# Supplementary material for: Estimating the reduction in US mortality if cigarettes were largely replaced by e-cigarettes
Source: PubMed Central journal article supplement (PMC8748352; doi:10.1007/s00204-021-03180-3), 2021-10-22
Supplement: 204_2021_3180_MOESM7_ESM.pdf [file 204_2021_3180_MOESM7_ESM.pdf]

# **Estimating the reduction in US mortality if cigarettes were largely replaced by e-cigarettes**

Published in: Archives of Toxicology

Peter N Lee<sup>1\*</sup>, John S Fry<sup>2</sup>, Stanley Gilliland III<sup>3</sup>, Preston Campbell<sup>3</sup>, Andrew R. Joyce<sup>3</sup>

<sup>1</sup>P N Lee Statistics and Computing Ltd, 17 Cedar Road, Sutton, Surrey, SM2 5DA

<sup>2</sup>RoeLee Statistics Ltd., 17 Cedar Road, Sutton, Surrey SM2 5DA

<sup>3</sup>Consilium Sciences, LLC, 7400 Beaufont Springs Drive, Suite 300, N. Chesterfield, VA 23325

\* Author for correspondence

E-mail: Peterlee@pnlee.co.uk

## **ONLINE RESOURCE 7**

### **Full output from PHIM**

This gives the results from all the runs of PHIM as well as an explanation of it.

This file gives the full output from the Main Analysis, the Pessimistic Analysis and the four Sensitivity Analyses described in the paper.

## **Introduction**

This file provides the full computer output for all the simulations. There are six sets of detailed output, the main analysis (MA), the pessimistic analysis (PA) and then four sets of sensitivity analyses. For the MA and PA there are two runs, one for males then one for females. The four sensitivity analyses start with the values for the MA and then vary one factor. In sensitivity analysis 1 the effective dose (F) is varied from the MA value of 0.05, using values 0.4 (as in the PA), 0, 0.1, 0.2 or 0.3. This produces 10 runs, with the results for females following those for males. In sensitivity analysis 2 the switching rates (X) are varied from the MA value of 5% to 0.01%, 2.5%, 10% (as in the PA), 7.5% or 15% giving 10 runs. In sensitivity analysis 3 the MA quitting rates (Q) are multiplied by 0.5 (as in the PA), 0.75, 1.25 or 1.5 giving 8 runs. In sensitivity analysis 4 the MA initialisation rates (I) are multiplied by 0.5, 0.75, 1.25 or 1.5 (as in the PA).

For each set of output, the first page (see pages numbered 8, 123, 214, 667, 1120 and 1483 for the six sets of output) starts by giving details of when the simulations were run, the person who ran them, the version of the PHIM software that was used, and the input and output files used, followed by a table of contents. Within each set, each run starts with a page giving the control file details, which is then followed by the transition probabilities, the tobacco history output generated from the P-component, and the results for the E-component, firstly for drop in deaths and then for years of life saved. Full details of the NULL smoking prevalences are only given for the MA results, for which each run has 47 pages with a final 20 pages at the end giving details of years of life saved. For all other analyses each run has 35 pages. For the MA, the total output consists of 115 pages.

Further explanation of the output is given below, followed by the full computer output. Before that, it should be noted that the terminology on the output varies somewhat from that in the main paper. Thus:

| <u>Terminology in paper</u> | <u>Terminology on output</u>        |
|-----------------------------|-------------------------------------|
| Null Scenario               | Reference Scenario or NULL Scenario |
| Alternative Scenario        | Test Scenario or MRTP Scenario      |
| TP                          | TTP                                 |
| CC                          | Product 1, PR1 or CC                |
| ECig                        | Product 2, PR2 or Ecig              |
| Dual                        | Product 4, PR4 or Dual              |

Below we use the terminology on the output.

### **Control File Details**

When running the software, there are 52 variable parameters, not all relevant to all runs. Explanation of some parameters which may not be self-evident is given below.

- 12-13 Age limits for risk estimation. These are the limits for the baseline population. As individuals exceed 79 years of age they drop out of the analysis. The results concerning deaths or years of life lost only relate to those aged 30-79 years.
- 14-17 Effective doses in the Reference scenario. Only product 1 is relevant here. Current CC smokers have a dose of 1 unit.

- 18-21 Effective doses in the Test scenario. Current CC smokers have a dose of 1 unit, current ECig users have a dose of F units, and dual users have the dose “FROMF2” which implies the average of the doses for products 1 and 2, i.e.  $(1+F)/2$ .
- 23 Number of MC simulations. MC stands for Monte Carlo. Here we only have one simulation for each sex.
- 25-32 Files used. Parameter 26 is not used.
- 33-37 Assumption sets used. See section 3 below. Parameter 37 is not used.
- 38 Output choice file. The file determining which outputs are to be produced.
- 39-46 Further details of output. The user has the option to include or not include various parts of the output.
- 47-48 Run number for P-component and Results file for E-component. This is only relevant if results are only to be output for one of the components, so is not relevant here.
- 49 Components required. PE implies that both P-component and E-component results are to be produced.
- 50 Results folder for P to be used in E-component. This is not relevant here.
- 51 Fixed age of starting product use. This is the assumed age of starting for individuals whose product use history starts as a current or former user.
- 52 Output absolute risk file? This is an option for additional output, which is not used here.

### **Transition probabilities (TPs)**

For the MA, pages 10 and 11 show the monthly TPs for the NULL Scenario and pages 13 to 16 show the monthly TTPs for the Alternative (ECig) Scenario. On pages 12 and 17 the values of special factors are shown. These factors are applied in special cases, such as Factor 1a which doubles the probability of the transition from current ECigs (PR2) to current cigarette smokers (PR1) when the individual has smoked current cigarettes in the past. The same factors have been applied through the analysis, but have only been shown for the MA.

For the NULL Scenario there are three TPs (initiation, cessation and re-initiation), while for the ECig Scenario there are 15 TPs, three relating each to initiation, cessation and re-initiation and six to switching. The TPs may vary by grouped age and by time period since baseline. Note that, in order to match the Levy results, TPs relating to re-initiation and dual usage have been set to zero in these simulations.

### **Tobacco history output from the P-Component**

For the MA, the tobacco history output from the P-Component is then shown by time of follow-up from baseline in 1990 by five year period (0, 5, 10 ... 50), and by age group (18-19, 20-24, 25-29 ... 75-79, and for all ages combined).

The output on pages 18 to 29 for the first run for the NULL scenario gives results for three smoking groups: Never Any, CC (i.e. current conventional cigarettes) and former (i.e. former conventional cigarettes). The output on pages 30 to 45 for the first run for the ECig Scenario gives results for five smoking groups: never any, three current use groups (cigarettes [CC], ECig, Dual) and former (i.e. not a current user, but formerly used one or both products).

For each group, the output shows the total numbers and percentages in each group. For current CC smokers it also shows the number and percentage who have previously quit, while for former smokers it also shows the mean years quit, and the number and percentage of short term quitters.

Note that for scenarios other than the MA, when showing the prevalences for the NULL scenario only the results for the final year are shown. This is because the prevalence for the NULL scenario varies only by sex, but not by set or sensitivity analysis.

### **Results for drops in death from the E-Component**

The results for drops in death from the E-Component are shown for all four diseases combined and then for the four diseases separately, with estimates unadjusted for differential mortality in the ECig Scenario shown on the first five pages and adjusted estimates shown on the next five pages. Each of the 10 pages for a given run (pages 46-55 and 93-102 for females in the MA) is laid out similarly, with results for all years combined shown first and then results for individual years. The results relate to the age groups 30-79 combined. The output shows the total number of deaths from the disease (or four diseases combined), followed by the number attributed to tobacco in the NULL and ECig Scenarios. The output also shows the drop in deaths associated with the ECig Scenario (compared to the NULL Scenario), expressed as a number, and as a percentage, both of the total deaths and of the attributable deaths in the NULL Scenario. Finally, the output shows the total death rate from the disease (or four diseases combined), the rate of attributable deaths in each scenario and the drop in rates. Rates are expressed per million of population.

## **Results for years of life lost from the E-Component**

The final 20 pages (pages 103 to 122 for the MA) provide the full computer output for years of life lost for males and females. Each page gives data on the estimated cumulative years of life lost in the Reference (Null) Scenario and in the particular ECig Scenario of interest, as well as the difference, the cumulative years of life saved. The results are shown for the four diseases separately and combined, separately for males and females. Tables 1, 3 and 5 relate to results unadjusted for deaths in the Test Scenario, while Tables 2, 4 and 6 give the corresponding adjusted results. Tables 1 and 2 give overall results for the whole follow-up period and for ages 30-79 combined. Tables 3 and 4 give results by year of follow-up for ages 30-79 years combined. Tables 5 and 6 give results for the whole follow-up period by 5 year age group.

These 20 pages of output are repeated for every separate pair of runs (male and female). Thus for sensitivity analyses 1 and 2 there are five sets for results taking up 100 pages, while for sensitivity analyses 3 and 4 there are four sets of results taking up 80 pages of output.

## Results for PHIM for Run 1 (Main\_Analysis.RTF)

System Date and Time: 20210223T100622  
User: JohnS  
SAS Version: 9.4  
Project: Population Health Impact Model 7.3

The System is running in Test Mode

Maximum Upper Age for P Component = 79  
Upper Age for ELL Calculations = 75  
Report in E-component: Social Classes A and B combined  
Description: Main Analysis for VeneBio on US  
Assumption Files:  
Options Control File: C:\VeneBio\OG\_Test\US\_Control\_V\_MA.CSV  
TTP Test File: C:\VeneBio\OG\_Test\TTP\_Test\_MA.csv  
TTP Reference File: C:\VeneBio\OG\_Test\TTP\_Reference\_V.csv  
TTP Factor Test File: C:\VeneBio\OG\_Test\TTP\_FACTOR\_Test.csv  
TTP Factor Reference File: C:\VeneBio\OG\_Test\TTP\_FACTOR\_Test.csv  
TP Socioeconomic Groups: Not Used  
Output Choices:C:\VeneBio\OG\_Test\OUTC\_MA.csv

Main Results will be sent to the folder C:\VeneBio\Main\_Results\  
Plots will be sent to the folder C:\VeneBio\Plot\_Results\Plots\_20210223T100622  
Saved P, E and/or A Component results will be sent to the folder C:\VeneBio\SAVED\Saved\_20210223T100622\

### Table of Contents

|                                                                                                                                                   |     |
|---------------------------------------------------------------------------------------------------------------------------------------------------|-----|
| <b>Control File Details for Run: 1</b>                                                                                                            | 9   |
| <b>TTP values for Run: 1, Scenario: NULL</b>                                                                                                      | 10  |
| <b>TTP values for Run: 1, Scenario: Ecig</b>                                                                                                      | 13  |
| <b>Main Output for the Tobacco History for Run: 1, Simulation: 1, Scenario: NULL</b>                                                              | 18  |
| <b>Main Output for the Tobacco History for Run: 1, Simulation: 1, Scenario: Ecig</b>                                                              | 30  |
| <b>Main Results for E-Component for Run: 1, Simulation: 1, COD: Four Diseases Combined</b>                                                        | 46  |
| <b>Main Results for E-Component for Run: 1, Simulation: 1, COD: LUNG CANCER</b>                                                                   | 47  |
| <b>Main Results for E-Component for Run: 1, Simulation: 1, COD: IHD</b>                                                                           | 48  |
| <b>Main Results for E-Component for Run: 1, Simulation: 1, COD: STROKE</b>                                                                        | 49  |
| <b>Main Results for E-Component for Run: 1, Simulation: 1, COD: COPD</b>                                                                          | 50  |
| <b>Main Results for E-Component for Run: 1, Simulation: 1, COD: Four Diseases Combined, Adjusted</b>                                              | 51  |
| <b>Main Results for E-Component for Run: 1, Simulation: 1, COD: LUNG CANCER, Adjusted</b>                                                         | 52  |
| <b>Main Results for E-Component for Run: 1, Simulation: 1, COD: IHD, Adjusted</b>                                                                 | 53  |
| <b>Main Results for E-Component for Run: 1, Simulation: 1, COD: STROKE, Adjusted</b>                                                              | 54  |
| <b>Main Results for E-Component for Run: 1, Simulation: 1, COD: COPD, Adjusted</b>                                                                | 55  |
| <b>Control File Details for Run: 2</b>                                                                                                            | 56  |
| <b>TTP values for Run: 2, Scenario: NULL</b>                                                                                                      | 57  |
| <b>TTP values for Run: 2, Scenario: Ecig</b>                                                                                                      | 60  |
| <b>Main Output for the Tobacco History for Run: 2, Simulation: 1, Scenario: NULL</b>                                                              | 65  |
| <b>Main Output for the Tobacco History for Run: 2, Simulation: 1, Scenario: Ecig</b>                                                              | 77  |
| <b>Main Results for E-Component for Run: 2, Simulation: 1, COD: Four Diseases Combined</b>                                                        | 93  |
| <b>Main Results for E-Component for Run: 2, Simulation: 1, COD: LUNG CANCER</b>                                                                   | 94  |
| <b>Main Results for E-Component for Run: 2, Simulation: 1, COD: IHD</b>                                                                           | 95  |
| <b>Main Results for E-Component for Run: 2, Simulation: 1, COD: STROKE</b>                                                                        | 96  |
| <b>Main Results for E-Component for Run: 2, Simulation: 1, COD: COPD</b>                                                                          | 97  |
| <b>Main Results for E-Component for Run: 2, Simulation: 1, COD: Four Diseases Combined, Adjusted</b>                                              | 98  |
| <b>Main Results for E-Component for Run: 2, Simulation: 1, COD: LUNG CANCER, Adjusted</b>                                                         | 99  |
| <b>Main Results for E-Component for Run: 2, Simulation: 1, COD: IHD, Adjusted</b>                                                                 | 100 |
| <b>Main Results for E-Component for Run: 2, Simulation: 1, COD: STROKE, Adjusted</b>                                                              | 101 |
| <b>Main Results for E-Component for Run: 2, Simulation: 1, COD: COPD, Adjusted</b>                                                                | 102 |
| <b>Estimated Loss of Life from the E Component for Run: 2, Simulation: 1</b>                                                                      | 103 |
| <b>Table 1: Estimated Loss of Life, at the end of follow-up, all age groups combined, Population unadjusted for deaths in Ecig scenario</b>       | 103 |
| <b>Table 2: Estimated Loss of Life, at the end of follow-up, all age groups combined, Population and Number deaths adjusted for Ecig scenario</b> | 104 |
| <b>Table 3: Estimated Loss of Life, All age groups combined, Population unadjusted for deaths in Ecig scenario, cumulative over years</b>         | 105 |
| <b>Table 4: Estimated Loss of Life, All age groups combined, Population and Number deaths adjusted for Ecig scenario, cumulative over years</b>   | 112 |
| <b>Table 5: Estimated Loss of Life, at the end of follow-up, Population unadjusted for deaths in Ecig scenario</b>                                | 119 |
| <b>Table 6: Estimated Loss of Life, at the end of follow-up, Population and Number deaths adjusted for Ecig scenario</b>                          | 121 |



## Results for PHIM for Run 1 (Main\_Analysis.RTF)

---

### Control File Details for Run: 1

| Variable Parameter                                       | Value              |
|----------------------------------------------------------|--------------------|
| 1. Name for Reference Scenario                           | NULL               |
| 2. Name for Test Scenario                                | Ecig               |
| 3. Name for Product 1                                    | CC                 |
| 4. Name for Product 2                                    | Ecig               |
| 5. Name for Product 3                                    | -                  |
| 6. Name for Product 4                                    | Dual               |
| 7. Country                                               | US (United States) |
| 8. Sex                                                   | M (Males)          |
| 9. Year of start of process                              | 1990               |
| 10. Number of months of follow-up                        | 600                |
| 11. Follow-up interval length (in months)                | 12                 |
| 12. Lower age for risk estimation                        | 10                 |
| 13. Upper age for risk estimation                        | 79                 |
| 14. The effective dose for Product 1 (F1) - Ref          | 1                  |
| 15. The effective dose for Product 2 (F2) - Ref          | -                  |
| 16. The effective dose for Product 3 (F3) - Ref          | -                  |
| 17. The effective dose for Product 4 (F4) - Ref          | -                  |
| 18. The effective dose for Product 1 (F1) - Test         | 1                  |
| 19. The effective dose for Product 2 (F2) - Test         | 0.05               |
| 20. The effective dose for Product 3 (F3) - Test         | -                  |
| 21. The effective dose for Product 4 (F4) - Test         | FROMF2             |
| 22. Number in population to be simulated                 | 100000             |
| 23. Number of MC simulations                             | 1                  |
| 24. The random number seed for the first simulation      | 15975263           |
| 25. Source for the population file (POP)                 | UN4                |
| 26. Source for the socioeconomic prevalence file (SEP)   | -                  |
| 27. Source for the current smoking prevalence file (CSP) | ISS3               |
| 28. Source for the former smoking prevalence file (FSP)  | ISS3               |
| 29. Source for the quit-time distribution file (QTD)     | NHIS2006           |
| 30. Source for the death file (MORT)                     | APR-20             |
| 31. Source for the relative risk file (RR)               | PNLEST             |
| 32. Source for the half-life file (H)                    | PNLEST             |
| 33. Assumption Set for TTP Factor Reference              | F1                 |
| 34. Assumption Set for TTP Factor Test                   | F1                 |
| 35. Assumption Set for TTP Reference                     | ISS3               |
| 36. Assumption Set for TTP Test                          | ISS3               |
| 37. Assumption Set for TP for socioeconomic group        | -                  |
| 38. Source for Output Choice file (OUTC)                 | BASIC              |
| 39. Output for DTP P1                                    | N                  |
| 40. Output for DTP P2                                    | N                  |
| 41. Output for Main P Component                          | Y                  |
| 42. Output for DTP E1                                    | N                  |
| 43. Output for DTP E2                                    | N                  |
| 44. Output for DTP E3                                    | N                  |
| 45. Output for Main E Component                          | Y                  |
| 46. Output file name                                     | Main_Analysis      |
| 47. Run number for P-Component                           | -                  |
| 48. Results file for E-Component                         | -                  |
| 49. Components required                                  | PE                 |
| 50. Results folder for P to be used in E-Component       | -                  |
| 51. Fixed age of starting product use                    | 16                 |
| 52. Output absolute risk file?                           | N                  |

## Results for PHIM for Run 1 (Main\_Analysis.RTF)

\*\*\*\*\*

TTP values for Run: 1, Scenario: NULL

| Variable Parameter | Value               |
|--------------------|---------------------|
| 1. Country         | US (United States)  |
| 2. Sex             | M (Males)           |
| 3. Assumption Set  | ISS3                |
| Note:              | Period is in Months |

| Age   | Period  | Initiation  | Cessation    | Re-initiation |
|-------|---------|-------------|--------------|---------------|
|       |         | Never<br>CC | CC<br>Former | Former<br>CC  |
| 10-14 | 1-12    | 0.003842    | 0.008742     | 0.000000      |
| 15-19 | 1-12    | 0.004720    | 0.003614     | 0.000000      |
| 20-24 | 1-12    | 0.000376    | 0.000943     | 0.000000      |
| 25-29 | 1-12    | 0.000187    | 0.001143     | 0.000000      |
| 30-34 | 1-12    | 0.000093    | 0.000871     | 0.000000      |
| 35-39 | 1-12    | 0.000000    | 0.000867     | 0.000000      |
| 40-44 | 1-12    | 0.000000    | 0.001399     | 0.000000      |
| 45-49 | 1-12    | 0.000000    | 0.002033     | 0.000000      |
| 50-54 | 1-12    | 0.000000    | 0.003209     | 0.000000      |
| 55-59 | 1-12    | 0.000000    | 0.003574     | 0.000000      |
| 60-64 | 1-12    | 0.000000    | 0.003460     | 0.000000      |
| 65-69 | 1-12    | 0.000000    | 0.004136     | 0.000000      |
| 70-74 | 1-12    | 0.000000    | 0.005592     | 0.000000      |
| 75-79 | 1-12    | 0.000000    | 0.005592     | 0.000000      |
| 10-14 | 13-72   | 0.004906    | 0.008742     | 0.000000      |
| 15-19 | 13-72   | 0.006989    | 0.004426     | 0.000000      |
| 20-24 | 13-72   | 0.000687    | 0.001527     | 0.000000      |
| 25-29 | 13-72   | 0.000962    | 0.001515     | 0.000000      |
| 30-34 | 13-72   | 0.000364    | 0.001227     | 0.000000      |
| 35-39 | 13-72   | 0.000000    | 0.001630     | 0.000000      |
| 40-44 | 13-72   | 0.000000    | 0.001852     | 0.000000      |
| 45-49 | 13-72   | 0.000000    | 0.002667     | 0.000000      |
| 50-54 | 13-72   | 0.000000    | 0.003208     | 0.000000      |
| 55-59 | 13-72   | 0.000000    | 0.003978     | 0.000000      |
| 60-64 | 13-72   | 0.000000    | 0.005771     | 0.000000      |
| 65-69 | 13-72   | 0.000000    | 0.010432     | 0.000000      |
| 70-74 | 13-72   | 0.000000    | 0.007079     | 0.000000      |
| 75-79 | 13-72   | 0.000000    | 0.007079     | 0.000000      |
| 10-14 | 73-132  | 0.004312    | 0.008742     | 0.000000      |
| 15-19 | 73-132  | 0.005330    | 0.003289     | 0.000000      |
| 20-24 | 73-132  | 0.002456    | 0.003844     | 0.000000      |
| 25-29 | 73-132  | 0.000839    | 0.002006     | 0.000000      |
| 30-34 | 73-132  | 0.000414    | 0.001329     | 0.000000      |
| 35-39 | 73-132  | 0.000000    | 0.001278     | 0.000000      |
| 40-44 | 73-132  | 0.000000    | 0.001691     | 0.000000      |
| 45-49 | 73-132  | 0.000000    | 0.002904     | 0.000000      |
| 50-54 | 73-132  | 0.000000    | 0.003319     | 0.000000      |
| 55-59 | 73-132  | 0.000000    | 0.003976     | 0.000000      |
| 60-64 | 73-132  | 0.000000    | 0.005235     | 0.000000      |
| 65-69 | 73-132  | 0.000000    | 0.005901     | 0.000000      |
| 70-74 | 73-132  | 0.000000    | 0.005615     | 0.000000      |
| 75-79 | 73-132  | 0.000000    | 0.005615     | 0.000000      |
| 10-14 | 133-192 | 0.003468    | 0.008742     | 0.000000      |
| 15-19 | 133-192 | 0.004675    | 0.003732     | 0.000000      |
| 20-24 | 133-192 | 0.000062    | 0.002260     | 0.000000      |
| 25-29 | 133-192 | 0.001422    | 0.002822     | 0.000000      |
| 30-34 | 133-192 | 0.000696    | 0.002610     | 0.000000      |
| 35-39 | 133-192 | 0.000000    | 0.002058     | 0.000000      |
| 40-44 | 133-192 | 0.000000    | 0.002310     | 0.000000      |
| 45-49 | 133-192 | 0.000000    | 0.002256     | 0.000000      |
| 50-54 | 133-192 | 0.000000    | 0.002663     | 0.000000      |
| 55-59 | 133-192 | 0.000000    | 0.001746     | 0.000000      |
| 60-64 | 133-192 | 0.000000    | 0.005809     | 0.000000      |
| 65-69 | 133-192 | 0.000000    | 0.005896     | 0.000000      |
| 70-74 | 133-192 | 0.000000    | 0.007323     | 0.000000      |
| 75-79 | 133-192 | 0.000000    | 0.007323     | 0.000000      |
| 10-14 | 193-252 | 0.002314    | 0.008742     | 0.000000      |
| 15-19 | 193-252 | 0.003987    | 0.005036     | 0.000000      |
| 20-24 | 193-252 | 0.000320    | 0.002857     | 0.000000      |
| 25-29 | 193-252 | 0.000251    | 0.002314     | 0.000000      |
| 30-34 | 193-252 | 0.000125    | 0.004343     | 0.000000      |
| 35-39 | 193-252 | 0.000000    | 0.002092     | 0.000000      |
| 40-44 | 193-252 | 0.000000    | 0.002566     | 0.000000      |
| 45-49 | 193-252 | 0.000000    | 0.002311     | 0.000000      |
| 50-54 | 193-252 | 0.000000    | 0.003209     | 0.000000      |

### Results for PHIM for Run 1 (Main\_Analysis.RTF)

|       |         |          |          |          |
|-------|---------|----------|----------|----------|
| 55-59 | 193-252 | 0.000000 | 0.004057 | 0.000000 |
| 60-64 | 193-252 | 0.000000 | 0.007166 | 0.000000 |
| 65-69 | 193-252 | 0.000000 | 0.004281 | 0.000000 |
| 70-74 | 193-252 | 0.000000 | 0.004580 | 0.000000 |
| 75-79 | 193-252 | 0.000000 | 0.004580 | 0.000000 |
| 10-14 | 253+    | 0.001325 | 0.008742 | 0.000000 |
| 15-19 | 253+    | 0.002984 | 0.010602 | 0.000000 |
| 20-24 | 253+    | 0.000452 | 0.004314 | 0.000000 |
| 25-29 | 253+    | 0.000225 | 0.003645 | 0.000000 |
| 30-34 | 253+    | 0.000112 | 0.004512 | 0.000000 |
| 35-39 | 253+    | 0.000000 | 0.002147 | 0.000000 |
| 40-44 | 253+    | 0.000000 | 0.002636 | 0.000000 |
| 45-49 | 253+    | 0.000000 | 0.001051 | 0.000000 |
| 50-54 | 253+    | 0.000000 | 0.002519 | 0.000000 |
| 55-59 | 253+    | 0.000000 | 0.003693 | 0.000000 |
| 60-64 | 253+    | 0.000000 | 0.005888 | 0.000000 |
| 65-69 | 253+    | 0.000000 | 0.004823 | 0.000000 |
| 70-74 | 253+    | 0.000000 | 0.004733 | 0.000000 |
| 75-79 | 253+    | 0.000000 | 0.004733 | 0.000000 |

## Results for PHIM for Run 1 (Main\_Analysis.RTF)

\*\*\*\*\*

### TTP Factors

| Factor | TTP Affected               | Relates to       | Value | < or > | Years |
|--------|----------------------------|------------------|-------|--------|-------|
| 1a     | Current PR2 to Current PR1 | Previous PR1 use | 2     | -      | -     |
| 1b     | Current PR3 to Current PR1 | Previous PR1 use | 2     | -      | -     |
| 1c     | Current PR4 to Current PR1 | Previous PR1 use | 2     | -      | -     |
| 2a     | Current PR1 to Former      | Previously quit  | 2     | -      | -     |
| 2b     | Current PR2 to Former      | Previously quit  | 2     | -      | -     |
| 2c     | Current PR3 to Former      | Previously quit  | 2     | -      | -     |
| 2d     | Current PR4 to Former      | Previously quit  | 2     | -      | -     |
| 3a     | Former to Current PR1      | Time quit        | 2     | <      | 2     |
| 3b     | Former to Current PR2      | Time quit        | 2     | <      | 2     |
| 3c     | Former to Current PR3      | Time quit        | 2     | <      | 2     |
| 3d     | Former to Current PR4      | Time quit        | 2     | <      | 2     |
| 4a     | Current PR2 to Current PR1 | Time PR2 use     | 0     | >      | 2     |
| 4b     | Current PR2 to Current PR3 | Time PR2 use     | 0     | >      | 2     |
| 4c     | Current PR2 to Current PR4 | Time PR2 use     | 0     | >      | 2     |
| 5a     | Current PR3 to Current PR1 | Time PR3 use     | 0     | >      | 2     |
| 5b     | Current PR3 to Current PR2 | Time PR3 use     | 0     | >      | 2     |
| 5c     | Current PR3 to Current PR4 | Time PR3 use     | 0     | >      | 2     |
| 6a     | Current PR4 to Current PR1 | Time PR4 use     | -     | -      | -     |
| 6b     | Current PR4 to Current PR2 | Time PR4 use     | -     | -      | -     |
| 6c     | Current PR4 to Current PR3 | Time PR4 use     | -     | -      | -     |
| 7a     | Current PR1 to Current PR2 | Time PR1 use     | -     | -      | -     |
| 7b     | Current PR1 to Current PR3 | Time PR1 use     | -     | -      | -     |
| 7c     | Current PR1 to Current PR4 | Time PR1 use     | -     | -      | -     |

## Results for PHIM for Run 1 (Main\_Analysis.RTF)

\*\*\*\*\*

TTP values for Run: 1, Scenario: Ecig

| Variable Parameter | Value               |
|--------------------|---------------------|
| 1. Country         | US (United States)  |
| 2. Sex             | M (Males)           |
| 3. Assumption Set  | ISS3                |
| Note:              | Period is in Months |

| Age   | Period  | Initiation  |               |               | Cessation    |                |                | Re-initiation |                |                |
|-------|---------|-------------|---------------|---------------|--------------|----------------|----------------|---------------|----------------|----------------|
|       |         | Never<br>CC | Never<br>Ecig | Never<br>Dual | CC<br>Former | Ecig<br>Former | Dual<br>Former | Former<br>CC  | Former<br>Ecig | Former<br>Dual |
| 10-14 | 1-12    | 0.001921    | 0.001921      | 0.000000      | 0.008742     | 0.008742       | 0.000000       | 0.000000      | 0.000000       | 0.000000       |
| 15-19 | 1-12    | 0.002360    | 0.002360      | 0.000000      | 0.003614     | 0.003614       | 0.000000       | 0.000000      | 0.000000       | 0.000000       |
| 20-24 | 1-12    | 0.000188    | 0.000188      | 0.000000      | 0.000943     | 0.000943       | 0.000000       | 0.000000      | 0.000000       | 0.000000       |
| 25-29 | 1-12    | 0.000093    | 0.000093      | 0.000000      | 0.001143     | 0.001143       | 0.000000       | 0.000000      | 0.000000       | 0.000000       |
| 30-34 | 1-12    | 0.000047    | 0.000047      | 0.000000      | 0.000871     | 0.000871       | 0.000000       | 0.000000      | 0.000000       | 0.000000       |
| 35-39 | 1-12    | 0.000000    | 0.000000      | 0.000000      | 0.000867     | 0.000867       | 0.000000       | 0.000000      | 0.000000       | 0.000000       |
| 40-44 | 1-12    | 0.000000    | 0.000000      | 0.000000      | 0.001399     | 0.001399       | 0.000000       | 0.000000      | 0.000000       | 0.000000       |
| 45-49 | 1-12    | 0.000000    | 0.000000      | 0.000000      | 0.002033     | 0.002033       | 0.000000       | 0.000000      | 0.000000       | 0.000000       |
| 50-54 | 1-12    | 0.000000    | 0.000000      | 0.000000      | 0.003209     | 0.003209       | 0.000000       | 0.000000      | 0.000000       | 0.000000       |
| 55-59 | 1-12    | 0.000000    | 0.000000      | 0.000000      | 0.003574     | 0.003574       | 0.000000       | 0.000000      | 0.000000       | 0.000000       |
| 60-64 | 1-12    | 0.000000    | 0.000000      | 0.000000      | 0.003460     | 0.003460       | 0.000000       | 0.000000      | 0.000000       | 0.000000       |
| 65-69 | 1-12    | 0.000000    | 0.000000      | 0.000000      | 0.004136     | 0.004136       | 0.000000       | 0.000000      | 0.000000       | 0.000000       |
| 70-74 | 1-12    | 0.000000    | 0.000000      | 0.000000      | 0.005592     | 0.005592       | 0.000000       | 0.000000      | 0.000000       | 0.000000       |
| 75-79 | 1-12    | 0.000000    | 0.000000      | 0.000000      | 0.005592     | 0.005592       | 0.000000       | 0.000000      | 0.000000       | 0.000000       |
| 10-14 | 13-72   | 0.001962    | 0.002944      | 0.000000      | 0.008742     | 0.008742       | 0.000000       | 0.000000      | 0.000000       | 0.000000       |
| 15-19 | 13-72   | 0.002796    | 0.004193      | 0.000000      | 0.004426     | 0.004426       | 0.000000       | 0.000000      | 0.000000       | 0.000000       |
| 20-24 | 13-72   | 0.000275    | 0.000412      | 0.000000      | 0.001527     | 0.001527       | 0.000000       | 0.000000      | 0.000000       | 0.000000       |
| 25-29 | 13-72   | 0.000385    | 0.000578      | 0.000000      | 0.001515     | 0.001515       | 0.000000       | 0.000000      | 0.000000       | 0.000000       |
| 30-34 | 13-72   | 0.000146    | 0.000218      | 0.000000      | 0.001227     | 0.001227       | 0.000000       | 0.000000      | 0.000000       | 0.000000       |
| 35-39 | 13-72   | 0.000000    | 0.000000      | 0.000000      | 0.001630     | 0.001630       | 0.000000       | 0.000000      | 0.000000       | 0.000000       |
| 40-44 | 13-72   | 0.000000    | 0.000000      | 0.000000      | 0.001852     | 0.001852       | 0.000000       | 0.000000      | 0.000000       | 0.000000       |
| 45-49 | 13-72   | 0.000000    | 0.000000      | 0.000000      | 0.002667     | 0.002667       | 0.000000       | 0.000000      | 0.000000       | 0.000000       |
| 50-54 | 13-72   | 0.000000    | 0.000000      | 0.000000      | 0.003208     | 0.003208       | 0.000000       | 0.000000      | 0.000000       | 0.000000       |
| 55-59 | 13-72   | 0.000000    | 0.000000      | 0.000000      | 0.003978     | 0.003978       | 0.000000       | 0.000000      | 0.000000       | 0.000000       |
| 60-64 | 13-72   | 0.000000    | 0.000000      | 0.000000      | 0.005771     | 0.005771       | 0.000000       | 0.000000      | 0.000000       | 0.000000       |
| 65-69 | 13-72   | 0.000000    | 0.000000      | 0.000000      | 0.010432     | 0.010432       | 0.000000       | 0.000000      | 0.000000       | 0.000000       |
| 70-74 | 13-72   | 0.000000    | 0.000000      | 0.000000      | 0.007079     | 0.007079       | 0.000000       | 0.000000      | 0.000000       | 0.000000       |
| 75-79 | 13-72   | 0.000000    | 0.000000      | 0.000000      | 0.007079     | 0.007079       | 0.000000       | 0.000000      | 0.000000       | 0.000000       |
| 10-14 | 73-132  | 0.000862    | 0.003449      | 0.000000      | 0.008742     | 0.008742       | 0.000000       | 0.000000      | 0.000000       | 0.000000       |
| 15-19 | 73-132  | 0.001066    | 0.004264      | 0.000000      | 0.003289     | 0.003289       | 0.000000       | 0.000000      | 0.000000       | 0.000000       |
| 20-24 | 73-132  | 0.000491    | 0.001965      | 0.000000      | 0.003844     | 0.003844       | 0.000000       | 0.000000      | 0.000000       | 0.000000       |
| 25-29 | 73-132  | 0.000168    | 0.000671      | 0.000000      | 0.002006     | 0.002006       | 0.000000       | 0.000000      | 0.000000       | 0.000000       |
| 30-34 | 73-132  | 0.000083    | 0.000332      | 0.000000      | 0.001329     | 0.001329       | 0.000000       | 0.000000      | 0.000000       | 0.000000       |
| 35-39 | 73-132  | 0.000000    | 0.000000      | 0.000000      | 0.001278     | 0.001278       | 0.000000       | 0.000000      | 0.000000       | 0.000000       |
| 40-44 | 73-132  | 0.000000    | 0.000000      | 0.000000      | 0.001691     | 0.001691       | 0.000000       | 0.000000      | 0.000000       | 0.000000       |
| 45-49 | 73-132  | 0.000000    | 0.000000      | 0.000000      | 0.002904     | 0.002904       | 0.000000       | 0.000000      | 0.000000       | 0.000000       |
| 50-54 | 73-132  | 0.000000    | 0.000000      | 0.000000      | 0.003319     | 0.003319       | 0.000000       | 0.000000      | 0.000000       | 0.000000       |
| 55-59 | 73-132  | 0.000000    | 0.000000      | 0.000000      | 0.003976     | 0.003976       | 0.000000       | 0.000000      | 0.000000       | 0.000000       |
| 60-64 | 73-132  | 0.000000    | 0.000000      | 0.000000      | 0.005235     | 0.005235       | 0.000000       | 0.000000      | 0.000000       | 0.000000       |
| 65-69 | 73-132  | 0.000000    | 0.000000      | 0.000000      | 0.005901     | 0.005901       | 0.000000       | 0.000000      | 0.000000       | 0.000000       |
| 70-74 | 73-132  | 0.000000    | 0.000000      | 0.000000      | 0.005615     | 0.005615       | 0.000000       | 0.000000      | 0.000000       | 0.000000       |
| 75-79 | 73-132  | 0.000000    | 0.000000      | 0.000000      | 0.005615     | 0.005615       | 0.000000       | 0.000000      | 0.000000       | 0.000000       |
| 10-14 | 133-192 | 0.000173    | 0.003294      | 0.000000      | 0.008742     | 0.008742       | 0.000000       | 0.000000      | 0.000000       | 0.000000       |
| 15-19 | 133-192 | 0.000234    | 0.004442      | 0.000000      | 0.003732     | 0.003732       | 0.000000       | 0.000000      | 0.000000       | 0.000000       |
| 20-24 | 133-192 | 0.000003    | 0.000059      | 0.000000      | 0.002260     | 0.002260       | 0.000000       | 0.000000      | 0.000000       | 0.000000       |
| 25-29 | 133-192 | 0.000071    | 0.001351      | 0.000000      | 0.002822     | 0.002822       | 0.000000       | 0.000000      | 0.000000       | 0.000000       |
| 30-34 | 133-192 | 0.000035    | 0.000661      | 0.000000      | 0.002610     | 0.002610       | 0.000000       | 0.000000      | 0.000000       | 0.000000       |
| 35-39 | 133-192 | 0.000000    | 0.000000      | 0.000000      | 0.002058     | 0.002058       | 0.000000       | 0.000000      | 0.000000       | 0.000000       |
| 40-44 | 133-192 | 0.000000    | 0.000000      | 0.000000      | 0.002310     | 0.002310       | 0.000000       | 0.000000      | 0.000000       | 0.000000       |
| 45-49 | 133-192 | 0.000000    | 0.000000      | 0.000000      | 0.002256     | 0.002256       | 0.000000       | 0.000000      | 0.000000       | 0.000000       |
| 50-54 | 133-192 | 0.000000    | 0.000000      | 0.000000      | 0.002663     | 0.002663       | 0.000000       | 0.000000      | 0.000000       | 0.000000       |
| 55-59 | 133-192 | 0.000000    | 0.000000      | 0.000000      | 0.001747     | 0.001747       | 0.000000       | 0.000000      | 0.000000       | 0.000000       |
| 60-64 | 133-192 | 0.000000    | 0.000000      | 0.000000      | 0.005809     | 0.005809       | 0.000000       | 0.000000      | 0.000000       | 0.000000       |
| 65-69 | 133-192 | 0.000000    | 0.000000      | 0.000000      | 0.005896     | 0.005896       | 0.000000       | 0.000000      | 0.000000       | 0.000000       |
| 70-74 | 133-192 | 0.000000    | 0.000000      | 0.000000      | 0.007323     | 0.007323       | 0.000000       | 0.000000      | 0.000000       | 0.000000       |
| 75-79 | 133-192 | 0.000000    | 0.000000      | 0.000000      | 0.007323     | 0.007323       | 0.000000       | 0.000000      | 0.000000       | 0.000000       |
| 10-14 | 193-252 | 0.000116    | 0.002198      | 0.000000      | 0.008742     | 0.008742       | 0.000000       | 0.000000      | 0.000000       | 0.000000       |
| 15-19 | 193-252 | 0.000199    | 0.003788      | 0.000000      | 0.005036     | 0.005036       | 0.000000       | 0.000000      | 0.000000       | 0.000000       |
| 20-24 | 193-252 | 0.000016    | 0.000304      | 0.000000      | 0.002857     | 0.002857       | 0.000000       | 0.000000      | 0.000000       | 0.000000       |
| 25-29 | 193-252 | 0.000013    | 0.000239      | 0.000000      | 0.002314     | 0.002314       | 0.000000       | 0.000000      | 0.000000       | 0.000000       |
| 30-34 | 193-252 | 0.000006    | 0.000119      | 0.000000      | 0.004343     | 0.004343       | 0.000000       | 0.000000      | 0.000000       | 0.000000       |
| 35-39 | 193-252 | 0.000000    | 0.000000      | 0.000000      | 0.002092     | 0.002092       | 0.000000       | 0.000000      | 0.000000       | 0.000000       |
| 40-44 | 193-252 | 0.000000    | 0.000000      | 0.000000      | 0.002566     | 0.002566       | 0.000000       | 0.000000      | 0.000000       | 0.000000       |
| 45-49 | 193-252 | 0.000000    | 0.000000      | 0.000000      | 0.002311     | 0.002311       | 0.000000       | 0.000000      | 0.000000       | 0.000000       |
| 50-54 | 193-252 | 0.000000    | 0.000000      | 0.000000      | 0.003209     | 0.003209       | 0.000000       | 0.000000      | 0.000000       | 0.000000       |

**Results for PHIM for Run 1 (Main\_Analysis.RTF)**

|       |         |          |          |          |          |          |          |          |          |          |
|-------|---------|----------|----------|----------|----------|----------|----------|----------|----------|----------|
| 55-59 | 193-252 | 0.000000 | 0.000000 | 0.000000 | 0.004057 | 0.004057 | 0.000000 | 0.000000 | 0.000000 | 0.000000 |
| 60-64 | 193-252 | 0.000000 | 0.000000 | 0.000000 | 0.007166 | 0.007166 | 0.000000 | 0.000000 | 0.000000 | 0.000000 |
| 65-69 | 193-252 | 0.000000 | 0.000000 | 0.000000 | 0.004281 | 0.004281 | 0.000000 | 0.000000 | 0.000000 | 0.000000 |
| 70-74 | 193-252 | 0.000000 | 0.000000 | 0.000000 | 0.004580 | 0.004580 | 0.000000 | 0.000000 | 0.000000 | 0.000000 |
| 75-79 | 193-252 | 0.000000 | 0.000000 | 0.000000 | 0.004580 | 0.004580 | 0.000000 | 0.000000 | 0.000000 | 0.000000 |
| 10-14 | 253+    | 0.000066 | 0.001259 | 0.000000 | 0.008742 | 0.008742 | 0.000000 | 0.000000 | 0.000000 | 0.000000 |
| 15-19 | 253+    | 0.000149 | 0.002835 | 0.000000 | 0.010602 | 0.010602 | 0.000000 | 0.000000 | 0.000000 | 0.000000 |
| 20-24 | 253+    | 0.000023 | 0.000430 | 0.000000 | 0.004314 | 0.004314 | 0.000000 | 0.000000 | 0.000000 | 0.000000 |
| 25-29 | 253+    | 0.000011 | 0.000213 | 0.000000 | 0.003645 | 0.003645 | 0.000000 | 0.000000 | 0.000000 | 0.000000 |
| 30-34 | 253+    | 0.000006 | 0.000106 | 0.000000 | 0.004512 | 0.004512 | 0.000000 | 0.000000 | 0.000000 | 0.000000 |
| 35-39 | 253+    | 0.000000 | 0.000000 | 0.000000 | 0.002147 | 0.002147 | 0.000000 | 0.000000 | 0.000000 | 0.000000 |
| 40-44 | 253+    | 0.000000 | 0.000000 | 0.000000 | 0.002636 | 0.002636 | 0.000000 | 0.000000 | 0.000000 | 0.000000 |
| 45-49 | 253+    | 0.000000 | 0.000000 | 0.000000 | 0.001051 | 0.001051 | 0.000000 | 0.000000 | 0.000000 | 0.000000 |
| 50-54 | 253+    | 0.000000 | 0.000000 | 0.000000 | 0.002519 | 0.002519 | 0.000000 | 0.000000 | 0.000000 | 0.000000 |
| 55-59 | 253+    | 0.000000 | 0.000000 | 0.000000 | 0.003693 | 0.003693 | 0.000000 | 0.000000 | 0.000000 | 0.000000 |
| 60-64 | 253+    | 0.000000 | 0.000000 | 0.000000 | 0.005888 | 0.005888 | 0.000000 | 0.000000 | 0.000000 | 0.000000 |
| 65-69 | 253+    | 0.000000 | 0.000000 | 0.000000 | 0.004823 | 0.004823 | 0.000000 | 0.000000 | 0.000000 | 0.000000 |
| 70-74 | 253+    | 0.000000 | 0.000000 | 0.000000 | 0.004733 | 0.004733 | 0.000000 | 0.000000 | 0.000000 | 0.000000 |
| 75-79 | 253+    | 0.000000 | 0.000000 | 0.000000 | 0.004733 | 0.004733 | 0.000000 | 0.000000 | 0.000000 | 0.000000 |



**Results for PHIM for Run 1 (Main\_Analysis.RTF)**

|       |      |          |          |          |          |          |          |
|-------|------|----------|----------|----------|----------|----------|----------|
| 25-29 | 253+ | 0.015212 | 0.000000 | 0.000000 | 0.000000 | 0.000000 | 0.000000 |
| 30-34 | 253+ | 0.015460 | 0.000000 | 0.000000 | 0.000000 | 0.000000 | 0.000000 |
| 35-39 | 253+ | 0.014711 | 0.000000 | 0.000000 | 0.000000 | 0.000000 | 0.000000 |
| 40-44 | 253+ | 0.014241 | 0.000000 | 0.000000 | 0.000000 | 0.000000 | 0.000000 |
| 45-49 | 253+ | 0.013014 | 0.000000 | 0.000000 | 0.000000 | 0.000000 | 0.000000 |
| 50-54 | 253+ | 0.011768 | 0.000000 | 0.000000 | 0.000000 | 0.000000 | 0.000000 |
| 55-59 | 253+ | 0.011032 | 0.000000 | 0.000000 | 0.000000 | 0.000000 | 0.000000 |
| 60-64 | 253+ | 0.009525 | 0.000000 | 0.000000 | 0.000000 | 0.000000 | 0.000000 |
| 65-69 | 253+ | 0.006897 | 0.000000 | 0.000000 | 0.000000 | 0.000000 | 0.000000 |
| 70-74 | 253+ | 0.005435 | 0.000000 | 0.000000 | 0.000000 | 0.000000 | 0.000000 |
| 75-79 | 253+ | 0.005435 | 0.000000 | 0.000000 | 0.000000 | 0.000000 | 0.000000 |



## Results for PHIM for Run 1 (Main\_Analysis.RTF)

\*\*\*\*\*

### TTP Factors

| Factor | TTP Affected               | Relates to       | Value | < or > | Years |
|--------|----------------------------|------------------|-------|--------|-------|
| 1a     | Current PR2 to Current PR1 | Previous PR1 use | 2     | -      | -     |
| 1b     | Current PR3 to Current PR1 | Previous PR1 use | 2     | -      | -     |
| 1c     | Current PR4 to Current PR1 | Previous PR1 use | 2     | -      | -     |
| 2a     | Current PR1 to Former      | Previously quit  | 2     | -      | -     |
| 2b     | Current PR2 to Former      | Previously quit  | 2     | -      | -     |
| 2c     | Current PR3 to Former      | Previously quit  | 2     | -      | -     |
| 2d     | Current PR4 to Former      | Previously quit  | 2     | -      | -     |
| 3a     | Former to Current PR1      | Time quit        | 2     | <      | 2     |
| 3b     | Former to Current PR2      | Time quit        | 2     | <      | 2     |
| 3c     | Former to Current PR3      | Time quit        | 2     | <      | 2     |
| 3d     | Former to Current PR4      | Time quit        | 2     | <      | 2     |
| 4a     | Current PR2 to Current PR1 | Time PR2 use     | 0     | >      | 2     |
| 4b     | Current PR2 to Current PR3 | Time PR2 use     | 0     | >      | 2     |
| 4c     | Current PR2 to Current PR4 | Time PR2 use     | 0     | >      | 2     |
| 5a     | Current PR3 to Current PR1 | Time PR3 use     | 0     | >      | 2     |
| 5b     | Current PR3 to Current PR2 | Time PR3 use     | 0     | >      | 2     |
| 5c     | Current PR3 to Current PR4 | Time PR3 use     | 0     | >      | 2     |
| 6a     | Current PR4 to Current PR1 | Time PR4 use     | -     | -      | -     |
| 6b     | Current PR4 to Current PR2 | Time PR4 use     | -     | -      | -     |
| 6c     | Current PR4 to Current PR3 | Time PR4 use     | -     | -      | -     |
| 7a     | Current PR1 to Current PR2 | Time PR1 use     | -     | -      | -     |
| 7b     | Current PR1 to Current PR3 | Time PR1 use     | -     | -      | -     |
| 7c     | Current PR1 to Current PR4 | Time PR1 use     | -     | -      | -     |

## Results for PHIM for Run 1 (Main\_Analysis.RTF)

\*\*\*\*\*

**Main Output for the Tobacco History for Run: 1, Simulation: 1, Scenario: NULL**

| Variable Parameter                           |           |               | Value              |       |               |             |               |                |              |
|----------------------------------------------|-----------|---------------|--------------------|-------|---------------|-------------|---------------|----------------|--------------|
| 1. Country                                   |           |               | US (United States) |       |               |             |               |                |              |
| 2. Sex                                       |           |               | M (Males)          |       |               |             |               |                |              |
| 3. Year of start of process                  |           |               | 1990               |       |               |             |               |                |              |
| Year of Follow-up: 1990, Age Group: All Ages |           |               |                    |       |               |             |               |                |              |
| Period                                       | Age Group | Smoking Group | N                  | %     | Ever Quit (N) | Ever Quit % | Mean Yrs Quit | Short Term (n) | Short Term % |
| 0                                            | All Ages  | Never Any     | 34075              | 39.78 |               |             |               |                |              |
| 0                                            | All Ages  | CC            | 27323              | 31.90 | 0             | 0.00        |               |                |              |
| 0                                            | All Ages  | Former        | 24266              | 28.33 |               |             | 13.08         | 3623           | 14.93        |
| Year of Follow-up: 1990, Age Group: 18-19    |           |               |                    |       |               |             |               |                |              |
| Period                                       | Age Group | Smoking Group | N                  | %     | Ever Quit (N) | Ever Quit % | Mean Yrs Quit | Short Term (n) | Short Term % |
| 0                                            | 18-19     | Never Any     | 2783               | 78.42 |               |             |               |                |              |
| 0                                            | 18-19     | CC            | 634                | 17.86 | 0             | 0.00        |               |                |              |
| 0                                            | 18-19     | Former        | 132                | 3.72  |               |             | 0.11          | 132            | 100.00       |
| Year of Follow-up: 1990, Age Group: 20-24    |           |               |                    |       |               |             |               |                |              |
| Period                                       | Age Group | Smoking Group | N                  | %     | Ever Quit (N) | Ever Quit % | Mean Yrs Quit | Short Term (n) | Short Term % |
| 0                                            | 20-24     | Never Any     | 5722               | 58.29 |               |             |               |                |              |
| 0                                            | 20-24     | CC            | 3199               | 32.59 | 0             | 0.00        |               |                |              |
| 0                                            | 20-24     | Former        | 895                | 9.12  |               |             | 1.46          | 506            | 56.54        |
| Year of Follow-up: 1990, Age Group: 25-29    |           |               |                    |       |               |             |               |                |              |
| Period                                       | Age Group | Smoking Group | N                  | %     | Ever Quit (N) | Ever Quit % | Mean Yrs Quit | Short Term (n) | Short Term % |
| 0                                            | 25-29     | Never Any     | 5232               | 49.06 |               |             |               |                |              |
| 0                                            | 25-29     | CC            | 3914               | 36.70 | 0             | 0.00        |               |                |              |
| 0                                            | 25-29     | Former        | 1518               | 14.23 |               |             | 2.87          | 643            | 42.36        |
| Year of Follow-up: 1990, Age Group: 30-34    |           |               |                    |       |               |             |               |                |              |
| Period                                       | Age Group | Smoking Group | N                  | %     | Ever Quit (N) | Ever Quit % | Mean Yrs Quit | Short Term (n) | Short Term % |
| 0                                            | 30-34     | Never Any     | 4765               | 43.65 |               |             |               |                |              |
| 0                                            | 30-34     | CC            | 4023               | 36.85 | 0             | 0.00        |               |                |              |
| 0                                            | 30-34     | Former        | 2128               | 19.49 |               |             | 4.06          | 592            | 27.82        |
| Year of Follow-up: 1990, Age Group: 35-39    |           |               |                    |       |               |             |               |                |              |
| Period                                       | Age Group | Smoking Group | N                  | %     | Ever Quit (N) | Ever Quit % | Mean Yrs Quit | Short Term (n) | Short Term % |
| 0                                            | 35-39     | Never Any     | 3941               | 39.85 |               |             |               |                |              |
| 0                                            | 35-39     | CC            | 3474               | 35.13 | 0             | 0.00        |               |                |              |
| 0                                            | 35-39     | Former        | 2474               | 25.02 |               |             | 8.31          | 425            | 17.18        |
| Year of Follow-up: 1990, Age Group: 40-44    |           |               |                    |       |               |             |               |                |              |
| Period                                       | Age Group | Smoking Group | N                  | %     | Ever Quit (N) | Ever Quit % | Mean Yrs Quit | Short Term (n) | Short Term % |
| 0                                            | 40-44     | Never Any     | 2912               | 33.65 |               |             |               |                |              |
| 0                                            | 40-44     | CC            | 3113               | 35.97 | 0             | 0.00        |               |                |              |
| 0                                            | 40-44     | Former        | 2630               | 30.39 |               |             | 10.69         | 317            | 12.05        |
| Year of Follow-up: 1990, Age Group: 45-49    |           |               |                    |       |               |             |               |                |              |
| Period                                       | Age Group | Smoking Group | N                  | %     | Ever Quit (N) | Ever Quit % | Mean Yrs Quit | Short Term (n) | Short Term % |
| 0                                            | 45-49     | Never Any     | 1919               | 29.46 |               |             |               |                |              |
| 0                                            | 45-49     | CC            | 2318               | 35.58 | 0             | 0.00        |               |                |              |
| 0                                            | 45-49     | Former        | 2278               | 34.97 |               |             | 13.26         | 221            | 9.70         |
| Year of Follow-up: 1990, Age Group: 50-54    |           |               |                    |       |               |             |               |                |              |
| Period                                       | Age Group | Smoking Group | N                  | %     | Ever Quit (N) | Ever Quit % | Mean Yrs Quit | Short Term (n) | Short Term % |
| 0                                            | 50-54     | Never Any     | 1611               | 29.41 |               |             |               |                |              |
| 0                                            | 50-54     | CC            | 1816               | 33.16 | 0             | 0.00        |               |                |              |
| 0                                            | 50-54     | Former        | 2050               | 37.43 |               |             | 14.55         | 261            | 12.73        |
| Year of Follow-up: 1990, Age Group: 55-59    |           |               |                    |       |               |             |               |                |              |
| Period                                       | Age Group | Smoking Group | N                  | %     | Ever Quit (N) | Ever Quit % | Mean Yrs Quit | Short Term (n) | Short Term % |
| 0                                            | 55-59     | Never Any     | 1337               | 26.83 |               |             |               |                |              |
| 0                                            | 55-59     | CC            | 1520               | 30.50 | 0             | 0.00        |               |                |              |
| 0                                            | 55-59     | Former        | 2126               | 42.67 |               |             | 14.80         | 216            | 10.16        |
| Year of Follow-up: 1990, Age Group: 60-64    |           |               |                    |       |               |             |               |                |              |
| Period                                       | Age Group | Smoking Group | N                  | %     | Ever Quit (N) | Ever Quit % | Mean Yrs Quit | Short Term (n) | Short Term % |
| 0                                            | 60-64     | Never Any     | 1169               | 23.83 |               |             |               |                |              |
| 0                                            | 60-64     | CC            | 1287               | 26.24 | 0             | 0.00        |               |                |              |
| 0                                            | 60-64     | Former        | 2449               | 49.93 |               |             | 18.87         | 106            | 4.33         |
| Year of Follow-up: 1990, Age Group: 65-69    |           |               |                    |       |               |             |               |                |              |
| Period                                       | Age Group | Smoking Group | N                  | %     | Ever Quit (N) | Ever Quit % | Mean Yrs Quit | Short Term (n) | Short Term % |

**Results for PHIM for Run 1 (Main\_Analysis.RTF)**

|                                              |           |               |       |       |               |             |               |                |              |
|----------------------------------------------|-----------|---------------|-------|-------|---------------|-------------|---------------|----------------|--------------|
| 0                                            | 65-69     | Never Any     | 1023  | 23.32 |               |             |               |                |              |
| 0                                            | 65-69     | CC            | 979   | 22.32 | 0             | 0.00        |               |                |              |
| 0                                            | 65-69     | Former        | 2385  | 54.37 |               |             | 19.91         | 113            | 4.74         |
| Year of Follow-up: 1990, Age Group: 70-74    |           |               |       |       |               |             |               |                |              |
| Period                                       | Age Group | Smoking Group | N     | %     | Ever Quit (N) | Ever Quit % | Mean Yrs Quit | Short Term (n) | Short Term % |
| 0                                            | 70-74     | Never Any     | 961   | 27.46 |               |             |               |                |              |
| 0                                            | 70-74     | CC            | 675   | 19.29 | 0             | 0.00        |               |                |              |
| 0                                            | 70-74     | Former        | 1863  | 53.24 |               |             | 20.69         | 23             | 1.23         |
| Year of Follow-up: 1990, Age Group: 75-79    |           |               |       |       |               |             |               |                |              |
| Period                                       | Age Group | Smoking Group | N     | %     | Ever Quit (N) | Ever Quit % | Mean Yrs Quit | Short Term (n) | Short Term % |
| 0                                            | 75-79     | Never Any     | 700   | 29.06 |               |             |               |                |              |
| 0                                            | 75-79     | CC            | 371   | 15.40 | 0             | 0.00        |               |                |              |
| 0                                            | 75-79     | Former        | 1338  | 55.54 |               |             | 22.88         | 68             | 5.08         |
| Year of Follow-up: 1995, Age Group: All Ages |           |               |       |       |               |             |               |                |              |
| Period                                       | Age Group | Smoking Group | N     | %     | Ever Quit (N) | Ever Quit % | Mean Yrs Quit | Short Term (n) | Short Term % |
| 5                                            | All Ages  | Never Any     | 38379 | 41.59 |               |             |               |                |              |
| 5                                            | All Ages  | CC            | 26792 | 29.03 | 0             | 0.00        |               |                |              |
| 5                                            | All Ages  | Former        | 27119 | 29.38 |               |             | 15.09         | 1786           | 6.59         |
| Year of Follow-up: 1995, Age Group: 18-19    |           |               |       |       |               |             |               |                |              |
| Period                                       | Age Group | Smoking Group | N     | %     | Ever Quit (N) | Ever Quit % | Mean Yrs Quit | Short Term (n) | Short Term % |
| 5                                            | 18-19     | Never Any     | 2456  | 69.30 |               |             |               |                |              |
| 5                                            | 18-19     | CC            | 989   | 27.91 | 0             | 0.00        |               |                |              |
| 5                                            | 18-19     | Former        | 99    | 2.79  |               |             | 0.96          | 70             | 70.71        |
| Year of Follow-up: 1995, Age Group: 20-24    |           |               |       |       |               |             |               |                |              |
| Period                                       | Age Group | Smoking Group | N     | %     | Ever Quit (N) | Ever Quit % | Mean Yrs Quit | Short Term (n) | Short Term % |
| 5                                            | 20-24     | Never Any     | 5811  | 64.28 |               |             |               |                |              |
| 5                                            | 20-24     | CC            | 2706  | 29.93 | 0             | 0.00        |               |                |              |
| 5                                            | 20-24     | Former        | 523   | 5.79  |               |             | 2.70          | 162            | 30.98        |
| Year of Follow-up: 1995, Age Group: 25-29    |           |               |       |       |               |             |               |                |              |
| Period                                       | Age Group | Smoking Group | N     | %     | Ever Quit (N) | Ever Quit % | Mean Yrs Quit | Short Term (n) | Short Term % |
| 5                                            | 25-29     | Never Any     | 5473  | 55.76 |               |             |               |                |              |
| 5                                            | 25-29     | CC            | 3144  | 32.03 | 0             | 0.00        |               |                |              |
| 5                                            | 25-29     | Former        | 1199  | 12.21 |               |             | 5.30          | 123            | 10.26        |
| Year of Follow-up: 1995, Age Group: 30-34    |           |               |       |       |               |             |               |                |              |
| Period                                       | Age Group | Smoking Group | N     | %     | Ever Quit (N) | Ever Quit % | Mean Yrs Quit | Short Term (n) | Short Term % |
| 5                                            | 30-34     | Never Any     | 5055  | 47.40 |               |             |               |                |              |
| 5                                            | 30-34     | CC            | 3816  | 35.78 | 0             | 0.00        |               |                |              |
| 5                                            | 30-34     | Former        | 1793  | 16.81 |               |             | 6.95          | 112            | 6.25         |
| Year of Follow-up: 1995, Age Group: 35-39    |           |               |       |       |               |             |               |                |              |
| Period                                       | Age Group | Smoking Group | N     | %     | Ever Quit (N) | Ever Quit % | Mean Yrs Quit | Short Term (n) | Short Term % |
| 5                                            | 35-39     | Never Any     | 4711  | 43.16 |               |             |               |                |              |
| 5                                            | 35-39     | CC            | 3760  | 34.44 | 0             | 0.00        |               |                |              |
| 5                                            | 35-39     | Former        | 2445  | 22.40 |               |             | 8.12          | 150            | 6.13         |
| Year of Follow-up: 1995, Age Group: 40-44    |           |               |       |       |               |             |               |                |              |
| Period                                       | Age Group | Smoking Group | N     | %     | Ever Quit (N) | Ever Quit % | Mean Yrs Quit | Short Term (n) | Short Term % |
| 5                                            | 40-44     | Never Any     | 3941  | 39.85 |               |             |               |                |              |
| 5                                            | 40-44     | CC            | 3197  | 32.33 | 0             | 0.00        |               |                |              |
| 5                                            | 40-44     | Former        | 2751  | 27.82 |               |             | 12.14         | 128            | 4.65         |
| Year of Follow-up: 1995, Age Group: 45-49    |           |               |       |       |               |             |               |                |              |
| Period                                       | Age Group | Smoking Group | N     | %     | Ever Quit (N) | Ever Quit % | Mean Yrs Quit | Short Term (n) | Short Term % |
| 5                                            | 45-49     | Never Any     | 2912  | 33.65 |               |             |               |                |              |
| 5                                            | 45-49     | CC            | 2701  | 31.21 | 0             | 0.00        |               |                |              |
| 5                                            | 45-49     | Former        | 3042  | 35.15 |               |             | 13.81         | 165            | 5.42         |
| Year of Follow-up: 1995, Age Group: 50-54    |           |               |       |       |               |             |               |                |              |
| Period                                       | Age Group | Smoking Group | N     | %     | Ever Quit (N) | Ever Quit % | Mean Yrs Quit | Short Term (n) | Short Term % |
| 5                                            | 50-54     | Never Any     | 1919  | 29.46 |               |             |               |                |              |
| 5                                            | 50-54     | CC            | 1968  | 30.21 | 0             | 0.00        |               |                |              |
| 5                                            | 50-54     | Former        | 2628  | 40.34 |               |             | 16.08         | 147            | 5.59         |
| Year of Follow-up: 1995, Age Group: 55-59    |           |               |       |       |               |             |               |                |              |
| Period                                       | Age Group | Smoking Group | N     | %     | Ever Quit (N) | Ever Quit % | Mean Yrs Quit | Short Term (n) | Short Term % |
| 5                                            | 55-59     | Never Any     | 1611  | 29.41 |               |             |               |                |              |
| 5                                            | 55-59     | CC            | 1466  | 26.77 | 0             | 0.00        |               |                |              |
| 5                                            | 55-59     | Former        | 2400  | 43.82 |               |             | 16.98         | 153            | 6.38         |
| Year of Follow-up: 1995, Age Group: 60-64    |           |               |       |       |               |             |               |                |              |
| Period                                       | Age Group | Smoking Group | N     | %     | Ever Quit (N) | Ever Quit % | Mean Yrs Quit | Short Term (n) | Short Term % |

**Results for PHIM for Run 1 (Main\_Analysis.RTF)**

|                                              |           |               |       |       |               |             |               |                |              |
|----------------------------------------------|-----------|---------------|-------|-------|---------------|-------------|---------------|----------------|--------------|
| 5                                            | 60-64     | Never Any     | 1337  | 26.83 |               |             |               |                |              |
| 5                                            | 60-64     | CC            | 1155  | 23.18 | 0             | 0.00        |               |                |              |
| 5                                            | 60-64     | Former        | 2491  | 49.99 |               |             | 17.18         | 144            | 5.78         |
| Year of Follow-up: 1995, Age Group: 65-69    |           |               |       |       |               |             |               |                |              |
| Period                                       | Age Group | Smoking Group | N     | %     | Ever Quit (N) | Ever Quit % | Mean Yrs Quit | Short Term (n) | Short Term % |
| 5                                            | 65-69     | Never Any     | 1169  | 23.83 |               |             |               |                |              |
| 5                                            | 65-69     | CC            | 832   | 16.96 | 0             | 0.00        |               |                |              |
| 5                                            | 65-69     | Former        | 2904  | 59.20 |               |             | 20.40         | 208            | 7.16         |
| Year of Follow-up: 1995, Age Group: 70-74    |           |               |       |       |               |             |               |                |              |
| Period                                       | Age Group | Smoking Group | N     | %     | Ever Quit (N) | Ever Quit % | Mean Yrs Quit | Short Term (n) | Short Term % |
| 5                                            | 70-74     | Never Any     | 1023  | 23.32 |               |             |               |                |              |
| 5                                            | 70-74     | CC            | 610   | 13.90 | 0             | 0.00        |               |                |              |
| 5                                            | 70-74     | Former        | 2754  | 62.78 |               |             | 21.83         | 137            | 4.97         |
| Year of Follow-up: 1995, Age Group: 75-79    |           |               |       |       |               |             |               |                |              |
| Period                                       | Age Group | Smoking Group | N     | %     | Ever Quit (N) | Ever Quit % | Mean Yrs Quit | Short Term (n) | Short Term % |
| 5                                            | 75-79     | Never Any     | 961   | 27.46 |               |             |               |                |              |
| 5                                            | 75-79     | CC            | 448   | 12.80 | 0             | 0.00        |               |                |              |
| 5                                            | 75-79     | Former        | 2090  | 59.73 |               |             | 23.12         | 87             | 4.16         |
| Year of Follow-up: 2000, Age Group: All Ages |           |               |       |       |               |             |               |                |              |
| Period                                       | Age Group | Smoking Group | N     | %     | Ever Quit (N) | Ever Quit % | Mean Yrs Quit | Short Term (n) | Short Term % |
| 10                                           | All Ages  | Never Any     | 39029 | 41.48 |               |             |               |                |              |
| 10                                           | All Ages  | CC            | 25505 | 27.11 | 0             | 0.00        |               |                |              |
| 10                                           | All Ages  | Former        | 29558 | 31.41 |               |             | 16.78         | 1706           | 5.77         |
| Year of Follow-up: 2000, Age Group: 18-19    |           |               |       |       |               |             |               |                |              |
| Period                                       | Age Group | Smoking Group | N     | %     | Ever Quit (N) | Ever Quit % | Mean Yrs Quit | Short Term (n) | Short Term % |
| 10                                           | 18-19     | Never Any     | 0     | .     |               |             |               |                |              |
| 10                                           | 18-19     | CC            | 0     | .     | 0             | .           |               | 0              | .            |
| 10                                           | 18-19     | Former        | 0     | .     |               |             |               |                |              |
| Year of Follow-up: 2000, Age Group: 20-24    |           |               |       |       |               |             |               |                |              |
| Period                                       | Age Group | Smoking Group | N     | %     | Ever Quit (N) | Ever Quit % | Mean Yrs Quit | Short Term (n) | Short Term % |
| 10                                           | 20-24     | Never Any     | 4845  | 54.78 |               |             |               |                |              |
| 10                                           | 20-24     | CC            | 3091  | 34.95 | 0             | 0.00        |               |                |              |
| 10                                           | 20-24     | Former        | 909   | 10.28 |               |             | 3.29          | 273            | 30.03        |
| Year of Follow-up: 2000, Age Group: 25-29    |           |               |       |       |               |             |               |                |              |
| Period                                       | Age Group | Smoking Group | N     | %     | Ever Quit (N) | Ever Quit % | Mean Yrs Quit | Short Term (n) | Short Term % |
| 10                                           | 25-29     | Never Any     | 5316  | 58.81 |               |             |               |                |              |
| 10                                           | 25-29     | CC            | 2773  | 30.67 | 0             | 0.00        |               |                |              |
| 10                                           | 25-29     | Former        | 951   | 10.52 |               |             | 5.07          | 174            | 18.30        |
| Year of Follow-up: 2000, Age Group: 30-34    |           |               |       |       |               |             |               |                |              |
| Period                                       | Age Group | Smoking Group | N     | %     | Ever Quit (N) | Ever Quit % | Mean Yrs Quit | Short Term (n) | Short Term % |
| 10                                           | 30-34     | Never Any     | 5256  | 53.55 |               |             |               |                |              |
| 10                                           | 30-34     | CC            | 3060  | 31.17 | 0             | 0.00        |               |                |              |
| 10                                           | 30-34     | Former        | 1500  | 15.28 |               |             | 8.63          | 125            | 8.33         |
| Year of Follow-up: 2000, Age Group: 35-39    |           |               |       |       |               |             |               |                |              |
| Period                                       | Age Group | Smoking Group | N     | %     | Ever Quit (N) | Ever Quit % | Mean Yrs Quit | Short Term (n) | Short Term % |
| 10                                           | 35-39     | Never Any     | 4989  | 46.78 |               |             |               |                |              |
| 10                                           | 35-39     | CC            | 3629  | 34.03 | 0             | 0.00        |               |                |              |
| 10                                           | 35-39     | Former        | 2046  | 19.19 |               |             | 10.71         | 110            | 5.38         |
| Year of Follow-up: 2000, Age Group: 40-44    |           |               |       |       |               |             |               |                |              |
| Period                                       | Age Group | Smoking Group | N     | %     | Ever Quit (N) | Ever Quit % | Mean Yrs Quit | Short Term (n) | Short Term % |
| 10                                           | 40-44     | Never Any     | 4711  | 43.16 |               |             |               |                |              |
| 10                                           | 40-44     | CC            | 3416  | 31.29 | 0             | 0.00        |               |                |              |
| 10                                           | 40-44     | Former        | 2789  | 25.55 |               |             | 11.76         | 131            | 4.70         |
| Year of Follow-up: 2000, Age Group: 45-49    |           |               |       |       |               |             |               |                |              |
| Period                                       | Age Group | Smoking Group | N     | %     | Ever Quit (N) | Ever Quit % | Mean Yrs Quit | Short Term (n) | Short Term % |
| 10                                           | 45-49     | Never Any     | 3941  | 39.85 |               |             |               |                |              |
| 10                                           | 45-49     | CC            | 2816  | 28.48 | 0             | 0.00        |               |                |              |
| 10                                           | 45-49     | Former        | 3132  | 31.67 |               |             | 15.29         | 160            | 5.11         |
| Year of Follow-up: 2000, Age Group: 50-54    |           |               |       |       |               |             |               |                |              |
| Period                                       | Age Group | Smoking Group | N     | %     | Ever Quit (N) | Ever Quit % | Mean Yrs Quit | Short Term (n) | Short Term % |
| 10                                           | 50-54     | Never Any     | 2912  | 33.65 |               |             |               |                |              |
| 10                                           | 50-54     | CC            | 2237  | 25.85 | 0             | 0.00        |               |                |              |
| 10                                           | 50-54     | Former        | 3506  | 40.51 |               |             | 16.59         | 184            | 5.25         |
| Year of Follow-up: 2000, Age Group: 55-59    |           |               |       |       |               |             |               |                |              |
| Period                                       | Age Group | Smoking Group | N     | %     | Ever Quit (N) | Ever Quit % | Mean Yrs Quit | Short Term (n) | Short Term % |

**Results for PHIM for Run 1 (Main\_Analysis.RTF)**

|                                              |           |               |       |       |               |             |               |                |              |
|----------------------------------------------|-----------|---------------|-------|-------|---------------|-------------|---------------|----------------|--------------|
| 10                                           | 55-59     | Never Any     | 1919  | 29.46 |               |             |               |                |              |
| 10                                           | 55-59     | CC            | 1538  | 23.61 | 0             | 0.00        |               |                |              |
| 10                                           | 55-59     | Former        | 3058  | 46.94 |               |             | 18.41         | 158            | 5.17         |
| Year of Follow-up: 2000, Age Group: 60-64    |           |               |       |       |               |             |               |                |              |
| Period                                       | Age Group | Smoking Group | N     | %     | Ever Quit (N) | Ever Quit % | Mean Yrs Quit | Short Term (n) | Short Term % |
| 10                                           | 60-64     | Never Any     | 1611  | 29.41 |               |             |               |                |              |
| 10                                           | 60-64     | CC            | 1140  | 20.81 | 0             | 0.00        |               |                |              |
| 10                                           | 60-64     | Former        | 2726  | 49.77 |               |             | 19.59         | 122            | 4.48         |
| Year of Follow-up: 2000, Age Group: 65-69    |           |               |       |       |               |             |               |                |              |
| Period                                       | Age Group | Smoking Group | N     | %     | Ever Quit (N) | Ever Quit % | Mean Yrs Quit | Short Term (n) | Short Term % |
| 10                                           | 65-69     | Never Any     | 1337  | 26.83 |               |             |               |                |              |
| 10                                           | 65-69     | CC            | 809   | 16.24 | 0             | 0.00        |               |                |              |
| 10                                           | 65-69     | Former        | 2837  | 56.93 |               |             | 19.73         | 124            | 4.37         |
| Year of Follow-up: 2000, Age Group: 70-74    |           |               |       |       |               |             |               |                |              |
| Period                                       | Age Group | Smoking Group | N     | %     | Ever Quit (N) | Ever Quit % | Mean Yrs Quit | Short Term (n) | Short Term % |
| 10                                           | 70-74     | Never Any     | 1169  | 23.83 |               |             |               |                |              |
| 10                                           | 70-74     | CC            | 570   | 11.62 | 0             | 0.00        |               |                |              |
| 10                                           | 70-74     | Former        | 3166  | 64.55 |               |             | 23.50         | 80             | 2.53         |
| Year of Follow-up: 2000, Age Group: 75-79    |           |               |       |       |               |             |               |                |              |
| Period                                       | Age Group | Smoking Group | N     | %     | Ever Quit (N) | Ever Quit % | Mean Yrs Quit | Short Term (n) | Short Term % |
| 10                                           | 75-79     | Never Any     | 1023  | 23.32 |               |             |               |                |              |
| 10                                           | 75-79     | CC            | 426   | 9.71  | 0             | 0.00        |               |                |              |
| 10                                           | 75-79     | Former        | 2938  | 66.97 |               |             | 25.29         | 65             | 2.21         |
| Year of Follow-up: 2005, Age Group: All Ages |           |               |       |       |               |             |               |                |              |
| Period                                       | Age Group | Smoking Group | N     | %     | Ever Quit (N) | Ever Quit % | Mean Yrs Quit | Short Term (n) | Short Term % |
| 15                                           | All Ages  | Never Any     | 37254 | 41.53 |               |             |               |                |              |
| 15                                           | All Ages  | CC            | 21889 | 24.40 | 0             | 0.00        |               |                |              |
| 15                                           | All Ages  | Former        | 30562 | 34.07 |               |             | 18.41         | 1493           | 4.89         |
| Year of Follow-up: 2005, Age Group: 18-19    |           |               |       |       |               |             |               |                |              |
| Period                                       | Age Group | Smoking Group | N     | %     | Ever Quit (N) | Ever Quit % | Mean Yrs Quit | Short Term (n) | Short Term % |
| 15                                           | 18-19     | Never Any     | 0     | .     |               |             |               |                |              |
| 15                                           | 18-19     | CC            | 0     | .     | 0             | .           |               |                |              |
| 15                                           | 18-19     | Former        | 0     | .     |               |             | .             | 0              | .            |
| Year of Follow-up: 2005, Age Group: 20-24    |           |               |       |       |               |             |               |                |              |
| Period                                       | Age Group | Smoking Group | N     | %     | Ever Quit (N) | Ever Quit % | Mean Yrs Quit | Short Term (n) | Short Term % |
| 15                                           | 20-24     | Never Any     | 0     | .     |               |             |               |                |              |
| 15                                           | 20-24     | CC            | 0     | .     | 0             | .           |               |                |              |
| 15                                           | 20-24     | Former        | 0     | .     |               |             | .             | 0              | .            |
| Year of Follow-up: 2005, Age Group: 25-29    |           |               |       |       |               |             |               |                |              |
| Period                                       | Age Group | Smoking Group | N     | %     | Ever Quit (N) | Ever Quit % | Mean Yrs Quit | Short Term (n) | Short Term % |
| 15                                           | 25-29     | Never Any     | 4521  | 51.11 |               |             |               |                |              |
| 15                                           | 25-29     | CC            | 2890  | 32.67 | 0             | 0.00        |               |                |              |
| 15                                           | 25-29     | Former        | 1434  | 16.21 |               |             | 6.06          | 189            | 13.18        |
| Year of Follow-up: 2005, Age Group: 30-34    |           |               |       |       |               |             |               |                |              |
| Period                                       | Age Group | Smoking Group | N     | %     | Ever Quit (N) | Ever Quit % | Mean Yrs Quit | Short Term (n) | Short Term % |
| 15                                           | 30-34     | Never Any     | 4999  | 55.30 |               |             |               |                |              |
| 15                                           | 30-34     | CC            | 2700  | 29.87 | 0             | 0.00        |               |                |              |
| 15                                           | 30-34     | Former        | 1341  | 14.83 |               |             | 7.70          | 161            | 12.01        |
| Year of Follow-up: 2005, Age Group: 35-39    |           |               |       |       |               |             |               |                |              |
| Period                                       | Age Group | Smoking Group | N     | %     | Ever Quit (N) | Ever Quit % | Mean Yrs Quit | Short Term (n) | Short Term % |
| 15                                           | 35-39     | Never Any     | 5145  | 52.41 |               |             |               |                |              |
| 15                                           | 35-39     | CC            | 2789  | 28.41 | 0             | 0.00        |               |                |              |
| 15                                           | 35-39     | Former        | 1882  | 19.17 |               |             | 11.26         | 146            | 7.76         |
| Year of Follow-up: 2005, Age Group: 40-44    |           |               |       |       |               |             |               |                |              |
| Period                                       | Age Group | Smoking Group | N     | %     | Ever Quit (N) | Ever Quit % | Mean Yrs Quit | Short Term (n) | Short Term % |
| 15                                           | 40-44     | Never Any     | 4989  | 46.78 |               |             |               |                |              |
| 15                                           | 40-44     | CC            | 3202  | 30.03 | 0             | 0.00        |               |                |              |
| 15                                           | 40-44     | Former        | 2473  | 23.19 |               |             | 13.31         | 182            | 7.36         |
| Year of Follow-up: 2005, Age Group: 45-49    |           |               |       |       |               |             |               |                |              |
| Period                                       | Age Group | Smoking Group | N     | %     | Ever Quit (N) | Ever Quit % | Mean Yrs Quit | Short Term (n) | Short Term % |
| 15                                           | 45-49     | Never Any     | 4711  | 43.16 |               |             |               |                |              |
| 15                                           | 45-49     | CC            | 3012  | 27.59 | 0             | 0.00        |               |                |              |
| 15                                           | 45-49     | Former        | 3193  | 29.25 |               |             | 14.88         | 167            | 5.23         |
| Year of Follow-up: 2005, Age Group: 50-54    |           |               |       |       |               |             |               |                |              |
| Period                                       | Age Group | Smoking Group | N     | %     | Ever Quit (N) | Ever Quit % | Mean Yrs Quit | Short Term (n) | Short Term % |

**Results for PHIM for Run 1 (Main\_Analysis.RTF)**

|                                              |           |               |       |       |               |             |               |                |              |
|----------------------------------------------|-----------|---------------|-------|-------|---------------|-------------|---------------|----------------|--------------|
| 15                                           | 50-54     | Never Any     | 3941  | 39.85 |               |             |               |                |              |
| 15                                           | 50-54     | CC            | 2432  | 24.59 | 0             | 0.00        |               |                |              |
| 15                                           | 50-54     | Former        | 3516  | 35.55 |               |             | 18.30         | 155            | 4.41         |
| Year of Follow-up: 2005, Age Group: 55-59    |           |               |       |       |               |             |               |                |              |
| Period                                       | Age Group | Smoking Group | N     | %     | Ever Quit (N) | Ever Quit % | Mean Yrs Quit | Short Term (n) | Short Term % |
| 15                                           | 55-59     | Never Any     | 2912  | 33.65 |               |             |               |                |              |
| 15                                           | 55-59     | CC            | 1928  | 22.28 | 0             | 0.00        |               |                |              |
| 15                                           | 55-59     | Former        | 3815  | 44.08 |               |             | 20.03         | 78             | 2.04         |
| Year of Follow-up: 2005, Age Group: 60-64    |           |               |       |       |               |             |               |                |              |
| Period                                       | Age Group | Smoking Group | N     | %     | Ever Quit (N) | Ever Quit % | Mean Yrs Quit | Short Term (n) | Short Term % |
| 15                                           | 60-64     | Never Any     | 1919  | 29.46 |               |             |               |                |              |
| 15                                           | 60-64     | CC            | 1202  | 18.45 | 0             | 0.00        |               |                |              |
| 15                                           | 60-64     | Former        | 3394  | 52.10 |               |             | 21.28         | 142            | 4.18         |
| Year of Follow-up: 2005, Age Group: 65-69    |           |               |       |       |               |             |               |                |              |
| Period                                       | Age Group | Smoking Group | N     | %     | Ever Quit (N) | Ever Quit % | Mean Yrs Quit | Short Term (n) | Short Term % |
| 15                                           | 65-69     | Never Any     | 1611  | 29.41 |               |             |               |                |              |
| 15                                           | 65-69     | CC            | 813   | 14.84 | 0             | 0.00        |               |                |              |
| 15                                           | 65-69     | Former        | 3053  | 55.74 |               |             | 22.18         | 121            | 3.96         |
| Year of Follow-up: 2005, Age Group: 70-74    |           |               |       |       |               |             |               |                |              |
| Period                                       | Age Group | Smoking Group | N     | %     | Ever Quit (N) | Ever Quit % | Mean Yrs Quit | Short Term (n) | Short Term % |
| 15                                           | 70-74     | Never Any     | 1337  | 26.83 |               |             |               |                |              |
| 15                                           | 70-74     | CC            | 543   | 10.90 | 0             | 0.00        |               |                |              |
| 15                                           | 70-74     | Former        | 3103  | 62.27 |               |             | 22.80         | 96             | 3.09         |
| Year of Follow-up: 2005, Age Group: 75-79    |           |               |       |       |               |             |               |                |              |
| Period                                       | Age Group | Smoking Group | N     | %     | Ever Quit (N) | Ever Quit % | Mean Yrs Quit | Short Term (n) | Short Term % |
| 15                                           | 75-79     | Never Any     | 1169  | 23.83 |               |             |               |                |              |
| 15                                           | 75-79     | CC            | 378   | 7.71  | 0             | 0.00        |               |                |              |
| 15                                           | 75-79     | Former        | 3358  | 68.46 |               |             | 27.00         | 56             | 1.67         |
| Year of Follow-up: 2010, Age Group: All Ages |           |               |       |       |               |             |               |                |              |
| Period                                       | Age Group | Smoking Group | N     | %     | Ever Quit (N) | Ever Quit % | Mean Yrs Quit | Short Term (n) | Short Term % |
| 20                                           | All Ages  | Never Any     | 35903 | 42.34 |               |             |               |                |              |
| 20                                           | All Ages  | CC            | 17853 | 21.05 | 0             | 0.00        |               |                |              |
| 20                                           | All Ages  | Former        | 31044 | 36.61 |               |             | 19.83         | 1550           | 4.99         |
| Year of Follow-up: 2010, Age Group: 18-19    |           |               |       |       |               |             |               |                |              |
| Period                                       | Age Group | Smoking Group | N     | %     | Ever Quit (N) | Ever Quit % | Mean Yrs Quit | Short Term (n) | Short Term % |
| 20                                           | 18-19     | Never Any     | 0     | .     |               |             |               |                |              |
| 20                                           | 18-19     | CC            | 0     | .     | 0             | .           |               |                |              |
| 20                                           | 18-19     | Former        | 0     | .     |               |             | .             | 0              | .            |
| Year of Follow-up: 2010, Age Group: 20-24    |           |               |       |       |               |             |               |                |              |
| Period                                       | Age Group | Smoking Group | N     | %     | Ever Quit (N) | Ever Quit % | Mean Yrs Quit | Short Term (n) | Short Term % |
| 20                                           | 20-24     | Never Any     | 0     | .     |               |             |               |                |              |
| 20                                           | 20-24     | CC            | 0     | .     | 0             | .           |               |                |              |
| 20                                           | 20-24     | Former        | 0     | .     |               |             | .             | 0              | .            |
| Year of Follow-up: 2010, Age Group: 25-29    |           |               |       |       |               |             |               |                |              |
| Period                                       | Age Group | Smoking Group | N     | %     | Ever Quit (N) | Ever Quit % | Mean Yrs Quit | Short Term (n) | Short Term % |
| 20                                           | 25-29     | Never Any     | 0     | .     |               |             |               |                |              |
| 20                                           | 25-29     | CC            | 0     | .     | 0             | .           |               |                |              |
| 20                                           | 25-29     | Former        | 0     | .     |               |             | .             | 0              | .            |
| Year of Follow-up: 2010, Age Group: 30-34    |           |               |       |       |               |             |               |                |              |
| Period                                       | Age Group | Smoking Group | N     | %     | Ever Quit (N) | Ever Quit % | Mean Yrs Quit | Short Term (n) | Short Term % |
| 20                                           | 30-34     | Never Any     | 4390  | 49.63 |               |             |               |                |              |
| 20                                           | 30-34     | CC            | 2501  | 28.28 | 0             | 0.00        |               |                |              |
| 20                                           | 30-34     | Former        | 1954  | 22.09 |               |             | 8.61          | 240            | 12.28        |
| Year of Follow-up: 2010, Age Group: 35-39    |           |               |       |       |               |             |               |                |              |
| Period                                       | Age Group | Smoking Group | N     | %     | Ever Quit (N) | Ever Quit % | Mean Yrs Quit | Short Term (n) | Short Term % |
| 20                                           | 35-39     | Never Any     | 4948  | 54.73 |               |             |               |                |              |
| 20                                           | 35-39     | CC            | 2261  | 25.01 | 0             | 0.00        |               |                |              |
| 20                                           | 35-39     | Former        | 1831  | 20.25 |               |             | 9.87          | 174            | 9.50         |
| Year of Follow-up: 2010, Age Group: 40-44    |           |               |       |       |               |             |               |                |              |
| Period                                       | Age Group | Smoking Group | N     | %     | Ever Quit (N) | Ever Quit % | Mean Yrs Quit | Short Term (n) | Short Term % |
| 20                                           | 40-44     | Never Any     | 5145  | 52.41 |               |             |               |                |              |
| 20                                           | 40-44     | CC            | 2437  | 24.83 | 0             | 0.00        |               |                |              |
| 20                                           | 40-44     | Former        | 2234  | 22.76 |               |             | 13.99         | 167            | 7.48         |
| Year of Follow-up: 2010, Age Group: 45-49    |           |               |       |       |               |             |               |                |              |
| Period                                       | Age Group | Smoking Group | N     | %     | Ever Quit (N) | Ever Quit % | Mean Yrs Quit | Short Term (n) | Short Term % |

**Results for PHIM for Run 1 (Main\_Analysis.RTF)**

|                                              |           |               |       |       |               |             |               |                |              |
|----------------------------------------------|-----------|---------------|-------|-------|---------------|-------------|---------------|----------------|--------------|
| 20                                           | 45-49     | Never Any     | 4989  | 46.78 |               |             |               |                |              |
| 20                                           | 45-49     | CC            | 2794  | 26.20 | 0             | 0.00        |               |                |              |
| 20                                           | 45-49     | Former        | 2881  | 27.02 |               |             | 16.01         | 148            | 5.14         |
| Year of Follow-up: 2010, Age Group: 50-54    |           |               |       |       |               |             |               |                |              |
| Period                                       | Age Group | Smoking Group | N     | %     | Ever Quit (N) | Ever Quit % | Mean Yrs Quit | Short Term (n) | Short Term % |
| 20                                           | 50-54     | Never Any     | 4711  | 43.16 |               |             |               |                |              |
| 20                                           | 50-54     | CC            | 2568  | 23.53 | 0             | 0.00        |               |                |              |
| 20                                           | 50-54     | Former        | 3637  | 33.32 |               |             | 17.69         | 169            | 4.65         |
| Year of Follow-up: 2010, Age Group: 55-59    |           |               |       |       |               |             |               |                |              |
| Period                                       | Age Group | Smoking Group | N     | %     | Ever Quit (N) | Ever Quit % | Mean Yrs Quit | Short Term (n) | Short Term % |
| 20                                           | 55-59     | Never Any     | 3941  | 39.85 |               |             |               |                |              |
| 20                                           | 55-59     | CC            | 2005  | 20.28 | 0             | 0.00        |               |                |              |
| 20                                           | 55-59     | Former        | 3943  | 39.87 |               |             | 20.98         | 188            | 4.77         |
| Year of Follow-up: 2010, Age Group: 60-64    |           |               |       |       |               |             |               |                |              |
| Period                                       | Age Group | Smoking Group | N     | %     | Ever Quit (N) | Ever Quit % | Mean Yrs Quit | Short Term (n) | Short Term % |
| 20                                           | 60-64     | Never Any     | 2912  | 33.65 |               |             |               |                |              |
| 20                                           | 60-64     | CC            | 1438  | 16.61 | 0             | 0.00        |               |                |              |
| 20                                           | 60-64     | Former        | 4305  | 49.74 |               |             | 22.38         | 221            | 5.13         |
| Year of Follow-up: 2010, Age Group: 65-69    |           |               |       |       |               |             |               |                |              |
| Period                                       | Age Group | Smoking Group | N     | %     | Ever Quit (N) | Ever Quit % | Mean Yrs Quit | Short Term (n) | Short Term % |
| 20                                           | 65-69     | Never Any     | 1919  | 29.46 |               |             |               |                |              |
| 20                                           | 65-69     | CC            | 844   | 12.95 | 0             | 0.00        |               |                |              |
| 20                                           | 65-69     | Former        | 3752  | 57.59 |               |             | 23.99         | 116            | 3.09         |
| Year of Follow-up: 2010, Age Group: 70-74    |           |               |       |       |               |             |               |                |              |
| Period                                       | Age Group | Smoking Group | N     | %     | Ever Quit (N) | Ever Quit % | Mean Yrs Quit | Short Term (n) | Short Term % |
| 20                                           | 70-74     | Never Any     | 1611  | 29.41 |               |             |               |                |              |
| 20                                           | 70-74     | CC            | 602   | 10.99 | 0             | 0.00        |               |                |              |
| 20                                           | 70-74     | Former        | 3264  | 59.59 |               |             | 25.56         | 74             | 2.27         |
| Year of Follow-up: 2010, Age Group: 75-79    |           |               |       |       |               |             |               |                |              |
| Period                                       | Age Group | Smoking Group | N     | %     | Ever Quit (N) | Ever Quit % | Mean Yrs Quit | Short Term (n) | Short Term % |
| 20                                           | 75-79     | Never Any     | 1337  | 26.83 |               |             |               |                |              |
| 20                                           | 75-79     | CC            | 403   | 8.09  | 0             | 0.00        |               |                |              |
| 20                                           | 75-79     | Former        | 3243  | 65.08 |               |             | 26.69         | 53             | 1.63         |
| Year of Follow-up: 2015, Age Group: All Ages |           |               |       |       |               |             |               |                |              |
| Period                                       | Age Group | Smoking Group | N     | %     | Ever Quit (N) | Ever Quit % | Mean Yrs Quit | Short Term (n) | Short Term % |
| 25                                           | All Ages  | Never Any     | 34539 | 43.27 |               |             |               |                |              |
| 25                                           | All Ages  | CC            | 14583 | 18.27 | 0             | 0.00        |               |                |              |
| 25                                           | All Ages  | Former        | 30695 | 38.46 |               |             | 21.97         | 1073           | 3.50         |
| Year of Follow-up: 2015, Age Group: 18-19    |           |               |       |       |               |             |               |                |              |
| Period                                       | Age Group | Smoking Group | N     | %     | Ever Quit (N) | Ever Quit % | Mean Yrs Quit | Short Term (n) | Short Term % |
| 25                                           | 18-19     | Never Any     | 0     | .     |               |             |               |                |              |
| 25                                           | 18-19     | CC            | 0     | .     | 0             | .           |               |                |              |
| 25                                           | 18-19     | Former        | 0     | .     |               |             | .             | 0              | .            |
| Year of Follow-up: 2015, Age Group: 20-24    |           |               |       |       |               |             |               |                |              |
| Period                                       | Age Group | Smoking Group | N     | %     | Ever Quit (N) | Ever Quit % | Mean Yrs Quit | Short Term (n) | Short Term % |
| 25                                           | 20-24     | Never Any     | 0     | .     |               |             |               |                |              |
| 25                                           | 20-24     | CC            | 0     | .     | 0             | .           |               |                |              |
| 25                                           | 20-24     | Former        | 0     | .     |               |             | .             | 0              | .            |
| Year of Follow-up: 2015, Age Group: 25-29    |           |               |       |       |               |             |               |                |              |
| Period                                       | Age Group | Smoking Group | N     | %     | Ever Quit (N) | Ever Quit % | Mean Yrs Quit | Short Term (n) | Short Term % |
| 25                                           | 25-29     | Never Any     | 0     | .     |               |             |               |                |              |
| 25                                           | 25-29     | CC            | 0     | .     | 0             | .           |               |                |              |
| 25                                           | 25-29     | Former        | 0     | .     |               |             | .             | 0              | .            |
| Year of Follow-up: 2015, Age Group: 30-34    |           |               |       |       |               |             |               |                |              |
| Period                                       | Age Group | Smoking Group | N     | %     | Ever Quit (N) | Ever Quit % | Mean Yrs Quit | Short Term (n) | Short Term % |
| 25                                           | 30-34     | Never Any     | 0     | .     |               |             |               |                |              |
| 25                                           | 30-34     | CC            | 0     | .     | 0             | .           |               |                |              |
| 25                                           | 30-34     | Former        | 0     | .     |               |             | .             | 0              | .            |
| Year of Follow-up: 2015, Age Group: 35-39    |           |               |       |       |               |             |               |                |              |
| Period                                       | Age Group | Smoking Group | N     | %     | Ever Quit (N) | Ever Quit % | Mean Yrs Quit | Short Term (n) | Short Term % |
| 25                                           | 35-39     | Never Any     | 4363  | 49.33 |               |             |               |                |              |
| 25                                           | 35-39     | CC            | 2079  | 23.50 | 0             | 0.00        |               |                |              |
| 25                                           | 35-39     | Former        | 2403  | 27.17 |               |             | 11.50         | 140            | 5.83         |
| Year of Follow-up: 2015, Age Group: 40-44    |           |               |       |       |               |             |               |                |              |
| Period                                       | Age Group | Smoking Group | N     | %     | Ever Quit (N) | Ever Quit % | Mean Yrs Quit | Short Term (n) | Short Term % |

**Results for PHIM for Run 1 (Main\_Analysis.RTF)**

|                                              |           |               |       |       |               |             |               |                |              |
|----------------------------------------------|-----------|---------------|-------|-------|---------------|-------------|---------------|----------------|--------------|
| 25                                           | 40-44     | Never Any     | 4948  | 54.73 |               |             |               |                |              |
| 25                                           | 40-44     | CC            | 1988  | 21.99 | 0             | 0.00        |               |                |              |
| 25                                           | 40-44     | Former        | 2104  | 23.27 |               |             | 13.19         | 101            | 4.80         |
| Year of Follow-up: 2015, Age Group: 45-49    |           |               |       |       |               |             |               |                |              |
| Period                                       | Age Group | Smoking Group | N     | %     | Ever Quit (N) | Ever Quit % | Mean Yrs Quit | Short Term (n) | Short Term % |
| 25                                           | 45-49     | Never Any     | 5145  | 52.41 |               |             |               |                |              |
| 25                                           | 45-49     | CC            | 2186  | 22.27 | 0             | 0.00        |               |                |              |
| 25                                           | 45-49     | Former        | 2485  | 25.32 |               |             | 17.30         | 81             | 3.26         |
| Year of Follow-up: 2015, Age Group: 50-54    |           |               |       |       |               |             |               |                |              |
| Period                                       | Age Group | Smoking Group | N     | %     | Ever Quit (N) | Ever Quit % | Mean Yrs Quit | Short Term (n) | Short Term % |
| 25                                           | 50-54     | Never Any     | 4989  | 46.78 |               |             |               |                |              |
| 25                                           | 50-54     | CC            | 2518  | 23.61 | 0             | 0.00        |               |                |              |
| 25                                           | 50-54     | Former        | 3157  | 29.60 |               |             | 19.36         | 117            | 3.71         |
| Year of Follow-up: 2015, Age Group: 55-59    |           |               |       |       |               |             |               |                |              |
| Period                                       | Age Group | Smoking Group | N     | %     | Ever Quit (N) | Ever Quit % | Mean Yrs Quit | Short Term (n) | Short Term % |
| 25                                           | 55-59     | Never Any     | 4711  | 43.16 |               |             |               |                |              |
| 25                                           | 55-59     | CC            | 2129  | 19.50 | 0             | 0.00        |               |                |              |
| 25                                           | 55-59     | Former        | 4076  | 37.34 |               |             | 20.47         | 180            | 4.42         |
| Year of Follow-up: 2015, Age Group: 60-64    |           |               |       |       |               |             |               |                |              |
| Period                                       | Age Group | Smoking Group | N     | %     | Ever Quit (N) | Ever Quit % | Mean Yrs Quit | Short Term (n) | Short Term % |
| 25                                           | 60-64     | Never Any     | 3941  | 39.85 |               |             |               |                |              |
| 25                                           | 60-64     | CC            | 1565  | 15.83 | 0             | 0.00        |               |                |              |
| 25                                           | 60-64     | Former        | 4383  | 44.32 |               |             | 23.56         | 197            | 4.49         |
| Year of Follow-up: 2015, Age Group: 65-69    |           |               |       |       |               |             |               |                |              |
| Period                                       | Age Group | Smoking Group | N     | %     | Ever Quit (N) | Ever Quit % | Mean Yrs Quit | Short Term (n) | Short Term % |
| 25                                           | 65-69     | Never Any     | 2912  | 33.65 |               |             |               |                |              |
| 25                                           | 65-69     | CC            | 1017  | 11.75 | 0             | 0.00        |               |                |              |
| 25                                           | 65-69     | Former        | 4726  | 54.60 |               |             | 25.14         | 136            | 2.88         |
| Year of Follow-up: 2015, Age Group: 70-74    |           |               |       |       |               |             |               |                |              |
| Period                                       | Age Group | Smoking Group | N     | %     | Ever Quit (N) | Ever Quit % | Mean Yrs Quit | Short Term (n) | Short Term % |
| 25                                           | 70-74     | Never Any     | 1919  | 29.46 |               |             |               |                |              |
| 25                                           | 70-74     | CC            | 638   | 9.79  | 0             | 0.00        |               |                |              |
| 25                                           | 70-74     | Former        | 3958  | 60.75 |               |             | 27.59         | 75             | 1.89         |
| Year of Follow-up: 2015, Age Group: 75-79    |           |               |       |       |               |             |               |                |              |
| Period                                       | Age Group | Smoking Group | N     | %     | Ever Quit (N) | Ever Quit % | Mean Yrs Quit | Short Term (n) | Short Term % |
| 25                                           | 75-79     | Never Any     | 1611  | 29.41 |               |             |               |                |              |
| 25                                           | 75-79     | CC            | 463   | 8.45  | 0             | 0.00        |               |                |              |
| 25                                           | 75-79     | Former        | 3403  | 62.13 |               |             | 29.40         | 46             | 1.35         |
| Year of Follow-up: 2020, Age Group: All Ages |           |               |       |       |               |             |               |                |              |
| Period                                       | Age Group | Smoking Group | N     | %     | Ever Quit (N) | Ever Quit % | Mean Yrs Quit | Short Term (n) | Short Term % |
| 30                                           | All Ages  | Never Any     | 32928 | 44.29 |               |             |               |                |              |
| 30                                           | All Ages  | CC            | 11664 | 15.69 | 0             | 0.00        |               |                |              |
| 30                                           | All Ages  | Former        | 29748 | 40.02 |               |             | 24.06         | 964            | 3.24         |
| Year of Follow-up: 2020, Age Group: 18-19    |           |               |       |       |               |             |               |                |              |
| Period                                       | Age Group | Smoking Group | N     | %     | Ever Quit (N) | Ever Quit % | Mean Yrs Quit | Short Term (n) | Short Term % |
| 30                                           | 18-19     | Never Any     | 0     | .     |               |             |               |                |              |
| 30                                           | 18-19     | CC            | 0     | .     | 0             | .           |               | 0              | .            |
| 30                                           | 18-19     | Former        | 0     | .     |               |             | .             | 0              | .            |
| Year of Follow-up: 2020, Age Group: 20-24    |           |               |       |       |               |             |               |                |              |
| Period                                       | Age Group | Smoking Group | N     | %     | Ever Quit (N) | Ever Quit % | Mean Yrs Quit | Short Term (n) | Short Term % |
| 30                                           | 20-24     | Never Any     | 0     | .     |               |             |               |                |              |
| 30                                           | 20-24     | CC            | 0     | .     | 0             | .           |               |                |              |
| 30                                           | 20-24     | Former        | 0     | .     |               |             | .             | 0              | .            |
| Year of Follow-up: 2020, Age Group: 25-29    |           |               |       |       |               |             |               |                |              |
| Period                                       | Age Group | Smoking Group | N     | %     | Ever Quit (N) | Ever Quit % | Mean Yrs Quit | Short Term (n) | Short Term % |
| 30                                           | 25-29     | Never Any     | 0     | .     |               |             |               |                |              |
| 30                                           | 25-29     | CC            | 0     | .     | 0             | .           |               |                |              |
| 30                                           | 25-29     | Former        | 0     | .     |               |             | .             | 0              | .            |
| Year of Follow-up: 2020, Age Group: 30-34    |           |               |       |       |               |             |               |                |              |
| Period                                       | Age Group | Smoking Group | N     | %     | Ever Quit (N) | Ever Quit % | Mean Yrs Quit | Short Term (n) | Short Term % |
| 30                                           | 30-34     | Never Any     | 0     | .     |               |             |               |                |              |
| 30                                           | 30-34     | CC            | 0     | .     | 0             | .           |               |                |              |
| 30                                           | 30-34     | Former        | 0     | .     |               |             | .             | 0              | .            |
| Year of Follow-up: 2020, Age Group: 35-39    |           |               |       |       |               |             |               |                |              |
| Period                                       | Age Group | Smoking Group | N     | %     | Ever Quit (N) | Ever Quit % | Mean Yrs Quit | Short Term (n) | Short Term % |



**Results for PHIM for Run 1 (Main\_Analysis.RTF)**

|                                              |           |               |       |       |               |             |               |                |              |
|----------------------------------------------|-----------|---------------|-------|-------|---------------|-------------|---------------|----------------|--------------|
| 30                                           | 35-39     | Never Any     | 0     | .     |               |             |               |                |              |
| 30                                           | 35-39     | CC            | 0     | .     | 0             | .           |               |                |              |
| 30                                           | 35-39     | Former        | 0     | .     |               |             | 0             | .              |              |
| Year of Follow-up: 2020, Age Group: 40-44    |           |               |       |       |               |             |               |                |              |
| Period                                       | Age Group | Smoking Group | N     | %     | Ever Quit (N) | Ever Quit % | Mean Yrs Quit | Short Term (n) | Short Term % |
| 30                                           | 40-44     | Never Any     | 4363  | 49.33 |               |             |               |                |              |
| 30                                           | 40-44     | CC            | 1810  | 20.46 | 0             | 0.00        |               |                |              |
| 30                                           | 40-44     | Former        | 2672  | 30.21 |               |             | 15.03         | 113            | 4.23         |
| Year of Follow-up: 2020, Age Group: 45-49    |           |               |       |       |               |             |               |                |              |
| Period                                       | Age Group | Smoking Group | N     | %     | Ever Quit (N) | Ever Quit % | Mean Yrs Quit | Short Term (n) | Short Term % |
| 30                                           | 45-49     | Never Any     | 4948  | 54.73 |               |             |               |                |              |
| 30                                           | 45-49     | CC            | 1753  | 19.39 | 0             | 0.00        |               |                |              |
| 30                                           | 45-49     | Former        | 2339  | 25.87 |               |             | 16.60         | 68             | 2.91         |
| Year of Follow-up: 2020, Age Group: 50-54    |           |               |       |       |               |             |               |                |              |
| Period                                       | Age Group | Smoking Group | N     | %     | Ever Quit (N) | Ever Quit % | Mean Yrs Quit | Short Term (n) | Short Term % |
| 30                                           | 50-54     | Never Any     | 5145  | 52.41 |               |             |               |                |              |
| 30                                           | 50-54     | CC            | 1976  | 20.13 | 0             | 0.00        |               |                |              |
| 30                                           | 50-54     | Former        | 2695  | 27.46 |               |             | 20.69         | 108            | 4.01         |
| Year of Follow-up: 2020, Age Group: 55-59    |           |               |       |       |               |             |               |                |              |
| Period                                       | Age Group | Smoking Group | N     | %     | Ever Quit (N) | Ever Quit % | Mean Yrs Quit | Short Term (n) | Short Term % |
| 30                                           | 55-59     | Never Any     | 4989  | 46.78 |               |             |               |                |              |
| 30                                           | 55-59     | CC            | 2119  | 19.87 | 0             | 0.00        |               |                |              |
| 30                                           | 55-59     | Former        | 3556  | 33.35 |               |             | 21.84         | 166            | 4.67         |
| Year of Follow-up: 2020, Age Group: 60-64    |           |               |       |       |               |             |               |                |              |
| Period                                       | Age Group | Smoking Group | N     | %     | Ever Quit (N) | Ever Quit % | Mean Yrs Quit | Short Term (n) | Short Term % |
| 30                                           | 60-64     | Never Any     | 4711  | 43.16 |               |             |               |                |              |
| 30                                           | 60-64     | CC            | 1618  | 14.82 | 0             | 0.00        |               |                |              |
| 30                                           | 60-64     | Former        | 4587  | 42.02 |               |             | 22.85         | 203            | 4.43         |
| Year of Follow-up: 2020, Age Group: 65-69    |           |               |       |       |               |             |               |                |              |
| Period                                       | Age Group | Smoking Group | N     | %     | Ever Quit (N) | Ever Quit % | Mean Yrs Quit | Short Term (n) | Short Term % |
| 30                                           | 65-69     | Never Any     | 3941  | 39.85 |               |             |               |                |              |
| 30                                           | 65-69     | CC            | 1133  | 11.46 | 0             | 0.00        |               |                |              |
| 30                                           | 65-69     | Former        | 4815  | 48.69 |               |             | 26.19         | 150            | 3.12         |
| Year of Follow-up: 2020, Age Group: 70-74    |           |               |       |       |               |             |               |                |              |
| Period                                       | Age Group | Smoking Group | N     | %     | Ever Quit (N) | Ever Quit % | Mean Yrs Quit | Short Term (n) | Short Term % |
| 30                                           | 70-74     | Never Any     | 2912  | 33.65 |               |             |               |                |              |
| 30                                           | 70-74     | CC            | 769   | 8.89  | 0             | 0.00        |               |                |              |
| 30                                           | 70-74     | Former        | 4974  | 57.47 |               |             | 28.74         | 95             | 1.91         |
| Year of Follow-up: 2020, Age Group: 75-79    |           |               |       |       |               |             |               |                |              |
| Period                                       | Age Group | Smoking Group | N     | %     | Ever Quit (N) | Ever Quit % | Mean Yrs Quit | Short Term (n) | Short Term % |
| 30                                           | 75-79     | Never Any     | 1919  | 29.46 |               |             |               |                |              |
| 30                                           | 75-79     | CC            | 486   | 7.46  | 0             | 0.00        |               |                |              |
| 30                                           | 75-79     | Former        | 4110  | 63.09 |               |             | 31.46         | 61             | 1.48         |
| Year of Follow-up: 2025, Age Group: All Ages |           |               |       |       |               |             |               |                |              |
| Period                                       | Age Group | Smoking Group | N     | %     | Ever Quit (N) | Ever Quit % | Mean Yrs Quit | Short Term (n) | Short Term % |
| 35                                           | All Ages  | Never Any     | 31009 | 45.72 |               |             |               |                |              |
| 35                                           | All Ages  | CC            | 9033  | 13.32 | 0             | 0.00        |               |                |              |
| 35                                           | All Ages  | Former        | 27783 | 40.96 |               |             | 25.88         | 811            | 2.92         |
| Year of Follow-up: 2025, Age Group: 18-19    |           |               |       |       |               |             |               |                |              |
| Period                                       | Age Group | Smoking Group | N     | %     | Ever Quit (N) | Ever Quit % | Mean Yrs Quit | Short Term (n) | Short Term % |
| 35                                           | 18-19     | Never Any     | 0     | .     |               |             |               |                |              |
| 35                                           | 18-19     | CC            | 0     | .     | 0             | .           |               |                |              |
| 35                                           | 18-19     | Former        | 0     | .     |               |             | .             | 0              | .            |
| Year of Follow-up: 2025, Age Group: 20-24    |           |               |       |       |               |             |               |                |              |
| Period                                       | Age Group | Smoking Group | N     | %     | Ever Quit (N) | Ever Quit % | Mean Yrs Quit | Short Term (n) | Short Term % |
| 35                                           | 20-24     | Never Any     | 0     | .     |               |             |               |                |              |
| 35                                           | 20-24     | CC            | 0     | .     | 0             | .           |               |                |              |
| 35                                           | 20-24     | Former        | 0     | .     |               |             | .             | 0              | .            |
| Year of Follow-up: 2025, Age Group: 25-29    |           |               |       |       |               |             |               |                |              |
| Period                                       | Age Group | Smoking Group | N     | %     | Ever Quit (N) | Ever Quit % | Mean Yrs Quit | Short Term (n) | Short Term % |
| 35                                           | 25-29     | Never Any     | 0     | .     |               |             |               |                |              |
| 35                                           | 25-29     | CC            | 0     | .     | 0             | .           |               |                |              |
| 35                                           | 25-29     | Former        | 0     | .     |               |             | .             | 0              | .            |
| Year of Follow-up: 2025, Age Group: 30-34    |           |               |       |       |               |             |               |                |              |
| Period                                       | Age Group | Smoking Group | N     | %     | Ever Quit (N) | Ever Quit % | Mean Yrs Quit | Short Term (n) | Short Term % |

**Results for PHIM for Run 1 (Main\_Analysis.RTF)**

|                                              |           |               |       |       |               |             |               |                |              |
|----------------------------------------------|-----------|---------------|-------|-------|---------------|-------------|---------------|----------------|--------------|
| 35                                           | 30-34     | Never Any     | 0     | .     |               |             |               |                |              |
| 35                                           | 30-34     | CC            | 0     | .     | 0             | .           |               |                |              |
| 35                                           | 30-34     | Former        | 0     | .     |               |             | 0             | .              |              |
| Year of Follow-up: 2025, Age Group: 35-39    |           |               |       |       |               |             |               |                |              |
| Period                                       | Age Group | Smoking Group | N     | %     | Ever Quit (N) | Ever Quit % | Mean Yrs Quit | Short Term (n) | Short Term % |
| 35                                           | 35-39     | Never Any     | 0     | .     |               |             |               |                |              |
| 35                                           | 35-39     | CC            | 0     | .     | 0             | .           |               |                |              |
| 35                                           | 35-39     | Former        | 0     | .     |               |             | 0             | .              |              |
| Year of Follow-up: 2025, Age Group: 40-44    |           |               |       |       |               |             |               |                |              |
| Period                                       | Age Group | Smoking Group | N     | %     | Ever Quit (N) | Ever Quit % | Mean Yrs Quit | Short Term (n) | Short Term % |
| 35                                           | 40-44     | Never Any     | 0     | .     |               |             |               |                |              |
| 35                                           | 40-44     | CC            | 0     | .     | 0             | .           |               |                |              |
| 35                                           | 40-44     | Former        | 0     | .     |               |             | 0             | .              |              |
| Year of Follow-up: 2025, Age Group: 45-49    |           |               |       |       |               |             |               |                |              |
| Period                                       | Age Group | Smoking Group | N     | %     | Ever Quit (N) | Ever Quit % | Mean Yrs Quit | Short Term (n) | Short Term % |
| 35                                           | 45-49     | Never Any     | 4363  | 49.33 |               |             |               |                |              |
| 35                                           | 45-49     | CC            | 1611  | 18.21 | 0             | 0.00        |               |                |              |
| 35                                           | 45-49     | Former        | 2871  | 32.46 |               |             | 18.79         | 66             | 2.30         |
| Year of Follow-up: 2025, Age Group: 50-54    |           |               |       |       |               |             |               |                |              |
| Period                                       | Age Group | Smoking Group | N     | %     | Ever Quit (N) | Ever Quit % | Mean Yrs Quit | Short Term (n) | Short Term % |
| 35                                           | 50-54     | Never Any     | 4948  | 54.73 |               |             |               |                |              |
| 35                                           | 50-54     | CC            | 1590  | 17.59 | 0             | 0.00        |               |                |              |
| 35                                           | 50-54     | Former        | 2502  | 27.68 |               |             | 20.31         | 78             | 3.12         |
| Year of Follow-up: 2025, Age Group: 55-59    |           |               |       |       |               |             |               |                |              |
| Period                                       | Age Group | Smoking Group | N     | %     | Ever Quit (N) | Ever Quit % | Mean Yrs Quit | Short Term (n) | Short Term % |
| 35                                           | 55-59     | Never Any     | 5145  | 52.41 |               |             |               |                |              |
| 35                                           | 55-59     | CC            | 1654  | 16.85 | 0             | 0.00        |               |                |              |
| 35                                           | 55-59     | Former        | 3017  | 30.74 |               |             | 23.14         | 143            | 4.74         |
| Year of Follow-up: 2025, Age Group: 60-64    |           |               |       |       |               |             |               |                |              |
| Period                                       | Age Group | Smoking Group | N     | %     | Ever Quit (N) | Ever Quit % | Mean Yrs Quit | Short Term (n) | Short Term % |
| 35                                           | 60-64     | Never Any     | 4989  | 46.78 |               |             |               |                |              |
| 35                                           | 60-64     | CC            | 1665  | 15.61 | 0             | 0.00        |               |                |              |
| 35                                           | 60-64     | Former        | 4010  | 37.60 |               |             | 24.03         | 181            | 4.51         |
| Year of Follow-up: 2025, Age Group: 65-69    |           |               |       |       |               |             |               |                |              |
| Period                                       | Age Group | Smoking Group | N     | %     | Ever Quit (N) | Ever Quit % | Mean Yrs Quit | Short Term (n) | Short Term % |
| 35                                           | 65-69     | Never Any     | 4711  | 43.16 |               |             |               |                |              |
| 35                                           | 65-69     | CC            | 1116  | 10.22 | 0             | 0.00        |               |                |              |
| 35                                           | 65-69     | Former        | 5089  | 46.62 |               |             | 25.33         | 163            | 3.20         |
| Year of Follow-up: 2025, Age Group: 70-74    |           |               |       |       |               |             |               |                |              |
| Period                                       | Age Group | Smoking Group | N     | %     | Ever Quit (N) | Ever Quit % | Mean Yrs Quit | Short Term (n) | Short Term % |
| 35                                           | 70-74     | Never Any     | 3941  | 39.85 |               |             |               |                |              |
| 35                                           | 70-74     | CC            | 838   | 8.47  | 0             | 0.00        |               |                |              |
| 35                                           | 70-74     | Former        | 5110  | 51.67 |               |             | 29.52         | 105            | 2.05         |
| Year of Follow-up: 2025, Age Group: 75-79    |           |               |       |       |               |             |               |                |              |
| Period                                       | Age Group | Smoking Group | N     | %     | Ever Quit (N) | Ever Quit % | Mean Yrs Quit | Short Term (n) | Short Term % |
| 35                                           | 75-79     | Never Any     | 2912  | 33.65 |               |             |               |                |              |
| 35                                           | 75-79     | CC            | 559   | 6.46  | 0             | 0.00        |               |                |              |
| 35                                           | 75-79     | Former        | 5184  | 59.90 |               |             | 32.46         | 75             | 1.45         |
| Year of Follow-up: 2030, Age Group: All Ages |           |               |       |       |               |             |               |                |              |
| Period                                       | Age Group | Smoking Group | N     | %     | Ever Quit (N) | Ever Quit % | Mean Yrs Quit | Short Term (n) | Short Term % |
| 40                                           | All Ages  | Never Any     | 28097 | 47.49 |               |             |               |                |              |
| 40                                           | All Ages  | CC            | 6677  | 11.28 | 0             | 0.00        |               |                |              |
| 40                                           | All Ages  | Former        | 24396 | 41.23 |               |             | 27.35         | 754            | 3.09         |
| Year of Follow-up: 2030, Age Group: 18-19    |           |               |       |       |               |             |               |                |              |
| Period                                       | Age Group | Smoking Group | N     | %     | Ever Quit (N) | Ever Quit % | Mean Yrs Quit | Short Term (n) | Short Term % |
| 40                                           | 18-19     | Never Any     | 0     | .     |               |             |               |                |              |
| 40                                           | 18-19     | CC            | 0     | .     | 0             | .           |               |                |              |
| 40                                           | 18-19     | Former        | 0     | .     |               |             | 0             | .              |              |
| Year of Follow-up: 2030, Age Group: 20-24    |           |               |       |       |               |             |               |                |              |
| Period                                       | Age Group | Smoking Group | N     | %     | Ever Quit (N) | Ever Quit % | Mean Yrs Quit | Short Term (n) | Short Term % |
| 40                                           | 20-24     | Never Any     | 0     | .     |               |             |               |                |              |
| 40                                           | 20-24     | CC            | 0     | .     | 0             | .           |               |                |              |
| 40                                           | 20-24     | Former        | 0     | .     |               |             | 0             | .              |              |
| Year of Follow-up: 2030, Age Group: 25-29    |           |               |       |       |               |             |               |                |              |
| Period                                       | Age Group | Smoking Group | N     | %     | Ever Quit (N) | Ever Quit % | Mean Yrs Quit | Short Term (n) | Short Term % |

**Results for PHIM for Run 1 (Main\_Analysis.RTF)**

|                                              |           |               |       |       |               |             |               |                |              |
|----------------------------------------------|-----------|---------------|-------|-------|---------------|-------------|---------------|----------------|--------------|
| 40                                           | 25-29     | Never Any     | 0     | .     |               |             |               |                |              |
| 40                                           | 25-29     | CC            | 0     | .     | 0             | .           |               |                |              |
| 40                                           | 25-29     | Former        | 0     | .     |               |             | 0             | .              |              |
| Year of Follow-up: 2030, Age Group: 30-34    |           |               |       |       |               |             |               |                |              |
| Period                                       | Age Group | Smoking Group | N     | %     | Ever Quit (N) | Ever Quit % | Mean Yrs Quit | Short Term (n) | Short Term % |
| 40                                           | 30-34     | Never Any     | 0     | .     |               |             |               |                |              |
| 40                                           | 30-34     | CC            | 0     | .     | 0             | .           |               |                |              |
| 40                                           | 30-34     | Former        | 0     | .     |               |             | 0             | .              |              |
| Year of Follow-up: 2030, Age Group: 35-39    |           |               |       |       |               |             |               |                |              |
| Period                                       | Age Group | Smoking Group | N     | %     | Ever Quit (N) | Ever Quit % | Mean Yrs Quit | Short Term (n) | Short Term % |
| 40                                           | 35-39     | Never Any     | 0     | .     |               |             |               |                |              |
| 40                                           | 35-39     | CC            | 0     | .     | 0             | .           |               |                |              |
| 40                                           | 35-39     | Former        | 0     | .     |               |             | 0             | .              |              |
| Year of Follow-up: 2030, Age Group: 40-44    |           |               |       |       |               |             |               |                |              |
| Period                                       | Age Group | Smoking Group | N     | %     | Ever Quit (N) | Ever Quit % | Mean Yrs Quit | Short Term (n) | Short Term % |
| 40                                           | 40-44     | Never Any     | 0     | .     |               |             |               |                |              |
| 40                                           | 40-44     | CC            | 0     | .     | 0             | .           |               |                |              |
| 40                                           | 40-44     | Former        | 0     | .     |               |             | 0             | .              |              |
| Year of Follow-up: 2030, Age Group: 45-49    |           |               |       |       |               |             |               |                |              |
| Period                                       | Age Group | Smoking Group | N     | %     | Ever Quit (N) | Ever Quit % | Mean Yrs Quit | Short Term (n) | Short Term % |
| 40                                           | 45-49     | Never Any     | 0     | .     |               |             |               |                |              |
| 40                                           | 45-49     | CC            | 0     | .     | 0             | .           |               |                |              |
| 40                                           | 45-49     | Former        | 0     | .     |               |             | 0             | .              |              |
| Year of Follow-up: 2030, Age Group: 50-54    |           |               |       |       |               |             |               |                |              |
| Period                                       | Age Group | Smoking Group | N     | %     | Ever Quit (N) | Ever Quit % | Mean Yrs Quit | Short Term (n) | Short Term % |
| 40                                           | 50-54     | Never Any     | 4363  | 49.33 |               |             |               |                |              |
| 40                                           | 50-54     | CC            | 1474  | 16.66 | 0             | 0.00        |               |                |              |
| 40                                           | 50-54     | Former        | 3008  | 34.01 |               |             | 22.78         | 73             | 2.43         |
| Year of Follow-up: 2030, Age Group: 55-59    |           |               |       |       |               |             |               |                |              |
| Period                                       | Age Group | Smoking Group | N     | %     | Ever Quit (N) | Ever Quit % | Mean Yrs Quit | Short Term (n) | Short Term % |
| 40                                           | 55-59     | Never Any     | 4948  | 54.73 |               |             |               |                |              |
| 40                                           | 55-59     | CC            | 1338  | 14.80 | 0             | 0.00        |               |                |              |
| 40                                           | 55-59     | Former        | 2754  | 30.46 |               |             | 23.16         | 111            | 4.03         |
| Year of Follow-up: 2030, Age Group: 60-64    |           |               |       |       |               |             |               |                |              |
| Period                                       | Age Group | Smoking Group | N     | %     | Ever Quit (N) | Ever Quit % | Mean Yrs Quit | Short Term (n) | Short Term % |
| 40                                           | 60-64     | Never Any     | 5145  | 52.41 |               |             |               |                |              |
| 40                                           | 60-64     | CC            | 1258  | 12.82 | 0             | 0.00        |               |                |              |
| 40                                           | 60-64     | Former        | 3413  | 34.77 |               |             | 25.09         | 185            | 5.42         |
| Year of Follow-up: 2030, Age Group: 65-69    |           |               |       |       |               |             |               |                |              |
| Period                                       | Age Group | Smoking Group | N     | %     | Ever Quit (N) | Ever Quit % | Mean Yrs Quit | Short Term (n) | Short Term % |
| 40                                           | 65-69     | Never Any     | 4989  | 46.78 |               |             |               |                |              |
| 40                                           | 65-69     | CC            | 1177  | 11.04 | 0             | 0.00        |               |                |              |
| 40                                           | 65-69     | Former        | 4498  | 42.18 |               |             | 26.11         | 178            | 3.96         |
| Year of Follow-up: 2030, Age Group: 70-74    |           |               |       |       |               |             |               |                |              |
| Period                                       | Age Group | Smoking Group | N     | %     | Ever Quit (N) | Ever Quit % | Mean Yrs Quit | Short Term (n) | Short Term % |
| 40                                           | 70-74     | Never Any     | 4711  | 43.16 |               |             |               |                |              |
| 40                                           | 70-74     | CC            | 835   | 7.65  | 0             | 0.00        |               |                |              |
| 40                                           | 70-74     | Former        | 5370  | 49.19 |               |             | 28.84         | 113            | 2.10         |
| Year of Follow-up: 2030, Age Group: 75-79    |           |               |       |       |               |             |               |                |              |
| Period                                       | Age Group | Smoking Group | N     | %     | Ever Quit (N) | Ever Quit % | Mean Yrs Quit | Short Term (n) | Short Term % |
| 40                                           | 75-79     | Never Any     | 3941  | 39.85 |               |             |               |                |              |
| 40                                           | 75-79     | CC            | 595   | 6.02  | 0             | 0.00        |               |                |              |
| 40                                           | 75-79     | Former        | 5353  | 54.13 |               |             | 33.05         | 94             | 1.76         |
| Year of Follow-up: 2035, Age Group: All Ages |           |               |       |       |               |             |               |                |              |
| Period                                       | Age Group | Smoking Group | N     | %     | Ever Quit (N) | Ever Quit % | Mean Yrs Quit | Short Term (n) | Short Term % |
| 45                                           | All Ages  | Never Any     | 24156 | 49.02 |               |             |               |                |              |
| 45                                           | All Ages  | CC            | 4673  | 9.48  | 0             | 0.00        |               |                |              |
| 45                                           | All Ages  | Former        | 20452 | 41.50 |               |             | 28.77         | 524            | 2.56         |
| Year of Follow-up: 2035, Age Group: 18-19    |           |               |       |       |               |             |               |                |              |
| Period                                       | Age Group | Smoking Group | N     | %     | Ever Quit (N) | Ever Quit % | Mean Yrs Quit | Short Term (n) | Short Term % |
| 45                                           | 18-19     | Never Any     | 0     | .     |               |             |               |                |              |
| 45                                           | 18-19     | CC            | 0     | .     | 0             | .           |               |                |              |
| 45                                           | 18-19     | Former        | 0     | .     |               |             | 0             | .              |              |
| Year of Follow-up: 2035, Age Group: 20-24    |           |               |       |       |               |             |               |                |              |
| Period                                       | Age Group | Smoking Group | N     | %     | Ever Quit (N) | Ever Quit % | Mean Yrs Quit | Short Term (n) | Short Term % |

**Results for PHIM for Run 1 (Main\_Analysis.RTF)**

|                                              |           |               |       |       |               |             |               |                |              |
|----------------------------------------------|-----------|---------------|-------|-------|---------------|-------------|---------------|----------------|--------------|
| 45                                           | 20-24     | Never Any     | 0     | .     |               |             |               |                |              |
| 45                                           | 20-24     | CC            | 0     | .     | 0             | .           |               |                |              |
| 45                                           | 20-24     | Former        | 0     | .     |               |             | 0             | .              |              |
| Year of Follow-up: 2035, Age Group: 25-29    |           |               |       |       |               |             |               |                |              |
| Period                                       | Age Group | Smoking Group | N     | %     | Ever Quit (N) | Ever Quit % | Mean Yrs Quit | Short Term (n) | Short Term % |
| 45                                           | 25-29     | Never Any     | 0     | .     |               |             |               |                |              |
| 45                                           | 25-29     | CC            | 0     | .     | 0             | .           |               |                |              |
| 45                                           | 25-29     | Former        | 0     | .     |               |             | 0             | .              |              |
| Year of Follow-up: 2035, Age Group: 30-34    |           |               |       |       |               |             |               |                |              |
| Period                                       | Age Group | Smoking Group | N     | %     | Ever Quit (N) | Ever Quit % | Mean Yrs Quit | Short Term (n) | Short Term % |
| 45                                           | 30-34     | Never Any     | 0     | .     |               |             |               |                |              |
| 45                                           | 30-34     | CC            | 0     | .     | 0             | .           |               |                |              |
| 45                                           | 30-34     | Former        | 0     | .     |               |             | 0             | .              |              |
| Year of Follow-up: 2035, Age Group: 35-39    |           |               |       |       |               |             |               |                |              |
| Period                                       | Age Group | Smoking Group | N     | %     | Ever Quit (N) | Ever Quit % | Mean Yrs Quit | Short Term (n) | Short Term % |
| 45                                           | 35-39     | Never Any     | 0     | .     |               |             |               |                |              |
| 45                                           | 35-39     | CC            | 0     | .     | 0             | .           |               |                |              |
| 45                                           | 35-39     | Former        | 0     | .     |               |             | 0             | .              |              |
| Year of Follow-up: 2035, Age Group: 40-44    |           |               |       |       |               |             |               |                |              |
| Period                                       | Age Group | Smoking Group | N     | %     | Ever Quit (N) | Ever Quit % | Mean Yrs Quit | Short Term (n) | Short Term % |
| 45                                           | 40-44     | Never Any     | 0     | .     |               |             |               |                |              |
| 45                                           | 40-44     | CC            | 0     | .     | 0             | .           |               |                |              |
| 45                                           | 40-44     | Former        | 0     | .     |               |             | 0             | .              |              |
| Year of Follow-up: 2035, Age Group: 45-49    |           |               |       |       |               |             |               |                |              |
| Period                                       | Age Group | Smoking Group | N     | %     | Ever Quit (N) | Ever Quit % | Mean Yrs Quit | Short Term (n) | Short Term % |
| 45                                           | 45-49     | Never Any     | 0     | .     |               |             |               |                |              |
| 45                                           | 45-49     | CC            | 0     | .     | 0             | .           |               |                |              |
| 45                                           | 45-49     | Former        | 0     | .     |               |             | 0             | .              |              |
| Year of Follow-up: 2035, Age Group: 50-54    |           |               |       |       |               |             |               |                |              |
| Period                                       | Age Group | Smoking Group | N     | %     | Ever Quit (N) | Ever Quit % | Mean Yrs Quit | Short Term (n) | Short Term % |
| 45                                           | 50-54     | Never Any     | 0     | .     |               |             |               |                |              |
| 45                                           | 50-54     | CC            | 0     | .     | 0             | .           |               |                |              |
| 45                                           | 50-54     | Former        | 0     | .     |               |             | 0             | .              |              |
| Year of Follow-up: 2035, Age Group: 55-59    |           |               |       |       |               |             |               |                |              |
| Period                                       | Age Group | Smoking Group | N     | %     | Ever Quit (N) | Ever Quit % | Mean Yrs Quit | Short Term (n) | Short Term % |
| 45                                           | 55-59     | Never Any     | 4363  | 49.33 |               |             |               |                |              |
| 45                                           | 55-59     | CC            | 1233  | 13.94 | 0             | 0.00        |               |                |              |
| 45                                           | 55-59     | Former        | 3249  | 36.73 |               |             | 25.87         | 94             | 2.89         |
| Year of Follow-up: 2035, Age Group: 60-64    |           |               |       |       |               |             |               |                |              |
| Period                                       | Age Group | Smoking Group | N     | %     | Ever Quit (N) | Ever Quit % | Mean Yrs Quit | Short Term (n) | Short Term % |
| 45                                           | 60-64     | Never Any     | 4948  | 54.73 |               |             |               |                |              |
| 45                                           | 60-64     | CC            | 1020  | 11.28 | 0             | 0.00        |               |                |              |
| 45                                           | 60-64     | Former        | 3072  | 33.98 |               |             | 25.45         | 128            | 4.17         |
| Year of Follow-up: 2035, Age Group: 65-69    |           |               |       |       |               |             |               |                |              |
| Period                                       | Age Group | Smoking Group | N     | %     | Ever Quit (N) | Ever Quit % | Mean Yrs Quit | Short Term (n) | Short Term % |
| 45                                           | 65-69     | Never Any     | 5145  | 52.41 |               |             |               |                |              |
| 45                                           | 65-69     | CC            | 923   | 9.40  | 0             | 0.00        |               |                |              |
| 45                                           | 65-69     | Former        | 3748  | 38.18 |               |             | 27.59         | 116            | 3.09         |
| Year of Follow-up: 2035, Age Group: 70-74    |           |               |       |       |               |             |               |                |              |
| Period                                       | Age Group | Smoking Group | N     | %     | Ever Quit (N) | Ever Quit % | Mean Yrs Quit | Short Term (n) | Short Term % |
| 45                                           | 70-74     | Never Any     | 4989  | 46.78 |               |             |               |                |              |
| 45                                           | 70-74     | CC            | 865   | 8.11  | 0             | 0.00        |               |                |              |
| 45                                           | 70-74     | Former        | 4810  | 45.11 |               |             | 29.23         | 111            | 2.31         |
| Year of Follow-up: 2035, Age Group: 75-79    |           |               |       |       |               |             |               |                |              |
| Period                                       | Age Group | Smoking Group | N     | %     | Ever Quit (N) | Ever Quit % | Mean Yrs Quit | Short Term (n) | Short Term % |
| 45                                           | 75-79     | Never Any     | 4711  | 43.16 |               |             |               |                |              |
| 45                                           | 75-79     | CC            | 632   | 5.79  | 0             | 0.00        |               |                |              |
| 45                                           | 75-79     | Former        | 5573  | 51.05 |               |             | 32.69         | 75             | 1.35         |
| Year of Follow-up: 2040, Age Group: All Ages |           |               |       |       |               |             |               |                |              |
| Period                                       | Age Group | Smoking Group | N     | %     | Ever Quit (N) | Ever Quit % | Mean Yrs Quit | Short Term (n) | Short Term % |
| 50                                           | All Ages  | Never Any     | 19445 | 50.68 |               |             |               |                |              |
| 50                                           | All Ages  | CC            | 3024  | 7.88  | 0             | 0.00        |               |                |              |
| 50                                           | All Ages  | Former        | 15896 | 41.43 |               |             | 30.37         | 356            | 2.24         |
| Year of Follow-up: 2040, Age Group: 18-19    |           |               |       |       |               |             |               |                |              |
| Period                                       | Age Group | Smoking Group | N     | %     | Ever Quit (N) | Ever Quit % | Mean Yrs Quit | Short Term (n) | Short Term % |

**Results for PHIM for Run 1 (Main\_Analysis.RTF)**

|                                           |           |               |      |       |               |             |               |                |              |
|-------------------------------------------|-----------|---------------|------|-------|---------------|-------------|---------------|----------------|--------------|
| 50                                        | 18-19     | Never Any     | 0    | .     |               |             |               |                |              |
| 50                                        | 18-19     | CC            | 0    | .     | 0             | .           |               |                |              |
| 50                                        | 18-19     | Former        | 0    | .     |               |             | 0             | .              |              |
| Year of Follow-up: 2040, Age Group: 20-24 |           |               |      |       |               |             |               |                |              |
| Period                                    | Age Group | Smoking Group | N    | %     | Ever Quit (N) | Ever Quit % | Mean Yrs Quit | Short Term (n) | Short Term % |
| 50                                        | 20-24     | Never Any     | 0    | .     |               |             |               |                |              |
| 50                                        | 20-24     | CC            | 0    | .     | 0             | .           |               |                |              |
| 50                                        | 20-24     | Former        | 0    | .     |               |             | 0             | .              |              |
| Year of Follow-up: 2040, Age Group: 25-29 |           |               |      |       |               |             |               |                |              |
| Period                                    | Age Group | Smoking Group | N    | %     | Ever Quit (N) | Ever Quit % | Mean Yrs Quit | Short Term (n) | Short Term % |
| 50                                        | 25-29     | Never Any     | 0    | .     |               |             |               |                |              |
| 50                                        | 25-29     | CC            | 0    | .     | 0             | .           |               |                |              |
| 50                                        | 25-29     | Former        | 0    | .     |               |             | 0             | .              |              |
| Year of Follow-up: 2040, Age Group: 30-34 |           |               |      |       |               |             |               |                |              |
| Period                                    | Age Group | Smoking Group | N    | %     | Ever Quit (N) | Ever Quit % | Mean Yrs Quit | Short Term (n) | Short Term % |
| 50                                        | 30-34     | Never Any     | 0    | .     |               |             |               |                |              |
| 50                                        | 30-34     | CC            | 0    | .     | 0             | .           |               |                |              |
| 50                                        | 30-34     | Former        | 0    | .     |               |             | 0             | .              |              |
| Year of Follow-up: 2040, Age Group: 35-39 |           |               |      |       |               |             |               |                |              |
| Period                                    | Age Group | Smoking Group | N    | %     | Ever Quit (N) | Ever Quit % | Mean Yrs Quit | Short Term (n) | Short Term % |
| 50                                        | 35-39     | Never Any     | 0    | .     |               |             |               |                |              |
| 50                                        | 35-39     | CC            | 0    | .     | 0             | .           |               |                |              |
| 50                                        | 35-39     | Former        | 0    | .     |               |             | 0             | .              |              |
| Year of Follow-up: 2040, Age Group: 40-44 |           |               |      |       |               |             |               |                |              |
| Period                                    | Age Group | Smoking Group | N    | %     | Ever Quit (N) | Ever Quit % | Mean Yrs Quit | Short Term (n) | Short Term % |
| 50                                        | 40-44     | Never Any     | 0    | .     |               |             |               |                |              |
| 50                                        | 40-44     | CC            | 0    | .     | 0             | .           |               |                |              |
| 50                                        | 40-44     | Former        | 0    | .     |               |             | 0             | .              |              |
| Year of Follow-up: 2040, Age Group: 45-49 |           |               |      |       |               |             |               |                |              |
| Period                                    | Age Group | Smoking Group | N    | %     | Ever Quit (N) | Ever Quit % | Mean Yrs Quit | Short Term (n) | Short Term % |
| 50                                        | 45-49     | Never Any     | 0    | .     |               |             |               |                |              |
| 50                                        | 45-49     | CC            | 0    | .     | 0             | .           |               |                |              |
| 50                                        | 45-49     | Former        | 0    | .     |               |             | 0             | .              |              |
| Year of Follow-up: 2040, Age Group: 50-54 |           |               |      |       |               |             |               |                |              |
| Period                                    | Age Group | Smoking Group | N    | %     | Ever Quit (N) | Ever Quit % | Mean Yrs Quit | Short Term (n) | Short Term % |
| 50                                        | 50-54     | Never Any     | 0    | .     |               |             |               |                |              |
| 50                                        | 50-54     | CC            | 0    | .     | 0             | .           |               |                |              |
| 50                                        | 50-54     | Former        | 0    | .     |               |             | 0             | .              |              |
| Year of Follow-up: 2040, Age Group: 55-59 |           |               |      |       |               |             |               |                |              |
| Period                                    | Age Group | Smoking Group | N    | %     | Ever Quit (N) | Ever Quit % | Mean Yrs Quit | Short Term (n) | Short Term % |
| 50                                        | 55-59     | Never Any     | 0    | .     |               |             |               |                |              |
| 50                                        | 55-59     | CC            | 0    | .     | 0             | .           |               |                |              |
| 50                                        | 55-59     | Former        | 0    | .     |               |             | 0             | .              |              |
| Year of Follow-up: 2040, Age Group: 60-64 |           |               |      |       |               |             |               |                |              |
| Period                                    | Age Group | Smoking Group | N    | %     | Ever Quit (N) | Ever Quit % | Mean Yrs Quit | Short Term (n) | Short Term % |
| 50                                        | 60-64     | Never Any     | 4363 | 49.33 |               |             |               |                |              |
| 50                                        | 60-64     | CC            | 934  | 10.56 | 0             | 0.00        |               |                |              |
| 50                                        | 60-64     | Former        | 3548 | 40.11 |               |             | 28.44         | 109            | 3.07         |
| Year of Follow-up: 2040, Age Group: 65-69 |           |               |      |       |               |             |               |                |              |
| Period                                    | Age Group | Smoking Group | N    | %     | Ever Quit (N) | Ever Quit % | Mean Yrs Quit | Short Term (n) | Short Term % |
| 50                                        | 65-69     | Never Any     | 4948 | 54.73 |               |             |               |                |              |
| 50                                        | 65-69     | CC            | 734  | 8.12  | 0             | 0.00        |               |                |              |
| 50                                        | 65-69     | Former        | 3358 | 37.15 |               |             | 28.04         | 94             | 2.80         |
| Year of Follow-up: 2040, Age Group: 70-74 |           |               |      |       |               |             |               |                |              |
| Period                                    | Age Group | Smoking Group | N    | %     | Ever Quit (N) | Ever Quit % | Mean Yrs Quit | Short Term (n) | Short Term % |
| 50                                        | 70-74     | Never Any     | 5145 | 52.41 |               |             |               |                |              |
| 50                                        | 70-74     | CC            | 688  | 7.01  | 0             | 0.00        |               |                |              |
| 50                                        | 70-74     | Former        | 3983 | 40.58 |               |             | 30.80         | 81             | 2.03         |
| Year of Follow-up: 2040, Age Group: 75-79 |           |               |      |       |               |             |               |                |              |
| Period                                    | Age Group | Smoking Group | N    | %     | Ever Quit (N) | Ever Quit % | Mean Yrs Quit | Short Term (n) | Short Term % |
| 50                                        | 75-79     | Never Any     | 4989 | 46.78 |               |             |               |                |              |
| 50                                        | 75-79     | CC            | 668  | 6.26  | 0             | 0.00        |               |                |              |
| 50                                        | 75-79     | Former        | 5007 | 46.95 |               |             | 32.97         | 72             | 1.44         |

## Results for PHIM for Run 1 (Main\_Analysis.RTF)

\*\*\*\*\*

### Main Output for the Tobacco History for Run: 1, Simulation: 1, Scenario: Ecig

| Variable Parameter                           |           | Value              |       |       |               |             |               |                |              |
|----------------------------------------------|-----------|--------------------|-------|-------|---------------|-------------|---------------|----------------|--------------|
| 1. Country                                   |           | US (United States) |       |       |               |             |               |                |              |
| 2. Sex                                       |           | M (Males)          |       |       |               |             |               |                |              |
| 3. Year of start of process                  |           | 1990               |       |       |               |             |               |                |              |
| Year of Follow-up: 1990, Age Group: All Ages |           |                    |       |       |               |             |               |                |              |
| Period                                       | Age Group | Smoking Group      | N     | %     | Ever Quit (N) | Ever Quit % | Mean Yrs Quit | Short Term (n) | Short Term % |
| 0                                            | All Ages  | Never Any          | 34075 | 39.78 |               |             |               |                |              |
| 0                                            | All Ages  | CC                 | 27323 | 31.90 | 0             | 0.00        |               |                |              |
| 0                                            | All Ages  | Ecig               | 0     | 0.00  |               |             |               |                |              |
| 0                                            | All Ages  | Dual               | 0     | 0.00  |               |             |               |                |              |
| 0                                            | All Ages  | Former             | 24266 | 28.33 |               |             | 13.08         | 3623           | 14.93        |
| Year of Follow-up: 1990, Age Group: 18-19    |           |                    |       |       |               |             |               |                |              |
| Period                                       | Age Group | Smoking Group      | N     | %     | Ever Quit (N) | Ever Quit % | Mean Yrs Quit | Short Term (n) | Short Term % |
| 0                                            | 18-19     | Never Any          | 2783  | 78.42 |               |             |               |                |              |
| 0                                            | 18-19     | CC                 | 634   | 17.86 | 0             | 0.00        |               |                |              |
| 0                                            | 18-19     | Ecig               | 0     | 0.00  |               |             |               |                |              |
| 0                                            | 18-19     | Dual               | 0     | 0.00  |               |             |               |                |              |
| 0                                            | 18-19     | Former             | 132   | 3.72  |               |             | 0.11          | 132            | 100.00       |
| Year of Follow-up: 1990, Age Group: 20-24    |           |                    |       |       |               |             |               |                |              |
| Period                                       | Age Group | Smoking Group      | N     | %     | Ever Quit (N) | Ever Quit % | Mean Yrs Quit | Short Term (n) | Short Term % |
| 0                                            | 20-24     | Never Any          | 5722  | 58.29 |               |             |               |                |              |
| 0                                            | 20-24     | CC                 | 3199  | 32.59 | 0             | 0.00        |               |                |              |
| 0                                            | 20-24     | Ecig               | 0     | 0.00  |               |             |               |                |              |
| 0                                            | 20-24     | Dual               | 0     | 0.00  |               |             |               |                |              |
| 0                                            | 20-24     | Former             | 895   | 9.12  |               |             | 1.46          | 506            | 56.54        |
| Year of Follow-up: 1990, Age Group: 25-29    |           |                    |       |       |               |             |               |                |              |
| Period                                       | Age Group | Smoking Group      | N     | %     | Ever Quit (N) | Ever Quit % | Mean Yrs Quit | Short Term (n) | Short Term % |
| 0                                            | 25-29     | Never Any          | 5232  | 49.06 |               |             |               |                |              |
| 0                                            | 25-29     | CC                 | 3914  | 36.70 | 0             | 0.00        |               |                |              |
| 0                                            | 25-29     | Ecig               | 0     | 0.00  |               |             |               |                |              |
| 0                                            | 25-29     | Dual               | 0     | 0.00  |               |             |               |                |              |
| 0                                            | 25-29     | Former             | 1518  | 14.23 |               |             | 2.87          | 643            | 42.36        |
| Year of Follow-up: 1990, Age Group: 30-34    |           |                    |       |       |               |             |               |                |              |
| Period                                       | Age Group | Smoking Group      | N     | %     | Ever Quit (N) | Ever Quit % | Mean Yrs Quit | Short Term (n) | Short Term % |
| 0                                            | 30-34     | Never Any          | 4765  | 43.65 |               |             |               |                |              |
| 0                                            | 30-34     | CC                 | 4023  | 36.85 | 0             | 0.00        |               |                |              |
| 0                                            | 30-34     | Ecig               | 0     | 0.00  |               |             |               |                |              |
| 0                                            | 30-34     | Dual               | 0     | 0.00  |               |             |               |                |              |
| 0                                            | 30-34     | Former             | 2128  | 19.49 |               |             | 4.06          | 592            | 27.82        |
| Year of Follow-up: 1990, Age Group: 35-39    |           |                    |       |       |               |             |               |                |              |
| Period                                       | Age Group | Smoking Group      | N     | %     | Ever Quit (N) | Ever Quit % | Mean Yrs Quit | Short Term (n) | Short Term % |
| 0                                            | 35-39     | Never Any          | 3941  | 39.85 |               |             |               |                |              |
| 0                                            | 35-39     | CC                 | 3474  | 35.13 | 0             | 0.00        |               |                |              |
| 0                                            | 35-39     | Ecig               | 0     | 0.00  |               |             |               |                |              |
| 0                                            | 35-39     | Dual               | 0     | 0.00  |               |             |               |                |              |
| 0                                            | 35-39     | Former             | 2474  | 25.02 |               |             | 8.31          | 425            | 17.18        |
| Year of Follow-up: 1990, Age Group: 40-44    |           |                    |       |       |               |             |               |                |              |
| Period                                       | Age Group | Smoking Group      | N     | %     | Ever Quit (N) | Ever Quit % | Mean Yrs Quit | Short Term (n) | Short Term % |
| 0                                            | 40-44     | Never Any          | 2912  | 33.65 |               |             |               |                |              |
| 0                                            | 40-44     | CC                 | 3113  | 35.97 | 0             | 0.00        |               |                |              |
| 0                                            | 40-44     | Ecig               | 0     | 0.00  |               |             |               |                |              |
| 0                                            | 40-44     | Dual               | 0     | 0.00  |               |             |               |                |              |
| 0                                            | 40-44     | Former             | 2630  | 30.39 |               |             | 10.69         | 317            | 12.05        |
| Year of Follow-up: 1990, Age Group: 45-49    |           |                    |       |       |               |             |               |                |              |
| Period                                       | Age Group | Smoking Group      | N     | %     | Ever Quit (N) | Ever Quit % | Mean Yrs Quit | Short Term (n) | Short Term % |
| 0                                            | 45-49     | Never Any          | 1919  | 29.46 |               |             |               |                |              |
| 0                                            | 45-49     | CC                 | 2318  | 35.58 | 0             | 0.00        |               |                |              |
| 0                                            | 45-49     | Ecig               | 0     | 0.00  |               |             |               |                |              |
| 0                                            | 45-49     | Dual               | 0     | 0.00  |               |             |               |                |              |
| 0                                            | 45-49     | Former             | 2278  | 34.97 |               |             | 13.26         | 221            | 9.70         |
| Year of Follow-up: 1990, Age Group: 50-54    |           |                    |       |       |               |             |               |                |              |
| Period                                       | Age Group | Smoking Group      | N     | %     | Ever Quit (N) | Ever Quit % | Mean Yrs Quit | Short Term (n) | Short Term % |
| 0                                            | 50-54     | Never Any          | 1611  | 29.41 |               |             |               |                |              |
| 0                                            | 50-54     | CC                 | 1816  | 33.16 | 0             | 0.00        |               |                |              |

**Results for PHIM for Run 1 (Main\_Analysis.RTF)**

|                                              |           |               |       |       |               |             |               |                |              |
|----------------------------------------------|-----------|---------------|-------|-------|---------------|-------------|---------------|----------------|--------------|
| 0                                            | 50-54     | Ecig          | 0     | 0.00  |               |             |               |                |              |
| 0                                            | 50-54     | Dual          | 0     | 0.00  |               |             |               |                |              |
| 0                                            | 50-54     | Former        | 2050  | 37.43 |               |             | 14.55         | 261            | 12.73        |
| Year of Follow-up: 1990, Age Group: 55-59    |           |               |       |       |               |             |               |                |              |
| Period                                       | Age Group | Smoking Group | N     | %     | Ever Quit (N) | Ever Quit % | Mean Yrs Quit | Short Term (n) | Short Term % |
| 0                                            | 55-59     | Never Any     | 1337  | 26.83 |               |             |               |                |              |
| 0                                            | 55-59     | CC            | 1520  | 30.50 | 0             | 0.00        |               |                |              |
| 0                                            | 55-59     | Ecig          | 0     | 0.00  |               |             |               |                |              |
| 0                                            | 55-59     | Dual          | 0     | 0.00  |               |             |               |                |              |
| 0                                            | 55-59     | Former        | 2126  | 42.67 |               |             | 14.80         | 216            | 10.16        |
| Year of Follow-up: 1990, Age Group: 60-64    |           |               |       |       |               |             |               |                |              |
| Period                                       | Age Group | Smoking Group | N     | %     | Ever Quit (N) | Ever Quit % | Mean Yrs Quit | Short Term (n) | Short Term % |
| 0                                            | 60-64     | Never Any     | 1169  | 23.83 |               |             |               |                |              |
| 0                                            | 60-64     | CC            | 1287  | 26.24 | 0             | 0.00        |               |                |              |
| 0                                            | 60-64     | Ecig          | 0     | 0.00  |               |             |               |                |              |
| 0                                            | 60-64     | Dual          | 0     | 0.00  |               |             |               |                |              |
| 0                                            | 60-64     | Former        | 2449  | 49.93 |               |             | 18.87         | 106            | 4.33         |
| Year of Follow-up: 1990, Age Group: 65-69    |           |               |       |       |               |             |               |                |              |
| Period                                       | Age Group | Smoking Group | N     | %     | Ever Quit (N) | Ever Quit % | Mean Yrs Quit | Short Term (n) | Short Term % |
| 0                                            | 65-69     | Never Any     | 1023  | 23.32 |               |             |               |                |              |
| 0                                            | 65-69     | CC            | 979   | 22.32 | 0             | 0.00        |               |                |              |
| 0                                            | 65-69     | Ecig          | 0     | 0.00  |               |             |               |                |              |
| 0                                            | 65-69     | Dual          | 0     | 0.00  |               |             |               |                |              |
| 0                                            | 65-69     | Former        | 2385  | 54.37 |               |             | 19.91         | 113            | 4.74         |
| Year of Follow-up: 1990, Age Group: 70-74    |           |               |       |       |               |             |               |                |              |
| Period                                       | Age Group | Smoking Group | N     | %     | Ever Quit (N) | Ever Quit % | Mean Yrs Quit | Short Term (n) | Short Term % |
| 0                                            | 70-74     | Never Any     | 961   | 27.46 |               |             |               |                |              |
| 0                                            | 70-74     | CC            | 675   | 19.29 | 0             | 0.00        |               |                |              |
| 0                                            | 70-74     | Ecig          | 0     | 0.00  |               |             |               |                |              |
| 0                                            | 70-74     | Dual          | 0     | 0.00  |               |             |               |                |              |
| 0                                            | 70-74     | Former        | 1863  | 53.24 |               |             | 20.69         | 23             | 1.23         |
| Year of Follow-up: 1990, Age Group: 75-79    |           |               |       |       |               |             |               |                |              |
| Period                                       | Age Group | Smoking Group | N     | %     | Ever Quit (N) | Ever Quit % | Mean Yrs Quit | Short Term (n) | Short Term % |
| 0                                            | 75-79     | Never Any     | 700   | 29.06 |               |             |               |                |              |
| 0                                            | 75-79     | CC            | 371   | 15.40 | 0             | 0.00        |               |                |              |
| 0                                            | 75-79     | Ecig          | 0     | 0.00  |               |             |               |                |              |
| 0                                            | 75-79     | Dual          | 0     | 0.00  |               |             |               |                |              |
| 0                                            | 75-79     | Former        | 1338  | 55.54 |               |             | 22.88         | 68             | 5.08         |
| Year of Follow-up: 1995, Age Group: All Ages |           |               |       |       |               |             |               |                |              |
| Period                                       | Age Group | Smoking Group | N     | %     | Ever Quit (N) | Ever Quit % | Mean Yrs Quit | Short Term (n) | Short Term % |
| 5                                            | All Ages  | Never Any     | 38368 | 41.57 |               |             |               |                |              |
| 5                                            | All Ages  | CC            | 11508 | 12.47 | 0             | 0.00        |               |                |              |
| 5                                            | All Ages  | Ecig          | 15517 | 16.81 |               |             |               |                |              |
| 5                                            | All Ages  | Dual          | 0     | 0.00  |               |             |               |                |              |
| 5                                            | All Ages  | Former        | 26897 | 29.14 |               |             | 15.19         | 1705           | 6.34         |
| Year of Follow-up: 1995, Age Group: 18-19    |           |               |       |       |               |             |               |                |              |
| Period                                       | Age Group | Smoking Group | N     | %     | Ever Quit (N) | Ever Quit % | Mean Yrs Quit | Short Term (n) | Short Term % |
| 5                                            | 18-19     | Never Any     | 2448  | 69.07 |               |             |               |                |              |
| 5                                            | 18-19     | CC            | 320   | 9.03  | 0             | 0.00        |               |                |              |
| 5                                            | 18-19     | Ecig          | 659   | 18.59 |               |             |               |                |              |
| 5                                            | 18-19     | Dual          | 0     | 0.00  |               |             |               |                |              |
| 5                                            | 18-19     | Former        | 117   | 3.30  |               |             | 1.11          | 80             | 68.38        |
| Year of Follow-up: 1995, Age Group: 20-24    |           |               |       |       |               |             |               |                |              |
| Period                                       | Age Group | Smoking Group | N     | %     | Ever Quit (N) | Ever Quit % | Mean Yrs Quit | Short Term (n) | Short Term % |
| 5                                            | 20-24     | Never Any     | 5787  | 64.02 |               |             |               |                |              |
| 5                                            | 20-24     | CC            | 946   | 10.46 | 0             | 0.00        |               |                |              |
| 5                                            | 20-24     | Ecig          | 1826  | 20.20 |               |             |               |                |              |
| 5                                            | 20-24     | Dual          | 0     | 0.00  |               |             |               |                |              |
| 5                                            | 20-24     | Former        | 481   | 5.32  |               |             | 2.81          | 142            | 29.52        |
| Year of Follow-up: 1995, Age Group: 25-29    |           |               |       |       |               |             |               |                |              |
| Period                                       | Age Group | Smoking Group | N     | %     | Ever Quit (N) | Ever Quit % | Mean Yrs Quit | Short Term (n) | Short Term % |
| 5                                            | 25-29     | Never Any     | 5471  | 55.74 |               |             |               |                |              |
| 5                                            | 25-29     | CC            | 1255  | 12.79 | 0             | 0.00        |               |                |              |
| 5                                            | 25-29     | Ecig          | 1942  | 19.78 |               |             |               |                |              |
| 5                                            | 25-29     | Dual          | 0     | 0.00  |               |             |               |                |              |
| 5                                            | 25-29     | Former        | 1148  | 11.70 |               |             | 5.43          | 115            | 10.02        |
| Year of Follow-up: 1995, Age Group: 30-34    |           |               |       |       |               |             |               |                |              |
| Period                                       | Age Group | Smoking Group | N     | %     | Ever Quit (N) | Ever Quit % | Mean Yrs Quit | Short Term (n) | Short Term % |

**Results for PHIM for Run 1 (Main\_Analysis.RTF)**

|                                              |           |               |      |       |               |             |               |                |              |
|----------------------------------------------|-----------|---------------|------|-------|---------------|-------------|---------------|----------------|--------------|
| 5                                            | 30-34     | Never Any     | 5065 | 47.50 |               |             |               |                |              |
| 5                                            | 30-34     | CC            | 1480 | 13.88 | 0             | 0.00        |               |                |              |
| 5                                            | 30-34     | Ecig          | 2319 | 21.75 |               |             |               |                |              |
| 5                                            | 30-34     | Dual          | 0    | 0.00  |               |             |               |                |              |
| 5                                            | 30-34     | Former        | 1800 | 16.88 |               |             | 6.94          | 106            | 5.89         |
| Year of Follow-up: 1995, Age Group: 35-39    |           |               |      |       |               |             |               |                |              |
| Period                                       | Age Group | Smoking Group | N    | %     | Ever Quit (N) | Ever Quit % | Mean Yrs Quit | Short Term (n) | Short Term % |
| 5                                            | 35-39     | Never Any     | 4724 | 43.28 |               |             |               |                |              |
| 5                                            | 35-39     | CC            | 1496 | 13.70 | 0             | 0.00        |               |                |              |
| 5                                            | 35-39     | Ecig          | 2275 | 20.84 |               |             |               |                |              |
| 5                                            | 35-39     | Dual          | 0    | 0.00  |               |             |               |                |              |
| 5                                            | 35-39     | Former        | 2421 | 22.18 |               |             | 8.20          | 114            | 4.71         |
| Year of Follow-up: 1995, Age Group: 40-44    |           |               |      |       |               |             |               |                |              |
| Period                                       | Age Group | Smoking Group | N    | %     | Ever Quit (N) | Ever Quit % | Mean Yrs Quit | Short Term (n) | Short Term % |
| 5                                            | 40-44     | Never Any     | 3941 | 39.85 |               |             |               |                |              |
| 5                                            | 40-44     | CC            | 1280 | 12.94 | 0             | 0.00        |               |                |              |
| 5                                            | 40-44     | Ecig          | 1894 | 19.15 |               |             |               |                |              |
| 5                                            | 40-44     | Dual          | 0    | 0.00  |               |             |               |                |              |
| 5                                            | 40-44     | Former        | 2774 | 28.05 |               |             | 12.06         | 130            | 4.69         |
| Year of Follow-up: 1995, Age Group: 45-49    |           |               |      |       |               |             |               |                |              |
| Period                                       | Age Group | Smoking Group | N    | %     | Ever Quit (N) | Ever Quit % | Mean Yrs Quit | Short Term (n) | Short Term % |
| 5                                            | 45-49     | Never Any     | 2912 | 33.65 |               |             |               |                |              |
| 5                                            | 45-49     | CC            | 1236 | 14.28 | 0             | 0.00        |               |                |              |
| 5                                            | 45-49     | Ecig          | 1562 | 18.05 |               |             |               |                |              |
| 5                                            | 45-49     | Dual          | 0    | 0.00  |               |             |               |                |              |
| 5                                            | 45-49     | Former        | 2945 | 34.03 |               |             | 14.20         | 148            | 5.03         |
| Year of Follow-up: 1995, Age Group: 50-54    |           |               |      |       |               |             |               |                |              |
| Period                                       | Age Group | Smoking Group | N    | %     | Ever Quit (N) | Ever Quit % | Mean Yrs Quit | Short Term (n) | Short Term % |
| 5                                            | 50-54     | Never Any     | 1919 | 29.46 |               |             |               |                |              |
| 5                                            | 50-54     | CC            | 940  | 14.43 | 0             | 0.00        |               |                |              |
| 5                                            | 50-54     | Ecig          | 1015 | 15.58 |               |             |               |                |              |
| 5                                            | 50-54     | Dual          | 0    | 0.00  |               |             |               |                |              |
| 5                                            | 50-54     | Former        | 2641 | 40.54 |               |             | 15.98         | 175            | 6.63         |
| Year of Follow-up: 1995, Age Group: 55-59    |           |               |      |       |               |             |               |                |              |
| Period                                       | Age Group | Smoking Group | N    | %     | Ever Quit (N) | Ever Quit % | Mean Yrs Quit | Short Term (n) | Short Term % |
| 5                                            | 55-59     | Never Any     | 1611 | 29.41 |               |             |               |                |              |
| 5                                            | 55-59     | CC            | 740  | 13.51 | 0             | 0.00        |               |                |              |
| 5                                            | 55-59     | Ecig          | 762  | 13.91 |               |             |               |                |              |
| 5                                            | 55-59     | Dual          | 0    | 0.00  |               |             |               |                |              |
| 5                                            | 55-59     | Former        | 2364 | 43.16 |               |             | 17.21         | 122            | 5.16         |
| Year of Follow-up: 1995, Age Group: 60-64    |           |               |      |       |               |             |               |                |              |
| Period                                       | Age Group | Smoking Group | N    | %     | Ever Quit (N) | Ever Quit % | Mean Yrs Quit | Short Term (n) | Short Term % |
| 5                                            | 60-64     | Never Any     | 1337 | 26.83 |               |             |               |                |              |
| 5                                            | 60-64     | CC            | 597  | 11.98 | 0             | 0.00        |               |                |              |
| 5                                            | 60-64     | Ecig          | 572  | 11.48 |               |             |               |                |              |
| 5                                            | 60-64     | Dual          | 0    | 0.00  |               |             |               |                |              |
| 5                                            | 60-64     | Former        | 2477 | 49.71 |               |             | 17.27         | 143            | 5.77         |
| Year of Follow-up: 1995, Age Group: 65-69    |           |               |      |       |               |             |               |                |              |
| Period                                       | Age Group | Smoking Group | N    | %     | Ever Quit (N) | Ever Quit % | Mean Yrs Quit | Short Term (n) | Short Term % |
| 5                                            | 65-69     | Never Any     | 1169 | 23.83 |               |             |               |                |              |
| 5                                            | 65-69     | CC            | 477  | 9.72  | 0             | 0.00        |               |                |              |
| 5                                            | 65-69     | Ecig          | 360  | 7.34  |               |             |               |                |              |
| 5                                            | 65-69     | Dual          | 0    | 0.00  |               |             |               |                |              |
| 5                                            | 65-69     | Former        | 2899 | 59.10 |               |             | 20.44         | 196            | 6.76         |
| Year of Follow-up: 1995, Age Group: 70-74    |           |               |      |       |               |             |               |                |              |
| Period                                       | Age Group | Smoking Group | N    | %     | Ever Quit (N) | Ever Quit % | Mean Yrs Quit | Short Term (n) | Short Term % |
| 5                                            | 70-74     | Never Any     | 1023 | 23.32 |               |             |               |                |              |
| 5                                            | 70-74     | CC            | 438  | 9.98  | 0             | 0.00        |               |                |              |
| 5                                            | 70-74     | Ecig          | 196  | 4.47  |               |             |               |                |              |
| 5                                            | 70-74     | Dual          | 0    | 0.00  |               |             |               |                |              |
| 5                                            | 70-74     | Former        | 2730 | 62.23 |               |             | 22.00         | 137            | 5.02         |
| Year of Follow-up: 1995, Age Group: 75-79    |           |               |      |       |               |             |               |                |              |
| Period                                       | Age Group | Smoking Group | N    | %     | Ever Quit (N) | Ever Quit % | Mean Yrs Quit | Short Term (n) | Short Term % |
| 5                                            | 75-79     | Never Any     | 961  | 27.46 |               |             |               |                |              |
| 5                                            | 75-79     | CC            | 303  | 8.66  | 0             | 0.00        |               |                |              |
| 5                                            | 75-79     | Ecig          | 135  | 3.86  |               |             |               |                |              |
| 5                                            | 75-79     | Dual          | 0    | 0.00  |               |             |               |                |              |
| 5                                            | 75-79     | Former        | 2100 | 60.02 |               |             | 23.02         | 97             | 4.62         |
| Year of Follow-up: 2000, Age Group: All Ages |           |               |      |       |               |             |               |                |              |



**Results for PHIM for Run 1 (Main\_Analysis.RTF)**

| Period                                    | Age Group | Smoking Group | N     | %     | Ever Quit (N) | Ever Quit % | Mean Yrs Quit | Short Term (n) | Short Term % |
|-------------------------------------------|-----------|---------------|-------|-------|---------------|-------------|---------------|----------------|--------------|
| 10                                        | All Ages  | Never Any     | 39177 | 41.64 |               |             |               |                |              |
| 10                                        | All Ages  | CC            | 4843  | 5.15  | 0             | 0.00        |               |                |              |
| 10                                        | All Ages  | Ecig          | 20724 | 22.03 |               |             |               |                |              |
| 10                                        | All Ages  | Dual          | 0     | 0.00  |               |             |               |                |              |
| 10                                        | All Ages  | Former        | 29348 | 31.19 |               |             | 16.84         | 1724           | 5.87         |
| Year of Follow-up: 2000, Age Group: 18-19 |           |               |       |       |               |             |               |                |              |
| Period                                    | Age Group | Smoking Group | N     | %     | Ever Quit (N) | Ever Quit % | Mean Yrs Quit | Short Term (n) | Short Term % |
| 10                                        | 18-19     | Never Any     | 0     | .     |               |             |               |                |              |
| 10                                        | 18-19     | CC            | 0     | .     | 0             | .           |               |                |              |
| 10                                        | 18-19     | Ecig          | 0     | .     |               |             |               |                |              |
| 10                                        | 18-19     | Dual          | 0     | .     |               |             |               |                |              |
| 10                                        | 18-19     | Former        | 0     | .     |               |             |               | 0              | .            |
| Year of Follow-up: 2000, Age Group: 20-24 |           |               |       |       |               |             |               |                |              |
| Period                                    | Age Group | Smoking Group | N     | %     | Ever Quit (N) | Ever Quit % | Mean Yrs Quit | Short Term (n) | Short Term % |
| 10                                        | 20-24     | Never Any     | 4927  | 55.70 |               |             |               |                |              |
| 10                                        | 20-24     | CC            | 462   | 5.22  | 0             | 0.00        |               |                |              |
| 10                                        | 20-24     | Ecig          | 2544  | 28.76 |               |             |               |                |              |
| 10                                        | 20-24     | Dual          | 0     | 0.00  |               |             |               |                |              |
| 10                                        | 20-24     | Former        | 912   | 10.31 |               |             | 3.41          | 258            | 28.29        |
| Year of Follow-up: 2000, Age Group: 25-29 |           |               |       |       |               |             |               |                |              |
| Period                                    | Age Group | Smoking Group | N     | %     | Ever Quit (N) | Ever Quit % | Mean Yrs Quit | Short Term (n) | Short Term % |
| 10                                        | 25-29     | Never Any     | 5341  | 59.08 |               |             |               |                |              |
| 10                                        | 25-29     | CC            | 404   | 4.47  | 0             | 0.00        |               |                |              |
| 10                                        | 25-29     | Ecig          | 2359  | 26.10 |               |             |               |                |              |
| 10                                        | 25-29     | Dual          | 0     | 0.00  |               |             |               |                |              |
| 10                                        | 25-29     | Former        | 936   | 10.35 |               |             | 4.91          | 195            | 20.83        |
| Year of Follow-up: 2000, Age Group: 30-34 |           |               |       |       |               |             |               |                |              |
| Period                                    | Age Group | Smoking Group | N     | %     | Ever Quit (N) | Ever Quit % | Mean Yrs Quit | Short Term (n) | Short Term % |
| 10                                        | 30-34     | Never Any     | 5276  | 53.75 |               |             |               |                |              |
| 10                                        | 30-34     | CC            | 481   | 4.90  | 0             | 0.00        |               |                |              |
| 10                                        | 30-34     | Ecig          | 2608  | 26.57 |               |             |               |                |              |
| 10                                        | 30-34     | Dual          | 0     | 0.00  |               |             |               |                |              |
| 10                                        | 30-34     | Former        | 1451  | 14.78 |               |             | 8.66          | 118            | 8.13         |
| Year of Follow-up: 2000, Age Group: 35-39 |           |               |       |       |               |             |               |                |              |
| Period                                    | Age Group | Smoking Group | N     | %     | Ever Quit (N) | Ever Quit % | Mean Yrs Quit | Short Term (n) | Short Term % |
| 10                                        | 35-39     | Never Any     | 4997  | 46.86 |               |             |               |                |              |
| 10                                        | 35-39     | CC            | 609   | 5.71  | 0             | 0.00        |               |                |              |
| 10                                        | 35-39     | Ecig          | 2980  | 27.94 |               |             |               |                |              |
| 10                                        | 35-39     | Dual          | 0     | 0.00  |               |             |               |                |              |
| 10                                        | 35-39     | Former        | 2078  | 19.49 |               |             | 10.61         | 109            | 5.25         |
| Year of Follow-up: 2000, Age Group: 40-44 |           |               |       |       |               |             |               |                |              |
| Period                                    | Age Group | Smoking Group | N     | %     | Ever Quit (N) | Ever Quit % | Mean Yrs Quit | Short Term (n) | Short Term % |
| 10                                        | 40-44     | Never Any     | 4724  | 43.28 |               |             |               |                |              |
| 10                                        | 40-44     | CC            | 567   | 5.19  | 0             | 0.00        |               |                |              |
| 10                                        | 40-44     | Ecig          | 2857  | 26.17 |               |             |               |                |              |
| 10                                        | 40-44     | Dual          | 0     | 0.00  |               |             |               |                |              |
| 10                                        | 40-44     | Former        | 2768  | 25.36 |               |             | 11.82         | 124            | 4.48         |
| Year of Follow-up: 2000, Age Group: 45-49 |           |               |       |       |               |             |               |                |              |
| Period                                    | Age Group | Smoking Group | N     | %     | Ever Quit (N) | Ever Quit % | Mean Yrs Quit | Short Term (n) | Short Term % |
| 10                                        | 45-49     | Never Any     | 3941  | 39.85 |               |             |               |                |              |
| 10                                        | 45-49     | CC            | 484   | 4.89  | 0             | 0.00        |               |                |              |
| 10                                        | 45-49     | Ecig          | 2312  | 23.38 |               |             |               |                |              |
| 10                                        | 45-49     | Dual          | 0     | 0.00  |               |             |               |                |              |
| 10                                        | 45-49     | Former        | 3152  | 31.87 |               |             | 15.25         | 163            | 5.17         |
| Year of Follow-up: 2000, Age Group: 50-54 |           |               |       |       |               |             |               |                |              |
| Period                                    | Age Group | Smoking Group | N     | %     | Ever Quit (N) | Ever Quit % | Mean Yrs Quit | Short Term (n) | Short Term % |
| 10                                        | 50-54     | Never Any     | 2912  | 33.65 |               |             |               |                |              |
| 10                                        | 50-54     | CC            | 473   | 5.47  | 0             | 0.00        |               |                |              |
| 10                                        | 50-54     | Ecig          | 1859  | 21.48 |               |             |               |                |              |
| 10                                        | 50-54     | Dual          | 0     | 0.00  |               |             |               |                |              |
| 10                                        | 50-54     | Former        | 3411  | 39.41 |               |             | 16.85         | 186            | 5.45         |
| Year of Follow-up: 2000, Age Group: 55-59 |           |               |       |       |               |             |               |                |              |
| Period                                    | Age Group | Smoking Group | N     | %     | Ever Quit (N) | Ever Quit % | Mean Yrs Quit | Short Term (n) | Short Term % |
| 10                                        | 55-59     | Never Any     | 1919  | 29.46 |               |             |               |                |              |
| 10                                        | 55-59     | CC            | 363   | 5.57  | 0             | 0.00        |               |                |              |
| 10                                        | 55-59     | Ecig          | 1194  | 18.33 |               |             |               |                |              |
| 10                                        | 55-59     | Dual          | 0     | 0.00  |               |             |               |                |              |

**Results for PHIM for Run 1 (Main\_Analysis.RTF)**

|                                              |           |               |       |       |               |             |               |                |              |
|----------------------------------------------|-----------|---------------|-------|-------|---------------|-------------|---------------|----------------|--------------|
| 10                                           | 55-59     | Former        | 3039  | 46.65 |               |             | 18.50         | 146            | 4.80         |
| Year of Follow-up: 2000, Age Group: 60-64    |           |               |       |       |               |             |               |                |              |
| Period                                       | Age Group | Smoking Group | N     | %     | Ever Quit (N) | Ever Quit % | Mean Yrs Quit | Short Term (n) | Short Term % |
| 10                                           | 60-64     | Never Any     | 1611  | 29.41 |               |             |               |                |              |
| 10                                           | 60-64     | CC            | 306   | 5.59  | 0             | 0.00        |               |                |              |
| 10                                           | 60-64     | Ecig          | 852   | 15.56 |               |             |               |                |              |
| 10                                           | 60-64     | Dual          | 0     | 0.00  |               |             |               |                |              |
| 10                                           | 60-64     | Former        | 2708  | 49.44 |               |             | 19.63         | 144            | 5.32         |
| Year of Follow-up: 2000, Age Group: 65-69    |           |               |       |       |               |             |               |                |              |
| Period                                       | Age Group | Smoking Group | N     | %     | Ever Quit (N) | Ever Quit % | Mean Yrs Quit | Short Term (n) | Short Term % |
| 10                                           | 65-69     | Never Any     | 1337  | 26.83 |               |             |               |                |              |
| 10                                           | 65-69     | CC            | 244   | 4.90  | 0             | 0.00        |               |                |              |
| 10                                           | 65-69     | Ecig          | 603   | 12.10 |               |             |               |                |              |
| 10                                           | 65-69     | Dual          | 0     | 0.00  |               |             |               |                |              |
| 10                                           | 65-69     | Former        | 2799  | 56.17 |               |             | 19.95         | 120            | 4.29         |
| Year of Follow-up: 2000, Age Group: 70-74    |           |               |       |       |               |             |               |                |              |
| Period                                       | Age Group | Smoking Group | N     | %     | Ever Quit (N) | Ever Quit % | Mean Yrs Quit | Short Term (n) | Short Term % |
| 10                                           | 70-74     | Never Any     | 1169  | 23.83 |               |             |               |                |              |
| 10                                           | 70-74     | CC            | 236   | 4.81  | 0             | 0.00        |               |                |              |
| 10                                           | 70-74     | Ecig          | 327   | 6.67  |               |             |               |                |              |
| 10                                           | 70-74     | Dual          | 0     | 0.00  |               |             |               |                |              |
| 10                                           | 70-74     | Former        | 3173  | 64.69 |               |             | 23.44         | 94             | 2.96         |
| Year of Follow-up: 2000, Age Group: 75-79    |           |               |       |       |               |             |               |                |              |
| Period                                       | Age Group | Smoking Group | N     | %     | Ever Quit (N) | Ever Quit % | Mean Yrs Quit | Short Term (n) | Short Term % |
| 10                                           | 75-79     | Never Any     | 1023  | 23.32 |               |             |               |                |              |
| 10                                           | 75-79     | CC            | 214   | 4.88  | 0             | 0.00        |               |                |              |
| 10                                           | 75-79     | Ecig          | 229   | 5.22  |               |             |               |                |              |
| 10                                           | 75-79     | Dual          | 0     | 0.00  |               |             |               |                |              |
| 10                                           | 75-79     | Former        | 2921  | 66.58 |               |             | 25.38         | 67             | 2.29         |
| Year of Follow-up: 2005, Age Group: All Ages |           |               |       |       |               |             |               |                |              |
| Period                                       | Age Group | Smoking Group | N     | %     | Ever Quit (N) | Ever Quit % | Mean Yrs Quit | Short Term (n) | Short Term % |
| 15                                           | All Ages  | Never Any     | 37449 | 41.75 |               |             |               |                |              |
| 15                                           | All Ages  | CC            | 1911  | 2.13  | 0             | 0.00        |               |                |              |
| 15                                           | All Ages  | Ecig          | 20003 | 22.30 |               |             |               |                |              |
| 15                                           | All Ages  | Dual          | 0     | 0.00  |               |             |               |                |              |
| 15                                           | All Ages  | Former        | 30342 | 33.82 |               |             | 18.46         | 1574           | 5.19         |
| Year of Follow-up: 2005, Age Group: 18-19    |           |               |       |       |               |             |               |                |              |
| Period                                       | Age Group | Smoking Group | N     | %     | Ever Quit (N) | Ever Quit % | Mean Yrs Quit | Short Term (n) | Short Term % |
| 15                                           | 18-19     | Never Any     | 0     | .     |               |             |               |                |              |
| 15                                           | 18-19     | CC            | 0     | .     | 0             | .           |               |                |              |
| 15                                           | 18-19     | Ecig          | 0     | .     |               |             |               |                |              |
| 15                                           | 18-19     | Dual          | 0     | .     |               |             |               |                |              |
| 15                                           | 18-19     | Former        | 0     | .     |               |             | .             | 0              | .            |
| Year of Follow-up: 2005, Age Group: 20-24    |           |               |       |       |               |             |               |                |              |
| Period                                       | Age Group | Smoking Group | N     | %     | Ever Quit (N) | Ever Quit % | Mean Yrs Quit | Short Term (n) | Short Term % |
| 15                                           | 20-24     | Never Any     | 0     | .     |               |             |               |                |              |
| 15                                           | 20-24     | CC            | 0     | .     | 0             | .           |               |                |              |
| 15                                           | 20-24     | Ecig          | 0     | .     |               |             |               |                |              |
| 15                                           | 20-24     | Dual          | 0     | .     |               |             |               |                |              |
| 15                                           | 20-24     | Former        | 0     | .     |               |             | .             | 0              | .            |
| Year of Follow-up: 2005, Age Group: 25-29    |           |               |       |       |               |             |               |                |              |
| Period                                       | Age Group | Smoking Group | N     | %     | Ever Quit (N) | Ever Quit % | Mean Yrs Quit | Short Term (n) | Short Term % |
| 15                                           | 25-29     | Never Any     | 4634  | 52.39 |               |             |               |                |              |
| 15                                           | 25-29     | CC            | 179   | 2.02  | 0             | 0.00        |               |                |              |
| 15                                           | 25-29     | Ecig          | 2661  | 30.08 |               |             |               |                |              |
| 15                                           | 25-29     | Dual          | 0     | 0.00  |               |             |               |                |              |
| 15                                           | 25-29     | Former        | 1371  | 15.50 |               |             | 6.32          | 174            | 12.69        |
| Year of Follow-up: 2005, Age Group: 30-34    |           |               |       |       |               |             |               |                |              |
| Period                                       | Age Group | Smoking Group | N     | %     | Ever Quit (N) | Ever Quit % | Mean Yrs Quit | Short Term (n) | Short Term % |
| 15                                           | 30-34     | Never Any     | 5042  | 55.77 |               |             |               |                |              |
| 15                                           | 30-34     | CC            | 153   | 1.69  | 0             | 0.00        |               |                |              |
| 15                                           | 30-34     | Ecig          | 2479  | 27.42 |               |             |               |                |              |
| 15                                           | 30-34     | Dual          | 0     | 0.00  |               |             |               |                |              |
| 15                                           | 30-34     | Former        | 1366  | 15.11 |               |             | 7.38          | 171            | 12.52        |
| Year of Follow-up: 2005, Age Group: 35-39    |           |               |       |       |               |             |               |                |              |
| Period                                       | Age Group | Smoking Group | N     | %     | Ever Quit (N) | Ever Quit % | Mean Yrs Quit | Short Term (n) | Short Term % |
| 15                                           | 35-39     | Never Any     | 5163  | 52.60 |               |             |               |                |              |
| 15                                           | 35-39     | CC            | 188   | 1.92  | 0             | 0.00        |               |                |              |

**Results for PHIM for Run 1 (Main\_Analysis.RTF)**

|                                              |           |               |       |       |               |             |               |                |              |
|----------------------------------------------|-----------|---------------|-------|-------|---------------|-------------|---------------|----------------|--------------|
| 15                                           | 35-39     | Ecig          | 2654  | 27.04 |               |             |               |                |              |
| 15                                           | 35-39     | Dual          | 0     | 0.00  |               |             |               |                |              |
| 15                                           | 35-39     | Former        | 1811  | 18.45 |               |             | 11.33         | 147            | 8.12         |
| Year of Follow-up: 2005, Age Group: 40-44    |           |               |       |       |               |             |               |                |              |
| Period                                       | Age Group | Smoking Group | N     | %     | Ever Quit (N) | Ever Quit % | Mean Yrs Quit | Short Term (n) | Short Term % |
| 15                                           | 40-44     | Never Any     | 4997  | 46.86 |               |             |               |                |              |
| 15                                           | 40-44     | CC            | 231   | 2.17  | 0             | 0.00        |               |                |              |
| 15                                           | 40-44     | Ecig          | 2948  | 27.64 |               |             |               |                |              |
| 15                                           | 40-44     | Dual          | 0     | 0.00  |               |             |               |                |              |
| 15                                           | 40-44     | Former        | 2488  | 23.33 |               |             | 13.32         | 199            | 8.00         |
| Year of Follow-up: 2005, Age Group: 45-49    |           |               |       |       |               |             |               |                |              |
| Period                                       | Age Group | Smoking Group | N     | %     | Ever Quit (N) | Ever Quit % | Mean Yrs Quit | Short Term (n) | Short Term % |
| 15                                           | 45-49     | Never Any     | 4724  | 43.28 |               |             |               |                |              |
| 15                                           | 45-49     | CC            | 216   | 1.98  | 0             | 0.00        |               |                |              |
| 15                                           | 45-49     | Ecig          | 2793  | 25.59 |               |             |               |                |              |
| 15                                           | 45-49     | Dual          | 0     | 0.00  |               |             |               |                |              |
| 15                                           | 45-49     | Former        | 3183  | 29.16 |               |             | 14.88         | 160            | 5.03         |
| Year of Follow-up: 2005, Age Group: 50-54    |           |               |       |       |               |             |               |                |              |
| Period                                       | Age Group | Smoking Group | N     | %     | Ever Quit (N) | Ever Quit % | Mean Yrs Quit | Short Term (n) | Short Term % |
| 15                                           | 50-54     | Never Any     | 3941  | 39.85 |               |             |               |                |              |
| 15                                           | 50-54     | CC            | 213   | 2.15  | 0             | 0.00        |               |                |              |
| 15                                           | 50-54     | Ecig          | 2180  | 22.04 |               |             |               |                |              |
| 15                                           | 50-54     | Dual          | 0     | 0.00  |               |             |               |                |              |
| 15                                           | 50-54     | Former        | 3555  | 35.95 |               |             | 18.19         | 154            | 4.33         |
| Year of Follow-up: 2005, Age Group: 55-59    |           |               |       |       |               |             |               |                |              |
| Period                                       | Age Group | Smoking Group | N     | %     | Ever Quit (N) | Ever Quit % | Mean Yrs Quit | Short Term (n) | Short Term % |
| 15                                           | 55-59     | Never Any     | 2912  | 33.65 |               |             |               |                |              |
| 15                                           | 55-59     | CC            | 215   | 2.48  | 0             | 0.00        |               |                |              |
| 15                                           | 55-59     | Ecig          | 1781  | 20.58 |               |             |               |                |              |
| 15                                           | 55-59     | Dual          | 0     | 0.00  |               |             |               |                |              |
| 15                                           | 55-59     | Former        | 3747  | 43.29 |               |             | 20.09         | 117            | 3.12         |
| Year of Follow-up: 2005, Age Group: 60-64    |           |               |       |       |               |             |               |                |              |
| Period                                       | Age Group | Smoking Group | N     | %     | Ever Quit (N) | Ever Quit % | Mean Yrs Quit | Short Term (n) | Short Term % |
| 15                                           | 60-64     | Never Any     | 1919  | 29.46 |               |             |               |                |              |
| 15                                           | 60-64     | CC            | 143   | 2.19  | 0             | 0.00        |               |                |              |
| 15                                           | 60-64     | Ecig          | 1100  | 16.88 |               |             |               |                |              |
| 15                                           | 60-64     | Dual          | 0     | 0.00  |               |             |               |                |              |
| 15                                           | 60-64     | Former        | 3353  | 51.47 |               |             | 21.47         | 156            | 4.65         |
| Year of Follow-up: 2005, Age Group: 65-69    |           |               |       |       |               |             |               |                |              |
| Period                                       | Age Group | Smoking Group | N     | %     | Ever Quit (N) | Ever Quit % | Mean Yrs Quit | Short Term (n) | Short Term % |
| 15                                           | 65-69     | Never Any     | 1611  | 29.41 |               |             |               |                |              |
| 15                                           | 65-69     | CC            | 124   | 2.26  | 0             | 0.00        |               |                |              |
| 15                                           | 65-69     | Ecig          | 705   | 12.87 |               |             |               |                |              |
| 15                                           | 65-69     | Dual          | 0     | 0.00  |               |             |               |                |              |
| 15                                           | 65-69     | Former        | 3037  | 55.45 |               |             | 22.19         | 118            | 3.89         |
| Year of Follow-up: 2005, Age Group: 70-74    |           |               |       |       |               |             |               |                |              |
| Period                                       | Age Group | Smoking Group | N     | %     | Ever Quit (N) | Ever Quit % | Mean Yrs Quit | Short Term (n) | Short Term % |
| 15                                           | 70-74     | Never Any     | 1337  | 26.83 |               |             |               |                |              |
| 15                                           | 70-74     | CC            | 129   | 2.59  | 0             | 0.00        |               |                |              |
| 15                                           | 70-74     | Ecig          | 441   | 8.85  |               |             |               |                |              |
| 15                                           | 70-74     | Dual          | 0     | 0.00  |               |             |               |                |              |
| 15                                           | 70-74     | Former        | 3076  | 61.73 |               |             | 22.89         | 112            | 3.64         |
| Year of Follow-up: 2005, Age Group: 75-79    |           |               |       |       |               |             |               |                |              |
| Period                                       | Age Group | Smoking Group | N     | %     | Ever Quit (N) | Ever Quit % | Mean Yrs Quit | Short Term (n) | Short Term % |
| 15                                           | 75-79     | Never Any     | 1169  | 23.83 |               |             |               |                |              |
| 15                                           | 75-79     | CC            | 120   | 2.45  | 0             | 0.00        |               |                |              |
| 15                                           | 75-79     | Ecig          | 261   | 5.32  |               |             |               |                |              |
| 15                                           | 75-79     | Dual          | 0     | 0.00  |               |             |               |                |              |
| 15                                           | 75-79     | Former        | 3355  | 68.40 |               |             | 27.01         | 66             | 1.97         |
| Year of Follow-up: 2010, Age Group: All Ages |           |               |       |       |               |             |               |                |              |
| Period                                       | Age Group | Smoking Group | N     | %     | Ever Quit (N) | Ever Quit % | Mean Yrs Quit | Short Term (n) | Short Term % |
| 20                                           | All Ages  | Never Any     | 36103 | 42.57 |               |             |               |                |              |
| 20                                           | All Ages  | CC            | 738   | 0.87  | 0             | 0.00        |               |                |              |
| 20                                           | All Ages  | Ecig          | 17076 | 20.14 |               |             |               |                |              |
| 20                                           | All Ages  | Dual          | 0     | 0.00  |               |             |               |                |              |
| 20                                           | All Ages  | Former        | 30883 | 36.42 |               |             | 19.82         | 1518           | 4.92         |
| Year of Follow-up: 2010, Age Group: 18-19    |           |               |       |       |               |             |               |                |              |
| Period                                       | Age Group | Smoking Group | N     | %     | Ever Quit (N) | Ever Quit % | Mean Yrs Quit | Short Term (n) | Short Term % |

**Results for PHIM for Run 1 (Main\_Analysis.RTF)**

|                                           |           |               |      |       |               |             |               |                |              |
|-------------------------------------------|-----------|---------------|------|-------|---------------|-------------|---------------|----------------|--------------|
| 20                                        | 18-19     | Never Any     | 0    | .     |               |             |               |                |              |
| 20                                        | 18-19     | CC            | 0    | .     | 0             | .           |               |                |              |
| 20                                        | 18-19     | Ecig          | 0    | .     |               |             |               |                |              |
| 20                                        | 18-19     | Dual          | 0    | .     |               |             |               |                |              |
| 20                                        | 18-19     | Former        | 0    | .     |               |             | 0             | .              |              |
| Year of Follow-up: 2010, Age Group: 20-24 |           |               |      |       |               |             |               |                |              |
| Period                                    | Age Group | Smoking Group | N    | %     | Ever Quit (N) | Ever Quit % | Mean Yrs Quit | Short Term (n) | Short Term % |
| 20                                        | 20-24     | Never Any     | 0    | .     |               |             |               |                |              |
| 20                                        | 20-24     | CC            | 0    | .     | 0             | .           |               |                |              |
| 20                                        | 20-24     | Ecig          | 0    | .     |               |             |               |                |              |
| 20                                        | 20-24     | Dual          | 0    | .     |               |             |               |                |              |
| 20                                        | 20-24     | Former        | 0    | .     |               |             |               | 0              | .            |
| Year of Follow-up: 2010, Age Group: 25-29 |           |               |      |       |               |             |               |                |              |
| Period                                    | Age Group | Smoking Group | N    | %     | Ever Quit (N) | Ever Quit % | Mean Yrs Quit | Short Term (n) | Short Term % |
| 20                                        | 25-29     | Never Any     | 0    | .     |               |             |               |                |              |
| 20                                        | 25-29     | CC            | 0    | .     | 0             | .           |               |                |              |
| 20                                        | 25-29     | Ecig          | 0    | .     |               |             |               |                |              |
| 20                                        | 25-29     | Dual          | 0    | .     |               |             |               |                |              |
| 20                                        | 25-29     | Former        | 0    | .     |               |             |               | 0              | .            |
| Year of Follow-up: 2010, Age Group: 30-34 |           |               |      |       |               |             |               |                |              |
| Period                                    | Age Group | Smoking Group | N    | %     | Ever Quit (N) | Ever Quit % | Mean Yrs Quit | Short Term (n) | Short Term % |
| 20                                        | 30-34     | Never Any     | 4508 | 50.97 |               |             |               |                |              |
| 20                                        | 30-34     | CC            | 71   | 0.80  | 0             | 0.00        |               |                |              |
| 20                                        | 30-34     | Ecig          | 2376 | 26.86 |               |             |               |                |              |
| 20                                        | 30-34     | Dual          | 0    | 0.00  |               |             |               |                |              |
| 20                                        | 30-34     | Former        | 1890 | 21.37 |               |             | 8.72          | 230            | 12.17        |
| Year of Follow-up: 2010, Age Group: 35-39 |           |               |      |       |               |             |               |                |              |
| Period                                    | Age Group | Smoking Group | N    | %     | Ever Quit (N) | Ever Quit % | Mean Yrs Quit | Short Term (n) | Short Term % |
| 20                                        | 35-39     | Never Any     | 4991 | 55.21 |               |             |               |                |              |
| 20                                        | 35-39     | CC            | 59   | 0.65  | 0             | 0.00        |               |                |              |
| 20                                        | 35-39     | Ecig          | 2154 | 23.83 |               |             |               |                |              |
| 20                                        | 35-39     | Dual          | 0    | 0.00  |               |             |               |                |              |
| 20                                        | 35-39     | Former        | 1836 | 20.31 |               |             | 9.77          | 141            | 7.68         |
| Year of Follow-up: 2010, Age Group: 40-44 |           |               |      |       |               |             |               |                |              |
| Period                                    | Age Group | Smoking Group | N    | %     | Ever Quit (N) | Ever Quit % | Mean Yrs Quit | Short Term (n) | Short Term % |
| 20                                        | 40-44     | Never Any     | 5163 | 52.60 |               |             |               |                |              |
| 20                                        | 40-44     | CC            | 68   | 0.69  | 0             | 0.00        |               |                |              |
| 20                                        | 40-44     | Ecig          | 2416 | 24.61 |               |             |               |                |              |
| 20                                        | 40-44     | Dual          | 0    | 0.00  |               |             |               |                |              |
| 20                                        | 40-44     | Former        | 2169 | 22.10 |               |             | 13.96         | 143            | 6.59         |
| Year of Follow-up: 2010, Age Group: 45-49 |           |               |      |       |               |             |               |                |              |
| Period                                    | Age Group | Smoking Group | N    | %     | Ever Quit (N) | Ever Quit % | Mean Yrs Quit | Short Term (n) | Short Term % |
| 20                                        | 45-49     | Never Any     | 4997 | 46.86 |               |             |               |                |              |
| 20                                        | 45-49     | CC            | 89   | 0.83  | 0             | 0.00        |               |                |              |
| 20                                        | 45-49     | Ecig          | 2619 | 24.56 |               |             |               |                |              |
| 20                                        | 45-49     | Dual          | 0    | 0.00  |               |             |               |                |              |
| 20                                        | 45-49     | Former        | 2959 | 27.75 |               |             | 15.74         | 171            | 5.78         |
| Year of Follow-up: 2010, Age Group: 50-54 |           |               |      |       |               |             |               |                |              |
| Period                                    | Age Group | Smoking Group | N    | %     | Ever Quit (N) | Ever Quit % | Mean Yrs Quit | Short Term (n) | Short Term % |
| 20                                        | 50-54     | Never Any     | 4724 | 43.28 |               |             |               |                |              |
| 20                                        | 50-54     | CC            | 87   | 0.80  | 0             | 0.00        |               |                |              |
| 20                                        | 50-54     | Ecig          | 2490 | 22.81 |               |             |               |                |              |
| 20                                        | 50-54     | Dual          | 0    | 0.00  |               |             |               |                |              |
| 20                                        | 50-54     | Former        | 3615 | 33.12 |               |             | 17.75         | 174            | 4.81         |
| Year of Follow-up: 2010, Age Group: 55-59 |           |               |      |       |               |             |               |                |              |
| Period                                    | Age Group | Smoking Group | N    | %     | Ever Quit (N) | Ever Quit % | Mean Yrs Quit | Short Term (n) | Short Term % |
| 20                                        | 55-59     | Never Any     | 3941 | 39.85 |               |             |               |                |              |
| 20                                        | 55-59     | CC            | 85   | 0.86  | 0             | 0.00        |               |                |              |
| 20                                        | 55-59     | Ecig          | 1859 | 18.80 |               |             |               |                |              |
| 20                                        | 55-59     | Dual          | 0    | 0.00  |               |             |               |                |              |
| 20                                        | 55-59     | Former        | 4004 | 40.49 |               |             | 20.81         | 181            | 4.52         |
| Year of Follow-up: 2010, Age Group: 60-64 |           |               |      |       |               |             |               |                |              |
| Period                                    | Age Group | Smoking Group | N    | %     | Ever Quit (N) | Ever Quit % | Mean Yrs Quit | Short Term (n) | Short Term % |
| 20                                        | 60-64     | Never Any     | 2912 | 33.65 |               |             |               |                |              |
| 20                                        | 60-64     | CC            | 87   | 1.01  | 0             | 0.00        |               |                |              |
| 20                                        | 60-64     | Ecig          | 1428 | 16.50 |               |             |               |                |              |
| 20                                        | 60-64     | Dual          | 0    | 0.00  |               |             |               |                |              |
| 20                                        | 60-64     | Former        | 4228 | 48.85 |               |             | 22.41         | 241            | 5.70         |
| Year of Follow-up: 2010, Age Group: 65-69 |           |               |      |       |               |             |               |                |              |

**Results for PHIM for Run 1 (Main\_Analysis.RTF)**

| Period                                       | Age Group | Smoking Group | N     | %     | Ever Quit (N) | Ever Quit % | Mean Yrs Quit | Short Term (n) | Short Term % |
|----------------------------------------------|-----------|---------------|-------|-------|---------------|-------------|---------------|----------------|--------------|
| 20                                           | 65-69     | Never Any     | 1919  | 29.46 |               |             |               |                |              |
| 20                                           | 65-69     | CC            | 60    | 0.92  | 0             | 0.00        |               |                |              |
| 20                                           | 65-69     | Ecig          | 809   | 12.42 |               |             |               |                |              |
| 20                                           | 65-69     | Dual          | 0     | 0.00  |               |             |               |                |              |
| 20                                           | 65-69     | Former        | 3727  | 57.21 |               |             | 24.03         | 133            | 3.57         |
| Year of Follow-up: 2010, Age Group: 70-74    |           |               |       |       |               |             |               |                |              |
| Period                                       | Age Group | Smoking Group | N     | %     | Ever Quit (N) | Ever Quit % | Mean Yrs Quit | Short Term (n) | Short Term % |
| 20                                           | 70-74     | Never Any     | 1611  | 29.41 |               |             |               |                |              |
| 20                                           | 70-74     | CC            | 69    | 1.26  | 0             | 0.00        |               |                |              |
| 20                                           | 70-74     | Ecig          | 574   | 10.48 |               |             |               |                |              |
| 20                                           | 70-74     | Dual          | 0     | 0.00  |               |             |               |                |              |
| 20                                           | 70-74     | Former        | 3223  | 58.85 |               |             | 25.75         | 61             | 1.89         |
| Year of Follow-up: 2010, Age Group: 75-79    |           |               |       |       |               |             |               |                |              |
| Period                                       | Age Group | Smoking Group | N     | %     | Ever Quit (N) | Ever Quit % | Mean Yrs Quit | Short Term (n) | Short Term % |
| 20                                           | 75-79     | Never Any     | 1337  | 26.83 |               |             |               |                |              |
| 20                                           | 75-79     | CC            | 63    | 1.26  | 0             | 0.00        |               |                |              |
| 20                                           | 75-79     | Ecig          | 351   | 7.04  |               |             |               |                |              |
| 20                                           | 75-79     | Dual          | 0     | 0.00  |               |             |               |                |              |
| 20                                           | 75-79     | Former        | 3232  | 64.86 |               |             | 26.66         | 43             | 1.33         |
| Year of Follow-up: 2015, Age Group: All Ages |           |               |       |       |               |             |               |                |              |
| Period                                       | Age Group | Smoking Group | N     | %     | Ever Quit (N) | Ever Quit % | Mean Yrs Quit | Short Term (n) | Short Term % |
| 25                                           | All Ages  | Never Any     | 34747 | 43.53 |               |             |               |                |              |
| 25                                           | All Ages  | CC            | 289   | 0.36  | 0             | 0.00        |               |                |              |
| 25                                           | All Ages  | Ecig          | 14107 | 17.67 |               |             |               |                |              |
| 25                                           | All Ages  | Dual          | 0     | 0.00  |               |             |               |                |              |
| 25                                           | All Ages  | Former        | 30674 | 38.43 |               |             | 21.87         | 1088           | 3.55         |
| Year of Follow-up: 2015, Age Group: 18-19    |           |               |       |       |               |             |               |                |              |
| Period                                       | Age Group | Smoking Group | N     | %     | Ever Quit (N) | Ever Quit % | Mean Yrs Quit | Short Term (n) | Short Term % |
| 25                                           | 18-19     | Never Any     | 0     | .     |               |             |               |                |              |
| 25                                           | 18-19     | CC            | 0     | .     | 0             | .           |               |                |              |
| 25                                           | 18-19     | Ecig          | 0     | .     |               |             |               |                |              |
| 25                                           | 18-19     | Dual          | 0     | .     |               |             |               |                |              |
| 25                                           | 18-19     | Former        | 0     | .     |               |             | .             | 0              | .            |
| Year of Follow-up: 2015, Age Group: 20-24    |           |               |       |       |               |             |               |                |              |
| Period                                       | Age Group | Smoking Group | N     | %     | Ever Quit (N) | Ever Quit % | Mean Yrs Quit | Short Term (n) | Short Term % |
| 25                                           | 20-24     | Never Any     | 0     | .     |               |             |               |                |              |
| 25                                           | 20-24     | CC            | 0     | .     | 0             | .           |               |                |              |
| 25                                           | 20-24     | Ecig          | 0     | .     |               |             |               |                |              |
| 25                                           | 20-24     | Dual          | 0     | .     |               |             |               |                |              |
| 25                                           | 20-24     | Former        | 0     | .     |               |             | .             | 0              | .            |
| Year of Follow-up: 2015, Age Group: 25-29    |           |               |       |       |               |             |               |                |              |
| Period                                       | Age Group | Smoking Group | N     | %     | Ever Quit (N) | Ever Quit % | Mean Yrs Quit | Short Term (n) | Short Term % |
| 25                                           | 25-29     | Never Any     | 0     | .     |               |             |               |                |              |
| 25                                           | 25-29     | CC            | 0     | .     | 0             | .           |               |                |              |
| 25                                           | 25-29     | Ecig          | 0     | .     |               |             |               |                |              |
| 25                                           | 25-29     | Dual          | 0     | .     |               |             |               |                |              |
| 25                                           | 25-29     | Former        | 0     | .     |               |             | .             | 0              | .            |
| Year of Follow-up: 2015, Age Group: 30-34    |           |               |       |       |               |             |               |                |              |
| Period                                       | Age Group | Smoking Group | N     | %     | Ever Quit (N) | Ever Quit % | Mean Yrs Quit | Short Term (n) | Short Term % |
| 25                                           | 30-34     | Never Any     | 0     | .     |               |             |               |                |              |
| 25                                           | 30-34     | CC            | 0     | .     | 0             | .           |               |                |              |
| 25                                           | 30-34     | Ecig          | 0     | .     |               |             |               |                |              |
| 25                                           | 30-34     | Dual          | 0     | .     |               |             |               |                |              |
| 25                                           | 30-34     | Former        | 0     | .     |               |             | .             | 0              | .            |
| Year of Follow-up: 2015, Age Group: 35-39    |           |               |       |       |               |             |               |                |              |
| Period                                       | Age Group | Smoking Group | N     | %     | Ever Quit (N) | Ever Quit % | Mean Yrs Quit | Short Term (n) | Short Term % |
| 25                                           | 35-39     | Never Any     | 4489  | 50.75 |               |             |               |                |              |
| 25                                           | 35-39     | CC            | 28    | 0.32  | 0             | 0.00        |               |                |              |
| 25                                           | 35-39     | Ecig          | 1990  | 22.50 |               |             |               |                |              |
| 25                                           | 35-39     | Dual          | 0     | 0.00  |               |             |               |                |              |
| 25                                           | 35-39     | Former        | 2338  | 26.43 |               |             | 11.53         | 142            | 6.07         |
| Year of Follow-up: 2015, Age Group: 40-44    |           |               |       |       |               |             |               |                |              |
| Period                                       | Age Group | Smoking Group | N     | %     | Ever Quit (N) | Ever Quit % | Mean Yrs Quit | Short Term (n) | Short Term % |
| 25                                           | 40-44     | Never Any     | 4991  | 55.21 |               |             |               |                |              |
| 25                                           | 40-44     | CC            | 20    | 0.22  | 0             | 0.00        |               |                |              |
| 25                                           | 40-44     | Ecig          | 1897  | 20.98 |               |             |               |                |              |
| 25                                           | 40-44     | Dual          | 0     | 0.00  |               |             |               |                |              |

**Results for PHIM for Run 1 (Main\_Analysis.RTF)**

|                                              |           |               |       |       |               |             |               |                |              |
|----------------------------------------------|-----------|---------------|-------|-------|---------------|-------------|---------------|----------------|--------------|
| 25                                           | 40-44     | Former        | 2132  | 23.58 |               |             | 13.01         | 112            | 5.25         |
| Year of Follow-up: 2015, Age Group: 45-49    |           |               |       |       |               |             |               |                |              |
| Period                                       | Age Group | Smoking Group | N     | %     | Ever Quit (N) | Ever Quit % | Mean Yrs Quit | Short Term (n) | Short Term % |
| 25                                           | 45-49     | Never Any     | 5163  | 52.60 |               |             |               |                |              |
| 25                                           | 45-49     | CC            | 29    | 0.30  | 0             | 0.00        |               |                |              |
| 25                                           | 45-49     | Ecig          | 2195  | 22.36 |               |             |               |                |              |
| 25                                           | 45-49     | Dual          | 0     | 0.00  |               |             |               |                |              |
| 25                                           | 45-49     | Former        | 2429  | 24.75 |               |             | 17.18         | 81             | 3.33         |
| Year of Follow-up: 2015, Age Group: 50-54    |           |               |       |       |               |             |               |                |              |
| Period                                       | Age Group | Smoking Group | N     | %     | Ever Quit (N) | Ever Quit % | Mean Yrs Quit | Short Term (n) | Short Term % |
| 25                                           | 50-54     | Never Any     | 4997  | 46.86 |               |             |               |                |              |
| 25                                           | 50-54     | CC            | 37    | 0.35  | 0             | 0.00        |               |                |              |
| 25                                           | 50-54     | Ecig          | 2387  | 22.38 |               |             |               |                |              |
| 25                                           | 50-54     | Dual          | 0     | 0.00  |               |             |               |                |              |
| 25                                           | 50-54     | Former        | 3243  | 30.41 |               |             | 19.10         | 130            | 4.01         |
| Year of Follow-up: 2015, Age Group: 55-59    |           |               |       |       |               |             |               |                |              |
| Period                                       | Age Group | Smoking Group | N     | %     | Ever Quit (N) | Ever Quit % | Mean Yrs Quit | Short Term (n) | Short Term % |
| 25                                           | 55-59     | Never Any     | 4724  | 43.28 |               |             |               |                |              |
| 25                                           | 55-59     | CC            | 33    | 0.30  | 0             | 0.00        |               |                |              |
| 25                                           | 55-59     | Ecig          | 2103  | 19.27 |               |             |               |                |              |
| 25                                           | 55-59     | Dual          | 0     | 0.00  |               |             |               |                |              |
| 25                                           | 55-59     | Former        | 4056  | 37.16 |               |             | 20.50         | 162            | 3.99         |
| Year of Follow-up: 2015, Age Group: 60-64    |           |               |       |       |               |             |               |                |              |
| Period                                       | Age Group | Smoking Group | N     | %     | Ever Quit (N) | Ever Quit % | Mean Yrs Quit | Short Term (n) | Short Term % |
| 25                                           | 60-64     | Never Any     | 3941  | 39.85 |               |             |               |                |              |
| 25                                           | 60-64     | CC            | 28    | 0.28  | 0             | 0.00        |               |                |              |
| 25                                           | 60-64     | Ecig          | 1443  | 14.59 |               |             |               |                |              |
| 25                                           | 60-64     | Dual          | 0     | 0.00  |               |             |               |                |              |
| 25                                           | 60-64     | Former        | 4477  | 45.27 |               |             | 23.28         | 205            | 4.58         |
| Year of Follow-up: 2015, Age Group: 65-69    |           |               |       |       |               |             |               |                |              |
| Period                                       | Age Group | Smoking Group | N     | %     | Ever Quit (N) | Ever Quit % | Mean Yrs Quit | Short Term (n) | Short Term % |
| 25                                           | 65-69     | Never Any     | 2912  | 33.65 |               |             |               |                |              |
| 25                                           | 65-69     | CC            | 43    | 0.50  | 0             | 0.00        |               |                |              |
| 25                                           | 65-69     | Ecig          | 1019  | 11.77 |               |             |               |                |              |
| 25                                           | 65-69     | Dual          | 0     | 0.00  |               |             |               |                |              |
| 25                                           | 65-69     | Former        | 4681  | 54.08 |               |             | 24.99         | 134            | 2.86         |
| Year of Follow-up: 2015, Age Group: 70-74    |           |               |       |       |               |             |               |                |              |
| Period                                       | Age Group | Smoking Group | N     | %     | Ever Quit (N) | Ever Quit % | Mean Yrs Quit | Short Term (n) | Short Term % |
| 25                                           | 70-74     | Never Any     | 1919  | 29.46 |               |             |               |                |              |
| 25                                           | 70-74     | CC            | 35    | 0.54  | 0             | 0.00        |               |                |              |
| 25                                           | 70-74     | Ecig          | 616   | 9.46  |               |             |               |                |              |
| 25                                           | 70-74     | Dual          | 0     | 0.00  |               |             |               |                |              |
| 25                                           | 70-74     | Former        | 3945  | 60.55 |               |             | 27.55         | 70             | 1.77         |
| Year of Follow-up: 2015, Age Group: 75-79    |           |               |       |       |               |             |               |                |              |
| Period                                       | Age Group | Smoking Group | N     | %     | Ever Quit (N) | Ever Quit % | Mean Yrs Quit | Short Term (n) | Short Term % |
| 25                                           | 75-79     | Never Any     | 1611  | 29.41 |               |             |               |                |              |
| 25                                           | 75-79     | CC            | 36    | 0.66  | 0             | 0.00        |               |                |              |
| 25                                           | 75-79     | Ecig          | 457   | 8.34  |               |             |               |                |              |
| 25                                           | 75-79     | Dual          | 0     | 0.00  |               |             |               |                |              |
| 25                                           | 75-79     | Former        | 3373  | 61.58 |               |             | 29.48         | 52             | 1.54         |
| Year of Follow-up: 2020, Age Group: All Ages |           |               |       |       |               |             |               |                |              |
| Period                                       | Age Group | Smoking Group | N     | %     | Ever Quit (N) | Ever Quit % | Mean Yrs Quit | Short Term (n) | Short Term % |
| 30                                           | All Ages  | Never Any     | 33136 | 44.57 |               |             |               |                |              |
| 30                                           | All Ages  | CC            | 100   | 0.13  | 0             | 0.00        |               |                |              |
| 30                                           | All Ages  | Ecig          | 11358 | 15.28 |               |             |               |                |              |
| 30                                           | All Ages  | Dual          | 0     | 0.00  |               |             |               |                |              |
| 30                                           | All Ages  | Former        | 29746 | 40.01 |               |             | 23.97         | 918            | 3.09         |
| Year of Follow-up: 2020, Age Group: 18-19    |           |               |       |       |               |             |               |                |              |
| Period                                       | Age Group | Smoking Group | N     | %     | Ever Quit (N) | Ever Quit % | Mean Yrs Quit | Short Term (n) | Short Term % |
| 30                                           | 18-19     | Never Any     | 0     | .     |               |             |               |                |              |
| 30                                           | 18-19     | CC            | 0     | .     | 0             | .           |               |                |              |
| 30                                           | 18-19     | Ecig          | 0     | .     |               |             |               |                |              |
| 30                                           | 18-19     | Dual          | 0     | .     |               |             |               |                |              |
| 30                                           | 18-19     | Former        | 0     | .     |               |             | .             | 0              | .            |
| Year of Follow-up: 2020, Age Group: 20-24    |           |               |       |       |               |             |               |                |              |
| Period                                       | Age Group | Smoking Group | N     | %     | Ever Quit (N) | Ever Quit % | Mean Yrs Quit | Short Term (n) | Short Term % |
| 30                                           | 20-24     | Never Any     | 0     | .     |               |             |               |                |              |
| 30                                           | 20-24     | CC            | 0     | .     | 0             | .           |               |                |              |

**Results for PHIM for Run 1 (Main\_Analysis.RTF)**

|                                           |           |               |      |       |               |             |               |                |              |
|-------------------------------------------|-----------|---------------|------|-------|---------------|-------------|---------------|----------------|--------------|
| 30                                        | 20-24     | Ecig          | 0    | .     |               |             |               |                |              |
| 30                                        | 20-24     | Dual          | 0    | .     |               |             |               |                |              |
| 30                                        | 20-24     | Former        | 0    | .     |               |             | 0             | .              |              |
| Year of Follow-up: 2020, Age Group: 25-29 |           |               |      |       |               |             |               |                |              |
| Period                                    | Age Group | Smoking Group | N    | %     | Ever Quit (N) | Ever Quit % | Mean Yrs Quit | Short Term (n) | Short Term % |
| 30                                        | 25-29     | Never Any     | 0    | .     |               |             |               |                |              |
| 30                                        | 25-29     | CC            | 0    | .     | 0             | .           |               |                |              |
| 30                                        | 25-29     | Ecig          | 0    | .     |               |             |               |                |              |
| 30                                        | 25-29     | Dual          | 0    | .     |               |             |               |                |              |
| 30                                        | 25-29     | Former        | 0    | .     |               |             |               | 0              | .            |
| Year of Follow-up: 2020, Age Group: 30-34 |           |               |      |       |               |             |               |                |              |
| Period                                    | Age Group | Smoking Group | N    | %     | Ever Quit (N) | Ever Quit % | Mean Yrs Quit | Short Term (n) | Short Term % |
| 30                                        | 30-34     | Never Any     | 0    | .     |               |             |               |                |              |
| 30                                        | 30-34     | CC            | 0    | .     | 0             | .           |               |                |              |
| 30                                        | 30-34     | Ecig          | 0    | .     |               |             |               |                |              |
| 30                                        | 30-34     | Dual          | 0    | .     |               |             |               |                |              |
| 30                                        | 30-34     | Former        | 0    | .     |               |             |               | 0              | .            |
| Year of Follow-up: 2020, Age Group: 35-39 |           |               |      |       |               |             |               |                |              |
| Period                                    | Age Group | Smoking Group | N    | %     | Ever Quit (N) | Ever Quit % | Mean Yrs Quit | Short Term (n) | Short Term % |
| 30                                        | 35-39     | Never Any     | 0    | .     |               |             |               |                |              |
| 30                                        | 35-39     | CC            | 0    | .     | 0             | .           |               |                |              |
| 30                                        | 35-39     | Ecig          | 0    | .     |               |             |               |                |              |
| 30                                        | 35-39     | Dual          | 0    | .     |               |             |               |                |              |
| 30                                        | 35-39     | Former        | 0    | .     |               |             |               | 0              | .            |
| Year of Follow-up: 2020, Age Group: 40-44 |           |               |      |       |               |             |               |                |              |
| Period                                    | Age Group | Smoking Group | N    | %     | Ever Quit (N) | Ever Quit % | Mean Yrs Quit | Short Term (n) | Short Term % |
| 30                                        | 40-44     | Never Any     | 4489 | 50.75 |               |             |               |                |              |
| 30                                        | 40-44     | CC            | 12   | 0.14  | 0             | 0.00        |               |                |              |
| 30                                        | 40-44     | Ecig          | 1743 | 19.71 |               |             |               |                |              |
| 30                                        | 40-44     | Dual          | 0    | 0.00  |               |             |               |                |              |
| 30                                        | 40-44     | Former        | 2601 | 29.41 |               |             | 15.05         | 107            | 4.11         |
| Year of Follow-up: 2020, Age Group: 45-49 |           |               |      |       |               |             |               |                |              |
| Period                                    | Age Group | Smoking Group | N    | %     | Ever Quit (N) | Ever Quit % | Mean Yrs Quit | Short Term (n) | Short Term % |
| 30                                        | 45-49     | Never Any     | 4991 | 55.21 |               |             |               |                |              |
| 30                                        | 45-49     | CC            | 5    | 0.06  | 0             | 0.00        |               |                |              |
| 30                                        | 45-49     | Ecig          | 1690 | 18.69 |               |             |               |                |              |
| 30                                        | 45-49     | Dual          | 0    | 0.00  |               |             |               |                |              |
| 30                                        | 45-49     | Former        | 2354 | 26.04 |               |             | 16.54         | 63             | 2.68         |
| Year of Follow-up: 2020, Age Group: 50-54 |           |               |      |       |               |             |               |                |              |
| Period                                    | Age Group | Smoking Group | N    | %     | Ever Quit (N) | Ever Quit % | Mean Yrs Quit | Short Term (n) | Short Term % |
| 30                                        | 50-54     | Never Any     | 5163 | 52.60 |               |             |               |                |              |
| 30                                        | 50-54     | CC            | 9    | 0.09  | 0             | 0.00        |               |                |              |
| 30                                        | 50-54     | Ecig          | 2021 | 20.59 |               |             |               |                |              |
| 30                                        | 50-54     | Dual          | 0    | 0.00  |               |             |               |                |              |
| 30                                        | 50-54     | Former        | 2623 | 26.72 |               |             | 20.66         | 99             | 3.77         |
| Year of Follow-up: 2020, Age Group: 55-59 |           |               |      |       |               |             |               |                |              |
| Period                                    | Age Group | Smoking Group | N    | %     | Ever Quit (N) | Ever Quit % | Mean Yrs Quit | Short Term (n) | Short Term % |
| 30                                        | 55-59     | Never Any     | 4997 | 46.86 |               |             |               |                |              |
| 30                                        | 55-59     | CC            | 18   | 0.17  | 0             | 0.00        |               |                |              |
| 30                                        | 55-59     | Ecig          | 2002 | 18.77 |               |             |               |                |              |
| 30                                        | 55-59     | Dual          | 0    | 0.00  |               |             |               |                |              |
| 30                                        | 55-59     | Former        | 3647 | 34.20 |               |             | 21.65         | 157            | 4.30         |
| Year of Follow-up: 2020, Age Group: 60-64 |           |               |      |       |               |             |               |                |              |
| Period                                    | Age Group | Smoking Group | N    | %     | Ever Quit (N) | Ever Quit % | Mean Yrs Quit | Short Term (n) | Short Term % |
| 30                                        | 60-64     | Never Any     | 4724 | 43.28 |               |             |               |                |              |
| 30                                        | 60-64     | CC            | 10   | 0.09  | 0             | 0.00        |               |                |              |
| 30                                        | 60-64     | Ecig          | 1614 | 14.79 |               |             |               |                |              |
| 30                                        | 60-64     | Dual          | 0    | 0.00  |               |             |               |                |              |
| 30                                        | 60-64     | Former        | 4568 | 41.85 |               |             | 22.87         | 203            | 4.44         |
| Year of Follow-up: 2020, Age Group: 65-69 |           |               |      |       |               |             |               |                |              |
| Period                                    | Age Group | Smoking Group | N    | %     | Ever Quit (N) | Ever Quit % | Mean Yrs Quit | Short Term (n) | Short Term % |
| 30                                        | 65-69     | Never Any     | 3941 | 39.85 |               |             |               |                |              |
| 30                                        | 65-69     | CC            | 13   | 0.13  | 0             | 0.00        |               |                |              |
| 30                                        | 65-69     | Ecig          | 1039 | 10.51 |               |             |               |                |              |
| 30                                        | 65-69     | Dual          | 0    | 0.00  |               |             |               |                |              |
| 30                                        | 65-69     | Former        | 4896 | 49.51 |               |             | 26.05         | 145            | 2.96         |
| Year of Follow-up: 2020, Age Group: 70-74 |           |               |      |       |               |             |               |                |              |
| Period                                    | Age Group | Smoking Group | N    | %     | Ever Quit (N) | Ever Quit % | Mean Yrs Quit | Short Term (n) | Short Term % |

**Results for PHIM for Run 1 (Main\_Analysis.RTF)**

|                                              |           |               |       |       |               |             |               |                |              |
|----------------------------------------------|-----------|---------------|-------|-------|---------------|-------------|---------------|----------------|--------------|
| 30                                           | 70-74     | Never Any     | 2912  | 33.65 |               |             |               |                |              |
| 30                                           | 70-74     | CC            | 18    | 0.21  | 0             | 0.00        |               |                |              |
| 30                                           | 70-74     | Ecig          | 770   | 8.90  |               |             |               |                |              |
| 30                                           | 70-74     | Dual          | 0     | 0.00  |               |             |               |                |              |
| 30                                           | 70-74     | Former        | 4955  | 57.25 |               |             | 28.45         | 93             | 1.88         |
| Year of Follow-up: 2020, Age Group: 75-79    |           |               |       |       |               |             |               |                |              |
| Period                                       | Age Group | Smoking Group | N     | %     | Ever Quit (N) | Ever Quit % | Mean Yrs Quit | Short Term (n) | Short Term % |
| 30                                           | 75-79     | Never Any     | 1919  | 29.46 |               |             |               |                |              |
| 30                                           | 75-79     | CC            | 15    | 0.23  | 0             | 0.00        |               |                |              |
| 30                                           | 75-79     | Ecig          | 479   | 7.35  |               |             |               |                |              |
| 30                                           | 75-79     | Dual          | 0     | 0.00  |               |             |               |                |              |
| 30                                           | 75-79     | Former        | 4102  | 62.96 |               |             | 31.39         | 51             | 1.24         |
| Year of Follow-up: 2025, Age Group: All Ages |           |               |       |       |               |             |               |                |              |
| Period                                       | Age Group | Smoking Group | N     | %     | Ever Quit (N) | Ever Quit % | Mean Yrs Quit | Short Term (n) | Short Term % |
| 35                                           | All Ages  | Never Any     | 31217 | 46.03 |               |             |               |                |              |
| 35                                           | All Ages  | CC            | 38    | 0.06  | 0             | 0.00        |               |                |              |
| 35                                           | All Ages  | Ecig          | 8864  | 13.07 |               |             |               |                |              |
| 35                                           | All Ages  | Dual          | 0     | 0.00  |               |             |               |                |              |
| 35                                           | All Ages  | Former        | 27706 | 40.85 |               |             | 25.87         | 785            | 2.83         |
| Year of Follow-up: 2025, Age Group: 18-19    |           |               |       |       |               |             |               |                |              |
| Period                                       | Age Group | Smoking Group | N     | %     | Ever Quit (N) | Ever Quit % | Mean Yrs Quit | Short Term (n) | Short Term % |
| 35                                           | 18-19     | Never Any     | 0     | .     |               |             |               |                |              |
| 35                                           | 18-19     | CC            | 0     | .     | 0             | .           |               |                |              |
| 35                                           | 18-19     | Ecig          | 0     | .     |               |             |               |                |              |
| 35                                           | 18-19     | Dual          | 0     | .     |               |             |               |                |              |
| 35                                           | 18-19     | Former        | 0     | .     |               |             | .             | 0              | .            |
| Year of Follow-up: 2025, Age Group: 20-24    |           |               |       |       |               |             |               |                |              |
| Period                                       | Age Group | Smoking Group | N     | %     | Ever Quit (N) | Ever Quit % | Mean Yrs Quit | Short Term (n) | Short Term % |
| 35                                           | 20-24     | Never Any     | 0     | .     |               |             |               |                |              |
| 35                                           | 20-24     | CC            | 0     | .     | 0             | .           |               |                |              |
| 35                                           | 20-24     | Ecig          | 0     | .     |               |             |               |                |              |
| 35                                           | 20-24     | Dual          | 0     | .     |               |             |               |                |              |
| 35                                           | 20-24     | Former        | 0     | .     |               |             | .             | 0              | .            |
| Year of Follow-up: 2025, Age Group: 25-29    |           |               |       |       |               |             |               |                |              |
| Period                                       | Age Group | Smoking Group | N     | %     | Ever Quit (N) | Ever Quit % | Mean Yrs Quit | Short Term (n) | Short Term % |
| 35                                           | 25-29     | Never Any     | 0     | .     |               |             |               |                |              |
| 35                                           | 25-29     | CC            | 0     | .     | 0             | .           |               |                |              |
| 35                                           | 25-29     | Ecig          | 0     | .     |               |             |               |                |              |
| 35                                           | 25-29     | Dual          | 0     | .     |               |             |               |                |              |
| 35                                           | 25-29     | Former        | 0     | .     |               |             | .             | 0              | .            |
| Year of Follow-up: 2025, Age Group: 30-34    |           |               |       |       |               |             |               |                |              |
| Period                                       | Age Group | Smoking Group | N     | %     | Ever Quit (N) | Ever Quit % | Mean Yrs Quit | Short Term (n) | Short Term % |
| 35                                           | 30-34     | Never Any     | 0     | .     |               |             |               |                |              |
| 35                                           | 30-34     | CC            | 0     | .     | 0             | .           |               |                |              |
| 35                                           | 30-34     | Ecig          | 0     | .     |               |             |               |                |              |
| 35                                           | 30-34     | Dual          | 0     | .     |               |             |               |                |              |
| 35                                           | 30-34     | Former        | 0     | .     |               |             | .             | 0              | .            |
| Year of Follow-up: 2025, Age Group: 35-39    |           |               |       |       |               |             |               |                |              |
| Period                                       | Age Group | Smoking Group | N     | %     | Ever Quit (N) | Ever Quit % | Mean Yrs Quit | Short Term (n) | Short Term % |
| 35                                           | 35-39     | Never Any     | 0     | .     |               |             |               |                |              |
| 35                                           | 35-39     | CC            | 0     | .     | 0             | .           |               |                |              |
| 35                                           | 35-39     | Ecig          | 0     | .     |               |             |               |                |              |
| 35                                           | 35-39     | Dual          | 0     | .     |               |             |               |                |              |
| 35                                           | 35-39     | Former        | 0     | .     |               |             | .             | 0              | .            |
| Year of Follow-up: 2025, Age Group: 40-44    |           |               |       |       |               |             |               |                |              |
| Period                                       | Age Group | Smoking Group | N     | %     | Ever Quit (N) | Ever Quit % | Mean Yrs Quit | Short Term (n) | Short Term % |
| 35                                           | 40-44     | Never Any     | 0     | .     |               |             |               |                |              |
| 35                                           | 40-44     | CC            | 0     | .     | 0             | .           |               |                |              |
| 35                                           | 40-44     | Ecig          | 0     | .     |               |             |               |                |              |
| 35                                           | 40-44     | Dual          | 0     | .     |               |             |               |                |              |
| 35                                           | 40-44     | Former        | 0     | .     |               |             | .             | 0              | .            |
| Year of Follow-up: 2025, Age Group: 45-49    |           |               |       |       |               |             |               |                |              |
| Period                                       | Age Group | Smoking Group | N     | %     | Ever Quit (N) | Ever Quit % | Mean Yrs Quit | Short Term (n) | Short Term % |
| 35                                           | 45-49     | Never Any     | 4489  | 50.75 |               |             |               |                |              |
| 35                                           | 45-49     | CC            | 7     | 0.08  | 0             | 0.00        |               |                |              |
| 35                                           | 45-49     | Ecig          | 1541  | 17.42 |               |             |               |                |              |
| 35                                           | 45-49     | Dual          | 0     | 0.00  |               |             |               |                |              |
| 35                                           | 45-49     | Former        | 2808  | 31.75 |               |             | 18.76         | 60             | 2.14         |
| Year of Follow-up: 2025, Age Group: 50-54    |           |               |       |       |               |             |               |                |              |



**Results for PHIM for Run 1 (Main\_Analysis.RTF)**

| Period                                       | Age Group | Smoking Group | N     | %     | Ever Quit (N) | Ever Quit % | Mean Yrs Quit | Short Term (n) | Short Term % |
|----------------------------------------------|-----------|---------------|-------|-------|---------------|-------------|---------------|----------------|--------------|
| 35                                           | 50-54     | Never Any     | 4991  | 55.21 |               |             |               |                |              |
| 35                                           | 50-54     | CC            | 3     | 0.03  | 0             | 0.00        |               |                |              |
| 35                                           | 50-54     | Ecig          | 1554  | 17.19 |               |             |               |                |              |
| 35                                           | 50-54     | Dual          | 0     | 0.00  |               |             |               |                |              |
| 35                                           | 50-54     | Former        | 2492  | 27.57 |               |             | 20.44         | 75             | 3.01         |
| Year of Follow-up: 2025, Age Group: 55-59    |           |               |       |       |               |             |               |                |              |
| Period                                       | Age Group | Smoking Group | N     | %     | Ever Quit (N) | Ever Quit % | Mean Yrs Quit | Short Term (n) | Short Term % |
| 35                                           | 55-59     | Never Any     | 5163  | 52.60 |               |             |               |                |              |
| 35                                           | 55-59     | CC            | 0     | 0.00  | 0             | 0.00        |               |                |              |
| 35                                           | 55-59     | Ecig          | 1664  | 16.95 |               |             |               |                |              |
| 35                                           | 55-59     | Dual          | 0     | 0.00  |               |             |               |                |              |
| 35                                           | 55-59     | Former        | 2989  | 30.45 |               |             | 22.76         | 155            | 5.19         |
| Year of Follow-up: 2025, Age Group: 60-64    |           |               |       |       |               |             |               |                |              |
| Period                                       | Age Group | Smoking Group | N     | %     | Ever Quit (N) | Ever Quit % | Mean Yrs Quit | Short Term (n) | Short Term % |
| 35                                           | 60-64     | Never Any     | 4997  | 46.86 |               |             |               |                |              |
| 35                                           | 60-64     | CC            | 9     | 0.08  | 0             | 0.00        |               |                |              |
| 35                                           | 60-64     | Ecig          | 1532  | 14.37 |               |             |               |                |              |
| 35                                           | 60-64     | Dual          | 0     | 0.00  |               |             |               |                |              |
| 35                                           | 60-64     | Former        | 4126  | 38.69 |               |             | 23.79         | 186            | 4.51         |
| Year of Follow-up: 2025, Age Group: 65-69    |           |               |       |       |               |             |               |                |              |
| Period                                       | Age Group | Smoking Group | N     | %     | Ever Quit (N) | Ever Quit % | Mean Yrs Quit | Short Term (n) | Short Term % |
| 35                                           | 65-69     | Never Any     | 4724  | 43.28 |               |             |               |                |              |
| 35                                           | 65-69     | CC            | 5     | 0.05  | 0             | 0.00        |               |                |              |
| 35                                           | 65-69     | Ecig          | 1169  | 10.71 |               |             |               |                |              |
| 35                                           | 65-69     | Dual          | 0     | 0.00  |               |             |               |                |              |
| 35                                           | 65-69     | Former        | 5018  | 45.97 |               |             | 25.57         | 158            | 3.15         |
| Year of Follow-up: 2025, Age Group: 70-74    |           |               |       |       |               |             |               |                |              |
| Period                                       | Age Group | Smoking Group | N     | %     | Ever Quit (N) | Ever Quit % | Mean Yrs Quit | Short Term (n) | Short Term % |
| 35                                           | 70-74     | Never Any     | 3941  | 39.85 |               |             |               |                |              |
| 35                                           | 70-74     | CC            | 5     | 0.05  | 0             | 0.00        |               |                |              |
| 35                                           | 70-74     | Ecig          | 811   | 8.20  |               |             |               |                |              |
| 35                                           | 70-74     | Dual          | 0     | 0.00  |               |             |               |                |              |
| 35                                           | 70-74     | Former        | 5132  | 51.90 |               |             | 29.73         | 79             | 1.54         |
| Year of Follow-up: 2025, Age Group: 75-79    |           |               |       |       |               |             |               |                |              |
| Period                                       | Age Group | Smoking Group | N     | %     | Ever Quit (N) | Ever Quit % | Mean Yrs Quit | Short Term (n) | Short Term % |
| 35                                           | 75-79     | Never Any     | 2912  | 33.65 |               |             |               |                |              |
| 35                                           | 75-79     | CC            | 9     | 0.10  | 0             | 0.00        |               |                |              |
| 35                                           | 75-79     | Ecig          | 593   | 6.85  |               |             |               |                |              |
| 35                                           | 75-79     | Dual          | 0     | 0.00  |               |             |               |                |              |
| 35                                           | 75-79     | Former        | 5141  | 59.40 |               |             | 32.31         | 72             | 1.40         |
| Year of Follow-up: 2030, Age Group: All Ages |           |               |       |       |               |             |               |                |              |
| Period                                       | Age Group | Smoking Group | N     | %     | Ever Quit (N) | Ever Quit % | Mean Yrs Quit | Short Term (n) | Short Term % |
| 40                                           | All Ages  | Never Any     | 28305 | 47.84 |               |             |               |                |              |
| 40                                           | All Ages  | CC            | 15    | 0.03  | 0             | 0.00        |               |                |              |
| 40                                           | All Ages  | Ecig          | 6535  | 11.04 |               |             |               |                |              |
| 40                                           | All Ages  | Dual          | 0     | 0.00  |               |             |               |                |              |
| 40                                           | All Ages  | Former        | 24315 | 41.09 |               |             | 27.43         | 691            | 2.84         |
| Year of Follow-up: 2030, Age Group: 18-19    |           |               |       |       |               |             |               |                |              |
| Period                                       | Age Group | Smoking Group | N     | %     | Ever Quit (N) | Ever Quit % | Mean Yrs Quit | Short Term (n) | Short Term % |
| 40                                           | 18-19     | Never Any     | 0     | .     |               |             |               |                |              |
| 40                                           | 18-19     | CC            | 0     | .     | 0             | .           |               |                |              |
| 40                                           | 18-19     | Ecig          | 0     | .     |               |             |               |                |              |
| 40                                           | 18-19     | Dual          | 0     | .     |               |             |               |                |              |
| 40                                           | 18-19     | Former        | 0     | .     |               |             | .             | 0              | .            |
| Year of Follow-up: 2030, Age Group: 20-24    |           |               |       |       |               |             |               |                |              |
| Period                                       | Age Group | Smoking Group | N     | %     | Ever Quit (N) | Ever Quit % | Mean Yrs Quit | Short Term (n) | Short Term % |
| 40                                           | 20-24     | Never Any     | 0     | .     |               |             |               |                |              |
| 40                                           | 20-24     | CC            | 0     | .     | 0             | .           |               |                |              |
| 40                                           | 20-24     | Ecig          | 0     | .     |               |             |               |                |              |
| 40                                           | 20-24     | Dual          | 0     | .     |               |             |               |                |              |
| 40                                           | 20-24     | Former        | 0     | .     |               |             | .             | 0              | .            |
| Year of Follow-up: 2030, Age Group: 25-29    |           |               |       |       |               |             |               |                |              |
| Period                                       | Age Group | Smoking Group | N     | %     | Ever Quit (N) | Ever Quit % | Mean Yrs Quit | Short Term (n) | Short Term % |
| 40                                           | 25-29     | Never Any     | 0     | .     |               |             |               |                |              |
| 40                                           | 25-29     | CC            | 0     | .     | 0             | .           |               |                |              |
| 40                                           | 25-29     | Ecig          | 0     | .     |               |             |               |                |              |
| 40                                           | 25-29     | Dual          | 0     | .     |               |             |               |                |              |

**Results for PHIM for Run 1 (Main\_Analysis.RTF)**

|                                           |           |               |      |       |               |             |               |                |              |
|-------------------------------------------|-----------|---------------|------|-------|---------------|-------------|---------------|----------------|--------------|
| 40                                        | 25-29     | Former        | 0    | .     |               |             | 0             | .              |              |
| Year of Follow-up: 2030, Age Group: 30-34 |           |               |      |       |               |             |               |                |              |
| Period                                    | Age Group | Smoking Group | N    | %     | Ever Quit (N) | Ever Quit % | Mean Yrs Quit | Short Term (n) | Short Term % |
| 40                                        | 30-34     | Never Any     | 0    | .     |               |             |               |                |              |
| 40                                        | 30-34     | CC            | 0    | .     | 0             | .           |               |                |              |
| 40                                        | 30-34     | Ecig          | 0    | .     |               |             |               |                |              |
| 40                                        | 30-34     | Dual          | 0    | .     |               |             |               |                |              |
| 40                                        | 30-34     | Former        | 0    | .     |               |             | 0             | .              |              |
| Year of Follow-up: 2030, Age Group: 35-39 |           |               |      |       |               |             |               |                |              |
| Period                                    | Age Group | Smoking Group | N    | %     | Ever Quit (N) | Ever Quit % | Mean Yrs Quit | Short Term (n) | Short Term % |
| 40                                        | 35-39     | Never Any     | 0    | .     |               |             |               |                |              |
| 40                                        | 35-39     | CC            | 0    | .     | 0             | .           |               |                |              |
| 40                                        | 35-39     | Ecig          | 0    | .     |               |             |               |                |              |
| 40                                        | 35-39     | Dual          | 0    | .     |               |             |               |                |              |
| 40                                        | 35-39     | Former        | 0    | .     |               |             | 0             | .              |              |
| Year of Follow-up: 2030, Age Group: 40-44 |           |               |      |       |               |             |               |                |              |
| Period                                    | Age Group | Smoking Group | N    | %     | Ever Quit (N) | Ever Quit % | Mean Yrs Quit | Short Term (n) | Short Term % |
| 40                                        | 40-44     | Never Any     | 0    | .     |               |             |               |                |              |
| 40                                        | 40-44     | CC            | 0    | .     | 0             | .           |               |                |              |
| 40                                        | 40-44     | Ecig          | 0    | .     |               |             |               |                |              |
| 40                                        | 40-44     | Dual          | 0    | .     |               |             |               |                |              |
| 40                                        | 40-44     | Former        | 0    | .     |               |             | 0             | .              |              |
| Year of Follow-up: 2030, Age Group: 45-49 |           |               |      |       |               |             |               |                |              |
| Period                                    | Age Group | Smoking Group | N    | %     | Ever Quit (N) | Ever Quit % | Mean Yrs Quit | Short Term (n) | Short Term % |
| 40                                        | 45-49     | Never Any     | 0    | .     |               |             |               |                |              |
| 40                                        | 45-49     | CC            | 0    | .     | 0             | .           |               |                |              |
| 40                                        | 45-49     | Ecig          | 0    | .     |               |             |               |                |              |
| 40                                        | 45-49     | Dual          | 0    | .     |               |             |               |                |              |
| 40                                        | 45-49     | Former        | 0    | .     |               |             | 0             | .              |              |
| Year of Follow-up: 2030, Age Group: 50-54 |           |               |      |       |               |             |               |                |              |
| Period                                    | Age Group | Smoking Group | N    | %     | Ever Quit (N) | Ever Quit % | Mean Yrs Quit | Short Term (n) | Short Term % |
| 40                                        | 50-54     | Never Any     | 4489 | 50.75 |               |             |               |                |              |
| 40                                        | 50-54     | CC            | 3    | 0.03  | 0             | 0.00        |               |                |              |
| 40                                        | 50-54     | Ecig          | 1392 | 15.74 |               |             |               |                |              |
| 40                                        | 50-54     | Dual          | 0    | 0.00  |               |             |               |                |              |
| 40                                        | 50-54     | Former        | 2961 | 33.48 |               |             | 22.61         | 80             | 2.70         |
| Year of Follow-up: 2030, Age Group: 55-59 |           |               |      |       |               |             |               |                |              |
| Period                                    | Age Group | Smoking Group | N    | %     | Ever Quit (N) | Ever Quit % | Mean Yrs Quit | Short Term (n) | Short Term % |
| 40                                        | 55-59     | Never Any     | 4991 | 55.21 |               |             |               |                |              |
| 40                                        | 55-59     | CC            | 2    | 0.02  | 0             | 0.00        |               |                |              |
| 40                                        | 55-59     | Ecig          | 1291 | 14.28 |               |             |               |                |              |
| 40                                        | 55-59     | Dual          | 0    | 0.00  |               |             |               |                |              |
| 40                                        | 55-59     | Former        | 2756 | 30.49 |               |             | 23.19         | 114            | 4.14         |
| Year of Follow-up: 2030, Age Group: 60-64 |           |               |      |       |               |             |               |                |              |
| Period                                    | Age Group | Smoking Group | N    | %     | Ever Quit (N) | Ever Quit % | Mean Yrs Quit | Short Term (n) | Short Term % |
| 40                                        | 60-64     | Never Any     | 5163 | 52.60 |               |             |               |                |              |
| 40                                        | 60-64     | CC            | 0    | 0.00  | 0             | 0.00        |               |                |              |
| 40                                        | 60-64     | Ecig          | 1238 | 12.61 |               |             |               |                |              |
| 40                                        | 60-64     | Dual          | 0    | 0.00  |               |             |               |                |              |
| 40                                        | 60-64     | Former        | 3415 | 34.79 |               |             | 24.53         | 183            | 5.36         |
| Year of Follow-up: 2030, Age Group: 65-69 |           |               |      |       |               |             |               |                |              |
| Period                                    | Age Group | Smoking Group | N    | %     | Ever Quit (N) | Ever Quit % | Mean Yrs Quit | Short Term (n) | Short Term % |
| 40                                        | 65-69     | Never Any     | 4997 | 46.86 |               |             |               |                |              |
| 40                                        | 65-69     | CC            | 4    | 0.04  | 0             | 0.00        |               |                |              |
| 40                                        | 65-69     | Ecig          | 1119 | 10.49 |               |             |               |                |              |
| 40                                        | 65-69     | Dual          | 0    | 0.00  |               |             |               |                |              |
| 40                                        | 65-69     | Former        | 4544 | 42.61 |               |             | 26.35         | 136            | 2.99         |
| Year of Follow-up: 2030, Age Group: 70-74 |           |               |      |       |               |             |               |                |              |
| Period                                    | Age Group | Smoking Group | N    | %     | Ever Quit (N) | Ever Quit % | Mean Yrs Quit | Short Term (n) | Short Term % |
| 40                                        | 70-74     | Never Any     | 4724 | 43.28 |               |             |               |                |              |
| 40                                        | 70-74     | CC            | 3    | 0.03  | 0             | 0.00        |               |                |              |
| 40                                        | 70-74     | Ecig          | 880  | 8.06  |               |             |               |                |              |
| 40                                        | 70-74     | Dual          | 0    | 0.00  |               |             |               |                |              |
| 40                                        | 70-74     | Former        | 5309 | 48.64 |               |             | 29.01         | 95             | 1.79         |
| Year of Follow-up: 2030, Age Group: 75-79 |           |               |      |       |               |             |               |                |              |
| Period                                    | Age Group | Smoking Group | N    | %     | Ever Quit (N) | Ever Quit % | Mean Yrs Quit | Short Term (n) | Short Term % |
| 40                                        | 75-79     | Never Any     | 3941 | 39.85 |               |             |               |                |              |
| 40                                        | 75-79     | CC            | 3    | 0.03  | 0             | 0.00        |               |                |              |

**Results for PHIM for Run 1 (Main\_Analysis.RTF)**

|                                              |           |               |       |       |               |             |               |                |              |
|----------------------------------------------|-----------|---------------|-------|-------|---------------|-------------|---------------|----------------|--------------|
| 40                                           | 75-79     | Ecig          | 615   | 6.22  |               |             |               |                |              |
| 40                                           | 75-79     | Dual          | 0     | 0.00  |               |             |               |                |              |
| 40                                           | 75-79     | Former        | 5330  | 53.90 |               |             | 33.51         | 83             | 1.56         |
| Year of Follow-up: 2035, Age Group: All Ages |           |               |       |       |               |             |               |                |              |
| Period                                       | Age Group | Smoking Group | N     | %     | Ever Quit (N) | Ever Quit % | Mean Yrs Quit | Short Term (n) | Short Term % |
| 45                                           | All Ages  | Never Any     | 24364 | 49.44 |               |             |               |                |              |
| 45                                           | All Ages  | CC            | 6     | 0.01  | 0             | 0.00        |               |                |              |
| 45                                           | All Ages  | Ecig          | 4578  | 9.29  |               |             |               |                |              |
| 45                                           | All Ages  | Dual          | 0     | 0.00  |               |             |               |                |              |
| 45                                           | All Ages  | Former        | 20333 | 41.26 |               |             | 28.82         | 538            | 2.65         |
| Year of Follow-up: 2035, Age Group: 18-19    |           |               |       |       |               |             |               |                |              |
| Period                                       | Age Group | Smoking Group | N     | %     | Ever Quit (N) | Ever Quit % | Mean Yrs Quit | Short Term (n) | Short Term % |
| 45                                           | 18-19     | Never Any     | 0     | .     |               |             |               |                |              |
| 45                                           | 18-19     | CC            | 0     | .     | 0             | .           |               |                |              |
| 45                                           | 18-19     | Ecig          | 0     | .     |               |             |               |                |              |
| 45                                           | 18-19     | Dual          | 0     | .     |               |             |               |                |              |
| 45                                           | 18-19     | Former        | 0     | .     |               |             | .             | 0              | .            |
| Year of Follow-up: 2035, Age Group: 20-24    |           |               |       |       |               |             |               |                |              |
| Period                                       | Age Group | Smoking Group | N     | %     | Ever Quit (N) | Ever Quit % | Mean Yrs Quit | Short Term (n) | Short Term % |
| 45                                           | 20-24     | Never Any     | 0     | .     |               |             |               |                |              |
| 45                                           | 20-24     | CC            | 0     | .     | 0             | .           |               |                |              |
| 45                                           | 20-24     | Ecig          | 0     | .     |               |             |               |                |              |
| 45                                           | 20-24     | Dual          | 0     | .     |               |             |               |                |              |
| 45                                           | 20-24     | Former        | 0     | .     |               |             | .             | 0              | .            |
| Year of Follow-up: 2035, Age Group: 25-29    |           |               |       |       |               |             |               |                |              |
| Period                                       | Age Group | Smoking Group | N     | %     | Ever Quit (N) | Ever Quit % | Mean Yrs Quit | Short Term (n) | Short Term % |
| 45                                           | 25-29     | Never Any     | 0     | .     |               |             |               |                |              |
| 45                                           | 25-29     | CC            | 0     | .     | 0             | .           |               |                |              |
| 45                                           | 25-29     | Ecig          | 0     | .     |               |             |               |                |              |
| 45                                           | 25-29     | Dual          | 0     | .     |               |             |               |                |              |
| 45                                           | 25-29     | Former        | 0     | .     |               |             | .             | 0              | .            |
| Year of Follow-up: 2035, Age Group: 30-34    |           |               |       |       |               |             |               |                |              |
| Period                                       | Age Group | Smoking Group | N     | %     | Ever Quit (N) | Ever Quit % | Mean Yrs Quit | Short Term (n) | Short Term % |
| 45                                           | 30-34     | Never Any     | 0     | .     |               |             |               |                |              |
| 45                                           | 30-34     | CC            | 0     | .     | 0             | .           |               |                |              |
| 45                                           | 30-34     | Ecig          | 0     | .     |               |             |               |                |              |
| 45                                           | 30-34     | Dual          | 0     | .     |               |             |               |                |              |
| 45                                           | 30-34     | Former        | 0     | .     |               |             | .             | 0              | .            |
| Year of Follow-up: 2035, Age Group: 35-39    |           |               |       |       |               |             |               |                |              |
| Period                                       | Age Group | Smoking Group | N     | %     | Ever Quit (N) | Ever Quit % | Mean Yrs Quit | Short Term (n) | Short Term % |
| 45                                           | 35-39     | Never Any     | 0     | .     |               |             |               |                |              |
| 45                                           | 35-39     | CC            | 0     | .     | 0             | .           |               |                |              |
| 45                                           | 35-39     | Ecig          | 0     | .     |               |             |               |                |              |
| 45                                           | 35-39     | Dual          | 0     | .     |               |             |               |                |              |
| 45                                           | 35-39     | Former        | 0     | .     |               |             | .             | 0              | .            |
| Year of Follow-up: 2035, Age Group: 40-44    |           |               |       |       |               |             |               |                |              |
| Period                                       | Age Group | Smoking Group | N     | %     | Ever Quit (N) | Ever Quit % | Mean Yrs Quit | Short Term (n) | Short Term % |
| 45                                           | 40-44     | Never Any     | 0     | .     |               |             |               |                |              |
| 45                                           | 40-44     | CC            | 0     | .     | 0             | .           |               |                |              |
| 45                                           | 40-44     | Ecig          | 0     | .     |               |             |               |                |              |
| 45                                           | 40-44     | Dual          | 0     | .     |               |             |               |                |              |
| 45                                           | 40-44     | Former        | 0     | .     |               |             | .             | 0              | .            |
| Year of Follow-up: 2035, Age Group: 45-49    |           |               |       |       |               |             |               |                |              |
| Period                                       | Age Group | Smoking Group | N     | %     | Ever Quit (N) | Ever Quit % | Mean Yrs Quit | Short Term (n) | Short Term % |
| 45                                           | 45-49     | Never Any     | 0     | .     |               |             |               |                |              |
| 45                                           | 45-49     | CC            | 0     | .     | 0             | .           |               |                |              |
| 45                                           | 45-49     | Ecig          | 0     | .     |               |             |               |                |              |
| 45                                           | 45-49     | Dual          | 0     | .     |               |             |               |                |              |
| 45                                           | 45-49     | Former        | 0     | .     |               |             | .             | 0              | .            |
| Year of Follow-up: 2035, Age Group: 50-54    |           |               |       |       |               |             |               |                |              |
| Period                                       | Age Group | Smoking Group | N     | %     | Ever Quit (N) | Ever Quit % | Mean Yrs Quit | Short Term (n) | Short Term % |
| 45                                           | 50-54     | Never Any     | 0     | .     |               |             |               |                |              |
| 45                                           | 50-54     | CC            | 0     | .     | 0             | .           |               |                |              |
| 45                                           | 50-54     | Ecig          | 0     | .     |               |             |               |                |              |
| 45                                           | 50-54     | Dual          | 0     | .     |               |             |               |                |              |
| 45                                           | 50-54     | Former        | 0     | .     |               |             | .             | 0              | .            |
| Year of Follow-up: 2035, Age Group: 55-59    |           |               |       |       |               |             |               |                |              |
| Period                                       | Age Group | Smoking Group | N     | %     | Ever Quit (N) | Ever Quit % | Mean Yrs Quit | Short Term (n) | Short Term % |

**Results for PHIM for Run 1 (Main\_Analysis.RTF)**

|                                              |           |               |       |       |               |             |               |                |              |
|----------------------------------------------|-----------|---------------|-------|-------|---------------|-------------|---------------|----------------|--------------|
| 45                                           | 55-59     | Never Any     | 4489  | 50.75 |               |             |               |                |              |
| 45                                           | 55-59     | CC            | 2     | 0.02  | 0             | 0.00        |               |                |              |
| 45                                           | 55-59     | Ecig          | 1171  | 13.24 |               |             |               |                |              |
| 45                                           | 55-59     | Dual          | 0     | 0.00  |               |             |               |                |              |
| 45                                           | 55-59     | Former        | 3183  | 35.99 |               |             | 25.82         | 100            | 3.14         |
| Year of Follow-up: 2035, Age Group: 60-64    |           |               |       |       |               |             |               |                |              |
| Period                                       | Age Group | Smoking Group | N     | %     | Ever Quit (N) | Ever Quit % | Mean Yrs Quit | Short Term (n) | Short Term % |
| 45                                           | 60-64     | Never Any     | 4991  | 55.21 |               |             |               |                |              |
| 45                                           | 60-64     | CC            | 0     | 0.00  | 0             | 0.00        |               |                |              |
| 45                                           | 60-64     | Ecig          | 1020  | 11.28 |               |             |               |                |              |
| 45                                           | 60-64     | Dual          | 0     | 0.00  |               |             |               |                |              |
| 45                                           | 60-64     | Former        | 3029  | 33.51 |               |             | 25.81         | 129            | 4.26         |
| Year of Follow-up: 2035, Age Group: 65-69    |           |               |       |       |               |             |               |                |              |
| Period                                       | Age Group | Smoking Group | N     | %     | Ever Quit (N) | Ever Quit % | Mean Yrs Quit | Short Term (n) | Short Term % |
| 45                                           | 65-69     | Never Any     | 5163  | 52.60 |               |             |               |                |              |
| 45                                           | 65-69     | CC            | 0     | 0.00  | 0             | 0.00        |               |                |              |
| 45                                           | 65-69     | Ecig          | 902   | 9.19  |               |             |               |                |              |
| 45                                           | 65-69     | Dual          | 0     | 0.00  |               |             |               |                |              |
| 45                                           | 65-69     | Former        | 3751  | 38.21 |               |             | 27.09         | 106            | 2.83         |
| Year of Follow-up: 2035, Age Group: 70-74    |           |               |       |       |               |             |               |                |              |
| Period                                       | Age Group | Smoking Group | N     | %     | Ever Quit (N) | Ever Quit % | Mean Yrs Quit | Short Term (n) | Short Term % |
| 45                                           | 70-74     | Never Any     | 4997  | 46.86 |               |             |               |                |              |
| 45                                           | 70-74     | CC            | 1     | 0.01  | 0             | 0.00        |               |                |              |
| 45                                           | 70-74     | Ecig          | 850   | 7.97  |               |             |               |                |              |
| 45                                           | 70-74     | Dual          | 0     | 0.00  |               |             |               |                |              |
| 45                                           | 70-74     | Former        | 4816  | 45.16 |               |             | 29.70         | 104            | 2.16         |
| Year of Follow-up: 2035, Age Group: 75-79    |           |               |       |       |               |             |               |                |              |
| Period                                       | Age Group | Smoking Group | N     | %     | Ever Quit (N) | Ever Quit % | Mean Yrs Quit | Short Term (n) | Short Term % |
| 45                                           | 75-79     | Never Any     | 4724  | 43.28 |               |             |               |                |              |
| 45                                           | 75-79     | CC            | 3     | 0.03  | 0             | 0.00        |               |                |              |
| 45                                           | 75-79     | Ecig          | 635   | 5.82  |               |             |               |                |              |
| 45                                           | 75-79     | Dual          | 0     | 0.00  |               |             |               |                |              |
| 45                                           | 75-79     | Former        | 5554  | 50.88 |               |             | 32.60         | 99             | 1.78         |
| Year of Follow-up: 2040, Age Group: All Ages |           |               |       |       |               |             |               |                |              |
| Period                                       | Age Group | Smoking Group | N     | %     | Ever Quit (N) | Ever Quit % | Mean Yrs Quit | Short Term (n) | Short Term % |
| 50                                           | All Ages  | Never Any     | 19640 | 51.19 |               |             |               |                |              |
| 50                                           | All Ages  | CC            | 1     | 0.00  | 0             | 0.00        |               |                |              |
| 50                                           | All Ages  | Ecig          | 2868  | 7.48  |               |             |               |                |              |
| 50                                           | All Ages  | Dual          | 0     | 0.00  |               |             |               |                |              |
| 50                                           | All Ages  | Former        | 15856 | 41.33 |               |             | 30.34         | 408            | 2.57         |
| Year of Follow-up: 2040, Age Group: 18-19    |           |               |       |       |               |             |               |                |              |
| Period                                       | Age Group | Smoking Group | N     | %     | Ever Quit (N) | Ever Quit % | Mean Yrs Quit | Short Term (n) | Short Term % |
| 50                                           | 18-19     | Never Any     | 0     | .     |               |             |               |                |              |
| 50                                           | 18-19     | CC            | 0     | .     | 0             | .           |               |                |              |
| 50                                           | 18-19     | Ecig          | 0     | .     |               |             |               |                |              |
| 50                                           | 18-19     | Dual          | 0     | .     |               |             |               |                |              |
| 50                                           | 18-19     | Former        | 0     | .     |               |             | .             | 0              | .            |
| Year of Follow-up: 2040, Age Group: 20-24    |           |               |       |       |               |             |               |                |              |
| Period                                       | Age Group | Smoking Group | N     | %     | Ever Quit (N) | Ever Quit % | Mean Yrs Quit | Short Term (n) | Short Term % |
| 50                                           | 20-24     | Never Any     | 0     | .     |               |             |               |                |              |
| 50                                           | 20-24     | CC            | 0     | .     | 0             | .           |               |                |              |
| 50                                           | 20-24     | Ecig          | 0     | .     |               |             |               |                |              |
| 50                                           | 20-24     | Dual          | 0     | .     |               |             |               |                |              |
| 50                                           | 20-24     | Former        | 0     | .     |               |             | .             | 0              | .            |
| Year of Follow-up: 2040, Age Group: 25-29    |           |               |       |       |               |             |               |                |              |
| Period                                       | Age Group | Smoking Group | N     | %     | Ever Quit (N) | Ever Quit % | Mean Yrs Quit | Short Term (n) | Short Term % |
| 50                                           | 25-29     | Never Any     | 0     | .     |               |             |               |                |              |
| 50                                           | 25-29     | CC            | 0     | .     | 0             | .           |               |                |              |
| 50                                           | 25-29     | Ecig          | 0     | .     |               |             |               |                |              |
| 50                                           | 25-29     | Dual          | 0     | .     |               |             |               |                |              |
| 50                                           | 25-29     | Former        | 0     | .     |               |             | .             | 0              | .            |
| Year of Follow-up: 2040, Age Group: 30-34    |           |               |       |       |               |             |               |                |              |
| Period                                       | Age Group | Smoking Group | N     | %     | Ever Quit (N) | Ever Quit % | Mean Yrs Quit | Short Term (n) | Short Term % |
| 50                                           | 30-34     | Never Any     | 0     | .     |               |             |               |                |              |
| 50                                           | 30-34     | CC            | 0     | .     | 0             | .           |               |                |              |
| 50                                           | 30-34     | Ecig          | 0     | .     |               |             |               |                |              |
| 50                                           | 30-34     | Dual          | 0     | .     |               |             |               |                |              |
| 50                                           | 30-34     | Former        | 0     | .     |               |             | .             | 0              | .            |
| Year of Follow-up: 2040, Age Group: 35-39    |           |               |       |       |               |             |               |                |              |

**Results for PHIM for Run 1 (Main\_Analysis.RTF)**

| Period                                    | Age Group | Smoking Group | N    | %     | Ever Quit (N) | Ever Quit % | Mean Yrs Quit | Short Term (n) | Short Term % |
|-------------------------------------------|-----------|---------------|------|-------|---------------|-------------|---------------|----------------|--------------|
| 50                                        | 35-39     | Never Any     | 0    | .     |               |             |               |                |              |
| 50                                        | 35-39     | CC            | 0    | .     | 0             | .           |               |                |              |
| 50                                        | 35-39     | Ecig          | 0    | .     |               |             |               |                |              |
| 50                                        | 35-39     | Dual          | 0    | .     |               |             |               |                |              |
| 50                                        | 35-39     | Former        | 0    | .     |               |             | .             | 0              | .            |
| Year of Follow-up: 2040, Age Group: 40-44 |           |               |      |       |               |             |               |                |              |
| Period                                    | Age Group | Smoking Group | N    | %     | Ever Quit (N) | Ever Quit % | Mean Yrs Quit | Short Term (n) | Short Term % |
| 50                                        | 40-44     | Never Any     | 0    | .     |               |             |               |                |              |
| 50                                        | 40-44     | CC            | 0    | .     | 0             | .           |               |                |              |
| 50                                        | 40-44     | Ecig          | 0    | .     |               |             |               |                |              |
| 50                                        | 40-44     | Dual          | 0    | .     |               |             |               |                |              |
| 50                                        | 40-44     | Former        | 0    | .     |               |             | .             | 0              | .            |
| Year of Follow-up: 2040, Age Group: 45-49 |           |               |      |       |               |             |               |                |              |
| Period                                    | Age Group | Smoking Group | N    | %     | Ever Quit (N) | Ever Quit % | Mean Yrs Quit | Short Term (n) | Short Term % |
| 50                                        | 45-49     | Never Any     | 0    | .     |               |             |               |                |              |
| 50                                        | 45-49     | CC            | 0    | .     | 0             | .           |               |                |              |
| 50                                        | 45-49     | Ecig          | 0    | .     |               |             |               |                |              |
| 50                                        | 45-49     | Dual          | 0    | .     |               |             |               |                |              |
| 50                                        | 45-49     | Former        | 0    | .     |               |             | .             | 0              | .            |
| Year of Follow-up: 2040, Age Group: 50-54 |           |               |      |       |               |             |               |                |              |
| Period                                    | Age Group | Smoking Group | N    | %     | Ever Quit (N) | Ever Quit % | Mean Yrs Quit | Short Term (n) | Short Term % |
| 50                                        | 50-54     | Never Any     | 0    | .     |               |             |               |                |              |
| 50                                        | 50-54     | CC            | 0    | .     | 0             | .           |               |                |              |
| 50                                        | 50-54     | Ecig          | 0    | .     |               |             |               |                |              |
| 50                                        | 50-54     | Dual          | 0    | .     |               |             |               |                |              |
| 50                                        | 50-54     | Former        | 0    | .     |               |             | .             | 0              | .            |
| Year of Follow-up: 2040, Age Group: 55-59 |           |               |      |       |               |             |               |                |              |
| Period                                    | Age Group | Smoking Group | N    | %     | Ever Quit (N) | Ever Quit % | Mean Yrs Quit | Short Term (n) | Short Term % |
| 50                                        | 55-59     | Never Any     | 0    | .     |               |             |               |                |              |
| 50                                        | 55-59     | CC            | 0    | .     | 0             | .           |               |                |              |
| 50                                        | 55-59     | Ecig          | 0    | .     |               |             |               |                |              |
| 50                                        | 55-59     | Dual          | 0    | .     |               |             |               |                |              |
| 50                                        | 55-59     | Former        | 0    | .     |               |             | .             | 0              | .            |
| Year of Follow-up: 2040, Age Group: 60-64 |           |               |      |       |               |             |               |                |              |
| Period                                    | Age Group | Smoking Group | N    | %     | Ever Quit (N) | Ever Quit % | Mean Yrs Quit | Short Term (n) | Short Term % |
| 50                                        | 60-64     | Never Any     | 4489 | 50.75 |               |             |               |                |              |
| 50                                        | 60-64     | CC            | 0    | 0.00  | 0             | 0.00        |               |                |              |
| 50                                        | 60-64     | Ecig          | 865  | 9.78  |               |             |               |                |              |
| 50                                        | 60-64     | Dual          | 0    | 0.00  |               |             |               |                |              |
| 50                                        | 60-64     | Former        | 3491 | 39.47 |               |             | 28.27         | 129            | 3.70         |
| Year of Follow-up: 2040, Age Group: 65-69 |           |               |      |       |               |             |               |                |              |
| Period                                    | Age Group | Smoking Group | N    | %     | Ever Quit (N) | Ever Quit % | Mean Yrs Quit | Short Term (n) | Short Term % |
| 50                                        | 65-69     | Never Any     | 4991 | 55.21 |               |             |               |                |              |
| 50                                        | 65-69     | CC            | 0    | 0.00  | 0             | 0.00        |               |                |              |
| 50                                        | 65-69     | Ecig          | 705  | 7.80  |               |             |               |                |              |
| 50                                        | 65-69     | Dual          | 0    | 0.00  |               |             |               |                |              |
| 50                                        | 65-69     | Former        | 3344 | 36.99 |               |             | 28.11         | 120            | 3.59         |
| Year of Follow-up: 2040, Age Group: 70-74 |           |               |      |       |               |             |               |                |              |
| Period                                    | Age Group | Smoking Group | N    | %     | Ever Quit (N) | Ever Quit % | Mean Yrs Quit | Short Term (n) | Short Term % |
| 50                                        | 70-74     | Never Any     | 5163 | 52.60 |               |             |               |                |              |
| 50                                        | 70-74     | CC            | 0    | 0.00  | 0             | 0.00        |               |                |              |
| 50                                        | 70-74     | Ecig          | 665  | 6.77  |               |             |               |                |              |
| 50                                        | 70-74     | Dual          | 0    | 0.00  |               |             |               |                |              |
| 50                                        | 70-74     | Former        | 3988 | 40.63 |               |             | 30.31         | 80             | 2.01         |
| Year of Follow-up: 2040, Age Group: 75-79 |           |               |      |       |               |             |               |                |              |
| Period                                    | Age Group | Smoking Group | N    | %     | Ever Quit (N) | Ever Quit % | Mean Yrs Quit | Short Term (n) | Short Term % |
| 50                                        | 75-79     | Never Any     | 4997 | 46.86 |               |             |               |                |              |
| 50                                        | 75-79     | CC            | 1    | 0.01  | 0             | 0.00        |               |                |              |
| 50                                        | 75-79     | Ecig          | 633  | 5.94  |               |             |               |                |              |
| 50                                        | 75-79     | Dual          | 0    | 0.00  |               |             |               |                |              |
| 50                                        | 75-79     | Former        | 5033 | 47.20 |               |             | 33.29         | 79             | 1.57         |

## Results for PHIM for Run 1 (Main\_Analysis.RTF)

\*\*\*\*\*

### Main Results for E-Component for Run: 1, Simulation: 1, COD: Four Diseases Combined

| Variable Parameter          | Value                                  |
|-----------------------------|----------------------------------------|
| 1. Country                  | US (United States)                     |
| 2. Sex                      | M (Males)                              |
| 3. Year of start of process | 1990                                   |
| 4. Cause of Death           | Four Diseases Combined                 |
| 5. Effective Dose NULL      | CC:1                                   |
| 6. Effective Dose Ecig      | CC:1 Ecig:0.05 Dual:0.525              |
| Note:                       | Death rates are per million population |

#### Results for Age Groups Combined and Years combined, Population unadjusted for deaths in Ecig scenario,

| Age Group:All | NULL     | Ecig        | %Drop       |         |        |        | NULL    | Ecig    | Drop    |         |
|---------------|----------|-------------|-------------|---------|--------|--------|---------|---------|---------|---------|
| Year          | Number   | Attrib      | Attrib      | Drop    | %Drop  | Attrib | Death   | Attrib  | Attrib  | Drop    |
|               | Deaths   | Deaths      | Deaths      | Deaths  | Deaths | Deaths | Rate    | Rates   | Rates   | Rates   |
| All Comb      | 13148871 | 4509390.583 | 2984679.112 | 1524711 | 11.596 | 33.812 | 3806.31 | 1305.37 | 864.000 | 441.371 |

#### Results for Age Groups Combined, Population unadjusted for deaths in Ecig scenario,

| Age Group:All | NULL   | Ecig       | %Drop      |          |        |        | NULL    | Ecig    | Drop    |         |
|---------------|--------|------------|------------|----------|--------|--------|---------|---------|---------|---------|
| Year          | Number | Attrib     | Attrib     | Drop     | %Drop  | Attrib | Death   | Attrib  | Attrib  | Drop    |
|               | Deaths | Deaths     | Deaths     | Deaths   | Deaths | Deaths | Rate    | Rates   | Rates   | Rates   |
| 1990          | 317161 | 125773.065 | 125773.065 | 0.000    | 0.000  | 0.000  | 5027.71 | 1993.78 | 1993.78 | 0.000   |
| 1991          | 313217 | 123999.442 | 123575.252 | 424.190  | 0.135  | 0.342  | 4883.81 | 1933.45 | 1926.84 | 6.614   |
| 1992          | 308577 | 122014.015 | 120877.258 | 1136.757 | 0.368  | 0.932  | 4729.73 | 1870.18 | 1852.75 | 17.424  |
| 1993          | 311713 | 122810.618 | 120675.272 | 2135.346 | 0.685  | 1.739  | 4692.62 | 1848.83 | 1816.68 | 32.146  |
| 1994          | 305700 | 119925.592 | 116642.213 | 3283.379 | 1.074  | 2.738  | 4516.19 | 1771.69 | 1723.19 | 48.506  |
| 1995          | 303225 | 117896.496 | 113270.222 | 4626.275 | 1.526  | 3.924  | 4393.80 | 1708.35 | 1641.31 | 67.036  |
| 1996          | 299559 | 115698.645 | 109592.838 | 6105.807 | 2.038  | 5.277  | 4273.16 | 1650.42 | 1563.32 | 87.098  |
| 1997          | 294226 | 113359.847 | 105764.237 | 7595.609 | 2.582  | 6.700  | 4128.67 | 1590.70 | 1484.12 | 106.584 |
| 1998          | 289258 | 111444.212 | 102354.614 | 9089.598 | 3.142  | 8.156  | 3992.19 | 1538.10 | 1412.65 | 125.450 |
| 1999          | 311002 | 114877.722 | 102717.729 | 12159.99 | 3.910  | 10.585 | 4224.60 | 1560.48 | 1395.30 | 165.179 |
| 2000          | 303786 | 112379.704 | 98503.172  | 13876.53 | 4.568  | 12.348 | 4066.21 | 1504.22 | 1318.48 | 185.739 |
| 2001          | 296294 | 110024.943 | 94313.120  | 15711.82 | 5.303  | 14.280 | 3914.28 | 1453.52 | 1245.95 | 207.566 |
| 2002          | 291898 | 108289.173 | 90517.550  | 17771.62 | 6.088  | 16.411 | 3813.00 | 1414.56 | 1182.41 | 232.147 |
| 2003          | 285865 | 106539.023 | 86946.352  | 19592.67 | 6.854  | 18.390 | 3695.36 | 1377.22 | 1123.95 | 253.273 |
| 2004          | 274177 | 103037.251 | 82110.840  | 20926.41 | 7.632  | 20.310 | 3506.10 | 1317.61 | 1050.01 | 267.601 |
| 2005          | 272379 | 103044.562 | 80197.351  | 22847.21 | 8.388  | 22.172 | 3442.69 | 1302.41 | 1013.64 | 288.773 |
| 2006          | 264118 | 99672.555  | 75189.882  | 24482.67 | 9.270  | 24.563 | 3307.76 | 1248.28 | 941.663 | 306.616 |
| 2007          | 258419 | 97839.152  | 71981.795  | 25857.36 | 10.006 | 26.428 | 3203.20 | 1212.75 | 892.240 | 320.511 |
| 2008          | 259461 | 98075.852  | 70477.901  | 27597.95 | 10.637 | 28.139 | 3180.09 | 1202.07 | 863.815 | 338.255 |
| 2009          | 253907 | 95617.338  | 66805.356  | 28811.98 | 11.347 | 30.133 | 3075.31 | 1158.11 | 809.144 | 348.970 |
| 2010          | 251878 | 94607.988  | 64431.426  | 30176.56 | 11.981 | 31.896 | 3013.72 | 1131.98 | 770.922 | 361.062 |
| 2011          | 251779 | 93633.119  | 61788.680  | 31844.44 | 12.648 | 34.010 | 2982.76 | 1109.25 | 731.996 | 377.253 |
| 2012          | 252643 | 92775.175  | 59296.371  | 33478.80 | 13.251 | 36.086 | 2960.61 | 1087.19 | 694.867 | 392.323 |
| 2013          | 256175 | 92345.780  | 57192.739  | 35153.04 | 13.722 | 38.067 | 2967.76 | 1069.82 | 662.572 | 407.244 |
| 2014          | 257393 | 91379.215  | 54826.416  | 36552.80 | 14.201 | 40.001 | 2947.05 | 1046.26 | 627.741 | 418.515 |
| 2015          | 259782 | 90750.242  | 52936.177  | 37814.07 | 14.556 | 41.668 | 3346.10 | 1168.90 | 681.840 | 487.061 |
| 2016          | 261453 | 88811.996  | 49699.461  | 39112.53 | 14.960 | 44.040 | 3336.15 | 1133.24 | 634.167 | 499.078 |
| 2017          | 263685 | 87325.126  | 47066.158  | 40258.97 | 15.268 | 46.102 | 3333.85 | 1104.08 | 595.072 | 509.007 |
| 2018          | 258714 | 87612.144  | 46315.614  | 41296.53 | 15.962 | 47.136 | 3240.73 | 1097.46 | 580.163 | 517.293 |
| 2019          | 261438 | 87797.760  | 44988.643  | 42809.12 | 16.374 | 48.759 | 3242.99 | 1089.08 | 558.059 | 531.023 |
| 2020          | 262288 | 87221.042  | 43536.345  | 43684.70 | 16.655 | 50.085 | 3715.29 | 1235.48 | 616.689 | 618.790 |
| 2021          | 255079 | 82001.292  | 38768.306  | 43232.99 | 16.949 | 52.722 | 3587.82 | 1153.39 | 545.296 | 608.094 |
| 2022          | 257097 | 81915.977  | 37292.841  | 44623.14 | 17.357 | 54.474 | 3588.53 | 1143.37 | 520.530 | 622.845 |
| 2023          | 259080 | 81810.810  | 35853.657  | 45957.15 | 17.739 | 56.175 | 3586.88 | 1132.64 | 496.383 | 636.262 |
| 2024          | 260719 | 81528.303  | 34430.663  | 47097.64 | 18.065 | 57.768 | 3579.65 | 1119.38 | 472.731 | 646.647 |
| 2025          | 257308 | 79599.213  | 32763.035  | 46836.18 | 18.202 | 58.840 | 4112.08 | 1272.09 | 523.591 | 748.496 |
| 2026          | 251528 | 75082.462  | 29110.480  | 45971.98 | 18.277 | 61.229 | 4003.24 | 1194.99 | 463.313 | 731.675 |
| 2027          | 250988 | 74444.425  | 27620.624  | 46823.80 | 18.656 | 62.898 | 3976.53 | 1179.46 | 437.608 | 741.853 |
| 2028          | 250285 | 73699.585  | 26060.257  | 47639.33 | 19.034 | 64.640 | 3945.35 | 1161.76 | 410.800 | 750.960 |
| 2029          | 249525 | 72819.703  | 24567.072  | 48252.63 | 19.338 | 66.263 | 3910.99 | 1141.36 | 385.058 | 756.299 |
| 2030          | 240528 | 69309.277  | 22886.854  | 46422.42 | 19.300 | 66.979 | 4504.36 | 1297.95 | 428.600 | 869.349 |
| 2031          | 235442 | 65433.368  | 20269.324  | 45164.04 | 19.183 | 69.023 | 4397.65 | 1222.18 | 378.596 | 843.586 |
| 2032          | 234017 | 64643.552  | 19038.140  | 45605.41 | 19.488 | 70.549 | 4356.12 | 1203.31 | 354.386 | 848.923 |
| 2033          | 232559 | 63793.514  | 17876.751  | 45916.76 | 19.744 | 71.977 | 4310.93 | 1182.54 | 331.380 | 851.156 |
| 2034          | 230963 | 63032.151  | 16784.296  | 46247.86 | 20.024 | 73.372 | 4260.75 | 1162.80 | 309.632 | 853.168 |
| 2035          | 215822 | 57653.301  | 15283.522  | 42369.78 | 19.632 | 73.491 | 4924.38 | 1315.47 | 348.723 | 966.748 |
| 2036          | 208183 | 52988.733  | 12794.436  | 40194.30 | 19.307 | 75.854 | 4748.94 | 1208.75 | 291.859 | 916.887 |
| 2037          | 205491 | 52026.921  | 11850.994  | 40175.93 | 19.551 | 77.221 | 4682.40 | 1185.50 | 270.041 | 915.462 |
| 2038          | 202834 | 50943.211  | 10923.876  | 40019.34 | 19.730 | 78.557 | 4612.18 | 1158.38 | 248.395 | 909.988 |
| 2039          | 200251 | 50085.991  | 10139.935  | 39946.06 | 19.948 | 79.755 | 4538.65 | 1135.19 | 229.820 | 905.371 |

## Results for PHIM for Run 1 (Main\_Analysis.RTF)

\*\*\*\*\*

### Main Results for E-Component for Run: 1, Simulation: 1, COD: LUNG CANCER

| Variable Parameter          | Value                                  |
|-----------------------------|----------------------------------------|
| 1. Country                  | US (United States)                     |
| 2. Sex                      | M (Males)                              |
| 3. Year of start of process | 1990                                   |
| 4. Cause of Death           | LUNG CANCER                            |
| 5. Effective Dose NULL      | CC:1                                   |
| 6. Effective Dose Ecig      | CC:1 Ecig:0.05 Dual:0.525              |
| Note:                       | Death rates are per million population |

#### Results for Age Groups Combined and Years combined, Population unadjusted for deaths in Ecig scenario,

| Age Group:All |         | NULL        | Ecig        | %Drop    |        |        | NULL    | Ecig    | Drop    |         |
|---------------|---------|-------------|-------------|----------|--------|--------|---------|---------|---------|---------|
| Year          | Number  | Attrib      | Attrib      | Drop     | %Drop  | Attrib | Death   | Attrib  | Drop    |         |
|               | Deaths  | Deaths      | Deaths      | Deaths   | Deaths | Deaths | Rate    | Rates   | Rates   |         |
| All Comb      | 3065988 | 2244988.113 | 1722967.276 | 522020.8 | 17.026 | 23.253 | 887.537 | 649.875 | 498.762 | 151.114 |

#### Results for Age Groups Combined, Population unadjusted for deaths in Ecig scenario,

| Age Group:All |        | NULL      | Ecig      | %Drop    |        |        | NULL    | Ecig    | Drop    |         |
|---------------|--------|-----------|-----------|----------|--------|--------|---------|---------|---------|---------|
| Year          | Number | Attrib    | Attrib    | Drop     | %Drop  | Attrib | Death   | Attrib  | Drop    |         |
|               | Deaths | Deaths    | Deaths    | Deaths   | Deaths | Deaths | Rate    | Rates   | Rates   |         |
| 1990          | 78822  | 63385.736 | 63385.736 | 0.000    | 0.000  | 0.000  | 1249.50 | 1004.81 | 0.000   |         |
| 1991          | 78462  | 62918.402 | 62870.284 | 48.118   | 0.061  | 0.076  | 1223.41 | 981.049 | 980.299 | 0.750   |
| 1992          | 77987  | 62366.766 | 62237.572 | 129.194  | 0.166  | 0.207  | 1195.35 | 955.930 | 953.949 | 1.980   |
| 1993          | 78542  | 62652.888 | 62398.514 | 254.374  | 0.324  | 0.406  | 1182.39 | 943.195 | 939.365 | 3.829   |
| 1994          | 77437  | 61565.227 | 61163.821 | 401.406  | 0.518  | 0.652  | 1144.00 | 909.520 | 903.590 | 5.930   |
| 1995          | 76904  | 60851.961 | 60267.833 | 584.128  | 0.760  | 0.960  | 1114.36 | 881.759 | 873.295 | 8.464   |
| 1996          | 76232  | 60122.922 | 59308.518 | 814.404  | 1.068  | 1.355  | 1087.44 | 857.643 | 846.026 | 11.617  |
| 1997          | 75473  | 59237.155 | 58175.080 | 1062.074 | 1.407  | 1.793  | 1059.06 | 831.234 | 816.331 | 14.903  |
| 1998          | 75381  | 58906.696 | 57537.293 | 1369.403 | 1.817  | 2.325  | 1040.37 | 813.001 | 794.101 | 18.900  |
| 1999          | 73159  | 56930.073 | 55258.820 | 1671.253 | 2.284  | 2.936  | 993.781 | 773.329 | 750.627 | 22.702  |
| 2000          | 73784  | 57137.121 | 55072.463 | 2064.658 | 2.798  | 3.614  | 987.608 | 764.787 | 737.152 | 27.636  |
| 2001          | 73294  | 56481.726 | 53973.185 | 2508.541 | 3.423  | 4.441  | 968.273 | 746.169 | 713.030 | 33.140  |
| 2002          | 72442  | 55588.365 | 52613.222 | 2975.143 | 4.107  | 5.352  | 946.293 | 726.138 | 687.274 | 38.864  |
| 2003          | 71942  | 54945.856 | 51454.115 | 3491.742 | 4.854  | 6.355  | 929.989 | 710.281 | 665.143 | 45.137  |
| 2004          | 71301  | 54203.126 | 50142.148 | 4060.977 | 5.696  | 7.492  | 911.778 | 693.135 | 641.204 | 51.931  |
| 2005          | 70964  | 53744.603 | 49094.615 | 4649.988 | 6.553  | 8.652  | 896.937 | 679.296 | 620.523 | 58.773  |
| 2006          | 69658  | 52535.572 | 47267.564 | 5268.008 | 7.563  | 10.028 | 872.383 | 657.945 | 591.969 | 65.975  |
| 2007          | 68565  | 51492.124 | 45613.004 | 5879.120 | 8.575  | 11.418 | 849.888 | 638.264 | 565.390 | 72.874  |
| 2008          | 68226  | 51030.736 | 44410.892 | 6619.843 | 9.703  | 12.972 | 836.215 | 625.460 | 544.324 | 81.136  |
| 2009          | 67509  | 50276.199 | 42915.597 | 7360.602 | 10.903 | 14.640 | 817.667 | 608.943 | 519.792 | 89.151  |
| 2010          | 67196  | 49840.933 | 41737.184 | 8103.749 | 12.060 | 16.259 | 804.000 | 596.347 | 499.385 | 96.961  |
| 2011          | 66506  | 49072.841 | 40150.989 | 8921.852 | 13.415 | 18.181 | 787.880 | 581.354 | 475.659 | 105.695 |
| 2012          | 66155  | 48539.512 | 38739.555 | 9799.957 | 14.814 | 20.190 | 775.240 | 568.812 | 453.971 | 114.841 |
| 2013          | 65333  | 47675.741 | 37094.574 | 10581.17 | 16.196 | 22.194 | 756.876 | 552.318 | 429.737 | 122.582 |
| 2014          | 65033  | 47194.534 | 35798.099 | 11396.44 | 17.524 | 24.148 | 744.602 | 540.359 | 409.874 | 130.485 |
| 2015          | 64145  | 46305.842 | 34200.531 | 12105.31 | 18.872 | 26.142 | 826.215 | 596.439 | 440.517 | 155.922 |
| 2016          | 61618  | 44208.867 | 31690.376 | 12518.49 | 20.316 | 28.317 | 786.248 | 564.107 | 404.371 | 159.736 |
| 2017          | 59897  | 42702.624 | 29702.634 | 12999.99 | 21.704 | 30.443 | 757.297 | 539.903 | 375.540 | 164.363 |
| 2018          | 62468  | 44321.202 | 29714.738 | 14606.46 | 23.382 | 32.956 | 782.490 | 555.181 | 372.216 | 182.965 |
| 2019          | 63045  | 44493.088 | 28815.278 | 15677.81 | 24.868 | 35.237 | 782.035 | 551.912 | 357.437 | 194.474 |
| 2020          | 63466  | 44529.551 | 27852.542 | 16677.01 | 26.277 | 37.452 | 898.991 | 630.757 | 394.529 | 236.228 |
| 2021          | 57113  | 39852.556 | 23958.784 | 15893.77 | 27.829 | 39.881 | 803.323 | 560.546 | 336.992 | 223.554 |
| 2022          | 57440  | 39853.685 | 22965.786 | 16887.90 | 29.401 | 42.375 | 801.745 | 556.274 | 320.554 | 235.720 |
| 2023          | 57738  | 39847.050 | 21980.631 | 17866.42 | 30.944 | 44.837 | 799.366 | 551.670 | 304.315 | 247.355 |
| 2024          | 57942  | 39726.010 | 20989.883 | 18736.13 | 32.336 | 47.163 | 795.539 | 545.435 | 288.190 | 257.246 |
| 2025          | 57521  | 39207.348 | 19886.366 | 19320.98 | 33.589 | 49.279 | 919.257 | 626.579 | 317.807 | 308.772 |
| 2026          | 51428  | 34803.960 | 16841.985 | 17961.97 | 34.927 | 51.609 | 818.510 | 553.929 | 268.052 | 285.877 |
| 2027          | 51172  | 34484.595 | 15859.227 | 18625.37 | 36.398 | 54.011 | 810.740 | 546.357 | 251.266 | 295.091 |
| 2028          | 50870  | 34100.638 | 14849.719 | 19250.92 | 37.843 | 56.453 | 801.884 | 537.544 | 234.083 | 303.461 |
| 2029          | 50540  | 33669.838 | 13893.199 | 19776.64 | 39.131 | 58.737 | 792.146 | 527.732 | 217.758 | 309.974 |
| 2030          | 49109  | 32557.688 | 12861.081 | 19696.61 | 40.108 | 60.498 | 919.662 | 609.705 | 240.848 | 368.857 |
| 2031          | 43585  | 28646.393 | 10735.554 | 17910.84 | 41.094 | 62.524 | 814.096 | 535.065 | 200.521 | 334.543 |
| 2032          | 43163  | 28227.160 | 9993.007  | 18234.15 | 42.245 | 64.598 | 803.454 | 525.435 | 186.015 | 339.420 |
| 2033          | 42725  | 27786.623 | 9298.038  | 18488.58 | 43.273 | 66.538 | 791.996 | 515.079 | 172.357 | 342.722 |
| 2034          | 42256  | 27348.299 | 8653.437  | 18694.86 | 44.242 | 68.358 | 779.523 | 504.514 | 159.636 | 344.878 |
| 2035          | 39748  | 25570.077 | 7820.113  | 17749.96 | 44.656 | 69.417 | 906.933 | 583.430 | 178.431 | 404.999 |
| 2036          | 34030  | 21717.319 | 6135.387  | 15581.93 | 45.789 | 71.749 | 776.269 | 495.402 | 139.957 | 355.445 |
| 2037          | 33454  | 21256.024 | 5642.911  | 15613.11 | 46.671 | 73.453 | 762.289 | 484.347 | 128.581 | 355.766 |
| 2038          | 32883  | 20747.175 | 5168.957  | 15578.22 | 47.374 | 75.086 | 747.720 | 471.764 | 117.535 | 354.229 |
| 2039          | 32325  | 20327.688 | 4776.433  | 15551.25 | 48.109 | 76.503 | 732.644 | 460.724 | 108.257 | 352.467 |

## Results for PHIM for Run 1 (Main\_Analysis.RTF)

\*\*\*\*\*

### Main Results for E-Component for Run: 1, Simulation: 1, COD: IHD

| Variable Parameter          | Value                                  |
|-----------------------------|----------------------------------------|
| 1. Country                  | US (United States)                     |
| 2. Sex                      | M (Males)                              |
| 3. Year of start of process | 1990                                   |
| 4. Cause of Death           | IHD                                    |
| 5. Effective Dose NULL      | CC:1                                   |
| 6. Effective Dose Ecig      | CC:1 Ecig:0.05 Dual:0.525              |
| Note:                       | Death rates are per million population |

#### Results for Age Groups Combined and Years combined, Population unadjusted for deaths in Ecig scenario,

| Age Group:All |         | NULL        | Ecig       | %Drop    |        | Death  |         | NULL    | Ecig    | Drop    |
|---------------|---------|-------------|------------|----------|--------|--------|---------|---------|---------|---------|
| Year          | Number  | Attrib      | Attrib     | Drop     | %Drop  | Attrib | Rate    | Attrib  | Attrib  | Rates   |
|               | Deaths  | Deaths      | Deaths     | Deaths   | Deaths | Deaths |         | Rates   | Rates   | Rates   |
| All Comb      | 6360041 | 1098877.421 | 515692.894 | 583184.5 | 9.170  | 53.071 | 1841.09 | 318.101 | 149.282 | 168.819 |

#### Results for Age Groups Combined, Population unadjusted for deaths in Ecig scenario,

| Age Group:All |        | NULL      | Ecig      | %Drop    |        | Death  |         | NULL    | Ecig    | Drop    |
|---------------|--------|-----------|-----------|----------|--------|--------|---------|---------|---------|---------|
| Year          | Number | Attrib    | Attrib    | Drop     | %Drop  | Attrib | Rate    | Attrib  | Attrib  | Rates   |
|               | Deaths | Deaths    | Deaths    | Deaths   | Deaths | Deaths |         | Rates   | Rates   | Rates   |
| 1990          | 171484 | 38511.725 | 38511.725 | 0.000    | 0.000  | 0.000  | 2718.40 | 610.497 | 610.497 | 0.000   |
| 1991          | 168044 | 37309.838 | 36996.011 | 313.827  | 0.187  | 0.841  | 2620.21 | 581.750 | 576.857 | 4.893   |
| 1992          | 164548 | 36137.488 | 35292.956 | 844.532  | 0.513  | 2.337  | 2522.12 | 553.899 | 540.955 | 12.945  |
| 1993          | 164362 | 35599.588 | 34035.919 | 1563.668 | 0.951  | 4.392  | 2474.35 | 535.926 | 512.387 | 23.540  |
| 1994          | 159866 | 34336.757 | 31950.205 | 2386.552 | 1.493  | 6.950  | 2361.75 | 507.267 | 472.009 | 35.257  |
| 1995          | 158083 | 33455.759 | 30119.059 | 3336.700 | 2.111  | 9.973  | 2290.66 | 484.782 | 436.432 | 48.350  |
| 1996          | 154875 | 32193.824 | 27848.795 | 4345.029 | 2.806  | 13.496 | 2209.26 | 459.239 | 397.258 | 61.981  |
| 1997          | 149970 | 30665.509 | 25343.155 | 5322.354 | 3.549  | 17.356 | 2104.43 | 430.308 | 355.623 | 74.685  |
| 1998          | 145407 | 29188.430 | 22951.010 | 6237.421 | 4.290  | 21.369 | 2006.83 | 402.844 | 316.758 | 86.086  |
| 1999          | 165952 | 33375.386 | 24696.433 | 8678.953 | 5.230  | 26.004 | 2254.27 | 453.366 | 335.473 | 117.894 |
| 2000          | 160260 | 32024.754 | 22305.964 | 9718.790 | 6.064  | 30.348 | 2145.10 | 428.655 | 298.568 | 130.087 |
| 2001          | 154444 | 30682.393 | 19884.180 | 10798.21 | 6.992  | 35.194 | 2040.33 | 405.339 | 262.686 | 142.653 |
| 2002          | 151887 | 30218.370 | 18154.596 | 12063.77 | 7.943  | 39.922 | 1984.06 | 394.736 | 237.149 | 157.586 |
| 2003          | 146733 | 29175.202 | 16178.320 | 12996.88 | 8.858  | 44.548 | 1896.81 | 377.146 | 209.136 | 168.010 |
| 2004          | 138381 | 27488.687 | 14008.217 | 13480.47 | 9.742  | 49.040 | 1769.58 | 351.518 | 179.133 | 172.385 |
| 2005          | 135881 | 27017.439 | 12666.767 | 14350.67 | 10.561 | 53.116 | 1717.44 | 341.482 | 160.099 | 181.383 |
| 2006          | 131922 | 26231.435 | 11140.901 | 15090.53 | 11.439 | 57.528 | 1652.16 | 328.517 | 139.526 | 188.991 |
| 2007          | 126502 | 25103.049 | 9701.108  | 15401.94 | 12.175 | 61.355 | 1568.04 | 311.161 | 120.249 | 190.913 |
| 2008          | 125859 | 24621.740 | 8736.544  | 15885.20 | 12.621 | 64.517 | 1542.60 | 301.777 | 107.080 | 194.698 |
| 2009          | 122428 | 23741.177 | 7701.208  | 16039.97 | 13.102 | 67.562 | 1482.84 | 287.552 | 93.277  | 194.276 |
| 2010          | 120537 | 23189.160 | 6895.061  | 16294.10 | 13.518 | 70.266 | 1442.22 | 277.458 | 82.499  | 194.959 |
| 2011          | 120221 | 22786.927 | 6145.166  | 16641.76 | 13.843 | 73.032 | 1424.23 | 269.951 | 72.800  | 197.151 |
| 2012          | 120927 | 22485.295 | 5535.829  | 16949.47 | 14.016 | 75.380 | 1417.09 | 263.495 | 64.872  | 198.623 |
| 2013          | 122648 | 22251.884 | 5023.153  | 17228.73 | 14.047 | 77.426 | 1420.86 | 257.786 | 58.193  | 199.593 |
| 2014          | 123229 | 21894.593 | 4537.468  | 17357.12 | 14.085 | 79.276 | 1410.92 | 250.685 | 51.952  | 198.732 |
| 2015          | 123774 | 21471.109 | 4115.852  | 17355.26 | 14.022 | 80.831 | 1594.26 | 276.557 | 53.014  | 223.543 |
| 2016          | 126218 | 21411.568 | 3741.021  | 17670.55 | 14.000 | 82.528 | 1610.55 | 273.213 | 47.736  | 225.477 |
| 2017          | 128265 | 21169.399 | 3404.678  | 17764.72 | 13.850 | 83.917 | 1621.69 | 267.651 | 43.046  | 224.605 |
| 2018          | 121429 | 19830.576 | 2905.328  | 16925.25 | 13.938 | 85.349 | 1521.05 | 248.404 | 36.393  | 212.011 |
| 2019          | 121832 | 19431.014 | 2647.024  | 16783.99 | 13.776 | 86.377 | 1511.26 | 241.031 | 32.835  | 208.196 |
| 2020          | 120811 | 18532.612 | 2364.275  | 16168.34 | 13.383 | 87.243 | 1711.27 | 262.513 | 33.490  | 229.023 |
| 2021          | 119407 | 18234.128 | 2129.607  | 16104.52 | 13.487 | 88.321 | 1679.51 | 256.472 | 29.954  | 226.518 |
| 2022          | 119438 | 17812.559 | 1932.519  | 15880.04 | 13.296 | 89.151 | 1667.10 | 248.626 | 26.974  | 221.652 |
| 2023          | 119445 | 17361.668 | 1753.701  | 15607.97 | 13.067 | 89.899 | 1653.68 | 240.367 | 24.279  | 216.087 |
| 2024          | 119305 | 16929.676 | 1612.037  | 15317.64 | 12.839 | 90.478 | 1638.05 | 232.443 | 22.133  | 210.310 |
| 2025          | 115685 | 15501.666 | 1409.242  | 14092.42 | 12.182 | 90.909 | 1848.78 | 247.735 | 22.521  | 225.213 |
| 2026          | 115073 | 15523.814 | 1323.705  | 14200.11 | 12.340 | 91.473 | 1831.46 | 247.072 | 21.068  | 226.004 |
| 2027          | 113989 | 15073.070 | 1226.503  | 13846.57 | 12.147 | 91.863 | 1805.98 | 238.810 | 19.432  | 219.378 |
| 2028          | 112855 | 14636.710 | 1129.785  | 13506.92 | 11.968 | 92.281 | 1778.98 | 230.725 | 17.809  | 212.916 |
| 2029          | 111718 | 14180.166 | 1049.525  | 13130.64 | 11.753 | 92.599 | 1751.04 | 222.256 | 16.450  | 205.806 |
| 2030          | 104851 | 12111.772 | 874.312   | 11237.46 | 10.718 | 92.781 | 1963.54 | 226.816 | 16.373  | 210.443 |
| 2031          | 105289 | 12417.367 | 868.428   | 11548.94 | 10.969 | 93.006 | 1966.62 | 231.935 | 16.221  | 215.714 |
| 2032          | 103879 | 12054.064 | 816.882   | 11237.18 | 10.818 | 93.223 | 1933.67 | 224.381 | 15.206  | 209.175 |
| 2033          | 102485 | 11672.389 | 761.751   | 10910.64 | 10.646 | 93.474 | 1899.76 | 216.370 | 14.121  | 202.250 |
| 2034          | 101070 | 11365.762 | 724.458   | 10641.30 | 10.529 | 93.626 | 1864.51 | 209.673 | 13.365  | 196.308 |
| 2035          | 90820  | 8580.360  | 535.436   | 8044.924 | 8.858  | 93.760 | 2072.23 | 195.777 | 12.217  | 183.560 |
| 2036          | 92117  | 8948.841  | 542.755   | 8406.086 | 9.125  | 93.935 | 2101.31 | 204.135 | 12.381  | 191.754 |
| 2037          | 90327  | 8624.570  | 517.892   | 8106.678 | 8.975  | 93.995 | 2058.21 | 196.522 | 11.801  | 184.721 |
| 2038          | 88590  | 8315.017  | 486.985   | 7828.032 | 8.836  | 94.143 | 2014.42 | 189.073 | 11.073  | 177.999 |
| 2039          | 86921  | 8001.132  | 459.442   | 7541.690 | 8.676  | 94.258 | 1970.05 | 181.344 | 10.413  | 170.931 |



## Results for PHIM for Run 1 (Main\_Analysis.RTF)

\*\*\*\*\*

### Main Results for E-Component for Run: 1, Simulation: 1, COD: STROKE

| Variable Parameter          | Value                                  |
|-----------------------------|----------------------------------------|
| 1. Country                  | US (United States)                     |
| 2. Sex                      | M (Males)                              |
| 3. Year of start of process | 1990                                   |
| 4. Cause of Death           | STROKE                                 |
| 5. Effective Dose NULL      | CC:1                                   |
| 6. Effective Dose Ecig      | CC:1 Ecig:0.05 Dual:0.525              |
| Note:                       | Death rates are per million population |

#### Results for Age Groups Combined and Years combined, Population unadjusted for deaths in Ecig scenario,

| Age Group:All | NULL    | Ecig       | %Drop     |          |        |        | NULL    | Ecig   | Drop   |        |
|---------------|---------|------------|-----------|----------|--------|--------|---------|--------|--------|--------|
| Year          | Number  | Attrib     | Attrib    | Drop     | %Drop  | Attrib | Death   | Attrib | Attrib | Drop   |
|               | Deaths  | Deaths     | Deaths    | Deaths   | Deaths | Deaths | Rate    | Rates  | Rates  | Rates  |
| All Comb      | 1489699 | 149918.462 | 69563.177 | 80355.29 | 5.394  | 53.599 | 431.236 | 43.398 | 20.137 | 23.261 |

#### Results for Age Groups Combined, Population unadjusted for deaths in Ecig scenario,

| Age Group:All | NULL   | Ecig     | %Drop    |          |        |        | NULL    | Ecig   | Drop   |        |
|---------------|--------|----------|----------|----------|--------|--------|---------|--------|--------|--------|
| Year          | Number | Attrib   | Attrib   | Drop     | %Drop  | Attrib | Death   | Attrib | Attrib | Drop   |
|               | Deaths | Deaths   | Deaths   | Deaths   | Deaths | Deaths | Rate    | Rates  | Rates  | Rates  |
| 1990          | 32862  | 4613.166 | 4613.166 | 0.000    | 0.000  | 0.000  | 520.936 | 73.129 | 73.129 | 0.000  |
| 1991          | 32619  | 4555.566 | 4515.509 | 40.057   | 0.123  | 0.879  | 508.609 | 71.032 | 70.408 | 0.625  |
| 1992          | 32100  | 4453.572 | 4348.504 | 105.068  | 0.327  | 2.359  | 492.014 | 68.262 | 66.652 | 1.610  |
| 1993          | 32896  | 4462.473 | 4263.946 | 198.527  | 0.603  | 4.449  | 495.226 | 67.179 | 64.191 | 2.989  |
| 1994          | 33323  | 4499.513 | 4186.127 | 313.387  | 0.940  | 6.965  | 492.290 | 66.473 | 61.843 | 4.630  |
| 1995          | 33569  | 4472.774 | 4028.406 | 444.368  | 1.324  | 9.935  | 486.422 | 64.812 | 58.373 | 6.439  |
| 1996          | 33870  | 4406.878 | 3817.675 | 589.204  | 1.740  | 13.370 | 483.150 | 62.863 | 54.458 | 8.405  |
| 1997          | 33516  | 4288.158 | 3551.996 | 736.162  | 2.196  | 17.167 | 470.307 | 60.173 | 49.843 | 10.330 |
| 1998          | 32795  | 4120.148 | 3249.742 | 870.406  | 2.654  | 21.126 | 452.620 | 56.864 | 44.851 | 12.013 |
| 1999          | 33375  | 3982.443 | 2978.317 | 1004.125 | 3.009  | 25.214 | 453.361 | 54.097 | 40.457 | 13.640 |
| 2000          | 33459  | 4021.411 | 2841.047 | 1180.365 | 3.528  | 29.352 | 447.853 | 53.827 | 38.028 | 15.799 |
| 2001          | 32275  | 3848.092 | 2549.160 | 1298.932 | 4.025  | 33.755 | 426.379 | 50.836 | 33.676 | 17.160 |
| 2002          | 31586  | 3783.081 | 2345.597 | 1437.484 | 4.551  | 37.998 | 412.601 | 49.418 | 30.640 | 18.778 |
| 2003          | 30985  | 3754.415 | 2163.500 | 1590.915 | 5.134  | 42.375 | 400.541 | 48.533 | 27.967 | 20.566 |
| 2004          | 29884  | 3666.274 | 1959.474 | 1706.801 | 5.711  | 46.554 | 382.149 | 46.883 | 25.057 | 21.826 |
| 2005          | 28708  | 3589.688 | 1772.555 | 1817.134 | 6.330  | 50.621 | 362.850 | 45.371 | 22.404 | 22.967 |
| 2006          | 28188  | 3596.985 | 1628.628 | 1968.356 | 6.983  | 54.722 | 353.021 | 45.048 | 20.397 | 24.651 |
| 2007          | 28026  | 3560.798 | 1480.452 | 2080.346 | 7.423  | 58.424 | 347.392 | 44.137 | 18.351 | 25.787 |
| 2008          | 27128  | 3417.001 | 1304.470 | 2112.532 | 7.787  | 61.824 | 332.495 | 41.881 | 15.988 | 25.892 |
| 2009          | 27068  | 3394.390 | 1189.173 | 2205.216 | 8.147  | 64.967 | 327.847 | 41.113 | 14.403 | 26.709 |
| 2010          | 26911  | 3340.137 | 1078.162 | 2261.975 | 8.405  | 67.721 | 321.990 | 39.965 | 12.900 | 27.065 |
| 2011          | 26959  | 3285.435 | 973.719  | 2311.716 | 8.575  | 70.363 | 319.377 | 38.922 | 11.535 | 27.386 |
| 2012          | 27057  | 3259.209 | 880.447  | 2378.763 | 8.792  | 72.986 | 317.068 | 38.193 | 10.318 | 27.876 |
| 2013          | 27904  | 3274.703 | 810.288  | 2464.414 | 8.832  | 75.256 | 323.265 | 37.937 | 9.387  | 28.550 |
| 2014          | 28792  | 3298.083 | 745.491  | 2552.592 | 8.866  | 77.396 | 329.657 | 37.762 | 8.536  | 29.226 |
| 2015          | 29560  | 3244.406 | 677.792  | 2566.614 | 8.683  | 79.109 | 380.745 | 41.789 | 8.730  | 33.059 |
| 2016          | 30513  | 3314.836 | 634.348  | 2680.489 | 8.785  | 80.863 | 389.347 | 42.297 | 8.094  | 34.203 |
| 2017          | 31416  | 3333.314 | 585.609  | 2747.705 | 8.746  | 82.432 | 397.202 | 42.144 | 7.404  | 34.740 |
| 2018          | 29348  | 2925.242 | 476.835  | 2448.407 | 8.343  | 83.699 | 367.626 | 36.642 | 5.973  | 30.669 |
| 2019          | 29598  | 2864.628 | 433.082  | 2431.546 | 8.215  | 84.882 | 367.149 | 35.534 | 5.372  | 30.162 |
| 2020          | 29592  | 2730.366 | 384.634  | 2345.732 | 7.927  | 85.913 | 419.174 | 38.675 | 5.448  | 33.227 |
| 2021          | 30097  | 2647.911 | 346.581  | 2301.329 | 7.646  | 86.911 | 423.328 | 37.244 | 4.875  | 32.369 |
| 2022          | 30304  | 2586.165 | 313.384  | 2272.780 | 7.500  | 87.882 | 422.974 | 36.097 | 4.374  | 31.723 |
| 2023          | 30505  | 2517.960 | 283.847  | 2234.113 | 7.324  | 88.727 | 422.337 | 34.860 | 3.930  | 30.931 |
| 2024          | 30661  | 2454.161 | 259.791  | 2194.370 | 7.157  | 89.414 | 420.968 | 33.695 | 3.567  | 30.129 |
| 2025          | 30254  | 2275.364 | 227.321  | 2048.043 | 6.770  | 90.009 | 483.488 | 36.363 | 3.633  | 32.730 |
| 2026          | 30685  | 2183.166 | 205.664  | 1977.502 | 6.444  | 90.580 | 488.380 | 34.747 | 3.273  | 31.473 |
| 2027          | 30561  | 2112.345 | 188.826  | 1923.519 | 6.294  | 91.061 | 484.196 | 33.467 | 2.992  | 30.475 |
| 2028          | 30412  | 2046.677 | 173.460  | 1873.217 | 6.160  | 91.525 | 479.392 | 32.263 | 2.734  | 29.528 |
| 2029          | 30254  | 1977.671 | 159.798  | 1817.874 | 6.009  | 91.920 | 474.195 | 30.997 | 2.505  | 28.493 |
| 2030          | 29330  | 1744.457 | 135.628  | 1608.829 | 5.485  | 92.225 | 549.260 | 32.668 | 2.540  | 30.128 |
| 2031          | 28976  | 1653.738 | 123.967  | 1529.770 | 5.279  | 92.504 | 541.223 | 30.889 | 2.315  | 28.573 |
| 2032          | 28724  | 1603.120 | 114.929  | 1488.191 | 5.181  | 92.831 | 534.690 | 29.841 | 2.139  | 27.702 |
| 2033          | 28464  | 1548.245 | 106.814  | 1441.431 | 5.064  | 93.101 | 527.627 | 28.700 | 1.980  | 26.720 |
| 2034          | 28178  | 1511.985 | 101.001  | 1410.983 | 5.007  | 93.320 | 519.826 | 27.893 | 1.863  | 26.029 |
| 2035          | 26737  | 1239.866 | 80.697   | 1159.168 | 4.335  | 93.491 | 610.065 | 28.290 | 1.841  | 26.449 |
| 2036          | 25591  | 1182.522 | 74.571   | 1107.951 | 4.329  | 93.694 | 583.762 | 26.975 | 1.701  | 25.274 |
| 2037          | 25143  | 1134.483 | 70.737   | 1063.746 | 4.231  | 93.765 | 572.916 | 25.851 | 1.612  | 24.239 |
| 2038          | 24693  | 1093.537 | 66.302   | 1027.235 | 4.160  | 93.937 | 561.491 | 24.866 | 1.508  | 23.358 |
| 2039          | 24247  | 1047.905 | 62.007   | 985.898  | 4.066  | 94.083 | 549.553 | 23.751 | 1.405  | 22.345 |

## Results for PHIM for Run 1 (Main\_Analysis.RTF)

\*\*\*\*\*

### Main Results for E-Component for Run: 1, Simulation: 1, COD: COPD

| Variable Parameter          | Value                                  |
|-----------------------------|----------------------------------------|
| 1. Country                  | US (United States)                     |
| 2. Sex                      | M (Males)                              |
| 3. Year of start of process | 1990                                   |
| 4. Cause of Death           | COPD                                   |
| 5. Effective Dose NULL      | CC:1                                   |
| 6. Effective Dose Ecig      | CC:1 Ecig:0.05 Dual:0.525              |
| Note:                       | Death rates are per million population |

#### Results for Age Groups Combined and Years combined, Population unadjusted for deaths in Ecig scenario,

| Age Group:All | NULL    |             | Ecig       |          | %Drop  |        | NULL    |         | Ecig    |        |
|---------------|---------|-------------|------------|----------|--------|--------|---------|---------|---------|--------|
| Year          | Number  | Attrib      | Attrib     | Drop     | %Drop  | Attrib | Death   | Attrib  | Attrib  | Drop   |
|               | Deaths  | Deaths      | Deaths     | Deaths   | Deaths | Deaths | Rate    | Rates   | Rates   | Rates  |
| All Comb      | 2233143 | 1015606.587 | 676455.765 | 339150.8 | 15.187 | 33.394 | 646.447 | 293.996 | 195.819 | 98.177 |

#### Results for Age Groups Combined, Population unadjusted for deaths in Ecig scenario,

| Age Group:All | NULL   |           | Ecig      |          | %Drop  |        | NULL    |         | Ecig    |         |
|---------------|--------|-----------|-----------|----------|--------|--------|---------|---------|---------|---------|
| Year          | Number | Attrib    | Attrib    | Drop     | %Drop  | Attrib | Death   | Attrib  | Attrib  | Drop    |
|               | Deaths | Deaths    | Deaths    | Deaths   | Deaths | Deaths | Rate    | Rates   | Rates   | Rates   |
| 1990          | 33993  | 19262.437 | 19262.437 | 0.000    | 0.000  | 0.000  | 538.865 | 305.353 | 305.353 | 0.000   |
| 1991          | 34092  | 19215.636 | 19193.448 | 22.188   | 0.065  | 0.115  | 531.576 | 299.618 | 299.272 | 0.346   |
| 1992          | 33942  | 19056.189 | 18998.226 | 57.963   | 0.171  | 0.304  | 520.248 | 292.085 | 291.196 | 0.888   |
| 1993          | 35913  | 20095.670 | 19976.893 | 118.777  | 0.331  | 0.591  | 540.645 | 302.526 | 300.738 | 1.788   |
| 1994          | 35074  | 19524.095 | 19342.060 | 182.034  | 0.519  | 0.932  | 518.158 | 288.435 | 285.746 | 2.689   |
| 1995          | 34669  | 19116.002 | 18854.923 | 261.079  | 0.753  | 1.366  | 502.362 | 276.995 | 273.212 | 3.783   |
| 1996          | 34582  | 18975.021 | 18617.851 | 357.170  | 1.033  | 1.882  | 493.306 | 270.675 | 265.580 | 5.095   |
| 1997          | 35267  | 19169.025 | 18694.006 | 475.019  | 1.347  | 2.478  | 494.878 | 268.986 | 262.320 | 6.666   |
| 1998          | 35675  | 19228.937 | 18616.569 | 612.368  | 1.717  | 3.185  | 492.368 | 265.388 | 256.937 | 8.452   |
| 1999          | 38516  | 20589.820 | 19784.158 | 805.662  | 2.092  | 3.913  | 523.195 | 279.689 | 268.745 | 10.944  |
| 2000          | 36283  | 19196.417 | 18283.698 | 912.719  | 2.516  | 4.755  | 485.652 | 256.946 | 244.730 | 12.217  |
| 2001          | 36281  | 19012.731 | 17906.595 | 1106.137 | 3.049  | 5.818  | 479.301 | 251.174 | 236.561 | 14.613  |
| 2002          | 35983  | 18699.357 | 17404.135 | 1295.222 | 3.600  | 6.927  | 470.038 | 244.265 | 227.346 | 16.919  |
| 2003          | 36205  | 18663.550 | 17150.417 | 1513.133 | 4.179  | 8.107  | 468.019 | 241.262 | 221.702 | 19.560  |
| 2004          | 34611  | 17679.164 | 16001.001 | 1678.162 | 4.849  | 9.492  | 442.596 | 226.076 | 204.616 | 21.460  |
| 2005          | 36826  | 18692.832 | 16663.414 | 2029.418 | 5.511  | 10.857 | 465.456 | 236.265 | 210.614 | 25.650  |
| 2006          | 34350  | 17308.564 | 15152.789 | 2155.774 | 6.276  | 12.455 | 430.192 | 216.769 | 189.770 | 26.998  |
| 2007          | 35326  | 17683.181 | 15187.232 | 2495.949 | 7.065  | 14.115 | 437.879 | 219.189 | 188.251 | 30.938  |
| 2008          | 38248  | 19006.374 | 16025.995 | 2980.379 | 7.792  | 15.681 | 468.788 | 232.952 | 196.423 | 36.529  |
| 2009          | 36902  | 18205.573 | 14999.378 | 3206.194 | 8.688  | 17.611 | 446.956 | 220.505 | 181.672 | 38.833  |
| 2010          | 37234  | 18237.758 | 14721.018 | 3516.740 | 9.445  | 19.283 | 445.505 | 218.215 | 176.137 | 42.078  |
| 2011          | 38093  | 18487.916 | 14518.806 | 3969.111 | 10.420 | 21.469 | 451.279 | 219.022 | 172.001 | 47.021  |
| 2012          | 38504  | 18491.158 | 14140.540 | 4350.618 | 11.299 | 23.528 | 451.211 | 216.689 | 165.706 | 50.983  |
| 2013          | 40290  | 19143.452 | 14264.724 | 4878.728 | 12.109 | 25.485 | 466.755 | 221.775 | 165.255 | 56.520  |
| 2014          | 40339  | 18992.005 | 13745.357 | 5246.647 | 13.006 | 27.626 | 461.866 | 217.451 | 157.379 | 60.072  |
| 2015          | 42303  | 19728.885 | 13942.001 | 5786.884 | 13.680 | 29.332 | 544.880 | 254.116 | 179.579 | 74.538  |
| 2016          | 43104  | 19876.724 | 13633.716 | 6243.008 | 14.484 | 31.409 | 550.009 | 253.628 | 173.967 | 79.661  |
| 2017          | 44107  | 20119.790 | 13373.237 | 6746.553 | 15.296 | 33.532 | 557.659 | 254.381 | 169.082 | 85.299  |
| 2018          | 45469  | 20535.123 | 13218.713 | 7316.410 | 16.091 | 35.629 | 569.564 | 257.229 | 165.582 | 91.648  |
| 2019          | 46963  | 21009.029 | 13093.260 | 7915.769 | 16.855 | 37.678 | 582.552 | 260.605 | 162.415 | 98.191  |
| 2020          | 48419  | 21428.512 | 12934.893 | 8493.619 | 17.542 | 39.637 | 685.853 | 303.533 | 183.222 | 120.311 |
| 2021          | 48463  | 21266.697 | 12333.333 | 8933.364 | 18.433 | 42.006 | 681.652 | 299.127 | 173.474 | 125.652 |
| 2022          | 49915  | 21663.568 | 12081.152 | 9582.416 | 19.197 | 44.233 | 696.712 | 302.378 | 168.628 | 133.750 |
| 2023          | 51391  | 22084.131 | 11835.478 | 10248.65 | 19.943 | 46.407 | 711.491 | 305.748 | 163.858 | 141.889 |
| 2024          | 52811  | 22418.456 | 11568.951 | 10849.50 | 20.544 | 48.395 | 725.093 | 307.804 | 158.841 | 148.963 |
| 2025          | 53848  | 22614.834 | 11240.107 | 11374.73 | 21.124 | 50.298 | 860.553 | 361.411 | 179.630 | 181.781 |
| 2026          | 54342  | 22571.522 | 10739.126 | 11832.40 | 21.774 | 52.422 | 864.886 | 359.241 | 170.921 | 188.321 |
| 2027          | 55267  | 22774.416 | 10346.068 | 12428.35 | 22.488 | 54.572 | 875.619 | 360.827 | 163.918 | 196.909 |
| 2028          | 56149  | 22915.561 | 9907.294  | 13008.27 | 23.167 | 56.766 | 885.102 | 361.228 | 156.173 | 205.055 |
| 2029          | 57014  | 22992.027 | 9464.550  | 13527.48 | 23.727 | 58.836 | 893.616 | 360.371 | 148.345 | 212.026 |
| 2030          | 57238  | 22895.360 | 9015.833  | 13879.53 | 24.249 | 60.622 | 1071.90 | 428.760 | 168.839 | 259.921 |
| 2031          | 57592  | 22715.871 | 8541.375  | 14174.50 | 24.612 | 62.399 | 1075.71 | 424.293 | 159.538 | 264.755 |
| 2032          | 58251  | 22759.207 | 8113.322  | 14645.89 | 25.143 | 64.351 | 1084.31 | 423.652 | 151.026 | 272.626 |
| 2033          | 58885  | 22786.258 | 7710.147  | 15076.11 | 25.603 | 66.163 | 1091.54 | 422.387 | 142.923 | 279.465 |
| 2034          | 59460  | 22806.106 | 7305.399  | 15500.71 | 26.069 | 67.967 | 1096.89 | 420.721 | 134.768 | 285.953 |
| 2035          | 58516  | 22262.998 | 6847.275  | 15415.72 | 26.344 | 69.244 | 1335.15 | 507.973 | 156.234 | 351.739 |
| 2036          | 56446  | 21140.051 | 6041.723  | 15098.33 | 26.748 | 71.420 | 1287.60 | 482.234 | 137.820 | 344.414 |
| 2037          | 56568  | 21011.845 | 5619.454  | 15392.39 | 27.210 | 73.256 | 1288.98 | 478.783 | 128.047 | 350.736 |
| 2038          | 56668  | 20787.483 | 5201.632  | 15585.85 | 27.504 | 74.977 | 1288.55 | 472.681 | 118.278 | 354.402 |
| 2039          | 56758  | 20709.267 | 4842.053  | 15867.21 | 27.956 | 76.619 | 1286.40 | 469.372 | 109.744 | 359.628 |

## Results for PHIM for Run 1 (Main\_Analysis.RTF)

\*\*\*\*\*

### Main Results for E-Component for Run: 1, Simulation: 1, COD: Four Diseases Combined, Adjusted

| Variable Parameter          | Value                                  |
|-----------------------------|----------------------------------------|
| 1. Country                  | US (United States)                     |
| 2. Sex                      | M (Males)                              |
| 3. Year of start of process | 1990                                   |
| 4. Cause of Death           | Four Diseases Combined                 |
| 5. Effective Dose NULL      | CC:1                                   |
| 6. Effective Dose Ecig      | CC:1 Ecig:0.05 Dual:0.525              |
| Note:                       | Death rates are per million population |

#### Results for Age Groups Combined and Years combined, Population and Number deaths adjusted for Ecig scenario,

| Age Group:All | NULL     | Ecig        | %Drop       |         |        |        | NULL    | Ecig    | Drop    |         |
|---------------|----------|-------------|-------------|---------|--------|--------|---------|---------|---------|---------|
| Year          | Number   | Attrib      | Attrib      | Drop    | %Drop  | Attrib | Death   | Attrib  | Drop    |         |
|               | Deaths   | Deaths      | Deaths      | Deaths  | Deaths | Deaths | Rate    | Rates   | Rates   |         |
| All Comb      | 13291564 | 4509390.583 | 3002576.182 | 1506814 | 11.337 | 33.415 | 3815.59 | 1305.37 | 861.944 | 443.427 |

#### Results for Age Groups Combined, Population and Number deaths adjusted for Ecig scenario,

| Age Group:All | NULL   | Ecig       | %Drop      |          |        |        | NULL    | Ecig    | Drop    |         |
|---------------|--------|------------|------------|----------|--------|--------|---------|---------|---------|---------|
| Year          | Number | Attrib     | Attrib     | Drop     | %Drop  | Attrib | Death   | Attrib  | Drop    |         |
|               | Deaths | Deaths     | Deaths     | Deaths   | Deaths | Deaths | Rate    | Rates   | Rates   |         |
| 1990          | 317161 | 125773.065 | 125773.065 | 0.000    | 0.000  | 0.000  | 5027.71 | 1993.78 | 1993.78 | 0.000   |
| 1991          | 313217 | 123999.442 | 123575.252 | 424.190  | 0.135  | 0.342  | 4883.81 | 1933.45 | 1926.84 | 6.614   |
| 1992          | 308580 | 122014.015 | 120878.376 | 1135.639 | 0.368  | 0.931  | 4729.74 | 1870.18 | 1852.76 | 17.419  |
| 1993          | 311723 | 122810.618 | 120679.258 | 2131.360 | 0.684  | 1.735  | 4692.65 | 1848.83 | 1816.70 | 32.131  |
| 1994          | 305723 | 119925.592 | 116651.381 | 3274.211 | 1.071  | 2.730  | 4516.28 | 1771.69 | 1723.23 | 48.469  |
| 1995          | 303268 | 117896.496 | 113286.850 | 4609.647 | 1.520  | 3.910  | 4393.95 | 1708.35 | 1641.38 | 66.970  |
| 1996          | 299629 | 115698.645 | 109619.386 | 6079.259 | 2.029  | 5.254  | 4273.40 | 1650.42 | 1563.43 | 86.994  |
| 1997          | 294330 | 113359.847 | 105803.241 | 7556.606 | 2.567  | 6.666  | 4129.04 | 1590.70 | 1484.27 | 106.431 |
| 1998          | 289405 | 111444.212 | 102408.577 | 9035.635 | 3.122  | 8.108  | 3992.71 | 1538.10 | 1412.86 | 125.237 |
| 1999          | 311218 | 114877.722 | 102791.891 | 12085.83 | 3.883  | 10.521 | 4225.40 | 1560.48 | 1395.60 | 164.880 |
| 2000          | 304071 | 112379.704 | 98599.233  | 13780.47 | 4.532  | 12.262 | 4067.26 | 1504.22 | 1318.86 | 185.351 |
| 2001          | 296654 | 110024.943 | 94431.956  | 15592.99 | 5.256  | 14.172 | 3915.60 | 1453.52 | 1246.43 | 207.089 |
| 2002          | 292345 | 108289.173 | 90661.379  | 17627.79 | 6.030  | 16.278 | 3814.65 | 1414.56 | 1182.99 | 231.566 |
| 2003          | 286406 | 106539.023 | 87116.574  | 19422.45 | 6.781  | 18.230 | 3697.37 | 1377.22 | 1124.64 | 252.586 |
| 2004          | 274805 | 103037.251 | 82305.225  | 20732.03 | 7.544  | 20.121 | 3508.45 | 1317.61 | 1050.80 | 266.817 |
| 2005          | 273120 | 103044.562 | 80422.573  | 22621.99 | 8.283  | 21.954 | 3445.47 | 1302.41 | 1014.55 | 287.865 |
| 2006          | 264961 | 99672.555  | 75437.151  | 24235.40 | 9.147  | 24.315 | 3310.95 | 1248.28 | 942.662 | 305.617 |
| 2007          | 259376 | 97839.152  | 72255.840  | 25583.31 | 9.863  | 26.148 | 3206.84 | 1212.75 | 893.348 | 319.403 |
| 2008          | 260562 | 98075.852  | 70785.159  | 27290.69 | 10.474 | 27.826 | 3184.31 | 1202.07 | 865.058 | 337.012 |
| 2009          | 255134 | 95617.338  | 67136.888  | 28480.45 | 11.163 | 29.786 | 3080.04 | 1158.11 | 810.492 | 347.621 |
| 2010          | 253248 | 94607.988  | 64791.819  | 29816.17 | 11.774 | 31.515 | 3019.01 | 1131.98 | 772.394 | 359.591 |
| 2011          | 253310 | 93633.119  | 62175.287  | 31457.83 | 12.419 | 33.597 | 2988.73 | 1109.25 | 733.589 | 375.660 |
| 2012          | 254350 | 92775.175  | 59708.597  | 33066.58 | 13.000 | 35.642 | 2967.32 | 1087.19 | 696.576 | 390.613 |
| 2013          | 258091 | 92345.780  | 57632.987  | 34712.79 | 13.450 | 37.590 | 2975.36 | 1069.82 | 664.412 | 405.404 |
| 2014          | 259513 | 91379.215  | 55292.072  | 36087.14 | 13.906 | 39.492 | 2955.52 | 1046.26 | 629.706 | 416.551 |
| 2015          | 262135 | 90750.242  | 53429.343  | 37320.90 | 14.237 | 41.125 | 3354.48 | 1168.90 | 683.724 | 485.178 |
| 2016          | 264033 | 88811.996  | 50204.850  | 38607.15 | 14.622 | 43.471 | 3345.44 | 1133.24 | 636.123 | 497.121 |
| 2017          | 266514 | 87325.126  | 47586.473  | 39738.65 | 14.911 | 45.507 | 3344.20 | 1104.08 | 597.112 | 506.967 |
| 2018          | 261706 | 87612.144  | 46869.666  | 40742.48 | 15.568 | 46.503 | 3251.71 | 1097.46 | 582.358 | 515.098 |
| 2019          | 264699 | 87797.760  | 45569.732  | 42228.03 | 15.953 | 48.097 | 3255.11 | 1089.08 | 560.390 | 528.692 |
| 2020          | 265832 | 87221.042  | 44143.179  | 43077.86 | 16.205 | 49.389 | 3726.42 | 1235.48 | 618.798 | 616.681 |
| 2021          | 258761 | 82001.292  | 39348.726  | 42652.57 | 16.483 | 52.015 | 3599.51 | 1153.39 | 547.362 | 606.027 |
| 2022          | 261054 | 81915.977  | 37888.836  | 44027.14 | 16.865 | 53.747 | 3601.33 | 1143.37 | 522.691 | 620.684 |
| 2023          | 263324 | 81810.810  | 36464.063  | 45346.75 | 17.221 | 55.429 | 3600.87 | 1132.64 | 498.634 | 634.011 |
| 2024          | 265258 | 81528.303  | 35054.186  | 46474.12 | 17.520 | 57.004 | 3594.91 | 1119.38 | 475.071 | 644.307 |
| 2025          | 262127 | 79599.213  | 33395.942  | 46203.27 | 17.626 | 58.045 | 4125.11 | 1272.09 | 525.553 | 746.534 |
| 2026          | 256490 | 75082.462  | 29707.887  | 45374.57 | 17.691 | 60.433 | 4016.80 | 1194.99 | 465.244 | 729.745 |
| 2027          | 256211 | 74444.425  | 28219.439  | 46224.99 | 18.042 | 62.093 | 3991.28 | 1179.46 | 439.605 | 739.856 |
| 2028          | 255771 | 73699.585  | 26656.824  | 47042.76 | 18.393 | 63.830 | 3961.35 | 1161.76 | 412.858 | 748.902 |
| 2029          | 255278 | 72819.703  | 25159.430  | 47660.27 | 18.670 | 65.450 | 3928.29 | 1141.36 | 387.161 | 754.196 |
| 2030          | 246482 | 69309.277  | 23472.738  | 45836.54 | 18.596 | 66.133 | 4518.49 | 1297.95 | 430.300 | 867.649 |
| 2031          | 241507 | 65433.368  | 20812.640  | 44620.73 | 18.476 | 68.193 | 4411.95 | 1222.18 | 380.215 | 841.967 |
| 2032          | 240318 | 64643.552  | 19572.221  | 45071.33 | 18.755 | 69.723 | 4371.61 | 1203.31 | 356.037 | 847.271 |
| 2033          | 239095 | 63793.514  | 18401.504  | 45392.01 | 18.985 | 71.155 | 4327.66 | 1182.54 | 333.070 | 849.466 |
| 2034          | 237730 | 63032.151  | 17299.174  | 45732.98 | 19.237 | 72.555 | 4278.74 | 1162.80 | 311.356 | 851.445 |
| 2035          | 222602 | 57653.301  | 15780.529  | 41872.77 | 18.811 | 72.629 | 4939.41 | 1315.47 | 350.161 | 965.309 |
| 2036          | 214890 | 52988.733  | 13223.027  | 39765.71 | 18.505 | 75.046 | 4762.71 | 1208.75 | 293.068 | 915.677 |
| 2037          | 212343 | 52026.921  | 12262.379  | 39764.54 | 18.727 | 76.431 | 4697.04 | 1185.50 | 271.245 | 914.258 |
| 2038          | 209826 | 50943.211  | 11316.701  | 39626.51 | 18.885 | 77.786 | 4627.73 | 1158.38 | 249.591 | 908.792 |
| 2039          | 207379 | 50085.991  | 10516.675  | 39569.32 | 19.081 | 79.003 | 4555.10 | 1135.19 | 231.000 | 904.191 |

## Results for PHIM for Run 1 (Main\_Analysis.RTF)

\*\*\*\*\*

### Main Results for E-Component for Run: 1, Simulation: 1, COD: LUNG CANCER, Adjusted

| Variable Parameter          | Value                                  |
|-----------------------------|----------------------------------------|
| 1. Country                  | US (United States)                     |
| 2. Sex                      | M (Males)                              |
| 3. Year of start of process | 1990                                   |
| 4. Cause of Death           | LUNG CANCER                            |
| 5. Effective Dose NULL      | CC:1                                   |
| 6. Effective Dose Ecig      | CC:1 Ecig:0.05 Dual:0.525              |
| Note:                       | Death rates are per million population |

#### Results for Age Groups Combined and Years combined, Population and Number deaths adjusted for Ecig scenario,

| Age Group:All | NULL    | Ecig        | %Drop       |          |        |        | NULL    | Ecig    | Drop    |         |
|---------------|---------|-------------|-------------|----------|--------|--------|---------|---------|---------|---------|
| Year          | Number  | Attrib      | Attrib      | Drop     | %Drop  | Attrib | Death   | Attrib  | Attrib  | Drop    |
|               | Deaths  | Deaths      | Deaths      | Deaths   | Deaths | Deaths | Rate    | Rates   | Rates   | Rates   |
| All Comb      | 3095731 | 2244988.113 | 1733526.139 | 511462.0 | 16.522 | 22.782 | 888.686 | 649.875 | 497.640 | 152.235 |

#### Results for Age Groups Combined, Population and Number deaths adjusted for Ecig scenario,

| Age Group:All | NULL   | Ecig      | %Drop     |          |        |        | NULL    | Ecig    | Drop    |         |
|---------------|--------|-----------|-----------|----------|--------|--------|---------|---------|---------|---------|
| Year          | Number | Attrib    | Attrib    | Drop     | %Drop  | Attrib | Death   | Attrib  | Attrib  | Drop    |
|               | Deaths | Deaths    | Deaths    | Deaths   | Deaths | Deaths | Rate    | Rates   | Rates   | Rates   |
| 1990          | 78822  | 63385.736 | 63385.736 | 0.000    | 0.000  | 0.000  | 1249.50 | 1004.81 | 1004.81 | 0.000   |
| 1991          | 78462  | 62918.402 | 62870.284 | 48.118   | 0.061  | 0.076  | 1223.41 | 981.049 | 980.299 | 0.750   |
| 1992          | 77988  | 62366.766 | 62238.154 | 128.612  | 0.165  | 0.206  | 1195.35 | 955.930 | 953.952 | 1.978   |
| 1993          | 78545  | 62652.888 | 62400.588 | 252.300  | 0.321  | 0.403  | 1182.40 | 943.195 | 939.373 | 3.821   |
| 1994          | 77443  | 61565.227 | 61168.659 | 396.567  | 0.512  | 0.644  | 1144.02 | 909.520 | 903.610 | 5.910   |
| 1995          | 76915  | 60851.961 | 60276.730 | 575.231  | 0.748  | 0.945  | 1114.40 | 881.759 | 873.330 | 8.428   |
| 1996          | 76251  | 60122.922 | 59322.964 | 799.958  | 1.049  | 1.331  | 1087.51 | 857.643 | 846.083 | 11.560  |
| 1997          | 75501  | 59237.155 | 58196.647 | 1040.508 | 1.378  | 1.757  | 1059.17 | 831.234 | 816.417 | 14.817  |
| 1998          | 75421  | 58906.696 | 57567.804 | 1338.892 | 1.775  | 2.273  | 1040.53 | 813.001 | 794.223 | 18.778  |
| 1999          | 73212  | 56930.073 | 55298.971 | 1631.102 | 2.228  | 2.865  | 993.996 | 773.329 | 750.792 | 22.538  |
| 2000          | 73856  | 57137.121 | 55126.429 | 2010.692 | 2.722  | 3.519  | 987.900 | 764.787 | 737.372 | 27.415  |
| 2001          | 73387  | 56481.726 | 54041.555 | 2440.172 | 3.325  | 4.320  | 968.647 | 746.169 | 713.307 | 32.862  |
| 2002          | 72557  | 55588.365 | 52697.356 | 2891.010 | 3.984  | 5.201  | 946.763 | 726.138 | 687.619 | 38.519  |
| 2003          | 72083  | 54945.856 | 51555.378 | 3390.478 | 4.704  | 6.171  | 930.560 | 710.281 | 665.557 | 44.724  |
| 2004          | 71470  | 54203.126 | 50261.518 | 3941.607 | 5.515  | 7.272  | 912.463 | 693.135 | 641.692 | 51.443  |
| 2005          | 71164  | 53744.603 | 49233.335 | 4511.269 | 6.339  | 8.394  | 897.747 | 679.296 | 621.090 | 58.206  |
| 2006          | 69888  | 52535.572 | 47424.012 | 5111.560 | 7.314  | 9.730  | 873.316 | 657.945 | 592.610 | 65.335  |
| 2007          | 68827  | 51492.124 | 45787.823 | 5704.301 | 8.288  | 11.078 | 850.955 | 638.264 | 566.106 | 72.157  |
| 2008          | 68524  | 51030.736 | 44605.800 | 6424.936 | 9.376  | 12.590 | 837.430 | 625.460 | 545.123 | 80.337  |
| 2009          | 67845  | 50276.199 | 43129.834 | 7146.365 | 10.533 | 14.214 | 819.037 | 608.943 | 520.673 | 88.270  |
| 2010          | 67572  | 49840.933 | 41972.027 | 7868.906 | 11.645 | 15.788 | 805.542 | 596.347 | 500.355 | 95.991  |
| 2011          | 66923  | 49072.841 | 40403.735 | 8669.106 | 12.954 | 17.666 | 789.601 | 581.354 | 476.712 | 104.642 |
| 2012          | 66614  | 48539.512 | 39010.320 | 9529.191 | 14.305 | 19.632 | 777.141 | 568.812 | 455.104 | 113.708 |
| 2013          | 65835  | 47675.741 | 37381.462 | 10294.28 | 15.637 | 21.592 | 758.963 | 552.318 | 430.946 | 121.373 |
| 2014          | 65583  | 47194.534 | 36103.670 | 11090.86 | 16.911 | 23.500 | 746.911 | 540.359 | 411.174 | 129.185 |
| 2015          | 64740  | 46305.842 | 34520.386 | 11785.46 | 18.204 | 25.451 | 828.462 | 596.439 | 441.750 | 154.689 |
| 2016          | 62241  | 44208.867 | 32013.927 | 12194.94 | 19.593 | 27.585 | 788.628 | 564.107 | 405.634 | 158.473 |
| 2017          | 60555  | 42702.624 | 30032.201 | 12670.42 | 20.924 | 29.671 | 759.838 | 539.903 | 376.842 | 163.061 |
| 2018          | 63208  | 44321.202 | 30071.572 | 14249.63 | 22.544 | 32.151 | 785.367 | 555.181 | 373.641 | 181.540 |
| 2019          | 63850  | 44493.088 | 29188.786 | 15304.30 | 23.969 | 34.397 | 785.194 | 551.912 | 358.947 | 192.965 |
| 2020          | 64340  | 44529.551 | 28241.670 | 16287.88 | 25.315 | 36.578 | 901.914 | 630.757 | 395.891 | 234.867 |
| 2021          | 57957  | 39852.556 | 24318.688 | 15533.87 | 26.803 | 38.978 | 806.210 | 560.546 | 338.286 | 222.260 |
| 2022          | 58345  | 39853.685 | 23334.004 | 16519.68 | 28.314 | 41.451 | 804.886 | 556.274 | 321.901 | 234.372 |
| 2023          | 58705  | 39847.050 | 22355.999 | 17491.05 | 29.795 | 43.895 | 802.776 | 551.670 | 305.711 | 245.959 |
| 2024          | 58973  | 39726.010 | 21371.112 | 18354.90 | 31.124 | 46.204 | 799.232 | 545.435 | 289.632 | 255.804 |
| 2025          | 58614  | 39207.348 | 20271.094 | 18936.25 | 32.307 | 48.298 | 922.414 | 626.579 | 319.007 | 307.572 |
| 2026          | 52463  | 34803.960 | 17188.478 | 17615.48 | 33.577 | 50.613 | 821.595 | 553.929 | 269.182 | 284.747 |
| 2027          | 52257  | 34484.595 | 16203.865 | 18280.73 | 34.982 | 53.011 | 814.070 | 546.357 | 252.425 | 293.932 |
| 2028          | 52006  | 34100.638 | 15190.338 | 18910.30 | 36.361 | 55.454 | 805.470 | 537.544 | 235.266 | 302.278 |
| 2029          | 51727  | 33669.838 | 14228.762 | 19441.08 | 37.584 | 57.740 | 795.994 | 527.732 | 218.956 | 308.776 |
| 2030          | 50338  | 32557.688 | 13190.340 | 19367.35 | 38.474 | 59.486 | 922.797 | 609.705 | 241.804 | 367.901 |
| 2031          | 44723  | 28646.393 | 11023.526 | 17622.87 | 39.404 | 61.519 | 817.022 | 535.065 | 201.383 | 333.682 |
| 2032          | 44340  | 28227.160 | 10273.450 | 17953.71 | 40.491 | 63.604 | 806.596 | 525.435 | 186.884 | 338.551 |
| 2033          | 43942  | 27786.623 | 9570.950  | 18215.67 | 41.454 | 65.556 | 795.361 | 515.079 | 173.236 | 341.843 |
| 2034          | 43510  | 27348.299 | 8918.752  | 18429.55 | 42.357 | 67.388 | 783.111 | 504.514 | 160.522 | 343.992 |
| 2035          | 41007  | 25570.077 | 8073.938  | 17496.14 | 42.666 | 68.424 | 909.922 | 583.430 | 179.156 | 404.274 |
| 2036          | 35129  | 21717.319 | 6339.777  | 15377.54 | 43.774 | 70.808 | 778.589 | 495.402 | 140.512 | 354.890 |
| 2037          | 34572  | 21256.024 | 5837.586  | 15418.44 | 44.598 | 72.537 | 764.741 | 484.347 | 129.128 | 355.219 |
| 2038          | 34020  | 20747.175 | 5353.592  | 15393.58 | 45.249 | 74.196 | 750.307 | 471.764 | 118.074 | 353.690 |
| 2039          | 33479  | 20327.688 | 4952.557  | 15375.13 | 45.925 | 75.636 | 735.362 | 460.724 | 108.783 | 351.940 |

## Results for PHIM for Run 1 (Main\_Analysis.RTF)

\*\*\*\*\*

### Main Results for E-Component for Run: 1, Simulation: 1, COD: IHD, Adjusted

| Variable Parameter          | Value                                  |
|-----------------------------|----------------------------------------|
| 1. Country                  | US (United States)                     |
| 2. Sex                      | M (Males)                              |
| 3. Year of start of process | 1990                                   |
| 4. Cause of Death           | IHD                                    |
| 5. Effective Dose NULL      | CC:1                                   |
| 6. Effective Dose Ecig      | CC:1 Ecig:0.05 Dual:0.525              |
| Note:                       | Death rates are per million population |

### Results for Age Groups Combined and Years combined, Population and Number deaths adjusted for Ecig scenario,

| Age Group:All | NULL    | Ecig        | %Drop      |          |        |        | NULL    | Ecig    | Drop    |         |
|---------------|---------|-------------|------------|----------|--------|--------|---------|---------|---------|---------|
| Year          | Number  | Attrib      | Attrib     | Drop     | %Drop  | Attrib | Death   | Attrib  | Attrib  | Drop    |
|               | Deaths  | Deaths      | Deaths     | Deaths   | Deaths | Deaths | Rate    | Rates   | Rates   | Rates   |
| All Comb      | 6423083 | 1098877.421 | 516869.102 | 582008.3 | 9.061  | 52.964 | 1843.86 | 318.101 | 148.377 | 169.725 |

### Results for Age Groups Combined, Population and Number deaths adjusted for Ecig scenario,

| Age Group:All | NULL   | Ecig      | %Drop     |          |        |        | NULL    | Ecig    | Drop    |         |
|---------------|--------|-----------|-----------|----------|--------|--------|---------|---------|---------|---------|
| Year          | Number | Attrib    | Attrib    | Drop     | %Drop  | Attrib | Death   | Attrib  | Attrib  | Drop    |
|               | Deaths | Deaths    | Deaths    | Deaths   | Deaths | Deaths | Rate    | Rates   | Rates   | Rates   |
| 1990          | 171484 | 38511.725 | 38511.725 | 0.000    | 0.000  | 0.000  | 2718.40 | 610.497 | 610.497 | 0.000   |
| 1991          | 168044 | 37309.838 | 36996.011 | 313.827  | 0.187  | 0.841  | 2620.21 | 581.750 | 576.857 | 4.893   |
| 1992          | 164549 | 36137.488 | 35293.287 | 844.201  | 0.513  | 2.336  | 2522.12 | 553.899 | 540.956 | 12.943  |
| 1993          | 164367 | 35599.588 | 34037.071 | 1562.516 | 0.951  | 4.389  | 2474.37 | 535.926 | 512.391 | 23.535  |
| 1994          | 159878 | 34336.757 | 31952.773 | 2383.985 | 1.491  | 6.943  | 2361.79 | 507.267 | 472.020 | 35.246  |
| 1995          | 158105 | 33455.759 | 30123.602 | 3332.157 | 2.108  | 9.960  | 2290.74 | 484.782 | 436.451 | 48.330  |
| 1996          | 154911 | 32193.824 | 27855.739 | 4338.085 | 2.800  | 13.475 | 2209.39 | 459.239 | 397.287 | 61.952  |
| 1997          | 150023 | 30665.509 | 25352.796 | 5312.713 | 3.541  | 17.325 | 2104.61 | 430.308 | 355.664 | 74.644  |
| 1998          | 145480 | 29188.430 | 22963.494 | 6224.936 | 4.279  | 21.327 | 2007.09 | 402.844 | 316.811 | 86.033  |
| 1999          | 166067 | 33375.386 | 24714.776 | 8660.610 | 5.215  | 25.949 | 2254.68 | 453.366 | 335.551 | 117.815 |
| 2000          | 160410 | 32024.754 | 22328.379 | 9696.376 | 6.045  | 30.278 | 2145.65 | 428.655 | 298.665 | 129.991 |
| 2001          | 154631 | 30682.393 | 19910.004 | 10772.39 | 6.967  | 35.109 | 2041.01 | 405.339 | 262.797 | 142.542 |
| 2002          | 152119 | 30218.370 | 18184.244 | 12034.13 | 7.911  | 39.824 | 1984.91 | 394.736 | 237.276 | 157.459 |
| 2003          | 147009 | 29175.202 | 16210.799 | 12964.40 | 8.819  | 44.436 | 1897.82 | 377.146 | 209.274 | 167.872 |
| 2004          | 138696 | 27488.687 | 14042.122 | 13446.57 | 9.695  | 48.917 | 1770.73 | 351.518 | 179.277 | 172.241 |
| 2005          | 136248 | 27017.439 | 12703.002 | 14314.44 | 10.506 | 52.982 | 1718.80 | 341.482 | 160.251 | 181.231 |
| 2006          | 132339 | 26231.435 | 11177.999 | 15053.44 | 11.375 | 57.387 | 1653.71 | 328.517 | 139.680 | 188.837 |
| 2007          | 126966 | 25103.049 | 9738.335  | 15364.71 | 12.101 | 61.207 | 1569.76 | 311.161 | 120.402 | 190.760 |
| 2008          | 126388 | 24621.740 | 8774.835  | 15846.91 | 12.538 | 64.361 | 1544.57 | 301.777 | 107.236 | 194.541 |
| 2009          | 123013 | 23741.177 | 7739.451  | 16001.73 | 13.008 | 67.401 | 1485.04 | 287.552 | 93.432  | 194.120 |
| 2010          | 121184 | 23189.160 | 6933.395  | 16255.77 | 13.414 | 70.101 | 1444.65 | 277.458 | 82.654  | 194.804 |
| 2011          | 120941 | 22786.927 | 6183.129  | 16603.80 | 13.729 | 72.865 | 1426.95 | 269.951 | 72.953  | 196.998 |
| 2012          | 121732 | 22485.295 | 5573.671  | 16911.62 | 13.892 | 75.212 | 1420.16 | 263.495 | 65.024  | 198.471 |
| 2013          | 123551 | 22251.884 | 5060.925  | 17190.96 | 13.914 | 77.256 | 1424.34 | 257.786 | 58.344  | 199.442 |
| 2014          | 124228 | 21894.593 | 4574.847  | 17319.75 | 13.942 | 79.105 | 1414.79 | 250.685 | 52.102  | 198.583 |
| 2015          | 124877 | 21471.109 | 4152.948  | 17318.16 | 13.868 | 80.658 | 1598.02 | 276.557 | 53.144  | 223.413 |
| 2016          | 127443 | 21411.568 | 3777.592  | 17633.98 | 13.837 | 82.357 | 1614.78 | 273.213 | 47.864  | 225.348 |
| 2017          | 129619 | 21169.399 | 3440.644  | 17728.76 | 13.678 | 83.747 | 1626.45 | 267.651 | 43.173  | 224.478 |
| 2018          | 122801 | 19830.576 | 2937.931  | 16892.64 | 13.756 | 85.185 | 1525.81 | 248.404 | 36.504  | 211.900 |
| 2019          | 123315 | 19431.014 | 2678.804  | 16752.21 | 13.585 | 86.214 | 1516.46 | 241.031 | 32.942  | 208.088 |
| 2020          | 122409 | 18532.612 | 2395.078  | 16137.53 | 13.183 | 87.076 | 1715.92 | 262.513 | 33.574  | 228.939 |
| 2021          | 121084 | 18234.128 | 2158.705  | 16075.42 | 13.276 | 88.161 | 1684.35 | 256.472 | 30.029  | 226.443 |
| 2022          | 121226 | 17812.559 | 1960.341  | 15852.22 | 13.077 | 88.995 | 1672.35 | 248.626 | 27.044  | 221.582 |
| 2023          | 121347 | 17361.668 | 1780.294  | 15581.37 | 12.840 | 89.746 | 1659.38 | 240.367 | 24.345  | 216.022 |
| 2024          | 121322 | 16929.676 | 1637.739  | 15291.94 | 12.604 | 90.326 | 1644.21 | 232.443 | 22.195  | 210.248 |
| 2025          | 117804 | 15501.666 | 1433.770  | 14067.90 | 11.942 | 90.751 | 1853.89 | 247.735 | 22.563  | 225.171 |
| 2026          | 117276 | 15523.814 | 1347.314  | 14176.50 | 12.088 | 91.321 | 1836.61 | 247.072 | 21.100  | 225.972 |
| 2027          | 116287 | 15073.070 | 1249.289  | 13823.78 | 11.888 | 91.712 | 1811.53 | 238.810 | 19.462  | 219.349 |
| 2028          | 115248 | 14636.710 | 1151.707  | 13485.00 | 11.701 | 92.131 | 1784.95 | 230.725 | 17.837  | 212.888 |
| 2029          | 114207 | 14180.166 | 1070.677  | 13109.49 | 11.479 | 92.449 | 1757.45 | 222.256 | 16.476  | 205.780 |
| 2030          | 107387 | 12111.772 | 893.945   | 11217.83 | 10.446 | 92.619 | 1968.62 | 226.816 | 16.388  | 210.428 |
| 2031          | 107921 | 12417.367 | 888.138   | 11529.23 | 10.683 | 92.848 | 1971.56 | 231.935 | 16.225  | 215.710 |
| 2032          | 106590 | 12054.064 | 835.991   | 11218.07 | 10.525 | 93.065 | 1938.98 | 224.381 | 15.207  | 209.173 |
| 2033          | 105273 | 11672.389 | 780.250   | 10892.14 | 10.347 | 93.315 | 1905.45 | 216.370 | 14.123  | 202.248 |
| 2034          | 103931 | 11365.762 | 742.678   | 10623.08 | 10.221 | 93.466 | 1870.57 | 209.673 | 13.367  | 196.306 |
| 2035          | 93612  | 8580.360  | 550.937   | 8029.423 | 8.577  | 93.579 | 2077.21 | 195.777 | 12.225  | 183.552 |
| 2036          | 95007  | 8948.841  | 558.540   | 8390.301 | 8.831  | 93.759 | 2105.69 | 204.135 | 12.379  | 191.756 |
| 2037          | 93256  | 8624.570  | 533.388   | 8091.181 | 8.676  | 93.815 | 2062.83 | 196.522 | 11.799  | 184.724 |
| 2038          | 91556  | 8315.017  | 501.997   | 7813.019 | 8.534  | 93.963 | 2019.28 | 189.073 | 11.072  | 178.001 |
| 2039          | 89922  | 8001.132  | 473.991   | 7527.141 | 8.371  | 94.076 | 1975.16 | 181.344 | 10.411  | 170.933 |

## Results for PHIM for Run 1 (Main\_Analysis.RTF)

\*\*\*\*\*

### Main Results for E-Component for Run: 1, Simulation: 1, COD: STROKE, Adjusted

| Variable Parameter          | Value                                  |
|-----------------------------|----------------------------------------|
| 1. Country                  | US (United States)                     |
| 2. Sex                      | M (Males)                              |
| 3. Year of start of process | 1990                                   |
| 4. Cause of Death           | STROKE                                 |
| 5. Effective Dose NULL      | CC:1                                   |
| 6. Effective Dose Ecig      | CC:1 Ecig:0.05 Dual:0.525              |
| Note:                       | Death rates are per million population |

#### Results for Age Groups Combined and Years combined, Population and Number deaths adjusted for Ecig scenario,

| Age Group:All | NULL    | Ecig       | %Drop     |          |        |        | NULL    | Ecig   | Drop   |        |
|---------------|---------|------------|-----------|----------|--------|--------|---------|--------|--------|--------|
| Year          | Number  | Attrib     | Attrib    | Drop     | %Drop  | Attrib | Death   | Attrib | Attrib | Drop   |
|               | Deaths  | Deaths     | Deaths    | Deaths   | Deaths | Deaths | Rate    | Rates  | Rates  | Rates  |
| All Comb      | 1506815 | 149918.462 | 69737.075 | 80181.39 | 5.321  | 53.483 | 432.559 | 43.398 | 20.019 | 23.379 |

#### Results for Age Groups Combined, Population and Number deaths adjusted for Ecig scenario,

| Age Group:All | NULL   | Ecig     | %Drop    |          |        |        | NULL    | Ecig   | Drop   |        |
|---------------|--------|----------|----------|----------|--------|--------|---------|--------|--------|--------|
| Year          | Number | Attrib   | Attrib   | Drop     | %Drop  | Attrib | Death   | Attrib | Attrib | Drop   |
|               | Deaths | Deaths   | Deaths   | Deaths   | Deaths | Deaths | Rate    | Rates  | Rates  | Rates  |
| 1990          | 32862  | 4613.166 | 4613.166 | 0.000    | 0.000  | 0.000  | 520.936 | 73.129 | 73.129 | 0.000  |
| 1991          | 32619  | 4555.566 | 4515.509 | 40.057   | 0.123  | 0.879  | 508.609 | 71.032 | 70.408 | 0.625  |
| 1992          | 32100  | 4453.572 | 4348.544 | 105.028  | 0.327  | 2.358  | 492.015 | 68.262 | 66.652 | 1.610  |
| 1993          | 32897  | 4462.473 | 4264.090 | 198.384  | 0.603  | 4.446  | 495.229 | 67.179 | 64.191 | 2.988  |
| 1994          | 33325  | 4499.513 | 4186.460 | 313.053  | 0.939  | 6.957  | 492.297 | 66.473 | 61.844 | 4.628  |
| 1995          | 33574  | 4472.774 | 4029.008 | 443.766  | 1.322  | 9.921  | 486.436 | 64.812 | 58.375 | 6.436  |
| 1996          | 33877  | 4406.878 | 3818.620 | 588.258  | 1.736  | 13.349 | 483.172 | 62.863 | 54.462 | 8.401  |
| 1997          | 33527  | 4288.158 | 3553.336 | 734.822  | 2.192  | 17.136 | 470.341 | 60.173 | 49.848 | 10.324 |
| 1998          | 32811  | 4120.148 | 3251.495 | 868.653  | 2.647  | 21.083 | 452.668 | 56.864 | 44.859 | 12.006 |
| 1999          | 33397  | 3982.443 | 2980.498 | 1001.944 | 3.000  | 25.159 | 453.430 | 54.097 | 40.466 | 13.631 |
| 2000          | 33489  | 4021.411 | 2843.864 | 1177.548 | 3.516  | 29.282 | 447.949 | 53.827 | 38.040 | 15.788 |
| 2001          | 32312  | 3848.092 | 2552.413 | 1295.680 | 4.010  | 33.671 | 426.499 | 50.836 | 33.690 | 17.147 |
| 2002          | 31632  | 3783.081 | 2349.366 | 1433.715 | 4.532  | 37.898 | 412.754 | 49.418 | 30.656 | 18.762 |
| 2003          | 31041  | 3754.415 | 2167.726 | 1586.689 | 5.112  | 42.262 | 400.725 | 48.533 | 27.984 | 20.549 |
| 2004          | 29950  | 3666.274 | 1964.083 | 1702.192 | 5.683  | 46.428 | 382.370 | 46.883 | 25.076 | 21.808 |
| 2005          | 28783  | 3589.688 | 1777.469 | 1812.219 | 6.296  | 50.484 | 363.108 | 45.371 | 22.423 | 22.948 |
| 2006          | 28275  | 3596.985 | 1633.871 | 1963.113 | 6.943  | 54.577 | 353.323 | 45.048 | 20.417 | 24.631 |
| 2007          | 28126  | 3560.798 | 1485.921 | 2074.876 | 7.377  | 58.270 | 347.744 | 44.137 | 18.371 | 25.766 |
| 2008          | 27239  | 3417.001 | 1309.951 | 2107.051 | 7.735  | 61.664 | 332.889 | 41.881 | 16.009 | 25.872 |
| 2009          | 27195  | 3394.390 | 1194.810 | 2199.580 | 8.088  | 64.800 | 328.299 | 41.113 | 14.424 | 26.689 |
| 2010          | 27053  | 3340.137 | 1083.882 | 2256.255 | 8.340  | 67.550 | 322.502 | 39.965 | 12.921 | 27.044 |
| 2011          | 27118  | 3285.435 | 979.483  | 2305.952 | 8.503  | 70.187 | 319.963 | 38.922 | 11.557 | 27.365 |
| 2012          | 27235  | 3259.209 | 886.159  | 2373.051 | 8.713  | 72.811 | 317.728 | 38.193 | 10.338 | 27.855 |
| 2013          | 28108  | 3274.703 | 816.076  | 2458.627 | 8.747  | 75.079 | 324.034 | 37.937 | 9.408  | 28.529 |
| 2014          | 29023  | 3298.083 | 751.279  | 2546.804 | 8.775  | 77.221 | 330.534 | 37.762 | 8.556  | 29.206 |
| 2015          | 29822  | 3244.406 | 683.589  | 2560.817 | 8.587  | 78.930 | 381.630 | 41.789 | 8.748  | 33.042 |
| 2016          | 30808  | 3314.836 | 640.200  | 2674.637 | 8.682  | 80.687 | 390.350 | 42.297 | 8.112  | 34.186 |
| 2017          | 31746  | 3333.314 | 591.436  | 2741.878 | 8.637  | 82.257 | 398.346 | 42.144 | 7.421  | 34.723 |
| 2018          | 29685  | 2925.242 | 482.021  | 2443.221 | 8.230  | 83.522 | 368.842 | 36.642 | 5.989  | 30.653 |
| 2019          | 29965  | 2864.628 | 438.117  | 2426.511 | 8.098  | 84.706 | 368.493 | 35.534 | 5.388  | 30.146 |
| 2020          | 29991  | 2730.366 | 389.496  | 2340.870 | 7.805  | 85.735 | 420.408 | 38.675 | 5.460  | 33.215 |
| 2021          | 30533  | 2647.911 | 351.250  | 2296.661 | 7.522  | 86.735 | 424.730 | 37.244 | 4.886  | 32.358 |
| 2022          | 30772  | 2586.165 | 317.840  | 2268.325 | 7.371  | 87.710 | 424.511 | 36.097 | 4.385  | 31.713 |
| 2023          | 31008  | 2517.960 | 288.107  | 2229.854 | 7.191  | 88.558 | 424.018 | 34.860 | 3.940  | 30.921 |
| 2024          | 31197  | 2454.161 | 263.895  | 2190.266 | 7.021  | 89.247 | 422.802 | 33.695 | 3.576  | 30.119 |
| 2025          | 30823  | 2275.364 | 231.230  | 2044.134 | 6.632  | 89.838 | 485.065 | 36.363 | 3.639  | 32.724 |
| 2026          | 31298  | 2183.166 | 209.373  | 1973.793 | 6.306  | 90.410 | 490.151 | 34.747 | 3.279  | 31.468 |
| 2027          | 31205  | 2112.345 | 192.381  | 1919.964 | 6.153  | 90.893 | 486.121 | 33.467 | 2.997  | 30.470 |
| 2028          | 31087  | 2046.677 | 176.876  | 1869.801 | 6.015  | 91.358 | 481.478 | 32.263 | 2.739  | 29.523 |
| 2029          | 30962  | 1977.671 | 163.065  | 1814.607 | 5.861  | 91.755 | 476.450 | 30.997 | 2.509  | 28.488 |
| 2030          | 30063  | 1744.457 | 138.669  | 1605.788 | 5.341  | 92.051 | 551.120 | 32.668 | 2.542  | 30.126 |
| 2031          | 29736  | 1653.738 | 126.840  | 1526.898 | 5.135  | 92.330 | 543.231 | 30.889 | 2.317  | 28.572 |
| 2032          | 29513  | 1603.120 | 117.676  | 1485.445 | 5.033  | 92.660 | 536.862 | 29.841 | 2.141  | 27.701 |
| 2033          | 29280  | 1548.245 | 109.458  | 1438.786 | 4.914  | 92.930 | 529.967 | 28.700 | 1.981  | 26.719 |
| 2034          | 29021  | 1511.985 | 103.589  | 1408.396 | 4.853  | 93.149 | 522.336 | 27.893 | 1.864  | 26.028 |
| 2035          | 27588  | 1239.866 | 82.992   | 1156.874 | 4.193  | 93.306 | 612.170 | 28.290 | 1.842  | 26.448 |
| 2036          | 26436  | 1182.522 | 76.741   | 1105.781 | 4.183  | 93.510 | 585.916 | 26.975 | 1.701  | 25.274 |
| 2037          | 26003  | 1134.483 | 72.854   | 1061.629 | 4.083  | 93.578 | 575.193 | 25.851 | 1.612  | 24.239 |
| 2038          | 25568  | 1093.537 | 68.342   | 1025.195 | 4.010  | 93.750 | 563.894 | 24.866 | 1.507  | 23.358 |
| 2039          | 25134  | 1047.905 | 63.961   | 983.944  | 3.915  | 93.896 | 552.079 | 23.751 | 1.405  | 22.346 |

## Results for PHIM for Run 1 (Main\_Analysis.RTF)

\*\*\*\*\*

### Main Results for E-Component for Run: 1, Simulation: 1, COD: COPD, Adjusted

| Variable Parameter          | Value                                  |
|-----------------------------|----------------------------------------|
| 1. Country                  | US (United States)                     |
| 2. Sex                      | M (Males)                              |
| 3. Year of start of process | 1990                                   |
| 4. Cause of Death           | COPD                                   |
| 5. Effective Dose NULL      | CC:1                                   |
| 6. Effective Dose Ecig      | CC:1 Ecig:0.05 Dual:0.525              |
| Note:                       | Death rates are per million population |

### Results for Age Groups Combined and Years combined, Population and Number deaths adjusted for Ecig scenario,

| Age Group:All | NULL    | Ecig        | %Drop      |          |        |        | NULL    | Ecig    | Drop    |        |
|---------------|---------|-------------|------------|----------|--------|--------|---------|---------|---------|--------|
| Year          | Number  | Attrib      | Attrib     | Drop     | %Drop  | Attrib | Death   | Attrib  | Attrib  | Drop   |
|               | Deaths  | Deaths      | Deaths     | Deaths   | Deaths | Deaths | Rate    | Rates   | Rates   | Rates  |
| All Comb      | 2265935 | 1015606.587 | 682443.867 | 333162.7 | 14.703 | 32.804 | 650.478 | 293.996 | 195.908 | 98.088 |

### Results for Age Groups Combined, Population and Number deaths adjusted for Ecig scenario,

| Age Group:All | NULL   | Ecig      | %Drop     |          |        |        | NULL    | Ecig    | Drop    |         |
|---------------|--------|-----------|-----------|----------|--------|--------|---------|---------|---------|---------|
| Year          | Number | Attrib    | Attrib    | Drop     | %Drop  | Attrib | Death   | Attrib  | Attrib  | Drop    |
|               | Deaths | Deaths    | Deaths    | Deaths   | Deaths | Deaths | Rate    | Rates   | Rates   | Rates   |
| 1990          | 33993  | 19262.437 | 19262.437 | 0.000    | 0.000  | 0.000  | 538.865 | 305.353 | 305.353 | 0.000   |
| 1991          | 34092  | 19215.636 | 19193.448 | 22.188   | 0.065  | 0.115  | 531.576 | 299.618 | 299.272 | 0.346   |
| 1992          | 33942  | 19056.189 | 18998.391 | 57.798   | 0.170  | 0.303  | 520.249 | 292.085 | 291.197 | 0.888   |
| 1993          | 35914  | 20095.670 | 19977.509 | 118.160  | 0.329  | 0.588  | 540.648 | 302.526 | 300.740 | 1.786   |
| 1994          | 35077  | 19524.095 | 19343.489 | 180.605  | 0.515  | 0.925  | 518.166 | 288.435 | 285.750 | 2.684   |
| 1995          | 34674  | 19116.002 | 18857.509 | 258.493  | 0.746  | 1.352  | 502.376 | 276.995 | 273.220 | 3.775   |
| 1996          | 34590  | 18975.021 | 18622.063 | 352.959  | 1.020  | 1.860  | 493.330 | 270.675 | 265.594 | 5.082   |
| 1997          | 35279  | 19169.025 | 18700.462 | 468.563  | 1.328  | 2.444  | 494.916 | 268.986 | 262.341 | 6.645   |
| 1998          | 35693  | 19228.937 | 18625.784 | 603.154  | 1.690  | 3.137  | 492.425 | 265.388 | 256.967 | 8.421   |
| 1999          | 38542  | 20589.820 | 19797.645 | 792.175  | 2.055  | 3.847  | 523.284 | 279.689 | 268.792 | 10.897  |
| 2000          | 36316  | 19196.417 | 18300.562 | 895.856  | 2.467  | 4.667  | 485.767 | 256.946 | 244.789 | 12.158  |
| 2001          | 36324  | 19012.731 | 17927.985 | 1084.746 | 2.986  | 5.705  | 479.449 | 251.174 | 236.636 | 14.538  |
| 2002          | 36037  | 18699.357 | 17430.413 | 1268.944 | 3.521  | 6.786  | 470.226 | 244.265 | 227.440 | 16.826  |
| 2003          | 36273  | 18663.550 | 17182.671 | 1480.879 | 4.083  | 7.935  | 468.262 | 241.262 | 221.821 | 19.442  |
| 2004          | 34689  | 17679.164 | 16037.502 | 1641.662 | 4.732  | 9.286  | 442.880 | 226.076 | 204.752 | 21.325  |
| 2005          | 36925  | 18692.832 | 16708.767 | 1984.065 | 5.373  | 10.614 | 465.823 | 236.265 | 210.785 | 25.480  |
| 2006          | 34459  | 17308.564 | 15201.269 | 2107.294 | 6.115  | 12.175 | 430.602 | 216.769 | 189.955 | 26.814  |
| 2007          | 35457  | 17683.181 | 15243.761 | 2439.421 | 6.880  | 13.795 | 438.377 | 219.189 | 188.469 | 30.720  |
| 2008          | 38411  | 19006.374 | 16094.573 | 2911.801 | 7.581  | 15.320 | 469.416 | 232.952 | 196.690 | 36.262  |
| 2009          | 37082  | 18205.573 | 15072.793 | 3132.780 | 8.448  | 17.208 | 447.660 | 220.505 | 181.962 | 38.543  |
| 2010          | 37439  | 18237.758 | 14802.515 | 3435.243 | 9.176  | 18.836 | 446.317 | 218.215 | 176.463 | 41.752  |
| 2011          | 38328  | 18487.916 | 14608.940 | 3878.976 | 10.120 | 20.981 | 452.222 | 219.022 | 172.367 | 46.655  |
| 2012          | 38769  | 18491.158 | 14238.447 | 4252.711 | 10.969 | 22.999 | 452.285 | 216.689 | 166.109 | 50.580  |
| 2013          | 40598  | 19143.452 | 14374.525 | 4768.928 | 11.747 | 24.912 | 468.022 | 221.775 | 165.714 | 56.061  |
| 2014          | 40679  | 18992.005 | 13862.276 | 5129.729 | 12.610 | 27.010 | 463.279 | 217.451 | 157.874 | 59.578  |
| 2015          | 42696  | 19728.885 | 14072.420 | 5656.465 | 13.248 | 28.671 | 546.368 | 254.116 | 180.082 | 74.035  |
| 2016          | 43541  | 19876.724 | 13773.132 | 6103.592 | 14.018 | 30.707 | 551.685 | 253.628 | 174.513 | 79.115  |
| 2017          | 44594  | 20119.790 | 13522.192 | 6597.598 | 14.795 | 32.792 | 559.561 | 254.381 | 169.676 | 84.705  |
| 2018          | 46012  | 20535.123 | 13378.141 | 7156.982 | 15.555 | 34.852 | 571.699 | 257.229 | 166.224 | 91.005  |
| 2019          | 47568  | 21009.029 | 13264.025 | 7745.004 | 16.282 | 36.865 | 584.967 | 260.605 | 163.113 | 97.492  |
| 2020          | 49093  | 21428.512 | 13116.934 | 8311.578 | 16.930 | 38.787 | 688.181 | 303.533 | 183.873 | 119.660 |
| 2021          | 49187  | 21266.697 | 12520.083 | 8746.614 | 17.782 | 41.128 | 684.220 | 299.127 | 174.161 | 124.966 |
| 2022          | 50712  | 21663.568 | 12276.650 | 9386.918 | 18.510 | 43.330 | 699.584 | 302.378 | 169.361 | 133.017 |
| 2023          | 52264  | 22084.131 | 12039.664 | 10044.47 | 19.219 | 45.483 | 714.697 | 305.748 | 164.638 | 141.109 |
| 2024          | 53766  | 22418.456 | 11781.441 | 10637.01 | 19.784 | 47.448 | 728.661 | 307.804 | 159.668 | 148.136 |
| 2025          | 54886  | 22614.834 | 11459.849 | 11154.99 | 20.324 | 49.326 | 863.742 | 361.411 | 180.344 | 181.067 |
| 2026          | 55454  | 22571.522 | 10962.722 | 11608.80 | 20.934 | 51.431 | 868.444 | 359.241 | 171.683 | 187.558 |
| 2027          | 56461  | 22774.416 | 10573.905 | 12200.51 | 21.609 | 53.571 | 879.556 | 360.827 | 164.721 | 196.106 |
| 2028          | 57429  | 22915.561 | 10137.904 | 12777.66 | 22.250 | 55.760 | 889.447 | 361.228 | 157.015 | 204.214 |
| 2029          | 58382  | 22992.027 | 9696.925  | 13295.10 | 22.773 | 57.825 | 898.397 | 360.371 | 149.219 | 211.152 |
| 2030          | 58693  | 22895.360 | 9249.784  | 13645.58 | 23.249 | 59.600 | 1075.96 | 428.760 | 169.566 | 259.193 |
| 2031          | 59126  | 22715.871 | 8774.137  | 13941.73 | 23.580 | 61.374 | 1080.14 | 424.293 | 160.290 | 264.003 |
| 2032          | 59875  | 22759.207 | 8345.104  | 14414.10 | 24.074 | 63.333 | 1089.18 | 423.652 | 151.805 | 271.846 |
| 2033          | 60600  | 22786.258 | 7940.846  | 14845.41 | 24.497 | 65.151 | 1096.88 | 422.387 | 143.730 | 278.657 |
| 2034          | 61268  | 22806.106 | 7534.156  | 15271.95 | 24.926 | 66.964 | 1102.72 | 420.721 | 135.602 | 285.119 |
| 2035          | 60394  | 22262.998 | 7072.662  | 15190.34 | 25.152 | 68.231 | 1340.11 | 507.973 | 156.938 | 351.035 |
| 2036          | 58318  | 21140.051 | 6247.969  | 14892.08 | 25.536 | 70.445 | 1292.52 | 482.234 | 138.477 | 343.757 |
| 2037          | 58511  | 21011.845 | 5818.550  | 15193.29 | 25.966 | 72.308 | 1294.28 | 478.783 | 128.707 | 350.076 |
| 2038          | 58682  | 20787.483 | 5392.771  | 15394.71 | 26.234 | 74.058 | 1294.25 | 472.681 | 118.938 | 353.743 |
| 2039          | 58844  | 20709.267 | 5026.167  | 15683.10 | 26.652 | 75.730 | 1292.50 | 469.372 | 110.400 | 358.972 |

## Results for PHIM for Run 2 (Main\_Analysis.RTF)

---

### Control File Details for Run: 2

| Variable Parameter                                       | Value              |
|----------------------------------------------------------|--------------------|
| 1. Name for Reference Scenario                           | NULL               |
| 2. Name for Test Scenario                                | Ecig               |
| 3. Name for Product 1                                    | CC                 |
| 4. Name for Product 2                                    | Ecig               |
| 5. Name for Product 3                                    | -                  |
| 6. Name for Product 4                                    | Dual               |
| 7. Country                                               | US (United States) |
| 8. Sex                                                   | F (Females)        |
| 9. Year of start of process                              | 1990               |
| 10. Number of months of follow-up                        | 600                |
| 11. Follow-up interval length (in months)                | 12                 |
| 12. Lower age for risk estimation                        | 10                 |
| 13. Upper age for risk estimation                        | 79                 |
| 14. The effective dose for Product 1 (F1) - Ref          | 1                  |
| 15. The effective dose for Product 2 (F2) - Ref          | -                  |
| 16. The effective dose for Product 3 (F3) - Ref          | -                  |
| 17. The effective dose for Product 4 (F4) - Ref          | -                  |
| 18. The effective dose for Product 1 (F1) - Test         | 1                  |
| 19. The effective dose for Product 2 (F2) - Test         | 0.05               |
| 20. The effective dose for Product 3 (F3) - Test         | -                  |
| 21. The effective dose for Product 4 (F4) - Test         | FROMF2             |
| 22. Number in population to be simulated                 | 100000             |
| 23. Number of MC simulations                             | 1                  |
| 24. The random number seed for the first simulation      | 15975263           |
| 25. Source for the population file (POP)                 | UN4                |
| 26. Source for the socioeconomic prevalence file (SEP)   | -                  |
| 27. Source for the current smoking prevalence file (CSP) | ISS3               |
| 28. Source for the former smoking prevalence file (FSP)  | ISS3               |
| 29. Source for the quit-time distribution file (QTD)     | NHIS2006           |
| 30. Source for the death file (MORT)                     | APR-20             |
| 31. Source for the relative risk file (RR)               | PNLEST             |
| 32. Source for the half-life file (H)                    | PNLEST             |
| 33. Assumption Set for TTP Factor Reference              | F1                 |
| 34. Assumption Set for TTP Factor Test                   | F1                 |
| 35. Assumption Set for TTP Reference                     | ISS3               |
| 36. Assumption Set for TTP Test                          | ISS3               |
| 37. Assumption Set for TP for socioeconomic group        | -                  |
| 38. Source for Output Choice file (OUTC)                 | BASIC              |
| 39. Output for DTP P1                                    | N                  |
| 40. Output for DTP P2                                    | N                  |
| 41. Output for Main P Component                          | Y                  |
| 42. Output for DTP E1                                    | N                  |
| 43. Output for DTP E2                                    | N                  |
| 44. Output for DTP E3                                    | N                  |
| 45. Output for Main E Component                          | Y                  |
| 46. Output file name                                     | Main_Analysis      |
| 47. Run number for P-Component                           | -                  |
| 48. Results file for E-Component                         | -                  |
| 49. Components required                                  | PE                 |
| 50. Results folder for P to be used in E-Component       | -                  |
| 51. Fixed age of starting product use                    | 16                 |
| 52. Output absolute risk file?                           | N                  |



## Results for PHIM for Run 2 (Main\_Analysis.RTF)

\*\*\*\*\*

TTP values for Run: 2, Scenario: NULL

| Variable Parameter | Value               |
|--------------------|---------------------|
| 1. Country         | US (United States)  |
| 2. Sex             | F (Females)         |
| 3. Assumption Set  | ISS3                |
| Note:              | Period is in Months |

| Age   | Period  | Initiation  | Cessation    | Re-initiation |
|-------|---------|-------------|--------------|---------------|
|       |         | Never<br>CC | CC<br>Former | Former<br>CC  |
| 10-14 | 1-12    | 0.003758    | 0.008742     | 0.000000      |
| 15-19 | 1-12    | 0.003469    | 0.002515     | 0.000000      |
| 20-24 | 1-12    | 0.000276    | 0.000761     | 0.000000      |
| 25-29 | 1-12    | 0.000137    | 0.001375     | 0.000000      |
| 30-34 | 1-12    | 0.000069    | 0.001149     | 0.000000      |
| 35-39 | 1-12    | 0.000000    | 0.000991     | 0.000000      |
| 40-44 | 1-12    | 0.000000    | 0.000833     | 0.000000      |
| 45-49 | 1-12    | 0.000000    | 0.001723     | 0.000000      |
| 50-54 | 1-12    | 0.000000    | 0.002336     | 0.000000      |
| 55-59 | 1-12    | 0.000000    | 0.002233     | 0.000000      |
| 60-64 | 1-12    | 0.000000    | 0.004634     | 0.000000      |
| 65-69 | 1-12    | 0.000000    | 0.003505     | 0.000000      |
| 70-74 | 1-12    | 0.000000    | 0.004329     | 0.000000      |
| 75-79 | 1-12    | 0.000000    | 0.004329     | 0.000000      |
| 10-14 | 13-72   | 0.004794    | 0.008742     | 0.000000      |
| 15-19 | 13-72   | 0.004527    | 0.004082     | 0.000000      |
| 20-24 | 13-72   | 0.000105    | 0.001261     | 0.000000      |
| 25-29 | 13-72   | 0.000053    | 0.000952     | 0.000000      |
| 30-34 | 13-72   | 0.000026    | 0.000733     | 0.000000      |
| 35-39 | 13-72   | 0.000000    | 0.000753     | 0.000000      |
| 40-44 | 13-72   | 0.000000    | 0.001535     | 0.000000      |
| 45-49 | 13-72   | 0.000000    | 0.002998     | 0.000000      |
| 50-54 | 13-72   | 0.000000    | 0.003159     | 0.000000      |
| 55-59 | 13-72   | 0.000000    | 0.002965     | 0.000000      |
| 60-64 | 13-72   | 0.000000    | 0.003633     | 0.000000      |
| 65-69 | 13-72   | 0.000000    | 0.004522     | 0.000000      |
| 70-74 | 13-72   | 0.000000    | 0.005208     | 0.000000      |
| 75-79 | 13-72   | 0.000000    | 0.005208     | 0.000000      |
| 10-14 | 73-132  | 0.003969    | 0.008742     | 0.000000      |
| 15-19 | 73-132  | 0.003056    | 0.003373     | 0.000000      |
| 20-24 | 73-132  | 0.001459    | 0.003881     | 0.000000      |
| 25-29 | 73-132  | 0.000714    | 0.001953     | 0.000000      |
| 30-34 | 73-132  | 0.000111    | 0.001338     | 0.000000      |
| 35-39 | 73-132  | 0.000000    | 0.001507     | 0.000000      |
| 40-44 | 73-132  | 0.000000    | 0.002080     | 0.000000      |
| 45-49 | 73-132  | 0.000000    | 0.003809     | 0.000000      |
| 50-54 | 73-132  | 0.000000    | 0.004871     | 0.000000      |
| 55-59 | 73-132  | 0.000000    | 0.004560     | 0.000000      |
| 60-64 | 73-132  | 0.000000    | 0.007192     | 0.000000      |
| 65-69 | 73-132  | 0.000000    | 0.007033     | 0.000000      |
| 70-74 | 73-132  | 0.000000    | 0.008206     | 0.000000      |
| 75-79 | 73-132  | 0.000000    | 0.008206     | 0.000000      |
| 10-14 | 133-192 | 0.002861    | 0.008742     | 0.000000      |
| 15-19 | 133-192 | 0.002594    | 0.003996     | 0.000000      |
| 20-24 | 133-192 | 0.001247    | 0.002805     | 0.000000      |
| 25-29 | 133-192 | 0.000289    | 0.001574     | 0.000000      |
| 30-34 | 133-192 | 0.000132    | 0.001293     | 0.000000      |
| 35-39 | 133-192 | 0.000000    | 0.001219     | 0.000000      |
| 40-44 | 133-192 | 0.000000    | 0.001657     | 0.000000      |
| 45-49 | 133-192 | 0.000000    | 0.001995     | 0.000000      |
| 50-54 | 133-192 | 0.000000    | 0.002154     | 0.000000      |
| 55-59 | 133-192 | 0.000000    | 0.002072     | 0.000000      |
| 60-64 | 133-192 | 0.000000    | 0.005049     | 0.000000      |
| 65-69 | 133-192 | 0.000000    | 0.003680     | 0.000000      |
| 70-74 | 133-192 | 0.000000    | 0.006144     | 0.000000      |
| 75-79 | 133-192 | 0.000000    | 0.006144     | 0.000000      |
| 10-14 | 193-252 | 0.001859    | 0.008742     | 0.000000      |
| 15-19 | 193-252 | 0.002232    | 0.005770     | 0.000000      |
| 20-24 | 193-252 | 0.001079    | 0.003262     | 0.000000      |
| 25-29 | 193-252 | 0.000531    | 0.002002     | 0.000000      |
| 30-34 | 193-252 | 0.000263    | 0.003240     | 0.000000      |
| 35-39 | 193-252 | 0.000000    | 0.001771     | 0.000000      |
| 40-44 | 193-252 | 0.000000    | 0.002173     | 0.000000      |
| 45-49 | 193-252 | 0.000000    | 0.002075     | 0.000000      |
| 50-54 | 193-252 | 0.000000    | 0.003431     | 0.000000      |

### Results for PHIM for Run 2 (Main\_Analysis.RTF)

|       |         |          |          |          |
|-------|---------|----------|----------|----------|
| 55-59 | 193-252 | 0.000000 | 0.002906 | 0.000000 |
| 60-64 | 193-252 | 0.000000 | 0.007139 | 0.000000 |
| 65-69 | 193-252 | 0.000000 | 0.004963 | 0.000000 |
| 70-74 | 193-252 | 0.000000 | 0.006269 | 0.000000 |
| 75-79 | 193-252 | 0.000000 | 0.006269 | 0.000000 |
| 10-14 | 253+    | 0.000931 | 0.008742 | 0.000000 |
| 15-19 | 253+    | 0.001798 | 0.009440 | 0.000000 |
| 20-24 | 253+    | 0.000023 | 0.002831 | 0.000000 |
| 25-29 | 253+    | 0.000073 | 0.002655 | 0.000000 |
| 30-34 | 253+    | 0.000037 | 0.004614 | 0.000000 |
| 35-39 | 253+    | 0.000000 | 0.002607 | 0.000000 |
| 40-44 | 253+    | 0.000000 | 0.003115 | 0.000000 |
| 45-49 | 253+    | 0.000000 | 0.002132 | 0.000000 |
| 50-54 | 253+    | 0.000000 | 0.003497 | 0.000000 |
| 55-59 | 253+    | 0.000000 | 0.002942 | 0.000000 |
| 60-64 | 253+    | 0.000000 | 0.005376 | 0.000000 |
| 65-69 | 253+    | 0.000000 | 0.001789 | 0.000000 |
| 70-74 | 253+    | 0.000000 | 0.004077 | 0.000000 |
| 75-79 | 253+    | 0.000000 | 0.004077 | 0.000000 |

## Results for PHIM for Run 2 (Main\_Analysis.RTF)

\*\*\*\*\*

### TTP Factors

| Factor | TTP Affected               | Relates to       | Value | < or > | Years |
|--------|----------------------------|------------------|-------|--------|-------|
| 1a     | Current PR2 to Current PR1 | Previous PR1 use | 2     | -      | -     |
| 1b     | Current PR3 to Current PR1 | Previous PR1 use | 2     | -      | -     |
| 1c     | Current PR4 to Current PR1 | Previous PR1 use | 2     | -      | -     |
| 2a     | Current PR1 to Former      | Previously quit  | 2     | -      | -     |
| 2b     | Current PR2 to Former      | Previously quit  | 2     | -      | -     |
| 2c     | Current PR3 to Former      | Previously quit  | 2     | -      | -     |
| 2d     | Current PR4 to Former      | Previously quit  | 2     | -      | -     |
| 3a     | Former to Current PR1      | Time quit        | 2     | <      | 2     |
| 3b     | Former to Current PR2      | Time quit        | 2     | <      | 2     |
| 3c     | Former to Current PR3      | Time quit        | 2     | <      | 2     |
| 3d     | Former to Current PR4      | Time quit        | 2     | <      | 2     |
| 4a     | Current PR2 to Current PR1 | Time PR2 use     | 0     | >      | 2     |
| 4b     | Current PR2 to Current PR3 | Time PR2 use     | 0     | >      | 2     |
| 4c     | Current PR2 to Current PR4 | Time PR2 use     | 0     | >      | 2     |
| 5a     | Current PR3 to Current PR1 | Time PR3 use     | 0     | >      | 2     |
| 5b     | Current PR3 to Current PR2 | Time PR3 use     | 0     | >      | 2     |
| 5c     | Current PR3 to Current PR4 | Time PR3 use     | 0     | >      | 2     |
| 6a     | Current PR4 to Current PR1 | Time PR4 use     | -     | -      | -     |
| 6b     | Current PR4 to Current PR2 | Time PR4 use     | -     | -      | -     |
| 6c     | Current PR4 to Current PR3 | Time PR4 use     | -     | -      | -     |
| 7a     | Current PR1 to Current PR2 | Time PR1 use     | -     | -      | -     |
| 7b     | Current PR1 to Current PR3 | Time PR1 use     | -     | -      | -     |
| 7c     | Current PR1 to Current PR4 | Time PR1 use     | -     | -      | -     |

## Results for PHIM for Run 2 (Main\_Analysis.RTF)

\*\*\*\*\*

TTP values for Run: 2, Scenario: Ecig

| Variable Parameter | Value               |
|--------------------|---------------------|
| 1. Country         | US (United States)  |
| 2. Sex             | F (Females)         |
| 3. Assumption Set  | ISS3                |
| Note:              | Period is in Months |

| Age   | Period  | Initiation  |               |               | Cessation    |                |                | Re-initiation |                |                |
|-------|---------|-------------|---------------|---------------|--------------|----------------|----------------|---------------|----------------|----------------|
|       |         | Never<br>CC | Never<br>Ecig | Never<br>Dual | CC<br>Former | Ecig<br>Former | Dual<br>Former | Former<br>CC  | Former<br>Ecig | Former<br>Dual |
| 10-14 | 1-12    | 0.001879    | 0.001879      | 0.000000      | 0.008742     | 0.008742       | 0.000000       | 0.000000      | 0.000000       | 0.000000       |
| 15-19 | 1-12    | 0.001735    | 0.001735      | 0.000000      | 0.002515     | 0.002515       | 0.000000       | 0.000000      | 0.000000       | 0.000000       |
| 20-24 | 1-12    | 0.000138    | 0.000138      | 0.000000      | 0.000761     | 0.000761       | 0.000000       | 0.000000      | 0.000000       | 0.000000       |
| 25-29 | 1-12    | 0.000069    | 0.000069      | 0.000000      | 0.001376     | 0.001376       | 0.000000       | 0.000000      | 0.000000       | 0.000000       |
| 30-34 | 1-12    | 0.000034    | 0.000034      | 0.000000      | 0.001149     | 0.001149       | 0.000000       | 0.000000      | 0.000000       | 0.000000       |
| 35-39 | 1-12    | 0.000000    | 0.000000      | 0.000000      | 0.000991     | 0.000991       | 0.000000       | 0.000000      | 0.000000       | 0.000000       |
| 40-44 | 1-12    | 0.000000    | 0.000000      | 0.000000      | 0.000833     | 0.000833       | 0.000000       | 0.000000      | 0.000000       | 0.000000       |
| 45-49 | 1-12    | 0.000000    | 0.000000      | 0.000000      | 0.001723     | 0.001723       | 0.000000       | 0.000000      | 0.000000       | 0.000000       |
| 50-54 | 1-12    | 0.000000    | 0.000000      | 0.000000      | 0.002336     | 0.002336       | 0.000000       | 0.000000      | 0.000000       | 0.000000       |
| 55-59 | 1-12    | 0.000000    | 0.000000      | 0.000000      | 0.002233     | 0.002233       | 0.000000       | 0.000000      | 0.000000       | 0.000000       |
| 60-64 | 1-12    | 0.000000    | 0.000000      | 0.000000      | 0.004635     | 0.004635       | 0.000000       | 0.000000      | 0.000000       | 0.000000       |
| 65-69 | 1-12    | 0.000000    | 0.000000      | 0.000000      | 0.003505     | 0.003505       | 0.000000       | 0.000000      | 0.000000       | 0.000000       |
| 70-74 | 1-12    | 0.000000    | 0.000000      | 0.000000      | 0.004329     | 0.004329       | 0.000000       | 0.000000      | 0.000000       | 0.000000       |
| 75-79 | 1-12    | 0.000000    | 0.000000      | 0.000000      | 0.004329     | 0.004329       | 0.000000       | 0.000000      | 0.000000       | 0.000000       |
| 10-14 | 13-72   | 0.001918    | 0.002877      | 0.000000      | 0.008742     | 0.008742       | 0.000000       | 0.000000      | 0.000000       | 0.000000       |
| 15-19 | 13-72   | 0.001811    | 0.002716      | 0.000000      | 0.004083     | 0.004083       | 0.000000       | 0.000000      | 0.000000       | 0.000000       |
| 20-24 | 13-72   | 0.000042    | 0.000063      | 0.000000      | 0.001261     | 0.001261       | 0.000000       | 0.000000      | 0.000000       | 0.000000       |
| 25-29 | 13-72   | 0.000021    | 0.000032      | 0.000000      | 0.000952     | 0.000952       | 0.000000       | 0.000000      | 0.000000       | 0.000000       |
| 30-34 | 13-72   | 0.000011    | 0.000016      | 0.000000      | 0.000733     | 0.000733       | 0.000000       | 0.000000      | 0.000000       | 0.000000       |
| 35-39 | 13-72   | 0.000000    | 0.000000      | 0.000000      | 0.000754     | 0.000754       | 0.000000       | 0.000000      | 0.000000       | 0.000000       |
| 40-44 | 13-72   | 0.000000    | 0.000000      | 0.000000      | 0.001535     | 0.001535       | 0.000000       | 0.000000      | 0.000000       | 0.000000       |
| 45-49 | 13-72   | 0.000000    | 0.000000      | 0.000000      | 0.002998     | 0.002998       | 0.000000       | 0.000000      | 0.000000       | 0.000000       |
| 50-54 | 13-72   | 0.000000    | 0.000000      | 0.000000      | 0.003160     | 0.003160       | 0.000000       | 0.000000      | 0.000000       | 0.000000       |
| 55-59 | 13-72   | 0.000000    | 0.000000      | 0.000000      | 0.002965     | 0.002965       | 0.000000       | 0.000000      | 0.000000       | 0.000000       |
| 60-64 | 13-72   | 0.000000    | 0.000000      | 0.000000      | 0.003633     | 0.003633       | 0.000000       | 0.000000      | 0.000000       | 0.000000       |
| 65-69 | 13-72   | 0.000000    | 0.000000      | 0.000000      | 0.004522     | 0.004522       | 0.000000       | 0.000000      | 0.000000       | 0.000000       |
| 70-74 | 13-72   | 0.000000    | 0.000000      | 0.000000      | 0.005208     | 0.005208       | 0.000000       | 0.000000      | 0.000000       | 0.000000       |
| 75-79 | 13-72   | 0.000000    | 0.000000      | 0.000000      | 0.005208     | 0.005208       | 0.000000       | 0.000000      | 0.000000       | 0.000000       |
| 10-14 | 73-132  | 0.000794    | 0.003175      | 0.000000      | 0.008742     | 0.008742       | 0.000000       | 0.000000      | 0.000000       | 0.000000       |
| 15-19 | 73-132  | 0.000611    | 0.002445      | 0.000000      | 0.003373     | 0.003373       | 0.000000       | 0.000000      | 0.000000       | 0.000000       |
| 20-24 | 73-132  | 0.000292    | 0.001167      | 0.000000      | 0.003881     | 0.003881       | 0.000000       | 0.000000      | 0.000000       | 0.000000       |
| 25-29 | 73-132  | 0.000143    | 0.000571      | 0.000000      | 0.001954     | 0.001954       | 0.000000       | 0.000000      | 0.000000       | 0.000000       |
| 30-34 | 73-132  | 0.000022    | 0.000089      | 0.000000      | 0.001338     | 0.001338       | 0.000000       | 0.000000      | 0.000000       | 0.000000       |
| 35-39 | 73-132  | 0.000000    | 0.000000      | 0.000000      | 0.001507     | 0.001507       | 0.000000       | 0.000000      | 0.000000       | 0.000000       |
| 40-44 | 73-132  | 0.000000    | 0.000000      | 0.000000      | 0.002080     | 0.002080       | 0.000000       | 0.000000      | 0.000000       | 0.000000       |
| 45-49 | 73-132  | 0.000000    | 0.000000      | 0.000000      | 0.003809     | 0.003809       | 0.000000       | 0.000000      | 0.000000       | 0.000000       |
| 50-54 | 73-132  | 0.000000    | 0.000000      | 0.000000      | 0.004871     | 0.004871       | 0.000000       | 0.000000      | 0.000000       | 0.000000       |
| 55-59 | 73-132  | 0.000000    | 0.000000      | 0.000000      | 0.004560     | 0.004560       | 0.000000       | 0.000000      | 0.000000       | 0.000000       |
| 60-64 | 73-132  | 0.000000    | 0.000000      | 0.000000      | 0.007192     | 0.007192       | 0.000000       | 0.000000      | 0.000000       | 0.000000       |
| 65-69 | 73-132  | 0.000000    | 0.000000      | 0.000000      | 0.007033     | 0.007033       | 0.000000       | 0.000000      | 0.000000       | 0.000000       |
| 70-74 | 73-132  | 0.000000    | 0.000000      | 0.000000      | 0.008206     | 0.008206       | 0.000000       | 0.000000      | 0.000000       | 0.000000       |
| 75-79 | 73-132  | 0.000000    | 0.000000      | 0.000000      | 0.008206     | 0.008206       | 0.000000       | 0.000000      | 0.000000       | 0.000000       |
| 10-14 | 133-192 | 0.000143    | 0.002718      | 0.000000      | 0.008742     | 0.008742       | 0.000000       | 0.000000      | 0.000000       | 0.000000       |
| 15-19 | 133-192 | 0.000130    | 0.002465      | 0.000000      | 0.003996     | 0.003996       | 0.000000       | 0.000000      | 0.000000       | 0.000000       |
| 20-24 | 133-192 | 0.000062    | 0.001185      | 0.000000      | 0.002805     | 0.002805       | 0.000000       | 0.000000      | 0.000000       | 0.000000       |
| 25-29 | 133-192 | 0.000015    | 0.000275      | 0.000000      | 0.001574     | 0.001574       | 0.000000       | 0.000000      | 0.000000       | 0.000000       |
| 30-34 | 133-192 | 0.000007    | 0.000125      | 0.000000      | 0.001293     | 0.001293       | 0.000000       | 0.000000      | 0.000000       | 0.000000       |
| 35-39 | 133-192 | 0.000000    | 0.000000      | 0.000000      | 0.001219     | 0.001219       | 0.000000       | 0.000000      | 0.000000       | 0.000000       |
| 40-44 | 133-192 | 0.000000    | 0.000000      | 0.000000      | 0.001657     | 0.001657       | 0.000000       | 0.000000      | 0.000000       | 0.000000       |
| 45-49 | 133-192 | 0.000000    | 0.000000      | 0.000000      | 0.001995     | 0.001995       | 0.000000       | 0.000000      | 0.000000       | 0.000000       |
| 50-54 | 133-192 | 0.000000    | 0.000000      | 0.000000      | 0.002154     | 0.002154       | 0.000000       | 0.000000      | 0.000000       | 0.000000       |
| 55-59 | 133-192 | 0.000000    | 0.000000      | 0.000000      | 0.002072     | 0.002072       | 0.000000       | 0.000000      | 0.000000       | 0.000000       |
| 60-64 | 133-192 | 0.000000    | 0.000000      | 0.000000      | 0.005049     | 0.005049       | 0.000000       | 0.000000      | 0.000000       | 0.000000       |
| 65-69 | 133-192 | 0.000000    | 0.000000      | 0.000000      | 0.003681     | 0.003681       | 0.000000       | 0.000000      | 0.000000       | 0.000000       |
| 70-74 | 133-192 | 0.000000    | 0.000000      | 0.000000      | 0.006144     | 0.006144       | 0.000000       | 0.000000      | 0.000000       | 0.000000       |
| 75-79 | 133-192 | 0.000000    | 0.000000      | 0.000000      | 0.006144     | 0.006144       | 0.000000       | 0.000000      | 0.000000       | 0.000000       |
| 10-14 | 193-252 | 0.000093    | 0.001766      | 0.000000      | 0.008742     | 0.008742       | 0.000000       | 0.000000      | 0.000000       | 0.000000       |
| 15-19 | 193-252 | 0.000112    | 0.002120      | 0.000000      | 0.005770     | 0.005770       | 0.000000       | 0.000000      | 0.000000       | 0.000000       |
| 20-24 | 193-252 | 0.000054    | 0.001025      | 0.000000      | 0.003262     | 0.003262       | 0.000000       | 0.000000      | 0.000000       | 0.000000       |
| 25-29 | 193-252 | 0.000027    | 0.000504      | 0.000000      | 0.002002     | 0.002002       | 0.000000       | 0.000000      | 0.000000       | 0.000000       |
| 30-34 | 193-252 | 0.000013    | 0.000250      | 0.000000      | 0.003241     | 0.003241       | 0.000000       | 0.000000      | 0.000000       | 0.000000       |
| 35-39 | 193-252 | 0.000000    | 0.000000      | 0.000000      | 0.001771     | 0.001771       | 0.000000       | 0.000000      | 0.000000       | 0.000000       |
| 40-44 | 193-252 | 0.000000    | 0.000000      | 0.000000      | 0.002173     | 0.002173       | 0.000000       | 0.000000      | 0.000000       | 0.000000       |
| 45-49 | 193-252 | 0.000000    | 0.000000      | 0.000000      | 0.002075     | 0.002075       | 0.000000       | 0.000000      | 0.000000       | 0.000000       |
| 50-54 | 193-252 | 0.000000    | 0.000000      | 0.000000      | 0.003432     | 0.003432       | 0.000000       | 0.000000      | 0.000000       | 0.000000       |

**Results for PHIM for Run 2 (Main\_Analysis.RTF)**

|       |         |          |          |          |          |          |          |          |          |          |
|-------|---------|----------|----------|----------|----------|----------|----------|----------|----------|----------|
| 55-59 | 193-252 | 0.000000 | 0.000000 | 0.000000 | 0.002906 | 0.002906 | 0.000000 | 0.000000 | 0.000000 | 0.000000 |
| 60-64 | 193-252 | 0.000000 | 0.000000 | 0.000000 | 0.007139 | 0.007139 | 0.000000 | 0.000000 | 0.000000 | 0.000000 |
| 65-69 | 193-252 | 0.000000 | 0.000000 | 0.000000 | 0.004963 | 0.004963 | 0.000000 | 0.000000 | 0.000000 | 0.000000 |
| 70-74 | 193-252 | 0.000000 | 0.000000 | 0.000000 | 0.006269 | 0.006269 | 0.000000 | 0.000000 | 0.000000 | 0.000000 |
| 75-79 | 193-252 | 0.000000 | 0.000000 | 0.000000 | 0.006269 | 0.006269 | 0.000000 | 0.000000 | 0.000000 | 0.000000 |
| 10-14 | 253+    | 0.000047 | 0.000884 | 0.000000 | 0.008742 | 0.008742 | 0.000000 | 0.000000 | 0.000000 | 0.000000 |
| 15-19 | 253+    | 0.000090 | 0.001708 | 0.000000 | 0.009440 | 0.009440 | 0.000000 | 0.000000 | 0.000000 | 0.000000 |
| 20-24 | 253+    | 0.000001 | 0.000022 | 0.000000 | 0.002831 | 0.002831 | 0.000000 | 0.000000 | 0.000000 | 0.000000 |
| 25-29 | 253+    | 0.000004 | 0.000070 | 0.000000 | 0.002656 | 0.002656 | 0.000000 | 0.000000 | 0.000000 | 0.000000 |
| 30-34 | 253+    | 0.000002 | 0.000035 | 0.000000 | 0.004614 | 0.004614 | 0.000000 | 0.000000 | 0.000000 | 0.000000 |
| 35-39 | 253+    | 0.000000 | 0.000000 | 0.000000 | 0.002608 | 0.002608 | 0.000000 | 0.000000 | 0.000000 | 0.000000 |
| 40-44 | 253+    | 0.000000 | 0.000000 | 0.000000 | 0.003115 | 0.003115 | 0.000000 | 0.000000 | 0.000000 | 0.000000 |
| 45-49 | 253+    | 0.000000 | 0.000000 | 0.000000 | 0.002132 | 0.002132 | 0.000000 | 0.000000 | 0.000000 | 0.000000 |
| 50-54 | 253+    | 0.000000 | 0.000000 | 0.000000 | 0.003497 | 0.003497 | 0.000000 | 0.000000 | 0.000000 | 0.000000 |
| 55-59 | 253+    | 0.000000 | 0.000000 | 0.000000 | 0.002942 | 0.002942 | 0.000000 | 0.000000 | 0.000000 | 0.000000 |
| 60-64 | 253+    | 0.000000 | 0.000000 | 0.000000 | 0.005376 | 0.005376 | 0.000000 | 0.000000 | 0.000000 | 0.000000 |
| 65-69 | 253+    | 0.000000 | 0.000000 | 0.000000 | 0.001789 | 0.001789 | 0.000000 | 0.000000 | 0.000000 | 0.000000 |
| 70-74 | 253+    | 0.000000 | 0.000000 | 0.000000 | 0.004077 | 0.004077 | 0.000000 | 0.000000 | 0.000000 | 0.000000 |
| 75-79 | 253+    | 0.000000 | 0.000000 | 0.000000 | 0.004077 | 0.004077 | 0.000000 | 0.000000 | 0.000000 | 0.000000 |



### Results for PHIM for Run 2 (Main\_Analysis.RTF)

|       |      |          |          |          |          |          |          |
|-------|------|----------|----------|----------|----------|----------|----------|
| 25-29 | 253+ | 0.014127 | 0.000000 | 0.000000 | 0.000000 | 0.000000 | 0.000000 |
| 30-34 | 253+ | 0.013889 | 0.000000 | 0.000000 | 0.000000 | 0.000000 | 0.000000 |
| 35-39 | 253+ | 0.012929 | 0.000000 | 0.000000 | 0.000000 | 0.000000 | 0.000000 |
| 40-44 | 253+ | 0.012785 | 0.000000 | 0.000000 | 0.000000 | 0.000000 | 0.000000 |
| 45-49 | 253+ | 0.012295 | 0.000000 | 0.000000 | 0.000000 | 0.000000 | 0.000000 |
| 50-54 | 253+ | 0.011536 | 0.000000 | 0.000000 | 0.000000 | 0.000000 | 0.000000 |
| 55-59 | 253+ | 0.008988 | 0.000000 | 0.000000 | 0.000000 | 0.000000 | 0.000000 |
| 60-64 | 253+ | 0.008098 | 0.000000 | 0.000000 | 0.000000 | 0.000000 | 0.000000 |
| 65-69 | 253+ | 0.006274 | 0.000000 | 0.000000 | 0.000000 | 0.000000 | 0.000000 |
| 70-74 | 253+ | 0.004141 | 0.000000 | 0.000000 | 0.000000 | 0.000000 | 0.000000 |
| 75-79 | 253+ | 0.004141 | 0.000000 | 0.000000 | 0.000000 | 0.000000 | 0.000000 |

## Results for PHIM for Run 2 (Main\_Analysis.RTF)

\*\*\*\*\*

### TTP Factors

| Factor | TTP Affected               | Relates to       | Value | < or > | Years |
|--------|----------------------------|------------------|-------|--------|-------|
| 1a     | Current PR2 to Current PR1 | Previous PR1 use | 2     | -      | -     |
| 1b     | Current PR3 to Current PR1 | Previous PR1 use | 2     | -      | -     |
| 1c     | Current PR4 to Current PR1 | Previous PR1 use | 2     | -      | -     |
| 2a     | Current PR1 to Former      | Previously quit  | 2     | -      | -     |
| 2b     | Current PR2 to Former      | Previously quit  | 2     | -      | -     |
| 2c     | Current PR3 to Former      | Previously quit  | 2     | -      | -     |
| 2d     | Current PR4 to Former      | Previously quit  | 2     | -      | -     |
| 3a     | Former to Current PR1      | Time quit        | 2     | <      | 2     |
| 3b     | Former to Current PR2      | Time quit        | 2     | <      | 2     |
| 3c     | Former to Current PR3      | Time quit        | 2     | <      | 2     |
| 3d     | Former to Current PR4      | Time quit        | 2     | <      | 2     |
| 4a     | Current PR2 to Current PR1 | Time PR2 use     | 0     | >      | 2     |
| 4b     | Current PR2 to Current PR3 | Time PR2 use     | 0     | >      | 2     |
| 4c     | Current PR2 to Current PR4 | Time PR2 use     | 0     | >      | 2     |
| 5a     | Current PR3 to Current PR1 | Time PR3 use     | 0     | >      | 2     |
| 5b     | Current PR3 to Current PR2 | Time PR3 use     | 0     | >      | 2     |
| 5c     | Current PR3 to Current PR4 | Time PR3 use     | 0     | >      | 2     |
| 6a     | Current PR4 to Current PR1 | Time PR4 use     | -     | -      | -     |
| 6b     | Current PR4 to Current PR2 | Time PR4 use     | -     | -      | -     |
| 6c     | Current PR4 to Current PR3 | Time PR4 use     | -     | -      | -     |
| 7a     | Current PR1 to Current PR2 | Time PR1 use     | -     | -      | -     |
| 7b     | Current PR1 to Current PR3 | Time PR1 use     | -     | -      | -     |
| 7c     | Current PR1 to Current PR4 | Time PR1 use     | -     | -      | -     |



## Results for PHIM for Run 2 (Main\_Analysis.RTF)

\*\*\*\*\*

**Main Output for the Tobacco History for Run: 2, Simulation: 1, Scenario: NULL**

| Variable Parameter                           |           |               | Value              |       |               |             |               |                |              |
|----------------------------------------------|-----------|---------------|--------------------|-------|---------------|-------------|---------------|----------------|--------------|
| 1. Country                                   |           |               | US (United States) |       |               |             |               |                |              |
| 2. Sex                                       |           |               | F (Females)        |       |               |             |               |                |              |
| 3. Year of start of process                  |           |               | 1990               |       |               |             |               |                |              |
| Year of Follow-up: 1990, Age Group: All Ages |           |               |                    |       |               |             |               |                |              |
| Period                                       | Age Group | Smoking Group | N                  | %     | Ever Quit (N) | Ever Quit % | Mean Yrs Quit | Short Term (n) | Short Term % |
| 0                                            | All Ages  | Never Any     | 47776              | 54.92 |               |             |               |                |              |
| 0                                            | All Ages  | CC            | 22737              | 26.14 | 0             | 0.00        |               |                |              |
| 0                                            | All Ages  | Former        | 16484              | 18.95 |               |             | 11.90         | 2815           | 17.08        |
| Year of Follow-up: 1990, Age Group: 18-19    |           |               |                    |       |               |             |               |                |              |
| Period                                       | Age Group | Smoking Group | N                  | %     | Ever Quit (N) | Ever Quit % | Mean Yrs Quit | Short Term (n) | Short Term % |
| 0                                            | 18-19     | Never Any     | 2570               | 78.43 |               |             |               |                |              |
| 0                                            | 18-19     | CC            | 535                | 16.33 | 0             | 0.00        |               |                |              |
| 0                                            | 18-19     | Former        | 172                | 5.25  |               |             | 0.20          | 172            | 100.00       |
| Year of Follow-up: 1990, Age Group: 20-24    |           |               |                    |       |               |             |               |                |              |
| Period                                       | Age Group | Smoking Group | N                  | %     | Ever Quit (N) | Ever Quit % | Mean Yrs Quit | Short Term (n) | Short Term % |
| 0                                            | 20-24     | Never Any     | 5354               | 60.89 |               |             |               |                |              |
| 0                                            | 20-24     | CC            | 2560               | 29.11 | 0             | 0.00        |               |                |              |
| 0                                            | 20-24     | Former        | 879                | 10.00 |               |             | 1.58          | 420            | 47.78        |
| Year of Follow-up: 1990, Age Group: 25-29    |           |               |                    |       |               |             |               |                |              |
| Period                                       | Age Group | Smoking Group | N                  | %     | Ever Quit (N) | Ever Quit % | Mean Yrs Quit | Short Term (n) | Short Term % |
| 0                                            | 25-29     | Never Any     | 5318               | 52.77 |               |             |               |                |              |
| 0                                            | 25-29     | CC            | 3335               | 33.09 | 0             | 0.00        |               |                |              |
| 0                                            | 25-29     | Former        | 1425               | 14.14 |               |             | 3.91          | 404            | 28.35        |
| Year of Follow-up: 1990, Age Group: 30-34    |           |               |                    |       |               |             |               |                |              |
| Period                                       | Age Group | Smoking Group | N                  | %     | Ever Quit (N) | Ever Quit % | Mean Yrs Quit | Short Term (n) | Short Term % |
| 0                                            | 30-34     | Never Any     | 5287               | 50.36 |               |             |               |                |              |
| 0                                            | 30-34     | CC            | 3326               | 31.68 | 0             | 0.00        |               |                |              |
| 0                                            | 30-34     | Former        | 1886               | 17.96 |               |             | 4.36          | 566            | 30.01        |
| Year of Follow-up: 1990, Age Group: 35-39    |           |               |                    |       |               |             |               |                |              |
| Period                                       | Age Group | Smoking Group | N                  | %     | Ever Quit (N) | Ever Quit % | Mean Yrs Quit | Short Term (n) | Short Term % |
| 0                                            | 35-39     | Never Any     | 5018               | 52.27 |               |             |               |                |              |
| 0                                            | 35-39     | CC            | 2653               | 27.64 | 0             | 0.00        |               |                |              |
| 0                                            | 35-39     | Former        | 1929               | 20.09 |               |             | 7.96          | 324            | 16.80        |
| Year of Follow-up: 1990, Age Group: 40-44    |           |               |                    |       |               |             |               |                |              |
| Period                                       | Age Group | Smoking Group | N                  | %     | Ever Quit (N) | Ever Quit % | Mean Yrs Quit | Short Term (n) | Short Term % |
| 0                                            | 40-44     | Never Any     | 4356               | 51.27 |               |             |               |                |              |
| 0                                            | 40-44     | CC            | 2397               | 28.21 | 0             | 0.00        |               |                |              |
| 0                                            | 40-44     | Former        | 1744               | 20.52 |               |             | 7.33          | 339            | 19.44        |
| Year of Follow-up: 1990, Age Group: 45-49    |           |               |                    |       |               |             |               |                |              |
| Period                                       | Age Group | Smoking Group | N                  | %     | Ever Quit (N) | Ever Quit % | Mean Yrs Quit | Short Term (n) | Short Term % |
| 0                                            | 45-49     | Never Any     | 3116               | 47.67 |               |             |               |                |              |
| 0                                            | 45-49     | CC            | 1875               | 28.69 | 0             | 0.00        |               |                |              |
| 0                                            | 45-49     | Former        | 1545               | 23.64 |               |             | 12.55         | 194            | 12.56        |
| Year of Follow-up: 1990, Age Group: 50-54    |           |               |                    |       |               |             |               |                |              |
| Period                                       | Age Group | Smoking Group | N                  | %     | Ever Quit (N) | Ever Quit % | Mean Yrs Quit | Short Term (n) | Short Term % |
| 0                                            | 50-54     | Never Any     | 2684               | 48.50 |               |             |               |                |              |
| 0                                            | 50-54     | CC            | 1572               | 28.41 | 0             | 0.00        |               |                |              |
| 0                                            | 50-54     | Former        | 1278               | 23.09 |               |             | 13.28         | 126            | 9.86         |
| Year of Follow-up: 1990, Age Group: 55-59    |           |               |                    |       |               |             |               |                |              |
| Period                                       | Age Group | Smoking Group | N                  | %     | Ever Quit (N) | Ever Quit % | Mean Yrs Quit | Short Term (n) | Short Term % |
| 0                                            | 55-59     | Never Any     | 2732               | 51.90 |               |             |               |                |              |
| 0                                            | 55-59     | CC            | 1295               | 24.60 | 0             | 0.00        |               |                |              |
| 0                                            | 55-59     | Former        | 1237               | 23.50 |               |             | 17.26         | 90             | 7.28         |
| Year of Follow-up: 1990, Age Group: 60-64    |           |               |                    |       |               |             |               |                |              |
| Period                                       | Age Group | Smoking Group | N                  | %     | Ever Quit (N) | Ever Quit % | Mean Yrs Quit | Short Term (n) | Short Term % |
| 0                                            | 60-64     | Never Any     | 3078               | 55.72 |               |             |               |                |              |
| 0                                            | 60-64     | CC            | 1249               | 22.61 | 0             | 0.00        |               |                |              |
| 0                                            | 60-64     | Former        | 1197               | 21.67 |               |             | 18.28         | 61             | 5.10         |
| Year of Follow-up: 1990, Age Group: 65-69    |           |               |                    |       |               |             |               |                |              |
| Period                                       | Age Group | Smoking Group | N                  | %     | Ever Quit (N) | Ever Quit % | Mean Yrs Quit | Short Term (n) | Short Term % |

**Results for PHIM for Run 2 (Main\_Analysis.RTF)**

|                                              |           |               |       |       |               |             |               |                |              |
|----------------------------------------------|-----------|---------------|-------|-------|---------------|-------------|---------------|----------------|--------------|
| 0                                            | 65-69     | Never Any     | 3042  | 57.36 |               |             |               |                |              |
| 0                                            | 65-69     | CC            | 976   | 18.40 | 0             | 0.00        |               |                |              |
| 0                                            | 65-69     | Former        | 1285  | 24.23 |               |             | 20.65         | 68             | 5.29         |
| Year of Follow-up: 1990, Age Group: 70-74    |           |               |       |       |               |             |               |                |              |
| Period                                       | Age Group | Smoking Group | N     | %     | Ever Quit (N) | Ever Quit % | Mean Yrs Quit | Short Term (n) | Short Term % |
| 0                                            | 70-74     | Never Any     | 2738  | 61.05 |               |             |               |                |              |
| 0                                            | 70-74     | CC            | 610   | 13.60 | 0             | 0.00        |               |                |              |
| 0                                            | 70-74     | Former        | 1137  | 25.35 |               |             | 24.48         | 27             | 2.37         |
| Year of Follow-up: 1990, Age Group: 75-79    |           |               |       |       |               |             |               |                |              |
| Period                                       | Age Group | Smoking Group | N     | %     | Ever Quit (N) | Ever Quit % | Mean Yrs Quit | Short Term (n) | Short Term % |
| 0                                            | 75-79     | Never Any     | 2483  | 68.84 |               |             |               |                |              |
| 0                                            | 75-79     | CC            | 354   | 9.81  | 0             | 0.00        |               |                |              |
| 0                                            | 75-79     | Former        | 770   | 21.35 |               |             | 24.48         | 24             | 3.12         |
| Year of Follow-up: 1995, Age Group: All Ages |           |               |       |       |               |             |               |                |              |
| Period                                       | Age Group | Smoking Group | N     | %     | Ever Quit (N) | Ever Quit % | Mean Yrs Quit | Short Term (n) | Short Term % |
| 5                                            | All Ages  | Never Any     | 50981 | 55.63 |               |             |               |                |              |
| 5                                            | All Ages  | CC            | 22244 | 24.27 | 0             | 0.00        |               |                |              |
| 5                                            | All Ages  | Former        | 18414 | 20.09 |               |             | 14.18         | 1112           | 6.04         |
| Year of Follow-up: 1995, Age Group: 18-19    |           |               |       |       |               |             |               |                |              |
| Period                                       | Age Group | Smoking Group | N     | %     | Ever Quit (N) | Ever Quit % | Mean Yrs Quit | Short Term (n) | Short Term % |
| 5                                            | 18-19     | Never Any     | 2456  | 77.33 |               |             |               |                |              |
| 5                                            | 18-19     | CC            | 655   | 20.62 | 0             | 0.00        |               |                |              |
| 5                                            | 18-19     | Former        | 65    | 2.05  |               |             | 1.03          | 44             | 67.69        |
| Year of Follow-up: 1995, Age Group: 20-24    |           |               |       |       |               |             |               |                |              |
| Period                                       | Age Group | Smoking Group | N     | %     | Ever Quit (N) | Ever Quit % | Mean Yrs Quit | Short Term (n) | Short Term % |
| 5                                            | 20-24     | Never Any     | 5863  | 70.22 |               |             |               |                |              |
| 5                                            | 20-24     | CC            | 2044  | 24.48 | 0             | 0.00        |               |                |              |
| 5                                            | 20-24     | Former        | 443   | 5.31  |               |             | 3.18          | 111            | 25.06        |
| Year of Follow-up: 1995, Age Group: 25-29    |           |               |       |       |               |             |               |                |              |
| Period                                       | Age Group | Smoking Group | N     | %     | Ever Quit (N) | Ever Quit % | Mean Yrs Quit | Short Term (n) | Short Term % |
| 5                                            | 25-29     | Never Any     | 5317  | 60.47 |               |             |               |                |              |
| 5                                            | 25-29     | CC            | 2445  | 27.81 | 0             | 0.00        |               |                |              |
| 5                                            | 25-29     | Former        | 1031  | 11.73 |               |             | 5.90          | 56             | 5.43         |
| Year of Follow-up: 1995, Age Group: 30-34    |           |               |       |       |               |             |               |                |              |
| Period                                       | Age Group | Smoking Group | N     | %     | Ever Quit (N) | Ever Quit % | Mean Yrs Quit | Short Term (n) | Short Term % |
| 5                                            | 30-34     | Never Any     | 5299  | 52.58 |               |             |               |                |              |
| 5                                            | 30-34     | CC            | 3133  | 31.09 | 0             | 0.00        |               |                |              |
| 5                                            | 30-34     | Former        | 1646  | 16.33 |               |             | 8.04          | 60             | 3.65         |
| Year of Follow-up: 1995, Age Group: 35-39    |           |               |       |       |               |             |               |                |              |
| Period                                       | Age Group | Smoking Group | N     | %     | Ever Quit (N) | Ever Quit % | Mean Yrs Quit | Short Term (n) | Short Term % |
| 5                                            | 35-39     | Never Any     | 5282  | 50.31 |               |             |               |                |              |
| 5                                            | 35-39     | CC            | 3194  | 30.42 | 0             | 0.00        |               |                |              |
| 5                                            | 35-39     | Former        | 2023  | 19.27 |               |             | 8.86          | 56             | 2.77         |
| Year of Follow-up: 1995, Age Group: 40-44    |           |               |       |       |               |             |               |                |              |
| Period                                       | Age Group | Smoking Group | N     | %     | Ever Quit (N) | Ever Quit % | Mean Yrs Quit | Short Term (n) | Short Term % |
| 5                                            | 40-44     | Never Any     | 5018  | 52.27 |               |             |               |                |              |
| 5                                            | 40-44     | CC            | 2469  | 25.72 | 0             | 0.00        |               |                |              |
| 5                                            | 40-44     | Former        | 2113  | 22.01 |               |             | 11.98         | 88             | 4.16         |
| Year of Follow-up: 1995, Age Group: 45-49    |           |               |       |       |               |             |               |                |              |
| Period                                       | Age Group | Smoking Group | N     | %     | Ever Quit (N) | Ever Quit % | Mean Yrs Quit | Short Term (n) | Short Term % |
| 5                                            | 45-49     | Never Any     | 4356  | 51.27 |               |             |               |                |              |
| 5                                            | 45-49     | CC            | 2119  | 24.94 | 0             | 0.00        |               |                |              |
| 5                                            | 45-49     | Former        | 2022  | 23.80 |               |             | 10.86         | 131            | 6.48         |
| Year of Follow-up: 1995, Age Group: 50-54    |           |               |       |       |               |             |               |                |              |
| Period                                       | Age Group | Smoking Group | N     | %     | Ever Quit (N) | Ever Quit % | Mean Yrs Quit | Short Term (n) | Short Term % |
| 5                                            | 50-54     | Never Any     | 3116  | 47.67 |               |             |               |                |              |
| 5                                            | 50-54     | CC            | 1609  | 24.62 | 0             | 0.00        |               |                |              |
| 5                                            | 50-54     | Former        | 1811  | 27.71 |               |             | 15.25         | 103            | 5.69         |
| Year of Follow-up: 1995, Age Group: 55-59    |           |               |       |       |               |             |               |                |              |
| Period                                       | Age Group | Smoking Group | N     | %     | Ever Quit (N) | Ever Quit % | Mean Yrs Quit | Short Term (n) | Short Term % |
| 5                                            | 55-59     | Never Any     | 2684  | 48.50 |               |             |               |                |              |
| 5                                            | 55-59     | CC            | 1332  | 24.07 | 0             | 0.00        |               |                |              |
| 5                                            | 55-59     | Former        | 1518  | 27.43 |               |             | 15.70         | 98             | 6.46         |
| Year of Follow-up: 1995, Age Group: 60-64    |           |               |       |       |               |             |               |                |              |
| Period                                       | Age Group | Smoking Group | N     | %     | Ever Quit (N) | Ever Quit % | Mean Yrs Quit | Short Term (n) | Short Term % |

**Results for PHIM for Run 2 (Main\_Analysis.RTF)**

|                                              |           |               |       |       |               |             |               |                |              |
|----------------------------------------------|-----------|---------------|-------|-------|---------------|-------------|---------------|----------------|--------------|
| 5                                            | 60-64     | Never Any     | 2732  | 51.90 |               |             |               |                |              |
| 5                                            | 60-64     | CC            | 1075  | 20.42 | 0             | 0.00        |               |                |              |
| 5                                            | 60-64     | Former        | 1457  | 27.68 |               |             | 19.19         | 91             | 6.25         |
| Year of Follow-up: 1995, Age Group: 65-69    |           |               |       |       |               |             |               |                |              |
| Period                                       | Age Group | Smoking Group | N     | %     | Ever Quit (N) | Ever Quit % | Mean Yrs Quit | Short Term (n) | Short Term % |
| 5                                            | 65-69     | Never Any     | 3078  | 55.72 |               |             |               |                |              |
| 5                                            | 65-69     | CC            | 973   | 17.61 | 0             | 0.00        |               |                |              |
| 5                                            | 65-69     | Former        | 1473  | 26.67 |               |             | 19.32         | 103            | 6.99         |
| Year of Follow-up: 1995, Age Group: 70-74    |           |               |       |       |               |             |               |                |              |
| Period                                       | Age Group | Smoking Group | N     | %     | Ever Quit (N) | Ever Quit % | Mean Yrs Quit | Short Term (n) | Short Term % |
| 5                                            | 70-74     | Never Any     | 3042  | 57.36 |               |             |               |                |              |
| 5                                            | 70-74     | CC            | 743   | 14.01 | 0             | 0.00        |               |                |              |
| 5                                            | 70-74     | Former        | 1518  | 28.63 |               |             | 22.00         | 101            | 6.65         |
| Year of Follow-up: 1995, Age Group: 75-79    |           |               |       |       |               |             |               |                |              |
| Period                                       | Age Group | Smoking Group | N     | %     | Ever Quit (N) | Ever Quit % | Mean Yrs Quit | Short Term (n) | Short Term % |
| 5                                            | 75-79     | Never Any     | 2738  | 61.05 |               |             |               |                |              |
| 5                                            | 75-79     | CC            | 453   | 10.10 | 0             | 0.00        |               |                |              |
| 5                                            | 75-79     | Former        | 1294  | 28.85 |               |             | 26.12         | 70             | 5.41         |
| Year of Follow-up: 2000, Age Group: All Ages |           |               |       |       |               |             |               |                |              |
| Period                                       | Age Group | Smoking Group | N     | %     | Ever Quit (N) | Ever Quit % | Mean Yrs Quit | Short Term (n) | Short Term % |
| 10                                           | All Ages  | Never Any     | 50547 | 55.00 |               |             |               |                |              |
| 10                                           | All Ages  | CC            | 20170 | 21.95 | 0             | 0.00        |               |                |              |
| 10                                           | All Ages  | Former        | 21191 | 23.06 |               |             | 15.16         | 1629           | 7.69         |
| Year of Follow-up: 2000, Age Group: 18-19    |           |               |       |       |               |             |               |                |              |
| Period                                       | Age Group | Smoking Group | N     | %     | Ever Quit (N) | Ever Quit % | Mean Yrs Quit | Short Term (n) | Short Term % |
| 10                                           | 18-19     | Never Any     | 0     | .     |               |             |               |                |              |
| 10                                           | 18-19     | CC            | 0     | .     | 0             | .           |               |                |              |
| 10                                           | 18-19     | Former        | 0     | .     |               |             |               | 0              | .            |
| Year of Follow-up: 2000, Age Group: 20-24    |           |               |       |       |               |             |               |                |              |
| Period                                       | Age Group | Smoking Group | N     | %     | Ever Quit (N) | Ever Quit % | Mean Yrs Quit | Short Term (n) | Short Term % |
| 10                                           | 20-24     | Never Any     | 5202  | 65.60 |               |             |               |                |              |
| 10                                           | 20-24     | CC            | 2090  | 26.36 | 0             | 0.00        |               |                |              |
| 10                                           | 20-24     | Former        | 638   | 8.05  |               |             | 3.29          | 203            | 31.82        |
| Year of Follow-up: 2000, Age Group: 25-29    |           |               |       |       |               |             |               |                |              |
| Period                                       | Age Group | Smoking Group | N     | %     | Ever Quit (N) | Ever Quit % | Mean Yrs Quit | Short Term (n) | Short Term % |
| 10                                           | 25-29     | Never Any     | 5551  | 66.48 |               |             |               |                |              |
| 10                                           | 25-29     | CC            | 2028  | 24.29 | 0             | 0.00        |               |                |              |
| 10                                           | 25-29     | Former        | 771   | 9.23  |               |             | 5.52          | 121            | 15.69        |
| Year of Follow-up: 2000, Age Group: 30-34    |           |               |       |       |               |             |               |                |              |
| Period                                       | Age Group | Smoking Group | N     | %     | Ever Quit (N) | Ever Quit % | Mean Yrs Quit | Short Term (n) | Short Term % |
| 10                                           | 30-34     | Never Any     | 5207  | 59.22 |               |             |               |                |              |
| 10                                           | 30-34     | CC            | 2340  | 26.61 | 0             | 0.00        |               |                |              |
| 10                                           | 30-34     | Former        | 1246  | 14.17 |               |             | 9.37          | 75             | 6.02         |
| Year of Follow-up: 2000, Age Group: 35-39    |           |               |       |       |               |             |               |                |              |
| Period                                       | Age Group | Smoking Group | N     | %     | Ever Quit (N) | Ever Quit % | Mean Yrs Quit | Short Term (n) | Short Term % |
| 10                                           | 35-39     | Never Any     | 5279  | 52.38 |               |             |               |                |              |
| 10                                           | 35-39     | CC            | 2932  | 29.09 | 0             | 0.00        |               |                |              |
| 10                                           | 35-39     | Former        | 1867  | 18.53 |               |             | 11.71         | 99             | 5.30         |
| Year of Follow-up: 2000, Age Group: 40-44    |           |               |       |       |               |             |               |                |              |
| Period                                       | Age Group | Smoking Group | N     | %     | Ever Quit (N) | Ever Quit % | Mean Yrs Quit | Short Term (n) | Short Term % |
| 10                                           | 40-44     | Never Any     | 5282  | 50.31 |               |             |               |                |              |
| 10                                           | 40-44     | CC            | 2909  | 27.71 | 0             | 0.00        |               |                |              |
| 10                                           | 40-44     | Former        | 2308  | 21.98 |               |             | 12.36         | 121            | 5.24         |
| Year of Follow-up: 2000, Age Group: 45-49    |           |               |       |       |               |             |               |                |              |
| Period                                       | Age Group | Smoking Group | N     | %     | Ever Quit (N) | Ever Quit % | Mean Yrs Quit | Short Term (n) | Short Term % |
| 10                                           | 45-49     | Never Any     | 5018  | 52.27 |               |             |               |                |              |
| 10                                           | 45-49     | CC            | 2119  | 22.07 | 0             | 0.00        |               |                |              |
| 10                                           | 45-49     | Former        | 2463  | 25.66 |               |             | 14.83         | 164            | 6.66         |
| Year of Follow-up: 2000, Age Group: 50-54    |           |               |       |       |               |             |               |                |              |
| Period                                       | Age Group | Smoking Group | N     | %     | Ever Quit (N) | Ever Quit % | Mean Yrs Quit | Short Term (n) | Short Term % |
| 10                                           | 50-54     | Never Any     | 4356  | 51.27 |               |             |               |                |              |
| 10                                           | 50-54     | CC            | 1637  | 19.27 | 0             | 0.00        |               |                |              |
| 10                                           | 50-54     | Former        | 2504  | 29.47 |               |             | 13.17         | 199            | 7.95         |
| Year of Follow-up: 2000, Age Group: 55-59    |           |               |       |       |               |             |               |                |              |
| Period                                       | Age Group | Smoking Group | N     | %     | Ever Quit (N) | Ever Quit % | Mean Yrs Quit | Short Term (n) | Short Term % |

**Results for PHIM for Run 2 (Main\_Analysis.RTF)**

|                                              |           |               |       |       |               |             |               |                |              |
|----------------------------------------------|-----------|---------------|-------|-------|---------------|-------------|---------------|----------------|--------------|
| 10                                           | 55-59     | Never Any     | 3116  | 47.67 |               |             |               |                |              |
| 10                                           | 55-59     | CC            | 1238  | 18.94 | 0             | 0.00        |               |                |              |
| 10                                           | 55-59     | Former        | 2182  | 33.38 |               |             | 17.12         | 160            | 7.33         |
| Year of Follow-up: 2000, Age Group: 60-64    |           |               |       |       |               |             |               |                |              |
| Period                                       | Age Group | Smoking Group | N     | %     | Ever Quit (N) | Ever Quit % | Mean Yrs Quit | Short Term (n) | Short Term % |
| 10                                           | 60-64     | Never Any     | 2684  | 48.50 |               |             |               |                |              |
| 10                                           | 60-64     | CC            | 986   | 17.82 | 0             | 0.00        |               |                |              |
| 10                                           | 60-64     | Former        | 1864  | 33.68 |               |             | 17.20         | 136            | 7.30         |
| Year of Follow-up: 2000, Age Group: 65-69    |           |               |       |       |               |             |               |                |              |
| Period                                       | Age Group | Smoking Group | N     | %     | Ever Quit (N) | Ever Quit % | Mean Yrs Quit | Short Term (n) | Short Term % |
| 10                                           | 65-69     | Never Any     | 2732  | 51.90 |               |             |               |                |              |
| 10                                           | 65-69     | CC            | 745   | 14.15 | 0             | 0.00        |               |                |              |
| 10                                           | 65-69     | Former        | 1787  | 33.95 |               |             | 20.07         | 142            | 7.95         |
| Year of Follow-up: 2000, Age Group: 70-74    |           |               |       |       |               |             |               |                |              |
| Period                                       | Age Group | Smoking Group | N     | %     | Ever Quit (N) | Ever Quit % | Mean Yrs Quit | Short Term (n) | Short Term % |
| 10                                           | 70-74     | Never Any     | 3078  | 55.72 |               |             |               |                |              |
| 10                                           | 70-74     | CC            | 669   | 12.11 | 0             | 0.00        |               |                |              |
| 10                                           | 70-74     | Former        | 1777  | 32.17 |               |             | 20.49         | 122            | 6.87         |
| Year of Follow-up: 2000, Age Group: 75-79    |           |               |       |       |               |             |               |                |              |
| Period                                       | Age Group | Smoking Group | N     | %     | Ever Quit (N) | Ever Quit % | Mean Yrs Quit | Short Term (n) | Short Term % |
| 10                                           | 75-79     | Never Any     | 3042  | 57.36 |               |             |               |                |              |
| 10                                           | 75-79     | CC            | 477   | 8.99  | 0             | 0.00        |               |                |              |
| 10                                           | 75-79     | Former        | 1784  | 33.64 |               |             | 23.30         | 87             | 4.88         |
| Year of Follow-up: 2005, Age Group: All Ages |           |               |       |       |               |             |               |                |              |
| Period                                       | Age Group | Smoking Group | N     | %     | Ever Quit (N) | Ever Quit % | Mean Yrs Quit | Short Term (n) | Short Term % |
| 15                                           | All Ages  | Never Any     | 47103 | 54.39 |               |             |               |                |              |
| 15                                           | All Ages  | CC            | 17388 | 20.08 | 0             | 0.00        |               |                |              |
| 15                                           | All Ages  | Former        | 22114 | 25.53 |               |             | 17.31         | 946            | 4.28         |
| Year of Follow-up: 2005, Age Group: 18-19    |           |               |       |       |               |             |               |                |              |
| Period                                       | Age Group | Smoking Group | N     | %     | Ever Quit (N) | Ever Quit % | Mean Yrs Quit | Short Term (n) | Short Term % |
| 15                                           | 18-19     | Never Any     | 0     | .     |               |             |               |                |              |
| 15                                           | 18-19     | CC            | 0     | .     | 0             | .           |               |                |              |
| 15                                           | 18-19     | Former        | 0     | .     |               |             | .             | 0              | .            |
| Year of Follow-up: 2005, Age Group: 20-24    |           |               |       |       |               |             |               |                |              |
| Period                                       | Age Group | Smoking Group | N     | %     | Ever Quit (N) | Ever Quit % | Mean Yrs Quit | Short Term (n) | Short Term % |
| 15                                           | 20-24     | Never Any     | 0     | .     |               |             |               |                |              |
| 15                                           | 20-24     | CC            | 0     | .     | 0             | .           |               |                |              |
| 15                                           | 20-24     | Former        | 0     | .     |               |             | .             | 0              | .            |
| Year of Follow-up: 2005, Age Group: 25-29    |           |               |       |       |               |             |               |                |              |
| Period                                       | Age Group | Smoking Group | N     | %     | Ever Quit (N) | Ever Quit % | Mean Yrs Quit | Short Term (n) | Short Term % |
| 15                                           | 25-29     | Never Any     | 4932  | 62.19 |               |             |               |                |              |
| 15                                           | 25-29     | CC            | 2046  | 25.80 | 0             | 0.00        |               |                |              |
| 15                                           | 25-29     | Former        | 952   | 12.01 |               |             | 6.37          | 91             | 9.56         |
| Year of Follow-up: 2005, Age Group: 30-34    |           |               |       |       |               |             |               |                |              |
| Period                                       | Age Group | Smoking Group | N     | %     | Ever Quit (N) | Ever Quit % | Mean Yrs Quit | Short Term (n) | Short Term % |
| 15                                           | 30-34     | Never Any     | 5445  | 65.21 |               |             |               |                |              |
| 15                                           | 30-34     | CC            | 1941  | 23.25 | 0             | 0.00        |               |                |              |
| 15                                           | 30-34     | Former        | 964   | 11.54 |               |             | 8.81          | 80             | 8.30         |
| Year of Follow-up: 2005, Age Group: 35-39    |           |               |       |       |               |             |               |                |              |
| Period                                       | Age Group | Smoking Group | N     | %     | Ever Quit (N) | Ever Quit % | Mean Yrs Quit | Short Term (n) | Short Term % |
| 15                                           | 35-39     | Never Any     | 5181  | 58.92 |               |             |               |                |              |
| 15                                           | 35-39     | CC            | 2182  | 24.82 | 0             | 0.00        |               |                |              |
| 15                                           | 35-39     | Former        | 1430  | 16.26 |               |             | 12.82         | 53             | 3.71         |
| Year of Follow-up: 2005, Age Group: 40-44    |           |               |       |       |               |             |               |                |              |
| Period                                       | Age Group | Smoking Group | N     | %     | Ever Quit (N) | Ever Quit % | Mean Yrs Quit | Short Term (n) | Short Term % |
| 15                                           | 40-44     | Never Any     | 5279  | 52.38 |               |             |               |                |              |
| 15                                           | 40-44     | CC            | 2692  | 26.71 | 0             | 0.00        |               |                |              |
| 15                                           | 40-44     | Former        | 2107  | 20.91 |               |             | 15.03         | 104            | 4.94         |
| Year of Follow-up: 2005, Age Group: 45-49    |           |               |       |       |               |             |               |                |              |
| Period                                       | Age Group | Smoking Group | N     | %     | Ever Quit (N) | Ever Quit % | Mean Yrs Quit | Short Term (n) | Short Term % |
| 15                                           | 45-49     | Never Any     | 5282  | 50.31 |               |             |               |                |              |
| 15                                           | 45-49     | CC            | 2582  | 24.59 | 0             | 0.00        |               |                |              |
| 15                                           | 45-49     | Former        | 2635  | 25.10 |               |             | 15.46         | 132            | 5.01         |
| Year of Follow-up: 2005, Age Group: 50-54    |           |               |       |       |               |             |               |                |              |
| Period                                       | Age Group | Smoking Group | N     | %     | Ever Quit (N) | Ever Quit % | Mean Yrs Quit | Short Term (n) | Short Term % |

**Results for PHIM for Run 2 (Main\_Analysis.RTF)**

|                                              |           |               |       |       |               |             |               |                |              |
|----------------------------------------------|-----------|---------------|-------|-------|---------------|-------------|---------------|----------------|--------------|
| 15                                           | 50-54     | Never Any     | 5018  | 52.27 |               |             |               |                |              |
| 15                                           | 50-54     | CC            | 1831  | 19.07 | 0             | 0.00        |               |                |              |
| 15                                           | 50-54     | Former        | 2751  | 28.66 |               |             | 18.00         | 96             | 3.49         |
| Year of Follow-up: 2005, Age Group: 55-59    |           |               |       |       |               |             |               |                |              |
| Period                                       | Age Group | Smoking Group | N     | %     | Ever Quit (N) | Ever Quit % | Mean Yrs Quit | Short Term (n) | Short Term % |
| 15                                           | 55-59     | Never Any     | 4356  | 51.27 |               |             |               |                |              |
| 15                                           | 55-59     | CC            | 1398  | 16.45 | 0             | 0.00        |               |                |              |
| 15                                           | 55-59     | Former        | 2743  | 32.28 |               |             | 16.81         | 63             | 2.30         |
| Year of Follow-up: 2005, Age Group: 60-64    |           |               |       |       |               |             |               |                |              |
| Period                                       | Age Group | Smoking Group | N     | %     | Ever Quit (N) | Ever Quit % | Mean Yrs Quit | Short Term (n) | Short Term % |
| 15                                           | 60-64     | Never Any     | 3116  | 47.67 |               |             |               |                |              |
| 15                                           | 60-64     | CC            | 972   | 14.87 | 0             | 0.00        |               |                |              |
| 15                                           | 60-64     | Former        | 2448  | 37.45 |               |             | 19.94         | 116            | 4.74         |
| Year of Follow-up: 2005, Age Group: 65-69    |           |               |       |       |               |             |               |                |              |
| Period                                       | Age Group | Smoking Group | N     | %     | Ever Quit (N) | Ever Quit % | Mean Yrs Quit | Short Term (n) | Short Term % |
| 15                                           | 65-69     | Never Any     | 2684  | 48.50 |               |             |               |                |              |
| 15                                           | 65-69     | CC            | 725   | 13.10 | 0             | 0.00        |               |                |              |
| 15                                           | 65-69     | Former        | 2125  | 38.40 |               |             | 19.76         | 83             | 3.91         |
| Year of Follow-up: 2005, Age Group: 70-74    |           |               |       |       |               |             |               |                |              |
| Period                                       | Age Group | Smoking Group | N     | %     | Ever Quit (N) | Ever Quit % | Mean Yrs Quit | Short Term (n) | Short Term % |
| 15                                           | 70-74     | Never Any     | 2732  | 51.90 |               |             |               |                |              |
| 15                                           | 70-74     | CC            | 555   | 10.54 | 0             | 0.00        |               |                |              |
| 15                                           | 70-74     | Former        | 1977  | 37.56 |               |             | 22.86         | 71             | 3.59         |
| Year of Follow-up: 2005, Age Group: 75-79    |           |               |       |       |               |             |               |                |              |
| Period                                       | Age Group | Smoking Group | N     | %     | Ever Quit (N) | Ever Quit % | Mean Yrs Quit | Short Term (n) | Short Term % |
| 15                                           | 75-79     | Never Any     | 3078  | 55.72 |               |             |               |                |              |
| 15                                           | 75-79     | CC            | 464   | 8.40  | 0             | 0.00        |               |                |              |
| 15                                           | 75-79     | Former        | 1982  | 35.88 |               |             | 23.10         | 57             | 2.88         |
| Year of Follow-up: 2010, Age Group: All Ages |           |               |       |       |               |             |               |                |              |
| Period                                       | Age Group | Smoking Group | N     | %     | Ever Quit (N) | Ever Quit % | Mean Yrs Quit | Short Term (n) | Short Term % |
| 20                                           | All Ages  | Never Any     | 43878 | 54.12 |               |             |               |                |              |
| 20                                           | All Ages  | CC            | 14309 | 17.65 | 0             | 0.00        |               |                |              |
| 20                                           | All Ages  | Former        | 22894 | 28.24 |               |             | 19.34         | 1178           | 5.15         |
| Year of Follow-up: 2010, Age Group: 18-19    |           |               |       |       |               |             |               |                |              |
| Period                                       | Age Group | Smoking Group | N     | %     | Ever Quit (N) | Ever Quit % | Mean Yrs Quit | Short Term (n) | Short Term % |
| 20                                           | 18-19     | Never Any     | 0     | .     |               |             |               |                |              |
| 20                                           | 18-19     | CC            | 0     | .     | 0             | .           |               |                |              |
| 20                                           | 18-19     | Former        | 0     | .     |               |             | .             | 0              | .            |
| Year of Follow-up: 2010, Age Group: 20-24    |           |               |       |       |               |             |               |                |              |
| Period                                       | Age Group | Smoking Group | N     | %     | Ever Quit (N) | Ever Quit % | Mean Yrs Quit | Short Term (n) | Short Term % |
| 20                                           | 20-24     | Never Any     | 0     | .     |               |             |               |                |              |
| 20                                           | 20-24     | CC            | 0     | .     | 0             | .           |               |                |              |
| 20                                           | 20-24     | Former        | 0     | .     |               |             | .             | 0              | .            |
| Year of Follow-up: 2010, Age Group: 25-29    |           |               |       |       |               |             |               |                |              |
| Period                                       | Age Group | Smoking Group | N     | %     | Ever Quit (N) | Ever Quit % | Mean Yrs Quit | Short Term (n) | Short Term % |
| 20                                           | 25-29     | Never Any     | 0     | .     |               |             |               |                |              |
| 20                                           | 25-29     | CC            | 0     | .     | 0             | .           |               |                |              |
| 20                                           | 25-29     | Former        | 0     | .     |               |             | .             | 0              | .            |
| Year of Follow-up: 2010, Age Group: 30-34    |           |               |       |       |               |             |               |                |              |
| Period                                       | Age Group | Smoking Group | N     | %     | Ever Quit (N) | Ever Quit % | Mean Yrs Quit | Short Term (n) | Short Term % |
| 20                                           | 30-34     | Never Any     | 4823  | 60.82 |               |             |               |                |              |
| 20                                           | 30-34     | CC            | 1886  | 23.78 | 0             | 0.00        |               |                |              |
| 20                                           | 30-34     | Former        | 1221  | 15.40 |               |             | 9.25          | 131            | 10.73        |
| Year of Follow-up: 2010, Age Group: 35-39    |           |               |       |       |               |             |               |                |              |
| Period                                       | Age Group | Smoking Group | N     | %     | Ever Quit (N) | Ever Quit % | Mean Yrs Quit | Short Term (n) | Short Term % |
| 20                                           | 35-39     | Never Any     | 5407  | 64.75 |               |             |               |                |              |
| 20                                           | 35-39     | CC            | 1717  | 20.56 | 0             | 0.00        |               |                |              |
| 20                                           | 35-39     | Former        | 1226  | 14.68 |               |             | 11.27         | 97             | 7.91         |
| Year of Follow-up: 2010, Age Group: 40-44    |           |               |       |       |               |             |               |                |              |
| Period                                       | Age Group | Smoking Group | N     | %     | Ever Quit (N) | Ever Quit % | Mean Yrs Quit | Short Term (n) | Short Term % |
| 20                                           | 40-44     | Never Any     | 5181  | 58.92 |               |             |               |                |              |
| 20                                           | 40-44     | CC            | 1927  | 21.92 | 0             | 0.00        |               |                |              |
| 20                                           | 40-44     | Former        | 1685  | 19.16 |               |             | 15.41         | 106            | 6.29         |
| Year of Follow-up: 2010, Age Group: 45-49    |           |               |       |       |               |             |               |                |              |
| Period                                       | Age Group | Smoking Group | N     | %     | Ever Quit (N) | Ever Quit % | Mean Yrs Quit | Short Term (n) | Short Term % |

**Results for PHIM for Run 2 (Main\_Analysis.RTF)**

|                                              |           |               |       |       |               |             |               |                |              |
|----------------------------------------------|-----------|---------------|-------|-------|---------------|-------------|---------------|----------------|--------------|
| 20                                           | 45-49     | Never Any     | 5279  | 52.38 |               |             |               |                |              |
| 20                                           | 45-49     | CC            | 2378  | 23.60 | 0             | 0.00        |               |                |              |
| 20                                           | 45-49     | Former        | 2421  | 24.02 |               |             | 17.69         | 128            | 5.29         |
| Year of Follow-up: 2010, Age Group: 50-54    |           |               |       |       |               |             |               |                |              |
| Period                                       | Age Group | Smoking Group | N     | %     | Ever Quit (N) | Ever Quit % | Mean Yrs Quit | Short Term (n) | Short Term % |
| 20                                           | 50-54     | Never Any     | 5282  | 50.31 |               |             |               |                |              |
| 20                                           | 50-54     | CC            | 2192  | 20.88 | 0             | 0.00        |               |                |              |
| 20                                           | 50-54     | Former        | 3025  | 28.81 |               |             | 18.05         | 181            | 5.98         |
| Year of Follow-up: 2010, Age Group: 55-59    |           |               |       |       |               |             |               |                |              |
| Period                                       | Age Group | Smoking Group | N     | %     | Ever Quit (N) | Ever Quit % | Mean Yrs Quit | Short Term (n) | Short Term % |
| 20                                           | 55-59     | Never Any     | 5018  | 52.27 |               |             |               |                |              |
| 20                                           | 55-59     | CC            | 1529  | 15.93 | 0             | 0.00        |               |                |              |
| 20                                           | 55-59     | Former        | 3053  | 31.80 |               |             | 20.92         | 129            | 4.23         |
| Year of Follow-up: 2010, Age Group: 60-64    |           |               |       |       |               |             |               |                |              |
| Period                                       | Age Group | Smoking Group | N     | %     | Ever Quit (N) | Ever Quit % | Mean Yrs Quit | Short Term (n) | Short Term % |
| 20                                           | 60-64     | Never Any     | 4356  | 51.27 |               |             |               |                |              |
| 20                                           | 60-64     | CC            | 1087  | 12.79 | 0             | 0.00        |               |                |              |
| 20                                           | 60-64     | Former        | 3054  | 35.94 |               |             | 19.75         | 163            | 5.34         |
| Year of Follow-up: 2010, Age Group: 65-69    |           |               |       |       |               |             |               |                |              |
| Period                                       | Age Group | Smoking Group | N     | %     | Ever Quit (N) | Ever Quit % | Mean Yrs Quit | Short Term (n) | Short Term % |
| 20                                           | 65-69     | Never Any     | 3116  | 47.67 |               |             |               |                |              |
| 20                                           | 65-69     | CC            | 677   | 10.36 | 0             | 0.00        |               |                |              |
| 20                                           | 65-69     | Former        | 2743  | 41.97 |               |             | 22.49         | 97             | 3.54         |
| Year of Follow-up: 2010, Age Group: 70-74    |           |               |       |       |               |             |               |                |              |
| Period                                       | Age Group | Smoking Group | N     | %     | Ever Quit (N) | Ever Quit % | Mean Yrs Quit | Short Term (n) | Short Term % |
| 20                                           | 70-74     | Never Any     | 2684  | 48.50 |               |             |               |                |              |
| 20                                           | 70-74     | CC            | 527   | 9.52  | 0             | 0.00        |               |                |              |
| 20                                           | 70-74     | Former        | 2323  | 41.98 |               |             | 22.81         | 85             | 3.66         |
| Year of Follow-up: 2010, Age Group: 75-79    |           |               |       |       |               |             |               |                |              |
| Period                                       | Age Group | Smoking Group | N     | %     | Ever Quit (N) | Ever Quit % | Mean Yrs Quit | Short Term (n) | Short Term % |
| 20                                           | 75-79     | Never Any     | 2732  | 51.90 |               |             |               |                |              |
| 20                                           | 75-79     | CC            | 389   | 7.39  | 0             | 0.00        |               |                |              |
| 20                                           | 75-79     | Former        | 2143  | 40.71 |               |             | 25.87         | 61             | 2.85         |
| Year of Follow-up: 2015, Age Group: All Ages |           |               |       |       |               |             |               |                |              |
| Period                                       | Age Group | Smoking Group | N     | %     | Ever Quit (N) | Ever Quit % | Mean Yrs Quit | Short Term (n) | Short Term % |
| 25                                           | All Ages  | Never Any     | 41126 | 54.24 |               |             |               |                |              |
| 25                                           | All Ages  | CC            | 11487 | 15.15 | 0             | 0.00        |               |                |              |
| 25                                           | All Ages  | Former        | 23204 | 30.61 |               |             | 21.38         | 942            | 4.06         |
| Year of Follow-up: 2015, Age Group: 18-19    |           |               |       |       |               |             |               |                |              |
| Period                                       | Age Group | Smoking Group | N     | %     | Ever Quit (N) | Ever Quit % | Mean Yrs Quit | Short Term (n) | Short Term % |
| 25                                           | 18-19     | Never Any     | 0     | .     |               |             |               |                |              |
| 25                                           | 18-19     | CC            | 0     | .     | 0             | .           |               |                |              |
| 25                                           | 18-19     | Former        | 0     | .     |               |             | .             | 0              | .            |
| Year of Follow-up: 2015, Age Group: 20-24    |           |               |       |       |               |             |               |                |              |
| Period                                       | Age Group | Smoking Group | N     | %     | Ever Quit (N) | Ever Quit % | Mean Yrs Quit | Short Term (n) | Short Term % |
| 25                                           | 20-24     | Never Any     | 0     | .     |               |             |               |                |              |
| 25                                           | 20-24     | CC            | 0     | .     | 0             | .           |               |                |              |
| 25                                           | 20-24     | Former        | 0     | .     |               |             | .             | 0              | .            |
| Year of Follow-up: 2015, Age Group: 25-29    |           |               |       |       |               |             |               |                |              |
| Period                                       | Age Group | Smoking Group | N     | %     | Ever Quit (N) | Ever Quit % | Mean Yrs Quit | Short Term (n) | Short Term % |
| 25                                           | 25-29     | Never Any     | 0     | .     |               |             |               |                |              |
| 25                                           | 25-29     | CC            | 0     | .     | 0             | .           |               |                |              |
| 25                                           | 25-29     | Former        | 0     | .     |               |             | .             | 0              | .            |
| Year of Follow-up: 2015, Age Group: 30-34    |           |               |       |       |               |             |               |                |              |
| Period                                       | Age Group | Smoking Group | N     | %     | Ever Quit (N) | Ever Quit % | Mean Yrs Quit | Short Term (n) | Short Term % |
| 25                                           | 30-34     | Never Any     | 0     | .     |               |             |               |                |              |
| 25                                           | 30-34     | CC            | 0     | .     | 0             | .           |               |                |              |
| 25                                           | 30-34     | Former        | 0     | .     |               |             | .             | 0              | .            |
| Year of Follow-up: 2015, Age Group: 35-39    |           |               |       |       |               |             |               |                |              |
| Period                                       | Age Group | Smoking Group | N     | %     | Ever Quit (N) | Ever Quit % | Mean Yrs Quit | Short Term (n) | Short Term % |
| 25                                           | 35-39     | Never Any     | 4803  | 60.57 |               |             |               |                |              |
| 25                                           | 35-39     | CC            | 1520  | 19.17 | 0             | 0.00        |               |                |              |
| 25                                           | 35-39     | Former        | 1607  | 20.26 |               |             | 11.32         | 140            | 8.71         |
| Year of Follow-up: 2015, Age Group: 40-44    |           |               |       |       |               |             |               |                |              |
| Period                                       | Age Group | Smoking Group | N     | %     | Ever Quit (N) | Ever Quit % | Mean Yrs Quit | Short Term (n) | Short Term % |

**Results for PHIM for Run 2 (Main\_Analysis.RTF)**

|                                              |           |               |       |       |               |             |               |                |              |
|----------------------------------------------|-----------|---------------|-------|-------|---------------|-------------|---------------|----------------|--------------|
| 25                                           | 40-44     | Never Any     | 5407  | 64.75 |               |             |               |                |              |
| 25                                           | 40-44     | CC            | 1456  | 17.44 | 0             | 0.00        |               |                |              |
| 25                                           | 40-44     | Former        | 1487  | 17.81 |               |             | 13.77         | 95             | 6.39         |
| Year of Follow-up: 2015, Age Group: 45-49    |           |               |       |       |               |             |               |                |              |
| Period                                       | Age Group | Smoking Group | N     | %     | Ever Quit (N) | Ever Quit % | Mean Yrs Quit | Short Term (n) | Short Term % |
| 25                                           | 45-49     | Never Any     | 5181  | 58.92 |               |             |               |                |              |
| 25                                           | 45-49     | CC            | 1616  | 18.38 | 0             | 0.00        |               |                |              |
| 25                                           | 45-49     | Former        | 1996  | 22.70 |               |             | 17.55         | 115            | 5.76         |
| Year of Follow-up: 2015, Age Group: 50-54    |           |               |       |       |               |             |               |                |              |
| Period                                       | Age Group | Smoking Group | N     | %     | Ever Quit (N) | Ever Quit % | Mean Yrs Quit | Short Term (n) | Short Term % |
| 25                                           | 50-54     | Never Any     | 5279  | 52.38 |               |             |               |                |              |
| 25                                           | 50-54     | CC            | 2034  | 20.18 | 0             | 0.00        |               |                |              |
| 25                                           | 50-54     | Former        | 2765  | 27.44 |               |             | 20.11         | 143            | 5.17         |
| Year of Follow-up: 2015, Age Group: 55-59    |           |               |       |       |               |             |               |                |              |
| Period                                       | Age Group | Smoking Group | N     | %     | Ever Quit (N) | Ever Quit % | Mean Yrs Quit | Short Term (n) | Short Term % |
| 25                                           | 55-59     | Never Any     | 5282  | 50.31 |               |             |               |                |              |
| 25                                           | 55-59     | CC            | 1817  | 17.31 | 0             | 0.00        |               |                |              |
| 25                                           | 55-59     | Former        | 3400  | 32.38 |               |             | 20.73         | 148            | 4.35         |
| Year of Follow-up: 2015, Age Group: 60-64    |           |               |       |       |               |             |               |                |              |
| Period                                       | Age Group | Smoking Group | N     | %     | Ever Quit (N) | Ever Quit % | Mean Yrs Quit | Short Term (n) | Short Term % |
| 25                                           | 60-64     | Never Any     | 5018  | 52.27 |               |             |               |                |              |
| 25                                           | 60-64     | CC            | 1220  | 12.71 | 0             | 0.00        |               |                |              |
| 25                                           | 60-64     | Former        | 3362  | 35.02 |               |             | 23.69         | 151            | 4.49         |
| Year of Follow-up: 2015, Age Group: 65-69    |           |               |       |       |               |             |               |                |              |
| Period                                       | Age Group | Smoking Group | N     | %     | Ever Quit (N) | Ever Quit % | Mean Yrs Quit | Short Term (n) | Short Term % |
| 25                                           | 65-69     | Never Any     | 4356  | 51.27 |               |             |               |                |              |
| 25                                           | 65-69     | CC            | 840   | 9.89  | 0             | 0.00        |               |                |              |
| 25                                           | 65-69     | Former        | 3301  | 38.85 |               |             | 23.09         | 63             | 1.91         |
| Year of Follow-up: 2015, Age Group: 70-74    |           |               |       |       |               |             |               |                |              |
| Period                                       | Age Group | Smoking Group | N     | %     | Ever Quit (N) | Ever Quit % | Mean Yrs Quit | Short Term (n) | Short Term % |
| 25                                           | 70-74     | Never Any     | 3116  | 47.67 |               |             |               |                |              |
| 25                                           | 70-74     | CC            | 565   | 8.64  | 0             | 0.00        |               |                |              |
| 25                                           | 70-74     | Former        | 2855  | 43.68 |               |             | 26.49         | 43             | 1.51         |
| Year of Follow-up: 2015, Age Group: 75-79    |           |               |       |       |               |             |               |                |              |
| Period                                       | Age Group | Smoking Group | N     | %     | Ever Quit (N) | Ever Quit % | Mean Yrs Quit | Short Term (n) | Short Term % |
| 25                                           | 75-79     | Never Any     | 2684  | 48.50 |               |             |               |                |              |
| 25                                           | 75-79     | CC            | 419   | 7.57  | 0             | 0.00        |               |                |              |
| 25                                           | 75-79     | Former        | 2431  | 43.93 |               |             | 26.67         | 44             | 1.81         |
| Year of Follow-up: 2020, Age Group: All Ages |           |               |       |       |               |             |               |                |              |
| Period                                       | Age Group | Smoking Group | N     | %     | Ever Quit (N) | Ever Quit % | Mean Yrs Quit | Short Term (n) | Short Term % |
| 30                                           | All Ages  | Never Any     | 38442 | 54.70 |               |             |               |                |              |
| 30                                           | All Ages  | CC            | 9164  | 13.04 | 0             | 0.00        |               |                |              |
| 30                                           | All Ages  | Former        | 22677 | 32.27 |               |             | 23.77         | 745            | 3.29         |
| Year of Follow-up: 2020, Age Group: 18-19    |           |               |       |       |               |             |               |                |              |
| Period                                       | Age Group | Smoking Group | N     | %     | Ever Quit (N) | Ever Quit % | Mean Yrs Quit | Short Term (n) | Short Term % |
| 30                                           | 18-19     | Never Any     | 0     | .     |               |             |               |                |              |
| 30                                           | 18-19     | CC            | 0     | .     | 0             | .           |               | 0              | .            |
| 30                                           | 18-19     | Former        | 0     | .     |               |             | .             | 0              | .            |
| Year of Follow-up: 2020, Age Group: 20-24    |           |               |       |       |               |             |               |                |              |
| Period                                       | Age Group | Smoking Group | N     | %     | Ever Quit (N) | Ever Quit % | Mean Yrs Quit | Short Term (n) | Short Term % |
| 30                                           | 20-24     | Never Any     | 0     | .     |               |             |               |                |              |
| 30                                           | 20-24     | CC            | 0     | .     | 0             | .           |               |                |              |
| 30                                           | 20-24     | Former        | 0     | .     |               |             | .             | 0              | .            |
| Year of Follow-up: 2020, Age Group: 25-29    |           |               |       |       |               |             |               |                |              |
| Period                                       | Age Group | Smoking Group | N     | %     | Ever Quit (N) | Ever Quit % | Mean Yrs Quit | Short Term (n) | Short Term % |
| 30                                           | 25-29     | Never Any     | 0     | .     |               |             |               |                |              |
| 30                                           | 25-29     | CC            | 0     | .     | 0             | .           |               |                |              |
| 30                                           | 25-29     | Former        | 0     | .     |               |             | .             | 0              | .            |
| Year of Follow-up: 2020, Age Group: 30-34    |           |               |       |       |               |             |               |                |              |
| Period                                       | Age Group | Smoking Group | N     | %     | Ever Quit (N) | Ever Quit % | Mean Yrs Quit | Short Term (n) | Short Term % |
| 30                                           | 30-34     | Never Any     | 0     | .     |               |             |               |                |              |
| 30                                           | 30-34     | CC            | 0     | .     | 0             | .           |               |                |              |
| 30                                           | 30-34     | Former        | 0     | .     |               |             | .             | 0              | .            |
| Year of Follow-up: 2020, Age Group: 35-39    |           |               |       |       |               |             |               |                |              |
| Period                                       | Age Group | Smoking Group | N     | %     | Ever Quit (N) | Ever Quit % | Mean Yrs Quit | Short Term (n) | Short Term % |

**Results for PHIM for Run 2 (Main\_Analysis.RTF)**

|                                              |           |               |       |       |               |             |               |                |              |
|----------------------------------------------|-----------|---------------|-------|-------|---------------|-------------|---------------|----------------|--------------|
| 30                                           | 35-39     | Never Any     | 0     | .     |               |             |               |                |              |
| 30                                           | 35-39     | CC            | 0     | .     | 0             | .           |               |                |              |
| 30                                           | 35-39     | Former        | 0     | .     |               |             | 0             | .              |              |
| Year of Follow-up: 2020, Age Group: 40-44    |           |               |       |       |               |             |               |                |              |
| Period                                       | Age Group | Smoking Group | N     | %     | Ever Quit (N) | Ever Quit % | Mean Yrs Quit | Short Term (n) | Short Term % |
| 30                                           | 40-44     | Never Any     | 4803  | 60.57 |               |             |               |                |              |
| 30                                           | 40-44     | CC            | 1279  | 16.13 | 0             | 0.00        |               |                |              |
| 30                                           | 40-44     | Former        | 1848  | 23.30 |               |             | 14.45         | 108            | 5.84         |
| Year of Follow-up: 2020, Age Group: 45-49    |           |               |       |       |               |             |               |                |              |
| Period                                       | Age Group | Smoking Group | N     | %     | Ever Quit (N) | Ever Quit % | Mean Yrs Quit | Short Term (n) | Short Term % |
| 30                                           | 45-49     | Never Any     | 5407  | 64.75 |               |             |               |                |              |
| 30                                           | 45-49     | CC            | 1247  | 14.93 | 0             | 0.00        |               |                |              |
| 30                                           | 45-49     | Former        | 1696  | 20.31 |               |             | 16.75         | 65             | 3.83         |
| Year of Follow-up: 2020, Age Group: 50-54    |           |               |       |       |               |             |               |                |              |
| Period                                       | Age Group | Smoking Group | N     | %     | Ever Quit (N) | Ever Quit % | Mean Yrs Quit | Short Term (n) | Short Term % |
| 30                                           | 50-54     | Never Any     | 5181  | 58.92 |               |             |               |                |              |
| 30                                           | 50-54     | CC            | 1363  | 15.50 | 0             | 0.00        |               |                |              |
| 30                                           | 50-54     | Former        | 2249  | 25.58 |               |             | 20.22         | 115            | 5.11         |
| Year of Follow-up: 2020, Age Group: 55-59    |           |               |       |       |               |             |               |                |              |
| Period                                       | Age Group | Smoking Group | N     | %     | Ever Quit (N) | Ever Quit % | Mean Yrs Quit | Short Term (n) | Short Term % |
| 30                                           | 55-59     | Never Any     | 5279  | 52.38 |               |             |               |                |              |
| 30                                           | 55-59     | CC            | 1698  | 16.85 | 0             | 0.00        |               |                |              |
| 30                                           | 55-59     | Former        | 3101  | 30.77 |               |             | 22.63         | 108            | 3.48         |
| Year of Follow-up: 2020, Age Group: 60-64    |           |               |       |       |               |             |               |                |              |
| Period                                       | Age Group | Smoking Group | N     | %     | Ever Quit (N) | Ever Quit % | Mean Yrs Quit | Short Term (n) | Short Term % |
| 30                                           | 60-64     | Never Any     | 5282  | 50.31 |               |             |               |                |              |
| 30                                           | 60-64     | CC            | 1451  | 13.82 | 0             | 0.00        |               |                |              |
| 30                                           | 60-64     | Former        | 3766  | 35.87 |               |             | 23.40         | 173            | 4.59         |
| Year of Follow-up: 2020, Age Group: 65-69    |           |               |       |       |               |             |               |                |              |
| Period                                       | Age Group | Smoking Group | N     | %     | Ever Quit (N) | Ever Quit % | Mean Yrs Quit | Short Term (n) | Short Term % |
| 30                                           | 65-69     | Never Any     | 5018  | 52.27 |               |             |               |                |              |
| 30                                           | 65-69     | CC            | 961   | 10.01 | 0             | 0.00        |               |                |              |
| 30                                           | 65-69     | Former        | 3621  | 37.72 |               |             | 26.81         | 78             | 2.15         |
| Year of Follow-up: 2020, Age Group: 70-74    |           |               |       |       |               |             |               |                |              |
| Period                                       | Age Group | Smoking Group | N     | %     | Ever Quit (N) | Ever Quit % | Mean Yrs Quit | Short Term (n) | Short Term % |
| 30                                           | 70-74     | Never Any     | 4356  | 51.27 |               |             |               |                |              |
| 30                                           | 70-74     | CC            | 720   | 8.47  | 0             | 0.00        |               |                |              |
| 30                                           | 70-74     | Former        | 3421  | 40.26 |               |             | 27.18         | 45             | 1.32         |
| Year of Follow-up: 2020, Age Group: 75-79    |           |               |       |       |               |             |               |                |              |
| Period                                       | Age Group | Smoking Group | N     | %     | Ever Quit (N) | Ever Quit % | Mean Yrs Quit | Short Term (n) | Short Term % |
| 30                                           | 75-79     | Never Any     | 3116  | 47.67 |               |             |               |                |              |
| 30                                           | 75-79     | CC            | 445   | 6.81  | 0             | 0.00        |               |                |              |
| 30                                           | 75-79     | Former        | 2975  | 45.52 |               |             | 30.30         | 53             | 1.78         |
| Year of Follow-up: 2025, Age Group: All Ages |           |               |       |       |               |             |               |                |              |
| Period                                       | Age Group | Smoking Group | N     | %     | Ever Quit (N) | Ever Quit % | Mean Yrs Quit | Short Term (n) | Short Term % |
| 35                                           | All Ages  | Never Any     | 35326 | 55.42 |               |             |               |                |              |
| 35                                           | All Ages  | CC            | 7117  | 11.16 | 0             | 0.00        |               |                |              |
| 35                                           | All Ages  | Former        | 21304 | 33.42 |               |             | 25.85         | 631            | 2.96         |
| Year of Follow-up: 2025, Age Group: 18-19    |           |               |       |       |               |             |               |                |              |
| Period                                       | Age Group | Smoking Group | N     | %     | Ever Quit (N) | Ever Quit % | Mean Yrs Quit | Short Term (n) | Short Term % |
| 35                                           | 18-19     | Never Any     | 0     | .     |               |             |               |                |              |
| 35                                           | 18-19     | CC            | 0     | .     | 0             | .           |               |                |              |
| 35                                           | 18-19     | Former        | 0     | .     |               |             | .             | 0              | .            |
| Year of Follow-up: 2025, Age Group: 20-24    |           |               |       |       |               |             |               |                |              |
| Period                                       | Age Group | Smoking Group | N     | %     | Ever Quit (N) | Ever Quit % | Mean Yrs Quit | Short Term (n) | Short Term % |
| 35                                           | 20-24     | Never Any     | 0     | .     |               |             |               |                |              |
| 35                                           | 20-24     | CC            | 0     | .     | 0             | .           |               |                |              |
| 35                                           | 20-24     | Former        | 0     | .     |               |             | .             | 0              | .            |
| Year of Follow-up: 2025, Age Group: 25-29    |           |               |       |       |               |             |               |                |              |
| Period                                       | Age Group | Smoking Group | N     | %     | Ever Quit (N) | Ever Quit % | Mean Yrs Quit | Short Term (n) | Short Term % |
| 35                                           | 25-29     | Never Any     | 0     | .     |               |             |               |                |              |
| 35                                           | 25-29     | CC            | 0     | .     | 0             | .           |               |                |              |
| 35                                           | 25-29     | Former        | 0     | .     |               |             | .             | 0              | .            |
| Year of Follow-up: 2025, Age Group: 30-34    |           |               |       |       |               |             |               |                |              |
| Period                                       | Age Group | Smoking Group | N     | %     | Ever Quit (N) | Ever Quit % | Mean Yrs Quit | Short Term (n) | Short Term % |



**Results for PHIM for Run 2 (Main\_Analysis.RTF)**

|                                              |           |               |       |       |               |             |               |                |              |
|----------------------------------------------|-----------|---------------|-------|-------|---------------|-------------|---------------|----------------|--------------|
| 35                                           | 30-34     | Never Any     | 0     | .     |               |             |               |                |              |
| 35                                           | 30-34     | CC            | 0     | .     | 0             | .           |               |                |              |
| 35                                           | 30-34     | Former        | 0     | .     |               |             | 0             | .              |              |
| Year of Follow-up: 2025, Age Group: 35-39    |           |               |       |       |               |             |               |                |              |
| Period                                       | Age Group | Smoking Group | N     | %     | Ever Quit (N) | Ever Quit % | Mean Yrs Quit | Short Term (n) | Short Term % |
| 35                                           | 35-39     | Never Any     | 0     | .     |               |             |               |                |              |
| 35                                           | 35-39     | CC            | 0     | .     | 0             | .           |               |                |              |
| 35                                           | 35-39     | Former        | 0     | .     |               |             | 0             | .              |              |
| Year of Follow-up: 2025, Age Group: 40-44    |           |               |       |       |               |             |               |                |              |
| Period                                       | Age Group | Smoking Group | N     | %     | Ever Quit (N) | Ever Quit % | Mean Yrs Quit | Short Term (n) | Short Term % |
| 35                                           | 40-44     | Never Any     | 0     | .     |               |             |               |                |              |
| 35                                           | 40-44     | CC            | 0     | .     | 0             | .           |               |                |              |
| 35                                           | 40-44     | Former        | 0     | .     |               |             | 0             | .              |              |
| Year of Follow-up: 2025, Age Group: 45-49    |           |               |       |       |               |             |               |                |              |
| Period                                       | Age Group | Smoking Group | N     | %     | Ever Quit (N) | Ever Quit % | Mean Yrs Quit | Short Term (n) | Short Term % |
| 35                                           | 45-49     | Never Any     | 4803  | 60.57 |               |             |               |                |              |
| 35                                           | 45-49     | CC            | 1077  | 13.58 | 0             | 0.00        |               |                |              |
| 35                                           | 45-49     | Former        | 2050  | 25.85 |               |             | 17.75         | 79             | 3.85         |
| Year of Follow-up: 2025, Age Group: 50-54    |           |               |       |       |               |             |               |                |              |
| Period                                       | Age Group | Smoking Group | N     | %     | Ever Quit (N) | Ever Quit % | Mean Yrs Quit | Short Term (n) | Short Term % |
| 35                                           | 50-54     | Never Any     | 5407  | 64.75 |               |             |               |                |              |
| 35                                           | 50-54     | CC            | 1071  | 12.83 | 0             | 0.00        |               |                |              |
| 35                                           | 50-54     | Former        | 1872  | 22.42 |               |             | 19.88         | 75             | 4.01         |
| Year of Follow-up: 2025, Age Group: 55-59    |           |               |       |       |               |             |               |                |              |
| Period                                       | Age Group | Smoking Group | N     | %     | Ever Quit (N) | Ever Quit % | Mean Yrs Quit | Short Term (n) | Short Term % |
| 35                                           | 55-59     | Never Any     | 5181  | 58.92 |               |             |               |                |              |
| 35                                           | 55-59     | CC            | 1098  | 12.49 | 0             | 0.00        |               |                |              |
| 35                                           | 55-59     | Former        | 2514  | 28.59 |               |             | 22.77         | 110            | 4.38         |
| Year of Follow-up: 2025, Age Group: 60-64    |           |               |       |       |               |             |               |                |              |
| Period                                       | Age Group | Smoking Group | N     | %     | Ever Quit (N) | Ever Quit % | Mean Yrs Quit | Short Term (n) | Short Term % |
| 35                                           | 60-64     | Never Any     | 5279  | 52.38 |               |             |               |                |              |
| 35                                           | 60-64     | CC            | 1327  | 13.17 | 0             | 0.00        |               |                |              |
| 35                                           | 60-64     | Former        | 3472  | 34.45 |               |             | 24.88         | 166            | 4.78         |
| Year of Follow-up: 2025, Age Group: 65-69    |           |               |       |       |               |             |               |                |              |
| Period                                       | Age Group | Smoking Group | N     | %     | Ever Quit (N) | Ever Quit % | Mean Yrs Quit | Short Term (n) | Short Term % |
| 35                                           | 65-69     | Never Any     | 5282  | 50.31 |               |             |               |                |              |
| 35                                           | 65-69     | CC            | 1147  | 10.92 | 0             | 0.00        |               |                |              |
| 35                                           | 65-69     | Former        | 4070  | 38.77 |               |             | 26.47         | 82             | 2.01         |
| Year of Follow-up: 2025, Age Group: 70-74    |           |               |       |       |               |             |               |                |              |
| Period                                       | Age Group | Smoking Group | N     | %     | Ever Quit (N) | Ever Quit % | Mean Yrs Quit | Short Term (n) | Short Term % |
| 35                                           | 70-74     | Never Any     | 5018  | 52.27 |               |             |               |                |              |
| 35                                           | 70-74     | CC            | 817   | 8.51  | 0             | 0.00        |               |                |              |
| 35                                           | 70-74     | Former        | 3765  | 39.22 |               |             | 30.66         | 59             | 1.57         |
| Year of Follow-up: 2025, Age Group: 75-79    |           |               |       |       |               |             |               |                |              |
| Period                                       | Age Group | Smoking Group | N     | %     | Ever Quit (N) | Ever Quit % | Mean Yrs Quit | Short Term (n) | Short Term % |
| 35                                           | 75-79     | Never Any     | 4356  | 51.27 |               |             |               |                |              |
| 35                                           | 75-79     | CC            | 580   | 6.83  | 0             | 0.00        |               |                |              |
| 35                                           | 75-79     | Former        | 3561  | 41.91 |               |             | 30.99         | 60             | 1.68         |
| Year of Follow-up: 2030, Age Group: All Ages |           |               |       |       |               |             |               |                |              |
| Period                                       | Age Group | Smoking Group | N     | %     | Ever Quit (N) | Ever Quit % | Mean Yrs Quit | Short Term (n) | Short Term % |
| 40                                           | All Ages  | Never Any     | 30970 | 56.05 |               |             |               |                |              |
| 40                                           | All Ages  | CC            | 5318  | 9.63  | 0             | 0.00        |               |                |              |
| 40                                           | All Ages  | Former        | 18962 | 34.32 |               |             | 28.04         | 458            | 2.42         |
| Year of Follow-up: 2030, Age Group: 18-19    |           |               |       |       |               |             |               |                |              |
| Period                                       | Age Group | Smoking Group | N     | %     | Ever Quit (N) | Ever Quit % | Mean Yrs Quit | Short Term (n) | Short Term % |
| 40                                           | 18-19     | Never Any     | 0     | .     |               |             |               |                |              |
| 40                                           | 18-19     | CC            | 0     | .     | 0             | .           |               |                |              |
| 40                                           | 18-19     | Former        | 0     | .     |               |             | 0             | .              |              |
| Year of Follow-up: 2030, Age Group: 20-24    |           |               |       |       |               |             |               |                |              |
| Period                                       | Age Group | Smoking Group | N     | %     | Ever Quit (N) | Ever Quit % | Mean Yrs Quit | Short Term (n) | Short Term % |
| 40                                           | 20-24     | Never Any     | 0     | .     |               |             |               |                |              |
| 40                                           | 20-24     | CC            | 0     | .     | 0             | .           |               |                |              |
| 40                                           | 20-24     | Former        | 0     | .     |               |             | 0             | .              |              |
| Year of Follow-up: 2030, Age Group: 25-29    |           |               |       |       |               |             |               |                |              |
| Period                                       | Age Group | Smoking Group | N     | %     | Ever Quit (N) | Ever Quit % | Mean Yrs Quit | Short Term (n) | Short Term % |

**Results for PHIM for Run 2 (Main\_Analysis.RTF)**

|                                              |           |               |       |       |               |             |               |                |              |
|----------------------------------------------|-----------|---------------|-------|-------|---------------|-------------|---------------|----------------|--------------|
| 40                                           | 25-29     | Never Any     | 0     | .     |               |             |               |                |              |
| 40                                           | 25-29     | CC            | 0     | .     | 0             | .           |               |                |              |
| 40                                           | 25-29     | Former        | 0     | .     |               |             | 0             | .              |              |
| Year of Follow-up: 2030, Age Group: 30-34    |           |               |       |       |               |             |               |                |              |
| Period                                       | Age Group | Smoking Group | N     | %     | Ever Quit (N) | Ever Quit % | Mean Yrs Quit | Short Term (n) | Short Term % |
| 40                                           | 30-34     | Never Any     | 0     | .     |               |             |               |                |              |
| 40                                           | 30-34     | CC            | 0     | .     | 0             | .           |               |                |              |
| 40                                           | 30-34     | Former        | 0     | .     |               |             | 0             | .              |              |
| Year of Follow-up: 2030, Age Group: 35-39    |           |               |       |       |               |             |               |                |              |
| Period                                       | Age Group | Smoking Group | N     | %     | Ever Quit (N) | Ever Quit % | Mean Yrs Quit | Short Term (n) | Short Term % |
| 40                                           | 35-39     | Never Any     | 0     | .     |               |             |               |                |              |
| 40                                           | 35-39     | CC            | 0     | .     | 0             | .           |               |                |              |
| 40                                           | 35-39     | Former        | 0     | .     |               |             | 0             | .              |              |
| Year of Follow-up: 2030, Age Group: 40-44    |           |               |       |       |               |             |               |                |              |
| Period                                       | Age Group | Smoking Group | N     | %     | Ever Quit (N) | Ever Quit % | Mean Yrs Quit | Short Term (n) | Short Term % |
| 40                                           | 40-44     | Never Any     | 0     | .     |               |             |               |                |              |
| 40                                           | 40-44     | CC            | 0     | .     | 0             | .           |               |                |              |
| 40                                           | 40-44     | Former        | 0     | .     |               |             | 0             | .              |              |
| Year of Follow-up: 2030, Age Group: 45-49    |           |               |       |       |               |             |               |                |              |
| Period                                       | Age Group | Smoking Group | N     | %     | Ever Quit (N) | Ever Quit % | Mean Yrs Quit | Short Term (n) | Short Term % |
| 40                                           | 45-49     | Never Any     | 0     | .     |               |             |               |                |              |
| 40                                           | 45-49     | CC            | 0     | .     | 0             | .           |               |                |              |
| 40                                           | 45-49     | Former        | 0     | .     |               |             | 0             | .              |              |
| Year of Follow-up: 2030, Age Group: 50-54    |           |               |       |       |               |             |               |                |              |
| Period                                       | Age Group | Smoking Group | N     | %     | Ever Quit (N) | Ever Quit % | Mean Yrs Quit | Short Term (n) | Short Term % |
| 40                                           | 50-54     | Never Any     | 4803  | 60.57 |               |             |               |                |              |
| 40                                           | 50-54     | CC            | 918   | 11.58 | 0             | 0.00        |               |                |              |
| 40                                           | 50-54     | Former        | 2209  | 27.86 |               |             | 21.26         | 61             | 2.76         |
| Year of Follow-up: 2030, Age Group: 55-59    |           |               |       |       |               |             |               |                |              |
| Period                                       | Age Group | Smoking Group | N     | %     | Ever Quit (N) | Ever Quit % | Mean Yrs Quit | Short Term (n) | Short Term % |
| 40                                           | 55-59     | Never Any     | 5407  | 64.75 |               |             |               |                |              |
| 40                                           | 55-59     | CC            | 881   | 10.55 | 0             | 0.00        |               |                |              |
| 40                                           | 55-59     | Former        | 2062  | 24.69 |               |             | 22.78         | 70             | 3.39         |
| Year of Follow-up: 2030, Age Group: 60-64    |           |               |       |       |               |             |               |                |              |
| Period                                       | Age Group | Smoking Group | N     | %     | Ever Quit (N) | Ever Quit % | Mean Yrs Quit | Short Term (n) | Short Term % |
| 40                                           | 60-64     | Never Any     | 5181  | 58.92 |               |             |               |                |              |
| 40                                           | 60-64     | CC            | 870   | 9.89  | 0             | 0.00        |               |                |              |
| 40                                           | 60-64     | Former        | 2742  | 31.18 |               |             | 25.61         | 111            | 4.05         |
| Year of Follow-up: 2030, Age Group: 65-69    |           |               |       |       |               |             |               |                |              |
| Period                                       | Age Group | Smoking Group | N     | %     | Ever Quit (N) | Ever Quit % | Mean Yrs Quit | Short Term (n) | Short Term % |
| 40                                           | 65-69     | Never Any     | 5279  | 52.38 |               |             |               |                |              |
| 40                                           | 65-69     | CC            | 1041  | 10.33 | 0             | 0.00        |               |                |              |
| 40                                           | 65-69     | Former        | 3758  | 37.29 |               |             | 27.80         | 71             | 1.89         |
| Year of Follow-up: 2030, Age Group: 70-74    |           |               |       |       |               |             |               |                |              |
| Period                                       | Age Group | Smoking Group | N     | %     | Ever Quit (N) | Ever Quit % | Mean Yrs Quit | Short Term (n) | Short Term % |
| 40                                           | 70-74     | Never Any     | 5282  | 50.31 |               |             |               |                |              |
| 40                                           | 70-74     | CC            | 965   | 9.19  | 0             | 0.00        |               |                |              |
| 40                                           | 70-74     | Former        | 4252  | 40.50 |               |             | 30.20         | 80             | 1.88         |
| Year of Follow-up: 2030, Age Group: 75-79    |           |               |       |       |               |             |               |                |              |
| Period                                       | Age Group | Smoking Group | N     | %     | Ever Quit (N) | Ever Quit % | Mean Yrs Quit | Short Term (n) | Short Term % |
| 40                                           | 75-79     | Never Any     | 5018  | 52.27 |               |             |               |                |              |
| 40                                           | 75-79     | CC            | 643   | 6.70  | 0             | 0.00        |               |                |              |
| 40                                           | 75-79     | Former        | 3939  | 41.03 |               |             | 34.18         | 65             | 1.65         |
| Year of Follow-up: 2035, Age Group: All Ages |           |               |       |       |               |             |               |                |              |
| Period                                       | Age Group | Smoking Group | N     | %     | Ever Quit (N) | Ever Quit % | Mean Yrs Quit | Short Term (n) | Short Term % |
| 45                                           | All Ages  | Never Any     | 25952 | 56.85 |               |             |               |                |              |
| 45                                           | All Ages  | CC            | 3767  | 8.25  | 0             | 0.00        |               |                |              |
| 45                                           | All Ages  | Former        | 15931 | 34.90 |               |             | 29.76         | 350            | 2.20         |
| Year of Follow-up: 2035, Age Group: 18-19    |           |               |       |       |               |             |               |                |              |
| Period                                       | Age Group | Smoking Group | N     | %     | Ever Quit (N) | Ever Quit % | Mean Yrs Quit | Short Term (n) | Short Term % |
| 45                                           | 18-19     | Never Any     | 0     | .     |               |             |               |                |              |
| 45                                           | 18-19     | CC            | 0     | .     | 0             | .           |               |                |              |
| 45                                           | 18-19     | Former        | 0     | .     |               |             | 0             | .              |              |
| Year of Follow-up: 2035, Age Group: 20-24    |           |               |       |       |               |             |               |                |              |
| Period                                       | Age Group | Smoking Group | N     | %     | Ever Quit (N) | Ever Quit % | Mean Yrs Quit | Short Term (n) | Short Term % |

**Results for PHIM for Run 2 (Main\_Analysis.RTF)**

|                                              |           |               |       |       |               |             |               |                |              |
|----------------------------------------------|-----------|---------------|-------|-------|---------------|-------------|---------------|----------------|--------------|
| 45                                           | 20-24     | Never Any     | 0     | .     |               |             |               |                |              |
| 45                                           | 20-24     | CC            | 0     | .     | 0             | .           |               |                |              |
| 45                                           | 20-24     | Former        | 0     | .     |               |             | 0             | .              |              |
| Year of Follow-up: 2035, Age Group: 25-29    |           |               |       |       |               |             |               |                |              |
| Period                                       | Age Group | Smoking Group | N     | %     | Ever Quit (N) | Ever Quit % | Mean Yrs Quit | Short Term (n) | Short Term % |
| 45                                           | 25-29     | Never Any     | 0     | .     |               |             |               |                |              |
| 45                                           | 25-29     | CC            | 0     | .     | 0             | .           |               |                |              |
| 45                                           | 25-29     | Former        | 0     | .     |               |             | 0             | .              |              |
| Year of Follow-up: 2035, Age Group: 30-34    |           |               |       |       |               |             |               |                |              |
| Period                                       | Age Group | Smoking Group | N     | %     | Ever Quit (N) | Ever Quit % | Mean Yrs Quit | Short Term (n) | Short Term % |
| 45                                           | 30-34     | Never Any     | 0     | .     |               |             |               |                |              |
| 45                                           | 30-34     | CC            | 0     | .     | 0             | .           |               |                |              |
| 45                                           | 30-34     | Former        | 0     | .     |               |             | 0             | .              |              |
| Year of Follow-up: 2035, Age Group: 35-39    |           |               |       |       |               |             |               |                |              |
| Period                                       | Age Group | Smoking Group | N     | %     | Ever Quit (N) | Ever Quit % | Mean Yrs Quit | Short Term (n) | Short Term % |
| 45                                           | 35-39     | Never Any     | 0     | .     |               |             |               |                |              |
| 45                                           | 35-39     | CC            | 0     | .     | 0             | .           |               |                |              |
| 45                                           | 35-39     | Former        | 0     | .     |               |             | 0             | .              |              |
| Year of Follow-up: 2035, Age Group: 40-44    |           |               |       |       |               |             |               |                |              |
| Period                                       | Age Group | Smoking Group | N     | %     | Ever Quit (N) | Ever Quit % | Mean Yrs Quit | Short Term (n) | Short Term % |
| 45                                           | 40-44     | Never Any     | 0     | .     |               |             |               |                |              |
| 45                                           | 40-44     | CC            | 0     | .     | 0             | .           |               |                |              |
| 45                                           | 40-44     | Former        | 0     | .     |               |             | 0             | .              |              |
| Year of Follow-up: 2035, Age Group: 45-49    |           |               |       |       |               |             |               |                |              |
| Period                                       | Age Group | Smoking Group | N     | %     | Ever Quit (N) | Ever Quit % | Mean Yrs Quit | Short Term (n) | Short Term % |
| 45                                           | 45-49     | Never Any     | 0     | .     |               |             |               |                |              |
| 45                                           | 45-49     | CC            | 0     | .     | 0             | .           |               |                |              |
| 45                                           | 45-49     | Former        | 0     | .     |               |             | 0             | .              |              |
| Year of Follow-up: 2035, Age Group: 50-54    |           |               |       |       |               |             |               |                |              |
| Period                                       | Age Group | Smoking Group | N     | %     | Ever Quit (N) | Ever Quit % | Mean Yrs Quit | Short Term (n) | Short Term % |
| 45                                           | 50-54     | Never Any     | 0     | .     |               |             |               |                |              |
| 45                                           | 50-54     | CC            | 0     | .     | 0             | .           |               |                |              |
| 45                                           | 50-54     | Former        | 0     | .     |               |             | 0             | .              |              |
| Year of Follow-up: 2035, Age Group: 55-59    |           |               |       |       |               |             |               |                |              |
| Period                                       | Age Group | Smoking Group | N     | %     | Ever Quit (N) | Ever Quit % | Mean Yrs Quit | Short Term (n) | Short Term % |
| 45                                           | 55-59     | Never Any     | 4803  | 60.57 |               |             |               |                |              |
| 45                                           | 55-59     | CC            | 763   | 9.62  | 0             | 0.00        |               |                |              |
| 45                                           | 55-59     | Former        | 2364  | 29.81 |               |             | 24.66         | 71             | 3.00         |
| Year of Follow-up: 2035, Age Group: 60-64    |           |               |       |       |               |             |               |                |              |
| Period                                       | Age Group | Smoking Group | N     | %     | Ever Quit (N) | Ever Quit % | Mean Yrs Quit | Short Term (n) | Short Term % |
| 45                                           | 60-64     | Never Any     | 5407  | 64.75 |               |             |               |                |              |
| 45                                           | 60-64     | CC            | 691   | 8.28  | 0             | 0.00        |               |                |              |
| 45                                           | 60-64     | Former        | 2252  | 26.97 |               |             | 25.59         | 91             | 4.04         |
| Year of Follow-up: 2035, Age Group: 65-69    |           |               |       |       |               |             |               |                |              |
| Period                                       | Age Group | Smoking Group | N     | %     | Ever Quit (N) | Ever Quit % | Mean Yrs Quit | Short Term (n) | Short Term % |
| 45                                           | 65-69     | Never Any     | 5181  | 58.92 |               |             |               |                |              |
| 45                                           | 65-69     | CC            | 702   | 7.98  | 0             | 0.00        |               |                |              |
| 45                                           | 65-69     | Former        | 2910  | 33.09 |               |             | 28.98         | 48             | 1.65         |
| Year of Follow-up: 2035, Age Group: 70-74    |           |               |       |       |               |             |               |                |              |
| Period                                       | Age Group | Smoking Group | N     | %     | Ever Quit (N) | Ever Quit % | Mean Yrs Quit | Short Term (n) | Short Term % |
| 45                                           | 70-74     | Never Any     | 5279  | 52.38 |               |             |               |                |              |
| 45                                           | 70-74     | CC            | 880   | 8.73  | 0             | 0.00        |               |                |              |
| 45                                           | 70-74     | Former        | 3919  | 38.89 |               |             | 31.53         | 68             | 1.74         |
| Year of Follow-up: 2035, Age Group: 75-79    |           |               |       |       |               |             |               |                |              |
| Period                                       | Age Group | Smoking Group | N     | %     | Ever Quit (N) | Ever Quit % | Mean Yrs Quit | Short Term (n) | Short Term % |
| 45                                           | 75-79     | Never Any     | 5282  | 50.31 |               |             |               |                |              |
| 45                                           | 75-79     | CC            | 731   | 6.96  | 0             | 0.00        |               |                |              |
| 45                                           | 75-79     | Former        | 4486  | 42.73 |               |             | 33.48         | 72             | 1.60         |
| Year of Follow-up: 2040, Age Group: All Ages |           |               |       |       |               |             |               |                |              |
| Period                                       | Age Group | Smoking Group | N     | %     | Ever Quit (N) | Ever Quit % | Mean Yrs Quit | Short Term (n) | Short Term % |
| 50                                           | All Ages  | Never Any     | 20670 | 58.80 |               |             |               |                |              |
| 50                                           | All Ages  | CC            | 2462  | 7.00  | 0             | 0.00        |               |                |              |
| 50                                           | All Ages  | Former        | 12019 | 34.19 |               |             | 31.80         | 230            | 1.91         |
| Year of Follow-up: 2040, Age Group: 18-19    |           |               |       |       |               |             |               |                |              |
| Period                                       | Age Group | Smoking Group | N     | %     | Ever Quit (N) | Ever Quit % | Mean Yrs Quit | Short Term (n) | Short Term % |

**Results for PHIM for Run 2 (Main\_Analysis.RTF)**

|                                           |           |               |      |       |               |             |               |                |              |
|-------------------------------------------|-----------|---------------|------|-------|---------------|-------------|---------------|----------------|--------------|
| 50                                        | 18-19     | Never         | 0    | .     |               |             |               |                |              |
| 50                                        | 18-19     | CC            | 0    | .     | 0             | .           |               |                |              |
| 50                                        | 18-19     | Former        | 0    | .     |               |             | 0             | .              |              |
| Year of Follow-up: 2040, Age Group: 20-24 |           |               |      |       |               |             |               |                |              |
| Period                                    | Age Group | Smoking Group | N    | %     | Ever Quit (N) | Ever Quit % | Mean Yrs Quit | Short Term (n) | Short Term % |
| 50                                        | 20-24     | Never         | 0    | .     |               |             |               |                |              |
| 50                                        | 20-24     | CC            | 0    | .     | 0             | .           |               |                |              |
| 50                                        | 20-24     | Former        | 0    | .     |               |             | 0             | .              |              |
| Year of Follow-up: 2040, Age Group: 25-29 |           |               |      |       |               |             |               |                |              |
| Period                                    | Age Group | Smoking Group | N    | %     | Ever Quit (N) | Ever Quit % | Mean Yrs Quit | Short Term (n) | Short Term % |
| 50                                        | 25-29     | Never         | 0    | .     |               |             |               |                |              |
| 50                                        | 25-29     | CC            | 0    | .     | 0             | .           |               |                |              |
| 50                                        | 25-29     | Former        | 0    | .     |               |             | 0             | .              |              |
| Year of Follow-up: 2040, Age Group: 30-34 |           |               |      |       |               |             |               |                |              |
| Period                                    | Age Group | Smoking Group | N    | %     | Ever Quit (N) | Ever Quit % | Mean Yrs Quit | Short Term (n) | Short Term % |
| 50                                        | 30-34     | Never         | 0    | .     |               |             |               |                |              |
| 50                                        | 30-34     | CC            | 0    | .     | 0             | .           |               |                |              |
| 50                                        | 30-34     | Former        | 0    | .     |               |             | 0             | .              |              |
| Year of Follow-up: 2040, Age Group: 35-39 |           |               |      |       |               |             |               |                |              |
| Period                                    | Age Group | Smoking Group | N    | %     | Ever Quit (N) | Ever Quit % | Mean Yrs Quit | Short Term (n) | Short Term % |
| 50                                        | 35-39     | Never         | 0    | .     |               |             |               |                |              |
| 50                                        | 35-39     | CC            | 0    | .     | 0             | .           |               |                |              |
| 50                                        | 35-39     | Former        | 0    | .     |               |             | 0             | .              |              |
| Year of Follow-up: 2040, Age Group: 40-44 |           |               |      |       |               |             |               |                |              |
| Period                                    | Age Group | Smoking Group | N    | %     | Ever Quit (N) | Ever Quit % | Mean Yrs Quit | Short Term (n) | Short Term % |
| 50                                        | 40-44     | Never         | 0    | .     |               |             |               |                |              |
| 50                                        | 40-44     | CC            | 0    | .     | 0             | .           |               |                |              |
| 50                                        | 40-44     | Former        | 0    | .     |               |             | 0             | .              |              |
| Year of Follow-up: 2040, Age Group: 45-49 |           |               |      |       |               |             |               |                |              |
| Period                                    | Age Group | Smoking Group | N    | %     | Ever Quit (N) | Ever Quit % | Mean Yrs Quit | Short Term (n) | Short Term % |
| 50                                        | 45-49     | Never         | 0    | .     |               |             |               |                |              |
| 50                                        | 45-49     | CC            | 0    | .     | 0             | .           |               |                |              |
| 50                                        | 45-49     | Former        | 0    | .     |               |             | 0             | .              |              |
| Year of Follow-up: 2040, Age Group: 50-54 |           |               |      |       |               |             |               |                |              |
| Period                                    | Age Group | Smoking Group | N    | %     | Ever Quit (N) | Ever Quit % | Mean Yrs Quit | Short Term (n) | Short Term % |
| 50                                        | 50-54     | Never         | 0    | .     |               |             |               |                |              |
| 50                                        | 50-54     | CC            | 0    | .     | 0             | .           |               |                |              |
| 50                                        | 50-54     | Former        | 0    | .     |               |             | 0             | .              |              |
| Year of Follow-up: 2040, Age Group: 55-59 |           |               |      |       |               |             |               |                |              |
| Period                                    | Age Group | Smoking Group | N    | %     | Ever Quit (N) | Ever Quit % | Mean Yrs Quit | Short Term (n) | Short Term % |
| 50                                        | 55-59     | Never         | 0    | .     |               |             |               |                |              |
| 50                                        | 55-59     | CC            | 0    | .     | 0             | .           |               |                |              |
| 50                                        | 55-59     | Former        | 0    | .     |               |             | 0             | .              |              |
| Year of Follow-up: 2040, Age Group: 60-64 |           |               |      |       |               |             |               |                |              |
| Period                                    | Age Group | Smoking Group | N    | %     | Ever Quit (N) | Ever Quit % | Mean Yrs Quit | Short Term (n) | Short Term % |
| 50                                        | 60-64     | Never         | 4803 | 60.57 |               |             |               |                |              |
| 50                                        | 60-64     | CC            | 621  | 7.83  | 0             | 0.00        |               |                |              |
| 50                                        | 60-64     | Former        | 2506 | 31.60 |               |             | 28.08         | 64             | 2.55         |
| Year of Follow-up: 2040, Age Group: 65-69 |           |               |      |       |               |             |               |                |              |
| Period                                    | Age Group | Smoking Group | N    | %     | Ever Quit (N) | Ever Quit % | Mean Yrs Quit | Short Term (n) | Short Term % |
| 50                                        | 65-69     | Never         | 5407 | 64.75 |               |             |               |                |              |
| 50                                        | 65-69     | CC            | 538  | 6.44  | 0             | 0.00        |               |                |              |
| 50                                        | 65-69     | Former        | 2405 | 28.80 |               |             | 28.80         | 40             | 1.66         |
| Year of Follow-up: 2040, Age Group: 70-74 |           |               |      |       |               |             |               |                |              |
| Period                                    | Age Group | Smoking Group | N    | %     | Ever Quit (N) | Ever Quit % | Mean Yrs Quit | Short Term (n) | Short Term % |
| 50                                        | 70-74     | Never         | 5181 | 58.92 |               |             |               |                |              |
| 50                                        | 70-74     | CC            | 605  | 6.88  | 0             | 0.00        |               |                |              |
| 50                                        | 70-74     | Former        | 3007 | 34.20 |               |             | 32.94         | 48             | 1.60         |
| Year of Follow-up: 2040, Age Group: 75-79 |           |               |      |       |               |             |               |                |              |
| Period                                    | Age Group | Smoking Group | N    | %     | Ever Quit (N) | Ever Quit % | Mean Yrs Quit | Short Term (n) | Short Term % |
| 50                                        | 75-79     | Never         | 5279 | 52.38 |               |             |               |                |              |
| 50                                        | 75-79     | CC            | 698  | 6.93  | 0             | 0.00        |               |                |              |
| 50                                        | 75-79     | Former        | 4101 | 40.69 |               |             | 34.99         | 78             | 1.90         |

## Results for PHIM for Run 2 (Main\_Analysis.RTF)

\*\*\*\*\*

### Main Output for the Tobacco History for Run: 2, Simulation: 1, Scenario: Ecig

| Variable Parameter                           |           | Value              |       |       |               |             |               |                |              |
|----------------------------------------------|-----------|--------------------|-------|-------|---------------|-------------|---------------|----------------|--------------|
| 1. Country                                   |           | US (United States) |       |       |               |             |               |                |              |
| 2. Sex                                       |           | F (Females)        |       |       |               |             |               |                |              |
| 3. Year of start of process                  |           | 1990               |       |       |               |             |               |                |              |
| Year of Follow-up: 1990, Age Group: All Ages |           |                    |       |       |               |             |               |                |              |
| Period                                       | Age Group | Smoking Group      | N     | %     | Ever Quit (N) | Ever Quit % | Mean Yrs Quit | Short Term (n) | Short Term % |
| 0                                            | All Ages  | Never Any          | 47776 | 54.92 |               |             |               |                |              |
| 0                                            | All Ages  | CC                 | 22737 | 26.14 | 0             | 0.00        |               |                |              |
| 0                                            | All Ages  | Ecig               | 0     | 0.00  |               |             |               |                |              |
| 0                                            | All Ages  | Dual               | 0     | 0.00  |               |             |               |                |              |
| 0                                            | All Ages  | Former             | 16484 | 18.95 |               |             | 11.90         | 2815           | 17.08        |
| Year of Follow-up: 1990, Age Group: 18-19    |           |                    |       |       |               |             |               |                |              |
| Period                                       | Age Group | Smoking Group      | N     | %     | Ever Quit (N) | Ever Quit % | Mean Yrs Quit | Short Term (n) | Short Term % |
| 0                                            | 18-19     | Never Any          | 2570  | 78.43 |               |             |               |                |              |
| 0                                            | 18-19     | CC                 | 535   | 16.33 | 0             | 0.00        |               |                |              |
| 0                                            | 18-19     | Ecig               | 0     | 0.00  |               |             |               |                |              |
| 0                                            | 18-19     | Dual               | 0     | 0.00  |               |             |               |                |              |
| 0                                            | 18-19     | Former             | 172   | 5.25  |               |             | 0.20          | 172            | 100.00       |
| Year of Follow-up: 1990, Age Group: 20-24    |           |                    |       |       |               |             |               |                |              |
| Period                                       | Age Group | Smoking Group      | N     | %     | Ever Quit (N) | Ever Quit % | Mean Yrs Quit | Short Term (n) | Short Term % |
| 0                                            | 20-24     | Never Any          | 5354  | 60.89 |               |             |               |                |              |
| 0                                            | 20-24     | CC                 | 2560  | 29.11 | 0             | 0.00        |               |                |              |
| 0                                            | 20-24     | Ecig               | 0     | 0.00  |               |             |               |                |              |
| 0                                            | 20-24     | Dual               | 0     | 0.00  |               |             |               |                |              |
| 0                                            | 20-24     | Former             | 879   | 10.00 |               |             | 1.58          | 420            | 47.78        |
| Year of Follow-up: 1990, Age Group: 25-29    |           |                    |       |       |               |             |               |                |              |
| Period                                       | Age Group | Smoking Group      | N     | %     | Ever Quit (N) | Ever Quit % | Mean Yrs Quit | Short Term (n) | Short Term % |
| 0                                            | 25-29     | Never Any          | 5318  | 52.77 |               |             |               |                |              |
| 0                                            | 25-29     | CC                 | 3335  | 33.09 | 0             | 0.00        |               |                |              |
| 0                                            | 25-29     | Ecig               | 0     | 0.00  |               |             |               |                |              |
| 0                                            | 25-29     | Dual               | 0     | 0.00  |               |             |               |                |              |
| 0                                            | 25-29     | Former             | 1425  | 14.14 |               |             | 3.91          | 404            | 28.35        |
| Year of Follow-up: 1990, Age Group: 30-34    |           |                    |       |       |               |             |               |                |              |
| Period                                       | Age Group | Smoking Group      | N     | %     | Ever Quit (N) | Ever Quit % | Mean Yrs Quit | Short Term (n) | Short Term % |
| 0                                            | 30-34     | Never Any          | 5287  | 50.36 |               |             |               |                |              |
| 0                                            | 30-34     | CC                 | 3326  | 31.68 | 0             | 0.00        |               |                |              |
| 0                                            | 30-34     | Ecig               | 0     | 0.00  |               |             |               |                |              |
| 0                                            | 30-34     | Dual               | 0     | 0.00  |               |             |               |                |              |
| 0                                            | 30-34     | Former             | 1886  | 17.96 |               |             | 4.36          | 566            | 30.01        |
| Year of Follow-up: 1990, Age Group: 35-39    |           |                    |       |       |               |             |               |                |              |
| Period                                       | Age Group | Smoking Group      | N     | %     | Ever Quit (N) | Ever Quit % | Mean Yrs Quit | Short Term (n) | Short Term % |
| 0                                            | 35-39     | Never Any          | 5018  | 52.27 |               |             |               |                |              |
| 0                                            | 35-39     | CC                 | 2653  | 27.64 | 0             | 0.00        |               |                |              |
| 0                                            | 35-39     | Ecig               | 0     | 0.00  |               |             |               |                |              |
| 0                                            | 35-39     | Dual               | 0     | 0.00  |               |             |               |                |              |
| 0                                            | 35-39     | Former             | 1929  | 20.09 |               |             | 7.96          | 324            | 16.80        |
| Year of Follow-up: 1990, Age Group: 40-44    |           |                    |       |       |               |             |               |                |              |
| Period                                       | Age Group | Smoking Group      | N     | %     | Ever Quit (N) | Ever Quit % | Mean Yrs Quit | Short Term (n) | Short Term % |
| 0                                            | 40-44     | Never Any          | 4356  | 51.27 |               |             |               |                |              |
| 0                                            | 40-44     | CC                 | 2397  | 28.21 | 0             | 0.00        |               |                |              |
| 0                                            | 40-44     | Ecig               | 0     | 0.00  |               |             |               |                |              |
| 0                                            | 40-44     | Dual               | 0     | 0.00  |               |             |               |                |              |
| 0                                            | 40-44     | Former             | 1744  | 20.52 |               |             | 7.33          | 339            | 19.44        |
| Year of Follow-up: 1990, Age Group: 45-49    |           |                    |       |       |               |             |               |                |              |
| Period                                       | Age Group | Smoking Group      | N     | %     | Ever Quit (N) | Ever Quit % | Mean Yrs Quit | Short Term (n) | Short Term % |
| 0                                            | 45-49     | Never Any          | 3116  | 47.67 |               |             |               |                |              |
| 0                                            | 45-49     | CC                 | 1875  | 28.69 | 0             | 0.00        |               |                |              |
| 0                                            | 45-49     | Ecig               | 0     | 0.00  |               |             |               |                |              |
| 0                                            | 45-49     | Dual               | 0     | 0.00  |               |             |               |                |              |
| 0                                            | 45-49     | Former             | 1545  | 23.64 |               |             | 12.55         | 194            | 12.56        |
| Year of Follow-up: 1990, Age Group: 50-54    |           |                    |       |       |               |             |               |                |              |
| Period                                       | Age Group | Smoking Group      | N     | %     | Ever Quit (N) | Ever Quit % | Mean Yrs Quit | Short Term (n) | Short Term % |
| 0                                            | 50-54     | Never Any          | 2684  | 48.50 |               |             |               |                |              |
| 0                                            | 50-54     | CC                 | 1572  | 28.41 | 0             | 0.00        |               |                |              |

**Results for PHIM for Run 2 (Main\_Analysis.RTF)**

|                                              |           |               |       |       |               |             |               |                |              |
|----------------------------------------------|-----------|---------------|-------|-------|---------------|-------------|---------------|----------------|--------------|
| 0                                            | 50-54     | Ecig          | 0     | 0.00  |               |             |               |                |              |
| 0                                            | 50-54     | Dual          | 0     | 0.00  |               |             |               |                |              |
| 0                                            | 50-54     | Former        | 1278  | 23.09 |               |             | 13.28         | 126            | 9.86         |
| Year of Follow-up: 1990, Age Group: 55-59    |           |               |       |       |               |             |               |                |              |
| Period                                       | Age Group | Smoking Group | N     | %     | Ever Quit (N) | Ever Quit % | Mean Yrs Quit | Short Term (n) | Short Term % |
| 0                                            | 55-59     | Never Any     | 2732  | 51.90 |               |             |               |                |              |
| 0                                            | 55-59     | CC            | 1295  | 24.60 | 0             | 0.00        |               |                |              |
| 0                                            | 55-59     | Ecig          | 0     | 0.00  |               |             |               |                |              |
| 0                                            | 55-59     | Dual          | 0     | 0.00  |               |             |               |                |              |
| 0                                            | 55-59     | Former        | 1237  | 23.50 |               |             | 17.26         | 90             | 7.28         |
| Year of Follow-up: 1990, Age Group: 60-64    |           |               |       |       |               |             |               |                |              |
| Period                                       | Age Group | Smoking Group | N     | %     | Ever Quit (N) | Ever Quit % | Mean Yrs Quit | Short Term (n) | Short Term % |
| 0                                            | 60-64     | Never Any     | 3078  | 55.72 |               |             |               |                |              |
| 0                                            | 60-64     | CC            | 1249  | 22.61 | 0             | 0.00        |               |                |              |
| 0                                            | 60-64     | Ecig          | 0     | 0.00  |               |             |               |                |              |
| 0                                            | 60-64     | Dual          | 0     | 0.00  |               |             |               |                |              |
| 0                                            | 60-64     | Former        | 1197  | 21.67 |               |             | 18.28         | 61             | 5.10         |
| Year of Follow-up: 1990, Age Group: 65-69    |           |               |       |       |               |             |               |                |              |
| Period                                       | Age Group | Smoking Group | N     | %     | Ever Quit (N) | Ever Quit % | Mean Yrs Quit | Short Term (n) | Short Term % |
| 0                                            | 65-69     | Never Any     | 3042  | 57.36 |               |             |               |                |              |
| 0                                            | 65-69     | CC            | 976   | 18.40 | 0             | 0.00        |               |                |              |
| 0                                            | 65-69     | Ecig          | 0     | 0.00  |               |             |               |                |              |
| 0                                            | 65-69     | Dual          | 0     | 0.00  |               |             |               |                |              |
| 0                                            | 65-69     | Former        | 1285  | 24.23 |               |             | 20.65         | 68             | 5.29         |
| Year of Follow-up: 1990, Age Group: 70-74    |           |               |       |       |               |             |               |                |              |
| Period                                       | Age Group | Smoking Group | N     | %     | Ever Quit (N) | Ever Quit % | Mean Yrs Quit | Short Term (n) | Short Term % |
| 0                                            | 70-74     | Never Any     | 2738  | 61.05 |               |             |               |                |              |
| 0                                            | 70-74     | CC            | 610   | 13.60 | 0             | 0.00        |               |                |              |
| 0                                            | 70-74     | Ecig          | 0     | 0.00  |               |             |               |                |              |
| 0                                            | 70-74     | Dual          | 0     | 0.00  |               |             |               |                |              |
| 0                                            | 70-74     | Former        | 1137  | 25.35 |               |             | 24.48         | 27             | 2.37         |
| Year of Follow-up: 1990, Age Group: 75-79    |           |               |       |       |               |             |               |                |              |
| Period                                       | Age Group | Smoking Group | N     | %     | Ever Quit (N) | Ever Quit % | Mean Yrs Quit | Short Term (n) | Short Term % |
| 0                                            | 75-79     | Never Any     | 2483  | 68.84 |               |             |               |                |              |
| 0                                            | 75-79     | CC            | 354   | 9.81  | 0             | 0.00        |               |                |              |
| 0                                            | 75-79     | Ecig          | 0     | 0.00  |               |             |               |                |              |
| 0                                            | 75-79     | Dual          | 0     | 0.00  |               |             |               |                |              |
| 0                                            | 75-79     | Former        | 770   | 21.35 |               |             | 24.48         | 24             | 3.12         |
| Year of Follow-up: 1995, Age Group: All Ages |           |               |       |       |               |             |               |                |              |
| Period                                       | Age Group | Smoking Group | N     | %     | Ever Quit (N) | Ever Quit % | Mean Yrs Quit | Short Term (n) | Short Term % |
| 5                                            | All Ages  | Never Any     | 50887 | 55.53 |               |             |               |                |              |
| 5                                            | All Ages  | CC            | 10659 | 11.63 | 0             | 0.00        |               |                |              |
| 5                                            | All Ages  | Ecig          | 11697 | 12.76 |               |             |               |                |              |
| 5                                            | All Ages  | Dual          | 0     | 0.00  |               |             |               |                |              |
| 5                                            | All Ages  | Former        | 18396 | 20.07 |               |             | 14.19         | 1129           | 6.14         |
| Year of Follow-up: 1995, Age Group: 18-19    |           |               |       |       |               |             |               |                |              |
| Period                                       | Age Group | Smoking Group | N     | %     | Ever Quit (N) | Ever Quit % | Mean Yrs Quit | Short Term (n) | Short Term % |
| 5                                            | 18-19     | Never Any     | 2434  | 76.64 |               |             |               |                |              |
| 5                                            | 18-19     | CC            | 233   | 7.34  | 0             | 0.00        |               |                |              |
| 5                                            | 18-19     | Ecig          | 427   | 13.44 |               |             |               |                |              |
| 5                                            | 18-19     | Dual          | 0     | 0.00  |               |             |               |                |              |
| 5                                            | 18-19     | Former        | 82    | 2.58  |               |             | 1.15          | 52             | 63.41        |
| Year of Follow-up: 1995, Age Group: 20-24    |           |               |       |       |               |             |               |                |              |
| Period                                       | Age Group | Smoking Group | N     | %     | Ever Quit (N) | Ever Quit % | Mean Yrs Quit | Short Term (n) | Short Term % |
| 5                                            | 20-24     | Never Any     | 5794  | 69.39 |               |             |               |                |              |
| 5                                            | 20-24     | CC            | 862   | 10.32 | 0             | 0.00        |               |                |              |
| 5                                            | 20-24     | Ecig          | 1250  | 14.97 |               |             |               |                |              |
| 5                                            | 20-24     | Dual          | 0     | 0.00  |               |             |               |                |              |
| 5                                            | 20-24     | Former        | 444   | 5.32  |               |             | 3.23          | 106            | 23.87        |
| Year of Follow-up: 1995, Age Group: 25-29    |           |               |       |       |               |             |               |                |              |
| Period                                       | Age Group | Smoking Group | N     | %     | Ever Quit (N) | Ever Quit % | Mean Yrs Quit | Short Term (n) | Short Term % |
| 5                                            | 25-29     | Never Any     | 5313  | 60.42 |               |             |               |                |              |
| 5                                            | 25-29     | CC            | 1062  | 12.08 | 0             | 0.00        |               |                |              |
| 5                                            | 25-29     | Ecig          | 1395  | 15.86 |               |             |               |                |              |
| 5                                            | 25-29     | Dual          | 0     | 0.00  |               |             |               |                |              |
| 5                                            | 25-29     | Former        | 1023  | 11.63 |               |             | 5.94          | 54             | 5.28         |
| Year of Follow-up: 1995, Age Group: 30-34    |           |               |       |       |               |             |               |                |              |
| Period                                       | Age Group | Smoking Group | N     | %     | Ever Quit (N) | Ever Quit % | Mean Yrs Quit | Short Term (n) | Short Term % |

**Results for PHIM for Run 2 (Main\_Analysis.RTF)**

|                                              |           |               |      |       |               |             |               |                |              |
|----------------------------------------------|-----------|---------------|------|-------|---------------|-------------|---------------|----------------|--------------|
| 5                                            | 30-34     | Never Any     | 5304 | 52.63 |               |             |               |                |              |
| 5                                            | 30-34     | CC            | 1373 | 13.62 | 0             | 0.00        |               |                |              |
| 5                                            | 30-34     | Ecig          | 1802 | 17.88 |               |             |               |                |              |
| 5                                            | 30-34     | Dual          | 0    | 0.00  |               |             |               |                |              |
| 5                                            | 30-34     | Former        | 1599 | 15.87 |               |             | 8.16          | 67             | 4.19         |
| Year of Follow-up: 1995, Age Group: 35-39    |           |               |      |       |               |             |               |                |              |
| Period                                       | Age Group | Smoking Group | N    | %     | Ever Quit (N) | Ever Quit % | Mean Yrs Quit | Short Term (n) | Short Term % |
| 5                                            | 35-39     | Never Any     | 5278 | 50.27 |               |             |               |                |              |
| 5                                            | 35-39     | CC            | 1410 | 13.43 | 0             | 0.00        |               |                |              |
| 5                                            | 35-39     | Ecig          | 1746 | 16.63 |               |             |               |                |              |
| 5                                            | 35-39     | Dual          | 0    | 0.00  |               |             |               |                |              |
| 5                                            | 35-39     | Former        | 2065 | 19.67 |               |             | 8.75          | 62             | 3.00         |
| Year of Follow-up: 1995, Age Group: 40-44    |           |               |      |       |               |             |               |                |              |
| Period                                       | Age Group | Smoking Group | N    | %     | Ever Quit (N) | Ever Quit % | Mean Yrs Quit | Short Term (n) | Short Term % |
| 5                                            | 40-44     | Never Any     | 5018 | 52.27 |               |             |               |                |              |
| 5                                            | 40-44     | CC            | 1135 | 11.82 | 0             | 0.00        |               |                |              |
| 5                                            | 40-44     | Ecig          | 1356 | 14.13 |               |             |               |                |              |
| 5                                            | 40-44     | Dual          | 0    | 0.00  |               |             |               |                |              |
| 5                                            | 40-44     | Former        | 2091 | 21.78 |               |             | 12.09         | 81             | 3.87         |
| Year of Follow-up: 1995, Age Group: 45-49    |           |               |      |       |               |             |               |                |              |
| Period                                       | Age Group | Smoking Group | N    | %     | Ever Quit (N) | Ever Quit % | Mean Yrs Quit | Short Term (n) | Short Term % |
| 5                                            | 45-49     | Never Any     | 4356 | 51.27 |               |             |               |                |              |
| 5                                            | 45-49     | CC            | 974  | 11.46 | 0             | 0.00        |               |                |              |
| 5                                            | 45-49     | Ecig          | 1161 | 13.66 |               |             |               |                |              |
| 5                                            | 45-49     | Dual          | 0    | 0.00  |               |             |               |                |              |
| 5                                            | 45-49     | Former        | 2006 | 23.61 |               |             | 10.93         | 133            | 6.63         |
| Year of Follow-up: 1995, Age Group: 50-54    |           |               |      |       |               |             |               |                |              |
| Period                                       | Age Group | Smoking Group | N    | %     | Ever Quit (N) | Ever Quit % | Mean Yrs Quit | Short Term (n) | Short Term % |
| 5                                            | 50-54     | Never Any     | 3116 | 47.67 |               |             |               |                |              |
| 5                                            | 50-54     | CC            | 739  | 11.31 | 0             | 0.00        |               |                |              |
| 5                                            | 50-54     | Ecig          | 826  | 12.64 |               |             |               |                |              |
| 5                                            | 50-54     | Dual          | 0    | 0.00  |               |             |               |                |              |
| 5                                            | 50-54     | Former        | 1855 | 28.38 |               |             | 14.92         | 140            | 7.55         |
| Year of Follow-up: 1995, Age Group: 55-59    |           |               |      |       |               |             |               |                |              |
| Period                                       | Age Group | Smoking Group | N    | %     | Ever Quit (N) | Ever Quit % | Mean Yrs Quit | Short Term (n) | Short Term % |
| 5                                            | 55-59     | Never Any     | 2684 | 48.50 |               |             |               |                |              |
| 5                                            | 55-59     | CC            | 722  | 13.05 | 0             | 0.00        |               |                |              |
| 5                                            | 55-59     | Ecig          | 627  | 11.33 |               |             |               |                |              |
| 5                                            | 55-59     | Dual          | 0    | 0.00  |               |             |               |                |              |
| 5                                            | 55-59     | Former        | 1501 | 27.12 |               |             | 15.84         | 93             | 6.20         |
| Year of Follow-up: 1995, Age Group: 60-64    |           |               |      |       |               |             |               |                |              |
| Period                                       | Age Group | Smoking Group | N    | %     | Ever Quit (N) | Ever Quit % | Mean Yrs Quit | Short Term (n) | Short Term % |
| 5                                            | 60-64     | Never Any     | 2732 | 51.90 |               |             |               |                |              |
| 5                                            | 60-64     | CC            | 633  | 12.03 | 0             | 0.00        |               |                |              |
| 5                                            | 60-64     | Ecig          | 444  | 8.43  |               |             |               |                |              |
| 5                                            | 60-64     | Dual          | 0    | 0.00  |               |             |               |                |              |
| 5                                            | 60-64     | Former        | 1455 | 27.64 |               |             | 19.22         | 87             | 5.98         |
| Year of Follow-up: 1995, Age Group: 65-69    |           |               |      |       |               |             |               |                |              |
| Period                                       | Age Group | Smoking Group | N    | %     | Ever Quit (N) | Ever Quit % | Mean Yrs Quit | Short Term (n) | Short Term % |
| 5                                            | 65-69     | Never Any     | 3078 | 55.72 |               |             |               |                |              |
| 5                                            | 65-69     | CC            | 602  | 10.90 | 0             | 0.00        |               |                |              |
| 5                                            | 65-69     | Ecig          | 374  | 6.77  |               |             |               |                |              |
| 5                                            | 65-69     | Dual          | 0    | 0.00  |               |             |               |                |              |
| 5                                            | 65-69     | Former        | 1470 | 26.61 |               |             | 19.34         | 107            | 7.28         |
| Year of Follow-up: 1995, Age Group: 70-74    |           |               |      |       |               |             |               |                |              |
| Period                                       | Age Group | Smoking Group | N    | %     | Ever Quit (N) | Ever Quit % | Mean Yrs Quit | Short Term (n) | Short Term % |
| 5                                            | 70-74     | Never Any     | 3042 | 57.36 |               |             |               |                |              |
| 5                                            | 70-74     | CC            | 577  | 10.88 | 0             | 0.00        |               |                |              |
| 5                                            | 70-74     | Ecig          | 188  | 3.55  |               |             |               |                |              |
| 5                                            | 70-74     | Dual          | 0    | 0.00  |               |             |               |                |              |
| 5                                            | 70-74     | Former        | 1496 | 28.21 |               |             | 22.32         | 77             | 5.15         |
| Year of Follow-up: 1995, Age Group: 75-79    |           |               |      |       |               |             |               |                |              |
| Period                                       | Age Group | Smoking Group | N    | %     | Ever Quit (N) | Ever Quit % | Mean Yrs Quit | Short Term (n) | Short Term % |
| 5                                            | 75-79     | Never Any     | 2738 | 61.05 |               |             |               |                |              |
| 5                                            | 75-79     | CC            | 337  | 7.51  | 0             | 0.00        |               |                |              |
| 5                                            | 75-79     | Ecig          | 101  | 2.25  |               |             |               |                |              |
| 5                                            | 75-79     | Dual          | 0    | 0.00  |               |             |               |                |              |
| 5                                            | 75-79     | Former        | 1309 | 29.19 |               |             | 25.87         | 70             | 5.35         |
| Year of Follow-up: 2000, Age Group: All Ages |           |               |      |       |               |             |               |                |              |

**Results for PHIM for Run 2 (Main\_Analysis.RTF)**

| Period                                    | Age Group | Smoking Group | N     | %     | Ever Quit (N) | Ever Quit % | Mean Yrs Quit | Short Term (n) | Short Term % |
|-------------------------------------------|-----------|---------------|-------|-------|---------------|-------------|---------------|----------------|--------------|
| 10                                        | All Ages  | Never Any     | 50423 | 54.86 |               |             |               |                |              |
| 10                                        | All Ages  | CC            | 4595  | 5.00  | 0             | 0.00        |               |                |              |
| 10                                        | All Ages  | Ecig          | 15644 | 17.02 |               |             |               |                |              |
| 10                                        | All Ages  | Dual          | 0     | 0.00  |               |             |               |                |              |
| 10                                        | All Ages  | Former        | 21246 | 23.12 |               |             | 15.11         | 1717           | 8.08         |
| Year of Follow-up: 2000, Age Group: 18-19 |           |               |       |       |               |             |               |                |              |
| Period                                    | Age Group | Smoking Group | N     | %     | Ever Quit (N) | Ever Quit % | Mean Yrs Quit | Short Term (n) | Short Term % |
| 10                                        | 18-19     | Never Any     | 0     | .     |               |             |               |                |              |
| 10                                        | 18-19     | CC            | 0     | .     | 0             | .           |               |                |              |
| 10                                        | 18-19     | Ecig          | 0     | .     |               |             |               |                |              |
| 10                                        | 18-19     | Dual          | 0     | .     |               |             |               |                |              |
| 10                                        | 18-19     | Former        | 0     | .     |               |             |               | 0              | .            |
| Year of Follow-up: 2000, Age Group: 20-24 |           |               |       |       |               |             |               |                |              |
| Period                                    | Age Group | Smoking Group | N     | %     | Ever Quit (N) | Ever Quit % | Mean Yrs Quit | Short Term (n) | Short Term % |
| 10                                        | 20-24     | Never Any     | 5128  | 64.67 |               |             |               |                |              |
| 10                                        | 20-24     | CC            | 370   | 4.67  | 0             | 0.00        |               |                |              |
| 10                                        | 20-24     | Ecig          | 1780  | 22.45 |               |             |               |                |              |
| 10                                        | 20-24     | Dual          | 0     | 0.00  |               |             |               |                |              |
| 10                                        | 20-24     | Former        | 652   | 8.22  |               |             | 3.55          | 169            | 25.92        |
| Year of Follow-up: 2000, Age Group: 25-29 |           |               |       |       |               |             |               |                |              |
| Period                                    | Age Group | Smoking Group | N     | %     | Ever Quit (N) | Ever Quit % | Mean Yrs Quit | Short Term (n) | Short Term % |
| 10                                        | 25-29     | Never Any     | 5493  | 65.78 |               |             |               |                |              |
| 10                                        | 25-29     | CC            | 400   | 4.79  | 0             | 0.00        |               |                |              |
| 10                                        | 25-29     | Ecig          | 1690  | 20.24 |               |             |               |                |              |
| 10                                        | 25-29     | Dual          | 0     | 0.00  |               |             |               |                |              |
| 10                                        | 25-29     | Former        | 767   | 9.19  |               |             | 5.59          | 126            | 16.43        |
| Year of Follow-up: 2000, Age Group: 30-34 |           |               |       |       |               |             |               |                |              |
| Period                                    | Age Group | Smoking Group | N     | %     | Ever Quit (N) | Ever Quit % | Mean Yrs Quit | Short Term (n) | Short Term % |
| 10                                        | 30-34     | Never Any     | 5214  | 59.30 |               |             |               |                |              |
| 10                                        | 30-34     | CC            | 417   | 4.74  | 0             | 0.00        |               |                |              |
| 10                                        | 30-34     | Ecig          | 1908  | 21.70 |               |             |               |                |              |
| 10                                        | 30-34     | Dual          | 0     | 0.00  |               |             |               |                |              |
| 10                                        | 30-34     | Former        | 1254  | 14.26 |               |             | 9.28          | 91             | 7.26         |
| Year of Follow-up: 2000, Age Group: 35-39 |           |               |       |       |               |             |               |                |              |
| Period                                    | Age Group | Smoking Group | N     | %     | Ever Quit (N) | Ever Quit % | Mean Yrs Quit | Short Term (n) | Short Term % |
| 10                                        | 35-39     | Never Any     | 5284  | 52.43 |               |             |               |                |              |
| 10                                        | 35-39     | CC            | 561   | 5.57  | 0             | 0.00        |               |                |              |
| 10                                        | 35-39     | Ecig          | 2413  | 23.94 |               |             |               |                |              |
| 10                                        | 35-39     | Dual          | 0     | 0.00  |               |             |               |                |              |
| 10                                        | 35-39     | Former        | 1820  | 18.06 |               |             | 11.77         | 105            | 5.77         |
| Year of Follow-up: 2000, Age Group: 40-44 |           |               |       |       |               |             |               |                |              |
| Period                                    | Age Group | Smoking Group | N     | %     | Ever Quit (N) | Ever Quit % | Mean Yrs Quit | Short Term (n) | Short Term % |
| 10                                        | 40-44     | Never Any     | 5278  | 50.27 |               |             |               |                |              |
| 10                                        | 40-44     | CC            | 584   | 5.56  | 0             | 0.00        |               |                |              |
| 10                                        | 40-44     | Ecig          | 2292  | 21.83 |               |             |               |                |              |
| 10                                        | 40-44     | Dual          | 0     | 0.00  |               |             |               |                |              |
| 10                                        | 40-44     | Former        | 2345  | 22.34 |               |             | 12.30         | 143            | 6.10         |
| Year of Follow-up: 2000, Age Group: 45-49 |           |               |       |       |               |             |               |                |              |
| Period                                    | Age Group | Smoking Group | N     | %     | Ever Quit (N) | Ever Quit % | Mean Yrs Quit | Short Term (n) | Short Term % |
| 10                                        | 45-49     | Never Any     | 5018  | 52.27 |               |             |               |                |              |
| 10                                        | 45-49     | CC            | 446   | 4.65  | 0             | 0.00        |               |                |              |
| 10                                        | 45-49     | Ecig          | 1673  | 17.43 |               |             |               |                |              |
| 10                                        | 45-49     | Dual          | 0     | 0.00  |               |             |               |                |              |
| 10                                        | 45-49     | Former        | 2463  | 25.66 |               |             | 14.76         | 181            | 7.35         |
| Year of Follow-up: 2000, Age Group: 50-54 |           |               |       |       |               |             |               |                |              |
| Period                                    | Age Group | Smoking Group | N     | %     | Ever Quit (N) | Ever Quit % | Mean Yrs Quit | Short Term (n) | Short Term % |
| 10                                        | 50-54     | Never Any     | 4356  | 51.27 |               |             |               |                |              |
| 10                                        | 50-54     | CC            | 378   | 4.45  | 0             | 0.00        |               |                |              |
| 10                                        | 50-54     | Ecig          | 1299  | 15.29 |               |             |               |                |              |
| 10                                        | 50-54     | Dual          | 0     | 0.00  |               |             |               |                |              |
| 10                                        | 50-54     | Former        | 2464  | 29.00 |               |             | 13.32         | 188            | 7.63         |
| Year of Follow-up: 2000, Age Group: 55-59 |           |               |       |       |               |             |               |                |              |
| Period                                    | Age Group | Smoking Group | N     | %     | Ever Quit (N) | Ever Quit % | Mean Yrs Quit | Short Term (n) | Short Term % |
| 10                                        | 55-59     | Never Any     | 3116  | 47.67 |               |             |               |                |              |
| 10                                        | 55-59     | CC            | 283   | 4.33  | 0             | 0.00        |               |                |              |
| 10                                        | 55-59     | Ecig          | 912   | 13.95 |               |             |               |                |              |
| 10                                        | 55-59     | Dual          | 0     | 0.00  |               |             |               |                |              |



**Results for PHIM for Run 2 (Main\_Analysis.RTF)**

| Year of Follow-up: 2000, Age Group: 60-64    | Period   | Age Group | Smoking Group | N     | %     | Ever Quit (N) | Ever Quit % | Mean Yrs Quit | Short Term (n) | Short Term % |
|----------------------------------------------|----------|-----------|---------------|-------|-------|---------------|-------------|---------------|----------------|--------------|
| 10                                           | 55-59    | Former    |               | 2225  | 34.04 |               |             | 16.92         | 157            | 7.06         |
| 10                                           | 60-64    | Never Any |               | 2684  | 48.50 |               |             |               |                |              |
| 10                                           | 60-64    | CC        |               | 334   | 6.04  | 0             | 0.00        |               |                |              |
| 10                                           | 60-64    | Ecig      |               | 663   | 11.98 |               |             |               |                |              |
| 10                                           | 60-64    | Dual      |               | 0     | 0.00  |               |             |               |                |              |
| 10                                           | 60-64    | Former    |               | 1853  | 33.48 |               |             | 17.23         | 149            | 8.04         |
| Year of Follow-up: 2000, Age Group: 65-69    | Period   | Age Group | Smoking Group | N     | %     | Ever Quit (N) | Ever Quit % | Mean Yrs Quit | Short Term (n) | Short Term % |
| 10                                           | 65-69    | Never Any |               | 2732  | 51.90 |               |             |               |                |              |
| 10                                           | 65-69    | CC        |               | 280   | 5.32  | 0             | 0.00        |               |                |              |
| 10                                           | 65-69    | Ecig      |               | 443   | 8.42  |               |             |               |                |              |
| 10                                           | 65-69    | Dual      |               | 0     | 0.00  |               |             |               |                |              |
| 10                                           | 65-69    | Former    |               | 1809  | 34.37 |               |             | 19.85         | 146            | 8.07         |
| Year of Follow-up: 2000, Age Group: 70-74    | Period   | Age Group | Smoking Group | N     | %     | Ever Quit (N) | Ever Quit % | Mean Yrs Quit | Short Term (n) | Short Term % |
| 10                                           | 70-74    | Never Any |               | 3078  | 55.72 |               |             |               |                |              |
| 10                                           | 70-74    | CC        |               | 274   | 4.96  | 0             | 0.00        |               |                |              |
| 10                                           | 70-74    | Ecig      |               | 368   | 6.66  |               |             |               |                |              |
| 10                                           | 70-74    | Dual      |               | 0     | 0.00  |               |             |               |                |              |
| 10                                           | 70-74    | Former    |               | 1804  | 32.66 |               |             | 20.18         | 154            | 8.54         |
| Year of Follow-up: 2000, Age Group: 75-79    | Period   | Age Group | Smoking Group | N     | %     | Ever Quit (N) | Ever Quit % | Mean Yrs Quit | Short Term (n) | Short Term % |
| 10                                           | 75-79    | Never Any |               | 3042  | 57.36 |               |             |               |                |              |
| 10                                           | 75-79    | CC        |               | 268   | 5.05  | 0             | 0.00        |               |                |              |
| 10                                           | 75-79    | Ecig      |               | 203   | 3.83  |               |             |               |                |              |
| 10                                           | 75-79    | Dual      |               | 0     | 0.00  |               |             |               |                |              |
| 10                                           | 75-79    | Former    |               | 1790  | 33.75 |               |             | 23.17         | 108            | 6.03         |
| Year of Follow-up: 2005, Age Group: All Ages | Period   | Age Group | Smoking Group | N     | %     | Ever Quit (N) | Ever Quit % | Mean Yrs Quit | Short Term (n) | Short Term % |
| 15                                           | All Ages | Never Any |               | 47002 | 54.27 |               |             |               |                |              |
| 15                                           | All Ages | CC        |               | 1890  | 2.18  | 0             | 0.00        |               |                |              |
| 15                                           | All Ages | Ecig      |               | 15617 | 18.03 |               |             |               |                |              |
| 15                                           | All Ages | Dual      |               | 0     | 0.00  |               |             |               |                |              |
| 15                                           | All Ages | Former    |               | 22096 | 25.51 |               |             | 17.32         | 941            | 4.26         |
| Year of Follow-up: 2005, Age Group: 18-19    | Period   | Age Group | Smoking Group | N     | %     | Ever Quit (N) | Ever Quit % | Mean Yrs Quit | Short Term (n) | Short Term % |
| 15                                           | 18-19    | Never Any |               | 0     | .     |               |             |               |                |              |
| 15                                           | 18-19    | CC        |               | 0     | .     | 0             | .           |               |                |              |
| 15                                           | 18-19    | Ecig      |               | 0     | .     |               |             |               |                |              |
| 15                                           | 18-19    | Dual      |               | 0     | .     |               |             |               |                |              |
| 15                                           | 18-19    | Former    |               | 0     | .     |               |             | .             | 0              | .            |
| Year of Follow-up: 2005, Age Group: 20-24    | Period   | Age Group | Smoking Group | N     | %     | Ever Quit (N) | Ever Quit % | Mean Yrs Quit | Short Term (n) | Short Term % |
| 15                                           | 20-24    | Never Any |               | 0     | .     |               |             |               |                |              |
| 15                                           | 20-24    | CC        |               | 0     | .     | 0             | .           |               |                |              |
| 15                                           | 20-24    | Ecig      |               | 0     | .     |               |             |               |                |              |
| 15                                           | 20-24    | Dual      |               | 0     | .     |               |             |               |                |              |
| 15                                           | 20-24    | Former    |               | 0     | .     |               |             | .             | 0              | .            |
| Year of Follow-up: 2005, Age Group: 25-29    | Period   | Age Group | Smoking Group | N     | %     | Ever Quit (N) | Ever Quit % | Mean Yrs Quit | Short Term (n) | Short Term % |
| 15                                           | 25-29    | Never Any |               | 4860  | 61.29 |               |             |               |                |              |
| 15                                           | 25-29    | CC        |               | 166   | 2.09  | 0             | 0.00        |               |                |              |
| 15                                           | 25-29    | Ecig      |               | 1941  | 24.48 |               |             |               |                |              |
| 15                                           | 25-29    | Dual      |               | 0     | 0.00  |               |             |               |                |              |
| 15                                           | 25-29    | Former    |               | 963   | 12.14 |               |             | 6.57          | 96             | 9.97         |
| Year of Follow-up: 2005, Age Group: 30-34    | Period   | Age Group | Smoking Group | N     | %     | Ever Quit (N) | Ever Quit % | Mean Yrs Quit | Short Term (n) | Short Term % |
| 15                                           | 30-34    | Never Any |               | 5407  | 64.75 |               |             |               |                |              |
| 15                                           | 30-34    | CC        |               | 149   | 1.78  | 0             | 0.00        |               |                |              |
| 15                                           | 30-34    | Ecig      |               | 1822  | 21.82 |               |             |               |                |              |
| 15                                           | 30-34    | Dual      |               | 0     | 0.00  |               |             |               |                |              |
| 15                                           | 30-34    | Former    |               | 972   | 11.64 |               |             | 8.77          | 80             | 8.23         |
| Year of Follow-up: 2005, Age Group: 35-39    | Period   | Age Group | Smoking Group | N     | %     | Ever Quit (N) | Ever Quit % | Mean Yrs Quit | Short Term (n) | Short Term % |
| 15                                           | 35-39    | Never Any |               | 5189  | 59.01 |               |             |               |                |              |
| 15                                           | 35-39    | CC        |               | 167   | 1.90  | 0             | 0.00        |               |                |              |

**Results for PHIM for Run 2 (Main\_Analysis.RTF)**

|                                              |           |               |       |       |               |             |               |                |              |
|----------------------------------------------|-----------|---------------|-------|-------|---------------|-------------|---------------|----------------|--------------|
| 15                                           | 35-39     | Ecig          | 2002  | 22.77 |               |             |               |                |              |
| 15                                           | 35-39     | Dual          | 0     | 0.00  |               |             |               |                |              |
| 15                                           | 35-39     | Former        | 1435  | 16.32 |               |             | 12.75         | 66             | 4.60         |
| Year of Follow-up: 2005, Age Group: 40-44    |           |               |       |       |               |             |               |                |              |
| Period                                       | Age Group | Smoking Group | N     | %     | Ever Quit (N) | Ever Quit % | Mean Yrs Quit | Short Term (n) | Short Term % |
| 15                                           | 40-44     | Never Any     | 5284  | 52.43 |               |             |               |                |              |
| 15                                           | 40-44     | CC            | 238   | 2.36  | 0             | 0.00        |               |                |              |
| 15                                           | 40-44     | Ecig          | 2500  | 24.81 |               |             |               |                |              |
| 15                                           | 40-44     | Dual          | 0     | 0.00  |               |             |               |                |              |
| 15                                           | 40-44     | Former        | 2056  | 20.40 |               |             | 15.08         | 101            | 4.91         |
| Year of Follow-up: 2005, Age Group: 45-49    |           |               |       |       |               |             |               |                |              |
| Period                                       | Age Group | Smoking Group | N     | %     | Ever Quit (N) | Ever Quit % | Mean Yrs Quit | Short Term (n) | Short Term % |
| 15                                           | 45-49     | Never Any     | 5278  | 50.27 |               |             |               |                |              |
| 15                                           | 45-49     | CC            | 237   | 2.26  | 0             | 0.00        |               |                |              |
| 15                                           | 45-49     | Ecig          | 2318  | 22.08 |               |             |               |                |              |
| 15                                           | 45-49     | Dual          | 0     | 0.00  |               |             |               |                |              |
| 15                                           | 45-49     | Former        | 2666  | 25.39 |               |             | 15.45         | 135            | 5.06         |
| Year of Follow-up: 2005, Age Group: 50-54    |           |               |       |       |               |             |               |                |              |
| Period                                       | Age Group | Smoking Group | N     | %     | Ever Quit (N) | Ever Quit % | Mean Yrs Quit | Short Term (n) | Short Term % |
| 15                                           | 50-54     | Never Any     | 5018  | 52.27 |               |             |               |                |              |
| 15                                           | 50-54     | CC            | 191   | 1.99  | 0             | 0.00        |               |                |              |
| 15                                           | 50-54     | Ecig          | 1622  | 16.90 |               |             |               |                |              |
| 15                                           | 50-54     | Dual          | 0     | 0.00  |               |             |               |                |              |
| 15                                           | 50-54     | Former        | 2769  | 28.84 |               |             | 17.84         | 99             | 3.58         |
| Year of Follow-up: 2005, Age Group: 55-59    |           |               |       |       |               |             |               |                |              |
| Period                                       | Age Group | Smoking Group | N     | %     | Ever Quit (N) | Ever Quit % | Mean Yrs Quit | Short Term (n) | Short Term % |
| 15                                           | 55-59     | Never Any     | 4356  | 51.27 |               |             |               |                |              |
| 15                                           | 55-59     | CC            | 166   | 1.95  | 0             | 0.00        |               |                |              |
| 15                                           | 55-59     | Ecig          | 1281  | 15.08 |               |             |               |                |              |
| 15                                           | 55-59     | Dual          | 0     | 0.00  |               |             |               |                |              |
| 15                                           | 55-59     | Former        | 2694  | 31.71 |               |             | 16.95         | 78             | 2.90         |
| Year of Follow-up: 2005, Age Group: 60-64    |           |               |       |       |               |             |               |                |              |
| Period                                       | Age Group | Smoking Group | N     | %     | Ever Quit (N) | Ever Quit % | Mean Yrs Quit | Short Term (n) | Short Term % |
| 15                                           | 60-64     | Never Any     | 3116  | 47.67 |               |             |               |                |              |
| 15                                           | 60-64     | CC            | 131   | 2.00  | 0             | 0.00        |               |                |              |
| 15                                           | 60-64     | Ecig          | 852   | 13.04 |               |             |               |                |              |
| 15                                           | 60-64     | Dual          | 0     | 0.00  |               |             |               |                |              |
| 15                                           | 60-64     | Former        | 2437  | 37.29 |               |             | 20.18         | 93             | 3.82         |
| Year of Follow-up: 2005, Age Group: 65-69    |           |               |       |       |               |             |               |                |              |
| Period                                       | Age Group | Smoking Group | N     | %     | Ever Quit (N) | Ever Quit % | Mean Yrs Quit | Short Term (n) | Short Term % |
| 15                                           | 65-69     | Never Any     | 2684  | 48.50 |               |             |               |                |              |
| 15                                           | 65-69     | CC            | 160   | 2.89  | 0             | 0.00        |               |                |              |
| 15                                           | 65-69     | Ecig          | 591   | 10.68 |               |             |               |                |              |
| 15                                           | 65-69     | Dual          | 0     | 0.00  |               |             |               |                |              |
| 15                                           | 65-69     | Former        | 2099  | 37.93 |               |             | 19.92         | 68             | 3.24         |
| Year of Follow-up: 2005, Age Group: 70-74    |           |               |       |       |               |             |               |                |              |
| Period                                       | Age Group | Smoking Group | N     | %     | Ever Quit (N) | Ever Quit % | Mean Yrs Quit | Short Term (n) | Short Term % |
| 15                                           | 70-74     | Never Any     | 2732  | 51.90 |               |             |               |                |              |
| 15                                           | 70-74     | CC            | 139   | 2.64  | 0             | 0.00        |               |                |              |
| 15                                           | 70-74     | Ecig          | 391   | 7.43  |               |             |               |                |              |
| 15                                           | 70-74     | Dual          | 0     | 0.00  |               |             |               |                |              |
| 15                                           | 70-74     | Former        | 2002  | 38.03 |               |             | 22.67         | 69             | 3.45         |
| Year of Follow-up: 2005, Age Group: 75-79    |           |               |       |       |               |             |               |                |              |
| Period                                       | Age Group | Smoking Group | N     | %     | Ever Quit (N) | Ever Quit % | Mean Yrs Quit | Short Term (n) | Short Term % |
| 15                                           | 75-79     | Never Any     | 3078  | 55.72 |               |             |               |                |              |
| 15                                           | 75-79     | CC            | 146   | 2.64  | 0             | 0.00        |               |                |              |
| 15                                           | 75-79     | Ecig          | 297   | 5.38  |               |             |               |                |              |
| 15                                           | 75-79     | Dual          | 0     | 0.00  |               |             |               |                |              |
| 15                                           | 75-79     | Former        | 2003  | 36.26 |               |             | 22.91         | 56             | 2.80         |
| Year of Follow-up: 2010, Age Group: All Ages |           |               |       |       |               |             |               |                |              |
| Period                                       | Age Group | Smoking Group | N     | %     | Ever Quit (N) | Ever Quit % | Mean Yrs Quit | Short Term (n) | Short Term % |
| 20                                           | All Ages  | Never Any     | 43759 | 53.97 |               |             |               |                |              |
| 20                                           | All Ages  | CC            | 765   | 0.94  | 0             | 0.00        |               |                |              |
| 20                                           | All Ages  | Ecig          | 13785 | 17.00 |               |             |               |                |              |
| 20                                           | All Ages  | Dual          | 0     | 0.00  |               |             |               |                |              |
| 20                                           | All Ages  | Former        | 22772 | 28.09 |               |             | 19.42         | 1117           | 4.91         |
| Year of Follow-up: 2010, Age Group: 18-19    |           |               |       |       |               |             |               |                |              |
| Period                                       | Age Group | Smoking Group | N     | %     | Ever Quit (N) | Ever Quit % | Mean Yrs Quit | Short Term (n) | Short Term % |

**Results for PHIM for Run 2 (Main\_Analysis.RTF)**

|                                           |           |               |      |       |               |             |               |                |              |
|-------------------------------------------|-----------|---------------|------|-------|---------------|-------------|---------------|----------------|--------------|
| 20                                        | 18-19     | Never Any     | 0    | .     |               |             |               |                |              |
| 20                                        | 18-19     | CC            | 0    | .     | 0             | .           |               |                |              |
| 20                                        | 18-19     | Ecig          | 0    | .     |               |             |               |                |              |
| 20                                        | 18-19     | Dual          | 0    | .     |               |             |               |                |              |
| 20                                        | 18-19     | Former        | 0    | .     |               |             | 0             | .              |              |
| Year of Follow-up: 2010, Age Group: 20-24 |           |               |      |       |               |             |               |                |              |
| Period                                    | Age Group | Smoking Group | N    | %     | Ever Quit (N) | Ever Quit % | Mean Yrs Quit | Short Term (n) | Short Term % |
| 20                                        | 20-24     | Never Any     | 0    | .     |               |             |               |                |              |
| 20                                        | 20-24     | CC            | 0    | .     | 0             | .           |               |                |              |
| 20                                        | 20-24     | Ecig          | 0    | .     |               |             |               |                |              |
| 20                                        | 20-24     | Dual          | 0    | .     |               |             |               |                |              |
| 20                                        | 20-24     | Former        | 0    | .     |               |             |               | 0              | .            |
| Year of Follow-up: 2010, Age Group: 25-29 |           |               |      |       |               |             |               |                |              |
| Period                                    | Age Group | Smoking Group | N    | %     | Ever Quit (N) | Ever Quit % | Mean Yrs Quit | Short Term (n) | Short Term % |
| 20                                        | 25-29     | Never Any     | 0    | .     |               |             |               |                |              |
| 20                                        | 25-29     | CC            | 0    | .     | 0             | .           |               |                |              |
| 20                                        | 25-29     | Ecig          | 0    | .     |               |             |               |                |              |
| 20                                        | 25-29     | Dual          | 0    | .     |               |             |               |                |              |
| 20                                        | 25-29     | Former        | 0    | .     |               |             |               | 0              | .            |
| Year of Follow-up: 2010, Age Group: 30-34 |           |               |      |       |               |             |               |                |              |
| Period                                    | Age Group | Smoking Group | N    | %     | Ever Quit (N) | Ever Quit % | Mean Yrs Quit | Short Term (n) | Short Term % |
| 20                                        | 30-34     | Never Any     | 4743 | 59.81 |               |             |               |                |              |
| 20                                        | 30-34     | CC            | 65   | 0.82  | 0             | 0.00        |               |                |              |
| 20                                        | 30-34     | Ecig          | 1881 | 23.72 |               |             |               |                |              |
| 20                                        | 30-34     | Dual          | 0    | 0.00  |               |             |               |                |              |
| 20                                        | 30-34     | Former        | 1241 | 15.65 |               |             | 9.36          | 130            | 10.48        |
| Year of Follow-up: 2010, Age Group: 35-39 |           |               |      |       |               |             |               |                |              |
| Period                                    | Age Group | Smoking Group | N    | %     | Ever Quit (N) | Ever Quit % | Mean Yrs Quit | Short Term (n) | Short Term % |
| 20                                        | 35-39     | Never Any     | 5359 | 64.18 |               |             |               |                |              |
| 20                                        | 35-39     | CC            | 58   | 0.69  | 0             | 0.00        |               |                |              |
| 20                                        | 35-39     | Ecig          | 1717 | 20.56 |               |             |               |                |              |
| 20                                        | 35-39     | Dual          | 0    | 0.00  |               |             |               |                |              |
| 20                                        | 35-39     | Former        | 1216 | 14.56 |               |             | 11.38         | 98             | 8.06         |
| Year of Follow-up: 2010, Age Group: 40-44 |           |               |      |       |               |             |               |                |              |
| Period                                    | Age Group | Smoking Group | N    | %     | Ever Quit (N) | Ever Quit % | Mean Yrs Quit | Short Term (n) | Short Term % |
| 20                                        | 40-44     | Never Any     | 5189 | 59.01 |               |             |               |                |              |
| 20                                        | 40-44     | CC            | 64   | 0.73  | 0             | 0.00        |               |                |              |
| 20                                        | 40-44     | Ecig          | 1849 | 21.03 |               |             |               |                |              |
| 20                                        | 40-44     | Dual          | 0    | 0.00  |               |             |               |                |              |
| 20                                        | 40-44     | Former        | 1691 | 19.23 |               |             | 15.34         | 112            | 6.62         |
| Year of Follow-up: 2010, Age Group: 45-49 |           |               |      |       |               |             |               |                |              |
| Period                                    | Age Group | Smoking Group | N    | %     | Ever Quit (N) | Ever Quit % | Mean Yrs Quit | Short Term (n) | Short Term % |
| 20                                        | 45-49     | Never Any     | 5284 | 52.43 |               |             |               |                |              |
| 20                                        | 45-49     | CC            | 105  | 1.04  | 0             | 0.00        |               |                |              |
| 20                                        | 45-49     | Ecig          | 2327 | 23.09 |               |             |               |                |              |
| 20                                        | 45-49     | Dual          | 0    | 0.00  |               |             |               |                |              |
| 20                                        | 45-49     | Former        | 2362 | 23.44 |               |             | 17.71         | 131            | 5.55         |
| Year of Follow-up: 2010, Age Group: 50-54 |           |               |      |       |               |             |               |                |              |
| Period                                    | Age Group | Smoking Group | N    | %     | Ever Quit (N) | Ever Quit % | Mean Yrs Quit | Short Term (n) | Short Term % |
| 20                                        | 50-54     | Never Any     | 5278 | 50.27 |               |             |               |                |              |
| 20                                        | 50-54     | CC            | 101  | 0.96  | 0             | 0.00        |               |                |              |
| 20                                        | 50-54     | Ecig          | 2101 | 20.01 |               |             |               |                |              |
| 20                                        | 50-54     | Dual          | 0    | 0.00  |               |             |               |                |              |
| 20                                        | 50-54     | Former        | 3019 | 28.76 |               |             | 18.27         | 163            | 5.40         |
| Year of Follow-up: 2010, Age Group: 55-59 |           |               |      |       |               |             |               |                |              |
| Period                                    | Age Group | Smoking Group | N    | %     | Ever Quit (N) | Ever Quit % | Mean Yrs Quit | Short Term (n) | Short Term % |
| 20                                        | 55-59     | Never Any     | 5018 | 52.27 |               |             |               |                |              |
| 20                                        | 55-59     | CC            | 91   | 0.95  | 0             | 0.00        |               |                |              |
| 20                                        | 55-59     | Ecig          | 1433 | 14.93 |               |             |               |                |              |
| 20                                        | 55-59     | Dual          | 0    | 0.00  |               |             |               |                |              |
| 20                                        | 55-59     | Former        | 3058 | 31.85 |               |             | 20.88         | 103            | 3.37         |
| Year of Follow-up: 2010, Age Group: 60-64 |           |               |      |       |               |             |               |                |              |
| Period                                    | Age Group | Smoking Group | N    | %     | Ever Quit (N) | Ever Quit % | Mean Yrs Quit | Short Term (n) | Short Term % |
| 20                                        | 60-64     | Never Any     | 4356 | 51.27 |               |             |               |                |              |
| 20                                        | 60-64     | CC            | 71   | 0.84  | 0             | 0.00        |               |                |              |
| 20                                        | 60-64     | Ecig          | 1079 | 12.70 |               |             |               |                |              |
| 20                                        | 60-64     | Dual          | 0    | 0.00  |               |             |               |                |              |
| 20                                        | 60-64     | Former        | 2991 | 35.20 |               |             | 19.94         | 144            | 4.81         |
| Year of Follow-up: 2010, Age Group: 65-69 |           |               |      |       |               |             |               |                |              |

**Results for PHIM for Run 2 (Main\_Analysis.RTF)**

| Period                                       | Age Group | Smoking Group | N     | %     | Ever Quit (N) | Ever Quit % | Mean Yrs Quit | Short Term (n) | Short Term % |
|----------------------------------------------|-----------|---------------|-------|-------|---------------|-------------|---------------|----------------|--------------|
| 20                                           | 65-69     | Never Any     | 3116  | 47.67 |               |             |               |                |              |
| 20                                           | 65-69     | CC            | 47    | 0.72  | 0             | 0.00        |               |                |              |
| 20                                           | 65-69     | Ecig          | 645   | 9.87  |               |             |               |                |              |
| 20                                           | 65-69     | Dual          | 0     | 0.00  |               |             |               |                |              |
| 20                                           | 65-69     | Former        | 2728  | 41.74 |               |             | 22.72         | 95             | 3.48         |
| Year of Follow-up: 2010, Age Group: 70-74    |           |               |       |       |               |             |               |                |              |
| Period                                       | Age Group | Smoking Group | N     | %     | Ever Quit (N) | Ever Quit % | Mean Yrs Quit | Short Term (n) | Short Term % |
| 20                                           | 70-74     | Never Any     | 2684  | 48.50 |               |             |               |                |              |
| 20                                           | 70-74     | CC            | 88    | 1.59  | 0             | 0.00        |               |                |              |
| 20                                           | 70-74     | Ecig          | 477   | 8.62  |               |             |               |                |              |
| 20                                           | 70-74     | Dual          | 0     | 0.00  |               |             |               |                |              |
| 20                                           | 70-74     | Former        | 2285  | 41.29 |               |             | 23.05         | 69             | 3.02         |
| Year of Follow-up: 2010, Age Group: 75-79    |           |               |       |       |               |             |               |                |              |
| Period                                       | Age Group | Smoking Group | N     | %     | Ever Quit (N) | Ever Quit % | Mean Yrs Quit | Short Term (n) | Short Term % |
| 20                                           | 75-79     | Never Any     | 2732  | 51.90 |               |             |               |                |              |
| 20                                           | 75-79     | CC            | 75    | 1.42  | 0             | 0.00        |               |                |              |
| 20                                           | 75-79     | Ecig          | 276   | 5.24  |               |             |               |                |              |
| 20                                           | 75-79     | Dual          | 0     | 0.00  |               |             |               |                |              |
| 20                                           | 75-79     | Former        | 2181  | 41.43 |               |             | 25.56         | 72             | 3.30         |
| Year of Follow-up: 2015, Age Group: All Ages |           |               |       |       |               |             |               |                |              |
| Period                                       | Age Group | Smoking Group | N     | %     | Ever Quit (N) | Ever Quit % | Mean Yrs Quit | Short Term (n) | Short Term % |
| 25                                           | All Ages  | Never Any     | 41010 | 54.09 |               |             |               |                |              |
| 25                                           | All Ages  | CC            | 340   | 0.45  | 0             | 0.00        |               |                |              |
| 25                                           | All Ages  | Ecig          | 11438 | 15.09 |               |             |               |                |              |
| 25                                           | All Ages  | Dual          | 0     | 0.00  |               |             |               |                |              |
| 25                                           | All Ages  | Former        | 23029 | 30.37 |               |             | 21.48         | 914            | 3.97         |
| Year of Follow-up: 2015, Age Group: 18-19    |           |               |       |       |               |             |               |                |              |
| Period                                       | Age Group | Smoking Group | N     | %     | Ever Quit (N) | Ever Quit % | Mean Yrs Quit | Short Term (n) | Short Term % |
| 25                                           | 18-19     | Never Any     | 0     | .     |               |             |               |                |              |
| 25                                           | 18-19     | CC            | 0     | .     | 0             | .           |               |                |              |
| 25                                           | 18-19     | Ecig          | 0     | .     |               |             |               |                |              |
| 25                                           | 18-19     | Dual          | 0     | .     |               |             |               |                |              |
| 25                                           | 18-19     | Former        | 0     | .     |               |             | .             | 0              | .            |
| Year of Follow-up: 2015, Age Group: 20-24    |           |               |       |       |               |             |               |                |              |
| Period                                       | Age Group | Smoking Group | N     | %     | Ever Quit (N) | Ever Quit % | Mean Yrs Quit | Short Term (n) | Short Term % |
| 25                                           | 20-24     | Never Any     | 0     | .     |               |             |               |                |              |
| 25                                           | 20-24     | CC            | 0     | .     | 0             | .           |               |                |              |
| 25                                           | 20-24     | Ecig          | 0     | .     |               |             |               |                |              |
| 25                                           | 20-24     | Dual          | 0     | .     |               |             |               |                |              |
| 25                                           | 20-24     | Former        | 0     | .     |               |             | .             | 0              | .            |
| Year of Follow-up: 2015, Age Group: 25-29    |           |               |       |       |               |             |               |                |              |
| Period                                       | Age Group | Smoking Group | N     | %     | Ever Quit (N) | Ever Quit % | Mean Yrs Quit | Short Term (n) | Short Term % |
| 25                                           | 25-29     | Never Any     | 0     | .     |               |             |               |                |              |
| 25                                           | 25-29     | CC            | 0     | .     | 0             | .           |               |                |              |
| 25                                           | 25-29     | Ecig          | 0     | .     |               |             |               |                |              |
| 25                                           | 25-29     | Dual          | 0     | .     |               |             |               |                |              |
| 25                                           | 25-29     | Former        | 0     | .     |               |             | .             | 0              | .            |
| Year of Follow-up: 2015, Age Group: 30-34    |           |               |       |       |               |             |               |                |              |
| Period                                       | Age Group | Smoking Group | N     | %     | Ever Quit (N) | Ever Quit % | Mean Yrs Quit | Short Term (n) | Short Term % |
| 25                                           | 30-34     | Never Any     | 0     | .     |               |             |               |                |              |
| 25                                           | 30-34     | CC            | 0     | .     | 0             | .           |               |                |              |
| 25                                           | 30-34     | Ecig          | 0     | .     |               |             |               |                |              |
| 25                                           | 30-34     | Dual          | 0     | .     |               |             |               |                |              |
| 25                                           | 30-34     | Former        | 0     | .     |               |             | .             | 0              | .            |
| Year of Follow-up: 2015, Age Group: 35-39    |           |               |       |       |               |             |               |                |              |
| Period                                       | Age Group | Smoking Group | N     | %     | Ever Quit (N) | Ever Quit % | Mean Yrs Quit | Short Term (n) | Short Term % |
| 25                                           | 35-39     | Never Any     | 4726  | 59.60 |               |             |               |                |              |
| 25                                           | 35-39     | CC            | 20    | 0.25  | 0             | 0.00        |               |                |              |
| 25                                           | 35-39     | Ecig          | 1567  | 19.76 |               |             |               |                |              |
| 25                                           | 35-39     | Dual          | 0     | 0.00  |               |             |               |                |              |
| 25                                           | 35-39     | Former        | 1617  | 20.39 |               |             | 11.52         | 129            | 7.98         |
| Year of Follow-up: 2015, Age Group: 40-44    |           |               |       |       |               |             |               |                |              |
| Period                                       | Age Group | Smoking Group | N     | %     | Ever Quit (N) | Ever Quit % | Mean Yrs Quit | Short Term (n) | Short Term % |
| 25                                           | 40-44     | Never Any     | 5359  | 64.18 |               |             |               |                |              |
| 25                                           | 40-44     | CC            | 33    | 0.40  | 0             | 0.00        |               |                |              |
| 25                                           | 40-44     | Ecig          | 1502  | 17.99 |               |             |               |                |              |
| 25                                           | 40-44     | Dual          | 0     | 0.00  |               |             |               |                |              |

**Results for PHIM for Run 2 (Main\_Analysis.RTF)**

|                                              |           |               |       |       |               |             |               |                |              |
|----------------------------------------------|-----------|---------------|-------|-------|---------------|-------------|---------------|----------------|--------------|
| 25                                           | 40-44     | Former        | 1456  | 17.44 |               |             | 14.00         | 103            | 7.07         |
| Year of Follow-up: 2015, Age Group: 45-49    |           |               |       |       |               |             |               |                |              |
| Period                                       | Age Group | Smoking Group | N     | %     | Ever Quit (N) | Ever Quit % | Mean Yrs Quit | Short Term (n) | Short Term % |
| 25                                           | 45-49     | Never Any     | 5189  | 59.01 |               |             |               |                |              |
| 25                                           | 45-49     | CC            | 32    | 0.36  | 0             | 0.00        |               |                |              |
| 25                                           | 45-49     | Ecig          | 1627  | 18.50 |               |             |               |                |              |
| 25                                           | 45-49     | Dual          | 0     | 0.00  |               |             |               |                |              |
| 25                                           | 45-49     | Former        | 1945  | 22.12 |               |             | 17.95         | 96             | 4.94         |
| Year of Follow-up: 2015, Age Group: 50-54    |           |               |       |       |               |             |               |                |              |
| Period                                       | Age Group | Smoking Group | N     | %     | Ever Quit (N) | Ever Quit % | Mean Yrs Quit | Short Term (n) | Short Term % |
| 25                                           | 50-54     | Never Any     | 5284  | 52.43 |               |             |               |                |              |
| 25                                           | 50-54     | CC            | 45    | 0.45  | 0             | 0.00        |               |                |              |
| 25                                           | 50-54     | Ecig          | 2059  | 20.43 |               |             |               |                |              |
| 25                                           | 50-54     | Dual          | 0     | 0.00  |               |             |               |                |              |
| 25                                           | 50-54     | Former        | 2690  | 26.69 |               |             | 20.17         | 150            | 5.58         |
| Year of Follow-up: 2015, Age Group: 55-59    |           |               |       |       |               |             |               |                |              |
| Period                                       | Age Group | Smoking Group | N     | %     | Ever Quit (N) | Ever Quit % | Mean Yrs Quit | Short Term (n) | Short Term % |
| 25                                           | 55-59     | Never Any     | 5278  | 50.27 |               |             |               |                |              |
| 25                                           | 55-59     | CC            | 37    | 0.35  | 0             | 0.00        |               |                |              |
| 25                                           | 55-59     | Ecig          | 1773  | 16.89 |               |             |               |                |              |
| 25                                           | 55-59     | Dual          | 0     | 0.00  |               |             |               |                |              |
| 25                                           | 55-59     | Former        | 3411  | 32.49 |               |             | 20.84         | 140            | 4.10         |
| Year of Follow-up: 2015, Age Group: 60-64    |           |               |       |       |               |             |               |                |              |
| Period                                       | Age Group | Smoking Group | N     | %     | Ever Quit (N) | Ever Quit % | Mean Yrs Quit | Short Term (n) | Short Term % |
| 25                                           | 60-64     | Never Any     | 5018  | 52.27 |               |             |               |                |              |
| 25                                           | 60-64     | CC            | 42    | 0.44  | 0             | 0.00        |               |                |              |
| 25                                           | 60-64     | Ecig          | 1154  | 12.02 |               |             |               |                |              |
| 25                                           | 60-64     | Dual          | 0     | 0.00  |               |             |               |                |              |
| 25                                           | 60-64     | Former        | 3386  | 35.27 |               |             | 23.56         | 144            | 4.25         |
| Year of Follow-up: 2015, Age Group: 65-69    |           |               |       |       |               |             |               |                |              |
| Period                                       | Age Group | Smoking Group | N     | %     | Ever Quit (N) | Ever Quit % | Mean Yrs Quit | Short Term (n) | Short Term % |
| 25                                           | 65-69     | Never Any     | 4356  | 51.27 |               |             |               |                |              |
| 25                                           | 65-69     | CC            | 41    | 0.48  | 0             | 0.00        |               |                |              |
| 25                                           | 65-69     | Ecig          | 844   | 9.93  |               |             |               |                |              |
| 25                                           | 65-69     | Dual          | 0     | 0.00  |               |             |               |                |              |
| 25                                           | 65-69     | Former        | 3256  | 38.32 |               |             | 23.12         | 70             | 2.15         |
| Year of Follow-up: 2015, Age Group: 70-74    |           |               |       |       |               |             |               |                |              |
| Period                                       | Age Group | Smoking Group | N     | %     | Ever Quit (N) | Ever Quit % | Mean Yrs Quit | Short Term (n) | Short Term % |
| 25                                           | 70-74     | Never Any     | 3116  | 47.67 |               |             |               |                |              |
| 25                                           | 70-74     | CC            | 31    | 0.47  | 0             | 0.00        |               |                |              |
| 25                                           | 70-74     | Ecig          | 527   | 8.06  |               |             |               |                |              |
| 25                                           | 70-74     | Dual          | 0     | 0.00  |               |             |               |                |              |
| 25                                           | 70-74     | Former        | 2862  | 43.79 |               |             | 26.54         | 42             | 1.47         |
| Year of Follow-up: 2015, Age Group: 75-79    |           |               |       |       |               |             |               |                |              |
| Period                                       | Age Group | Smoking Group | N     | %     | Ever Quit (N) | Ever Quit % | Mean Yrs Quit | Short Term (n) | Short Term % |
| 25                                           | 75-79     | Never Any     | 2684  | 48.50 |               |             |               |                |              |
| 25                                           | 75-79     | CC            | 59    | 1.07  | 0             | 0.00        |               |                |              |
| 25                                           | 75-79     | Ecig          | 385   | 6.96  |               |             |               |                |              |
| 25                                           | 75-79     | Dual          | 0     | 0.00  |               |             |               |                |              |
| 25                                           | 75-79     | Former        | 2406  | 43.48 |               |             | 26.76         | 40             | 1.66         |
| Year of Follow-up: 2020, Age Group: All Ages |           |               |       |       |               |             |               |                |              |
| Period                                       | Age Group | Smoking Group | N     | %     | Ever Quit (N) | Ever Quit % | Mean Yrs Quit | Short Term (n) | Short Term % |
| 30                                           | All Ages  | Never Any     | 38326 | 54.53 |               |             |               |                |              |
| 30                                           | All Ages  | CC            | 115   | 0.16  | 0             | 0.00        |               |                |              |
| 30                                           | All Ages  | Ecig          | 9272  | 13.19 |               |             |               |                |              |
| 30                                           | All Ages  | Dual          | 0     | 0.00  |               |             |               |                |              |
| 30                                           | All Ages  | Former        | 22570 | 32.11 |               |             | 23.81         | 756            | 3.35         |
| Year of Follow-up: 2020, Age Group: 18-19    |           |               |       |       |               |             |               |                |              |
| Period                                       | Age Group | Smoking Group | N     | %     | Ever Quit (N) | Ever Quit % | Mean Yrs Quit | Short Term (n) | Short Term % |
| 30                                           | 18-19     | Never Any     | 0     | .     |               |             |               |                |              |
| 30                                           | 18-19     | CC            | 0     | .     | 0             | .           |               |                |              |
| 30                                           | 18-19     | Ecig          | 0     | .     |               |             |               |                |              |
| 30                                           | 18-19     | Dual          | 0     | .     |               |             |               |                |              |
| 30                                           | 18-19     | Former        | 0     | .     |               |             | .             | 0              | .            |
| Year of Follow-up: 2020, Age Group: 20-24    |           |               |       |       |               |             |               |                |              |
| Period                                       | Age Group | Smoking Group | N     | %     | Ever Quit (N) | Ever Quit % | Mean Yrs Quit | Short Term (n) | Short Term % |
| 30                                           | 20-24     | Never Any     | 0     | .     |               |             |               |                |              |
| 30                                           | 20-24     | CC            | 0     | .     | 0             | .           |               |                |              |

**Results for PHIM for Run 2 (Main\_Analysis.RTF)**

|                                           |           |               |      |       |               |             |               |                |              |
|-------------------------------------------|-----------|---------------|------|-------|---------------|-------------|---------------|----------------|--------------|
| 30                                        | 20-24     | Ecig          | 0    | .     |               |             |               |                |              |
| 30                                        | 20-24     | Dual          | 0    | .     |               |             |               |                |              |
| 30                                        | 20-24     | Former        | 0    | .     |               |             | 0             | .              |              |
| Year of Follow-up: 2020, Age Group: 25-29 |           |               |      |       |               |             |               |                |              |
| Period                                    | Age Group | Smoking Group | N    | %     | Ever Quit (N) | Ever Quit % | Mean Yrs Quit | Short Term (n) | Short Term % |
| 30                                        | 25-29     | Never Any     | 0    | .     |               |             |               |                |              |
| 30                                        | 25-29     | CC            | 0    | .     | 0             | .           |               |                |              |
| 30                                        | 25-29     | Ecig          | 0    | .     |               |             |               |                |              |
| 30                                        | 25-29     | Dual          | 0    | .     |               |             |               |                |              |
| 30                                        | 25-29     | Former        | 0    | .     |               |             | 0             | .              |              |
| Year of Follow-up: 2020, Age Group: 30-34 |           |               |      |       |               |             |               |                |              |
| Period                                    | Age Group | Smoking Group | N    | %     | Ever Quit (N) | Ever Quit % | Mean Yrs Quit | Short Term (n) | Short Term % |
| 30                                        | 30-34     | Never Any     | 0    | .     |               |             |               |                |              |
| 30                                        | 30-34     | CC            | 0    | .     | 0             | .           |               |                |              |
| 30                                        | 30-34     | Ecig          | 0    | .     |               |             |               |                |              |
| 30                                        | 30-34     | Dual          | 0    | .     |               |             |               |                |              |
| 30                                        | 30-34     | Former        | 0    | .     |               |             | 0             | .              |              |
| Year of Follow-up: 2020, Age Group: 35-39 |           |               |      |       |               |             |               |                |              |
| Period                                    | Age Group | Smoking Group | N    | %     | Ever Quit (N) | Ever Quit % | Mean Yrs Quit | Short Term (n) | Short Term % |
| 30                                        | 35-39     | Never Any     | 0    | .     |               |             |               |                |              |
| 30                                        | 35-39     | CC            | 0    | .     | 0             | .           |               |                |              |
| 30                                        | 35-39     | Ecig          | 0    | .     |               |             |               |                |              |
| 30                                        | 35-39     | Dual          | 0    | .     |               |             |               |                |              |
| 30                                        | 35-39     | Former        | 0    | .     |               |             | 0             | .              |              |
| Year of Follow-up: 2020, Age Group: 40-44 |           |               |      |       |               |             |               |                |              |
| Period                                    | Age Group | Smoking Group | N    | %     | Ever Quit (N) | Ever Quit % | Mean Yrs Quit | Short Term (n) | Short Term % |
| 30                                        | 40-44     | Never Any     | 4726 | 59.60 |               |             |               |                |              |
| 30                                        | 40-44     | CC            | 6    | 0.08  | 0             | 0.00        |               |                |              |
| 30                                        | 40-44     | Ecig          | 1345 | 16.96 |               |             |               |                |              |
| 30                                        | 40-44     | Dual          | 0    | 0.00  |               |             |               |                |              |
| 30                                        | 40-44     | Former        | 1853 | 23.37 |               |             | 14.68         | 82             | 4.43         |
| Year of Follow-up: 2020, Age Group: 45-49 |           |               |      |       |               |             |               |                |              |
| Period                                    | Age Group | Smoking Group | N    | %     | Ever Quit (N) | Ever Quit % | Mean Yrs Quit | Short Term (n) | Short Term % |
| 30                                        | 45-49     | Never Any     | 5359 | 64.18 |               |             |               |                |              |
| 30                                        | 45-49     | CC            | 13   | 0.16  | 0             | 0.00        |               |                |              |
| 30                                        | 45-49     | Ecig          | 1317 | 15.77 |               |             |               |                |              |
| 30                                        | 45-49     | Dual          | 0    | 0.00  |               |             |               |                |              |
| 30                                        | 45-49     | Former        | 1661 | 19.89 |               |             | 16.93         | 71             | 4.27         |
| Year of Follow-up: 2020, Age Group: 50-54 |           |               |      |       |               |             |               |                |              |
| Period                                    | Age Group | Smoking Group | N    | %     | Ever Quit (N) | Ever Quit % | Mean Yrs Quit | Short Term (n) | Short Term % |
| 30                                        | 50-54     | Never Any     | 5189 | 59.01 |               |             |               |                |              |
| 30                                        | 50-54     | CC            | 9    | 0.10  | 0             | 0.00        |               |                |              |
| 30                                        | 50-54     | Ecig          | 1395 | 15.86 |               |             |               |                |              |
| 30                                        | 50-54     | Dual          | 0    | 0.00  |               |             |               |                |              |
| 30                                        | 50-54     | Former        | 2200 | 25.02 |               |             | 20.50         | 121            | 5.50         |
| Year of Follow-up: 2020, Age Group: 55-59 |           |               |      |       |               |             |               |                |              |
| Period                                    | Age Group | Smoking Group | N    | %     | Ever Quit (N) | Ever Quit % | Mean Yrs Quit | Short Term (n) | Short Term % |
| 30                                        | 55-59     | Never Any     | 5284 | 52.43 |               |             |               |                |              |
| 30                                        | 55-59     | CC            | 14   | 0.14  | 0             | 0.00        |               |                |              |
| 30                                        | 55-59     | Ecig          | 1708 | 16.95 |               |             |               |                |              |
| 30                                        | 55-59     | Dual          | 0    | 0.00  |               |             |               |                |              |
| 30                                        | 55-59     | Former        | 3072 | 30.48 |               |             | 22.30         | 140            | 4.56         |
| Year of Follow-up: 2020, Age Group: 60-64 |           |               |      |       |               |             |               |                |              |
| Period                                    | Age Group | Smoking Group | N    | %     | Ever Quit (N) | Ever Quit % | Mean Yrs Quit | Short Term (n) | Short Term % |
| 30                                        | 60-64     | Never Any     | 5278 | 50.27 |               |             |               |                |              |
| 30                                        | 60-64     | CC            | 15   | 0.14  | 0             | 0.00        |               |                |              |
| 30                                        | 60-64     | Ecig          | 1428 | 13.60 |               |             |               |                |              |
| 30                                        | 60-64     | Dual          | 0    | 0.00  |               |             |               |                |              |
| 30                                        | 60-64     | Former        | 3778 | 35.98 |               |             | 23.52         | 153            | 4.05         |
| Year of Follow-up: 2020, Age Group: 65-69 |           |               |      |       |               |             |               |                |              |
| Period                                    | Age Group | Smoking Group | N    | %     | Ever Quit (N) | Ever Quit % | Mean Yrs Quit | Short Term (n) | Short Term % |
| 30                                        | 65-69     | Never Any     | 5018 | 52.27 |               |             |               |                |              |
| 30                                        | 65-69     | CC            | 18   | 0.19  | 0             | 0.00        |               |                |              |
| 30                                        | 65-69     | Ecig          | 917  | 9.55  |               |             |               |                |              |
| 30                                        | 65-69     | Dual          | 0    | 0.00  |               |             |               |                |              |
| 30                                        | 65-69     | Former        | 3647 | 37.99 |               |             | 26.68         | 75             | 2.06         |
| Year of Follow-up: 2020, Age Group: 70-74 |           |               |      |       |               |             |               |                |              |
| Period                                    | Age Group | Smoking Group | N    | %     | Ever Quit (N) | Ever Quit % | Mean Yrs Quit | Short Term (n) | Short Term % |

**Results for PHIM for Run 2 (Main\_Analysis.RTF)**

|                                              |           |               |       |       |               |             |               |                |              |
|----------------------------------------------|-----------|---------------|-------|-------|---------------|-------------|---------------|----------------|--------------|
| 30                                           | 70-74     | Never Any     | 4356  | 51.27 |               |             |               |                |              |
| 30                                           | 70-74     | CC            | 22    | 0.26  | 0             | 0.00        |               |                |              |
| 30                                           | 70-74     | Ecig          | 727   | 8.56  |               |             |               |                |              |
| 30                                           | 70-74     | Dual          | 0     | 0.00  |               |             |               |                |              |
| 30                                           | 70-74     | Former        | 3392  | 39.92 |               |             | 27.06         | 66             | 1.95         |
| Year of Follow-up: 2020, Age Group: 75-79    |           |               |       |       |               |             |               |                |              |
| Period                                       | Age Group | Smoking Group | N     | %     | Ever Quit (N) | Ever Quit % | Mean Yrs Quit | Short Term (n) | Short Term % |
| 30                                           | 75-79     | Never Any     | 3116  | 47.67 |               |             |               |                |              |
| 30                                           | 75-79     | CC            | 18    | 0.28  | 0             | 0.00        |               |                |              |
| 30                                           | 75-79     | Ecig          | 435   | 6.66  |               |             |               |                |              |
| 30                                           | 75-79     | Dual          | 0     | 0.00  |               |             |               |                |              |
| 30                                           | 75-79     | Former        | 2967  | 45.39 |               |             | 30.49         | 48             | 1.62         |
| Year of Follow-up: 2025, Age Group: All Ages |           |               |       |       |               |             |               |                |              |
| Period                                       | Age Group | Smoking Group | N     | %     | Ever Quit (N) | Ever Quit % | Mean Yrs Quit | Short Term (n) | Short Term % |
| 35                                           | All Ages  | Never Any     | 35210 | 55.23 |               |             |               |                |              |
| 35                                           | All Ages  | CC            | 47    | 0.07  | 0             | 0.00        |               |                |              |
| 35                                           | All Ages  | Ecig          | 7305  | 11.46 |               |             |               |                |              |
| 35                                           | All Ages  | Dual          | 0     | 0.00  |               |             |               |                |              |
| 35                                           | All Ages  | Former        | 21185 | 33.23 |               |             | 25.87         | 616            | 2.91         |
| Year of Follow-up: 2025, Age Group: 18-19    |           |               |       |       |               |             |               |                |              |
| Period                                       | Age Group | Smoking Group | N     | %     | Ever Quit (N) | Ever Quit % | Mean Yrs Quit | Short Term (n) | Short Term % |
| 35                                           | 18-19     | Never Any     | 0     | .     |               |             |               |                |              |
| 35                                           | 18-19     | CC            | 0     | .     | 0             | .           |               |                |              |
| 35                                           | 18-19     | Ecig          | 0     | .     |               |             |               |                |              |
| 35                                           | 18-19     | Dual          | 0     | .     |               |             |               |                |              |
| 35                                           | 18-19     | Former        | 0     | .     |               |             | .             | 0              | .            |
| Year of Follow-up: 2025, Age Group: 20-24    |           |               |       |       |               |             |               |                |              |
| Period                                       | Age Group | Smoking Group | N     | %     | Ever Quit (N) | Ever Quit % | Mean Yrs Quit | Short Term (n) | Short Term % |
| 35                                           | 20-24     | Never Any     | 0     | .     |               |             |               |                |              |
| 35                                           | 20-24     | CC            | 0     | .     | 0             | .           |               |                |              |
| 35                                           | 20-24     | Ecig          | 0     | .     |               |             |               |                |              |
| 35                                           | 20-24     | Dual          | 0     | .     |               |             |               |                |              |
| 35                                           | 20-24     | Former        | 0     | .     |               |             | .             | 0              | .            |
| Year of Follow-up: 2025, Age Group: 25-29    |           |               |       |       |               |             |               |                |              |
| Period                                       | Age Group | Smoking Group | N     | %     | Ever Quit (N) | Ever Quit % | Mean Yrs Quit | Short Term (n) | Short Term % |
| 35                                           | 25-29     | Never Any     | 0     | .     |               |             |               |                |              |
| 35                                           | 25-29     | CC            | 0     | .     | 0             | .           |               |                |              |
| 35                                           | 25-29     | Ecig          | 0     | .     |               |             |               |                |              |
| 35                                           | 25-29     | Dual          | 0     | .     |               |             |               |                |              |
| 35                                           | 25-29     | Former        | 0     | .     |               |             | .             | 0              | .            |
| Year of Follow-up: 2025, Age Group: 30-34    |           |               |       |       |               |             |               |                |              |
| Period                                       | Age Group | Smoking Group | N     | %     | Ever Quit (N) | Ever Quit % | Mean Yrs Quit | Short Term (n) | Short Term % |
| 35                                           | 30-34     | Never Any     | 0     | .     |               |             |               |                |              |
| 35                                           | 30-34     | CC            | 0     | .     | 0             | .           |               |                |              |
| 35                                           | 30-34     | Ecig          | 0     | .     |               |             |               |                |              |
| 35                                           | 30-34     | Dual          | 0     | .     |               |             |               |                |              |
| 35                                           | 30-34     | Former        | 0     | .     |               |             | .             | 0              | .            |
| Year of Follow-up: 2025, Age Group: 35-39    |           |               |       |       |               |             |               |                |              |
| Period                                       | Age Group | Smoking Group | N     | %     | Ever Quit (N) | Ever Quit % | Mean Yrs Quit | Short Term (n) | Short Term % |
| 35                                           | 35-39     | Never Any     | 0     | .     |               |             |               |                |              |
| 35                                           | 35-39     | CC            | 0     | .     | 0             | .           |               |                |              |
| 35                                           | 35-39     | Ecig          | 0     | .     |               |             |               |                |              |
| 35                                           | 35-39     | Dual          | 0     | .     |               |             |               |                |              |
| 35                                           | 35-39     | Former        | 0     | .     |               |             | .             | 0              | .            |
| Year of Follow-up: 2025, Age Group: 40-44    |           |               |       |       |               |             |               |                |              |
| Period                                       | Age Group | Smoking Group | N     | %     | Ever Quit (N) | Ever Quit % | Mean Yrs Quit | Short Term (n) | Short Term % |
| 35                                           | 40-44     | Never Any     | 0     | .     |               |             |               |                |              |
| 35                                           | 40-44     | CC            | 0     | .     | 0             | .           |               |                |              |
| 35                                           | 40-44     | Ecig          | 0     | .     |               |             |               |                |              |
| 35                                           | 40-44     | Dual          | 0     | .     |               |             |               |                |              |
| 35                                           | 40-44     | Former        | 0     | .     |               |             | .             | 0              | .            |
| Year of Follow-up: 2025, Age Group: 45-49    |           |               |       |       |               |             |               |                |              |
| Period                                       | Age Group | Smoking Group | N     | %     | Ever Quit (N) | Ever Quit % | Mean Yrs Quit | Short Term (n) | Short Term % |
| 35                                           | 45-49     | Never Any     | 4726  | 59.60 |               |             |               |                |              |
| 35                                           | 45-49     | CC            | 1     | 0.01  | 0             | 0.00        |               |                |              |
| 35                                           | 45-49     | Ecig          | 1146  | 14.45 |               |             |               |                |              |
| 35                                           | 45-49     | Dual          | 0     | 0.00  |               |             |               |                |              |
| 35                                           | 45-49     | Former        | 2057  | 25.94 |               |             | 17.95         | 74             | 3.60         |
| Year of Follow-up: 2025, Age Group: 50-54    |           |               |       |       |               |             |               |                |              |

**Results for PHIM for Run 2 (Main\_Analysis.RTF)**

| Period                                       | Age Group | Smoking Group | N     | %     | Ever Quit (N) | Ever Quit % | Mean Yrs Quit | Short Term (n) | Short Term % |
|----------------------------------------------|-----------|---------------|-------|-------|---------------|-------------|---------------|----------------|--------------|
| 35                                           | 50-54     | Never Any     | 5359  | 64.18 |               |             |               |                |              |
| 35                                           | 50-54     | CC            | 3     | 0.04  | 0             | 0.00        |               |                |              |
| 35                                           | 50-54     | Ecig          | 1112  | 13.32 |               |             |               |                |              |
| 35                                           | 50-54     | Dual          | 0     | 0.00  |               |             |               |                |              |
| 35                                           | 50-54     | Former        | 1876  | 22.47 |               |             | 19.62         | 104            | 5.54         |
| Year of Follow-up: 2025, Age Group: 55-59    |           |               |       |       |               |             |               |                |              |
| Period                                       | Age Group | Smoking Group | N     | %     | Ever Quit (N) | Ever Quit % | Mean Yrs Quit | Short Term (n) | Short Term % |
| 35                                           | 55-59     | Never Any     | 5189  | 59.01 |               |             |               |                |              |
| 35                                           | 55-59     | CC            | 4     | 0.05  | 0             | 0.00        |               |                |              |
| 35                                           | 55-59     | Ecig          | 1153  | 13.11 |               |             |               |                |              |
| 35                                           | 55-59     | Dual          | 0     | 0.00  |               |             |               |                |              |
| 35                                           | 55-59     | Former        | 2447  | 27.83 |               |             | 23.13         | 98             | 4.00         |
| Year of Follow-up: 2025, Age Group: 60-64    |           |               |       |       |               |             |               |                |              |
| Period                                       | Age Group | Smoking Group | N     | %     | Ever Quit (N) | Ever Quit % | Mean Yrs Quit | Short Term (n) | Short Term % |
| 35                                           | 60-64     | Never Any     | 5284  | 52.43 |               |             |               |                |              |
| 35                                           | 60-64     | CC            | 7     | 0.07  | 0             | 0.00        |               |                |              |
| 35                                           | 60-64     | Ecig          | 1378  | 13.67 |               |             |               |                |              |
| 35                                           | 60-64     | Dual          | 0     | 0.00  |               |             |               |                |              |
| 35                                           | 60-64     | Former        | 3409  | 33.83 |               |             | 24.79         | 139            | 4.08         |
| Year of Follow-up: 2025, Age Group: 65-69    |           |               |       |       |               |             |               |                |              |
| Period                                       | Age Group | Smoking Group | N     | %     | Ever Quit (N) | Ever Quit % | Mean Yrs Quit | Short Term (n) | Short Term % |
| 35                                           | 65-69     | Never Any     | 5278  | 50.27 |               |             |               |                |              |
| 35                                           | 65-69     | CC            | 7     | 0.07  | 0             | 0.00        |               |                |              |
| 35                                           | 65-69     | Ecig          | 1139  | 10.85 |               |             |               |                |              |
| 35                                           | 65-69     | Dual          | 0     | 0.00  |               |             |               |                |              |
| 35                                           | 65-69     | Former        | 4075  | 38.81 |               |             | 26.61         | 83             | 2.04         |
| Year of Follow-up: 2025, Age Group: 70-74    |           |               |       |       |               |             |               |                |              |
| Period                                       | Age Group | Smoking Group | N     | %     | Ever Quit (N) | Ever Quit % | Mean Yrs Quit | Short Term (n) | Short Term % |
| 35                                           | 70-74     | Never Any     | 5018  | 52.27 |               |             |               |                |              |
| 35                                           | 70-74     | CC            | 11    | 0.11  | 0             | 0.00        |               |                |              |
| 35                                           | 70-74     | Ecig          | 789   | 8.22  |               |             |               |                |              |
| 35                                           | 70-74     | Dual          | 0     | 0.00  |               |             |               |                |              |
| 35                                           | 70-74     | Former        | 3782  | 39.40 |               |             | 30.61         | 65             | 1.72         |
| Year of Follow-up: 2025, Age Group: 75-79    |           |               |       |       |               |             |               |                |              |
| Period                                       | Age Group | Smoking Group | N     | %     | Ever Quit (N) | Ever Quit % | Mean Yrs Quit | Short Term (n) | Short Term % |
| 35                                           | 75-79     | Never Any     | 4356  | 51.27 |               |             |               |                |              |
| 35                                           | 75-79     | CC            | 14    | 0.16  | 0             | 0.00        |               |                |              |
| 35                                           | 75-79     | Ecig          | 588   | 6.92  |               |             |               |                |              |
| 35                                           | 75-79     | Dual          | 0     | 0.00  |               |             |               |                |              |
| 35                                           | 75-79     | Former        | 3539  | 41.65 |               |             | 30.81         | 53             | 1.50         |
| Year of Follow-up: 2030, Age Group: All Ages |           |               |       |       |               |             |               |                |              |
| Period                                       | Age Group | Smoking Group | N     | %     | Ever Quit (N) | Ever Quit % | Mean Yrs Quit | Short Term (n) | Short Term % |
| 40                                           | All Ages  | Never Any     | 30854 | 55.84 |               |             |               |                |              |
| 40                                           | All Ages  | CC            | 14    | 0.03  | 0             | 0.00        |               |                |              |
| 40                                           | All Ages  | Ecig          | 5391  | 9.76  |               |             |               |                |              |
| 40                                           | All Ages  | Dual          | 0     | 0.00  |               |             |               |                |              |
| 40                                           | All Ages  | Former        | 18991 | 34.37 |               |             | 27.90         | 543            | 2.86         |
| Year of Follow-up: 2030, Age Group: 18-19    |           |               |       |       |               |             |               |                |              |
| Period                                       | Age Group | Smoking Group | N     | %     | Ever Quit (N) | Ever Quit % | Mean Yrs Quit | Short Term (n) | Short Term % |
| 40                                           | 18-19     | Never Any     | 0     | .     |               |             |               |                |              |
| 40                                           | 18-19     | CC            | 0     | .     | 0             | .           |               |                |              |
| 40                                           | 18-19     | Ecig          | 0     | .     |               |             |               |                |              |
| 40                                           | 18-19     | Dual          | 0     | .     |               |             |               |                |              |
| 40                                           | 18-19     | Former        | 0     | .     |               |             | .             | 0              | .            |
| Year of Follow-up: 2030, Age Group: 20-24    |           |               |       |       |               |             |               |                |              |
| Period                                       | Age Group | Smoking Group | N     | %     | Ever Quit (N) | Ever Quit % | Mean Yrs Quit | Short Term (n) | Short Term % |
| 40                                           | 20-24     | Never Any     | 0     | .     |               |             |               |                |              |
| 40                                           | 20-24     | CC            | 0     | .     | 0             | .           |               |                |              |
| 40                                           | 20-24     | Ecig          | 0     | .     |               |             |               |                |              |
| 40                                           | 20-24     | Dual          | 0     | .     |               |             |               |                |              |
| 40                                           | 20-24     | Former        | 0     | .     |               |             | .             | 0              | .            |
| Year of Follow-up: 2030, Age Group: 25-29    |           |               |       |       |               |             |               |                |              |
| Period                                       | Age Group | Smoking Group | N     | %     | Ever Quit (N) | Ever Quit % | Mean Yrs Quit | Short Term (n) | Short Term % |
| 40                                           | 25-29     | Never Any     | 0     | .     |               |             |               |                |              |
| 40                                           | 25-29     | CC            | 0     | .     | 0             | .           |               |                |              |
| 40                                           | 25-29     | Ecig          | 0     | .     |               |             |               |                |              |
| 40                                           | 25-29     | Dual          | 0     | .     |               |             |               |                |              |



**Results for PHIM for Run 2 (Main\_Analysis.RTF)**

| Year of Follow-up: 2030, Age Group: 30-34 | Period | Age Group | Smoking Group | N    | %     | Ever Quit (N) | Ever Quit % | Mean Yrs Quit | Short Term (n) | Short Term % |
|-------------------------------------------|--------|-----------|---------------|------|-------|---------------|-------------|---------------|----------------|--------------|
| Year of Follow-up: 2030, Age Group: 30-34 |        |           |               |      |       |               |             |               |                |              |
| 40                                        | 25-29  | Former    |               | 0    | .     |               |             |               | 0              | .            |
| 40                                        | 30-34  | Never Any |               | 0    | .     |               |             |               |                |              |
| 40                                        | 30-34  | CC        |               | 0    | .     | 0             | .           |               |                |              |
| 40                                        | 30-34  | Ecig      |               | 0    | .     |               |             |               |                |              |
| 40                                        | 30-34  | Dual      |               | 0    | .     |               |             |               |                |              |
| 40                                        | 30-34  | Former    |               | 0    | .     |               |             |               | 0              | .            |
| Year of Follow-up: 2030, Age Group: 35-39 |        |           |               |      |       |               |             |               |                |              |
| 40                                        | 35-39  | Never Any |               | 0    | .     |               |             |               |                |              |
| 40                                        | 35-39  | CC        |               | 0    | .     | 0             | .           |               |                |              |
| 40                                        | 35-39  | Ecig      |               | 0    | .     |               |             |               |                |              |
| 40                                        | 35-39  | Dual      |               | 0    | .     |               |             |               |                |              |
| 40                                        | 35-39  | Former    |               | 0    | .     |               |             |               | 0              | .            |
| Year of Follow-up: 2030, Age Group: 40-44 |        |           |               |      |       |               |             |               |                |              |
| 40                                        | 40-44  | Never Any |               | 0    | .     |               |             |               |                |              |
| 40                                        | 40-44  | CC        |               | 0    | .     | 0             | .           |               |                |              |
| 40                                        | 40-44  | Ecig      |               | 0    | .     |               |             |               |                |              |
| 40                                        | 40-44  | Dual      |               | 0    | .     |               |             |               |                |              |
| 40                                        | 40-44  | Former    |               | 0    | .     |               |             |               | 0              | .            |
| Year of Follow-up: 2030, Age Group: 45-49 |        |           |               |      |       |               |             |               |                |              |
| 40                                        | 45-49  | Never Any |               | 0    | .     |               |             |               |                |              |
| 40                                        | 45-49  | CC        |               | 0    | .     | 0             | .           |               |                |              |
| 40                                        | 45-49  | Ecig      |               | 0    | .     |               |             |               |                |              |
| 40                                        | 45-49  | Dual      |               | 0    | .     |               |             |               |                |              |
| 40                                        | 45-49  | Former    |               | 0    | .     |               |             |               | 0              | .            |
| Year of Follow-up: 2030, Age Group: 50-54 |        |           |               |      |       |               |             |               |                |              |
| 40                                        | 50-54  | Never Any |               | 4726 | 59.60 |               |             |               |                |              |
| 40                                        | 50-54  | CC        |               | 0    | 0.00  | 0             | 0.00        |               |                |              |
| 40                                        | 50-54  | Ecig      |               | 959  | 12.09 |               |             |               |                |              |
| 40                                        | 50-54  | Dual      |               | 0    | 0.00  |               |             |               |                |              |
| 40                                        | 50-54  | Former    |               | 2245 | 28.31 |               |             | 21.16         | 100            | 4.45         |
| Year of Follow-up: 2030, Age Group: 55-59 |        |           |               |      |       |               |             |               |                |              |
| 40                                        | 55-59  | Never Any |               | 5359 | 64.18 |               |             |               |                |              |
| 40                                        | 55-59  | CC        |               | 0    | 0.00  | 0             | 0.00        |               |                |              |
| 40                                        | 55-59  | Ecig      |               | 897  | 10.74 |               |             |               |                |              |
| 40                                        | 55-59  | Dual      |               | 0    | 0.00  |               |             |               |                |              |
| 40                                        | 55-59  | Former    |               | 2094 | 25.08 |               |             | 22.27         | 80             | 3.82         |
| Year of Follow-up: 2030, Age Group: 60-64 |        |           |               |      |       |               |             |               |                |              |
| 40                                        | 60-64  | Never Any |               | 5189 | 59.01 |               |             |               |                |              |
| 40                                        | 60-64  | CC        |               | 3    | 0.03  | 0             | 0.00        |               |                |              |
| 40                                        | 60-64  | Ecig      |               | 886  | 10.08 |               |             |               |                |              |
| 40                                        | 60-64  | Dual      |               | 0    | 0.00  |               |             |               |                |              |
| 40                                        | 60-64  | Former    |               | 2715 | 30.88 |               |             | 25.52         | 128            | 4.71         |
| Year of Follow-up: 2030, Age Group: 65-69 |        |           |               |      |       |               |             |               |                |              |
| 40                                        | 65-69  | Never Any |               | 5284 | 52.43 |               |             |               |                |              |
| 40                                        | 65-69  | CC        |               | 3    | 0.03  | 0             | 0.00        |               |                |              |
| 40                                        | 65-69  | Ecig      |               | 1080 | 10.72 |               |             |               |                |              |
| 40                                        | 65-69  | Dual      |               | 0    | 0.00  |               |             |               |                |              |
| 40                                        | 65-69  | Former    |               | 3711 | 36.82 |               |             | 27.57         | 73             | 1.97         |
| Year of Follow-up: 2030, Age Group: 70-74 |        |           |               |      |       |               |             |               |                |              |
| 40                                        | 70-74  | Never Any |               | 5278 | 50.27 |               |             |               |                |              |
| 40                                        | 70-74  | CC        |               | 4    | 0.04  | 0             | 0.00        |               |                |              |
| 40                                        | 70-74  | Ecig      |               | 957  | 9.12  |               |             |               |                |              |
| 40                                        | 70-74  | Dual      |               | 0    | 0.00  |               |             |               |                |              |
| 40                                        | 70-74  | Former    |               | 4260 | 40.58 |               |             | 30.32         | 86             | 2.02         |
| Year of Follow-up: 2030, Age Group: 75-79 |        |           |               |      |       |               |             |               |                |              |
| 40                                        | 75-79  | Never Any |               | 5018 | 52.27 |               |             |               |                |              |
| 40                                        | 75-79  | CC        |               | 4    | 0.04  | 0             | 0.00        |               |                |              |

**Results for PHIM for Run 2 (Main\_Analysis.RTF)**

|                                              |           |               |       |       |               |             |               |                |              |
|----------------------------------------------|-----------|---------------|-------|-------|---------------|-------------|---------------|----------------|--------------|
| 40                                           | 75-79     | Ecig          | 612   | 6.38  |               |             |               |                |              |
| 40                                           | 75-79     | Dual          | 0     | 0.00  |               |             |               |                |              |
| 40                                           | 75-79     | Former        | 3966  | 41.31 |               |             | 34.05         | 76             | 1.92         |
| Year of Follow-up: 2035, Age Group: All Ages |           |               |       |       |               |             |               |                |              |
| Period                                       | Age Group | Smoking Group | N     | %     | Ever Quit (N) | Ever Quit % | Mean Yrs Quit | Short Term (n) | Short Term % |
| 45                                           | All Ages  | Never Any     | 25836 | 56.60 |               |             |               |                |              |
| 45                                           | All Ages  | CC            | 5     | 0.01  | 0             | 0.00        |               |                |              |
| 45                                           | All Ages  | Ecig          | 3886  | 8.51  |               |             |               |                |              |
| 45                                           | All Ages  | Dual          | 0     | 0.00  |               |             |               |                |              |
| 45                                           | All Ages  | Former        | 15923 | 34.88 |               |             | 29.63         | 351            | 2.20         |
| Year of Follow-up: 2035, Age Group: 18-19    |           |               |       |       |               |             |               |                |              |
| Period                                       | Age Group | Smoking Group | N     | %     | Ever Quit (N) | Ever Quit % | Mean Yrs Quit | Short Term (n) | Short Term % |
| 45                                           | 18-19     | Never Any     | 0     | .     |               |             |               |                |              |
| 45                                           | 18-19     | CC            | 0     | .     | 0             | .           |               |                |              |
| 45                                           | 18-19     | Ecig          | 0     | .     |               |             |               |                |              |
| 45                                           | 18-19     | Dual          | 0     | .     |               |             |               |                |              |
| 45                                           | 18-19     | Former        | 0     | .     |               |             | .             | 0              | .            |
| Year of Follow-up: 2035, Age Group: 20-24    |           |               |       |       |               |             |               |                |              |
| Period                                       | Age Group | Smoking Group | N     | %     | Ever Quit (N) | Ever Quit % | Mean Yrs Quit | Short Term (n) | Short Term % |
| 45                                           | 20-24     | Never Any     | 0     | .     |               |             |               |                |              |
| 45                                           | 20-24     | CC            | 0     | .     | 0             | .           |               |                |              |
| 45                                           | 20-24     | Ecig          | 0     | .     |               |             |               |                |              |
| 45                                           | 20-24     | Dual          | 0     | .     |               |             |               |                |              |
| 45                                           | 20-24     | Former        | 0     | .     |               |             | .             | 0              | .            |
| Year of Follow-up: 2035, Age Group: 25-29    |           |               |       |       |               |             |               |                |              |
| Period                                       | Age Group | Smoking Group | N     | %     | Ever Quit (N) | Ever Quit % | Mean Yrs Quit | Short Term (n) | Short Term % |
| 45                                           | 25-29     | Never Any     | 0     | .     |               |             |               |                |              |
| 45                                           | 25-29     | CC            | 0     | .     | 0             | .           |               |                |              |
| 45                                           | 25-29     | Ecig          | 0     | .     |               |             |               |                |              |
| 45                                           | 25-29     | Dual          | 0     | .     |               |             |               |                |              |
| 45                                           | 25-29     | Former        | 0     | .     |               |             | .             | 0              | .            |
| Year of Follow-up: 2035, Age Group: 30-34    |           |               |       |       |               |             |               |                |              |
| Period                                       | Age Group | Smoking Group | N     | %     | Ever Quit (N) | Ever Quit % | Mean Yrs Quit | Short Term (n) | Short Term % |
| 45                                           | 30-34     | Never Any     | 0     | .     |               |             |               |                |              |
| 45                                           | 30-34     | CC            | 0     | .     | 0             | .           |               |                |              |
| 45                                           | 30-34     | Ecig          | 0     | .     |               |             |               |                |              |
| 45                                           | 30-34     | Dual          | 0     | .     |               |             |               |                |              |
| 45                                           | 30-34     | Former        | 0     | .     |               |             | .             | 0              | .            |
| Year of Follow-up: 2035, Age Group: 35-39    |           |               |       |       |               |             |               |                |              |
| Period                                       | Age Group | Smoking Group | N     | %     | Ever Quit (N) | Ever Quit % | Mean Yrs Quit | Short Term (n) | Short Term % |
| 45                                           | 35-39     | Never Any     | 0     | .     |               |             |               |                |              |
| 45                                           | 35-39     | CC            | 0     | .     | 0             | .           |               |                |              |
| 45                                           | 35-39     | Ecig          | 0     | .     |               |             |               |                |              |
| 45                                           | 35-39     | Dual          | 0     | .     |               |             |               |                |              |
| 45                                           | 35-39     | Former        | 0     | .     |               |             | .             | 0              | .            |
| Year of Follow-up: 2035, Age Group: 40-44    |           |               |       |       |               |             |               |                |              |
| Period                                       | Age Group | Smoking Group | N     | %     | Ever Quit (N) | Ever Quit % | Mean Yrs Quit | Short Term (n) | Short Term % |
| 45                                           | 40-44     | Never Any     | 0     | .     |               |             |               |                |              |
| 45                                           | 40-44     | CC            | 0     | .     | 0             | .           |               |                |              |
| 45                                           | 40-44     | Ecig          | 0     | .     |               |             |               |                |              |
| 45                                           | 40-44     | Dual          | 0     | .     |               |             |               |                |              |
| 45                                           | 40-44     | Former        | 0     | .     |               |             | .             | 0              | .            |
| Year of Follow-up: 2035, Age Group: 45-49    |           |               |       |       |               |             |               |                |              |
| Period                                       | Age Group | Smoking Group | N     | %     | Ever Quit (N) | Ever Quit % | Mean Yrs Quit | Short Term (n) | Short Term % |
| 45                                           | 45-49     | Never Any     | 0     | .     |               |             |               |                |              |
| 45                                           | 45-49     | CC            | 0     | .     | 0             | .           |               |                |              |
| 45                                           | 45-49     | Ecig          | 0     | .     |               |             |               |                |              |
| 45                                           | 45-49     | Dual          | 0     | .     |               |             |               |                |              |
| 45                                           | 45-49     | Former        | 0     | .     |               |             | .             | 0              | .            |
| Year of Follow-up: 2035, Age Group: 50-54    |           |               |       |       |               |             |               |                |              |
| Period                                       | Age Group | Smoking Group | N     | %     | Ever Quit (N) | Ever Quit % | Mean Yrs Quit | Short Term (n) | Short Term % |
| 45                                           | 50-54     | Never Any     | 0     | .     |               |             |               |                |              |
| 45                                           | 50-54     | CC            | 0     | .     | 0             | .           |               |                |              |
| 45                                           | 50-54     | Ecig          | 0     | .     |               |             |               |                |              |
| 45                                           | 50-54     | Dual          | 0     | .     |               |             |               |                |              |
| 45                                           | 50-54     | Former        | 0     | .     |               |             | .             | 0              | .            |
| Year of Follow-up: 2035, Age Group: 55-59    |           |               |       |       |               |             |               |                |              |
| Period                                       | Age Group | Smoking Group | N     | %     | Ever Quit (N) | Ever Quit % | Mean Yrs Quit | Short Term (n) | Short Term % |

**Results for PHIM for Run 2 (Main\_Analysis.RTF)**

|                                              |           |               |       |       |               |             |               |                |              |
|----------------------------------------------|-----------|---------------|-------|-------|---------------|-------------|---------------|----------------|--------------|
| 45                                           | 55-59     | Never Any     | 4726  | 59.60 |               |             |               |                |              |
| 45                                           | 55-59     | CC            | 0     | 0.00  | 0             | 0.00        |               |                |              |
| 45                                           | 55-59     | Ecig          | 792   | 9.99  |               |             |               |                |              |
| 45                                           | 55-59     | Dual          | 0     | 0.00  |               |             |               |                |              |
| 45                                           | 55-59     | Former        | 2412  | 30.42 |               |             | 24.49         | 64             | 2.65         |
| Year of Follow-up: 2035, Age Group: 60-64    |           |               |       |       |               |             |               |                |              |
| Period                                       | Age Group | Smoking Group | N     | %     | Ever Quit (N) | Ever Quit % | Mean Yrs Quit | Short Term (n) | Short Term % |
| 45                                           | 60-64     | Never Any     | 5359  | 64.18 |               |             |               |                |              |
| 45                                           | 60-64     | CC            | 0     | 0.00  | 0             | 0.00        |               |                |              |
| 45                                           | 60-64     | Ecig          | 719   | 8.61  |               |             |               |                |              |
| 45                                           | 60-64     | Dual          | 0     | 0.00  |               |             |               |                |              |
| 45                                           | 60-64     | Former        | 2272  | 27.21 |               |             | 25.28         | 77             | 3.39         |
| Year of Follow-up: 2035, Age Group: 65-69    |           |               |       |       |               |             |               |                |              |
| Period                                       | Age Group | Smoking Group | N     | %     | Ever Quit (N) | Ever Quit % | Mean Yrs Quit | Short Term (n) | Short Term % |
| 45                                           | 65-69     | Never Any     | 5189  | 59.01 |               |             |               |                |              |
| 45                                           | 65-69     | CC            | 3     | 0.03  | 0             | 0.00        |               |                |              |
| 45                                           | 65-69     | Ecig          | 694   | 7.89  |               |             |               |                |              |
| 45                                           | 65-69     | Dual          | 0     | 0.00  |               |             |               |                |              |
| 45                                           | 65-69     | Former        | 2907  | 33.06 |               |             | 28.66         | 55             | 1.89         |
| Year of Follow-up: 2035, Age Group: 70-74    |           |               |       |       |               |             |               |                |              |
| Period                                       | Age Group | Smoking Group | N     | %     | Ever Quit (N) | Ever Quit % | Mean Yrs Quit | Short Term (n) | Short Term % |
| 45                                           | 70-74     | Never Any     | 5284  | 52.43 |               |             |               |                |              |
| 45                                           | 70-74     | CC            | 1     | 0.01  | 0             | 0.00        |               |                |              |
| 45                                           | 70-74     | Ecig          | 934   | 9.27  |               |             |               |                |              |
| 45                                           | 70-74     | Dual          | 0     | 0.00  |               |             |               |                |              |
| 45                                           | 70-74     | Former        | 3859  | 38.29 |               |             | 31.38         | 76             | 1.97         |
| Year of Follow-up: 2035, Age Group: 75-79    |           |               |       |       |               |             |               |                |              |
| Period                                       | Age Group | Smoking Group | N     | %     | Ever Quit (N) | Ever Quit % | Mean Yrs Quit | Short Term (n) | Short Term % |
| 45                                           | 75-79     | Never Any     | 5278  | 50.27 |               |             |               |                |              |
| 45                                           | 75-79     | CC            | 1     | 0.01  | 0             | 0.00        |               |                |              |
| 45                                           | 75-79     | Ecig          | 747   | 7.11  |               |             |               |                |              |
| 45                                           | 75-79     | Dual          | 0     | 0.00  |               |             |               |                |              |
| 45                                           | 75-79     | Former        | 4473  | 42.60 |               |             | 33.73         | 79             | 1.77         |
| Year of Follow-up: 2040, Age Group: All Ages |           |               |       |       |               |             |               |                |              |
| Period                                       | Age Group | Smoking Group | N     | %     | Ever Quit (N) | Ever Quit % | Mean Yrs Quit | Short Term (n) | Short Term % |
| 50                                           | All Ages  | Never Any     | 20558 | 58.48 |               |             |               |                |              |
| 50                                           | All Ages  | CC            | 4     | 0.01  | 0             | 0.00        |               |                |              |
| 50                                           | All Ages  | Ecig          | 2497  | 7.10  |               |             |               |                |              |
| 50                                           | All Ages  | Dual          | 0     | 0.00  |               |             |               |                |              |
| 50                                           | All Ages  | Former        | 12092 | 34.40 |               |             | 31.39         | 238            | 1.97         |
| Year of Follow-up: 2040, Age Group: 18-19    |           |               |       |       |               |             |               |                |              |
| Period                                       | Age Group | Smoking Group | N     | %     | Ever Quit (N) | Ever Quit % | Mean Yrs Quit | Short Term (n) | Short Term % |
| 50                                           | 18-19     | Never Any     | 0     | .     |               |             |               |                |              |
| 50                                           | 18-19     | CC            | 0     | .     | 0             | .           |               |                |              |
| 50                                           | 18-19     | Ecig          | 0     | .     |               |             |               |                |              |
| 50                                           | 18-19     | Dual          | 0     | .     |               |             |               |                |              |
| 50                                           | 18-19     | Former        | 0     | .     |               |             | .             | 0              | .            |
| Year of Follow-up: 2040, Age Group: 20-24    |           |               |       |       |               |             |               |                |              |
| Period                                       | Age Group | Smoking Group | N     | %     | Ever Quit (N) | Ever Quit % | Mean Yrs Quit | Short Term (n) | Short Term % |
| 50                                           | 20-24     | Never Any     | 0     | .     |               |             |               |                |              |
| 50                                           | 20-24     | CC            | 0     | .     | 0             | .           |               |                |              |
| 50                                           | 20-24     | Ecig          | 0     | .     |               |             |               |                |              |
| 50                                           | 20-24     | Dual          | 0     | .     |               |             |               |                |              |
| 50                                           | 20-24     | Former        | 0     | .     |               |             | .             | 0              | .            |
| Year of Follow-up: 2040, Age Group: 25-29    |           |               |       |       |               |             |               |                |              |
| Period                                       | Age Group | Smoking Group | N     | %     | Ever Quit (N) | Ever Quit % | Mean Yrs Quit | Short Term (n) | Short Term % |
| 50                                           | 25-29     | Never Any     | 0     | .     |               |             |               |                |              |
| 50                                           | 25-29     | CC            | 0     | .     | 0             | .           |               |                |              |
| 50                                           | 25-29     | Ecig          | 0     | .     |               |             |               |                |              |
| 50                                           | 25-29     | Dual          | 0     | .     |               |             |               |                |              |
| 50                                           | 25-29     | Former        | 0     | .     |               |             | .             | 0              | .            |
| Year of Follow-up: 2040, Age Group: 30-34    |           |               |       |       |               |             |               |                |              |
| Period                                       | Age Group | Smoking Group | N     | %     | Ever Quit (N) | Ever Quit % | Mean Yrs Quit | Short Term (n) | Short Term % |
| 50                                           | 30-34     | Never Any     | 0     | .     |               |             |               |                |              |
| 50                                           | 30-34     | CC            | 0     | .     | 0             | .           |               |                |              |
| 50                                           | 30-34     | Ecig          | 0     | .     |               |             |               |                |              |
| 50                                           | 30-34     | Dual          | 0     | .     |               |             |               |                |              |
| 50                                           | 30-34     | Former        | 0     | .     |               |             | .             | 0              | .            |
| Year of Follow-up: 2040, Age Group: 35-39    |           |               |       |       |               |             |               |                |              |

**Results for PHIM for Run 2 (Main\_Analysis.RTF)**

| Period                                    | Age Group | Smoking Group | N    | %     | Ever Quit (N) | Ever Quit % | Mean Yrs Quit | Short Term (n) | Short Term % |
|-------------------------------------------|-----------|---------------|------|-------|---------------|-------------|---------------|----------------|--------------|
| 50                                        | 35-39     | Never Any     | 0    | .     |               |             |               |                |              |
| 50                                        | 35-39     | CC            | 0    | .     | 0             | .           |               |                |              |
| 50                                        | 35-39     | Ecig          | 0    | .     |               |             |               |                |              |
| 50                                        | 35-39     | Dual          | 0    | .     |               |             |               |                |              |
| 50                                        | 35-39     | Former        | 0    | .     |               |             | .             | 0              | .            |
| Year of Follow-up: 2040, Age Group: 40-44 |           |               |      |       |               |             |               |                |              |
| Period                                    | Age Group | Smoking Group | N    | %     | Ever Quit (N) | Ever Quit % | Mean Yrs Quit | Short Term (n) | Short Term % |
| 50                                        | 40-44     | Never Any     | 0    | .     |               |             |               |                |              |
| 50                                        | 40-44     | CC            | 0    | .     | 0             | .           |               |                |              |
| 50                                        | 40-44     | Ecig          | 0    | .     |               |             |               |                |              |
| 50                                        | 40-44     | Dual          | 0    | .     |               |             |               |                |              |
| 50                                        | 40-44     | Former        | 0    | .     |               |             | .             | 0              | .            |
| Year of Follow-up: 2040, Age Group: 45-49 |           |               |      |       |               |             |               |                |              |
| Period                                    | Age Group | Smoking Group | N    | %     | Ever Quit (N) | Ever Quit % | Mean Yrs Quit | Short Term (n) | Short Term % |
| 50                                        | 45-49     | Never Any     | 0    | .     |               |             |               |                |              |
| 50                                        | 45-49     | CC            | 0    | .     | 0             | .           |               |                |              |
| 50                                        | 45-49     | Ecig          | 0    | .     |               |             |               |                |              |
| 50                                        | 45-49     | Dual          | 0    | .     |               |             |               |                |              |
| 50                                        | 45-49     | Former        | 0    | .     |               |             | .             | 0              | .            |
| Year of Follow-up: 2040, Age Group: 50-54 |           |               |      |       |               |             |               |                |              |
| Period                                    | Age Group | Smoking Group | N    | %     | Ever Quit (N) | Ever Quit % | Mean Yrs Quit | Short Term (n) | Short Term % |
| 50                                        | 50-54     | Never Any     | 0    | .     |               |             |               |                |              |
| 50                                        | 50-54     | CC            | 0    | .     | 0             | .           |               |                |              |
| 50                                        | 50-54     | Ecig          | 0    | .     |               |             |               |                |              |
| 50                                        | 50-54     | Dual          | 0    | .     |               |             |               |                |              |
| 50                                        | 50-54     | Former        | 0    | .     |               |             | .             | 0              | .            |
| Year of Follow-up: 2040, Age Group: 55-59 |           |               |      |       |               |             |               |                |              |
| Period                                    | Age Group | Smoking Group | N    | %     | Ever Quit (N) | Ever Quit % | Mean Yrs Quit | Short Term (n) | Short Term % |
| 50                                        | 55-59     | Never Any     | 0    | .     |               |             |               |                |              |
| 50                                        | 55-59     | CC            | 0    | .     | 0             | .           |               |                |              |
| 50                                        | 55-59     | Ecig          | 0    | .     |               |             |               |                |              |
| 50                                        | 55-59     | Dual          | 0    | .     |               |             |               |                |              |
| 50                                        | 55-59     | Former        | 0    | .     |               |             | .             | 0              | .            |
| Year of Follow-up: 2040, Age Group: 60-64 |           |               |      |       |               |             |               |                |              |
| Period                                    | Age Group | Smoking Group | N    | %     | Ever Quit (N) | Ever Quit % | Mean Yrs Quit | Short Term (n) | Short Term % |
| 50                                        | 60-64     | Never Any     | 4726 | 59.60 |               |             |               |                |              |
| 50                                        | 60-64     | CC            | 0    | 0.00  | 0             | 0.00        |               |                |              |
| 50                                        | 60-64     | Ecig          | 613  | 7.73  |               |             |               |                |              |
| 50                                        | 60-64     | Dual          | 0    | 0.00  |               |             |               |                |              |
| 50                                        | 60-64     | Former        | 2591 | 32.67 |               |             | 27.58         | 77             | 2.97         |
| Year of Follow-up: 2040, Age Group: 65-69 |           |               |      |       |               |             |               |                |              |
| Period                                    | Age Group | Smoking Group | N    | %     | Ever Quit (N) | Ever Quit % | Mean Yrs Quit | Short Term (n) | Short Term % |
| 50                                        | 65-69     | Never Any     | 5359 | 64.18 |               |             |               |                |              |
| 50                                        | 65-69     | CC            | 0    | 0.00  | 0             | 0.00        |               |                |              |
| 50                                        | 65-69     | Ecig          | 578  | 6.92  |               |             |               |                |              |
| 50                                        | 65-69     | Dual          | 0    | 0.00  |               |             |               |                |              |
| 50                                        | 65-69     | Former        | 2413 | 28.90 |               |             | 28.67         | 34             | 1.41         |
| Year of Follow-up: 2040, Age Group: 70-74 |           |               |      |       |               |             |               |                |              |
| Period                                    | Age Group | Smoking Group | N    | %     | Ever Quit (N) | Ever Quit % | Mean Yrs Quit | Short Term (n) | Short Term % |
| 50                                        | 70-74     | Never Any     | 5189 | 59.01 |               |             |               |                |              |
| 50                                        | 70-74     | CC            | 3    | 0.03  | 0             | 0.00        |               |                |              |
| 50                                        | 70-74     | Ecig          | 583  | 6.63  |               |             |               |                |              |
| 50                                        | 70-74     | Dual          | 0    | 0.00  |               |             |               |                |              |
| 50                                        | 70-74     | Former        | 3018 | 34.32 |               |             | 32.48         | 56             | 1.86         |
| Year of Follow-up: 2040, Age Group: 75-79 |           |               |      |       |               |             |               |                |              |
| Period                                    | Age Group | Smoking Group | N    | %     | Ever Quit (N) | Ever Quit % | Mean Yrs Quit | Short Term (n) | Short Term % |
| 50                                        | 75-79     | Never Any     | 5284 | 52.43 |               |             |               |                |              |
| 50                                        | 75-79     | CC            | 1    | 0.01  | 0             | 0.00        |               |                |              |
| 50                                        | 75-79     | Ecig          | 723  | 7.17  |               |             |               |                |              |
| 50                                        | 75-79     | Dual          | 0    | 0.00  |               |             |               |                |              |
| 50                                        | 75-79     | Former        | 4070 | 40.38 |               |             | 34.61         | 71             | 1.74         |

## Results for PHIM for Run 2 (Main\_Analysis.RTF)

\*\*\*\*\*

### Main Results for E-Component for Run: 2, Simulation: 1, COD: Four Diseases Combined

| Variable Parameter          | Value                                  |
|-----------------------------|----------------------------------------|
| 1. Country                  | US (United States)                     |
| 2. Sex                      | F (Females)                            |
| 3. Year of start of process | 1990                                   |
| 4. Cause of Death           | Four Diseases Combined                 |
| 5. Effective Dose NULL      | CC:1                                   |
| 6. Effective Dose Ecig      | CC:1 Ecig:0.05 Dual:0.525              |
| Note:                       | Death rates are per million population |

#### Results for Age Groups Combined and Years combined, Population unadjusted for deaths in Ecig scenario,

| Age Group:All |         | NULL        | Ecig        | %Drop   |        | NULL   | Ecig    | Drop    |         |         |
|---------------|---------|-------------|-------------|---------|--------|--------|---------|---------|---------|---------|
| Year          | Number  | Attrib      | Attrib      | Drop    | %Drop  | Attrib | Death   | Attrib  | Attrib  | Drop    |
|               | Deaths  | Deaths      | Deaths      | Deaths  | Deaths | Deaths | Rate    | Rates   | Rates   | Rates   |
| All Comb      | 9082078 | 2946250.006 | 1945986.460 | 1000264 | 11.014 | 33.950 | 2493.45 | 808.881 | 534.263 | 274.618 |

#### Results for Age Groups Combined, Population unadjusted for deaths in Ecig scenario,

| Age Group:All |        | NULL      | Ecig      | %Drop    |        | NULL   | Ecig    | Drop    |         |         |
|---------------|--------|-----------|-----------|----------|--------|--------|---------|---------|---------|---------|
| Year          | Number | Attrib    | Attrib    | Drop     | %Drop  | Attrib | Death   | Attrib  | Attrib  | Drop    |
|               | Deaths | Deaths    | Deaths    | Deaths   | Deaths | Deaths | Rate    | Rates   | Rates   | Rates   |
| 1990          | 199848 | 57524.822 | 57524.822 | 0.000    | 0.000  | 0.000  | 2926.84 | 842.471 | 842.471 | 0.000   |
| 1991          | 199162 | 59078.486 | 58910.022 | 168.464  | 0.085  | 0.285  | 2877.87 | 853.678 | 851.244 | 2.434   |
| 1992          | 198532 | 60494.150 | 60022.454 | 471.695  | 0.238  | 0.780  | 2829.84 | 862.271 | 855.548 | 6.723   |
| 1993          | 202512 | 62694.848 | 61776.738 | 918.109  | 0.453  | 1.464  | 2845.85 | 881.034 | 868.132 | 12.902  |
| 1994          | 200658 | 63202.598 | 61751.785 | 1450.813 | 0.723  | 2.295  | 2777.87 | 874.966 | 854.881 | 20.085  |
| 1995          | 201023 | 63766.862 | 61670.717 | 2096.145 | 1.043  | 3.287  | 2739.80 | 869.097 | 840.528 | 28.569  |
| 1996          | 201180 | 64591.163 | 61718.469 | 2872.693 | 1.428  | 4.448  | 2706.36 | 868.908 | 830.263 | 38.645  |
| 1997          | 198639 | 64686.912 | 61088.629 | 3598.283 | 1.811  | 5.563  | 2635.18 | 858.147 | 810.412 | 47.735  |
| 1998          | 197573 | 65295.961 | 60857.310 | 4438.651 | 2.247  | 6.798  | 2584.18 | 854.046 | 795.990 | 58.056  |
| 1999          | 211329 | 67327.521 | 61593.161 | 5734.360 | 2.713  | 8.517  | 2726.91 | 868.771 | 794.776 | 73.994  |
| 2000          | 208496 | 67596.897 | 60917.212 | 6679.684 | 3.204  | 9.882  | 2656.96 | 861.419 | 776.297 | 85.122  |
| 2001          | 203606 | 67008.811 | 59328.640 | 7680.170 | 3.772  | 11.461 | 2565.88 | 844.458 | 747.671 | 96.787  |
| 2002          | 200828 | 67067.744 | 58272.836 | 8794.908 | 4.379  | 13.113 | 2506.09 | 836.925 | 727.175 | 109.750 |
| 2003          | 196352 | 66756.217 | 56953.992 | 9802.225 | 4.992  | 14.684 | 2427.31 | 825.244 | 704.068 | 121.176 |
| 2004          | 188160 | 65058.725 | 54404.731 | 10653.99 | 5.662  | 16.376 | 2302.83 | 796.234 | 665.843 | 130.391 |
| 2005          | 186416 | 65214.724 | 53412.806 | 11801.92 | 6.331  | 18.097 | 2256.27 | 789.321 | 646.477 | 142.843 |
| 2006          | 180088 | 63771.146 | 51098.360 | 12672.79 | 7.037  | 19.872 | 2160.67 | 765.117 | 613.071 | 152.046 |
| 2007          | 175644 | 63110.718 | 49543.854 | 13566.86 | 7.724  | 21.497 | 2086.36 | 749.650 | 588.498 | 161.152 |
| 2008          | 177570 | 63718.624 | 48858.922 | 14859.70 | 8.368  | 23.321 | 2086.39 | 748.674 | 574.077 | 174.597 |
| 2009          | 172806 | 62794.698 | 47101.532 | 15693.17 | 9.081  | 24.991 | 2007.57 | 729.515 | 547.200 | 182.315 |
| 2010          | 170489 | 61917.074 | 45348.407 | 16568.67 | 9.718  | 26.759 | 1957.97 | 711.083 | 520.801 | 190.282 |
| 2011          | 170305 | 61680.114 | 43937.404 | 17742.71 | 10.418 | 28.766 | 1937.46 | 701.700 | 499.851 | 201.849 |
| 2012          | 171421 | 62023.127 | 42978.209 | 19044.92 | 11.110 | 30.706 | 1930.22 | 698.386 | 483.939 | 214.448 |
| 2013          | 172699 | 62037.765 | 41820.587 | 20217.18 | 11.707 | 32.589 | 1923.75 | 691.059 | 465.853 | 225.206 |
| 2014          | 174169 | 61921.017 | 40417.468 | 21503.55 | 12.346 | 34.727 | 1918.85 | 682.195 | 445.286 | 236.908 |
| 2015          | 177354 | 61856.204 | 39257.952 | 22598.25 | 12.742 | 36.534 | 2184.51 | 761.899 | 483.550 | 278.348 |
| 2016          | 176853 | 60464.119 | 36987.444 | 23476.67 | 13.275 | 38.827 | 2157.59 | 737.655 | 451.243 | 286.413 |
| 2017          | 179309 | 60243.839 | 35585.731 | 24658.11 | 13.752 | 40.931 | 2166.86 | 728.017 | 430.036 | 297.981 |
| 2018          | 177157 | 60713.327 | 34986.207 | 25727.12 | 14.522 | 42.375 | 2120.51 | 726.721 | 418.775 | 307.946 |
| 2019          | 179227 | 61148.172 | 34050.786 | 27097.39 | 15.119 | 44.314 | 2124.53 | 724.841 | 403.633 | 321.208 |
| 2020          | 180467 | 61149.317 | 33100.796 | 28048.52 | 15.542 | 45.869 | 2424.25 | 821.432 | 444.650 | 376.782 |
| 2021          | 178116 | 58727.786 | 30280.704 | 28447.08 | 15.971 | 48.439 | 2375.42 | 783.216 | 403.835 | 379.381 |
| 2022          | 179408 | 58848.802 | 29245.268 | 29603.53 | 16.501 | 50.304 | 2374.52 | 778.881 | 387.069 | 391.811 |
| 2023          | 180640 | 58816.149 | 28199.145 | 30617.00 | 16.949 | 52.055 | 2372.26 | 772.407 | 370.327 | 402.080 |
| 2024          | 181610 | 58955.232 | 27162.218 | 31793.01 | 17.506 | 53.927 | 2366.77 | 768.316 | 353.983 | 414.333 |
| 2025          | 180418 | 58297.744 | 26007.992 | 32289.75 | 17.897 | 55.388 | 2713.69 | 876.861 | 391.188 | 485.673 |
| 2026          | 180313 | 56469.971 | 23968.749 | 32501.22 | 18.025 | 57.555 | 2701.83 | 846.150 | 359.149 | 487.000 |
| 2027          | 179619 | 56209.427 | 22822.059 | 33387.37 | 18.588 | 59.398 | 2680.68 | 838.883 | 340.602 | 498.281 |
| 2028          | 178762 | 55733.105 | 21620.876 | 34112.23 | 19.082 | 61.206 | 2656.74 | 828.298 | 321.327 | 506.971 |
| 2029          | 177808 | 55145.838 | 20403.767 | 34742.07 | 19.539 | 63.000 | 2630.89 | 815.951 | 301.899 | 514.052 |
| 2030          | 173587 | 53615.097 | 19159.325 | 34455.77 | 19.849 | 64.265 | 3040.33 | 939.056 | 335.571 | 603.485 |
| 2031          | 174985 | 52046.561 | 17935.340 | 34111.22 | 19.494 | 65.540 | 3060.73 | 910.364 | 313.713 | 596.651 |
| 2032          | 173400 | 51582.636 | 16946.423 | 34636.21 | 19.975 | 67.147 | 3027.10 | 900.496 | 295.839 | 604.656 |
| 2033          | 171756 | 50839.758 | 15943.578 | 34896.18 | 20.317 | 68.640 | 2991.14 | 885.375 | 277.657 | 607.717 |
| 2034          | 169973 | 50215.451 | 14970.006 | 35245.45 | 20.736 | 70.188 | 2951.96 | 872.104 | 259.988 | 612.116 |
| 2035          | 162644 | 47773.075 | 13853.280 | 33919.79 | 20.855 | 71.002 | 3459.14 | 1016.05 | 294.634 | 721.412 |
| 2036          | 156254 | 43298.709 | 11869.439 | 31429.27 | 20.114 | 72.587 | 3328.25 | 922.274 | 252.822 | 669.452 |
| 2037          | 153593 | 42241.563 | 10908.835 | 31332.73 | 20.400 | 74.175 | 3274.10 | 900.450 | 232.540 | 667.910 |
| 2038          | 150947 | 41356.353 | 10137.398 | 31218.95 | 20.682 | 75.488 | 3217.50 | 881.531 | 216.084 | 665.447 |
| 2039          | 148373 | 40161.050 | 9274.074  | 30886.98 | 20.817 | 76.908 | 3159.42 | 855.178 | 197.479 | 657.698 |

## Results for PHIM for Run 2 (Main\_Analysis.RTF)

\*\*\*\*\*

### Main Results for E-Component for Run: 2, Simulation: 1, COD: LUNG CANCER

| Variable Parameter          | Value                                  |
|-----------------------------|----------------------------------------|
| 1. Country                  | US (United States)                     |
| 2. Sex                      | F (Females)                            |
| 3. Year of start of process | 1990                                   |
| 4. Cause of Death           | LUNG CANCER                            |
| 5. Effective Dose NULL      | CC:1                                   |
| 6. Effective Dose Ecig      | CC:1 Ecig:0.05 Dual:0.525              |
| Note:                       | Death rates are per million population |

#### Results for Age Groups Combined and Years combined, Population unadjusted for deaths in Ecig scenario,

| Age Group:All | NULL    | Ecig        | %Drop       |          |        | NULL   | Ecig    | Drop    |         |         |
|---------------|---------|-------------|-------------|----------|--------|--------|---------|---------|---------|---------|
| Year          | Number  | Attrib      | Attrib      | Drop     | %Drop  | Attrib | Death   | Attrib  | Attrib  | Drop    |
|               | Deaths  | Deaths      | Deaths      | Deaths   | Deaths | Deaths | Rate    | Rates   | Rates   | Rates   |
| All Comb      | 2327764 | 1580465.217 | 1143412.495 | 437052.7 | 18.776 | 27.653 | 639.078 | 433.910 | 313.919 | 119.991 |

#### Results for Age Groups Combined, Population unadjusted for deaths in Ecig scenario,

| Age Group:All | NULL   | Ecig      | %Drop     |          |        | NULL   | Ecig    | Drop    |         |         |
|---------------|--------|-----------|-----------|----------|--------|--------|---------|---------|---------|---------|
| Year          | Number | Attrib    | Attrib    | Drop     | %Drop  | Attrib | Death   | Attrib  | Attrib  | Drop    |
|               | Deaths | Deaths    | Deaths    | Deaths   | Deaths | Deaths | Rate    | Rates   | Rates   | Rates   |
| 1990          | 42690  | 30614.201 | 30614.201 | 0.000    | 0.000  | 0.000  | 625.210 | 448.355 | 448.355 | 0.000   |
| 1991          | 43692  | 31412.010 | 31379.684 | 32.326   | 0.074  | 0.103  | 631.345 | 453.901 | 453.433 | 0.467   |
| 1992          | 45423  | 32782.407 | 32688.427 | 93.980   | 0.207  | 0.287  | 647.450 | 467.274 | 465.934 | 1.340   |
| 1993          | 46291  | 33491.183 | 33305.336 | 185.847  | 0.401  | 0.555  | 650.515 | 470.643 | 468.031 | 2.612   |
| 1994          | 47017  | 34074.347 | 33772.924 | 301.424  | 0.641  | 0.885  | 650.895 | 471.719 | 467.546 | 4.173   |
| 1995          | 47840  | 34694.454 | 34239.732 | 454.722  | 0.951  | 1.311  | 652.025 | 472.861 | 466.663 | 6.198   |
| 1996          | 48244  | 35027.269 | 34397.689 | 629.580  | 1.305  | 1.797  | 648.999 | 471.202 | 462.732 | 8.469   |
| 1997          | 49035  | 35590.763 | 34752.669 | 838.093  | 1.709  | 2.355  | 650.506 | 472.153 | 461.035 | 11.118  |
| 1998          | 49686  | 36100.785 | 35016.164 | 1084.620 | 2.183  | 3.004  | 649.874 | 472.184 | 457.998 | 14.186  |
| 1999          | 48883  | 35451.030 | 34143.611 | 1307.418 | 2.675  | 3.688  | 630.769 | 457.448 | 440.577 | 16.870  |
| 2000          | 50331  | 36447.986 | 34810.942 | 1637.044 | 3.253  | 4.491  | 641.392 | 464.474 | 443.612 | 20.862  |
| 2001          | 50389  | 36411.326 | 34439.844 | 1971.482 | 3.913  | 5.414  | 635.012 | 458.863 | 434.018 | 24.845  |
| 2002          | 51445  | 37078.545 | 34691.561 | 2386.984 | 4.640  | 6.438  | 641.972 | 462.696 | 432.909 | 29.787  |
| 2003          | 51408  | 36999.876 | 34215.919 | 2783.956 | 5.415  | 7.524  | 635.509 | 457.395 | 422.979 | 34.415  |
| 2004          | 51399  | 36861.555 | 33637.298 | 3224.257 | 6.273  | 8.747  | 629.057 | 451.138 | 411.677 | 39.461  |
| 2005          | 51421  | 36689.529 | 32999.409 | 3690.119 | 7.176  | 10.058 | 622.370 | 444.069 | 399.406 | 44.663  |
| 2006          | 51355  | 36504.774 | 32325.093 | 4179.681 | 8.139  | 11.450 | 616.150 | 437.979 | 387.832 | 50.147  |
| 2007          | 51839  | 36663.202 | 31900.792 | 4762.410 | 9.187  | 12.990 | 615.761 | 435.498 | 378.928 | 56.570  |
| 2008          | 50976  | 35898.803 | 30697.995 | 5200.808 | 10.202 | 14.487 | 598.952 | 421.800 | 360.692 | 61.108  |
| 2009          | 51193  | 35934.525 | 30107.924 | 5826.602 | 11.382 | 16.214 | 594.733 | 417.468 | 349.778 | 67.690  |
| 2010          | 50853  | 35502.829 | 29162.994 | 6339.836 | 12.467 | 17.857 | 584.018 | 407.730 | 334.921 | 72.809  |
| 2011          | 50509  | 35136.342 | 28199.604 | 6936.738 | 13.734 | 19.742 | 574.613 | 399.726 | 320.811 | 78.915  |
| 2012          | 51245  | 35450.201 | 27770.845 | 7679.356 | 14.986 | 21.662 | 577.023 | 399.173 | 312.702 | 86.470  |
| 2013          | 51069  | 35123.224 | 26792.547 | 8330.677 | 16.313 | 23.718 | 568.874 | 391.249 | 298.451 | 92.798  |
| 2014          | 51251  | 35079.370 | 26051.341 | 9028.029 | 17.615 | 25.736 | 564.641 | 386.476 | 287.012 | 99.463  |
| 2015          | 50443  | 34324.171 | 24840.755 | 9483.416 | 18.800 | 27.629 | 621.319 | 422.780 | 305.970 | 116.810 |
| 2016          | 48854  | 33054.753 | 23174.732 | 9880.021 | 20.224 | 29.890 | 596.013 | 403.264 | 282.729 | 120.535 |
| 2017          | 48325  | 32471.234 | 22019.651 | 10451.58 | 21.628 | 32.187 | 583.983 | 392.399 | 266.096 | 126.304 |
| 2018          | 50465  | 33657.595 | 21983.043 | 11674.55 | 23.134 | 34.686 | 604.052 | 402.871 | 262.131 | 139.741 |
| 2019          | 51036  | 33863.424 | 21320.199 | 12543.23 | 24.577 | 37.041 | 604.975 | 401.412 | 252.726 | 148.685 |
| 2020          | 51444  | 33910.830 | 20644.971 | 13265.86 | 25.787 | 39.120 | 691.053 | 455.532 | 277.329 | 178.203 |
| 2021          | 48037  | 31531.880 | 18418.652 | 13113.23 | 27.298 | 41.587 | 640.639 | 420.521 | 245.638 | 174.883 |
| 2022          | 48335  | 31560.212 | 17690.096 | 13870.12 | 28.696 | 43.948 | 639.727 | 417.708 | 234.133 | 183.575 |
| 2023          | 48599  | 31508.781 | 16951.480 | 14557.30 | 29.954 | 46.201 | 638.227 | 413.791 | 222.616 | 191.175 |
| 2024          | 48784  | 31517.293 | 16210.852 | 15306.44 | 31.376 | 48.565 | 635.757 | 410.740 | 211.263 | 199.477 |
| 2025          | 48477  | 31175.389 | 15408.304 | 15767.08 | 32.525 | 50.575 | 729.141 | 468.912 | 231.758 | 237.154 |
| 2026          | 45324  | 29044.598 | 13710.768 | 15333.83 | 33.832 | 52.794 | 679.138 | 435.206 | 205.443 | 229.763 |
| 2027          | 45107  | 28825.765 | 12948.464 | 15877.30 | 35.199 | 55.080 | 673.191 | 430.203 | 193.246 | 236.957 |
| 2028          | 44842  | 28513.846 | 12170.255 | 16343.59 | 36.447 | 57.318 | 666.430 | 423.769 | 180.873 | 242.896 |
| 2029          | 44539  | 28148.109 | 11387.707 | 16760.40 | 37.631 | 59.544 | 659.013 | 416.486 | 168.495 | 247.991 |
| 2030          | 43393  | 27314.475 | 10589.226 | 16725.25 | 38.544 | 61.232 | 760.018 | 478.407 | 185.468 | 292.939 |
| 2031          | 40748  | 25423.102 | 9508.069  | 15915.03 | 39.058 | 62.601 | 712.731 | 444.684 | 166.309 | 278.375 |
| 2032          | 40325  | 25085.902 | 8892.058  | 16193.84 | 40.158 | 64.554 | 703.969 | 437.933 | 155.232 | 282.701 |
| 2033          | 39882  | 24645.067 | 8289.126  | 16355.94 | 41.011 | 66.366 | 694.543 | 429.194 | 144.355 | 284.839 |
| 2034          | 39404  | 24239.126 | 7709.207  | 16529.92 | 41.949 | 68.195 | 684.347 | 420.967 | 133.888 | 287.079 |
| 2035          | 37454  | 22944.147 | 7036.732  | 15907.41 | 42.471 | 69.331 | 796.588 | 487.980 | 149.658 | 338.322 |
| 2036          | 32988  | 19950.581 | 5790.589  | 14159.99 | 42.924 | 70.975 | 702.663 | 424.953 | 123.341 | 301.612 |
| 2037          | 32403  | 19415.334 | 5282.513  | 14132.82 | 43.615 | 72.792 | 690.731 | 413.871 | 112.606 | 301.265 |
| 2038          | 31820  | 18939.317 | 4879.891  | 14059.43 | 44.184 | 74.234 | 678.257 | 403.701 | 104.017 | 299.684 |
| 2039          | 31251  | 18379.752 | 4440.611  | 13939.14 | 44.603 | 75.840 | 665.457 | 391.373 | 94.557  | 296.816 |

## Results for PHIM for Run 2 (Main\_Analysis.RTF)

\*\*\*\*\*

### Main Results for E-Component for Run: 2, Simulation: 1, COD: IHD

| Variable Parameter          | Value                                  |
|-----------------------------|----------------------------------------|
| 1. Country                  | US (United States)                     |
| 2. Sex                      | F (Females)                            |
| 3. Year of start of process | 1990                                   |
| 4. Cause of Death           | IHD                                    |
| 5. Effective Dose NULL      | CC:1                                   |
| 6. Effective Dose Ecig      | CC:1 Ecig:0.05 Dual:0.525              |
| Note:                       | Death rates are per million population |

#### Results for Age Groups Combined and Years combined, Population unadjusted for deaths in Ecig scenario,

| Age Group:All |         | NULL       | Ecig       | %Drop    |        | Death  |         | NULL    | Ecig   | Drop   |
|---------------|---------|------------|------------|----------|--------|--------|---------|---------|--------|--------|
| Year          | Number  | Attrib     | Attrib     | Drop     | %Drop  | Attrib | Rate    | Attrib  | Attrib | Rates  |
|               | Deaths  | Deaths     | Deaths     | Deaths   | Deaths | Deaths |         | Rates   | Rates  | Rates  |
| All Comb      | 3242167 | 398833.796 | 199495.584 | 199338.2 | 6.148  | 49.980 | 890.124 | 109.498 | 54.771 | 54.728 |

#### Results for Age Groups Combined, Population unadjusted for deaths in Ecig scenario,

| Age Group:All |        | NULL      | Ecig      | %Drop    |        | Death  |         | NULL    | Ecig    | Drop   |
|---------------|--------|-----------|-----------|----------|--------|--------|---------|---------|---------|--------|
| Year          | Number | Attrib    | Attrib    | Drop     | %Drop  | Attrib | Rate    | Attrib  | Attrib  | Rates  |
|               | Deaths | Deaths    | Deaths    | Deaths   | Deaths | Deaths |         | Rates   | Rates   | Rates  |
| 1990          | 98916  | 12922.892 | 12922.892 | 0.000    | 0.000  | 0.000  | 1448.66 | 189.260 | 189.260 | 0.000  |
| 1991          | 96403  | 12856.479 | 12766.075 | 90.404   | 0.094  | 0.703  | 1393.01 | 185.775 | 184.469 | 1.306  |
| 1992          | 93721  | 12662.244 | 12411.645 | 250.598  | 0.267  | 1.979  | 1335.88 | 180.485 | 176.913 | 3.572  |
| 1993          | 93679  | 12730.613 | 12252.269 | 478.344  | 0.511  | 3.757  | 1316.45 | 178.900 | 172.178 | 6.722  |
| 1994          | 90832  | 12495.323 | 11750.260 | 745.063  | 0.820  | 5.963  | 1257.46 | 172.983 | 162.669 | 10.315 |
| 1995          | 89698  | 12365.590 | 11312.560 | 1053.030 | 1.174  | 8.516  | 1222.52 | 168.534 | 154.182 | 14.352 |
| 1996          | 88286  | 12290.551 | 10854.600 | 1435.951 | 1.626  | 11.683 | 1187.66 | 165.338 | 146.021 | 19.317 |
| 1997          | 84777  | 11719.531 | 9989.885  | 1729.646 | 2.040  | 14.759 | 1124.67 | 155.473 | 132.527 | 22.946 |
| 1998          | 82517  | 11416.794 | 9346.031  | 2070.763 | 2.509  | 18.138 | 1079.29 | 149.327 | 122.243 | 27.085 |
| 1999          | 93939  | 13028.038 | 10177.102 | 2850.936 | 3.035  | 21.883 | 1212.16 | 168.109 | 131.322 | 36.787 |
| 2000          | 90039  | 12426.299 | 9243.118  | 3183.181 | 3.535  | 25.616 | 1147.41 | 158.354 | 117.789 | 40.565 |
| 2001          | 86119  | 11939.281 | 8351.446  | 3587.835 | 4.166  | 30.051 | 1085.29 | 150.461 | 105.247 | 45.215 |
| 2002          | 83014  | 11528.794 | 7547.387  | 3981.407 | 4.796  | 34.534 | 1035.91 | 143.865 | 94.182  | 49.683 |
| 2003          | 79302  | 11048.407 | 6769.312  | 4279.095 | 5.396  | 38.730 | 980.336 | 136.581 | 83.683  | 52.898 |
| 2004          | 73861  | 10375.132 | 5895.069  | 4480.063 | 6.066  | 43.181 | 903.963 | 126.978 | 72.148  | 54.830 |
| 2005          | 71649  | 10051.029 | 5297.510  | 4753.520 | 6.634  | 47.294 | 867.197 | 121.652 | 64.118  | 57.534 |
| 2006          | 67551  | 9542.523  | 4614.220  | 4928.303 | 7.296  | 51.646 | 810.467 | 114.490 | 55.361  | 59.129 |
| 2007          | 63503  | 8936.533  | 3972.675  | 4963.858 | 7.817  | 55.546 | 754.310 | 106.151 | 47.189  | 58.962 |
| 2008          | 63171  | 8944.180  | 3646.455  | 5297.726 | 8.386  | 59.231 | 742.239 | 105.091 | 42.845  | 62.247 |
| 2009          | 59747  | 8390.033  | 3157.331  | 5232.702 | 8.758  | 62.368 | 694.108 | 97.471  | 36.680  | 60.791 |
| 2010          | 58008  | 8157.570  | 2817.796  | 5339.773 | 9.205  | 65.458 | 666.189 | 93.685  | 32.361  | 61.324 |
| 2011          | 57368  | 8035.356  | 2526.732  | 5508.624 | 9.602  | 68.555 | 652.644 | 91.414  | 28.745  | 62.669 |
| 2012          | 57411  | 7970.766  | 2271.713  | 5699.053 | 9.927  | 71.499 | 646.453 | 89.752  | 25.580  | 64.172 |
| 2013          | 57067  | 7743.216  | 2027.909  | 5715.307 | 10.015 | 73.811 | 635.688 | 86.254  | 22.590  | 63.665 |
| 2014          | 57538  | 7774.935  | 1850.157  | 5924.778 | 10.297 | 76.204 | 633.906 | 85.658  | 20.384  | 65.274 |
| 2015          | 58395  | 7722.535  | 1705.608  | 6016.927 | 10.304 | 77.914 | 719.266 | 95.120  | 21.008  | 74.112 |
| 2016          | 58658  | 7600.353  | 1527.004  | 6073.349 | 10.354 | 79.909 | 715.621 | 92.723  | 18.629  | 74.094 |
| 2017          | 59004  | 7470.266  | 1373.755  | 6096.512 | 10.332 | 81.610 | 713.034 | 90.274  | 16.601  | 73.673 |
| 2018          | 56077  | 6907.050  | 1161.948  | 5745.102 | 10.245 | 83.177 | 671.224 | 82.675  | 13.908  | 68.767 |
| 2019          | 55886  | 6732.046  | 1043.761  | 5688.285 | 10.178 | 84.496 | 662.462 | 79.801  | 12.373  | 67.428 |
| 2020          | 55313  | 6429.836  | 931.733   | 5498.102 | 9.940  | 85.509 | 743.037 | 86.373  | 12.516  | 73.857 |
| 2021          | 56292  | 6562.016  | 859.600   | 5702.415 | 10.130 | 86.900 | 750.730 | 87.513  | 11.464  | 76.050 |
| 2022          | 55827  | 6352.366  | 772.433   | 5579.933 | 9.995  | 87.840 | 738.885 | 84.075  | 10.223  | 73.852 |
| 2023          | 55338  | 6134.123  | 698.988   | 5435.136 | 9.822  | 88.605 | 726.728 | 80.557  | 9.179   | 71.377 |
| 2024          | 54770  | 5922.193  | 630.685   | 5291.508 | 9.661  | 89.350 | 713.771 | 77.179  | 8.219   | 68.960 |
| 2025          | 53295  | 5504.188  | 558.358   | 4945.830 | 9.280  | 89.856 | 801.612 | 82.789  | 8.398   | 74.391 |
| 2026          | 55278  | 5641.075  | 536.622   | 5104.454 | 9.234  | 90.487 | 828.283 | 84.526  | 8.041   | 76.485 |
| 2027          | 54199  | 5426.216  | 489.706   | 4936.510 | 9.108  | 90.975 | 808.875 | 80.982  | 7.308   | 73.674 |
| 2028          | 53090  | 5197.830  | 445.214   | 4752.616 | 8.952  | 91.435 | 789.020 | 77.249  | 6.617   | 70.633 |
| 2029          | 51974  | 4973.547  | 406.751   | 4566.796 | 8.787  | 91.822 | 769.023 | 73.590  | 6.018   | 67.571 |
| 2030          | 49479  | 4450.618  | 350.673   | 4099.945 | 8.286  | 92.121 | 866.605 | 77.952  | 6.142   | 71.810 |
| 2031          | 51987  | 4555.052  | 347.120   | 4207.932 | 8.094  | 92.379 | 909.317 | 79.674  | 6.072   | 73.602 |
| 2032          | 50677  | 4349.999  | 318.996   | 4031.003 | 7.954  | 92.667 | 884.689 | 75.939  | 5.569   | 70.371 |
| 2033          | 49380  | 4147.948  | 296.451   | 3851.497 | 7.800  | 92.853 | 859.955 | 72.237  | 5.163   | 67.074 |
| 2034          | 48076  | 3966.133  | 275.159   | 3690.974 | 7.677  | 93.062 | 834.943 | 68.881  | 4.779   | 64.102 |
| 2035          | 44518  | 3289.064  | 222.276   | 3066.788 | 6.889  | 93.242 | 946.825 | 69.952  | 4.727   | 65.225 |
| 2036          | 46347  | 3313.192  | 216.323   | 3096.869 | 6.682  | 93.471 | 987.211 | 70.572  | 4.608   | 65.964 |
| 2037          | 44841  | 3117.951  | 198.215   | 2919.736 | 6.511  | 93.643 | 955.859 | 66.464  | 4.225   | 62.239 |
| 2038          | 43378  | 2949.775  | 184.628   | 2765.147 | 6.375  | 93.741 | 924.621 | 62.876  | 3.935   | 58.940 |
| 2039          | 41973  | 2766.312  | 171.425   | 2594.887 | 6.182  | 93.803 | 893.753 | 58.905  | 3.650   | 55.255 |

## Results for PHIM for Run 2 (Main\_Analysis.RTF)

\*\*\*\*\*

### Main Results for E-Component for Run: 2, Simulation: 1, COD: STROKE

| Variable Parameter          | Value                                  |
|-----------------------------|----------------------------------------|
| 1. Country                  | US (United States)                     |
| 2. Sex                      | F (Females)                            |
| 3. Year of start of process | 1990                                   |
| 4. Cause of Death           | STROKE                                 |
| 5. Effective Dose NULL      | CC:1                                   |
| 6. Effective Dose Ecig      | CC:1 Ecig:0.05 Dual:0.525              |
| Note:                       | Death rates are per million population |

#### Results for Age Groups Combined and Years combined, Population unadjusted for deaths in Ecig scenario,

| Age Group:All | NULL    | Ecig       | %Drop     |          |        | NULL   | Ecig    | Drop   |        |        |
|---------------|---------|------------|-----------|----------|--------|--------|---------|--------|--------|--------|
| Year          | Number  | Attrib     | Attrib    | Drop     | %Drop  | Attrib | Death   | Attrib | Attrib | Drop   |
|               | Deaths  | Deaths     | Deaths    | Deaths   | Deaths | Deaths | Rate    | Rates  | Rates  | Rates  |
| All Comb      | 1352207 | 104899.750 | 51393.873 | 53505.88 | 3.957  | 51.007 | 371.243 | 28.800 | 14.110 | 14.690 |

#### Results for Age Groups Combined, Population unadjusted for deaths in Ecig scenario,

| Age Group:All | NULL   | Ecig     | %Drop    |          |        | NULL   | Ecig    | Drop   |        |        |
|---------------|--------|----------|----------|----------|--------|--------|---------|--------|--------|--------|
| Year          | Number | Attrib   | Attrib   | Drop     | %Drop  | Attrib | Death   | Attrib | Attrib | Drop   |
|               | Deaths | Deaths   | Deaths   | Deaths   | Deaths | Deaths | Rate    | Rates  | Rates  | Rates  |
| 1990          | 33504  | 3293.017 | 3293.017 | 0.000    | 0.000  | 0.000  | 490.678 | 48.227 | 48.227 | 0.000  |
| 1991          | 32505  | 3207.063 | 3179.556 | 27.507   | 0.085  | 0.858  | 469.694 | 46.342 | 45.944 | 0.397  |
| 1992          | 32560  | 3218.125 | 3141.225 | 76.899   | 0.236  | 2.390  | 464.104 | 45.871 | 44.774 | 1.096  |
| 1993          | 32768  | 3226.680 | 3081.071 | 145.609  | 0.444  | 4.513  | 460.480 | 45.344 | 43.297 | 2.046  |
| 1994          | 33005  | 3277.266 | 3045.067 | 232.199  | 0.704  | 7.085  | 456.915 | 45.370 | 42.155 | 3.215  |
| 1995          | 33730  | 3309.378 | 2976.639 | 332.739  | 0.986  | 10.054 | 459.716 | 45.104 | 40.569 | 4.535  |
| 1996          | 33750  | 3312.987 | 2863.115 | 449.871  | 1.333  | 13.579 | 454.019 | 44.568 | 38.516 | 6.052  |
| 1997          | 33699  | 3267.066 | 2703.734 | 563.332  | 1.672  | 17.243 | 447.056 | 43.341 | 35.868 | 7.473  |
| 1998          | 33274  | 3178.725 | 2507.134 | 671.591  | 2.018  | 21.128 | 435.211 | 41.577 | 32.792 | 8.784  |
| 1999          | 33891  | 3120.351 | 2338.538 | 781.813  | 2.307  | 25.055 | 437.317 | 40.264 | 30.176 | 10.088 |
| 2000          | 33827  | 3142.808 | 2228.404 | 914.404  | 2.703  | 29.095 | 431.074 | 40.050 | 28.398 | 11.653 |
| 2001          | 32506  | 2961.588 | 1979.726 | 981.862  | 3.021  | 33.153 | 409.647 | 37.323 | 24.949 | 12.374 |
| 2002          | 32078  | 2940.627 | 1836.883 | 1103.744 | 3.441  | 37.534 | 400.295 | 36.695 | 22.922 | 13.773 |
| 2003          | 30568  | 2819.545 | 1644.379 | 1175.166 | 3.844  | 41.679 | 377.883 | 34.855 | 20.328 | 14.527 |
| 2004          | 29388  | 2730.466 | 1479.270 | 1251.196 | 4.258  | 45.824 | 359.671 | 33.417 | 18.104 | 15.313 |
| 2005          | 27954  | 2670.510 | 1342.312 | 1328.198 | 4.751  | 49.736 | 338.339 | 32.322 | 16.247 | 16.076 |
| 2006          | 27201  | 2623.285 | 1220.899 | 1402.387 | 5.156  | 53.459 | 326.354 | 31.474 | 14.648 | 16.826 |
| 2007          | 26302  | 2536.599 | 1089.111 | 1447.488 | 5.503  | 57.064 | 312.424 | 30.131 | 12.937 | 17.194 |
| 2008          | 25998  | 2469.443 | 980.367  | 1489.077 | 5.728  | 60.300 | 305.468 | 29.015 | 11.519 | 17.496 |
| 2009          | 25040  | 2386.945 | 873.650  | 1513.295 | 6.044  | 63.399 | 290.901 | 27.730 | 10.150 | 17.581 |
| 2010          | 24840  | 2329.274 | 786.008  | 1543.267 | 6.213  | 66.255 | 285.273 | 26.750 | 9.027  | 17.724 |
| 2011          | 24792  | 2286.581 | 706.526  | 1580.055 | 6.373  | 69.101 | 282.045 | 26.013 | 8.038  | 17.975 |
| 2012          | 24500  | 2243.311 | 634.417  | 1608.894 | 6.567  | 71.720 | 275.872 | 25.260 | 7.144  | 18.116 |
| 2013          | 24451  | 2176.503 | 563.638  | 1612.866 | 6.596  | 74.104 | 272.368 | 24.245 | 6.279  | 17.966 |
| 2014          | 25296  | 2211.619 | 525.463  | 1686.156 | 6.666  | 76.241 | 278.691 | 24.366 | 5.789  | 18.577 |
| 2015          | 26316  | 2237.016 | 493.301  | 1743.715 | 6.626  | 77.948 | 324.141 | 27.554 | 6.076  | 21.478 |
| 2016          | 26735  | 2229.057 | 452.970  | 1776.087 | 6.643  | 79.679 | 326.164 | 27.194 | 5.526  | 21.668 |
| 2017          | 27616  | 2221.649 | 417.118  | 1804.531 | 6.534  | 81.225 | 333.726 | 26.848 | 5.041  | 21.807 |
| 2018          | 25256  | 1939.420 | 338.305  | 1601.115 | 6.340  | 82.556 | 302.304 | 23.214 | 4.049  | 19.165 |
| 2019          | 25429  | 1904.400 | 306.072  | 1598.328 | 6.285  | 83.928 | 301.434 | 22.574 | 3.628  | 18.946 |
| 2020          | 25379  | 1806.054 | 271.196  | 1534.859 | 6.048  | 84.984 | 340.922 | 24.261 | 3.643  | 20.618 |
| 2021          | 25448  | 1748.172 | 242.963  | 1505.209 | 5.915  | 86.102 | 339.386 | 23.314 | 3.240  | 20.074 |
| 2022          | 25539  | 1701.148 | 219.987  | 1481.161 | 5.800  | 87.068 | 338.015 | 22.515 | 2.912  | 19.604 |
| 2023          | 25620  | 1652.087 | 200.308  | 1451.779 | 5.667  | 87.875 | 336.461 | 21.696 | 2.631  | 19.066 |
| 2024          | 25659  | 1597.127 | 180.903  | 1416.224 | 5.519  | 88.673 | 334.391 | 20.814 | 2.358  | 18.457 |
| 2025          | 25260  | 1467.622 | 157.696  | 1309.926 | 5.186  | 89.255 | 379.931 | 22.075 | 2.372  | 19.703 |
| 2026          | 25480  | 1390.505 | 141.337  | 1249.169 | 4.903  | 89.836 | 381.790 | 20.835 | 2.118  | 18.718 |
| 2027          | 25264  | 1342.095 | 128.856  | 1213.239 | 4.802  | 90.399 | 377.042 | 20.030 | 1.923  | 18.107 |
| 2028          | 25022  | 1289.536 | 117.622  | 1171.914 | 4.684  | 90.879 | 371.879 | 19.165 | 1.748  | 17.417 |
| 2029          | 24767  | 1242.216 | 107.730  | 1134.486 | 4.581  | 91.328 | 366.459 | 18.380 | 1.594  | 16.786 |
| 2030          | 23959  | 1096.803 | 90.911   | 1005.892 | 4.198  | 91.711 | 419.641 | 19.210 | 1.592  | 17.618 |
| 2031          | 23963  | 1019.991 | 81.416   | 938.575  | 3.917  | 92.018 | 419.142 | 17.841 | 1.424  | 16.417 |
| 2032          | 23615  | 977.406  | 74.813   | 902.593  | 3.822  | 92.346 | 412.259 | 17.063 | 1.306  | 15.757 |
| 2033          | 23259  | 937.450  | 69.681   | 867.768  | 3.731  | 92.567 | 405.051 | 16.326 | 1.213  | 15.112 |
| 2034          | 22879  | 900.763  | 64.722   | 836.041  | 3.654  | 92.815 | 397.339 | 15.644 | 1.124  | 14.520 |
| 2035          | 21733  | 745.023  | 51.968   | 693.055  | 3.189  | 93.025 | 462.224 | 15.845 | 1.105  | 14.740 |
| 2036          | 20904  | 680.360  | 45.611   | 634.749  | 3.036  | 93.296 | 445.263 | 14.492 | 0.972  | 13.520 |
| 2037          | 20397  | 644.109  | 42.149   | 601.960  | 2.951  | 93.456 | 434.791 | 13.730 | 0.898  | 12.832 |
| 2038          | 19890  | 612.448  | 39.375   | 573.073  | 2.881  | 93.571 | 423.966 | 13.055 | 0.839  | 12.215 |
| 2039          | 19392  | 577.529  | 36.715   | 540.815  | 2.789  | 93.643 | 412.930 | 12.298 | 0.782  | 11.516 |



## Results for PHIM for Run 2 (Main\_Analysis.RTF)

\*\*\*\*\*

### Main Results for E-Component for Run: 2, Simulation: 1, COD: COPD

| Variable Parameter          | Value                                  |
|-----------------------------|----------------------------------------|
| 1. Country                  | US (United States)                     |
| 2. Sex                      | F (Females)                            |
| 3. Year of start of process | 1990                                   |
| 4. Cause of Death           | COPD                                   |
| 5. Effective Dose NULL      | CC:1                                   |
| 6. Effective Dose Ecig      | CC:1 Ecig:0.05 Dual:0.525              |
| Note:                       | Death rates are per million population |

#### Results for Age Groups Combined and Years combined, Population unadjusted for deaths in Ecig scenario,

| Age Group:All | NULL    | Ecig       | %Drop      |          |        | NULL   | Ecig    | Drop    |         |        |
|---------------|---------|------------|------------|----------|--------|--------|---------|---------|---------|--------|
| Year          | Number  | Attrib     | Attrib     | Drop     | %Drop  | Attrib | Death   | Attrib  | Attrib  | Drop   |
|               | Deaths  | Deaths     | Deaths     | Deaths   | Deaths | Deaths | Rate    | Rates   | Rates   | Rates  |
| All Comb      | 2159941 | 862051.244 | 551684.508 | 310366.7 | 14.369 | 36.003 | 593.003 | 236.673 | 151.463 | 85.210 |

#### Results for Age Groups Combined, Population unadjusted for deaths in Ecig scenario,

| Age Group:All | NULL   | Ecig      | %Drop     |          |        | NULL   | Ecig    | Drop    |         |         |
|---------------|--------|-----------|-----------|----------|--------|--------|---------|---------|---------|---------|
| Year          | Number | Attrib    | Attrib    | Drop     | %Drop  | Attrib | Death   | Attrib  | Attrib  | Drop    |
|               | Deaths | Deaths    | Deaths    | Deaths   | Deaths | Deaths | Rate    | Rates   | Rates   | Rates   |
| 1990          | 24738  | 10694.712 | 10694.712 | 0.000    | 0.000  | 0.000  | 362.296 | 156.628 | 156.628 | 0.000   |
| 1991          | 26562  | 11602.933 | 11584.706 | 18.227   | 0.069  | 0.157  | 383.818 | 167.661 | 167.398 | 0.263   |
| 1992          | 26828  | 11831.375 | 11781.157 | 50.218   | 0.187  | 0.424  | 382.401 | 168.642 | 167.926 | 0.716   |
| 1993          | 29774  | 13246.371 | 13138.062 | 108.309  | 0.364  | 0.818  | 418.406 | 186.148 | 184.626 | 1.522   |
| 1994          | 29804  | 13355.662 | 13183.534 | 172.127  | 0.578  | 1.289  | 412.601 | 184.893 | 182.511 | 2.383   |
| 1995          | 29755  | 13397.439 | 13141.785 | 255.654  | 0.859  | 1.908  | 405.540 | 182.598 | 179.113 | 3.484   |
| 1996          | 30900  | 13960.356 | 13603.065 | 357.291  | 1.156  | 2.559  | 415.680 | 187.801 | 182.994 | 4.806   |
| 1997          | 31128  | 14109.552 | 13642.341 | 467.211  | 1.501  | 3.311  | 412.949 | 187.180 | 180.981 | 6.198   |
| 1998          | 32096  | 14599.657 | 13987.980 | 611.677  | 1.906  | 4.190  | 419.803 | 190.958 | 182.957 | 8.000   |
| 1999          | 34616  | 15728.102 | 14933.909 | 794.193  | 2.294  | 5.050  | 446.673 | 202.950 | 192.702 | 10.248  |
| 2000          | 34299  | 15579.803 | 14634.748 | 945.056  | 2.755  | 6.066  | 437.088 | 198.541 | 186.498 | 12.043  |
| 2001          | 34592  | 15696.614 | 14557.623 | 1138.991 | 3.293  | 7.256  | 435.935 | 197.812 | 183.458 | 14.354  |
| 2002          | 34291  | 15519.777 | 14197.005 | 1322.773 | 3.857  | 8.523  | 427.910 | 193.668 | 177.162 | 16.507  |
| 2003          | 35074  | 15888.389 | 14324.381 | 1564.008 | 4.459  | 9.844  | 433.587 | 196.413 | 177.079 | 19.334  |
| 2004          | 33512  | 15091.573 | 13393.094 | 1698.478 | 5.068  | 11.254 | 410.143 | 184.701 | 163.914 | 20.787  |
| 2005          | 35392  | 15803.656 | 13773.575 | 2030.081 | 5.736  | 12.846 | 428.364 | 191.278 | 166.707 | 24.571  |
| 2006          | 33981  | 15100.563 | 12938.149 | 2162.415 | 6.364  | 14.320 | 407.699 | 181.174 | 155.230 | 25.944  |
| 2007          | 34000  | 14974.384 | 12581.276 | 2393.108 | 7.039  | 15.981 | 403.863 | 177.871 | 149.445 | 28.426  |
| 2008          | 37425  | 16406.197 | 13534.105 | 2872.092 | 7.674  | 17.506 | 439.732 | 192.768 | 159.021 | 33.746  |
| 2009          | 36826  | 16083.194 | 12962.627 | 3120.567 | 8.474  | 19.403 | 427.825 | 186.846 | 150.593 | 36.253  |
| 2010          | 36788  | 15927.400 | 12581.609 | 3345.791 | 9.095  | 21.007 | 422.489 | 182.917 | 144.493 | 38.425  |
| 2011          | 37636  | 16221.836 | 12504.543 | 3717.293 | 9.877  | 22.915 | 428.164 | 184.547 | 142.257 | 42.290  |
| 2012          | 38265  | 16358.849 | 12301.235 | 4057.615 | 10.604 | 24.804 | 430.867 | 184.202 | 138.513 | 45.689  |
| 2013          | 40112  | 16994.822 | 12436.493 | 4558.329 | 11.364 | 26.822 | 446.821 | 189.311 | 138.534 | 50.777  |
| 2014          | 40084  | 16855.093 | 11990.508 | 4864.585 | 12.136 | 28.861 | 441.613 | 185.696 | 132.102 | 53.594  |
| 2015          | 42200  | 17572.483 | 12218.289 | 5354.194 | 12.688 | 30.469 | 519.788 | 216.445 | 150.496 | 65.949  |
| 2016          | 42606  | 17579.955 | 11832.738 | 5747.218 | 13.489 | 32.692 | 519.788 | 214.473 | 144.358 | 70.115  |
| 2017          | 44364  | 18080.688 | 11775.207 | 6305.481 | 14.213 | 34.874 | 536.117 | 218.496 | 142.297 | 76.199  |
| 2018          | 45359  | 18209.262 | 11502.911 | 6706.351 | 14.785 | 36.829 | 542.932 | 217.960 | 137.686 | 80.273  |
| 2019          | 46876  | 18648.302 | 11380.754 | 7267.548 | 15.504 | 38.972 | 555.657 | 221.054 | 134.906 | 86.148  |
| 2020          | 48331  | 19002.597 | 11252.896 | 7749.701 | 16.035 | 40.782 | 649.239 | 255.266 | 151.163 | 104.103 |
| 2021          | 48338  | 18885.717 | 10759.489 | 8126.229 | 16.811 | 43.028 | 644.660 | 251.867 | 143.493 | 108.374 |
| 2022          | 49708  | 19235.076 | 10562.751 | 8672.325 | 17.447 | 45.086 | 657.895 | 254.582 | 139.801 | 114.781 |
| 2023          | 51083  | 19521.158 | 10348.370 | 9172.788 | 17.957 | 46.989 | 670.849 | 256.363 | 135.901 | 120.462 |
| 2024          | 52397  | 19918.620 | 10139.779 | 9778.841 | 18.663 | 49.094 | 682.854 | 259.583 | 132.144 | 127.440 |
| 2025          | 53387  | 20150.545 | 9883.634  | 10266.91 | 19.231 | 50.951 | 803.004 | 303.086 | 148.661 | 154.425 |
| 2026          | 54232  | 20393.792 | 9580.022  | 10813.77 | 19.940 | 53.025 | 812.615 | 305.582 | 143.548 | 162.034 |
| 2027          | 55049  | 20615.351 | 9255.033  | 11360.32 | 20.637 | 55.106 | 821.568 | 307.668 | 138.124 | 169.544 |
| 2028          | 55809  | 20731.894 | 8887.786  | 11844.11 | 21.223 | 57.130 | 829.419 | 308.115 | 132.089 | 176.026 |
| 2029          | 56527  | 20781.967 | 8501.578  | 12280.39 | 21.725 | 59.092 | 836.392 | 307.495 | 125.791 | 181.704 |
| 2030          | 56756  | 20753.201 | 8128.515  | 12624.69 | 22.244 | 60.832 | 994.067 | 363.487 | 142.369 | 221.118 |
| 2031          | 58288  | 21048.417 | 7998.735  | 13049.68 | 22.388 | 61.998 | 1019.54 | 368.165 | 139.909 | 228.256 |
| 2032          | 58782  | 21169.329 | 7660.556  | 13508.77 | 22.981 | 63.813 | 1026.18 | 369.560 | 133.733 | 235.827 |
| 2033          | 59236  | 21109.293 | 7288.320  | 13820.97 | 23.332 | 65.473 | 1031.59 | 367.618 | 126.926 | 240.692 |
| 2034          | 59614  | 21109.429 | 6920.918  | 14188.51 | 23.801 | 67.214 | 1035.33 | 366.613 | 120.197 | 246.415 |
| 2035          | 58938  | 20794.840 | 6542.303  | 14252.54 | 24.182 | 68.539 | 1253.51 | 442.268 | 139.143 | 303.125 |
| 2036          | 56014  | 19354.577 | 5816.916  | 13537.66 | 24.168 | 69.946 | 1193.11 | 412.258 | 123.902 | 288.356 |
| 2037          | 55953  | 19064.169 | 5385.959  | 13678.21 | 24.446 | 71.748 | 1192.72 | 406.385 | 114.811 | 291.574 |
| 2038          | 55859  | 18854.812 | 5033.504  | 13821.31 | 24.743 | 73.304 | 1190.66 | 401.900 | 107.292 | 294.608 |
| 2039          | 55757  | 18437.457 | 4625.323  | 13812.13 | 24.772 | 74.913 | 1187.28 | 392.602 | 98.490  | 294.111 |

## Results for PHIM for Run 2 (Main\_Analysis.RTF)

\*\*\*\*\*

### Main Results for E-Component for Run: 2, Simulation: 1, COD: Four Diseases Combined, Adjusted

| Variable Parameter          | Value                                  |
|-----------------------------|----------------------------------------|
| 1. Country                  | US (United States)                     |
| 2. Sex                      | F (Females)                            |
| 3. Year of start of process | 1990                                   |
| 4. Cause of Death           | Four Diseases Combined                 |
| 5. Effective Dose NULL      | CC:1                                   |
| 6. Effective Dose Ecig      | CC:1 Ecig:0.05 Dual:0.525              |
| Note:                       | Death rates are per million population |

#### Results for Age Groups Combined and Years combined, Population and Number deaths adjusted for Ecig scenario,

| Age Group:All |         | NULL        | Ecig        | %Drop    |        | NULL   | Ecig    | Drop    |         |         |
|---------------|---------|-------------|-------------|----------|--------|--------|---------|---------|---------|---------|
| Year          | Number  | Attrib      | Attrib      | Drop     | %Drop  | Attrib | Death   | Attrib  | Attrib  | Drop    |
|               | Deaths  | Deaths      | Deaths      | Deaths   | Deaths | Deaths | Rate    | Rates   | Rates   | Rates   |
| All Comb      | 9148407 | 2946250.006 | 1954823.387 | 991426.6 | 10.837 | 33.650 | 2499.62 | 808.881 | 534.116 | 274.766 |

#### Results for Age Groups Combined, Population and Number deaths adjusted for Ecig scenario,

| Age Group:All |        | NULL      | Ecig      | %Drop    |        | NULL   | Ecig    | Drop    |         |         |
|---------------|--------|-----------|-----------|----------|--------|--------|---------|---------|---------|---------|
| Year          | Number | Attrib    | Attrib    | Drop     | %Drop  | Attrib | Death   | Attrib  | Attrib  | Drop    |
|               | Deaths | Deaths    | Deaths    | Deaths   | Deaths | Deaths | Rate    | Rates   | Rates   | Rates   |
| 1990          | 199848 | 57524.822 | 57524.822 | 0.000    | 0.000  | 0.000  | 2926.84 | 842.471 | 842.471 | 0.000   |
| 1991          | 199162 | 59078.486 | 58910.022 | 168.464  | 0.085  | 0.285  | 2877.87 | 853.678 | 851.244 | 2.434   |
| 1992          | 198533 | 60494.150 | 60022.679 | 471.471  | 0.237  | 0.779  | 2829.84 | 862.271 | 855.549 | 6.722   |
| 1993          | 202515 | 62694.848 | 61777.616 | 917.231  | 0.453  | 1.463  | 2845.86 | 881.034 | 868.136 | 12.898  |
| 1994          | 200665 | 63202.598 | 61753.940 | 1448.657 | 0.722  | 2.292  | 2777.91 | 874.966 | 854.892 | 20.074  |
| 1995          | 201036 | 63766.862 | 61674.857 | 2092.005 | 1.041  | 3.281  | 2739.86 | 869.097 | 840.549 | 28.548  |
| 1996          | 201202 | 64591.163 | 61725.514 | 2865.648 | 1.424  | 4.437  | 2706.47 | 868.908 | 830.299 | 38.609  |
| 1997          | 198673 | 64686.912 | 61099.550 | 3587.362 | 1.806  | 5.546  | 2635.34 | 858.147 | 810.467 | 47.680  |
| 1998          | 197623 | 65295.961 | 60873.258 | 4422.704 | 2.238  | 6.773  | 2584.42 | 854.046 | 796.072 | 57.975  |
| 1999          | 211404 | 67327.521 | 61615.666 | 5711.855 | 2.702  | 8.484  | 2727.28 | 868.771 | 794.892 | 73.878  |
| 2000          | 208596 | 67596.897 | 60947.459 | 6649.437 | 3.188  | 9.837  | 2657.45 | 861.419 | 776.453 | 84.967  |
| 2001          | 203735 | 67008.811 | 59367.234 | 7641.577 | 3.751  | 11.404 | 2566.52 | 844.458 | 747.870 | 96.588  |
| 2002          | 200990 | 67067.744 | 58321.004 | 8746.739 | 4.352  | 13.042 | 2506.90 | 836.925 | 727.423 | 109.501 |
| 2003          | 196550 | 66756.217 | 57012.856 | 9743.361 | 4.957  | 14.595 | 2428.31 | 825.244 | 704.374 | 120.870 |
| 2004          | 188394 | 65058.725 | 54473.689 | 10585.04 | 5.619  | 16.270 | 2304.02 | 796.234 | 666.202 | 130.032 |
| 2005          | 186694 | 65214.724 | 53493.802 | 11720.92 | 6.278  | 17.973 | 2257.67 | 789.321 | 646.897 | 142.424 |
| 2006          | 180406 | 63771.146 | 51190.155 | 12580.99 | 6.974  | 19.728 | 2162.28 | 765.117 | 613.547 | 151.571 |
| 2007          | 176006 | 63110.718 | 49647.768 | 13462.95 | 7.649  | 21.332 | 2088.19 | 749.650 | 589.036 | 160.615 |
| 2008          | 177993 | 63718.624 | 48977.494 | 14741.13 | 8.282  | 23.135 | 2088.52 | 748.674 | 574.689 | 173.984 |
| 2009          | 173277 | 62794.698 | 47232.424 | 15562.27 | 8.981  | 24.783 | 2009.93 | 729.515 | 547.872 | 181.643 |
| 2010          | 171016 | 61917.074 | 45491.241 | 16425.83 | 9.605  | 26.529 | 1960.59 | 711.083 | 521.529 | 189.554 |
| 2011          | 170895 | 61680.114 | 44092.757 | 17587.36 | 10.291 | 28.514 | 1940.38 | 701.700 | 500.638 | 201.062 |
| 2012          | 172084 | 62023.127 | 43148.010 | 18875.12 | 10.969 | 30.432 | 1933.47 | 698.386 | 484.794 | 213.593 |
| 2013          | 173443 | 62037.765 | 42004.473 | 20033.29 | 11.550 | 32.292 | 1927.38 | 691.059 | 466.773 | 224.285 |
| 2014          | 174998 | 61921.017 | 40614.209 | 21306.81 | 12.175 | 34.410 | 1922.86 | 682.195 | 446.264 | 235.931 |
| 2015          | 178288 | 61856.204 | 39469.169 | 22387.04 | 12.557 | 36.192 | 2188.82 | 761.899 | 484.560 | 277.338 |
| 2016          | 177872 | 60464.119 | 37205.628 | 23258.49 | 13.076 | 38.467 | 2162.26 | 737.655 | 452.279 | 285.376 |
| 2017          | 180440 | 60243.839 | 35815.740 | 24428.10 | 13.538 | 40.549 | 2172.04 | 728.017 | 431.129 | 296.887 |
| 2018          | 178377 | 60713.327 | 35233.084 | 25480.24 | 14.284 | 41.968 | 2126.10 | 726.721 | 419.948 | 306.772 |
| 2019          | 180571 | 61148.172 | 34312.773 | 26835.40 | 14.861 | 43.886 | 2130.69 | 724.841 | 404.883 | 319.959 |
| 2020          | 181943 | 61149.317 | 33378.065 | 27771.25 | 15.264 | 45.415 | 2430.54 | 821.432 | 445.892 | 375.541 |
| 2021          | 179686 | 58727.786 | 30554.645 | 28173.14 | 15.679 | 47.972 | 2382.11 | 783.216 | 405.065 | 378.151 |
| 2022          | 181110 | 58848.802 | 29530.122 | 29318.68 | 16.188 | 49.820 | 2381.81 | 778.881 | 388.355 | 390.525 |
| 2023          | 182478 | 58816.149 | 28494.241 | 30321.91 | 16.617 | 51.554 | 2380.17 | 772.407 | 371.667 | 400.740 |
| 2024          | 183588 | 58955.232 | 27466.918 | 31488.31 | 17.152 | 53.411 | 2375.32 | 768.316 | 355.376 | 412.940 |
| 2025          | 182536 | 58297.744 | 26321.127 | 31976.62 | 17.518 | 54.851 | 2721.85 | 876.861 | 392.483 | 484.378 |
| 2026          | 182579 | 56469.971 | 24279.267 | 32190.70 | 17.631 | 57.005 | 2710.80 | 846.150 | 360.480 | 485.669 |
| 2027          | 182020 | 56209.427 | 23137.418 | 33072.01 | 18.169 | 58.837 | 2690.34 | 838.883 | 341.983 | 496.900 |
| 2028          | 181299 | 55733.105 | 21938.573 | 33794.53 | 18.640 | 60.636 | 2667.13 | 828.298 | 322.744 | 505.555 |
| 2029          | 180482 | 55145.838 | 20722.296 | 34423.54 | 19.073 | 62.423 | 2642.03 | 815.951 | 303.348 | 512.602 |
| 2030          | 176388 | 53615.097 | 19478.584 | 34136.51 | 19.353 | 63.670 | 3050.43 | 939.056 | 336.860 | 602.196 |
| 2031          | 177997 | 52046.561 | 18256.129 | 33790.43 | 18.984 | 64.923 | 3072.27 | 910.364 | 315.105 | 595.258 |
| 2032          | 176549 | 51582.636 | 17267.357 | 34315.28 | 19.437 | 66.525 | 3039.56 | 900.496 | 297.283 | 603.213 |
| 2033          | 175044 | 50839.758 | 16262.688 | 34577.07 | 19.753 | 68.012 | 3004.54 | 885.375 | 279.141 | 606.234 |
| 2034          | 173393 | 50215.451 | 15286.085 | 34929.37 | 20.145 | 69.559 | 2966.30 | 872.104 | 261.504 | 610.600 |
| 2035          | 166157 | 47773.075 | 14165.206 | 33607.87 | 20.227 | 70.349 | 3471.86 | 1016.05 | 295.983 | 720.062 |
| 2036          | 159795 | 43298.709 | 12150.966 | 31147.74 | 19.492 | 71.937 | 3341.66 | 922.274 | 254.104 | 668.170 |
| 2037          | 157227 | 42241.563 | 11179.493 | 31062.07 | 19.756 | 73.534 | 3288.45 | 900.450 | 233.822 | 666.628 |
| 2038          | 154669 | 41356.353 | 10400.445 | 30955.91 | 20.014 | 74.852 | 3232.78 | 881.531 | 217.383 | 664.148 |
| 2039          | 152181 | 40161.050 | 9524.869  | 30636.18 | 20.131 | 76.283 | 3175.61 | 855.178 | 198.759 | 656.419 |

## Results for PHIM for Run 2 (Main\_Analysis.RTF)

\*\*\*\*\*

### Main Results for E-Component for Run: 2, Simulation: 1, COD: LUNG CANCER, Adjusted

| Variable Parameter          | Value                                  |
|-----------------------------|----------------------------------------|
| 1. Country                  | US (United States)                     |
| 2. Sex                      | F (Females)                            |
| 3. Year of start of process | 1990                                   |
| 4. Cause of Death           | LUNG CANCER                            |
| 5. Effective Dose NULL      | CC:1                                   |
| 6. Effective Dose Ecig      | CC:1 Ecig:0.05 Dual:0.525              |
| Note:                       | Death rates are per million population |

#### Results for Age Groups Combined and Years combined, Population and Number deaths adjusted for Ecig scenario,

| Age Group:All | NULL    | Ecig        | %Drop       |          |        |        | NULL    | Ecig    | Drop    |         |
|---------------|---------|-------------|-------------|----------|--------|--------|---------|---------|---------|---------|
| Year          | Number  | Attrib      | Attrib      | Drop     | %Drop  | Attrib | Death   | Attrib  | Attrib  | Drop    |
|               | Deaths  | Deaths      | Deaths      | Deaths   | Deaths | Deaths | Rate    | Rates   | Rates   | Rates   |
| All Comb      | 2343934 | 1580465.217 | 1148450.411 | 432014.8 | 18.431 | 27.335 | 640.432 | 433.910 | 313.791 | 120.120 |

#### Results for Age Groups Combined, Population and Number deaths adjusted for Ecig scenario,

| Age Group:All | NULL   | Ecig      | %Drop     |          |        |        | NULL    | Ecig    | Drop    |         |
|---------------|--------|-----------|-----------|----------|--------|--------|---------|---------|---------|---------|
| Year          | Number | Attrib    | Attrib    | Drop     | %Drop  | Attrib | Death   | Attrib  | Attrib  | Drop    |
|               | Deaths | Deaths    | Deaths    | Deaths   | Deaths | Deaths | Rate    | Rates   | Rates   | Rates   |
| 1990          | 42690  | 30614.201 | 30614.201 | 0.000    | 0.000  | 0.000  | 625.210 | 448.355 | 448.355 | 0.000   |
| 1991          | 43692  | 31412.010 | 31379.684 | 32.326   | 0.074  | 0.103  | 631.345 | 453.901 | 453.433 | 0.467   |
| 1992          | 45423  | 32782.407 | 32688.550 | 93.857   | 0.207  | 0.286  | 647.451 | 467.274 | 465.935 | 1.339   |
| 1993          | 46292  | 33491.183 | 33305.813 | 185.370  | 0.400  | 0.553  | 650.518 | 470.643 | 468.033 | 2.609   |
| 1994          | 47019  | 34074.347 | 33774.114 | 300.233  | 0.639  | 0.881  | 650.904 | 471.719 | 467.553 | 4.167   |
| 1995          | 47843  | 34694.454 | 34242.053 | 452.401  | 0.946  | 1.304  | 652.042 | 472.861 | 466.675 | 6.186   |
| 1996          | 48250  | 35027.269 | 34401.657 | 625.612  | 1.297  | 1.786  | 649.027 | 471.202 | 462.753 | 8.449   |
| 1997          | 49044  | 35590.763 | 34758.927 | 831.836  | 1.696  | 2.337  | 650.551 | 472.153 | 461.066 | 11.086  |
| 1998          | 49699  | 36100.785 | 35025.397 | 1075.388 | 2.164  | 2.979  | 649.940 | 472.184 | 458.046 | 14.139  |
| 1999          | 48901  | 35451.030 | 34156.135 | 1294.894 | 2.648  | 3.653  | 630.861 | 457.448 | 440.642 | 16.806  |
| 2000          | 50356  | 36447.986 | 34828.291 | 1619.695 | 3.216  | 4.444  | 641.520 | 464.474 | 443.702 | 20.772  |
| 2001          | 50422  | 36411.326 | 34462.282 | 1949.045 | 3.865  | 5.353  | 635.180 | 458.863 | 434.134 | 24.729  |
| 2002          | 51487  | 37078.545 | 34720.291 | 2358.254 | 4.580  | 6.360  | 642.190 | 462.696 | 433.058 | 29.638  |
| 2003          | 51461  | 36999.876 | 34251.317 | 2748.559 | 5.341  | 7.429  | 635.782 | 457.395 | 423.163 | 34.232  |
| 2004          | 51464  | 36861.555 | 33679.922 | 3181.633 | 6.182  | 8.631  | 629.391 | 451.138 | 411.899 | 39.239  |
| 2005          | 51498  | 36689.529 | 33049.362 | 3640.167 | 7.069  | 9.922  | 622.765 | 444.069 | 399.664 | 44.405  |
| 2006          | 51446  | 36504.774 | 32382.996 | 4121.778 | 8.012  | 11.291 | 616.615 | 437.979 | 388.131 | 49.848  |
| 2007          | 51946  | 36663.202 | 31967.477 | 4695.725 | 9.040  | 12.808 | 616.306 | 435.498 | 379.272 | 56.226  |
| 2008          | 51098  | 35898.803 | 30772.110 | 5126.693 | 10.033 | 14.281 | 599.566 | 421.800 | 361.072 | 60.728  |
| 2009          | 51333  | 35934.525 | 30191.194 | 5743.331 | 11.188 | 15.983 | 595.432 | 417.468 | 350.202 | 67.266  |
| 2010          | 51010  | 35502.829 | 29254.342 | 6248.488 | 12.250 | 17.600 | 584.795 | 407.730 | 335.383 | 72.347  |
| 2011          | 50684  | 35136.342 | 28298.729 | 6837.613 | 13.491 | 19.460 | 575.471 | 399.726 | 321.309 | 78.417  |
| 2012          | 51443  | 35450.201 | 27879.940 | 7570.261 | 14.716 | 21.355 | 577.989 | 399.173 | 313.248 | 85.925  |
| 2013          | 51288  | 35123.224 | 26909.619 | 8213.605 | 16.015 | 23.385 | 569.935 | 391.249 | 299.032 | 92.217  |
| 2014          | 51494  | 35079.370 | 26177.440 | 8901.930 | 17.287 | 25.377 | 565.810 | 386.476 | 287.635 | 98.841  |
| 2015          | 50707  | 34324.171 | 24973.591 | 9350.579 | 18.440 | 27.242 | 622.527 | 422.780 | 306.599 | 116.180 |
| 2016          | 49134  | 33054.753 | 23310.695 | 9744.057 | 19.832 | 29.479 | 597.284 | 403.264 | 283.370 | 119.894 |
| 2017          | 48628  | 32471.234 | 22161.218 | 10310.02 | 21.202 | 31.751 | 585.360 | 392.399 | 266.674 | 125.635 |
| 2018          | 50809  | 33657.595 | 22136.895 | 11520.70 | 22.674 | 34.229 | 605.601 | 402.871 | 263.853 | 139.019 |
| 2019          | 51414  | 33863.424 | 21482.826 | 12380.60 | 24.080 | 36.560 | 606.676 | 401.412 | 253.492 | 147.920 |
| 2020          | 51858  | 33910.830 | 20816.314 | 13094.52 | 25.251 | 38.615 | 692.762 | 455.532 | 278.081 | 177.450 |
| 2021          | 48455  | 31531.880 | 18583.832 | 12948.05 | 26.722 | 41.063 | 642.374 | 420.521 | 246.367 | 174.154 |
| 2022          | 48787  | 31560.212 | 17860.891 | 13699.32 | 28.080 | 43.407 | 641.609 | 417.708 | 234.891 | 182.817 |
| 2023          | 49087  | 31508.781 | 17127.298 | 14381.48 | 29.298 | 45.643 | 640.264 | 413.791 | 223.401 | 190.390 |
| 2024          | 49307  | 31517.293 | 16391.065 | 15126.23 | 30.678 | 47.993 | 637.953 | 410.740 | 212.073 | 198.667 |
| 2025          | 49036  | 31175.389 | 15592.140 | 15583.25 | 31.779 | 49.986 | 731.193 | 468.912 | 232.499 | 236.412 |
| 2026          | 45887  | 29044.598 | 13886.873 | 15157.72 | 33.033 | 52.188 | 681.289 | 435.206 | 206.182 | 229.024 |
| 2027          | 45702  | 28825.765 | 13125.800 | 15699.96 | 34.353 | 54.465 | 675.504 | 430.203 | 194.006 | 236.197 |
| 2028          | 45469  | 28513.846 | 12347.422 | 16166.42 | 35.554 | 56.697 | 668.912 | 423.769 | 181.646 | 242.123 |
| 2029          | 45200  | 28148.109 | 11563.755 | 16584.35 | 36.691 | 58.918 | 661.667 | 416.486 | 169.279 | 247.207 |
| 2030          | 44083  | 27314.475 | 10764.030 | 16550.45 | 37.544 | 60.592 | 762.366 | 478.407 | 186.152 | 292.255 |
| 2031          | 41442  | 25423.102 | 9676.647  | 15746.45 | 37.996 | 61.938 | 715.304 | 444.684 | 167.021 | 277.662 |
| 2032          | 41050  | 25085.902 | 9058.840  | 16027.06 | 39.043 | 63.889 | 706.733 | 437.933 | 155.961 | 281.972 |
| 2033          | 40636  | 24645.067 | 8453.303  | 16191.76 | 39.845 | 65.700 | 697.504 | 429.194 | 145.097 | 284.097 |
| 2034          | 40188  | 24239.126 | 7870.133  | 16368.99 | 40.731 | 67.531 | 687.502 | 420.967 | 134.637 | 286.330 |
| 2035          | 38255  | 22944.147 | 7193.640  | 15750.51 | 41.172 | 68.647 | 799.343 | 487.980 | 150.312 | 337.668 |
| 2036          | 33726  | 19950.581 | 5926.294  | 14024.29 | 41.583 | 70.295 | 705.291 | 424.953 | 123.932 | 301.021 |
| 2037          | 33159  | 19415.334 | 5411.787  | 14003.55 | 42.232 | 72.126 | 693.530 | 413.871 | 113.189 | 300.682 |
| 2038          | 32593  | 18939.317 | 5004.607  | 13934.71 | 42.754 | 73.576 | 681.227 | 403.701 | 104.603 | 299.098 |
| 2039          | 32040  | 18379.752 | 4558.672  | 13821.08 | 43.137 | 75.197 | 668.593 | 391.373 | 95.127  | 296.246 |

## Results for PHIM for Run 2 (Main\_Analysis.RTF)

\*\*\*\*\*

### Main Results for E-Component for Run: 2, Simulation: 1, COD: IHD, Adjusted

| Variable Parameter          | Value                                  |
|-----------------------------|----------------------------------------|
| 1. Country                  | US (United States)                     |
| 2. Sex                      | F (Females)                            |
| 3. Year of start of process | 1990                                   |
| 4. Cause of Death           | IHD                                    |
| 5. Effective Dose NULL      | CC:1                                   |
| 6. Effective Dose Ecig      | CC:1 Ecig:0.05 Dual:0.525              |
| Note:                       | Death rates are per million population |

#### Results for Age Groups Combined and Years combined, Population and Number deaths adjusted for Ecig scenario,

| Age Group:All |         | NULL       | Ecig       | %Drop    |        | NULL   | Ecig    | Drop    |        |        |
|---------------|---------|------------|------------|----------|--------|--------|---------|---------|--------|--------|
| Year          | Number  | Attrib     | Attrib     | Drop     | %Drop  | Attrib | Death   | Attrib  | Drop   |        |
|               | Deaths  | Deaths     | Deaths     | Deaths   | Deaths | Deaths | Rate    | Rates   | Rates  |        |
| All Comb      | 3261640 | 398833.796 | 199770.684 | 199063.1 | 6.103  | 49.911 | 891.176 | 109.498 | 54.583 | 54.915 |

#### Results for Age Groups Combined, Population and Number deaths adjusted for Ecig scenario,

| Age Group:All |        | NULL      | Ecig      | %Drop    |        | NULL   | Ecig    | Drop    |        |
|---------------|--------|-----------|-----------|----------|--------|--------|---------|---------|--------|
| Year          | Number | Attrib    | Attrib    | Drop     | %Drop  | Attrib | Death   | Attrib  | Drop   |
|               | Deaths | Deaths    | Deaths    | Deaths   | Deaths | Deaths | Rate    | Rates   | Rates  |
| 1990          | 98916  | 12922.892 | 12922.892 | 0.000    | 0.000  | 0.000  | 1448.66 | 189.260 | 0.000  |
| 1991          | 96403  | 12856.479 | 12766.075 | 90.404   | 0.094  | 0.703  | 1393.01 | 185.775 | 1.306  |
| 1992          | 93721  | 12662.244 | 12411.692 | 250.552  | 0.267  | 1.979  | 1335.88 | 180.485 | 3.572  |
| 1993          | 93680  | 12730.613 | 12252.443 | 478.170  | 0.510  | 3.756  | 1316.45 | 178.900 | 6.721  |
| 1994          | 90835  | 12495.323 | 11750.669 | 744.654  | 0.820  | 5.959  | 1257.48 | 172.983 | 10.312 |
| 1995          | 89704  | 12365.590 | 11313.321 | 1052.269 | 1.173  | 8.510  | 1222.55 | 168.534 | 14.348 |
| 1996          | 88296  | 12290.551 | 10855.838 | 1434.714 | 1.625  | 11.673 | 1187.71 | 165.338 | 19.311 |
| 1997          | 84792  | 11719.531 | 9991.683  | 1727.848 | 2.038  | 14.743 | 1124.73 | 155.473 | 22.937 |
| 1998          | 82538  | 11416.794 | 9348.504  | 2068.291 | 2.506  | 18.116 | 1079.39 | 149.327 | 27.072 |
| 1999          | 93972  | 13028.038 | 10180.868 | 2847.170 | 3.030  | 21.854 | 1212.32 | 168.109 | 36.768 |
| 2000          | 90082  | 12426.299 | 9247.769  | 3178.530 | 3.528  | 25.579 | 1147.62 | 158.354 | 40.540 |
| 2001          | 86173  | 11939.281 | 8356.945  | 3582.336 | 4.157  | 30.005 | 1085.55 | 150.461 | 45.186 |
| 2002          | 83080  | 11528.794 | 7553.679  | 3975.115 | 4.785  | 34.480 | 1036.24 | 143.865 | 49.650 |
| 2003          | 79382  | 11048.407 | 6776.349  | 4272.058 | 5.382  | 38.667 | 980.731 | 136.581 | 52.862 |
| 2004          | 73952  | 10375.132 | 5902.554  | 4472.577 | 6.048  | 43.109 | 904.420 | 126.978 | 54.791 |
| 2005          | 71755  | 10051.029 | 5305.549  | 4745.481 | 6.613  | 47.214 | 867.730 | 121.652 | 57.492 |
| 2006          | 67670  | 9542.523  | 4622.475  | 4920.048 | 7.271  | 51.559 | 811.063 | 114.490 | 59.087 |
| 2007          | 63633  | 8936.533  | 3980.938  | 4955.595 | 7.788  | 55.453 | 754.960 | 106.151 | 58.920 |
| 2008          | 63320  | 8944.180  | 3655.167  | 5289.013 | 8.353  | 59.134 | 742.981 | 105.091 | 62.203 |
| 2009          | 59909  | 8390.033  | 3165.961  | 5224.073 | 8.720  | 62.265 | 694.908 | 97.471  | 60.747 |
| 2010          | 58185  | 8157.570  | 2826.488  | 5331.081 | 9.162  | 65.351 | 667.060 | 93.685  | 61.281 |
| 2011          | 57565  | 8035.356  | 2535.443  | 5499.912 | 9.554  | 68.446 | 653.604 | 91.414  | 62.626 |
| 2012          | 57630  | 7970.766  | 2280.366  | 5690.399 | 9.874  | 71.391 | 647.510 | 89.752  | 64.130 |
| 2013          | 57310  | 7743.216  | 2036.461  | 5706.755 | 9.958  | 73.700 | 636.855 | 86.254  | 63.624 |
| 2014          | 57808  | 7774.935  | 1858.730  | 5916.205 | 10.234 | 76.093 | 635.189 | 85.658  | 65.234 |
| 2015          | 58698  | 7722.535  | 1714.316  | 6008.219 | 10.236 | 77.801 | 720.628 | 95.120  | 74.074 |
| 2016          | 58991  | 7600.353  | 1535.501  | 6064.852 | 10.281 | 79.797 | 717.111 | 92.723  | 74.058 |
| 2017          | 59370  | 7470.266  | 1382.058  | 6088.208 | 10.255 | 81.499 | 714.666 | 90.274  | 73.638 |
| 2018          | 56456  | 6907.050  | 1169.537  | 5737.513 | 10.163 | 83.067 | 672.908 | 82.675  | 68.735 |
| 2019          | 56297  | 6732.046  | 1051.133  | 5680.914 | 10.091 | 84.386 | 664.292 | 79.801  | 67.398 |
| 2020          | 55758  | 6429.836  | 938.891   | 5490.944 | 9.848  | 85.398 | 744.863 | 86.373  | 73.831 |
| 2021          | 56777  | 6562.016  | 866.607   | 5695.408 | 10.031 | 86.794 | 752.699 | 87.513  | 76.025 |
| 2022          | 56344  | 6352.366  | 779.157   | 5573.209 | 9.891  | 87.734 | 740.994 | 84.075  | 73.829 |
| 2023          | 55888  | 6134.123  | 705.465   | 5428.658 | 9.713  | 88.499 | 728.982 | 80.557  | 71.355 |
| 2024          | 55353  | 5922.193  | 636.884   | 5285.309 | 9.548  | 89.246 | 716.170 | 77.179  | 68.939 |
| 2025          | 53908  | 5504.188  | 564.314   | 4939.873 | 9.163  | 89.748 | 803.846 | 82.789  | 74.374 |
| 2026          | 55953  | 5641.075  | 542.669   | 5098.406 | 9.112  | 90.380 | 830.754 | 84.526  | 76.469 |
| 2027          | 54903  | 5426.216  | 495.543   | 4930.673 | 8.981  | 90.868 | 811.493 | 80.982  | 73.658 |
| 2028          | 53822  | 5197.830  | 450.788   | 4747.042 | 8.820  | 91.327 | 791.789 | 77.249  | 70.618 |
| 2029          | 52733  | 4973.547  | 412.095   | 4561.452 | 8.650  | 91.714 | 771.943 | 73.590  | 67.557 |
| 2030          | 50258  | 4450.618  | 355.747   | 4094.871 | 8.148  | 92.007 | 869.160 | 77.952  | 71.799 |
| 2031          | 52852  | 4555.052  | 352.379   | 4202.674 | 7.952  | 92.264 | 912.245 | 79.674  | 73.592 |
| 2032          | 51566  | 4349.999  | 324.041   | 4025.959 | 7.807  | 92.551 | 887.792 | 75.939  | 70.361 |
| 2033          | 50292  | 4147.948  | 301.349   | 3846.599 | 7.649  | 92.735 | 863.234 | 72.237  | 67.064 |
| 2034          | 49008  | 3966.133  | 279.883   | 3686.250 | 7.522  | 92.943 | 838.389 | 68.881  | 64.093 |
| 2035          | 45453  | 3289.064  | 226.646   | 3062.418 | 6.738  | 93.109 | 949.745 | 69.952  | 65.217 |
| 2036          | 47364  | 3313.192  | 220.698   | 3092.494 | 6.529  | 93.339 | 990.481 | 70.572  | 65.957 |
| 2037          | 45866  | 3117.951  | 202.340   | 2915.612 | 6.357  | 93.510 | 959.290 | 66.464  | 62.232 |
| 2038          | 44409  | 2949.775  | 188.587   | 2761.187 | 6.218  | 93.607 | 928.206 | 62.876  | 58.934 |
| 2039          | 43009  | 2766.312  | 175.195   | 2591.118 | 6.025  | 93.667 | 897.481 | 58.905  | 55.249 |

## Results for PHIM for Run 2 (Main\_Analysis.RTF)

\*\*\*\*\*

### Main Results for E-Component for Run: 2, Simulation: 1, COD: STROKE, Adjusted

| Variable Parameter          | Value                                  |
|-----------------------------|----------------------------------------|
| 1. Country                  | US (United States)                     |
| 2. Sex                      | F (Females)                            |
| 3. Year of start of process | 1990                                   |
| 4. Cause of Death           | STROKE                                 |
| 5. Effective Dose NULL      | CC:1                                   |
| 6. Effective Dose Ecig      | CC:1 Ecig:0.05 Dual:0.525              |
| Note:                       | Death rates are per million population |

#### Results for Age Groups Combined and Years combined, Population and Number deaths adjusted for Ecig scenario,

| Age Group:All | NULL    | Ecig       | %Drop     |          |        |        | NULL    | Ecig   | Drop   |        |
|---------------|---------|------------|-----------|----------|--------|--------|---------|--------|--------|--------|
| Year          | Number  | Attrib     | Attrib    | Drop     | %Drop  | Attrib | Death   | Attrib | Attrib | Drop   |
|               | Deaths  | Deaths     | Deaths    | Deaths   | Deaths | Deaths | Rate    | Rates  | Rates  | Rates  |
| All Comb      | 1361482 | 104899.750 | 51457.219 | 53442.53 | 3.925  | 50.946 | 371.997 | 28.800 | 14.060 | 14.740 |

#### Results for Age Groups Combined, Population and Number deaths adjusted for Ecig scenario,

| Age Group:All | NULL   | Ecig     | %Drop    |          |        |        | NULL    | Ecig   | Drop   |        |
|---------------|--------|----------|----------|----------|--------|--------|---------|--------|--------|--------|
| Year          | Number | Attrib   | Attrib   | Drop     | %Drop  | Attrib | Death   | Attrib | Attrib | Drop   |
|               | Deaths | Deaths   | Deaths   | Deaths   | Deaths | Deaths | Rate    | Rates  | Rates  | Rates  |
| 1990          | 33504  | 3293.017 | 3293.017 | 0.000    | 0.000  | 0.000  | 490.678 | 48.227 | 48.227 | 0.000  |
| 1991          | 32505  | 3207.063 | 3179.556 | 27.507   | 0.085  | 0.858  | 469.694 | 46.342 | 45.944 | 0.397  |
| 1992          | 32560  | 3218.125 | 3141.236 | 76.889   | 0.236  | 2.389  | 464.104 | 45.871 | 44.774 | 1.096  |
| 1993          | 32768  | 3226.680 | 3081.112 | 145.569  | 0.444  | 4.511  | 460.482 | 45.344 | 43.298 | 2.046  |
| 1994          | 33006  | 3277.266 | 3045.164 | 232.102  | 0.703  | 7.082  | 456.920 | 45.370 | 42.156 | 3.214  |
| 1995          | 33732  | 3309.378 | 2976.822 | 332.557  | 0.986  | 10.049 | 459.725 | 45.104 | 40.570 | 4.534  |
| 1996          | 33754  | 3312.987 | 2863.411 | 449.575  | 1.332  | 13.570 | 454.035 | 44.568 | 38.517 | 6.051  |
| 1997          | 33705  | 3267.066 | 2704.171 | 562.895  | 1.670  | 17.229 | 447.080 | 43.341 | 35.870 | 7.471  |
| 1998          | 33282  | 3178.725 | 2507.729 | 670.996  | 2.016  | 21.109 | 435.246 | 41.577 | 32.795 | 8.782  |
| 1999          | 33902  | 3120.351 | 2339.308 | 781.043  | 2.304  | 25.031 | 437.368 | 40.264 | 30.179 | 10.085 |
| 2000          | 33842  | 3142.808 | 2229.393 | 913.415  | 2.699  | 29.064 | 431.143 | 40.050 | 28.402 | 11.648 |
| 2001          | 32525  | 2961.588 | 1980.871 | 980.718  | 3.015  | 33.115 | 409.735 | 37.323 | 24.954 | 12.369 |
| 2002          | 32103  | 2940.627 | 1838.210 | 1102.418 | 3.434  | 37.489 | 400.409 | 36.695 | 22.928 | 13.768 |
| 2003          | 30598  | 2819.545 | 1645.842 | 1173.703 | 3.836  | 41.627 | 378.021 | 34.855 | 20.334 | 14.522 |
| 2004          | 29423  | 2730.466 | 1480.857 | 1249.609 | 4.247  | 45.765 | 359.838 | 33.417 | 18.111 | 15.307 |
| 2005          | 27994  | 2670.510 | 1344.000 | 1326.510 | 4.739  | 49.673 | 338.529 | 32.322 | 16.253 | 16.069 |
| 2006          | 27247  | 2623.285 | 1222.709 | 1400.576 | 5.140  | 53.390 | 326.577 | 31.474 | 14.655 | 16.819 |
| 2007          | 26354  | 2536.599 | 1090.972 | 1445.628 | 5.485  | 56.991 | 312.675 | 30.131 | 12.944 | 17.187 |
| 2008          | 26058  | 2469.443 | 982.288  | 1487.156 | 5.707  | 60.222 | 305.757 | 29.015 | 11.526 | 17.489 |
| 2009          | 25106  | 2386.945 | 875.597  | 1511.348 | 6.020  | 63.317 | 291.220 | 27.730 | 10.156 | 17.574 |
| 2010          | 24915  | 2329.274 | 787.985  | 1541.289 | 6.186  | 66.170 | 285.632 | 26.750 | 9.034  | 17.717 |
| 2011          | 24876  | 2286.581 | 708.512  | 1578.069 | 6.344  | 69.014 | 282.447 | 26.013 | 8.045  | 17.969 |
| 2012          | 24593  | 2243.311 | 636.382  | 1606.929 | 6.534  | 71.632 | 276.315 | 25.260 | 7.150  | 18.110 |
| 2013          | 24554  | 2176.503 | 565.569  | 1610.934 | 6.561  | 74.015 | 272.859 | 24.245 | 6.285  | 17.960 |
| 2014          | 25415  | 2211.619 | 527.451  | 1684.168 | 6.627  | 76.151 | 279.253 | 24.366 | 5.796  | 18.570 |
| 2015          | 26453  | 2237.016 | 495.368  | 1741.648 | 6.584  | 77.856 | 324.759 | 27.554 | 6.082  | 21.472 |
| 2016          | 26887  | 2229.057 | 455.049  | 1774.008 | 6.598  | 79.586 | 326.848 | 27.194 | 5.532  | 21.663 |
| 2017          | 27789  | 2221.649 | 419.226  | 1802.423 | 6.486  | 81.130 | 334.505 | 26.848 | 5.046  | 21.801 |
| 2018          | 25429  | 1939.420 | 340.180  | 1599.240 | 6.289  | 82.460 | 303.090 | 23.214 | 4.055  | 19.160 |
| 2019          | 25619  | 1904.400 | 307.909  | 1596.490 | 6.232  | 83.832 | 302.300 | 22.574 | 3.633  | 18.941 |
| 2020          | 25587  | 1806.054 | 272.988  | 1533.066 | 5.992  | 84.885 | 341.810 | 24.261 | 3.647  | 20.614 |
| 2021          | 25674  | 1748.172 | 244.707  | 1503.466 | 5.856  | 86.002 | 340.366 | 23.314 | 3.244  | 20.070 |
| 2022          | 25783  | 1701.148 | 221.681  | 1479.467 | 5.738  | 86.969 | 339.077 | 22.515 | 2.915  | 19.600 |
| 2023          | 25883  | 1652.087 | 201.955  | 1450.131 | 5.603  | 87.776 | 337.609 | 21.696 | 2.634  | 19.062 |
| 2024          | 25941  | 1597.127 | 182.484  | 1414.642 | 5.453  | 88.574 | 335.627 | 20.814 | 2.361  | 18.453 |
| 2025          | 25560  | 1467.622 | 159.217  | 1308.405 | 5.119  | 89.151 | 381.129 | 22.075 | 2.374  | 19.700 |
| 2026          | 25804  | 1390.505 | 142.800  | 1247.705 | 4.835  | 89.730 | 383.124 | 20.835 | 2.120  | 18.715 |
| 2027          | 25606  | 1342.095 | 130.268  | 1211.827 | 4.733  | 90.294 | 378.470 | 20.030 | 1.925  | 18.104 |
| 2028          | 25382  | 1289.536 | 118.979  | 1170.557 | 4.612  | 90.774 | 373.396 | 19.165 | 1.750  | 17.415 |
| 2029          | 25145  | 1242.216 | 109.037  | 1133.179 | 4.507  | 91.222 | 368.085 | 18.380 | 1.596  | 16.784 |
| 2030          | 24353  | 1096.803 | 92.145   | 1004.658 | 4.125  | 91.599 | 421.149 | 19.210 | 1.594  | 17.617 |
| 2031          | 24381  | 1019.991 | 82.579   | 937.411  | 3.845  | 91.904 | 420.823 | 17.841 | 1.425  | 16.416 |
| 2032          | 24050  | 977.406  | 75.928   | 901.478  | 3.748  | 92.232 | 414.064 | 17.063 | 1.307  | 15.756 |
| 2033          | 23711  | 937.450  | 70.767   | 866.682  | 3.655  | 92.451 | 406.982 | 16.326 | 1.215  | 15.111 |
| 2034          | 23346  | 900.763  | 65.771   | 834.992  | 3.577  | 92.698 | 399.394 | 15.644 | 1.125  | 14.519 |
| 2035          | 22211  | 745.023  | 52.933   | 692.090  | 3.116  | 92.895 | 464.092 | 15.845 | 1.106  | 14.739 |
| 2036          | 21387  | 680.360  | 46.480   | 633.880  | 2.964  | 93.168 | 447.244 | 14.492 | 0.972  | 13.520 |
| 2037          | 20889  | 644.109  | 42.974   | 601.136  | 2.878  | 93.328 | 436.896 | 13.730 | 0.899  | 12.831 |
| 2038          | 20391  | 612.448  | 40.165   | 572.283  | 2.807  | 93.442 | 426.194 | 13.055 | 0.840  | 12.215 |
| 2039          | 19901  | 577.529  | 37.467   | 540.062  | 2.714  | 93.512 | 415.275 | 12.298 | 0.782  | 11.516 |

## Results for PHIM for Run 2 (Main\_Analysis.RTF)

\*\*\*\*\*

### Main Results for E-Component for Run: 2, Simulation: 1, COD: COPD, Adjusted

| Variable Parameter          | Value                                  |
|-----------------------------|----------------------------------------|
| 1. Country                  | US (United States)                     |
| 2. Sex                      | F (Females)                            |
| 3. Year of start of process | 1990                                   |
| 4. Cause of Death           | COPD                                   |
| 5. Effective Dose NULL      | CC:1                                   |
| 6. Effective Dose Ecig      | CC:1 Ecig:0.05 Dual:0.525              |
| Note:                       | Death rates are per million population |

#### Results for Age Groups Combined and Years combined, Population and Number deaths adjusted for Ecig scenario,

| Age Group:All | NULL    | Ecig       | %Drop      |          |        |        | NULL    | Ecig    | Drop    |        |
|---------------|---------|------------|------------|----------|--------|--------|---------|---------|---------|--------|
| Year          | Number  | Attrib     | Attrib     | Drop     | %Drop  | Attrib | Death   | Attrib  | Attrib  | Drop   |
|               | Deaths  | Deaths     | Deaths     | Deaths   | Deaths | Deaths | Rate    | Rates   | Rates   | Rates  |
| All Comb      | 2181351 | 862051.244 | 555145.073 | 306906.2 | 14.070 | 35.602 | 596.010 | 236.673 | 151.682 | 84.991 |

#### Results for Age Groups Combined, Population and Number deaths adjusted for Ecig scenario,

| Age Group:All | NULL   | Ecig      | %Drop     |          |        |        | NULL    | Ecig    | Drop    |         |
|---------------|--------|-----------|-----------|----------|--------|--------|---------|---------|---------|---------|
| Year          | Number | Attrib    | Attrib    | Drop     | %Drop  | Attrib | Death   | Attrib  | Attrib  | Drop    |
|               | Deaths | Deaths    | Deaths    | Deaths   | Deaths | Deaths | Rate    | Rates   | Rates   | Rates   |
| 1990          | 24738  | 10694.712 | 10694.712 | 0.000    | 0.000  | 0.000  | 362.296 | 156.628 | 156.628 | 0.000   |
| 1991          | 26562  | 11602.933 | 11584.706 | 18.227   | 0.069  | 0.157  | 383.818 | 167.661 | 167.398 | 0.263   |
| 1992          | 26828  | 11831.375 | 11781.201 | 50.173   | 0.187  | 0.424  | 382.401 | 168.642 | 167.926 | 0.716   |
| 1993          | 29774  | 13246.371 | 13138.248 | 108.123  | 0.363  | 0.816  | 418.408 | 186.148 | 184.627 | 1.521   |
| 1994          | 29805  | 13355.662 | 13183.994 | 171.668  | 0.576  | 1.285  | 412.606 | 184.893 | 182.513 | 2.381   |
| 1995          | 29757  | 13397.439 | 13142.661 | 254.778  | 0.856  | 1.902  | 405.549 | 182.598 | 179.118 | 3.480   |
| 1996          | 30903  | 13960.356 | 13604.608 | 355.748  | 1.151  | 2.548  | 415.697 | 187.801 | 183.002 | 4.799   |
| 1997          | 31133  | 14109.552 | 13644.769 | 464.783  | 1.493  | 3.294  | 412.976 | 187.180 | 180.994 | 6.186   |
| 1998          | 32104  | 14599.657 | 13991.628 | 608.029  | 1.894  | 4.165  | 419.844 | 190.958 | 182.976 | 7.982   |
| 1999          | 34628  | 15728.102 | 14939.356 | 788.747  | 2.278  | 5.015  | 446.736 | 202.950 | 192.730 | 10.220  |
| 2000          | 34316  | 15579.803 | 14642.006 | 937.797  | 2.733  | 6.019  | 437.174 | 198.541 | 186.535 | 12.006  |
| 2001          | 34614  | 15696.614 | 14567.136 | 1129.478 | 3.263  | 7.196  | 436.050 | 197.812 | 183.507 | 14.304  |
| 2002          | 34319  | 15519.777 | 14208.824 | 1310.953 | 3.820  | 8.447  | 428.057 | 193.668 | 177.223 | 16.445  |
| 2003          | 35110  | 15888.389 | 14339.348 | 1549.041 | 4.412  | 9.750  | 433.777 | 196.413 | 177.158 | 19.256  |
| 2004          | 33555  | 15091.573 | 13410.356 | 1681.217 | 5.010  | 11.140 | 410.370 | 184.701 | 164.006 | 20.695  |
| 2005          | 35446  | 15803.656 | 13794.891 | 2008.765 | 5.667  | 12.711 | 428.650 | 191.278 | 166.821 | 24.458  |
| 2006          | 34043  | 15100.563 | 12961.975 | 2138.589 | 6.282  | 14.162 | 408.027 | 181.174 | 155.358 | 25.817  |
| 2007          | 34073  | 14974.384 | 12608.381 | 2366.003 | 6.944  | 15.800 | 404.246 | 177.871 | 149.590 | 28.281  |
| 2008          | 37518  | 16406.197 | 13567.928 | 2838.269 | 7.565  | 17.300 | 440.221 | 192.768 | 159.203 | 33.565  |
| 2009          | 36930  | 16083.194 | 12999.672 | 3083.522 | 8.350  | 19.172 | 428.368 | 186.846 | 150.790 | 36.056  |
| 2010          | 36906  | 15927.400 | 12622.425 | 3304.975 | 8.955  | 20.750 | 423.101 | 182.917 | 144.708 | 38.209  |
| 2011          | 37771  | 16221.836 | 12550.073 | 3671.762 | 9.721  | 22.635 | 428.860 | 184.547 | 142.496 | 42.051  |
| 2012          | 38419  | 16358.849 | 12351.321 | 4007.528 | 10.431 | 24.498 | 431.655 | 184.202 | 138.774 | 45.428  |
| 2013          | 40291  | 16994.822 | 12492.823 | 4501.999 | 11.174 | 26.490 | 447.732 | 189.311 | 138.826 | 50.485  |
| 2014          | 40282  | 16855.093 | 12050.588 | 4804.505 | 11.927 | 28.505 | 442.609 | 185.696 | 132.410 | 53.285  |
| 2015          | 42430  | 17572.483 | 12285.894 | 5286.589 | 12.460 | 30.084 | 520.910 | 216.445 | 150.833 | 65.612  |
| 2016          | 42860  | 17579.955 | 11904.383 | 5675.573 | 13.242 | 32.284 | 521.011 | 214.473 | 144.712 | 69.761  |
| 2017          | 44653  | 18080.688 | 11853.238 | 6227.451 | 13.946 | 34.443 | 537.504 | 218.496 | 142.682 | 75.814  |
| 2018          | 45683  | 18209.262 | 11586.472 | 6622.790 | 14.497 | 36.370 | 544.501 | 217.960 | 138.101 | 79.859  |
| 2019          | 47240  | 18648.302 | 11470.906 | 7177.396 | 15.193 | 38.488 | 557.422 | 221.054 | 135.354 | 85.700  |
| 2020          | 48740  | 19002.597 | 11349.872 | 7652.725 | 15.701 | 40.272 | 651.104 | 255.266 | 151.621 | 103.645 |
| 2021          | 48780  | 18885.717 | 10859.498 | 8026.219 | 16.454 | 42.499 | 646.673 | 251.867 | 143.965 | 107.902 |
| 2022          | 50195  | 19235.076 | 10668.394 | 8566.682 | 17.067 | 44.537 | 660.126 | 254.582 | 140.302 | 114.280 |
| 2023          | 51620  | 19521.158 | 10459.522 | 9061.636 | 17.554 | 46.420 | 673.315 | 256.363 | 136.430 | 119.933 |
| 2024          | 52987  | 19918.620 | 10256.485 | 9662.135 | 18.235 | 48.508 | 685.568 | 259.583 | 132.702 | 126.882 |
| 2025          | 54032  | 20150.545 | 10005.456 | 10145.09 | 18.776 | 50.346 | 805.685 | 303.086 | 149.195 | 153.891 |
| 2026          | 54935  | 20393.792 | 9706.924  | 10686.87 | 19.454 | 52.403 | 815.636 | 305.582 | 144.121 | 161.461 |
| 2027          | 55808  | 20615.351 | 9385.807  | 11229.54 | 20.122 | 54.472 | 824.877 | 307.668 | 138.727 | 168.941 |
| 2028          | 56626  | 20731.894 | 9021.384  | 11710.51 | 20.681 | 56.485 | 833.037 | 308.115 | 132.716 | 175.399 |
| 2029          | 57405  | 20781.967 | 8637.409  | 12144.56 | 21.156 | 58.438 | 840.335 | 307.495 | 126.441 | 181.054 |
| 2030          | 57694  | 20753.201 | 8266.662  | 12486.54 | 21.643 | 60.167 | 997.750 | 363.487 | 142.963 | 220.525 |
| 2031          | 59321  | 21048.417 | 8144.524  | 12903.89 | 21.753 | 61.306 | 1023.90 | 368.165 | 140.577 | 227.588 |
| 2032          | 59883  | 21169.329 | 7808.549  | 13360.78 | 22.312 | 63.114 | 1030.97 | 369.560 | 134.436 | 235.125 |
| 2033          | 60405  | 21109.293 | 7437.269  | 13672.02 | 22.634 | 64.768 | 1036.82 | 367.618 | 127.657 | 239.961 |
| 2034          | 60852  | 21109.429 | 7070.298  | 14039.13 | 23.071 | 66.506 | 1041.01 | 366.613 | 120.954 | 245.659 |
| 2035          | 60238  | 20794.840 | 6691.987  | 14102.85 | 23.412 | 67.819 | 1258.68 | 442.268 | 139.830 | 302.438 |
| 2036          | 57318  | 19354.577 | 5957.494  | 13397.08 | 23.373 | 69.219 | 1198.65 | 412.258 | 124.585 | 287.673 |
| 2037          | 57314  | 19064.169 | 5522.393  | 13541.78 | 23.627 | 71.033 | 1198.73 | 406.385 | 115.502 | 290.883 |
| 2038          | 57277  | 18854.812 | 5167.085  | 13687.73 | 23.898 | 72.595 | 1197.15 | 401.900 | 107.999 | 293.901 |
| 2039          | 57231  | 18437.457 | 4753.536  | 13683.92 | 23.910 | 74.218 | 1194.27 | 392.602 | 99.194  | 293.408 |

## Results for PHIM for Run 2 (ELL Summary Main\_Analysis.RTF)

\*\*\*\*\*

### Estimated Loss of Life from the E Component for Run: 2, Simulation: 1

Country: US (United States)  
 Follow-up Period: 1990 to 2039

**Table 1: Estimated Loss of Life, at the end of follow-up, all age groups combined, Population unadjusted for deaths in Ecig scenario**

| Disease      | Sex    | Year | Years of life lost<br>NULL | Years of life lost<br>Ecig | Years of life<br>Saved |
|--------------|--------|------|----------------------------|----------------------------|------------------------|
| All Diseases | Males  | 2039 | 42093547.949               | 24844842.920               | 17248705.0             |
|              | Female | 2039 | 23817891.273               | 14841321.981               | 8976569.29             |
| Lung cancer  | Males  | 2039 | 18222549.860               | 13673132.793               | 4549417.07             |
|              | Female | 2039 | 12512468.845               | 8943697.068                | 3568771.78             |
| IHD          | Males  | 2039 | 15635992.616               | 6388971.725                | 9247020.89             |
|              | Female | 2039 | 4798769.065                | 2031004.418                | 2767764.65             |
| Stroke       | Males  | 2039 | 2389546.238                | 1130931.546                | 1258614.69             |
|              | Female | 2039 | 1665361.569                | 838551.181                 | 826810.388             |
| COPD         | Males  | 2039 | 5845459.234                | 3651806.856                | 2193652.38             |
|              | Female | 2039 | 4841291.793                | 3028069.314                | 1813222.48             |

## Results for PHIM for Run 2 (ELL Summary Main\_Analysis.RTF)

\*\*\*\*\*

**Table 2: Estimated Loss of Life, at the end of follow-up, all age groups combined, Population and Number deaths adjusted for Ecig scenario**

| Disease      | Sex    | Year | Years of life lost<br>NULL | Years of life lost<br>Ecig | Years of life<br>Saved |
|--------------|--------|------|----------------------------|----------------------------|------------------------|
| All Diseases | Males  | 2039 | 42093547.949               | 24944049.345               | 17149498.6             |
|              | Female | 2039 | 23817891.273               | 14878472.973               | 8939418.30             |
| Lung cancer  | Males  | 2039 | 18222549.860               | 13734071.508               | 4488478.35             |
|              | Female | 2039 | 12512468.845               | 8966835.101                | 3545633.74             |
| IHD          | Males  | 2039 | 15635992.616               | 6400411.543                | 9235581.07             |
|              | Female | 2039 | 4798769.065                | 2032897.444                | 2765871.62             |
| Stroke       | Males  | 2039 | 2389546.238                | 1133120.630                | 1256425.61             |
|              | Female | 2039 | 1665361.569                | 839227.001                 | 826134.569             |
| COPD         | Males  | 2039 | 5845459.234                | 3676445.664                | 2169013.57             |
|              | Female | 2039 | 4841291.793                | 3039513.428                | 1801778.37             |



## Results for PHIM for Run 2 (ELL Summary Main\_Analysis.RTF)

\*\*\*\*\*

**Table 3: Estimated Loss of Life, All age groups combined, Population unadjusted for deaths in Ecig scenario, cumulative over years**

| Disease      | Sex          | Year         | Years of life lost<br>NULL | Years of life lost<br>Ecig | Years of life<br>Saved |
|--------------|--------------|--------------|----------------------------|----------------------------|------------------------|
| All Diseases | Males        | 1990         | 1304839.645                | 1304839.645                | 0.000                  |
|              |              | 1991         | 2579865.358                | 2571191.563                | 8673.794               |
|              |              | 1992         | 3830683.831                | 3798434.278                | 32249.553              |
|              |              | 1993         | 5076567.803                | 5000945.334                | 75622.469              |
|              |              | 1994         | 6292145.526                | 6149972.450                | 142173.076             |
|              |              | 1995         | 7485537.010                | 7250147.137                | 235389.872             |
|              |              | 1996         | 8655955.028                | 8299455.316                | 356499.712             |
|              |              | 1997         | 9791729.713                | 9287416.800                | 504312.913             |
|              |              | 1998         | 10899134.186               | 10221705.069               | 677429.116             |
|              |              | 1999         | 12070409.674               | 11161557.359               | 908852.316             |
|              |              | 2000         | 13231384.595               | 12060869.628               | 1170514.97             |
|              |              | 2001         | 14371761.018               | 12909860.896               | 1461900.12             |
|              |              | 2002         | 15508906.386               | 13721118.233               | 1787788.15             |
|              |              | 2003         | 16638100.422               | 14494953.295               | 2143147.13             |
|              |              | 2004         | 17736465.088               | 15221016.767               | 2515448.32             |
|              |              | 2005         | 18834658.606               | 15920770.426               | 2913888.18             |
|              |              | 2006         | 19909100.501               | 16574333.431               | 3334767.07             |
|              |              | 2007         | 20958321.463               | 17189500.048               | 3768821.42             |
|              |              | 2008         | 22000068.148               | 17780542.528               | 4219525.62             |
|              |              | 2009         | 23018816.903               | 18338833.779               | 4679983.12             |
|              |              | 2010         | 24018480.537               | 18865893.612               | 5152586.92             |
|              |              | 2011         | 25003034.574               | 19365460.142               | 5637574.43             |
|              |              | 2012         | 25969871.429               | 19836253.379               | 6133618.05             |
|              |              | 2013         | 26920275.180               | 20280410.566               | 6639864.61             |
|              |              | 2014         | 27849005.227               | 20696280.124               | 7152725.10             |
|              |              | 2015         | 28749620.400               | 21087450.541               | 7662169.86             |
|              |              | 2016         | 29622417.562               | 21445334.867               | 8177082.69             |
|              |              | 2017         | 30462559.724               | 21772633.062               | 8689926.66             |
|              |              | 2018         | 31293299.299               | 22086805.483               | 9206493.82             |
|              |              | 2019         | 32109993.427               | 22383308.149               | 9726685.28             |
|              |              | 2020         | 32883323.977               | 22658766.923               | 10224557.1             |
|              |              | 2021         | 33610102.554               | 22897203.212               | 10712899.3             |
|              |              | 2022         | 34322010.448               | 23120423.621               | 11201586.8             |
|              |              | 2023         | 35018383.550               | 23328545.924               | 11689837.6             |
|              |              | 2024         | 35700177.955               | 23522841.800               | 12177336.2             |
|              |              | 2025         | 36315500.346               | 23697896.667               | 12617603.7             |
|              |              | 2026         | 36896159.343               | 23846299.741               | 13049859.6             |
|              |              | 2027         | 37462570.116               | 23983904.847               | 13478665.3             |
|              |              | 2028         | 38015337.780               | 24110842.845               | 13904494.9             |
|              |              | 2029         | 38554814.764               | 24228461.159               | 14326353.6             |
|              |              | 2030         | 39003805.400               | 24328914.052               | 14674891.3             |
| 2031         | 39436509.703 | 24414150.996 | 15022358.7                 |                            |                        |
| 2032         | 39858470.458 | 24492813.925 | 15365656.5                 |                            |                        |
| 2033         | 40270147.082 | 24564731.518 | 15705415.6                 |                            |                        |
| 2034         | 40672665.743 | 24631241.939 | 16041423.8                 |                            |                        |
| 2035         | 40962732.664 | 24681878.285 | 16280854.4                 |                            |                        |
| 2036         | 41255021.653 | 24727475.101 | 16527546.6                 |                            |                        |
| 2037         | 41540573.023 | 24769779.637 | 16770793.4                 |                            |                        |
| 2038         | 41820158.066 | 24808653.227 | 17011504.8                 |                            |                        |
| 2039         | 42093547.949 | 24844842.920 | 17248705.0                 |                            |                        |
|              | Female       | 1990         | 588979.406                 | 588979.406                 | 0.000                  |
|              |              | 1991         | 1182571.252                | 1179606.280                | 2964.972               |
|              |              | 1992         | 1777346.679                | 1766096.264                | 11250.415              |
|              |              | 1993         | 2380261.899                | 2353262.976                | 26998.923              |
|              |              | 1994         | 2983130.039                | 2931319.535                | 51810.504              |
|              |              | 1995         | 3588982.584                | 3501953.135                | 87029.448              |
|              |              | 1996         | 4195430.235                | 4060559.156                | 134871.078             |
|              |              | 1997         | 4793866.694                | 4600669.542                | 193197.152             |
|              |              | 1998         | 5389747.381                | 5126522.729                | 263224.652             |
|              |              | 1999         | 6006722.467                | 5652709.202                | 354013.265             |
|              |              | 2000         | 6625758.871                | 6168008.445                | 457750.425             |
|              |              | 2001         | 7245135.411                | 6668469.982                | 576665.429             |
|              |              | 2002         | 7867492.021                | 7156230.900                | 711261.121             |
|              |              | 2003         | 8485051.793                | 7626509.909                | 858541.884             |
|              |              | 2004         | 9092994.774                | 8075889.851                | 1017104.92             |
|              |              | 2005         | 9706032.803                | 8515624.851                | 1190407.95             |
|              |              | 2006         | 10311907.548               | 8936036.634                | 1375870.91             |
|              |              | 2007         | 10909437.502               | 9339199.145                | 1570238.36             |
|              |              | 2008         | 11506462.491               | 9726998.701                | 1779463.79             |
|              |              | 2009         | 12098393.287               | 10101269.888               | 1997123.40             |
|              |              | 2010         | 12681188.981               | 10457302.966               | 2223886.02             |

**Results for PHIM for Run 2 (ELL Summary Main\_Analysis.RTF)**

|             |       |      |              |              |            |
|-------------|-------|------|--------------|--------------|------------|
|             |       | 2011 | 13260062.991 | 10798106.476 | 2461956.52 |
|             |       | 2012 | 13839417.441 | 11126309.813 | 2713107.63 |
|             |       | 2013 | 14409614.758 | 11438724.543 | 2970890.22 |
|             |       | 2014 | 14976658.746 | 11735791.599 | 3240867.15 |
|             |       | 2015 | 15529977.821 | 12016036.561 | 3513941.26 |
|             |       | 2016 | 16066640.764 | 12275711.741 | 3790929.02 |
|             |       | 2017 | 16590035.078 | 12518427.703 | 4071607.38 |
|             |       | 2018 | 17098716.137 | 12747664.327 | 4351051.81 |
|             |       | 2019 | 17599868.850 | 12964026.696 | 4635842.15 |
|             |       | 2020 | 18081346.241 | 13166276.826 | 4915069.42 |
|             |       | 2021 | 18537594.460 | 13348102.615 | 5189491.84 |
|             |       | 2022 | 18985300.234 | 13518565.788 | 5466734.45 |
|             |       | 2023 | 19423958.747 | 13678091.569 | 5745867.18 |
|             |       | 2024 | 19853347.772 | 13826545.792 | 6026801.98 |
|             |       | 2025 | 20252822.245 | 13961902.146 | 6290920.10 |
|             |       | 2026 | 20619307.063 | 14078701.719 | 6540605.34 |
|             |       | 2027 | 20976063.406 | 14186622.182 | 6789441.22 |
|             |       | 2028 | 21323641.947 | 14286616.429 | 7037025.52 |
|             |       | 2029 | 21662117.106 | 14378588.022 | 7283529.08 |
|             |       | 2030 | 21960971.694 | 14459104.607 | 7501867.09 |
|             |       | 2031 | 22224951.983 | 14524390.922 | 7700561.06 |
|             |       | 2032 | 22480397.853 | 14583926.600 | 7896471.25 |
|             |       | 2033 | 22728639.455 | 14638591.108 | 8090048.35 |
|             |       | 2034 | 22970448.888 | 14688423.591 | 8282025.30 |
|             |       | 2035 | 23164154.188 | 14728542.093 | 8435612.10 |
|             |       | 2036 | 23334538.616 | 14760471.560 | 8574067.06 |
|             |       | 2037 | 23499760.723 | 14789694.462 | 8710066.26 |
|             |       | 2038 | 23660308.401 | 14816547.837 | 8843760.56 |
|             |       | 2039 | 23817891.273 | 14841321.981 | 8976569.29 |
| Lung cancer | Males | 1990 | 595621.791   | 595621.791   | 0.000      |
|             |       | 1991 | 1177744.113  | 1177096.215  | 647.898    |
|             |       | 1992 | 1750034.892  | 1747588.524  | 2446.368   |
|             |       | 1993 | 2319752.308  | 2313793.474  | 5958.833   |
|             |       | 1994 | 2872597.339  | 2861044.943  | 11552.396  |
|             |       | 1995 | 3411494.825  | 3391837.345  | 19657.480  |
|             |       | 1996 | 3945569.726  | 3914495.006  | 31074.720  |
|             |       | 1997 | 4463316.362  | 4417529.473  | 45786.889  |
|             |       | 1998 | 4975301.180  | 4910809.033  | 64492.147  |
|             |       | 1999 | 5473691.125  | 5386270.379  | 87420.746  |
|             |       | 2000 | 5977500.570  | 5861408.635  | 116091.935 |
|             |       | 2001 | 6474795.516  | 6324339.217  | 150456.299 |
|             |       | 2002 | 6968769.705  | 6777551.543  | 191218.162 |
|             |       | 2003 | 7460282.140  | 7221078.886  | 239203.254 |
|             |       | 2004 | 7947048.275  | 7652813.485  | 294234.791 |
|             |       | 2005 | 8430571.669  | 8073726.972  | 356844.697 |
|             |       | 2006 | 8903945.390  | 8477112.119  | 426833.271 |
|             |       | 2007 | 9364177.982  | 8860731.444  | 503446.538 |
|             |       | 2008 | 9822525.458  | 9233176.188  | 589349.271 |
|             |       | 2009 | 10275228.886 | 9591550.883  | 683678.003 |
|             |       | 2010 | 10720275.500 | 9934556.553  | 785718.947 |
|             |       | 2011 | 11155356.373 | 10260302.038 | 895054.335 |
|             |       | 2012 | 11582611.617 | 10569495.530 | 1013116.09 |
|             |       | 2013 | 11998803.791 | 10860600.203 | 1138203.59 |
|             |       | 2014 | 12402087.090 | 11133009.920 | 1269077.17 |
|             |       | 2015 | 12793451.706 | 11388523.018 | 1404928.69 |
|             |       | 2016 | 13160101.653 | 11618462.876 | 1541638.78 |
|             |       | 2017 | 13503583.414 | 11825261.361 | 1678322.05 |
|             |       | 2018 | 13859755.737 | 12028890.032 | 1830865.71 |
|             |       | 2019 | 14211625.176 | 12220929.355 | 1990695.82 |
|             |       | 2020 | 14553935.288 | 12400132.143 | 2153803.14 |
|             |       | 2021 | 14851747.495 | 12548213.981 | 2303533.51 |
|             |       | 2022 | 15144531.004 | 12686347.277 | 2458183.73 |
|             |       | 2023 | 15431932.496 | 12814666.588 | 2617265.91 |
|             |       | 2024 | 15713920.740 | 12933847.277 | 2780073.46 |
|             |       | 2025 | 15979112.816 | 13041642.796 | 2937470.02 |
|             |       | 2026 | 16206550.153 | 13127605.870 | 3078944.28 |
|             |       | 2027 | 16428826.050 | 13206742.693 | 3222083.36 |
|             |       | 2028 | 16645902.186 | 13279304.459 | 3366597.73 |
|             |       | 2029 | 16858126.517 | 13346132.562 | 3511993.95 |
|             |       | 2030 | 17045220.687 | 13403560.703 | 3641659.98 |
|             |       | 2031 | 17208482.610 | 13449035.864 | 3759446.75 |
|             |       | 2032 | 17367586.074 | 13490760.199 | 3876825.88 |
|             |       | 2033 | 17522716.280 | 13528751.798 | 3993964.48 |
|             |       | 2034 | 17674226.555 | 13563727.351 | 4110499.20 |
|             |       | 2035 | 17792201.734 | 13590647.600 | 4201554.13 |
|             |       | 2036 | 17903508.236 | 13613766.039 | 4289742.20 |
|             |       | 2037 | 18012162.345 | 13635190.297 | 4376972.05 |
|             |       | 2038 | 18118464.470 | 13654828.273 | 4463636.20 |

**Results for PHIM for Run 2 (ELL Summary Main\_Analysis.RTF)**

|     |        |      |              |              |            |
|-----|--------|------|--------------|--------------|------------|
|     | Female | 2039 | 18222549.860 | 13673132.793 | 4549417.07 |
|     |        | 1990 | 307897.357   | 307897.357   | 0.000      |
|     |        | 1991 | 616547.418   | 616130.924   | 416.494    |
|     |        | 1992 | 931086.773   | 929437.087   | 1649.686   |
|     |        | 1993 | 1246155.671  | 1242093.622  | 4062.049   |
|     |        | 1994 | 1561212.934  | 1553213.610  | 7999.324   |
|     |        | 1995 | 1879967.742  | 1866031.995  | 13935.747  |
|     |        | 1996 | 2197488.109  | 2175330.941  | 22157.168  |
|     |        | 1997 | 2515698.453  | 2482608.212  | 33090.240  |
|     |        | 1998 | 2836249.556  | 2789166.728  | 47082.828  |
|     |        | 1999 | 3150201.390  | 3086075.629  | 64125.761  |
|     |        | 2000 | 3472722.342  | 3387451.783  | 85270.560  |
|     |        | 2001 | 3796994.889  | 3686142.879  | 110852.010 |
|     |        | 2002 | 4126619.935  | 3984994.427  | 141625.508 |
|     |        | 2003 | 4454982.533  | 4277792.995  | 177189.538 |
|     |        | 2004 | 4784343.030  | 4565968.922  | 218374.109 |
|     |        | 2005 | 5113443.121  | 4848172.807  | 265270.314 |
|     |        | 2006 | 5442543.963  | 5123799.513  | 318744.449 |
|     |        | 2007 | 5772441.497  | 5393546.115  | 378895.382 |
|     |        | 2008 | 6091911.943  | 5648112.112  | 443799.831 |
|     |        | 2009 | 6413671.330  | 5897096.830  | 516574.500 |
|     |        | 2010 | 6730763.530  | 6135774.383  | 594989.146 |
|     |        | 2011 | 7043614.101  | 6363893.211  | 679720.890 |
|     |        | 2012 | 7356270.780  | 6584383.784  | 771886.996 |
|     |        | 2013 | 7662551.964  | 6793036.181  | 869515.782 |
|     |        | 2014 | 7964551.465  | 6991439.356  | 973112.109 |
|     |        | 2015 | 8254895.403  | 7176068.627  | 1078826.78 |
|     |        | 2016 | 8530661.848  | 7344333.377  | 1186328.47 |
|     |        | 2017 | 8795826.122  | 7499811.619  | 1296014.50 |
|     |        | 2018 | 9067233.707  | 7651200.460  | 1416033.25 |
|     |        | 2019 | 9335343.270  | 7793747.034  | 1541596.24 |
|     |        | 2020 | 9596110.883  | 7926871.666  | 1669239.22 |
|     |        | 2021 | 9833186.859  | 8043051.101  | 1790135.76 |
|     |        | 2022 | 10066452.037 | 8151529.510  | 1914922.53 |
|     |        | 2023 | 10295503.609 | 8252603.152  | 2042900.46 |
|     |        | 2024 | 10520125.318 | 8346209.147  | 2173916.17 |
|     |        | 2025 | 10731915.863 | 8431162.800  | 2300753.06 |
|     |        | 2026 | 10917495.549 | 8501919.930  | 2415575.62 |
|     |        | 2027 | 11098620.885 | 8566938.175  | 2531682.71 |
|     |        | 2028 | 11275441.234 | 8626869.944  | 2648571.29 |
|     |        | 2029 | 11447962.710 | 8681691.318  | 2766271.39 |
|     |        | 2030 | 11601867.623 | 8729270.165  | 2872597.46 |
|     |        | 2031 | 11731666.516 | 8766524.676  | 2965141.84 |
|     |        | 2032 | 11857585.969 | 8800389.551  | 3057196.42 |
|     |        | 2033 | 11980128.625 | 8831382.206  | 3148746.42 |
|     |        | 2034 | 12099562.464 | 8859569.651  | 3239992.81 |
|     |        | 2035 | 12195919.946 | 8881900.533  | 3314019.41 |
|     |        | 2036 | 12278201.969 | 8899335.753  | 3378866.22 |
|     |        | 2037 | 12358146.336 | 8915337.369  | 3442808.97 |
|     |        | 2038 | 12435978.633 | 8930069.880  | 3505908.75 |
|     |        | 2039 | 12512468.845 | 8943697.068  | 3568771.78 |
| IHD | Males  | 1990 | 517209.093   | 517209.093   | 0.000      |
|     |        | 1991 | 1019219.395  | 1012116.414  | 7102.981   |
|     |        | 1992 | 1509598.614  | 1483223.780  | 26374.834  |
|     |        | 1993 | 1992735.299  | 1931293.560  | 61441.739  |
|     |        | 1994 | 2462877.575  | 2348236.427  | 114641.147 |
|     |        | 1995 | 2928249.390  | 2739587.604  | 188661.786 |
|     |        | 1996 | 3377377.730  | 3093769.594  | 283608.136 |
|     |        | 1997 | 3809062.472  | 3410983.614  | 398078.858 |
|     |        | 1998 | 4222213.867  | 3691999.343  | 530214.525 |
|     |        | 1999 | 4708317.743  | 3995842.935  | 712474.808 |
|     |        | 2000 | 5182084.396  | 4267611.500  | 914472.896 |
|     |        | 2001 | 5644097.705  | 4507654.531  | 1136443.17 |
|     |        | 2002 | 6107232.129  | 4725171.439  | 1382060.69 |
|     |        | 2003 | 6561785.704  | 4917367.588  | 1644418.12 |
|     |        | 2004 | 6996156.348  | 5083038.074  | 1913118.27 |
|     |        | 2005 | 7426261.361  | 5231275.656  | 2194985.71 |
|     |        | 2006 | 7849012.694  | 5361233.683  | 2487779.01 |
|     |        | 2007 | 8255300.530  | 5473563.830  | 2781736.70 |
|     |        | 2008 | 8650662.040  | 5572263.316  | 3078398.72 |
|     |        | 2009 | 9030818.513  | 5658314.697  | 3372503.82 |
|     |        | 2010 | 9403026.327  | 5734767.765  | 3668258.56 |
|     |        | 2011 | 9767535.506  | 5802661.524  | 3964873.98 |
|     |        | 2012 | 10123044.281 | 5863226.883  | 4259817.40 |
|     |        | 2013 | 10470104.786 | 5917213.307  | 4552891.48 |
|     |        | 2014 | 10807756.112 | 5965604.967  | 4842151.15 |
|     |        | 2015 | 11130681.425 | 6008570.192  | 5122111.23 |
|     |        | 2016 | 11448966.506 | 6047704.281  | 5401262.22 |

**Results for PHIM for Run 2 (ELL Summary Main\_Analysis.RTF)**

|        |        |      |              |             |            |
|--------|--------|------|--------------|-------------|------------|
|        |        | 2017 | 11758164.882 | 6083249.110 | 5674915.77 |
|        |        | 2018 | 12054448.241 | 6114587.734 | 5939860.51 |
|        |        | 2019 | 12341606.261 | 6143268.022 | 6198338.24 |
|        |        | 2020 | 12600728.939 | 6167887.690 | 6432841.25 |
|        |        | 2021 | 12861767.105 | 6191301.895 | 6670465.21 |
|        |        | 2022 | 13114168.616 | 6212951.237 | 6901217.38 |
|        |        | 2023 | 13357894.797 | 6232859.489 | 7125035.31 |
|        |        | 2024 | 13593848.521 | 6251462.470 | 7342386.05 |
|        |        | 2025 | 13789177.359 | 6266464.753 | 7522712.61 |
|        |        | 2026 | 13993401.656 | 6281594.134 | 7711807.52 |
|        |        | 2027 | 14190519.224 | 6295912.057 | 7894607.17 |
|        |        | 2028 | 14381193.356 | 6309234.044 | 8071959.31 |
|        |        | 2029 | 14565171.927 | 6321780.927 | 8243391.00 |
|        |        | 2030 | 14697381.605 | 6330713.522 | 8366668.08 |
|        |        | 2031 | 14842203.512 | 6340380.062 | 8501823.45 |
|        |        | 2032 | 14982485.826 | 6349625.811 | 8632860.01 |
|        |        | 2033 | 15118410.647 | 6358208.273 | 8760202.37 |
|        |        | 2034 | 15250284.398 | 6366399.959 | 8883884.44 |
|        |        | 2035 | 15322911.166 | 6370776.265 | 8952134.90 |
|        |        | 2036 | 15405115.031 | 6375654.323 | 9029460.71 |
|        |        | 2037 | 15484709.137 | 6380358.809 | 9104350.33 |
|        |        | 2038 | 15561812.193 | 6384788.800 | 9177023.39 |
|        |        | 2039 | 15635992.616 | 6388971.725 | 9247020.89 |
|        | Female | 1990 | 147299.110   | 147299.110  | 0.000      |
|        |        | 1991 | 295122.462   | 293257.343  | 1865.120   |
|        |        | 1992 | 439962.920   | 432980.418  | 6982.502   |
|        |        | 1993 | 584735.615   | 568176.357  | 16559.258  |
|        |        | 1994 | 727640.783   | 696325.065  | 31315.717  |
|        |        | 1995 | 868486.937   | 816723.530  | 51763.407  |
|        |        | 1996 | 1010321.847  | 930874.715  | 79447.132  |
|        |        | 1997 | 1144230.930  | 1032428.216 | 111802.713 |
|        |        | 1998 | 1274513.622  | 1124660.899 | 149852.722 |
|        |        | 1999 | 1426725.938  | 1224827.253 | 201898.685 |
|        |        | 2000 | 1573462.680  | 1314391.947 | 259070.733 |
|        |        | 2001 | 1719132.015  | 1395197.136 | 323934.879 |
|        |        | 2002 | 1863006.732  | 1467654.366 | 395352.366 |
|        |        | 2003 | 2002943.227  | 1531544.847 | 471398.381 |
|        |        | 2004 | 2137798.705  | 1587240.173 | 550558.532 |
|        |        | 2005 | 2271071.245  | 1637284.865 | 633786.381 |
|        |        | 2006 | 2400707.731  | 1680843.235 | 719864.496 |
|        |        | 2007 | 2523634.512  | 1718179.358 | 805455.154 |
|        |        | 2008 | 2648752.232  | 1752373.351 | 896378.881 |
|        |        | 2009 | 2765973.961  | 1781570.120 | 984403.841 |
|        |        | 2010 | 2881329.235  | 1807703.688 | 1073625.55 |
|        |        | 2011 | 2994972.694  | 1831017.606 | 1163955.09 |
|        |        | 2012 | 3108958.829  | 1852205.036 | 1256753.79 |
|        |        | 2013 | 3218140.416  | 1870994.327 | 1347146.09 |
|        |        | 2014 | 3328387.914  | 1888351.743 | 1440036.17 |
|        |        | 2015 | 3435342.796  | 1904126.035 | 1531216.76 |
|        |        | 2016 | 3539189.408  | 1918341.043 | 1620848.37 |
|        |        | 2017 | 3640041.363  | 1931171.774 | 1708869.59 |
|        |        | 2018 | 3732645.362  | 1942128.745 | 1790516.62 |
|        |        | 2019 | 3821421.978  | 1951959.221 | 1869462.76 |
|        |        | 2020 | 3902115.950  | 1960442.965 | 1941672.99 |
|        |        | 2021 | 3984301.053  | 1968588.745 | 2015712.31 |
|        |        | 2022 | 4062629.299  | 1975923.341 | 2086705.96 |
|        |        | 2023 | 4137348.729  | 1982600.137 | 2154748.59 |
|        |        | 2024 | 4208611.493  | 1988661.061 | 2219950.43 |
|        |        | 2025 | 4269419.492  | 1993701.540 | 2275717.95 |
|        |        | 2026 | 4330969.998  | 1998593.325 | 2332376.67 |
|        |        | 2027 | 4389134.306  | 2003055.260 | 2386079.05 |
|        |        | 2028 | 4444222.970  | 2007162.144 | 2437060.83 |
|        |        | 2029 | 4496447.877  | 2010961.378 | 2485486.50 |
|        |        | 2030 | 4536975.698  | 2013836.656 | 2523139.04 |
|        |        | 2031 | 4578338.586  | 2016712.196 | 2561626.39 |
|        |        | 2032 | 4617397.784  | 2019384.771 | 2598013.01 |
|        |        | 2033 | 4654407.697  | 2021889.930 | 2632517.77 |
|        |        | 2034 | 4689913.454  | 2024250.640 | 2665662.81 |
|        |        | 2035 | 4712518.190  | 2025681.025 | 2686837.16 |
|        |        | 2036 | 4735845.827  | 2027129.806 | 2708716.02 |
|        |        | 2037 | 4757958.806  | 2028491.318 | 2729467.49 |
|        |        | 2038 | 4778813.806  | 2029778.356 | 2749035.45 |
|        |        | 2039 | 4798769.065  | 2031004.418 | 2767764.65 |
| Stroke | Males  | 1990 | 75005.854    | 75005.854   | 0.000      |
|        |        | 1991 | 149463.017   | 148743.133  | 719.885    |
|        |        | 1992 | 222966.278   | 220289.469  | 2676.810   |
|        |        | 1993 | 296801.879   | 290425.407  | 6376.472   |
|        |        | 1994 | 372453.706   | 360103.582  | 12350.124  |

**Results for PHIM for Run 2 (ELL Summary Main\_Analysis.RTF)**

|        |      |             |             |            |
|--------|------|-------------|-------------|------------|
|        | 1995 | 448401.338  | 427518.754  | 20882.584  |
|        | 1996 | 523536.301  | 491400.873  | 32135.428  |
|        | 1997 | 596763.211  | 550666.507  | 46096.704  |
|        | 1998 | 667546.681  | 604952.842  | 62593.839  |
|        | 1999 | 734925.407  | 653716.943  | 81208.464  |
|        | 2000 | 803749.361  | 700561.059  | 103188.302 |
|        | 2001 | 870081.588  | 742674.246  | 127407.343 |
|        | 2002 | 935347.140  | 781277.487  | 154069.653 |
|        | 2003 | 1001627.349 | 817465.778  | 184161.572 |
|        | 2004 | 1066587.976 | 850306.480  | 216281.496 |
|        | 2005 | 1130548.052 | 880061.563  | 250486.489 |
|        | 2006 | 1195132.454 | 907588.589  | 287543.865 |
|        | 2007 | 1258974.043 | 932518.398  | 326455.645 |
|        | 2008 | 1320124.867 | 954280.138  | 365844.729 |
|        | 2009 | 1380776.123 | 974032.396  | 406743.727 |
|        | 2010 | 1440048.533 | 991731.884  | 448316.649 |
|        | 2011 | 1497484.847 | 1007458.785 | 490026.062 |
|        | 2012 | 1554496.526 | 1021639.478 | 532857.048 |
|        | 2013 | 1610819.598 | 1034456.307 | 576363.291 |
|        | 2014 | 1667484.890 | 1046195.419 | 621289.471 |
|        | 2015 | 1720948.287 | 1056475.234 | 664473.053 |
|        | 2016 | 1775699.228 | 1066095.981 | 709603.247 |
|        | 2017 | 1830250.175 | 1074919.927 | 755330.248 |
|        | 2018 | 1875958.950 | 1081771.422 | 794187.528 |
|        | 2019 | 1920359.232 | 1087941.738 | 832417.493 |
|        | 2020 | 1960605.297 | 1093193.599 | 867411.698 |
|        | 2021 | 1998912.887 | 1097839.741 | 901073.147 |
|        | 2022 | 2036003.696 | 1102030.521 | 933973.175 |
|        | 2023 | 2071857.536 | 1105812.477 | 966045.060 |
|        | 2024 | 2106636.468 | 1109277.008 | 997359.460 |
|        | 2025 | 2136450.873 | 1112108.644 | 1024342.23 |
|        | 2026 | 2164796.470 | 1114649.808 | 1050146.66 |
|        | 2027 | 2192079.608 | 1116990.155 | 1075089.45 |
|        | 2028 | 2218404.367 | 1119127.749 | 1099276.62 |
|        | 2029 | 2243769.140 | 1121105.350 | 1122663.79 |
|        | 2030 | 2263570.213 | 1122597.818 | 1140972.39 |
|        | 2031 | 2282521.590 | 1123980.619 | 1158540.97 |
|        | 2032 | 2300804.945 | 1125272.581 | 1175532.36 |
|        | 2033 | 2318464.018 | 1126467.716 | 1191996.30 |
|        | 2034 | 2335611.973 | 1127598.460 | 1208013.51 |
|        | 2035 | 2347097.290 | 1128337.696 | 1218759.59 |
|        | 2036 | 2358248.747 | 1129038.631 | 1229210.12 |
|        | 2037 | 2369033.655 | 1129708.358 | 1239325.30 |
|        | 2038 | 2379490.114 | 1130338.450 | 1249151.66 |
|        | 2039 | 2389546.238 | 1130931.546 | 1258614.69 |
| Female | 1990 | 56348.092   | 56348.092   | 0.000      |
|        | 1991 | 110871.862  | 110356.693  | 515.169    |
|        | 1992 | 165654.454  | 163676.511  | 1977.943   |
|        | 1993 | 220008.519  | 215283.502  | 4725.018   |
|        | 1994 | 275706.807  | 266523.785  | 9183.022   |
|        | 1995 | 331417.547  | 315917.897  | 15499.650  |
|        | 1996 | 387580.161  | 363579.386  | 24000.774  |
|        | 1997 | 442778.242  | 408222.520  | 34555.722  |
|        | 1998 | 496117.305  | 449177.869  | 46939.435  |
|        | 1999 | 548268.214  | 487022.220  | 61245.995  |
|        | 2000 | 601693.202  | 523576.314  | 78116.888  |
|        | 2001 | 652221.103  | 555966.299  | 96254.804  |
|        | 2002 | 703022.600  | 586296.080  | 116726.520 |
|        | 2003 | 752023.351  | 613473.084  | 138550.267 |
|        | 2004 | 799826.733  | 637985.805  | 161840.927 |
|        | 2005 | 847563.928  | 660622.448  | 186941.481 |
|        | 2006 | 894205.027  | 680984.758  | 213220.269 |
|        | 2007 | 939571.282  | 699160.730  | 240410.552 |
|        | 2008 | 983437.578  | 715316.542  | 268121.036 |
|        | 2009 | 1025803.786 | 729647.054  | 296156.732 |
|        | 2010 | 1066964.934 | 742381.777  | 324583.157 |
|        | 2011 | 1106954.044 | 753699.091  | 353254.953 |
|        | 2012 | 1146108.461 | 763870.354  | 382238.107 |
|        | 2013 | 1183544.689 | 772820.741  | 410723.948 |
|        | 2014 | 1221220.945 | 781069.226  | 440151.720 |
|        | 2015 | 1258289.311 | 788624.395  | 469664.916 |
|        | 2016 | 1294830.207 | 795481.871  | 499348.336 |
|        | 2017 | 1330332.626 | 801635.078  | 528697.548 |
|        | 2018 | 1360571.987 | 806504.624  | 554067.363 |
|        | 2019 | 1389848.723 | 810852.754  | 578995.968 |
|        | 2020 | 1416046.192 | 814520.721  | 601525.472 |
|        | 2021 | 1440588.850 | 817717.425  | 622871.425 |
|        | 2022 | 1464157.934 | 820577.251  | 643580.683 |

**Results for PHIM for Run 2 (ELL Summary Main\_Analysis.RTF)**

|      |             |             |             |             |            |
|------|-------------|-------------|-------------|-------------|------------|
|      |             | 2023        | 1486810.237 | 823161.957  | 663648.280 |
|      |             | 2024        | 1508591.729 | 825488.519  | 683103.211 |
|      |             | 2025        | 1526875.621 | 827363.468  | 699512.153 |
|      |             | 2026        | 1543659.810 | 828987.557  | 714672.252 |
|      |             | 2027        | 1559623.774 | 830455.771  | 729168.003 |
|      |             | 2028        | 1574852.850 | 831795.191  | 743057.659 |
|      |             | 2029        | 1589437.452 | 833020.917  | 756416.535 |
|      |             | 2030        | 1600568.199 | 833923.008  | 766645.191 |
|      |             | 2031        | 1610776.297 | 834722.434  | 776053.862 |
|      |             | 2032        | 1620483.563 | 835460.615  | 785022.948 |
|      |             | 2033        | 1629745.442 | 836146.781  | 793598.661 |
|      |             | 2034        | 1638721.425 | 836788.579  | 801932.846 |
|      |             | 2035        | 1644649.404 | 837194.641  | 807454.763 |
|      |             | 2036        | 1650181.590 | 837562.894  | 812618.695 |
|      |             | 2037        | 1655476.066 | 837909.646  | 817566.420 |
|      |             | 2038        | 1660507.914 | 838238.210  | 822269.704 |
|      |             | 2039        | 1665361.569 | 838551.181  | 826810.388 |
| COPD | Males       | 1990        | 117002.906  | 117002.906  | 0.000      |
|      |             | 1991        | 233438.833  | 233235.802  | 203.031    |
|      |             | 1992        | 348084.047  | 347332.506  | 751.541    |
|      |             | 1993        | 467278.318  | 465432.893  | 1845.425   |
|      |             | 1994        | 584216.907  | 580587.498  | 3629.409   |
|      |             | 1995        | 697391.457  | 691203.434  | 6188.022   |
|      |             | 1996        | 809471.271  | 799789.842  | 9681.428   |
|      |             | 1997        | 922587.668  | 908237.206  | 14350.462  |
|      |             | 1998        | 1034072.457 | 1013943.852 | 20128.605  |
|      |             | 1999        | 1153475.399 | 1125727.102 | 27748.298  |
|      |             | 2000        | 1268050.268 | 1231288.434 | 36761.834  |
|      |             | 2001        | 1382786.209 | 1335192.903 | 47593.307  |
|      |             | 2002        | 1497557.412 | 1437117.764 | 60439.648  |
|      |             | 2003        | 1614405.229 | 1539041.044 | 75364.185  |
|      |             | 2004        | 1726672.489 | 1634858.729 | 91813.760  |
|      |             | 2005        | 1847277.524 | 1735706.236 | 111571.289 |
|      |             | 2006        | 1961009.963 | 1828399.040 | 132610.923 |
|      |             | 2007        | 2079868.908 | 1922686.375 | 157182.533 |
|      |             | 2008        | 2206755.783 | 2020822.886 | 185932.896 |
|      |             | 2009        | 2331993.380 | 2114935.803 | 217057.578 |
|      |             | 2010        | 2455130.176 | 2204837.410 | 250292.766 |
|      |             | 2011        | 2582657.849 | 2295037.795 | 287620.053 |
|      |             | 2012        | 2709719.005 | 2381891.487 | 327827.518 |
|      |             | 2013        | 2840547.005 | 2468140.749 | 372406.256 |
|      |             | 2014        | 2971677.135 | 2551469.818 | 420207.317 |
|      |             | 2015        | 3104538.983 | 2633882.097 | 470656.886 |
|      |             | 2016        | 3237650.175 | 2713071.730 | 524578.446 |
|      |             | 2017        | 3370561.253 | 2789202.664 | 581358.589 |
|      |             | 2018        | 3503136.371 | 2861556.296 | 641580.076 |
|      |             | 2019        | 3636402.758 | 2931169.034 | 705233.724 |
|      |             | 2020        | 3768054.453 | 2997553.491 | 770500.962 |
|      |             | 2021        | 3897675.067 | 3059847.595 | 837827.472 |
|      |             | 2022        | 4027307.132 | 3119094.585 | 908212.547 |
|      |             | 2023        | 4156698.720 | 3175207.371 | 981491.350 |
|      |             | 2024        | 4285772.226 | 3228255.044 | 1057517.18 |
|      |             | 2025        | 4410759.298 | 3277680.474 | 1133078.82 |
|      |             | 2026        | 4531411.064 | 3322449.929 | 1208961.14 |
|      |             | 2027        | 4651145.233 | 3364259.942 | 1286885.29 |
|      |             | 2028        | 4769837.872 | 3403176.594 | 1366661.28 |
|      |             | 2029        | 4887747.179 | 3439442.319 | 1448304.86 |
| 2030 | 4997632.895 | 3472042.009 | 1525590.89  |             |            |
| 2031 | 5103301.991 | 3500754.451 | 1602547.54  |             |            |
| 2032 | 5207593.613 | 3527155.334 | 1680438.28  |             |            |
| 2033 | 5310556.138 | 3551303.731 | 1759252.41  |             |            |
| 2034 | 5412542.816 | 3573516.169 | 1839026.65  |             |            |
| 2035 | 5500522.473 | 3592116.723 | 1908405.75  |             |            |
| 2036 | 5588149.640 | 3609016.108 | 1979133.53  |             |            |
| 2037 | 5674667.886 | 3624522.174 | 2050145.71  |             |            |
| 2038 | 5760391.289 | 3638697.704 | 2121693.58  |             |            |
| 2039 | 5845459.234 | 3651806.856 | 2193652.38  |             |            |
|      | Female      | 1990        | 77434.846   | 77434.846   | 0.000      |
|      |             | 1991        | 160029.510  | 159861.321  | 168.190    |
|      |             | 1992        | 240642.531  | 240002.248  | 640.284    |
|      |             | 1993        | 329362.093  | 327709.495  | 1652.598   |
|      |             | 1994        | 418569.515  | 415257.075  | 3312.440   |
|      |             | 1995        | 509110.357  | 503279.713  | 5830.644   |
|      |             | 1996        | 600040.117  | 590774.114  | 9266.004   |
|      |             | 1997        | 691159.071  | 677410.594  | 13748.477  |
|      |             | 1998        | 782866.899  | 763517.233  | 19349.666  |
|      |             | 1999        | 881526.925  | 854784.101  | 26742.824  |
|      |             | 2000        | 977880.647  | 942588.402  | 35292.245  |

**Results for PHIM for Run 2 (ELL Summary Main\_Analysis.RTF)**

|      |             |             |            |
|------|-------------|-------------|------------|
| 2001 | 1076787.404 | 1031163.667 | 45623.737  |
| 2002 | 1174842.754 | 1117286.026 | 57556.727  |
| 2003 | 1275102.681 | 1203698.984 | 71403.697  |
| 2004 | 1371026.306 | 1284694.950 | 86331.355  |
| 2005 | 1473954.509 | 1369544.732 | 104409.777 |
| 2006 | 1574450.828 | 1450409.128 | 124041.700 |
| 2007 | 1673790.211 | 1528312.941 | 145477.270 |
| 2008 | 1782360.738 | 1611196.696 | 171164.042 |
| 2009 | 1892944.209 | 1692955.884 | 199988.325 |
| 2010 | 2002131.282 | 1771443.116 | 230688.166 |
| 2011 | 2114522.152 | 1849496.567 | 265025.585 |
| 2012 | 2228079.372 | 1925850.640 | 302228.732 |
| 2013 | 2345377.689 | 2001873.293 | 343504.396 |
| 2014 | 2462498.422 | 2074931.275 | 387567.147 |
| 2015 | 2581450.312 | 2147217.505 | 434232.807 |
| 2016 | 2701959.301 | 2217555.449 | 484403.852 |
| 2017 | 2823834.967 | 2285809.232 | 538025.736 |
| 2018 | 2938265.081 | 2347830.498 | 590434.582 |
| 2019 | 3053254.880 | 2407467.687 | 645787.193 |
| 2020 | 3167073.216 | 2464441.474 | 702631.742 |
| 2021 | 3279517.699 | 2518745.344 | 760772.356 |
| 2022 | 3392060.964 | 2570535.685 | 821525.278 |
| 2023 | 3504296.171 | 2619726.322 | 884569.850 |
| 2024 | 3616019.231 | 2666187.066 | 949832.165 |
| 2025 | 3724611.269 | 2709674.338 | 1014936.93 |
| 2026 | 3827181.707 | 2749200.906 | 1077980.80 |
| 2027 | 3928684.441 | 2786172.976 | 1142511.46 |
| 2028 | 4029124.892 | 2820789.149 | 1208335.74 |
| 2029 | 4128269.068 | 2852914.409 | 1275354.66 |
| 2030 | 4221560.174 | 2882074.778 | 1339485.40 |
| 2031 | 4304170.584 | 2906431.616 | 1397738.97 |
| 2032 | 4384930.537 | 2928691.664 | 1456238.87 |
| 2033 | 4464357.691 | 2949172.191 | 1515185.50 |
| 2034 | 4542251.545 | 2967814.721 | 1574436.82 |
| 2035 | 4611066.648 | 2983765.893 | 1627300.75 |
| 2036 | 4670309.230 | 2996443.107 | 1673866.12 |
| 2037 | 4728179.514 | 3007956.130 | 1720223.38 |
| 2038 | 4785008.048 | 3018461.391 | 1766546.66 |
| 2039 | 4841291.793 | 3028069.314 | 1813222.48 |

---

## Results for PHIM for Run 2 (ELL Summary Main\_Analysis.RTF)

\*\*\*\*\*

**Table 4: Estimated Loss of Life, All age groups combined, Population and Number deaths adjusted for Ecig scenario, cumulative over years**

| Disease      | Sex          | Year         | Years of life lost<br>NULL | Years of life lost<br>Ecig | Years of life<br>Saved |
|--------------|--------------|--------------|----------------------------|----------------------------|------------------------|
| All Diseases | Males        | 1990         | 1304839.645                | 1304839.645                | 0.000                  |
|              |              | 1991         | 2579865.358                | 2571191.563                | 8673.794               |
|              |              | 1992         | 3830683.831                | 3798446.216                | 32237.615              |
|              |              | 1993         | 5076567.803                | 5000999.590                | 75568.213              |
|              |              | 1994         | 6292145.526                | 6150122.035                | 142023.492             |
|              |              | 1995         | 7485537.010                | 7250468.764                | 235068.245             |
|              |              | 1996         | 8655955.028                | 8300049.303                | 355905.725             |
|              |              | 1997         | 9791729.713                | 9288401.804                | 503327.909             |
|              |              | 1998         | 10899134.186               | 10223216.561               | 675917.625             |
|              |              | 1999         | 12070409.674               | 11163784.337               | 906625.338             |
|              |              | 2000         | 13231384.595               | 12064014.243               | 1167370.35             |
|              |              | 2001         | 14371761.018               | 12914122.231               | 1457638.79             |
|              |              | 2002         | 15508906.386               | 13726715.633               | 1782190.75             |
|              |              | 2003         | 16638100.422               | 14502109.591               | 2135990.83             |
|              |              | 2004         | 17736465.088               | 15229931.517               | 2506533.57             |
|              |              | 2005         | 18834658.606               | 15931683.532               | 2902975.07             |
|              |              | 2006         | 19909100.501               | 16587416.172               | 3321684.33             |
|              |              | 2007         | 20958321.463               | 17204934.202               | 3753387.26             |
|              |              | 2008         | 22000068.148               | 17798549.966               | 4201518.18             |
|              |              | 2009         | 23018816.903               | 18359583.298               | 4659233.61             |
|              |              | 2010         | 24018480.537               | 18889541.562               | 5128938.97             |
|              |              | 2011         | 25003034.574               | 19392159.479               | 5610875.10             |
|              |              | 2012         | 25969871.429               | 19866117.792               | 6103753.64             |
|              |              | 2013         | 26920275.180               | 20313553.922               | 6606721.26             |
|              |              | 2014         | 27849005.227               | 20732780.841               | 7116224.39             |
|              |              | 2015         | 28749620.400               | 21127411.399               | 7622209.00             |
|              |              | 2016         | 29622417.562               | 21488726.936               | 8133690.63             |
|              |              | 2017         | 30462559.724               | 21819422.499               | 8643137.23             |
|              |              | 2018         | 31293299.299               | 22137089.451               | 9156209.85             |
|              |              | 2019         | 32109993.427               | 22437123.004               | 9672870.42             |
|              |              | 2020         | 32883323.977               | 22716131.636               | 10167192.3             |
|              |              | 2021         | 33610102.554               | 22957831.316               | 10652271.2             |
|              |              | 2022         | 34322010.448               | 23184288.281               | 11137722.2             |
|              |              | 2023         | 35018383.550               | 23395605.268               | 11622778.3             |
|              |              | 2024         | 35700177.955               | 23593049.343               | 12107128.6             |
|              |              | 2025         | 36315500.346               | 23771173.995               | 12544326.4             |
|              |              | 2026         | 36896159.343               | 23922277.482               | 12973881.9             |
|              |              | 2027         | 37462570.116               | 24062501.748               | 13400068.4             |
|              |              | 2028         | 38015337.780               | 24191968.767               | 13823369.0             |
|              |              | 2029         | 38554814.764               | 24312027.250               | 14242787.5             |
|              |              | 2030         | 39003805.400               | 24414757.530               | 14589047.9             |
| 2031         | 39436509.703 | 24501954.120 | 14934555.6                 |                            |                        |
| 2032         | 39858470.458 | 24582481.566 | 15275988.9                 |                            |                        |
| 2033         | 40270147.082 | 24656159.192 | 15613987.9                 |                            |                        |
| 2034         | 40672665.743 | 24724344.026 | 15948321.7                 |                            |                        |
| 2035         | 40962732.664 | 24776397.561 | 16186335.1                 |                            |                        |
| 2036         | 41255021.653 | 24823265.382 | 16431756.3                 |                            |                        |
| 2037         | 41540573.023 | 24866775.507 | 16673797.5                 |                            |                        |
| 2038         | 41820158.066 | 24906784.462 | 16913373.6                 |                            |                        |
| 2039         | 42093547.949 | 24944049.345 | 17149498.6                 |                            |                        |
|              | Female       | 1990         | 588979.406                 | 588979.406                 | 0.000                  |
|              |              | 1991         | 1182571.252                | 1179606.280                | 2964.972               |
|              |              | 1992         | 1777346.679                | 1766098.293                | 11248.386              |
|              |              | 1993         | 2380261.899                | 2353272.844                | 26989.055              |
|              |              | 1994         | 2983130.039                | 2931348.284                | 51781.755              |
|              |              | 1995         | 3588982.584                | 3502017.856                | 86964.728              |
|              |              | 1996         | 4195430.235                | 4060683.539                | 134746.695             |
|              |              | 1997         | 4793866.694                | 4600883.769                | 192982.926             |
|              |              | 1998         | 5389747.381                | 5126864.206                | 262883.175             |
|              |              | 1999         | 6006722.467                | 5653225.387                | 353497.080             |
|              |              | 2000         | 6625758.871                | 6168755.643                | 457003.228             |
|              |              | 2001         | 7245135.411                | 6669506.678                | 575628.733             |
|              | 2002         | 7867492.021  | 7157621.042                | 709870.979                 |                        |
|              | 2003         | 8485051.793  | 7628322.364                | 856729.429                 |                        |
|              | 2004         | 9092994.774  | 8078188.922                | 1014805.85                 |                        |
|              | 2005         | 9706032.803  | 8518486.010                | 1187546.79                 |                        |
|              | 2006         | 10311907.548 | 8939525.790                | 1372381.76                 |                        |
|              | 2007         | 10909437.502 | 9343386.471                | 1566051.03                 |                        |
|              | 2008         | 11506462.491 | 9731957.443                | 1774505.05                 |                        |
|              | 2009         | 12098393.287 | 10107071.964               | 1991321.32                 |                        |
|              | 2010         | 12681188.981 | 10464009.317               | 2217179.66                 |                        |



**Results for PHIM for Run 2 (ELL Summary Main\_Analysis.RTF)**

|             |       |      |              |              |            |
|-------------|-------|------|--------------|--------------|------------|
|             |       | 2011 | 13260062.991 | 10805779.853 | 2454283.14 |
|             |       | 2012 | 13839417.441 | 11135018.447 | 2704398.99 |
|             |       | 2013 | 14409614.758 | 11448525.204 | 2961089.55 |
|             |       | 2014 | 14976658.746 | 11746736.502 | 3229922.24 |
|             |       | 2015 | 15529977.821 | 12028176.575 | 3501801.25 |
|             |       | 2016 | 16066640.764 | 12289066.766 | 3777574.00 |
|             |       | 2017 | 16590035.078 | 12533029.998 | 4057005.08 |
|             |       | 2018 | 17098716.137 | 12763548.255 | 4335167.88 |
|             |       | 2019 | 17599868.850 | 12981221.513 | 4618647.34 |
|             |       | 2020 | 18081346.241 | 13184807.328 | 4896538.91 |
|             |       | 2021 | 18537594.460 | 13367946.050 | 5169648.41 |
|             |       | 2022 | 18985300.234 | 13539731.862 | 5445568.37 |
|             |       | 2023 | 19423958.747 | 13700583.577 | 5723375.17 |
|             |       | 2024 | 19853347.772 | 13850356.373 | 6002991.40 |
|             |       | 2025 | 20252822.245 | 13987019.698 | 6265802.55 |
|             |       | 2026 | 20619307.063 | 14105036.806 | 6514270.26 |
|             |       | 2027 | 20976063.406 | 14214150.226 | 6761913.18 |
|             |       | 2028 | 21323641.947 | 14315313.849 | 7008328.10 |
|             |       | 2029 | 21662117.106 | 14408420.330 | 7253696.78 |
|             |       | 2030 | 21960971.694 | 14490025.520 | 7470946.17 |
|             |       | 2031 | 22224951.983 | 14556239.544 | 7668712.44 |
|             |       | 2032 | 22480397.853 | 14616655.459 | 7863742.39 |
|             |       | 2033 | 22728639.455 | 14672161.209 | 8056478.25 |
|             |       | 2034 | 22970448.888 | 14722787.650 | 8247661.24 |
|             |       | 2035 | 23164154.188 | 14763621.031 | 8400533.16 |
|             |       | 2036 | 23334538.616 | 14796122.902 | 8538415.71 |
|             |       | 2037 | 23499760.723 | 14825879.278 | 8673881.44 |
|             |       | 2038 | 23660308.401 | 14853231.741 | 8807076.66 |
|             |       | 2039 | 23817891.273 | 14878472.973 | 8939418.30 |
| Lung cancer | Males | 1990 | 595621.791   | 595621.791   | 0.000      |
|             |       | 1991 | 1177744.113  | 1177096.215  | 647.898    |
|             |       | 1992 | 1750034.892  | 1747594.305  | 2440.587   |
|             |       | 1993 | 2319752.308  | 2313819.857  | 5932.450   |
|             |       | 1994 | 2872597.339  | 2861118.286  | 11479.052  |
|             |       | 1995 | 3411494.825  | 3391996.555  | 19498.271  |
|             |       | 1996 | 3945569.726  | 3914793.909  | 30775.816  |
|             |       | 1997 | 4463316.362  | 4418033.301  | 45283.061  |
|             |       | 1998 | 4975301.180  | 4911598.470  | 63702.710  |
|             |       | 1999 | 5473691.125  | 5387431.814  | 86259.311  |
|             |       | 2000 | 5977500.570  | 5863066.309  | 114434.261 |
|             |       | 2001 | 6474795.516  | 6326620.248  | 148175.268 |
|             |       | 2002 | 6968769.705  | 6780596.847  | 188172.858 |
|             |       | 2003 | 7460282.140  | 7225037.116  | 235245.024 |
|             |       | 2004 | 7947048.275  | 7657839.350  | 289208.925 |
|             |       | 2005 | 8430571.669  | 8079977.552  | 350594.117 |
|             |       | 2006 | 8903945.390  | 8484728.563  | 419216.827 |
|             |       | 2007 | 9364177.982  | 8869843.501  | 494334.480 |
|             |       | 2008 | 9822525.458  | 9243937.015  | 578588.443 |
|             |       | 2009 | 10275228.886 | 9604100.581  | 671128.305 |
|             |       | 2010 | 10720275.500 | 9949023.521  | 771251.979 |
|             |       | 2011 | 11155356.373 | 10276792.516 | 878563.857 |
|             |       | 2012 | 11582611.617 | 10588098.479 | 994513.138 |
|             |       | 2013 | 11998803.791 | 10881386.232 | 1117417.56 |
|             |       | 2014 | 12402087.090 | 11156032.938 | 1246054.15 |
|             |       | 2015 | 12793451.706 | 11413837.357 | 1379614.35 |
|             |       | 2016 | 13160101.653 | 11646016.408 | 1514085.24 |
|             |       | 2017 | 13503583.414 | 11854996.911 | 1648586.50 |
|             |       | 2018 | 13859755.737 | 12060928.797 | 1798826.94 |
|             |       | 2019 | 14211625.176 | 12255294.199 | 1956330.98 |
|             |       | 2020 | 14553935.288 | 12436833.593 | 2117101.70 |
|             |       | 2021 | 14851747.495 | 12586976.727 | 2264770.77 |
|             |       | 2022 | 15144531.004 | 12727148.519 | 2417382.49 |
|             |       | 2023 | 15431932.496 | 12857472.730 | 2574459.77 |
|             |       | 2024 | 15713920.740 | 12978619.787 | 2735300.95 |
|             |       | 2025 | 15979112.816 | 13088326.525 | 2890786.29 |
|             |       | 2026 | 16206550.153 | 13175876.174 | 3030673.98 |
|             |       | 2027 | 16428826.050 | 13256541.653 | 3172284.40 |
|             |       | 2028 | 16645902.186 | 13330570.262 | 3315331.92 |
|             |       | 2029 | 16858126.517 | 13398805.322 | 3459321.20 |
|             |       | 2030 | 17045220.687 | 13457544.816 | 3587675.87 |
|             |       | 2031 | 17208482.610 | 13504070.926 | 3704411.68 |
|             |       | 2032 | 17367586.074 | 13546789.518 | 3820796.56 |
|             |       | 2033 | 17522716.280 | 13585715.369 | 3937000.91 |
|             |       | 2034 | 17674226.555 | 13621575.338 | 4052651.22 |
|             |       | 2035 | 17792201.734 | 13649247.315 | 4142954.42 |
|             |       | 2036 | 17903508.236 | 13673001.354 | 4230506.88 |
|             |       | 2037 | 18012162.345 | 13695027.545 | 4317134.80 |
|             |       | 2038 | 18118464.470 | 13715231.081 | 4403233.39 |

**Results for PHIM for Run 2 (ELL Summary Main\_Analysis.RTF)**

|     |        |      |              |              |            |
|-----|--------|------|--------------|--------------|------------|
|     | Female | 2039 | 18222549.860 | 13734071.508 | 4488478.35 |
|     |        | 1990 | 307897.357   | 307897.357   | 0.000      |
|     |        | 1991 | 616547.418   | 616130.924   | 416.494    |
|     |        | 1992 | 931086.773   | 929438.203   | 1648.571   |
|     |        | 1993 | 1246155.671  | 1242099.033  | 4056.638   |
|     |        | 1994 | 1561212.934  | 1553229.491  | 7983.444   |
|     |        | 1995 | 1879967.742  | 1866068.175  | 13899.567  |
|     |        | 1996 | 2197488.109  | 2175401.079  | 22087.031  |
|     |        | 1997 | 2515698.453  | 2482730.562  | 32967.891  |
|     |        | 1998 | 2836249.556  | 2789364.617  | 46884.940  |
|     |        | 1999 | 3150201.390  | 3086373.458  | 63827.932  |
|     |        | 2000 | 3472722.342  | 3387886.446  | 84835.897  |
|     |        | 2001 | 3796994.889  | 3686751.835  | 110243.054 |
|     |        | 2002 | 4126619.935  | 3985821.974  | 140797.962 |
|     |        | 2003 | 4454982.533  | 4278885.687  | 176096.847 |
|     |        | 2004 | 4784343.030  | 4567375.615  | 216967.415 |
|     |        | 2005 | 5113443.121  | 4849941.924  | 263501.197 |
|     |        | 2006 | 5442543.963  | 5125982.138  | 316561.825 |
|     |        | 2007 | 5772441.497  | 5396197.542  | 376243.954 |
|     |        | 2008 | 6091911.943  | 5651271.110  | 440640.833 |
|     |        | 2009 | 6413671.330  | 5900817.659  | 512853.671 |
|     |        | 2010 | 6730763.530  | 6140102.704  | 590660.826 |
|     |        | 2011 | 7043614.101  | 6368870.335  | 674743.766 |
|     |        | 2012 | 7356270.780  | 6590058.476  | 766212.304 |
|     |        | 2013 | 7662551.964  | 6799441.966  | 863109.998 |
|     |        | 2014 | 7964551.465  | 6998612.901  | 965938.564 |
|     |        | 2015 | 8254895.403  | 7184031.876  | 1070863.53 |
|     |        | 2016 | 8530661.848  | 7353086.955  | 1177574.89 |
|     |        | 2017 | 8795826.122  | 7509367.467  | 1286458.66 |
|     |        | 2018 | 9067233.707  | 7661600.426  | 1405633.28 |
|     |        | 2019 | 9335343.270  | 7805007.849  | 1530335.42 |
|     |        | 2020 | 9596110.883  | 7939006.659  | 1657104.22 |
|     |        | 2021 | 9833186.859  | 8056021.601  | 1777165.26 |
|     |        | 2022 | 10066452.037 | 8165337.769  | 1901114.27 |
|     |        | 2023 | 10295503.609 | 8267247.085  | 2028256.52 |
|     |        | 2024 | 10520125.318 | 8361679.641  | 2158445.68 |
|     |        | 2025 | 10731915.863 | 8447447.676  | 2284468.19 |
|     |        | 2026 | 10917495.549 | 8518936.556  | 2398558.99 |
|     |        | 2027 | 11098620.885 | 8584666.857  | 2513954.03 |
|     |        | 2028 | 11275441.234 | 8645292.217  | 2630149.02 |
|     |        | 2029 | 11447962.710 | 8700782.146  | 2747180.56 |
|     |        | 2030 | 11601867.623 | 8748997.324  | 2852870.30 |
|     |        | 2031 | 11731666.516 | 8786772.888  | 2944893.63 |
|     |        | 2032 | 11857585.969 | 8821129.507  | 3036456.46 |
|     |        | 2033 | 11980128.625 | 8852589.710  | 3127538.91 |
|     |        | 2034 | 12099562.464 | 8881216.574  | 3218345.89 |
|     |        | 2035 | 12195919.946 | 8903939.129  | 3291980.82 |
|     |        | 2036 | 12278201.969 | 8921677.802  | 3356524.17 |
|     |        | 2037 | 12358146.336 | 8937962.388  | 3420183.95 |
|     |        | 2038 | 12435978.633 | 8952959.672  | 3483018.96 |
|     |        | 2039 | 12512468.845 | 8966835.101  | 3545633.74 |
| IHD | Males  | 1990 | 517209.093   | 517209.093   | 0.000      |
|     |        | 1991 | 1019219.395  | 1012116.414  | 7102.981   |
|     |        | 1992 | 1509598.614  | 1483228.170  | 26370.445  |
|     |        | 1993 | 1992735.299  | 1931313.195  | 61422.104  |
|     |        | 1994 | 2462877.575  | 2348289.509  | 114588.066 |
|     |        | 1995 | 2928249.390  | 2739699.863  | 188549.527 |
|     |        | 1996 | 3377377.730  | 3093970.875  | 283406.855 |
|     |        | 1997 | 3809062.472  | 3411306.451  | 397756.021 |
|     |        | 1998 | 4222213.867  | 3692475.151  | 529738.716 |
|     |        | 1999 | 4708317.743  | 3996541.764  | 711775.979 |
|     |        | 2000 | 5182084.396  | 4268578.824  | 913505.572 |
|     |        | 2001 | 5644097.705  | 4508926.177  | 1135171.53 |
|     |        | 2002 | 6107232.129  | 4726786.586  | 1380445.54 |
|     |        | 2003 | 6561785.704  | 4919352.611  | 1642433.09 |
|     |        | 2004 | 6996156.348  | 5085404.558  | 1910751.79 |
|     |        | 2005 | 7426261.361  | 5234043.552  | 2192217.81 |
|     |        | 2006 | 7849012.694  | 5364407.456  | 2484605.24 |
|     |        | 2007 | 8255300.530  | 5477139.204  | 2778161.33 |
|     |        | 2008 | 8650662.040  | 5576239.715  | 3074422.33 |
|     |        | 2009 | 9030818.513  | 5662683.579  | 3368134.93 |
|     |        | 2010 | 9403026.327  | 5739522.784  | 3663503.54 |
|     |        | 2011 | 9767535.506  | 5807793.488  | 3959742.02 |
|     |        | 2012 | 10123044.281 | 5868727.078  | 4254317.20 |
|     |        | 2013 | 10470104.786 | 5923070.665  | 4547034.12 |
|     |        | 2014 | 10807756.112 | 5971808.731  | 4835947.38 |
|     |        | 2015 | 11130681.425 | 6015110.406  | 5115571.02 |
|     |        | 2016 | 11448966.506 | 6054572.859  | 5394393.65 |

**Results for PHIM for Run 2 (ELL Summary Main\_Analysis.RTF)**

|        |        |      |              |             |            |
|--------|--------|------|--------------|-------------|------------|
|        |        | 2017 | 11758164.882 | 6090436.370 | 5667728.51 |
|        |        | 2018 | 12054448.241 | 6122062.377 | 5932385.86 |
|        |        | 2019 | 12341606.261 | 6151019.415 | 6190586.85 |
|        |        | 2020 | 12600728.939 | 6175903.695 | 6424825.24 |
|        |        | 2021 | 12861767.105 | 6199573.496 | 6662193.61 |
|        |        | 2022 | 13114168.616 | 6221468.010 | 6892700.61 |
|        |        | 2023 | 13357894.797 | 6241611.778 | 7116283.02 |
|        |        | 2024 | 13593848.521 | 6260443.886 | 7333404.64 |
|        |        | 2025 | 13789177.359 | 6275659.749 | 7513517.61 |
|        |        | 2026 | 13993401.656 | 6291003.321 | 7702398.33 |
|        |        | 2027 | 14190519.224 | 6305530.500 | 7884988.72 |
|        |        | 2028 | 14381193.356 | 6319054.862 | 8062138.49 |
|        |        | 2029 | 14565171.927 | 6331797.936 | 8233373.99 |
|        |        | 2030 | 14697381.605 | 6340896.520 | 8356485.09 |
|        |        | 2031 | 14842203.512 | 6350741.964 | 8491461.55 |
|        |        | 2032 | 14982485.826 | 6360162.936 | 8622322.89 |
|        |        | 2033 | 15118410.647 | 6368913.243 | 8749497.40 |
|        |        | 2034 | 15250284.398 | 6377269.451 | 8873014.95 |
|        |        | 2035 | 15322911.166 | 6381752.773 | 8941158.39 |
|        |        | 2036 | 15405115.031 | 6386750.292 | 9018364.74 |
|        |        | 2037 | 15484709.137 | 6391572.984 | 9093136.15 |
|        |        | 2038 | 15561812.193 | 6396117.691 | 9165694.50 |
|        |        | 2039 | 15635992.616 | 6400411.543 | 9235581.07 |
|        | Female | 1990 | 147299.110   | 147299.110  | 0.000      |
|        |        | 1991 | 295122.462   | 293257.343  | 1865.120   |
|        |        | 1992 | 439962.920   | 432980.887  | 6982.033   |
|        |        | 1993 | 584735.615   | 568178.568  | 16557.047  |
|        |        | 1994 | 727640.783   | 696331.324  | 31309.459  |
|        |        | 1995 | 868486.937   | 816737.160  | 51749.777  |
|        |        | 1996 | 1010321.847  | 930900.151  | 79421.697  |
|        |        | 1997 | 1144230.930  | 1032470.161 | 111760.769 |
|        |        | 1998 | 1274513.622  | 1124724.572 | 149789.050 |
|        |        | 1999 | 1426725.938  | 1224923.489 | 201802.449 |
|        |        | 2000 | 1573462.680  | 1314527.573 | 258935.107 |
|        |        | 2001 | 1719132.015  | 1395378.307 | 323753.708 |
|        |        | 2002 | 1863006.732  | 1467886.511 | 395120.221 |
|        |        | 2003 | 2002943.227  | 1531832.121 | 471111.106 |
|        |        | 2004 | 2137798.705  | 1587585.252 | 550213.453 |
|        |        | 2005 | 2271071.245  | 1637691.437 | 633379.809 |
|        |        | 2006 | 2400707.731  | 1681311.723 | 719396.008 |
|        |        | 2007 | 2523634.512  | 1718708.931 | 804925.582 |
|        |        | 2008 | 2648752.232  | 1752966.104 | 895786.128 |
|        |        | 2009 | 2765973.961  | 1782224.032 | 983749.929 |
|        |        | 2010 | 2881329.235  | 1808418.686 | 1072910.55 |
|        |        | 2011 | 2994972.694  | 1831792.976 | 1163179.72 |
|        |        | 2012 | 3108958.829  | 1853040.208 | 1255918.62 |
|        |        | 2013 | 3218140.416  | 1871887.835 | 1346252.58 |
|        |        | 2014 | 3328387.914  | 1889303.660 | 1439084.25 |
|        |        | 2015 | 3435342.796  | 1905136.772 | 1530206.02 |
|        |        | 2016 | 3539189.408  | 1919409.556 | 1619779.85 |
|        |        | 2017 | 3640041.363  | 1932296.736 | 1707744.63 |
|        |        | 2018 | 3732645.362  | 1943305.134 | 1789340.23 |
|        |        | 2019 | 3821421.978  | 1953184.899 | 1868237.08 |
|        |        | 2020 | 3902115.950  | 1961715.823 | 1940400.13 |
|        |        | 2021 | 3984301.053  | 1969909.629 | 2014391.42 |
|        |        | 2022 | 4062629.299  | 1977290.000 | 2085339.30 |
|        |        | 2023 | 4137348.729  | 1984010.869 | 2153337.86 |
|        |        | 2024 | 4208611.493  | 1990113.798 | 2218497.70 |
|        |        | 2025 | 4269419.492  | 1995194.021 | 2274225.47 |
|        |        | 2026 | 4330969.998  | 2000125.893 | 2330844.11 |
|        |        | 2027 | 4389134.306  | 2004625.783 | 2384508.52 |
|        |        | 2028 | 4444222.970  | 2008768.890 | 2435454.08 |
|        |        | 2029 | 4496447.877  | 2012602.747 | 2483845.13 |
|        |        | 2030 | 4536975.698  | 2015508.997 | 2521466.70 |
|        |        | 2031 | 4578338.586  | 2018416.109 | 2559922.48 |
|        |        | 2032 | 4617397.784  | 2021118.606 | 2596279.18 |
|        |        | 2033 | 4654407.697  | 2023652.510 | 2630755.19 |
|        |        | 2034 | 4689913.454  | 2026040.842 | 2663872.61 |
|        |        | 2035 | 4712518.190  | 2027492.516 | 2685025.67 |
|        |        | 2036 | 4735845.827  | 2028963.048 | 2706882.78 |
|        |        | 2037 | 4757958.806  | 2030345.289 | 2727613.52 |
|        |        | 2038 | 4778813.806  | 2031652.192 | 2747161.61 |
|        |        | 2039 | 4798769.065  | 2032897.444 | 2765871.62 |
| Stroke | Males  | 1990 | 75005.854    | 75005.854   | 0.000      |
|        |        | 1991 | 149463.017   | 148743.133  | 719.885    |
|        |        | 1992 | 222966.278   | 220290.087  | 2676.192   |
|        |        | 1993 | 296801.879   | 290428.236  | 6373.643   |
|        |        | 1994 | 372453.706   | 360111.565  | 12342.141  |

**Results for PHIM for Run 2 (ELL Summary Main\_Analysis.RTF)**

|        |      |             |             |            |
|--------|------|-------------|-------------|------------|
|        | 1995 | 448401.338  | 427536.079  | 20865.259  |
|        | 1996 | 523536.301  | 491432.928  | 32103.373  |
|        | 1997 | 596763.211  | 550719.256  | 46043.955  |
|        | 1998 | 667546.681  | 605032.443  | 62514.238  |
|        | 1999 | 734925.407  | 653829.062  | 81096.345  |
|        | 2000 | 803749.361  | 700715.235  | 103034.126 |
|        | 2001 | 870081.588  | 742876.682  | 127204.906 |
|        | 2002 | 935347.140  | 781535.649  | 153811.491 |
|        | 2003 | 1001627.349 | 817786.716  | 183840.633 |
|        | 2004 | 1066587.976 | 850696.034  | 215891.942 |
|        | 2005 | 1130548.052 | 880524.399  | 250023.653 |
|        | 2006 | 1195132.454 | 908129.950  | 287002.504 |
|        | 2007 | 1258974.043 | 933141.147  | 325832.896 |
|        | 2008 | 1320124.867 | 954983.147  | 365141.719 |
|        | 2009 | 1380776.123 | 974817.314  | 405958.809 |
|        | 2010 | 1440048.533 | 992598.724  | 447449.809 |
|        | 2011 | 1497484.847 | 1008406.908 | 489077.939 |
|        | 2012 | 1554496.526 | 1022667.142 | 531829.384 |
|        | 2013 | 1610819.598 | 1035563.084 | 575256.514 |
|        | 2014 | 1667484.890 | 1047379.990 | 620104.899 |
|        | 2015 | 1720948.287 | 1057735.870 | 663212.416 |
|        | 2016 | 1775699.228 | 1067432.465 | 708266.763 |
|        | 2017 | 1830250.175 | 1076330.968 | 753919.207 |
|        | 2018 | 1875958.950 | 1083245.687 | 792713.262 |
|        | 2019 | 1920359.232 | 1089476.244 | 830882.988 |
|        | 2020 | 1960605.297 | 1094785.174 | 865820.124 |
|        | 2021 | 1998912.887 | 1099484.348 | 899428.540 |
|        | 2022 | 2036003.696 | 1103725.121 | 932278.575 |
|        | 2023 | 2071857.536 | 1107554.383 | 964303.154 |
|        | 2024 | 2106636.468 | 1111064.113 | 995572.356 |
|        | 2025 | 2136450.873 | 1113937.599 | 1022513.27 |
|        | 2026 | 2164796.470 | 1116517.465 | 1048279.01 |
|        | 2027 | 2192079.608 | 1118894.676 | 1073184.93 |
|        | 2028 | 2218404.367 | 1121067.193 | 1097337.17 |
|        | 2029 | 2243769.140 | 1123077.959 | 1120691.18 |
|        | 2030 | 2263570.213 | 1124599.156 | 1138971.06 |
|        | 2031 | 2282521.590 | 1126009.188 | 1156512.40 |
|        | 2032 | 2300804.945 | 1127327.194 | 1173477.75 |
|        | 2033 | 2318464.018 | 1128547.130 | 1189916.89 |
|        | 2034 | 2335611.973 | 1129701.942 | 1205910.03 |
|        | 2035 | 2347097.290 | 1130459.343 | 1216637.95 |
|        | 2036 | 2358248.747 | 1131177.824 | 1227070.92 |
|        | 2037 | 2369033.655 | 1131864.746 | 1237168.91 |
|        | 2038 | 2379490.114 | 1132511.498 | 1246978.62 |
|        | 2039 | 2389546.238 | 1133120.630 | 1256425.61 |
| Female | 1990 | 56348.092   | 56348.092   | 0.000      |
|        | 1991 | 110871.862  | 110356.693  | 515.169    |
|        | 1992 | 165654.454  | 163676.662  | 1977.792   |
|        | 1993 | 220008.519  | 215284.214  | 4724.305   |
|        | 1994 | 275706.807  | 266525.818  | 9180.988   |
|        | 1995 | 331417.547  | 315922.396  | 15495.151  |
|        | 1996 | 387580.161  | 363587.877  | 23992.284  |
|        | 1997 | 442778.242  | 408236.762  | 34541.479  |
|        | 1998 | 496117.305  | 449199.774  | 46917.531  |
|        | 1999 | 548268.214  | 487053.793  | 61214.421  |
|        | 2000 | 601693.202  | 523620.373  | 78072.829  |
|        | 2001 | 652221.103  | 556024.633  | 96196.470  |
|        | 2002 | 703022.600  | 586370.987  | 116651.613 |
|        | 2003 | 752023.351  | 613566.293  | 138457.058 |
|        | 2004 | 799826.733  | 638098.830  | 161727.903 |
|        | 2005 | 847563.928  | 660756.943  | 186806.985 |
|        | 2006 | 894205.027  | 681142.109  | 213062.918 |
|        | 2007 | 939571.282  | 699341.610  | 240229.672 |
|        | 2008 | 983437.578  | 715521.359  | 267916.219 |
|        | 2009 | 1025803.786 | 729876.054  | 295927.732 |
|        | 2010 | 1066964.934 | 742634.945  | 324329.989 |
|        | 2011 | 1106954.044 | 753976.396  | 352977.648 |
|        | 2012 | 1146108.461 | 764171.646  | 381936.815 |
|        | 2013 | 1183544.689 | 773145.525  | 410399.164 |
|        | 2014 | 1221220.945 | 781417.845  | 439803.101 |
|        | 2015 | 1258289.311 | 788997.466  | 469291.845 |
|        | 2016 | 1294830.207 | 795879.146  | 498951.061 |
|        | 2017 | 1330332.626 | 802056.235  | 528276.390 |
|        | 2018 | 1360571.987 | 806946.462  | 553625.526 |
|        | 2019 | 1389848.723 | 811314.418  | 578534.305 |
|        | 2020 | 1416046.192 | 815001.306  | 601044.887 |
|        | 2021 | 1440588.850 | 818215.773  | 622373.077 |
|        | 2022 | 1464157.934 | 821092.444  | 643065.491 |

**Results for PHIM for Run 2 (ELL Summary Main\_Analysis.RTF)**

|      |             |             |             |             |            |
|------|-------------|-------------|-------------|-------------|------------|
|      |             | 2023        | 1486810.237 | 823693.287  | 663116.950 |
|      |             | 2024        | 1508591.729 | 826035.138  | 682556.592 |
|      |             | 2025        | 1526875.621 | 827924.344  | 698951.277 |
|      |             | 2026        | 1543659.810 | 829561.338  | 714098.471 |
|      |             | 2027        | 1559623.774 | 831041.647  | 728582.127 |
|      |             | 2028        | 1574852.850 | 832392.517  | 742460.333 |
|      |             | 2029        | 1589437.452 | 833629.081  | 755808.372 |
|      |             | 2030        | 1600568.199 | 834540.697  | 766027.502 |
|      |             | 2031        | 1610776.297 | 835348.778  | 775427.518 |
|      |             | 2032        | 1620483.563 | 836095.128  | 784388.435 |
|      |             | 2033        | 1629745.442 | 836789.087  | 792956.355 |
|      |             | 2034        | 1638721.425 | 837438.342  | 801283.083 |
|      |             | 2035        | 1644649.404 | 837850.253  | 806799.151 |
|      |             | 2036        | 1650181.590 | 838223.873  | 811957.717 |
|      |             | 2037        | 1655476.066 | 838575.753  | 816900.313 |
|      |             | 2038        | 1660507.914 | 838909.255  | 821598.659 |
|      |             | 2039        | 1665361.569 | 839227.001  | 826134.569 |
| COPD | Males       | 1990        | 117002.906  | 117002.906  | 0.000      |
|      |             | 1991        | 233438.833  | 233235.802  | 203.031    |
|      |             | 1992        | 348084.047  | 347333.655  | 750.392    |
|      |             | 1993        | 467278.318  | 465438.303  | 1840.015   |
|      |             | 1994        | 584216.907  | 580602.674  | 3614.233   |
|      |             | 1995        | 697391.457  | 691236.268  | 6155.189   |
|      |             | 1996        | 809471.271  | 799851.591  | 9619.680   |
|      |             | 1997        | 922587.668  | 908342.795  | 14244.873  |
|      |             | 1998        | 1034072.457 | 1014110.497 | 19961.960  |
|      |             | 1999        | 1153475.399 | 1125981.696 | 27493.703  |
|      |             | 2000        | 1268050.268 | 1231653.876 | 36396.392  |
|      |             | 2001        | 1382786.209 | 1335699.125 | 47087.084  |
|      |             | 2002        | 1497557.412 | 1437796.551 | 59760.861  |
|      |             | 2003        | 1614405.229 | 1539933.149 | 74472.081  |
|      |             | 2004        | 1726672.489 | 1635991.575 | 90680.914  |
|      |             | 2005        | 1847277.524 | 1737138.030 | 110139.495 |
|      |             | 2006        | 1961009.963 | 1830150.203 | 130859.760 |
|      |             | 2007        | 2079868.908 | 1924810.350 | 155058.558 |
|      |             | 2008        | 2206755.783 | 2023390.089 | 183365.694 |
|      |             | 2009        | 2331993.380 | 2117981.823 | 214011.557 |
|      |             | 2010        | 2455130.176 | 2208396.533 | 246733.644 |
|      |             | 2011        | 2582657.849 | 2299166.567 | 283491.282 |
|      |             | 2012        | 2709719.005 | 2386625.093 | 323093.912 |
|      |             | 2013        | 2840547.005 | 2473533.941 | 367013.065 |
|      |             | 2014        | 2971677.135 | 2557559.181 | 414117.954 |
|      |             | 2015        | 3104538.983 | 2640727.766 | 463811.217 |
|      |             | 2016        | 3237650.175 | 2720705.205 | 516944.971 |
|      |             | 2017        | 3370561.253 | 2797658.250 | 572903.003 |
|      |             | 2018        | 3503136.371 | 2870852.589 | 632283.782 |
|      |             | 2019        | 3636402.758 | 2941333.146 | 695069.612 |
|      |             | 2020        | 3768054.453 | 3008609.175 | 759445.278 |
|      |             | 2021        | 3897675.067 | 3071796.745 | 825878.322 |
|      |             | 2022        | 4027307.132 | 3131946.632 | 895360.500 |
|      |             | 2023        | 4156698.720 | 3188966.378 | 967732.343 |
|      |             | 2024        | 4285772.226 | 3242921.557 | 1042850.67 |
|      |             | 2025        | 4410759.298 | 3293250.121 | 1117509.18 |
|      |             | 2026        | 4531411.064 | 3338880.521 | 1192530.54 |
|      |             | 2027        | 4651145.233 | 3381534.919 | 1269610.31 |
|      |             | 2028        | 4769837.872 | 3421276.450 | 1348561.42 |
|      |             | 2029        | 4887747.179 | 3458346.033 | 1429401.15 |
| 2030 | 4997632.895 | 3491717.038 | 1505915.86  |             |            |
| 2031 | 5103301.991 | 3521132.043 | 1582169.95  |             |            |
| 2032 | 5207593.613 | 3548201.919 | 1659391.69  |             |            |
| 2033 | 5310556.138 | 3572983.450 | 1737572.69  |             |            |
| 2034 | 5412542.816 | 3595797.295 | 1816745.52  |             |            |
| 2035 | 5500522.473 | 3614938.130 | 1885584.34  |             |            |
| 2036 | 5588149.640 | 3632335.913 | 1955813.73  |             |            |
| 2037 | 5674667.886 | 3648310.231 | 2026357.65  |             |            |
| 2038 | 5760391.289 | 3662924.192 | 2097467.10  |             |            |
| 2039 | 5845459.234 | 3676445.664 | 2169013.57  |             |            |
|      | Female      | 1990        | 77434.846   | 77434.846   | 0.000      |
|      |             | 1991        | 160029.510  | 159861.321  | 168.190    |
|      |             | 1992        | 240642.531  | 240002.541  | 639.990    |
|      |             | 1993        | 329362.093  | 327711.028  | 1651.065   |
|      |             | 1994        | 418569.515  | 415261.651  | 3307.864   |
|      |             | 1995        | 509110.357  | 503290.124  | 5820.233   |
|      |             | 1996        | 600040.117  | 590794.433  | 9245.684   |
|      |             | 1997        | 691159.071  | 677446.284  | 13712.786  |
|      |             | 1998        | 782866.899  | 763575.243  | 19291.655  |
|      |             | 1999        | 881526.925  | 854874.647  | 26652.278  |
|      |             | 2000        | 977880.647  | 942721.251  | 35159.396  |

**Results for PHIM for Run 2 (ELL Summary Main\_Analysis.RTF)**

|      |             |             |            |
|------|-------------|-------------|------------|
| 2001 | 1076787.404 | 1031351.903 | 45435.501  |
| 2002 | 1174842.754 | 1117541.570 | 57301.184  |
| 2003 | 1275102.681 | 1204038.263 | 71064.418  |
| 2004 | 1371026.306 | 1285129.225 | 85897.080  |
| 2005 | 1473954.509 | 1370095.706 | 103858.802 |
| 2006 | 1574450.828 | 1451089.820 | 123361.008 |
| 2007 | 1673790.211 | 1529138.388 | 144651.823 |
| 2008 | 1782360.738 | 1612198.870 | 170161.867 |
| 2009 | 1892944.209 | 1694154.218 | 198789.992 |
| 2010 | 2002131.282 | 1772852.982 | 229278.300 |
| 2011 | 2114522.152 | 1851140.146 | 263382.006 |
| 2012 | 2228079.372 | 1927748.117 | 300331.255 |
| 2013 | 2345377.689 | 2004049.878 | 341327.811 |
| 2014 | 2462498.422 | 2077402.096 | 385096.326 |
| 2015 | 2581450.312 | 2150010.460 | 431439.852 |
| 2016 | 2701959.301 | 2220691.109 | 481268.192 |
| 2017 | 2823834.967 | 2289309.559 | 534525.408 |
| 2018 | 2938265.081 | 2351696.233 | 586568.847 |
| 2019 | 3053254.880 | 2411714.348 | 641540.532 |
| 2020 | 3167073.216 | 2469083.541 | 697989.675 |
| 2021 | 3279517.699 | 2523799.047 | 755718.652 |
| 2022 | 3392060.964 | 2576011.649 | 816049.314 |
| 2023 | 3504296.171 | 2625632.336 | 878663.835 |
| 2024 | 3616019.231 | 2672527.796 | 943491.435 |
| 2025 | 3724611.269 | 2716453.658 | 1008157.61 |
| 2026 | 3827181.707 | 2756413.018 | 1070768.69 |
| 2027 | 3928684.441 | 2793815.938 | 1134868.50 |
| 2028 | 4029124.892 | 2828860.225 | 1200264.67 |
| 2029 | 4128269.068 | 2861406.356 | 1266862.71 |
| 2030 | 4221560.174 | 2890978.501 | 1330581.67 |
| 2031 | 4304170.584 | 2915701.768 | 1388468.82 |
| 2032 | 4384930.537 | 2938312.218 | 1446618.32 |
| 2033 | 4464357.691 | 2959129.901 | 1505227.79 |
| 2034 | 4542251.545 | 2978091.893 | 1564159.65 |
| 2035 | 4611066.648 | 2994339.134 | 1616727.51 |
| 2036 | 4670309.230 | 3007258.180 | 1663051.05 |
| 2037 | 4728179.514 | 3018995.848 | 1709183.67 |
| 2038 | 4785008.048 | 3029710.622 | 1755297.43 |
| 2039 | 4841291.793 | 3039513.428 | 1801778.37 |

---

## Results for PHIM for Run 2 (ELL Summary Main\_Analysis.RTF)

\*\*\*\*\*

**Table 5: Estimated Loss of Life, at the end of follow-up, Population unadjusted for deaths in Ecig scenario**

| Disease      | Sex    | Age Group   | Years of life lost<br>NULL | Years of life lost<br>Ecig | Years of life<br>Saved |
|--------------|--------|-------------|----------------------------|----------------------------|------------------------|
| All Diseases | Males  | 30-34       | 443911.034                 | 238683.977                 | 205227.057             |
|              |        | 35-39       | 1146798.555                | 610243.444                 | 536555.111             |
|              |        | 40-44       | 2609591.408                | 1349167.978                | 1260423.43             |
|              |        | 45-49       | 4775841.753                | 2428118.032                | 2347723.72             |
|              |        | 50-54       | 7446969.205                | 3925842.223                | 3521126.98             |
|              |        | 55-59       | 8240205.925                | 4771295.184                | 3468910.74             |
|              |        | 60-64       | 8772829.118                | 5499674.699                | 3273154.42             |
|              |        | 65-69       | 6161494.678                | 4243210.109                | 1918284.57             |
|              |        | 70-74       | 2495906.274                | 1778607.274                | 717298.999             |
|              | 75-79  | 0.000       | 0.000                      | 0.000                      |                        |
|              | Female | 30-34       | 229140.561                 | 142114.245                 | 87026.316              |
|              |        | 35-39       | 570217.942                 | 347146.463                 | 223071.478             |
|              |        | 40-44       | 1267538.938                | 748645.249                 | 518893.689             |
|              |        | 45-49       | 2340070.698                | 1359164.050                | 980906.648             |
|              |        | 50-54       | 3743803.613                | 2189604.741                | 1554198.87             |
|              |        | 55-59       | 4591478.168                | 2807126.419                | 1784351.75             |
|              |        | 60-64       | 5207367.788                | 3305062.784                | 1902305.00             |
|              |        | 65-69       | 4092181.394                | 2736939.809                | 1355241.59             |
| 70-74        |        | 1776092.171 | 1205518.221                | 570573.949                 |                        |
| Lung cancer  | Males  | 30-34       | 66065.017                  | 51712.541                  | 14352.476              |
|              |        | 35-39       | 232509.414                 | 183484.631                 | 49024.784              |
|              |        | 40-44       | 688628.041                 | 531489.729                 | 157138.312             |
|              |        | 45-49       | 1528300.367                | 1142312.132                | 385988.235             |
|              |        | 50-54       | 2730187.229                | 2007521.021                | 722666.209             |
|              |        | 55-59       | 3909101.673                | 2855854.172                | 1053247.50             |
|              |        | 60-64       | 4287716.660                | 3223303.002                | 1064413.66             |
|              |        | 65-69       | 3467897.115                | 2656175.004                | 811722.111             |
|              |        | 70-74       | 1312144.343                | 1021280.562                | 290863.782             |
|              | 75-79  | 0.000       | 0.000                      | 0.000                      |                        |
|              | Female | 30-34       | 51913.113                  | 40645.069                  | 11268.044              |
|              |        | 35-39       | 189792.904                 | 148856.758                 | 40936.146              |
|              |        | 40-44       | 527596.573                 | 396619.330                 | 130977.243             |
|              |        | 45-49       | 1122524.269                | 812310.482                 | 310213.786             |
|              |        | 50-54       | 1882214.322                | 1331788.765                | 550425.557             |
|              |        | 55-59       | 2595581.943                | 1811859.595                | 783722.348             |
|              |        | 60-64       | 2846273.090                | 2024084.478                | 822188.612             |
|              |        | 65-69       | 2358758.394                | 1695538.427                | 663219.967             |
| 70-74        |        | 937814.238  | 681994.164                 | 255820.073                 |                        |
| IHD          | Males  | 30-34       | 263834.566                 | 117992.888                 | 145841.678             |
|              |        | 35-39       | 692140.150                 | 295160.109                 | 396980.041             |
|              |        | 40-44       | 1519708.432                | 588864.931                 | 930843.501             |
|              |        | 45-49       | 2568546.697                | 911115.964                 | 1657430.73             |
|              |        | 50-54       | 3632929.903                | 1340974.189                | 2291955.71             |
|              |        | 55-59       | 2807892.356                | 1098170.591                | 1709721.77             |
|              |        | 60-64       | 2599825.934                | 1191664.301                | 1408161.63             |
|              |        | 65-69       | 1113578.307                | 583540.251                 | 530038.056             |
|              |        | 70-74       | 437536.271                 | 261488.501                 | 176047.769             |
|              | 75-79  | 0.000       | 0.000                      | 0.000                      |                        |
|              | Female | 30-34       | 79649.097                  | 37852.193                  | 41796.904              |
|              |        | 35-39       | 193965.908                 | 81447.686                  | 112518.221             |
|              |        | 40-44       | 403380.974                 | 151123.428                 | 252257.546             |
|              |        | 45-49       | 671385.408                 | 232831.376                 | 438554.032             |
|              |        | 50-54       | 1011875.989                | 376040.561                 | 635835.429             |
|              |        | 55-59       | 849875.715                 | 343991.407                 | 505884.309             |
|              |        | 60-64       | 925490.876                 | 436192.169                 | 489298.708             |
|              |        | 65-69       | 455463.881                 | 246010.438                 | 209453.443             |
| 70-74        |        | 207681.216  | 125515.161                 | 82166.056                  |                        |
| Stroke       | Males  | 30-34       | 73463.650                  | 43068.115                  | 30395.535              |
|              |        | 35-39       | 151934.057                 | 86388.815                  | 65545.242              |
|              |        | 40-44       | 262845.974                 | 141430.433                 | 121415.541             |
|              |        | 45-49       | 383421.246                 | 192597.008                 | 190824.238             |
|              |        | 50-54       | 479872.634                 | 218809.696                 | 261062.938             |
|              |        | 55-59       | 437124.903                 | 184459.622                 | 252665.282             |
|              |        | 60-64       | 419457.235                 | 180370.148                 | 239087.087             |
|              |        | 65-69       | 128180.574                 | 57699.210                  | 70481.364              |
|              |        | 70-74       | 53245.965                  | 26108.500                  | 27137.465              |
|              | 75-79  | 0.000       | 0.000                      | 0.000                      |                        |
|              | Female | 30-34       | 62919.090                  | 40065.099                  | 22853.991              |

**Results for PHIM for Run 2 (ELL Summary Main\_Analysis.RTF)**

|      |       |        |             |             |            |            |
|------|-------|--------|-------------|-------------|------------|------------|
|      |       | 35-39  | 120806.205  | 72695.725   | 48110.480  |            |
|      |       | 40-44  | 203391.885  | 113506.261  | 89885.624  |            |
|      |       | 45-49  | 278172.097  | 143983.320  | 134188.777 |            |
|      |       | 50-54  | 325979.181  | 157261.008  | 168718.173 |            |
|      |       | 55-59  | 275161.340  | 124712.430  | 150448.910 |            |
|      |       | 60-64  | 268920.493  | 123470.229  | 145450.264 |            |
|      |       | 65-69  | 87956.054   | 41969.550   | 45986.504  |            |
|      |       | 70-74  | 42055.224   | 20887.558   | 21167.665  |            |
|      |       | 75-79  | 0.000       | 0.000       | 0.000      |            |
| COPD | Males | 30-34  | 40547.801   | 25910.433   | 14637.368  |            |
|      |       | 35-39  | 70214.933   | 45209.890   | 25005.044  |            |
|      |       | 40-44  | 138408.960  | 87382.885   | 51026.075  |            |
|      |       | 45-49  | 295573.443  | 182092.928  | 113480.515 |            |
|      |       | 50-54  | 603979.438  | 358537.317  | 245442.121 |            |
|      |       | 55-59  | 1086086.992 | 632810.800  | 453276.192 |            |
|      |       | 60-64  | 1465829.290 | 904337.248  | 561492.042 |            |
|      |       | 65-69  | 1451838.682 | 945795.644  | 506043.038 |            |
|      |       | 70-74  | 692979.695  | 469729.712  | 223249.983 |            |
|      |       |        | 75-79       | 0.000       | 0.000      | 0.000      |
|      |       | Female | 30-34       | 34659.261   | 23551.884  | 11107.377  |
|      |       |        | 35-39       | 65652.924   | 44146.294  | 21506.631  |
|      |       |        | 40-44       | 133169.505  | 87396.230  | 45773.275  |
|      |       |        | 45-49       | 267988.924  | 170038.872 | 97950.053  |
|      |       |        | 50-54       | 523734.121  | 324514.407 | 199219.714 |
|      |       |        | 55-59       | 870859.170  | 526562.987 | 344296.182 |
|      |       |        | 60-64       | 1166683.329 | 721315.908 | 445367.421 |
|      |       |        | 65-69       | 1190003.066 | 753421.394 | 436581.672 |
|      |       |        | 70-74       | 588541.493  | 377121.338 | 211420.155 |
|      |       |        | 75-79       | 0.000       | 0.000      | 0.000      |

---



## Results for PHIM for Run 2 (ELL Summary Main\_Analysis.RTF)

\*\*\*\*\*

**Table 6: Estimated Loss of Life, at the end of follow-up, Population and Number deaths adjusted for Ecig scenario**

| Disease      | Sex    | Age Group   | Years of life lost<br>NULL | Years of life lost<br>Ecig | Years of life<br>Saved |
|--------------|--------|-------------|----------------------------|----------------------------|------------------------|
| All Diseases | Males  | 30-34       | 443911.034                 | 238699.292                 | 205211.742             |
|              |        | 35-39       | 1146798.555                | 610359.649                 | 536438.906             |
|              |        | 40-44       | 2609591.408                | 1349924.882                | 1259666.53             |
|              |        | 45-49       | 4775841.753                | 2431509.736                | 2344332.02             |
|              |        | 50-54       | 7446969.205                | 3936197.522                | 3510771.68             |
|              |        | 55-59       | 8240205.925                | 4788241.179                | 3451964.75             |
|              |        | 60-64       | 8772829.118                | 5528603.499                | 3244225.62             |
|              |        | 65-69       | 6161494.678                | 4268174.993                | 1893319.69             |
|              | 70-74  | 2495906.274 | 1792338.592                | 703567.681                 |                        |
|              | 75-79  | 0.000       | 0.000                      | 0.000                      |                        |
|              | Female | 30-34       | 229140.561                 | 142118.173                 | 87022.387              |
|              |        | 35-39       | 570217.942                 | 347175.885                 | 223042.057             |
|              |        | 40-44       | 1267538.938                | 748834.778                 | 518704.160             |
|              |        | 45-49       | 2340070.698                | 1360010.092                | 980060.607             |
|              |        | 50-54       | 3743803.613                | 2192291.881                | 1551511.73             |
|              |        | 55-59       | 4591478.168                | 2812347.624                | 1779130.54             |
|              |        | 60-64       | 5207367.788                | 3315180.334                | 1892187.45             |
| 65-69        |        | 4092181.394 | 2747910.770                | 1344270.62                 |                        |
| 70-74        |        | 1776092.171 | 1212603.436                | 563488.734                 |                        |
| 75-79        | 0.000  | 0.000       | 0.000                      |                            |                        |
| Lung cancer  | Males  | 30-34       | 66065.017                  | 51716.159                  | 14348.858              |
|              |        | 35-39       | 232509.414                 | 183524.180                 | 48985.234              |
|              |        | 40-44       | 688628.041                 | 531833.027                 | 156795.014             |
|              |        | 45-49       | 1528300.367                | 1144140.708                | 384159.659             |
|              |        | 50-54       | 2730187.229                | 2013471.176                | 716716.053             |
|              |        | 55-59       | 3909101.673                | 2866796.630                | 1042305.04             |
|              |        | 60-64       | 4287716.660                | 3241425.968                | 1046290.69             |
|              |        | 65-69       | 3467897.115                | 2671917.726                | 795979.389             |
|              | 70-74  | 1312144.343 | 1029245.934                | 282898.409                 |                        |
|              | 75-79  | 0.000       | 0.000                      | 0.000                      |                        |
|              | Female | 30-34       | 51913.113                  | 40646.356                  | 11266.756              |
|              |        | 35-39       | 189792.904                 | 148870.579                 | 40922.325              |
|              |        | 40-44       | 527596.573                 | 396729.948                 | 130866.625             |
|              |        | 45-49       | 1122524.269                | 812853.665                 | 309670.604             |
|              |        | 50-54       | 1882214.322                | 1333534.926                | 548679.396             |
|              |        | 55-59       | 2595581.943                | 1815374.024                | 780207.919             |
|              |        | 60-64       | 2846273.090                | 2030547.851                | 815725.239             |
| 65-69        |        | 2358758.394 | 1702293.438                | 656464.956                 |                        |
| 70-74        |        | 937814.238  | 685984.313                 | 251829.924                 |                        |
| 75-79        | 0.000  | 0.000       | 0.000                      |                            |                        |
| IHD          | Males  | 30-34       | 263834.566                 | 118000.103                 | 145834.462             |
|              |        | 35-39       | 692140.150                 | 295209.655                 | 396930.495             |
|              |        | 40-44       | 1519708.432                | 589135.039                 | 930573.393             |
|              |        | 45-49       | 2568546.697                | 912069.594                 | 1656477.10             |
|              |        | 50-54       | 3632929.903                | 1343452.082                | 2289477.82             |
|              |        | 55-59       | 2807892.356                | 1100407.237                | 1707485.12             |
|              |        | 60-64       | 2599825.934                | 1194919.554                | 1404906.38             |
|              |        | 65-69       | 1113578.307                | 584963.142                 | 528615.166             |
|              | 70-74  | 437536.271  | 262255.136                 | 175281.134                 |                        |
|              | 75-79  | 0.000       | 0.000                      | 0.000                      |                        |
|              | Female | 30-34       | 79649.097                  | 37853.176                  | 41795.920              |
|              |        | 35-39       | 193965.908                 | 81453.727                  | 112512.180             |
|              |        | 40-44       | 403380.974                 | 151153.112                 | 252227.862             |
|              |        | 45-49       | 671385.408                 | 232932.262                 | 438453.146             |
|              |        | 50-54       | 1011875.989                | 376327.213                 | 635548.776             |
|              |        | 55-59       | 849875.715                 | 344304.860                 | 505570.855             |
|              |        | 60-64       | 925490.876                 | 436774.710                 | 488716.166             |
| 65-69        |        | 455463.881  | 246347.224                 | 209116.657                 |                        |
| 70-74        |        | 207681.216  | 125751.158                 | 81930.058                  |                        |
| 75-79        | 0.000  | 0.000       | 0.000                      |                            |                        |
| Stroke       | Males  | 30-34       | 73463.650                  | 43070.555                  | 30393.095              |
|              |        | 35-39       | 151934.057                 | 86404.109                  | 65529.948              |
|              |        | 40-44       | 262845.974                 | 141502.760                 | 121343.214             |
|              |        | 45-49       | 383421.246                 | 192832.541                 | 190588.705             |
|              |        | 50-54       | 479872.634                 | 219294.720                 | 260577.914             |
|              |        | 55-59       | 437124.903                 | 184941.796                 | 252183.108             |
|              |        | 60-64       | 419457.235                 | 181008.217                 | 238449.018             |
|              |        | 65-69       | 128180.574                 | 57871.667                  | 70308.907              |
|              | 70-74  | 53245.965   | 26194.265                  | 27051.700                  |                        |
|              | 75-79  | 0.000       | 0.000                      | 0.000                      |                        |
|              | Female | 30-34       | 62919.090                  | 40066.003                  | 22853.087              |

**Results for PHIM for Run 2 (ELL Summary Main\_Analysis.RTF)**

|      |       |        |             |             |            |            |
|------|-------|--------|-------------|-------------|------------|------------|
|      |       | 35-39  | 120806.205  | 72700.709   | 48105.496  |            |
|      |       | 40-44  | 203391.885  | 113528.310  | 89863.576  |            |
|      |       | 45-49  | 278172.097  | 144048.534  | 134123.563 |            |
|      |       | 50-54  | 325979.181  | 157392.218  | 168586.963 |            |
|      |       | 55-59  | 275161.340  | 124849.429  | 150311.911 |            |
|      |       | 60-64  | 268920.493  | 123672.215  | 145248.278 |            |
|      |       | 65-69  | 87956.054   | 42037.992   | 45918.061  |            |
|      |       | 70-74  | 42055.224   | 20931.590   | 21123.634  |            |
|      |       | 75-79  | 0.000       | 0.000       | 0.000      |            |
| COPD | Males | 30-34  | 40547.801   | 25912.474   | 14635.327  |            |
|      |       | 35-39  | 70214.933   | 45221.705   | 24993.229  |            |
|      |       | 40-44  | 138408.960  | 87454.055   | 50954.905  |            |
|      |       | 45-49  | 295573.443  | 182466.892  | 113106.551 |            |
|      |       | 50-54  | 603979.438  | 359979.544  | 243999.894 |            |
|      |       | 55-59  | 1086086.992 | 636095.518  | 449991.474 |            |
|      |       | 60-64  | 1465829.290 | 911249.761  | 554579.529 |            |
|      |       | 65-69  | 1451838.682 | 953422.458  | 498416.224 |            |
|      |       | 70-74  | 692979.695  | 474643.257  | 218336.438 |            |
|      |       | 75-79  | 0.000       | 0.000       | 0.000      |            |
|      |       | Female | 30-34       | 34659.261   | 23552.637  | 11106.624  |
|      |       |        | 35-39       | 65652.924   | 44150.869  | 21502.055  |
|      |       |        | 40-44       | 133169.505  | 87423.408  | 45746.097  |
|      |       |        | 45-49       | 267988.924  | 170175.630 | 97813.294  |
|      |       |        | 50-54       | 523734.121  | 325037.523 | 198696.597 |
|      |       |        | 55-59       | 870859.170  | 527819.311 | 343039.859 |
|      |       |        | 60-64       | 1166683.329 | 724185.558 | 442497.771 |
|      |       |        | 65-69       | 1190003.066 | 757232.116 | 432770.950 |
|      |       |        | 70-74       | 588541.493  | 379936.375 | 208605.118 |
|      |       | 75-79  | 0.000       | 0.000       | 0.000      |            |

---

## Results for PHIM for Run 1 (Pessimistic\_Analysis.RTF)

)

System Date and Time: 20210220T083445  
User: JohnS  
SAS Version: 9.4  
Project: Population Health Impact Model 7.3

The System is running in Test Mode

Maximum Upper Age for P Component = 79  
Upper Age for ELL Calculations = 75  
Report in E-component: Social Classes A and B combined  
Description: Pessimistic Analysis for VeneBio on US  
Assumption Files:  
Options Control File: C:\VeneBio\OG\_Test\US\_Control\_V\_PA.CSV  
TTP Test File: C:\VeneBio\OG\_Test\TTP\_Test\_PA.csv  
TTP Reference File: C:\VeneBio\OG\_Test\TTP\_Reference\_V.csv  
TTP Factor Test File: C:\VeneBio\OG\_Test\TTP\_FACTOR\_Test.csv  
TTP Factor Reference File: C:\VeneBio\OG\_Test\TTP\_FACTOR\_Test.csv  
TP Socioeconomic Groups: Not Used  
Output Choices:C:\VeneBio\OG\_Test\OUTC\_PA.csv

Main Results will be sent to the folder C:\VeneBio\Main\_Results\  
Plots will be sent to the folder C:\VeneBio\Plot\_Results\Plots\_20210220T083445  
Saved P, E and/or A Component results will be sent to the folder C:\VeneBio\SAVED\Saved\_20210220T083445\

### Table of Contents

|                                                                                                                                                            |     |
|------------------------------------------------------------------------------------------------------------------------------------------------------------|-----|
| <a href="#">Control File Details for Run: 1</a>                                                                                                            | 124 |
| <a href="#">TTP values for Run: 1, Scenario: NULL</a>                                                                                                      | 125 |
| <a href="#">TTP values for Run: 1, Scenario: Ecig</a>                                                                                                      | 127 |
| <a href="#">Main Output for the Tobacco History for Run: 1, Simulation: 1, Scenario: NULL</a>                                                              | 131 |
| <a href="#">Main Output for the Tobacco History for Run: 1, Simulation: 1, Scenario: Ecig</a>                                                              | 133 |
| <a href="#">Main Results for E-Component for Run: 1, Simulation: 1, COD: Four Diseases Combined</a>                                                        | 149 |
| <a href="#">Main Results for E-Component for Run: 1, Simulation: 1, COD: LUNG CANCER</a>                                                                   | 150 |
| <a href="#">Main Results for E-Component for Run: 1, Simulation: 1, COD: IHD</a>                                                                           | 151 |
| <a href="#">Main Results for E-Component for Run: 1, Simulation: 1, COD: STROKE</a>                                                                        | 152 |
| <a href="#">Main Results for E-Component for Run: 1, Simulation: 1, COD: COPD</a>                                                                          | 153 |
| <a href="#">Main Results for E-Component for Run: 1, Simulation: 1, COD: Four Diseases Combined, Adjusted</a>                                              | 154 |
| <a href="#">Main Results for E-Component for Run: 1, Simulation: 1, COD: LUNG CANCER, Adjusted</a>                                                         | 155 |
| <a href="#">Main Results for E-Component for Run: 1, Simulation: 1, COD: IHD, Adjusted</a>                                                                 | 156 |
| <a href="#">Main Results for E-Component for Run: 1, Simulation: 1, COD: STROKE, Adjusted</a>                                                              | 157 |
| <a href="#">Main Results for E-Component for Run: 1, Simulation: 1, COD: COPD, Adjusted</a>                                                                | 158 |
| <a href="#">Control File Details for Run: 2</a>                                                                                                            | 159 |
| <a href="#">TTP values for Run: 2, Scenario: NULL</a>                                                                                                      | 160 |
| <a href="#">TTP values for Run: 2, Scenario: Ecig</a>                                                                                                      | 162 |
| <a href="#">Main Output for the Tobacco History for Run: 2, Simulation: 1, Scenario: NULL</a>                                                              | 166 |
| <a href="#">Main Output for the Tobacco History for Run: 2, Simulation: 1, Scenario: Ecig</a>                                                              | 168 |
| <a href="#">Main Results for E-Component for Run: 2, Simulation: 1, COD: Four Diseases Combined</a>                                                        | 184 |
| <a href="#">Main Results for E-Component for Run: 2, Simulation: 1, COD: LUNG CANCER</a>                                                                   | 185 |
| <a href="#">Main Results for E-Component for Run: 2, Simulation: 1, COD: IHD</a>                                                                           | 186 |
| <a href="#">Main Results for E-Component for Run: 2, Simulation: 1, COD: STROKE</a>                                                                        | 187 |
| <a href="#">Main Results for E-Component for Run: 2, Simulation: 1, COD: COPD</a>                                                                          | 188 |
| <a href="#">Main Results for E-Component for Run: 2, Simulation: 1, COD: Four Diseases Combined, Adjusted</a>                                              | 189 |
| <a href="#">Main Results for E-Component for Run: 2, Simulation: 1, COD: LUNG CANCER, Adjusted</a>                                                         | 190 |
| <a href="#">Main Results for E-Component for Run: 2, Simulation: 1, COD: IHD, Adjusted</a>                                                                 | 191 |
| <a href="#">Main Results for E-Component for Run: 2, Simulation: 1, COD: STROKE, Adjusted</a>                                                              | 192 |
| <a href="#">Main Results for E-Component for Run: 2, Simulation: 1, COD: COPD, Adjusted</a>                                                                | 193 |
| <a href="#">Estimated Loss of Life from the E Component for Run: 2, Simulation: 1</a>                                                                      | 194 |
| <a href="#">Table 1: Estimated Loss of Life, at the end of follow-up, all age groups combined, Population unadjusted for deaths in Ecig scenario</a>       | 194 |
| <a href="#">Table 2: Estimated Loss of Life, at the end of follow-up, all age groups combined, Population and Number deaths adjusted for Ecig scenario</a> | 195 |
| <a href="#">Table 3: Estimated Loss of Life, All age groups combined, Population unadjusted for deaths in Ecig scenario, cumulative over years</a>         | 196 |
| <a href="#">Table 4: Estimated Loss of Life, All age groups combined, Population and Number deaths adjusted for Ecig scenario, cumulative over years</a>   | 203 |
| <a href="#">Table 5: Estimated Loss of Life, at the end of follow-up, Population unadjusted for deaths in Ecig scenario</a>                                | 210 |
| <a href="#">Table 6: Estimated Loss of Life, at the end of follow-up, Population and Number deaths adjusted for Ecig scenario</a>                          | 212 |

## Results for PHIM for Run 1 (Pessimistic\_Analysis.RTF)

---

### Control File Details for Run: 1

| Variable Parameter                                       | Value                |
|----------------------------------------------------------|----------------------|
| 1. Name for Reference Scenario                           | NULL                 |
| 2. Name for Test Scenario                                | Ecig                 |
| 3. Name for Product 1                                    | CC                   |
| 4. Name for Product 2                                    | Ecig                 |
| 5. Name for Product 3                                    | -                    |
| 6. Name for Product 4                                    | Dual                 |
| 7. Country                                               | US (United States)   |
| 8. Sex                                                   | M (Males)            |
| 9. Year of start of process                              | 1990                 |
| 10. Number of months of follow-up                        | 600                  |
| 11. Follow-up interval length (in months)                | 12                   |
| 12. Lower age for risk estimation                        | 10                   |
| 13. Upper age for risk estimation                        | 79                   |
| 14. The effective dose for Product 1 (F1) - Ref          | 1                    |
| 15. The effective dose for Product 2 (F2) - Ref          | -                    |
| 16. The effective dose for Product 3 (F3) - Ref          | -                    |
| 17. The effective dose for Product 4 (F4) - Ref          | -                    |
| 18. The effective dose for Product 1 (F1) - Test         | 1                    |
| 19. The effective dose for Product 2 (F2) - Test         | 0.4                  |
| 20. The effective dose for Product 3 (F3) - Test         | -                    |
| 21. The effective dose for Product 4 (F4) - Test         | FROMF2               |
| 22. Number in population to be simulated                 | 100000               |
| 23. Number of MC simulations                             | 1                    |
| 24. The random number seed for the first simulation      | 15975263             |
| 25. Source for the population file (POP)                 | UN4                  |
| 26. Source for the socioeconomic prevalence file (SEP)   | -                    |
| 27. Source for the current smoking prevalence file (CSP) | ISS3                 |
| 28. Source for the former smoking prevalence file (FSP)  | ISS3                 |
| 29. Source for the quit-time distribution file (QTD)     | NHIS2006             |
| 30. Source for the death file (MORT)                     | APR-20               |
| 31. Source for the relative risk file (RR)               | PNLEST               |
| 32. Source for the half-life file (H)                    | PNLEST               |
| 33. Assumption Set for TTP Factor Reference              | F1                   |
| 34. Assumption Set for TTP Factor Test                   | F1                   |
| 35. Assumption Set for TTP Reference                     | ISS3                 |
| 36. Assumption Set for TTP Test                          | ISS3                 |
| 37. Assumption Set for TP for socioeconomic group        | -                    |
| 38. Source for Output Choice file (OUTC)                 | BASIC                |
| 39. Output for DTP P1                                    | N                    |
| 40. Output for DTP P2                                    | N                    |
| 41. Output for Main P Component                          | Y                    |
| 42. Output for DTP E1                                    | N                    |
| 43. Output for DTP E2                                    | N                    |
| 44. Output for DTP E3                                    | N                    |
| 45. Output for Main E Component                          | Y                    |
| 46. Output file name                                     | Pessimistic_Analysis |
| 47. Run number for P-Component                           | -                    |
| 48. Results file for E-Component                         | -                    |
| 49. Components required                                  | PE                   |
| 50. Results folder for P to be used in E-Component       | -                    |
| 51. Fixed age of starting product use                    | 16                   |
| 52. Output absolute risk file?                           | N                    |

## Results for PHIM for Run 1 (Pessimistic\_Analysis.RTF)

\*\*\*\*\*

TTP values for Run: 1, Scenario: NULL

| Variable Parameter | Value               |
|--------------------|---------------------|
| 1. Country         | US (United States)  |
| 2. Sex             | M (Males)           |
| 3. Assumption Set  | ISS3                |
| Note:              | Period is in Months |

| Age   | Period  | Initiation  | Cessation    | Re-initiation |
|-------|---------|-------------|--------------|---------------|
|       |         | Never<br>CC | CC<br>Former | Former<br>CC  |
| 10-14 | 1-12    | 0.003842    | 0.008742     | 0.000000      |
| 15-19 | 1-12    | 0.004720    | 0.003614     | 0.000000      |
| 20-24 | 1-12    | 0.000376    | 0.000943     | 0.000000      |
| 25-29 | 1-12    | 0.000187    | 0.001143     | 0.000000      |
| 30-34 | 1-12    | 0.000093    | 0.000871     | 0.000000      |
| 35-39 | 1-12    | 0.000000    | 0.000867     | 0.000000      |
| 40-44 | 1-12    | 0.000000    | 0.001399     | 0.000000      |
| 45-49 | 1-12    | 0.000000    | 0.002033     | 0.000000      |
| 50-54 | 1-12    | 0.000000    | 0.003209     | 0.000000      |
| 55-59 | 1-12    | 0.000000    | 0.003574     | 0.000000      |
| 60-64 | 1-12    | 0.000000    | 0.003460     | 0.000000      |
| 65-69 | 1-12    | 0.000000    | 0.004136     | 0.000000      |
| 70-74 | 1-12    | 0.000000    | 0.005592     | 0.000000      |
| 75-79 | 1-12    | 0.000000    | 0.005592     | 0.000000      |
| 10-14 | 13-72   | 0.004906    | 0.008742     | 0.000000      |
| 15-19 | 13-72   | 0.006989    | 0.004426     | 0.000000      |
| 20-24 | 13-72   | 0.000687    | 0.001527     | 0.000000      |
| 25-29 | 13-72   | 0.000962    | 0.001515     | 0.000000      |
| 30-34 | 13-72   | 0.000364    | 0.001227     | 0.000000      |
| 35-39 | 13-72   | 0.000000    | 0.001630     | 0.000000      |
| 40-44 | 13-72   | 0.000000    | 0.001852     | 0.000000      |
| 45-49 | 13-72   | 0.000000    | 0.002667     | 0.000000      |
| 50-54 | 13-72   | 0.000000    | 0.003208     | 0.000000      |
| 55-59 | 13-72   | 0.000000    | 0.003978     | 0.000000      |
| 60-64 | 13-72   | 0.000000    | 0.005771     | 0.000000      |
| 65-69 | 13-72   | 0.000000    | 0.010432     | 0.000000      |
| 70-74 | 13-72   | 0.000000    | 0.007079     | 0.000000      |
| 75-79 | 13-72   | 0.000000    | 0.007079     | 0.000000      |
| 10-14 | 73-132  | 0.004312    | 0.008742     | 0.000000      |
| 15-19 | 73-132  | 0.005330    | 0.003289     | 0.000000      |
| 20-24 | 73-132  | 0.002456    | 0.003844     | 0.000000      |
| 25-29 | 73-132  | 0.000839    | 0.002006     | 0.000000      |
| 30-34 | 73-132  | 0.000414    | 0.001329     | 0.000000      |
| 35-39 | 73-132  | 0.000000    | 0.001278     | 0.000000      |
| 40-44 | 73-132  | 0.000000    | 0.001691     | 0.000000      |
| 45-49 | 73-132  | 0.000000    | 0.002904     | 0.000000      |
| 50-54 | 73-132  | 0.000000    | 0.003319     | 0.000000      |
| 55-59 | 73-132  | 0.000000    | 0.003976     | 0.000000      |
| 60-64 | 73-132  | 0.000000    | 0.005235     | 0.000000      |
| 65-69 | 73-132  | 0.000000    | 0.005901     | 0.000000      |
| 70-74 | 73-132  | 0.000000    | 0.005615     | 0.000000      |
| 75-79 | 73-132  | 0.000000    | 0.005615     | 0.000000      |
| 10-14 | 133-192 | 0.003468    | 0.008742     | 0.000000      |
| 15-19 | 133-192 | 0.004675    | 0.003732     | 0.000000      |
| 20-24 | 133-192 | 0.000062    | 0.002260     | 0.000000      |
| 25-29 | 133-192 | 0.001422    | 0.002822     | 0.000000      |
| 30-34 | 133-192 | 0.000696    | 0.002610     | 0.000000      |
| 35-39 | 133-192 | 0.000000    | 0.002058     | 0.000000      |
| 40-44 | 133-192 | 0.000000    | 0.002310     | 0.000000      |
| 45-49 | 133-192 | 0.000000    | 0.002256     | 0.000000      |
| 50-54 | 133-192 | 0.000000    | 0.002663     | 0.000000      |
| 55-59 | 133-192 | 0.000000    | 0.001746     | 0.000000      |
| 60-64 | 133-192 | 0.000000    | 0.005809     | 0.000000      |
| 65-69 | 133-192 | 0.000000    | 0.005896     | 0.000000      |
| 70-74 | 133-192 | 0.000000    | 0.007323     | 0.000000      |
| 75-79 | 133-192 | 0.000000    | 0.007323     | 0.000000      |
| 10-14 | 193-252 | 0.002314    | 0.008742     | 0.000000      |
| 15-19 | 193-252 | 0.003987    | 0.005036     | 0.000000      |
| 20-24 | 193-252 | 0.000320    | 0.002857     | 0.000000      |
| 25-29 | 193-252 | 0.000251    | 0.002314     | 0.000000      |
| 30-34 | 193-252 | 0.000125    | 0.004343     | 0.000000      |
| 35-39 | 193-252 | 0.000000    | 0.002092     | 0.000000      |
| 40-44 | 193-252 | 0.000000    | 0.002566     | 0.000000      |
| 45-49 | 193-252 | 0.000000    | 0.002311     | 0.000000      |
| 50-54 | 193-252 | 0.000000    | 0.003209     | 0.000000      |

**Results for PHIM for Run 1 (Pessimistic\_Analysis.RTF)**

|       |         |          |          |          |
|-------|---------|----------|----------|----------|
| 55-59 | 193-252 | 0.000000 | 0.004057 | 0.000000 |
| 60-64 | 193-252 | 0.000000 | 0.007166 | 0.000000 |
| 65-69 | 193-252 | 0.000000 | 0.004281 | 0.000000 |
| 70-74 | 193-252 | 0.000000 | 0.004580 | 0.000000 |
| 75-79 | 193-252 | 0.000000 | 0.004580 | 0.000000 |
| 10-14 | 253+    | 0.001325 | 0.008742 | 0.000000 |
| 15-19 | 253+    | 0.002984 | 0.010602 | 0.000000 |
| 20-24 | 253+    | 0.000452 | 0.004314 | 0.000000 |
| 25-29 | 253+    | 0.000225 | 0.003645 | 0.000000 |
| 30-34 | 253+    | 0.000112 | 0.004512 | 0.000000 |
| 35-39 | 253+    | 0.000000 | 0.002147 | 0.000000 |
| 40-44 | 253+    | 0.000000 | 0.002636 | 0.000000 |
| 45-49 | 253+    | 0.000000 | 0.001051 | 0.000000 |
| 50-54 | 253+    | 0.000000 | 0.002519 | 0.000000 |
| 55-59 | 253+    | 0.000000 | 0.003693 | 0.000000 |
| 60-64 | 253+    | 0.000000 | 0.005888 | 0.000000 |
| 65-69 | 253+    | 0.000000 | 0.004823 | 0.000000 |
| 70-74 | 253+    | 0.000000 | 0.004733 | 0.000000 |
| 75-79 | 253+    | 0.000000 | 0.004733 | 0.000000 |

## Results for PHIM for Run 1 (Pessimistic\_Analysis.RTF)

\*\*\*\*\*

TTP values for Run: 1, Scenario: Ecig

| Variable Parameter |         | Value               |            |            |           |             |             |               |             |             |  |
|--------------------|---------|---------------------|------------|------------|-----------|-------------|-------------|---------------|-------------|-------------|--|
| 1. Country         |         | US (United States)  |            |            |           |             |             |               |             |             |  |
| 2. Sex             |         | M (Males)           |            |            |           |             |             |               |             |             |  |
| 3. Assumption Set  |         | ISS3                |            |            |           |             |             |               |             |             |  |
| Note:              |         | Period is in Months |            |            |           |             |             |               |             |             |  |
| Age                | Period  | Initiation          |            |            | Cessation |             |             | Re-initiation |             |             |  |
|                    |         | Never CC            | Never Ecig | Never Dual | CC Former | Ecig Former | Dual Former | Former CC     | Former Ecig | Former Dual |  |
| 10-14              | 1-12    | 0.001921            | 0.002882   | 0.000000   | 0.008742  | 0.004371    | 0.000000    | 0.000000      | 0.000000    | 0.000000    |  |
| 15-19              | 1-12    | 0.002360            | 0.003540   | 0.000000   | 0.003614  | 0.001807    | 0.000000    | 0.000000      | 0.000000    | 0.000000    |  |
| 20-24              | 1-12    | 0.000188            | 0.000282   | 0.000000   | 0.000943  | 0.000472    | 0.000000    | 0.000000      | 0.000000    | 0.000000    |  |
| 25-29              | 1-12    | 0.000093            | 0.000140   | 0.000000   | 0.001143  | 0.000571    | 0.000000    | 0.000000      | 0.000000    | 0.000000    |  |
| 30-34              | 1-12    | 0.000047            | 0.000070   | 0.000000   | 0.000871  | 0.000435    | 0.000000    | 0.000000      | 0.000000    | 0.000000    |  |
| 35-39              | 1-12    | 0.000000            | 0.000000   | 0.000000   | 0.000867  | 0.000433    | 0.000000    | 0.000000      | 0.000000    | 0.000000    |  |
| 40-44              | 1-12    | 0.000000            | 0.000000   | 0.000000   | 0.001399  | 0.000699    | 0.000000    | 0.000000      | 0.000000    | 0.000000    |  |
| 45-49              | 1-12    | 0.000000            | 0.000000   | 0.000000   | 0.002033  | 0.001016    | 0.000000    | 0.000000      | 0.000000    | 0.000000    |  |
| 50-54              | 1-12    | 0.000000            | 0.000000   | 0.000000   | 0.003209  | 0.001604    | 0.000000    | 0.000000      | 0.000000    | 0.000000    |  |
| 55-59              | 1-12    | 0.000000            | 0.000000   | 0.000000   | 0.003574  | 0.001787    | 0.000000    | 0.000000      | 0.000000    | 0.000000    |  |
| 60-64              | 1-12    | 0.000000            | 0.000000   | 0.000000   | 0.003460  | 0.001730    | 0.000000    | 0.000000      | 0.000000    | 0.000000    |  |
| 65-69              | 1-12    | 0.000000            | 0.000000   | 0.000000   | 0.004136  | 0.002068    | 0.000000    | 0.000000      | 0.000000    | 0.000000    |  |
| 70-74              | 1-12    | 0.000000            | 0.000000   | 0.000000   | 0.005592  | 0.002796    | 0.000000    | 0.000000      | 0.000000    | 0.000000    |  |
| 75-79              | 1-12    | 0.000000            | 0.000000   | 0.000000   | 0.005592  | 0.002796    | 0.000000    | 0.000000      | 0.000000    | 0.000000    |  |
| 10-14              | 13-72   | 0.001962            | 0.004415   | 0.000000   | 0.008742  | 0.004371    | 0.000000    | 0.000000      | 0.000000    | 0.000000    |  |
| 15-19              | 13-72   | 0.002796            | 0.006290   | 0.000000   | 0.004426  | 0.002213    | 0.000000    | 0.000000      | 0.000000    | 0.000000    |  |
| 20-24              | 13-72   | 0.000275            | 0.000618   | 0.000000   | 0.001527  | 0.000764    | 0.000000    | 0.000000      | 0.000000    | 0.000000    |  |
| 25-29              | 13-72   | 0.000385            | 0.000866   | 0.000000   | 0.001515  | 0.000758    | 0.000000    | 0.000000      | 0.000000    | 0.000000    |  |
| 30-34              | 13-72   | 0.000146            | 0.000328   | 0.000000   | 0.001227  | 0.000613    | 0.000000    | 0.000000      | 0.000000    | 0.000000    |  |
| 35-39              | 13-72   | 0.000000            | 0.000000   | 0.000000   | 0.001630  | 0.000815    | 0.000000    | 0.000000      | 0.000000    | 0.000000    |  |
| 40-44              | 13-72   | 0.000000            | 0.000000   | 0.000000   | 0.001852  | 0.000926    | 0.000000    | 0.000000      | 0.000000    | 0.000000    |  |
| 45-49              | 13-72   | 0.000000            | 0.000000   | 0.000000   | 0.002667  | 0.001333    | 0.000000    | 0.000000      | 0.000000    | 0.000000    |  |
| 50-54              | 13-72   | 0.000000            | 0.000000   | 0.000000   | 0.003208  | 0.001604    | 0.000000    | 0.000000      | 0.000000    | 0.000000    |  |
| 55-59              | 13-72   | 0.000000            | 0.000000   | 0.000000   | 0.003978  | 0.001989    | 0.000000    | 0.000000      | 0.000000    | 0.000000    |  |
| 60-64              | 13-72   | 0.000000            | 0.000000   | 0.000000   | 0.005771  | 0.002886    | 0.000000    | 0.000000      | 0.000000    | 0.000000    |  |
| 65-69              | 13-72   | 0.000000            | 0.000000   | 0.000000   | 0.010432  | 0.005216    | 0.000000    | 0.000000      | 0.000000    | 0.000000    |  |
| 70-74              | 13-72   | 0.000000            | 0.000000   | 0.000000   | 0.007079  | 0.003540    | 0.000000    | 0.000000      | 0.000000    | 0.000000    |  |
| 75-79              | 13-72   | 0.000000            | 0.000000   | 0.000000   | 0.007079  | 0.003540    | 0.000000    | 0.000000      | 0.000000    | 0.000000    |  |
| 10-14              | 73-132  | 0.000862            | 0.005174   | 0.000000   | 0.008742  | 0.004371    | 0.000000    | 0.000000      | 0.000000    | 0.000000    |  |
| 15-19              | 73-132  | 0.001066            | 0.006396   | 0.000000   | 0.003289  | 0.001645    | 0.000000    | 0.000000      | 0.000000    | 0.000000    |  |
| 20-24              | 73-132  | 0.000491            | 0.002947   | 0.000000   | 0.003844  | 0.001922    | 0.000000    | 0.000000      | 0.000000    | 0.000000    |  |
| 25-29              | 73-132  | 0.000168            | 0.001007   | 0.000000   | 0.002006  | 0.001003    | 0.000000    | 0.000000      | 0.000000    | 0.000000    |  |
| 30-34              | 73-132  | 0.000083            | 0.000497   | 0.000000   | 0.001329  | 0.000664    | 0.000000    | 0.000000      | 0.000000    | 0.000000    |  |
| 35-39              | 73-132  | 0.000000            | 0.000000   | 0.000000   | 0.001278  | 0.000639    | 0.000000    | 0.000000      | 0.000000    | 0.000000    |  |
| 40-44              | 73-132  | 0.000000            | 0.000000   | 0.000000   | 0.001691  | 0.000846    | 0.000000    | 0.000000      | 0.000000    | 0.000000    |  |
| 45-49              | 73-132  | 0.000000            | 0.000000   | 0.000000   | 0.002904  | 0.001452    | 0.000000    | 0.000000      | 0.000000    | 0.000000    |  |
| 50-54              | 73-132  | 0.000000            | 0.000000   | 0.000000   | 0.003319  | 0.001660    | 0.000000    | 0.000000      | 0.000000    | 0.000000    |  |
| 55-59              | 73-132  | 0.000000            | 0.000000   | 0.000000   | 0.003976  | 0.001988    | 0.000000    | 0.000000      | 0.000000    | 0.000000    |  |
| 60-64              | 73-132  | 0.000000            | 0.000000   | 0.000000   | 0.005235  | 0.002617    | 0.000000    | 0.000000      | 0.000000    | 0.000000    |  |
| 65-69              | 73-132  | 0.000000            | 0.000000   | 0.000000   | 0.005901  | 0.002951    | 0.000000    | 0.000000      | 0.000000    | 0.000000    |  |
| 70-74              | 73-132  | 0.000000            | 0.000000   | 0.000000   | 0.005615  | 0.002808    | 0.000000    | 0.000000      | 0.000000    | 0.000000    |  |
| 75-79              | 73-132  | 0.000000            | 0.000000   | 0.000000   | 0.005615  | 0.002808    | 0.000000    | 0.000000      | 0.000000    | 0.000000    |  |
| 10-14              | 133-192 | 0.000173            | 0.004941   | 0.000000   | 0.008742  | 0.004371    | 0.000000    | 0.000000      | 0.000000    | 0.000000    |  |
| 15-19              | 133-192 | 0.000234            | 0.006663   | 0.000000   | 0.003732  | 0.001866    | 0.000000    | 0.000000      | 0.000000    | 0.000000    |  |
| 20-24              | 133-192 | 0.000003            | 0.000089   | 0.000000   | 0.002260  | 0.001130    | 0.000000    | 0.000000      | 0.000000    | 0.000000    |  |
| 25-29              | 133-192 | 0.000071            | 0.002027   | 0.000000   | 0.002822  | 0.001411    | 0.000000    | 0.000000      | 0.000000    | 0.000000    |  |
| 30-34              | 133-192 | 0.000035            | 0.000992   | 0.000000   | 0.002610  | 0.001305    | 0.000000    | 0.000000      | 0.000000    | 0.000000    |  |
| 35-39              | 133-192 | 0.000000            | 0.000000   | 0.000000   | 0.002058  | 0.001029    | 0.000000    | 0.000000      | 0.000000    | 0.000000    |  |
| 40-44              | 133-192 | 0.000000            | 0.000000   | 0.000000   | 0.002310  | 0.001155    | 0.000000    | 0.000000      | 0.000000    | 0.000000    |  |
| 45-49              | 133-192 | 0.000000            | 0.000000   | 0.000000   | 0.002256  | 0.001128    | 0.000000    | 0.000000      | 0.000000    | 0.000000    |  |
| 50-54              | 133-192 | 0.000000            | 0.000000   | 0.000000   | 0.002663  | 0.001332    | 0.000000    | 0.000000      | 0.000000    | 0.000000    |  |
| 55-59              | 133-192 | 0.000000            | 0.000000   | 0.000000   | 0.001747  | 0.000873    | 0.000000    | 0.000000      | 0.000000    | 0.000000    |  |
| 60-64              | 133-192 | 0.000000            | 0.000000   | 0.000000   | 0.005809  | 0.002905    | 0.000000    | 0.000000      | 0.000000    | 0.000000    |  |
| 65-69              | 133-192 | 0.000000            | 0.000000   | 0.000000   | 0.005896  | 0.002948    | 0.000000    | 0.000000      | 0.000000    | 0.000000    |  |
| 70-74              | 133-192 | 0.000000            | 0.000000   | 0.000000   | 0.007323  | 0.003661    | 0.000000    | 0.000000      | 0.000000    | 0.000000    |  |
| 75-79              | 133-192 | 0.000000            | 0.000000   | 0.000000   | 0.007323  | 0.003661    | 0.000000    | 0.000000      | 0.000000    | 0.000000    |  |
| 10-14              | 193-252 | 0.000116            | 0.003298   | 0.000000   | 0.008742  | 0.004371    | 0.000000    | 0.000000      | 0.000000    | 0.000000    |  |
| 15-19              | 193-252 | 0.000199            | 0.005682   | 0.000000   | 0.005036  | 0.002518    | 0.000000    | 0.000000      | 0.000000    | 0.000000    |  |
| 20-24              | 193-252 | 0.000016            | 0.000456   | 0.000000   | 0.002857  | 0.001429    | 0.000000    | 0.000000      | 0.000000    | 0.000000    |  |
| 25-29              | 193-252 | 0.000013            | 0.000358   | 0.000000   | 0.002314  | 0.001157    | 0.000000    | 0.000000      | 0.000000    | 0.000000    |  |
| 30-34              | 193-252 | 0.000006            | 0.000178   | 0.000000   | 0.004343  | 0.002171    | 0.000000    | 0.000000      | 0.000000    | 0.000000    |  |
| 35-39              | 193-252 | 0.000000            | 0.000000   | 0.000000   | 0.002092  | 0.001046    | 0.000000    | 0.000000      | 0.000000    | 0.000000    |  |
| 40-44              | 193-252 | 0.000000            | 0.000000   | 0.000000   | 0.002566  | 0.001283    | 0.000000    | 0.000000      | 0.000000    | 0.000000    |  |
| 45-49              | 193-252 | 0.000000            | 0.000000   | 0.000000   | 0.002311  | 0.001156    | 0.000000    | 0.000000      | 0.000000    | 0.000000    |  |
| 50-54              | 193-252 | 0.000000            | 0.000000   | 0.000000   | 0.003209  | 0.001604    | 0.000000    | 0.000000      | 0.000000    | 0.000000    |  |

**Results for PHIM for Run 1 (Pessimistic\_Analysis.RTF)**

|       |         |          |          |          |          |          |          |          |          |          |
|-------|---------|----------|----------|----------|----------|----------|----------|----------|----------|----------|
| 55-59 | 193-252 | 0.000000 | 0.000000 | 0.000000 | 0.004057 | 0.002029 | 0.000000 | 0.000000 | 0.000000 | 0.000000 |
| 60-64 | 193-252 | 0.000000 | 0.000000 | 0.000000 | 0.007166 | 0.003583 | 0.000000 | 0.000000 | 0.000000 | 0.000000 |
| 65-69 | 193-252 | 0.000000 | 0.000000 | 0.000000 | 0.004281 | 0.002141 | 0.000000 | 0.000000 | 0.000000 | 0.000000 |
| 70-74 | 193-252 | 0.000000 | 0.000000 | 0.000000 | 0.004580 | 0.002290 | 0.000000 | 0.000000 | 0.000000 | 0.000000 |
| 75-79 | 193-252 | 0.000000 | 0.000000 | 0.000000 | 0.004580 | 0.002290 | 0.000000 | 0.000000 | 0.000000 | 0.000000 |
| 10-14 | 253+    | 0.000066 | 0.001888 | 0.000000 | 0.008742 | 0.004371 | 0.000000 | 0.000000 | 0.000000 | 0.000000 |
| 15-19 | 253+    | 0.000149 | 0.004253 | 0.000000 | 0.010602 | 0.005301 | 0.000000 | 0.000000 | 0.000000 | 0.000000 |
| 20-24 | 253+    | 0.000023 | 0.000644 | 0.000000 | 0.004314 | 0.002157 | 0.000000 | 0.000000 | 0.000000 | 0.000000 |
| 25-29 | 253+    | 0.000011 | 0.000320 | 0.000000 | 0.003645 | 0.001823 | 0.000000 | 0.000000 | 0.000000 | 0.000000 |
| 30-34 | 253+    | 0.000006 | 0.000160 | 0.000000 | 0.004512 | 0.002256 | 0.000000 | 0.000000 | 0.000000 | 0.000000 |
| 35-39 | 253+    | 0.000000 | 0.000000 | 0.000000 | 0.002147 | 0.001073 | 0.000000 | 0.000000 | 0.000000 | 0.000000 |
| 40-44 | 253+    | 0.000000 | 0.000000 | 0.000000 | 0.002636 | 0.001318 | 0.000000 | 0.000000 | 0.000000 | 0.000000 |
| 45-49 | 253+    | 0.000000 | 0.000000 | 0.000000 | 0.001051 | 0.000525 | 0.000000 | 0.000000 | 0.000000 | 0.000000 |
| 50-54 | 253+    | 0.000000 | 0.000000 | 0.000000 | 0.002519 | 0.001259 | 0.000000 | 0.000000 | 0.000000 | 0.000000 |
| 55-59 | 253+    | 0.000000 | 0.000000 | 0.000000 | 0.003693 | 0.001847 | 0.000000 | 0.000000 | 0.000000 | 0.000000 |
| 60-64 | 253+    | 0.000000 | 0.000000 | 0.000000 | 0.005888 | 0.002944 | 0.000000 | 0.000000 | 0.000000 | 0.000000 |
| 65-69 | 253+    | 0.000000 | 0.000000 | 0.000000 | 0.004823 | 0.002412 | 0.000000 | 0.000000 | 0.000000 | 0.000000 |
| 70-74 | 253+    | 0.000000 | 0.000000 | 0.000000 | 0.004733 | 0.002366 | 0.000000 | 0.000000 | 0.000000 | 0.000000 |
| 75-79 | 253+    | 0.000000 | 0.000000 | 0.000000 | 0.004733 | 0.002366 | 0.000000 | 0.000000 | 0.000000 | 0.000000 |





**Results for PHIM for Run 1 (Pessimistic\_Analysis.RTF)**

|       |      |          |          |          |          |          |          |
|-------|------|----------|----------|----------|----------|----------|----------|
| 25-29 | 253+ | 0.009232 | 0.000000 | 0.000000 | 0.000000 | 0.000000 | 0.000000 |
| 30-34 | 253+ | 0.009517 | 0.000000 | 0.000000 | 0.000000 | 0.000000 | 0.000000 |
| 35-39 | 253+ | 0.008769 | 0.000000 | 0.000000 | 0.000000 | 0.000000 | 0.000000 |
| 40-44 | 253+ | 0.008295 | 0.000000 | 0.000000 | 0.000000 | 0.000000 | 0.000000 |
| 45-49 | 253+ | 0.007061 | 0.000000 | 0.000000 | 0.000000 | 0.000000 | 0.000000 |
| 50-54 | 253+ | 0.005807 | 0.000000 | 0.000000 | 0.000000 | 0.000000 | 0.000000 |
| 55-59 | 253+ | 0.005067 | 0.000000 | 0.000000 | 0.000000 | 0.000000 | 0.000000 |
| 60-64 | 253+ | 0.003551 | 0.000000 | 0.000000 | 0.000000 | 0.000000 | 0.000000 |
| 65-69 | 253+ | 0.000907 | 0.000000 | 0.000000 | 0.000000 | 0.000000 | 0.000000 |
| 70-74 | 253+ | 0.000000 | 0.000000 | 0.000000 | 0.000000 | 0.000000 | 0.000000 |
| 75-79 | 253+ | 0.000000 | 0.000000 | 0.000000 | 0.000000 | 0.000000 | 0.000000 |

## Results for PHIM for Run 1 (Pessimistic\_Analysis.RTF)

\*\*\*\*\*

### Main Output for the Tobacco History for Run: 1, Simulation: 1, Scenario: NULL

| Variable Parameter          | Value              |
|-----------------------------|--------------------|
| 1. Country                  | US (United States) |
| 2. Sex                      | M (Males)          |
| 3. Year of start of process | 1990               |

Year of Follow-up: 2040, Age Group: All Ages  
 Period    Age Group    Smoking Group            N            %

|    |          |           |       |       |
|----|----------|-----------|-------|-------|
| 50 | All Ages | Never Any | 19445 | 50.68 |
| 50 | All Ages | CC        | 3024  | 7.88  |
| 50 | All Ages | Former    | 15896 | 41.43 |

Year of Follow-up: 2040, Age Group: 18-19  
 Period    Age Group    Smoking Group            N            %

|    |       |           |   |   |
|----|-------|-----------|---|---|
| 50 | 18-19 | Never Any | 0 | . |
| 50 | 18-19 | CC        | 0 | . |
| 50 | 18-19 | Former    | 0 | . |

Year of Follow-up: 2040, Age Group: 20-24  
 Period    Age Group    Smoking Group            N            %

|    |       |           |   |   |
|----|-------|-----------|---|---|
| 50 | 20-24 | Never Any | 0 | . |
| 50 | 20-24 | CC        | 0 | . |
| 50 | 20-24 | Former    | 0 | . |

Year of Follow-up: 2040, Age Group: 25-29  
 Period    Age Group    Smoking Group            N            %

|    |       |           |   |   |
|----|-------|-----------|---|---|
| 50 | 25-29 | Never Any | 0 | . |
| 50 | 25-29 | CC        | 0 | . |
| 50 | 25-29 | Former    | 0 | . |

Year of Follow-up: 2040, Age Group: 30-34  
 Period    Age Group    Smoking Group            N            %

|    |       |           |   |   |
|----|-------|-----------|---|---|
| 50 | 30-34 | Never Any | 0 | . |
| 50 | 30-34 | CC        | 0 | . |
| 50 | 30-34 | Former    | 0 | . |

Year of Follow-up: 2040, Age Group: 35-39  
 Period    Age Group    Smoking Group            N            %

|    |       |           |   |   |
|----|-------|-----------|---|---|
| 50 | 35-39 | Never Any | 0 | . |
| 50 | 35-39 | CC        | 0 | . |
| 50 | 35-39 | Former    | 0 | . |

Year of Follow-up: 2040, Age Group: 40-44  
 Period    Age Group    Smoking Group            N            %

|    |       |           |   |   |
|----|-------|-----------|---|---|
| 50 | 40-44 | Never Any | 0 | . |
| 50 | 40-44 | CC        | 0 | . |
| 50 | 40-44 | Former    | 0 | . |

Year of Follow-up: 2040, Age Group: 45-49  
 Period    Age Group    Smoking Group            N            %

|    |       |           |   |   |
|----|-------|-----------|---|---|
| 50 | 45-49 | Never Any | 0 | . |
| 50 | 45-49 | CC        | 0 | . |
| 50 | 45-49 | Former    | 0 | . |

Year of Follow-up: 2040, Age Group: 50-54  
 Period    Age Group    Smoking Group            N            %

|    |       |           |   |   |
|----|-------|-----------|---|---|
| 50 | 50-54 | Never Any | 0 | . |
| 50 | 50-54 | CC        | 0 | . |
| 50 | 50-54 | Former    | 0 | . |

Year of Follow-up: 2040, Age Group: 55-59  
 Period    Age Group    Smoking Group            N            %

|    |       |           |   |   |
|----|-------|-----------|---|---|
| 50 | 55-59 | Never Any | 0 | . |
| 50 | 55-59 | CC        | 0 | . |
| 50 | 55-59 | Former    | 0 | . |

Year of Follow-up: 2040, Age Group: 60-64  
 Period    Age Group    Smoking Group            N            %

**Results for PHIM for Run 1 (Pessimistic\_Analysis.RTF)**

|                                           |           |               |      |       |
|-------------------------------------------|-----------|---------------|------|-------|
| 50                                        | 60-64     | Never Any     | 4363 | 49.33 |
| 50                                        | 60-64     | CC            | 934  | 10.56 |
| 50                                        | 60-64     | Former        | 3548 | 40.11 |
| Year of Follow-up: 2040, Age Group: 65-69 |           |               |      |       |
| Period                                    | Age Group | Smoking Group | N    | %     |
| 50                                        | 65-69     | Never Any     | 4948 | 54.73 |
| 50                                        | 65-69     | CC            | 734  | 8.12  |
| 50                                        | 65-69     | Former        | 3358 | 37.15 |
| Year of Follow-up: 2040, Age Group: 70-74 |           |               |      |       |
| Period                                    | Age Group | Smoking Group | N    | %     |
| 50                                        | 70-74     | Never Any     | 5145 | 52.41 |
| 50                                        | 70-74     | CC            | 688  | 7.01  |
| 50                                        | 70-74     | Former        | 3983 | 40.58 |
| Year of Follow-up: 2040, Age Group: 75-79 |           |               |      |       |
| Period                                    | Age Group | Smoking Group | N    | %     |
| 50                                        | 75-79     | Never Any     | 4989 | 46.78 |
| 50                                        | 75-79     | CC            | 668  | 6.26  |
| 50                                        | 75-79     | Former        | 5007 | 46.95 |

## Results for PHIM for Run 1 (Pessimistic\_Analysis.RTF)

\*\*\*\*\*

### Main Output for the Tobacco History for Run: 1, Simulation: 1, Scenario: Ecig

| Variable Parameter                           |           | Value              |       |       |               |             |               |                |              |
|----------------------------------------------|-----------|--------------------|-------|-------|---------------|-------------|---------------|----------------|--------------|
| 1. Country                                   |           | US (United States) |       |       |               |             |               |                |              |
| 2. Sex                                       |           | M (Males)          |       |       |               |             |               |                |              |
| 3. Year of start of process                  |           | 1990               |       |       |               |             |               |                |              |
| Year of Follow-up: 1990, Age Group: All Ages |           |                    |       |       |               |             |               |                |              |
| Period                                       | Age Group | Smoking Group      | N     | %     | Ever Quit (N) | Ever Quit % | Mean Yrs Quit | Short Term (n) | Short Term % |
| 0                                            | All Ages  | Never Any          | 34075 | 39.78 |               |             |               |                |              |
| 0                                            | All Ages  | CC                 | 27323 | 31.90 | 0             | 0.00        |               |                |              |
| 0                                            | All Ages  | Ecig               | 0     | 0.00  |               |             |               |                |              |
| 0                                            | All Ages  | Dual               | 0     | 0.00  |               |             |               |                |              |
| 0                                            | All Ages  | Former             | 24266 | 28.33 |               |             | 13.08         | 3623           | 14.93        |
| Year of Follow-up: 1990, Age Group: 18-19    |           |                    |       |       |               |             |               |                |              |
| Period                                       | Age Group | Smoking Group      | N     | %     | Ever Quit (N) | Ever Quit % | Mean Yrs Quit | Short Term (n) | Short Term % |
| 0                                            | 18-19     | Never Any          | 2783  | 78.42 |               |             |               |                |              |
| 0                                            | 18-19     | CC                 | 634   | 17.86 | 0             | 0.00        |               |                |              |
| 0                                            | 18-19     | Ecig               | 0     | 0.00  |               |             |               |                |              |
| 0                                            | 18-19     | Dual               | 0     | 0.00  |               |             |               |                |              |
| 0                                            | 18-19     | Former             | 132   | 3.72  |               |             | 0.11          | 132            | 100.00       |
| Year of Follow-up: 1990, Age Group: 20-24    |           |                    |       |       |               |             |               |                |              |
| Period                                       | Age Group | Smoking Group      | N     | %     | Ever Quit (N) | Ever Quit % | Mean Yrs Quit | Short Term (n) | Short Term % |
| 0                                            | 20-24     | Never Any          | 5722  | 58.29 |               |             |               |                |              |
| 0                                            | 20-24     | CC                 | 3199  | 32.59 | 0             | 0.00        |               |                |              |
| 0                                            | 20-24     | Ecig               | 0     | 0.00  |               |             |               |                |              |
| 0                                            | 20-24     | Dual               | 0     | 0.00  |               |             |               |                |              |
| 0                                            | 20-24     | Former             | 895   | 9.12  |               |             | 1.46          | 506            | 56.54        |
| Year of Follow-up: 1990, Age Group: 25-29    |           |                    |       |       |               |             |               |                |              |
| Period                                       | Age Group | Smoking Group      | N     | %     | Ever Quit (N) | Ever Quit % | Mean Yrs Quit | Short Term (n) | Short Term % |
| 0                                            | 25-29     | Never Any          | 5232  | 49.06 |               |             |               |                |              |
| 0                                            | 25-29     | CC                 | 3914  | 36.70 | 0             | 0.00        |               |                |              |
| 0                                            | 25-29     | Ecig               | 0     | 0.00  |               |             |               |                |              |
| 0                                            | 25-29     | Dual               | 0     | 0.00  |               |             |               |                |              |
| 0                                            | 25-29     | Former             | 1518  | 14.23 |               |             | 2.87          | 643            | 42.36        |
| Year of Follow-up: 1990, Age Group: 30-34    |           |                    |       |       |               |             |               |                |              |
| Period                                       | Age Group | Smoking Group      | N     | %     | Ever Quit (N) | Ever Quit % | Mean Yrs Quit | Short Term (n) | Short Term % |
| 0                                            | 30-34     | Never Any          | 4765  | 43.65 |               |             |               |                |              |
| 0                                            | 30-34     | CC                 | 4023  | 36.85 | 0             | 0.00        |               |                |              |
| 0                                            | 30-34     | Ecig               | 0     | 0.00  |               |             |               |                |              |
| 0                                            | 30-34     | Dual               | 0     | 0.00  |               |             |               |                |              |
| 0                                            | 30-34     | Former             | 2128  | 19.49 |               |             | 4.06          | 592            | 27.82        |
| Year of Follow-up: 1990, Age Group: 35-39    |           |                    |       |       |               |             |               |                |              |
| Period                                       | Age Group | Smoking Group      | N     | %     | Ever Quit (N) | Ever Quit % | Mean Yrs Quit | Short Term (n) | Short Term % |
| 0                                            | 35-39     | Never Any          | 3941  | 39.85 |               |             |               |                |              |
| 0                                            | 35-39     | CC                 | 3474  | 35.13 | 0             | 0.00        |               |                |              |
| 0                                            | 35-39     | Ecig               | 0     | 0.00  |               |             |               |                |              |
| 0                                            | 35-39     | Dual               | 0     | 0.00  |               |             |               |                |              |
| 0                                            | 35-39     | Former             | 2474  | 25.02 |               |             | 8.31          | 425            | 17.18        |
| Year of Follow-up: 1990, Age Group: 40-44    |           |                    |       |       |               |             |               |                |              |
| Period                                       | Age Group | Smoking Group      | N     | %     | Ever Quit (N) | Ever Quit % | Mean Yrs Quit | Short Term (n) | Short Term % |
| 0                                            | 40-44     | Never Any          | 2912  | 33.65 |               |             |               |                |              |
| 0                                            | 40-44     | CC                 | 3113  | 35.97 | 0             | 0.00        |               |                |              |
| 0                                            | 40-44     | Ecig               | 0     | 0.00  |               |             |               |                |              |
| 0                                            | 40-44     | Dual               | 0     | 0.00  |               |             |               |                |              |
| 0                                            | 40-44     | Former             | 2630  | 30.39 |               |             | 10.69         | 317            | 12.05        |
| Year of Follow-up: 1990, Age Group: 45-49    |           |                    |       |       |               |             |               |                |              |
| Period                                       | Age Group | Smoking Group      | N     | %     | Ever Quit (N) | Ever Quit % | Mean Yrs Quit | Short Term (n) | Short Term % |
| 0                                            | 45-49     | Never Any          | 1919  | 29.46 |               |             |               |                |              |
| 0                                            | 45-49     | CC                 | 2318  | 35.58 | 0             | 0.00        |               |                |              |
| 0                                            | 45-49     | Ecig               | 0     | 0.00  |               |             |               |                |              |
| 0                                            | 45-49     | Dual               | 0     | 0.00  |               |             |               |                |              |
| 0                                            | 45-49     | Former             | 2278  | 34.97 |               |             | 13.26         | 221            | 9.70         |
| Year of Follow-up: 1990, Age Group: 50-54    |           |                    |       |       |               |             |               |                |              |
| Period                                       | Age Group | Smoking Group      | N     | %     | Ever Quit (N) | Ever Quit % | Mean Yrs Quit | Short Term (n) | Short Term % |
| 0                                            | 50-54     | Never Any          | 1611  | 29.41 |               |             |               |                |              |
| 0                                            | 50-54     | CC                 | 1816  | 33.16 | 0             | 0.00        |               |                |              |

**Results for PHIM for Run 1 (Pessimistic\_Analysis.RTF)**

|                                              |           |               |       |       |               |             |               |                |              |
|----------------------------------------------|-----------|---------------|-------|-------|---------------|-------------|---------------|----------------|--------------|
| 0                                            | 50-54     | Ecig          | 0     | 0.00  |               |             |               |                |              |
| 0                                            | 50-54     | Dual          | 0     | 0.00  |               |             |               |                |              |
| 0                                            | 50-54     | Former        | 2050  | 37.43 |               |             | 14.55         | 261            | 12.73        |
| Year of Follow-up: 1990, Age Group: 55-59    |           |               |       |       |               |             |               |                |              |
| Period                                       | Age Group | Smoking Group | N     | %     | Ever Quit (N) | Ever Quit % | Mean Yrs Quit | Short Term (n) | Short Term % |
| 0                                            | 55-59     | Never Any     | 1337  | 26.83 |               |             |               |                |              |
| 0                                            | 55-59     | CC            | 1520  | 30.50 | 0             | 0.00        |               |                |              |
| 0                                            | 55-59     | Ecig          | 0     | 0.00  |               |             |               |                |              |
| 0                                            | 55-59     | Dual          | 0     | 0.00  |               |             |               |                |              |
| 0                                            | 55-59     | Former        | 2126  | 42.67 |               |             | 14.80         | 216            | 10.16        |
| Year of Follow-up: 1990, Age Group: 60-64    |           |               |       |       |               |             |               |                |              |
| Period                                       | Age Group | Smoking Group | N     | %     | Ever Quit (N) | Ever Quit % | Mean Yrs Quit | Short Term (n) | Short Term % |
| 0                                            | 60-64     | Never Any     | 1169  | 23.83 |               |             |               |                |              |
| 0                                            | 60-64     | CC            | 1287  | 26.24 | 0             | 0.00        |               |                |              |
| 0                                            | 60-64     | Ecig          | 0     | 0.00  |               |             |               |                |              |
| 0                                            | 60-64     | Dual          | 0     | 0.00  |               |             |               |                |              |
| 0                                            | 60-64     | Former        | 2449  | 49.93 |               |             | 18.87         | 106            | 4.33         |
| Year of Follow-up: 1990, Age Group: 65-69    |           |               |       |       |               |             |               |                |              |
| Period                                       | Age Group | Smoking Group | N     | %     | Ever Quit (N) | Ever Quit % | Mean Yrs Quit | Short Term (n) | Short Term % |
| 0                                            | 65-69     | Never Any     | 1023  | 23.32 |               |             |               |                |              |
| 0                                            | 65-69     | CC            | 979   | 22.32 | 0             | 0.00        |               |                |              |
| 0                                            | 65-69     | Ecig          | 0     | 0.00  |               |             |               |                |              |
| 0                                            | 65-69     | Dual          | 0     | 0.00  |               |             |               |                |              |
| 0                                            | 65-69     | Former        | 2385  | 54.37 |               |             | 19.91         | 113            | 4.74         |
| Year of Follow-up: 1990, Age Group: 70-74    |           |               |       |       |               |             |               |                |              |
| Period                                       | Age Group | Smoking Group | N     | %     | Ever Quit (N) | Ever Quit % | Mean Yrs Quit | Short Term (n) | Short Term % |
| 0                                            | 70-74     | Never Any     | 961   | 27.46 |               |             |               |                |              |
| 0                                            | 70-74     | CC            | 675   | 19.29 | 0             | 0.00        |               |                |              |
| 0                                            | 70-74     | Ecig          | 0     | 0.00  |               |             |               |                |              |
| 0                                            | 70-74     | Dual          | 0     | 0.00  |               |             |               |                |              |
| 0                                            | 70-74     | Former        | 1863  | 53.24 |               |             | 20.69         | 23             | 1.23         |
| Year of Follow-up: 1990, Age Group: 75-79    |           |               |       |       |               |             |               |                |              |
| Period                                       | Age Group | Smoking Group | N     | %     | Ever Quit (N) | Ever Quit % | Mean Yrs Quit | Short Term (n) | Short Term % |
| 0                                            | 75-79     | Never Any     | 700   | 29.06 |               |             |               |                |              |
| 0                                            | 75-79     | CC            | 371   | 15.40 | 0             | 0.00        |               |                |              |
| 0                                            | 75-79     | Ecig          | 0     | 0.00  |               |             |               |                |              |
| 0                                            | 75-79     | Dual          | 0     | 0.00  |               |             |               |                |              |
| 0                                            | 75-79     | Former        | 1338  | 55.54 |               |             | 22.88         | 68             | 5.08         |
| Year of Follow-up: 1995, Age Group: All Ages |           |               |       |       |               |             |               |                |              |
| Period                                       | Age Group | Smoking Group | N     | %     | Ever Quit (N) | Ever Quit % | Mean Yrs Quit | Short Term (n) | Short Term % |
| 5                                            | All Ages  | Never Any     | 37668 | 40.81 |               |             |               |                |              |
| 5                                            | All Ages  | CC            | 16332 | 17.70 | 0             | 0.00        |               |                |              |
| 5                                            | All Ages  | Ecig          | 11519 | 12.48 |               |             |               |                |              |
| 5                                            | All Ages  | Dual          | 0     | 0.00  |               |             |               |                |              |
| 5                                            | All Ages  | Former        | 26771 | 29.01 |               |             | 15.26         | 1588           | 5.93         |
| Year of Follow-up: 1995, Age Group: 18-19    |           |               |       |       |               |             |               |                |              |
| Period                                       | Age Group | Smoking Group | N     | %     | Ever Quit (N) | Ever Quit % | Mean Yrs Quit | Short Term (n) | Short Term % |
| 5                                            | 18-19     | Never Any     | 2215  | 62.50 |               |             |               |                |              |
| 5                                            | 18-19     | CC            | 361   | 10.19 | 0             | 0.00        |               |                |              |
| 5                                            | 18-19     | Ecig          | 884   | 24.94 |               |             |               |                |              |
| 5                                            | 18-19     | Dual          | 0     | 0.00  |               |             |               |                |              |
| 5                                            | 18-19     | Former        | 84    | 2.37  |               |             | 0.95          | 63             | 75.00        |
| Year of Follow-up: 1995, Age Group: 20-24    |           |               |       |       |               |             |               |                |              |
| Period                                       | Age Group | Smoking Group | N     | %     | Ever Quit (N) | Ever Quit % | Mean Yrs Quit | Short Term (n) | Short Term % |
| 5                                            | 20-24     | Never Any     | 5440  | 60.18 |               |             |               |                |              |
| 5                                            | 20-24     | CC            | 1327  | 14.68 | 0             | 0.00        |               |                |              |
| 5                                            | 20-24     | Ecig          | 1734  | 19.18 |               |             |               |                |              |
| 5                                            | 20-24     | Dual          | 0     | 0.00  |               |             |               |                |              |
| 5                                            | 20-24     | Former        | 539   | 5.96  |               |             | 2.77          | 160            | 29.68        |
| Year of Follow-up: 1995, Age Group: 25-29    |           |               |       |       |               |             |               |                |              |
| Period                                       | Age Group | Smoking Group | N     | %     | Ever Quit (N) | Ever Quit % | Mean Yrs Quit | Short Term (n) | Short Term % |
| 5                                            | 25-29     | Never Any     | 5406  | 55.07 |               |             |               |                |              |
| 5                                            | 25-29     | CC            | 1806  | 18.40 | 0             | 0.00        |               |                |              |
| 5                                            | 25-29     | Ecig          | 1496  | 15.24 |               |             |               |                |              |
| 5                                            | 25-29     | Dual          | 0     | 0.00  |               |             |               |                |              |
| 5                                            | 25-29     | Former        | 1108  | 11.29 |               |             | 5.57          | 90             | 8.12         |
| Year of Follow-up: 1995, Age Group: 30-34    |           |               |       |       |               |             |               |                |              |
| Period                                       | Age Group | Smoking Group | N     | %     | Ever Quit (N) | Ever Quit % | Mean Yrs Quit | Short Term (n) | Short Term % |

**Results for PHIM for Run 1 (Pessimistic\_Analysis.RTF)**

|                                              |           |               |      |       |               |             |               |                |              |
|----------------------------------------------|-----------|---------------|------|-------|---------------|-------------|---------------|----------------|--------------|
| 5                                            | 30-34     | Never Any     | 5022 | 47.09 |               |             |               |                |              |
| 5                                            | 30-34     | CC            | 2076 | 19.47 | 0             | 0.00        |               |                |              |
| 5                                            | 30-34     | Ecig          | 1797 | 16.85 |               |             |               |                |              |
| 5                                            | 30-34     | Dual          | 0    | 0.00  |               |             |               |                |              |
| 5                                            | 30-34     | Former        | 1769 | 16.59 |               |             | 7.05          | 87             | 4.92         |
| Year of Follow-up: 1995, Age Group: 35-39    |           |               |      |       |               |             |               |                |              |
| Period                                       | Age Group | Smoking Group | N    | %     | Ever Quit (N) | Ever Quit % | Mean Yrs Quit | Short Term (n) | Short Term % |
| 5                                            | 35-39     | Never Any     | 4712 | 43.17 |               |             |               |                |              |
| 5                                            | 35-39     | CC            | 2143 | 19.63 | 0             | 0.00        |               |                |              |
| 5                                            | 35-39     | Ecig          | 1653 | 15.14 |               |             |               |                |              |
| 5                                            | 35-39     | Dual          | 0    | 0.00  |               |             |               |                |              |
| 5                                            | 35-39     | Former        | 2408 | 22.06 |               |             | 8.24          | 112            | 4.65         |
| Year of Follow-up: 1995, Age Group: 40-44    |           |               |      |       |               |             |               |                |              |
| Period                                       | Age Group | Smoking Group | N    | %     | Ever Quit (N) | Ever Quit % | Mean Yrs Quit | Short Term (n) | Short Term % |
| 5                                            | 40-44     | Never Any     | 3941 | 39.85 |               |             |               |                |              |
| 5                                            | 40-44     | CC            | 1852 | 18.73 | 0             | 0.00        |               |                |              |
| 5                                            | 40-44     | Ecig          | 1336 | 13.51 |               |             |               |                |              |
| 5                                            | 40-44     | Dual          | 0    | 0.00  |               |             |               |                |              |
| 5                                            | 40-44     | Former        | 2760 | 27.91 |               |             | 12.10         | 137            | 4.96         |
| Year of Follow-up: 1995, Age Group: 45-49    |           |               |      |       |               |             |               |                |              |
| Period                                       | Age Group | Smoking Group | N    | %     | Ever Quit (N) | Ever Quit % | Mean Yrs Quit | Short Term (n) | Short Term % |
| 5                                            | 45-49     | Never Any     | 2912 | 33.65 |               |             |               |                |              |
| 5                                            | 45-49     | CC            | 1733 | 20.02 | 0             | 0.00        |               |                |              |
| 5                                            | 45-49     | Ecig          | 1056 | 12.20 |               |             |               |                |              |
| 5                                            | 45-49     | Dual          | 0    | 0.00  |               |             |               |                |              |
| 5                                            | 45-49     | Former        | 2954 | 34.13 |               |             | 14.16         | 141            | 4.77         |
| Year of Follow-up: 1995, Age Group: 50-54    |           |               |      |       |               |             |               |                |              |
| Period                                       | Age Group | Smoking Group | N    | %     | Ever Quit (N) | Ever Quit % | Mean Yrs Quit | Short Term (n) | Short Term % |
| 5                                            | 50-54     | Never Any     | 1919 | 29.46 |               |             |               |                |              |
| 5                                            | 50-54     | CC            | 1375 | 21.11 | 0             | 0.00        |               |                |              |
| 5                                            | 50-54     | Ecig          | 649  | 9.96  |               |             |               |                |              |
| 5                                            | 50-54     | Dual          | 0    | 0.00  |               |             |               |                |              |
| 5                                            | 50-54     | Former        | 2572 | 39.48 |               |             | 16.39         | 111            | 4.32         |
| Year of Follow-up: 1995, Age Group: 55-59    |           |               |      |       |               |             |               |                |              |
| Period                                       | Age Group | Smoking Group | N    | %     | Ever Quit (N) | Ever Quit % | Mean Yrs Quit | Short Term (n) | Short Term % |
| 5                                            | 55-59     | Never Any     | 1611 | 29.41 |               |             |               |                |              |
| 5                                            | 55-59     | CC            | 1051 | 19.19 | 0             | 0.00        |               |                |              |
| 5                                            | 55-59     | Ecig          | 434  | 7.92  |               |             |               |                |              |
| 5                                            | 55-59     | Dual          | 0    | 0.00  |               |             |               |                |              |
| 5                                            | 55-59     | Former        | 2381 | 43.47 |               |             | 17.12         | 121            | 5.08         |
| Year of Follow-up: 1995, Age Group: 60-64    |           |               |      |       |               |             |               |                |              |
| Period                                       | Age Group | Smoking Group | N    | %     | Ever Quit (N) | Ever Quit % | Mean Yrs Quit | Short Term (n) | Short Term % |
| 5                                            | 60-64     | Never Any     | 1337 | 26.83 |               |             |               |                |              |
| 5                                            | 60-64     | CC            | 869  | 17.44 | 0             | 0.00        |               |                |              |
| 5                                            | 60-64     | Ecig          | 306  | 6.14  |               |             |               |                |              |
| 5                                            | 60-64     | Dual          | 0    | 0.00  |               |             |               |                |              |
| 5                                            | 60-64     | Former        | 2471 | 49.59 |               |             | 17.31         | 133            | 5.38         |
| Year of Follow-up: 1995, Age Group: 65-69    |           |               |      |       |               |             |               |                |              |
| Period                                       | Age Group | Smoking Group | N    | %     | Ever Quit (N) | Ever Quit % | Mean Yrs Quit | Short Term (n) | Short Term % |
| 5                                            | 65-69     | Never Any     | 1169 | 23.83 |               |             |               |                |              |
| 5                                            | 65-69     | CC            | 708  | 14.43 | 0             | 0.00        |               |                |              |
| 5                                            | 65-69     | Ecig          | 156  | 3.18  |               |             |               |                |              |
| 5                                            | 65-69     | Dual          | 0    | 0.00  |               |             |               |                |              |
| 5                                            | 65-69     | Former        | 2872 | 58.55 |               |             | 20.61         | 202            | 7.03         |
| Year of Follow-up: 1995, Age Group: 70-74    |           |               |      |       |               |             |               |                |              |
| Period                                       | Age Group | Smoking Group | N    | %     | Ever Quit (N) | Ever Quit % | Mean Yrs Quit | Short Term (n) | Short Term % |
| 5                                            | 70-74     | Never Any     | 1023 | 23.32 |               |             |               |                |              |
| 5                                            | 70-74     | CC            | 595  | 13.56 | 0             | 0.00        |               |                |              |
| 5                                            | 70-74     | Ecig          | 18   | 0.41  |               |             |               |                |              |
| 5                                            | 70-74     | Dual          | 0    | 0.00  |               |             |               |                |              |
| 5                                            | 70-74     | Former        | 2751 | 62.71 |               |             | 21.85         | 137            | 4.98         |
| Year of Follow-up: 1995, Age Group: 75-79    |           |               |      |       |               |             |               |                |              |
| Period                                       | Age Group | Smoking Group | N    | %     | Ever Quit (N) | Ever Quit % | Mean Yrs Quit | Short Term (n) | Short Term % |
| 5                                            | 75-79     | Never Any     | 961  | 27.46 |               |             |               |                |              |
| 5                                            | 75-79     | CC            | 436  | 12.46 | 0             | 0.00        |               |                |              |
| 5                                            | 75-79     | Ecig          | 0    | 0.00  |               |             |               |                |              |
| 5                                            | 75-79     | Dual          | 0    | 0.00  |               |             |               |                |              |
| 5                                            | 75-79     | Former        | 2102 | 60.07 |               |             | 23.00         | 94             | 4.47         |
| Year of Follow-up: 2000, Age Group: All Ages |           |               |      |       |               |             |               |                |              |

**Results for PHIM for Run 1 (Pessimistic\_Analysis.RTF)**

| Period                                    | Age Group | Smoking Group | N     | %     | Ever Quit (N) | Ever Quit % | Mean Yrs Quit | Short Term (n) | Short Term % |
|-------------------------------------------|-----------|---------------|-------|-------|---------------|-------------|---------------|----------------|--------------|
| 10                                        | All Ages  | Never Any     | 37583 | 39.94 |               |             |               |                |              |
| 10                                        | All Ages  | CC            | 9539  | 10.14 | 0             | 0.00        |               |                |              |
| 10                                        | All Ages  | Ecig          | 18758 | 19.94 |               |             |               |                |              |
| 10                                        | All Ages  | Dual          | 0     | 0.00  |               |             |               |                |              |
| 10                                        | All Ages  | Former        | 28212 | 29.98 |               |             | 17.42         | 1320           | 4.68         |
| Year of Follow-up: 2000, Age Group: 18-19 |           |               |       |       |               |             |               |                |              |
| Period                                    | Age Group | Smoking Group | N     | %     | Ever Quit (N) | Ever Quit % | Mean Yrs Quit | Short Term (n) | Short Term % |
| 10                                        | 18-19     | Never Any     | 0     | .     |               |             |               |                |              |
| 10                                        | 18-19     | CC            | 0     | .     | 0             | .           |               |                |              |
| 10                                        | 18-19     | Ecig          | 0     | .     |               |             |               |                |              |
| 10                                        | 18-19     | Dual          | 0     | .     |               |             |               |                |              |
| 10                                        | 18-19     | Former        | 0     | .     |               |             |               | 0              | .            |
| Year of Follow-up: 2000, Age Group: 20-24 |           |               |       |       |               |             |               |                |              |
| Period                                    | Age Group | Smoking Group | N     | %     | Ever Quit (N) | Ever Quit % | Mean Yrs Quit | Short Term (n) | Short Term % |
| 10                                        | 20-24     | Never Any     | 4038  | 45.65 |               |             |               |                |              |
| 10                                        | 20-24     | CC            | 664   | 7.51  | 0             | 0.00        |               |                |              |
| 10                                        | 20-24     | Ecig          | 3423  | 38.70 |               |             |               |                |              |
| 10                                        | 20-24     | Dual          | 0     | 0.00  |               |             |               |                |              |
| 10                                        | 20-24     | Former        | 720   | 8.14  |               |             | 3.45          | 196            | 27.22        |
| Year of Follow-up: 2000, Age Group: 25-29 |           |               |       |       |               |             |               |                |              |
| Period                                    | Age Group | Smoking Group | N     | %     | Ever Quit (N) | Ever Quit % | Mean Yrs Quit | Short Term (n) | Short Term % |
| 10                                        | 25-29     | Never Any     | 4870  | 53.87 |               |             |               |                |              |
| 10                                        | 25-29     | CC            | 750   | 8.30  | 0             | 0.00        |               |                |              |
| 10                                        | 25-29     | Ecig          | 2557  | 28.29 |               |             |               |                |              |
| 10                                        | 25-29     | Dual          | 0     | 0.00  |               |             |               |                |              |
| 10                                        | 25-29     | Former        | 863   | 9.55  |               |             | 5.57          | 131            | 15.18        |
| Year of Follow-up: 2000, Age Group: 30-34 |           |               |       |       |               |             |               |                |              |
| Period                                    | Age Group | Smoking Group | N     | %     | Ever Quit (N) | Ever Quit % | Mean Yrs Quit | Short Term (n) | Short Term % |
| 10                                        | 30-34     | Never Any     | 5125  | 52.21 |               |             |               |                |              |
| 10                                        | 30-34     | CC            | 979   | 9.97  | 0             | 0.00        |               |                |              |
| 10                                        | 30-34     | Ecig          | 2359  | 24.03 |               |             |               |                |              |
| 10                                        | 30-34     | Dual          | 0     | 0.00  |               |             |               |                |              |
| 10                                        | 30-34     | Former        | 1353  | 13.78 |               |             | 9.04          | 88             | 6.50         |
| Year of Follow-up: 2000, Age Group: 35-39 |           |               |       |       |               |             |               |                |              |
| Period                                    | Age Group | Smoking Group | N     | %     | Ever Quit (N) | Ever Quit % | Mean Yrs Quit | Short Term (n) | Short Term % |
| 10                                        | 35-39     | Never Any     | 4926  | 46.19 |               |             |               |                |              |
| 10                                        | 35-39     | CC            | 1168  | 10.95 | 0             | 0.00        |               |                |              |
| 10                                        | 35-39     | Ecig          | 2621  | 24.58 |               |             |               |                |              |
| 10                                        | 35-39     | Dual          | 0     | 0.00  |               |             |               |                |              |
| 10                                        | 35-39     | Former        | 1949  | 18.28 |               |             | 11.12         | 64             | 3.28         |
| Year of Follow-up: 2000, Age Group: 40-44 |           |               |       |       |               |             |               |                |              |
| Period                                    | Age Group | Smoking Group | N     | %     | Ever Quit (N) | Ever Quit % | Mean Yrs Quit | Short Term (n) | Short Term % |
| 10                                        | 40-44     | Never Any     | 4712  | 43.17 |               |             |               |                |              |
| 10                                        | 40-44     | CC            | 1178  | 10.79 | 0             | 0.00        |               |                |              |
| 10                                        | 40-44     | Ecig          | 2393  | 21.92 |               |             |               |                |              |
| 10                                        | 40-44     | Dual          | 0     | 0.00  |               |             |               |                |              |
| 10                                        | 40-44     | Former        | 2633  | 24.12 |               |             | 12.29         | 81             | 3.08         |
| Year of Follow-up: 2000, Age Group: 45-49 |           |               |       |       |               |             |               |                |              |
| Period                                    | Age Group | Smoking Group | N     | %     | Ever Quit (N) | Ever Quit % | Mean Yrs Quit | Short Term (n) | Short Term % |
| 10                                        | 45-49     | Never Any     | 3941  | 39.85 |               |             |               |                |              |
| 10                                        | 45-49     | CC            | 1039  | 10.51 | 0             | 0.00        |               |                |              |
| 10                                        | 45-49     | Ecig          | 1880  | 19.01 |               |             |               |                |              |
| 10                                        | 45-49     | Dual          | 0     | 0.00  |               |             |               |                |              |
| 10                                        | 45-49     | Former        | 3029  | 30.63 |               |             | 15.75         | 116            | 3.83         |
| Year of Follow-up: 2000, Age Group: 50-54 |           |               |       |       |               |             |               |                |              |
| Period                                    | Age Group | Smoking Group | N     | %     | Ever Quit (N) | Ever Quit % | Mean Yrs Quit | Short Term (n) | Short Term % |
| 10                                        | 50-54     | Never Any     | 2912  | 33.65 |               |             |               |                |              |
| 10                                        | 50-54     | CC            | 953   | 11.01 | 0             | 0.00        |               |                |              |
| 10                                        | 50-54     | Ecig          | 1495  | 17.27 |               |             |               |                |              |
| 10                                        | 50-54     | Dual          | 0     | 0.00  |               |             |               |                |              |
| 10                                        | 50-54     | Former        | 3295  | 38.07 |               |             | 17.39         | 132            | 4.01         |
| Year of Follow-up: 2000, Age Group: 55-59 |           |               |       |       |               |             |               |                |              |
| Period                                    | Age Group | Smoking Group | N     | %     | Ever Quit (N) | Ever Quit % | Mean Yrs Quit | Short Term (n) | Short Term % |
| 10                                        | 55-59     | Never Any     | 1919  | 29.46 |               |             |               |                |              |
| 10                                        | 55-59     | CC            | 787   | 12.08 | 0             | 0.00        |               |                |              |
| 10                                        | 55-59     | Ecig          | 911   | 13.98 |               |             |               |                |              |
| 10                                        | 55-59     | Dual          | 0     | 0.00  |               |             |               |                |              |



**Results for PHIM for Run 1 (Pessimistic\_Analysis.RTF)**

|                                              |           |               |       |       |               |             |               |                |              |
|----------------------------------------------|-----------|---------------|-------|-------|---------------|-------------|---------------|----------------|--------------|
| 10                                           | 55-59     | Former        | 2898  | 44.48 |               |             | 19.22         | 124            | 4.28         |
| Year of Follow-up: 2000, Age Group: 60-64    |           |               |       |       |               |             |               |                |              |
| Period                                       | Age Group | Smoking Group | N     | %     | Ever Quit (N) | Ever Quit % | Mean Yrs Quit | Short Term (n) | Short Term % |
| 10                                           | 60-64     | Never Any     | 1611  | 29.41 |               |             |               |                |              |
| 10                                           | 60-64     | CC            | 626   | 11.43 | 0             | 0.00        |               |                |              |
| 10                                           | 60-64     | Ecig          | 597   | 10.90 |               |             |               |                |              |
| 10                                           | 60-64     | Dual          | 0     | 0.00  |               |             |               |                |              |
| 10                                           | 60-64     | Former        | 2643  | 48.26 |               |             | 20.11         | 119            | 4.50         |
| Year of Follow-up: 2000, Age Group: 65-69    |           |               |       |       |               |             |               |                |              |
| Period                                       | Age Group | Smoking Group | N     | %     | Ever Quit (N) | Ever Quit % | Mean Yrs Quit | Short Term (n) | Short Term % |
| 10                                           | 65-69     | Never Any     | 1337  | 26.83 |               |             |               |                |              |
| 10                                           | 65-69     | CC            | 519   | 10.42 | 0             | 0.00        |               |                |              |
| 10                                           | 65-69     | Ecig          | 364   | 7.30  |               |             |               |                |              |
| 10                                           | 65-69     | Dual          | 0     | 0.00  |               |             |               |                |              |
| 10                                           | 65-69     | Former        | 2763  | 55.45 |               |             | 20.16         | 127            | 4.60         |
| Year of Follow-up: 2000, Age Group: 70-74    |           |               |       |       |               |             |               |                |              |
| Period                                       | Age Group | Smoking Group | N     | %     | Ever Quit (N) | Ever Quit % | Mean Yrs Quit | Short Term (n) | Short Term % |
| 10                                           | 70-74     | Never Any     | 1169  | 23.83 |               |             |               |                |              |
| 10                                           | 70-74     | CC            | 474   | 9.66  | 0             | 0.00        |               |                |              |
| 10                                           | 70-74     | Ecig          | 145   | 2.96  |               |             |               |                |              |
| 10                                           | 70-74     | Dual          | 0     | 0.00  |               |             |               |                |              |
| 10                                           | 70-74     | Former        | 3117  | 63.55 |               |             | 23.79         | 69             | 2.21         |
| Year of Follow-up: 2000, Age Group: 75-79    |           |               |       |       |               |             |               |                |              |
| Period                                       | Age Group | Smoking Group | N     | %     | Ever Quit (N) | Ever Quit % | Mean Yrs Quit | Short Term (n) | Short Term % |
| 10                                           | 75-79     | Never Any     | 1023  | 23.32 |               |             |               |                |              |
| 10                                           | 75-79     | CC            | 402   | 9.16  | 0             | 0.00        |               |                |              |
| 10                                           | 75-79     | Ecig          | 13    | 0.30  |               |             |               |                |              |
| 10                                           | 75-79     | Dual          | 0     | 0.00  |               |             |               |                |              |
| 10                                           | 75-79     | Former        | 2949  | 67.22 |               |             | 25.19         | 73             | 2.48         |
| Year of Follow-up: 2005, Age Group: All Ages |           |               |       |       |               |             |               |                |              |
| Period                                       | Age Group | Smoking Group | N     | %     | Ever Quit (N) | Ever Quit % | Mean Yrs Quit | Short Term (n) | Short Term % |
| 15                                           | All Ages  | Never Any     | 35646 | 39.74 |               |             |               |                |              |
| 15                                           | All Ages  | CC            | 5286  | 5.89  | 0             | 0.00        |               |                |              |
| 15                                           | All Ages  | Ecig          | 20616 | 22.98 |               |             |               |                |              |
| 15                                           | All Ages  | Dual          | 0     | 0.00  |               |             |               |                |              |
| 15                                           | All Ages  | Former        | 28157 | 31.39 |               |             | 19.52         | 1141           | 4.05         |
| Year of Follow-up: 2005, Age Group: 18-19    |           |               |       |       |               |             |               |                |              |
| Period                                       | Age Group | Smoking Group | N     | %     | Ever Quit (N) | Ever Quit % | Mean Yrs Quit | Short Term (n) | Short Term % |
| 15                                           | 18-19     | Never Any     | 0     | .     |               |             |               |                |              |
| 15                                           | 18-19     | CC            | 0     | .     | 0             | .           |               |                |              |
| 15                                           | 18-19     | Ecig          | 0     | .     |               |             |               |                |              |
| 15                                           | 18-19     | Dual          | 0     | .     |               |             |               |                |              |
| 15                                           | 18-19     | Former        | 0     | .     |               |             | .             | 0              | .            |
| Year of Follow-up: 2005, Age Group: 20-24    |           |               |       |       |               |             |               |                |              |
| Period                                       | Age Group | Smoking Group | N     | %     | Ever Quit (N) | Ever Quit % | Mean Yrs Quit | Short Term (n) | Short Term % |
| 15                                           | 20-24     | Never Any     | 0     | .     |               |             |               |                |              |
| 15                                           | 20-24     | CC            | 0     | .     | 0             | .           |               |                |              |
| 15                                           | 20-24     | Ecig          | 0     | .     |               |             |               |                |              |
| 15                                           | 20-24     | Dual          | 0     | .     |               |             |               |                |              |
| 15                                           | 20-24     | Former        | 0     | .     |               |             | .             | 0              | .            |
| Year of Follow-up: 2005, Age Group: 25-29    |           |               |       |       |               |             |               |                |              |
| Period                                       | Age Group | Smoking Group | N     | %     | Ever Quit (N) | Ever Quit % | Mean Yrs Quit | Short Term (n) | Short Term % |
| 15                                           | 25-29     | Never Any     | 3679  | 41.59 |               |             |               |                |              |
| 15                                           | 25-29     | CC            | 350   | 3.96  | 0             | 0.00        |               |                |              |
| 15                                           | 25-29     | Ecig          | 3734  | 42.22 |               |             |               |                |              |
| 15                                           | 25-29     | Dual          | 0     | 0.00  |               |             |               |                |              |
| 15                                           | 25-29     | Former        | 1082  | 12.23 |               |             | 6.34          | 139            | 12.85        |
| Year of Follow-up: 2005, Age Group: 30-34    |           |               |       |       |               |             |               |                |              |
| Period                                       | Age Group | Smoking Group | N     | %     | Ever Quit (N) | Ever Quit % | Mean Yrs Quit | Short Term (n) | Short Term % |
| 15                                           | 30-34     | Never Any     | 4479  | 49.55 |               |             |               |                |              |
| 15                                           | 30-34     | CC            | 373   | 4.13  | 0             | 0.00        |               |                |              |
| 15                                           | 30-34     | Ecig          | 2990  | 33.08 |               |             |               |                |              |
| 15                                           | 30-34     | Dual          | 0     | 0.00  |               |             |               |                |              |
| 15                                           | 30-34     | Former        | 1198  | 13.25 |               |             | 8.14          | 140            | 11.69        |
| Year of Follow-up: 2005, Age Group: 35-39    |           |               |       |       |               |             |               |                |              |
| Period                                       | Age Group | Smoking Group | N     | %     | Ever Quit (N) | Ever Quit % | Mean Yrs Quit | Short Term (n) | Short Term % |
| 15                                           | 35-39     | Never Any     | 4961  | 50.54 |               |             |               |                |              |
| 15                                           | 35-39     | CC            | 532   | 5.42  | 0             | 0.00        |               |                |              |

**Results for PHIM for Run 1 (Pessimistic\_Analysis.RTF)**

|                                              |           |               |       |       |               |             |               |                |              |
|----------------------------------------------|-----------|---------------|-------|-------|---------------|-------------|---------------|----------------|--------------|
| 15                                           | 35-39     | Ecig          | 2742  | 27.93 |               |             |               |                |              |
| 15                                           | 35-39     | Dual          | 0     | 0.00  |               |             |               |                |              |
| 15                                           | 35-39     | Former        | 1581  | 16.11 |               |             | 12.30         | 93             | 5.88         |
| Year of Follow-up: 2005, Age Group: 40-44    |           |               |       |       |               |             |               |                |              |
| Period                                       | Age Group | Smoking Group | N     | %     | Ever Quit (N) | Ever Quit % | Mean Yrs Quit | Short Term (n) | Short Term % |
| 15                                           | 40-44     | Never Any     | 4926  | 46.19 |               |             |               |                |              |
| 15                                           | 40-44     | CC            | 622   | 5.83  | 0             | 0.00        |               |                |              |
| 15                                           | 40-44     | Ecig          | 2883  | 27.03 |               |             |               |                |              |
| 15                                           | 40-44     | Dual          | 0     | 0.00  |               |             |               |                |              |
| 15                                           | 40-44     | Former        | 2233  | 20.94 |               |             | 14.31         | 124            | 5.55         |
| Year of Follow-up: 2005, Age Group: 45-49    |           |               |       |       |               |             |               |                |              |
| Period                                       | Age Group | Smoking Group | N     | %     | Ever Quit (N) | Ever Quit % | Mean Yrs Quit | Short Term (n) | Short Term % |
| 15                                           | 45-49     | Never Any     | 4712  | 43.17 |               |             |               |                |              |
| 15                                           | 45-49     | CC            | 657   | 6.02  | 0             | 0.00        |               |                |              |
| 15                                           | 45-49     | Ecig          | 2637  | 24.16 |               |             |               |                |              |
| 15                                           | 45-49     | Dual          | 0     | 0.00  |               |             |               |                |              |
| 15                                           | 45-49     | Former        | 2910  | 26.66 |               |             | 15.83         | 109            | 3.75         |
| Year of Follow-up: 2005, Age Group: 50-54    |           |               |       |       |               |             |               |                |              |
| Period                                       | Age Group | Smoking Group | N     | %     | Ever Quit (N) | Ever Quit % | Mean Yrs Quit | Short Term (n) | Short Term % |
| 15                                           | 50-54     | Never Any     | 3941  | 39.85 |               |             |               |                |              |
| 15                                           | 50-54     | CC            | 637   | 6.44  | 0             | 0.00        |               |                |              |
| 15                                           | 50-54     | Ecig          | 2030  | 20.53 |               |             |               |                |              |
| 15                                           | 50-54     | Dual          | 0     | 0.00  |               |             |               |                |              |
| 15                                           | 50-54     | Former        | 3281  | 33.18 |               |             | 19.31         | 100            | 3.05         |
| Year of Follow-up: 2005, Age Group: 55-59    |           |               |       |       |               |             |               |                |              |
| Period                                       | Age Group | Smoking Group | N     | %     | Ever Quit (N) | Ever Quit % | Mean Yrs Quit | Short Term (n) | Short Term % |
| 15                                           | 55-59     | Never Any     | 2912  | 33.65 |               |             |               |                |              |
| 15                                           | 55-59     | CC            | 596   | 6.89  | 0             | 0.00        |               |                |              |
| 15                                           | 55-59     | Ecig          | 1633  | 18.87 |               |             |               |                |              |
| 15                                           | 55-59     | Dual          | 0     | 0.00  |               |             |               |                |              |
| 15                                           | 55-59     | Former        | 3514  | 40.60 |               |             | 21.14         | 72             | 2.05         |
| Year of Follow-up: 2005, Age Group: 60-64    |           |               |       |       |               |             |               |                |              |
| Period                                       | Age Group | Smoking Group | N     | %     | Ever Quit (N) | Ever Quit % | Mean Yrs Quit | Short Term (n) | Short Term % |
| 15                                           | 60-64     | Never Any     | 1919  | 29.46 |               |             |               |                |              |
| 15                                           | 60-64     | CC            | 469   | 7.20  | 0             | 0.00        |               |                |              |
| 15                                           | 60-64     | Ecig          | 973   | 14.93 |               |             |               |                |              |
| 15                                           | 60-64     | Dual          | 0     | 0.00  |               |             |               |                |              |
| 15                                           | 60-64     | Former        | 3154  | 48.41 |               |             | 22.41         | 118            | 3.74         |
| Year of Follow-up: 2005, Age Group: 65-69    |           |               |       |       |               |             |               |                |              |
| Period                                       | Age Group | Smoking Group | N     | %     | Ever Quit (N) | Ever Quit % | Mean Yrs Quit | Short Term (n) | Short Term % |
| 15                                           | 65-69     | Never Any     | 1611  | 29.41 |               |             |               |                |              |
| 15                                           | 65-69     | CC            | 374   | 6.83  | 0             | 0.00        |               |                |              |
| 15                                           | 65-69     | Ecig          | 564   | 10.30 |               |             |               |                |              |
| 15                                           | 65-69     | Dual          | 0     | 0.00  |               |             |               |                |              |
| 15                                           | 65-69     | Former        | 2928  | 53.46 |               |             | 22.88         | 103            | 3.52         |
| Year of Follow-up: 2005, Age Group: 70-74    |           |               |       |       |               |             |               |                |              |
| Period                                       | Age Group | Smoking Group | N     | %     | Ever Quit (N) | Ever Quit % | Mean Yrs Quit | Short Term (n) | Short Term % |
| 15                                           | 70-74     | Never Any     | 1337  | 26.83 |               |             |               |                |              |
| 15                                           | 70-74     | CC            | 358   | 7.18  | 0             | 0.00        |               |                |              |
| 15                                           | 70-74     | Ecig          | 315   | 6.32  |               |             |               |                |              |
| 15                                           | 70-74     | Dual          | 0     | 0.00  |               |             |               |                |              |
| 15                                           | 70-74     | Former        | 2973  | 59.66 |               |             | 23.54         | 69             | 2.32         |
| Year of Follow-up: 2005, Age Group: 75-79    |           |               |       |       |               |             |               |                |              |
| Period                                       | Age Group | Smoking Group | N     | %     | Ever Quit (N) | Ever Quit % | Mean Yrs Quit | Short Term (n) | Short Term % |
| 15                                           | 75-79     | Never Any     | 1169  | 23.83 |               |             |               |                |              |
| 15                                           | 75-79     | CC            | 318   | 6.48  | 0             | 0.00        |               |                |              |
| 15                                           | 75-79     | Ecig          | 115   | 2.34  |               |             |               |                |              |
| 15                                           | 75-79     | Dual          | 0     | 0.00  |               |             |               |                |              |
| 15                                           | 75-79     | Former        | 3303  | 67.34 |               |             | 27.28         | 74             | 2.24         |
| Year of Follow-up: 2010, Age Group: All Ages |           |               |       |       |               |             |               |                |              |
| Period                                       | Age Group | Smoking Group | N     | %     | Ever Quit (N) | Ever Quit % | Mean Yrs Quit | Short Term (n) | Short Term % |
| 20                                           | All Ages  | Never Any     | 34261 | 40.40 |               |             |               |                |              |
| 20                                           | All Ages  | CC            | 2878  | 3.39  | 0             | 0.00        |               |                |              |
| 20                                           | All Ages  | Ecig          | 19984 | 23.57 |               |             |               |                |              |
| 20                                           | All Ages  | Dual          | 0     | 0.00  |               |             |               |                |              |
| 20                                           | All Ages  | Former        | 27677 | 32.64 |               |             | 21.29         | 1139           | 4.12         |
| Year of Follow-up: 2010, Age Group: 18-19    |           |               |       |       |               |             |               |                |              |
| Period                                       | Age Group | Smoking Group | N     | %     | Ever Quit (N) | Ever Quit % | Mean Yrs Quit | Short Term (n) | Short Term % |

**Results for PHIM for Run 1 (Pessimistic\_Analysis.RTF)**

|                                           |           |               |      |       |               |             |               |                |              |
|-------------------------------------------|-----------|---------------|------|-------|---------------|-------------|---------------|----------------|--------------|
| 20                                        | 18-19     | Never Any     | 0    | .     |               |             |               |                |              |
| 20                                        | 18-19     | CC            | 0    | .     | 0             | .           |               |                |              |
| 20                                        | 18-19     | Ecig          | 0    | .     |               |             |               |                |              |
| 20                                        | 18-19     | Dual          | 0    | .     |               |             |               |                |              |
| 20                                        | 18-19     | Former        | 0    | .     |               |             | 0             | .              |              |
| Year of Follow-up: 2010, Age Group: 20-24 |           |               |      |       |               |             |               |                |              |
| Period                                    | Age Group | Smoking Group | N    | %     | Ever Quit (N) | Ever Quit % | Mean Yrs Quit | Short Term (n) | Short Term % |
| 20                                        | 20-24     | Never Any     | 0    | .     |               |             |               |                |              |
| 20                                        | 20-24     | CC            | 0    | .     | 0             | .           |               |                |              |
| 20                                        | 20-24     | Ecig          | 0    | .     |               |             |               |                |              |
| 20                                        | 20-24     | Dual          | 0    | .     |               |             |               |                |              |
| 20                                        | 20-24     | Former        | 0    | .     |               |             |               | 0              | .            |
| Year of Follow-up: 2010, Age Group: 25-29 |           |               |      |       |               |             |               |                |              |
| Period                                    | Age Group | Smoking Group | N    | %     | Ever Quit (N) | Ever Quit % | Mean Yrs Quit | Short Term (n) | Short Term % |
| 20                                        | 25-29     | Never Any     | 0    | .     |               |             |               |                |              |
| 20                                        | 25-29     | CC            | 0    | .     | 0             | .           |               |                |              |
| 20                                        | 25-29     | Ecig          | 0    | .     |               |             |               |                |              |
| 20                                        | 25-29     | Dual          | 0    | .     |               |             |               |                |              |
| 20                                        | 25-29     | Former        | 0    | .     |               |             |               | 0              | .            |
| Year of Follow-up: 2010, Age Group: 30-34 |           |               |      |       |               |             |               |                |              |
| Period                                    | Age Group | Smoking Group | N    | %     | Ever Quit (N) | Ever Quit % | Mean Yrs Quit | Short Term (n) | Short Term % |
| 20                                        | 30-34     | Never Any     | 3537 | 39.99 |               |             |               |                |              |
| 20                                        | 30-34     | CC            | 155  | 1.75  | 0             | 0.00        |               |                |              |
| 20                                        | 30-34     | Ecig          | 3656 | 41.33 |               |             |               |                |              |
| 20                                        | 30-34     | Dual          | 0    | 0.00  |               |             |               |                |              |
| 20                                        | 30-34     | Former        | 1497 | 16.92 |               |             | 8.72          | 190            | 12.69        |
| Year of Follow-up: 2010, Age Group: 35-39 |           |               |      |       |               |             |               |                |              |
| Period                                    | Age Group | Smoking Group | N    | %     | Ever Quit (N) | Ever Quit % | Mean Yrs Quit | Short Term (n) | Short Term % |
| 20                                        | 35-39     | Never Any     | 4405 | 48.73 |               |             |               |                |              |
| 20                                        | 35-39     | CC            | 188  | 2.08  | 0             | 0.00        |               |                |              |
| 20                                        | 35-39     | Ecig          | 2887 | 31.94 |               |             |               |                |              |
| 20                                        | 35-39     | Dual          | 0    | 0.00  |               |             |               |                |              |
| 20                                        | 35-39     | Former        | 1560 | 17.26 |               |             | 10.58         | 123            | 7.88         |
| Year of Follow-up: 2010, Age Group: 40-44 |           |               |      |       |               |             |               |                |              |
| Period                                    | Age Group | Smoking Group | N    | %     | Ever Quit (N) | Ever Quit % | Mean Yrs Quit | Short Term (n) | Short Term % |
| 20                                        | 40-44     | Never Any     | 4961 | 50.54 |               |             |               |                |              |
| 20                                        | 40-44     | CC            | 295  | 3.01  | 0             | 0.00        |               |                |              |
| 20                                        | 40-44     | Ecig          | 2735 | 27.86 |               |             |               |                |              |
| 20                                        | 40-44     | Dual          | 0    | 0.00  |               |             |               |                |              |
| 20                                        | 40-44     | Former        | 1825 | 18.59 |               |             | 15.26         | 97             | 5.32         |
| Year of Follow-up: 2010, Age Group: 45-49 |           |               |      |       |               |             |               |                |              |
| Period                                    | Age Group | Smoking Group | N    | %     | Ever Quit (N) | Ever Quit % | Mean Yrs Quit | Short Term (n) | Short Term % |
| 20                                        | 45-49     | Never Any     | 4926 | 46.19 |               |             |               |                |              |
| 20                                        | 45-49     | CC            | 342  | 3.21  | 0             | 0.00        |               |                |              |
| 20                                        | 45-49     | Ecig          | 2877 | 26.98 |               |             |               |                |              |
| 20                                        | 45-49     | Dual          | 0    | 0.00  |               |             |               |                |              |
| 20                                        | 45-49     | Former        | 2519 | 23.62 |               |             | 17.35         | 110            | 4.37         |
| Year of Follow-up: 2010, Age Group: 50-54 |           |               |      |       |               |             |               |                |              |
| Period                                    | Age Group | Smoking Group | N    | %     | Ever Quit (N) | Ever Quit % | Mean Yrs Quit | Short Term (n) | Short Term % |
| 20                                        | 50-54     | Never Any     | 4712 | 43.17 |               |             |               |                |              |
| 20                                        | 50-54     | CC            | 377  | 3.45  | 0             | 0.00        |               |                |              |
| 20                                        | 50-54     | Ecig          | 2629 | 24.08 |               |             |               |                |              |
| 20                                        | 50-54     | Dual          | 0    | 0.00  |               |             |               |                |              |
| 20                                        | 50-54     | Former        | 3198 | 29.30 |               |             | 19.14         | 117            | 3.66         |
| Year of Follow-up: 2010, Age Group: 55-59 |           |               |      |       |               |             |               |                |              |
| Period                                    | Age Group | Smoking Group | N    | %     | Ever Quit (N) | Ever Quit % | Mean Yrs Quit | Short Term (n) | Short Term % |
| 20                                        | 55-59     | Never Any     | 3941 | 39.85 |               |             |               |                |              |
| 20                                        | 55-59     | CC            | 372  | 3.76  | 0             | 0.00        |               |                |              |
| 20                                        | 55-59     | Ecig          | 1976 | 19.98 |               |             |               |                |              |
| 20                                        | 55-59     | Dual          | 0    | 0.00  |               |             |               |                |              |
| 20                                        | 55-59     | Former        | 3600 | 36.40 |               |             | 22.33         | 123            | 3.42         |
| Year of Follow-up: 2010, Age Group: 60-64 |           |               |      |       |               |             |               |                |              |
| Period                                    | Age Group | Smoking Group | N    | %     | Ever Quit (N) | Ever Quit % | Mean Yrs Quit | Short Term (n) | Short Term % |
| 20                                        | 60-64     | Never Any     | 2912 | 33.65 |               |             |               |                |              |
| 20                                        | 60-64     | CC            | 332  | 3.84  | 0             | 0.00        |               |                |              |
| 20                                        | 60-64     | Ecig          | 1547 | 17.87 |               |             |               |                |              |
| 20                                        | 60-64     | Dual          | 0    | 0.00  |               |             |               |                |              |
| 20                                        | 60-64     | Former        | 3864 | 44.64 |               |             | 23.92         | 186            | 4.81         |
| Year of Follow-up: 2010, Age Group: 65-69 |           |               |      |       |               |             |               |                |              |

**Results for PHIM for Run 1 (Pessimistic\_Analysis.RTF)**

| Period                                       | Age Group | Smoking Group | N     | %     | Ever Quit (N) | Ever Quit % | Mean Yrs Quit | Short Term (n) | Short Term % |
|----------------------------------------------|-----------|---------------|-------|-------|---------------|-------------|---------------|----------------|--------------|
| 20                                           | 65-69     | Never Any     | 1919  | 29.46 |               |             |               |                |              |
| 20                                           | 65-69     | CC            | 283   | 4.34  | 0             | 0.00        |               |                |              |
| 20                                           | 65-69     | Ecig          | 890   | 13.66 |               |             |               |                |              |
| 20                                           | 65-69     | Dual          | 0     | 0.00  |               |             |               |                |              |
| 20                                           | 65-69     | Former        | 3423  | 52.54 |               |             | 25.43         | 89             | 2.60         |
| Year of Follow-up: 2010, Age Group: 70-74    |           |               |       |       |               |             |               |                |              |
| Period                                       | Age Group | Smoking Group | N     | %     | Ever Quit (N) | Ever Quit % | Mean Yrs Quit | Short Term (n) | Short Term % |
| 20                                           | 70-74     | Never Any     | 1611  | 29.41 |               |             |               |                |              |
| 20                                           | 70-74     | CC            | 270   | 4.93  | 0             | 0.00        |               |                |              |
| 20                                           | 70-74     | Ecig          | 510   | 9.31  |               |             |               |                |              |
| 20                                           | 70-74     | Dual          | 0     | 0.00  |               |             |               |                |              |
| 20                                           | 70-74     | Former        | 3086  | 56.34 |               |             | 26.56         | 60             | 1.94         |
| Year of Follow-up: 2010, Age Group: 75-79    |           |               |       |       |               |             |               |                |              |
| Period                                       | Age Group | Smoking Group | N     | %     | Ever Quit (N) | Ever Quit % | Mean Yrs Quit | Short Term (n) | Short Term % |
| 20                                           | 75-79     | Never Any     | 1337  | 26.83 |               |             |               |                |              |
| 20                                           | 75-79     | CC            | 264   | 5.30  | 0             | 0.00        |               |                |              |
| 20                                           | 75-79     | Ecig          | 277   | 5.56  |               |             |               |                |              |
| 20                                           | 75-79     | Dual          | 0     | 0.00  |               |             |               |                |              |
| 20                                           | 75-79     | Former        | 3105  | 62.31 |               |             | 27.42         | 44             | 1.42         |
| Year of Follow-up: 2015, Age Group: All Ages |           |               |       |       |               |             |               |                |              |
| Period                                       | Age Group | Smoking Group | N     | %     | Ever Quit (N) | Ever Quit % | Mean Yrs Quit | Short Term (n) | Short Term % |
| 25                                           | All Ages  | Never Any     | 32900 | 41.22 |               |             |               |                |              |
| 25                                           | All Ages  | CC            | 1555  | 1.95  | 0             | 0.00        |               |                |              |
| 25                                           | All Ages  | Ecig          | 18489 | 23.16 |               |             |               |                |              |
| 25                                           | All Ages  | Dual          | 0     | 0.00  |               |             |               |                |              |
| 25                                           | All Ages  | Former        | 26873 | 33.67 |               |             | 23.51         | 830            | 3.09         |
| Year of Follow-up: 2015, Age Group: 18-19    |           |               |       |       |               |             |               |                |              |
| Period                                       | Age Group | Smoking Group | N     | %     | Ever Quit (N) | Ever Quit % | Mean Yrs Quit | Short Term (n) | Short Term % |
| 25                                           | 18-19     | Never Any     | 0     | .     |               |             |               |                |              |
| 25                                           | 18-19     | CC            | 0     | .     | 0             | .           |               |                |              |
| 25                                           | 18-19     | Ecig          | 0     | .     |               |             |               |                |              |
| 25                                           | 18-19     | Dual          | 0     | .     |               |             |               |                |              |
| 25                                           | 18-19     | Former        | 0     | .     |               |             | .             | 0              | .            |
| Year of Follow-up: 2015, Age Group: 20-24    |           |               |       |       |               |             |               |                |              |
| Period                                       | Age Group | Smoking Group | N     | %     | Ever Quit (N) | Ever Quit % | Mean Yrs Quit | Short Term (n) | Short Term % |
| 25                                           | 20-24     | Never Any     | 0     | .     |               |             |               |                |              |
| 25                                           | 20-24     | CC            | 0     | .     | 0             | .           |               |                |              |
| 25                                           | 20-24     | Ecig          | 0     | .     |               |             |               |                |              |
| 25                                           | 20-24     | Dual          | 0     | .     |               |             |               |                |              |
| 25                                           | 20-24     | Former        | 0     | .     |               |             | .             | 0              | .            |
| Year of Follow-up: 2015, Age Group: 25-29    |           |               |       |       |               |             |               |                |              |
| Period                                       | Age Group | Smoking Group | N     | %     | Ever Quit (N) | Ever Quit % | Mean Yrs Quit | Short Term (n) | Short Term % |
| 25                                           | 25-29     | Never Any     | 0     | .     |               |             |               |                |              |
| 25                                           | 25-29     | CC            | 0     | .     | 0             | .           |               |                |              |
| 25                                           | 25-29     | Ecig          | 0     | .     |               |             |               |                |              |
| 25                                           | 25-29     | Dual          | 0     | .     |               |             |               |                |              |
| 25                                           | 25-29     | Former        | 0     | .     |               |             | .             | 0              | .            |
| Year of Follow-up: 2015, Age Group: 30-34    |           |               |       |       |               |             |               |                |              |
| Period                                       | Age Group | Smoking Group | N     | %     | Ever Quit (N) | Ever Quit % | Mean Yrs Quit | Short Term (n) | Short Term % |
| 25                                           | 30-34     | Never Any     | 0     | .     |               |             |               |                |              |
| 25                                           | 30-34     | CC            | 0     | .     | 0             | .           |               |                |              |
| 25                                           | 30-34     | Ecig          | 0     | .     |               |             |               |                |              |
| 25                                           | 30-34     | Dual          | 0     | .     |               |             |               |                |              |
| 25                                           | 30-34     | Former        | 0     | .     |               |             | .             | 0              | .            |
| Year of Follow-up: 2015, Age Group: 35-39    |           |               |       |       |               |             |               |                |              |
| Period                                       | Age Group | Smoking Group | N     | %     | Ever Quit (N) | Ever Quit % | Mean Yrs Quit | Short Term (n) | Short Term % |
| 25                                           | 35-39     | Never Any     | 3513  | 39.72 |               |             |               |                |              |
| 25                                           | 35-39     | CC            | 70    | 0.79  | 0             | 0.00        |               |                |              |
| 25                                           | 35-39     | Ecig          | 3376  | 38.17 |               |             |               |                |              |
| 25                                           | 35-39     | Dual          | 0     | 0.00  |               |             |               |                |              |
| 25                                           | 35-39     | Former        | 1886  | 21.32 |               |             | 11.35         | 131            | 6.95         |
| Year of Follow-up: 2015, Age Group: 40-44    |           |               |       |       |               |             |               |                |              |
| Period                                       | Age Group | Smoking Group | N     | %     | Ever Quit (N) | Ever Quit % | Mean Yrs Quit | Short Term (n) | Short Term % |
| 25                                           | 40-44     | Never Any     | 4405  | 48.73 |               |             |               |                |              |
| 25                                           | 40-44     | CC            | 87    | 0.96  | 0             | 0.00        |               |                |              |
| 25                                           | 40-44     | Ecig          | 2774  | 30.69 |               |             |               |                |              |
| 25                                           | 40-44     | Dual          | 0     | 0.00  |               |             |               |                |              |

**Results for PHIM for Run 1 (Pessimistic\_Analysis.RTF)**

|                                              |           |               |       |       |               |             |               |                |              |
|----------------------------------------------|-----------|---------------|-------|-------|---------------|-------------|---------------|----------------|--------------|
| 25                                           | 40-44     | Former        | 1774  | 19.62 |               |             | 13.94         | 89             | 5.02         |
| Year of Follow-up: 2015, Age Group: 45-49    |           |               |       |       |               |             |               |                |              |
| Period                                       | Age Group | Smoking Group | N     | %     | Ever Quit (N) | Ever Quit % | Mean Yrs Quit | Short Term (n) | Short Term % |
| 25                                           | 45-49     | Never Any     | 4961  | 50.54 |               |             |               |                |              |
| 25                                           | 45-49     | CC            | 166   | 1.69  | 0             | 0.00        |               |                |              |
| 25                                           | 45-49     | Ecig          | 2676  | 27.26 |               |             |               |                |              |
| 25                                           | 45-49     | Dual          | 0     | 0.00  |               |             |               |                |              |
| 25                                           | 45-49     | Former        | 2013  | 20.51 |               |             | 18.58         | 56             | 2.78         |
| Year of Follow-up: 2015, Age Group: 50-54    |           |               |       |       |               |             |               |                |              |
| Period                                       | Age Group | Smoking Group | N     | %     | Ever Quit (N) | Ever Quit % | Mean Yrs Quit | Short Term (n) | Short Term % |
| 25                                           | 50-54     | Never Any     | 4926  | 46.19 |               |             |               |                |              |
| 25                                           | 50-54     | CC            | 194   | 1.82  | 0             | 0.00        |               |                |              |
| 25                                           | 50-54     | Ecig          | 2831  | 26.55 |               |             |               |                |              |
| 25                                           | 50-54     | Dual          | 0     | 0.00  |               |             |               |                |              |
| 25                                           | 50-54     | Former        | 2713  | 25.44 |               |             | 20.88         | 94             | 3.46         |
| Year of Follow-up: 2015, Age Group: 55-59    |           |               |       |       |               |             |               |                |              |
| Period                                       | Age Group | Smoking Group | N     | %     | Ever Quit (N) | Ever Quit % | Mean Yrs Quit | Short Term (n) | Short Term % |
| 25                                           | 55-59     | Never Any     | 4712  | 43.17 |               |             |               |                |              |
| 25                                           | 55-59     | CC            | 202   | 1.85  | 0             | 0.00        |               |                |              |
| 25                                           | 55-59     | Ecig          | 2493  | 22.84 |               |             |               |                |              |
| 25                                           | 55-59     | Dual          | 0     | 0.00  |               |             |               |                |              |
| 25                                           | 55-59     | Former        | 3509  | 32.15 |               |             | 22.19         | 110            | 3.13         |
| Year of Follow-up: 2015, Age Group: 60-64    |           |               |       |       |               |             |               |                |              |
| Period                                       | Age Group | Smoking Group | N     | %     | Ever Quit (N) | Ever Quit % | Mean Yrs Quit | Short Term (n) | Short Term % |
| 25                                           | 60-64     | Never Any     | 3941  | 39.85 |               |             |               |                |              |
| 25                                           | 60-64     | CC            | 202   | 2.04  | 0             | 0.00        |               |                |              |
| 25                                           | 60-64     | Ecig          | 1785  | 18.05 |               |             |               |                |              |
| 25                                           | 60-64     | Dual          | 0     | 0.00  |               |             |               |                |              |
| 25                                           | 60-64     | Former        | 3961  | 40.05 |               |             | 25.03         | 135            | 3.41         |
| Year of Follow-up: 2015, Age Group: 65-69    |           |               |       |       |               |             |               |                |              |
| Period                                       | Age Group | Smoking Group | N     | %     | Ever Quit (N) | Ever Quit % | Mean Yrs Quit | Short Term (n) | Short Term % |
| 25                                           | 65-69     | Never Any     | 2912  | 33.65 |               |             |               |                |              |
| 25                                           | 65-69     | CC            | 219   | 2.53  | 0             | 0.00        |               |                |              |
| 25                                           | 65-69     | Ecig          | 1325  | 15.31 |               |             |               |                |              |
| 25                                           | 65-69     | Dual          | 0     | 0.00  |               |             |               |                |              |
| 25                                           | 65-69     | Former        | 4199  | 48.52 |               |             | 26.79         | 109            | 2.60         |
| Year of Follow-up: 2015, Age Group: 70-74    |           |               |       |       |               |             |               |                |              |
| Period                                       | Age Group | Smoking Group | N     | %     | Ever Quit (N) | Ever Quit % | Mean Yrs Quit | Short Term (n) | Short Term % |
| 25                                           | 70-74     | Never Any     | 1919  | 29.46 |               |             |               |                |              |
| 25                                           | 70-74     | CC            | 216   | 3.32  | 0             | 0.00        |               |                |              |
| 25                                           | 70-74     | Ecig          | 779   | 11.96 |               |             |               |                |              |
| 25                                           | 70-74     | Dual          | 0     | 0.00  |               |             |               |                |              |
| 25                                           | 70-74     | Former        | 3601  | 55.27 |               |             | 29.03         | 61             | 1.69         |
| Year of Follow-up: 2015, Age Group: 75-79    |           |               |       |       |               |             |               |                |              |
| Period                                       | Age Group | Smoking Group | N     | %     | Ever Quit (N) | Ever Quit % | Mean Yrs Quit | Short Term (n) | Short Term % |
| 25                                           | 75-79     | Never Any     | 1611  | 29.41 |               |             |               |                |              |
| 25                                           | 75-79     | CC            | 199   | 3.63  | 0             | 0.00        |               |                |              |
| 25                                           | 75-79     | Ecig          | 450   | 8.22  |               |             |               |                |              |
| 25                                           | 75-79     | Dual          | 0     | 0.00  |               |             |               |                |              |
| 25                                           | 75-79     | Former        | 3217  | 58.74 |               |             | 30.36         | 45             | 1.40         |
| Year of Follow-up: 2020, Age Group: All Ages |           |               |       |       |               |             |               |                |              |
| Period                                       | Age Group | Smoking Group | N     | %     | Ever Quit (N) | Ever Quit % | Mean Yrs Quit | Short Term (n) | Short Term % |
| 30                                           | All Ages  | Never Any     | 31289 | 42.09 |               |             |               |                |              |
| 30                                           | All Ages  | CC            | 861   | 1.16  | 0             | 0.00        |               |                |              |
| 30                                           | All Ages  | Ecig          | 16609 | 22.34 |               |             |               |                |              |
| 30                                           | All Ages  | Dual          | 0     | 0.00  |               |             |               |                |              |
| 30                                           | All Ages  | Former        | 25581 | 34.41 |               |             | 25.66         | 740            | 2.89         |
| Year of Follow-up: 2020, Age Group: 18-19    |           |               |       |       |               |             |               |                |              |
| Period                                       | Age Group | Smoking Group | N     | %     | Ever Quit (N) | Ever Quit % | Mean Yrs Quit | Short Term (n) | Short Term % |
| 30                                           | 18-19     | Never Any     | 0     | .     |               |             |               |                |              |
| 30                                           | 18-19     | CC            | 0     | .     | 0             | .           |               |                |              |
| 30                                           | 18-19     | Ecig          | 0     | .     |               |             |               |                |              |
| 30                                           | 18-19     | Dual          | 0     | .     |               |             |               |                |              |
| 30                                           | 18-19     | Former        | 0     | .     |               |             | .             | 0              | .            |
| Year of Follow-up: 2020, Age Group: 20-24    |           |               |       |       |               |             |               |                |              |
| Period                                       | Age Group | Smoking Group | N     | %     | Ever Quit (N) | Ever Quit % | Mean Yrs Quit | Short Term (n) | Short Term % |
| 30                                           | 20-24     | Never Any     | 0     | .     |               |             |               |                |              |
| 30                                           | 20-24     | CC            | 0     | .     | 0             | .           |               |                |              |

**Results for PHIM for Run 1 (Pessimistic\_Analysis.RTF)**

|                                           |           |               |      |       |               |             |               |                |              |
|-------------------------------------------|-----------|---------------|------|-------|---------------|-------------|---------------|----------------|--------------|
| 30                                        | 20-24     | Ecig          | 0    | .     |               |             |               |                |              |
| 30                                        | 20-24     | Dual          | 0    | .     |               |             |               |                |              |
| 30                                        | 20-24     | Former        | 0    | .     |               |             | 0             | .              |              |
| Year of Follow-up: 2020, Age Group: 25-29 |           |               |      |       |               |             |               |                |              |
| Period                                    | Age Group | Smoking Group | N    | %     | Ever Quit (N) | Ever Quit % | Mean Yrs Quit | Short Term (n) | Short Term % |
| 30                                        | 25-29     | Never Any     | 0    | .     |               |             |               |                |              |
| 30                                        | 25-29     | CC            | 0    | .     | 0             | .           |               |                |              |
| 30                                        | 25-29     | Ecig          | 0    | .     |               |             |               |                |              |
| 30                                        | 25-29     | Dual          | 0    | .     |               |             |               |                |              |
| 30                                        | 25-29     | Former        | 0    | .     |               |             | 0             | .              |              |
| Year of Follow-up: 2020, Age Group: 30-34 |           |               |      |       |               |             |               |                |              |
| Period                                    | Age Group | Smoking Group | N    | %     | Ever Quit (N) | Ever Quit % | Mean Yrs Quit | Short Term (n) | Short Term % |
| 30                                        | 30-34     | Never Any     | 0    | .     |               |             |               |                |              |
| 30                                        | 30-34     | CC            | 0    | .     | 0             | .           |               |                |              |
| 30                                        | 30-34     | Ecig          | 0    | .     |               |             |               |                |              |
| 30                                        | 30-34     | Dual          | 0    | .     |               |             |               |                |              |
| 30                                        | 30-34     | Former        | 0    | .     |               |             | 0             | .              |              |
| Year of Follow-up: 2020, Age Group: 35-39 |           |               |      |       |               |             |               |                |              |
| Period                                    | Age Group | Smoking Group | N    | %     | Ever Quit (N) | Ever Quit % | Mean Yrs Quit | Short Term (n) | Short Term % |
| 30                                        | 35-39     | Never Any     | 0    | .     |               |             |               |                |              |
| 30                                        | 35-39     | CC            | 0    | .     | 0             | .           |               |                |              |
| 30                                        | 35-39     | Ecig          | 0    | .     |               |             |               |                |              |
| 30                                        | 35-39     | Dual          | 0    | .     |               |             |               |                |              |
| 30                                        | 35-39     | Former        | 0    | .     |               |             | 0             | .              |              |
| Year of Follow-up: 2020, Age Group: 40-44 |           |               |      |       |               |             |               |                |              |
| Period                                    | Age Group | Smoking Group | N    | %     | Ever Quit (N) | Ever Quit % | Mean Yrs Quit | Short Term (n) | Short Term % |
| 30                                        | 40-44     | Never Any     | 3513 | 39.72 |               |             |               |                |              |
| 30                                        | 40-44     | CC            | 34   | 0.38  | 0             | 0.00        |               |                |              |
| 30                                        | 40-44     | Ecig          | 3160 | 35.73 |               |             |               |                |              |
| 30                                        | 40-44     | Dual          | 0    | 0.00  |               |             |               |                |              |
| 30                                        | 40-44     | Former        | 2138 | 24.17 |               |             | 14.67         | 103            | 4.82         |
| Year of Follow-up: 2020, Age Group: 45-49 |           |               |      |       |               |             |               |                |              |
| Period                                    | Age Group | Smoking Group | N    | %     | Ever Quit (N) | Ever Quit % | Mean Yrs Quit | Short Term (n) | Short Term % |
| 30                                        | 45-49     | Never Any     | 4405 | 48.73 |               |             |               |                |              |
| 30                                        | 45-49     | CC            | 52   | 0.58  | 0             | 0.00        |               |                |              |
| 30                                        | 45-49     | Ecig          | 2637 | 29.17 |               |             |               |                |              |
| 30                                        | 45-49     | Dual          | 0    | 0.00  |               |             |               |                |              |
| 30                                        | 45-49     | Former        | 1946 | 21.53 |               |             | 17.47         | 53             | 2.72         |
| Year of Follow-up: 2020, Age Group: 50-54 |           |               |      |       |               |             |               |                |              |
| Period                                    | Age Group | Smoking Group | N    | %     | Ever Quit (N) | Ever Quit % | Mean Yrs Quit | Short Term (n) | Short Term % |
| 30                                        | 50-54     | Never Any     | 4961 | 50.54 |               |             |               |                |              |
| 30                                        | 50-54     | CC            | 99   | 1.01  | 0             | 0.00        |               |                |              |
| 30                                        | 50-54     | Ecig          | 2606 | 26.55 |               |             |               |                |              |
| 30                                        | 50-54     | Dual          | 0    | 0.00  |               |             |               |                |              |
| 30                                        | 50-54     | Former        | 2150 | 21.90 |               |             | 22.19         | 68             | 3.16         |
| Year of Follow-up: 2020, Age Group: 55-59 |           |               |      |       |               |             |               |                |              |
| Period                                    | Age Group | Smoking Group | N    | %     | Ever Quit (N) | Ever Quit % | Mean Yrs Quit | Short Term (n) | Short Term % |
| 30                                        | 55-59     | Never Any     | 4926 | 46.19 |               |             |               |                |              |
| 30                                        | 55-59     | CC            | 114  | 1.07  | 0             | 0.00        |               |                |              |
| 30                                        | 55-59     | Ecig          | 2629 | 24.65 |               |             |               |                |              |
| 30                                        | 55-59     | Dual          | 0    | 0.00  |               |             |               |                |              |
| 30                                        | 55-59     | Former        | 2995 | 28.09 |               |             | 23.64         | 100            | 3.34         |
| Year of Follow-up: 2020, Age Group: 60-64 |           |               |      |       |               |             |               |                |              |
| Period                                    | Age Group | Smoking Group | N    | %     | Ever Quit (N) | Ever Quit % | Mean Yrs Quit | Short Term (n) | Short Term % |
| 30                                        | 60-64     | Never Any     | 4712 | 43.17 |               |             |               |                |              |
| 30                                        | 60-64     | CC            | 115  | 1.05  | 0             | 0.00        |               |                |              |
| 30                                        | 60-64     | Ecig          | 2199 | 20.14 |               |             |               |                |              |
| 30                                        | 60-64     | Dual          | 0    | 0.00  |               |             |               |                |              |
| 30                                        | 60-64     | Former        | 3890 | 35.64 |               |             | 24.71         | 165            | 4.24         |
| Year of Follow-up: 2020, Age Group: 65-69 |           |               |      |       |               |             |               |                |              |
| Period                                    | Age Group | Smoking Group | N    | %     | Ever Quit (N) | Ever Quit % | Mean Yrs Quit | Short Term (n) | Short Term % |
| 30                                        | 65-69     | Never Any     | 3941 | 39.85 |               |             |               |                |              |
| 30                                        | 65-69     | CC            | 133  | 1.34  | 0             | 0.00        |               |                |              |
| 30                                        | 65-69     | Ecig          | 1543 | 15.60 |               |             |               |                |              |
| 30                                        | 65-69     | Dual          | 0    | 0.00  |               |             |               |                |              |
| 30                                        | 65-69     | Former        | 4272 | 43.20 |               |             | 28.00         | 119            | 2.79         |
| Year of Follow-up: 2020, Age Group: 70-74 |           |               |      |       |               |             |               |                |              |
| Period                                    | Age Group | Smoking Group | N    | %     | Ever Quit (N) | Ever Quit % | Mean Yrs Quit | Short Term (n) | Short Term % |

**Results for PHIM for Run 1 (Pessimistic\_Analysis.RTF)**

|                                              |           |               |       |       |               |             |               |                |              |
|----------------------------------------------|-----------|---------------|-------|-------|---------------|-------------|---------------|----------------|--------------|
| 30                                           | 70-74     | Never Any     | 2912  | 33.65 |               |             |               |                |              |
| 30                                           | 70-74     | CC            | 154   | 1.78  | 0             | 0.00        |               |                |              |
| 30                                           | 70-74     | Ecig          | 1144  | 13.22 |               |             |               |                |              |
| 30                                           | 70-74     | Dual          | 0     | 0.00  |               |             |               |                |              |
| 30                                           | 70-74     | Former        | 4445  | 51.36 |               |             | 30.15         | 80             | 1.80         |
| Year of Follow-up: 2020, Age Group: 75-79    |           |               |       |       |               |             |               |                |              |
| Period                                       | Age Group | Smoking Group | N     | %     | Ever Quit (N) | Ever Quit % | Mean Yrs Quit | Short Term (n) | Short Term % |
| 30                                           | 75-79     | Never Any     | 1919  | 29.46 |               |             |               |                |              |
| 30                                           | 75-79     | CC            | 160   | 2.46  | 0             | 0.00        |               |                |              |
| 30                                           | 75-79     | Ecig          | 691   | 10.61 |               |             |               |                |              |
| 30                                           | 75-79     | Dual          | 0     | 0.00  |               |             |               |                |              |
| 30                                           | 75-79     | Former        | 3745  | 57.48 |               |             | 32.81         | 52             | 1.39         |
| Year of Follow-up: 2025, Age Group: All Ages |           |               |       |       |               |             |               |                |              |
| Period                                       | Age Group | Smoking Group | N     | %     | Ever Quit (N) | Ever Quit % | Mean Yrs Quit | Short Term (n) | Short Term % |
| 35                                           | All Ages  | Never Any     | 29370 | 43.30 |               |             |               |                |              |
| 35                                           | All Ages  | CC            | 473   | 0.70  | 0             | 0.00        |               |                |              |
| 35                                           | All Ages  | Ecig          | 14438 | 21.29 |               |             |               |                |              |
| 35                                           | All Ages  | Dual          | 0     | 0.00  |               |             |               |                |              |
| 35                                           | All Ages  | Former        | 23544 | 34.71 |               |             | 27.45         | 662            | 2.81         |
| Year of Follow-up: 2025, Age Group: 18-19    |           |               |       |       |               |             |               |                |              |
| Period                                       | Age Group | Smoking Group | N     | %     | Ever Quit (N) | Ever Quit % | Mean Yrs Quit | Short Term (n) | Short Term % |
| 35                                           | 18-19     | Never Any     | 0     | .     |               |             |               |                |              |
| 35                                           | 18-19     | CC            | 0     | .     | 0             | .           |               |                |              |
| 35                                           | 18-19     | Ecig          | 0     | .     |               |             |               |                |              |
| 35                                           | 18-19     | Dual          | 0     | .     |               |             |               |                |              |
| 35                                           | 18-19     | Former        | 0     | .     |               |             | .             | 0              | .            |
| Year of Follow-up: 2025, Age Group: 20-24    |           |               |       |       |               |             |               |                |              |
| Period                                       | Age Group | Smoking Group | N     | %     | Ever Quit (N) | Ever Quit % | Mean Yrs Quit | Short Term (n) | Short Term % |
| 35                                           | 20-24     | Never Any     | 0     | .     |               |             |               |                |              |
| 35                                           | 20-24     | CC            | 0     | .     | 0             | .           |               |                |              |
| 35                                           | 20-24     | Ecig          | 0     | .     |               |             |               |                |              |
| 35                                           | 20-24     | Dual          | 0     | .     |               |             |               |                |              |
| 35                                           | 20-24     | Former        | 0     | .     |               |             | .             | 0              | .            |
| Year of Follow-up: 2025, Age Group: 25-29    |           |               |       |       |               |             |               |                |              |
| Period                                       | Age Group | Smoking Group | N     | %     | Ever Quit (N) | Ever Quit % | Mean Yrs Quit | Short Term (n) | Short Term % |
| 35                                           | 25-29     | Never Any     | 0     | .     |               |             |               |                |              |
| 35                                           | 25-29     | CC            | 0     | .     | 0             | .           |               |                |              |
| 35                                           | 25-29     | Ecig          | 0     | .     |               |             |               |                |              |
| 35                                           | 25-29     | Dual          | 0     | .     |               |             |               |                |              |
| 35                                           | 25-29     | Former        | 0     | .     |               |             | .             | 0              | .            |
| Year of Follow-up: 2025, Age Group: 30-34    |           |               |       |       |               |             |               |                |              |
| Period                                       | Age Group | Smoking Group | N     | %     | Ever Quit (N) | Ever Quit % | Mean Yrs Quit | Short Term (n) | Short Term % |
| 35                                           | 30-34     | Never Any     | 0     | .     |               |             |               |                |              |
| 35                                           | 30-34     | CC            | 0     | .     | 0             | .           |               |                |              |
| 35                                           | 30-34     | Ecig          | 0     | .     |               |             |               |                |              |
| 35                                           | 30-34     | Dual          | 0     | .     |               |             |               |                |              |
| 35                                           | 30-34     | Former        | 0     | .     |               |             | .             | 0              | .            |
| Year of Follow-up: 2025, Age Group: 35-39    |           |               |       |       |               |             |               |                |              |
| Period                                       | Age Group | Smoking Group | N     | %     | Ever Quit (N) | Ever Quit % | Mean Yrs Quit | Short Term (n) | Short Term % |
| 35                                           | 35-39     | Never Any     | 0     | .     |               |             |               |                |              |
| 35                                           | 35-39     | CC            | 0     | .     | 0             | .           |               |                |              |
| 35                                           | 35-39     | Ecig          | 0     | .     |               |             |               |                |              |
| 35                                           | 35-39     | Dual          | 0     | .     |               |             |               |                |              |
| 35                                           | 35-39     | Former        | 0     | .     |               |             | .             | 0              | .            |
| Year of Follow-up: 2025, Age Group: 40-44    |           |               |       |       |               |             |               |                |              |
| Period                                       | Age Group | Smoking Group | N     | %     | Ever Quit (N) | Ever Quit % | Mean Yrs Quit | Short Term (n) | Short Term % |
| 35                                           | 40-44     | Never Any     | 0     | .     |               |             |               |                |              |
| 35                                           | 40-44     | CC            | 0     | .     | 0             | .           |               |                |              |
| 35                                           | 40-44     | Ecig          | 0     | .     |               |             |               |                |              |
| 35                                           | 40-44     | Dual          | 0     | .     |               |             |               |                |              |
| 35                                           | 40-44     | Former        | 0     | .     |               |             | .             | 0              | .            |
| Year of Follow-up: 2025, Age Group: 45-49    |           |               |       |       |               |             |               |                |              |
| Period                                       | Age Group | Smoking Group | N     | %     | Ever Quit (N) | Ever Quit % | Mean Yrs Quit | Short Term (n) | Short Term % |
| 35                                           | 45-49     | Never Any     | 3513  | 39.72 |               |             |               |                |              |
| 35                                           | 45-49     | CC            | 20    | 0.23  | 0             | 0.00        |               |                |              |
| 35                                           | 45-49     | Ecig          | 2991  | 33.82 |               |             |               |                |              |
| 35                                           | 45-49     | Dual          | 0     | 0.00  |               |             |               |                |              |
| 35                                           | 45-49     | Former        | 2321  | 26.24 |               |             | 18.31         | 49             | 2.11         |
| Year of Follow-up: 2025, Age Group: 50-54    |           |               |       |       |               |             |               |                |              |

**Results for PHIM for Run 1 (Pessimistic\_Analysis.RTF)**

| Period                                       | Age Group | Smoking Group | N     | %     | Ever Quit (N) | Ever Quit % | Mean Yrs Quit | Short Term (n) | Short Term % |
|----------------------------------------------|-----------|---------------|-------|-------|---------------|-------------|---------------|----------------|--------------|
| 35                                           | 50-54     | Never Any     | 4405  | 48.73 |               |             |               |                |              |
| 35                                           | 50-54     | CC            | 33    | 0.37  | 0             | 0.00        |               |                |              |
| 35                                           | 50-54     | Ecig          | 2537  | 28.06 |               |             |               |                |              |
| 35                                           | 50-54     | Dual          | 0     | 0.00  |               |             |               |                |              |
| 35                                           | 50-54     | Former        | 2065  | 22.84 |               |             | 21.27         | 57             | 2.76         |
| Year of Follow-up: 2025, Age Group: 55-59    |           |               |       |       |               |             |               |                |              |
| Period                                       | Age Group | Smoking Group | N     | %     | Ever Quit (N) | Ever Quit % | Mean Yrs Quit | Short Term (n) | Short Term % |
| 35                                           | 55-59     | Never Any     | 4961  | 50.54 |               |             |               |                |              |
| 35                                           | 55-59     | CC            | 58    | 0.59  | 0             | 0.00        |               |                |              |
| 35                                           | 55-59     | Ecig          | 2368  | 24.12 |               |             |               |                |              |
| 35                                           | 55-59     | Dual          | 0     | 0.00  |               |             |               |                |              |
| 35                                           | 55-59     | Former        | 2429  | 24.75 |               |             | 24.29         | 123            | 5.06         |
| Year of Follow-up: 2025, Age Group: 60-64    |           |               |       |       |               |             |               |                |              |
| Period                                       | Age Group | Smoking Group | N     | %     | Ever Quit (N) | Ever Quit % | Mean Yrs Quit | Short Term (n) | Short Term % |
| 35                                           | 60-64     | Never Any     | 4926  | 46.19 |               |             |               |                |              |
| 35                                           | 60-64     | CC            | 65    | 0.61  | 0             | 0.00        |               |                |              |
| 35                                           | 60-64     | Ecig          | 2309  | 21.65 |               |             |               |                |              |
| 35                                           | 60-64     | Dual          | 0     | 0.00  |               |             |               |                |              |
| 35                                           | 60-64     | Former        | 3364  | 31.55 |               |             | 25.72         | 148            | 4.40         |
| Year of Follow-up: 2025, Age Group: 65-69    |           |               |       |       |               |             |               |                |              |
| Period                                       | Age Group | Smoking Group | N     | %     | Ever Quit (N) | Ever Quit % | Mean Yrs Quit | Short Term (n) | Short Term % |
| 35                                           | 65-69     | Never Any     | 4712  | 43.17 |               |             |               |                |              |
| 35                                           | 65-69     | CC            | 73    | 0.67  | 0             | 0.00        |               |                |              |
| 35                                           | 65-69     | Ecig          | 1870  | 17.13 |               |             |               |                |              |
| 35                                           | 65-69     | Dual          | 0     | 0.00  |               |             |               |                |              |
| 35                                           | 65-69     | Former        | 4261  | 39.03 |               |             | 27.31         | 134            | 3.14         |
| Year of Follow-up: 2025, Age Group: 70-74    |           |               |       |       |               |             |               |                |              |
| Period                                       | Age Group | Smoking Group | N     | %     | Ever Quit (N) | Ever Quit % | Mean Yrs Quit | Short Term (n) | Short Term % |
| 35                                           | 70-74     | Never Any     | 3941  | 39.85 |               |             |               |                |              |
| 35                                           | 70-74     | CC            | 104   | 1.05  | 0             | 0.00        |               |                |              |
| 35                                           | 70-74     | Ecig          | 1362  | 13.77 |               |             |               |                |              |
| 35                                           | 70-74     | Dual          | 0     | 0.00  |               |             |               |                |              |
| 35                                           | 70-74     | Former        | 4482  | 45.32 |               |             | 31.55         | 75             | 1.67         |
| Year of Follow-up: 2025, Age Group: 75-79    |           |               |       |       |               |             |               |                |              |
| Period                                       | Age Group | Smoking Group | N     | %     | Ever Quit (N) | Ever Quit % | Mean Yrs Quit | Short Term (n) | Short Term % |
| 35                                           | 75-79     | Never Any     | 2912  | 33.65 |               |             |               |                |              |
| 35                                           | 75-79     | CC            | 120   | 1.39  | 0             | 0.00        |               |                |              |
| 35                                           | 75-79     | Ecig          | 1001  | 11.57 |               |             |               |                |              |
| 35                                           | 75-79     | Dual          | 0     | 0.00  |               |             |               |                |              |
| 35                                           | 75-79     | Former        | 4622  | 53.40 |               |             | 33.88         | 76             | 1.64         |
| Year of Follow-up: 2030, Age Group: All Ages |           |               |       |       |               |             |               |                |              |
| Period                                       | Age Group | Smoking Group | N     | %     | Ever Quit (N) | Ever Quit % | Mean Yrs Quit | Short Term (n) | Short Term % |
| 40                                           | All Ages  | Never Any     | 26458 | 44.72 |               |             |               |                |              |
| 40                                           | All Ages  | CC            | 228   | 0.39  | 0             | 0.00        |               |                |              |
| 40                                           | All Ages  | Ecig          | 12012 | 20.30 |               |             |               |                |              |
| 40                                           | All Ages  | Dual          | 0     | 0.00  |               |             |               |                |              |
| 40                                           | All Ages  | Former        | 20472 | 34.60 |               |             | 28.69         | 609            | 2.97         |
| Year of Follow-up: 2030, Age Group: 18-19    |           |               |       |       |               |             |               |                |              |
| Period                                       | Age Group | Smoking Group | N     | %     | Ever Quit (N) | Ever Quit % | Mean Yrs Quit | Short Term (n) | Short Term % |
| 40                                           | 18-19     | Never Any     | 0     | .     |               |             |               |                |              |
| 40                                           | 18-19     | CC            | 0     | .     | 0             | .           |               |                |              |
| 40                                           | 18-19     | Ecig          | 0     | .     |               |             |               |                |              |
| 40                                           | 18-19     | Dual          | 0     | .     |               |             |               |                |              |
| 40                                           | 18-19     | Former        | 0     | .     |               |             | .             | 0              | .            |
| Year of Follow-up: 2030, Age Group: 20-24    |           |               |       |       |               |             |               |                |              |
| Period                                       | Age Group | Smoking Group | N     | %     | Ever Quit (N) | Ever Quit % | Mean Yrs Quit | Short Term (n) | Short Term % |
| 40                                           | 20-24     | Never Any     | 0     | .     |               |             |               |                |              |
| 40                                           | 20-24     | CC            | 0     | .     | 0             | .           |               |                |              |
| 40                                           | 20-24     | Ecig          | 0     | .     |               |             |               |                |              |
| 40                                           | 20-24     | Dual          | 0     | .     |               |             |               |                |              |
| 40                                           | 20-24     | Former        | 0     | .     |               |             | .             | 0              | .            |
| Year of Follow-up: 2030, Age Group: 25-29    |           |               |       |       |               |             |               |                |              |
| Period                                       | Age Group | Smoking Group | N     | %     | Ever Quit (N) | Ever Quit % | Mean Yrs Quit | Short Term (n) | Short Term % |
| 40                                           | 25-29     | Never Any     | 0     | .     |               |             |               |                |              |
| 40                                           | 25-29     | CC            | 0     | .     | 0             | .           |               |                |              |
| 40                                           | 25-29     | Ecig          | 0     | .     |               |             |               |                |              |
| 40                                           | 25-29     | Dual          | 0     | .     |               |             |               |                |              |



**Results for PHIM for Run 1 (Pessimistic\_Analysis.RTF)**

| Year of Follow-up: 2030, Age Group: 30-34 | Period | Age Group | Smoking Group | N    | %     | Ever Quit (N) | Ever Quit % | Mean Yrs Quit | Short Term (n) | Short Term % |
|-------------------------------------------|--------|-----------|---------------|------|-------|---------------|-------------|---------------|----------------|--------------|
| 40                                        | 25-29  | Former    |               | 0    | .     |               |             |               | 0              | .            |
| 40                                        | 30-34  | Never Any |               | 0    | .     |               |             |               |                |              |
| 40                                        | 30-34  | CC        |               | 0    | .     | 0             | .           |               |                |              |
| 40                                        | 30-34  | Ecig      |               | 0    | .     |               |             |               |                |              |
| 40                                        | 30-34  | Dual      |               | 0    | .     |               |             |               |                |              |
| 40                                        | 30-34  | Former    |               | 0    | .     |               |             |               | 0              | .            |
| Year of Follow-up: 2030, Age Group: 35-39 | Period | Age Group | Smoking Group | N    | %     | Ever Quit (N) | Ever Quit % | Mean Yrs Quit | Short Term (n) | Short Term % |
| 40                                        | 35-39  | Never Any |               | 0    | .     |               |             |               |                |              |
| 40                                        | 35-39  | CC        |               | 0    | .     | 0             | .           |               |                |              |
| 40                                        | 35-39  | Ecig      |               | 0    | .     |               |             |               |                |              |
| 40                                        | 35-39  | Dual      |               | 0    | .     |               |             |               |                |              |
| 40                                        | 35-39  | Former    |               | 0    | .     |               |             |               | 0              | .            |
| Year of Follow-up: 2030, Age Group: 40-44 | Period | Age Group | Smoking Group | N    | %     | Ever Quit (N) | Ever Quit % | Mean Yrs Quit | Short Term (n) | Short Term % |
| 40                                        | 40-44  | Never Any |               | 0    | .     |               |             |               |                |              |
| 40                                        | 40-44  | CC        |               | 0    | .     | 0             | .           |               |                |              |
| 40                                        | 40-44  | Ecig      |               | 0    | .     |               |             |               |                |              |
| 40                                        | 40-44  | Dual      |               | 0    | .     |               |             |               |                |              |
| 40                                        | 40-44  | Former    |               | 0    | .     |               |             |               | 0              | .            |
| Year of Follow-up: 2030, Age Group: 45-49 | Period | Age Group | Smoking Group | N    | %     | Ever Quit (N) | Ever Quit % | Mean Yrs Quit | Short Term (n) | Short Term % |
| 40                                        | 45-49  | Never Any |               | 0    | .     |               |             |               |                |              |
| 40                                        | 45-49  | CC        |               | 0    | .     | 0             | .           |               |                |              |
| 40                                        | 45-49  | Ecig      |               | 0    | .     |               |             |               |                |              |
| 40                                        | 45-49  | Dual      |               | 0    | .     |               |             |               |                |              |
| 40                                        | 45-49  | Former    |               | 0    | .     |               |             |               | 0              | .            |
| Year of Follow-up: 2030, Age Group: 50-54 | Period | Age Group | Smoking Group | N    | %     | Ever Quit (N) | Ever Quit % | Mean Yrs Quit | Short Term (n) | Short Term % |
| 40                                        | 50-54  | Never Any |               | 3513 | 39.72 |               |             |               |                |              |
| 40                                        | 50-54  | CC        |               | 14   | 0.16  | 0             | 0.00        |               |                |              |
| 40                                        | 50-54  | Ecig      |               | 2852 | 32.24 |               |             |               |                |              |
| 40                                        | 50-54  | Dual      |               | 0    | 0.00  |               |             |               |                |              |
| 40                                        | 50-54  | Former    |               | 2466 | 27.88 |               |             | 22.05         | 69             | 2.80         |
| Year of Follow-up: 2030, Age Group: 55-59 | Period | Age Group | Smoking Group | N    | %     | Ever Quit (N) | Ever Quit % | Mean Yrs Quit | Short Term (n) | Short Term % |
| 40                                        | 55-59  | Never Any |               | 4405 | 48.73 |               |             |               |                |              |
| 40                                        | 55-59  | CC        |               | 20   | 0.22  | 0             | 0.00        |               |                |              |
| 40                                        | 55-59  | Ecig      |               | 2308 | 25.53 |               |             |               |                |              |
| 40                                        | 55-59  | Dual      |               | 0    | 0.00  |               |             |               |                |              |
| 40                                        | 55-59  | Former    |               | 2307 | 25.52 |               |             | 23.73         | 89             | 3.86         |
| Year of Follow-up: 2030, Age Group: 60-64 | Period | Age Group | Smoking Group | N    | %     | Ever Quit (N) | Ever Quit % | Mean Yrs Quit | Short Term (n) | Short Term % |
| 40                                        | 60-64  | Never Any |               | 4961 | 50.54 |               |             |               |                |              |
| 40                                        | 60-64  | CC        |               | 30   | 0.31  | 0             | 0.00        |               |                |              |
| 40                                        | 60-64  | Ecig      |               | 2059 | 20.98 |               |             |               |                |              |
| 40                                        | 60-64  | Dual      |               | 0    | 0.00  |               |             |               |                |              |
| 40                                        | 60-64  | Former    |               | 2766 | 28.18 |               |             | 25.94         | 155            | 5.60         |
| Year of Follow-up: 2030, Age Group: 65-69 | Period | Age Group | Smoking Group | N    | %     | Ever Quit (N) | Ever Quit % | Mean Yrs Quit | Short Term (n) | Short Term % |
| 40                                        | 65-69  | Never Any |               | 4926 | 46.19 |               |             |               |                |              |
| 40                                        | 65-69  | CC        |               | 33   | 0.31  | 0             | 0.00        |               |                |              |
| 40                                        | 65-69  | Ecig      |               | 1969 | 18.46 |               |             |               |                |              |
| 40                                        | 65-69  | Dual      |               | 0    | 0.00  |               |             |               |                |              |
| 40                                        | 65-69  | Former    |               | 3736 | 35.03 |               |             | 27.87         | 127            | 3.40         |
| Year of Follow-up: 2030, Age Group: 70-74 | Period | Age Group | Smoking Group | N    | %     | Ever Quit (N) | Ever Quit % | Mean Yrs Quit | Short Term (n) | Short Term % |
| 40                                        | 70-74  | Never Any |               | 4712 | 43.17 |               |             |               |                |              |
| 40                                        | 70-74  | CC        |               | 50   | 0.46  | 0             | 0.00        |               |                |              |
| 40                                        | 70-74  | Ecig      |               | 1631 | 14.94 |               |             |               |                |              |
| 40                                        | 70-74  | Dual      |               | 0    | 0.00  |               |             |               |                |              |
| 40                                        | 70-74  | Former    |               | 4523 | 41.43 |               |             | 30.55         | 96             | 2.12         |
| Year of Follow-up: 2030, Age Group: 75-79 | Period | Age Group | Smoking Group | N    | %     | Ever Quit (N) | Ever Quit % | Mean Yrs Quit | Short Term (n) | Short Term % |
| 40                                        | 75-79  | Never Any |               | 3941 | 39.85 |               |             |               |                |              |
| 40                                        | 75-79  | CC        |               | 81   | 0.82  | 0             | 0.00        |               |                |              |

**Results for PHIM for Run 1 (Pessimistic\_Analysis.RTF)**

|                                              |           |               |       |       |               |             |               |                |              |
|----------------------------------------------|-----------|---------------|-------|-------|---------------|-------------|---------------|----------------|--------------|
| 40                                           | 75-79     | Ecig          | 1193  | 12.06 |               |             |               |                |              |
| 40                                           | 75-79     | Dual          | 0     | 0.00  |               |             |               |                |              |
| 40                                           | 75-79     | Former        | 4674  | 47.26 |               |             | 35.13         | 73             | 1.56         |
| Year of Follow-up: 2035, Age Group: All Ages |           |               |       |       |               |             |               |                |              |
| Period                                       | Age Group | Smoking Group | N     | %     | Ever Quit (N) | Ever Quit % | Mean Yrs Quit | Short Term (n) | Short Term % |
| 45                                           | All Ages  | Never Any     | 22517 | 45.69 |               |             |               |                |              |
| 45                                           | All Ages  | CC            | 102   | 0.21  | 0             | 0.00        |               |                |              |
| 45                                           | All Ages  | Ecig          | 9520  | 19.32 |               |             |               |                |              |
| 45                                           | All Ages  | Dual          | 0     | 0.00  |               |             |               |                |              |
| 45                                           | All Ages  | Former        | 17142 | 34.78 |               |             | 29.45         | 563            | 3.28         |
| Year of Follow-up: 2035, Age Group: 18-19    |           |               |       |       |               |             |               |                |              |
| Period                                       | Age Group | Smoking Group | N     | %     | Ever Quit (N) | Ever Quit % | Mean Yrs Quit | Short Term (n) | Short Term % |
| 45                                           | 18-19     | Never Any     | 0     | .     |               |             |               |                |              |
| 45                                           | 18-19     | CC            | 0     | .     | 0             | .           |               |                |              |
| 45                                           | 18-19     | Ecig          | 0     | .     |               |             |               |                |              |
| 45                                           | 18-19     | Dual          | 0     | .     |               |             |               |                |              |
| 45                                           | 18-19     | Former        | 0     | .     |               |             | .             | 0              | .            |
| Year of Follow-up: 2035, Age Group: 20-24    |           |               |       |       |               |             |               |                |              |
| Period                                       | Age Group | Smoking Group | N     | %     | Ever Quit (N) | Ever Quit % | Mean Yrs Quit | Short Term (n) | Short Term % |
| 45                                           | 20-24     | Never Any     | 0     | .     |               |             |               |                |              |
| 45                                           | 20-24     | CC            | 0     | .     | 0             | .           |               |                |              |
| 45                                           | 20-24     | Ecig          | 0     | .     |               |             |               |                |              |
| 45                                           | 20-24     | Dual          | 0     | .     |               |             |               |                |              |
| 45                                           | 20-24     | Former        | 0     | .     |               |             | .             | 0              | .            |
| Year of Follow-up: 2035, Age Group: 25-29    |           |               |       |       |               |             |               |                |              |
| Period                                       | Age Group | Smoking Group | N     | %     | Ever Quit (N) | Ever Quit % | Mean Yrs Quit | Short Term (n) | Short Term % |
| 45                                           | 25-29     | Never Any     | 0     | .     |               |             |               |                |              |
| 45                                           | 25-29     | CC            | 0     | .     | 0             | .           |               |                |              |
| 45                                           | 25-29     | Ecig          | 0     | .     |               |             |               |                |              |
| 45                                           | 25-29     | Dual          | 0     | .     |               |             |               |                |              |
| 45                                           | 25-29     | Former        | 0     | .     |               |             | .             | 0              | .            |
| Year of Follow-up: 2035, Age Group: 30-34    |           |               |       |       |               |             |               |                |              |
| Period                                       | Age Group | Smoking Group | N     | %     | Ever Quit (N) | Ever Quit % | Mean Yrs Quit | Short Term (n) | Short Term % |
| 45                                           | 30-34     | Never Any     | 0     | .     |               |             |               |                |              |
| 45                                           | 30-34     | CC            | 0     | .     | 0             | .           |               |                |              |
| 45                                           | 30-34     | Ecig          | 0     | .     |               |             |               |                |              |
| 45                                           | 30-34     | Dual          | 0     | .     |               |             |               |                |              |
| 45                                           | 30-34     | Former        | 0     | .     |               |             | .             | 0              | .            |
| Year of Follow-up: 2035, Age Group: 35-39    |           |               |       |       |               |             |               |                |              |
| Period                                       | Age Group | Smoking Group | N     | %     | Ever Quit (N) | Ever Quit % | Mean Yrs Quit | Short Term (n) | Short Term % |
| 45                                           | 35-39     | Never Any     | 0     | .     |               |             |               |                |              |
| 45                                           | 35-39     | CC            | 0     | .     | 0             | .           |               |                |              |
| 45                                           | 35-39     | Ecig          | 0     | .     |               |             |               |                |              |
| 45                                           | 35-39     | Dual          | 0     | .     |               |             |               |                |              |
| 45                                           | 35-39     | Former        | 0     | .     |               |             | .             | 0              | .            |
| Year of Follow-up: 2035, Age Group: 40-44    |           |               |       |       |               |             |               |                |              |
| Period                                       | Age Group | Smoking Group | N     | %     | Ever Quit (N) | Ever Quit % | Mean Yrs Quit | Short Term (n) | Short Term % |
| 45                                           | 40-44     | Never Any     | 0     | .     |               |             |               |                |              |
| 45                                           | 40-44     | CC            | 0     | .     | 0             | .           |               |                |              |
| 45                                           | 40-44     | Ecig          | 0     | .     |               |             |               |                |              |
| 45                                           | 40-44     | Dual          | 0     | .     |               |             |               |                |              |
| 45                                           | 40-44     | Former        | 0     | .     |               |             | .             | 0              | .            |
| Year of Follow-up: 2035, Age Group: 45-49    |           |               |       |       |               |             |               |                |              |
| Period                                       | Age Group | Smoking Group | N     | %     | Ever Quit (N) | Ever Quit % | Mean Yrs Quit | Short Term (n) | Short Term % |
| 45                                           | 45-49     | Never Any     | 0     | .     |               |             |               |                |              |
| 45                                           | 45-49     | CC            | 0     | .     | 0             | .           |               |                |              |
| 45                                           | 45-49     | Ecig          | 0     | .     |               |             |               |                |              |
| 45                                           | 45-49     | Dual          | 0     | .     |               |             |               |                |              |
| 45                                           | 45-49     | Former        | 0     | .     |               |             | .             | 0              | .            |
| Year of Follow-up: 2035, Age Group: 50-54    |           |               |       |       |               |             |               |                |              |
| Period                                       | Age Group | Smoking Group | N     | %     | Ever Quit (N) | Ever Quit % | Mean Yrs Quit | Short Term (n) | Short Term % |
| 45                                           | 50-54     | Never Any     | 0     | .     |               |             |               |                |              |
| 45                                           | 50-54     | CC            | 0     | .     | 0             | .           |               |                |              |
| 45                                           | 50-54     | Ecig          | 0     | .     |               |             |               |                |              |
| 45                                           | 50-54     | Dual          | 0     | .     |               |             |               |                |              |
| 45                                           | 50-54     | Former        | 0     | .     |               |             | .             | 0              | .            |
| Year of Follow-up: 2035, Age Group: 55-59    |           |               |       |       |               |             |               |                |              |
| Period                                       | Age Group | Smoking Group | N     | %     | Ever Quit (N) | Ever Quit % | Mean Yrs Quit | Short Term (n) | Short Term % |

**Results for PHIM for Run 1 (Pessimistic\_Analysis.RTF)**

|                                              |           |               |       |       |               |             |               |                |              |
|----------------------------------------------|-----------|---------------|-------|-------|---------------|-------------|---------------|----------------|--------------|
| 45                                           | 55-59     | Never Any     | 3513  | 39.72 |               |             |               |                |              |
| 45                                           | 55-59     | CC            | 9     | 0.10  | 0             | 0.00        |               |                |              |
| 45                                           | 55-59     | Ecig          | 2636  | 29.80 |               |             |               |                |              |
| 45                                           | 55-59     | Dual          | 0     | 0.00  |               |             |               |                |              |
| 45                                           | 55-59     | Former        | 2687  | 30.38 |               |             | 24.97         | 103            | 3.83         |
| Year of Follow-up: 2035, Age Group: 60-64    |           |               |       |       |               |             |               |                |              |
| Period                                       | Age Group | Smoking Group | N     | %     | Ever Quit (N) | Ever Quit % | Mean Yrs Quit | Short Term (n) | Short Term % |
| 45                                           | 60-64     | Never Any     | 4405  | 48.73 |               |             |               |                |              |
| 45                                           | 60-64     | CC            | 14    | 0.15  | 0             | 0.00        |               |                |              |
| 45                                           | 60-64     | Ecig          | 2027  | 22.42 |               |             |               |                |              |
| 45                                           | 60-64     | Dual          | 0     | 0.00  |               |             |               |                |              |
| 45                                           | 60-64     | Former        | 2594  | 28.69 |               |             | 25.75         | 125            | 4.82         |
| Year of Follow-up: 2035, Age Group: 65-69    |           |               |       |       |               |             |               |                |              |
| Period                                       | Age Group | Smoking Group | N     | %     | Ever Quit (N) | Ever Quit % | Mean Yrs Quit | Short Term (n) | Short Term % |
| 45                                           | 65-69     | Never Any     | 4961  | 50.54 |               |             |               |                |              |
| 45                                           | 65-69     | CC            | 18    | 0.18  | 0             | 0.00        |               |                |              |
| 45                                           | 65-69     | Ecig          | 1756  | 17.89 |               |             |               |                |              |
| 45                                           | 65-69     | Dual          | 0     | 0.00  |               |             |               |                |              |
| 45                                           | 65-69     | Former        | 3081  | 31.39 |               |             | 27.99         | 117            | 3.80         |
| Year of Follow-up: 2035, Age Group: 70-74    |           |               |       |       |               |             |               |                |              |
| Period                                       | Age Group | Smoking Group | N     | %     | Ever Quit (N) | Ever Quit % | Mean Yrs Quit | Short Term (n) | Short Term % |
| 45                                           | 70-74     | Never Any     | 4926  | 46.19 |               |             |               |                |              |
| 45                                           | 70-74     | CC            | 26    | 0.24  | 0             | 0.00        |               |                |              |
| 45                                           | 70-74     | Ecig          | 1709  | 16.03 |               |             |               |                |              |
| 45                                           | 70-74     | Dual          | 0     | 0.00  |               |             |               |                |              |
| 45                                           | 70-74     | Former        | 4003  | 37.54 |               |             | 30.81         | 115            | 2.87         |
| Year of Follow-up: 2035, Age Group: 75-79    |           |               |       |       |               |             |               |                |              |
| Period                                       | Age Group | Smoking Group | N     | %     | Ever Quit (N) | Ever Quit % | Mean Yrs Quit | Short Term (n) | Short Term % |
| 45                                           | 75-79     | Never Any     | 4712  | 43.17 |               |             |               |                |              |
| 45                                           | 75-79     | CC            | 35    | 0.32  | 0             | 0.00        |               |                |              |
| 45                                           | 75-79     | Ecig          | 1392  | 12.75 |               |             |               |                |              |
| 45                                           | 75-79     | Dual          | 0     | 0.00  |               |             |               |                |              |
| 45                                           | 75-79     | Former        | 4777  | 43.76 |               |             | 33.77         | 103            | 2.16         |
| Year of Follow-up: 2040, Age Group: All Ages |           |               |       |       |               |             |               |                |              |
| Period                                       | Age Group | Smoking Group | N     | %     | Ever Quit (N) | Ever Quit % | Mean Yrs Quit | Short Term (n) | Short Term % |
| 50                                           | All Ages  | Never Any     | 17805 | 46.41 |               |             |               |                |              |
| 50                                           | All Ages  | CC            | 46    | 0.12  | 0             | 0.00        |               |                |              |
| 50                                           | All Ages  | Ecig          | 7017  | 18.29 |               |             |               |                |              |
| 50                                           | All Ages  | Dual          | 0     | 0.00  |               |             |               |                |              |
| 50                                           | All Ages  | Former        | 13497 | 35.18 |               |             | 30.19         | 465            | 3.45         |
| Year of Follow-up: 2040, Age Group: 18-19    |           |               |       |       |               |             |               |                |              |
| Period                                       | Age Group | Smoking Group | N     | %     | Ever Quit (N) | Ever Quit % | Mean Yrs Quit | Short Term (n) | Short Term % |
| 50                                           | 18-19     | Never Any     | 0     | .     |               |             |               |                |              |
| 50                                           | 18-19     | CC            | 0     | .     | 0             | .           |               |                |              |
| 50                                           | 18-19     | Ecig          | 0     | .     |               |             |               |                |              |
| 50                                           | 18-19     | Dual          | 0     | .     |               |             |               |                |              |
| 50                                           | 18-19     | Former        | 0     | .     |               |             | .             | 0              | .            |
| Year of Follow-up: 2040, Age Group: 20-24    |           |               |       |       |               |             |               |                |              |
| Period                                       | Age Group | Smoking Group | N     | %     | Ever Quit (N) | Ever Quit % | Mean Yrs Quit | Short Term (n) | Short Term % |
| 50                                           | 20-24     | Never Any     | 0     | .     |               |             |               |                |              |
| 50                                           | 20-24     | CC            | 0     | .     | 0             | .           |               |                |              |
| 50                                           | 20-24     | Ecig          | 0     | .     |               |             |               |                |              |
| 50                                           | 20-24     | Dual          | 0     | .     |               |             |               |                |              |
| 50                                           | 20-24     | Former        | 0     | .     |               |             | .             | 0              | .            |
| Year of Follow-up: 2040, Age Group: 25-29    |           |               |       |       |               |             |               |                |              |
| Period                                       | Age Group | Smoking Group | N     | %     | Ever Quit (N) | Ever Quit % | Mean Yrs Quit | Short Term (n) | Short Term % |
| 50                                           | 25-29     | Never Any     | 0     | .     |               |             |               |                |              |
| 50                                           | 25-29     | CC            | 0     | .     | 0             | .           |               |                |              |
| 50                                           | 25-29     | Ecig          | 0     | .     |               |             |               |                |              |
| 50                                           | 25-29     | Dual          | 0     | .     |               |             |               |                |              |
| 50                                           | 25-29     | Former        | 0     | .     |               |             | .             | 0              | .            |
| Year of Follow-up: 2040, Age Group: 30-34    |           |               |       |       |               |             |               |                |              |
| Period                                       | Age Group | Smoking Group | N     | %     | Ever Quit (N) | Ever Quit % | Mean Yrs Quit | Short Term (n) | Short Term % |
| 50                                           | 30-34     | Never Any     | 0     | .     |               |             |               |                |              |
| 50                                           | 30-34     | CC            | 0     | .     | 0             | .           |               |                |              |
| 50                                           | 30-34     | Ecig          | 0     | .     |               |             |               |                |              |
| 50                                           | 30-34     | Dual          | 0     | .     |               |             |               |                |              |
| 50                                           | 30-34     | Former        | 0     | .     |               |             | .             | 0              | .            |
| Year of Follow-up: 2040, Age Group: 35-39    |           |               |       |       |               |             |               |                |              |

**Results for PHIM for Run 1 (Pessimistic\_Analysis.RTF)**

| Period                                    | Age Group | Smoking Group | N    | %     | Ever Quit (N) | Ever Quit % | Mean Yrs Quit | Short Term (n) | Short Term % |
|-------------------------------------------|-----------|---------------|------|-------|---------------|-------------|---------------|----------------|--------------|
| 50                                        | 35-39     | Never Any     | 0    | .     |               |             |               |                |              |
| 50                                        | 35-39     | CC            | 0    | .     | 0             | .           |               |                |              |
| 50                                        | 35-39     | Ecig          | 0    | .     |               |             |               |                |              |
| 50                                        | 35-39     | Dual          | 0    | .     |               |             |               |                |              |
| 50                                        | 35-39     | Former        | 0    | .     |               |             | .             | 0              | .            |
| Year of Follow-up: 2040, Age Group: 40-44 |           |               |      |       |               |             |               |                |              |
| Period                                    | Age Group | Smoking Group | N    | %     | Ever Quit (N) | Ever Quit % | Mean Yrs Quit | Short Term (n) | Short Term % |
| 50                                        | 40-44     | Never Any     | 0    | .     |               |             |               |                |              |
| 50                                        | 40-44     | CC            | 0    | .     | 0             | .           |               |                |              |
| 50                                        | 40-44     | Ecig          | 0    | .     |               |             |               |                |              |
| 50                                        | 40-44     | Dual          | 0    | .     |               |             |               |                |              |
| 50                                        | 40-44     | Former        | 0    | .     |               |             | .             | 0              | .            |
| Year of Follow-up: 2040, Age Group: 45-49 |           |               |      |       |               |             |               |                |              |
| Period                                    | Age Group | Smoking Group | N    | %     | Ever Quit (N) | Ever Quit % | Mean Yrs Quit | Short Term (n) | Short Term % |
| 50                                        | 45-49     | Never Any     | 0    | .     |               |             |               |                |              |
| 50                                        | 45-49     | CC            | 0    | .     | 0             | .           |               |                |              |
| 50                                        | 45-49     | Ecig          | 0    | .     |               |             |               |                |              |
| 50                                        | 45-49     | Dual          | 0    | .     |               |             |               |                |              |
| 50                                        | 45-49     | Former        | 0    | .     |               |             | .             | 0              | .            |
| Year of Follow-up: 2040, Age Group: 50-54 |           |               |      |       |               |             |               |                |              |
| Period                                    | Age Group | Smoking Group | N    | %     | Ever Quit (N) | Ever Quit % | Mean Yrs Quit | Short Term (n) | Short Term % |
| 50                                        | 50-54     | Never Any     | 0    | .     |               |             |               |                |              |
| 50                                        | 50-54     | CC            | 0    | .     | 0             | .           |               |                |              |
| 50                                        | 50-54     | Ecig          | 0    | .     |               |             |               |                |              |
| 50                                        | 50-54     | Dual          | 0    | .     |               |             |               |                |              |
| 50                                        | 50-54     | Former        | 0    | .     |               |             | .             | 0              | .            |
| Year of Follow-up: 2040, Age Group: 55-59 |           |               |      |       |               |             |               |                |              |
| Period                                    | Age Group | Smoking Group | N    | %     | Ever Quit (N) | Ever Quit % | Mean Yrs Quit | Short Term (n) | Short Term % |
| 50                                        | 55-59     | Never Any     | 0    | .     |               |             |               |                |              |
| 50                                        | 55-59     | CC            | 0    | .     | 0             | .           |               |                |              |
| 50                                        | 55-59     | Ecig          | 0    | .     |               |             |               |                |              |
| 50                                        | 55-59     | Dual          | 0    | .     |               |             |               |                |              |
| 50                                        | 55-59     | Former        | 0    | .     |               |             | .             | 0              | .            |
| Year of Follow-up: 2040, Age Group: 60-64 |           |               |      |       |               |             |               |                |              |
| Period                                    | Age Group | Smoking Group | N    | %     | Ever Quit (N) | Ever Quit % | Mean Yrs Quit | Short Term (n) | Short Term % |
| 50                                        | 60-64     | Never Any     | 3513 | 39.72 |               |             |               |                |              |
| 50                                        | 60-64     | CC            | 7    | 0.08  | 0             | 0.00        |               |                |              |
| 50                                        | 60-64     | Ecig          | 2285 | 25.83 |               |             |               |                |              |
| 50                                        | 60-64     | Dual          | 0    | 0.00  |               |             |               |                |              |
| 50                                        | 60-64     | Former        | 3040 | 34.37 |               |             | 26.70         | 163            | 5.36         |
| Year of Follow-up: 2040, Age Group: 65-69 |           |               |      |       |               |             |               |                |              |
| Period                                    | Age Group | Smoking Group | N    | %     | Ever Quit (N) | Ever Quit % | Mean Yrs Quit | Short Term (n) | Short Term % |
| 50                                        | 65-69     | Never Any     | 4405 | 48.73 |               |             |               |                |              |
| 50                                        | 65-69     | CC            | 6    | 0.07  | 0             | 0.00        |               |                |              |
| 50                                        | 65-69     | Ecig          | 1729 | 19.13 |               |             |               |                |              |
| 50                                        | 65-69     | Dual          | 0    | 0.00  |               |             |               |                |              |
| 50                                        | 65-69     | Former        | 2900 | 32.08 |               |             | 27.73         | 118            | 4.07         |
| Year of Follow-up: 2040, Age Group: 70-74 |           |               |      |       |               |             |               |                |              |
| Period                                    | Age Group | Smoking Group | N    | %     | Ever Quit (N) | Ever Quit % | Mean Yrs Quit | Short Term (n) | Short Term % |
| 50                                        | 70-74     | Never Any     | 4961 | 50.54 |               |             |               |                |              |
| 50                                        | 70-74     | CC            | 13   | 0.13  | 0             | 0.00        |               |                |              |
| 50                                        | 70-74     | Ecig          | 1530 | 15.59 |               |             |               |                |              |
| 50                                        | 70-74     | Dual          | 0    | 0.00  |               |             |               |                |              |
| 50                                        | 70-74     | Former        | 3312 | 33.74 |               |             | 30.84         | 83             | 2.51         |
| Year of Follow-up: 2040, Age Group: 75-79 |           |               |      |       |               |             |               |                |              |
| Period                                    | Age Group | Smoking Group | N    | %     | Ever Quit (N) | Ever Quit % | Mean Yrs Quit | Short Term (n) | Short Term % |
| 50                                        | 75-79     | Never Any     | 4926 | 46.19 |               |             |               |                |              |
| 50                                        | 75-79     | CC            | 20   | 0.19  | 0             | 0.00        |               |                |              |
| 50                                        | 75-79     | Ecig          | 1473 | 13.81 |               |             |               |                |              |
| 50                                        | 75-79     | Dual          | 0    | 0.00  |               |             |               |                |              |
| 50                                        | 75-79     | Former        | 4245 | 39.81 |               |             | 33.87         | 101            | 2.38         |

## Results for PHIM for Run 1 (Pessimistic\_Analysis.RTF)

\*\*\*\*\*

### Main Results for E-Component for Run: 1, Simulation: 1, COD: Four Diseases Combined

| Variable Parameter          | Value                                  |
|-----------------------------|----------------------------------------|
| 1. Country                  | US (United States)                     |
| 2. Sex                      | M (Males)                              |
| 3. Year of start of process | 1990                                   |
| 4. Cause of Death           | Four Diseases Combined                 |
| 5. Effective Dose NULL      | CC:1                                   |
| 6. Effective Dose Ecig      | CC:1 Ecig:0.4 Dual:0.7                 |
| Note:                       | Death rates are per million population |

#### Results for Age Groups Combined and Years combined, Population unadjusted for deaths in Ecig scenario,

| Age Group:All |          | NULL        | Ecig        | %Drop    |        | NULL   | Ecig    | Drop    |         |         |
|---------------|----------|-------------|-------------|----------|--------|--------|---------|---------|---------|---------|
| Year          | Number   | Attrib      | Attrib      | Drop     | %Drop  | Attrib | Death   | Attrib  | Attrib  | Drop    |
|               | Deaths   | Deaths      | Deaths      | Deaths   | Deaths | Deaths | Rate    | Rates   | Rates   | Rates   |
| All Comb      | 13148871 | 4509390.583 | 4037084.197 | 472306.4 | 3.592  | 10.474 | 3806.31 | 1305.37 | 1168.65 | 136.722 |

#### Results for Age Groups Combined, Population unadjusted for deaths in Ecig scenario,

| Age Group:All |        | NULL       | Ecig       | %Drop    |        | NULL   | Ecig    | Drop    |         |         |
|---------------|--------|------------|------------|----------|--------|--------|---------|---------|---------|---------|
| Year          | Number | Attrib     | Attrib     | Drop     | %Drop  | Attrib | Death   | Attrib  | Attrib  | Drop    |
|               | Deaths | Deaths     | Deaths     | Deaths   | Deaths | Deaths | Rate    | Rates   | Rates   | Rates   |
| 1990          | 317161 | 125773.065 | 125773.065 | 0.000    | 0.000  | 0.000  | 5027.71 | 1993.78 | 1993.78 | 0.000   |
| 1991          | 313217 | 123999.442 | 123873.164 | 126.278  | 0.040  | 0.102  | 4883.81 | 1933.45 | 1931.48 | 1.969   |
| 1992          | 308577 | 122014.015 | 121689.663 | 324.352  | 0.105  | 0.266  | 4729.73 | 1870.18 | 1865.20 | 4.972   |
| 1993          | 311713 | 122810.618 | 122195.247 | 615.371  | 0.197  | 0.501  | 4692.62 | 1848.83 | 1839.56 | 9.264   |
| 1994          | 305700 | 119925.592 | 118971.566 | 954.026  | 0.312  | 0.796  | 4516.19 | 1771.69 | 1757.60 | 14.094  |
| 1995          | 303225 | 117896.496 | 116520.681 | 1375.815 | 0.454  | 1.167  | 4393.80 | 1708.35 | 1688.41 | 19.936  |
| 1996          | 299559 | 115698.645 | 113866.225 | 1832.420 | 0.612  | 1.584  | 4273.16 | 1650.42 | 1624.28 | 26.139  |
| 1997          | 294226 | 113359.847 | 111063.249 | 2296.598 | 0.781  | 2.026  | 4128.67 | 1590.70 | 1558.47 | 32.227  |
| 1998          | 289258 | 111444.212 | 108678.734 | 2765.478 | 0.956  | 2.481  | 3992.19 | 1538.10 | 1499.93 | 38.168  |
| 1999          | 311002 | 114877.722 | 111117.570 | 3760.151 | 1.209  | 3.273  | 4224.60 | 1560.48 | 1509.40 | 51.077  |
| 2000          | 303786 | 112379.704 | 108017.543 | 4362.161 | 1.436  | 3.882  | 4066.21 | 1504.22 | 1445.83 | 58.388  |
| 2001          | 296294 | 110024.943 | 105019.397 | 5005.546 | 1.689  | 4.549  | 3914.28 | 1453.52 | 1387.39 | 66.127  |
| 2002          | 291898 | 108289.173 | 102554.454 | 5734.719 | 1.965  | 5.296  | 3813.00 | 1414.56 | 1339.65 | 74.911  |
| 2003          | 285865 | 106539.023 | 100187.979 | 6351.044 | 2.222  | 5.961  | 3695.36 | 1377.22 | 1295.12 | 82.099  |
| 2004          | 274177 | 103037.251 | 96162.823  | 6874.428 | 2.507  | 6.672  | 3506.10 | 1317.61 | 1229.70 | 87.908  |
| 2005          | 272379 | 103044.562 | 95502.265  | 7542.297 | 2.769  | 7.319  | 3442.69 | 1302.41 | 1207.08 | 95.330  |
| 2006          | 264118 | 99672.555  | 91436.308  | 8236.247 | 3.118  | 8.263  | 3307.76 | 1248.28 | 1145.13 | 103.149 |
| 2007          | 258419 | 97839.152  | 89078.066  | 8761.086 | 3.390  | 8.955  | 3203.20 | 1212.75 | 1104.15 | 108.597 |
| 2008          | 259461 | 98075.852  | 88714.450  | 9361.402 | 3.608  | 9.545  | 3180.09 | 1202.07 | 1087.33 | 114.738 |
| 2009          | 253907 | 95617.338  | 85794.454  | 9822.884 | 3.869  | 10.273 | 3075.31 | 1158.11 | 1039.14 | 118.974 |
| 2010          | 251878 | 94607.988  | 84367.449  | 10240.54 | 4.066  | 10.824 | 3013.72 | 1131.98 | 1009.46 | 122.528 |
| 2011          | 251779 | 93633.119  | 82762.832  | 10870.29 | 4.317  | 11.609 | 2982.76 | 1109.25 | 980.471 | 128.778 |
| 2012          | 252643 | 92775.175  | 81346.552  | 11428.62 | 4.524  | 12.319 | 2960.61 | 1087.19 | 953.263 | 133.927 |
| 2013          | 256175 | 92345.780  | 80305.701  | 12040.08 | 4.700  | 13.038 | 2967.76 | 1069.82 | 930.333 | 139.483 |
| 2014          | 257393 | 91379.215  | 78924.444  | 12454.77 | 4.839  | 13.630 | 2947.05 | 1046.26 | 903.654 | 142.602 |
| 2015          | 259782 | 90750.242  | 77919.415  | 12830.83 | 4.939  | 14.139 | 3346.10 | 1168.90 | 1003.63 | 165.266 |
| 2016          | 261453 | 88811.996  | 75587.022  | 13224.97 | 5.058  | 14.891 | 3336.15 | 1133.24 | 964.494 | 168.751 |
| 2017          | 263685 | 87325.126  | 73749.469  | 13575.66 | 5.148  | 15.546 | 3333.85 | 1104.08 | 932.438 | 171.641 |
| 2018          | 258714 | 87612.144  | 73899.715  | 13712.43 | 5.300  | 15.651 | 3240.73 | 1097.46 | 925.690 | 171.766 |
| 2019          | 261438 | 87797.760  | 73726.752  | 14071.01 | 5.382  | 16.027 | 3242.99 | 1089.08 | 914.539 | 174.543 |
| 2020          | 262288 | 87221.042  | 72992.945  | 14228.10 | 5.425  | 16.313 | 3715.29 | 1235.48 | 1033.94 | 201.540 |
| 2021          | 255079 | 82001.292  | 67941.638  | 14059.65 | 5.512  | 17.146 | 3587.82 | 1153.39 | 955.633 | 197.756 |
| 2022          | 257097 | 81915.977  | 67474.072  | 14441.91 | 5.617  | 17.630 | 3588.53 | 1143.37 | 941.796 | 201.579 |
| 2023          | 259080 | 81810.810  | 67060.731  | 14750.08 | 5.693  | 18.029 | 3586.88 | 1132.64 | 928.435 | 204.210 |
| 2024          | 260719 | 81528.303  | 66657.718  | 14870.58 | 5.704  | 18.240 | 3579.65 | 1119.38 | 915.206 | 204.172 |
| 2025          | 257308 | 79599.213  | 64881.940  | 14717.27 | 5.720  | 18.489 | 4112.08 | 1272.09 | 1036.89 | 235.199 |
| 2026          | 251528 | 75082.462  | 60855.609  | 14226.85 | 5.656  | 18.948 | 4003.24 | 1194.99 | 968.558 | 226.430 |
| 2027          | 250988 | 74444.425  | 60137.888  | 14306.54 | 5.700  | 19.218 | 3976.53 | 1179.46 | 952.795 | 226.666 |
| 2028          | 250285 | 73699.585  | 59300.454  | 14399.13 | 5.753  | 19.538 | 3945.35 | 1161.76 | 934.780 | 226.980 |
| 2029          | 249525 | 72819.703  | 58532.836  | 14286.87 | 5.726  | 19.620 | 3910.99 | 1141.36 | 917.428 | 223.929 |
| 2030          | 240528 | 69309.277  | 55515.726  | 13793.55 | 5.735  | 19.901 | 4504.36 | 1297.95 | 1039.64 | 258.311 |
| 2031          | 235442 | 65433.368  | 52338.296  | 13095.07 | 5.562  | 20.013 | 4397.65 | 1222.18 | 977.588 | 244.593 |
| 2032          | 234017 | 64643.552  | 51618.159  | 13025.39 | 5.566  | 20.150 | 4356.12 | 1203.31 | 960.847 | 242.461 |
| 2033          | 232559 | 63793.514  | 51021.495  | 12772.02 | 5.492  | 20.021 | 4310.93 | 1182.54 | 945.782 | 236.754 |
| 2034          | 230963 | 63032.151  | 50484.587  | 12547.56 | 5.433  | 19.907 | 4260.75 | 1162.80 | 931.326 | 231.474 |
| 2035          | 215822 | 57653.301  | 46033.427  | 11619.87 | 5.384  | 20.155 | 4924.38 | 1315.47 | 1050.34 | 265.130 |
| 2036          | 208183 | 52988.733  | 42241.847  | 10746.89 | 5.162  | 20.281 | 4748.94 | 1208.75 | 963.595 | 245.151 |
| 2037          | 205491 | 52026.921  | 41651.392  | 10375.53 | 5.049  | 19.943 | 4682.40 | 1185.50 | 949.083 | 236.420 |
| 2038          | 202834 | 50943.211  | 40969.014  | 9974.198 | 4.917  | 19.579 | 4612.18 | 1158.38 | 931.583 | 226.800 |
| 2039          | 200251 | 50085.991  | 40568.170  | 9517.820 | 4.753  | 19.003 | 4538.65 | 1135.19 | 919.471 | 215.720 |

## Results for PHIM for Run 1 (Pessimistic\_Analysis.RTF)

\*\*\*\*\*

### Main Results for E-Component for Run: 1, Simulation: 1, COD: LUNG CANCER

| Variable Parameter          | Value                                  |
|-----------------------------|----------------------------------------|
| 1. Country                  | US (United States)                     |
| 2. Sex                      | M (Males)                              |
| 3. Year of start of process | 1990                                   |
| 4. Cause of Death           | LUNG CANCER                            |
| 5. Effective Dose NULL      | CC:1                                   |
| 6. Effective Dose Ecig      | CC:1 Ecig:0.4 Dual:0.7                 |
| Note:                       | Death rates are per million population |

#### Results for Age Groups Combined and Years combined, Population unadjusted for deaths in Ecig scenario,

| Age Group:All |         | NULL        | Ecig        | %Drop    |        | NULL   | Ecig    | Drop    |         |        |
|---------------|---------|-------------|-------------|----------|--------|--------|---------|---------|---------|--------|
| Year          | Number  | Attrib      | Attrib      | Drop     | %Drop  | Attrib | Death   | Attrib  | Attrib  | Drop   |
|               | Deaths  | Deaths      | Deaths      | Deaths   | Deaths | Deaths | Rate    | Rates   | Rates   | Rates  |
| All Comb      | 3065988 | 2244988.113 | 2114227.357 | 130760.8 | 4.265  | 5.825  | 887.537 | 649.875 | 612.023 | 37.852 |

#### Results for Age Groups Combined, Population unadjusted for deaths in Ecig scenario,

| Age Group:All |        | NULL      | Ecig      | %Drop    |        | NULL   | Ecig    | Drop    |         |        |
|---------------|--------|-----------|-----------|----------|--------|--------|---------|---------|---------|--------|
| Year          | Number | Attrib    | Attrib    | Drop     | %Drop  | Attrib | Death   | Attrib  | Attrib  | Drop   |
|               | Deaths | Deaths    | Deaths    | Deaths   | Deaths | Deaths | Rate    | Rates   | Rates   | Rates  |
| 1990          | 78822  | 63385.736 | 63385.736 | 0.000    | 0.000  | 0.000  | 1249.50 | 1004.81 | 1004.81 | 0.000  |
| 1991          | 78462  | 62918.402 | 62905.561 | 12.841   | 0.016  | 0.020  | 1223.41 | 981.049 | 980.849 | 0.200  |
| 1992          | 77987  | 62366.766 | 62336.739 | 30.027   | 0.039  | 0.048  | 1195.35 | 955.930 | 955.469 | 0.460  |
| 1993          | 78542  | 62652.888 | 62592.993 | 59.895   | 0.076  | 0.096  | 1182.39 | 943.195 | 942.293 | 0.902  |
| 1994          | 77437  | 61565.227 | 61470.526 | 94.701   | 0.122  | 0.154  | 1144.00 | 909.520 | 908.121 | 1.399  |
| 1995          | 76904  | 60851.961 | 60707.978 | 143.983  | 0.187  | 0.237  | 1114.36 | 881.759 | 879.672 | 2.086  |
| 1996          | 76232  | 60122.922 | 59917.035 | 205.886  | 0.270  | 0.342  | 1087.44 | 857.643 | 854.706 | 2.937  |
| 1997          | 75473  | 59237.155 | 58964.385 | 272.770  | 0.361  | 0.460  | 1059.06 | 831.234 | 827.407 | 3.828  |
| 1998          | 75381  | 58906.696 | 58547.480 | 359.216  | 0.477  | 0.610  | 1040.37 | 813.001 | 808.043 | 4.958  |
| 1999          | 73159  | 56930.073 | 56486.341 | 443.732  | 0.607  | 0.779  | 993.781 | 773.329 | 767.302 | 6.028  |
| 2000          | 73784  | 57137.121 | 56573.793 | 563.328  | 0.763  | 0.986  | 987.608 | 764.787 | 757.247 | 7.540  |
| 2001          | 73294  | 56481.726 | 55785.480 | 696.247  | 0.950  | 1.233  | 968.273 | 746.169 | 736.971 | 9.198  |
| 2002          | 72442  | 55588.365 | 54754.397 | 833.968  | 1.151  | 1.500  | 946.293 | 726.138 | 715.244 | 10.894 |
| 2003          | 71942  | 54945.856 | 53973.182 | 972.674  | 1.352  | 1.770  | 929.989 | 710.281 | 697.707 | 12.574 |
| 2004          | 71301  | 54203.126 | 53053.422 | 1149.703 | 1.612  | 2.121  | 911.778 | 693.135 | 678.433 | 14.702 |
| 2005          | 70964  | 53744.603 | 52425.113 | 1319.490 | 1.859  | 2.455  | 896.937 | 679.296 | 662.618 | 16.677 |
| 2006          | 69658  | 52535.572 | 51019.725 | 1515.847 | 2.176  | 2.885  | 872.383 | 657.945 | 638.961 | 18.984 |
| 2007          | 68565  | 51492.124 | 49796.954 | 1695.170 | 2.472  | 3.292  | 849.888 | 638.264 | 617.251 | 21.012 |
| 2008          | 68226  | 51030.736 | 49125.174 | 1905.562 | 2.793  | 3.734  | 836.215 | 625.460 | 602.105 | 23.356 |
| 2009          | 67509  | 50276.199 | 48152.138 | 2124.061 | 3.146  | 4.225  | 817.667 | 608.943 | 583.217 | 25.727 |
| 2010          | 67196  | 49840.933 | 47530.604 | 2310.329 | 3.438  | 4.635  | 804.000 | 596.347 | 568.704 | 27.643 |
| 2011          | 66506  | 49072.841 | 46514.379 | 2558.462 | 3.847  | 5.214  | 787.880 | 581.354 | 551.045 | 30.309 |
| 2012          | 66155  | 48539.512 | 45747.649 | 2791.863 | 4.220  | 5.752  | 775.240 | 568.812 | 536.096 | 32.717 |
| 2013          | 65333  | 47675.741 | 44665.145 | 3010.596 | 4.608  | 6.315  | 756.876 | 552.318 | 517.441 | 34.877 |
| 2014          | 65033  | 47194.534 | 43995.722 | 3198.812 | 4.919  | 6.778  | 744.602 | 540.359 | 503.734 | 36.625 |
| 2015          | 64145  | 46305.842 | 42940.126 | 3365.716 | 5.247  | 7.268  | 726.215 | 526.439 | 488.087 | 38.352 |
| 2016          | 61618  | 44208.867 | 40773.496 | 3435.371 | 5.575  | 7.771  | 786.248 | 564.107 | 520.272 | 43.835 |
| 2017          | 59897  | 42702.624 | 39168.310 | 3534.313 | 5.901  | 8.277  | 757.297 | 539.903 | 495.217 | 44.685 |
| 2018          | 62468  | 44321.202 | 40366.295 | 3954.908 | 6.331  | 8.923  | 782.490 | 555.181 | 505.640 | 49.540 |
| 2019          | 63045  | 44493.088 | 40288.344 | 4204.744 | 6.669  | 9.450  | 782.035 | 551.912 | 499.754 | 52.157 |
| 2020          | 63466  | 44529.551 | 40112.455 | 4417.096 | 6.960  | 9.919  | 898.991 | 630.757 | 568.190 | 62.568 |
| 2021          | 57113  | 39852.556 | 35667.294 | 4185.262 | 7.328  | 10.502 | 803.323 | 560.546 | 501.678 | 58.868 |
| 2022          | 57440  | 39853.685 | 35414.822 | 4438.863 | 7.728  | 11.138 | 801.745 | 556.274 | 494.317 | 61.957 |
| 2023          | 57738  | 39847.050 | 35181.275 | 4665.775 | 8.081  | 11.709 | 799.366 | 551.670 | 487.074 | 64.596 |
| 2024          | 57942  | 39726.010 | 34902.789 | 4823.221 | 8.324  | 12.141 | 795.539 | 545.435 | 479.213 | 66.223 |
| 2025          | 57521  | 39207.348 | 34279.922 | 4927.426 | 8.566  | 12.568 | 919.257 | 626.579 | 547.833 | 78.746 |
| 2026          | 51428  | 34803.960 | 30313.564 | 4490.397 | 8.731  | 12.902 | 818.510 | 553.929 | 482.461 | 71.468 |
| 2027          | 51172  | 34484.595 | 29862.506 | 4622.088 | 9.032  | 13.403 | 810.740 | 546.357 | 473.127 | 73.230 |
| 2028          | 50870  | 34100.638 | 29359.620 | 4741.018 | 9.320  | 13.903 | 801.884 | 537.544 | 462.809 | 74.735 |
| 2029          | 50540  | 33669.838 | 28876.633 | 4793.205 | 9.484  | 14.236 | 792.146 | 527.732 | 452.605 | 75.127 |
| 2030          | 49109  | 32557.688 | 27800.697 | 4756.991 | 9.687  | 14.611 | 919.662 | 609.705 | 520.621 | 89.084 |
| 2031          | 43585  | 28646.393 | 24460.806 | 4185.587 | 9.603  | 14.611 | 814.096 | 535.065 | 456.885 | 78.179 |
| 2032          | 43163  | 28227.160 | 24021.736 | 4205.424 | 9.743  | 14.899 | 803.454 | 525.435 | 447.153 | 78.282 |
| 2033          | 42725  | 27786.623 | 23631.889 | 4154.734 | 9.724  | 14.952 | 791.996 | 515.079 | 438.063 | 77.016 |
| 2034          | 42256  | 27348.299 | 23228.643 | 4119.655 | 9.749  | 15.064 | 779.523 | 504.514 | 428.516 | 75.998 |
| 2035          | 39748  | 25570.077 | 21661.529 | 3908.549 | 9.833  | 15.286 | 906.933 | 583.430 | 494.249 | 89.181 |
| 2036          | 34030  | 21717.319 | 18420.584 | 3296.735 | 9.688  | 15.180 | 776.269 | 495.402 | 420.199 | 75.203 |
| 2037          | 33454  | 21256.024 | 18048.008 | 3208.016 | 9.589  | 15.092 | 762.289 | 484.347 | 411.248 | 73.099 |
| 2038          | 32883  | 20747.175 | 17653.749 | 3093.426 | 9.407  | 14.910 | 747.720 | 471.764 | 401.424 | 70.341 |
| 2039          | 32325  | 20327.688 | 17364.617 | 2963.070 | 9.166  | 14.577 | 732.644 | 460.724 | 393.566 | 67.158 |

## Results for PHIM for Run 1 (Pessimistic\_Analysis.RTF)

\*\*\*\*\*

### Main Results for E-Component for Run: 1, Simulation: 1, COD: IHD

| Variable Parameter          | Value                                  |
|-----------------------------|----------------------------------------|
| 1. Country                  | US (United States)                     |
| 2. Sex                      | M (Males)                              |
| 3. Year of start of process | 1990                                   |
| 4. Cause of Death           | IHD                                    |
| 5. Effective Dose NULL      | CC:1                                   |
| 6. Effective Dose Ecig      | CC:1 Ecig:0.4 Dual:0.7                 |
| Note:                       | Death rates are per million population |

### Results for Age Groups Combined and Years combined, Population unadjusted for deaths in Ecig scenario,

| Age Group:All |         | NULL        | Ecig       | %Drop    |        | NULL   | Ecig    | Drop    |         |        |
|---------------|---------|-------------|------------|----------|--------|--------|---------|---------|---------|--------|
| Year          | Number  | Attrib      | Attrib     | Drop     | %Drop  | Attrib | Death   | Attrib  | Attrib  | Drop   |
|               | Deaths  | Deaths      | Deaths     | Deaths   | Deaths | Deaths | Rate    | Rates   | Rates   | Rates  |
| All Comb      | 6360041 | 1098877.421 | 894508.089 | 204369.3 | 3.213  | 18.598 | 1841.09 | 318.101 | 258.941 | 59.160 |

### Results for Age Groups Combined, Population unadjusted for deaths in Ecig scenario,

| Age Group:All |        | NULL      | Ecig      | %Drop    |        | NULL   | Ecig    | Drop    |         |        |
|---------------|--------|-----------|-----------|----------|--------|--------|---------|---------|---------|--------|
| Year          | Number | Attrib    | Attrib    | Drop     | %Drop  | Attrib | Death   | Attrib  | Attrib  | Drop   |
|               | Deaths | Deaths    | Deaths    | Deaths   | Deaths | Deaths | Rate    | Rates   | Rates   | Rates  |
| 1990          | 171484 | 38511.725 | 38511.725 | 0.000    | 0.000  | 0.000  | 2718.40 | 610.497 | 610.497 | 0.000  |
| 1991          | 168044 | 37309.838 | 37213.274 | 96.564   | 0.057  | 0.259  | 2620.21 | 581.750 | 580.245 | 1.506  |
| 1992          | 164548 | 36137.488 | 35882.632 | 254.856  | 0.155  | 0.705  | 2522.12 | 553.899 | 549.993 | 3.906  |
| 1993          | 164362 | 35599.588 | 35122.407 | 477.181  | 0.290  | 1.340  | 2474.35 | 535.926 | 528.743 | 7.184  |
| 1994          | 159866 | 34336.757 | 33600.934 | 735.823  | 0.460  | 2.143  | 2361.75 | 507.267 | 496.396 | 10.871 |
| 1995          | 158083 | 33455.759 | 32409.461 | 1046.298 | 0.662  | 3.127  | 2290.66 | 484.782 | 469.620 | 15.161 |
| 1996          | 154875 | 32193.824 | 30819.797 | 1374.027 | 0.887  | 4.268  | 2209.26 | 459.239 | 439.639 | 19.600 |
| 1997          | 149970 | 30665.509 | 28972.696 | 1692.813 | 1.129  | 5.520  | 2104.43 | 430.308 | 406.554 | 23.754 |
| 1998          | 145407 | 29188.430 | 27196.817 | 1991.613 | 1.370  | 6.823  | 2006.83 | 402.844 | 375.357 | 27.487 |
| 1999          | 165952 | 33375.386 | 30563.488 | 2811.898 | 1.694  | 8.425  | 2254.27 | 453.366 | 415.170 | 38.196 |
| 2000          | 160260 | 32024.754 | 28836.473 | 3188.281 | 1.989  | 9.956  | 2145.10 | 428.655 | 385.980 | 42.676 |
| 2001          | 154444 | 30682.393 | 27089.949 | 3592.444 | 2.326  | 11.708 | 2040.33 | 405.339 | 357.880 | 47.459 |
| 2002          | 151887 | 30218.370 | 26147.623 | 4070.747 | 2.680  | 13.471 | 1984.06 | 394.736 | 341.560 | 53.175 |
| 2003          | 146733 | 29175.202 | 24744.808 | 4430.394 | 3.019  | 15.185 | 1896.81 | 377.146 | 319.874 | 57.271 |
| 2004          | 138381 | 27488.687 | 22829.241 | 4659.446 | 3.367  | 16.950 | 1769.58 | 351.518 | 291.934 | 59.584 |
| 2005          | 135881 | 27017.439 | 22017.260 | 5000.179 | 3.680  | 18.507 | 1717.44 | 341.482 | 278.283 | 63.199 |
| 2006          | 131922 | 26231.435 | 20869.756 | 5361.679 | 4.064  | 20.440 | 1652.16 | 328.517 | 261.369 | 67.149 |
| 2007          | 126502 | 25103.049 | 19567.055 | 5535.994 | 4.376  | 22.053 | 1568.04 | 311.161 | 242.541 | 68.621 |
| 2008          | 125859 | 24621.740 | 18864.858 | 5756.882 | 4.574  | 23.381 | 1542.60 | 301.777 | 231.218 | 70.559 |
| 2009          | 122428 | 23741.177 | 17882.082 | 5859.095 | 4.786  | 24.679 | 1482.84 | 287.552 | 216.587 | 70.965 |
| 2010          | 120537 | 23189.160 | 17213.506 | 5975.654 | 4.958  | 25.769 | 1442.22 | 277.458 | 205.960 | 71.499 |
| 2011          | 120221 | 22786.927 | 16634.659 | 6152.268 | 5.117  | 26.999 | 1424.23 | 269.951 | 197.067 | 72.884 |
| 2012          | 120927 | 22485.295 | 16172.104 | 6313.191 | 5.221  | 28.077 | 1417.09 | 263.495 | 189.513 | 73.981 |
| 2013          | 122648 | 22251.884 | 15776.420 | 6475.465 | 5.280  | 29.101 | 1420.86 | 257.786 | 182.768 | 75.018 |
| 2014          | 123229 | 21894.593 | 15347.945 | 6546.648 | 5.313  | 29.901 | 1410.92 | 250.685 | 175.728 | 74.957 |
| 2015          | 123774 | 21471.109 | 14903.180 | 6567.929 | 5.306  | 30.590 | 1594.26 | 276.557 | 191.959 | 84.598 |
| 2016          | 126218 | 21411.568 | 14707.434 | 6704.134 | 5.312  | 31.311 | 1610.55 | 273.213 | 187.667 | 85.545 |
| 2017          | 128265 | 21169.399 | 14415.109 | 6754.290 | 5.266  | 31.906 | 1621.69 | 267.651 | 182.255 | 85.397 |
| 2018          | 121429 | 19830.576 | 13444.914 | 6385.662 | 5.259  | 32.201 | 1521.05 | 248.404 | 168.415 | 79.989 |
| 2019          | 121832 | 19431.014 | 13126.288 | 6304.726 | 5.175  | 32.447 | 1511.26 | 241.031 | 162.824 | 78.207 |
| 2020          | 120811 | 18532.612 | 12431.147 | 6101.466 | 5.050  | 32.923 | 1711.27 | 262.513 | 176.086 | 86.427 |
| 2021          | 119407 | 18234.128 | 12230.942 | 6003.186 | 5.028  | 32.923 | 1679.51 | 256.472 | 172.034 | 84.438 |
| 2022          | 119438 | 17812.559 | 11915.385 | 5897.174 | 4.937  | 33.107 | 1667.10 | 248.626 | 166.314 | 82.312 |
| 2023          | 119445 | 17361.668 | 11605.861 | 5755.807 | 4.819  | 33.152 | 1653.68 | 240.367 | 160.679 | 79.687 |
| 2024          | 119305 | 16929.676 | 11365.986 | 5563.690 | 4.663  | 32.864 | 1638.05 | 232.443 | 156.054 | 76.389 |
| 2025          | 115685 | 15501.666 | 10310.285 | 5191.381 | 4.488  | 33.489 | 1848.78 | 247.735 | 164.770 | 82.964 |
| 2026          | 115073 | 15523.814 | 10471.173 | 5052.641 | 4.391  | 32.548 | 1831.46 | 247.072 | 166.656 | 80.416 |
| 2027          | 113989 | 15073.070 | 10243.633 | 4829.437 | 4.237  | 32.040 | 1805.98 | 238.810 | 162.295 | 76.515 |
| 2028          | 112855 | 14636.710 | 10009.251 | 4627.458 | 4.100  | 31.615 | 1778.98 | 230.725 | 157.780 | 72.945 |
| 2029          | 111718 | 14180.166 | 9818.836  | 4361.330 | 3.904  | 30.757 | 1751.04 | 222.256 | 153.898 | 68.358 |
| 2030          | 104851 | 12111.772 | 8242.260  | 3869.512 | 3.690  | 31.948 | 1963.54 | 226.816 | 154.352 | 72.464 |
| 2031          | 105289 | 12417.367 | 8640.278  | 3777.088 | 3.587  | 30.418 | 1966.62 | 231.935 | 161.385 | 70.549 |
| 2032          | 103879 | 12054.064 | 8469.321  | 3584.743 | 3.451  | 29.739 | 1933.67 | 224.381 | 157.652 | 66.728 |
| 2033          | 102485 | 11672.389 | 8304.301  | 3368.088 | 3.286  | 28.855 | 1899.76 | 216.370 | 153.936 | 62.434 |
| 2034          | 101070 | 11365.762 | 8245.972  | 3119.790 | 3.087  | 27.449 | 1864.51 | 209.673 | 152.119 | 57.553 |
| 2035          | 90820  | 8580.360  | 6035.279  | 2545.081 | 2.802  | 29.662 | 2072.23 | 195.777 | 137.706 | 58.071 |
| 2036          | 92117  | 8948.841  | 6463.404  | 2485.436 | 2.698  | 27.774 | 2101.31 | 204.135 | 147.439 | 56.696 |
| 2037          | 90327  | 8624.570  | 6373.458  | 2251.112 | 2.492  | 26.101 | 2058.21 | 196.522 | 145.228 | 51.295 |
| 2038          | 88590  | 8315.017  | 6255.073  | 2059.944 | 2.325  | 24.774 | 2014.42 | 189.073 | 142.232 | 46.840 |
| 2039          | 86921  | 8001.132  | 6192.347  | 1808.784 | 2.081  | 22.607 | 1970.05 | 181.344 | 140.349 | 40.996 |

## Results for PHIM for Run 1 (Pessimistic\_Analysis.RTF)

\*\*\*\*\*

### Main Results for E-Component for Run: 1, Simulation: 1, COD: STROKE

| Variable Parameter          | Value                                  |
|-----------------------------|----------------------------------------|
| 1. Country                  | US (United States)                     |
| 2. Sex                      | M (Males)                              |
| 3. Year of start of process | 1990                                   |
| 4. Cause of Death           | STROKE                                 |
| 5. Effective Dose NULL      | CC:1                                   |
| 6. Effective Dose Ecig      | CC:1 Ecig:0.4 Dual:0.7                 |
| Note:                       | Death rates are per million population |

#### Results for Age Groups Combined and Years combined, Population unadjusted for deaths in Ecig scenario,

| Age Group:All | NULL    | Ecig       | %Drop      |          |        | NULL   | Ecig    | Drop   |        |       |
|---------------|---------|------------|------------|----------|--------|--------|---------|--------|--------|-------|
| Year          | Number  | Attrib     | Attrib     | Drop     | %Drop  | Attrib | Death   | Attrib | Attrib | Drop  |
|               | Deaths  | Deaths     | Deaths     | Deaths   | Deaths | Deaths | Rate    | Rates  | Rates  | Rates |
| All Comb      | 1489699 | 149918.462 | 120982.566 | 28935.90 | 1.942  | 19.301 | 431.236 | 43.398 | 35.022 | 8.376 |

#### Results for Age Groups Combined, Population unadjusted for deaths in Ecig scenario,

| Age Group:All | NULL   | Ecig     | %Drop    |          |        | NULL   | Ecig    | Drop   |        |        |
|---------------|--------|----------|----------|----------|--------|--------|---------|--------|--------|--------|
| Year          | Number | Attrib   | Attrib   | Drop     | %Drop  | Attrib | Death   | Attrib | Attrib | Drop   |
|               | Deaths | Deaths   | Deaths   | Deaths   | Deaths | Deaths | Rate    | Rates  | Rates  | Rates  |
| 1990          | 32862  | 4613.166 | 4613.166 | 0.000    | 0.000  | 0.000  | 520.936 | 73.129 | 73.129 | 0.000  |
| 1991          | 32619  | 4555.566 | 4544.170 | 11.396   | 0.035  | 0.250  | 508.609 | 71.032 | 70.855 | 0.178  |
| 1992          | 32100  | 4453.572 | 4424.763 | 28.809   | 0.090  | 0.647  | 492.014 | 68.262 | 67.821 | 0.442  |
| 1993          | 32896  | 4462.473 | 4406.237 | 56.237   | 0.171  | 1.260  | 495.226 | 67.179 | 66.333 | 0.847  |
| 1994          | 33323  | 4499.513 | 4409.321 | 90.192   | 0.271  | 2.004  | 492.290 | 66.473 | 65.140 | 1.332  |
| 1995          | 33569  | 4472.774 | 4339.160 | 133.615  | 0.398  | 2.987  | 486.422 | 64.812 | 62.875 | 1.936  |
| 1996          | 33870  | 4406.878 | 4225.271 | 181.607  | 0.536  | 4.121  | 483.150 | 62.863 | 60.273 | 2.591  |
| 1997          | 33516  | 4288.158 | 4056.440 | 231.718  | 0.691  | 5.404  | 470.307 | 60.173 | 56.921 | 3.252  |
| 1998          | 32795  | 4120.148 | 3842.479 | 277.669  | 0.847  | 6.739  | 452.620 | 56.864 | 53.032 | 3.832  |
| 1999          | 33375  | 3982.443 | 3657.649 | 324.793  | 0.973  | 8.156  | 453.361 | 54.097 | 49.685 | 4.412  |
| 2000          | 33459  | 4021.411 | 3630.953 | 390.458  | 1.167  | 9.709  | 447.853 | 53.827 | 48.601 | 5.226  |
| 2001          | 32275  | 3848.092 | 3409.250 | 438.843  | 1.360  | 11.404 | 426.379 | 50.836 | 45.039 | 5.797  |
| 2002          | 31586  | 3783.081 | 3288.031 | 495.050  | 1.567  | 13.086 | 412.601 | 49.418 | 42.951 | 6.467  |
| 2003          | 30985  | 3754.415 | 3196.398 | 558.017  | 1.801  | 14.863 | 400.541 | 48.533 | 41.320 | 7.213  |
| 2004          | 29884  | 3666.274 | 3055.630 | 610.645  | 2.043  | 16.656 | 382.149 | 46.883 | 39.075 | 7.809  |
| 2005          | 28708  | 3589.688 | 2933.114 | 656.574  | 2.287  | 18.291 | 362.850 | 45.371 | 37.073 | 8.299  |
| 2006          | 28188  | 3596.985 | 2865.974 | 731.011  | 2.593  | 20.323 | 353.021 | 45.048 | 35.893 | 9.155  |
| 2007          | 28026  | 3560.798 | 2778.148 | 782.650  | 2.793  | 21.980 | 347.392 | 44.137 | 34.436 | 9.701  |
| 2008          | 27128  | 3417.001 | 2615.667 | 801.334  | 2.954  | 23.451 | 332.495 | 41.881 | 32.059 | 9.822  |
| 2009          | 27068  | 3394.390 | 2552.424 | 841.965  | 3.111  | 24.805 | 327.847 | 41.113 | 30.915 | 10.198 |
| 2010          | 26911  | 3340.137 | 2473.219 | 866.918  | 3.221  | 25.955 | 321.990 | 39.965 | 29.592 | 10.373 |
| 2011          | 26959  | 3285.435 | 2396.669 | 888.766  | 3.297  | 27.052 | 319.377 | 38.922 | 28.393 | 10.529 |
| 2012          | 27057  | 3259.209 | 2338.944 | 920.266  | 3.401  | 28.236 | 317.068 | 38.193 | 27.409 | 10.784 |
| 2013          | 27904  | 3274.703 | 2311.747 | 962.955  | 3.451  | 29.406 | 323.265 | 37.937 | 26.781 | 11.156 |
| 2014          | 28792  | 3298.083 | 2300.359 | 997.724  | 3.465  | 30.252 | 329.657 | 37.762 | 26.338 | 11.424 |
| 2015          | 29560  | 3244.406 | 2238.171 | 1006.235 | 3.404  | 31.014 | 380.745 | 41.789 | 28.829 | 12.961 |
| 2016          | 30513  | 3314.836 | 2262.762 | 1052.074 | 3.448  | 31.738 | 389.347 | 42.297 | 28.873 | 13.425 |
| 2017          | 31416  | 3333.314 | 2251.377 | 1081.936 | 3.444  | 32.458 | 397.202 | 42.144 | 28.465 | 13.679 |
| 2018          | 29348  | 2925.242 | 1962.889 | 962.352  | 3.279  | 32.898 | 367.626 | 36.642 | 24.588 | 12.055 |
| 2019          | 29598  | 2864.628 | 1914.447 | 950.181  | 3.210  | 33.169 | 367.149 | 35.534 | 23.748 | 11.786 |
| 2020          | 29592  | 2730.366 | 1813.877 | 916.489  | 3.097  | 33.567 | 419.174 | 38.675 | 25.693 | 12.982 |
| 2021          | 30097  | 2647.911 | 1754.873 | 893.037  | 2.967  | 33.726 | 423.328 | 37.244 | 24.683 | 12.561 |
| 2022          | 30304  | 2586.165 | 1709.787 | 876.377  | 2.892  | 33.887 | 422.974 | 36.097 | 23.865 | 12.232 |
| 2023          | 30505  | 2517.960 | 1662.318 | 855.642  | 2.805  | 33.982 | 422.337 | 34.860 | 23.014 | 11.846 |
| 2024          | 30661  | 2454.161 | 1626.349 | 827.812  | 2.700  | 33.731 | 420.968 | 33.695 | 22.330 | 11.366 |
| 2025          | 30254  | 2275.364 | 1500.328 | 775.036  | 2.562  | 34.062 | 483.488 | 36.363 | 23.977 | 12.386 |
| 2026          | 30685  | 2183.166 | 1452.374 | 730.792  | 2.382  | 33.474 | 488.380 | 34.747 | 23.116 | 11.631 |
| 2027          | 30561  | 2112.345 | 1418.703 | 693.642  | 2.270  | 32.838 | 484.196 | 33.467 | 22.477 | 10.990 |
| 2028          | 30412  | 2046.677 | 1387.748 | 658.928  | 2.167  | 32.195 | 479.392 | 32.263 | 21.876 | 10.387 |
| 2029          | 30254  | 1977.671 | 1357.151 | 620.521  | 2.051  | 31.376 | 474.195 | 30.997 | 21.272 | 9.726  |
| 2030          | 29330  | 1744.457 | 1195.940 | 548.517  | 1.870  | 31.443 | 549.260 | 32.668 | 22.396 | 10.272 |
| 2031          | 28976  | 1653.738 | 1149.489 | 504.249  | 1.740  | 30.491 | 541.223 | 30.889 | 21.470 | 9.418  |
| 2032          | 28724  | 1603.120 | 1126.212 | 476.908  | 1.660  | 29.749 | 534.690 | 29.841 | 20.964 | 8.877  |
| 2033          | 28464  | 1548.245 | 1105.974 | 442.271  | 1.554  | 28.566 | 527.627 | 28.700 | 20.501 | 8.198  |
| 2034          | 28178  | 1511.985 | 1099.399 | 412.585  | 1.464  | 27.288 | 519.826 | 27.893 | 20.281 | 7.611  |
| 2035          | 26737  | 1239.866 | 898.724  | 341.142  | 1.276  | 27.514 | 610.065 | 28.290 | 20.506 | 7.784  |
| 2036          | 25591  | 1182.522 | 873.829  | 308.693  | 1.206  | 26.105 | 583.762 | 26.975 | 19.933 | 7.042  |
| 2037          | 25143  | 1134.483 | 864.069  | 270.414  | 1.076  | 23.836 | 572.916 | 25.851 | 19.689 | 6.162  |
| 2038          | 24693  | 1093.537 | 850.679  | 242.857  | 0.984  | 22.208 | 561.491 | 24.866 | 19.343 | 5.522  |
| 2039          | 24247  | 1047.905 | 839.914  | 207.991  | 0.858  | 19.848 | 549.553 | 23.751 | 19.037 | 4.714  |



## Results for PHIM for Run 1 (Pessimistic\_Analysis.RTF)

\*\*\*\*\*

### Main Results for E-Component for Run: 1, Simulation: 1, COD: COPD

| Variable Parameter          | Value                                  |
|-----------------------------|----------------------------------------|
| 1. Country                  | US (United States)                     |
| 2. Sex                      | M (Males)                              |
| 3. Year of start of process | 1990                                   |
| 4. Cause of Death           | COPD                                   |
| 5. Effective Dose NULL      | CC:1                                   |
| 6. Effective Dose Ecig      | CC:1 Ecig:0.4 Dual:0.7                 |
| Note:                       | Death rates are per million population |

#### Results for Age Groups Combined and Years combined, Population unadjusted for deaths in Ecig scenario,

| Age Group:All | NULL    | Ecig        | %Drop      |          |        | NULL   | Ecig    | Drop    |         |        |
|---------------|---------|-------------|------------|----------|--------|--------|---------|---------|---------|--------|
| Year          | Number  | Attrib      | Attrib     | Drop     | %Drop  | Attrib | Death   | Attrib  | Attrib  | Drop   |
|               | Deaths  | Deaths      | Deaths     | Deaths   | Deaths | Deaths | Rate    | Rates   | Rates   | Rates  |
| All Comb      | 2233143 | 1015606.587 | 907366.185 | 108240.4 | 4.847  | 10.658 | 646.447 | 293.996 | 262.663 | 31.333 |

#### Results for Age Groups Combined, Population unadjusted for deaths in Ecig scenario,

| Age Group:All | NULL   | Ecig      | %Drop     |          |        | NULL   | Ecig    | Drop    |         |         |
|---------------|--------|-----------|-----------|----------|--------|--------|---------|---------|---------|---------|
| Year          | Number | Attrib    | Attrib    | Drop     | %Drop  | Attrib | Death   | Attrib  | Attrib  | Drop    |
|               | Deaths | Deaths    | Deaths    | Deaths   | Deaths | Deaths | Rate    | Rates   | Rates   | Rates   |
| 1990          | 33993  | 19262.437 | 19262.437 | 0.000    | 0.000  | 0.000  | 538.865 | 305.353 | 305.353 | 0.000   |
| 1991          | 34092  | 19215.636 | 19210.159 | 5.477    | 0.016  | 0.029  | 531.576 | 299.618 | 299.533 | 0.085   |
| 1992          | 33942  | 19056.189 | 19045.530 | 10.660   | 0.031  | 0.056  | 520.248 | 292.085 | 291.921 | 0.163   |
| 1993          | 35913  | 20095.670 | 20073.611 | 22.059   | 0.061  | 0.110  | 540.645 | 302.526 | 302.194 | 0.332   |
| 1994          | 35074  | 19524.095 | 19490.785 | 33.309   | 0.095  | 0.171  | 518.158 | 288.435 | 287.943 | 0.492   |
| 1995          | 34669  | 19116.002 | 19064.083 | 51.919   | 0.150  | 0.272  | 502.362 | 276.995 | 276.243 | 0.752   |
| 1996          | 34582  | 18975.021 | 18904.122 | 70.899   | 0.205  | 0.374  | 493.306 | 270.675 | 269.664 | 1.011   |
| 1997          | 35267  | 19169.025 | 19069.727 | 99.298   | 0.282  | 0.518  | 494.878 | 268.986 | 267.592 | 1.393   |
| 1998          | 35675  | 19228.937 | 19091.958 | 136.979  | 0.384  | 0.712  | 492.368 | 265.388 | 263.498 | 1.891   |
| 1999          | 38516  | 20589.820 | 20410.092 | 179.729  | 0.467  | 0.873  | 523.195 | 279.689 | 277.248 | 2.441   |
| 2000          | 36283  | 19196.417 | 18976.324 | 220.094  | 0.607  | 1.147  | 485.652 | 256.946 | 254.000 | 2.946   |
| 2001          | 36281  | 19012.731 | 18734.719 | 278.012  | 0.766  | 1.462  | 479.301 | 251.174 | 247.501 | 3.673   |
| 2002          | 35983  | 18699.357 | 18364.403 | 334.954  | 0.931  | 1.791  | 470.038 | 244.265 | 239.890 | 4.375   |
| 2003          | 36205  | 18663.550 | 18273.590 | 389.959  | 1.077  | 2.089  | 468.019 | 241.262 | 236.221 | 5.041   |
| 2004          | 34611  | 17679.164 | 17224.531 | 454.633  | 1.314  | 2.572  | 442.596 | 226.076 | 220.263 | 5.814   |
| 2005          | 36826  | 18692.832 | 18126.778 | 566.054  | 1.537  | 3.028  | 465.456 | 236.265 | 229.110 | 7.155   |
| 2006          | 34350  | 17308.564 | 16680.854 | 627.710  | 1.827  | 3.627  | 430.192 | 216.769 | 208.908 | 7.861   |
| 2007          | 35326  | 17683.181 | 16935.909 | 747.272  | 2.115  | 4.226  | 437.879 | 219.189 | 209.927 | 9.263   |
| 2008          | 38248  | 19006.374 | 18108.751 | 897.624  | 2.347  | 4.723  | 468.788 | 232.952 | 221.951 | 11.002  |
| 2009          | 36902  | 18205.573 | 17207.810 | 997.763  | 2.704  | 5.481  | 446.956 | 220.505 | 208.420 | 12.085  |
| 2010          | 37234  | 18237.758 | 17150.120 | 1087.638 | 2.921  | 5.964  | 445.505 | 218.215 | 205.201 | 13.014  |
| 2011          | 38093  | 18487.916 | 17217.126 | 1270.790 | 3.336  | 6.874  | 451.279 | 219.022 | 203.967 | 15.055  |
| 2012          | 38504  | 18491.158 | 17087.855 | 1403.303 | 3.645  | 7.589  | 451.211 | 216.689 | 200.245 | 16.445  |
| 2013          | 40290  | 19143.452 | 17552.389 | 1591.063 | 3.949  | 8.311  | 466.755 | 221.775 | 203.343 | 18.432  |
| 2014          | 40339  | 18992.005 | 17280.418 | 1711.587 | 4.243  | 9.012  | 461.866 | 217.451 | 197.854 | 19.597  |
| 2015          | 42303  | 19728.885 | 17837.937 | 1890.947 | 4.470  | 9.585  | 544.880 | 254.116 | 229.760 | 24.356  |
| 2016          | 43104  | 19876.724 | 17843.329 | 2033.395 | 4.717  | 10.230 | 550.009 | 253.628 | 227.682 | 25.946  |
| 2017          | 44107  | 20119.790 | 17914.672 | 2205.118 | 4.999  | 10.960 | 557.659 | 254.381 | 226.501 | 27.880  |
| 2018          | 45469  | 20535.123 | 18125.617 | 2409.506 | 5.299  | 11.734 | 569.564 | 257.229 | 227.047 | 30.182  |
| 2019          | 46963  | 21009.029 | 18397.672 | 2611.357 | 5.560  | 12.430 | 582.552 | 260.605 | 228.213 | 32.392  |
| 2020          | 48419  | 21428.512 | 18635.465 | 2793.047 | 5.768  | 13.034 | 685.853 | 303.533 | 263.970 | 39.563  |
| 2021          | 48463  | 21266.697 | 18288.529 | 2978.168 | 6.145  | 14.004 | 681.652 | 299.127 | 257.237 | 41.889  |
| 2022          | 49915  | 21663.568 | 18434.077 | 3229.491 | 6.470  | 14.907 | 696.712 | 302.378 | 257.301 | 45.077  |
| 2023          | 51391  | 22084.131 | 18611.277 | 3472.854 | 6.758  | 15.726 | 711.491 | 305.748 | 257.667 | 48.081  |
| 2024          | 52811  | 22418.456 | 18762.595 | 3655.861 | 6.923  | 16.307 | 725.093 | 307.804 | 257.609 | 50.195  |
| 2025          | 53848  | 22614.834 | 18791.405 | 3823.429 | 7.100  | 16.907 | 860.553 | 361.411 | 300.308 | 61.103  |
| 2026          | 54342  | 22571.522 | 18618.498 | 3953.023 | 7.274  | 17.513 | 864.886 | 359.241 | 296.326 | 62.915  |
| 2027          | 55267  | 22774.416 | 18613.045 | 4161.371 | 7.530  | 18.272 | 875.619 | 360.827 | 294.896 | 65.931  |
| 2028          | 56149  | 22915.561 | 18543.835 | 4371.726 | 7.786  | 19.078 | 885.102 | 361.228 | 292.315 | 68.913  |
| 2029          | 57014  | 22992.027 | 18480.217 | 4511.811 | 7.914  | 19.623 | 893.616 | 360.371 | 289.654 | 70.717  |
| 2030          | 57238  | 22895.360 | 18276.829 | 4618.531 | 8.069  | 20.172 | 1071.90 | 428.760 | 342.269 | 86.491  |
| 2031          | 57592  | 22715.871 | 18087.723 | 4628.148 | 8.036  | 20.374 | 1075.71 | 424.293 | 337.847 | 86.446  |
| 2032          | 58251  | 22759.207 | 18000.889 | 4758.318 | 8.169  | 20.907 | 1084.31 | 423.652 | 335.078 | 88.574  |
| 2033          | 58885  | 22786.258 | 17979.332 | 4806.925 | 8.163  | 21.096 | 1091.54 | 422.387 | 333.282 | 89.106  |
| 2034          | 59460  | 22806.106 | 17910.572 | 4895.534 | 8.233  | 21.466 | 1096.89 | 420.721 | 330.409 | 90.311  |
| 2035          | 58516  | 22262.998 | 17437.896 | 4825.102 | 8.246  | 21.673 | 1335.15 | 507.973 | 397.879 | 110.094 |
| 2036          | 56446  | 21140.051 | 16484.031 | 4656.020 | 8.249  | 22.025 | 1287.60 | 482.234 | 376.023 | 106.210 |
| 2037          | 56568  | 21011.845 | 16365.857 | 4645.988 | 8.213  | 22.111 | 1288.98 | 478.783 | 372.918 | 105.865 |
| 2038          | 56668  | 20787.483 | 16209.512 | 4577.971 | 8.079  | 22.023 | 1288.55 | 472.681 | 368.583 | 104.097 |
| 2039          | 56758  | 20709.267 | 16171.292 | 4537.975 | 7.995  | 21.913 | 1286.40 | 469.372 | 366.520 | 102.852 |

## Results for PHIM for Run 1 (Pessimistic\_Analysis.RTF)

\*\*\*\*\*

### Main Results for E-Component for Run: 1, Simulation: 1, COD: Four Diseases Combined, Adjusted

| Variable Parameter          | Value                                  |
|-----------------------------|----------------------------------------|
| 1. Country                  | US (United States)                     |
| 2. Sex                      | M (Males)                              |
| 3. Year of start of process | 1990                                   |
| 4. Cause of Death           | Four Diseases Combined                 |
| 5. Effective Dose NULL      | CC:1                                   |
| 6. Effective Dose Ecig      | CC:1 Ecig:0.4 Dual:0.7                 |
| Note:                       | Death rates are per million population |

### Results for Age Groups Combined and Years combined, Population and Number deaths adjusted for Ecig scenario,

| Age Group:All |          | NULL        | Ecig        | %Drop    |        |        | NULL    | Ecig    | Drop    |         |
|---------------|----------|-------------|-------------|----------|--------|--------|---------|---------|---------|---------|
| Year          | Number   | Attrib      | Attrib      | Drop     | %Drop  | Attrib | Death   | Attrib  | Drop    |         |
|               | Deaths   | Deaths      | Deaths      | Deaths   | Deaths | Deaths | Rate    | Rates   | Rates   |         |
| All Comb      | 13188829 | 4509390.583 | 4046974.432 | 462416.2 | 3.506  | 10.255 | 3807.87 | 1305.37 | 1168.44 | 136.933 |

### Results for Age Groups Combined, Population and Number deaths adjusted for Ecig scenario,

| Age Group:All |        | NULL       | Ecig       | %Drop    |        |        | NULL    | Ecig    | Drop    |         |
|---------------|--------|------------|------------|----------|--------|--------|---------|---------|---------|---------|
| Year          | Number | Attrib     | Attrib     | Drop     | %Drop  | Attrib | Death   | Attrib  | Drop    |         |
|               | Deaths | Deaths     | Deaths     | Deaths   | Deaths | Deaths | Rate    | Rates   | Rates   |         |
| 1990          | 317161 | 125773.065 | 125773.065 | 0.000    | 0.000  | 0.000  | 5027.71 | 1993.78 | 1993.78 | 0.000   |
| 1991          | 313217 | 123999.442 | 123873.164 | 126.278  | 0.040  | 0.102  | 4883.81 | 1933.45 | 1931.48 | 1.969   |
| 1992          | 308578 | 122014.015 | 121689.944 | 324.071  | 0.105  | 0.266  | 4729.73 | 1870.18 | 1865.20 | 4.971   |
| 1993          | 311715 | 122810.618 | 122196.117 | 614.501  | 0.197  | 0.500  | 4692.61 | 1848.83 | 1839.56 | 9.264   |
| 1994          | 305704 | 119925.592 | 118973.511 | 952.081  | 0.311  | 0.794  | 4516.18 | 1771.69 | 1757.60 | 14.094  |
| 1995          | 303233 | 117896.496 | 116524.149 | 1372.347 | 0.453  | 1.164  | 4393.78 | 1708.35 | 1688.41 | 19.938  |
| 1996          | 299572 | 115698.645 | 113871.915 | 1826.730 | 0.610  | 1.579  | 4273.12 | 1650.42 | 1624.28 | 26.142  |
| 1997          | 294246 | 113359.847 | 111071.742 | 2288.104 | 0.778  | 2.018  | 4128.62 | 1590.70 | 1558.47 | 32.230  |
| 1998          | 289286 | 111444.212 | 108690.733 | 2753.479 | 0.952  | 2.471  | 3992.13 | 1538.10 | 1499.93 | 38.170  |
| 1999          | 311045 | 114877.722 | 111134.871 | 3742.850 | 1.203  | 3.258  | 4224.54 | 1560.48 | 1509.41 | 51.072  |
| 2000          | 303844 | 112379.704 | 108040.828 | 4338.876 | 1.428  | 3.861  | 4066.15 | 1504.22 | 1445.84 | 58.374  |
| 2001          | 296370 | 110024.943 | 105049.391 | 4975.551 | 1.679  | 4.522  | 3914.23 | 1453.52 | 1387.42 | 66.103  |
| 2002          | 291996 | 108289.173 | 102592.439 | 5696.734 | 1.951  | 5.261  | 3812.98 | 1414.56 | 1339.69 | 74.869  |
| 2003          | 285987 | 106539.023 | 100234.729 | 6304.294 | 2.204  | 5.917  | 3695.38 | 1377.22 | 1295.18 | 82.038  |
| 2004          | 274322 | 103037.251 | 96217.977  | 6819.275 | 2.486  | 6.618  | 3506.17 | 1317.61 | 1229.79 | 87.827  |
| 2005          | 272554 | 103044.562 | 95568.317  | 7476.246 | 2.743  | 7.255  | 3442.83 | 1302.41 | 1207.19 | 95.222  |
| 2006          | 264323 | 99672.555  | 91511.785  | 8160.770 | 3.087  | 8.188  | 3307.99 | 1248.28 | 1145.27 | 103.013 |
| 2007          | 258658 | 97839.152  | 89164.799  | 8674.353 | 3.354  | 8.866  | 3203.53 | 1212.75 | 1104.33 | 108.426 |
| 2008          | 259742 | 98075.852  | 88814.850  | 9261.002 | 3.565  | 9.443  | 3180.55 | 1202.07 | 1087.54 | 114.527 |
| 2009          | 254226 | 95617.338  | 85906.785  | 9710.553 | 3.820  | 10.156 | 3075.91 | 1158.11 | 1039.40 | 118.718 |
| 2010          | 252241 | 94607.988  | 84493.196  | 10114.79 | 4.010  | 10.691 | 3014.46 | 1131.98 | 1009.76 | 122.227 |
| 2011          | 252190 | 93633.119  | 82902.289  | 10730.83 | 4.255  | 11.461 | 2983.68 | 1109.25 | 980.826 | 128.423 |
| 2012          | 253108 | 92775.175  | 81500.156  | 11275.02 | 4.455  | 12.153 | 2961.73 | 1087.19 | 953.671 | 133.518 |
| 2013          | 256702 | 92345.780  | 80474.763  | 11871.02 | 4.624  | 12.855 | 2969.11 | 1069.82 | 930.802 | 139.014 |
| 2014          | 257981 | 91379.215  | 79108.808  | 12270.41 | 4.756  | 13.428 | 2948.64 | 1046.26 | 904.187 | 142.070 |
| 2015          | 260440 | 90750.242  | 78120.607  | 12629.63 | 4.849  | 13.917 | 3347.44 | 1168.90 | 1004.08 | 164.818 |
| 2016          | 262179 | 88811.996  | 75800.576  | 13011.42 | 4.963  | 14.651 | 3337.73 | 1133.24 | 964.994 | 168.251 |
| 2017          | 264484 | 87325.126  | 73976.048  | 13349.08 | 5.047  | 15.287 | 3335.68 | 1104.08 | 932.989 | 171.090 |
| 2018          | 259560 | 87612.144  | 74144.541  | 13467.60 | 5.189  | 15.372 | 3242.71 | 1097.46 | 926.297 | 171.160 |
| 2019          | 262361 | 87797.760  | 73990.170  | 13807.59 | 5.263  | 15.727 | 3245.26 | 1089.08 | 915.216 | 173.866 |
| 2020          | 263292 | 87221.042  | 73275.511  | 13945.53 | 5.297  | 15.989 | 3716.88 | 1235.48 | 1034.43 | 201.052 |
| 2021          | 256124 | 82001.292  | 68222.606  | 13778.69 | 5.380  | 16.803 | 3589.59 | 1153.39 | 956.143 | 197.246 |
| 2022          | 258220 | 81915.977  | 67771.642  | 14144.34 | 5.478  | 17.267 | 3590.59 | 1143.37 | 942.373 | 201.002 |
| 2023          | 260286 | 81810.810  | 67375.435  | 14435.38 | 5.546  | 17.645 | 3589.25 | 1132.64 | 929.082 | 203.563 |
| 2024          | 262010 | 81528.303  | 66990.158  | 14538.14 | 5.549  | 17.832 | 3582.37 | 1119.38 | 915.932 | 203.447 |
| 2025          | 258680 | 79599.213  | 65230.620  | 14368.59 | 5.555  | 18.051 | 4113.68 | 1272.09 | 1037.34 | 234.751 |
| 2026          | 252939 | 75082.462  | 61198.821  | 13883.64 | 5.489  | 18.491 | 4004.99 | 1194.99 | 969.011 | 225.977 |
| 2027          | 252474 | 74444.425  | 60495.436  | 13948.99 | 5.525  | 18.737 | 3978.63 | 1179.46 | 953.322 | 226.139 |
| 2028          | 251847 | 73699.585  | 59671.954  | 14027.63 | 5.570  | 19.034 | 3947.84 | 1161.76 | 935.391 | 226.368 |
| 2029          | 251165 | 72819.703  | 58918.002  | 13901.70 | 5.535  | 19.091 | 3913.90 | 1141.36 | 918.119 | 223.237 |
| 2030          | 242223 | 69309.277  | 55909.036  | 13400.24 | 5.532  | 19.334 | 4505.84 | 1297.95 | 1040.02 | 257.925 |
| 2031          | 237165 | 65433.368  | 52720.322  | 12713.05 | 5.360  | 19.429 | 4399.21 | 1222.18 | 977.917 | 244.264 |
| 2032          | 235805 | 64643.552  | 52011.118  | 12632.43 | 5.357  | 19.542 | 4358.06 | 1203.31 | 961.247 | 242.061 |
| 2033          | 234412 | 63793.514  | 51426.052  | 12367.46 | 5.276  | 19.387 | 4313.27 | 1182.54 | 946.258 | 236.278 |
| 2034          | 232879 | 63032.151  | 50900.829  | 12131.32 | 5.209  | 19.246 | 4263.51 | 1162.80 | 931.882 | 230.918 |
| 2035          | 217731 | 57653.301  | 46441.622  | 11211.68 | 5.149  | 19.447 | 4925.81 | 1315.47 | 1050.67 | 264.803 |
| 2036          | 210077 | 52988.733  | 42625.303  | 10363.43 | 4.933  | 19.558 | 4750.33 | 1208.75 | 963.855 | 244.891 |
| 2037          | 207424 | 52026.921  | 42041.855  | 9985.066 | 4.814  | 19.192 | 4684.11 | 1185.50 | 949.403 | 236.100 |
| 2038          | 204802 | 50943.211  | 41364.952  | 9578.260 | 4.677  | 18.802 | 4614.24 | 1158.38 | 931.964 | 226.419 |
| 2039          | 202252 | 50085.991  | 40970.894  | 9115.097 | 4.507  | 18.199 | 4541.07 | 1135.19 | 919.898 | 215.293 |

## Results for PHIM for Run 1 (Pessimistic\_Analysis.RTF)

\*\*\*\*\*

### Main Results for E-Component for Run: 1, Simulation: 1, COD: LUNG CANCER, Adjusted

| Variable Parameter          | Value                                  |
|-----------------------------|----------------------------------------|
| 1. Country                  | US (United States)                     |
| 2. Sex                      | M (Males)                              |
| 3. Year of start of process | 1990                                   |
| 4. Cause of Death           | LUNG CANCER                            |
| 5. Effective Dose NULL      | CC:1                                   |
| 6. Effective Dose Ecig      | CC:1 Ecig:0.4 Dual:0.7                 |
| Note:                       | Death rates are per million population |

### Results for Age Groups Combined and Years combined, Population and Number deaths adjusted for Ecig scenario,

| Age Group: | NULL    | Ecig        | %Drop       |          |        |        | NULL    | Ecig    | Drop    |        |
|------------|---------|-------------|-------------|----------|--------|--------|---------|---------|---------|--------|
| Year       | Number  | Attrib      | Attrib      | Drop     | %Drop  | Attrib | Death   | Attrib  | Attrib  | Drop   |
|            | Deaths  | Deaths      | Deaths      | Deaths   | Deaths | Deaths | Rate    | Rates   | Rates   | Rates  |
| All Comb   | 3074319 | 2244988.113 | 2119222.685 | 125765.4 | 4.091  | 5.602  | 887.614 | 649.875 | 611.860 | 38.016 |

### Results for Age Groups Combined, Population and Number deaths adjusted for Ecig scenario,

| Age Group: | NULL   | Ecig      | %Drop     |          |        |        | NULL    | Ecig    | Drop    |         |
|------------|--------|-----------|-----------|----------|--------|--------|---------|---------|---------|---------|
| Year       | Number | Attrib    | Attrib    | Drop     | %Drop  | Attrib | Death   | Attrib  | Attrib  | Drop    |
|            | Deaths | Deaths    | Deaths    | Deaths   | Deaths | Deaths | Rate    | Rates   | Rates   | Rates   |
| 1990       | 78822  | 63385.736 | 63385.736 | 0.000    | 0.000  | 0.000  | 1249.50 | 1004.81 | 1004.81 | 0.000   |
| 1991       | 78462  | 62918.402 | 62905.561 | 12.841   | 0.016  | 0.020  | 1223.41 | 981.049 | 980.849 | 0.200   |
| 1992       | 77987  | 62366.766 | 62336.882 | 29.884   | 0.038  | 0.048  | 1195.35 | 955.930 | 955.470 | 0.460   |
| 1993       | 78543  | 62652.888 | 62593.429 | 59.458   | 0.076  | 0.095  | 1182.39 | 943.195 | 942.293 | 0.902   |
| 1994       | 77438  | 61565.227 | 61471.500 | 93.727   | 0.121  | 0.152  | 1144.00 | 909.520 | 908.121 | 1.400   |
| 1995       | 76906  | 60851.961 | 60709.716 | 142.245  | 0.185  | 0.234  | 1114.35 | 881.759 | 879.670 | 2.088   |
| 1996       | 76236  | 60122.922 | 59919.930 | 202.991  | 0.266  | 0.338  | 1087.43 | 857.643 | 854.703 | 2.940   |
| 1997       | 75479  | 59237.155 | 58968.755 | 268.400  | 0.356  | 0.453  | 1059.06 | 831.234 | 827.403 | 3.831   |
| 1998       | 75389  | 58906.696 | 58553.781 | 352.915  | 0.468  | 0.599  | 1040.36 | 813.001 | 808.039 | 4.961   |
| 1999       | 73170  | 56930.073 | 56494.913 | 435.160  | 0.595  | 0.764  | 993.778 | 773.329 | 767.301 | 6.028   |
| 2000       | 73799  | 57137.121 | 56585.647 | 551.474  | 0.747  | 0.965  | 987.609 | 764.787 | 757.250 | 7.538   |
| 2001       | 73314  | 56481.726 | 55801.033 | 680.694  | 0.928  | 1.205  | 968.281 | 746.169 | 736.979 | 9.190   |
| 2002       | 72468  | 55588.365 | 54774.305 | 814.060  | 1.123  | 1.464  | 946.314 | 726.138 | 715.262 | 10.876  |
| 2003       | 71975  | 54945.856 | 53997.936 | 947.921  | 1.317  | 1.725  | 930.023 | 710.281 | 697.735 | 12.546  |
| 2004       | 71341  | 54203.126 | 53083.398 | 1119.727 | 1.570  | 2.066  | 911.827 | 693.135 | 678.472 | 14.663  |
| 2005       | 71012  | 53744.603 | 52460.957 | 1283.646 | 1.808  | 2.388  | 897.006 | 679.296 | 662.672 | 16.624  |
| 2006       | 69715  | 52535.572 | 51061.423 | 1474.149 | 2.115  | 2.806  | 872.476 | 657.945 | 639.032 | 18.913  |
| 2007       | 68631  | 51492.124 | 49845.055 | 1647.069 | 2.400  | 3.199  | 850.010 | 638.264 | 617.342 | 20.921  |
| 2008       | 68303  | 51030.736 | 49180.632 | 1850.104 | 2.709  | 3.625  | 836.373 | 625.460 | 602.220 | 23.240  |
| 2009       | 67597  | 50276.199 | 48215.065 | 2061.134 | 3.049  | 4.100  | 817.865 | 608.943 | 583.359 | 25.584  |
| 2010       | 67296  | 49840.933 | 47601.576 | 2239.357 | 3.328  | 4.493  | 804.242 | 596.347 | 568.875 | 27.472  |
| 2011       | 66618  | 49072.841 | 46593.032 | 2479.809 | 3.722  | 5.053  | 788.170 | 581.354 | 551.247 | 30.107  |
| 2012       | 66280  | 48539.512 | 45834.424 | 2705.088 | 4.081  | 5.573  | 775.579 | 568.812 | 536.330 | 32.482  |
| 2013       | 65471  | 47675.741 | 44759.830 | 2915.911 | 4.454  | 6.116  | 757.269 | 552.318 | 517.710 | 34.609  |
| 2014       | 65186  | 47194.534 | 44099.279 | 3095.255 | 4.748  | 6.559  | 745.055 | 540.359 | 504.040 | 36.319  |
| 2015       | 64312  | 46305.842 | 43051.843 | 3253.999 | 5.060  | 7.027  | 726.602 | 526.439 | 485.345 | 38.263  |
| 2016       | 61794  | 44208.867 | 40889.714 | 3319.153 | 5.371  | 7.508  | 706.676 | 514.107 | 472.554 | 40.553  |
| 2017       | 60083  | 42702.624 | 39289.619 | 3413.005 | 5.681  | 7.992  | 692.765 | 503.903 | 465.522 | 42.241  |
| 2018       | 62678  | 44321.202 | 40501.960 | 3819.243 | 6.093  | 8.617  | 678.043 | 495.181 | 455.996 | 44.185  |
| 2019       | 63274  | 44493.088 | 40434.605 | 4058.483 | 6.414  | 9.122  | 662.662 | 488.912 | 450.153 | 46.759  |
| 2020       | 63715  | 44529.551 | 40269.612 | 4259.940 | 6.686  | 9.567  | 649.461 | 482.757 | 445.484 | 49.273  |
| 2021       | 57353  | 39852.556 | 35817.225 | 4035.331 | 7.036  | 10.126 | 633.810 | 476.546 | 440.980 | 51.826  |
| 2022       | 57698  | 39853.685 | 35573.770 | 4279.916 | 7.418  | 10.739 | 619.301 | 470.231 | 436.658 | 54.642  |
| 2023       | 58014  | 39847.050 | 35349.510 | 4497.540 | 7.752  | 11.287 | 608.998 | 464.670 | 432.457 | 57.543  |
| 2024       | 58237  | 39726.010 | 35080.403 | 4645.607 | 7.977  | 11.694 | 599.254 | 459.435 | 427.641 | 60.609  |
| 2025       | 57834  | 39207.348 | 34466.479 | 4740.869 | 8.197  | 12.092 | 591.718 | 454.579 | 423.106 | 64.614  |
| 2026       | 51723  | 34803.960 | 30487.271 | 4316.689 | 8.346  | 12.403 | 584.969 | 450.929 | 420.730 | 69.239  |
| 2027       | 51482  | 34484.595 | 30043.155 | 4441.439 | 8.627  | 12.879 | 578.277 | 447.357 | 417.437 | 74.847  |
| 2028       | 51195  | 34100.638 | 29547.000 | 4553.638 | 8.895  | 13.354 | 572.505 | 444.544 | 414.166 | 80.347  |
| 2029       | 50879  | 33669.838 | 29070.595 | 4599.242 | 9.039  | 13.660 | 567.855 | 441.732 | 411.007 | 86.847  |
| 2030       | 49461  | 32557.688 | 27999.738 | 4557.950 | 9.215  | 14.000 | 563.070 | 439.705 | 409.853 | 93.217  |
| 2031       | 43908  | 28646.393 | 24641.474 | 4004.919 | 9.121  | 13.981 | 559.452 | 437.065 | 407.078 | 100.374 |
| 2032       | 43496  | 28227.160 | 24207.048 | 4020.112 | 9.242  | 14.242 | 556.883 | 434.435 | 404.384 | 108.496 |
| 2033       | 43070  | 27786.623 | 23821.997 | 3964.626 | 9.205  | 14.268 | 554.503 | 431.079 | 401.334 | 117.166 |
| 2034       | 42611  | 27348.299 | 23423.217 | 3925.082 | 9.211  | 14.352 | 552.108 | 428.514 | 408.828 | 126.278 |
| 2035       | 40103  | 25570.077 | 21854.582 | 3715.495 | 9.265  | 14.531 | 550.264 | 426.430 | 407.425 | 136.805 |
| 2036       | 34340  | 21717.319 | 18588.058 | 3129.262 | 9.113  | 14.409 | 548.503 | 424.402 | 405.318 | 148.187 |
| 2037       | 33769  | 21256.024 | 18217.549 | 3038.475 | 8.998  | 14.295 | 546.577 | 422.347 | 403.395 | 160.182 |
| 2038       | 33203  | 20747.175 | 17824.809 | 2922.365 | 8.802  | 14.086 | 544.064 | 420.764 | 401.598 | 172.484 |
| 2039       | 32649  | 20327.688 | 17537.657 | 2790.030 | 8.546  | 13.725 | 541.043 | 419.724 | 399.764 | 185.220 |

## Results for PHIM for Run 1 (Pessimistic\_Analysis.RTF)

\*\*\*\*\*

### Main Results for E-Component for Run: 1, Simulation: 1, COD: IHD, Adjusted

| Variable Parameter          | Value                                  |
|-----------------------------|----------------------------------------|
| 1. Country                  | US (United States)                     |
| 2. Sex                      | M (Males)                              |
| 3. Year of start of process | 1990                                   |
| 4. Cause of Death           | IHD                                    |
| 5. Effective Dose NULL      | CC:1                                   |
| 6. Effective Dose Ecig      | CC:1 Ecig:0.4 Dual:0.7                 |
| Note:                       | Death rates are per million population |

### Results for Age Groups Combined and Years combined, Population and Number deaths adjusted for Ecig scenario,

| Age Group:All | NULL    | Ecig        |            |          |        |        |         |         |         |        |
|---------------|---------|-------------|------------|----------|--------|--------|---------|---------|---------|--------|
| Year          | Number  | Attrib      | Attrib     | Drop     | %Drop  | Attrib | Death   | Attrib  | Ecig    | Drop   |
|               | Deaths  | Deaths      | Deaths     | Deaths   | Deaths | Deaths | Rate    | Rates   | Rates   | Rates  |
| All Comb      | 6377985 | 1098877.421 | 896176.760 | 202700.7 | 3.178  | 18.446 | 1841.45 | 318.101 | 258.743 | 59.358 |

### Results for Age Groups Combined, Population and Number deaths adjusted for Ecig scenario,

| Age Group:All | NULL   | Ecig      |           |          |        |        |         |         |         |        |
|---------------|--------|-----------|-----------|----------|--------|--------|---------|---------|---------|--------|
| Year          | Number | Attrib    | Attrib    | Drop     | %Drop  | Attrib | Death   | Attrib  | Ecig    | Drop   |
|               | Deaths | Deaths    | Deaths    | Deaths   | Deaths | Deaths | Rate    | Rates   | Rates   | Rates  |
| 1990          | 171484 | 38511.725 | 38511.725 | 0.000    | 0.000  | 0.000  | 2718.40 | 610.497 | 610.497 | 0.000  |
| 1991          | 168044 | 37309.838 | 37213.274 | 96.564   | 0.057  | 0.259  | 2620.21 | 581.750 | 580.245 | 1.506  |
| 1992          | 164548 | 36137.488 | 35882.720 | 254.768  | 0.155  | 0.705  | 2522.12 | 553.899 | 549.993 | 3.906  |
| 1993          | 164363 | 35599.588 | 35122.691 | 476.897  | 0.290  | 1.340  | 2474.35 | 535.926 | 528.743 | 7.183  |
| 1994          | 159868 | 34336.757 | 33601.572 | 735.185  | 0.460  | 2.141  | 2361.74 | 507.267 | 496.397 | 10.869 |
| 1995          | 158087 | 33455.759 | 32410.609 | 1045.150 | 0.661  | 3.124  | 2290.65 | 484.782 | 469.623 | 15.159 |
| 1996          | 154882 | 32193.824 | 30821.627 | 1372.197 | 0.886  | 4.262  | 2209.25 | 459.239 | 439.642 | 19.597 |
| 1997          | 149980 | 30665.509 | 28975.361 | 1690.149 | 1.127  | 5.512  | 2104.40 | 430.308 | 406.559 | 23.749 |
| 1998          | 145421 | 29188.430 | 27200.428 | 1988.003 | 1.367  | 6.811  | 2006.80 | 402.844 | 375.364 | 27.480 |
| 1999          | 165975 | 33375.386 | 30569.146 | 2806.240 | 1.691  | 8.408  | 2254.24 | 453.366 | 415.183 | 38.183 |
| 2000          | 160291 | 32024.754 | 28843.842 | 3180.912 | 1.984  | 9.933  | 2145.07 | 428.655 | 385.999 | 42.656 |
| 2001          | 154484 | 30682.393 | 27099.062 | 3583.331 | 2.320  | 11.679 | 2040.32 | 405.339 | 357.905 | 47.435 |
| 2002          | 151939 | 30218.370 | 26158.884 | 4059.485 | 2.672  | 13.434 | 1984.07 | 394.736 | 341.592 | 53.144 |
| 2003          | 146797 | 29175.202 | 24758.115 | 4417.087 | 3.009  | 15.140 | 1896.84 | 377.146 | 319.912 | 57.233 |
| 2004          | 138455 | 27488.687 | 22844.251 | 4644.437 | 3.354  | 16.896 | 1769.63 | 351.518 | 291.978 | 59.540 |
| 2005          | 135970 | 27017.439 | 22034.598 | 4982.841 | 3.665  | 18.443 | 1717.53 | 341.482 | 278.335 | 63.148 |
| 2006          | 132026 | 26231.435 | 20889.111 | 5342.325 | 4.046  | 20.366 | 1652.30 | 328.517 | 261.426 | 67.091 |
| 2007          | 126621 | 25103.049 | 19588.284 | 5514.765 | 4.355  | 21.969 | 1568.23 | 311.161 | 242.605 | 68.556 |
| 2008          | 125997 | 24621.740 | 18888.433 | 5733.307 | 4.550  | 23.286 | 1542.85 | 301.777 | 231.290 | 70.487 |
| 2009          | 122584 | 23741.177 | 17907.581 | 5833.596 | 4.759  | 24.572 | 1483.16 | 287.552 | 216.666 | 70.887 |
| 2010          | 120713 | 23189.160 | 17241.094 | 5948.066 | 4.927  | 25.650 | 1442.61 | 277.458 | 206.044 | 71.414 |
| 2011          | 120419 | 22786.927 | 16664.430 | 6122.497 | 5.084  | 26.868 | 1424.69 | 269.951 | 197.159 | 72.793 |
| 2012          | 121152 | 22485.295 | 16204.249 | 6281.045 | 5.184  | 27.934 | 1417.65 | 263.495 | 189.613 | 73.881 |
| 2013          | 122902 | 22251.884 | 15810.944 | 6440.940 | 5.241  | 28.946 | 1421.53 | 257.786 | 182.876 | 74.910 |
| 2014          | 123512 | 21894.593 | 15384.808 | 6509.786 | 5.271  | 29.732 | 1411.70 | 250.685 | 175.843 | 74.841 |
| 2015          | 124089 | 21471.109 | 14942.568 | 6528.542 | 5.261  | 30.406 | 1594.92 | 276.557 | 192.057 | 84.500 |
| 2016          | 126570 | 21411.568 | 14749.671 | 6661.898 | 5.263  | 31.114 | 1611.33 | 273.213 | 187.773 | 85.439 |
| 2017          | 128655 | 21169.399 | 14459.924 | 6709.475 | 5.215  | 31.694 | 1622.60 | 267.651 | 182.369 | 85.282 |
| 2018          | 121824 | 19830.576 | 13488.875 | 6341.702 | 5.206  | 31.979 | 1521.96 | 248.404 | 168.518 | 79.886 |
| 2019          | 122260 | 19431.014 | 13172.137 | 6258.877 | 5.119  | 32.211 | 1512.28 | 241.031 | 162.932 | 78.099 |
| 2020          | 121272 | 18532.612 | 12478.795 | 6053.817 | 4.992  | 32.666 | 1711.98 | 262.513 | 176.163 | 86.350 |
| 2021          | 119892 | 18234.128 | 12279.768 | 5954.360 | 4.966  | 32.655 | 1680.29 | 256.472 | 172.102 | 84.371 |
| 2022          | 119954 | 17812.559 | 11965.650 | 5846.909 | 4.874  | 32.825 | 1667.98 | 248.626 | 166.384 | 82.242 |
| 2023          | 119995 | 17361.668 | 11657.474 | 5704.195 | 4.754  | 32.855 | 1654.68 | 240.367 | 160.752 | 79.615 |
| 2024          | 119888 | 16929.676 | 11419.152 | 5510.525 | 4.596  | 32.549 | 1639.19 | 232.443 | 156.130 | 76.313 |
| 2025          | 116297 | 15501.666 | 10364.014 | 5137.652 | 4.418  | 33.143 | 1849.43 | 247.735 | 164.815 | 82.920 |
| 2026          | 115711 | 15523.814 | 10526.942 | 4996.872 | 4.318  | 32.188 | 1832.14 | 247.072 | 166.682 | 80.390 |
| 2027          | 114654 | 15073.070 | 10300.545 | 4772.526 | 4.163  | 31.663 | 1806.79 | 238.810 | 162.322 | 76.488 |
| 2028          | 113547 | 14636.710 | 10067.169 | 4569.540 | 4.024  | 31.220 | 1779.92 | 230.725 | 157.809 | 72.917 |
| 2029          | 112438 | 14180.166 | 9877.630  | 4302.537 | 3.827  | 30.342 | 1752.13 | 222.256 | 153.923 | 68.333 |
| 2030          | 105583 | 12111.772 | 8298.262  | 3813.510 | 3.612  | 31.486 | 1964.06 | 226.816 | 154.365 | 72.451 |
| 2031          | 106051 | 12417.367 | 8699.569  | 3717.798 | 3.506  | 29.940 | 1967.16 | 231.935 | 161.370 | 70.565 |
| 2032          | 104663 | 12054.064 | 8529.230  | 3524.835 | 3.368  | 29.242 | 1934.34 | 224.381 | 157.634 | 66.747 |
| 2033          | 103290 | 11672.389 | 8364.838  | 3307.552 | 3.202  | 28.337 | 1900.57 | 216.370 | 153.916 | 62.454 |
| 2034          | 101893 | 11365.762 | 8307.734  | 3058.028 | 3.001  | 26.906 | 1865.44 | 209.673 | 152.096 | 57.576 |
| 2035          | 91618  | 8580.360  | 6087.386  | 2492.974 | 2.721  | 29.054 | 2072.70 | 195.777 | 137.717 | 58.060 |
| 2036          | 92947  | 8948.841  | 6519.793  | 2429.048 | 2.613  | 27.144 | 2101.73 | 204.135 | 147.427 | 56.708 |
| 2037          | 91166  | 8624.570  | 6430.475  | 2194.095 | 2.407  | 25.440 | 2058.74 | 196.522 | 145.215 | 51.307 |
| 2038          | 89437  | 8315.017  | 6312.333  | 2002.684 | 2.239  | 24.085 | 2015.05 | 189.073 | 142.219 | 46.854 |
| 2039          | 87776  | 8001.132  | 6249.991  | 1751.141 | 1.995  | 21.886 | 1970.79 | 181.344 | 140.328 | 41.017 |

## Results for PHIM for Run 1 (Pessimistic\_Analysis.RTF)

\*\*\*\*\*

### Main Results for E-Component for Run: 1, Simulation: 1, COD: STROKE, Adjusted

| Variable Parameter          | Value                                  |
|-----------------------------|----------------------------------------|
| 1. Country                  | US (United States)                     |
| 2. Sex                      | M (Males)                              |
| 3. Year of start of process | 1990                                   |
| 4. Cause of Death           | STROKE                                 |
| 5. Effective Dose NULL      | CC:1                                   |
| 6. Effective Dose Ecig      | CC:1 Ecig:0.4 Dual:0.7                 |
| Note:                       | Death rates are per million population |

### Results for Age Groups Combined and Years combined, Population and Number deaths adjusted for Ecig scenario,

| Age Group:All |         | NULL       | Ecig       | %Drop    |        |        | NULL    | Ecig   | Drop   |       |
|---------------|---------|------------|------------|----------|--------|--------|---------|--------|--------|-------|
| Year          | Number  | Attrib     | Attrib     | Drop     | %Drop  | Attrib | Death   | Attrib | Attrib | Drop  |
|               | Deaths  | Deaths     | Deaths     | Deaths   | Deaths | Deaths | Rate    | Rates  | Rates  | Rates |
| All Comb      | 1494409 | 149918.462 | 121226.790 | 28691.67 | 1.920  | 19.138 | 431.464 | 43.398 | 35.000 | 8.398 |

### Results for Age Groups Combined, Population and Number deaths adjusted for Ecig scenario,

| Age Group:All |        | NULL     | Ecig     | %Drop    |        |        | NULL    | Ecig   | Drop   |        |
|---------------|--------|----------|----------|----------|--------|--------|---------|--------|--------|--------|
| Year          | Number | Attrib   | Attrib   | Drop     | %Drop  | Attrib | Death   | Attrib | Attrib | Drop   |
|               | Deaths | Deaths   | Deaths   | Deaths   | Deaths | Deaths | Rate    | Rates  | Rates  | Rates  |
| 1990          | 32862  | 4613.166 | 4613.166 | 0.000    | 0.000  | 0.000  | 520.936 | 73.129 | 73.129 | 0.000  |
| 1991          | 32619  | 4555.566 | 4544.170 | 11.396   | 0.035  | 0.250  | 508.609 | 71.032 | 70.855 | 0.178  |
| 1992          | 32100  | 4453.572 | 4424.774 | 28.798   | 0.090  | 0.647  | 492.014 | 68.262 | 67.821 | 0.442  |
| 1993          | 32896  | 4462.473 | 4406.275 | 56.199   | 0.171  | 1.259  | 495.225 | 67.179 | 66.333 | 0.846  |
| 1994          | 33323  | 4499.513 | 4409.412 | 90.102   | 0.270  | 2.002  | 492.288 | 66.473 | 65.140 | 1.332  |
| 1995          | 33570  | 4472.774 | 4339.328 | 133.446  | 0.398  | 2.984  | 486.419 | 64.812 | 62.876 | 1.936  |
| 1996          | 33871  | 4406.878 | 4225.547 | 181.331  | 0.535  | 4.115  | 483.144 | 62.863 | 60.274 | 2.590  |
| 1997          | 33518  | 4288.158 | 4056.851 | 231.307  | 0.690  | 5.394  | 470.298 | 60.173 | 56.923 | 3.250  |
| 1998          | 32798  | 4120.148 | 3843.043 | 277.105  | 0.845  | 6.726  | 452.608 | 56.864 | 53.034 | 3.830  |
| 1999          | 33379  | 3982.443 | 3658.378 | 324.064  | 0.971  | 8.137  | 453.346 | 54.097 | 49.687 | 4.410  |
| 2000          | 33465  | 4021.411 | 3631.955 | 389.456  | 1.164  | 9.685  | 447.836 | 53.827 | 48.604 | 5.223  |
| 2001          | 32282  | 3848.092 | 3410.473 | 437.619  | 1.356  | 11.372 | 426.361 | 50.836 | 45.043 | 5.793  |
| 2002          | 31595  | 3783.081 | 3289.545 | 493.536  | 1.562  | 13.046 | 412.585 | 49.418 | 42.956 | 6.461  |
| 2003          | 30997  | 3754.415 | 3198.213 | 556.202  | 1.794  | 14.815 | 400.526 | 48.533 | 41.326 | 7.207  |
| 2004          | 29898  | 3666.274 | 3057.753 | 608.521  | 2.035  | 16.598 | 382.138 | 46.883 | 39.082 | 7.801  |
| 2005          | 28725  | 3589.688 | 2935.548 | 654.140  | 2.277  | 18.223 | 362.847 | 45.371 | 37.081 | 8.290  |
| 2006          | 28208  | 3596.985 | 2868.768 | 728.217  | 2.582  | 20.245 | 353.027 | 45.048 | 35.903 | 9.145  |
| 2007          | 28050  | 3560.798 | 2781.287 | 779.511  | 2.779  | 21.891 | 347.408 | 44.137 | 34.447 | 9.691  |
| 2008          | 27156  | 3417.001 | 2619.045 | 797.956  | 2.938  | 23.353 | 332.522 | 41.881 | 32.070 | 9.810  |
| 2009          | 27100  | 3394.390 | 2556.166 | 838.224  | 3.093  | 24.694 | 327.886 | 41.113 | 30.927 | 10.185 |
| 2010          | 26948  | 3340.137 | 2477.293 | 862.845  | 3.202  | 25.833 | 322.044 | 39.965 | 29.606 | 10.359 |
| 2011          | 27001  | 3285.435 | 2401.092 | 884.343  | 3.275  | 26.917 | 319.448 | 38.922 | 28.408 | 10.514 |
| 2012          | 27104  | 3259.209 | 2343.673 | 915.536  | 3.378  | 28.091 | 317.161 | 38.193 | 27.424 | 10.769 |
| 2013          | 27959  | 3274.703 | 2316.903 | 957.800  | 3.426  | 29.248 | 323.383 | 37.937 | 26.798 | 11.139 |
| 2014          | 28855  | 3298.083 | 2305.926 | 992.157  | 3.438  | 30.083 | 329.801 | 37.762 | 26.356 | 11.406 |
| 2015          | 29632  | 3244.406 | 2244.183 | 1000.223 | 3.375  | 30.829 | 380.859 | 41.789 | 28.844 | 12.945 |
| 2016          | 30595  | 3314.836 | 2269.311 | 1045.525 | 3.417  | 31.541 | 389.490 | 42.297 | 28.890 | 13.408 |
| 2017          | 31508  | 3333.314 | 2258.412 | 1074.901 | 3.412  | 32.247 | 397.376 | 42.144 | 28.483 | 13.661 |
| 2018          | 29442  | 2925.242 | 1969.577 | 955.665  | 3.246  | 32.670 | 367.822 | 36.642 | 24.606 | 12.036 |
| 2019          | 29700  | 2864.628 | 1921.406 | 943.222  | 3.176  | 32.927 | 367.376 | 35.534 | 23.767 | 11.767 |
| 2020          | 29703  | 2730.366 | 1821.105 | 909.261  | 3.061  | 33.302 | 419.321 | 38.675 | 25.708 | 12.967 |
| 2021          | 30218  | 2647.911 | 1762.267 | 885.643  | 2.931  | 33.447 | 423.509 | 37.244 | 24.698 | 12.546 |
| 2022          | 30434  | 2586.165 | 1717.396 | 868.768  | 2.855  | 33.593 | 423.187 | 36.097 | 23.881 | 12.217 |
| 2023          | 30645  | 2517.960 | 1670.113 | 847.847  | 2.767  | 33.672 | 422.588 | 34.860 | 23.030 | 11.830 |
| 2024          | 30811  | 2454.161 | 1634.369 | 819.791  | 2.661  | 33.404 | 421.261 | 33.695 | 22.346 | 11.349 |
| 2025          | 30413  | 2275.364 | 1508.464 | 766.900  | 2.522  | 33.704 | 483.643 | 36.363 | 23.988 | 12.374 |
| 2026          | 30856  | 2183.166 | 1460.589 | 722.577  | 2.342  | 33.098 | 488.567 | 34.747 | 23.127 | 11.620 |
| 2027          | 30741  | 2112.345 | 1427.075 | 685.269  | 2.229  | 32.441 | 484.428 | 33.467 | 22.489 | 10.978 |
| 2028          | 30600  | 2046.677 | 1396.273 | 650.404  | 2.125  | 31.779 | 479.674 | 32.263 | 21.887 | 10.375 |
| 2029          | 30452  | 1977.671 | 1365.777 | 611.895  | 2.009  | 30.940 | 474.533 | 30.997 | 21.283 | 9.715  |
| 2030          | 29535  | 1744.457 | 1204.328 | 540.129  | 1.829  | 30.963 | 549.410 | 32.668 | 22.403 | 10.265 |
| 2031          | 29188  | 1653.738 | 1157.777 | 495.961  | 1.699  | 29.990 | 541.411 | 30.889 | 21.476 | 9.413  |
| 2032          | 28944  | 1603.120 | 1134.578 | 468.543  | 1.619  | 29.227 | 534.931 | 29.841 | 20.969 | 8.873  |
| 2033          | 28691  | 1548.245 | 1114.436 | 433.808  | 1.512  | 28.019 | 527.925 | 28.700 | 20.506 | 8.194  |
| 2034          | 28413  | 1511.985 | 1108.052 | 403.933  | 1.422  | 26.715 | 520.183 | 27.893 | 20.286 | 7.607  |
| 2035          | 26974  | 1239.866 | 906.574  | 333.291  | 1.236  | 26.881 | 610.233 | 28.290 | 20.510 | 7.780  |
| 2036          | 25825  | 1182.522 | 881.634  | 300.888  | 1.165  | 25.445 | 583.972 | 26.975 | 19.936 | 7.039  |
| 2037          | 25382  | 1134.483 | 871.978  | 262.505  | 1.034  | 23.139 | 573.177 | 25.851 | 19.691 | 6.159  |
| 2038          | 24936  | 1093.537 | 858.637  | 234.900  | 0.942  | 21.481 | 561.804 | 24.866 | 19.345 | 5.520  |
| 2039          | 24493  | 1047.905 | 847.896  | 200.009  | 0.817  | 19.087 | 549.919 | 23.751 | 19.037 | 4.713  |

## Results for PHIM for Run 1 (Pessimistic\_Analysis.RTF)

\*\*\*\*\*

### Main Results for E-Component for Run: 1, Simulation: 1, COD: COPD, Adjusted

| Variable Parameter          | Value                                  |
|-----------------------------|----------------------------------------|
| 1. Country                  | US (United States)                     |
| 2. Sex                      | M (Males)                              |
| 3. Year of start of process | 1990                                   |
| 4. Cause of Death           | COPD                                   |
| 5. Effective Dose NULL      | CC:1                                   |
| 6. Effective Dose Ecig      | CC:1 Ecig:0.4 Dual:0.7                 |
| Note:                       | Death rates are per million population |

### Results for Age Groups Combined and Years combined, Population and Number deaths adjusted for Ecig scenario,

| Age Group:All | NULL    | Ecig        | %Drop      |          |        |        | NULL    | Ecig    | Drop    |        |
|---------------|---------|-------------|------------|----------|--------|--------|---------|---------|---------|--------|
| Year          | Number  | Attrib      | Attrib     | Drop     | %Drop  | Attrib | Death   | Attrib  | Attrib  | Drop   |
|               | Deaths  | Deaths      | Deaths     | Deaths   | Deaths | Deaths | Rate    | Rates   | Rates   | Rates  |
| All Comb      | 2242116 | 1015606.587 | 910348.198 | 105258.4 | 4.695  | 10.364 | 647.342 | 293.996 | 262.835 | 31.161 |

### Results for Age Groups Combined, Population and Number deaths adjusted for Ecig scenario,

| Age Group:All | NULL   | Ecig      | %Drop     |          |        |        | NULL    | Ecig    | Drop    |         |
|---------------|--------|-----------|-----------|----------|--------|--------|---------|---------|---------|---------|
| Year          | Number | Attrib    | Attrib    | Drop     | %Drop  | Attrib | Death   | Attrib  | Attrib  | Drop    |
|               | Deaths | Deaths    | Deaths    | Deaths   | Deaths | Deaths | Rate    | Rates   | Rates   | Rates   |
| 1990          | 33993  | 19262.437 | 19262.437 | 0.000    | 0.000  | 0.000  | 538.865 | 305.353 | 305.353 | 0.000   |
| 1991          | 34092  | 19215.636 | 19210.159 | 5.477    | 0.016  | 0.029  | 531.576 | 299.618 | 299.533 | 0.085   |
| 1992          | 33942  | 19056.189 | 19045.568 | 10.621   | 0.031  | 0.056  | 520.248 | 292.085 | 291.921 | 0.163   |
| 1993          | 35913  | 20095.670 | 20073.722 | 21.947   | 0.061  | 0.109  | 540.644 | 302.526 | 302.193 | 0.333   |
| 1994          | 35074  | 19524.095 | 19491.027 | 33.067   | 0.094  | 0.169  | 518.156 | 288.435 | 287.942 | 0.493   |
| 1995          | 34670  | 19116.002 | 19064.496 | 51.506   | 0.149  | 0.269  | 502.357 | 276.995 | 276.240 | 0.755   |
| 1996          | 34583  | 18975.021 | 18904.811 | 70.211   | 0.203  | 0.370  | 493.298 | 270.675 | 269.660 | 1.015   |
| 1997          | 35269  | 19169.025 | 19070.776 | 98.249   | 0.279  | 0.513  | 494.865 | 268.986 | 267.586 | 1.400   |
| 1998          | 35678  | 19228.937 | 19093.482 | 135.456  | 0.380  | 0.704  | 492.351 | 265.388 | 263.489 | 1.899   |
| 1999          | 38520  | 20589.820 | 20412.434 | 177.387  | 0.461  | 0.862  | 523.174 | 279.689 | 277.237 | 2.452   |
| 2000          | 36289  | 19196.417 | 18979.383 | 217.034  | 0.598  | 1.131  | 485.629 | 256.946 | 253.989 | 2.957   |
| 2001          | 36289  | 19012.731 | 18738.824 | 273.907  | 0.755  | 1.441  | 479.276 | 251.174 | 247.489 | 3.685   |
| 2002          | 35993  | 18699.357 | 18369.705 | 329.653  | 0.916  | 1.763  | 470.012 | 244.265 | 239.878 | 4.387   |
| 2003          | 36218  | 18663.550 | 18280.465 | 383.084  | 1.058  | 2.053  | 467.996 | 241.262 | 236.211 | 5.051   |
| 2004          | 34627  | 17679.164 | 17232.575 | 446.589  | 1.290  | 2.526  | 442.574 | 226.076 | 220.254 | 5.823   |
| 2005          | 36847  | 18692.832 | 18137.213 | 555.619  | 1.508  | 2.972  | 465.439 | 236.265 | 229.104 | 7.161   |
| 2006          | 34374  | 17308.564 | 16692.483 | 616.080  | 1.792  | 3.559  | 430.185 | 216.769 | 208.906 | 7.863   |
| 2007          | 35355  | 17683.181 | 16950.173 | 733.008  | 2.073  | 4.145  | 437.885 | 219.189 | 209.932 | 9.258   |
| 2008          | 38286  | 19006.374 | 18126.739 | 879.635  | 2.298  | 4.628  | 468.811 | 232.952 | 221.963 | 10.989  |
| 2009          | 36945  | 18205.573 | 17227.973 | 977.599  | 2.646  | 5.370  | 447.002 | 220.505 | 208.443 | 12.062  |
| 2010          | 37284  | 18237.758 | 17173.234 | 1064.524 | 2.855  | 5.837  | 445.572 | 218.215 | 205.233 | 12.982  |
| 2011          | 38152  | 18487.916 | 17243.735 | 1244.181 | 3.261  | 6.730  | 451.377 | 219.022 | 204.013 | 15.009  |
| 2012          | 38571  | 18491.158 | 17117.810 | 1373.348 | 3.561  | 7.427  | 451.340 | 216.689 | 200.303 | 16.386  |
| 2013          | 40369  | 19143.452 | 17587.086 | 1556.366 | 3.855  | 8.130  | 466.928 | 221.775 | 203.419 | 18.356  |
| 2014          | 40428  | 18992.005 | 17318.795 | 1673.210 | 4.139  | 8.810  | 462.082 | 217.451 | 197.948 | 19.503  |
| 2015          | 42407  | 19728.885 | 17882.014 | 1846.871 | 4.355  | 9.361  | 545.062 | 254.116 | 229.837 | 24.279  |
| 2016          | 43221  | 19876.724 | 17891.880 | 1984.844 | 4.592  | 9.986  | 550.234 | 253.628 | 227.776 | 25.852  |
| 2017          | 44238  | 20119.790 | 17968.094 | 2151.697 | 4.864  | 10.694 | 557.937 | 254.381 | 226.614 | 27.767  |
| 2018          | 45616  | 20535.123 | 18184.129 | 2350.994 | 5.154  | 11.449 | 569.887 | 257.229 | 227.176 | 30.053  |
| 2019          | 47127  | 21009.029 | 18462.022 | 2547.007 | 5.405  | 12.123 | 582.939 | 260.605 | 228.365 | 32.241  |
| 2020          | 48602  | 21428.512 | 18705.999 | 2722.513 | 5.602  | 12.705 | 686.118 | 303.533 | 264.072 | 39.461  |
| 2021          | 48661  | 21266.697 | 18363.346 | 2903.351 | 5.966  | 13.652 | 681.987 | 299.127 | 257.363 | 41.764  |
| 2022          | 50134  | 21663.568 | 18514.825 | 3148.743 | 6.281  | 14.535 | 697.116 | 302.378 | 257.451 | 44.927  |
| 2023          | 51631  | 22084.131 | 18698.337 | 3385.793 | 6.558  | 15.331 | 711.975 | 305.748 | 257.843 | 47.905  |
| 2024          | 53075  | 22418.456 | 18856.235 | 3562.221 | 6.712  | 15.890 | 725.670 | 307.804 | 257.814 | 49.990  |
| 2025          | 54135  | 22614.834 | 18891.662 | 3723.172 | 6.878  | 16.463 | 860.889 | 361.411 | 300.426 | 60.985  |
| 2026          | 54649  | 22571.522 | 18724.019 | 3847.503 | 7.040  | 17.046 | 865.310 | 359.241 | 296.473 | 62.768  |
| 2027          | 55598  | 22774.416 | 18724.661 | 4049.754 | 7.284  | 17.782 | 876.145 | 360.827 | 295.074 | 65.753  |
| 2028          | 56505  | 22915.561 | 18661.513 | 4254.048 | 7.529  | 18.564 | 885.742 | 361.228 | 292.530 | 68.699  |
| 2029          | 57395  | 22992.027 | 18604.001 | 4388.027 | 7.645  | 19.085 | 894.385 | 360.371 | 289.906 | 70.465  |
| 2030          | 57644  | 22895.360 | 18406.709 | 4488.651 | 7.787  | 19.605 | 1072.30 | 428.760 | 342.403 | 86.357  |
| 2031          | 58018  | 22715.871 | 18221.502 | 4494.369 | 7.747  | 19.785 | 1076.18 | 424.293 | 337.993 | 86.299  |
| 2032          | 58702  | 22759.207 | 18140.262 | 4618.945 | 7.868  | 20.295 | 1084.91 | 423.652 | 335.261 | 88.391  |
| 2033          | 59361  | 22786.258 | 18124.781 | 4661.476 | 7.853  | 20.457 | 1092.27 | 422.387 | 333.503 | 88.885  |
| 2034          | 59962  | 22806.106 | 18061.826 | 4744.280 | 7.912  | 20.803 | 1097.77 | 420.721 | 330.672 | 90.049  |
| 2035          | 59037  | 22262.998 | 17593.080 | 4669.918 | 7.910  | 20.976 | 1335.61 | 507.973 | 398.015 | 109.958 |
| 2036          | 56965  | 21140.051 | 16635.819 | 4504.233 | 7.907  | 21.307 | 1288.12 | 482.234 | 376.174 | 106.060 |
| 2037          | 57107  | 21011.845 | 16521.852 | 4489.992 | 7.862  | 21.369 | 1289.62 | 478.783 | 373.102 | 105.681 |
| 2038          | 57226  | 20787.483 | 16369.173 | 4418.311 | 7.721  | 21.255 | 1289.33 | 472.681 | 368.802 | 103.879 |
| 2039          | 57335  | 20709.267 | 16335.350 | 4373.917 | 7.629  | 21.121 | 1287.32 | 469.372 | 366.769 | 102.603 |

## Results for PHIM for Run 2 (Pessimistic\_Analysis.RTF)

---

### Control File Details for Run: 2

| Variable Parameter                                       | Value                |
|----------------------------------------------------------|----------------------|
| 1. Name for Reference Scenario                           | NULL                 |
| 2. Name for Test Scenario                                | Ecig                 |
| 3. Name for Product 1                                    | CC                   |
| 4. Name for Product 2                                    | Ecig                 |
| 5. Name for Product 3                                    | -                    |
| 6. Name for Product 4                                    | Dual                 |
| 7. Country                                               | US (United States)   |
| 8. Sex                                                   | F (Females)          |
| 9. Year of start of process                              | 1990                 |
| 10. Number of months of follow-up                        | 600                  |
| 11. Follow-up interval length (in months)                | 12                   |
| 12. Lower age for risk estimation                        | 10                   |
| 13. Upper age for risk estimation                        | 79                   |
| 14. The effective dose for Product 1 (F1) - Ref          | 1                    |
| 15. The effective dose for Product 2 (F2) - Ref          | -                    |
| 16. The effective dose for Product 3 (F3) - Ref          | -                    |
| 17. The effective dose for Product 4 (F4) - Ref          | -                    |
| 18. The effective dose for Product 1 (F1) - Test         | 1                    |
| 19. The effective dose for Product 2 (F2) - Test         | 0.4                  |
| 20. The effective dose for Product 3 (F3) - Test         | -                    |
| 21. The effective dose for Product 4 (F4) - Test         | FROMF2               |
| 22. Number in population to be simulated                 | 100000               |
| 23. Number of MC simulations                             | 1                    |
| 24. The random number seed for the first simulation      | 15975263             |
| 25. Source for the population file (POP)                 | UN4                  |
| 26. Source for the socioeconomic prevalence file (SEP)   | -                    |
| 27. Source for the current smoking prevalence file (CSP) | ISS3                 |
| 28. Source for the former smoking prevalence file (FSP)  | ISS3                 |
| 29. Source for the quit-time distribution file (QTD)     | NHIS2006             |
| 30. Source for the death file (MORT)                     | APR-20               |
| 31. Source for the relative risk file (RR)               | PNLEST               |
| 32. Source for the half-life file (H)                    | PNLEST               |
| 33. Assumption Set for TTP Factor Reference              | F1                   |
| 34. Assumption Set for TTP Factor Test                   | F1                   |
| 35. Assumption Set for TTP Reference                     | ISS3                 |
| 36. Assumption Set for TTP Test                          | ISS3                 |
| 37. Assumption Set for TP for socioeconomic group        | -                    |
| 38. Source for Output Choice file (OUTC)                 | BASIC                |
| 39. Output for DTP P1                                    | N                    |
| 40. Output for DTP P2                                    | N                    |
| 41. Output for Main P Component                          | Y                    |
| 42. Output for DTP E1                                    | N                    |
| 43. Output for DTP E2                                    | N                    |
| 44. Output for DTP E3                                    | N                    |
| 45. Output for Main E Component                          | Y                    |
| 46. Output file name                                     | Pessimistic_Analysis |
| 47. Run number for P-Component                           | -                    |
| 48. Results file for E-Component                         | -                    |
| 49. Components required                                  | PE                   |
| 50. Results folder for P to be used in E-Component       | -                    |
| 51. Fixed age of starting product use                    | 16                   |
| 52. Output absolute risk file?                           | N                    |

## Results for PHIM for Run 2 (Pessimistic\_Analysis.RTF)

\*\*\*\*\*

TTP values for Run: 2, Scenario: NULL

| Variable Parameter | Value               |
|--------------------|---------------------|
| 1. Country         | US (United States)  |
| 2. Sex             | F (Females)         |
| 3. Assumption Set  | ISS3                |
| Note:              | Period is in Months |

| Age   | Period  | Initiation  | Cessation    | Re-initiation |
|-------|---------|-------------|--------------|---------------|
|       |         | Never<br>CC | CC<br>Former | Former<br>CC  |
| 10-14 | 1-12    | 0.003758    | 0.008742     | 0.000000      |
| 15-19 | 1-12    | 0.003469    | 0.002515     | 0.000000      |
| 20-24 | 1-12    | 0.000276    | 0.000761     | 0.000000      |
| 25-29 | 1-12    | 0.000137    | 0.001375     | 0.000000      |
| 30-34 | 1-12    | 0.000069    | 0.001149     | 0.000000      |
| 35-39 | 1-12    | 0.000000    | 0.000991     | 0.000000      |
| 40-44 | 1-12    | 0.000000    | 0.000833     | 0.000000      |
| 45-49 | 1-12    | 0.000000    | 0.001723     | 0.000000      |
| 50-54 | 1-12    | 0.000000    | 0.002336     | 0.000000      |
| 55-59 | 1-12    | 0.000000    | 0.002233     | 0.000000      |
| 60-64 | 1-12    | 0.000000    | 0.004634     | 0.000000      |
| 65-69 | 1-12    | 0.000000    | 0.003505     | 0.000000      |
| 70-74 | 1-12    | 0.000000    | 0.004329     | 0.000000      |
| 75-79 | 1-12    | 0.000000    | 0.004329     | 0.000000      |
| 10-14 | 13-72   | 0.004794    | 0.008742     | 0.000000      |
| 15-19 | 13-72   | 0.004527    | 0.004082     | 0.000000      |
| 20-24 | 13-72   | 0.000105    | 0.001261     | 0.000000      |
| 25-29 | 13-72   | 0.000053    | 0.000952     | 0.000000      |
| 30-34 | 13-72   | 0.000026    | 0.000733     | 0.000000      |
| 35-39 | 13-72   | 0.000000    | 0.000753     | 0.000000      |
| 40-44 | 13-72   | 0.000000    | 0.001535     | 0.000000      |
| 45-49 | 13-72   | 0.000000    | 0.002998     | 0.000000      |
| 50-54 | 13-72   | 0.000000    | 0.003159     | 0.000000      |
| 55-59 | 13-72   | 0.000000    | 0.002965     | 0.000000      |
| 60-64 | 13-72   | 0.000000    | 0.003633     | 0.000000      |
| 65-69 | 13-72   | 0.000000    | 0.004522     | 0.000000      |
| 70-74 | 13-72   | 0.000000    | 0.005208     | 0.000000      |
| 75-79 | 13-72   | 0.000000    | 0.005208     | 0.000000      |
| 10-14 | 73-132  | 0.003969    | 0.008742     | 0.000000      |
| 15-19 | 73-132  | 0.003056    | 0.003373     | 0.000000      |
| 20-24 | 73-132  | 0.001459    | 0.003881     | 0.000000      |
| 25-29 | 73-132  | 0.000714    | 0.001953     | 0.000000      |
| 30-34 | 73-132  | 0.000111    | 0.001338     | 0.000000      |
| 35-39 | 73-132  | 0.000000    | 0.001507     | 0.000000      |
| 40-44 | 73-132  | 0.000000    | 0.002080     | 0.000000      |
| 45-49 | 73-132  | 0.000000    | 0.003809     | 0.000000      |
| 50-54 | 73-132  | 0.000000    | 0.004871     | 0.000000      |
| 55-59 | 73-132  | 0.000000    | 0.004560     | 0.000000      |
| 60-64 | 73-132  | 0.000000    | 0.007192     | 0.000000      |
| 65-69 | 73-132  | 0.000000    | 0.007033     | 0.000000      |
| 70-74 | 73-132  | 0.000000    | 0.008206     | 0.000000      |
| 75-79 | 73-132  | 0.000000    | 0.008206     | 0.000000      |
| 10-14 | 133-192 | 0.002861    | 0.008742     | 0.000000      |
| 15-19 | 133-192 | 0.002594    | 0.003996     | 0.000000      |
| 20-24 | 133-192 | 0.001247    | 0.002805     | 0.000000      |
| 25-29 | 133-192 | 0.000289    | 0.001574     | 0.000000      |
| 30-34 | 133-192 | 0.000132    | 0.001293     | 0.000000      |
| 35-39 | 133-192 | 0.000000    | 0.001219     | 0.000000      |
| 40-44 | 133-192 | 0.000000    | 0.001657     | 0.000000      |
| 45-49 | 133-192 | 0.000000    | 0.001995     | 0.000000      |
| 50-54 | 133-192 | 0.000000    | 0.002154     | 0.000000      |
| 55-59 | 133-192 | 0.000000    | 0.002072     | 0.000000      |
| 60-64 | 133-192 | 0.000000    | 0.005049     | 0.000000      |
| 65-69 | 133-192 | 0.000000    | 0.003680     | 0.000000      |
| 70-74 | 133-192 | 0.000000    | 0.006144     | 0.000000      |
| 75-79 | 133-192 | 0.000000    | 0.006144     | 0.000000      |
| 10-14 | 193-252 | 0.001859    | 0.008742     | 0.000000      |
| 15-19 | 193-252 | 0.002232    | 0.005770     | 0.000000      |
| 20-24 | 193-252 | 0.001079    | 0.003262     | 0.000000      |
| 25-29 | 193-252 | 0.000531    | 0.002002     | 0.000000      |
| 30-34 | 193-252 | 0.000263    | 0.003240     | 0.000000      |
| 35-39 | 193-252 | 0.000000    | 0.001771     | 0.000000      |
| 40-44 | 193-252 | 0.000000    | 0.002173     | 0.000000      |
| 45-49 | 193-252 | 0.000000    | 0.002075     | 0.000000      |
| 50-54 | 193-252 | 0.000000    | 0.003431     | 0.000000      |



**Results for PHIM for Run 2 (Pessimistic\_Analysis.RTF)**

|       |         |          |          |          |
|-------|---------|----------|----------|----------|
| 55-59 | 193-252 | 0.000000 | 0.002906 | 0.000000 |
| 60-64 | 193-252 | 0.000000 | 0.007139 | 0.000000 |
| 65-69 | 193-252 | 0.000000 | 0.004963 | 0.000000 |
| 70-74 | 193-252 | 0.000000 | 0.006269 | 0.000000 |
| 75-79 | 193-252 | 0.000000 | 0.006269 | 0.000000 |
| 10-14 | 253+    | 0.000931 | 0.008742 | 0.000000 |
| 15-19 | 253+    | 0.001798 | 0.009440 | 0.000000 |
| 20-24 | 253+    | 0.000023 | 0.002831 | 0.000000 |
| 25-29 | 253+    | 0.000073 | 0.002655 | 0.000000 |
| 30-34 | 253+    | 0.000037 | 0.004614 | 0.000000 |
| 35-39 | 253+    | 0.000000 | 0.002607 | 0.000000 |
| 40-44 | 253+    | 0.000000 | 0.003115 | 0.000000 |
| 45-49 | 253+    | 0.000000 | 0.002132 | 0.000000 |
| 50-54 | 253+    | 0.000000 | 0.003497 | 0.000000 |
| 55-59 | 253+    | 0.000000 | 0.002942 | 0.000000 |
| 60-64 | 253+    | 0.000000 | 0.005376 | 0.000000 |
| 65-69 | 253+    | 0.000000 | 0.001789 | 0.000000 |
| 70-74 | 253+    | 0.000000 | 0.004077 | 0.000000 |
| 75-79 | 253+    | 0.000000 | 0.004077 | 0.000000 |

## Results for PHIM for Run 2 (Pessimistic\_Analysis.RTF)

\*\*\*\*\*

TTP values for Run: 2, Scenario: Ecig

| Variable Parameter | Value               |
|--------------------|---------------------|
| 1. Country         | US (United States)  |
| 2. Sex             | F (Females)         |
| 3. Assumption Set  | ISS3                |
| Note:              | Period is in Months |

| Age   | Period  | Initiation |            |            | Cessation |             |             | Re-initiation |             |             |
|-------|---------|------------|------------|------------|-----------|-------------|-------------|---------------|-------------|-------------|
|       |         | Never CC   | Never Ecig | Never Dual | CC Former | Ecig Former | Dual Former | Former CC     | Former Ecig | Former Dual |
| 10-14 | 1-12    | 0.001879   | 0.002819   | 0.000000   | 0.008742  | 0.004371    | 0.000000    | 0.000000      | 0.000000    | 0.000000    |
| 15-19 | 1-12    | 0.001735   | 0.002602   | 0.000000   | 0.002515  | 0.001258    | 0.000000    | 0.000000      | 0.000000    | 0.000000    |
| 20-24 | 1-12    | 0.000138   | 0.000207   | 0.000000   | 0.000761  | 0.000381    | 0.000000    | 0.000000      | 0.000000    | 0.000000    |
| 25-29 | 1-12    | 0.000069   | 0.000103   | 0.000000   | 0.001376  | 0.000688    | 0.000000    | 0.000000      | 0.000000    | 0.000000    |
| 30-34 | 1-12    | 0.000034   | 0.000051   | 0.000000   | 0.001149  | 0.000575    | 0.000000    | 0.000000      | 0.000000    | 0.000000    |
| 35-39 | 1-12    | 0.000000   | 0.000000   | 0.000000   | 0.000991  | 0.000496    | 0.000000    | 0.000000      | 0.000000    | 0.000000    |
| 40-44 | 1-12    | 0.000000   | 0.000000   | 0.000000   | 0.000833  | 0.000417    | 0.000000    | 0.000000      | 0.000000    | 0.000000    |
| 45-49 | 1-12    | 0.000000   | 0.000000   | 0.000000   | 0.001723  | 0.000862    | 0.000000    | 0.000000      | 0.000000    | 0.000000    |
| 50-54 | 1-12    | 0.000000   | 0.000000   | 0.000000   | 0.002336  | 0.001168    | 0.000000    | 0.000000      | 0.000000    | 0.000000    |
| 55-59 | 1-12    | 0.000000   | 0.000000   | 0.000000   | 0.002233  | 0.001116    | 0.000000    | 0.000000      | 0.000000    | 0.000000    |
| 60-64 | 1-12    | 0.000000   | 0.000000   | 0.000000   | 0.004635  | 0.002317    | 0.000000    | 0.000000      | 0.000000    | 0.000000    |
| 65-69 | 1-12    | 0.000000   | 0.000000   | 0.000000   | 0.003505  | 0.001752    | 0.000000    | 0.000000      | 0.000000    | 0.000000    |
| 70-74 | 1-12    | 0.000000   | 0.000000   | 0.000000   | 0.004329  | 0.002164    | 0.000000    | 0.000000      | 0.000000    | 0.000000    |
| 75-79 | 1-12    | 0.000000   | 0.000000   | 0.000000   | 0.004329  | 0.002164    | 0.000000    | 0.000000      | 0.000000    | 0.000000    |
| 10-14 | 13-72   | 0.001918   | 0.004315   | 0.000000   | 0.008742  | 0.004371    | 0.000000    | 0.000000      | 0.000000    | 0.000000    |
| 15-19 | 13-72   | 0.001811   | 0.004075   | 0.000000   | 0.004083  | 0.002041    | 0.000000    | 0.000000      | 0.000000    | 0.000000    |
| 20-24 | 13-72   | 0.000042   | 0.000095   | 0.000000   | 0.001261  | 0.000631    | 0.000000    | 0.000000      | 0.000000    | 0.000000    |
| 25-29 | 13-72   | 0.000021   | 0.000047   | 0.000000   | 0.000952  | 0.000476    | 0.000000    | 0.000000      | 0.000000    | 0.000000    |
| 30-34 | 13-72   | 0.000011   | 0.000024   | 0.000000   | 0.000733  | 0.000367    | 0.000000    | 0.000000      | 0.000000    | 0.000000    |
| 35-39 | 13-72   | 0.000000   | 0.000000   | 0.000000   | 0.000754  | 0.000377    | 0.000000    | 0.000000      | 0.000000    | 0.000000    |
| 40-44 | 13-72   | 0.000000   | 0.000000   | 0.000000   | 0.001535  | 0.000767    | 0.000000    | 0.000000      | 0.000000    | 0.000000    |
| 45-49 | 13-72   | 0.000000   | 0.000000   | 0.000000   | 0.002998  | 0.001499    | 0.000000    | 0.000000      | 0.000000    | 0.000000    |
| 50-54 | 13-72   | 0.000000   | 0.000000   | 0.000000   | 0.003160  | 0.001580    | 0.000000    | 0.000000      | 0.000000    | 0.000000    |
| 55-59 | 13-72   | 0.000000   | 0.000000   | 0.000000   | 0.002965  | 0.001482    | 0.000000    | 0.000000      | 0.000000    | 0.000000    |
| 60-64 | 13-72   | 0.000000   | 0.000000   | 0.000000   | 0.003633  | 0.001816    | 0.000000    | 0.000000      | 0.000000    | 0.000000    |
| 65-69 | 13-72   | 0.000000   | 0.000000   | 0.000000   | 0.004522  | 0.002261    | 0.000000    | 0.000000      | 0.000000    | 0.000000    |
| 70-74 | 13-72   | 0.000000   | 0.000000   | 0.000000   | 0.005208  | 0.002604    | 0.000000    | 0.000000      | 0.000000    | 0.000000    |
| 75-79 | 13-72   | 0.000000   | 0.000000   | 0.000000   | 0.005208  | 0.002604    | 0.000000    | 0.000000      | 0.000000    | 0.000000    |
| 10-14 | 73-132  | 0.000794   | 0.004763   | 0.000000   | 0.008742  | 0.004371    | 0.000000    | 0.000000      | 0.000000    | 0.000000    |
| 15-19 | 73-132  | 0.000611   | 0.003668   | 0.000000   | 0.003373  | 0.001686    | 0.000000    | 0.000000      | 0.000000    | 0.000000    |
| 20-24 | 73-132  | 0.000292   | 0.001751   | 0.000000   | 0.003881  | 0.001940    | 0.000000    | 0.000000      | 0.000000    | 0.000000    |
| 25-29 | 73-132  | 0.000143   | 0.000857   | 0.000000   | 0.001954  | 0.000977    | 0.000000    | 0.000000      | 0.000000    | 0.000000    |
| 30-34 | 73-132  | 0.000022   | 0.000134   | 0.000000   | 0.001338  | 0.000669    | 0.000000    | 0.000000      | 0.000000    | 0.000000    |
| 35-39 | 73-132  | 0.000000   | 0.000000   | 0.000000   | 0.001507  | 0.000753    | 0.000000    | 0.000000      | 0.000000    | 0.000000    |
| 40-44 | 73-132  | 0.000000   | 0.000000   | 0.000000   | 0.002080  | 0.001040    | 0.000000    | 0.000000      | 0.000000    | 0.000000    |
| 45-49 | 73-132  | 0.000000   | 0.000000   | 0.000000   | 0.003809  | 0.001904    | 0.000000    | 0.000000      | 0.000000    | 0.000000    |
| 50-54 | 73-132  | 0.000000   | 0.000000   | 0.000000   | 0.004871  | 0.002436    | 0.000000    | 0.000000      | 0.000000    | 0.000000    |
| 55-59 | 73-132  | 0.000000   | 0.000000   | 0.000000   | 0.004560  | 0.002280    | 0.000000    | 0.000000      | 0.000000    | 0.000000    |
| 60-64 | 73-132  | 0.000000   | 0.000000   | 0.000000   | 0.007192  | 0.003596    | 0.000000    | 0.000000      | 0.000000    | 0.000000    |
| 65-69 | 73-132  | 0.000000   | 0.000000   | 0.000000   | 0.007033  | 0.003517    | 0.000000    | 0.000000      | 0.000000    | 0.000000    |
| 70-74 | 73-132  | 0.000000   | 0.000000   | 0.000000   | 0.008206  | 0.004103    | 0.000000    | 0.000000      | 0.000000    | 0.000000    |
| 75-79 | 73-132  | 0.000000   | 0.000000   | 0.000000   | 0.008206  | 0.004103    | 0.000000    | 0.000000      | 0.000000    | 0.000000    |
| 10-14 | 133-192 | 0.000143   | 0.004077   | 0.000000   | 0.008742  | 0.004371    | 0.000000    | 0.000000      | 0.000000    | 0.000000    |
| 15-19 | 133-192 | 0.000130   | 0.003697   | 0.000000   | 0.003996  | 0.001998    | 0.000000    | 0.000000      | 0.000000    | 0.000000    |
| 20-24 | 133-192 | 0.000062   | 0.001778   | 0.000000   | 0.002805  | 0.001403    | 0.000000    | 0.000000      | 0.000000    | 0.000000    |
| 25-29 | 133-192 | 0.000015   | 0.000412   | 0.000000   | 0.001574  | 0.000787    | 0.000000    | 0.000000      | 0.000000    | 0.000000    |
| 30-34 | 133-192 | 0.000007   | 0.000188   | 0.000000   | 0.001293  | 0.000646    | 0.000000    | 0.000000      | 0.000000    | 0.000000    |
| 35-39 | 133-192 | 0.000000   | 0.000000   | 0.000000   | 0.001219  | 0.000610    | 0.000000    | 0.000000      | 0.000000    | 0.000000    |
| 40-44 | 133-192 | 0.000000   | 0.000000   | 0.000000   | 0.001657  | 0.000828    | 0.000000    | 0.000000      | 0.000000    | 0.000000    |
| 45-49 | 133-192 | 0.000000   | 0.000000   | 0.000000   | 0.001995  | 0.000997    | 0.000000    | 0.000000      | 0.000000    | 0.000000    |
| 50-54 | 133-192 | 0.000000   | 0.000000   | 0.000000   | 0.002154  | 0.001077    | 0.000000    | 0.000000      | 0.000000    | 0.000000    |
| 55-59 | 133-192 | 0.000000   | 0.000000   | 0.000000   | 0.002072  | 0.001036    | 0.000000    | 0.000000      | 0.000000    | 0.000000    |
| 60-64 | 133-192 | 0.000000   | 0.000000   | 0.000000   | 0.005049  | 0.002524    | 0.000000    | 0.000000      | 0.000000    | 0.000000    |
| 65-69 | 133-192 | 0.000000   | 0.000000   | 0.000000   | 0.003681  | 0.001840    | 0.000000    | 0.000000      | 0.000000    | 0.000000    |
| 70-74 | 133-192 | 0.000000   | 0.000000   | 0.000000   | 0.006144  | 0.003072    | 0.000000    | 0.000000      | 0.000000    | 0.000000    |
| 75-79 | 133-192 | 0.000000   | 0.000000   | 0.000000   | 0.006144  | 0.003072    | 0.000000    | 0.000000      | 0.000000    | 0.000000    |
| 10-14 | 193-252 | 0.000093   | 0.002649   | 0.000000   | 0.008742  | 0.004371    | 0.000000    | 0.000000      | 0.000000    | 0.000000    |
| 15-19 | 193-252 | 0.000112   | 0.003180   | 0.000000   | 0.005770  | 0.002885    | 0.000000    | 0.000000      | 0.000000    | 0.000000    |
| 20-24 | 193-252 | 0.000054   | 0.001538   | 0.000000   | 0.003262  | 0.001631    | 0.000000    | 0.000000      | 0.000000    | 0.000000    |
| 25-29 | 193-252 | 0.000027   | 0.000757   | 0.000000   | 0.002002  | 0.001001    | 0.000000    | 0.000000      | 0.000000    | 0.000000    |
| 30-34 | 193-252 | 0.000013   | 0.000375   | 0.000000   | 0.003241  | 0.001620    | 0.000000    | 0.000000      | 0.000000    | 0.000000    |
| 35-39 | 193-252 | 0.000000   | 0.000000   | 0.000000   | 0.001771  | 0.000885    | 0.000000    | 0.000000      | 0.000000    | 0.000000    |
| 40-44 | 193-252 | 0.000000   | 0.000000   | 0.000000   | 0.002173  | 0.001087    | 0.000000    | 0.000000      | 0.000000    | 0.000000    |
| 45-49 | 193-252 | 0.000000   | 0.000000   | 0.000000   | 0.002075  | 0.001037    | 0.000000    | 0.000000      | 0.000000    | 0.000000    |
| 50-54 | 193-252 | 0.000000   | 0.000000   | 0.000000   | 0.003432  | 0.001716    | 0.000000    | 0.000000      | 0.000000    | 0.000000    |

### Results for PHIM for Run 2 (Pessimistic\_Analysis.RTF)

|       |         |          |          |          |          |          |          |          |          |          |
|-------|---------|----------|----------|----------|----------|----------|----------|----------|----------|----------|
| 55-59 | 193-252 | 0.000000 | 0.000000 | 0.000000 | 0.002906 | 0.001453 | 0.000000 | 0.000000 | 0.000000 | 0.000000 |
| 60-64 | 193-252 | 0.000000 | 0.000000 | 0.000000 | 0.007139 | 0.003569 | 0.000000 | 0.000000 | 0.000000 | 0.000000 |
| 65-69 | 193-252 | 0.000000 | 0.000000 | 0.000000 | 0.004963 | 0.002481 | 0.000000 | 0.000000 | 0.000000 | 0.000000 |
| 70-74 | 193-252 | 0.000000 | 0.000000 | 0.000000 | 0.006269 | 0.003134 | 0.000000 | 0.000000 | 0.000000 | 0.000000 |
| 75-79 | 193-252 | 0.000000 | 0.000000 | 0.000000 | 0.006269 | 0.003134 | 0.000000 | 0.000000 | 0.000000 | 0.000000 |
| 10-14 | 253+    | 0.000047 | 0.001326 | 0.000000 | 0.008742 | 0.004371 | 0.000000 | 0.000000 | 0.000000 | 0.000000 |
| 15-19 | 253+    | 0.000090 | 0.002562 | 0.000000 | 0.009440 | 0.004720 | 0.000000 | 0.000000 | 0.000000 | 0.000000 |
| 20-24 | 253+    | 0.000001 | 0.000033 | 0.000000 | 0.002831 | 0.001415 | 0.000000 | 0.000000 | 0.000000 | 0.000000 |
| 25-29 | 253+    | 0.000004 | 0.000105 | 0.000000 | 0.002656 | 0.001328 | 0.000000 | 0.000000 | 0.000000 | 0.000000 |
| 30-34 | 253+    | 0.000002 | 0.000052 | 0.000000 | 0.004614 | 0.002307 | 0.000000 | 0.000000 | 0.000000 | 0.000000 |
| 35-39 | 253+    | 0.000000 | 0.000000 | 0.000000 | 0.002608 | 0.001304 | 0.000000 | 0.000000 | 0.000000 | 0.000000 |
| 40-44 | 253+    | 0.000000 | 0.000000 | 0.000000 | 0.003115 | 0.001558 | 0.000000 | 0.000000 | 0.000000 | 0.000000 |
| 45-49 | 253+    | 0.000000 | 0.000000 | 0.000000 | 0.002132 | 0.001066 | 0.000000 | 0.000000 | 0.000000 | 0.000000 |
| 50-54 | 253+    | 0.000000 | 0.000000 | 0.000000 | 0.003497 | 0.001749 | 0.000000 | 0.000000 | 0.000000 | 0.000000 |
| 55-59 | 253+    | 0.000000 | 0.000000 | 0.000000 | 0.002942 | 0.001471 | 0.000000 | 0.000000 | 0.000000 | 0.000000 |
| 60-64 | 253+    | 0.000000 | 0.000000 | 0.000000 | 0.005376 | 0.002688 | 0.000000 | 0.000000 | 0.000000 | 0.000000 |
| 65-69 | 253+    | 0.000000 | 0.000000 | 0.000000 | 0.001789 | 0.000894 | 0.000000 | 0.000000 | 0.000000 | 0.000000 |
| 70-74 | 253+    | 0.000000 | 0.000000 | 0.000000 | 0.004077 | 0.002039 | 0.000000 | 0.000000 | 0.000000 | 0.000000 |
| 75-79 | 253+    | 0.000000 | 0.000000 | 0.000000 | 0.004077 | 0.002039 | 0.000000 | 0.000000 | 0.000000 | 0.000000 |



**Results for PHIM for Run 2 (Pessimistic\_Analysis.RTF)**

|       |      |          |          |          |          |          |          |
|-------|------|----------|----------|----------|----------|----------|----------|
| 25-29 | 253+ | 0.008145 | 0.000000 | 0.000000 | 0.000000 | 0.000000 | 0.000000 |
| 30-34 | 253+ | 0.007936 | 0.000000 | 0.000000 | 0.000000 | 0.000000 | 0.000000 |
| 35-39 | 253+ | 0.006975 | 0.000000 | 0.000000 | 0.000000 | 0.000000 | 0.000000 |
| 40-44 | 253+ | 0.006830 | 0.000000 | 0.000000 | 0.000000 | 0.000000 | 0.000000 |
| 45-49 | 253+ | 0.006338 | 0.000000 | 0.000000 | 0.000000 | 0.000000 | 0.000000 |
| 50-54 | 253+ | 0.005574 | 0.000000 | 0.000000 | 0.000000 | 0.000000 | 0.000000 |
| 55-59 | 253+ | 0.003011 | 0.000000 | 0.000000 | 0.000000 | 0.000000 | 0.000000 |
| 60-64 | 253+ | 0.002115 | 0.000000 | 0.000000 | 0.000000 | 0.000000 | 0.000000 |
| 65-69 | 253+ | 0.000281 | 0.000000 | 0.000000 | 0.000000 | 0.000000 | 0.000000 |
| 70-74 | 253+ | 0.000000 | 0.000000 | 0.000000 | 0.000000 | 0.000000 | 0.000000 |
| 75-79 | 253+ | 0.000000 | 0.000000 | 0.000000 | 0.000000 | 0.000000 | 0.000000 |

## Results for PHIM for Run 2 (Pessimistic\_Analysis.RTF)

\*\*\*\*\*

### Main Output for the Tobacco History for Run: 2, Simulation: 1, Scenario: NULL

| Variable Parameter          | Value              |
|-----------------------------|--------------------|
| 1. Country                  | US (United States) |
| 2. Sex                      | F (Females)        |
| 3. Year of start of process | 1990               |

Year of Follow-up: 2040, Age Group: All Ages  
 Period    Age Group    Smoking Group            N            %

|    |          |           |       |       |
|----|----------|-----------|-------|-------|
| 50 | All Ages | Never Any | 20670 | 58.80 |
| 50 | All Ages | CC        | 2462  | 7.00  |
| 50 | All Ages | Former    | 12019 | 34.19 |

Year of Follow-up: 2040, Age Group: 18-19  
 Period    Age Group    Smoking Group            N            %

|    |       |           |   |   |
|----|-------|-----------|---|---|
| 50 | 18-19 | Never Any | 0 | . |
| 50 | 18-19 | CC        | 0 | . |
| 50 | 18-19 | Former    | 0 | . |

Year of Follow-up: 2040, Age Group: 20-24  
 Period    Age Group    Smoking Group            N            %

|    |       |           |   |   |
|----|-------|-----------|---|---|
| 50 | 20-24 | Never Any | 0 | . |
| 50 | 20-24 | CC        | 0 | . |
| 50 | 20-24 | Former    | 0 | . |

Year of Follow-up: 2040, Age Group: 25-29  
 Period    Age Group    Smoking Group            N            %

|    |       |           |   |   |
|----|-------|-----------|---|---|
| 50 | 25-29 | Never Any | 0 | . |
| 50 | 25-29 | CC        | 0 | . |
| 50 | 25-29 | Former    | 0 | . |

Year of Follow-up: 2040, Age Group: 30-34  
 Period    Age Group    Smoking Group            N            %

|    |       |           |   |   |
|----|-------|-----------|---|---|
| 50 | 30-34 | Never Any | 0 | . |
| 50 | 30-34 | CC        | 0 | . |
| 50 | 30-34 | Former    | 0 | . |

Year of Follow-up: 2040, Age Group: 35-39  
 Period    Age Group    Smoking Group            N            %

|    |       |           |   |   |
|----|-------|-----------|---|---|
| 50 | 35-39 | Never Any | 0 | . |
| 50 | 35-39 | CC        | 0 | . |
| 50 | 35-39 | Former    | 0 | . |

Year of Follow-up: 2040, Age Group: 40-44  
 Period    Age Group    Smoking Group            N            %

|    |       |           |   |   |
|----|-------|-----------|---|---|
| 50 | 40-44 | Never Any | 0 | . |
| 50 | 40-44 | CC        | 0 | . |
| 50 | 40-44 | Former    | 0 | . |

Year of Follow-up: 2040, Age Group: 45-49  
 Period    Age Group    Smoking Group            N            %

|    |       |           |   |   |
|----|-------|-----------|---|---|
| 50 | 45-49 | Never Any | 0 | . |
| 50 | 45-49 | CC        | 0 | . |
| 50 | 45-49 | Former    | 0 | . |

Year of Follow-up: 2040, Age Group: 50-54  
 Period    Age Group    Smoking Group            N            %

|    |       |           |   |   |
|----|-------|-----------|---|---|
| 50 | 50-54 | Never Any | 0 | . |
| 50 | 50-54 | CC        | 0 | . |
| 50 | 50-54 | Former    | 0 | . |

Year of Follow-up: 2040, Age Group: 55-59  
 Period    Age Group    Smoking Group            N            %

|    |       |           |   |   |
|----|-------|-----------|---|---|
| 50 | 55-59 | Never Any | 0 | . |
| 50 | 55-59 | CC        | 0 | . |
| 50 | 55-59 | Former    | 0 | . |

Year of Follow-up: 2040, Age Group: 60-64  
 Period    Age Group    Smoking Group            N            %

**Results for PHIM for Run 2 (Pessimistic\_Analysis.RTF)**

|                                           |           |               |      |       |
|-------------------------------------------|-----------|---------------|------|-------|
| 50                                        | 60-64     | Never Any     | 4803 | 60.57 |
| 50                                        | 60-64     | CC            | 621  | 7.83  |
| 50                                        | 60-64     | Former        | 2506 | 31.60 |
| Year of Follow-up: 2040, Age Group: 65-69 |           |               |      |       |
| Period                                    | Age Group | Smoking Group | N    | %     |
| 50                                        | 65-69     | Never Any     | 5407 | 64.75 |
| 50                                        | 65-69     | CC            | 538  | 6.44  |
| 50                                        | 65-69     | Former        | 2405 | 28.80 |
| Year of Follow-up: 2040, Age Group: 70-74 |           |               |      |       |
| Period                                    | Age Group | Smoking Group | N    | %     |
| 50                                        | 70-74     | Never Any     | 5181 | 58.92 |
| 50                                        | 70-74     | CC            | 605  | 6.88  |
| 50                                        | 70-74     | Former        | 3007 | 34.20 |
| Year of Follow-up: 2040, Age Group: 75-79 |           |               |      |       |
| Period                                    | Age Group | Smoking Group | N    | %     |
| 50                                        | 75-79     | Never Any     | 5279 | 52.38 |
| 50                                        | 75-79     | CC            | 698  | 6.93  |
| 50                                        | 75-79     | Former        | 4101 | 40.69 |

## Results for PHIM for Run 2 (Pessimistic\_Analysis.RTF)

\*\*\*\*\*

### Main Output for the Tobacco History for Run: 2, Simulation: 1, Scenario: Ecig

| Variable Parameter                           |           | Value              |       |       |               |             |               |                |              |
|----------------------------------------------|-----------|--------------------|-------|-------|---------------|-------------|---------------|----------------|--------------|
| 1. Country                                   |           | US (United States) |       |       |               |             |               |                |              |
| 2. Sex                                       |           | F (Females)        |       |       |               |             |               |                |              |
| 3. Year of start of process                  |           | 1990               |       |       |               |             |               |                |              |
| Year of Follow-up: 1990, Age Group: All Ages |           |                    |       |       |               |             |               |                |              |
| Period                                       | Age Group | Smoking Group      | N     | %     | Ever Quit (N) | Ever Quit % | Mean Yrs Quit | Short Term (n) | Short Term % |
| 0                                            | All Ages  | Never Any          | 47776 | 54.92 |               |             |               |                |              |
| 0                                            | All Ages  | CC                 | 22737 | 26.14 | 0             | 0.00        |               |                |              |
| 0                                            | All Ages  | Ecig               | 0     | 0.00  |               |             |               |                |              |
| 0                                            | All Ages  | Dual               | 0     | 0.00  |               |             |               |                |              |
| 0                                            | All Ages  | Former             | 16484 | 18.95 |               |             | 11.90         | 2815           | 17.08        |
| Year of Follow-up: 1990, Age Group: 18-19    |           |                    |       |       |               |             |               |                |              |
| Period                                       | Age Group | Smoking Group      | N     | %     | Ever Quit (N) | Ever Quit % | Mean Yrs Quit | Short Term (n) | Short Term % |
| 0                                            | 18-19     | Never Any          | 2570  | 78.43 |               |             |               |                |              |
| 0                                            | 18-19     | CC                 | 535   | 16.33 | 0             | 0.00        |               |                |              |
| 0                                            | 18-19     | Ecig               | 0     | 0.00  |               |             |               |                |              |
| 0                                            | 18-19     | Dual               | 0     | 0.00  |               |             |               |                |              |
| 0                                            | 18-19     | Former             | 172   | 5.25  |               |             | 0.20          | 172            | 100.00       |
| Year of Follow-up: 1990, Age Group: 20-24    |           |                    |       |       |               |             |               |                |              |
| Period                                       | Age Group | Smoking Group      | N     | %     | Ever Quit (N) | Ever Quit % | Mean Yrs Quit | Short Term (n) | Short Term % |
| 0                                            | 20-24     | Never Any          | 5354  | 60.89 |               |             |               |                |              |
| 0                                            | 20-24     | CC                 | 2560  | 29.11 | 0             | 0.00        |               |                |              |
| 0                                            | 20-24     | Ecig               | 0     | 0.00  |               |             |               |                |              |
| 0                                            | 20-24     | Dual               | 0     | 0.00  |               |             |               |                |              |
| 0                                            | 20-24     | Former             | 879   | 10.00 |               |             | 1.58          | 420            | 47.78        |
| Year of Follow-up: 1990, Age Group: 25-29    |           |                    |       |       |               |             |               |                |              |
| Period                                       | Age Group | Smoking Group      | N     | %     | Ever Quit (N) | Ever Quit % | Mean Yrs Quit | Short Term (n) | Short Term % |
| 0                                            | 25-29     | Never Any          | 5318  | 52.77 |               |             |               |                |              |
| 0                                            | 25-29     | CC                 | 3335  | 33.09 | 0             | 0.00        |               |                |              |
| 0                                            | 25-29     | Ecig               | 0     | 0.00  |               |             |               |                |              |
| 0                                            | 25-29     | Dual               | 0     | 0.00  |               |             |               |                |              |
| 0                                            | 25-29     | Former             | 1425  | 14.14 |               |             | 3.91          | 404            | 28.35        |
| Year of Follow-up: 1990, Age Group: 30-34    |           |                    |       |       |               |             |               |                |              |
| Period                                       | Age Group | Smoking Group      | N     | %     | Ever Quit (N) | Ever Quit % | Mean Yrs Quit | Short Term (n) | Short Term % |
| 0                                            | 30-34     | Never Any          | 5287  | 50.36 |               |             |               |                |              |
| 0                                            | 30-34     | CC                 | 3326  | 31.68 | 0             | 0.00        |               |                |              |
| 0                                            | 30-34     | Ecig               | 0     | 0.00  |               |             |               |                |              |
| 0                                            | 30-34     | Dual               | 0     | 0.00  |               |             |               |                |              |
| 0                                            | 30-34     | Former             | 1886  | 17.96 |               |             | 4.36          | 566            | 30.01        |
| Year of Follow-up: 1990, Age Group: 35-39    |           |                    |       |       |               |             |               |                |              |
| Period                                       | Age Group | Smoking Group      | N     | %     | Ever Quit (N) | Ever Quit % | Mean Yrs Quit | Short Term (n) | Short Term % |
| 0                                            | 35-39     | Never Any          | 5018  | 52.27 |               |             |               |                |              |
| 0                                            | 35-39     | CC                 | 2653  | 27.64 | 0             | 0.00        |               |                |              |
| 0                                            | 35-39     | Ecig               | 0     | 0.00  |               |             |               |                |              |
| 0                                            | 35-39     | Dual               | 0     | 0.00  |               |             |               |                |              |
| 0                                            | 35-39     | Former             | 1929  | 20.09 |               |             | 7.96          | 324            | 16.80        |
| Year of Follow-up: 1990, Age Group: 40-44    |           |                    |       |       |               |             |               |                |              |
| Period                                       | Age Group | Smoking Group      | N     | %     | Ever Quit (N) | Ever Quit % | Mean Yrs Quit | Short Term (n) | Short Term % |
| 0                                            | 40-44     | Never Any          | 4356  | 51.27 |               |             |               |                |              |
| 0                                            | 40-44     | CC                 | 2397  | 28.21 | 0             | 0.00        |               |                |              |
| 0                                            | 40-44     | Ecig               | 0     | 0.00  |               |             |               |                |              |
| 0                                            | 40-44     | Dual               | 0     | 0.00  |               |             |               |                |              |
| 0                                            | 40-44     | Former             | 1744  | 20.52 |               |             | 7.33          | 339            | 19.44        |
| Year of Follow-up: 1990, Age Group: 45-49    |           |                    |       |       |               |             |               |                |              |
| Period                                       | Age Group | Smoking Group      | N     | %     | Ever Quit (N) | Ever Quit % | Mean Yrs Quit | Short Term (n) | Short Term % |
| 0                                            | 45-49     | Never Any          | 3116  | 47.67 |               |             |               |                |              |
| 0                                            | 45-49     | CC                 | 1875  | 28.69 | 0             | 0.00        |               |                |              |
| 0                                            | 45-49     | Ecig               | 0     | 0.00  |               |             |               |                |              |
| 0                                            | 45-49     | Dual               | 0     | 0.00  |               |             |               |                |              |
| 0                                            | 45-49     | Former             | 1545  | 23.64 |               |             | 12.55         | 194            | 12.56        |
| Year of Follow-up: 1990, Age Group: 50-54    |           |                    |       |       |               |             |               |                |              |
| Period                                       | Age Group | Smoking Group      | N     | %     | Ever Quit (N) | Ever Quit % | Mean Yrs Quit | Short Term (n) | Short Term % |
| 0                                            | 50-54     | Never Any          | 2684  | 48.50 |               |             |               |                |              |
| 0                                            | 50-54     | CC                 | 1572  | 28.41 | 0             | 0.00        |               |                |              |



**Results for PHIM for Run 2 (Pessimistic\_Analysis.RTF)**

|                                              |           |               |       |       |               |             |               |                |              |
|----------------------------------------------|-----------|---------------|-------|-------|---------------|-------------|---------------|----------------|--------------|
| 0                                            | 50-54     | Ecig          | 0     | 0.00  |               |             |               |                |              |
| 0                                            | 50-54     | Dual          | 0     | 0.00  |               |             |               |                |              |
| 0                                            | 50-54     | Former        | 1278  | 23.09 |               |             | 13.28         | 126            | 9.86         |
| Year of Follow-up: 1990, Age Group: 55-59    |           |               |       |       |               |             |               |                |              |
| Period                                       | Age Group | Smoking Group | N     | %     | Ever Quit (N) | Ever Quit % | Mean Yrs Quit | Short Term (n) | Short Term % |
| 0                                            | 55-59     | Never Any     | 2732  | 51.90 |               |             |               |                |              |
| 0                                            | 55-59     | CC            | 1295  | 24.60 | 0             | 0.00        |               |                |              |
| 0                                            | 55-59     | Ecig          | 0     | 0.00  |               |             |               |                |              |
| 0                                            | 55-59     | Dual          | 0     | 0.00  |               |             |               |                |              |
| 0                                            | 55-59     | Former        | 1237  | 23.50 |               |             | 17.26         | 90             | 7.28         |
| Year of Follow-up: 1990, Age Group: 60-64    |           |               |       |       |               |             |               |                |              |
| Period                                       | Age Group | Smoking Group | N     | %     | Ever Quit (N) | Ever Quit % | Mean Yrs Quit | Short Term (n) | Short Term % |
| 0                                            | 60-64     | Never Any     | 3078  | 55.72 |               |             |               |                |              |
| 0                                            | 60-64     | CC            | 1249  | 22.61 | 0             | 0.00        |               |                |              |
| 0                                            | 60-64     | Ecig          | 0     | 0.00  |               |             |               |                |              |
| 0                                            | 60-64     | Dual          | 0     | 0.00  |               |             |               |                |              |
| 0                                            | 60-64     | Former        | 1197  | 21.67 |               |             | 18.28         | 61             | 5.10         |
| Year of Follow-up: 1990, Age Group: 65-69    |           |               |       |       |               |             |               |                |              |
| Period                                       | Age Group | Smoking Group | N     | %     | Ever Quit (N) | Ever Quit % | Mean Yrs Quit | Short Term (n) | Short Term % |
| 0                                            | 65-69     | Never Any     | 3042  | 57.36 |               |             |               |                |              |
| 0                                            | 65-69     | CC            | 976   | 18.40 | 0             | 0.00        |               |                |              |
| 0                                            | 65-69     | Ecig          | 0     | 0.00  |               |             |               |                |              |
| 0                                            | 65-69     | Dual          | 0     | 0.00  |               |             |               |                |              |
| 0                                            | 65-69     | Former        | 1285  | 24.23 |               |             | 20.65         | 68             | 5.29         |
| Year of Follow-up: 1990, Age Group: 70-74    |           |               |       |       |               |             |               |                |              |
| Period                                       | Age Group | Smoking Group | N     | %     | Ever Quit (N) | Ever Quit % | Mean Yrs Quit | Short Term (n) | Short Term % |
| 0                                            | 70-74     | Never Any     | 2738  | 61.05 |               |             |               |                |              |
| 0                                            | 70-74     | CC            | 610   | 13.60 | 0             | 0.00        |               |                |              |
| 0                                            | 70-74     | Ecig          | 0     | 0.00  |               |             |               |                |              |
| 0                                            | 70-74     | Dual          | 0     | 0.00  |               |             |               |                |              |
| 0                                            | 70-74     | Former        | 1137  | 25.35 |               |             | 24.48         | 27             | 2.37         |
| Year of Follow-up: 1990, Age Group: 75-79    |           |               |       |       |               |             |               |                |              |
| Period                                       | Age Group | Smoking Group | N     | %     | Ever Quit (N) | Ever Quit % | Mean Yrs Quit | Short Term (n) | Short Term % |
| 0                                            | 75-79     | Never Any     | 2483  | 68.84 |               |             |               |                |              |
| 0                                            | 75-79     | CC            | 354   | 9.81  | 0             | 0.00        |               |                |              |
| 0                                            | 75-79     | Ecig          | 0     | 0.00  |               |             |               |                |              |
| 0                                            | 75-79     | Dual          | 0     | 0.00  |               |             |               |                |              |
| 0                                            | 75-79     | Former        | 770   | 21.35 |               |             | 24.48         | 24             | 3.12         |
| Year of Follow-up: 1995, Age Group: All Ages |           |               |       |       |               |             |               |                |              |
| Period                                       | Age Group | Smoking Group | N     | %     | Ever Quit (N) | Ever Quit % | Mean Yrs Quit | Short Term (n) | Short Term % |
| 5                                            | All Ages  | Never Any     | 50436 | 55.04 |               |             |               |                |              |
| 5                                            | All Ages  | CC            | 15052 | 16.43 | 0             | 0.00        |               |                |              |
| 5                                            | All Ages  | Ecig          | 7906  | 8.63  |               |             |               |                |              |
| 5                                            | All Ages  | Dual          | 0     | 0.00  |               |             |               |                |              |
| 5                                            | All Ages  | Former        | 18245 | 19.91 |               |             | 14.29         | 1028           | 5.63         |
| Year of Follow-up: 1995, Age Group: 18-19    |           |               |       |       |               |             |               |                |              |
| Period                                       | Age Group | Smoking Group | N     | %     | Ever Quit (N) | Ever Quit % | Mean Yrs Quit | Short Term (n) | Short Term % |
| 5                                            | 18-19     | Never Any     | 2249  | 70.81 |               |             |               |                |              |
| 5                                            | 18-19     | CC            | 276   | 8.69  | 0             | 0.00        |               |                |              |
| 5                                            | 18-19     | Ecig          | 594   | 18.70 |               |             |               |                |              |
| 5                                            | 18-19     | Dual          | 0     | 0.00  |               |             |               |                |              |
| 5                                            | 18-19     | Former        | 57    | 1.79  |               |             | 1.04          | 37             | 64.91        |
| Year of Follow-up: 1995, Age Group: 20-24    |           |               |       |       |               |             |               |                |              |
| Period                                       | Age Group | Smoking Group | N     | %     | Ever Quit (N) | Ever Quit % | Mean Yrs Quit | Short Term (n) | Short Term % |
| 5                                            | 20-24     | Never Any     | 5544  | 66.40 |               |             |               |                |              |
| 5                                            | 20-24     | CC            | 1213  | 14.53 | 0             | 0.00        |               |                |              |
| 5                                            | 20-24     | Ecig          | 1173  | 14.05 |               |             |               |                |              |
| 5                                            | 20-24     | Dual          | 0     | 0.00  |               |             |               |                |              |
| 5                                            | 20-24     | Former        | 420   | 5.03  |               |             | 3.32          | 91             | 21.67        |
| Year of Follow-up: 1995, Age Group: 25-29    |           |               |       |       |               |             |               |                |              |
| Period                                       | Age Group | Smoking Group | N     | %     | Ever Quit (N) | Ever Quit % | Mean Yrs Quit | Short Term (n) | Short Term % |
| 5                                            | 25-29     | Never Any     | 5302  | 60.30 |               |             |               |                |              |
| 5                                            | 25-29     | CC            | 1528  | 17.38 | 0             | 0.00        |               |                |              |
| 5                                            | 25-29     | Ecig          | 964   | 10.96 |               |             |               |                |              |
| 5                                            | 25-29     | Dual          | 0     | 0.00  |               |             |               |                |              |
| 5                                            | 25-29     | Former        | 999   | 11.36 |               |             | 6.02          | 49             | 4.90         |
| Year of Follow-up: 1995, Age Group: 30-34    |           |               |       |       |               |             |               |                |              |
| Period                                       | Age Group | Smoking Group | N     | %     | Ever Quit (N) | Ever Quit % | Mean Yrs Quit | Short Term (n) | Short Term % |

**Results for PHIM for Run 2 (Pessimistic\_Analysis.RTF)**

|                                              |           |               |      |       |               |             |               |                |              |
|----------------------------------------------|-----------|---------------|------|-------|---------------|-------------|---------------|----------------|--------------|
| 5                                            | 30-34     | Never Any     | 5301 | 52.60 |               |             |               |                |              |
| 5                                            | 30-34     | CC            | 1922 | 19.07 | 0             | 0.00        |               |                |              |
| 5                                            | 30-34     | Ecig          | 1253 | 12.43 |               |             |               |                |              |
| 5                                            | 30-34     | Dual          | 0    | 0.00  |               |             |               |                |              |
| 5                                            | 30-34     | Former        | 1602 | 15.90 |               |             | 8.17          | 64             | 4.00         |
| Year of Follow-up: 1995, Age Group: 35-39    |           |               |      |       |               |             |               |                |              |
| Period                                       | Age Group | Smoking Group | N    | %     | Ever Quit (N) | Ever Quit % | Mean Yrs Quit | Short Term (n) | Short Term % |
| 5                                            | 35-39     | Never Any     | 5276 | 50.25 |               |             |               |                |              |
| 5                                            | 35-39     | CC            | 2029 | 19.33 | 0             | 0.00        |               |                |              |
| 5                                            | 35-39     | Ecig          | 1184 | 11.28 |               |             |               |                |              |
| 5                                            | 35-39     | Dual          | 0    | 0.00  |               |             |               |                |              |
| 5                                            | 35-39     | Former        | 2010 | 19.14 |               |             | 8.93          | 40             | 1.99         |
| Year of Follow-up: 1995, Age Group: 40-44    |           |               |      |       |               |             |               |                |              |
| Period                                       | Age Group | Smoking Group | N    | %     | Ever Quit (N) | Ever Quit % | Mean Yrs Quit | Short Term (n) | Short Term % |
| 5                                            | 40-44     | Never Any     | 5018 | 52.27 |               |             |               |                |              |
| 5                                            | 40-44     | CC            | 1610 | 16.77 | 0             | 0.00        |               |                |              |
| 5                                            | 40-44     | Ecig          | 876  | 9.13  |               |             |               |                |              |
| 5                                            | 40-44     | Dual          | 0    | 0.00  |               |             |               |                |              |
| 5                                            | 40-44     | Former        | 2096 | 21.83 |               |             | 12.07         | 73             | 3.48         |
| Year of Follow-up: 1995, Age Group: 45-49    |           |               |      |       |               |             |               |                |              |
| Period                                       | Age Group | Smoking Group | N    | %     | Ever Quit (N) | Ever Quit % | Mean Yrs Quit | Short Term (n) | Short Term % |
| 5                                            | 45-49     | Never Any     | 4356 | 51.27 |               |             |               |                |              |
| 5                                            | 45-49     | CC            | 1404 | 16.52 | 0             | 0.00        |               |                |              |
| 5                                            | 45-49     | Ecig          | 734  | 8.64  |               |             |               |                |              |
| 5                                            | 45-49     | Dual          | 0    | 0.00  |               |             |               |                |              |
| 5                                            | 45-49     | Former        | 2003 | 23.57 |               |             | 10.95         | 124            | 6.19         |
| Year of Follow-up: 1995, Age Group: 50-54    |           |               |      |       |               |             |               |                |              |
| Period                                       | Age Group | Smoking Group | N    | %     | Ever Quit (N) | Ever Quit % | Mean Yrs Quit | Short Term (n) | Short Term % |
| 5                                            | 50-54     | Never Any     | 3116 | 47.67 |               |             |               |                |              |
| 5                                            | 50-54     | CC            | 1067 | 16.32 | 0             | 0.00        |               |                |              |
| 5                                            | 50-54     | Ecig          | 536  | 8.20  |               |             |               |                |              |
| 5                                            | 50-54     | Dual          | 0    | 0.00  |               |             |               |                |              |
| 5                                            | 50-54     | Former        | 1817 | 27.80 |               |             | 15.21         | 119            | 6.55         |
| Year of Follow-up: 1995, Age Group: 55-59    |           |               |      |       |               |             |               |                |              |
| Period                                       | Age Group | Smoking Group | N    | %     | Ever Quit (N) | Ever Quit % | Mean Yrs Quit | Short Term (n) | Short Term % |
| 5                                            | 55-59     | Never Any     | 2684 | 48.50 |               |             |               |                |              |
| 5                                            | 55-59     | CC            | 1039 | 18.77 | 0             | 0.00        |               |                |              |
| 5                                            | 55-59     | Ecig          | 305  | 5.51  |               |             |               |                |              |
| 5                                            | 55-59     | Dual          | 0    | 0.00  |               |             |               |                |              |
| 5                                            | 55-59     | Former        | 1506 | 27.21 |               |             | 15.78         | 100            | 6.64         |
| Year of Follow-up: 1995, Age Group: 60-64    |           |               |      |       |               |             |               |                |              |
| Period                                       | Age Group | Smoking Group | N    | %     | Ever Quit (N) | Ever Quit % | Mean Yrs Quit | Short Term (n) | Short Term % |
| 5                                            | 60-64     | Never Any     | 2732 | 51.90 |               |             |               |                |              |
| 5                                            | 60-64     | CC            | 900  | 17.10 | 0             | 0.00        |               |                |              |
| 5                                            | 60-64     | Ecig          | 182  | 3.46  |               |             |               |                |              |
| 5                                            | 60-64     | Dual          | 0    | 0.00  |               |             |               |                |              |
| 5                                            | 60-64     | Former        | 1450 | 27.55 |               |             | 19.27         | 84             | 5.79         |
| Year of Follow-up: 1995, Age Group: 65-69    |           |               |      |       |               |             |               |                |              |
| Period                                       | Age Group | Smoking Group | N    | %     | Ever Quit (N) | Ever Quit % | Mean Yrs Quit | Short Term (n) | Short Term % |
| 5                                            | 65-69     | Never Any     | 3078 | 55.72 |               |             |               |                |              |
| 5                                            | 65-69     | CC            | 866  | 15.68 | 0             | 0.00        |               |                |              |
| 5                                            | 65-69     | Ecig          | 95   | 1.72  |               |             |               |                |              |
| 5                                            | 65-69     | Dual          | 0    | 0.00  |               |             |               |                |              |
| 5                                            | 65-69     | Former        | 1485 | 26.88 |               |             | 19.19         | 97             | 6.53         |
| Year of Follow-up: 1995, Age Group: 70-74    |           |               |      |       |               |             |               |                |              |
| Period                                       | Age Group | Smoking Group | N    | %     | Ever Quit (N) | Ever Quit % | Mean Yrs Quit | Short Term (n) | Short Term % |
| 5                                            | 70-74     | Never Any     | 3042 | 57.36 |               |             |               |                |              |
| 5                                            | 70-74     | CC            | 743  | 14.01 | 0             | 0.00        |               |                |              |
| 5                                            | 70-74     | Ecig          | 10   | 0.19  |               |             |               |                |              |
| 5                                            | 70-74     | Dual          | 0    | 0.00  |               |             |               |                |              |
| 5                                            | 70-74     | Former        | 1508 | 28.44 |               |             | 22.14         | 87             | 5.77         |
| Year of Follow-up: 1995, Age Group: 75-79    |           |               |      |       |               |             |               |                |              |
| Period                                       | Age Group | Smoking Group | N    | %     | Ever Quit (N) | Ever Quit % | Mean Yrs Quit | Short Term (n) | Short Term % |
| 5                                            | 75-79     | Never Any     | 2738 | 61.05 |               |             |               |                |              |
| 5                                            | 75-79     | CC            | 455  | 10.14 | 0             | 0.00        |               |                |              |
| 5                                            | 75-79     | Ecig          | 0    | 0.00  |               |             |               |                |              |
| 5                                            | 75-79     | Dual          | 0    | 0.00  |               |             |               |                |              |
| 5                                            | 75-79     | Former        | 1292 | 28.81 |               |             | 26.18         | 63             | 4.88         |
| Year of Follow-up: 2000, Age Group: All Ages |           |               |      |       |               |             |               |                |              |

**Results for PHIM for Run 2 (Pessimistic\_Analysis.RTF)**

| Period                                    | Age Group | Smoking Group | N     | %     | Ever Quit (N) | Ever Quit % | Mean Yrs Quit | Short Term (n) | Short Term % |
|-------------------------------------------|-----------|---------------|-------|-------|---------------|-------------|---------------|----------------|--------------|
| 10                                        | All Ages  | Never Any     | 49386 | 53.73 |               |             |               |                |              |
| 10                                        | All Ages  | CC            | 9072  | 9.87  | 0             | 0.00        |               |                |              |
| 10                                        | All Ages  | Ecig          | 13000 | 14.14 |               |             |               |                |              |
| 10                                        | All Ages  | Dual          | 0     | 0.00  |               |             |               |                |              |
| 10                                        | All Ages  | Former        | 20450 | 22.25 |               |             | 15.60         | 1372           | 6.71         |
| Year of Follow-up: 2000, Age Group: 18-19 |           |               |       |       |               |             |               |                |              |
| Period                                    | Age Group | Smoking Group | N     | %     | Ever Quit (N) | Ever Quit % | Mean Yrs Quit | Short Term (n) | Short Term % |
| 10                                        | 18-19     | Never Any     | 0     | .     |               |             |               |                |              |
| 10                                        | 18-19     | CC            | 0     | .     | 0             | .           |               |                |              |
| 10                                        | 18-19     | Ecig          | 0     | .     |               |             |               |                |              |
| 10                                        | 18-19     | Dual          | 0     | .     |               |             |               |                |              |
| 10                                        | 18-19     | Former        | 0     | .     |               |             |               | 0              | .            |
| Year of Follow-up: 2000, Age Group: 20-24 |           |               |       |       |               |             |               |                |              |
| Period                                    | Age Group | Smoking Group | N     | %     | Ever Quit (N) | Ever Quit % | Mean Yrs Quit | Short Term (n) | Short Term % |
| 10                                        | 20-24     | Never Any     | 4505  | 56.81 |               |             |               |                |              |
| 10                                        | 20-24     | CC            | 580   | 7.31  | 0             | 0.00        |               |                |              |
| 10                                        | 20-24     | Ecig          | 2296  | 28.95 |               |             |               |                |              |
| 10                                        | 20-24     | Dual          | 0     | 0.00  |               |             |               |                |              |
| 10                                        | 20-24     | Former        | 549   | 6.92  |               |             | 3.53          | 150            | 27.32        |
| Year of Follow-up: 2000, Age Group: 25-29 |           |               |       |       |               |             |               |                |              |
| Period                                    | Age Group | Smoking Group | N     | %     | Ever Quit (N) | Ever Quit % | Mean Yrs Quit | Short Term (n) | Short Term % |
| 10                                        | 25-29     | Never Any     | 5140  | 61.56 |               |             |               |                |              |
| 10                                        | 25-29     | CC            | 711   | 8.51  | 0             | 0.00        |               |                |              |
| 10                                        | 25-29     | Ecig          | 1817  | 21.76 |               |             |               |                |              |
| 10                                        | 25-29     | Dual          | 0     | 0.00  |               |             |               |                |              |
| 10                                        | 25-29     | Former        | 682   | 8.17  |               |             | 5.88          | 94             | 13.78        |
| Year of Follow-up: 2000, Age Group: 30-34 |           |               |       |       |               |             |               |                |              |
| Period                                    | Age Group | Smoking Group | N     | %     | Ever Quit (N) | Ever Quit % | Mean Yrs Quit | Short Term (n) | Short Term % |
| 10                                        | 30-34     | Never Any     | 5169  | 58.79 |               |             |               |                |              |
| 10                                        | 30-34     | CC            | 856   | 9.74  | 0             | 0.00        |               |                |              |
| 10                                        | 30-34     | Ecig          | 1579  | 17.96 |               |             |               |                |              |
| 10                                        | 30-34     | Dual          | 0     | 0.00  |               |             |               |                |              |
| 10                                        | 30-34     | Former        | 1189  | 13.52 |               |             | 9.57          | 70             | 5.89         |
| Year of Follow-up: 2000, Age Group: 35-39 |           |               |       |       |               |             |               |                |              |
| Period                                    | Age Group | Smoking Group | N     | %     | Ever Quit (N) | Ever Quit % | Mean Yrs Quit | Short Term (n) | Short Term % |
| 10                                        | 35-39     | Never Any     | 5270  | 52.29 |               |             |               |                |              |
| 10                                        | 35-39     | CC            | 1115  | 11.06 | 0             | 0.00        |               |                |              |
| 10                                        | 35-39     | Ecig          | 1904  | 18.89 |               |             |               |                |              |
| 10                                        | 35-39     | Dual          | 0     | 0.00  |               |             |               |                |              |
| 10                                        | 35-39     | Former        | 1789  | 17.75 |               |             | 11.98         | 87             | 4.86         |
| Year of Follow-up: 2000, Age Group: 40-44 |           |               |       |       |               |             |               |                |              |
| Period                                    | Age Group | Smoking Group | N     | %     | Ever Quit (N) | Ever Quit % | Mean Yrs Quit | Short Term (n) | Short Term % |
| 10                                        | 40-44     | Never Any     | 5276  | 50.25 |               |             |               |                |              |
| 10                                        | 40-44     | CC            | 1227  | 11.69 | 0             | 0.00        |               |                |              |
| 10                                        | 40-44     | Ecig          | 1749  | 16.66 |               |             |               |                |              |
| 10                                        | 40-44     | Dual          | 0     | 0.00  |               |             |               |                |              |
| 10                                        | 40-44     | Former        | 2247  | 21.40 |               |             | 12.63         | 115            | 5.12         |
| Year of Follow-up: 2000, Age Group: 45-49 |           |               |       |       |               |             |               |                |              |
| Period                                    | Age Group | Smoking Group | N     | %     | Ever Quit (N) | Ever Quit % | Mean Yrs Quit | Short Term (n) | Short Term % |
| 10                                        | 45-49     | Never Any     | 5018  | 52.27 |               |             |               |                |              |
| 10                                        | 45-49     | CC            | 949   | 9.89  | 0             | 0.00        |               |                |              |
| 10                                        | 45-49     | Ecig          | 1275  | 13.28 |               |             |               |                |              |
| 10                                        | 45-49     | Dual          | 0     | 0.00  |               |             |               |                |              |
| 10                                        | 45-49     | Former        | 2358  | 24.56 |               |             | 15.37         | 118            | 5.00         |
| Year of Follow-up: 2000, Age Group: 50-54 |           |               |       |       |               |             |               |                |              |
| Period                                    | Age Group | Smoking Group | N     | %     | Ever Quit (N) | Ever Quit % | Mean Yrs Quit | Short Term (n) | Short Term % |
| 10                                        | 50-54     | Never Any     | 4356  | 51.27 |               |             |               |                |              |
| 10                                        | 50-54     | CC            | 772   | 9.09  | 0             | 0.00        |               |                |              |
| 10                                        | 50-54     | Ecig          | 1029  | 12.11 |               |             |               |                |              |
| 10                                        | 50-54     | Dual          | 0     | 0.00  |               |             |               |                |              |
| 10                                        | 50-54     | Former        | 2340  | 27.54 |               |             | 13.93         | 130            | 5.56         |
| Year of Follow-up: 2000, Age Group: 55-59 |           |               |       |       |               |             |               |                |              |
| Period                                    | Age Group | Smoking Group | N     | %     | Ever Quit (N) | Ever Quit % | Mean Yrs Quit | Short Term (n) | Short Term % |
| 10                                        | 55-59     | Never Any     | 3116  | 47.67 |               |             |               |                |              |
| 10                                        | 55-59     | CC            | 614   | 9.39  | 0             | 0.00        |               |                |              |
| 10                                        | 55-59     | Ecig          | 678   | 10.37 |               |             |               |                |              |
| 10                                        | 55-59     | Dual          | 0     | 0.00  |               |             |               |                |              |

**Results for PHIM for Run 2 (Pessimistic\_Analysis.RTF)**

|                                              |           |               |       |       |               |             |               |                |              |
|----------------------------------------------|-----------|---------------|-------|-------|---------------|-------------|---------------|----------------|--------------|
| 10                                           | 55-59     | Former        | 2128  | 32.56 |               |             | 17.55         | 123            | 5.78         |
| Year of Follow-up: 2000, Age Group: 60-64    |           |               |       |       |               |             |               |                |              |
| Period                                       | Age Group | Smoking Group | N     | %     | Ever Quit (N) | Ever Quit % | Mean Yrs Quit | Short Term (n) | Short Term % |
| 10                                           | 60-64     | Never Any     | 2684  | 48.50 |               |             |               |                |              |
| 10                                           | 60-64     | CC            | 661   | 11.94 | 0             | 0.00        |               |                |              |
| 10                                           | 60-64     | Ecig          | 377   | 6.81  |               |             |               |                |              |
| 10                                           | 60-64     | Dual          | 0     | 0.00  |               |             |               |                |              |
| 10                                           | 60-64     | Former        | 1812  | 32.74 |               |             | 17.58         | 137            | 7.56         |
| Year of Follow-up: 2000, Age Group: 65-69    |           |               |       |       |               |             |               |                |              |
| Period                                       | Age Group | Smoking Group | N     | %     | Ever Quit (N) | Ever Quit % | Mean Yrs Quit | Short Term (n) | Short Term % |
| 10                                           | 65-69     | Never Any     | 2732  | 51.90 |               |             |               |                |              |
| 10                                           | 65-69     | CC            | 581   | 11.04 | 0             | 0.00        |               |                |              |
| 10                                           | 65-69     | Ecig          | 201   | 3.82  |               |             |               |                |              |
| 10                                           | 65-69     | Dual          | 0     | 0.00  |               |             |               |                |              |
| 10                                           | 65-69     | Former        | 1750  | 33.24 |               |             | 20.45         | 112            | 6.40         |
| Year of Follow-up: 2000, Age Group: 70-74    |           |               |       |       |               |             |               |                |              |
| Period                                       | Age Group | Smoking Group | N     | %     | Ever Quit (N) | Ever Quit % | Mean Yrs Quit | Short Term (n) | Short Term % |
| 10                                           | 70-74     | Never Any     | 3078  | 55.72 |               |             |               |                |              |
| 10                                           | 70-74     | CC            | 558   | 10.10 | 0             | 0.00        |               |                |              |
| 10                                           | 70-74     | Ecig          | 86    | 1.56  |               |             |               |                |              |
| 10                                           | 70-74     | Dual          | 0     | 0.00  |               |             |               |                |              |
| 10                                           | 70-74     | Former        | 1802  | 32.62 |               |             | 20.28         | 132            | 7.33         |
| Year of Follow-up: 2000, Age Group: 75-79    |           |               |       |       |               |             |               |                |              |
| Period                                       | Age Group | Smoking Group | N     | %     | Ever Quit (N) | Ever Quit % | Mean Yrs Quit | Short Term (n) | Short Term % |
| 10                                           | 75-79     | Never Any     | 3042  | 57.36 |               |             |               |                |              |
| 10                                           | 75-79     | CC            | 448   | 8.45  | 0             | 0.00        |               |                |              |
| 10                                           | 75-79     | Ecig          | 9     | 0.17  |               |             |               |                |              |
| 10                                           | 75-79     | Dual          | 0     | 0.00  |               |             |               |                |              |
| 10                                           | 75-79     | Former        | 1804  | 34.02 |               |             | 23.03         | 104            | 5.76         |
| Year of Follow-up: 2005, Age Group: All Ages |           |               |       |       |               |             |               |                |              |
| Period                                       | Age Group | Smoking Group | N     | %     | Ever Quit (N) | Ever Quit % | Mean Yrs Quit | Short Term (n) | Short Term % |
| 15                                           | All Ages  | Never Any     | 45867 | 52.96 |               |             |               |                |              |
| 15                                           | All Ages  | CC            | 5423  | 6.26  | 0             | 0.00        |               |                |              |
| 15                                           | All Ages  | Ecig          | 14616 | 16.88 |               |             |               |                |              |
| 15                                           | All Ages  | Dual          | 0     | 0.00  |               |             |               |                |              |
| 15                                           | All Ages  | Former        | 20699 | 23.90 |               |             | 18.13         | 737            | 3.56         |
| Year of Follow-up: 2005, Age Group: 18-19    |           |               |       |       |               |             |               |                |              |
| Period                                       | Age Group | Smoking Group | N     | %     | Ever Quit (N) | Ever Quit % | Mean Yrs Quit | Short Term (n) | Short Term % |
| 15                                           | 18-19     | Never Any     | 0     | .     |               |             |               |                |              |
| 15                                           | 18-19     | CC            | 0     | .     | 0             | .           |               |                |              |
| 15                                           | 18-19     | Ecig          | 0     | .     |               |             |               |                |              |
| 15                                           | 18-19     | Dual          | 0     | .     |               |             |               |                |              |
| 15                                           | 18-19     | Former        | 0     | .     |               |             | .             | 0              | .            |
| Year of Follow-up: 2005, Age Group: 20-24    |           |               |       |       |               |             |               |                |              |
| Period                                       | Age Group | Smoking Group | N     | %     | Ever Quit (N) | Ever Quit % | Mean Yrs Quit | Short Term (n) | Short Term % |
| 15                                           | 20-24     | Never Any     | 0     | .     |               |             |               |                |              |
| 15                                           | 20-24     | CC            | 0     | .     | 0             | .           |               |                |              |
| 15                                           | 20-24     | Ecig          | 0     | .     |               |             |               |                |              |
| 15                                           | 20-24     | Dual          | 0     | .     |               |             |               |                |              |
| 15                                           | 20-24     | Former        | 0     | .     |               |             | .             | 0              | .            |
| Year of Follow-up: 2005, Age Group: 25-29    |           |               |       |       |               |             |               |                |              |
| Period                                       | Age Group | Smoking Group | N     | %     | Ever Quit (N) | Ever Quit % | Mean Yrs Quit | Short Term (n) | Short Term % |
| 15                                           | 25-29     | Never Any     | 4174  | 52.64 |               |             |               |                |              |
| 15                                           | 25-29     | CC            | 341   | 4.30  | 0             | 0.00        |               |                |              |
| 15                                           | 25-29     | Ecig          | 2625  | 33.10 |               |             |               |                |              |
| 15                                           | 25-29     | Dual          | 0     | 0.00  |               |             |               |                |              |
| 15                                           | 25-29     | Former        | 790   | 9.96  |               |             | 6.60          | 90             | 11.39        |
| Year of Follow-up: 2005, Age Group: 30-34    |           |               |       |       |               |             |               |                |              |
| Period                                       | Age Group | Smoking Group | N     | %     | Ever Quit (N) | Ever Quit % | Mean Yrs Quit | Short Term (n) | Short Term % |
| 15                                           | 30-34     | Never Any     | 5026  | 60.19 |               |             |               |                |              |
| 15                                           | 30-34     | CC            | 410   | 4.91  | 0             | 0.00        |               |                |              |
| 15                                           | 30-34     | Ecig          | 2088  | 25.01 |               |             |               |                |              |
| 15                                           | 30-34     | Dual          | 0     | 0.00  |               |             |               |                |              |
| 15                                           | 30-34     | Former        | 826   | 9.89  |               |             | 9.38          | 42             | 5.08         |
| Year of Follow-up: 2005, Age Group: 35-39    |           |               |       |       |               |             |               |                |              |
| Period                                       | Age Group | Smoking Group | N     | %     | Ever Quit (N) | Ever Quit % | Mean Yrs Quit | Short Term (n) | Short Term % |
| 15                                           | 35-39     | Never Any     | 5137  | 58.42 |               |             |               |                |              |
| 15                                           | 35-39     | CC            | 503   | 5.72  | 0             | 0.00        |               |                |              |

**Results for PHIM for Run 2 (Pessimistic\_Analysis.RTF)**

|                                              |           |               |       |       |               |             |               |                |              |
|----------------------------------------------|-----------|---------------|-------|-------|---------------|-------------|---------------|----------------|--------------|
| 15                                           | 35-39     | Ecig          | 1854  | 21.08 |               |             |               |                |              |
| 15                                           | 35-39     | Dual          | 0     | 0.00  |               |             |               |                |              |
| 15                                           | 35-39     | Former        | 1299  | 14.77 |               |             | 13.52         | 43             | 3.31         |
| Year of Follow-up: 2005, Age Group: 40-44    |           |               |       |       |               |             |               |                |              |
| Period                                       | Age Group | Smoking Group | N     | %     | Ever Quit (N) | Ever Quit % | Mean Yrs Quit | Short Term (n) | Short Term % |
| 15                                           | 40-44     | Never Any     | 5270  | 52.29 |               |             |               |                |              |
| 15                                           | 40-44     | CC            | 674   | 6.69  | 0             | 0.00        |               |                |              |
| 15                                           | 40-44     | Ecig          | 2168  | 21.51 |               |             |               |                |              |
| 15                                           | 40-44     | Dual          | 0     | 0.00  |               |             |               |                |              |
| 15                                           | 40-44     | Former        | 1966  | 19.51 |               |             | 15.64         | 74             | 3.76         |
| Year of Follow-up: 2005, Age Group: 45-49    |           |               |       |       |               |             |               |                |              |
| Period                                       | Age Group | Smoking Group | N     | %     | Ever Quit (N) | Ever Quit % | Mean Yrs Quit | Short Term (n) | Short Term % |
| 15                                           | 45-49     | Never Any     | 5276  | 50.25 |               |             |               |                |              |
| 15                                           | 45-49     | CC            | 757   | 7.21  | 0             | 0.00        |               |                |              |
| 15                                           | 45-49     | Ecig          | 2017  | 19.21 |               |             |               |                |              |
| 15                                           | 45-49     | Dual          | 0     | 0.00  |               |             |               |                |              |
| 15                                           | 45-49     | Former        | 2449  | 23.33 |               |             | 16.34         | 91             | 3.72         |
| Year of Follow-up: 2005, Age Group: 50-54    |           |               |       |       |               |             |               |                |              |
| Period                                       | Age Group | Smoking Group | N     | %     | Ever Quit (N) | Ever Quit % | Mean Yrs Quit | Short Term (n) | Short Term % |
| 15                                           | 50-54     | Never Any     | 5018  | 52.27 |               |             |               |                |              |
| 15                                           | 50-54     | CC            | 583   | 6.07  | 0             | 0.00        |               |                |              |
| 15                                           | 50-54     | Ecig          | 1428  | 14.88 |               |             |               |                |              |
| 15                                           | 50-54     | Dual          | 0     | 0.00  |               |             |               |                |              |
| 15                                           | 50-54     | Former        | 2571  | 26.78 |               |             | 18.87         | 69             | 2.68         |
| Year of Follow-up: 2005, Age Group: 55-59    |           |               |       |       |               |             |               |                |              |
| Period                                       | Age Group | Smoking Group | N     | %     | Ever Quit (N) | Ever Quit % | Mean Yrs Quit | Short Term (n) | Short Term % |
| 15                                           | 55-59     | Never Any     | 4356  | 51.27 |               |             |               |                |              |
| 15                                           | 55-59     | CC            | 510   | 6.00  | 0             | 0.00        |               |                |              |
| 15                                           | 55-59     | Ecig          | 1124  | 13.23 |               |             |               |                |              |
| 15                                           | 55-59     | Dual          | 0     | 0.00  |               |             |               |                |              |
| 15                                           | 55-59     | Former        | 2507  | 29.50 |               |             | 17.82         | 55             | 2.19         |
| Year of Follow-up: 2005, Age Group: 60-64    |           |               |       |       |               |             |               |                |              |
| Period                                       | Age Group | Smoking Group | N     | %     | Ever Quit (N) | Ever Quit % | Mean Yrs Quit | Short Term (n) | Short Term % |
| 15                                           | 60-64     | Never Any     | 3116  | 47.67 |               |             |               |                |              |
| 15                                           | 60-64     | CC            | 423   | 6.47  | 0             | 0.00        |               |                |              |
| 15                                           | 60-64     | Ecig          | 686   | 10.50 |               |             |               |                |              |
| 15                                           | 60-64     | Dual          | 0     | 0.00  |               |             |               |                |              |
| 15                                           | 60-64     | Former        | 2311  | 35.36 |               |             | 20.91         | 81             | 3.50         |
| Year of Follow-up: 2005, Age Group: 65-69    |           |               |       |       |               |             |               |                |              |
| Period                                       | Age Group | Smoking Group | N     | %     | Ever Quit (N) | Ever Quit % | Mean Yrs Quit | Short Term (n) | Short Term % |
| 15                                           | 65-69     | Never Any     | 2684  | 48.50 |               |             |               |                |              |
| 15                                           | 65-69     | CC            | 457   | 8.26  | 0             | 0.00        |               |                |              |
| 15                                           | 65-69     | Ecig          | 374   | 6.76  |               |             |               |                |              |
| 15                                           | 65-69     | Dual          | 0     | 0.00  |               |             |               |                |              |
| 15                                           | 65-69     | Former        | 2019  | 36.48 |               |             | 20.52         | 55             | 2.72         |
| Year of Follow-up: 2005, Age Group: 70-74    |           |               |       |       |               |             |               |                |              |
| Period                                       | Age Group | Smoking Group | N     | %     | Ever Quit (N) | Ever Quit % | Mean Yrs Quit | Short Term (n) | Short Term % |
| 15                                           | 70-74     | Never Any     | 2732  | 51.90 |               |             |               |                |              |
| 15                                           | 70-74     | CC            | 387   | 7.35  | 0             | 0.00        |               |                |              |
| 15                                           | 70-74     | Ecig          | 177   | 3.36  |               |             |               |                |              |
| 15                                           | 70-74     | Dual          | 0     | 0.00  |               |             |               |                |              |
| 15                                           | 70-74     | Former        | 1968  | 37.39 |               |             | 22.87         | 77             | 3.91         |
| Year of Follow-up: 2005, Age Group: 75-79    |           |               |       |       |               |             |               |                |              |
| Period                                       | Age Group | Smoking Group | N     | %     | Ever Quit (N) | Ever Quit % | Mean Yrs Quit | Short Term (n) | Short Term % |
| 15                                           | 75-79     | Never Any     | 3078  | 55.72 |               |             |               |                |              |
| 15                                           | 75-79     | CC            | 378   | 6.84  | 0             | 0.00        |               |                |              |
| 15                                           | 75-79     | Ecig          | 75    | 1.36  |               |             |               |                |              |
| 15                                           | 75-79     | Dual          | 0     | 0.00  |               |             |               |                |              |
| 15                                           | 75-79     | Former        | 1993  | 36.08 |               |             | 23.08         | 60             | 3.01         |
| Year of Follow-up: 2010, Age Group: All Ages |           |               |       |       |               |             |               |                |              |
| Period                                       | Age Group | Smoking Group | N     | %     | Ever Quit (N) | Ever Quit % | Mean Yrs Quit | Short Term (n) | Short Term % |
| 20                                           | All Ages  | Never Any     | 42596 | 52.54 |               |             |               |                |              |
| 20                                           | All Ages  | CC            | 3145  | 3.88  | 0             | 0.00        |               |                |              |
| 20                                           | All Ages  | Ecig          | 14615 | 18.03 |               |             |               |                |              |
| 20                                           | All Ages  | Dual          | 0     | 0.00  |               |             |               |                |              |
| 20                                           | All Ages  | Former        | 20725 | 25.56 |               |             | 20.58         | 862            | 4.16         |
| Year of Follow-up: 2010, Age Group: 18-19    |           |               |       |       |               |             |               |                |              |
| Period                                       | Age Group | Smoking Group | N     | %     | Ever Quit (N) | Ever Quit % | Mean Yrs Quit | Short Term (n) | Short Term % |

**Results for PHIM for Run 2 (Pessimistic\_Analysis.RTF)**

|                                           |           |               |      |       |               |             |               |                |              |
|-------------------------------------------|-----------|---------------|------|-------|---------------|-------------|---------------|----------------|--------------|
| 20                                        | 18-19     | Never Any     | 0    | .     |               |             |               |                |              |
| 20                                        | 18-19     | CC            | 0    | .     | 0             | .           |               |                |              |
| 20                                        | 18-19     | Ecig          | 0    | .     |               |             |               |                |              |
| 20                                        | 18-19     | Dual          | 0    | .     |               |             |               |                |              |
| 20                                        | 18-19     | Former        | 0    | .     |               |             | 0             | .              |              |
| Year of Follow-up: 2010, Age Group: 20-24 |           |               |      |       |               |             |               |                |              |
| Period                                    | Age Group | Smoking Group | N    | %     | Ever Quit (N) | Ever Quit % | Mean Yrs Quit | Short Term (n) | Short Term % |
| 20                                        | 20-24     | Never Any     | 0    | .     |               |             |               |                |              |
| 20                                        | 20-24     | CC            | 0    | .     | 0             | .           |               |                |              |
| 20                                        | 20-24     | Ecig          | 0    | .     |               |             |               |                |              |
| 20                                        | 20-24     | Dual          | 0    | .     |               |             |               |                |              |
| 20                                        | 20-24     | Former        | 0    | .     |               |             |               | 0              | .            |
| Year of Follow-up: 2010, Age Group: 25-29 |           |               |      |       |               |             |               |                |              |
| Period                                    | Age Group | Smoking Group | N    | %     | Ever Quit (N) | Ever Quit % | Mean Yrs Quit | Short Term (n) | Short Term % |
| 20                                        | 25-29     | Never Any     | 0    | .     |               |             |               |                |              |
| 20                                        | 25-29     | CC            | 0    | .     | 0             | .           |               |                |              |
| 20                                        | 25-29     | Ecig          | 0    | .     |               |             |               |                |              |
| 20                                        | 25-29     | Dual          | 0    | .     |               |             |               |                |              |
| 20                                        | 25-29     | Former        | 0    | .     |               |             |               | 0              | .            |
| Year of Follow-up: 2010, Age Group: 30-34 |           |               |      |       |               |             |               |                |              |
| Period                                    | Age Group | Smoking Group | N    | %     | Ever Quit (N) | Ever Quit % | Mean Yrs Quit | Short Term (n) | Short Term % |
| 20                                        | 30-34     | Never Any     | 4039 | 50.93 |               |             |               |                |              |
| 20                                        | 30-34     | CC            | 177  | 2.23  | 0             | 0.00        |               |                |              |
| 20                                        | 30-34     | Ecig          | 2697 | 34.01 |               |             |               |                |              |
| 20                                        | 30-34     | Dual          | 0    | 0.00  |               |             |               |                |              |
| 20                                        | 30-34     | Former        | 1017 | 12.82 |               |             | 9.38          | 105            | 10.32        |
| Year of Follow-up: 2010, Age Group: 35-39 |           |               |      |       |               |             |               |                |              |
| Period                                    | Age Group | Smoking Group | N    | %     | Ever Quit (N) | Ever Quit % | Mean Yrs Quit | Short Term (n) | Short Term % |
| 20                                        | 35-39     | Never Any     | 4968 | 59.50 |               |             |               |                |              |
| 20                                        | 35-39     | CC            | 230  | 2.75  | 0             | 0.00        |               |                |              |
| 20                                        | 35-39     | Ecig          | 2138 | 25.60 |               |             |               |                |              |
| 20                                        | 35-39     | Dual          | 0    | 0.00  |               |             |               |                |              |
| 20                                        | 35-39     | Former        | 1014 | 12.14 |               |             | 12.07         | 72             | 7.10         |
| Year of Follow-up: 2010, Age Group: 40-44 |           |               |      |       |               |             |               |                |              |
| Period                                    | Age Group | Smoking Group | N    | %     | Ever Quit (N) | Ever Quit % | Mean Yrs Quit | Short Term (n) | Short Term % |
| 20                                        | 40-44     | Never Any     | 5137 | 58.42 |               |             |               |                |              |
| 20                                        | 40-44     | CC            | 274  | 3.12  | 0             | 0.00        |               |                |              |
| 20                                        | 40-44     | Ecig          | 1909 | 21.71 |               |             |               |                |              |
| 20                                        | 40-44     | Dual          | 0    | 0.00  |               |             |               |                |              |
| 20                                        | 40-44     | Former        | 1473 | 16.75 |               |             | 16.55         | 77             | 5.23         |
| Year of Follow-up: 2010, Age Group: 45-49 |           |               |      |       |               |             |               |                |              |
| Period                                    | Age Group | Smoking Group | N    | %     | Ever Quit (N) | Ever Quit % | Mean Yrs Quit | Short Term (n) | Short Term % |
| 20                                        | 45-49     | Never Any     | 5270 | 52.29 |               |             |               |                |              |
| 20                                        | 45-49     | CC            | 407  | 4.04  | 0             | 0.00        |               |                |              |
| 20                                        | 45-49     | Ecig          | 2262 | 22.44 |               |             |               |                |              |
| 20                                        | 45-49     | Dual          | 0    | 0.00  |               |             |               |                |              |
| 20                                        | 45-49     | Former        | 2139 | 21.22 |               |             | 19.12         | 74             | 3.46         |
| Year of Follow-up: 2010, Age Group: 50-54 |           |               |      |       |               |             |               |                |              |
| Period                                    | Age Group | Smoking Group | N    | %     | Ever Quit (N) | Ever Quit % | Mean Yrs Quit | Short Term (n) | Short Term % |
| 20                                        | 50-54     | Never Any     | 5276 | 50.25 |               |             |               |                |              |
| 20                                        | 50-54     | CC            | 458  | 4.36  | 0             | 0.00        |               |                |              |
| 20                                        | 50-54     | Ecig          | 2072 | 19.74 |               |             |               |                |              |
| 20                                        | 50-54     | Dual          | 0    | 0.00  |               |             |               |                |              |
| 20                                        | 50-54     | Former        | 2693 | 25.65 |               |             | 19.56         | 123            | 4.57         |
| Year of Follow-up: 2010, Age Group: 55-59 |           |               |      |       |               |             |               |                |              |
| Period                                    | Age Group | Smoking Group | N    | %     | Ever Quit (N) | Ever Quit % | Mean Yrs Quit | Short Term (n) | Short Term % |
| 20                                        | 55-59     | Never Any     | 5018 | 52.27 |               |             |               |                |              |
| 20                                        | 55-59     | CC            | 386  | 4.02  | 0             | 0.00        |               |                |              |
| 20                                        | 55-59     | Ecig          | 1434 | 14.94 |               |             |               |                |              |
| 20                                        | 55-59     | Dual          | 0    | 0.00  |               |             |               |                |              |
| 20                                        | 55-59     | Former        | 2762 | 28.77 |               |             | 22.37         | 68             | 2.46         |
| Year of Follow-up: 2010, Age Group: 60-64 |           |               |      |       |               |             |               |                |              |
| Period                                    | Age Group | Smoking Group | N    | %     | Ever Quit (N) | Ever Quit % | Mean Yrs Quit | Short Term (n) | Short Term % |
| 20                                        | 60-64     | Never Any     | 4356 | 51.27 |               |             |               |                |              |
| 20                                        | 60-64     | CC            | 334  | 3.93  | 0             | 0.00        |               |                |              |
| 20                                        | 60-64     | Ecig          | 1049 | 12.35 |               |             |               |                |              |
| 20                                        | 60-64     | Dual          | 0    | 0.00  |               |             |               |                |              |
| 20                                        | 60-64     | Former        | 2758 | 32.46 |               |             | 20.89         | 129            | 4.68         |
| Year of Follow-up: 2010, Age Group: 65-69 |           |               |      |       |               |             |               |                |              |

**Results for PHIM for Run 2 (Pessimistic\_Analysis.RTF)**

| Period                                       | Age Group | Smoking Group | N     | %     | Ever Quit (N) | Ever Quit % | Mean Yrs Quit | Short Term (n) | Short Term % |
|----------------------------------------------|-----------|---------------|-------|-------|---------------|-------------|---------------|----------------|--------------|
| 20                                           | 65-69     | Never Any     | 3116  | 47.67 |               |             |               |                |              |
| 20                                           | 65-69     | CC            | 276   | 4.22  | 0             | 0.00        |               |                |              |
| 20                                           | 65-69     | Ecig          | 583   | 8.92  |               |             |               |                |              |
| 20                                           | 65-69     | Dual          | 0     | 0.00  |               |             |               |                |              |
| 20                                           | 65-69     | Former        | 2561  | 39.18 |               |             | 23.59         | 90             | 3.51         |
| Year of Follow-up: 2010, Age Group: 70-74    |           |               |       |       |               |             |               |                |              |
| Period                                       | Age Group | Smoking Group | N     | %     | Ever Quit (N) | Ever Quit % | Mean Yrs Quit | Short Term (n) | Short Term % |
| 20                                           | 70-74     | Never Any     | 2684  | 48.50 |               |             |               |                |              |
| 20                                           | 70-74     | CC            | 327   | 5.91  | 0             | 0.00        |               |                |              |
| 20                                           | 70-74     | Ecig          | 333   | 6.02  |               |             |               |                |              |
| 20                                           | 70-74     | Dual          | 0     | 0.00  |               |             |               |                |              |
| 20                                           | 70-74     | Former        | 2190  | 39.57 |               |             | 23.68         | 64             | 2.92         |
| Year of Follow-up: 2010, Age Group: 75-79    |           |               |       |       |               |             |               |                |              |
| Period                                       | Age Group | Smoking Group | N     | %     | Ever Quit (N) | Ever Quit % | Mean Yrs Quit | Short Term (n) | Short Term % |
| 20                                           | 75-79     | Never Any     | 2732  | 51.90 |               |             |               |                |              |
| 20                                           | 75-79     | CC            | 276   | 5.24  | 0             | 0.00        |               |                |              |
| 20                                           | 75-79     | Ecig          | 138   | 2.62  |               |             |               |                |              |
| 20                                           | 75-79     | Dual          | 0     | 0.00  |               |             |               |                |              |
| 20                                           | 75-79     | Former        | 2118  | 40.24 |               |             | 26.04         | 60             | 2.83         |
| Year of Follow-up: 2015, Age Group: All Ages |           |               |       |       |               |             |               |                |              |
| Period                                       | Age Group | Smoking Group | N     | %     | Ever Quit (N) | Ever Quit % | Mean Yrs Quit | Short Term (n) | Short Term % |
| 25                                           | All Ages  | Never Any     | 39842 | 52.55 |               |             |               |                |              |
| 25                                           | All Ages  | CC            | 1922  | 2.54  | 0             | 0.00        |               |                |              |
| 25                                           | All Ages  | Ecig          | 13689 | 18.06 |               |             |               |                |              |
| 25                                           | All Ages  | Dual          | 0     | 0.00  |               |             |               |                |              |
| 25                                           | All Ages  | Former        | 20364 | 26.86 |               |             | 22.98         | 668            | 3.28         |
| Year of Follow-up: 2015, Age Group: 18-19    |           |               |       |       |               |             |               |                |              |
| Period                                       | Age Group | Smoking Group | N     | %     | Ever Quit (N) | Ever Quit % | Mean Yrs Quit | Short Term (n) | Short Term % |
| 25                                           | 18-19     | Never Any     | 0     | .     |               |             |               |                |              |
| 25                                           | 18-19     | CC            | 0     | .     | 0             | .           |               |                |              |
| 25                                           | 18-19     | Ecig          | 0     | .     |               |             |               |                |              |
| 25                                           | 18-19     | Dual          | 0     | .     |               |             |               |                |              |
| 25                                           | 18-19     | Former        | 0     | .     |               |             |               | 0              | .            |
| Year of Follow-up: 2015, Age Group: 20-24    |           |               |       |       |               |             |               |                |              |
| Period                                       | Age Group | Smoking Group | N     | %     | Ever Quit (N) | Ever Quit % | Mean Yrs Quit | Short Term (n) | Short Term % |
| 25                                           | 20-24     | Never Any     | 0     | .     |               |             |               |                |              |
| 25                                           | 20-24     | CC            | 0     | .     | 0             | .           |               |                |              |
| 25                                           | 20-24     | Ecig          | 0     | .     |               |             |               |                |              |
| 25                                           | 20-24     | Dual          | 0     | .     |               |             |               |                |              |
| 25                                           | 20-24     | Former        | 0     | .     |               |             |               | 0              | .            |
| Year of Follow-up: 2015, Age Group: 25-29    |           |               |       |       |               |             |               |                |              |
| Period                                       | Age Group | Smoking Group | N     | %     | Ever Quit (N) | Ever Quit % | Mean Yrs Quit | Short Term (n) | Short Term % |
| 25                                           | 25-29     | Never Any     | 0     | .     |               |             |               |                |              |
| 25                                           | 25-29     | CC            | 0     | .     | 0             | .           |               |                |              |
| 25                                           | 25-29     | Ecig          | 0     | .     |               |             |               |                |              |
| 25                                           | 25-29     | Dual          | 0     | .     |               |             |               |                |              |
| 25                                           | 25-29     | Former        | 0     | .     |               |             |               | 0              | .            |
| Year of Follow-up: 2015, Age Group: 30-34    |           |               |       |       |               |             |               |                |              |
| Period                                       | Age Group | Smoking Group | N     | %     | Ever Quit (N) | Ever Quit % | Mean Yrs Quit | Short Term (n) | Short Term % |
| 25                                           | 30-34     | Never Any     | 0     | .     |               |             |               |                |              |
| 25                                           | 30-34     | CC            | 0     | .     | 0             | .           |               |                |              |
| 25                                           | 30-34     | Ecig          | 0     | .     |               |             |               |                |              |
| 25                                           | 30-34     | Dual          | 0     | .     |               |             |               |                |              |
| 25                                           | 30-34     | Former        | 0     | .     |               |             |               | 0              | .            |
| Year of Follow-up: 2015, Age Group: 35-39    |           |               |       |       |               |             |               |                |              |
| Period                                       | Age Group | Smoking Group | N     | %     | Ever Quit (N) | Ever Quit % | Mean Yrs Quit | Short Term (n) | Short Term % |
| 25                                           | 35-39     | Never Any     | 4017  | 50.66 |               |             |               |                |              |
| 25                                           | 35-39     | CC            | 85    | 1.07  | 0             | 0.00        |               |                |              |
| 25                                           | 35-39     | Ecig          | 2516  | 31.73 |               |             |               |                |              |
| 25                                           | 35-39     | Dual          | 0     | 0.00  |               |             |               |                |              |
| 25                                           | 35-39     | Former        | 1312  | 16.54 |               |             | 11.63         | 101            | 7.70         |
| Year of Follow-up: 2015, Age Group: 40-44    |           |               |       |       |               |             |               |                |              |
| Period                                       | Age Group | Smoking Group | N     | %     | Ever Quit (N) | Ever Quit % | Mean Yrs Quit | Short Term (n) | Short Term % |
| 25                                           | 40-44     | Never Any     | 4968  | 59.50 |               |             |               |                |              |
| 25                                           | 40-44     | CC            | 145   | 1.74  | 0             | 0.00        |               |                |              |
| 25                                           | 40-44     | Ecig          | 2040  | 24.43 |               |             |               |                |              |
| 25                                           | 40-44     | Dual          | 0     | 0.00  |               |             |               |                |              |

**Results for PHIM for Run 2 (Pessimistic\_Analysis.RTF)**

|                                              |           |               |       |       |               |             |               |                |              |
|----------------------------------------------|-----------|---------------|-------|-------|---------------|-------------|---------------|----------------|--------------|
| 25                                           | 40-44     | Former        | 1197  | 14.34 |               |             | 14.76         | 75             | 6.27         |
| Year of Follow-up: 2015, Age Group: 45-49    |           |               |       |       |               |             |               |                |              |
| Period                                       | Age Group | Smoking Group | N     | %     | Ever Quit (N) | Ever Quit % | Mean Yrs Quit | Short Term (n) | Short Term % |
| 25                                           | 45-49     | Never Any     | 5137  | 58.42 |               |             |               |                |              |
| 25                                           | 45-49     | CC            | 168   | 1.91  | 0             | 0.00        |               |                |              |
| 25                                           | 45-49     | Ecig          | 1860  | 21.15 |               |             |               |                |              |
| 25                                           | 45-49     | Dual          | 0     | 0.00  |               |             |               |                |              |
| 25                                           | 45-49     | Former        | 1628  | 18.51 |               |             | 19.68         | 59             | 3.62         |
| Year of Follow-up: 2015, Age Group: 50-54    |           |               |       |       |               |             |               |                |              |
| Period                                       | Age Group | Smoking Group | N     | %     | Ever Quit (N) | Ever Quit % | Mean Yrs Quit | Short Term (n) | Short Term % |
| 25                                           | 50-54     | Never Any     | 5270  | 52.29 |               |             |               |                |              |
| 25                                           | 50-54     | CC            | 234   | 2.32  | 0             | 0.00        |               |                |              |
| 25                                           | 50-54     | Ecig          | 2220  | 22.03 |               |             |               |                |              |
| 25                                           | 50-54     | Dual          | 0     | 0.00  |               |             |               |                |              |
| 25                                           | 50-54     | Former        | 2354  | 23.36 |               |             | 22.09         | 95             | 4.04         |
| Year of Follow-up: 2015, Age Group: 55-59    |           |               |       |       |               |             |               |                |              |
| Period                                       | Age Group | Smoking Group | N     | %     | Ever Quit (N) | Ever Quit % | Mean Yrs Quit | Short Term (n) | Short Term % |
| 25                                           | 55-59     | Never Any     | 5276  | 50.25 |               |             |               |                |              |
| 25                                           | 55-59     | CC            | 295   | 2.81  | 0             | 0.00        |               |                |              |
| 25                                           | 55-59     | Ecig          | 1984  | 18.90 |               |             |               |                |              |
| 25                                           | 55-59     | Dual          | 0     | 0.00  |               |             |               |                |              |
| 25                                           | 55-59     | Former        | 2944  | 28.04 |               |             | 22.63         | 104            | 3.53         |
| Year of Follow-up: 2015, Age Group: 60-64    |           |               |       |       |               |             |               |                |              |
| Period                                       | Age Group | Smoking Group | N     | %     | Ever Quit (N) | Ever Quit % | Mean Yrs Quit | Short Term (n) | Short Term % |
| 25                                           | 60-64     | Never Any     | 5018  | 52.27 |               |             |               |                |              |
| 25                                           | 60-64     | CC            | 261   | 2.72  | 0             | 0.00        |               |                |              |
| 25                                           | 60-64     | Ecig          | 1312  | 13.67 |               |             |               |                |              |
| 25                                           | 60-64     | Dual          | 0     | 0.00  |               |             |               |                |              |
| 25                                           | 60-64     | Former        | 3009  | 31.34 |               |             | 25.27         | 118            | 3.92         |
| Year of Follow-up: 2015, Age Group: 65-69    |           |               |       |       |               |             |               |                |              |
| Period                                       | Age Group | Smoking Group | N     | %     | Ever Quit (N) | Ever Quit % | Mean Yrs Quit | Short Term (n) | Short Term % |
| 25                                           | 65-69     | Never Any     | 4356  | 51.27 |               |             |               |                |              |
| 25                                           | 65-69     | CC            | 242   | 2.85  | 0             | 0.00        |               |                |              |
| 25                                           | 65-69     | Ecig          | 948   | 11.16 |               |             |               |                |              |
| 25                                           | 65-69     | Dual          | 0     | 0.00  |               |             |               |                |              |
| 25                                           | 65-69     | Former        | 2951  | 34.73 |               |             | 24.37         | 44             | 1.49         |
| Year of Follow-up: 2015, Age Group: 70-74    |           |               |       |       |               |             |               |                |              |
| Period                                       | Age Group | Smoking Group | N     | %     | Ever Quit (N) | Ever Quit % | Mean Yrs Quit | Short Term (n) | Short Term % |
| 25                                           | 70-74     | Never Any     | 3116  | 47.67 |               |             |               |                |              |
| 25                                           | 70-74     | CC            | 227   | 3.47  | 0             | 0.00        |               |                |              |
| 25                                           | 70-74     | Ecig          | 521   | 7.97  |               |             |               |                |              |
| 25                                           | 70-74     | Dual          | 0     | 0.00  |               |             |               |                |              |
| 25                                           | 70-74     | Former        | 2672  | 40.88 |               |             | 27.49         | 42             | 1.57         |
| Year of Follow-up: 2015, Age Group: 75-79    |           |               |       |       |               |             |               |                |              |
| Period                                       | Age Group | Smoking Group | N     | %     | Ever Quit (N) | Ever Quit % | Mean Yrs Quit | Short Term (n) | Short Term % |
| 25                                           | 75-79     | Never Any     | 2684  | 48.50 |               |             |               |                |              |
| 25                                           | 75-79     | CC            | 265   | 4.79  | 0             | 0.00        |               |                |              |
| 25                                           | 75-79     | Ecig          | 288   | 5.20  |               |             |               |                |              |
| 25                                           | 75-79     | Dual          | 0     | 0.00  |               |             |               |                |              |
| 25                                           | 75-79     | Former        | 2297  | 41.51 |               |             | 27.46         | 30             | 1.31         |
| Year of Follow-up: 2020, Age Group: All Ages |           |               |       |       |               |             |               |                |              |
| Period                                       | Age Group | Smoking Group | N     | %     | Ever Quit (N) | Ever Quit % | Mean Yrs Quit | Short Term (n) | Short Term % |
| 30                                           | All Ages  | Never Any     | 37158 | 52.87 |               |             |               |                |              |
| 30                                           | All Ages  | CC            | 1139  | 1.62  | 0             | 0.00        |               |                |              |
| 30                                           | All Ages  | Ecig          | 12414 | 17.66 |               |             |               |                |              |
| 30                                           | All Ages  | Dual          | 0     | 0.00  |               |             |               |                |              |
| 30                                           | All Ages  | Former        | 19572 | 27.85 |               |             | 25.46         | 595            | 3.04         |
| Year of Follow-up: 2020, Age Group: 18-19    |           |               |       |       |               |             |               |                |              |
| Period                                       | Age Group | Smoking Group | N     | %     | Ever Quit (N) | Ever Quit % | Mean Yrs Quit | Short Term (n) | Short Term % |
| 30                                           | 18-19     | Never Any     | 0     | .     |               |             |               |                |              |
| 30                                           | 18-19     | CC            | 0     | .     | 0             | .           |               |                |              |
| 30                                           | 18-19     | Ecig          | 0     | .     |               |             |               |                |              |
| 30                                           | 18-19     | Dual          | 0     | .     |               |             |               |                |              |
| 30                                           | 18-19     | Former        | 0     | .     |               |             | .             | 0              | .            |
| Year of Follow-up: 2020, Age Group: 20-24    |           |               |       |       |               |             |               |                |              |
| Period                                       | Age Group | Smoking Group | N     | %     | Ever Quit (N) | Ever Quit % | Mean Yrs Quit | Short Term (n) | Short Term % |
| 30                                           | 20-24     | Never Any     | 0     | .     |               |             |               |                |              |
| 30                                           | 20-24     | CC            | 0     | .     | 0             | .           |               |                |              |



**Results for PHIM for Run 2 (Pessimistic\_Analysis.RTF)**

|                                           |           |               |      |       |               |             |               |                |              |
|-------------------------------------------|-----------|---------------|------|-------|---------------|-------------|---------------|----------------|--------------|
| 30                                        | 20-24     | Ecig          | 0    | .     |               |             |               |                |              |
| 30                                        | 20-24     | Dual          | 0    | .     |               |             |               |                |              |
| 30                                        | 20-24     | Former        | 0    | .     |               |             | 0             | .              |              |
| Year of Follow-up: 2020, Age Group: 25-29 |           |               |      |       |               |             |               |                |              |
| Period                                    | Age Group | Smoking Group | N    | %     | Ever Quit (N) | Ever Quit % | Mean Yrs Quit | Short Term (n) | Short Term % |
| 30                                        | 25-29     | Never Any     | 0    | .     |               |             |               |                |              |
| 30                                        | 25-29     | CC            | 0    | .     | 0             | .           |               |                |              |
| 30                                        | 25-29     | Ecig          | 0    | .     |               |             |               |                |              |
| 30                                        | 25-29     | Dual          | 0    | .     |               |             |               |                |              |
| 30                                        | 25-29     | Former        | 0    | .     |               |             |               | 0              | .            |
| Year of Follow-up: 2020, Age Group: 30-34 |           |               |      |       |               |             |               |                |              |
| Period                                    | Age Group | Smoking Group | N    | %     | Ever Quit (N) | Ever Quit % | Mean Yrs Quit | Short Term (n) | Short Term % |
| 30                                        | 30-34     | Never Any     | 0    | .     |               |             |               |                |              |
| 30                                        | 30-34     | CC            | 0    | .     | 0             | .           |               |                |              |
| 30                                        | 30-34     | Ecig          | 0    | .     |               |             |               |                |              |
| 30                                        | 30-34     | Dual          | 0    | .     |               |             |               |                |              |
| 30                                        | 30-34     | Former        | 0    | .     |               |             |               | 0              | .            |
| Year of Follow-up: 2020, Age Group: 35-39 |           |               |      |       |               |             |               |                |              |
| Period                                    | Age Group | Smoking Group | N    | %     | Ever Quit (N) | Ever Quit % | Mean Yrs Quit | Short Term (n) | Short Term % |
| 30                                        | 35-39     | Never Any     | 0    | .     |               |             |               |                |              |
| 30                                        | 35-39     | CC            | 0    | .     | 0             | .           |               |                |              |
| 30                                        | 35-39     | Ecig          | 0    | .     |               |             |               |                |              |
| 30                                        | 35-39     | Dual          | 0    | .     |               |             |               |                |              |
| 30                                        | 35-39     | Former        | 0    | .     |               |             |               | 0              | .            |
| Year of Follow-up: 2020, Age Group: 40-44 |           |               |      |       |               |             |               |                |              |
| Period                                    | Age Group | Smoking Group | N    | %     | Ever Quit (N) | Ever Quit % | Mean Yrs Quit | Short Term (n) | Short Term % |
| 30                                        | 40-44     | Never Any     | 4017 | 50.66 |               |             |               |                |              |
| 30                                        | 40-44     | CC            | 48   | 0.61  | 0             | 0.00        |               |                |              |
| 30                                        | 40-44     | Ecig          | 2328 | 29.36 |               |             |               |                |              |
| 30                                        | 40-44     | Dual          | 0    | 0.00  |               |             |               |                |              |
| 30                                        | 40-44     | Former        | 1537 | 19.38 |               |             | 14.49         | 90             | 5.86         |
| Year of Follow-up: 2020, Age Group: 45-49 |           |               |      |       |               |             |               |                |              |
| Period                                    | Age Group | Smoking Group | N    | %     | Ever Quit (N) | Ever Quit % | Mean Yrs Quit | Short Term (n) | Short Term % |
| 30                                        | 45-49     | Never Any     | 4968 | 59.50 |               |             |               |                |              |
| 30                                        | 45-49     | CC            | 84   | 1.01  | 0             | 0.00        |               |                |              |
| 30                                        | 45-49     | Ecig          | 1935 | 23.17 |               |             |               |                |              |
| 30                                        | 45-49     | Dual          | 0    | 0.00  |               |             |               |                |              |
| 30                                        | 45-49     | Former        | 1363 | 16.32 |               |             | 17.61         | 64             | 4.70         |
| Year of Follow-up: 2020, Age Group: 50-54 |           |               |      |       |               |             |               |                |              |
| Period                                    | Age Group | Smoking Group | N    | %     | Ever Quit (N) | Ever Quit % | Mean Yrs Quit | Short Term (n) | Short Term % |
| 30                                        | 50-54     | Never Any     | 5137 | 58.42 |               |             |               |                |              |
| 30                                        | 50-54     | CC            | 92   | 1.05  | 0             | 0.00        |               |                |              |
| 30                                        | 50-54     | Ecig          | 1766 | 20.08 |               |             |               |                |              |
| 30                                        | 50-54     | Dual          | 0    | 0.00  |               |             |               |                |              |
| 30                                        | 50-54     | Former        | 1798 | 20.45 |               |             | 22.52         | 79             | 4.39         |
| Year of Follow-up: 2020, Age Group: 55-59 |           |               |      |       |               |             |               |                |              |
| Period                                    | Age Group | Smoking Group | N    | %     | Ever Quit (N) | Ever Quit % | Mean Yrs Quit | Short Term (n) | Short Term % |
| 30                                        | 55-59     | Never Any     | 5270 | 52.29 |               |             |               |                |              |
| 30                                        | 55-59     | CC            | 141  | 1.40  | 0             | 0.00        |               |                |              |
| 30                                        | 55-59     | Ecig          | 2078 | 20.62 |               |             |               |                |              |
| 30                                        | 55-59     | Dual          | 0    | 0.00  |               |             |               |                |              |
| 30                                        | 55-59     | Former        | 2589 | 25.69 |               |             | 24.82         | 88             | 3.40         |
| Year of Follow-up: 2020, Age Group: 60-64 |           |               |      |       |               |             |               |                |              |
| Period                                    | Age Group | Smoking Group | N    | %     | Ever Quit (N) | Ever Quit % | Mean Yrs Quit | Short Term (n) | Short Term % |
| 30                                        | 60-64     | Never Any     | 5276 | 50.25 |               |             |               |                |              |
| 30                                        | 60-64     | CC            | 213  | 2.03  | 0             | 0.00        |               |                |              |
| 30                                        | 60-64     | Ecig          | 1790 | 17.05 |               |             |               |                |              |
| 30                                        | 60-64     | Dual          | 0    | 0.00  |               |             |               |                |              |
| 30                                        | 60-64     | Former        | 3220 | 30.67 |               |             | 25.43         | 113            | 3.51         |
| Year of Follow-up: 2020, Age Group: 65-69 |           |               |      |       |               |             |               |                |              |
| Period                                    | Age Group | Smoking Group | N    | %     | Ever Quit (N) | Ever Quit % | Mean Yrs Quit | Short Term (n) | Short Term % |
| 30                                        | 65-69     | Never Any     | 5018 | 52.27 |               |             |               |                |              |
| 30                                        | 65-69     | CC            | 183  | 1.91  | 0             | 0.00        |               |                |              |
| 30                                        | 65-69     | Ecig          | 1185 | 12.34 |               |             |               |                |              |
| 30                                        | 65-69     | Dual          | 0    | 0.00  |               |             |               |                |              |
| 30                                        | 65-69     | Former        | 3214 | 33.48 |               |             | 28.49         | 61             | 1.90         |
| Year of Follow-up: 2020, Age Group: 70-74 |           |               |      |       |               |             |               |                |              |
| Period                                    | Age Group | Smoking Group | N    | %     | Ever Quit (N) | Ever Quit % | Mean Yrs Quit | Short Term (n) | Short Term % |

**Results for PHIM for Run 2 (Pessimistic\_Analysis.RTF)**

|                                              |           |               |       |       |               |             |               |                |              |
|----------------------------------------------|-----------|---------------|-------|-------|---------------|-------------|---------------|----------------|--------------|
| 30                                           | 70-74     | Never Any     | 4356  | 51.27 |               |             |               |                |              |
| 30                                           | 70-74     | CC            | 200   | 2.35  | 0             | 0.00        |               |                |              |
| 30                                           | 70-74     | Ecig          | 884   | 10.40 |               |             |               |                |              |
| 30                                           | 70-74     | Dual          | 0     | 0.00  |               |             |               |                |              |
| 30                                           | 70-74     | Former        | 3057  | 35.98 |               |             | 28.40         | 54             | 1.77         |
| Year of Follow-up: 2020, Age Group: 75-79    |           |               |       |       |               |             |               |                |              |
| Period                                       | Age Group | Smoking Group | N     | %     | Ever Quit (N) | Ever Quit % | Mean Yrs Quit | Short Term (n) | Short Term % |
| 30                                           | 75-79     | Never Any     | 3116  | 47.67 |               |             |               |                |              |
| 30                                           | 75-79     | CC            | 178   | 2.72  | 0             | 0.00        |               |                |              |
| 30                                           | 75-79     | Ecig          | 448   | 6.85  |               |             |               |                |              |
| 30                                           | 75-79     | Dual          | 0     | 0.00  |               |             |               |                |              |
| 30                                           | 75-79     | Former        | 2794  | 42.75 |               |             | 31.16         | 46             | 1.65         |
| Year of Follow-up: 2025, Age Group: All Ages |           |               |       |       |               |             |               |                |              |
| Period                                       | Age Group | Smoking Group | N     | %     | Ever Quit (N) | Ever Quit % | Mean Yrs Quit | Short Term (n) | Short Term % |
| 35                                           | All Ages  | Never Any     | 34042 | 53.40 |               |             |               |                |              |
| 35                                           | All Ages  | CC            | 707   | 1.11  | 0             | 0.00        |               |                |              |
| 35                                           | All Ages  | Ecig          | 10971 | 17.21 |               |             |               |                |              |
| 35                                           | All Ages  | Dual          | 0     | 0.00  |               |             |               |                |              |
| 35                                           | All Ages  | Former        | 18027 | 28.28 |               |             | 27.61         | 476            | 2.64         |
| Year of Follow-up: 2025, Age Group: 18-19    |           |               |       |       |               |             |               |                |              |
| Period                                       | Age Group | Smoking Group | N     | %     | Ever Quit (N) | Ever Quit % | Mean Yrs Quit | Short Term (n) | Short Term % |
| 35                                           | 18-19     | Never Any     | 0     | .     |               |             |               |                |              |
| 35                                           | 18-19     | CC            | 0     | .     | 0             | .           |               |                |              |
| 35                                           | 18-19     | Ecig          | 0     | .     |               |             |               |                |              |
| 35                                           | 18-19     | Dual          | 0     | .     |               |             |               |                |              |
| 35                                           | 18-19     | Former        | 0     | .     |               |             | .             | 0              | .            |
| Year of Follow-up: 2025, Age Group: 20-24    |           |               |       |       |               |             |               |                |              |
| Period                                       | Age Group | Smoking Group | N     | %     | Ever Quit (N) | Ever Quit % | Mean Yrs Quit | Short Term (n) | Short Term % |
| 35                                           | 20-24     | Never Any     | 0     | .     |               |             |               |                |              |
| 35                                           | 20-24     | CC            | 0     | .     | 0             | .           |               |                |              |
| 35                                           | 20-24     | Ecig          | 0     | .     |               |             |               |                |              |
| 35                                           | 20-24     | Dual          | 0     | .     |               |             |               |                |              |
| 35                                           | 20-24     | Former        | 0     | .     |               |             | .             | 0              | .            |
| Year of Follow-up: 2025, Age Group: 25-29    |           |               |       |       |               |             |               |                |              |
| Period                                       | Age Group | Smoking Group | N     | %     | Ever Quit (N) | Ever Quit % | Mean Yrs Quit | Short Term (n) | Short Term % |
| 35                                           | 25-29     | Never Any     | 0     | .     |               |             |               |                |              |
| 35                                           | 25-29     | CC            | 0     | .     | 0             | .           |               |                |              |
| 35                                           | 25-29     | Ecig          | 0     | .     |               |             |               |                |              |
| 35                                           | 25-29     | Dual          | 0     | .     |               |             |               |                |              |
| 35                                           | 25-29     | Former        | 0     | .     |               |             | .             | 0              | .            |
| Year of Follow-up: 2025, Age Group: 30-34    |           |               |       |       |               |             |               |                |              |
| Period                                       | Age Group | Smoking Group | N     | %     | Ever Quit (N) | Ever Quit % | Mean Yrs Quit | Short Term (n) | Short Term % |
| 35                                           | 30-34     | Never Any     | 0     | .     |               |             |               |                |              |
| 35                                           | 30-34     | CC            | 0     | .     | 0             | .           |               |                |              |
| 35                                           | 30-34     | Ecig          | 0     | .     |               |             |               |                |              |
| 35                                           | 30-34     | Dual          | 0     | .     |               |             |               |                |              |
| 35                                           | 30-34     | Former        | 0     | .     |               |             | .             | 0              | .            |
| Year of Follow-up: 2025, Age Group: 35-39    |           |               |       |       |               |             |               |                |              |
| Period                                       | Age Group | Smoking Group | N     | %     | Ever Quit (N) | Ever Quit % | Mean Yrs Quit | Short Term (n) | Short Term % |
| 35                                           | 35-39     | Never Any     | 0     | .     |               |             |               |                |              |
| 35                                           | 35-39     | CC            | 0     | .     | 0             | .           |               |                |              |
| 35                                           | 35-39     | Ecig          | 0     | .     |               |             |               |                |              |
| 35                                           | 35-39     | Dual          | 0     | .     |               |             |               |                |              |
| 35                                           | 35-39     | Former        | 0     | .     |               |             | .             | 0              | .            |
| Year of Follow-up: 2025, Age Group: 40-44    |           |               |       |       |               |             |               |                |              |
| Period                                       | Age Group | Smoking Group | N     | %     | Ever Quit (N) | Ever Quit % | Mean Yrs Quit | Short Term (n) | Short Term % |
| 35                                           | 40-44     | Never Any     | 0     | .     |               |             |               |                |              |
| 35                                           | 40-44     | CC            | 0     | .     | 0             | .           |               |                |              |
| 35                                           | 40-44     | Ecig          | 0     | .     |               |             |               |                |              |
| 35                                           | 40-44     | Dual          | 0     | .     |               |             |               |                |              |
| 35                                           | 40-44     | Former        | 0     | .     |               |             | .             | 0              | .            |
| Year of Follow-up: 2025, Age Group: 45-49    |           |               |       |       |               |             |               |                |              |
| Period                                       | Age Group | Smoking Group | N     | %     | Ever Quit (N) | Ever Quit % | Mean Yrs Quit | Short Term (n) | Short Term % |
| 35                                           | 45-49     | Never Any     | 4017  | 50.66 |               |             |               |                |              |
| 35                                           | 45-49     | CC            | 24    | 0.30  | 0             | 0.00        |               |                |              |
| 35                                           | 45-49     | Ecig          | 2179  | 27.48 |               |             |               |                |              |
| 35                                           | 45-49     | Dual          | 0     | 0.00  |               |             |               |                |              |
| 35                                           | 45-49     | Former        | 1710  | 21.56 |               |             | 17.75         | 54             | 3.16         |
| Year of Follow-up: 2025, Age Group: 50-54    |           |               |       |       |               |             |               |                |              |

**Results for PHIM for Run 2 (Pessimistic\_Analysis.RTF)**

| Period                                       | Age Group | Smoking Group | N     | %     | Ever Quit (N) | Ever Quit % | Mean Yrs Quit | Short Term (n) | Short Term % |
|----------------------------------------------|-----------|---------------|-------|-------|---------------|-------------|---------------|----------------|--------------|
| 35                                           | 50-54     | Never Any     | 4968  | 59.50 |               |             |               |                |              |
| 35                                           | 50-54     | CC            | 51    | 0.61  | 0             | 0.00        |               |                |              |
| 35                                           | 50-54     | Ecig          | 1808  | 21.65 |               |             |               |                |              |
| 35                                           | 50-54     | Dual          | 0     | 0.00  |               |             |               |                |              |
| 35                                           | 50-54     | Former        | 1523  | 18.24 |               |             | 20.43         | 71             | 4.66         |
| Year of Follow-up: 2025, Age Group: 55-59    |           |               |       |       |               |             |               |                |              |
| Period                                       | Age Group | Smoking Group | N     | %     | Ever Quit (N) | Ever Quit % | Mean Yrs Quit | Short Term (n) | Short Term % |
| 35                                           | 55-59     | Never Any     | 5137  | 58.42 |               |             |               |                |              |
| 35                                           | 55-59     | CC            | 57    | 0.65  | 0             | 0.00        |               |                |              |
| 35                                           | 55-59     | Ecig          | 1626  | 18.49 |               |             |               |                |              |
| 35                                           | 55-59     | Dual          | 0     | 0.00  |               |             |               |                |              |
| 35                                           | 55-59     | Former        | 1973  | 22.44 |               |             | 25.25         | 68             | 3.45         |
| Year of Follow-up: 2025, Age Group: 60-64    |           |               |       |       |               |             |               |                |              |
| Period                                       | Age Group | Smoking Group | N     | %     | Ever Quit (N) | Ever Quit % | Mean Yrs Quit | Short Term (n) | Short Term % |
| 35                                           | 60-64     | Never Any     | 5270  | 52.29 |               |             |               |                |              |
| 35                                           | 60-64     | CC            | 99    | 0.98  | 0             | 0.00        |               |                |              |
| 35                                           | 60-64     | Ecig          | 1856  | 18.42 |               |             |               |                |              |
| 35                                           | 60-64     | Dual          | 0     | 0.00  |               |             |               |                |              |
| 35                                           | 60-64     | Former        | 2853  | 28.31 |               |             | 27.22         | 123            | 4.31         |
| Year of Follow-up: 2025, Age Group: 65-69    |           |               |       |       |               |             |               |                |              |
| Period                                       | Age Group | Smoking Group | N     | %     | Ever Quit (N) | Ever Quit % | Mean Yrs Quit | Short Term (n) | Short Term % |
| 35                                           | 65-69     | Never Any     | 5276  | 50.25 |               |             |               |                |              |
| 35                                           | 65-69     | CC            | 162   | 1.54  | 0             | 0.00        |               |                |              |
| 35                                           | 65-69     | Ecig          | 1615  | 15.38 |               |             |               |                |              |
| 35                                           | 65-69     | Dual          | 0     | 0.00  |               |             |               |                |              |
| 35                                           | 65-69     | Former        | 3446  | 32.82 |               |             | 28.59         | 62             | 1.80         |
| Year of Follow-up: 2025, Age Group: 70-74    |           |               |       |       |               |             |               |                |              |
| Period                                       | Age Group | Smoking Group | N     | %     | Ever Quit (N) | Ever Quit % | Mean Yrs Quit | Short Term (n) | Short Term % |
| 35                                           | 70-74     | Never Any     | 5018  | 52.27 |               |             |               |                |              |
| 35                                           | 70-74     | CC            | 153   | 1.59  | 0             | 0.00        |               |                |              |
| 35                                           | 70-74     | Ecig          | 1094  | 11.40 |               |             |               |                |              |
| 35                                           | 70-74     | Dual          | 0     | 0.00  |               |             |               |                |              |
| 35                                           | 70-74     | Former        | 3335  | 34.74 |               |             | 32.34         | 53             | 1.59         |
| Year of Follow-up: 2025, Age Group: 75-79    |           |               |       |       |               |             |               |                |              |
| Period                                       | Age Group | Smoking Group | N     | %     | Ever Quit (N) | Ever Quit % | Mean Yrs Quit | Short Term (n) | Short Term % |
| 35                                           | 75-79     | Never Any     | 4356  | 51.27 |               |             |               |                |              |
| 35                                           | 75-79     | CC            | 161   | 1.89  | 0             | 0.00        |               |                |              |
| 35                                           | 75-79     | Ecig          | 793   | 9.33  |               |             |               |                |              |
| 35                                           | 75-79     | Dual          | 0     | 0.00  |               |             |               |                |              |
| 35                                           | 75-79     | Former        | 3187  | 37.51 |               |             | 32.13         | 45             | 1.41         |
| Year of Follow-up: 2030, Age Group: All Ages |           |               |       |       |               |             |               |                |              |
| Period                                       | Age Group | Smoking Group | N     | %     | Ever Quit (N) | Ever Quit % | Mean Yrs Quit | Short Term (n) | Short Term % |
| 40                                           | All Ages  | Never Any     | 29686 | 53.73 |               |             |               |                |              |
| 40                                           | All Ages  | CC            | 399   | 0.72  | 0             | 0.00        |               |                |              |
| 40                                           | All Ages  | Ecig          | 9240  | 16.72 |               |             |               |                |              |
| 40                                           | All Ages  | Dual          | 0     | 0.00  |               |             |               |                |              |
| 40                                           | All Ages  | Former        | 15925 | 28.82 |               |             | 29.62         | 431            | 2.71         |
| Year of Follow-up: 2030, Age Group: 18-19    |           |               |       |       |               |             |               |                |              |
| Period                                       | Age Group | Smoking Group | N     | %     | Ever Quit (N) | Ever Quit % | Mean Yrs Quit | Short Term (n) | Short Term % |
| 40                                           | 18-19     | Never Any     | 0     | .     |               |             |               |                |              |
| 40                                           | 18-19     | CC            | 0     | .     | 0             | .           |               |                |              |
| 40                                           | 18-19     | Ecig          | 0     | .     |               |             |               |                |              |
| 40                                           | 18-19     | Dual          | 0     | .     |               |             |               |                |              |
| 40                                           | 18-19     | Former        | 0     | .     |               |             | .             | 0              | .            |
| Year of Follow-up: 2030, Age Group: 20-24    |           |               |       |       |               |             |               |                |              |
| Period                                       | Age Group | Smoking Group | N     | %     | Ever Quit (N) | Ever Quit % | Mean Yrs Quit | Short Term (n) | Short Term % |
| 40                                           | 20-24     | Never Any     | 0     | .     |               |             |               |                |              |
| 40                                           | 20-24     | CC            | 0     | .     | 0             | .           |               |                |              |
| 40                                           | 20-24     | Ecig          | 0     | .     |               |             |               |                |              |
| 40                                           | 20-24     | Dual          | 0     | .     |               |             |               |                |              |
| 40                                           | 20-24     | Former        | 0     | .     |               |             | .             | 0              | .            |
| Year of Follow-up: 2030, Age Group: 25-29    |           |               |       |       |               |             |               |                |              |
| Period                                       | Age Group | Smoking Group | N     | %     | Ever Quit (N) | Ever Quit % | Mean Yrs Quit | Short Term (n) | Short Term % |
| 40                                           | 25-29     | Never Any     | 0     | .     |               |             |               |                |              |
| 40                                           | 25-29     | CC            | 0     | .     | 0             | .           |               |                |              |
| 40                                           | 25-29     | Ecig          | 0     | .     |               |             |               |                |              |
| 40                                           | 25-29     | Dual          | 0     | .     |               |             |               |                |              |

**Results for PHIM for Run 2 (Pessimistic\_Analysis.RTF)**

| Year of Follow-up: 2030, Age Group: 30-34 | Period | Age Group | Smoking Group | N    | %     | Ever Quit (N) | Ever Quit % | Mean Yrs Quit | Short Term (n) | Short Term % |
|-------------------------------------------|--------|-----------|---------------|------|-------|---------------|-------------|---------------|----------------|--------------|
| Year of Follow-up: 2030, Age Group: 30-34 |        |           |               |      |       |               |             |               |                |              |
| 40                                        | 25-29  | Former    |               | 0    | .     |               |             |               | 0              | .            |
| Year of Follow-up: 2030, Age Group: 35-39 |        |           |               |      |       |               |             |               |                |              |
| 40                                        | 30-34  | Never Any |               | 0    | .     |               |             |               | 0              | .            |
| 40                                        | 30-34  | CC        |               | 0    | .     | 0             | .           |               |                |              |
| 40                                        | 30-34  | Ecig      |               | 0    | .     |               |             |               |                |              |
| 40                                        | 30-34  | Dual      |               | 0    | .     |               |             |               |                |              |
| 40                                        | 30-34  | Former    |               | 0    | .     |               |             |               | 0              | .            |
| Year of Follow-up: 2030, Age Group: 40-44 |        |           |               |      |       |               |             |               |                |              |
| 40                                        | 35-39  | Never Any |               | 0    | .     |               |             |               |                |              |
| 40                                        | 35-39  | CC        |               | 0    | .     | 0             | .           |               |                |              |
| 40                                        | 35-39  | Ecig      |               | 0    | .     |               |             |               |                |              |
| 40                                        | 35-39  | Dual      |               | 0    | .     |               |             |               |                |              |
| 40                                        | 35-39  | Former    |               | 0    | .     |               |             |               | 0              | .            |
| Year of Follow-up: 2030, Age Group: 45-49 |        |           |               |      |       |               |             |               |                |              |
| 40                                        | 40-44  | Never Any |               | 0    | .     |               |             |               |                |              |
| 40                                        | 40-44  | CC        |               | 0    | .     | 0             | .           |               |                |              |
| 40                                        | 40-44  | Ecig      |               | 0    | .     |               |             |               |                |              |
| 40                                        | 40-44  | Dual      |               | 0    | .     |               |             |               |                |              |
| 40                                        | 40-44  | Former    |               | 0    | .     |               |             |               | 0              | .            |
| Year of Follow-up: 2030, Age Group: 50-54 |        |           |               |      |       |               |             |               |                |              |
| 40                                        | 45-49  | Never Any |               | 0    | .     |               |             |               |                |              |
| 40                                        | 45-49  | CC        |               | 0    | .     | 0             | .           |               |                |              |
| 40                                        | 45-49  | Ecig      |               | 0    | .     |               |             |               |                |              |
| 40                                        | 45-49  | Dual      |               | 0    | .     |               |             |               |                |              |
| 40                                        | 45-49  | Former    |               | 0    | .     |               |             |               | 0              | .            |
| Year of Follow-up: 2030, Age Group: 55-59 |        |           |               |      |       |               |             |               |                |              |
| 40                                        | 50-54  | Never Any |               | 4017 | 50.66 |               |             |               |                |              |
| 40                                        | 50-54  | CC        |               | 11   | 0.14  | 0             | 0.00        |               |                |              |
| 40                                        | 50-54  | Ecig      |               | 2007 | 25.31 |               |             |               |                |              |
| 40                                        | 50-54  | Dual      |               | 0    | 0.00  |               |             |               |                |              |
| 40                                        | 50-54  | Former    |               | 1895 | 23.90 |               |             | 20.69         | 99             | 5.22         |
| Year of Follow-up: 2030, Age Group: 60-64 |        |           |               |      |       |               |             |               |                |              |
| 40                                        | 55-59  | Never Any |               | 4968 | 59.50 |               |             |               |                |              |
| 40                                        | 55-59  | CC        |               | 25   | 0.30  | 0             | 0.00        |               |                |              |
| 40                                        | 55-59  | Ecig      |               | 1658 | 19.86 |               |             |               |                |              |
| 40                                        | 55-59  | Dual      |               | 0    | 0.00  |               |             |               |                |              |
| 40                                        | 55-59  | Former    |               | 1699 | 20.35 |               |             | 23.03         | 55             | 3.24         |
| Year of Follow-up: 2030, Age Group: 65-69 |        |           |               |      |       |               |             |               |                |              |
| 40                                        | 60-64  | Never Any |               | 5137 | 58.42 |               |             |               |                |              |
| 40                                        | 60-64  | CC        |               | 35   | 0.40  | 0             | 0.00        |               |                |              |
| 40                                        | 60-64  | Ecig      |               | 1453 | 16.52 |               |             |               |                |              |
| 40                                        | 60-64  | Dual      |               | 0    | 0.00  |               |             |               |                |              |
| 40                                        | 60-64  | Former    |               | 2168 | 24.66 |               |             | 27.71         | 79             | 3.64         |
| Year of Follow-up: 2030, Age Group: 70-74 |        |           |               |      |       |               |             |               |                |              |
| 40                                        | 65-69  | Never Any |               | 5270 | 52.29 |               |             |               |                |              |
| 40                                        | 65-69  | CC        |               | 77   | 0.76  | 0             | 0.00        |               |                |              |
| 40                                        | 65-69  | Ecig      |               | 1646 | 16.33 |               |             |               |                |              |
| 40                                        | 65-69  | Dual      |               | 0    | 0.00  |               |             |               |                |              |
| 40                                        | 65-69  | Former    |               | 3085 | 30.61 |               |             | 29.98         | 70             | 2.27         |
| Year of Follow-up: 2030, Age Group: 75-79 |        |           |               |      |       |               |             |               |                |              |
| 40                                        | 70-74  | Never Any |               | 5276 | 50.25 |               |             |               |                |              |
| 40                                        | 70-74  | CC        |               | 132  | 1.26  | 0             | 0.00        |               |                |              |
| 40                                        | 70-74  | Ecig      |               | 1491 | 14.20 |               |             |               |                |              |
| 40                                        | 70-74  | Dual      |               | 0    | 0.00  |               |             |               |                |              |
| 40                                        | 70-74  | Former    |               | 3600 | 34.29 |               |             | 32.23         | 74             | 2.06         |
| Year of Follow-up: 2030, Age Group: 75-79 |        |           |               |      |       |               |             |               |                |              |
| 40                                        | 75-79  | Never Any |               | 5018 | 52.27 |               |             |               |                |              |
| 40                                        | 75-79  | CC        |               | 119  | 1.24  | 0             | 0.00        |               |                |              |

**Results for PHIM for Run 2 (Pessimistic\_Analysis.RTF)**

|                                              |           |               |       |       |               |             |               |                |              |
|----------------------------------------------|-----------|---------------|-------|-------|---------------|-------------|---------------|----------------|--------------|
| 40                                           | 75-79     | Ecig          | 985   | 10.26 |               |             |               |                |              |
| 40                                           | 75-79     | Dual          | 0     | 0.00  |               |             |               |                |              |
| 40                                           | 75-79     | Former        | 3478  | 36.23 |               |             | 35.88         | 54             | 1.55         |
| Year of Follow-up: 2035, Age Group: All Ages |           |               |       |       |               |             |               |                |              |
| Period                                       | Age Group | Smoking Group | N     | %     | Ever Quit (N) | Ever Quit % | Mean Yrs Quit | Short Term (n) | Short Term % |
| 45                                           | All Ages  | Never Any     | 24668 | 54.04 |               |             |               |                |              |
| 45                                           | All Ages  | CC            | 203   | 0.44  | 0             | 0.00        |               |                |              |
| 45                                           | All Ages  | Ecig          | 7433  | 16.28 |               |             |               |                |              |
| 45                                           | All Ages  | Dual          | 0     | 0.00  |               |             |               |                |              |
| 45                                           | All Ages  | Former        | 13346 | 29.24 |               |             | 30.79         | 366            | 2.74         |
| Year of Follow-up: 2035, Age Group: 18-19    |           |               |       |       |               |             |               |                |              |
| Period                                       | Age Group | Smoking Group | N     | %     | Ever Quit (N) | Ever Quit % | Mean Yrs Quit | Short Term (n) | Short Term % |
| 45                                           | 18-19     | Never Any     | 0     | .     |               |             |               |                |              |
| 45                                           | 18-19     | CC            | 0     | .     | 0             | .           |               |                |              |
| 45                                           | 18-19     | Ecig          | 0     | .     |               |             |               |                |              |
| 45                                           | 18-19     | Dual          | 0     | .     |               |             |               |                |              |
| 45                                           | 18-19     | Former        | 0     | .     |               |             | .             | 0              | .            |
| Year of Follow-up: 2035, Age Group: 20-24    |           |               |       |       |               |             |               |                |              |
| Period                                       | Age Group | Smoking Group | N     | %     | Ever Quit (N) | Ever Quit % | Mean Yrs Quit | Short Term (n) | Short Term % |
| 45                                           | 20-24     | Never Any     | 0     | .     |               |             |               |                |              |
| 45                                           | 20-24     | CC            | 0     | .     | 0             | .           |               |                |              |
| 45                                           | 20-24     | Ecig          | 0     | .     |               |             |               |                |              |
| 45                                           | 20-24     | Dual          | 0     | .     |               |             |               |                |              |
| 45                                           | 20-24     | Former        | 0     | .     |               |             | .             | 0              | .            |
| Year of Follow-up: 2035, Age Group: 25-29    |           |               |       |       |               |             |               |                |              |
| Period                                       | Age Group | Smoking Group | N     | %     | Ever Quit (N) | Ever Quit % | Mean Yrs Quit | Short Term (n) | Short Term % |
| 45                                           | 25-29     | Never Any     | 0     | .     |               |             |               |                |              |
| 45                                           | 25-29     | CC            | 0     | .     | 0             | .           |               |                |              |
| 45                                           | 25-29     | Ecig          | 0     | .     |               |             |               |                |              |
| 45                                           | 25-29     | Dual          | 0     | .     |               |             |               |                |              |
| 45                                           | 25-29     | Former        | 0     | .     |               |             | .             | 0              | .            |
| Year of Follow-up: 2035, Age Group: 30-34    |           |               |       |       |               |             |               |                |              |
| Period                                       | Age Group | Smoking Group | N     | %     | Ever Quit (N) | Ever Quit % | Mean Yrs Quit | Short Term (n) | Short Term % |
| 45                                           | 30-34     | Never Any     | 0     | .     |               |             |               |                |              |
| 45                                           | 30-34     | CC            | 0     | .     | 0             | .           |               |                |              |
| 45                                           | 30-34     | Ecig          | 0     | .     |               |             |               |                |              |
| 45                                           | 30-34     | Dual          | 0     | .     |               |             |               |                |              |
| 45                                           | 30-34     | Former        | 0     | .     |               |             | .             | 0              | .            |
| Year of Follow-up: 2035, Age Group: 35-39    |           |               |       |       |               |             |               |                |              |
| Period                                       | Age Group | Smoking Group | N     | %     | Ever Quit (N) | Ever Quit % | Mean Yrs Quit | Short Term (n) | Short Term % |
| 45                                           | 35-39     | Never Any     | 0     | .     |               |             |               |                |              |
| 45                                           | 35-39     | CC            | 0     | .     | 0             | .           |               |                |              |
| 45                                           | 35-39     | Ecig          | 0     | .     |               |             |               |                |              |
| 45                                           | 35-39     | Dual          | 0     | .     |               |             |               |                |              |
| 45                                           | 35-39     | Former        | 0     | .     |               |             | .             | 0              | .            |
| Year of Follow-up: 2035, Age Group: 40-44    |           |               |       |       |               |             |               |                |              |
| Period                                       | Age Group | Smoking Group | N     | %     | Ever Quit (N) | Ever Quit % | Mean Yrs Quit | Short Term (n) | Short Term % |
| 45                                           | 40-44     | Never Any     | 0     | .     |               |             |               |                |              |
| 45                                           | 40-44     | CC            | 0     | .     | 0             | .           |               |                |              |
| 45                                           | 40-44     | Ecig          | 0     | .     |               |             |               |                |              |
| 45                                           | 40-44     | Dual          | 0     | .     |               |             |               |                |              |
| 45                                           | 40-44     | Former        | 0     | .     |               |             | .             | 0              | .            |
| Year of Follow-up: 2035, Age Group: 45-49    |           |               |       |       |               |             |               |                |              |
| Period                                       | Age Group | Smoking Group | N     | %     | Ever Quit (N) | Ever Quit % | Mean Yrs Quit | Short Term (n) | Short Term % |
| 45                                           | 45-49     | Never Any     | 0     | .     |               |             |               |                |              |
| 45                                           | 45-49     | CC            | 0     | .     | 0             | .           |               |                |              |
| 45                                           | 45-49     | Ecig          | 0     | .     |               |             |               |                |              |
| 45                                           | 45-49     | Dual          | 0     | .     |               |             |               |                |              |
| 45                                           | 45-49     | Former        | 0     | .     |               |             | .             | 0              | .            |
| Year of Follow-up: 2035, Age Group: 50-54    |           |               |       |       |               |             |               |                |              |
| Period                                       | Age Group | Smoking Group | N     | %     | Ever Quit (N) | Ever Quit % | Mean Yrs Quit | Short Term (n) | Short Term % |
| 45                                           | 50-54     | Never Any     | 0     | .     |               |             |               |                |              |
| 45                                           | 50-54     | CC            | 0     | .     | 0             | .           |               |                |              |
| 45                                           | 50-54     | Ecig          | 0     | .     |               |             |               |                |              |
| 45                                           | 50-54     | Dual          | 0     | .     |               |             |               |                |              |
| 45                                           | 50-54     | Former        | 0     | .     |               |             | .             | 0              | .            |
| Year of Follow-up: 2035, Age Group: 55-59    |           |               |       |       |               |             |               |                |              |
| Period                                       | Age Group | Smoking Group | N     | %     | Ever Quit (N) | Ever Quit % | Mean Yrs Quit | Short Term (n) | Short Term % |

**Results for PHIM for Run 2 (Pessimistic\_Analysis.RTF)**

|                                              |           |               |       |       |               |             |               |                |              |
|----------------------------------------------|-----------|---------------|-------|-------|---------------|-------------|---------------|----------------|--------------|
| 45                                           | 55-59     | Never Any     | 4017  | 50.66 |               |             |               |                |              |
| 45                                           | 55-59     | CC            | 8     | 0.10  | 0             | 0.00        |               |                |              |
| 45                                           | 55-59     | Ecig          | 1806  | 22.77 |               |             |               |                |              |
| 45                                           | 55-59     | Dual          | 0     | 0.00  |               |             |               |                |              |
| 45                                           | 55-59     | Former        | 2099  | 26.47 |               |             | 23.38         | 86             | 4.10         |
| Year of Follow-up: 2035, Age Group: 60-64    |           |               |       |       |               |             |               |                |              |
| Period                                       | Age Group | Smoking Group | N     | %     | Ever Quit (N) | Ever Quit % | Mean Yrs Quit | Short Term (n) | Short Term % |
| 45                                           | 60-64     | Never Any     | 4968  | 59.50 |               |             |               |                |              |
| 45                                           | 60-64     | CC            | 15    | 0.18  | 0             | 0.00        |               |                |              |
| 45                                           | 60-64     | Ecig          | 1482  | 17.75 |               |             |               |                |              |
| 45                                           | 60-64     | Dual          | 0     | 0.00  |               |             |               |                |              |
| 45                                           | 60-64     | Former        | 1885  | 22.57 |               |             | 25.43         | 90             | 4.77         |
| Year of Follow-up: 2035, Age Group: 65-69    |           |               |       |       |               |             |               |                |              |
| Period                                       | Age Group | Smoking Group | N     | %     | Ever Quit (N) | Ever Quit % | Mean Yrs Quit | Short Term (n) | Short Term % |
| 45                                           | 65-69     | Never Any     | 5137  | 58.42 |               |             |               |                |              |
| 45                                           | 65-69     | CC            | 26    | 0.30  | 0             | 0.00        |               |                |              |
| 45                                           | 65-69     | Ecig          | 1299  | 14.77 |               |             |               |                |              |
| 45                                           | 65-69     | Dual          | 0     | 0.00  |               |             |               |                |              |
| 45                                           | 65-69     | Former        | 2331  | 26.51 |               |             | 30.59         | 47             | 2.02         |
| Year of Follow-up: 2035, Age Group: 70-74    |           |               |       |       |               |             |               |                |              |
| Period                                       | Age Group | Smoking Group | N     | %     | Ever Quit (N) | Ever Quit % | Mean Yrs Quit | Short Term (n) | Short Term % |
| 45                                           | 70-74     | Never Any     | 5270  | 52.29 |               |             |               |                |              |
| 45                                           | 70-74     | CC            | 59    | 0.59  | 0             | 0.00        |               |                |              |
| 45                                           | 70-74     | Ecig          | 1525  | 15.13 |               |             |               |                |              |
| 45                                           | 70-74     | Dual          | 0     | 0.00  |               |             |               |                |              |
| 45                                           | 70-74     | Former        | 3224  | 31.99 |               |             | 33.54         | 69             | 2.14         |
| Year of Follow-up: 2035, Age Group: 75-79    |           |               |       |       |               |             |               |                |              |
| Period                                       | Age Group | Smoking Group | N     | %     | Ever Quit (N) | Ever Quit % | Mean Yrs Quit | Short Term (n) | Short Term % |
| 45                                           | 75-79     | Never Any     | 5276  | 50.25 |               |             |               |                |              |
| 45                                           | 75-79     | CC            | 95    | 0.90  | 0             | 0.00        |               |                |              |
| 45                                           | 75-79     | Ecig          | 1321  | 12.58 |               |             |               |                |              |
| 45                                           | 75-79     | Dual          | 0     | 0.00  |               |             |               |                |              |
| 45                                           | 75-79     | Former        | 3807  | 36.26 |               |             | 35.32         | 74             | 1.94         |
| Year of Follow-up: 2040, Age Group: All Ages |           |               |       |       |               |             |               |                |              |
| Period                                       | Age Group | Smoking Group | N     | %     | Ever Quit (N) | Ever Quit % | Mean Yrs Quit | Short Term (n) | Short Term % |
| 50                                           | All Ages  | Never Any     | 19392 | 55.17 |               |             |               |                |              |
| 50                                           | All Ages  | CC            | 83    | 0.24  | 0             | 0.00        |               |                |              |
| 50                                           | All Ages  | Ecig          | 5518  | 15.70 |               |             |               |                |              |
| 50                                           | All Ages  | Dual          | 0     | 0.00  |               |             |               |                |              |
| 50                                           | All Ages  | Former        | 10158 | 28.90 |               |             | 32.03         | 263            | 2.59         |
| Year of Follow-up: 2040, Age Group: 18-19    |           |               |       |       |               |             |               |                |              |
| Period                                       | Age Group | Smoking Group | N     | %     | Ever Quit (N) | Ever Quit % | Mean Yrs Quit | Short Term (n) | Short Term % |
| 50                                           | 18-19     | Never Any     | 0     | .     |               |             |               |                |              |
| 50                                           | 18-19     | CC            | 0     | .     | 0             | .           |               |                |              |
| 50                                           | 18-19     | Ecig          | 0     | .     |               |             |               |                |              |
| 50                                           | 18-19     | Dual          | 0     | .     |               |             |               |                |              |
| 50                                           | 18-19     | Former        | 0     | .     |               |             | .             | 0              | .            |
| Year of Follow-up: 2040, Age Group: 20-24    |           |               |       |       |               |             |               |                |              |
| Period                                       | Age Group | Smoking Group | N     | %     | Ever Quit (N) | Ever Quit % | Mean Yrs Quit | Short Term (n) | Short Term % |
| 50                                           | 20-24     | Never Any     | 0     | .     |               |             |               |                |              |
| 50                                           | 20-24     | CC            | 0     | .     | 0             | .           |               |                |              |
| 50                                           | 20-24     | Ecig          | 0     | .     |               |             |               |                |              |
| 50                                           | 20-24     | Dual          | 0     | .     |               |             |               |                |              |
| 50                                           | 20-24     | Former        | 0     | .     |               |             | .             | 0              | .            |
| Year of Follow-up: 2040, Age Group: 25-29    |           |               |       |       |               |             |               |                |              |
| Period                                       | Age Group | Smoking Group | N     | %     | Ever Quit (N) | Ever Quit % | Mean Yrs Quit | Short Term (n) | Short Term % |
| 50                                           | 25-29     | Never Any     | 0     | .     |               |             |               |                |              |
| 50                                           | 25-29     | CC            | 0     | .     | 0             | .           |               |                |              |
| 50                                           | 25-29     | Ecig          | 0     | .     |               |             |               |                |              |
| 50                                           | 25-29     | Dual          | 0     | .     |               |             |               |                |              |
| 50                                           | 25-29     | Former        | 0     | .     |               |             | .             | 0              | .            |
| Year of Follow-up: 2040, Age Group: 30-34    |           |               |       |       |               |             |               |                |              |
| Period                                       | Age Group | Smoking Group | N     | %     | Ever Quit (N) | Ever Quit % | Mean Yrs Quit | Short Term (n) | Short Term % |
| 50                                           | 30-34     | Never Any     | 0     | .     |               |             |               |                |              |
| 50                                           | 30-34     | CC            | 0     | .     | 0             | .           |               |                |              |
| 50                                           | 30-34     | Ecig          | 0     | .     |               |             |               |                |              |
| 50                                           | 30-34     | Dual          | 0     | .     |               |             |               |                |              |
| 50                                           | 30-34     | Former        | 0     | .     |               |             | .             | 0              | .            |
| Year of Follow-up: 2040, Age Group: 35-39    |           |               |       |       |               |             |               |                |              |

**Results for PHIM for Run 2 (Pessimistic\_Analysis.RTF)**

| Period                                    | Age Group | Smoking Group | N    | %     | Ever Quit (N) | Ever Quit % | Mean Yrs Quit | Short Term (n) | Short Term % |
|-------------------------------------------|-----------|---------------|------|-------|---------------|-------------|---------------|----------------|--------------|
| 50                                        | 35-39     | Never Any     | 0    | .     |               |             |               |                |              |
| 50                                        | 35-39     | CC            | 0    | .     | 0             | .           |               |                |              |
| 50                                        | 35-39     | Ecig          | 0    | .     |               |             |               |                |              |
| 50                                        | 35-39     | Dual          | 0    | .     |               |             |               |                |              |
| 50                                        | 35-39     | Former        | 0    | .     |               |             | .             | 0              | .            |
| Year of Follow-up: 2040, Age Group: 40-44 |           |               |      |       |               |             |               |                |              |
| Period                                    | Age Group | Smoking Group | N    | %     | Ever Quit (N) | Ever Quit % | Mean Yrs Quit | Short Term (n) | Short Term % |
| 50                                        | 40-44     | Never Any     | 0    | .     |               |             |               |                |              |
| 50                                        | 40-44     | CC            | 0    | .     | 0             | .           |               |                |              |
| 50                                        | 40-44     | Ecig          | 0    | .     |               |             |               |                |              |
| 50                                        | 40-44     | Dual          | 0    | .     |               |             |               |                |              |
| 50                                        | 40-44     | Former        | 0    | .     |               |             | .             | 0              | .            |
| Year of Follow-up: 2040, Age Group: 45-49 |           |               |      |       |               |             |               |                |              |
| Period                                    | Age Group | Smoking Group | N    | %     | Ever Quit (N) | Ever Quit % | Mean Yrs Quit | Short Term (n) | Short Term % |
| 50                                        | 45-49     | Never Any     | 0    | .     |               |             |               |                |              |
| 50                                        | 45-49     | CC            | 0    | .     | 0             | .           |               |                |              |
| 50                                        | 45-49     | Ecig          | 0    | .     |               |             |               |                |              |
| 50                                        | 45-49     | Dual          | 0    | .     |               |             |               |                |              |
| 50                                        | 45-49     | Former        | 0    | .     |               |             | .             | 0              | .            |
| Year of Follow-up: 2040, Age Group: 50-54 |           |               |      |       |               |             |               |                |              |
| Period                                    | Age Group | Smoking Group | N    | %     | Ever Quit (N) | Ever Quit % | Mean Yrs Quit | Short Term (n) | Short Term % |
| 50                                        | 50-54     | Never Any     | 0    | .     |               |             |               |                |              |
| 50                                        | 50-54     | CC            | 0    | .     | 0             | .           |               |                |              |
| 50                                        | 50-54     | Ecig          | 0    | .     |               |             |               |                |              |
| 50                                        | 50-54     | Dual          | 0    | .     |               |             |               |                |              |
| 50                                        | 50-54     | Former        | 0    | .     |               |             | .             | 0              | .            |
| Year of Follow-up: 2040, Age Group: 55-59 |           |               |      |       |               |             |               |                |              |
| Period                                    | Age Group | Smoking Group | N    | %     | Ever Quit (N) | Ever Quit % | Mean Yrs Quit | Short Term (n) | Short Term % |
| 50                                        | 55-59     | Never Any     | 0    | .     |               |             |               |                |              |
| 50                                        | 55-59     | CC            | 0    | .     | 0             | .           |               |                |              |
| 50                                        | 55-59     | Ecig          | 0    | .     |               |             |               |                |              |
| 50                                        | 55-59     | Dual          | 0    | .     |               |             |               |                |              |
| 50                                        | 55-59     | Former        | 0    | .     |               |             | .             | 0              | .            |
| Year of Follow-up: 2040, Age Group: 60-64 |           |               |      |       |               |             |               |                |              |
| Period                                    | Age Group | Smoking Group | N    | %     | Ever Quit (N) | Ever Quit % | Mean Yrs Quit | Short Term (n) | Short Term % |
| 50                                        | 60-64     | Never Any     | 4017 | 50.66 |               |             |               |                |              |
| 50                                        | 60-64     | CC            | 6    | 0.08  | 0             | 0.00        |               |                |              |
| 50                                        | 60-64     | Ecig          | 1617 | 20.39 |               |             |               |                |              |
| 50                                        | 60-64     | Dual          | 0    | 0.00  |               |             |               |                |              |
| 50                                        | 60-64     | Former        | 2290 | 28.88 |               |             | 26.16         | 95             | 4.15         |
| Year of Follow-up: 2040, Age Group: 65-69 |           |               |      |       |               |             |               |                |              |
| Period                                    | Age Group | Smoking Group | N    | %     | Ever Quit (N) | Ever Quit % | Mean Yrs Quit | Short Term (n) | Short Term % |
| 50                                        | 65-69     | Never Any     | 4968 | 59.50 |               |             |               |                |              |
| 50                                        | 65-69     | CC            | 7    | 0.08  | 0             | 0.00        |               |                |              |
| 50                                        | 65-69     | Ecig          | 1343 | 16.08 |               |             |               |                |              |
| 50                                        | 65-69     | Dual          | 0    | 0.00  |               |             |               |                |              |
| 50                                        | 65-69     | Former        | 2032 | 24.34 |               |             | 28.40         | 53             | 2.61         |
| Year of Follow-up: 2040, Age Group: 70-74 |           |               |      |       |               |             |               |                |              |
| Period                                    | Age Group | Smoking Group | N    | %     | Ever Quit (N) | Ever Quit % | Mean Yrs Quit | Short Term (n) | Short Term % |
| 50                                        | 70-74     | Never Any     | 5137 | 58.42 |               |             |               |                |              |
| 50                                        | 70-74     | CC            | 22   | 0.25  | 0             | 0.00        |               |                |              |
| 50                                        | 70-74     | Ecig          | 1200 | 13.65 |               |             |               |                |              |
| 50                                        | 70-74     | Dual          | 0    | 0.00  |               |             |               |                |              |
| 50                                        | 70-74     | Former        | 2434 | 27.68 |               |             | 34.15         | 50             | 2.05         |
| Year of Follow-up: 2040, Age Group: 75-79 |           |               |      |       |               |             |               |                |              |
| Period                                    | Age Group | Smoking Group | N    | %     | Ever Quit (N) | Ever Quit % | Mean Yrs Quit | Short Term (n) | Short Term % |
| 50                                        | 75-79     | Never Any     | 5270 | 52.29 |               |             |               |                |              |
| 50                                        | 75-79     | CC            | 48   | 0.48  | 0             | 0.00        |               |                |              |
| 50                                        | 75-79     | Ecig          | 1358 | 13.47 |               |             |               |                |              |
| 50                                        | 75-79     | Dual          | 0    | 0.00  |               |             |               |                |              |
| 50                                        | 75-79     | Former        | 3402 | 33.76 |               |             | 36.63         | 65             | 1.91         |

## Results for PHIM for Run 2 (Pessimistic\_Analysis.RTF)

\*\*\*\*\*

### Main Results for E-Component for Run: 2, Simulation: 1, COD: Four Diseases Combined

| Variable Parameter          | Value                                  |
|-----------------------------|----------------------------------------|
| 1. Country                  | US (United States)                     |
| 2. Sex                      | F (Females)                            |
| 3. Year of start of process | 1990                                   |
| 4. Cause of Death           | Four Diseases Combined                 |
| 5. Effective Dose NULL      | CC:1                                   |
| 6. Effective Dose Ecig      | CC:1 Ecig:0.4 Dual:0.7                 |
| Note:                       | Death rates are per million population |

#### Results for Age Groups Combined and Years combined, Population unadjusted for deaths in Ecig scenario,

| Age Group:All |         | NULL        | Ecig        | %Drop    |        | NULL   | Ecig    | Drop    |         |        |
|---------------|---------|-------------|-------------|----------|--------|--------|---------|---------|---------|--------|
| Year          | Number  | Attrib      | Attrib      | Drop     | %Drop  | Attrib | Death   | Attrib  | Attrib  | Drop   |
|               | Deaths  | Deaths      | Deaths      | Deaths   | Deaths | Deaths | Rate    | Rates   | Rates   | Rates  |
| All Comb      | 9082078 | 2946250.006 | 2659500.065 | 286749.9 | 3.157  | 9.733  | 2493.45 | 808.881 | 730.155 | 78.726 |

#### Results for Age Groups Combined, Population unadjusted for deaths in Ecig scenario,

| Age Group:All |        | NULL      | Ecig      | %Drop    |        | NULL   | Ecig    | Drop    |         |         |
|---------------|--------|-----------|-----------|----------|--------|--------|---------|---------|---------|---------|
| Year          | Number | Attrib    | Attrib    | Drop     | %Drop  | Attrib | Death   | Attrib  | Attrib  | Drop    |
|               | Deaths | Deaths    | Deaths    | Deaths   | Deaths | Deaths | Rate    | Rates   | Rates   | Rates   |
| 1990          | 199848 | 57524.822 | 57524.822 | 0.000    | 0.000  | 0.000  | 2926.84 | 842.471 | 842.471 | 0.000   |
| 1991          | 199162 | 59078.486 | 59034.753 | 43.732   | 0.022  | 0.074  | 2877.87 | 853.678 | 853.047 | 0.632   |
| 1992          | 198532 | 60494.150 | 60380.223 | 113.927  | 0.057  | 0.188  | 2829.84 | 862.271 | 860.648 | 1.624   |
| 1993          | 202512 | 62694.848 | 62470.729 | 224.119  | 0.111  | 0.357  | 2845.85 | 881.034 | 877.884 | 3.149   |
| 1994          | 200658 | 63202.598 | 62848.417 | 354.181  | 0.177  | 0.560  | 2777.87 | 874.966 | 870.063 | 4.903   |
| 1995          | 201023 | 63766.862 | 63246.921 | 519.941  | 0.259  | 0.815  | 2739.80 | 869.097 | 862.011 | 7.086   |
| 1996          | 201180 | 64591.163 | 63880.417 | 710.745  | 0.353  | 1.100  | 2706.36 | 868.908 | 859.347 | 9.561   |
| 1997          | 198639 | 64686.912 | 63775.903 | 911.009  | 0.459  | 1.408  | 2635.18 | 858.147 | 846.061 | 12.086  |
| 1998          | 197573 | 65295.961 | 64135.880 | 1160.081 | 0.587  | 1.777  | 2584.18 | 854.046 | 838.873 | 15.173  |
| 1999          | 211329 | 67327.521 | 65782.998 | 1544.523 | 0.731  | 2.294  | 2726.91 | 868.771 | 848.841 | 19.930  |
| 2000          | 208496 | 67596.897 | 65748.523 | 1848.373 | 0.887  | 2.734  | 2656.96 | 861.419 | 837.865 | 23.555  |
| 2001          | 203606 | 67008.811 | 64868.504 | 2140.307 | 1.051  | 3.194  | 2565.88 | 844.458 | 817.486 | 26.973  |
| 2002          | 200828 | 67067.744 | 64545.210 | 2522.534 | 1.256  | 3.761  | 2506.09 | 836.925 | 805.447 | 31.478  |
| 2003          | 196352 | 66756.217 | 63904.094 | 2852.123 | 1.453  | 4.272  | 2427.31 | 825.244 | 789.986 | 35.258  |
| 2004          | 188160 | 65058.725 | 61903.935 | 3154.790 | 1.677  | 4.849  | 2302.83 | 796.234 | 757.624 | 38.611  |
| 2005          | 186416 | 65214.724 | 61686.062 | 3528.661 | 1.893  | 5.411  | 2256.27 | 789.321 | 746.612 | 42.709  |
| 2006          | 180088 | 63771.146 | 59923.078 | 3848.068 | 2.137  | 6.034  | 2160.67 | 765.117 | 718.949 | 46.169  |
| 2007          | 175644 | 63110.718 | 58952.387 | 4158.331 | 2.367  | 6.589  | 2086.36 | 749.650 | 700.256 | 49.394  |
| 2008          | 177570 | 63718.624 | 59166.725 | 4551.899 | 2.563  | 7.144  | 2086.39 | 748.674 | 695.190 | 53.483  |
| 2009          | 172806 | 62794.698 | 58005.753 | 4788.945 | 2.771  | 7.626  | 2007.57 | 729.515 | 673.880 | 55.635  |
| 2010          | 170489 | 61917.074 | 56845.832 | 5071.241 | 2.975  | 8.190  | 1957.97 | 711.083 | 652.842 | 58.240  |
| 2011          | 170305 | 61680.114 | 56188.063 | 5492.052 | 3.225  | 8.904  | 1937.46 | 701.700 | 639.220 | 62.480  |
| 2012          | 171421 | 62023.127 | 56131.698 | 5891.429 | 3.437  | 9.499  | 1930.22 | 698.386 | 632.048 | 66.338  |
| 2013          | 172699 | 62037.765 | 55791.971 | 6245.794 | 3.617  | 10.068 | 1923.75 | 691.059 | 621.485 | 69.574  |
| 2014          | 174169 | 61921.017 | 55276.316 | 6644.701 | 3.815  | 10.731 | 1918.85 | 682.195 | 608.989 | 73.206  |
| 2015          | 177354 | 61856.204 | 54883.160 | 6973.044 | 3.932  | 11.273 | 2184.51 | 761.899 | 676.010 | 85.889  |
| 2016          | 176853 | 60464.119 | 53216.690 | 7247.429 | 4.098  | 11.986 | 2157.59 | 737.655 | 649.237 | 88.418  |
| 2017          | 179309 | 60243.839 | 52640.748 | 7603.091 | 4.240  | 12.621 | 2166.86 | 728.017 | 636.137 | 91.880  |
| 2018          | 177157 | 60713.327 | 52823.825 | 7889.502 | 4.453  | 12.995 | 2120.51 | 726.721 | 632.286 | 94.435  |
| 2019          | 179227 | 61148.172 | 52886.830 | 8261.342 | 4.609  | 13.510 | 2124.53 | 724.841 | 626.912 | 97.929  |
| 2020          | 180467 | 61149.317 | 52643.017 | 8506.299 | 4.713  | 13.911 | 2424.25 | 821.432 | 707.165 | 114.267 |
| 2021          | 178116 | 58727.786 | 50072.452 | 8655.334 | 4.859  | 14.738 | 2375.42 | 783.216 | 667.785 | 115.431 |
| 2022          | 179408 | 58848.802 | 49884.885 | 8963.917 | 4.996  | 15.232 | 2374.52 | 778.881 | 660.241 | 118.640 |
| 2023          | 180640 | 58816.149 | 49669.571 | 9146.579 | 5.063  | 15.551 | 2372.26 | 772.407 | 652.289 | 120.118 |
| 2024          | 181610 | 58955.232 | 49551.429 | 9403.803 | 5.178  | 15.951 | 2366.77 | 768.316 | 645.764 | 122.552 |
| 2025          | 180418 | 58297.744 | 48837.823 | 9459.921 | 5.243  | 16.227 | 2713.69 | 876.861 | 734.574 | 142.287 |
| 2026          | 180313 | 56469.971 | 46941.391 | 9528.580 | 5.284  | 16.874 | 2701.83 | 846.150 | 703.373 | 142.777 |
| 2027          | 179619 | 56209.427 | 46487.295 | 9722.132 | 5.413  | 17.296 | 2680.68 | 838.883 | 693.788 | 145.095 |
| 2028          | 178762 | 55733.105 | 45952.390 | 9780.715 | 5.471  | 17.549 | 2656.74 | 828.298 | 682.938 | 145.360 |
| 2029          | 177808 | 55145.838 | 45338.881 | 9806.958 | 5.515  | 17.784 | 2630.89 | 815.951 | 670.845 | 145.106 |
| 2030          | 173587 | 53615.097 | 43862.851 | 9752.246 | 5.618  | 18.189 | 3040.33 | 939.056 | 768.248 | 170.808 |
| 2031          | 174985 | 52046.561 | 42557.131 | 9489.430 | 5.423  | 18.233 | 3060.73 | 910.364 | 744.381 | 165.983 |
| 2032          | 173400 | 51582.636 | 42076.328 | 9506.308 | 5.482  | 18.429 | 3027.10 | 900.496 | 734.541 | 165.955 |
| 2033          | 171756 | 50839.758 | 41535.129 | 9304.629 | 5.417  | 18.302 | 2991.14 | 885.375 | 723.334 | 162.040 |
| 2034          | 169973 | 50215.451 | 41022.491 | 9192.961 | 5.408  | 18.307 | 2951.96 | 872.104 | 712.447 | 159.656 |
| 2035          | 162644 | 47773.075 | 38791.884 | 8981.191 | 5.522  | 18.800 | 3459.14 | 1016.05 | 825.032 | 191.013 |
| 2036          | 156254 | 43298.709 | 35129.189 | 8169.520 | 5.228  | 18.868 | 3328.25 | 922.274 | 748.261 | 174.013 |
| 2037          | 153593 | 42241.563 | 34260.564 | 7980.999 | 5.196  | 18.894 | 3274.10 | 900.450 | 730.322 | 170.129 |
| 2038          | 150947 | 41356.353 | 33631.251 | 7725.101 | 5.118  | 18.679 | 3217.50 | 881.531 | 716.867 | 164.664 |
| 2039          | 148373 | 40161.050 | 32783.644 | 7377.406 | 4.972  | 18.370 | 3159.42 | 855.178 | 698.085 | 157.092 |



## Results for PHIM for Run 2 (Pessimistic\_Analysis.RTF)

\*\*\*\*\*

### Main Results for E-Component for Run: 2, Simulation: 1, COD: LUNG CANCER

| Variable Parameter          | Value                                  |
|-----------------------------|----------------------------------------|
| 1. Country                  | US (United States)                     |
| 2. Sex                      | F (Females)                            |
| 3. Year of start of process | 1990                                   |
| 4. Cause of Death           | LUNG CANCER                            |
| 5. Effective Dose NULL      | CC:1                                   |
| 6. Effective Dose Ecig      | CC:1 Ecig:0.4 Dual:0.7                 |
| Note:                       | Death rates are per million population |

#### Results for Age Groups Combined and Years combined, Population unadjusted for deaths in Ecig scenario,

| Age Group:All |         | NULL        | Ecig        | %Drop    |        |        | NULL    | Ecig    | Drop    |        |
|---------------|---------|-------------|-------------|----------|--------|--------|---------|---------|---------|--------|
| Year          | Number  | Attrib      | Attrib      | Drop     | %Drop  | Attrib | Death   | Attrib  | Attrib  | Drop   |
|               | Deaths  | Deaths      | Deaths      | Deaths   | Deaths | Deaths | Rate    | Rates   | Rates   | Rates  |
| All Comb      | 2327764 | 1580465.217 | 1473995.308 | 106469.9 | 4.574  | 6.737  | 639.078 | 433.910 | 404.680 | 29.231 |

#### Results for Age Groups Combined, Population unadjusted for deaths in Ecig scenario,

| Age Group:All |        | NULL      | Ecig      | %Drop    |        |        | NULL    | Ecig    | Drop    |        |
|---------------|--------|-----------|-----------|----------|--------|--------|---------|---------|---------|--------|
| Year          | Number | Attrib    | Attrib    | Drop     | %Drop  | Attrib | Death   | Attrib  | Attrib  | Drop   |
|               | Deaths | Deaths    | Deaths    | Deaths   | Deaths | Deaths | Rate    | Rates   | Rates   | Rates  |
| 1990          | 42690  | 30614.201 | 30614.201 | 0.000    | 0.000  | 0.000  | 625.210 | 448.355 | 448.355 | 0.000  |
| 1991          | 43692  | 31412.010 | 31404.310 | 7.700    | 0.018  | 0.025  | 631.345 | 453.901 | 453.789 | 0.111  |
| 1992          | 45423  | 32782.407 | 32763.024 | 19.383   | 0.043  | 0.059  | 647.450 | 467.274 | 466.998 | 0.276  |
| 1993          | 46291  | 33491.183 | 33451.795 | 39.388   | 0.085  | 0.118  | 650.515 | 470.643 | 470.089 | 0.554  |
| 1994          | 47017  | 34074.347 | 34011.713 | 62.634   | 0.133  | 0.184  | 650.895 | 471.719 | 470.852 | 0.867  |
| 1995          | 47840  | 34694.454 | 34598.207 | 96.247   | 0.201  | 0.277  | 652.025 | 472.861 | 471.549 | 1.312  |
| 1996          | 48244  | 35027.269 | 34896.426 | 130.842  | 0.271  | 0.374  | 648.999 | 471.202 | 469.442 | 1.760  |
| 1997          | 49035  | 35590.763 | 35410.199 | 180.564  | 0.368  | 0.507  | 650.506 | 472.153 | 469.757 | 2.395  |
| 1998          | 49686  | 36100.785 | 35850.972 | 249.813  | 0.503  | 0.692  | 649.874 | 472.184 | 468.917 | 3.267  |
| 1999          | 48883  | 35451.030 | 35139.426 | 311.604  | 0.637  | 0.879  | 630.769 | 457.448 | 453.427 | 4.021  |
| 2000          | 50331  | 36447.986 | 36042.617 | 405.369  | 0.805  | 1.112  | 641.392 | 464.474 | 459.308 | 5.166  |
| 2001          | 50389  | 36411.326 | 35920.159 | 491.167  | 0.975  | 1.349  | 635.012 | 458.863 | 452.673 | 6.190  |
| 2002          | 51445  | 37078.545 | 36464.657 | 613.888  | 1.193  | 1.656  | 641.972 | 462.696 | 455.035 | 7.661  |
| 2003          | 51408  | 36999.876 | 36273.227 | 726.649  | 1.413  | 1.964  | 635.509 | 457.395 | 448.412 | 8.983  |
| 2004          | 51399  | 36861.555 | 36005.637 | 855.919  | 1.665  | 2.322  | 629.057 | 451.138 | 440.662 | 10.475 |
| 2005          | 51421  | 36689.529 | 35702.884 | 986.645  | 1.919  | 2.689  | 622.370 | 444.069 | 432.127 | 11.942 |
| 2006          | 51355  | 36504.774 | 35375.712 | 1129.062 | 2.199  | 3.093  | 616.150 | 437.979 | 424.433 | 13.546 |
| 2007          | 51839  | 36663.202 | 35364.339 | 1298.863 | 2.506  | 3.543  | 615.761 | 435.498 | 420.069 | 15.428 |
| 2008          | 50976  | 35898.803 | 34488.508 | 1410.296 | 2.767  | 3.929  | 598.952 | 421.800 | 405.229 | 16.571 |
| 2009          | 51193  | 35934.525 | 34364.837 | 1569.689 | 3.066  | 4.368  | 594.733 | 417.468 | 399.232 | 18.236 |
| 2010          | 50853  | 35502.829 | 33794.796 | 1708.033 | 3.359  | 4.811  | 584.018 | 407.730 | 388.114 | 19.616 |
| 2011          | 50509  | 35136.342 | 33251.050 | 1885.292 | 3.733  | 5.366  | 574.613 | 399.726 | 378.279 | 21.448 |
| 2012          | 51245  | 35450.201 | 33379.079 | 2071.122 | 4.042  | 5.842  | 577.023 | 399.173 | 375.852 | 23.321 |
| 2013          | 51069  | 35123.224 | 32885.333 | 2237.891 | 4.382  | 6.372  | 568.874 | 391.249 | 366.320 | 24.929 |
| 2014          | 51251  | 35079.370 | 32666.461 | 2412.909 | 4.708  | 6.878  | 564.641 | 386.476 | 359.892 | 26.583 |
| 2015          | 50443  | 34324.171 | 31806.955 | 2517.215 | 4.990  | 7.334  | 621.319 | 422.780 | 391.774 | 31.005 |
| 2016          | 48854  | 33054.753 | 30445.622 | 2609.130 | 5.341  | 7.893  | 596.013 | 403.264 | 371.433 | 31.831 |
| 2017          | 48325  | 32471.234 | 29719.224 | 2752.011 | 5.695  | 8.475  | 583.983 | 392.399 | 359.142 | 33.257 |
| 2018          | 50465  | 33657.595 | 30575.385 | 3082.210 | 6.108  | 9.158  | 604.052 | 402.871 | 365.978 | 36.893 |
| 2019          | 51036  | 33863.424 | 30571.369 | 3292.055 | 6.450  | 9.722  | 604.975 | 401.412 | 362.388 | 39.024 |
| 2020          | 51444  | 33910.830 | 30453.613 | 3457.217 | 6.720  | 10.195 | 691.053 | 455.532 | 409.090 | 46.442 |
| 2021          | 48037  | 31531.880 | 28130.980 | 3400.900 | 7.080  | 10.786 | 640.639 | 420.521 | 375.165 | 45.356 |
| 2022          | 48335  | 31560.212 | 27981.263 | 3578.950 | 7.404  | 11.340 | 639.727 | 417.708 | 370.340 | 47.368 |
| 2023          | 48599  | 31508.781 | 27804.284 | 3704.497 | 7.623  | 11.757 | 638.227 | 413.791 | 365.141 | 48.650 |
| 2024          | 48784  | 31517.293 | 27659.458 | 3857.835 | 7.908  | 12.240 | 635.757 | 410.740 | 360.463 | 50.276 |
| 2025          | 48477  | 31175.389 | 27246.422 | 3928.967 | 8.105  | 12.603 | 729.141 | 468.912 | 409.816 | 59.096 |
| 2026          | 45324  | 29044.598 | 25244.664 | 3799.933 | 8.384  | 13.083 | 679.138 | 435.206 | 378.268 | 56.938 |
| 2027          | 45107  | 28825.765 | 24916.044 | 3909.721 | 8.668  | 13.563 | 673.191 | 430.203 | 371.853 | 58.350 |
| 2028          | 44842  | 28513.846 | 24551.552 | 3962.293 | 8.836  | 13.896 | 666.430 | 423.769 | 364.882 | 58.887 |
| 2029          | 44539  | 28148.109 | 24144.045 | 4004.064 | 8.990  | 14.225 | 659.013 | 416.486 | 357.241 | 59.245 |
| 2030          | 43393  | 27314.475 | 23323.576 | 3990.899 | 9.197  | 14.611 | 760.018 | 478.407 | 408.507 | 69.900 |
| 2031          | 40748  | 25423.102 | 21715.993 | 3707.108 | 9.098  | 14.582 | 712.731 | 444.684 | 379.842 | 64.842 |
| 2032          | 40325  | 25085.902 | 21367.191 | 3718.711 | 9.222  | 14.824 | 703.969 | 437.933 | 373.014 | 64.919 |
| 2033          | 39882  | 24645.067 | 20997.669 | 3647.398 | 9.145  | 14.800 | 694.543 | 429.194 | 365.674 | 63.519 |
| 2034          | 39404  | 24239.126 | 20637.699 | 3601.427 | 9.140  | 14.858 | 684.347 | 420.967 | 358.420 | 62.547 |
| 2035          | 37454  | 22944.147 | 19444.639 | 3499.507 | 9.343  | 15.252 | 796.588 | 487.980 | 413.552 | 74.428 |
| 2036          | 32988  | 19950.581 | 16929.831 | 3020.750 | 9.157  | 15.141 | 702.663 | 424.953 | 360.610 | 64.343 |
| 2037          | 32403  | 19415.334 | 16460.477 | 2954.857 | 9.119  | 15.219 | 690.731 | 413.871 | 350.883 | 62.988 |
| 2038          | 31820  | 18939.317 | 16094.400 | 2844.918 | 8.941  | 15.021 | 678.257 | 403.701 | 343.060 | 60.641 |
| 2039          | 31251  | 18379.752 | 15653.384 | 2726.368 | 8.724  | 14.834 | 665.457 | 391.373 | 333.319 | 58.054 |

## Results for PHIM for Run 2 (Pessimistic\_Analysis.RTF)

\*\*\*\*\*

### Main Results for E-Component for Run: 2, Simulation: 1, COD: IHD

| Variable Parameter          | Value                                  |
|-----------------------------|----------------------------------------|
| 1. Country                  | US (United States)                     |
| 2. Sex                      | F (Females)                            |
| 3. Year of start of process | 1990                                   |
| 4. Cause of Death           | IHD                                    |
| 5. Effective Dose NULL      | CC:1                                   |
| 6. Effective Dose Ecig      | CC:1 Ecig:0.4 Dual:0.7                 |
| Note:                       | Death rates are per million population |

#### Results for Age Groups Combined and Years combined, Population unadjusted for deaths in Ecig scenario,

| Age Group:All |         | NULL       | Ecig       | %Drop    |        |        | NULL    | Ecig    | Drop   |        |
|---------------|---------|------------|------------|----------|--------|--------|---------|---------|--------|--------|
| Year          | Number  | Attrib     | Attrib     | Drop     | %Drop  | Attrib | Death   | Attrib  | Attrib | Drop   |
|               | Deaths  | Deaths     | Deaths     | Deaths   | Deaths | Deaths | Rate    | Rates   | Rates  | Rates  |
| All Comb      | 3242167 | 398833.796 | 332460.338 | 66373.46 | 2.047  | 16.642 | 890.124 | 109.498 | 91.276 | 18.223 |

#### Results for Age Groups Combined, Population unadjusted for deaths in Ecig scenario,

| Age Group:All |        | NULL      | Ecig      | %Drop    |        |        | NULL    | Ecig    | Drop    |        |
|---------------|--------|-----------|-----------|----------|--------|--------|---------|---------|---------|--------|
| Year          | Number | Attrib    | Attrib    | Drop     | %Drop  | Attrib | Death   | Attrib  | Attrib  | Drop   |
|               | Deaths | Deaths    | Deaths    | Deaths   | Deaths | Deaths | Rate    | Rates   | Rates   | Rates  |
| 1990          | 98916  | 12922.892 | 12922.892 | 0.000    | 0.000  | 0.000  | 1448.66 | 189.260 | 189.260 | 0.000  |
| 1991          | 96403  | 12856.479 | 12831.863 | 24.616   | 0.026  | 0.191  | 1393.01 | 185.775 | 185.419 | 0.356  |
| 1992          | 93721  | 12662.244 | 12595.504 | 66.740   | 0.071  | 0.527  | 1335.88 | 180.485 | 179.534 | 0.951  |
| 1993          | 93679  | 12730.613 | 12602.358 | 128.255  | 0.137  | 1.007  | 1316.45 | 178.900 | 177.098 | 1.802  |
| 1994          | 90832  | 12495.323 | 12293.736 | 201.586  | 0.222  | 1.613  | 1257.46 | 172.983 | 170.192 | 2.791  |
| 1995          | 89698  | 12365.590 | 12075.407 | 290.184  | 0.324  | 2.347  | 1222.52 | 168.534 | 164.579 | 3.955  |
| 1996          | 88286  | 12290.551 | 11893.052 | 397.500  | 0.450  | 3.234  | 1187.66 | 165.338 | 159.990 | 5.347  |
| 1997          | 84777  | 11719.531 | 11231.564 | 487.967  | 0.576  | 4.164  | 1124.67 | 155.473 | 149.000 | 6.473  |
| 1998          | 82517  | 11416.794 | 10822.861 | 593.933  | 0.720  | 5.202  | 1079.29 | 149.327 | 141.559 | 7.768  |
| 1999          | 93939  | 13028.038 | 12194.062 | 833.976  | 0.888  | 6.401  | 1212.16 | 168.109 | 157.348 | 10.761 |
| 2000          | 90039  | 12426.299 | 11474.877 | 951.422  | 1.057  | 7.657  | 1147.41 | 158.354 | 146.230 | 12.124 |
| 2001          | 86119  | 11939.281 | 10853.946 | 1085.336 | 1.260  | 9.090  | 1085.29 | 150.461 | 136.784 | 13.678 |
| 2002          | 83014  | 11528.794 | 10295.143 | 1233.651 | 1.486  | 10.701 | 1035.91 | 143.865 | 128.471 | 15.394 |
| 2003          | 79302  | 11048.407 | 9700.532  | 1347.875 | 1.700  | 12.200 | 980.336 | 136.581 | 119.919 | 16.663 |
| 2004          | 73861  | 10375.132 | 8937.805  | 1437.327 | 1.946  | 13.854 | 903.963 | 126.978 | 109.387 | 17.591 |
| 2005          | 71649  | 10051.029 | 8505.117  | 1545.913 | 2.158  | 15.381 | 867.197 | 121.652 | 102.941 | 18.711 |
| 2006          | 67551  | 9542.523  | 7906.784  | 1635.740 | 2.421  | 17.142 | 810.467 | 114.490 | 94.864  | 19.625 |
| 2007          | 63503  | 8936.533  | 7266.125  | 1670.408 | 2.630  | 18.692 | 754.310 | 106.151 | 86.309  | 19.842 |
| 2008          | 63171  | 8944.180  | 7147.303  | 1796.878 | 2.844  | 20.090 | 742.239 | 105.091 | 83.979  | 21.113 |
| 2009          | 59747  | 8390.033  | 6606.912  | 1783.121 | 2.984  | 21.253 | 694.108 | 97.471  | 76.756  | 20.715 |
| 2010          | 58008  | 8157.570  | 6320.312  | 1837.257 | 3.167  | 22.522 | 666.189 | 93.685  | 72.585  | 21.100 |
| 2011          | 57368  | 8035.356  | 6113.220  | 1922.136 | 3.351  | 23.921 | 652.644 | 91.414  | 69.547  | 21.867 |
| 2012          | 57411  | 7970.766  | 5958.935  | 2011.831 | 3.504  | 25.240 | 646.453 | 89.752  | 67.098  | 22.653 |
| 2013          | 57067  | 7743.216  | 5710.217  | 2032.998 | 3.562  | 26.255 | 635.688 | 86.254  | 63.608  | 22.646 |
| 2014          | 57538  | 7774.935  | 5655.763  | 2119.172 | 3.683  | 27.256 | 633.906 | 85.658  | 62.311  | 23.347 |
| 2015          | 58395  | 7722.535  | 5557.884  | 2164.651 | 3.707  | 28.030 | 719.266 | 95.120  | 68.458  | 26.663 |
| 2016          | 58658  | 7600.353  | 5405.046  | 2195.307 | 3.743  | 28.884 | 715.621 | 92.723  | 65.941  | 26.782 |
| 2017          | 59004  | 7470.266  | 5259.435  | 2210.832 | 3.747  | 29.595 | 713.034 | 90.274  | 63.558  | 26.717 |
| 2018          | 56077  | 6907.050  | 4822.813  | 2084.237 | 3.717  | 30.175 | 671.224 | 82.675  | 57.728  | 24.948 |
| 2019          | 55886  | 6732.046  | 4677.009  | 2055.037 | 3.677  | 30.526 | 662.462 | 79.801  | 55.441  | 24.360 |
| 2020          | 55313  | 6429.836  | 4435.363  | 1994.473 | 3.606  | 31.019 | 743.037 | 86.373  | 59.581  | 26.792 |
| 2021          | 56292  | 6562.016  | 4493.310  | 2068.706 | 3.675  | 31.525 | 750.730 | 87.513  | 59.924  | 27.589 |
| 2022          | 55827  | 6352.366  | 4332.974  | 2019.391 | 3.617  | 31.790 | 738.885 | 84.075  | 57.348  | 26.727 |
| 2023          | 55338  | 6134.123  | 4189.897  | 1944.226 | 3.513  | 31.695 | 726.728 | 80.557  | 55.024  | 25.533 |
| 2024          | 54770  | 5922.193  | 4053.302  | 1868.891 | 3.412  | 31.557 | 713.771 | 77.179  | 52.823  | 24.356 |
| 2025          | 53295  | 5504.188  | 3748.484  | 1755.704 | 3.294  | 31.898 | 801.612 | 82.789  | 56.381  | 26.408 |
| 2026          | 55278  | 5641.075  | 3860.288  | 1780.788 | 3.222  | 31.568 | 828.283 | 84.526  | 57.843  | 26.683 |
| 2027          | 54199  | 5426.216  | 3732.326  | 1693.890 | 3.125  | 31.217 | 808.875 | 80.982  | 55.702  | 25.280 |
| 2028          | 53090  | 5197.830  | 3609.218  | 1588.612 | 2.992  | 30.563 | 789.020 | 77.249  | 53.640  | 23.610 |
| 2029          | 51974  | 4973.547  | 3493.924  | 1479.623 | 2.847  | 29.750 | 769.023 | 73.590  | 51.697  | 21.893 |
| 2030          | 49479  | 4450.618  | 3082.609  | 1368.009 | 2.765  | 30.737 | 866.605 | 77.952  | 53.991  | 23.960 |
| 2031          | 51987  | 4555.052  | 3205.952  | 1349.100 | 2.595  | 29.618 | 909.317 | 79.674  | 56.076  | 23.598 |
| 2032          | 50677  | 4349.999  | 3096.683  | 1253.316 | 2.473  | 28.812 | 884.689 | 75.939  | 54.060  | 21.880 |
| 2033          | 49380  | 4147.948  | 3009.564  | 1138.384 | 2.305  | 27.445 | 859.955 | 72.237  | 52.412  | 19.825 |
| 2034          | 48076  | 3966.133  | 2923.265  | 1042.868 | 2.169  | 26.294 | 834.943 | 68.881  | 50.769  | 18.112 |
| 2035          | 44518  | 3289.064  | 2359.424  | 929.640  | 2.088  | 28.265 | 946.825 | 69.952  | 50.181  | 19.772 |
| 2036          | 46347  | 3313.192  | 2424.657  | 888.535  | 1.917  | 26.818 | 987.211 | 70.572  | 51.646  | 18.926 |
| 2037          | 44841  | 3117.951  | 2330.141  | 787.810  | 1.757  | 25.267 | 955.859 | 66.464  | 49.671  | 16.794 |
| 2038          | 43378  | 2949.775  | 2257.882  | 691.893  | 1.595  | 23.456 | 924.621 | 62.876  | 48.128  | 14.748 |
| 2039          | 41973  | 2766.312  | 2182.601  | 583.711  | 1.391  | 21.101 | 893.753 | 58.905  | 46.476  | 12.429 |

## Results for PHIM for Run 2 (Pessimistic\_Analysis.RTF)

\*\*\*\*\*

### Main Results for E-Component for Run: 2, Simulation: 1, COD: STROKE

| Variable Parameter          | Value                                  |
|-----------------------------|----------------------------------------|
| 1. Country                  | US (United States)                     |
| 2. Sex                      | F (Females)                            |
| 3. Year of start of process | 1990                                   |
| 4. Cause of Death           | STROKE                                 |
| 5. Effective Dose NULL      | CC:1                                   |
| 6. Effective Dose Ecig      | CC:1 Ecig:0.4 Dual:0.7                 |
| Note:                       | Death rates are per million population |

#### Results for Age Groups Combined and Years combined, Population unadjusted for deaths in Ecig scenario,

| Age Group:All | NULL    | Ecig       | %Drop     |          |        | NULL   | Ecig    | Drop   |        |       |
|---------------|---------|------------|-----------|----------|--------|--------|---------|--------|--------|-------|
| Year          | Number  | Attrib     | Attrib    | Drop     | %Drop  | Attrib | Death   | Attrib | Attrib | Drop  |
|               | Deaths  | Deaths     | Deaths    | Deaths   | Deaths | Deaths | Rate    | Rates  | Rates  | Rates |
| All Comb      | 1352207 | 104899.750 | 86668.100 | 18231.65 | 1.348  | 17.380 | 371.243 | 28.800 | 23.794 | 5.005 |

#### Results for Age Groups Combined, Population unadjusted for deaths in Ecig scenario,

| Age Group:All | NULL   | Ecig     | %Drop    |         |        | NULL   | Ecig    | Drop   |        |       |
|---------------|--------|----------|----------|---------|--------|--------|---------|--------|--------|-------|
| Year          | Number | Attrib   | Attrib   | Drop    | %Drop  | Attrib | Death   | Attrib | Attrib | Drop  |
|               | Deaths | Deaths   | Deaths   | Deaths  | Deaths | Deaths | Rate    | Rates  | Rates  | Rates |
| 1990          | 33504  | 3293.017 | 3293.017 | 0.000   | 0.000  | 0.000  | 490.678 | 48.227 | 48.227 | 0.000 |
| 1991          | 32505  | 3207.063 | 3200.117 | 6.946   | 0.021  | 0.217  | 469.694 | 46.342 | 46.241 | 0.100 |
| 1992          | 32560  | 3218.125 | 3199.463 | 18.662  | 0.057  | 0.580  | 464.104 | 45.871 | 45.604 | 0.266 |
| 1993          | 32768  | 3226.680 | 3189.786 | 36.894  | 0.113  | 1.143  | 460.480 | 45.344 | 44.825 | 0.518 |
| 1994          | 33005  | 3277.266 | 3216.480 | 60.786  | 0.184  | 1.855  | 456.915 | 45.370 | 44.528 | 0.842 |
| 1995          | 33730  | 3309.378 | 3219.287 | 90.092  | 0.267  | 2.722  | 459.716 | 45.104 | 43.877 | 1.228 |
| 1996          | 33750  | 3312.987 | 3186.961 | 126.025 | 0.373  | 3.804  | 454.019 | 44.568 | 42.872 | 1.695 |
| 1997          | 33699  | 3267.066 | 3102.281 | 164.785 | 0.489  | 5.044  | 447.056 | 43.341 | 41.155 | 2.186 |
| 1998          | 33274  | 3178.725 | 2977.942 | 200.783 | 0.603  | 6.316  | 435.211 | 41.577 | 38.950 | 2.626 |
| 1999          | 33891  | 3120.351 | 2881.900 | 238.451 | 0.704  | 7.642  | 437.317 | 40.264 | 37.187 | 3.077 |
| 2000          | 33827  | 3142.808 | 2856.575 | 286.233 | 0.846  | 9.108  | 431.074 | 40.050 | 36.403 | 3.648 |
| 2001          | 32506  | 2961.588 | 2649.251 | 312.337 | 0.961  | 10.546 | 409.647 | 37.323 | 33.386 | 3.936 |
| 2002          | 32078  | 2940.627 | 2579.506 | 361.121 | 1.126  | 12.280 | 400.295 | 36.695 | 32.189 | 4.506 |
| 2003          | 30568  | 2819.545 | 2426.835 | 392.710 | 1.285  | 13.928 | 377.883 | 34.855 | 30.001 | 4.855 |
| 2004          | 29388  | 2730.466 | 2306.957 | 423.509 | 1.441  | 15.510 | 359.671 | 33.417 | 28.234 | 5.183 |
| 2005          | 27954  | 2670.510 | 2211.948 | 458.562 | 1.640  | 17.171 | 338.339 | 32.322 | 26.772 | 5.550 |
| 2006          | 27201  | 2623.285 | 2129.687 | 493.598 | 1.815  | 18.816 | 326.354 | 31.474 | 25.552 | 5.922 |
| 2007          | 26302  | 2536.599 | 2021.476 | 515.123 | 1.958  | 20.308 | 312.424 | 30.131 | 24.012 | 6.119 |
| 2008          | 25998  | 2469.443 | 1936.676 | 532.767 | 2.049  | 21.574 | 305.468 | 29.015 | 22.755 | 6.260 |
| 2009          | 25040  | 2386.945 | 1842.544 | 544.401 | 2.174  | 22.807 | 290.901 | 27.730 | 21.406 | 6.325 |
| 2010          | 24840  | 2329.274 | 1773.409 | 555.865 | 2.238  | 23.864 | 285.273 | 26.750 | 20.367 | 6.384 |
| 2011          | 24792  | 2286.581 | 1712.204 | 574.376 | 2.317  | 25.119 | 282.045 | 26.013 | 19.479 | 6.534 |
| 2012          | 24500  | 2243.311 | 1651.225 | 592.086 | 2.417  | 26.393 | 275.872 | 25.260 | 18.593 | 6.667 |
| 2013          | 24451  | 2176.503 | 1577.365 | 599.138 | 2.450  | 27.528 | 272.368 | 24.245 | 17.571 | 6.674 |
| 2014          | 25296  | 2211.619 | 1583.657 | 627.962 | 2.482  | 28.394 | 278.691 | 24.366 | 17.447 | 6.918 |
| 2015          | 26316  | 2237.016 | 1584.981 | 652.035 | 2.478  | 29.148 | 324.141 | 27.554 | 19.523 | 8.031 |
| 2016          | 26735  | 2229.057 | 1564.464 | 664.593 | 2.486  | 29.815 | 326.164 | 27.194 | 19.086 | 8.108 |
| 2017          | 27616  | 2221.649 | 1546.221 | 675.429 | 2.446  | 30.402 | 333.726 | 26.848 | 18.685 | 8.162 |
| 2018          | 25256  | 1939.420 | 1343.006 | 596.414 | 2.362  | 30.752 | 302.304 | 23.214 | 16.075 | 7.139 |
| 2019          | 25429  | 1904.400 | 1312.092 | 592.307 | 2.329  | 31.102 | 301.434 | 22.574 | 15.553 | 7.021 |
| 2020          | 25379  | 1806.054 | 1235.962 | 570.092 | 2.246  | 31.566 | 340.922 | 24.261 | 16.603 | 7.658 |
| 2021          | 25448  | 1748.172 | 1190.540 | 557.632 | 2.191  | 31.898 | 339.386 | 23.314 | 15.877 | 7.437 |
| 2022          | 25539  | 1701.148 | 1155.373 | 545.775 | 2.137  | 32.083 | 338.015 | 22.515 | 15.292 | 7.223 |
| 2023          | 25620  | 1652.087 | 1124.113 | 527.973 | 2.061  | 31.958 | 336.461 | 21.696 | 14.762 | 6.934 |
| 2024          | 25659  | 1597.127 | 1089.786 | 507.341 | 1.977  | 31.766 | 334.391 | 20.814 | 14.202 | 6.612 |
| 2025          | 25260  | 1467.622 | 996.876  | 470.746 | 1.864  | 32.075 | 379.931 | 22.075 | 14.994 | 7.081 |
| 2026          | 25480  | 1390.505 | 953.000  | 437.505 | 1.717  | 31.464 | 381.790 | 20.835 | 14.280 | 6.556 |
| 2027          | 25264  | 1342.095 | 926.500  | 415.596 | 1.645  | 30.966 | 377.042 | 20.030 | 13.827 | 6.202 |
| 2028          | 25022  | 1289.536 | 901.952  | 387.584 | 1.549  | 30.056 | 371.870 | 19.165 | 13.405 | 5.760 |
| 2029          | 24767  | 1242.216 | 880.882  | 361.334 | 1.459  | 29.088 | 366.459 | 18.380 | 13.034 | 5.346 |
| 2030          | 23959  | 1096.803 | 771.704  | 325.099 | 1.357  | 29.641 | 419.641 | 19.210 | 13.516 | 5.694 |
| 2031          | 23963  | 1019.991 | 731.189  | 288.802 | 1.205  | 28.314 | 419.142 | 17.841 | 12.789 | 5.052 |
| 2032          | 23615  | 977.406  | 710.267  | 267.139 | 1.131  | 27.331 | 412.259 | 17.063 | 12.399 | 4.664 |
| 2033          | 23259  | 937.450  | 696.071  | 241.378 | 1.038  | 25.748 | 405.051 | 16.326 | 12.122 | 4.204 |
| 2034          | 22879  | 900.763  | 680.583  | 220.180 | 0.962  | 24.444 | 397.339 | 15.644 | 11.820 | 3.824 |
| 2035          | 21733  | 745.023  | 556.299  | 188.724 | 0.868  | 25.331 | 462.224 | 15.845 | 11.831 | 4.014 |
| 2036          | 20904  | 680.360  | 517.977  | 162.382 | 0.777  | 23.867 | 445.263 | 14.492 | 11.033 | 3.459 |
| 2037          | 20397  | 644.109  | 502.424  | 141.685 | 0.695  | 21.997 | 434.791 | 13.730 | 10.710 | 3.020 |
| 2038          | 19890  | 612.448  | 490.377  | 122.071 | 0.614  | 19.932 | 423.966 | 13.055 | 10.453 | 2.602 |
| 2039          | 19392  | 577.529  | 478.907  | 98.622  | 0.509  | 17.077 | 412.930 | 12.298 | 10.198 | 2.100 |

## Results for PHIM for Run 2 (Pessimistic\_Analysis.RTF)

\*\*\*\*\*

### Main Results for E-Component for Run: 2, Simulation: 1, COD: COPD

| Variable Parameter          | Value                                  |
|-----------------------------|----------------------------------------|
| 1. Country                  | US (United States)                     |
| 2. Sex                      | F (Females)                            |
| 3. Year of start of process | 1990                                   |
| 4. Cause of Death           | COPD                                   |
| 5. Effective Dose NULL      | CC:1                                   |
| 6. Effective Dose Ecig      | CC:1 Ecig:0.4 Dual:0.7                 |
| Note:                       | Death rates are per million population |

### Results for Age Groups Combined and Years combined, Population unadjusted for deaths in Ecig scenario,

| Age Group:All | NULL    | Ecig       | %Drop      |          |        | NULL   | Ecig    | Drop    |         |        |
|---------------|---------|------------|------------|----------|--------|--------|---------|---------|---------|--------|
| Year          | Number  | Attrib     | Attrib     | Drop     | %Drop  | Attrib | Death   | Attrib  | Attrib  | Drop   |
|               | Deaths  | Deaths     | Deaths     | Deaths   | Deaths | Deaths | Rate    | Rates   | Rates   | Rates  |
| All Comb      | 2159941 | 862051.244 | 766376.319 | 95674.92 | 4.430  | 11.099 | 593.003 | 236.673 | 210.406 | 26.267 |

### Results for Age Groups Combined, Population unadjusted for deaths in Ecig scenario,

| Age Group:All | NULL   | Ecig      | %Drop     |          |        | NULL   | Ecig    | Drop    |         |        |
|---------------|--------|-----------|-----------|----------|--------|--------|---------|---------|---------|--------|
| Year          | Number | Attrib    | Attrib    | Drop     | %Drop  | Attrib | Death   | Attrib  | Attrib  | Drop   |
|               | Deaths | Deaths    | Deaths    | Deaths   | Deaths | Deaths | Rate    | Rates   | Rates   | Rates  |
| 1990          | 24738  | 10694.712 | 10694.712 | 0.000    | 0.000  | 0.000  | 362.296 | 156.628 | 156.628 | 0.000  |
| 1991          | 26562  | 11602.933 | 11598.462 | 4.471    | 0.017  | 0.039  | 383.818 | 167.661 | 167.597 | 0.065  |
| 1992          | 26828  | 11831.375 | 11822.232 | 9.142    | 0.034  | 0.077  | 382.401 | 168.642 | 168.512 | 0.130  |
| 1993          | 29774  | 13246.371 | 13226.791 | 19.581   | 0.066  | 0.148  | 418.406 | 186.148 | 185.873 | 0.275  |
| 1994          | 29804  | 13355.662 | 13326.487 | 29.175   | 0.098  | 0.218  | 412.601 | 184.893 | 184.490 | 0.404  |
| 1995          | 29755  | 13397.439 | 13354.021 | 43.419   | 0.146  | 0.324  | 405.540 | 182.598 | 182.006 | 0.592  |
| 1996          | 30900  | 13960.356 | 13903.978 | 56.378   | 0.182  | 0.404  | 415.680 | 187.801 | 187.042 | 0.758  |
| 1997          | 31128  | 14109.552 | 14031.859 | 77.693   | 0.250  | 0.551  | 412.949 | 187.180 | 186.149 | 1.031  |
| 1998          | 32096  | 14599.657 | 14484.105 | 115.552  | 0.360  | 0.791  | 419.803 | 190.958 | 189.447 | 1.511  |
| 1999          | 34616  | 15728.102 | 15567.611 | 160.492  | 0.464  | 1.020  | 446.673 | 202.950 | 200.879 | 2.071  |
| 2000          | 34299  | 15579.803 | 15374.454 | 205.349  | 0.599  | 1.318  | 437.088 | 198.541 | 195.924 | 2.617  |
| 2001          | 34592  | 15696.614 | 15445.148 | 251.466  | 0.727  | 1.602  | 435.935 | 197.812 | 194.643 | 3.169  |
| 2002          | 34291  | 15519.777 | 15205.904 | 313.873  | 0.915  | 2.022  | 427.910 | 193.668 | 189.751 | 3.917  |
| 2003          | 35074  | 15888.389 | 15503.500 | 384.889  | 1.097  | 2.422  | 433.587 | 196.413 | 191.655 | 4.758  |
| 2004          | 33512  | 15091.573 | 14653.537 | 438.036  | 1.307  | 2.903  | 410.143 | 184.701 | 179.340 | 5.361  |
| 2005          | 35392  | 15803.656 | 15266.114 | 537.542  | 1.519  | 3.401  | 428.364 | 191.278 | 184.772 | 6.506  |
| 2006          | 33981  | 15100.563 | 14510.895 | 589.669  | 1.735  | 3.905  | 407.699 | 181.174 | 174.100 | 7.075  |
| 2007          | 34000  | 14974.384 | 14300.446 | 673.937  | 1.982  | 4.501  | 403.863 | 177.871 | 169.865 | 8.005  |
| 2008          | 37425  | 16406.197 | 15594.239 | 811.958  | 2.170  | 4.949  | 439.732 | 192.768 | 183.227 | 9.540  |
| 2009          | 36826  | 16083.194 | 15191.460 | 891.734  | 2.421  | 5.545  | 427.825 | 186.846 | 176.486 | 10.360 |
| 2010          | 36788  | 15927.400 | 14957.315 | 970.085  | 2.637  | 6.091  | 422.489 | 182.917 | 171.776 | 11.141 |
| 2011          | 37636  | 16221.836 | 15111.588 | 1110.248 | 2.950  | 6.844  | 428.164 | 184.547 | 171.916 | 12.631 |
| 2012          | 38265  | 16358.849 | 15142.459 | 1216.390 | 3.179  | 7.436  | 430.867 | 184.202 | 170.506 | 13.697 |
| 2013          | 40112  | 16994.822 | 15619.056 | 1375.767 | 3.430  | 8.095  | 446.821 | 189.311 | 173.986 | 15.325 |
| 2014          | 40084  | 16855.093 | 15370.435 | 1484.658 | 3.704  | 8.808  | 441.613 | 185.696 | 169.339 | 16.357 |
| 2015          | 42200  | 17572.483 | 15933.340 | 1639.143 | 3.884  | 9.328  | 519.788 | 216.445 | 196.255 | 20.190 |
| 2016          | 42606  | 17579.955 | 15801.557 | 1778.398 | 4.174  | 10.116 | 519.788 | 214.473 | 192.777 | 21.696 |
| 2017          | 44364  | 18080.688 | 16115.869 | 1964.820 | 4.429  | 10.867 | 536.117 | 218.496 | 194.752 | 23.744 |
| 2018          | 45359  | 18209.262 | 16082.621 | 2126.641 | 4.688  | 11.679 | 542.932 | 217.960 | 192.504 | 25.455 |
| 2019          | 46876  | 18648.302 | 16326.360 | 2321.942 | 4.953  | 12.451 | 555.657 | 221.054 | 193.530 | 27.524 |
| 2020          | 48331  | 19002.597 | 16518.080 | 2484.517 | 5.141  | 13.075 | 649.239 | 255.266 | 221.891 | 33.375 |
| 2021          | 48338  | 18885.717 | 16257.622 | 2628.095 | 5.437  | 13.916 | 644.660 | 251.867 | 216.818 | 35.049 |
| 2022          | 49708  | 19235.076 | 16415.275 | 2819.801 | 5.673  | 14.660 | 657.895 | 254.582 | 217.261 | 37.321 |
| 2023          | 51083  | 19521.158 | 16551.276 | 2969.882 | 5.814  | 15.214 | 670.849 | 256.363 | 217.361 | 39.002 |
| 2024          | 52397  | 19918.620 | 16748.882 | 3169.737 | 6.049  | 15.913 | 682.854 | 259.583 | 218.275 | 41.309 |
| 2025          | 53387  | 20150.545 | 16846.041 | 3304.504 | 6.190  | 16.399 | 803.004 | 303.086 | 253.383 | 49.703 |
| 2026          | 54232  | 20393.792 | 16883.439 | 3510.354 | 6.473  | 17.213 | 812.615 | 305.582 | 252.983 | 52.599 |
| 2027          | 55049  | 20615.351 | 16912.426 | 3702.925 | 6.727  | 17.962 | 821.568 | 307.668 | 252.405 | 55.263 |
| 2028          | 55809  | 20731.894 | 16889.667 | 3842.227 | 6.885  | 18.533 | 829.419 | 308.115 | 251.012 | 57.103 |
| 2029          | 56527  | 20781.967 | 16820.029 | 3961.938 | 7.009  | 19.064 | 836.392 | 307.495 | 248.873 | 58.622 |
| 2030          | 56756  | 20753.201 | 16684.962 | 4068.239 | 7.168  | 19.603 | 994.067 | 363.487 | 292.233 | 71.254 |
| 2031          | 58288  | 21048.417 | 16903.997 | 4144.420 | 7.110  | 19.690 | 1019.54 | 368.165 | 295.673 | 72.491 |
| 2032          | 58782  | 21169.329 | 16902.187 | 4267.142 | 7.259  | 20.157 | 1026.18 | 369.560 | 295.067 | 74.493 |
| 2033          | 59236  | 21109.293 | 16831.825 | 4277.468 | 7.221  | 20.263 | 1031.59 | 367.618 | 293.126 | 74.492 |
| 2034          | 59614  | 21109.429 | 16780.942 | 4328.486 | 7.261  | 20.505 | 1035.33 | 366.613 | 291.439 | 75.174 |
| 2035          | 58938  | 20794.840 | 16431.521 | 4363.319 | 7.403  | 20.983 | 1253.51 | 442.268 | 349.468 | 92.800 |
| 2036          | 56014  | 19354.577 | 15256.724 | 4097.853 | 7.316  | 21.173 | 1193.11 | 412.258 | 324.972 | 87.285 |
| 2037          | 55953  | 19064.169 | 14967.521 | 4096.648 | 7.322  | 21.489 | 1192.72 | 406.385 | 319.058 | 87.327 |
| 2038          | 55859  | 18854.812 | 14788.593 | 4066.219 | 7.279  | 21.566 | 1190.66 | 401.900 | 315.226 | 86.673 |
| 2039          | 55757  | 18437.457 | 14468.753 | 3968.704 | 7.118  | 21.525 | 1187.28 | 392.602 | 308.093 | 84.508 |

## Results for PHIM for Run 2 (Pessimistic\_Analysis.RTF)

\*\*\*\*\*

### Main Results for E-Component for Run: 2, Simulation: 1, COD: Four Diseases Combined, Adjusted

| Variable Parameter          | Value                                  |
|-----------------------------|----------------------------------------|
| 1. Country                  | US (United States)                     |
| 2. Sex                      | F (Females)                            |
| 3. Year of start of process | 1990                                   |
| 4. Cause of Death           | Four Diseases Combined                 |
| 5. Effective Dose NULL      | CC:1                                   |
| 6. Effective Dose Ecig      | CC:1 Ecig:0.4 Dual:0.7                 |
| Note:                       | Death rates are per million population |

#### Results for Age Groups Combined and Years combined, Population and Number deaths adjusted for Ecig scenario,

| Age Group:All |         | NULL        | Ecig        | %Drop    |        |        | NULL    | Ecig    | Drop    |        |
|---------------|---------|-------------|-------------|----------|--------|--------|---------|---------|---------|--------|
| Year          | Number  | Attrib      | Attrib      | Drop     | %Drop  | Attrib | Death   | Attrib  | Attrib  | Drop   |
|               | Deaths  | Deaths      | Deaths      | Deaths   | Deaths | Deaths | Rate    | Rates   | Rates   | Rates  |
| All Comb      | 9098863 | 2946250.006 | 2663836.376 | 282413.6 | 3.104  | 9.586  | 2494.62 | 808.881 | 730.341 | 78.540 |

#### Results for Age Groups Combined, Population and Number deaths adjusted for Ecig scenario,

| Age Group:All |        | NULL      | Ecig      | %Drop    |        |        | NULL    | Ecig    | Drop    |         |
|---------------|--------|-----------|-----------|----------|--------|--------|---------|---------|---------|---------|
| Year          | Number | Attrib    | Attrib    | Drop     | %Drop  | Attrib | Death   | Attrib  | Attrib  | Drop    |
|               | Deaths | Deaths    | Deaths    | Deaths   | Deaths | Deaths | Rate    | Rates   | Rates   | Rates   |
| 1990          | 199848 | 57524.822 | 57524.822 | 0.000    | 0.000  | 0.000  | 2926.84 | 842.471 | 842.471 | 0.000   |
| 1991          | 199162 | 59078.486 | 59034.753 | 43.732   | 0.022  | 0.074  | 2877.87 | 853.678 | 853.047 | 0.632   |
| 1992          | 198532 | 60494.150 | 60380.268 | 113.881  | 0.057  | 0.188  | 2829.84 | 862.271 | 860.648 | 1.624   |
| 1993          | 202513 | 62694.848 | 62470.874 | 223.973  | 0.111  | 0.357  | 2845.85 | 881.034 | 877.884 | 3.149   |
| 1994          | 200659 | 63202.598 | 62848.772 | 353.825  | 0.176  | 0.560  | 2777.87 | 874.966 | 870.063 | 4.903   |
| 1995          | 201025 | 63766.862 | 63247.599 | 519.263  | 0.258  | 0.814  | 2739.80 | 869.097 | 862.011 | 7.086   |
| 1996          | 201183 | 64591.163 | 63881.571 | 709.592  | 0.353  | 1.099  | 2706.35 | 868.908 | 859.347 | 9.561   |
| 1997          | 198644 | 64686.912 | 63777.657 | 909.255  | 0.458  | 1.406  | 2635.16 | 858.147 | 846.061 | 12.086  |
| 1998          | 197579 | 65295.961 | 64138.468 | 1157.493 | 0.586  | 1.773  | 2584.16 | 854.046 | 838.873 | 15.173  |
| 1999          | 211339 | 67327.521 | 65786.860 | 1540.661 | 0.729  | 2.288  | 2726.89 | 868.771 | 848.843 | 19.928  |
| 2000          | 208510 | 67596.897 | 65754.023 | 1842.874 | 0.884  | 2.726  | 2656.94 | 861.419 | 837.870 | 23.549  |
| 2001          | 203626 | 67008.811 | 64875.978 | 2132.832 | 1.047  | 3.183  | 2565.87 | 844.458 | 817.497 | 26.962  |
| 2002          | 200854 | 67067.744 | 64554.936 | 2512.807 | 1.251  | 3.747  | 2506.09 | 836.925 | 805.463 | 31.462  |
| 2003          | 196386 | 66756.217 | 63916.588 | 2839.628 | 1.446  | 4.254  | 2427.34 | 825.244 | 790.011 | 35.233  |
| 2004          | 188202 | 65058.725 | 61919.351 | 3139.374 | 1.668  | 4.825  | 2302.89 | 796.234 | 757.660 | 38.575  |
| 2005          | 186469 | 65214.724 | 61705.025 | 3509.699 | 1.882  | 5.382  | 2256.36 | 789.321 | 746.660 | 42.661  |
| 2006          | 180151 | 63771.146 | 59945.585 | 3825.560 | 2.124  | 5.999  | 2160.80 | 765.117 | 719.011 | 46.106  |
| 2007          | 175719 | 63110.718 | 58978.874 | 4131.844 | 2.351  | 6.547  | 2086.54 | 749.650 | 700.333 | 49.317  |
| 2008          | 177660 | 63718.624 | 59198.056 | 4520.568 | 2.545  | 7.095  | 2086.63 | 748.674 | 695.285 | 53.388  |
| 2009          | 172909 | 62794.698 | 58041.613 | 4753.085 | 2.749  | 7.569  | 2007.86 | 729.515 | 673.993 | 55.522  |
| 2010          | 170606 | 61917.074 | 56886.172 | 5030.901 | 2.949  | 8.125  | 1958.32 | 711.083 | 652.972 | 58.111  |
| 2011          | 170439 | 61680.114 | 56233.386 | 5446.728 | 3.196  | 8.831  | 1937.88 | 701.700 | 639.369 | 62.331  |
| 2012          | 171574 | 62023.127 | 56182.893 | 5840.234 | 3.404  | 9.416  | 1930.71 | 698.386 | 632.220 | 66.166  |
| 2013          | 172873 | 62037.765 | 55849.059 | 6188.706 | 3.580  | 9.976  | 1924.32 | 691.059 | 621.679 | 69.380  |
| 2014          | 174366 | 61921.017 | 55339.472 | 6581.546 | 3.775  | 10.629 | 1919.51 | 682.195 | 609.207 | 72.988  |
| 2015          | 177578 | 61856.204 | 54953.073 | 6903.131 | 3.887  | 11.160 | 2185.16 | 761.899 | 676.217 | 85.681  |
| 2016          | 177100 | 60464.119 | 53291.635 | 7172.483 | 4.050  | 11.862 | 2158.31 | 737.655 | 649.465 | 88.190  |
| 2017          | 179584 | 60243.839 | 52722.402 | 7521.437 | 4.188  | 12.485 | 2167.69 | 728.017 | 636.392 | 91.625  |
| 2018          | 177454 | 60713.327 | 52913.294 | 7800.033 | 4.396  | 12.847 | 2121.43 | 726.721 | 632.568 | 94.153  |
| 2019          | 179557 | 61148.172 | 52984.961 | 8163.211 | 4.546  | 13.350 | 2125.59 | 724.841 | 627.232 | 97.609  |
| 2020          | 180832 | 61149.317 | 52750.196 | 8399.120 | 4.645  | 13.735 | 2425.21 | 821.432 | 707.452 | 113.980 |
| 2021          | 178510 | 58727.786 | 50183.784 | 8544.002 | 4.786  | 14.548 | 2376.52 | 783.216 | 668.102 | 115.114 |
| 2022          | 179838 | 58848.802 | 50004.781 | 8844.022 | 4.918  | 15.028 | 2375.78 | 778.881 | 660.594 | 118.286 |
| 2023          | 181107 | 58816.149 | 49798.215 | 9017.935 | 4.979  | 15.332 | 2373.68 | 772.407 | 652.681 | 119.726 |
| 2024          | 182114 | 58955.232 | 49689.114 | 9266.118 | 5.088  | 15.717 | 2368.35 | 768.316 | 646.195 | 122.121 |
| 2025          | 180961 | 58297.744 | 48984.638 | 9313.106 | 5.146  | 15.975 | 2715.00 | 876.861 | 734.931 | 141.930 |
| 2026          | 180895 | 56469.971 | 47093.011 | 9376.959 | 5.184  | 16.605 | 2703.35 | 846.150 | 703.772 | 142.378 |
| 2027          | 180238 | 56209.427 | 46647.688 | 9561.739 | 5.305  | 17.011 | 2682.40 | 838.883 | 694.235 | 144.648 |
| 2028          | 179420 | 55733.105 | 46121.334 | 9611.771 | 5.357  | 17.246 | 2658.68 | 828.298 | 683.435 | 144.863 |
| 2029          | 178504 | 55145.838 | 45516.071 | 9629.767 | 5.395  | 17.462 | 2633.05 | 815.951 | 671.392 | 144.559 |
| 2030          | 174318 | 53615.097 | 44047.718 | 9567.378 | 5.488  | 17.845 | 3042.05 | 939.056 | 768.684 | 170.372 |
| 2031          | 175768 | 52046.561 | 42747.036 | 9299.525 | 5.291  | 17.868 | 3062.73 | 910.364 | 744.862 | 165.501 |
| 2032          | 174220 | 51582.636 | 42274.754 | 9307.882 | 5.343  | 18.045 | 3029.37 | 900.496 | 735.083 | 165.413 |
| 2033          | 172614 | 50839.758 | 41741.794 | 9097.964 | 5.271  | 17.895 | 2993.70 | 885.375 | 723.940 | 161.435 |
| 2034          | 170866 | 50215.451 | 41236.926 | 8978.526 | 5.255  | 17.880 | 2954.80 | 872.104 | 713.112 | 158.991 |
| 2035          | 163561 | 47773.075 | 39010.468 | 8762.607 | 5.357  | 18.342 | 3461.37 | 1016.05 | 825.562 | 190.483 |
| 2036          | 157174 | 43298.709 | 35335.090 | 7963.619 | 5.067  | 18.392 | 3330.62 | 922.274 | 748.775 | 173.499 |
| 2037          | 154539 | 42241.563 | 34470.033 | 7771.530 | 5.029  | 18.398 | 3276.78 | 900.450 | 730.889 | 169.562 |
| 2038          | 151916 | 41356.353 | 33845.392 | 7510.960 | 4.944  | 18.162 | 3220.49 | 881.531 | 717.492 | 164.039 |
| 2039          | 149366 | 40161.050 | 33000.309 | 7160.741 | 4.794  | 17.830 | 3162.71 | 855.178 | 698.759 | 156.419 |

## Results for PHIM for Run 2 (Pessimistic\_Analysis.RTF)

\*\*\*\*\*

### Main Results for E-Component for Run: 2, Simulation: 1, COD: LUNG CANCER, Adjusted

| Variable Parameter          | Value                                  |
|-----------------------------|----------------------------------------|
| 1. Country                  | US (United States)                     |
| 2. Sex                      | F (Females)                            |
| 3. Year of start of process | 1990                                   |
| 4. Cause of Death           | LUNG CANCER                            |
| 5. Effective Dose NULL      | CC:1                                   |
| 6. Effective Dose Ecig      | CC:1 Ecig:0.4 Dual:0.7                 |
| Note:                       | Death rates are per million population |

### Results for Age Groups Combined and Years combined, Population and Number deaths adjusted for Ecig scenario,

| Age Group: | NULL    | Ecig        | %Drop       |          |        |        | NULL    | Ecig    | Drop    |        |
|------------|---------|-------------|-------------|----------|--------|--------|---------|---------|---------|--------|
| Year       | Number  | Attrib      | Attrib      | Drop     | %Drop  | Attrib | Death   | Attrib  | Attrib  | Drop   |
|            | Deaths  | Deaths      | Deaths      | Deaths   | Deaths | Deaths | Rate    | Rates   | Rates   | Rates  |
| All Comb   | 2331914 | 1580465.217 | 1476306.165 | 104159.1 | 4.467  | 6.590  | 639.338 | 433.910 | 404.757 | 29.153 |

### Results for Age Groups Combined, Population and Number deaths adjusted for Ecig scenario,

| Age Group: | NULL   | Ecig      | %Drop     |          |        |        | NULL    | Ecig    | Drop    |        |
|------------|--------|-----------|-----------|----------|--------|--------|---------|---------|---------|--------|
| Year       | Number | Attrib    | Attrib    | Drop     | %Drop  | Attrib | Death   | Attrib  | Attrib  | Drop   |
|            | Deaths | Deaths    | Deaths    | Deaths   | Deaths | Deaths | Rate    | Rates   | Rates   | Rates  |
| 1990       | 42690  | 30614.201 | 30614.201 | 0.000    | 0.000  | 0.000  | 625.210 | 448.355 | 448.355 | 0.000  |
| 1991       | 43692  | 31412.010 | 31404.310 | 7.700    | 0.018  | 0.025  | 631.345 | 453.901 | 453.789 | 0.111  |
| 1992       | 45423  | 32782.407 | 32763.048 | 19.358   | 0.043  | 0.059  | 647.450 | 467.274 | 466.998 | 0.276  |
| 1993       | 46291  | 33491.183 | 33451.874 | 39.309   | 0.085  | 0.117  | 650.515 | 470.643 | 470.089 | 0.553  |
| 1994       | 47017  | 34074.347 | 34011.909 | 62.438   | 0.133  | 0.183  | 650.895 | 471.719 | 470.852 | 0.867  |
| 1995       | 47841  | 34694.454 | 34598.585 | 95.869   | 0.200  | 0.276  | 652.026 | 472.861 | 471.549 | 1.312  |
| 1996       | 48245  | 35027.269 | 34897.071 | 130.197  | 0.270  | 0.372  | 648.999 | 471.202 | 469.442 | 1.760  |
| 1997       | 49036  | 35590.763 | 35411.191 | 179.571  | 0.366  | 0.505  | 650.506 | 472.153 | 469.758 | 2.395  |
| 1998       | 49688  | 36100.785 | 35852.454 | 248.331  | 0.500  | 0.688  | 649.874 | 472.184 | 468.917 | 3.267  |
| 1999       | 48886  | 35451.030 | 35141.527 | 309.502  | 0.633  | 0.873  | 630.770 | 457.448 | 453.428 | 4.019  |
| 2000       | 50335  | 36447.986 | 36045.693 | 402.293  | 0.799  | 1.104  | 641.396 | 464.474 | 459.312 | 5.162  |
| 2001       | 50395  | 36411.326 | 35924.369 | 486.957  | 0.966  | 1.337  | 635.021 | 458.863 | 452.680 | 6.183  |
| 2002       | 51453  | 37078.545 | 36470.249 | 608.296  | 1.182  | 1.641  | 641.985 | 462.696 | 455.045 | 7.650  |
| 2003       | 51418  | 36999.876 | 36280.460 | 719.416  | 1.399  | 1.944  | 635.530 | 457.395 | 448.428 | 8.967  |
| 2004       | 51412  | 36861.555 | 36014.758 | 846.797  | 1.647  | 2.297  | 629.088 | 451.138 | 440.685 | 10.453 |
| 2005       | 51437  | 36689.529 | 35714.027 | 975.502  | 1.897  | 2.659  | 622.411 | 444.069 | 432.157 | 11.912 |
| 2006       | 51374  | 36504.774 | 35389.170 | 1115.604 | 2.172  | 3.056  | 616.205 | 437.979 | 424.471 | 13.508 |
| 2007       | 51862  | 36663.202 | 35380.436 | 1282.766 | 2.473  | 3.499  | 615.831 | 435.498 | 420.118 | 15.380 |
| 2008       | 51003  | 35898.803 | 34507.001 | 1391.802 | 2.729  | 3.877  | 599.037 | 421.800 | 405.287 | 16.512 |
| 2009       | 51225  | 35934.525 | 34386.328 | 1548.198 | 3.022  | 4.308  | 594.836 | 417.468 | 399.302 | 18.166 |
| 2010       | 50889  | 35502.829 | 33819.070 | 1683.759 | 3.309  | 4.743  | 584.138 | 407.730 | 388.195 | 19.535 |
| 2011       | 50550  | 35136.342 | 33278.198 | 1858.144 | 3.676  | 5.288  | 574.751 | 399.726 | 378.730 | 21.356 |
| 2012       | 51292  | 35450.201 | 33409.887 | 2040.314 | 3.978  | 5.755  | 577.186 | 399.173 | 375.958 | 23.215 |
| 2013       | 51122  | 35123.224 | 32919.385 | 2203.839 | 4.311  | 6.275  | 569.059 | 391.249 | 366.439 | 24.810 |
| 2014       | 51310  | 35079.370 | 32704.233 | 2375.137 | 4.629  | 6.771  | 564.852 | 386.476 | 360.026 | 26.450 |
| 2015       | 50508  | 34324.171 | 31847.947 | 2476.224 | 4.903  | 7.214  | 621.520 | 422.780 | 391.901 | 30.879 |
| 2016       | 48924  | 33054.753 | 30488.959 | 2565.793 | 5.244  | 7.762  | 596.232 | 403.264 | 371.569 | 31.695 |
| 2017       | 48401  | 32471.234 | 29765.855 | 2705.379 | 5.590  | 8.332  | 584.228 | 392.399 | 359.292 | 33.107 |
| 2018       | 50551  | 33657.595 | 30627.658 | 3029.937 | 5.994  | 9.002  | 604.332 | 402.871 | 366.147 | 36.724 |
| 2019       | 51132  | 33863.424 | 30628.587 | 3234.837 | 6.326  | 9.553  | 605.292 | 401.412 | 362.579 | 38.833 |
| 2020       | 51549  | 33910.830 | 30515.991 | 3394.839 | 6.586  | 10.011 | 691.340 | 455.532 | 409.261 | 46.271 |
| 2021       | 48144  | 31531.880 | 28193.957 | 3337.923 | 6.933  | 10.586 | 640.952 | 420.521 | 375.349 | 45.172 |
| 2022       | 48452  | 31560.212 | 28048.962 | 3511.251 | 7.247  | 11.126 | 640.078 | 417.708 | 370.544 | 47.164 |
| 2023       | 48725  | 31508.781 | 27876.764 | 3632.018 | 7.454  | 11.527 | 638.620 | 413.791 | 365.367 | 48.424 |
| 2024       | 48920  | 31517.293 | 27736.814 | 3780.480 | 7.728  | 11.995 | 636.193 | 410.740 | 360.711 | 50.029 |
| 2025       | 48623  | 31175.389 | 27328.649 | 3846.740 | 7.911  | 12.339 | 729.503 | 468.912 | 410.020 | 58.892 |
| 2026       | 45471  | 29044.598 | 25326.583 | 3718.015 | 8.177  | 12.801 | 679.533 | 435.206 | 378.488 | 56.718 |
| 2027       | 45263  | 28825.765 | 25002.387 | 3823.378 | 8.447  | 13.264 | 673.634 | 430.203 | 372.098 | 58.104 |
| 2028       | 45007  | 28513.846 | 24642.193 | 3871.653 | 8.602  | 13.578 | 666.925 | 423.769 | 365.153 | 58.616 |
| 2029       | 44714  | 28148.109 | 24238.762 | 3909.346 | 8.743  | 13.888 | 659.561 | 416.486 | 357.537 | 58.949 |
| 2030       | 43576  | 27314.475 | 23422.018 | 3892.457 | 8.933  | 14.251 | 760.450 | 478.407 | 408.741 | 69.665 |
| 2031       | 40930  | 25423.102 | 21813.035 | 3610.066 | 8.820  | 14.200 | 713.198 | 444.684 | 380.090 | 64.594 |
| 2032       | 40516  | 25085.902 | 21468.063 | 3617.839 | 8.929  | 14.422 | 704.494 | 437.933 | 373.291 | 64.642 |
| 2033       | 40081  | 24645.067 | 21102.209 | 3542.858 | 8.839  | 14.376 | 695.131 | 429.194 | 365.981 | 63.212 |
| 2034       | 39611  | 24239.126 | 20745.610 | 3493.516 | 8.820  | 14.413 | 684.995 | 420.967 | 358.755 | 62.212 |
| 2035       | 37665  | 22944.147 | 19554.069 | 3390.077 | 9.001  | 14.775 | 797.095 | 487.980 | 413.815 | 74.165 |
| 2036       | 33181  | 19950.581 | 17028.592 | 2921.988 | 8.806  | 14.646 | 703.134 | 424.953 | 360.848 | 64.105 |
| 2037       | 32601  | 19415.334 | 16560.594 | 2854.740 | 8.757  | 14.704 | 691.259 | 413.871 | 351.144 | 62.726 |
| 2038       | 32022  | 18939.317 | 16196.283 | 2743.034 | 8.566  | 14.483 | 678.843 | 403.701 | 343.347 | 60.354 |
| 2039       | 31458  | 18379.752 | 15756.188 | 2623.564 | 8.340  | 14.274 | 666.102 | 391.373 | 333.626 | 57.747 |

## Results for PHIM for Run 2 (Pessimistic\_Analysis.RTF)

\*\*\*\*\*

### Main Results for E-Component for Run: 2, Simulation: 1, COD: IHD, Adjusted

| Variable Parameter          | Value                                  |
|-----------------------------|----------------------------------------|
| 1. Country                  | US (United States)                     |
| 2. Sex                      | F (Females)                            |
| 3. Year of start of process | 1990                                   |
| 4. Cause of Death           | IHD                                    |
| 5. Effective Dose NULL      | CC:1                                   |
| 6. Effective Dose Ecig      | CC:1 Ecig:0.4 Dual:0.7                 |
| Note:                       | Death rates are per million population |

### Results for Age Groups Combined and Years combined, Population and Number deaths adjusted for Ecig scenario,

| Age Group: | NULL    | Ecig       | %Drop      |          |        |        | NULL    | Ecig    | Drop   |        |
|------------|---------|------------|------------|----------|--------|--------|---------|---------|--------|--------|
| Year       | Number  | Attrib     | Attrib     | Drop     | %Drop  | Attrib | Death   | Attrib  | Attrib | Drop   |
|            | Deaths  | Deaths     | Deaths     | Deaths   | Deaths | Deaths | Rate    | Rates   | Rates  | Rates  |
| All Comb   | 3247109 | 398833.796 | 332784.329 | 66049.47 | 2.034  | 16.561 | 890.256 | 109.498 | 91.239 | 18.259 |

### Results for Age Groups Combined, Population and Number deaths adjusted for Ecig scenario,

| Age Group: | NULL   | Ecig      | %Drop     |          |        |        | NULL    | Ecig    | Drop    |        |
|------------|--------|-----------|-----------|----------|--------|--------|---------|---------|---------|--------|
| Year       | Number | Attrib    | Attrib    | Drop     | %Drop  | Attrib | Death   | Attrib  | Attrib  | Drop   |
|            | Deaths | Deaths    | Deaths    | Deaths   | Deaths | Deaths | Rate    | Rates   | Rates   | Rates  |
| 1990       | 98916  | 12922.892 | 12922.892 | 0.000    | 0.000  | 0.000  | 1448.66 | 189.260 | 189.260 | 0.000  |
| 1991       | 96403  | 12856.479 | 12831.863 | 24.616   | 0.026  | 0.191  | 1393.01 | 185.775 | 185.419 | 0.356  |
| 1992       | 93721  | 12662.244 | 12595.513 | 66.731   | 0.071  | 0.527  | 1335.88 | 180.485 | 179.534 | 0.951  |
| 1993       | 93679  | 12730.613 | 12602.386 | 128.227  | 0.137  | 1.007  | 1316.45 | 178.900 | 177.098 | 1.802  |
| 1994       | 90833  | 12495.323 | 12293.806 | 201.517  | 0.222  | 1.613  | 1257.46 | 172.983 | 170.192 | 2.791  |
| 1995       | 89699  | 12365.590 | 12075.539 | 290.051  | 0.323  | 2.346  | 1222.52 | 168.534 | 164.579 | 3.955  |
| 1996       | 88287  | 12290.551 | 11893.277 | 397.274  | 0.450  | 3.232  | 1187.66 | 165.338 | 159.991 | 5.347  |
| 1997       | 84779  | 11719.531 | 11231.899 | 487.632  | 0.575  | 4.161  | 1124.66 | 155.473 | 149.000 | 6.473  |
| 1998       | 82519  | 11416.794 | 10823.344 | 593.451  | 0.719  | 5.198  | 1079.28 | 149.327 | 141.559 | 7.768  |
| 1999       | 93943  | 13028.038 | 12194.865 | 833.174  | 0.887  | 6.395  | 1212.14 | 168.109 | 157.349 | 10.760 |
| 2000       | 90045  | 12426.299 | 11475.948 | 950.351  | 1.055  | 7.648  | 1147.40 | 158.354 | 146.232 | 12.122 |
| 2001       | 86127  | 11939.281 | 10855.325 | 1083.957 | 1.259  | 9.079  | 1085.28 | 150.461 | 136.787 | 13.674 |
| 2002       | 83024  | 11528.794 | 10296.841 | 1231.953 | 1.484  | 10.686 | 1035.91 | 143.865 | 128.475 | 15.390 |
| 2003       | 79315  | 11048.407 | 9702.575  | 1345.832 | 1.697  | 12.181 | 980.337 | 136.581 | 119.924 | 16.657 |
| 2004       | 73877  | 10375.132 | 8940.175  | 1434.957 | 1.942  | 13.831 | 903.976 | 126.978 | 109.394 | 17.584 |
| 2005       | 71669  | 10051.029 | 8507.880  | 1543.149 | 2.153  | 15.353 | 867.225 | 121.652 | 102.949 | 18.702 |
| 2006       | 67574  | 9542.523  | 7909.870  | 1632.653 | 2.416  | 17.109 | 810.511 | 114.490 | 94.874  | 19.616 |
| 2007       | 63529  | 8936.533  | 7269.486  | 1667.047 | 2.624  | 18.654 | 754.367 | 106.151 | 86.320  | 19.831 |
| 2008       | 63202  | 8944.180  | 7151.150  | 1793.030 | 2.837  | 20.047 | 742.318 | 105.091 | 83.991  | 21.101 |
| 2009       | 59782  | 8390.033  | 6611.016  | 1779.018 | 2.976  | 21.204 | 694.203 | 97.471  | 76.769  | 20.702 |
| 2010       | 58047  | 8157.570  | 6324.782  | 1832.787 | 3.157  | 22.467 | 666.302 | 93.685  | 72.599  | 21.086 |
| 2011       | 57413  | 8035.356  | 6118.097  | 1917.259 | 3.339  | 23.860 | 652.777 | 91.414  | 69.562  | 21.851 |
| 2012       | 57462  | 7970.766  | 5964.233  | 2006.533 | 3.492  | 25.174 | 646.611 | 89.752  | 67.115  | 22.637 |
| 2013       | 57124  | 7743.216  | 5715.882  | 2027.334 | 3.549  | 26.182 | 635.870 | 86.254  | 63.626  | 22.628 |
| 2014       | 57602  | 7774.935  | 5661.974  | 2112.962 | 3.668  | 27.177 | 634.117 | 85.658  | 62.330  | 23.328 |
| 2015       | 58468  | 7722.535  | 5564.696  | 2157.839 | 3.691  | 27.942 | 719.469 | 95.120  | 68.476  | 26.645 |
| 2016       | 58739  | 7600.353  | 5412.359  | 2187.994 | 3.725  | 28.788 | 715.854 | 92.723  | 65.960  | 26.763 |
| 2017       | 59094  | 7470.266  | 5267.224  | 2203.042 | 3.728  | 29.491 | 713.298 | 90.274  | 63.579  | 26.696 |
| 2018       | 56170  | 6907.050  | 4830.564  | 2076.486 | 3.697  | 30.063 | 671.503 | 82.675  | 57.748  | 24.927 |
| 2019       | 55988  | 6732.046  | 4685.169  | 2046.878 | 3.656  | 30.405 | 662.778 | 79.801  | 55.463  | 24.338 |
| 2020       | 55424  | 6429.836  | 4443.901  | 1985.935 | 3.583  | 30.886 | 743.315 | 86.373  | 59.599  | 26.775 |
| 2021       | 56415  | 6562.016  | 4502.605  | 2059.410 | 3.650  | 31.384 | 751.057 | 87.513  | 59.944  | 27.570 |
| 2022       | 55959  | 6352.366  | 4342.586  | 2009.780 | 3.592  | 31.638 | 739.250 | 84.075  | 57.368  | 26.707 |
| 2023       | 55479  | 6134.123  | 4199.831  | 1934.293 | 3.487  | 31.533 | 727.133 | 80.557  | 55.045  | 25.512 |
| 2024       | 54920  | 5922.193  | 4063.515  | 1858.677 | 3.384  | 31.385 | 714.216 | 77.179  | 52.845  | 24.334 |
| 2025       | 53453  | 5504.188  | 3758.930  | 1745.257 | 3.265  | 31.708 | 801.972 | 82.789  | 56.396  | 26.393 |
| 2026       | 55453  | 5641.075  | 3871.642  | 1769.434 | 3.191  | 31.367 | 828.705 | 84.526  | 57.859  | 26.667 |
| 2027       | 54382  | 5426.216  | 3743.922  | 1682.294 | 3.093  | 31.003 | 809.344 | 80.982  | 55.719  | 25.263 |
| 2028       | 53282  | 5197.830  | 3621.025  | 1576.805 | 2.959  | 30.336 | 789.539 | 77.249  | 53.657  | 23.592 |
| 2029       | 52173  | 4973.547  | 3505.927  | 1467.620 | 2.813  | 29.509 | 769.592 | 73.590  | 51.715  | 21.875 |
| 2030       | 49684  | 4450.618  | 3094.490  | 1356.128 | 2.730  | 30.471 | 867.036 | 77.952  | 54.002  | 23.949 |
| 2031       | 52215  | 4555.052  | 3218.798  | 1336.255 | 2.559  | 29.336 | 909.834 | 79.674  | 56.087  | 23.587 |
| 2032       | 50912  | 4349.999  | 3109.611  | 1240.388 | 2.436  | 28.515 | 885.265 | 75.939  | 54.071  | 21.869 |
| 2033       | 49621  | 4147.948  | 3022.643  | 1125.305 | 2.268  | 27.129 | 860.591 | 72.237  | 52.423  | 19.814 |
| 2034       | 48322  | 3966.133  | 2936.423  | 1029.711 | 2.131  | 25.963 | 835.635 | 68.881  | 50.780  | 18.101 |
| 2035       | 44765  | 3289.064  | 2371.692  | 917.372  | 2.049  | 27.892 | 947.339 | 69.952  | 50.191  | 19.761 |
| 2036       | 46615  | 3313.192  | 2437.583  | 875.610  | 1.878  | 26.428 | 987.801 | 70.572  | 51.654  | 18.918 |
| 2037       | 45111  | 3117.951  | 2342.899  | 775.052  | 1.718  | 24.858 | 956.511 | 66.464  | 49.678  | 16.787 |
| 2038       | 43650  | 2949.775  | 2270.557  | 679.217  | 1.556  | 23.026 | 925.332 | 62.876  | 48.134  | 14.742 |
| 2039       | 42246  | 2766.312  | 2195.120  | 571.192  | 1.352  | 20.648 | 894.523 | 58.905  | 46.480  | 12.425 |

## Results for PHIM for Run 2 (Pessimistic\_Analysis.RTF)

\*\*\*\*\*

### Main Results for E-Component for Run: 2, Simulation: 1, COD: STROKE, Adjusted

| Variable Parameter          | Value                                  |
|-----------------------------|----------------------------------------|
| 1. Country                  | US (United States)                     |
| 2. Sex                      | F (Females)                            |
| 3. Year of start of process | 1990                                   |
| 4. Cause of Death           | STROKE                                 |
| 5. Effective Dose NULL      | CC:1                                   |
| 6. Effective Dose Ecig      | CC:1 Ecig:0.4 Dual:0.7                 |
| Note:                       | Death rates are per million population |

### Results for Age Groups Combined and Years combined, Population and Number deaths adjusted for Ecig scenario,

| Age Group:All | NULL    | Ecig       | %Drop     |          |        |        | NULL    | Ecig   | Drop   |       |
|---------------|---------|------------|-----------|----------|--------|--------|---------|--------|--------|-------|
| Year          | Number  | Attrib     | Attrib    | Drop     | %Drop  | Attrib | Death   | Attrib | Attrib | Drop  |
|               | Deaths  | Deaths     | Deaths    | Deaths   | Deaths | Deaths | Rate    | Rates  | Rates  | Rates |
| All Comb      | 1354509 | 104899.750 | 86748.638 | 18151.11 | 1.340  | 17.303 | 371.364 | 28.800 | 23.784 | 5.016 |

### Results for Age Groups Combined, Population and Number deaths adjusted for Ecig scenario,

| Age Group:All | NULL   | Ecig     | %Drop    |         |        |        | NULL    | Ecig   | Drop   |       |
|---------------|--------|----------|----------|---------|--------|--------|---------|--------|--------|-------|
| Year          | Number | Attrib   | Attrib   | Drop    | %Drop  | Attrib | Death   | Attrib | Attrib | Drop  |
|               | Deaths | Deaths   | Deaths   | Deaths  | Deaths | Deaths | Rate    | Rates  | Rates  | Rates |
| 1990          | 33504  | 3293.017 | 3293.017 | 0.000   | 0.000  | 0.000  | 490.678 | 48.227 | 48.227 | 0.000 |
| 1991          | 32505  | 3207.063 | 3200.117 | 6.946   | 0.021  | 0.217  | 469.694 | 46.342 | 46.241 | 0.100 |
| 1992          | 32560  | 3218.125 | 3199.465 | 18.660  | 0.057  | 0.580  | 464.104 | 45.871 | 45.605 | 0.266 |
| 1993          | 32768  | 3226.680 | 3189.794 | 36.886  | 0.113  | 1.143  | 460.480 | 45.344 | 44.825 | 0.518 |
| 1994          | 33005  | 3277.266 | 3216.500 | 60.766  | 0.184  | 1.854  | 456.916 | 45.370 | 44.528 | 0.841 |
| 1995          | 33730  | 3309.378 | 3219.326 | 90.052  | 0.267  | 2.721  | 459.716 | 45.104 | 43.877 | 1.228 |
| 1996          | 33751  | 3312.987 | 3187.030 | 125.957 | 0.373  | 3.802  | 454.018 | 44.568 | 42.873 | 1.695 |
| 1997          | 33700  | 3267.066 | 3102.386 | 164.680 | 0.489  | 5.041  | 447.053 | 43.341 | 41.156 | 2.186 |
| 1998          | 33275  | 3178.725 | 2978.096 | 200.629 | 0.603  | 6.312  | 435.206 | 41.577 | 38.951 | 2.626 |
| 1999          | 33892  | 3120.351 | 2882.112 | 238.239 | 0.703  | 7.635  | 437.311 | 40.264 | 37.188 | 3.076 |
| 2000          | 33829  | 3142.808 | 2856.870 | 285.938 | 0.845  | 9.098  | 431.066 | 40.050 | 36.404 | 3.647 |
| 2001          | 32509  | 2961.588 | 2649.617 | 311.971 | 0.960  | 10.534 | 409.640 | 37.323 | 33.388 | 3.935 |
| 2002          | 32082  | 2940.627 | 2579.963 | 360.665 | 1.124  | 12.265 | 400.289 | 36.695 | 32.191 | 4.505 |
| 2003          | 30573  | 2819.545 | 2427.379 | 392.166 | 1.283  | 13.909 | 377.880 | 34.855 | 30.002 | 4.853 |
| 2004          | 29394  | 2730.466 | 2307.594 | 422.872 | 1.439  | 15.487 | 359.672 | 33.417 | 28.236 | 5.181 |
| 2005          | 27961  | 2670.510 | 2212.681 | 457.829 | 1.637  | 17.144 | 338.345 | 32.322 | 26.774 | 5.548 |
| 2006          | 27210  | 2623.285 | 2130.531 | 492.754 | 1.811  | 18.784 | 326.367 | 31.474 | 25.554 | 5.919 |
| 2007          | 26312  | 2536.599 | 2022.412 | 514.187 | 1.954  | 20.271 | 312.442 | 30.131 | 24.015 | 6.116 |
| 2008          | 26010  | 2469.443 | 1937.711 | 531.733 | 2.044  | 21.532 | 305.494 | 29.015 | 22.759 | 6.257 |
| 2009          | 25054  | 2386.945 | 1843.673 | 543.272 | 2.168  | 22.760 | 290.934 | 27.730 | 21.409 | 6.321 |
| 2010          | 24856  | 2329.274 | 1774.637 | 554.637 | 2.231  | 23.812 | 285.314 | 26.750 | 20.370 | 6.380 |
| 2011          | 24811  | 2286.581 | 1713.539 | 573.042 | 2.310  | 25.061 | 282.094 | 26.013 | 19.483 | 6.530 |
| 2012          | 24521  | 2243.311 | 1652.654 | 590.657 | 2.409  | 26.330 | 275.931 | 25.260 | 18.597 | 6.663 |
| 2013          | 24475  | 2176.503 | 1578.885 | 597.618 | 2.442  | 27.458 | 272.437 | 24.245 | 17.575 | 6.670 |
| 2014          | 25323  | 2211.619 | 1585.347 | 626.272 | 2.473  | 28.317 | 278.774 | 24.366 | 17.452 | 6.913 |
| 2015          | 26348  | 2237.016 | 1586.868 | 650.148 | 2.468  | 29.063 | 324.221 | 27.554 | 19.527 | 8.027 |
| 2016          | 26771  | 2229.057 | 1566.506 | 662.552 | 2.475  | 29.723 | 326.258 | 27.194 | 19.091 | 8.103 |
| 2017          | 27657  | 2221.649 | 1548.442 | 673.207 | 2.434  | 30.302 | 333.838 | 26.848 | 18.691 | 8.157 |
| 2018          | 25297  | 1939.420 | 1345.120 | 594.300 | 2.349  | 30.643 | 302.421 | 23.214 | 16.081 | 7.134 |
| 2019          | 25475  | 1904.400 | 1314.325 | 590.075 | 2.316  | 30.985 | 301.570 | 22.574 | 15.559 | 7.016 |
| 2020          | 25429  | 1806.054 | 1238.300 | 567.754 | 2.233  | 31.436 | 341.043 | 24.261 | 16.607 | 7.654 |
| 2021          | 25504  | 1748.172 | 1192.972 | 555.201 | 2.177  | 31.759 | 339.532 | 23.314 | 15.882 | 7.432 |
| 2022          | 25599  | 1701.148 | 1157.897 | 543.251 | 2.122  | 31.934 | 338.181 | 22.515 | 15.297 | 7.219 |
| 2023          | 25686  | 1652.087 | 1126.731 | 525.355 | 2.045  | 31.800 | 336.648 | 21.696 | 14.768 | 6.929 |
| 2024          | 25729  | 1597.127 | 1092.476 | 504.651 | 1.961  | 31.597 | 334.601 | 20.814 | 14.207 | 6.607 |
| 2025          | 25335  | 1467.622 | 999.622  | 468.000 | 1.847  | 31.888 | 380.105 | 22.075 | 14.998 | 7.077 |
| 2026          | 25561  | 1390.505 | 955.782  | 434.723 | 1.701  | 31.264 | 381.994 | 20.835 | 14.283 | 6.552 |
| 2027          | 25350  | 1342.095 | 929.350  | 412.746 | 1.628  | 30.754 | 377.273 | 20.030 | 13.831 | 6.199 |
| 2028          | 25113  | 1289.536 | 904.866  | 384.669 | 1.532  | 29.830 | 372.131 | 19.165 | 13.408 | 5.756 |
| 2029          | 24863  | 1242.216 | 883.863  | 358.353 | 1.441  | 28.848 | 366.751 | 18.380 | 13.038 | 5.343 |
| 2030          | 24060  | 1096.803 | 774.653  | 322.150 | 1.339  | 29.372 | 419.875 | 19.210 | 13.519 | 5.692 |
| 2031          | 24070  | 1019.991 | 734.101  | 285.889 | 1.188  | 28.029 | 419.413 | 17.841 | 12.792 | 5.049 |
| 2032          | 23727  | 977.406  | 713.208  | 264.198 | 1.113  | 27.031 | 412.569 | 17.063 | 12.401 | 4.661 |
| 2033          | 23375  | 937.450  | 699.066  | 238.384 | 1.020  | 25.429 | 405.400 | 16.326 | 12.124 | 4.202 |
| 2034          | 22999  | 900.763  | 683.608  | 217.155 | 0.944  | 24.108 | 397.727 | 15.644 | 11.822 | 3.822 |
| 2035          | 21856  | 745.023  | 559.139  | 185.885 | 0.850  | 24.950 | 462.531 | 15.845 | 11.833 | 4.012 |
| 2036          | 21028  | 680.360  | 520.682  | 159.677 | 0.759  | 23.470 | 445.600 | 14.492 | 11.034 | 3.458 |
| 2037          | 20523  | 644.109  | 505.108  | 139.001 | 0.677  | 21.580 | 435.171 | 13.730 | 10.710 | 3.020 |
| 2038          | 20019  | 612.448  | 493.051  | 119.397 | 0.596  | 19.495 | 424.389 | 13.055 | 10.452 | 2.602 |
| 2039          | 19523  | 577.529  | 481.566  | 95.963  | 0.492  | 16.616 | 413.396 | 12.298 | 10.197 | 2.101 |



## Results for PHIM for Run 2 (Pessimistic\_Analysis.RTF)

\*\*\*\*\*

### Main Results for E-Component for Run: 2, Simulation: 1, COD: COPD, Adjusted

| Variable Parameter          | Value                                  |
|-----------------------------|----------------------------------------|
| 1. Country                  | US (United States)                     |
| 2. Sex                      | F (Females)                            |
| 3. Year of start of process | 1990                                   |
| 4. Cause of Death           | COPD                                   |
| 5. Effective Dose NULL      | CC:1                                   |
| 6. Effective Dose Ecig      | CC:1 Ecig:0.4 Dual:0.7                 |
| Note:                       | Death rates are per million population |

#### Results for Age Groups Combined and Years combined, Population and Number deaths adjusted for Ecig scenario,

| Age Group: | NULL    | Ecig       | %Drop      |          |        |        | NULL    | Ecig    | Drop    |        |
|------------|---------|------------|------------|----------|--------|--------|---------|---------|---------|--------|
| Year       | Number  | Attrib     | Attrib     | Drop     | %Drop  | Attrib | Death   | Attrib  | Attrib  | Drop   |
|            | Deaths  | Deaths     | Deaths     | Deaths   | Deaths | Deaths | Rate    | Rates   | Rates   | Rates  |
| All Comb   | 2165331 | 862051.244 | 767997.244 | 94054.00 | 4.344  | 10.910 | 593.666 | 236.673 | 210.561 | 26.112 |

#### Results for Age Groups Combined, Population and Number deaths adjusted for Ecig scenario,

| Age Group: | NULL   | Ecig      | %Drop     |          |        |        | NULL    | Ecig    | Drop    |        |
|------------|--------|-----------|-----------|----------|--------|--------|---------|---------|---------|--------|
| Year       | Number | Attrib    | Attrib    | Drop     | %Drop  | Attrib | Death   | Attrib  | Attrib  | Drop   |
|            | Deaths | Deaths    | Deaths    | Deaths   | Deaths | Deaths | Rate    | Rates   | Rates   | Rates  |
| 1990       | 24738  | 10694.712 | 10694.712 | 0.000    | 0.000  | 0.000  | 362.296 | 156.628 | 156.628 | 0.000  |
| 1991       | 26562  | 11602.933 | 11598.462 | 4.471    | 0.017  | 0.039  | 383.818 | 167.661 | 167.597 | 0.065  |
| 1992       | 26828  | 11831.375 | 11822.242 | 9.133    | 0.034  | 0.077  | 382.401 | 168.642 | 168.512 | 0.130  |
| 1993       | 29774  | 13246.371 | 13226.820 | 19.551   | 0.066  | 0.148  | 418.406 | 186.148 | 185.873 | 0.275  |
| 1994       | 29804  | 13355.662 | 13326.558 | 29.104   | 0.098  | 0.218  | 412.601 | 184.893 | 184.490 | 0.404  |
| 1995       | 29755  | 13397.439 | 13354.149 | 43.291   | 0.145  | 0.323  | 405.539 | 182.598 | 182.006 | 0.592  |
| 1996       | 30900  | 13960.356 | 13904.192 | 56.163   | 0.182  | 0.402  | 415.679 | 187.801 | 187.042 | 0.759  |
| 1997       | 31129  | 14109.552 | 14032.180 | 77.372   | 0.249  | 0.548  | 412.947 | 187.180 | 186.148 | 1.032  |
| 1998       | 32097  | 14599.657 | 14484.575 | 115.082  | 0.359  | 0.788  | 419.799 | 190.958 | 189.445 | 1.513  |
| 1999       | 34618  | 15728.102 | 15568.356 | 159.746  | 0.461  | 1.016  | 446.668 | 202.950 | 200.877 | 2.073  |
| 2000       | 34301  | 15579.803 | 15375.512 | 204.292  | 0.596  | 1.311  | 437.083 | 198.541 | 195.922 | 2.618  |
| 2001       | 34595  | 15696.614 | 15446.667 | 249.948  | 0.722  | 1.592  | 435.932 | 197.812 | 194.642 | 3.170  |
| 2002       | 34295  | 15519.777 | 15207.884 | 311.894  | 0.909  | 2.010  | 427.909 | 193.668 | 189.751 | 3.917  |
| 2003       | 35080  | 15888.389 | 15506.174 | 382.215  | 1.090  | 2.406  | 433.589 | 196.413 | 191.657 | 4.756  |
| 2004       | 33519  | 15091.573 | 14656.824 | 434.749  | 1.297  | 2.881  | 410.151 | 184.701 | 179.344 | 5.357  |
| 2005       | 35402  | 15803.656 | 15270.437 | 533.219  | 1.506  | 3.374  | 428.379 | 191.278 | 184.779 | 6.499  |
| 2006       | 33993  | 15100.563 | 14516.014 | 584.549  | 1.720  | 3.871  | 407.723 | 181.174 | 174.111 | 7.064  |
| 2007       | 34014  | 14974.384 | 14306.540 | 667.844  | 1.963  | 4.460  | 403.896 | 177.871 | 169.880 | 7.990  |
| 2008       | 37444  | 16406.197 | 15602.195 | 804.003  | 2.147  | 4.901  | 439.781 | 192.768 | 183.249 | 9.519  |
| 2009       | 36848  | 16083.194 | 15200.597 | 882.597  | 2.395  | 5.488  | 427.887 | 186.846 | 176.513 | 10.333 |
| 2010       | 36813  | 15927.400 | 14967.683 | 959.717  | 2.607  | 6.026  | 422.564 | 182.917 | 171.808 | 11.110 |
| 2011       | 37666  | 16221.836 | 15123.552 | 1098.284 | 2.916  | 6.770  | 428.255 | 184.547 | 171.954 | 12.593 |
| 2012       | 38299  | 16358.849 | 15156.118 | 1202.731 | 3.140  | 7.352  | 430.979 | 184.202 | 170.550 | 13.652 |
| 2013       | 40153  | 16994.822 | 15634.907 | 1359.915 | 3.387  | 8.002  | 446.955 | 189.311 | 174.039 | 15.272 |
| 2014       | 40130  | 16855.093 | 15387.918 | 1467.175 | 3.656  | 8.705  | 441.768 | 185.696 | 169.399 | 16.297 |
| 2015       | 42254  | 17572.483 | 15953.562 | 1618.921 | 3.831  | 9.213  | 519.945 | 216.445 | 196.314 | 20.130 |
| 2016       | 42666  | 17579.955 | 15823.811 | 1756.144 | 4.116  | 9.989  | 519.970 | 214.473 | 192.845 | 21.629 |
| 2017       | 44433  | 18080.688 | 16140.880 | 1939.808 | 4.366  | 10.729 | 536.331 | 218.496 | 194.830 | 23.666 |
| 2018       | 45436  | 18209.262 | 16109.952 | 2099.310 | 4.620  | 11.529 | 543.176 | 217.960 | 192.591 | 25.368 |
| 2019       | 46963  | 18648.302 | 16356.881 | 2291.421 | 4.879  | 12.288 | 555.945 | 221.054 | 193.631 | 27.423 |
| 2020       | 48430  | 19002.597 | 16552.005 | 2450.592 | 5.060  | 12.896 | 649.509 | 255.266 | 221.985 | 33.281 |
| 2021       | 48447  | 18885.717 | 16294.250 | 2591.468 | 5.349  | 13.722 | 644.980 | 251.867 | 216.927 | 34.940 |
| 2022       | 49829  | 19235.076 | 16455.336 | 2779.740 | 5.579  | 14.451 | 658.266 | 254.582 | 217.385 | 37.196 |
| 2023       | 51217  | 19521.158 | 16594.889 | 2926.269 | 5.713  | 14.990 | 671.276 | 256.363 | 217.501 | 38.862 |
| 2024       | 52545  | 19918.620 | 16796.310 | 3122.310 | 5.942  | 15.675 | 683.341 | 259.583 | 218.432 | 41.151 |
| 2025       | 53550  | 20150.545 | 16897.436 | 3253.109 | 6.075  | 16.144 | 803.425 | 303.086 | 253.517 | 49.569 |
| 2026       | 54410  | 20393.792 | 16939.005 | 3454.788 | 6.350  | 16.940 | 813.119 | 305.582 | 253.141 | 52.441 |
| 2027       | 55243  | 20615.351 | 16972.030 | 3643.321 | 6.595  | 17.673 | 822.149 | 307.668 | 252.586 | 55.082 |
| 2028       | 56018  | 20731.894 | 16953.250 | 3778.644 | 6.745  | 18.226 | 830.085 | 308.115 | 251.216 | 56.898 |
| 2029       | 56753  | 20781.967 | 16887.519 | 3894.448 | 6.862  | 18.740 | 837.149 | 307.495 | 249.102 | 58.393 |
| 2030       | 56998  | 20753.201 | 16756.556 | 3996.644 | 7.012  | 19.258 | 994.688 | 363.487 | 292.421 | 71.066 |
| 2031       | 58553  | 21048.417 | 16981.102 | 4067.314 | 6.946  | 19.324 | 1020.28 | 368.165 | 295.894 | 72.271 |
| 2032       | 59066  | 21169.329 | 16983.871 | 4185.458 | 7.086  | 19.771 | 1027.05 | 369.560 | 295.319 | 74.241 |
| 2033       | 59538  | 21109.293 | 16917.876 | 4191.417 | 7.040  | 19.856 | 1032.58 | 367.618 | 293.411 | 74.207 |
| 2034       | 59934  | 21109.429 | 16871.285 | 4238.144 | 7.071  | 20.077 | 1036.45 | 366.613 | 291.756 | 74.857 |
| 2035       | 59275  | 20794.840 | 16525.567 | 4269.273 | 7.203  | 20.530 | 1254.40 | 442.268 | 349.724 | 92.544 |
| 2036       | 56350  | 19354.577 | 15348.234 | 4006.343 | 7.110  | 20.700 | 1194.09 | 412.258 | 325.240 | 87.018 |
| 2037       | 56303  | 19064.169 | 15061.432 | 4002.737 | 7.109  | 20.996 | 1193.84 | 406.385 | 319.357 | 87.028 |
| 2038       | 56225  | 18854.812 | 14885.500 | 3969.312 | 7.060  | 21.052 | 1191.92 | 401.900 | 315.559 | 86.340 |
| 2039       | 56138  | 18437.457 | 14567.435 | 3870.022 | 6.894  | 20.990 | 1188.69 | 392.602 | 308.455 | 84.146 |

## Results for PHIM for Run 2 (ELL Summary Pessimistic\_Analysis.RTF)

\*\*\*\*\*

### Estimated Loss of Life from the E Component for Run: 2, Simulation: 1

Country: US (United States)  
 Follow-up Period: 1990 to 2039

**Table 1: Estimated Loss of Life, at the end of follow-up, all age groups combined, Population unadjusted for deaths in Ecig scenario**

| Disease      | Sex    | Year | Years of life lost<br>NULL | Years of life lost<br>Ecig | Years of life<br>Saved |
|--------------|--------|------|----------------------------|----------------------------|------------------------|
| All Diseases | Males  | 2039 | 42093547.949               | 36501440.925               | 5592107.02             |
|              | Female | 2039 | 23817891.273               | 21104833.012               | 2713058.26             |
| Lung cancer  | Males  | 2039 | 18222549.860               | 17057566.947               | 1164982.91             |
|              | Female | 2039 | 12512468.845               | 11616087.724               | 896381.122             |
| IHD          | Males  | 2039 | 15635992.616               | 12406132.581               | 3229860.04             |
|              | Female | 2039 | 4798769.065                | 3865706.661                | 933062.405             |
| Stroke       | Males  | 2039 | 2389546.238                | 1920183.109                | 469363.128             |
|              | Female | 2039 | 1665361.569                | 1370650.422                | 294711.147             |
| COPD         | Males  | 2039 | 5845459.234                | 5117558.287                | 727900.947             |
|              | Female | 2039 | 4841291.793                | 4252388.206                | 588903.587             |

## Results for PHIM for Run 2 (ELL Summary Pessimistic\_Analysis.RTF)

\*\*\*\*\*

**Table 2: Estimated Loss of Life, at the end of follow-up, all age groups combined, Population and Number deaths adjusted for Ecig scenario**

| Disease      | Sex    | Year | Years of life lost<br>NULL | Years of life lost<br>Ecig | Years of life<br>Saved |
|--------------|--------|------|----------------------------|----------------------------|------------------------|
| All Diseases | Males  | 2039 | 42093547.949               | 36575271.380               | 5518276.57             |
|              | Female | 2039 | 23817891.273               | 21128264.569               | 2689626.70             |
| Lung cancer  | Males  | 2039 | 18222549.860               | 17092593.671               | 1129956.19             |
|              | Female | 2039 | 12512468.845               | 11629065.776               | 883403.070             |
| IHD          | Males  | 2039 | 15635992.616               | 12426196.035               | 3209796.58             |
|              | Female | 2039 | 4798769.065                | 3868680.028                | 930089.038             |
| Stroke       | Males  | 2039 | 2389546.238                | 1923208.547                | 466337.691             |
|              | Female | 2039 | 1665361.569                | 1371516.889                | 293844.681             |
| COPD         | Males  | 2039 | 5845459.234                | 5133273.128                | 712186.106             |
|              | Female | 2039 | 4841291.793                | 4259001.877                | 582289.915             |

## Results for PHIM for Run 2 (ELL Summary Pessimistic\_Analysis.RTF)

\*\*\*\*\*

**Table 3: Estimated Loss of Life, All age groups combined, Population unadjusted for deaths in Ecig scenario, cumulative over years**

| Disease      | Sex          | Year         | Years of life lost<br>NULL | Years of life lost<br>Ecig | Years of life<br>Saved |
|--------------|--------------|--------------|----------------------------|----------------------------|------------------------|
| All Diseases | Males        | 1990         | 1304839.645                | 1304839.645                | 0.000                  |
|              |              | 1991         | 2579865.358                | 2577032.488                | 2832.870               |
|              |              | 1992         | 3830683.831                | 3820089.698                | 10594.133              |
|              |              | 1993         | 5076567.803                | 5051440.774                | 25127.028              |
|              |              | 1994         | 6292145.526                | 6244458.839                | 47686.687              |
|              |              | 1995         | 7485537.010                | 7405922.781                | 79614.229              |
|              |              | 1996         | 8655955.028                | 8534518.085                | 121436.943             |
|              |              | 1997         | 9791729.713                | 9619102.296                | 172627.417             |
|              |              | 1998         | 10899134.186               | 10666365.492               | 232768.693             |
|              |              | 1999         | 12070409.674               | 11756805.077               | 313604.597             |
|              |              | 2000         | 13231384.595               | 12825994.379               | 405390.216             |
|              |              | 2001         | 14371761.018               | 13863259.939               | 508501.079             |
|              |              | 2002         | 15508906.386               | 14884081.064               | 624825.322             |
|              |              | 2003         | 16638100.422               | 15885469.649               | 752630.773             |
|              |              | 2004         | 17736465.088               | 16849455.775               | 887009.314             |
|              |              | 2005         | 18834658.606               | 17803650.819               | 1031007.79             |
|              |              | 2006         | 19909100.501               | 18724838.275               | 1184262.23             |
|              |              | 2007         | 20958321.463               | 19615555.718               | 1342765.75             |
|              |              | 2008         | 22000068.148               | 20492514.340               | 1507553.81             |
|              |              | 2009         | 23018816.903               | 21343268.561               | 1675548.34             |
|              |              | 2010         | 24018480.537               | 22171224.791               | 1847255.75             |
|              |              | 2011         | 25003034.574               | 22979746.393               | 2023288.18             |
|              |              | 2012         | 25969871.429               | 23766971.921               | 2202899.51             |
|              |              | 2013         | 26920275.180               | 24534260.331               | 2386014.85             |
|              |              | 2014         | 27849005.227               | 25278562.237               | 2570442.99             |
|              |              | 2015         | 28749620.400               | 25996196.864               | 2753423.54             |
|              |              | 2016         | 29622417.562               | 26685049.029               | 2937368.53             |
|              |              | 2017         | 30462559.724               | 27343130.343               | 3119429.38             |
|              |              | 2018         | 31293299.299               | 27995624.491               | 3297674.81             |
|              |              | 2019         | 32109993.427               | 28635806.506               | 3474186.92             |
|              |              | 2020         | 32883323.977               | 29240469.430               | 3642854.55             |
|              |              | 2021         | 33610102.554               | 29805244.016               | 3804858.54             |
|              |              | 2022         | 34322010.448               | 30358169.415               | 3963841.03             |
|              |              | 2023         | 35018383.550               | 30899260.069               | 4119123.48             |
|              |              | 2024         | 35700177.955               | 31430317.139               | 4269860.82             |
|              |              | 2025         | 36315500.346               | 31908347.670               | 4407152.68             |
|              |              | 2026         | 36896159.343               | 32358891.750               | 4537267.59             |
|              |              | 2027         | 37462570.116               | 32800347.882               | 4662222.23             |
|              |              | 2028         | 38015337.780               | 33232534.617               | 4782803.16             |
|              |              | 2029         | 38554814.764               | 33657876.512               | 4896938.25             |
|              |              | 2030         | 39003805.400               | 34009486.170               | 4994319.23             |
|              |              | 2031         | 39436509.703               | 34349897.472               | 5086612.23             |
| 2032         | 39858470.458 | 34684145.884 | 5174324.57                 |                            |                        |
| 2033         | 40270147.082 | 35012184.737 | 5257962.34                 |                            |                        |
| 2034         | 40672665.743 | 35337740.990 | 5334924.75                 |                            |                        |
| 2035         | 40962732.664 | 35569642.610 | 5393090.05                 |                            |                        |
| 2036         | 41255021.653 | 35806146.957 | 5448874.70                 |                            |                        |
| 2037         | 41540573.023 | 36039900.187 | 5500672.84                 |                            |                        |
| 2038         | 41820158.066 | 36270909.142 | 5549248.92                 |                            |                        |
| 2039         | 42093547.949 | 36501440.925 | 5592107.02                 |                            |                        |
|              | Female       | 1990         | 588979.406                 | 588979.406                 | 0.000                  |
|              |              | 1991         | 1182571.252                | 1181666.191                | 905.061                |
|              |              | 1992         | 1777346.679                | 1773859.750                | 3486.929               |
|              |              | 1993         | 2380261.899                | 2371859.441                | 8402.458               |
|              |              | 1994         | 2983130.039                | 2966951.849                | 16178.190              |
|              |              | 1995         | 3588982.584                | 3561502.537                | 27480.047              |
|              |              | 1996         | 4195430.235                | 4152341.381                | 43088.853              |
|              |              | 1997         | 4793866.694                | 4731536.380                | 62330.314              |
|              |              | 1998         | 5389747.381                | 5304192.195                | 85555.186              |
|              |              | 1999         | 6006722.467                | 5890967.387                | 115755.080             |
|              |              | 2000         | 6625758.871                | 6475249.479                | 150509.392             |
|              |              | 2001         | 7245135.411                | 7054390.300                | 190745.111             |
|              |              | 2002         | 7867492.021                | 7630879.877                | 236612.144             |
|              |              | 2003         | 8485051.793                | 8198013.219                | 287038.574             |
|              |              | 2004         | 9092994.774                | 8751487.060                | 341507.714             |
|              |              | 2005         | 9706032.803                | 9304859.859                | 401172.945             |
|              |              | 2006         | 10311907.548               | 9846553.240                | 465354.308             |
|              |              | 2007         | 10909437.502               | 10376770.648               | 532666.854             |
|              |              | 2008         | 11506462.491               | 10901220.059               | 605242.432             |
|              |              | 2009         | 12098393.287               | 11418151.358               | 680241.928             |
|              |              | 2010         | 12681188.981               | 11923143.179               | 758045.801             |

**Results for PHIM for Run 2 (ELL Summary Pessimistic\_Analysis.RTF)**

|             |       |      |              |              |            |
|-------------|-------|------|--------------|--------------|------------|
|             |       | 2011 | 13260062.991 | 12420356.784 | 839706.207 |
|             |       | 2012 | 13839417.441 | 12913688.477 | 925728.964 |
|             |       | 2013 | 14409614.758 | 13396214.144 | 1013400.61 |
|             |       | 2014 | 14976658.746 | 13872121.557 | 1104537.19 |
|             |       | 2015 | 15529977.821 | 14333462.623 | 1196515.20 |
|             |       | 2016 | 16066640.764 | 14777191.163 | 1289449.60 |
|             |       | 2017 | 16590035.078 | 15207041.958 | 1382993.12 |
|             |       | 2018 | 17098716.137 | 15625075.669 | 1473640.47 |
|             |       | 2019 | 17599868.850 | 16035494.314 | 1564374.54 |
|             |       | 2020 | 18081346.241 | 16428362.700 | 1652983.54 |
|             |       | 2021 | 18537594.460 | 16798482.956 | 1739111.50 |
|             |       | 2022 | 18985300.234 | 17160595.412 | 1824704.82 |
|             |       | 2023 | 19423958.747 | 17515195.326 | 1908763.42 |
|             |       | 2024 | 19853347.772 | 17862078.654 | 1991269.12 |
|             |       | 2025 | 20252822.245 | 18183685.191 | 2069137.05 |
|             |       | 2026 | 20619307.063 | 18478517.894 | 2140789.17 |
|             |       | 2027 | 20976063.406 | 18765911.074 | 2210152.33 |
|             |       | 2028 | 21323641.947 | 19047026.696 | 2276615.25 |
|             |       | 2029 | 21662117.106 | 19321777.713 | 2340339.39 |
|             |       | 2030 | 21960971.694 | 19562649.048 | 2398322.65 |
|             |       | 2031 | 22224951.983 | 19776625.142 | 2448326.84 |
|             |       | 2032 | 22480397.853 | 19984905.162 | 2495492.69 |
|             |       | 2033 | 22728639.455 | 20189259.493 | 2539379.96 |
|             |       | 2034 | 22970448.888 | 20389914.807 | 2580534.08 |
|             |       | 2035 | 23164154.188 | 20548660.320 | 2615493.87 |
|             |       | 2036 | 23334538.616 | 20690431.092 | 2644107.52 |
|             |       | 2037 | 23499760.723 | 20829689.134 | 2670071.59 |
|             |       | 2038 | 23660308.401 | 20967566.185 | 2692742.22 |
|             |       | 2039 | 23817891.273 | 21104833.012 | 2713058.26 |
| Lung cancer | Males | 1990 | 595621.791   | 595621.791   | 0.000      |
|             |       | 1991 | 1177744.113  | 1177548.728  | 195.384    |
|             |       | 1992 | 1750034.892  | 1749299.108  | 735.784    |
|             |       | 1993 | 2319752.308  | 2317935.178  | 1817.130   |
|             |       | 1994 | 2872597.339  | 2869024.623  | 3572.716   |
|             |       | 1995 | 3411494.825  | 3405330.604  | 6164.221   |
|             |       | 1996 | 3945569.726  | 3935657.135  | 9912.590   |
|             |       | 1997 | 4463316.362  | 4448551.009  | 14765.354  |
|             |       | 1998 | 4975301.180  | 4954365.937  | 20935.243  |
|             |       | 1999 | 5473691.125  | 5445164.742  | 28526.383  |
|             |       | 2000 | 5977500.570  | 5939499.207  | 38001.363  |
|             |       | 2001 | 6474795.516  | 6425394.117  | 49401.398  |
|             |       | 2002 | 6968769.705  | 6905890.132  | 62879.573  |
|             |       | 2003 | 7460282.140  | 7381572.267  | 78709.873  |
|             |       | 2004 | 7947048.275  | 7850331.518  | 96716.757  |
|             |       | 2005 | 8430571.669  | 8313619.487  | 116952.182 |
|             |       | 2006 | 8903945.390  | 8764520.286  | 139425.104 |
|             |       | 2007 | 9364177.982  | 9200395.608  | 163782.374 |
|             |       | 2008 | 9822525.458  | 9631632.176  | 190893.283 |
|             |       | 2009 | 10275228.886 | 10055008.513 | 220220.373 |
|             |       | 2010 | 10720275.500 | 10468779.791 | 251495.709 |
|             |       | 2011 | 11155356.373 | 10870655.507 | 284700.866 |
|             |       | 2012 | 11582611.617 | 11262468.106 | 320143.510 |
|             |       | 2013 | 11998803.791 | 11641393.284 | 357410.507 |
|             |       | 2014 | 12402087.090 | 12006270.915 | 395816.175 |
|             |       | 2015 | 12793451.706 | 12358196.548 | 435255.158 |
|             |       | 2016 | 13160101.653 | 12685664.139 | 474437.514 |
|             |       | 2017 | 13503583.414 | 12990405.829 | 513177.585 |
|             |       | 2018 | 13859755.737 | 13304208.649 | 555547.088 |
|             |       | 2019 | 14211625.176 | 13612390.245 | 599234.931 |
|             |       | 2020 | 14553935.288 | 13910532.492 | 643402.796 |
|             |       | 2021 | 14851747.495 | 14168880.596 | 682866.899 |
|             |       | 2022 | 15144531.004 | 14421604.946 | 722926.058 |
|             |       | 2023 | 15431932.496 | 14668672.069 | 763260.427 |
|             |       | 2024 | 15713920.740 | 14910262.456 | 803658.284 |
|             |       | 2025 | 15979112.816 | 15136464.962 | 842647.854 |
|             |       | 2026 | 16206550.153 | 15330315.655 | 876234.498 |
|             |       | 2027 | 16428826.050 | 15519475.996 | 909350.054 |
|             |       | 2028 | 16645902.186 | 15704047.422 | 941854.764 |
|             |       | 2029 | 16858126.517 | 15884626.227 | 973500.291 |
|             |       | 2030 | 17045220.687 | 16043012.207 | 1002208.48 |
|             |       | 2031 | 17208482.610 | 16181882.297 | 1026600.31 |
|             |       | 2032 | 17367586.074 | 16317625.865 | 1049960.21 |
|             |       | 2033 | 17522716.280 | 16450307.853 | 1072408.43 |
|             |       | 2034 | 17674226.555 | 16580751.671 | 1093474.88 |
|             |       | 2035 | 17792201.734 | 16681583.203 | 1110618.53 |
|             |       | 2036 | 17903508.236 | 16777846.881 | 1125661.35 |
|             |       | 2037 | 18012162.345 | 16872408.053 | 1139754.29 |
|             |       | 2038 | 18118464.470 | 16965400.116 | 1153064.35 |

**Results for PHIM for Run 2 (ELL Summary Pessimistic\_Analysis.RTF)**

|     |        |      |              |              |            |
|-----|--------|------|--------------|--------------|------------|
|     | Female | 2039 | 18222549.860 | 17057566.947 | 1164982.91 |
|     |        | 1990 | 307897.357   | 307897.357   | 0.000      |
|     |        | 1991 | 616547.418   | 616436.677   | 110.741    |
|     |        | 1992 | 931086.773   | 930632.576   | 454.197    |
|     |        | 1993 | 1246155.671  | 1245012.803  | 1142.868   |
|     |        | 1994 | 1561212.934  | 1558930.543  | 2282.392   |
|     |        | 1995 | 1879967.742  | 1875903.733  | 4064.009   |
|     |        | 1996 | 2197488.109  | 2190911.519  | 6576.590   |
|     |        | 1997 | 2515698.453  | 2505718.043  | 9980.410   |
|     |        | 1998 | 2836249.556  | 2821881.469  | 14368.087  |
|     |        | 1999 | 3150201.390  | 3130476.235  | 19725.154  |
|     |        | 2000 | 3472722.342  | 3446337.323  | 26385.019  |
|     |        | 2001 | 3796994.889  | 3762497.580  | 34497.310  |
|     |        | 2002 | 4126619.935  | 4082391.452  | 44228.483  |
|     |        | 2003 | 4454982.533  | 4399574.498  | 55408.035  |
|     |        | 2004 | 4784343.030  | 4716075.733  | 68267.297  |
|     |        | 2005 | 5113443.121  | 5030610.299  | 82832.822  |
|     |        | 2006 | 5442543.963  | 5343180.073  | 99363.890  |
|     |        | 2007 | 5772441.497  | 5654614.070  | 117827.426 |
|     |        | 2008 | 6091911.943  | 5954327.204  | 137584.739 |
|     |        | 2009 | 6413671.330  | 6254189.837  | 159481.493 |
|     |        | 2010 | 6730763.530  | 6547986.264  | 182777.266 |
|     |        | 2011 | 7043614.101  | 6835796.374  | 207817.727 |
|     |        | 2012 | 7356270.780  | 7121467.557  | 234803.223 |
|     |        | 2013 | 7662551.964  | 7399448.045  | 263103.919 |
|     |        | 2014 | 7964551.465  | 7671793.223  | 292758.242 |
|     |        | 2015 | 8254895.403  | 7932241.248  | 322654.154 |
|     |        | 2016 | 8530661.848  | 8177819.635  | 352842.212 |
|     |        | 2017 | 8795826.122  | 8412414.746  | 383411.376 |
|     |        | 2018 | 9067233.707  | 8651105.411  | 416128.296 |
|     |        | 2019 | 9335343.270  | 8885572.097  | 449771.173 |
|     |        | 2020 | 9596110.883  | 9112401.734  | 483709.149 |
|     |        | 2021 | 9833186.859  | 9317897.016  | 515289.843 |
|     |        | 2022 | 10066452.037 | 9519006.650  | 547445.387 |
|     |        | 2023 | 10295503.609 | 9715816.974  | 579686.636 |
|     |        | 2024 | 10520125.318 | 9908176.191  | 611949.127 |
|     |        | 2025 | 10731915.863 | 10088678.052 | 643237.811 |
|     |        | 2026 | 10917495.549 | 10246895.823 | 670599.725 |
|     |        | 2027 | 11098620.885 | 10400975.660 | 697645.225 |
|     |        | 2028 | 11275441.234 | 10551467.597 | 723973.637 |
|     |        | 2029 | 11447962.710 | 10698304.710 | 749657.999 |
|     |        | 2030 | 11601867.623 | 10828543.357 | 773324.266 |
|     |        | 2031 | 11731666.516 | 10939029.764 | 792636.752 |
|     |        | 2032 | 11857585.969 | 11046456.250 | 811129.719 |
|     |        | 2033 | 11980128.625 | 11151580.568 | 828548.057 |
|     |        | 2034 | 12099562.464 | 11254532.955 | 845029.510 |
|     |        | 2035 | 12195919.946 | 11336911.291 | 859008.655 |
|     |        | 2036 | 12278201.969 | 11408349.568 | 869852.402 |
|     |        | 2037 | 12358146.336 | 11478366.300 | 879780.036 |
|     |        | 2038 | 12435978.633 | 11547497.459 | 888481.174 |
|     |        | 2039 | 12512468.845 | 11616087.724 | 896381.122 |
| IHD | Males  | 1990 | 517209.093   | 517209.093   | 0.000      |
|     |        | 1991 | 1019219.395  | 1016872.731  | 2346.664   |
|     |        | 1992 | 1509598.614  | 1500828.384  | 8770.230   |
|     |        | 1993 | 1992735.299  | 1972080.183  | 20655.116  |
|     |        | 1994 | 2462877.575  | 2424019.152  | 38858.422  |
|     |        | 1995 | 2928249.390  | 2863870.443  | 64378.946  |
|     |        | 1996 | 3377377.730  | 3280101.348  | 97276.382  |
|     |        | 1997 | 3809062.472  | 3672069.475  | 136992.997 |
|     |        | 1998 | 4222213.867  | 4039229.287  | 182984.580 |
|     |        | 1999 | 4708317.743  | 4461535.068  | 246782.675 |
|     |        | 2000 | 5182084.396  | 4864257.604  | 317826.792 |
|     |        | 2001 | 5644097.705  | 5247487.715  | 396609.990 |
|     |        | 2002 | 6107232.129  | 5622487.116  | 484745.013 |
|     |        | 2003 | 6561785.704  | 5981991.070  | 579794.634 |
|     |        | 2004 | 6996156.348  | 6318370.555  | 677785.793 |
|     |        | 2005 | 7426261.361  | 6645153.832  | 781107.529 |
|     |        | 2006 | 7849012.694  | 6959389.073  | 889623.621 |
|     |        | 2007 | 8255300.530  | 7255959.728  | 999340.802 |
|     |        | 2008 | 8650662.040  | 7539870.435  | 1110791.60 |
|     |        | 2009 | 9030818.513  | 7809109.508  | 1221709.00 |
|     |        | 2010 | 9403026.327  | 8069611.628  | 1333414.70 |
|     |        | 2011 | 9767535.506  | 8321660.179  | 1445875.33 |
|     |        | 2012 | 10123044.281 | 8564930.397  | 1558113.88 |
|     |        | 2013 | 10470104.786 | 8800062.445  | 1670042.34 |
|     |        | 2014 | 10807756.112 | 9027190.028  | 1780566.08 |
|     |        | 2015 | 11130681.425 | 9242603.053  | 1888078.37 |
|     |        | 2016 | 11448966.506 | 9454045.950  | 1994920.56 |

**Results for PHIM for Run 2 (ELL Summary Pessimistic\_Analysis.RTF)**

|        |        |      |              |              |            |
|--------|--------|------|--------------|--------------|------------|
|        |        | 2017 | 11758164.882 | 9659109.318  | 2099055.56 |
|        |        | 2018 | 12054448.241 | 9857047.024  | 2197401.22 |
|        |        | 2019 | 12341606.261 | 10049602.668 | 2292003.59 |
|        |        | 2020 | 12600728.939 | 10221905.481 | 2378823.46 |
|        |        | 2021 | 12861767.105 | 10397849.194 | 2463917.91 |
|        |        | 2022 | 13114168.616 | 10569202.539 | 2544966.08 |
|        |        | 2023 | 13357894.797 | 10736071.474 | 2621823.32 |
|        |        | 2024 | 13593848.521 | 10899871.892 | 2693976.63 |
|        |        | 2025 | 13789177.359 | 11033459.378 | 2755717.98 |
|        |        | 2026 | 13993401.656 | 11176632.265 | 2816769.39 |
|        |        | 2027 | 14190519.224 | 11317008.877 | 2873510.35 |
|        |        | 2028 | 14381193.356 | 11454278.679 | 2926914.68 |
|        |        | 2029 | 14565171.927 | 11589870.180 | 2975301.75 |
|        |        | 2030 | 14697381.605 | 11684626.285 | 3012755.32 |
|        |        | 2031 | 14842203.512 | 11791416.886 | 3050786.63 |
|        |        | 2032 | 14982485.826 | 11896319.931 | 3086165.89 |
|        |        | 2033 | 15118410.647 | 11999166.786 | 3119243.86 |
|        |        | 2034 | 15250284.398 | 12102120.743 | 3148163.65 |
|        |        | 2035 | 15322911.166 | 12156574.690 | 3166336.48 |
|        |        | 2036 | 15405115.031 | 12220011.608 | 3185103.42 |
|        |        | 2037 | 15484709.137 | 12282739.924 | 3201969.21 |
|        |        | 2038 | 15561812.193 | 12344480.150 | 3217332.04 |
|        |        | 2039 | 15635992.616 | 12406132.581 | 3229860.04 |
|        | Female | 1990 | 147299.110   | 147299.110   | 0.000      |
|        |        | 1991 | 295122.462   | 294526.629   | 595.834    |
|        |        | 1992 | 439962.920   | 437705.670   | 2257.250   |
|        |        | 1993 | 584735.615   | 579392.968   | 5342.647   |
|        |        | 1994 | 727640.783   | 717561.270   | 10079.513  |
|        |        | 1995 | 868486.937   | 851721.743   | 16765.194  |
|        |        | 1996 | 1010321.847  | 984391.531   | 25930.316  |
|        |        | 1997 | 1144230.930  | 1107519.344  | 36711.585  |
|        |        | 1998 | 1274513.622  | 1225072.427  | 49441.194  |
|        |        | 1999 | 1426725.938  | 1359861.049  | 66864.889  |
|        |        | 2000 | 1573462.680  | 1487299.399  | 86163.281  |
|        |        | 2001 | 1719132.015  | 1610812.639  | 108319.376 |
|        |        | 2002 | 1863006.732  | 1730041.269  | 132965.463 |
|        |        | 2003 | 2002943.227  | 1843464.644  | 159478.584 |
|        |        | 2004 | 2137798.705  | 1950446.851  | 187351.855 |
|        |        | 2005 | 2271071.245  | 2054242.255  | 216828.991 |
|        |        | 2006 | 2400707.731  | 2152997.132  | 247710.599 |
|        |        | 2007 | 2523634.512  | 2244928.728  | 278705.784 |
|        |        | 2008 | 2648752.232  | 2336881.832  | 311870.400 |
|        |        | 2009 | 2765973.961  | 2421925.001  | 344048.960 |
|        |        | 2010 | 2881329.235  | 2504503.916  | 376825.318 |
|        |        | 2011 | 2994972.694  | 2584730.514  | 410242.179 |
|        |        | 2012 | 3108958.829  | 2664150.652  | 444808.177 |
|        |        | 2013 | 3218140.416  | 2739655.984  | 478484.432 |
|        |        | 2014 | 3328387.914  | 2815433.409  | 512954.505 |
|        |        | 2015 | 3435342.796  | 2888380.878  | 546961.918 |
|        |        | 2016 | 3539189.408  | 2958891.076  | 580298.332 |
|        |        | 2017 | 3640041.363  | 3027161.717  | 612879.645 |
|        |        | 2018 | 3732645.362  | 3089991.299  | 642654.063 |
|        |        | 2019 | 3821421.978  | 3150451.286  | 670970.692 |
|        |        | 2020 | 3902115.950  | 3204989.537  | 697126.413 |
|        |        | 2021 | 3984301.053  | 3260914.454  | 723386.599 |
|        |        | 2022 | 4062629.299  | 3314552.154  | 748077.144 |
|        |        | 2023 | 4137348.729  | 3366311.493  | 771037.237 |
|        |        | 2024 | 4208611.493  | 3416282.660  | 792328.833 |
|        |        | 2025 | 4269419.492  | 3458507.498  | 810911.994 |
|        |        | 2026 | 4330969.998  | 3502086.124  | 828883.874 |
|        |        | 2027 | 4389134.306  | 3544044.664  | 845089.642 |
|        |        | 2028 | 4444222.970  | 3584663.137  | 859559.832 |
|        |        | 2029 | 4496447.877  | 3624053.540  | 872394.337 |
|        |        | 2030 | 4536975.698  | 3653806.567  | 883169.130 |
|        |        | 2031 | 4578338.586  | 3685153.832  | 893184.754 |
|        |        | 2032 | 4617397.784  | 3715512.648  | 901885.136 |
|        |        | 2033 | 4654407.697  | 3745220.254  | 909187.442 |
|        |        | 2034 | 4689913.454  | 3774390.191  | 915523.263 |
|        |        | 2035 | 4712518.190  | 3792086.983  | 920431.207 |
|        |        | 2036 | 4735845.827  | 3810985.579  | 924860.248 |
|        |        | 2037 | 4757958.806  | 3829501.471  | 928457.335 |
|        |        | 2038 | 4778813.806  | 3847720.855  | 931092.950 |
|        |        | 2039 | 4798769.065  | 3865706.661  | 933062.405 |
| Stroke | Males  | 1990 | 75005.854    | 75005.854    | 0.000      |
|        |        | 1991 | 149463.017   | 149231.128   | 231.889    |
|        |        | 1992 | 222966.278   | 222092.327   | 873.951    |
|        |        | 1993 | 296801.879   | 294674.600   | 2127.278   |
|        |        | 1994 | 372453.706   | 368258.010   | 4195.696   |

**Results for PHIM for Run 2 (ELL Summary Pessimistic\_Analysis.RTF)**

|        |      |             |             |            |
|--------|------|-------------|-------------|------------|
|        | 1995 | 448401.338  | 441186.641  | 7214.696   |
|        | 1996 | 523536.301  | 512273.354  | 11262.948  |
|        | 1997 | 596763.211  | 580415.495  | 16347.716  |
|        | 1998 | 667546.681  | 645126.974  | 22419.707  |
|        | 1999 | 734925.407  | 705614.108  | 29311.299  |
|        | 2000 | 803749.361  | 766243.806  | 37505.555  |
|        | 2001 | 870081.588  | 823425.257  | 46656.331  |
|        | 2002 | 935347.140  | 878530.045  | 56817.095  |
|        | 2003 | 1001627.349 | 933190.124  | 68437.226  |
|        | 2004 | 1066587.976 | 985665.633  | 80922.343  |
|        | 2005 | 1130548.052 | 1036267.158 | 94280.894  |
|        | 2006 | 1195132.454 | 1086217.871 | 108914.583 |
|        | 2007 | 1258974.043 | 1134578.653 | 124395.390 |
|        | 2008 | 1320124.867 | 1180010.199 | 140114.668 |
|        | 2009 | 1380776.123 | 1224303.881 | 156472.243 |
|        | 2010 | 1440048.533 | 1266939.650 | 173108.883 |
|        | 2011 | 1497484.847 | 1307677.513 | 189807.334 |
|        | 2012 | 1554496.526 | 1347522.569 | 206973.957 |
|        | 2013 | 1610819.598 | 1386348.454 | 224471.144 |
|        | 2014 | 1667484.890 | 1425053.897 | 242430.993 |
|        | 2015 | 1720948.287 | 1461105.867 | 259842.420 |
|        | 2016 | 1775699.228 | 1497804.165 | 277895.063 |
|        | 2017 | 1830250.175 | 1534165.590 | 296084.585 |
|        | 2018 | 1875958.950 | 1564501.890 | 311457.060 |
|        | 2019 | 1920359.232 | 1593963.131 | 326396.101 |
|        | 2020 | 1960605.297 | 1620442.087 | 340163.211 |
|        | 2021 | 1998912.887 | 1645702.338 | 353210.550 |
|        | 2022 | 2036003.696 | 1670254.675 | 365749.020 |
|        | 2023 | 2071857.536 | 1694118.950 | 377738.586 |
|        | 2024 | 2106636.468 | 1717485.354 | 389151.114 |
|        | 2025 | 2136450.873 | 1737328.771 | 399122.103 |
|        | 2026 | 2164796.470 | 1756414.491 | 408381.979 |
|        | 2027 | 2192079.608 | 1775070.136 | 417009.472 |
|        | 2028 | 2218404.367 | 1793277.588 | 425126.779 |
|        | 2029 | 2243769.140 | 1811175.169 | 432593.972 |
|        | 2030 | 2263570.213 | 1825002.572 | 438567.641 |
|        | 2031 | 2282521.590 | 1838497.828 | 444023.762 |
|        | 2032 | 2300804.945 | 1851733.663 | 449071.282 |
|        | 2033 | 2318464.018 | 1864737.794 | 453726.224 |
|        | 2034 | 2335611.973 | 1877723.460 | 457888.512 |
|        | 2035 | 2347097.290 | 1886339.967 | 460757.324 |
|        | 2036 | 2358248.747 | 1894906.485 | 463342.262 |
|        | 2037 | 2369033.655 | 1903407.231 | 465626.425 |
|        | 2038 | 2379490.114 | 1911810.495 | 467679.618 |
|        | 2039 | 2389546.238 | 1920183.109 | 469363.128 |
| Female | 1990 | 56348.092   | 56348.092   | 0.000      |
|        | 1991 | 110871.862  | 110712.449  | 159.413    |
|        | 1992 | 165654.454  | 165033.661  | 620.794    |
|        | 1993 | 220008.519  | 218507.923  | 1500.597   |
|        | 1994 | 275706.807  | 272755.205  | 2951.602   |
|        | 1995 | 331417.547  | 326357.573  | 5059.974   |
|        | 1996 | 387580.161  | 379598.488  | 7981.672   |
|        | 1997 | 442778.242  | 431103.063  | 11675.179  |
|        | 1998 | 496117.305  | 480066.913  | 16050.391  |
|        | 1999 | 548268.214  | 527134.114  | 21134.101  |
|        | 2000 | 601693.202  | 574504.842  | 27188.359  |
|        | 2001 | 652221.103  | 618448.141  | 33772.962  |
|        | 2002 | 703022.600  | 661734.096  | 41288.504  |
|        | 2003 | 752023.351  | 702644.219  | 49379.132  |
|        | 2004 | 799826.733  | 741745.481  | 58081.251  |
|        | 2005 | 847563.928  | 780020.571  | 67543.357  |
|        | 2006 | 894205.027  | 816670.423  | 77534.604  |
|        | 2007 | 939571.282  | 851623.648  | 87947.634  |
|        | 2008 | 983437.578  | 884806.674  | 98630.904  |
|        | 2009 | 1025803.786 | 916350.060  | 109453.726 |
|        | 2010 | 1066964.934 | 946561.469  | 120403.465 |
|        | 2011 | 1106954.044 | 975485.278  | 131468.767 |
|        | 2012 | 1146108.461 | 1003366.351 | 142742.110 |
|        | 2013 | 1183544.689 | 1029764.559 | 153780.131 |
|        | 2014 | 1221220.945 | 1056074.445 | 165146.500 |
|        | 2015 | 1258289.311 | 1081686.575 | 176602.737 |
|        | 2016 | 1294830.207 | 1106770.988 | 188059.219 |
|        | 2017 | 1330332.626 | 1131025.749 | 199306.877 |
|        | 2018 | 1360571.987 | 1151667.872 | 208904.115 |
|        | 2019 | 1389848.723 | 1171658.011 | 218190.712 |
|        | 2020 | 1416046.192 | 1189366.997 | 226679.195 |
|        | 2021 | 1440588.850 | 1206014.962 | 234573.888 |
|        | 2022 | 1464157.934 | 1222076.537 | 242081.398 |



**Results for PHIM for Run 2 (ELL Summary Pessimistic\_Analysis.RTF)**

|      |             |             |             |             |            |
|------|-------------|-------------|-------------|-------------|------------|
|      |             | 2023        | 1486810.237 | 1237665.983 | 249144.254 |
|      |             | 2024        | 1508591.729 | 1252789.715 | 255802.014 |
|      |             | 2025        | 1526875.621 | 1265360.831 | 261514.790 |
|      |             | 2026        | 1543659.810 | 1277091.611 | 266568.199 |
|      |             | 2027        | 1559623.774 | 1288436.024 | 271187.751 |
|      |             | 2028        | 1574852.850 | 1299481.460 | 275371.390 |
|      |             | 2029        | 1589437.452 | 1310272.461 | 279164.991 |
|      |             | 2030        | 1600568.199 | 1318378.102 | 282190.097 |
|      |             | 2031        | 1610776.297 | 1326034.101 | 284742.196 |
|      |             | 2032        | 1620483.563 | 1333496.047 | 286987.516 |
|      |             | 2033        | 1629745.442 | 1340849.468 | 288895.974 |
|      |             | 2034        | 1638721.425 | 1348132.858 | 290588.567 |
|      |             | 2035        | 1644649.404 | 1352829.266 | 291820.138 |
|      |             | 2036        | 1650181.590 | 1357346.560 | 292835.030 |
|      |             | 2037        | 1655476.066 | 1361815.602 | 293660.464 |
|      |             | 2038        | 1660507.914 | 1366245.141 | 294262.773 |
|      |             | 2039        | 1665361.569 | 1370650.422 | 294711.147 |
| COPD | Males       | 1990        | 117002.906  | 117002.906  | 0.000      |
|      |             | 1991        | 233438.833  | 233379.900  | 58.932     |
|      |             | 1992        | 348084.047  | 347869.879  | 214.168    |
|      |             | 1993        | 467278.318  | 466750.813  | 527.504    |
|      |             | 1994        | 584216.907  | 583157.054  | 1059.853   |
|      |             | 1995        | 697391.457  | 695535.091  | 1856.365   |
|      |             | 1996        | 809471.271  | 806486.248  | 2985.023   |
|      |             | 1997        | 922587.668  | 918066.318  | 4521.350   |
|      |             | 1998        | 1034072.457 | 1027643.293 | 6429.163   |
|      |             | 1999        | 1153475.399 | 1144491.160 | 8984.239   |
|      |             | 2000        | 1268050.268 | 1255993.762 | 12056.506  |
|      |             | 2001        | 1382786.209 | 1366952.849 | 15833.360  |
|      |             | 2002        | 1497557.412 | 1477173.771 | 20383.641  |
|      |             | 2003        | 1614405.229 | 1588716.189 | 25689.040  |
|      |             | 2004        | 1726672.489 | 1695088.069 | 31584.420  |
|      |             | 2005        | 1847277.524 | 1808610.342 | 38667.182  |
|      |             | 2006        | 1961009.963 | 1914711.044 | 46298.919  |
|      |             | 2007        | 2079868.908 | 2024621.729 | 55247.179  |
|      |             | 2008        | 2206755.783 | 2141001.530 | 65754.252  |
|      |             | 2009        | 2331993.380 | 2254846.659 | 77146.721  |
|      |             | 2010        | 2455130.176 | 2365893.723 | 89236.454  |
|      |             | 2011        | 2582657.849 | 2479753.194 | 102904.655 |
|      |             | 2012        | 2709719.005 | 2592050.849 | 117668.156 |
|      |             | 2013        | 2840547.005 | 2706456.149 | 134090.857 |
|      |             | 2014        | 2971677.135 | 2820047.397 | 151629.739 |
|      |             | 2015        | 3104538.983 | 2934291.395 | 170247.588 |
|      |             | 2016        | 3237650.175 | 3047534.775 | 190115.400 |
|      |             | 2017        | 3370561.253 | 3159449.607 | 211111.646 |
|      |             | 2018        | 3503136.371 | 3269866.929 | 233269.442 |
|      |             | 2019        | 3636402.758 | 3379850.462 | 256552.296 |
|      |             | 2020        | 3768054.453 | 3487589.371 | 280465.082 |
|      |             | 2021        | 3897675.067 | 3592811.888 | 304863.178 |
|      |             | 2022        | 4027307.132 | 3697107.255 | 330199.877 |
|      |             | 2023        | 4156698.720 | 3800397.574 | 356301.146 |
|      |             | 2024        | 4285772.226 | 3902697.437 | 383074.789 |
|      |             | 2025        | 4410759.298 | 4001094.559 | 409664.738 |
|      |             | 2026        | 4531411.064 | 4095529.339 | 435881.726 |
|      |             | 2027        | 4651145.233 | 4188792.873 | 462352.360 |
|      |             | 2028        | 4769837.872 | 4280930.928 | 488906.944 |
|      |             | 2029        | 4887747.179 | 4372204.937 | 515542.242 |
| 2030 | 4997632.895 | 4456845.106 | 540787.790  |             |            |
| 2031 | 5103301.991 | 4538100.461 | 565201.531  |             |            |
| 2032 | 5207593.613 | 4618466.425 | 589127.188  |             |            |
| 2033 | 5310556.138 | 4697972.304 | 612583.833  |             |            |
| 2034 | 5412542.816 | 4777145.115 | 635397.701  |             |            |
| 2035 | 5500522.473 | 4845144.751 | 655377.722  |             |            |
| 2036 | 5588149.640 | 4913381.983 | 674767.657  |             |            |
| 2037 | 5674667.886 | 4981344.980 | 693322.907  |             |            |
| 2038 | 5760391.289 | 5049218.380 | 711172.909  |             |            |
| 2039 | 5845459.234 | 5117558.287 | 727900.947  |             |            |
|      | Female      | 1990        | 77434.846   | 77434.846   | 0.000      |
|      |             | 1991        | 160029.510  | 159990.437  | 39.074     |
|      |             | 1992        | 240642.531  | 240487.844  | 154.687    |
|      |             | 1993        | 329362.093  | 328945.748  | 416.346    |
|      |             | 1994        | 418569.515  | 417704.831  | 864.685    |
|      |             | 1995        | 509110.357  | 507519.488  | 1590.869   |
|      |             | 1996        | 600040.117  | 597439.842  | 2600.275   |
|      |             | 1997        | 691159.071  | 687195.930  | 3963.140   |
|      |             | 1998        | 782866.899  | 777171.385  | 5695.514   |
|      |             | 1999        | 881526.925  | 873495.989  | 8030.937   |
|      |             | 2000        | 977880.647  | 967107.914  | 10772.733  |

**Results for PHIM for Run 2 (ELL Summary Pessimistic\_Analysis.RTF)**

|      |             |             |            |
|------|-------------|-------------|------------|
| 2001 | 1076787.404 | 1062631.941 | 14155.463  |
| 2002 | 1174842.754 | 1156713.059 | 18129.694  |
| 2003 | 1275102.681 | 1252329.858 | 22772.823  |
| 2004 | 1371026.306 | 1343218.995 | 27807.310  |
| 2005 | 1473954.509 | 1439986.735 | 33967.774  |
| 2006 | 1574450.828 | 1533705.613 | 40745.215  |
| 2007 | 1673790.211 | 1625604.202 | 48186.009  |
| 2008 | 1782360.738 | 1725204.349 | 57156.388  |
| 2009 | 1892944.209 | 1825686.460 | 67257.749  |
| 2010 | 2002131.282 | 1924091.530 | 78039.752  |
| 2011 | 2114522.152 | 2024344.619 | 90177.533  |
| 2012 | 2228079.372 | 2124703.917 | 103375.455 |
| 2013 | 2345377.689 | 2227345.556 | 118032.133 |
| 2014 | 2462498.422 | 2328820.479 | 133677.943 |
| 2015 | 2581450.312 | 2431153.922 | 150296.390 |
| 2016 | 2701959.301 | 2533709.463 | 168249.838 |
| 2017 | 2823834.967 | 2636439.746 | 187395.221 |
| 2018 | 2938265.081 | 2732311.087 | 205953.994 |
| 2019 | 3053254.880 | 2827812.920 | 225441.959 |
| 2020 | 3167073.216 | 2921604.431 | 245468.785 |
| 2021 | 3279517.699 | 3013656.525 | 265861.174 |
| 2022 | 3392060.964 | 3104960.072 | 287100.892 |
| 2023 | 3504296.171 | 3195400.877 | 308895.295 |
| 2024 | 3616019.231 | 3284830.087 | 331189.144 |
| 2025 | 3724611.269 | 3371138.810 | 353472.459 |
| 2026 | 3827181.707 | 3452444.336 | 374737.371 |
| 2027 | 3928684.441 | 3532454.726 | 396229.715 |
| 2028 | 4029124.892 | 3611414.501 | 417710.391 |
| 2029 | 4128269.068 | 3689147.001 | 439122.066 |
| 2030 | 4221560.174 | 3761921.022 | 459639.152 |
| 2031 | 4304170.584 | 3826407.446 | 477763.139 |
| 2032 | 4384930.537 | 3889440.218 | 495490.320 |
| 2033 | 4464357.691 | 3951609.203 | 512748.489 |
| 2034 | 4542251.545 | 4012858.803 | 529392.741 |
| 2035 | 4611066.648 | 4066832.780 | 544233.868 |
| 2036 | 4670309.230 | 4113749.385 | 556559.845 |
| 2037 | 4728179.514 | 4160005.760 | 568173.754 |
| 2038 | 4785008.048 | 4206102.730 | 578905.318 |
| 2039 | 4841291.793 | 4252388.206 | 588903.587 |

---

## Results for PHIM for Run 2 (ELL Summary Pessimistic\_Analysis.RTF)

\*\*\*\*\*

**Table 4: Estimated Loss of Life, All age groups combined, Population and Number deaths adjusted for Ecig scenario, cumulative over years**

| Disease      | Sex          | Year         | Years of life lost<br>NULL | Years of life lost<br>Ecig | Years of life<br>Saved |
|--------------|--------------|--------------|----------------------------|----------------------------|------------------------|
| All Diseases | Males        | 1990         | 1304839.645                | 1304839.645                | 0.000                  |
|              |              | 1991         | 2579865.358                | 2577032.488                | 2832.870               |
|              |              | 1992         | 3830683.831                | 3820093.127                | 10590.704              |
|              |              | 1993         | 5076567.803                | 5051456.133                | 25111.670              |
|              |              | 1994         | 6292145.526                | 6244501.481                | 47644.045              |
|              |              | 1995         | 7485537.010                | 7406016.033                | 79520.976              |
|              |              | 1996         | 8655955.028                | 8534694.242                | 121260.786             |
|              |              | 1997         | 9791729.713                | 9619402.087                | 172327.626             |
|              |              | 1998         | 10899134.186               | 10666837.108               | 232297.078             |
|              |              | 1999         | 12070409.674               | 11757520.530               | 312889.144             |
|              |              | 2000         | 13231384.595               | 12827033.650               | 404350.945             |
|              |              | 2001         | 14371761.018               | 13864706.220               | 507054.798             |
|              |              | 2002         | 15508906.386               | 14886033.072               | 622873.313             |
|              |              | 2003         | 16638100.422               | 15888032.373               | 750068.049             |
|              |              | 2004         | 17736465.088               | 16852729.545               | 883735.543             |
|              |              | 2005         | 18834658.606               | 17807758.568               | 1026900.04             |
|              |              | 2006         | 19909100.501               | 18729884.485               | 1179216.02             |
|              |              | 2007         | 20958321.463               | 19621650.695               | 1336670.77             |
|              |              | 2008         | 22000068.148               | 20499788.700               | 1500279.45             |
|              |              | 2009         | 23018816.903               | 21351836.413               | 1666980.49             |
|              |              | 2010         | 24018480.537               | 22181199.835               | 1837280.70             |
|              |              | 2011         | 25003034.574               | 22991248.935               | 2011785.64             |
|              |              | 2012         | 25969871.429               | 23780110.204               | 2189761.23             |
|              |              | 2013         | 26920275.180               | 24549149.316               | 2371125.86             |
|              |              | 2014         | 27849005.227               | 25295302.755               | 2553702.47             |
|              |              | 2015         | 28749620.400               | 26014908.417               | 2734711.98             |
|              |              | 2016         | 29622417.562               | 26705801.665               | 2916615.90             |
|              |              | 2017         | 30462559.724               | 27365987.076               | 3096572.65             |
|              |              | 2018         | 31293299.299               | 28020687.418               | 3272611.88             |
|              |              | 2019         | 32109993.427               | 28663176.610               | 3446816.82             |
|              |              | 2020         | 32883323.977               | 29270238.412               | 3613085.56             |
|              |              | 2021         | 33610102.554               | 29837335.934               | 3772766.62             |
|              |              | 2022         | 34322010.448               | 30392658.452               | 3929352.00             |
|              |              | 2023         | 35018383.550               | 30936216.641               | 4082166.91             |
|              |              | 2024         | 35700177.955               | 31469812.014               | 4230365.94             |
|              |              | 2025         | 36315500.346               | 31950397.026               | 4365103.32             |
|              |              | 2026         | 36896159.343               | 32403373.037               | 4492786.31             |
|              |              | 2027         | 37462570.116               | 32847304.946               | 4615265.17             |
|              |              | 2028         | 38015337.780               | 33282003.853               | 4733333.93             |
|              |              | 2029         | 38554814.764               | 33709894.463               | 4844920.30             |
|              |              | 2030         | 39003805.400               | 34063905.418               | 4939899.98             |
|              |              | 2031         | 39436509.703               | 34406638.239               | 5029871.46             |
| 2032         | 39858470.458 | 34743224.330 | 5115246.13                 |                            |                        |
| 2033         | 40270147.082 | 35073614.547 | 5196532.54                 |                            |                        |
| 2034         | 40672665.743 | 35401554.365 | 5271111.38                 |                            |                        |
| 2035         | 40962732.664 | 35635410.330 | 5327322.33                 |                            |                        |
| 2036         | 41255021.653 | 35873907.047 | 5381114.61                 |                            |                        |
| 2037         | 41540573.023 | 36109668.024 | 5430905.00                 |                            |                        |
| 2038         | 41820158.066 | 36342697.408 | 5477460.66                 |                            |                        |
| 2039         | 42093547.949 | 36575271.380 | 5518276.57                 |                            |                        |
|              | Female       | 1990         | 588979.406                 | 588979.406                 | 0.000                  |
|              |              | 1991         | 1182571.252                | 1181666.191                | 905.061                |
|              |              | 1992         | 1777346.679                | 1773860.176                | 3486.503               |
|              |              | 1993         | 2380261.899                | 2371861.572                | 8400.327               |
|              |              | 1994         | 2983130.039                | 2966958.320                | 16171.719              |
|              |              | 1995         | 3588982.584                | 3561517.691                | 27464.893              |
|              |              | 1996         | 4195430.235                | 4152371.653                | 43058.581              |
|              |              | 1997         | 4793866.694                | 4731590.219                | 62276.475              |
|              |              | 1998         | 5389747.381                | 5304280.620                | 85466.761              |
|              |              | 1999         | 6006722.467                | 5891105.533                | 115616.934             |
|              |              | 2000         | 6625758.871                | 6475455.707                | 150303.164             |
|              |              | 2001         | 7245135.411                | 7054684.972                | 190450.439             |
|              |              | 2002         | 7867492.021                | 7631286.384                | 236205.637             |
|              |              | 2003         | 8485051.793                | 8198557.411                | 286494.382             |
|              |              | 2004         | 9092994.774                | 8752195.139                | 340799.635             |
|              |              | 2005         | 9706032.803                | 9305763.398                | 400269.406             |
|              |              | 2006         | 10311907.548               | 9847682.112                | 464225.436             |
|              |              | 2007         | 10909437.502               | 10378156.942               | 531280.560             |
|              |              | 2008         | 11506462.491               | 10902898.892               | 603563.598             |
|              |              | 2009         | 12098393.287               | 11420158.986               | 678234.301             |
|              |              | 2010         | 12681188.981               | 11925514.140               | 755674.840             |

**Results for PHIM for Run 2 (ELL Summary Pessimistic\_Analysis.RTF)**

|             |       |      |              |              |            |
|-------------|-------|------|--------------|--------------|------------|
|             |       | 2011 | 13260062.991 | 12423129.096 | 836933.895 |
|             |       | 2012 | 13839417.441 | 12916903.566 | 922513.875 |
|             |       | 2013 | 14409614.758 | 13399910.015 | 1009704.74 |
|             |       | 2014 | 14976658.746 | 13876340.436 | 1100318.31 |
|             |       | 2015 | 15529977.821 | 14338246.267 | 1191731.55 |
|             |       | 2016 | 16066640.764 | 14782571.551 | 1284069.21 |
|             |       | 2017 | 16590035.078 | 15213054.972 | 1376980.11 |
|             |       | 2018 | 17098716.137 | 15631756.082 | 1466960.05 |
|             |       | 2019 | 17599868.850 | 16042881.430 | 1556987.42 |
|             |       | 2020 | 18081346.241 | 16436494.086 | 1644852.15 |
|             |       | 2021 | 18537594.460 | 16807371.067 | 1730223.39 |
|             |       | 2022 | 18985300.234 | 17170274.811 | 1815025.42 |
|             |       | 2023 | 19423958.747 | 17525700.293 | 1898258.45 |
|             |       | 2024 | 19853347.772 | 17873440.014 | 1979907.76 |
|             |       | 2025 | 20252822.245 | 18195925.172 | 2056897.07 |
|             |       | 2026 | 20619307.063 | 18491604.448 | 2127702.61 |
|             |       | 2027 | 20976063.406 | 18779864.783 | 2196198.62 |
|             |       | 2028 | 21323641.947 | 19061869.318 | 2261772.63 |
|             |       | 2029 | 21662117.106 | 19337526.924 | 2324590.18 |
|             |       | 2030 | 21960971.694 | 19579293.028 | 2381678.67 |
|             |       | 2031 | 22224951.983 | 19794083.236 | 2430868.75 |
|             |       | 2032 | 22480397.853 | 20003181.028 | 2477216.83 |
|             |       | 2033 | 22728639.455 | 20208362.794 | 2520276.66 |
|             |       | 2034 | 22970448.888 | 20409852.756 | 2560596.13 |
|             |       | 2035 | 23164154.188 | 20569362.276 | 2594791.91 |
|             |       | 2036 | 23334538.616 | 20711813.094 | 2622725.52 |
|             |       | 2037 | 23499760.723 | 20851750.027 | 2648010.70 |
|             |       | 2038 | 23660308.401 | 20990309.373 | 2669999.03 |
|             |       | 2039 | 23817891.273 | 21128264.569 | 2689626.70 |
| Lung cancer | Males | 1990 | 595621.791   | 595621.791   | 0.000      |
|             |       | 1991 | 1177744.113  | 1177548.728  | 195.384    |
|             |       | 1992 | 1750034.892  | 1749300.720  | 734.171    |
|             |       | 1993 | 2319752.308  | 2317942.342  | 1809.966   |
|             |       | 1994 | 2872597.339  | 2869044.430  | 3552.909   |
|             |       | 1995 | 3411494.825  | 3405373.902  | 6120.923   |
|             |       | 1996 | 3945569.726  | 3935739.681  | 9830.045   |
|             |       | 1997 | 4463316.362  | 4448692.826  | 14623.536  |
|             |       | 1998 | 4975301.180  | 4954592.300  | 20708.880  |
|             |       | 1999 | 5473691.125  | 5445503.357  | 28187.768  |
|             |       | 2000 | 5977500.570  | 5939990.803  | 37509.768  |
|             |       | 2001 | 6474795.516  | 6426081.575  | 48713.941  |
|             |       | 2002 | 6968769.705  | 6906823.363  | 61946.342  |
|             |       | 2003 | 7460282.140  | 7382805.850  | 77476.290  |
|             |       | 2004 | 7947048.275  | 7851923.879  | 95124.396  |
|             |       | 2005 | 8430571.669  | 8315632.054  | 114939.615 |
|             |       | 2006 | 8903945.390  | 8767011.598  | 136933.792 |
|             |       | 2007 | 9364177.982  | 9203422.735  | 160755.247 |
|             |       | 2008 | 9822525.458  | 9635264.719  | 187260.739 |
|             |       | 2009 | 10275228.886 | 10059313.979 | 215914.908 |
|             |       | 2010 | 10720275.500 | 10473823.582 | 246451.918 |
|             |       | 2011 | 11155356.373 | 10876498.841 | 278857.532 |
|             |       | 2012 | 11582611.617 | 11269169.337 | 313442.279 |
|             |       | 2013 | 11998803.791 | 11649007.820 | 349795.971 |
|             |       | 2014 | 12402087.090 | 12014847.446 | 387239.644 |
|             |       | 2015 | 12793451.706 | 12367790.556 | 425661.150 |
|             |       | 2016 | 13160101.653 | 12696285.649 | 463816.004 |
|             |       | 2017 | 13503583.414 | 13002062.042 | 501521.372 |
|             |       | 2018 | 13859755.737 | 13317002.056 | 542753.681 |
|             |       | 2019 | 14211625.176 | 13626377.726 | 585247.451 |
|             |       | 2020 | 14553935.288 | 13925768.365 | 628166.923 |
|             |       | 2021 | 14851747.495 | 14185255.569 | 666491.926 |
|             |       | 2022 | 15144531.004 | 14439157.998 | 705373.006 |
|             |       | 2023 | 15431932.496 | 14687439.862 | 744492.635 |
|             |       | 2024 | 15713920.740 | 14930279.449 | 783641.291 |
|             |       | 2025 | 15979112.816 | 15157752.156 | 821360.660 |
|             |       | 2026 | 16206550.153 | 15352712.418 | 853837.735 |
|             |       | 2027 | 16428826.050 | 15543000.474 | 885825.576 |
|             |       | 2028 | 16645902.186 | 15728715.048 | 917187.138 |
|             |       | 2029 | 16858126.517 | 15910451.521 | 947674.996 |
|             |       | 2030 | 17045220.687 | 16069958.678 | 975262.009 |
|             |       | 2031 | 17208482.610 | 16209810.761 | 998671.849 |
|             |       | 2032 | 17367586.074 | 16346540.488 | 1021045.59 |
|             |       | 2033 | 17522716.280 | 16480211.310 | 1042504.97 |
|             |       | 2034 | 17674226.555 | 16611650.032 | 1062576.52 |
|             |       | 2035 | 17792201.734 | 16713343.224 | 1078858.51 |
|             |       | 2036 | 17903508.236 | 16810421.806 | 1093086.43 |
|             |       | 2037 | 18012162.345 | 16905798.727 | 1106363.62 |
|             |       | 2038 | 18118464.470 | 16999606.974 | 1118857.50 |

**Results for PHIM for Run 2 (ELL Summary Pessimistic\_Analysis.RTF)**

|     |        |      |              |              |            |
|-----|--------|------|--------------|--------------|------------|
|     | Female | 2039 | 18222549.860 | 17092593.671 | 1129956.19 |
|     |        | 1990 | 307897.357   | 307897.357   | 0.000      |
|     |        | 1991 | 616547.418   | 616436.677   | 110.741    |
|     |        | 1992 | 931086.773   | 930632.803   | 453.970    |
|     |        | 1993 | 1246155.671  | 1245013.947  | 1141.724   |
|     |        | 1994 | 1561212.934  | 1558934.029  | 2278.905   |
|     |        | 1995 | 1879967.742  | 1875911.971  | 4055.771   |
|     |        | 1996 | 2197488.109  | 2190928.038  | 6560.072   |
|     |        | 1997 | 2515698.453  | 2505747.688  | 9950.764   |
|     |        | 1998 | 2836249.556  | 2821930.716  | 14318.840  |
|     |        | 1999 | 3150201.390  | 3130552.290  | 19649.100  |
|     |        | 2000 | 3472722.342  | 3446451.171  | 26271.171  |
|     |        | 2001 | 3796994.889  | 3762661.031  | 34333.859  |
|     |        | 2002 | 4126619.935  | 4082618.752  | 44001.184  |
|     |        | 2003 | 4454982.533  | 4399881.206  | 55101.327  |
|     |        | 2004 | 4784343.030  | 4716478.917  | 67864.114  |
|     |        | 2005 | 5113443.121  | 5031127.832  | 82315.289  |
|     |        | 2006 | 5442543.963  | 5343831.435  | 98712.527  |
|     |        | 2007 | 5772441.497  | 5655420.956  | 117020.540 |
|     |        | 2008 | 6091911.943  | 5955306.335  | 136605.608 |
|     |        | 2009 | 6413671.330  | 6255365.064  | 158306.266 |
|     |        | 2010 | 6730763.530  | 6549379.189  | 181384.341 |
|     |        | 2011 | 7043614.101  | 6837428.902  | 206185.199 |
|     |        | 2012 | 7356270.780  | 7123364.973  | 232905.807 |
|     |        | 2013 | 7662551.964  | 7401631.531  | 260920.432 |
|     |        | 2014 | 7964551.465  | 7674287.184  | 290264.281 |
|     |        | 2015 | 8254895.403  | 7935064.128  | 319831.275 |
|     |        | 2016 | 8530661.848  | 8180983.831  | 349678.017 |
|     |        | 2017 | 8795826.122  | 8415936.625  | 379889.498 |
|     |        | 2018 | 9067233.707  | 8655019.398  | 412214.308 |
|     |        | 2019 | 9335343.270  | 8889901.635  | 445441.635 |
|     |        | 2020 | 9596110.883  | 9117169.470  | 478941.412 |
|     |        | 2021 | 9833186.859  | 9323095.292  | 510091.567 |
|     |        | 2022 | 10066452.037 | 9524655.517  | 541796.520 |
|     |        | 2023 | 10295503.609 | 9721935.902  | 573567.707 |
|     |        | 2024 | 10520125.318 | 9914782.755  | 605342.563 |
|     |        | 2025 | 10731915.863 | 10095785.686 | 636130.177 |
|     |        | 2026 | 10917495.549 | 10254465.836 | 663029.712 |
|     |        | 2027 | 11098620.885 | 10409019.291 | 689601.594 |
|     |        | 2028 | 11275441.234 | 10559996.379 | 715444.855 |
|     |        | 2029 | 11447962.710 | 10707327.891 | 740634.819 |
|     |        | 2030 | 11601867.623 | 10838055.955 | 763811.668 |
|     |        | 2031 | 11731666.516 | 10948966.268 | 782700.248 |
|     |        | 2032 | 11857585.969 | 11056818.430 | 800767.539 |
|     |        | 2033 | 11980128.625 | 11162372.448 | 817756.177 |
|     |        | 2034 | 12099562.464 | 11265757.362 | 833805.102 |
|     |        | 2035 | 12195919.946 | 11348533.289 | 847386.657 |
|     |        | 2036 | 12278201.969 | 11420310.677 | 857891.292 |
|     |        | 2037 | 12358146.336 | 11490665.243 | 867481.093 |
|     |        | 2038 | 12435978.633 | 11560135.032 | 875843.601 |
|     |        | 2039 | 12512468.845 | 11629065.776 | 883403.070 |
| IHD | Males  | 1990 | 517209.093   | 517209.093   | 0.000      |
|     |        | 1991 | 1019219.395  | 1016872.731  | 2346.664   |
|     |        | 1992 | 1509598.614  | 1500829.708  | 8768.906   |
|     |        | 1993 | 1992735.299  | 1972086.148  | 20649.151  |
|     |        | 1994 | 2462877.575  | 2424035.705  | 38841.870  |
|     |        | 1995 | 2928249.390  | 2863906.606  | 64342.783  |
|     |        | 1996 | 3377377.730  | 3280168.571  | 97209.159  |
|     |        | 1997 | 3809062.472  | 3672181.806  | 136880.666 |
|     |        | 1998 | 4222213.867  | 4039401.868  | 182811.999 |
|     |        | 1999 | 4708317.743  | 4461801.448  | 246516.295 |
|     |        | 2000 | 5182084.396  | 4864644.837  | 317439.560 |
|     |        | 2001 | 5644097.705  | 5248022.545  | 396075.160 |
|     |        | 2002 | 6107232.129  | 5623202.414  | 484029.715 |
|     |        | 2003 | 6561785.704  | 5982917.596  | 578868.108 |
|     |        | 2004 | 6996156.348  | 6319534.320  | 676622.028 |
|     |        | 2005 | 7426261.361  | 6646589.564  | 779671.797 |
|     |        | 2006 | 7849012.694  | 6961126.995  | 887885.699 |
|     |        | 2007 | 8255300.530  | 7258025.672  | 997274.857 |
|     |        | 2008 | 8650662.040  | 7542293.783  | 1108368.26 |
|     |        | 2009 | 9030818.513  | 7811913.668  | 1218904.84 |
|     |        | 2010 | 9403026.327  | 8072823.903  | 1330202.42 |
|     |        | 2011 | 9767535.506  | 8325307.382  | 1442228.12 |
|     |        | 2012 | 10123044.281 | 8569038.637  | 1554005.64 |
|     |        | 2013 | 10470104.786 | 8804656.859  | 1665447.93 |
|     |        | 2014 | 10807756.112 | 9032294.446  | 1775461.67 |
|     |        | 2015 | 11130681.425 | 9248242.431  | 1882438.99 |
|     |        | 2016 | 11448966.506 | 9460249.240  | 1988717.27 |

**Results for PHIM for Run 2 (ELL Summary Pessimistic\_Analysis.RTF)**

|        |        |      |              |              |            |
|--------|--------|------|--------------|--------------|------------|
|        |        | 2017 | 11758164.882 | 9665899.659  | 2092265.22 |
|        |        | 2018 | 12054448.241 | 9864411.658  | 2190036.58 |
|        |        | 2019 | 12341606.261 | 10057556.422 | 2284049.84 |
|        |        | 2020 | 12600728.939 | 10230457.090 | 2370271.85 |
|        |        | 2021 | 12861767.105 | 10407016.338 | 2454750.77 |
|        |        | 2022 | 13114168.616 | 10578995.297 | 2535173.32 |
|        |        | 2023 | 13357894.797 | 10746499.118 | 2611395.68 |
|        |        | 2024 | 13593848.521 | 10910946.195 | 2682902.33 |
|        |        | 2025 | 13789177.359 | 11045157.865 | 2744019.49 |
|        |        | 2026 | 13993401.656 | 11188995.866 | 2804405.79 |
|        |        | 2027 | 14190519.224 | 11330045.142 | 2860474.08 |
|        |        | 2028 | 14381193.356 | 11467991.721 | 2913201.63 |
|        |        | 2029 | 14565171.927 | 11604265.377 | 2960906.55 |
|        |        | 2030 | 14697381.605 | 11699602.320 | 2997779.28 |
|        |        | 2031 | 14842203.512 | 11807043.597 | 3035159.92 |
|        |        | 2032 | 14982485.826 | 11912598.844 | 3069886.98 |
|        |        | 2033 | 15118410.647 | 12016098.716 | 3102311.93 |
|        |        | 2034 | 15250284.398 | 12119717.400 | 3130567.00 |
|        |        | 2035 | 15322911.166 | 12174603.180 | 3148307.99 |
|        |        | 2036 | 15405115.031 | 12238544.060 | 3166570.97 |
|        |        | 2037 | 15484709.137 | 12301780.282 | 3182928.85 |
|        |        | 2038 | 15561812.193 | 12364029.729 | 3197782.46 |
|        |        | 2039 | 15635992.616 | 12426196.035 | 3209796.58 |
|        | Female | 1990 | 147299.110   | 147299.110   | 0.000      |
|        |        | 1991 | 295122.462   | 294526.629   | 595.834    |
|        |        | 1992 | 439962.920   | 437705.779   | 2257.142   |
|        |        | 1993 | 584735.615   | 579393.492   | 5342.124   |
|        |        | 1994 | 727640.783   | 717562.822   | 10077.961  |
|        |        | 1995 | 868486.937   | 851725.267   | 16761.671  |
|        |        | 1996 | 1010321.847  | 984398.453   | 25923.394  |
|        |        | 1997 | 1144230.930  | 1107531.290  | 36699.640  |
|        |        | 1998 | 1274513.622  | 1225091.387  | 49422.235  |
|        |        | 1999 | 1426725.938  | 1359891.293  | 66834.644  |
|        |        | 2000 | 1573462.680  | 1487344.204  | 86118.475  |
|        |        | 2001 | 1719132.015  | 1610875.635  | 108256.380 |
|        |        | 2002 | 1863006.732  | 1730126.351  | 132880.381 |
|        |        | 2003 | 2002943.227  | 1843575.551  | 159367.677 |
|        |        | 2004 | 2137798.705  | 1950587.282  | 187211.424 |
|        |        | 2005 | 2271071.245  | 2054416.783  | 216654.462 |
|        |        | 2006 | 2400707.731  | 2153209.510  | 247498.221 |
|        |        | 2007 | 2523634.512  | 2245181.980  | 278452.532 |
|        |        | 2008 | 2648752.232  | 2337181.484  | 311570.748 |
|        |        | 2009 | 2765973.961  | 2422273.404  | 343700.557 |
|        |        | 2010 | 2881329.235  | 2504905.548  | 376423.686 |
|        |        | 2011 | 2994972.694  | 2585189.851  | 409782.843 |
|        |        | 2012 | 3108958.829  | 2664672.651  | 444286.178 |
|        |        | 2013 | 3218140.416  | 2740244.005  | 477896.411 |
|        |        | 2014 | 3328387.914  | 2816093.535  | 512294.379 |
|        |        | 2015 | 3435342.796  | 2889119.176  | 546223.620 |
|        |        | 2016 | 3539189.408  | 2959712.162  | 579477.246 |
|        |        | 2017 | 3640041.363  | 3028069.604  | 611971.758 |
|        |        | 2018 | 3732645.362  | 3090984.405  | 641660.958 |
|        |        | 2019 | 3821421.978  | 3151532.024  | 669889.954 |
|        |        | 2020 | 3902115.950  | 3206159.526  | 695956.424 |
|        |        | 2021 | 3984301.053  | 3262181.049  | 722120.004 |
|        |        | 2022 | 4062629.299  | 3315916.594  | 746712.705 |
|        |        | 2023 | 4137348.729  | 3367775.385  | 769573.345 |
|        |        | 2024 | 4208611.493  | 3417846.989  | 790764.504 |
|        |        | 2025 | 4269419.492  | 3460170.467  | 809249.025 |
|        |        | 2026 | 4330969.998  | 3503853.848  | 827116.150 |
|        |        | 2027 | 4389134.306  | 3545916.640  | 843217.666 |
|        |        | 2028 | 4444222.970  | 3586639.245  | 857583.725 |
|        |        | 2029 | 4496447.877  | 3626133.396  | 870314.480 |
|        |        | 2030 | 4536975.698  | 3655980.926  | 880994.772 |
|        |        | 2031 | 4578338.586  | 3687428.836  | 890909.750 |
|        |        | 2032 | 4617397.784  | 3717886.839  | 899510.945 |
|        |        | 2033 | 4654407.697  | 3747693.402  | 906714.295 |
|        |        | 2034 | 4689913.454  | 3776962.196  | 912951.257 |
|        |        | 2035 | 4712518.190  | 3794735.505  | 917782.685 |
|        |        | 2036 | 4735845.827  | 3813716.152  | 922129.674 |
|        |        | 2037 | 4757958.806  | 3832313.411  | 925645.396 |
|        |        | 2038 | 4778813.806  | 3850613.631  | 928200.175 |
|        |        | 2039 | 4798769.065  | 3868680.028  | 930089.038 |
| Stroke | Males  | 1990 | 75005.854    | 75005.854    | 0.000      |
|        |        | 1991 | 149463.017   | 149231.128   | 231.889    |
|        |        | 1992 | 222966.278   | 222092.516   | 873.762    |
|        |        | 1993 | 296801.879   | 294675.475   | 2126.403   |
|        |        | 1994 | 372453.706   | 368260.542   | 4193.164   |

**Results for PHIM for Run 2 (ELL Summary Pessimistic\_Analysis.RTF)**

|        |      |             |             |            |
|--------|------|-------------|-------------|------------|
|        | 1995 | 448401.338  | 441192.296  | 7209.042   |
|        | 1996 | 523536.301  | 512284.127  | 11252.174  |
|        | 1997 | 596763.211  | 580433.781  | 16329.430  |
|        | 1998 | 667546.681  | 645155.453  | 22391.228  |
|        | 1999 | 734925.407  | 705655.461  | 29269.946  |
|        | 2000 | 803749.361  | 766302.652  | 37446.709  |
|        | 2001 | 870081.588  | 823505.218  | 46576.370  |
|        | 2002 | 935347.140  | 878635.760  | 56711.379  |
|        | 2003 | 1001627.349 | 933326.659  | 68300.690  |
|        | 2004 | 1066587.976 | 985838.009  | 80749.967  |
|        | 2005 | 1130548.052 | 1036480.343 | 94067.708  |
|        | 2006 | 1195132.454 | 1086477.777 | 108654.676 |
|        | 2007 | 1258974.043 | 1134890.501 | 124083.542 |
|        | 2008 | 1320124.867 | 1180376.990 | 139747.877 |
|        | 2009 | 1380776.123 | 1224730.866 | 156045.257 |
|        | 2010 | 1440048.533 | 1267431.275 | 172617.258 |
|        | 2011 | 1497484.847 | 1308238.020 | 189246.826 |
|        | 2012 | 1554496.526 | 1348155.837 | 206340.689 |
|        | 2013 | 1610819.598 | 1387059.748 | 223759.849 |
|        | 2014 | 1667484.890 | 1425848.168 | 241636.722 |
|        | 2015 | 1720948.287 | 1461987.782 | 258960.504 |
|        | 2016 | 1775699.228 | 1498780.634 | 276918.594 |
|        | 2017 | 1830250.175 | 1535242.485 | 295007.690 |
|        | 2018 | 1875958.950 | 1565670.173 | 310288.777 |
|        | 2019 | 1920359.232 | 1595225.090 | 325134.142 |
|        | 2020 | 1960605.297 | 1621799.318 | 338805.980 |
|        | 2021 | 1998912.887 | 1647154.338 | 351758.550 |
|        | 2022 | 2036003.696 | 1671802.976 | 364200.719 |
|        | 2023 | 2071857.536 | 1695764.914 | 376092.623 |
|        | 2024 | 2106636.468 | 1719230.743 | 387405.725 |
|        | 2025 | 2136450.873 | 1739171.466 | 397279.407 |
|        | 2026 | 2164796.470 | 1758353.368 | 406443.103 |
|        | 2027 | 2192079.608 | 1777106.129 | 414973.479 |
|        | 2028 | 2218404.367 | 1795411.166 | 422993.201 |
|        | 2029 | 2243769.140 | 1813406.840 | 430362.301 |
|        | 2030 | 2263570.213 | 1827322.473 | 436247.740 |
|        | 2031 | 2282521.590 | 1840905.341 | 441616.249 |
|        | 2032 | 2300804.945 | 1854228.889 | 446576.056 |
|        | 2033 | 2318464.018 | 1867321.097 | 451142.921 |
|        | 2034 | 2335611.973 | 1880396.393 | 455215.580 |
|        | 2035 | 2347097.290 | 1889082.120 | 458015.170 |
|        | 2036 | 2358248.747 | 1897718.451 | 460530.296 |
|        | 2037 | 2369033.655 | 1906289.842 | 462743.813 |
|        | 2038 | 2379490.114 | 1914764.258 | 464725.855 |
|        | 2039 | 2389546.238 | 1923208.547 | 466337.691 |
| Female | 1990 | 56348.092   | 56348.092   | 0.000      |
|        | 1991 | 110871.862  | 110712.449  | 159.413    |
|        | 1992 | 165654.454  | 165033.702  | 620.752    |
|        | 1993 | 220008.519  | 218508.122  | 1500.397   |
|        | 1994 | 275706.807  | 272755.789  | 2951.018   |
|        | 1995 | 331417.547  | 326358.898  | 5058.649   |
|        | 1996 | 387580.161  | 379601.078  | 7979.083   |
|        | 1997 | 442778.242  | 431107.562  | 11670.680  |
|        | 1998 | 496117.305  | 480074.092  | 16043.212  |
|        | 1999 | 548268.214  | 527144.842  | 21123.373  |
|        | 2000 | 601693.202  | 574520.395  | 27172.807  |
|        | 2001 | 652221.103  | 618469.521  | 33751.582  |
|        | 2002 | 703022.600  | 661762.670  | 41259.930  |
|        | 2003 | 752023.351  | 702681.261  | 49342.090  |
|        | 2004 | 799826.733  | 741792.298  | 58034.434  |
|        | 2005 | 847563.928  | 780078.719  | 67485.209  |
|        | 2006 | 894205.027  | 816741.431  | 77463.596  |
|        | 2007 | 939571.282  | 851708.825  | 87862.457  |
|        | 2008 | 983437.578  | 884907.264  | 98530.314  |
|        | 2009 | 1025803.786 | 916467.348  | 109336.438 |
|        | 2010 | 1066964.934 | 946696.625  | 120268.309 |
|        | 2011 | 1106954.044 | 975639.602  | 131314.442 |
|        | 2012 | 1146108.461 | 1003541.171 | 142567.290 |
|        | 2013 | 1183544.689 | 1029960.880 | 153583.809 |
|        | 2014 | 1221220.945 | 1056294.235 | 164926.711 |
|        | 2015 | 1258289.311 | 1081932.243 | 176357.069 |
|        | 2016 | 1294830.207 | 1107044.132 | 187786.076 |
|        | 2017 | 1330332.626 | 1131327.913 | 199004.713 |
|        | 2018 | 1360571.987 | 1151996.946 | 208575.041 |
|        | 2019 | 1389848.723 | 1172014.884 | 217833.838 |
|        | 2020 | 1416046.192 | 1189752.231 | 226293.961 |
|        | 2021 | 1440588.850 | 1206428.538 | 234160.311 |
|        | 2022 | 1464157.934 | 1222518.946 | 241638.988 |

**Results for PHIM for Run 2 (ELL Summary Pessimistic\_Analysis.RTF)**

|      |             |             |             |             |            |
|------|-------------|-------------|-------------|-------------|------------|
|      |             | 2023        | 1486810.237 | 1238137.837 | 248672.400 |
|      |             | 2024        | 1508591.729 | 1253291.393 | 255300.336 |
|      |             | 2025        | 1526875.621 | 1265891.754 | 260983.867 |
|      |             | 2026        | 1543659.810 | 1277650.728 | 266009.082 |
|      |             | 2027        | 1559623.774 | 1289023.281 | 270600.494 |
|      |             | 2028        | 1574852.850 | 1300096.959 | 274755.891 |
|      |             | 2029        | 1589437.452 | 1310916.273 | 278521.179 |
|      |             | 2030        | 1600568.199 | 1319047.741 | 281520.458 |
|      |             | 2031        | 1610776.297 | 1326728.518 | 284047.779 |
|      |             | 2032        | 1620483.563 | 1334215.040 | 286268.523 |
|      |             | 2033        | 1629745.442 | 1341593.177 | 288152.265 |
|      |             | 2034        | 1638721.425 | 1348901.494 | 289819.931 |
|      |             | 2035        | 1644649.404 | 1353617.930 | 291031.475 |
|      |             | 2036        | 1650181.590 | 1358154.628 | 292026.962 |
|      |             | 2037        | 1655476.066 | 1362643.104 | 292832.962 |
|      |             | 2038        | 1660507.914 | 1367092.086 | 293415.828 |
|      |             | 2039        | 1665361.569 | 1371516.889 | 293844.681 |
| COPD | Males       | 1990        | 117002.906  | 117002.906  | 0.000      |
|      |             | 1991        | 233438.833  | 233379.900  | 58.932     |
|      |             | 1992        | 348084.047  | 347870.183  | 213.864    |
|      |             | 1993        | 467278.318  | 466752.168  | 526.150    |
|      |             | 1994        | 584216.907  | 583160.805  | 1056.102   |
|      |             | 1995        | 697391.457  | 695543.229  | 1848.227   |
|      |             | 1996        | 809471.271  | 806501.863  | 2969.408   |
|      |             | 1997        | 922587.668  | 918093.674  | 4493.993   |
|      |             | 1998        | 1034072.457 | 1027687.487 | 6384.970   |
|      |             | 1999        | 1153475.399 | 1144560.264 | 8915.135   |
|      |             | 2000        | 1268050.268 | 1256095.359 | 11954.909  |
|      |             | 2001        | 1382786.209 | 1367096.882 | 15689.328  |
|      |             | 2002        | 1497557.412 | 1477371.536 | 20185.876  |
|      |             | 2003        | 1614405.229 | 1588982.269 | 25422.961  |
|      |             | 2004        | 1726672.489 | 1695433.337 | 31239.152  |
|      |             | 2005        | 1847277.524 | 1809056.606 | 38220.918  |
|      |             | 2006        | 1961009.963 | 1915268.115 | 45741.848  |
|      |             | 2007        | 2079868.908 | 2025311.787 | 54557.122  |
|      |             | 2008        | 2206755.783 | 2141853.208 | 64902.575  |
|      |             | 2009        | 2331993.380 | 2255877.900 | 76115.480  |
|      | 2010        | 2455130.176 | 2367121.075 | 88009.101   |            |
|      | 2011        | 2582657.849 | 2481204.691 | 101453.158  |            |
|      | 2012        | 2709719.005 | 2593746.393 | 115972.612  |            |
|      | 2013        | 2840547.005 | 2708424.889 | 132122.117  |            |
|      | 2014        | 2971677.135 | 2822312.696 | 149364.440  |            |
|      | 2015        | 3104538.983 | 2936887.648 | 167651.335  |            |
|      | 2016        | 3237650.175 | 3050486.142 | 187164.033  |            |
|      | 2017        | 3370561.253 | 3162782.890 | 207778.363  |            |
|      | 2018        | 3503136.371 | 3273603.531 | 229532.841  |            |
|      | 2019        | 3636402.758 | 3384017.372 | 252385.386  |            |
|      | 2020        | 3768054.453 | 3492213.639 | 275840.813  |            |
|      | 2021        | 3897675.067 | 3597909.689 | 299765.378  |            |
|      | 2022        | 4027307.132 | 3702702.180 | 324604.952  |            |
|      | 2023        | 4156698.720 | 3806512.747 | 350185.973  |            |
|      | 2024        | 4285772.226 | 3909355.627 | 376416.598  |            |
|      | 2025        | 4410759.298 | 4008315.539 | 402443.759  |            |
|      | 2026        | 4531411.064 | 4103311.386 | 428099.678  |            |
|      | 2027        | 4651145.233 | 4197153.200 | 453992.033  |            |
|      | 2028        | 4769837.872 | 4289885.918 | 479951.954  |            |
|      | 2029        | 4887747.179 | 4381770.725 | 505976.454  |            |
| 2030 | 4997632.895 | 4467021.946 | 530610.949  |             |            |
| 2031 | 5103301.991 | 4548878.541 | 554423.450  |             |            |
| 2032 | 5207593.613 | 4629856.110 | 577737.503  |             |            |
| 2033 | 5310556.138 | 4709983.423 | 600572.714  |             |            |
| 2034 | 5412542.816 | 4789790.540 | 622752.276  |             |            |
| 2035 | 5500522.473 | 4858381.805 | 642140.668  |             |            |
| 2036 | 5588149.640 | 4927222.730 | 660926.910  |             |            |
| 2037 | 5674667.886 | 4995799.173 | 678868.713  |             |            |
| 2038 | 5760391.289 | 5064296.447 | 696094.841  |             |            |
| 2039 | 5845459.234 | 5133273.128 | 712186.106  |             |            |
|      | Female      | 1990        | 77434.846   | 77434.846   | 0.000      |
|      |             | 1991        | 160029.510  | 159990.437  | 39.074     |
|      |             | 1992        | 240642.531  | 240487.892  | 154.639    |
|      |             | 1993        | 329362.093  | 328946.011  | 416.083    |
|      |             | 1994        | 418569.515  | 417705.680  | 863.835    |
|      |             | 1995        | 509110.357  | 507521.555  | 1588.802   |
|      |             | 1996        | 600040.117  | 597444.084  | 2596.033   |
|      |             | 1997        | 691159.071  | 687203.680  | 3955.391   |
|      |             | 1998        | 782866.899  | 777184.425  | 5682.474   |
|      |             | 1999        | 881526.925  | 873517.108  | 8009.817   |
|      |             | 2000        | 977880.647  | 967139.937  | 10740.711  |



**Results for PHIM for Run 2 (ELL Summary Pessimistic\_Analysis.RTF)**

|      |             |             |            |
|------|-------------|-------------|------------|
| 2001 | 1076787.404 | 1062678.786 | 14108.618  |
| 2002 | 1174842.754 | 1156778.611 | 18064.143  |
| 2003 | 1275102.681 | 1252419.393 | 22683.288  |
| 2004 | 1371026.306 | 1343336.642 | 27689.664  |
| 2005 | 1473954.509 | 1440140.064 | 33814.445  |
| 2006 | 1574450.828 | 1533899.736 | 40551.092  |
| 2007 | 1673790.211 | 1625845.181 | 47945.030  |
| 2008 | 1782360.738 | 1725503.809 | 56856.928  |
| 2009 | 1892944.209 | 1826053.171 | 66891.039  |
| 2010 | 2002131.282 | 1924532.778 | 77598.504  |
| 2011 | 2114522.152 | 2024870.741 | 89651.412  |
| 2012 | 2228079.372 | 2125324.771 | 102754.601 |
| 2013 | 2345377.689 | 2228073.598 | 117304.091 |
| 2014 | 2462498.422 | 2329665.483 | 132832.939 |
| 2015 | 2581450.312 | 2432130.721 | 149319.591 |
| 2016 | 2701959.301 | 2534831.427 | 167127.874 |
| 2017 | 2823834.967 | 2637720.830 | 186114.137 |
| 2018 | 2938265.081 | 2733755.333 | 204509.748 |
| 2019 | 3053254.880 | 2829432.886 | 223821.994 |
| 2020 | 3167073.216 | 2923412.858 | 243660.357 |
| 2021 | 3279517.699 | 3015666.188 | 263851.511 |
| 2022 | 3392060.964 | 3107183.754 | 284877.210 |
| 2023 | 3504296.171 | 3197851.169 | 306445.002 |
| 2024 | 3616019.231 | 3287518.876 | 328500.355 |
| 2025 | 3724611.269 | 3374077.265 | 350534.004 |
| 2026 | 3827181.707 | 3455634.036 | 371547.671 |
| 2027 | 3928684.441 | 3535905.572 | 392778.869 |
| 2028 | 4029124.892 | 3615136.735 | 413988.158 |
| 2029 | 4128269.068 | 3693149.364 | 435119.704 |
| 2030 | 4221560.174 | 3766208.406 | 455351.768 |
| 2031 | 4304170.584 | 3830959.615 | 473210.970 |
| 2032 | 4384930.537 | 3894260.719 | 490669.818 |
| 2033 | 4464357.691 | 3956703.767 | 507653.924 |
| 2034 | 4542251.545 | 4018231.703 | 524019.841 |
| 2035 | 4611066.648 | 4072475.553 | 538591.095 |
| 2036 | 4670309.230 | 4119631.637 | 550677.593 |
| 2037 | 4728179.514 | 4166128.269 | 562051.245 |
| 2038 | 4785008.048 | 4212468.624 | 572539.424 |
| 2039 | 4841291.793 | 4259001.877 | 582289.915 |

---

## Results for PHIM for Run 2 (ELL Summary Pessimistic\_Analysis.RTF)

\*\*\*\*\*

**Table 5: Estimated Loss of Life, at the end of follow-up, Population unadjusted for deaths in Ecig scenario**

| Disease      | Sex    | Age Group   | Years of life lost<br>NULL | Years of life lost<br>Ecig | Years of life<br>Saved |
|--------------|--------|-------------|----------------------------|----------------------------|------------------------|
| All Diseases | Males  | 30-34       | 443911.034                 | 375714.313                 | 68196.720              |
|              |        | 35-39       | 1146798.555                | 966951.329                 | 179847.226             |
|              |        | 40-44       | 2609591.408                | 2190451.513                | 419139.895             |
|              |        | 45-49       | 4775841.753                | 4003538.532                | 772303.221             |
|              |        | 50-54       | 7446969.205                | 6309468.925                | 1137500.28             |
|              |        | 55-59       | 8240205.925                | 7117767.847                | 1122438.08             |
|              |        | 60-64       | 8772829.118                | 7699950.326                | 1072878.79             |
|              |        | 65-69       | 6161494.678                | 5554521.986                | 606972.692             |
|              |        | 70-74       | 2495906.274                | 2283076.153                | 212830.120             |
|              | 75-79  | 0.000       | 0.000                      | 0.000                      |                        |
|              | Female | 30-34       | 229140.561                 | 201838.358                 | 27302.203              |
|              |        | 35-39       | 570217.942                 | 498986.428                 | 71231.514              |
|              |        | 40-44       | 1267538.938                | 1102790.874                | 164748.064             |
|              |        | 45-49       | 2340070.698                | 2035727.180                | 304343.518             |
|              |        | 50-54       | 3743803.613                | 3270929.125                | 472874.488             |
|              |        | 55-59       | 4591478.168                | 4060430.894                | 531047.274             |
|              |        | 60-64       | 5207367.788                | 4625493.137                | 581874.650             |
|              |        | 65-69       | 4092181.394                | 3692652.702                | 399528.692             |
| 70-74        |        | 1776092.171 | 1615984.313                | 160107.858                 |                        |
| 75-79        | 0.000  | 0.000       | 0.000                      |                            |                        |
| Lung cancer  | Males  | 30-34       | 66065.017                  | 62447.790                  | 3617.228               |
|              |        | 35-39       | 232509.414                 | 220041.730                 | 12467.684              |
|              |        | 40-44       | 688628.041                 | 648789.215                 | 39838.826              |
|              |        | 45-49       | 1528300.367                | 1430409.886                | 97890.482              |
|              |        | 50-54       | 2730187.229                | 2547439.495                | 182747.734             |
|              |        | 55-59       | 3909101.673                | 3645942.383                | 263159.290             |
|              |        | 60-64       | 4287716.660                | 4008286.522                | 279430.138             |
|              |        | 65-69       | 3467897.115                | 3254635.855                | 213261.260             |
|              |        | 70-74       | 1312144.343                | 1239574.071                | 72570.272              |
|              | 75-79  | 0.000       | 0.000                      | 0.000                      |                        |
|              | Female | 30-34       | 51913.113                  | 49204.937                  | 2708.176               |
|              |        | 35-39       | 189792.904                 | 179504.453                 | 10288.451              |
|              |        | 40-44       | 527596.573                 | 494565.039                 | 33031.534              |
|              |        | 45-49       | 1122524.269                | 1044666.406                | 77857.863              |
|              |        | 50-54       | 1882214.322                | 1744847.660                | 137366.662             |
|              |        | 55-59       | 2595581.943                | 2403314.583                | 192267.360             |
|              |        | 60-64       | 2846273.090                | 2634005.717                | 212267.372             |
|              |        | 65-69       | 2358758.394                | 2190048.276                | 168710.118             |
| 70-74        |        | 937814.238  | 875930.652                 | 61883.585                  |                        |
| 75-79        | 0.000  | 0.000       | 0.000                      |                            |                        |
| IHD          | Males  | 30-34       | 263834.566                 | 215372.781                 | 48461.785              |
|              |        | 35-39       | 692140.150                 | 557555.898                 | 134584.253             |
|              |        | 40-44       | 1519708.432                | 1203399.181                | 316309.251             |
|              |        | 45-49       | 2568546.697                | 2004301.730                | 564244.967             |
|              |        | 50-54       | 3632929.903                | 2857036.822                | 775893.082             |
|              |        | 55-59       | 2807892.356                | 2189053.194                | 618839.162             |
|              |        | 60-64       | 2599825.934                | 2083694.874                | 516131.059             |
|              |        | 65-69       | 1113578.307                | 917959.439                 | 195618.868             |
|              |        | 70-74       | 437536.271                 | 377758.660                 | 59777.610              |
|              | 75-79  | 0.000       | 0.000                      | 0.000                      |                        |
|              | Female | 30-34       | 79649.097                  | 66374.850                  | 13274.247              |
|              |        | 35-39       | 193965.908                 | 157033.521                 | 36932.387              |
|              |        | 40-44       | 403380.974                 | 319497.935                 | 83883.039              |
|              |        | 45-49       | 671385.408                 | 526342.880                 | 145042.528             |
|              |        | 50-54       | 1011875.989                | 802613.315                 | 209262.674             |
|              |        | 55-59       | 849875.715                 | 674373.378                 | 175502.338             |
|              |        | 60-64       | 925490.876                 | 754260.361                 | 171230.515             |
|              |        | 65-69       | 455463.881                 | 383607.404                 | 71856.478              |
| 70-74        |        | 207681.216  | 181603.016                 | 26078.200                  |                        |
| 75-79        | 0.000  | 0.000       | 0.000                      |                            |                        |
| Stroke       | Males  | 30-34       | 73463.650                  | 62326.949                  | 11136.701              |
|              |        | 35-39       | 151934.057                 | 127582.332                 | 24351.725              |
|              |        | 40-44       | 262845.974                 | 216954.578                 | 45891.396              |
|              |        | 45-49       | 383421.246                 | 310908.685                 | 72512.561              |
|              |        | 50-54       | 479872.634                 | 381700.024                 | 98172.610              |
|              |        | 55-59       | 437124.903                 | 342138.390                 | 94986.514              |
|              |        | 60-64       | 419457.235                 | 330911.881                 | 88545.354              |
|              |        | 65-69       | 128180.574                 | 102641.171                 | 25539.403              |
|              |        | 70-74       | 53245.965                  | 45019.100                  | 8226.865               |
|              | 75-79  | 0.000       | 0.000                      | 0.000                      |                        |
|              | Female | 30-34       | 62919.090                  | 55104.294                  | 7814.796               |

**Results for PHIM for Run 2 (ELL Summary Pessimistic\_Analysis.RTF)**

|      |        |       |             |             |            |
|------|--------|-------|-------------|-------------|------------|
|      |        | 35-39 | 120806.205  | 103732.523  | 17073.682  |
|      |        | 40-44 | 203391.885  | 170514.335  | 32877.550  |
|      |        | 45-49 | 278172.097  | 228948.433  | 49223.664  |
|      |        | 50-54 | 325979.181  | 264813.689  | 61165.492  |
|      |        | 55-59 | 275161.340  | 221115.046  | 54046.294  |
|      |        | 60-64 | 268920.493  | 217833.927  | 51086.566  |
|      |        | 65-69 | 87956.054   | 72664.757   | 15291.296  |
|      |        | 70-74 | 42055.224   | 35923.418   | 6131.806   |
|      |        | 75-79 | 0.000       | 0.000       | 0.000      |
| COPD | Males  | 30-34 | 40547.801   | 35566.793   | 4981.008   |
|      |        | 35-39 | 70214.933   | 61771.369   | 8443.565   |
|      |        | 40-44 | 138408.960  | 121308.539  | 17100.421  |
|      |        | 45-49 | 295573.443  | 257918.231  | 37655.212  |
|      |        | 50-54 | 603979.438  | 523292.584  | 80686.854  |
|      |        | 55-59 | 1086086.992 | 940633.880  | 145453.112 |
|      |        | 60-64 | 1465829.290 | 1277057.049 | 188772.241 |
|      |        | 65-69 | 1451838.682 | 1279285.521 | 172553.161 |
|      |        | 70-74 | 692979.695  | 620724.321  | 72255.374  |
|      |        | 75-79 | 0.000       | 0.000       | 0.000      |
|      | Female | 30-34 | 34659.261   | 31154.277   | 3504.984   |
|      |        | 35-39 | 65652.924   | 58715.931   | 6936.993   |
|      |        | 40-44 | 133169.505  | 118213.565  | 14955.940  |
|      |        | 45-49 | 267988.924  | 235769.461  | 32219.463  |
|      |        | 50-54 | 523734.121  | 458654.460  | 65079.660  |
|      |        | 55-59 | 870859.170  | 761627.887  | 109231.282 |
|      |        | 60-64 | 1166683.329 | 1019393.132 | 147290.197 |
|      |        | 65-69 | 1190003.066 | 1046332.265 | 143670.800 |
|      |        | 70-74 | 588541.493  | 522527.227  | 66014.267  |
|      |        | 75-79 | 0.000       | 0.000       | 0.000      |

---

## Results for PHIM for Run 2 (ELL Summary Pessimistic\_Analysis.RTF)

\*\*\*\*\*

**Table 6: Estimated Loss of Life, at the end of follow-up, Population and Number deaths adjusted for Ecig scenario**

| Disease      | Sex    | Age Group   | Years of life lost<br>NULL | Years of life lost<br>Ecig | Years of life<br>Saved |
|--------------|--------|-------------|----------------------------|----------------------------|------------------------|
| All Diseases | Males  | 30-34       | 443911.034                 | 375731.167                 | 68179.867              |
|              |        | 35-39       | 1146798.555                | 967081.754                 | 179716.801             |
|              |        | 40-44       | 2609591.408                | 2191293.860                | 418297.548             |
|              |        | 45-49       | 4775841.753                | 4007165.135                | 768676.618             |
|              |        | 50-54       | 7446969.205                | 6319900.081                | 1127069.12             |
|              |        | 55-59       | 8240205.925                | 7133021.341                | 1107184.58             |
|              |        | 60-64       | 8772829.118                | 7721783.482                | 1051045.64             |
|              |        | 65-69       | 6161494.678                | 5569414.801                | 592079.877             |
|              |        | 70-74       | 2495906.274                | 2289879.759                | 206026.514             |
|              | 75-79  | 0.000       | 0.000                      | 0.000                      |                        |
|              | Female | 30-34       | 229140.561                 | 201841.798                 | 27298.763              |
|              |        | 35-39       | 570217.942                 | 499012.531                 | 71205.411              |
|              |        | 40-44       | 1267538.938                | 1102955.049                | 164583.889             |
|              |        | 45-49       | 2340070.698                | 2036437.365                | 303633.333             |
|              |        | 50-54       | 3743803.613                | 3273154.781                | 470648.832             |
|              |        | 55-59       | 4591478.168                | 4064511.539                | 526966.629             |
|              |        | 60-64       | 5207367.788                | 4632328.621                | 575039.167             |
|              |        | 65-69       | 4092181.394                | 3698692.902                | 393488.492             |
| 70-74        |        | 1776092.171 | 1619329.983                | 156762.187                 |                        |
| 75-79        | 0.000  | 0.000       | 0.000                      |                            |                        |
| Lung cancer  | Males  | 30-34       | 66065.017                  | 62450.117                  | 3614.900               |
|              |        | 35-39       | 232509.414                 | 220067.106                 | 12442.308              |
|              |        | 40-44       | 688628.041                 | 649009.921                 | 39618.120              |
|              |        | 45-49       | 1528300.367                | 1431590.356                | 96710.011              |
|              |        | 50-54       | 2730187.229                | 2551283.518                | 178903.711             |
|              |        | 55-59       | 3909101.673                | 3653217.503                | 255884.170             |
|              |        | 60-64       | 4287716.660                | 4019004.571                | 268712.089             |
|              |        | 65-69       | 3467897.115                | 3262881.237                | 205015.877             |
|              |        | 70-74       | 1312144.343                | 1243089.342                | 69055.001              |
|              | 75-79  | 0.000       | 0.000                      | 0.000                      |                        |
|              | Female | 30-34       | 51913.113                  | 49205.721                  | 2707.391               |
|              |        | 35-39       | 189792.904                 | 179512.991                 | 10279.914              |
|              |        | 40-44       | 527596.573                 | 494635.193                 | 32961.380              |
|              |        | 45-49       | 1122524.269                | 1045017.792                | 77506.477              |
|              |        | 50-54       | 1882214.322                | 1745999.380                | 136214.942             |
|              |        | 55-59       | 2595581.943                | 2405671.928                | 189910.015             |
|              |        | 60-64       | 2846273.090                | 2637823.586                | 208449.504             |
|              |        | 65-69       | 2358758.394                | 2193513.376                | 165245.018             |
| 70-74        |        | 937814.238  | 877685.810                 | 60128.428                  |                        |
| 75-79        | 0.000  | 0.000       | 0.000                      |                            |                        |
| IHD          | Males  | 30-34       | 263834.566                 | 215383.101                 | 48451.465              |
|              |        | 35-39       | 692140.150                 | 557635.204                 | 134504.947             |
|              |        | 40-44       | 1519708.432                | 1203887.699                | 315820.733             |
|              |        | 45-49       | 2568546.697                | 2006199.949                | 562346.748             |
|              |        | 50-54       | 3632929.903                | 2861912.000                | 771017.903             |
|              |        | 55-59       | 2807892.356                | 2193661.285                | 614231.072             |
|              |        | 60-64       | 2599825.934                | 2089073.161                | 510752.773             |
|              |        | 65-69       | 1113578.307                | 919894.997                 | 193683.311             |
|              |        | 70-74       | 437536.271                 | 378548.640                 | 58987.631              |
|              | 75-79  | 0.000       | 0.000                      | 0.000                      |                        |
|              | Female | 30-34       | 79649.097                  | 66376.117                  | 13272.979              |
|              |        | 35-39       | 193965.908                 | 157042.801                 | 36923.107              |
|              |        | 40-44       | 403380.974                 | 319549.823                 | 83831.151              |
|              |        | 45-49       | 671385.408                 | 526535.393                 | 144850.015             |
|              |        | 50-54       | 1011875.989                | 803160.585                 | 208715.404             |
|              |        | 55-59       | 849875.715                 | 674990.298                 | 174885.417             |
|              |        | 60-64       | 925490.876                 | 755171.297                 | 170319.580             |
|              |        | 65-69       | 455463.881                 | 384028.625                 | 71435.257              |
| 70-74        |        | 207681.216  | 181825.088                 | 25856.128                  |                        |
| 75-79        | 0.000  | 0.000       | 0.000                      |                            |                        |
| Stroke       | Males  | 30-34       | 73463.650                  | 62329.484                  | 11134.165              |
|              |        | 35-39       | 151934.057                 | 127598.676                 | 24335.380              |
|              |        | 40-44       | 262845.974                 | 217032.801                 | 45813.174              |
|              |        | 45-49       | 383421.246                 | 311173.630                 | 72247.616              |
|              |        | 50-54       | 479872.634                 | 382314.149                 | 97558.485              |
|              |        | 55-59       | 437124.903                 | 342867.851                 | 94257.052              |
|              |        | 60-64       | 419457.235                 | 331859.368                 | 87597.866              |
|              |        | 65-69       | 128180.574                 | 102896.570                 | 25284.004              |
|              |        | 70-74       | 53245.965                  | 45136.017                  | 8109.948               |
|              | 75-79  | 0.000       | 0.000                      | 0.000                      |                        |
|              | Female | 30-34       | 62919.090                  | 55105.123                  | 7813.967               |

**Results for PHIM for Run 2 (ELL Summary Pessimistic\_Analysis.RTF)**

|      |        |       |             |             |            |
|------|--------|-------|-------------|-------------|------------|
|      |        | 35-39 | 120806.205  | 103737.427  | 17068.778  |
|      |        | 40-44 | 203391.885  | 170536.781  | 32855.105  |
|      |        | 45-49 | 278172.097  | 229018.954  | 49153.143  |
|      |        | 50-54 | 325979.181  | 264972.934  | 61006.247  |
|      |        | 55-59 | 275161.340  | 221307.765  | 53853.575  |
|      |        | 60-64 | 268920.493  | 218107.258  | 50813.235  |
|      |        | 65-69 | 87956.054   | 72754.078   | 15201.976  |
|      |        | 70-74 | 42055.224   | 35976.568   | 6078.655   |
|      |        | 75-79 | 0.000       | 0.000       | 0.000      |
| COPD | Males  | 30-34 | 40547.801   | 35568.464   | 4979.337   |
|      |        | 35-39 | 70214.933   | 61780.768   | 8434.165   |
|      |        | 40-44 | 138408.960  | 121363.439  | 17045.521  |
|      |        | 45-49 | 295573.443  | 258201.200  | 37372.243  |
|      |        | 50-54 | 603979.438  | 524390.413  | 79589.025  |
|      |        | 55-59 | 1086086.992 | 943274.703  | 142812.289 |
|      |        | 60-64 | 1465829.290 | 1281846.382 | 183982.908 |
|      |        | 65-69 | 1451838.682 | 1283741.997 | 168096.685 |
|      |        | 70-74 | 692979.695  | 623105.760  | 69873.934  |
|      |        | 75-79 | 0.000       | 0.000       | 0.000      |
|      | Female | 30-34 | 34659.261   | 31154.836   | 3504.425   |
|      |        | 35-39 | 65652.924   | 58719.312   | 6933.612   |
|      |        | 40-44 | 133169.505  | 118233.252  | 14936.253  |
|      |        | 45-49 | 267988.924  | 235865.226  | 32123.698  |
|      |        | 50-54 | 523734.121  | 459021.882  | 64712.239  |
|      |        | 55-59 | 870859.170  | 762541.548  | 108317.622 |
|      |        | 60-64 | 1166683.329 | 1021226.480 | 145456.849 |
|      |        | 65-69 | 1190003.066 | 1048396.824 | 141606.241 |
|      |        | 70-74 | 588541.493  | 523842.517  | 64698.976  |
|      |        | 75-79 | 0.000       | 0.000       | 0.000      |

---

## Results for PHIM for Run 1 (Sensitivity\_Analysis\_1.RTF)

System Date and Time: 20210220T085818  
User: JohnS  
SAS Version: 9.4  
Project: Population Health Impact Model 7.3

The System is running in Test Mode

Maximum Upper Age for P Component = 79  
Upper Age for ELL Calculations = 75  
Report in E-component: Social Classes A and B combined  
Description: Sensitivity Analysis 1 for VeneBio, Change F value  
Assumption Files:  
Options Control File: C:\VeneBio\OG\_Test\US\_Control\_V\_S1.CSV  
TTP Test File: C:\VeneBio\OG\_Test\TTP\_Test\_MA.csv  
TTP Reference File: C:\VeneBio\OG\_Test\TTP\_Reference\_V.csv  
TTP Factor Test File: C:\VeneBio\OG\_Test\TTP\_FACTOR\_Test.csv  
TTP Factor Reference File: C:\VeneBio\OG\_Test\TTP\_FACTOR\_Test.csv  
TP Socioeconomic Groups: Not Used  
Output Choices:C:\VeneBio\OG\_Test\OUTC\_PA.csv

Main Results will be sent to the folder C:\VeneBio\Main\_Results\  
Plots will be sent to the folder C:\VeneBio\Plot\_Results\Plots\_20210220T085818  
Saved P, E and/or A Component results will be sent to the folder C:\VeneBio\SAVED\Saved\_20210220T085818\

### Table of Contents

|                                                                                                               |     |
|---------------------------------------------------------------------------------------------------------------|-----|
| <a href="#">Control File Details for Run: 1</a>                                                               | 217 |
| <a href="#">TTP values for Run: 1, Scenario: NULL</a>                                                         | 218 |
| <a href="#">TTP values for Run: 1, Scenario: Ecig</a>                                                         | 220 |
| <a href="#">Main Output for the Tobacco History for Run: 1, Simulation: 1, Scenario: NULL</a>                 | 224 |
| <a href="#">Main Output for the Tobacco History for Run: 1, Simulation: 1, Scenario: Ecig</a>                 | 226 |
| <a href="#">Main Results for E-Component for Run: 1, Simulation: 1, COD: Four Diseases Combined</a>           | 242 |
| <a href="#">Main Results for E-Component for Run: 1, Simulation: 1, COD: LUNG CANCER</a>                      | 243 |
| <a href="#">Main Results for E-Component for Run: 1, Simulation: 1, COD: IHD</a>                              | 244 |
| <a href="#">Main Results for E-Component for Run: 1, Simulation: 1, COD: STROKE</a>                           | 245 |
| <a href="#">Main Results for E-Component for Run: 1, Simulation: 1, COD: COPD</a>                             | 246 |
| <a href="#">Main Results for E-Component for Run: 1, Simulation: 1, COD: Four Diseases Combined, Adjusted</a> | 247 |
| <a href="#">Main Results for E-Component for Run: 1, Simulation: 1, COD: LUNG CANCER, Adjusted</a>            | 248 |
| <a href="#">Main Results for E-Component for Run: 1, Simulation: 1, COD: IHD, Adjusted</a>                    | 249 |
| <a href="#">Main Results for E-Component for Run: 1, Simulation: 1, COD: STROKE, Adjusted</a>                 | 250 |
| <a href="#">Main Results for E-Component for Run: 1, Simulation: 1, COD: COPD, Adjusted</a>                   | 251 |
| <a href="#">Control File Details for Run: 2</a>                                                               | 252 |
| <a href="#">TTP values for Run: 2, Scenario: NULL</a>                                                         | 253 |
| <a href="#">TTP values for Run: 2, Scenario: Ecig</a>                                                         | 255 |
| <a href="#">Main Output for the Tobacco History for Run: 2, Simulation: 1, Scenario: NULL</a>                 | 259 |
| <a href="#">Main Output for the Tobacco History for Run: 2, Simulation: 1, Scenario: Ecig</a>                 | 261 |
| <a href="#">Main Results for E-Component for Run: 2, Simulation: 1, COD: Four Diseases Combined</a>           | 277 |
| <a href="#">Main Results for E-Component for Run: 2, Simulation: 1, COD: LUNG CANCER</a>                      | 278 |
| <a href="#">Main Results for E-Component for Run: 2, Simulation: 1, COD: IHD</a>                              | 279 |
| <a href="#">Main Results for E-Component for Run: 2, Simulation: 1, COD: STROKE</a>                           | 280 |
| <a href="#">Main Results for E-Component for Run: 2, Simulation: 1, COD: COPD</a>                             | 281 |
| <a href="#">Main Results for E-Component for Run: 2, Simulation: 1, COD: Four Diseases Combined, Adjusted</a> | 282 |
| <a href="#">Main Results for E-Component for Run: 2, Simulation: 1, COD: LUNG CANCER, Adjusted</a>            | 283 |
| <a href="#">Main Results for E-Component for Run: 2, Simulation: 1, COD: IHD, Adjusted</a>                    | 284 |
| <a href="#">Main Results for E-Component for Run: 2, Simulation: 1, COD: STROKE, Adjusted</a>                 | 285 |
| <a href="#">Main Results for E-Component for Run: 2, Simulation: 1, COD: COPD, Adjusted</a>                   | 286 |
| <a href="#">Control File Details for Run: 3</a>                                                               | 287 |
| <a href="#">TTP values for Run: 3, Scenario: NULL</a>                                                         | 288 |
| <a href="#">TTP values for Run: 3, Scenario: Ecig</a>                                                         | 290 |
| <a href="#">Main Output for the Tobacco History for Run: 3, Simulation: 1, Scenario: NULL</a>                 | 294 |
| <a href="#">Main Output for the Tobacco History for Run: 3, Simulation: 1, Scenario: Ecig</a>                 | 296 |
| <a href="#">Main Results for E-Component for Run: 3, Simulation: 1, COD: Four Diseases Combined</a>           | 312 |
| <a href="#">Main Results for E-Component for Run: 3, Simulation: 1, COD: LUNG CANCER</a>                      | 313 |
| <a href="#">Main Results for E-Component for Run: 3, Simulation: 1, COD: IHD</a>                              | 314 |
| <a href="#">Main Results for E-Component for Run: 3, Simulation: 1, COD: STROKE</a>                           | 315 |
| <a href="#">Main Results for E-Component for Run: 3, Simulation: 1, COD: COPD</a>                             | 316 |
| <a href="#">Main Results for E-Component for Run: 3, Simulation: 1, COD: Four Diseases Combined, Adjusted</a> | 317 |
| <a href="#">Main Results for E-Component for Run: 3, Simulation: 1, COD: LUNG CANCER, Adjusted</a>            | 318 |
| <a href="#">Main Results for E-Component for Run: 3, Simulation: 1, COD: IHD, Adjusted</a>                    | 319 |
| <a href="#">Main Results for E-Component for Run: 3, Simulation: 1, COD: STROKE, Adjusted</a>                 | 320 |
| <a href="#">Main Results for E-Component for Run: 3, Simulation: 1, COD: COPD, Adjusted</a>                   | 321 |
| <a href="#">Control File Details for Run: 4</a>                                                               | 322 |
| <a href="#">TTP values for Run: 4, Scenario: NULL</a>                                                         | 323 |

## Results for PHIM for Run 1 (Sensitivity\_Analysis\_1.RTF)

|                                                                                                               |     |
|---------------------------------------------------------------------------------------------------------------|-----|
| <a href="#">TTP values for Run: 4, Scenario: Ecig</a>                                                         | 325 |
| <a href="#">Main Output for the Tobacco History for Run: 4, Simulation: 1, Scenario: NULL</a>                 | 329 |
| <a href="#">Main Output for the Tobacco History for Run: 4, Simulation: 1, Scenario: Ecig</a>                 | 331 |
| <a href="#">Main Results for E-Component for Run: 4, Simulation: 1, COD: Four Diseases Combined</a>           | 347 |
| <a href="#">Main Results for E-Component for Run: 4, Simulation: 1, COD: LUNG CANCER</a>                      | 348 |
| <a href="#">Main Results for E-Component for Run: 4, Simulation: 1, COD: IHD</a>                              | 349 |
| <a href="#">Main Results for E-Component for Run: 4, Simulation: 1, COD: STROKE</a>                           | 350 |
| <a href="#">Main Results for E-Component for Run: 4, Simulation: 1, COD: COPD</a>                             | 351 |
| <a href="#">Main Results for E-Component for Run: 4, Simulation: 1, COD: Four Diseases Combined, Adjusted</a> | 352 |
| <a href="#">Main Results for E-Component for Run: 4, Simulation: 1, COD: LUNG CANCER, Adjusted</a>            | 353 |
| <a href="#">Main Results for E-Component for Run: 4, Simulation: 1, COD: IHD, Adjusted</a>                    | 354 |
| <a href="#">Main Results for E-Component for Run: 4, Simulation: 1, COD: STROKE, Adjusted</a>                 | 355 |
| <a href="#">Main Results for E-Component for Run: 4, Simulation: 1, COD: COPD, Adjusted</a>                   | 356 |
| <a href="#">Control File Details for Run: 5</a>                                                               | 357 |
| <a href="#">TTP values for Run: 5, Scenario: NULL</a>                                                         | 358 |
| <a href="#">TTP values for Run: 5, Scenario: Ecig</a>                                                         | 360 |
| <a href="#">Main Output for the Tobacco History for Run: 5, Simulation: 1, Scenario: NULL</a>                 | 364 |
| <a href="#">Main Output for the Tobacco History for Run: 5, Simulation: 1, Scenario: Ecig</a>                 | 366 |
| <a href="#">Main Results for E-Component for Run: 5, Simulation: 1, COD: Four Diseases Combined</a>           | 382 |
| <a href="#">Main Results for E-Component for Run: 5, Simulation: 1, COD: LUNG CANCER</a>                      | 383 |
| <a href="#">Main Results for E-Component for Run: 5, Simulation: 1, COD: IHD</a>                              | 384 |
| <a href="#">Main Results for E-Component for Run: 5, Simulation: 1, COD: STROKE</a>                           | 385 |
| <a href="#">Main Results for E-Component for Run: 5, Simulation: 1, COD: COPD</a>                             | 386 |
| <a href="#">Main Results for E-Component for Run: 5, Simulation: 1, COD: Four Diseases Combined, Adjusted</a> | 387 |
| <a href="#">Main Results for E-Component for Run: 5, Simulation: 1, COD: LUNG CANCER, Adjusted</a>            | 388 |
| <a href="#">Main Results for E-Component for Run: 5, Simulation: 1, COD: IHD, Adjusted</a>                    | 389 |
| <a href="#">Main Results for E-Component for Run: 5, Simulation: 1, COD: STROKE, Adjusted</a>                 | 390 |
| <a href="#">Main Results for E-Component for Run: 5, Simulation: 1, COD: COPD, Adjusted</a>                   | 391 |
| <a href="#">Control File Details for Run: 6</a>                                                               | 392 |
| <a href="#">TTP values for Run: 6, Scenario: NULL</a>                                                         | 393 |
| <a href="#">TTP values for Run: 6, Scenario: Ecig</a>                                                         | 395 |
| <a href="#">Main Output for the Tobacco History for Run: 6, Simulation: 1, Scenario: NULL</a>                 | 399 |
| <a href="#">Main Output for the Tobacco History for Run: 6, Simulation: 1, Scenario: Ecig</a>                 | 401 |
| <a href="#">Main Results for E-Component for Run: 6, Simulation: 1, COD: Four Diseases Combined</a>           | 417 |
| <a href="#">Main Results for E-Component for Run: 6, Simulation: 1, COD: LUNG CANCER</a>                      | 418 |
| <a href="#">Main Results for E-Component for Run: 6, Simulation: 1, COD: IHD</a>                              | 419 |
| <a href="#">Main Results for E-Component for Run: 6, Simulation: 1, COD: STROKE</a>                           | 420 |
| <a href="#">Main Results for E-Component for Run: 6, Simulation: 1, COD: COPD</a>                             | 421 |
| <a href="#">Main Results for E-Component for Run: 6, Simulation: 1, COD: Four Diseases Combined, Adjusted</a> | 422 |
| <a href="#">Main Results for E-Component for Run: 6, Simulation: 1, COD: LUNG CANCER, Adjusted</a>            | 423 |
| <a href="#">Main Results for E-Component for Run: 6, Simulation: 1, COD: IHD, Adjusted</a>                    | 424 |
| <a href="#">Main Results for E-Component for Run: 6, Simulation: 1, COD: STROKE, Adjusted</a>                 | 425 |
| <a href="#">Main Results for E-Component for Run: 6, Simulation: 1, COD: COPD, Adjusted</a>                   | 426 |
| <a href="#">Control File Details for Run: 7</a>                                                               | 427 |
| <a href="#">TTP values for Run: 7, Scenario: NULL</a>                                                         | 428 |
| <a href="#">TTP values for Run: 7, Scenario: Ecig</a>                                                         | 430 |
| <a href="#">Main Output for the Tobacco History for Run: 7, Simulation: 1, Scenario: NULL</a>                 | 434 |
| <a href="#">Main Output for the Tobacco History for Run: 7, Simulation: 1, Scenario: Ecig</a>                 | 436 |
| <a href="#">Main Results for E-Component for Run: 7, Simulation: 1, COD: Four Diseases Combined</a>           | 452 |
| <a href="#">Main Results for E-Component for Run: 7, Simulation: 1, COD: LUNG CANCER</a>                      | 453 |
| <a href="#">Main Results for E-Component for Run: 7, Simulation: 1, COD: IHD</a>                              | 454 |
| <a href="#">Main Results for E-Component for Run: 7, Simulation: 1, COD: STROKE</a>                           | 455 |
| <a href="#">Main Results for E-Component for Run: 7, Simulation: 1, COD: COPD</a>                             | 456 |
| <a href="#">Main Results for E-Component for Run: 7, Simulation: 1, COD: Four Diseases Combined, Adjusted</a> | 457 |
| <a href="#">Main Results for E-Component for Run: 7, Simulation: 1, COD: LUNG CANCER, Adjusted</a>            | 458 |
| <a href="#">Main Results for E-Component for Run: 7, Simulation: 1, COD: IHD, Adjusted</a>                    | 459 |
| <a href="#">Main Results for E-Component for Run: 7, Simulation: 1, COD: STROKE, Adjusted</a>                 | 460 |
| <a href="#">Main Results for E-Component for Run: 7, Simulation: 1, COD: COPD, Adjusted</a>                   | 461 |
| <a href="#">Control File Details for Run: 8</a>                                                               | 462 |
| <a href="#">TTP values for Run: 8, Scenario: NULL</a>                                                         | 463 |
| <a href="#">TTP values for Run: 8, Scenario: Ecig</a>                                                         | 465 |
| <a href="#">Main Output for the Tobacco History for Run: 8, Simulation: 1, Scenario: NULL</a>                 | 469 |
| <a href="#">Main Output for the Tobacco History for Run: 8, Simulation: 1, Scenario: Ecig</a>                 | 471 |
| <a href="#">Main Results for E-Component for Run: 8, Simulation: 1, COD: Four Diseases Combined</a>           | 487 |
| <a href="#">Main Results for E-Component for Run: 8, Simulation: 1, COD: LUNG CANCER</a>                      | 488 |
| <a href="#">Main Results for E-Component for Run: 8, Simulation: 1, COD: IHD</a>                              | 489 |
| <a href="#">Main Results for E-Component for Run: 8, Simulation: 1, COD: STROKE</a>                           | 490 |
| <a href="#">Main Results for E-Component for Run: 8, Simulation: 1, COD: COPD</a>                             | 491 |
| <a href="#">Main Results for E-Component for Run: 8, Simulation: 1, COD: Four Diseases Combined, Adjusted</a> | 492 |
| <a href="#">Main Results for E-Component for Run: 8, Simulation: 1, COD: LUNG CANCER, Adjusted</a>            | 493 |
| <a href="#">Main Results for E-Component for Run: 8, Simulation: 1, COD: IHD, Adjusted</a>                    | 494 |
| <a href="#">Main Results for E-Component for Run: 8, Simulation: 1, COD: STROKE, Adjusted</a>                 | 495 |
| <a href="#">Main Results for E-Component for Run: 8, Simulation: 1, COD: COPD, Adjusted</a>                   | 496 |

## Results for PHIM for Run 1 (Sensitivity\_Analysis\_1.RTF)

|                                                                                                                                                            |     |
|------------------------------------------------------------------------------------------------------------------------------------------------------------|-----|
| <a href="#">Control File Details for Run: 9</a>                                                                                                            | 497 |
| <a href="#">TTP values for Run: 9, Scenario: NULL</a>                                                                                                      | 498 |
| <a href="#">TTP values for Run: 9, Scenario: Ecig</a>                                                                                                      | 500 |
| <a href="#">Main Output for the Tobacco History for Run: 9, Simulation: 1, Scenario: NULL</a>                                                              | 504 |
| <a href="#">Main Output for the Tobacco History for Run: 9, Simulation: 1, Scenario: Ecig</a>                                                              | 506 |
| <a href="#">Main Results for E-Component for Run: 9, Simulation: 1, COD: Four Diseases Combined</a>                                                        | 522 |
| <a href="#">Main Results for E-Component for Run: 9, Simulation: 1, COD: LUNG CANCER</a>                                                                   | 523 |
| <a href="#">Main Results for E-Component for Run: 9, Simulation: 1, COD: IHD</a>                                                                           | 524 |
| <a href="#">Main Results for E-Component for Run: 9, Simulation: 1, COD: STROKE</a>                                                                        | 525 |
| <a href="#">Main Results for E-Component for Run: 9, Simulation: 1, COD: COPD</a>                                                                          | 526 |
| <a href="#">Main Results for E-Component for Run: 9, Simulation: 1, COD: Four Diseases Combined, Adjusted</a>                                              | 527 |
| <a href="#">Main Results for E-Component for Run: 9, Simulation: 1, COD: LUNG CANCER, Adjusted</a>                                                         | 528 |
| <a href="#">Main Results for E-Component for Run: 9, Simulation: 1, COD: IHD, Adjusted</a>                                                                 | 529 |
| <a href="#">Main Results for E-Component for Run: 9, Simulation: 1, COD: STROKE, Adjusted</a>                                                              | 530 |
| <a href="#">Main Results for E-Component for Run: 9, Simulation: 1, COD: COPD, Adjusted</a>                                                                | 531 |
| <a href="#">Control File Details for Run: 10</a>                                                                                                           | 532 |
| <a href="#">TTP values for Run: 10, Scenario: NULL</a>                                                                                                     | 533 |
| <a href="#">TTP values for Run: 10, Scenario: Ecig</a>                                                                                                     | 535 |
| <a href="#">Main Output for the Tobacco History for Run: 10, Simulation: 1, Scenario: NULL</a>                                                             | 539 |
| <a href="#">Main Output for the Tobacco History for Run: 10, Simulation: 1, Scenario: Ecig</a>                                                             | 541 |
| <a href="#">Main Results for E-Component for Run: 10, Simulation: 1, COD: Four Diseases Combined</a>                                                       | 557 |
| <a href="#">Main Results for E-Component for Run: 10, Simulation: 1, COD: LUNG CANCER</a>                                                                  | 558 |
| <a href="#">Main Results for E-Component for Run: 10, Simulation: 1, COD: IHD</a>                                                                          | 559 |
| <a href="#">Main Results for E-Component for Run: 10, Simulation: 1, COD: STROKE</a>                                                                       | 560 |
| <a href="#">Main Results for E-Component for Run: 10, Simulation: 1, COD: COPD</a>                                                                         | 561 |
| <a href="#">Main Results for E-Component for Run: 10, Simulation: 1, COD: Four Diseases Combined, Adjusted</a>                                             | 562 |
| <a href="#">Main Results for E-Component for Run: 10, Simulation: 1, COD: LUNG CANCER, Adjusted</a>                                                        | 563 |
| <a href="#">Main Results for E-Component for Run: 10, Simulation: 1, COD: IHD, Adjusted</a>                                                                | 564 |
| <a href="#">Main Results for E-Component for Run: 10, Simulation: 1, COD: STROKE, Adjusted</a>                                                             | 565 |
| <a href="#">Main Results for E-Component for Run: 10, Simulation: 1, COD: COPD, Adjusted</a>                                                               | 566 |
| <a href="#">Estimated Loss of Life from the E Component for Run: 2, Simulation: 1</a>                                                                      | 567 |
| <a href="#">Table 1: Estimated Loss of Life, at the end of follow-up, all age groups combined, Population unadjusted for deaths in Ecig scenario</a>       | 567 |
| <a href="#">Table 2: Estimated Loss of Life, at the end of follow-up, all age groups combined, Population and Number deaths adjusted for Ecig scenario</a> | 568 |
| <a href="#">Table 3: Estimated Loss of Life, All age groups combined, Population unadjusted for deaths in Ecig scenario, cumulative over years</a>         | 569 |
| <a href="#">Table 4: Estimated Loss of Life, All age groups combined, Population and Number deaths adjusted for Ecig scenario, cumulative over years</a>   | 576 |
| <a href="#">Table 5: Estimated Loss of Life, at the end of follow-up, Population unadjusted for deaths in Ecig scenario</a>                                | 583 |
| <a href="#">Table 6: Estimated Loss of Life, at the end of follow-up, Population and Number deaths adjusted for Ecig scenario</a>                          | 585 |
| <a href="#">Estimated Loss of Life from the E Component for Run: 4, Simulation: 1</a>                                                                      | 587 |
| <a href="#">Table 1: Estimated Loss of Life, at the end of follow-up, all age groups combined, Population unadjusted for deaths in Ecig scenario</a>       | 587 |
| <a href="#">Table 2: Estimated Loss of Life, at the end of follow-up, all age groups combined, Population and Number deaths adjusted for Ecig scenario</a> | 588 |
| <a href="#">Table 3: Estimated Loss of Life, All age groups combined, Population unadjusted for deaths in Ecig scenario, cumulative over years</a>         | 589 |
| <a href="#">Table 4: Estimated Loss of Life, All age groups combined, Population and Number deaths adjusted for Ecig scenario, cumulative over years</a>   | 596 |
| <a href="#">Table 5: Estimated Loss of Life, at the end of follow-up, Population unadjusted for deaths in Ecig scenario</a>                                | 603 |
| <a href="#">Table 6: Estimated Loss of Life, at the end of follow-up, Population and Number deaths adjusted for Ecig scenario</a>                          | 605 |
| <a href="#">Estimated Loss of Life from the E Component for Run: 6, Simulation: 1</a>                                                                      | 607 |
| <a href="#">Table 1: Estimated Loss of Life, at the end of follow-up, all age groups combined, Population unadjusted for deaths in Ecig scenario</a>       | 607 |
| <a href="#">Table 2: Estimated Loss of Life, at the end of follow-up, all age groups combined, Population and Number deaths adjusted for Ecig scenario</a> | 608 |
| <a href="#">Table 3: Estimated Loss of Life, All age groups combined, Population unadjusted for deaths in Ecig scenario, cumulative over years</a>         | 609 |
| <a href="#">Table 4: Estimated Loss of Life, All age groups combined, Population and Number deaths adjusted for Ecig scenario, cumulative over years</a>   | 616 |
| <a href="#">Table 5: Estimated Loss of Life, at the end of follow-up, Population unadjusted for deaths in Ecig scenario</a>                                | 623 |
| <a href="#">Table 6: Estimated Loss of Life, at the end of follow-up, Population and Number deaths adjusted for Ecig scenario</a>                          | 625 |
| <a href="#">Estimated Loss of Life from the E Component for Run: 8, Simulation: 1</a>                                                                      | 627 |
| <a href="#">Table 1: Estimated Loss of Life, at the end of follow-up, all age groups combined, Population unadjusted for deaths in Ecig scenario</a>       | 627 |
| <a href="#">Table 2: Estimated Loss of Life, at the end of follow-up, all age groups combined, Population and Number deaths adjusted for Ecig scenario</a> | 628 |
| <a href="#">Table 3: Estimated Loss of Life, All age groups combined, Population unadjusted for deaths in Ecig scenario, cumulative over years</a>         | 629 |
| <a href="#">Table 4: Estimated Loss of Life, All age groups combined, Population and Number deaths adjusted for Ecig scenario, cumulative over years</a>   | 636 |
| <a href="#">Table 5: Estimated Loss of Life, at the end of follow-up, Population unadjusted for deaths in Ecig scenario</a>                                | 643 |
| <a href="#">Table 6: Estimated Loss of Life, at the end of follow-up, Population and Number deaths adjusted for Ecig scenario</a>                          | 645 |
| <a href="#">Estimated Loss of Life from the E Component for Run: 10, Simulation: 1</a>                                                                     | 647 |
| <a href="#">Table 1: Estimated Loss of Life, at the end of follow-up, all age groups combined, Population unadjusted for deaths in Ecig scenario</a>       | 647 |
| <a href="#">Table 2: Estimated Loss of Life, at the end of follow-up, all age groups combined, Population and Number deaths adjusted for Ecig scenario</a> | 648 |
| <a href="#">Table 3: Estimated Loss of Life, All age groups combined, Population unadjusted for deaths in Ecig scenario, cumulative over years</a>         | 649 |
| <a href="#">Table 4: Estimated Loss of Life, All age groups combined, Population and Number deaths adjusted for Ecig scenario, cumulative over years</a>   | 656 |
| <a href="#">Table 5: Estimated Loss of Life, at the end of follow-up, Population unadjusted for deaths in Ecig scenario</a>                                | 663 |
| <a href="#">Table 6: Estimated Loss of Life, at the end of follow-up, Population and Number deaths adjusted for Ecig scenario</a>                          | 665 |



## Results for PHIM for Run 1 (Sensitivity\_Analysis\_1.RTF)

---

### Control File Details for Run: 1

| Variable Parameter                                       | Value                  |
|----------------------------------------------------------|------------------------|
| 1. Name for Reference Scenario                           | NULL                   |
| 2. Name for Test Scenario                                | Ecig                   |
| 3. Name for Product 1                                    | CC                     |
| 4. Name for Product 2                                    | Ecig                   |
| 5. Name for Product 3                                    | -                      |
| 6. Name for Product 4                                    | Dual                   |
| 7. Country                                               | US (United States)     |
| 8. Sex                                                   | M (Males)              |
| 9. Year of start of process                              | 1990                   |
| 10. Number of months of follow-up                        | 600                    |
| 11. Follow-up interval length (in months)                | 12                     |
| 12. Lower age for risk estimation                        | 10                     |
| 13. Upper age for risk estimation                        | 79                     |
| 14. The effective dose for Product 1 (F1) - Ref          | 1                      |
| 15. The effective dose for Product 2 (F2) - Ref          | -                      |
| 16. The effective dose for Product 3 (F3) - Ref          | -                      |
| 17. The effective dose for Product 4 (F4) - Ref          | -                      |
| 18. The effective dose for Product 1 (F1) - Test         | 1                      |
| 19. The effective dose for Product 2 (F2) - Test         | 0.4                    |
| 20. The effective dose for Product 3 (F3) - Test         | -                      |
| 21. The effective dose for Product 4 (F4) - Test         | FROMF2                 |
| 22. Number in population to be simulated                 | 100000                 |
| 23. Number of MC simulations                             | 1                      |
| 24. The random number seed for the first simulation      | 15975263               |
| 25. Source for the population file (POP)                 | UN4                    |
| 26. Source for the socioeconomic prevalence file (SEP)   | -                      |
| 27. Source for the current smoking prevalence file (CSP) | ISS3                   |
| 28. Source for the former smoking prevalence file (FSP)  | ISS3                   |
| 29. Source for the quit-time distribution file (QTD)     | NHIS2006               |
| 30. Source for the death file (MORT)                     | APR-20                 |
| 31. Source for the relative risk file (RR)               | PNLEST                 |
| 32. Source for the half-life file (H)                    | PNLEST                 |
| 33. Assumption Set for TTP Factor Reference              | F1                     |
| 34. Assumption Set for TTP Factor Test                   | F1                     |
| 35. Assumption Set for TTP Reference                     | ISS3                   |
| 36. Assumption Set for TTP Test                          | ISS3                   |
| 37. Assumption Set for TP for socioeconomic group        | -                      |
| 38. Source for Output Choice file (OUTC)                 | BASIC                  |
| 39. Output for DTP P1                                    | N                      |
| 40. Output for DTP P2                                    | N                      |
| 41. Output for Main P Component                          | Y                      |
| 42. Output for DTP E1                                    | N                      |
| 43. Output for DTP E2                                    | N                      |
| 44. Output for DTP E3                                    | N                      |
| 45. Output for Main E Component                          | Y                      |
| 46. Output file name                                     | Sensitivity_Analysis_1 |
| 47. Run number for P-Component                           | -                      |
| 48. Results file for E-Component                         | -                      |
| 49. Components required                                  | PE                     |
| 50. Results folder for P to be used in E-Component       | -                      |
| 51. Fixed age of starting product use                    | 16                     |
| 52. Output absolute risk file?                           | N                      |

## Results for PHIM for Run 1 (Sensitivity\_Analysis\_1.RTF)

\*\*\*\*\*

TTP values for Run: 1, Scenario: NULL

| Variable Parameter | Value               |
|--------------------|---------------------|
| 1. Country         | US (United States)  |
| 2. Sex             | M (Males)           |
| 3. Assumption Set  | ISS3                |
| Note:              | Period is in Months |

| Age   | Period  | Initiation  | Cessation    | Re-initiation |
|-------|---------|-------------|--------------|---------------|
|       |         | Never<br>CC | CC<br>Former | Former<br>CC  |
| 10-14 | 1-12    | 0.003842    | 0.008742     | 0.000000      |
| 15-19 | 1-12    | 0.004720    | 0.003614     | 0.000000      |
| 20-24 | 1-12    | 0.000376    | 0.000943     | 0.000000      |
| 25-29 | 1-12    | 0.000187    | 0.001143     | 0.000000      |
| 30-34 | 1-12    | 0.000093    | 0.000871     | 0.000000      |
| 35-39 | 1-12    | 0.000000    | 0.000867     | 0.000000      |
| 40-44 | 1-12    | 0.000000    | 0.001399     | 0.000000      |
| 45-49 | 1-12    | 0.000000    | 0.002033     | 0.000000      |
| 50-54 | 1-12    | 0.000000    | 0.003209     | 0.000000      |
| 55-59 | 1-12    | 0.000000    | 0.003574     | 0.000000      |
| 60-64 | 1-12    | 0.000000    | 0.003460     | 0.000000      |
| 65-69 | 1-12    | 0.000000    | 0.004136     | 0.000000      |
| 70-74 | 1-12    | 0.000000    | 0.005592     | 0.000000      |
| 75-79 | 1-12    | 0.000000    | 0.005592     | 0.000000      |
| 10-14 | 13-72   | 0.004906    | 0.008742     | 0.000000      |
| 15-19 | 13-72   | 0.006989    | 0.004426     | 0.000000      |
| 20-24 | 13-72   | 0.000687    | 0.001527     | 0.000000      |
| 25-29 | 13-72   | 0.000962    | 0.001515     | 0.000000      |
| 30-34 | 13-72   | 0.000364    | 0.001227     | 0.000000      |
| 35-39 | 13-72   | 0.000000    | 0.001630     | 0.000000      |
| 40-44 | 13-72   | 0.000000    | 0.001852     | 0.000000      |
| 45-49 | 13-72   | 0.000000    | 0.002667     | 0.000000      |
| 50-54 | 13-72   | 0.000000    | 0.003208     | 0.000000      |
| 55-59 | 13-72   | 0.000000    | 0.003978     | 0.000000      |
| 60-64 | 13-72   | 0.000000    | 0.005771     | 0.000000      |
| 65-69 | 13-72   | 0.000000    | 0.010432     | 0.000000      |
| 70-74 | 13-72   | 0.000000    | 0.007079     | 0.000000      |
| 75-79 | 13-72   | 0.000000    | 0.007079     | 0.000000      |
| 10-14 | 73-132  | 0.004312    | 0.008742     | 0.000000      |
| 15-19 | 73-132  | 0.005330    | 0.003289     | 0.000000      |
| 20-24 | 73-132  | 0.002456    | 0.003844     | 0.000000      |
| 25-29 | 73-132  | 0.000839    | 0.002006     | 0.000000      |
| 30-34 | 73-132  | 0.000414    | 0.001329     | 0.000000      |
| 35-39 | 73-132  | 0.000000    | 0.001278     | 0.000000      |
| 40-44 | 73-132  | 0.000000    | 0.001691     | 0.000000      |
| 45-49 | 73-132  | 0.000000    | 0.002904     | 0.000000      |
| 50-54 | 73-132  | 0.000000    | 0.003319     | 0.000000      |
| 55-59 | 73-132  | 0.000000    | 0.003976     | 0.000000      |
| 60-64 | 73-132  | 0.000000    | 0.005235     | 0.000000      |
| 65-69 | 73-132  | 0.000000    | 0.005901     | 0.000000      |
| 70-74 | 73-132  | 0.000000    | 0.005615     | 0.000000      |
| 75-79 | 73-132  | 0.000000    | 0.005615     | 0.000000      |
| 10-14 | 133-192 | 0.003468    | 0.008742     | 0.000000      |
| 15-19 | 133-192 | 0.004675    | 0.003732     | 0.000000      |
| 20-24 | 133-192 | 0.000062    | 0.002260     | 0.000000      |
| 25-29 | 133-192 | 0.001422    | 0.002822     | 0.000000      |
| 30-34 | 133-192 | 0.000696    | 0.002610     | 0.000000      |
| 35-39 | 133-192 | 0.000000    | 0.002058     | 0.000000      |
| 40-44 | 133-192 | 0.000000    | 0.002310     | 0.000000      |
| 45-49 | 133-192 | 0.000000    | 0.002256     | 0.000000      |
| 50-54 | 133-192 | 0.000000    | 0.002663     | 0.000000      |
| 55-59 | 133-192 | 0.000000    | 0.001746     | 0.000000      |
| 60-64 | 133-192 | 0.000000    | 0.005809     | 0.000000      |
| 65-69 | 133-192 | 0.000000    | 0.005896     | 0.000000      |
| 70-74 | 133-192 | 0.000000    | 0.007323     | 0.000000      |
| 75-79 | 133-192 | 0.000000    | 0.007323     | 0.000000      |
| 10-14 | 193-252 | 0.002314    | 0.008742     | 0.000000      |
| 15-19 | 193-252 | 0.003987    | 0.005036     | 0.000000      |
| 20-24 | 193-252 | 0.000320    | 0.002857     | 0.000000      |
| 25-29 | 193-252 | 0.000251    | 0.002314     | 0.000000      |
| 30-34 | 193-252 | 0.000125    | 0.004343     | 0.000000      |
| 35-39 | 193-252 | 0.000000    | 0.002092     | 0.000000      |
| 40-44 | 193-252 | 0.000000    | 0.002566     | 0.000000      |
| 45-49 | 193-252 | 0.000000    | 0.002311     | 0.000000      |
| 50-54 | 193-252 | 0.000000    | 0.003209     | 0.000000      |

### Results for PHIM for Run 1 (Sensitivity\_Analysis\_1.RTF)

|       |         |          |          |          |
|-------|---------|----------|----------|----------|
| 55-59 | 193-252 | 0.000000 | 0.004057 | 0.000000 |
| 60-64 | 193-252 | 0.000000 | 0.007166 | 0.000000 |
| 65-69 | 193-252 | 0.000000 | 0.004281 | 0.000000 |
| 70-74 | 193-252 | 0.000000 | 0.004580 | 0.000000 |
| 75-79 | 193-252 | 0.000000 | 0.004580 | 0.000000 |
| 10-14 | 253+    | 0.001325 | 0.008742 | 0.000000 |
| 15-19 | 253+    | 0.002984 | 0.010602 | 0.000000 |
| 20-24 | 253+    | 0.000452 | 0.004314 | 0.000000 |
| 25-29 | 253+    | 0.000225 | 0.003645 | 0.000000 |
| 30-34 | 253+    | 0.000112 | 0.004512 | 0.000000 |
| 35-39 | 253+    | 0.000000 | 0.002147 | 0.000000 |
| 40-44 | 253+    | 0.000000 | 0.002636 | 0.000000 |
| 45-49 | 253+    | 0.000000 | 0.001051 | 0.000000 |
| 50-54 | 253+    | 0.000000 | 0.002519 | 0.000000 |
| 55-59 | 253+    | 0.000000 | 0.003693 | 0.000000 |
| 60-64 | 253+    | 0.000000 | 0.005888 | 0.000000 |
| 65-69 | 253+    | 0.000000 | 0.004823 | 0.000000 |
| 70-74 | 253+    | 0.000000 | 0.004733 | 0.000000 |
| 75-79 | 253+    | 0.000000 | 0.004733 | 0.000000 |

## Results for PHIM for Run 1 (Sensitivity\_Analysis\_1.RTF)

\*\*\*\*\*

TTP values for Run: 1, Scenario: Ecig

| Variable Parameter | Value               |
|--------------------|---------------------|
| 1. Country         | US (United States)  |
| 2. Sex             | M (Males)           |
| 3. Assumption Set  | ISS3                |
| Note:              | Period is in Months |

| Age   | Period  | Initiation  |               | Cessation     |              |                | Re-initiation  |              |                |                |
|-------|---------|-------------|---------------|---------------|--------------|----------------|----------------|--------------|----------------|----------------|
|       |         | Never<br>CC | Never<br>Ecig | Never<br>Dual | CC<br>Former | Ecig<br>Former | Dual<br>Former | Former<br>CC | Former<br>Ecig | Former<br>Dual |
| 10-14 | 1-12    | 0.001921    | 0.001921      | 0.000000      | 0.008742     | 0.008742       | 0.000000       | 0.000000     | 0.000000       | 0.000000       |
| 15-19 | 1-12    | 0.002360    | 0.002360      | 0.000000      | 0.003614     | 0.003614       | 0.000000       | 0.000000     | 0.000000       | 0.000000       |
| 20-24 | 1-12    | 0.000188    | 0.000188      | 0.000000      | 0.000943     | 0.000943       | 0.000000       | 0.000000     | 0.000000       | 0.000000       |
| 25-29 | 1-12    | 0.000093    | 0.000093      | 0.000000      | 0.001143     | 0.001143       | 0.000000       | 0.000000     | 0.000000       | 0.000000       |
| 30-34 | 1-12    | 0.000047    | 0.000047      | 0.000000      | 0.000871     | 0.000871       | 0.000000       | 0.000000     | 0.000000       | 0.000000       |
| 35-39 | 1-12    | 0.000000    | 0.000000      | 0.000000      | 0.000867     | 0.000867       | 0.000000       | 0.000000     | 0.000000       | 0.000000       |
| 40-44 | 1-12    | 0.000000    | 0.000000      | 0.000000      | 0.001399     | 0.001399       | 0.000000       | 0.000000     | 0.000000       | 0.000000       |
| 45-49 | 1-12    | 0.000000    | 0.000000      | 0.000000      | 0.002033     | 0.002033       | 0.000000       | 0.000000     | 0.000000       | 0.000000       |
| 50-54 | 1-12    | 0.000000    | 0.000000      | 0.000000      | 0.003209     | 0.003209       | 0.000000       | 0.000000     | 0.000000       | 0.000000       |
| 55-59 | 1-12    | 0.000000    | 0.000000      | 0.000000      | 0.003574     | 0.003574       | 0.000000       | 0.000000     | 0.000000       | 0.000000       |
| 60-64 | 1-12    | 0.000000    | 0.000000      | 0.000000      | 0.003460     | 0.003460       | 0.000000       | 0.000000     | 0.000000       | 0.000000       |
| 65-69 | 1-12    | 0.000000    | 0.000000      | 0.000000      | 0.004136     | 0.004136       | 0.000000       | 0.000000     | 0.000000       | 0.000000       |
| 70-74 | 1-12    | 0.000000    | 0.000000      | 0.000000      | 0.005592     | 0.005592       | 0.000000       | 0.000000     | 0.000000       | 0.000000       |
| 75-79 | 1-12    | 0.000000    | 0.000000      | 0.000000      | 0.005592     | 0.005592       | 0.000000       | 0.000000     | 0.000000       | 0.000000       |
| 10-14 | 13-72   | 0.001962    | 0.002944      | 0.000000      | 0.008742     | 0.008742       | 0.000000       | 0.000000     | 0.000000       | 0.000000       |
| 15-19 | 13-72   | 0.002796    | 0.004193      | 0.000000      | 0.004426     | 0.004426       | 0.000000       | 0.000000     | 0.000000       | 0.000000       |
| 20-24 | 13-72   | 0.000275    | 0.000412      | 0.000000      | 0.001527     | 0.001527       | 0.000000       | 0.000000     | 0.000000       | 0.000000       |
| 25-29 | 13-72   | 0.000385    | 0.000578      | 0.000000      | 0.001515     | 0.001515       | 0.000000       | 0.000000     | 0.000000       | 0.000000       |
| 30-34 | 13-72   | 0.000146    | 0.000218      | 0.000000      | 0.001227     | 0.001227       | 0.000000       | 0.000000     | 0.000000       | 0.000000       |
| 35-39 | 13-72   | 0.000000    | 0.000000      | 0.000000      | 0.001630     | 0.001630       | 0.000000       | 0.000000     | 0.000000       | 0.000000       |
| 40-44 | 13-72   | 0.000000    | 0.000000      | 0.000000      | 0.001852     | 0.001852       | 0.000000       | 0.000000     | 0.000000       | 0.000000       |
| 45-49 | 13-72   | 0.000000    | 0.000000      | 0.000000      | 0.002667     | 0.002667       | 0.000000       | 0.000000     | 0.000000       | 0.000000       |
| 50-54 | 13-72   | 0.000000    | 0.000000      | 0.000000      | 0.003208     | 0.003208       | 0.000000       | 0.000000     | 0.000000       | 0.000000       |
| 55-59 | 13-72   | 0.000000    | 0.000000      | 0.000000      | 0.003978     | 0.003978       | 0.000000       | 0.000000     | 0.000000       | 0.000000       |
| 60-64 | 13-72   | 0.000000    | 0.000000      | 0.000000      | 0.005771     | 0.005771       | 0.000000       | 0.000000     | 0.000000       | 0.000000       |
| 65-69 | 13-72   | 0.000000    | 0.000000      | 0.000000      | 0.010432     | 0.010432       | 0.000000       | 0.000000     | 0.000000       | 0.000000       |
| 70-74 | 13-72   | 0.000000    | 0.000000      | 0.000000      | 0.007079     | 0.007079       | 0.000000       | 0.000000     | 0.000000       | 0.000000       |
| 75-79 | 13-72   | 0.000000    | 0.000000      | 0.000000      | 0.007079     | 0.007079       | 0.000000       | 0.000000     | 0.000000       | 0.000000       |
| 10-14 | 73-132  | 0.000862    | 0.003449      | 0.000000      | 0.008742     | 0.008742       | 0.000000       | 0.000000     | 0.000000       | 0.000000       |
| 15-19 | 73-132  | 0.001066    | 0.004264      | 0.000000      | 0.003289     | 0.003289       | 0.000000       | 0.000000     | 0.000000       | 0.000000       |
| 20-24 | 73-132  | 0.000491    | 0.001965      | 0.000000      | 0.003844     | 0.003844       | 0.000000       | 0.000000     | 0.000000       | 0.000000       |
| 25-29 | 73-132  | 0.000168    | 0.000671      | 0.000000      | 0.002006     | 0.002006       | 0.000000       | 0.000000     | 0.000000       | 0.000000       |
| 30-34 | 73-132  | 0.000083    | 0.000332      | 0.000000      | 0.001329     | 0.001329       | 0.000000       | 0.000000     | 0.000000       | 0.000000       |
| 35-39 | 73-132  | 0.000000    | 0.000000      | 0.000000      | 0.001278     | 0.001278       | 0.000000       | 0.000000     | 0.000000       | 0.000000       |
| 40-44 | 73-132  | 0.000000    | 0.000000      | 0.000000      | 0.001691     | 0.001691       | 0.000000       | 0.000000     | 0.000000       | 0.000000       |
| 45-49 | 73-132  | 0.000000    | 0.000000      | 0.000000      | 0.002904     | 0.002904       | 0.000000       | 0.000000     | 0.000000       | 0.000000       |
| 50-54 | 73-132  | 0.000000    | 0.000000      | 0.000000      | 0.003319     | 0.003319       | 0.000000       | 0.000000     | 0.000000       | 0.000000       |
| 55-59 | 73-132  | 0.000000    | 0.000000      | 0.000000      | 0.003976     | 0.003976       | 0.000000       | 0.000000     | 0.000000       | 0.000000       |
| 60-64 | 73-132  | 0.000000    | 0.000000      | 0.000000      | 0.005235     | 0.005235       | 0.000000       | 0.000000     | 0.000000       | 0.000000       |
| 65-69 | 73-132  | 0.000000    | 0.000000      | 0.000000      | 0.005901     | 0.005901       | 0.000000       | 0.000000     | 0.000000       | 0.000000       |
| 70-74 | 73-132  | 0.000000    | 0.000000      | 0.000000      | 0.005615     | 0.005615       | 0.000000       | 0.000000     | 0.000000       | 0.000000       |
| 75-79 | 73-132  | 0.000000    | 0.000000      | 0.000000      | 0.005615     | 0.005615       | 0.000000       | 0.000000     | 0.000000       | 0.000000       |
| 10-14 | 133-192 | 0.000173    | 0.003294      | 0.000000      | 0.008742     | 0.008742       | 0.000000       | 0.000000     | 0.000000       | 0.000000       |
| 15-19 | 133-192 | 0.000234    | 0.004442      | 0.000000      | 0.003732     | 0.003732       | 0.000000       | 0.000000     | 0.000000       | 0.000000       |
| 20-24 | 133-192 | 0.000003    | 0.000059      | 0.000000      | 0.002260     | 0.002260       | 0.000000       | 0.000000     | 0.000000       | 0.000000       |
| 25-29 | 133-192 | 0.000071    | 0.001351      | 0.000000      | 0.002822     | 0.002822       | 0.000000       | 0.000000     | 0.000000       | 0.000000       |
| 30-34 | 133-192 | 0.000035    | 0.000661      | 0.000000      | 0.002610     | 0.002610       | 0.000000       | 0.000000     | 0.000000       | 0.000000       |
| 35-39 | 133-192 | 0.000000    | 0.000000      | 0.000000      | 0.002058     | 0.002058       | 0.000000       | 0.000000     | 0.000000       | 0.000000       |
| 40-44 | 133-192 | 0.000000    | 0.000000      | 0.000000      | 0.002310     | 0.002310       | 0.000000       | 0.000000     | 0.000000       | 0.000000       |
| 45-49 | 133-192 | 0.000000    | 0.000000      | 0.000000      | 0.002256     | 0.002256       | 0.000000       | 0.000000     | 0.000000       | 0.000000       |
| 50-54 | 133-192 | 0.000000    | 0.000000      | 0.000000      | 0.002663     | 0.002663       | 0.000000       | 0.000000     | 0.000000       | 0.000000       |
| 55-59 | 133-192 | 0.000000    | 0.000000      | 0.000000      | 0.001747     | 0.001747       | 0.000000       | 0.000000     | 0.000000       | 0.000000       |
| 60-64 | 133-192 | 0.000000    | 0.000000      | 0.000000      | 0.005809     | 0.005809       | 0.000000       | 0.000000     | 0.000000       | 0.000000       |
| 65-69 | 133-192 | 0.000000    | 0.000000      | 0.000000      | 0.005896     | 0.005896       | 0.000000       | 0.000000     | 0.000000       | 0.000000       |
| 70-74 | 133-192 | 0.000000    | 0.000000      | 0.000000      | 0.007323     | 0.007323       | 0.000000       | 0.000000     | 0.000000       | 0.000000       |
| 75-79 | 133-192 | 0.000000    | 0.000000      | 0.000000      | 0.007323     | 0.007323       | 0.000000       | 0.000000     | 0.000000       | 0.000000       |
| 10-14 | 193-252 | 0.000116    | 0.002198      | 0.000000      | 0.008742     | 0.008742       | 0.000000       | 0.000000     | 0.000000       | 0.000000       |
| 15-19 | 193-252 | 0.000199    | 0.003788      | 0.000000      | 0.005036     | 0.005036       | 0.000000       | 0.000000     | 0.000000       | 0.000000       |
| 20-24 | 193-252 | 0.000016    | 0.000304      | 0.000000      | 0.002857     | 0.002857       | 0.000000       | 0.000000     | 0.000000       | 0.000000       |
| 25-29 | 193-252 | 0.000013    | 0.000239      | 0.000000      | 0.002314     | 0.002314       | 0.000000       | 0.000000     | 0.000000       | 0.000000       |
| 30-34 | 193-252 | 0.000006    | 0.000119      | 0.000000      | 0.004343     | 0.004343       | 0.000000       | 0.000000     | 0.000000       | 0.000000       |
| 35-39 | 193-252 | 0.000000    | 0.000000      | 0.000000      | 0.002092     | 0.002092       | 0.000000       | 0.000000     | 0.000000       | 0.000000       |
| 40-44 | 193-252 | 0.000000    | 0.000000      | 0.000000      | 0.002566     | 0.002566       | 0.000000       | 0.000000     | 0.000000       | 0.000000       |
| 45-49 | 193-252 | 0.000000    | 0.000000      | 0.000000      | 0.002311     | 0.002311       | 0.000000       | 0.000000     | 0.000000       | 0.000000       |
| 50-54 | 193-252 | 0.000000    | 0.000000      | 0.000000      | 0.003209     | 0.003209       | 0.000000       | 0.000000     | 0.000000       | 0.000000       |

### Results for PHIM for Run 1 (Sensitivity\_Analysis\_1.RTF)

|       |         |          |          |          |          |          |          |          |          |          |
|-------|---------|----------|----------|----------|----------|----------|----------|----------|----------|----------|
| 55-59 | 193-252 | 0.000000 | 0.000000 | 0.000000 | 0.004057 | 0.004057 | 0.000000 | 0.000000 | 0.000000 | 0.000000 |
| 60-64 | 193-252 | 0.000000 | 0.000000 | 0.000000 | 0.007166 | 0.007166 | 0.000000 | 0.000000 | 0.000000 | 0.000000 |
| 65-69 | 193-252 | 0.000000 | 0.000000 | 0.000000 | 0.004281 | 0.004281 | 0.000000 | 0.000000 | 0.000000 | 0.000000 |
| 70-74 | 193-252 | 0.000000 | 0.000000 | 0.000000 | 0.004580 | 0.004580 | 0.000000 | 0.000000 | 0.000000 | 0.000000 |
| 75-79 | 193-252 | 0.000000 | 0.000000 | 0.000000 | 0.004580 | 0.004580 | 0.000000 | 0.000000 | 0.000000 | 0.000000 |
| 10-14 | 253+    | 0.000066 | 0.001259 | 0.000000 | 0.008742 | 0.008742 | 0.000000 | 0.000000 | 0.000000 | 0.000000 |
| 15-19 | 253+    | 0.000149 | 0.002835 | 0.000000 | 0.010602 | 0.010602 | 0.000000 | 0.000000 | 0.000000 | 0.000000 |
| 20-24 | 253+    | 0.000023 | 0.000430 | 0.000000 | 0.004314 | 0.004314 | 0.000000 | 0.000000 | 0.000000 | 0.000000 |
| 25-29 | 253+    | 0.000011 | 0.000213 | 0.000000 | 0.003645 | 0.003645 | 0.000000 | 0.000000 | 0.000000 | 0.000000 |
| 30-34 | 253+    | 0.000006 | 0.000106 | 0.000000 | 0.004512 | 0.004512 | 0.000000 | 0.000000 | 0.000000 | 0.000000 |
| 35-39 | 253+    | 0.000000 | 0.000000 | 0.000000 | 0.002147 | 0.002147 | 0.000000 | 0.000000 | 0.000000 | 0.000000 |
| 40-44 | 253+    | 0.000000 | 0.000000 | 0.000000 | 0.002636 | 0.002636 | 0.000000 | 0.000000 | 0.000000 | 0.000000 |
| 45-49 | 253+    | 0.000000 | 0.000000 | 0.000000 | 0.001051 | 0.001051 | 0.000000 | 0.000000 | 0.000000 | 0.000000 |
| 50-54 | 253+    | 0.000000 | 0.000000 | 0.000000 | 0.002519 | 0.002519 | 0.000000 | 0.000000 | 0.000000 | 0.000000 |
| 55-59 | 253+    | 0.000000 | 0.000000 | 0.000000 | 0.003693 | 0.003693 | 0.000000 | 0.000000 | 0.000000 | 0.000000 |
| 60-64 | 253+    | 0.000000 | 0.000000 | 0.000000 | 0.005888 | 0.005888 | 0.000000 | 0.000000 | 0.000000 | 0.000000 |
| 65-69 | 253+    | 0.000000 | 0.000000 | 0.000000 | 0.004823 | 0.004823 | 0.000000 | 0.000000 | 0.000000 | 0.000000 |
| 70-74 | 253+    | 0.000000 | 0.000000 | 0.000000 | 0.004733 | 0.004733 | 0.000000 | 0.000000 | 0.000000 | 0.000000 |
| 75-79 | 253+    | 0.000000 | 0.000000 | 0.000000 | 0.004733 | 0.004733 | 0.000000 | 0.000000 | 0.000000 | 0.000000 |



**Results for PHIM for Run 1 (Sensitivity\_Analysis\_1.RTF)**

|       |      |          |          |          |          |          |          |
|-------|------|----------|----------|----------|----------|----------|----------|
| 25-29 | 253+ | 0.015212 | 0.000000 | 0.000000 | 0.000000 | 0.000000 | 0.000000 |
| 30-34 | 253+ | 0.015460 | 0.000000 | 0.000000 | 0.000000 | 0.000000 | 0.000000 |
| 35-39 | 253+ | 0.014711 | 0.000000 | 0.000000 | 0.000000 | 0.000000 | 0.000000 |
| 40-44 | 253+ | 0.014241 | 0.000000 | 0.000000 | 0.000000 | 0.000000 | 0.000000 |
| 45-49 | 253+ | 0.013014 | 0.000000 | 0.000000 | 0.000000 | 0.000000 | 0.000000 |
| 50-54 | 253+ | 0.011768 | 0.000000 | 0.000000 | 0.000000 | 0.000000 | 0.000000 |
| 55-59 | 253+ | 0.011032 | 0.000000 | 0.000000 | 0.000000 | 0.000000 | 0.000000 |
| 60-64 | 253+ | 0.009525 | 0.000000 | 0.000000 | 0.000000 | 0.000000 | 0.000000 |
| 65-69 | 253+ | 0.006897 | 0.000000 | 0.000000 | 0.000000 | 0.000000 | 0.000000 |
| 70-74 | 253+ | 0.005435 | 0.000000 | 0.000000 | 0.000000 | 0.000000 | 0.000000 |
| 75-79 | 253+ | 0.005435 | 0.000000 | 0.000000 | 0.000000 | 0.000000 | 0.000000 |

## Results for PHIM for Run 1 (Sensitivity\_Analysis\_1.RTF)

\*\*\*\*\*

### Main Output for the Tobacco History for Run: 1, Simulation: 1, Scenario: NULL

| Variable Parameter          | Value              |
|-----------------------------|--------------------|
| 1. Country                  | US (United States) |
| 2. Sex                      | M (Males)          |
| 3. Year of start of process | 1990               |

Year of Follow-up: 2040, Age Group: All Ages  
 Period    Age Group    Smoking Group            N            %

|    |          |           |       |       |
|----|----------|-----------|-------|-------|
| 50 | All Ages | Never Any | 19445 | 50.68 |
| 50 | All Ages | CC        | 3024  | 7.88  |
| 50 | All Ages | Former    | 15896 | 41.43 |

Year of Follow-up: 2040, Age Group: 18-19  
 Period    Age Group    Smoking Group            N            %

|    |       |           |   |   |
|----|-------|-----------|---|---|
| 50 | 18-19 | Never Any | 0 | . |
| 50 | 18-19 | CC        | 0 | . |
| 50 | 18-19 | Former    | 0 | . |

Year of Follow-up: 2040, Age Group: 20-24  
 Period    Age Group    Smoking Group            N            %

|    |       |           |   |   |
|----|-------|-----------|---|---|
| 50 | 20-24 | Never Any | 0 | . |
| 50 | 20-24 | CC        | 0 | . |
| 50 | 20-24 | Former    | 0 | . |

Year of Follow-up: 2040, Age Group: 25-29  
 Period    Age Group    Smoking Group            N            %

|    |       |           |   |   |
|----|-------|-----------|---|---|
| 50 | 25-29 | Never Any | 0 | . |
| 50 | 25-29 | CC        | 0 | . |
| 50 | 25-29 | Former    | 0 | . |

Year of Follow-up: 2040, Age Group: 30-34  
 Period    Age Group    Smoking Group            N            %

|    |       |           |   |   |
|----|-------|-----------|---|---|
| 50 | 30-34 | Never Any | 0 | . |
| 50 | 30-34 | CC        | 0 | . |
| 50 | 30-34 | Former    | 0 | . |

Year of Follow-up: 2040, Age Group: 35-39  
 Period    Age Group    Smoking Group            N            %

|    |       |           |   |   |
|----|-------|-----------|---|---|
| 50 | 35-39 | Never Any | 0 | . |
| 50 | 35-39 | CC        | 0 | . |
| 50 | 35-39 | Former    | 0 | . |

Year of Follow-up: 2040, Age Group: 40-44  
 Period    Age Group    Smoking Group            N            %

|    |       |           |   |   |
|----|-------|-----------|---|---|
| 50 | 40-44 | Never Any | 0 | . |
| 50 | 40-44 | CC        | 0 | . |
| 50 | 40-44 | Former    | 0 | . |

Year of Follow-up: 2040, Age Group: 45-49  
 Period    Age Group    Smoking Group            N            %

|    |       |           |   |   |
|----|-------|-----------|---|---|
| 50 | 45-49 | Never Any | 0 | . |
| 50 | 45-49 | CC        | 0 | . |
| 50 | 45-49 | Former    | 0 | . |

Year of Follow-up: 2040, Age Group: 50-54  
 Period    Age Group    Smoking Group            N            %

|    |       |           |   |   |
|----|-------|-----------|---|---|
| 50 | 50-54 | Never Any | 0 | . |
| 50 | 50-54 | CC        | 0 | . |
| 50 | 50-54 | Former    | 0 | . |

Year of Follow-up: 2040, Age Group: 55-59  
 Period    Age Group    Smoking Group            N            %

|    |       |           |   |   |
|----|-------|-----------|---|---|
| 50 | 55-59 | Never Any | 0 | . |
| 50 | 55-59 | CC        | 0 | . |
| 50 | 55-59 | Former    | 0 | . |

Year of Follow-up: 2040, Age Group: 60-64  
 Period    Age Group    Smoking Group            N            %



### Results for PHIM for Run 1 (Sensitivity\_Analysis\_1.RTF)

|                                           |           |               |      |       |
|-------------------------------------------|-----------|---------------|------|-------|
| 50                                        | 60-64     | Never Any     | 4363 | 49.33 |
| 50                                        | 60-64     | CC            | 934  | 10.56 |
| 50                                        | 60-64     | Former        | 3548 | 40.11 |
| Year of Follow-up: 2040, Age Group: 65-69 |           |               |      |       |
| Period                                    | Age Group | Smoking Group | N    | %     |
| 50                                        | 65-69     | Never Any     | 4948 | 54.73 |
| 50                                        | 65-69     | CC            | 734  | 8.12  |
| 50                                        | 65-69     | Former        | 3358 | 37.15 |
| Year of Follow-up: 2040, Age Group: 70-74 |           |               |      |       |
| Period                                    | Age Group | Smoking Group | N    | %     |
| 50                                        | 70-74     | Never Any     | 5145 | 52.41 |
| 50                                        | 70-74     | CC            | 688  | 7.01  |
| 50                                        | 70-74     | Former        | 3983 | 40.58 |
| Year of Follow-up: 2040, Age Group: 75-79 |           |               |      |       |
| Period                                    | Age Group | Smoking Group | N    | %     |
| 50                                        | 75-79     | Never Any     | 4989 | 46.78 |
| 50                                        | 75-79     | CC            | 668  | 6.26  |
| 50                                        | 75-79     | Former        | 5007 | 46.95 |

## Results for PHIM for Run 1 (Sensitivity\_Analysis\_1.RTF)

\*\*\*\*\*

### Main Output for the Tobacco History for Run: 1, Simulation: 1, Scenario: Ecig

| Variable Parameter                           |           |               | Value              |       |               |             |               |                |              |
|----------------------------------------------|-----------|---------------|--------------------|-------|---------------|-------------|---------------|----------------|--------------|
| 1. Country                                   |           |               | US (United States) |       |               |             |               |                |              |
| 2. Sex                                       |           |               | M (Males)          |       |               |             |               |                |              |
| 3. Year of start of process                  |           |               | 1990               |       |               |             |               |                |              |
| Year of Follow-up: 1990, Age Group: All Ages |           |               |                    |       |               |             |               |                |              |
| Period                                       | Age Group | Smoking Group | N                  | %     | Ever Quit (N) | Ever Quit % | Mean Yrs Quit | Short Term (n) | Short Term % |
| 0                                            | All Ages  | Never Any     | 34075              | 39.78 |               |             |               |                |              |
| 0                                            | All Ages  | CC            | 27323              | 31.90 | 0             | 0.00        |               |                |              |
| 0                                            | All Ages  | Ecig          | 0                  | 0.00  |               |             |               |                |              |
| 0                                            | All Ages  | Dual          | 0                  | 0.00  |               |             |               |                |              |
| 0                                            | All Ages  | Former        | 24266              | 28.33 |               |             | 13.08         | 3623           | 14.93        |
| Year of Follow-up: 1990, Age Group: 18-19    |           |               |                    |       |               |             |               |                |              |
| Period                                       | Age Group | Smoking Group | N                  | %     | Ever Quit (N) | Ever Quit % | Mean Yrs Quit | Short Term (n) | Short Term % |
| 0                                            | 18-19     | Never Any     | 2783               | 78.42 |               |             |               |                |              |
| 0                                            | 18-19     | CC            | 634                | 17.86 | 0             | 0.00        |               |                |              |
| 0                                            | 18-19     | Ecig          | 0                  | 0.00  |               |             |               |                |              |
| 0                                            | 18-19     | Dual          | 0                  | 0.00  |               |             |               |                |              |
| 0                                            | 18-19     | Former        | 132                | 3.72  |               |             | 0.11          | 132            | 100.00       |
| Year of Follow-up: 1990, Age Group: 20-24    |           |               |                    |       |               |             |               |                |              |
| Period                                       | Age Group | Smoking Group | N                  | %     | Ever Quit (N) | Ever Quit % | Mean Yrs Quit | Short Term (n) | Short Term % |
| 0                                            | 20-24     | Never Any     | 5722               | 58.29 |               |             |               |                |              |
| 0                                            | 20-24     | CC            | 3199               | 32.59 | 0             | 0.00        |               |                |              |
| 0                                            | 20-24     | Ecig          | 0                  | 0.00  |               |             |               |                |              |
| 0                                            | 20-24     | Dual          | 0                  | 0.00  |               |             |               |                |              |
| 0                                            | 20-24     | Former        | 895                | 9.12  |               |             | 1.46          | 506            | 56.54        |
| Year of Follow-up: 1990, Age Group: 25-29    |           |               |                    |       |               |             |               |                |              |
| Period                                       | Age Group | Smoking Group | N                  | %     | Ever Quit (N) | Ever Quit % | Mean Yrs Quit | Short Term (n) | Short Term % |
| 0                                            | 25-29     | Never Any     | 5232               | 49.06 |               |             |               |                |              |
| 0                                            | 25-29     | CC            | 3914               | 36.70 | 0             | 0.00        |               |                |              |
| 0                                            | 25-29     | Ecig          | 0                  | 0.00  |               |             |               |                |              |
| 0                                            | 25-29     | Dual          | 0                  | 0.00  |               |             |               |                |              |
| 0                                            | 25-29     | Former        | 1518               | 14.23 |               |             | 2.87          | 643            | 42.36        |
| Year of Follow-up: 1990, Age Group: 30-34    |           |               |                    |       |               |             |               |                |              |
| Period                                       | Age Group | Smoking Group | N                  | %     | Ever Quit (N) | Ever Quit % | Mean Yrs Quit | Short Term (n) | Short Term % |
| 0                                            | 30-34     | Never Any     | 4765               | 43.65 |               |             |               |                |              |
| 0                                            | 30-34     | CC            | 4023               | 36.85 | 0             | 0.00        |               |                |              |
| 0                                            | 30-34     | Ecig          | 0                  | 0.00  |               |             |               |                |              |
| 0                                            | 30-34     | Dual          | 0                  | 0.00  |               |             |               |                |              |
| 0                                            | 30-34     | Former        | 2128               | 19.49 |               |             | 4.06          | 592            | 27.82        |
| Year of Follow-up: 1990, Age Group: 35-39    |           |               |                    |       |               |             |               |                |              |
| Period                                       | Age Group | Smoking Group | N                  | %     | Ever Quit (N) | Ever Quit % | Mean Yrs Quit | Short Term (n) | Short Term % |
| 0                                            | 35-39     | Never Any     | 3941               | 39.85 |               |             |               |                |              |
| 0                                            | 35-39     | CC            | 3474               | 35.13 | 0             | 0.00        |               |                |              |
| 0                                            | 35-39     | Ecig          | 0                  | 0.00  |               |             |               |                |              |
| 0                                            | 35-39     | Dual          | 0                  | 0.00  |               |             |               |                |              |
| 0                                            | 35-39     | Former        | 2474               | 25.02 |               |             | 8.31          | 425            | 17.18        |
| Year of Follow-up: 1990, Age Group: 40-44    |           |               |                    |       |               |             |               |                |              |
| Period                                       | Age Group | Smoking Group | N                  | %     | Ever Quit (N) | Ever Quit % | Mean Yrs Quit | Short Term (n) | Short Term % |
| 0                                            | 40-44     | Never Any     | 2912               | 33.65 |               |             |               |                |              |
| 0                                            | 40-44     | CC            | 3113               | 35.97 | 0             | 0.00        |               |                |              |
| 0                                            | 40-44     | Ecig          | 0                  | 0.00  |               |             |               |                |              |
| 0                                            | 40-44     | Dual          | 0                  | 0.00  |               |             |               |                |              |
| 0                                            | 40-44     | Former        | 2630               | 30.39 |               |             | 10.69         | 317            | 12.05        |
| Year of Follow-up: 1990, Age Group: 45-49    |           |               |                    |       |               |             |               |                |              |
| Period                                       | Age Group | Smoking Group | N                  | %     | Ever Quit (N) | Ever Quit % | Mean Yrs Quit | Short Term (n) | Short Term % |
| 0                                            | 45-49     | Never Any     | 1919               | 29.46 |               |             |               |                |              |
| 0                                            | 45-49     | CC            | 2318               | 35.58 | 0             | 0.00        |               |                |              |
| 0                                            | 45-49     | Ecig          | 0                  | 0.00  |               |             |               |                |              |
| 0                                            | 45-49     | Dual          | 0                  | 0.00  |               |             |               |                |              |
| 0                                            | 45-49     | Former        | 2278               | 34.97 |               |             | 13.26         | 221            | 9.70         |
| Year of Follow-up: 1990, Age Group: 50-54    |           |               |                    |       |               |             |               |                |              |
| Period                                       | Age Group | Smoking Group | N                  | %     | Ever Quit (N) | Ever Quit % | Mean Yrs Quit | Short Term (n) | Short Term % |
| 0                                            | 50-54     | Never Any     | 1611               | 29.41 |               |             |               |                |              |
| 0                                            | 50-54     | CC            | 1816               | 33.16 | 0             | 0.00        |               |                |              |

**Results for PHIM for Run 1 (Sensitivity\_Analysis\_1.RTF)**

|                                              |           |               |       |       |               |             |               |                |              |
|----------------------------------------------|-----------|---------------|-------|-------|---------------|-------------|---------------|----------------|--------------|
| 0                                            | 50-54     | Ecig          | 0     | 0.00  |               |             |               |                |              |
| 0                                            | 50-54     | Dual          | 0     | 0.00  |               |             |               |                |              |
| 0                                            | 50-54     | Former        | 2050  | 37.43 |               |             | 14.55         | 261            | 12.73        |
| Year of Follow-up: 1990, Age Group: 55-59    |           |               |       |       |               |             |               |                |              |
| Period                                       | Age Group | Smoking Group | N     | %     | Ever Quit (N) | Ever Quit % | Mean Yrs Quit | Short Term (n) | Short Term % |
| 0                                            | 55-59     | Never Any     | 1337  | 26.83 |               |             |               |                |              |
| 0                                            | 55-59     | CC            | 1520  | 30.50 | 0             | 0.00        |               |                |              |
| 0                                            | 55-59     | Ecig          | 0     | 0.00  |               |             |               |                |              |
| 0                                            | 55-59     | Dual          | 0     | 0.00  |               |             |               |                |              |
| 0                                            | 55-59     | Former        | 2126  | 42.67 |               |             | 14.80         | 216            | 10.16        |
| Year of Follow-up: 1990, Age Group: 60-64    |           |               |       |       |               |             |               |                |              |
| Period                                       | Age Group | Smoking Group | N     | %     | Ever Quit (N) | Ever Quit % | Mean Yrs Quit | Short Term (n) | Short Term % |
| 0                                            | 60-64     | Never Any     | 1169  | 23.83 |               |             |               |                |              |
| 0                                            | 60-64     | CC            | 1287  | 26.24 | 0             | 0.00        |               |                |              |
| 0                                            | 60-64     | Ecig          | 0     | 0.00  |               |             |               |                |              |
| 0                                            | 60-64     | Dual          | 0     | 0.00  |               |             |               |                |              |
| 0                                            | 60-64     | Former        | 2449  | 49.93 |               |             | 18.87         | 106            | 4.33         |
| Year of Follow-up: 1990, Age Group: 65-69    |           |               |       |       |               |             |               |                |              |
| Period                                       | Age Group | Smoking Group | N     | %     | Ever Quit (N) | Ever Quit % | Mean Yrs Quit | Short Term (n) | Short Term % |
| 0                                            | 65-69     | Never Any     | 1023  | 23.32 |               |             |               |                |              |
| 0                                            | 65-69     | CC            | 979   | 22.32 | 0             | 0.00        |               |                |              |
| 0                                            | 65-69     | Ecig          | 0     | 0.00  |               |             |               |                |              |
| 0                                            | 65-69     | Dual          | 0     | 0.00  |               |             |               |                |              |
| 0                                            | 65-69     | Former        | 2385  | 54.37 |               |             | 19.91         | 113            | 4.74         |
| Year of Follow-up: 1990, Age Group: 70-74    |           |               |       |       |               |             |               |                |              |
| Period                                       | Age Group | Smoking Group | N     | %     | Ever Quit (N) | Ever Quit % | Mean Yrs Quit | Short Term (n) | Short Term % |
| 0                                            | 70-74     | Never Any     | 961   | 27.46 |               |             |               |                |              |
| 0                                            | 70-74     | CC            | 675   | 19.29 | 0             | 0.00        |               |                |              |
| 0                                            | 70-74     | Ecig          | 0     | 0.00  |               |             |               |                |              |
| 0                                            | 70-74     | Dual          | 0     | 0.00  |               |             |               |                |              |
| 0                                            | 70-74     | Former        | 1863  | 53.24 |               |             | 20.69         | 23             | 1.23         |
| Year of Follow-up: 1990, Age Group: 75-79    |           |               |       |       |               |             |               |                |              |
| Period                                       | Age Group | Smoking Group | N     | %     | Ever Quit (N) | Ever Quit % | Mean Yrs Quit | Short Term (n) | Short Term % |
| 0                                            | 75-79     | Never Any     | 700   | 29.06 |               |             |               |                |              |
| 0                                            | 75-79     | CC            | 371   | 15.40 | 0             | 0.00        |               |                |              |
| 0                                            | 75-79     | Ecig          | 0     | 0.00  |               |             |               |                |              |
| 0                                            | 75-79     | Dual          | 0     | 0.00  |               |             |               |                |              |
| 0                                            | 75-79     | Former        | 1338  | 55.54 |               |             | 22.88         | 68             | 5.08         |
| Year of Follow-up: 1995, Age Group: All Ages |           |               |       |       |               |             |               |                |              |
| Period                                       | Age Group | Smoking Group | N     | %     | Ever Quit (N) | Ever Quit % | Mean Yrs Quit | Short Term (n) | Short Term % |
| 5                                            | All Ages  | Never Any     | 38368 | 41.57 |               |             |               |                |              |
| 5                                            | All Ages  | CC            | 11508 | 12.47 | 0             | 0.00        |               |                |              |
| 5                                            | All Ages  | Ecig          | 15517 | 16.81 |               |             |               |                |              |
| 5                                            | All Ages  | Dual          | 0     | 0.00  |               |             |               |                |              |
| 5                                            | All Ages  | Former        | 26897 | 29.14 |               |             | 15.19         | 1705           | 6.34         |
| Year of Follow-up: 1995, Age Group: 18-19    |           |               |       |       |               |             |               |                |              |
| Period                                       | Age Group | Smoking Group | N     | %     | Ever Quit (N) | Ever Quit % | Mean Yrs Quit | Short Term (n) | Short Term % |
| 5                                            | 18-19     | Never Any     | 2448  | 69.07 |               |             |               |                |              |
| 5                                            | 18-19     | CC            | 320   | 9.03  | 0             | 0.00        |               |                |              |
| 5                                            | 18-19     | Ecig          | 659   | 18.59 |               |             |               |                |              |
| 5                                            | 18-19     | Dual          | 0     | 0.00  |               |             |               |                |              |
| 5                                            | 18-19     | Former        | 117   | 3.30  |               |             | 1.11          | 80             | 68.38        |
| Year of Follow-up: 1995, Age Group: 20-24    |           |               |       |       |               |             |               |                |              |
| Period                                       | Age Group | Smoking Group | N     | %     | Ever Quit (N) | Ever Quit % | Mean Yrs Quit | Short Term (n) | Short Term % |
| 5                                            | 20-24     | Never Any     | 5787  | 64.02 |               |             |               |                |              |
| 5                                            | 20-24     | CC            | 946   | 10.46 | 0             | 0.00        |               |                |              |
| 5                                            | 20-24     | Ecig          | 1826  | 20.20 |               |             |               |                |              |
| 5                                            | 20-24     | Dual          | 0     | 0.00  |               |             |               |                |              |
| 5                                            | 20-24     | Former        | 481   | 5.32  |               |             | 2.81          | 142            | 29.52        |
| Year of Follow-up: 1995, Age Group: 25-29    |           |               |       |       |               |             |               |                |              |
| Period                                       | Age Group | Smoking Group | N     | %     | Ever Quit (N) | Ever Quit % | Mean Yrs Quit | Short Term (n) | Short Term % |
| 5                                            | 25-29     | Never Any     | 5471  | 55.74 |               |             |               |                |              |
| 5                                            | 25-29     | CC            | 1255  | 12.79 | 0             | 0.00        |               |                |              |
| 5                                            | 25-29     | Ecig          | 1942  | 19.78 |               |             |               |                |              |
| 5                                            | 25-29     | Dual          | 0     | 0.00  |               |             |               |                |              |
| 5                                            | 25-29     | Former        | 1148  | 11.70 |               |             | 5.43          | 115            | 10.02        |
| Year of Follow-up: 1995, Age Group: 30-34    |           |               |       |       |               |             |               |                |              |
| Period                                       | Age Group | Smoking Group | N     | %     | Ever Quit (N) | Ever Quit % | Mean Yrs Quit | Short Term (n) | Short Term % |

**Results for PHIM for Run 1 (Sensitivity\_Analysis\_1.RTF)**

|                                              |           |               |      |       |               |             |               |                |              |
|----------------------------------------------|-----------|---------------|------|-------|---------------|-------------|---------------|----------------|--------------|
| 5                                            | 30-34     | Never Any     | 5065 | 47.50 |               |             |               |                |              |
| 5                                            | 30-34     | CC            | 1480 | 13.88 | 0             | 0.00        |               |                |              |
| 5                                            | 30-34     | Ecig          | 2319 | 21.75 |               |             |               |                |              |
| 5                                            | 30-34     | Dual          | 0    | 0.00  |               |             |               |                |              |
| 5                                            | 30-34     | Former        | 1800 | 16.88 |               |             | 6.94          | 106            | 5.89         |
| Year of Follow-up: 1995, Age Group: 35-39    |           |               |      |       |               |             |               |                |              |
| Period                                       | Age Group | Smoking Group | N    | %     | Ever Quit (N) | Ever Quit % | Mean Yrs Quit | Short Term (n) | Short Term % |
| 5                                            | 35-39     | Never Any     | 4724 | 43.28 |               |             |               |                |              |
| 5                                            | 35-39     | CC            | 1496 | 13.70 | 0             | 0.00        |               |                |              |
| 5                                            | 35-39     | Ecig          | 2275 | 20.84 |               |             |               |                |              |
| 5                                            | 35-39     | Dual          | 0    | 0.00  |               |             |               |                |              |
| 5                                            | 35-39     | Former        | 2421 | 22.18 |               |             | 8.20          | 114            | 4.71         |
| Year of Follow-up: 1995, Age Group: 40-44    |           |               |      |       |               |             |               |                |              |
| Period                                       | Age Group | Smoking Group | N    | %     | Ever Quit (N) | Ever Quit % | Mean Yrs Quit | Short Term (n) | Short Term % |
| 5                                            | 40-44     | Never Any     | 3941 | 39.85 |               |             |               |                |              |
| 5                                            | 40-44     | CC            | 1280 | 12.94 | 0             | 0.00        |               |                |              |
| 5                                            | 40-44     | Ecig          | 1894 | 19.15 |               |             |               |                |              |
| 5                                            | 40-44     | Dual          | 0    | 0.00  |               |             |               |                |              |
| 5                                            | 40-44     | Former        | 2774 | 28.05 |               |             | 12.06         | 130            | 4.69         |
| Year of Follow-up: 1995, Age Group: 45-49    |           |               |      |       |               |             |               |                |              |
| Period                                       | Age Group | Smoking Group | N    | %     | Ever Quit (N) | Ever Quit % | Mean Yrs Quit | Short Term (n) | Short Term % |
| 5                                            | 45-49     | Never Any     | 2912 | 33.65 |               |             |               |                |              |
| 5                                            | 45-49     | CC            | 1236 | 14.28 | 0             | 0.00        |               |                |              |
| 5                                            | 45-49     | Ecig          | 1562 | 18.05 |               |             |               |                |              |
| 5                                            | 45-49     | Dual          | 0    | 0.00  |               |             |               |                |              |
| 5                                            | 45-49     | Former        | 2945 | 34.03 |               |             | 14.20         | 148            | 5.03         |
| Year of Follow-up: 1995, Age Group: 50-54    |           |               |      |       |               |             |               |                |              |
| Period                                       | Age Group | Smoking Group | N    | %     | Ever Quit (N) | Ever Quit % | Mean Yrs Quit | Short Term (n) | Short Term % |
| 5                                            | 50-54     | Never Any     | 1919 | 29.46 |               |             |               |                |              |
| 5                                            | 50-54     | CC            | 940  | 14.43 | 0             | 0.00        |               |                |              |
| 5                                            | 50-54     | Ecig          | 1015 | 15.58 |               |             |               |                |              |
| 5                                            | 50-54     | Dual          | 0    | 0.00  |               |             |               |                |              |
| 5                                            | 50-54     | Former        | 2641 | 40.54 |               |             | 15.98         | 175            | 6.63         |
| Year of Follow-up: 1995, Age Group: 55-59    |           |               |      |       |               |             |               |                |              |
| Period                                       | Age Group | Smoking Group | N    | %     | Ever Quit (N) | Ever Quit % | Mean Yrs Quit | Short Term (n) | Short Term % |
| 5                                            | 55-59     | Never Any     | 1611 | 29.41 |               |             |               |                |              |
| 5                                            | 55-59     | CC            | 740  | 13.51 | 0             | 0.00        |               |                |              |
| 5                                            | 55-59     | Ecig          | 762  | 13.91 |               |             |               |                |              |
| 5                                            | 55-59     | Dual          | 0    | 0.00  |               |             |               |                |              |
| 5                                            | 55-59     | Former        | 2364 | 43.16 |               |             | 17.21         | 122            | 5.16         |
| Year of Follow-up: 1995, Age Group: 60-64    |           |               |      |       |               |             |               |                |              |
| Period                                       | Age Group | Smoking Group | N    | %     | Ever Quit (N) | Ever Quit % | Mean Yrs Quit | Short Term (n) | Short Term % |
| 5                                            | 60-64     | Never Any     | 1337 | 26.83 |               |             |               |                |              |
| 5                                            | 60-64     | CC            | 597  | 11.98 | 0             | 0.00        |               |                |              |
| 5                                            | 60-64     | Ecig          | 572  | 11.48 |               |             |               |                |              |
| 5                                            | 60-64     | Dual          | 0    | 0.00  |               |             |               |                |              |
| 5                                            | 60-64     | Former        | 2477 | 49.71 |               |             | 17.27         | 143            | 5.77         |
| Year of Follow-up: 1995, Age Group: 65-69    |           |               |      |       |               |             |               |                |              |
| Period                                       | Age Group | Smoking Group | N    | %     | Ever Quit (N) | Ever Quit % | Mean Yrs Quit | Short Term (n) | Short Term % |
| 5                                            | 65-69     | Never Any     | 1169 | 23.83 |               |             |               |                |              |
| 5                                            | 65-69     | CC            | 477  | 9.72  | 0             | 0.00        |               |                |              |
| 5                                            | 65-69     | Ecig          | 360  | 7.34  |               |             |               |                |              |
| 5                                            | 65-69     | Dual          | 0    | 0.00  |               |             |               |                |              |
| 5                                            | 65-69     | Former        | 2899 | 59.10 |               |             | 20.44         | 196            | 6.76         |
| Year of Follow-up: 1995, Age Group: 70-74    |           |               |      |       |               |             |               |                |              |
| Period                                       | Age Group | Smoking Group | N    | %     | Ever Quit (N) | Ever Quit % | Mean Yrs Quit | Short Term (n) | Short Term % |
| 5                                            | 70-74     | Never Any     | 1023 | 23.32 |               |             |               |                |              |
| 5                                            | 70-74     | CC            | 438  | 9.98  | 0             | 0.00        |               |                |              |
| 5                                            | 70-74     | Ecig          | 196  | 4.47  |               |             |               |                |              |
| 5                                            | 70-74     | Dual          | 0    | 0.00  |               |             |               |                |              |
| 5                                            | 70-74     | Former        | 2730 | 62.23 |               |             | 22.00         | 137            | 5.02         |
| Year of Follow-up: 1995, Age Group: 75-79    |           |               |      |       |               |             |               |                |              |
| Period                                       | Age Group | Smoking Group | N    | %     | Ever Quit (N) | Ever Quit % | Mean Yrs Quit | Short Term (n) | Short Term % |
| 5                                            | 75-79     | Never Any     | 961  | 27.46 |               |             |               |                |              |
| 5                                            | 75-79     | CC            | 303  | 8.66  | 0             | 0.00        |               |                |              |
| 5                                            | 75-79     | Ecig          | 135  | 3.86  |               |             |               |                |              |
| 5                                            | 75-79     | Dual          | 0    | 0.00  |               |             |               |                |              |
| 5                                            | 75-79     | Former        | 2100 | 60.02 |               |             | 23.02         | 97             | 4.62         |
| Year of Follow-up: 2000, Age Group: All Ages |           |               |      |       |               |             |               |                |              |

**Results for PHIM for Run 1 (Sensitivity\_Analysis\_1.RTF)**

| Period                                    | Age Group | Smoking Group | N     | %     | Ever Quit (N) | Ever Quit % | Mean Yrs Quit | Short Term (n) | Short Term % |
|-------------------------------------------|-----------|---------------|-------|-------|---------------|-------------|---------------|----------------|--------------|
| 10                                        | All Ages  | Never Any     | 39177 | 41.64 |               |             |               |                |              |
| 10                                        | All Ages  | CC            | 4843  | 5.15  | 0             | 0.00        |               |                |              |
| 10                                        | All Ages  | Ecig          | 20724 | 22.03 |               |             |               |                |              |
| 10                                        | All Ages  | Dual          | 0     | 0.00  |               |             |               |                |              |
| 10                                        | All Ages  | Former        | 29348 | 31.19 |               |             | 16.84         | 1724           | 5.87         |
| Year of Follow-up: 2000, Age Group: 18-19 |           |               |       |       |               |             |               |                |              |
| Period                                    | Age Group | Smoking Group | N     | %     | Ever Quit (N) | Ever Quit % | Mean Yrs Quit | Short Term (n) | Short Term % |
| 10                                        | 18-19     | Never Any     | 0     | .     |               |             |               |                |              |
| 10                                        | 18-19     | CC            | 0     | .     | 0             | .           |               |                |              |
| 10                                        | 18-19     | Ecig          | 0     | .     |               |             |               |                |              |
| 10                                        | 18-19     | Dual          | 0     | .     |               |             |               |                |              |
| 10                                        | 18-19     | Former        | 0     | .     |               |             |               | 0              | .            |
| Year of Follow-up: 2000, Age Group: 20-24 |           |               |       |       |               |             |               |                |              |
| Period                                    | Age Group | Smoking Group | N     | %     | Ever Quit (N) | Ever Quit % | Mean Yrs Quit | Short Term (n) | Short Term % |
| 10                                        | 20-24     | Never Any     | 4927  | 55.70 |               |             |               |                |              |
| 10                                        | 20-24     | CC            | 462   | 5.22  | 0             | 0.00        |               |                |              |
| 10                                        | 20-24     | Ecig          | 2544  | 28.76 |               |             |               |                |              |
| 10                                        | 20-24     | Dual          | 0     | 0.00  |               |             |               |                |              |
| 10                                        | 20-24     | Former        | 912   | 10.31 |               |             | 3.41          | 258            | 28.29        |
| Year of Follow-up: 2000, Age Group: 25-29 |           |               |       |       |               |             |               |                |              |
| Period                                    | Age Group | Smoking Group | N     | %     | Ever Quit (N) | Ever Quit % | Mean Yrs Quit | Short Term (n) | Short Term % |
| 10                                        | 25-29     | Never Any     | 5341  | 59.08 |               |             |               |                |              |
| 10                                        | 25-29     | CC            | 404   | 4.47  | 0             | 0.00        |               |                |              |
| 10                                        | 25-29     | Ecig          | 2359  | 26.10 |               |             |               |                |              |
| 10                                        | 25-29     | Dual          | 0     | 0.00  |               |             |               |                |              |
| 10                                        | 25-29     | Former        | 936   | 10.35 |               |             | 4.91          | 195            | 20.83        |
| Year of Follow-up: 2000, Age Group: 30-34 |           |               |       |       |               |             |               |                |              |
| Period                                    | Age Group | Smoking Group | N     | %     | Ever Quit (N) | Ever Quit % | Mean Yrs Quit | Short Term (n) | Short Term % |
| 10                                        | 30-34     | Never Any     | 5276  | 53.75 |               |             |               |                |              |
| 10                                        | 30-34     | CC            | 481   | 4.90  | 0             | 0.00        |               |                |              |
| 10                                        | 30-34     | Ecig          | 2608  | 26.57 |               |             |               |                |              |
| 10                                        | 30-34     | Dual          | 0     | 0.00  |               |             |               |                |              |
| 10                                        | 30-34     | Former        | 1451  | 14.78 |               |             | 8.66          | 118            | 8.13         |
| Year of Follow-up: 2000, Age Group: 35-39 |           |               |       |       |               |             |               |                |              |
| Period                                    | Age Group | Smoking Group | N     | %     | Ever Quit (N) | Ever Quit % | Mean Yrs Quit | Short Term (n) | Short Term % |
| 10                                        | 35-39     | Never Any     | 4997  | 46.86 |               |             |               |                |              |
| 10                                        | 35-39     | CC            | 609   | 5.71  | 0             | 0.00        |               |                |              |
| 10                                        | 35-39     | Ecig          | 2980  | 27.94 |               |             |               |                |              |
| 10                                        | 35-39     | Dual          | 0     | 0.00  |               |             |               |                |              |
| 10                                        | 35-39     | Former        | 2078  | 19.49 |               |             | 10.61         | 109            | 5.25         |
| Year of Follow-up: 2000, Age Group: 40-44 |           |               |       |       |               |             |               |                |              |
| Period                                    | Age Group | Smoking Group | N     | %     | Ever Quit (N) | Ever Quit % | Mean Yrs Quit | Short Term (n) | Short Term % |
| 10                                        | 40-44     | Never Any     | 4724  | 43.28 |               |             |               |                |              |
| 10                                        | 40-44     | CC            | 567   | 5.19  | 0             | 0.00        |               |                |              |
| 10                                        | 40-44     | Ecig          | 2857  | 26.17 |               |             |               |                |              |
| 10                                        | 40-44     | Dual          | 0     | 0.00  |               |             |               |                |              |
| 10                                        | 40-44     | Former        | 2768  | 25.36 |               |             | 11.82         | 124            | 4.48         |
| Year of Follow-up: 2000, Age Group: 45-49 |           |               |       |       |               |             |               |                |              |
| Period                                    | Age Group | Smoking Group | N     | %     | Ever Quit (N) | Ever Quit % | Mean Yrs Quit | Short Term (n) | Short Term % |
| 10                                        | 45-49     | Never Any     | 3941  | 39.85 |               |             |               |                |              |
| 10                                        | 45-49     | CC            | 484   | 4.89  | 0             | 0.00        |               |                |              |
| 10                                        | 45-49     | Ecig          | 2312  | 23.38 |               |             |               |                |              |
| 10                                        | 45-49     | Dual          | 0     | 0.00  |               |             |               |                |              |
| 10                                        | 45-49     | Former        | 3152  | 31.87 |               |             | 15.25         | 163            | 5.17         |
| Year of Follow-up: 2000, Age Group: 50-54 |           |               |       |       |               |             |               |                |              |
| Period                                    | Age Group | Smoking Group | N     | %     | Ever Quit (N) | Ever Quit % | Mean Yrs Quit | Short Term (n) | Short Term % |
| 10                                        | 50-54     | Never Any     | 2912  | 33.65 |               |             |               |                |              |
| 10                                        | 50-54     | CC            | 473   | 5.47  | 0             | 0.00        |               |                |              |
| 10                                        | 50-54     | Ecig          | 1859  | 21.48 |               |             |               |                |              |
| 10                                        | 50-54     | Dual          | 0     | 0.00  |               |             |               |                |              |
| 10                                        | 50-54     | Former        | 3411  | 39.41 |               |             | 16.85         | 186            | 5.45         |
| Year of Follow-up: 2000, Age Group: 55-59 |           |               |       |       |               |             |               |                |              |
| Period                                    | Age Group | Smoking Group | N     | %     | Ever Quit (N) | Ever Quit % | Mean Yrs Quit | Short Term (n) | Short Term % |
| 10                                        | 55-59     | Never Any     | 1919  | 29.46 |               |             |               |                |              |
| 10                                        | 55-59     | CC            | 363   | 5.57  | 0             | 0.00        |               |                |              |
| 10                                        | 55-59     | Ecig          | 1194  | 18.33 |               |             |               |                |              |
| 10                                        | 55-59     | Dual          | 0     | 0.00  |               |             |               |                |              |

**Results for PHIM for Run 1 (Sensitivity\_Analysis\_1.RTF)**

| Year of Follow-up: 2000, Age Group: 60-64    | Period   | Age Group | Smoking Group | N     | %     | Ever Quit (N) | Ever Quit % | Mean Yrs Quit | Short Term (n) | Short Term % |
|----------------------------------------------|----------|-----------|---------------|-------|-------|---------------|-------------|---------------|----------------|--------------|
| 10                                           | 55-59    | Former    |               | 3039  | 46.65 |               |             | 18.50         | 146            | 4.80         |
| 10                                           | 60-64    | Never Any |               | 1611  | 29.41 |               |             |               |                |              |
| 10                                           | 60-64    | CC        |               | 306   | 5.59  | 0             | 0.00        |               |                |              |
| 10                                           | 60-64    | Ecig      |               | 852   | 15.56 |               |             |               |                |              |
| 10                                           | 60-64    | Dual      |               | 0     | 0.00  |               |             |               |                |              |
| 10                                           | 60-64    | Former    |               | 2708  | 49.44 |               |             | 19.63         | 144            | 5.32         |
| Year of Follow-up: 2000, Age Group: 65-69    | Period   | Age Group | Smoking Group | N     | %     | Ever Quit (N) | Ever Quit % | Mean Yrs Quit | Short Term (n) | Short Term % |
| 10                                           | 65-69    | Never Any |               | 1337  | 26.83 |               |             |               |                |              |
| 10                                           | 65-69    | CC        |               | 244   | 4.90  | 0             | 0.00        |               |                |              |
| 10                                           | 65-69    | Ecig      |               | 603   | 12.10 |               |             |               |                |              |
| 10                                           | 65-69    | Dual      |               | 0     | 0.00  |               |             |               |                |              |
| 10                                           | 65-69    | Former    |               | 2799  | 56.17 |               |             | 19.95         | 120            | 4.29         |
| Year of Follow-up: 2000, Age Group: 70-74    | Period   | Age Group | Smoking Group | N     | %     | Ever Quit (N) | Ever Quit % | Mean Yrs Quit | Short Term (n) | Short Term % |
| 10                                           | 70-74    | Never Any |               | 1169  | 23.83 |               |             |               |                |              |
| 10                                           | 70-74    | CC        |               | 236   | 4.81  | 0             | 0.00        |               |                |              |
| 10                                           | 70-74    | Ecig      |               | 327   | 6.67  |               |             |               |                |              |
| 10                                           | 70-74    | Dual      |               | 0     | 0.00  |               |             |               |                |              |
| 10                                           | 70-74    | Former    |               | 3173  | 64.69 |               |             | 23.44         | 94             | 2.96         |
| Year of Follow-up: 2000, Age Group: 75-79    | Period   | Age Group | Smoking Group | N     | %     | Ever Quit (N) | Ever Quit % | Mean Yrs Quit | Short Term (n) | Short Term % |
| 10                                           | 75-79    | Never Any |               | 1023  | 23.32 |               |             |               |                |              |
| 10                                           | 75-79    | CC        |               | 214   | 4.88  | 0             | 0.00        |               |                |              |
| 10                                           | 75-79    | Ecig      |               | 229   | 5.22  |               |             |               |                |              |
| 10                                           | 75-79    | Dual      |               | 0     | 0.00  |               |             |               |                |              |
| 10                                           | 75-79    | Former    |               | 2921  | 66.58 |               |             | 25.38         | 67             | 2.29         |
| Year of Follow-up: 2005, Age Group: All Ages | Period   | Age Group | Smoking Group | N     | %     | Ever Quit (N) | Ever Quit % | Mean Yrs Quit | Short Term (n) | Short Term % |
| 15                                           | All Ages | Never Any |               | 37449 | 41.75 |               |             |               |                |              |
| 15                                           | All Ages | CC        |               | 1911  | 2.13  | 0             | 0.00        |               |                |              |
| 15                                           | All Ages | Ecig      |               | 20003 | 22.30 |               |             |               |                |              |
| 15                                           | All Ages | Dual      |               | 0     | 0.00  |               |             |               |                |              |
| 15                                           | All Ages | Former    |               | 30342 | 33.82 |               |             | 18.46         | 1574           | 5.19         |
| Year of Follow-up: 2005, Age Group: 18-19    | Period   | Age Group | Smoking Group | N     | %     | Ever Quit (N) | Ever Quit % | Mean Yrs Quit | Short Term (n) | Short Term % |
| 15                                           | 18-19    | Never Any |               | 0     | .     |               |             |               |                |              |
| 15                                           | 18-19    | CC        |               | 0     | .     | 0             | .           |               |                |              |
| 15                                           | 18-19    | Ecig      |               | 0     | .     |               |             |               |                |              |
| 15                                           | 18-19    | Dual      |               | 0     | .     |               |             |               |                |              |
| 15                                           | 18-19    | Former    |               | 0     | .     |               |             | .             | 0              | .            |
| Year of Follow-up: 2005, Age Group: 20-24    | Period   | Age Group | Smoking Group | N     | %     | Ever Quit (N) | Ever Quit % | Mean Yrs Quit | Short Term (n) | Short Term % |
| 15                                           | 20-24    | Never Any |               | 0     | .     |               |             |               |                |              |
| 15                                           | 20-24    | CC        |               | 0     | .     | 0             | .           |               |                |              |
| 15                                           | 20-24    | Ecig      |               | 0     | .     |               |             |               |                |              |
| 15                                           | 20-24    | Dual      |               | 0     | .     |               |             |               |                |              |
| 15                                           | 20-24    | Former    |               | 0     | .     |               |             | .             | 0              | .            |
| Year of Follow-up: 2005, Age Group: 25-29    | Period   | Age Group | Smoking Group | N     | %     | Ever Quit (N) | Ever Quit % | Mean Yrs Quit | Short Term (n) | Short Term % |
| 15                                           | 25-29    | Never Any |               | 4634  | 52.39 |               |             |               |                |              |
| 15                                           | 25-29    | CC        |               | 179   | 2.02  | 0             | 0.00        |               |                |              |
| 15                                           | 25-29    | Ecig      |               | 2661  | 30.08 |               |             |               |                |              |
| 15                                           | 25-29    | Dual      |               | 0     | 0.00  |               |             |               |                |              |
| 15                                           | 25-29    | Former    |               | 1371  | 15.50 |               |             | 6.32          | 174            | 12.69        |
| Year of Follow-up: 2005, Age Group: 30-34    | Period   | Age Group | Smoking Group | N     | %     | Ever Quit (N) | Ever Quit % | Mean Yrs Quit | Short Term (n) | Short Term % |
| 15                                           | 30-34    | Never Any |               | 5042  | 55.77 |               |             |               |                |              |
| 15                                           | 30-34    | CC        |               | 153   | 1.69  | 0             | 0.00        |               |                |              |
| 15                                           | 30-34    | Ecig      |               | 2479  | 27.42 |               |             |               |                |              |
| 15                                           | 30-34    | Dual      |               | 0     | 0.00  |               |             |               |                |              |
| 15                                           | 30-34    | Former    |               | 1366  | 15.11 |               |             | 7.38          | 171            | 12.52        |
| Year of Follow-up: 2005, Age Group: 35-39    | Period   | Age Group | Smoking Group | N     | %     | Ever Quit (N) | Ever Quit % | Mean Yrs Quit | Short Term (n) | Short Term % |
| 15                                           | 35-39    | Never Any |               | 5163  | 52.60 |               |             |               |                |              |
| 15                                           | 35-39    | CC        |               | 188   | 1.92  | 0             | 0.00        |               |                |              |

**Results for PHIM for Run 1 (Sensitivity\_Analysis\_1.RTF)**

|                                              |           |               |       |       |               |             |               |                |              |
|----------------------------------------------|-----------|---------------|-------|-------|---------------|-------------|---------------|----------------|--------------|
| 15                                           | 35-39     | Ecig          | 2654  | 27.04 |               |             |               |                |              |
| 15                                           | 35-39     | Dual          | 0     | 0.00  |               |             |               |                |              |
| 15                                           | 35-39     | Former        | 1811  | 18.45 |               |             | 11.33         | 147            | 8.12         |
| Year of Follow-up: 2005, Age Group: 40-44    |           |               |       |       |               |             |               |                |              |
| Period                                       | Age Group | Smoking Group | N     | %     | Ever Quit (N) | Ever Quit % | Mean Yrs Quit | Short Term (n) | Short Term % |
| 15                                           | 40-44     | Never Any     | 4997  | 46.86 |               |             |               |                |              |
| 15                                           | 40-44     | CC            | 231   | 2.17  | 0             | 0.00        |               |                |              |
| 15                                           | 40-44     | Ecig          | 2948  | 27.64 |               |             |               |                |              |
| 15                                           | 40-44     | Dual          | 0     | 0.00  |               |             |               |                |              |
| 15                                           | 40-44     | Former        | 2488  | 23.33 |               |             | 13.32         | 199            | 8.00         |
| Year of Follow-up: 2005, Age Group: 45-49    |           |               |       |       |               |             |               |                |              |
| Period                                       | Age Group | Smoking Group | N     | %     | Ever Quit (N) | Ever Quit % | Mean Yrs Quit | Short Term (n) | Short Term % |
| 15                                           | 45-49     | Never Any     | 4724  | 43.28 |               |             |               |                |              |
| 15                                           | 45-49     | CC            | 216   | 1.98  | 0             | 0.00        |               |                |              |
| 15                                           | 45-49     | Ecig          | 2793  | 25.59 |               |             |               |                |              |
| 15                                           | 45-49     | Dual          | 0     | 0.00  |               |             |               |                |              |
| 15                                           | 45-49     | Former        | 3183  | 29.16 |               |             | 14.88         | 160            | 5.03         |
| Year of Follow-up: 2005, Age Group: 50-54    |           |               |       |       |               |             |               |                |              |
| Period                                       | Age Group | Smoking Group | N     | %     | Ever Quit (N) | Ever Quit % | Mean Yrs Quit | Short Term (n) | Short Term % |
| 15                                           | 50-54     | Never Any     | 3941  | 39.85 |               |             |               |                |              |
| 15                                           | 50-54     | CC            | 213   | 2.15  | 0             | 0.00        |               |                |              |
| 15                                           | 50-54     | Ecig          | 2180  | 22.04 |               |             |               |                |              |
| 15                                           | 50-54     | Dual          | 0     | 0.00  |               |             |               |                |              |
| 15                                           | 50-54     | Former        | 3555  | 35.95 |               |             | 18.19         | 154            | 4.33         |
| Year of Follow-up: 2005, Age Group: 55-59    |           |               |       |       |               |             |               |                |              |
| Period                                       | Age Group | Smoking Group | N     | %     | Ever Quit (N) | Ever Quit % | Mean Yrs Quit | Short Term (n) | Short Term % |
| 15                                           | 55-59     | Never Any     | 2912  | 33.65 |               |             |               |                |              |
| 15                                           | 55-59     | CC            | 215   | 2.48  | 0             | 0.00        |               |                |              |
| 15                                           | 55-59     | Ecig          | 1781  | 20.58 |               |             |               |                |              |
| 15                                           | 55-59     | Dual          | 0     | 0.00  |               |             |               |                |              |
| 15                                           | 55-59     | Former        | 3747  | 43.29 |               |             | 20.09         | 117            | 3.12         |
| Year of Follow-up: 2005, Age Group: 60-64    |           |               |       |       |               |             |               |                |              |
| Period                                       | Age Group | Smoking Group | N     | %     | Ever Quit (N) | Ever Quit % | Mean Yrs Quit | Short Term (n) | Short Term % |
| 15                                           | 60-64     | Never Any     | 1919  | 29.46 |               |             |               |                |              |
| 15                                           | 60-64     | CC            | 143   | 2.19  | 0             | 0.00        |               |                |              |
| 15                                           | 60-64     | Ecig          | 1100  | 16.88 |               |             |               |                |              |
| 15                                           | 60-64     | Dual          | 0     | 0.00  |               |             |               |                |              |
| 15                                           | 60-64     | Former        | 3353  | 51.47 |               |             | 21.47         | 156            | 4.65         |
| Year of Follow-up: 2005, Age Group: 65-69    |           |               |       |       |               |             |               |                |              |
| Period                                       | Age Group | Smoking Group | N     | %     | Ever Quit (N) | Ever Quit % | Mean Yrs Quit | Short Term (n) | Short Term % |
| 15                                           | 65-69     | Never Any     | 1611  | 29.41 |               |             |               |                |              |
| 15                                           | 65-69     | CC            | 124   | 2.26  | 0             | 0.00        |               |                |              |
| 15                                           | 65-69     | Ecig          | 705   | 12.87 |               |             |               |                |              |
| 15                                           | 65-69     | Dual          | 0     | 0.00  |               |             |               |                |              |
| 15                                           | 65-69     | Former        | 3037  | 55.45 |               |             | 22.19         | 118            | 3.89         |
| Year of Follow-up: 2005, Age Group: 70-74    |           |               |       |       |               |             |               |                |              |
| Period                                       | Age Group | Smoking Group | N     | %     | Ever Quit (N) | Ever Quit % | Mean Yrs Quit | Short Term (n) | Short Term % |
| 15                                           | 70-74     | Never Any     | 1337  | 26.83 |               |             |               |                |              |
| 15                                           | 70-74     | CC            | 129   | 2.59  | 0             | 0.00        |               |                |              |
| 15                                           | 70-74     | Ecig          | 441   | 8.85  |               |             |               |                |              |
| 15                                           | 70-74     | Dual          | 0     | 0.00  |               |             |               |                |              |
| 15                                           | 70-74     | Former        | 3076  | 61.73 |               |             | 22.89         | 112            | 3.64         |
| Year of Follow-up: 2005, Age Group: 75-79    |           |               |       |       |               |             |               |                |              |
| Period                                       | Age Group | Smoking Group | N     | %     | Ever Quit (N) | Ever Quit % | Mean Yrs Quit | Short Term (n) | Short Term % |
| 15                                           | 75-79     | Never Any     | 1169  | 23.83 |               |             |               |                |              |
| 15                                           | 75-79     | CC            | 120   | 2.45  | 0             | 0.00        |               |                |              |
| 15                                           | 75-79     | Ecig          | 261   | 5.32  |               |             |               |                |              |
| 15                                           | 75-79     | Dual          | 0     | 0.00  |               |             |               |                |              |
| 15                                           | 75-79     | Former        | 3355  | 68.40 |               |             | 27.01         | 66             | 1.97         |
| Year of Follow-up: 2010, Age Group: All Ages |           |               |       |       |               |             |               |                |              |
| Period                                       | Age Group | Smoking Group | N     | %     | Ever Quit (N) | Ever Quit % | Mean Yrs Quit | Short Term (n) | Short Term % |
| 20                                           | All Ages  | Never Any     | 36103 | 42.57 |               |             |               |                |              |
| 20                                           | All Ages  | CC            | 738   | 0.87  | 0             | 0.00        |               |                |              |
| 20                                           | All Ages  | Ecig          | 17076 | 20.14 |               |             |               |                |              |
| 20                                           | All Ages  | Dual          | 0     | 0.00  |               |             |               |                |              |
| 20                                           | All Ages  | Former        | 30883 | 36.42 |               |             | 19.82         | 1518           | 4.92         |
| Year of Follow-up: 2010, Age Group: 18-19    |           |               |       |       |               |             |               |                |              |
| Period                                       | Age Group | Smoking Group | N     | %     | Ever Quit (N) | Ever Quit % | Mean Yrs Quit | Short Term (n) | Short Term % |

**Results for PHIM for Run 1 (Sensitivity\_Analysis\_1.RTF)**

|                                           |           |               |      |       |               |             |               |                |              |
|-------------------------------------------|-----------|---------------|------|-------|---------------|-------------|---------------|----------------|--------------|
| 20                                        | 18-19     | Never Any     | 0    | .     |               |             |               |                |              |
| 20                                        | 18-19     | CC            | 0    | .     | 0             | .           |               |                |              |
| 20                                        | 18-19     | Ecig          | 0    | .     |               |             |               |                |              |
| 20                                        | 18-19     | Dual          | 0    | .     |               |             |               |                |              |
| 20                                        | 18-19     | Former        | 0    | .     |               |             | 0             | .              |              |
| Year of Follow-up: 2010, Age Group: 20-24 |           |               |      |       |               |             |               |                |              |
| Period                                    | Age Group | Smoking Group | N    | %     | Ever Quit (N) | Ever Quit % | Mean Yrs Quit | Short Term (n) | Short Term % |
| 20                                        | 20-24     | Never Any     | 0    | .     |               |             |               |                |              |
| 20                                        | 20-24     | CC            | 0    | .     | 0             | .           |               |                |              |
| 20                                        | 20-24     | Ecig          | 0    | .     |               |             |               |                |              |
| 20                                        | 20-24     | Dual          | 0    | .     |               |             |               |                |              |
| 20                                        | 20-24     | Former        | 0    | .     |               |             |               | 0              | .            |
| Year of Follow-up: 2010, Age Group: 25-29 |           |               |      |       |               |             |               |                |              |
| Period                                    | Age Group | Smoking Group | N    | %     | Ever Quit (N) | Ever Quit % | Mean Yrs Quit | Short Term (n) | Short Term % |
| 20                                        | 25-29     | Never Any     | 0    | .     |               |             |               |                |              |
| 20                                        | 25-29     | CC            | 0    | .     | 0             | .           |               |                |              |
| 20                                        | 25-29     | Ecig          | 0    | .     |               |             |               |                |              |
| 20                                        | 25-29     | Dual          | 0    | .     |               |             |               |                |              |
| 20                                        | 25-29     | Former        | 0    | .     |               |             |               | 0              | .            |
| Year of Follow-up: 2010, Age Group: 30-34 |           |               |      |       |               |             |               |                |              |
| Period                                    | Age Group | Smoking Group | N    | %     | Ever Quit (N) | Ever Quit % | Mean Yrs Quit | Short Term (n) | Short Term % |
| 20                                        | 30-34     | Never Any     | 4508 | 50.97 |               |             |               |                |              |
| 20                                        | 30-34     | CC            | 71   | 0.80  | 0             | 0.00        |               |                |              |
| 20                                        | 30-34     | Ecig          | 2376 | 26.86 |               |             |               |                |              |
| 20                                        | 30-34     | Dual          | 0    | 0.00  |               |             |               |                |              |
| 20                                        | 30-34     | Former        | 1890 | 21.37 |               |             | 8.72          | 230            | 12.17        |
| Year of Follow-up: 2010, Age Group: 35-39 |           |               |      |       |               |             |               |                |              |
| Period                                    | Age Group | Smoking Group | N    | %     | Ever Quit (N) | Ever Quit % | Mean Yrs Quit | Short Term (n) | Short Term % |
| 20                                        | 35-39     | Never Any     | 4991 | 55.21 |               |             |               |                |              |
| 20                                        | 35-39     | CC            | 59   | 0.65  | 0             | 0.00        |               |                |              |
| 20                                        | 35-39     | Ecig          | 2154 | 23.83 |               |             |               |                |              |
| 20                                        | 35-39     | Dual          | 0    | 0.00  |               |             |               |                |              |
| 20                                        | 35-39     | Former        | 1836 | 20.31 |               |             | 9.77          | 141            | 7.68         |
| Year of Follow-up: 2010, Age Group: 40-44 |           |               |      |       |               |             |               |                |              |
| Period                                    | Age Group | Smoking Group | N    | %     | Ever Quit (N) | Ever Quit % | Mean Yrs Quit | Short Term (n) | Short Term % |
| 20                                        | 40-44     | Never Any     | 5163 | 52.60 |               |             |               |                |              |
| 20                                        | 40-44     | CC            | 68   | 0.69  | 0             | 0.00        |               |                |              |
| 20                                        | 40-44     | Ecig          | 2416 | 24.61 |               |             |               |                |              |
| 20                                        | 40-44     | Dual          | 0    | 0.00  |               |             |               |                |              |
| 20                                        | 40-44     | Former        | 2169 | 22.10 |               |             | 13.96         | 143            | 6.59         |
| Year of Follow-up: 2010, Age Group: 45-49 |           |               |      |       |               |             |               |                |              |
| Period                                    | Age Group | Smoking Group | N    | %     | Ever Quit (N) | Ever Quit % | Mean Yrs Quit | Short Term (n) | Short Term % |
| 20                                        | 45-49     | Never Any     | 4997 | 46.86 |               |             |               |                |              |
| 20                                        | 45-49     | CC            | 89   | 0.83  | 0             | 0.00        |               |                |              |
| 20                                        | 45-49     | Ecig          | 2619 | 24.56 |               |             |               |                |              |
| 20                                        | 45-49     | Dual          | 0    | 0.00  |               |             |               |                |              |
| 20                                        | 45-49     | Former        | 2959 | 27.75 |               |             | 15.74         | 171            | 5.78         |
| Year of Follow-up: 2010, Age Group: 50-54 |           |               |      |       |               |             |               |                |              |
| Period                                    | Age Group | Smoking Group | N    | %     | Ever Quit (N) | Ever Quit % | Mean Yrs Quit | Short Term (n) | Short Term % |
| 20                                        | 50-54     | Never Any     | 4724 | 43.28 |               |             |               |                |              |
| 20                                        | 50-54     | CC            | 87   | 0.80  | 0             | 0.00        |               |                |              |
| 20                                        | 50-54     | Ecig          | 2490 | 22.81 |               |             |               |                |              |
| 20                                        | 50-54     | Dual          | 0    | 0.00  |               |             |               |                |              |
| 20                                        | 50-54     | Former        | 3615 | 33.12 |               |             | 17.75         | 174            | 4.81         |
| Year of Follow-up: 2010, Age Group: 55-59 |           |               |      |       |               |             |               |                |              |
| Period                                    | Age Group | Smoking Group | N    | %     | Ever Quit (N) | Ever Quit % | Mean Yrs Quit | Short Term (n) | Short Term % |
| 20                                        | 55-59     | Never Any     | 3941 | 39.85 |               |             |               |                |              |
| 20                                        | 55-59     | CC            | 85   | 0.86  | 0             | 0.00        |               |                |              |
| 20                                        | 55-59     | Ecig          | 1859 | 18.80 |               |             |               |                |              |
| 20                                        | 55-59     | Dual          | 0    | 0.00  |               |             |               |                |              |
| 20                                        | 55-59     | Former        | 4004 | 40.49 |               |             | 20.81         | 181            | 4.52         |
| Year of Follow-up: 2010, Age Group: 60-64 |           |               |      |       |               |             |               |                |              |
| Period                                    | Age Group | Smoking Group | N    | %     | Ever Quit (N) | Ever Quit % | Mean Yrs Quit | Short Term (n) | Short Term % |
| 20                                        | 60-64     | Never Any     | 2912 | 33.65 |               |             |               |                |              |
| 20                                        | 60-64     | CC            | 87   | 1.01  | 0             | 0.00        |               |                |              |
| 20                                        | 60-64     | Ecig          | 1428 | 16.50 |               |             |               |                |              |
| 20                                        | 60-64     | Dual          | 0    | 0.00  |               |             |               |                |              |
| 20                                        | 60-64     | Former        | 4228 | 48.85 |               |             | 22.41         | 241            | 5.70         |
| Year of Follow-up: 2010, Age Group: 65-69 |           |               |      |       |               |             |               |                |              |



**Results for PHIM for Run 1 (Sensitivity\_Analysis\_1.RTF)**

| Period                                       | Age Group | Smoking Group | N     | %     | Ever Quit (N) | Ever Quit % | Mean Yrs Quit | Short Term (n) | Short Term % |
|----------------------------------------------|-----------|---------------|-------|-------|---------------|-------------|---------------|----------------|--------------|
| 20                                           | 65-69     | Never Any     | 1919  | 29.46 |               |             |               |                |              |
| 20                                           | 65-69     | CC            | 60    | 0.92  | 0             | 0.00        |               |                |              |
| 20                                           | 65-69     | Ecig          | 809   | 12.42 |               |             |               |                |              |
| 20                                           | 65-69     | Dual          | 0     | 0.00  |               |             |               |                |              |
| 20                                           | 65-69     | Former        | 3727  | 57.21 |               |             | 24.03         | 133            | 3.57         |
| Year of Follow-up: 2010, Age Group: 70-74    |           |               |       |       |               |             |               |                |              |
| Period                                       | Age Group | Smoking Group | N     | %     | Ever Quit (N) | Ever Quit % | Mean Yrs Quit | Short Term (n) | Short Term % |
| 20                                           | 70-74     | Never Any     | 1611  | 29.41 |               |             |               |                |              |
| 20                                           | 70-74     | CC            | 69    | 1.26  | 0             | 0.00        |               |                |              |
| 20                                           | 70-74     | Ecig          | 574   | 10.48 |               |             |               |                |              |
| 20                                           | 70-74     | Dual          | 0     | 0.00  |               |             |               |                |              |
| 20                                           | 70-74     | Former        | 3223  | 58.85 |               |             | 25.75         | 61             | 1.89         |
| Year of Follow-up: 2010, Age Group: 75-79    |           |               |       |       |               |             |               |                |              |
| Period                                       | Age Group | Smoking Group | N     | %     | Ever Quit (N) | Ever Quit % | Mean Yrs Quit | Short Term (n) | Short Term % |
| 20                                           | 75-79     | Never Any     | 1337  | 26.83 |               |             |               |                |              |
| 20                                           | 75-79     | CC            | 63    | 1.26  | 0             | 0.00        |               |                |              |
| 20                                           | 75-79     | Ecig          | 351   | 7.04  |               |             |               |                |              |
| 20                                           | 75-79     | Dual          | 0     | 0.00  |               |             |               |                |              |
| 20                                           | 75-79     | Former        | 3232  | 64.86 |               |             | 26.66         | 43             | 1.33         |
| Year of Follow-up: 2015, Age Group: All Ages |           |               |       |       |               |             |               |                |              |
| Period                                       | Age Group | Smoking Group | N     | %     | Ever Quit (N) | Ever Quit % | Mean Yrs Quit | Short Term (n) | Short Term % |
| 25                                           | All Ages  | Never Any     | 34747 | 43.53 |               |             |               |                |              |
| 25                                           | All Ages  | CC            | 289   | 0.36  | 0             | 0.00        |               |                |              |
| 25                                           | All Ages  | Ecig          | 14107 | 17.67 |               |             |               |                |              |
| 25                                           | All Ages  | Dual          | 0     | 0.00  |               |             |               |                |              |
| 25                                           | All Ages  | Former        | 30674 | 38.43 |               |             | 21.87         | 1088           | 3.55         |
| Year of Follow-up: 2015, Age Group: 18-19    |           |               |       |       |               |             |               |                |              |
| Period                                       | Age Group | Smoking Group | N     | %     | Ever Quit (N) | Ever Quit % | Mean Yrs Quit | Short Term (n) | Short Term % |
| 25                                           | 18-19     | Never Any     | 0     | .     |               |             |               |                |              |
| 25                                           | 18-19     | CC            | 0     | .     | 0             | .           |               |                |              |
| 25                                           | 18-19     | Ecig          | 0     | .     |               |             |               |                |              |
| 25                                           | 18-19     | Dual          | 0     | .     |               |             |               |                |              |
| 25                                           | 18-19     | Former        | 0     | .     |               |             | .             | 0              | .            |
| Year of Follow-up: 2015, Age Group: 20-24    |           |               |       |       |               |             |               |                |              |
| Period                                       | Age Group | Smoking Group | N     | %     | Ever Quit (N) | Ever Quit % | Mean Yrs Quit | Short Term (n) | Short Term % |
| 25                                           | 20-24     | Never Any     | 0     | .     |               |             |               |                |              |
| 25                                           | 20-24     | CC            | 0     | .     | 0             | .           |               |                |              |
| 25                                           | 20-24     | Ecig          | 0     | .     |               |             |               |                |              |
| 25                                           | 20-24     | Dual          | 0     | .     |               |             |               |                |              |
| 25                                           | 20-24     | Former        | 0     | .     |               |             | .             | 0              | .            |
| Year of Follow-up: 2015, Age Group: 25-29    |           |               |       |       |               |             |               |                |              |
| Period                                       | Age Group | Smoking Group | N     | %     | Ever Quit (N) | Ever Quit % | Mean Yrs Quit | Short Term (n) | Short Term % |
| 25                                           | 25-29     | Never Any     | 0     | .     |               |             |               |                |              |
| 25                                           | 25-29     | CC            | 0     | .     | 0             | .           |               |                |              |
| 25                                           | 25-29     | Ecig          | 0     | .     |               |             |               |                |              |
| 25                                           | 25-29     | Dual          | 0     | .     |               |             |               |                |              |
| 25                                           | 25-29     | Former        | 0     | .     |               |             | .             | 0              | .            |
| Year of Follow-up: 2015, Age Group: 30-34    |           |               |       |       |               |             |               |                |              |
| Period                                       | Age Group | Smoking Group | N     | %     | Ever Quit (N) | Ever Quit % | Mean Yrs Quit | Short Term (n) | Short Term % |
| 25                                           | 30-34     | Never Any     | 0     | .     |               |             |               |                |              |
| 25                                           | 30-34     | CC            | 0     | .     | 0             | .           |               |                |              |
| 25                                           | 30-34     | Ecig          | 0     | .     |               |             |               |                |              |
| 25                                           | 30-34     | Dual          | 0     | .     |               |             |               |                |              |
| 25                                           | 30-34     | Former        | 0     | .     |               |             | .             | 0              | .            |
| Year of Follow-up: 2015, Age Group: 35-39    |           |               |       |       |               |             |               |                |              |
| Period                                       | Age Group | Smoking Group | N     | %     | Ever Quit (N) | Ever Quit % | Mean Yrs Quit | Short Term (n) | Short Term % |
| 25                                           | 35-39     | Never Any     | 4489  | 50.75 |               |             |               |                |              |
| 25                                           | 35-39     | CC            | 28    | 0.32  | 0             | 0.00        |               |                |              |
| 25                                           | 35-39     | Ecig          | 1990  | 22.50 |               |             |               |                |              |
| 25                                           | 35-39     | Dual          | 0     | 0.00  |               |             |               |                |              |
| 25                                           | 35-39     | Former        | 2338  | 26.43 |               |             | 11.53         | 142            | 6.07         |
| Year of Follow-up: 2015, Age Group: 40-44    |           |               |       |       |               |             |               |                |              |
| Period                                       | Age Group | Smoking Group | N     | %     | Ever Quit (N) | Ever Quit % | Mean Yrs Quit | Short Term (n) | Short Term % |
| 25                                           | 40-44     | Never Any     | 4991  | 55.21 |               |             |               |                |              |
| 25                                           | 40-44     | CC            | 20    | 0.22  | 0             | 0.00        |               |                |              |
| 25                                           | 40-44     | Ecig          | 1897  | 20.98 |               |             |               |                |              |
| 25                                           | 40-44     | Dual          | 0     | 0.00  |               |             |               |                |              |

**Results for PHIM for Run 1 (Sensitivity\_Analysis\_1.RTF)**

|                                              |           |               |       |       |               |             |               |                |              |
|----------------------------------------------|-----------|---------------|-------|-------|---------------|-------------|---------------|----------------|--------------|
| 25                                           | 40-44     | Former        | 2132  | 23.58 |               |             | 13.01         | 112            | 5.25         |
| Year of Follow-up: 2015, Age Group: 45-49    |           |               |       |       |               |             |               |                |              |
| Period                                       | Age Group | Smoking Group | N     | %     | Ever Quit (N) | Ever Quit % | Mean Yrs Quit | Short Term (n) | Short Term % |
| 25                                           | 45-49     | Never Any     | 5163  | 52.60 |               |             |               |                |              |
| 25                                           | 45-49     | CC            | 29    | 0.30  | 0             | 0.00        |               |                |              |
| 25                                           | 45-49     | Ecig          | 2195  | 22.36 |               |             |               |                |              |
| 25                                           | 45-49     | Dual          | 0     | 0.00  |               |             |               |                |              |
| 25                                           | 45-49     | Former        | 2429  | 24.75 |               |             | 17.18         | 81             | 3.33         |
| Year of Follow-up: 2015, Age Group: 50-54    |           |               |       |       |               |             |               |                |              |
| Period                                       | Age Group | Smoking Group | N     | %     | Ever Quit (N) | Ever Quit % | Mean Yrs Quit | Short Term (n) | Short Term % |
| 25                                           | 50-54     | Never Any     | 4997  | 46.86 |               |             |               |                |              |
| 25                                           | 50-54     | CC            | 37    | 0.35  | 0             | 0.00        |               |                |              |
| 25                                           | 50-54     | Ecig          | 2387  | 22.38 |               |             |               |                |              |
| 25                                           | 50-54     | Dual          | 0     | 0.00  |               |             |               |                |              |
| 25                                           | 50-54     | Former        | 3243  | 30.41 |               |             | 19.10         | 130            | 4.01         |
| Year of Follow-up: 2015, Age Group: 55-59    |           |               |       |       |               |             |               |                |              |
| Period                                       | Age Group | Smoking Group | N     | %     | Ever Quit (N) | Ever Quit % | Mean Yrs Quit | Short Term (n) | Short Term % |
| 25                                           | 55-59     | Never Any     | 4724  | 43.28 |               |             |               |                |              |
| 25                                           | 55-59     | CC            | 33    | 0.30  | 0             | 0.00        |               |                |              |
| 25                                           | 55-59     | Ecig          | 2103  | 19.27 |               |             |               |                |              |
| 25                                           | 55-59     | Dual          | 0     | 0.00  |               |             |               |                |              |
| 25                                           | 55-59     | Former        | 4056  | 37.16 |               |             | 20.50         | 162            | 3.99         |
| Year of Follow-up: 2015, Age Group: 60-64    |           |               |       |       |               |             |               |                |              |
| Period                                       | Age Group | Smoking Group | N     | %     | Ever Quit (N) | Ever Quit % | Mean Yrs Quit | Short Term (n) | Short Term % |
| 25                                           | 60-64     | Never Any     | 3941  | 39.85 |               |             |               |                |              |
| 25                                           | 60-64     | CC            | 28    | 0.28  | 0             | 0.00        |               |                |              |
| 25                                           | 60-64     | Ecig          | 1443  | 14.59 |               |             |               |                |              |
| 25                                           | 60-64     | Dual          | 0     | 0.00  |               |             |               |                |              |
| 25                                           | 60-64     | Former        | 4477  | 45.27 |               |             | 23.28         | 205            | 4.58         |
| Year of Follow-up: 2015, Age Group: 65-69    |           |               |       |       |               |             |               |                |              |
| Period                                       | Age Group | Smoking Group | N     | %     | Ever Quit (N) | Ever Quit % | Mean Yrs Quit | Short Term (n) | Short Term % |
| 25                                           | 65-69     | Never Any     | 2912  | 33.65 |               |             |               |                |              |
| 25                                           | 65-69     | CC            | 43    | 0.50  | 0             | 0.00        |               |                |              |
| 25                                           | 65-69     | Ecig          | 1019  | 11.77 |               |             |               |                |              |
| 25                                           | 65-69     | Dual          | 0     | 0.00  |               |             |               |                |              |
| 25                                           | 65-69     | Former        | 4681  | 54.08 |               |             | 24.99         | 134            | 2.86         |
| Year of Follow-up: 2015, Age Group: 70-74    |           |               |       |       |               |             |               |                |              |
| Period                                       | Age Group | Smoking Group | N     | %     | Ever Quit (N) | Ever Quit % | Mean Yrs Quit | Short Term (n) | Short Term % |
| 25                                           | 70-74     | Never Any     | 1919  | 29.46 |               |             |               |                |              |
| 25                                           | 70-74     | CC            | 35    | 0.54  | 0             | 0.00        |               |                |              |
| 25                                           | 70-74     | Ecig          | 616   | 9.46  |               |             |               |                |              |
| 25                                           | 70-74     | Dual          | 0     | 0.00  |               |             |               |                |              |
| 25                                           | 70-74     | Former        | 3945  | 60.55 |               |             | 27.55         | 70             | 1.77         |
| Year of Follow-up: 2015, Age Group: 75-79    |           |               |       |       |               |             |               |                |              |
| Period                                       | Age Group | Smoking Group | N     | %     | Ever Quit (N) | Ever Quit % | Mean Yrs Quit | Short Term (n) | Short Term % |
| 25                                           | 75-79     | Never Any     | 1611  | 29.41 |               |             |               |                |              |
| 25                                           | 75-79     | CC            | 36    | 0.66  | 0             | 0.00        |               |                |              |
| 25                                           | 75-79     | Ecig          | 457   | 8.34  |               |             |               |                |              |
| 25                                           | 75-79     | Dual          | 0     | 0.00  |               |             |               |                |              |
| 25                                           | 75-79     | Former        | 3373  | 61.58 |               |             | 29.48         | 52             | 1.54         |
| Year of Follow-up: 2020, Age Group: All Ages |           |               |       |       |               |             |               |                |              |
| Period                                       | Age Group | Smoking Group | N     | %     | Ever Quit (N) | Ever Quit % | Mean Yrs Quit | Short Term (n) | Short Term % |
| 30                                           | All Ages  | Never Any     | 33136 | 44.57 |               |             |               |                |              |
| 30                                           | All Ages  | CC            | 100   | 0.13  | 0             | 0.00        |               |                |              |
| 30                                           | All Ages  | Ecig          | 11358 | 15.28 |               |             |               |                |              |
| 30                                           | All Ages  | Dual          | 0     | 0.00  |               |             |               |                |              |
| 30                                           | All Ages  | Former        | 29746 | 40.01 |               |             | 23.97         | 918            | 3.09         |
| Year of Follow-up: 2020, Age Group: 18-19    |           |               |       |       |               |             |               |                |              |
| Period                                       | Age Group | Smoking Group | N     | %     | Ever Quit (N) | Ever Quit % | Mean Yrs Quit | Short Term (n) | Short Term % |
| 30                                           | 18-19     | Never Any     | 0     | .     |               |             |               |                |              |
| 30                                           | 18-19     | CC            | 0     | .     | 0             | .           |               |                |              |
| 30                                           | 18-19     | Ecig          | 0     | .     |               |             |               |                |              |
| 30                                           | 18-19     | Dual          | 0     | .     |               |             |               |                |              |
| 30                                           | 18-19     | Former        | 0     | .     |               |             | .             | 0              | .            |
| Year of Follow-up: 2020, Age Group: 20-24    |           |               |       |       |               |             |               |                |              |
| Period                                       | Age Group | Smoking Group | N     | %     | Ever Quit (N) | Ever Quit % | Mean Yrs Quit | Short Term (n) | Short Term % |
| 30                                           | 20-24     | Never Any     | 0     | .     |               |             |               |                |              |
| 30                                           | 20-24     | CC            | 0     | .     | 0             | .           |               |                |              |

**Results for PHIM for Run 1 (Sensitivity\_Analysis\_1.RTF)**

|                                           |           |               |      |       |               |             |               |                |              |
|-------------------------------------------|-----------|---------------|------|-------|---------------|-------------|---------------|----------------|--------------|
| 30                                        | 20-24     | Ecig          | 0    | .     |               |             |               |                |              |
| 30                                        | 20-24     | Dual          | 0    | .     |               |             |               |                |              |
| 30                                        | 20-24     | Former        | 0    | .     |               |             | 0             | .              |              |
| Year of Follow-up: 2020, Age Group: 25-29 |           |               |      |       |               |             |               |                |              |
| Period                                    | Age Group | Smoking Group | N    | %     | Ever Quit (N) | Ever Quit % | Mean Yrs Quit | Short Term (n) | Short Term % |
| 30                                        | 25-29     | Never Any     | 0    | .     |               |             |               |                |              |
| 30                                        | 25-29     | CC            | 0    | .     | 0             | .           |               |                |              |
| 30                                        | 25-29     | Ecig          | 0    | .     |               |             |               |                |              |
| 30                                        | 25-29     | Dual          | 0    | .     |               |             |               |                |              |
| 30                                        | 25-29     | Former        | 0    | .     |               |             | 0             | .              |              |
| Year of Follow-up: 2020, Age Group: 30-34 |           |               |      |       |               |             |               |                |              |
| Period                                    | Age Group | Smoking Group | N    | %     | Ever Quit (N) | Ever Quit % | Mean Yrs Quit | Short Term (n) | Short Term % |
| 30                                        | 30-34     | Never Any     | 0    | .     |               |             |               |                |              |
| 30                                        | 30-34     | CC            | 0    | .     | 0             | .           |               |                |              |
| 30                                        | 30-34     | Ecig          | 0    | .     |               |             |               |                |              |
| 30                                        | 30-34     | Dual          | 0    | .     |               |             |               |                |              |
| 30                                        | 30-34     | Former        | 0    | .     |               |             | 0             | .              |              |
| Year of Follow-up: 2020, Age Group: 35-39 |           |               |      |       |               |             |               |                |              |
| Period                                    | Age Group | Smoking Group | N    | %     | Ever Quit (N) | Ever Quit % | Mean Yrs Quit | Short Term (n) | Short Term % |
| 30                                        | 35-39     | Never Any     | 0    | .     |               |             |               |                |              |
| 30                                        | 35-39     | CC            | 0    | .     | 0             | .           |               |                |              |
| 30                                        | 35-39     | Ecig          | 0    | .     |               |             |               |                |              |
| 30                                        | 35-39     | Dual          | 0    | .     |               |             |               |                |              |
| 30                                        | 35-39     | Former        | 0    | .     |               |             | 0             | .              |              |
| Year of Follow-up: 2020, Age Group: 40-44 |           |               |      |       |               |             |               |                |              |
| Period                                    | Age Group | Smoking Group | N    | %     | Ever Quit (N) | Ever Quit % | Mean Yrs Quit | Short Term (n) | Short Term % |
| 30                                        | 40-44     | Never Any     | 4489 | 50.75 |               |             |               |                |              |
| 30                                        | 40-44     | CC            | 12   | 0.14  | 0             | 0.00        |               |                |              |
| 30                                        | 40-44     | Ecig          | 1743 | 19.71 |               |             |               |                |              |
| 30                                        | 40-44     | Dual          | 0    | 0.00  |               |             |               |                |              |
| 30                                        | 40-44     | Former        | 2601 | 29.41 |               |             | 15.05         | 107            | 4.11         |
| Year of Follow-up: 2020, Age Group: 45-49 |           |               |      |       |               |             |               |                |              |
| Period                                    | Age Group | Smoking Group | N    | %     | Ever Quit (N) | Ever Quit % | Mean Yrs Quit | Short Term (n) | Short Term % |
| 30                                        | 45-49     | Never Any     | 4991 | 55.21 |               |             |               |                |              |
| 30                                        | 45-49     | CC            | 5    | 0.06  | 0             | 0.00        |               |                |              |
| 30                                        | 45-49     | Ecig          | 1690 | 18.69 |               |             |               |                |              |
| 30                                        | 45-49     | Dual          | 0    | 0.00  |               |             |               |                |              |
| 30                                        | 45-49     | Former        | 2354 | 26.04 |               |             | 16.54         | 63             | 2.68         |
| Year of Follow-up: 2020, Age Group: 50-54 |           |               |      |       |               |             |               |                |              |
| Period                                    | Age Group | Smoking Group | N    | %     | Ever Quit (N) | Ever Quit % | Mean Yrs Quit | Short Term (n) | Short Term % |
| 30                                        | 50-54     | Never Any     | 5163 | 52.60 |               |             |               |                |              |
| 30                                        | 50-54     | CC            | 9    | 0.09  | 0             | 0.00        |               |                |              |
| 30                                        | 50-54     | Ecig          | 2021 | 20.59 |               |             |               |                |              |
| 30                                        | 50-54     | Dual          | 0    | 0.00  |               |             |               |                |              |
| 30                                        | 50-54     | Former        | 2623 | 26.72 |               |             | 20.66         | 99             | 3.77         |
| Year of Follow-up: 2020, Age Group: 55-59 |           |               |      |       |               |             |               |                |              |
| Period                                    | Age Group | Smoking Group | N    | %     | Ever Quit (N) | Ever Quit % | Mean Yrs Quit | Short Term (n) | Short Term % |
| 30                                        | 55-59     | Never Any     | 4997 | 46.86 |               |             |               |                |              |
| 30                                        | 55-59     | CC            | 18   | 0.17  | 0             | 0.00        |               |                |              |
| 30                                        | 55-59     | Ecig          | 2002 | 18.77 |               |             |               |                |              |
| 30                                        | 55-59     | Dual          | 0    | 0.00  |               |             |               |                |              |
| 30                                        | 55-59     | Former        | 3647 | 34.20 |               |             | 21.65         | 157            | 4.30         |
| Year of Follow-up: 2020, Age Group: 60-64 |           |               |      |       |               |             |               |                |              |
| Period                                    | Age Group | Smoking Group | N    | %     | Ever Quit (N) | Ever Quit % | Mean Yrs Quit | Short Term (n) | Short Term % |
| 30                                        | 60-64     | Never Any     | 4724 | 43.28 |               |             |               |                |              |
| 30                                        | 60-64     | CC            | 10   | 0.09  | 0             | 0.00        |               |                |              |
| 30                                        | 60-64     | Ecig          | 1614 | 14.79 |               |             |               |                |              |
| 30                                        | 60-64     | Dual          | 0    | 0.00  |               |             |               |                |              |
| 30                                        | 60-64     | Former        | 4568 | 41.85 |               |             | 22.87         | 203            | 4.44         |
| Year of Follow-up: 2020, Age Group: 65-69 |           |               |      |       |               |             |               |                |              |
| Period                                    | Age Group | Smoking Group | N    | %     | Ever Quit (N) | Ever Quit % | Mean Yrs Quit | Short Term (n) | Short Term % |
| 30                                        | 65-69     | Never Any     | 3941 | 39.85 |               |             |               |                |              |
| 30                                        | 65-69     | CC            | 13   | 0.13  | 0             | 0.00        |               |                |              |
| 30                                        | 65-69     | Ecig          | 1039 | 10.51 |               |             |               |                |              |
| 30                                        | 65-69     | Dual          | 0    | 0.00  |               |             |               |                |              |
| 30                                        | 65-69     | Former        | 4896 | 49.51 |               |             | 26.05         | 145            | 2.96         |
| Year of Follow-up: 2020, Age Group: 70-74 |           |               |      |       |               |             |               |                |              |
| Period                                    | Age Group | Smoking Group | N    | %     | Ever Quit (N) | Ever Quit % | Mean Yrs Quit | Short Term (n) | Short Term % |

**Results for PHIM for Run 1 (Sensitivity\_Analysis\_1.RTF)**

|                                              |           |               |       |       |               |             |               |                |              |
|----------------------------------------------|-----------|---------------|-------|-------|---------------|-------------|---------------|----------------|--------------|
| 30                                           | 70-74     | Never Any     | 2912  | 33.65 |               |             |               |                |              |
| 30                                           | 70-74     | CC            | 18    | 0.21  | 0             | 0.00        |               |                |              |
| 30                                           | 70-74     | Ecig          | 770   | 8.90  |               |             |               |                |              |
| 30                                           | 70-74     | Dual          | 0     | 0.00  |               |             |               |                |              |
| 30                                           | 70-74     | Former        | 4955  | 57.25 |               |             | 28.45         | 93             | 1.88         |
| Year of Follow-up: 2020, Age Group: 75-79    |           |               |       |       |               |             |               |                |              |
| Period                                       | Age Group | Smoking Group | N     | %     | Ever Quit (N) | Ever Quit % | Mean Yrs Quit | Short Term (n) | Short Term % |
| 30                                           | 75-79     | Never Any     | 1919  | 29.46 |               |             |               |                |              |
| 30                                           | 75-79     | CC            | 15    | 0.23  | 0             | 0.00        |               |                |              |
| 30                                           | 75-79     | Ecig          | 479   | 7.35  |               |             |               |                |              |
| 30                                           | 75-79     | Dual          | 0     | 0.00  |               |             |               |                |              |
| 30                                           | 75-79     | Former        | 4102  | 62.96 |               |             | 31.39         | 51             | 1.24         |
| Year of Follow-up: 2025, Age Group: All Ages |           |               |       |       |               |             |               |                |              |
| Period                                       | Age Group | Smoking Group | N     | %     | Ever Quit (N) | Ever Quit % | Mean Yrs Quit | Short Term (n) | Short Term % |
| 35                                           | All Ages  | Never Any     | 31217 | 46.03 |               |             |               |                |              |
| 35                                           | All Ages  | CC            | 38    | 0.06  | 0             | 0.00        |               |                |              |
| 35                                           | All Ages  | Ecig          | 8864  | 13.07 |               |             |               |                |              |
| 35                                           | All Ages  | Dual          | 0     | 0.00  |               |             |               |                |              |
| 35                                           | All Ages  | Former        | 27706 | 40.85 |               |             | 25.87         | 785            | 2.83         |
| Year of Follow-up: 2025, Age Group: 18-19    |           |               |       |       |               |             |               |                |              |
| Period                                       | Age Group | Smoking Group | N     | %     | Ever Quit (N) | Ever Quit % | Mean Yrs Quit | Short Term (n) | Short Term % |
| 35                                           | 18-19     | Never Any     | 0     | .     |               |             |               |                |              |
| 35                                           | 18-19     | CC            | 0     | .     | 0             | .           |               |                |              |
| 35                                           | 18-19     | Ecig          | 0     | .     |               |             |               |                |              |
| 35                                           | 18-19     | Dual          | 0     | .     |               |             |               |                |              |
| 35                                           | 18-19     | Former        | 0     | .     |               |             | .             | 0              | .            |
| Year of Follow-up: 2025, Age Group: 20-24    |           |               |       |       |               |             |               |                |              |
| Period                                       | Age Group | Smoking Group | N     | %     | Ever Quit (N) | Ever Quit % | Mean Yrs Quit | Short Term (n) | Short Term % |
| 35                                           | 20-24     | Never Any     | 0     | .     |               |             |               |                |              |
| 35                                           | 20-24     | CC            | 0     | .     | 0             | .           |               |                |              |
| 35                                           | 20-24     | Ecig          | 0     | .     |               |             |               |                |              |
| 35                                           | 20-24     | Dual          | 0     | .     |               |             |               |                |              |
| 35                                           | 20-24     | Former        | 0     | .     |               |             | .             | 0              | .            |
| Year of Follow-up: 2025, Age Group: 25-29    |           |               |       |       |               |             |               |                |              |
| Period                                       | Age Group | Smoking Group | N     | %     | Ever Quit (N) | Ever Quit % | Mean Yrs Quit | Short Term (n) | Short Term % |
| 35                                           | 25-29     | Never Any     | 0     | .     |               |             |               |                |              |
| 35                                           | 25-29     | CC            | 0     | .     | 0             | .           |               |                |              |
| 35                                           | 25-29     | Ecig          | 0     | .     |               |             |               |                |              |
| 35                                           | 25-29     | Dual          | 0     | .     |               |             |               |                |              |
| 35                                           | 25-29     | Former        | 0     | .     |               |             | .             | 0              | .            |
| Year of Follow-up: 2025, Age Group: 30-34    |           |               |       |       |               |             |               |                |              |
| Period                                       | Age Group | Smoking Group | N     | %     | Ever Quit (N) | Ever Quit % | Mean Yrs Quit | Short Term (n) | Short Term % |
| 35                                           | 30-34     | Never Any     | 0     | .     |               |             |               |                |              |
| 35                                           | 30-34     | CC            | 0     | .     | 0             | .           |               |                |              |
| 35                                           | 30-34     | Ecig          | 0     | .     |               |             |               |                |              |
| 35                                           | 30-34     | Dual          | 0     | .     |               |             |               |                |              |
| 35                                           | 30-34     | Former        | 0     | .     |               |             | .             | 0              | .            |
| Year of Follow-up: 2025, Age Group: 35-39    |           |               |       |       |               |             |               |                |              |
| Period                                       | Age Group | Smoking Group | N     | %     | Ever Quit (N) | Ever Quit % | Mean Yrs Quit | Short Term (n) | Short Term % |
| 35                                           | 35-39     | Never Any     | 0     | .     |               |             |               |                |              |
| 35                                           | 35-39     | CC            | 0     | .     | 0             | .           |               |                |              |
| 35                                           | 35-39     | Ecig          | 0     | .     |               |             |               |                |              |
| 35                                           | 35-39     | Dual          | 0     | .     |               |             |               |                |              |
| 35                                           | 35-39     | Former        | 0     | .     |               |             | .             | 0              | .            |
| Year of Follow-up: 2025, Age Group: 40-44    |           |               |       |       |               |             |               |                |              |
| Period                                       | Age Group | Smoking Group | N     | %     | Ever Quit (N) | Ever Quit % | Mean Yrs Quit | Short Term (n) | Short Term % |
| 35                                           | 40-44     | Never Any     | 0     | .     |               |             |               |                |              |
| 35                                           | 40-44     | CC            | 0     | .     | 0             | .           |               |                |              |
| 35                                           | 40-44     | Ecig          | 0     | .     |               |             |               |                |              |
| 35                                           | 40-44     | Dual          | 0     | .     |               |             |               |                |              |
| 35                                           | 40-44     | Former        | 0     | .     |               |             | .             | 0              | .            |
| Year of Follow-up: 2025, Age Group: 45-49    |           |               |       |       |               |             |               |                |              |
| Period                                       | Age Group | Smoking Group | N     | %     | Ever Quit (N) | Ever Quit % | Mean Yrs Quit | Short Term (n) | Short Term % |
| 35                                           | 45-49     | Never Any     | 4489  | 50.75 |               |             |               |                |              |
| 35                                           | 45-49     | CC            | 7     | 0.08  | 0             | 0.00        |               |                |              |
| 35                                           | 45-49     | Ecig          | 1541  | 17.42 |               |             |               |                |              |
| 35                                           | 45-49     | Dual          | 0     | 0.00  |               |             |               |                |              |
| 35                                           | 45-49     | Former        | 2808  | 31.75 |               |             | 18.76         | 60             | 2.14         |
| Year of Follow-up: 2025, Age Group: 50-54    |           |               |       |       |               |             |               |                |              |

**Results for PHIM for Run 1 (Sensitivity\_Analysis\_1.RTF)**

| Period                                       | Age Group | Smoking Group | N     | %     | Ever Quit (N) | Ever Quit % | Mean Yrs Quit | Short Term (n) | Short Term % |
|----------------------------------------------|-----------|---------------|-------|-------|---------------|-------------|---------------|----------------|--------------|
| 35                                           | 50-54     | Never Any     | 4991  | 55.21 |               |             |               |                |              |
| 35                                           | 50-54     | CC            | 3     | 0.03  | 0             | 0.00        |               |                |              |
| 35                                           | 50-54     | Ecig          | 1554  | 17.19 |               |             |               |                |              |
| 35                                           | 50-54     | Dual          | 0     | 0.00  |               |             |               |                |              |
| 35                                           | 50-54     | Former        | 2492  | 27.57 |               |             | 20.44         | 75             | 3.01         |
| Year of Follow-up: 2025, Age Group: 55-59    |           |               |       |       |               |             |               |                |              |
| Period                                       | Age Group | Smoking Group | N     | %     | Ever Quit (N) | Ever Quit % | Mean Yrs Quit | Short Term (n) | Short Term % |
| 35                                           | 55-59     | Never Any     | 5163  | 52.60 |               |             |               |                |              |
| 35                                           | 55-59     | CC            | 0     | 0.00  | 0             | 0.00        |               |                |              |
| 35                                           | 55-59     | Ecig          | 1664  | 16.95 |               |             |               |                |              |
| 35                                           | 55-59     | Dual          | 0     | 0.00  |               |             |               |                |              |
| 35                                           | 55-59     | Former        | 2989  | 30.45 |               |             | 22.76         | 155            | 5.19         |
| Year of Follow-up: 2025, Age Group: 60-64    |           |               |       |       |               |             |               |                |              |
| Period                                       | Age Group | Smoking Group | N     | %     | Ever Quit (N) | Ever Quit % | Mean Yrs Quit | Short Term (n) | Short Term % |
| 35                                           | 60-64     | Never Any     | 4997  | 46.86 |               |             |               |                |              |
| 35                                           | 60-64     | CC            | 9     | 0.08  | 0             | 0.00        |               |                |              |
| 35                                           | 60-64     | Ecig          | 1532  | 14.37 |               |             |               |                |              |
| 35                                           | 60-64     | Dual          | 0     | 0.00  |               |             |               |                |              |
| 35                                           | 60-64     | Former        | 4126  | 38.69 |               |             | 23.79         | 186            | 4.51         |
| Year of Follow-up: 2025, Age Group: 65-69    |           |               |       |       |               |             |               |                |              |
| Period                                       | Age Group | Smoking Group | N     | %     | Ever Quit (N) | Ever Quit % | Mean Yrs Quit | Short Term (n) | Short Term % |
| 35                                           | 65-69     | Never Any     | 4724  | 43.28 |               |             |               |                |              |
| 35                                           | 65-69     | CC            | 5     | 0.05  | 0             | 0.00        |               |                |              |
| 35                                           | 65-69     | Ecig          | 1169  | 10.71 |               |             |               |                |              |
| 35                                           | 65-69     | Dual          | 0     | 0.00  |               |             |               |                |              |
| 35                                           | 65-69     | Former        | 5018  | 45.97 |               |             | 25.57         | 158            | 3.15         |
| Year of Follow-up: 2025, Age Group: 70-74    |           |               |       |       |               |             |               |                |              |
| Period                                       | Age Group | Smoking Group | N     | %     | Ever Quit (N) | Ever Quit % | Mean Yrs Quit | Short Term (n) | Short Term % |
| 35                                           | 70-74     | Never Any     | 3941  | 39.85 |               |             |               |                |              |
| 35                                           | 70-74     | CC            | 5     | 0.05  | 0             | 0.00        |               |                |              |
| 35                                           | 70-74     | Ecig          | 811   | 8.20  |               |             |               |                |              |
| 35                                           | 70-74     | Dual          | 0     | 0.00  |               |             |               |                |              |
| 35                                           | 70-74     | Former        | 5132  | 51.90 |               |             | 29.73         | 79             | 1.54         |
| Year of Follow-up: 2025, Age Group: 75-79    |           |               |       |       |               |             |               |                |              |
| Period                                       | Age Group | Smoking Group | N     | %     | Ever Quit (N) | Ever Quit % | Mean Yrs Quit | Short Term (n) | Short Term % |
| 35                                           | 75-79     | Never Any     | 2912  | 33.65 |               |             |               |                |              |
| 35                                           | 75-79     | CC            | 9     | 0.10  | 0             | 0.00        |               |                |              |
| 35                                           | 75-79     | Ecig          | 593   | 6.85  |               |             |               |                |              |
| 35                                           | 75-79     | Dual          | 0     | 0.00  |               |             |               |                |              |
| 35                                           | 75-79     | Former        | 5141  | 59.40 |               |             | 32.31         | 72             | 1.40         |
| Year of Follow-up: 2030, Age Group: All Ages |           |               |       |       |               |             |               |                |              |
| Period                                       | Age Group | Smoking Group | N     | %     | Ever Quit (N) | Ever Quit % | Mean Yrs Quit | Short Term (n) | Short Term % |
| 40                                           | All Ages  | Never Any     | 28305 | 47.84 |               |             |               |                |              |
| 40                                           | All Ages  | CC            | 15    | 0.03  | 0             | 0.00        |               |                |              |
| 40                                           | All Ages  | Ecig          | 6535  | 11.04 |               |             |               |                |              |
| 40                                           | All Ages  | Dual          | 0     | 0.00  |               |             |               |                |              |
| 40                                           | All Ages  | Former        | 24315 | 41.09 |               |             | 27.43         | 691            | 2.84         |
| Year of Follow-up: 2030, Age Group: 18-19    |           |               |       |       |               |             |               |                |              |
| Period                                       | Age Group | Smoking Group | N     | %     | Ever Quit (N) | Ever Quit % | Mean Yrs Quit | Short Term (n) | Short Term % |
| 40                                           | 18-19     | Never Any     | 0     | .     |               |             |               |                |              |
| 40                                           | 18-19     | CC            | 0     | .     | 0             | .           |               |                |              |
| 40                                           | 18-19     | Ecig          | 0     | .     |               |             |               |                |              |
| 40                                           | 18-19     | Dual          | 0     | .     |               |             |               |                |              |
| 40                                           | 18-19     | Former        | 0     | .     |               |             | .             | 0              | .            |
| Year of Follow-up: 2030, Age Group: 20-24    |           |               |       |       |               |             |               |                |              |
| Period                                       | Age Group | Smoking Group | N     | %     | Ever Quit (N) | Ever Quit % | Mean Yrs Quit | Short Term (n) | Short Term % |
| 40                                           | 20-24     | Never Any     | 0     | .     |               |             |               |                |              |
| 40                                           | 20-24     | CC            | 0     | .     | 0             | .           |               |                |              |
| 40                                           | 20-24     | Ecig          | 0     | .     |               |             |               |                |              |
| 40                                           | 20-24     | Dual          | 0     | .     |               |             |               |                |              |
| 40                                           | 20-24     | Former        | 0     | .     |               |             | .             | 0              | .            |
| Year of Follow-up: 2030, Age Group: 25-29    |           |               |       |       |               |             |               |                |              |
| Period                                       | Age Group | Smoking Group | N     | %     | Ever Quit (N) | Ever Quit % | Mean Yrs Quit | Short Term (n) | Short Term % |
| 40                                           | 25-29     | Never Any     | 0     | .     |               |             |               |                |              |
| 40                                           | 25-29     | CC            | 0     | .     | 0             | .           |               |                |              |
| 40                                           | 25-29     | Ecig          | 0     | .     |               |             |               |                |              |
| 40                                           | 25-29     | Dual          | 0     | .     |               |             |               |                |              |

### Results for PHIM for Run 1 (Sensitivity\_Analysis\_1.RTF)

| Year of Follow-up: 2030, Age Group: 30-34 | Period | Age Group | Smoking Group | N    | %     | Ever Quit (N) | Ever Quit % | Mean Yrs Quit | Short Term (n) | Short Term % |
|-------------------------------------------|--------|-----------|---------------|------|-------|---------------|-------------|---------------|----------------|--------------|
| Year of Follow-up: 2030, Age Group: 30-34 |        |           |               |      |       |               |             |               |                |              |
| 40                                        | 25-29  | Former    |               | 0    | .     |               |             |               | 0              | .            |
| 40                                        | 30-34  | Never Any |               | 0    | .     |               |             |               |                |              |
| 40                                        | 30-34  | CC        |               | 0    | .     | 0             | .           |               |                |              |
| 40                                        | 30-34  | Ecig      |               | 0    | .     |               |             |               |                |              |
| 40                                        | 30-34  | Dual      |               | 0    | .     |               |             |               |                |              |
| 40                                        | 30-34  | Former    |               | 0    | .     |               |             |               | 0              | .            |
| Year of Follow-up: 2030, Age Group: 35-39 |        |           |               |      |       |               |             |               |                |              |
| 40                                        | 35-39  | Never Any |               | 0    | .     |               |             |               |                |              |
| 40                                        | 35-39  | CC        |               | 0    | .     | 0             | .           |               |                |              |
| 40                                        | 35-39  | Ecig      |               | 0    | .     |               |             |               |                |              |
| 40                                        | 35-39  | Dual      |               | 0    | .     |               |             |               |                |              |
| 40                                        | 35-39  | Former    |               | 0    | .     |               |             |               | 0              | .            |
| Year of Follow-up: 2030, Age Group: 40-44 |        |           |               |      |       |               |             |               |                |              |
| 40                                        | 40-44  | Never Any |               | 0    | .     |               |             |               |                |              |
| 40                                        | 40-44  | CC        |               | 0    | .     | 0             | .           |               |                |              |
| 40                                        | 40-44  | Ecig      |               | 0    | .     |               |             |               |                |              |
| 40                                        | 40-44  | Dual      |               | 0    | .     |               |             |               |                |              |
| 40                                        | 40-44  | Former    |               | 0    | .     |               |             |               | 0              | .            |
| Year of Follow-up: 2030, Age Group: 45-49 |        |           |               |      |       |               |             |               |                |              |
| 40                                        | 45-49  | Never Any |               | 0    | .     |               |             |               |                |              |
| 40                                        | 45-49  | CC        |               | 0    | .     | 0             | .           |               |                |              |
| 40                                        | 45-49  | Ecig      |               | 0    | .     |               |             |               |                |              |
| 40                                        | 45-49  | Dual      |               | 0    | .     |               |             |               |                |              |
| 40                                        | 45-49  | Former    |               | 0    | .     |               |             |               | 0              | .            |
| Year of Follow-up: 2030, Age Group: 50-54 |        |           |               |      |       |               |             |               |                |              |
| 40                                        | 50-54  | Never Any |               | 4489 | 50.75 |               |             |               |                |              |
| 40                                        | 50-54  | CC        |               | 3    | 0.03  | 0             | 0.00        |               |                |              |
| 40                                        | 50-54  | Ecig      |               | 1392 | 15.74 |               |             |               |                |              |
| 40                                        | 50-54  | Dual      |               | 0    | 0.00  |               |             |               |                |              |
| 40                                        | 50-54  | Former    |               | 2961 | 33.48 |               |             | 22.61         | 80             | 2.70         |
| Year of Follow-up: 2030, Age Group: 55-59 |        |           |               |      |       |               |             |               |                |              |
| 40                                        | 55-59  | Never Any |               | 4991 | 55.21 |               |             |               |                |              |
| 40                                        | 55-59  | CC        |               | 2    | 0.02  | 0             | 0.00        |               |                |              |
| 40                                        | 55-59  | Ecig      |               | 1291 | 14.28 |               |             |               |                |              |
| 40                                        | 55-59  | Dual      |               | 0    | 0.00  |               |             |               |                |              |
| 40                                        | 55-59  | Former    |               | 2756 | 30.49 |               |             | 23.19         | 114            | 4.14         |
| Year of Follow-up: 2030, Age Group: 60-64 |        |           |               |      |       |               |             |               |                |              |
| 40                                        | 60-64  | Never Any |               | 5163 | 52.60 |               |             |               |                |              |
| 40                                        | 60-64  | CC        |               | 0    | 0.00  | 0             | 0.00        |               |                |              |
| 40                                        | 60-64  | Ecig      |               | 1238 | 12.61 |               |             |               |                |              |
| 40                                        | 60-64  | Dual      |               | 0    | 0.00  |               |             |               |                |              |
| 40                                        | 60-64  | Former    |               | 3415 | 34.79 |               |             | 24.53         | 183            | 5.36         |
| Year of Follow-up: 2030, Age Group: 65-69 |        |           |               |      |       |               |             |               |                |              |
| 40                                        | 65-69  | Never Any |               | 4997 | 46.86 |               |             |               |                |              |
| 40                                        | 65-69  | CC        |               | 4    | 0.04  | 0             | 0.00        |               |                |              |
| 40                                        | 65-69  | Ecig      |               | 1119 | 10.49 |               |             |               |                |              |
| 40                                        | 65-69  | Dual      |               | 0    | 0.00  |               |             |               |                |              |
| 40                                        | 65-69  | Former    |               | 4544 | 42.61 |               |             | 26.35         | 136            | 2.99         |
| Year of Follow-up: 2030, Age Group: 70-74 |        |           |               |      |       |               |             |               |                |              |
| 40                                        | 70-74  | Never Any |               | 4724 | 43.28 |               |             |               |                |              |
| 40                                        | 70-74  | CC        |               | 3    | 0.03  | 0             | 0.00        |               |                |              |
| 40                                        | 70-74  | Ecig      |               | 880  | 8.06  |               |             |               |                |              |
| 40                                        | 70-74  | Dual      |               | 0    | 0.00  |               |             |               |                |              |
| 40                                        | 70-74  | Former    |               | 5309 | 48.64 |               |             | 29.01         | 95             | 1.79         |
| Year of Follow-up: 2030, Age Group: 75-79 |        |           |               |      |       |               |             |               |                |              |
| 40                                        | 75-79  | Never Any |               | 3941 | 39.85 |               |             |               |                |              |
| 40                                        | 75-79  | CC        |               | 3    | 0.03  | 0             | 0.00        |               |                |              |

**Results for PHIM for Run 1 (Sensitivity\_Analysis\_1.RTF)**

|                                              |           |               |       |       |               |             |               |                |              |
|----------------------------------------------|-----------|---------------|-------|-------|---------------|-------------|---------------|----------------|--------------|
| 40                                           | 75-79     | Ecig          | 615   | 6.22  |               |             |               |                |              |
| 40                                           | 75-79     | Dual          | 0     | 0.00  |               |             |               |                |              |
| 40                                           | 75-79     | Former        | 5330  | 53.90 |               |             | 33.51         | 83             | 1.56         |
| Year of Follow-up: 2035, Age Group: All Ages |           |               |       |       |               |             |               |                |              |
| Period                                       | Age Group | Smoking Group | N     | %     | Ever Quit (N) | Ever Quit % | Mean Yrs Quit | Short Term (n) | Short Term % |
| 45                                           | All Ages  | Never Any     | 24364 | 49.44 |               |             |               |                |              |
| 45                                           | All Ages  | CC            | 6     | 0.01  | 0             | 0.00        |               |                |              |
| 45                                           | All Ages  | Ecig          | 4578  | 9.29  |               |             |               |                |              |
| 45                                           | All Ages  | Dual          | 0     | 0.00  |               |             |               |                |              |
| 45                                           | All Ages  | Former        | 20333 | 41.26 |               |             | 28.82         | 538            | 2.65         |
| Year of Follow-up: 2035, Age Group: 18-19    |           |               |       |       |               |             |               |                |              |
| Period                                       | Age Group | Smoking Group | N     | %     | Ever Quit (N) | Ever Quit % | Mean Yrs Quit | Short Term (n) | Short Term % |
| 45                                           | 18-19     | Never Any     | 0     | .     |               |             |               |                |              |
| 45                                           | 18-19     | CC            | 0     | .     | 0             | .           |               |                |              |
| 45                                           | 18-19     | Ecig          | 0     | .     |               |             |               |                |              |
| 45                                           | 18-19     | Dual          | 0     | .     |               |             |               |                |              |
| 45                                           | 18-19     | Former        | 0     | .     |               |             | .             | 0              | .            |
| Year of Follow-up: 2035, Age Group: 20-24    |           |               |       |       |               |             |               |                |              |
| Period                                       | Age Group | Smoking Group | N     | %     | Ever Quit (N) | Ever Quit % | Mean Yrs Quit | Short Term (n) | Short Term % |
| 45                                           | 20-24     | Never Any     | 0     | .     |               |             |               |                |              |
| 45                                           | 20-24     | CC            | 0     | .     | 0             | .           |               |                |              |
| 45                                           | 20-24     | Ecig          | 0     | .     |               |             |               |                |              |
| 45                                           | 20-24     | Dual          | 0     | .     |               |             |               |                |              |
| 45                                           | 20-24     | Former        | 0     | .     |               |             | .             | 0              | .            |
| Year of Follow-up: 2035, Age Group: 25-29    |           |               |       |       |               |             |               |                |              |
| Period                                       | Age Group | Smoking Group | N     | %     | Ever Quit (N) | Ever Quit % | Mean Yrs Quit | Short Term (n) | Short Term % |
| 45                                           | 25-29     | Never Any     | 0     | .     |               |             |               |                |              |
| 45                                           | 25-29     | CC            | 0     | .     | 0             | .           |               |                |              |
| 45                                           | 25-29     | Ecig          | 0     | .     |               |             |               |                |              |
| 45                                           | 25-29     | Dual          | 0     | .     |               |             |               |                |              |
| 45                                           | 25-29     | Former        | 0     | .     |               |             | .             | 0              | .            |
| Year of Follow-up: 2035, Age Group: 30-34    |           |               |       |       |               |             |               |                |              |
| Period                                       | Age Group | Smoking Group | N     | %     | Ever Quit (N) | Ever Quit % | Mean Yrs Quit | Short Term (n) | Short Term % |
| 45                                           | 30-34     | Never Any     | 0     | .     |               |             |               |                |              |
| 45                                           | 30-34     | CC            | 0     | .     | 0             | .           |               |                |              |
| 45                                           | 30-34     | Ecig          | 0     | .     |               |             |               |                |              |
| 45                                           | 30-34     | Dual          | 0     | .     |               |             |               |                |              |
| 45                                           | 30-34     | Former        | 0     | .     |               |             | .             | 0              | .            |
| Year of Follow-up: 2035, Age Group: 35-39    |           |               |       |       |               |             |               |                |              |
| Period                                       | Age Group | Smoking Group | N     | %     | Ever Quit (N) | Ever Quit % | Mean Yrs Quit | Short Term (n) | Short Term % |
| 45                                           | 35-39     | Never Any     | 0     | .     |               |             |               |                |              |
| 45                                           | 35-39     | CC            | 0     | .     | 0             | .           |               |                |              |
| 45                                           | 35-39     | Ecig          | 0     | .     |               |             |               |                |              |
| 45                                           | 35-39     | Dual          | 0     | .     |               |             |               |                |              |
| 45                                           | 35-39     | Former        | 0     | .     |               |             | .             | 0              | .            |
| Year of Follow-up: 2035, Age Group: 40-44    |           |               |       |       |               |             |               |                |              |
| Period                                       | Age Group | Smoking Group | N     | %     | Ever Quit (N) | Ever Quit % | Mean Yrs Quit | Short Term (n) | Short Term % |
| 45                                           | 40-44     | Never Any     | 0     | .     |               |             |               |                |              |
| 45                                           | 40-44     | CC            | 0     | .     | 0             | .           |               |                |              |
| 45                                           | 40-44     | Ecig          | 0     | .     |               |             |               |                |              |
| 45                                           | 40-44     | Dual          | 0     | .     |               |             |               |                |              |
| 45                                           | 40-44     | Former        | 0     | .     |               |             | .             | 0              | .            |
| Year of Follow-up: 2035, Age Group: 45-49    |           |               |       |       |               |             |               |                |              |
| Period                                       | Age Group | Smoking Group | N     | %     | Ever Quit (N) | Ever Quit % | Mean Yrs Quit | Short Term (n) | Short Term % |
| 45                                           | 45-49     | Never Any     | 0     | .     |               |             |               |                |              |
| 45                                           | 45-49     | CC            | 0     | .     | 0             | .           |               |                |              |
| 45                                           | 45-49     | Ecig          | 0     | .     |               |             |               |                |              |
| 45                                           | 45-49     | Dual          | 0     | .     |               |             |               |                |              |
| 45                                           | 45-49     | Former        | 0     | .     |               |             | .             | 0              | .            |
| Year of Follow-up: 2035, Age Group: 50-54    |           |               |       |       |               |             |               |                |              |
| Period                                       | Age Group | Smoking Group | N     | %     | Ever Quit (N) | Ever Quit % | Mean Yrs Quit | Short Term (n) | Short Term % |
| 45                                           | 50-54     | Never Any     | 0     | .     |               |             |               |                |              |
| 45                                           | 50-54     | CC            | 0     | .     | 0             | .           |               |                |              |
| 45                                           | 50-54     | Ecig          | 0     | .     |               |             |               |                |              |
| 45                                           | 50-54     | Dual          | 0     | .     |               |             |               |                |              |
| 45                                           | 50-54     | Former        | 0     | .     |               |             | .             | 0              | .            |
| Year of Follow-up: 2035, Age Group: 55-59    |           |               |       |       |               |             |               |                |              |
| Period                                       | Age Group | Smoking Group | N     | %     | Ever Quit (N) | Ever Quit % | Mean Yrs Quit | Short Term (n) | Short Term % |

**Results for PHIM for Run 1 (Sensitivity\_Analysis\_1.RTF)**

|                                              |           |               |       |       |               |             |               |                |              |
|----------------------------------------------|-----------|---------------|-------|-------|---------------|-------------|---------------|----------------|--------------|
| 45                                           | 55-59     | Never Any     | 4489  | 50.75 |               |             |               |                |              |
| 45                                           | 55-59     | CC            | 2     | 0.02  | 0             | 0.00        |               |                |              |
| 45                                           | 55-59     | Ecig          | 1171  | 13.24 |               |             |               |                |              |
| 45                                           | 55-59     | Dual          | 0     | 0.00  |               |             |               |                |              |
| 45                                           | 55-59     | Former        | 3183  | 35.99 |               |             | 25.82         | 100            | 3.14         |
| Year of Follow-up: 2035, Age Group: 60-64    |           |               |       |       |               |             |               |                |              |
| Period                                       | Age Group | Smoking Group | N     | %     | Ever Quit (N) | Ever Quit % | Mean Yrs Quit | Short Term (n) | Short Term % |
| 45                                           | 60-64     | Never Any     | 4991  | 55.21 |               |             |               |                |              |
| 45                                           | 60-64     | CC            | 0     | 0.00  | 0             | 0.00        |               |                |              |
| 45                                           | 60-64     | Ecig          | 1020  | 11.28 |               |             |               |                |              |
| 45                                           | 60-64     | Dual          | 0     | 0.00  |               |             |               |                |              |
| 45                                           | 60-64     | Former        | 3029  | 33.51 |               |             | 25.81         | 129            | 4.26         |
| Year of Follow-up: 2035, Age Group: 65-69    |           |               |       |       |               |             |               |                |              |
| Period                                       | Age Group | Smoking Group | N     | %     | Ever Quit (N) | Ever Quit % | Mean Yrs Quit | Short Term (n) | Short Term % |
| 45                                           | 65-69     | Never Any     | 5163  | 52.60 |               |             |               |                |              |
| 45                                           | 65-69     | CC            | 0     | 0.00  | 0             | 0.00        |               |                |              |
| 45                                           | 65-69     | Ecig          | 902   | 9.19  |               |             |               |                |              |
| 45                                           | 65-69     | Dual          | 0     | 0.00  |               |             |               |                |              |
| 45                                           | 65-69     | Former        | 3751  | 38.21 |               |             | 27.09         | 106            | 2.83         |
| Year of Follow-up: 2035, Age Group: 70-74    |           |               |       |       |               |             |               |                |              |
| Period                                       | Age Group | Smoking Group | N     | %     | Ever Quit (N) | Ever Quit % | Mean Yrs Quit | Short Term (n) | Short Term % |
| 45                                           | 70-74     | Never Any     | 4997  | 46.86 |               |             |               |                |              |
| 45                                           | 70-74     | CC            | 1     | 0.01  | 0             | 0.00        |               |                |              |
| 45                                           | 70-74     | Ecig          | 850   | 7.97  |               |             |               |                |              |
| 45                                           | 70-74     | Dual          | 0     | 0.00  |               |             |               |                |              |
| 45                                           | 70-74     | Former        | 4816  | 45.16 |               |             | 29.70         | 104            | 2.16         |
| Year of Follow-up: 2035, Age Group: 75-79    |           |               |       |       |               |             |               |                |              |
| Period                                       | Age Group | Smoking Group | N     | %     | Ever Quit (N) | Ever Quit % | Mean Yrs Quit | Short Term (n) | Short Term % |
| 45                                           | 75-79     | Never Any     | 4724  | 43.28 |               |             |               |                |              |
| 45                                           | 75-79     | CC            | 3     | 0.03  | 0             | 0.00        |               |                |              |
| 45                                           | 75-79     | Ecig          | 635   | 5.82  |               |             |               |                |              |
| 45                                           | 75-79     | Dual          | 0     | 0.00  |               |             |               |                |              |
| 45                                           | 75-79     | Former        | 5554  | 50.88 |               |             | 32.60         | 99             | 1.78         |
| Year of Follow-up: 2040, Age Group: All Ages |           |               |       |       |               |             |               |                |              |
| Period                                       | Age Group | Smoking Group | N     | %     | Ever Quit (N) | Ever Quit % | Mean Yrs Quit | Short Term (n) | Short Term % |
| 50                                           | All Ages  | Never Any     | 19640 | 51.19 |               |             |               |                |              |
| 50                                           | All Ages  | CC            | 1     | 0.00  | 0             | 0.00        |               |                |              |
| 50                                           | All Ages  | Ecig          | 2868  | 7.48  |               |             |               |                |              |
| 50                                           | All Ages  | Dual          | 0     | 0.00  |               |             |               |                |              |
| 50                                           | All Ages  | Former        | 15856 | 41.33 |               |             | 30.34         | 408            | 2.57         |
| Year of Follow-up: 2040, Age Group: 18-19    |           |               |       |       |               |             |               |                |              |
| Period                                       | Age Group | Smoking Group | N     | %     | Ever Quit (N) | Ever Quit % | Mean Yrs Quit | Short Term (n) | Short Term % |
| 50                                           | 18-19     | Never Any     | 0     | .     |               |             |               |                |              |
| 50                                           | 18-19     | CC            | 0     | .     | 0             | .           |               |                |              |
| 50                                           | 18-19     | Ecig          | 0     | .     |               |             |               |                |              |
| 50                                           | 18-19     | Dual          | 0     | .     |               |             |               |                |              |
| 50                                           | 18-19     | Former        | 0     | .     |               |             | .             | 0              | .            |
| Year of Follow-up: 2040, Age Group: 20-24    |           |               |       |       |               |             |               |                |              |
| Period                                       | Age Group | Smoking Group | N     | %     | Ever Quit (N) | Ever Quit % | Mean Yrs Quit | Short Term (n) | Short Term % |
| 50                                           | 20-24     | Never Any     | 0     | .     |               |             |               |                |              |
| 50                                           | 20-24     | CC            | 0     | .     | 0             | .           |               |                |              |
| 50                                           | 20-24     | Ecig          | 0     | .     |               |             |               |                |              |
| 50                                           | 20-24     | Dual          | 0     | .     |               |             |               |                |              |
| 50                                           | 20-24     | Former        | 0     | .     |               |             | .             | 0              | .            |
| Year of Follow-up: 2040, Age Group: 25-29    |           |               |       |       |               |             |               |                |              |
| Period                                       | Age Group | Smoking Group | N     | %     | Ever Quit (N) | Ever Quit % | Mean Yrs Quit | Short Term (n) | Short Term % |
| 50                                           | 25-29     | Never Any     | 0     | .     |               |             |               |                |              |
| 50                                           | 25-29     | CC            | 0     | .     | 0             | .           |               |                |              |
| 50                                           | 25-29     | Ecig          | 0     | .     |               |             |               |                |              |
| 50                                           | 25-29     | Dual          | 0     | .     |               |             |               |                |              |
| 50                                           | 25-29     | Former        | 0     | .     |               |             | .             | 0              | .            |
| Year of Follow-up: 2040, Age Group: 30-34    |           |               |       |       |               |             |               |                |              |
| Period                                       | Age Group | Smoking Group | N     | %     | Ever Quit (N) | Ever Quit % | Mean Yrs Quit | Short Term (n) | Short Term % |
| 50                                           | 30-34     | Never Any     | 0     | .     |               |             |               |                |              |
| 50                                           | 30-34     | CC            | 0     | .     | 0             | .           |               |                |              |
| 50                                           | 30-34     | Ecig          | 0     | .     |               |             |               |                |              |
| 50                                           | 30-34     | Dual          | 0     | .     |               |             |               |                |              |
| 50                                           | 30-34     | Former        | 0     | .     |               |             | .             | 0              | .            |
| Year of Follow-up: 2040, Age Group: 35-39    |           |               |       |       |               |             |               |                |              |



**Results for PHIM for Run 1 (Sensitivity\_Analysis\_1.RTF)**

| Period                                    | Age Group | Smoking Group | N    | %     | Ever Quit (N) | Ever Quit % | Mean Yrs Quit | Short Term (n) | Short Term % |
|-------------------------------------------|-----------|---------------|------|-------|---------------|-------------|---------------|----------------|--------------|
| 50                                        | 35-39     | Never Any     | 0    | .     |               |             |               |                |              |
| 50                                        | 35-39     | CC            | 0    | .     | 0             | .           |               |                |              |
| 50                                        | 35-39     | Ecig          | 0    | .     |               |             |               |                |              |
| 50                                        | 35-39     | Dual          | 0    | .     |               |             |               |                |              |
| 50                                        | 35-39     | Former        | 0    | .     |               |             | .             | 0              | .            |
| Year of Follow-up: 2040, Age Group: 40-44 |           |               |      |       |               |             |               |                |              |
| Period                                    | Age Group | Smoking Group | N    | %     | Ever Quit (N) | Ever Quit % | Mean Yrs Quit | Short Term (n) | Short Term % |
| 50                                        | 40-44     | Never Any     | 0    | .     |               |             |               |                |              |
| 50                                        | 40-44     | CC            | 0    | .     | 0             | .           |               |                |              |
| 50                                        | 40-44     | Ecig          | 0    | .     |               |             |               |                |              |
| 50                                        | 40-44     | Dual          | 0    | .     |               |             |               |                |              |
| 50                                        | 40-44     | Former        | 0    | .     |               |             | .             | 0              | .            |
| Year of Follow-up: 2040, Age Group: 45-49 |           |               |      |       |               |             |               |                |              |
| Period                                    | Age Group | Smoking Group | N    | %     | Ever Quit (N) | Ever Quit % | Mean Yrs Quit | Short Term (n) | Short Term % |
| 50                                        | 45-49     | Never Any     | 0    | .     |               |             |               |                |              |
| 50                                        | 45-49     | CC            | 0    | .     | 0             | .           |               |                |              |
| 50                                        | 45-49     | Ecig          | 0    | .     |               |             |               |                |              |
| 50                                        | 45-49     | Dual          | 0    | .     |               |             |               |                |              |
| 50                                        | 45-49     | Former        | 0    | .     |               |             | .             | 0              | .            |
| Year of Follow-up: 2040, Age Group: 50-54 |           |               |      |       |               |             |               |                |              |
| Period                                    | Age Group | Smoking Group | N    | %     | Ever Quit (N) | Ever Quit % | Mean Yrs Quit | Short Term (n) | Short Term % |
| 50                                        | 50-54     | Never Any     | 0    | .     |               |             |               |                |              |
| 50                                        | 50-54     | CC            | 0    | .     | 0             | .           |               |                |              |
| 50                                        | 50-54     | Ecig          | 0    | .     |               |             |               |                |              |
| 50                                        | 50-54     | Dual          | 0    | .     |               |             |               |                |              |
| 50                                        | 50-54     | Former        | 0    | .     |               |             | .             | 0              | .            |
| Year of Follow-up: 2040, Age Group: 55-59 |           |               |      |       |               |             |               |                |              |
| Period                                    | Age Group | Smoking Group | N    | %     | Ever Quit (N) | Ever Quit % | Mean Yrs Quit | Short Term (n) | Short Term % |
| 50                                        | 55-59     | Never Any     | 0    | .     |               |             |               |                |              |
| 50                                        | 55-59     | CC            | 0    | .     | 0             | .           |               |                |              |
| 50                                        | 55-59     | Ecig          | 0    | .     |               |             |               |                |              |
| 50                                        | 55-59     | Dual          | 0    | .     |               |             |               |                |              |
| 50                                        | 55-59     | Former        | 0    | .     |               |             | .             | 0              | .            |
| Year of Follow-up: 2040, Age Group: 60-64 |           |               |      |       |               |             |               |                |              |
| Period                                    | Age Group | Smoking Group | N    | %     | Ever Quit (N) | Ever Quit % | Mean Yrs Quit | Short Term (n) | Short Term % |
| 50                                        | 60-64     | Never Any     | 4489 | 50.75 |               |             |               |                |              |
| 50                                        | 60-64     | CC            | 0    | 0.00  | 0             | 0.00        |               |                |              |
| 50                                        | 60-64     | Ecig          | 865  | 9.78  |               |             |               |                |              |
| 50                                        | 60-64     | Dual          | 0    | 0.00  |               |             |               |                |              |
| 50                                        | 60-64     | Former        | 3491 | 39.47 |               |             | 28.27         | 129            | 3.70         |
| Year of Follow-up: 2040, Age Group: 65-69 |           |               |      |       |               |             |               |                |              |
| Period                                    | Age Group | Smoking Group | N    | %     | Ever Quit (N) | Ever Quit % | Mean Yrs Quit | Short Term (n) | Short Term % |
| 50                                        | 65-69     | Never Any     | 4991 | 55.21 |               |             |               |                |              |
| 50                                        | 65-69     | CC            | 0    | 0.00  | 0             | 0.00        |               |                |              |
| 50                                        | 65-69     | Ecig          | 705  | 7.80  |               |             |               |                |              |
| 50                                        | 65-69     | Dual          | 0    | 0.00  |               |             |               |                |              |
| 50                                        | 65-69     | Former        | 3344 | 36.99 |               |             | 28.11         | 120            | 3.59         |
| Year of Follow-up: 2040, Age Group: 70-74 |           |               |      |       |               |             |               |                |              |
| Period                                    | Age Group | Smoking Group | N    | %     | Ever Quit (N) | Ever Quit % | Mean Yrs Quit | Short Term (n) | Short Term % |
| 50                                        | 70-74     | Never Any     | 5163 | 52.60 |               |             |               |                |              |
| 50                                        | 70-74     | CC            | 0    | 0.00  | 0             | 0.00        |               |                |              |
| 50                                        | 70-74     | Ecig          | 665  | 6.77  |               |             |               |                |              |
| 50                                        | 70-74     | Dual          | 0    | 0.00  |               |             |               |                |              |
| 50                                        | 70-74     | Former        | 3988 | 40.63 |               |             | 30.31         | 80             | 2.01         |
| Year of Follow-up: 2040, Age Group: 75-79 |           |               |      |       |               |             |               |                |              |
| Period                                    | Age Group | Smoking Group | N    | %     | Ever Quit (N) | Ever Quit % | Mean Yrs Quit | Short Term (n) | Short Term % |
| 50                                        | 75-79     | Never Any     | 4997 | 46.86 |               |             |               |                |              |
| 50                                        | 75-79     | CC            | 1    | 0.01  | 0             | 0.00        |               |                |              |
| 50                                        | 75-79     | Ecig          | 633  | 5.94  |               |             |               |                |              |
| 50                                        | 75-79     | Dual          | 0    | 0.00  |               |             |               |                |              |
| 50                                        | 75-79     | Former        | 5033 | 47.20 |               |             | 33.29         | 79             | 1.57         |

## Results for PHIM for Run 1 (Sensitivity\_Analysis\_1.RTF)

\*\*\*\*\*

### Main Results for E-Component for Run: 1, Simulation: 1, COD: Four Diseases Combined

| Variable Parameter          | Value                                  |
|-----------------------------|----------------------------------------|
| 1. Country                  | US (United States)                     |
| 2. Sex                      | M (Males)                              |
| 3. Year of start of process | 1990                                   |
| 4. Cause of Death           | Four Diseases Combined                 |
| 5. Effective Dose NULL      | CC:1                                   |
| 6. Effective Dose Ecig      | CC:1 Ecig:0.4 Dual:0.7                 |
| Note:                       | Death rates are per million population |

#### Results for Age Groups Combined and Years combined, Population unadjusted for deaths in Ecig scenario,

| Age Group:All |          | NULL        | Ecig        | %Drop    |        | NULL   | Ecig    | Drop    |         |         |
|---------------|----------|-------------|-------------|----------|--------|--------|---------|---------|---------|---------|
| Year          | Number   | Attrib      | Attrib      | Drop     | %Drop  | Attrib | Death   | Attrib  | Attrib  | Drop    |
|               | Deaths   | Deaths      | Deaths      | Deaths   | Deaths | Deaths | Rate    | Rates   | Rates   | Rates   |
| All Comb      | 13148871 | 4509390.583 | 3692121.713 | 817268.9 | 6.216  | 18.124 | 3806.31 | 1305.37 | 1068.79 | 236.582 |

#### Results for Age Groups Combined, Population unadjusted for deaths in Ecig scenario,

| Age Group:All |        | NULL       | Ecig       | %Drop    |        | NULL   | Ecig    | Drop    |         |         |
|---------------|--------|------------|------------|----------|--------|--------|---------|---------|---------|---------|
| Year          | Number | Attrib     | Attrib     | Drop     | %Drop  | Attrib | Death   | Attrib  | Attrib  | Drop    |
|               | Deaths | Deaths     | Deaths     | Deaths   | Deaths | Deaths | Rate    | Rates   | Rates   | Rates   |
| 1990          | 317161 | 125773.065 | 125773.065 | 0.000    | 0.000  | 0.000  | 5027.71 | 1993.78 | 1993.78 | 0.000   |
| 1991          | 313217 | 123999.442 | 123730.577 | 268.866  | 0.086  | 0.217  | 4883.81 | 1933.45 | 1929.26 | 4.192   |
| 1992          | 308577 | 122014.015 | 121308.909 | 705.107  | 0.229  | 0.578  | 4729.73 | 1870.18 | 1859.37 | 10.808  |
| 1993          | 311713 | 122810.618 | 121500.897 | 1309.721 | 0.420  | 1.066  | 4692.62 | 1848.83 | 1829.11 | 19.717  |
| 1994          | 305700 | 119925.592 | 117938.639 | 1986.953 | 0.650  | 1.657  | 4516.19 | 1771.69 | 1742.34 | 29.354  |
| 1995          | 303225 | 117896.496 | 115123.838 | 2772.658 | 0.914  | 2.352  | 4393.80 | 1708.35 | 1668.17 | 40.176  |
| 1996          | 299559 | 115698.645 | 112070.850 | 3627.795 | 1.211  | 3.136  | 4273.16 | 1650.42 | 1598.67 | 51.750  |
| 1997          | 294226 | 113359.847 | 108883.214 | 4476.632 | 1.521  | 3.949  | 4128.67 | 1590.70 | 1527.88 | 62.818  |
| 1998          | 289258 | 111444.212 | 106111.638 | 5332.574 | 1.844  | 4.785  | 3992.19 | 1538.10 | 1464.50 | 73.598  |
| 1999          | 311002 | 114877.722 | 107802.858 | 7074.864 | 2.275  | 6.159  | 4224.60 | 1560.48 | 1464.38 | 96.104  |
| 2000          | 303786 | 112379.704 | 104387.314 | 7992.390 | 2.631  | 7.112  | 4066.21 | 1504.22 | 1397.24 | 106.979 |
| 2001          | 296294 | 110024.943 | 101015.392 | 9009.551 | 3.041  | 8.189  | 3914.28 | 1453.52 | 1334.50 | 119.023 |
| 2002          | 291898 | 108289.173 | 98169.699  | 10119.47 | 3.467  | 9.345  | 3813.00 | 1414.56 | 1282.37 | 132.188 |
| 2003          | 285865 | 106539.023 | 95456.769  | 11082.25 | 3.877  | 10.402 | 3695.36 | 1377.22 | 1233.96 | 143.259 |
| 2004          | 274177 | 103037.251 | 91223.556  | 11813.69 | 4.309  | 11.465 | 3506.10 | 1317.61 | 1166.54 | 151.070 |
| 2005          | 272379 | 103044.562 | 90200.271  | 12844.29 | 4.716  | 12.465 | 3442.69 | 1302.41 | 1140.07 | 162.343 |
| 2006          | 264118 | 99672.555  | 85966.619  | 13705.94 | 5.189  | 13.751 | 3307.76 | 1248.28 | 1076.63 | 171.650 |
| 2007          | 258419 | 97839.152  | 83410.595  | 14428.56 | 5.583  | 14.747 | 3203.20 | 1212.75 | 1033.90 | 178.847 |
| 2008          | 259461 | 98075.852  | 82747.547  | 15328.31 | 5.908  | 15.629 | 3180.09 | 1202.07 | 1014.20 | 187.872 |
| 2009          | 253907 | 95617.338  | 79671.919  | 15945.42 | 6.280  | 16.676 | 3075.31 | 1158.11 | 964.983 | 193.130 |
| 2010          | 251878 | 94607.988  | 77981.406  | 16626.58 | 6.601  | 17.574 | 3013.72 | 1131.98 | 933.047 | 198.937 |
| 2011          | 251779 | 93633.119  | 76140.482  | 17492.64 | 6.948  | 18.682 | 2982.76 | 1109.25 | 902.018 | 207.231 |
| 2012          | 252643 | 92775.175  | 74430.140  | 18345.03 | 7.261  | 19.774 | 2960.61 | 1087.19 | 872.212 | 214.977 |
| 2013          | 256175 | 92345.780  | 73121.645  | 19224.14 | 7.504  | 20.818 | 2967.76 | 1069.82 | 847.106 | 222.710 |
| 2014          | 257393 | 91379.215  | 71430.861  | 19948.35 | 7.750  | 21.830 | 2947.05 | 1046.26 | 817.856 | 228.401 |
| 2015          | 259782 | 90750.242  | 70193.402  | 20556.84 | 7.913  | 22.652 | 3346.10 | 1168.90 | 904.121 | 264.781 |
| 2016          | 261453 | 88811.996  | 67646.515  | 21165.48 | 8.095  | 23.832 | 3336.15 | 1133.24 | 863.172 | 270.072 |
| 2017          | 263685 | 87325.126  | 65532.963  | 21792.16 | 8.264  | 24.955 | 3333.85 | 1104.08 | 828.554 | 275.525 |
| 2018          | 258714 | 87612.144  | 65450.748  | 22161.40 | 8.566  | 25.295 | 3240.73 | 1097.46 | 819.856 | 277.600 |
| 2019          | 261438 | 87797.760  | 64926.578  | 22871.18 | 8.748  | 26.050 | 3242.99 | 1089.08 | 805.378 | 283.704 |
| 2020          | 262288 | 87221.042  | 63972.925  | 23248.12 | 8.864  | 26.654 | 3715.29 | 1235.48 | 906.171 | 329.308 |
| 2021          | 255079 | 82001.292  | 58982.820  | 23018.47 | 9.024  | 28.071 | 3587.82 | 1153.39 | 829.623 | 323.766 |
| 2022          | 257097 | 81915.977  | 58207.001  | 23708.98 | 9.222  | 28.943 | 3588.53 | 1143.37 | 812.447 | 330.927 |
| 2023          | 259080 | 81810.810  | 57481.824  | 24328.99 | 9.391  | 29.738 | 3586.88 | 1132.64 | 795.818 | 336.827 |
| 2024          | 260719 | 81528.303  | 56712.019  | 24816.28 | 9.518  | 30.439 | 3579.65 | 1119.38 | 778.652 | 340.726 |
| 2025          | 257308 | 79599.213  | 55066.570  | 24532.64 | 9.534  | 30.820 | 4112.08 | 1272.09 | 880.027 | 392.060 |
| 2026          | 251528 | 75082.462  | 50936.261  | 24146.20 | 9.600  | 32.160 | 4003.24 | 1194.99 | 810.685 | 384.303 |
| 2027          | 250988 | 74444.425  | 49915.584  | 24528.84 | 9.773  | 32.949 | 3976.53 | 1179.46 | 790.838 | 388.623 |
| 2028          | 250285 | 73699.585  | 48813.675  | 24885.91 | 9.943  | 33.767 | 3945.35 | 1161.76 | 769.472 | 392.288 |
| 2029          | 249525 | 72819.703  | 47675.401  | 25144.30 | 10.077 | 34.530 | 3910.99 | 1141.36 | 747.252 | 394.105 |
| 2030          | 240528 | 69309.277  | 45228.072  | 24081.21 | 10.012 | 34.745 | 4504.36 | 1297.95 | 846.983 | 450.967 |
| 2031          | 235442 | 65433.368  | 41925.116  | 23508.25 | 9.985  | 35.927 | 4397.65 | 1222.18 | 783.088 | 439.093 |
| 2032          | 234017 | 64643.552  | 40856.714  | 23786.84 | 10.165 | 36.797 | 4356.12 | 1203.31 | 760.528 | 442.781 |
| 2033          | 232559 | 63793.514  | 39927.416  | 23866.10 | 10.262 | 37.411 | 4310.93 | 1182.54 | 740.132 | 442.404 |
| 2034          | 230963 | 63032.151  | 39010.729  | 24021.42 | 10.401 | 38.110 | 4260.75 | 1162.80 | 719.659 | 443.141 |
| 2035          | 215822 | 57653.301  | 35832.722  | 21820.58 | 10.110 | 37.848 | 4924.38 | 1315.47 | 817.592 | 497.878 |
| 2036          | 208183 | 52988.733  | 32031.376  | 20957.36 | 10.067 | 39.551 | 4748.94 | 1208.75 | 730.680 | 478.066 |
| 2037          | 205491 | 52026.921  | 31024.288  | 21002.63 | 10.221 | 40.369 | 4682.40 | 1185.50 | 706.930 | 478.573 |
| 2038          | 202834 | 50943.211  | 30005.859  | 20937.35 | 10.322 | 41.099 | 4612.18 | 1158.38 | 682.295 | 476.088 |
| 2039          | 200251 | 50085.991  | 29166.437  | 20919.55 | 10.447 | 41.767 | 4538.65 | 1135.19 | 661.053 | 474.138 |

## Results for PHIM for Run 1 (Sensitivity\_Analysis\_1.RTF)

\*\*\*\*\*

### Main Results for E-Component for Run: 1, Simulation: 1, COD: LUNG CANCER

| Variable Parameter          | Value                                  |
|-----------------------------|----------------------------------------|
| 1. Country                  | US (United States)                     |
| 2. Sex                      | M (Males)                              |
| 3. Year of start of process | 1990                                   |
| 4. Cause of Death           | LUNG CANCER                            |
| 5. Effective Dose NULL      | CC:1                                   |
| 6. Effective Dose Ecig      | CC:1 Ecig:0.4 Dual:0.7                 |
| Note:                       | Death rates are per million population |

#### Results for Age Groups Combined and Years combined, Population unadjusted for deaths in Ecig scenario,

| Age Group:All |         | NULL        | Ecig        | %Drop    |        |        | NULL    | Ecig    | Drop    |        |
|---------------|---------|-------------|-------------|----------|--------|--------|---------|---------|---------|--------|
| Year          | Number  | Attrib      | Attrib      | Drop     | %Drop  | Attrib | Death   | Attrib  | Drop    |        |
|               | Deaths  | Deaths      | Deaths      | Deaths   | Deaths | Deaths | Rate    | Rates   | Rates   |        |
| All Comb      | 3065988 | 2244988.113 | 2002713.165 | 242274.9 | 7.902  | 10.792 | 887.537 | 649.875 | 579.742 | 70.133 |

#### Results for Age Groups Combined, Population unadjusted for deaths in Ecig scenario,

| Age Group:All |        | NULL      | Ecig      | %Drop    |        |        | NULL    | Ecig    | Drop    |        |
|---------------|--------|-----------|-----------|----------|--------|--------|---------|---------|---------|--------|
| Year          | Number | Attrib    | Attrib    | Drop     | %Drop  | Attrib | Death   | Attrib  | Drop    |        |
|               | Deaths | Deaths    | Deaths    | Deaths   | Deaths | Deaths | Rate    | Rates   | Rates   |        |
| 1990          | 78822  | 63385.736 | 63385.736 | 0.000    | 0.000  | 0.000  | 1249.50 | 1004.81 | 0.000   |        |
| 1991          | 78462  | 62918.402 | 62887.194 | 31.208   | 0.040  | 0.050  | 1223.41 | 981.049 | 980.563 | 0.487  |
| 1992          | 77987  | 62366.766 | 62285.514 | 81.252   | 0.104  | 0.130  | 1195.35 | 955.930 | 954.684 | 1.245  |
| 1993          | 78542  | 62652.888 | 62494.447 | 158.440  | 0.202  | 0.253  | 1182.39 | 943.195 | 940.809 | 2.385  |
| 1994          | 77437  | 61565.227 | 61319.172 | 246.054  | 0.318  | 0.400  | 1144.00 | 909.520 | 905.885 | 3.635  |
| 1995          | 76904  | 60851.961 | 60496.037 | 355.924  | 0.463  | 0.585  | 1114.36 | 881.759 | 876.601 | 5.157  |
| 1996          | 76232  | 60122.922 | 59629.916 | 493.006  | 0.647  | 0.820  | 1087.44 | 857.643 | 850.610 | 7.033  |
| 1997          | 75473  | 59237.155 | 58600.818 | 636.337  | 0.843  | 1.074  | 1059.06 | 831.234 | 822.305 | 8.929  |
| 1998          | 75381  | 58906.696 | 58088.409 | 818.287  | 1.086  | 1.389  | 1040.37 | 813.001 | 801.707 | 11.294 |
| 1999          | 73159  | 56930.073 | 55942.669 | 987.404  | 1.350  | 1.734  | 993.781 | 773.329 | 759.917 | 13.413 |
| 2000          | 73784  | 57137.121 | 55937.740 | 1199.381 | 1.626  | 2.099  | 987.608 | 764.787 | 748.734 | 16.054 |
| 2001          | 73294  | 56481.726 | 55035.979 | 1445.747 | 1.973  | 2.560  | 968.273 | 746.169 | 727.070 | 19.099 |
| 2002          | 72442  | 55588.365 | 53896.774 | 1691.592 | 2.335  | 3.043  | 946.293 | 726.138 | 704.041 | 22.097 |
| 2003          | 71942  | 54945.856 | 52988.486 | 1957.370 | 2.721  | 3.562  | 929.989 | 710.281 | 684.978 | 25.303 |
| 2004          | 71301  | 54203.126 | 51944.757 | 2258.368 | 3.167  | 4.166  | 911.778 | 693.135 | 664.256 | 28.879 |
| 2005          | 70964  | 53744.603 | 51195.381 | 2549.222 | 3.592  | 4.743  | 896.937 | 679.296 | 647.075 | 32.220 |
| 2006          | 69658  | 52535.572 | 49682.260 | 2853.312 | 4.096  | 5.431  | 872.383 | 657.945 | 622.211 | 35.734 |
| 2007          | 68565  | 51492.124 | 48348.050 | 3144.074 | 4.586  | 6.106  | 849.888 | 638.264 | 599.292 | 38.972 |
| 2008          | 68226  | 51030.736 | 47547.164 | 3483.571 | 5.106  | 6.826  | 836.215 | 625.460 | 582.764 | 42.697 |
| 2009          | 67509  | 50276.199 | 46451.450 | 3824.749 | 5.666  | 7.607  | 817.667 | 608.943 | 562.618 | 46.325 |
| 2010          | 67196  | 49840.933 | 45682.776 | 4158.157 | 6.188  | 8.343  | 804.000 | 596.347 | 546.594 | 49.752 |
| 2011          | 66506  | 49072.841 | 44550.465 | 4522.376 | 6.800  | 9.216  | 787.880 | 581.354 | 527.779 | 53.575 |
| 2012          | 66155  | 48539.512 | 43629.568 | 4909.944 | 7.422  | 10.115 | 775.240 | 568.812 | 511.275 | 57.537 |
| 2013          | 65333  | 47675.741 | 42433.098 | 5242.643 | 8.024  | 10.996 | 756.876 | 552.318 | 491.583 | 60.735 |
| 2014          | 65033  | 47194.534 | 41601.098 | 5593.436 | 8.601  | 11.852 | 744.602 | 540.359 | 476.316 | 64.043 |
| 2015          | 64145  | 46305.842 | 40435.374 | 5870.468 | 9.152  | 12.678 | 726.215 | 526.439 | 460.825 | 67.614 |
| 2016          | 61618  | 44208.867 | 38219.951 | 5988.916 | 9.719  | 13.547 | 706.248 | 514.107 | 451.688 | 62.410 |
| 2017          | 59897  | 42702.624 | 36521.861 | 6180.763 | 10.319 | 14.474 | 687.297 | 503.903 | 442.757 | 60.145 |
| 2018          | 62468  | 44321.202 | 37447.158 | 6874.044 | 11.004 | 15.510 | 668.490 | 493.181 | 433.074 | 60.106 |
| 2019          | 63045  | 44493.088 | 37172.187 | 7320.901 | 11.612 | 16.454 | 650.035 | 483.912 | 424.100 | 58.812 |
| 2020          | 63466  | 44529.551 | 36790.751 | 7738.800 | 12.194 | 17.379 | 632.991 | 474.757 | 415.138 | 57.859 |
| 2021          | 57113  | 39852.556 | 32538.159 | 7314.397 | 12.807 | 18.354 | 615.323 | 465.546 | 406.665 | 56.865 |
| 2022          | 57440  | 39853.685 | 32122.244 | 7731.441 | 13.460 | 19.400 | 601.745 | 456.274 | 400.359 | 55.915 |
| 2023          | 57738  | 39847.050 | 31723.071 | 8123.979 | 14.070 | 20.388 | 593.366 | 447.670 | 399.196 | 55.474 |
| 2024          | 57942  | 39726.010 | 31268.335 | 8457.675 | 14.597 | 21.290 | 585.539 | 438.435 | 392.312 | 54.912 |
| 2025          | 57521  | 39207.348 | 30543.210 | 8664.138 | 15.062 | 22.098 | 577.257 | 429.579 | 389.116 | 54.463 |
| 2026          | 51428  | 34803.960 | 26784.585 | 8019.375 | 15.593 | 23.042 | 569.510 | 420.929 | 386.295 | 53.634 |
| 2027          | 51172  | 34484.595 | 26194.146 | 8290.449 | 16.201 | 24.041 | 561.740 | 412.357 | 379.007 | 52.850 |
| 2028          | 50870  | 34100.638 | 25575.923 | 8524.715 | 16.758 | 24.999 | 553.884 | 403.544 | 376.165 | 52.139 |
| 2029          | 50540  | 33669.838 | 24935.429 | 8734.409 | 17.282 | 25.941 | 546.146 | 394.732 | 373.831 | 51.491 |
| 2030          | 49109  | 32557.688 | 23872.656 | 8685.032 | 17.685 | 26.676 | 538.662 | 386.705 | 371.061 | 50.844 |
| 2031          | 43585  | 28646.393 | 20793.271 | 7853.122 | 18.018 | 27.414 | 531.096 | 378.065 | 368.382 | 49.683 |
| 2032          | 43163  | 28227.160 | 20218.625 | 8008.535 | 18.554 | 28.372 | 523.454 | 369.435 | 365.360 | 48.975 |
| 2033          | 42725  | 27786.623 | 19713.232 | 8073.390 | 18.896 | 29.055 | 515.996 | 360.079 | 362.423 | 48.266 |
| 2034          | 42256  | 27348.299 | 19192.356 | 8155.943 | 19.301 | 29.822 | 508.523 | 350.514 | 359.055 | 47.469 |
| 2035          | 39748  | 25570.077 | 17850.716 | 7719.361 | 19.421 | 30.189 | 500.933 | 341.430 | 356.298 | 46.712 |
| 2036          | 34030  | 21717.319 | 14926.996 | 6790.323 | 19.954 | 31.267 | 493.269 | 332.505 | 347.505 | 45.997 |
| 2037          | 33454  | 21256.024 | 14412.915 | 6843.109 | 20.455 | 32.194 | 485.289 | 323.347 | 338.417 | 45.229 |
| 2038          | 32883  | 20747.175 | 13912.997 | 6834.178 | 20.783 | 32.940 | 477.720 | 314.764 | 329.364 | 44.400 |
| 2039          | 32325  | 20327.688 | 13492.060 | 6835.627 | 21.146 | 33.627 | 470.644 | 306.724 | 320.795 | 43.633 |

## Results for PHIM for Run 1 (Sensitivity\_Analysis\_1.RTF)

\*\*\*\*\*

### Main Results for E-Component for Run: 1, Simulation: 1, COD: IHD

| Variable Parameter          | Value                                  |
|-----------------------------|----------------------------------------|
| 1. Country                  | US (United States)                     |
| 2. Sex                      | M (Males)                              |
| 3. Year of start of process | 1990                                   |
| 4. Cause of Death           | IHD                                    |
| 5. Effective Dose NULL      | CC:1                                   |
| 6. Effective Dose Ecig      | CC:1 Ecig:0.4 Dual:0.7                 |
| Note:                       | Death rates are per million population |

#### Results for Age Groups Combined and Years combined, Population unadjusted for deaths in Ecig scenario,

| Age Group:All |         | NULL        | Ecig       | %Drop    |        | Death  |         | NULL    | Ecig    | Drop   |
|---------------|---------|-------------|------------|----------|--------|--------|---------|---------|---------|--------|
| Year          | Number  | Attrib      | Attrib     | Drop     | %Drop  | Attrib | Rate    | Attrib  | Attrib  | Rates  |
|               | Deaths  | Deaths      | Deaths     | Deaths   | Deaths | Deaths |         | Rates   | Rates   | Rates  |
| All Comb      | 6360041 | 1098877.421 | 760965.061 | 337912.4 | 5.313  | 30.751 | 1841.09 | 318.101 | 220.283 | 97.818 |

#### Results for Age Groups Combined, Population unadjusted for deaths in Ecig scenario,

| Age Group:All |        | NULL      | Ecig      | %Drop    |        | Death  |         | NULL    | Ecig    | Drop    |
|---------------|--------|-----------|-----------|----------|--------|--------|---------|---------|---------|---------|
| Year          | Number | Attrib    | Attrib    | Drop     | %Drop  | Attrib | Rate    | Attrib  | Attrib  | Rates   |
|               | Deaths | Deaths    | Deaths    | Deaths   | Deaths | Deaths |         | Rates   | Rates   | Rates   |
| 1990          | 171484 | 38511.725 | 38511.725 | 0.000    | 0.000  | 0.000  | 2718.40 | 610.497 | 610.497 | 0.000   |
| 1991          | 168044 | 37309.838 | 37112.529 | 197.309  | 0.117  | 0.529  | 2620.21 | 581.750 | 578.674 | 3.077   |
| 1992          | 164548 | 36137.488 | 35616.322 | 521.166  | 0.317  | 1.442  | 2522.12 | 553.899 | 545.911 | 7.988   |
| 1993          | 164362 | 35599.588 | 34646.209 | 953.379  | 0.580  | 2.678  | 2474.35 | 535.926 | 521.574 | 14.352  |
| 1994          | 159866 | 34336.757 | 32900.110 | 1436.647 | 0.899  | 4.184  | 2361.75 | 507.267 | 486.043 | 21.224  |
| 1995          | 158083 | 33455.759 | 31471.215 | 1984.544 | 1.255  | 5.932  | 2290.66 | 484.782 | 456.025 | 28.756  |
| 1996          | 154875 | 32193.824 | 29636.547 | 2557.277 | 1.651  | 7.943  | 2209.26 | 459.239 | 422.760 | 36.479  |
| 1997          | 149970 | 30665.509 | 27561.126 | 3104.383 | 2.070  | 10.123 | 2104.43 | 430.308 | 386.746 | 43.562  |
| 1998          | 145407 | 29188.430 | 25577.819 | 3610.611 | 2.483  | 12.370 | 2006.83 | 402.844 | 353.012 | 49.832  |
| 1999          | 165952 | 33375.386 | 28385.999 | 4989.386 | 3.007  | 14.949 | 2254.27 | 453.366 | 385.591 | 67.775  |
| 2000          | 160260 | 32024.754 | 26486.651 | 5538.103 | 3.456  | 17.293 | 2145.10 | 428.655 | 354.527 | 74.128  |
| 2001          | 154444 | 30682.393 | 24558.805 | 6123.588 | 3.965  | 19.958 | 2040.33 | 405.339 | 324.442 | 80.898  |
| 2002          | 151887 | 30218.370 | 23417.213 | 6801.157 | 4.478  | 22.507 | 1984.06 | 394.736 | 305.894 | 88.842  |
| 2003          | 146733 | 29175.202 | 21885.941 | 7289.261 | 4.968  | 24.984 | 1896.81 | 377.146 | 282.918 | 94.228  |
| 2004          | 138381 | 27488.687 | 19935.129 | 7553.559 | 5.459  | 27.479 | 1769.58 | 351.518 | 254.925 | 96.593  |
| 2005          | 135881 | 27017.439 | 18986.715 | 8030.724 | 5.910  | 29.724 | 1717.44 | 341.482 | 239.979 | 101.503 |
| 2006          | 131922 | 26231.435 | 17801.060 | 8430.375 | 6.390  | 32.138 | 1652.16 | 328.517 | 222.937 | 105.580 |
| 2007          | 126502 | 25103.049 | 16497.301 | 8605.749 | 6.803  | 34.282 | 1568.04 | 311.161 | 204.490 | 106.671 |
| 2008          | 125859 | 24621.740 | 15741.758 | 8879.982 | 7.056  | 36.066 | 1542.60 | 301.777 | 192.939 | 108.838 |
| 2009          | 122428 | 23741.177 | 14759.830 | 8981.347 | 7.336  | 37.830 | 1482.84 | 287.552 | 178.771 | 108.782 |
| 2010          | 120537 | 23189.160 | 14060.510 | 9128.650 | 7.573  | 39.366 | 1442.22 | 277.458 | 168.234 | 109.224 |
| 2011          | 120221 | 22786.927 | 13439.007 | 9347.920 | 7.776  | 41.023 | 1424.23 | 269.951 | 159.209 | 110.743 |
| 2012          | 120927 | 22485.295 | 12923.671 | 9561.624 | 7.907  | 42.524 | 1417.09 | 263.495 | 151.447 | 112.048 |
| 2013          | 122648 | 22251.884 | 12491.789 | 9760.095 | 7.958  | 43.862 | 1420.86 | 257.786 | 144.716 | 113.070 |
| 2014          | 123229 | 21894.593 | 12015.922 | 9878.672 | 8.017  | 45.119 | 1410.92 | 250.685 | 137.578 | 113.107 |
| 2015          | 123774 | 21471.109 | 11563.169 | 9907.940 | 8.005  | 46.145 | 1594.26 | 276.557 | 148.939 | 127.618 |
| 2016          | 126218 | 21411.568 | 11310.527 | 10101.04 | 8.003  | 47.176 | 1610.55 | 273.213 | 144.323 | 128.890 |
| 2017          | 128265 | 21169.399 | 10961.897 | 10207.50 | 7.958  | 48.218 | 1621.69 | 267.651 | 138.955 | 129.057 |
| 2018          | 121429 | 19830.576 | 10090.355 | 9740.222 | 8.021  | 49.117 | 1521.05 | 248.404 | 126.395 | 122.009 |
| 2019          | 121832 | 19431.014 | 9749.286  | 9681.729 | 7.947  | 49.826 | 1511.26 | 241.031 | 120.934 | 120.096 |
| 2020          | 120811 | 18532.612 | 9166.962  | 9365.650 | 7.752  | 50.536 | 1711.27 | 262.513 | 129.849 | 132.664 |
| 2021          | 119407 | 18234.128 | 8881.545  | 9352.582 | 7.833  | 51.292 | 1679.51 | 256.472 | 124.923 | 131.549 |
| 2022          | 119438 | 17812.559 | 8539.299  | 9273.260 | 7.764  | 52.060 | 1667.10 | 248.626 | 119.191 | 129.435 |
| 2023          | 119445 | 17361.668 | 8209.130  | 9152.538 | 7.663  | 52.717 | 1653.68 | 240.367 | 113.653 | 126.714 |
| 2024          | 119305 | 16929.676 | 7918.262  | 9011.414 | 7.553  | 53.229 | 1638.05 | 232.443 | 108.717 | 123.726 |
| 2025          | 115685 | 15501.666 | 7170.064  | 8331.602 | 7.202  | 53.746 | 1848.78 | 247.735 | 114.586 | 133.149 |
| 2026          | 115073 | 15523.814 | 7136.085  | 8387.729 | 7.289  | 54.031 | 1831.46 | 247.072 | 113.576 | 133.496 |
| 2027          | 113989 | 15073.070 | 6874.301  | 8198.769 | 7.193  | 54.393 | 1805.98 | 238.810 | 108.913 | 129.897 |
| 2028          | 112855 | 14636.710 | 6602.188  | 8034.522 | 7.119  | 54.893 | 1778.98 | 230.725 | 104.073 | 126.652 |
| 2029          | 111718 | 14180.166 | 6353.864  | 7826.302 | 7.005  | 55.192 | 1751.04 | 222.256 | 99.589  | 122.667 |
| 2030          | 104851 | 12111.772 | 5376.550  | 6735.222 | 6.424  | 55.609 | 1963.54 | 226.816 | 100.686 | 126.130 |
| 2031          | 105289 | 12417.367 | 5502.150  | 6915.217 | 6.568  | 55.690 | 1966.62 | 231.935 | 102.771 | 129.164 |
| 2032          | 103879 | 12054.064 | 5281.733  | 6772.332 | 6.519  | 56.183 | 1933.67 | 224.381 | 98.317  | 126.064 |
| 2033          | 102485 | 11672.389 | 5058.525  | 6613.864 | 6.453  | 56.662 | 1899.76 | 216.370 | 93.770  | 122.601 |
| 2034          | 101070 | 11365.762 | 4905.408  | 6460.354 | 6.392  | 56.840 | 1864.51 | 209.673 | 90.494  | 119.179 |
| 2035          | 90820  | 8580.360  | 3655.601  | 4924.759 | 5.423  | 57.396 | 2072.23 | 195.777 | 83.410  | 112.368 |
| 2036          | 92117  | 8948.841  | 3786.827  | 5162.013 | 5.604  | 57.684 | 2101.31 | 204.135 | 86.383  | 117.753 |
| 2037          | 90327  | 8624.570  | 3646.441  | 4978.129 | 5.511  | 57.720 | 2058.21 | 196.522 | 83.089  | 113.433 |
| 2038          | 88590  | 8315.017  | 3472.434  | 4842.582 | 5.466  | 58.239 | 2014.42 | 189.073 | 78.959  | 110.114 |
| 2039          | 86921  | 8001.132  | 3331.555  | 4669.577 | 5.372  | 58.361 | 1970.05 | 181.344 | 75.509  | 105.835 |

## Results for PHIM for Run 1 (Sensitivity\_Analysis\_1.RTF)

\*\*\*\*\*

### Main Results for E-Component for Run: 1, Simulation: 1, COD: STROKE

| Variable Parameter          | Value                                  |
|-----------------------------|----------------------------------------|
| 1. Country                  | US (United States)                     |
| 2. Sex                      | M (Males)                              |
| 3. Year of start of process | 1990                                   |
| 4. Cause of Death           | STROKE                                 |
| 5. Effective Dose NULL      | CC:1                                   |
| 6. Effective Dose Ecig      | CC:1 Ecig:0.4 Dual:0.7                 |
| Note:                       | Death rates are per million population |

#### Results for Age Groups Combined and Years combined, Population unadjusted for deaths in Ecig scenario,

| Age Group:All |         | NULL       | Ecig       | %Drop    |        | NULL   | Ecig    | Drop   |        |        |
|---------------|---------|------------|------------|----------|--------|--------|---------|--------|--------|--------|
| Year          | Number  | Attrib     | Attrib     | Drop     | %Drop  | Attrib | Death   | Attrib | Attrib | Drop   |
|               | Deaths  | Deaths     | Deaths     | Deaths   | Deaths | Deaths | Rate    | Rates  | Rates  | Rates  |
| All Comb      | 1489699 | 149918.462 | 101962.098 | 47956.36 | 3.219  | 31.988 | 431.236 | 43.398 | 29.516 | 13.882 |

#### Results for Age Groups Combined, Population unadjusted for deaths in Ecig scenario,

| Age Group:All |        | NULL     | Ecig     | %Drop    |        | NULL   | Ecig    | Drop   |        |        |
|---------------|--------|----------|----------|----------|--------|--------|---------|--------|--------|--------|
| Year          | Number | Attrib   | Attrib   | Drop     | %Drop  | Attrib | Death   | Attrib | Attrib | Drop   |
|               | Deaths | Deaths   | Deaths   | Deaths   | Deaths | Deaths | Rate    | Rates  | Rates  | Rates  |
| 1990          | 32862  | 4613.166 | 4613.166 | 0.000    | 0.000  | 0.000  | 520.936 | 73.129 | 73.129 | 0.000  |
| 1991          | 32619  | 4555.566 | 4529.884 | 25.682   | 0.079  | 0.564  | 508.609 | 71.032 | 70.632 | 0.400  |
| 1992          | 32100  | 4453.572 | 4387.821 | 65.752   | 0.205  | 1.476  | 492.014 | 68.262 | 67.255 | 1.008  |
| 1993          | 32896  | 4462.473 | 4339.168 | 123.305  | 0.375  | 2.763  | 495.226 | 67.179 | 65.323 | 1.856  |
| 1994          | 33323  | 4499.513 | 4307.041 | 192.473  | 0.578  | 4.278  | 492.290 | 66.473 | 63.629 | 2.843  |
| 1995          | 33569  | 4472.774 | 4201.557 | 271.217  | 0.808  | 6.064  | 486.422 | 64.812 | 60.882 | 3.930  |
| 1996          | 33870  | 4406.878 | 4048.913 | 357.965  | 1.057  | 8.123  | 483.150 | 62.863 | 57.757 | 5.106  |
| 1997          | 33516  | 4288.158 | 3842.071 | 446.087  | 1.331  | 10.403 | 470.307 | 60.173 | 53.913 | 6.260  |
| 1998          | 32795  | 4120.148 | 3594.339 | 525.809  | 1.603  | 12.762 | 452.620 | 56.864 | 49.607 | 7.257  |
| 1999          | 33375  | 3982.443 | 3376.645 | 605.797  | 1.815  | 15.212 | 453.361 | 54.097 | 45.868 | 8.229  |
| 2000          | 33459  | 4021.411 | 3315.232 | 706.179  | 2.111  | 17.560 | 447.853 | 53.827 | 44.375 | 9.452  |
| 2001          | 32275  | 3848.092 | 3073.636 | 774.456  | 2.400  | 20.126 | 426.379 | 50.836 | 40.605 | 10.231 |
| 2002          | 31586  | 3783.081 | 2930.452 | 852.629  | 2.699  | 22.538 | 412.601 | 49.418 | 38.280 | 11.138 |
| 2003          | 30985  | 3754.415 | 2817.327 | 937.088  | 3.024  | 24.960 | 400.541 | 48.533 | 36.419 | 12.114 |
| 2004          | 29884  | 3666.274 | 2663.120 | 1003.154 | 3.357  | 27.362 | 382.149 | 46.883 | 34.055 | 12.828 |
| 2005          | 28708  | 3589.688 | 2524.071 | 1065.617 | 3.712  | 29.685 | 362.850 | 45.371 | 31.903 | 13.469 |
| 2006          | 28188  | 3596.985 | 2445.278 | 1151.707 | 4.086  | 32.019 | 353.021 | 45.048 | 30.624 | 14.424 |
| 2007          | 28026  | 3560.798 | 2344.412 | 1216.385 | 4.340  | 34.160 | 347.392 | 44.137 | 29.060 | 15.078 |
| 2008          | 27128  | 3417.001 | 2183.430 | 1233.571 | 4.547  | 36.101 | 332.495 | 41.881 | 26.761 | 15.119 |
| 2009          | 27068  | 3394.390 | 2108.499 | 1285.891 | 4.751  | 37.883 | 327.847 | 41.113 | 25.538 | 15.575 |
| 2010          | 26911  | 3340.137 | 2023.051 | 1317.086 | 4.894  | 39.432 | 321.990 | 39.965 | 24.206 | 15.759 |
| 2011          | 26959  | 3285.435 | 1939.351 | 1346.084 | 4.993  | 40.971 | 319.377 | 38.922 | 22.975 | 15.947 |
| 2012          | 27057  | 3259.209 | 1871.276 | 1387.934 | 5.130  | 42.585 | 317.068 | 38.193 | 21.929 | 16.265 |
| 2013          | 27904  | 3274.703 | 1832.091 | 1442.612 | 5.170  | 44.053 | 323.265 | 37.937 | 21.225 | 16.713 |
| 2014          | 28792  | 3298.083 | 1799.531 | 1498.552 | 5.205  | 45.437 | 329.657 | 37.762 | 20.604 | 17.158 |
| 2015          | 29560  | 3244.406 | 1733.182 | 1511.224 | 5.112  | 46.579 | 380.745 | 41.789 | 22.324 | 19.465 |
| 2016          | 30513  | 3314.836 | 1738.419 | 1576.417 | 5.166  | 47.556 | 389.347 | 42.297 | 22.182 | 20.115 |
| 2017          | 31416  | 3333.314 | 1710.930 | 1622.384 | 5.164  | 48.672 | 397.202 | 42.144 | 21.632 | 20.512 |
| 2018          | 29348  | 2925.242 | 1474.302 | 1450.940 | 4.944  | 49.601 | 367.626 | 36.642 | 18.468 | 18.175 |
| 2019          | 29598  | 2864.628 | 1422.295 | 1442.333 | 4.873  | 50.350 | 367.149 | 35.534 | 17.643 | 17.891 |
| 2020          | 29592  | 2730.366 | 1337.306 | 1393.061 | 4.707  | 51.021 | 419.174 | 38.675 | 18.943 | 19.733 |
| 2021          | 30097  | 2647.911 | 1275.298 | 1372.613 | 4.561  | 51.838 | 423.328 | 37.244 | 17.938 | 19.306 |
| 2022          | 30304  | 2586.165 | 1224.588 | 1361.576 | 4.493  | 52.648 | 422.974 | 36.097 | 17.093 | 19.005 |
| 2023          | 30505  | 2517.960 | 1176.880 | 1341.080 | 4.396  | 53.261 | 422.337 | 34.860 | 16.294 | 18.567 |
| 2024          | 30661  | 2454.161 | 1133.658 | 1320.502 | 4.307  | 53.807 | 420.968 | 33.695 | 15.565 | 18.130 |
| 2025          | 30254  | 2275.364 | 1038.562 | 1236.803 | 4.088  | 54.356 | 483.488 | 36.363 | 16.597 | 19.766 |
| 2026          | 30685  | 2183.166 | 988.769  | 1194.397 | 3.892  | 54.709 | 488.380 | 34.747 | 15.737 | 19.010 |
| 2027          | 30561  | 2112.345 | 949.695  | 1162.650 | 3.804  | 55.041 | 484.196 | 33.467 | 15.046 | 18.420 |
| 2028          | 30412  | 2046.677 | 912.520  | 1134.156 | 3.729  | 55.415 | 479.392 | 32.263 | 14.384 | 17.878 |
| 2029          | 30254  | 1977.671 | 876.128  | 1101.543 | 3.641  | 55.699 | 474.195 | 30.997 | 13.732 | 17.265 |
| 2030          | 29330  | 1744.457 | 766.828  | 977.629  | 3.333  | 56.042 | 549.260 | 32.668 | 14.360 | 18.308 |
| 2031          | 28976  | 1653.738 | 721.678  | 932.059  | 3.217  | 56.361 | 541.223 | 30.889 | 13.480 | 17.409 |
| 2032          | 28724  | 1603.120 | 689.317  | 913.803  | 3.181  | 57.002 | 534.690 | 29.841 | 12.831 | 17.010 |
| 2033          | 28464  | 1548.245 | 661.256  | 886.988  | 3.116  | 57.290 | 527.627 | 28.700 | 12.258 | 16.442 |
| 2034          | 28178  | 1511.985 | 639.995  | 871.990  | 3.095  | 57.672 | 519.826 | 27.893 | 11.806 | 16.086 |
| 2035          | 26737  | 1239.866 | 522.330  | 717.536  | 2.684  | 57.872 | 610.065 | 28.290 | 11.918 | 16.372 |
| 2036          | 25591  | 1182.522 | 493.513  | 689.009  | 2.692  | 58.266 | 583.762 | 26.975 | 11.258 | 15.717 |
| 2037          | 25143  | 1134.483 | 476.451  | 658.032  | 2.617  | 58.003 | 572.916 | 25.851 | 10.857 | 14.994 |
| 2038          | 24693  | 1093.537 | 453.601  | 639.935  | 2.592  | 58.520 | 561.491 | 24.866 | 10.314 | 14.551 |
| 2039          | 24247  | 1047.905 | 433.232  | 614.673  | 2.535  | 58.657 | 549.553 | 23.751 | 9.819  | 13.931 |

## Results for PHIM for Run 1 (Sensitivity\_Analysis\_1.RTF)

\*\*\*\*\*

### Main Results for E-Component for Run: 1, Simulation: 1, COD: COPD

| Variable Parameter          | Value                                  |
|-----------------------------|----------------------------------------|
| 1. Country                  | US (United States)                     |
| 2. Sex                      | M (Males)                              |
| 3. Year of start of process | 1990                                   |
| 4. Cause of Death           | COPD                                   |
| 5. Effective Dose NULL      | CC:1                                   |
| 6. Effective Dose Ecig      | CC:1 Ecig:0.4 Dual:0.7                 |
| Note:                       | Death rates are per million population |

#### Results for Age Groups Combined and Years combined, Population unadjusted for deaths in Ecig scenario,

| Age Group:All |         | NULL        | Ecig       | %Drop    |        | Death  |         | NULL    | Ecig    | Drop   |
|---------------|---------|-------------|------------|----------|--------|--------|---------|---------|---------|--------|
| Year          | Number  | Attrib      | Attrib     | Drop     | %Drop  | Attrib | Rate    | Attrib  | Attrib  | Rates  |
|               | Deaths  | Deaths      | Deaths     | Deaths   | Deaths | Deaths |         | Rates   | Rates   | Rates  |
| All Comb      | 2233143 | 1015606.587 | 826481.389 | 189125.2 | 8.469  | 18.622 | 646.447 | 293.996 | 239.248 | 54.748 |

#### Results for Age Groups Combined, Population unadjusted for deaths in Ecig scenario,

| Age Group:All |        | NULL      | Ecig      | %Drop    |        | Death  |         | NULL    | Ecig    | Drop    |
|---------------|--------|-----------|-----------|----------|--------|--------|---------|---------|---------|---------|
| Year          | Number | Attrib    | Attrib    | Drop     | %Drop  | Attrib | Rate    | Attrib  | Attrib  | Rates   |
|               | Deaths | Deaths    | Deaths    | Deaths   | Deaths | Deaths |         | Rates   | Rates   | Rates   |
| 1990          | 33993  | 19262.437 | 19262.437 | 0.000    | 0.000  | 0.000  | 538.865 | 305.353 | 305.353 | 0.000   |
| 1991          | 34092  | 19215.636 | 19200.970 | 14.666   | 0.043  | 0.076  | 531.576 | 299.618 | 299.389 | 0.229   |
| 1992          | 33942  | 19056.189 | 19019.252 | 36.937   | 0.109  | 0.194  | 520.248 | 292.085 | 291.519 | 0.566   |
| 1993          | 35913  | 20095.670 | 20021.073 | 74.597   | 0.208  | 0.371  | 540.645 | 302.526 | 301.403 | 1.123   |
| 1994          | 35074  | 19524.095 | 19412.316 | 111.778  | 0.319  | 0.573  | 518.158 | 288.435 | 286.784 | 1.651   |
| 1995          | 34669  | 19116.002 | 18955.029 | 160.973  | 0.464  | 0.842  | 502.362 | 276.995 | 274.663 | 2.333   |
| 1996          | 34582  | 18975.021 | 18755.475 | 219.547  | 0.635  | 1.157  | 493.306 | 270.675 | 267.544 | 3.132   |
| 1997          | 35267  | 19169.025 | 18879.200 | 289.825  | 0.822  | 1.512  | 494.878 | 268.986 | 264.919 | 4.067   |
| 1998          | 35675  | 19228.937 | 18851.070 | 377.867  | 1.059  | 1.965  | 492.368 | 265.388 | 260.173 | 5.215   |
| 1999          | 38516  | 20589.820 | 20097.544 | 492.276  | 1.278  | 2.391  | 523.195 | 279.689 | 273.002 | 6.687   |
| 2000          | 36283  | 19196.417 | 18647.691 | 548.726  | 1.512  | 2.858  | 485.652 | 256.946 | 249.602 | 7.345   |
| 2001          | 36281  | 19012.731 | 18346.971 | 665.760  | 1.835  | 3.502  | 479.301 | 251.174 | 242.378 | 8.795   |
| 2002          | 35983  | 18699.357 | 17925.261 | 774.097  | 2.151  | 4.140  | 470.038 | 244.265 | 234.154 | 10.112  |
| 2003          | 36205  | 18663.550 | 17765.014 | 898.535  | 2.482  | 4.814  | 468.019 | 241.262 | 229.647 | 11.615  |
| 2004          | 34611  | 17679.164 | 16680.550 | 998.614  | 2.885  | 5.649  | 442.596 | 226.076 | 213.306 | 12.770  |
| 2005          | 36826  | 18692.832 | 17494.104 | 1198.728 | 3.255  | 6.413  | 465.456 | 236.265 | 221.114 | 15.151  |
| 2006          | 34350  | 17308.564 | 16038.021 | 1270.543 | 3.699  | 7.341  | 430.192 | 216.769 | 200.857 | 15.912  |
| 2007          | 35326  | 17683.181 | 16220.833 | 1462.348 | 4.140  | 8.270  | 437.879 | 219.189 | 201.063 | 18.126  |
| 2008          | 38248  | 19006.374 | 17275.194 | 1731.180 | 4.526  | 9.108  | 468.788 | 232.952 | 211.734 | 21.218  |
| 2009          | 36902  | 18205.573 | 16352.140 | 1853.432 | 5.023  | 10.181 | 446.956 | 220.505 | 198.057 | 22.449  |
| 2010          | 37234  | 18237.758 | 16215.069 | 2022.690 | 5.432  | 11.091 | 445.505 | 218.215 | 194.013 | 24.201  |
| 2011          | 38093  | 18487.916 | 16211.660 | 2276.256 | 5.976  | 12.312 | 451.279 | 219.022 | 192.056 | 26.966  |
| 2012          | 38504  | 18491.158 | 16005.626 | 2485.533 | 6.455  | 13.442 | 451.211 | 216.689 | 187.563 | 29.127  |
| 2013          | 40290  | 19143.452 | 16364.666 | 2778.786 | 6.897  | 14.516 | 466.755 | 221.775 | 189.583 | 32.192  |
| 2014          | 40339  | 18992.005 | 16014.309 | 2977.695 | 7.382  | 15.679 | 461.866 | 217.451 | 183.358 | 34.093  |
| 2015          | 42303  | 19728.885 | 16461.676 | 3267.208 | 7.723  | 16.561 | 544.880 | 254.116 | 212.033 | 42.083  |
| 2016          | 43104  | 19876.724 | 16377.618 | 3499.106 | 8.118  | 17.604 | 550.009 | 253.628 | 208.979 | 44.649  |
| 2017          | 44107  | 20119.790 | 16338.276 | 3781.515 | 8.574  | 18.795 | 557.659 | 254.381 | 206.570 | 47.811  |
| 2018          | 45469  | 20535.123 | 16438.933 | 4096.190 | 9.009  | 19.947 | 569.564 | 257.229 | 205.919 | 51.310  |
| 2019          | 46963  | 21009.029 | 16582.809 | 4426.220 | 9.425  | 21.068 | 582.552 | 260.605 | 205.700 | 54.905  |
| 2020          | 48419  | 21428.512 | 16677.906 | 4750.606 | 9.811  | 22.170 | 685.853 | 303.533 | 236.241 | 67.292  |
| 2021          | 48463  | 21266.697 | 16287.818 | 4978.879 | 10.274 | 23.412 | 681.652 | 299.127 | 229.096 | 70.030  |
| 2022          | 49915  | 21663.568 | 16320.870 | 5342.698 | 10.704 | 24.662 | 696.712 | 302.378 | 227.805 | 74.573  |
| 2023          | 51391  | 22084.131 | 16372.742 | 5711.389 | 11.114 | 25.862 | 711.491 | 305.748 | 226.675 | 79.072  |
| 2024          | 52811  | 22418.456 | 16391.763 | 6026.692 | 11.412 | 26.883 | 725.093 | 307.804 | 225.058 | 82.746  |
| 2025          | 53848  | 22614.834 | 16314.735 | 6300.099 | 11.700 | 27.858 | 860.553 | 361.411 | 260.728 | 100.683 |
| 2026          | 54342  | 22571.522 | 16026.821 | 6544.701 | 12.044 | 28.995 | 864.886 | 359.241 | 255.078 | 104.163 |
| 2027          | 55267  | 22774.416 | 15897.442 | 6876.974 | 12.443 | 30.196 | 875.619 | 360.827 | 251.871 | 108.955 |
| 2028          | 56149  | 22915.561 | 15723.044 | 7192.517 | 12.810 | 31.387 | 885.102 | 361.228 | 247.849 | 113.379 |
| 2029          | 57014  | 22992.027 | 15509.981 | 7482.047 | 13.123 | 32.542 | 893.616 | 360.371 | 243.099 | 117.272 |
| 2030          | 57238  | 22895.360 | 15212.038 | 7683.321 | 13.423 | 33.558 | 1071.90 | 428.760 | 284.875 | 143.885 |
| 2031          | 57592  | 22715.871 | 14908.017 | 7807.854 | 13.557 | 34.372 | 1075.71 | 424.293 | 278.456 | 145.837 |
| 2032          | 58251  | 22759.207 | 14667.039 | 8092.168 | 13.892 | 35.556 | 1084.31 | 423.652 | 273.020 | 150.632 |
| 2033          | 58885  | 22786.258 | 14494.402 | 8291.855 | 14.082 | 36.390 | 1091.54 | 422.387 | 268.682 | 153.706 |
| 2034          | 59460  | 22806.106 | 14272.971 | 8533.135 | 14.351 | 37.416 | 1096.89 | 420.721 | 263.304 | 157.417 |
| 2035          | 58516  | 22262.998 | 13804.076 | 8458.922 | 14.456 | 37.995 | 1335.15 | 507.973 | 314.966 | 193.007 |
| 2036          | 56446  | 21140.051 | 12824.039 | 8316.012 | 14.733 | 39.338 | 1287.60 | 482.234 | 292.534 | 189.700 |
| 2037          | 56568  | 21011.845 | 12488.481 | 8523.363 | 15.067 | 40.565 | 1288.98 | 478.783 | 284.567 | 194.216 |
| 2038          | 56668  | 20787.483 | 12166.827 | 8620.656 | 15.213 | 41.470 | 1288.55 | 472.681 | 276.658 | 196.023 |
| 2039          | 56758  | 20709.267 | 11909.589 | 8799.678 | 15.504 | 42.491 | 1286.40 | 469.372 | 269.929 | 199.443 |

## Results for PHIM for Run 1 (Sensitivity\_Analysis\_1.RTF)

\*\*\*\*\*

### Main Results for E-Component for Run: 1, Simulation: 1, COD: Four Diseases Combined, Adjusted

| Variable Parameter          | Value                                  |
|-----------------------------|----------------------------------------|
| 1. Country                  | US (United States)                     |
| 2. Sex                      | M (Males)                              |
| 3. Year of start of process | 1990                                   |
| 4. Cause of Death           | Four Diseases Combined                 |
| 5. Effective Dose NULL      | CC:1                                   |
| 6. Effective Dose Ecig      | CC:1 Ecig:0.4 Dual:0.7                 |
| Note:                       | Death rates are per million population |

#### Results for Age Groups Combined and Years combined, Population and Number deaths adjusted for Ecig scenario,

| Age Group:All | NULL     | Ecig        |             |          | %Drop  | NULL   | Ecig    |         |         |         |
|---------------|----------|-------------|-------------|----------|--------|--------|---------|---------|---------|---------|
| Year          | Number   | Attrib      | Attrib      | Drop     | %Drop  | Attrib | Death   | Attrib  | Drop    |         |
|               | Deaths   | Deaths      | Deaths      | Deaths   | Deaths | Deaths | Rate    | Rates   | Rates   |         |
| All Comb      | 13228515 | 4509390.583 | 3708665.052 | 800725.5 | 6.053  | 17.757 | 3811.74 | 1305.37 | 1068.63 | 236.736 |

#### Results for Age Groups Combined, Population and Number deaths adjusted for Ecig scenario,

| Age Group:All | NULL   | Ecig       |            |          | %Drop  | NULL   | Ecig    |         |         |         |
|---------------|--------|------------|------------|----------|--------|--------|---------|---------|---------|---------|
| Year          | Number | Attrib     | Attrib     | Drop     | %Drop  | Attrib | Death   | Attrib  | Drop    |         |
|               | Deaths | Deaths     | Deaths     | Deaths   | Deaths | Deaths | Rate    | Rates   | Rates   |         |
| 1990          | 317161 | 125773.065 | 125773.065 | 0.000    | 0.000  | 0.000  | 5027.71 | 1993.78 | 1993.78 | 0.000   |
| 1991          | 313217 | 123999.442 | 123730.577 | 268.866  | 0.086  | 0.217  | 4883.81 | 1933.45 | 1929.26 | 4.192   |
| 1992          | 308579 | 122014.015 | 121309.643 | 704.372  | 0.228  | 0.577  | 4729.74 | 1870.18 | 1859.37 | 10.804  |
| 1993          | 311719 | 122810.618 | 121503.461 | 1307.157 | 0.419  | 1.064  | 4692.64 | 1848.83 | 1829.12 | 19.706  |
| 1994          | 305715 | 119925.592 | 117944.483 | 1981.108 | 0.648  | 1.652  | 4516.25 | 1771.69 | 1742.37 | 29.329  |
| 1995          | 303252 | 117896.496 | 115134.347 | 2762.149 | 0.911  | 2.343  | 4393.90 | 1708.35 | 1668.21 | 40.133  |
| 1996          | 299602 | 115698.645 | 112087.607 | 3611.038 | 1.205  | 3.121  | 4273.32 | 1650.42 | 1598.74 | 51.681  |
| 1997          | 294290 | 113359.847 | 108907.872 | 4451.975 | 1.513  | 3.927  | 4128.91 | 1590.70 | 1527.99 | 62.716  |
| 1998          | 289348 | 111444.212 | 106145.812 | 5298.400 | 1.831  | 4.754  | 3992.53 | 1538.10 | 1464.64 | 73.456  |
| 1999          | 311134 | 114877.722 | 107850.303 | 7027.419 | 2.259  | 6.117  | 4225.12 | 1560.48 | 1464.58 | 95.902  |
| 2000          | 303960 | 112379.704 | 104449.162 | 7930.543 | 2.609  | 7.057  | 4066.90 | 1504.22 | 1397.50 | 106.714 |
| 2001          | 296512 | 110024.943 | 101092.295 | 8932.648 | 3.013  | 8.119  | 3915.15 | 1453.52 | 1334.82 | 118.696 |
| 2002          | 292169 | 108289.173 | 98263.533  | 10025.64 | 3.431  | 9.258  | 3814.08 | 1414.56 | 1282.77 | 131.787 |
| 2003          | 286190 | 106539.023 | 95568.612  | 10970.41 | 3.833  | 10.297 | 3696.66 | 1377.22 | 1234.44 | 142.782 |
| 2004          | 274553 | 103037.251 | 91352.096  | 11685.16 | 4.256  | 11.341 | 3507.62 | 1317.61 | 1167.09 | 150.523 |
| 2005          | 272822 | 103044.562 | 90350.413  | 12694.15 | 4.653  | 12.319 | 3444.48 | 1302.41 | 1140.71 | 161.705 |
| 2006          | 264620 | 99672.555  | 86133.388  | 13539.17 | 5.116  | 13.584 | 3309.80 | 1248.28 | 1077.34 | 170.942 |
| 2007          | 258987 | 97839.152  | 83597.266  | 14241.89 | 5.499  | 14.556 | 3205.52 | 1212.75 | 1034.70 | 178.055 |
| 2008          | 260113 | 98075.852  | 82958.810  | 15117.04 | 5.812  | 15.414 | 3182.77 | 1202.07 | 1015.09 | 186.977 |
| 2009          | 254630 | 95617.338  | 79902.230  | 15715.11 | 6.172  | 16.435 | 3078.29 | 1158.11 | 965.958 | 192.155 |
| 2010          | 252683 | 94607.988  | 78234.173  | 16373.82 | 6.480  | 17.307 | 3017.03 | 1131.98 | 934.116 | 197.868 |
| 2011          | 252675 | 93633.119  | 76415.111  | 17218.01 | 6.814  | 18.389 | 2986.47 | 1109.25 | 903.183 | 206.066 |
| 2012          | 253639 | 92775.175  | 74726.962  | 18048.21 | 7.116  | 19.454 | 2964.75 | 1087.19 | 873.473 | 213.716 |
| 2013          | 257289 | 92345.780  | 73442.945  | 18902.84 | 7.347  | 20.470 | 2972.42 | 1069.82 | 848.476 | 221.340 |
| 2014          | 258622 | 91379.215  | 71775.338  | 19603.88 | 7.580  | 21.453 | 2952.21 | 1046.26 | 819.329 | 226.928 |
| 2015          | 261141 | 90750.242  | 70563.584  | 20186.66 | 7.730  | 22.244 | 3351.28 | 1168.90 | 905.556 | 263.346 |
| 2016          | 262939 | 88811.996  | 68033.947  | 20778.05 | 7.902  | 23.396 | 3341.84 | 1133.24 | 864.684 | 268.561 |
| 2017          | 265309 | 87325.126  | 65939.171  | 21385.95 | 8.061  | 24.490 | 3340.14 | 1104.08 | 830.151 | 273.928 |
| 2018          | 260426 | 87612.144  | 65887.088  | 21725.06 | 8.342  | 24.797 | 3247.37 | 1097.46 | 821.574 | 275.882 |
| 2019          | 263298 | 87797.760  | 65391.570  | 22406.19 | 8.510  | 25.520 | 3250.26 | 1089.08 | 807.223 | 281.859 |
| 2020          | 264302 | 87221.042  | 64466.774  | 22754.27 | 8.609  | 26.088 | 3722.07 | 1235.48 | 907.861 | 327.618 |
| 2021          | 257165 | 82001.292  | 59467.679  | 22533.61 | 8.762  | 27.480 | 3594.89 | 1153.39 | 831.293 | 322.096 |
| 2022          | 259332 | 81915.977  | 58715.525  | 23200.45 | 8.946  | 28.322 | 3596.22 | 1143.37 | 814.223 | 329.152 |
| 2023          | 261470 | 81810.810  | 58014.569  | 23796.24 | 9.101  | 29.087 | 3595.22 | 1132.64 | 797.702 | 334.943 |
| 2024          | 263268 | 81528.303  | 57268.542  | 24259.76 | 9.215  | 29.756 | 3588.69 | 1119.38 | 780.646 | 338.732 |
| 2025          | 260006 | 79599.213  | 55644.855  | 23954.36 | 9.213  | 30.094 | 4119.93 | 1272.09 | 881.720 | 390.367 |
| 2026          | 254297 | 75082.462  | 51499.119  | 23583.34 | 9.274  | 31.410 | 4011.35 | 1194.99 | 812.360 | 382.629 |
| 2027          | 253895 | 74444.425  | 50495.550  | 23948.88 | 9.433  | 32.170 | 3985.29 | 1179.46 | 792.609 | 386.852 |
| 2028          | 253329 | 73699.585  | 49409.711  | 24289.87 | 9.588  | 32.958 | 3954.77 | 1161.76 | 771.346 | 390.413 |
| 2029          | 252708 | 72819.703  | 48285.391  | 24534.31 | 9.709  | 33.692 | 3921.11 | 1141.36 | 749.213 | 392.143 |
| 2030          | 243814 | 69309.277  | 45847.185  | 23462.09 | 9.623  | 33.851 | 4512.73 | 1297.95 | 848.580 | 449.369 |
| 2031          | 238780 | 65433.368  | 42519.934  | 22913.43 | 9.596  | 35.018 | 4406.08 | 1222.18 | 784.599 | 437.582 |
| 2032          | 237476 | 64643.552  | 41460.504  | 23183.05 | 9.762  | 35.863 | 4365.18 | 1203.31 | 762.109 | 441.199 |
| 2033          | 236138 | 63793.514  | 40542.528  | 23250.99 | 9.846  | 36.447 | 4320.63 | 1182.54 | 741.810 | 440.726 |
| 2034          | 234659 | 63032.151  | 39635.655  | 23396.50 | 9.970  | 37.118 | 4271.11 | 1162.80 | 721.421 | 441.379 |
| 2035          | 219519 | 57653.301  | 36449.511  | 21203.79 | 9.659  | 36.778 | 4932.99 | 1315.47 | 819.087 | 496.384 |
| 2036          | 211829 | 52988.733  | 32593.375  | 20395.36 | 9.628  | 38.490 | 4756.77 | 1208.75 | 731.907 | 476.839 |
| 2037          | 209209 | 52026.921  | 31586.741  | 20440.18 | 9.770  | 39.288 | 4690.68 | 1185.50 | 708.207 | 477.296 |
| 2038          | 206622 | 50943.211  | 30567.764  | 20375.45 | 9.861  | 39.996 | 4620.95 | 1158.38 | 683.626 | 474.757 |
| 2039          | 204106 | 50085.991  | 29729.279  | 20356.71 | 9.974  | 40.644 | 4547.88 | 1135.19 | 662.427 | 472.764 |

## Results for PHIM for Run 1 (Sensitivity\_Analysis\_1.RTF)

\*\*\*\*\*

### Main Results for E-Component for Run: 1, Simulation: 1, COD: LUNG CANCER, Adjusted

| Variable Parameter          | Value                                  |
|-----------------------------|----------------------------------------|
| 1. Country                  | US (United States)                     |
| 2. Sex                      | M (Males)                              |
| 3. Year of start of process | 1990                                   |
| 4. Cause of Death           | LUNG CANCER                            |
| 5. Effective Dose NULL      | CC:1                                   |
| 6. Effective Dose Ecig      | CC:1 Ecig:0.4 Dual:0.7                 |
| Note:                       | Death rates are per million population |

#### Results for Age Groups Combined and Years combined, Population and Number deaths adjusted for Ecig scenario,

| Age Group:All | NULL    | Ecig        | %Drop       | NULL     | Ecig   | Drop   |         |         |         |        |
|---------------|---------|-------------|-------------|----------|--------|--------|---------|---------|---------|--------|
| Year          | Number  | Attrib      | Attrib      | Death    | Attrib | Attrib |         |         |         |        |
|               | Deaths  | Deaths      | Deaths      | Rate     | Rates  | Rates  |         |         |         |        |
| All Comb      | 3082667 | 2244988.113 | 2011642.868 | 233345.2 | 7.570  | 10.394 | 888.256 | 649.875 | 579.646 | 70.230 |

#### Results for Age Groups Combined, Population and Number deaths adjusted for Ecig scenario,

| Age Group:All | NULL   | Ecig      | %Drop     | NULL     | Ecig   | Drop   |
|---------------|--------|-----------|-----------|----------|--------|--------|
| Year          | Number | Attrib    | Attrib    | Death    | Attrib | Attrib |
|               | Deaths | Deaths    | Deaths    | Rate     | Rates  | Rates  |
| 1990          | 78822  | 63385.736 | 63385.736 | 0.000    | 0.000  | 0.000  |
| 1991          | 78462  | 62918.402 | 62887.194 | 31.208   | 0.040  | 0.050  |
| 1992          | 77987  | 62366.766 | 62285.896 | 80.870   | 0.104  | 0.130  |
| 1993          | 78544  | 62652.888 | 62495.777 | 157.111  | 0.200  | 0.251  |
| 1994          | 77441  | 61565.227 | 61322.238 | 242.989  | 0.314  | 0.395  |
| 1995          | 76911  | 60851.961 | 60501.604 | 350.357  | 0.456  | 0.576  |
| 1996          | 76243  | 60122.922 | 59638.904 | 484.018  | 0.635  | 0.805  |
| 1997          | 75490  | 59237.155 | 58614.197 | 622.958  | 0.825  | 1.052  |
| 1998          | 75405  | 58906.696 | 58107.281 | 799.415  | 1.060  | 1.357  |
| 1999          | 73191  | 56930.073 | 55967.547 | 962.526  | 1.315  | 1.691  |
| 2000          | 73828  | 57137.121 | 55971.193 | 1165.928 | 1.579  | 2.041  |
| 2001          | 73350  | 56481.726 | 55078.321 | 1403.405 | 1.913  | 2.485  |
| 2002          | 72512  | 55588.365 | 53948.937 | 1639.429 | 2.261  | 2.949  |
| 2003          | 72027  | 54945.856 | 53051.330 | 1894.527 | 2.630  | 3.448  |
| 2004          | 71402  | 54203.126 | 52018.937 | 2184.189 | 3.059  | 4.030  |
| 2005          | 71083  | 53744.603 | 51281.849 | 2462.755 | 3.465  | 4.582  |
| 2006          | 69795  | 52535.572 | 49780.209 | 2755.363 | 3.948  | 5.245  |
| 2007          | 68721  | 51492.124 | 48458.108 | 3034.015 | 4.415  | 5.892  |
| 2008          | 68403  | 51030.736 | 47670.628 | 3360.108 | 4.912  | 6.584  |
| 2009          | 67707  | 50276.199 | 46588.051 | 3688.148 | 5.447  | 7.336  |
| 2010          | 67417  | 49840.933 | 45833.575 | 4007.357 | 5.944  | 8.040  |
| 2011          | 66750  | 49072.841 | 44714.301 | 4358.540 | 6.530  | 8.882  |
| 2012          | 66423  | 48539.512 | 43806.924 | 4732.588 | 7.125  | 9.750  |
| 2013          | 65625  | 47675.741 | 42623.150 | 5052.591 | 7.699  | 10.598 |
| 2014          | 65352  | 47194.534 | 41805.886 | 5388.648 | 8.246  | 11.418 |
| 2015          | 64489  | 46305.842 | 40652.643 | 5653.199 | 8.766  | 12.208 |
| 2016          | 61977  | 44208.867 | 38443.249 | 5765.617 | 9.303  | 13.042 |
| 2017          | 60275  | 42702.624 | 36752.845 | 5949.779 | 9.871  | 13.933 |
| 2018          | 62892  | 44321.202 | 37702.044 | 6619.159 | 10.525 | 14.935 |
| 2019          | 63504  | 44493.088 | 37443.960 | 7049.128 | 11.100 | 15.843 |
| 2020          | 63963  | 44529.551 | 37079.549 | 7450.002 | 11.647 | 16.730 |
| 2021          | 57591  | 39852.556 | 32811.398 | 7041.158 | 12.226 | 17.668 |
| 2022          | 57951  | 39853.685 | 32408.877 | 7444.808 | 12.847 | 18.680 |
| 2023          | 58283  | 39847.050 | 32023.254 | 7823.797 | 13.424 | 19.635 |
| 2024          | 58521  | 39726.010 | 31581.577 | 8144.433 | 13.917 | 20.502 |
| 2025          | 58133  | 39207.348 | 30868.643 | 8338.705 | 14.344 | 21.268 |
| 2026          | 52006  | 34803.960 | 27086.184 | 7717.776 | 14.840 | 22.175 |
| 2027          | 51776  | 34484.595 | 26504.247 | 7980.348 | 15.413 | 23.142 |
| 2028          | 51501  | 34100.638 | 25893.977 | 8206.661 | 15.935 | 24.066 |
| 2029          | 51197  | 33669.838 | 25260.371 | 8409.467 | 16.426 | 24.976 |
| 2030          | 49788  | 32557.688 | 24202.940 | 8354.748 | 16.781 | 25.661 |
| 2031          | 44212  | 28646.393 | 21092.400 | 7553.993 | 17.086 | 26.370 |
| 2032          | 43809  | 28227.160 | 20521.617 | 7705.543 | 17.589 | 27.298 |
| 2033          | 43392  | 27786.623 | 20021.027 | 7765.596 | 17.896 | 27.947 |
| 2034          | 42941  | 27348.299 | 19503.943 | 7844.356 | 18.268 | 28.683 |
| 2035          | 40435  | 25570.077 | 18159.480 | 7410.597 | 18.327 | 28.982 |
| 2036          | 34628  | 21717.319 | 15189.439 | 6527.880 | 18.852 | 30.058 |
| 2037          | 34061  | 21256.024 | 14674.695 | 6581.328 | 19.322 | 30.962 |
| 2038          | 33499  | 20747.175 | 14173.946 | 6573.229 | 19.622 | 31.683 |
| 2039          | 32949  | 20327.688 | 13752.792 | 6574.895 | 19.955 | 32.345 |



## Results for PHIM for Run 1 (Sensitivity\_Analysis\_1.RTF)

\*\*\*\*\*

### Main Results for E-Component for Run: 1, Simulation: 1, COD: IHD, Adjusted

| Variable Parameter          | Value                                  |
|-----------------------------|----------------------------------------|
| 1. Country                  | US (United States)                     |
| 2. Sex                      | M (Males)                              |
| 3. Year of start of process | 1990                                   |
| 4. Cause of Death           | IHD                                    |
| 5. Effective Dose NULL      | CC:1                                   |
| 6. Effective Dose Ecig      | CC:1 Ecig:0.4 Dual:0.7                 |
| Note:                       | Death rates are per million population |

#### Results for Age Groups Combined and Years combined, Population and Number deaths adjusted for Ecig scenario,

| Age Group: | NULL    | Ecig        | %Drop      |          |        |        | NULL    | Ecig    | Drop    |        |
|------------|---------|-------------|------------|----------|--------|--------|---------|---------|---------|--------|
| Year       | Number  | Attrib      | Attrib     | Drop     | %Drop  | Attrib | Death   | Attrib  | Attrib  | Drop   |
|            | Deaths  | Deaths      | Deaths     | Deaths   | Deaths | Deaths | Rate    | Rates   | Rates   | Rates  |
| All Comb   | 6395210 | 1098877.421 | 763102.519 | 335774.9 | 5.250  | 30.556 | 1842.75 | 318.101 | 219.884 | 98.217 |

#### Results for Age Groups Combined, Population and Number deaths adjusted for Ecig scenario,

| Age Group: | NULL   | Ecig      | %Drop     |          |        |        | NULL    | Ecig    | Drop    |         |
|------------|--------|-----------|-----------|----------|--------|--------|---------|---------|---------|---------|
| Year       | Number | Attrib    | Attrib    | Drop     | %Drop  | Attrib | Death   | Attrib  | Attrib  | Drop    |
|            | Deaths | Deaths    | Deaths    | Deaths   | Deaths | Deaths | Rate    | Rates   | Rates   | Rates   |
| 1990       | 171484 | 38511.725 | 38511.725 | 0.000    | 0.000  | 0.000  | 2718.40 | 610.497 | 610.497 | 0.000   |
| 1991       | 168044 | 37309.838 | 37112.529 | 197.309  | 0.117  | 0.529  | 2620.21 | 581.750 | 578.674 | 3.077   |
| 1992       | 164549 | 36137.488 | 35616.539 | 520.949  | 0.317  | 1.442  | 2522.12 | 553.899 | 545.912 | 7.987   |
| 1993       | 164365 | 35599.588 | 34646.952 | 952.636  | 0.580  | 2.676  | 2474.37 | 535.926 | 521.577 | 14.349  |
| 1994       | 159874 | 34336.757 | 32901.763 | 1434.994 | 0.898  | 4.179  | 2361.77 | 507.267 | 486.050 | 21.217  |
| 1995       | 158097 | 33455.759 | 31474.144 | 1981.615 | 1.253  | 5.923  | 2290.71 | 484.782 | 456.038 | 28.744  |
| 1996       | 154897 | 32193.824 | 29641.070 | 2552.755 | 1.648  | 7.929  | 2209.35 | 459.239 | 422.780 | 36.460  |
| 1997       | 150003 | 30665.509 | 27567.498 | 3098.011 | 2.065  | 10.103 | 2104.55 | 430.308 | 386.774 | 43.534  |
| 1998       | 145452 | 29188.430 | 25586.217 | 3602.214 | 2.477  | 12.341 | 2007.00 | 402.844 | 353.049 | 49.795  |
| 1999       | 166022 | 33375.386 | 28398.647 | 4976.739 | 2.998  | 14.911 | 2254.54 | 453.366 | 385.646 | 67.720  |
| 2000       | 160351 | 32024.754 | 26502.512 | 5522.242 | 3.444  | 17.244 | 2145.46 | 428.655 | 354.596 | 74.059  |
| 2001       | 154557 | 30682.393 | 24577.643 | 6104.750 | 3.950  | 19.897 | 2040.77 | 405.339 | 324.523 | 80.816  |
| 2002       | 152027 | 30218.370 | 23439.614 | 6778.756 | 4.459  | 22.433 | 1984.61 | 394.736 | 305.990 | 88.746  |
| 2003       | 146899 | 29175.202 | 21911.444 | 7263.757 | 4.945  | 24.897 | 1897.46 | 377.146 | 283.026 | 94.120  |
| 2004       | 138569 | 27488.687 | 19962.859 | 7525.829 | 5.431  | 27.378 | 1770.32 | 351.518 | 255.040 | 96.478  |
| 2005       | 136099 | 27017.439 | 19017.671 | 7999.769 | 5.878  | 29.610 | 1718.31 | 341.482 | 240.105 | 101.377 |
| 2006       | 132169 | 26231.435 | 17834.563 | 8396.872 | 6.353  | 32.011 | 1653.14 | 328.517 | 223.071 | 105.447 |
| 2007       | 126776 | 25103.049 | 16532.834 | 8570.215 | 6.760  | 34.140 | 1569.13 | 311.161 | 204.629 | 106.532 |
| 2008       | 126171 | 24621.740 | 15780.247 | 8841.494 | 7.008  | 35.909 | 1543.84 | 301.777 | 193.089 | 108.688 |
| 2009       | 122772 | 23741.177 | 14800.386 | 8940.791 | 7.282  | 37.659 | 1484.22 | 287.552 | 178.926 | 108.627 |
| 2010       | 120916 | 23189.160 | 14103.369 | 9085.791 | 7.514  | 39.181 | 1443.73 | 277.458 | 168.394 | 109.064 |
| 2011       | 120641 | 22786.927 | 13484.160 | 9302.767 | 7.711  | 40.825 | 1425.91 | 269.951 | 159.375 | 110.576 |
| 2012       | 121395 | 22485.295 | 12971.465 | 9513.829 | 7.837  | 42.311 | 1418.97 | 263.495 | 151.622 | 111.873 |
| 2013       | 123172 | 22251.884 | 12542.315 | 9709.569 | 7.883  | 43.635 | 1422.98 | 257.786 | 144.900 | 112.886 |
| 2014       | 123806 | 21894.593 | 12068.850 | 9825.744 | 7.936  | 44.877 | 1413.27 | 250.685 | 137.768 | 112.916 |
| 2015       | 124410 | 21471.109 | 11618.782 | 9852.327 | 7.919  | 45.886 | 1596.57 | 276.557 | 149.106 | 127.451 |
| 2016       | 126922 | 21411.568 | 11369.349 | 10042.22 | 7.912  | 46.901 | 1613.13 | 273.213 | 144.500 | 128.713 |
| 2017       | 129041 | 21169.399 | 11023.394 | 10146.01 | 7.863  | 47.928 | 1624.58 | 267.651 | 138.871 | 128.871 |
| 2018       | 122212 | 19830.576 | 10149.777 | 9680.799 | 7.921  | 48.818 | 1523.91 | 248.404 | 126.562 | 121.842 |
| 2019       | 122676 | 19431.014 | 9810.510  | 9620.504 | 7.842  | 49.511 | 1514.37 | 241.031 | 121.105 | 119.925 |
| 2020       | 121717 | 18532.612 | 9229.774  | 9302.838 | 7.643  | 50.197 | 1714.09 | 262.513 | 129.979 | 132.534 |
| 2021       | 120355 | 18234.128 | 8944.769  | 9289.359 | 7.718  | 50.945 | 1682.43 | 256.472 | 125.038 | 131.434 |
| 2022       | 120445 | 17812.559 | 8603.437  | 9209.122 | 7.646  | 51.700 | 1670.25 | 248.626 | 119.306 | 129.320 |
| 2023       | 120514 | 17361.668 | 8274.162  | 9087.507 | 7.541  | 52.342 | 1657.07 | 240.367 | 113.770 | 126.597 |
| 2024       | 120435 | 16929.676 | 7984.201  | 8945.475 | 7.428  | 52.839 | 1641.69 | 232.443 | 108.835 | 123.608 |
| 2025       | 116870 | 15501.666 | 7236.061  | 8265.606 | 7.073  | 53.321 | 1851.86 | 247.735 | 114.659 | 133.076 |
| 2026       | 116300 | 15523.814 | 7203.189  | 8320.625 | 7.154  | 53.599 | 1834.54 | 247.072 | 113.625 | 133.447 |
| 2027       | 115265 | 15073.070 | 6941.801  | 8131.270 | 7.054  | 53.946 | 1809.27 | 238.810 | 108.963 | 129.848 |
| 2028       | 114180 | 14636.710 | 6669.971  | 7966.739 | 6.977  | 54.430 | 1782.49 | 230.725 | 104.126 | 126.599 |
| 2029       | 113092 | 14180.166 | 6421.666  | 7758.500 | 6.860  | 54.714 | 1754.78 | 222.256 | 99.641  | 122.615 |
| 2030       | 106249 | 12111.772 | 5441.216  | 6670.556 | 6.278  | 55.075 | 1966.55 | 226.816 | 100.711 | 126.105 |
| 2031       | 106735 | 12417.367 | 5568.772  | 6848.595 | 6.416  | 55.153 | 1969.53 | 231.935 | 102.758 | 129.177 |
| 2032       | 105365 | 12054.064 | 5347.794  | 6706.271 | 6.365  | 55.635 | 1936.77 | 224.381 | 98.301  | 126.080 |
| 2033       | 104009 | 11672.389 | 5124.197  | 6548.192 | 6.296  | 56.100 | 1903.06 | 216.370 | 93.758  | 122.612 |
| 2034       | 102630 | 11365.762 | 4971.177  | 6394.585 | 6.231  | 56.262 | 1868.00 | 209.673 | 90.482  | 119.191 |
| 2035       | 92342  | 8580.360  | 3712.449  | 4867.911 | 5.272  | 56.733 | 2075.08 | 195.777 | 83.425  | 112.352 |
| 2036       | 93687  | 8948.841  | 3845.939  | 5102.902 | 5.447  | 57.023 | 2103.80 | 204.135 | 86.363  | 117.772 |
| 2037       | 91915  | 8624.570  | 3705.064  | 4919.506 | 5.352  | 57.041 | 2060.83 | 196.522 | 83.071  | 113.451 |
| 2038       | 90196  | 8315.017  | 3529.927  | 4785.090 | 5.305  | 57.548 | 2017.16 | 189.073 | 78.944  | 110.128 |
| 2039       | 88543  | 8001.132  | 3388.126  | 4613.006 | 5.210  | 57.654 | 1972.92 | 181.344 | 75.494  | 105.850 |

## Results for PHIM for Run 1 (Sensitivity\_Analysis\_1.RTF)

\*\*\*\*\*

### Main Results for E-Component for Run: 1, Simulation: 1, COD: STROKE, Adjusted

| Variable Parameter          | Value                                  |
|-----------------------------|----------------------------------------|
| 1. Country                  | US (United States)                     |
| 2. Sex                      | M (Males)                              |
| 3. Year of start of process | 1990                                   |
| 4. Cause of Death           | STROKE                                 |
| 5. Effective Dose NULL      | CC:1                                   |
| 6. Effective Dose Ecig      | CC:1 Ecig:0.4 Dual:0.7                 |
| Note:                       | Death rates are per million population |

### Results for Age Groups Combined and Years combined, Population and Number deaths adjusted for Ecig scenario,

| Age Group:All | NULL    | Ecig       | %Drop      |          |        |        | NULL    | Ecig   | Drop   |        |
|---------------|---------|------------|------------|----------|--------|--------|---------|--------|--------|--------|
| Year          | Number  | Attrib     | Attrib     | Drop     | %Drop  | Attrib | Death   | Attrib | Attrib | Drop   |
|               | Deaths  | Deaths     | Deaths     | Deaths   | Deaths | Deaths | Rate    | Rates  | Rates  | Rates  |
| All Comb      | 1499248 | 149918.462 | 102260.563 | 47657.90 | 3.179  | 31.789 | 432.001 | 43.398 | 29.466 | 13.932 |

### Results for Age Groups Combined, Population and Number deaths adjusted for Ecig scenario,

| Age Group:All | NULL   | Ecig     | %Drop    |          |        |        | NULL    | Ecig   | Drop   |        |
|---------------|--------|----------|----------|----------|--------|--------|---------|--------|--------|--------|
| Year          | Number | Attrib   | Attrib   | Drop     | %Drop  | Attrib | Death   | Attrib | Attrib | Drop   |
|               | Deaths | Deaths   | Deaths   | Deaths   | Deaths | Deaths | Rate    | Rates  | Rates  | Rates  |
| 1990          | 32862  | 4613.166 | 4613.166 | 0.000    | 0.000  | 0.000  | 520.936 | 73.129 | 73.129 | 0.000  |
| 1991          | 32619  | 4555.566 | 4529.884 | 25.682   | 0.079  | 0.564  | 508.609 | 71.032 | 70.632 | 0.400  |
| 1992          | 32100  | 4453.572 | 4387.847 | 65.725   | 0.205  | 1.476  | 492.015 | 68.262 | 67.255 | 1.008  |
| 1993          | 32897  | 4462.473 | 4339.260 | 123.213  | 0.375  | 2.761  | 495.228 | 67.179 | 65.323 | 1.856  |
| 1994          | 33325  | 4499.513 | 4307.254 | 192.259  | 0.577  | 4.273  | 492.295 | 66.473 | 63.630 | 2.843  |
| 1995          | 33572  | 4472.774 | 4201.944 | 270.830  | 0.807  | 6.055  | 486.431 | 64.812 | 60.883 | 3.928  |
| 1996          | 33875  | 4406.878 | 4049.525 | 357.353  | 1.055  | 8.109  | 483.164 | 62.863 | 57.760 | 5.104  |
| 1997          | 33523  | 4288.158 | 3842.950 | 445.208  | 1.328  | 10.382 | 470.330 | 60.173 | 53.917 | 6.256  |
| 1998          | 32805  | 4120.148 | 3595.508 | 524.640  | 1.599  | 12.734 | 452.652 | 56.864 | 49.612 | 7.252  |
| 1999          | 33389  | 3982.443 | 3378.130 | 604.313  | 1.810  | 15.174 | 453.408 | 54.097 | 45.874 | 8.223  |
| 2000          | 33477  | 4021.411 | 3317.195 | 704.216  | 2.104  | 17.512 | 447.918 | 53.827 | 44.383 | 9.444  |
| 2001          | 32298  | 3848.092 | 3075.961 | 772.132  | 2.391  | 20.065 | 426.459 | 50.836 | 40.615 | 10.221 |
| 2002          | 31614  | 3783.081 | 2933.228 | 849.853  | 2.688  | 22.465 | 412.702 | 49.418 | 38.291 | 11.126 |
| 2003          | 31019  | 3754.415 | 2820.545 | 933.870  | 3.011  | 24.874 | 400.663 | 48.533 | 36.432 | 12.101 |
| 2004          | 29923  | 3666.274 | 2666.757 | 999.517  | 3.340  | 27.262 | 382.293 | 46.883 | 34.070 | 12.814 |
| 2005          | 28753  | 3589.688 | 2528.105 | 1061.583 | 3.692  | 29.573 | 363.018 | 45.371 | 31.918 | 13.453 |
| 2006          | 28240  | 3596.985 | 2449.786 | 1147.198 | 4.062  | 31.893 | 353.216 | 45.048 | 30.641 | 14.407 |
| 2007          | 28086  | 3560.798 | 2349.344 | 1211.454 | 4.313  | 34.022 | 347.619 | 44.137 | 29.078 | 15.059 |
| 2008          | 27194  | 3417.001 | 2188.616 | 1228.385 | 4.517  | 35.949 | 332.748 | 41.881 | 26.780 | 15.100 |
| 2009          | 27143  | 3394.390 | 2114.111 | 1280.278 | 4.717  | 37.717 | 328.134 | 41.113 | 25.558 | 15.555 |
| 2010          | 26994  | 3340.137 | 2029.043 | 1311.095 | 4.857  | 39.253 | 322.313 | 39.965 | 24.227 | 15.738 |
| 2011          | 27052  | 3285.435 | 1945.729 | 1339.706 | 4.952  | 40.777 | 319.743 | 38.922 | 22.997 | 15.924 |
| 2012          | 27161  | 3259.209 | 1877.975 | 1381.235 | 5.085  | 42.379 | 317.479 | 38.193 | 21.951 | 16.242 |
| 2013          | 28022  | 3274.703 | 1839.284 | 1435.419 | 5.122  | 43.834 | 323.739 | 37.937 | 21.249 | 16.688 |
| 2014          | 28926  | 3298.083 | 1807.159 | 1490.924 | 5.154  | 45.206 | 330.195 | 37.762 | 20.629 | 17.133 |
| 2015          | 29712  | 3244.406 | 1741.285 | 1503.121 | 5.059  | 46.330 | 381.296 | 41.789 | 22.346 | 19.443 |
| 2016          | 30683  | 3314.836 | 1747.143 | 1567.693 | 5.109  | 47.293 | 389.966 | 42.297 | 22.205 | 20.092 |
| 2017          | 31605  | 3333.314 | 1720.157 | 1613.157 | 5.104  | 48.395 | 397.902 | 42.144 | 21.656 | 20.488 |
| 2018          | 29541  | 2925.242 | 1482.996 | 1442.246 | 4.882  | 49.303 | 368.364 | 36.642 | 18.492 | 18.150 |
| 2019          | 29808  | 2864.628 | 1431.226 | 1433.402 | 4.809  | 50.038 | 367.959 | 35.534 | 17.668 | 17.866 |
| 2020          | 29819  | 2730.366 | 1346.459 | 1383.907 | 4.641  | 50.686 | 419.930 | 38.675 | 18.962 | 19.714 |
| 2021          | 30344  | 2647.911 | 1284.556 | 1363.355 | 4.493  | 51.488 | 424.179 | 37.244 | 17.957 | 19.288 |
| 2022          | 30568  | 2586.165 | 1233.959 | 1352.206 | 4.424  | 52.286 | 423.900 | 36.097 | 17.112 | 18.986 |
| 2023          | 30789  | 2517.960 | 1186.367 | 1331.593 | 4.325  | 52.884 | 423.343 | 34.860 | 16.313 | 18.548 |
| 2024          | 30962  | 2454.161 | 1143.253 | 1310.908 | 4.234  | 53.416 | 422.059 | 33.695 | 15.584 | 18.111 |
| 2025          | 30573  | 2275.364 | 1048.175 | 1227.189 | 4.014  | 53.934 | 484.443 | 36.363 | 16.609 | 19.754 |
| 2026          | 31028  | 2183.166 | 998.364  | 1184.802 | 3.818  | 54.270 | 489.444 | 34.747 | 15.748 | 18.998 |
| 2027          | 30920  | 2112.345 | 959.313  | 1153.032 | 3.729  | 54.585 | 485.342 | 33.467 | 15.058 | 18.409 |
| 2028          | 30787  | 2046.677 | 922.170  | 1124.506 | 3.653  | 54.943 | 480.624 | 32.263 | 14.396 | 17.866 |
| 2029          | 30646  | 1977.671 | 885.743  | 1091.929 | 3.563  | 55.213 | 475.517 | 30.997 | 13.744 | 17.254 |
| 2030          | 29735  | 1744.457 | 776.090  | 968.367  | 3.257  | 55.511 | 550.365 | 32.668 | 14.365 | 18.304 |
| 2031          | 29395  | 1653.738 | 730.655  | 923.082  | 3.140  | 55.818 | 542.409 | 30.889 | 13.482 | 17.407 |
| 2032          | 29158  | 1603.120 | 698.160  | 904.961  | 3.104  | 56.450 | 535.962 | 29.841 | 12.833 | 17.008 |
| 2033          | 28911  | 1548.245 | 670.043  | 878.202  | 3.038  | 56.722 | 528.987 | 28.700 | 12.260 | 16.440 |
| 2034          | 28639  | 1511.985 | 648.775  | 863.210  | 3.014  | 57.091 | 521.273 | 27.893 | 11.809 | 16.084 |
| 2035          | 27202  | 1239.866 | 530.323  | 709.542  | 2.608  | 57.227 | 611.273 | 28.290 | 11.917 | 16.373 |
| 2036          | 26051  | 1182.522 | 501.237  | 681.285  | 2.615  | 57.613 | 584.987 | 26.975 | 11.256 | 15.719 |
| 2037          | 25610  | 1134.483 | 484.128  | 650.355  | 2.539  | 57.326 | 574.204 | 25.851 | 10.855 | 14.996 |
| 2038          | 25167  | 1093.537 | 461.110  | 632.427  | 2.513  | 57.833 | 562.846 | 24.866 | 10.312 | 14.553 |
| 2039          | 24727  | 1047.905 | 440.575  | 607.330  | 2.456  | 57.957 | 550.971 | 23.751 | 9.817  | 13.934 |

## Results for PHIM for Run 1 (Sensitivity\_Analysis\_1.RTF)

\*\*\*\*\*

### Main Results for E-Component for Run: 1, Simulation: 1, COD: COPD, Adjusted

| Variable Parameter          | Value                                  |
|-----------------------------|----------------------------------------|
| 1. Country                  | US (United States)                     |
| 2. Sex                      | M (Males)                              |
| 3. Year of start of process | 1990                                   |
| 4. Cause of Death           | COPD                                   |
| 5. Effective Dose NULL      | CC:1                                   |
| 6. Effective Dose Ecig      | CC:1 Ecig:0.4 Dual:0.7                 |
| Note:                       | Death rates are per million population |

#### Results for Age Groups Combined and Years combined, Population and Number deaths adjusted for Ecig scenario,

| Age Group:All | NULL    | Ecig        | %Drop      |          |        | NULL   | Ecig    | Drop    |         |        |
|---------------|---------|-------------|------------|----------|--------|--------|---------|---------|---------|--------|
| Year          | Number  | Attrib      | Attrib     | Drop     | %Drop  | Attrib | Death   | Attrib  | Attrib  | Drop   |
|               | Deaths  | Deaths      | Deaths     | Deaths   | Deaths | Deaths | Rate    | Rates   | Rates   | Rates  |
| All Comb      | 2251391 | 1015606.587 | 831659.102 | 183947.5 | 8.170  | 18.112 | 648.728 | 293.996 | 239.639 | 54.357 |

#### Results for Age Groups Combined, Population and Number deaths adjusted for Ecig scenario,

| Age Group:All | NULL   | Ecig      | %Drop     |          |        | NULL   | Ecig    | Drop    |         |         |
|---------------|--------|-----------|-----------|----------|--------|--------|---------|---------|---------|---------|
| Year          | Number | Attrib    | Attrib    | Drop     | %Drop  | Attrib | Death   | Attrib  | Attrib  | Drop    |
|               | Deaths | Deaths    | Deaths    | Deaths   | Deaths | Deaths | Rate    | Rates   | Rates   | Rates   |
| 1990          | 33993  | 19262.437 | 19262.437 | 0.000    | 0.000  | 0.000  | 538.865 | 305.353 | 305.353 | 0.000   |
| 1991          | 34092  | 19215.636 | 19200.970 | 14.666   | 0.043  | 0.076  | 531.576 | 299.618 | 299.389 | 0.229   |
| 1992          | 33942  | 19056.189 | 19019.362 | 36.828   | 0.109  | 0.193  | 520.248 | 292.085 | 291.519 | 0.566   |
| 1993          | 35914  | 20095.670 | 20021.472 | 74.197   | 0.207  | 0.369  | 540.647 | 302.526 | 301.404 | 1.122   |
| 1994          | 35076  | 19524.095 | 19413.229 | 110.866  | 0.316  | 0.568  | 518.164 | 288.435 | 286.787 | 1.648   |
| 1995          | 34672  | 19116.002 | 18956.654 | 159.348  | 0.460  | 0.834  | 502.372 | 276.995 | 274.668 | 2.327   |
| 1996          | 34587  | 18975.021 | 18758.109 | 216.913  | 0.627  | 1.143  | 493.322 | 270.675 | 267.553 | 3.123   |
| 1997          | 35274  | 19169.025 | 18883.227 | 285.798  | 0.810  | 1.491  | 494.903 | 268.986 | 264.933 | 4.053   |
| 1998          | 35686  | 19228.937 | 18856.807 | 372.130  | 1.043  | 1.935  | 492.406 | 265.388 | 260.194 | 5.195   |
| 1999          | 38532  | 20589.820 | 20105.980 | 483.841  | 1.256  | 2.350  | 523.255 | 279.689 | 273.034 | 6.655   |
| 2000          | 36303  | 19196.417 | 18658.261 | 538.157  | 1.482  | 2.803  | 485.730 | 256.946 | 249.642 | 7.304   |
| 2001          | 36307  | 19012.731 | 18360.371 | 652.361  | 1.797  | 3.431  | 479.401 | 251.174 | 242.430 | 8.743   |
| 2002          | 36016  | 18699.357 | 17941.754 | 757.603  | 2.104  | 4.051  | 470.164 | 244.265 | 234.218 | 10.047  |
| 2003          | 36246  | 18663.550 | 17785.293 | 878.257  | 2.423  | 4.706  | 468.182 | 241.262 | 229.729 | 11.533  |
| 2004          | 34658  | 17679.164 | 16703.543 | 975.621  | 2.815  | 5.518  | 442.785 | 226.076 | 213.400 | 12.676  |
| 2005          | 36886  | 18692.832 | 17522.789 | 1170.043 | 3.172  | 6.259  | 465.698 | 236.265 | 221.232 | 15.033  |
| 2006          | 34415  | 17308.564 | 16068.829 | 1239.734 | 3.602  | 7.163  | 430.461 | 216.769 | 200.985 | 15.784  |
| 2007          | 35404  | 17683.181 | 16256.980 | 1426.201 | 4.028  | 8.065  | 438.204 | 219.189 | 201.215 | 17.974  |
| 2008          | 38345  | 19006.374 | 17319.319 | 1687.055 | 4.400  | 8.876  | 469.196 | 232.952 | 211.921 | 21.031  |
| 2009          | 37009  | 18205.573 | 16399.682 | 1805.891 | 4.880  | 9.919  | 447.408 | 220.505 | 198.260 | 22.245  |
| 2010          | 37355  | 18237.758 | 16268.186 | 1969.573 | 5.273  | 10.799 | 446.023 | 218.215 | 194.242 | 23.973  |
| 2011          | 38232  | 18487.916 | 16270.920 | 2216.996 | 5.799  | 11.992 | 451.875 | 219.022 | 192.313 | 26.709  |
| 2012          | 38659  | 18491.158 | 16070.599 | 2420.560 | 6.261  | 13.090 | 451.885 | 216.689 | 187.847 | 28.842  |
| 2013          | 40470  | 19143.452 | 16438.196 | 2705.256 | 6.685  | 14.131 | 467.544 | 221.775 | 189.908 | 31.867  |
| 2014          | 40537  | 18992.005 | 16093.444 | 2898.561 | 7.150  | 15.262 | 462.738 | 217.451 | 183.710 | 33.741  |
| 2015          | 42531  | 19728.885 | 16550.873 | 3178.011 | 7.472  | 16.108 | 545.811 | 254.116 | 212.400 | 41.716  |
| 2016          | 43357  | 19876.724 | 16474.206 | 3402.518 | 7.848  | 17.118 | 551.048 | 253.628 | 209.381 | 44.247  |
| 2017          | 44388  | 20119.790 | 16442.776 | 3677.014 | 8.284  | 18.276 | 558.826 | 254.381 | 207.009 | 47.372  |
| 2018          | 45781  | 20535.123 | 16552.272 | 3982.851 | 8.700  | 19.395 | 570.865 | 257.229 | 206.397 | 50.832  |
| 2019          | 47310  | 21009.029 | 16705.873 | 4303.156 | 9.096  | 20.482 | 584.012 | 260.605 | 206.225 | 54.380  |
| 2020          | 48803  | 21428.512 | 16810.992 | 4617.520 | 9.461  | 21.548 | 687.281 | 303.533 | 236.743 | 66.790  |
| 2021          | 48875  | 21266.697 | 16426.956 | 4839.741 | 9.902  | 22.757 | 683.213 | 299.127 | 229.631 | 69.496  |
| 2022          | 50367  | 21663.568 | 16469.252 | 5194.316 | 10.313 | 23.977 | 698.445 | 302.378 | 228.383 | 73.995  |
| 2023          | 51884  | 22084.131 | 16530.787 | 5553.344 | 10.703 | 25.146 | 713.411 | 305.748 | 227.299 | 78.449  |
| 2024          | 53349  | 22418.456 | 16559.510 | 5858.946 | 10.982 | 26.134 | 727.215 | 307.804 | 225.728 | 82.076  |
| 2025          | 54431  | 22614.834 | 16491.977 | 6122.858 | 11.249 | 27.075 | 862.482 | 361.411 | 261.324 | 100.088 |
| 2026          | 54964  | 22571.522 | 16211.382 | 6360.140 | 11.571 | 28.178 | 867.020 | 359.241 | 255.722 | 103.519 |
| 2027          | 55933  | 22774.416 | 16090.189 | 6684.226 | 11.950 | 29.350 | 877.960 | 360.827 | 252.561 | 108.265 |
| 2028          | 56861  | 22915.561 | 15923.593 | 6991.967 | 12.297 | 30.512 | 887.664 | 361.228 | 248.587 | 112.641 |
| 2029          | 57772  | 22992.027 | 15717.611 | 7274.416 | 12.592 | 31.639 | 896.415 | 360.371 | 243.880 | 116.491 |
| 2030          | 58043  | 22895.360 | 15426.939 | 7468.420 | 12.867 | 32.620 | 1074.30 | 428.760 | 285.535 | 143.224 |
| 2031          | 58438  | 22715.871 | 15128.107 | 7587.764 | 12.984 | 33.403 | 1078.32 | 424.293 | 279.151 | 145.142 |
| 2032          | 59144  | 22759.207 | 14892.933 | 7866.274 | 13.300 | 34.563 | 1087.16 | 423.652 | 273.756 | 149.896 |
| 2033          | 59826  | 22786.258 | 14727.261 | 8058.996 | 13.471 | 35.368 | 1094.64 | 422.387 | 269.466 | 152.922 |
| 2034          | 60449  | 22806.106 | 14511.760 | 8294.346 | 13.721 | 36.369 | 1100.25 | 420.721 | 264.133 | 156.588 |
| 2035          | 59541  | 22262.998 | 14047.258 | 8215.739 | 13.798 | 36.903 | 1337.99 | 507.973 | 315.667 | 192.306 |
| 2036          | 57464  | 21140.051 | 13056.760 | 8083.291 | 14.067 | 38.237 | 1290.40 | 482.234 | 293.199 | 189.035 |
| 2037          | 57623  | 21011.845 | 12722.854 | 8288.991 | 14.385 | 39.449 | 1291.97 | 478.783 | 285.259 | 193.524 |
| 2038          | 57760  | 20787.483 | 12402.781 | 8384.703 | 14.516 | 40.335 | 1291.76 | 472.681 | 277.379 | 195.301 |
| 2039          | 57886  | 20709.267 | 12147.787 | 8561.480 | 14.790 | 41.341 | 1289.83 | 469.372 | 270.677 | 198.696 |

## Results for PHIM for Run 2 (Sensitivity\_Analysis\_1.RTF)

---

### Control File Details for Run: 2

| Variable Parameter                                       | Value                  |
|----------------------------------------------------------|------------------------|
| 1. Name for Reference Scenario                           | NULL                   |
| 2. Name for Test Scenario                                | Ecig                   |
| 3. Name for Product 1                                    | CC                     |
| 4. Name for Product 2                                    | Ecig                   |
| 5. Name for Product 3                                    | -                      |
| 6. Name for Product 4                                    | Dual                   |
| 7. Country                                               | US (United States)     |
| 8. Sex                                                   | F (Females)            |
| 9. Year of start of process                              | 1990                   |
| 10. Number of months of follow-up                        | 600                    |
| 11. Follow-up interval length (in months)                | 12                     |
| 12. Lower age for risk estimation                        | 10                     |
| 13. Upper age for risk estimation                        | 79                     |
| 14. The effective dose for Product 1 (F1) - Ref          | 1                      |
| 15. The effective dose for Product 2 (F2) - Ref          | -                      |
| 16. The effective dose for Product 3 (F3) - Ref          | -                      |
| 17. The effective dose for Product 4 (F4) - Ref          | -                      |
| 18. The effective dose for Product 1 (F1) - Test         | 1                      |
| 19. The effective dose for Product 2 (F2) - Test         | 0.4                    |
| 20. The effective dose for Product 3 (F3) - Test         | -                      |
| 21. The effective dose for Product 4 (F4) - Test         | FROMF2                 |
| 22. Number in population to be simulated                 | 100000                 |
| 23. Number of MC simulations                             | 1                      |
| 24. The random number seed for the first simulation      | 15975263               |
| 25. Source for the population file (POP)                 | UN4                    |
| 26. Source for the socioeconomic prevalence file (SEP)   | -                      |
| 27. Source for the current smoking prevalence file (CSP) | ISS3                   |
| 28. Source for the former smoking prevalence file (FSP)  | ISS3                   |
| 29. Source for the quit-time distribution file (QTD)     | NHIS2006               |
| 30. Source for the death file (MORT)                     | APR-20                 |
| 31. Source for the relative risk file (RR)               | PNLEST                 |
| 32. Source for the half-life file (H)                    | PNLEST                 |
| 33. Assumption Set for TTP Factor Reference              | F1                     |
| 34. Assumption Set for TTP Factor Test                   | F1                     |
| 35. Assumption Set for TTP Reference                     | ISS3                   |
| 36. Assumption Set for TTP Test                          | ISS3                   |
| 37. Assumption Set for TP for socioeconomic group        | -                      |
| 38. Source for Output Choice file (OUTC)                 | BASIC                  |
| 39. Output for DTP P1                                    | N                      |
| 40. Output for DTP P2                                    | N                      |
| 41. Output for Main P Component                          | Y                      |
| 42. Output for DTP E1                                    | N                      |
| 43. Output for DTP E2                                    | N                      |
| 44. Output for DTP E3                                    | N                      |
| 45. Output for Main E Component                          | Y                      |
| 46. Output file name                                     | Sensitivity_Analysis_1 |
| 47. Run number for P-Component                           | -                      |
| 48. Results file for E-Component                         | -                      |
| 49. Components required                                  | PE                     |
| 50. Results folder for P to be used in E-Component       | -                      |
| 51. Fixed age of starting product use                    | 16                     |
| 52. Output absolute risk file?                           | N                      |

## Results for PHIM for Run 2 (Sensitivity\_Analysis\_1.RTF)

\*\*\*\*\*

TTP values for Run: 2, Scenario: NULL

| Variable Parameter | Value               |
|--------------------|---------------------|
| 1. Country         | US (United States)  |
| 2. Sex             | F (Females)         |
| 3. Assumption Set  | ISS3                |
| Note:              | Period is in Months |

| Age   | Period  | Initiation  | Cessation    | Re-initiation |
|-------|---------|-------------|--------------|---------------|
|       |         | Never<br>CC | CC<br>Former | Former<br>CC  |
| 10-14 | 1-12    | 0.003758    | 0.008742     | 0.000000      |
| 15-19 | 1-12    | 0.003469    | 0.002515     | 0.000000      |
| 20-24 | 1-12    | 0.000276    | 0.000761     | 0.000000      |
| 25-29 | 1-12    | 0.000137    | 0.001375     | 0.000000      |
| 30-34 | 1-12    | 0.000069    | 0.001149     | 0.000000      |
| 35-39 | 1-12    | 0.000000    | 0.000991     | 0.000000      |
| 40-44 | 1-12    | 0.000000    | 0.000833     | 0.000000      |
| 45-49 | 1-12    | 0.000000    | 0.001723     | 0.000000      |
| 50-54 | 1-12    | 0.000000    | 0.002336     | 0.000000      |
| 55-59 | 1-12    | 0.000000    | 0.002233     | 0.000000      |
| 60-64 | 1-12    | 0.000000    | 0.004634     | 0.000000      |
| 65-69 | 1-12    | 0.000000    | 0.003505     | 0.000000      |
| 70-74 | 1-12    | 0.000000    | 0.004329     | 0.000000      |
| 75-79 | 1-12    | 0.000000    | 0.004329     | 0.000000      |
| 10-14 | 13-72   | 0.004794    | 0.008742     | 0.000000      |
| 15-19 | 13-72   | 0.004527    | 0.004082     | 0.000000      |
| 20-24 | 13-72   | 0.000105    | 0.001261     | 0.000000      |
| 25-29 | 13-72   | 0.000053    | 0.000952     | 0.000000      |
| 30-34 | 13-72   | 0.000026    | 0.000733     | 0.000000      |
| 35-39 | 13-72   | 0.000000    | 0.000753     | 0.000000      |
| 40-44 | 13-72   | 0.000000    | 0.001535     | 0.000000      |
| 45-49 | 13-72   | 0.000000    | 0.002998     | 0.000000      |
| 50-54 | 13-72   | 0.000000    | 0.003159     | 0.000000      |
| 55-59 | 13-72   | 0.000000    | 0.002965     | 0.000000      |
| 60-64 | 13-72   | 0.000000    | 0.003633     | 0.000000      |
| 65-69 | 13-72   | 0.000000    | 0.004522     | 0.000000      |
| 70-74 | 13-72   | 0.000000    | 0.005208     | 0.000000      |
| 75-79 | 13-72   | 0.000000    | 0.005208     | 0.000000      |
| 10-14 | 73-132  | 0.003969    | 0.008742     | 0.000000      |
| 15-19 | 73-132  | 0.003056    | 0.003373     | 0.000000      |
| 20-24 | 73-132  | 0.001459    | 0.003881     | 0.000000      |
| 25-29 | 73-132  | 0.000714    | 0.001953     | 0.000000      |
| 30-34 | 73-132  | 0.000111    | 0.001338     | 0.000000      |
| 35-39 | 73-132  | 0.000000    | 0.001507     | 0.000000      |
| 40-44 | 73-132  | 0.000000    | 0.002080     | 0.000000      |
| 45-49 | 73-132  | 0.000000    | 0.003809     | 0.000000      |
| 50-54 | 73-132  | 0.000000    | 0.004871     | 0.000000      |
| 55-59 | 73-132  | 0.000000    | 0.004560     | 0.000000      |
| 60-64 | 73-132  | 0.000000    | 0.007192     | 0.000000      |
| 65-69 | 73-132  | 0.000000    | 0.007033     | 0.000000      |
| 70-74 | 73-132  | 0.000000    | 0.008206     | 0.000000      |
| 75-79 | 73-132  | 0.000000    | 0.008206     | 0.000000      |
| 10-14 | 133-192 | 0.002861    | 0.008742     | 0.000000      |
| 15-19 | 133-192 | 0.002594    | 0.003996     | 0.000000      |
| 20-24 | 133-192 | 0.001247    | 0.002805     | 0.000000      |
| 25-29 | 133-192 | 0.000289    | 0.001574     | 0.000000      |
| 30-34 | 133-192 | 0.000132    | 0.001293     | 0.000000      |
| 35-39 | 133-192 | 0.000000    | 0.001219     | 0.000000      |
| 40-44 | 133-192 | 0.000000    | 0.001657     | 0.000000      |
| 45-49 | 133-192 | 0.000000    | 0.001995     | 0.000000      |
| 50-54 | 133-192 | 0.000000    | 0.002154     | 0.000000      |
| 55-59 | 133-192 | 0.000000    | 0.002072     | 0.000000      |
| 60-64 | 133-192 | 0.000000    | 0.005049     | 0.000000      |
| 65-69 | 133-192 | 0.000000    | 0.003680     | 0.000000      |
| 70-74 | 133-192 | 0.000000    | 0.006144     | 0.000000      |
| 75-79 | 133-192 | 0.000000    | 0.006144     | 0.000000      |
| 10-14 | 193-252 | 0.001859    | 0.008742     | 0.000000      |
| 15-19 | 193-252 | 0.002232    | 0.005770     | 0.000000      |
| 20-24 | 193-252 | 0.001079    | 0.003262     | 0.000000      |
| 25-29 | 193-252 | 0.000531    | 0.002002     | 0.000000      |
| 30-34 | 193-252 | 0.000263    | 0.003240     | 0.000000      |
| 35-39 | 193-252 | 0.000000    | 0.001771     | 0.000000      |
| 40-44 | 193-252 | 0.000000    | 0.002173     | 0.000000      |
| 45-49 | 193-252 | 0.000000    | 0.002075     | 0.000000      |
| 50-54 | 193-252 | 0.000000    | 0.003431     | 0.000000      |

### Results for PHIM for Run 2 (Sensitivity\_Analysis\_1.RTF)

|       |         |          |          |          |
|-------|---------|----------|----------|----------|
| 55-59 | 193-252 | 0.000000 | 0.002906 | 0.000000 |
| 60-64 | 193-252 | 0.000000 | 0.007139 | 0.000000 |
| 65-69 | 193-252 | 0.000000 | 0.004963 | 0.000000 |
| 70-74 | 193-252 | 0.000000 | 0.006269 | 0.000000 |
| 75-79 | 193-252 | 0.000000 | 0.006269 | 0.000000 |
| 10-14 | 253+    | 0.000931 | 0.008742 | 0.000000 |
| 15-19 | 253+    | 0.001798 | 0.009440 | 0.000000 |
| 20-24 | 253+    | 0.000023 | 0.002831 | 0.000000 |
| 25-29 | 253+    | 0.000073 | 0.002655 | 0.000000 |
| 30-34 | 253+    | 0.000037 | 0.004614 | 0.000000 |
| 35-39 | 253+    | 0.000000 | 0.002607 | 0.000000 |
| 40-44 | 253+    | 0.000000 | 0.003115 | 0.000000 |
| 45-49 | 253+    | 0.000000 | 0.002132 | 0.000000 |
| 50-54 | 253+    | 0.000000 | 0.003497 | 0.000000 |
| 55-59 | 253+    | 0.000000 | 0.002942 | 0.000000 |
| 60-64 | 253+    | 0.000000 | 0.005376 | 0.000000 |
| 65-69 | 253+    | 0.000000 | 0.001789 | 0.000000 |
| 70-74 | 253+    | 0.000000 | 0.004077 | 0.000000 |
| 75-79 | 253+    | 0.000000 | 0.004077 | 0.000000 |

## Results for PHIM for Run 2 (Sensitivity\_Analysis\_1.RTF)

\*\*\*\*\*

TTP values for Run: 2, Scenario: Ecig

Variable Parameter

Value

- 1. Country
  - 2. Sex
  - 3. Assumption Set
- Note:

US (United States)  
 F (Females)  
 ISS3  
 Period is in Months

| Age   | Period  | Initiation  |               |               | Cessation    |                |                | Re-initiation |                |                |
|-------|---------|-------------|---------------|---------------|--------------|----------------|----------------|---------------|----------------|----------------|
|       |         | Never<br>CC | Never<br>Ecig | Never<br>Dual | CC<br>Former | Ecig<br>Former | Dual<br>Former | Former<br>CC  | Former<br>Ecig | Former<br>Dual |
| 10-14 | 1-12    | 0.001879    | 0.001879      | 0.000000      | 0.008742     | 0.008742       | 0.000000       | 0.000000      | 0.000000       | 0.000000       |
| 15-19 | 1-12    | 0.001735    | 0.001735      | 0.000000      | 0.002515     | 0.002515       | 0.000000       | 0.000000      | 0.000000       | 0.000000       |
| 20-24 | 1-12    | 0.000138    | 0.000138      | 0.000000      | 0.000761     | 0.000761       | 0.000000       | 0.000000      | 0.000000       | 0.000000       |
| 25-29 | 1-12    | 0.000069    | 0.000069      | 0.000000      | 0.001376     | 0.001376       | 0.000000       | 0.000000      | 0.000000       | 0.000000       |
| 30-34 | 1-12    | 0.000034    | 0.000034      | 0.000000      | 0.001149     | 0.001149       | 0.000000       | 0.000000      | 0.000000       | 0.000000       |
| 35-39 | 1-12    | 0.000000    | 0.000000      | 0.000000      | 0.000991     | 0.000991       | 0.000000       | 0.000000      | 0.000000       | 0.000000       |
| 40-44 | 1-12    | 0.000000    | 0.000000      | 0.000000      | 0.000833     | 0.000833       | 0.000000       | 0.000000      | 0.000000       | 0.000000       |
| 45-49 | 1-12    | 0.000000    | 0.000000      | 0.000000      | 0.001723     | 0.001723       | 0.000000       | 0.000000      | 0.000000       | 0.000000       |
| 50-54 | 1-12    | 0.000000    | 0.000000      | 0.000000      | 0.002336     | 0.002336       | 0.000000       | 0.000000      | 0.000000       | 0.000000       |
| 55-59 | 1-12    | 0.000000    | 0.000000      | 0.000000      | 0.002233     | 0.002233       | 0.000000       | 0.000000      | 0.000000       | 0.000000       |
| 60-64 | 1-12    | 0.000000    | 0.000000      | 0.000000      | 0.004635     | 0.004635       | 0.000000       | 0.000000      | 0.000000       | 0.000000       |
| 65-69 | 1-12    | 0.000000    | 0.000000      | 0.000000      | 0.003505     | 0.003505       | 0.000000       | 0.000000      | 0.000000       | 0.000000       |
| 70-74 | 1-12    | 0.000000    | 0.000000      | 0.000000      | 0.004329     | 0.004329       | 0.000000       | 0.000000      | 0.000000       | 0.000000       |
| 75-79 | 1-12    | 0.000000    | 0.000000      | 0.000000      | 0.004329     | 0.004329       | 0.000000       | 0.000000      | 0.000000       | 0.000000       |
| 10-14 | 13-72   | 0.001918    | 0.002877      | 0.000000      | 0.008742     | 0.008742       | 0.000000       | 0.000000      | 0.000000       | 0.000000       |
| 15-19 | 13-72   | 0.001811    | 0.002716      | 0.000000      | 0.004083     | 0.004083       | 0.000000       | 0.000000      | 0.000000       | 0.000000       |
| 20-24 | 13-72   | 0.000042    | 0.000063      | 0.000000      | 0.001261     | 0.001261       | 0.000000       | 0.000000      | 0.000000       | 0.000000       |
| 25-29 | 13-72   | 0.000021    | 0.000032      | 0.000000      | 0.000952     | 0.000952       | 0.000000       | 0.000000      | 0.000000       | 0.000000       |
| 30-34 | 13-72   | 0.000011    | 0.000016      | 0.000000      | 0.000733     | 0.000733       | 0.000000       | 0.000000      | 0.000000       | 0.000000       |
| 35-39 | 13-72   | 0.000000    | 0.000000      | 0.000000      | 0.000754     | 0.000754       | 0.000000       | 0.000000      | 0.000000       | 0.000000       |
| 40-44 | 13-72   | 0.000000    | 0.000000      | 0.000000      | 0.001535     | 0.001535       | 0.000000       | 0.000000      | 0.000000       | 0.000000       |
| 45-49 | 13-72   | 0.000000    | 0.000000      | 0.000000      | 0.002998     | 0.002998       | 0.000000       | 0.000000      | 0.000000       | 0.000000       |
| 50-54 | 13-72   | 0.000000    | 0.000000      | 0.000000      | 0.003160     | 0.003160       | 0.000000       | 0.000000      | 0.000000       | 0.000000       |
| 55-59 | 13-72   | 0.000000    | 0.000000      | 0.000000      | 0.002965     | 0.002965       | 0.000000       | 0.000000      | 0.000000       | 0.000000       |
| 60-64 | 13-72   | 0.000000    | 0.000000      | 0.000000      | 0.003633     | 0.003633       | 0.000000       | 0.000000      | 0.000000       | 0.000000       |
| 65-69 | 13-72   | 0.000000    | 0.000000      | 0.000000      | 0.004522     | 0.004522       | 0.000000       | 0.000000      | 0.000000       | 0.000000       |
| 70-74 | 13-72   | 0.000000    | 0.000000      | 0.000000      | 0.005208     | 0.005208       | 0.000000       | 0.000000      | 0.000000       | 0.000000       |
| 75-79 | 13-72   | 0.000000    | 0.000000      | 0.000000      | 0.005208     | 0.005208       | 0.000000       | 0.000000      | 0.000000       | 0.000000       |
| 10-14 | 73-132  | 0.000794    | 0.003175      | 0.000000      | 0.008742     | 0.008742       | 0.000000       | 0.000000      | 0.000000       | 0.000000       |
| 15-19 | 73-132  | 0.000611    | 0.002445      | 0.000000      | 0.003373     | 0.003373       | 0.000000       | 0.000000      | 0.000000       | 0.000000       |
| 20-24 | 73-132  | 0.000292    | 0.001167      | 0.000000      | 0.003881     | 0.003881       | 0.000000       | 0.000000      | 0.000000       | 0.000000       |
| 25-29 | 73-132  | 0.000143    | 0.000571      | 0.000000      | 0.001954     | 0.001954       | 0.000000       | 0.000000      | 0.000000       | 0.000000       |
| 30-34 | 73-132  | 0.000022    | 0.000089      | 0.000000      | 0.001338     | 0.001338       | 0.000000       | 0.000000      | 0.000000       | 0.000000       |
| 35-39 | 73-132  | 0.000000    | 0.000000      | 0.000000      | 0.001507     | 0.001507       | 0.000000       | 0.000000      | 0.000000       | 0.000000       |
| 40-44 | 73-132  | 0.000000    | 0.000000      | 0.000000      | 0.002080     | 0.002080       | 0.000000       | 0.000000      | 0.000000       | 0.000000       |
| 45-49 | 73-132  | 0.000000    | 0.000000      | 0.000000      | 0.003809     | 0.003809       | 0.000000       | 0.000000      | 0.000000       | 0.000000       |
| 50-54 | 73-132  | 0.000000    | 0.000000      | 0.000000      | 0.004871     | 0.004871       | 0.000000       | 0.000000      | 0.000000       | 0.000000       |
| 55-59 | 73-132  | 0.000000    | 0.000000      | 0.000000      | 0.004560     | 0.004560       | 0.000000       | 0.000000      | 0.000000       | 0.000000       |
| 60-64 | 73-132  | 0.000000    | 0.000000      | 0.000000      | 0.007192     | 0.007192       | 0.000000       | 0.000000      | 0.000000       | 0.000000       |
| 65-69 | 73-132  | 0.000000    | 0.000000      | 0.000000      | 0.007033     | 0.007033       | 0.000000       | 0.000000      | 0.000000       | 0.000000       |
| 70-74 | 73-132  | 0.000000    | 0.000000      | 0.000000      | 0.008206     | 0.008206       | 0.000000       | 0.000000      | 0.000000       | 0.000000       |
| 75-79 | 73-132  | 0.000000    | 0.000000      | 0.000000      | 0.008206     | 0.008206       | 0.000000       | 0.000000      | 0.000000       | 0.000000       |
| 10-14 | 133-192 | 0.000143    | 0.002718      | 0.000000      | 0.008742     | 0.008742       | 0.000000       | 0.000000      | 0.000000       | 0.000000       |
| 15-19 | 133-192 | 0.000130    | 0.002465      | 0.000000      | 0.003996     | 0.003996       | 0.000000       | 0.000000      | 0.000000       | 0.000000       |
| 20-24 | 133-192 | 0.000062    | 0.001185      | 0.000000      | 0.002805     | 0.002805       | 0.000000       | 0.000000      | 0.000000       | 0.000000       |
| 25-29 | 133-192 | 0.000015    | 0.000275      | 0.000000      | 0.001574     | 0.001574       | 0.000000       | 0.000000      | 0.000000       | 0.000000       |
| 30-34 | 133-192 | 0.000007    | 0.000125      | 0.000000      | 0.001293     | 0.001293       | 0.000000       | 0.000000      | 0.000000       | 0.000000       |
| 35-39 | 133-192 | 0.000000    | 0.000000      | 0.000000      | 0.001219     | 0.001219       | 0.000000       | 0.000000      | 0.000000       | 0.000000       |
| 40-44 | 133-192 | 0.000000    | 0.000000      | 0.000000      | 0.001657     | 0.001657       | 0.000000       | 0.000000      | 0.000000       | 0.000000       |
| 45-49 | 133-192 | 0.000000    | 0.000000      | 0.000000      | 0.001995     | 0.001995       | 0.000000       | 0.000000      | 0.000000       | 0.000000       |
| 50-54 | 133-192 | 0.000000    | 0.000000      | 0.000000      | 0.002154     | 0.002154       | 0.000000       | 0.000000      | 0.000000       | 0.000000       |
| 55-59 | 133-192 | 0.000000    | 0.000000      | 0.000000      | 0.002072     | 0.002072       | 0.000000       | 0.000000      | 0.000000       | 0.000000       |
| 60-64 | 133-192 | 0.000000    | 0.000000      | 0.000000      | 0.005049     | 0.005049       | 0.000000       | 0.000000      | 0.000000       | 0.000000       |
| 65-69 | 133-192 | 0.000000    | 0.000000      | 0.000000      | 0.003681     | 0.003681       | 0.000000       | 0.000000      | 0.000000       | 0.000000       |
| 70-74 | 133-192 | 0.000000    | 0.000000      | 0.000000      | 0.006144     | 0.006144       | 0.000000       | 0.000000      | 0.000000       | 0.000000       |
| 75-79 | 133-192 | 0.000000    | 0.000000      | 0.000000      | 0.006144     | 0.006144       | 0.000000       | 0.000000      | 0.000000       | 0.000000       |
| 10-14 | 193-252 | 0.000093    | 0.001766      | 0.000000      | 0.008742     | 0.008742       | 0.000000       | 0.000000      | 0.000000       | 0.000000       |
| 15-19 | 193-252 | 0.000112    | 0.002120      | 0.000000      | 0.005770     | 0.005770       | 0.000000       | 0.000000      | 0.000000       | 0.000000       |
| 20-24 | 193-252 | 0.000054    | 0.001025      | 0.000000      | 0.003262     | 0.003262       | 0.000000       | 0.000000      | 0.000000       | 0.000000       |
| 25-29 | 193-252 | 0.000027    | 0.000504      | 0.000000      | 0.002002     | 0.002002       | 0.000000       | 0.000000      | 0.000000       | 0.000000       |
| 30-34 | 193-252 | 0.000013    | 0.000250      | 0.000000      | 0.003241     | 0.003241       | 0.000000       | 0.000000      | 0.000000       | 0.000000       |
| 35-39 | 193-252 | 0.000000    | 0.000000      | 0.000000      | 0.001771     | 0.001771       | 0.000000       | 0.000000      | 0.000000       | 0.000000       |
| 40-44 | 193-252 | 0.000000    | 0.000000      | 0.000000      | 0.002173     | 0.002173       | 0.000000       | 0.000000      | 0.000000       | 0.000000       |
| 45-49 | 193-252 | 0.000000    | 0.000000      | 0.000000      | 0.002075     | 0.002075       | 0.000000       | 0.000000      | 0.000000       | 0.000000       |
| 50-54 | 193-252 | 0.000000    | 0.000000      | 0.000000      | 0.003432     | 0.003432       | 0.000000       | 0.000000      | 0.000000       | 0.000000       |

### Results for PHIM for Run 2 (Sensitivity\_Analysis\_1.RTF)

|       |         |          |          |          |          |          |          |          |          |          |
|-------|---------|----------|----------|----------|----------|----------|----------|----------|----------|----------|
| 55-59 | 193-252 | 0.000000 | 0.000000 | 0.000000 | 0.002906 | 0.002906 | 0.000000 | 0.000000 | 0.000000 | 0.000000 |
| 60-64 | 193-252 | 0.000000 | 0.000000 | 0.000000 | 0.007139 | 0.007139 | 0.000000 | 0.000000 | 0.000000 | 0.000000 |
| 65-69 | 193-252 | 0.000000 | 0.000000 | 0.000000 | 0.004963 | 0.004963 | 0.000000 | 0.000000 | 0.000000 | 0.000000 |
| 70-74 | 193-252 | 0.000000 | 0.000000 | 0.000000 | 0.006269 | 0.006269 | 0.000000 | 0.000000 | 0.000000 | 0.000000 |
| 75-79 | 193-252 | 0.000000 | 0.000000 | 0.000000 | 0.006269 | 0.006269 | 0.000000 | 0.000000 | 0.000000 | 0.000000 |
| 10-14 | 253+    | 0.000047 | 0.000884 | 0.000000 | 0.008742 | 0.008742 | 0.000000 | 0.000000 | 0.000000 | 0.000000 |
| 15-19 | 253+    | 0.000090 | 0.001708 | 0.000000 | 0.009440 | 0.009440 | 0.000000 | 0.000000 | 0.000000 | 0.000000 |
| 20-24 | 253+    | 0.000001 | 0.000022 | 0.000000 | 0.002831 | 0.002831 | 0.000000 | 0.000000 | 0.000000 | 0.000000 |
| 25-29 | 253+    | 0.000004 | 0.000070 | 0.000000 | 0.002656 | 0.002656 | 0.000000 | 0.000000 | 0.000000 | 0.000000 |
| 30-34 | 253+    | 0.000002 | 0.000035 | 0.000000 | 0.004614 | 0.004614 | 0.000000 | 0.000000 | 0.000000 | 0.000000 |
| 35-39 | 253+    | 0.000000 | 0.000000 | 0.000000 | 0.002608 | 0.002608 | 0.000000 | 0.000000 | 0.000000 | 0.000000 |
| 40-44 | 253+    | 0.000000 | 0.000000 | 0.000000 | 0.003115 | 0.003115 | 0.000000 | 0.000000 | 0.000000 | 0.000000 |
| 45-49 | 253+    | 0.000000 | 0.000000 | 0.000000 | 0.002132 | 0.002132 | 0.000000 | 0.000000 | 0.000000 | 0.000000 |
| 50-54 | 253+    | 0.000000 | 0.000000 | 0.000000 | 0.003497 | 0.003497 | 0.000000 | 0.000000 | 0.000000 | 0.000000 |
| 55-59 | 253+    | 0.000000 | 0.000000 | 0.000000 | 0.002942 | 0.002942 | 0.000000 | 0.000000 | 0.000000 | 0.000000 |
| 60-64 | 253+    | 0.000000 | 0.000000 | 0.000000 | 0.005376 | 0.005376 | 0.000000 | 0.000000 | 0.000000 | 0.000000 |
| 65-69 | 253+    | 0.000000 | 0.000000 | 0.000000 | 0.001789 | 0.001789 | 0.000000 | 0.000000 | 0.000000 | 0.000000 |
| 70-74 | 253+    | 0.000000 | 0.000000 | 0.000000 | 0.004077 | 0.004077 | 0.000000 | 0.000000 | 0.000000 | 0.000000 |
| 75-79 | 253+    | 0.000000 | 0.000000 | 0.000000 | 0.004077 | 0.004077 | 0.000000 | 0.000000 | 0.000000 | 0.000000 |





**Results for PHIM for Run 2 (Sensitivity\_Analysis\_1.RTF)**

|       |      |          |          |          |          |          |          |
|-------|------|----------|----------|----------|----------|----------|----------|
| 25-29 | 253+ | 0.014127 | 0.000000 | 0.000000 | 0.000000 | 0.000000 | 0.000000 |
| 30-34 | 253+ | 0.013889 | 0.000000 | 0.000000 | 0.000000 | 0.000000 | 0.000000 |
| 35-39 | 253+ | 0.012929 | 0.000000 | 0.000000 | 0.000000 | 0.000000 | 0.000000 |
| 40-44 | 253+ | 0.012785 | 0.000000 | 0.000000 | 0.000000 | 0.000000 | 0.000000 |
| 45-49 | 253+ | 0.012295 | 0.000000 | 0.000000 | 0.000000 | 0.000000 | 0.000000 |
| 50-54 | 253+ | 0.011536 | 0.000000 | 0.000000 | 0.000000 | 0.000000 | 0.000000 |
| 55-59 | 253+ | 0.008988 | 0.000000 | 0.000000 | 0.000000 | 0.000000 | 0.000000 |
| 60-64 | 253+ | 0.008098 | 0.000000 | 0.000000 | 0.000000 | 0.000000 | 0.000000 |
| 65-69 | 253+ | 0.006274 | 0.000000 | 0.000000 | 0.000000 | 0.000000 | 0.000000 |
| 70-74 | 253+ | 0.004141 | 0.000000 | 0.000000 | 0.000000 | 0.000000 | 0.000000 |
| 75-79 | 253+ | 0.004141 | 0.000000 | 0.000000 | 0.000000 | 0.000000 | 0.000000 |

## Results for PHIM for Run 2 (Sensitivity\_Analysis\_1.RTF)

\*\*\*\*\*

### Main Output for the Tobacco History for Run: 2, Simulation: 1, Scenario: NULL

| Variable Parameter          | Value              |
|-----------------------------|--------------------|
| 1. Country                  | US (United States) |
| 2. Sex                      | F (Females)        |
| 3. Year of start of process | 1990               |

Year of Follow-up: 2040, Age Group: All Ages  
 Period    Age Group    Smoking Group            N            %

|    |          |           |       |       |
|----|----------|-----------|-------|-------|
| 50 | All Ages | Never Any | 20670 | 58.80 |
| 50 | All Ages | CC        | 2462  | 7.00  |
| 50 | All Ages | Former    | 12019 | 34.19 |

Year of Follow-up: 2040, Age Group: 18-19  
 Period    Age Group    Smoking Group            N            %

|    |       |           |   |   |
|----|-------|-----------|---|---|
| 50 | 18-19 | Never Any | 0 | . |
| 50 | 18-19 | CC        | 0 | . |
| 50 | 18-19 | Former    | 0 | . |

Year of Follow-up: 2040, Age Group: 20-24  
 Period    Age Group    Smoking Group            N            %

|    |       |           |   |   |
|----|-------|-----------|---|---|
| 50 | 20-24 | Never Any | 0 | . |
| 50 | 20-24 | CC        | 0 | . |
| 50 | 20-24 | Former    | 0 | . |

Year of Follow-up: 2040, Age Group: 25-29  
 Period    Age Group    Smoking Group            N            %

|    |       |           |   |   |
|----|-------|-----------|---|---|
| 50 | 25-29 | Never Any | 0 | . |
| 50 | 25-29 | CC        | 0 | . |
| 50 | 25-29 | Former    | 0 | . |

Year of Follow-up: 2040, Age Group: 30-34  
 Period    Age Group    Smoking Group            N            %

|    |       |           |   |   |
|----|-------|-----------|---|---|
| 50 | 30-34 | Never Any | 0 | . |
| 50 | 30-34 | CC        | 0 | . |
| 50 | 30-34 | Former    | 0 | . |

Year of Follow-up: 2040, Age Group: 35-39  
 Period    Age Group    Smoking Group            N            %

|    |       |           |   |   |
|----|-------|-----------|---|---|
| 50 | 35-39 | Never Any | 0 | . |
| 50 | 35-39 | CC        | 0 | . |
| 50 | 35-39 | Former    | 0 | . |

Year of Follow-up: 2040, Age Group: 40-44  
 Period    Age Group    Smoking Group            N            %

|    |       |           |   |   |
|----|-------|-----------|---|---|
| 50 | 40-44 | Never Any | 0 | . |
| 50 | 40-44 | CC        | 0 | . |
| 50 | 40-44 | Former    | 0 | . |

Year of Follow-up: 2040, Age Group: 45-49  
 Period    Age Group    Smoking Group            N            %

|    |       |           |   |   |
|----|-------|-----------|---|---|
| 50 | 45-49 | Never Any | 0 | . |
| 50 | 45-49 | CC        | 0 | . |
| 50 | 45-49 | Former    | 0 | . |

Year of Follow-up: 2040, Age Group: 50-54  
 Period    Age Group    Smoking Group            N            %

|    |       |           |   |   |
|----|-------|-----------|---|---|
| 50 | 50-54 | Never Any | 0 | . |
| 50 | 50-54 | CC        | 0 | . |
| 50 | 50-54 | Former    | 0 | . |

Year of Follow-up: 2040, Age Group: 55-59  
 Period    Age Group    Smoking Group            N            %

|    |       |           |   |   |
|----|-------|-----------|---|---|
| 50 | 55-59 | Never Any | 0 | . |
| 50 | 55-59 | CC        | 0 | . |
| 50 | 55-59 | Former    | 0 | . |

Year of Follow-up: 2040, Age Group: 60-64  
 Period    Age Group    Smoking Group            N            %

### Results for PHIM for Run 2 (Sensitivity\_Analysis\_1.RTF)

|                                           |           |               |      |       |
|-------------------------------------------|-----------|---------------|------|-------|
| 50                                        | 60-64     | Never Any     | 4803 | 60.57 |
| 50                                        | 60-64     | CC            | 621  | 7.83  |
| 50                                        | 60-64     | Former        | 2506 | 31.60 |
| Year of Follow-up: 2040, Age Group: 65-69 |           |               |      |       |
| Period                                    | Age Group | Smoking Group | N    | %     |
| 50                                        | 65-69     | Never Any     | 5407 | 64.75 |
| 50                                        | 65-69     | CC            | 538  | 6.44  |
| 50                                        | 65-69     | Former        | 2405 | 28.80 |
| Year of Follow-up: 2040, Age Group: 70-74 |           |               |      |       |
| Period                                    | Age Group | Smoking Group | N    | %     |
| 50                                        | 70-74     | Never Any     | 5181 | 58.92 |
| 50                                        | 70-74     | CC            | 605  | 6.88  |
| 50                                        | 70-74     | Former        | 3007 | 34.20 |
| Year of Follow-up: 2040, Age Group: 75-79 |           |               |      |       |
| Period                                    | Age Group | Smoking Group | N    | %     |
| 50                                        | 75-79     | Never Any     | 5279 | 52.38 |
| 50                                        | 75-79     | CC            | 698  | 6.93  |
| 50                                        | 75-79     | Former        | 4101 | 40.69 |

## Results for PHIM for Run 2 (Sensitivity\_Analysis\_1.RTF)

\*\*\*\*\*

### Main Output for the Tobacco History for Run: 2, Simulation: 1, Scenario: Ecig

| Variable Parameter                           |           |               | Value              |       |               |             |               |                |              |
|----------------------------------------------|-----------|---------------|--------------------|-------|---------------|-------------|---------------|----------------|--------------|
| 1. Country                                   |           |               | US (United States) |       |               |             |               |                |              |
| 2. Sex                                       |           |               | F (Females)        |       |               |             |               |                |              |
| 3. Year of start of process                  |           |               | 1990               |       |               |             |               |                |              |
| Year of Follow-up: 1990, Age Group: All Ages |           |               |                    |       |               |             |               |                |              |
| Period                                       | Age Group | Smoking Group | N                  | %     | Ever Quit (N) | Ever Quit % | Mean Yrs Quit | Short Term (n) | Short Term % |
| 0                                            | All Ages  | Never Any     | 47776              | 54.92 |               |             |               |                |              |
| 0                                            | All Ages  | CC            | 22737              | 26.14 | 0             | 0.00        |               |                |              |
| 0                                            | All Ages  | Ecig          | 0                  | 0.00  |               |             |               |                |              |
| 0                                            | All Ages  | Dual          | 0                  | 0.00  |               |             |               |                |              |
| 0                                            | All Ages  | Former        | 16484              | 18.95 |               |             | 11.90         | 2815           | 17.08        |
| Year of Follow-up: 1990, Age Group: 18-19    |           |               |                    |       |               |             |               |                |              |
| Period                                       | Age Group | Smoking Group | N                  | %     | Ever Quit (N) | Ever Quit % | Mean Yrs Quit | Short Term (n) | Short Term % |
| 0                                            | 18-19     | Never Any     | 2570               | 78.43 |               |             |               |                |              |
| 0                                            | 18-19     | CC            | 535                | 16.33 | 0             | 0.00        |               |                |              |
| 0                                            | 18-19     | Ecig          | 0                  | 0.00  |               |             |               |                |              |
| 0                                            | 18-19     | Dual          | 0                  | 0.00  |               |             |               |                |              |
| 0                                            | 18-19     | Former        | 172                | 5.25  |               |             | 0.20          | 172            | 100.00       |
| Year of Follow-up: 1990, Age Group: 20-24    |           |               |                    |       |               |             |               |                |              |
| Period                                       | Age Group | Smoking Group | N                  | %     | Ever Quit (N) | Ever Quit % | Mean Yrs Quit | Short Term (n) | Short Term % |
| 0                                            | 20-24     | Never Any     | 5354               | 60.89 |               |             |               |                |              |
| 0                                            | 20-24     | CC            | 2560               | 29.11 | 0             | 0.00        |               |                |              |
| 0                                            | 20-24     | Ecig          | 0                  | 0.00  |               |             |               |                |              |
| 0                                            | 20-24     | Dual          | 0                  | 0.00  |               |             |               |                |              |
| 0                                            | 20-24     | Former        | 879                | 10.00 |               |             | 1.58          | 420            | 47.78        |
| Year of Follow-up: 1990, Age Group: 25-29    |           |               |                    |       |               |             |               |                |              |
| Period                                       | Age Group | Smoking Group | N                  | %     | Ever Quit (N) | Ever Quit % | Mean Yrs Quit | Short Term (n) | Short Term % |
| 0                                            | 25-29     | Never Any     | 5318               | 52.77 |               |             |               |                |              |
| 0                                            | 25-29     | CC            | 3335               | 33.09 | 0             | 0.00        |               |                |              |
| 0                                            | 25-29     | Ecig          | 0                  | 0.00  |               |             |               |                |              |
| 0                                            | 25-29     | Dual          | 0                  | 0.00  |               |             |               |                |              |
| 0                                            | 25-29     | Former        | 1425               | 14.14 |               |             | 3.91          | 404            | 28.35        |
| Year of Follow-up: 1990, Age Group: 30-34    |           |               |                    |       |               |             |               |                |              |
| Period                                       | Age Group | Smoking Group | N                  | %     | Ever Quit (N) | Ever Quit % | Mean Yrs Quit | Short Term (n) | Short Term % |
| 0                                            | 30-34     | Never Any     | 5287               | 50.36 |               |             |               |                |              |
| 0                                            | 30-34     | CC            | 3326               | 31.68 | 0             | 0.00        |               |                |              |
| 0                                            | 30-34     | Ecig          | 0                  | 0.00  |               |             |               |                |              |
| 0                                            | 30-34     | Dual          | 0                  | 0.00  |               |             |               |                |              |
| 0                                            | 30-34     | Former        | 1886               | 17.96 |               |             | 4.36          | 566            | 30.01        |
| Year of Follow-up: 1990, Age Group: 35-39    |           |               |                    |       |               |             |               |                |              |
| Period                                       | Age Group | Smoking Group | N                  | %     | Ever Quit (N) | Ever Quit % | Mean Yrs Quit | Short Term (n) | Short Term % |
| 0                                            | 35-39     | Never Any     | 5018               | 52.27 |               |             |               |                |              |
| 0                                            | 35-39     | CC            | 2653               | 27.64 | 0             | 0.00        |               |                |              |
| 0                                            | 35-39     | Ecig          | 0                  | 0.00  |               |             |               |                |              |
| 0                                            | 35-39     | Dual          | 0                  | 0.00  |               |             |               |                |              |
| 0                                            | 35-39     | Former        | 1929               | 20.09 |               |             | 7.96          | 324            | 16.80        |
| Year of Follow-up: 1990, Age Group: 40-44    |           |               |                    |       |               |             |               |                |              |
| Period                                       | Age Group | Smoking Group | N                  | %     | Ever Quit (N) | Ever Quit % | Mean Yrs Quit | Short Term (n) | Short Term % |
| 0                                            | 40-44     | Never Any     | 4356               | 51.27 |               |             |               |                |              |
| 0                                            | 40-44     | CC            | 2397               | 28.21 | 0             | 0.00        |               |                |              |
| 0                                            | 40-44     | Ecig          | 0                  | 0.00  |               |             |               |                |              |
| 0                                            | 40-44     | Dual          | 0                  | 0.00  |               |             |               |                |              |
| 0                                            | 40-44     | Former        | 1744               | 20.52 |               |             | 7.33          | 339            | 19.44        |
| Year of Follow-up: 1990, Age Group: 45-49    |           |               |                    |       |               |             |               |                |              |
| Period                                       | Age Group | Smoking Group | N                  | %     | Ever Quit (N) | Ever Quit % | Mean Yrs Quit | Short Term (n) | Short Term % |
| 0                                            | 45-49     | Never Any     | 3116               | 47.67 |               |             |               |                |              |
| 0                                            | 45-49     | CC            | 1875               | 28.69 | 0             | 0.00        |               |                |              |
| 0                                            | 45-49     | Ecig          | 0                  | 0.00  |               |             |               |                |              |
| 0                                            | 45-49     | Dual          | 0                  | 0.00  |               |             |               |                |              |
| 0                                            | 45-49     | Former        | 1545               | 23.64 |               |             | 12.55         | 194            | 12.56        |
| Year of Follow-up: 1990, Age Group: 50-54    |           |               |                    |       |               |             |               |                |              |
| Period                                       | Age Group | Smoking Group | N                  | %     | Ever Quit (N) | Ever Quit % | Mean Yrs Quit | Short Term (n) | Short Term % |
| 0                                            | 50-54     | Never Any     | 2684               | 48.50 |               |             |               |                |              |
| 0                                            | 50-54     | CC            | 1572               | 28.41 | 0             | 0.00        |               |                |              |

**Results for PHIM for Run 2 (Sensitivity\_Analysis\_1.RTF)**

|                                              |           |               |       |       |               |             |               |                |              |
|----------------------------------------------|-----------|---------------|-------|-------|---------------|-------------|---------------|----------------|--------------|
| 0                                            | 50-54     | Ecig          | 0     | 0.00  |               |             |               |                |              |
| 0                                            | 50-54     | Dual          | 0     | 0.00  |               |             |               |                |              |
| 0                                            | 50-54     | Former        | 1278  | 23.09 |               |             | 13.28         | 126            | 9.86         |
| Year of Follow-up: 1990, Age Group: 55-59    |           |               |       |       |               |             |               |                |              |
| Period                                       | Age Group | Smoking Group | N     | %     | Ever Quit (N) | Ever Quit % | Mean Yrs Quit | Short Term (n) | Short Term % |
| 0                                            | 55-59     | Never Any     | 2732  | 51.90 |               |             |               |                |              |
| 0                                            | 55-59     | CC            | 1295  | 24.60 | 0             | 0.00        |               |                |              |
| 0                                            | 55-59     | Ecig          | 0     | 0.00  |               |             |               |                |              |
| 0                                            | 55-59     | Dual          | 0     | 0.00  |               |             |               |                |              |
| 0                                            | 55-59     | Former        | 1237  | 23.50 |               |             | 17.26         | 90             | 7.28         |
| Year of Follow-up: 1990, Age Group: 60-64    |           |               |       |       |               |             |               |                |              |
| Period                                       | Age Group | Smoking Group | N     | %     | Ever Quit (N) | Ever Quit % | Mean Yrs Quit | Short Term (n) | Short Term % |
| 0                                            | 60-64     | Never Any     | 3078  | 55.72 |               |             |               |                |              |
| 0                                            | 60-64     | CC            | 1249  | 22.61 | 0             | 0.00        |               |                |              |
| 0                                            | 60-64     | Ecig          | 0     | 0.00  |               |             |               |                |              |
| 0                                            | 60-64     | Dual          | 0     | 0.00  |               |             |               |                |              |
| 0                                            | 60-64     | Former        | 1197  | 21.67 |               |             | 18.28         | 61             | 5.10         |
| Year of Follow-up: 1990, Age Group: 65-69    |           |               |       |       |               |             |               |                |              |
| Period                                       | Age Group | Smoking Group | N     | %     | Ever Quit (N) | Ever Quit % | Mean Yrs Quit | Short Term (n) | Short Term % |
| 0                                            | 65-69     | Never Any     | 3042  | 57.36 |               |             |               |                |              |
| 0                                            | 65-69     | CC            | 976   | 18.40 | 0             | 0.00        |               |                |              |
| 0                                            | 65-69     | Ecig          | 0     | 0.00  |               |             |               |                |              |
| 0                                            | 65-69     | Dual          | 0     | 0.00  |               |             |               |                |              |
| 0                                            | 65-69     | Former        | 1285  | 24.23 |               |             | 20.65         | 68             | 5.29         |
| Year of Follow-up: 1990, Age Group: 70-74    |           |               |       |       |               |             |               |                |              |
| Period                                       | Age Group | Smoking Group | N     | %     | Ever Quit (N) | Ever Quit % | Mean Yrs Quit | Short Term (n) | Short Term % |
| 0                                            | 70-74     | Never Any     | 2738  | 61.05 |               |             |               |                |              |
| 0                                            | 70-74     | CC            | 610   | 13.60 | 0             | 0.00        |               |                |              |
| 0                                            | 70-74     | Ecig          | 0     | 0.00  |               |             |               |                |              |
| 0                                            | 70-74     | Dual          | 0     | 0.00  |               |             |               |                |              |
| 0                                            | 70-74     | Former        | 1137  | 25.35 |               |             | 24.48         | 27             | 2.37         |
| Year of Follow-up: 1990, Age Group: 75-79    |           |               |       |       |               |             |               |                |              |
| Period                                       | Age Group | Smoking Group | N     | %     | Ever Quit (N) | Ever Quit % | Mean Yrs Quit | Short Term (n) | Short Term % |
| 0                                            | 75-79     | Never Any     | 2483  | 68.84 |               |             |               |                |              |
| 0                                            | 75-79     | CC            | 354   | 9.81  | 0             | 0.00        |               |                |              |
| 0                                            | 75-79     | Ecig          | 0     | 0.00  |               |             |               |                |              |
| 0                                            | 75-79     | Dual          | 0     | 0.00  |               |             |               |                |              |
| 0                                            | 75-79     | Former        | 770   | 21.35 |               |             | 24.48         | 24             | 3.12         |
| Year of Follow-up: 1995, Age Group: All Ages |           |               |       |       |               |             |               |                |              |
| Period                                       | Age Group | Smoking Group | N     | %     | Ever Quit (N) | Ever Quit % | Mean Yrs Quit | Short Term (n) | Short Term % |
| 5                                            | All Ages  | Never Any     | 50887 | 55.53 |               |             |               |                |              |
| 5                                            | All Ages  | CC            | 10659 | 11.63 | 0             | 0.00        |               |                |              |
| 5                                            | All Ages  | Ecig          | 11697 | 12.76 |               |             |               |                |              |
| 5                                            | All Ages  | Dual          | 0     | 0.00  |               |             |               |                |              |
| 5                                            | All Ages  | Former        | 18396 | 20.07 |               |             | 14.19         | 1129           | 6.14         |
| Year of Follow-up: 1995, Age Group: 18-19    |           |               |       |       |               |             |               |                |              |
| Period                                       | Age Group | Smoking Group | N     | %     | Ever Quit (N) | Ever Quit % | Mean Yrs Quit | Short Term (n) | Short Term % |
| 5                                            | 18-19     | Never Any     | 2434  | 76.64 |               |             |               |                |              |
| 5                                            | 18-19     | CC            | 233   | 7.34  | 0             | 0.00        |               |                |              |
| 5                                            | 18-19     | Ecig          | 427   | 13.44 |               |             |               |                |              |
| 5                                            | 18-19     | Dual          | 0     | 0.00  |               |             |               |                |              |
| 5                                            | 18-19     | Former        | 82    | 2.58  |               |             | 1.15          | 52             | 63.41        |
| Year of Follow-up: 1995, Age Group: 20-24    |           |               |       |       |               |             |               |                |              |
| Period                                       | Age Group | Smoking Group | N     | %     | Ever Quit (N) | Ever Quit % | Mean Yrs Quit | Short Term (n) | Short Term % |
| 5                                            | 20-24     | Never Any     | 5794  | 69.39 |               |             |               |                |              |
| 5                                            | 20-24     | CC            | 862   | 10.32 | 0             | 0.00        |               |                |              |
| 5                                            | 20-24     | Ecig          | 1250  | 14.97 |               |             |               |                |              |
| 5                                            | 20-24     | Dual          | 0     | 0.00  |               |             |               |                |              |
| 5                                            | 20-24     | Former        | 444   | 5.32  |               |             | 3.23          | 106            | 23.87        |
| Year of Follow-up: 1995, Age Group: 25-29    |           |               |       |       |               |             |               |                |              |
| Period                                       | Age Group | Smoking Group | N     | %     | Ever Quit (N) | Ever Quit % | Mean Yrs Quit | Short Term (n) | Short Term % |
| 5                                            | 25-29     | Never Any     | 5313  | 60.42 |               |             |               |                |              |
| 5                                            | 25-29     | CC            | 1062  | 12.08 | 0             | 0.00        |               |                |              |
| 5                                            | 25-29     | Ecig          | 1395  | 15.86 |               |             |               |                |              |
| 5                                            | 25-29     | Dual          | 0     | 0.00  |               |             |               |                |              |
| 5                                            | 25-29     | Former        | 1023  | 11.63 |               |             | 5.94          | 54             | 5.28         |
| Year of Follow-up: 1995, Age Group: 30-34    |           |               |       |       |               |             |               |                |              |
| Period                                       | Age Group | Smoking Group | N     | %     | Ever Quit (N) | Ever Quit % | Mean Yrs Quit | Short Term (n) | Short Term % |

**Results for PHIM for Run 2 (Sensitivity\_Analysis\_1.RTF)**

|                                              |           |               |      |       |               |             |               |                |              |
|----------------------------------------------|-----------|---------------|------|-------|---------------|-------------|---------------|----------------|--------------|
| 5                                            | 30-34     | Never Any     | 5304 | 52.63 |               |             |               |                |              |
| 5                                            | 30-34     | CC            | 1373 | 13.62 | 0             | 0.00        |               |                |              |
| 5                                            | 30-34     | Ecig          | 1802 | 17.88 |               |             |               |                |              |
| 5                                            | 30-34     | Dual          | 0    | 0.00  |               |             |               |                |              |
| 5                                            | 30-34     | Former        | 1599 | 15.87 |               |             | 8.16          | 67             | 4.19         |
| Year of Follow-up: 1995, Age Group: 35-39    |           |               |      |       |               |             |               |                |              |
| Period                                       | Age Group | Smoking Group | N    | %     | Ever Quit (N) | Ever Quit % | Mean Yrs Quit | Short Term (n) | Short Term % |
| 5                                            | 35-39     | Never Any     | 5278 | 50.27 |               |             |               |                |              |
| 5                                            | 35-39     | CC            | 1410 | 13.43 | 0             | 0.00        |               |                |              |
| 5                                            | 35-39     | Ecig          | 1746 | 16.63 |               |             |               |                |              |
| 5                                            | 35-39     | Dual          | 0    | 0.00  |               |             |               |                |              |
| 5                                            | 35-39     | Former        | 2065 | 19.67 |               |             | 8.75          | 62             | 3.00         |
| Year of Follow-up: 1995, Age Group: 40-44    |           |               |      |       |               |             |               |                |              |
| Period                                       | Age Group | Smoking Group | N    | %     | Ever Quit (N) | Ever Quit % | Mean Yrs Quit | Short Term (n) | Short Term % |
| 5                                            | 40-44     | Never Any     | 5018 | 52.27 |               |             |               |                |              |
| 5                                            | 40-44     | CC            | 1135 | 11.82 | 0             | 0.00        |               |                |              |
| 5                                            | 40-44     | Ecig          | 1356 | 14.13 |               |             |               |                |              |
| 5                                            | 40-44     | Dual          | 0    | 0.00  |               |             |               |                |              |
| 5                                            | 40-44     | Former        | 2091 | 21.78 |               |             | 12.09         | 81             | 3.87         |
| Year of Follow-up: 1995, Age Group: 45-49    |           |               |      |       |               |             |               |                |              |
| Period                                       | Age Group | Smoking Group | N    | %     | Ever Quit (N) | Ever Quit % | Mean Yrs Quit | Short Term (n) | Short Term % |
| 5                                            | 45-49     | Never Any     | 4356 | 51.27 |               |             |               |                |              |
| 5                                            | 45-49     | CC            | 974  | 11.46 | 0             | 0.00        |               |                |              |
| 5                                            | 45-49     | Ecig          | 1161 | 13.66 |               |             |               |                |              |
| 5                                            | 45-49     | Dual          | 0    | 0.00  |               |             |               |                |              |
| 5                                            | 45-49     | Former        | 2006 | 23.61 |               |             | 10.93         | 133            | 6.63         |
| Year of Follow-up: 1995, Age Group: 50-54    |           |               |      |       |               |             |               |                |              |
| Period                                       | Age Group | Smoking Group | N    | %     | Ever Quit (N) | Ever Quit % | Mean Yrs Quit | Short Term (n) | Short Term % |
| 5                                            | 50-54     | Never Any     | 3116 | 47.67 |               |             |               |                |              |
| 5                                            | 50-54     | CC            | 739  | 11.31 | 0             | 0.00        |               |                |              |
| 5                                            | 50-54     | Ecig          | 826  | 12.64 |               |             |               |                |              |
| 5                                            | 50-54     | Dual          | 0    | 0.00  |               |             |               |                |              |
| 5                                            | 50-54     | Former        | 1855 | 28.38 |               |             | 14.92         | 140            | 7.55         |
| Year of Follow-up: 1995, Age Group: 55-59    |           |               |      |       |               |             |               |                |              |
| Period                                       | Age Group | Smoking Group | N    | %     | Ever Quit (N) | Ever Quit % | Mean Yrs Quit | Short Term (n) | Short Term % |
| 5                                            | 55-59     | Never Any     | 2684 | 48.50 |               |             |               |                |              |
| 5                                            | 55-59     | CC            | 722  | 13.05 | 0             | 0.00        |               |                |              |
| 5                                            | 55-59     | Ecig          | 627  | 11.33 |               |             |               |                |              |
| 5                                            | 55-59     | Dual          | 0    | 0.00  |               |             |               |                |              |
| 5                                            | 55-59     | Former        | 1501 | 27.12 |               |             | 15.84         | 93             | 6.20         |
| Year of Follow-up: 1995, Age Group: 60-64    |           |               |      |       |               |             |               |                |              |
| Period                                       | Age Group | Smoking Group | N    | %     | Ever Quit (N) | Ever Quit % | Mean Yrs Quit | Short Term (n) | Short Term % |
| 5                                            | 60-64     | Never Any     | 2732 | 51.90 |               |             |               |                |              |
| 5                                            | 60-64     | CC            | 633  | 12.03 | 0             | 0.00        |               |                |              |
| 5                                            | 60-64     | Ecig          | 444  | 8.43  |               |             |               |                |              |
| 5                                            | 60-64     | Dual          | 0    | 0.00  |               |             |               |                |              |
| 5                                            | 60-64     | Former        | 1455 | 27.64 |               |             | 19.22         | 87             | 5.98         |
| Year of Follow-up: 1995, Age Group: 65-69    |           |               |      |       |               |             |               |                |              |
| Period                                       | Age Group | Smoking Group | N    | %     | Ever Quit (N) | Ever Quit % | Mean Yrs Quit | Short Term (n) | Short Term % |
| 5                                            | 65-69     | Never Any     | 3078 | 55.72 |               |             |               |                |              |
| 5                                            | 65-69     | CC            | 602  | 10.90 | 0             | 0.00        |               |                |              |
| 5                                            | 65-69     | Ecig          | 374  | 6.77  |               |             |               |                |              |
| 5                                            | 65-69     | Dual          | 0    | 0.00  |               |             |               |                |              |
| 5                                            | 65-69     | Former        | 1470 | 26.61 |               |             | 19.34         | 107            | 7.28         |
| Year of Follow-up: 1995, Age Group: 70-74    |           |               |      |       |               |             |               |                |              |
| Period                                       | Age Group | Smoking Group | N    | %     | Ever Quit (N) | Ever Quit % | Mean Yrs Quit | Short Term (n) | Short Term % |
| 5                                            | 70-74     | Never Any     | 3042 | 57.36 |               |             |               |                |              |
| 5                                            | 70-74     | CC            | 577  | 10.88 | 0             | 0.00        |               |                |              |
| 5                                            | 70-74     | Ecig          | 188  | 3.55  |               |             |               |                |              |
| 5                                            | 70-74     | Dual          | 0    | 0.00  |               |             |               |                |              |
| 5                                            | 70-74     | Former        | 1496 | 28.21 |               |             | 22.32         | 77             | 5.15         |
| Year of Follow-up: 1995, Age Group: 75-79    |           |               |      |       |               |             |               |                |              |
| Period                                       | Age Group | Smoking Group | N    | %     | Ever Quit (N) | Ever Quit % | Mean Yrs Quit | Short Term (n) | Short Term % |
| 5                                            | 75-79     | Never Any     | 2738 | 61.05 |               |             |               |                |              |
| 5                                            | 75-79     | CC            | 337  | 7.51  | 0             | 0.00        |               |                |              |
| 5                                            | 75-79     | Ecig          | 101  | 2.25  |               |             |               |                |              |
| 5                                            | 75-79     | Dual          | 0    | 0.00  |               |             |               |                |              |
| 5                                            | 75-79     | Former        | 1309 | 29.19 |               |             | 25.87         | 70             | 5.35         |
| Year of Follow-up: 2000, Age Group: All Ages |           |               |      |       |               |             |               |                |              |

**Results for PHIM for Run 2 (Sensitivity\_Analysis\_1.RTF)**

| Period                                    | Age Group | Smoking Group | N     | %     | Ever Quit (N) | Ever Quit % | Mean Yrs Quit | Short Term (n) | Short Term % |
|-------------------------------------------|-----------|---------------|-------|-------|---------------|-------------|---------------|----------------|--------------|
| 10                                        | All Ages  | Never Any     | 50423 | 54.86 |               |             |               |                |              |
| 10                                        | All Ages  | CC            | 4595  | 5.00  | 0             | 0.00        |               |                |              |
| 10                                        | All Ages  | Ecig          | 15644 | 17.02 |               |             |               |                |              |
| 10                                        | All Ages  | Dual          | 0     | 0.00  |               |             |               |                |              |
| 10                                        | All Ages  | Former        | 21246 | 23.12 |               |             | 15.11         | 1717           | 8.08         |
| Year of Follow-up: 2000, Age Group: 18-19 |           |               |       |       |               |             |               |                |              |
| Period                                    | Age Group | Smoking Group | N     | %     | Ever Quit (N) | Ever Quit % | Mean Yrs Quit | Short Term (n) | Short Term % |
| 10                                        | 18-19     | Never Any     | 0     | .     |               |             |               |                |              |
| 10                                        | 18-19     | CC            | 0     | .     | 0             | .           |               |                |              |
| 10                                        | 18-19     | Ecig          | 0     | .     |               |             |               |                |              |
| 10                                        | 18-19     | Dual          | 0     | .     |               |             |               |                |              |
| 10                                        | 18-19     | Former        | 0     | .     |               |             |               | 0              | .            |
| Year of Follow-up: 2000, Age Group: 20-24 |           |               |       |       |               |             |               |                |              |
| Period                                    | Age Group | Smoking Group | N     | %     | Ever Quit (N) | Ever Quit % | Mean Yrs Quit | Short Term (n) | Short Term % |
| 10                                        | 20-24     | Never Any     | 5128  | 64.67 |               |             |               |                |              |
| 10                                        | 20-24     | CC            | 370   | 4.67  | 0             | 0.00        |               |                |              |
| 10                                        | 20-24     | Ecig          | 1780  | 22.45 |               |             |               |                |              |
| 10                                        | 20-24     | Dual          | 0     | 0.00  |               |             |               |                |              |
| 10                                        | 20-24     | Former        | 652   | 8.22  |               |             | 3.55          | 169            | 25.92        |
| Year of Follow-up: 2000, Age Group: 25-29 |           |               |       |       |               |             |               |                |              |
| Period                                    | Age Group | Smoking Group | N     | %     | Ever Quit (N) | Ever Quit % | Mean Yrs Quit | Short Term (n) | Short Term % |
| 10                                        | 25-29     | Never Any     | 5493  | 65.78 |               |             |               |                |              |
| 10                                        | 25-29     | CC            | 400   | 4.79  | 0             | 0.00        |               |                |              |
| 10                                        | 25-29     | Ecig          | 1690  | 20.24 |               |             |               |                |              |
| 10                                        | 25-29     | Dual          | 0     | 0.00  |               |             |               |                |              |
| 10                                        | 25-29     | Former        | 767   | 9.19  |               |             | 5.59          | 126            | 16.43        |
| Year of Follow-up: 2000, Age Group: 30-34 |           |               |       |       |               |             |               |                |              |
| Period                                    | Age Group | Smoking Group | N     | %     | Ever Quit (N) | Ever Quit % | Mean Yrs Quit | Short Term (n) | Short Term % |
| 10                                        | 30-34     | Never Any     | 5214  | 59.30 |               |             |               |                |              |
| 10                                        | 30-34     | CC            | 417   | 4.74  | 0             | 0.00        |               |                |              |
| 10                                        | 30-34     | Ecig          | 1908  | 21.70 |               |             |               |                |              |
| 10                                        | 30-34     | Dual          | 0     | 0.00  |               |             |               |                |              |
| 10                                        | 30-34     | Former        | 1254  | 14.26 |               |             | 9.28          | 91             | 7.26         |
| Year of Follow-up: 2000, Age Group: 35-39 |           |               |       |       |               |             |               |                |              |
| Period                                    | Age Group | Smoking Group | N     | %     | Ever Quit (N) | Ever Quit % | Mean Yrs Quit | Short Term (n) | Short Term % |
| 10                                        | 35-39     | Never Any     | 5284  | 52.43 |               |             |               |                |              |
| 10                                        | 35-39     | CC            | 561   | 5.57  | 0             | 0.00        |               |                |              |
| 10                                        | 35-39     | Ecig          | 2413  | 23.94 |               |             |               |                |              |
| 10                                        | 35-39     | Dual          | 0     | 0.00  |               |             |               |                |              |
| 10                                        | 35-39     | Former        | 1820  | 18.06 |               |             | 11.77         | 105            | 5.77         |
| Year of Follow-up: 2000, Age Group: 40-44 |           |               |       |       |               |             |               |                |              |
| Period                                    | Age Group | Smoking Group | N     | %     | Ever Quit (N) | Ever Quit % | Mean Yrs Quit | Short Term (n) | Short Term % |
| 10                                        | 40-44     | Never Any     | 5278  | 50.27 |               |             |               |                |              |
| 10                                        | 40-44     | CC            | 584   | 5.56  | 0             | 0.00        |               |                |              |
| 10                                        | 40-44     | Ecig          | 2292  | 21.83 |               |             |               |                |              |
| 10                                        | 40-44     | Dual          | 0     | 0.00  |               |             |               |                |              |
| 10                                        | 40-44     | Former        | 2345  | 22.34 |               |             | 12.30         | 143            | 6.10         |
| Year of Follow-up: 2000, Age Group: 45-49 |           |               |       |       |               |             |               |                |              |
| Period                                    | Age Group | Smoking Group | N     | %     | Ever Quit (N) | Ever Quit % | Mean Yrs Quit | Short Term (n) | Short Term % |
| 10                                        | 45-49     | Never Any     | 5018  | 52.27 |               |             |               |                |              |
| 10                                        | 45-49     | CC            | 446   | 4.65  | 0             | 0.00        |               |                |              |
| 10                                        | 45-49     | Ecig          | 1673  | 17.43 |               |             |               |                |              |
| 10                                        | 45-49     | Dual          | 0     | 0.00  |               |             |               |                |              |
| 10                                        | 45-49     | Former        | 2463  | 25.66 |               |             | 14.76         | 181            | 7.35         |
| Year of Follow-up: 2000, Age Group: 50-54 |           |               |       |       |               |             |               |                |              |
| Period                                    | Age Group | Smoking Group | N     | %     | Ever Quit (N) | Ever Quit % | Mean Yrs Quit | Short Term (n) | Short Term % |
| 10                                        | 50-54     | Never Any     | 4356  | 51.27 |               |             |               |                |              |
| 10                                        | 50-54     | CC            | 378   | 4.45  | 0             | 0.00        |               |                |              |
| 10                                        | 50-54     | Ecig          | 1299  | 15.29 |               |             |               |                |              |
| 10                                        | 50-54     | Dual          | 0     | 0.00  |               |             |               |                |              |
| 10                                        | 50-54     | Former        | 2464  | 29.00 |               |             | 13.32         | 188            | 7.63         |
| Year of Follow-up: 2000, Age Group: 55-59 |           |               |       |       |               |             |               |                |              |
| Period                                    | Age Group | Smoking Group | N     | %     | Ever Quit (N) | Ever Quit % | Mean Yrs Quit | Short Term (n) | Short Term % |
| 10                                        | 55-59     | Never Any     | 3116  | 47.67 |               |             |               |                |              |
| 10                                        | 55-59     | CC            | 283   | 4.33  | 0             | 0.00        |               |                |              |
| 10                                        | 55-59     | Ecig          | 912   | 13.95 |               |             |               |                |              |
| 10                                        | 55-59     | Dual          | 0     | 0.00  |               |             |               |                |              |



**Results for PHIM for Run 2 (Sensitivity\_Analysis\_1.RTF)**

| Year of Follow-up: 2000, Age Group: 60-64    | Period   | Age Group | Smoking Group | N     | %     | Ever Quit (N) | Ever Quit % | Mean Yrs Quit | Short Term (n) | Short Term % |
|----------------------------------------------|----------|-----------|---------------|-------|-------|---------------|-------------|---------------|----------------|--------------|
| 10                                           | 55-59    | Former    |               | 2225  | 34.04 |               |             | 16.92         | 157            | 7.06         |
| 10                                           | 60-64    | Never Any |               | 2684  | 48.50 |               |             |               |                |              |
| 10                                           | 60-64    | CC        |               | 334   | 6.04  | 0             | 0.00        |               |                |              |
| 10                                           | 60-64    | Ecig      |               | 663   | 11.98 |               |             |               |                |              |
| 10                                           | 60-64    | Dual      |               | 0     | 0.00  |               |             |               |                |              |
| 10                                           | 60-64    | Former    |               | 1853  | 33.48 |               |             | 17.23         | 149            | 8.04         |
| Year of Follow-up: 2000, Age Group: 65-69    | Period   | Age Group | Smoking Group | N     | %     | Ever Quit (N) | Ever Quit % | Mean Yrs Quit | Short Term (n) | Short Term % |
| 10                                           | 65-69    | Never Any |               | 2732  | 51.90 |               |             |               |                |              |
| 10                                           | 65-69    | CC        |               | 280   | 5.32  | 0             | 0.00        |               |                |              |
| 10                                           | 65-69    | Ecig      |               | 443   | 8.42  |               |             |               |                |              |
| 10                                           | 65-69    | Dual      |               | 0     | 0.00  |               |             |               |                |              |
| 10                                           | 65-69    | Former    |               | 1809  | 34.37 |               |             | 19.85         | 146            | 8.07         |
| Year of Follow-up: 2000, Age Group: 70-74    | Period   | Age Group | Smoking Group | N     | %     | Ever Quit (N) | Ever Quit % | Mean Yrs Quit | Short Term (n) | Short Term % |
| 10                                           | 70-74    | Never Any |               | 3078  | 55.72 |               |             |               |                |              |
| 10                                           | 70-74    | CC        |               | 274   | 4.96  | 0             | 0.00        |               |                |              |
| 10                                           | 70-74    | Ecig      |               | 368   | 6.66  |               |             |               |                |              |
| 10                                           | 70-74    | Dual      |               | 0     | 0.00  |               |             |               |                |              |
| 10                                           | 70-74    | Former    |               | 1804  | 32.66 |               |             | 20.18         | 154            | 8.54         |
| Year of Follow-up: 2000, Age Group: 75-79    | Period   | Age Group | Smoking Group | N     | %     | Ever Quit (N) | Ever Quit % | Mean Yrs Quit | Short Term (n) | Short Term % |
| 10                                           | 75-79    | Never Any |               | 3042  | 57.36 |               |             |               |                |              |
| 10                                           | 75-79    | CC        |               | 268   | 5.05  | 0             | 0.00        |               |                |              |
| 10                                           | 75-79    | Ecig      |               | 203   | 3.83  |               |             |               |                |              |
| 10                                           | 75-79    | Dual      |               | 0     | 0.00  |               |             |               |                |              |
| 10                                           | 75-79    | Former    |               | 1790  | 33.75 |               |             | 23.17         | 108            | 6.03         |
| Year of Follow-up: 2005, Age Group: All Ages | Period   | Age Group | Smoking Group | N     | %     | Ever Quit (N) | Ever Quit % | Mean Yrs Quit | Short Term (n) | Short Term % |
| 15                                           | All Ages | Never Any |               | 47002 | 54.27 |               |             |               |                |              |
| 15                                           | All Ages | CC        |               | 1890  | 2.18  | 0             | 0.00        |               |                |              |
| 15                                           | All Ages | Ecig      |               | 15617 | 18.03 |               |             |               |                |              |
| 15                                           | All Ages | Dual      |               | 0     | 0.00  |               |             |               |                |              |
| 15                                           | All Ages | Former    |               | 22096 | 25.51 |               |             | 17.32         | 941            | 4.26         |
| Year of Follow-up: 2005, Age Group: 18-19    | Period   | Age Group | Smoking Group | N     | %     | Ever Quit (N) | Ever Quit % | Mean Yrs Quit | Short Term (n) | Short Term % |
| 15                                           | 18-19    | Never Any |               | 0     | .     |               |             |               |                |              |
| 15                                           | 18-19    | CC        |               | 0     | .     | 0             | .           |               |                |              |
| 15                                           | 18-19    | Ecig      |               | 0     | .     |               |             |               |                |              |
| 15                                           | 18-19    | Dual      |               | 0     | .     |               |             |               |                |              |
| 15                                           | 18-19    | Former    |               | 0     | .     |               |             | .             | 0              | .            |
| Year of Follow-up: 2005, Age Group: 20-24    | Period   | Age Group | Smoking Group | N     | %     | Ever Quit (N) | Ever Quit % | Mean Yrs Quit | Short Term (n) | Short Term % |
| 15                                           | 20-24    | Never Any |               | 0     | .     |               |             |               |                |              |
| 15                                           | 20-24    | CC        |               | 0     | .     | 0             | .           |               |                |              |
| 15                                           | 20-24    | Ecig      |               | 0     | .     |               |             |               |                |              |
| 15                                           | 20-24    | Dual      |               | 0     | .     |               |             |               |                |              |
| 15                                           | 20-24    | Former    |               | 0     | .     |               |             | .             | 0              | .            |
| Year of Follow-up: 2005, Age Group: 25-29    | Period   | Age Group | Smoking Group | N     | %     | Ever Quit (N) | Ever Quit % | Mean Yrs Quit | Short Term (n) | Short Term % |
| 15                                           | 25-29    | Never Any |               | 4860  | 61.29 |               |             |               |                |              |
| 15                                           | 25-29    | CC        |               | 166   | 2.09  | 0             | 0.00        |               |                |              |
| 15                                           | 25-29    | Ecig      |               | 1941  | 24.48 |               |             |               |                |              |
| 15                                           | 25-29    | Dual      |               | 0     | 0.00  |               |             |               |                |              |
| 15                                           | 25-29    | Former    |               | 963   | 12.14 |               |             | 6.57          | 96             | 9.97         |
| Year of Follow-up: 2005, Age Group: 30-34    | Period   | Age Group | Smoking Group | N     | %     | Ever Quit (N) | Ever Quit % | Mean Yrs Quit | Short Term (n) | Short Term % |
| 15                                           | 30-34    | Never Any |               | 5407  | 64.75 |               |             |               |                |              |
| 15                                           | 30-34    | CC        |               | 149   | 1.78  | 0             | 0.00        |               |                |              |
| 15                                           | 30-34    | Ecig      |               | 1822  | 21.82 |               |             |               |                |              |
| 15                                           | 30-34    | Dual      |               | 0     | 0.00  |               |             |               |                |              |
| 15                                           | 30-34    | Former    |               | 972   | 11.64 |               |             | 8.77          | 80             | 8.23         |
| Year of Follow-up: 2005, Age Group: 35-39    | Period   | Age Group | Smoking Group | N     | %     | Ever Quit (N) | Ever Quit % | Mean Yrs Quit | Short Term (n) | Short Term % |
| 15                                           | 35-39    | Never Any |               | 5189  | 59.01 |               |             |               |                |              |
| 15                                           | 35-39    | CC        |               | 167   | 1.90  | 0             | 0.00        |               |                |              |

**Results for PHIM for Run 2 (Sensitivity\_Analysis\_1.RTF)**

|                                              |           |               |       |       |               |             |               |                |              |
|----------------------------------------------|-----------|---------------|-------|-------|---------------|-------------|---------------|----------------|--------------|
| 15                                           | 35-39     | Ecig          | 2002  | 22.77 |               |             |               |                |              |
| 15                                           | 35-39     | Dual          | 0     | 0.00  |               |             |               |                |              |
| 15                                           | 35-39     | Former        | 1435  | 16.32 |               |             | 12.75         | 66             | 4.60         |
| Year of Follow-up: 2005, Age Group: 40-44    |           |               |       |       |               |             |               |                |              |
| Period                                       | Age Group | Smoking Group | N     | %     | Ever Quit (N) | Ever Quit % | Mean Yrs Quit | Short Term (n) | Short Term % |
| 15                                           | 40-44     | Never Any     | 5284  | 52.43 |               |             |               |                |              |
| 15                                           | 40-44     | CC            | 238   | 2.36  | 0             | 0.00        |               |                |              |
| 15                                           | 40-44     | Ecig          | 2500  | 24.81 |               |             |               |                |              |
| 15                                           | 40-44     | Dual          | 0     | 0.00  |               |             |               |                |              |
| 15                                           | 40-44     | Former        | 2056  | 20.40 |               |             | 15.08         | 101            | 4.91         |
| Year of Follow-up: 2005, Age Group: 45-49    |           |               |       |       |               |             |               |                |              |
| Period                                       | Age Group | Smoking Group | N     | %     | Ever Quit (N) | Ever Quit % | Mean Yrs Quit | Short Term (n) | Short Term % |
| 15                                           | 45-49     | Never Any     | 5278  | 50.27 |               |             |               |                |              |
| 15                                           | 45-49     | CC            | 237   | 2.26  | 0             | 0.00        |               |                |              |
| 15                                           | 45-49     | Ecig          | 2318  | 22.08 |               |             |               |                |              |
| 15                                           | 45-49     | Dual          | 0     | 0.00  |               |             |               |                |              |
| 15                                           | 45-49     | Former        | 2666  | 25.39 |               |             | 15.45         | 135            | 5.06         |
| Year of Follow-up: 2005, Age Group: 50-54    |           |               |       |       |               |             |               |                |              |
| Period                                       | Age Group | Smoking Group | N     | %     | Ever Quit (N) | Ever Quit % | Mean Yrs Quit | Short Term (n) | Short Term % |
| 15                                           | 50-54     | Never Any     | 5018  | 52.27 |               |             |               |                |              |
| 15                                           | 50-54     | CC            | 191   | 1.99  | 0             | 0.00        |               |                |              |
| 15                                           | 50-54     | Ecig          | 1622  | 16.90 |               |             |               |                |              |
| 15                                           | 50-54     | Dual          | 0     | 0.00  |               |             |               |                |              |
| 15                                           | 50-54     | Former        | 2769  | 28.84 |               |             | 17.84         | 99             | 3.58         |
| Year of Follow-up: 2005, Age Group: 55-59    |           |               |       |       |               |             |               |                |              |
| Period                                       | Age Group | Smoking Group | N     | %     | Ever Quit (N) | Ever Quit % | Mean Yrs Quit | Short Term (n) | Short Term % |
| 15                                           | 55-59     | Never Any     | 4356  | 51.27 |               |             |               |                |              |
| 15                                           | 55-59     | CC            | 166   | 1.95  | 0             | 0.00        |               |                |              |
| 15                                           | 55-59     | Ecig          | 1281  | 15.08 |               |             |               |                |              |
| 15                                           | 55-59     | Dual          | 0     | 0.00  |               |             |               |                |              |
| 15                                           | 55-59     | Former        | 2694  | 31.71 |               |             | 16.95         | 78             | 2.90         |
| Year of Follow-up: 2005, Age Group: 60-64    |           |               |       |       |               |             |               |                |              |
| Period                                       | Age Group | Smoking Group | N     | %     | Ever Quit (N) | Ever Quit % | Mean Yrs Quit | Short Term (n) | Short Term % |
| 15                                           | 60-64     | Never Any     | 3116  | 47.67 |               |             |               |                |              |
| 15                                           | 60-64     | CC            | 131   | 2.00  | 0             | 0.00        |               |                |              |
| 15                                           | 60-64     | Ecig          | 852   | 13.04 |               |             |               |                |              |
| 15                                           | 60-64     | Dual          | 0     | 0.00  |               |             |               |                |              |
| 15                                           | 60-64     | Former        | 2437  | 37.29 |               |             | 20.18         | 93             | 3.82         |
| Year of Follow-up: 2005, Age Group: 65-69    |           |               |       |       |               |             |               |                |              |
| Period                                       | Age Group | Smoking Group | N     | %     | Ever Quit (N) | Ever Quit % | Mean Yrs Quit | Short Term (n) | Short Term % |
| 15                                           | 65-69     | Never Any     | 2684  | 48.50 |               |             |               |                |              |
| 15                                           | 65-69     | CC            | 160   | 2.89  | 0             | 0.00        |               |                |              |
| 15                                           | 65-69     | Ecig          | 591   | 10.68 |               |             |               |                |              |
| 15                                           | 65-69     | Dual          | 0     | 0.00  |               |             |               |                |              |
| 15                                           | 65-69     | Former        | 2099  | 37.93 |               |             | 19.92         | 68             | 3.24         |
| Year of Follow-up: 2005, Age Group: 70-74    |           |               |       |       |               |             |               |                |              |
| Period                                       | Age Group | Smoking Group | N     | %     | Ever Quit (N) | Ever Quit % | Mean Yrs Quit | Short Term (n) | Short Term % |
| 15                                           | 70-74     | Never Any     | 2732  | 51.90 |               |             |               |                |              |
| 15                                           | 70-74     | CC            | 139   | 2.64  | 0             | 0.00        |               |                |              |
| 15                                           | 70-74     | Ecig          | 391   | 7.43  |               |             |               |                |              |
| 15                                           | 70-74     | Dual          | 0     | 0.00  |               |             |               |                |              |
| 15                                           | 70-74     | Former        | 2002  | 38.03 |               |             | 22.67         | 69             | 3.45         |
| Year of Follow-up: 2005, Age Group: 75-79    |           |               |       |       |               |             |               |                |              |
| Period                                       | Age Group | Smoking Group | N     | %     | Ever Quit (N) | Ever Quit % | Mean Yrs Quit | Short Term (n) | Short Term % |
| 15                                           | 75-79     | Never Any     | 3078  | 55.72 |               |             |               |                |              |
| 15                                           | 75-79     | CC            | 146   | 2.64  | 0             | 0.00        |               |                |              |
| 15                                           | 75-79     | Ecig          | 297   | 5.38  |               |             |               |                |              |
| 15                                           | 75-79     | Dual          | 0     | 0.00  |               |             |               |                |              |
| 15                                           | 75-79     | Former        | 2003  | 36.26 |               |             | 22.91         | 56             | 2.80         |
| Year of Follow-up: 2010, Age Group: All Ages |           |               |       |       |               |             |               |                |              |
| Period                                       | Age Group | Smoking Group | N     | %     | Ever Quit (N) | Ever Quit % | Mean Yrs Quit | Short Term (n) | Short Term % |
| 20                                           | All Ages  | Never Any     | 43759 | 53.97 |               |             |               |                |              |
| 20                                           | All Ages  | CC            | 765   | 0.94  | 0             | 0.00        |               |                |              |
| 20                                           | All Ages  | Ecig          | 13785 | 17.00 |               |             |               |                |              |
| 20                                           | All Ages  | Dual          | 0     | 0.00  |               |             |               |                |              |
| 20                                           | All Ages  | Former        | 22772 | 28.09 |               |             | 19.42         | 1117           | 4.91         |
| Year of Follow-up: 2010, Age Group: 18-19    |           |               |       |       |               |             |               |                |              |
| Period                                       | Age Group | Smoking Group | N     | %     | Ever Quit (N) | Ever Quit % | Mean Yrs Quit | Short Term (n) | Short Term % |

**Results for PHIM for Run 2 (Sensitivity\_Analysis\_1.RTF)**

|                                           |           |               |      |       |               |             |               |                |              |
|-------------------------------------------|-----------|---------------|------|-------|---------------|-------------|---------------|----------------|--------------|
| 20                                        | 18-19     | Never Any     | 0    | .     |               |             |               |                |              |
| 20                                        | 18-19     | CC            | 0    | .     | 0             | .           |               |                |              |
| 20                                        | 18-19     | Ecig          | 0    | .     |               |             |               |                |              |
| 20                                        | 18-19     | Dual          | 0    | .     |               |             |               |                |              |
| 20                                        | 18-19     | Former        | 0    | .     |               |             | 0             | .              |              |
| Year of Follow-up: 2010, Age Group: 20-24 |           |               |      |       |               |             |               |                |              |
| Period                                    | Age Group | Smoking Group | N    | %     | Ever Quit (N) | Ever Quit % | Mean Yrs Quit | Short Term (n) | Short Term % |
| 20                                        | 20-24     | Never Any     | 0    | .     |               |             |               |                |              |
| 20                                        | 20-24     | CC            | 0    | .     | 0             | .           |               |                |              |
| 20                                        | 20-24     | Ecig          | 0    | .     |               |             |               |                |              |
| 20                                        | 20-24     | Dual          | 0    | .     |               |             |               |                |              |
| 20                                        | 20-24     | Former        | 0    | .     |               |             |               | 0              | .            |
| Year of Follow-up: 2010, Age Group: 25-29 |           |               |      |       |               |             |               |                |              |
| Period                                    | Age Group | Smoking Group | N    | %     | Ever Quit (N) | Ever Quit % | Mean Yrs Quit | Short Term (n) | Short Term % |
| 20                                        | 25-29     | Never Any     | 0    | .     |               |             |               |                |              |
| 20                                        | 25-29     | CC            | 0    | .     | 0             | .           |               |                |              |
| 20                                        | 25-29     | Ecig          | 0    | .     |               |             |               |                |              |
| 20                                        | 25-29     | Dual          | 0    | .     |               |             |               |                |              |
| 20                                        | 25-29     | Former        | 0    | .     |               |             |               | 0              | .            |
| Year of Follow-up: 2010, Age Group: 30-34 |           |               |      |       |               |             |               |                |              |
| Period                                    | Age Group | Smoking Group | N    | %     | Ever Quit (N) | Ever Quit % | Mean Yrs Quit | Short Term (n) | Short Term % |
| 20                                        | 30-34     | Never Any     | 4743 | 59.81 |               |             |               |                |              |
| 20                                        | 30-34     | CC            | 65   | 0.82  | 0             | 0.00        |               |                |              |
| 20                                        | 30-34     | Ecig          | 1881 | 23.72 |               |             |               |                |              |
| 20                                        | 30-34     | Dual          | 0    | 0.00  |               |             |               |                |              |
| 20                                        | 30-34     | Former        | 1241 | 15.65 |               |             | 9.36          | 130            | 10.48        |
| Year of Follow-up: 2010, Age Group: 35-39 |           |               |      |       |               |             |               |                |              |
| Period                                    | Age Group | Smoking Group | N    | %     | Ever Quit (N) | Ever Quit % | Mean Yrs Quit | Short Term (n) | Short Term % |
| 20                                        | 35-39     | Never Any     | 5359 | 64.18 |               |             |               |                |              |
| 20                                        | 35-39     | CC            | 58   | 0.69  | 0             | 0.00        |               |                |              |
| 20                                        | 35-39     | Ecig          | 1717 | 20.56 |               |             |               |                |              |
| 20                                        | 35-39     | Dual          | 0    | 0.00  |               |             |               |                |              |
| 20                                        | 35-39     | Former        | 1216 | 14.56 |               |             | 11.38         | 98             | 8.06         |
| Year of Follow-up: 2010, Age Group: 40-44 |           |               |      |       |               |             |               |                |              |
| Period                                    | Age Group | Smoking Group | N    | %     | Ever Quit (N) | Ever Quit % | Mean Yrs Quit | Short Term (n) | Short Term % |
| 20                                        | 40-44     | Never Any     | 5189 | 59.01 |               |             |               |                |              |
| 20                                        | 40-44     | CC            | 64   | 0.73  | 0             | 0.00        |               |                |              |
| 20                                        | 40-44     | Ecig          | 1849 | 21.03 |               |             |               |                |              |
| 20                                        | 40-44     | Dual          | 0    | 0.00  |               |             |               |                |              |
| 20                                        | 40-44     | Former        | 1691 | 19.23 |               |             | 15.34         | 112            | 6.62         |
| Year of Follow-up: 2010, Age Group: 45-49 |           |               |      |       |               |             |               |                |              |
| Period                                    | Age Group | Smoking Group | N    | %     | Ever Quit (N) | Ever Quit % | Mean Yrs Quit | Short Term (n) | Short Term % |
| 20                                        | 45-49     | Never Any     | 5284 | 52.43 |               |             |               |                |              |
| 20                                        | 45-49     | CC            | 105  | 1.04  | 0             | 0.00        |               |                |              |
| 20                                        | 45-49     | Ecig          | 2327 | 23.09 |               |             |               |                |              |
| 20                                        | 45-49     | Dual          | 0    | 0.00  |               |             |               |                |              |
| 20                                        | 45-49     | Former        | 2362 | 23.44 |               |             | 17.71         | 131            | 5.55         |
| Year of Follow-up: 2010, Age Group: 50-54 |           |               |      |       |               |             |               |                |              |
| Period                                    | Age Group | Smoking Group | N    | %     | Ever Quit (N) | Ever Quit % | Mean Yrs Quit | Short Term (n) | Short Term % |
| 20                                        | 50-54     | Never Any     | 5278 | 50.27 |               |             |               |                |              |
| 20                                        | 50-54     | CC            | 101  | 0.96  | 0             | 0.00        |               |                |              |
| 20                                        | 50-54     | Ecig          | 2101 | 20.01 |               |             |               |                |              |
| 20                                        | 50-54     | Dual          | 0    | 0.00  |               |             |               |                |              |
| 20                                        | 50-54     | Former        | 3019 | 28.76 |               |             | 18.27         | 163            | 5.40         |
| Year of Follow-up: 2010, Age Group: 55-59 |           |               |      |       |               |             |               |                |              |
| Period                                    | Age Group | Smoking Group | N    | %     | Ever Quit (N) | Ever Quit % | Mean Yrs Quit | Short Term (n) | Short Term % |
| 20                                        | 55-59     | Never Any     | 5018 | 52.27 |               |             |               |                |              |
| 20                                        | 55-59     | CC            | 91   | 0.95  | 0             | 0.00        |               |                |              |
| 20                                        | 55-59     | Ecig          | 1433 | 14.93 |               |             |               |                |              |
| 20                                        | 55-59     | Dual          | 0    | 0.00  |               |             |               |                |              |
| 20                                        | 55-59     | Former        | 3058 | 31.85 |               |             | 20.88         | 103            | 3.37         |
| Year of Follow-up: 2010, Age Group: 60-64 |           |               |      |       |               |             |               |                |              |
| Period                                    | Age Group | Smoking Group | N    | %     | Ever Quit (N) | Ever Quit % | Mean Yrs Quit | Short Term (n) | Short Term % |
| 20                                        | 60-64     | Never Any     | 4356 | 51.27 |               |             |               |                |              |
| 20                                        | 60-64     | CC            | 71   | 0.84  | 0             | 0.00        |               |                |              |
| 20                                        | 60-64     | Ecig          | 1079 | 12.70 |               |             |               |                |              |
| 20                                        | 60-64     | Dual          | 0    | 0.00  |               |             |               |                |              |
| 20                                        | 60-64     | Former        | 2991 | 35.20 |               |             | 19.94         | 144            | 4.81         |
| Year of Follow-up: 2010, Age Group: 65-69 |           |               |      |       |               |             |               |                |              |

**Results for PHIM for Run 2 (Sensitivity\_Analysis\_1.RTF)**

| Period                                       | Age Group | Smoking Group | N     | %     | Ever Quit (N) | Ever Quit % | Mean Yrs Quit | Short Term (n) | Short Term % |
|----------------------------------------------|-----------|---------------|-------|-------|---------------|-------------|---------------|----------------|--------------|
| 20                                           | 65-69     | Never Any     | 3116  | 47.67 |               |             |               |                |              |
| 20                                           | 65-69     | CC            | 47    | 0.72  | 0             | 0.00        |               |                |              |
| 20                                           | 65-69     | Ecig          | 645   | 9.87  |               |             |               |                |              |
| 20                                           | 65-69     | Dual          | 0     | 0.00  |               |             |               |                |              |
| 20                                           | 65-69     | Former        | 2728  | 41.74 |               |             | 22.72         | 95             | 3.48         |
| Year of Follow-up: 2010, Age Group: 70-74    |           |               |       |       |               |             |               |                |              |
| Period                                       | Age Group | Smoking Group | N     | %     | Ever Quit (N) | Ever Quit % | Mean Yrs Quit | Short Term (n) | Short Term % |
| 20                                           | 70-74     | Never Any     | 2684  | 48.50 |               |             |               |                |              |
| 20                                           | 70-74     | CC            | 88    | 1.59  | 0             | 0.00        |               |                |              |
| 20                                           | 70-74     | Ecig          | 477   | 8.62  |               |             |               |                |              |
| 20                                           | 70-74     | Dual          | 0     | 0.00  |               |             |               |                |              |
| 20                                           | 70-74     | Former        | 2285  | 41.29 |               |             | 23.05         | 69             | 3.02         |
| Year of Follow-up: 2010, Age Group: 75-79    |           |               |       |       |               |             |               |                |              |
| Period                                       | Age Group | Smoking Group | N     | %     | Ever Quit (N) | Ever Quit % | Mean Yrs Quit | Short Term (n) | Short Term % |
| 20                                           | 75-79     | Never Any     | 2732  | 51.90 |               |             |               |                |              |
| 20                                           | 75-79     | CC            | 75    | 1.42  | 0             | 0.00        |               |                |              |
| 20                                           | 75-79     | Ecig          | 276   | 5.24  |               |             |               |                |              |
| 20                                           | 75-79     | Dual          | 0     | 0.00  |               |             |               |                |              |
| 20                                           | 75-79     | Former        | 2181  | 41.43 |               |             | 25.56         | 72             | 3.30         |
| Year of Follow-up: 2015, Age Group: All Ages |           |               |       |       |               |             |               |                |              |
| Period                                       | Age Group | Smoking Group | N     | %     | Ever Quit (N) | Ever Quit % | Mean Yrs Quit | Short Term (n) | Short Term % |
| 25                                           | All Ages  | Never Any     | 41010 | 54.09 |               |             |               |                |              |
| 25                                           | All Ages  | CC            | 340   | 0.45  | 0             | 0.00        |               |                |              |
| 25                                           | All Ages  | Ecig          | 11438 | 15.09 |               |             |               |                |              |
| 25                                           | All Ages  | Dual          | 0     | 0.00  |               |             |               |                |              |
| 25                                           | All Ages  | Former        | 23029 | 30.37 |               |             | 21.48         | 914            | 3.97         |
| Year of Follow-up: 2015, Age Group: 18-19    |           |               |       |       |               |             |               |                |              |
| Period                                       | Age Group | Smoking Group | N     | %     | Ever Quit (N) | Ever Quit % | Mean Yrs Quit | Short Term (n) | Short Term % |
| 25                                           | 18-19     | Never Any     | 0     | .     |               |             |               |                |              |
| 25                                           | 18-19     | CC            | 0     | .     | 0             | .           |               |                |              |
| 25                                           | 18-19     | Ecig          | 0     | .     |               |             |               |                |              |
| 25                                           | 18-19     | Dual          | 0     | .     |               |             |               |                |              |
| 25                                           | 18-19     | Former        | 0     | .     |               |             | .             | 0              | .            |
| Year of Follow-up: 2015, Age Group: 20-24    |           |               |       |       |               |             |               |                |              |
| Period                                       | Age Group | Smoking Group | N     | %     | Ever Quit (N) | Ever Quit % | Mean Yrs Quit | Short Term (n) | Short Term % |
| 25                                           | 20-24     | Never Any     | 0     | .     |               |             |               |                |              |
| 25                                           | 20-24     | CC            | 0     | .     | 0             | .           |               |                |              |
| 25                                           | 20-24     | Ecig          | 0     | .     |               |             |               |                |              |
| 25                                           | 20-24     | Dual          | 0     | .     |               |             |               |                |              |
| 25                                           | 20-24     | Former        | 0     | .     |               |             | .             | 0              | .            |
| Year of Follow-up: 2015, Age Group: 25-29    |           |               |       |       |               |             |               |                |              |
| Period                                       | Age Group | Smoking Group | N     | %     | Ever Quit (N) | Ever Quit % | Mean Yrs Quit | Short Term (n) | Short Term % |
| 25                                           | 25-29     | Never Any     | 0     | .     |               |             |               |                |              |
| 25                                           | 25-29     | CC            | 0     | .     | 0             | .           |               |                |              |
| 25                                           | 25-29     | Ecig          | 0     | .     |               |             |               |                |              |
| 25                                           | 25-29     | Dual          | 0     | .     |               |             |               |                |              |
| 25                                           | 25-29     | Former        | 0     | .     |               |             | .             | 0              | .            |
| Year of Follow-up: 2015, Age Group: 30-34    |           |               |       |       |               |             |               |                |              |
| Period                                       | Age Group | Smoking Group | N     | %     | Ever Quit (N) | Ever Quit % | Mean Yrs Quit | Short Term (n) | Short Term % |
| 25                                           | 30-34     | Never Any     | 0     | .     |               |             |               |                |              |
| 25                                           | 30-34     | CC            | 0     | .     | 0             | .           |               |                |              |
| 25                                           | 30-34     | Ecig          | 0     | .     |               |             |               |                |              |
| 25                                           | 30-34     | Dual          | 0     | .     |               |             |               |                |              |
| 25                                           | 30-34     | Former        | 0     | .     |               |             | .             | 0              | .            |
| Year of Follow-up: 2015, Age Group: 35-39    |           |               |       |       |               |             |               |                |              |
| Period                                       | Age Group | Smoking Group | N     | %     | Ever Quit (N) | Ever Quit % | Mean Yrs Quit | Short Term (n) | Short Term % |
| 25                                           | 35-39     | Never Any     | 4726  | 59.60 |               |             |               |                |              |
| 25                                           | 35-39     | CC            | 20    | 0.25  | 0             | 0.00        |               |                |              |
| 25                                           | 35-39     | Ecig          | 1567  | 19.76 |               |             |               |                |              |
| 25                                           | 35-39     | Dual          | 0     | 0.00  |               |             |               |                |              |
| 25                                           | 35-39     | Former        | 1617  | 20.39 |               |             | 11.52         | 129            | 7.98         |
| Year of Follow-up: 2015, Age Group: 40-44    |           |               |       |       |               |             |               |                |              |
| Period                                       | Age Group | Smoking Group | N     | %     | Ever Quit (N) | Ever Quit % | Mean Yrs Quit | Short Term (n) | Short Term % |
| 25                                           | 40-44     | Never Any     | 5359  | 64.18 |               |             |               |                |              |
| 25                                           | 40-44     | CC            | 33    | 0.40  | 0             | 0.00        |               |                |              |
| 25                                           | 40-44     | Ecig          | 1502  | 17.99 |               |             |               |                |              |
| 25                                           | 40-44     | Dual          | 0     | 0.00  |               |             |               |                |              |

**Results for PHIM for Run 2 (Sensitivity\_Analysis\_1.RTF)**

|                                              |           |               |       |       |               |             |               |                |              |
|----------------------------------------------|-----------|---------------|-------|-------|---------------|-------------|---------------|----------------|--------------|
| 25                                           | 40-44     | Former        | 1456  | 17.44 |               |             | 14.00         | 103            | 7.07         |
| Year of Follow-up: 2015, Age Group: 45-49    |           |               |       |       |               |             |               |                |              |
| Period                                       | Age Group | Smoking Group | N     | %     | Ever Quit (N) | Ever Quit % | Mean Yrs Quit | Short Term (n) | Short Term % |
| 25                                           | 45-49     | Never Any     | 5189  | 59.01 |               |             |               |                |              |
| 25                                           | 45-49     | CC            | 32    | 0.36  | 0             | 0.00        |               |                |              |
| 25                                           | 45-49     | Ecig          | 1627  | 18.50 |               |             |               |                |              |
| 25                                           | 45-49     | Dual          | 0     | 0.00  |               |             |               |                |              |
| 25                                           | 45-49     | Former        | 1945  | 22.12 |               |             | 17.95         | 96             | 4.94         |
| Year of Follow-up: 2015, Age Group: 50-54    |           |               |       |       |               |             |               |                |              |
| Period                                       | Age Group | Smoking Group | N     | %     | Ever Quit (N) | Ever Quit % | Mean Yrs Quit | Short Term (n) | Short Term % |
| 25                                           | 50-54     | Never Any     | 5284  | 52.43 |               |             |               |                |              |
| 25                                           | 50-54     | CC            | 45    | 0.45  | 0             | 0.00        |               |                |              |
| 25                                           | 50-54     | Ecig          | 2059  | 20.43 |               |             |               |                |              |
| 25                                           | 50-54     | Dual          | 0     | 0.00  |               |             |               |                |              |
| 25                                           | 50-54     | Former        | 2690  | 26.69 |               |             | 20.17         | 150            | 5.58         |
| Year of Follow-up: 2015, Age Group: 55-59    |           |               |       |       |               |             |               |                |              |
| Period                                       | Age Group | Smoking Group | N     | %     | Ever Quit (N) | Ever Quit % | Mean Yrs Quit | Short Term (n) | Short Term % |
| 25                                           | 55-59     | Never Any     | 5278  | 50.27 |               |             |               |                |              |
| 25                                           | 55-59     | CC            | 37    | 0.35  | 0             | 0.00        |               |                |              |
| 25                                           | 55-59     | Ecig          | 1773  | 16.89 |               |             |               |                |              |
| 25                                           | 55-59     | Dual          | 0     | 0.00  |               |             |               |                |              |
| 25                                           | 55-59     | Former        | 3411  | 32.49 |               |             | 20.84         | 140            | 4.10         |
| Year of Follow-up: 2015, Age Group: 60-64    |           |               |       |       |               |             |               |                |              |
| Period                                       | Age Group | Smoking Group | N     | %     | Ever Quit (N) | Ever Quit % | Mean Yrs Quit | Short Term (n) | Short Term % |
| 25                                           | 60-64     | Never Any     | 5018  | 52.27 |               |             |               |                |              |
| 25                                           | 60-64     | CC            | 42    | 0.44  | 0             | 0.00        |               |                |              |
| 25                                           | 60-64     | Ecig          | 1154  | 12.02 |               |             |               |                |              |
| 25                                           | 60-64     | Dual          | 0     | 0.00  |               |             |               |                |              |
| 25                                           | 60-64     | Former        | 3386  | 35.27 |               |             | 23.56         | 144            | 4.25         |
| Year of Follow-up: 2015, Age Group: 65-69    |           |               |       |       |               |             |               |                |              |
| Period                                       | Age Group | Smoking Group | N     | %     | Ever Quit (N) | Ever Quit % | Mean Yrs Quit | Short Term (n) | Short Term % |
| 25                                           | 65-69     | Never Any     | 4356  | 51.27 |               |             |               |                |              |
| 25                                           | 65-69     | CC            | 41    | 0.48  | 0             | 0.00        |               |                |              |
| 25                                           | 65-69     | Ecig          | 844   | 9.93  |               |             |               |                |              |
| 25                                           | 65-69     | Dual          | 0     | 0.00  |               |             |               |                |              |
| 25                                           | 65-69     | Former        | 3256  | 38.32 |               |             | 23.12         | 70             | 2.15         |
| Year of Follow-up: 2015, Age Group: 70-74    |           |               |       |       |               |             |               |                |              |
| Period                                       | Age Group | Smoking Group | N     | %     | Ever Quit (N) | Ever Quit % | Mean Yrs Quit | Short Term (n) | Short Term % |
| 25                                           | 70-74     | Never Any     | 3116  | 47.67 |               |             |               |                |              |
| 25                                           | 70-74     | CC            | 31    | 0.47  | 0             | 0.00        |               |                |              |
| 25                                           | 70-74     | Ecig          | 527   | 8.06  |               |             |               |                |              |
| 25                                           | 70-74     | Dual          | 0     | 0.00  |               |             |               |                |              |
| 25                                           | 70-74     | Former        | 2862  | 43.79 |               |             | 26.54         | 42             | 1.47         |
| Year of Follow-up: 2015, Age Group: 75-79    |           |               |       |       |               |             |               |                |              |
| Period                                       | Age Group | Smoking Group | N     | %     | Ever Quit (N) | Ever Quit % | Mean Yrs Quit | Short Term (n) | Short Term % |
| 25                                           | 75-79     | Never Any     | 2684  | 48.50 |               |             |               |                |              |
| 25                                           | 75-79     | CC            | 59    | 1.07  | 0             | 0.00        |               |                |              |
| 25                                           | 75-79     | Ecig          | 385   | 6.96  |               |             |               |                |              |
| 25                                           | 75-79     | Dual          | 0     | 0.00  |               |             |               |                |              |
| 25                                           | 75-79     | Former        | 2406  | 43.48 |               |             | 26.76         | 40             | 1.66         |
| Year of Follow-up: 2020, Age Group: All Ages |           |               |       |       |               |             |               |                |              |
| Period                                       | Age Group | Smoking Group | N     | %     | Ever Quit (N) | Ever Quit % | Mean Yrs Quit | Short Term (n) | Short Term % |
| 30                                           | All Ages  | Never Any     | 38326 | 54.53 |               |             |               |                |              |
| 30                                           | All Ages  | CC            | 115   | 0.16  | 0             | 0.00        |               |                |              |
| 30                                           | All Ages  | Ecig          | 9272  | 13.19 |               |             |               |                |              |
| 30                                           | All Ages  | Dual          | 0     | 0.00  |               |             |               |                |              |
| 30                                           | All Ages  | Former        | 22570 | 32.11 |               |             | 23.81         | 756            | 3.35         |
| Year of Follow-up: 2020, Age Group: 18-19    |           |               |       |       |               |             |               |                |              |
| Period                                       | Age Group | Smoking Group | N     | %     | Ever Quit (N) | Ever Quit % | Mean Yrs Quit | Short Term (n) | Short Term % |
| 30                                           | 18-19     | Never Any     | 0     | .     |               |             |               |                |              |
| 30                                           | 18-19     | CC            | 0     | .     | 0             | .           |               |                |              |
| 30                                           | 18-19     | Ecig          | 0     | .     |               |             |               |                |              |
| 30                                           | 18-19     | Dual          | 0     | .     |               |             |               |                |              |
| 30                                           | 18-19     | Former        | 0     | .     |               |             | .             | 0              | .            |
| Year of Follow-up: 2020, Age Group: 20-24    |           |               |       |       |               |             |               |                |              |
| Period                                       | Age Group | Smoking Group | N     | %     | Ever Quit (N) | Ever Quit % | Mean Yrs Quit | Short Term (n) | Short Term % |
| 30                                           | 20-24     | Never Any     | 0     | .     |               |             |               |                |              |
| 30                                           | 20-24     | CC            | 0     | .     | 0             | .           |               |                |              |

**Results for PHIM for Run 2 (Sensitivity\_Analysis\_1.RTF)**

| 30                                        | 20-24     | Ecig          | 0    | .     |               |             |               |                |              |
|-------------------------------------------|-----------|---------------|------|-------|---------------|-------------|---------------|----------------|--------------|
| 30                                        | 20-24     | Dual          | 0    | .     |               |             |               |                |              |
| 30                                        | 20-24     | Former        | 0    | .     |               |             | 0             | .              |              |
| Year of Follow-up: 2020, Age Group: 25-29 |           |               |      |       |               |             |               |                |              |
| Period                                    | Age Group | Smoking Group | N    | %     | Ever Quit (N) | Ever Quit % | Mean Yrs Quit | Short Term (n) | Short Term % |
| 30                                        | 25-29     | Never Any     | 0    | .     |               |             |               |                |              |
| 30                                        | 25-29     | CC            | 0    | .     | 0             | .           |               |                |              |
| 30                                        | 25-29     | Ecig          | 0    | .     |               |             |               |                |              |
| 30                                        | 25-29     | Dual          | 0    | .     |               |             |               |                |              |
| 30                                        | 25-29     | Former        | 0    | .     |               |             |               | 0              | .            |
| Year of Follow-up: 2020, Age Group: 30-34 |           |               |      |       |               |             |               |                |              |
| Period                                    | Age Group | Smoking Group | N    | %     | Ever Quit (N) | Ever Quit % | Mean Yrs Quit | Short Term (n) | Short Term % |
| 30                                        | 30-34     | Never Any     | 0    | .     |               |             |               |                |              |
| 30                                        | 30-34     | CC            | 0    | .     | 0             | .           |               |                |              |
| 30                                        | 30-34     | Ecig          | 0    | .     |               |             |               |                |              |
| 30                                        | 30-34     | Dual          | 0    | .     |               |             |               |                |              |
| 30                                        | 30-34     | Former        | 0    | .     |               |             |               | 0              | .            |
| Year of Follow-up: 2020, Age Group: 35-39 |           |               |      |       |               |             |               |                |              |
| Period                                    | Age Group | Smoking Group | N    | %     | Ever Quit (N) | Ever Quit % | Mean Yrs Quit | Short Term (n) | Short Term % |
| 30                                        | 35-39     | Never Any     | 0    | .     |               |             |               |                |              |
| 30                                        | 35-39     | CC            | 0    | .     | 0             | .           |               |                |              |
| 30                                        | 35-39     | Ecig          | 0    | .     |               |             |               |                |              |
| 30                                        | 35-39     | Dual          | 0    | .     |               |             |               |                |              |
| 30                                        | 35-39     | Former        | 0    | .     |               |             |               | 0              | .            |
| Year of Follow-up: 2020, Age Group: 40-44 |           |               |      |       |               |             |               |                |              |
| Period                                    | Age Group | Smoking Group | N    | %     | Ever Quit (N) | Ever Quit % | Mean Yrs Quit | Short Term (n) | Short Term % |
| 30                                        | 40-44     | Never Any     | 4726 | 59.60 |               |             |               |                |              |
| 30                                        | 40-44     | CC            | 6    | 0.08  | 0             | 0.00        |               |                |              |
| 30                                        | 40-44     | Ecig          | 1345 | 16.96 |               |             |               |                |              |
| 30                                        | 40-44     | Dual          | 0    | 0.00  |               |             |               |                |              |
| 30                                        | 40-44     | Former        | 1853 | 23.37 |               |             | 14.68         | 82             | 4.43         |
| Year of Follow-up: 2020, Age Group: 45-49 |           |               |      |       |               |             |               |                |              |
| Period                                    | Age Group | Smoking Group | N    | %     | Ever Quit (N) | Ever Quit % | Mean Yrs Quit | Short Term (n) | Short Term % |
| 30                                        | 45-49     | Never Any     | 5359 | 64.18 |               |             |               |                |              |
| 30                                        | 45-49     | CC            | 13   | 0.16  | 0             | 0.00        |               |                |              |
| 30                                        | 45-49     | Ecig          | 1317 | 15.77 |               |             |               |                |              |
| 30                                        | 45-49     | Dual          | 0    | 0.00  |               |             |               |                |              |
| 30                                        | 45-49     | Former        | 1661 | 19.89 |               |             | 16.93         | 71             | 4.27         |
| Year of Follow-up: 2020, Age Group: 50-54 |           |               |      |       |               |             |               |                |              |
| Period                                    | Age Group | Smoking Group | N    | %     | Ever Quit (N) | Ever Quit % | Mean Yrs Quit | Short Term (n) | Short Term % |
| 30                                        | 50-54     | Never Any     | 5189 | 59.01 |               |             |               |                |              |
| 30                                        | 50-54     | CC            | 9    | 0.10  | 0             | 0.00        |               |                |              |
| 30                                        | 50-54     | Ecig          | 1395 | 15.86 |               |             |               |                |              |
| 30                                        | 50-54     | Dual          | 0    | 0.00  |               |             |               |                |              |
| 30                                        | 50-54     | Former        | 2200 | 25.02 |               |             | 20.50         | 121            | 5.50         |
| Year of Follow-up: 2020, Age Group: 55-59 |           |               |      |       |               |             |               |                |              |
| Period                                    | Age Group | Smoking Group | N    | %     | Ever Quit (N) | Ever Quit % | Mean Yrs Quit | Short Term (n) | Short Term % |
| 30                                        | 55-59     | Never Any     | 5284 | 52.43 |               |             |               |                |              |
| 30                                        | 55-59     | CC            | 14   | 0.14  | 0             | 0.00        |               |                |              |
| 30                                        | 55-59     | Ecig          | 1708 | 16.95 |               |             |               |                |              |
| 30                                        | 55-59     | Dual          | 0    | 0.00  |               |             |               |                |              |
| 30                                        | 55-59     | Former        | 3072 | 30.48 |               |             | 22.30         | 140            | 4.56         |
| Year of Follow-up: 2020, Age Group: 60-64 |           |               |      |       |               |             |               |                |              |
| Period                                    | Age Group | Smoking Group | N    | %     | Ever Quit (N) | Ever Quit % | Mean Yrs Quit | Short Term (n) | Short Term % |
| 30                                        | 60-64     | Never Any     | 5278 | 50.27 |               |             |               |                |              |
| 30                                        | 60-64     | CC            | 15   | 0.14  | 0             | 0.00        |               |                |              |
| 30                                        | 60-64     | Ecig          | 1428 | 13.60 |               |             |               |                |              |
| 30                                        | 60-64     | Dual          | 0    | 0.00  |               |             |               |                |              |
| 30                                        | 60-64     | Former        | 3778 | 35.98 |               |             | 23.52         | 153            | 4.05         |
| Year of Follow-up: 2020, Age Group: 65-69 |           |               |      |       |               |             |               |                |              |
| Period                                    | Age Group | Smoking Group | N    | %     | Ever Quit (N) | Ever Quit % | Mean Yrs Quit | Short Term (n) | Short Term % |
| 30                                        | 65-69     | Never Any     | 5018 | 52.27 |               |             |               |                |              |
| 30                                        | 65-69     | CC            | 18   | 0.19  | 0             | 0.00        |               |                |              |
| 30                                        | 65-69     | Ecig          | 917  | 9.55  |               |             |               |                |              |
| 30                                        | 65-69     | Dual          | 0    | 0.00  |               |             |               |                |              |
| 30                                        | 65-69     | Former        | 3647 | 37.99 |               |             | 26.68         | 75             | 2.06         |
| Year of Follow-up: 2020, Age Group: 70-74 |           |               |      |       |               |             |               |                |              |
| Period                                    | Age Group | Smoking Group | N    | %     | Ever Quit (N) | Ever Quit % | Mean Yrs Quit | Short Term (n) | Short Term % |

**Results for PHIM for Run 2 (Sensitivity\_Analysis\_1.RTF)**

|                                              |           |               |       |       |               |             |               |                |              |
|----------------------------------------------|-----------|---------------|-------|-------|---------------|-------------|---------------|----------------|--------------|
| 30                                           | 70-74     | Never Any     | 4356  | 51.27 |               |             |               |                |              |
| 30                                           | 70-74     | CC            | 22    | 0.26  | 0             | 0.00        |               |                |              |
| 30                                           | 70-74     | Ecig          | 727   | 8.56  |               |             |               |                |              |
| 30                                           | 70-74     | Dual          | 0     | 0.00  |               |             |               |                |              |
| 30                                           | 70-74     | Former        | 3392  | 39.92 |               |             | 27.06         | 66             | 1.95         |
| Year of Follow-up: 2020, Age Group: 75-79    |           |               |       |       |               |             |               |                |              |
| Period                                       | Age Group | Smoking Group | N     | %     | Ever Quit (N) | Ever Quit % | Mean Yrs Quit | Short Term (n) | Short Term % |
| 30                                           | 75-79     | Never Any     | 3116  | 47.67 |               |             |               |                |              |
| 30                                           | 75-79     | CC            | 18    | 0.28  | 0             | 0.00        |               |                |              |
| 30                                           | 75-79     | Ecig          | 435   | 6.66  |               |             |               |                |              |
| 30                                           | 75-79     | Dual          | 0     | 0.00  |               |             |               |                |              |
| 30                                           | 75-79     | Former        | 2967  | 45.39 |               |             | 30.49         | 48             | 1.62         |
| Year of Follow-up: 2025, Age Group: All Ages |           |               |       |       |               |             |               |                |              |
| Period                                       | Age Group | Smoking Group | N     | %     | Ever Quit (N) | Ever Quit % | Mean Yrs Quit | Short Term (n) | Short Term % |
| 35                                           | All Ages  | Never Any     | 35210 | 55.23 |               |             |               |                |              |
| 35                                           | All Ages  | CC            | 47    | 0.07  | 0             | 0.00        |               |                |              |
| 35                                           | All Ages  | Ecig          | 7305  | 11.46 |               |             |               |                |              |
| 35                                           | All Ages  | Dual          | 0     | 0.00  |               |             |               |                |              |
| 35                                           | All Ages  | Former        | 21185 | 33.23 |               |             | 25.87         | 616            | 2.91         |
| Year of Follow-up: 2025, Age Group: 18-19    |           |               |       |       |               |             |               |                |              |
| Period                                       | Age Group | Smoking Group | N     | %     | Ever Quit (N) | Ever Quit % | Mean Yrs Quit | Short Term (n) | Short Term % |
| 35                                           | 18-19     | Never Any     | 0     | .     |               |             |               |                |              |
| 35                                           | 18-19     | CC            | 0     | .     | 0             | .           |               |                |              |
| 35                                           | 18-19     | Ecig          | 0     | .     |               |             |               |                |              |
| 35                                           | 18-19     | Dual          | 0     | .     |               |             |               |                |              |
| 35                                           | 18-19     | Former        | 0     | .     |               |             | .             | 0              | .            |
| Year of Follow-up: 2025, Age Group: 20-24    |           |               |       |       |               |             |               |                |              |
| Period                                       | Age Group | Smoking Group | N     | %     | Ever Quit (N) | Ever Quit % | Mean Yrs Quit | Short Term (n) | Short Term % |
| 35                                           | 20-24     | Never Any     | 0     | .     |               |             |               |                |              |
| 35                                           | 20-24     | CC            | 0     | .     | 0             | .           |               |                |              |
| 35                                           | 20-24     | Ecig          | 0     | .     |               |             |               |                |              |
| 35                                           | 20-24     | Dual          | 0     | .     |               |             |               |                |              |
| 35                                           | 20-24     | Former        | 0     | .     |               |             | .             | 0              | .            |
| Year of Follow-up: 2025, Age Group: 25-29    |           |               |       |       |               |             |               |                |              |
| Period                                       | Age Group | Smoking Group | N     | %     | Ever Quit (N) | Ever Quit % | Mean Yrs Quit | Short Term (n) | Short Term % |
| 35                                           | 25-29     | Never Any     | 0     | .     |               |             |               |                |              |
| 35                                           | 25-29     | CC            | 0     | .     | 0             | .           |               |                |              |
| 35                                           | 25-29     | Ecig          | 0     | .     |               |             |               |                |              |
| 35                                           | 25-29     | Dual          | 0     | .     |               |             |               |                |              |
| 35                                           | 25-29     | Former        | 0     | .     |               |             | .             | 0              | .            |
| Year of Follow-up: 2025, Age Group: 30-34    |           |               |       |       |               |             |               |                |              |
| Period                                       | Age Group | Smoking Group | N     | %     | Ever Quit (N) | Ever Quit % | Mean Yrs Quit | Short Term (n) | Short Term % |
| 35                                           | 30-34     | Never Any     | 0     | .     |               |             |               |                |              |
| 35                                           | 30-34     | CC            | 0     | .     | 0             | .           |               |                |              |
| 35                                           | 30-34     | Ecig          | 0     | .     |               |             |               |                |              |
| 35                                           | 30-34     | Dual          | 0     | .     |               |             |               |                |              |
| 35                                           | 30-34     | Former        | 0     | .     |               |             | .             | 0              | .            |
| Year of Follow-up: 2025, Age Group: 35-39    |           |               |       |       |               |             |               |                |              |
| Period                                       | Age Group | Smoking Group | N     | %     | Ever Quit (N) | Ever Quit % | Mean Yrs Quit | Short Term (n) | Short Term % |
| 35                                           | 35-39     | Never Any     | 0     | .     |               |             |               |                |              |
| 35                                           | 35-39     | CC            | 0     | .     | 0             | .           |               |                |              |
| 35                                           | 35-39     | Ecig          | 0     | .     |               |             |               |                |              |
| 35                                           | 35-39     | Dual          | 0     | .     |               |             |               |                |              |
| 35                                           | 35-39     | Former        | 0     | .     |               |             | .             | 0              | .            |
| Year of Follow-up: 2025, Age Group: 40-44    |           |               |       |       |               |             |               |                |              |
| Period                                       | Age Group | Smoking Group | N     | %     | Ever Quit (N) | Ever Quit % | Mean Yrs Quit | Short Term (n) | Short Term % |
| 35                                           | 40-44     | Never Any     | 0     | .     |               |             |               |                |              |
| 35                                           | 40-44     | CC            | 0     | .     | 0             | .           |               |                |              |
| 35                                           | 40-44     | Ecig          | 0     | .     |               |             |               |                |              |
| 35                                           | 40-44     | Dual          | 0     | .     |               |             |               |                |              |
| 35                                           | 40-44     | Former        | 0     | .     |               |             | .             | 0              | .            |
| Year of Follow-up: 2025, Age Group: 45-49    |           |               |       |       |               |             |               |                |              |
| Period                                       | Age Group | Smoking Group | N     | %     | Ever Quit (N) | Ever Quit % | Mean Yrs Quit | Short Term (n) | Short Term % |
| 35                                           | 45-49     | Never Any     | 4726  | 59.60 |               |             |               |                |              |
| 35                                           | 45-49     | CC            | 1     | 0.01  | 0             | 0.00        |               |                |              |
| 35                                           | 45-49     | Ecig          | 1146  | 14.45 |               |             |               |                |              |
| 35                                           | 45-49     | Dual          | 0     | 0.00  |               |             |               |                |              |
| 35                                           | 45-49     | Former        | 2057  | 25.94 |               |             | 17.95         | 74             | 3.60         |
| Year of Follow-up: 2025, Age Group: 50-54    |           |               |       |       |               |             |               |                |              |

**Results for PHIM for Run 2 (Sensitivity\_Analysis\_1.RTF)**

| Period                                       | Age Group | Smoking Group | N     | %     | Ever Quit (N) | Ever Quit % | Mean Yrs Quit | Short Term (n) | Short Term % |
|----------------------------------------------|-----------|---------------|-------|-------|---------------|-------------|---------------|----------------|--------------|
| 35                                           | 50-54     | Never Any     | 5359  | 64.18 |               |             |               |                |              |
| 35                                           | 50-54     | CC            | 3     | 0.04  | 0             | 0.00        |               |                |              |
| 35                                           | 50-54     | Ecig          | 1112  | 13.32 |               |             |               |                |              |
| 35                                           | 50-54     | Dual          | 0     | 0.00  |               |             |               |                |              |
| 35                                           | 50-54     | Former        | 1876  | 22.47 |               |             | 19.62         | 104            | 5.54         |
| Year of Follow-up: 2025, Age Group: 55-59    |           |               |       |       |               |             |               |                |              |
| Period                                       | Age Group | Smoking Group | N     | %     | Ever Quit (N) | Ever Quit % | Mean Yrs Quit | Short Term (n) | Short Term % |
| 35                                           | 55-59     | Never Any     | 5189  | 59.01 |               |             |               |                |              |
| 35                                           | 55-59     | CC            | 4     | 0.05  | 0             | 0.00        |               |                |              |
| 35                                           | 55-59     | Ecig          | 1153  | 13.11 |               |             |               |                |              |
| 35                                           | 55-59     | Dual          | 0     | 0.00  |               |             |               |                |              |
| 35                                           | 55-59     | Former        | 2447  | 27.83 |               |             | 23.13         | 98             | 4.00         |
| Year of Follow-up: 2025, Age Group: 60-64    |           |               |       |       |               |             |               |                |              |
| Period                                       | Age Group | Smoking Group | N     | %     | Ever Quit (N) | Ever Quit % | Mean Yrs Quit | Short Term (n) | Short Term % |
| 35                                           | 60-64     | Never Any     | 5284  | 52.43 |               |             |               |                |              |
| 35                                           | 60-64     | CC            | 7     | 0.07  | 0             | 0.00        |               |                |              |
| 35                                           | 60-64     | Ecig          | 1378  | 13.67 |               |             |               |                |              |
| 35                                           | 60-64     | Dual          | 0     | 0.00  |               |             |               |                |              |
| 35                                           | 60-64     | Former        | 3409  | 33.83 |               |             | 24.79         | 139            | 4.08         |
| Year of Follow-up: 2025, Age Group: 65-69    |           |               |       |       |               |             |               |                |              |
| Period                                       | Age Group | Smoking Group | N     | %     | Ever Quit (N) | Ever Quit % | Mean Yrs Quit | Short Term (n) | Short Term % |
| 35                                           | 65-69     | Never Any     | 5278  | 50.27 |               |             |               |                |              |
| 35                                           | 65-69     | CC            | 7     | 0.07  | 0             | 0.00        |               |                |              |
| 35                                           | 65-69     | Ecig          | 1139  | 10.85 |               |             |               |                |              |
| 35                                           | 65-69     | Dual          | 0     | 0.00  |               |             |               |                |              |
| 35                                           | 65-69     | Former        | 4075  | 38.81 |               |             | 26.61         | 83             | 2.04         |
| Year of Follow-up: 2025, Age Group: 70-74    |           |               |       |       |               |             |               |                |              |
| Period                                       | Age Group | Smoking Group | N     | %     | Ever Quit (N) | Ever Quit % | Mean Yrs Quit | Short Term (n) | Short Term % |
| 35                                           | 70-74     | Never Any     | 5018  | 52.27 |               |             |               |                |              |
| 35                                           | 70-74     | CC            | 11    | 0.11  | 0             | 0.00        |               |                |              |
| 35                                           | 70-74     | Ecig          | 789   | 8.22  |               |             |               |                |              |
| 35                                           | 70-74     | Dual          | 0     | 0.00  |               |             |               |                |              |
| 35                                           | 70-74     | Former        | 3782  | 39.40 |               |             | 30.61         | 65             | 1.72         |
| Year of Follow-up: 2025, Age Group: 75-79    |           |               |       |       |               |             |               |                |              |
| Period                                       | Age Group | Smoking Group | N     | %     | Ever Quit (N) | Ever Quit % | Mean Yrs Quit | Short Term (n) | Short Term % |
| 35                                           | 75-79     | Never Any     | 4356  | 51.27 |               |             |               |                |              |
| 35                                           | 75-79     | CC            | 14    | 0.16  | 0             | 0.00        |               |                |              |
| 35                                           | 75-79     | Ecig          | 588   | 6.92  |               |             |               |                |              |
| 35                                           | 75-79     | Dual          | 0     | 0.00  |               |             |               |                |              |
| 35                                           | 75-79     | Former        | 3539  | 41.65 |               |             | 30.81         | 53             | 1.50         |
| Year of Follow-up: 2030, Age Group: All Ages |           |               |       |       |               |             |               |                |              |
| Period                                       | Age Group | Smoking Group | N     | %     | Ever Quit (N) | Ever Quit % | Mean Yrs Quit | Short Term (n) | Short Term % |
| 40                                           | All Ages  | Never Any     | 30854 | 55.84 |               |             |               |                |              |
| 40                                           | All Ages  | CC            | 14    | 0.03  | 0             | 0.00        |               |                |              |
| 40                                           | All Ages  | Ecig          | 5391  | 9.76  |               |             |               |                |              |
| 40                                           | All Ages  | Dual          | 0     | 0.00  |               |             |               |                |              |
| 40                                           | All Ages  | Former        | 18991 | 34.37 |               |             | 27.90         | 543            | 2.86         |
| Year of Follow-up: 2030, Age Group: 18-19    |           |               |       |       |               |             |               |                |              |
| Period                                       | Age Group | Smoking Group | N     | %     | Ever Quit (N) | Ever Quit % | Mean Yrs Quit | Short Term (n) | Short Term % |
| 40                                           | 18-19     | Never Any     | 0     | .     |               |             |               |                |              |
| 40                                           | 18-19     | CC            | 0     | .     | 0             | .           |               |                |              |
| 40                                           | 18-19     | Ecig          | 0     | .     |               |             |               |                |              |
| 40                                           | 18-19     | Dual          | 0     | .     |               |             |               |                |              |
| 40                                           | 18-19     | Former        | 0     | .     |               |             | .             | 0              | .            |
| Year of Follow-up: 2030, Age Group: 20-24    |           |               |       |       |               |             |               |                |              |
| Period                                       | Age Group | Smoking Group | N     | %     | Ever Quit (N) | Ever Quit % | Mean Yrs Quit | Short Term (n) | Short Term % |
| 40                                           | 20-24     | Never Any     | 0     | .     |               |             |               |                |              |
| 40                                           | 20-24     | CC            | 0     | .     | 0             | .           |               |                |              |
| 40                                           | 20-24     | Ecig          | 0     | .     |               |             |               |                |              |
| 40                                           | 20-24     | Dual          | 0     | .     |               |             |               |                |              |
| 40                                           | 20-24     | Former        | 0     | .     |               |             | .             | 0              | .            |
| Year of Follow-up: 2030, Age Group: 25-29    |           |               |       |       |               |             |               |                |              |
| Period                                       | Age Group | Smoking Group | N     | %     | Ever Quit (N) | Ever Quit % | Mean Yrs Quit | Short Term (n) | Short Term % |
| 40                                           | 25-29     | Never Any     | 0     | .     |               |             |               |                |              |
| 40                                           | 25-29     | CC            | 0     | .     | 0             | .           |               |                |              |
| 40                                           | 25-29     | Ecig          | 0     | .     |               |             |               |                |              |
| 40                                           | 25-29     | Dual          | 0     | .     |               |             |               |                |              |



**Results for PHIM for Run 2 (Sensitivity\_Analysis\_1.RTF)**

| Year of Follow-up: 2030, Age Group: 30-34 | Period | Age Group | Smoking Group | N    | %     | Ever Quit (N) | Ever Quit % | Mean Yrs Quit | Short Term (n) | Short Term % |
|-------------------------------------------|--------|-----------|---------------|------|-------|---------------|-------------|---------------|----------------|--------------|
| Year of Follow-up: 2030, Age Group: 30-34 |        |           |               |      |       |               |             |               |                |              |
| 40                                        | 25-29  | Former    |               | 0    | .     |               |             |               | 0              | .            |
| 40                                        | 30-34  | Never Any |               | 0    | .     |               |             |               |                |              |
| 40                                        | 30-34  | CC        |               | 0    | .     | 0             | .           |               |                |              |
| 40                                        | 30-34  | Ecig      |               | 0    | .     |               |             |               |                |              |
| 40                                        | 30-34  | Dual      |               | 0    | .     |               |             |               |                |              |
| 40                                        | 30-34  | Former    |               | 0    | .     |               |             |               | 0              | .            |
| Year of Follow-up: 2030, Age Group: 35-39 |        |           |               |      |       |               |             |               |                |              |
| 40                                        | 35-39  | Never Any |               | 0    | .     |               |             |               |                |              |
| 40                                        | 35-39  | CC        |               | 0    | .     | 0             | .           |               |                |              |
| 40                                        | 35-39  | Ecig      |               | 0    | .     |               |             |               |                |              |
| 40                                        | 35-39  | Dual      |               | 0    | .     |               |             |               |                |              |
| 40                                        | 35-39  | Former    |               | 0    | .     |               |             |               | 0              | .            |
| Year of Follow-up: 2030, Age Group: 40-44 |        |           |               |      |       |               |             |               |                |              |
| 40                                        | 40-44  | Never Any |               | 0    | .     |               |             |               |                |              |
| 40                                        | 40-44  | CC        |               | 0    | .     | 0             | .           |               |                |              |
| 40                                        | 40-44  | Ecig      |               | 0    | .     |               |             |               |                |              |
| 40                                        | 40-44  | Dual      |               | 0    | .     |               |             |               |                |              |
| 40                                        | 40-44  | Former    |               | 0    | .     |               |             |               | 0              | .            |
| Year of Follow-up: 2030, Age Group: 45-49 |        |           |               |      |       |               |             |               |                |              |
| 40                                        | 45-49  | Never Any |               | 0    | .     |               |             |               |                |              |
| 40                                        | 45-49  | CC        |               | 0    | .     | 0             | .           |               |                |              |
| 40                                        | 45-49  | Ecig      |               | 0    | .     |               |             |               |                |              |
| 40                                        | 45-49  | Dual      |               | 0    | .     |               |             |               |                |              |
| 40                                        | 45-49  | Former    |               | 0    | .     |               |             |               | 0              | .            |
| Year of Follow-up: 2030, Age Group: 50-54 |        |           |               |      |       |               |             |               |                |              |
| 40                                        | 50-54  | Never Any |               | 4726 | 59.60 |               |             |               |                |              |
| 40                                        | 50-54  | CC        |               | 0    | 0.00  | 0             | 0.00        |               |                |              |
| 40                                        | 50-54  | Ecig      |               | 959  | 12.09 |               |             |               |                |              |
| 40                                        | 50-54  | Dual      |               | 0    | 0.00  |               |             |               |                |              |
| 40                                        | 50-54  | Former    |               | 2245 | 28.31 |               |             | 21.16         | 100            | 4.45         |
| Year of Follow-up: 2030, Age Group: 55-59 |        |           |               |      |       |               |             |               |                |              |
| 40                                        | 55-59  | Never Any |               | 5359 | 64.18 |               |             |               |                |              |
| 40                                        | 55-59  | CC        |               | 0    | 0.00  | 0             | 0.00        |               |                |              |
| 40                                        | 55-59  | Ecig      |               | 897  | 10.74 |               |             |               |                |              |
| 40                                        | 55-59  | Dual      |               | 0    | 0.00  |               |             |               |                |              |
| 40                                        | 55-59  | Former    |               | 2094 | 25.08 |               |             | 22.27         | 80             | 3.82         |
| Year of Follow-up: 2030, Age Group: 60-64 |        |           |               |      |       |               |             |               |                |              |
| 40                                        | 60-64  | Never Any |               | 5189 | 59.01 |               |             |               |                |              |
| 40                                        | 60-64  | CC        |               | 3    | 0.03  | 0             | 0.00        |               |                |              |
| 40                                        | 60-64  | Ecig      |               | 886  | 10.08 |               |             |               |                |              |
| 40                                        | 60-64  | Dual      |               | 0    | 0.00  |               |             |               |                |              |
| 40                                        | 60-64  | Former    |               | 2715 | 30.88 |               |             | 25.52         | 128            | 4.71         |
| Year of Follow-up: 2030, Age Group: 65-69 |        |           |               |      |       |               |             |               |                |              |
| 40                                        | 65-69  | Never Any |               | 5284 | 52.43 |               |             |               |                |              |
| 40                                        | 65-69  | CC        |               | 3    | 0.03  | 0             | 0.00        |               |                |              |
| 40                                        | 65-69  | Ecig      |               | 1080 | 10.72 |               |             |               |                |              |
| 40                                        | 65-69  | Dual      |               | 0    | 0.00  |               |             |               |                |              |
| 40                                        | 65-69  | Former    |               | 3711 | 36.82 |               |             | 27.57         | 73             | 1.97         |
| Year of Follow-up: 2030, Age Group: 70-74 |        |           |               |      |       |               |             |               |                |              |
| 40                                        | 70-74  | Never Any |               | 5278 | 50.27 |               |             |               |                |              |
| 40                                        | 70-74  | CC        |               | 4    | 0.04  | 0             | 0.00        |               |                |              |
| 40                                        | 70-74  | Ecig      |               | 957  | 9.12  |               |             |               |                |              |
| 40                                        | 70-74  | Dual      |               | 0    | 0.00  |               |             |               |                |              |
| 40                                        | 70-74  | Former    |               | 4260 | 40.58 |               |             | 30.32         | 86             | 2.02         |
| Year of Follow-up: 2030, Age Group: 75-79 |        |           |               |      |       |               |             |               |                |              |
| 40                                        | 75-79  | Never Any |               | 5018 | 52.27 |               |             |               |                |              |
| 40                                        | 75-79  | CC        |               | 4    | 0.04  | 0             | 0.00        |               |                |              |

**Results for PHIM for Run 2 (Sensitivity\_Analysis\_1.RTF)**

|                                              |           |               |       |       |               |             |               |                |              |
|----------------------------------------------|-----------|---------------|-------|-------|---------------|-------------|---------------|----------------|--------------|
| 40                                           | 75-79     | Ecig          | 612   | 6.38  |               |             |               |                |              |
| 40                                           | 75-79     | Dual          | 0     | 0.00  |               |             |               |                |              |
| 40                                           | 75-79     | Former        | 3966  | 41.31 |               |             | 34.05         | 76             | 1.92         |
| Year of Follow-up: 2035, Age Group: All Ages |           |               |       |       |               |             |               |                |              |
| Period                                       | Age Group | Smoking Group | N     | %     | Ever Quit (N) | Ever Quit % | Mean Yrs Quit | Short Term (n) | Short Term % |
| 45                                           | All Ages  | Never Any     | 25836 | 56.60 |               |             |               |                |              |
| 45                                           | All Ages  | CC            | 5     | 0.01  | 0             | 0.00        |               |                |              |
| 45                                           | All Ages  | Ecig          | 3886  | 8.51  |               |             |               |                |              |
| 45                                           | All Ages  | Dual          | 0     | 0.00  |               |             |               |                |              |
| 45                                           | All Ages  | Former        | 15923 | 34.88 |               |             | 29.63         | 351            | 2.20         |
| Year of Follow-up: 2035, Age Group: 18-19    |           |               |       |       |               |             |               |                |              |
| Period                                       | Age Group | Smoking Group | N     | %     | Ever Quit (N) | Ever Quit % | Mean Yrs Quit | Short Term (n) | Short Term % |
| 45                                           | 18-19     | Never Any     | 0     | .     |               |             |               |                |              |
| 45                                           | 18-19     | CC            | 0     | .     | 0             | .           |               |                |              |
| 45                                           | 18-19     | Ecig          | 0     | .     |               |             |               |                |              |
| 45                                           | 18-19     | Dual          | 0     | .     |               |             |               |                |              |
| 45                                           | 18-19     | Former        | 0     | .     |               |             | .             | 0              | .            |
| Year of Follow-up: 2035, Age Group: 20-24    |           |               |       |       |               |             |               |                |              |
| Period                                       | Age Group | Smoking Group | N     | %     | Ever Quit (N) | Ever Quit % | Mean Yrs Quit | Short Term (n) | Short Term % |
| 45                                           | 20-24     | Never Any     | 0     | .     |               |             |               |                |              |
| 45                                           | 20-24     | CC            | 0     | .     | 0             | .           |               |                |              |
| 45                                           | 20-24     | Ecig          | 0     | .     |               |             |               |                |              |
| 45                                           | 20-24     | Dual          | 0     | .     |               |             |               |                |              |
| 45                                           | 20-24     | Former        | 0     | .     |               |             | .             | 0              | .            |
| Year of Follow-up: 2035, Age Group: 25-29    |           |               |       |       |               |             |               |                |              |
| Period                                       | Age Group | Smoking Group | N     | %     | Ever Quit (N) | Ever Quit % | Mean Yrs Quit | Short Term (n) | Short Term % |
| 45                                           | 25-29     | Never Any     | 0     | .     |               |             |               |                |              |
| 45                                           | 25-29     | CC            | 0     | .     | 0             | .           |               |                |              |
| 45                                           | 25-29     | Ecig          | 0     | .     |               |             |               |                |              |
| 45                                           | 25-29     | Dual          | 0     | .     |               |             |               |                |              |
| 45                                           | 25-29     | Former        | 0     | .     |               |             | .             | 0              | .            |
| Year of Follow-up: 2035, Age Group: 30-34    |           |               |       |       |               |             |               |                |              |
| Period                                       | Age Group | Smoking Group | N     | %     | Ever Quit (N) | Ever Quit % | Mean Yrs Quit | Short Term (n) | Short Term % |
| 45                                           | 30-34     | Never Any     | 0     | .     |               |             |               |                |              |
| 45                                           | 30-34     | CC            | 0     | .     | 0             | .           |               |                |              |
| 45                                           | 30-34     | Ecig          | 0     | .     |               |             |               |                |              |
| 45                                           | 30-34     | Dual          | 0     | .     |               |             |               |                |              |
| 45                                           | 30-34     | Former        | 0     | .     |               |             | .             | 0              | .            |
| Year of Follow-up: 2035, Age Group: 35-39    |           |               |       |       |               |             |               |                |              |
| Period                                       | Age Group | Smoking Group | N     | %     | Ever Quit (N) | Ever Quit % | Mean Yrs Quit | Short Term (n) | Short Term % |
| 45                                           | 35-39     | Never Any     | 0     | .     |               |             |               |                |              |
| 45                                           | 35-39     | CC            | 0     | .     | 0             | .           |               |                |              |
| 45                                           | 35-39     | Ecig          | 0     | .     |               |             |               |                |              |
| 45                                           | 35-39     | Dual          | 0     | .     |               |             |               |                |              |
| 45                                           | 35-39     | Former        | 0     | .     |               |             | .             | 0              | .            |
| Year of Follow-up: 2035, Age Group: 40-44    |           |               |       |       |               |             |               |                |              |
| Period                                       | Age Group | Smoking Group | N     | %     | Ever Quit (N) | Ever Quit % | Mean Yrs Quit | Short Term (n) | Short Term % |
| 45                                           | 40-44     | Never Any     | 0     | .     |               |             |               |                |              |
| 45                                           | 40-44     | CC            | 0     | .     | 0             | .           |               |                |              |
| 45                                           | 40-44     | Ecig          | 0     | .     |               |             |               |                |              |
| 45                                           | 40-44     | Dual          | 0     | .     |               |             |               |                |              |
| 45                                           | 40-44     | Former        | 0     | .     |               |             | .             | 0              | .            |
| Year of Follow-up: 2035, Age Group: 45-49    |           |               |       |       |               |             |               |                |              |
| Period                                       | Age Group | Smoking Group | N     | %     | Ever Quit (N) | Ever Quit % | Mean Yrs Quit | Short Term (n) | Short Term % |
| 45                                           | 45-49     | Never Any     | 0     | .     |               |             |               |                |              |
| 45                                           | 45-49     | CC            | 0     | .     | 0             | .           |               |                |              |
| 45                                           | 45-49     | Ecig          | 0     | .     |               |             |               |                |              |
| 45                                           | 45-49     | Dual          | 0     | .     |               |             |               |                |              |
| 45                                           | 45-49     | Former        | 0     | .     |               |             | .             | 0              | .            |
| Year of Follow-up: 2035, Age Group: 50-54    |           |               |       |       |               |             |               |                |              |
| Period                                       | Age Group | Smoking Group | N     | %     | Ever Quit (N) | Ever Quit % | Mean Yrs Quit | Short Term (n) | Short Term % |
| 45                                           | 50-54     | Never Any     | 0     | .     |               |             |               |                |              |
| 45                                           | 50-54     | CC            | 0     | .     | 0             | .           |               |                |              |
| 45                                           | 50-54     | Ecig          | 0     | .     |               |             |               |                |              |
| 45                                           | 50-54     | Dual          | 0     | .     |               |             |               |                |              |
| 45                                           | 50-54     | Former        | 0     | .     |               |             | .             | 0              | .            |
| Year of Follow-up: 2035, Age Group: 55-59    |           |               |       |       |               |             |               |                |              |
| Period                                       | Age Group | Smoking Group | N     | %     | Ever Quit (N) | Ever Quit % | Mean Yrs Quit | Short Term (n) | Short Term % |

**Results for PHIM for Run 2 (Sensitivity\_Analysis\_1.RTF)**

|                                              |           |               |       |       |               |             |               |                |              |
|----------------------------------------------|-----------|---------------|-------|-------|---------------|-------------|---------------|----------------|--------------|
| 45                                           | 55-59     | Never Any     | 4726  | 59.60 |               |             |               |                |              |
| 45                                           | 55-59     | CC            | 0     | 0.00  | 0             | 0.00        |               |                |              |
| 45                                           | 55-59     | Ecig          | 792   | 9.99  |               |             |               |                |              |
| 45                                           | 55-59     | Dual          | 0     | 0.00  |               |             |               |                |              |
| 45                                           | 55-59     | Former        | 2412  | 30.42 |               |             | 24.49         | 64             | 2.65         |
| Year of Follow-up: 2035, Age Group: 60-64    |           |               |       |       |               |             |               |                |              |
| Period                                       | Age Group | Smoking Group | N     | %     | Ever Quit (N) | Ever Quit % | Mean Yrs Quit | Short Term (n) | Short Term % |
| 45                                           | 60-64     | Never Any     | 5359  | 64.18 |               |             |               |                |              |
| 45                                           | 60-64     | CC            | 0     | 0.00  | 0             | 0.00        |               |                |              |
| 45                                           | 60-64     | Ecig          | 719   | 8.61  |               |             |               |                |              |
| 45                                           | 60-64     | Dual          | 0     | 0.00  |               |             |               |                |              |
| 45                                           | 60-64     | Former        | 2272  | 27.21 |               |             | 25.28         | 77             | 3.39         |
| Year of Follow-up: 2035, Age Group: 65-69    |           |               |       |       |               |             |               |                |              |
| Period                                       | Age Group | Smoking Group | N     | %     | Ever Quit (N) | Ever Quit % | Mean Yrs Quit | Short Term (n) | Short Term % |
| 45                                           | 65-69     | Never Any     | 5189  | 59.01 |               |             |               |                |              |
| 45                                           | 65-69     | CC            | 3     | 0.03  | 0             | 0.00        |               |                |              |
| 45                                           | 65-69     | Ecig          | 694   | 7.89  |               |             |               |                |              |
| 45                                           | 65-69     | Dual          | 0     | 0.00  |               |             |               |                |              |
| 45                                           | 65-69     | Former        | 2907  | 33.06 |               |             | 28.66         | 55             | 1.89         |
| Year of Follow-up: 2035, Age Group: 70-74    |           |               |       |       |               |             |               |                |              |
| Period                                       | Age Group | Smoking Group | N     | %     | Ever Quit (N) | Ever Quit % | Mean Yrs Quit | Short Term (n) | Short Term % |
| 45                                           | 70-74     | Never Any     | 5284  | 52.43 |               |             |               |                |              |
| 45                                           | 70-74     | CC            | 1     | 0.01  | 0             | 0.00        |               |                |              |
| 45                                           | 70-74     | Ecig          | 934   | 9.27  |               |             |               |                |              |
| 45                                           | 70-74     | Dual          | 0     | 0.00  |               |             |               |                |              |
| 45                                           | 70-74     | Former        | 3859  | 38.29 |               |             | 31.38         | 76             | 1.97         |
| Year of Follow-up: 2035, Age Group: 75-79    |           |               |       |       |               |             |               |                |              |
| Period                                       | Age Group | Smoking Group | N     | %     | Ever Quit (N) | Ever Quit % | Mean Yrs Quit | Short Term (n) | Short Term % |
| 45                                           | 75-79     | Never Any     | 5278  | 50.27 |               |             |               |                |              |
| 45                                           | 75-79     | CC            | 1     | 0.01  | 0             | 0.00        |               |                |              |
| 45                                           | 75-79     | Ecig          | 747   | 7.11  |               |             |               |                |              |
| 45                                           | 75-79     | Dual          | 0     | 0.00  |               |             |               |                |              |
| 45                                           | 75-79     | Former        | 4473  | 42.60 |               |             | 33.73         | 79             | 1.77         |
| Year of Follow-up: 2040, Age Group: All Ages |           |               |       |       |               |             |               |                |              |
| Period                                       | Age Group | Smoking Group | N     | %     | Ever Quit (N) | Ever Quit % | Mean Yrs Quit | Short Term (n) | Short Term % |
| 50                                           | All Ages  | Never Any     | 20558 | 58.48 |               |             |               |                |              |
| 50                                           | All Ages  | CC            | 4     | 0.01  | 0             | 0.00        |               |                |              |
| 50                                           | All Ages  | Ecig          | 2497  | 7.10  |               |             |               |                |              |
| 50                                           | All Ages  | Dual          | 0     | 0.00  |               |             |               |                |              |
| 50                                           | All Ages  | Former        | 12092 | 34.40 |               |             | 31.39         | 238            | 1.97         |
| Year of Follow-up: 2040, Age Group: 18-19    |           |               |       |       |               |             |               |                |              |
| Period                                       | Age Group | Smoking Group | N     | %     | Ever Quit (N) | Ever Quit % | Mean Yrs Quit | Short Term (n) | Short Term % |
| 50                                           | 18-19     | Never Any     | 0     | .     |               |             |               |                |              |
| 50                                           | 18-19     | CC            | 0     | .     | 0             | .           |               |                |              |
| 50                                           | 18-19     | Ecig          | 0     | .     |               |             |               |                |              |
| 50                                           | 18-19     | Dual          | 0     | .     |               |             |               |                |              |
| 50                                           | 18-19     | Former        | 0     | .     |               |             | .             | 0              | .            |
| Year of Follow-up: 2040, Age Group: 20-24    |           |               |       |       |               |             |               |                |              |
| Period                                       | Age Group | Smoking Group | N     | %     | Ever Quit (N) | Ever Quit % | Mean Yrs Quit | Short Term (n) | Short Term % |
| 50                                           | 20-24     | Never Any     | 0     | .     |               |             |               |                |              |
| 50                                           | 20-24     | CC            | 0     | .     | 0             | .           |               |                |              |
| 50                                           | 20-24     | Ecig          | 0     | .     |               |             |               |                |              |
| 50                                           | 20-24     | Dual          | 0     | .     |               |             |               |                |              |
| 50                                           | 20-24     | Former        | 0     | .     |               |             | .             | 0              | .            |
| Year of Follow-up: 2040, Age Group: 25-29    |           |               |       |       |               |             |               |                |              |
| Period                                       | Age Group | Smoking Group | N     | %     | Ever Quit (N) | Ever Quit % | Mean Yrs Quit | Short Term (n) | Short Term % |
| 50                                           | 25-29     | Never Any     | 0     | .     |               |             |               |                |              |
| 50                                           | 25-29     | CC            | 0     | .     | 0             | .           |               |                |              |
| 50                                           | 25-29     | Ecig          | 0     | .     |               |             |               |                |              |
| 50                                           | 25-29     | Dual          | 0     | .     |               |             |               |                |              |
| 50                                           | 25-29     | Former        | 0     | .     |               |             | .             | 0              | .            |
| Year of Follow-up: 2040, Age Group: 30-34    |           |               |       |       |               |             |               |                |              |
| Period                                       | Age Group | Smoking Group | N     | %     | Ever Quit (N) | Ever Quit % | Mean Yrs Quit | Short Term (n) | Short Term % |
| 50                                           | 30-34     | Never Any     | 0     | .     |               |             |               |                |              |
| 50                                           | 30-34     | CC            | 0     | .     | 0             | .           |               |                |              |
| 50                                           | 30-34     | Ecig          | 0     | .     |               |             |               |                |              |
| 50                                           | 30-34     | Dual          | 0     | .     |               |             |               |                |              |
| 50                                           | 30-34     | Former        | 0     | .     |               |             | .             | 0              | .            |
| Year of Follow-up: 2040, Age Group: 35-39    |           |               |       |       |               |             |               |                |              |

**Results for PHIM for Run 2 (Sensitivity\_Analysis\_1.RTF)**

| Period                                    | Age Group | Smoking Group | N    | %     | Ever Quit (N) | Ever Quit % | Mean Yrs Quit | Short Term (n) | Short Term % |
|-------------------------------------------|-----------|---------------|------|-------|---------------|-------------|---------------|----------------|--------------|
| 50                                        | 35-39     | Never Any     | 0    | .     |               |             |               |                |              |
| 50                                        | 35-39     | CC            | 0    | .     | 0             | .           |               |                |              |
| 50                                        | 35-39     | Ecig          | 0    | .     |               |             |               |                |              |
| 50                                        | 35-39     | Dual          | 0    | .     |               |             |               |                |              |
| 50                                        | 35-39     | Former        | 0    | .     |               |             | .             | 0              | .            |
| Year of Follow-up: 2040, Age Group: 40-44 |           |               |      |       |               |             |               |                |              |
| Period                                    | Age Group | Smoking Group | N    | %     | Ever Quit (N) | Ever Quit % | Mean Yrs Quit | Short Term (n) | Short Term % |
| 50                                        | 40-44     | Never Any     | 0    | .     |               |             |               |                |              |
| 50                                        | 40-44     | CC            | 0    | .     | 0             | .           |               |                |              |
| 50                                        | 40-44     | Ecig          | 0    | .     |               |             |               |                |              |
| 50                                        | 40-44     | Dual          | 0    | .     |               |             |               |                |              |
| 50                                        | 40-44     | Former        | 0    | .     |               |             | .             | 0              | .            |
| Year of Follow-up: 2040, Age Group: 45-49 |           |               |      |       |               |             |               |                |              |
| Period                                    | Age Group | Smoking Group | N    | %     | Ever Quit (N) | Ever Quit % | Mean Yrs Quit | Short Term (n) | Short Term % |
| 50                                        | 45-49     | Never Any     | 0    | .     |               |             |               |                |              |
| 50                                        | 45-49     | CC            | 0    | .     | 0             | .           |               |                |              |
| 50                                        | 45-49     | Ecig          | 0    | .     |               |             |               |                |              |
| 50                                        | 45-49     | Dual          | 0    | .     |               |             |               |                |              |
| 50                                        | 45-49     | Former        | 0    | .     |               |             | .             | 0              | .            |
| Year of Follow-up: 2040, Age Group: 50-54 |           |               |      |       |               |             |               |                |              |
| Period                                    | Age Group | Smoking Group | N    | %     | Ever Quit (N) | Ever Quit % | Mean Yrs Quit | Short Term (n) | Short Term % |
| 50                                        | 50-54     | Never Any     | 0    | .     |               |             |               |                |              |
| 50                                        | 50-54     | CC            | 0    | .     | 0             | .           |               |                |              |
| 50                                        | 50-54     | Ecig          | 0    | .     |               |             |               |                |              |
| 50                                        | 50-54     | Dual          | 0    | .     |               |             |               |                |              |
| 50                                        | 50-54     | Former        | 0    | .     |               |             | .             | 0              | .            |
| Year of Follow-up: 2040, Age Group: 55-59 |           |               |      |       |               |             |               |                |              |
| Period                                    | Age Group | Smoking Group | N    | %     | Ever Quit (N) | Ever Quit % | Mean Yrs Quit | Short Term (n) | Short Term % |
| 50                                        | 55-59     | Never Any     | 0    | .     |               |             |               |                |              |
| 50                                        | 55-59     | CC            | 0    | .     | 0             | .           |               |                |              |
| 50                                        | 55-59     | Ecig          | 0    | .     |               |             |               |                |              |
| 50                                        | 55-59     | Dual          | 0    | .     |               |             |               |                |              |
| 50                                        | 55-59     | Former        | 0    | .     |               |             | .             | 0              | .            |
| Year of Follow-up: 2040, Age Group: 60-64 |           |               |      |       |               |             |               |                |              |
| Period                                    | Age Group | Smoking Group | N    | %     | Ever Quit (N) | Ever Quit % | Mean Yrs Quit | Short Term (n) | Short Term % |
| 50                                        | 60-64     | Never Any     | 4726 | 59.60 |               |             |               |                |              |
| 50                                        | 60-64     | CC            | 0    | 0.00  | 0             | 0.00        |               |                |              |
| 50                                        | 60-64     | Ecig          | 613  | 7.73  |               |             |               |                |              |
| 50                                        | 60-64     | Dual          | 0    | 0.00  |               |             |               |                |              |
| 50                                        | 60-64     | Former        | 2591 | 32.67 |               |             | 27.58         | 77             | 2.97         |
| Year of Follow-up: 2040, Age Group: 65-69 |           |               |      |       |               |             |               |                |              |
| Period                                    | Age Group | Smoking Group | N    | %     | Ever Quit (N) | Ever Quit % | Mean Yrs Quit | Short Term (n) | Short Term % |
| 50                                        | 65-69     | Never Any     | 5359 | 64.18 |               |             |               |                |              |
| 50                                        | 65-69     | CC            | 0    | 0.00  | 0             | 0.00        |               |                |              |
| 50                                        | 65-69     | Ecig          | 578  | 6.92  |               |             |               |                |              |
| 50                                        | 65-69     | Dual          | 0    | 0.00  |               |             |               |                |              |
| 50                                        | 65-69     | Former        | 2413 | 28.90 |               |             | 28.67         | 34             | 1.41         |
| Year of Follow-up: 2040, Age Group: 70-74 |           |               |      |       |               |             |               |                |              |
| Period                                    | Age Group | Smoking Group | N    | %     | Ever Quit (N) | Ever Quit % | Mean Yrs Quit | Short Term (n) | Short Term % |
| 50                                        | 70-74     | Never Any     | 5189 | 59.01 |               |             |               |                |              |
| 50                                        | 70-74     | CC            | 3    | 0.03  | 0             | 0.00        |               |                |              |
| 50                                        | 70-74     | Ecig          | 583  | 6.63  |               |             |               |                |              |
| 50                                        | 70-74     | Dual          | 0    | 0.00  |               |             |               |                |              |
| 50                                        | 70-74     | Former        | 3018 | 34.32 |               |             | 32.48         | 56             | 1.86         |
| Year of Follow-up: 2040, Age Group: 75-79 |           |               |      |       |               |             |               |                |              |
| Period                                    | Age Group | Smoking Group | N    | %     | Ever Quit (N) | Ever Quit % | Mean Yrs Quit | Short Term (n) | Short Term % |
| 50                                        | 75-79     | Never Any     | 5284 | 52.43 |               |             |               |                |              |
| 50                                        | 75-79     | CC            | 1    | 0.01  | 0             | 0.00        |               |                |              |
| 50                                        | 75-79     | Ecig          | 723  | 7.17  |               |             |               |                |              |
| 50                                        | 75-79     | Dual          | 0    | 0.00  |               |             |               |                |              |
| 50                                        | 75-79     | Former        | 4070 | 40.38 |               |             | 34.61         | 71             | 1.74         |

## Results for PHIM for Run 2 (Sensitivity\_Analysis\_1.RTF)

\*\*\*\*\*

### Main Results for E-Component for Run: 2, Simulation: 1, COD: Four Diseases Combined

| Variable Parameter          | Value                                  |
|-----------------------------|----------------------------------------|
| 1. Country                  | US (United States)                     |
| 2. Sex                      | F (Females)                            |
| 3. Year of start of process | 1990                                   |
| 4. Cause of Death           | Four Diseases Combined                 |
| 5. Effective Dose NULL      | CC:1                                   |
| 6. Effective Dose Ecig      | CC:1 Ecig:0.4 Dual:0.7                 |
| Note:                       | Death rates are per million population |

#### Results for Age Groups Combined and Years combined, Population unadjusted for deaths in Ecig scenario,

| Age Group:All |         | NULL        | Ecig        | %Drop    |        | Death  |         | NULL    | Ecig    | Drop    |
|---------------|---------|-------------|-------------|----------|--------|--------|---------|---------|---------|---------|
| Year          | Number  | Attrib      | Attrib      | Drop     | %Drop  | Attrib | Rate    | Attrib  | Attrib  | Drop    |
|               | Deaths  | Deaths      | Deaths      | Deaths   | Deaths | Deaths |         | Rates   | Rates   | Rates   |
| All Comb      | 9082078 | 2946250.006 | 2416528.159 | 529721.8 | 5.833  | 17.980 | 2493.45 | 808.881 | 663.448 | 145.433 |

#### Results for Age Groups Combined, Population unadjusted for deaths in Ecig scenario,

| Age Group:All |        | NULL      | Ecig      | %Drop    |        | Death  |         | NULL    | Ecig    | Drop    |
|---------------|--------|-----------|-----------|----------|--------|--------|---------|---------|---------|---------|
| Year          | Number | Attrib    | Attrib    | Drop     | %Drop  | Attrib | Rate    | Attrib  | Attrib  | Drop    |
|               | Deaths | Deaths    | Deaths    | Deaths   | Deaths | Deaths |         | Rates   | Rates   | Rates   |
| 1990          | 199848 | 57524.822 | 57524.822 | 0.000    | 0.000  | 0.000  | 2926.84 | 842.471 | 842.471 | 0.000   |
| 1991          | 199162 | 59078.486 | 58970.930 | 107.556  | 0.054  | 0.182  | 2877.87 | 853.678 | 852.124 | 1.554   |
| 1992          | 198532 | 60494.150 | 60197.996 | 296.153  | 0.149  | 0.490  | 2829.84 | 862.271 | 858.050 | 4.221   |
| 1993          | 202512 | 62694.848 | 62121.218 | 573.629  | 0.283  | 0.915  | 2845.85 | 881.034 | 872.973 | 8.061   |
| 1994          | 200658 | 63202.598 | 62303.100 | 899.498  | 0.448  | 1.423  | 2777.87 | 874.966 | 862.513 | 12.452  |
| 1995          | 201023 | 63766.862 | 62470.595 | 1296.267 | 0.645  | 2.033  | 2739.80 | 869.097 | 851.430 | 17.667  |
| 1996          | 201180 | 64591.163 | 62826.784 | 1764.378 | 0.877  | 2.732  | 2706.36 | 868.908 | 845.173 | 23.735  |
| 1997          | 198639 | 64686.912 | 62494.562 | 2192.350 | 1.104  | 3.389  | 2635.18 | 858.147 | 829.063 | 29.084  |
| 1998          | 197573 | 65295.961 | 62604.665 | 2691.296 | 1.362  | 4.122  | 2584.18 | 854.046 | 818.845 | 35.201  |
| 1999          | 211329 | 67327.521 | 63882.307 | 3445.214 | 1.630  | 5.117  | 2726.91 | 868.771 | 824.315 | 44.456  |
| 2000          | 208496 | 67596.897 | 63587.436 | 4009.460 | 1.923  | 5.931  | 2656.96 | 861.419 | 810.325 | 51.094  |
| 2001          | 203606 | 67008.811 | 62422.143 | 4586.668 | 2.253  | 6.845  | 2565.88 | 844.458 | 786.656 | 57.802  |
| 2002          | 200828 | 67067.744 | 61829.255 | 5238.488 | 2.608  | 7.811  | 2506.09 | 836.925 | 771.555 | 65.370  |
| 2003          | 196352 | 66756.217 | 60940.712 | 5815.505 | 2.962  | 8.712  | 2427.31 | 825.244 | 753.353 | 71.892  |
| 2004          | 188160 | 65058.725 | 58775.962 | 6282.763 | 3.339  | 9.657  | 2302.83 | 796.234 | 719.342 | 76.893  |
| 2005          | 186416 | 65214.724 | 58303.979 | 6910.745 | 3.707  | 10.597 | 2256.27 | 789.321 | 705.677 | 83.644  |
| 2006          | 180088 | 63771.146 | 56405.526 | 7365.620 | 4.090  | 11.550 | 2160.67 | 765.117 | 676.745 | 88.372  |
| 2007          | 175644 | 63110.718 | 55287.415 | 7823.303 | 4.454  | 12.396 | 2086.36 | 749.650 | 656.722 | 92.928  |
| 2008          | 177570 | 63718.624 | 55209.170 | 8509.455 | 4.792  | 13.355 | 2086.39 | 748.674 | 648.690 | 99.983  |
| 2009          | 172806 | 62794.698 | 53868.398 | 8926.300 | 5.166  | 14.215 | 2007.57 | 729.515 | 625.814 | 103.701 |
| 2010          | 170489 | 61917.074 | 52583.313 | 9333.761 | 5.475  | 15.075 | 1957.97 | 711.083 | 603.890 | 107.193 |
| 2011          | 170305 | 61680.114 | 51747.558 | 9932.556 | 5.832  | 16.103 | 1937.46 | 701.700 | 588.703 | 112.997 |
| 2012          | 171421 | 62023.127 | 51461.914 | 10561.21 | 6.161  | 17.028 | 1930.22 | 698.386 | 579.466 | 118.920 |
| 2013          | 172699 | 62037.765 | 50878.198 | 11159.57 | 6.462  | 17.988 | 1923.75 | 691.059 | 566.749 | 124.310 |
| 2014          | 174169 | 61921.017 | 50122.614 | 11798.40 | 6.774  | 19.054 | 1918.85 | 682.195 | 552.210 | 129.985 |
| 2015          | 177354 | 61856.204 | 49543.255 | 12312.95 | 6.943  | 19.906 | 2184.51 | 761.899 | 610.237 | 151.662 |
| 2016          | 176853 | 60464.119 | 47732.844 | 12731.27 | 7.199  | 21.056 | 2157.59 | 737.655 | 582.335 | 155.320 |
| 2017          | 179309 | 60243.839 | 46928.227 | 13315.61 | 7.426  | 22.103 | 2166.86 | 728.017 | 567.104 | 160.912 |
| 2018          | 177157 | 60713.327 | 46904.288 | 13809.04 | 7.795  | 22.745 | 2120.51 | 726.721 | 561.431 | 165.290 |
| 2019          | 179227 | 61148.172 | 46669.922 | 14478.25 | 8.078  | 23.677 | 2124.53 | 724.841 | 553.218 | 171.623 |
| 2020          | 180467 | 61149.317 | 46307.966 | 14841.35 | 8.224  | 24.271 | 2424.25 | 821.432 | 622.065 | 199.367 |
| 2021          | 178116 | 58727.786 | 43663.462 | 15064.32 | 8.458  | 25.651 | 2375.42 | 783.216 | 582.312 | 200.903 |
| 2022          | 179408 | 58848.802 | 43295.615 | 15553.19 | 8.669  | 26.429 | 2374.52 | 778.881 | 573.030 | 205.851 |
| 2023          | 180640 | 58816.149 | 42838.573 | 15977.58 | 8.845  | 27.165 | 2372.26 | 772.407 | 562.580 | 209.827 |
| 2024          | 181610 | 58955.232 | 42474.245 | 16480.99 | 9.075  | 27.955 | 2366.77 | 768.316 | 553.533 | 214.783 |
| 2025          | 180418 | 58297.744 | 41656.125 | 16641.62 | 9.224  | 28.546 | 2713.69 | 876.861 | 626.553 | 250.308 |
| 2026          | 180313 | 56469.971 | 39686.346 | 16783.62 | 9.308  | 29.721 | 2701.83 | 846.150 | 594.663 | 251.487 |
| 2027          | 179619 | 56209.427 | 39032.859 | 17176.57 | 9.563  | 30.558 | 2680.68 | 838.883 | 582.536 | 256.347 |
| 2028          | 178762 | 55733.105 | 38292.762 | 17440.34 | 9.756  | 31.293 | 2656.74 | 828.298 | 569.102 | 259.196 |
| 2029          | 177808 | 55145.838 | 37458.905 | 17686.93 | 9.947  | 32.073 | 2630.89 | 815.951 | 554.251 | 261.700 |
| 2030          | 173587 | 53615.097 | 36066.003 | 17549.09 | 10.110 | 32.732 | 3040.33 | 939.056 | 631.688 | 307.368 |
| 2031          | 174985 | 52046.561 | 34661.629 | 17384.93 | 9.935  | 33.403 | 3060.73 | 910.364 | 606.278 | 304.086 |
| 2032          | 173400 | 51582.636 | 33997.205 | 17585.43 | 10.142 | 34.092 | 3027.10 | 900.496 | 593.501 | 306.995 |
| 2033          | 171756 | 50839.758 | 33238.439 | 17601.32 | 10.248 | 34.621 | 2991.14 | 885.375 | 578.847 | 306.527 |
| 2034          | 169973 | 50215.451 | 32531.236 | 17684.22 | 10.404 | 35.217 | 2951.96 | 872.104 | 564.978 | 307.126 |
| 2035          | 162644 | 47773.075 | 30726.459 | 17046.62 | 10.481 | 35.682 | 3459.14 | 1016.05 | 653.495 | 362.550 |
| 2036          | 156254 | 43298.709 | 27381.748 | 15916.96 | 10.187 | 36.761 | 3328.25 | 922.274 | 683.239 | 339.036 |
| 2037          | 153593 | 42241.563 | 26387.681 | 15853.88 | 10.322 | 37.531 | 3274.10 | 900.450 | 562.498 | 337.952 |
| 2038          | 150947 | 41356.353 | 25611.427 | 15744.93 | 10.431 | 38.071 | 3217.50 | 881.531 | 545.920 | 335.611 |
| 2039          | 148373 | 40161.050 | 24620.365 | 15540.68 | 10.474 | 38.696 | 3159.42 | 855.178 | 524.259 | 330.919 |

## Results for PHIM for Run 2 (Sensitivity\_Analysis\_1.RTF)

\*\*\*\*\*

### Main Results for E-Component for Run: 2, Simulation: 1, COD: LUNG CANCER

| Variable Parameter          | Value                                  |
|-----------------------------|----------------------------------------|
| 1. Country                  | US (United States)                     |
| 2. Sex                      | F (Females)                            |
| 3. Year of start of process | 1990                                   |
| 4. Cause of Death           | LUNG CANCER                            |
| 5. Effective Dose NULL      | CC:1                                   |
| 6. Effective Dose Ecig      | CC:1 Ecig:0.4 Dual:0.7                 |
| Note:                       | Death rates are per million population |

#### Results for Age Groups Combined and Years combined, Population unadjusted for deaths in Ecig scenario,

| Age Group:All |         | NULL        | Ecig        | %Drop    |        |        | NULL    | Ecig    | Drop    |        |
|---------------|---------|-------------|-------------|----------|--------|--------|---------|---------|---------|--------|
| Year          | Number  | Attrib      | Attrib      | Drop     | %Drop  | Attrib | Death   | Attrib  | Drop    |        |
|               | Deaths  | Deaths      | Deaths      | Deaths   | Deaths | Deaths | Rate    | Rates   | Rates   |        |
| All Comb      | 2327764 | 1580465.217 | 1373633.475 | 206831.7 | 8.885  | 13.087 | 639.078 | 433.910 | 377.126 | 56.785 |

#### Results for Age Groups Combined, Population unadjusted for deaths in Ecig scenario,

| Age Group:All |        | NULL      | Ecig      | %Drop    |        |        | NULL    | Ecig    | Drop    |
|---------------|--------|-----------|-----------|----------|--------|--------|---------|---------|---------|
| Year          | Number | Attrib    | Attrib    | Drop     | %Drop  | Attrib | Death   | Attrib  | Drop    |
|               | Deaths | Deaths    | Deaths    | Deaths   | Deaths | Deaths | Rate    | Rates   | Rates   |
| 1990          | 42690  | 30614.201 | 30614.201 | 0.000    | 0.000  | 0.000  | 625.210 | 448.355 | 0.000   |
| 1991          | 43692  | 31412.010 | 31391.193 | 20.818   | 0.048  | 0.066  | 631.345 | 453.901 | 0.301   |
| 1992          | 45423  | 32782.407 | 32723.146 | 59.261   | 0.130  | 0.181  | 647.450 | 467.274 | 0.845   |
| 1993          | 46291  | 33491.183 | 33374.294 | 116.889  | 0.253  | 0.349  | 650.515 | 470.643 | 1.643   |
| 1994          | 47017  | 34074.347 | 33886.411 | 187.936  | 0.400  | 0.552  | 650.895 | 471.719 | 2.602   |
| 1995          | 47840  | 34694.454 | 34411.198 | 283.256  | 0.592  | 0.816  | 652.025 | 472.861 | 3.861   |
| 1996          | 48244  | 35027.269 | 34638.666 | 388.603  | 0.805  | 1.109  | 648.999 | 471.202 | 5.228   |
| 1997          | 49035  | 35590.763 | 35079.055 | 511.708  | 1.044  | 1.438  | 650.506 | 472.153 | 6.788   |
| 1998          | 49686  | 36100.785 | 35443.870 | 656.915  | 1.322  | 1.820  | 649.874 | 472.184 | 8.592   |
| 1999          | 48883  | 35451.030 | 34669.445 | 781.584  | 1.599  | 2.205  | 630.769 | 457.448 | 10.085  |
| 2000          | 50331  | 36447.986 | 35472.086 | 975.900  | 1.939  | 2.678  | 641.392 | 464.474 | 12.436  |
| 2001          | 50389  | 36411.326 | 35245.043 | 1166.283 | 2.315  | 3.203  | 635.012 | 458.863 | 14.698  |
| 2002          | 51445  | 37078.545 | 35676.866 | 1401.679 | 2.725  | 3.780  | 641.972 | 462.696 | 17.491  |
| 2003          | 51408  | 36999.876 | 35379.010 | 1620.866 | 3.153  | 4.381  | 635.509 | 457.395 | 20.037  |
| 2004          | 51399  | 36861.555 | 35005.896 | 1855.659 | 3.610  | 5.034  | 629.057 | 451.138 | 22.711  |
| 2005          | 51421  | 36689.529 | 34591.770 | 2097.759 | 4.080  | 5.718  | 622.370 | 444.069 | 25.390  |
| 2006          | 51355  | 36504.774 | 34160.217 | 2344.557 | 4.565  | 6.423  | 616.150 | 437.979 | 28.130  |
| 2007          | 51839  | 36663.202 | 34024.884 | 2638.318 | 5.089  | 7.196  | 615.761 | 435.498 | 31.339  |
| 2008          | 50976  | 35898.803 | 33056.642 | 2842.161 | 5.575  | 7.917  | 598.952 | 421.800 | 33.394  |
| 2009          | 51193  | 35934.525 | 32788.223 | 3146.302 | 6.146  | 8.756  | 594.733 | 417.468 | 36.552  |
| 2010          | 50853  | 35502.829 | 32130.836 | 3371.993 | 6.631  | 9.498  | 584.018 | 407.730 | 38.725  |
| 2011          | 50509  | 35136.342 | 31493.468 | 3642.873 | 7.212  | 10.368 | 574.613 | 399.726 | 41.443  |
| 2012          | 51245  | 35450.201 | 31480.586 | 3969.615 | 7.746  | 11.198 | 577.023 | 399.173 | 44.698  |
| 2013          | 51069  | 35123.224 | 30858.074 | 4265.149 | 8.352  | 12.143 | 568.874 | 391.249 | 47.511  |
| 2014          | 51251  | 35079.370 | 30508.580 | 4570.790 | 8.918  | 13.030 | 564.641 | 386.476 | 50.357  |
| 2015          | 50443  | 34324.171 | 29585.243 | 4738.928 | 9.395  | 13.806 | 621.319 | 422.780 | 58.371  |
| 2016          | 48854  | 33054.753 | 28168.638 | 4886.115 | 10.001 | 14.782 | 596.013 | 403.264 | 59.610  |
| 2017          | 48325  | 32471.234 | 27347.059 | 5124.175 | 10.604 | 15.781 | 583.983 | 392.399 | 61.923  |
| 2018          | 50465  | 33657.595 | 27967.874 | 5689.720 | 11.275 | 16.905 | 604.052 | 402.871 | 68.104  |
| 2019          | 51036  | 33863.424 | 27795.561 | 6067.863 | 11.889 | 17.919 | 604.975 | 401.412 | 71.928  |
| 2020          | 51444  | 33910.830 | 27574.470 | 6336.359 | 12.317 | 18.685 | 691.053 | 455.532 | 85.118  |
| 2021          | 48037  | 31531.880 | 25300.130 | 6231.750 | 12.973 | 19.763 | 640.639 | 420.521 | 83.109  |
| 2022          | 48335  | 31560.212 | 25040.680 | 6519.532 | 13.488 | 20.657 | 639.727 | 417.708 | 86.288  |
| 2023          | 48599  | 31508.781 | 24724.777 | 6784.005 | 13.959 | 21.531 | 638.227 | 413.791 | 89.091  |
| 2024          | 48784  | 31517.293 | 24447.513 | 7069.780 | 14.492 | 22.431 | 635.757 | 410.740 | 92.135  |
| 2025          | 48477  | 31175.389 | 23943.092 | 7232.297 | 14.919 | 23.199 | 729.141 | 468.912 | 108.782 |
| 2026          | 45324  | 29044.598 | 22033.598 | 7010.999 | 15.469 | 24.139 | 679.138 | 435.206 | 105.053 |
| 2027          | 45107  | 28825.765 | 21607.611 | 7218.153 | 16.002 | 25.041 | 673.191 | 430.203 | 107.725 |
| 2028          | 44842  | 28513.846 | 21142.352 | 7371.493 | 16.439 | 25.852 | 666.430 | 423.769 | 109.554 |
| 2029          | 44539  | 28148.109 | 20627.887 | 7520.221 | 16.884 | 26.717 | 659.013 | 416.486 | 111.271 |
| 2030          | 43393  | 27314.475 | 19809.966 | 7504.509 | 17.294 | 27.474 | 760.018 | 478.407 | 131.440 |
| 2031          | 40748  | 25423.102 | 18303.813 | 7119.289 | 17.472 | 28.003 | 712.731 | 444.684 | 124.526 |
| 2032          | 40325  | 25085.902 | 17878.842 | 7207.060 | 17.872 | 28.730 | 703.969 | 437.933 | 125.816 |
| 2033          | 39882  | 24645.067 | 17418.485 | 7226.581 | 18.120 | 29.323 | 694.543 | 429.194 | 125.851 |
| 2034          | 39404  | 24239.126 | 16981.108 | 7258.018 | 18.419 | 29.943 | 684.347 | 420.967 | 126.052 |
| 2035          | 37454  | 22944.147 | 15942.846 | 7001.300 | 18.693 | 30.515 | 796.588 | 487.980 | 148.905 |
| 2036          | 32988  | 19950.581 | 13698.778 | 6251.802 | 18.951 | 31.336 | 702.663 | 424.953 | 133.165 |
| 2037          | 32403  | 19415.334 | 13179.607 | 6235.727 | 19.244 | 32.118 | 690.731 | 413.871 | 132.925 |
| 2038          | 31820  | 18939.317 | 12757.790 | 6181.527 | 19.427 | 32.639 | 678.257 | 403.701 | 131.762 |
| 2039          | 31251  | 18379.752 | 12252.089 | 6127.663 | 19.608 | 33.339 | 665.457 | 391.373 | 130.481 |

## Results for PHIM for Run 2 (Sensitivity\_Analysis\_1.RTF)

\*\*\*\*\*

### Main Results for E-Component for Run: 2, Simulation: 1, COD: IHD

| Variable Parameter          | Value                                  |
|-----------------------------|----------------------------------------|
| 1. Country                  | US (United States)                     |
| 2. Sex                      | F (Females)                            |
| 3. Year of start of process | 1990                                   |
| 4. Cause of Death           | IHD                                    |
| 5. Effective Dose NULL      | CC:1                                   |
| 6. Effective Dose Ecig      | CC:1 Ecig:0.4 Dual:0.7                 |
| Note:                       | Death rates are per million population |

#### Results for Age Groups Combined and Years combined, Population unadjusted for deaths in Ecig scenario,

| Age Group:All |         | NULL       | Ecig       | %Drop    |        | NULL   | Ecig    | Drop    |        |        |
|---------------|---------|------------|------------|----------|--------|--------|---------|---------|--------|--------|
| Year          | Number  | Attrib     | Attrib     | Drop     | %Drop  | Attrib | Death   | Attrib  | Attrib | Drop   |
|               | Deaths  | Deaths     | Deaths     | Deaths   | Deaths | Deaths | Rate    | Rates   | Rates  | Rates  |
| All Comb      | 3242167 | 398833.796 | 282177.202 | 116656.6 | 3.598  | 29.249 | 890.124 | 109.498 | 77.471 | 32.028 |

#### Results for Age Groups Combined, Population unadjusted for deaths in Ecig scenario,

| Age Group:All |        | NULL      | Ecig      | %Drop    |        | NULL   | Ecig    | Drop    |         |        |
|---------------|--------|-----------|-----------|----------|--------|--------|---------|---------|---------|--------|
| Year          | Number | Attrib    | Attrib    | Drop     | %Drop  | Attrib | Death   | Attrib  | Attrib  | Drop   |
|               | Deaths | Deaths    | Deaths    | Deaths   | Deaths | Deaths | Rate    | Rates   | Rates   | Rates  |
| 1990          | 98916  | 12922.892 | 12922.892 | 0.000    | 0.000  | 0.000  | 1448.66 | 189.260 | 189.260 | 0.000  |
| 1991          | 96403  | 12856.479 | 12799.224 | 57.256   | 0.059  | 0.445  | 1393.01 | 185.775 | 184.948 | 0.827  |
| 1992          | 93721  | 12662.244 | 12505.888 | 156.355  | 0.167  | 1.235  | 1335.88 | 180.485 | 178.256 | 2.229  |
| 1993          | 93679  | 12730.613 | 12434.248 | 296.365  | 0.316  | 2.328  | 1316.45 | 178.900 | 174.735 | 4.165  |
| 1994          | 90832  | 12495.323 | 12037.119 | 458.204  | 0.504  | 3.667  | 1257.46 | 172.983 | 166.640 | 6.343  |
| 1995          | 89698  | 12365.590 | 11721.075 | 644.515  | 0.719  | 5.212  | 1222.52 | 168.534 | 159.750 | 8.784  |
| 1996          | 88286  | 12290.551 | 11418.114 | 872.437  | 0.988  | 7.098  | 1187.66 | 165.338 | 153.601 | 11.736 |
| 1997          | 84777  | 11719.531 | 10676.301 | 1043.230 | 1.231  | 8.902  | 1124.67 | 155.473 | 141.634 | 13.840 |
| 1998          | 82517  | 11416.794 | 10174.253 | 1242.541 | 1.506  | 10.883 | 1079.29 | 149.327 | 133.075 | 16.252 |
| 1999          | 93939  | 13028.038 | 11329.161 | 1698.877 | 1.808  | 13.040 | 1212.16 | 168.109 | 146.187 | 21.922 |
| 2000          | 90039  | 12426.299 | 10533.572 | 1892.727 | 2.102  | 15.232 | 1147.41 | 158.354 | 134.234 | 24.120 |
| 2001          | 86119  | 11939.281 | 9817.779  | 2121.502 | 2.463  | 17.769 | 1085.29 | 150.461 | 123.726 | 26.736 |
| 2002          | 83014  | 11528.794 | 9178.591  | 2350.203 | 2.831  | 20.386 | 1035.91 | 143.865 | 114.538 | 29.328 |
| 2003          | 79302  | 11048.407 | 8529.482  | 2518.924 | 3.176  | 22.799 | 980.336 | 136.581 | 105.442 | 31.139 |
| 2004          | 73861  | 10375.132 | 7746.374  | 2628.757 | 3.559  | 25.337 | 903.963 | 126.978 | 94.806  | 32.173 |
| 2005          | 71649  | 10051.029 | 7275.788  | 2775.241 | 3.873  | 27.612 | 867.197 | 121.652 | 88.062  | 33.590 |
| 2006          | 67551  | 9542.523  | 6675.027  | 2867.496 | 4.245  | 30.050 | 810.467 | 114.490 | 80.086  | 34.404 |
| 2007          | 63503  | 8936.533  | 6061.523  | 2875.010 | 4.527  | 32.171 | 754.310 | 106.151 | 72.001  | 34.150 |
| 2008          | 63171  | 8944.180  | 5883.614  | 3060.566 | 4.845  | 34.219 | 742.239 | 105.091 | 69.131  | 35.961 |
| 2009          | 59747  | 8390.033  | 5371.045  | 3018.988 | 5.053  | 35.983 | 694.108 | 97.471  | 62.398  | 35.073 |
| 2010          | 58008  | 8157.570  | 5089.817  | 3067.752 | 5.288  | 37.606 | 666.189 | 93.685  | 58.454  | 35.231 |
| 2011          | 57368  | 8035.356  | 4868.251  | 3167.104 | 5.521  | 39.415 | 652.644 | 91.414  | 55.383  | 36.030 |
| 2012          | 57411  | 7970.766  | 4694.893  | 3275.872 | 5.706  | 41.099 | 646.453 | 89.752  | 52.865  | 36.887 |
| 2013          | 57067  | 7743.216  | 4450.745  | 3292.471 | 5.769  | 42.521 | 635.688 | 86.254  | 49.578  | 36.676 |
| 2014          | 57538  | 7774.935  | 4359.371  | 3415.564 | 5.936  | 43.930 | 633.906 | 85.658  | 48.028  | 37.630 |
| 2015          | 58395  | 7722.535  | 4254.205  | 3468.329 | 5.939  | 44.912 | 719.266 | 95.120  | 52.400  | 42.720 |
| 2016          | 58658  | 7600.353  | 4091.397  | 3508.956 | 5.982  | 46.168 | 715.621 | 92.723  | 49.915  | 42.809 |
| 2017          | 59004  | 7470.266  | 3943.068  | 3527.198 | 5.978  | 47.216 | 713.034 | 90.274  | 47.650  | 42.624 |
| 2018          | 56077  | 6907.050  | 3576.073  | 3330.977 | 5.940  | 48.226 | 671.224 | 82.675  | 42.805  | 39.871 |
| 2019          | 55886  | 6732.046  | 3429.648  | 3302.399 | 5.909  | 49.055 | 662.462 | 79.801  | 40.655  | 39.146 |
| 2020          | 55313  | 6429.836  | 3231.714  | 3198.121 | 5.782  | 49.739 | 743.037 | 86.373  | 43.412  | 42.961 |
| 2021          | 56292  | 6562.016  | 3236.875  | 3325.141 | 5.907  | 50.673 | 750.730 | 87.513  | 43.168  | 44.345 |
| 2022          | 55827  | 6352.366  | 3093.251  | 3259.115 | 5.838  | 51.306 | 738.885 | 84.075  | 40.940  | 43.135 |
| 2023          | 55338  | 6134.123  | 2960.352  | 3173.772 | 5.735  | 51.740 | 726.728 | 80.557  | 38.877  | 41.680 |
| 2024          | 54770  | 5922.193  | 2829.562  | 3092.630 | 5.647  | 52.221 | 713.771 | 77.179  | 36.875  | 40.304 |
| 2025          | 53295  | 5504.188  | 2601.482  | 2902.706 | 5.447  | 52.736 | 801.612 | 82.789  | 39.129  | 43.660 |
| 2026          | 55278  | 5641.075  | 2643.898  | 2997.178 | 5.422  | 53.131 | 828.283 | 84.526  | 39.616  | 44.910 |
| 2027          | 54199  | 5426.216  | 2523.436  | 2902.780 | 5.356  | 53.495 | 808.875 | 80.982  | 37.660  | 43.322 |
| 2028          | 53090  | 5197.830  | 2405.304  | 2792.526 | 5.260  | 53.725 | 789.020 | 77.249  | 35.747  | 41.502 |
| 2029          | 51974  | 4973.547  | 2291.453  | 2682.093 | 5.160  | 53.927 | 769.023 | 73.590  | 33.905  | 39.685 |
| 2030          | 49479  | 4450.618  | 2017.318  | 2433.300 | 4.918  | 54.673 | 866.605 | 77.952  | 35.333  | 42.619 |
| 2031          | 51987  | 4555.052  | 2064.934  | 2490.119 | 4.790  | 54.667 | 909.317 | 79.674  | 36.118  | 43.555 |
| 2032          | 50677  | 4349.999  | 1965.830  | 2384.169 | 4.705  | 54.809 | 884.689 | 75.939  | 34.318  | 41.621 |
| 2033          | 49380  | 4147.948  | 1877.256  | 2270.692 | 4.598  | 54.743 | 859.955 | 72.237  | 32.692  | 39.544 |
| 2034          | 48076  | 3966.133  | 1790.237  | 2175.896 | 4.526  | 54.862 | 834.943 | 68.881  | 31.091  | 37.789 |
| 2035          | 44518  | 3289.064  | 1455.751  | 1833.314 | 4.118  | 55.740 | 946.825 | 69.952  | 30.961  | 38.991 |
| 2036          | 46347  | 3313.192  | 1456.764  | 1856.428 | 4.005  | 56.031 | 987.211 | 70.572  | 31.029  | 39.542 |
| 2037          | 44841  | 3117.951  | 1368.495  | 1749.456 | 3.901  | 56.109 | 955.859 | 66.464  | 29.172  | 37.293 |
| 2038          | 43378  | 2949.775  | 1295.726  | 1654.049 | 3.813  | 56.074 | 924.621 | 62.876  | 27.619  | 35.257 |
| 2039          | 41973  | 2766.312  | 1219.025  | 1547.287 | 3.686  | 55.933 | 893.753 | 58.905  | 25.958  | 32.947 |

## Results for PHIM for Run 2 (Sensitivity\_Analysis\_1.RTF)

\*\*\*\*\*

### Main Results for E-Component for Run: 2, Simulation: 1, COD: STROKE

| Variable Parameter          | Value                                  |
|-----------------------------|----------------------------------------|
| 1. Country                  | US (United States)                     |
| 2. Sex                      | F (Females)                            |
| 3. Year of start of process | 1990                                   |
| 4. Cause of Death           | STROKE                                 |
| 5. Effective Dose NULL      | CC:1                                   |
| 6. Effective Dose Ecig      | CC:1 Ecig:0.4 Dual:0.7                 |
| Note:                       | Death rates are per million population |

#### Results for Age Groups Combined and Years combined, Population unadjusted for deaths in Ecig scenario,

| Age Group:All | NULL    | Ecig       | %Drop     |          |        | NULL   | Ecig    | Drop   |        |       |
|---------------|---------|------------|-----------|----------|--------|--------|---------|--------|--------|-------|
| Year          | Number  | Attrib     | Attrib    | Drop     | %Drop  | Attrib | Death   | Attrib | Attrib | Drop  |
|               | Deaths  | Deaths     | Deaths    | Deaths   | Deaths | Deaths | Rate    | Rates  | Rates  | Rates |
| All Comb      | 1352207 | 104899.750 | 72985.607 | 31914.14 | 2.360  | 30.423 | 371.243 | 28.800 | 20.038 | 8.762 |

#### Results for Age Groups Combined, Population unadjusted for deaths in Ecig scenario,

| Age Group:All | NULL   | Ecig     | %Drop    |          |        | NULL   | Ecig    | Drop   |        |        |
|---------------|--------|----------|----------|----------|--------|--------|---------|--------|--------|--------|
| Year          | Number | Attrib   | Attrib   | Drop     | %Drop  | Attrib | Death   | Attrib | Attrib | Drop   |
|               | Deaths | Deaths   | Deaths   | Deaths   | Deaths | Deaths | Rate    | Rates  | Rates  | Rates  |
| 1990          | 33504  | 3293.017 | 3293.017 | 0.000    | 0.000  | 0.000  | 490.678 | 48.227 | 48.227 | 0.000  |
| 1991          | 32505  | 3207.063 | 3189.553 | 17.510   | 0.054  | 0.546  | 469.694 | 46.342 | 46.089 | 0.253  |
| 1992          | 32560  | 3218.125 | 3169.595 | 48.529   | 0.149  | 1.508  | 464.104 | 45.871 | 45.179 | 0.692  |
| 1993          | 32768  | 3226.680 | 3135.233 | 91.447   | 0.279  | 2.834  | 460.480 | 45.344 | 44.059 | 1.285  |
| 1994          | 33005  | 3277.266 | 3132.503 | 144.763  | 0.439  | 4.417  | 456.915 | 45.370 | 43.366 | 2.004  |
| 1995          | 33730  | 3309.378 | 3102.802 | 206.576  | 0.612  | 6.242  | 459.716 | 45.104 | 42.289 | 2.815  |
| 1996          | 33750  | 3312.987 | 3034.184 | 278.802  | 0.826  | 8.415  | 454.019 | 44.568 | 40.817 | 3.751  |
| 1997          | 33699  | 3267.066 | 2919.678 | 347.388  | 1.031  | 10.633 | 447.056 | 43.341 | 38.733 | 4.609  |
| 1998          | 33274  | 3178.725 | 2765.267 | 413.458  | 1.243  | 13.007 | 435.211 | 41.577 | 36.169 | 5.408  |
| 1999          | 33891  | 3120.351 | 2640.822 | 479.529  | 1.415  | 15.368 | 437.317 | 40.264 | 34.076 | 6.188  |
| 2000          | 33827  | 3142.808 | 2583.369 | 559.439  | 1.654  | 17.801 | 431.074 | 40.050 | 32.921 | 7.129  |
| 2001          | 32506  | 2961.588 | 2362.778 | 598.810  | 1.842  | 20.219 | 409.647 | 37.323 | 29.776 | 7.546  |
| 2002          | 32078  | 2940.627 | 2267.671 | 672.957  | 2.098  | 22.885 | 400.295 | 36.695 | 28.298 | 8.398  |
| 2003          | 30568  | 2819.545 | 2105.910 | 713.635  | 2.335  | 25.310 | 377.883 | 34.855 | 26.033 | 8.822  |
| 2004          | 29388  | 2730.466 | 1972.530 | 757.936  | 2.579  | 27.758 | 359.671 | 33.417 | 24.141 | 9.276  |
| 2005          | 27954  | 2670.510 | 1871.750 | 798.760  | 2.857  | 29.910 | 338.339 | 32.322 | 22.655 | 9.668  |
| 2006          | 27201  | 2623.285 | 1782.189 | 841.096  | 3.092  | 32.063 | 326.354 | 31.474 | 21.382 | 10.091 |
| 2007          | 26302  | 2536.599 | 1674.241 | 862.358  | 3.279  | 33.997 | 312.424 | 30.131 | 19.887 | 10.243 |
| 2008          | 25998  | 2469.443 | 1584.294 | 885.150  | 3.405  | 35.844 | 305.468 | 29.015 | 18.615 | 10.400 |
| 2009          | 25040  | 2386.945 | 1491.204 | 895.741  | 3.577  | 37.527 | 290.901 | 27.730 | 17.324 | 10.406 |
| 2010          | 24840  | 2329.274 | 1419.583 | 909.691  | 3.662  | 39.055 | 285.273 | 26.750 | 16.303 | 10.447 |
| 2011          | 24792  | 2286.581 | 1356.572 | 930.009  | 3.751  | 40.672 | 282.045 | 26.013 | 15.433 | 10.580 |
| 2012          | 24500  | 2243.311 | 1296.194 | 947.117  | 3.866  | 42.220 | 275.872 | 25.260 | 14.595 | 10.665 |
| 2013          | 24451  | 2176.503 | 1225.545 | 950.958  | 3.889  | 43.692 | 272.368 | 24.245 | 13.652 | 10.593 |
| 2014          | 25296  | 2211.619 | 1215.884 | 995.735  | 3.936  | 45.023 | 278.691 | 24.366 | 13.396 | 10.970 |
| 2015          | 26316  | 2237.016 | 1209.202 | 1027.814 | 3.906  | 45.946 | 324.141 | 27.554 | 14.894 | 12.660 |
| 2016          | 26735  | 2229.057 | 1182.466 | 1046.592 | 3.915  | 46.952 | 326.164 | 27.194 | 14.426 | 12.768 |
| 2017          | 27616  | 2221.649 | 1158.439 | 1063.210 | 3.850  | 47.857 | 333.726 | 26.848 | 13.999 | 12.848 |
| 2018          | 25256  | 1939.420 | 995.973  | 943.447  | 3.736  | 48.646 | 302.304 | 23.214 | 11.921 | 11.293 |
| 2019          | 25429  | 1904.400 | 962.171  | 942.229  | 3.705  | 49.476 | 301.434 | 22.574 | 11.405 | 11.169 |
| 2020          | 25379  | 1806.054 | 900.119  | 905.936  | 3.570  | 50.161 | 340.922 | 24.261 | 12.091 | 12.170 |
| 2021          | 25448  | 1748.172 | 855.863  | 892.309  | 3.506  | 51.042 | 339.386 | 23.314 | 11.414 | 11.900 |
| 2022          | 25539  | 1701.148 | 822.310  | 878.838  | 3.441  | 51.661 | 338.015 | 22.515 | 10.883 | 11.632 |
| 2023          | 25620  | 1652.087 | 792.260  | 859.827  | 3.356  | 52.045 | 336.461 | 21.696 | 10.404 | 11.292 |
| 2024          | 25659  | 1597.127 | 758.076  | 839.051  | 3.270  | 52.535 | 334.391 | 20.814 | 9.879  | 10.935 |
| 2025          | 25260  | 1467.622 | 688.871  | 778.751  | 3.083  | 53.062 | 379.931 | 22.075 | 10.361 | 11.713 |
| 2026          | 25480  | 1390.505 | 647.754  | 742.752  | 2.915  | 53.416 | 381.790 | 20.835 | 9.706  | 11.129 |
| 2027          | 25264  | 1342.095 | 620.167  | 721.928  | 2.858  | 53.791 | 377.042 | 20.030 | 9.256  | 10.774 |
| 2028          | 25022  | 1289.536 | 592.945  | 696.591  | 2.784  | 54.019 | 371.870 | 19.165 | 8.812  | 10.353 |
| 2029          | 24767  | 1242.216 | 568.354  | 673.862  | 2.721  | 54.247 | 366.459 | 18.380 | 8.410  | 9.971  |
| 2030          | 23959  | 1096.803 | 493.566  | 603.237  | 2.518  | 55.000 | 419.641 | 19.210 | 8.645  | 10.566 |
| 2031          | 23963  | 1019.991 | 458.796  | 561.195  | 2.342  | 55.020 | 419.142 | 17.841 | 8.025  | 9.816  |
| 2032          | 23615  | 977.406  | 438.192  | 539.214  | 2.283  | 55.168 | 412.259 | 17.063 | 7.650  | 9.413  |
| 2033          | 23259  | 937.450  | 420.538  | 516.912  | 2.222  | 55.140 | 405.051 | 16.326 | 7.324  | 9.002  |
| 2034          | 22879  | 900.763  | 402.616  | 498.147  | 2.177  | 55.303 | 397.339 | 15.644 | 6.992  | 8.651  |
| 2035          | 21733  | 745.023  | 328.547  | 416.476  | 1.916  | 55.901 | 462.224 | 15.845 | 6.988  | 8.858  |
| 2036          | 20904  | 680.360  | 296.763  | 383.597  | 1.835  | 56.381 | 445.263 | 14.492 | 6.321  | 8.171  |
| 2037          | 20397  | 644.109  | 280.383  | 363.726  | 1.783  | 56.470 | 434.791 | 13.730 | 5.977  | 7.753  |
| 2038          | 19890  | 612.448  | 266.542  | 345.906  | 1.739  | 56.479 | 423.966 | 13.055 | 5.681  | 7.373  |
| 2039          | 19392  | 577.529  | 252.327  | 325.202  | 1.677  | 56.309 | 412.930 | 12.298 | 5.373  | 6.925  |



## Results for PHIM for Run 2 (Sensitivity\_Analysis\_1.RTF)

\*\*\*\*\*

### Main Results for E-Component for Run: 2, Simulation: 1, COD: COPD

| Variable Parameter          | Value                                  |
|-----------------------------|----------------------------------------|
| 1. Country                  | US (United States)                     |
| 2. Sex                      | F (Females)                            |
| 3. Year of start of process | 1990                                   |
| 4. Cause of Death           | COPD                                   |
| 5. Effective Dose NULL      | CC:1                                   |
| 6. Effective Dose Ecig      | CC:1 Ecig:0.4 Dual:0.7                 |
| Note:                       | Death rates are per million population |

#### Results for Age Groups Combined and Years combined, Population unadjusted for deaths in Ecig scenario,

| Age Group:All |         | NULL       | Ecig       | %Drop    |        |        | NULL    | Ecig    | Drop    |        |
|---------------|---------|------------|------------|----------|--------|--------|---------|---------|---------|--------|
| Year          | Number  | Attrib     | Attrib     | Drop     | %Drop  | Attrib | Death   | Attrib  | Attrib  | Drop   |
|               | Deaths  | Deaths     | Deaths     | Deaths   | Deaths | Deaths | Rate    | Rates   | Rates   | Rates  |
| All Comb      | 2159941 | 862051.244 | 687731.875 | 174319.4 | 8.071  | 20.221 | 593.003 | 236.673 | 188.814 | 47.859 |

#### Results for Age Groups Combined, Population unadjusted for deaths in Ecig scenario,

| Age Group:All |        | NULL      | Ecig      | %Drop    |        |        | NULL    | Ecig    | Drop    |         |
|---------------|--------|-----------|-----------|----------|--------|--------|---------|---------|---------|---------|
| Year          | Number | Attrib    | Attrib    | Drop     | %Drop  | Attrib | Death   | Attrib  | Attrib  | Drop    |
|               | Deaths | Deaths    | Deaths    | Deaths   | Deaths | Deaths | Rate    | Rates   | Rates   | Rates   |
| 1990          | 24738  | 10694.712 | 10694.712 | 0.000    | 0.000  | 0.000  | 362.296 | 156.628 | 156.628 | 0.000   |
| 1991          | 26562  | 11602.933 | 11590.960 | 11.972   | 0.045  | 0.103  | 383.818 | 167.661 | 167.488 | 0.173   |
| 1992          | 26828  | 11831.375 | 11799.367 | 32.008   | 0.119  | 0.271  | 382.401 | 168.642 | 168.186 | 0.456   |
| 1993          | 29774  | 13246.371 | 13177.443 | 68.928   | 0.232  | 0.520  | 418.406 | 186.148 | 185.179 | 0.969   |
| 1994          | 29804  | 13355.662 | 13247.068 | 108.594  | 0.364  | 0.813  | 412.601 | 184.893 | 183.390 | 1.503   |
| 1995          | 29755  | 13397.439 | 13235.521 | 161.919  | 0.544  | 1.209  | 405.540 | 182.598 | 180.391 | 2.207   |
| 1996          | 30900  | 13960.356 | 13735.820 | 224.536  | 0.727  | 1.608  | 415.680 | 187.801 | 184.780 | 3.021   |
| 1997          | 31128  | 14109.552 | 13819.528 | 290.024  | 0.932  | 2.056  | 412.949 | 187.180 | 183.332 | 3.848   |
| 1998          | 32096  | 14599.657 | 14221.275 | 378.383  | 1.179  | 2.592  | 419.803 | 190.958 | 186.009 | 4.949   |
| 1999          | 34616  | 15728.102 | 15242.878 | 485.224  | 1.402  | 3.085  | 446.673 | 202.950 | 196.689 | 6.261   |
| 2000          | 34299  | 15579.803 | 14998.410 | 581.393  | 1.695  | 3.732  | 437.088 | 198.541 | 191.132 | 7.409   |
| 2001          | 34592  | 15696.614 | 14996.542 | 700.072  | 2.024  | 4.460  | 435.935 | 197.812 | 188.989 | 8.822   |
| 2002          | 34291  | 15519.777 | 14706.128 | 813.649  | 2.373  | 5.243  | 427.910 | 193.668 | 183.515 | 10.153  |
| 2003          | 35074  | 15888.389 | 14926.310 | 962.080  | 2.743  | 6.055  | 433.587 | 196.413 | 184.520 | 11.893  |
| 2004          | 33512  | 15091.573 | 14051.162 | 1040.411 | 3.105  | 6.894  | 410.143 | 184.701 | 171.968 | 12.733  |
| 2005          | 35392  | 15803.656 | 14564.672 | 1238.984 | 3.501  | 7.840  | 428.364 | 191.278 | 176.282 | 14.996  |
| 2006          | 33981  | 15100.563 | 13788.093 | 1312.471 | 3.862  | 8.692  | 407.699 | 181.174 | 165.428 | 15.747  |
| 2007          | 34000  | 14974.384 | 13526.766 | 1447.618 | 4.258  | 9.667  | 403.863 | 177.871 | 160.675 | 17.195  |
| 2008          | 37425  | 16406.197 | 14684.619 | 1721.578 | 4.600  | 10.493 | 439.732 | 192.768 | 172.540 | 20.228  |
| 2009          | 36826  | 16083.194 | 14217.926 | 1865.268 | 5.065  | 11.598 | 427.825 | 186.846 | 165.176 | 21.670  |
| 2010          | 36788  | 15927.400 | 13943.077 | 1984.324 | 5.394  | 12.459 | 422.489 | 182.917 | 160.128 | 22.789  |
| 2011          | 37636  | 16221.836 | 14029.266 | 2192.570 | 5.826  | 13.516 | 428.164 | 184.547 | 159.603 | 24.944  |
| 2012          | 38265  | 16358.849 | 13990.241 | 2368.609 | 6.190  | 14.479 | 430.867 | 184.202 | 157.531 | 26.671  |
| 2013          | 40112  | 16994.822 | 14343.834 | 2650.988 | 6.609  | 15.599 | 446.821 | 189.311 | 159.781 | 29.530  |
| 2014          | 40084  | 16855.093 | 14038.779 | 2816.314 | 7.026  | 16.709 | 441.613 | 185.696 | 154.668 | 31.028  |
| 2015          | 42200  | 17572.483 | 14494.605 | 3077.878 | 7.294  | 17.515 | 519.788 | 216.445 | 178.534 | 37.911  |
| 2016          | 42606  | 17579.955 | 14290.343 | 3289.612 | 7.721  | 18.712 | 519.788 | 214.473 | 174.341 | 40.133  |
| 2017          | 44364  | 18080.688 | 14479.661 | 3601.028 | 8.117  | 19.916 | 536.117 | 218.496 | 174.979 | 43.517  |
| 2018          | 45359  | 18209.262 | 14364.368 | 3844.894 | 8.477  | 21.115 | 542.932 | 217.960 | 171.937 | 46.022  |
| 2019          | 46876  | 18648.302 | 14482.542 | 4165.760 | 8.887  | 22.339 | 555.657 | 221.054 | 171.674 | 49.380  |
| 2020          | 48331  | 19002.597 | 14601.663 | 4400.934 | 9.106  | 23.160 | 649.239 | 255.266 | 196.147 | 59.119  |
| 2021          | 48338  | 18885.717 | 14270.594 | 4615.123 | 9.548  | 24.437 | 644.660 | 251.867 | 190.318 | 61.549  |
| 2022          | 49708  | 19235.076 | 14339.375 | 4895.702 | 9.849  | 25.452 | 657.895 | 254.582 | 189.786 | 64.796  |
| 2023          | 51083  | 19521.158 | 14361.185 | 5159.973 | 10.101 | 26.433 | 670.849 | 256.363 | 188.599 | 67.764  |
| 2024          | 52397  | 19918.620 | 14439.094 | 5479.526 | 10.458 | 27.510 | 682.854 | 259.583 | 188.173 | 71.410  |
| 2025          | 53387  | 20150.545 | 14422.680 | 5727.865 | 10.729 | 28.425 | 803.004 | 303.086 | 216.933 | 86.153  |
| 2026          | 54232  | 20393.792 | 14361.097 | 6032.696 | 11.124 | 29.581 | 812.615 | 305.582 | 215.188 | 90.394  |
| 2027          | 55049  | 20615.351 | 14281.644 | 6333.707 | 11.506 | 30.723 | 821.568 | 307.668 | 213.143 | 94.526  |
| 2028          | 55809  | 20731.894 | 14152.161 | 6579.733 | 11.790 | 31.737 | 829.419 | 308.115 | 210.328 | 97.787  |
| 2029          | 56527  | 20781.967 | 13971.209 | 6810.758 | 12.049 | 32.772 | 836.392 | 307.495 | 206.721 | 100.774 |
| 2030          | 56756  | 20753.201 | 13745.153 | 7008.048 | 12.348 | 33.769 | 994.067 | 363.487 | 240.743 | 122.744 |
| 2031          | 58288  | 21048.417 | 13834.087 | 7214.330 | 12.377 | 34.275 | 1019.54 | 368.165 | 241.977 | 126.188 |
| 2032          | 58782  | 21169.329 | 13714.341 | 7454.988 | 12.682 | 35.216 | 1026.18 | 369.560 | 239.416 | 130.144 |
| 2033          | 59236  | 21109.293 | 13522.160 | 7587.134 | 12.808 | 35.942 | 1031.59 | 367.618 | 235.488 | 132.130 |
| 2034          | 59614  | 21109.429 | 13357.274 | 7752.155 | 13.004 | 36.724 | 1035.33 | 366.613 | 231.979 | 134.634 |
| 2035          | 58938  | 20794.840 | 12999.315 | 7795.525 | 13.227 | 37.488 | 1253.51 | 442.268 | 276.472 | 165.797 |
| 2036          | 56014  | 19354.577 | 11929.443 | 7425.134 | 13.256 | 38.364 | 1193.11 | 412.258 | 254.100 | 158.157 |
| 2037          | 55953  | 19064.169 | 11559.196 | 7504.974 | 13.413 | 39.367 | 1192.72 | 406.385 | 246.404 | 159.981 |
| 2038          | 55859  | 18854.812 | 11291.369 | 7563.443 | 13.540 | 40.114 | 1190.66 | 401.900 | 240.681 | 161.218 |
| 2039          | 55757  | 18437.457 | 10896.923 | 7540.533 | 13.524 | 40.898 | 1187.28 | 392.602 | 232.036 | 160.566 |

## Results for PHIM for Run 2 (Sensitivity\_Analysis\_1.RTF)

\*\*\*\*\*

### Main Results for E-Component for Run: 2, Simulation: 1, COD: Four Diseases Combined, Adjusted

| Variable Parameter          | Value                                  |
|-----------------------------|----------------------------------------|
| 1. Country                  | US (United States)                     |
| 2. Sex                      | F (Females)                            |
| 3. Year of start of process | 1990                                   |
| 4. Cause of Death           | Four Diseases Combined                 |
| 5. Effective Dose NULL      | CC:1                                   |
| 6. Effective Dose Ecig      | CC:1 Ecig:0.4 Dual:0.7                 |
| Note:                       | Death rates are per million population |

### Results for Age Groups Combined and Years combined, Population and Number deaths adjusted for Ecig scenario,

| Age Group:All |         | NULL        | Ecig        | %Drop    |        |        | NULL    | Ecig    | Drop    |         |
|---------------|---------|-------------|-------------|----------|--------|--------|---------|---------|---------|---------|
| Year          | Number  | Attrib      | Attrib      | Drop     | %Drop  | Attrib | Death   | Attrib  | Attrib  | Drop    |
|               | Deaths  | Deaths      | Deaths      | Deaths   | Deaths | Deaths | Rate    | Rates   | Rates   | Rates   |
| All Comb      | 9119610 | 2946250.006 | 2424661.893 | 521588.1 | 5.719  | 17.703 | 2497.07 | 808.881 | 663.905 | 144.977 |

### Results for Age Groups Combined, Population and Number deaths adjusted for Ecig scenario,

| Age Group:All |        | NULL      | Ecig      | %Drop    |        |        | NULL    | Ecig    | Drop    |         |
|---------------|--------|-----------|-----------|----------|--------|--------|---------|---------|---------|---------|
| Year          | Number | Attrib    | Attrib    | Drop     | %Drop  | Attrib | Death   | Attrib  | Attrib  | Drop    |
|               | Deaths | Deaths    | Deaths    | Deaths   | Deaths | Deaths | Rate    | Rates   | Rates   | Rates   |
| 1990          | 199848 | 57524.822 | 57524.822 | 0.000    | 0.000  | 0.000  | 2926.84 | 842.471 | 842.471 | 0.000   |
| 1991          | 199162 | 59078.486 | 58970.930 | 107.556  | 0.054  | 0.182  | 2877.87 | 853.678 | 852.124 | 1.554   |
| 1992          | 198532 | 60494.150 | 60198.144 | 296.006  | 0.149  | 0.489  | 2829.84 | 862.271 | 858.051 | 4.221   |
| 1993          | 202514 | 62694.848 | 62121.784 | 573.063  | 0.283  | 0.914  | 2845.86 | 881.034 | 872.976 | 8.058   |
| 1994          | 200662 | 63202.598 | 62304.484 | 898.114  | 0.448  | 1.421  | 2777.90 | 874.966 | 862.520 | 12.445  |
| 1995          | 201031 | 63766.862 | 62473.241 | 1293.621 | 0.643  | 2.029  | 2739.84 | 869.097 | 851.444 | 17.654  |
| 1996          | 201194 | 64591.163 | 62831.300 | 1759.863 | 0.875  | 2.725  | 2706.43 | 868.908 | 845.196 | 23.712  |
| 1997          | 198661 | 64686.912 | 62501.575 | 2185.337 | 1.100  | 3.378  | 2635.29 | 858.147 | 829.099 | 29.048  |
| 1998          | 197604 | 65295.961 | 62614.899 | 2681.062 | 1.357  | 4.106  | 2584.34 | 854.046 | 818.898 | 35.148  |
| 1999          | 211376 | 67327.521 | 63896.793 | 3430.729 | 1.623  | 5.096  | 2727.15 | 868.771 | 824.391 | 44.380  |
| 2000          | 208558 | 67596.897 | 63606.898 | 3989.999 | 1.913  | 5.903  | 2657.28 | 861.419 | 810.427 | 50.993  |
| 2001          | 203686 | 67008.811 | 62447.078 | 4561.732 | 2.240  | 6.808  | 2566.29 | 844.458 | 786.787 | 57.672  |
| 2002          | 200928 | 67067.744 | 61860.533 | 5207.211 | 2.592  | 7.764  | 2506.60 | 836.925 | 771.718 | 65.206  |
| 2003          | 196474 | 66756.217 | 60979.171 | 5777.046 | 2.940  | 8.654  | 2427.95 | 825.244 | 753.555 | 71.689  |
| 2004          | 188304 | 65058.725 | 58821.319 | 6237.406 | 3.312  | 9.587  | 2303.59 | 796.234 | 719.581 | 76.653  |
| 2005          | 186587 | 65214.724 | 58357.622 | 6857.102 | 3.675  | 10.515 | 2257.17 | 789.321 | 705.959 | 83.362  |
| 2006          | 180284 | 63771.146 | 56466.750 | 7304.396 | 4.052  | 11.454 | 2161.70 | 765.117 | 677.067 | 88.050  |
| 2007          | 175866 | 63110.718 | 55357.222 | 7753.496 | 4.409  | 12.286 | 2087.52 | 749.650 | 657.088 | 92.562  |
| 2008          | 177829 | 63718.624 | 55289.456 | 8429.168 | 4.740  | 13.229 | 2087.75 | 748.674 | 649.110 | 99.564  |
| 2009          | 173093 | 62794.698 | 53957.594 | 8837.104 | 5.105  | 14.073 | 2009.06 | 729.515 | 626.276 | 103.239 |
| 2010          | 170809 | 61917.074 | 52681.449 | 9235.624 | 5.407  | 14.916 | 1959.63 | 711.083 | 604.393 | 106.690 |
| 2011          | 170663 | 61680.114 | 51855.377 | 9824.737 | 5.757  | 15.929 | 1939.30 | 701.700 | 589.252 | 112.448 |
| 2012          | 171821 | 62023.127 | 51580.999 | 10442.13 | 6.077  | 16.836 | 1932.26 | 698.386 | 580.067 | 118.319 |
| 2013          | 173146 | 62037.765 | 51008.482 | 11029.28 | 6.370  | 17.778 | 1926.02 | 691.059 | 567.401 | 123.657 |
| 2014          | 174665 | 61921.017 | 50263.695 | 11657.32 | 6.674  | 18.826 | 1921.34 | 682.195 | 552.909 | 129.286 |
| 2015          | 177910 | 61856.204 | 49696.620 | 12159.58 | 6.835  | 19.658 | 2187.20 | 761.899 | 610.966 | 150.933 |
| 2016          | 177457 | 60464.119 | 47893.765 | 12570.35 | 7.084  | 20.790 | 2160.48 | 737.655 | 583.092 | 154.563 |
| 2017          | 179976 | 60243.839 | 47100.633 | 13143.21 | 7.303  | 21.817 | 2170.05 | 728.017 | 567.913 | 160.103 |
| 2018          | 177873 | 60713.327 | 47091.502 | 13621.82 | 7.658  | 22.436 | 2123.94 | 726.721 | 562.308 | 164.413 |
| 2019          | 180013 | 61148.172 | 46871.897 | 14276.27 | 7.931  | 23.347 | 2128.29 | 724.841 | 554.166 | 170.675 |
| 2020          | 181327 | 61149.317 | 46525.527 | 14623.79 | 8.065  | 23.915 | 2428.13 | 821.432 | 623.017 | 198.416 |
| 2021          | 179027 | 58727.786 | 43883.716 | 14844.07 | 8.292  | 25.276 | 2379.52 | 783.216 | 583.276 | 199.940 |
| 2022          | 180392 | 58848.802 | 43529.568 | 15319.23 | 8.492  | 26.032 | 2378.96 | 778.881 | 574.056 | 204.825 |
| 2023          | 181699 | 58816.149 | 43085.853 | 15730.30 | 8.657  | 26.745 | 2377.06 | 772.407 | 563.667 | 208.739 |
| 2024          | 182744 | 58955.232 | 42735.631 | 16219.60 | 8.876  | 27.512 | 2371.93 | 768.316 | 554.687 | 213.629 |
| 2025          | 181628 | 58297.744 | 41931.085 | 16366.66 | 9.011  | 28.074 | 2718.67 | 876.861 | 627.638 | 249.223 |
| 2026          | 181602 | 56469.971 | 39967.101 | 16502.87 | 9.087  | 29.224 | 2707.26 | 846.150 | 595.815 | 250.334 |
| 2027          | 180979 | 56209.427 | 39325.681 | 16883.75 | 9.329  | 30.037 | 2686.49 | 838.883 | 583.760 | 255.124 |
| 2028          | 180193 | 55733.105 | 38596.534 | 17136.57 | 9.510  | 30.748 | 2662.95 | 828.298 | 570.391 | 257.907 |
| 2029          | 179310 | 55145.838 | 37772.730 | 17373.11 | 9.689  | 31.504 | 2637.50 | 815.951 | 555.604 | 260.346 |
| 2030          | 175155 | 53615.097 | 36389.340 | 17225.76 | 9.835  | 32.129 | 3046.39 | 939.056 | 632.904 | 306.152 |
| 2031          | 176667 | 52046.561 | 34994.357 | 17052.20 | 9.652  | 32.763 | 3067.64 | 910.364 | 607.639 | 302.725 |
| 2032          | 175152 | 51582.636 | 34340.899 | 17241.74 | 9.844  | 33.425 | 3034.49 | 900.496 | 594.953 | 305.543 |
| 2033          | 173578 | 50839.758 | 33591.495 | 17248.26 | 9.937  | 33.927 | 2999.03 | 885.375 | 580.383 | 304.992 |
| 2034          | 171861 | 50215.451 | 32893.679 | 17321.77 | 10.079 | 34.495 | 2960.34 | 872.104 | 566.600 | 305.504 |
| 2035          | 164576 | 47773.075 | 31093.939 | 16679.14 | 10.135 | 34.913 | 3466.61 | 1016.05 | 654.957 | 361.088 |
| 2036          | 158196 | 43298.709 | 27724.203 | 15574.51 | 9.845  | 35.970 | 3336.09 | 922.274 | 584.659 | 337.616 |
| 2037          | 155580 | 42241.563 | 26731.029 | 15510.53 | 9.970  | 36.719 | 3282.42 | 900.450 | 563.972 | 336.478 |
| 2038          | 152975 | 41356.353 | 25957.958 | 15398.39 | 10.066 | 37.233 | 3226.30 | 881.531 | 547.463 | 334.067 |
| 2039          | 150441 | 40161.050 | 24965.535 | 15195.52 | 10.101 | 37.836 | 3168.68 | 855.178 | 525.837 | 329.340 |

## Results for PHIM for Run 2 (Sensitivity\_Analysis\_1.RTF)

\*\*\*\*\*

### Main Results for E-Component for Run: 2, Simulation: 1, COD: LUNG CANCER, Adjusted

| Variable Parameter          | Value                                  |
|-----------------------------|----------------------------------------|
| 1. Country                  | US (United States)                     |
| 2. Sex                      | F (Females)                            |
| 3. Year of start of process | 1990                                   |
| 4. Cause of Death           | LUNG CANCER                            |
| 5. Effective Dose NULL      | CC:1                                   |
| 6. Effective Dose Ecig      | CC:1 Ecig:0.4 Dual:0.7                 |
| Note:                       | Death rates are per million population |

#### Results for Age Groups Combined and Years combined, Population and Number deaths adjusted for Ecig scenario,

| Age Group:All | NULL    | Ecig        | %Drop       |          |        |        | NULL    | Ecig    | Drop    |        |
|---------------|---------|-------------|-------------|----------|--------|--------|---------|---------|---------|--------|
| Year          | Number  | Attrib      | Attrib      | Drop     | %Drop  | Attrib | Death   | Attrib  | Attrib  | Drop   |
|               | Deaths  | Deaths      | Deaths      | Deaths   | Deaths | Deaths | Rate    | Rates   | Rates   | Rates  |
| All Comb      | 2336928 | 1580465.217 | 1378116.696 | 202348.5 | 8.659  | 12.803 | 639.882 | 433.910 | 377.347 | 56.564 |

#### Results for Age Groups Combined, Population and Number deaths adjusted for Ecig scenario,

| Age Group:All | NULL   | Ecig      | %Drop     |          |        |        | NULL    | Ecig    | Drop    |         |
|---------------|--------|-----------|-----------|----------|--------|--------|---------|---------|---------|---------|
| Year          | Number | Attrib    | Attrib    | Drop     | %Drop  | Attrib | Death   | Attrib  | Attrib  | Drop    |
|               | Deaths | Deaths    | Deaths    | Deaths   | Deaths | Deaths | Rate    | Rates   | Rates   | Rates   |
| 1990          | 42690  | 30614.201 | 30614.201 | 0.000    | 0.000  | 0.000  | 625.210 | 448.355 | 448.355 | 0.000   |
| 1991          | 43692  | 31412.010 | 31391.193 | 20.818   | 0.048  | 0.066  | 631.345 | 453.901 | 453.600 | 0.301   |
| 1992          | 45423  | 32782.407 | 32723.227 | 59.180   | 0.130  | 0.181  | 647.451 | 467.274 | 466.430 | 0.844   |
| 1993          | 46291  | 33491.183 | 33374.600 | 116.583  | 0.252  | 0.348  | 650.517 | 470.643 | 469.001 | 1.641   |
| 1994          | 47018  | 34074.347 | 33887.170 | 187.177  | 0.398  | 0.549  | 650.901 | 471.719 | 469.122 | 2.598   |
| 1995          | 47842  | 34694.454 | 34412.670 | 281.784  | 0.589  | 0.812  | 652.036 | 472.861 | 469.008 | 3.853   |
| 1996          | 48247  | 35027.269 | 34641.184 | 386.085  | 0.800  | 1.102  | 649.017 | 471.202 | 465.987 | 5.215   |
| 1997          | 49041  | 35590.763 | 35083.025 | 507.737  | 1.035  | 1.427  | 650.535 | 472.153 | 465.385 | 6.768   |
| 1998          | 49694  | 36100.785 | 35449.713 | 651.072  | 1.310  | 1.803  | 649.917 | 472.184 | 463.623 | 8.561   |
| 1999          | 48894  | 35451.030 | 34677.363 | 773.666  | 1.582  | 2.182  | 630.828 | 457.448 | 447.404 | 10.043  |
| 2000          | 50346  | 36447.986 | 35483.027 | 964.959  | 1.917  | 2.647  | 641.473 | 464.474 | 452.095 | 12.379  |
| 2001          | 50409  | 36411.326 | 35259.216 | 1152.111 | 2.286  | 3.164  | 635.118 | 458.863 | 444.240 | 14.623  |
| 2002          | 51471  | 37078.545 | 35695.057 | 1383.487 | 2.688  | 3.731  | 642.110 | 462.696 | 445.301 | 17.395  |
| 2003          | 51441  | 36999.876 | 35401.511 | 1598.365 | 3.107  | 4.320  | 635.682 | 457.395 | 437.477 | 19.918  |
| 2004          | 51439  | 36861.555 | 35033.111 | 1828.444 | 3.555  | 4.960  | 629.269 | 451.138 | 428.572 | 22.566  |
| 2005          | 51469  | 36689.529 | 34623.807 | 2065.721 | 4.014  | 5.630  | 622.621 | 444.069 | 418.848 | 25.220  |
| 2006          | 51411  | 36504.774 | 34197.534 | 2307.240 | 4.488  | 6.320  | 616.445 | 437.979 | 410.047 | 27.932  |
| 2007          | 51905  | 36663.202 | 34068.110 | 2595.092 | 5.000  | 7.078  | 616.106 | 435.498 | 404.387 | 31.111  |
| 2008          | 51050  | 35898.803 | 33104.956 | 2793.847 | 5.473  | 7.783  | 599.341 | 421.800 | 388.659 | 33.140  |
| 2009          | 51278  | 35934.525 | 32842.815 | 3091.710 | 6.029  | 8.604  | 595.174 | 417.468 | 381.201 | 36.267  |
| 2010          | 50948  | 35502.829 | 32191.123 | 3311.707 | 6.500  | 9.328  | 584.507 | 407.730 | 369.316 | 38.414  |
| 2011          | 50614  | 35136.342 | 31559.429 | 3576.913 | 7.067  | 10.180 | 575.150 | 399.726 | 358.622 | 41.105  |
| 2012          | 51364  | 35450.201 | 31553.872 | 3896.329 | 7.586  | 10.991 | 577.626 | 399.173 | 354.847 | 44.326  |
| 2013          | 51200  | 35123.224 | 30937.490 | 4185.733 | 8.175  | 11.917 | 569.533 | 391.249 | 344.138 | 47.111  |
| 2014          | 51396  | 35079.370 | 30595.026 | 4484.344 | 8.725  | 12.783 | 565.363 | 386.476 | 336.550 | 49.925  |
| 2015          | 50600  | 34324.171 | 29677.342 | 4646.829 | 9.184  | 13.538 | 622.069 | 422.780 | 364.851 | 57.929  |
| 2016          | 49020  | 33054.753 | 28264.232 | 4790.521 | 9.773  | 14.493 | 596.798 | 403.264 | 344.108 | 59.156  |
| 2017          | 48504  | 32471.234 | 27448.190 | 5023.044 | 10.356 | 15.469 | 584.829 | 392.399 | 330.955 | 61.443  |
| 2018          | 50667  | 33657.595 | 28079.658 | 5577.937 | 11.009 | 16.573 | 604.999 | 402.871 | 335.292 | 67.579  |
| 2019          | 51257  | 33863.424 | 27915.888 | 5947.536 | 11.603 | 17.563 | 606.009 | 401.412 | 330.049 | 71.363  |
| 2020          | 51685  | 33910.830 | 27703.752 | 6207.078 | 12.010 | 18.304 | 692.101 | 455.532 | 370.977 | 84.555  |
| 2021          | 48279  | 31531.880 | 25427.693 | 6104.187 | 12.644 | 19.359 | 641.697 | 420.521 | 337.969 | 82.552  |
| 2022          | 48596  | 31560.212 | 25175.831 | 6384.382 | 13.138 | 20.229 | 640.869 | 417.708 | 332.012 | 85.696  |
| 2023          | 48879  | 31508.781 | 24867.235 | 6641.547 | 13.588 | 21.078 | 639.456 | 413.791 | 325.324 | 88.467  |
| 2024          | 49083  | 31517.293 | 24597.575 | 6919.718 | 14.098 | 21.955 | 637.074 | 410.740 | 319.264 | 91.475  |
| 2025          | 48795  | 31175.389 | 24100.398 | 7074.991 | 14.499 | 22.694 | 730.384 | 468.912 | 360.743 | 108.169 |
| 2026          | 45643  | 29044.598 | 22188.932 | 6855.666 | 15.020 | 23.604 | 680.434 | 435.206 | 330.785 | 104.421 |
| 2027          | 45444  | 28825.765 | 21769.013 | 7056.752 | 15.529 | 24.481 | 674.575 | 430.203 | 323.144 | 107.058 |
| 2028          | 45195  | 28513.846 | 21309.235 | 7204.611 | 15.941 | 25.267 | 667.905 | 423.769 | 314.914 | 108.855 |
| 2029          | 44909  | 28148.109 | 20799.700 | 7348.409 | 16.363 | 26.106 | 660.579 | 416.486 | 305.946 | 110.540 |
| 2030          | 43778  | 27314.475 | 19986.296 | 7328.179 | 16.739 | 26.829 | 761.417 | 478.407 | 347.613 | 130.794 |
| 2031          | 41135  | 25423.102 | 18478.419 | 6944.683 | 16.883 | 27.316 | 714.264 | 444.684 | 320.858 | 123.826 |
| 2032          | 40728  | 25085.902 | 18058.266 | 7027.636 | 17.255 | 28.014 | 705.603 | 437.933 | 312.858 | 125.075 |
| 2033          | 40299  | 24645.067 | 17601.978 | 7043.089 | 17.477 | 28.578 | 696.280 | 429.194 | 304.121 | 125.073 |
| 2034          | 39836  | 24239.126 | 17168.557 | 7070.570 | 17.749 | 29.170 | 686.184 | 420.967 | 295.732 | 125.235 |
| 2035          | 37894  | 22944.147 | 16131.756 | 6812.391 | 17.977 | 29.691 | 798.197 | 487.980 | 339.797 | 148.183 |
| 2036          | 33393  | 19950.581 | 13868.080 | 6082.500 | 18.215 | 30.488 | 704.197 | 424.953 | 292.455 | 132.497 |
| 2037          | 32816  | 19415.334 | 13348.898 | 6066.436 | 18.486 | 31.246 | 692.352 | 413.871 | 281.635 | 132.235 |
| 2038          | 32241  | 18939.317 | 12928.018 | 6011.299 | 18.645 | 31.740 | 679.965 | 403.701 | 272.657 | 131.044 |
| 2039          | 31679  | 18379.752 | 12421.327 | 5958.425 | 18.809 | 32.418 | 667.249 | 391.373 | 261.625 | 129.748 |

## Results for PHIM for Run 2 (Sensitivity\_Analysis\_1.RTF)

\*\*\*\*\*

### Main Results for E-Component for Run: 2, Simulation: 1, COD: IHD, Adjusted

| Variable Parameter          | Value                                  |
|-----------------------------|----------------------------------------|
| 1. Country                  | US (United States)                     |
| 2. Sex                      | F (Females)                            |
| 3. Year of start of process | 1990                                   |
| 4. Cause of Death           | IHD                                    |
| 5. Effective Dose NULL      | CC:1                                   |
| 6. Effective Dose Ecig      | CC:1 Ecig:0.4 Dual:0.7                 |
| Note:                       | Death rates are per million population |

#### Results for Age Groups Combined and Years combined, Population and Number deaths adjusted for Ecig scenario,

| Age Group:All | NULL    | Ecig       | %Drop      |          |        |        | NULL    | Ecig    | Drop   |        |
|---------------|---------|------------|------------|----------|--------|--------|---------|---------|--------|--------|
| Year          | Number  | Attrib     | Attrib     | Drop     | %Drop  | Attrib | Death   | Attrib  | Attrib | Drop   |
|               | Deaths  | Deaths     | Deaths     | Deaths   | Deaths | Deaths | Rate    | Rates   | Rates  | Rates  |
| All Comb      | 3253198 | 398833.796 | 282649.619 | 116184.2 | 3.571  | 29.131 | 890.769 | 109.498 | 77.393 | 32.105 |

#### Results for Age Groups Combined, Population and Number deaths adjusted for Ecig scenario,

| Age Group:All | NULL   | Ecig      | %Drop     |          |        |        | NULL    | Ecig    | Drop    |        |
|---------------|--------|-----------|-----------|----------|--------|--------|---------|---------|---------|--------|
| Year          | Number | Attrib    | Attrib    | Drop     | %Drop  | Attrib | Death   | Attrib  | Attrib  | Drop   |
|               | Deaths | Deaths    | Deaths    | Deaths   | Deaths | Deaths | Rate    | Rates   | Rates   | Rates  |
| 1990          | 98916  | 12922.892 | 12922.892 | 0.000    | 0.000  | 0.000  | 1448.66 | 189.260 | 189.260 | 0.000  |
| 1991          | 96403  | 12856.479 | 12799.224 | 57.256   | 0.059  | 0.445  | 1393.01 | 185.775 | 184.948 | 0.827  |
| 1992          | 93721  | 12662.244 | 12505.919 | 156.325  | 0.167  | 1.235  | 1335.88 | 180.485 | 178.257 | 2.229  |
| 1993          | 93680  | 12730.613 | 12434.361 | 296.252  | 0.316  | 2.327  | 1316.45 | 178.900 | 174.736 | 4.164  |
| 1994          | 90834  | 12495.323 | 12037.384 | 457.939  | 0.504  | 3.665  | 1257.47 | 172.983 | 166.641 | 6.342  |
| 1995          | 89702  | 12365.590 | 11721.569 | 644.021  | 0.718  | 5.208  | 1222.54 | 168.534 | 159.752 | 8.782  |
| 1996          | 88292  | 12290.551 | 11418.926 | 871.626  | 0.987  | 7.092  | 1187.69 | 165.338 | 153.605 | 11.732 |
| 1997          | 84786  | 11719.531 | 10677.493 | 1042.038 | 1.229  | 8.891  | 1124.71 | 155.473 | 141.640 | 13.834 |
| 1998          | 82530  | 11416.794 | 10175.908 | 1240.887 | 1.504  | 10.869 | 1079.36 | 149.327 | 133.084 | 16.243 |
| 1999          | 93960  | 13028.038 | 11331.718 | 1696.321 | 1.805  | 13.021 | 1212.26 | 168.109 | 146.201 | 21.908 |
| 2000          | 90066  | 12426.299 | 10536.774 | 1889.525 | 2.098  | 15.206 | 1147.54 | 158.354 | 134.251 | 24.103 |
| 2001          | 86152  | 11939.281 | 9821.646  | 2117.636 | 2.458  | 17.737 | 1085.46 | 150.461 | 123.745 | 26.716 |
| 2002          | 83055  | 11528.794 | 9183.124  | 2345.670 | 2.824  | 20.346 | 1036.12 | 143.865 | 114.561 | 29.305 |
| 2003          | 79351  | 11048.407 | 8534.690  | 2513.717 | 3.168  | 22.752 | 980.588 | 136.581 | 105.468 | 31.113 |
| 2004          | 73917  | 10375.132 | 7752.089  | 2623.042 | 3.549  | 25.282 | 904.255 | 126.978 | 94.834  | 32.144 |
| 2005          | 71714  | 10051.029 | 7282.134  | 2768.895 | 3.861  | 27.548 | 867.537 | 121.652 | 88.093  | 33.559 |
| 2006          | 67624  | 9542.523  | 6681.796  | 2860.727 | 4.230  | 29.979 | 810.848 | 114.490 | 80.118  | 34.371 |
| 2007          | 63583  | 8936.533  | 6068.590  | 2867.943 | 4.511  | 32.092 | 754.725 | 106.151 | 72.034  | 34.117 |
| 2008          | 63262  | 8944.180  | 5891.380  | 3052.800 | 4.826  | 34.132 | 742.712 | 105.091 | 69.166  | 35.925 |
| 2009          | 59846  | 8390.033  | 5379.061  | 3010.972 | 5.031  | 35.887 | 694.617 | 97.471  | 62.434  | 35.037 |
| 2010          | 58116  | 8157.570  | 5098.272  | 3059.298 | 5.264  | 37.503 | 666.740 | 93.685  | 58.490  | 35.195 |
| 2011          | 57487  | 8035.356  | 4877.198  | 3158.158 | 5.494  | 39.303 | 653.250 | 91.414  | 55.421  | 35.992 |
| 2012          | 57543  | 7970.766  | 4704.307  | 3266.459 | 5.677  | 40.980 | 647.117 | 89.752  | 52.903  | 36.848 |
| 2013          | 57213  | 7743.216  | 4460.557  | 3282.659 | 5.738  | 42.394 | 636.417 | 86.254  | 49.618  | 36.636 |
| 2014          | 57699  | 7774.935  | 4369.808  | 3405.127 | 5.901  | 43.796 | 634.703 | 85.658  | 48.069  | 37.589 |
| 2015          | 58575  | 7722.535  | 4265.398  | 3457.137 | 5.902  | 44.767 | 720.116 | 95.120  | 52.438  | 42.682 |
| 2016          | 58855  | 7600.353  | 4103.093  | 3497.261 | 5.942  | 46.014 | 716.545 | 92.723  | 49.954  | 42.770 |
| 2017          | 59220  | 7470.266  | 3955.278  | 3514.989 | 5.935  | 47.053 | 714.400 | 90.274  | 47.691  | 42.584 |
| 2018          | 56299  | 6907.050  | 3587.968  | 3319.082 | 5.895  | 48.054 | 672.256 | 82.675  | 42.843  | 39.832 |
| 2019          | 56126  | 6732.046  | 3441.955  | 3290.091 | 5.862  | 48.872 | 663.579 | 79.801  | 40.694  | 39.106 |
| 2020          | 55572  | 6429.836  | 3244.410  | 3185.426 | 5.732  | 49.541 | 744.163 | 86.373  | 43.445  | 42.928 |
| 2021          | 56573  | 6562.016  | 3250.369  | 3311.647 | 5.854  | 50.467 | 751.935 | 87.513  | 43.202  | 44.312 |
| 2022          | 56126  | 6352.366  | 3107.014  | 3245.352 | 5.782  | 51.089 | 740.170 | 84.075  | 40.974  | 43.101 |
| 2023          | 55654  | 6134.123  | 2974.368  | 3159.755 | 5.677  | 51.511 | 728.094 | 80.557  | 38.912  | 41.645 |
| 2024          | 55104  | 5922.193  | 2843.779  | 3078.414 | 5.587  | 51.981 | 715.217 | 77.179  | 36.911  | 40.268 |
| 2025          | 53645  | 5504.188  | 2615.850  | 2888.338 | 5.384  | 52.475 | 802.974 | 82.789  | 39.155  | 43.634 |
| 2026          | 55661  | 5641.075  | 2659.337  | 2981.738 | 5.357  | 52.858 | 829.778 | 84.526  | 39.644  | 44.882 |
| 2027          | 54597  | 5426.216  | 2539.010  | 2887.206 | 5.288  | 53.208 | 810.448 | 80.982  | 37.690  | 43.292 |
| 2028          | 53502  | 5197.830  | 2420.927  | 2776.903 | 5.190  | 53.424 | 790.673 | 77.249  | 35.777  | 41.472 |
| 2029          | 52400  | 4973.547  | 2307.109  | 2666.438 | 5.089  | 53.612 | 770.755 | 73.590  | 33.936  | 39.654 |
| 2030          | 49914  | 4450.618  | 2032.702  | 2417.916 | 4.844  | 54.328 | 868.139 | 77.952  | 35.354  | 42.598 |
| 2031          | 52469  | 4555.052  | 2081.396  | 2473.657 | 4.715  | 54.306 | 911.067 | 79.674  | 36.141  | 43.533 |
| 2032          | 51171  | 4349.999  | 1982.206  | 2367.793 | 4.627  | 54.432 | 886.529 | 75.939  | 34.342  | 41.598 |
| 2033          | 49884  | 4147.948  | 1893.583  | 2254.365 | 4.519  | 54.349 | 861.884 | 72.237  | 32.717  | 39.520 |
| 2034          | 48589  | 3966.133  | 1806.437  | 2159.696 | 4.445  | 54.453 | 836.955 | 68.881  | 31.116  | 37.765 |
| 2035          | 45032  | 3289.064  | 1470.970  | 1818.094 | 4.037  | 55.277 | 948.538 | 69.952  | 30.984  | 38.968 |
| 2036          | 46903  | 3313.192  | 1472.395  | 1840.798 | 3.925  | 55.560 | 989.118 | 70.572  | 31.050  | 39.521 |
| 2037          | 45400  | 3117.951  | 1383.602  | 1734.349 | 3.820  | 55.625 | 957.845 | 66.464  | 29.191  | 37.273 |
| 2038          | 43939  | 2949.775  | 1310.443  | 1639.332 | 3.731  | 55.575 | 926.682 | 62.876  | 27.638  | 35.238 |
| 2039          | 42534  | 2766.312  | 1233.201  | 1533.111 | 3.604  | 55.421 | 895.882 | 58.905  | 25.974  | 32.931 |

## Results for PHIM for Run 2 (Sensitivity\_Analysis\_1.RTF)

\*\*\*\*\*

### Main Results for E-Component for Run: 2, Simulation: 1, COD: STROKE, Adjusted

| Variable Parameter          | Value                                  |
|-----------------------------|----------------------------------------|
| 1. Country                  | US (United States)                     |
| 2. Sex                      | F (Females)                            |
| 3. Year of start of process | 1990                                   |
| 4. Cause of Death           | STROKE                                 |
| 5. Effective Dose NULL      | CC:1                                   |
| 6. Effective Dose Ecig      | CC:1 Ecig:0.4 Dual:0.7                 |
| Note:                       | Death rates are per million population |

#### Results for Age Groups Combined and Years combined, Population and Number deaths adjusted for Ecig scenario,

| Age Group:All | NULL    | Ecig       | %Drop     |          |        |        | NULL    | Ecig   | Drop   |       |
|---------------|---------|------------|-----------|----------|--------|--------|---------|--------|--------|-------|
| Year          | Number  | Attrib     | Attrib    | Drop     | %Drop  | Attrib | Death   | Attrib | Attrib | Drop  |
|               | Deaths  | Deaths     | Deaths    | Deaths   | Deaths | Deaths | Rate    | Rates  | Rates  | Rates |
| All Comb      | 1357470 | 104899.750 | 73094.278 | 31805.47 | 2.343  | 30.320 | 371.693 | 28.800 | 20.014 | 8.786 |

#### Results for Age Groups Combined, Population and Number deaths adjusted for Ecig scenario,

| Age Group:All | NULL   | Ecig     | %Drop    |          |        |        | NULL    | Ecig   | Drop   |        |
|---------------|--------|----------|----------|----------|--------|--------|---------|--------|--------|--------|
| Year          | Number | Attrib   | Attrib   | Drop     | %Drop  | Attrib | Death   | Attrib | Attrib | Drop   |
|               | Deaths | Deaths   | Deaths   | Deaths   | Deaths | Deaths | Rate    | Rates  | Rates  | Rates  |
| 1990          | 33504  | 3293.017 | 3293.017 | 0.000    | 0.000  | 0.000  | 490.678 | 48.227 | 48.227 | 0.000  |
| 1991          | 32505  | 3207.063 | 3189.553 | 17.510   | 0.054  | 0.546  | 469.694 | 46.342 | 46.089 | 0.253  |
| 1992          | 32560  | 3218.125 | 3169.602 | 48.522   | 0.149  | 1.508  | 464.104 | 45.871 | 45.179 | 0.692  |
| 1993          | 32768  | 3226.680 | 3135.259 | 91.421   | 0.279  | 2.833  | 460.481 | 45.344 | 44.059 | 1.285  |
| 1994          | 33006  | 3277.266 | 3132.565 | 144.700  | 0.438  | 4.415  | 456.919 | 45.370 | 43.366 | 2.004  |
| 1995          | 33731  | 3309.378 | 3102.921 | 206.458  | 0.612  | 6.239  | 459.722 | 45.104 | 42.289 | 2.815  |
| 1996          | 33752  | 3312.987 | 3034.379 | 278.608  | 0.825  | 8.410  | 454.030 | 44.568 | 40.818 | 3.750  |
| 1997          | 33703  | 3267.066 | 2919.970 | 347.096  | 1.030  | 10.624 | 447.073 | 43.341 | 38.734 | 4.607  |
| 1998          | 33279  | 3178.725 | 2765.671 | 413.054  | 1.241  | 12.994 | 435.234 | 41.577 | 36.170 | 5.406  |
| 1999          | 33898  | 3120.351 | 2641.354 | 478.997  | 1.413  | 15.351 | 437.351 | 40.264 | 34.079 | 6.185  |
| 2000          | 33837  | 3142.808 | 2584.067 | 558.742  | 1.651  | 17.778 | 431.118 | 40.050 | 32.924 | 7.126  |
| 2001          | 32518  | 2961.588 | 2363.604 | 597.985  | 1.839  | 20.191 | 409.704 | 37.323 | 29.780 | 7.543  |
| 2002          | 32093  | 2940.627 | 2268.655 | 671.972  | 2.094  | 22.851 | 400.368 | 36.695 | 28.302 | 8.394  |
| 2003          | 30586  | 2819.545 | 2107.031 | 712.514  | 2.330  | 25.271 | 377.971 | 34.855 | 26.038 | 8.818  |
| 2004          | 29410  | 2730.466 | 1973.787 | 756.678  | 2.573  | 27.712 | 359.777 | 33.417 | 24.146 | 9.271  |
| 2005          | 27979  | 2670.510 | 1873.138 | 797.372  | 2.850  | 29.858 | 338.460 | 32.322 | 22.660 | 9.663  |
| 2006          | 27230  | 2623.285 | 1783.737 | 839.549  | 3.083  | 32.004 | 326.497 | 31.474 | 21.388 | 10.086 |
| 2007          | 26334  | 2536.599 | 1675.904 | 860.696  | 3.268  | 33.931 | 312.585 | 30.131 | 19.893 | 10.238 |
| 2008          | 26035  | 2469.443 | 1586.082 | 883.362  | 3.393  | 35.772 | 305.653 | 29.015 | 18.621 | 10.394 |
| 2009          | 25080  | 2386.945 | 1493.101 | 893.844  | 3.564  | 37.447 | 291.104 | 27.730 | 17.330 | 10.400 |
| 2010          | 24885  | 2329.274 | 1421.604 | 907.670  | 3.647  | 38.968 | 285.501 | 26.750 | 16.309 | 10.441 |
| 2011          | 24843  | 2286.581 | 1358.717 | 927.864  | 3.735  | 40.579 | 282.300 | 26.013 | 15.440 | 10.574 |
| 2012          | 24556  | 2243.311 | 1298.437 | 944.874  | 3.848  | 42.120 | 276.152 | 25.260 | 14.602 | 10.658 |
| 2013          | 24513  | 2176.503 | 1227.879 | 948.625  | 3.870  | 43.585 | 272.676 | 24.245 | 13.659 | 10.586 |
| 2014          | 25367  | 2211.619 | 1218.421 | 993.198  | 3.915  | 44.908 | 279.042 | 24.366 | 13.403 | 10.963 |
| 2015          | 26398  | 2237.016 | 1211.989 | 1025.026 | 3.883  | 45.821 | 324.529 | 27.554 | 14.900 | 12.654 |
| 2016          | 26825  | 2229.057 | 1185.432 | 1043.625 | 3.890  | 46.819 | 326.590 | 27.194 | 14.432 | 12.762 |
| 2017          | 27718  | 2221.649 | 1161.630 | 1060.019 | 3.824  | 47.713 | 334.208 | 26.848 | 14.006 | 12.841 |
| 2018          | 25358  | 1939.420 | 998.967  | 940.453  | 3.709  | 48.491 | 302.788 | 23.214 | 11.928 | 11.286 |
| 2019          | 25540  | 1904.400 | 965.292  | 939.107  | 3.677  | 49.313 | 301.965 | 22.574 | 11.413 | 11.162 |
| 2020          | 25500  | 1806.054 | 903.347  | 902.707  | 3.540  | 49.982 | 341.472 | 24.261 | 12.097 | 12.165 |
| 2021          | 25580  | 1748.172 | 859.189  | 888.984  | 3.475  | 50.852 | 339.989 | 23.314 | 11.420 | 11.894 |
| 2022          | 25680  | 1701.148 | 825.720  | 875.428  | 3.409  | 51.461 | 338.666 | 22.515 | 10.889 | 11.626 |
| 2023          | 25772  | 1652.087 | 795.756  | 856.330  | 3.323  | 51.833 | 337.161 | 21.696 | 10.410 | 11.286 |
| 2024          | 25821  | 1597.127 | 761.617  | 835.510  | 3.236  | 52.313 | 335.140 | 20.814 | 9.885  | 10.929 |
| 2025          | 25431  | 1467.622 | 692.445  | 775.178  | 3.048  | 52.819 | 380.666 | 22.075 | 10.365 | 11.710 |
| 2026          | 25665  | 1390.505 | 651.352  | 739.153  | 2.880  | 53.157 | 382.603 | 20.835 | 9.710  | 11.125 |
| 2027          | 25458  | 1342.095 | 623.803  | 718.293  | 2.821  | 53.520 | 377.906 | 20.030 | 9.260  | 10.770 |
| 2028          | 25225  | 1289.536 | 596.596  | 692.940  | 2.747  | 53.736 | 372.787 | 19.165 | 8.817  | 10.348 |
| 2029          | 24980  | 1242.216 | 572.031  | 670.185  | 2.683  | 53.951 | 367.430 | 18.380 | 8.414  | 9.966  |
| 2030          | 24180  | 1096.803 | 497.164  | 599.640  | 2.480  | 54.672 | 420.553 | 19.210 | 8.647  | 10.563 |
| 2031          | 24197  | 1019.991 | 462.309  | 557.681  | 2.305  | 54.675 | 420.155 | 17.841 | 8.027  | 9.813  |
| 2032          | 23858  | 977.406  | 441.692  | 535.714  | 2.245  | 54.810 | 413.337 | 17.063 | 7.652  | 9.411  |
| 2033          | 23510  | 937.450  | 424.039  | 513.410  | 2.184  | 54.767 | 406.195 | 16.326 | 7.326  | 8.999  |
| 2034          | 23137  | 900.763  | 406.093  | 494.670  | 2.138  | 54.917 | 398.547 | 15.644 | 6.995  | 8.649  |
| 2035          | 21996  | 745.023  | 331.817  | 413.207  | 1.879  | 55.462 | 463.327 | 15.845 | 6.989  | 8.856  |
| 2036          | 21169  | 680.360  | 299.783  | 380.576  | 1.798  | 55.938 | 446.425 | 14.492 | 6.322  | 8.170  |
| 2037          | 20666  | 644.109  | 283.306  | 360.803  | 1.746  | 56.016 | 436.016 | 13.730 | 5.977  | 7.753  |
| 2038          | 20163  | 612.448  | 269.385  | 343.063  | 1.701  | 56.015 | 425.253 | 13.055 | 5.681  | 7.373  |
| 2039          | 19669  | 577.529  | 255.069  | 322.461  | 1.639  | 55.835 | 414.274 | 12.298 | 5.372  | 6.925  |

## Results for PHIM for Run 2 (Sensitivity\_Analysis\_1.RTF)

\*\*\*\*\*

### Main Results for E-Component for Run: 2, Simulation: 1, COD: COPD, Adjusted

| Variable Parameter          | Value                                  |
|-----------------------------|----------------------------------------|
| 1. Country                  | US (United States)                     |
| 2. Sex                      | F (Females)                            |
| 3. Year of start of process | 1990                                   |
| 4. Cause of Death           | COPD                                   |
| 5. Effective Dose NULL      | CC:1                                   |
| 6. Effective Dose Ecig      | CC:1 Ecig:0.4 Dual:0.7                 |
| Note:                       | Death rates are per million population |

#### Results for Age Groups Combined and Years combined, Population and Number deaths adjusted for Ecig scenario,

| Age Group:All | NULL    | Ecig       | %Drop      |          |        |        | NULL    | Ecig    | Drop    |        |
|---------------|---------|------------|------------|----------|--------|--------|---------|---------|---------|--------|
| Year          | Number  | Attrib     | Attrib     | Drop     | %Drop  | Attrib | Death   | Attrib  | Attrib  | Drop   |
|               | Deaths  | Deaths     | Deaths     | Deaths   | Deaths | Deaths | Rate    | Rates   | Rates   | Rates  |
| All Comb      | 2172014 | 862051.244 | 690801.300 | 171249.9 | 7.884  | 19.865 | 594.726 | 236.673 | 189.151 | 47.522 |

#### Results for Age Groups Combined, Population and Number deaths adjusted for Ecig scenario,

| Age Group:All | NULL   | Ecig      | %Drop     |          |        |        | NULL    | Ecig    | Drop    |         |
|---------------|--------|-----------|-----------|----------|--------|--------|---------|---------|---------|---------|
| Year          | Number | Attrib    | Attrib    | Drop     | %Drop  | Attrib | Death   | Attrib  | Attrib  | Drop    |
|               | Deaths | Deaths    | Deaths    | Deaths   | Deaths | Deaths | Rate    | Rates   | Rates   | Rates   |
| 1990          | 24738  | 10694.712 | 10694.712 | 0.000    | 0.000  | 0.000  | 362.296 | 156.628 | 156.628 | 0.000   |
| 1991          | 26562  | 11602.933 | 11590.960 | 11.972   | 0.045  | 0.103  | 383.818 | 167.661 | 167.488 | 0.173   |
| 1992          | 26828  | 11831.375 | 11799.396 | 31.979   | 0.119  | 0.270  | 382.401 | 168.642 | 168.186 | 0.456   |
| 1993          | 29774  | 13246.371 | 13177.564 | 68.807   | 0.231  | 0.519  | 418.407 | 186.148 | 185.180 | 0.968   |
| 1994          | 29805  | 13355.662 | 13247.364 | 108.298  | 0.363  | 0.811  | 412.605 | 184.893 | 183.392 | 1.502   |
| 1995          | 29756  | 13397.439 | 13236.082 | 161.357  | 0.542  | 1.204  | 405.546 | 182.598 | 180.394 | 2.204   |
| 1996          | 30902  | 13960.356 | 13736.810 | 223.545  | 0.723  | 1.601  | 415.691 | 187.801 | 184.785 | 3.015   |
| 1997          | 31131  | 14109.552 | 13821.087 | 288.466  | 0.927  | 2.044  | 412.967 | 187.180 | 183.340 | 3.839   |
| 1998          | 32101  | 14599.657 | 14223.608 | 376.049  | 1.171  | 2.576  | 419.830 | 190.958 | 186.021 | 4.937   |
| 1999          | 34624  | 15728.102 | 15246.358 | 481.745  | 1.391  | 3.063  | 446.713 | 202.950 | 196.707 | 6.243   |
| 2000          | 34309  | 15579.803 | 15003.031 | 576.772  | 1.681  | 3.702  | 437.143 | 198.541 | 191.156 | 7.385   |
| 2001          | 34606  | 15696.614 | 15002.613 | 694.001  | 2.005  | 4.421  | 436.008 | 197.812 | 189.022 | 8.790   |
| 2002          | 34309  | 15519.777 | 14713.696 | 806.081  | 2.350  | 5.194  | 428.004 | 193.668 | 183.555 | 10.113  |
| 2003          | 35097  | 15888.389 | 14935.939 | 952.450  | 2.714  | 5.995  | 433.708 | 196.413 | 184.572 | 11.841  |
| 2004          | 33539  | 15091.573 | 14062.332 | 1029.241 | 3.069  | 6.820  | 410.288 | 184.701 | 172.029 | 12.672  |
| 2005          | 35426  | 15803.656 | 14578.543 | 1225.113 | 3.458  | 7.752  | 428.547 | 191.278 | 176.358 | 14.920  |
| 2006          | 34019  | 15100.563 | 13803.684 | 1296.879 | 3.812  | 8.588  | 407.909 | 181.174 | 165.514 | 15.661  |
| 2007          | 34045  | 14974.384 | 13544.618 | 1429.766 | 4.200  | 9.548  | 404.108 | 177.871 | 160.774 | 17.097  |
| 2008          | 37482  | 16406.197 | 14707.038 | 1699.160 | 4.533  | 10.357 | 440.044 | 192.768 | 172.664 | 20.104  |
| 2009          | 36890  | 16083.194 | 14242.616 | 1840.578 | 4.989  | 11.444 | 428.170 | 186.846 | 165.311 | 21.534  |
| 2010          | 36860  | 15927.400 | 13970.451 | 1956.950 | 5.309  | 12.287 | 422.877 | 182.917 | 160.277 | 22.640  |
| 2011          | 37718  | 16221.836 | 14060.033 | 2161.803 | 5.731  | 13.327 | 428.604 | 184.547 | 159.769 | 24.777  |
| 2012          | 38358  | 16358.849 | 14024.384 | 2334.465 | 6.086  | 14.270 | 431.363 | 184.202 | 157.715 | 26.487  |
| 2013          | 40220  | 16994.822 | 14382.556 | 2612.266 | 6.495  | 15.371 | 447.391 | 189.311 | 159.987 | 29.324  |
| 2014          | 40202  | 16855.093 | 14080.440 | 2774.654 | 6.902  | 16.462 | 442.233 | 185.696 | 154.887 | 30.808  |
| 2015          | 42337  | 17572.483 | 14541.891 | 3030.592 | 7.158  | 17.246 | 520.490 | 216.445 | 178.777 | 37.668  |
| 2016          | 42757  | 17579.955 | 14341.009 | 3238.946 | 7.575  | 18.424 | 520.548 | 214.473 | 174.597 | 39.876  |
| 2017          | 44535  | 18080.688 | 14535.534 | 3545.154 | 7.960  | 19.607 | 536.974 | 218.496 | 175.261 | 43.235  |
| 2018          | 45550  | 18209.262 | 14424.909 | 3784.353 | 8.300  | 20.783 | 543.898 | 217.960 | 172.244 | 45.715  |
| 2019          | 47089  | 18648.302 | 14548.761 | 4099.541 | 8.706  | 21.983 | 556.738 | 221.054 | 172.010 | 49.044  |
| 2020          | 48570  | 19002.597 | 14674.018 | 4328.579 | 8.912  | 22.779 | 650.392 | 255.266 | 196.498 | 58.768  |
| 2021          | 48595  | 18885.717 | 14346.465 | 4539.252 | 9.341  | 24.035 | 645.896 | 251.867 | 190.684 | 61.183  |
| 2022          | 49990  | 19235.076 | 14421.004 | 4814.072 | 9.630  | 25.028 | 659.258 | 254.582 | 190.180 | 64.401  |
| 2023          | 51393  | 19521.158 | 14448.494 | 5072.664 | 9.870  | 25.985 | 672.347 | 256.363 | 189.021 | 67.341  |
| 2024          | 52737  | 19918.620 | 14532.660 | 5385.960 | 10.213 | 27.040 | 684.495 | 259.583 | 188.627 | 70.957  |
| 2025          | 53756  | 20150.545 | 14522.392 | 5628.153 | 10.470 | 27.931 | 804.641 | 303.086 | 217.376 | 85.710  |
| 2026          | 54633  | 20393.792 | 14467.480 | 5926.312 | 10.848 | 29.059 | 814.447 | 305.582 | 215.676 | 89.906  |
| 2027          | 55480  | 20615.351 | 14393.855 | 6221.497 | 11.214 | 30.179 | 823.561 | 307.668 | 213.666 | 94.003  |
| 2028          | 56271  | 20731.894 | 14269.777 | 6462.117 | 11.484 | 31.170 | 831.583 | 308.115 | 210.883 | 97.232  |
| 2029          | 57021  | 20781.967 | 14093.890 | 6688.077 | 11.729 | 32.182 | 838.735 | 307.495 | 207.309 | 100.186 |
| 2030          | 57282  | 20753.201 | 13873.178 | 6880.023 | 12.011 | 33.152 | 996.279 | 363.487 | 241.290 | 122.197 |
| 2031          | 58867  | 21048.417 | 13972.234 | 7076.183 | 12.021 | 33.619 | 1022.15 | 368.165 | 242.613 | 125.552 |
| 2032          | 59396  | 21169.329 | 13858.735 | 7310.594 | 12.308 | 34.534 | 1029.03 | 369.560 | 240.101 | 129.459 |
| 2033          | 59885  | 21109.293 | 13671.895 | 7437.399 | 12.420 | 35.233 | 1034.67 | 367.618 | 236.219 | 131.400 |
| 2034          | 60298  | 21109.429 | 13512.592 | 7596.836 | 12.599 | 35.988 | 1038.65 | 366.613 | 232.757 | 133.856 |
| 2035          | 59654  | 20794.840 | 13159.396 | 7635.444 | 12.800 | 36.718 | 1256.54 | 442.268 | 277.187 | 165.081 |
| 2036          | 56730  | 19354.577 | 12083.945 | 7270.632 | 12.816 | 37.565 | 1196.35 | 412.258 | 254.831 | 157.427 |
| 2037          | 56698  | 19064.169 | 11715.223 | 7348.946 | 12.962 | 38.548 | 1196.21 | 406.385 | 247.168 | 159.217 |
| 2038          | 56632  | 18854.812 | 11450.111 | 7404.701 | 13.075 | 39.272 | 1194.40 | 401.900 | 241.487 | 160.412 |
| 2039          | 56559  | 18437.457 | 11055.938 | 7381.519 | 13.051 | 40.035 | 1191.27 | 392.602 | 232.866 | 159.736 |

## Results for PHIM for Run 3 (Sensitivity\_Analysis\_1.RTF)

---

### Control File Details for Run: 3

| Variable Parameter                                       | Value                  |
|----------------------------------------------------------|------------------------|
| 1. Name for Reference Scenario                           | NULL                   |
| 2. Name for Test Scenario                                | Ecig                   |
| 3. Name for Product 1                                    | CC                     |
| 4. Name for Product 2                                    | Ecig                   |
| 5. Name for Product 3                                    | -                      |
| 6. Name for Product 4                                    | Dual                   |
| 7. Country                                               | US (United States)     |
| 8. Sex                                                   | M (Males)              |
| 9. Year of start of process                              | 1990                   |
| 10. Number of months of follow-up                        | 600                    |
| 11. Follow-up interval length (in months)                | 12                     |
| 12. Lower age for risk estimation                        | 10                     |
| 13. Upper age for risk estimation                        | 79                     |
| 14. The effective dose for Product 1 (F1) - Ref          | 1                      |
| 15. The effective dose for Product 2 (F2) - Ref          | -                      |
| 16. The effective dose for Product 3 (F3) - Ref          | -                      |
| 17. The effective dose for Product 4 (F4) - Ref          | -                      |
| 18. The effective dose for Product 1 (F1) - Test         | 1                      |
| 19. The effective dose for Product 2 (F2) - Test         | 0                      |
| 20. The effective dose for Product 3 (F3) - Test         | -                      |
| 21. The effective dose for Product 4 (F4) - Test         | FROMF2                 |
| 22. Number in population to be simulated                 | 100000                 |
| 23. Number of MC simulations                             | 1                      |
| 24. The random number seed for the first simulation      | 15975263               |
| 25. Source for the population file (POP)                 | UN4                    |
| 26. Source for the socioeconomic prevalence file (SEP)   | -                      |
| 27. Source for the current smoking prevalence file (CSP) | ISS3                   |
| 28. Source for the former smoking prevalence file (FSP)  | ISS3                   |
| 29. Source for the quit-time distribution file (QTD)     | NHIS2006               |
| 30. Source for the death file (MORT)                     | APR-20                 |
| 31. Source for the relative risk file (RR)               | PNLEST                 |
| 32. Source for the half-life file (H)                    | PNLEST                 |
| 33. Assumption Set for TTP Factor Reference              | F1                     |
| 34. Assumption Set for TTP Factor Test                   | F1                     |
| 35. Assumption Set for TTP Reference                     | ISS3                   |
| 36. Assumption Set for TTP Test                          | ISS3                   |
| 37. Assumption Set for TP for socioeconomic group        | -                      |
| 38. Source for Output Choice file (OUTC)                 | BASIC                  |
| 39. Output for DTP P1                                    | N                      |
| 40. Output for DTP P2                                    | N                      |
| 41. Output for Main P Component                          | Y                      |
| 42. Output for DTP E1                                    | N                      |
| 43. Output for DTP E2                                    | N                      |
| 44. Output for DTP E3                                    | N                      |
| 45. Output for Main E Component                          | Y                      |
| 46. Output file name                                     | Sensitivity_Analysis_1 |
| 47. Run number for P-Component                           | -                      |
| 48. Results file for E-Component                         | -                      |
| 49. Components required                                  | PE                     |
| 50. Results folder for P to be used in E-Component       | -                      |
| 51. Fixed age of starting product use                    | 16                     |
| 52. Output absolute risk file?                           | N                      |

## Results for PHIM for Run 3 (Sensitivity\_Analysis\_1.RTF)

\*\*\*\*\*

TTP values for Run: 3, Scenario: NULL

| Variable Parameter | Value               |
|--------------------|---------------------|
| 1. Country         | US (United States)  |
| 2. Sex             | M (Males)           |
| 3. Assumption Set  | ISS3                |
| Note:              | Period is in Months |

| Age   | Period  | Initiation  | Cessation    | Re-initiation |
|-------|---------|-------------|--------------|---------------|
|       |         | Never<br>CC | CC<br>Former | Former<br>CC  |
| 10-14 | 1-12    | 0.003842    | 0.008742     | 0.000000      |
| 15-19 | 1-12    | 0.004720    | 0.003614     | 0.000000      |
| 20-24 | 1-12    | 0.000376    | 0.000943     | 0.000000      |
| 25-29 | 1-12    | 0.000187    | 0.001143     | 0.000000      |
| 30-34 | 1-12    | 0.000093    | 0.000871     | 0.000000      |
| 35-39 | 1-12    | 0.000000    | 0.000867     | 0.000000      |
| 40-44 | 1-12    | 0.000000    | 0.001399     | 0.000000      |
| 45-49 | 1-12    | 0.000000    | 0.002033     | 0.000000      |
| 50-54 | 1-12    | 0.000000    | 0.003209     | 0.000000      |
| 55-59 | 1-12    | 0.000000    | 0.003574     | 0.000000      |
| 60-64 | 1-12    | 0.000000    | 0.003460     | 0.000000      |
| 65-69 | 1-12    | 0.000000    | 0.004136     | 0.000000      |
| 70-74 | 1-12    | 0.000000    | 0.005592     | 0.000000      |
| 75-79 | 1-12    | 0.000000    | 0.005592     | 0.000000      |
| 10-14 | 13-72   | 0.004906    | 0.008742     | 0.000000      |
| 15-19 | 13-72   | 0.006989    | 0.004426     | 0.000000      |
| 20-24 | 13-72   | 0.000687    | 0.001527     | 0.000000      |
| 25-29 | 13-72   | 0.000962    | 0.001515     | 0.000000      |
| 30-34 | 13-72   | 0.000364    | 0.001227     | 0.000000      |
| 35-39 | 13-72   | 0.000000    | 0.001630     | 0.000000      |
| 40-44 | 13-72   | 0.000000    | 0.001852     | 0.000000      |
| 45-49 | 13-72   | 0.000000    | 0.002667     | 0.000000      |
| 50-54 | 13-72   | 0.000000    | 0.003208     | 0.000000      |
| 55-59 | 13-72   | 0.000000    | 0.003978     | 0.000000      |
| 60-64 | 13-72   | 0.000000    | 0.005771     | 0.000000      |
| 65-69 | 13-72   | 0.000000    | 0.010432     | 0.000000      |
| 70-74 | 13-72   | 0.000000    | 0.007079     | 0.000000      |
| 75-79 | 13-72   | 0.000000    | 0.007079     | 0.000000      |
| 10-14 | 73-132  | 0.004312    | 0.008742     | 0.000000      |
| 15-19 | 73-132  | 0.005330    | 0.003289     | 0.000000      |
| 20-24 | 73-132  | 0.002456    | 0.003844     | 0.000000      |
| 25-29 | 73-132  | 0.000839    | 0.002006     | 0.000000      |
| 30-34 | 73-132  | 0.000414    | 0.001329     | 0.000000      |
| 35-39 | 73-132  | 0.000000    | 0.001278     | 0.000000      |
| 40-44 | 73-132  | 0.000000    | 0.001691     | 0.000000      |
| 45-49 | 73-132  | 0.000000    | 0.002904     | 0.000000      |
| 50-54 | 73-132  | 0.000000    | 0.003319     | 0.000000      |
| 55-59 | 73-132  | 0.000000    | 0.003976     | 0.000000      |
| 60-64 | 73-132  | 0.000000    | 0.005235     | 0.000000      |
| 65-69 | 73-132  | 0.000000    | 0.005901     | 0.000000      |
| 70-74 | 73-132  | 0.000000    | 0.005615     | 0.000000      |
| 75-79 | 73-132  | 0.000000    | 0.005615     | 0.000000      |
| 10-14 | 133-192 | 0.003468    | 0.008742     | 0.000000      |
| 15-19 | 133-192 | 0.004675    | 0.003732     | 0.000000      |
| 20-24 | 133-192 | 0.000062    | 0.002260     | 0.000000      |
| 25-29 | 133-192 | 0.001422    | 0.002822     | 0.000000      |
| 30-34 | 133-192 | 0.000696    | 0.002610     | 0.000000      |
| 35-39 | 133-192 | 0.000000    | 0.002058     | 0.000000      |
| 40-44 | 133-192 | 0.000000    | 0.002310     | 0.000000      |
| 45-49 | 133-192 | 0.000000    | 0.002256     | 0.000000      |
| 50-54 | 133-192 | 0.000000    | 0.002663     | 0.000000      |
| 55-59 | 133-192 | 0.000000    | 0.001746     | 0.000000      |
| 60-64 | 133-192 | 0.000000    | 0.005809     | 0.000000      |
| 65-69 | 133-192 | 0.000000    | 0.005896     | 0.000000      |
| 70-74 | 133-192 | 0.000000    | 0.007323     | 0.000000      |
| 75-79 | 133-192 | 0.000000    | 0.007323     | 0.000000      |
| 10-14 | 193-252 | 0.002314    | 0.008742     | 0.000000      |
| 15-19 | 193-252 | 0.003987    | 0.005036     | 0.000000      |
| 20-24 | 193-252 | 0.000320    | 0.002857     | 0.000000      |
| 25-29 | 193-252 | 0.000251    | 0.002314     | 0.000000      |
| 30-34 | 193-252 | 0.000125    | 0.004343     | 0.000000      |
| 35-39 | 193-252 | 0.000000    | 0.002092     | 0.000000      |
| 40-44 | 193-252 | 0.000000    | 0.002566     | 0.000000      |
| 45-49 | 193-252 | 0.000000    | 0.002311     | 0.000000      |
| 50-54 | 193-252 | 0.000000    | 0.003209     | 0.000000      |



### Results for PHIM for Run 3 (Sensitivity\_Analysis\_1.RTF)

|       |         |          |          |          |
|-------|---------|----------|----------|----------|
| 55-59 | 193-252 | 0.000000 | 0.004057 | 0.000000 |
| 60-64 | 193-252 | 0.000000 | 0.007166 | 0.000000 |
| 65-69 | 193-252 | 0.000000 | 0.004281 | 0.000000 |
| 70-74 | 193-252 | 0.000000 | 0.004580 | 0.000000 |
| 75-79 | 193-252 | 0.000000 | 0.004580 | 0.000000 |
| 10-14 | 253+    | 0.001325 | 0.008742 | 0.000000 |
| 15-19 | 253+    | 0.002984 | 0.010602 | 0.000000 |
| 20-24 | 253+    | 0.000452 | 0.004314 | 0.000000 |
| 25-29 | 253+    | 0.000225 | 0.003645 | 0.000000 |
| 30-34 | 253+    | 0.000112 | 0.004512 | 0.000000 |
| 35-39 | 253+    | 0.000000 | 0.002147 | 0.000000 |
| 40-44 | 253+    | 0.000000 | 0.002636 | 0.000000 |
| 45-49 | 253+    | 0.000000 | 0.001051 | 0.000000 |
| 50-54 | 253+    | 0.000000 | 0.002519 | 0.000000 |
| 55-59 | 253+    | 0.000000 | 0.003693 | 0.000000 |
| 60-64 | 253+    | 0.000000 | 0.005888 | 0.000000 |
| 65-69 | 253+    | 0.000000 | 0.004823 | 0.000000 |
| 70-74 | 253+    | 0.000000 | 0.004733 | 0.000000 |
| 75-79 | 253+    | 0.000000 | 0.004733 | 0.000000 |

## Results for PHIM for Run 3 (Sensitivity\_Analysis\_1.RTF)

\*\*\*\*\*

TTP values for Run: 3, Scenario: Ecig

| Variable Parameter | Value               |
|--------------------|---------------------|
| 1. Country         | US (United States)  |
| 2. Sex             | M (Males)           |
| 3. Assumption Set  | ISS3                |
| Note:              | Period is in Months |

| Age   | Period  | Initiation  |               | Cessation     |              |                | Re-initiation  |              |                |                |
|-------|---------|-------------|---------------|---------------|--------------|----------------|----------------|--------------|----------------|----------------|
|       |         | Never<br>CC | Never<br>Ecig | Never<br>Dual | CC<br>Former | Ecig<br>Former | Dual<br>Former | Former<br>CC | Former<br>Ecig | Former<br>Dual |
| 10-14 | 1-12    | 0.001921    | 0.001921      | 0.000000      | 0.008742     | 0.008742       | 0.000000       | 0.000000     | 0.000000       | 0.000000       |
| 15-19 | 1-12    | 0.002360    | 0.002360      | 0.000000      | 0.003614     | 0.003614       | 0.000000       | 0.000000     | 0.000000       | 0.000000       |
| 20-24 | 1-12    | 0.000188    | 0.000188      | 0.000000      | 0.000943     | 0.000943       | 0.000000       | 0.000000     | 0.000000       | 0.000000       |
| 25-29 | 1-12    | 0.000093    | 0.000093      | 0.000000      | 0.001143     | 0.001143       | 0.000000       | 0.000000     | 0.000000       | 0.000000       |
| 30-34 | 1-12    | 0.000047    | 0.000047      | 0.000000      | 0.000871     | 0.000871       | 0.000000       | 0.000000     | 0.000000       | 0.000000       |
| 35-39 | 1-12    | 0.000000    | 0.000000      | 0.000000      | 0.000867     | 0.000867       | 0.000000       | 0.000000     | 0.000000       | 0.000000       |
| 40-44 | 1-12    | 0.000000    | 0.000000      | 0.000000      | 0.001399     | 0.001399       | 0.000000       | 0.000000     | 0.000000       | 0.000000       |
| 45-49 | 1-12    | 0.000000    | 0.000000      | 0.000000      | 0.002033     | 0.002033       | 0.000000       | 0.000000     | 0.000000       | 0.000000       |
| 50-54 | 1-12    | 0.000000    | 0.000000      | 0.000000      | 0.003209     | 0.003209       | 0.000000       | 0.000000     | 0.000000       | 0.000000       |
| 55-59 | 1-12    | 0.000000    | 0.000000      | 0.000000      | 0.003574     | 0.003574       | 0.000000       | 0.000000     | 0.000000       | 0.000000       |
| 60-64 | 1-12    | 0.000000    | 0.000000      | 0.000000      | 0.003460     | 0.003460       | 0.000000       | 0.000000     | 0.000000       | 0.000000       |
| 65-69 | 1-12    | 0.000000    | 0.000000      | 0.000000      | 0.004136     | 0.004136       | 0.000000       | 0.000000     | 0.000000       | 0.000000       |
| 70-74 | 1-12    | 0.000000    | 0.000000      | 0.000000      | 0.005592     | 0.005592       | 0.000000       | 0.000000     | 0.000000       | 0.000000       |
| 75-79 | 1-12    | 0.000000    | 0.000000      | 0.000000      | 0.005592     | 0.005592       | 0.000000       | 0.000000     | 0.000000       | 0.000000       |
| 10-14 | 13-72   | 0.001962    | 0.002944      | 0.000000      | 0.008742     | 0.008742       | 0.000000       | 0.000000     | 0.000000       | 0.000000       |
| 15-19 | 13-72   | 0.002796    | 0.004193      | 0.000000      | 0.004426     | 0.004426       | 0.000000       | 0.000000     | 0.000000       | 0.000000       |
| 20-24 | 13-72   | 0.000275    | 0.000412      | 0.000000      | 0.001527     | 0.001527       | 0.000000       | 0.000000     | 0.000000       | 0.000000       |
| 25-29 | 13-72   | 0.000385    | 0.000578      | 0.000000      | 0.001515     | 0.001515       | 0.000000       | 0.000000     | 0.000000       | 0.000000       |
| 30-34 | 13-72   | 0.000146    | 0.000218      | 0.000000      | 0.001227     | 0.001227       | 0.000000       | 0.000000     | 0.000000       | 0.000000       |
| 35-39 | 13-72   | 0.000000    | 0.000000      | 0.000000      | 0.001630     | 0.001630       | 0.000000       | 0.000000     | 0.000000       | 0.000000       |
| 40-44 | 13-72   | 0.000000    | 0.000000      | 0.000000      | 0.001852     | 0.001852       | 0.000000       | 0.000000     | 0.000000       | 0.000000       |
| 45-49 | 13-72   | 0.000000    | 0.000000      | 0.000000      | 0.002667     | 0.002667       | 0.000000       | 0.000000     | 0.000000       | 0.000000       |
| 50-54 | 13-72   | 0.000000    | 0.000000      | 0.000000      | 0.003208     | 0.003208       | 0.000000       | 0.000000     | 0.000000       | 0.000000       |
| 55-59 | 13-72   | 0.000000    | 0.000000      | 0.000000      | 0.003978     | 0.003978       | 0.000000       | 0.000000     | 0.000000       | 0.000000       |
| 60-64 | 13-72   | 0.000000    | 0.000000      | 0.000000      | 0.005771     | 0.005771       | 0.000000       | 0.000000     | 0.000000       | 0.000000       |
| 65-69 | 13-72   | 0.000000    | 0.000000      | 0.000000      | 0.010432     | 0.010432       | 0.000000       | 0.000000     | 0.000000       | 0.000000       |
| 70-74 | 13-72   | 0.000000    | 0.000000      | 0.000000      | 0.007079     | 0.007079       | 0.000000       | 0.000000     | 0.000000       | 0.000000       |
| 75-79 | 13-72   | 0.000000    | 0.000000      | 0.000000      | 0.007079     | 0.007079       | 0.000000       | 0.000000     | 0.000000       | 0.000000       |
| 10-14 | 73-132  | 0.000862    | 0.003449      | 0.000000      | 0.008742     | 0.008742       | 0.000000       | 0.000000     | 0.000000       | 0.000000       |
| 15-19 | 73-132  | 0.001066    | 0.004264      | 0.000000      | 0.003289     | 0.003289       | 0.000000       | 0.000000     | 0.000000       | 0.000000       |
| 20-24 | 73-132  | 0.000491    | 0.001965      | 0.000000      | 0.003844     | 0.003844       | 0.000000       | 0.000000     | 0.000000       | 0.000000       |
| 25-29 | 73-132  | 0.000168    | 0.000671      | 0.000000      | 0.002006     | 0.002006       | 0.000000       | 0.000000     | 0.000000       | 0.000000       |
| 30-34 | 73-132  | 0.000083    | 0.000332      | 0.000000      | 0.001329     | 0.001329       | 0.000000       | 0.000000     | 0.000000       | 0.000000       |
| 35-39 | 73-132  | 0.000000    | 0.000000      | 0.000000      | 0.001278     | 0.001278       | 0.000000       | 0.000000     | 0.000000       | 0.000000       |
| 40-44 | 73-132  | 0.000000    | 0.000000      | 0.000000      | 0.001691     | 0.001691       | 0.000000       | 0.000000     | 0.000000       | 0.000000       |
| 45-49 | 73-132  | 0.000000    | 0.000000      | 0.000000      | 0.002904     | 0.002904       | 0.000000       | 0.000000     | 0.000000       | 0.000000       |
| 50-54 | 73-132  | 0.000000    | 0.000000      | 0.000000      | 0.003319     | 0.003319       | 0.000000       | 0.000000     | 0.000000       | 0.000000       |
| 55-59 | 73-132  | 0.000000    | 0.000000      | 0.000000      | 0.003976     | 0.003976       | 0.000000       | 0.000000     | 0.000000       | 0.000000       |
| 60-64 | 73-132  | 0.000000    | 0.000000      | 0.000000      | 0.005235     | 0.005235       | 0.000000       | 0.000000     | 0.000000       | 0.000000       |
| 65-69 | 73-132  | 0.000000    | 0.000000      | 0.000000      | 0.005901     | 0.005901       | 0.000000       | 0.000000     | 0.000000       | 0.000000       |
| 70-74 | 73-132  | 0.000000    | 0.000000      | 0.000000      | 0.005615     | 0.005615       | 0.000000       | 0.000000     | 0.000000       | 0.000000       |
| 75-79 | 73-132  | 0.000000    | 0.000000      | 0.000000      | 0.005615     | 0.005615       | 0.000000       | 0.000000     | 0.000000       | 0.000000       |
| 10-14 | 133-192 | 0.000173    | 0.003294      | 0.000000      | 0.008742     | 0.008742       | 0.000000       | 0.000000     | 0.000000       | 0.000000       |
| 15-19 | 133-192 | 0.000234    | 0.004442      | 0.000000      | 0.003732     | 0.003732       | 0.000000       | 0.000000     | 0.000000       | 0.000000       |
| 20-24 | 133-192 | 0.000003    | 0.000059      | 0.000000      | 0.002260     | 0.002260       | 0.000000       | 0.000000     | 0.000000       | 0.000000       |
| 25-29 | 133-192 | 0.000071    | 0.001351      | 0.000000      | 0.002822     | 0.002822       | 0.000000       | 0.000000     | 0.000000       | 0.000000       |
| 30-34 | 133-192 | 0.000035    | 0.000661      | 0.000000      | 0.002610     | 0.002610       | 0.000000       | 0.000000     | 0.000000       | 0.000000       |
| 35-39 | 133-192 | 0.000000    | 0.000000      | 0.000000      | 0.002058     | 0.002058       | 0.000000       | 0.000000     | 0.000000       | 0.000000       |
| 40-44 | 133-192 | 0.000000    | 0.000000      | 0.000000      | 0.002310     | 0.002310       | 0.000000       | 0.000000     | 0.000000       | 0.000000       |
| 45-49 | 133-192 | 0.000000    | 0.000000      | 0.000000      | 0.002256     | 0.002256       | 0.000000       | 0.000000     | 0.000000       | 0.000000       |
| 50-54 | 133-192 | 0.000000    | 0.000000      | 0.000000      | 0.002663     | 0.002663       | 0.000000       | 0.000000     | 0.000000       | 0.000000       |
| 55-59 | 133-192 | 0.000000    | 0.000000      | 0.000000      | 0.001747     | 0.001747       | 0.000000       | 0.000000     | 0.000000       | 0.000000       |
| 60-64 | 133-192 | 0.000000    | 0.000000      | 0.000000      | 0.005809     | 0.005809       | 0.000000       | 0.000000     | 0.000000       | 0.000000       |
| 65-69 | 133-192 | 0.000000    | 0.000000      | 0.000000      | 0.005896     | 0.005896       | 0.000000       | 0.000000     | 0.000000       | 0.000000       |
| 70-74 | 133-192 | 0.000000    | 0.000000      | 0.000000      | 0.007323     | 0.007323       | 0.000000       | 0.000000     | 0.000000       | 0.000000       |
| 75-79 | 133-192 | 0.000000    | 0.000000      | 0.000000      | 0.007323     | 0.007323       | 0.000000       | 0.000000     | 0.000000       | 0.000000       |
| 10-14 | 193-252 | 0.000116    | 0.002198      | 0.000000      | 0.008742     | 0.008742       | 0.000000       | 0.000000     | 0.000000       | 0.000000       |
| 15-19 | 193-252 | 0.000199    | 0.003788      | 0.000000      | 0.005036     | 0.005036       | 0.000000       | 0.000000     | 0.000000       | 0.000000       |
| 20-24 | 193-252 | 0.000016    | 0.000304      | 0.000000      | 0.002857     | 0.002857       | 0.000000       | 0.000000     | 0.000000       | 0.000000       |
| 25-29 | 193-252 | 0.000013    | 0.000239      | 0.000000      | 0.002314     | 0.002314       | 0.000000       | 0.000000     | 0.000000       | 0.000000       |
| 30-34 | 193-252 | 0.000006    | 0.000119      | 0.000000      | 0.004343     | 0.004343       | 0.000000       | 0.000000     | 0.000000       | 0.000000       |
| 35-39 | 193-252 | 0.000000    | 0.000000      | 0.000000      | 0.002092     | 0.002092       | 0.000000       | 0.000000     | 0.000000       | 0.000000       |
| 40-44 | 193-252 | 0.000000    | 0.000000      | 0.000000      | 0.002566     | 0.002566       | 0.000000       | 0.000000     | 0.000000       | 0.000000       |
| 45-49 | 193-252 | 0.000000    | 0.000000      | 0.000000      | 0.002311     | 0.002311       | 0.000000       | 0.000000     | 0.000000       | 0.000000       |
| 50-54 | 193-252 | 0.000000    | 0.000000      | 0.000000      | 0.003209     | 0.003209       | 0.000000       | 0.000000     | 0.000000       | 0.000000       |

### Results for PHIM for Run 3 (Sensitivity\_Analysis\_1.RTF)

|       |         |          |          |          |          |          |          |          |          |          |
|-------|---------|----------|----------|----------|----------|----------|----------|----------|----------|----------|
| 55-59 | 193-252 | 0.000000 | 0.000000 | 0.000000 | 0.004057 | 0.004057 | 0.000000 | 0.000000 | 0.000000 | 0.000000 |
| 60-64 | 193-252 | 0.000000 | 0.000000 | 0.000000 | 0.007166 | 0.007166 | 0.000000 | 0.000000 | 0.000000 | 0.000000 |
| 65-69 | 193-252 | 0.000000 | 0.000000 | 0.000000 | 0.004281 | 0.004281 | 0.000000 | 0.000000 | 0.000000 | 0.000000 |
| 70-74 | 193-252 | 0.000000 | 0.000000 | 0.000000 | 0.004580 | 0.004580 | 0.000000 | 0.000000 | 0.000000 | 0.000000 |
| 75-79 | 193-252 | 0.000000 | 0.000000 | 0.000000 | 0.004580 | 0.004580 | 0.000000 | 0.000000 | 0.000000 | 0.000000 |
| 10-14 | 253+    | 0.000066 | 0.001259 | 0.000000 | 0.008742 | 0.008742 | 0.000000 | 0.000000 | 0.000000 | 0.000000 |
| 15-19 | 253+    | 0.000149 | 0.002835 | 0.000000 | 0.010602 | 0.010602 | 0.000000 | 0.000000 | 0.000000 | 0.000000 |
| 20-24 | 253+    | 0.000023 | 0.000430 | 0.000000 | 0.004314 | 0.004314 | 0.000000 | 0.000000 | 0.000000 | 0.000000 |
| 25-29 | 253+    | 0.000011 | 0.000213 | 0.000000 | 0.003645 | 0.003645 | 0.000000 | 0.000000 | 0.000000 | 0.000000 |
| 30-34 | 253+    | 0.000006 | 0.000106 | 0.000000 | 0.004512 | 0.004512 | 0.000000 | 0.000000 | 0.000000 | 0.000000 |
| 35-39 | 253+    | 0.000000 | 0.000000 | 0.000000 | 0.002147 | 0.002147 | 0.000000 | 0.000000 | 0.000000 | 0.000000 |
| 40-44 | 253+    | 0.000000 | 0.000000 | 0.000000 | 0.002636 | 0.002636 | 0.000000 | 0.000000 | 0.000000 | 0.000000 |
| 45-49 | 253+    | 0.000000 | 0.000000 | 0.000000 | 0.001051 | 0.001051 | 0.000000 | 0.000000 | 0.000000 | 0.000000 |
| 50-54 | 253+    | 0.000000 | 0.000000 | 0.000000 | 0.002519 | 0.002519 | 0.000000 | 0.000000 | 0.000000 | 0.000000 |
| 55-59 | 253+    | 0.000000 | 0.000000 | 0.000000 | 0.003693 | 0.003693 | 0.000000 | 0.000000 | 0.000000 | 0.000000 |
| 60-64 | 253+    | 0.000000 | 0.000000 | 0.000000 | 0.005888 | 0.005888 | 0.000000 | 0.000000 | 0.000000 | 0.000000 |
| 65-69 | 253+    | 0.000000 | 0.000000 | 0.000000 | 0.004823 | 0.004823 | 0.000000 | 0.000000 | 0.000000 | 0.000000 |
| 70-74 | 253+    | 0.000000 | 0.000000 | 0.000000 | 0.004733 | 0.004733 | 0.000000 | 0.000000 | 0.000000 | 0.000000 |
| 75-79 | 253+    | 0.000000 | 0.000000 | 0.000000 | 0.004733 | 0.004733 | 0.000000 | 0.000000 | 0.000000 | 0.000000 |



### Results for PHIM for Run 3 (Sensitivity\_Analysis\_1.RTF)

|       |      |          |          |          |          |          |          |
|-------|------|----------|----------|----------|----------|----------|----------|
| 25-29 | 253+ | 0.015212 | 0.000000 | 0.000000 | 0.000000 | 0.000000 | 0.000000 |
| 30-34 | 253+ | 0.015460 | 0.000000 | 0.000000 | 0.000000 | 0.000000 | 0.000000 |
| 35-39 | 253+ | 0.014711 | 0.000000 | 0.000000 | 0.000000 | 0.000000 | 0.000000 |
| 40-44 | 253+ | 0.014241 | 0.000000 | 0.000000 | 0.000000 | 0.000000 | 0.000000 |
| 45-49 | 253+ | 0.013014 | 0.000000 | 0.000000 | 0.000000 | 0.000000 | 0.000000 |
| 50-54 | 253+ | 0.011768 | 0.000000 | 0.000000 | 0.000000 | 0.000000 | 0.000000 |
| 55-59 | 253+ | 0.011032 | 0.000000 | 0.000000 | 0.000000 | 0.000000 | 0.000000 |
| 60-64 | 253+ | 0.009525 | 0.000000 | 0.000000 | 0.000000 | 0.000000 | 0.000000 |
| 65-69 | 253+ | 0.006897 | 0.000000 | 0.000000 | 0.000000 | 0.000000 | 0.000000 |
| 70-74 | 253+ | 0.005435 | 0.000000 | 0.000000 | 0.000000 | 0.000000 | 0.000000 |
| 75-79 | 253+ | 0.005435 | 0.000000 | 0.000000 | 0.000000 | 0.000000 | 0.000000 |

## Results for PHIM for Run 3 (Sensitivity\_Analysis\_1.RTF)

\*\*\*\*\*

### Main Output for the Tobacco History for Run: 3, Simulation: 1, Scenario: NULL

| Variable Parameter          | Value              |
|-----------------------------|--------------------|
| 1. Country                  | US (United States) |
| 2. Sex                      | M (Males)          |
| 3. Year of start of process | 1990               |

Year of Follow-up: 2040, Age Group: All Ages  
 Period    Age Group    Smoking Group            N            %

|    |          |           |       |       |
|----|----------|-----------|-------|-------|
| 50 | All Ages | Never Any | 19445 | 50.68 |
| 50 | All Ages | CC        | 3024  | 7.88  |
| 50 | All Ages | Former    | 15896 | 41.43 |

Year of Follow-up: 2040, Age Group: 18-19  
 Period    Age Group    Smoking Group            N            %

|    |       |           |   |   |
|----|-------|-----------|---|---|
| 50 | 18-19 | Never Any | 0 | . |
| 50 | 18-19 | CC        | 0 | . |
| 50 | 18-19 | Former    | 0 | . |

Year of Follow-up: 2040, Age Group: 20-24  
 Period    Age Group    Smoking Group            N            %

|    |       |           |   |   |
|----|-------|-----------|---|---|
| 50 | 20-24 | Never Any | 0 | . |
| 50 | 20-24 | CC        | 0 | . |
| 50 | 20-24 | Former    | 0 | . |

Year of Follow-up: 2040, Age Group: 25-29  
 Period    Age Group    Smoking Group            N            %

|    |       |           |   |   |
|----|-------|-----------|---|---|
| 50 | 25-29 | Never Any | 0 | . |
| 50 | 25-29 | CC        | 0 | . |
| 50 | 25-29 | Former    | 0 | . |

Year of Follow-up: 2040, Age Group: 30-34  
 Period    Age Group    Smoking Group            N            %

|    |       |           |   |   |
|----|-------|-----------|---|---|
| 50 | 30-34 | Never Any | 0 | . |
| 50 | 30-34 | CC        | 0 | . |
| 50 | 30-34 | Former    | 0 | . |

Year of Follow-up: 2040, Age Group: 35-39  
 Period    Age Group    Smoking Group            N            %

|    |       |           |   |   |
|----|-------|-----------|---|---|
| 50 | 35-39 | Never Any | 0 | . |
| 50 | 35-39 | CC        | 0 | . |
| 50 | 35-39 | Former    | 0 | . |

Year of Follow-up: 2040, Age Group: 40-44  
 Period    Age Group    Smoking Group            N            %

|    |       |           |   |   |
|----|-------|-----------|---|---|
| 50 | 40-44 | Never Any | 0 | . |
| 50 | 40-44 | CC        | 0 | . |
| 50 | 40-44 | Former    | 0 | . |

Year of Follow-up: 2040, Age Group: 45-49  
 Period    Age Group    Smoking Group            N            %

|    |       |           |   |   |
|----|-------|-----------|---|---|
| 50 | 45-49 | Never Any | 0 | . |
| 50 | 45-49 | CC        | 0 | . |
| 50 | 45-49 | Former    | 0 | . |

Year of Follow-up: 2040, Age Group: 50-54  
 Period    Age Group    Smoking Group            N            %

|    |       |           |   |   |
|----|-------|-----------|---|---|
| 50 | 50-54 | Never Any | 0 | . |
| 50 | 50-54 | CC        | 0 | . |
| 50 | 50-54 | Former    | 0 | . |

Year of Follow-up: 2040, Age Group: 55-59  
 Period    Age Group    Smoking Group            N            %

|    |       |           |   |   |
|----|-------|-----------|---|---|
| 50 | 55-59 | Never Any | 0 | . |
| 50 | 55-59 | CC        | 0 | . |
| 50 | 55-59 | Former    | 0 | . |

Year of Follow-up: 2040, Age Group: 60-64  
 Period    Age Group    Smoking Group            N            %

### Results for PHIM for Run 3 (Sensitivity\_Analysis\_1.RTF)

|                                           |           |               |      |       |
|-------------------------------------------|-----------|---------------|------|-------|
| 50                                        | 60-64     | Never Any     | 4363 | 49.33 |
| 50                                        | 60-64     | CC            | 934  | 10.56 |
| 50                                        | 60-64     | Former        | 3548 | 40.11 |
| Year of Follow-up: 2040, Age Group: 65-69 |           |               |      |       |
| Period                                    | Age Group | Smoking Group | N    | %     |
| 50                                        | 65-69     | Never Any     | 4948 | 54.73 |
| 50                                        | 65-69     | CC            | 734  | 8.12  |
| 50                                        | 65-69     | Former        | 3358 | 37.15 |
| Year of Follow-up: 2040, Age Group: 70-74 |           |               |      |       |
| Period                                    | Age Group | Smoking Group | N    | %     |
| 50                                        | 70-74     | Never Any     | 5145 | 52.41 |
| 50                                        | 70-74     | CC            | 688  | 7.01  |
| 50                                        | 70-74     | Former        | 3983 | 40.58 |
| Year of Follow-up: 2040, Age Group: 75-79 |           |               |      |       |
| Period                                    | Age Group | Smoking Group | N    | %     |
| 50                                        | 75-79     | Never Any     | 4989 | 46.78 |
| 50                                        | 75-79     | CC            | 668  | 6.26  |
| 50                                        | 75-79     | Former        | 5007 | 46.95 |

## Results for PHIM for Run 3 (Sensitivity\_Analysis\_1.RTF)

\*\*\*\*\*

### Main Output for the Tobacco History for Run: 3, Simulation: 1, Scenario: Ecig

| Variable Parameter                           |           | Value              |       |       |               |             |               |                |              |
|----------------------------------------------|-----------|--------------------|-------|-------|---------------|-------------|---------------|----------------|--------------|
| 1. Country                                   |           | US (United States) |       |       |               |             |               |                |              |
| 2. Sex                                       |           | M (Males)          |       |       |               |             |               |                |              |
| 3. Year of start of process                  |           | 1990               |       |       |               |             |               |                |              |
| Year of Follow-up: 1990, Age Group: All Ages |           |                    |       |       |               |             |               |                |              |
| Period                                       | Age Group | Smoking Group      | N     | %     | Ever Quit (N) | Ever Quit % | Mean Yrs Quit | Short Term (n) | Short Term % |
| 0                                            | All Ages  | Never Any          | 34075 | 39.78 |               |             |               |                |              |
| 0                                            | All Ages  | CC                 | 27323 | 31.90 | 0             | 0.00        |               |                |              |
| 0                                            | All Ages  | Ecig               | 0     | 0.00  |               |             |               |                |              |
| 0                                            | All Ages  | Dual               | 0     | 0.00  |               |             |               |                |              |
| 0                                            | All Ages  | Former             | 24266 | 28.33 |               |             | 13.08         | 3623           | 14.93        |
| Year of Follow-up: 1990, Age Group: 18-19    |           |                    |       |       |               |             |               |                |              |
| Period                                       | Age Group | Smoking Group      | N     | %     | Ever Quit (N) | Ever Quit % | Mean Yrs Quit | Short Term (n) | Short Term % |
| 0                                            | 18-19     | Never Any          | 2783  | 78.42 |               |             |               |                |              |
| 0                                            | 18-19     | CC                 | 634   | 17.86 | 0             | 0.00        |               |                |              |
| 0                                            | 18-19     | Ecig               | 0     | 0.00  |               |             |               |                |              |
| 0                                            | 18-19     | Dual               | 0     | 0.00  |               |             |               |                |              |
| 0                                            | 18-19     | Former             | 132   | 3.72  |               |             | 0.11          | 132            | 100.00       |
| Year of Follow-up: 1990, Age Group: 20-24    |           |                    |       |       |               |             |               |                |              |
| Period                                       | Age Group | Smoking Group      | N     | %     | Ever Quit (N) | Ever Quit % | Mean Yrs Quit | Short Term (n) | Short Term % |
| 0                                            | 20-24     | Never Any          | 5722  | 58.29 |               |             |               |                |              |
| 0                                            | 20-24     | CC                 | 3199  | 32.59 | 0             | 0.00        |               |                |              |
| 0                                            | 20-24     | Ecig               | 0     | 0.00  |               |             |               |                |              |
| 0                                            | 20-24     | Dual               | 0     | 0.00  |               |             |               |                |              |
| 0                                            | 20-24     | Former             | 895   | 9.12  |               |             | 1.46          | 506            | 56.54        |
| Year of Follow-up: 1990, Age Group: 25-29    |           |                    |       |       |               |             |               |                |              |
| Period                                       | Age Group | Smoking Group      | N     | %     | Ever Quit (N) | Ever Quit % | Mean Yrs Quit | Short Term (n) | Short Term % |
| 0                                            | 25-29     | Never Any          | 5232  | 49.06 |               |             |               |                |              |
| 0                                            | 25-29     | CC                 | 3914  | 36.70 | 0             | 0.00        |               |                |              |
| 0                                            | 25-29     | Ecig               | 0     | 0.00  |               |             |               |                |              |
| 0                                            | 25-29     | Dual               | 0     | 0.00  |               |             |               |                |              |
| 0                                            | 25-29     | Former             | 1518  | 14.23 |               |             | 2.87          | 643            | 42.36        |
| Year of Follow-up: 1990, Age Group: 30-34    |           |                    |       |       |               |             |               |                |              |
| Period                                       | Age Group | Smoking Group      | N     | %     | Ever Quit (N) | Ever Quit % | Mean Yrs Quit | Short Term (n) | Short Term % |
| 0                                            | 30-34     | Never Any          | 4765  | 43.65 |               |             |               |                |              |
| 0                                            | 30-34     | CC                 | 4023  | 36.85 | 0             | 0.00        |               |                |              |
| 0                                            | 30-34     | Ecig               | 0     | 0.00  |               |             |               |                |              |
| 0                                            | 30-34     | Dual               | 0     | 0.00  |               |             |               |                |              |
| 0                                            | 30-34     | Former             | 2128  | 19.49 |               |             | 4.06          | 592            | 27.82        |
| Year of Follow-up: 1990, Age Group: 35-39    |           |                    |       |       |               |             |               |                |              |
| Period                                       | Age Group | Smoking Group      | N     | %     | Ever Quit (N) | Ever Quit % | Mean Yrs Quit | Short Term (n) | Short Term % |
| 0                                            | 35-39     | Never Any          | 3941  | 39.85 |               |             |               |                |              |
| 0                                            | 35-39     | CC                 | 3474  | 35.13 | 0             | 0.00        |               |                |              |
| 0                                            | 35-39     | Ecig               | 0     | 0.00  |               |             |               |                |              |
| 0                                            | 35-39     | Dual               | 0     | 0.00  |               |             |               |                |              |
| 0                                            | 35-39     | Former             | 2474  | 25.02 |               |             | 8.31          | 425            | 17.18        |
| Year of Follow-up: 1990, Age Group: 40-44    |           |                    |       |       |               |             |               |                |              |
| Period                                       | Age Group | Smoking Group      | N     | %     | Ever Quit (N) | Ever Quit % | Mean Yrs Quit | Short Term (n) | Short Term % |
| 0                                            | 40-44     | Never Any          | 2912  | 33.65 |               |             |               |                |              |
| 0                                            | 40-44     | CC                 | 3113  | 35.97 | 0             | 0.00        |               |                |              |
| 0                                            | 40-44     | Ecig               | 0     | 0.00  |               |             |               |                |              |
| 0                                            | 40-44     | Dual               | 0     | 0.00  |               |             |               |                |              |
| 0                                            | 40-44     | Former             | 2630  | 30.39 |               |             | 10.69         | 317            | 12.05        |
| Year of Follow-up: 1990, Age Group: 45-49    |           |                    |       |       |               |             |               |                |              |
| Period                                       | Age Group | Smoking Group      | N     | %     | Ever Quit (N) | Ever Quit % | Mean Yrs Quit | Short Term (n) | Short Term % |
| 0                                            | 45-49     | Never Any          | 1919  | 29.46 |               |             |               |                |              |
| 0                                            | 45-49     | CC                 | 2318  | 35.58 | 0             | 0.00        |               |                |              |
| 0                                            | 45-49     | Ecig               | 0     | 0.00  |               |             |               |                |              |
| 0                                            | 45-49     | Dual               | 0     | 0.00  |               |             |               |                |              |
| 0                                            | 45-49     | Former             | 2278  | 34.97 |               |             | 13.26         | 221            | 9.70         |
| Year of Follow-up: 1990, Age Group: 50-54    |           |                    |       |       |               |             |               |                |              |
| Period                                       | Age Group | Smoking Group      | N     | %     | Ever Quit (N) | Ever Quit % | Mean Yrs Quit | Short Term (n) | Short Term % |
| 0                                            | 50-54     | Never Any          | 1611  | 29.41 |               |             |               |                |              |
| 0                                            | 50-54     | CC                 | 1816  | 33.16 | 0             | 0.00        |               |                |              |



**Results for PHIM for Run 3 (Sensitivity\_Analysis\_1.RTF)**

|                                              |           |               |       |       |               |             |               |                |              |
|----------------------------------------------|-----------|---------------|-------|-------|---------------|-------------|---------------|----------------|--------------|
| 0                                            | 50-54     | Ecig          | 0     | 0.00  |               |             |               |                |              |
| 0                                            | 50-54     | Dual          | 0     | 0.00  |               |             |               |                |              |
| 0                                            | 50-54     | Former        | 2050  | 37.43 |               |             | 14.55         | 261            | 12.73        |
| Year of Follow-up: 1990, Age Group: 55-59    |           |               |       |       |               |             |               |                |              |
| Period                                       | Age Group | Smoking Group | N     | %     | Ever Quit (N) | Ever Quit % | Mean Yrs Quit | Short Term (n) | Short Term % |
| 0                                            | 55-59     | Never Any     | 1337  | 26.83 |               |             |               |                |              |
| 0                                            | 55-59     | CC            | 1520  | 30.50 | 0             | 0.00        |               |                |              |
| 0                                            | 55-59     | Ecig          | 0     | 0.00  |               |             |               |                |              |
| 0                                            | 55-59     | Dual          | 0     | 0.00  |               |             |               |                |              |
| 0                                            | 55-59     | Former        | 2126  | 42.67 |               |             | 14.80         | 216            | 10.16        |
| Year of Follow-up: 1990, Age Group: 60-64    |           |               |       |       |               |             |               |                |              |
| Period                                       | Age Group | Smoking Group | N     | %     | Ever Quit (N) | Ever Quit % | Mean Yrs Quit | Short Term (n) | Short Term % |
| 0                                            | 60-64     | Never Any     | 1169  | 23.83 |               |             |               |                |              |
| 0                                            | 60-64     | CC            | 1287  | 26.24 | 0             | 0.00        |               |                |              |
| 0                                            | 60-64     | Ecig          | 0     | 0.00  |               |             |               |                |              |
| 0                                            | 60-64     | Dual          | 0     | 0.00  |               |             |               |                |              |
| 0                                            | 60-64     | Former        | 2449  | 49.93 |               |             | 18.87         | 106            | 4.33         |
| Year of Follow-up: 1990, Age Group: 65-69    |           |               |       |       |               |             |               |                |              |
| Period                                       | Age Group | Smoking Group | N     | %     | Ever Quit (N) | Ever Quit % | Mean Yrs Quit | Short Term (n) | Short Term % |
| 0                                            | 65-69     | Never Any     | 1023  | 23.32 |               |             |               |                |              |
| 0                                            | 65-69     | CC            | 979   | 22.32 | 0             | 0.00        |               |                |              |
| 0                                            | 65-69     | Ecig          | 0     | 0.00  |               |             |               |                |              |
| 0                                            | 65-69     | Dual          | 0     | 0.00  |               |             |               |                |              |
| 0                                            | 65-69     | Former        | 2385  | 54.37 |               |             | 19.91         | 113            | 4.74         |
| Year of Follow-up: 1990, Age Group: 70-74    |           |               |       |       |               |             |               |                |              |
| Period                                       | Age Group | Smoking Group | N     | %     | Ever Quit (N) | Ever Quit % | Mean Yrs Quit | Short Term (n) | Short Term % |
| 0                                            | 70-74     | Never Any     | 961   | 27.46 |               |             |               |                |              |
| 0                                            | 70-74     | CC            | 675   | 19.29 | 0             | 0.00        |               |                |              |
| 0                                            | 70-74     | Ecig          | 0     | 0.00  |               |             |               |                |              |
| 0                                            | 70-74     | Dual          | 0     | 0.00  |               |             |               |                |              |
| 0                                            | 70-74     | Former        | 1863  | 53.24 |               |             | 20.69         | 23             | 1.23         |
| Year of Follow-up: 1990, Age Group: 75-79    |           |               |       |       |               |             |               |                |              |
| Period                                       | Age Group | Smoking Group | N     | %     | Ever Quit (N) | Ever Quit % | Mean Yrs Quit | Short Term (n) | Short Term % |
| 0                                            | 75-79     | Never Any     | 700   | 29.06 |               |             |               |                |              |
| 0                                            | 75-79     | CC            | 371   | 15.40 | 0             | 0.00        |               |                |              |
| 0                                            | 75-79     | Ecig          | 0     | 0.00  |               |             |               |                |              |
| 0                                            | 75-79     | Dual          | 0     | 0.00  |               |             |               |                |              |
| 0                                            | 75-79     | Former        | 1338  | 55.54 |               |             | 22.88         | 68             | 5.08         |
| Year of Follow-up: 1995, Age Group: All Ages |           |               |       |       |               |             |               |                |              |
| Period                                       | Age Group | Smoking Group | N     | %     | Ever Quit (N) | Ever Quit % | Mean Yrs Quit | Short Term (n) | Short Term % |
| 5                                            | All Ages  | Never Any     | 38368 | 41.57 |               |             |               |                |              |
| 5                                            | All Ages  | CC            | 11508 | 12.47 | 0             | 0.00        |               |                |              |
| 5                                            | All Ages  | Ecig          | 15517 | 16.81 |               |             |               |                |              |
| 5                                            | All Ages  | Dual          | 0     | 0.00  |               |             |               |                |              |
| 5                                            | All Ages  | Former        | 26897 | 29.14 |               |             | 15.19         | 1705           | 6.34         |
| Year of Follow-up: 1995, Age Group: 18-19    |           |               |       |       |               |             |               |                |              |
| Period                                       | Age Group | Smoking Group | N     | %     | Ever Quit (N) | Ever Quit % | Mean Yrs Quit | Short Term (n) | Short Term % |
| 5                                            | 18-19     | Never Any     | 2448  | 69.07 |               |             |               |                |              |
| 5                                            | 18-19     | CC            | 320   | 9.03  | 0             | 0.00        |               |                |              |
| 5                                            | 18-19     | Ecig          | 659   | 18.59 |               |             |               |                |              |
| 5                                            | 18-19     | Dual          | 0     | 0.00  |               |             |               |                |              |
| 5                                            | 18-19     | Former        | 117   | 3.30  |               |             | 1.11          | 80             | 68.38        |
| Year of Follow-up: 1995, Age Group: 20-24    |           |               |       |       |               |             |               |                |              |
| Period                                       | Age Group | Smoking Group | N     | %     | Ever Quit (N) | Ever Quit % | Mean Yrs Quit | Short Term (n) | Short Term % |
| 5                                            | 20-24     | Never Any     | 5787  | 64.02 |               |             |               |                |              |
| 5                                            | 20-24     | CC            | 946   | 10.46 | 0             | 0.00        |               |                |              |
| 5                                            | 20-24     | Ecig          | 1826  | 20.20 |               |             |               |                |              |
| 5                                            | 20-24     | Dual          | 0     | 0.00  |               |             |               |                |              |
| 5                                            | 20-24     | Former        | 481   | 5.32  |               |             | 2.81          | 142            | 29.52        |
| Year of Follow-up: 1995, Age Group: 25-29    |           |               |       |       |               |             |               |                |              |
| Period                                       | Age Group | Smoking Group | N     | %     | Ever Quit (N) | Ever Quit % | Mean Yrs Quit | Short Term (n) | Short Term % |
| 5                                            | 25-29     | Never Any     | 5471  | 55.74 |               |             |               |                |              |
| 5                                            | 25-29     | CC            | 1255  | 12.79 | 0             | 0.00        |               |                |              |
| 5                                            | 25-29     | Ecig          | 1942  | 19.78 |               |             |               |                |              |
| 5                                            | 25-29     | Dual          | 0     | 0.00  |               |             |               |                |              |
| 5                                            | 25-29     | Former        | 1148  | 11.70 |               |             | 5.43          | 115            | 10.02        |
| Year of Follow-up: 1995, Age Group: 30-34    |           |               |       |       |               |             |               |                |              |
| Period                                       | Age Group | Smoking Group | N     | %     | Ever Quit (N) | Ever Quit % | Mean Yrs Quit | Short Term (n) | Short Term % |

**Results for PHIM for Run 3 (Sensitivity\_Analysis\_1.RTF)**

|                                              |           |               |      |       |               |             |               |                |              |
|----------------------------------------------|-----------|---------------|------|-------|---------------|-------------|---------------|----------------|--------------|
| 5                                            | 30-34     | Never Any     | 5065 | 47.50 |               |             |               |                |              |
| 5                                            | 30-34     | CC            | 1480 | 13.88 | 0             | 0.00        |               |                |              |
| 5                                            | 30-34     | Ecig          | 2319 | 21.75 |               |             |               |                |              |
| 5                                            | 30-34     | Dual          | 0    | 0.00  |               |             |               |                |              |
| 5                                            | 30-34     | Former        | 1800 | 16.88 |               |             | 6.94          | 106            | 5.89         |
| Year of Follow-up: 1995, Age Group: 35-39    |           |               |      |       |               |             |               |                |              |
| Period                                       | Age Group | Smoking Group | N    | %     | Ever Quit (N) | Ever Quit % | Mean Yrs Quit | Short Term (n) | Short Term % |
| 5                                            | 35-39     | Never Any     | 4724 | 43.28 |               |             |               |                |              |
| 5                                            | 35-39     | CC            | 1496 | 13.70 | 0             | 0.00        |               |                |              |
| 5                                            | 35-39     | Ecig          | 2275 | 20.84 |               |             |               |                |              |
| 5                                            | 35-39     | Dual          | 0    | 0.00  |               |             |               |                |              |
| 5                                            | 35-39     | Former        | 2421 | 22.18 |               |             | 8.20          | 114            | 4.71         |
| Year of Follow-up: 1995, Age Group: 40-44    |           |               |      |       |               |             |               |                |              |
| Period                                       | Age Group | Smoking Group | N    | %     | Ever Quit (N) | Ever Quit % | Mean Yrs Quit | Short Term (n) | Short Term % |
| 5                                            | 40-44     | Never Any     | 3941 | 39.85 |               |             |               |                |              |
| 5                                            | 40-44     | CC            | 1280 | 12.94 | 0             | 0.00        |               |                |              |
| 5                                            | 40-44     | Ecig          | 1894 | 19.15 |               |             |               |                |              |
| 5                                            | 40-44     | Dual          | 0    | 0.00  |               |             |               |                |              |
| 5                                            | 40-44     | Former        | 2774 | 28.05 |               |             | 12.06         | 130            | 4.69         |
| Year of Follow-up: 1995, Age Group: 45-49    |           |               |      |       |               |             |               |                |              |
| Period                                       | Age Group | Smoking Group | N    | %     | Ever Quit (N) | Ever Quit % | Mean Yrs Quit | Short Term (n) | Short Term % |
| 5                                            | 45-49     | Never Any     | 2912 | 33.65 |               |             |               |                |              |
| 5                                            | 45-49     | CC            | 1236 | 14.28 | 0             | 0.00        |               |                |              |
| 5                                            | 45-49     | Ecig          | 1562 | 18.05 |               |             |               |                |              |
| 5                                            | 45-49     | Dual          | 0    | 0.00  |               |             |               |                |              |
| 5                                            | 45-49     | Former        | 2945 | 34.03 |               |             | 14.20         | 148            | 5.03         |
| Year of Follow-up: 1995, Age Group: 50-54    |           |               |      |       |               |             |               |                |              |
| Period                                       | Age Group | Smoking Group | N    | %     | Ever Quit (N) | Ever Quit % | Mean Yrs Quit | Short Term (n) | Short Term % |
| 5                                            | 50-54     | Never Any     | 1919 | 29.46 |               |             |               |                |              |
| 5                                            | 50-54     | CC            | 940  | 14.43 | 0             | 0.00        |               |                |              |
| 5                                            | 50-54     | Ecig          | 1015 | 15.58 |               |             |               |                |              |
| 5                                            | 50-54     | Dual          | 0    | 0.00  |               |             |               |                |              |
| 5                                            | 50-54     | Former        | 2641 | 40.54 |               |             | 15.98         | 175            | 6.63         |
| Year of Follow-up: 1995, Age Group: 55-59    |           |               |      |       |               |             |               |                |              |
| Period                                       | Age Group | Smoking Group | N    | %     | Ever Quit (N) | Ever Quit % | Mean Yrs Quit | Short Term (n) | Short Term % |
| 5                                            | 55-59     | Never Any     | 1611 | 29.41 |               |             |               |                |              |
| 5                                            | 55-59     | CC            | 740  | 13.51 | 0             | 0.00        |               |                |              |
| 5                                            | 55-59     | Ecig          | 762  | 13.91 |               |             |               |                |              |
| 5                                            | 55-59     | Dual          | 0    | 0.00  |               |             |               |                |              |
| 5                                            | 55-59     | Former        | 2364 | 43.16 |               |             | 17.21         | 122            | 5.16         |
| Year of Follow-up: 1995, Age Group: 60-64    |           |               |      |       |               |             |               |                |              |
| Period                                       | Age Group | Smoking Group | N    | %     | Ever Quit (N) | Ever Quit % | Mean Yrs Quit | Short Term (n) | Short Term % |
| 5                                            | 60-64     | Never Any     | 1337 | 26.83 |               |             |               |                |              |
| 5                                            | 60-64     | CC            | 597  | 11.98 | 0             | 0.00        |               |                |              |
| 5                                            | 60-64     | Ecig          | 572  | 11.48 |               |             |               |                |              |
| 5                                            | 60-64     | Dual          | 0    | 0.00  |               |             |               |                |              |
| 5                                            | 60-64     | Former        | 2477 | 49.71 |               |             | 17.27         | 143            | 5.77         |
| Year of Follow-up: 1995, Age Group: 65-69    |           |               |      |       |               |             |               |                |              |
| Period                                       | Age Group | Smoking Group | N    | %     | Ever Quit (N) | Ever Quit % | Mean Yrs Quit | Short Term (n) | Short Term % |
| 5                                            | 65-69     | Never Any     | 1169 | 23.83 |               |             |               |                |              |
| 5                                            | 65-69     | CC            | 477  | 9.72  | 0             | 0.00        |               |                |              |
| 5                                            | 65-69     | Ecig          | 360  | 7.34  |               |             |               |                |              |
| 5                                            | 65-69     | Dual          | 0    | 0.00  |               |             |               |                |              |
| 5                                            | 65-69     | Former        | 2899 | 59.10 |               |             | 20.44         | 196            | 6.76         |
| Year of Follow-up: 1995, Age Group: 70-74    |           |               |      |       |               |             |               |                |              |
| Period                                       | Age Group | Smoking Group | N    | %     | Ever Quit (N) | Ever Quit % | Mean Yrs Quit | Short Term (n) | Short Term % |
| 5                                            | 70-74     | Never Any     | 1023 | 23.32 |               |             |               |                |              |
| 5                                            | 70-74     | CC            | 438  | 9.98  | 0             | 0.00        |               |                |              |
| 5                                            | 70-74     | Ecig          | 196  | 4.47  |               |             |               |                |              |
| 5                                            | 70-74     | Dual          | 0    | 0.00  |               |             |               |                |              |
| 5                                            | 70-74     | Former        | 2730 | 62.23 |               |             | 22.00         | 137            | 5.02         |
| Year of Follow-up: 1995, Age Group: 75-79    |           |               |      |       |               |             |               |                |              |
| Period                                       | Age Group | Smoking Group | N    | %     | Ever Quit (N) | Ever Quit % | Mean Yrs Quit | Short Term (n) | Short Term % |
| 5                                            | 75-79     | Never Any     | 961  | 27.46 |               |             |               |                |              |
| 5                                            | 75-79     | CC            | 303  | 8.66  | 0             | 0.00        |               |                |              |
| 5                                            | 75-79     | Ecig          | 135  | 3.86  |               |             |               |                |              |
| 5                                            | 75-79     | Dual          | 0    | 0.00  |               |             |               |                |              |
| 5                                            | 75-79     | Former        | 2100 | 60.02 |               |             | 23.02         | 97             | 4.62         |
| Year of Follow-up: 2000, Age Group: All Ages |           |               |      |       |               |             |               |                |              |

**Results for PHIM for Run 3 (Sensitivity\_Analysis\_1.RTF)**

| Period                                    | Age Group | Smoking Group | N     | %     | Ever Quit (N) | Ever Quit % | Mean Yrs Quit | Short Term (n) | Short Term % |
|-------------------------------------------|-----------|---------------|-------|-------|---------------|-------------|---------------|----------------|--------------|
| 10                                        | All Ages  | Never Any     | 39177 | 41.64 |               |             |               |                |              |
| 10                                        | All Ages  | CC            | 4843  | 5.15  | 0             | 0.00        |               |                |              |
| 10                                        | All Ages  | Ecig          | 20724 | 22.03 |               |             |               |                |              |
| 10                                        | All Ages  | Dual          | 0     | 0.00  |               |             |               |                |              |
| 10                                        | All Ages  | Former        | 29348 | 31.19 |               |             | 16.84         | 1724           | 5.87         |
| Year of Follow-up: 2000, Age Group: 18-19 |           |               |       |       |               |             |               |                |              |
| Period                                    | Age Group | Smoking Group | N     | %     | Ever Quit (N) | Ever Quit % | Mean Yrs Quit | Short Term (n) | Short Term % |
| 10                                        | 18-19     | Never Any     | 0     | .     |               |             |               |                |              |
| 10                                        | 18-19     | CC            | 0     | .     | 0             | .           |               |                |              |
| 10                                        | 18-19     | Ecig          | 0     | .     |               |             |               |                |              |
| 10                                        | 18-19     | Dual          | 0     | .     |               |             |               |                |              |
| 10                                        | 18-19     | Former        | 0     | .     |               |             |               | 0              | .            |
| Year of Follow-up: 2000, Age Group: 20-24 |           |               |       |       |               |             |               |                |              |
| Period                                    | Age Group | Smoking Group | N     | %     | Ever Quit (N) | Ever Quit % | Mean Yrs Quit | Short Term (n) | Short Term % |
| 10                                        | 20-24     | Never Any     | 4927  | 55.70 |               |             |               |                |              |
| 10                                        | 20-24     | CC            | 462   | 5.22  | 0             | 0.00        |               |                |              |
| 10                                        | 20-24     | Ecig          | 2544  | 28.76 |               |             |               |                |              |
| 10                                        | 20-24     | Dual          | 0     | 0.00  |               |             |               |                |              |
| 10                                        | 20-24     | Former        | 912   | 10.31 |               |             | 3.41          | 258            | 28.29        |
| Year of Follow-up: 2000, Age Group: 25-29 |           |               |       |       |               |             |               |                |              |
| Period                                    | Age Group | Smoking Group | N     | %     | Ever Quit (N) | Ever Quit % | Mean Yrs Quit | Short Term (n) | Short Term % |
| 10                                        | 25-29     | Never Any     | 5341  | 59.08 |               |             |               |                |              |
| 10                                        | 25-29     | CC            | 404   | 4.47  | 0             | 0.00        |               |                |              |
| 10                                        | 25-29     | Ecig          | 2359  | 26.10 |               |             |               |                |              |
| 10                                        | 25-29     | Dual          | 0     | 0.00  |               |             |               |                |              |
| 10                                        | 25-29     | Former        | 936   | 10.35 |               |             | 4.91          | 195            | 20.83        |
| Year of Follow-up: 2000, Age Group: 30-34 |           |               |       |       |               |             |               |                |              |
| Period                                    | Age Group | Smoking Group | N     | %     | Ever Quit (N) | Ever Quit % | Mean Yrs Quit | Short Term (n) | Short Term % |
| 10                                        | 30-34     | Never Any     | 5276  | 53.75 |               |             |               |                |              |
| 10                                        | 30-34     | CC            | 481   | 4.90  | 0             | 0.00        |               |                |              |
| 10                                        | 30-34     | Ecig          | 2608  | 26.57 |               |             |               |                |              |
| 10                                        | 30-34     | Dual          | 0     | 0.00  |               |             |               |                |              |
| 10                                        | 30-34     | Former        | 1451  | 14.78 |               |             | 8.66          | 118            | 8.13         |
| Year of Follow-up: 2000, Age Group: 35-39 |           |               |       |       |               |             |               |                |              |
| Period                                    | Age Group | Smoking Group | N     | %     | Ever Quit (N) | Ever Quit % | Mean Yrs Quit | Short Term (n) | Short Term % |
| 10                                        | 35-39     | Never Any     | 4997  | 46.86 |               |             |               |                |              |
| 10                                        | 35-39     | CC            | 609   | 5.71  | 0             | 0.00        |               |                |              |
| 10                                        | 35-39     | Ecig          | 2980  | 27.94 |               |             |               |                |              |
| 10                                        | 35-39     | Dual          | 0     | 0.00  |               |             |               |                |              |
| 10                                        | 35-39     | Former        | 2078  | 19.49 |               |             | 10.61         | 109            | 5.25         |
| Year of Follow-up: 2000, Age Group: 40-44 |           |               |       |       |               |             |               |                |              |
| Period                                    | Age Group | Smoking Group | N     | %     | Ever Quit (N) | Ever Quit % | Mean Yrs Quit | Short Term (n) | Short Term % |
| 10                                        | 40-44     | Never Any     | 4724  | 43.28 |               |             |               |                |              |
| 10                                        | 40-44     | CC            | 567   | 5.19  | 0             | 0.00        |               |                |              |
| 10                                        | 40-44     | Ecig          | 2857  | 26.17 |               |             |               |                |              |
| 10                                        | 40-44     | Dual          | 0     | 0.00  |               |             |               |                |              |
| 10                                        | 40-44     | Former        | 2768  | 25.36 |               |             | 11.82         | 124            | 4.48         |
| Year of Follow-up: 2000, Age Group: 45-49 |           |               |       |       |               |             |               |                |              |
| Period                                    | Age Group | Smoking Group | N     | %     | Ever Quit (N) | Ever Quit % | Mean Yrs Quit | Short Term (n) | Short Term % |
| 10                                        | 45-49     | Never Any     | 3941  | 39.85 |               |             |               |                |              |
| 10                                        | 45-49     | CC            | 484   | 4.89  | 0             | 0.00        |               |                |              |
| 10                                        | 45-49     | Ecig          | 2312  | 23.38 |               |             |               |                |              |
| 10                                        | 45-49     | Dual          | 0     | 0.00  |               |             |               |                |              |
| 10                                        | 45-49     | Former        | 3152  | 31.87 |               |             | 15.25         | 163            | 5.17         |
| Year of Follow-up: 2000, Age Group: 50-54 |           |               |       |       |               |             |               |                |              |
| Period                                    | Age Group | Smoking Group | N     | %     | Ever Quit (N) | Ever Quit % | Mean Yrs Quit | Short Term (n) | Short Term % |
| 10                                        | 50-54     | Never Any     | 2912  | 33.65 |               |             |               |                |              |
| 10                                        | 50-54     | CC            | 473   | 5.47  | 0             | 0.00        |               |                |              |
| 10                                        | 50-54     | Ecig          | 1859  | 21.48 |               |             |               |                |              |
| 10                                        | 50-54     | Dual          | 0     | 0.00  |               |             |               |                |              |
| 10                                        | 50-54     | Former        | 3411  | 39.41 |               |             | 16.85         | 186            | 5.45         |
| Year of Follow-up: 2000, Age Group: 55-59 |           |               |       |       |               |             |               |                |              |
| Period                                    | Age Group | Smoking Group | N     | %     | Ever Quit (N) | Ever Quit % | Mean Yrs Quit | Short Term (n) | Short Term % |
| 10                                        | 55-59     | Never Any     | 1919  | 29.46 |               |             |               |                |              |
| 10                                        | 55-59     | CC            | 363   | 5.57  | 0             | 0.00        |               |                |              |
| 10                                        | 55-59     | Ecig          | 1194  | 18.33 |               |             |               |                |              |
| 10                                        | 55-59     | Dual          | 0     | 0.00  |               |             |               |                |              |

**Results for PHIM for Run 3 (Sensitivity\_Analysis\_1.RTF)**

| Year of Follow-up: 2000, Age Group: 60-64    | Period   | Age Group | Smoking Group | N     | %     | Ever Quit (N) | Ever Quit % | Mean Yrs Quit | Short Term (n) | Short Term % |
|----------------------------------------------|----------|-----------|---------------|-------|-------|---------------|-------------|---------------|----------------|--------------|
| 10                                           | 55-59    | Former    |               | 3039  | 46.65 |               |             | 18.50         | 146            | 4.80         |
| 10                                           | 60-64    | Never Any |               | 1611  | 29.41 |               |             |               |                |              |
| 10                                           | 60-64    | CC        |               | 306   | 5.59  | 0             | 0.00        |               |                |              |
| 10                                           | 60-64    | Ecig      |               | 852   | 15.56 |               |             |               |                |              |
| 10                                           | 60-64    | Dual      |               | 0     | 0.00  |               |             |               |                |              |
| 10                                           | 60-64    | Former    |               | 2708  | 49.44 |               |             | 19.63         | 144            | 5.32         |
| Year of Follow-up: 2000, Age Group: 65-69    | Period   | Age Group | Smoking Group | N     | %     | Ever Quit (N) | Ever Quit % | Mean Yrs Quit | Short Term (n) | Short Term % |
| 10                                           | 65-69    | Never Any |               | 1337  | 26.83 |               |             |               |                |              |
| 10                                           | 65-69    | CC        |               | 244   | 4.90  | 0             | 0.00        |               |                |              |
| 10                                           | 65-69    | Ecig      |               | 603   | 12.10 |               |             |               |                |              |
| 10                                           | 65-69    | Dual      |               | 0     | 0.00  |               |             |               |                |              |
| 10                                           | 65-69    | Former    |               | 2799  | 56.17 |               |             | 19.95         | 120            | 4.29         |
| Year of Follow-up: 2000, Age Group: 70-74    | Period   | Age Group | Smoking Group | N     | %     | Ever Quit (N) | Ever Quit % | Mean Yrs Quit | Short Term (n) | Short Term % |
| 10                                           | 70-74    | Never Any |               | 1169  | 23.83 |               |             |               |                |              |
| 10                                           | 70-74    | CC        |               | 236   | 4.81  | 0             | 0.00        |               |                |              |
| 10                                           | 70-74    | Ecig      |               | 327   | 6.67  |               |             |               |                |              |
| 10                                           | 70-74    | Dual      |               | 0     | 0.00  |               |             |               |                |              |
| 10                                           | 70-74    | Former    |               | 3173  | 64.69 |               |             | 23.44         | 94             | 2.96         |
| Year of Follow-up: 2000, Age Group: 75-79    | Period   | Age Group | Smoking Group | N     | %     | Ever Quit (N) | Ever Quit % | Mean Yrs Quit | Short Term (n) | Short Term % |
| 10                                           | 75-79    | Never Any |               | 1023  | 23.32 |               |             |               |                |              |
| 10                                           | 75-79    | CC        |               | 214   | 4.88  | 0             | 0.00        |               |                |              |
| 10                                           | 75-79    | Ecig      |               | 229   | 5.22  |               |             |               |                |              |
| 10                                           | 75-79    | Dual      |               | 0     | 0.00  |               |             |               |                |              |
| 10                                           | 75-79    | Former    |               | 2921  | 66.58 |               |             | 25.38         | 67             | 2.29         |
| Year of Follow-up: 2005, Age Group: All Ages | Period   | Age Group | Smoking Group | N     | %     | Ever Quit (N) | Ever Quit % | Mean Yrs Quit | Short Term (n) | Short Term % |
| 15                                           | All Ages | Never Any |               | 37449 | 41.75 |               |             |               |                |              |
| 15                                           | All Ages | CC        |               | 1911  | 2.13  | 0             | 0.00        |               |                |              |
| 15                                           | All Ages | Ecig      |               | 20003 | 22.30 |               |             |               |                |              |
| 15                                           | All Ages | Dual      |               | 0     | 0.00  |               |             |               |                |              |
| 15                                           | All Ages | Former    |               | 30342 | 33.82 |               |             | 18.46         | 1574           | 5.19         |
| Year of Follow-up: 2005, Age Group: 18-19    | Period   | Age Group | Smoking Group | N     | %     | Ever Quit (N) | Ever Quit % | Mean Yrs Quit | Short Term (n) | Short Term % |
| 15                                           | 18-19    | Never Any |               | 0     | .     |               |             |               |                |              |
| 15                                           | 18-19    | CC        |               | 0     | .     | 0             | .           |               |                |              |
| 15                                           | 18-19    | Ecig      |               | 0     | .     |               |             |               |                |              |
| 15                                           | 18-19    | Dual      |               | 0     | .     |               |             |               |                |              |
| 15                                           | 18-19    | Former    |               | 0     | .     |               |             | .             | 0              | .            |
| Year of Follow-up: 2005, Age Group: 20-24    | Period   | Age Group | Smoking Group | N     | %     | Ever Quit (N) | Ever Quit % | Mean Yrs Quit | Short Term (n) | Short Term % |
| 15                                           | 20-24    | Never Any |               | 0     | .     |               |             |               |                |              |
| 15                                           | 20-24    | CC        |               | 0     | .     | 0             | .           |               |                |              |
| 15                                           | 20-24    | Ecig      |               | 0     | .     |               |             |               |                |              |
| 15                                           | 20-24    | Dual      |               | 0     | .     |               |             |               |                |              |
| 15                                           | 20-24    | Former    |               | 0     | .     |               |             | .             | 0              | .            |
| Year of Follow-up: 2005, Age Group: 25-29    | Period   | Age Group | Smoking Group | N     | %     | Ever Quit (N) | Ever Quit % | Mean Yrs Quit | Short Term (n) | Short Term % |
| 15                                           | 25-29    | Never Any |               | 4634  | 52.39 |               |             |               |                |              |
| 15                                           | 25-29    | CC        |               | 179   | 2.02  | 0             | 0.00        |               |                |              |
| 15                                           | 25-29    | Ecig      |               | 2661  | 30.08 |               |             |               |                |              |
| 15                                           | 25-29    | Dual      |               | 0     | 0.00  |               |             |               |                |              |
| 15                                           | 25-29    | Former    |               | 1371  | 15.50 |               |             | 6.32          | 174            | 12.69        |
| Year of Follow-up: 2005, Age Group: 30-34    | Period   | Age Group | Smoking Group | N     | %     | Ever Quit (N) | Ever Quit % | Mean Yrs Quit | Short Term (n) | Short Term % |
| 15                                           | 30-34    | Never Any |               | 5042  | 55.77 |               |             |               |                |              |
| 15                                           | 30-34    | CC        |               | 153   | 1.69  | 0             | 0.00        |               |                |              |
| 15                                           | 30-34    | Ecig      |               | 2479  | 27.42 |               |             |               |                |              |
| 15                                           | 30-34    | Dual      |               | 0     | 0.00  |               |             |               |                |              |
| 15                                           | 30-34    | Former    |               | 1366  | 15.11 |               |             | 7.38          | 171            | 12.52        |
| Year of Follow-up: 2005, Age Group: 35-39    | Period   | Age Group | Smoking Group | N     | %     | Ever Quit (N) | Ever Quit % | Mean Yrs Quit | Short Term (n) | Short Term % |
| 15                                           | 35-39    | Never Any |               | 5163  | 52.60 |               |             |               |                |              |
| 15                                           | 35-39    | CC        |               | 188   | 1.92  | 0             | 0.00        |               |                |              |

**Results for PHIM for Run 3 (Sensitivity\_Analysis\_1.RTF)**

|                                              |           |               |       |       |               |             |               |                |              |
|----------------------------------------------|-----------|---------------|-------|-------|---------------|-------------|---------------|----------------|--------------|
| 15                                           | 35-39     | Ecig          | 2654  | 27.04 |               |             |               |                |              |
| 15                                           | 35-39     | Dual          | 0     | 0.00  |               |             |               |                |              |
| 15                                           | 35-39     | Former        | 1811  | 18.45 |               |             | 11.33         | 147            | 8.12         |
| Year of Follow-up: 2005, Age Group: 40-44    |           |               |       |       |               |             |               |                |              |
| Period                                       | Age Group | Smoking Group | N     | %     | Ever Quit (N) | Ever Quit % | Mean Yrs Quit | Short Term (n) | Short Term % |
| 15                                           | 40-44     | Never Any     | 4997  | 46.86 |               |             |               |                |              |
| 15                                           | 40-44     | CC            | 231   | 2.17  | 0             | 0.00        |               |                |              |
| 15                                           | 40-44     | Ecig          | 2948  | 27.64 |               |             |               |                |              |
| 15                                           | 40-44     | Dual          | 0     | 0.00  |               |             |               |                |              |
| 15                                           | 40-44     | Former        | 2488  | 23.33 |               |             | 13.32         | 199            | 8.00         |
| Year of Follow-up: 2005, Age Group: 45-49    |           |               |       |       |               |             |               |                |              |
| Period                                       | Age Group | Smoking Group | N     | %     | Ever Quit (N) | Ever Quit % | Mean Yrs Quit | Short Term (n) | Short Term % |
| 15                                           | 45-49     | Never Any     | 4724  | 43.28 |               |             |               |                |              |
| 15                                           | 45-49     | CC            | 216   | 1.98  | 0             | 0.00        |               |                |              |
| 15                                           | 45-49     | Ecig          | 2793  | 25.59 |               |             |               |                |              |
| 15                                           | 45-49     | Dual          | 0     | 0.00  |               |             |               |                |              |
| 15                                           | 45-49     | Former        | 3183  | 29.16 |               |             | 14.88         | 160            | 5.03         |
| Year of Follow-up: 2005, Age Group: 50-54    |           |               |       |       |               |             |               |                |              |
| Period                                       | Age Group | Smoking Group | N     | %     | Ever Quit (N) | Ever Quit % | Mean Yrs Quit | Short Term (n) | Short Term % |
| 15                                           | 50-54     | Never Any     | 3941  | 39.85 |               |             |               |                |              |
| 15                                           | 50-54     | CC            | 213   | 2.15  | 0             | 0.00        |               |                |              |
| 15                                           | 50-54     | Ecig          | 2180  | 22.04 |               |             |               |                |              |
| 15                                           | 50-54     | Dual          | 0     | 0.00  |               |             |               |                |              |
| 15                                           | 50-54     | Former        | 3555  | 35.95 |               |             | 18.19         | 154            | 4.33         |
| Year of Follow-up: 2005, Age Group: 55-59    |           |               |       |       |               |             |               |                |              |
| Period                                       | Age Group | Smoking Group | N     | %     | Ever Quit (N) | Ever Quit % | Mean Yrs Quit | Short Term (n) | Short Term % |
| 15                                           | 55-59     | Never Any     | 2912  | 33.65 |               |             |               |                |              |
| 15                                           | 55-59     | CC            | 215   | 2.48  | 0             | 0.00        |               |                |              |
| 15                                           | 55-59     | Ecig          | 1781  | 20.58 |               |             |               |                |              |
| 15                                           | 55-59     | Dual          | 0     | 0.00  |               |             |               |                |              |
| 15                                           | 55-59     | Former        | 3747  | 43.29 |               |             | 20.09         | 117            | 3.12         |
| Year of Follow-up: 2005, Age Group: 60-64    |           |               |       |       |               |             |               |                |              |
| Period                                       | Age Group | Smoking Group | N     | %     | Ever Quit (N) | Ever Quit % | Mean Yrs Quit | Short Term (n) | Short Term % |
| 15                                           | 60-64     | Never Any     | 1919  | 29.46 |               |             |               |                |              |
| 15                                           | 60-64     | CC            | 143   | 2.19  | 0             | 0.00        |               |                |              |
| 15                                           | 60-64     | Ecig          | 1100  | 16.88 |               |             |               |                |              |
| 15                                           | 60-64     | Dual          | 0     | 0.00  |               |             |               |                |              |
| 15                                           | 60-64     | Former        | 3353  | 51.47 |               |             | 21.47         | 156            | 4.65         |
| Year of Follow-up: 2005, Age Group: 65-69    |           |               |       |       |               |             |               |                |              |
| Period                                       | Age Group | Smoking Group | N     | %     | Ever Quit (N) | Ever Quit % | Mean Yrs Quit | Short Term (n) | Short Term % |
| 15                                           | 65-69     | Never Any     | 1611  | 29.41 |               |             |               |                |              |
| 15                                           | 65-69     | CC            | 124   | 2.26  | 0             | 0.00        |               |                |              |
| 15                                           | 65-69     | Ecig          | 705   | 12.87 |               |             |               |                |              |
| 15                                           | 65-69     | Dual          | 0     | 0.00  |               |             |               |                |              |
| 15                                           | 65-69     | Former        | 3037  | 55.45 |               |             | 22.19         | 118            | 3.89         |
| Year of Follow-up: 2005, Age Group: 70-74    |           |               |       |       |               |             |               |                |              |
| Period                                       | Age Group | Smoking Group | N     | %     | Ever Quit (N) | Ever Quit % | Mean Yrs Quit | Short Term (n) | Short Term % |
| 15                                           | 70-74     | Never Any     | 1337  | 26.83 |               |             |               |                |              |
| 15                                           | 70-74     | CC            | 129   | 2.59  | 0             | 0.00        |               |                |              |
| 15                                           | 70-74     | Ecig          | 441   | 8.85  |               |             |               |                |              |
| 15                                           | 70-74     | Dual          | 0     | 0.00  |               |             |               |                |              |
| 15                                           | 70-74     | Former        | 3076  | 61.73 |               |             | 22.89         | 112            | 3.64         |
| Year of Follow-up: 2005, Age Group: 75-79    |           |               |       |       |               |             |               |                |              |
| Period                                       | Age Group | Smoking Group | N     | %     | Ever Quit (N) | Ever Quit % | Mean Yrs Quit | Short Term (n) | Short Term % |
| 15                                           | 75-79     | Never Any     | 1169  | 23.83 |               |             |               |                |              |
| 15                                           | 75-79     | CC            | 120   | 2.45  | 0             | 0.00        |               |                |              |
| 15                                           | 75-79     | Ecig          | 261   | 5.32  |               |             |               |                |              |
| 15                                           | 75-79     | Dual          | 0     | 0.00  |               |             |               |                |              |
| 15                                           | 75-79     | Former        | 3355  | 68.40 |               |             | 27.01         | 66             | 1.97         |
| Year of Follow-up: 2010, Age Group: All Ages |           |               |       |       |               |             |               |                |              |
| Period                                       | Age Group | Smoking Group | N     | %     | Ever Quit (N) | Ever Quit % | Mean Yrs Quit | Short Term (n) | Short Term % |
| 20                                           | All Ages  | Never Any     | 36103 | 42.57 |               |             |               |                |              |
| 20                                           | All Ages  | CC            | 738   | 0.87  | 0             | 0.00        |               |                |              |
| 20                                           | All Ages  | Ecig          | 17076 | 20.14 |               |             |               |                |              |
| 20                                           | All Ages  | Dual          | 0     | 0.00  |               |             |               |                |              |
| 20                                           | All Ages  | Former        | 30883 | 36.42 |               |             | 19.82         | 1518           | 4.92         |
| Year of Follow-up: 2010, Age Group: 18-19    |           |               |       |       |               |             |               |                |              |
| Period                                       | Age Group | Smoking Group | N     | %     | Ever Quit (N) | Ever Quit % | Mean Yrs Quit | Short Term (n) | Short Term % |

**Results for PHIM for Run 3 (Sensitivity\_Analysis\_1.RTF)**

|                                           |           |               |      |       |               |             |               |                |              |
|-------------------------------------------|-----------|---------------|------|-------|---------------|-------------|---------------|----------------|--------------|
| 20                                        | 18-19     | Never Any     | 0    | .     |               |             |               |                |              |
| 20                                        | 18-19     | CC            | 0    | .     | 0             | .           |               |                |              |
| 20                                        | 18-19     | Ecig          | 0    | .     |               |             |               |                |              |
| 20                                        | 18-19     | Dual          | 0    | .     |               |             |               |                |              |
| 20                                        | 18-19     | Former        | 0    | .     |               |             | 0             | .              |              |
| Year of Follow-up: 2010, Age Group: 20-24 |           |               |      |       |               |             |               |                |              |
| Period                                    | Age Group | Smoking Group | N    | %     | Ever Quit (N) | Ever Quit % | Mean Yrs Quit | Short Term (n) | Short Term % |
| 20                                        | 20-24     | Never Any     | 0    | .     |               |             |               |                |              |
| 20                                        | 20-24     | CC            | 0    | .     | 0             | .           |               |                |              |
| 20                                        | 20-24     | Ecig          | 0    | .     |               |             |               |                |              |
| 20                                        | 20-24     | Dual          | 0    | .     |               |             |               |                |              |
| 20                                        | 20-24     | Former        | 0    | .     |               |             |               | 0              | .            |
| Year of Follow-up: 2010, Age Group: 25-29 |           |               |      |       |               |             |               |                |              |
| Period                                    | Age Group | Smoking Group | N    | %     | Ever Quit (N) | Ever Quit % | Mean Yrs Quit | Short Term (n) | Short Term % |
| 20                                        | 25-29     | Never Any     | 0    | .     |               |             |               |                |              |
| 20                                        | 25-29     | CC            | 0    | .     | 0             | .           |               |                |              |
| 20                                        | 25-29     | Ecig          | 0    | .     |               |             |               |                |              |
| 20                                        | 25-29     | Dual          | 0    | .     |               |             |               |                |              |
| 20                                        | 25-29     | Former        | 0    | .     |               |             |               | 0              | .            |
| Year of Follow-up: 2010, Age Group: 30-34 |           |               |      |       |               |             |               |                |              |
| Period                                    | Age Group | Smoking Group | N    | %     | Ever Quit (N) | Ever Quit % | Mean Yrs Quit | Short Term (n) | Short Term % |
| 20                                        | 30-34     | Never Any     | 4508 | 50.97 |               |             |               |                |              |
| 20                                        | 30-34     | CC            | 71   | 0.80  | 0             | 0.00        |               |                |              |
| 20                                        | 30-34     | Ecig          | 2376 | 26.86 |               |             |               |                |              |
| 20                                        | 30-34     | Dual          | 0    | 0.00  |               |             |               |                |              |
| 20                                        | 30-34     | Former        | 1890 | 21.37 |               |             | 8.72          | 230            | 12.17        |
| Year of Follow-up: 2010, Age Group: 35-39 |           |               |      |       |               |             |               |                |              |
| Period                                    | Age Group | Smoking Group | N    | %     | Ever Quit (N) | Ever Quit % | Mean Yrs Quit | Short Term (n) | Short Term % |
| 20                                        | 35-39     | Never Any     | 4991 | 55.21 |               |             |               |                |              |
| 20                                        | 35-39     | CC            | 59   | 0.65  | 0             | 0.00        |               |                |              |
| 20                                        | 35-39     | Ecig          | 2154 | 23.83 |               |             |               |                |              |
| 20                                        | 35-39     | Dual          | 0    | 0.00  |               |             |               |                |              |
| 20                                        | 35-39     | Former        | 1836 | 20.31 |               |             | 9.77          | 141            | 7.68         |
| Year of Follow-up: 2010, Age Group: 40-44 |           |               |      |       |               |             |               |                |              |
| Period                                    | Age Group | Smoking Group | N    | %     | Ever Quit (N) | Ever Quit % | Mean Yrs Quit | Short Term (n) | Short Term % |
| 20                                        | 40-44     | Never Any     | 5163 | 52.60 |               |             |               |                |              |
| 20                                        | 40-44     | CC            | 68   | 0.69  | 0             | 0.00        |               |                |              |
| 20                                        | 40-44     | Ecig          | 2416 | 24.61 |               |             |               |                |              |
| 20                                        | 40-44     | Dual          | 0    | 0.00  |               |             |               |                |              |
| 20                                        | 40-44     | Former        | 2169 | 22.10 |               |             | 13.96         | 143            | 6.59         |
| Year of Follow-up: 2010, Age Group: 45-49 |           |               |      |       |               |             |               |                |              |
| Period                                    | Age Group | Smoking Group | N    | %     | Ever Quit (N) | Ever Quit % | Mean Yrs Quit | Short Term (n) | Short Term % |
| 20                                        | 45-49     | Never Any     | 4997 | 46.86 |               |             |               |                |              |
| 20                                        | 45-49     | CC            | 89   | 0.83  | 0             | 0.00        |               |                |              |
| 20                                        | 45-49     | Ecig          | 2619 | 24.56 |               |             |               |                |              |
| 20                                        | 45-49     | Dual          | 0    | 0.00  |               |             |               |                |              |
| 20                                        | 45-49     | Former        | 2959 | 27.75 |               |             | 15.74         | 171            | 5.78         |
| Year of Follow-up: 2010, Age Group: 50-54 |           |               |      |       |               |             |               |                |              |
| Period                                    | Age Group | Smoking Group | N    | %     | Ever Quit (N) | Ever Quit % | Mean Yrs Quit | Short Term (n) | Short Term % |
| 20                                        | 50-54     | Never Any     | 4724 | 43.28 |               |             |               |                |              |
| 20                                        | 50-54     | CC            | 87   | 0.80  | 0             | 0.00        |               |                |              |
| 20                                        | 50-54     | Ecig          | 2490 | 22.81 |               |             |               |                |              |
| 20                                        | 50-54     | Dual          | 0    | 0.00  |               |             |               |                |              |
| 20                                        | 50-54     | Former        | 3615 | 33.12 |               |             | 17.75         | 174            | 4.81         |
| Year of Follow-up: 2010, Age Group: 55-59 |           |               |      |       |               |             |               |                |              |
| Period                                    | Age Group | Smoking Group | N    | %     | Ever Quit (N) | Ever Quit % | Mean Yrs Quit | Short Term (n) | Short Term % |
| 20                                        | 55-59     | Never Any     | 3941 | 39.85 |               |             |               |                |              |
| 20                                        | 55-59     | CC            | 85   | 0.86  | 0             | 0.00        |               |                |              |
| 20                                        | 55-59     | Ecig          | 1859 | 18.80 |               |             |               |                |              |
| 20                                        | 55-59     | Dual          | 0    | 0.00  |               |             |               |                |              |
| 20                                        | 55-59     | Former        | 4004 | 40.49 |               |             | 20.81         | 181            | 4.52         |
| Year of Follow-up: 2010, Age Group: 60-64 |           |               |      |       |               |             |               |                |              |
| Period                                    | Age Group | Smoking Group | N    | %     | Ever Quit (N) | Ever Quit % | Mean Yrs Quit | Short Term (n) | Short Term % |
| 20                                        | 60-64     | Never Any     | 2912 | 33.65 |               |             |               |                |              |
| 20                                        | 60-64     | CC            | 87   | 1.01  | 0             | 0.00        |               |                |              |
| 20                                        | 60-64     | Ecig          | 1428 | 16.50 |               |             |               |                |              |
| 20                                        | 60-64     | Dual          | 0    | 0.00  |               |             |               |                |              |
| 20                                        | 60-64     | Former        | 4228 | 48.85 |               |             | 22.41         | 241            | 5.70         |
| Year of Follow-up: 2010, Age Group: 65-69 |           |               |      |       |               |             |               |                |              |

### Results for PHIM for Run 3 (Sensitivity\_Analysis\_1.RTF)

| Period                                       | Age Group | Smoking Group | N     | %     | Ever Quit (N) | Ever Quit % | Mean Yrs Quit | Short Term (n) | Short Term % |
|----------------------------------------------|-----------|---------------|-------|-------|---------------|-------------|---------------|----------------|--------------|
| 20                                           | 65-69     | Never Any     | 1919  | 29.46 |               |             |               |                |              |
| 20                                           | 65-69     | CC            | 60    | 0.92  | 0             | 0.00        |               |                |              |
| 20                                           | 65-69     | Ecig          | 809   | 12.42 |               |             |               |                |              |
| 20                                           | 65-69     | Dual          | 0     | 0.00  |               |             |               |                |              |
| 20                                           | 65-69     | Former        | 3727  | 57.21 |               |             | 24.03         | 133            | 3.57         |
| Year of Follow-up: 2010, Age Group: 70-74    |           |               |       |       |               |             |               |                |              |
| Period                                       | Age Group | Smoking Group | N     | %     | Ever Quit (N) | Ever Quit % | Mean Yrs Quit | Short Term (n) | Short Term % |
| 20                                           | 70-74     | Never Any     | 1611  | 29.41 |               |             |               |                |              |
| 20                                           | 70-74     | CC            | 69    | 1.26  | 0             | 0.00        |               |                |              |
| 20                                           | 70-74     | Ecig          | 574   | 10.48 |               |             |               |                |              |
| 20                                           | 70-74     | Dual          | 0     | 0.00  |               |             |               |                |              |
| 20                                           | 70-74     | Former        | 3223  | 58.85 |               |             | 25.75         | 61             | 1.89         |
| Year of Follow-up: 2010, Age Group: 75-79    |           |               |       |       |               |             |               |                |              |
| Period                                       | Age Group | Smoking Group | N     | %     | Ever Quit (N) | Ever Quit % | Mean Yrs Quit | Short Term (n) | Short Term % |
| 20                                           | 75-79     | Never Any     | 1337  | 26.83 |               |             |               |                |              |
| 20                                           | 75-79     | CC            | 63    | 1.26  | 0             | 0.00        |               |                |              |
| 20                                           | 75-79     | Ecig          | 351   | 7.04  |               |             |               |                |              |
| 20                                           | 75-79     | Dual          | 0     | 0.00  |               |             |               |                |              |
| 20                                           | 75-79     | Former        | 3232  | 64.86 |               |             | 26.66         | 43             | 1.33         |
| Year of Follow-up: 2015, Age Group: All Ages |           |               |       |       |               |             |               |                |              |
| Period                                       | Age Group | Smoking Group | N     | %     | Ever Quit (N) | Ever Quit % | Mean Yrs Quit | Short Term (n) | Short Term % |
| 25                                           | All Ages  | Never Any     | 34747 | 43.53 |               |             |               |                |              |
| 25                                           | All Ages  | CC            | 289   | 0.36  | 0             | 0.00        |               |                |              |
| 25                                           | All Ages  | Ecig          | 14107 | 17.67 |               |             |               |                |              |
| 25                                           | All Ages  | Dual          | 0     | 0.00  |               |             |               |                |              |
| 25                                           | All Ages  | Former        | 30674 | 38.43 |               |             | 21.87         | 1088           | 3.55         |
| Year of Follow-up: 2015, Age Group: 18-19    |           |               |       |       |               |             |               |                |              |
| Period                                       | Age Group | Smoking Group | N     | %     | Ever Quit (N) | Ever Quit % | Mean Yrs Quit | Short Term (n) | Short Term % |
| 25                                           | 18-19     | Never Any     | 0     | .     |               |             |               |                |              |
| 25                                           | 18-19     | CC            | 0     | .     | 0             | .           |               |                |              |
| 25                                           | 18-19     | Ecig          | 0     | .     |               |             |               |                |              |
| 25                                           | 18-19     | Dual          | 0     | .     |               |             |               |                |              |
| 25                                           | 18-19     | Former        | 0     | .     |               |             |               | 0              | .            |
| Year of Follow-up: 2015, Age Group: 20-24    |           |               |       |       |               |             |               |                |              |
| Period                                       | Age Group | Smoking Group | N     | %     | Ever Quit (N) | Ever Quit % | Mean Yrs Quit | Short Term (n) | Short Term % |
| 25                                           | 20-24     | Never Any     | 0     | .     |               |             |               |                |              |
| 25                                           | 20-24     | CC            | 0     | .     | 0             | .           |               |                |              |
| 25                                           | 20-24     | Ecig          | 0     | .     |               |             |               |                |              |
| 25                                           | 20-24     | Dual          | 0     | .     |               |             |               |                |              |
| 25                                           | 20-24     | Former        | 0     | .     |               |             |               | 0              | .            |
| Year of Follow-up: 2015, Age Group: 25-29    |           |               |       |       |               |             |               |                |              |
| Period                                       | Age Group | Smoking Group | N     | %     | Ever Quit (N) | Ever Quit % | Mean Yrs Quit | Short Term (n) | Short Term % |
| 25                                           | 25-29     | Never Any     | 0     | .     |               |             |               |                |              |
| 25                                           | 25-29     | CC            | 0     | .     | 0             | .           |               |                |              |
| 25                                           | 25-29     | Ecig          | 0     | .     |               |             |               |                |              |
| 25                                           | 25-29     | Dual          | 0     | .     |               |             |               |                |              |
| 25                                           | 25-29     | Former        | 0     | .     |               |             |               | 0              | .            |
| Year of Follow-up: 2015, Age Group: 30-34    |           |               |       |       |               |             |               |                |              |
| Period                                       | Age Group | Smoking Group | N     | %     | Ever Quit (N) | Ever Quit % | Mean Yrs Quit | Short Term (n) | Short Term % |
| 25                                           | 30-34     | Never Any     | 0     | .     |               |             |               |                |              |
| 25                                           | 30-34     | CC            | 0     | .     | 0             | .           |               |                |              |
| 25                                           | 30-34     | Ecig          | 0     | .     |               |             |               |                |              |
| 25                                           | 30-34     | Dual          | 0     | .     |               |             |               |                |              |
| 25                                           | 30-34     | Former        | 0     | .     |               |             |               | 0              | .            |
| Year of Follow-up: 2015, Age Group: 35-39    |           |               |       |       |               |             |               |                |              |
| Period                                       | Age Group | Smoking Group | N     | %     | Ever Quit (N) | Ever Quit % | Mean Yrs Quit | Short Term (n) | Short Term % |
| 25                                           | 35-39     | Never Any     | 4489  | 50.75 |               |             |               |                |              |
| 25                                           | 35-39     | CC            | 28    | 0.32  | 0             | 0.00        |               |                |              |
| 25                                           | 35-39     | Ecig          | 1990  | 22.50 |               |             |               |                |              |
| 25                                           | 35-39     | Dual          | 0     | 0.00  |               |             |               |                |              |
| 25                                           | 35-39     | Former        | 2338  | 26.43 |               |             | 11.53         | 142            | 6.07         |
| Year of Follow-up: 2015, Age Group: 40-44    |           |               |       |       |               |             |               |                |              |
| Period                                       | Age Group | Smoking Group | N     | %     | Ever Quit (N) | Ever Quit % | Mean Yrs Quit | Short Term (n) | Short Term % |
| 25                                           | 40-44     | Never Any     | 4991  | 55.21 |               |             |               |                |              |
| 25                                           | 40-44     | CC            | 20    | 0.22  | 0             | 0.00        |               |                |              |
| 25                                           | 40-44     | Ecig          | 1897  | 20.98 |               |             |               |                |              |
| 25                                           | 40-44     | Dual          | 0     | 0.00  |               |             |               |                |              |

**Results for PHIM for Run 3 (Sensitivity\_Analysis\_1.RTF)**

|                                              |           |               |       |       |               |             |               |                |              |
|----------------------------------------------|-----------|---------------|-------|-------|---------------|-------------|---------------|----------------|--------------|
| 25                                           | 40-44     | Former        | 2132  | 23.58 |               |             | 13.01         | 112            | 5.25         |
| Year of Follow-up: 2015, Age Group: 45-49    |           |               |       |       |               |             |               |                |              |
| Period                                       | Age Group | Smoking Group | N     | %     | Ever Quit (N) | Ever Quit % | Mean Yrs Quit | Short Term (n) | Short Term % |
| 25                                           | 45-49     | Never Any     | 5163  | 52.60 |               |             |               |                |              |
| 25                                           | 45-49     | CC            | 29    | 0.30  | 0             | 0.00        |               |                |              |
| 25                                           | 45-49     | Ecig          | 2195  | 22.36 |               |             |               |                |              |
| 25                                           | 45-49     | Dual          | 0     | 0.00  |               |             |               |                |              |
| 25                                           | 45-49     | Former        | 2429  | 24.75 |               |             | 17.18         | 81             | 3.33         |
| Year of Follow-up: 2015, Age Group: 50-54    |           |               |       |       |               |             |               |                |              |
| Period                                       | Age Group | Smoking Group | N     | %     | Ever Quit (N) | Ever Quit % | Mean Yrs Quit | Short Term (n) | Short Term % |
| 25                                           | 50-54     | Never Any     | 4997  | 46.86 |               |             |               |                |              |
| 25                                           | 50-54     | CC            | 37    | 0.35  | 0             | 0.00        |               |                |              |
| 25                                           | 50-54     | Ecig          | 2387  | 22.38 |               |             |               |                |              |
| 25                                           | 50-54     | Dual          | 0     | 0.00  |               |             |               |                |              |
| 25                                           | 50-54     | Former        | 3243  | 30.41 |               |             | 19.10         | 130            | 4.01         |
| Year of Follow-up: 2015, Age Group: 55-59    |           |               |       |       |               |             |               |                |              |
| Period                                       | Age Group | Smoking Group | N     | %     | Ever Quit (N) | Ever Quit % | Mean Yrs Quit | Short Term (n) | Short Term % |
| 25                                           | 55-59     | Never Any     | 4724  | 43.28 |               |             |               |                |              |
| 25                                           | 55-59     | CC            | 33    | 0.30  | 0             | 0.00        |               |                |              |
| 25                                           | 55-59     | Ecig          | 2103  | 19.27 |               |             |               |                |              |
| 25                                           | 55-59     | Dual          | 0     | 0.00  |               |             |               |                |              |
| 25                                           | 55-59     | Former        | 4056  | 37.16 |               |             | 20.50         | 162            | 3.99         |
| Year of Follow-up: 2015, Age Group: 60-64    |           |               |       |       |               |             |               |                |              |
| Period                                       | Age Group | Smoking Group | N     | %     | Ever Quit (N) | Ever Quit % | Mean Yrs Quit | Short Term (n) | Short Term % |
| 25                                           | 60-64     | Never Any     | 3941  | 39.85 |               |             |               |                |              |
| 25                                           | 60-64     | CC            | 28    | 0.28  | 0             | 0.00        |               |                |              |
| 25                                           | 60-64     | Ecig          | 1443  | 14.59 |               |             |               |                |              |
| 25                                           | 60-64     | Dual          | 0     | 0.00  |               |             |               |                |              |
| 25                                           | 60-64     | Former        | 4477  | 45.27 |               |             | 23.28         | 205            | 4.58         |
| Year of Follow-up: 2015, Age Group: 65-69    |           |               |       |       |               |             |               |                |              |
| Period                                       | Age Group | Smoking Group | N     | %     | Ever Quit (N) | Ever Quit % | Mean Yrs Quit | Short Term (n) | Short Term % |
| 25                                           | 65-69     | Never Any     | 2912  | 33.65 |               |             |               |                |              |
| 25                                           | 65-69     | CC            | 43    | 0.50  | 0             | 0.00        |               |                |              |
| 25                                           | 65-69     | Ecig          | 1019  | 11.77 |               |             |               |                |              |
| 25                                           | 65-69     | Dual          | 0     | 0.00  |               |             |               |                |              |
| 25                                           | 65-69     | Former        | 4681  | 54.08 |               |             | 24.99         | 134            | 2.86         |
| Year of Follow-up: 2015, Age Group: 70-74    |           |               |       |       |               |             |               |                |              |
| Period                                       | Age Group | Smoking Group | N     | %     | Ever Quit (N) | Ever Quit % | Mean Yrs Quit | Short Term (n) | Short Term % |
| 25                                           | 70-74     | Never Any     | 1919  | 29.46 |               |             |               |                |              |
| 25                                           | 70-74     | CC            | 35    | 0.54  | 0             | 0.00        |               |                |              |
| 25                                           | 70-74     | Ecig          | 616   | 9.46  |               |             |               |                |              |
| 25                                           | 70-74     | Dual          | 0     | 0.00  |               |             |               |                |              |
| 25                                           | 70-74     | Former        | 3945  | 60.55 |               |             | 27.55         | 70             | 1.77         |
| Year of Follow-up: 2015, Age Group: 75-79    |           |               |       |       |               |             |               |                |              |
| Period                                       | Age Group | Smoking Group | N     | %     | Ever Quit (N) | Ever Quit % | Mean Yrs Quit | Short Term (n) | Short Term % |
| 25                                           | 75-79     | Never Any     | 1611  | 29.41 |               |             |               |                |              |
| 25                                           | 75-79     | CC            | 36    | 0.66  | 0             | 0.00        |               |                |              |
| 25                                           | 75-79     | Ecig          | 457   | 8.34  |               |             |               |                |              |
| 25                                           | 75-79     | Dual          | 0     | 0.00  |               |             |               |                |              |
| 25                                           | 75-79     | Former        | 3373  | 61.58 |               |             | 29.48         | 52             | 1.54         |
| Year of Follow-up: 2020, Age Group: All Ages |           |               |       |       |               |             |               |                |              |
| Period                                       | Age Group | Smoking Group | N     | %     | Ever Quit (N) | Ever Quit % | Mean Yrs Quit | Short Term (n) | Short Term % |
| 30                                           | All Ages  | Never Any     | 33136 | 44.57 |               |             |               |                |              |
| 30                                           | All Ages  | CC            | 100   | 0.13  | 0             | 0.00        |               |                |              |
| 30                                           | All Ages  | Ecig          | 11358 | 15.28 |               |             |               |                |              |
| 30                                           | All Ages  | Dual          | 0     | 0.00  |               |             |               |                |              |
| 30                                           | All Ages  | Former        | 29746 | 40.01 |               |             | 23.97         | 918            | 3.09         |
| Year of Follow-up: 2020, Age Group: 18-19    |           |               |       |       |               |             |               |                |              |
| Period                                       | Age Group | Smoking Group | N     | %     | Ever Quit (N) | Ever Quit % | Mean Yrs Quit | Short Term (n) | Short Term % |
| 30                                           | 18-19     | Never Any     | 0     | .     |               |             |               |                |              |
| 30                                           | 18-19     | CC            | 0     | .     | 0             | .           |               |                |              |
| 30                                           | 18-19     | Ecig          | 0     | .     |               |             |               |                |              |
| 30                                           | 18-19     | Dual          | 0     | .     |               |             |               |                |              |
| 30                                           | 18-19     | Former        | 0     | .     |               |             | .             | 0              | .            |
| Year of Follow-up: 2020, Age Group: 20-24    |           |               |       |       |               |             |               |                |              |
| Period                                       | Age Group | Smoking Group | N     | %     | Ever Quit (N) | Ever Quit % | Mean Yrs Quit | Short Term (n) | Short Term % |
| 30                                           | 20-24     | Never Any     | 0     | .     |               |             |               |                |              |
| 30                                           | 20-24     | CC            | 0     | .     | 0             | .           |               |                |              |



**Results for PHIM for Run 3 (Sensitivity\_Analysis\_1.RTF)**

|                                           |           |               |      |       |               |             |               |                |              |
|-------------------------------------------|-----------|---------------|------|-------|---------------|-------------|---------------|----------------|--------------|
| 30                                        | 20-24     | Ecig          | 0    | .     |               |             |               |                |              |
| 30                                        | 20-24     | Dual          | 0    | .     |               |             |               |                |              |
| 30                                        | 20-24     | Former        | 0    | .     |               |             | 0             | .              |              |
| Year of Follow-up: 2020, Age Group: 25-29 |           |               |      |       |               |             |               |                |              |
| Period                                    | Age Group | Smoking Group | N    | %     | Ever Quit (N) | Ever Quit % | Mean Yrs Quit | Short Term (n) | Short Term % |
| 30                                        | 25-29     | Never Any     | 0    | .     |               |             |               |                |              |
| 30                                        | 25-29     | CC            | 0    | .     | 0             | .           |               |                |              |
| 30                                        | 25-29     | Ecig          | 0    | .     |               |             |               |                |              |
| 30                                        | 25-29     | Dual          | 0    | .     |               |             |               |                |              |
| 30                                        | 25-29     | Former        | 0    | .     |               |             | 0             | .              |              |
| Year of Follow-up: 2020, Age Group: 30-34 |           |               |      |       |               |             |               |                |              |
| Period                                    | Age Group | Smoking Group | N    | %     | Ever Quit (N) | Ever Quit % | Mean Yrs Quit | Short Term (n) | Short Term % |
| 30                                        | 30-34     | Never Any     | 0    | .     |               |             |               |                |              |
| 30                                        | 30-34     | CC            | 0    | .     | 0             | .           |               |                |              |
| 30                                        | 30-34     | Ecig          | 0    | .     |               |             |               |                |              |
| 30                                        | 30-34     | Dual          | 0    | .     |               |             |               |                |              |
| 30                                        | 30-34     | Former        | 0    | .     |               |             | 0             | .              |              |
| Year of Follow-up: 2020, Age Group: 35-39 |           |               |      |       |               |             |               |                |              |
| Period                                    | Age Group | Smoking Group | N    | %     | Ever Quit (N) | Ever Quit % | Mean Yrs Quit | Short Term (n) | Short Term % |
| 30                                        | 35-39     | Never Any     | 0    | .     |               |             |               |                |              |
| 30                                        | 35-39     | CC            | 0    | .     | 0             | .           |               |                |              |
| 30                                        | 35-39     | Ecig          | 0    | .     |               |             |               |                |              |
| 30                                        | 35-39     | Dual          | 0    | .     |               |             |               |                |              |
| 30                                        | 35-39     | Former        | 0    | .     |               |             | 0             | .              |              |
| Year of Follow-up: 2020, Age Group: 40-44 |           |               |      |       |               |             |               |                |              |
| Period                                    | Age Group | Smoking Group | N    | %     | Ever Quit (N) | Ever Quit % | Mean Yrs Quit | Short Term (n) | Short Term % |
| 30                                        | 40-44     | Never Any     | 4489 | 50.75 |               |             |               |                |              |
| 30                                        | 40-44     | CC            | 12   | 0.14  | 0             | 0.00        |               |                |              |
| 30                                        | 40-44     | Ecig          | 1743 | 19.71 |               |             |               |                |              |
| 30                                        | 40-44     | Dual          | 0    | 0.00  |               |             |               |                |              |
| 30                                        | 40-44     | Former        | 2601 | 29.41 |               |             | 15.05         | 107            | 4.11         |
| Year of Follow-up: 2020, Age Group: 45-49 |           |               |      |       |               |             |               |                |              |
| Period                                    | Age Group | Smoking Group | N    | %     | Ever Quit (N) | Ever Quit % | Mean Yrs Quit | Short Term (n) | Short Term % |
| 30                                        | 45-49     | Never Any     | 4991 | 55.21 |               |             |               |                |              |
| 30                                        | 45-49     | CC            | 5    | 0.06  | 0             | 0.00        |               |                |              |
| 30                                        | 45-49     | Ecig          | 1690 | 18.69 |               |             |               |                |              |
| 30                                        | 45-49     | Dual          | 0    | 0.00  |               |             |               |                |              |
| 30                                        | 45-49     | Former        | 2354 | 26.04 |               |             | 16.54         | 63             | 2.68         |
| Year of Follow-up: 2020, Age Group: 50-54 |           |               |      |       |               |             |               |                |              |
| Period                                    | Age Group | Smoking Group | N    | %     | Ever Quit (N) | Ever Quit % | Mean Yrs Quit | Short Term (n) | Short Term % |
| 30                                        | 50-54     | Never Any     | 5163 | 52.60 |               |             |               |                |              |
| 30                                        | 50-54     | CC            | 9    | 0.09  | 0             | 0.00        |               |                |              |
| 30                                        | 50-54     | Ecig          | 2021 | 20.59 |               |             |               |                |              |
| 30                                        | 50-54     | Dual          | 0    | 0.00  |               |             |               |                |              |
| 30                                        | 50-54     | Former        | 2623 | 26.72 |               |             | 20.66         | 99             | 3.77         |
| Year of Follow-up: 2020, Age Group: 55-59 |           |               |      |       |               |             |               |                |              |
| Period                                    | Age Group | Smoking Group | N    | %     | Ever Quit (N) | Ever Quit % | Mean Yrs Quit | Short Term (n) | Short Term % |
| 30                                        | 55-59     | Never Any     | 4997 | 46.86 |               |             |               |                |              |
| 30                                        | 55-59     | CC            | 18   | 0.17  | 0             | 0.00        |               |                |              |
| 30                                        | 55-59     | Ecig          | 2002 | 18.77 |               |             |               |                |              |
| 30                                        | 55-59     | Dual          | 0    | 0.00  |               |             |               |                |              |
| 30                                        | 55-59     | Former        | 3647 | 34.20 |               |             | 21.65         | 157            | 4.30         |
| Year of Follow-up: 2020, Age Group: 60-64 |           |               |      |       |               |             |               |                |              |
| Period                                    | Age Group | Smoking Group | N    | %     | Ever Quit (N) | Ever Quit % | Mean Yrs Quit | Short Term (n) | Short Term % |
| 30                                        | 60-64     | Never Any     | 4724 | 43.28 |               |             |               |                |              |
| 30                                        | 60-64     | CC            | 10   | 0.09  | 0             | 0.00        |               |                |              |
| 30                                        | 60-64     | Ecig          | 1614 | 14.79 |               |             |               |                |              |
| 30                                        | 60-64     | Dual          | 0    | 0.00  |               |             |               |                |              |
| 30                                        | 60-64     | Former        | 4568 | 41.85 |               |             | 22.87         | 203            | 4.44         |
| Year of Follow-up: 2020, Age Group: 65-69 |           |               |      |       |               |             |               |                |              |
| Period                                    | Age Group | Smoking Group | N    | %     | Ever Quit (N) | Ever Quit % | Mean Yrs Quit | Short Term (n) | Short Term % |
| 30                                        | 65-69     | Never Any     | 3941 | 39.85 |               |             |               |                |              |
| 30                                        | 65-69     | CC            | 13   | 0.13  | 0             | 0.00        |               |                |              |
| 30                                        | 65-69     | Ecig          | 1039 | 10.51 |               |             |               |                |              |
| 30                                        | 65-69     | Dual          | 0    | 0.00  |               |             |               |                |              |
| 30                                        | 65-69     | Former        | 4896 | 49.51 |               |             | 26.05         | 145            | 2.96         |
| Year of Follow-up: 2020, Age Group: 70-74 |           |               |      |       |               |             |               |                |              |
| Period                                    | Age Group | Smoking Group | N    | %     | Ever Quit (N) | Ever Quit % | Mean Yrs Quit | Short Term (n) | Short Term % |

### Results for PHIM for Run 3 (Sensitivity\_Analysis\_1.RTF)

|                                              |           |               |       |       |               |             |               |                |              |
|----------------------------------------------|-----------|---------------|-------|-------|---------------|-------------|---------------|----------------|--------------|
| 30                                           | 70-74     | Never Any     | 2912  | 33.65 |               |             |               |                |              |
| 30                                           | 70-74     | CC            | 18    | 0.21  | 0             | 0.00        |               |                |              |
| 30                                           | 70-74     | Ecig          | 770   | 8.90  |               |             |               |                |              |
| 30                                           | 70-74     | Dual          | 0     | 0.00  |               |             |               |                |              |
| 30                                           | 70-74     | Former        | 4955  | 57.25 |               |             | 28.45         | 93             | 1.88         |
| Year of Follow-up: 2020, Age Group: 75-79    |           |               |       |       |               |             |               |                |              |
| Period                                       | Age Group | Smoking Group | N     | %     | Ever Quit (N) | Ever Quit % | Mean Yrs Quit | Short Term (n) | Short Term % |
| 30                                           | 75-79     | Never Any     | 1919  | 29.46 |               |             |               |                |              |
| 30                                           | 75-79     | CC            | 15    | 0.23  | 0             | 0.00        |               |                |              |
| 30                                           | 75-79     | Ecig          | 479   | 7.35  |               |             |               |                |              |
| 30                                           | 75-79     | Dual          | 0     | 0.00  |               |             |               |                |              |
| 30                                           | 75-79     | Former        | 4102  | 62.96 |               |             | 31.39         | 51             | 1.24         |
| Year of Follow-up: 2025, Age Group: All Ages |           |               |       |       |               |             |               |                |              |
| Period                                       | Age Group | Smoking Group | N     | %     | Ever Quit (N) | Ever Quit % | Mean Yrs Quit | Short Term (n) | Short Term % |
| 35                                           | All Ages  | Never Any     | 31217 | 46.03 |               |             |               |                |              |
| 35                                           | All Ages  | CC            | 38    | 0.06  | 0             | 0.00        |               |                |              |
| 35                                           | All Ages  | Ecig          | 8864  | 13.07 |               |             |               |                |              |
| 35                                           | All Ages  | Dual          | 0     | 0.00  |               |             |               |                |              |
| 35                                           | All Ages  | Former        | 27706 | 40.85 |               |             | 25.87         | 785            | 2.83         |
| Year of Follow-up: 2025, Age Group: 18-19    |           |               |       |       |               |             |               |                |              |
| Period                                       | Age Group | Smoking Group | N     | %     | Ever Quit (N) | Ever Quit % | Mean Yrs Quit | Short Term (n) | Short Term % |
| 35                                           | 18-19     | Never Any     | 0     | .     |               |             |               |                |              |
| 35                                           | 18-19     | CC            | 0     | .     | 0             | .           |               |                |              |
| 35                                           | 18-19     | Ecig          | 0     | .     |               |             |               |                |              |
| 35                                           | 18-19     | Dual          | 0     | .     |               |             |               |                |              |
| 35                                           | 18-19     | Former        | 0     | .     |               |             | .             | 0              | .            |
| Year of Follow-up: 2025, Age Group: 20-24    |           |               |       |       |               |             |               |                |              |
| Period                                       | Age Group | Smoking Group | N     | %     | Ever Quit (N) | Ever Quit % | Mean Yrs Quit | Short Term (n) | Short Term % |
| 35                                           | 20-24     | Never Any     | 0     | .     |               |             |               |                |              |
| 35                                           | 20-24     | CC            | 0     | .     | 0             | .           |               |                |              |
| 35                                           | 20-24     | Ecig          | 0     | .     |               |             |               |                |              |
| 35                                           | 20-24     | Dual          | 0     | .     |               |             |               |                |              |
| 35                                           | 20-24     | Former        | 0     | .     |               |             | .             | 0              | .            |
| Year of Follow-up: 2025, Age Group: 25-29    |           |               |       |       |               |             |               |                |              |
| Period                                       | Age Group | Smoking Group | N     | %     | Ever Quit (N) | Ever Quit % | Mean Yrs Quit | Short Term (n) | Short Term % |
| 35                                           | 25-29     | Never Any     | 0     | .     |               |             |               |                |              |
| 35                                           | 25-29     | CC            | 0     | .     | 0             | .           |               |                |              |
| 35                                           | 25-29     | Ecig          | 0     | .     |               |             |               |                |              |
| 35                                           | 25-29     | Dual          | 0     | .     |               |             |               |                |              |
| 35                                           | 25-29     | Former        | 0     | .     |               |             | .             | 0              | .            |
| Year of Follow-up: 2025, Age Group: 30-34    |           |               |       |       |               |             |               |                |              |
| Period                                       | Age Group | Smoking Group | N     | %     | Ever Quit (N) | Ever Quit % | Mean Yrs Quit | Short Term (n) | Short Term % |
| 35                                           | 30-34     | Never Any     | 0     | .     |               |             |               |                |              |
| 35                                           | 30-34     | CC            | 0     | .     | 0             | .           |               |                |              |
| 35                                           | 30-34     | Ecig          | 0     | .     |               |             |               |                |              |
| 35                                           | 30-34     | Dual          | 0     | .     |               |             |               |                |              |
| 35                                           | 30-34     | Former        | 0     | .     |               |             | .             | 0              | .            |
| Year of Follow-up: 2025, Age Group: 35-39    |           |               |       |       |               |             |               |                |              |
| Period                                       | Age Group | Smoking Group | N     | %     | Ever Quit (N) | Ever Quit % | Mean Yrs Quit | Short Term (n) | Short Term % |
| 35                                           | 35-39     | Never Any     | 0     | .     |               |             |               |                |              |
| 35                                           | 35-39     | CC            | 0     | .     | 0             | .           |               |                |              |
| 35                                           | 35-39     | Ecig          | 0     | .     |               |             |               |                |              |
| 35                                           | 35-39     | Dual          | 0     | .     |               |             |               |                |              |
| 35                                           | 35-39     | Former        | 0     | .     |               |             | .             | 0              | .            |
| Year of Follow-up: 2025, Age Group: 40-44    |           |               |       |       |               |             |               |                |              |
| Period                                       | Age Group | Smoking Group | N     | %     | Ever Quit (N) | Ever Quit % | Mean Yrs Quit | Short Term (n) | Short Term % |
| 35                                           | 40-44     | Never Any     | 0     | .     |               |             |               |                |              |
| 35                                           | 40-44     | CC            | 0     | .     | 0             | .           |               |                |              |
| 35                                           | 40-44     | Ecig          | 0     | .     |               |             |               |                |              |
| 35                                           | 40-44     | Dual          | 0     | .     |               |             |               |                |              |
| 35                                           | 40-44     | Former        | 0     | .     |               |             | .             | 0              | .            |
| Year of Follow-up: 2025, Age Group: 45-49    |           |               |       |       |               |             |               |                |              |
| Period                                       | Age Group | Smoking Group | N     | %     | Ever Quit (N) | Ever Quit % | Mean Yrs Quit | Short Term (n) | Short Term % |
| 35                                           | 45-49     | Never Any     | 4489  | 50.75 |               |             |               |                |              |
| 35                                           | 45-49     | CC            | 7     | 0.08  | 0             | 0.00        |               |                |              |
| 35                                           | 45-49     | Ecig          | 1541  | 17.42 |               |             |               |                |              |
| 35                                           | 45-49     | Dual          | 0     | 0.00  |               |             |               |                |              |
| 35                                           | 45-49     | Former        | 2808  | 31.75 |               |             | 18.76         | 60             | 2.14         |
| Year of Follow-up: 2025, Age Group: 50-54    |           |               |       |       |               |             |               |                |              |

**Results for PHIM for Run 3 (Sensitivity\_Analysis\_1.RTF)**

| Period                                       | Age Group | Smoking Group | N     | %     | Ever Quit (N) | Ever Quit % | Mean Yrs Quit | Short Term (n) | Short Term % |
|----------------------------------------------|-----------|---------------|-------|-------|---------------|-------------|---------------|----------------|--------------|
| 35                                           | 50-54     | Never Any     | 4991  | 55.21 |               |             |               |                |              |
| 35                                           | 50-54     | CC            | 3     | 0.03  | 0             | 0.00        |               |                |              |
| 35                                           | 50-54     | Ecig          | 1554  | 17.19 |               |             |               |                |              |
| 35                                           | 50-54     | Dual          | 0     | 0.00  |               |             |               |                |              |
| 35                                           | 50-54     | Former        | 2492  | 27.57 |               |             | 20.44         | 75             | 3.01         |
| Year of Follow-up: 2025, Age Group: 55-59    |           |               |       |       |               |             |               |                |              |
| Period                                       | Age Group | Smoking Group | N     | %     | Ever Quit (N) | Ever Quit % | Mean Yrs Quit | Short Term (n) | Short Term % |
| 35                                           | 55-59     | Never Any     | 5163  | 52.60 |               |             |               |                |              |
| 35                                           | 55-59     | CC            | 0     | 0.00  | 0             | 0.00        |               |                |              |
| 35                                           | 55-59     | Ecig          | 1664  | 16.95 |               |             |               |                |              |
| 35                                           | 55-59     | Dual          | 0     | 0.00  |               |             |               |                |              |
| 35                                           | 55-59     | Former        | 2989  | 30.45 |               |             | 22.76         | 155            | 5.19         |
| Year of Follow-up: 2025, Age Group: 60-64    |           |               |       |       |               |             |               |                |              |
| Period                                       | Age Group | Smoking Group | N     | %     | Ever Quit (N) | Ever Quit % | Mean Yrs Quit | Short Term (n) | Short Term % |
| 35                                           | 60-64     | Never Any     | 4997  | 46.86 |               |             |               |                |              |
| 35                                           | 60-64     | CC            | 9     | 0.08  | 0             | 0.00        |               |                |              |
| 35                                           | 60-64     | Ecig          | 1532  | 14.37 |               |             |               |                |              |
| 35                                           | 60-64     | Dual          | 0     | 0.00  |               |             |               |                |              |
| 35                                           | 60-64     | Former        | 4126  | 38.69 |               |             | 23.79         | 186            | 4.51         |
| Year of Follow-up: 2025, Age Group: 65-69    |           |               |       |       |               |             |               |                |              |
| Period                                       | Age Group | Smoking Group | N     | %     | Ever Quit (N) | Ever Quit % | Mean Yrs Quit | Short Term (n) | Short Term % |
| 35                                           | 65-69     | Never Any     | 4724  | 43.28 |               |             |               |                |              |
| 35                                           | 65-69     | CC            | 5     | 0.05  | 0             | 0.00        |               |                |              |
| 35                                           | 65-69     | Ecig          | 1169  | 10.71 |               |             |               |                |              |
| 35                                           | 65-69     | Dual          | 0     | 0.00  |               |             |               |                |              |
| 35                                           | 65-69     | Former        | 5018  | 45.97 |               |             | 25.57         | 158            | 3.15         |
| Year of Follow-up: 2025, Age Group: 70-74    |           |               |       |       |               |             |               |                |              |
| Period                                       | Age Group | Smoking Group | N     | %     | Ever Quit (N) | Ever Quit % | Mean Yrs Quit | Short Term (n) | Short Term % |
| 35                                           | 70-74     | Never Any     | 3941  | 39.85 |               |             |               |                |              |
| 35                                           | 70-74     | CC            | 5     | 0.05  | 0             | 0.00        |               |                |              |
| 35                                           | 70-74     | Ecig          | 811   | 8.20  |               |             |               |                |              |
| 35                                           | 70-74     | Dual          | 0     | 0.00  |               |             |               |                |              |
| 35                                           | 70-74     | Former        | 5132  | 51.90 |               |             | 29.73         | 79             | 1.54         |
| Year of Follow-up: 2025, Age Group: 75-79    |           |               |       |       |               |             |               |                |              |
| Period                                       | Age Group | Smoking Group | N     | %     | Ever Quit (N) | Ever Quit % | Mean Yrs Quit | Short Term (n) | Short Term % |
| 35                                           | 75-79     | Never Any     | 2912  | 33.65 |               |             |               |                |              |
| 35                                           | 75-79     | CC            | 9     | 0.10  | 0             | 0.00        |               |                |              |
| 35                                           | 75-79     | Ecig          | 593   | 6.85  |               |             |               |                |              |
| 35                                           | 75-79     | Dual          | 0     | 0.00  |               |             |               |                |              |
| 35                                           | 75-79     | Former        | 5141  | 59.40 |               |             | 32.31         | 72             | 1.40         |
| Year of Follow-up: 2030, Age Group: All Ages |           |               |       |       |               |             |               |                |              |
| Period                                       | Age Group | Smoking Group | N     | %     | Ever Quit (N) | Ever Quit % | Mean Yrs Quit | Short Term (n) | Short Term % |
| 40                                           | All Ages  | Never Any     | 28305 | 47.84 |               |             |               |                |              |
| 40                                           | All Ages  | CC            | 15    | 0.03  | 0             | 0.00        |               |                |              |
| 40                                           | All Ages  | Ecig          | 6535  | 11.04 |               |             |               |                |              |
| 40                                           | All Ages  | Dual          | 0     | 0.00  |               |             |               |                |              |
| 40                                           | All Ages  | Former        | 24315 | 41.09 |               |             | 27.43         | 691            | 2.84         |
| Year of Follow-up: 2030, Age Group: 18-19    |           |               |       |       |               |             |               |                |              |
| Period                                       | Age Group | Smoking Group | N     | %     | Ever Quit (N) | Ever Quit % | Mean Yrs Quit | Short Term (n) | Short Term % |
| 40                                           | 18-19     | Never Any     | 0     | .     |               |             |               |                |              |
| 40                                           | 18-19     | CC            | 0     | .     | 0             | .           |               |                |              |
| 40                                           | 18-19     | Ecig          | 0     | .     |               |             |               |                |              |
| 40                                           | 18-19     | Dual          | 0     | .     |               |             |               |                |              |
| 40                                           | 18-19     | Former        | 0     | .     |               |             | .             | 0              | .            |
| Year of Follow-up: 2030, Age Group: 20-24    |           |               |       |       |               |             |               |                |              |
| Period                                       | Age Group | Smoking Group | N     | %     | Ever Quit (N) | Ever Quit % | Mean Yrs Quit | Short Term (n) | Short Term % |
| 40                                           | 20-24     | Never Any     | 0     | .     |               |             |               |                |              |
| 40                                           | 20-24     | CC            | 0     | .     | 0             | .           |               |                |              |
| 40                                           | 20-24     | Ecig          | 0     | .     |               |             |               |                |              |
| 40                                           | 20-24     | Dual          | 0     | .     |               |             |               |                |              |
| 40                                           | 20-24     | Former        | 0     | .     |               |             | .             | 0              | .            |
| Year of Follow-up: 2030, Age Group: 25-29    |           |               |       |       |               |             |               |                |              |
| Period                                       | Age Group | Smoking Group | N     | %     | Ever Quit (N) | Ever Quit % | Mean Yrs Quit | Short Term (n) | Short Term % |
| 40                                           | 25-29     | Never Any     | 0     | .     |               |             |               |                |              |
| 40                                           | 25-29     | CC            | 0     | .     | 0             | .           |               |                |              |
| 40                                           | 25-29     | Ecig          | 0     | .     |               |             |               |                |              |
| 40                                           | 25-29     | Dual          | 0     | .     |               |             |               |                |              |

**Results for PHIM for Run 3 (Sensitivity\_Analysis\_1.RTF)**

| Year of Follow-up: 2030, Age Group: 30-34 | Period | Age Group | Smoking Group | N    | %     | Ever Quit (N) | Ever Quit % | Mean Yrs Quit | Short Term (n) | Short Term % |
|-------------------------------------------|--------|-----------|---------------|------|-------|---------------|-------------|---------------|----------------|--------------|
| Year of Follow-up: 2030, Age Group: 30-34 |        |           |               |      |       |               |             |               |                |              |
| 40                                        | 25-29  | Former    |               | 0    | .     |               |             |               | 0              | .            |
| Year of Follow-up: 2030, Age Group: 35-39 |        |           |               |      |       |               |             |               |                |              |
| 40                                        | 30-34  | Never Any |               | 0    | .     |               |             |               | 0              | .            |
| 40                                        | 30-34  | CC        |               | 0    | .     | 0             | .           |               |                |              |
| 40                                        | 30-34  | Ecig      |               | 0    | .     |               |             |               |                |              |
| 40                                        | 30-34  | Dual      |               | 0    | .     |               |             |               |                |              |
| 40                                        | 30-34  | Former    |               | 0    | .     |               |             |               | 0              | .            |
| Year of Follow-up: 2030, Age Group: 40-44 |        |           |               |      |       |               |             |               |                |              |
| 40                                        | 35-39  | Never Any |               | 0    | .     |               |             |               |                |              |
| 40                                        | 35-39  | CC        |               | 0    | .     | 0             | .           |               |                |              |
| 40                                        | 35-39  | Ecig      |               | 0    | .     |               |             |               |                |              |
| 40                                        | 35-39  | Dual      |               | 0    | .     |               |             |               |                |              |
| 40                                        | 35-39  | Former    |               | 0    | .     |               |             |               | 0              | .            |
| Year of Follow-up: 2030, Age Group: 45-49 |        |           |               |      |       |               |             |               |                |              |
| 40                                        | 40-44  | Never Any |               | 0    | .     |               |             |               |                |              |
| 40                                        | 40-44  | CC        |               | 0    | .     | 0             | .           |               |                |              |
| 40                                        | 40-44  | Ecig      |               | 0    | .     |               |             |               |                |              |
| 40                                        | 40-44  | Dual      |               | 0    | .     |               |             |               |                |              |
| 40                                        | 40-44  | Former    |               | 0    | .     |               |             |               | 0              | .            |
| Year of Follow-up: 2030, Age Group: 50-54 |        |           |               |      |       |               |             |               |                |              |
| 40                                        | 45-49  | Never Any |               | 0    | .     |               |             |               |                |              |
| 40                                        | 45-49  | CC        |               | 0    | .     | 0             | .           |               |                |              |
| 40                                        | 45-49  | Ecig      |               | 0    | .     |               |             |               |                |              |
| 40                                        | 45-49  | Dual      |               | 0    | .     |               |             |               |                |              |
| 40                                        | 45-49  | Former    |               | 0    | .     |               |             |               | 0              | .            |
| Year of Follow-up: 2030, Age Group: 55-59 |        |           |               |      |       |               |             |               |                |              |
| 40                                        | 50-54  | Never Any |               | 4489 | 50.75 |               |             |               |                |              |
| 40                                        | 50-54  | CC        |               | 3    | 0.03  | 0             | 0.00        |               |                |              |
| 40                                        | 50-54  | Ecig      |               | 1392 | 15.74 |               |             |               |                |              |
| 40                                        | 50-54  | Dual      |               | 0    | 0.00  |               |             |               |                |              |
| 40                                        | 50-54  | Former    |               | 2961 | 33.48 |               |             | 22.61         | 80             | 2.70         |
| Year of Follow-up: 2030, Age Group: 60-64 |        |           |               |      |       |               |             |               |                |              |
| 40                                        | 55-59  | Never Any |               | 4991 | 55.21 |               |             |               |                |              |
| 40                                        | 55-59  | CC        |               | 2    | 0.02  | 0             | 0.00        |               |                |              |
| 40                                        | 55-59  | Ecig      |               | 1291 | 14.28 |               |             |               |                |              |
| 40                                        | 55-59  | Dual      |               | 0    | 0.00  |               |             |               |                |              |
| 40                                        | 55-59  | Former    |               | 2756 | 30.49 |               |             | 23.19         | 114            | 4.14         |
| Year of Follow-up: 2030, Age Group: 65-69 |        |           |               |      |       |               |             |               |                |              |
| 40                                        | 60-64  | Never Any |               | 5163 | 52.60 |               |             |               |                |              |
| 40                                        | 60-64  | CC        |               | 0    | 0.00  | 0             | 0.00        |               |                |              |
| 40                                        | 60-64  | Ecig      |               | 1238 | 12.61 |               |             |               |                |              |
| 40                                        | 60-64  | Dual      |               | 0    | 0.00  |               |             |               |                |              |
| 40                                        | 60-64  | Former    |               | 3415 | 34.79 |               |             | 24.53         | 183            | 5.36         |
| Year of Follow-up: 2030, Age Group: 70-74 |        |           |               |      |       |               |             |               |                |              |
| 40                                        | 65-69  | Never Any |               | 4997 | 46.86 |               |             |               |                |              |
| 40                                        | 65-69  | CC        |               | 4    | 0.04  | 0             | 0.00        |               |                |              |
| 40                                        | 65-69  | Ecig      |               | 1119 | 10.49 |               |             |               |                |              |
| 40                                        | 65-69  | Dual      |               | 0    | 0.00  |               |             |               |                |              |
| 40                                        | 65-69  | Former    |               | 4544 | 42.61 |               |             | 26.35         | 136            | 2.99         |
| Year of Follow-up: 2030, Age Group: 75-79 |        |           |               |      |       |               |             |               |                |              |
| 40                                        | 70-74  | Never Any |               | 4724 | 43.28 |               |             |               |                |              |
| 40                                        | 70-74  | CC        |               | 3    | 0.03  | 0             | 0.00        |               |                |              |
| 40                                        | 70-74  | Ecig      |               | 880  | 8.06  |               |             |               |                |              |
| 40                                        | 70-74  | Dual      |               | 0    | 0.00  |               |             |               |                |              |
| 40                                        | 70-74  | Former    |               | 5309 | 48.64 |               |             | 29.01         | 95             | 1.79         |
| Year of Follow-up: 2030, Age Group: 75-79 |        |           |               |      |       |               |             |               |                |              |
| 40                                        | 75-79  | Never Any |               | 3941 | 39.85 |               |             |               |                |              |
| 40                                        | 75-79  | CC        |               | 3    | 0.03  | 0             | 0.00        |               |                |              |

### Results for PHIM for Run 3 (Sensitivity\_Analysis\_1.RTF)

|                                              |           |               |       |       |               |             |               |                |              |
|----------------------------------------------|-----------|---------------|-------|-------|---------------|-------------|---------------|----------------|--------------|
| 40                                           | 75-79     | Ecig          | 615   | 6.22  |               |             |               |                |              |
| 40                                           | 75-79     | Dual          | 0     | 0.00  |               |             |               |                |              |
| 40                                           | 75-79     | Former        | 5330  | 53.90 |               |             | 33.51         | 83             | 1.56         |
| Year of Follow-up: 2035, Age Group: All Ages |           |               |       |       |               |             |               |                |              |
| Period                                       | Age Group | Smoking Group | N     | %     | Ever Quit (N) | Ever Quit % | Mean Yrs Quit | Short Term (n) | Short Term % |
| 45                                           | All Ages  | Never Any     | 24364 | 49.44 |               |             |               |                |              |
| 45                                           | All Ages  | CC            | 6     | 0.01  | 0             | 0.00        |               |                |              |
| 45                                           | All Ages  | Ecig          | 4578  | 9.29  |               |             |               |                |              |
| 45                                           | All Ages  | Dual          | 0     | 0.00  |               |             |               |                |              |
| 45                                           | All Ages  | Former        | 20333 | 41.26 |               |             | 28.82         | 538            | 2.65         |
| Year of Follow-up: 2035, Age Group: 18-19    |           |               |       |       |               |             |               |                |              |
| Period                                       | Age Group | Smoking Group | N     | %     | Ever Quit (N) | Ever Quit % | Mean Yrs Quit | Short Term (n) | Short Term % |
| 45                                           | 18-19     | Never Any     | 0     | .     |               |             |               |                |              |
| 45                                           | 18-19     | CC            | 0     | .     | 0             | .           |               |                |              |
| 45                                           | 18-19     | Ecig          | 0     | .     |               |             |               |                |              |
| 45                                           | 18-19     | Dual          | 0     | .     |               |             |               |                |              |
| 45                                           | 18-19     | Former        | 0     | .     |               |             | .             | 0              | .            |
| Year of Follow-up: 2035, Age Group: 20-24    |           |               |       |       |               |             |               |                |              |
| Period                                       | Age Group | Smoking Group | N     | %     | Ever Quit (N) | Ever Quit % | Mean Yrs Quit | Short Term (n) | Short Term % |
| 45                                           | 20-24     | Never Any     | 0     | .     |               |             |               |                |              |
| 45                                           | 20-24     | CC            | 0     | .     | 0             | .           |               |                |              |
| 45                                           | 20-24     | Ecig          | 0     | .     |               |             |               |                |              |
| 45                                           | 20-24     | Dual          | 0     | .     |               |             |               |                |              |
| 45                                           | 20-24     | Former        | 0     | .     |               |             | .             | 0              | .            |
| Year of Follow-up: 2035, Age Group: 25-29    |           |               |       |       |               |             |               |                |              |
| Period                                       | Age Group | Smoking Group | N     | %     | Ever Quit (N) | Ever Quit % | Mean Yrs Quit | Short Term (n) | Short Term % |
| 45                                           | 25-29     | Never Any     | 0     | .     |               |             |               |                |              |
| 45                                           | 25-29     | CC            | 0     | .     | 0             | .           |               |                |              |
| 45                                           | 25-29     | Ecig          | 0     | .     |               |             |               |                |              |
| 45                                           | 25-29     | Dual          | 0     | .     |               |             |               |                |              |
| 45                                           | 25-29     | Former        | 0     | .     |               |             | .             | 0              | .            |
| Year of Follow-up: 2035, Age Group: 30-34    |           |               |       |       |               |             |               |                |              |
| Period                                       | Age Group | Smoking Group | N     | %     | Ever Quit (N) | Ever Quit % | Mean Yrs Quit | Short Term (n) | Short Term % |
| 45                                           | 30-34     | Never Any     | 0     | .     |               |             |               |                |              |
| 45                                           | 30-34     | CC            | 0     | .     | 0             | .           |               |                |              |
| 45                                           | 30-34     | Ecig          | 0     | .     |               |             |               |                |              |
| 45                                           | 30-34     | Dual          | 0     | .     |               |             |               |                |              |
| 45                                           | 30-34     | Former        | 0     | .     |               |             | .             | 0              | .            |
| Year of Follow-up: 2035, Age Group: 35-39    |           |               |       |       |               |             |               |                |              |
| Period                                       | Age Group | Smoking Group | N     | %     | Ever Quit (N) | Ever Quit % | Mean Yrs Quit | Short Term (n) | Short Term % |
| 45                                           | 35-39     | Never Any     | 0     | .     |               |             |               |                |              |
| 45                                           | 35-39     | CC            | 0     | .     | 0             | .           |               |                |              |
| 45                                           | 35-39     | Ecig          | 0     | .     |               |             |               |                |              |
| 45                                           | 35-39     | Dual          | 0     | .     |               |             |               |                |              |
| 45                                           | 35-39     | Former        | 0     | .     |               |             | .             | 0              | .            |
| Year of Follow-up: 2035, Age Group: 40-44    |           |               |       |       |               |             |               |                |              |
| Period                                       | Age Group | Smoking Group | N     | %     | Ever Quit (N) | Ever Quit % | Mean Yrs Quit | Short Term (n) | Short Term % |
| 45                                           | 40-44     | Never Any     | 0     | .     |               |             |               |                |              |
| 45                                           | 40-44     | CC            | 0     | .     | 0             | .           |               |                |              |
| 45                                           | 40-44     | Ecig          | 0     | .     |               |             |               |                |              |
| 45                                           | 40-44     | Dual          | 0     | .     |               |             |               |                |              |
| 45                                           | 40-44     | Former        | 0     | .     |               |             | .             | 0              | .            |
| Year of Follow-up: 2035, Age Group: 45-49    |           |               |       |       |               |             |               |                |              |
| Period                                       | Age Group | Smoking Group | N     | %     | Ever Quit (N) | Ever Quit % | Mean Yrs Quit | Short Term (n) | Short Term % |
| 45                                           | 45-49     | Never Any     | 0     | .     |               |             |               |                |              |
| 45                                           | 45-49     | CC            | 0     | .     | 0             | .           |               |                |              |
| 45                                           | 45-49     | Ecig          | 0     | .     |               |             |               |                |              |
| 45                                           | 45-49     | Dual          | 0     | .     |               |             |               |                |              |
| 45                                           | 45-49     | Former        | 0     | .     |               |             | .             | 0              | .            |
| Year of Follow-up: 2035, Age Group: 50-54    |           |               |       |       |               |             |               |                |              |
| Period                                       | Age Group | Smoking Group | N     | %     | Ever Quit (N) | Ever Quit % | Mean Yrs Quit | Short Term (n) | Short Term % |
| 45                                           | 50-54     | Never Any     | 0     | .     |               |             |               |                |              |
| 45                                           | 50-54     | CC            | 0     | .     | 0             | .           |               |                |              |
| 45                                           | 50-54     | Ecig          | 0     | .     |               |             |               |                |              |
| 45                                           | 50-54     | Dual          | 0     | .     |               |             |               |                |              |
| 45                                           | 50-54     | Former        | 0     | .     |               |             | .             | 0              | .            |
| Year of Follow-up: 2035, Age Group: 55-59    |           |               |       |       |               |             |               |                |              |
| Period                                       | Age Group | Smoking Group | N     | %     | Ever Quit (N) | Ever Quit % | Mean Yrs Quit | Short Term (n) | Short Term % |

**Results for PHIM for Run 3 (Sensitivity\_Analysis\_1.RTF)**

|                                              |           |               |       |       |               |             |               |                |              |
|----------------------------------------------|-----------|---------------|-------|-------|---------------|-------------|---------------|----------------|--------------|
| 45                                           | 55-59     | Never Any     | 4489  | 50.75 |               |             |               |                |              |
| 45                                           | 55-59     | CC            | 2     | 0.02  | 0             | 0.00        |               |                |              |
| 45                                           | 55-59     | Ecig          | 1171  | 13.24 |               |             |               |                |              |
| 45                                           | 55-59     | Dual          | 0     | 0.00  |               |             |               |                |              |
| 45                                           | 55-59     | Former        | 3183  | 35.99 |               |             | 25.82         | 100            | 3.14         |
| Year of Follow-up: 2035, Age Group: 60-64    |           |               |       |       |               |             |               |                |              |
| Period                                       | Age Group | Smoking Group | N     | %     | Ever Quit (N) | Ever Quit % | Mean Yrs Quit | Short Term (n) | Short Term % |
| 45                                           | 60-64     | Never Any     | 4991  | 55.21 |               |             |               |                |              |
| 45                                           | 60-64     | CC            | 0     | 0.00  | 0             | 0.00        |               |                |              |
| 45                                           | 60-64     | Ecig          | 1020  | 11.28 |               |             |               |                |              |
| 45                                           | 60-64     | Dual          | 0     | 0.00  |               |             |               |                |              |
| 45                                           | 60-64     | Former        | 3029  | 33.51 |               |             | 25.81         | 129            | 4.26         |
| Year of Follow-up: 2035, Age Group: 65-69    |           |               |       |       |               |             |               |                |              |
| Period                                       | Age Group | Smoking Group | N     | %     | Ever Quit (N) | Ever Quit % | Mean Yrs Quit | Short Term (n) | Short Term % |
| 45                                           | 65-69     | Never Any     | 5163  | 52.60 |               |             |               |                |              |
| 45                                           | 65-69     | CC            | 0     | 0.00  | 0             | 0.00        |               |                |              |
| 45                                           | 65-69     | Ecig          | 902   | 9.19  |               |             |               |                |              |
| 45                                           | 65-69     | Dual          | 0     | 0.00  |               |             |               |                |              |
| 45                                           | 65-69     | Former        | 3751  | 38.21 |               |             | 27.09         | 106            | 2.83         |
| Year of Follow-up: 2035, Age Group: 70-74    |           |               |       |       |               |             |               |                |              |
| Period                                       | Age Group | Smoking Group | N     | %     | Ever Quit (N) | Ever Quit % | Mean Yrs Quit | Short Term (n) | Short Term % |
| 45                                           | 70-74     | Never Any     | 4997  | 46.86 |               |             |               |                |              |
| 45                                           | 70-74     | CC            | 1     | 0.01  | 0             | 0.00        |               |                |              |
| 45                                           | 70-74     | Ecig          | 850   | 7.97  |               |             |               |                |              |
| 45                                           | 70-74     | Dual          | 0     | 0.00  |               |             |               |                |              |
| 45                                           | 70-74     | Former        | 4816  | 45.16 |               |             | 29.70         | 104            | 2.16         |
| Year of Follow-up: 2035, Age Group: 75-79    |           |               |       |       |               |             |               |                |              |
| Period                                       | Age Group | Smoking Group | N     | %     | Ever Quit (N) | Ever Quit % | Mean Yrs Quit | Short Term (n) | Short Term % |
| 45                                           | 75-79     | Never Any     | 4724  | 43.28 |               |             |               |                |              |
| 45                                           | 75-79     | CC            | 3     | 0.03  | 0             | 0.00        |               |                |              |
| 45                                           | 75-79     | Ecig          | 635   | 5.82  |               |             |               |                |              |
| 45                                           | 75-79     | Dual          | 0     | 0.00  |               |             |               |                |              |
| 45                                           | 75-79     | Former        | 5554  | 50.88 |               |             | 32.60         | 99             | 1.78         |
| Year of Follow-up: 2040, Age Group: All Ages |           |               |       |       |               |             |               |                |              |
| Period                                       | Age Group | Smoking Group | N     | %     | Ever Quit (N) | Ever Quit % | Mean Yrs Quit | Short Term (n) | Short Term % |
| 50                                           | All Ages  | Never Any     | 19640 | 51.19 |               |             |               |                |              |
| 50                                           | All Ages  | CC            | 1     | 0.00  | 0             | 0.00        |               |                |              |
| 50                                           | All Ages  | Ecig          | 2868  | 7.48  |               |             |               |                |              |
| 50                                           | All Ages  | Dual          | 0     | 0.00  |               |             |               |                |              |
| 50                                           | All Ages  | Former        | 15856 | 41.33 |               |             | 30.34         | 408            | 2.57         |
| Year of Follow-up: 2040, Age Group: 18-19    |           |               |       |       |               |             |               |                |              |
| Period                                       | Age Group | Smoking Group | N     | %     | Ever Quit (N) | Ever Quit % | Mean Yrs Quit | Short Term (n) | Short Term % |
| 50                                           | 18-19     | Never Any     | 0     | .     |               |             |               |                |              |
| 50                                           | 18-19     | CC            | 0     | .     | 0             | .           |               |                |              |
| 50                                           | 18-19     | Ecig          | 0     | .     |               |             |               |                |              |
| 50                                           | 18-19     | Dual          | 0     | .     |               |             |               |                |              |
| 50                                           | 18-19     | Former        | 0     | .     |               |             | .             | 0              | .            |
| Year of Follow-up: 2040, Age Group: 20-24    |           |               |       |       |               |             |               |                |              |
| Period                                       | Age Group | Smoking Group | N     | %     | Ever Quit (N) | Ever Quit % | Mean Yrs Quit | Short Term (n) | Short Term % |
| 50                                           | 20-24     | Never Any     | 0     | .     |               |             |               |                |              |
| 50                                           | 20-24     | CC            | 0     | .     | 0             | .           |               |                |              |
| 50                                           | 20-24     | Ecig          | 0     | .     |               |             |               |                |              |
| 50                                           | 20-24     | Dual          | 0     | .     |               |             |               |                |              |
| 50                                           | 20-24     | Former        | 0     | .     |               |             | .             | 0              | .            |
| Year of Follow-up: 2040, Age Group: 25-29    |           |               |       |       |               |             |               |                |              |
| Period                                       | Age Group | Smoking Group | N     | %     | Ever Quit (N) | Ever Quit % | Mean Yrs Quit | Short Term (n) | Short Term % |
| 50                                           | 25-29     | Never Any     | 0     | .     |               |             |               |                |              |
| 50                                           | 25-29     | CC            | 0     | .     | 0             | .           |               |                |              |
| 50                                           | 25-29     | Ecig          | 0     | .     |               |             |               |                |              |
| 50                                           | 25-29     | Dual          | 0     | .     |               |             |               |                |              |
| 50                                           | 25-29     | Former        | 0     | .     |               |             | .             | 0              | .            |
| Year of Follow-up: 2040, Age Group: 30-34    |           |               |       |       |               |             |               |                |              |
| Period                                       | Age Group | Smoking Group | N     | %     | Ever Quit (N) | Ever Quit % | Mean Yrs Quit | Short Term (n) | Short Term % |
| 50                                           | 30-34     | Never Any     | 0     | .     |               |             |               |                |              |
| 50                                           | 30-34     | CC            | 0     | .     | 0             | .           |               |                |              |
| 50                                           | 30-34     | Ecig          | 0     | .     |               |             |               |                |              |
| 50                                           | 30-34     | Dual          | 0     | .     |               |             |               |                |              |
| 50                                           | 30-34     | Former        | 0     | .     |               |             | .             | 0              | .            |
| Year of Follow-up: 2040, Age Group: 35-39    |           |               |       |       |               |             |               |                |              |

**Results for PHIM for Run 3 (Sensitivity\_Analysis\_1.RTF)**

| Period                                    | Age Group | Smoking Group | N    | %     | Ever Quit (N) | Ever Quit % | Mean Yrs Quit | Short Term (n) | Short Term % |
|-------------------------------------------|-----------|---------------|------|-------|---------------|-------------|---------------|----------------|--------------|
| 50                                        | 35-39     | Never Any     | 0    | .     |               |             |               |                |              |
| 50                                        | 35-39     | CC            | 0    | .     | 0             | .           |               |                |              |
| 50                                        | 35-39     | Ecig          | 0    | .     |               |             |               |                |              |
| 50                                        | 35-39     | Dual          | 0    | .     |               |             |               |                |              |
| 50                                        | 35-39     | Former        | 0    | .     |               |             | .             | 0              | .            |
| Year of Follow-up: 2040, Age Group: 40-44 |           |               |      |       |               |             |               |                |              |
| Period                                    | Age Group | Smoking Group | N    | %     | Ever Quit (N) | Ever Quit % | Mean Yrs Quit | Short Term (n) | Short Term % |
| 50                                        | 40-44     | Never Any     | 0    | .     |               |             |               |                |              |
| 50                                        | 40-44     | CC            | 0    | .     | 0             | .           |               |                |              |
| 50                                        | 40-44     | Ecig          | 0    | .     |               |             |               |                |              |
| 50                                        | 40-44     | Dual          | 0    | .     |               |             |               |                |              |
| 50                                        | 40-44     | Former        | 0    | .     |               |             | .             | 0              | .            |
| Year of Follow-up: 2040, Age Group: 45-49 |           |               |      |       |               |             |               |                |              |
| Period                                    | Age Group | Smoking Group | N    | %     | Ever Quit (N) | Ever Quit % | Mean Yrs Quit | Short Term (n) | Short Term % |
| 50                                        | 45-49     | Never Any     | 0    | .     |               |             |               |                |              |
| 50                                        | 45-49     | CC            | 0    | .     | 0             | .           |               |                |              |
| 50                                        | 45-49     | Ecig          | 0    | .     |               |             |               |                |              |
| 50                                        | 45-49     | Dual          | 0    | .     |               |             |               |                |              |
| 50                                        | 45-49     | Former        | 0    | .     |               |             | .             | 0              | .            |
| Year of Follow-up: 2040, Age Group: 50-54 |           |               |      |       |               |             |               |                |              |
| Period                                    | Age Group | Smoking Group | N    | %     | Ever Quit (N) | Ever Quit % | Mean Yrs Quit | Short Term (n) | Short Term % |
| 50                                        | 50-54     | Never Any     | 0    | .     |               |             |               |                |              |
| 50                                        | 50-54     | CC            | 0    | .     | 0             | .           |               |                |              |
| 50                                        | 50-54     | Ecig          | 0    | .     |               |             |               |                |              |
| 50                                        | 50-54     | Dual          | 0    | .     |               |             |               |                |              |
| 50                                        | 50-54     | Former        | 0    | .     |               |             | .             | 0              | .            |
| Year of Follow-up: 2040, Age Group: 55-59 |           |               |      |       |               |             |               |                |              |
| Period                                    | Age Group | Smoking Group | N    | %     | Ever Quit (N) | Ever Quit % | Mean Yrs Quit | Short Term (n) | Short Term % |
| 50                                        | 55-59     | Never Any     | 0    | .     |               |             |               |                |              |
| 50                                        | 55-59     | CC            | 0    | .     | 0             | .           |               |                |              |
| 50                                        | 55-59     | Ecig          | 0    | .     |               |             |               |                |              |
| 50                                        | 55-59     | Dual          | 0    | .     |               |             |               |                |              |
| 50                                        | 55-59     | Former        | 0    | .     |               |             | .             | 0              | .            |
| Year of Follow-up: 2040, Age Group: 60-64 |           |               |      |       |               |             |               |                |              |
| Period                                    | Age Group | Smoking Group | N    | %     | Ever Quit (N) | Ever Quit % | Mean Yrs Quit | Short Term (n) | Short Term % |
| 50                                        | 60-64     | Never Any     | 4489 | 50.75 |               |             |               |                |              |
| 50                                        | 60-64     | CC            | 0    | 0.00  | 0             | 0.00        |               |                |              |
| 50                                        | 60-64     | Ecig          | 865  | 9.78  |               |             |               |                |              |
| 50                                        | 60-64     | Dual          | 0    | 0.00  |               |             |               |                |              |
| 50                                        | 60-64     | Former        | 3491 | 39.47 |               |             | 28.27         | 129            | 3.70         |
| Year of Follow-up: 2040, Age Group: 65-69 |           |               |      |       |               |             |               |                |              |
| Period                                    | Age Group | Smoking Group | N    | %     | Ever Quit (N) | Ever Quit % | Mean Yrs Quit | Short Term (n) | Short Term % |
| 50                                        | 65-69     | Never Any     | 4991 | 55.21 |               |             |               |                |              |
| 50                                        | 65-69     | CC            | 0    | 0.00  | 0             | 0.00        |               |                |              |
| 50                                        | 65-69     | Ecig          | 705  | 7.80  |               |             |               |                |              |
| 50                                        | 65-69     | Dual          | 0    | 0.00  |               |             |               |                |              |
| 50                                        | 65-69     | Former        | 3344 | 36.99 |               |             | 28.11         | 120            | 3.59         |
| Year of Follow-up: 2040, Age Group: 70-74 |           |               |      |       |               |             |               |                |              |
| Period                                    | Age Group | Smoking Group | N    | %     | Ever Quit (N) | Ever Quit % | Mean Yrs Quit | Short Term (n) | Short Term % |
| 50                                        | 70-74     | Never Any     | 5163 | 52.60 |               |             |               |                |              |
| 50                                        | 70-74     | CC            | 0    | 0.00  | 0             | 0.00        |               |                |              |
| 50                                        | 70-74     | Ecig          | 665  | 6.77  |               |             |               |                |              |
| 50                                        | 70-74     | Dual          | 0    | 0.00  |               |             |               |                |              |
| 50                                        | 70-74     | Former        | 3988 | 40.63 |               |             | 30.31         | 80             | 2.01         |
| Year of Follow-up: 2040, Age Group: 75-79 |           |               |      |       |               |             |               |                |              |
| Period                                    | Age Group | Smoking Group | N    | %     | Ever Quit (N) | Ever Quit % | Mean Yrs Quit | Short Term (n) | Short Term % |
| 50                                        | 75-79     | Never Any     | 4997 | 46.86 |               |             |               |                |              |
| 50                                        | 75-79     | CC            | 1    | 0.01  | 0             | 0.00        |               |                |              |
| 50                                        | 75-79     | Ecig          | 633  | 5.94  |               |             |               |                |              |
| 50                                        | 75-79     | Dual          | 0    | 0.00  |               |             |               |                |              |
| 50                                        | 75-79     | Former        | 5033 | 47.20 |               |             | 33.29         | 79             | 1.57         |

## Results for PHIM for Run 3 (Sensitivity\_Analysis\_1.RTF)

\*\*\*\*\*

### Main Results for E-Component for Run: 3, Simulation: 1, COD: Four Diseases Combined

| Variable Parameter          | Value                                  |
|-----------------------------|----------------------------------------|
| 1. Country                  | US (United States)                     |
| 2. Sex                      | M (Males)                              |
| 3. Year of start of process | 1990                                   |
| 4. Cause of Death           | Four Diseases Combined                 |
| 5. Effective Dose NULL      | CC:1                                   |
| 6. Effective Dose Ecig      | CC:1 Ecig:0 Dual:0.5                   |
| Note:                       | Death rates are per million population |

#### Results for Age Groups Combined and Years combined, Population unadjusted for deaths in Ecig scenario,

| Age Group:All | NULL     | Ecig        | %Drop       |         |        |        | NULL    | Ecig    | Drop    |         |
|---------------|----------|-------------|-------------|---------|--------|--------|---------|---------|---------|---------|
| Year          | Number   | Attrib      | Attrib      | Drop    | %Drop  | Attrib | Death   | Attrib  | Attrib  | Drop    |
|               | Deaths   | Deaths      | Deaths      | Deaths  | Deaths | Deaths | Rate    | Rates   | Rates   | Rates   |
| All Comb      | 13148871 | 4509390.583 | 2856614.918 | 1652776 | 12.570 | 36.652 | 3806.31 | 1305.37 | 826.928 | 478.443 |

#### Results for Age Groups Combined, Population unadjusted for deaths in Ecig scenario,

| Age Group:All | NULL   | Ecig       | %Drop      |          |        |        | NULL    | Ecig    | Drop    |         |
|---------------|--------|------------|------------|----------|--------|--------|---------|---------|---------|---------|
| Year          | Number | Attrib     | Attrib     | Drop     | %Drop  | Attrib | Death   | Attrib  | Attrib  | Drop    |
|               | Deaths | Deaths     | Deaths     | Deaths   | Deaths | Deaths | Rate    | Rates   | Rates   | Rates   |
| 1990          | 317161 | 125773.065 | 125773.065 | 0.000    | 0.000  | 0.000  | 5027.71 | 1993.78 | 1993.78 | 0.000   |
| 1991          | 313217 | 123999.442 | 123552.947 | 446.495  | 0.143  | 0.360  | 4883.81 | 1933.45 | 1926.49 | 6.962   |
| 1992          | 308577 | 122014.015 | 120814.764 | 1199.251 | 0.389  | 0.983  | 4729.73 | 1870.18 | 1851.79 | 18.382  |
| 1993          | 311713 | 122810.618 | 120554.604 | 2256.014 | 0.724  | 1.837  | 4692.62 | 1848.83 | 1814.86 | 33.963  |
| 1994          | 305700 | 119925.592 | 116450.703 | 3474.889 | 1.137  | 2.898  | 4516.19 | 1771.69 | 1720.36 | 51.336  |
| 1995          | 303225 | 117896.496 | 112993.274 | 4903.222 | 1.617  | 4.159  | 4393.80 | 1708.35 | 1637.30 | 71.049  |
| 1996          | 299559 | 115698.645 | 109218.297 | 6480.349 | 2.163  | 5.601  | 4273.16 | 1650.42 | 1557.98 | 92.441  |
| 1997          | 294226 | 113359.847 | 105287.828 | 8072.019 | 2.743  | 7.121  | 4128.67 | 1590.70 | 1477.43 | 113.269 |
| 1998          | 289258 | 111444.212 | 101774.972 | 9669.240 | 3.343  | 8.676  | 3992.19 | 1538.10 | 1404.65 | 133.450 |
| 1999          | 311002 | 114877.722 | 101924.420 | 12953.30 | 4.165  | 11.276 | 4224.60 | 1560.48 | 1384.53 | 175.956 |
| 2000          | 303786 | 112379.704 | 97577.455  | 14802.25 | 4.873  | 13.172 | 4066.21 | 1504.22 | 1306.09 | 198.130 |
| 2001          | 296294 | 110024.943 | 93250.230  | 16774.71 | 5.662  | 15.246 | 3914.28 | 1453.52 | 1231.91 | 221.608 |
| 2002          | 291898 | 108289.173 | 89294.516  | 18994.66 | 6.507  | 17.541 | 3813.00 | 1414.56 | 1166.43 | 248.123 |
| 2003          | 285865 | 106539.023 | 85576.545  | 20962.48 | 7.333  | 19.676 | 3695.36 | 1377.22 | 1106.24 | 270.980 |
| 2004          | 274177 | 103037.251 | 80635.435  | 22401.82 | 8.171  | 21.741 | 3506.10 | 1317.61 | 1031.14 | 286.468 |
| 2005          | 272379 | 103044.562 | 78568.549  | 24476.01 | 8.986  | 23.753 | 3442.69 | 1302.41 | 993.054 | 309.360 |
| 2006          | 264118 | 99672.555  | 73422.734  | 26249.82 | 9.939  | 26.336 | 3307.76 | 1248.28 | 919.531 | 328.747 |
| 2007          | 258419 | 97839.152  | 70098.169  | 27740.98 | 10.735 | 28.354 | 3203.20 | 1212.75 | 868.892 | 343.860 |
| 2008          | 259461 | 98075.852  | 68443.911  | 29631.94 | 11.421 | 30.213 | 3180.09 | 1202.07 | 838.886 | 363.185 |
| 2009          | 253907 | 95617.338  | 64658.682  | 30958.66 | 12.193 | 32.378 | 3075.31 | 1158.11 | 783.144 | 374.970 |
| 2010          | 251878 | 94607.988  | 62155.127  | 32452.86 | 12.884 | 34.302 | 3013.72 | 1131.98 | 743.686 | 388.298 |
| 2011          | 251779 | 93633.119  | 59363.942  | 34269.18 | 13.611 | 36.599 | 2982.76 | 1109.25 | 703.270 | 405.979 |
| 2012          | 252643 | 92775.175  | 56721.337  | 36053.84 | 14.271 | 38.862 | 2960.61 | 1087.19 | 664.691 | 422.498 |
| 2013          | 256175 | 92345.780  | 54463.985  | 37881.79 | 14.787 | 41.022 | 2967.76 | 1069.82 | 630.959 | 438.857 |
| 2014          | 257393 | 91379.215  | 51961.698  | 39417.52 | 15.314 | 43.136 | 2947.05 | 1046.26 | 594.941 | 451.315 |
| 2015          | 259782 | 90750.242  | 49937.651  | 40812.59 | 15.710 | 44.972 | 3346.10 | 1168.90 | 643.218 | 525.683 |
| 2016          | 261453 | 88811.996  | 46563.415  | 42248.58 | 16.159 | 47.571 | 3336.15 | 1133.24 | 594.151 | 539.094 |
| 2017          | 263685 | 87325.126  | 43822.789  | 43502.34 | 16.498 | 49.817 | 3333.85 | 1104.08 | 554.065 | 550.014 |
| 2018          | 258714 | 87612.144  | 42900.765  | 44711.38 | 17.282 | 51.033 | 3240.73 | 1097.46 | 537.388 | 560.068 |
| 2019          | 261438 | 87797.760  | 41397.987  | 46399.77 | 17.748 | 52.848 | 3242.99 | 1089.08 | 513.519 | 575.563 |
| 2020          | 262288 | 87221.042  | 39822.614  | 47398.43 | 18.071 | 54.343 | 3715.29 | 1235.48 | 564.084 | 671.395 |
| 2021          | 255079 | 82001.292  | 35090.341  | 46910.95 | 18.391 | 57.208 | 3587.82 | 1153.39 | 493.563 | 659.826 |
| 2022          | 257097 | 81915.977  | 33455.320  | 48460.66 | 18.849 | 59.159 | 3588.53 | 1143.37 | 466.966 | 676.409 |
| 2023          | 259080 | 81810.810  | 31849.675  | 49961.14 | 19.284 | 61.069 | 3586.88 | 1132.64 | 440.949 | 691.696 |
| 2024          | 260719 | 81528.303  | 30272.735  | 51255.57 | 19.659 | 62.868 | 3579.65 | 1119.38 | 415.643 | 703.736 |
| 2025          | 257308 | 79599.213  | 28566.385  | 51032.83 | 19.833 | 64.112 | 4112.08 | 1272.09 | 456.524 | 815.564 |
| 2026          | 251528 | 75082.462  | 25016.974  | 50065.49 | 19.905 | 66.681 | 4003.24 | 1194.99 | 398.162 | 796.826 |
| 2027          | 250988 | 74444.425  | 23411.364  | 51033.06 | 20.333 | 68.552 | 3976.53 | 1179.46 | 370.918 | 808.543 |
| 2028          | 250285 | 73699.585  | 21736.178  | 51963.41 | 20.762 | 70.507 | 3945.35 | 1161.76 | 342.637 | 819.122 |
| 2029          | 249525 | 72819.703  | 20151.964  | 52667.74 | 21.107 | 72.326 | 3910.99 | 1141.36 | 315.857 | 825.500 |
| 2030          | 240528 | 69309.277  | 18592.541  | 50716.74 | 21.086 | 73.175 | 4504.36 | 1297.95 | 348.181 | 949.768 |
| 2031          | 235442 | 65433.368  | 16136.330  | 49297.04 | 20.938 | 75.339 | 4397.65 | 1222.18 | 301.399 | 920.783 |
| 2032          | 234017 | 64643.552  | 14860.237  | 49783.32 | 21.273 | 77.012 | 4356.12 | 1203.31 | 276.616 | 926.692 |
| 2033          | 232559 | 63793.514  | 13640.344  | 50153.17 | 21.566 | 78.618 | 4310.93 | 1182.54 | 252.850 | 929.686 |
| 2034          | 230963 | 63032.151  | 12502.378  | 50529.77 | 21.878 | 80.165 | 4260.75 | 1162.80 | 230.641 | 932.160 |
| 2035          | 215822 | 57653.301  | 11310.760  | 46342.54 | 21.473 | 80.381 | 4924.38 | 1315.47 | 258.077 | 1057.39 |
| 2036          | 208183 | 52988.733  | 9107.963   | 43880.77 | 21.078 | 82.812 | 4748.94 | 1208.75 | 207.765 | 1000.98 |
| 2037          | 205491 | 52026.921  | 8174.189   | 43852.73 | 21.340 | 84.289 | 4682.40 | 1185.50 | 186.260 | 999.243 |
| 2038          | 202834 | 50943.211  | 7265.698   | 43677.51 | 21.534 | 85.738 | 4612.18 | 1158.38 | 165.213 | 993.171 |
| 2039          | 200251 | 50085.991  | 6491.129   | 43594.86 | 21.770 | 87.040 | 4538.65 | 1135.19 | 147.120 | 988.071 |



## Results for PHIM for Run 3 (Sensitivity\_Analysis\_1.RTF)

\*\*\*\*\*

### Main Results for E-Component for Run: 3, Simulation: 1, COD: LUNG CANCER

| Variable Parameter          | Value                                  |
|-----------------------------|----------------------------------------|
| 1. Country                  | US (United States)                     |
| 2. Sex                      | M (Males)                              |
| 3. Year of start of process | 1990                                   |
| 4. Cause of Death           | LUNG CANCER                            |
| 5. Effective Dose NULL      | CC:1                                   |
| 6. Effective Dose Ecig      | CC:1 Ecig:0 Dual:0.5                   |
| Note:                       | Death rates are per million population |

#### Results for Age Groups Combined and Years combined, Population unadjusted for deaths in Ecig scenario,

| Age Group:All |         | NULL        | Ecig        | %Drop    |        |        | NULL    | Ecig    | Drop    |         |
|---------------|---------|-------------|-------------|----------|--------|--------|---------|---------|---------|---------|
| Year          | Number  | Attrib      | Attrib      | Drop     | %Drop  | Attrib | Death   | Attrib  | Attrib  | Drop    |
|               | Deaths  | Deaths      | Deaths      | Deaths   | Deaths | Deaths | Rate    | Rates   | Rates   | Rates   |
| All Comb      | 3065988 | 2244988.113 | 1663881.390 | 581106.7 | 18.953 | 25.885 | 887.537 | 649.875 | 481.658 | 168.218 |

#### Results for Age Groups Combined, Population unadjusted for deaths in Ecig scenario,

| Age Group:All |        | NULL      | Ecig      | %Drop    |        |        | NULL    | Ecig    | Drop    |         |
|---------------|--------|-----------|-----------|----------|--------|--------|---------|---------|---------|---------|
| Year          | Number | Attrib    | Attrib    | Drop     | %Drop  | Attrib | Death   | Attrib  | Attrib  | Drop    |
|               | Deaths | Deaths    | Deaths    | Deaths   | Deaths | Deaths | Rate    | Rates   | Rates   | Rates   |
| 1990          | 78822  | 63385.736 | 63385.736 | 0.000    | 0.000  | 0.000  | 1249.50 | 1004.81 | 1004.81 | 0.000   |
| 1991          | 78462  | 62918.402 | 62867.864 | 50.538   | 0.064  | 0.080  | 1223.41 | 981.049 | 980.261 | 0.788   |
| 1992          | 77987  | 62366.766 | 62230.688 | 136.078  | 0.174  | 0.218  | 1195.35 | 955.930 | 953.844 | 2.086   |
| 1993          | 78542  | 62652.888 | 62384.672 | 268.216  | 0.341  | 0.428  | 1182.39 | 943.195 | 939.157 | 4.038   |
| 1994          | 77437  | 61565.227 | 61141.270 | 423.957  | 0.547  | 0.689  | 1144.00 | 909.520 | 903.257 | 6.263   |
| 1995          | 76904  | 60851.961 | 60234.465 | 617.496  | 0.803  | 1.015  | 1114.36 | 881.759 | 872.811 | 8.948   |
| 1996          | 76232  | 60122.922 | 59261.097 | 861.824  | 1.131  | 1.433  | 1087.44 | 857.643 | 845.349 | 12.294  |
| 1997          | 75473  | 59237.155 | 58111.669 | 1125.486 | 1.491  | 1.900  | 1059.06 | 831.234 | 815.441 | 15.793  |
| 1998          | 75381  | 58906.696 | 57454.311 | 1452.385 | 1.927  | 2.466  | 1040.37 | 813.001 | 792.955 | 20.045  |
| 1999          | 73159  | 56930.073 | 55154.606 | 1775.467 | 2.427  | 3.119  | 993.781 | 773.329 | 749.212 | 24.118  |
| 2000          | 73784  | 57137.121 | 54938.811 | 2198.310 | 2.979  | 3.847  | 987.608 | 764.787 | 735.363 | 29.425  |
| 2001          | 73294  | 56481.726 | 53806.700 | 2675.027 | 3.650  | 4.736  | 968.273 | 746.169 | 710.830 | 35.339  |
| 2002          | 72442  | 55588.365 | 52409.108 | 3179.258 | 4.389  | 5.719  | 946.293 | 726.138 | 684.608 | 41.530  |
| 2003          | 71942  | 54945.856 | 51206.020 | 3739.837 | 5.198  | 6.806  | 929.989 | 710.281 | 661.936 | 48.345  |
| 2004          | 71301  | 54203.126 | 49846.005 | 4357.121 | 6.111  | 8.039  | 911.778 | 693.135 | 637.417 | 55.718  |
| 2005          | 70964  | 53744.603 | 48743.701 | 5000.902 | 7.047  | 9.305  | 896.937 | 679.296 | 616.088 | 63.208  |
| 2006          | 69658  | 52535.572 | 46856.966 | 5678.605 | 8.152  | 10.809 | 872.383 | 657.945 | 586.827 | 71.118  |
| 2007          | 68565  | 51492.124 | 45140.298 | 6351.826 | 9.264  | 12.336 | 849.888 | 638.264 | 559.530 | 78.733  |
| 2008          | 68226  | 51030.736 | 43858.818 | 7171.918 | 10.512 | 14.054 | 836.215 | 625.460 | 537.557 | 87.903  |
| 2009          | 67509  | 50276.199 | 42282.418 | 7993.781 | 11.841 | 15.900 | 817.667 | 608.943 | 512.123 | 96.820  |
| 2010          | 67196  | 49840.933 | 41019.119 | 8821.814 | 13.128 | 17.700 | 804.000 | 596.347 | 490.794 | 105.553 |
| 2011          | 66506  | 49207.841 | 39337.603 | 9735.238 | 14.638 | 19.838 | 787.880 | 581.354 | 466.023 | 115.331 |
| 2012          | 66155  | 48539.512 | 37820.384 | 10719.13 | 16.203 | 22.083 | 775.240 | 568.812 | 443.200 | 125.613 |
| 2013          | 65333  | 47675.741 | 36075.045 | 11600.70 | 17.756 | 24.332 | 756.876 | 552.318 | 417.926 | 134.393 |
| 2014          | 65033  | 47194.534 | 34674.797 | 12519.74 | 19.251 | 26.528 | 744.602 | 540.359 | 397.013 | 143.346 |
| 2015          | 64145  | 46305.842 | 32976.627 | 13329.21 | 20.780 | 28.785 | 726.215 | 526.439 | 424.753 | 171.686 |
| 2016          | 61618  | 44208.867 | 30390.901 | 13817.97 | 22.425 | 31.256 | 786.248 | 564.107 | 387.789 | 176.318 |
| 2017          | 59897  | 42702.624 | 28330.400 | 14372.22 | 23.995 | 33.657 | 757.297 | 539.903 | 358.190 | 181.713 |
| 2018          | 62468  | 44321.202 | 28133.909 | 16187.29 | 25.913 | 36.523 | 782.490 | 555.181 | 352.414 | 202.767 |
| 2019          | 63045  | 44493.088 | 27086.766 | 17406.32 | 27.609 | 39.121 | 782.035 | 551.912 | 335.996 | 215.916 |
| 2020          | 63466  | 44529.551 | 25984.551 | 18545.00 | 29.220 | 41.647 | 898.991 | 630.757 | 368.069 | 262.688 |
| 2021          | 57113  | 39852.556 | 22150.268 | 17702.29 | 30.995 | 44.419 | 803.323 | 560.546 | 311.555 | 248.992 |
| 2022          | 57440  | 39853.685 | 21017.447 | 18836.24 | 32.793 | 47.263 | 801.745 | 556.274 | 293.359 | 262.914 |
| 2023          | 57738  | 39847.050 | 19887.343 | 19959.71 | 34.569 | 50.091 | 799.366 | 551.670 | 275.334 | 276.336 |
| 2024          | 57942  | 39726.010 | 18763.494 | 20962.52 | 36.178 | 52.768 | 795.539 | 545.435 | 257.622 | 287.814 |
| 2025          | 57521  | 39207.348 | 17563.186 | 21644.16 | 37.628 | 55.204 | 919.257 | 626.579 | 280.680 | 345.899 |
| 2026          | 51428  | 34803.960 | 14664.793 | 20139.17 | 39.160 | 57.865 | 818.510 | 553.929 | 233.400 | 320.529 |
| 2027          | 51172  | 34484.595 | 13582.059 | 20902.54 | 40.848 | 60.614 | 810.740 | 546.357 | 215.187 | 331.169 |
| 2028          | 50870  | 34100.638 | 12471.121 | 21629.52 | 42.519 | 63.428 | 801.884 | 537.544 | 196.588 | 340.956 |
| 2029          | 50540  | 33669.838 | 11432.114 | 22237.72 | 44.000 | 66.046 | 792.146 | 527.732 | 179.184 | 348.548 |
| 2030          | 49109  | 32557.688 | 10401.638 | 22156.05 | 45.116 | 68.052 | 919.662 | 609.705 | 194.791 | 414.915 |
| 2031          | 43585  | 28646.393 | 8484.152  | 20162.24 | 46.259 | 70.383 | 814.096 | 535.065 | 158.469 | 376.595 |
| 2032          | 43163  | 28227.160 | 7698.172  | 20528.99 | 47.562 | 72.728 | 803.454 | 525.435 | 143.298 | 382.137 |
| 2033          | 42725  | 27786.623 | 6954.106  | 20832.52 | 48.759 | 74.973 | 791.996 | 515.079 | 128.908 | 386.171 |
| 2034          | 42256  | 27348.299 | 6275.922  | 21072.38 | 49.869 | 77.052 | 779.523 | 504.514 | 115.777 | 388.738 |
| 2035          | 39748  | 25570.077 | 5562.507  | 20007.57 | 50.336 | 78.246 | 906.933 | 583.430 | 126.919 | 456.511 |
| 2036          | 34030  | 21717.319 | 4150.983  | 17566.34 | 51.620 | 80.886 | 776.269 | 495.402 | 94.690  | 400.712 |
| 2037          | 33454  | 21256.024 | 3663.632  | 17592.39 | 52.587 | 82.764 | 762.289 | 484.347 | 83.481  | 400.866 |
| 2038          | 32883  | 20747.175 | 3199.358  | 17547.82 | 53.364 | 84.579 | 747.720 | 471.764 | 72.749  | 399.015 |
| 2039          | 32325  | 20327.688 | 2813.771  | 17513.92 | 54.181 | 86.158 | 732.644 | 460.724 | 63.774  | 396.950 |

## Results for PHIM for Run 3 (Sensitivity\_Analysis\_1.RTF)

\*\*\*\*\*

### Main Results for E-Component for Run: 3, Simulation: 1, COD: IHD

| Variable Parameter          | Value                                  |
|-----------------------------|----------------------------------------|
| 1. Country                  | US (United States)                     |
| 2. Sex                      | M (Males)                              |
| 3. Year of start of process | 1990                                   |
| 4. Cause of Death           | IHD                                    |
| 5. Effective Dose NULL      | CC:1                                   |
| 6. Effective Dose Ecig      | CC:1 Ecig:0 Dual:0.5                   |
| Note:                       | Death rates are per million population |

#### Results for Age Groups Combined and Years combined, Population unadjusted for deaths in Ecig scenario,

| Age Group:All |         | NULL        | Ecig       | %Drop    |        |        | NULL    | Ecig    | Drop    |         |
|---------------|---------|-------------|------------|----------|--------|--------|---------|---------|---------|---------|
| Year          | Number  | Attrib      | Attrib     | Drop     | %Drop  | Attrib | Death   | Attrib  | Attrib  | Drop    |
|               | Deaths  | Deaths      | Deaths     | Deaths   | Deaths | Deaths | Rate    | Rates   | Rates   | Rates   |
| All Comb      | 6360041 | 1098877.421 | 476566.196 | 622311.2 | 9.785  | 56.632 | 1841.09 | 318.101 | 137.956 | 180.146 |

#### Results for Age Groups Combined, Population unadjusted for deaths in Ecig scenario,

| Age Group:All |        | NULL      | Ecig      | %Drop    |        |        | NULL    | Ecig    | Drop    |         |
|---------------|--------|-----------|-----------|----------|--------|--------|---------|---------|---------|---------|
| Year          | Number | Attrib    | Attrib    | Drop     | %Drop  | Attrib | Death   | Attrib  | Attrib  | Drop    |
|               | Deaths | Deaths    | Deaths    | Deaths   | Deaths | Deaths | Rate    | Rates   | Rates   | Rates   |
| 1990          | 171484 | 38511.725 | 38511.725 | 0.000    | 0.000  | 0.000  | 2718.40 | 610.497 | 610.497 | 0.000   |
| 1991          | 168044 | 37309.838 | 36979.259 | 330.579  | 0.197  | 0.886  | 2620.21 | 581.750 | 576.596 | 5.155   |
| 1992          | 164548 | 36137.488 | 35246.000 | 891.488  | 0.542  | 2.467  | 2522.12 | 553.899 | 540.235 | 13.664  |
| 1993          | 164362 | 35599.588 | 33946.271 | 1653.317 | 1.006  | 4.644  | 2474.35 | 535.926 | 511.037 | 24.890  |
| 1994          | 159866 | 34336.757 | 31808.860 | 2527.897 | 1.581  | 7.362  | 2361.75 | 507.267 | 469.921 | 37.345  |
| 1995          | 158083 | 33455.759 | 29915.129 | 3540.630 | 2.240  | 10.583 | 2290.66 | 484.782 | 433.477 | 51.305  |
| 1996          | 154875 | 32193.824 | 27575.456 | 4618.369 | 2.982  | 14.346 | 2209.26 | 459.239 | 393.359 | 65.880  |
| 1997          | 149970 | 30665.509 | 24999.792 | 5665.718 | 3.778  | 18.476 | 2104.43 | 430.308 | 350.805 | 79.503  |
| 1998          | 145407 | 29188.430 | 22539.620 | 6648.810 | 4.573  | 22.779 | 2006.83 | 402.844 | 311.080 | 91.764  |
| 1999          | 165952 | 33375.386 | 24112.583 | 9262.803 | 5.582  | 27.753 | 2254.27 | 453.366 | 327.542 | 125.824 |
| 2000          | 160260 | 32024.754 | 21638.548 | 10386.21 | 6.481  | 32.432 | 2145.10 | 428.655 | 289.635 | 139.021 |
| 2001          | 154444 | 30682.393 | 19131.991 | 11550.40 | 7.479  | 37.645 | 2040.33 | 405.339 | 252.749 | 152.590 |
| 2002          | 151887 | 30218.370 | 17301.832 | 12916.54 | 8.504  | 42.744 | 1984.06 | 394.736 | 226.010 | 168.726 |
| 2003          | 146733 | 29175.202 | 15248.232 | 13926.97 | 9.491  | 47.736 | 1896.81 | 377.146 | 197.113 | 180.033 |
| 2004          | 138381 | 27488.687 | 13038.979 | 14449.71 | 10.442 | 52.566 | 1769.58 | 351.518 | 166.739 | 184.779 |
| 2005          | 135881 | 27017.439 | 11630.228 | 15387.21 | 11.324 | 56.953 | 1717.44 | 341.482 | 146.998 | 194.484 |
| 2006          | 131922 | 26231.435 | 10045.441 | 16185.99 | 12.269 | 61.705 | 1652.16 | 328.517 | 125.807 | 202.710 |
| 2007          | 126502 | 25103.049 | 8582.641  | 16520.41 | 13.059 | 65.810 | 1568.04 | 311.161 | 106.385 | 204.776 |
| 2008          | 125859 | 24621.740 | 7583.940  | 17037.80 | 13.537 | 69.198 | 1542.60 | 301.777 | 92.953  | 208.824 |
| 2009          | 122428 | 23741.177 | 6540.958  | 17200.22 | 14.049 | 72.449 | 1482.84 | 287.552 | 79.224  | 208.328 |
| 2010          | 120537 | 23189.160 | 5717.460  | 17471.70 | 14.495 | 75.344 | 1442.22 | 277.458 | 68.409  | 209.049 |
| 2011          | 120221 | 22786.927 | 4950.478  | 17836.45 | 14.836 | 78.275 | 1424.23 | 269.951 | 58.647  | 211.304 |
| 2012          | 120927 | 22485.295 | 4329.406  | 18155.89 | 15.014 | 80.746 | 1417.09 | 263.495 | 50.734  | 212.760 |
| 2013          | 122648 | 22251.884 | 3807.095  | 18444.79 | 15.039 | 82.891 | 1420.86 | 257.786 | 44.105  | 213.681 |
| 2014          | 123229 | 21894.593 | 3323.136  | 18571.46 | 15.071 | 84.822 | 1410.92 | 250.685 | 38.049  | 212.636 |
| 2015          | 123774 | 21471.109 | 2909.966  | 18561.14 | 14.996 | 86.447 | 1594.26 | 276.557 | 37.482  | 239.075 |
| 2016          | 126218 | 21411.568 | 2519.178  | 18892.39 | 14.968 | 88.235 | 1610.55 | 273.213 | 32.145  | 241.068 |
| 2017          | 128265 | 21169.399 | 2189.175  | 18980.22 | 14.798 | 89.659 | 1621.69 | 267.651 | 27.678  | 239.973 |
| 2018          | 121429 | 19830.576 | 1750.180  | 18080.40 | 14.890 | 91.174 | 1521.05 | 248.404 | 21.923  | 226.480 |
| 2019          | 121832 | 19431.014 | 1508.386  | 17922.63 | 14.711 | 92.237 | 1511.26 | 241.031 | 18.711  | 222.320 |
| 2020          | 120811 | 18532.612 | 1279.520  | 17253.09 | 14.281 | 93.096 | 1711.27 | 262.513 | 18.124  | 244.389 |
| 2021          | 119407 | 18234.128 | 1054.484  | 17179.64 | 14.388 | 94.217 | 1679.51 | 256.472 | 14.832  | 241.640 |
| 2022          | 119438 | 17812.559 | 884.051   | 16928.51 | 14.173 | 95.037 | 1667.10 | 248.626 | 12.339  | 236.286 |
| 2023          | 119445 | 17361.668 | 732.450   | 16629.22 | 13.922 | 95.781 | 1653.68 | 240.367 | 10.141  | 230.226 |
| 2024          | 119305 | 16929.676 | 616.463   | 16313.21 | 13.674 | 96.359 | 1638.05 | 232.443 | 8.464   | 223.979 |
| 2025          | 115685 | 15501.666 | 505.852   | 14995.81 | 12.963 | 96.737 | 1848.78 | 247.735 | 8.084   | 239.650 |
| 2026          | 115073 | 15523.814 | 410.429   | 15113.39 | 13.134 | 97.356 | 1831.46 | 247.072 | 6.532   | 240.540 |
| 2027          | 113989 | 15073.070 | 340.359   | 14732.71 | 12.925 | 97.742 | 1805.98 | 238.810 | 5.392   | 233.418 |
| 2028          | 112855 | 14636.710 | 273.564   | 14363.15 | 12.727 | 98.131 | 1778.98 | 230.725 | 4.312   | 226.413 |
| 2029          | 111718 | 14180.166 | 221.619   | 13958.55 | 12.494 | 98.437 | 1751.04 | 222.256 | 3.474   | 218.783 |
| 2030          | 104851 | 12111.772 | 179.027   | 11932.74 | 11.381 | 98.522 | 1963.54 | 226.816 | 3.353   | 223.464 |
| 2031          | 105289 | 12417.367 | 150.914   | 12266.45 | 11.650 | 98.785 | 1966.62 | 231.935 | 2.819   | 229.116 |
| 2032          | 103879 | 12054.064 | 127.074   | 11926.99 | 11.482 | 98.946 | 1933.67 | 224.381 | 2.365   | 222.015 |
| 2033          | 102485 | 11672.389 | 100.261   | 11572.13 | 11.291 | 99.141 | 1899.76 | 216.370 | 1.859   | 214.512 |
| 2034          | 101070 | 11365.762 | 81.063    | 11284.70 | 11.165 | 99.287 | 1864.51 | 209.673 | 1.495   | 208.177 |
| 2035          | 90820  | 8580.360  | 64.810    | 8515.550 | 9.376  | 99.245 | 2072.23 | 195.777 | 1.479   | 194.299 |
| 2036          | 92117  | 8948.841  | 52.548    | 8896.293 | 9.658  | 99.413 | 2101.31 | 204.135 | 1.199   | 202.937 |
| 2037          | 90327  | 8624.570  | 45.460    | 8579.110 | 9.498  | 99.473 | 2058.21 | 196.522 | 1.036   | 195.486 |
| 2038          | 88590  | 8315.017  | 37.008    | 8278.009 | 9.344  | 99.555 | 2014.42 | 189.073 | 0.842   | 188.231 |
| 2039          | 86921  | 8001.132  | 27.296    | 7973.835 | 9.174  | 99.659 | 1970.05 | 181.344 | 0.619   | 180.726 |

## Results for PHIM for Run 3 (Sensitivity\_Analysis\_1.RTF)

\*\*\*\*\*

### Main Results for E-Component for Run: 3, Simulation: 1, COD: STROKE

| Variable Parameter          | Value                                  |
|-----------------------------|----------------------------------------|
| 1. Country                  | US (United States)                     |
| 2. Sex                      | M (Males)                              |
| 3. Year of start of process | 1990                                   |
| 4. Cause of Death           | STROKE                                 |
| 5. Effective Dose NULL      | CC:1                                   |
| 6. Effective Dose Ecig      | CC:1 Ecig:0 Dual:0.5                   |
| Note:                       | Death rates are per million population |

#### Results for Age Groups Combined and Years combined, Population unadjusted for deaths in Ecig scenario,

| Age Group:All |         | NULL       | Ecig      | %Drop    |        |        | NULL    | Ecig   | Drop   |        |
|---------------|---------|------------|-----------|----------|--------|--------|---------|--------|--------|--------|
| Year          | Number  | Attrib     | Attrib    | Drop     | %Drop  | Attrib | Death   | Attrib | Attrib | Drop   |
|               | Deaths  | Deaths     | Deaths    | Deaths   | Deaths | Deaths | Rate    | Rates  | Rates  | Rates  |
| All Comb      | 1489699 | 149918.462 | 64595.015 | 85323.45 | 5.728  | 56.913 | 431.236 | 43.398 | 18.699 | 24.699 |

#### Results for Age Groups Combined, Population unadjusted for deaths in Ecig scenario,

| Age Group:All |        | NULL     | Ecig     | %Drop    |        |        | NULL    | Ecig   | Drop   |        |
|---------------|--------|----------|----------|----------|--------|--------|---------|--------|--------|--------|
| Year          | Number | Attrib   | Attrib   | Drop     | %Drop  | Attrib | Death   | Attrib | Attrib | Drop   |
|               | Deaths | Deaths   | Deaths   | Deaths   | Deaths | Deaths | Rate    | Rates  | Rates  | Rates  |
| 1990          | 32862  | 4613.166 | 4613.166 | 0.000    | 0.000  | 0.000  | 520.936 | 73.129 | 73.129 | 0.000  |
| 1991          | 32619  | 4555.566 | 4513.452 | 42.114   | 0.129  | 0.924  | 508.609 | 71.032 | 70.376 | 0.657  |
| 1992          | 32100  | 4453.572 | 4342.861 | 110.712  | 0.345  | 2.486  | 492.014 | 68.262 | 66.565 | 1.697  |
| 1993          | 32896  | 4462.473 | 4253.106 | 209.367  | 0.636  | 4.692  | 495.226 | 67.179 | 64.027 | 3.152  |
| 1994          | 33323  | 4499.513 | 4168.617 | 330.897  | 0.993  | 7.354  | 492.290 | 66.473 | 61.584 | 4.888  |
| 1995          | 33569  | 4472.774 | 4003.197 | 469.577  | 1.399  | 10.499 | 486.422 | 64.812 | 58.007 | 6.804  |
| 1996          | 33870  | 4406.878 | 3783.811 | 623.067  | 1.840  | 14.139 | 483.150 | 62.863 | 53.975 | 8.888  |
| 1997          | 33516  | 4288.158 | 3509.267 | 778.890  | 2.324  | 18.164 | 470.307 | 60.173 | 49.243 | 10.930 |
| 1998          | 32795  | 4120.148 | 3198.676 | 921.472  | 2.810  | 22.365 | 452.620 | 56.864 | 44.147 | 12.718 |
| 1999          | 33375  | 3982.443 | 2918.982 | 1063.460 | 3.186  | 26.704 | 453.361 | 54.097 | 39.651 | 14.446 |
| 2000          | 33459  | 4021.411 | 2770.001 | 1251.410 | 3.740  | 31.119 | 447.853 | 53.827 | 37.077 | 16.750 |
| 2001          | 32275  | 3848.092 | 2470.139 | 1377.953 | 4.269  | 35.809 | 426.379 | 50.836 | 32.633 | 18.204 |
| 2002          | 31586  | 3783.081 | 2257.026 | 1526.055 | 4.831  | 40.339 | 412.601 | 49.418 | 29.483 | 19.935 |
| 2003          | 30985  | 3754.415 | 2063.890 | 1690.525 | 5.456  | 45.028 | 400.541 | 48.533 | 26.680 | 21.853 |
| 2004          | 29884  | 3666.274 | 1851.790 | 1814.484 | 6.072  | 49.491 | 382.149 | 46.883 | 23.680 | 23.203 |
| 2005          | 28708  | 3589.688 | 1657.038 | 1932.650 | 6.732  | 53.839 | 362.850 | 45.371 | 20.944 | 24.427 |
| 2006          | 28188  | 3596.985 | 1502.526 | 2094.459 | 7.430  | 58.228 | 353.021 | 45.048 | 18.817 | 26.231 |
| 2007          | 28026  | 3560.798 | 1346.654 | 2214.144 | 7.900  | 62.181 | 347.392 | 44.137 | 16.692 | 27.445 |
| 2008          | 27128  | 3417.001 | 1167.979 | 2249.023 | 8.290  | 65.819 | 332.495 | 41.881 | 14.315 | 27.565 |
| 2009          | 27068  | 3394.390 | 1046.116 | 2348.274 | 8.675  | 69.181 | 327.847 | 41.113 | 12.671 | 28.442 |
| 2010          | 26911  | 3340.137 | 930.903  | 2409.234 | 8.953  | 72.130 | 321.990 | 39.965 | 11.138 | 28.826 |
| 2011          | 26959  | 3285.435 | 823.221  | 2462.214 | 9.133  | 74.943 | 319.377 | 38.922 | 9.752  | 29.169 |
| 2012          | 27057  | 3259.209 | 725.882  | 2533.328 | 9.363  | 77.728 | 317.068 | 38.193 | 8.506  | 29.687 |
| 2013          | 27904  | 3274.703 | 650.941  | 2623.762 | 9.403  | 80.122 | 323.265 | 37.937 | 7.541  | 30.396 |
| 2014          | 28792  | 3298.083 | 581.111  | 2716.972 | 9.437  | 82.380 | 329.657 | 37.762 | 6.653  | 31.108 |
| 2015          | 29560  | 3244.406 | 513.437  | 2730.969 | 9.239  | 84.175 | 380.745 | 41.789 | 6.613  | 35.176 |
| 2016          | 30513  | 3314.836 | 462.366  | 2852.470 | 9.348  | 86.052 | 389.347 | 42.297 | 5.900  | 36.398 |
| 2017          | 31416  | 3333.314 | 410.439  | 2922.874 | 9.304  | 87.687 | 397.202 | 42.144 | 5.189  | 36.955 |
| 2018          | 29348  | 2925.242 | 322.055  | 2603.187 | 8.870  | 88.990 | 367.626 | 36.642 | 4.034  | 32.608 |
| 2019          | 29598  | 2864.628 | 279.727  | 2584.901 | 8.733  | 90.235 | 367.149 | 35.534 | 3.470  | 32.064 |
| 2020          | 29592  | 2730.366 | 237.257  | 2493.109 | 8.425  | 91.310 | 419.174 | 38.675 | 3.361  | 35.315 |
| 2021          | 30097  | 2647.911 | 203.328  | 2444.582 | 8.122  | 92.321 | 423.328 | 37.244 | 2.860  | 34.384 |
| 2022          | 30304  | 2586.165 | 173.048  | 2413.117 | 7.963  | 93.309 | 422.974 | 36.097 | 2.415  | 33.682 |
| 2023          | 30505  | 2517.960 | 146.504  | 2371.456 | 7.774  | 94.182 | 422.337 | 34.860 | 2.028  | 32.832 |
| 2024          | 30661  | 2454.161 | 125.508  | 2328.652 | 7.595  | 94.886 | 420.968 | 33.695 | 1.723  | 31.972 |
| 2025          | 30254  | 2275.364 | 103.084  | 2172.280 | 7.180  | 95.470 | 483.488 | 36.363 | 1.647  | 34.716 |
| 2026          | 30685  | 2183.166 | 85.941   | 2097.225 | 6.835  | 96.063 | 488.380 | 34.747 | 1.368  | 33.379 |
| 2027          | 30561  | 2112.345 | 72.612   | 2039.733 | 6.674  | 96.563 | 484.196 | 33.467 | 1.150  | 32.317 |
| 2028          | 30412  | 2046.677 | 60.804   | 1985.873 | 6.530  | 97.029 | 479.392 | 32.263 | 0.958  | 31.304 |
| 2029          | 30254  | 1977.671 | 50.769   | 1926.903 | 6.369  | 97.433 | 474.195 | 30.997 | 0.796  | 30.202 |
| 2030          | 29330  | 1744.457 | 40.161   | 1704.296 | 5.811  | 97.698 | 549.260 | 32.668 | 0.752  | 31.916 |
| 2031          | 28976  | 1653.738 | 33.663   | 1620.074 | 5.591  | 97.964 | 541.223 | 30.889 | 0.629  | 30.260 |
| 2032          | 28724  | 1603.120 | 28.290   | 1574.831 | 5.483  | 98.235 | 534.690 | 29.841 | 0.527  | 29.315 |
| 2033          | 28464  | 1548.245 | 23.337   | 1524.908 | 5.357  | 98.493 | 527.627 | 28.700 | 0.433  | 28.267 |
| 2034          | 28178  | 1511.985 | 19.902   | 1492.083 | 5.295  | 98.684 | 519.826 | 27.893 | 0.367  | 27.526 |
| 2035          | 26737  | 1239.866 | 14.806   | 1225.059 | 4.582  | 98.806 | 610.065 | 28.290 | 0.338  | 27.952 |
| 2036          | 25591  | 1182.522 | 12.042   | 1170.480 | 4.574  | 98.982 | 583.762 | 26.975 | 0.275  | 26.700 |
| 2037          | 25143  | 1134.483 | 10.208   | 1124.275 | 4.472  | 99.100 | 572.916 | 25.851 | 0.233  | 25.618 |
| 2038          | 24693  | 1093.537 | 8.594    | 1084.943 | 4.394  | 99.214 | 561.491 | 24.866 | 0.195  | 24.670 |
| 2039          | 24247  | 1047.905 | 6.783    | 1041.122 | 4.294  | 99.353 | 549.553 | 23.751 | 0.154  | 23.597 |

## Results for PHIM for Run 3 (Sensitivity\_Analysis\_1.RTF)

\*\*\*\*\*

### Main Results for E-Component for Run: 3, Simulation: 1, COD: COPD

| Variable Parameter          | Value                                  |
|-----------------------------|----------------------------------------|
| 1. Country                  | US (United States)                     |
| 2. Sex                      | M (Males)                              |
| 3. Year of start of process | 1990                                   |
| 4. Cause of Death           | COPD                                   |
| 5. Effective Dose NULL      | CC:1                                   |
| 6. Effective Dose Ecig      | CC:1 Ecig:0 Dual:0.5                   |
| Note:                       | Death rates are per million population |

#### Results for Age Groups Combined and Years combined, Population unadjusted for deaths in Ecig scenario,

| Age Group:All | NULL    | Ecig        | %Drop      |          |        | NULL   | Ecig    | Drop    |         |         |
|---------------|---------|-------------|------------|----------|--------|--------|---------|---------|---------|---------|
| Year          | Number  | Attrib      | Attrib     | Drop     | %Drop  | Attrib | Death   | Attrib  | Attrib  | Drop    |
|               | Deaths  | Deaths      | Deaths     | Deaths   | Deaths | Deaths | Rate    | Rates   | Rates   | Rates   |
| All Comb      | 2233143 | 1015606.587 | 651572.317 | 364034.3 | 16.301 | 35.844 | 646.447 | 293.996 | 188.616 | 105.380 |

#### Results for Age Groups Combined, Population unadjusted for deaths in Ecig scenario,

| Age Group:All | NULL   | Ecig      | %Drop     |          |        | NULL   | Ecig    | Drop    |         |         |
|---------------|--------|-----------|-----------|----------|--------|--------|---------|---------|---------|---------|
| Year          | Number | Attrib    | Attrib    | Drop     | %Drop  | Attrib | Death   | Attrib  | Attrib  | Drop    |
|               | Deaths | Deaths    | Deaths    | Deaths   | Deaths | Deaths | Rate    | Rates   | Rates   | Rates   |
| 1990          | 33993  | 19262.437 | 19262.437 | 0.000    | 0.000  | 0.000  | 538.865 | 305.353 | 305.353 | 0.000   |
| 1991          | 34092  | 19215.636 | 19192.373 | 23.264   | 0.068  | 0.121  | 531.576 | 299.618 | 299.255 | 0.363   |
| 1992          | 33942  | 19056.189 | 18995.216 | 60.973   | 0.180  | 0.320  | 520.248 | 292.085 | 291.150 | 0.935   |
| 1993          | 35913  | 20095.670 | 19970.556 | 125.114  | 0.348  | 0.623  | 540.645 | 302.526 | 300.643 | 1.884   |
| 1994          | 35074  | 19524.095 | 19331.957 | 192.138  | 0.548  | 0.984  | 518.158 | 288.435 | 285.596 | 2.839   |
| 1995          | 34669  | 19116.002 | 18840.483 | 275.519  | 0.795  | 1.441  | 502.362 | 276.995 | 273.003 | 3.992   |
| 1996          | 34582  | 18975.021 | 18597.933 | 377.089  | 1.090  | 1.987  | 493.306 | 270.675 | 265.296 | 5.379   |
| 1997          | 35267  | 19169.025 | 18667.100 | 501.925  | 1.423  | 2.618  | 494.878 | 268.986 | 261.943 | 7.043   |
| 1998          | 35675  | 19228.937 | 18582.365 | 646.573  | 1.812  | 3.362  | 492.368 | 265.388 | 256.464 | 8.924   |
| 1999          | 38516  | 20589.820 | 19738.248 | 851.572  | 2.211  | 4.136  | 523.195 | 279.689 | 268.121 | 11.568  |
| 2000          | 36283  | 19196.417 | 18230.095 | 966.322  | 2.663  | 5.034  | 485.652 | 256.946 | 244.012 | 12.934  |
| 2001          | 36281  | 19012.731 | 17841.401 | 1171.331 | 3.228  | 6.161  | 479.301 | 251.174 | 235.699 | 15.474  |
| 2002          | 35983  | 18699.357 | 17326.551 | 1372.806 | 3.815  | 7.341  | 470.038 | 244.265 | 226.333 | 17.933  |
| 2003          | 36205  | 18663.550 | 17058.404 | 1605.146 | 4.433  | 8.600  | 468.019 | 241.262 | 220.513 | 20.750  |
| 2004          | 34611  | 17679.164 | 15898.661 | 1780.503 | 5.144  | 10.071 | 442.596 | 226.076 | 203.308 | 22.769  |
| 2005          | 36826  | 18692.832 | 16537.581 | 2155.251 | 5.853  | 11.530 | 465.456 | 236.265 | 209.024 | 27.241  |
| 2006          | 34350  | 17308.564 | 15017.801 | 2290.762 | 6.669  | 13.235 | 430.192 | 216.769 | 188.080 | 28.689  |
| 2007          | 35326  | 17683.181 | 15028.577 | 2654.605 | 7.515  | 15.012 | 437.879 | 219.189 | 186.285 | 32.905  |
| 2008          | 38248  | 19006.374 | 15833.174 | 3173.200 | 8.296  | 16.695 | 468.878 | 232.952 | 194.060 | 38.892  |
| 2009          | 36902  | 18205.573 | 14789.190 | 3416.382 | 9.258  | 18.766 | 446.956 | 220.505 | 179.126 | 41.379  |
| 2010          | 37234  | 18237.758 | 14487.644 | 3750.114 | 10.072 | 20.562 | 445.505 | 218.215 | 173.345 | 44.870  |
| 2011          | 38093  | 18487.916 | 14252.640 | 4235.276 | 11.118 | 22.908 | 451.279 | 219.022 | 168.848 | 50.174  |
| 2012          | 38504  | 18491.158 | 13845.665 | 4645.493 | 12.065 | 25.123 | 451.211 | 216.689 | 162.251 | 54.438  |
| 2013          | 40290  | 19143.452 | 13930.904 | 5212.548 | 12.938 | 27.229 | 466.755 | 221.775 | 161.388 | 60.387  |
| 2014          | 40339  | 18992.005 | 13382.655 | 5609.350 | 13.906 | 29.535 | 461.866 | 217.451 | 153.226 | 64.225  |
| 2015          | 42303  | 19728.885 | 13537.621 | 6191.264 | 14.636 | 31.382 | 544.880 | 254.116 | 174.370 | 79.746  |
| 2016          | 43104  | 19876.724 | 13190.969 | 6685.755 | 15.511 | 33.636 | 550.009 | 253.628 | 168.317 | 85.311  |
| 2017          | 44107  | 20119.790 | 12892.775 | 7227.016 | 16.385 | 35.920 | 557.659 | 254.381 | 163.007 | 91.373  |
| 2018          | 45469  | 20535.123 | 12694.622 | 7840.501 | 17.243 | 38.181 | 569.564 | 257.229 | 159.017 | 98.212  |
| 2019          | 46963  | 21009.029 | 12523.109 | 8485.920 | 18.069 | 40.392 | 582.552 | 260.605 | 155.342 | 105.263 |
| 2020          | 48419  | 21428.512 | 12321.286 | 9107.226 | 18.809 | 42.501 | 685.853 | 303.533 | 174.530 | 129.003 |
| 2021          | 48463  | 21266.697 | 11682.261 | 9584.436 | 19.777 | 45.068 | 681.652 | 299.127 | 164.317 | 134.810 |
| 2022          | 49915  | 21663.568 | 11380.774 | 10282.79 | 20.600 | 47.466 | 696.712 | 302.378 | 158.852 | 143.526 |
| 2023          | 51391  | 22084.131 | 11083.377 | 11000.75 | 21.406 | 49.813 | 711.491 | 305.748 | 153.446 | 152.302 |
| 2024          | 52811  | 22418.456 | 10767.270 | 11651.19 | 22.062 | 51.971 | 725.093 | 307.804 | 147.834 | 159.970 |
| 2025          | 53848  | 22614.834 | 10394.263 | 12220.57 | 22.695 | 54.038 | 860.553 | 361.411 | 166.112 | 195.299 |
| 2026          | 54342  | 22571.522 | 9855.812  | 12715.71 | 23.400 | 56.335 | 864.886 | 359.241 | 156.862 | 202.379 |
| 2027          | 55267  | 22774.416 | 9416.334  | 13358.08 | 24.170 | 58.654 | 875.619 | 360.827 | 149.188 | 211.639 |
| 2028          | 56149  | 22915.561 | 8930.690  | 13984.87 | 24.907 | 61.028 | 885.102 | 361.228 | 140.778 | 220.450 |
| 2029          | 57014  | 22992.027 | 8447.463  | 14544.56 | 25.511 | 63.259 | 893.616 | 360.371 | 132.403 | 227.968 |
| 2030          | 57238  | 22895.360 | 7971.714  | 14923.65 | 26.073 | 65.182 | 1071.90 | 428.760 | 149.286 | 279.474 |
| 2031          | 57592  | 22715.871 | 7467.601  | 15248.27 | 26.476 | 67.126 | 1075.71 | 424.293 | 139.482 | 284.811 |
| 2032          | 58251  | 22759.207 | 7006.701  | 15752.51 | 27.043 | 69.214 | 1084.31 | 423.652 | 130.426 | 293.225 |
| 2033          | 58885  | 22786.258 | 6562.641  | 16223.62 | 27.552 | 71.199 | 1091.54 | 422.387 | 121.651 | 300.736 |
| 2034          | 59460  | 22806.106 | 6125.492  | 16680.61 | 28.054 | 73.141 | 1096.89 | 420.721 | 113.001 | 307.719 |
| 2035          | 58516  | 22262.998 | 5668.636  | 16594.36 | 28.359 | 74.538 | 1335.15 | 507.973 | 129.341 | 378.632 |
| 2036          | 56446  | 21140.051 | 4892.390  | 16247.66 | 28.785 | 76.857 | 1287.60 | 482.234 | 111.602 | 370.631 |
| 2037          | 56568  | 21011.845 | 4454.890  | 16556.96 | 29.269 | 78.798 | 1288.98 | 478.783 | 101.511 | 377.272 |
| 2038          | 56668  | 20787.483 | 4020.739  | 16766.74 | 29.588 | 80.658 | 1288.55 | 472.681 | 91.426  | 381.254 |
| 2039          | 56758  | 20709.267 | 3643.279  | 17065.99 | 30.068 | 82.407 | 1286.40 | 469.372 | 82.574  | 386.798 |

## Results for PHIM for Run 3 (Sensitivity\_Analysis\_1.RTF)

\*\*\*\*\*

### Main Results for E-Component for Run: 3, Simulation: 1, COD: Four Diseases Combined, Adjusted

| Variable Parameter          | Value                                  |
|-----------------------------|----------------------------------------|
| 1. Country                  | US (United States)                     |
| 2. Sex                      | M (Males)                              |
| 3. Year of start of process | 1990                                   |
| 4. Cause of Death           | Four Diseases Combined                 |
| 5. Effective Dose NULL      | CC:1                                   |
| 6. Effective Dose Ecig      | CC:1 Ecig:0 Dual:0.5                   |
| Note:                       | Death rates are per million population |

#### Results for Age Groups Combined and Years combined, Population and Number deaths adjusted for Ecig scenario,

| Age Group:All | NULL     | Ecig        |             |         |        |        | NULL    | Ecig    |         |         |
|---------------|----------|-------------|-------------|---------|--------|--------|---------|---------|---------|---------|
| Year          | Number   | Attrib      | Attrib      | Drop    | %Drop  | Attrib | Death   | Attrib  | Attrib  | Drop    |
|               | Deaths   | Deaths      | Deaths      | Deaths  | Deaths | Deaths | Rate    | Rates   | Rates   | Rates   |
| All Comb      | 13302112 | 4509390.583 | 2873449.699 | 1635941 | 12.298 | 36.279 | 3816.17 | 1305.37 | 824.348 | 481.023 |

#### Results for Age Groups Combined, Population and Number deaths adjusted for Ecig scenario,

| Age Group:All | NULL   | Ecig       |            |          |        |        | NULL    | Ecig    |         |         |
|---------------|--------|------------|------------|----------|--------|--------|---------|---------|---------|---------|
| Year          | Number | Attrib     | Attrib     | Drop     | %Drop  | Attrib | Death   | Attrib  | Attrib  | Drop    |
|               | Deaths | Deaths     | Deaths     | Deaths   | Deaths | Deaths | Rate    | Rates   | Rates   | Rates   |
| 1990          | 317161 | 125773.065 | 125773.065 | 0.000    | 0.000  | 0.000  | 5027.71 | 1993.78 | 1993.78 | 0.000   |
| 1991          | 313217 | 123999.442 | 123552.947 | 446.495  | 0.143  | 0.360  | 4883.81 | 1933.45 | 1926.49 | 6.962   |
| 1992          | 308580 | 122014.015 | 120815.937 | 1198.078 | 0.388  | 0.982  | 4729.74 | 1870.18 | 1851.80 | 18.377  |
| 1993          | 311723 | 122810.618 | 120558.793 | 2251.825 | 0.722  | 1.834  | 4692.65 | 1848.83 | 1814.88 | 33.946  |
| 1994          | 305724 | 119925.592 | 116460.343 | 3465.249 | 1.133  | 2.889  | 4516.28 | 1771.69 | 1720.40 | 51.297  |
| 1995          | 303270 | 117896.496 | 113010.766 | 4885.730 | 1.611  | 4.144  | 4393.96 | 1708.35 | 1637.37 | 70.980  |
| 1996          | 299633 | 115698.645 | 109246.218 | 6452.427 | 2.153  | 5.577  | 4273.41 | 1650.42 | 1558.09 | 92.332  |
| 1997          | 294336 | 113359.847 | 105328.830 | 8031.017 | 2.729  | 7.085  | 4129.06 | 1590.70 | 1477.59 | 113.109 |
| 1998          | 289413 | 111444.212 | 101831.670 | 9612.542 | 3.321  | 8.625  | 3992.74 | 1538.10 | 1404.87 | 133.228 |
| 1999          | 311230 | 114877.722 | 102002.212 | 12875.51 | 4.137  | 11.208 | 4225.43 | 1560.48 | 1384.84 | 175.645 |
| 2000          | 304088 | 112379.704 | 97678.104  | 14701.60 | 4.835  | 13.082 | 4067.31 | 1504.22 | 1306.49 | 197.727 |
| 2001          | 296674 | 110024.943 | 93374.596  | 16650.35 | 5.612  | 15.133 | 3915.66 | 1453.52 | 1232.41 | 221.113 |
| 2002          | 292371 | 108289.173 | 89444.796  | 18844.38 | 6.445  | 17.402 | 3814.73 | 1414.56 | 1167.03 | 247.523 |
| 2003          | 286437 | 106539.023 | 85754.130  | 20784.89 | 7.256  | 19.509 | 3697.46 | 1377.22 | 1106.95 | 270.271 |
| 2004          | 274842 | 103037.251 | 80837.932  | 22199.32 | 8.077  | 21.545 | 3508.55 | 1317.61 | 1031.95 | 285.659 |
| 2005          | 273165 | 103044.562 | 78802.766  | 24241.80 | 8.874  | 23.526 | 3445.60 | 1302.41 | 993.989 | 308.425 |
| 2006          | 265012 | 99672.555  | 73679.242  | 25993.31 | 9.808  | 26.079 | 3311.10 | 1248.28 | 920.558 | 327.720 |
| 2007          | 259434 | 97839.152  | 70381.852  | 27457.30 | 10.584 | 28.064 | 3207.01 | 1212.75 | 870.029 | 342.723 |
| 2008          | 260631 | 98075.852  | 68761.307  | 29314.55 | 11.248 | 29.890 | 3184.51 | 1202.07 | 840.159 | 361.912 |
| 2009          | 255211 | 95617.338  | 65000.327  | 30617.01 | 11.997 | 32.020 | 3080.27 | 1158.11 | 784.523 | 373.591 |
| 2010          | 253335 | 94607.988  | 62525.645  | 32082.34 | 12.664 | 33.911 | 3019.28 | 1131.98 | 745.190 | 386.795 |
| 2011          | 253408 | 93633.119  | 59760.194  | 33872.93 | 13.367 | 36.176 | 2989.04 | 1109.25 | 704.895 | 404.354 |
| 2012          | 254460 | 92775.175  | 57142.433  | 35632.74 | 14.003 | 38.408 | 2967.67 | 1087.19 | 666.430 | 420.759 |
| 2013          | 258216 | 92345.780  | 54912.160  | 37433.62 | 14.497 | 40.536 | 2975.77 | 1069.82 | 632.828 | 436.988 |
| 2014          | 259652 | 91379.215  | 52434.051  | 38945.16 | 14.999 | 42.619 | 2955.99 | 1046.26 | 596.931 | 449.325 |
| 2015          | 262291 | 90750.242  | 50435.932  | 40314.31 | 15.370 | 44.423 | 3354.92 | 1168.90 | 645.119 | 523.783 |
| 2016          | 264205 | 88811.996  | 47071.171  | 41740.82 | 15.799 | 46.999 | 3345.94 | 1133.24 | 596.118 | 537.127 |
| 2017          | 266705 | 87325.126  | 44342.863  | 42982.26 | 16.116 | 49.221 | 3344.77 | 1104.08 | 556.108 | 547.971 |
| 2018          | 261910 | 87612.144  | 43452.622  | 44159.52 | 16.861 | 50.403 | 3252.33 | 1097.46 | 539.583 | 557.873 |
| 2019          | 264923 | 87797.760  | 41973.787  | 45823.97 | 17.297 | 52.193 | 3255.81 | 1089.08 | 515.843 | 573.239 |
| 2020          | 266078 | 87221.042  | 40420.512  | 46800.53 | 17.589 | 53.657 | 3727.02 | 1235.48 | 566.180 | 669.298 |
| 2021          | 259019 | 82001.292  | 35657.714  | 46343.58 | 17.892 | 56.516 | 3600.15 | 1153.39 | 495.612 | 657.777 |
| 2022          | 261334 | 81915.977  | 34033.599  | 47882.38 | 18.322 | 58.453 | 3602.06 | 1143.37 | 469.097 | 674.278 |
| 2023          | 263627 | 81810.810  | 32437.019  | 49373.79 | 18.729 | 60.351 | 3601.68 | 1132.64 | 443.155 | 689.490 |
| 2024          | 265585 | 81528.303  | 30867.589  | 50660.71 | 19.075 | 62.139 | 3595.81 | 1119.38 | 417.922 | 701.456 |
| 2025          | 262478 | 79599.213  | 29164.509  | 50434.70 | 19.215 | 63.361 | 4125.82 | 1272.09 | 458.429 | 813.659 |
| 2026          | 256855 | 75082.462  | 25575.404  | 49507.06 | 19.274 | 65.937 | 4017.56 | 1194.99 | 400.033 | 794.955 |
| 2027          | 256599 | 74444.425  | 23964.564  | 50479.86 | 19.673 | 67.809 | 3992.13 | 1179.46 | 372.838 | 806.623 |
| 2028          | 256182 | 73699.585  | 22279.713  | 51419.87 | 20.072 | 69.770 | 3962.30 | 1161.76 | 344.595 | 817.164 |
| 2029          | 255713 | 72819.703  | 20684.120  | 52135.58 | 20.388 | 71.595 | 3929.36 | 1141.36 | 317.838 | 823.519 |
| 2030          | 246936 | 69309.277  | 19112.112  | 50197.16 | 20.328 | 72.425 | 4519.30 | 1297.95 | 349.781 | 948.169 |
| 2031          | 241973 | 65433.368  | 16610.897  | 48822.47 | 20.177 | 74.614 | 4412.78 | 1222.18 | 302.928 | 919.253 |
| 2032          | 240806 | 64643.552  | 15318.934  | 49324.62 | 20.483 | 76.302 | 4372.55 | 1203.31 | 278.161 | 925.148 |
| 2033          | 239605 | 63793.514  | 14082.066  | 49711.45 | 20.747 | 77.926 | 4328.69 | 1182.54 | 254.406 | 928.130 |
| 2034          | 238262 | 63032.151  | 12926.954  | 50105.20 | 21.029 | 79.491 | 4279.89 | 1162.80 | 232.206 | 930.594 |
| 2035          | 223137 | 57653.301  | 11714.816  | 45938.48 | 20.588 | 79.681 | 4940.35 | 1315.47 | 259.371 | 1056.10 |
| 2036          | 215425 | 52988.733  | 9445.675   | 43543.06 | 20.213 | 82.174 | 4763.60 | 1208.75 | 208.868 | 999.878 |
| 2037          | 212893 | 52026.921  | 8489.199   | 43537.72 | 20.451 | 83.683 | 4698.00 | 1185.50 | 187.335 | 998.168 |
| 2038          | 210390 | 50943.211  | 7556.781   | 43386.43 | 20.622 | 85.166 | 4628.77 | 1158.38 | 166.256 | 992.127 |
| 2039          | 207957 | 50085.991  | 6760.832   | 43325.16 | 20.834 | 86.502 | 4556.22 | 1135.19 | 148.126 | 987.065 |

## Results for PHIM for Run 3 (Sensitivity\_Analysis\_1.RTF)

\*\*\*\*\*

### Main Results for E-Component for Run: 3, Simulation: 1, COD: LUNG CANCER, Adjusted

| Variable Parameter          | Value                                  |
|-----------------------------|----------------------------------------|
| 1. Country                  | US (United States)                     |
| 2. Sex                      | M (Males)                              |
| 3. Year of start of process | 1990                                   |
| 4. Cause of Death           | LUNG CANCER                            |
| 5. Effective Dose NULL      | CC:1                                   |
| 6. Effective Dose Ecig      | CC:1 Ecig:0 Dual:0.5                   |
| Note:                       | Death rates are per million population |

#### Results for Age Groups Combined and Years combined, Population and Number deaths adjusted for Ecig scenario,

| Age Group:All | NULL    | Ecig        | %Drop       |          |        |        | NULL    | Ecig    | Drop    |         |
|---------------|---------|-------------|-------------|----------|--------|--------|---------|---------|---------|---------|
| Year          | Number  | Attrib      | Attrib      | Drop     | %Drop  | Attrib | Death   | Attrib  | Attrib  | Drop    |
|               | Deaths  | Deaths      | Deaths      | Deaths   | Deaths | Deaths | Rate    | Rates   | Rates   | Rates   |
| All Comb      | 3097900 | 2244988.113 | 1673945.285 | 571042.8 | 18.433 | 25.436 | 888.739 | 649.875 | 480.229 | 169.647 |

#### Results for Age Groups Combined, Population and Number deaths adjusted for Ecig scenario,

| Age Group:All | NULL   | Ecig      | %Drop     |          |        |        | NULL    | Ecig    | Drop    |         |
|---------------|--------|-----------|-----------|----------|--------|--------|---------|---------|---------|---------|
| Year          | Number | Attrib    | Attrib    | Drop     | %Drop  | Attrib | Death   | Attrib  | Attrib  | Drop    |
|               | Deaths | Deaths    | Deaths    | Deaths   | Deaths | Deaths | Rate    | Rates   | Rates   | Rates   |
| 1990          | 78822  | 63385.736 | 63385.736 | 0.000    | 0.000  | 0.000  | 1249.50 | 1004.81 | 1004.81 | 0.000   |
| 1991          | 78462  | 62918.402 | 62867.864 | 50.538   | 0.064  | 0.080  | 1223.41 | 981.049 | 980.261 | 0.788   |
| 1992          | 77988  | 62366.766 | 62231.297 | 135.468  | 0.174  | 0.217  | 1195.35 | 955.930 | 953.846 | 2.083   |
| 1993          | 78545  | 62652.888 | 62386.853 | 266.035  | 0.339  | 0.425  | 1182.40 | 943.195 | 939.165 | 4.029   |
| 1994          | 77443  | 61565.227 | 61146.363 | 418.864  | 0.541  | 0.680  | 1144.02 | 909.520 | 903.278 | 6.243   |
| 1995          | 76916  | 60851.961 | 60243.839 | 608.122  | 0.791  | 0.999  | 1114.40 | 881.759 | 872.848 | 8.910   |
| 1996          | 76252  | 60122.922 | 59276.326 | 846.595  | 1.110  | 1.408  | 1087.51 | 857.643 | 845.409 | 12.234  |
| 1997          | 75502  | 59237.155 | 58134.410 | 1102.744 | 1.461  | 1.862  | 1059.18 | 831.234 | 815.531 | 15.703  |
| 1998          | 75423  | 58906.696 | 57486.494 | 1420.202 | 1.883  | 2.411  | 1040.54 | 813.001 | 793.083 | 19.917  |
| 1999          | 73215  | 56930.073 | 55196.949 | 1733.124 | 2.367  | 3.044  | 994.006 | 773.329 | 749.383 | 23.946  |
| 2000          | 73860  | 57137.121 | 54995.718 | 2141.403 | 2.899  | 3.748  | 987.914 | 764.787 | 735.593 | 29.195  |
| 2001          | 73392  | 56481.726 | 53878.792 | 2602.935 | 3.547  | 4.608  | 968.664 | 746.169 | 711.120 | 35.050  |
| 2002          | 72564  | 55588.365 | 52497.797 | 3090.568 | 4.259  | 5.560  | 946.784 | 726.138 | 684.967 | 41.171  |
| 2003          | 72091  | 54945.856 | 51312.730 | 3633.126 | 5.040  | 6.612  | 930.587 | 710.281 | 662.366 | 47.914  |
| 2004          | 71480  | 54203.126 | 49971.739 | 4231.387 | 5.920  | 7.807  | 912.495 | 693.135 | 637.924 | 55.210  |
| 2005          | 71176  | 53744.603 | 48889.714 | 4854.889 | 6.821  | 9.033  | 897.785 | 679.296 | 616.677 | 62.619  |
| 2006          | 69902  | 52535.572 | 47021.474 | 5514.098 | 7.888  | 10.496 | 873.361 | 657.945 | 587.493 | 70.452  |
| 2007          | 68843  | 51492.124 | 45323.902 | 6168.222 | 8.960  | 11.979 | 851.006 | 638.264 | 560.274 | 77.990  |
| 2008          | 68543  | 51030.736 | 44063.225 | 6967.511 | 10.165 | 13.654 | 837.490 | 625.460 | 538.386 | 87.075  |
| 2009          | 67866  | 50276.199 | 42506.732 | 7769.467 | 11.448 | 15.454 | 819.106 | 608.943 | 513.036 | 95.908  |
| 2010          | 67596  | 49840.933 | 41264.572 | 8576.361 | 12.688 | 17.207 | 805.621 | 596.347 | 491.797 | 104.550 |
| 2011          | 66949  | 49072.841 | 39601.137 | 9471.704 | 14.148 | 19.301 | 789.690 | 581.354 | 467.111 | 114.243 |
| 2012          | 66644  | 48539.512 | 38101.952 | 10437.56 | 15.662 | 21.503 | 777.243 | 568.812 | 444.368 | 124.444 |
| 2013          | 65867  | 47675.741 | 36372.481 | 11303.26 | 17.161 | 23.709 | 759.077 | 552.318 | 419.170 | 133.149 |
| 2014          | 65619  | 47194.534 | 34990.618 | 12203.92 | 18.598 | 25.859 | 747.039 | 540.359 | 398.348 | 142.011 |
| 2015          | 64779  | 46305.842 | 33305.967 | 12999.88 | 20.068 | 28.074 | 828.581 | 596.439 | 426.012 | 170.427 |
| 2016          | 62283  | 44208.867 | 30722.535 | 13486.33 | 21.653 | 30.506 | 788.757 | 564.107 | 389.076 | 175.031 |
| 2017          | 60599  | 42702.624 | 28666.663 | 14035.96 | 23.162 | 32.869 | 759.979 | 539.903 | 359.511 | 180.391 |
| 2018          | 63259  | 44321.202 | 28495.857 | 15825.35 | 25.017 | 35.706 | 785.530 | 555.181 | 353.854 | 201.327 |
| 2019          | 63906  | 44493.088 | 27463.396 | 17029.69 | 26.648 | 38.275 | 785.377 | 551.912 | 337.515 | 214.396 |
| 2020          | 64400  | 44529.551 | 26374.343 | 18155.21 | 28.191 | 40.771 | 902.074 | 630.757 | 369.432 | 261.325 |
| 2021          | 58016  | 39852.556 | 22508.109 | 17344.45 | 29.896 | 43.522 | 806.372 | 560.546 | 312.844 | 247.702 |
| 2022          | 58409  | 39853.685 | 21380.360 | 18473.33 | 31.628 | 46.353 | 805.067 | 556.274 | 294.693 | 261.580 |
| 2023          | 58774  | 39847.050 | 20253.639 | 19593.41 | 33.337 | 49.172 | 802.977 | 551.670 | 276.706 | 274.964 |
| 2024          | 59047  | 39726.010 | 19131.664 | 20594.35 | 34.878 | 51.841 | 799.454 | 545.435 | 259.027 | 286.408 |
| 2025          | 58694  | 39207.348 | 17930.353 | 21277.00 | 36.251 | 54.268 | 922.591 | 626.579 | 281.842 | 344.736 |
| 2026          | 52538  | 34803.960 | 14991.643 | 19812.32 | 37.710 | 56.925 | 821.772 | 553.929 | 234.489 | 319.440 |
| 2027          | 52338  | 34484.595 | 13902.447 | 20582.15 | 39.325 | 59.685 | 814.267 | 546.357 | 216.293 | 330.064 |
| 2028          | 52092  | 34100.638 | 12782.333 | 21318.31 | 40.925 | 62.516 | 805.688 | 537.544 | 197.701 | 339.842 |
| 2029          | 51817  | 33669.838 | 11733.265 | 21936.57 | 42.335 | 65.152 | 796.235 | 527.732 | 180.297 | 347.435 |
| 2030          | 50432  | 32557.688 | 10691.719 | 21865.97 | 43.357 | 67.161 | 922.981 | 609.705 | 195.675 | 414.031 |
| 2031          | 44810  | 28646.393 | 8733.220  | 19913.17 | 44.439 | 69.514 | 817.195 | 535.065 | 159.265 | 375.800 |
| 2032          | 44432  | 28227.160 | 7935.309  | 20291.85 | 45.670 | 71.888 | 806.788 | 525.435 | 144.089 | 381.346 |
| 2033          | 44037  | 27786.623 | 7178.792  | 20607.83 | 46.797 | 74.165 | 795.572 | 515.079 | 129.692 | 385.387 |
| 2034          | 43609  | 27348.299 | 6488.486  | 20859.81 | 47.834 | 76.275 | 783.342 | 504.514 | 116.552 | 387.962 |
| 2035          | 41106  | 25570.077 | 5760.935  | 19809.14 | 48.190 | 77.470 | 910.112 | 583.430 | 127.549 | 455.881 |
| 2036          | 35217  | 21717.319 | 4304.298  | 17413.02 | 49.445 | 80.180 | 778.738 | 495.402 | 95.179  | 400.223 |
| 2037          | 34662  | 21256.024 | 3804.203  | 17451.82 | 50.349 | 82.103 | 764.902 | 484.347 | 83.949  | 400.398 |
| 2038          | 34111  | 20747.175 | 3326.963  | 17420.21 | 51.069 | 83.964 | 750.480 | 471.764 | 73.196  | 398.568 |
| 2039          | 33572  | 20327.688 | 2930.074  | 17397.61 | 51.822 | 85.586 | 735.546 | 460.724 | 64.196  | 396.527 |

## Results for PHIM for Run 3 (Sensitivity\_Analysis\_1.RTF)

\*\*\*\*\*

### Main Results for E-Component for Run: 3, Simulation: 1, COD: IHD, Adjusted

| Variable Parameter          | Value                                  |
|-----------------------------|----------------------------------------|
| 1. Country                  | US (United States)                     |
| 2. Sex                      | M (Males)                              |
| 3. Year of start of process | 1990                                   |
| 4. Cause of Death           | IHD                                    |
| 5. Effective Dose NULL      | CC:1                                   |
| 6. Effective Dose Ecig      | CC:1 Ecig:0 Dual:0.5                   |
| Note:                       | Death rates are per million population |

### Results for Age Groups Combined and Years combined, Population and Number deaths adjusted for Ecig scenario,

| Age Group: | NULL    | Ecig        | %Drop      |          |        |        | NULL    | Ecig    | Drop    |         |
|------------|---------|-------------|------------|----------|--------|--------|---------|---------|---------|---------|
| Year       | Number  | Attrib      | Attrib     | Drop     | %Drop  | Attrib | Death   | Attrib  | Attrib  | Drop    |
|            | Deaths  | Deaths      | Deaths     | Deaths   | Deaths | Deaths | Rate    | Rates   | Rates   | Rates   |
| All Comb   | 6427754 | 1098877.421 | 477380.920 | 621496.5 | 9.669  | 56.557 | 1844.02 | 318.101 | 136.953 | 181.148 |

### Results for Age Groups Combined, Population and Number deaths adjusted for Ecig scenario,

| Age Group: | NULL   | Ecig      | %Drop     |          |        |        | NULL    | Ecig    | Drop    |         |
|------------|--------|-----------|-----------|----------|--------|--------|---------|---------|---------|---------|
| Year       | Number | Attrib    | Attrib    | Drop     | %Drop  | Attrib | Death   | Attrib  | Attrib  | Drop    |
|            | Deaths | Deaths    | Deaths    | Deaths   | Deaths | Deaths | Rate    | Rates   | Rates   | Rates   |
| 1990       | 171484 | 38511.725 | 38511.725 | 0.000    | 0.000  | 0.000  | 2718.40 | 610.497 | 610.497 | 0.000   |
| 1991       | 168044 | 37309.838 | 36979.259 | 330.579  | 0.197  | 0.886  | 2620.21 | 581.750 | 576.596 | 5.155   |
| 1992       | 164550 | 36137.488 | 35246.348 | 891.140  | 0.542  | 2.466  | 2522.12 | 553.899 | 540.236 | 13.663  |
| 1993       | 164367 | 35599.588 | 33947.480 | 1652.107 | 1.005  | 4.641  | 2474.37 | 535.926 | 511.042 | 24.884  |
| 1994       | 159879 | 34336.757 | 31811.554 | 2525.203 | 1.579  | 7.354  | 2361.79 | 507.267 | 469.933 | 37.334  |
| 1995       | 158106 | 33455.759 | 29919.891 | 3535.868 | 2.236  | 10.569 | 2290.74 | 484.782 | 433.497 | 51.284  |
| 1996       | 154913 | 32193.824 | 27582.721 | 4611.103 | 2.977  | 14.323 | 2209.39 | 459.239 | 393.390 | 65.850  |
| 1997       | 150026 | 30665.509 | 25009.850 | 5655.660 | 3.770  | 18.443 | 2104.62 | 430.308 | 350.847 | 79.461  |
| 1998       | 145484 | 29188.430 | 22552.600 | 6635.831 | 4.561  | 22.734 | 2007.10 | 402.844 | 311.135 | 91.709  |
| 1999       | 166074 | 33375.386 | 24131.564 | 9243.822 | 5.566  | 27.697 | 2254.70 | 453.366 | 327.623 | 125.743 |
| 2000       | 160419 | 32024.754 | 21661.621 | 10363.13 | 6.460  | 32.360 | 2145.67 | 428.655 | 289.734 | 138.921 |
| 2001       | 154641 | 30682.393 | 19158.398 | 11523.99 | 7.452  | 37.559 | 2041.04 | 405.339 | 252.862 | 152.477 |
| 2002       | 152132 | 30218.370 | 17331.912 | 12886.46 | 8.471  | 42.644 | 1984.95 | 394.736 | 226.139 | 168.597 |
| 2003       | 147025 | 29175.202 | 15280.884 | 13894.32 | 9.450  | 47.624 | 1897.86 | 377.146 | 197.252 | 179.894 |
| 2004       | 138714 | 27488.687 | 13072.718 | 14415.97 | 10.393 | 52.443 | 1770.79 | 351.518 | 166.882 | 184.635 |
| 2005       | 136270 | 27017.439 | 11665.872 | 15351.57 | 11.266 | 56.821 | 1718.86 | 341.482 | 147.149 | 194.333 |
| 2006       | 132365 | 26231.435 | 10081.372 | 16150.06 | 12.201 | 61.568 | 1653.78 | 328.517 | 125.958 | 202.559 |
| 2007       | 126994 | 25103.049 | 8618.107  | 16484.94 | 12.981 | 65.669 | 1569.85 | 311.161 | 106.533 | 204.628 |
| 2008       | 126421 | 24621.740 | 7619.822  | 17001.92 | 13.449 | 69.052 | 1544.67 | 301.777 | 93.103  | 208.675 |
| 2009       | 123050 | 23741.177 | 6576.146  | 17165.03 | 13.950 | 72.301 | 1485.16 | 287.552 | 79.371  | 208.181 |
| 2010       | 121225 | 23189.160 | 5752.044  | 17437.12 | 14.384 | 75.195 | 1444.78 | 277.458 | 68.554  | 208.905 |
| 2011       | 120987 | 22786.927 | 4983.913  | 17803.01 | 14.715 | 78.128 | 1427.09 | 269.951 | 58.787  | 211.164 |
| 2012       | 121785 | 22485.295 | 4361.893  | 18123.40 | 14.881 | 80.601 | 1420.33 | 263.495 | 50.871  | 212.624 |
| 2013       | 123610 | 22251.884 | 3838.674  | 18413.21 | 14.896 | 82.749 | 1424.53 | 257.786 | 44.238  | 213.547 |
| 2014       | 124294 | 21894.593 | 3353.505  | 18541.09 | 14.917 | 84.683 | 1415.01 | 250.685 | 38.178  | 212.507 |
| 2015       | 124951 | 21471.109 | 2939.171  | 18531.94 | 14.831 | 86.311 | 1598.22 | 276.557 | 37.595  | 238.962 |
| 2016       | 127526 | 21411.568 | 2546.775  | 18864.79 | 14.793 | 88.106 | 1615.01 | 273.213 | 32.253  | 240.960 |
| 2017       | 129711 | 21169.399 | 2215.231  | 18954.17 | 14.613 | 89.536 | 1626.72 | 267.651 | 27.781  | 239.870 |
| 2018       | 122895 | 19830.576 | 1772.681  | 18057.90 | 14.694 | 91.061 | 1526.08 | 248.404 | 22.013  | 226.391 |
| 2019       | 123418 | 19431.014 | 1529.328  | 17901.69 | 14.505 | 92.129 | 1516.76 | 241.031 | 18.795  | 222.236 |
| 2020       | 122520 | 18532.612 | 1298.783  | 17233.83 | 14.066 | 92.992 | 1716.18 | 262.513 | 18.192  | 244.321 |
| 2021       | 121203 | 18234.128 | 1071.500  | 17162.63 | 14.160 | 94.124 | 1684.62 | 256.472 | 14.893  | 241.579 |
| 2022       | 121353 | 17812.559 | 899.226   | 16913.33 | 13.937 | 94.952 | 1672.65 | 248.626 | 12.394  | 236.232 |
| 2023       | 121484 | 17361.668 | 745.837   | 16615.83 | 13.677 | 95.704 | 1659.71 | 240.367 | 10.190  | 230.177 |
| 2024       | 121468 | 16929.676 | 628.459   | 16301.22 | 13.420 | 96.288 | 1644.58 | 232.443 | 8.509   | 223.934 |
| 2025       | 117959 | 15501.666 | 516.398   | 14985.27 | 12.704 | 96.669 | 1854.17 | 247.735 | 8.117   | 239.617 |
| 2026       | 117439 | 15523.814 | 419.431   | 15104.38 | 12.861 | 97.298 | 1836.90 | 247.072 | 6.560   | 240.512 |
| 2027       | 116459 | 15073.070 | 348.203   | 14724.87 | 12.644 | 97.690 | 1811.85 | 238.810 | 5.417   | 233.393 |
| 2028       | 115429 | 14636.710 | 280.251   | 14356.46 | 12.438 | 98.085 | 1785.31 | 230.725 | 4.335   | 226.390 |
| 2029       | 114396 | 14180.166 | 227.344   | 13952.82 | 12.197 | 98.397 | 1757.85 | 222.256 | 3.493   | 218.763 |
| 2030       | 107582 | 12111.772 | 183.912   | 11927.86 | 11.087 | 98.482 | 1968.91 | 226.816 | 3.366   | 223.450 |
| 2031       | 108125 | 12417.367 | 155.209   | 12262.16 | 11.341 | 98.750 | 1971.84 | 231.935 | 2.831   | 229.104 |
| 2032       | 106801 | 12054.064 | 130.794   | 11923.27 | 11.164 | 98.915 | 1939.30 | 224.381 | 2.375   | 222.006 |
| 2033       | 105492 | 11672.389 | 103.362   | 11569.03 | 10.967 | 99.114 | 1905.80 | 216.370 | 1.867   | 214.503 |
| 2034       | 104157 | 11365.762 | 83.763    | 11282.00 | 10.832 | 99.263 | 1870.96 | 209.673 | 1.505   | 208.168 |
| 2035       | 93834  | 8580.360  | 67.080    | 8513.280 | 9.073  | 99.218 | 2077.52 | 195.777 | 1.485   | 194.292 |
| 2036       | 95238  | 8948.841  | 54.424    | 8894.416 | 9.339  | 99.392 | 2105.97 | 204.135 | 1.203   | 202.932 |
| 2037       | 93492  | 8624.570  | 47.108    | 8577.461 | 9.175  | 99.454 | 2063.13 | 196.522 | 1.040   | 195.483 |
| 2038       | 91796  | 8315.017  | 38.392    | 8276.625 | 9.016  | 99.538 | 2019.61 | 189.073 | 0.845   | 188.228 |
| 2039       | 90167  | 8001.132  | 28.384    | 7972.747 | 8.842  | 99.645 | 1975.50 | 181.344 | 0.622   | 180.722 |

## Results for PHIM for Run 3 (Sensitivity\_Analysis\_1.RTF)

\*\*\*\*\*

### Main Results for E-Component for Run: 3, Simulation: 1, COD: STROKE, Adjusted

| Variable Parameter          | Value                                  |
|-----------------------------|----------------------------------------|
| 1. Country                  | US (United States)                     |
| 2. Sex                      | M (Males)                              |
| 3. Year of start of process | 1990                                   |
| 4. Cause of Death           | STROKE                                 |
| 5. Effective Dose NULL      | CC:1                                   |
| 6. Effective Dose Ecig      | CC:1 Ecig:0 Dual:0.5                   |
| Note:                       | Death rates are per million population |

#### Results for Age Groups Combined and Years combined, Population and Number deaths adjusted for Ecig scenario,

| Age Group:All | NULL    | Ecig       | %Drop     |          |        |        | NULL    | Ecig   | Drop   |        |
|---------------|---------|------------|-----------|----------|--------|--------|---------|--------|--------|--------|
| Year          | Number  | Attrib     | Attrib    | Drop     | %Drop  | Attrib | Death   | Attrib | Attrib | Drop   |
|               | Deaths  | Deaths     | Deaths    | Deaths   | Deaths | Deaths | Rate    | Rates  | Rates  | Rates  |
| All Comb      | 1508081 | 149918.462 | 64722.288 | 85196.17 | 5.649  | 56.828 | 432.645 | 43.398 | 18.568 | 24.830 |

#### Results for Age Groups Combined, Population and Number deaths adjusted for Ecig scenario,

| Age Group:All | NULL   | Ecig     | %Drop    |          |        |        | NULL    | Ecig   | Drop   |        |
|---------------|--------|----------|----------|----------|--------|--------|---------|--------|--------|--------|
| Year          | Number | Attrib   | Attrib   | Drop     | %Drop  | Attrib | Death   | Attrib | Attrib | Drop   |
|               | Deaths | Deaths   | Deaths   | Deaths   | Deaths | Deaths | Rate    | Rates  | Rates  | Rates  |
| 1990          | 32862  | 4613.166 | 4613.166 | 0.000    | 0.000  | 0.000  | 520.936 | 73.129 | 73.129 | 0.000  |
| 1991          | 32619  | 4555.566 | 4513.452 | 42.114   | 0.129  | 0.924  | 508.609 | 71.032 | 70.376 | 0.657  |
| 1992          | 32100  | 4453.572 | 4342.903 | 110.669  | 0.345  | 2.485  | 492.015 | 68.262 | 66.566 | 1.697  |
| 1993          | 32897  | 4462.473 | 4253.257 | 209.216  | 0.636  | 4.688  | 495.229 | 67.179 | 64.028 | 3.151  |
| 1994          | 33326  | 4499.513 | 4168.967 | 330.547  | 0.992  | 7.346  | 492.298 | 66.473 | 61.586 | 4.887  |
| 1995          | 33574  | 4472.774 | 4003.829 | 468.945  | 1.397  | 10.484 | 486.436 | 64.812 | 58.010 | 6.802  |
| 1996          | 33878  | 4406.878 | 3784.802 | 622.076  | 1.836  | 14.116 | 483.173 | 62.863 | 53.980 | 8.884  |
| 1997          | 33528  | 4288.158 | 3510.668 | 777.489  | 2.319  | 18.131 | 470.342 | 60.173 | 49.249 | 10.924 |
| 1998          | 32812  | 4120.148 | 3200.503 | 919.645  | 2.803  | 22.321 | 452.670 | 56.864 | 44.154 | 12.710 |
| 1999          | 33398  | 3982.443 | 2921.247 | 1061.195 | 3.177  | 26.647 | 453.433 | 54.097 | 39.660 | 14.436 |
| 2000          | 33491  | 4021.411 | 2772.914 | 1248.497 | 3.728  | 31.046 | 447.953 | 53.827 | 37.089 | 16.738 |
| 2001          | 32315  | 3848.092 | 2473.486 | 1374.606 | 4.254  | 35.722 | 426.504 | 50.836 | 32.646 | 18.190 |
| 2002          | 31635  | 3783.081 | 2260.882 | 1522.199 | 4.812  | 40.237 | 412.760 | 49.418 | 29.499 | 19.919 |
| 2003          | 31044  | 3754.415 | 2068.181 | 1686.234 | 5.432  | 44.913 | 400.733 | 48.533 | 26.697 | 21.836 |
| 2004          | 29954  | 3666.274 | 1856.434 | 1809.841 | 6.042  | 49.365 | 382.379 | 46.883 | 23.699 | 23.185 |
| 2005          | 28788  | 3589.688 | 1661.944 | 1927.745 | 6.696  | 53.702 | 363.119 | 45.371 | 20.963 | 24.408 |
| 2006          | 28280  | 3596.985 | 1507.698 | 2089.286 | 7.388  | 58.084 | 353.337 | 45.048 | 18.837 | 26.211 |
| 2007          | 28132  | 3560.798 | 1351.982 | 2208.815 | 7.851  | 62.031 | 347.761 | 44.137 | 16.713 | 27.425 |
| 2008          | 27246  | 3417.001 | 1173.246 | 2243.756 | 8.235  | 65.664 | 332.908 | 41.881 | 14.335 | 27.545 |
| 2009          | 27202  | 3394.390 | 1051.449 | 2342.940 | 8.613  | 69.024 | 328.320 | 41.113 | 12.690 | 28.422 |
| 2010          | 27062  | 3340.137 | 936.227  | 2403.910 | 8.883  | 71.970 | 322.527 | 39.965 | 11.158 | 28.807 |
| 2011          | 27129  | 3285.435 | 828.485  | 2456.950 | 9.057  | 74.783 | 319.993 | 38.922 | 9.772  | 29.149 |
| 2012          | 27246  | 3259.209 | 730.985  | 2528.224 | 9.279  | 77.572 | 317.763 | 38.193 | 8.525  | 29.668 |
| 2013          | 28121  | 3274.703 | 655.992  | 2618.711 | 9.312  | 79.968 | 324.075 | 37.937 | 7.560  | 30.377 |
| 2014          | 29038  | 3298.083 | 586.033  | 2712.050 | 9.340  | 82.231 | 330.582 | 37.762 | 6.672  | 31.090 |
| 2015          | 29840  | 3244.406 | 518.230  | 2726.176 | 9.136  | 84.027 | 381.675 | 41.789 | 6.629  | 35.161 |
| 2016          | 30827  | 3314.836 | 467.042  | 2847.794 | 9.238  | 85.911 | 390.402 | 42.297 | 5.915  | 36.383 |
| 2017          | 31768  | 3333.314 | 414.933  | 2918.380 | 9.186  | 87.552 | 398.407 | 42.144 | 5.204  | 36.940 |
| 2018          | 29708  | 2925.242 | 325.916  | 2599.326 | 8.750  | 88.858 | 368.909 | 36.642 | 4.047  | 32.595 |
| 2019          | 29990  | 2864.628 | 283.329  | 2581.299 | 8.607  | 90.109 | 368.569 | 35.534 | 3.482  | 32.052 |
| 2020          | 30018  | 2730.366 | 240.577  | 2489.789 | 8.294  | 91.189 | 420.473 | 38.675 | 3.370  | 35.306 |
| 2021          | 30563  | 2647.911 | 206.380  | 2441.531 | 7.988  | 92.206 | 424.805 | 37.244 | 2.869  | 34.376 |
| 2022          | 30805  | 2586.165 | 175.802  | 2410.363 | 7.825  | 93.202 | 424.596 | 36.097 | 2.423  | 33.674 |
| 2023          | 31043  | 2517.960 | 148.978  | 2368.982 | 7.631  | 94.083 | 424.114 | 34.860 | 2.035  | 32.825 |
| 2024          | 31236  | 2454.161 | 127.754  | 2326.407 | 7.448  | 94.794 | 422.909 | 33.695 | 1.730  | 31.966 |
| 2025          | 30864  | 2275.364 | 105.081  | 2170.283 | 7.032  | 95.382 | 485.150 | 36.363 | 1.652  | 34.711 |
| 2026          | 31343  | 2183.166 | 87.695   | 2095.471 | 6.686  | 95.983 | 490.249 | 34.747 | 1.372  | 33.375 |
| 2027          | 31253  | 2112.345 | 74.166   | 2038.179 | 6.522  | 96.489 | 486.230 | 33.467 | 1.154  | 32.313 |
| 2028          | 31138  | 2046.677 | 62.175   | 1984.502 | 6.373  | 96.962 | 481.601 | 32.263 | 0.962  | 31.301 |
| 2029          | 31015  | 1977.671 | 51.962   | 1925.709 | 6.209  | 97.373 | 476.586 | 30.997 | 0.798  | 30.199 |
| 2030          | 30119  | 1744.457 | 41.186   | 1703.271 | 5.655  | 97.639 | 551.223 | 32.668 | 0.754  | 31.915 |
| 2031          | 29794  | 1653.738 | 34.560   | 1619.177 | 5.435  | 97.910 | 543.346 | 30.889 | 0.630  | 30.259 |
| 2032          | 29573  | 1603.120 | 29.069   | 1574.051 | 5.323  | 98.187 | 536.991 | 29.841 | 0.528  | 29.313 |
| 2033          | 29343  | 1548.245 | 24.006   | 1524.239 | 5.195  | 98.449 | 530.110 | 28.700 | 0.434  | 28.266 |
| 2034          | 29087  | 1511.985 | 20.499   | 1491.485 | 5.128  | 98.644 | 522.495 | 27.893 | 0.368  | 27.524 |
| 2035          | 27655  | 1239.866 | 15.290   | 1224.576 | 4.428  | 98.767 | 612.300 | 28.290 | 0.339  | 27.951 |
| 2036          | 26503  | 1182.522 | 12.445   | 1170.077 | 4.415  | 98.948 | 586.054 | 26.975 | 0.275  | 26.700 |
| 2037          | 26072  | 1134.483 | 10.556   | 1123.927 | 4.311  | 99.070 | 575.342 | 25.851 | 0.233  | 25.618 |
| 2038          | 25638  | 1093.537 | 8.895    | 1084.641 | 4.231  | 99.187 | 564.054 | 24.866 | 0.196  | 24.670 |
| 2039          | 25206  | 1047.905 | 7.027    | 1040.878 | 4.129  | 99.329 | 552.251 | 23.751 | 0.154  | 23.597 |



## Results for PHIM for Run 3 (Sensitivity\_Analysis\_1.RTF)

\*\*\*\*\*

### Main Results for E-Component for Run: 3, Simulation: 1, COD: COPD, Adjusted

| Variable Parameter          | Value                                  |
|-----------------------------|----------------------------------------|
| 1. Country                  | US (United States)                     |
| 2. Sex                      | M (Males)                              |
| 3. Year of start of process | 1990                                   |
| 4. Cause of Death           | COPD                                   |
| 5. Effective Dose NULL      | CC:1                                   |
| 6. Effective Dose Ecig      | CC:1 Ecig:0 Dual:0.5                   |
| Note:                       | Death rates are per million population |

#### Results for Age Groups Combined and Years combined, Population and Number deaths adjusted for Ecig scenario,

| Age Group:All | NULL    | Ecig        | %Drop      |          |        |        | NULL    | Ecig    | Drop    |         |
|---------------|---------|-------------|------------|----------|--------|--------|---------|---------|---------|---------|
| Year          | Number  | Attrib      | Attrib     | Drop     | %Drop  | Attrib | Death   | Attrib  | Attrib  | Drop    |
|               | Deaths  | Deaths      | Deaths     | Deaths   | Deaths | Deaths | Rate    | Rates   | Rates   | Rates   |
| All Comb      | 2268378 | 1015606.587 | 657401.205 | 358205.4 | 15.791 | 35.270 | 650.762 | 293.996 | 188.598 | 105.398 |

#### Results for Age Groups Combined, Population and Number deaths adjusted for Ecig scenario,

| Age Group:All | NULL   | Ecig      | %Drop     |          |        |        | NULL    | Ecig    | Drop    |         |
|---------------|--------|-----------|-----------|----------|--------|--------|---------|---------|---------|---------|
| Year          | Number | Attrib    | Attrib    | Drop     | %Drop  | Attrib | Death   | Attrib  | Attrib  | Drop    |
|               | Deaths | Deaths    | Deaths    | Deaths   | Deaths | Deaths | Rate    | Rates   | Rates   | Rates   |
| 1990          | 33993  | 19262.437 | 19262.437 | 0.000    | 0.000  | 0.000  | 538.865 | 305.353 | 305.353 | 0.000   |
| 1991          | 34092  | 19215.636 | 19192.373 | 23.264   | 0.068  | 0.121  | 531.576 | 299.618 | 299.255 | 0.363   |
| 1992          | 33942  | 19056.189 | 18995.389 | 60.801   | 0.179  | 0.319  | 520.249 | 292.085 | 291.151 | 0.934   |
| 1993          | 35914  | 20095.670 | 19971.203 | 124.467  | 0.347  | 0.619  | 540.648 | 302.526 | 300.645 | 1.882   |
| 1994          | 35077  | 19524.095 | 19333.459 | 190.635  | 0.543  | 0.976  | 518.167 | 288.435 | 285.601 | 2.834   |
| 1995          | 34674  | 19116.002 | 18843.207 | 272.795  | 0.787  | 1.427  | 502.377 | 276.995 | 273.012 | 3.984   |
| 1996          | 34590  | 18975.021 | 18602.369 | 372.652  | 1.077  | 1.964  | 493.331 | 270.675 | 265.310 | 5.365   |
| 1997          | 35280  | 19169.025 | 18673.901 | 495.123  | 1.403  | 2.583  | 494.918 | 268.986 | 261.964 | 7.021   |
| 1998          | 35694  | 19228.937 | 18592.074 | 636.863  | 1.784  | 3.312  | 492.427 | 265.388 | 256.496 | 8.892   |
| 1999          | 38544  | 20589.820 | 19752.453 | 837.368  | 2.173  | 4.067  | 523.288 | 279.689 | 268.170 | 11.519  |
| 2000          | 36318  | 19196.417 | 18247.851 | 948.567  | 2.612  | 4.941  | 485.771 | 256.946 | 244.073 | 12.873  |
| 2001          | 36326  | 19012.731 | 17863.920 | 1148.811 | 3.162  | 6.042  | 479.455 | 251.174 | 235.777 | 15.397  |
| 2002          | 36040  | 18699.357 | 17354.206 | 1345.151 | 3.732  | 7.194  | 470.233 | 244.265 | 226.430 | 17.836  |
| 2003          | 36276  | 18663.550 | 17092.334 | 1571.215 | 4.331  | 8.419  | 468.272 | 241.262 | 220.635 | 20.627  |
| 2004          | 34694  | 17679.164 | 15937.041 | 1742.122 | 5.021  | 9.854  | 442.892 | 226.076 | 203.448 | 22.629  |
| 2005          | 36931  | 18692.832 | 16585.237 | 2107.595 | 5.707  | 11.275 | 465.838 | 236.265 | 209.200 | 27.065  |
| 2006          | 34466  | 17308.564 | 15068.698 | 2239.866 | 6.499  | 12.941 | 430.619 | 216.769 | 188.270 | 28.499  |
| 2007          | 35465  | 17683.181 | 15087.861 | 2595.320 | 7.318  | 14.677 | 438.398 | 219.189 | 186.509 | 32.680  |
| 2008          | 38421  | 19006.374 | 15905.014 | 3101.360 | 8.072  | 16.317 | 469.444 | 232.952 | 194.335 | 38.617  |
| 2009          | 37093  | 18205.573 | 14865.999 | 3339.573 | 9.003  | 18.344 | 447.692 | 220.505 | 179.425 | 41.080  |
| 2010          | 37452  | 18237.758 | 14572.802 | 3664.957 | 9.786  | 20.095 | 446.355 | 218.215 | 173.681 | 44.534  |
| 2011          | 38343  | 18487.916 | 14346.659 | 4141.257 | 10.801 | 22.400 | 452.268 | 219.022 | 169.225 | 49.797  |
| 2012          | 38785  | 18491.158 | 13947.603 | 4543.556 | 11.715 | 24.572 | 452.339 | 216.689 | 162.665 | 54.024  |
| 2013          | 40617  | 19143.452 | 14045.013 | 5098.440 | 12.552 | 26.633 | 468.087 | 221.775 | 161.860 | 59.915  |
| 2014          | 40701  | 18992.005 | 13503.894 | 5488.110 | 13.484 | 28.897 | 463.354 | 217.451 | 153.734 | 63.717  |
| 2015          | 42721  | 19728.885 | 13672.564 | 6056.320 | 14.176 | 30.698 | 546.442 | 254.116 | 174.884 | 79.233  |
| 2016          | 43569  | 19876.724 | 13334.819 | 6541.905 | 15.015 | 32.912 | 551.771 | 253.628 | 168.874 | 84.753  |
| 2017          | 44626  | 20119.790 | 13046.036 | 7073.755 | 15.851 | 35.158 | 559.662 | 254.381 | 163.612 | 90.769  |
| 2018          | 46048  | 20535.123 | 12858.168 | 7676.955 | 16.672 | 37.385 | 571.815 | 257.229 | 159.669 | 97.560  |
| 2019          | 47609  | 21009.029 | 12697.734 | 8311.296 | 17.457 | 39.561 | 585.102 | 260.605 | 156.051 | 104.555 |
| 2020          | 49139  | 21428.512 | 12506.810 | 8921.702 | 18.156 | 41.635 | 688.302 | 303.533 | 175.186 | 128.347 |
| 2021          | 49237  | 21266.697 | 11871.725 | 9394.972 | 19.081 | 44.177 | 684.358 | 299.127 | 165.007 | 134.120 |
| 2022          | 50767  | 21663.568 | 11578.211 | 10085.36 | 19.866 | 46.554 | 699.743 | 302.378 | 159.587 | 142.791 |
| 2023          | 52326  | 22084.131 | 11288.564 | 10795.57 | 20.631 | 48.884 | 714.879 | 305.748 | 154.225 | 151.523 |
| 2024          | 53834  | 22418.456 | 10979.712 | 11438.74 | 21.248 | 51.024 | 728.869 | 307.804 | 148.656 | 159.147 |
| 2025          | 54961  | 22614.834 | 10612.676 | 12002.16 | 21.838 | 53.072 | 863.914 | 361.411 | 166.818 | 194.593 |
| 2026          | 55535  | 22571.522 | 10076.635 | 12494.89 | 22.499 | 55.357 | 868.642 | 359.241 | 157.612 | 201.629 |
| 2027          | 56549  | 22774.416 | 9639.749  | 13134.67 | 23.227 | 57.673 | 879.782 | 360.827 | 149.974 | 210.853 |
| 2028          | 57524  | 22915.561 | 9154.955  | 13760.61 | 23.922 | 60.049 | 889.704 | 361.228 | 141.598 | 219.631 |
| 2029          | 58484  | 22992.027 | 8671.548  | 14320.48 | 24.486 | 62.285 | 898.689 | 360.371 | 133.249 | 227.121 |
| 2030          | 58803  | 22895.360 | 8195.295  | 14700.06 | 24.999 | 64.205 | 1076.19 | 428.760 | 149.986 | 278.773 |
| 2031          | 59243  | 22715.871 | 7687.907  | 15027.96 | 25.367 | 66.156 | 1080.40 | 424.293 | 140.202 | 284.091 |
| 2032          | 60000  | 22759.207 | 7223.761  | 15535.45 | 25.893 | 68.260 | 1089.47 | 423.652 | 131.169 | 292.483 |
| 2033          | 60733  | 22786.258 | 6775.906  | 16010.35 | 26.362 | 70.263 | 1097.21 | 422.387 | 122.413 | 299.974 |
| 2034          | 61409  | 22806.106 | 6334.204  | 16471.90 | 26.823 | 72.226 | 1103.09 | 420.721 | 113.781 | 306.940 |
| 2035          | 60542  | 22262.998 | 5871.512  | 16391.49 | 27.075 | 73.627 | 1340.42 | 507.973 | 129.998 | 377.975 |
| 2036          | 58466  | 21140.051 | 5074.508  | 16065.54 | 27.478 | 75.996 | 1292.84 | 482.234 | 112.210 | 370.023 |
| 2037          | 58667  | 21011.845 | 4627.331  | 16384.51 | 27.928 | 77.978 | 1294.62 | 478.783 | 102.114 | 376.669 |
| 2038          | 58844  | 20787.483 | 4182.531  | 16604.95 | 28.218 | 79.880 | 1294.63 | 472.681 | 92.020  | 380.661 |
| 2039          | 59012  | 20709.267 | 3795.347  | 16913.92 | 28.662 | 81.673 | 1292.92 | 469.372 | 83.154  | 386.218 |

## Results for PHIM for Run 4 (Sensitivity\_Analysis\_1.RTF)

---

### Control File Details for Run: 4

| Variable Parameter                                       | Value                  |
|----------------------------------------------------------|------------------------|
| 1. Name for Reference Scenario                           | NULL                   |
| 2. Name for Test Scenario                                | Ecig                   |
| 3. Name for Product 1                                    | CC                     |
| 4. Name for Product 2                                    | Ecig                   |
| 5. Name for Product 3                                    | -                      |
| 6. Name for Product 4                                    | Dual                   |
| 7. Country                                               | US (United States)     |
| 8. Sex                                                   | F (Females)            |
| 9. Year of start of process                              | 1990                   |
| 10. Number of months of follow-up                        | 600                    |
| 11. Follow-up interval length (in months)                | 12                     |
| 12. Lower age for risk estimation                        | 10                     |
| 13. Upper age for risk estimation                        | 79                     |
| 14. The effective dose for Product 1 (F1) - Ref          | 1                      |
| 15. The effective dose for Product 2 (F2) - Ref          | -                      |
| 16. The effective dose for Product 3 (F3) - Ref          | -                      |
| 17. The effective dose for Product 4 (F4) - Ref          | -                      |
| 18. The effective dose for Product 1 (F1) - Test         | 1                      |
| 19. The effective dose for Product 2 (F2) - Test         | 0                      |
| 20. The effective dose for Product 3 (F3) - Test         | -                      |
| 21. The effective dose for Product 4 (F4) - Test         | FROMF2                 |
| 22. Number in population to be simulated                 | 100000                 |
| 23. Number of MC simulations                             | 1                      |
| 24. The random number seed for the first simulation      | 15975263               |
| 25. Source for the population file (POP)                 | UN4                    |
| 26. Source for the socioeconomic prevalence file (SEP)   | -                      |
| 27. Source for the current smoking prevalence file (CSP) | ISS3                   |
| 28. Source for the former smoking prevalence file (FSP)  | ISS3                   |
| 29. Source for the quit-time distribution file (QTD)     | NHIS2006               |
| 30. Source for the death file (MORT)                     | APR-20                 |
| 31. Source for the relative risk file (RR)               | PNLEST                 |
| 32. Source for the half-life file (H)                    | PNLEST                 |
| 33. Assumption Set for TTP Factor Reference              | F1                     |
| 34. Assumption Set for TTP Factor Test                   | F1                     |
| 35. Assumption Set for TTP Reference                     | ISS3                   |
| 36. Assumption Set for TTP Test                          | ISS3                   |
| 37. Assumption Set for TP for socioeconomic group        | -                      |
| 38. Source for Output Choice file (OUTC)                 | BASIC                  |
| 39. Output for DTP P1                                    | N                      |
| 40. Output for DTP P2                                    | N                      |
| 41. Output for Main P Component                          | Y                      |
| 42. Output for DTP E1                                    | N                      |
| 43. Output for DTP E2                                    | N                      |
| 44. Output for DTP E3                                    | N                      |
| 45. Output for Main E Component                          | Y                      |
| 46. Output file name                                     | Sensitivity_Analysis_1 |
| 47. Run number for P-Component                           | -                      |
| 48. Results file for E-Component                         | -                      |
| 49. Components required                                  | PE                     |
| 50. Results folder for P to be used in E-Component       | -                      |
| 51. Fixed age of starting product use                    | 16                     |
| 52. Output absolute risk file?                           | N                      |

## Results for PHIM for Run 4 (Sensitivity\_Analysis\_1.RTF)

\*\*\*\*\*

TTP values for Run: 4, Scenario: NULL

| Variable Parameter | Value               |
|--------------------|---------------------|
| 1. Country         | US (United States)  |
| 2. Sex             | F (Females)         |
| 3. Assumption Set  | ISS3                |
| Note:              | Period is in Months |

| Age   | Period  | Initiation  | Cessation    | Re-initiation |
|-------|---------|-------------|--------------|---------------|
|       |         | Never<br>CC | CC<br>Former | Former<br>CC  |
| 10-14 | 1-12    | 0.003758    | 0.008742     | 0.000000      |
| 15-19 | 1-12    | 0.003469    | 0.002515     | 0.000000      |
| 20-24 | 1-12    | 0.000276    | 0.000761     | 0.000000      |
| 25-29 | 1-12    | 0.000137    | 0.001375     | 0.000000      |
| 30-34 | 1-12    | 0.000069    | 0.001149     | 0.000000      |
| 35-39 | 1-12    | 0.000000    | 0.000991     | 0.000000      |
| 40-44 | 1-12    | 0.000000    | 0.000833     | 0.000000      |
| 45-49 | 1-12    | 0.000000    | 0.001723     | 0.000000      |
| 50-54 | 1-12    | 0.000000    | 0.002336     | 0.000000      |
| 55-59 | 1-12    | 0.000000    | 0.002233     | 0.000000      |
| 60-64 | 1-12    | 0.000000    | 0.004634     | 0.000000      |
| 65-69 | 1-12    | 0.000000    | 0.003505     | 0.000000      |
| 70-74 | 1-12    | 0.000000    | 0.004329     | 0.000000      |
| 75-79 | 1-12    | 0.000000    | 0.004329     | 0.000000      |
| 10-14 | 13-72   | 0.004794    | 0.008742     | 0.000000      |
| 15-19 | 13-72   | 0.004527    | 0.004082     | 0.000000      |
| 20-24 | 13-72   | 0.000105    | 0.001261     | 0.000000      |
| 25-29 | 13-72   | 0.000053    | 0.000952     | 0.000000      |
| 30-34 | 13-72   | 0.000026    | 0.000733     | 0.000000      |
| 35-39 | 13-72   | 0.000000    | 0.000753     | 0.000000      |
| 40-44 | 13-72   | 0.000000    | 0.001535     | 0.000000      |
| 45-49 | 13-72   | 0.000000    | 0.002998     | 0.000000      |
| 50-54 | 13-72   | 0.000000    | 0.003159     | 0.000000      |
| 55-59 | 13-72   | 0.000000    | 0.002965     | 0.000000      |
| 60-64 | 13-72   | 0.000000    | 0.003633     | 0.000000      |
| 65-69 | 13-72   | 0.000000    | 0.004522     | 0.000000      |
| 70-74 | 13-72   | 0.000000    | 0.005208     | 0.000000      |
| 75-79 | 13-72   | 0.000000    | 0.005208     | 0.000000      |
| 10-14 | 73-132  | 0.003969    | 0.008742     | 0.000000      |
| 15-19 | 73-132  | 0.003056    | 0.003373     | 0.000000      |
| 20-24 | 73-132  | 0.001459    | 0.003881     | 0.000000      |
| 25-29 | 73-132  | 0.000714    | 0.001953     | 0.000000      |
| 30-34 | 73-132  | 0.000111    | 0.001338     | 0.000000      |
| 35-39 | 73-132  | 0.000000    | 0.001507     | 0.000000      |
| 40-44 | 73-132  | 0.000000    | 0.002080     | 0.000000      |
| 45-49 | 73-132  | 0.000000    | 0.003809     | 0.000000      |
| 50-54 | 73-132  | 0.000000    | 0.004871     | 0.000000      |
| 55-59 | 73-132  | 0.000000    | 0.004560     | 0.000000      |
| 60-64 | 73-132  | 0.000000    | 0.007192     | 0.000000      |
| 65-69 | 73-132  | 0.000000    | 0.007033     | 0.000000      |
| 70-74 | 73-132  | 0.000000    | 0.008206     | 0.000000      |
| 75-79 | 73-132  | 0.000000    | 0.008206     | 0.000000      |
| 10-14 | 133-192 | 0.002861    | 0.008742     | 0.000000      |
| 15-19 | 133-192 | 0.002594    | 0.003996     | 0.000000      |
| 20-24 | 133-192 | 0.001247    | 0.002805     | 0.000000      |
| 25-29 | 133-192 | 0.000289    | 0.001574     | 0.000000      |
| 30-34 | 133-192 | 0.000132    | 0.001293     | 0.000000      |
| 35-39 | 133-192 | 0.000000    | 0.001219     | 0.000000      |
| 40-44 | 133-192 | 0.000000    | 0.001657     | 0.000000      |
| 45-49 | 133-192 | 0.000000    | 0.001995     | 0.000000      |
| 50-54 | 133-192 | 0.000000    | 0.002154     | 0.000000      |
| 55-59 | 133-192 | 0.000000    | 0.002072     | 0.000000      |
| 60-64 | 133-192 | 0.000000    | 0.005049     | 0.000000      |
| 65-69 | 133-192 | 0.000000    | 0.003680     | 0.000000      |
| 70-74 | 133-192 | 0.000000    | 0.006144     | 0.000000      |
| 75-79 | 133-192 | 0.000000    | 0.006144     | 0.000000      |
| 10-14 | 193-252 | 0.001859    | 0.008742     | 0.000000      |
| 15-19 | 193-252 | 0.002232    | 0.005770     | 0.000000      |
| 20-24 | 193-252 | 0.001079    | 0.003262     | 0.000000      |
| 25-29 | 193-252 | 0.000531    | 0.002002     | 0.000000      |
| 30-34 | 193-252 | 0.000263    | 0.003240     | 0.000000      |
| 35-39 | 193-252 | 0.000000    | 0.001771     | 0.000000      |
| 40-44 | 193-252 | 0.000000    | 0.002173     | 0.000000      |
| 45-49 | 193-252 | 0.000000    | 0.002075     | 0.000000      |
| 50-54 | 193-252 | 0.000000    | 0.003431     | 0.000000      |

### Results for PHIM for Run 4 (Sensitivity\_Analysis\_1.RTF)

|       |         |          |          |          |
|-------|---------|----------|----------|----------|
| 55-59 | 193-252 | 0.000000 | 0.002906 | 0.000000 |
| 60-64 | 193-252 | 0.000000 | 0.007139 | 0.000000 |
| 65-69 | 193-252 | 0.000000 | 0.004963 | 0.000000 |
| 70-74 | 193-252 | 0.000000 | 0.006269 | 0.000000 |
| 75-79 | 193-252 | 0.000000 | 0.006269 | 0.000000 |
| 10-14 | 253+    | 0.000931 | 0.008742 | 0.000000 |
| 15-19 | 253+    | 0.001798 | 0.009440 | 0.000000 |
| 20-24 | 253+    | 0.000023 | 0.002831 | 0.000000 |
| 25-29 | 253+    | 0.000073 | 0.002655 | 0.000000 |
| 30-34 | 253+    | 0.000037 | 0.004614 | 0.000000 |
| 35-39 | 253+    | 0.000000 | 0.002607 | 0.000000 |
| 40-44 | 253+    | 0.000000 | 0.003115 | 0.000000 |
| 45-49 | 253+    | 0.000000 | 0.002132 | 0.000000 |
| 50-54 | 253+    | 0.000000 | 0.003497 | 0.000000 |
| 55-59 | 253+    | 0.000000 | 0.002942 | 0.000000 |
| 60-64 | 253+    | 0.000000 | 0.005376 | 0.000000 |
| 65-69 | 253+    | 0.000000 | 0.001789 | 0.000000 |
| 70-74 | 253+    | 0.000000 | 0.004077 | 0.000000 |
| 75-79 | 253+    | 0.000000 | 0.004077 | 0.000000 |

## Results for PHIM for Run 4 (Sensitivity\_Analysis\_1.RTF)

\*\*\*\*\*

TTP values for Run: 4, Scenario: Ecig

| Variable Parameter |         | Value               |               |               |              |                |                |               |                |                |  |
|--------------------|---------|---------------------|---------------|---------------|--------------|----------------|----------------|---------------|----------------|----------------|--|
| 1. Country         |         | US (United States)  |               |               |              |                |                |               |                |                |  |
| 2. Sex             |         | F (Females)         |               |               |              |                |                |               |                |                |  |
| 3. Assumption Set  |         | ISS3                |               |               |              |                |                |               |                |                |  |
| Note:              |         | Period is in Months |               |               |              |                |                |               |                |                |  |
| Age                | Period  | Initiation          |               |               | Cessation    |                |                | Re-initiation |                |                |  |
|                    |         | Never<br>CC         | Never<br>Ecig | Never<br>Dual | CC<br>Former | Ecig<br>Former | Dual<br>Former | Former<br>CC  | Former<br>Ecig | Former<br>Dual |  |
| 10-14              | 1-12    | 0.001879            | 0.001879      | 0.000000      | 0.008742     | 0.008742       | 0.000000       | 0.000000      | 0.000000       | 0.000000       |  |
| 15-19              | 1-12    | 0.001735            | 0.001735      | 0.000000      | 0.002515     | 0.002515       | 0.000000       | 0.000000      | 0.000000       | 0.000000       |  |
| 20-24              | 1-12    | 0.000138            | 0.000138      | 0.000000      | 0.000761     | 0.000761       | 0.000000       | 0.000000      | 0.000000       | 0.000000       |  |
| 25-29              | 1-12    | 0.000069            | 0.000069      | 0.000000      | 0.001376     | 0.001376       | 0.000000       | 0.000000      | 0.000000       | 0.000000       |  |
| 30-34              | 1-12    | 0.000034            | 0.000034      | 0.000000      | 0.001149     | 0.001149       | 0.000000       | 0.000000      | 0.000000       | 0.000000       |  |
| 35-39              | 1-12    | 0.000000            | 0.000000      | 0.000000      | 0.000991     | 0.000991       | 0.000000       | 0.000000      | 0.000000       | 0.000000       |  |
| 40-44              | 1-12    | 0.000000            | 0.000000      | 0.000000      | 0.000833     | 0.000833       | 0.000000       | 0.000000      | 0.000000       | 0.000000       |  |
| 45-49              | 1-12    | 0.000000            | 0.000000      | 0.000000      | 0.001723     | 0.001723       | 0.000000       | 0.000000      | 0.000000       | 0.000000       |  |
| 50-54              | 1-12    | 0.000000            | 0.000000      | 0.000000      | 0.002336     | 0.002336       | 0.000000       | 0.000000      | 0.000000       | 0.000000       |  |
| 55-59              | 1-12    | 0.000000            | 0.000000      | 0.000000      | 0.002233     | 0.002233       | 0.000000       | 0.000000      | 0.000000       | 0.000000       |  |
| 60-64              | 1-12    | 0.000000            | 0.000000      | 0.000000      | 0.004635     | 0.004635       | 0.000000       | 0.000000      | 0.000000       | 0.000000       |  |
| 65-69              | 1-12    | 0.000000            | 0.000000      | 0.000000      | 0.003505     | 0.003505       | 0.000000       | 0.000000      | 0.000000       | 0.000000       |  |
| 70-74              | 1-12    | 0.000000            | 0.000000      | 0.000000      | 0.004329     | 0.004329       | 0.000000       | 0.000000      | 0.000000       | 0.000000       |  |
| 75-79              | 1-12    | 0.000000            | 0.000000      | 0.000000      | 0.004329     | 0.004329       | 0.000000       | 0.000000      | 0.000000       | 0.000000       |  |
| 10-14              | 13-72   | 0.001918            | 0.002877      | 0.000000      | 0.008742     | 0.008742       | 0.000000       | 0.000000      | 0.000000       | 0.000000       |  |
| 15-19              | 13-72   | 0.001811            | 0.002716      | 0.000000      | 0.004083     | 0.004083       | 0.000000       | 0.000000      | 0.000000       | 0.000000       |  |
| 20-24              | 13-72   | 0.000042            | 0.000063      | 0.000000      | 0.001261     | 0.001261       | 0.000000       | 0.000000      | 0.000000       | 0.000000       |  |
| 25-29              | 13-72   | 0.000021            | 0.000032      | 0.000000      | 0.000952     | 0.000952       | 0.000000       | 0.000000      | 0.000000       | 0.000000       |  |
| 30-34              | 13-72   | 0.000011            | 0.000016      | 0.000000      | 0.000733     | 0.000733       | 0.000000       | 0.000000      | 0.000000       | 0.000000       |  |
| 35-39              | 13-72   | 0.000000            | 0.000000      | 0.000000      | 0.000754     | 0.000754       | 0.000000       | 0.000000      | 0.000000       | 0.000000       |  |
| 40-44              | 13-72   | 0.000000            | 0.000000      | 0.000000      | 0.001535     | 0.001535       | 0.000000       | 0.000000      | 0.000000       | 0.000000       |  |
| 45-49              | 13-72   | 0.000000            | 0.000000      | 0.000000      | 0.002998     | 0.002998       | 0.000000       | 0.000000      | 0.000000       | 0.000000       |  |
| 50-54              | 13-72   | 0.000000            | 0.000000      | 0.000000      | 0.003160     | 0.003160       | 0.000000       | 0.000000      | 0.000000       | 0.000000       |  |
| 55-59              | 13-72   | 0.000000            | 0.000000      | 0.000000      | 0.002965     | 0.002965       | 0.000000       | 0.000000      | 0.000000       | 0.000000       |  |
| 60-64              | 13-72   | 0.000000            | 0.000000      | 0.000000      | 0.003633     | 0.003633       | 0.000000       | 0.000000      | 0.000000       | 0.000000       |  |
| 65-69              | 13-72   | 0.000000            | 0.000000      | 0.000000      | 0.004522     | 0.004522       | 0.000000       | 0.000000      | 0.000000       | 0.000000       |  |
| 70-74              | 13-72   | 0.000000            | 0.000000      | 0.000000      | 0.005208     | 0.005208       | 0.000000       | 0.000000      | 0.000000       | 0.000000       |  |
| 75-79              | 13-72   | 0.000000            | 0.000000      | 0.000000      | 0.005208     | 0.005208       | 0.000000       | 0.000000      | 0.000000       | 0.000000       |  |
| 10-14              | 73-132  | 0.000794            | 0.003175      | 0.000000      | 0.008742     | 0.008742       | 0.000000       | 0.000000      | 0.000000       | 0.000000       |  |
| 15-19              | 73-132  | 0.000611            | 0.002445      | 0.000000      | 0.003373     | 0.003373       | 0.000000       | 0.000000      | 0.000000       | 0.000000       |  |
| 20-24              | 73-132  | 0.000292            | 0.001167      | 0.000000      | 0.003881     | 0.003881       | 0.000000       | 0.000000      | 0.000000       | 0.000000       |  |
| 25-29              | 73-132  | 0.000143            | 0.000571      | 0.000000      | 0.001954     | 0.001954       | 0.000000       | 0.000000      | 0.000000       | 0.000000       |  |
| 30-34              | 73-132  | 0.000022            | 0.000089      | 0.000000      | 0.001338     | 0.001338       | 0.000000       | 0.000000      | 0.000000       | 0.000000       |  |
| 35-39              | 73-132  | 0.000000            | 0.000000      | 0.000000      | 0.001507     | 0.001507       | 0.000000       | 0.000000      | 0.000000       | 0.000000       |  |
| 40-44              | 73-132  | 0.000000            | 0.000000      | 0.000000      | 0.002080     | 0.002080       | 0.000000       | 0.000000      | 0.000000       | 0.000000       |  |
| 45-49              | 73-132  | 0.000000            | 0.000000      | 0.000000      | 0.003809     | 0.003809       | 0.000000       | 0.000000      | 0.000000       | 0.000000       |  |
| 50-54              | 73-132  | 0.000000            | 0.000000      | 0.000000      | 0.004871     | 0.004871       | 0.000000       | 0.000000      | 0.000000       | 0.000000       |  |
| 55-59              | 73-132  | 0.000000            | 0.000000      | 0.000000      | 0.004560     | 0.004560       | 0.000000       | 0.000000      | 0.000000       | 0.000000       |  |
| 60-64              | 73-132  | 0.000000            | 0.000000      | 0.000000      | 0.007192     | 0.007192       | 0.000000       | 0.000000      | 0.000000       | 0.000000       |  |
| 65-69              | 73-132  | 0.000000            | 0.000000      | 0.000000      | 0.007033     | 0.007033       | 0.000000       | 0.000000      | 0.000000       | 0.000000       |  |
| 70-74              | 73-132  | 0.000000            | 0.000000      | 0.000000      | 0.008206     | 0.008206       | 0.000000       | 0.000000      | 0.000000       | 0.000000       |  |
| 75-79              | 73-132  | 0.000000            | 0.000000      | 0.000000      | 0.008206     | 0.008206       | 0.000000       | 0.000000      | 0.000000       | 0.000000       |  |
| 10-14              | 133-192 | 0.000143            | 0.002718      | 0.000000      | 0.008742     | 0.008742       | 0.000000       | 0.000000      | 0.000000       | 0.000000       |  |
| 15-19              | 133-192 | 0.000130            | 0.002465      | 0.000000      | 0.003996     | 0.003996       | 0.000000       | 0.000000      | 0.000000       | 0.000000       |  |
| 20-24              | 133-192 | 0.000062            | 0.001185      | 0.000000      | 0.002805     | 0.002805       | 0.000000       | 0.000000      | 0.000000       | 0.000000       |  |
| 25-29              | 133-192 | 0.000015            | 0.000275      | 0.000000      | 0.001574     | 0.001574       | 0.000000       | 0.000000      | 0.000000       | 0.000000       |  |
| 30-34              | 133-192 | 0.000007            | 0.000125      | 0.000000      | 0.001293     | 0.001293       | 0.000000       | 0.000000      | 0.000000       | 0.000000       |  |
| 35-39              | 133-192 | 0.000000            | 0.000000      | 0.000000      | 0.001219     | 0.001219       | 0.000000       | 0.000000      | 0.000000       | 0.000000       |  |
| 40-44              | 133-192 | 0.000000            | 0.000000      | 0.000000      | 0.001657     | 0.001657       | 0.000000       | 0.000000      | 0.000000       | 0.000000       |  |
| 45-49              | 133-192 | 0.000000            | 0.000000      | 0.000000      | 0.001995     | 0.001995       | 0.000000       | 0.000000      | 0.000000       | 0.000000       |  |
| 50-54              | 133-192 | 0.000000            | 0.000000      | 0.000000      | 0.002154     | 0.002154       | 0.000000       | 0.000000      | 0.000000       | 0.000000       |  |
| 55-59              | 133-192 | 0.000000            | 0.000000      | 0.000000      | 0.002072     | 0.002072       | 0.000000       | 0.000000      | 0.000000       | 0.000000       |  |
| 60-64              | 133-192 | 0.000000            | 0.000000      | 0.000000      | 0.005049     | 0.005049       | 0.000000       | 0.000000      | 0.000000       | 0.000000       |  |
| 65-69              | 133-192 | 0.000000            | 0.000000      | 0.000000      | 0.003681     | 0.003681       | 0.000000       | 0.000000      | 0.000000       | 0.000000       |  |
| 70-74              | 133-192 | 0.000000            | 0.000000      | 0.000000      | 0.006144     | 0.006144       | 0.000000       | 0.000000      | 0.000000       | 0.000000       |  |
| 75-79              | 133-192 | 0.000000            | 0.000000      | 0.000000      | 0.006144     | 0.006144       | 0.000000       | 0.000000      | 0.000000       | 0.000000       |  |
| 10-14              | 193-252 | 0.000093            | 0.001766      | 0.000000      | 0.008742     | 0.008742       | 0.000000       | 0.000000      | 0.000000       | 0.000000       |  |
| 15-19              | 193-252 | 0.000112            | 0.002120      | 0.000000      | 0.005770     | 0.005770       | 0.000000       | 0.000000      | 0.000000       | 0.000000       |  |
| 20-24              | 193-252 | 0.000054            | 0.001025      | 0.000000      | 0.003262     | 0.003262       | 0.000000       | 0.000000      | 0.000000       | 0.000000       |  |
| 25-29              | 193-252 | 0.000027            | 0.000504      | 0.000000      | 0.002002     | 0.002002       | 0.000000       | 0.000000      | 0.000000       | 0.000000       |  |
| 30-34              | 193-252 | 0.000013            | 0.000250      | 0.000000      | 0.003241     | 0.003241       | 0.000000       | 0.000000      | 0.000000       | 0.000000       |  |
| 35-39              | 193-252 | 0.000000            | 0.000000      | 0.000000      | 0.001771     | 0.001771       | 0.000000       | 0.000000      | 0.000000       | 0.000000       |  |
| 40-44              | 193-252 | 0.000000            | 0.000000      | 0.000000      | 0.002173     | 0.002173       | 0.000000       | 0.000000      | 0.000000       | 0.000000       |  |
| 45-49              | 193-252 | 0.000000            | 0.000000      | 0.000000      | 0.002075     | 0.002075       | 0.000000       | 0.000000      | 0.000000       | 0.000000       |  |
| 50-54              | 193-252 | 0.000000            | 0.000000      | 0.000000      | 0.003432     | 0.003432       | 0.000000       | 0.000000      | 0.000000       | 0.000000       |  |

### Results for PHIM for Run 4 (Sensitivity\_Analysis\_1.RTF)

|       |         |          |          |          |          |          |          |          |          |          |
|-------|---------|----------|----------|----------|----------|----------|----------|----------|----------|----------|
| 55-59 | 193-252 | 0.000000 | 0.000000 | 0.000000 | 0.002906 | 0.002906 | 0.000000 | 0.000000 | 0.000000 | 0.000000 |
| 60-64 | 193-252 | 0.000000 | 0.000000 | 0.000000 | 0.007139 | 0.007139 | 0.000000 | 0.000000 | 0.000000 | 0.000000 |
| 65-69 | 193-252 | 0.000000 | 0.000000 | 0.000000 | 0.004963 | 0.004963 | 0.000000 | 0.000000 | 0.000000 | 0.000000 |
| 70-74 | 193-252 | 0.000000 | 0.000000 | 0.000000 | 0.006269 | 0.006269 | 0.000000 | 0.000000 | 0.000000 | 0.000000 |
| 75-79 | 193-252 | 0.000000 | 0.000000 | 0.000000 | 0.006269 | 0.006269 | 0.000000 | 0.000000 | 0.000000 | 0.000000 |
| 10-14 | 253+    | 0.000047 | 0.000884 | 0.000000 | 0.008742 | 0.008742 | 0.000000 | 0.000000 | 0.000000 | 0.000000 |
| 15-19 | 253+    | 0.000090 | 0.001708 | 0.000000 | 0.009440 | 0.009440 | 0.000000 | 0.000000 | 0.000000 | 0.000000 |
| 20-24 | 253+    | 0.000001 | 0.000022 | 0.000000 | 0.002831 | 0.002831 | 0.000000 | 0.000000 | 0.000000 | 0.000000 |
| 25-29 | 253+    | 0.000004 | 0.000070 | 0.000000 | 0.002656 | 0.002656 | 0.000000 | 0.000000 | 0.000000 | 0.000000 |
| 30-34 | 253+    | 0.000002 | 0.000035 | 0.000000 | 0.004614 | 0.004614 | 0.000000 | 0.000000 | 0.000000 | 0.000000 |
| 35-39 | 253+    | 0.000000 | 0.000000 | 0.000000 | 0.002608 | 0.002608 | 0.000000 | 0.000000 | 0.000000 | 0.000000 |
| 40-44 | 253+    | 0.000000 | 0.000000 | 0.000000 | 0.003115 | 0.003115 | 0.000000 | 0.000000 | 0.000000 | 0.000000 |
| 45-49 | 253+    | 0.000000 | 0.000000 | 0.000000 | 0.002132 | 0.002132 | 0.000000 | 0.000000 | 0.000000 | 0.000000 |
| 50-54 | 253+    | 0.000000 | 0.000000 | 0.000000 | 0.003497 | 0.003497 | 0.000000 | 0.000000 | 0.000000 | 0.000000 |
| 55-59 | 253+    | 0.000000 | 0.000000 | 0.000000 | 0.002942 | 0.002942 | 0.000000 | 0.000000 | 0.000000 | 0.000000 |
| 60-64 | 253+    | 0.000000 | 0.000000 | 0.000000 | 0.005376 | 0.005376 | 0.000000 | 0.000000 | 0.000000 | 0.000000 |
| 65-69 | 253+    | 0.000000 | 0.000000 | 0.000000 | 0.001789 | 0.001789 | 0.000000 | 0.000000 | 0.000000 | 0.000000 |
| 70-74 | 253+    | 0.000000 | 0.000000 | 0.000000 | 0.004077 | 0.004077 | 0.000000 | 0.000000 | 0.000000 | 0.000000 |
| 75-79 | 253+    | 0.000000 | 0.000000 | 0.000000 | 0.004077 | 0.004077 | 0.000000 | 0.000000 | 0.000000 | 0.000000 |



**Results for PHIM for Run 4 (Sensitivity\_Analysis\_1.RTF)**

|       |      |          |          |          |          |          |          |
|-------|------|----------|----------|----------|----------|----------|----------|
| 25-29 | 253+ | 0.014127 | 0.000000 | 0.000000 | 0.000000 | 0.000000 | 0.000000 |
| 30-34 | 253+ | 0.013889 | 0.000000 | 0.000000 | 0.000000 | 0.000000 | 0.000000 |
| 35-39 | 253+ | 0.012929 | 0.000000 | 0.000000 | 0.000000 | 0.000000 | 0.000000 |
| 40-44 | 253+ | 0.012785 | 0.000000 | 0.000000 | 0.000000 | 0.000000 | 0.000000 |
| 45-49 | 253+ | 0.012295 | 0.000000 | 0.000000 | 0.000000 | 0.000000 | 0.000000 |
| 50-54 | 253+ | 0.011536 | 0.000000 | 0.000000 | 0.000000 | 0.000000 | 0.000000 |
| 55-59 | 253+ | 0.008988 | 0.000000 | 0.000000 | 0.000000 | 0.000000 | 0.000000 |
| 60-64 | 253+ | 0.008098 | 0.000000 | 0.000000 | 0.000000 | 0.000000 | 0.000000 |
| 65-69 | 253+ | 0.006274 | 0.000000 | 0.000000 | 0.000000 | 0.000000 | 0.000000 |
| 70-74 | 253+ | 0.004141 | 0.000000 | 0.000000 | 0.000000 | 0.000000 | 0.000000 |
| 75-79 | 253+ | 0.004141 | 0.000000 | 0.000000 | 0.000000 | 0.000000 | 0.000000 |



## Results for PHIM for Run 4 (Sensitivity\_Analysis\_1.RTF)

\*\*\*\*\*

### Main Output for the Tobacco History for Run: 4, Simulation: 1, Scenario: NULL

| Variable Parameter          | Value              |
|-----------------------------|--------------------|
| 1. Country                  | US (United States) |
| 2. Sex                      | F (Females)        |
| 3. Year of start of process | 1990               |

Year of Follow-up: 2040, Age Group: All Ages  
 Period    Age Group    Smoking Group            N            %

|    |          |           |       |       |
|----|----------|-----------|-------|-------|
| 50 | All Ages | Never Any | 20670 | 58.80 |
| 50 | All Ages | CC        | 2462  | 7.00  |
| 50 | All Ages | Former    | 12019 | 34.19 |

Year of Follow-up: 2040, Age Group: 18-19  
 Period    Age Group    Smoking Group            N            %

|    |       |           |   |   |
|----|-------|-----------|---|---|
| 50 | 18-19 | Never Any | 0 | . |
| 50 | 18-19 | CC        | 0 | . |
| 50 | 18-19 | Former    | 0 | . |

Year of Follow-up: 2040, Age Group: 20-24  
 Period    Age Group    Smoking Group            N            %

|    |       |           |   |   |
|----|-------|-----------|---|---|
| 50 | 20-24 | Never Any | 0 | . |
| 50 | 20-24 | CC        | 0 | . |
| 50 | 20-24 | Former    | 0 | . |

Year of Follow-up: 2040, Age Group: 25-29  
 Period    Age Group    Smoking Group            N            %

|    |       |           |   |   |
|----|-------|-----------|---|---|
| 50 | 25-29 | Never Any | 0 | . |
| 50 | 25-29 | CC        | 0 | . |
| 50 | 25-29 | Former    | 0 | . |

Year of Follow-up: 2040, Age Group: 30-34  
 Period    Age Group    Smoking Group            N            %

|    |       |           |   |   |
|----|-------|-----------|---|---|
| 50 | 30-34 | Never Any | 0 | . |
| 50 | 30-34 | CC        | 0 | . |
| 50 | 30-34 | Former    | 0 | . |

Year of Follow-up: 2040, Age Group: 35-39  
 Period    Age Group    Smoking Group            N            %

|    |       |           |   |   |
|----|-------|-----------|---|---|
| 50 | 35-39 | Never Any | 0 | . |
| 50 | 35-39 | CC        | 0 | . |
| 50 | 35-39 | Former    | 0 | . |

Year of Follow-up: 2040, Age Group: 40-44  
 Period    Age Group    Smoking Group            N            %

|    |       |           |   |   |
|----|-------|-----------|---|---|
| 50 | 40-44 | Never Any | 0 | . |
| 50 | 40-44 | CC        | 0 | . |
| 50 | 40-44 | Former    | 0 | . |

Year of Follow-up: 2040, Age Group: 45-49  
 Period    Age Group    Smoking Group            N            %

|    |       |           |   |   |
|----|-------|-----------|---|---|
| 50 | 45-49 | Never Any | 0 | . |
| 50 | 45-49 | CC        | 0 | . |
| 50 | 45-49 | Former    | 0 | . |

Year of Follow-up: 2040, Age Group: 50-54  
 Period    Age Group    Smoking Group            N            %

|    |       |           |   |   |
|----|-------|-----------|---|---|
| 50 | 50-54 | Never Any | 0 | . |
| 50 | 50-54 | CC        | 0 | . |
| 50 | 50-54 | Former    | 0 | . |

Year of Follow-up: 2040, Age Group: 55-59  
 Period    Age Group    Smoking Group            N            %

|    |       |           |   |   |
|----|-------|-----------|---|---|
| 50 | 55-59 | Never Any | 0 | . |
| 50 | 55-59 | CC        | 0 | . |
| 50 | 55-59 | Former    | 0 | . |

Year of Follow-up: 2040, Age Group: 60-64  
 Period    Age Group    Smoking Group            N            %

### Results for PHIM for Run 4 (Sensitivity\_Analysis\_1.RTF)

|                                           |           |               |      |       |
|-------------------------------------------|-----------|---------------|------|-------|
| 50                                        | 60-64     | Never Any     | 4803 | 60.57 |
| 50                                        | 60-64     | CC            | 621  | 7.83  |
| 50                                        | 60-64     | Former        | 2506 | 31.60 |
| Year of Follow-up: 2040, Age Group: 65-69 |           |               |      |       |
| Period                                    | Age Group | Smoking Group | N    | %     |
| 50                                        | 65-69     | Never Any     | 5407 | 64.75 |
| 50                                        | 65-69     | CC            | 538  | 6.44  |
| 50                                        | 65-69     | Former        | 2405 | 28.80 |
| Year of Follow-up: 2040, Age Group: 70-74 |           |               |      |       |
| Period                                    | Age Group | Smoking Group | N    | %     |
| 50                                        | 70-74     | Never Any     | 5181 | 58.92 |
| 50                                        | 70-74     | CC            | 605  | 6.88  |
| 50                                        | 70-74     | Former        | 3007 | 34.20 |
| Year of Follow-up: 2040, Age Group: 75-79 |           |               |      |       |
| Period                                    | Age Group | Smoking Group | N    | %     |
| 50                                        | 75-79     | Never Any     | 5279 | 52.38 |
| 50                                        | 75-79     | CC            | 698  | 6.93  |
| 50                                        | 75-79     | Former        | 4101 | 40.69 |

## Results for PHIM for Run 4 (Sensitivity\_Analysis\_1.RTF)

\*\*\*\*\*

### Main Output for the Tobacco History for Run: 4, Simulation: 1, Scenario: Ecig

| Variable Parameter                           |           | Value              |       |       |               |             |               |                |              |
|----------------------------------------------|-----------|--------------------|-------|-------|---------------|-------------|---------------|----------------|--------------|
| 1. Country                                   |           | US (United States) |       |       |               |             |               |                |              |
| 2. Sex                                       |           | F (Females)        |       |       |               |             |               |                |              |
| 3. Year of start of process                  |           | 1990               |       |       |               |             |               |                |              |
| Year of Follow-up: 1990, Age Group: All Ages |           |                    |       |       |               |             |               |                |              |
| Period                                       | Age Group | Smoking Group      | N     | %     | Ever Quit (N) | Ever Quit % | Mean Yrs Quit | Short Term (n) | Short Term % |
| 0                                            | All Ages  | Never Any          | 47776 | 54.92 |               |             |               |                |              |
| 0                                            | All Ages  | CC                 | 22737 | 26.14 | 0             | 0.00        |               |                |              |
| 0                                            | All Ages  | Ecig               | 0     | 0.00  |               |             |               |                |              |
| 0                                            | All Ages  | Dual               | 0     | 0.00  |               |             |               |                |              |
| 0                                            | All Ages  | Former             | 16484 | 18.95 |               |             | 11.90         | 2815           | 17.08        |
| Year of Follow-up: 1990, Age Group: 18-19    |           |                    |       |       |               |             |               |                |              |
| Period                                       | Age Group | Smoking Group      | N     | %     | Ever Quit (N) | Ever Quit % | Mean Yrs Quit | Short Term (n) | Short Term % |
| 0                                            | 18-19     | Never Any          | 2570  | 78.43 |               |             |               |                |              |
| 0                                            | 18-19     | CC                 | 535   | 16.33 | 0             | 0.00        |               |                |              |
| 0                                            | 18-19     | Ecig               | 0     | 0.00  |               |             |               |                |              |
| 0                                            | 18-19     | Dual               | 0     | 0.00  |               |             |               |                |              |
| 0                                            | 18-19     | Former             | 172   | 5.25  |               |             | 0.20          | 172            | 100.00       |
| Year of Follow-up: 1990, Age Group: 20-24    |           |                    |       |       |               |             |               |                |              |
| Period                                       | Age Group | Smoking Group      | N     | %     | Ever Quit (N) | Ever Quit % | Mean Yrs Quit | Short Term (n) | Short Term % |
| 0                                            | 20-24     | Never Any          | 5354  | 60.89 |               |             |               |                |              |
| 0                                            | 20-24     | CC                 | 2560  | 29.11 | 0             | 0.00        |               |                |              |
| 0                                            | 20-24     | Ecig               | 0     | 0.00  |               |             |               |                |              |
| 0                                            | 20-24     | Dual               | 0     | 0.00  |               |             |               |                |              |
| 0                                            | 20-24     | Former             | 879   | 10.00 |               |             | 1.58          | 420            | 47.78        |
| Year of Follow-up: 1990, Age Group: 25-29    |           |                    |       |       |               |             |               |                |              |
| Period                                       | Age Group | Smoking Group      | N     | %     | Ever Quit (N) | Ever Quit % | Mean Yrs Quit | Short Term (n) | Short Term % |
| 0                                            | 25-29     | Never Any          | 5318  | 52.77 |               |             |               |                |              |
| 0                                            | 25-29     | CC                 | 3335  | 33.09 | 0             | 0.00        |               |                |              |
| 0                                            | 25-29     | Ecig               | 0     | 0.00  |               |             |               |                |              |
| 0                                            | 25-29     | Dual               | 0     | 0.00  |               |             |               |                |              |
| 0                                            | 25-29     | Former             | 1425  | 14.14 |               |             | 3.91          | 404            | 28.35        |
| Year of Follow-up: 1990, Age Group: 30-34    |           |                    |       |       |               |             |               |                |              |
| Period                                       | Age Group | Smoking Group      | N     | %     | Ever Quit (N) | Ever Quit % | Mean Yrs Quit | Short Term (n) | Short Term % |
| 0                                            | 30-34     | Never Any          | 5287  | 50.36 |               |             |               |                |              |
| 0                                            | 30-34     | CC                 | 3326  | 31.68 | 0             | 0.00        |               |                |              |
| 0                                            | 30-34     | Ecig               | 0     | 0.00  |               |             |               |                |              |
| 0                                            | 30-34     | Dual               | 0     | 0.00  |               |             |               |                |              |
| 0                                            | 30-34     | Former             | 1886  | 17.96 |               |             | 4.36          | 566            | 30.01        |
| Year of Follow-up: 1990, Age Group: 35-39    |           |                    |       |       |               |             |               |                |              |
| Period                                       | Age Group | Smoking Group      | N     | %     | Ever Quit (N) | Ever Quit % | Mean Yrs Quit | Short Term (n) | Short Term % |
| 0                                            | 35-39     | Never Any          | 5018  | 52.27 |               |             |               |                |              |
| 0                                            | 35-39     | CC                 | 2653  | 27.64 | 0             | 0.00        |               |                |              |
| 0                                            | 35-39     | Ecig               | 0     | 0.00  |               |             |               |                |              |
| 0                                            | 35-39     | Dual               | 0     | 0.00  |               |             |               |                |              |
| 0                                            | 35-39     | Former             | 1929  | 20.09 |               |             | 7.96          | 324            | 16.80        |
| Year of Follow-up: 1990, Age Group: 40-44    |           |                    |       |       |               |             |               |                |              |
| Period                                       | Age Group | Smoking Group      | N     | %     | Ever Quit (N) | Ever Quit % | Mean Yrs Quit | Short Term (n) | Short Term % |
| 0                                            | 40-44     | Never Any          | 4356  | 51.27 |               |             |               |                |              |
| 0                                            | 40-44     | CC                 | 2397  | 28.21 | 0             | 0.00        |               |                |              |
| 0                                            | 40-44     | Ecig               | 0     | 0.00  |               |             |               |                |              |
| 0                                            | 40-44     | Dual               | 0     | 0.00  |               |             |               |                |              |
| 0                                            | 40-44     | Former             | 1744  | 20.52 |               |             | 7.33          | 339            | 19.44        |
| Year of Follow-up: 1990, Age Group: 45-49    |           |                    |       |       |               |             |               |                |              |
| Period                                       | Age Group | Smoking Group      | N     | %     | Ever Quit (N) | Ever Quit % | Mean Yrs Quit | Short Term (n) | Short Term % |
| 0                                            | 45-49     | Never Any          | 3116  | 47.67 |               |             |               |                |              |
| 0                                            | 45-49     | CC                 | 1875  | 28.69 | 0             | 0.00        |               |                |              |
| 0                                            | 45-49     | Ecig               | 0     | 0.00  |               |             |               |                |              |
| 0                                            | 45-49     | Dual               | 0     | 0.00  |               |             |               |                |              |
| 0                                            | 45-49     | Former             | 1545  | 23.64 |               |             | 12.55         | 194            | 12.56        |
| Year of Follow-up: 1990, Age Group: 50-54    |           |                    |       |       |               |             |               |                |              |
| Period                                       | Age Group | Smoking Group      | N     | %     | Ever Quit (N) | Ever Quit % | Mean Yrs Quit | Short Term (n) | Short Term % |
| 0                                            | 50-54     | Never Any          | 2684  | 48.50 |               |             |               |                |              |
| 0                                            | 50-54     | CC                 | 1572  | 28.41 | 0             | 0.00        |               |                |              |

**Results for PHIM for Run 4 (Sensitivity\_Analysis\_1.RTF)**

|                                              |           |               |       |       |               |             |               |                |              |
|----------------------------------------------|-----------|---------------|-------|-------|---------------|-------------|---------------|----------------|--------------|
| 0                                            | 50-54     | Ecig          | 0     | 0.00  |               |             |               |                |              |
| 0                                            | 50-54     | Dual          | 0     | 0.00  |               |             |               |                |              |
| 0                                            | 50-54     | Former        | 1278  | 23.09 |               |             | 13.28         | 126            | 9.86         |
| Year of Follow-up: 1990, Age Group: 55-59    |           |               |       |       |               |             |               |                |              |
| Period                                       | Age Group | Smoking Group | N     | %     | Ever Quit (N) | Ever Quit % | Mean Yrs Quit | Short Term (n) | Short Term % |
| 0                                            | 55-59     | Never Any     | 2732  | 51.90 |               |             |               |                |              |
| 0                                            | 55-59     | CC            | 1295  | 24.60 | 0             | 0.00        |               |                |              |
| 0                                            | 55-59     | Ecig          | 0     | 0.00  |               |             |               |                |              |
| 0                                            | 55-59     | Dual          | 0     | 0.00  |               |             |               |                |              |
| 0                                            | 55-59     | Former        | 1237  | 23.50 |               |             | 17.26         | 90             | 7.28         |
| Year of Follow-up: 1990, Age Group: 60-64    |           |               |       |       |               |             |               |                |              |
| Period                                       | Age Group | Smoking Group | N     | %     | Ever Quit (N) | Ever Quit % | Mean Yrs Quit | Short Term (n) | Short Term % |
| 0                                            | 60-64     | Never Any     | 3078  | 55.72 |               |             |               |                |              |
| 0                                            | 60-64     | CC            | 1249  | 22.61 | 0             | 0.00        |               |                |              |
| 0                                            | 60-64     | Ecig          | 0     | 0.00  |               |             |               |                |              |
| 0                                            | 60-64     | Dual          | 0     | 0.00  |               |             |               |                |              |
| 0                                            | 60-64     | Former        | 1197  | 21.67 |               |             | 18.28         | 61             | 5.10         |
| Year of Follow-up: 1990, Age Group: 65-69    |           |               |       |       |               |             |               |                |              |
| Period                                       | Age Group | Smoking Group | N     | %     | Ever Quit (N) | Ever Quit % | Mean Yrs Quit | Short Term (n) | Short Term % |
| 0                                            | 65-69     | Never Any     | 3042  | 57.36 |               |             |               |                |              |
| 0                                            | 65-69     | CC            | 976   | 18.40 | 0             | 0.00        |               |                |              |
| 0                                            | 65-69     | Ecig          | 0     | 0.00  |               |             |               |                |              |
| 0                                            | 65-69     | Dual          | 0     | 0.00  |               |             |               |                |              |
| 0                                            | 65-69     | Former        | 1285  | 24.23 |               |             | 20.65         | 68             | 5.29         |
| Year of Follow-up: 1990, Age Group: 70-74    |           |               |       |       |               |             |               |                |              |
| Period                                       | Age Group | Smoking Group | N     | %     | Ever Quit (N) | Ever Quit % | Mean Yrs Quit | Short Term (n) | Short Term % |
| 0                                            | 70-74     | Never Any     | 2738  | 61.05 |               |             |               |                |              |
| 0                                            | 70-74     | CC            | 610   | 13.60 | 0             | 0.00        |               |                |              |
| 0                                            | 70-74     | Ecig          | 0     | 0.00  |               |             |               |                |              |
| 0                                            | 70-74     | Dual          | 0     | 0.00  |               |             |               |                |              |
| 0                                            | 70-74     | Former        | 1137  | 25.35 |               |             | 24.48         | 27             | 2.37         |
| Year of Follow-up: 1990, Age Group: 75-79    |           |               |       |       |               |             |               |                |              |
| Period                                       | Age Group | Smoking Group | N     | %     | Ever Quit (N) | Ever Quit % | Mean Yrs Quit | Short Term (n) | Short Term % |
| 0                                            | 75-79     | Never Any     | 2483  | 68.84 |               |             |               |                |              |
| 0                                            | 75-79     | CC            | 354   | 9.81  | 0             | 0.00        |               |                |              |
| 0                                            | 75-79     | Ecig          | 0     | 0.00  |               |             |               |                |              |
| 0                                            | 75-79     | Dual          | 0     | 0.00  |               |             |               |                |              |
| 0                                            | 75-79     | Former        | 770   | 21.35 |               |             | 24.48         | 24             | 3.12         |
| Year of Follow-up: 1995, Age Group: All Ages |           |               |       |       |               |             |               |                |              |
| Period                                       | Age Group | Smoking Group | N     | %     | Ever Quit (N) | Ever Quit % | Mean Yrs Quit | Short Term (n) | Short Term % |
| 5                                            | All Ages  | Never Any     | 50887 | 55.53 |               |             |               |                |              |
| 5                                            | All Ages  | CC            | 10659 | 11.63 | 0             | 0.00        |               |                |              |
| 5                                            | All Ages  | Ecig          | 11697 | 12.76 |               |             |               |                |              |
| 5                                            | All Ages  | Dual          | 0     | 0.00  |               |             |               |                |              |
| 5                                            | All Ages  | Former        | 18396 | 20.07 |               |             | 14.19         | 1129           | 6.14         |
| Year of Follow-up: 1995, Age Group: 18-19    |           |               |       |       |               |             |               |                |              |
| Period                                       | Age Group | Smoking Group | N     | %     | Ever Quit (N) | Ever Quit % | Mean Yrs Quit | Short Term (n) | Short Term % |
| 5                                            | 18-19     | Never Any     | 2434  | 76.64 |               |             |               |                |              |
| 5                                            | 18-19     | CC            | 233   | 7.34  | 0             | 0.00        |               |                |              |
| 5                                            | 18-19     | Ecig          | 427   | 13.44 |               |             |               |                |              |
| 5                                            | 18-19     | Dual          | 0     | 0.00  |               |             |               |                |              |
| 5                                            | 18-19     | Former        | 82    | 2.58  |               |             | 1.15          | 52             | 63.41        |
| Year of Follow-up: 1995, Age Group: 20-24    |           |               |       |       |               |             |               |                |              |
| Period                                       | Age Group | Smoking Group | N     | %     | Ever Quit (N) | Ever Quit % | Mean Yrs Quit | Short Term (n) | Short Term % |
| 5                                            | 20-24     | Never Any     | 5794  | 69.39 |               |             |               |                |              |
| 5                                            | 20-24     | CC            | 862   | 10.32 | 0             | 0.00        |               |                |              |
| 5                                            | 20-24     | Ecig          | 1250  | 14.97 |               |             |               |                |              |
| 5                                            | 20-24     | Dual          | 0     | 0.00  |               |             |               |                |              |
| 5                                            | 20-24     | Former        | 444   | 5.32  |               |             | 3.23          | 106            | 23.87        |
| Year of Follow-up: 1995, Age Group: 25-29    |           |               |       |       |               |             |               |                |              |
| Period                                       | Age Group | Smoking Group | N     | %     | Ever Quit (N) | Ever Quit % | Mean Yrs Quit | Short Term (n) | Short Term % |
| 5                                            | 25-29     | Never Any     | 5313  | 60.42 |               |             |               |                |              |
| 5                                            | 25-29     | CC            | 1062  | 12.08 | 0             | 0.00        |               |                |              |
| 5                                            | 25-29     | Ecig          | 1395  | 15.86 |               |             |               |                |              |
| 5                                            | 25-29     | Dual          | 0     | 0.00  |               |             |               |                |              |
| 5                                            | 25-29     | Former        | 1023  | 11.63 |               |             | 5.94          | 54             | 5.28         |
| Year of Follow-up: 1995, Age Group: 30-34    |           |               |       |       |               |             |               |                |              |
| Period                                       | Age Group | Smoking Group | N     | %     | Ever Quit (N) | Ever Quit % | Mean Yrs Quit | Short Term (n) | Short Term % |

**Results for PHIM for Run 4 (Sensitivity\_Analysis\_1.RTF)**

|                                              |           |               |      |       |               |             |               |                |              |
|----------------------------------------------|-----------|---------------|------|-------|---------------|-------------|---------------|----------------|--------------|
| 5                                            | 30-34     | Never Any     | 5304 | 52.63 |               |             |               |                |              |
| 5                                            | 30-34     | CC            | 1373 | 13.62 | 0             | 0.00        |               |                |              |
| 5                                            | 30-34     | Ecig          | 1802 | 17.88 |               |             |               |                |              |
| 5                                            | 30-34     | Dual          | 0    | 0.00  |               |             |               |                |              |
| 5                                            | 30-34     | Former        | 1599 | 15.87 |               |             | 8.16          | 67             | 4.19         |
| Year of Follow-up: 1995, Age Group: 35-39    |           |               |      |       |               |             |               |                |              |
| Period                                       | Age Group | Smoking Group | N    | %     | Ever Quit (N) | Ever Quit % | Mean Yrs Quit | Short Term (n) | Short Term % |
| 5                                            | 35-39     | Never Any     | 5278 | 50.27 |               |             |               |                |              |
| 5                                            | 35-39     | CC            | 1410 | 13.43 | 0             | 0.00        |               |                |              |
| 5                                            | 35-39     | Ecig          | 1746 | 16.63 |               |             |               |                |              |
| 5                                            | 35-39     | Dual          | 0    | 0.00  |               |             |               |                |              |
| 5                                            | 35-39     | Former        | 2065 | 19.67 |               |             | 8.75          | 62             | 3.00         |
| Year of Follow-up: 1995, Age Group: 40-44    |           |               |      |       |               |             |               |                |              |
| Period                                       | Age Group | Smoking Group | N    | %     | Ever Quit (N) | Ever Quit % | Mean Yrs Quit | Short Term (n) | Short Term % |
| 5                                            | 40-44     | Never Any     | 5018 | 52.27 |               |             |               |                |              |
| 5                                            | 40-44     | CC            | 1135 | 11.82 | 0             | 0.00        |               |                |              |
| 5                                            | 40-44     | Ecig          | 1356 | 14.13 |               |             |               |                |              |
| 5                                            | 40-44     | Dual          | 0    | 0.00  |               |             |               |                |              |
| 5                                            | 40-44     | Former        | 2091 | 21.78 |               |             | 12.09         | 81             | 3.87         |
| Year of Follow-up: 1995, Age Group: 45-49    |           |               |      |       |               |             |               |                |              |
| Period                                       | Age Group | Smoking Group | N    | %     | Ever Quit (N) | Ever Quit % | Mean Yrs Quit | Short Term (n) | Short Term % |
| 5                                            | 45-49     | Never Any     | 4356 | 51.27 |               |             |               |                |              |
| 5                                            | 45-49     | CC            | 974  | 11.46 | 0             | 0.00        |               |                |              |
| 5                                            | 45-49     | Ecig          | 1161 | 13.66 |               |             |               |                |              |
| 5                                            | 45-49     | Dual          | 0    | 0.00  |               |             |               |                |              |
| 5                                            | 45-49     | Former        | 2006 | 23.61 |               |             | 10.93         | 133            | 6.63         |
| Year of Follow-up: 1995, Age Group: 50-54    |           |               |      |       |               |             |               |                |              |
| Period                                       | Age Group | Smoking Group | N    | %     | Ever Quit (N) | Ever Quit % | Mean Yrs Quit | Short Term (n) | Short Term % |
| 5                                            | 50-54     | Never Any     | 3116 | 47.67 |               |             |               |                |              |
| 5                                            | 50-54     | CC            | 739  | 11.31 | 0             | 0.00        |               |                |              |
| 5                                            | 50-54     | Ecig          | 826  | 12.64 |               |             |               |                |              |
| 5                                            | 50-54     | Dual          | 0    | 0.00  |               |             |               |                |              |
| 5                                            | 50-54     | Former        | 1855 | 28.38 |               |             | 14.92         | 140            | 7.55         |
| Year of Follow-up: 1995, Age Group: 55-59    |           |               |      |       |               |             |               |                |              |
| Period                                       | Age Group | Smoking Group | N    | %     | Ever Quit (N) | Ever Quit % | Mean Yrs Quit | Short Term (n) | Short Term % |
| 5                                            | 55-59     | Never Any     | 2684 | 48.50 |               |             |               |                |              |
| 5                                            | 55-59     | CC            | 722  | 13.05 | 0             | 0.00        |               |                |              |
| 5                                            | 55-59     | Ecig          | 627  | 11.33 |               |             |               |                |              |
| 5                                            | 55-59     | Dual          | 0    | 0.00  |               |             |               |                |              |
| 5                                            | 55-59     | Former        | 1501 | 27.12 |               |             | 15.84         | 93             | 6.20         |
| Year of Follow-up: 1995, Age Group: 60-64    |           |               |      |       |               |             |               |                |              |
| Period                                       | Age Group | Smoking Group | N    | %     | Ever Quit (N) | Ever Quit % | Mean Yrs Quit | Short Term (n) | Short Term % |
| 5                                            | 60-64     | Never Any     | 2732 | 51.90 |               |             |               |                |              |
| 5                                            | 60-64     | CC            | 633  | 12.03 | 0             | 0.00        |               |                |              |
| 5                                            | 60-64     | Ecig          | 444  | 8.43  |               |             |               |                |              |
| 5                                            | 60-64     | Dual          | 0    | 0.00  |               |             |               |                |              |
| 5                                            | 60-64     | Former        | 1455 | 27.64 |               |             | 19.22         | 87             | 5.98         |
| Year of Follow-up: 1995, Age Group: 65-69    |           |               |      |       |               |             |               |                |              |
| Period                                       | Age Group | Smoking Group | N    | %     | Ever Quit (N) | Ever Quit % | Mean Yrs Quit | Short Term (n) | Short Term % |
| 5                                            | 65-69     | Never Any     | 3078 | 55.72 |               |             |               |                |              |
| 5                                            | 65-69     | CC            | 602  | 10.90 | 0             | 0.00        |               |                |              |
| 5                                            | 65-69     | Ecig          | 374  | 6.77  |               |             |               |                |              |
| 5                                            | 65-69     | Dual          | 0    | 0.00  |               |             |               |                |              |
| 5                                            | 65-69     | Former        | 1470 | 26.61 |               |             | 19.34         | 107            | 7.28         |
| Year of Follow-up: 1995, Age Group: 70-74    |           |               |      |       |               |             |               |                |              |
| Period                                       | Age Group | Smoking Group | N    | %     | Ever Quit (N) | Ever Quit % | Mean Yrs Quit | Short Term (n) | Short Term % |
| 5                                            | 70-74     | Never Any     | 3042 | 57.36 |               |             |               |                |              |
| 5                                            | 70-74     | CC            | 577  | 10.88 | 0             | 0.00        |               |                |              |
| 5                                            | 70-74     | Ecig          | 188  | 3.55  |               |             |               |                |              |
| 5                                            | 70-74     | Dual          | 0    | 0.00  |               |             |               |                |              |
| 5                                            | 70-74     | Former        | 1496 | 28.21 |               |             | 22.32         | 77             | 5.15         |
| Year of Follow-up: 1995, Age Group: 75-79    |           |               |      |       |               |             |               |                |              |
| Period                                       | Age Group | Smoking Group | N    | %     | Ever Quit (N) | Ever Quit % | Mean Yrs Quit | Short Term (n) | Short Term % |
| 5                                            | 75-79     | Never Any     | 2738 | 61.05 |               |             |               |                |              |
| 5                                            | 75-79     | CC            | 337  | 7.51  | 0             | 0.00        |               |                |              |
| 5                                            | 75-79     | Ecig          | 101  | 2.25  |               |             |               |                |              |
| 5                                            | 75-79     | Dual          | 0    | 0.00  |               |             |               |                |              |
| 5                                            | 75-79     | Former        | 1309 | 29.19 |               |             | 25.87         | 70             | 5.35         |
| Year of Follow-up: 2000, Age Group: All Ages |           |               |      |       |               |             |               |                |              |

**Results for PHIM for Run 4 (Sensitivity\_Analysis\_1.RTF)**

| Period                                    | Age Group | Smoking Group | N     | %     | Ever Quit (N) | Ever Quit % | Mean Yrs Quit | Short Term (n) | Short Term % |
|-------------------------------------------|-----------|---------------|-------|-------|---------------|-------------|---------------|----------------|--------------|
| 10                                        | All Ages  | Never Any     | 50423 | 54.86 |               |             |               |                |              |
| 10                                        | All Ages  | CC            | 4595  | 5.00  | 0             | 0.00        |               |                |              |
| 10                                        | All Ages  | Ecig          | 15644 | 17.02 |               |             |               |                |              |
| 10                                        | All Ages  | Dual          | 0     | 0.00  |               |             |               |                |              |
| 10                                        | All Ages  | Former        | 21246 | 23.12 |               |             | 15.11         | 1717           | 8.08         |
| Year of Follow-up: 2000, Age Group: 18-19 |           |               |       |       |               |             |               |                |              |
| Period                                    | Age Group | Smoking Group | N     | %     | Ever Quit (N) | Ever Quit % | Mean Yrs Quit | Short Term (n) | Short Term % |
| 10                                        | 18-19     | Never Any     | 0     | .     |               |             |               |                |              |
| 10                                        | 18-19     | CC            | 0     | .     | 0             | .           |               |                |              |
| 10                                        | 18-19     | Ecig          | 0     | .     |               |             |               |                |              |
| 10                                        | 18-19     | Dual          | 0     | .     |               |             |               |                |              |
| 10                                        | 18-19     | Former        | 0     | .     |               |             |               | 0              | .            |
| Year of Follow-up: 2000, Age Group: 20-24 |           |               |       |       |               |             |               |                |              |
| Period                                    | Age Group | Smoking Group | N     | %     | Ever Quit (N) | Ever Quit % | Mean Yrs Quit | Short Term (n) | Short Term % |
| 10                                        | 20-24     | Never Any     | 5128  | 64.67 |               |             |               |                |              |
| 10                                        | 20-24     | CC            | 370   | 4.67  | 0             | 0.00        |               |                |              |
| 10                                        | 20-24     | Ecig          | 1780  | 22.45 |               |             |               |                |              |
| 10                                        | 20-24     | Dual          | 0     | 0.00  |               |             |               |                |              |
| 10                                        | 20-24     | Former        | 652   | 8.22  |               |             | 3.55          | 169            | 25.92        |
| Year of Follow-up: 2000, Age Group: 25-29 |           |               |       |       |               |             |               |                |              |
| Period                                    | Age Group | Smoking Group | N     | %     | Ever Quit (N) | Ever Quit % | Mean Yrs Quit | Short Term (n) | Short Term % |
| 10                                        | 25-29     | Never Any     | 5493  | 65.78 |               |             |               |                |              |
| 10                                        | 25-29     | CC            | 400   | 4.79  | 0             | 0.00        |               |                |              |
| 10                                        | 25-29     | Ecig          | 1690  | 20.24 |               |             |               |                |              |
| 10                                        | 25-29     | Dual          | 0     | 0.00  |               |             |               |                |              |
| 10                                        | 25-29     | Former        | 767   | 9.19  |               |             | 5.59          | 126            | 16.43        |
| Year of Follow-up: 2000, Age Group: 30-34 |           |               |       |       |               |             |               |                |              |
| Period                                    | Age Group | Smoking Group | N     | %     | Ever Quit (N) | Ever Quit % | Mean Yrs Quit | Short Term (n) | Short Term % |
| 10                                        | 30-34     | Never Any     | 5214  | 59.30 |               |             |               |                |              |
| 10                                        | 30-34     | CC            | 417   | 4.74  | 0             | 0.00        |               |                |              |
| 10                                        | 30-34     | Ecig          | 1908  | 21.70 |               |             |               |                |              |
| 10                                        | 30-34     | Dual          | 0     | 0.00  |               |             |               |                |              |
| 10                                        | 30-34     | Former        | 1254  | 14.26 |               |             | 9.28          | 91             | 7.26         |
| Year of Follow-up: 2000, Age Group: 35-39 |           |               |       |       |               |             |               |                |              |
| Period                                    | Age Group | Smoking Group | N     | %     | Ever Quit (N) | Ever Quit % | Mean Yrs Quit | Short Term (n) | Short Term % |
| 10                                        | 35-39     | Never Any     | 5284  | 52.43 |               |             |               |                |              |
| 10                                        | 35-39     | CC            | 561   | 5.57  | 0             | 0.00        |               |                |              |
| 10                                        | 35-39     | Ecig          | 2413  | 23.94 |               |             |               |                |              |
| 10                                        | 35-39     | Dual          | 0     | 0.00  |               |             |               |                |              |
| 10                                        | 35-39     | Former        | 1820  | 18.06 |               |             | 11.77         | 105            | 5.77         |
| Year of Follow-up: 2000, Age Group: 40-44 |           |               |       |       |               |             |               |                |              |
| Period                                    | Age Group | Smoking Group | N     | %     | Ever Quit (N) | Ever Quit % | Mean Yrs Quit | Short Term (n) | Short Term % |
| 10                                        | 40-44     | Never Any     | 5278  | 50.27 |               |             |               |                |              |
| 10                                        | 40-44     | CC            | 584   | 5.56  | 0             | 0.00        |               |                |              |
| 10                                        | 40-44     | Ecig          | 2292  | 21.83 |               |             |               |                |              |
| 10                                        | 40-44     | Dual          | 0     | 0.00  |               |             |               |                |              |
| 10                                        | 40-44     | Former        | 2345  | 22.34 |               |             | 12.30         | 143            | 6.10         |
| Year of Follow-up: 2000, Age Group: 45-49 |           |               |       |       |               |             |               |                |              |
| Period                                    | Age Group | Smoking Group | N     | %     | Ever Quit (N) | Ever Quit % | Mean Yrs Quit | Short Term (n) | Short Term % |
| 10                                        | 45-49     | Never Any     | 5018  | 52.27 |               |             |               |                |              |
| 10                                        | 45-49     | CC            | 446   | 4.65  | 0             | 0.00        |               |                |              |
| 10                                        | 45-49     | Ecig          | 1673  | 17.43 |               |             |               |                |              |
| 10                                        | 45-49     | Dual          | 0     | 0.00  |               |             |               |                |              |
| 10                                        | 45-49     | Former        | 2463  | 25.66 |               |             | 14.76         | 181            | 7.35         |
| Year of Follow-up: 2000, Age Group: 50-54 |           |               |       |       |               |             |               |                |              |
| Period                                    | Age Group | Smoking Group | N     | %     | Ever Quit (N) | Ever Quit % | Mean Yrs Quit | Short Term (n) | Short Term % |
| 10                                        | 50-54     | Never Any     | 4356  | 51.27 |               |             |               |                |              |
| 10                                        | 50-54     | CC            | 378   | 4.45  | 0             | 0.00        |               |                |              |
| 10                                        | 50-54     | Ecig          | 1299  | 15.29 |               |             |               |                |              |
| 10                                        | 50-54     | Dual          | 0     | 0.00  |               |             |               |                |              |
| 10                                        | 50-54     | Former        | 2464  | 29.00 |               |             | 13.32         | 188            | 7.63         |
| Year of Follow-up: 2000, Age Group: 55-59 |           |               |       |       |               |             |               |                |              |
| Period                                    | Age Group | Smoking Group | N     | %     | Ever Quit (N) | Ever Quit % | Mean Yrs Quit | Short Term (n) | Short Term % |
| 10                                        | 55-59     | Never Any     | 3116  | 47.67 |               |             |               |                |              |
| 10                                        | 55-59     | CC            | 283   | 4.33  | 0             | 0.00        |               |                |              |
| 10                                        | 55-59     | Ecig          | 912   | 13.95 |               |             |               |                |              |
| 10                                        | 55-59     | Dual          | 0     | 0.00  |               |             |               |                |              |

**Results for PHIM for Run 4 (Sensitivity\_Analysis\_1.RTF)**

| Year of Follow-up: 2000, Age Group: 60-64    | Period   | Age Group | Smoking Group | N     | %     | Ever Quit (N) | Ever Quit % | Mean Yrs Quit | Short Term (n) | Short Term % |
|----------------------------------------------|----------|-----------|---------------|-------|-------|---------------|-------------|---------------|----------------|--------------|
| 10                                           | 55-59    | Former    |               | 2225  | 34.04 |               |             | 16.92         | 157            | 7.06         |
| 10                                           | 60-64    | Never Any |               | 2684  | 48.50 |               |             |               |                |              |
| 10                                           | 60-64    | CC        |               | 334   | 6.04  | 0             | 0.00        |               |                |              |
| 10                                           | 60-64    | Ecig      |               | 663   | 11.98 |               |             |               |                |              |
| 10                                           | 60-64    | Dual      |               | 0     | 0.00  |               |             |               |                |              |
| 10                                           | 60-64    | Former    |               | 1853  | 33.48 |               |             | 17.23         | 149            | 8.04         |
| Year of Follow-up: 2000, Age Group: 65-69    | Period   | Age Group | Smoking Group | N     | %     | Ever Quit (N) | Ever Quit % | Mean Yrs Quit | Short Term (n) | Short Term % |
| 10                                           | 65-69    | Never Any |               | 2732  | 51.90 |               |             |               |                |              |
| 10                                           | 65-69    | CC        |               | 280   | 5.32  | 0             | 0.00        |               |                |              |
| 10                                           | 65-69    | Ecig      |               | 443   | 8.42  |               |             |               |                |              |
| 10                                           | 65-69    | Dual      |               | 0     | 0.00  |               |             |               |                |              |
| 10                                           | 65-69    | Former    |               | 1809  | 34.37 |               |             | 19.85         | 146            | 8.07         |
| Year of Follow-up: 2000, Age Group: 70-74    | Period   | Age Group | Smoking Group | N     | %     | Ever Quit (N) | Ever Quit % | Mean Yrs Quit | Short Term (n) | Short Term % |
| 10                                           | 70-74    | Never Any |               | 3078  | 55.72 |               |             |               |                |              |
| 10                                           | 70-74    | CC        |               | 274   | 4.96  | 0             | 0.00        |               |                |              |
| 10                                           | 70-74    | Ecig      |               | 368   | 6.66  |               |             |               |                |              |
| 10                                           | 70-74    | Dual      |               | 0     | 0.00  |               |             |               |                |              |
| 10                                           | 70-74    | Former    |               | 1804  | 32.66 |               |             | 20.18         | 154            | 8.54         |
| Year of Follow-up: 2000, Age Group: 75-79    | Period   | Age Group | Smoking Group | N     | %     | Ever Quit (N) | Ever Quit % | Mean Yrs Quit | Short Term (n) | Short Term % |
| 10                                           | 75-79    | Never Any |               | 3042  | 57.36 |               |             |               |                |              |
| 10                                           | 75-79    | CC        |               | 268   | 5.05  | 0             | 0.00        |               |                |              |
| 10                                           | 75-79    | Ecig      |               | 203   | 3.83  |               |             |               |                |              |
| 10                                           | 75-79    | Dual      |               | 0     | 0.00  |               |             |               |                |              |
| 10                                           | 75-79    | Former    |               | 1790  | 33.75 |               |             | 23.17         | 108            | 6.03         |
| Year of Follow-up: 2005, Age Group: All Ages | Period   | Age Group | Smoking Group | N     | %     | Ever Quit (N) | Ever Quit % | Mean Yrs Quit | Short Term (n) | Short Term % |
| 15                                           | All Ages | Never Any |               | 47002 | 54.27 |               |             |               |                |              |
| 15                                           | All Ages | CC        |               | 1890  | 2.18  | 0             | 0.00        |               |                |              |
| 15                                           | All Ages | Ecig      |               | 15617 | 18.03 |               |             |               |                |              |
| 15                                           | All Ages | Dual      |               | 0     | 0.00  |               |             |               |                |              |
| 15                                           | All Ages | Former    |               | 22096 | 25.51 |               |             | 17.32         | 941            | 4.26         |
| Year of Follow-up: 2005, Age Group: 18-19    | Period   | Age Group | Smoking Group | N     | %     | Ever Quit (N) | Ever Quit % | Mean Yrs Quit | Short Term (n) | Short Term % |
| 15                                           | 18-19    | Never Any |               | 0     | .     |               |             |               |                |              |
| 15                                           | 18-19    | CC        |               | 0     | .     | 0             | .           |               |                |              |
| 15                                           | 18-19    | Ecig      |               | 0     | .     |               |             |               |                |              |
| 15                                           | 18-19    | Dual      |               | 0     | .     |               |             |               |                |              |
| 15                                           | 18-19    | Former    |               | 0     | .     |               |             | .             | 0              | .            |
| Year of Follow-up: 2005, Age Group: 20-24    | Period   | Age Group | Smoking Group | N     | %     | Ever Quit (N) | Ever Quit % | Mean Yrs Quit | Short Term (n) | Short Term % |
| 15                                           | 20-24    | Never Any |               | 0     | .     |               |             |               |                |              |
| 15                                           | 20-24    | CC        |               | 0     | .     | 0             | .           |               |                |              |
| 15                                           | 20-24    | Ecig      |               | 0     | .     |               |             |               |                |              |
| 15                                           | 20-24    | Dual      |               | 0     | .     |               |             |               |                |              |
| 15                                           | 20-24    | Former    |               | 0     | .     |               |             | .             | 0              | .            |
| Year of Follow-up: 2005, Age Group: 25-29    | Period   | Age Group | Smoking Group | N     | %     | Ever Quit (N) | Ever Quit % | Mean Yrs Quit | Short Term (n) | Short Term % |
| 15                                           | 25-29    | Never Any |               | 4860  | 61.29 |               |             |               |                |              |
| 15                                           | 25-29    | CC        |               | 166   | 2.09  | 0             | 0.00        |               |                |              |
| 15                                           | 25-29    | Ecig      |               | 1941  | 24.48 |               |             |               |                |              |
| 15                                           | 25-29    | Dual      |               | 0     | 0.00  |               |             |               |                |              |
| 15                                           | 25-29    | Former    |               | 963   | 12.14 |               |             | 6.57          | 96             | 9.97         |
| Year of Follow-up: 2005, Age Group: 30-34    | Period   | Age Group | Smoking Group | N     | %     | Ever Quit (N) | Ever Quit % | Mean Yrs Quit | Short Term (n) | Short Term % |
| 15                                           | 30-34    | Never Any |               | 5407  | 64.75 |               |             |               |                |              |
| 15                                           | 30-34    | CC        |               | 149   | 1.78  | 0             | 0.00        |               |                |              |
| 15                                           | 30-34    | Ecig      |               | 1822  | 21.82 |               |             |               |                |              |
| 15                                           | 30-34    | Dual      |               | 0     | 0.00  |               |             |               |                |              |
| 15                                           | 30-34    | Former    |               | 972   | 11.64 |               |             | 8.77          | 80             | 8.23         |
| Year of Follow-up: 2005, Age Group: 35-39    | Period   | Age Group | Smoking Group | N     | %     | Ever Quit (N) | Ever Quit % | Mean Yrs Quit | Short Term (n) | Short Term % |
| 15                                           | 35-39    | Never Any |               | 5189  | 59.01 |               |             |               |                |              |
| 15                                           | 35-39    | CC        |               | 167   | 1.90  | 0             | 0.00        |               |                |              |

**Results for PHIM for Run 4 (Sensitivity\_Analysis\_1.RTF)**

|                                              |           |               |       |       |               |             |               |                |              |
|----------------------------------------------|-----------|---------------|-------|-------|---------------|-------------|---------------|----------------|--------------|
| 15                                           | 35-39     | Ecig          | 2002  | 22.77 |               |             |               |                |              |
| 15                                           | 35-39     | Dual          | 0     | 0.00  |               |             |               |                |              |
| 15                                           | 35-39     | Former        | 1435  | 16.32 |               |             | 12.75         | 66             | 4.60         |
| Year of Follow-up: 2005, Age Group: 40-44    |           |               |       |       |               |             |               |                |              |
| Period                                       | Age Group | Smoking Group | N     | %     | Ever Quit (N) | Ever Quit % | Mean Yrs Quit | Short Term (n) | Short Term % |
| 15                                           | 40-44     | Never Any     | 5284  | 52.43 |               |             |               |                |              |
| 15                                           | 40-44     | CC            | 238   | 2.36  | 0             | 0.00        |               |                |              |
| 15                                           | 40-44     | Ecig          | 2500  | 24.81 |               |             |               |                |              |
| 15                                           | 40-44     | Dual          | 0     | 0.00  |               |             |               |                |              |
| 15                                           | 40-44     | Former        | 2056  | 20.40 |               |             | 15.08         | 101            | 4.91         |
| Year of Follow-up: 2005, Age Group: 45-49    |           |               |       |       |               |             |               |                |              |
| Period                                       | Age Group | Smoking Group | N     | %     | Ever Quit (N) | Ever Quit % | Mean Yrs Quit | Short Term (n) | Short Term % |
| 15                                           | 45-49     | Never Any     | 5278  | 50.27 |               |             |               |                |              |
| 15                                           | 45-49     | CC            | 237   | 2.26  | 0             | 0.00        |               |                |              |
| 15                                           | 45-49     | Ecig          | 2318  | 22.08 |               |             |               |                |              |
| 15                                           | 45-49     | Dual          | 0     | 0.00  |               |             |               |                |              |
| 15                                           | 45-49     | Former        | 2666  | 25.39 |               |             | 15.45         | 135            | 5.06         |
| Year of Follow-up: 2005, Age Group: 50-54    |           |               |       |       |               |             |               |                |              |
| Period                                       | Age Group | Smoking Group | N     | %     | Ever Quit (N) | Ever Quit % | Mean Yrs Quit | Short Term (n) | Short Term % |
| 15                                           | 50-54     | Never Any     | 5018  | 52.27 |               |             |               |                |              |
| 15                                           | 50-54     | CC            | 191   | 1.99  | 0             | 0.00        |               |                |              |
| 15                                           | 50-54     | Ecig          | 1622  | 16.90 |               |             |               |                |              |
| 15                                           | 50-54     | Dual          | 0     | 0.00  |               |             |               |                |              |
| 15                                           | 50-54     | Former        | 2769  | 28.84 |               |             | 17.84         | 99             | 3.58         |
| Year of Follow-up: 2005, Age Group: 55-59    |           |               |       |       |               |             |               |                |              |
| Period                                       | Age Group | Smoking Group | N     | %     | Ever Quit (N) | Ever Quit % | Mean Yrs Quit | Short Term (n) | Short Term % |
| 15                                           | 55-59     | Never Any     | 4356  | 51.27 |               |             |               |                |              |
| 15                                           | 55-59     | CC            | 166   | 1.95  | 0             | 0.00        |               |                |              |
| 15                                           | 55-59     | Ecig          | 1281  | 15.08 |               |             |               |                |              |
| 15                                           | 55-59     | Dual          | 0     | 0.00  |               |             |               |                |              |
| 15                                           | 55-59     | Former        | 2694  | 31.71 |               |             | 16.95         | 78             | 2.90         |
| Year of Follow-up: 2005, Age Group: 60-64    |           |               |       |       |               |             |               |                |              |
| Period                                       | Age Group | Smoking Group | N     | %     | Ever Quit (N) | Ever Quit % | Mean Yrs Quit | Short Term (n) | Short Term % |
| 15                                           | 60-64     | Never Any     | 3116  | 47.67 |               |             |               |                |              |
| 15                                           | 60-64     | CC            | 131   | 2.00  | 0             | 0.00        |               |                |              |
| 15                                           | 60-64     | Ecig          | 852   | 13.04 |               |             |               |                |              |
| 15                                           | 60-64     | Dual          | 0     | 0.00  |               |             |               |                |              |
| 15                                           | 60-64     | Former        | 2437  | 37.29 |               |             | 20.18         | 93             | 3.82         |
| Year of Follow-up: 2005, Age Group: 65-69    |           |               |       |       |               |             |               |                |              |
| Period                                       | Age Group | Smoking Group | N     | %     | Ever Quit (N) | Ever Quit % | Mean Yrs Quit | Short Term (n) | Short Term % |
| 15                                           | 65-69     | Never Any     | 2684  | 48.50 |               |             |               |                |              |
| 15                                           | 65-69     | CC            | 160   | 2.89  | 0             | 0.00        |               |                |              |
| 15                                           | 65-69     | Ecig          | 591   | 10.68 |               |             |               |                |              |
| 15                                           | 65-69     | Dual          | 0     | 0.00  |               |             |               |                |              |
| 15                                           | 65-69     | Former        | 2099  | 37.93 |               |             | 19.92         | 68             | 3.24         |
| Year of Follow-up: 2005, Age Group: 70-74    |           |               |       |       |               |             |               |                |              |
| Period                                       | Age Group | Smoking Group | N     | %     | Ever Quit (N) | Ever Quit % | Mean Yrs Quit | Short Term (n) | Short Term % |
| 15                                           | 70-74     | Never Any     | 2732  | 51.90 |               |             |               |                |              |
| 15                                           | 70-74     | CC            | 139   | 2.64  | 0             | 0.00        |               |                |              |
| 15                                           | 70-74     | Ecig          | 391   | 7.43  |               |             |               |                |              |
| 15                                           | 70-74     | Dual          | 0     | 0.00  |               |             |               |                |              |
| 15                                           | 70-74     | Former        | 2002  | 38.03 |               |             | 22.67         | 69             | 3.45         |
| Year of Follow-up: 2005, Age Group: 75-79    |           |               |       |       |               |             |               |                |              |
| Period                                       | Age Group | Smoking Group | N     | %     | Ever Quit (N) | Ever Quit % | Mean Yrs Quit | Short Term (n) | Short Term % |
| 15                                           | 75-79     | Never Any     | 3078  | 55.72 |               |             |               |                |              |
| 15                                           | 75-79     | CC            | 146   | 2.64  | 0             | 0.00        |               |                |              |
| 15                                           | 75-79     | Ecig          | 297   | 5.38  |               |             |               |                |              |
| 15                                           | 75-79     | Dual          | 0     | 0.00  |               |             |               |                |              |
| 15                                           | 75-79     | Former        | 2003  | 36.26 |               |             | 22.91         | 56             | 2.80         |
| Year of Follow-up: 2010, Age Group: All Ages |           |               |       |       |               |             |               |                |              |
| Period                                       | Age Group | Smoking Group | N     | %     | Ever Quit (N) | Ever Quit % | Mean Yrs Quit | Short Term (n) | Short Term % |
| 20                                           | All Ages  | Never Any     | 43759 | 53.97 |               |             |               |                |              |
| 20                                           | All Ages  | CC            | 765   | 0.94  | 0             | 0.00        |               |                |              |
| 20                                           | All Ages  | Ecig          | 13785 | 17.00 |               |             |               |                |              |
| 20                                           | All Ages  | Dual          | 0     | 0.00  |               |             |               |                |              |
| 20                                           | All Ages  | Former        | 22772 | 28.09 |               |             | 19.42         | 1117           | 4.91         |
| Year of Follow-up: 2010, Age Group: 18-19    |           |               |       |       |               |             |               |                |              |
| Period                                       | Age Group | Smoking Group | N     | %     | Ever Quit (N) | Ever Quit % | Mean Yrs Quit | Short Term (n) | Short Term % |



**Results for PHIM for Run 4 (Sensitivity\_Analysis\_1.RTF)**

|                                           |           |               |      |       |               |             |               |                |              |
|-------------------------------------------|-----------|---------------|------|-------|---------------|-------------|---------------|----------------|--------------|
| 20                                        | 18-19     | Never Any     | 0    | .     |               |             |               |                |              |
| 20                                        | 18-19     | CC            | 0    | .     | 0             | .           |               |                |              |
| 20                                        | 18-19     | Ecig          | 0    | .     |               |             |               |                |              |
| 20                                        | 18-19     | Dual          | 0    | .     |               |             |               |                |              |
| 20                                        | 18-19     | Former        | 0    | .     |               |             | 0             | .              |              |
| Year of Follow-up: 2010, Age Group: 20-24 |           |               |      |       |               |             |               |                |              |
| Period                                    | Age Group | Smoking Group | N    | %     | Ever Quit (N) | Ever Quit % | Mean Yrs Quit | Short Term (n) | Short Term % |
| 20                                        | 20-24     | Never Any     | 0    | .     |               |             |               |                |              |
| 20                                        | 20-24     | CC            | 0    | .     | 0             | .           |               |                |              |
| 20                                        | 20-24     | Ecig          | 0    | .     |               |             |               |                |              |
| 20                                        | 20-24     | Dual          | 0    | .     |               |             |               |                |              |
| 20                                        | 20-24     | Former        | 0    | .     |               |             |               | 0              | .            |
| Year of Follow-up: 2010, Age Group: 25-29 |           |               |      |       |               |             |               |                |              |
| Period                                    | Age Group | Smoking Group | N    | %     | Ever Quit (N) | Ever Quit % | Mean Yrs Quit | Short Term (n) | Short Term % |
| 20                                        | 25-29     | Never Any     | 0    | .     |               |             |               |                |              |
| 20                                        | 25-29     | CC            | 0    | .     | 0             | .           |               |                |              |
| 20                                        | 25-29     | Ecig          | 0    | .     |               |             |               |                |              |
| 20                                        | 25-29     | Dual          | 0    | .     |               |             |               |                |              |
| 20                                        | 25-29     | Former        | 0    | .     |               |             |               | 0              | .            |
| Year of Follow-up: 2010, Age Group: 30-34 |           |               |      |       |               |             |               |                |              |
| Period                                    | Age Group | Smoking Group | N    | %     | Ever Quit (N) | Ever Quit % | Mean Yrs Quit | Short Term (n) | Short Term % |
| 20                                        | 30-34     | Never Any     | 4743 | 59.81 |               |             |               |                |              |
| 20                                        | 30-34     | CC            | 65   | 0.82  | 0             | 0.00        |               |                |              |
| 20                                        | 30-34     | Ecig          | 1881 | 23.72 |               |             |               |                |              |
| 20                                        | 30-34     | Dual          | 0    | 0.00  |               |             |               |                |              |
| 20                                        | 30-34     | Former        | 1241 | 15.65 |               |             | 9.36          | 130            | 10.48        |
| Year of Follow-up: 2010, Age Group: 35-39 |           |               |      |       |               |             |               |                |              |
| Period                                    | Age Group | Smoking Group | N    | %     | Ever Quit (N) | Ever Quit % | Mean Yrs Quit | Short Term (n) | Short Term % |
| 20                                        | 35-39     | Never Any     | 5359 | 64.18 |               |             |               |                |              |
| 20                                        | 35-39     | CC            | 58   | 0.69  | 0             | 0.00        |               |                |              |
| 20                                        | 35-39     | Ecig          | 1717 | 20.56 |               |             |               |                |              |
| 20                                        | 35-39     | Dual          | 0    | 0.00  |               |             |               |                |              |
| 20                                        | 35-39     | Former        | 1216 | 14.56 |               |             | 11.38         | 98             | 8.06         |
| Year of Follow-up: 2010, Age Group: 40-44 |           |               |      |       |               |             |               |                |              |
| Period                                    | Age Group | Smoking Group | N    | %     | Ever Quit (N) | Ever Quit % | Mean Yrs Quit | Short Term (n) | Short Term % |
| 20                                        | 40-44     | Never Any     | 5189 | 59.01 |               |             |               |                |              |
| 20                                        | 40-44     | CC            | 64   | 0.73  | 0             | 0.00        |               |                |              |
| 20                                        | 40-44     | Ecig          | 1849 | 21.03 |               |             |               |                |              |
| 20                                        | 40-44     | Dual          | 0    | 0.00  |               |             |               |                |              |
| 20                                        | 40-44     | Former        | 1691 | 19.23 |               |             | 15.34         | 112            | 6.62         |
| Year of Follow-up: 2010, Age Group: 45-49 |           |               |      |       |               |             |               |                |              |
| Period                                    | Age Group | Smoking Group | N    | %     | Ever Quit (N) | Ever Quit % | Mean Yrs Quit | Short Term (n) | Short Term % |
| 20                                        | 45-49     | Never Any     | 5284 | 52.43 |               |             |               |                |              |
| 20                                        | 45-49     | CC            | 105  | 1.04  | 0             | 0.00        |               |                |              |
| 20                                        | 45-49     | Ecig          | 2327 | 23.09 |               |             |               |                |              |
| 20                                        | 45-49     | Dual          | 0    | 0.00  |               |             |               |                |              |
| 20                                        | 45-49     | Former        | 2362 | 23.44 |               |             | 17.71         | 131            | 5.55         |
| Year of Follow-up: 2010, Age Group: 50-54 |           |               |      |       |               |             |               |                |              |
| Period                                    | Age Group | Smoking Group | N    | %     | Ever Quit (N) | Ever Quit % | Mean Yrs Quit | Short Term (n) | Short Term % |
| 20                                        | 50-54     | Never Any     | 5278 | 50.27 |               |             |               |                |              |
| 20                                        | 50-54     | CC            | 101  | 0.96  | 0             | 0.00        |               |                |              |
| 20                                        | 50-54     | Ecig          | 2101 | 20.01 |               |             |               |                |              |
| 20                                        | 50-54     | Dual          | 0    | 0.00  |               |             |               |                |              |
| 20                                        | 50-54     | Former        | 3019 | 28.76 |               |             | 18.27         | 163            | 5.40         |
| Year of Follow-up: 2010, Age Group: 55-59 |           |               |      |       |               |             |               |                |              |
| Period                                    | Age Group | Smoking Group | N    | %     | Ever Quit (N) | Ever Quit % | Mean Yrs Quit | Short Term (n) | Short Term % |
| 20                                        | 55-59     | Never Any     | 5018 | 52.27 |               |             |               |                |              |
| 20                                        | 55-59     | CC            | 91   | 0.95  | 0             | 0.00        |               |                |              |
| 20                                        | 55-59     | Ecig          | 1433 | 14.93 |               |             |               |                |              |
| 20                                        | 55-59     | Dual          | 0    | 0.00  |               |             |               |                |              |
| 20                                        | 55-59     | Former        | 3058 | 31.85 |               |             | 20.88         | 103            | 3.37         |
| Year of Follow-up: 2010, Age Group: 60-64 |           |               |      |       |               |             |               |                |              |
| Period                                    | Age Group | Smoking Group | N    | %     | Ever Quit (N) | Ever Quit % | Mean Yrs Quit | Short Term (n) | Short Term % |
| 20                                        | 60-64     | Never Any     | 4356 | 51.27 |               |             |               |                |              |
| 20                                        | 60-64     | CC            | 71   | 0.84  | 0             | 0.00        |               |                |              |
| 20                                        | 60-64     | Ecig          | 1079 | 12.70 |               |             |               |                |              |
| 20                                        | 60-64     | Dual          | 0    | 0.00  |               |             |               |                |              |
| 20                                        | 60-64     | Former        | 2991 | 35.20 |               |             | 19.94         | 144            | 4.81         |
| Year of Follow-up: 2010, Age Group: 65-69 |           |               |      |       |               |             |               |                |              |

**Results for PHIM for Run 4 (Sensitivity\_Analysis\_1.RTF)**

| Period                                       | Age Group | Smoking Group | N     | %     | Ever Quit (N) | Ever Quit % | Mean Yrs Quit | Short Term (n) | Short Term % |
|----------------------------------------------|-----------|---------------|-------|-------|---------------|-------------|---------------|----------------|--------------|
| 20                                           | 65-69     | Never Any     | 3116  | 47.67 |               |             |               |                |              |
| 20                                           | 65-69     | CC            | 47    | 0.72  | 0             | 0.00        |               |                |              |
| 20                                           | 65-69     | Ecig          | 645   | 9.87  |               |             |               |                |              |
| 20                                           | 65-69     | Dual          | 0     | 0.00  |               |             |               |                |              |
| 20                                           | 65-69     | Former        | 2728  | 41.74 |               |             | 22.72         | 95             | 3.48         |
| Year of Follow-up: 2010, Age Group: 70-74    |           |               |       |       |               |             |               |                |              |
| Period                                       | Age Group | Smoking Group | N     | %     | Ever Quit (N) | Ever Quit % | Mean Yrs Quit | Short Term (n) | Short Term % |
| 20                                           | 70-74     | Never Any     | 2684  | 48.50 |               |             |               |                |              |
| 20                                           | 70-74     | CC            | 88    | 1.59  | 0             | 0.00        |               |                |              |
| 20                                           | 70-74     | Ecig          | 477   | 8.62  |               |             |               |                |              |
| 20                                           | 70-74     | Dual          | 0     | 0.00  |               |             |               |                |              |
| 20                                           | 70-74     | Former        | 2285  | 41.29 |               |             | 23.05         | 69             | 3.02         |
| Year of Follow-up: 2010, Age Group: 75-79    |           |               |       |       |               |             |               |                |              |
| Period                                       | Age Group | Smoking Group | N     | %     | Ever Quit (N) | Ever Quit % | Mean Yrs Quit | Short Term (n) | Short Term % |
| 20                                           | 75-79     | Never Any     | 2732  | 51.90 |               |             |               |                |              |
| 20                                           | 75-79     | CC            | 75    | 1.42  | 0             | 0.00        |               |                |              |
| 20                                           | 75-79     | Ecig          | 276   | 5.24  |               |             |               |                |              |
| 20                                           | 75-79     | Dual          | 0     | 0.00  |               |             |               |                |              |
| 20                                           | 75-79     | Former        | 2181  | 41.43 |               |             | 25.56         | 72             | 3.30         |
| Year of Follow-up: 2015, Age Group: All Ages |           |               |       |       |               |             |               |                |              |
| Period                                       | Age Group | Smoking Group | N     | %     | Ever Quit (N) | Ever Quit % | Mean Yrs Quit | Short Term (n) | Short Term % |
| 25                                           | All Ages  | Never Any     | 41010 | 54.09 |               |             |               |                |              |
| 25                                           | All Ages  | CC            | 340   | 0.45  | 0             | 0.00        |               |                |              |
| 25                                           | All Ages  | Ecig          | 11438 | 15.09 |               |             |               |                |              |
| 25                                           | All Ages  | Dual          | 0     | 0.00  |               |             |               |                |              |
| 25                                           | All Ages  | Former        | 23029 | 30.37 |               |             | 21.48         | 914            | 3.97         |
| Year of Follow-up: 2015, Age Group: 18-19    |           |               |       |       |               |             |               |                |              |
| Period                                       | Age Group | Smoking Group | N     | %     | Ever Quit (N) | Ever Quit % | Mean Yrs Quit | Short Term (n) | Short Term % |
| 25                                           | 18-19     | Never Any     | 0     | .     |               |             |               |                |              |
| 25                                           | 18-19     | CC            | 0     | .     | 0             | .           |               |                |              |
| 25                                           | 18-19     | Ecig          | 0     | .     |               |             |               |                |              |
| 25                                           | 18-19     | Dual          | 0     | .     |               |             |               |                |              |
| 25                                           | 18-19     | Former        | 0     | .     |               |             | .             | 0              | .            |
| Year of Follow-up: 2015, Age Group: 20-24    |           |               |       |       |               |             |               |                |              |
| Period                                       | Age Group | Smoking Group | N     | %     | Ever Quit (N) | Ever Quit % | Mean Yrs Quit | Short Term (n) | Short Term % |
| 25                                           | 20-24     | Never Any     | 0     | .     |               |             |               |                |              |
| 25                                           | 20-24     | CC            | 0     | .     | 0             | .           |               |                |              |
| 25                                           | 20-24     | Ecig          | 0     | .     |               |             |               |                |              |
| 25                                           | 20-24     | Dual          | 0     | .     |               |             |               |                |              |
| 25                                           | 20-24     | Former        | 0     | .     |               |             | .             | 0              | .            |
| Year of Follow-up: 2015, Age Group: 25-29    |           |               |       |       |               |             |               |                |              |
| Period                                       | Age Group | Smoking Group | N     | %     | Ever Quit (N) | Ever Quit % | Mean Yrs Quit | Short Term (n) | Short Term % |
| 25                                           | 25-29     | Never Any     | 0     | .     |               |             |               |                |              |
| 25                                           | 25-29     | CC            | 0     | .     | 0             | .           |               |                |              |
| 25                                           | 25-29     | Ecig          | 0     | .     |               |             |               |                |              |
| 25                                           | 25-29     | Dual          | 0     | .     |               |             |               |                |              |
| 25                                           | 25-29     | Former        | 0     | .     |               |             | .             | 0              | .            |
| Year of Follow-up: 2015, Age Group: 30-34    |           |               |       |       |               |             |               |                |              |
| Period                                       | Age Group | Smoking Group | N     | %     | Ever Quit (N) | Ever Quit % | Mean Yrs Quit | Short Term (n) | Short Term % |
| 25                                           | 30-34     | Never Any     | 0     | .     |               |             |               |                |              |
| 25                                           | 30-34     | CC            | 0     | .     | 0             | .           |               |                |              |
| 25                                           | 30-34     | Ecig          | 0     | .     |               |             |               |                |              |
| 25                                           | 30-34     | Dual          | 0     | .     |               |             |               |                |              |
| 25                                           | 30-34     | Former        | 0     | .     |               |             | .             | 0              | .            |
| Year of Follow-up: 2015, Age Group: 35-39    |           |               |       |       |               |             |               |                |              |
| Period                                       | Age Group | Smoking Group | N     | %     | Ever Quit (N) | Ever Quit % | Mean Yrs Quit | Short Term (n) | Short Term % |
| 25                                           | 35-39     | Never Any     | 4726  | 59.60 |               |             |               |                |              |
| 25                                           | 35-39     | CC            | 20    | 0.25  | 0             | 0.00        |               |                |              |
| 25                                           | 35-39     | Ecig          | 1567  | 19.76 |               |             |               |                |              |
| 25                                           | 35-39     | Dual          | 0     | 0.00  |               |             |               |                |              |
| 25                                           | 35-39     | Former        | 1617  | 20.39 |               |             | 11.52         | 129            | 7.98         |
| Year of Follow-up: 2015, Age Group: 40-44    |           |               |       |       |               |             |               |                |              |
| Period                                       | Age Group | Smoking Group | N     | %     | Ever Quit (N) | Ever Quit % | Mean Yrs Quit | Short Term (n) | Short Term % |
| 25                                           | 40-44     | Never Any     | 5359  | 64.18 |               |             |               |                |              |
| 25                                           | 40-44     | CC            | 33    | 0.40  | 0             | 0.00        |               |                |              |
| 25                                           | 40-44     | Ecig          | 1502  | 17.99 |               |             |               |                |              |
| 25                                           | 40-44     | Dual          | 0     | 0.00  |               |             |               |                |              |

**Results for PHIM for Run 4 (Sensitivity\_Analysis\_1.RTF)**

|                                              |           |               |       |       |               |             |               |                |              |
|----------------------------------------------|-----------|---------------|-------|-------|---------------|-------------|---------------|----------------|--------------|
| 25                                           | 40-44     | Former        | 1456  | 17.44 |               |             | 14.00         | 103            | 7.07         |
| Year of Follow-up: 2015, Age Group: 45-49    |           |               |       |       |               |             |               |                |              |
| Period                                       | Age Group | Smoking Group | N     | %     | Ever Quit (N) | Ever Quit % | Mean Yrs Quit | Short Term (n) | Short Term % |
| 25                                           | 45-49     | Never Any     | 5189  | 59.01 |               |             |               |                |              |
| 25                                           | 45-49     | CC            | 32    | 0.36  | 0             | 0.00        |               |                |              |
| 25                                           | 45-49     | Ecig          | 1627  | 18.50 |               |             |               |                |              |
| 25                                           | 45-49     | Dual          | 0     | 0.00  |               |             |               |                |              |
| 25                                           | 45-49     | Former        | 1945  | 22.12 |               |             | 17.95         | 96             | 4.94         |
| Year of Follow-up: 2015, Age Group: 50-54    |           |               |       |       |               |             |               |                |              |
| Period                                       | Age Group | Smoking Group | N     | %     | Ever Quit (N) | Ever Quit % | Mean Yrs Quit | Short Term (n) | Short Term % |
| 25                                           | 50-54     | Never Any     | 5284  | 52.43 |               |             |               |                |              |
| 25                                           | 50-54     | CC            | 45    | 0.45  | 0             | 0.00        |               |                |              |
| 25                                           | 50-54     | Ecig          | 2059  | 20.43 |               |             |               |                |              |
| 25                                           | 50-54     | Dual          | 0     | 0.00  |               |             |               |                |              |
| 25                                           | 50-54     | Former        | 2690  | 26.69 |               |             | 20.17         | 150            | 5.58         |
| Year of Follow-up: 2015, Age Group: 55-59    |           |               |       |       |               |             |               |                |              |
| Period                                       | Age Group | Smoking Group | N     | %     | Ever Quit (N) | Ever Quit % | Mean Yrs Quit | Short Term (n) | Short Term % |
| 25                                           | 55-59     | Never Any     | 5278  | 50.27 |               |             |               |                |              |
| 25                                           | 55-59     | CC            | 37    | 0.35  | 0             | 0.00        |               |                |              |
| 25                                           | 55-59     | Ecig          | 1773  | 16.89 |               |             |               |                |              |
| 25                                           | 55-59     | Dual          | 0     | 0.00  |               |             |               |                |              |
| 25                                           | 55-59     | Former        | 3411  | 32.49 |               |             | 20.84         | 140            | 4.10         |
| Year of Follow-up: 2015, Age Group: 60-64    |           |               |       |       |               |             |               |                |              |
| Period                                       | Age Group | Smoking Group | N     | %     | Ever Quit (N) | Ever Quit % | Mean Yrs Quit | Short Term (n) | Short Term % |
| 25                                           | 60-64     | Never Any     | 5018  | 52.27 |               |             |               |                |              |
| 25                                           | 60-64     | CC            | 42    | 0.44  | 0             | 0.00        |               |                |              |
| 25                                           | 60-64     | Ecig          | 1154  | 12.02 |               |             |               |                |              |
| 25                                           | 60-64     | Dual          | 0     | 0.00  |               |             |               |                |              |
| 25                                           | 60-64     | Former        | 3386  | 35.27 |               |             | 23.56         | 144            | 4.25         |
| Year of Follow-up: 2015, Age Group: 65-69    |           |               |       |       |               |             |               |                |              |
| Period                                       | Age Group | Smoking Group | N     | %     | Ever Quit (N) | Ever Quit % | Mean Yrs Quit | Short Term (n) | Short Term % |
| 25                                           | 65-69     | Never Any     | 4356  | 51.27 |               |             |               |                |              |
| 25                                           | 65-69     | CC            | 41    | 0.48  | 0             | 0.00        |               |                |              |
| 25                                           | 65-69     | Ecig          | 844   | 9.93  |               |             |               |                |              |
| 25                                           | 65-69     | Dual          | 0     | 0.00  |               |             |               |                |              |
| 25                                           | 65-69     | Former        | 3256  | 38.32 |               |             | 23.12         | 70             | 2.15         |
| Year of Follow-up: 2015, Age Group: 70-74    |           |               |       |       |               |             |               |                |              |
| Period                                       | Age Group | Smoking Group | N     | %     | Ever Quit (N) | Ever Quit % | Mean Yrs Quit | Short Term (n) | Short Term % |
| 25                                           | 70-74     | Never Any     | 3116  | 47.67 |               |             |               |                |              |
| 25                                           | 70-74     | CC            | 31    | 0.47  | 0             | 0.00        |               |                |              |
| 25                                           | 70-74     | Ecig          | 527   | 8.06  |               |             |               |                |              |
| 25                                           | 70-74     | Dual          | 0     | 0.00  |               |             |               |                |              |
| 25                                           | 70-74     | Former        | 2862  | 43.79 |               |             | 26.54         | 42             | 1.47         |
| Year of Follow-up: 2015, Age Group: 75-79    |           |               |       |       |               |             |               |                |              |
| Period                                       | Age Group | Smoking Group | N     | %     | Ever Quit (N) | Ever Quit % | Mean Yrs Quit | Short Term (n) | Short Term % |
| 25                                           | 75-79     | Never Any     | 2684  | 48.50 |               |             |               |                |              |
| 25                                           | 75-79     | CC            | 59    | 1.07  | 0             | 0.00        |               |                |              |
| 25                                           | 75-79     | Ecig          | 385   | 6.96  |               |             |               |                |              |
| 25                                           | 75-79     | Dual          | 0     | 0.00  |               |             |               |                |              |
| 25                                           | 75-79     | Former        | 2406  | 43.48 |               |             | 26.76         | 40             | 1.66         |
| Year of Follow-up: 2020, Age Group: All Ages |           |               |       |       |               |             |               |                |              |
| Period                                       | Age Group | Smoking Group | N     | %     | Ever Quit (N) | Ever Quit % | Mean Yrs Quit | Short Term (n) | Short Term % |
| 30                                           | All Ages  | Never Any     | 38326 | 54.53 |               |             |               |                |              |
| 30                                           | All Ages  | CC            | 115   | 0.16  | 0             | 0.00        |               |                |              |
| 30                                           | All Ages  | Ecig          | 9272  | 13.19 |               |             |               |                |              |
| 30                                           | All Ages  | Dual          | 0     | 0.00  |               |             |               |                |              |
| 30                                           | All Ages  | Former        | 22570 | 32.11 |               |             | 23.81         | 756            | 3.35         |
| Year of Follow-up: 2020, Age Group: 18-19    |           |               |       |       |               |             |               |                |              |
| Period                                       | Age Group | Smoking Group | N     | %     | Ever Quit (N) | Ever Quit % | Mean Yrs Quit | Short Term (n) | Short Term % |
| 30                                           | 18-19     | Never Any     | 0     | .     |               |             |               |                |              |
| 30                                           | 18-19     | CC            | 0     | .     | 0             | .           |               |                |              |
| 30                                           | 18-19     | Ecig          | 0     | .     |               |             |               |                |              |
| 30                                           | 18-19     | Dual          | 0     | .     |               |             |               |                |              |
| 30                                           | 18-19     | Former        | 0     | .     |               |             | .             | 0              | .            |
| Year of Follow-up: 2020, Age Group: 20-24    |           |               |       |       |               |             |               |                |              |
| Period                                       | Age Group | Smoking Group | N     | %     | Ever Quit (N) | Ever Quit % | Mean Yrs Quit | Short Term (n) | Short Term % |
| 30                                           | 20-24     | Never Any     | 0     | .     |               |             |               |                |              |
| 30                                           | 20-24     | CC            | 0     | .     | 0             | .           |               |                |              |

**Results for PHIM for Run 4 (Sensitivity\_Analysis\_1.RTF)**

| 30                                        | 20-24     | Ecig          | 0    | .     |               |             |               |                |              |
|-------------------------------------------|-----------|---------------|------|-------|---------------|-------------|---------------|----------------|--------------|
| 30                                        | 20-24     | Dual          | 0    | .     |               |             |               |                |              |
| 30                                        | 20-24     | Former        | 0    | .     |               |             | 0             | .              |              |
| Year of Follow-up: 2020, Age Group: 25-29 |           |               |      |       |               |             |               |                |              |
| Period                                    | Age Group | Smoking Group | N    | %     | Ever Quit (N) | Ever Quit % | Mean Yrs Quit | Short Term (n) | Short Term % |
| 30                                        | 25-29     | Never Any     | 0    | .     |               |             |               |                |              |
| 30                                        | 25-29     | CC            | 0    | .     | 0             | .           |               |                |              |
| 30                                        | 25-29     | Ecig          | 0    | .     |               |             |               |                |              |
| 30                                        | 25-29     | Dual          | 0    | .     |               |             |               |                |              |
| 30                                        | 25-29     | Former        | 0    | .     |               |             | 0             | .              |              |
| Year of Follow-up: 2020, Age Group: 30-34 |           |               |      |       |               |             |               |                |              |
| Period                                    | Age Group | Smoking Group | N    | %     | Ever Quit (N) | Ever Quit % | Mean Yrs Quit | Short Term (n) | Short Term % |
| 30                                        | 30-34     | Never Any     | 0    | .     |               |             |               |                |              |
| 30                                        | 30-34     | CC            | 0    | .     | 0             | .           |               |                |              |
| 30                                        | 30-34     | Ecig          | 0    | .     |               |             |               |                |              |
| 30                                        | 30-34     | Dual          | 0    | .     |               |             |               |                |              |
| 30                                        | 30-34     | Former        | 0    | .     |               |             | 0             | .              |              |
| Year of Follow-up: 2020, Age Group: 35-39 |           |               |      |       |               |             |               |                |              |
| Period                                    | Age Group | Smoking Group | N    | %     | Ever Quit (N) | Ever Quit % | Mean Yrs Quit | Short Term (n) | Short Term % |
| 30                                        | 35-39     | Never Any     | 0    | .     |               |             |               |                |              |
| 30                                        | 35-39     | CC            | 0    | .     | 0             | .           |               |                |              |
| 30                                        | 35-39     | Ecig          | 0    | .     |               |             |               |                |              |
| 30                                        | 35-39     | Dual          | 0    | .     |               |             |               |                |              |
| 30                                        | 35-39     | Former        | 0    | .     |               |             | 0             | .              |              |
| Year of Follow-up: 2020, Age Group: 40-44 |           |               |      |       |               |             |               |                |              |
| Period                                    | Age Group | Smoking Group | N    | %     | Ever Quit (N) | Ever Quit % | Mean Yrs Quit | Short Term (n) | Short Term % |
| 30                                        | 40-44     | Never Any     | 4726 | 59.60 |               |             |               |                |              |
| 30                                        | 40-44     | CC            | 6    | 0.08  | 0             | 0.00        |               |                |              |
| 30                                        | 40-44     | Ecig          | 1345 | 16.96 |               |             |               |                |              |
| 30                                        | 40-44     | Dual          | 0    | 0.00  |               |             |               |                |              |
| 30                                        | 40-44     | Former        | 1853 | 23.37 |               |             | 14.68         | 82             | 4.43         |
| Year of Follow-up: 2020, Age Group: 45-49 |           |               |      |       |               |             |               |                |              |
| Period                                    | Age Group | Smoking Group | N    | %     | Ever Quit (N) | Ever Quit % | Mean Yrs Quit | Short Term (n) | Short Term % |
| 30                                        | 45-49     | Never Any     | 5359 | 64.18 |               |             |               |                |              |
| 30                                        | 45-49     | CC            | 13   | 0.16  | 0             | 0.00        |               |                |              |
| 30                                        | 45-49     | Ecig          | 1317 | 15.77 |               |             |               |                |              |
| 30                                        | 45-49     | Dual          | 0    | 0.00  |               |             |               |                |              |
| 30                                        | 45-49     | Former        | 1661 | 19.89 |               |             | 16.93         | 71             | 4.27         |
| Year of Follow-up: 2020, Age Group: 50-54 |           |               |      |       |               |             |               |                |              |
| Period                                    | Age Group | Smoking Group | N    | %     | Ever Quit (N) | Ever Quit % | Mean Yrs Quit | Short Term (n) | Short Term % |
| 30                                        | 50-54     | Never Any     | 5189 | 59.01 |               |             |               |                |              |
| 30                                        | 50-54     | CC            | 9    | 0.10  | 0             | 0.00        |               |                |              |
| 30                                        | 50-54     | Ecig          | 1395 | 15.86 |               |             |               |                |              |
| 30                                        | 50-54     | Dual          | 0    | 0.00  |               |             |               |                |              |
| 30                                        | 50-54     | Former        | 2200 | 25.02 |               |             | 20.50         | 121            | 5.50         |
| Year of Follow-up: 2020, Age Group: 55-59 |           |               |      |       |               |             |               |                |              |
| Period                                    | Age Group | Smoking Group | N    | %     | Ever Quit (N) | Ever Quit % | Mean Yrs Quit | Short Term (n) | Short Term % |
| 30                                        | 55-59     | Never Any     | 5284 | 52.43 |               |             |               |                |              |
| 30                                        | 55-59     | CC            | 14   | 0.14  | 0             | 0.00        |               |                |              |
| 30                                        | 55-59     | Ecig          | 1708 | 16.95 |               |             |               |                |              |
| 30                                        | 55-59     | Dual          | 0    | 0.00  |               |             |               |                |              |
| 30                                        | 55-59     | Former        | 3072 | 30.48 |               |             | 22.30         | 140            | 4.56         |
| Year of Follow-up: 2020, Age Group: 60-64 |           |               |      |       |               |             |               |                |              |
| Period                                    | Age Group | Smoking Group | N    | %     | Ever Quit (N) | Ever Quit % | Mean Yrs Quit | Short Term (n) | Short Term % |
| 30                                        | 60-64     | Never Any     | 5278 | 50.27 |               |             |               |                |              |
| 30                                        | 60-64     | CC            | 15   | 0.14  | 0             | 0.00        |               |                |              |
| 30                                        | 60-64     | Ecig          | 1428 | 13.60 |               |             |               |                |              |
| 30                                        | 60-64     | Dual          | 0    | 0.00  |               |             |               |                |              |
| 30                                        | 60-64     | Former        | 3778 | 35.98 |               |             | 23.52         | 153            | 4.05         |
| Year of Follow-up: 2020, Age Group: 65-69 |           |               |      |       |               |             |               |                |              |
| Period                                    | Age Group | Smoking Group | N    | %     | Ever Quit (N) | Ever Quit % | Mean Yrs Quit | Short Term (n) | Short Term % |
| 30                                        | 65-69     | Never Any     | 5018 | 52.27 |               |             |               |                |              |
| 30                                        | 65-69     | CC            | 18   | 0.19  | 0             | 0.00        |               |                |              |
| 30                                        | 65-69     | Ecig          | 917  | 9.55  |               |             |               |                |              |
| 30                                        | 65-69     | Dual          | 0    | 0.00  |               |             |               |                |              |
| 30                                        | 65-69     | Former        | 3647 | 37.99 |               |             | 26.68         | 75             | 2.06         |
| Year of Follow-up: 2020, Age Group: 70-74 |           |               |      |       |               |             |               |                |              |
| Period                                    | Age Group | Smoking Group | N    | %     | Ever Quit (N) | Ever Quit % | Mean Yrs Quit | Short Term (n) | Short Term % |

**Results for PHIM for Run 4 (Sensitivity\_Analysis\_1.RTF)**

|                                              |           |               |       |       |               |             |               |                |              |
|----------------------------------------------|-----------|---------------|-------|-------|---------------|-------------|---------------|----------------|--------------|
| 30                                           | 70-74     | Never Any     | 4356  | 51.27 |               |             |               |                |              |
| 30                                           | 70-74     | CC            | 22    | 0.26  | 0             | 0.00        |               |                |              |
| 30                                           | 70-74     | Ecig          | 727   | 8.56  |               |             |               |                |              |
| 30                                           | 70-74     | Dual          | 0     | 0.00  |               |             |               |                |              |
| 30                                           | 70-74     | Former        | 3392  | 39.92 |               |             | 27.06         | 66             | 1.95         |
| Year of Follow-up: 2020, Age Group: 75-79    |           |               |       |       |               |             |               |                |              |
| Period                                       | Age Group | Smoking Group | N     | %     | Ever Quit (N) | Ever Quit % | Mean Yrs Quit | Short Term (n) | Short Term % |
| 30                                           | 75-79     | Never Any     | 3116  | 47.67 |               |             |               |                |              |
| 30                                           | 75-79     | CC            | 18    | 0.28  | 0             | 0.00        |               |                |              |
| 30                                           | 75-79     | Ecig          | 435   | 6.66  |               |             |               |                |              |
| 30                                           | 75-79     | Dual          | 0     | 0.00  |               |             |               |                |              |
| 30                                           | 75-79     | Former        | 2967  | 45.39 |               |             | 30.49         | 48             | 1.62         |
| Year of Follow-up: 2025, Age Group: All Ages |           |               |       |       |               |             |               |                |              |
| Period                                       | Age Group | Smoking Group | N     | %     | Ever Quit (N) | Ever Quit % | Mean Yrs Quit | Short Term (n) | Short Term % |
| 35                                           | All Ages  | Never Any     | 35210 | 55.23 |               |             |               |                |              |
| 35                                           | All Ages  | CC            | 47    | 0.07  | 0             | 0.00        |               |                |              |
| 35                                           | All Ages  | Ecig          | 7305  | 11.46 |               |             |               |                |              |
| 35                                           | All Ages  | Dual          | 0     | 0.00  |               |             |               |                |              |
| 35                                           | All Ages  | Former        | 21185 | 33.23 |               |             | 25.87         | 616            | 2.91         |
| Year of Follow-up: 2025, Age Group: 18-19    |           |               |       |       |               |             |               |                |              |
| Period                                       | Age Group | Smoking Group | N     | %     | Ever Quit (N) | Ever Quit % | Mean Yrs Quit | Short Term (n) | Short Term % |
| 35                                           | 18-19     | Never Any     | 0     | .     |               |             |               |                |              |
| 35                                           | 18-19     | CC            | 0     | .     | 0             | .           |               |                |              |
| 35                                           | 18-19     | Ecig          | 0     | .     |               |             |               |                |              |
| 35                                           | 18-19     | Dual          | 0     | .     |               |             |               |                |              |
| 35                                           | 18-19     | Former        | 0     | .     |               |             | .             | 0              | .            |
| Year of Follow-up: 2025, Age Group: 20-24    |           |               |       |       |               |             |               |                |              |
| Period                                       | Age Group | Smoking Group | N     | %     | Ever Quit (N) | Ever Quit % | Mean Yrs Quit | Short Term (n) | Short Term % |
| 35                                           | 20-24     | Never Any     | 0     | .     |               |             |               |                |              |
| 35                                           | 20-24     | CC            | 0     | .     | 0             | .           |               |                |              |
| 35                                           | 20-24     | Ecig          | 0     | .     |               |             |               |                |              |
| 35                                           | 20-24     | Dual          | 0     | .     |               |             |               |                |              |
| 35                                           | 20-24     | Former        | 0     | .     |               |             | .             | 0              | .            |
| Year of Follow-up: 2025, Age Group: 25-29    |           |               |       |       |               |             |               |                |              |
| Period                                       | Age Group | Smoking Group | N     | %     | Ever Quit (N) | Ever Quit % | Mean Yrs Quit | Short Term (n) | Short Term % |
| 35                                           | 25-29     | Never Any     | 0     | .     |               |             |               |                |              |
| 35                                           | 25-29     | CC            | 0     | .     | 0             | .           |               |                |              |
| 35                                           | 25-29     | Ecig          | 0     | .     |               |             |               |                |              |
| 35                                           | 25-29     | Dual          | 0     | .     |               |             |               |                |              |
| 35                                           | 25-29     | Former        | 0     | .     |               |             | .             | 0              | .            |
| Year of Follow-up: 2025, Age Group: 30-34    |           |               |       |       |               |             |               |                |              |
| Period                                       | Age Group | Smoking Group | N     | %     | Ever Quit (N) | Ever Quit % | Mean Yrs Quit | Short Term (n) | Short Term % |
| 35                                           | 30-34     | Never Any     | 0     | .     |               |             |               |                |              |
| 35                                           | 30-34     | CC            | 0     | .     | 0             | .           |               |                |              |
| 35                                           | 30-34     | Ecig          | 0     | .     |               |             |               |                |              |
| 35                                           | 30-34     | Dual          | 0     | .     |               |             |               |                |              |
| 35                                           | 30-34     | Former        | 0     | .     |               |             | .             | 0              | .            |
| Year of Follow-up: 2025, Age Group: 35-39    |           |               |       |       |               |             |               |                |              |
| Period                                       | Age Group | Smoking Group | N     | %     | Ever Quit (N) | Ever Quit % | Mean Yrs Quit | Short Term (n) | Short Term % |
| 35                                           | 35-39     | Never Any     | 0     | .     |               |             |               |                |              |
| 35                                           | 35-39     | CC            | 0     | .     | 0             | .           |               |                |              |
| 35                                           | 35-39     | Ecig          | 0     | .     |               |             |               |                |              |
| 35                                           | 35-39     | Dual          | 0     | .     |               |             |               |                |              |
| 35                                           | 35-39     | Former        | 0     | .     |               |             | .             | 0              | .            |
| Year of Follow-up: 2025, Age Group: 40-44    |           |               |       |       |               |             |               |                |              |
| Period                                       | Age Group | Smoking Group | N     | %     | Ever Quit (N) | Ever Quit % | Mean Yrs Quit | Short Term (n) | Short Term % |
| 35                                           | 40-44     | Never Any     | 0     | .     |               |             |               |                |              |
| 35                                           | 40-44     | CC            | 0     | .     | 0             | .           |               |                |              |
| 35                                           | 40-44     | Ecig          | 0     | .     |               |             |               |                |              |
| 35                                           | 40-44     | Dual          | 0     | .     |               |             |               |                |              |
| 35                                           | 40-44     | Former        | 0     | .     |               |             | .             | 0              | .            |
| Year of Follow-up: 2025, Age Group: 45-49    |           |               |       |       |               |             |               |                |              |
| Period                                       | Age Group | Smoking Group | N     | %     | Ever Quit (N) | Ever Quit % | Mean Yrs Quit | Short Term (n) | Short Term % |
| 35                                           | 45-49     | Never Any     | 4726  | 59.60 |               |             |               |                |              |
| 35                                           | 45-49     | CC            | 1     | 0.01  | 0             | 0.00        |               |                |              |
| 35                                           | 45-49     | Ecig          | 1146  | 14.45 |               |             |               |                |              |
| 35                                           | 45-49     | Dual          | 0     | 0.00  |               |             |               |                |              |
| 35                                           | 45-49     | Former        | 2057  | 25.94 |               |             | 17.95         | 74             | 3.60         |
| Year of Follow-up: 2025, Age Group: 50-54    |           |               |       |       |               |             |               |                |              |

**Results for PHIM for Run 4 (Sensitivity\_Analysis\_1.RTF)**

| Period                                       | Age Group | Smoking Group | N     | %     | Ever Quit (N) | Ever Quit % | Mean Yrs Quit | Short Term (n) | Short Term % |
|----------------------------------------------|-----------|---------------|-------|-------|---------------|-------------|---------------|----------------|--------------|
| 35                                           | 50-54     | Never Any     | 5359  | 64.18 |               |             |               |                |              |
| 35                                           | 50-54     | CC            | 3     | 0.04  | 0             | 0.00        |               |                |              |
| 35                                           | 50-54     | Ecig          | 1112  | 13.32 |               |             |               |                |              |
| 35                                           | 50-54     | Dual          | 0     | 0.00  |               |             |               |                |              |
| 35                                           | 50-54     | Former        | 1876  | 22.47 |               |             | 19.62         | 104            | 5.54         |
| Year of Follow-up: 2025, Age Group: 55-59    |           |               |       |       |               |             |               |                |              |
| Period                                       | Age Group | Smoking Group | N     | %     | Ever Quit (N) | Ever Quit % | Mean Yrs Quit | Short Term (n) | Short Term % |
| 35                                           | 55-59     | Never Any     | 5189  | 59.01 |               |             |               |                |              |
| 35                                           | 55-59     | CC            | 4     | 0.05  | 0             | 0.00        |               |                |              |
| 35                                           | 55-59     | Ecig          | 1153  | 13.11 |               |             |               |                |              |
| 35                                           | 55-59     | Dual          | 0     | 0.00  |               |             |               |                |              |
| 35                                           | 55-59     | Former        | 2447  | 27.83 |               |             | 23.13         | 98             | 4.00         |
| Year of Follow-up: 2025, Age Group: 60-64    |           |               |       |       |               |             |               |                |              |
| Period                                       | Age Group | Smoking Group | N     | %     | Ever Quit (N) | Ever Quit % | Mean Yrs Quit | Short Term (n) | Short Term % |
| 35                                           | 60-64     | Never Any     | 5284  | 52.43 |               |             |               |                |              |
| 35                                           | 60-64     | CC            | 7     | 0.07  | 0             | 0.00        |               |                |              |
| 35                                           | 60-64     | Ecig          | 1378  | 13.67 |               |             |               |                |              |
| 35                                           | 60-64     | Dual          | 0     | 0.00  |               |             |               |                |              |
| 35                                           | 60-64     | Former        | 3409  | 33.83 |               |             | 24.79         | 139            | 4.08         |
| Year of Follow-up: 2025, Age Group: 65-69    |           |               |       |       |               |             |               |                |              |
| Period                                       | Age Group | Smoking Group | N     | %     | Ever Quit (N) | Ever Quit % | Mean Yrs Quit | Short Term (n) | Short Term % |
| 35                                           | 65-69     | Never Any     | 5278  | 50.27 |               |             |               |                |              |
| 35                                           | 65-69     | CC            | 7     | 0.07  | 0             | 0.00        |               |                |              |
| 35                                           | 65-69     | Ecig          | 1139  | 10.85 |               |             |               |                |              |
| 35                                           | 65-69     | Dual          | 0     | 0.00  |               |             |               |                |              |
| 35                                           | 65-69     | Former        | 4075  | 38.81 |               |             | 26.61         | 83             | 2.04         |
| Year of Follow-up: 2025, Age Group: 70-74    |           |               |       |       |               |             |               |                |              |
| Period                                       | Age Group | Smoking Group | N     | %     | Ever Quit (N) | Ever Quit % | Mean Yrs Quit | Short Term (n) | Short Term % |
| 35                                           | 70-74     | Never Any     | 5018  | 52.27 |               |             |               |                |              |
| 35                                           | 70-74     | CC            | 11    | 0.11  | 0             | 0.00        |               |                |              |
| 35                                           | 70-74     | Ecig          | 789   | 8.22  |               |             |               |                |              |
| 35                                           | 70-74     | Dual          | 0     | 0.00  |               |             |               |                |              |
| 35                                           | 70-74     | Former        | 3782  | 39.40 |               |             | 30.61         | 65             | 1.72         |
| Year of Follow-up: 2025, Age Group: 75-79    |           |               |       |       |               |             |               |                |              |
| Period                                       | Age Group | Smoking Group | N     | %     | Ever Quit (N) | Ever Quit % | Mean Yrs Quit | Short Term (n) | Short Term % |
| 35                                           | 75-79     | Never Any     | 4356  | 51.27 |               |             |               |                |              |
| 35                                           | 75-79     | CC            | 14    | 0.16  | 0             | 0.00        |               |                |              |
| 35                                           | 75-79     | Ecig          | 588   | 6.92  |               |             |               |                |              |
| 35                                           | 75-79     | Dual          | 0     | 0.00  |               |             |               |                |              |
| 35                                           | 75-79     | Former        | 3539  | 41.65 |               |             | 30.81         | 53             | 1.50         |
| Year of Follow-up: 2030, Age Group: All Ages |           |               |       |       |               |             |               |                |              |
| Period                                       | Age Group | Smoking Group | N     | %     | Ever Quit (N) | Ever Quit % | Mean Yrs Quit | Short Term (n) | Short Term % |
| 40                                           | All Ages  | Never Any     | 30854 | 55.84 |               |             |               |                |              |
| 40                                           | All Ages  | CC            | 14    | 0.03  | 0             | 0.00        |               |                |              |
| 40                                           | All Ages  | Ecig          | 5391  | 9.76  |               |             |               |                |              |
| 40                                           | All Ages  | Dual          | 0     | 0.00  |               |             |               |                |              |
| 40                                           | All Ages  | Former        | 18991 | 34.37 |               |             | 27.90         | 543            | 2.86         |
| Year of Follow-up: 2030, Age Group: 18-19    |           |               |       |       |               |             |               |                |              |
| Period                                       | Age Group | Smoking Group | N     | %     | Ever Quit (N) | Ever Quit % | Mean Yrs Quit | Short Term (n) | Short Term % |
| 40                                           | 18-19     | Never Any     | 0     | .     |               |             |               |                |              |
| 40                                           | 18-19     | CC            | 0     | .     | 0             | .           |               |                |              |
| 40                                           | 18-19     | Ecig          | 0     | .     |               |             |               |                |              |
| 40                                           | 18-19     | Dual          | 0     | .     |               |             |               |                |              |
| 40                                           | 18-19     | Former        | 0     | .     |               |             | .             | 0              | .            |
| Year of Follow-up: 2030, Age Group: 20-24    |           |               |       |       |               |             |               |                |              |
| Period                                       | Age Group | Smoking Group | N     | %     | Ever Quit (N) | Ever Quit % | Mean Yrs Quit | Short Term (n) | Short Term % |
| 40                                           | 20-24     | Never Any     | 0     | .     |               |             |               |                |              |
| 40                                           | 20-24     | CC            | 0     | .     | 0             | .           |               |                |              |
| 40                                           | 20-24     | Ecig          | 0     | .     |               |             |               |                |              |
| 40                                           | 20-24     | Dual          | 0     | .     |               |             |               |                |              |
| 40                                           | 20-24     | Former        | 0     | .     |               |             | .             | 0              | .            |
| Year of Follow-up: 2030, Age Group: 25-29    |           |               |       |       |               |             |               |                |              |
| Period                                       | Age Group | Smoking Group | N     | %     | Ever Quit (N) | Ever Quit % | Mean Yrs Quit | Short Term (n) | Short Term % |
| 40                                           | 25-29     | Never Any     | 0     | .     |               |             |               |                |              |
| 40                                           | 25-29     | CC            | 0     | .     | 0             | .           |               |                |              |
| 40                                           | 25-29     | Ecig          | 0     | .     |               |             |               |                |              |
| 40                                           | 25-29     | Dual          | 0     | .     |               |             |               |                |              |

**Results for PHIM for Run 4 (Sensitivity\_Analysis\_1.RTF)**

| Year of Follow-up: 2030, Age Group: 30-34 | Period | Age Group | Smoking Group | N    | %     | Ever Quit (N) | Ever Quit % | Mean Yrs Quit | Short Term (n) | Short Term % |
|-------------------------------------------|--------|-----------|---------------|------|-------|---------------|-------------|---------------|----------------|--------------|
| 40                                        | 25-29  | Former    |               | 0    | .     |               |             |               | 0              | .            |
| 40                                        | 30-34  | Never Any |               | 0    | .     |               |             |               |                |              |
| 40                                        | 30-34  | CC        |               | 0    | .     | 0             | .           |               |                |              |
| 40                                        | 30-34  | Ecig      |               | 0    | .     |               |             |               |                |              |
| 40                                        | 30-34  | Dual      |               | 0    | .     |               |             |               |                |              |
| 40                                        | 30-34  | Former    |               | 0    | .     |               |             |               | 0              | .            |
| Year of Follow-up: 2030, Age Group: 35-39 | Period | Age Group | Smoking Group | N    | %     | Ever Quit (N) | Ever Quit % | Mean Yrs Quit | Short Term (n) | Short Term % |
| 40                                        | 35-39  | Never Any |               | 0    | .     |               |             |               |                |              |
| 40                                        | 35-39  | CC        |               | 0    | .     | 0             | .           |               |                |              |
| 40                                        | 35-39  | Ecig      |               | 0    | .     |               |             |               |                |              |
| 40                                        | 35-39  | Dual      |               | 0    | .     |               |             |               |                |              |
| 40                                        | 35-39  | Former    |               | 0    | .     |               |             |               | 0              | .            |
| Year of Follow-up: 2030, Age Group: 40-44 | Period | Age Group | Smoking Group | N    | %     | Ever Quit (N) | Ever Quit % | Mean Yrs Quit | Short Term (n) | Short Term % |
| 40                                        | 40-44  | Never Any |               | 0    | .     |               |             |               |                |              |
| 40                                        | 40-44  | CC        |               | 0    | .     | 0             | .           |               |                |              |
| 40                                        | 40-44  | Ecig      |               | 0    | .     |               |             |               |                |              |
| 40                                        | 40-44  | Dual      |               | 0    | .     |               |             |               |                |              |
| 40                                        | 40-44  | Former    |               | 0    | .     |               |             |               | 0              | .            |
| Year of Follow-up: 2030, Age Group: 45-49 | Period | Age Group | Smoking Group | N    | %     | Ever Quit (N) | Ever Quit % | Mean Yrs Quit | Short Term (n) | Short Term % |
| 40                                        | 45-49  | Never Any |               | 0    | .     |               |             |               |                |              |
| 40                                        | 45-49  | CC        |               | 0    | .     | 0             | .           |               |                |              |
| 40                                        | 45-49  | Ecig      |               | 0    | .     |               |             |               |                |              |
| 40                                        | 45-49  | Dual      |               | 0    | .     |               |             |               |                |              |
| 40                                        | 45-49  | Former    |               | 0    | .     |               |             |               | 0              | .            |
| Year of Follow-up: 2030, Age Group: 50-54 | Period | Age Group | Smoking Group | N    | %     | Ever Quit (N) | Ever Quit % | Mean Yrs Quit | Short Term (n) | Short Term % |
| 40                                        | 50-54  | Never Any |               | 4726 | 59.60 |               |             |               |                |              |
| 40                                        | 50-54  | CC        |               | 0    | 0.00  | 0             | 0.00        |               |                |              |
| 40                                        | 50-54  | Ecig      |               | 959  | 12.09 |               |             |               |                |              |
| 40                                        | 50-54  | Dual      |               | 0    | 0.00  |               |             |               |                |              |
| 40                                        | 50-54  | Former    |               | 2245 | 28.31 |               |             | 21.16         | 100            | 4.45         |
| Year of Follow-up: 2030, Age Group: 55-59 | Period | Age Group | Smoking Group | N    | %     | Ever Quit (N) | Ever Quit % | Mean Yrs Quit | Short Term (n) | Short Term % |
| 40                                        | 55-59  | Never Any |               | 5359 | 64.18 |               |             |               |                |              |
| 40                                        | 55-59  | CC        |               | 0    | 0.00  | 0             | 0.00        |               |                |              |
| 40                                        | 55-59  | Ecig      |               | 897  | 10.74 |               |             |               |                |              |
| 40                                        | 55-59  | Dual      |               | 0    | 0.00  |               |             |               |                |              |
| 40                                        | 55-59  | Former    |               | 2094 | 25.08 |               |             | 22.27         | 80             | 3.82         |
| Year of Follow-up: 2030, Age Group: 60-64 | Period | Age Group | Smoking Group | N    | %     | Ever Quit (N) | Ever Quit % | Mean Yrs Quit | Short Term (n) | Short Term % |
| 40                                        | 60-64  | Never Any |               | 5189 | 59.01 |               |             |               |                |              |
| 40                                        | 60-64  | CC        |               | 3    | 0.03  | 0             | 0.00        |               |                |              |
| 40                                        | 60-64  | Ecig      |               | 886  | 10.08 |               |             |               |                |              |
| 40                                        | 60-64  | Dual      |               | 0    | 0.00  |               |             |               |                |              |
| 40                                        | 60-64  | Former    |               | 2715 | 30.88 |               |             | 25.52         | 128            | 4.71         |
| Year of Follow-up: 2030, Age Group: 65-69 | Period | Age Group | Smoking Group | N    | %     | Ever Quit (N) | Ever Quit % | Mean Yrs Quit | Short Term (n) | Short Term % |
| 40                                        | 65-69  | Never Any |               | 5284 | 52.43 |               |             |               |                |              |
| 40                                        | 65-69  | CC        |               | 3    | 0.03  | 0             | 0.00        |               |                |              |
| 40                                        | 65-69  | Ecig      |               | 1080 | 10.72 |               |             |               |                |              |
| 40                                        | 65-69  | Dual      |               | 0    | 0.00  |               |             |               |                |              |
| 40                                        | 65-69  | Former    |               | 3711 | 36.82 |               |             | 27.57         | 73             | 1.97         |
| Year of Follow-up: 2030, Age Group: 70-74 | Period | Age Group | Smoking Group | N    | %     | Ever Quit (N) | Ever Quit % | Mean Yrs Quit | Short Term (n) | Short Term % |
| 40                                        | 70-74  | Never Any |               | 5278 | 50.27 |               |             |               |                |              |
| 40                                        | 70-74  | CC        |               | 4    | 0.04  | 0             | 0.00        |               |                |              |
| 40                                        | 70-74  | Ecig      |               | 957  | 9.12  |               |             |               |                |              |
| 40                                        | 70-74  | Dual      |               | 0    | 0.00  |               |             |               |                |              |
| 40                                        | 70-74  | Former    |               | 4260 | 40.58 |               |             | 30.32         | 86             | 2.02         |
| Year of Follow-up: 2030, Age Group: 75-79 | Period | Age Group | Smoking Group | N    | %     | Ever Quit (N) | Ever Quit % | Mean Yrs Quit | Short Term (n) | Short Term % |
| 40                                        | 75-79  | Never Any |               | 5018 | 52.27 |               |             |               |                |              |
| 40                                        | 75-79  | CC        |               | 4    | 0.04  | 0             | 0.00        |               |                |              |

**Results for PHIM for Run 4 (Sensitivity\_Analysis\_1.RTF)**

|                                              |           |               |       |       |               |             |               |                |              |
|----------------------------------------------|-----------|---------------|-------|-------|---------------|-------------|---------------|----------------|--------------|
| 40                                           | 75-79     | Ecig          | 612   | 6.38  |               |             |               |                |              |
| 40                                           | 75-79     | Dual          | 0     | 0.00  |               |             |               |                |              |
| 40                                           | 75-79     | Former        | 3966  | 41.31 |               |             | 34.05         | 76             | 1.92         |
| Year of Follow-up: 2035, Age Group: All Ages |           |               |       |       |               |             |               |                |              |
| Period                                       | Age Group | Smoking Group | N     | %     | Ever Quit (N) | Ever Quit % | Mean Yrs Quit | Short Term (n) | Short Term % |
| 45                                           | All Ages  | Never Any     | 25836 | 56.60 |               |             |               |                |              |
| 45                                           | All Ages  | CC            | 5     | 0.01  | 0             | 0.00        |               |                |              |
| 45                                           | All Ages  | Ecig          | 3886  | 8.51  |               |             |               |                |              |
| 45                                           | All Ages  | Dual          | 0     | 0.00  |               |             |               |                |              |
| 45                                           | All Ages  | Former        | 15923 | 34.88 |               |             | 29.63         | 351            | 2.20         |
| Year of Follow-up: 2035, Age Group: 18-19    |           |               |       |       |               |             |               |                |              |
| Period                                       | Age Group | Smoking Group | N     | %     | Ever Quit (N) | Ever Quit % | Mean Yrs Quit | Short Term (n) | Short Term % |
| 45                                           | 18-19     | Never Any     | 0     | .     |               |             |               |                |              |
| 45                                           | 18-19     | CC            | 0     | .     | 0             | .           |               |                |              |
| 45                                           | 18-19     | Ecig          | 0     | .     |               |             |               |                |              |
| 45                                           | 18-19     | Dual          | 0     | .     |               |             |               |                |              |
| 45                                           | 18-19     | Former        | 0     | .     |               |             | .             | 0              | .            |
| Year of Follow-up: 2035, Age Group: 20-24    |           |               |       |       |               |             |               |                |              |
| Period                                       | Age Group | Smoking Group | N     | %     | Ever Quit (N) | Ever Quit % | Mean Yrs Quit | Short Term (n) | Short Term % |
| 45                                           | 20-24     | Never Any     | 0     | .     |               |             |               |                |              |
| 45                                           | 20-24     | CC            | 0     | .     | 0             | .           |               |                |              |
| 45                                           | 20-24     | Ecig          | 0     | .     |               |             |               |                |              |
| 45                                           | 20-24     | Dual          | 0     | .     |               |             |               |                |              |
| 45                                           | 20-24     | Former        | 0     | .     |               |             | .             | 0              | .            |
| Year of Follow-up: 2035, Age Group: 25-29    |           |               |       |       |               |             |               |                |              |
| Period                                       | Age Group | Smoking Group | N     | %     | Ever Quit (N) | Ever Quit % | Mean Yrs Quit | Short Term (n) | Short Term % |
| 45                                           | 25-29     | Never Any     | 0     | .     |               |             |               |                |              |
| 45                                           | 25-29     | CC            | 0     | .     | 0             | .           |               |                |              |
| 45                                           | 25-29     | Ecig          | 0     | .     |               |             |               |                |              |
| 45                                           | 25-29     | Dual          | 0     | .     |               |             |               |                |              |
| 45                                           | 25-29     | Former        | 0     | .     |               |             | .             | 0              | .            |
| Year of Follow-up: 2035, Age Group: 30-34    |           |               |       |       |               |             |               |                |              |
| Period                                       | Age Group | Smoking Group | N     | %     | Ever Quit (N) | Ever Quit % | Mean Yrs Quit | Short Term (n) | Short Term % |
| 45                                           | 30-34     | Never Any     | 0     | .     |               |             |               |                |              |
| 45                                           | 30-34     | CC            | 0     | .     | 0             | .           |               |                |              |
| 45                                           | 30-34     | Ecig          | 0     | .     |               |             |               |                |              |
| 45                                           | 30-34     | Dual          | 0     | .     |               |             |               |                |              |
| 45                                           | 30-34     | Former        | 0     | .     |               |             | .             | 0              | .            |
| Year of Follow-up: 2035, Age Group: 35-39    |           |               |       |       |               |             |               |                |              |
| Period                                       | Age Group | Smoking Group | N     | %     | Ever Quit (N) | Ever Quit % | Mean Yrs Quit | Short Term (n) | Short Term % |
| 45                                           | 35-39     | Never Any     | 0     | .     |               |             |               |                |              |
| 45                                           | 35-39     | CC            | 0     | .     | 0             | .           |               |                |              |
| 45                                           | 35-39     | Ecig          | 0     | .     |               |             |               |                |              |
| 45                                           | 35-39     | Dual          | 0     | .     |               |             |               |                |              |
| 45                                           | 35-39     | Former        | 0     | .     |               |             | .             | 0              | .            |
| Year of Follow-up: 2035, Age Group: 40-44    |           |               |       |       |               |             |               |                |              |
| Period                                       | Age Group | Smoking Group | N     | %     | Ever Quit (N) | Ever Quit % | Mean Yrs Quit | Short Term (n) | Short Term % |
| 45                                           | 40-44     | Never Any     | 0     | .     |               |             |               |                |              |
| 45                                           | 40-44     | CC            | 0     | .     | 0             | .           |               |                |              |
| 45                                           | 40-44     | Ecig          | 0     | .     |               |             |               |                |              |
| 45                                           | 40-44     | Dual          | 0     | .     |               |             |               |                |              |
| 45                                           | 40-44     | Former        | 0     | .     |               |             | .             | 0              | .            |
| Year of Follow-up: 2035, Age Group: 45-49    |           |               |       |       |               |             |               |                |              |
| Period                                       | Age Group | Smoking Group | N     | %     | Ever Quit (N) | Ever Quit % | Mean Yrs Quit | Short Term (n) | Short Term % |
| 45                                           | 45-49     | Never Any     | 0     | .     |               |             |               |                |              |
| 45                                           | 45-49     | CC            | 0     | .     | 0             | .           |               |                |              |
| 45                                           | 45-49     | Ecig          | 0     | .     |               |             |               |                |              |
| 45                                           | 45-49     | Dual          | 0     | .     |               |             |               |                |              |
| 45                                           | 45-49     | Former        | 0     | .     |               |             | .             | 0              | .            |
| Year of Follow-up: 2035, Age Group: 50-54    |           |               |       |       |               |             |               |                |              |
| Period                                       | Age Group | Smoking Group | N     | %     | Ever Quit (N) | Ever Quit % | Mean Yrs Quit | Short Term (n) | Short Term % |
| 45                                           | 50-54     | Never Any     | 0     | .     |               |             |               |                |              |
| 45                                           | 50-54     | CC            | 0     | .     | 0             | .           |               |                |              |
| 45                                           | 50-54     | Ecig          | 0     | .     |               |             |               |                |              |
| 45                                           | 50-54     | Dual          | 0     | .     |               |             |               |                |              |
| 45                                           | 50-54     | Former        | 0     | .     |               |             | .             | 0              | .            |
| Year of Follow-up: 2035, Age Group: 55-59    |           |               |       |       |               |             |               |                |              |
| Period                                       | Age Group | Smoking Group | N     | %     | Ever Quit (N) | Ever Quit % | Mean Yrs Quit | Short Term (n) | Short Term % |



### Results for PHIM for Run 4 (Sensitivity\_Analysis\_1.RTF)

|                                              |           |               |       |       |               |             |               |                |              |
|----------------------------------------------|-----------|---------------|-------|-------|---------------|-------------|---------------|----------------|--------------|
| 45                                           | 55-59     | Never Any     | 4726  | 59.60 |               |             |               |                |              |
| 45                                           | 55-59     | CC            | 0     | 0.00  | 0             | 0.00        |               |                |              |
| 45                                           | 55-59     | Ecig          | 792   | 9.99  |               |             |               |                |              |
| 45                                           | 55-59     | Dual          | 0     | 0.00  |               |             |               |                |              |
| 45                                           | 55-59     | Former        | 2412  | 30.42 |               |             | 24.49         | 64             | 2.65         |
| Year of Follow-up: 2035, Age Group: 60-64    |           |               |       |       |               |             |               |                |              |
| Period                                       | Age Group | Smoking Group | N     | %     | Ever Quit (N) | Ever Quit % | Mean Yrs Quit | Short Term (n) | Short Term % |
| 45                                           | 60-64     | Never Any     | 5359  | 64.18 |               |             |               |                |              |
| 45                                           | 60-64     | CC            | 0     | 0.00  | 0             | 0.00        |               |                |              |
| 45                                           | 60-64     | Ecig          | 719   | 8.61  |               |             |               |                |              |
| 45                                           | 60-64     | Dual          | 0     | 0.00  |               |             |               |                |              |
| 45                                           | 60-64     | Former        | 2272  | 27.21 |               |             | 25.28         | 77             | 3.39         |
| Year of Follow-up: 2035, Age Group: 65-69    |           |               |       |       |               |             |               |                |              |
| Period                                       | Age Group | Smoking Group | N     | %     | Ever Quit (N) | Ever Quit % | Mean Yrs Quit | Short Term (n) | Short Term % |
| 45                                           | 65-69     | Never Any     | 5189  | 59.01 |               |             |               |                |              |
| 45                                           | 65-69     | CC            | 3     | 0.03  | 0             | 0.00        |               |                |              |
| 45                                           | 65-69     | Ecig          | 694   | 7.89  |               |             |               |                |              |
| 45                                           | 65-69     | Dual          | 0     | 0.00  |               |             |               |                |              |
| 45                                           | 65-69     | Former        | 2907  | 33.06 |               |             | 28.66         | 55             | 1.89         |
| Year of Follow-up: 2035, Age Group: 70-74    |           |               |       |       |               |             |               |                |              |
| Period                                       | Age Group | Smoking Group | N     | %     | Ever Quit (N) | Ever Quit % | Mean Yrs Quit | Short Term (n) | Short Term % |
| 45                                           | 70-74     | Never Any     | 5284  | 52.43 |               |             |               |                |              |
| 45                                           | 70-74     | CC            | 1     | 0.01  | 0             | 0.00        |               |                |              |
| 45                                           | 70-74     | Ecig          | 934   | 9.27  |               |             |               |                |              |
| 45                                           | 70-74     | Dual          | 0     | 0.00  |               |             |               |                |              |
| 45                                           | 70-74     | Former        | 3859  | 38.29 |               |             | 31.38         | 76             | 1.97         |
| Year of Follow-up: 2035, Age Group: 75-79    |           |               |       |       |               |             |               |                |              |
| Period                                       | Age Group | Smoking Group | N     | %     | Ever Quit (N) | Ever Quit % | Mean Yrs Quit | Short Term (n) | Short Term % |
| 45                                           | 75-79     | Never Any     | 5278  | 50.27 |               |             |               |                |              |
| 45                                           | 75-79     | CC            | 1     | 0.01  | 0             | 0.00        |               |                |              |
| 45                                           | 75-79     | Ecig          | 747   | 7.11  |               |             |               |                |              |
| 45                                           | 75-79     | Dual          | 0     | 0.00  |               |             |               |                |              |
| 45                                           | 75-79     | Former        | 4473  | 42.60 |               |             | 33.73         | 79             | 1.77         |
| Year of Follow-up: 2040, Age Group: All Ages |           |               |       |       |               |             |               |                |              |
| Period                                       | Age Group | Smoking Group | N     | %     | Ever Quit (N) | Ever Quit % | Mean Yrs Quit | Short Term (n) | Short Term % |
| 50                                           | All Ages  | Never Any     | 20558 | 58.48 |               |             |               |                |              |
| 50                                           | All Ages  | CC            | 4     | 0.01  | 0             | 0.00        |               |                |              |
| 50                                           | All Ages  | Ecig          | 2497  | 7.10  |               |             |               |                |              |
| 50                                           | All Ages  | Dual          | 0     | 0.00  |               |             |               |                |              |
| 50                                           | All Ages  | Former        | 12092 | 34.40 |               |             | 31.39         | 238            | 1.97         |
| Year of Follow-up: 2040, Age Group: 18-19    |           |               |       |       |               |             |               |                |              |
| Period                                       | Age Group | Smoking Group | N     | %     | Ever Quit (N) | Ever Quit % | Mean Yrs Quit | Short Term (n) | Short Term % |
| 50                                           | 18-19     | Never Any     | 0     | .     |               |             |               |                |              |
| 50                                           | 18-19     | CC            | 0     | .     | 0             | .           |               |                |              |
| 50                                           | 18-19     | Ecig          | 0     | .     |               |             |               |                |              |
| 50                                           | 18-19     | Dual          | 0     | .     |               |             |               |                |              |
| 50                                           | 18-19     | Former        | 0     | .     |               |             | .             | 0              | .            |
| Year of Follow-up: 2040, Age Group: 20-24    |           |               |       |       |               |             |               |                |              |
| Period                                       | Age Group | Smoking Group | N     | %     | Ever Quit (N) | Ever Quit % | Mean Yrs Quit | Short Term (n) | Short Term % |
| 50                                           | 20-24     | Never Any     | 0     | .     |               |             |               |                |              |
| 50                                           | 20-24     | CC            | 0     | .     | 0             | .           |               |                |              |
| 50                                           | 20-24     | Ecig          | 0     | .     |               |             |               |                |              |
| 50                                           | 20-24     | Dual          | 0     | .     |               |             |               |                |              |
| 50                                           | 20-24     | Former        | 0     | .     |               |             | .             | 0              | .            |
| Year of Follow-up: 2040, Age Group: 25-29    |           |               |       |       |               |             |               |                |              |
| Period                                       | Age Group | Smoking Group | N     | %     | Ever Quit (N) | Ever Quit % | Mean Yrs Quit | Short Term (n) | Short Term % |
| 50                                           | 25-29     | Never Any     | 0     | .     |               |             |               |                |              |
| 50                                           | 25-29     | CC            | 0     | .     | 0             | .           |               |                |              |
| 50                                           | 25-29     | Ecig          | 0     | .     |               |             |               |                |              |
| 50                                           | 25-29     | Dual          | 0     | .     |               |             |               |                |              |
| 50                                           | 25-29     | Former        | 0     | .     |               |             | .             | 0              | .            |
| Year of Follow-up: 2040, Age Group: 30-34    |           |               |       |       |               |             |               |                |              |
| Period                                       | Age Group | Smoking Group | N     | %     | Ever Quit (N) | Ever Quit % | Mean Yrs Quit | Short Term (n) | Short Term % |
| 50                                           | 30-34     | Never Any     | 0     | .     |               |             |               |                |              |
| 50                                           | 30-34     | CC            | 0     | .     | 0             | .           |               |                |              |
| 50                                           | 30-34     | Ecig          | 0     | .     |               |             |               |                |              |
| 50                                           | 30-34     | Dual          | 0     | .     |               |             |               |                |              |
| 50                                           | 30-34     | Former        | 0     | .     |               |             | .             | 0              | .            |
| Year of Follow-up: 2040, Age Group: 35-39    |           |               |       |       |               |             |               |                |              |

**Results for PHIM for Run 4 (Sensitivity\_Analysis\_1.RTF)**

| Period                                    | Age Group | Smoking Group | N    | %     | Ever Quit (N) | Ever Quit % | Mean Yrs Quit | Short Term (n) | Short Term % |
|-------------------------------------------|-----------|---------------|------|-------|---------------|-------------|---------------|----------------|--------------|
| 50                                        | 35-39     | Never Any     | 0    | .     |               |             |               |                |              |
| 50                                        | 35-39     | CC            | 0    | .     | 0             | .           |               |                |              |
| 50                                        | 35-39     | Ecig          | 0    | .     |               |             |               |                |              |
| 50                                        | 35-39     | Dual          | 0    | .     |               |             |               |                |              |
| 50                                        | 35-39     | Former        | 0    | .     |               |             | .             | 0              | .            |
| Year of Follow-up: 2040, Age Group: 40-44 |           |               |      |       |               |             |               |                |              |
| Period                                    | Age Group | Smoking Group | N    | %     | Ever Quit (N) | Ever Quit % | Mean Yrs Quit | Short Term (n) | Short Term % |
| 50                                        | 40-44     | Never Any     | 0    | .     |               |             |               |                |              |
| 50                                        | 40-44     | CC            | 0    | .     | 0             | .           |               |                |              |
| 50                                        | 40-44     | Ecig          | 0    | .     |               |             |               |                |              |
| 50                                        | 40-44     | Dual          | 0    | .     |               |             |               |                |              |
| 50                                        | 40-44     | Former        | 0    | .     |               |             | .             | 0              | .            |
| Year of Follow-up: 2040, Age Group: 45-49 |           |               |      |       |               |             |               |                |              |
| Period                                    | Age Group | Smoking Group | N    | %     | Ever Quit (N) | Ever Quit % | Mean Yrs Quit | Short Term (n) | Short Term % |
| 50                                        | 45-49     | Never Any     | 0    | .     |               |             |               |                |              |
| 50                                        | 45-49     | CC            | 0    | .     | 0             | .           |               |                |              |
| 50                                        | 45-49     | Ecig          | 0    | .     |               |             |               |                |              |
| 50                                        | 45-49     | Dual          | 0    | .     |               |             |               |                |              |
| 50                                        | 45-49     | Former        | 0    | .     |               |             | .             | 0              | .            |
| Year of Follow-up: 2040, Age Group: 50-54 |           |               |      |       |               |             |               |                |              |
| Period                                    | Age Group | Smoking Group | N    | %     | Ever Quit (N) | Ever Quit % | Mean Yrs Quit | Short Term (n) | Short Term % |
| 50                                        | 50-54     | Never Any     | 0    | .     |               |             |               |                |              |
| 50                                        | 50-54     | CC            | 0    | .     | 0             | .           |               |                |              |
| 50                                        | 50-54     | Ecig          | 0    | .     |               |             |               |                |              |
| 50                                        | 50-54     | Dual          | 0    | .     |               |             |               |                |              |
| 50                                        | 50-54     | Former        | 0    | .     |               |             | .             | 0              | .            |
| Year of Follow-up: 2040, Age Group: 55-59 |           |               |      |       |               |             |               |                |              |
| Period                                    | Age Group | Smoking Group | N    | %     | Ever Quit (N) | Ever Quit % | Mean Yrs Quit | Short Term (n) | Short Term % |
| 50                                        | 55-59     | Never Any     | 0    | .     |               |             |               |                |              |
| 50                                        | 55-59     | CC            | 0    | .     | 0             | .           |               |                |              |
| 50                                        | 55-59     | Ecig          | 0    | .     |               |             |               |                |              |
| 50                                        | 55-59     | Dual          | 0    | .     |               |             |               |                |              |
| 50                                        | 55-59     | Former        | 0    | .     |               |             | .             | 0              | .            |
| Year of Follow-up: 2040, Age Group: 60-64 |           |               |      |       |               |             |               |                |              |
| Period                                    | Age Group | Smoking Group | N    | %     | Ever Quit (N) | Ever Quit % | Mean Yrs Quit | Short Term (n) | Short Term % |
| 50                                        | 60-64     | Never Any     | 4726 | 59.60 |               |             |               |                |              |
| 50                                        | 60-64     | CC            | 0    | 0.00  | 0             | 0.00        |               |                |              |
| 50                                        | 60-64     | Ecig          | 613  | 7.73  |               |             |               |                |              |
| 50                                        | 60-64     | Dual          | 0    | 0.00  |               |             |               |                |              |
| 50                                        | 60-64     | Former        | 2591 | 32.67 |               |             | 27.58         | 77             | 2.97         |
| Year of Follow-up: 2040, Age Group: 65-69 |           |               |      |       |               |             |               |                |              |
| Period                                    | Age Group | Smoking Group | N    | %     | Ever Quit (N) | Ever Quit % | Mean Yrs Quit | Short Term (n) | Short Term % |
| 50                                        | 65-69     | Never Any     | 5359 | 64.18 |               |             |               |                |              |
| 50                                        | 65-69     | CC            | 0    | 0.00  | 0             | 0.00        |               |                |              |
| 50                                        | 65-69     | Ecig          | 578  | 6.92  |               |             |               |                |              |
| 50                                        | 65-69     | Dual          | 0    | 0.00  |               |             |               |                |              |
| 50                                        | 65-69     | Former        | 2413 | 28.90 |               |             | 28.67         | 34             | 1.41         |
| Year of Follow-up: 2040, Age Group: 70-74 |           |               |      |       |               |             |               |                |              |
| Period                                    | Age Group | Smoking Group | N    | %     | Ever Quit (N) | Ever Quit % | Mean Yrs Quit | Short Term (n) | Short Term % |
| 50                                        | 70-74     | Never Any     | 5189 | 59.01 |               |             |               |                |              |
| 50                                        | 70-74     | CC            | 3    | 0.03  | 0             | 0.00        |               |                |              |
| 50                                        | 70-74     | Ecig          | 583  | 6.63  |               |             |               |                |              |
| 50                                        | 70-74     | Dual          | 0    | 0.00  |               |             |               |                |              |
| 50                                        | 70-74     | Former        | 3018 | 34.32 |               |             | 32.48         | 56             | 1.86         |
| Year of Follow-up: 2040, Age Group: 75-79 |           |               |      |       |               |             |               |                |              |
| Period                                    | Age Group | Smoking Group | N    | %     | Ever Quit (N) | Ever Quit % | Mean Yrs Quit | Short Term (n) | Short Term % |
| 50                                        | 75-79     | Never Any     | 5284 | 52.43 |               |             |               |                |              |
| 50                                        | 75-79     | CC            | 1    | 0.01  | 0             | 0.00        |               |                |              |
| 50                                        | 75-79     | Ecig          | 723  | 7.17  |               |             |               |                |              |
| 50                                        | 75-79     | Dual          | 0    | 0.00  |               |             |               |                |              |
| 50                                        | 75-79     | Former        | 4070 | 40.38 |               |             | 34.61         | 71             | 1.74         |

## Results for PHIM for Run 4 (Sensitivity\_Analysis\_1.RTF)

\*\*\*\*\*

### Main Results for E-Component for Run: 4, Simulation: 1, COD: Four Diseases Combined

| Variable Parameter          | Value                                  |
|-----------------------------|----------------------------------------|
| 1. Country                  | US (United States)                     |
| 2. Sex                      | F (Females)                            |
| 3. Year of start of process | 1990                                   |
| 4. Cause of Death           | Four Diseases Combined                 |
| 5. Effective Dose NULL      | CC:1                                   |
| 6. Effective Dose Ecig      | CC:1 Ecig:0 Dual:0.5                   |
| Note:                       | Death rates are per million population |

#### Results for Age Groups Combined and Years combined, Population unadjusted for deaths in Ecig scenario,

| Age Group:All |         | NULL        | Ecig        | %Drop   |        | Death  |         | NULL    | Ecig    | Drop    |
|---------------|---------|-------------|-------------|---------|--------|--------|---------|---------|---------|---------|
| Year          | Number  | Attrib      | Attrib      | Drop    | %Drop  | Attrib | Rate    | Attrib  | Attrib  | Rates   |
|               | Deaths  | Deaths      | Deaths      | Deaths  | Deaths | Deaths |         | Rates   | Rates   | Rates   |
| All Comb      | 9082078 | 2946250.006 | 1860886.698 | 1085363 | 11.951 | 36.839 | 2493.45 | 808.881 | 510.899 | 297.982 |

#### Results for Age Groups Combined, Population unadjusted for deaths in Ecig scenario,

| Age Group:All |        | NULL      | Ecig      | %Drop    |        | Death  |         | NULL    | Ecig    | Drop    |
|---------------|--------|-----------|-----------|----------|--------|--------|---------|---------|---------|---------|
| Year          | Number | Attrib    | Attrib    | Drop     | %Drop  | Attrib | Rate    | Attrib  | Attrib  | Rates   |
|               | Deaths | Deaths    | Deaths    | Deaths   | Deaths | Deaths |         | Rates   | Rates   | Rates   |
| 1990          | 199848 | 57524.822 | 57524.822 | 0.000    | 0.000  | 0.000  | 2926.84 | 842.471 | 842.471 | 0.000   |
| 1991          | 199162 | 59078.486 | 58901.294 | 177.192  | 0.089  | 0.300  | 2877.87 | 853.678 | 851.118 | 2.560   |
| 1992          | 198532 | 60494.150 | 59997.182 | 496.968  | 0.250  | 0.822  | 2829.84 | 862.271 | 855.188 | 7.084   |
| 1993          | 202512 | 62694.848 | 61726.865 | 967.983  | 0.478  | 1.544  | 2845.85 | 881.034 | 867.431 | 13.603  |
| 1994          | 200658 | 63202.598 | 61671.454 | 1531.144 | 0.763  | 2.423  | 2777.87 | 874.966 | 853.769 | 21.197  |
| 1995          | 201023 | 63766.862 | 61553.356 | 2213.506 | 1.101  | 3.471  | 2739.80 | 869.097 | 838.929 | 30.169  |
| 1996          | 201180 | 64591.163 | 61554.552 | 3036.611 | 1.509  | 4.701  | 2706.36 | 868.908 | 828.058 | 40.850  |
| 1997          | 198639 | 64686.912 | 60879.386 | 3807.526 | 1.917  | 5.886  | 2635.18 | 858.147 | 807.636 | 50.511  |
| 1998          | 197573 | 65295.961 | 60595.574 | 4700.387 | 2.379  | 7.199  | 2584.18 | 854.046 | 792.567 | 61.479  |
| 1999          | 211329 | 67327.521 | 61247.607 | 6079.915 | 2.877  | 9.030  | 2726.91 | 868.771 | 790.317 | 78.453  |
| 2000          | 208496 | 67596.897 | 60511.435 | 7085.462 | 3.398  | 10.482 | 2656.96 | 861.419 | 771.126 | 90.293  |
| 2001          | 203606 | 67008.811 | 58854.674 | 8154.137 | 4.005  | 12.169 | 2565.88 | 844.458 | 741.698 | 102.760 |
| 2002          | 200828 | 67067.744 | 57723.791 | 9343.952 | 4.653  | 13.932 | 2506.09 | 836.925 | 720.324 | 116.601 |
| 2003          | 196352 | 66756.217 | 56334.234 | 10421.98 | 5.308  | 15.612 | 2427.31 | 825.244 | 696.407 | 128.837 |
| 2004          | 188160 | 65058.725 | 53719.770 | 11338.95 | 6.026  | 17.429 | 2302.83 | 796.234 | 657.460 | 138.774 |
| 2005          | 186416 | 65214.724 | 52640.432 | 12574.29 | 6.745  | 19.281 | 2256.27 | 789.321 | 637.129 | 152.192 |
| 2006          | 180088 | 63771.146 | 50252.345 | 13518.80 | 7.507  | 21.199 | 2160.67 | 765.117 | 602.920 | 162.197 |
| 2007          | 175644 | 63110.718 | 48619.911 | 14490.81 | 8.250  | 22.961 | 2086.36 | 749.650 | 577.524 | 172.127 |
| 2008          | 177570 | 63718.624 | 47829.926 | 15888.70 | 8.948  | 24.936 | 2086.39 | 748.674 | 561.986 | 186.687 |
| 2009          | 172806 | 62794.698 | 45993.592 | 16801.11 | 9.723  | 26.756 | 2007.57 | 729.515 | 534.329 | 195.186 |
| 2010          | 170489 | 61917.074 | 44152.580 | 17764.49 | 10.420 | 28.691 | 1957.97 | 711.083 | 507.068 | 204.015 |
| 2011          | 170305 | 61680.114 | 42635.339 | 19044.77 | 11.183 | 30.877 | 1937.46 | 701.700 | 485.038 | 216.662 |
| 2012          | 171421 | 62023.127 | 41550.340 | 20472.79 | 11.943 | 33.008 | 1930.22 | 698.386 | 467.861 | 230.525 |
| 2013          | 172699 | 62037.765 | 40282.898 | 21754.87 | 12.597 | 35.067 | 1923.75 | 691.059 | 448.724 | 242.334 |
| 2014          | 174169 | 61921.017 | 38754.656 | 23166.36 | 13.301 | 37.413 | 1918.85 | 682.195 | 426.967 | 255.228 |
| 2015          | 177354 | 61856.204 | 37484.859 | 24371.35 | 13.742 | 39.400 | 2184.51 | 761.899 | 461.711 | 300.188 |
| 2016          | 176853 | 60464.119 | 35121.569 | 25342.55 | 14.330 | 41.913 | 2157.59 | 737.655 | 428.479 | 309.176 |
| 2017          | 179309 | 60243.839 | 33602.989 | 26640.85 | 14.858 | 44.222 | 2166.86 | 728.017 | 406.075 | 321.941 |
| 2018          | 177157 | 60713.327 | 32873.591 | 27839.74 | 15.715 | 45.854 | 2120.51 | 726.721 | 393.487 | 333.233 |
| 2019          | 179227 | 61148.172 | 31792.895 | 29355.28 | 16.379 | 48.007 | 2124.53 | 724.841 | 376.868 | 347.973 |
| 2020          | 180467 | 61149.317 | 30718.704 | 30430.61 | 16.862 | 49.764 | 2424.25 | 821.432 | 412.651 | 408.781 |
| 2021          | 178116 | 58727.786 | 27861.551 | 30866.24 | 17.329 | 52.558 | 2375.42 | 783.216 | 371.572 | 411.644 |
| 2022          | 179408 | 58848.802 | 26682.894 | 32165.91 | 17.929 | 54.659 | 2374.52 | 778.881 | 353.156 | 425.725 |
| 2023          | 180640 | 58816.149 | 25507.010 | 33309.14 | 18.440 | 56.633 | 2372.26 | 772.407 | 334.972 | 437.434 |
| 2024          | 181610 | 58955.232 | 24323.636 | 34631.60 | 19.069 | 58.742 | 2366.77 | 768.316 | 316.990 | 451.326 |
| 2025          | 180418 | 58297.744 | 23090.125 | 35207.62 | 19.514 | 60.393 | 2713.69 | 876.861 | 347.300 | 529.561 |
| 2026          | 180313 | 56469.971 | 21044.921 | 35425.05 | 19.646 | 62.733 | 2701.83 | 846.150 | 315.338 | 530.811 |
| 2027          | 179619 | 56209.427 | 19786.036 | 36423.39 | 20.278 | 64.799 | 2680.68 | 838.883 | 295.292 | 543.591 |
| 2028          | 178762 | 55733.105 | 18478.197 | 37254.91 | 20.840 | 66.845 | 2656.74 | 828.298 | 274.621 | 553.678 |
| 2029          | 177808 | 55145.838 | 17171.394 | 37974.44 | 21.357 | 68.862 | 2630.89 | 815.951 | 254.072 | 561.879 |
| 2030          | 173587 | 53615.097 | 15946.546 | 37668.55 | 21.700 | 70.257 | 3040.33 | 939.056 | 279.300 | 659.756 |
| 2031          | 174985 | 52046.561 | 14779.582 | 37266.98 | 21.297 | 71.603 | 3060.73 | 910.364 | 258.515 | 651.849 |
| 2032          | 173400 | 51582.636 | 13716.137 | 37866.50 | 21.838 | 73.409 | 3027.10 | 900.496 | 239.447 | 661.048 |
| 2033          | 171756 | 50839.758 | 12654.899 | 38184.86 | 22.232 | 75.108 | 2991.14 | 885.375 | 220.385 | 664.989 |
| 2034          | 169973 | 50215.451 | 11619.530 | 38595.92 | 22.707 | 76.861 | 2951.96 | 872.104 | 201.799 | 670.305 |
| 2035          | 162644 | 47773.075 | 10634.793 | 37138.28 | 22.834 | 77.739 | 3459.14 | 1016.05 | 226.183 | 789.863 |
| 2036          | 156254 | 43298.709 | 8934.456  | 34364.25 | 21.993 | 79.366 | 3328.25 | 922.274 | 190.306 | 731.968 |
| 2037          | 153593 | 42241.563 | 7979.108  | 34262.45 | 22.307 | 81.111 | 3274.10 | 900.450 | 170.088 | 730.362 |
| 2038          | 150947 | 41356.353 | 7204.660  | 34151.69 | 22.625 | 82.579 | 3217.50 | 881.531 | 153.571 | 727.960 |
| 2039          | 148373 | 40161.050 | 6368.601  | 33792.45 | 22.775 | 84.142 | 3159.42 | 855.178 | 135.611 | 719.566 |

## Results for PHIM for Run 4 (Sensitivity\_Analysis\_1.RTF)

\*\*\*\*\*

### Main Results for E-Component for Run: 4, Simulation: 1, COD: LUNG CANCER

| Variable Parameter          | Value                                  |
|-----------------------------|----------------------------------------|
| 1. Country                  | US (United States)                     |
| 2. Sex                      | F (Females)                            |
| 3. Year of start of process | 1990                                   |
| 4. Cause of Death           | LUNG CANCER                            |
| 5. Effective Dose NULL      | CC:1                                   |
| 6. Effective Dose Ecig      | CC:1 Ecig:0 Dual:0.5                   |
| Note:                       | Death rates are per million population |

#### Results for Age Groups Combined and Years combined, Population unadjusted for deaths in Ecig scenario,

| Age Group:All | NULL    | Ecig        | %Drop       |          |        | NULL   | Ecig    | Drop    |         |         |
|---------------|---------|-------------|-------------|----------|--------|--------|---------|---------|---------|---------|
| Year          | Number  | Attrib      | Attrib      | Drop     | %Drop  | Attrib | Death   | Attrib  | Attrib  | Drop    |
|               | Deaths  | Deaths      | Deaths      | Deaths   | Deaths | Deaths | Rate    | Rates   | Rates   | Rates   |
| All Comb      | 2327764 | 1580465.217 | 1096584.929 | 483880.3 | 20.787 | 30.616 | 639.078 | 433.910 | 301.063 | 132.847 |

#### Results for Age Groups Combined, Population unadjusted for deaths in Ecig scenario,

| Age Group:All | NULL   | Ecig      | %Drop     |          |        | NULL   | Ecig    | Drop    |         |         |
|---------------|--------|-----------|-----------|----------|--------|--------|---------|---------|---------|---------|
| Year          | Number | Attrib    | Attrib    | Drop     | %Drop  | Attrib | Death   | Attrib  | Attrib  | Drop    |
|               | Deaths | Deaths    | Deaths    | Deaths   | Deaths | Deaths | Rate    | Rates   | Rates   | Rates   |
| 1990          | 42690  | 30614.201 | 30614.201 | 0.000    | 0.000  | 0.000  | 625.210 | 448.355 | 448.355 | 0.000   |
| 1991          | 43692  | 31412.010 | 31378.038 | 33.973   | 0.078  | 0.108  | 631.345 | 453.901 | 453.410 | 0.491   |
| 1992          | 45423  | 32782.407 | 32683.444 | 98.963   | 0.218  | 0.302  | 647.450 | 467.274 | 465.863 | 1.411   |
| 1993          | 46291  | 33491.183 | 33295.398 | 195.785  | 0.423  | 0.585  | 650.515 | 470.643 | 467.891 | 2.751   |
| 1994          | 47017  | 34074.347 | 33756.478 | 317.869  | 0.676  | 0.933  | 650.895 | 471.719 | 467.319 | 4.401   |
| 1995          | 47840  | 34694.454 | 34214.717 | 479.737  | 1.003  | 1.383  | 652.025 | 472.861 | 466.322 | 6.538   |
| 1996          | 48244  | 35027.269 | 34362.259 | 665.009  | 1.378  | 1.899  | 648.999 | 471.202 | 462.256 | 8.946   |
| 1997          | 49035  | 35590.763 | 34704.273 | 886.490  | 1.808  | 2.491  | 650.506 | 472.153 | 460.392 | 11.760  |
| 1998          | 49686  | 36100.785 | 34952.155 | 1148.630 | 2.312  | 3.182  | 649.874 | 472.184 | 457.161 | 15.024  |
| 1999          | 48883  | 35451.030 | 34064.096 | 1386.933 | 2.837  | 3.912  | 630.769 | 457.448 | 439.551 | 17.896  |
| 2000          | 50331  | 36447.986 | 34709.865 | 1738.121 | 3.453  | 4.769  | 641.392 | 464.474 | 442.324 | 22.150  |
| 2001          | 50389  | 36411.326 | 34315.212 | 2096.114 | 4.160  | 5.757  | 635.012 | 458.863 | 432.447 | 26.416  |
| 2002          | 51445  | 37078.545 | 34537.058 | 2541.487 | 4.940  | 6.854  | 641.972 | 462.696 | 430.981 | 31.715  |
| 2003          | 51408  | 36999.876 | 34031.159 | 2968.716 | 5.775  | 8.024  | 635.509 | 457.395 | 420.695 | 36.699  |
| 2004          | 51399  | 36861.555 | 33416.729 | 3444.826 | 6.702  | 9.345  | 629.057 | 451.138 | 408.977 | 42.160  |
| 2005          | 51421  | 36689.529 | 32738.907 | 3950.622 | 7.683  | 10.768 | 622.370 | 444.069 | 396.253 | 47.816  |
| 2006          | 51355  | 36504.774 | 32019.889 | 4484.885 | 8.733  | 12.286 | 616.150 | 437.979 | 384.170 | 53.809  |
| 2007          | 51839  | 36663.202 | 31542.011 | 5121.191 | 9.879  | 13.968 | 615.761 | 435.498 | 374.667 | 60.831  |
| 2008          | 50976  | 35898.803 | 30293.726 | 5605.077 | 10.996 | 15.614 | 598.952 | 421.800 | 355.942 | 65.858  |
| 2009          | 51193  | 35934.525 | 29640.586 | 6293.939 | 12.295 | 17.515 | 594.733 | 417.468 | 344.348 | 73.120  |
| 2010          | 50853  | 35502.829 | 28637.682 | 6865.147 | 13.500 | 19.337 | 584.018 | 407.730 | 328.888 | 78.842  |
| 2011          | 50509  | 35136.342 | 27607.592 | 7528.750 | 14.906 | 21.427 | 574.613 | 399.726 | 314.076 | 85.650  |
| 2012          | 51245  | 35450.201 | 27094.465 | 8355.736 | 16.305 | 23.570 | 577.023 | 399.173 | 305.086 | 94.086  |
| 2013          | 51069  | 35123.224 | 26041.249 | 9081.975 | 17.784 | 25.857 | 568.874 | 391.249 | 290.082 | 101.167 |
| 2014          | 51251  | 35079.370 | 25216.314 | 9863.056 | 19.245 | 28.116 | 564.641 | 386.476 | 277.813 | 108.663 |
| 2015          | 50443  | 34324.171 | 23941.487 | 10382.68 | 20.583 | 30.249 | 621.319 | 422.780 | 294.893 | 127.886 |
| 2016          | 48854  | 33054.753 | 22216.289 | 10838.46 | 22.185 | 32.789 | 596.013 | 403.264 | 271.036 | 132.228 |
| 2017          | 48325  | 32471.234 | 20986.230 | 11485.00 | 23.766 | 35.370 | 583.983 | 392.399 | 253.608 | 138.791 |
| 2018          | 50465  | 33657.595 | 20807.356 | 12850.24 | 25.464 | 38.179 | 604.052 | 402.871 | 249.058 | 153.814 |
| 2019          | 51036  | 33863.424 | 20033.678 | 13829.75 | 27.098 | 40.840 | 604.975 | 401.412 | 237.476 | 163.936 |
| 2020          | 51444  | 33910.830 | 19256.059 | 14654.77 | 28.487 | 43.216 | 691.053 | 455.532 | 258.671 | 196.861 |
| 2021          | 48037  | 31531.880 | 17029.248 | 14502.63 | 30.191 | 45.994 | 640.639 | 420.521 | 227.108 | 193.412 |
| 2022          | 48335  | 31560.212 | 16191.188 | 15369.02 | 31.797 | 48.697 | 639.727 | 417.708 | 214.295 | 203.413 |
| 2023          | 48599  | 31508.781 | 15351.652 | 16157.13 | 33.246 | 51.278 | 638.227 | 413.791 | 201.607 | 212.185 |
| 2024          | 48784  | 31517.293 | 14500.754 | 17016.54 | 34.882 | 53.991 | 635.757 | 410.740 | 188.977 | 221.763 |
| 2025          | 48477  | 31175.389 | 13627.039 | 17548.35 | 36.200 | 56.289 | 729.141 | 468.912 | 204.965 | 263.946 |
| 2026          | 45324  | 29044.598 | 11969.656 | 17074.94 | 37.673 | 58.789 | 679.138 | 435.206 | 179.354 | 255.852 |
| 2027          | 45107  | 28825.765 | 11123.591 | 17702.17 | 39.245 | 61.411 | 673.191 | 430.203 | 166.011 | 264.192 |
| 2028          | 44842  | 28513.846 | 10266.020 | 18247.83 | 40.694 | 63.996 | 666.430 | 423.769 | 152.572 | 271.197 |
| 2029          | 44539  | 28148.109 | 9415.305  | 18732.80 | 42.059 | 66.551 | 659.013 | 416.486 | 139.311 | 277.175 |
| 2030          | 43393  | 27314.475 | 8617.999  | 18696.48 | 43.086 | 68.449 | 760.018 | 478.407 | 150.942 | 327.464 |
| 2031          | 40748  | 25423.102 | 7632.832  | 17790.27 | 43.660 | 69.977 | 712.731 | 444.684 | 133.508 | 311.176 |
| 2032          | 40325  | 25085.902 | 6967.521  | 18118.38 | 44.931 | 72.225 | 703.969 | 437.933 | 121.634 | 316.299 |
| 2033          | 39882  | 24645.067 | 6326.005  | 18319.06 | 45.933 | 74.332 | 694.543 | 429.194 | 110.167 | 319.027 |
| 2034          | 39404  | 24239.126 | 5708.042  | 18531.08 | 47.028 | 76.451 | 684.347 | 420.967 | 99.133  | 321.834 |
| 2035          | 37454  | 22944.147 | 5117.691  | 17826.46 | 47.595 | 77.695 | 796.588 | 487.980 | 108.844 | 379.136 |
| 2036          | 32988  | 19950.581 | 4092.741  | 15857.84 | 48.071 | 79.486 | 702.663 | 424.953 | 87.176  | 337.776 |
| 2037          | 32403  | 19415.334 | 3587.541  | 15827.79 | 48.846 | 81.522 | 690.731 | 413.871 | 76.475  | 337.396 |
| 2038          | 31820  | 18939.317 | 3186.596  | 15752.72 | 49.506 | 83.175 | 678.257 | 403.701 | 67.924  | 335.777 |
| 2039          | 31251  | 18379.752 | 2764.908  | 15614.84 | 49.965 | 84.957 | 665.457 | 391.373 | 58.875  | 332.498 |

## Results for PHIM for Run 4 (Sensitivity\_Analysis\_1.RTF)

\*\*\*\*\*

### Main Results for E-Component for Run: 4, Simulation: 1, COD: IHD

| Variable Parameter          | Value                                  |
|-----------------------------|----------------------------------------|
| 1. Country                  | US (United States)                     |
| 2. Sex                      | F (Females)                            |
| 3. Year of start of process | 1990                                   |
| 4. Cause of Death           | IHD                                    |
| 5. Effective Dose NULL      | CC:1                                   |
| 6. Effective Dose Ecig      | CC:1 Ecig:0 Dual:0.5                   |
| Note:                       | Death rates are per million population |

#### Results for Age Groups Combined and Years combined, Population unadjusted for deaths in Ecig scenario,

| Age Group:All |         | NULL       | Ecig       | %Drop    |        | Death  |         | NULL    | Ecig   | Drop   |
|---------------|---------|------------|------------|----------|--------|--------|---------|---------|--------|--------|
| Year          | Number  | Attrib     | Attrib     | Drop     | %Drop  | Attrib | Rate    | Attrib  | Attrib | Rates  |
|               | Deaths  | Deaths     | Deaths     | Deaths   | Deaths | Deaths |         | Rates   | Rates  | Rates  |
| All Comb      | 3242167 | 398833.796 | 186644.106 | 212189.7 | 6.545  | 53.203 | 890.124 | 109.498 | 51.242 | 58.256 |

#### Results for Age Groups Combined, Population unadjusted for deaths in Ecig scenario,

| Age Group:All |        | NULL      | Ecig      | %Drop    |        | Death  |         | NULL    | Ecig    | Drop   |
|---------------|--------|-----------|-----------|----------|--------|--------|---------|---------|---------|--------|
| Year          | Number | Attrib    | Attrib    | Drop     | %Drop  | Attrib | Rate    | Attrib  | Attrib  | Rates  |
|               | Deaths | Deaths    | Deaths    | Deaths   | Deaths | Deaths |         | Rates   | Rates   | Rates  |
| 1990          | 98916  | 12922.892 | 12922.892 | 0.000    | 0.000  | 0.000  | 1448.66 | 189.260 | 189.260 | 0.000  |
| 1991          | 96403  | 12856.479 | 12761.318 | 95.161   | 0.099  | 0.740  | 1393.01 | 185.775 | 184.400 | 1.375  |
| 1992          | 93721  | 12662.244 | 12398.030 | 264.213  | 0.282  | 2.087  | 1335.88 | 180.485 | 176.719 | 3.766  |
| 1993          | 93679  | 12730.613 | 12225.772 | 504.841  | 0.539  | 3.966  | 1316.45 | 178.900 | 171.805 | 7.094  |
| 1994          | 90832  | 12495.323 | 11708.132 | 787.191  | 0.867  | 6.300  | 1257.46 | 172.983 | 162.085 | 10.898 |
| 1995          | 89698  | 12365.590 | 11252.022 | 1113.569 | 1.241  | 9.005  | 1222.52 | 168.534 | 153.357 | 15.177 |
| 1996          | 88286  | 12290.551 | 10770.229 | 1520.322 | 1.722  | 12.370 | 1187.66 | 165.338 | 144.886 | 20.452 |
| 1997          | 84777  | 11719.531 | 9886.351  | 1833.181 | 2.162  | 15.642 | 1124.67 | 155.473 | 131.154 | 24.319 |
| 1998          | 82517  | 11416.794 | 9220.211  | 2196.584 | 2.662  | 19.240 | 1079.29 | 149.327 | 120.597 | 28.730 |
| 1999          | 93939  | 13028.038 | 10000.842 | 3027.196 | 3.223  | 23.236 | 1212.16 | 168.109 | 129.047 | 39.062 |
| 2000          | 90039  | 12426.299 | 9044.426  | 3381.873 | 3.756  | 27.215 | 1147.41 | 158.354 | 115.257 | 43.097 |
| 2001          | 86119  | 11939.281 | 8123.854  | 3815.427 | 4.430  | 31.957 | 1085.29 | 150.461 | 102.378 | 48.083 |
| 2002          | 83014  | 11528.794 | 7292.673  | 4236.121 | 5.103  | 36.744 | 1035.91 | 143.865 | 91.004  | 52.862 |
| 2003          | 79302  | 11048.407 | 6493.168  | 4555.239 | 5.744  | 41.230 | 980.336 | 136.581 | 80.269  | 56.312 |
| 2004          | 73861  | 10375.132 | 5603.394  | 4771.738 | 6.460  | 45.992 | 903.963 | 126.978 | 68.578  | 58.400 |
| 2005          | 71649  | 10051.029 | 4984.676  | 5066.354 | 7.071  | 50.406 | 867.197 | 121.652 | 60.332  | 61.320 |
| 2006          | 67551  | 9542.523  | 4287.043  | 5255.481 | 7.780  | 55.074 | 810.467 | 114.490 | 51.435  | 63.055 |
| 2007          | 63503  | 8936.533  | 3640.194  | 5296.339 | 8.340  | 59.266 | 754.310 | 106.151 | 43.239  | 62.912 |
| 2008          | 63171  | 8944.180  | 3289.433  | 5654.747 | 8.951  | 63.223 | 742.239 | 105.091 | 38.650  | 66.441 |
| 2009          | 59747  | 8390.033  | 2803.936  | 5586.098 | 9.350  | 66.580 | 694.108 | 97.471  | 32.575  | 64.896 |
| 2010          | 58008  | 8157.570  | 2454.421  | 5703.149 | 9.832  | 69.912 | 666.189 | 93.685  | 28.188  | 65.497 |
| 2011          | 57368  | 8035.356  | 2152.897  | 5882.459 | 10.254 | 73.207 | 652.644 | 91.414  | 24.492  | 66.921 |
| 2012          | 57411  | 7970.766  | 1885.147  | 6085.619 | 10.600 | 76.349 | 646.453 | 89.752  | 21.227  | 68.525 |
| 2013          | 57067  | 7743.216  | 1641.938  | 6101.278 | 10.691 | 78.795 | 635.688 | 86.254  | 18.290  | 67.964 |
| 2014          | 57538  | 7774.935  | 1450.900  | 6324.035 | 10.991 | 81.339 | 633.906 | 85.658  | 15.985  | 69.673 |
| 2015          | 58395  | 7722.535  | 1301.374  | 6421.160 | 10.996 | 83.148 | 719.266 | 95.120  | 16.029  | 79.091 |
| 2016          | 58658  | 7600.353  | 1121.766  | 6478.587 | 11.045 | 85.241 | 715.621 | 92.723  | 13.685  | 79.038 |
| 2017          | 59004  | 7470.266  | 969.164   | 6501.102 | 11.018 | 87.026 | 713.034 | 90.274  | 11.712  | 78.563 |
| 2018          | 56077  | 6907.050  | 782.604   | 6124.447 | 10.922 | 88.669 | 671.224 | 82.675  | 9.368   | 73.308 |
| 2019          | 55886  | 6732.046  | 669.912   | 6062.135 | 10.847 | 90.049 | 662.462 | 79.801  | 7.941   | 71.860 |
| 2020          | 55313  | 6429.836  | 573.076   | 5856.760 | 10.588 | 91.087 | 743.037 | 86.373  | 7.698   | 78.675 |
| 2021          | 56292  | 6562.016  | 489.761   | 6072.254 | 10.787 | 92.536 | 750.730 | 87.513  | 6.532   | 80.982 |
| 2022          | 55827  | 6352.366  | 412.271   | 5940.094 | 10.640 | 93.510 | 738.885 | 84.075  | 5.457   | 78.619 |
| 2023          | 55338  | 6134.123  | 348.647   | 5785.476 | 10.455 | 94.316 | 726.728 | 80.557  | 4.579   | 75.978 |
| 2024          | 54770  | 5922.193  | 290.761   | 5631.432 | 10.282 | 95.090 | 713.771 | 77.179  | 3.789   | 73.390 |
| 2025          | 53295  | 5504.188  | 244.186   | 5260.002 | 9.870  | 95.564 | 801.612 | 82.789  | 3.673   | 79.116 |
| 2026          | 55278  | 5641.075  | 213.293   | 5427.782 | 9.819  | 96.219 | 828.283 | 84.526  | 3.196   | 81.330 |
| 2027          | 54199  | 5426.216  | 178.282   | 5247.934 | 9.683  | 96.714 | 808.875 | 80.982  | 2.661   | 78.321 |
| 2028          | 53090  | 5197.830  | 145.595   | 5052.235 | 9.516  | 97.199 | 789.020 | 77.249  | 2.164   | 75.086 |
| 2029          | 51974  | 4973.547  | 119.191   | 4854.355 | 9.340  | 97.603 | 769.023 | 73.590  | 1.764   | 71.826 |
| 2030          | 49479  | 4450.618  | 98.376    | 4352.242 | 8.796  | 97.790 | 866.605 | 77.952  | 1.723   | 76.228 |
| 2031          | 51987  | 4555.052  | 87.350    | 4467.702 | 8.594  | 98.082 | 909.317 | 79.674  | 1.528   | 78.146 |
| 2032          | 50677  | 4349.999  | 70.196    | 4279.803 | 8.445  | 98.386 | 884.689 | 75.939  | 1.225   | 74.714 |
| 2033          | 49380  | 4147.948  | 57.797    | 4090.151 | 8.283  | 98.607 | 859.955 | 72.237  | 1.007   | 71.230 |
| 2034          | 48076  | 3966.133  | 46.592    | 3919.542 | 8.153  | 98.825 | 834.943 | 68.881  | 0.809   | 68.072 |
| 2035          | 44518  | 3289.064  | 38.597    | 3250.468 | 7.301  | 98.827 | 946.825 | 69.952  | 0.821   | 69.131 |
| 2036          | 46347  | 3313.192  | 31.734    | 3281.459 | 7.080  | 99.042 | 987.211 | 70.572  | 0.676   | 69.896 |
| 2037          | 44841  | 3117.951  | 24.219    | 3093.732 | 6.899  | 99.223 | 955.859 | 66.464  | 0.516   | 65.948 |
| 2038          | 43378  | 2949.775  | 19.554    | 2930.221 | 6.755  | 99.337 | 924.621 | 62.876  | 0.417   | 62.459 |
| 2039          | 41973  | 2766.312  | 15.910    | 2750.402 | 6.553  | 99.425 | 893.753 | 58.905  | 0.339   | 58.566 |

## Results for PHIM for Run 4 (Sensitivity\_Analysis\_1.RTF)

\*\*\*\*\*

### Main Results for E-Component for Run: 4, Simulation: 1, COD: STROKE

| Variable Parameter          | Value                                  |
|-----------------------------|----------------------------------------|
| 1. Country                  | US (United States)                     |
| 2. Sex                      | F (Females)                            |
| 3. Year of start of process | 1990                                   |
| 4. Cause of Death           | STROKE                                 |
| 5. Effective Dose NULL      | CC:1                                   |
| 6. Effective Dose Ecig      | CC:1 Ecig:0 Dual:0.5                   |
| Note:                       | Death rates are per million population |

#### Results for Age Groups Combined and Years combined, Population unadjusted for deaths in Ecig scenario,

| Age Group:All | NULL    | Ecig       | %Drop     |          |        | NULL   | Ecig    | Drop   |        |        |
|---------------|---------|------------|-----------|----------|--------|--------|---------|--------|--------|--------|
| Year          | Number  | Attrib     | Attrib    | Drop     | %Drop  | Attrib | Death   | Attrib | Attrib | Drop   |
|               | Deaths  | Deaths     | Deaths    | Deaths   | Deaths | Deaths | Rate    | Rates  | Rates  | Rates  |
| All Comb      | 1352207 | 104899.750 | 48122.626 | 56777.12 | 4.199  | 54.125 | 371.243 | 28.800 | 13.212 | 15.588 |

#### Results for Age Groups Combined, Population unadjusted for deaths in Ecig scenario,

| Age Group:All | NULL   | Ecig     | %Drop    |          |        | NULL   | Ecig    | Drop   |        |        |
|---------------|--------|----------|----------|----------|--------|--------|---------|--------|--------|--------|
| Year          | Number | Attrib   | Attrib   | Drop     | %Drop  | Attrib | Death   | Attrib | Attrib | Drop   |
|               | Deaths | Deaths   | Deaths   | Deaths   | Deaths | Deaths | Rate    | Rates  | Rates  | Rates  |
| 1990          | 33504  | 3293.017 | 3293.017 | 0.000    | 0.000  | 0.000  | 490.678 | 48.227 | 48.227 | 0.000  |
| 1991          | 32505  | 3207.063 | 3178.126 | 28.937   | 0.089  | 0.902  | 469.694 | 46.342 | 45.924 | 0.418  |
| 1992          | 32560  | 3218.125 | 3137.157 | 80.968   | 0.249  | 2.516  | 464.104 | 45.871 | 44.716 | 1.154  |
| 1993          | 32768  | 3226.680 | 3073.280 | 153.401  | 0.468  | 4.754  | 460.480 | 45.344 | 43.188 | 2.156  |
| 1994          | 33005  | 3277.266 | 3032.440 | 244.826  | 0.742  | 7.470  | 456.915 | 45.370 | 41.981 | 3.389  |
| 1995          | 33730  | 3309.378 | 2958.341 | 351.037  | 1.041  | 10.607 | 459.716 | 45.104 | 40.320 | 4.784  |
| 1996          | 33750  | 3312.987 | 2838.187 | 474.800  | 1.407  | 14.331 | 454.019 | 44.568 | 38.181 | 6.387  |
| 1997          | 33699  | 3267.066 | 2672.119 | 594.947  | 1.765  | 18.210 | 447.056 | 43.341 | 35.449 | 7.893  |
| 1998          | 33274  | 3178.725 | 2469.179 | 709.546  | 2.132  | 22.322 | 435.211 | 41.577 | 32.296 | 9.281  |
| 1999          | 33891  | 3120.351 | 2293.897 | 826.455  | 2.439  | 26.486 | 437.317 | 40.264 | 29.600 | 10.664 |
| 2000          | 33827  | 3142.808 | 2175.729 | 967.079  | 2.859  | 30.771 | 431.074 | 40.050 | 27.726 | 12.324 |
| 2001          | 32506  | 2961.588 | 1922.624 | 1038.965 | 3.196  | 35.081 | 409.647 | 37.323 | 24.229 | 13.093 |
| 2002          | 32078  | 2940.627 | 1772.370 | 1168.257 | 3.642  | 39.728 | 400.295 | 36.695 | 22.117 | 14.578 |
| 2003          | 30568  | 2819.545 | 1574.976 | 1244.569 | 4.071  | 44.141 | 377.883 | 34.855 | 19.470 | 15.385 |
| 2004          | 29388  | 2730.466 | 1404.804 | 1325.662 | 4.511  | 48.551 | 359.671 | 33.417 | 17.193 | 16.224 |
| 2005          | 27954  | 2670.510 | 1262.005 | 1408.505 | 5.039  | 52.743 | 338.339 | 32.322 | 15.275 | 17.048 |
| 2006          | 27201  | 2623.285 | 1135.506 | 1487.780 | 5.470  | 56.714 | 326.354 | 31.474 | 13.624 | 17.850 |
| 2007          | 26302  | 2536.599 | 999.800  | 1536.799 | 5.843  | 60.585 | 312.424 | 30.131 | 11.876 | 18.255 |
| 2008          | 25998  | 2469.443 | 887.989  | 1581.454 | 6.083  | 64.041 | 305.468 | 29.015 | 10.434 | 18.582 |
| 2009          | 25040  | 2386.945 | 778.906  | 1608.039 | 6.422  | 67.368 | 290.901 | 27.730 | 9.049  | 18.681 |
| 2010          | 24840  | 2329.274 | 688.626  | 1640.649 | 6.605  | 70.436 | 285.273 | 26.750 | 7.908  | 18.842 |
| 2011          | 24792  | 2286.581 | 606.524  | 1680.056 | 6.777  | 73.475 | 282.045 | 26.013 | 6.900  | 19.113 |
| 2012          | 24500  | 2243.311 | 532.483  | 1710.828 | 6.983  | 76.264 | 275.872 | 25.260 | 5.996  | 19.264 |
| 2013          | 24451  | 2176.503 | 461.642  | 1714.861 | 7.013  | 78.790 | 272.368 | 24.245 | 5.142  | 19.102 |
| 2014          | 25296  | 2211.619 | 419.067  | 1792.552 | 7.086  | 81.052 | 278.691 | 24.366 | 4.617  | 19.749 |
| 2015          | 26316  | 2237.016 | 383.040  | 1853.976 | 7.045  | 82.877 | 324.141 | 27.554 | 4.718  | 22.836 |
| 2016          | 26735  | 2229.057 | 340.697  | 1888.360 | 7.063  | 84.716 | 326.164 | 27.194 | 4.156  | 23.038 |
| 2017          | 27616  | 2221.649 | 303.202  | 1918.447 | 6.947  | 86.352 | 333.726 | 26.848 | 3.664  | 23.183 |
| 2018          | 25256  | 1939.420 | 237.360  | 1702.060 | 6.739  | 87.761 | 302.304 | 23.214 | 2.841  | 20.373 |
| 2019          | 25429  | 1904.400 | 205.443  | 1698.956 | 6.681  | 89.212 | 301.434 | 22.574 | 2.435  | 20.139 |
| 2020          | 25379  | 1806.054 | 174.995  | 1631.059 | 6.427  | 90.311 | 340.922 | 24.261 | 2.351  | 21.910 |
| 2021          | 25448  | 1748.172 | 149.485  | 1598.688 | 6.282  | 91.449 | 339.386 | 23.314 | 1.994  | 21.321 |
| 2022          | 25539  | 1701.148 | 128.233  | 1572.915 | 6.159  | 92.462 | 338.015 | 22.515 | 1.697  | 20.818 |
| 2023          | 25620  | 1652.087 | 110.192  | 1541.895 | 6.018  | 93.330 | 336.461 | 21.696 | 1.447  | 20.249 |
| 2024          | 25659  | 1597.127 | 93.153   | 1503.973 | 5.861  | 94.167 | 334.391 | 20.814 | 1.214  | 19.600 |
| 2025          | 25260  | 1467.622 | 77.261   | 1390.361 | 5.504  | 94.736 | 379.931 | 22.075 | 1.162  | 20.913 |
| 2026          | 25480  | 1390.505 | 64.903   | 1325.602 | 5.203  | 95.332 | 381.790 | 20.835 | 0.973  | 19.863 |
| 2027          | 25264  | 1342.095 | 54.838   | 1287.257 | 5.095  | 95.914 | 377.042 | 20.030 | 0.818  | 19.211 |
| 2028          | 25022  | 1289.536 | 46.120   | 1243.416 | 4.969  | 96.424 | 371.870 | 19.165 | 0.685  | 18.479 |
| 2029          | 24767  | 1242.216 | 38.550   | 1203.666 | 4.860  | 96.897 | 366.459 | 18.380 | 0.570  | 17.810 |
| 2030          | 23959  | 1096.803 | 30.832   | 1065.971 | 4.449  | 97.189 | 419.641 | 19.210 | 0.540  | 18.670 |
| 2031          | 23963  | 1019.991 | 25.190   | 994.801  | 4.151  | 97.530 | 419.142 | 17.841 | 0.441  | 17.400 |
| 2032          | 23615  | 977.406  | 20.724   | 956.682  | 4.051  | 97.880 | 412.259 | 17.063 | 0.362  | 16.701 |
| 2033          | 23259  | 937.450  | 17.494   | 919.955  | 3.955  | 98.134 | 405.051 | 16.326 | 0.305  | 16.021 |
| 2034          | 22879  | 900.763  | 14.486   | 886.277  | 3.874  | 98.392 | 397.339 | 15.644 | 0.252  | 15.392 |
| 2035          | 21733  | 745.023  | 11.188   | 733.835  | 3.377  | 98.498 | 462.224 | 15.845 | 0.238  | 15.607 |
| 2036          | 20904  | 680.360  | 8.577    | 671.783  | 3.214  | 98.739 | 445.263 | 14.492 | 0.183  | 14.309 |
| 2037          | 20397  | 644.109  | 7.030    | 637.079  | 3.123  | 98.909 | 434.791 | 13.730 | 0.150  | 13.580 |
| 2038          | 19890  | 612.448  | 5.895    | 606.553  | 3.050  | 99.037 | 423.966 | 13.055 | 0.126  | 12.929 |
| 2039          | 19392  | 577.529  | 4.944    | 572.585  | 2.953  | 99.144 | 412.930 | 12.298 | 0.105  | 12.192 |

## Results for PHIM for Run 4 (Sensitivity\_Analysis\_1.RTF)

\*\*\*\*\*

### Main Results for E-Component for Run: 4, Simulation: 1, COD: COPD

| Variable Parameter          | Value                                  |
|-----------------------------|----------------------------------------|
| 1. Country                  | US (United States)                     |
| 2. Sex                      | F (Females)                            |
| 3. Year of start of process | 1990                                   |
| 4. Cause of Death           | COPD                                   |
| 5. Effective Dose NULL      | CC:1                                   |
| 6. Effective Dose Ecig      | CC:1 Ecig:0 Dual:0.5                   |
| Note:                       | Death rates are per million population |

#### Results for Age Groups Combined and Years combined, Population unadjusted for deaths in Ecig scenario,

| Age Group: | NULL    | Ecig       | %Drop      |          |        | NULL   | Ecig    | Drop    |         |        |
|------------|---------|------------|------------|----------|--------|--------|---------|---------|---------|--------|
| Year       | Number  | Attrib     | Attrib     | Drop     | %Drop  | Attrib | Death   | Attrib  | Attrib  | Drop   |
|            | Deaths  | Deaths     | Deaths     | Deaths   | Deaths | Deaths | Rate    | Rates   | Rates   | Rates  |
| All Comb   | 2159941 | 862051.244 | 529535.037 | 332516.2 | 15.395 | 38.573 | 593.003 | 236.673 | 145.382 | 91.291 |

#### Results for Age Groups Combined, Population unadjusted for deaths in Ecig scenario,

| Age Group: | NULL   | Ecig      | %Drop     |          |        | NULL   | Ecig    | Drop    |         |         |
|------------|--------|-----------|-----------|----------|--------|--------|---------|---------|---------|---------|
| Year       | Number | Attrib    | Attrib    | Drop     | %Drop  | Attrib | Death   | Attrib  | Attrib  | Drop    |
|            | Deaths | Deaths    | Deaths    | Deaths   | Deaths | Deaths | Rate    | Rates   | Rates   | Rates   |
| 1990       | 24738  | 10694.712 | 10694.712 | 0.000    | 0.000  | 0.000  | 362.296 | 156.628 | 156.628 | 0.000   |
| 1991       | 26562  | 11602.933 | 11583.812 | 19.121   | 0.072  | 0.165  | 383.818 | 167.661 | 167.385 | 0.276   |
| 1992       | 26828  | 11831.375 | 11778.551 | 52.824   | 0.197  | 0.446  | 382.401 | 168.642 | 167.889 | 0.753   |
| 1993       | 29774  | 13246.371 | 13132.416 | 113.955  | 0.383  | 0.860  | 418.406 | 186.148 | 184.546 | 1.601   |
| 1994       | 29804  | 13355.662 | 13174.404 | 181.258  | 0.608  | 1.357  | 412.601 | 184.893 | 182.384 | 2.509   |
| 1995       | 29755  | 13397.439 | 13128.276 | 269.163  | 0.905  | 2.009  | 405.540 | 182.598 | 178.929 | 3.669   |
| 1996       | 30900  | 13960.356 | 13583.876 | 376.480  | 1.218  | 2.697  | 415.680 | 187.801 | 182.736 | 5.065   |
| 1997       | 31128  | 14109.552 | 13616.644 | 492.908  | 1.583  | 3.493  | 412.949 | 187.180 | 180.641 | 6.539   |
| 1998       | 32096  | 14599.657 | 13954.030 | 645.627  | 2.012  | 4.422  | 419.803 | 190.958 | 182.513 | 8.445   |
| 1999       | 34616  | 15728.102 | 14888.772 | 839.330  | 2.425  | 5.337  | 446.673 | 202.950 | 192.119 | 10.830  |
| 2000       | 34299  | 15579.803 | 14581.415 | 998.388  | 2.911  | 6.408  | 437.088 | 198.541 | 185.818 | 12.723  |
| 2001       | 34592  | 15696.614 | 14492.984 | 1203.630 | 3.480  | 7.668  | 435.935 | 197.812 | 182.643 | 15.168  |
| 2002       | 34291  | 15519.777 | 14121.691 | 1398.086 | 4.077  | 9.008  | 427.910 | 193.668 | 176.222 | 17.446  |
| 2003       | 35074  | 15888.389 | 14234.931 | 1653.458 | 4.714  | 10.407 | 433.587 | 196.413 | 175.973 | 20.440  |
| 2004       | 33512  | 15091.573 | 13294.844 | 1796.729 | 5.361  | 11.906 | 410.143 | 184.701 | 162.712 | 21.990  |
| 2005       | 35392  | 15803.656 | 13654.845 | 2148.811 | 6.071  | 13.597 | 428.364 | 191.278 | 165.270 | 26.008  |
| 2006       | 33981  | 15100.563 | 12809.908 | 2290.655 | 6.741  | 15.169 | 407.699 | 181.174 | 153.691 | 27.483  |
| 2007       | 34000  | 14974.384 | 12437.906 | 2536.478 | 7.460  | 16.939 | 403.863 | 177.871 | 147.742 | 30.129  |
| 2008       | 37425  | 16406.197 | 13358.778 | 3047.420 | 8.143  | 18.575 | 439.732 | 192.768 | 156.961 | 35.806  |
| 2009       | 36826  | 16083.194 | 12770.164 | 3313.030 | 8.996  | 20.599 | 427.825 | 186.846 | 148.357 | 38.489  |
| 2010       | 36788  | 15927.400 | 12371.851 | 3555.550 | 9.665  | 22.323 | 422.489 | 182.917 | 142.084 | 40.833  |
| 2011       | 37636  | 16221.836 | 12268.327 | 3953.509 | 10.505 | 24.372 | 428.164 | 184.547 | 139.570 | 44.977  |
| 2012       | 38265  | 16358.849 | 12038.245 | 4320.605 | 11.291 | 26.411 | 430.867 | 184.202 | 135.552 | 48.650  |
| 2013       | 40112  | 16994.822 | 12138.069 | 4856.753 | 12.108 | 28.578 | 446.821 | 189.311 | 135.210 | 54.101  |
| 2014       | 40084  | 16855.093 | 11668.375 | 5186.719 | 12.940 | 30.772 | 441.613 | 185.696 | 128.553 | 57.143  |
| 2015       | 42200  | 17572.483 | 11858.958 | 5713.525 | 13.539 | 32.514 | 519.788 | 216.445 | 146.070 | 70.375  |
| 2016       | 42606  | 17579.955 | 11442.817 | 6137.138 | 14.404 | 34.910 | 519.788 | 214.473 | 139.601 | 74.872  |
| 2017       | 44364  | 18080.688 | 11344.393 | 6736.296 | 15.184 | 37.257 | 536.117 | 218.496 | 137.091 | 81.405  |
| 2018       | 45359  | 18209.262 | 11046.272 | 7162.991 | 15.792 | 39.337 | 542.932 | 217.960 | 132.221 | 85.739  |
| 2019       | 46876  | 18648.302 | 10883.862 | 7764.440 | 16.564 | 41.636 | 555.657 | 221.054 | 129.016 | 92.038  |
| 2020       | 48331  | 19002.597 | 10714.573 | 8288.024 | 17.149 | 43.615 | 649.239 | 255.266 | 143.931 | 111.335 |
| 2021       | 48338  | 18885.717 | 10193.057 | 8692.661 | 17.983 | 46.028 | 644.660 | 251.867 | 135.938 | 115.929 |
| 2022       | 49708  | 19235.076 | 9951.201  | 9283.875 | 18.677 | 48.265 | 657.895 | 254.582 | 131.707 | 122.875 |
| 2023       | 51083  | 19521.158 | 9696.519  | 9824.639 | 19.233 | 50.328 | 670.849 | 256.363 | 127.340 | 129.023 |
| 2024       | 52397  | 19918.620 | 9438.968  | 10479.65 | 20.000 | 52.612 | 682.854 | 259.583 | 123.010 | 136.573 |
| 2025       | 53387  | 20150.545 | 9141.639  | 11008.91 | 20.621 | 54.633 | 803.004 | 303.086 | 137.500 | 165.586 |
| 2026       | 54232  | 20393.792 | 8797.068  | 11596.72 | 21.384 | 56.864 | 812.615 | 305.582 | 131.816 | 173.766 |
| 2027       | 55049  | 20615.351 | 8429.324  | 12186.03 | 22.137 | 59.111 | 821.568 | 307.668 | 125.801 | 181.867 |
| 2028       | 55809  | 20731.894 | 8020.462  | 12711.43 | 22.777 | 61.313 | 829.419 | 308.115 | 119.199 | 188.916 |
| 2029       | 56527  | 20781.967 | 7598.347  | 13183.62 | 23.323 | 63.438 | 836.392 | 307.495 | 112.427 | 195.068 |
| 2030       | 56756  | 20753.201 | 7199.339  | 13553.86 | 23.881 | 65.310 | 994.067 | 363.487 | 126.095 | 237.393 |
| 2031       | 58288  | 21048.417 | 7034.211  | 14014.21 | 24.043 | 66.581 | 1019.54 | 368.165 | 123.038 | 245.127 |
| 2032       | 58782  | 21169.329 | 6657.696  | 14511.63 | 24.687 | 68.550 | 1026.18 | 369.560 | 116.226 | 253.335 |
| 2033       | 59236  | 21109.293 | 6253.603  | 14855.69 | 25.079 | 70.375 | 1031.59 | 367.618 | 108.907 | 258.712 |
| 2034       | 59614  | 21109.429 | 5850.411  | 15259.02 | 25.596 | 72.285 | 1035.33 | 366.613 | 101.605 | 265.007 |
| 2035       | 58938  | 20794.840 | 5467.317  | 15327.52 | 26.006 | 73.708 | 1253.51 | 442.268 | 116.280 | 325.988 |
| 2036       | 56014  | 19354.577 | 4801.405  | 14553.17 | 25.981 | 75.192 | 1193.11 | 412.258 | 102.271 | 309.986 |
| 2037       | 55953  | 19064.169 | 4360.319  | 14703.85 | 26.279 | 77.128 | 1192.72 | 406.385 | 92.948  | 313.437 |
| 2038       | 55859  | 18854.812 | 3992.614  | 14862.20 | 26.607 | 78.824 | 1190.66 | 401.900 | 85.105  | 316.795 |
| 2039       | 55757  | 18437.457 | 3582.838  | 14854.62 | 26.642 | 80.568 | 1187.28 | 392.602 | 76.292  | 316.310 |

## Results for PHIM for Run 4 (Sensitivity\_Analysis\_1.RTF)

\*\*\*\*\*

### Main Results for E-Component for Run: 4, Simulation: 1, COD: Four Diseases Combined, Adjusted

| Variable Parameter          | Value                                  |
|-----------------------------|----------------------------------------|
| 1. Country                  | US (United States)                     |
| 2. Sex                      | F (Females)                            |
| 3. Year of start of process | 1990                                   |
| 4. Cause of Death           | Four Diseases Combined                 |
| 5. Effective Dose NULL      | CC:1                                   |
| 6. Effective Dose Ecig      | CC:1 Ecig:0 Dual:0.5                   |
| Note:                       | Death rates are per million population |

#### Results for Age Groups Combined and Years combined, Population and Number deaths adjusted for Ecig scenario,

| Age Group:All |         | NULL        | Ecig        | %Drop   |        |        | NULL    | Ecig    | Drop    |         |
|---------------|---------|-------------|-------------|---------|--------|--------|---------|---------|---------|---------|
| Year          | Number  | Attrib      | Attrib      | Drop    | %Drop  | Attrib | Death   | Attrib  | Attrib  | Drop    |
|               | Deaths  | Deaths      | Deaths      | Deaths  | Deaths | Deaths | Rate    | Rates   | Rates   | Rates   |
| All Comb      | 9153195 | 2946250.006 | 1869245.975 | 1077004 | 11.766 | 36.555 | 2500.01 | 808.881 | 510.547 | 298.334 |

#### Results for Age Groups Combined, Population and Number deaths adjusted for Ecig scenario,

| Age Group:All |        | NULL      | Ecig      | %Drop    |        |        | NULL    | Ecig    | Drop    |         |
|---------------|--------|-----------|-----------|----------|--------|--------|---------|---------|---------|---------|
| Year          | Number | Attrib    | Attrib    | Drop     | %Drop  | Attrib | Death   | Attrib  | Attrib  | Drop    |
|               | Deaths | Deaths    | Deaths    | Deaths   | Deaths | Deaths | Rate    | Rates   | Rates   | Rates   |
| 1990          | 199848 | 57524.822 | 57524.822 | 0.000    | 0.000  | 0.000  | 2926.84 | 842.471 | 842.471 | 0.000   |
| 1991          | 199162 | 59078.486 | 58901.294 | 177.192  | 0.089  | 0.300  | 2877.87 | 853.678 | 851.118 | 2.560   |
| 1992          | 198533 | 60494.150 | 59997.417 | 496.732  | 0.250  | 0.821  | 2829.84 | 862.271 | 855.189 | 7.083   |
| 1993          | 202515 | 62694.848 | 61727.787 | 967.060  | 0.478  | 1.542  | 2845.86 | 881.034 | 867.435 | 13.598  |
| 1994          | 200665 | 63202.598 | 61673.719 | 1528.878 | 0.762  | 2.419  | 2777.91 | 874.966 | 853.780 | 21.186  |
| 1995          | 201037 | 63766.862 | 61557.707 | 2209.155 | 1.099  | 3.464  | 2739.87 | 869.097 | 838.950 | 30.147  |
| 1996          | 201203 | 64591.163 | 61561.954 | 3029.209 | 1.506  | 4.690  | 2706.47 | 868.908 | 828.095 | 40.813  |
| 1997          | 198675 | 64686.912 | 60890.856 | 3796.056 | 1.911  | 5.868  | 2635.35 | 858.147 | 807.693 | 50.454  |
| 1998          | 197626 | 65295.961 | 60612.321 | 4683.640 | 2.370  | 7.173  | 2584.43 | 854.046 | 792.652 | 61.394  |
| 1999          | 211408 | 67327.521 | 61271.226 | 6056.296 | 2.865  | 8.995  | 2727.30 | 868.771 | 790.439 | 78.332  |
| 2000          | 208602 | 67596.897 | 60543.171 | 7053.725 | 3.381  | 10.435 | 2657.48 | 861.419 | 771.289 | 90.130  |
| 2001          | 203742 | 67008.811 | 58895.138 | 8113.672 | 3.982  | 12.108 | 2566.55 | 844.458 | 741.906 | 102.552 |
| 2002          | 200999 | 67067.744 | 57774.253 | 9293.490 | 4.624  | 13.857 | 2506.94 | 836.925 | 720.583 | 116.342 |
| 2003          | 196562 | 66756.217 | 56395.842 | 10360.38 | 5.271  | 15.520 | 2428.36 | 825.244 | 696.726 | 128.518 |
| 2004          | 188407 | 65058.725 | 53791.863 | 11266.86 | 5.980  | 17.318 | 2304.08 | 796.234 | 657.835 | 138.400 |
| 2005          | 186710 | 65214.724 | 52725.010 | 12489.71 | 6.689  | 19.152 | 2257.75 | 789.321 | 637.566 | 151.755 |
| 2006          | 180424 | 63771.146 | 50348.076 | 13423.07 | 7.440  | 21.049 | 2162.37 | 765.117 | 603.416 | 161.701 |
| 2007          | 176027 | 63110.718 | 48728.130 | 14382.59 | 8.171  | 22.789 | 2088.28 | 749.650 | 578.082 | 171.568 |
| 2008          | 178018 | 63718.624 | 47953.217 | 15765.41 | 8.856  | 24.742 | 2088.63 | 748.674 | 562.623 | 186.051 |
| 2009          | 173305 | 62794.698 | 46129.495 | 16665.20 | 9.616  | 26.539 | 2010.05 | 729.515 | 535.026 | 194.489 |
| 2010          | 171047 | 61917.074 | 44300.611 | 17616.46 | 10.299 | 28.452 | 1960.73 | 711.083 | 507.822 | 203.261 |
| 2011          | 170931 | 61680.114 | 42795.979 | 18884.14 | 11.048 | 30.616 | 1940.54 | 701.700 | 485.852 | 215.848 |
| 2012          | 172124 | 62023.127 | 41725.486 | 20297.64 | 11.792 | 32.726 | 1933.64 | 698.386 | 468.744 | 229.643 |
| 2013          | 173489 | 62037.765 | 40472.092 | 21565.67 | 12.431 | 34.762 | 1927.58 | 691.059 | 449.673 | 241.386 |
| 2014          | 175050 | 61921.017 | 38956.459 | 22964.56 | 13.119 | 37.087 | 1923.08 | 682.195 | 427.973 | 254.222 |
| 2015          | 178346 | 61856.204 | 37700.825 | 24155.38 | 13.544 | 39.051 | 2189.06 | 761.899 | 462.748 | 299.151 |
| 2016          | 177937 | 60464.119 | 35343.749 | 25120.37 | 14.118 | 41.546 | 2162.51 | 737.655 | 429.541 | 308.115 |
| 2017          | 180513 | 60243.839 | 33836.204 | 26407.63 | 14.629 | 43.835 | 2172.32 | 728.017 | 407.191 | 320.826 |
| 2018          | 178456 | 60713.327 | 33123.003 | 27590.32 | 15.461 | 45.444 | 2126.41 | 726.721 | 394.681 | 332.039 |
| 2019          | 180659 | 61148.172 | 32056.310 | 29091.86 | 16.103 | 47.576 | 2131.04 | 724.841 | 378.135 | 346.706 |
| 2020          | 182040 | 61149.317 | 30996.028 | 30153.29 | 16.564 | 49.311 | 2430.89 | 821.432 | 413.907 | 407.525 |
| 2021          | 179791 | 58727.786 | 28133.607 | 30594.18 | 17.016 | 52.095 | 2382.49 | 783.216 | 372.810 | 410.406 |
| 2022          | 181225 | 58848.802 | 26963.856 | 31884.95 | 17.594 | 54.181 | 2382.22 | 778.881 | 354.442 | 424.438 |
| 2023          | 182604 | 58816.149 | 25796.082 | 33020.07 | 18.083 | 56.141 | 2380.63 | 772.407 | 336.306 | 436.101 |
| 2024          | 183725 | 58955.232 | 24619.675 | 34335.56 | 18.689 | 58.240 | 2375.82 | 768.316 | 318.367 | 449.949 |
| 2025          | 182684 | 58297.744 | 23391.767 | 34905.98 | 19.107 | 59.875 | 2722.31 | 876.861 | 348.578 | 528.283 |
| 2026          | 182740 | 56469.971 | 21341.104 | 35128.87 | 19.223 | 62.208 | 2711.32 | 846.150 | 316.639 | 529.511 |
| 2027          | 182192 | 56209.427 | 20083.674 | 36125.75 | 19.828 | 64.270 | 2690.91 | 838.883 | 296.630 | 542.254 |
| 2028          | 181483 | 55733.105 | 18774.441 | 36958.66 | 20.365 | 66.314 | 2667.76 | 828.298 | 275.980 | 552.318 |
| 2029          | 180678 | 55145.838 | 17464.597 | 37681.24 | 20.855 | 68.330 | 2642.72 | 815.951 | 255.449 | 560.502 |
| 2030          | 176595 | 53615.097 | 16236.778 | 37378.32 | 21.166 | 69.716 | 3051.02 | 939.056 | 280.522 | 658.534 |
| 2031          | 178221 | 52046.561 | 15068.634 | 36977.93 | 20.748 | 71.048 | 3072.96 | 910.364 | 259.819 | 650.545 |
| 2032          | 176786 | 51582.636 | 14000.875 | 37581.76 | 21.258 | 72.857 | 3040.32 | 900.496 | 240.783 | 659.713 |
| 2033          | 175294 | 50839.758 | 12933.341 | 37906.42 | 21.625 | 74.561 | 3005.38 | 885.375 | 221.740 | 663.635 |
| 2034          | 173656 | 50215.451 | 11890.059 | 38325.39 | 22.070 | 76.322 | 2967.22 | 872.104 | 203.163 | 668.941 |
| 2035          | 166429 | 47773.075 | 10897.692 | 36875.38 | 22.157 | 77.189 | 3472.66 | 1016.05 | 227.388 | 788.657 |
| 2036          | 160071 | 43298.709 | 9168.101  | 34130.61 | 21.322 | 78.826 | 3342.51 | 922.274 | 191.443 | 730.831 |
| 2037          | 157513 | 42241.563 | 8198.213  | 34043.35 | 21.613 | 80.592 | 3289.39 | 900.450 | 171.205 | 729.245 |
| 2038          | 154964 | 41356.353 | 7412.443  | 33943.91 | 21.904 | 82.077 | 3233.80 | 881.531 | 154.683 | 726.847 |
| 2039          | 152485 | 40161.050 | 6560.993  | 33600.06 | 22.035 | 83.663 | 3176.72 | 855.178 | 136.685 | 718.492 |



## Results for PHIM for Run 4 (Sensitivity\_Analysis\_1.RTF)

\*\*\*\*\*

### Main Results for E-Component for Run: 4, Simulation: 1, COD: LUNG CANCER, Adjusted

| Variable Parameter          | Value                                  |
|-----------------------------|----------------------------------------|
| 1. Country                  | US (United States)                     |
| 2. Sex                      | F (Females)                            |
| 3. Year of start of process | 1990                                   |
| 4. Cause of Death           | LUNG CANCER                            |
| 5. Effective Dose NULL      | CC:1                                   |
| 6. Effective Dose Ecig      | CC:1 Ecig:0 Dual:0.5                   |
| Note:                       | Death rates are per million population |

#### Results for Age Groups Combined and Years combined, Population and Number deaths adjusted for Ecig scenario,

| Age Group: | NULL    | Ecig        | %Drop       |          |        |        | NULL    | Ecig    | Drop    |         |
|------------|---------|-------------|-------------|----------|--------|--------|---------|---------|---------|---------|
| Year       | Number  | Attrib      | Attrib      | Drop     | %Drop  | Attrib | Death   | Attrib  | Attrib  | Drop    |
|            | Deaths  | Deaths      | Deaths      | Deaths   | Deaths | Deaths | Rate    | Rates   | Rates   | Rates   |
| All Comb   | 2345097 | 1580465.217 | 1101336.308 | 479128.9 | 20.431 | 30.316 | 640.517 | 433.910 | 300.808 | 133.102 |

#### Results for Age Groups Combined, Population and Number deaths adjusted for Ecig scenario,

| Age Group: | NULL   | Ecig      | %Drop     |          |        |        | NULL    | Ecig    | Drop    |         |
|------------|--------|-----------|-----------|----------|--------|--------|---------|---------|---------|---------|
| Year       | Number | Attrib    | Attrib    | Drop     | %Drop  | Attrib | Death   | Attrib  | Attrib  | Drop    |
|            | Deaths | Deaths    | Deaths    | Deaths   | Deaths | Deaths | Rate    | Rates   | Rates   | Rates   |
| 1990       | 42690  | 30614.201 | 30614.201 | 0.000    | 0.000  | 0.000  | 625.210 | 448.355 | 448.355 | 0.000   |
| 1991       | 43692  | 31412.010 | 31378.038 | 33.973   | 0.078  | 0.108  | 631.345 | 453.901 | 453.410 | 0.491   |
| 1992       | 45423  | 32782.407 | 32683.573 | 98.833   | 0.218  | 0.301  | 647.451 | 467.274 | 465.864 | 1.410   |
| 1993       | 46292  | 33491.183 | 33295.899 | 195.284  | 0.422  | 0.583  | 650.518 | 470.643 | 467.894 | 2.749   |
| 1994       | 47019  | 34074.347 | 33757.730 | 316.617  | 0.673  | 0.929  | 650.904 | 471.719 | 467.325 | 4.394   |
| 1995       | 47843  | 34694.454 | 34217.159 | 477.295  | 0.998  | 1.376  | 652.042 | 472.861 | 466.335 | 6.526   |
| 1996       | 48250  | 35027.269 | 34366.434 | 660.834  | 1.370  | 1.887  | 649.028 | 471.202 | 462.277 | 8.925   |
| 1997       | 49044  | 35590.763 | 34710.856 | 879.906  | 1.794  | 2.472  | 650.553 | 472.153 | 460.426 | 11.727  |
| 1998       | 49700  | 36100.785 | 34961.871 | 1138.914 | 2.292  | 3.155  | 649.944 | 472.184 | 457.211 | 14.974  |
| 1999       | 48902  | 35451.030 | 34077.276 | 1373.753 | 2.809  | 3.875  | 630.865 | 457.448 | 439.619 | 17.828  |
| 2000       | 50357  | 36447.986 | 34728.124 | 1719.862 | 3.415  | 4.719  | 641.527 | 464.474 | 442.418 | 22.056  |
| 2001       | 50424  | 36411.326 | 34338.822 | 2072.505 | 4.110  | 5.692  | 635.189 | 458.863 | 432.569 | 26.294  |
| 2002       | 51490  | 37078.545 | 34567.276 | 2511.269 | 4.877  | 6.773  | 642.201 | 462.696 | 431.137 | 31.559  |
| 2003       | 51464  | 36999.876 | 34068.370 | 2931.506 | 5.696  | 7.923  | 635.796 | 457.395 | 420.888 | 36.507  |
| 2004       | 51467  | 36861.555 | 33461.504 | 3400.051 | 6.606  | 9.224  | 629.409 | 451.138 | 409.210 | 41.928  |
| 2005       | 51503  | 36689.529 | 32791.340 | 3898.189 | 7.569  | 10.625 | 622.786 | 444.069 | 396.522 | 47.546  |
| 2006       | 51451  | 36504.774 | 32080.613 | 4424.161 | 8.599  | 12.119 | 616.639 | 437.979 | 384.482 | 53.497  |
| 2007       | 51952  | 36663.202 | 31611.866 | 5051.336 | 9.723  | 13.778 | 616.334 | 435.498 | 375.025 | 60.473  |
| 2008       | 51105  | 35898.803 | 30371.271 | 5527.532 | 10.816 | 15.398 | 599.598 | 421.800 | 356.338 | 65.461  |
| 2009       | 51341  | 35934.525 | 29727.593 | 6206.933 | 12.090 | 17.273 | 595.469 | 417.468 | 344.791 | 72.677  |
| 2010       | 51019  | 35502.829 | 28732.981 | 6769.848 | 13.269 | 19.068 | 584.837 | 407.730 | 329.369 | 78.361  |
| 2011       | 50694  | 35136.342 | 27710.796 | 7425.546 | 14.648 | 21.134 | 575.517 | 399.726 | 314.594 | 85.132  |
| 2012       | 51455  | 35450.201 | 27207.786 | 8242.414 | 16.019 | 23.251 | 578.041 | 399.173 | 305.652 | 93.521  |
| 2013       | 51301  | 35123.224 | 26162.546 | 8960.678 | 17.467 | 25.512 | 569.993 | 391.249 | 290.684 | 100.565 |
| 2014       | 51509  | 35079.370 | 25346.593 | 9732.777 | 18.895 | 27.745 | 565.875 | 386.476 | 278.456 | 108.020 |
| 2015       | 50724  | 34324.171 | 24078.299 | 10245.87 | 20.199 | 29.850 | 622.593 | 422.780 | 295.542 | 127.238 |
| 2016       | 49152  | 33054.753 | 22355.767 | 10698.99 | 21.767 | 32.367 | 597.355 | 403.264 | 271.695 | 131.569 |
| 2017       | 48648  | 32471.234 | 21130.800 | 11340.43 | 23.311 | 34.925 | 585.438 | 392.399 | 254.292 | 138.107 |
| 2018       | 50832  | 33657.595 | 20963.690 | 12693.91 | 24.972 | 37.715 | 605.690 | 402.871 | 249.795 | 153.076 |
| 2019       | 51439  | 33863.424 | 20198.020 | 13665.40 | 26.566 | 40.354 | 606.775 | 401.412 | 238.255 | 163.157 |
| 2020       | 51886  | 33910.830 | 19428.156 | 14482.67 | 27.913 | 42.708 | 692.857 | 455.532 | 259.435 | 196.097 |
| 2021       | 48483  | 31531.880 | 17193.912 | 14337.97 | 29.573 | 45.471 | 642.473 | 420.521 | 227.843 | 192.678 |
| 2022       | 48818  | 31560.212 | 16360.046 | 15200.17 | 31.136 | 48.162 | 641.718 | 417.708 | 215.054 | 202.654 |
| 2023       | 49120  | 31508.781 | 15524.000 | 15984.78 | 32.542 | 50.731 | 640.385 | 413.791 | 202.388 | 211.403 |
| 2024       | 49344  | 31517.293 | 14675.619 | 16841.67 | 34.131 | 53.436 | 638.085 | 410.740 | 189.777 | 220.963 |
| 2025       | 49076  | 31175.389 | 13803.512 | 17371.88 | 35.398 | 55.723 | 731.311 | 468.912 | 205.696 | 263.215 |
| 2026       | 45927  | 29044.598 | 12136.733 | 16907.86 | 36.815 | 58.213 | 681.416 | 435.206 | 180.073 | 255.133 |
| 2027       | 45745  | 28825.765 | 11289.559 | 17536.21 | 38.334 | 60.835 | 675.643 | 430.203 | 166.743 | 263.459 |
| 2028       | 45515  | 28513.846 | 10429.258 | 18084.59 | 39.733 | 63.424 | 669.064 | 423.769 | 153.308 | 270.461 |
| 2029       | 45248  | 28148.109 | 9574.765  | 18573.34 | 41.047 | 65.984 | 661.834 | 416.486 | 140.047 | 276.439 |
| 2030       | 44134  | 27314.475 | 8773.690  | 18540.79 | 42.010 | 67.879 | 762.509 | 478.407 | 151.582 | 326.824 |
| 2031       | 41494  | 25423.102 | 7781.158  | 17641.94 | 42.517 | 69.393 | 715.460 | 444.684 | 134.166 | 310.518 |
| 2032       | 41105  | 25085.902 | 7111.186  | 17974.72 | 43.729 | 71.653 | 706.905 | 437.933 | 122.296 | 315.637 |
| 2033       | 40694  | 24645.067 | 6464.226  | 18180.84 | 44.677 | 73.771 | 697.693 | 429.194 | 110.828 | 318.366 |
| 2034       | 40248  | 24239.126 | 5839.983  | 18399.14 | 45.714 | 75.907 | 687.709 | 420.967 | 99.786  | 321.180 |
| 2035       | 38317  | 22944.147 | 5243.476  | 17700.67 | 46.195 | 77.147 | 799.519 | 487.980 | 109.409 | 378.571 |
| 2036       | 33784  | 19950.581 | 4199.091  | 15751.49 | 46.624 | 78.953 | 705.459 | 424.953 | 87.683  | 337.270 |
| 2037       | 33219  | 19415.334 | 3685.333  | 15730.00 | 47.353 | 81.018 | 693.714 | 413.871 | 76.962  | 336.909 |
| 2038       | 32654  | 18939.317 | 3277.784  | 15661.53 | 47.962 | 82.693 | 681.427 | 403.701 | 68.401  | 335.300 |
| 2039       | 32103  | 18379.752 | 2847.727  | 15532.02 | 48.381 | 84.506 | 668.809 | 391.373 | 59.327  | 332.046 |

## Results for PHIM for Run 4 (Sensitivity\_Analysis\_1.RTF)

\*\*\*\*\*

### Main Results for E-Component for Run: 4, Simulation: 1, COD: IHD, Adjusted

| Variable Parameter          | Value                                  |
|-----------------------------|----------------------------------------|
| 1. Country                  | US (United States)                     |
| 2. Sex                      | F (Females)                            |
| 3. Year of start of process | 1990                                   |
| 4. Cause of Death           | IHD                                    |
| 5. Effective Dose NULL      | CC:1                                   |
| 6. Effective Dose Ecig      | CC:1 Ecig:0 Dual:0.5                   |
| Note:                       | Death rates are per million population |

#### Results for Age Groups Combined and Years combined, Population and Number deaths adjusted for Ecig scenario,

| Age Group:All | NULL    | Ecig       | %Drop      |          |        |        | NULL    | Ecig    | Drop   |        |
|---------------|---------|------------|------------|----------|--------|--------|---------|---------|--------|--------|
| Year          | Number  | Attrib     | Attrib     | Drop     | %Drop  | Attrib | Death   | Attrib  | Attrib | Drop   |
|               | Deaths  | Deaths     | Deaths     | Deaths   | Deaths | Deaths | Rate    | Rates   | Rates  | Rates  |
| All Comb      | 3263043 | 398833.796 | 186846.829 | 211987.0 | 6.497  | 53.152 | 891.235 | 109.498 | 51.033 | 58.465 |

#### Results for Age Groups Combined, Population and Number deaths adjusted for Ecig scenario,

| Age Group:All | NULL   | Ecig      | %Drop     |          |        |        | NULL    | Ecig    | Drop    |        |
|---------------|--------|-----------|-----------|----------|--------|--------|---------|---------|---------|--------|
| Year          | Number | Attrib    | Attrib    | Drop     | %Drop  | Attrib | Death   | Attrib  | Attrib  | Drop   |
|               | Deaths | Deaths    | Deaths    | Deaths   | Deaths | Deaths | Rate    | Rates   | Rates   | Rates  |
| 1990          | 98916  | 12922.892 | 12922.892 | 0.000    | 0.000  | 0.000  | 1448.66 | 189.260 | 189.260 | 0.000  |
| 1991          | 96403  | 12856.479 | 12761.318 | 95.161   | 0.099  | 0.740  | 1393.01 | 185.775 | 184.400 | 1.375  |
| 1992          | 93721  | 12662.244 | 12398.079 | 264.165  | 0.282  | 2.086  | 1335.88 | 180.485 | 176.719 | 3.766  |
| 1993          | 93680  | 12730.613 | 12225.954 | 504.659  | 0.539  | 3.964  | 1316.45 | 178.900 | 171.806 | 7.094  |
| 1994          | 90835  | 12495.323 | 11708.561 | 786.761  | 0.866  | 6.296  | 1257.48 | 172.983 | 162.087 | 10.896 |
| 1995          | 89704  | 12365.590 | 11252.819 | 1112.771 | 1.240  | 8.999  | 1222.55 | 168.534 | 153.361 | 15.173 |
| 1996          | 88296  | 12290.551 | 10771.525 | 1519.026 | 1.720  | 12.359 | 1187.71 | 165.338 | 144.892 | 20.446 |
| 1997          | 84792  | 11719.531 | 9888.229  | 1831.302 | 2.160  | 15.626 | 1124.74 | 155.473 | 131.163 | 24.310 |
| 1998          | 82539  | 11416.794 | 9222.789  | 2194.005 | 2.658  | 19.217 | 1079.39 | 149.327 | 120.610 | 28.717 |
| 1999          | 93974  | 13028.038 | 10004.759 | 3023.279 | 3.217  | 23.206 | 1212.32 | 168.109 | 129.068 | 39.041 |
| 2000          | 90084  | 12426.299 | 9049.251  | 3377.048 | 3.749  | 27.177 | 1147.63 | 158.354 | 115.283 | 43.071 |
| 2001          | 86176  | 11939.281 | 8129.536  | 3809.745 | 4.421  | 31.909 | 1085.56 | 150.461 | 102.408 | 48.053 |
| 2002          | 83084  | 11528.794 | 7299.145  | 4229.649 | 5.091  | 36.688 | 1036.26 | 143.865 | 91.038  | 52.828 |
| 2003          | 79386  | 11048.407 | 6500.370  | 4548.037 | 5.729  | 41.165 | 980.751 | 136.581 | 80.307  | 56.274 |
| 2004          | 73957  | 10375.132 | 5611.007  | 4764.125 | 6.442  | 45.919 | 904.443 | 126.978 | 68.618  | 58.360 |
| 2005          | 71761  | 10051.029 | 4992.794  | 5058.235 | 7.049  | 50.326 | 867.757 | 121.652 | 60.374  | 61.277 |
| 2006          | 67676  | 9542.523  | 4295.308  | 5247.215 | 7.753  | 54.988 | 811.094 | 114.490 | 51.479  | 63.011 |
| 2007          | 63640  | 8936.533  | 3648.384  | 5288.149 | 8.309  | 59.175 | 754.993 | 106.151 | 43.282  | 62.869 |
| 2008          | 63329  | 8944.180  | 3297.978  | 5646.202 | 8.916  | 63.127 | 743.019 | 105.091 | 38.694  | 66.397 |
| 2009          | 59918  | 8390.033  | 2812.306  | 5577.728 | 9.309  | 66.480 | 694.950 | 97.471  | 32.618  | 64.853 |
| 2010          | 58196  | 8157.570  | 2462.738  | 5694.831 | 9.786  | 69.810 | 667.105 | 93.685  | 28.231  | 65.455 |
| 2011          | 57577  | 8035.356  | 2161.096  | 5874.260 | 10.202 | 73.105 | 653.655 | 91.414  | 24.534  | 66.879 |
| 2012          | 57643  | 7970.766  | 1893.139  | 6077.627 | 10.543 | 76.249 | 647.566 | 89.752  | 21.268  | 68.484 |
| 2013          | 57325  | 7743.216  | 1649.687  | 6093.529 | 10.630 | 78.695 | 636.918 | 86.254  | 18.329  | 67.925 |
| 2014          | 57825  | 7774.935  | 1458.491  | 6316.444 | 10.923 | 81.241 | 635.260 | 85.658  | 16.023  | 69.635 |
| 2015          | 58717  | 7722.535  | 1308.912  | 6413.623 | 10.923 | 83.051 | 720.702 | 95.120  | 16.066  | 79.055 |
| 2016          | 59013  | 7600.353  | 1128.897  | 6471.456 | 10.966 | 85.147 | 717.193 | 92.723  | 13.720  | 79.004 |
| 2017          | 59394  | 7470.266  | 975.908   | 6494.359 | 10.934 | 86.936 | 714.757 | 90.274  | 11.744  | 78.530 |
| 2018          | 56481  | 6907.050  | 788.551   | 6118.499 | 10.833 | 88.583 | 673.003 | 82.675  | 9.396   | 73.279 |
| 2019          | 56324  | 6732.046  | 675.469   | 6056.577 | 10.753 | 89.966 | 664.397 | 79.801  | 7.968   | 71.833 |
| 2020          | 55788  | 6429.836  | 578.257   | 5851.579 | 10.489 | 91.007 | 744.964 | 86.373  | 7.722   | 78.652 |
| 2021          | 56810  | 6562.016  | 494.517   | 6067.499 | 10.680 | 92.464 | 752.810 | 87.513  | 6.553   | 80.960 |
| 2022          | 56380  | 6352.366  | 416.595   | 5935.771 | 10.528 | 93.442 | 741.115 | 84.075  | 5.476   | 78.599 |
| 2023          | 55926  | 6134.123  | 352.585   | 5781.538 | 10.338 | 94.252 | 729.114 | 80.557  | 4.597   | 75.960 |
| 2024          | 55393  | 5922.193  | 294.290   | 5627.903 | 10.160 | 95.031 | 716.312 | 77.179  | 3.806   | 73.374 |
| 2025          | 53952  | 5504.188  | 247.367   | 5256.821 | 9.744  | 95.506 | 803.972 | 82.789  | 3.686   | 79.103 |
| 2026          | 56002  | 5641.075  | 216.270   | 5424.805 | 9.687  | 96.166 | 830.897 | 84.526  | 3.209   | 81.317 |
| 2027          | 54954  | 5426.216  | 180.954   | 5245.262 | 9.545  | 96.665 | 811.648 | 80.982  | 2.673   | 78.310 |
| 2028          | 53875  | 5197.830  | 147.920   | 5049.910 | 9.373  | 97.154 | 791.956 | 77.249  | 2.174   | 75.075 |
| 2029          | 52789  | 4973.547  | 121.214   | 4852.332 | 9.192  | 97.563 | 772.123 | 73.590  | 1.773   | 71.817 |
| 2030          | 50316  | 4450.618  | 100.150   | 4350.468 | 8.646  | 97.750 | 869.310 | 77.952  | 1.730   | 76.221 |
| 2031          | 52917  | 4555.052  | 89.030    | 4466.023 | 8.440  | 98.045 | 912.420 | 79.674  | 1.535   | 78.139 |
| 2032          | 51634  | 4349.999  | 71.628    | 4278.371 | 8.286  | 98.353 | 887.983 | 75.939  | 1.232   | 74.708 |
| 2033          | 50362  | 4147.948  | 59.052    | 4088.896 | 8.119  | 98.576 | 863.441 | 72.237  | 1.012   | 71.224 |
| 2034          | 49080  | 3966.133  | 47.659    | 3918.474 | 7.984  | 98.798 | 838.612 | 68.881  | 0.814   | 68.066 |
| 2035          | 45526  | 3289.064  | 39.537    | 3249.527 | 7.138  | 98.798 | 949.929 | 69.952  | 0.825   | 69.127 |
| 2036          | 47444  | 3313.192  | 32.547    | 3280.645 | 6.915  | 99.018 | 990.691 | 70.572  | 0.680   | 69.892 |
| 2037          | 45947  | 3117.951  | 24.870    | 3093.081 | 6.732  | 99.202 | 959.516 | 66.464  | 0.519   | 65.945 |
| 2038          | 44491  | 2949.775  | 20.109    | 2929.666 | 6.585  | 99.318 | 928.447 | 62.876  | 0.420   | 62.456 |
| 2039          | 43092  | 2766.312  | 16.382    | 2749.930 | 6.382  | 99.408 | 897.738 | 58.905  | 0.341   | 58.564 |

## Results for PHIM for Run 4 (Sensitivity\_Analysis\_1.RTF)

\*\*\*\*\*

### Main Results for E-Component for Run: 4, Simulation: 1, COD: STROKE, Adjusted

| Variable Parameter          | Value                                  |
|-----------------------------|----------------------------------------|
| 1. Country                  | US (United States)                     |
| 2. Sex                      | F (Females)                            |
| 3. Year of start of process | 1990                                   |
| 4. Cause of Death           | STROKE                                 |
| 5. Effective Dose NULL      | CC:1                                   |
| 6. Effective Dose Ecig      | CC:1 Ecig:0 Dual:0.5                   |
| Note:                       | Death rates are per million population |

#### Results for Age Groups Combined and Years combined, Population and Number deaths adjusted for Ecig scenario,

| Age Group:All | NULL    | Ecig       | %Drop     |          |        |        | NULL    | Ecig   | Drop   |        |
|---------------|---------|------------|-----------|----------|--------|--------|---------|--------|--------|--------|
| Year          | Number  | Attrib     | Attrib    | Drop     | %Drop  | Attrib | Death   | Attrib | Attrib | Drop   |
|               | Deaths  | Deaths     | Deaths    | Deaths   | Deaths | Deaths | Rate    | Rates  | Rates  | Rates  |
| All Comb      | 1362146 | 104899.750 | 48169.601 | 56730.15 | 4.165  | 54.080 | 372.043 | 28.800 | 13.157 | 15.643 |

#### Results for Age Groups Combined, Population and Number deaths adjusted for Ecig scenario,

| Age Group:All | NULL   | Ecig     | %Drop    |          |        |        | NULL    | Ecig   | Drop   |        |
|---------------|--------|----------|----------|----------|--------|--------|---------|--------|--------|--------|
| Year          | Number | Attrib   | Attrib   | Drop     | %Drop  | Attrib | Death   | Attrib | Attrib | Drop   |
|               | Deaths | Deaths   | Deaths   | Deaths   | Deaths | Deaths | Rate    | Rates  | Rates  | Rates  |
| 1990          | 33504  | 3293.017 | 3293.017 | 0.000    | 0.000  | 0.000  | 490.678 | 48.227 | 48.227 | 0.000  |
| 1991          | 32505  | 3207.063 | 3178.126 | 28.937   | 0.089  | 0.902  | 469.694 | 46.342 | 45.924 | 0.418  |
| 1992          | 32560  | 3218.125 | 3137.168 | 80.956   | 0.249  | 2.516  | 464.104 | 45.871 | 44.716 | 1.154  |
| 1993          | 32768  | 3226.680 | 3073.322 | 153.358  | 0.468  | 4.753  | 460.482 | 45.344 | 43.188 | 2.156  |
| 1994          | 33006  | 3277.266 | 3032.541 | 244.725  | 0.741  | 7.467  | 456.920 | 45.370 | 41.981 | 3.389  |
| 1995          | 33732  | 3309.378 | 2958.532 | 350.846  | 1.040  | 10.602 | 459.725 | 45.104 | 40.321 | 4.784  |
| 1996          | 33754  | 3312.987 | 2838.497 | 474.490  | 1.406  | 14.322 | 454.036 | 44.568 | 38.182 | 6.386  |
| 1997          | 33705  | 3267.066 | 2672.575 | 594.491  | 1.764  | 18.196 | 447.081 | 43.341 | 35.451 | 7.891  |
| 1998          | 33282  | 3178.725 | 2469.798 | 708.927  | 2.130  | 22.302 | 435.248 | 41.577 | 32.299 | 9.278  |
| 1999          | 33903  | 3120.351 | 2294.695 | 825.656  | 2.435  | 26.460 | 437.371 | 40.264 | 29.603 | 10.661 |
| 2000          | 33843  | 3142.808 | 2176.752 | 966.056  | 2.854  | 30.739 | 431.146 | 40.050 | 27.731 | 12.320 |
| 2001          | 32527  | 2961.588 | 1923.801 | 1037.787 | 3.191  | 35.042 | 409.740 | 37.323 | 24.234 | 13.088 |
| 2002          | 32104  | 2940.627 | 1773.729 | 1166.898 | 3.635  | 39.682 | 400.415 | 36.695 | 22.123 | 14.573 |
| 2003          | 30599  | 2819.545 | 1576.464 | 1243.080 | 4.062  | 44.088 | 378.028 | 34.855 | 19.476 | 15.379 |
| 2004          | 29425  | 2730.466 | 1406.407 | 1324.059 | 4.500  | 48.492 | 359.846 | 33.417 | 17.199 | 16.218 |
| 2005          | 27996  | 2670.510 | 1263.697 | 1406.813 | 5.025  | 52.680 | 338.539 | 32.322 | 15.281 | 17.041 |
| 2006          | 27250  | 2623.285 | 1137.304 | 1485.981 | 5.453  | 56.646 | 326.588 | 31.474 | 13.630 | 17.843 |
| 2007          | 26357  | 2536.599 | 1001.629 | 1534.970 | 5.824  | 60.513 | 312.688 | 30.131 | 11.883 | 18.248 |
| 2008          | 26061  | 2469.443 | 889.857  | 1579.586 | 6.061  | 63.965 | 305.771 | 29.015 | 10.440 | 18.575 |
| 2009          | 25110  | 2386.945 | 780.775  | 1606.170 | 6.396  | 67.290 | 291.236 | 27.730 | 9.056  | 18.675 |
| 2010          | 24919  | 2329.274 | 690.497  | 1638.777 | 6.576  | 70.356 | 285.651 | 26.750 | 7.915  | 18.835 |
| 2011          | 24881  | 2286.581 | 608.371  | 1678.210 | 6.745  | 73.394 | 282.468 | 26.013 | 6.907  | 19.106 |
| 2012          | 24598  | 2243.311 | 534.275  | 1709.036 | 6.948  | 76.184 | 276.339 | 25.260 | 6.002  | 19.258 |
| 2013          | 24561  | 2176.503 | 463.365  | 1713.138 | 6.975  | 78.711 | 272.885 | 24.245 | 5.148  | 19.096 |
| 2014          | 25422  | 2211.619 | 420.802  | 1790.817 | 7.044  | 80.973 | 279.284 | 24.366 | 4.623  | 19.743 |
| 2015          | 26461  | 2237.016 | 384.799  | 1852.217 | 7.000  | 82.799 | 324.792 | 27.554 | 4.723  | 22.831 |
| 2016          | 26897  | 2229.057 | 342.420  | 1886.638 | 7.014  | 84.638 | 326.885 | 27.194 | 4.162  | 23.033 |
| 2017          | 27800  | 2221.649 | 304.896  | 1916.753 | 6.895  | 86.276 | 334.548 | 26.848 | 3.669  | 23.178 |
| 2018          | 25440  | 1939.420 | 238.821  | 1700.599 | 6.685  | 87.686 | 303.134 | 23.214 | 2.846  | 20.369 |
| 2019          | 25632  | 1904.400 | 206.820  | 1697.579 | 6.623  | 89.140 | 302.349 | 22.574 | 2.440  | 20.135 |
| 2020          | 25601  | 1806.054 | 176.284  | 1629.771 | 6.366  | 90.239 | 341.858 | 24.261 | 2.354  | 21.907 |
| 2021          | 25689  | 1748.172 | 150.685  | 1597.488 | 6.218  | 91.380 | 340.420 | 23.314 | 1.997  | 21.317 |
| 2022          | 25800  | 1701.148 | 129.346  | 1571.802 | 6.092  | 92.397 | 339.137 | 22.515 | 1.700  | 20.815 |
| 2023          | 25901  | 1652.087 | 111.220  | 1540.867 | 5.949  | 93.268 | 337.674 | 21.696 | 1.450  | 20.246 |
| 2024          | 25960  | 1597.127 | 94.085   | 1503.042 | 5.790  | 94.109 | 335.698 | 20.814 | 1.217  | 19.597 |
| 2025          | 25581  | 1467.622 | 78.107   | 1389.515 | 5.432  | 94.678 | 381.195 | 22.075 | 1.164  | 20.911 |
| 2026          | 25827  | 1390.505 | 65.672   | 1324.833 | 5.130  | 95.277 | 383.199 | 20.835 | 0.974  | 19.861 |
| 2027          | 25630  | 1342.095 | 55.532   | 1286.564 | 5.020  | 95.862 | 378.552 | 20.030 | 0.820  | 19.210 |
| 2028          | 25408  | 1289.536 | 46.739   | 1242.797 | 4.891  | 96.376 | 373.485 | 19.165 | 0.687  | 18.478 |
| 2029          | 25172  | 1242.216 | 39.098   | 1203.118 | 4.780  | 96.853 | 368.182 | 18.380 | 0.572  | 17.808 |
| 2030          | 24381  | 1096.803 | 31.313   | 1065.490 | 4.370  | 97.145 | 421.235 | 19.210 | 0.541  | 18.669 |
| 2031          | 24412  | 1019.991 | 25.608   | 994.383  | 4.073  | 97.489 | 420.920 | 17.841 | 0.442  | 17.399 |
| 2032          | 24083  | 977.406  | 21.084   | 956.322  | 3.971  | 97.843 | 414.171 | 17.063 | 0.363  | 16.700 |
| 2033          | 23745  | 937.450  | 17.816   | 919.633  | 3.873  | 98.100 | 407.101 | 16.326 | 0.305  | 16.020 |
| 2034          | 23382  | 900.763  | 14.765   | 885.998  | 3.789  | 98.361 | 399.524 | 15.644 | 0.252  | 15.391 |
| 2035          | 22247  | 745.023  | 11.429   | 733.595  | 3.297  | 98.466 | 464.207 | 15.845 | 0.238  | 15.607 |
| 2036          | 21424  | 680.360  | 8.768    | 671.592  | 3.135  | 98.711 | 447.368 | 14.492 | 0.183  | 14.309 |
| 2037          | 20927  | 644.109  | 7.192    | 636.917  | 3.043  | 98.883 | 437.032 | 13.730 | 0.150  | 13.580 |
| 2038          | 20430  | 612.448  | 6.037    | 606.411  | 2.968  | 99.014 | 426.342 | 13.055 | 0.126  | 12.929 |
| 2039          | 19941  | 577.529  | 5.068    | 572.461  | 2.871  | 99.122 | 415.434 | 12.298 | 0.106  | 12.192 |

## Results for PHIM for Run 4 (Sensitivity\_Analysis\_1.RTF)

\*\*\*\*\*

### Main Results for E-Component for Run: 4, Simulation: 1, COD: COPD, Adjusted

| Variable Parameter          | Value                                  |
|-----------------------------|----------------------------------------|
| 1. Country                  | US (United States)                     |
| 2. Sex                      | F (Females)                            |
| 3. Year of start of process | 1990                                   |
| 4. Cause of Death           | COPD                                   |
| 5. Effective Dose NULL      | CC:1                                   |
| 6. Effective Dose Ecig      | CC:1 Ecig:0 Dual:0.5                   |
| Note:                       | Death rates are per million population |

#### Results for Age Groups Combined and Years combined, Population and Number deaths adjusted for Ecig scenario,

| Age Group:All | NULL    | Ecig       | %Drop      |          |        |        | NULL    | Ecig    | Drop    |        |
|---------------|---------|------------|------------|----------|--------|--------|---------|---------|---------|--------|
| Year          | Number  | Attrib     | Attrib     | Drop     | %Drop  | Attrib | Death   | Attrib  | Attrib  | Drop   |
|               | Deaths  | Deaths     | Deaths     | Deaths   | Deaths | Deaths | Rate    | Rates   | Rates   | Rates  |
| All Comb      | 2182910 | 862051.244 | 532893.238 | 329158.0 | 15.079 | 38.183 | 596.218 | 236.673 | 145.549 | 91.124 |

#### Results for Age Groups Combined, Population and Number deaths adjusted for Ecig scenario,

| Age Group:All | NULL   | Ecig      | %Drop     |          |        |        | NULL    | Ecig    | Drop    |         |
|---------------|--------|-----------|-----------|----------|--------|--------|---------|---------|---------|---------|
| Year          | Number | Attrib    | Attrib    | Drop     | %Drop  | Attrib | Death   | Attrib  | Attrib  | Drop    |
|               | Deaths | Deaths    | Deaths    | Deaths   | Deaths | Deaths | Rate    | Rates   | Rates   | Rates   |
| 1990          | 24738  | 10694.712 | 10694.712 | 0.000    | 0.000  | 0.000  | 362.296 | 156.628 | 156.628 | 0.000   |
| 1991          | 26562  | 11602.933 | 11583.812 | 19.121   | 0.072  | 0.165  | 383.818 | 167.661 | 167.385 | 0.276   |
| 1992          | 26828  | 11831.375 | 11778.597 | 52.778   | 0.197  | 0.446  | 382.401 | 168.642 | 167.889 | 0.753   |
| 1993          | 29774  | 13246.371 | 13132.611 | 113.760  | 0.382  | 0.859  | 418.408 | 186.148 | 184.547 | 1.600   |
| 1994          | 29805  | 13355.662 | 13174.887 | 180.775  | 0.607  | 1.354  | 412.607 | 184.893 | 182.387 | 2.507   |
| 1995          | 29757  | 13397.439 | 13129.197 | 268.242  | 0.901  | 2.002  | 405.549 | 182.598 | 178.934 | 3.664   |
| 1996          | 30904  | 13960.356 | 13585.497 | 374.858  | 1.213  | 2.685  | 415.698 | 187.801 | 182.744 | 5.057   |
| 1997          | 31134  | 14109.552 | 13619.195 | 490.357  | 1.575  | 3.475  | 412.977 | 187.180 | 180.653 | 6.526   |
| 1998          | 32105  | 14599.657 | 13957.864 | 641.793  | 1.999  | 4.396  | 419.846 | 190.958 | 182.533 | 8.425   |
| 1999          | 34629  | 15728.102 | 14894.495 | 833.607  | 2.407  | 5.300  | 446.739 | 202.950 | 192.149 | 10.801  |
| 2000          | 34317  | 15579.803 | 14589.044 | 990.759  | 2.887  | 6.359  | 437.178 | 198.541 | 185.857 | 12.684  |
| 2001          | 34616  | 15696.614 | 14502.979 | 1193.635 | 3.448  | 7.604  | 436.056 | 197.812 | 182.695 | 15.117  |
| 2002          | 34321  | 15519.777 | 14134.104 | 1385.674 | 4.037  | 8.928  | 428.064 | 193.668 | 176.286 | 17.382  |
| 2003          | 35112  | 15888.389 | 14250.638 | 1637.751 | 4.664  | 10.308 | 433.786 | 196.413 | 176.055 | 20.358  |
| 2004          | 33557  | 15091.573 | 13312.945 | 1778.628 | 5.300  | 11.786 | 410.381 | 184.701 | 162.808 | 21.894  |
| 2005          | 35449  | 15803.656 | 13677.179 | 2126.477 | 5.999  | 13.456 | 428.664 | 191.278 | 165.388 | 25.890  |
| 2006          | 34047  | 15100.563 | 12834.851 | 2265.713 | 6.655  | 15.004 | 408.044 | 181.174 | 153.824 | 27.350  |
| 2007          | 34077  | 14974.384 | 12466.251 | 2508.133 | 7.360  | 16.749 | 404.266 | 177.871 | 147.892 | 29.978  |
| 2008          | 37523  | 16406.197 | 13394.111 | 3012.086 | 8.027  | 18.359 | 440.246 | 192.768 | 157.150 | 35.618  |
| 2009          | 36936  | 16083.194 | 12808.822 | 3274.372 | 8.865  | 20.359 | 428.396 | 186.846 | 148.561 | 38.285  |
| 2010          | 36913  | 15927.400 | 12414.395 | 3513.005 | 9.517  | 22.056 | 423.133 | 182.917 | 142.307 | 40.610  |
| 2011          | 37779  | 16221.836 | 12315.716 | 3906.120 | 10.339 | 24.079 | 428.896 | 184.547 | 139.817 | 44.729  |
| 2012          | 38428  | 16358.849 | 12090.286 | 4268.563 | 11.108 | 26.093 | 431.697 | 184.202 | 135.822 | 48.380  |
| 2013          | 40302  | 16994.822 | 12196.494 | 4798.328 | 11.906 | 28.234 | 447.781 | 189.311 | 135.511 | 53.799  |
| 2014          | 40294  | 16855.093 | 11730.573 | 5124.520 | 12.718 | 30.403 | 442.664 | 185.696 | 128.871 | 56.824  |
| 2015          | 42444  | 17572.483 | 11928.815 | 5643.668 | 13.297 | 32.117 | 520.970 | 216.445 | 146.417 | 70.028  |
| 2016          | 42876  | 17579.955 | 11516.665 | 6063.291 | 14.142 | 34.490 | 521.078 | 214.473 | 139.965 | 74.509  |
| 2017          | 44671  | 18080.688 | 11424.600 | 6656.089 | 14.900 | 36.813 | 537.581 | 218.496 | 137.486 | 81.010  |
| 2018          | 45704  | 18209.262 | 11131.941 | 7077.322 | 15.485 | 38.867 | 544.588 | 217.960 | 132.644 | 85.315  |
| 2019          | 47264  | 18648.302 | 10976.000 | 7672.301 | 16.233 | 41.142 | 557.521 | 221.054 | 129.472 | 91.582  |
| 2020          | 48766  | 19002.597 | 10813.332 | 8189.265 | 16.793 | 43.096 | 651.206 | 255.266 | 144.396 | 110.870 |
| 2021          | 48809  | 18885.717 | 10294.492 | 8591.225 | 17.602 | 45.491 | 646.786 | 251.867 | 136.416 | 115.451 |
| 2022          | 50228  | 19235.076 | 10057.869 | 9177.207 | 18.271 | 47.711 | 660.252 | 254.582 | 132.212 | 122.370 |
| 2023          | 51657  | 19521.158 | 9808.277  | 9712.881 | 18.803 | 49.756 | 673.457 | 256.363 | 127.871 | 128.491 |
| 2024          | 53028  | 19918.620 | 9555.681  | 10362.94 | 19.542 | 52.026 | 685.727 | 259.583 | 123.569 | 136.015 |
| 2025          | 54077  | 20150.545 | 9262.781  | 10887.76 | 20.134 | 54.032 | 805.835 | 303.086 | 138.031 | 165.055 |
| 2026          | 54985  | 20393.792 | 8922.428  | 11471.36 | 20.863 | 56.249 | 815.808 | 305.582 | 132.382 | 173.200 |
| 2027          | 55862  | 20615.351 | 8557.629  | 12057.72 | 21.585 | 58.489 | 825.071 | 307.668 | 126.393 | 181.275 |
| 2028          | 56685  | 20731.894 | 8150.523  | 12581.37 | 22.195 | 60.686 | 833.253 | 308.115 | 119.811 | 188.304 |
| 2029          | 57469  | 20781.967 | 7729.519  | 13052.45 | 22.712 | 62.807 | 840.576 | 307.495 | 113.057 | 194.438 |
| 2030          | 57763  | 20753.201 | 7331.624  | 13421.58 | 23.236 | 64.672 | 997.966 | 363.487 | 126.668 | 236.819 |
| 2031          | 59398  | 21048.417 | 7172.838  | 13875.58 | 23.360 | 65.922 | 1024.16 | 368.165 | 123.677 | 244.488 |
| 2032          | 59965  | 21169.329 | 6796.977  | 14372.35 | 23.968 | 67.892 | 1031.26 | 369.560 | 116.892 | 252.668 |
| 2033          | 60493  | 21109.293 | 6392.246  | 14717.05 | 24.328 | 69.718 | 1037.14 | 367.618 | 109.594 | 258.025 |
| 2034          | 60946  | 21109.429 | 5987.652  | 15121.78 | 24.812 | 71.635 | 1041.38 | 366.613 | 102.310 | 264.303 |
| 2035          | 60338  | 20794.840 | 5603.250  | 15191.59 | 25.177 | 73.055 | 1259.00 | 442.268 | 116.916 | 325.352 |
| 2036          | 57419  | 19354.577 | 4927.695  | 14426.88 | 25.126 | 74.540 | 1199.00 | 412.258 | 102.897 | 309.360 |
| 2037          | 57420  | 19064.169 | 4480.817  | 14583.35 | 25.398 | 76.496 | 1199.12 | 406.385 | 93.574  | 312.811 |
| 2038          | 57389  | 18854.812 | 4108.513  | 14746.30 | 25.696 | 78.210 | 1197.59 | 401.900 | 85.737  | 316.163 |
| 2039          | 57349  | 18437.457 | 3691.816  | 14745.64 | 25.712 | 79.977 | 1194.74 | 392.602 | 76.912  | 315.690 |

## Results for PHIM for Run 5 (Sensitivity\_Analysis\_1.RTF)

---

### Control File Details for Run: 5

| Variable Parameter                                       | Value                  |
|----------------------------------------------------------|------------------------|
| 1. Name for Reference Scenario                           | NULL                   |
| 2. Name for Test Scenario                                | Ecig                   |
| 3. Name for Product 1                                    | CC                     |
| 4. Name for Product 2                                    | Ecig                   |
| 5. Name for Product 3                                    | -                      |
| 6. Name for Product 4                                    | Dual                   |
| 7. Country                                               | US (United States)     |
| 8. Sex                                                   | M (Males)              |
| 9. Year of start of process                              | 1990                   |
| 10. Number of months of follow-up                        | 600                    |
| 11. Follow-up interval length (in months)                | 12                     |
| 12. Lower age for risk estimation                        | 10                     |
| 13. Upper age for risk estimation                        | 79                     |
| 14. The effective dose for Product 1 (F1) - Ref          | 1                      |
| 15. The effective dose for Product 2 (F2) - Ref          | -                      |
| 16. The effective dose for Product 3 (F3) - Ref          | -                      |
| 17. The effective dose for Product 4 (F4) - Ref          | -                      |
| 18. The effective dose for Product 1 (F1) - Test         | 1                      |
| 19. The effective dose for Product 2 (F2) - Test         | 0.1                    |
| 20. The effective dose for Product 3 (F3) - Test         | -                      |
| 21. The effective dose for Product 4 (F4) - Test         | FROMF2                 |
| 22. Number in population to be simulated                 | 100000                 |
| 23. Number of MC simulations                             | 1                      |
| 24. The random number seed for the first simulation      | 15975263               |
| 25. Source for the population file (POP)                 | UN4                    |
| 26. Source for the socioeconomic prevalence file (SEP)   | -                      |
| 27. Source for the current smoking prevalence file (CSP) | ISS3                   |
| 28. Source for the former smoking prevalence file (FSP)  | ISS3                   |
| 29. Source for the quit-time distribution file (QTD)     | NHIS2006               |
| 30. Source for the death file (MORT)                     | APR-20                 |
| 31. Source for the relative risk file (RR)               | PNLEST                 |
| 32. Source for the half-life file (H)                    | PNLEST                 |
| 33. Assumption Set for TTP Factor Reference              | F1                     |
| 34. Assumption Set for TTP Factor Test                   | F1                     |
| 35. Assumption Set for TTP Reference                     | ISS3                   |
| 36. Assumption Set for TTP Test                          | ISS3                   |
| 37. Assumption Set for TP for socioeconomic group        | -                      |
| 38. Source for Output Choice file (OUTC)                 | BASIC                  |
| 39. Output for DTP P1                                    | N                      |
| 40. Output for DTP P2                                    | N                      |
| 41. Output for Main P Component                          | Y                      |
| 42. Output for DTP E1                                    | N                      |
| 43. Output for DTP E2                                    | N                      |
| 44. Output for DTP E3                                    | N                      |
| 45. Output for Main E Component                          | Y                      |
| 46. Output file name                                     | Sensitivity_Analysis_1 |
| 47. Run number for P-Component                           | -                      |
| 48. Results file for E-Component                         | -                      |
| 49. Components required                                  | PE                     |
| 50. Results folder for P to be used in E-Component       | -                      |
| 51. Fixed age of starting product use                    | 16                     |
| 52. Output absolute risk file?                           | N                      |

## Results for PHIM for Run 5 (Sensitivity\_Analysis\_1.RTF)

\*\*\*\*\*

TTP values for Run: 5, Scenario: NULL

| Variable Parameter | Value               |
|--------------------|---------------------|
| 1. Country         | US (United States)  |
| 2. Sex             | M (Males)           |
| 3. Assumption Set  | ISS3                |
| Note:              | Period is in Months |

| Age   | Period  | Initiation  | Cessation    | Re-initiation |
|-------|---------|-------------|--------------|---------------|
|       |         | Never<br>CC | CC<br>Former | Former<br>CC  |
| 10-14 | 1-12    | 0.003842    | 0.008742     | 0.000000      |
| 15-19 | 1-12    | 0.004720    | 0.003614     | 0.000000      |
| 20-24 | 1-12    | 0.000376    | 0.000943     | 0.000000      |
| 25-29 | 1-12    | 0.000187    | 0.001143     | 0.000000      |
| 30-34 | 1-12    | 0.000093    | 0.000871     | 0.000000      |
| 35-39 | 1-12    | 0.000000    | 0.000867     | 0.000000      |
| 40-44 | 1-12    | 0.000000    | 0.001399     | 0.000000      |
| 45-49 | 1-12    | 0.000000    | 0.002033     | 0.000000      |
| 50-54 | 1-12    | 0.000000    | 0.003209     | 0.000000      |
| 55-59 | 1-12    | 0.000000    | 0.003574     | 0.000000      |
| 60-64 | 1-12    | 0.000000    | 0.003460     | 0.000000      |
| 65-69 | 1-12    | 0.000000    | 0.004136     | 0.000000      |
| 70-74 | 1-12    | 0.000000    | 0.005592     | 0.000000      |
| 75-79 | 1-12    | 0.000000    | 0.005592     | 0.000000      |
| 10-14 | 13-72   | 0.004906    | 0.008742     | 0.000000      |
| 15-19 | 13-72   | 0.006989    | 0.004426     | 0.000000      |
| 20-24 | 13-72   | 0.000687    | 0.001527     | 0.000000      |
| 25-29 | 13-72   | 0.000962    | 0.001515     | 0.000000      |
| 30-34 | 13-72   | 0.000364    | 0.001227     | 0.000000      |
| 35-39 | 13-72   | 0.000000    | 0.001630     | 0.000000      |
| 40-44 | 13-72   | 0.000000    | 0.001852     | 0.000000      |
| 45-49 | 13-72   | 0.000000    | 0.002667     | 0.000000      |
| 50-54 | 13-72   | 0.000000    | 0.003208     | 0.000000      |
| 55-59 | 13-72   | 0.000000    | 0.003978     | 0.000000      |
| 60-64 | 13-72   | 0.000000    | 0.005771     | 0.000000      |
| 65-69 | 13-72   | 0.000000    | 0.010432     | 0.000000      |
| 70-74 | 13-72   | 0.000000    | 0.007079     | 0.000000      |
| 75-79 | 13-72   | 0.000000    | 0.007079     | 0.000000      |
| 10-14 | 73-132  | 0.004312    | 0.008742     | 0.000000      |
| 15-19 | 73-132  | 0.005330    | 0.003289     | 0.000000      |
| 20-24 | 73-132  | 0.002456    | 0.003844     | 0.000000      |
| 25-29 | 73-132  | 0.000839    | 0.002006     | 0.000000      |
| 30-34 | 73-132  | 0.000414    | 0.001329     | 0.000000      |
| 35-39 | 73-132  | 0.000000    | 0.001278     | 0.000000      |
| 40-44 | 73-132  | 0.000000    | 0.001691     | 0.000000      |
| 45-49 | 73-132  | 0.000000    | 0.002904     | 0.000000      |
| 50-54 | 73-132  | 0.000000    | 0.003319     | 0.000000      |
| 55-59 | 73-132  | 0.000000    | 0.003976     | 0.000000      |
| 60-64 | 73-132  | 0.000000    | 0.005235     | 0.000000      |
| 65-69 | 73-132  | 0.000000    | 0.005901     | 0.000000      |
| 70-74 | 73-132  | 0.000000    | 0.005615     | 0.000000      |
| 75-79 | 73-132  | 0.000000    | 0.005615     | 0.000000      |
| 10-14 | 133-192 | 0.003468    | 0.008742     | 0.000000      |
| 15-19 | 133-192 | 0.004675    | 0.003732     | 0.000000      |
| 20-24 | 133-192 | 0.000062    | 0.002260     | 0.000000      |
| 25-29 | 133-192 | 0.001422    | 0.002822     | 0.000000      |
| 30-34 | 133-192 | 0.000696    | 0.002610     | 0.000000      |
| 35-39 | 133-192 | 0.000000    | 0.002058     | 0.000000      |
| 40-44 | 133-192 | 0.000000    | 0.002310     | 0.000000      |
| 45-49 | 133-192 | 0.000000    | 0.002256     | 0.000000      |
| 50-54 | 133-192 | 0.000000    | 0.002663     | 0.000000      |
| 55-59 | 133-192 | 0.000000    | 0.001746     | 0.000000      |
| 60-64 | 133-192 | 0.000000    | 0.005809     | 0.000000      |
| 65-69 | 133-192 | 0.000000    | 0.005896     | 0.000000      |
| 70-74 | 133-192 | 0.000000    | 0.007323     | 0.000000      |
| 75-79 | 133-192 | 0.000000    | 0.007323     | 0.000000      |
| 10-14 | 193-252 | 0.002314    | 0.008742     | 0.000000      |
| 15-19 | 193-252 | 0.003987    | 0.005036     | 0.000000      |
| 20-24 | 193-252 | 0.000320    | 0.002857     | 0.000000      |
| 25-29 | 193-252 | 0.000251    | 0.002314     | 0.000000      |
| 30-34 | 193-252 | 0.000125    | 0.004343     | 0.000000      |
| 35-39 | 193-252 | 0.000000    | 0.002092     | 0.000000      |
| 40-44 | 193-252 | 0.000000    | 0.002566     | 0.000000      |
| 45-49 | 193-252 | 0.000000    | 0.002311     | 0.000000      |
| 50-54 | 193-252 | 0.000000    | 0.003209     | 0.000000      |

### Results for PHIM for Run 5 (Sensitivity\_Analysis\_1.RTF)

|       |         |          |          |          |
|-------|---------|----------|----------|----------|
| 55-59 | 193-252 | 0.000000 | 0.004057 | 0.000000 |
| 60-64 | 193-252 | 0.000000 | 0.007166 | 0.000000 |
| 65-69 | 193-252 | 0.000000 | 0.004281 | 0.000000 |
| 70-74 | 193-252 | 0.000000 | 0.004580 | 0.000000 |
| 75-79 | 193-252 | 0.000000 | 0.004580 | 0.000000 |
| 10-14 | 253+    | 0.001325 | 0.008742 | 0.000000 |
| 15-19 | 253+    | 0.002984 | 0.010602 | 0.000000 |
| 20-24 | 253+    | 0.000452 | 0.004314 | 0.000000 |
| 25-29 | 253+    | 0.000225 | 0.003645 | 0.000000 |
| 30-34 | 253+    | 0.000112 | 0.004512 | 0.000000 |
| 35-39 | 253+    | 0.000000 | 0.002147 | 0.000000 |
| 40-44 | 253+    | 0.000000 | 0.002636 | 0.000000 |
| 45-49 | 253+    | 0.000000 | 0.001051 | 0.000000 |
| 50-54 | 253+    | 0.000000 | 0.002519 | 0.000000 |
| 55-59 | 253+    | 0.000000 | 0.003693 | 0.000000 |
| 60-64 | 253+    | 0.000000 | 0.005888 | 0.000000 |
| 65-69 | 253+    | 0.000000 | 0.004823 | 0.000000 |
| 70-74 | 253+    | 0.000000 | 0.004733 | 0.000000 |
| 75-79 | 253+    | 0.000000 | 0.004733 | 0.000000 |

## Results for PHIM for Run 5 (Sensitivity\_Analysis\_1.RTF)

\*\*\*\*\*

TTP values for Run: 5, Scenario: Ecig

**Variable Parameter**

**Value**

1. Country  
2. Sex  
3. Assumption Set  
Note:

US (United States)  
M (Males)  
ISS3  
Period is in Months

| Age   | Period  | Initiation  |               | Cessation     |              |                | Re-initiation  |              |                |                |
|-------|---------|-------------|---------------|---------------|--------------|----------------|----------------|--------------|----------------|----------------|
|       |         | Never<br>CC | Never<br>Ecig | Never<br>Dual | CC<br>Former | Ecig<br>Former | Dual<br>Former | Former<br>CC | Former<br>Ecig | Former<br>Dual |
| 10-14 | 1-12    | 0.001921    | 0.001921      | 0.000000      | 0.008742     | 0.008742       | 0.000000       | 0.000000     | 0.000000       | 0.000000       |
| 15-19 | 1-12    | 0.002360    | 0.002360      | 0.000000      | 0.003614     | 0.003614       | 0.000000       | 0.000000     | 0.000000       | 0.000000       |
| 20-24 | 1-12    | 0.000188    | 0.000188      | 0.000000      | 0.000943     | 0.000943       | 0.000000       | 0.000000     | 0.000000       | 0.000000       |
| 25-29 | 1-12    | 0.000093    | 0.000093      | 0.000000      | 0.001143     | 0.001143       | 0.000000       | 0.000000     | 0.000000       | 0.000000       |
| 30-34 | 1-12    | 0.000047    | 0.000047      | 0.000000      | 0.000871     | 0.000871       | 0.000000       | 0.000000     | 0.000000       | 0.000000       |
| 35-39 | 1-12    | 0.000000    | 0.000000      | 0.000000      | 0.000867     | 0.000867       | 0.000000       | 0.000000     | 0.000000       | 0.000000       |
| 40-44 | 1-12    | 0.000000    | 0.000000      | 0.000000      | 0.001399     | 0.001399       | 0.000000       | 0.000000     | 0.000000       | 0.000000       |
| 45-49 | 1-12    | 0.000000    | 0.000000      | 0.000000      | 0.002033     | 0.002033       | 0.000000       | 0.000000     | 0.000000       | 0.000000       |
| 50-54 | 1-12    | 0.000000    | 0.000000      | 0.000000      | 0.003209     | 0.003209       | 0.000000       | 0.000000     | 0.000000       | 0.000000       |
| 55-59 | 1-12    | 0.000000    | 0.000000      | 0.000000      | 0.003574     | 0.003574       | 0.000000       | 0.000000     | 0.000000       | 0.000000       |
| 60-64 | 1-12    | 0.000000    | 0.000000      | 0.000000      | 0.003460     | 0.003460       | 0.000000       | 0.000000     | 0.000000       | 0.000000       |
| 65-69 | 1-12    | 0.000000    | 0.000000      | 0.000000      | 0.004136     | 0.004136       | 0.000000       | 0.000000     | 0.000000       | 0.000000       |
| 70-74 | 1-12    | 0.000000    | 0.000000      | 0.000000      | 0.005592     | 0.005592       | 0.000000       | 0.000000     | 0.000000       | 0.000000       |
| 75-79 | 1-12    | 0.000000    | 0.000000      | 0.000000      | 0.005592     | 0.005592       | 0.000000       | 0.000000     | 0.000000       | 0.000000       |
| 10-14 | 13-72   | 0.001962    | 0.002944      | 0.000000      | 0.008742     | 0.008742       | 0.000000       | 0.000000     | 0.000000       | 0.000000       |
| 15-19 | 13-72   | 0.002796    | 0.004193      | 0.000000      | 0.004426     | 0.004426       | 0.000000       | 0.000000     | 0.000000       | 0.000000       |
| 20-24 | 13-72   | 0.000275    | 0.000412      | 0.000000      | 0.001527     | 0.001527       | 0.000000       | 0.000000     | 0.000000       | 0.000000       |
| 25-29 | 13-72   | 0.000385    | 0.000578      | 0.000000      | 0.001515     | 0.001515       | 0.000000       | 0.000000     | 0.000000       | 0.000000       |
| 30-34 | 13-72   | 0.000146    | 0.000218      | 0.000000      | 0.001227     | 0.001227       | 0.000000       | 0.000000     | 0.000000       | 0.000000       |
| 35-39 | 13-72   | 0.000000    | 0.000000      | 0.000000      | 0.001630     | 0.001630       | 0.000000       | 0.000000     | 0.000000       | 0.000000       |
| 40-44 | 13-72   | 0.000000    | 0.000000      | 0.000000      | 0.001852     | 0.001852       | 0.000000       | 0.000000     | 0.000000       | 0.000000       |
| 45-49 | 13-72   | 0.000000    | 0.000000      | 0.000000      | 0.002667     | 0.002667       | 0.000000       | 0.000000     | 0.000000       | 0.000000       |
| 50-54 | 13-72   | 0.000000    | 0.000000      | 0.000000      | 0.003208     | 0.003208       | 0.000000       | 0.000000     | 0.000000       | 0.000000       |
| 55-59 | 13-72   | 0.000000    | 0.000000      | 0.000000      | 0.003978     | 0.003978       | 0.000000       | 0.000000     | 0.000000       | 0.000000       |
| 60-64 | 13-72   | 0.000000    | 0.000000      | 0.000000      | 0.005771     | 0.005771       | 0.000000       | 0.000000     | 0.000000       | 0.000000       |
| 65-69 | 13-72   | 0.000000    | 0.000000      | 0.000000      | 0.010432     | 0.010432       | 0.000000       | 0.000000     | 0.000000       | 0.000000       |
| 70-74 | 13-72   | 0.000000    | 0.000000      | 0.000000      | 0.007079     | 0.007079       | 0.000000       | 0.000000     | 0.000000       | 0.000000       |
| 75-79 | 13-72   | 0.000000    | 0.000000      | 0.000000      | 0.007079     | 0.007079       | 0.000000       | 0.000000     | 0.000000       | 0.000000       |
| 10-14 | 73-132  | 0.000862    | 0.003449      | 0.000000      | 0.008742     | 0.008742       | 0.000000       | 0.000000     | 0.000000       | 0.000000       |
| 15-19 | 73-132  | 0.001066    | 0.004264      | 0.000000      | 0.003289     | 0.003289       | 0.000000       | 0.000000     | 0.000000       | 0.000000       |
| 20-24 | 73-132  | 0.000491    | 0.001965      | 0.000000      | 0.003844     | 0.003844       | 0.000000       | 0.000000     | 0.000000       | 0.000000       |
| 25-29 | 73-132  | 0.000168    | 0.000671      | 0.000000      | 0.002006     | 0.002006       | 0.000000       | 0.000000     | 0.000000       | 0.000000       |
| 30-34 | 73-132  | 0.000083    | 0.000332      | 0.000000      | 0.001329     | 0.001329       | 0.000000       | 0.000000     | 0.000000       | 0.000000       |
| 35-39 | 73-132  | 0.000000    | 0.000000      | 0.000000      | 0.001278     | 0.001278       | 0.000000       | 0.000000     | 0.000000       | 0.000000       |
| 40-44 | 73-132  | 0.000000    | 0.000000      | 0.000000      | 0.001691     | 0.001691       | 0.000000       | 0.000000     | 0.000000       | 0.000000       |
| 45-49 | 73-132  | 0.000000    | 0.000000      | 0.000000      | 0.002904     | 0.002904       | 0.000000       | 0.000000     | 0.000000       | 0.000000       |
| 50-54 | 73-132  | 0.000000    | 0.000000      | 0.000000      | 0.003319     | 0.003319       | 0.000000       | 0.000000     | 0.000000       | 0.000000       |
| 55-59 | 73-132  | 0.000000    | 0.000000      | 0.000000      | 0.003976     | 0.003976       | 0.000000       | 0.000000     | 0.000000       | 0.000000       |
| 60-64 | 73-132  | 0.000000    | 0.000000      | 0.000000      | 0.005235     | 0.005235       | 0.000000       | 0.000000     | 0.000000       | 0.000000       |
| 65-69 | 73-132  | 0.000000    | 0.000000      | 0.000000      | 0.005901     | 0.005901       | 0.000000       | 0.000000     | 0.000000       | 0.000000       |
| 70-74 | 73-132  | 0.000000    | 0.000000      | 0.000000      | 0.005615     | 0.005615       | 0.000000       | 0.000000     | 0.000000       | 0.000000       |
| 75-79 | 73-132  | 0.000000    | 0.000000      | 0.000000      | 0.005615     | 0.005615       | 0.000000       | 0.000000     | 0.000000       | 0.000000       |
| 10-14 | 133-192 | 0.000173    | 0.003294      | 0.000000      | 0.008742     | 0.008742       | 0.000000       | 0.000000     | 0.000000       | 0.000000       |
| 15-19 | 133-192 | 0.000234    | 0.004442      | 0.000000      | 0.003732     | 0.003732       | 0.000000       | 0.000000     | 0.000000       | 0.000000       |
| 20-24 | 133-192 | 0.000003    | 0.000059      | 0.000000      | 0.002260     | 0.002260       | 0.000000       | 0.000000     | 0.000000       | 0.000000       |
| 25-29 | 133-192 | 0.000071    | 0.001351      | 0.000000      | 0.002822     | 0.002822       | 0.000000       | 0.000000     | 0.000000       | 0.000000       |
| 30-34 | 133-192 | 0.000035    | 0.000661      | 0.000000      | 0.002610     | 0.002610       | 0.000000       | 0.000000     | 0.000000       | 0.000000       |
| 35-39 | 133-192 | 0.000000    | 0.000000      | 0.000000      | 0.002058     | 0.002058       | 0.000000       | 0.000000     | 0.000000       | 0.000000       |
| 40-44 | 133-192 | 0.000000    | 0.000000      | 0.000000      | 0.002310     | 0.002310       | 0.000000       | 0.000000     | 0.000000       | 0.000000       |
| 45-49 | 133-192 | 0.000000    | 0.000000      | 0.000000      | 0.002256     | 0.002256       | 0.000000       | 0.000000     | 0.000000       | 0.000000       |
| 50-54 | 133-192 | 0.000000    | 0.000000      | 0.000000      | 0.002663     | 0.002663       | 0.000000       | 0.000000     | 0.000000       | 0.000000       |
| 55-59 | 133-192 | 0.000000    | 0.000000      | 0.000000      | 0.001747     | 0.001747       | 0.000000       | 0.000000     | 0.000000       | 0.000000       |
| 60-64 | 133-192 | 0.000000    | 0.000000      | 0.000000      | 0.005809     | 0.005809       | 0.000000       | 0.000000     | 0.000000       | 0.000000       |
| 65-69 | 133-192 | 0.000000    | 0.000000      | 0.000000      | 0.005896     | 0.005896       | 0.000000       | 0.000000     | 0.000000       | 0.000000       |
| 70-74 | 133-192 | 0.000000    | 0.000000      | 0.000000      | 0.007323     | 0.007323       | 0.000000       | 0.000000     | 0.000000       | 0.000000       |
| 75-79 | 133-192 | 0.000000    | 0.000000      | 0.000000      | 0.007323     | 0.007323       | 0.000000       | 0.000000     | 0.000000       | 0.000000       |
| 10-14 | 193-252 | 0.000116    | 0.002198      | 0.000000      | 0.008742     | 0.008742       | 0.000000       | 0.000000     | 0.000000       | 0.000000       |
| 15-19 | 193-252 | 0.000199    | 0.003788      | 0.000000      | 0.005036     | 0.005036       | 0.000000       | 0.000000     | 0.000000       | 0.000000       |
| 20-24 | 193-252 | 0.000016    | 0.000304      | 0.000000      | 0.002857     | 0.002857       | 0.000000       | 0.000000     | 0.000000       | 0.000000       |
| 25-29 | 193-252 | 0.000013    | 0.000239      | 0.000000      | 0.002314     | 0.002314       | 0.000000       | 0.000000     | 0.000000       | 0.000000       |
| 30-34 | 193-252 | 0.000006    | 0.000119      | 0.000000      | 0.004343     | 0.004343       | 0.000000       | 0.000000     | 0.000000       | 0.000000       |
| 35-39 | 193-252 | 0.000000    | 0.000000      | 0.000000      | 0.002092     | 0.002092       | 0.000000       | 0.000000     | 0.000000       | 0.000000       |
| 40-44 | 193-252 | 0.000000    | 0.000000      | 0.000000      | 0.002566     | 0.002566       | 0.000000       | 0.000000     | 0.000000       | 0.000000       |
| 45-49 | 193-252 | 0.000000    | 0.000000      | 0.000000      | 0.002311     | 0.002311       | 0.000000       | 0.000000     | 0.000000       | 0.000000       |
| 50-54 | 193-252 | 0.000000    | 0.000000      | 0.000000      | 0.003209     | 0.003209       | 0.000000       | 0.000000     | 0.000000       | 0.000000       |



### Results for PHIM for Run 5 (Sensitivity\_Analysis\_1.RTF)

|       |         |          |          |          |          |          |          |          |          |          |
|-------|---------|----------|----------|----------|----------|----------|----------|----------|----------|----------|
| 55-59 | 193-252 | 0.000000 | 0.000000 | 0.000000 | 0.004057 | 0.004057 | 0.000000 | 0.000000 | 0.000000 | 0.000000 |
| 60-64 | 193-252 | 0.000000 | 0.000000 | 0.000000 | 0.007166 | 0.007166 | 0.000000 | 0.000000 | 0.000000 | 0.000000 |
| 65-69 | 193-252 | 0.000000 | 0.000000 | 0.000000 | 0.004281 | 0.004281 | 0.000000 | 0.000000 | 0.000000 | 0.000000 |
| 70-74 | 193-252 | 0.000000 | 0.000000 | 0.000000 | 0.004580 | 0.004580 | 0.000000 | 0.000000 | 0.000000 | 0.000000 |
| 75-79 | 193-252 | 0.000000 | 0.000000 | 0.000000 | 0.004580 | 0.004580 | 0.000000 | 0.000000 | 0.000000 | 0.000000 |
| 10-14 | 253+    | 0.000066 | 0.001259 | 0.000000 | 0.008742 | 0.008742 | 0.000000 | 0.000000 | 0.000000 | 0.000000 |
| 15-19 | 253+    | 0.000149 | 0.002835 | 0.000000 | 0.010602 | 0.010602 | 0.000000 | 0.000000 | 0.000000 | 0.000000 |
| 20-24 | 253+    | 0.000023 | 0.000430 | 0.000000 | 0.004314 | 0.004314 | 0.000000 | 0.000000 | 0.000000 | 0.000000 |
| 25-29 | 253+    | 0.000011 | 0.000213 | 0.000000 | 0.003645 | 0.003645 | 0.000000 | 0.000000 | 0.000000 | 0.000000 |
| 30-34 | 253+    | 0.000006 | 0.000106 | 0.000000 | 0.004512 | 0.004512 | 0.000000 | 0.000000 | 0.000000 | 0.000000 |
| 35-39 | 253+    | 0.000000 | 0.000000 | 0.000000 | 0.002147 | 0.002147 | 0.000000 | 0.000000 | 0.000000 | 0.000000 |
| 40-44 | 253+    | 0.000000 | 0.000000 | 0.000000 | 0.002636 | 0.002636 | 0.000000 | 0.000000 | 0.000000 | 0.000000 |
| 45-49 | 253+    | 0.000000 | 0.000000 | 0.000000 | 0.001051 | 0.001051 | 0.000000 | 0.000000 | 0.000000 | 0.000000 |
| 50-54 | 253+    | 0.000000 | 0.000000 | 0.000000 | 0.002519 | 0.002519 | 0.000000 | 0.000000 | 0.000000 | 0.000000 |
| 55-59 | 253+    | 0.000000 | 0.000000 | 0.000000 | 0.003693 | 0.003693 | 0.000000 | 0.000000 | 0.000000 | 0.000000 |
| 60-64 | 253+    | 0.000000 | 0.000000 | 0.000000 | 0.005888 | 0.005888 | 0.000000 | 0.000000 | 0.000000 | 0.000000 |
| 65-69 | 253+    | 0.000000 | 0.000000 | 0.000000 | 0.004823 | 0.004823 | 0.000000 | 0.000000 | 0.000000 | 0.000000 |
| 70-74 | 253+    | 0.000000 | 0.000000 | 0.000000 | 0.004733 | 0.004733 | 0.000000 | 0.000000 | 0.000000 | 0.000000 |
| 75-79 | 253+    | 0.000000 | 0.000000 | 0.000000 | 0.004733 | 0.004733 | 0.000000 | 0.000000 | 0.000000 | 0.000000 |



### Results for PHIM for Run 5 (Sensitivity\_Analysis\_1.RTF)

|       |      |          |          |          |          |          |          |
|-------|------|----------|----------|----------|----------|----------|----------|
| 25-29 | 253+ | 0.015212 | 0.000000 | 0.000000 | 0.000000 | 0.000000 | 0.000000 |
| 30-34 | 253+ | 0.015460 | 0.000000 | 0.000000 | 0.000000 | 0.000000 | 0.000000 |
| 35-39 | 253+ | 0.014711 | 0.000000 | 0.000000 | 0.000000 | 0.000000 | 0.000000 |
| 40-44 | 253+ | 0.014241 | 0.000000 | 0.000000 | 0.000000 | 0.000000 | 0.000000 |
| 45-49 | 253+ | 0.013014 | 0.000000 | 0.000000 | 0.000000 | 0.000000 | 0.000000 |
| 50-54 | 253+ | 0.011768 | 0.000000 | 0.000000 | 0.000000 | 0.000000 | 0.000000 |
| 55-59 | 253+ | 0.011032 | 0.000000 | 0.000000 | 0.000000 | 0.000000 | 0.000000 |
| 60-64 | 253+ | 0.009525 | 0.000000 | 0.000000 | 0.000000 | 0.000000 | 0.000000 |
| 65-69 | 253+ | 0.006897 | 0.000000 | 0.000000 | 0.000000 | 0.000000 | 0.000000 |
| 70-74 | 253+ | 0.005435 | 0.000000 | 0.000000 | 0.000000 | 0.000000 | 0.000000 |
| 75-79 | 253+ | 0.005435 | 0.000000 | 0.000000 | 0.000000 | 0.000000 | 0.000000 |

## Results for PHIM for Run 5 (Sensitivity\_Analysis\_1.RTF)

\*\*\*\*\*

### Main Output for the Tobacco History for Run: 5, Simulation: 1, Scenario: NULL

| Variable Parameter          | Value              |
|-----------------------------|--------------------|
| 1. Country                  | US (United States) |
| 2. Sex                      | M (Males)          |
| 3. Year of start of process | 1990               |

Year of Follow-up: 2040, Age Group: All Ages  
 Period    Age Group    Smoking Group            N            %

|    |          |           |       |       |
|----|----------|-----------|-------|-------|
| 50 | All Ages | Never Any | 19445 | 50.68 |
| 50 | All Ages | CC        | 3024  | 7.88  |
| 50 | All Ages | Former    | 15896 | 41.43 |

Year of Follow-up: 2040, Age Group: 18-19  
 Period    Age Group    Smoking Group            N            %

|    |       |           |   |   |
|----|-------|-----------|---|---|
| 50 | 18-19 | Never Any | 0 | . |
| 50 | 18-19 | CC        | 0 | . |
| 50 | 18-19 | Former    | 0 | . |

Year of Follow-up: 2040, Age Group: 20-24  
 Period    Age Group    Smoking Group            N            %

|    |       |           |   |   |
|----|-------|-----------|---|---|
| 50 | 20-24 | Never Any | 0 | . |
| 50 | 20-24 | CC        | 0 | . |
| 50 | 20-24 | Former    | 0 | . |

Year of Follow-up: 2040, Age Group: 25-29  
 Period    Age Group    Smoking Group            N            %

|    |       |           |   |   |
|----|-------|-----------|---|---|
| 50 | 25-29 | Never Any | 0 | . |
| 50 | 25-29 | CC        | 0 | . |
| 50 | 25-29 | Former    | 0 | . |

Year of Follow-up: 2040, Age Group: 30-34  
 Period    Age Group    Smoking Group            N            %

|    |       |           |   |   |
|----|-------|-----------|---|---|
| 50 | 30-34 | Never Any | 0 | . |
| 50 | 30-34 | CC        | 0 | . |
| 50 | 30-34 | Former    | 0 | . |

Year of Follow-up: 2040, Age Group: 35-39  
 Period    Age Group    Smoking Group            N            %

|    |       |           |   |   |
|----|-------|-----------|---|---|
| 50 | 35-39 | Never Any | 0 | . |
| 50 | 35-39 | CC        | 0 | . |
| 50 | 35-39 | Former    | 0 | . |

Year of Follow-up: 2040, Age Group: 40-44  
 Period    Age Group    Smoking Group            N            %

|    |       |           |   |   |
|----|-------|-----------|---|---|
| 50 | 40-44 | Never Any | 0 | . |
| 50 | 40-44 | CC        | 0 | . |
| 50 | 40-44 | Former    | 0 | . |

Year of Follow-up: 2040, Age Group: 45-49  
 Period    Age Group    Smoking Group            N            %

|    |       |           |   |   |
|----|-------|-----------|---|---|
| 50 | 45-49 | Never Any | 0 | . |
| 50 | 45-49 | CC        | 0 | . |
| 50 | 45-49 | Former    | 0 | . |

Year of Follow-up: 2040, Age Group: 50-54  
 Period    Age Group    Smoking Group            N            %

|    |       |           |   |   |
|----|-------|-----------|---|---|
| 50 | 50-54 | Never Any | 0 | . |
| 50 | 50-54 | CC        | 0 | . |
| 50 | 50-54 | Former    | 0 | . |

Year of Follow-up: 2040, Age Group: 55-59  
 Period    Age Group    Smoking Group            N            %

|    |       |           |   |   |
|----|-------|-----------|---|---|
| 50 | 55-59 | Never Any | 0 | . |
| 50 | 55-59 | CC        | 0 | . |
| 50 | 55-59 | Former    | 0 | . |

Year of Follow-up: 2040, Age Group: 60-64  
 Period    Age Group    Smoking Group            N            %

### Results for PHIM for Run 5 (Sensitivity\_Analysis\_1.RTF)

|                                           |           |               |      |       |
|-------------------------------------------|-----------|---------------|------|-------|
| 50                                        | 60-64     | Never Any     | 4363 | 49.33 |
| 50                                        | 60-64     | CC            | 934  | 10.56 |
| 50                                        | 60-64     | Former        | 3548 | 40.11 |
| Year of Follow-up: 2040, Age Group: 65-69 |           |               |      |       |
| Period                                    | Age Group | Smoking Group | N    | %     |
| 50                                        | 65-69     | Never Any     | 4948 | 54.73 |
| 50                                        | 65-69     | CC            | 734  | 8.12  |
| 50                                        | 65-69     | Former        | 3358 | 37.15 |
| Year of Follow-up: 2040, Age Group: 70-74 |           |               |      |       |
| Period                                    | Age Group | Smoking Group | N    | %     |
| 50                                        | 70-74     | Never Any     | 5145 | 52.41 |
| 50                                        | 70-74     | CC            | 688  | 7.01  |
| 50                                        | 70-74     | Former        | 3983 | 40.58 |
| Year of Follow-up: 2040, Age Group: 75-79 |           |               |      |       |
| Period                                    | Age Group | Smoking Group | N    | %     |
| 50                                        | 75-79     | Never Any     | 4989 | 46.78 |
| 50                                        | 75-79     | CC            | 668  | 6.26  |
| 50                                        | 75-79     | Former        | 5007 | 46.95 |

## Results for PHIM for Run 5 (Sensitivity\_Analysis\_1.RTF)

\*\*\*\*\*

### Main Output for the Tobacco History for Run: 5, Simulation: 1, Scenario: Ecig

| Variable Parameter                           |           | Value              |       |       |               |             |               |                |              |
|----------------------------------------------|-----------|--------------------|-------|-------|---------------|-------------|---------------|----------------|--------------|
| 1. Country                                   |           | US (United States) |       |       |               |             |               |                |              |
| 2. Sex                                       |           | M (Males)          |       |       |               |             |               |                |              |
| 3. Year of start of process                  |           | 1990               |       |       |               |             |               |                |              |
| Year of Follow-up: 1990, Age Group: All Ages |           |                    |       |       |               |             |               |                |              |
| Period                                       | Age Group | Smoking Group      | N     | %     | Ever Quit (N) | Ever Quit % | Mean Yrs Quit | Short Term (n) | Short Term % |
| 0                                            | All Ages  | Never Any          | 34075 | 39.78 |               |             |               |                |              |
| 0                                            | All Ages  | CC                 | 27323 | 31.90 | 0             | 0.00        |               |                |              |
| 0                                            | All Ages  | Ecig               | 0     | 0.00  |               |             |               |                |              |
| 0                                            | All Ages  | Dual               | 0     | 0.00  |               |             |               |                |              |
| 0                                            | All Ages  | Former             | 24266 | 28.33 |               |             | 13.08         | 3623           | 14.93        |
| Year of Follow-up: 1990, Age Group: 18-19    |           |                    |       |       |               |             |               |                |              |
| Period                                       | Age Group | Smoking Group      | N     | %     | Ever Quit (N) | Ever Quit % | Mean Yrs Quit | Short Term (n) | Short Term % |
| 0                                            | 18-19     | Never Any          | 2783  | 78.42 |               |             |               |                |              |
| 0                                            | 18-19     | CC                 | 634   | 17.86 | 0             | 0.00        |               |                |              |
| 0                                            | 18-19     | Ecig               | 0     | 0.00  |               |             |               |                |              |
| 0                                            | 18-19     | Dual               | 0     | 0.00  |               |             |               |                |              |
| 0                                            | 18-19     | Former             | 132   | 3.72  |               |             | 0.11          | 132            | 100.00       |
| Year of Follow-up: 1990, Age Group: 20-24    |           |                    |       |       |               |             |               |                |              |
| Period                                       | Age Group | Smoking Group      | N     | %     | Ever Quit (N) | Ever Quit % | Mean Yrs Quit | Short Term (n) | Short Term % |
| 0                                            | 20-24     | Never Any          | 5722  | 58.29 |               |             |               |                |              |
| 0                                            | 20-24     | CC                 | 3199  | 32.59 | 0             | 0.00        |               |                |              |
| 0                                            | 20-24     | Ecig               | 0     | 0.00  |               |             |               |                |              |
| 0                                            | 20-24     | Dual               | 0     | 0.00  |               |             |               |                |              |
| 0                                            | 20-24     | Former             | 895   | 9.12  |               |             | 1.46          | 506            | 56.54        |
| Year of Follow-up: 1990, Age Group: 25-29    |           |                    |       |       |               |             |               |                |              |
| Period                                       | Age Group | Smoking Group      | N     | %     | Ever Quit (N) | Ever Quit % | Mean Yrs Quit | Short Term (n) | Short Term % |
| 0                                            | 25-29     | Never Any          | 5232  | 49.06 |               |             |               |                |              |
| 0                                            | 25-29     | CC                 | 3914  | 36.70 | 0             | 0.00        |               |                |              |
| 0                                            | 25-29     | Ecig               | 0     | 0.00  |               |             |               |                |              |
| 0                                            | 25-29     | Dual               | 0     | 0.00  |               |             |               |                |              |
| 0                                            | 25-29     | Former             | 1518  | 14.23 |               |             | 2.87          | 643            | 42.36        |
| Year of Follow-up: 1990, Age Group: 30-34    |           |                    |       |       |               |             |               |                |              |
| Period                                       | Age Group | Smoking Group      | N     | %     | Ever Quit (N) | Ever Quit % | Mean Yrs Quit | Short Term (n) | Short Term % |
| 0                                            | 30-34     | Never Any          | 4765  | 43.65 |               |             |               |                |              |
| 0                                            | 30-34     | CC                 | 4023  | 36.85 | 0             | 0.00        |               |                |              |
| 0                                            | 30-34     | Ecig               | 0     | 0.00  |               |             |               |                |              |
| 0                                            | 30-34     | Dual               | 0     | 0.00  |               |             |               |                |              |
| 0                                            | 30-34     | Former             | 2128  | 19.49 |               |             | 4.06          | 592            | 27.82        |
| Year of Follow-up: 1990, Age Group: 35-39    |           |                    |       |       |               |             |               |                |              |
| Period                                       | Age Group | Smoking Group      | N     | %     | Ever Quit (N) | Ever Quit % | Mean Yrs Quit | Short Term (n) | Short Term % |
| 0                                            | 35-39     | Never Any          | 3941  | 39.85 |               |             |               |                |              |
| 0                                            | 35-39     | CC                 | 3474  | 35.13 | 0             | 0.00        |               |                |              |
| 0                                            | 35-39     | Ecig               | 0     | 0.00  |               |             |               |                |              |
| 0                                            | 35-39     | Dual               | 0     | 0.00  |               |             |               |                |              |
| 0                                            | 35-39     | Former             | 2474  | 25.02 |               |             | 8.31          | 425            | 17.18        |
| Year of Follow-up: 1990, Age Group: 40-44    |           |                    |       |       |               |             |               |                |              |
| Period                                       | Age Group | Smoking Group      | N     | %     | Ever Quit (N) | Ever Quit % | Mean Yrs Quit | Short Term (n) | Short Term % |
| 0                                            | 40-44     | Never Any          | 2912  | 33.65 |               |             |               |                |              |
| 0                                            | 40-44     | CC                 | 3113  | 35.97 | 0             | 0.00        |               |                |              |
| 0                                            | 40-44     | Ecig               | 0     | 0.00  |               |             |               |                |              |
| 0                                            | 40-44     | Dual               | 0     | 0.00  |               |             |               |                |              |
| 0                                            | 40-44     | Former             | 2630  | 30.39 |               |             | 10.69         | 317            | 12.05        |
| Year of Follow-up: 1990, Age Group: 45-49    |           |                    |       |       |               |             |               |                |              |
| Period                                       | Age Group | Smoking Group      | N     | %     | Ever Quit (N) | Ever Quit % | Mean Yrs Quit | Short Term (n) | Short Term % |
| 0                                            | 45-49     | Never Any          | 1919  | 29.46 |               |             |               |                |              |
| 0                                            | 45-49     | CC                 | 2318  | 35.58 | 0             | 0.00        |               |                |              |
| 0                                            | 45-49     | Ecig               | 0     | 0.00  |               |             |               |                |              |
| 0                                            | 45-49     | Dual               | 0     | 0.00  |               |             |               |                |              |
| 0                                            | 45-49     | Former             | 2278  | 34.97 |               |             | 13.26         | 221            | 9.70         |
| Year of Follow-up: 1990, Age Group: 50-54    |           |                    |       |       |               |             |               |                |              |
| Period                                       | Age Group | Smoking Group      | N     | %     | Ever Quit (N) | Ever Quit % | Mean Yrs Quit | Short Term (n) | Short Term % |
| 0                                            | 50-54     | Never Any          | 1611  | 29.41 |               |             |               |                |              |
| 0                                            | 50-54     | CC                 | 1816  | 33.16 | 0             | 0.00        |               |                |              |

**Results for PHIM for Run 5 (Sensitivity\_Analysis\_1.RTF)**

|                                              |           |               |       |       |               |             |               |                |              |
|----------------------------------------------|-----------|---------------|-------|-------|---------------|-------------|---------------|----------------|--------------|
| 0                                            | 50-54     | Ecig          | 0     | 0.00  |               |             |               |                |              |
| 0                                            | 50-54     | Dual          | 0     | 0.00  |               |             |               |                |              |
| 0                                            | 50-54     | Former        | 2050  | 37.43 |               |             | 14.55         | 261            | 12.73        |
| Year of Follow-up: 1990, Age Group: 55-59    |           |               |       |       |               |             |               |                |              |
| Period                                       | Age Group | Smoking Group | N     | %     | Ever Quit (N) | Ever Quit % | Mean Yrs Quit | Short Term (n) | Short Term % |
| 0                                            | 55-59     | Never Any     | 1337  | 26.83 |               |             |               |                |              |
| 0                                            | 55-59     | CC            | 1520  | 30.50 | 0             | 0.00        |               |                |              |
| 0                                            | 55-59     | Ecig          | 0     | 0.00  |               |             |               |                |              |
| 0                                            | 55-59     | Dual          | 0     | 0.00  |               |             |               |                |              |
| 0                                            | 55-59     | Former        | 2126  | 42.67 |               |             | 14.80         | 216            | 10.16        |
| Year of Follow-up: 1990, Age Group: 60-64    |           |               |       |       |               |             |               |                |              |
| Period                                       | Age Group | Smoking Group | N     | %     | Ever Quit (N) | Ever Quit % | Mean Yrs Quit | Short Term (n) | Short Term % |
| 0                                            | 60-64     | Never Any     | 1169  | 23.83 |               |             |               |                |              |
| 0                                            | 60-64     | CC            | 1287  | 26.24 | 0             | 0.00        |               |                |              |
| 0                                            | 60-64     | Ecig          | 0     | 0.00  |               |             |               |                |              |
| 0                                            | 60-64     | Dual          | 0     | 0.00  |               |             |               |                |              |
| 0                                            | 60-64     | Former        | 2449  | 49.93 |               |             | 18.87         | 106            | 4.33         |
| Year of Follow-up: 1990, Age Group: 65-69    |           |               |       |       |               |             |               |                |              |
| Period                                       | Age Group | Smoking Group | N     | %     | Ever Quit (N) | Ever Quit % | Mean Yrs Quit | Short Term (n) | Short Term % |
| 0                                            | 65-69     | Never Any     | 1023  | 23.32 |               |             |               |                |              |
| 0                                            | 65-69     | CC            | 979   | 22.32 | 0             | 0.00        |               |                |              |
| 0                                            | 65-69     | Ecig          | 0     | 0.00  |               |             |               |                |              |
| 0                                            | 65-69     | Dual          | 0     | 0.00  |               |             |               |                |              |
| 0                                            | 65-69     | Former        | 2385  | 54.37 |               |             | 19.91         | 113            | 4.74         |
| Year of Follow-up: 1990, Age Group: 70-74    |           |               |       |       |               |             |               |                |              |
| Period                                       | Age Group | Smoking Group | N     | %     | Ever Quit (N) | Ever Quit % | Mean Yrs Quit | Short Term (n) | Short Term % |
| 0                                            | 70-74     | Never Any     | 961   | 27.46 |               |             |               |                |              |
| 0                                            | 70-74     | CC            | 675   | 19.29 | 0             | 0.00        |               |                |              |
| 0                                            | 70-74     | Ecig          | 0     | 0.00  |               |             |               |                |              |
| 0                                            | 70-74     | Dual          | 0     | 0.00  |               |             |               |                |              |
| 0                                            | 70-74     | Former        | 1863  | 53.24 |               |             | 20.69         | 23             | 1.23         |
| Year of Follow-up: 1990, Age Group: 75-79    |           |               |       |       |               |             |               |                |              |
| Period                                       | Age Group | Smoking Group | N     | %     | Ever Quit (N) | Ever Quit % | Mean Yrs Quit | Short Term (n) | Short Term % |
| 0                                            | 75-79     | Never Any     | 700   | 29.06 |               |             |               |                |              |
| 0                                            | 75-79     | CC            | 371   | 15.40 | 0             | 0.00        |               |                |              |
| 0                                            | 75-79     | Ecig          | 0     | 0.00  |               |             |               |                |              |
| 0                                            | 75-79     | Dual          | 0     | 0.00  |               |             |               |                |              |
| 0                                            | 75-79     | Former        | 1338  | 55.54 |               |             | 22.88         | 68             | 5.08         |
| Year of Follow-up: 1995, Age Group: All Ages |           |               |       |       |               |             |               |                |              |
| Period                                       | Age Group | Smoking Group | N     | %     | Ever Quit (N) | Ever Quit % | Mean Yrs Quit | Short Term (n) | Short Term % |
| 5                                            | All Ages  | Never Any     | 38368 | 41.57 |               |             |               |                |              |
| 5                                            | All Ages  | CC            | 11508 | 12.47 | 0             | 0.00        |               |                |              |
| 5                                            | All Ages  | Ecig          | 15517 | 16.81 |               |             |               |                |              |
| 5                                            | All Ages  | Dual          | 0     | 0.00  |               |             |               |                |              |
| 5                                            | All Ages  | Former        | 26897 | 29.14 |               |             | 15.19         | 1705           | 6.34         |
| Year of Follow-up: 1995, Age Group: 18-19    |           |               |       |       |               |             |               |                |              |
| Period                                       | Age Group | Smoking Group | N     | %     | Ever Quit (N) | Ever Quit % | Mean Yrs Quit | Short Term (n) | Short Term % |
| 5                                            | 18-19     | Never Any     | 2448  | 69.07 |               |             |               |                |              |
| 5                                            | 18-19     | CC            | 320   | 9.03  | 0             | 0.00        |               |                |              |
| 5                                            | 18-19     | Ecig          | 659   | 18.59 |               |             |               |                |              |
| 5                                            | 18-19     | Dual          | 0     | 0.00  |               |             |               |                |              |
| 5                                            | 18-19     | Former        | 117   | 3.30  |               |             | 1.11          | 80             | 68.38        |
| Year of Follow-up: 1995, Age Group: 20-24    |           |               |       |       |               |             |               |                |              |
| Period                                       | Age Group | Smoking Group | N     | %     | Ever Quit (N) | Ever Quit % | Mean Yrs Quit | Short Term (n) | Short Term % |
| 5                                            | 20-24     | Never Any     | 5787  | 64.02 |               |             |               |                |              |
| 5                                            | 20-24     | CC            | 946   | 10.46 | 0             | 0.00        |               |                |              |
| 5                                            | 20-24     | Ecig          | 1826  | 20.20 |               |             |               |                |              |
| 5                                            | 20-24     | Dual          | 0     | 0.00  |               |             |               |                |              |
| 5                                            | 20-24     | Former        | 481   | 5.32  |               |             | 2.81          | 142            | 29.52        |
| Year of Follow-up: 1995, Age Group: 25-29    |           |               |       |       |               |             |               |                |              |
| Period                                       | Age Group | Smoking Group | N     | %     | Ever Quit (N) | Ever Quit % | Mean Yrs Quit | Short Term (n) | Short Term % |
| 5                                            | 25-29     | Never Any     | 5471  | 55.74 |               |             |               |                |              |
| 5                                            | 25-29     | CC            | 1255  | 12.79 | 0             | 0.00        |               |                |              |
| 5                                            | 25-29     | Ecig          | 1942  | 19.78 |               |             |               |                |              |
| 5                                            | 25-29     | Dual          | 0     | 0.00  |               |             |               |                |              |
| 5                                            | 25-29     | Former        | 1148  | 11.70 |               |             | 5.43          | 115            | 10.02        |
| Year of Follow-up: 1995, Age Group: 30-34    |           |               |       |       |               |             |               |                |              |
| Period                                       | Age Group | Smoking Group | N     | %     | Ever Quit (N) | Ever Quit % | Mean Yrs Quit | Short Term (n) | Short Term % |

**Results for PHIM for Run 5 (Sensitivity\_Analysis\_1.RTF)**

|                                              |           |               |      |       |               |             |               |                |              |
|----------------------------------------------|-----------|---------------|------|-------|---------------|-------------|---------------|----------------|--------------|
| 5                                            | 30-34     | Never Any     | 5065 | 47.50 |               |             |               |                |              |
| 5                                            | 30-34     | CC            | 1480 | 13.88 | 0             | 0.00        |               |                |              |
| 5                                            | 30-34     | Ecig          | 2319 | 21.75 |               |             |               |                |              |
| 5                                            | 30-34     | Dual          | 0    | 0.00  |               |             |               |                |              |
| 5                                            | 30-34     | Former        | 1800 | 16.88 |               |             | 6.94          | 106            | 5.89         |
| Year of Follow-up: 1995, Age Group: 35-39    |           |               |      |       |               |             |               |                |              |
| Period                                       | Age Group | Smoking Group | N    | %     | Ever Quit (N) | Ever Quit % | Mean Yrs Quit | Short Term (n) | Short Term % |
| 5                                            | 35-39     | Never Any     | 4724 | 43.28 |               |             |               |                |              |
| 5                                            | 35-39     | CC            | 1496 | 13.70 | 0             | 0.00        |               |                |              |
| 5                                            | 35-39     | Ecig          | 2275 | 20.84 |               |             |               |                |              |
| 5                                            | 35-39     | Dual          | 0    | 0.00  |               |             |               |                |              |
| 5                                            | 35-39     | Former        | 2421 | 22.18 |               |             | 8.20          | 114            | 4.71         |
| Year of Follow-up: 1995, Age Group: 40-44    |           |               |      |       |               |             |               |                |              |
| Period                                       | Age Group | Smoking Group | N    | %     | Ever Quit (N) | Ever Quit % | Mean Yrs Quit | Short Term (n) | Short Term % |
| 5                                            | 40-44     | Never Any     | 3941 | 39.85 |               |             |               |                |              |
| 5                                            | 40-44     | CC            | 1280 | 12.94 | 0             | 0.00        |               |                |              |
| 5                                            | 40-44     | Ecig          | 1894 | 19.15 |               |             |               |                |              |
| 5                                            | 40-44     | Dual          | 0    | 0.00  |               |             |               |                |              |
| 5                                            | 40-44     | Former        | 2774 | 28.05 |               |             | 12.06         | 130            | 4.69         |
| Year of Follow-up: 1995, Age Group: 45-49    |           |               |      |       |               |             |               |                |              |
| Period                                       | Age Group | Smoking Group | N    | %     | Ever Quit (N) | Ever Quit % | Mean Yrs Quit | Short Term (n) | Short Term % |
| 5                                            | 45-49     | Never Any     | 2912 | 33.65 |               |             |               |                |              |
| 5                                            | 45-49     | CC            | 1236 | 14.28 | 0             | 0.00        |               |                |              |
| 5                                            | 45-49     | Ecig          | 1562 | 18.05 |               |             |               |                |              |
| 5                                            | 45-49     | Dual          | 0    | 0.00  |               |             |               |                |              |
| 5                                            | 45-49     | Former        | 2945 | 34.03 |               |             | 14.20         | 148            | 5.03         |
| Year of Follow-up: 1995, Age Group: 50-54    |           |               |      |       |               |             |               |                |              |
| Period                                       | Age Group | Smoking Group | N    | %     | Ever Quit (N) | Ever Quit % | Mean Yrs Quit | Short Term (n) | Short Term % |
| 5                                            | 50-54     | Never Any     | 1919 | 29.46 |               |             |               |                |              |
| 5                                            | 50-54     | CC            | 940  | 14.43 | 0             | 0.00        |               |                |              |
| 5                                            | 50-54     | Ecig          | 1015 | 15.58 |               |             |               |                |              |
| 5                                            | 50-54     | Dual          | 0    | 0.00  |               |             |               |                |              |
| 5                                            | 50-54     | Former        | 2641 | 40.54 |               |             | 15.98         | 175            | 6.63         |
| Year of Follow-up: 1995, Age Group: 55-59    |           |               |      |       |               |             |               |                |              |
| Period                                       | Age Group | Smoking Group | N    | %     | Ever Quit (N) | Ever Quit % | Mean Yrs Quit | Short Term (n) | Short Term % |
| 5                                            | 55-59     | Never Any     | 1611 | 29.41 |               |             |               |                |              |
| 5                                            | 55-59     | CC            | 740  | 13.51 | 0             | 0.00        |               |                |              |
| 5                                            | 55-59     | Ecig          | 762  | 13.91 |               |             |               |                |              |
| 5                                            | 55-59     | Dual          | 0    | 0.00  |               |             |               |                |              |
| 5                                            | 55-59     | Former        | 2364 | 43.16 |               |             | 17.21         | 122            | 5.16         |
| Year of Follow-up: 1995, Age Group: 60-64    |           |               |      |       |               |             |               |                |              |
| Period                                       | Age Group | Smoking Group | N    | %     | Ever Quit (N) | Ever Quit % | Mean Yrs Quit | Short Term (n) | Short Term % |
| 5                                            | 60-64     | Never Any     | 1337 | 26.83 |               |             |               |                |              |
| 5                                            | 60-64     | CC            | 597  | 11.98 | 0             | 0.00        |               |                |              |
| 5                                            | 60-64     | Ecig          | 572  | 11.48 |               |             |               |                |              |
| 5                                            | 60-64     | Dual          | 0    | 0.00  |               |             |               |                |              |
| 5                                            | 60-64     | Former        | 2477 | 49.71 |               |             | 17.27         | 143            | 5.77         |
| Year of Follow-up: 1995, Age Group: 65-69    |           |               |      |       |               |             |               |                |              |
| Period                                       | Age Group | Smoking Group | N    | %     | Ever Quit (N) | Ever Quit % | Mean Yrs Quit | Short Term (n) | Short Term % |
| 5                                            | 65-69     | Never Any     | 1169 | 23.83 |               |             |               |                |              |
| 5                                            | 65-69     | CC            | 477  | 9.72  | 0             | 0.00        |               |                |              |
| 5                                            | 65-69     | Ecig          | 360  | 7.34  |               |             |               |                |              |
| 5                                            | 65-69     | Dual          | 0    | 0.00  |               |             |               |                |              |
| 5                                            | 65-69     | Former        | 2899 | 59.10 |               |             | 20.44         | 196            | 6.76         |
| Year of Follow-up: 1995, Age Group: 70-74    |           |               |      |       |               |             |               |                |              |
| Period                                       | Age Group | Smoking Group | N    | %     | Ever Quit (N) | Ever Quit % | Mean Yrs Quit | Short Term (n) | Short Term % |
| 5                                            | 70-74     | Never Any     | 1023 | 23.32 |               |             |               |                |              |
| 5                                            | 70-74     | CC            | 438  | 9.98  | 0             | 0.00        |               |                |              |
| 5                                            | 70-74     | Ecig          | 196  | 4.47  |               |             |               |                |              |
| 5                                            | 70-74     | Dual          | 0    | 0.00  |               |             |               |                |              |
| 5                                            | 70-74     | Former        | 2730 | 62.23 |               |             | 22.00         | 137            | 5.02         |
| Year of Follow-up: 1995, Age Group: 75-79    |           |               |      |       |               |             |               |                |              |
| Period                                       | Age Group | Smoking Group | N    | %     | Ever Quit (N) | Ever Quit % | Mean Yrs Quit | Short Term (n) | Short Term % |
| 5                                            | 75-79     | Never Any     | 961  | 27.46 |               |             |               |                |              |
| 5                                            | 75-79     | CC            | 303  | 8.66  | 0             | 0.00        |               |                |              |
| 5                                            | 75-79     | Ecig          | 135  | 3.86  |               |             |               |                |              |
| 5                                            | 75-79     | Dual          | 0    | 0.00  |               |             |               |                |              |
| 5                                            | 75-79     | Former        | 2100 | 60.02 |               |             | 23.02         | 97             | 4.62         |
| Year of Follow-up: 2000, Age Group: All Ages |           |               |      |       |               |             |               |                |              |



**Results for PHIM for Run 5 (Sensitivity\_Analysis\_1.RTF)**

| Period                                    | Age Group | Smoking Group | N     | %     | Ever Quit (N) | Ever Quit % | Mean Yrs Quit | Short Term (n) | Short Term % |
|-------------------------------------------|-----------|---------------|-------|-------|---------------|-------------|---------------|----------------|--------------|
| 10                                        | All Ages  | Never Any     | 39177 | 41.64 |               |             |               |                |              |
| 10                                        | All Ages  | CC            | 4843  | 5.15  | 0             | 0.00        |               |                |              |
| 10                                        | All Ages  | Ecig          | 20724 | 22.03 |               |             |               |                |              |
| 10                                        | All Ages  | Dual          | 0     | 0.00  |               |             |               |                |              |
| 10                                        | All Ages  | Former        | 29348 | 31.19 |               |             | 16.84         | 1724           | 5.87         |
| Year of Follow-up: 2000, Age Group: 18-19 |           |               |       |       |               |             |               |                |              |
| Period                                    | Age Group | Smoking Group | N     | %     | Ever Quit (N) | Ever Quit % | Mean Yrs Quit | Short Term (n) | Short Term % |
| 10                                        | 18-19     | Never Any     | 0     | .     |               |             |               |                |              |
| 10                                        | 18-19     | CC            | 0     | .     | 0             | .           |               |                |              |
| 10                                        | 18-19     | Ecig          | 0     | .     |               |             |               |                |              |
| 10                                        | 18-19     | Dual          | 0     | .     |               |             |               |                |              |
| 10                                        | 18-19     | Former        | 0     | .     |               |             |               | 0              | .            |
| Year of Follow-up: 2000, Age Group: 20-24 |           |               |       |       |               |             |               |                |              |
| Period                                    | Age Group | Smoking Group | N     | %     | Ever Quit (N) | Ever Quit % | Mean Yrs Quit | Short Term (n) | Short Term % |
| 10                                        | 20-24     | Never Any     | 4927  | 55.70 |               |             |               |                |              |
| 10                                        | 20-24     | CC            | 462   | 5.22  | 0             | 0.00        |               |                |              |
| 10                                        | 20-24     | Ecig          | 2544  | 28.76 |               |             |               |                |              |
| 10                                        | 20-24     | Dual          | 0     | 0.00  |               |             |               |                |              |
| 10                                        | 20-24     | Former        | 912   | 10.31 |               |             | 3.41          | 258            | 28.29        |
| Year of Follow-up: 2000, Age Group: 25-29 |           |               |       |       |               |             |               |                |              |
| Period                                    | Age Group | Smoking Group | N     | %     | Ever Quit (N) | Ever Quit % | Mean Yrs Quit | Short Term (n) | Short Term % |
| 10                                        | 25-29     | Never Any     | 5341  | 59.08 |               |             |               |                |              |
| 10                                        | 25-29     | CC            | 404   | 4.47  | 0             | 0.00        |               |                |              |
| 10                                        | 25-29     | Ecig          | 2359  | 26.10 |               |             |               |                |              |
| 10                                        | 25-29     | Dual          | 0     | 0.00  |               |             |               |                |              |
| 10                                        | 25-29     | Former        | 936   | 10.35 |               |             | 4.91          | 195            | 20.83        |
| Year of Follow-up: 2000, Age Group: 30-34 |           |               |       |       |               |             |               |                |              |
| Period                                    | Age Group | Smoking Group | N     | %     | Ever Quit (N) | Ever Quit % | Mean Yrs Quit | Short Term (n) | Short Term % |
| 10                                        | 30-34     | Never Any     | 5276  | 53.75 |               |             |               |                |              |
| 10                                        | 30-34     | CC            | 481   | 4.90  | 0             | 0.00        |               |                |              |
| 10                                        | 30-34     | Ecig          | 2608  | 26.57 |               |             |               |                |              |
| 10                                        | 30-34     | Dual          | 0     | 0.00  |               |             |               |                |              |
| 10                                        | 30-34     | Former        | 1451  | 14.78 |               |             | 8.66          | 118            | 8.13         |
| Year of Follow-up: 2000, Age Group: 35-39 |           |               |       |       |               |             |               |                |              |
| Period                                    | Age Group | Smoking Group | N     | %     | Ever Quit (N) | Ever Quit % | Mean Yrs Quit | Short Term (n) | Short Term % |
| 10                                        | 35-39     | Never Any     | 4997  | 46.86 |               |             |               |                |              |
| 10                                        | 35-39     | CC            | 609   | 5.71  | 0             | 0.00        |               |                |              |
| 10                                        | 35-39     | Ecig          | 2980  | 27.94 |               |             |               |                |              |
| 10                                        | 35-39     | Dual          | 0     | 0.00  |               |             |               |                |              |
| 10                                        | 35-39     | Former        | 2078  | 19.49 |               |             | 10.61         | 109            | 5.25         |
| Year of Follow-up: 2000, Age Group: 40-44 |           |               |       |       |               |             |               |                |              |
| Period                                    | Age Group | Smoking Group | N     | %     | Ever Quit (N) | Ever Quit % | Mean Yrs Quit | Short Term (n) | Short Term % |
| 10                                        | 40-44     | Never Any     | 4724  | 43.28 |               |             |               |                |              |
| 10                                        | 40-44     | CC            | 567   | 5.19  | 0             | 0.00        |               |                |              |
| 10                                        | 40-44     | Ecig          | 2857  | 26.17 |               |             |               |                |              |
| 10                                        | 40-44     | Dual          | 0     | 0.00  |               |             |               |                |              |
| 10                                        | 40-44     | Former        | 2768  | 25.36 |               |             | 11.82         | 124            | 4.48         |
| Year of Follow-up: 2000, Age Group: 45-49 |           |               |       |       |               |             |               |                |              |
| Period                                    | Age Group | Smoking Group | N     | %     | Ever Quit (N) | Ever Quit % | Mean Yrs Quit | Short Term (n) | Short Term % |
| 10                                        | 45-49     | Never Any     | 3941  | 39.85 |               |             |               |                |              |
| 10                                        | 45-49     | CC            | 484   | 4.89  | 0             | 0.00        |               |                |              |
| 10                                        | 45-49     | Ecig          | 2312  | 23.38 |               |             |               |                |              |
| 10                                        | 45-49     | Dual          | 0     | 0.00  |               |             |               |                |              |
| 10                                        | 45-49     | Former        | 3152  | 31.87 |               |             | 15.25         | 163            | 5.17         |
| Year of Follow-up: 2000, Age Group: 50-54 |           |               |       |       |               |             |               |                |              |
| Period                                    | Age Group | Smoking Group | N     | %     | Ever Quit (N) | Ever Quit % | Mean Yrs Quit | Short Term (n) | Short Term % |
| 10                                        | 50-54     | Never Any     | 2912  | 33.65 |               |             |               |                |              |
| 10                                        | 50-54     | CC            | 473   | 5.47  | 0             | 0.00        |               |                |              |
| 10                                        | 50-54     | Ecig          | 1859  | 21.48 |               |             |               |                |              |
| 10                                        | 50-54     | Dual          | 0     | 0.00  |               |             |               |                |              |
| 10                                        | 50-54     | Former        | 3411  | 39.41 |               |             | 16.85         | 186            | 5.45         |
| Year of Follow-up: 2000, Age Group: 55-59 |           |               |       |       |               |             |               |                |              |
| Period                                    | Age Group | Smoking Group | N     | %     | Ever Quit (N) | Ever Quit % | Mean Yrs Quit | Short Term (n) | Short Term % |
| 10                                        | 55-59     | Never Any     | 1919  | 29.46 |               |             |               |                |              |
| 10                                        | 55-59     | CC            | 363   | 5.57  | 0             | 0.00        |               |                |              |
| 10                                        | 55-59     | Ecig          | 1194  | 18.33 |               |             |               |                |              |
| 10                                        | 55-59     | Dual          | 0     | 0.00  |               |             |               |                |              |

**Results for PHIM for Run 5 (Sensitivity\_Analysis\_1.RTF)**

| Year of Follow-up: 2000, Age Group: 60-64    | Period   | Age Group | Smoking Group | N     | %     | Ever Quit (N) | Ever Quit % | Mean Yrs Quit | Short Term (n) | Short Term % |
|----------------------------------------------|----------|-----------|---------------|-------|-------|---------------|-------------|---------------|----------------|--------------|
| 10                                           | 55-59    | Former    |               | 3039  | 46.65 |               |             | 18.50         | 146            | 4.80         |
| 10                                           | 60-64    | Never Any |               | 1611  | 29.41 |               |             |               |                |              |
| 10                                           | 60-64    | CC        |               | 306   | 5.59  | 0             | 0.00        |               |                |              |
| 10                                           | 60-64    | Ecig      |               | 852   | 15.56 |               |             |               |                |              |
| 10                                           | 60-64    | Dual      |               | 0     | 0.00  |               |             |               |                |              |
| 10                                           | 60-64    | Former    |               | 2708  | 49.44 |               |             | 19.63         | 144            | 5.32         |
| Year of Follow-up: 2000, Age Group: 65-69    | Period   | Age Group | Smoking Group | N     | %     | Ever Quit (N) | Ever Quit % | Mean Yrs Quit | Short Term (n) | Short Term % |
| 10                                           | 65-69    | Never Any |               | 1337  | 26.83 |               |             |               |                |              |
| 10                                           | 65-69    | CC        |               | 244   | 4.90  | 0             | 0.00        |               |                |              |
| 10                                           | 65-69    | Ecig      |               | 603   | 12.10 |               |             |               |                |              |
| 10                                           | 65-69    | Dual      |               | 0     | 0.00  |               |             |               |                |              |
| 10                                           | 65-69    | Former    |               | 2799  | 56.17 |               |             | 19.95         | 120            | 4.29         |
| Year of Follow-up: 2000, Age Group: 70-74    | Period   | Age Group | Smoking Group | N     | %     | Ever Quit (N) | Ever Quit % | Mean Yrs Quit | Short Term (n) | Short Term % |
| 10                                           | 70-74    | Never Any |               | 1169  | 23.83 |               |             |               |                |              |
| 10                                           | 70-74    | CC        |               | 236   | 4.81  | 0             | 0.00        |               |                |              |
| 10                                           | 70-74    | Ecig      |               | 327   | 6.67  |               |             |               |                |              |
| 10                                           | 70-74    | Dual      |               | 0     | 0.00  |               |             |               |                |              |
| 10                                           | 70-74    | Former    |               | 3173  | 64.69 |               |             | 23.44         | 94             | 2.96         |
| Year of Follow-up: 2000, Age Group: 75-79    | Period   | Age Group | Smoking Group | N     | %     | Ever Quit (N) | Ever Quit % | Mean Yrs Quit | Short Term (n) | Short Term % |
| 10                                           | 75-79    | Never Any |               | 1023  | 23.32 |               |             |               |                |              |
| 10                                           | 75-79    | CC        |               | 214   | 4.88  | 0             | 0.00        |               |                |              |
| 10                                           | 75-79    | Ecig      |               | 229   | 5.22  |               |             |               |                |              |
| 10                                           | 75-79    | Dual      |               | 0     | 0.00  |               |             |               |                |              |
| 10                                           | 75-79    | Former    |               | 2921  | 66.58 |               |             | 25.38         | 67             | 2.29         |
| Year of Follow-up: 2005, Age Group: All Ages | Period   | Age Group | Smoking Group | N     | %     | Ever Quit (N) | Ever Quit % | Mean Yrs Quit | Short Term (n) | Short Term % |
| 15                                           | All Ages | Never Any |               | 37449 | 41.75 |               |             |               |                |              |
| 15                                           | All Ages | CC        |               | 1911  | 2.13  | 0             | 0.00        |               |                |              |
| 15                                           | All Ages | Ecig      |               | 20003 | 22.30 |               |             |               |                |              |
| 15                                           | All Ages | Dual      |               | 0     | 0.00  |               |             |               |                |              |
| 15                                           | All Ages | Former    |               | 30342 | 33.82 |               |             | 18.46         | 1574           | 5.19         |
| Year of Follow-up: 2005, Age Group: 18-19    | Period   | Age Group | Smoking Group | N     | %     | Ever Quit (N) | Ever Quit % | Mean Yrs Quit | Short Term (n) | Short Term % |
| 15                                           | 18-19    | Never Any |               | 0     | .     |               |             |               |                |              |
| 15                                           | 18-19    | CC        |               | 0     | .     | 0             | .           |               |                |              |
| 15                                           | 18-19    | Ecig      |               | 0     | .     |               |             |               |                |              |
| 15                                           | 18-19    | Dual      |               | 0     | .     |               |             |               |                |              |
| 15                                           | 18-19    | Former    |               | 0     | .     |               |             | .             | 0              | .            |
| Year of Follow-up: 2005, Age Group: 20-24    | Period   | Age Group | Smoking Group | N     | %     | Ever Quit (N) | Ever Quit % | Mean Yrs Quit | Short Term (n) | Short Term % |
| 15                                           | 20-24    | Never Any |               | 0     | .     |               |             |               |                |              |
| 15                                           | 20-24    | CC        |               | 0     | .     | 0             | .           |               |                |              |
| 15                                           | 20-24    | Ecig      |               | 0     | .     |               |             |               |                |              |
| 15                                           | 20-24    | Dual      |               | 0     | .     |               |             |               |                |              |
| 15                                           | 20-24    | Former    |               | 0     | .     |               |             | .             | 0              | .            |
| Year of Follow-up: 2005, Age Group: 25-29    | Period   | Age Group | Smoking Group | N     | %     | Ever Quit (N) | Ever Quit % | Mean Yrs Quit | Short Term (n) | Short Term % |
| 15                                           | 25-29    | Never Any |               | 4634  | 52.39 |               |             |               |                |              |
| 15                                           | 25-29    | CC        |               | 179   | 2.02  | 0             | 0.00        |               |                |              |
| 15                                           | 25-29    | Ecig      |               | 2661  | 30.08 |               |             |               |                |              |
| 15                                           | 25-29    | Dual      |               | 0     | 0.00  |               |             |               |                |              |
| 15                                           | 25-29    | Former    |               | 1371  | 15.50 |               |             | 6.32          | 174            | 12.69        |
| Year of Follow-up: 2005, Age Group: 30-34    | Period   | Age Group | Smoking Group | N     | %     | Ever Quit (N) | Ever Quit % | Mean Yrs Quit | Short Term (n) | Short Term % |
| 15                                           | 30-34    | Never Any |               | 5042  | 55.77 |               |             |               |                |              |
| 15                                           | 30-34    | CC        |               | 153   | 1.69  | 0             | 0.00        |               |                |              |
| 15                                           | 30-34    | Ecig      |               | 2479  | 27.42 |               |             |               |                |              |
| 15                                           | 30-34    | Dual      |               | 0     | 0.00  |               |             |               |                |              |
| 15                                           | 30-34    | Former    |               | 1366  | 15.11 |               |             | 7.38          | 171            | 12.52        |
| Year of Follow-up: 2005, Age Group: 35-39    | Period   | Age Group | Smoking Group | N     | %     | Ever Quit (N) | Ever Quit % | Mean Yrs Quit | Short Term (n) | Short Term % |
| 15                                           | 35-39    | Never Any |               | 5163  | 52.60 |               |             |               |                |              |
| 15                                           | 35-39    | CC        |               | 188   | 1.92  | 0             | 0.00        |               |                |              |

**Results for PHIM for Run 5 (Sensitivity\_Analysis\_1.RTF)**

|                                              |           |               |       |       |               |             |               |                |              |
|----------------------------------------------|-----------|---------------|-------|-------|---------------|-------------|---------------|----------------|--------------|
| 15                                           | 35-39     | Ecig          | 2654  | 27.04 |               |             |               |                |              |
| 15                                           | 35-39     | Dual          | 0     | 0.00  |               |             |               |                |              |
| 15                                           | 35-39     | Former        | 1811  | 18.45 |               |             | 11.33         | 147            | 8.12         |
| Year of Follow-up: 2005, Age Group: 40-44    |           |               |       |       |               |             |               |                |              |
| Period                                       | Age Group | Smoking Group | N     | %     | Ever Quit (N) | Ever Quit % | Mean Yrs Quit | Short Term (n) | Short Term % |
| 15                                           | 40-44     | Never Any     | 4997  | 46.86 |               |             |               |                |              |
| 15                                           | 40-44     | CC            | 231   | 2.17  | 0             | 0.00        |               |                |              |
| 15                                           | 40-44     | Ecig          | 2948  | 27.64 |               |             |               |                |              |
| 15                                           | 40-44     | Dual          | 0     | 0.00  |               |             |               |                |              |
| 15                                           | 40-44     | Former        | 2488  | 23.33 |               |             | 13.32         | 199            | 8.00         |
| Year of Follow-up: 2005, Age Group: 45-49    |           |               |       |       |               |             |               |                |              |
| Period                                       | Age Group | Smoking Group | N     | %     | Ever Quit (N) | Ever Quit % | Mean Yrs Quit | Short Term (n) | Short Term % |
| 15                                           | 45-49     | Never Any     | 4724  | 43.28 |               |             |               |                |              |
| 15                                           | 45-49     | CC            | 216   | 1.98  | 0             | 0.00        |               |                |              |
| 15                                           | 45-49     | Ecig          | 2793  | 25.59 |               |             |               |                |              |
| 15                                           | 45-49     | Dual          | 0     | 0.00  |               |             |               |                |              |
| 15                                           | 45-49     | Former        | 3183  | 29.16 |               |             | 14.88         | 160            | 5.03         |
| Year of Follow-up: 2005, Age Group: 50-54    |           |               |       |       |               |             |               |                |              |
| Period                                       | Age Group | Smoking Group | N     | %     | Ever Quit (N) | Ever Quit % | Mean Yrs Quit | Short Term (n) | Short Term % |
| 15                                           | 50-54     | Never Any     | 3941  | 39.85 |               |             |               |                |              |
| 15                                           | 50-54     | CC            | 213   | 2.15  | 0             | 0.00        |               |                |              |
| 15                                           | 50-54     | Ecig          | 2180  | 22.04 |               |             |               |                |              |
| 15                                           | 50-54     | Dual          | 0     | 0.00  |               |             |               |                |              |
| 15                                           | 50-54     | Former        | 3555  | 35.95 |               |             | 18.19         | 154            | 4.33         |
| Year of Follow-up: 2005, Age Group: 55-59    |           |               |       |       |               |             |               |                |              |
| Period                                       | Age Group | Smoking Group | N     | %     | Ever Quit (N) | Ever Quit % | Mean Yrs Quit | Short Term (n) | Short Term % |
| 15                                           | 55-59     | Never Any     | 2912  | 33.65 |               |             |               |                |              |
| 15                                           | 55-59     | CC            | 215   | 2.48  | 0             | 0.00        |               |                |              |
| 15                                           | 55-59     | Ecig          | 1781  | 20.58 |               |             |               |                |              |
| 15                                           | 55-59     | Dual          | 0     | 0.00  |               |             |               |                |              |
| 15                                           | 55-59     | Former        | 3747  | 43.29 |               |             | 20.09         | 117            | 3.12         |
| Year of Follow-up: 2005, Age Group: 60-64    |           |               |       |       |               |             |               |                |              |
| Period                                       | Age Group | Smoking Group | N     | %     | Ever Quit (N) | Ever Quit % | Mean Yrs Quit | Short Term (n) | Short Term % |
| 15                                           | 60-64     | Never Any     | 1919  | 29.46 |               |             |               |                |              |
| 15                                           | 60-64     | CC            | 143   | 2.19  | 0             | 0.00        |               |                |              |
| 15                                           | 60-64     | Ecig          | 1100  | 16.88 |               |             |               |                |              |
| 15                                           | 60-64     | Dual          | 0     | 0.00  |               |             |               |                |              |
| 15                                           | 60-64     | Former        | 3353  | 51.47 |               |             | 21.47         | 156            | 4.65         |
| Year of Follow-up: 2005, Age Group: 65-69    |           |               |       |       |               |             |               |                |              |
| Period                                       | Age Group | Smoking Group | N     | %     | Ever Quit (N) | Ever Quit % | Mean Yrs Quit | Short Term (n) | Short Term % |
| 15                                           | 65-69     | Never Any     | 1611  | 29.41 |               |             |               |                |              |
| 15                                           | 65-69     | CC            | 124   | 2.26  | 0             | 0.00        |               |                |              |
| 15                                           | 65-69     | Ecig          | 705   | 12.87 |               |             |               |                |              |
| 15                                           | 65-69     | Dual          | 0     | 0.00  |               |             |               |                |              |
| 15                                           | 65-69     | Former        | 3037  | 55.45 |               |             | 22.19         | 118            | 3.89         |
| Year of Follow-up: 2005, Age Group: 70-74    |           |               |       |       |               |             |               |                |              |
| Period                                       | Age Group | Smoking Group | N     | %     | Ever Quit (N) | Ever Quit % | Mean Yrs Quit | Short Term (n) | Short Term % |
| 15                                           | 70-74     | Never Any     | 1337  | 26.83 |               |             |               |                |              |
| 15                                           | 70-74     | CC            | 129   | 2.59  | 0             | 0.00        |               |                |              |
| 15                                           | 70-74     | Ecig          | 441   | 8.85  |               |             |               |                |              |
| 15                                           | 70-74     | Dual          | 0     | 0.00  |               |             |               |                |              |
| 15                                           | 70-74     | Former        | 3076  | 61.73 |               |             | 22.89         | 112            | 3.64         |
| Year of Follow-up: 2005, Age Group: 75-79    |           |               |       |       |               |             |               |                |              |
| Period                                       | Age Group | Smoking Group | N     | %     | Ever Quit (N) | Ever Quit % | Mean Yrs Quit | Short Term (n) | Short Term % |
| 15                                           | 75-79     | Never Any     | 1169  | 23.83 |               |             |               |                |              |
| 15                                           | 75-79     | CC            | 120   | 2.45  | 0             | 0.00        |               |                |              |
| 15                                           | 75-79     | Ecig          | 261   | 5.32  |               |             |               |                |              |
| 15                                           | 75-79     | Dual          | 0     | 0.00  |               |             |               |                |              |
| 15                                           | 75-79     | Former        | 3355  | 68.40 |               |             | 27.01         | 66             | 1.97         |
| Year of Follow-up: 2010, Age Group: All Ages |           |               |       |       |               |             |               |                |              |
| Period                                       | Age Group | Smoking Group | N     | %     | Ever Quit (N) | Ever Quit % | Mean Yrs Quit | Short Term (n) | Short Term % |
| 20                                           | All Ages  | Never Any     | 36103 | 42.57 |               |             |               |                |              |
| 20                                           | All Ages  | CC            | 738   | 0.87  | 0             | 0.00        |               |                |              |
| 20                                           | All Ages  | Ecig          | 17076 | 20.14 |               |             |               |                |              |
| 20                                           | All Ages  | Dual          | 0     | 0.00  |               |             |               |                |              |
| 20                                           | All Ages  | Former        | 30883 | 36.42 |               |             | 19.82         | 1518           | 4.92         |
| Year of Follow-up: 2010, Age Group: 18-19    |           |               |       |       |               |             |               |                |              |
| Period                                       | Age Group | Smoking Group | N     | %     | Ever Quit (N) | Ever Quit % | Mean Yrs Quit | Short Term (n) | Short Term % |

**Results for PHIM for Run 5 (Sensitivity\_Analysis\_1.RTF)**

|                                           |           |               |      |       |               |             |               |                |              |
|-------------------------------------------|-----------|---------------|------|-------|---------------|-------------|---------------|----------------|--------------|
| 20                                        | 18-19     | Never Any     | 0    | .     |               |             |               |                |              |
| 20                                        | 18-19     | CC            | 0    | .     | 0             | .           |               |                |              |
| 20                                        | 18-19     | Ecig          | 0    | .     |               |             |               |                |              |
| 20                                        | 18-19     | Dual          | 0    | .     |               |             |               |                |              |
| 20                                        | 18-19     | Former        | 0    | .     |               |             | 0             | .              |              |
| Year of Follow-up: 2010, Age Group: 20-24 |           |               |      |       |               |             |               |                |              |
| Period                                    | Age Group | Smoking Group | N    | %     | Ever Quit (N) | Ever Quit % | Mean Yrs Quit | Short Term (n) | Short Term % |
| 20                                        | 20-24     | Never Any     | 0    | .     |               |             |               |                |              |
| 20                                        | 20-24     | CC            | 0    | .     | 0             | .           |               |                |              |
| 20                                        | 20-24     | Ecig          | 0    | .     |               |             |               |                |              |
| 20                                        | 20-24     | Dual          | 0    | .     |               |             |               |                |              |
| 20                                        | 20-24     | Former        | 0    | .     |               |             |               | 0              | .            |
| Year of Follow-up: 2010, Age Group: 25-29 |           |               |      |       |               |             |               |                |              |
| Period                                    | Age Group | Smoking Group | N    | %     | Ever Quit (N) | Ever Quit % | Mean Yrs Quit | Short Term (n) | Short Term % |
| 20                                        | 25-29     | Never Any     | 0    | .     |               |             |               |                |              |
| 20                                        | 25-29     | CC            | 0    | .     | 0             | .           |               |                |              |
| 20                                        | 25-29     | Ecig          | 0    | .     |               |             |               |                |              |
| 20                                        | 25-29     | Dual          | 0    | .     |               |             |               |                |              |
| 20                                        | 25-29     | Former        | 0    | .     |               |             |               | 0              | .            |
| Year of Follow-up: 2010, Age Group: 30-34 |           |               |      |       |               |             |               |                |              |
| Period                                    | Age Group | Smoking Group | N    | %     | Ever Quit (N) | Ever Quit % | Mean Yrs Quit | Short Term (n) | Short Term % |
| 20                                        | 30-34     | Never Any     | 4508 | 50.97 |               |             |               |                |              |
| 20                                        | 30-34     | CC            | 71   | 0.80  | 0             | 0.00        |               |                |              |
| 20                                        | 30-34     | Ecig          | 2376 | 26.86 |               |             |               |                |              |
| 20                                        | 30-34     | Dual          | 0    | 0.00  |               |             |               |                |              |
| 20                                        | 30-34     | Former        | 1890 | 21.37 |               |             | 8.72          | 230            | 12.17        |
| Year of Follow-up: 2010, Age Group: 35-39 |           |               |      |       |               |             |               |                |              |
| Period                                    | Age Group | Smoking Group | N    | %     | Ever Quit (N) | Ever Quit % | Mean Yrs Quit | Short Term (n) | Short Term % |
| 20                                        | 35-39     | Never Any     | 4991 | 55.21 |               |             |               |                |              |
| 20                                        | 35-39     | CC            | 59   | 0.65  | 0             | 0.00        |               |                |              |
| 20                                        | 35-39     | Ecig          | 2154 | 23.83 |               |             |               |                |              |
| 20                                        | 35-39     | Dual          | 0    | 0.00  |               |             |               |                |              |
| 20                                        | 35-39     | Former        | 1836 | 20.31 |               |             | 9.77          | 141            | 7.68         |
| Year of Follow-up: 2010, Age Group: 40-44 |           |               |      |       |               |             |               |                |              |
| Period                                    | Age Group | Smoking Group | N    | %     | Ever Quit (N) | Ever Quit % | Mean Yrs Quit | Short Term (n) | Short Term % |
| 20                                        | 40-44     | Never Any     | 5163 | 52.60 |               |             |               |                |              |
| 20                                        | 40-44     | CC            | 68   | 0.69  | 0             | 0.00        |               |                |              |
| 20                                        | 40-44     | Ecig          | 2416 | 24.61 |               |             |               |                |              |
| 20                                        | 40-44     | Dual          | 0    | 0.00  |               |             |               |                |              |
| 20                                        | 40-44     | Former        | 2169 | 22.10 |               |             | 13.96         | 143            | 6.59         |
| Year of Follow-up: 2010, Age Group: 45-49 |           |               |      |       |               |             |               |                |              |
| Period                                    | Age Group | Smoking Group | N    | %     | Ever Quit (N) | Ever Quit % | Mean Yrs Quit | Short Term (n) | Short Term % |
| 20                                        | 45-49     | Never Any     | 4997 | 46.86 |               |             |               |                |              |
| 20                                        | 45-49     | CC            | 89   | 0.83  | 0             | 0.00        |               |                |              |
| 20                                        | 45-49     | Ecig          | 2619 | 24.56 |               |             |               |                |              |
| 20                                        | 45-49     | Dual          | 0    | 0.00  |               |             |               |                |              |
| 20                                        | 45-49     | Former        | 2959 | 27.75 |               |             | 15.74         | 171            | 5.78         |
| Year of Follow-up: 2010, Age Group: 50-54 |           |               |      |       |               |             |               |                |              |
| Period                                    | Age Group | Smoking Group | N    | %     | Ever Quit (N) | Ever Quit % | Mean Yrs Quit | Short Term (n) | Short Term % |
| 20                                        | 50-54     | Never Any     | 4724 | 43.28 |               |             |               |                |              |
| 20                                        | 50-54     | CC            | 87   | 0.80  | 0             | 0.00        |               |                |              |
| 20                                        | 50-54     | Ecig          | 2490 | 22.81 |               |             |               |                |              |
| 20                                        | 50-54     | Dual          | 0    | 0.00  |               |             |               |                |              |
| 20                                        | 50-54     | Former        | 3615 | 33.12 |               |             | 17.75         | 174            | 4.81         |
| Year of Follow-up: 2010, Age Group: 55-59 |           |               |      |       |               |             |               |                |              |
| Period                                    | Age Group | Smoking Group | N    | %     | Ever Quit (N) | Ever Quit % | Mean Yrs Quit | Short Term (n) | Short Term % |
| 20                                        | 55-59     | Never Any     | 3941 | 39.85 |               |             |               |                |              |
| 20                                        | 55-59     | CC            | 85   | 0.86  | 0             | 0.00        |               |                |              |
| 20                                        | 55-59     | Ecig          | 1859 | 18.80 |               |             |               |                |              |
| 20                                        | 55-59     | Dual          | 0    | 0.00  |               |             |               |                |              |
| 20                                        | 55-59     | Former        | 4004 | 40.49 |               |             | 20.81         | 181            | 4.52         |
| Year of Follow-up: 2010, Age Group: 60-64 |           |               |      |       |               |             |               |                |              |
| Period                                    | Age Group | Smoking Group | N    | %     | Ever Quit (N) | Ever Quit % | Mean Yrs Quit | Short Term (n) | Short Term % |
| 20                                        | 60-64     | Never Any     | 2912 | 33.65 |               |             |               |                |              |
| 20                                        | 60-64     | CC            | 87   | 1.01  | 0             | 0.00        |               |                |              |
| 20                                        | 60-64     | Ecig          | 1428 | 16.50 |               |             |               |                |              |
| 20                                        | 60-64     | Dual          | 0    | 0.00  |               |             |               |                |              |
| 20                                        | 60-64     | Former        | 4228 | 48.85 |               |             | 22.41         | 241            | 5.70         |
| Year of Follow-up: 2010, Age Group: 65-69 |           |               |      |       |               |             |               |                |              |

**Results for PHIM for Run 5 (Sensitivity\_Analysis\_1.RTF)**

| Period                                       | Age Group | Smoking Group | N     | %     | Ever Quit (N) | Ever Quit % | Mean Yrs Quit | Short Term (n) | Short Term % |
|----------------------------------------------|-----------|---------------|-------|-------|---------------|-------------|---------------|----------------|--------------|
| 20                                           | 65-69     | Never Any     | 1919  | 29.46 |               |             |               |                |              |
| 20                                           | 65-69     | CC            | 60    | 0.92  | 0             | 0.00        |               |                |              |
| 20                                           | 65-69     | Ecig          | 809   | 12.42 |               |             |               |                |              |
| 20                                           | 65-69     | Dual          | 0     | 0.00  |               |             |               |                |              |
| 20                                           | 65-69     | Former        | 3727  | 57.21 |               |             | 24.03         | 133            | 3.57         |
| Year of Follow-up: 2010, Age Group: 70-74    |           |               |       |       |               |             |               |                |              |
| Period                                       | Age Group | Smoking Group | N     | %     | Ever Quit (N) | Ever Quit % | Mean Yrs Quit | Short Term (n) | Short Term % |
| 20                                           | 70-74     | Never Any     | 1611  | 29.41 |               |             |               |                |              |
| 20                                           | 70-74     | CC            | 69    | 1.26  | 0             | 0.00        |               |                |              |
| 20                                           | 70-74     | Ecig          | 574   | 10.48 |               |             |               |                |              |
| 20                                           | 70-74     | Dual          | 0     | 0.00  |               |             |               |                |              |
| 20                                           | 70-74     | Former        | 3223  | 58.85 |               |             | 25.75         | 61             | 1.89         |
| Year of Follow-up: 2010, Age Group: 75-79    |           |               |       |       |               |             |               |                |              |
| Period                                       | Age Group | Smoking Group | N     | %     | Ever Quit (N) | Ever Quit % | Mean Yrs Quit | Short Term (n) | Short Term % |
| 20                                           | 75-79     | Never Any     | 1337  | 26.83 |               |             |               |                |              |
| 20                                           | 75-79     | CC            | 63    | 1.26  | 0             | 0.00        |               |                |              |
| 20                                           | 75-79     | Ecig          | 351   | 7.04  |               |             |               |                |              |
| 20                                           | 75-79     | Dual          | 0     | 0.00  |               |             |               |                |              |
| 20                                           | 75-79     | Former        | 3232  | 64.86 |               |             | 26.66         | 43             | 1.33         |
| Year of Follow-up: 2015, Age Group: All Ages |           |               |       |       |               |             |               |                |              |
| Period                                       | Age Group | Smoking Group | N     | %     | Ever Quit (N) | Ever Quit % | Mean Yrs Quit | Short Term (n) | Short Term % |
| 25                                           | All Ages  | Never Any     | 34747 | 43.53 |               |             |               |                |              |
| 25                                           | All Ages  | CC            | 289   | 0.36  | 0             | 0.00        |               |                |              |
| 25                                           | All Ages  | Ecig          | 14107 | 17.67 |               |             |               |                |              |
| 25                                           | All Ages  | Dual          | 0     | 0.00  |               |             |               |                |              |
| 25                                           | All Ages  | Former        | 30674 | 38.43 |               |             | 21.87         | 1088           | 3.55         |
| Year of Follow-up: 2015, Age Group: 18-19    |           |               |       |       |               |             |               |                |              |
| Period                                       | Age Group | Smoking Group | N     | %     | Ever Quit (N) | Ever Quit % | Mean Yrs Quit | Short Term (n) | Short Term % |
| 25                                           | 18-19     | Never Any     | 0     | .     |               |             |               |                |              |
| 25                                           | 18-19     | CC            | 0     | .     | 0             | .           |               |                |              |
| 25                                           | 18-19     | Ecig          | 0     | .     |               |             |               |                |              |
| 25                                           | 18-19     | Dual          | 0     | .     |               |             |               |                |              |
| 25                                           | 18-19     | Former        | 0     | .     |               |             | .             | 0              | .            |
| Year of Follow-up: 2015, Age Group: 20-24    |           |               |       |       |               |             |               |                |              |
| Period                                       | Age Group | Smoking Group | N     | %     | Ever Quit (N) | Ever Quit % | Mean Yrs Quit | Short Term (n) | Short Term % |
| 25                                           | 20-24     | Never Any     | 0     | .     |               |             |               |                |              |
| 25                                           | 20-24     | CC            | 0     | .     | 0             | .           |               |                |              |
| 25                                           | 20-24     | Ecig          | 0     | .     |               |             |               |                |              |
| 25                                           | 20-24     | Dual          | 0     | .     |               |             |               |                |              |
| 25                                           | 20-24     | Former        | 0     | .     |               |             | .             | 0              | .            |
| Year of Follow-up: 2015, Age Group: 25-29    |           |               |       |       |               |             |               |                |              |
| Period                                       | Age Group | Smoking Group | N     | %     | Ever Quit (N) | Ever Quit % | Mean Yrs Quit | Short Term (n) | Short Term % |
| 25                                           | 25-29     | Never Any     | 0     | .     |               |             |               |                |              |
| 25                                           | 25-29     | CC            | 0     | .     | 0             | .           |               |                |              |
| 25                                           | 25-29     | Ecig          | 0     | .     |               |             |               |                |              |
| 25                                           | 25-29     | Dual          | 0     | .     |               |             |               |                |              |
| 25                                           | 25-29     | Former        | 0     | .     |               |             | .             | 0              | .            |
| Year of Follow-up: 2015, Age Group: 30-34    |           |               |       |       |               |             |               |                |              |
| Period                                       | Age Group | Smoking Group | N     | %     | Ever Quit (N) | Ever Quit % | Mean Yrs Quit | Short Term (n) | Short Term % |
| 25                                           | 30-34     | Never Any     | 0     | .     |               |             |               |                |              |
| 25                                           | 30-34     | CC            | 0     | .     | 0             | .           |               |                |              |
| 25                                           | 30-34     | Ecig          | 0     | .     |               |             |               |                |              |
| 25                                           | 30-34     | Dual          | 0     | .     |               |             |               |                |              |
| 25                                           | 30-34     | Former        | 0     | .     |               |             | .             | 0              | .            |
| Year of Follow-up: 2015, Age Group: 35-39    |           |               |       |       |               |             |               |                |              |
| Period                                       | Age Group | Smoking Group | N     | %     | Ever Quit (N) | Ever Quit % | Mean Yrs Quit | Short Term (n) | Short Term % |
| 25                                           | 35-39     | Never Any     | 4489  | 50.75 |               |             |               |                |              |
| 25                                           | 35-39     | CC            | 28    | 0.32  | 0             | 0.00        |               |                |              |
| 25                                           | 35-39     | Ecig          | 1990  | 22.50 |               |             |               |                |              |
| 25                                           | 35-39     | Dual          | 0     | 0.00  |               |             |               |                |              |
| 25                                           | 35-39     | Former        | 2338  | 26.43 |               |             | 11.53         | 142            | 6.07         |
| Year of Follow-up: 2015, Age Group: 40-44    |           |               |       |       |               |             |               |                |              |
| Period                                       | Age Group | Smoking Group | N     | %     | Ever Quit (N) | Ever Quit % | Mean Yrs Quit | Short Term (n) | Short Term % |
| 25                                           | 40-44     | Never Any     | 4991  | 55.21 |               |             |               |                |              |
| 25                                           | 40-44     | CC            | 20    | 0.22  | 0             | 0.00        |               |                |              |
| 25                                           | 40-44     | Ecig          | 1897  | 20.98 |               |             |               |                |              |
| 25                                           | 40-44     | Dual          | 0     | 0.00  |               |             |               |                |              |

**Results for PHIM for Run 5 (Sensitivity\_Analysis\_1.RTF)**

|                                              |           |               |       |       |               |             |               |                |              |
|----------------------------------------------|-----------|---------------|-------|-------|---------------|-------------|---------------|----------------|--------------|
| 25                                           | 40-44     | Former        | 2132  | 23.58 |               |             | 13.01         | 112            | 5.25         |
| Year of Follow-up: 2015, Age Group: 45-49    |           |               |       |       |               |             |               |                |              |
| Period                                       | Age Group | Smoking Group | N     | %     | Ever Quit (N) | Ever Quit % | Mean Yrs Quit | Short Term (n) | Short Term % |
| 25                                           | 45-49     | Never Any     | 5163  | 52.60 |               |             |               |                |              |
| 25                                           | 45-49     | CC            | 29    | 0.30  | 0             | 0.00        |               |                |              |
| 25                                           | 45-49     | Ecig          | 2195  | 22.36 |               |             |               |                |              |
| 25                                           | 45-49     | Dual          | 0     | 0.00  |               |             |               |                |              |
| 25                                           | 45-49     | Former        | 2429  | 24.75 |               |             | 17.18         | 81             | 3.33         |
| Year of Follow-up: 2015, Age Group: 50-54    |           |               |       |       |               |             |               |                |              |
| Period                                       | Age Group | Smoking Group | N     | %     | Ever Quit (N) | Ever Quit % | Mean Yrs Quit | Short Term (n) | Short Term % |
| 25                                           | 50-54     | Never Any     | 4997  | 46.86 |               |             |               |                |              |
| 25                                           | 50-54     | CC            | 37    | 0.35  | 0             | 0.00        |               |                |              |
| 25                                           | 50-54     | Ecig          | 2387  | 22.38 |               |             |               |                |              |
| 25                                           | 50-54     | Dual          | 0     | 0.00  |               |             |               |                |              |
| 25                                           | 50-54     | Former        | 3243  | 30.41 |               |             | 19.10         | 130            | 4.01         |
| Year of Follow-up: 2015, Age Group: 55-59    |           |               |       |       |               |             |               |                |              |
| Period                                       | Age Group | Smoking Group | N     | %     | Ever Quit (N) | Ever Quit % | Mean Yrs Quit | Short Term (n) | Short Term % |
| 25                                           | 55-59     | Never Any     | 4724  | 43.28 |               |             |               |                |              |
| 25                                           | 55-59     | CC            | 33    | 0.30  | 0             | 0.00        |               |                |              |
| 25                                           | 55-59     | Ecig          | 2103  | 19.27 |               |             |               |                |              |
| 25                                           | 55-59     | Dual          | 0     | 0.00  |               |             |               |                |              |
| 25                                           | 55-59     | Former        | 4056  | 37.16 |               |             | 20.50         | 162            | 3.99         |
| Year of Follow-up: 2015, Age Group: 60-64    |           |               |       |       |               |             |               |                |              |
| Period                                       | Age Group | Smoking Group | N     | %     | Ever Quit (N) | Ever Quit % | Mean Yrs Quit | Short Term (n) | Short Term % |
| 25                                           | 60-64     | Never Any     | 3941  | 39.85 |               |             |               |                |              |
| 25                                           | 60-64     | CC            | 28    | 0.28  | 0             | 0.00        |               |                |              |
| 25                                           | 60-64     | Ecig          | 1443  | 14.59 |               |             |               |                |              |
| 25                                           | 60-64     | Dual          | 0     | 0.00  |               |             |               |                |              |
| 25                                           | 60-64     | Former        | 4477  | 45.27 |               |             | 23.28         | 205            | 4.58         |
| Year of Follow-up: 2015, Age Group: 65-69    |           |               |       |       |               |             |               |                |              |
| Period                                       | Age Group | Smoking Group | N     | %     | Ever Quit (N) | Ever Quit % | Mean Yrs Quit | Short Term (n) | Short Term % |
| 25                                           | 65-69     | Never Any     | 2912  | 33.65 |               |             |               |                |              |
| 25                                           | 65-69     | CC            | 43    | 0.50  | 0             | 0.00        |               |                |              |
| 25                                           | 65-69     | Ecig          | 1019  | 11.77 |               |             |               |                |              |
| 25                                           | 65-69     | Dual          | 0     | 0.00  |               |             |               |                |              |
| 25                                           | 65-69     | Former        | 4681  | 54.08 |               |             | 24.99         | 134            | 2.86         |
| Year of Follow-up: 2015, Age Group: 70-74    |           |               |       |       |               |             |               |                |              |
| Period                                       | Age Group | Smoking Group | N     | %     | Ever Quit (N) | Ever Quit % | Mean Yrs Quit | Short Term (n) | Short Term % |
| 25                                           | 70-74     | Never Any     | 1919  | 29.46 |               |             |               |                |              |
| 25                                           | 70-74     | CC            | 35    | 0.54  | 0             | 0.00        |               |                |              |
| 25                                           | 70-74     | Ecig          | 616   | 9.46  |               |             |               |                |              |
| 25                                           | 70-74     | Dual          | 0     | 0.00  |               |             |               |                |              |
| 25                                           | 70-74     | Former        | 3945  | 60.55 |               |             | 27.55         | 70             | 1.77         |
| Year of Follow-up: 2015, Age Group: 75-79    |           |               |       |       |               |             |               |                |              |
| Period                                       | Age Group | Smoking Group | N     | %     | Ever Quit (N) | Ever Quit % | Mean Yrs Quit | Short Term (n) | Short Term % |
| 25                                           | 75-79     | Never Any     | 1611  | 29.41 |               |             |               |                |              |
| 25                                           | 75-79     | CC            | 36    | 0.66  | 0             | 0.00        |               |                |              |
| 25                                           | 75-79     | Ecig          | 457   | 8.34  |               |             |               |                |              |
| 25                                           | 75-79     | Dual          | 0     | 0.00  |               |             |               |                |              |
| 25                                           | 75-79     | Former        | 3373  | 61.58 |               |             | 29.48         | 52             | 1.54         |
| Year of Follow-up: 2020, Age Group: All Ages |           |               |       |       |               |             |               |                |              |
| Period                                       | Age Group | Smoking Group | N     | %     | Ever Quit (N) | Ever Quit % | Mean Yrs Quit | Short Term (n) | Short Term % |
| 30                                           | All Ages  | Never Any     | 33136 | 44.57 |               |             |               |                |              |
| 30                                           | All Ages  | CC            | 100   | 0.13  | 0             | 0.00        |               |                |              |
| 30                                           | All Ages  | Ecig          | 11358 | 15.28 |               |             |               |                |              |
| 30                                           | All Ages  | Dual          | 0     | 0.00  |               |             |               |                |              |
| 30                                           | All Ages  | Former        | 29746 | 40.01 |               |             | 23.97         | 918            | 3.09         |
| Year of Follow-up: 2020, Age Group: 18-19    |           |               |       |       |               |             |               |                |              |
| Period                                       | Age Group | Smoking Group | N     | %     | Ever Quit (N) | Ever Quit % | Mean Yrs Quit | Short Term (n) | Short Term % |
| 30                                           | 18-19     | Never Any     | 0     | .     |               |             |               |                |              |
| 30                                           | 18-19     | CC            | 0     | .     | 0             | .           |               |                |              |
| 30                                           | 18-19     | Ecig          | 0     | .     |               |             |               |                |              |
| 30                                           | 18-19     | Dual          | 0     | .     |               |             |               |                |              |
| 30                                           | 18-19     | Former        | 0     | .     |               |             | .             | 0              | .            |
| Year of Follow-up: 2020, Age Group: 20-24    |           |               |       |       |               |             |               |                |              |
| Period                                       | Age Group | Smoking Group | N     | %     | Ever Quit (N) | Ever Quit % | Mean Yrs Quit | Short Term (n) | Short Term % |
| 30                                           | 20-24     | Never Any     | 0     | .     |               |             |               |                |              |
| 30                                           | 20-24     | CC            | 0     | .     | 0             | .           |               |                |              |

**Results for PHIM for Run 5 (Sensitivity\_Analysis\_1.RTF)**

|                                           |           |               |      |       |               |             |               |                |              |
|-------------------------------------------|-----------|---------------|------|-------|---------------|-------------|---------------|----------------|--------------|
| 30                                        | 20-24     | Ecig          | 0    | .     |               |             |               |                |              |
| 30                                        | 20-24     | Dual          | 0    | .     |               |             |               |                |              |
| 30                                        | 20-24     | Former        | 0    | .     |               |             | 0             | .              |              |
| Year of Follow-up: 2020, Age Group: 25-29 |           |               |      |       |               |             |               |                |              |
| Period                                    | Age Group | Smoking Group | N    | %     | Ever Quit (N) | Ever Quit % | Mean Yrs Quit | Short Term (n) | Short Term % |
| 30                                        | 25-29     | Never Any     | 0    | .     |               |             |               |                |              |
| 30                                        | 25-29     | CC            | 0    | .     | 0             | .           |               |                |              |
| 30                                        | 25-29     | Ecig          | 0    | .     |               |             |               |                |              |
| 30                                        | 25-29     | Dual          | 0    | .     |               |             |               |                |              |
| 30                                        | 25-29     | Former        | 0    | .     |               |             | 0             | .              |              |
| Year of Follow-up: 2020, Age Group: 30-34 |           |               |      |       |               |             |               |                |              |
| Period                                    | Age Group | Smoking Group | N    | %     | Ever Quit (N) | Ever Quit % | Mean Yrs Quit | Short Term (n) | Short Term % |
| 30                                        | 30-34     | Never Any     | 0    | .     |               |             |               |                |              |
| 30                                        | 30-34     | CC            | 0    | .     | 0             | .           |               |                |              |
| 30                                        | 30-34     | Ecig          | 0    | .     |               |             |               |                |              |
| 30                                        | 30-34     | Dual          | 0    | .     |               |             |               |                |              |
| 30                                        | 30-34     | Former        | 0    | .     |               |             | 0             | .              |              |
| Year of Follow-up: 2020, Age Group: 35-39 |           |               |      |       |               |             |               |                |              |
| Period                                    | Age Group | Smoking Group | N    | %     | Ever Quit (N) | Ever Quit % | Mean Yrs Quit | Short Term (n) | Short Term % |
| 30                                        | 35-39     | Never Any     | 0    | .     |               |             |               |                |              |
| 30                                        | 35-39     | CC            | 0    | .     | 0             | .           |               |                |              |
| 30                                        | 35-39     | Ecig          | 0    | .     |               |             |               |                |              |
| 30                                        | 35-39     | Dual          | 0    | .     |               |             |               |                |              |
| 30                                        | 35-39     | Former        | 0    | .     |               |             | 0             | .              |              |
| Year of Follow-up: 2020, Age Group: 40-44 |           |               |      |       |               |             |               |                |              |
| Period                                    | Age Group | Smoking Group | N    | %     | Ever Quit (N) | Ever Quit % | Mean Yrs Quit | Short Term (n) | Short Term % |
| 30                                        | 40-44     | Never Any     | 4489 | 50.75 |               |             |               |                |              |
| 30                                        | 40-44     | CC            | 12   | 0.14  | 0             | 0.00        |               |                |              |
| 30                                        | 40-44     | Ecig          | 1743 | 19.71 |               |             |               |                |              |
| 30                                        | 40-44     | Dual          | 0    | 0.00  |               |             |               |                |              |
| 30                                        | 40-44     | Former        | 2601 | 29.41 |               |             | 15.05         | 107            | 4.11         |
| Year of Follow-up: 2020, Age Group: 45-49 |           |               |      |       |               |             |               |                |              |
| Period                                    | Age Group | Smoking Group | N    | %     | Ever Quit (N) | Ever Quit % | Mean Yrs Quit | Short Term (n) | Short Term % |
| 30                                        | 45-49     | Never Any     | 4991 | 55.21 |               |             |               |                |              |
| 30                                        | 45-49     | CC            | 5    | 0.06  | 0             | 0.00        |               |                |              |
| 30                                        | 45-49     | Ecig          | 1690 | 18.69 |               |             |               |                |              |
| 30                                        | 45-49     | Dual          | 0    | 0.00  |               |             |               |                |              |
| 30                                        | 45-49     | Former        | 2354 | 26.04 |               |             | 16.54         | 63             | 2.68         |
| Year of Follow-up: 2020, Age Group: 50-54 |           |               |      |       |               |             |               |                |              |
| Period                                    | Age Group | Smoking Group | N    | %     | Ever Quit (N) | Ever Quit % | Mean Yrs Quit | Short Term (n) | Short Term % |
| 30                                        | 50-54     | Never Any     | 5163 | 52.60 |               |             |               |                |              |
| 30                                        | 50-54     | CC            | 9    | 0.09  | 0             | 0.00        |               |                |              |
| 30                                        | 50-54     | Ecig          | 2021 | 20.59 |               |             |               |                |              |
| 30                                        | 50-54     | Dual          | 0    | 0.00  |               |             |               |                |              |
| 30                                        | 50-54     | Former        | 2623 | 26.72 |               |             | 20.66         | 99             | 3.77         |
| Year of Follow-up: 2020, Age Group: 55-59 |           |               |      |       |               |             |               |                |              |
| Period                                    | Age Group | Smoking Group | N    | %     | Ever Quit (N) | Ever Quit % | Mean Yrs Quit | Short Term (n) | Short Term % |
| 30                                        | 55-59     | Never Any     | 4997 | 46.86 |               |             |               |                |              |
| 30                                        | 55-59     | CC            | 18   | 0.17  | 0             | 0.00        |               |                |              |
| 30                                        | 55-59     | Ecig          | 2002 | 18.77 |               |             |               |                |              |
| 30                                        | 55-59     | Dual          | 0    | 0.00  |               |             |               |                |              |
| 30                                        | 55-59     | Former        | 3647 | 34.20 |               |             | 21.65         | 157            | 4.30         |
| Year of Follow-up: 2020, Age Group: 60-64 |           |               |      |       |               |             |               |                |              |
| Period                                    | Age Group | Smoking Group | N    | %     | Ever Quit (N) | Ever Quit % | Mean Yrs Quit | Short Term (n) | Short Term % |
| 30                                        | 60-64     | Never Any     | 4724 | 43.28 |               |             |               |                |              |
| 30                                        | 60-64     | CC            | 10   | 0.09  | 0             | 0.00        |               |                |              |
| 30                                        | 60-64     | Ecig          | 1614 | 14.79 |               |             |               |                |              |
| 30                                        | 60-64     | Dual          | 0    | 0.00  |               |             |               |                |              |
| 30                                        | 60-64     | Former        | 4568 | 41.85 |               |             | 22.87         | 203            | 4.44         |
| Year of Follow-up: 2020, Age Group: 65-69 |           |               |      |       |               |             |               |                |              |
| Period                                    | Age Group | Smoking Group | N    | %     | Ever Quit (N) | Ever Quit % | Mean Yrs Quit | Short Term (n) | Short Term % |
| 30                                        | 65-69     | Never Any     | 3941 | 39.85 |               |             |               |                |              |
| 30                                        | 65-69     | CC            | 13   | 0.13  | 0             | 0.00        |               |                |              |
| 30                                        | 65-69     | Ecig          | 1039 | 10.51 |               |             |               |                |              |
| 30                                        | 65-69     | Dual          | 0    | 0.00  |               |             |               |                |              |
| 30                                        | 65-69     | Former        | 4896 | 49.51 |               |             | 26.05         | 145            | 2.96         |
| Year of Follow-up: 2020, Age Group: 70-74 |           |               |      |       |               |             |               |                |              |
| Period                                    | Age Group | Smoking Group | N    | %     | Ever Quit (N) | Ever Quit % | Mean Yrs Quit | Short Term (n) | Short Term % |

**Results for PHIM for Run 5 (Sensitivity\_Analysis\_1.RTF)**

|                                              |           |               |       |       |               |             |               |                |              |
|----------------------------------------------|-----------|---------------|-------|-------|---------------|-------------|---------------|----------------|--------------|
| 30                                           | 70-74     | Never Any     | 2912  | 33.65 |               |             |               |                |              |
| 30                                           | 70-74     | CC            | 18    | 0.21  | 0             | 0.00        |               |                |              |
| 30                                           | 70-74     | Ecig          | 770   | 8.90  |               |             |               |                |              |
| 30                                           | 70-74     | Dual          | 0     | 0.00  |               |             |               |                |              |
| 30                                           | 70-74     | Former        | 4955  | 57.25 |               |             | 28.45         | 93             | 1.88         |
| Year of Follow-up: 2020, Age Group: 75-79    |           |               |       |       |               |             |               |                |              |
| Period                                       | Age Group | Smoking Group | N     | %     | Ever Quit (N) | Ever Quit % | Mean Yrs Quit | Short Term (n) | Short Term % |
| 30                                           | 75-79     | Never Any     | 1919  | 29.46 |               |             |               |                |              |
| 30                                           | 75-79     | CC            | 15    | 0.23  | 0             | 0.00        |               |                |              |
| 30                                           | 75-79     | Ecig          | 479   | 7.35  |               |             |               |                |              |
| 30                                           | 75-79     | Dual          | 0     | 0.00  |               |             |               |                |              |
| 30                                           | 75-79     | Former        | 4102  | 62.96 |               |             | 31.39         | 51             | 1.24         |
| Year of Follow-up: 2025, Age Group: All Ages |           |               |       |       |               |             |               |                |              |
| Period                                       | Age Group | Smoking Group | N     | %     | Ever Quit (N) | Ever Quit % | Mean Yrs Quit | Short Term (n) | Short Term % |
| 35                                           | All Ages  | Never Any     | 31217 | 46.03 |               |             |               |                |              |
| 35                                           | All Ages  | CC            | 38    | 0.06  | 0             | 0.00        |               |                |              |
| 35                                           | All Ages  | Ecig          | 8864  | 13.07 |               |             |               |                |              |
| 35                                           | All Ages  | Dual          | 0     | 0.00  |               |             |               |                |              |
| 35                                           | All Ages  | Former        | 27706 | 40.85 |               |             | 25.87         | 785            | 2.83         |
| Year of Follow-up: 2025, Age Group: 18-19    |           |               |       |       |               |             |               |                |              |
| Period                                       | Age Group | Smoking Group | N     | %     | Ever Quit (N) | Ever Quit % | Mean Yrs Quit | Short Term (n) | Short Term % |
| 35                                           | 18-19     | Never Any     | 0     | .     |               |             |               |                |              |
| 35                                           | 18-19     | CC            | 0     | .     | 0             | .           |               |                |              |
| 35                                           | 18-19     | Ecig          | 0     | .     |               |             |               |                |              |
| 35                                           | 18-19     | Dual          | 0     | .     |               |             |               |                |              |
| 35                                           | 18-19     | Former        | 0     | .     |               |             | .             | 0              | .            |
| Year of Follow-up: 2025, Age Group: 20-24    |           |               |       |       |               |             |               |                |              |
| Period                                       | Age Group | Smoking Group | N     | %     | Ever Quit (N) | Ever Quit % | Mean Yrs Quit | Short Term (n) | Short Term % |
| 35                                           | 20-24     | Never Any     | 0     | .     |               |             |               |                |              |
| 35                                           | 20-24     | CC            | 0     | .     | 0             | .           |               |                |              |
| 35                                           | 20-24     | Ecig          | 0     | .     |               |             |               |                |              |
| 35                                           | 20-24     | Dual          | 0     | .     |               |             |               |                |              |
| 35                                           | 20-24     | Former        | 0     | .     |               |             | .             | 0              | .            |
| Year of Follow-up: 2025, Age Group: 25-29    |           |               |       |       |               |             |               |                |              |
| Period                                       | Age Group | Smoking Group | N     | %     | Ever Quit (N) | Ever Quit % | Mean Yrs Quit | Short Term (n) | Short Term % |
| 35                                           | 25-29     | Never Any     | 0     | .     |               |             |               |                |              |
| 35                                           | 25-29     | CC            | 0     | .     | 0             | .           |               |                |              |
| 35                                           | 25-29     | Ecig          | 0     | .     |               |             |               |                |              |
| 35                                           | 25-29     | Dual          | 0     | .     |               |             |               |                |              |
| 35                                           | 25-29     | Former        | 0     | .     |               |             | .             | 0              | .            |
| Year of Follow-up: 2025, Age Group: 30-34    |           |               |       |       |               |             |               |                |              |
| Period                                       | Age Group | Smoking Group | N     | %     | Ever Quit (N) | Ever Quit % | Mean Yrs Quit | Short Term (n) | Short Term % |
| 35                                           | 30-34     | Never Any     | 0     | .     |               |             |               |                |              |
| 35                                           | 30-34     | CC            | 0     | .     | 0             | .           |               |                |              |
| 35                                           | 30-34     | Ecig          | 0     | .     |               |             |               |                |              |
| 35                                           | 30-34     | Dual          | 0     | .     |               |             |               |                |              |
| 35                                           | 30-34     | Former        | 0     | .     |               |             | .             | 0              | .            |
| Year of Follow-up: 2025, Age Group: 35-39    |           |               |       |       |               |             |               |                |              |
| Period                                       | Age Group | Smoking Group | N     | %     | Ever Quit (N) | Ever Quit % | Mean Yrs Quit | Short Term (n) | Short Term % |
| 35                                           | 35-39     | Never Any     | 0     | .     |               |             |               |                |              |
| 35                                           | 35-39     | CC            | 0     | .     | 0             | .           |               |                |              |
| 35                                           | 35-39     | Ecig          | 0     | .     |               |             |               |                |              |
| 35                                           | 35-39     | Dual          | 0     | .     |               |             |               |                |              |
| 35                                           | 35-39     | Former        | 0     | .     |               |             | .             | 0              | .            |
| Year of Follow-up: 2025, Age Group: 40-44    |           |               |       |       |               |             |               |                |              |
| Period                                       | Age Group | Smoking Group | N     | %     | Ever Quit (N) | Ever Quit % | Mean Yrs Quit | Short Term (n) | Short Term % |
| 35                                           | 40-44     | Never Any     | 0     | .     |               |             |               |                |              |
| 35                                           | 40-44     | CC            | 0     | .     | 0             | .           |               |                |              |
| 35                                           | 40-44     | Ecig          | 0     | .     |               |             |               |                |              |
| 35                                           | 40-44     | Dual          | 0     | .     |               |             |               |                |              |
| 35                                           | 40-44     | Former        | 0     | .     |               |             | .             | 0              | .            |
| Year of Follow-up: 2025, Age Group: 45-49    |           |               |       |       |               |             |               |                |              |
| Period                                       | Age Group | Smoking Group | N     | %     | Ever Quit (N) | Ever Quit % | Mean Yrs Quit | Short Term (n) | Short Term % |
| 35                                           | 45-49     | Never Any     | 4489  | 50.75 |               |             |               |                |              |
| 35                                           | 45-49     | CC            | 7     | 0.08  | 0             | 0.00        |               |                |              |
| 35                                           | 45-49     | Ecig          | 1541  | 17.42 |               |             |               |                |              |
| 35                                           | 45-49     | Dual          | 0     | 0.00  |               |             |               |                |              |
| 35                                           | 45-49     | Former        | 2808  | 31.75 |               |             | 18.76         | 60             | 2.14         |
| Year of Follow-up: 2025, Age Group: 50-54    |           |               |       |       |               |             |               |                |              |



**Results for PHIM for Run 5 (Sensitivity\_Analysis\_1.RTF)**

| Period                                       | Age Group | Smoking Group | N     | %     | Ever Quit (N) | Ever Quit % | Mean Yrs Quit | Short Term (n) | Short Term % |
|----------------------------------------------|-----------|---------------|-------|-------|---------------|-------------|---------------|----------------|--------------|
| 35                                           | 50-54     | Never Any     | 4991  | 55.21 |               |             |               |                |              |
| 35                                           | 50-54     | CC            | 3     | 0.03  | 0             | 0.00        |               |                |              |
| 35                                           | 50-54     | Ecig          | 1554  | 17.19 |               |             |               |                |              |
| 35                                           | 50-54     | Dual          | 0     | 0.00  |               |             |               |                |              |
| 35                                           | 50-54     | Former        | 2492  | 27.57 |               |             | 20.44         | 75             | 3.01         |
| Year of Follow-up: 2025, Age Group: 55-59    |           |               |       |       |               |             |               |                |              |
| Period                                       | Age Group | Smoking Group | N     | %     | Ever Quit (N) | Ever Quit % | Mean Yrs Quit | Short Term (n) | Short Term % |
| 35                                           | 55-59     | Never Any     | 5163  | 52.60 |               |             |               |                |              |
| 35                                           | 55-59     | CC            | 0     | 0.00  | 0             | 0.00        |               |                |              |
| 35                                           | 55-59     | Ecig          | 1664  | 16.95 |               |             |               |                |              |
| 35                                           | 55-59     | Dual          | 0     | 0.00  |               |             |               |                |              |
| 35                                           | 55-59     | Former        | 2989  | 30.45 |               |             | 22.76         | 155            | 5.19         |
| Year of Follow-up: 2025, Age Group: 60-64    |           |               |       |       |               |             |               |                |              |
| Period                                       | Age Group | Smoking Group | N     | %     | Ever Quit (N) | Ever Quit % | Mean Yrs Quit | Short Term (n) | Short Term % |
| 35                                           | 60-64     | Never Any     | 4997  | 46.86 |               |             |               |                |              |
| 35                                           | 60-64     | CC            | 9     | 0.08  | 0             | 0.00        |               |                |              |
| 35                                           | 60-64     | Ecig          | 1532  | 14.37 |               |             |               |                |              |
| 35                                           | 60-64     | Dual          | 0     | 0.00  |               |             |               |                |              |
| 35                                           | 60-64     | Former        | 4126  | 38.69 |               |             | 23.79         | 186            | 4.51         |
| Year of Follow-up: 2025, Age Group: 65-69    |           |               |       |       |               |             |               |                |              |
| Period                                       | Age Group | Smoking Group | N     | %     | Ever Quit (N) | Ever Quit % | Mean Yrs Quit | Short Term (n) | Short Term % |
| 35                                           | 65-69     | Never Any     | 4724  | 43.28 |               |             |               |                |              |
| 35                                           | 65-69     | CC            | 5     | 0.05  | 0             | 0.00        |               |                |              |
| 35                                           | 65-69     | Ecig          | 1169  | 10.71 |               |             |               |                |              |
| 35                                           | 65-69     | Dual          | 0     | 0.00  |               |             |               |                |              |
| 35                                           | 65-69     | Former        | 5018  | 45.97 |               |             | 25.57         | 158            | 3.15         |
| Year of Follow-up: 2025, Age Group: 70-74    |           |               |       |       |               |             |               |                |              |
| Period                                       | Age Group | Smoking Group | N     | %     | Ever Quit (N) | Ever Quit % | Mean Yrs Quit | Short Term (n) | Short Term % |
| 35                                           | 70-74     | Never Any     | 3941  | 39.85 |               |             |               |                |              |
| 35                                           | 70-74     | CC            | 5     | 0.05  | 0             | 0.00        |               |                |              |
| 35                                           | 70-74     | Ecig          | 811   | 8.20  |               |             |               |                |              |
| 35                                           | 70-74     | Dual          | 0     | 0.00  |               |             |               |                |              |
| 35                                           | 70-74     | Former        | 5132  | 51.90 |               |             | 29.73         | 79             | 1.54         |
| Year of Follow-up: 2025, Age Group: 75-79    |           |               |       |       |               |             |               |                |              |
| Period                                       | Age Group | Smoking Group | N     | %     | Ever Quit (N) | Ever Quit % | Mean Yrs Quit | Short Term (n) | Short Term % |
| 35                                           | 75-79     | Never Any     | 2912  | 33.65 |               |             |               |                |              |
| 35                                           | 75-79     | CC            | 9     | 0.10  | 0             | 0.00        |               |                |              |
| 35                                           | 75-79     | Ecig          | 593   | 6.85  |               |             |               |                |              |
| 35                                           | 75-79     | Dual          | 0     | 0.00  |               |             |               |                |              |
| 35                                           | 75-79     | Former        | 5141  | 59.40 |               |             | 32.31         | 72             | 1.40         |
| Year of Follow-up: 2030, Age Group: All Ages |           |               |       |       |               |             |               |                |              |
| Period                                       | Age Group | Smoking Group | N     | %     | Ever Quit (N) | Ever Quit % | Mean Yrs Quit | Short Term (n) | Short Term % |
| 40                                           | All Ages  | Never Any     | 28305 | 47.84 |               |             |               |                |              |
| 40                                           | All Ages  | CC            | 15    | 0.03  | 0             | 0.00        |               |                |              |
| 40                                           | All Ages  | Ecig          | 6535  | 11.04 |               |             |               |                |              |
| 40                                           | All Ages  | Dual          | 0     | 0.00  |               |             |               |                |              |
| 40                                           | All Ages  | Former        | 24315 | 41.09 |               |             | 27.43         | 691            | 2.84         |
| Year of Follow-up: 2030, Age Group: 18-19    |           |               |       |       |               |             |               |                |              |
| Period                                       | Age Group | Smoking Group | N     | %     | Ever Quit (N) | Ever Quit % | Mean Yrs Quit | Short Term (n) | Short Term % |
| 40                                           | 18-19     | Never Any     | 0     | .     |               |             |               |                |              |
| 40                                           | 18-19     | CC            | 0     | .     | 0             | .           |               |                |              |
| 40                                           | 18-19     | Ecig          | 0     | .     |               |             |               |                |              |
| 40                                           | 18-19     | Dual          | 0     | .     |               |             |               |                |              |
| 40                                           | 18-19     | Former        | 0     | .     |               |             | .             | 0              | .            |
| Year of Follow-up: 2030, Age Group: 20-24    |           |               |       |       |               |             |               |                |              |
| Period                                       | Age Group | Smoking Group | N     | %     | Ever Quit (N) | Ever Quit % | Mean Yrs Quit | Short Term (n) | Short Term % |
| 40                                           | 20-24     | Never Any     | 0     | .     |               |             |               |                |              |
| 40                                           | 20-24     | CC            | 0     | .     | 0             | .           |               |                |              |
| 40                                           | 20-24     | Ecig          | 0     | .     |               |             |               |                |              |
| 40                                           | 20-24     | Dual          | 0     | .     |               |             |               |                |              |
| 40                                           | 20-24     | Former        | 0     | .     |               |             | .             | 0              | .            |
| Year of Follow-up: 2030, Age Group: 25-29    |           |               |       |       |               |             |               |                |              |
| Period                                       | Age Group | Smoking Group | N     | %     | Ever Quit (N) | Ever Quit % | Mean Yrs Quit | Short Term (n) | Short Term % |
| 40                                           | 25-29     | Never Any     | 0     | .     |               |             |               |                |              |
| 40                                           | 25-29     | CC            | 0     | .     | 0             | .           |               |                |              |
| 40                                           | 25-29     | Ecig          | 0     | .     |               |             |               |                |              |
| 40                                           | 25-29     | Dual          | 0     | .     |               |             |               |                |              |

**Results for PHIM for Run 5 (Sensitivity\_Analysis\_1.RTF)**

| Year of Follow-up: 2030, Age Group: 30-34 | Period | Age Group | Smoking Group | N    | %     | Ever Quit (N) | Ever Quit % | Mean Yrs Quit | Short Term (n) | Short Term % |
|-------------------------------------------|--------|-----------|---------------|------|-------|---------------|-------------|---------------|----------------|--------------|
| Year of Follow-up: 2030, Age Group: 30-34 |        |           |               |      |       |               |             |               |                |              |
| 40                                        | 25-29  | Former    |               | 0    | .     |               |             |               | 0              | .            |
| Year of Follow-up: 2030, Age Group: 35-39 |        |           |               |      |       |               |             |               |                |              |
| 40                                        | 30-34  | Never Any |               | 0    | .     |               |             |               | 0              | .            |
| 40                                        | 30-34  | CC        |               | 0    | .     | 0             | .           |               |                |              |
| 40                                        | 30-34  | Ecig      |               | 0    | .     |               |             |               |                |              |
| 40                                        | 30-34  | Dual      |               | 0    | .     |               |             |               |                |              |
| 40                                        | 30-34  | Former    |               | 0    | .     |               |             |               | 0              | .            |
| Year of Follow-up: 2030, Age Group: 40-44 |        |           |               |      |       |               |             |               |                |              |
| 40                                        | 35-39  | Never Any |               | 0    | .     |               |             |               |                |              |
| 40                                        | 35-39  | CC        |               | 0    | .     | 0             | .           |               |                |              |
| 40                                        | 35-39  | Ecig      |               | 0    | .     |               |             |               |                |              |
| 40                                        | 35-39  | Dual      |               | 0    | .     |               |             |               |                |              |
| 40                                        | 35-39  | Former    |               | 0    | .     |               |             |               | 0              | .            |
| Year of Follow-up: 2030, Age Group: 45-49 |        |           |               |      |       |               |             |               |                |              |
| 40                                        | 40-44  | Never Any |               | 0    | .     |               |             |               |                |              |
| 40                                        | 40-44  | CC        |               | 0    | .     | 0             | .           |               |                |              |
| 40                                        | 40-44  | Ecig      |               | 0    | .     |               |             |               |                |              |
| 40                                        | 40-44  | Dual      |               | 0    | .     |               |             |               |                |              |
| 40                                        | 40-44  | Former    |               | 0    | .     |               |             |               | 0              | .            |
| Year of Follow-up: 2030, Age Group: 50-54 |        |           |               |      |       |               |             |               |                |              |
| 40                                        | 45-49  | Never Any |               | 0    | .     |               |             |               |                |              |
| 40                                        | 45-49  | CC        |               | 0    | .     | 0             | .           |               |                |              |
| 40                                        | 45-49  | Ecig      |               | 0    | .     |               |             |               |                |              |
| 40                                        | 45-49  | Dual      |               | 0    | .     |               |             |               |                |              |
| 40                                        | 45-49  | Former    |               | 0    | .     |               |             |               | 0              | .            |
| Year of Follow-up: 2030, Age Group: 55-59 |        |           |               |      |       |               |             |               |                |              |
| 40                                        | 50-54  | Never Any |               | 4489 | 50.75 |               |             |               |                |              |
| 40                                        | 50-54  | CC        |               | 3    | 0.03  | 0             | 0.00        |               |                |              |
| 40                                        | 50-54  | Ecig      |               | 1392 | 15.74 |               |             |               |                |              |
| 40                                        | 50-54  | Dual      |               | 0    | 0.00  |               |             |               |                |              |
| 40                                        | 50-54  | Former    |               | 2961 | 33.48 |               |             | 22.61         | 80             | 2.70         |
| Year of Follow-up: 2030, Age Group: 60-64 |        |           |               |      |       |               |             |               |                |              |
| 40                                        | 55-59  | Never Any |               | 4991 | 55.21 |               |             |               |                |              |
| 40                                        | 55-59  | CC        |               | 2    | 0.02  | 0             | 0.00        |               |                |              |
| 40                                        | 55-59  | Ecig      |               | 1291 | 14.28 |               |             |               |                |              |
| 40                                        | 55-59  | Dual      |               | 0    | 0.00  |               |             |               |                |              |
| 40                                        | 55-59  | Former    |               | 2756 | 30.49 |               |             | 23.19         | 114            | 4.14         |
| Year of Follow-up: 2030, Age Group: 65-69 |        |           |               |      |       |               |             |               |                |              |
| 40                                        | 60-64  | Never Any |               | 5163 | 52.60 |               |             |               |                |              |
| 40                                        | 60-64  | CC        |               | 0    | 0.00  | 0             | 0.00        |               |                |              |
| 40                                        | 60-64  | Ecig      |               | 1238 | 12.61 |               |             |               |                |              |
| 40                                        | 60-64  | Dual      |               | 0    | 0.00  |               |             |               |                |              |
| 40                                        | 60-64  | Former    |               | 3415 | 34.79 |               |             | 24.53         | 183            | 5.36         |
| Year of Follow-up: 2030, Age Group: 70-74 |        |           |               |      |       |               |             |               |                |              |
| 40                                        | 65-69  | Never Any |               | 4997 | 46.86 |               |             |               |                |              |
| 40                                        | 65-69  | CC        |               | 4    | 0.04  | 0             | 0.00        |               |                |              |
| 40                                        | 65-69  | Ecig      |               | 1119 | 10.49 |               |             |               |                |              |
| 40                                        | 65-69  | Dual      |               | 0    | 0.00  |               |             |               |                |              |
| 40                                        | 65-69  | Former    |               | 4544 | 42.61 |               |             | 26.35         | 136            | 2.99         |
| Year of Follow-up: 2030, Age Group: 75-79 |        |           |               |      |       |               |             |               |                |              |
| 40                                        | 70-74  | Never Any |               | 4724 | 43.28 |               |             |               |                |              |
| 40                                        | 70-74  | CC        |               | 3    | 0.03  | 0             | 0.00        |               |                |              |
| 40                                        | 70-74  | Ecig      |               | 880  | 8.06  |               |             |               |                |              |
| 40                                        | 70-74  | Dual      |               | 0    | 0.00  |               |             |               |                |              |
| 40                                        | 70-74  | Former    |               | 5309 | 48.64 |               |             | 29.01         | 95             | 1.79         |
| Year of Follow-up: 2030, Age Group: 75-79 |        |           |               |      |       |               |             |               |                |              |
| 40                                        | 75-79  | Never Any |               | 3941 | 39.85 |               |             |               |                |              |
| 40                                        | 75-79  | CC        |               | 3    | 0.03  | 0             | 0.00        |               |                |              |

**Results for PHIM for Run 5 (Sensitivity\_Analysis\_1.RTF)**

|                                              |           |               |       |       |               |             |               |                |              |
|----------------------------------------------|-----------|---------------|-------|-------|---------------|-------------|---------------|----------------|--------------|
| 40                                           | 75-79     | Ecig          | 615   | 6.22  |               |             |               |                |              |
| 40                                           | 75-79     | Dual          | 0     | 0.00  |               |             |               |                |              |
| 40                                           | 75-79     | Former        | 5330  | 53.90 |               |             | 33.51         | 83             | 1.56         |
| Year of Follow-up: 2035, Age Group: All Ages |           |               |       |       |               |             |               |                |              |
| Period                                       | Age Group | Smoking Group | N     | %     | Ever Quit (N) | Ever Quit % | Mean Yrs Quit | Short Term (n) | Short Term % |
| 45                                           | All Ages  | Never Any     | 24364 | 49.44 |               |             |               |                |              |
| 45                                           | All Ages  | CC            | 6     | 0.01  | 0             | 0.00        |               |                |              |
| 45                                           | All Ages  | Ecig          | 4578  | 9.29  |               |             |               |                |              |
| 45                                           | All Ages  | Dual          | 0     | 0.00  |               |             |               |                |              |
| 45                                           | All Ages  | Former        | 20333 | 41.26 |               |             | 28.82         | 538            | 2.65         |
| Year of Follow-up: 2035, Age Group: 18-19    |           |               |       |       |               |             |               |                |              |
| Period                                       | Age Group | Smoking Group | N     | %     | Ever Quit (N) | Ever Quit % | Mean Yrs Quit | Short Term (n) | Short Term % |
| 45                                           | 18-19     | Never Any     | 0     | .     |               |             |               |                |              |
| 45                                           | 18-19     | CC            | 0     | .     | 0             | .           |               |                |              |
| 45                                           | 18-19     | Ecig          | 0     | .     |               |             |               |                |              |
| 45                                           | 18-19     | Dual          | 0     | .     |               |             |               |                |              |
| 45                                           | 18-19     | Former        | 0     | .     |               |             | .             | 0              | .            |
| Year of Follow-up: 2035, Age Group: 20-24    |           |               |       |       |               |             |               |                |              |
| Period                                       | Age Group | Smoking Group | N     | %     | Ever Quit (N) | Ever Quit % | Mean Yrs Quit | Short Term (n) | Short Term % |
| 45                                           | 20-24     | Never Any     | 0     | .     |               |             |               |                |              |
| 45                                           | 20-24     | CC            | 0     | .     | 0             | .           |               |                |              |
| 45                                           | 20-24     | Ecig          | 0     | .     |               |             |               |                |              |
| 45                                           | 20-24     | Dual          | 0     | .     |               |             |               |                |              |
| 45                                           | 20-24     | Former        | 0     | .     |               |             | .             | 0              | .            |
| Year of Follow-up: 2035, Age Group: 25-29    |           |               |       |       |               |             |               |                |              |
| Period                                       | Age Group | Smoking Group | N     | %     | Ever Quit (N) | Ever Quit % | Mean Yrs Quit | Short Term (n) | Short Term % |
| 45                                           | 25-29     | Never Any     | 0     | .     |               |             |               |                |              |
| 45                                           | 25-29     | CC            | 0     | .     | 0             | .           |               |                |              |
| 45                                           | 25-29     | Ecig          | 0     | .     |               |             |               |                |              |
| 45                                           | 25-29     | Dual          | 0     | .     |               |             |               |                |              |
| 45                                           | 25-29     | Former        | 0     | .     |               |             | .             | 0              | .            |
| Year of Follow-up: 2035, Age Group: 30-34    |           |               |       |       |               |             |               |                |              |
| Period                                       | Age Group | Smoking Group | N     | %     | Ever Quit (N) | Ever Quit % | Mean Yrs Quit | Short Term (n) | Short Term % |
| 45                                           | 30-34     | Never Any     | 0     | .     |               |             |               |                |              |
| 45                                           | 30-34     | CC            | 0     | .     | 0             | .           |               |                |              |
| 45                                           | 30-34     | Ecig          | 0     | .     |               |             |               |                |              |
| 45                                           | 30-34     | Dual          | 0     | .     |               |             |               |                |              |
| 45                                           | 30-34     | Former        | 0     | .     |               |             | .             | 0              | .            |
| Year of Follow-up: 2035, Age Group: 35-39    |           |               |       |       |               |             |               |                |              |
| Period                                       | Age Group | Smoking Group | N     | %     | Ever Quit (N) | Ever Quit % | Mean Yrs Quit | Short Term (n) | Short Term % |
| 45                                           | 35-39     | Never Any     | 0     | .     |               |             |               |                |              |
| 45                                           | 35-39     | CC            | 0     | .     | 0             | .           |               |                |              |
| 45                                           | 35-39     | Ecig          | 0     | .     |               |             |               |                |              |
| 45                                           | 35-39     | Dual          | 0     | .     |               |             |               |                |              |
| 45                                           | 35-39     | Former        | 0     | .     |               |             | .             | 0              | .            |
| Year of Follow-up: 2035, Age Group: 40-44    |           |               |       |       |               |             |               |                |              |
| Period                                       | Age Group | Smoking Group | N     | %     | Ever Quit (N) | Ever Quit % | Mean Yrs Quit | Short Term (n) | Short Term % |
| 45                                           | 40-44     | Never Any     | 0     | .     |               |             |               |                |              |
| 45                                           | 40-44     | CC            | 0     | .     | 0             | .           |               |                |              |
| 45                                           | 40-44     | Ecig          | 0     | .     |               |             |               |                |              |
| 45                                           | 40-44     | Dual          | 0     | .     |               |             |               |                |              |
| 45                                           | 40-44     | Former        | 0     | .     |               |             | .             | 0              | .            |
| Year of Follow-up: 2035, Age Group: 45-49    |           |               |       |       |               |             |               |                |              |
| Period                                       | Age Group | Smoking Group | N     | %     | Ever Quit (N) | Ever Quit % | Mean Yrs Quit | Short Term (n) | Short Term % |
| 45                                           | 45-49     | Never Any     | 0     | .     |               |             |               |                |              |
| 45                                           | 45-49     | CC            | 0     | .     | 0             | .           |               |                |              |
| 45                                           | 45-49     | Ecig          | 0     | .     |               |             |               |                |              |
| 45                                           | 45-49     | Dual          | 0     | .     |               |             |               |                |              |
| 45                                           | 45-49     | Former        | 0     | .     |               |             | .             | 0              | .            |
| Year of Follow-up: 2035, Age Group: 50-54    |           |               |       |       |               |             |               |                |              |
| Period                                       | Age Group | Smoking Group | N     | %     | Ever Quit (N) | Ever Quit % | Mean Yrs Quit | Short Term (n) | Short Term % |
| 45                                           | 50-54     | Never Any     | 0     | .     |               |             |               |                |              |
| 45                                           | 50-54     | CC            | 0     | .     | 0             | .           |               |                |              |
| 45                                           | 50-54     | Ecig          | 0     | .     |               |             |               |                |              |
| 45                                           | 50-54     | Dual          | 0     | .     |               |             |               |                |              |
| 45                                           | 50-54     | Former        | 0     | .     |               |             | .             | 0              | .            |
| Year of Follow-up: 2035, Age Group: 55-59    |           |               |       |       |               |             |               |                |              |
| Period                                       | Age Group | Smoking Group | N     | %     | Ever Quit (N) | Ever Quit % | Mean Yrs Quit | Short Term (n) | Short Term % |

**Results for PHIM for Run 5 (Sensitivity\_Analysis\_1.RTF)**

|                                              |           |               |       |       |               |             |               |                |              |
|----------------------------------------------|-----------|---------------|-------|-------|---------------|-------------|---------------|----------------|--------------|
| 45                                           | 55-59     | Never Any     | 4489  | 50.75 |               |             |               |                |              |
| 45                                           | 55-59     | CC            | 2     | 0.02  | 0             | 0.00        |               |                |              |
| 45                                           | 55-59     | Ecig          | 1171  | 13.24 |               |             |               |                |              |
| 45                                           | 55-59     | Dual          | 0     | 0.00  |               |             |               |                |              |
| 45                                           | 55-59     | Former        | 3183  | 35.99 |               |             | 25.82         | 100            | 3.14         |
| Year of Follow-up: 2035, Age Group: 60-64    |           |               |       |       |               |             |               |                |              |
| Period                                       | Age Group | Smoking Group | N     | %     | Ever Quit (N) | Ever Quit % | Mean Yrs Quit | Short Term (n) | Short Term % |
| 45                                           | 60-64     | Never Any     | 4991  | 55.21 |               |             |               |                |              |
| 45                                           | 60-64     | CC            | 0     | 0.00  | 0             | 0.00        |               |                |              |
| 45                                           | 60-64     | Ecig          | 1020  | 11.28 |               |             |               |                |              |
| 45                                           | 60-64     | Dual          | 0     | 0.00  |               |             |               |                |              |
| 45                                           | 60-64     | Former        | 3029  | 33.51 |               |             | 25.81         | 129            | 4.26         |
| Year of Follow-up: 2035, Age Group: 65-69    |           |               |       |       |               |             |               |                |              |
| Period                                       | Age Group | Smoking Group | N     | %     | Ever Quit (N) | Ever Quit % | Mean Yrs Quit | Short Term (n) | Short Term % |
| 45                                           | 65-69     | Never Any     | 5163  | 52.60 |               |             |               |                |              |
| 45                                           | 65-69     | CC            | 0     | 0.00  | 0             | 0.00        |               |                |              |
| 45                                           | 65-69     | Ecig          | 902   | 9.19  |               |             |               |                |              |
| 45                                           | 65-69     | Dual          | 0     | 0.00  |               |             |               |                |              |
| 45                                           | 65-69     | Former        | 3751  | 38.21 |               |             | 27.09         | 106            | 2.83         |
| Year of Follow-up: 2035, Age Group: 70-74    |           |               |       |       |               |             |               |                |              |
| Period                                       | Age Group | Smoking Group | N     | %     | Ever Quit (N) | Ever Quit % | Mean Yrs Quit | Short Term (n) | Short Term % |
| 45                                           | 70-74     | Never Any     | 4997  | 46.86 |               |             |               |                |              |
| 45                                           | 70-74     | CC            | 1     | 0.01  | 0             | 0.00        |               |                |              |
| 45                                           | 70-74     | Ecig          | 850   | 7.97  |               |             |               |                |              |
| 45                                           | 70-74     | Dual          | 0     | 0.00  |               |             |               |                |              |
| 45                                           | 70-74     | Former        | 4816  | 45.16 |               |             | 29.70         | 104            | 2.16         |
| Year of Follow-up: 2035, Age Group: 75-79    |           |               |       |       |               |             |               |                |              |
| Period                                       | Age Group | Smoking Group | N     | %     | Ever Quit (N) | Ever Quit % | Mean Yrs Quit | Short Term (n) | Short Term % |
| 45                                           | 75-79     | Never Any     | 4724  | 43.28 |               |             |               |                |              |
| 45                                           | 75-79     | CC            | 3     | 0.03  | 0             | 0.00        |               |                |              |
| 45                                           | 75-79     | Ecig          | 635   | 5.82  |               |             |               |                |              |
| 45                                           | 75-79     | Dual          | 0     | 0.00  |               |             |               |                |              |
| 45                                           | 75-79     | Former        | 5554  | 50.88 |               |             | 32.60         | 99             | 1.78         |
| Year of Follow-up: 2040, Age Group: All Ages |           |               |       |       |               |             |               |                |              |
| Period                                       | Age Group | Smoking Group | N     | %     | Ever Quit (N) | Ever Quit % | Mean Yrs Quit | Short Term (n) | Short Term % |
| 50                                           | All Ages  | Never Any     | 19640 | 51.19 |               |             |               |                |              |
| 50                                           | All Ages  | CC            | 1     | 0.00  | 0             | 0.00        |               |                |              |
| 50                                           | All Ages  | Ecig          | 2868  | 7.48  |               |             |               |                |              |
| 50                                           | All Ages  | Dual          | 0     | 0.00  |               |             |               |                |              |
| 50                                           | All Ages  | Former        | 15856 | 41.33 |               |             | 30.34         | 408            | 2.57         |
| Year of Follow-up: 2040, Age Group: 18-19    |           |               |       |       |               |             |               |                |              |
| Period                                       | Age Group | Smoking Group | N     | %     | Ever Quit (N) | Ever Quit % | Mean Yrs Quit | Short Term (n) | Short Term % |
| 50                                           | 18-19     | Never Any     | 0     | .     |               |             |               |                |              |
| 50                                           | 18-19     | CC            | 0     | .     | 0             | .           |               |                |              |
| 50                                           | 18-19     | Ecig          | 0     | .     |               |             |               |                |              |
| 50                                           | 18-19     | Dual          | 0     | .     |               |             |               |                |              |
| 50                                           | 18-19     | Former        | 0     | .     |               |             | .             | 0              | .            |
| Year of Follow-up: 2040, Age Group: 20-24    |           |               |       |       |               |             |               |                |              |
| Period                                       | Age Group | Smoking Group | N     | %     | Ever Quit (N) | Ever Quit % | Mean Yrs Quit | Short Term (n) | Short Term % |
| 50                                           | 20-24     | Never Any     | 0     | .     |               |             |               |                |              |
| 50                                           | 20-24     | CC            | 0     | .     | 0             | .           |               |                |              |
| 50                                           | 20-24     | Ecig          | 0     | .     |               |             |               |                |              |
| 50                                           | 20-24     | Dual          | 0     | .     |               |             |               |                |              |
| 50                                           | 20-24     | Former        | 0     | .     |               |             | .             | 0              | .            |
| Year of Follow-up: 2040, Age Group: 25-29    |           |               |       |       |               |             |               |                |              |
| Period                                       | Age Group | Smoking Group | N     | %     | Ever Quit (N) | Ever Quit % | Mean Yrs Quit | Short Term (n) | Short Term % |
| 50                                           | 25-29     | Never Any     | 0     | .     |               |             |               |                |              |
| 50                                           | 25-29     | CC            | 0     | .     | 0             | .           |               |                |              |
| 50                                           | 25-29     | Ecig          | 0     | .     |               |             |               |                |              |
| 50                                           | 25-29     | Dual          | 0     | .     |               |             |               |                |              |
| 50                                           | 25-29     | Former        | 0     | .     |               |             | .             | 0              | .            |
| Year of Follow-up: 2040, Age Group: 30-34    |           |               |       |       |               |             |               |                |              |
| Period                                       | Age Group | Smoking Group | N     | %     | Ever Quit (N) | Ever Quit % | Mean Yrs Quit | Short Term (n) | Short Term % |
| 50                                           | 30-34     | Never Any     | 0     | .     |               |             |               |                |              |
| 50                                           | 30-34     | CC            | 0     | .     | 0             | .           |               |                |              |
| 50                                           | 30-34     | Ecig          | 0     | .     |               |             |               |                |              |
| 50                                           | 30-34     | Dual          | 0     | .     |               |             |               |                |              |
| 50                                           | 30-34     | Former        | 0     | .     |               |             | .             | 0              | .            |
| Year of Follow-up: 2040, Age Group: 35-39    |           |               |       |       |               |             |               |                |              |

**Results for PHIM for Run 5 (Sensitivity\_Analysis\_1.RTF)**

| Period                                    | Age Group | Smoking Group | N    | %     | Ever Quit (N) | Ever Quit % | Mean Yrs Quit | Short Term (n) | Short Term % |
|-------------------------------------------|-----------|---------------|------|-------|---------------|-------------|---------------|----------------|--------------|
| 50                                        | 35-39     | Never Any     | 0    | .     |               |             |               |                |              |
| 50                                        | 35-39     | CC            | 0    | .     | 0             | .           |               |                |              |
| 50                                        | 35-39     | Ecig          | 0    | .     |               |             |               |                |              |
| 50                                        | 35-39     | Dual          | 0    | .     |               |             |               |                |              |
| 50                                        | 35-39     | Former        | 0    | .     |               |             | .             | 0              | .            |
| Year of Follow-up: 2040, Age Group: 40-44 |           |               |      |       |               |             |               |                |              |
| Period                                    | Age Group | Smoking Group | N    | %     | Ever Quit (N) | Ever Quit % | Mean Yrs Quit | Short Term (n) | Short Term % |
| 50                                        | 40-44     | Never Any     | 0    | .     |               |             |               |                |              |
| 50                                        | 40-44     | CC            | 0    | .     | 0             | .           |               |                |              |
| 50                                        | 40-44     | Ecig          | 0    | .     |               |             |               |                |              |
| 50                                        | 40-44     | Dual          | 0    | .     |               |             |               |                |              |
| 50                                        | 40-44     | Former        | 0    | .     |               |             | .             | 0              | .            |
| Year of Follow-up: 2040, Age Group: 45-49 |           |               |      |       |               |             |               |                |              |
| Period                                    | Age Group | Smoking Group | N    | %     | Ever Quit (N) | Ever Quit % | Mean Yrs Quit | Short Term (n) | Short Term % |
| 50                                        | 45-49     | Never Any     | 0    | .     |               |             |               |                |              |
| 50                                        | 45-49     | CC            | 0    | .     | 0             | .           |               |                |              |
| 50                                        | 45-49     | Ecig          | 0    | .     |               |             |               |                |              |
| 50                                        | 45-49     | Dual          | 0    | .     |               |             |               |                |              |
| 50                                        | 45-49     | Former        | 0    | .     |               |             | .             | 0              | .            |
| Year of Follow-up: 2040, Age Group: 50-54 |           |               |      |       |               |             |               |                |              |
| Period                                    | Age Group | Smoking Group | N    | %     | Ever Quit (N) | Ever Quit % | Mean Yrs Quit | Short Term (n) | Short Term % |
| 50                                        | 50-54     | Never Any     | 0    | .     |               |             |               |                |              |
| 50                                        | 50-54     | CC            | 0    | .     | 0             | .           |               |                |              |
| 50                                        | 50-54     | Ecig          | 0    | .     |               |             |               |                |              |
| 50                                        | 50-54     | Dual          | 0    | .     |               |             |               |                |              |
| 50                                        | 50-54     | Former        | 0    | .     |               |             | .             | 0              | .            |
| Year of Follow-up: 2040, Age Group: 55-59 |           |               |      |       |               |             |               |                |              |
| Period                                    | Age Group | Smoking Group | N    | %     | Ever Quit (N) | Ever Quit % | Mean Yrs Quit | Short Term (n) | Short Term % |
| 50                                        | 55-59     | Never Any     | 0    | .     |               |             |               |                |              |
| 50                                        | 55-59     | CC            | 0    | .     | 0             | .           |               |                |              |
| 50                                        | 55-59     | Ecig          | 0    | .     |               |             |               |                |              |
| 50                                        | 55-59     | Dual          | 0    | .     |               |             |               |                |              |
| 50                                        | 55-59     | Former        | 0    | .     |               |             | .             | 0              | .            |
| Year of Follow-up: 2040, Age Group: 60-64 |           |               |      |       |               |             |               |                |              |
| Period                                    | Age Group | Smoking Group | N    | %     | Ever Quit (N) | Ever Quit % | Mean Yrs Quit | Short Term (n) | Short Term % |
| 50                                        | 60-64     | Never Any     | 4489 | 50.75 |               |             |               |                |              |
| 50                                        | 60-64     | CC            | 0    | 0.00  | 0             | 0.00        |               |                |              |
| 50                                        | 60-64     | Ecig          | 865  | 9.78  |               |             |               |                |              |
| 50                                        | 60-64     | Dual          | 0    | 0.00  |               |             |               |                |              |
| 50                                        | 60-64     | Former        | 3491 | 39.47 |               |             | 28.27         | 129            | 3.70         |
| Year of Follow-up: 2040, Age Group: 65-69 |           |               |      |       |               |             |               |                |              |
| Period                                    | Age Group | Smoking Group | N    | %     | Ever Quit (N) | Ever Quit % | Mean Yrs Quit | Short Term (n) | Short Term % |
| 50                                        | 65-69     | Never Any     | 4991 | 55.21 |               |             |               |                |              |
| 50                                        | 65-69     | CC            | 0    | 0.00  | 0             | 0.00        |               |                |              |
| 50                                        | 65-69     | Ecig          | 705  | 7.80  |               |             |               |                |              |
| 50                                        | 65-69     | Dual          | 0    | 0.00  |               |             |               |                |              |
| 50                                        | 65-69     | Former        | 3344 | 36.99 |               |             | 28.11         | 120            | 3.59         |
| Year of Follow-up: 2040, Age Group: 70-74 |           |               |      |       |               |             |               |                |              |
| Period                                    | Age Group | Smoking Group | N    | %     | Ever Quit (N) | Ever Quit % | Mean Yrs Quit | Short Term (n) | Short Term % |
| 50                                        | 70-74     | Never Any     | 5163 | 52.60 |               |             |               |                |              |
| 50                                        | 70-74     | CC            | 0    | 0.00  | 0             | 0.00        |               |                |              |
| 50                                        | 70-74     | Ecig          | 665  | 6.77  |               |             |               |                |              |
| 50                                        | 70-74     | Dual          | 0    | 0.00  |               |             |               |                |              |
| 50                                        | 70-74     | Former        | 3988 | 40.63 |               |             | 30.31         | 80             | 2.01         |
| Year of Follow-up: 2040, Age Group: 75-79 |           |               |      |       |               |             |               |                |              |
| Period                                    | Age Group | Smoking Group | N    | %     | Ever Quit (N) | Ever Quit % | Mean Yrs Quit | Short Term (n) | Short Term % |
| 50                                        | 75-79     | Never Any     | 4997 | 46.86 |               |             |               |                |              |
| 50                                        | 75-79     | CC            | 1    | 0.01  | 0             | 0.00        |               |                |              |
| 50                                        | 75-79     | Ecig          | 633  | 5.94  |               |             |               |                |              |
| 50                                        | 75-79     | Dual          | 0    | 0.00  |               |             |               |                |              |
| 50                                        | 75-79     | Former        | 5033 | 47.20 |               |             | 33.29         | 79             | 1.57         |

## Results for PHIM for Run 5 (Sensitivity\_Analysis\_1.RTF)

\*\*\*\*\*

### Main Results for E-Component for Run: 5, Simulation: 1, COD: Four Diseases Combined

| Variable Parameter          | Value                                  |
|-----------------------------|----------------------------------------|
| 1. Country                  | US (United States)                     |
| 2. Sex                      | M (Males)                              |
| 3. Year of start of process | 1990                                   |
| 4. Cause of Death           | Four Diseases Combined                 |
| 5. Effective Dose NULL      | CC:1                                   |
| 6. Effective Dose Ecig      | CC:1 Ecig:0.1 Dual:0.55                |
| Note:                       | Death rates are per million population |

#### Results for Age Groups Combined and Years combined, Population unadjusted for deaths in Ecig scenario,

| Age Group:All | NULL     | Ecig        | %Drop       |         |        |        | NULL    | Ecig    | Drop    |         |
|---------------|----------|-------------|-------------|---------|--------|--------|---------|---------|---------|---------|
| Year          | Number   | Attrib      | Attrib      | Drop    | %Drop  | Attrib | Death   | Attrib  | Attrib  | Drop    |
|               | Deaths   | Deaths      | Deaths      | Deaths  | Deaths | Deaths | Rate    | Rates   | Rates   | Rates   |
| All Comb      | 13148871 | 4509390.583 | 3104046.546 | 1405344 | 10.688 | 31.165 | 3806.31 | 1305.37 | 898.554 | 406.817 |

#### Results for Age Groups Combined, Population unadjusted for deaths in Ecig scenario,

| Age Group:All | NULL   | Ecig       | %Drop      |          |        |        | NULL    | Ecig    | Drop    |         |
|---------------|--------|------------|------------|----------|--------|--------|---------|---------|---------|---------|
| Year          | Number | Attrib     | Attrib     | Drop     | %Drop  | Attrib | Death   | Attrib  | Attrib  | Drop    |
|               | Deaths | Deaths     | Deaths     | Deaths   | Deaths | Deaths | Rate    | Rates   | Rates   | Rates   |
| 1990          | 317161 | 125773.065 | 125773.065 | 0.000    | 0.000  | 0.000  | 5027.71 | 1993.78 | 1993.78 | 0.000   |
| 1991          | 313217 | 123999.442 | 123597.528 | 401.915  | 0.128  | 0.324  | 4883.81 | 1933.45 | 1927.18 | 6.267   |
| 1992          | 308577 | 122014.015 | 120939.541 | 1074.474 | 0.348  | 0.881  | 4729.73 | 1870.18 | 1853.71 | 16.469  |
| 1993          | 311713 | 122810.618 | 120795.239 | 2015.379 | 0.647  | 1.641  | 4692.62 | 1848.83 | 1818.49 | 30.340  |
| 1994          | 305700 | 119925.592 | 116832.080 | 3093.512 | 1.012  | 2.580  | 4516.19 | 1771.69 | 1725.99 | 45.701  |
| 1995          | 303225 | 117896.496 | 113543.966 | 4352.530 | 1.435  | 3.692  | 4393.80 | 1708.35 | 1645.28 | 63.069  |
| 1996          | 299559 | 115698.645 | 109961.901 | 5736.744 | 1.915  | 4.958  | 4273.16 | 1650.42 | 1568.59 | 81.834  |
| 1997          | 294226 | 113359.847 | 106232.334 | 7127.513 | 2.422  | 6.288  | 4128.67 | 1590.70 | 1490.69 | 100.016 |
| 1998          | 289258 | 111444.212 | 102922.575 | 8521.637 | 2.946  | 7.647  | 3992.19 | 1538.10 | 1420.49 | 117.611 |
| 1999          | 311002 | 114877.722 | 103492.683 | 11385.04 | 3.661  | 9.911  | 4224.60 | 1560.48 | 1405.83 | 154.653 |
| 2000          | 303786 | 112379.704 | 99405.356  | 12974.35 | 4.271  | 11.545 | 4066.21 | 1504.22 | 1330.55 | 173.663 |
| 2001          | 296294 | 110024.943 | 95346.688  | 14678.25 | 4.954  | 13.341 | 3914.28 | 1453.52 | 1259.61 | 193.912 |
| 2002          | 291898 | 108289.173 | 91704.255  | 16584.92 | 5.682  | 15.315 | 3813.00 | 1414.56 | 1197.91 | 216.645 |
| 2003          | 285865 | 106539.023 | 88272.843  | 18266.18 | 6.390  | 17.145 | 3695.36 | 1377.22 | 1141.10 | 236.126 |
| 2004          | 274177 | 103037.251 | 83537.219  | 19500.03 | 7.112  | 18.925 | 3506.10 | 1317.61 | 1068.25 | 249.361 |
| 2005          | 272379 | 103044.562 | 81769.435  | 21275.13 | 7.811  | 20.647 | 3442.69 | 1302.41 | 1033.51 | 268.903 |
| 2006          | 264118 | 99672.555  | 76892.062  | 22780.49 | 8.625  | 22.855 | 3307.76 | 1248.28 | 962.981 | 285.298 |
| 2007          | 258419 | 97839.152  | 73793.443  | 24045.71 | 9.305  | 24.577 | 3203.20 | 1212.75 | 914.696 | 298.055 |
| 2008          | 259461 | 98075.852  | 72430.681  | 25645.17 | 9.884  | 26.148 | 3180.09 | 1202.07 | 887.750 | 314.321 |
| 2009          | 253907 | 95617.338  | 68862.223  | 26755.11 | 10.537 | 27.981 | 3075.31 | 1158.11 | 834.057 | 324.057 |
| 2010          | 251878 | 94607.988  | 66607.772  | 28000.22 | 11.117 | 29.596 | 3013.72 | 1131.98 | 796.962 | 335.022 |
| 2011          | 251779 | 93633.119  | 64102.773  | 29530.35 | 11.729 | 31.538 | 2982.76 | 1109.25 | 759.410 | 349.839 |
| 2012          | 252643 | 92775.175  | 61748.187  | 31026.99 | 12.281 | 33.443 | 2960.61 | 1087.19 | 723.598 | 363.591 |
| 2013          | 256175 | 92345.780  | 59785.077  | 32560.70 | 12.710 | 35.260 | 2967.76 | 1069.82 | 692.604 | 377.212 |
| 2014          | 257393 | 91379.215  | 57541.473  | 33837.74 | 13.146 | 37.030 | 2947.05 | 1046.26 | 658.827 | 387.429 |
| 2015          | 259782 | 90750.242  | 55771.258  | 34978.98 | 13.465 | 38.544 | 3346.10 | 1168.90 | 718.357 | 450.544 |
| 2016          | 261453 | 88811.996  | 52658.840  | 36153.16 | 13.828 | 40.708 | 3336.15 | 1133.24 | 671.929 | 461.316 |
| 2017          | 263685 | 87325.126  | 50121.358  | 37203.77 | 14.109 | 42.604 | 3333.85 | 1104.08 | 633.700 | 470.379 |
| 2018          | 258714 | 87612.144  | 49515.640  | 38096.50 | 14.725 | 43.483 | 3240.73 | 1097.46 | 620.248 | 477.208 |
| 2019          | 261438 | 87797.760  | 48343.140  | 39454.62 | 15.091 | 44.938 | 3242.99 | 1089.08 | 599.669 | 489.412 |
| 2020          | 262288 | 87221.042  | 46995.269  | 40225.77 | 15.336 | 46.119 | 3715.29 | 1235.48 | 665.684 | 569.795 |
| 2021          | 255079 | 82001.292  | 42192.265  | 39809.03 | 15.607 | 48.547 | 3587.82 | 1153.39 | 593.455 | 559.934 |
| 2022          | 257097 | 81915.977  | 40855.313  | 41060.66 | 15.971 | 50.125 | 3588.53 | 1143.37 | 570.254 | 573.121 |
| 2023          | 259080 | 81810.810  | 39559.704  | 42251.11 | 16.308 | 51.645 | 3586.88 | 1132.64 | 547.692 | 584.953 |
| 2024          | 260719 | 81528.303  | 38269.029  | 43259.27 | 16.592 | 53.060 | 3579.65 | 1119.38 | 525.431 | 593.947 |
| 2025          | 257308 | 79599.213  | 36626.715  | 42972.50 | 16.701 | 53.986 | 4112.08 | 1272.09 | 585.337 | 686.750 |
| 2026          | 251528 | 75082.462  | 32882.997  | 42199.47 | 16.777 | 56.204 | 4003.24 | 1194.99 | 523.355 | 671.633 |
| 2027          | 250988 | 74444.425  | 31491.593  | 42952.83 | 17.113 | 57.698 | 3976.53 | 1179.46 | 498.937 | 680.523 |
| 2028          | 250285 | 73699.585  | 30028.465  | 43671.12 | 17.449 | 59.256 | 3945.35 | 1161.76 | 473.352 | 688.407 |
| 2029          | 249525 | 72819.703  | 28611.739  | 44207.96 | 17.717 | 60.709 | 3910.99 | 1141.36 | 448.453 | 692.904 |
| 2030          | 240528 | 69309.277  | 26813.646  | 42495.63 | 17.668 | 61.313 | 4504.36 | 1297.95 | 502.137 | 795.812 |
| 2031          | 235442 | 65433.368  | 24057.012  | 41376.36 | 17.574 | 63.234 | 4397.65 | 1222.18 | 449.343 | 772.838 |
| 2032          | 234017 | 64643.552  | 22863.000  | 41780.55 | 17.854 | 64.632 | 4356.12 | 1203.31 | 425.584 | 777.725 |
| 2033          | 232559 | 63793.514  | 21751.443  | 42042.07 | 18.078 | 65.903 | 4310.93 | 1182.54 | 403.205 | 779.331 |
| 2034          | 230963 | 63032.151  | 20697.423  | 42334.73 | 18.330 | 67.164 | 4260.75 | 1162.80 | 381.821 | 780.980 |
| 2035          | 215822 | 57653.301  | 18911.031  | 38742.27 | 17.951 | 67.199 | 4924.38 | 1315.47 | 431.491 | 883.979 |
| 2036          | 208183 | 52988.733  | 16169.110  | 36819.62 | 17.686 | 69.486 | 4748.94 | 1208.75 | 368.840 | 839.906 |
| 2037          | 205491 | 52026.921  | 15216.330  | 36810.59 | 17.913 | 70.753 | 4682.40 | 1185.50 | 346.724 | 838.778 |
| 2038          | 202834 | 50943.211  | 14273.132  | 36670.08 | 18.079 | 71.982 | 4612.18 | 1158.38 | 324.553 | 833.831 |
| 2039          | 200251 | 50085.991  | 13480.696  | 36605.30 | 18.280 | 73.085 | 4538.65 | 1135.19 | 305.538 | 829.653 |

## Results for PHIM for Run 5 (Sensitivity\_Analysis\_1.RTF)

\*\*\*\*\*

### Main Results for E-Component for Run: 5, Simulation: 1, COD: LUNG CANCER

| Variable Parameter          | Value                                  |
|-----------------------------|----------------------------------------|
| 1. Country                  | US (United States)                     |
| 2. Sex                      | M (Males)                              |
| 3. Year of start of process | 1990                                   |
| 4. Cause of Death           | LUNG CANCER                            |
| 5. Effective Dose NULL      | CC:1                                   |
| 6. Effective Dose Ecig      | CC:1 Ecig:0.1 Dual:0.55                |
| Note:                       | Death rates are per million population |

#### Results for Age Groups Combined and Years combined, Population unadjusted for deaths in Ecig scenario,

| Age Group:All | NULL    | Ecig        | %Drop       |          |        |        | NULL    | Ecig    | Drop    |         |
|---------------|---------|-------------|-------------|----------|--------|--------|---------|---------|---------|---------|
| Year          | Number  | Attrib      | Attrib      | Drop     | %Drop  | Attrib | Death   | Attrib  | Attrib  | Drop    |
|               | Deaths  | Deaths      | Deaths      | Deaths   | Deaths | Deaths | Rate    | Rates   | Rates   | Rates   |
| All Comb      | 3065988 | 2244988.113 | 1775558.458 | 469429.7 | 15.311 | 20.910 | 887.537 | 649.875 | 513.986 | 135.890 |

#### Results for Age Groups Combined, Population unadjusted for deaths in Ecig scenario,

| Age Group:All | NULL   | Ecig      | %Drop     |          |        |        | NULL    | Ecig    | Drop    |         |
|---------------|--------|-----------|-----------|----------|--------|--------|---------|---------|---------|---------|
| Year          | Number | Attrib    | Attrib    | Drop     | %Drop  | Attrib | Death   | Attrib  | Attrib  | Drop    |
|               | Deaths | Deaths    | Deaths    | Deaths   | Deaths | Deaths | Rate    | Rates   | Rates   | Rates   |
| 1990          | 78822  | 63385.736 | 63385.736 | 0.000    | 0.000  | 0.000  | 1249.50 | 1004.81 | 1004.81 | 0.000   |
| 1991          | 78462  | 62918.402 | 62872.703 | 45.699   | 0.058  | 0.073  | 1223.41 | 981.049 | 980.337 | 0.713   |
| 1992          | 77987  | 62366.766 | 62244.448 | 122.318  | 0.157  | 0.196  | 1195.35 | 955.930 | 954.055 | 1.875   |
| 1993          | 78542  | 62652.888 | 62412.321 | 240.567  | 0.306  | 0.384  | 1182.39 | 943.195 | 939.573 | 3.622   |
| 1994          | 77437  | 61565.227 | 61186.281 | 378.946  | 0.489  | 0.616  | 1144.00 | 909.520 | 903.922 | 5.598   |
| 1995          | 76904  | 60851.961 | 60301.005 | 550.956  | 0.716  | 0.905  | 1114.36 | 881.759 | 873.775 | 7.983   |
| 1996          | 76232  | 60122.922 | 59355.549 | 767.372  | 1.007  | 1.276  | 1087.44 | 857.643 | 846.696 | 10.946  |
| 1997          | 75473  | 59237.155 | 58237.816 | 999.338  | 1.324  | 1.687  | 1059.06 | 831.234 | 817.211 | 14.023  |
| 1998          | 75381  | 58906.696 | 57619.155 | 1287.541 | 1.708  | 2.186  | 1040.37 | 813.001 | 795.231 | 17.770  |
| 1999          | 73159  | 56930.073 | 55361.297 | 1568.776 | 2.144  | 2.756  | 993.781 | 773.329 | 752.019 | 21.310  |
| 2000          | 73784  | 57137.121 | 55203.407 | 1933.714 | 2.621  | 3.384  | 987.608 | 764.787 | 738.904 | 25.883  |
| 2001          | 73294  | 56481.726 | 54135.668 | 2346.058 | 3.201  | 4.154  | 968.273 | 746.169 | 715.176 | 30.993  |
| 2002          | 72442  | 55588.365 | 52811.598 | 2776.768 | 3.833  | 4.995  | 946.293 | 726.138 | 689.866 | 36.272  |
| 2003          | 71942  | 54945.856 | 51694.100 | 3251.756 | 4.520  | 5.918  | 929.989 | 710.281 | 668.246 | 42.035  |
| 2004          | 71301  | 54203.126 | 50427.308 | 3775.818 | 5.296  | 6.966  | 911.778 | 693.135 | 644.851 | 48.284  |
| 2005          | 70964  | 53744.603 | 49430.878 | 4313.725 | 6.079  | 8.026  | 896.937 | 679.296 | 624.773 | 54.523  |
| 2006          | 69658  | 52535.572 | 47658.972 | 4876.600 | 7.001  | 9.282  | 872.383 | 657.945 | 596.871 | 61.074  |
| 2007          | 68565  | 51492.124 | 46061.448 | 5430.676 | 7.920  | 10.547 | 849.888 | 638.264 | 570.948 | 67.315  |
| 2008          | 68226  | 51030.736 | 44931.755 | 6098.980 | 8.939  | 11.952 | 836.215 | 625.460 | 550.708 | 74.752  |
| 2009          | 67509  | 50276.199 | 43509.866 | 6766.333 | 10.023 | 13.458 | 817.667 | 608.943 | 526.990 | 81.954  |
| 2010          | 67196  | 49840.933 | 42407.763 | 7433.170 | 11.062 | 14.914 | 804.000 | 596.347 | 507.409 | 88.938  |
| 2011          | 66506  | 49072.841 | 40906.971 | 8165.870 | 12.278 | 16.640 | 787.880 | 581.354 | 484.615 | 96.739  |
| 2012          | 66155  | 48539.512 | 39589.429 | 8950.083 | 13.529 | 18.439 | 775.240 | 568.812 | 463.930 | 104.882 |
| 2013          | 65333  | 47675.741 | 38032.573 | 9643.168 | 14.760 | 20.227 | 756.876 | 552.318 | 440.603 | 111.715 |
| 2014          | 65033  | 47194.534 | 36827.121 | 10367.41 | 15.942 | 21.967 | 744.602 | 540.359 | 421.656 | 118.703 |
| 2015          | 64145  | 46305.842 | 35316.747 | 10989.09 | 17.132 | 23.732 | 726.215 | 526.215 | 404.895 | 126.324 |
| 2016          | 61618  | 44208.867 | 32870.384 | 11338.48 | 18.401 | 25.648 | 706.248 | 514.107 | 400.427 | 135.781 |
| 2017          | 59897  | 42702.624 | 30944.286 | 11758.34 | 19.631 | 27.535 | 691.297 | 503.903 | 391.238 | 148.664 |
| 2018          | 62468  | 44321.202 | 31137.742 | 13183.46 | 21.104 | 29.745 | 672.490 | 500.041 | 390.041 | 165.140 |
| 2019          | 63045  | 44493.088 | 30365.323 | 14127.77 | 22.409 | 31.753 | 662.035 | 500.041 | 390.041 | 165.140 |
| 2020          | 63466  | 44529.551 | 29522.026 | 15007.53 | 23.647 | 33.702 | 652.991 | 500.041 | 390.041 | 165.140 |
| 2021          | 57113  | 39852.556 | 25570.761 | 14281.80 | 25.006 | 35.837 | 643.323 | 500.041 | 390.041 | 165.140 |
| 2022          | 57440  | 39853.685 | 24697.146 | 15156.54 | 26.387 | 38.030 | 634.745 | 500.041 | 390.041 | 165.140 |
| 2023          | 57738  | 39847.050 | 23834.970 | 16012.08 | 27.732 | 40.184 | 626.366 | 500.041 | 390.041 | 165.140 |
| 2024          | 57942  | 39726.010 | 22956.895 | 16769.11 | 28.941 | 42.212 | 618.199 | 500.041 | 390.041 | 165.140 |
| 2025          | 57521  | 39207.348 | 21934.786 | 17272.56 | 30.028 | 44.054 | 610.146 | 500.041 | 390.041 | 165.140 |
| 2026          | 51428  | 34803.960 | 18759.021 | 16044.94 | 31.199 | 46.101 | 602.093 | 500.041 | 390.041 | 165.140 |
| 2027          | 51172  | 34484.595 | 17860.372 | 16624.22 | 32.487 | 48.208 | 594.040 | 500.041 | 390.041 | 165.140 |
| 2028          | 50870  | 34100.638 | 16935.849 | 17164.79 | 33.743 | 50.336 | 586.087 | 500.041 | 390.041 | 165.140 |
| 2029          | 50540  | 33669.838 | 16048.144 | 17621.69 | 34.867 | 52.337 | 578.034 | 500.041 | 390.041 | 165.140 |
| 2030          | 49109  | 32557.688 | 15013.496 | 17544.19 | 35.725 | 53.886 | 570.081 | 500.041 | 390.041 | 165.140 |
| 2031          | 43585  | 28646.393 | 12704.522 | 15941.87 | 36.576 | 55.651 | 562.028 | 500.041 | 390.041 | 165.140 |
| 2032          | 43163  | 28227.160 | 11998.356 | 16228.80 | 37.599 | 57.494 | 554.075 | 500.041 | 390.041 | 165.140 |
| 2033          | 42725  | 27786.623 | 11344.801 | 16441.82 | 38.483 | 59.172 | 546.022 | 500.041 | 390.041 | 165.140 |
| 2034          | 42256  | 27348.299 | 10728.044 | 16620.25 | 39.333 | 60.773 | 538.069 | 500.041 | 390.041 | 165.140 |
| 2035          | 39748  | 25570.077 | 9792.207  | 15777.87 | 39.694 | 61.704 | 530.016 | 500.041 | 390.041 | 165.140 |
| 2036          | 34030  | 21717.319 | 7866.979  | 13850.34 | 40.700 | 63.776 | 522.063 | 500.041 | 390.041 | 165.140 |
| 2037          | 33454  | 21256.024 | 7370.170  | 13885.85 | 41.508 | 65.327 | 514.010 | 500.041 | 390.041 | 165.140 |
| 2038          | 32883  | 20747.175 | 6889.209  | 13857.97 | 42.143 | 66.794 | 506.057 | 500.041 | 390.041 | 165.140 |
| 2039          | 32325  | 20327.688 | 6491.055  | 13836.63 | 42.805 | 68.068 | 498.004 | 500.041 | 390.041 | 165.140 |

## Results for PHIM for Run 5 (Sensitivity\_Analysis\_1.RTF)

\*\*\*\*\*

### Main Results for E-Component for Run: 5, Simulation: 1, COD: IHD

| Variable Parameter          | Value                                  |
|-----------------------------|----------------------------------------|
| 1. Country                  | US (United States)                     |
| 2. Sex                      | M (Males)                              |
| 3. Year of start of process | 1990                                   |
| 4. Cause of Death           | IHD                                    |
| 5. Effective Dose NULL      | CC:1                                   |
| 6. Effective Dose Ecig      | CC:1 Ecig:0.1 Dual:0.55                |
| Note:                       | Death rates are per million population |

#### Results for Age Groups Combined and Years combined, Population unadjusted for deaths in Ecig scenario,

| Age Group:All |         | NULL        | Ecig       | %Drop    |        | NULL   | Ecig    | Drop    |         |         |
|---------------|---------|-------------|------------|----------|--------|--------|---------|---------|---------|---------|
| Year          | Number  | Attrib      | Attrib     | Drop     | %Drop  | Attrib | Death   | Attrib  | Attrib  | Drop    |
|               | Deaths  | Deaths      | Deaths     | Deaths   | Deaths | Deaths | Rate    | Rates   | Rates   | Rates   |
| All Comb      | 6360041 | 1098877.421 | 553680.078 | 545197.3 | 8.572  | 49.614 | 1841.09 | 318.101 | 160.278 | 157.823 |

#### Results for Age Groups Combined, Population unadjusted for deaths in Ecig scenario,

| Age Group:All |        | NULL      | Ecig      | %Drop    |        | NULL   | Ecig    | Drop    |         |         |
|---------------|--------|-----------|-----------|----------|--------|--------|---------|---------|---------|---------|
| Year          | Number | Attrib    | Attrib    | Drop     | %Drop  | Attrib | Death   | Attrib  | Attrib  | Drop    |
|               | Deaths | Deaths    | Deaths    | Deaths   | Deaths | Deaths | Rate    | Rates   | Rates   | Rates   |
| 1990          | 171484 | 38511.725 | 38511.725 | 0.000    | 0.000  | 0.000  | 2718.40 | 610.497 | 610.497 | 0.000   |
| 1991          | 168044 | 37309.838 | 37012.736 | 297.102  | 0.177  | 0.796  | 2620.21 | 581.750 | 577.118 | 4.633   |
| 1992          | 164548 | 36137.488 | 35339.718 | 797.770  | 0.485  | 2.208  | 2522.12 | 553.899 | 541.671 | 12.228  |
| 1993          | 164362 | 35599.588 | 34124.933 | 1474.655 | 0.897  | 4.142  | 2474.35 | 535.926 | 513.727 | 22.200  |
| 1994          | 159866 | 34336.757 | 32090.076 | 2246.682 | 1.405  | 6.543  | 2361.75 | 507.267 | 474.076 | 33.191  |
| 1995          | 158083 | 33455.759 | 30320.139 | 3135.620 | 1.984  | 9.372  | 2290.66 | 484.782 | 439.346 | 45.436  |
| 1996          | 154875 | 32193.824 | 28117.322 | 4076.503 | 2.632  | 12.662 | 2209.26 | 459.239 | 401.089 | 58.151  |
| 1997          | 149970 | 30665.509 | 25679.327 | 4986.182 | 3.325  | 16.260 | 2104.43 | 430.308 | 360.340 | 69.968  |
| 1998          | 145407 | 29188.430 | 23352.493 | 5835.937 | 4.014  | 19.994 | 2006.83 | 402.844 | 322.299 | 80.545  |
| 1999          | 165952 | 33375.386 | 25264.589 | 8110.797 | 4.887  | 24.302 | 2254.27 | 453.366 | 343.190 | 110.176 |
| 2000          | 160260 | 32024.754 | 22953.831 | 9070.923 | 5.660  | 28.325 | 2145.10 | 428.655 | 307.240 | 121.415 |
| 2001          | 154444 | 30682.393 | 20612.716 | 10069.68 | 6.520  | 32.819 | 2040.33 | 405.339 | 272.311 | 133.029 |
| 2002          | 151887 | 30218.370 | 18978.910 | 11239.46 | 7.400  | 37.194 | 1984.06 | 394.736 | 247.917 | 146.818 |
| 2003          | 146733 | 29175.202 | 17075.945 | 12099.26 | 8.246  | 41.471 | 1896.81 | 377.146 | 220.739 | 156.406 |
| 2004          | 138381 | 27488.687 | 14942.696 | 12545.99 | 9.066  | 45.641 | 1769.58 | 351.518 | 191.083 | 160.435 |
| 2005          | 135881 | 27017.439 | 13665.301 | 13352.14 | 9.826  | 49.420 | 1717.44 | 341.482 | 172.720 | 168.762 |
| 2006          | 131922 | 26231.435 | 12195.366 | 14036.07 | 10.640 | 53.509 | 1652.16 | 328.517 | 152.732 | 175.785 |
| 2007          | 126502 | 25103.049 | 10777.568 | 14325.48 | 11.324 | 57.067 | 1568.04 | 311.161 | 133.592 | 177.570 |
| 2008          | 125859 | 24621.740 | 9845.924  | 14775.82 | 11.740 | 60.011 | 1542.60 | 301.777 | 120.677 | 181.100 |
| 2009          | 122428 | 23741.177 | 8818.264  | 14922.91 | 12.189 | 62.857 | 1482.84 | 287.552 | 106.806 | 180.746 |
| 2010          | 120537 | 23189.160 | 8028.880  | 15160.28 | 12.577 | 65.377 | 1442.22 | 277.458 | 96.066  | 181.393 |
| 2011          | 120221 | 22786.927 | 7296.583  | 15490.34 | 12.885 | 67.979 | 1424.23 | 269.951 | 86.441  | 183.510 |
| 2012          | 120927 | 22485.295 | 6699.570  | 15785.73 | 13.054 | 70.205 | 1417.09 | 263.495 | 78.509  | 184.986 |
| 2013          | 122648 | 22251.884 | 6197.161  | 16054.72 | 13.090 | 72.150 | 1420.86 | 257.786 | 71.793  | 185.992 |
| 2014          | 123229 | 21894.593 | 5710.708  | 16183.89 | 13.133 | 73.917 | 1410.92 | 250.685 | 65.385  | 185.299 |
| 2015          | 123774 | 21471.109 | 5281.842  | 16189.27 | 13.080 | 75.400 | 1594.26 | 276.557 | 68.032  | 208.525 |
| 2016          | 126218 | 21411.568 | 4923.496  | 16488.07 | 13.063 | 77.005 | 1610.55 | 273.213 | 62.824  | 210.388 |
| 2017          | 128265 | 21169.399 | 4582.200  | 16587.20 | 12.932 | 78.355 | 1621.69 | 267.651 | 57.934  | 209.717 |
| 2018          | 121429 | 19830.576 | 4024.543  | 15806.03 | 13.017 | 79.705 | 1521.05 | 248.404 | 50.413  | 197.991 |
| 2019          | 121832 | 19431.014 | 3751.122  | 15679.89 | 12.870 | 80.695 | 1511.26 | 241.031 | 46.531  | 194.500 |
| 2020          | 120811 | 18532.612 | 3417.742  | 15114.87 | 12.511 | 81.558 | 1711.27 | 262.513 | 48.412  | 214.101 |
| 2021          | 119407 | 18234.128 | 3174.162  | 15059.97 | 12.612 | 82.592 | 1679.51 | 256.472 | 44.646  | 211.826 |
| 2022          | 119438 | 17812.559 | 2952.151  | 14860.41 | 12.442 | 83.427 | 1667.10 | 248.626 | 41.206  | 207.420 |
| 2023          | 119445 | 17361.668 | 2747.736  | 14613.93 | 12.235 | 84.174 | 1653.68 | 240.367 | 38.042  | 202.325 |
| 2024          | 119305 | 16929.676 | 2581.639  | 14348.04 | 12.026 | 84.751 | 1638.05 | 232.443 | 35.446  | 196.998 |
| 2025          | 115685 | 15501.666 | 2290.695  | 13210.97 | 11.420 | 85.223 | 1848.78 | 247.735 | 36.608  | 211.127 |
| 2026          | 115073 | 15523.814 | 2214.311  | 13309.50 | 11.566 | 85.736 | 1831.46 | 247.072 | 35.242  | 211.830 |
| 2027          | 113989 | 15073.070 | 2090.980  | 12982.09 | 11.389 | 86.128 | 1805.98 | 238.810 | 33.128  | 205.682 |
| 2028          | 112855 | 14636.710 | 1965.717  | 12670.99 | 11.228 | 86.570 | 1778.98 | 230.725 | 30.986  | 199.739 |
| 2029          | 111718 | 14180.166 | 1858.369  | 12321.80 | 11.029 | 86.895 | 1751.04 | 222.256 | 29.128  | 193.129 |
| 2030          | 104851 | 12111.772 | 1555.555  | 10556.22 | 10.068 | 87.157 | 1963.54 | 226.816 | 29.131  | 197.685 |
| 2031          | 105289 | 12417.367 | 1570.934  | 10846.43 | 10.302 | 87.349 | 1966.62 | 231.935 | 29.342  | 202.592 |
| 2032          | 103879 | 12054.064 | 1492.682  | 10561.38 | 10.167 | 87.617 | 1933.67 | 224.381 | 27.786  | 196.595 |
| 2033          | 102485 | 11672.389 | 1410.452  | 10261.94 | 10.013 | 87.916 | 1899.76 | 216.370 | 26.145  | 190.225 |
| 2034          | 101070 | 11365.762 | 1355.478  | 10010.28 | 9.904  | 88.074 | 1864.51 | 209.673 | 25.005  | 184.667 |
| 2035          | 90820  | 8580.360  | 999.537   | 7580.823 | 8.347  | 88.351 | 2072.23 | 195.777 | 22.806  | 172.971 |
| 2036          | 92117  | 8948.841  | 1025.935  | 7922.906 | 8.601  | 88.536 | 2101.31 | 204.135 | 23.403  | 180.732 |
| 2037          | 90327  | 8624.570  | 983.634   | 7640.935 | 8.459  | 88.595 | 2058.21 | 196.522 | 22.413  | 174.109 |
| 2038          | 88590  | 8315.017  | 930.810   | 7384.206 | 8.335  | 88.806 | 2014.42 | 189.073 | 21.165  | 167.907 |
| 2039          | 86921  | 8001.132  | 885.876   | 7115.256 | 8.186  | 88.928 | 1970.05 | 181.344 | 20.078  | 161.266 |



## Results for PHIM for Run 5 (Sensitivity\_Analysis\_1.RTF)

\*\*\*\*\*

### Main Results for E-Component for Run: 5, Simulation: 1, COD: STROKE

| Variable Parameter          | Value                                  |
|-----------------------------|----------------------------------------|
| 1. Country                  | US (United States)                     |
| 2. Sex                      | M (Males)                              |
| 3. Year of start of process | 1990                                   |
| 4. Cause of Death           | STROKE                                 |
| 5. Effective Dose NULL      | CC:1                                   |
| 6. Effective Dose Ecig      | CC:1 Ecig:0.1 Dual:0.55                |
| Note:                       | Death rates are per million population |

#### Results for Age Groups Combined and Years combined, Population unadjusted for deaths in Ecig scenario,

| Age Group:All |         | NULL       | Ecig      | %Drop    |        | NULL   | Ecig    | Drop   |        |        |
|---------------|---------|------------|-----------|----------|--------|--------|---------|--------|--------|--------|
| Year          | Number  | Attrib     | Attrib    | Drop     | %Drop  | Attrib | Death   | Attrib | Drop   |        |
|               | Deaths  | Deaths     | Deaths    | Deaths   | Deaths | Deaths | Rate    | Rates  | Rates  |        |
| All Comb      | 1489699 | 149918.462 | 74440.445 | 75478.02 | 5.067  | 50.346 | 431.236 | 43.398 | 21.549 | 21.849 |

#### Results for Age Groups Combined, Population unadjusted for deaths in Ecig scenario,

| Age Group:All |        | NULL     | Ecig     | %Drop    |        | NULL   | Ecig    | Drop   |        |
|---------------|--------|----------|----------|----------|--------|--------|---------|--------|--------|
| Year          | Number | Attrib   | Attrib   | Drop     | %Drop  | Attrib | Death   | Attrib | Drop   |
|               | Deaths | Deaths   | Deaths   | Deaths   | Deaths | Deaths | Rate    | Rates  | Rates  |
| 1990          | 32862  | 4613.166 | 4613.166 | 0.000    | 0.000  | 0.000  | 520.936 | 73.129 | 0.000  |
| 1991          | 32619  | 4555.566 | 4517.565 | 38.001   | 0.116  | 0.834  | 508.609 | 71.032 | 0.593  |
| 1992          | 32100  | 4453.572 | 4354.141 | 99.432   | 0.310  | 2.233  | 492.014 | 68.262 | 1.524  |
| 1993          | 32896  | 4462.473 | 4274.762 | 187.711  | 0.571  | 4.206  | 495.226 | 67.179 | 2.826  |
| 1994          | 33323  | 4499.513 | 4203.577 | 295.937  | 0.888  | 6.577  | 492.290 | 66.473 | 4.372  |
| 1995          | 33569  | 4472.774 | 4053.495 | 419.279  | 1.249  | 9.374  | 486.422 | 64.812 | 6.075  |
| 1996          | 33870  | 4406.878 | 3851.326 | 555.553  | 1.640  | 12.606 | 483.150 | 62.863 | 7.925  |
| 1997          | 33516  | 4288.158 | 3594.393 | 693.765  | 2.070  | 16.179 | 470.307 | 60.173 | 9.735  |
| 1998          | 32795  | 4120.148 | 3300.333 | 819.815  | 2.500  | 19.898 | 452.620 | 56.864 | 11.315 |
| 1999          | 33375  | 3982.443 | 3037.020 | 945.422  | 2.833  | 23.740 | 453.361 | 54.097 | 12.842 |
| 2000          | 33459  | 4021.411 | 2911.229 | 1110.183 | 3.318  | 27.607 | 447.853 | 53.827 | 14.860 |
| 2001          | 32275  | 3848.092 | 2627.106 | 1220.986 | 3.783  | 31.730 | 426.379 | 50.836 | 16.130 |
| 2002          | 31586  | 3783.081 | 2432.844 | 1350.237 | 4.275  | 35.691 | 412.601 | 49.418 | 17.638 |
| 2003          | 30985  | 3754.415 | 2261.466 | 1492.949 | 4.818  | 39.765 | 400.541 | 48.533 | 19.299 |
| 2004          | 29884  | 3666.274 | 2065.252 | 1601.022 | 5.357  | 43.669 | 382.149 | 46.883 | 20.473 |
| 2005          | 28708  | 3589.688 | 1885.894 | 1703.794 | 5.935  | 47.464 | 362.850 | 45.371 | 21.535 |
| 2006          | 28188  | 3596.985 | 1752.204 | 1844.781 | 6.545  | 51.287 | 353.021 | 45.048 | 23.104 |
| 2007          | 28026  | 3560.798 | 1611.465 | 1949.332 | 6.955  | 54.744 | 347.392 | 44.137 | 24.163 |
| 2008          | 27128  | 3417.001 | 1438.022 | 1978.980 | 7.295  | 57.916 | 332.495 | 41.881 | 24.255 |
| 2009          | 27068  | 3394.390 | 1329.071 | 2065.319 | 7.630  | 60.845 | 327.847 | 41.113 | 25.015 |
| 2010          | 26911  | 3340.137 | 1222.108 | 2118.029 | 7.870  | 63.411 | 321.990 | 39.965 | 25.342 |
| 2011          | 26959  | 3285.435 | 1120.830 | 2164.604 | 8.029  | 65.885 | 319.377 | 38.922 | 25.644 |
| 2012          | 27057  | 3259.209 | 1031.496 | 2227.713 | 8.233  | 68.351 | 317.068 | 38.193 | 26.106 |
| 2013          | 27904  | 3274.703 | 966.024  | 2308.679 | 8.274  | 70.500 | 323.265 | 37.937 | 26.746 |
| 2014          | 28792  | 3298.083 | 906.142  | 2391.941 | 8.308  | 72.525 | 329.657 | 37.762 | 27.387 |
| 2015          | 29560  | 3244.406 | 838.479  | 2405.927 | 8.139  | 74.156 | 380.745 | 41.789 | 30.989 |
| 2016          | 30513  | 3314.836 | 802.479  | 2512.357 | 8.234  | 75.791 | 389.347 | 42.297 | 32.058 |
| 2017          | 31416  | 3333.314 | 756.889  | 2576.425 | 8.201  | 77.293 | 397.202 | 42.144 | 32.575 |
| 2018          | 29348  | 2925.242 | 628.306  | 2296.936 | 7.826  | 78.521 | 367.626 | 36.642 | 28.772 |
| 2019          | 29598  | 2864.628 | 583.196  | 2281.432 | 7.708  | 79.641 | 367.149 | 35.534 | 28.300 |
| 2020          | 29592  | 2730.366 | 528.980  | 2201.387 | 7.439  | 80.626 | 419.174 | 38.675 | 31.182 |
| 2021          | 30097  | 2647.911 | 486.996  | 2160.914 | 7.180  | 81.608 | 423.328 | 37.244 | 30.394 |
| 2022          | 30304  | 2586.165 | 450.997  | 2135.168 | 7.046  | 82.561 | 422.974 | 36.097 | 29.802 |
| 2023          | 30505  | 2517.960 | 418.576  | 2099.384 | 6.882  | 83.376 | 422.337 | 34.860 | 29.065 |
| 2024          | 30661  | 2454.161 | 391.548  | 2062.613 | 6.727  | 84.046 | 420.968 | 33.695 | 28.320 |
| 2025          | 30254  | 2275.364 | 349.332  | 1926.032 | 6.366  | 84.647 | 483.488 | 36.363 | 30.780 |
| 2026          | 30685  | 2183.166 | 323.295  | 1859.871 | 6.061  | 85.191 | 488.380 | 34.747 | 29.601 |
| 2027          | 30561  | 2112.345 | 303.036  | 1809.309 | 5.920  | 85.654 | 484.196 | 33.467 | 28.666 |
| 2028          | 30412  | 2046.677 | 284.234  | 1762.443 | 5.795  | 86.112 | 479.392 | 32.263 | 27.782 |
| 2029          | 30254  | 1977.671 | 267.049  | 1710.623 | 5.654  | 86.497 | 474.195 | 30.997 | 26.812 |
| 2030          | 29330  | 1744.457 | 229.696  | 1514.761 | 5.165  | 86.833 | 549.260 | 32.668 | 28.367 |
| 2031          | 28976  | 1653.738 | 212.973  | 1440.765 | 4.972  | 87.122 | 541.223 | 30.889 | 26.911 |
| 2032          | 28724  | 1603.120 | 200.360  | 1402.760 | 4.884  | 87.502 | 534.690 | 29.841 | 26.112 |
| 2033          | 28464  | 1548.245 | 189.168  | 1359.077 | 4.775  | 87.782 | 527.627 | 28.700 | 25.193 |
| 2034          | 28178  | 1511.985 | 181.022  | 1330.963 | 4.723  | 88.028 | 519.826 | 27.893 | 24.553 |
| 2035          | 26737  | 1239.866 | 145.857  | 1094.008 | 4.092  | 88.236 | 610.065 | 28.290 | 24.962 |
| 2036          | 25591  | 1182.522 | 136.400  | 1046.122 | 4.088  | 88.465 | 583.762 | 26.975 | 23.863 |
| 2037          | 25143  | 1134.483 | 130.596  | 1003.887 | 3.993  | 88.488 | 572.916 | 25.851 | 22.875 |
| 2038          | 24693  | 1093.537 | 123.390  | 970.147  | 3.929  | 88.716 | 561.491 | 24.866 | 22.060 |
| 2039          | 24247  | 1047.905 | 116.661  | 931.244  | 3.841  | 88.867 | 549.553 | 23.751 | 21.106 |

## Results for PHIM for Run 5 (Sensitivity\_Analysis\_1.RTF)

\*\*\*\*\*

### Main Results for E-Component for Run: 5, Simulation: 1, COD: COPD

| Variable Parameter          | Value                                  |
|-----------------------------|----------------------------------------|
| 1. Country                  | US (United States)                     |
| 2. Sex                      | M (Males)                              |
| 3. Year of start of process | 1990                                   |
| 4. Cause of Death           | COPD                                   |
| 5. Effective Dose NULL      | CC:1                                   |
| 6. Effective Dose Ecig      | CC:1 Ecig:0.1 Dual:0.55                |
| Note:                       | Death rates are per million population |

#### Results for Age Groups Combined and Years combined, Population unadjusted for deaths in Ecig scenario,

| Age Group:All | NULL    | Ecig        | %Drop      |          |        |        | NULL    | Ecig    | Drop    |        |
|---------------|---------|-------------|------------|----------|--------|--------|---------|---------|---------|--------|
| Year          | Number  | Attrib      | Attrib     | Drop     | %Drop  | Attrib | Death   | Attrib  | Attrib  | Drop   |
|               | Deaths  | Deaths      | Deaths     | Deaths   | Deaths | Deaths | Rate    | Rates   | Rates   | Rates  |
| All Comb      | 2233143 | 1015606.587 | 700367.564 | 315239.0 | 14.116 | 31.039 | 646.447 | 293.996 | 202.741 | 91.255 |

#### Results for Age Groups Combined, Population unadjusted for deaths in Ecig scenario,

| Age Group:All | NULL   | Ecig      | %Drop     |          |        |        | NULL    | Ecig    | Drop    |         |
|---------------|--------|-----------|-----------|----------|--------|--------|---------|---------|---------|---------|
| Year          | Number | Attrib    | Attrib    | Drop     | %Drop  | Attrib | Death   | Attrib  | Attrib  | Drop    |
|               | Deaths | Deaths    | Deaths    | Deaths   | Deaths | Deaths | Rate    | Rates   | Rates   | Rates   |
| 1990          | 33993  | 19262.437 | 19262.437 | 0.000    | 0.000  | 0.000  | 538.865 | 305.353 | 305.353 | 0.000   |
| 1991          | 34092  | 19215.636 | 19194.523 | 21.113   | 0.062  | 0.110  | 531.576 | 299.618 | 299.289 | 0.329   |
| 1992          | 33942  | 19056.189 | 19001.235 | 54.955   | 0.162  | 0.288  | 520.248 | 292.085 | 291.242 | 0.842   |
| 1993          | 35913  | 20095.670 | 19983.224 | 112.446  | 0.313  | 0.560  | 540.645 | 302.526 | 300.833 | 1.693   |
| 1994          | 35074  | 19524.095 | 19352.147 | 171.948  | 0.490  | 0.881  | 518.158 | 288.435 | 285.895 | 2.540   |
| 1995          | 34669  | 19116.002 | 18869.328 | 246.674  | 0.712  | 1.290  | 502.362 | 276.995 | 273.421 | 3.574   |
| 1996          | 34582  | 18975.021 | 18637.705 | 337.317  | 0.975  | 1.778  | 493.306 | 270.675 | 265.864 | 4.812   |
| 1997          | 35267  | 19169.025 | 18720.798 | 448.227  | 1.271  | 2.338  | 494.878 | 268.986 | 262.696 | 6.290   |
| 1998          | 35675  | 19228.937 | 18650.594 | 578.344  | 1.621  | 3.008  | 492.368 | 265.388 | 257.406 | 7.982   |
| 1999          | 38516  | 20589.820 | 19829.776 | 760.044  | 1.973  | 3.691  | 523.195 | 279.689 | 269.365 | 10.324  |
| 2000          | 36283  | 19196.417 | 18336.888 | 859.529  | 2.369  | 4.478  | 485.652 | 256.946 | 245.442 | 11.505  |
| 2001          | 36281  | 19012.731 | 17971.198 | 1041.533 | 2.871  | 5.478  | 479.301 | 251.174 | 237.414 | 13.759  |
| 2002          | 35983  | 18699.357 | 17480.904 | 1218.453 | 3.386  | 6.516  | 470.038 | 244.265 | 228.349 | 15.916  |
| 2003          | 36205  | 18663.550 | 17241.331 | 1422.219 | 3.928  | 7.620  | 468.019 | 241.262 | 222.877 | 18.385  |
| 2004          | 34611  | 17679.164 | 16101.963 | 1577.201 | 4.557  | 8.921  | 442.596 | 226.076 | 205.908 | 20.169  |
| 2005          | 36826  | 18692.832 | 16787.361 | 1905.470 | 5.174  | 10.194 | 465.456 | 236.265 | 212.181 | 24.084  |
| 2006          | 34350  | 17308.564 | 15285.521 | 2023.043 | 5.889  | 11.688 | 430.192 | 216.769 | 191.433 | 25.336  |
| 2007          | 35326  | 17683.181 | 15342.961 | 2340.220 | 6.625  | 13.234 | 437.879 | 219.189 | 190.182 | 29.008  |
| 2008          | 38248  | 19006.374 | 16214.980 | 2791.394 | 7.298  | 14.687 | 468.788 | 232.952 | 198.740 | 34.213  |
| 2009          | 36902  | 18205.573 | 15205.022 | 3000.550 | 8.131  | 16.481 | 446.956 | 220.505 | 184.163 | 36.343  |
| 2010          | 37234  | 18237.758 | 14949.021 | 3288.737 | 8.833  | 18.033 | 445.505 | 218.215 | 178.865 | 39.350  |
| 2011          | 38093  | 18487.916 | 14778.389 | 3709.528 | 9.738  | 20.065 | 451.279 | 219.022 | 175.076 | 43.946  |
| 2012          | 38504  | 18491.158 | 14427.692 | 4063.466 | 10.553 | 21.975 | 451.211 | 216.689 | 169.071 | 47.618  |
| 2013          | 40290  | 19143.452 | 14589.319 | 4554.134 | 11.303 | 23.790 | 466.755 | 221.775 | 169.016 | 52.759  |
| 2014          | 40339  | 18992.005 | 14097.502 | 4894.503 | 12.133 | 25.771 | 461.866 | 217.451 | 161.411 | 56.040  |
| 2015          | 42303  | 19728.885 | 14334.189 | 5394.696 | 12.753 | 27.344 | 544.880 | 254.116 | 184.630 | 69.486  |
| 2016          | 43104  | 19876.724 | 14062.480 | 5814.244 | 13.489 | 29.252 | 550.009 | 253.628 | 179.438 | 74.190  |
| 2017          | 44107  | 20119.790 | 13837.984 | 6281.807 | 14.242 | 31.222 | 557.659 | 254.381 | 174.958 | 79.423  |
| 2018          | 45469  | 20535.123 | 13725.049 | 6810.074 | 14.977 | 33.163 | 569.564 | 257.229 | 171.924 | 85.305  |
| 2019          | 46963  | 21009.029 | 13643.500 | 7365.529 | 15.684 | 35.059 | 582.552 | 260.605 | 169.240 | 91.365  |
| 2020          | 48419  | 21428.512 | 13526.522 | 7901.990 | 16.320 | 36.876 | 685.853 | 303.533 | 191.602 | 111.931 |
| 2021          | 48463  | 21266.697 | 12960.346 | 8306.351 | 17.140 | 39.058 | 681.652 | 299.127 | 182.294 | 116.833 |
| 2022          | 49915  | 21663.568 | 12755.019 | 8908.549 | 17.847 | 41.122 | 696.712 | 302.378 | 178.033 | 124.345 |
| 2023          | 51391  | 22084.131 | 12558.421 | 9525.710 | 18.536 | 43.134 | 711.491 | 305.748 | 173.867 | 131.880 |
| 2024          | 52811  | 22418.456 | 12338.947 | 10079.51 | 19.086 | 44.961 | 725.093 | 307.804 | 169.413 | 138.391 |
| 2025          | 53848  | 22614.834 | 12051.902 | 10562.93 | 19.616 | 46.708 | 860.553 | 361.411 | 192.603 | 168.808 |
| 2026          | 54342  | 22571.522 | 11586.370 | 10985.15 | 20.215 | 48.668 | 864.886 | 359.241 | 184.405 | 174.836 |
| 2027          | 55267  | 22774.416 | 11237.205 | 11537.21 | 20.876 | 50.659 | 875.619 | 360.827 | 178.037 | 182.790 |
| 2028          | 56149  | 22915.561 | 10842.665 | 12072.90 | 21.502 | 52.684 | 885.102 | 361.228 | 170.918 | 190.310 |
| 2029          | 57014  | 22992.027 | 10438.178 | 12553.85 | 22.019 | 54.601 | 893.616 | 360.371 | 163.605 | 196.766 |
| 2030          | 57238  | 22895.360 | 10014.900 | 12880.46 | 22.503 | 56.258 | 1071.90 | 428.760 | 187.548 | 241.211 |
| 2031          | 57592  | 22715.871 | 9568.583  | 13147.29 | 22.828 | 57.877 | 1075.71 | 424.293 | 178.724 | 245.568 |
| 2032          | 58251  | 22759.207 | 9171.602  | 13587.61 | 23.326 | 59.702 | 1084.31 | 423.652 | 170.725 | 252.927 |
| 2033          | 58885  | 22786.258 | 8807.023  | 13979.23 | 23.740 | 61.349 | 1091.54 | 422.387 | 163.255 | 259.132 |
| 2034          | 59460  | 22806.106 | 8432.879  | 14373.23 | 24.173 | 63.024 | 1096.89 | 420.721 | 155.567 | 265.153 |
| 2035          | 58516  | 22262.998 | 7973.430  | 14289.57 | 24.420 | 64.185 | 1335.15 | 507.973 | 181.929 | 326.044 |
| 2036          | 56446  | 21140.051 | 7139.796  | 14000.26 | 24.803 | 66.226 | 1287.60 | 482.234 | 162.869 | 319.365 |
| 2037          | 56568  | 21011.845 | 6731.929  | 14279.92 | 25.244 | 67.961 | 1288.98 | 478.783 | 153.396 | 325.387 |
| 2038          | 56668  | 20787.483 | 6329.722  | 14457.76 | 25.513 | 69.550 | 1288.55 | 472.681 | 143.930 | 328.751 |
| 2039          | 56758  | 20709.267 | 5987.105  | 14722.16 | 25.939 | 71.090 | 1286.40 | 469.372 | 135.697 | 333.675 |

## Results for PHIM for Run 5 (Sensitivity\_Analysis\_1.RTF)

\*\*\*\*\*

### Main Results for E-Component for Run: 5, Simulation: 1, COD: Four Diseases Combined, Adjusted

| Variable Parameter          | Value                                  |
|-----------------------------|----------------------------------------|
| 1. Country                  | US (United States)                     |
| 2. Sex                      | M (Males)                              |
| 3. Year of start of process | 1990                                   |
| 4. Cause of Death           | Four Diseases Combined                 |
| 5. Effective Dose NULL      | CC:1                                   |
| 6. Effective Dose Ecig      | CC:1 Ecig:0.1 Dual:0.55                |
| Note:                       | Death rates are per million population |

#### Results for Age Groups Combined and Years combined, Population and Number deaths adjusted for Ecig scenario,

| Age Group:All | NULL     | Ecig        | %Drop       | NULL    | Ecig   | Drop   |         |         |         |         |
|---------------|----------|-------------|-------------|---------|--------|--------|---------|---------|---------|---------|
| Year          | Number   | Attrib      | Attrib      | Death   | Attrib | Attrib |         |         |         |         |
|               | Deaths   | Deaths      | Deaths      | Rate    | Rates  | Rates  |         |         |         |         |
| All Comb      | 13281485 | 4509390.583 | 3122577.274 | 1386813 | 10.442 | 30.754 | 3815.01 | 1305.37 | 896.937 | 408.434 |

#### Results for Age Groups Combined, Population and Number deaths adjusted for Ecig scenario,

| Age Group:All | NULL   | Ecig       | %Drop      | NULL     | Ecig   | Drop   |         |         |         |         |
|---------------|--------|------------|------------|----------|--------|--------|---------|---------|---------|---------|
| Year          | Number | Attrib     | Attrib     | Death    | Attrib | Attrib |         |         |         |         |
|               | Deaths | Deaths     | Deaths     | Rate     | Rates  | Rates  |         |         |         |         |
| 1990          | 317161 | 125773.065 | 125773.065 | 0.000    | 0.000  | 0.000  | 5027.71 | 1993.78 | 1993.78 | 0.000   |
| 1991          | 313217 | 123999.442 | 123597.528 | 401.915  | 0.128  | 0.324  | 4883.81 | 1933.45 | 1927.18 | 6.267   |
| 1992          | 308580 | 122014.015 | 120940.605 | 1073.411 | 0.348  | 0.880  | 4729.74 | 1870.18 | 1853.71 | 16.465  |
| 1993          | 311722 | 122810.618 | 120799.023 | 2011.595 | 0.645  | 1.638  | 4692.65 | 1848.83 | 1818.50 | 30.325  |
| 1994          | 305722 | 119925.592 | 116840.776 | 3084.816 | 1.009  | 2.572  | 4516.27 | 1771.69 | 1726.03 | 45.666  |
| 1995          | 303265 | 117896.496 | 113559.728 | 4336.768 | 1.430  | 3.678  | 4393.94 | 1708.35 | 1645.34 | 63.006  |
| 1996          | 299625 | 115698.645 | 109987.068 | 5711.578 | 1.906  | 4.937  | 4273.39 | 1650.42 | 1568.69 | 81.734  |
| 1997          | 294324 | 113359.847 | 106269.325 | 7090.522 | 2.409  | 6.255  | 4129.02 | 1590.70 | 1490.83 | 99.869  |
| 1998          | 289396 | 111444.212 | 102973.777 | 8470.435 | 2.927  | 7.601  | 3992.69 | 1538.10 | 1420.69 | 117.407 |
| 1999          | 311206 | 114877.722 | 103563.162 | 11314.56 | 3.636  | 9.849  | 4225.36 | 1560.48 | 1406.12 | 154.366 |
| 2000          | 304055 | 112379.704 | 99496.744  | 12882.96 | 4.237  | 11.464 | 4067.22 | 1504.22 | 1330.93 | 173.291 |
| 2001          | 296633 | 110024.943 | 95459.861  | 14565.08 | 4.910  | 13.238 | 3915.54 | 1453.52 | 1260.07 | 193.453 |
| 2002          | 292319 | 108289.173 | 91841.432  | 16447.74 | 5.627  | 15.189 | 3814.58 | 1414.56 | 1198.47 | 216.086 |
| 2003          | 286374 | 106539.023 | 88435.416  | 18103.61 | 6.322  | 16.992 | 3697.27 | 1377.22 | 1141.76 | 235.463 |
| 2004          | 274768 | 103037.251 | 83723.112  | 19314.14 | 7.029  | 18.745 | 3508.34 | 1317.61 | 1069.01 | 248.604 |
| 2005          | 273076 | 103044.562 | 81985.148  | 21059.41 | 7.712  | 20.437 | 3445.34 | 1302.41 | 1034.39 | 268.025 |
| 2006          | 264910 | 99672.555  | 77129.419  | 22543.14 | 8.510  | 22.617 | 3310.79 | 1248.28 | 963.948 | 284.331 |
| 2007          | 259318 | 97839.152  | 74056.999  | 23782.15 | 9.171  | 24.307 | 3206.66 | 1212.75 | 915.771 | 296.981 |
| 2008          | 260495 | 98075.852  | 72726.724  | 25349.13 | 9.731  | 25.846 | 3184.10 | 1202.07 | 888.957 | 313.114 |
| 2009          | 255059 | 95617.338  | 69182.325  | 26435.01 | 10.364 | 27.647 | 3079.80 | 1158.11 | 835.368 | 322.746 |
| 2010          | 253163 | 94607.988  | 66956.437  | 27651.55 | 10.922 | 29.228 | 3018.74 | 1131.98 | 798.394 | 333.590 |
| 2011          | 253214 | 93633.119  | 64477.786  | 29155.33 | 11.514 | 31.138 | 2988.42 | 1109.25 | 760.963 | 348.286 |
| 2012          | 254243 | 92775.175  | 62149.190  | 30625.98 | 12.046 | 33.011 | 2966.96 | 1087.19 | 725.268 | 361.922 |
| 2013          | 257969 | 92345.780  | 60214.578  | 32131.20 | 12.455 | 34.794 | 2974.94 | 1069.82 | 694.404 | 375.411 |
| 2014          | 259377 | 91379.215  | 57997.107  | 33382.11 | 12.870 | 36.531 | 2955.05 | 1046.26 | 660.753 | 385.503 |
| 2015          | 261983 | 90750.242  | 56255.377  | 34494.86 | 13.167 | 38.011 | 3354.04 | 1168.90 | 720.210 | 448.692 |
| 2016          | 263865 | 88811.996  | 53157.263  | 35654.73 | 13.512 | 40.146 | 3344.94 | 1133.24 | 673.859 | 459.386 |
| 2017          | 266328 | 87325.126  | 50636.634  | 36688.49 | 13.776 | 42.014 | 3343.62 | 1104.08 | 635.718 | 468.361 |
| 2018          | 261509 | 87612.144  | 50065.737  | 37546.41 | 14.358 | 42.855 | 3251.09 | 1097.46 | 622.421 | 475.036 |
| 2019          | 264482 | 87797.760  | 48922.382  | 38875.38 | 14.699 | 44.278 | 3254.41 | 1089.08 | 601.984 | 487.098 |
| 2020          | 265594 | 87221.042  | 47602.784  | 39618.26 | 14.917 | 45.423 | 3725.81 | 1235.48 | 667.783 | 567.696 |
| 2021          | 258512 | 82001.292  | 42776.927  | 39224.36 | 15.173 | 47.834 | 3598.85 | 1153.39 | 595.517 | 557.873 |
| 2022          | 260784 | 81915.977  | 41458.985  | 40456.99 | 15.514 | 49.388 | 3600.60 | 1143.37 | 572.419 | 570.956 |
| 2023          | 263032 | 81810.810  | 40181.731  | 41629.08 | 15.827 | 50.885 | 3600.05 | 1132.64 | 549.957 | 582.688 |
| 2024          | 264943 | 81528.303  | 38908.319  | 42619.98 | 16.086 | 52.276 | 3594.00 | 1119.38 | 527.798 | 591.580 |
| 2025          | 261791 | 79599.213  | 37279.925  | 42319.29 | 16.165 | 53.165 | 4124.38 | 1272.09 | 587.326 | 684.761 |
| 2026          | 256141 | 75082.462  | 33504.465  | 41578.00 | 16.232 | 55.376 | 4016.02 | 1194.99 | 525.315 | 669.674 |
| 2027          | 255841 | 74444.425  | 32119.522  | 42324.90 | 16.543 | 56.854 | 3990.41 | 1179.46 | 500.977 | 678.484 |
| 2028          | 255379 | 73699.585  | 30659.821  | 43039.76 | 16.853 | 58.399 | 3960.39 | 1161.76 | 475.469 | 686.290 |
| 2029          | 254864 | 72819.703  | 29244.386  | 43575.32 | 17.097 | 59.840 | 3927.23 | 1141.36 | 450.631 | 690.726 |
| 2030          | 246051 | 69309.277  | 27444.491  | 41864.79 | 17.015 | 60.403 | 4517.67 | 1297.95 | 503.900 | 794.049 |
| 2031          | 241064 | 65433.368  | 24647.859  | 40785.51 | 16.919 | 62.331 | 4411.11 | 1222.18 | 451.018 | 771.163 |
| 2032          | 239855 | 64643.552  | 23449.785  | 41193.77 | 17.174 | 63.724 | 4370.68 | 1203.31 | 427.305 | 776.003 |
| 2033          | 238612 | 63793.514  | 22334.848  | 41458.67 | 17.375 | 64.989 | 4326.62 | 1182.54 | 404.985 | 777.551 |
| 2034          | 237227 | 63032.151  | 21276.599  | 41755.55 | 17.602 | 66.245 | 4277.60 | 1162.80 | 383.652 | 779.148 |
| 2035          | 222096 | 57653.301  | 19474.494  | 38178.81 | 17.190 | 66.221 | 4938.46 | 1315.47 | 433.029 | 882.441 |
| 2036          | 214386 | 52988.733  | 16663.570  | 36325.16 | 16.944 | 68.553 | 4761.83 | 1208.75 | 370.123 | 838.623 |
| 2037          | 211825 | 52026.921  | 15698.010  | 36328.91 | 17.150 | 69.827 | 4696.09 | 1185.50 | 348.019 | 837.484 |
| 2038          | 209295 | 50943.211  | 14740.636  | 36202.58 | 17.297 | 71.065 | 4626.70 | 1158.38 | 325.858 | 832.525 |
| 2039          | 206836 | 50085.991  | 13936.392  | 36149.60 | 17.477 | 72.175 | 4554.00 | 1135.19 | 306.844 | 828.347 |

## Results for PHIM for Run 5 (Sensitivity\_Analysis\_1.RTF)

\*\*\*\*\*

### Main Results for E-Component for Run: 5, Simulation: 1, COD: LUNG CANCER, Adjusted

| Variable Parameter          | Value                                  |
|-----------------------------|----------------------------------------|
| 1. Country                  | US (United States)                     |
| 2. Sex                      | M (Males)                              |
| 3. Year of start of process | 1990                                   |
| 4. Cause of Death           | LUNG CANCER                            |
| 5. Effective Dose NULL      | CC:1                                   |
| 6. Effective Dose Ecig      | CC:1 Ecig:0.1 Dual:0.55                |
| Note:                       | Death rates are per million population |

#### Results for Age Groups Combined and Years combined, Population and Number deaths adjusted for Ecig scenario,

| Age Group:All | NULL    | Ecig        | %Drop       |          |        | NULL   | Ecig    | Drop    |         |         |
|---------------|---------|-------------|-------------|----------|--------|--------|---------|---------|---------|---------|
| Year          | Number  | Attrib      | Attrib      | Drop     | %Drop  | Attrib | Death   | Attrib  | Attrib  | Drop    |
|               | Deaths  | Deaths      | Deaths      | Deaths   | Deaths | Deaths | Rate    | Rates   | Rates   | Rates   |
| All Comb      | 3093654 | 2244988.113 | 1786344.471 | 458643.6 | 14.825 | 20.430 | 888.629 | 649.875 | 513.114 | 136.761 |

#### Results for Age Groups Combined, Population and Number deaths adjusted for Ecig scenario,

| Age Group:All | NULL   | Ecig      | %Drop     |          |        | NULL   | Ecig    | Drop    |         |         |
|---------------|--------|-----------|-----------|----------|--------|--------|---------|---------|---------|---------|
| Year          | Number | Attrib    | Attrib    | Drop     | %Drop  | Attrib | Death   | Attrib  | Attrib  | Drop    |
|               | Deaths | Deaths    | Deaths    | Deaths   | Deaths | Deaths | Rate    | Rates   | Rates   | Rates   |
| 1990          | 78822  | 63385.736 | 63385.736 | 0.000    | 0.000  | 0.000  | 1249.50 | 1004.81 | 1004.81 | 0.000   |
| 1991          | 78462  | 62918.402 | 62872.703 | 45.699   | 0.058  | 0.073  | 1223.41 | 981.049 | 980.337 | 0.713   |
| 1992          | 77988  | 62366.766 | 62245.001 | 121.765  | 0.156  | 0.195  | 1195.35 | 955.930 | 954.057 | 1.872   |
| 1993          | 78544  | 62652.888 | 62414.288 | 238.599  | 0.304  | 0.381  | 1182.40 | 943.195 | 939.581 | 3.614   |
| 1994          | 77443  | 61565.227 | 61190.865 | 374.361  | 0.483  | 0.608  | 1144.02 | 909.520 | 903.941 | 5.579   |
| 1995          | 76915  | 60851.961 | 60309.425 | 542.536  | 0.705  | 0.892  | 1114.40 | 881.759 | 873.809 | 7.949   |
| 1996          | 76249  | 60122.922 | 59369.213 | 753.708  | 0.988  | 1.254  | 1087.51 | 857.643 | 846.751 | 10.892  |
| 1997          | 75499  | 59237.155 | 58258.209 | 978.946  | 1.297  | 1.653  | 1059.17 | 831.234 | 817.293 | 13.941  |
| 1998          | 75419  | 58906.696 | 57647.997 | 1258.699 | 1.669  | 2.137  | 1040.52 | 813.001 | 795.347 | 17.653  |
| 1999          | 73209  | 56930.073 | 55399.259 | 1530.814 | 2.091  | 2.689  | 993.986 | 773.329 | 752.176 | 21.153  |
| 2000          | 73852  | 57137.121 | 55254.434 | 1882.687 | 2.549  | 3.295  | 987.887 | 764.787 | 739.115 | 25.672  |
| 2001          | 73381  | 56481.726 | 54200.315 | 2281.412 | 3.109  | 4.039  | 968.629 | 746.169 | 715.442 | 30.728  |
| 2002          | 72551  | 55588.365 | 52891.169 | 2697.196 | 3.718  | 4.852  | 946.741 | 726.138 | 690.195 | 35.943  |
| 2003          | 72075  | 54945.856 | 51789.900 | 3155.956 | 4.379  | 5.744  | 930.533 | 710.281 | 668.641 | 41.640  |
| 2004          | 71460  | 54203.126 | 50540.282 | 3662.844 | 5.126  | 6.758  | 912.430 | 693.135 | 645.318 | 47.817  |
| 2005          | 71152  | 53744.603 | 49562.246 | 4182.357 | 5.878  | 7.782  | 897.708 | 679.296 | 625.316 | 53.980  |
| 2006          | 69874  | 52535.572 | 47807.259 | 4728.313 | 6.767  | 9.000  | 873.270 | 657.945 | 597.486 | 60.459  |
| 2007          | 68811  | 51492.124 | 46227.326 | 5264.798 | 7.651  | 10.224 | 850.902 | 638.264 | 571.636 | 66.628  |
| 2008          | 68506  | 51030.736 | 45116.926 | 5913.809 | 8.633  | 11.589 | 837.369 | 625.460 | 551.475 | 73.985  |
| 2009          | 67824  | 50276.199 | 43713.686 | 6562.513 | 9.676  | 13.053 | 818.967 | 608.943 | 527.837 | 81.106  |
| 2010          | 67549  | 49840.933 | 42631.525 | 7209.408 | 10.673 | 14.465 | 805.462 | 596.347 | 508.342 | 88.005  |
| 2011          | 66897  | 49072.841 | 41148.281 | 7924.559 | 11.846 | 16.149 | 789.509 | 581.354 | 485.630 | 95.724  |
| 2012          | 66586  | 48539.512 | 39848.528 | 8690.983 | 13.052 | 17.905 | 777.039 | 568.812 | 465.024 | 103.788 |
| 2013          | 65803  | 47675.741 | 38307.790 | 9367.951 | 14.236 | 19.649 | 758.849 | 552.318 | 441.772 | 110.547 |
| 2014          | 65548  | 47194.534 | 37121.017 | 10073.52 | 15.368 | 21.345 | 746.783 | 540.359 | 422.915 | 117.444 |
| 2015          | 64702  | 46305.842 | 35625.329 | 10680.51 | 16.507 | 23.065 | 828.341 | 596.439 | 456.093 | 140.346 |
| 2016          | 62201  | 44208.867 | 33183.682 | 11025.18 | 17.725 | 24.939 | 788.497 | 564.107 | 420.660 | 143.447 |
| 2017          | 60512  | 42702.624 | 31264.576 | 11438.05 | 18.902 | 26.785 | 759.697 | 539.903 | 392.512 | 147.391 |
| 2018          | 63160  | 44321.202 | 31486.136 | 12835.07 | 20.322 | 28.959 | 785.203 | 555.181 | 391.438 | 163.775 |
| 2019          | 63797  | 44493.088 | 30731.668 | 13761.42 | 21.571 | 30.929 | 785.011 | 551.912 | 378.149 | 173.762 |
| 2020          | 64281  | 44529.551 | 29905.614 | 14623.94 | 22.750 | 32.841 | 901.752 | 630.757 | 419.523 | 211.234 |
| 2021          | 57900  | 39852.556 | 25927.563 | 13924.99 | 24.050 | 34.941 | 806.047 | 560.546 | 360.949 | 199.597 |
| 2022          | 58283  | 39853.685 | 25064.576 | 14789.11 | 25.375 | 37.109 | 804.705 | 556.274 | 346.063 | 210.211 |
| 2023          | 58639  | 39847.050 | 24212.251 | 15634.80 | 26.663 | 39.237 | 802.576 | 551.670 | 331.387 | 220.283 |
| 2024          | 58902  | 39726.010 | 23342.914 | 16383.10 | 27.814 | 41.240 | 799.010 | 545.435 | 316.650 | 228.785 |
| 2025          | 58538  | 39207.348 | 22327.571 | 16879.78 | 28.836 | 43.053 | 922.234 | 626.579 | 351.759 | 274.819 |
| 2026          | 52390  | 34803.960 | 19115.631 | 15688.33 | 29.945 | 45.076 | 821.416 | 553.929 | 299.713 | 254.216 |
| 2027          | 52181  | 34484.595 | 18218.552 | 16266.04 | 31.173 | 47.169 | 813.873 | 546.357 | 284.159 | 262.197 |
| 2028          | 51925  | 34100.638 | 17293.857 | 16806.78 | 32.367 | 49.286 | 805.252 | 537.544 | 268.191 | 269.352 |
| 2029          | 51642  | 33669.838 | 16404.842 | 17265.00 | 33.432 | 51.277 | 795.756 | 527.732 | 252.784 | 274.948 |
| 2030          | 50249  | 32557.688 | 15367.469 | 17190.22 | 34.210 | 52.799 | 922.612 | 609.705 | 282.158 | 327.548 |
| 2031          | 44640  | 28646.393 | 13017.570 | 15628.82 | 35.011 | 54.558 | 816.848 | 535.065 | 238.202 | 296.863 |
| 2032          | 44254  | 28227.160 | 12307.227 | 15919.93 | 35.974 | 56.399 | 806.404 | 525.435 | 224.264 | 301.171 |
| 2033          | 43852  | 27786.623 | 11649.857 | 16136.77 | 36.798 | 58.074 | 795.151 | 515.079 | 211.240 | 303.839 |
| 2034          | 43417  | 27348.299 | 11028.913 | 16319.39 | 37.587 | 59.672 | 782.882 | 504.514 | 198.870 | 305.645 |
| 2035          | 40913  | 25570.077 | 10083.707 | 15486.37 | 37.852 | 60.564 | 909.732 | 583.430 | 224.219 | 359.212 |
| 2036          | 35047  | 21717.319 | 8106.466  | 13610.85 | 38.836 | 62.673 | 778.441 | 495.402 | 180.057 | 315.345 |
| 2037          | 34488  | 21256.024 | 7602.310  | 13653.71 | 39.590 | 64.235 | 764.581 | 484.347 | 168.540 | 315.807 |
| 2038          | 33933  | 20747.175 | 7113.643  | 13633.53 | 40.177 | 65.713 | 750.137 | 471.764 | 157.255 | 314.509 |
| 2039          | 33391  | 20327.688 | 6709.166  | 13618.52 | 40.785 | 66.995 | 735.180 | 460.724 | 147.719 | 313.005 |

## Results for PHIM for Run 5 (Sensitivity\_Analysis\_1.RTF)

\*\*\*\*\*

### Main Results for E-Component for Run: 5, Simulation: 1, COD: IHD, Adjusted

| Variable Parameter          | Value                                  |
|-----------------------------|----------------------------------------|
| 1. Country                  | US (United States)                     |
| 2. Sex                      | M (Males)                              |
| 3. Year of start of process | 1990                                   |
| 4. Cause of Death           | IHD                                    |
| 5. Effective Dose NULL      | CC:1                                   |
| 6. Effective Dose Ecig      | CC:1 Ecig:0.1 Dual:0.55                |
| Note:                       | Death rates are per million population |

#### Results for Age Groups Combined and Years combined, Population and Number deaths adjusted for Ecig scenario,

| Age Group:All |         | NULL        | Ecig       | %Drop    |        |        | NULL    | Ecig    | Drop    |         |
|---------------|---------|-------------|------------|----------|--------|--------|---------|---------|---------|---------|
| Year          | Number  | Attrib      | Attrib     | Drop     | %Drop  | Attrib | Death   | Attrib  | Drop    |         |
|               | Deaths  | Deaths      | Deaths     | Deaths   | Deaths | Deaths | Rate    | Rates   | Rates   |         |
| All Comb      | 6418622 | 1098877.421 | 555151.097 | 543726.3 | 8.471  | 49.480 | 1843.70 | 318.101 | 159.463 | 158.638 |

#### Results for Age Groups Combined, Population and Number deaths adjusted for Ecig scenario,

| Age Group:All |        | NULL      | Ecig      | %Drop    |        |        | NULL    | Ecig    | Drop    |         |
|---------------|--------|-----------|-----------|----------|--------|--------|---------|---------|---------|---------|
| Year          | Number | Attrib    | Attrib    | Drop     | %Drop  | Attrib | Death   | Attrib  | Drop    |         |
|               | Deaths | Deaths    | Deaths    | Deaths   | Deaths | Deaths | Rate    | Rates   | Rates   |         |
| 1990          | 171484 | 38511.725 | 38511.725 | 0.000    | 0.000  | 0.000  | 2718.40 | 610.497 | 0.000   |         |
| 1991          | 168044 | 37309.838 | 37012.736 | 297.102  | 0.177  | 0.796  | 2620.21 | 581.750 | 577.118 | 4.633   |
| 1992          | 164549 | 36137.488 | 35340.033 | 797.455  | 0.485  | 2.207  | 2522.12 | 553.899 | 541.673 | 12.226  |
| 1993          | 164367 | 35599.588 | 34126.027 | 1473.561 | 0.897  | 4.139  | 2474.37 | 535.926 | 513.731 | 22.195  |
| 1994          | 159877 | 34336.757 | 32092.515 | 2244.242 | 1.404  | 6.536  | 2361.79 | 507.267 | 474.086 | 33.180  |
| 1995          | 158104 | 33455.759 | 30324.459 | 3131.300 | 1.981  | 9.360  | 2290.73 | 484.782 | 439.364 | 45.417  |
| 1996          | 154909 | 32193.824 | 28123.938 | 4069.886 | 2.627  | 12.642 | 2209.38 | 459.239 | 401.117 | 58.123  |
| 1997          | 150020 | 30665.509 | 25688.537 | 4976.972 | 3.318  | 16.230 | 2104.60 | 430.308 | 360.380 | 69.929  |
| 1998          | 145476 | 29188.430 | 23364.458 | 5823.973 | 4.003  | 19.953 | 2007.08 | 402.844 | 322.350 | 80.494  |
| 1999          | 166061 | 33375.386 | 25282.245 | 8093.141 | 4.874  | 24.249 | 2254.66 | 453.366 | 343.266 | 110.100 |
| 2000          | 160401 | 32024.754 | 22975.509 | 9049.245 | 5.642  | 28.257 | 2145.62 | 428.655 | 307.334 | 121.322 |
| 2001          | 154620 | 30682.393 | 20637.837 | 10044.56 | 6.496  | 32.737 | 2040.97 | 405.339 | 272.418 | 132.921 |
| 2002          | 152105 | 30218.370 | 19007.952 | 11210.42 | 7.370  | 37.098 | 1984.87 | 394.736 | 248.041 | 146.694 |
| 2003          | 146993 | 29175.202 | 17108.013 | 12067.19 | 8.209  | 41.361 | 1897.77 | 377.146 | 220.876 | 156.270 |
| 2004          | 138677 | 27488.687 | 14976.462 | 12512.23 | 9.023  | 45.518 | 1770.68 | 351.518 | 191.225 | 160.293 |
| 2005          | 136226 | 27017.439 | 13701.731 | 13315.71 | 9.775  | 49.286 | 1718.73 | 341.482 | 172.872 | 168.610 |
| 2006          | 132314 | 26231.435 | 12233.138 | 13998.30 | 10.580 | 53.365 | 1653.63 | 328.517 | 152.887 | 175.630 |
| 2007          | 126937 | 25103.049 | 10815.967 | 14287.08 | 11.255 | 56.914 | 1569.68 | 311.161 | 133.748 | 177.414 |
| 2008          | 126355 | 24621.740 | 9885.922  | 14735.82 | 11.662 | 59.849 | 1544.47 | 301.777 | 120.838 | 180.939 |
| 2009          | 122977 | 23741.177 | 8858.758  | 14882.42 | 12.102 | 62.686 | 1484.93 | 287.552 | 106.968 | 180.584 |
| 2010          | 121143 | 23189.160 | 8070.045  | 15119.12 | 12.480 | 65.199 | 1444.52 | 277.458 | 96.228  | 181.230 |
| 2011          | 120895 | 22786.927 | 7338.040  | 15448.89 | 12.779 | 67.797 | 1426.80 | 269.951 | 86.603  | 183.348 |
| 2012          | 121681 | 22485.295 | 6741.605  | 15743.69 | 12.938 | 70.018 | 1419.99 | 263.495 | 78.673  | 184.822 |
| 2013          | 123493 | 22251.884 | 6239.836  | 16012.05 | 12.966 | 71.958 | 1424.15 | 257.786 | 71.959  | 185.827 |
| 2014          | 124163 | 21894.593 | 5753.683  | 16140.91 | 13.000 | 73.721 | 1414.58 | 250.685 | 65.551  | 185.134 |
| 2015          | 124805 | 21471.109 | 5325.280  | 16145.83 | 12.937 | 75.198 | 1597.82 | 276.557 | 68.177  | 208.380 |
| 2016          | 127363 | 21411.568 | 4967.329  | 16444.24 | 12.911 | 76.801 | 1614.55 | 273.213 | 62.969  | 210.243 |
| 2017          | 129530 | 21169.399 | 4626.226  | 16543.17 | 12.772 | 78.147 | 1626.19 | 267.651 | 58.080  | 209.571 |
| 2018          | 122710 | 19830.576 | 4065.395  | 15765.18 | 12.848 | 79.499 | 1525.53 | 248.400 | 50.541  | 197.862 |
| 2019          | 123216 | 19431.014 | 3791.779  | 15639.24 | 12.693 | 80.486 | 1516.16 | 241.031 | 46.657  | 194.373 |
| 2020          | 122301 | 18532.612 | 3458.026  | 15074.59 | 12.326 | 81.341 | 1715.66 | 262.513 | 48.510  | 214.003 |
| 2021          | 120970 | 18234.128 | 3213.209  | 15020.92 | 12.417 | 82.378 | 1684.08 | 256.472 | 44.733  | 211.740 |
| 2022          | 121103 | 17812.559 | 2990.413  | 14822.15 | 12.239 | 83.212 | 1672.05 | 248.626 | 41.288  | 207.338 |
| 2023          | 121215 | 17361.668 | 2785.251  | 14576.42 | 12.025 | 83.957 | 1659.04 | 240.367 | 38.121  | 202.246 |
| 2024          | 121181 | 16929.676 | 2618.685  | 14310.99 | 11.810 | 84.532 | 1643.84 | 232.443 | 35.523  | 196.920 |
| 2025          | 117655 | 15501.666 | 2326.813  | 13174.85 | 11.198 | 84.990 | 1853.60 | 247.735 | 36.658  | 211.077 |
| 2026          | 117120 | 15523.814 | 2250.026  | 13273.79 | 11.334 | 85.506 | 1836.31 | 247.072 | 35.278  | 211.794 |
| 2027          | 116123 | 15073.070 | 2126.152  | 12946.92 | 11.149 | 85.894 | 1811.20 | 238.810 | 33.162  | 205.648 |
| 2028          | 115076 | 14636.710 | 2000.279  | 12636.43 | 10.981 | 86.334 | 1784.59 | 230.725 | 31.020  | 199.705 |
| 2029          | 114027 | 14180.166 | 1892.326  | 12287.84 | 10.776 | 86.655 | 1757.06 | 222.256 | 29.159  | 193.097 |
| 2030          | 107203 | 12111.772 | 1587.456  | 10524.32 | 9.817  | 86.893 | 1968.32 | 226.816 | 29.147  | 197.669 |
| 2031          | 107728 | 12417.367 | 1603.446  | 10813.92 | 10.038 | 87.087 | 1971.26 | 231.935 | 29.341  | 202.594 |
| 2032          | 106390 | 12054.064 | 1524.574  | 10529.49 | 9.897  | 87.352 | 1938.65 | 224.381 | 27.781  | 196.600 |
| 2033          | 105066 | 11672.389 | 1441.750  | 10230.64 | 9.737  | 87.648 | 1905.10 | 216.370 | 26.142  | 190.228 |
| 2034          | 103717 | 11365.762 | 1386.592  | 9979.169 | 9.622  | 87.800 | 1870.19 | 209.673 | 25.003  | 184.670 |
| 2035          | 93404  | 8580.360  | 1026.089  | 7554.271 | 8.088  | 88.041 | 2076.89 | 195.777 | 22.816  | 172.962 |
| 2036          | 94789  | 8948.841  | 1053.320  | 7895.521 | 8.330  | 88.230 | 2105.40 | 204.135 | 23.396  | 180.740 |
| 2037          | 93034  | 8624.570  | 1010.677  | 7613.893 | 8.184  | 88.281 | 2062.53 | 196.522 | 22.406  | 174.116 |
| 2038          | 91331  | 8315.017  | 957.185   | 7357.832 | 8.056  | 88.488 | 2018.96 | 189.073 | 21.160  | 167.913 |
| 2039          | 89693  | 8001.132  | 911.648   | 7089.484 | 7.904  | 88.606 | 1974.82 | 181.344 | 20.072  | 161.272 |

## Results for PHIM for Run 5 (Sensitivity\_Analysis\_1.RTF)

\*\*\*\*\*

### Main Results for E-Component for Run: 5, Simulation: 1, COD: STROKE, Adjusted

| Variable Parameter          | Value                                  |
|-----------------------------|----------------------------------------|
| 1. Country                  | US (United States)                     |
| 2. Sex                      | M (Males)                              |
| 3. Year of start of process | 1990                                   |
| 4. Cause of Death           | STROKE                                 |
| 5. Effective Dose NULL      | CC:1                                   |
| 6. Effective Dose Ecig      | CC:1 Ecig:0.1 Dual:0.55                |
| Note:                       | Death rates are per million population |

#### Results for Age Groups Combined and Years combined, Population and Number deaths adjusted for Ecig scenario,

| Age Group:All | NULL    | Ecig       | %Drop     |          |        |        | NULL    | Ecig   | Drop   |        |
|---------------|---------|------------|-----------|----------|--------|--------|---------|--------|--------|--------|
| Year          | Number  | Attrib     | Attrib    | Drop     | %Drop  | Attrib | Death   | Attrib | Attrib | Drop   |
|               | Deaths  | Deaths     | Deaths    | Deaths   | Deaths | Deaths | Rate    | Rates  | Rates  | Rates  |
| All Comb      | 1505606 | 149918.462 | 74652.525 | 75265.94 | 4.999  | 50.205 | 432.474 | 43.398 | 21.443 | 21.955 |

#### Results for Age Groups Combined, Population and Number deaths adjusted for Ecig scenario,

| Age Group:All | NULL   | Ecig     | %Drop    |          |        |        | NULL    | Ecig   | Drop   |        |
|---------------|--------|----------|----------|----------|--------|--------|---------|--------|--------|--------|
| Year          | Number | Attrib   | Attrib   | Drop     | %Drop  | Attrib | Death   | Attrib | Attrib | Drop   |
|               | Deaths | Deaths   | Deaths   | Deaths   | Deaths | Deaths | Rate    | Rates  | Rates  | Rates  |
| 1990          | 32862  | 4613.166 | 4613.166 | 0.000    | 0.000  | 0.000  | 520.936 | 73.129 | 73.129 | 0.000  |
| 1991          | 32619  | 4555.566 | 4517.565 | 38.001   | 0.116  | 0.834  | 508.609 | 71.032 | 70.440 | 0.593  |
| 1992          | 32100  | 4453.572 | 4354.179 | 99.393   | 0.310  | 2.232  | 492.015 | 68.262 | 66.738 | 1.524  |
| 1993          | 32897  | 4462.473 | 4274.899 | 187.575  | 0.570  | 4.203  | 495.229 | 67.179 | 64.354 | 2.825  |
| 1994          | 33325  | 4499.513 | 4203.893 | 295.620  | 0.887  | 6.570  | 492.297 | 66.473 | 62.102 | 4.371  |
| 1995          | 33573  | 4472.774 | 4054.067 | 418.707  | 1.247  | 9.361  | 486.435 | 64.812 | 58.738 | 6.073  |
| 1996          | 33877  | 4406.878 | 3852.225 | 554.653  | 1.637  | 12.586 | 483.171 | 62.863 | 54.942 | 7.921  |
| 1997          | 33527  | 4288.158 | 3595.671 | 692.487  | 2.065  | 16.149 | 470.339 | 60.173 | 50.443 | 9.730  |
| 1998          | 32810  | 4120.148 | 3302.009 | 818.139  | 2.494  | 19.857 | 452.666 | 56.864 | 45.557 | 11.308 |
| 1999          | 33396  | 3982.443 | 3039.113 | 943.329  | 2.825  | 23.687 | 453.427 | 54.097 | 41.263 | 12.834 |
| 2000          | 33487  | 4021.411 | 2913.943 | 1107.469 | 3.307  | 27.539 | 447.945 | 53.827 | 38.979 | 14.849 |
| 2001          | 32310  | 3848.092 | 2630.253 | 1217.839 | 3.769  | 31.648 | 426.494 | 50.836 | 34.719 | 16.117 |
| 2002          | 31630  | 3783.081 | 2436.512 | 1346.569 | 4.257  | 35.595 | 412.747 | 49.418 | 31.795 | 17.623 |
| 2003          | 31038  | 3754.415 | 2265.605 | 1488.810 | 4.797  | 39.655 | 400.717 | 48.533 | 29.250 | 19.283 |
| 2004          | 29946  | 3666.274 | 2069.798 | 1596.476 | 5.331  | 43.545 | 382.360 | 46.883 | 26.428 | 20.455 |
| 2005          | 28779  | 3589.688 | 1890.781 | 1698.907 | 5.903  | 47.327 | 363.096 | 45.371 | 23.856 | 21.516 |
| 2006          | 28270  | 3596.985 | 1757.469 | 1839.516 | 6.507  | 51.141 | 353.309 | 45.048 | 21.964 | 23.083 |
| 2007          | 28120  | 3560.798 | 1617.015 | 1943.783 | 6.912  | 54.588 | 347.728 | 44.137 | 19.996 | 24.142 |
| 2008          | 27233  | 3417.001 | 1443.645 | 1973.357 | 7.246  | 57.751 | 332.870 | 41.881 | 17.646 | 24.235 |
| 2009          | 27187  | 3394.390 | 1334.924 | 2059.466 | 7.575  | 60.673 | 328.276 | 41.113 | 16.119 | 24.994 |
| 2010          | 27044  | 3340.137 | 1228.122 | 2112.015 | 7.810  | 63.231 | 322.476 | 39.965 | 14.644 | 25.320 |
| 2011          | 27108  | 3285.435 | 1126.977 | 2158.458 | 7.962  | 65.698 | 319.933 | 38.922 | 13.301 | 25.621 |
| 2012          | 27224  | 3259.209 | 1037.682 | 2221.527 | 8.160  | 68.162 | 317.694 | 38.193 | 12.110 | 26.084 |
| 2013          | 28095  | 3274.703 | 972.394  | 2302.308 | 8.195  | 70.306 | 323.992 | 37.937 | 11.214 | 26.723 |
| 2014          | 29008  | 3298.083 | 912.623  | 2385.460 | 8.223  | 72.329 | 330.487 | 37.762 | 10.397 | 27.364 |
| 2015          | 29805  | 3244.406 | 845.086  | 2399.320 | 8.050  | 73.953 | 381.584 | 41.789 | 10.819 | 30.970 |
| 2016          | 30788  | 3314.836 | 809.286  | 2505.550 | 8.138  | 75.586 | 390.297 | 42.297 | 10.259 | 32.038 |
| 2017          | 31724  | 3333.314 | 763.804  | 2569.510 | 8.100  | 77.086 | 398.283 | 42.144 | 9.589  | 32.555 |
| 2018          | 29663  | 2925.242 | 634.578  | 2290.664 | 7.722  | 78.307 | 368.774 | 36.642 | 7.889  | 28.753 |
| 2019          | 29941  | 2864.628 | 589.409  | 2275.219 | 7.599  | 79.425 | 368.416 | 35.534 | 7.253  | 28.281 |
| 2020          | 29964  | 2730.366 | 535.114  | 2195.252 | 7.326  | 80.401 | 420.342 | 38.675 | 7.507  | 31.169 |
| 2021          | 30503  | 2647.911 | 493.002  | 2154.908 | 7.064  | 81.381 | 424.653 | 37.244 | 6.863  | 30.381 |
| 2022          | 30740  | 2586.165 | 456.864  | 2129.301 | 6.927  | 82.334 | 424.424 | 36.097 | 6.308  | 29.790 |
| 2023          | 30973  | 2517.960 | 424.318  | 2093.642 | 6.760  | 83.148 | 423.922 | 34.860 | 5.808  | 29.053 |
| 2024          | 31160  | 2454.161 | 397.195  | 2056.965 | 6.601  | 83.815 | 422.695 | 33.695 | 5.388  | 28.307 |
| 2025          | 30784  | 2275.364 | 354.831  | 1920.533 | 6.239  | 84.406 | 484.979 | 36.363 | 5.590  | 30.773 |
| 2026          | 31255  | 2183.166 | 328.631  | 1854.535 | 5.933  | 84.947 | 490.052 | 34.747 | 5.153  | 29.594 |
| 2027          | 31160  | 2112.345 | 308.258  | 1804.086 | 5.790  | 85.407 | 486.010 | 33.467 | 4.808  | 28.659 |
| 2028          | 31039  | 2046.677 | 289.354  | 1757.323 | 5.662  | 85.862 | 481.355 | 32.263 | 4.487  | 27.775 |
| 2029          | 30911  | 1977.671 | 272.043  | 1705.628 | 5.518  | 86.244 | 476.313 | 30.997 | 4.192  | 26.806 |
| 2030          | 30010  | 1744.457 | 234.419  | 1510.038 | 5.032  | 86.562 | 551.013 | 32.668 | 4.304  | 28.364 |
| 2031          | 29681  | 1653.738 | 217.493  | 1436.244 | 4.839  | 86.848 | 543.114 | 30.889 | 3.980  | 26.909 |
| 2032          | 29455  | 1603.120 | 204.748  | 1398.372 | 4.747  | 87.228 | 536.732 | 29.841 | 3.731  | 26.110 |
| 2033          | 29220  | 1548.245 | 193.461  | 1354.784 | 4.637  | 87.505 | 529.823 | 28.700 | 3.508  | 25.192 |
| 2034          | 28959  | 1511.985 | 185.270  | 1326.715 | 4.581  | 87.747 | 522.178 | 27.893 | 3.341  | 24.552 |
| 2035          | 27525  | 1239.866 | 149.668  | 1090.198 | 3.961  | 87.929 | 612.039 | 28.290 | 3.328  | 24.962 |
| 2036          | 26373  | 1182.522 | 140.047  | 1042.475 | 3.953  | 88.157 | 585.778 | 26.975 | 3.111  | 23.864 |
| 2037          | 25938  | 1134.483 | 134.191  | 1000.292 | 3.856  | 88.172 | 575.045 | 25.851 | 2.975  | 22.876 |
| 2038          | 25501  | 1093.537 | 126.882  | 966.655  | 3.791  | 88.397 | 563.736 | 24.866 | 2.805  | 22.061 |
| 2039          | 25067  | 1047.905 | 120.043  | 927.862  | 3.702  | 88.544 | 551.910 | 23.751 | 2.643  | 21.108 |

## Results for PHIM for Run 5 (Sensitivity\_Analysis\_1.RTF)

\*\*\*\*\*

### Main Results for E-Component for Run: 5, Simulation: 1, COD: COPD, Adjusted

| Variable Parameter          | Value                                  |
|-----------------------------|----------------------------------------|
| 1. Country                  | US (United States)                     |
| 2. Sex                      | M (Males)                              |
| 3. Year of start of process | 1990                                   |
| 4. Cause of Death           | COPD                                   |
| 5. Effective Dose NULL      | CC:1                                   |
| 6. Effective Dose Ecig      | CC:1 Ecig:0.1 Dual:0.55                |
| Note:                       | Death rates are per million population |

#### Results for Age Groups Combined and Years combined, Population and Number deaths adjusted for Ecig scenario,

| Age Group:All | NULL    | Ecig        | %Drop      |          |        |        | NULL    | Ecig    | Drop    |        |
|---------------|---------|-------------|------------|----------|--------|--------|---------|---------|---------|--------|
| Year          | Number  | Attrib      | Attrib     | Drop     | %Drop  | Attrib | Death   | Attrib  | Attrib  | Drop   |
|               | Deaths  | Deaths      | Deaths     | Deaths   | Deaths | Deaths | Rate    | Rates   | Rates   | Rates  |
| All Comb      | 2263604 | 1015606.587 | 706429.182 | 309177.4 | 13.659 | 30.443 | 650.204 | 293.996 | 202.917 | 91.080 |

#### Results for Age Groups Combined, Population and Number deaths adjusted for Ecig scenario,

| Age Group:All | NULL   | Ecig      | %Drop     |          |        |        | NULL    | Ecig    | Drop    |         |
|---------------|--------|-----------|-----------|----------|--------|--------|---------|---------|---------|---------|
| Year          | Number | Attrib    | Attrib    | Drop     | %Drop  | Attrib | Death   | Attrib  | Attrib  | Drop    |
|               | Deaths | Deaths    | Deaths    | Deaths   | Deaths | Deaths | Rate    | Rates   | Rates   | Rates   |
| 1990          | 33993  | 19262.437 | 19262.437 | 0.000    | 0.000  | 0.000  | 538.865 | 305.353 | 305.353 | 0.000   |
| 1991          | 34092  | 19215.636 | 19194.523 | 21.113   | 0.062  | 0.110  | 531.576 | 299.618 | 299.289 | 0.329   |
| 1992          | 33942  | 19056.189 | 19001.392 | 54.798   | 0.161  | 0.288  | 520.249 | 292.085 | 291.243 | 0.842   |
| 1993          | 35914  | 20095.670 | 19983.809 | 111.861  | 0.311  | 0.557  | 540.648 | 302.526 | 300.835 | 1.691   |
| 1994          | 35076  | 19524.095 | 19353.502 | 170.592  | 0.486  | 0.874  | 518.166 | 288.435 | 285.899 | 2.536   |
| 1995          | 34673  | 19116.002 | 18871.777 | 244.225  | 0.704  | 1.278  | 502.376 | 276.995 | 273.429 | 3.566   |
| 1996          | 34589  | 18975.021 | 18641.691 | 333.330  | 0.964  | 1.757  | 493.329 | 270.675 | 265.876 | 4.799   |
| 1997          | 35278  | 19169.025 | 18726.907 | 442.117  | 1.253  | 2.306  | 494.914 | 268.986 | 262.716 | 6.270   |
| 1998          | 35692  | 19228.937 | 18659.313 | 569.625  | 1.596  | 2.962  | 492.423 | 265.388 | 257.435 | 7.953   |
| 1999          | 38541  | 20589.820 | 19842.544 | 747.276  | 1.939  | 3.629  | 523.281 | 279.689 | 269.410 | 10.279  |
| 2000          | 36314  | 19196.417 | 18352.858 | 843.560  | 2.323  | 4.394  | 485.762 | 256.946 | 245.498 | 11.448  |
| 2001          | 36322  | 19012.731 | 17991.456 | 1021.275 | 2.812  | 5.372  | 479.443 | 251.174 | 237.486 | 13.687  |
| 2002          | 36034  | 18699.357 | 17505.800 | 1193.558 | 3.312  | 6.383  | 470.218 | 244.265 | 228.439 | 15.826  |
| 2003          | 36269  | 18663.550 | 17271.899 | 1391.651 | 3.837  | 7.457  | 468.252 | 241.262 | 222.991 | 18.271  |
| 2004          | 34685  | 17679.164 | 16136.570 | 1542.594 | 4.447  | 8.725  | 442.868 | 226.076 | 206.038 | 20.038  |
| 2005          | 36920  | 18692.832 | 16830.390 | 1862.442 | 5.045  | 9.963  | 465.807 | 236.265 | 212.345 | 23.919  |
| 2006          | 34453  | 17308.564 | 15331.554 | 1977.010 | 5.738  | 11.422 | 430.583 | 216.769 | 191.611 | 25.158  |
| 2007          | 35449  | 17683.181 | 15396.691 | 2286.490 | 6.450  | 12.930 | 438.354 | 219.189 | 190.392 | 28.798  |
| 2008          | 38401  | 19006.374 | 16280.231 | 2726.143 | 7.099  | 14.343 | 469.387 | 232.952 | 198.997 | 33.955  |
| 2009          | 37071  | 18205.573 | 15274.957 | 2930.616 | 7.905  | 16.097 | 447.626 | 220.505 | 184.443 | 36.062  |
| 2010          | 37427  | 18237.758 | 15026.745 | 3211.013 | 8.580  | 17.606 | 446.277 | 218.215 | 179.180 | 39.035  |
| 2011          | 38314  | 18487.916 | 14864.488 | 3623.428 | 9.457  | 19.599 | 452.175 | 219.022 | 175.430 | 43.592  |
| 2012          | 38752  | 18491.158 | 14521.374 | 3969.785 | 10.244 | 21.469 | 452.231 | 216.689 | 169.461 | 47.228  |
| 2013          | 40578  | 19143.452 | 14694.558 | 4448.895 | 10.964 | 23.240 | 467.956 | 221.775 | 169.460 | 52.315  |
| 2014          | 40657  | 18992.005 | 14209.785 | 4782.220 | 11.762 | 25.180 | 463.204 | 217.451 | 161.890 | 55.561  |
| 2015          | 42671  | 19728.885 | 14459.683 | 5269.202 | 12.349 | 26.708 | 546.292 | 254.116 | 185.120 | 68.996  |
| 2016          | 43513  | 19876.724 | 14196.966 | 5679.758 | 13.053 | 28.575 | 551.597 | 253.628 | 179.971 | 73.657  |
| 2017          | 44562  | 20119.790 | 13982.028 | 6137.762 | 13.773 | 30.506 | 559.458 | 254.381 | 175.538 | 78.843  |
| 2018          | 45976  | 20535.123 | 13879.627 | 6655.496 | 14.476 | 32.410 | 571.582 | 257.229 | 172.552 | 84.677  |
| 2019          | 47528  | 21009.029 | 13809.526 | 7199.504 | 15.148 | 34.269 | 584.831 | 260.605 | 169.925 | 90.681  |
| 2020          | 49048  | 21428.512 | 13704.029 | 7724.482 | 15.749 | 36.048 | 688.057 | 303.533 | 192.243 | 111.290 |
| 2021          | 49139  | 21266.697 | 13143.153 | 8123.544 | 16.532 | 38.198 | 684.079 | 299.127 | 182.972 | 116.155 |
| 2022          | 50658  | 21663.568 | 12947.133 | 8716.435 | 17.207 | 40.235 | 699.423 | 302.378 | 178.759 | 123.619 |
| 2023          | 52205  | 22084.131 | 12759.910 | 9324.221 | 17.861 | 42.221 | 714.513 | 305.748 | 174.642 | 131.106 |
| 2024          | 53700  | 22418.456 | 12549.525 | 9868.931 | 18.378 | 44.021 | 728.452 | 307.804 | 170.236 | 137.568 |
| 2025          | 54814  | 22614.834 | 12270.710 | 10344.12 | 18.871 | 45.740 | 863.566 | 361.411 | 193.319 | 168.092 |
| 2026          | 55376  | 22571.522 | 11810.178 | 10761.34 | 19.433 | 47.677 | 868.242 | 359.241 | 185.171 | 174.070 |
| 2027          | 56377  | 22774.416 | 11466.559 | 11307.86 | 20.058 | 49.652 | 879.327 | 360.827 | 178.847 | 181.980 |
| 2028          | 57338  | 22915.561 | 11076.331 | 11839.23 | 20.648 | 51.665 | 889.188 | 361.228 | 171.771 | 189.458 |
| 2029          | 58284  | 22992.027 | 10675.175 | 12316.85 | 21.132 | 53.570 | 898.105 | 360.371 | 164.495 | 195.876 |
| 2030          | 58588  | 22895.360 | 10255.147 | 12640.21 | 21.575 | 55.209 | 1075.72 | 428.760 | 188.292 | 240.468 |
| 2031          | 59015  | 22715.871 | 9809.349  | 12906.52 | 21.870 | 56.817 | 1079.88 | 424.293 | 179.496 | 244.797 |
| 2032          | 59756  | 22759.207 | 9413.236  | 13345.97 | 22.334 | 58.640 | 1088.89 | 423.652 | 171.529 | 252.122 |
| 2033          | 60474  | 22786.258 | 9049.781  | 13736.48 | 22.715 | 60.284 | 1096.55 | 422.387 | 164.095 | 258.293 |
| 2034          | 61134  | 22806.106 | 8675.823  | 14130.28 | 23.114 | 61.958 | 1102.35 | 420.721 | 156.439 | 264.282 |
| 2035          | 60254  | 22262.998 | 8215.030  | 14047.97 | 23.314 | 63.100 | 1339.80 | 507.973 | 182.667 | 325.306 |
| 2036          | 58177  | 21140.051 | 7363.737  | 13776.31 | 23.680 | 65.167 | 1292.21 | 482.234 | 163.560 | 318.674 |
| 2037          | 58365  | 21011.845 | 6950.833  | 14061.01 | 24.092 | 66.919 | 1293.93 | 478.783 | 154.097 | 324.686 |
| 2038          | 58530  | 20787.483 | 6542.926  | 14244.56 | 24.337 | 68.525 | 1293.87 | 472.681 | 144.639 | 328.042 |
| 2039          | 58685  | 20709.267 | 6195.535  | 14513.73 | 24.732 | 70.083 | 1292.09 | 469.372 | 136.410 | 332.962 |

## Results for PHIM for Run 6 (Sensitivity\_Analysis\_1.RTF)

---

### Control File Details for Run: 6

| Variable Parameter                                       | Value                  |
|----------------------------------------------------------|------------------------|
| 1. Name for Reference Scenario                           | NULL                   |
| 2. Name for Test Scenario                                | Ecig                   |
| 3. Name for Product 1                                    | CC                     |
| 4. Name for Product 2                                    | Ecig                   |
| 5. Name for Product 3                                    | -                      |
| 6. Name for Product 4                                    | Dual                   |
| 7. Country                                               | US (United States)     |
| 8. Sex                                                   | F (Females)            |
| 9. Year of start of process                              | 1990                   |
| 10. Number of months of follow-up                        | 600                    |
| 11. Follow-up interval length (in months)                | 12                     |
| 12. Lower age for risk estimation                        | 10                     |
| 13. Upper age for risk estimation                        | 79                     |
| 14. The effective dose for Product 1 (F1) - Ref          | 1                      |
| 15. The effective dose for Product 2 (F2) - Ref          | -                      |
| 16. The effective dose for Product 3 (F3) - Ref          | -                      |
| 17. The effective dose for Product 4 (F4) - Ref          | -                      |
| 18. The effective dose for Product 1 (F1) - Test         | 1                      |
| 19. The effective dose for Product 2 (F2) - Test         | 0.1                    |
| 20. The effective dose for Product 3 (F3) - Test         | -                      |
| 21. The effective dose for Product 4 (F4) - Test         | FROMF2                 |
| 22. Number in population to be simulated                 | 100000                 |
| 23. Number of MC simulations                             | 1                      |
| 24. The random number seed for the first simulation      | 15975263               |
| 25. Source for the population file (POP)                 | UN4                    |
| 26. Source for the socioeconomic prevalence file (SEP)   | -                      |
| 27. Source for the current smoking prevalence file (CSP) | ISS3                   |
| 28. Source for the former smoking prevalence file (FSP)  | ISS3                   |
| 29. Source for the quit-time distribution file (QTD)     | NHIS2006               |
| 30. Source for the death file (MORT)                     | APR-20                 |
| 31. Source for the relative risk file (RR)               | PNLEST                 |
| 32. Source for the half-life file (H)                    | PNLEST                 |
| 33. Assumption Set for TTP Factor Reference              | F1                     |
| 34. Assumption Set for TTP Factor Test                   | F1                     |
| 35. Assumption Set for TTP Reference                     | ISS3                   |
| 36. Assumption Set for TTP Test                          | ISS3                   |
| 37. Assumption Set for TP for socioeconomic group        | -                      |
| 38. Source for Output Choice file (OUTC)                 | BASIC                  |
| 39. Output for DTP P1                                    | N                      |
| 40. Output for DTP P2                                    | N                      |
| 41. Output for Main P Component                          | Y                      |
| 42. Output for DTP E1                                    | N                      |
| 43. Output for DTP E2                                    | N                      |
| 44. Output for DTP E3                                    | N                      |
| 45. Output for Main E Component                          | Y                      |
| 46. Output file name                                     | Sensitivity_Analysis_1 |
| 47. Run number for P-Component                           | -                      |
| 48. Results file for E-Component                         | -                      |
| 49. Components required                                  | PE                     |
| 50. Results folder for P to be used in E-Component       | -                      |
| 51. Fixed age of starting product use                    | 16                     |
| 52. Output absolute risk file?                           | N                      |



## Results for PHIM for Run 6 (Sensitivity\_Analysis\_1.RTF)

\*\*\*\*\*

TTP values for Run: 6, Scenario: NULL

| Variable Parameter | Value               |
|--------------------|---------------------|
| 1. Country         | US (United States)  |
| 2. Sex             | F (Females)         |
| 3. Assumption Set  | ISS3                |
| Note:              | Period is in Months |

| Age   | Period  | Initiation  | Cessation    | Re-initiation |
|-------|---------|-------------|--------------|---------------|
|       |         | Never<br>CC | CC<br>Former | Former<br>CC  |
| 10-14 | 1-12    | 0.003758    | 0.008742     | 0.000000      |
| 15-19 | 1-12    | 0.003469    | 0.002515     | 0.000000      |
| 20-24 | 1-12    | 0.000276    | 0.000761     | 0.000000      |
| 25-29 | 1-12    | 0.000137    | 0.001375     | 0.000000      |
| 30-34 | 1-12    | 0.000069    | 0.001149     | 0.000000      |
| 35-39 | 1-12    | 0.000000    | 0.000991     | 0.000000      |
| 40-44 | 1-12    | 0.000000    | 0.000833     | 0.000000      |
| 45-49 | 1-12    | 0.000000    | 0.001723     | 0.000000      |
| 50-54 | 1-12    | 0.000000    | 0.002336     | 0.000000      |
| 55-59 | 1-12    | 0.000000    | 0.002233     | 0.000000      |
| 60-64 | 1-12    | 0.000000    | 0.004634     | 0.000000      |
| 65-69 | 1-12    | 0.000000    | 0.003505     | 0.000000      |
| 70-74 | 1-12    | 0.000000    | 0.004329     | 0.000000      |
| 75-79 | 1-12    | 0.000000    | 0.004329     | 0.000000      |
| 10-14 | 13-72   | 0.004794    | 0.008742     | 0.000000      |
| 15-19 | 13-72   | 0.004527    | 0.004082     | 0.000000      |
| 20-24 | 13-72   | 0.000105    | 0.001261     | 0.000000      |
| 25-29 | 13-72   | 0.000053    | 0.000952     | 0.000000      |
| 30-34 | 13-72   | 0.000026    | 0.000733     | 0.000000      |
| 35-39 | 13-72   | 0.000000    | 0.000753     | 0.000000      |
| 40-44 | 13-72   | 0.000000    | 0.001535     | 0.000000      |
| 45-49 | 13-72   | 0.000000    | 0.002998     | 0.000000      |
| 50-54 | 13-72   | 0.000000    | 0.003159     | 0.000000      |
| 55-59 | 13-72   | 0.000000    | 0.002965     | 0.000000      |
| 60-64 | 13-72   | 0.000000    | 0.003633     | 0.000000      |
| 65-69 | 13-72   | 0.000000    | 0.004522     | 0.000000      |
| 70-74 | 13-72   | 0.000000    | 0.005208     | 0.000000      |
| 75-79 | 13-72   | 0.000000    | 0.005208     | 0.000000      |
| 10-14 | 73-132  | 0.003969    | 0.008742     | 0.000000      |
| 15-19 | 73-132  | 0.003056    | 0.003373     | 0.000000      |
| 20-24 | 73-132  | 0.001459    | 0.003881     | 0.000000      |
| 25-29 | 73-132  | 0.000714    | 0.001953     | 0.000000      |
| 30-34 | 73-132  | 0.000111    | 0.001338     | 0.000000      |
| 35-39 | 73-132  | 0.000000    | 0.001507     | 0.000000      |
| 40-44 | 73-132  | 0.000000    | 0.002080     | 0.000000      |
| 45-49 | 73-132  | 0.000000    | 0.003809     | 0.000000      |
| 50-54 | 73-132  | 0.000000    | 0.004871     | 0.000000      |
| 55-59 | 73-132  | 0.000000    | 0.004560     | 0.000000      |
| 60-64 | 73-132  | 0.000000    | 0.007192     | 0.000000      |
| 65-69 | 73-132  | 0.000000    | 0.007033     | 0.000000      |
| 70-74 | 73-132  | 0.000000    | 0.008206     | 0.000000      |
| 75-79 | 73-132  | 0.000000    | 0.008206     | 0.000000      |
| 10-14 | 133-192 | 0.002861    | 0.008742     | 0.000000      |
| 15-19 | 133-192 | 0.002594    | 0.003996     | 0.000000      |
| 20-24 | 133-192 | 0.001247    | 0.002805     | 0.000000      |
| 25-29 | 133-192 | 0.000289    | 0.001574     | 0.000000      |
| 30-34 | 133-192 | 0.000132    | 0.001293     | 0.000000      |
| 35-39 | 133-192 | 0.000000    | 0.001219     | 0.000000      |
| 40-44 | 133-192 | 0.000000    | 0.001657     | 0.000000      |
| 45-49 | 133-192 | 0.000000    | 0.001995     | 0.000000      |
| 50-54 | 133-192 | 0.000000    | 0.002154     | 0.000000      |
| 55-59 | 133-192 | 0.000000    | 0.002072     | 0.000000      |
| 60-64 | 133-192 | 0.000000    | 0.005049     | 0.000000      |
| 65-69 | 133-192 | 0.000000    | 0.003680     | 0.000000      |
| 70-74 | 133-192 | 0.000000    | 0.006144     | 0.000000      |
| 75-79 | 133-192 | 0.000000    | 0.006144     | 0.000000      |
| 10-14 | 193-252 | 0.001859    | 0.008742     | 0.000000      |
| 15-19 | 193-252 | 0.002232    | 0.005770     | 0.000000      |
| 20-24 | 193-252 | 0.001079    | 0.003262     | 0.000000      |
| 25-29 | 193-252 | 0.000531    | 0.002002     | 0.000000      |
| 30-34 | 193-252 | 0.000263    | 0.003240     | 0.000000      |
| 35-39 | 193-252 | 0.000000    | 0.001771     | 0.000000      |
| 40-44 | 193-252 | 0.000000    | 0.002173     | 0.000000      |
| 45-49 | 193-252 | 0.000000    | 0.002075     | 0.000000      |
| 50-54 | 193-252 | 0.000000    | 0.003431     | 0.000000      |

### Results for PHIM for Run 6 (Sensitivity\_Analysis\_1.RTF)

|       |         |          |          |          |
|-------|---------|----------|----------|----------|
| 55-59 | 193-252 | 0.000000 | 0.002906 | 0.000000 |
| 60-64 | 193-252 | 0.000000 | 0.007139 | 0.000000 |
| 65-69 | 193-252 | 0.000000 | 0.004963 | 0.000000 |
| 70-74 | 193-252 | 0.000000 | 0.006269 | 0.000000 |
| 75-79 | 193-252 | 0.000000 | 0.006269 | 0.000000 |
| 10-14 | 253+    | 0.000931 | 0.008742 | 0.000000 |
| 15-19 | 253+    | 0.001798 | 0.009440 | 0.000000 |
| 20-24 | 253+    | 0.000023 | 0.002831 | 0.000000 |
| 25-29 | 253+    | 0.000073 | 0.002655 | 0.000000 |
| 30-34 | 253+    | 0.000037 | 0.004614 | 0.000000 |
| 35-39 | 253+    | 0.000000 | 0.002607 | 0.000000 |
| 40-44 | 253+    | 0.000000 | 0.003115 | 0.000000 |
| 45-49 | 253+    | 0.000000 | 0.002132 | 0.000000 |
| 50-54 | 253+    | 0.000000 | 0.003497 | 0.000000 |
| 55-59 | 253+    | 0.000000 | 0.002942 | 0.000000 |
| 60-64 | 253+    | 0.000000 | 0.005376 | 0.000000 |
| 65-69 | 253+    | 0.000000 | 0.001789 | 0.000000 |
| 70-74 | 253+    | 0.000000 | 0.004077 | 0.000000 |
| 75-79 | 253+    | 0.000000 | 0.004077 | 0.000000 |

## Results for PHIM for Run 6 (Sensitivity\_Analysis\_1.RTF)

\*\*\*\*\*

TTP values for Run: 6, Scenario: Ecig

| Variable Parameter | Value               |
|--------------------|---------------------|
| 1. Country         | US (United States)  |
| 2. Sex             | F (Females)         |
| 3. Assumption Set  | ISS3                |
| Note:              | Period is in Months |

| Age   | Period  | Initiation |            |            | Cessation |             |             | Re-initiation |             |             |
|-------|---------|------------|------------|------------|-----------|-------------|-------------|---------------|-------------|-------------|
|       |         | Never CC   | Never Ecig | Never Dual | CC Former | Ecig Former | Dual Former | Former CC     | Former Ecig | Former Dual |
| 10-14 | 1-12    | 0.001879   | 0.001879   | 0.000000   | 0.008742  | 0.008742    | 0.000000    | 0.000000      | 0.000000    | 0.000000    |
| 15-19 | 1-12    | 0.001735   | 0.001735   | 0.000000   | 0.002515  | 0.002515    | 0.000000    | 0.000000      | 0.000000    | 0.000000    |
| 20-24 | 1-12    | 0.000138   | 0.000138   | 0.000000   | 0.000761  | 0.000761    | 0.000000    | 0.000000      | 0.000000    | 0.000000    |
| 25-29 | 1-12    | 0.000069   | 0.000069   | 0.000000   | 0.001376  | 0.001376    | 0.000000    | 0.000000      | 0.000000    | 0.000000    |
| 30-34 | 1-12    | 0.000034   | 0.000034   | 0.000000   | 0.001149  | 0.001149    | 0.000000    | 0.000000      | 0.000000    | 0.000000    |
| 35-39 | 1-12    | 0.000000   | 0.000000   | 0.000000   | 0.000991  | 0.000991    | 0.000000    | 0.000000      | 0.000000    | 0.000000    |
| 40-44 | 1-12    | 0.000000   | 0.000000   | 0.000000   | 0.000833  | 0.000833    | 0.000000    | 0.000000      | 0.000000    | 0.000000    |
| 45-49 | 1-12    | 0.000000   | 0.000000   | 0.000000   | 0.001723  | 0.001723    | 0.000000    | 0.000000      | 0.000000    | 0.000000    |
| 50-54 | 1-12    | 0.000000   | 0.000000   | 0.000000   | 0.002336  | 0.002336    | 0.000000    | 0.000000      | 0.000000    | 0.000000    |
| 55-59 | 1-12    | 0.000000   | 0.000000   | 0.000000   | 0.002233  | 0.002233    | 0.000000    | 0.000000      | 0.000000    | 0.000000    |
| 60-64 | 1-12    | 0.000000   | 0.000000   | 0.000000   | 0.004635  | 0.004635    | 0.000000    | 0.000000      | 0.000000    | 0.000000    |
| 65-69 | 1-12    | 0.000000   | 0.000000   | 0.000000   | 0.003505  | 0.003505    | 0.000000    | 0.000000      | 0.000000    | 0.000000    |
| 70-74 | 1-12    | 0.000000   | 0.000000   | 0.000000   | 0.004329  | 0.004329    | 0.000000    | 0.000000      | 0.000000    | 0.000000    |
| 75-79 | 1-12    | 0.000000   | 0.000000   | 0.000000   | 0.004329  | 0.004329    | 0.000000    | 0.000000      | 0.000000    | 0.000000    |
| 10-14 | 13-72   | 0.001918   | 0.002877   | 0.000000   | 0.008742  | 0.008742    | 0.000000    | 0.000000      | 0.000000    | 0.000000    |
| 15-19 | 13-72   | 0.001811   | 0.002716   | 0.000000   | 0.004083  | 0.004083    | 0.000000    | 0.000000      | 0.000000    | 0.000000    |
| 20-24 | 13-72   | 0.000042   | 0.000063   | 0.000000   | 0.001261  | 0.001261    | 0.000000    | 0.000000      | 0.000000    | 0.000000    |
| 25-29 | 13-72   | 0.000021   | 0.000032   | 0.000000   | 0.000952  | 0.000952    | 0.000000    | 0.000000      | 0.000000    | 0.000000    |
| 30-34 | 13-72   | 0.000011   | 0.000016   | 0.000000   | 0.000733  | 0.000733    | 0.000000    | 0.000000      | 0.000000    | 0.000000    |
| 35-39 | 13-72   | 0.000000   | 0.000000   | 0.000000   | 0.000754  | 0.000754    | 0.000000    | 0.000000      | 0.000000    | 0.000000    |
| 40-44 | 13-72   | 0.000000   | 0.000000   | 0.000000   | 0.001535  | 0.001535    | 0.000000    | 0.000000      | 0.000000    | 0.000000    |
| 45-49 | 13-72   | 0.000000   | 0.000000   | 0.000000   | 0.002998  | 0.002998    | 0.000000    | 0.000000      | 0.000000    | 0.000000    |
| 50-54 | 13-72   | 0.000000   | 0.000000   | 0.000000   | 0.003160  | 0.003160    | 0.000000    | 0.000000      | 0.000000    | 0.000000    |
| 55-59 | 13-72   | 0.000000   | 0.000000   | 0.000000   | 0.002965  | 0.002965    | 0.000000    | 0.000000      | 0.000000    | 0.000000    |
| 60-64 | 13-72   | 0.000000   | 0.000000   | 0.000000   | 0.003633  | 0.003633    | 0.000000    | 0.000000      | 0.000000    | 0.000000    |
| 65-69 | 13-72   | 0.000000   | 0.000000   | 0.000000   | 0.004522  | 0.004522    | 0.000000    | 0.000000      | 0.000000    | 0.000000    |
| 70-74 | 13-72   | 0.000000   | 0.000000   | 0.000000   | 0.005208  | 0.005208    | 0.000000    | 0.000000      | 0.000000    | 0.000000    |
| 75-79 | 13-72   | 0.000000   | 0.000000   | 0.000000   | 0.005208  | 0.005208    | 0.000000    | 0.000000      | 0.000000    | 0.000000    |
| 10-14 | 73-132  | 0.000794   | 0.003175   | 0.000000   | 0.008742  | 0.008742    | 0.000000    | 0.000000      | 0.000000    | 0.000000    |
| 15-19 | 73-132  | 0.000611   | 0.002445   | 0.000000   | 0.003373  | 0.003373    | 0.000000    | 0.000000      | 0.000000    | 0.000000    |
| 20-24 | 73-132  | 0.000292   | 0.001167   | 0.000000   | 0.003881  | 0.003881    | 0.000000    | 0.000000      | 0.000000    | 0.000000    |
| 25-29 | 73-132  | 0.000143   | 0.000571   | 0.000000   | 0.001954  | 0.001954    | 0.000000    | 0.000000      | 0.000000    | 0.000000    |
| 30-34 | 73-132  | 0.000022   | 0.000089   | 0.000000   | 0.001338  | 0.001338    | 0.000000    | 0.000000      | 0.000000    | 0.000000    |
| 35-39 | 73-132  | 0.000000   | 0.000000   | 0.000000   | 0.001507  | 0.001507    | 0.000000    | 0.000000      | 0.000000    | 0.000000    |
| 40-44 | 73-132  | 0.000000   | 0.000000   | 0.000000   | 0.002080  | 0.002080    | 0.000000    | 0.000000      | 0.000000    | 0.000000    |
| 45-49 | 73-132  | 0.000000   | 0.000000   | 0.000000   | 0.003809  | 0.003809    | 0.000000    | 0.000000      | 0.000000    | 0.000000    |
| 50-54 | 73-132  | 0.000000   | 0.000000   | 0.000000   | 0.004871  | 0.004871    | 0.000000    | 0.000000      | 0.000000    | 0.000000    |
| 55-59 | 73-132  | 0.000000   | 0.000000   | 0.000000   | 0.004560  | 0.004560    | 0.000000    | 0.000000      | 0.000000    | 0.000000    |
| 60-64 | 73-132  | 0.000000   | 0.000000   | 0.000000   | 0.007192  | 0.007192    | 0.000000    | 0.000000      | 0.000000    | 0.000000    |
| 65-69 | 73-132  | 0.000000   | 0.000000   | 0.000000   | 0.007033  | 0.007033    | 0.000000    | 0.000000      | 0.000000    | 0.000000    |
| 70-74 | 73-132  | 0.000000   | 0.000000   | 0.000000   | 0.008206  | 0.008206    | 0.000000    | 0.000000      | 0.000000    | 0.000000    |
| 75-79 | 73-132  | 0.000000   | 0.000000   | 0.000000   | 0.008206  | 0.008206    | 0.000000    | 0.000000      | 0.000000    | 0.000000    |
| 10-14 | 133-192 | 0.000143   | 0.002718   | 0.000000   | 0.008742  | 0.008742    | 0.000000    | 0.000000      | 0.000000    | 0.000000    |
| 15-19 | 133-192 | 0.000130   | 0.002465   | 0.000000   | 0.003996  | 0.003996    | 0.000000    | 0.000000      | 0.000000    | 0.000000    |
| 20-24 | 133-192 | 0.000062   | 0.001185   | 0.000000   | 0.002805  | 0.002805    | 0.000000    | 0.000000      | 0.000000    | 0.000000    |
| 25-29 | 133-192 | 0.000015   | 0.000275   | 0.000000   | 0.001574  | 0.001574    | 0.000000    | 0.000000      | 0.000000    | 0.000000    |
| 30-34 | 133-192 | 0.000007   | 0.000125   | 0.000000   | 0.001293  | 0.001293    | 0.000000    | 0.000000      | 0.000000    | 0.000000    |
| 35-39 | 133-192 | 0.000000   | 0.000000   | 0.000000   | 0.001219  | 0.001219    | 0.000000    | 0.000000      | 0.000000    | 0.000000    |
| 40-44 | 133-192 | 0.000000   | 0.000000   | 0.000000   | 0.001657  | 0.001657    | 0.000000    | 0.000000      | 0.000000    | 0.000000    |
| 45-49 | 133-192 | 0.000000   | 0.000000   | 0.000000   | 0.001995  | 0.001995    | 0.000000    | 0.000000      | 0.000000    | 0.000000    |
| 50-54 | 133-192 | 0.000000   | 0.000000   | 0.000000   | 0.002154  | 0.002154    | 0.000000    | 0.000000      | 0.000000    | 0.000000    |
| 55-59 | 133-192 | 0.000000   | 0.000000   | 0.000000   | 0.002072  | 0.002072    | 0.000000    | 0.000000      | 0.000000    | 0.000000    |
| 60-64 | 133-192 | 0.000000   | 0.000000   | 0.000000   | 0.005049  | 0.005049    | 0.000000    | 0.000000      | 0.000000    | 0.000000    |
| 65-69 | 133-192 | 0.000000   | 0.000000   | 0.000000   | 0.003681  | 0.003681    | 0.000000    | 0.000000      | 0.000000    | 0.000000    |
| 70-74 | 133-192 | 0.000000   | 0.000000   | 0.000000   | 0.006144  | 0.006144    | 0.000000    | 0.000000      | 0.000000    | 0.000000    |
| 75-79 | 133-192 | 0.000000   | 0.000000   | 0.000000   | 0.006144  | 0.006144    | 0.000000    | 0.000000      | 0.000000    | 0.000000    |
| 10-14 | 193-252 | 0.000093   | 0.001766   | 0.000000   | 0.008742  | 0.008742    | 0.000000    | 0.000000      | 0.000000    | 0.000000    |
| 15-19 | 193-252 | 0.000112   | 0.002120   | 0.000000   | 0.005770  | 0.005770    | 0.000000    | 0.000000      | 0.000000    | 0.000000    |
| 20-24 | 193-252 | 0.000054   | 0.001025   | 0.000000   | 0.003262  | 0.003262    | 0.000000    | 0.000000      | 0.000000    | 0.000000    |
| 25-29 | 193-252 | 0.000027   | 0.000504   | 0.000000   | 0.002002  | 0.002002    | 0.000000    | 0.000000      | 0.000000    | 0.000000    |
| 30-34 | 193-252 | 0.000013   | 0.000250   | 0.000000   | 0.003241  | 0.003241    | 0.000000    | 0.000000      | 0.000000    | 0.000000    |
| 35-39 | 193-252 | 0.000000   | 0.000000   | 0.000000   | 0.001771  | 0.001771    | 0.000000    | 0.000000      | 0.000000    | 0.000000    |
| 40-44 | 193-252 | 0.000000   | 0.000000   | 0.000000   | 0.002173  | 0.002173    | 0.000000    | 0.000000      | 0.000000    | 0.000000    |
| 45-49 | 193-252 | 0.000000   | 0.000000   | 0.000000   | 0.002075  | 0.002075    | 0.000000    | 0.000000      | 0.000000    | 0.000000    |
| 50-54 | 193-252 | 0.000000   | 0.000000   | 0.000000   | 0.003432  | 0.003432    | 0.000000    | 0.000000      | 0.000000    | 0.000000    |

### Results for PHIM for Run 6 (Sensitivity\_Analysis\_1.RTF)

|       |         |          |          |          |          |          |          |          |          |          |
|-------|---------|----------|----------|----------|----------|----------|----------|----------|----------|----------|
| 55-59 | 193-252 | 0.000000 | 0.000000 | 0.000000 | 0.002906 | 0.002906 | 0.000000 | 0.000000 | 0.000000 | 0.000000 |
| 60-64 | 193-252 | 0.000000 | 0.000000 | 0.000000 | 0.007139 | 0.007139 | 0.000000 | 0.000000 | 0.000000 | 0.000000 |
| 65-69 | 193-252 | 0.000000 | 0.000000 | 0.000000 | 0.004963 | 0.004963 | 0.000000 | 0.000000 | 0.000000 | 0.000000 |
| 70-74 | 193-252 | 0.000000 | 0.000000 | 0.000000 | 0.006269 | 0.006269 | 0.000000 | 0.000000 | 0.000000 | 0.000000 |
| 75-79 | 193-252 | 0.000000 | 0.000000 | 0.000000 | 0.006269 | 0.006269 | 0.000000 | 0.000000 | 0.000000 | 0.000000 |
| 10-14 | 253+    | 0.000047 | 0.000884 | 0.000000 | 0.008742 | 0.008742 | 0.000000 | 0.000000 | 0.000000 | 0.000000 |
| 15-19 | 253+    | 0.000090 | 0.001708 | 0.000000 | 0.009440 | 0.009440 | 0.000000 | 0.000000 | 0.000000 | 0.000000 |
| 20-24 | 253+    | 0.000001 | 0.000022 | 0.000000 | 0.002831 | 0.002831 | 0.000000 | 0.000000 | 0.000000 | 0.000000 |
| 25-29 | 253+    | 0.000004 | 0.000070 | 0.000000 | 0.002656 | 0.002656 | 0.000000 | 0.000000 | 0.000000 | 0.000000 |
| 30-34 | 253+    | 0.000002 | 0.000035 | 0.000000 | 0.004614 | 0.004614 | 0.000000 | 0.000000 | 0.000000 | 0.000000 |
| 35-39 | 253+    | 0.000000 | 0.000000 | 0.000000 | 0.002608 | 0.002608 | 0.000000 | 0.000000 | 0.000000 | 0.000000 |
| 40-44 | 253+    | 0.000000 | 0.000000 | 0.000000 | 0.003115 | 0.003115 | 0.000000 | 0.000000 | 0.000000 | 0.000000 |
| 45-49 | 253+    | 0.000000 | 0.000000 | 0.000000 | 0.002132 | 0.002132 | 0.000000 | 0.000000 | 0.000000 | 0.000000 |
| 50-54 | 253+    | 0.000000 | 0.000000 | 0.000000 | 0.003497 | 0.003497 | 0.000000 | 0.000000 | 0.000000 | 0.000000 |
| 55-59 | 253+    | 0.000000 | 0.000000 | 0.000000 | 0.002942 | 0.002942 | 0.000000 | 0.000000 | 0.000000 | 0.000000 |
| 60-64 | 253+    | 0.000000 | 0.000000 | 0.000000 | 0.005376 | 0.005376 | 0.000000 | 0.000000 | 0.000000 | 0.000000 |
| 65-69 | 253+    | 0.000000 | 0.000000 | 0.000000 | 0.001789 | 0.001789 | 0.000000 | 0.000000 | 0.000000 | 0.000000 |
| 70-74 | 253+    | 0.000000 | 0.000000 | 0.000000 | 0.004077 | 0.004077 | 0.000000 | 0.000000 | 0.000000 | 0.000000 |
| 75-79 | 253+    | 0.000000 | 0.000000 | 0.000000 | 0.004077 | 0.004077 | 0.000000 | 0.000000 | 0.000000 | 0.000000 |



**Results for PHIM for Run 6 (Sensitivity\_Analysis\_1.RTF)**

|       |      |          |          |          |          |          |          |
|-------|------|----------|----------|----------|----------|----------|----------|
| 25-29 | 253+ | 0.014127 | 0.000000 | 0.000000 | 0.000000 | 0.000000 | 0.000000 |
| 30-34 | 253+ | 0.013889 | 0.000000 | 0.000000 | 0.000000 | 0.000000 | 0.000000 |
| 35-39 | 253+ | 0.012929 | 0.000000 | 0.000000 | 0.000000 | 0.000000 | 0.000000 |
| 40-44 | 253+ | 0.012785 | 0.000000 | 0.000000 | 0.000000 | 0.000000 | 0.000000 |
| 45-49 | 253+ | 0.012295 | 0.000000 | 0.000000 | 0.000000 | 0.000000 | 0.000000 |
| 50-54 | 253+ | 0.011536 | 0.000000 | 0.000000 | 0.000000 | 0.000000 | 0.000000 |
| 55-59 | 253+ | 0.008988 | 0.000000 | 0.000000 | 0.000000 | 0.000000 | 0.000000 |
| 60-64 | 253+ | 0.008098 | 0.000000 | 0.000000 | 0.000000 | 0.000000 | 0.000000 |
| 65-69 | 253+ | 0.006274 | 0.000000 | 0.000000 | 0.000000 | 0.000000 | 0.000000 |
| 70-74 | 253+ | 0.004141 | 0.000000 | 0.000000 | 0.000000 | 0.000000 | 0.000000 |
| 75-79 | 253+ | 0.004141 | 0.000000 | 0.000000 | 0.000000 | 0.000000 | 0.000000 |

## Results for PHIM for Run 6 (Sensitivity\_Analysis\_1.RTF)

\*\*\*\*\*

### Main Output for the Tobacco History for Run: 6, Simulation: 1, Scenario: NULL

| Variable Parameter          | Value              |
|-----------------------------|--------------------|
| 1. Country                  | US (United States) |
| 2. Sex                      | F (Females)        |
| 3. Year of start of process | 1990               |

Year of Follow-up: 2040, Age Group: All Ages  
 Period    Age Group    Smoking Group            N            %

|    |          |           |       |       |
|----|----------|-----------|-------|-------|
| 50 | All Ages | Never Any | 20670 | 58.80 |
| 50 | All Ages | CC        | 2462  | 7.00  |
| 50 | All Ages | Former    | 12019 | 34.19 |

Year of Follow-up: 2040, Age Group: 18-19  
 Period    Age Group    Smoking Group            N            %

|    |       |           |   |   |
|----|-------|-----------|---|---|
| 50 | 18-19 | Never Any | 0 | . |
| 50 | 18-19 | CC        | 0 | . |
| 50 | 18-19 | Former    | 0 | . |

Year of Follow-up: 2040, Age Group: 20-24  
 Period    Age Group    Smoking Group            N            %

|    |       |           |   |   |
|----|-------|-----------|---|---|
| 50 | 20-24 | Never Any | 0 | . |
| 50 | 20-24 | CC        | 0 | . |
| 50 | 20-24 | Former    | 0 | . |

Year of Follow-up: 2040, Age Group: 25-29  
 Period    Age Group    Smoking Group            N            %

|    |       |           |   |   |
|----|-------|-----------|---|---|
| 50 | 25-29 | Never Any | 0 | . |
| 50 | 25-29 | CC        | 0 | . |
| 50 | 25-29 | Former    | 0 | . |

Year of Follow-up: 2040, Age Group: 30-34  
 Period    Age Group    Smoking Group            N            %

|    |       |           |   |   |
|----|-------|-----------|---|---|
| 50 | 30-34 | Never Any | 0 | . |
| 50 | 30-34 | CC        | 0 | . |
| 50 | 30-34 | Former    | 0 | . |

Year of Follow-up: 2040, Age Group: 35-39  
 Period    Age Group    Smoking Group            N            %

|    |       |           |   |   |
|----|-------|-----------|---|---|
| 50 | 35-39 | Never Any | 0 | . |
| 50 | 35-39 | CC        | 0 | . |
| 50 | 35-39 | Former    | 0 | . |

Year of Follow-up: 2040, Age Group: 40-44  
 Period    Age Group    Smoking Group            N            %

|    |       |           |   |   |
|----|-------|-----------|---|---|
| 50 | 40-44 | Never Any | 0 | . |
| 50 | 40-44 | CC        | 0 | . |
| 50 | 40-44 | Former    | 0 | . |

Year of Follow-up: 2040, Age Group: 45-49  
 Period    Age Group    Smoking Group            N            %

|    |       |           |   |   |
|----|-------|-----------|---|---|
| 50 | 45-49 | Never Any | 0 | . |
| 50 | 45-49 | CC        | 0 | . |
| 50 | 45-49 | Former    | 0 | . |

Year of Follow-up: 2040, Age Group: 50-54  
 Period    Age Group    Smoking Group            N            %

|    |       |           |   |   |
|----|-------|-----------|---|---|
| 50 | 50-54 | Never Any | 0 | . |
| 50 | 50-54 | CC        | 0 | . |
| 50 | 50-54 | Former    | 0 | . |

Year of Follow-up: 2040, Age Group: 55-59  
 Period    Age Group    Smoking Group            N            %

|    |       |           |   |   |
|----|-------|-----------|---|---|
| 50 | 55-59 | Never Any | 0 | . |
| 50 | 55-59 | CC        | 0 | . |
| 50 | 55-59 | Former    | 0 | . |

Year of Follow-up: 2040, Age Group: 60-64  
 Period    Age Group    Smoking Group            N            %

### Results for PHIM for Run 6 (Sensitivity\_Analysis\_1.RTF)

|                                           |           |               |      |       |
|-------------------------------------------|-----------|---------------|------|-------|
| 50                                        | 60-64     | Never Any     | 4803 | 60.57 |
| 50                                        | 60-64     | CC            | 621  | 7.83  |
| 50                                        | 60-64     | Former        | 2506 | 31.60 |
| Year of Follow-up: 2040, Age Group: 65-69 |           |               |      |       |
| Period                                    | Age Group | Smoking Group | N    | %     |
| 50                                        | 65-69     | Never Any     | 5407 | 64.75 |
| 50                                        | 65-69     | CC            | 538  | 6.44  |
| 50                                        | 65-69     | Former        | 2405 | 28.80 |
| Year of Follow-up: 2040, Age Group: 70-74 |           |               |      |       |
| Period                                    | Age Group | Smoking Group | N    | %     |
| 50                                        | 70-74     | Never Any     | 5181 | 58.92 |
| 50                                        | 70-74     | CC            | 605  | 6.88  |
| 50                                        | 70-74     | Former        | 3007 | 34.20 |
| Year of Follow-up: 2040, Age Group: 75-79 |           |               |      |       |
| Period                                    | Age Group | Smoking Group | N    | %     |
| 50                                        | 75-79     | Never Any     | 5279 | 52.38 |
| 50                                        | 75-79     | CC            | 698  | 6.93  |
| 50                                        | 75-79     | Former        | 4101 | 40.69 |



## Results for PHIM for Run 6 (Sensitivity\_Analysis\_1.RTF)

\*\*\*\*\*

### Main Output for the Tobacco History for Run: 6, Simulation: 1, Scenario: Ecig

| Variable Parameter                           |           | Value              |       |       |               |             |               |                |              |
|----------------------------------------------|-----------|--------------------|-------|-------|---------------|-------------|---------------|----------------|--------------|
| 1. Country                                   |           | US (United States) |       |       |               |             |               |                |              |
| 2. Sex                                       |           | F (Females)        |       |       |               |             |               |                |              |
| 3. Year of start of process                  |           | 1990               |       |       |               |             |               |                |              |
| Year of Follow-up: 1990, Age Group: All Ages |           |                    |       |       |               |             |               |                |              |
| Period                                       | Age Group | Smoking Group      | N     | %     | Ever Quit (N) | Ever Quit % | Mean Yrs Quit | Short Term (n) | Short Term % |
| 0                                            | All Ages  | Never Any          | 47776 | 54.92 |               |             |               |                |              |
| 0                                            | All Ages  | CC                 | 22737 | 26.14 | 0             | 0.00        |               |                |              |
| 0                                            | All Ages  | Ecig               | 0     | 0.00  |               |             |               |                |              |
| 0                                            | All Ages  | Dual               | 0     | 0.00  |               |             |               |                |              |
| 0                                            | All Ages  | Former             | 16484 | 18.95 |               |             | 11.90         | 2815           | 17.08        |
| Year of Follow-up: 1990, Age Group: 18-19    |           |                    |       |       |               |             |               |                |              |
| Period                                       | Age Group | Smoking Group      | N     | %     | Ever Quit (N) | Ever Quit % | Mean Yrs Quit | Short Term (n) | Short Term % |
| 0                                            | 18-19     | Never Any          | 2570  | 78.43 |               |             |               |                |              |
| 0                                            | 18-19     | CC                 | 535   | 16.33 | 0             | 0.00        |               |                |              |
| 0                                            | 18-19     | Ecig               | 0     | 0.00  |               |             |               |                |              |
| 0                                            | 18-19     | Dual               | 0     | 0.00  |               |             |               |                |              |
| 0                                            | 18-19     | Former             | 172   | 5.25  |               |             | 0.20          | 172            | 100.00       |
| Year of Follow-up: 1990, Age Group: 20-24    |           |                    |       |       |               |             |               |                |              |
| Period                                       | Age Group | Smoking Group      | N     | %     | Ever Quit (N) | Ever Quit % | Mean Yrs Quit | Short Term (n) | Short Term % |
| 0                                            | 20-24     | Never Any          | 5354  | 60.89 |               |             |               |                |              |
| 0                                            | 20-24     | CC                 | 2560  | 29.11 | 0             | 0.00        |               |                |              |
| 0                                            | 20-24     | Ecig               | 0     | 0.00  |               |             |               |                |              |
| 0                                            | 20-24     | Dual               | 0     | 0.00  |               |             |               |                |              |
| 0                                            | 20-24     | Former             | 879   | 10.00 |               |             | 1.58          | 420            | 47.78        |
| Year of Follow-up: 1990, Age Group: 25-29    |           |                    |       |       |               |             |               |                |              |
| Period                                       | Age Group | Smoking Group      | N     | %     | Ever Quit (N) | Ever Quit % | Mean Yrs Quit | Short Term (n) | Short Term % |
| 0                                            | 25-29     | Never Any          | 5318  | 52.77 |               |             |               |                |              |
| 0                                            | 25-29     | CC                 | 3335  | 33.09 | 0             | 0.00        |               |                |              |
| 0                                            | 25-29     | Ecig               | 0     | 0.00  |               |             |               |                |              |
| 0                                            | 25-29     | Dual               | 0     | 0.00  |               |             |               |                |              |
| 0                                            | 25-29     | Former             | 1425  | 14.14 |               |             | 3.91          | 404            | 28.35        |
| Year of Follow-up: 1990, Age Group: 30-34    |           |                    |       |       |               |             |               |                |              |
| Period                                       | Age Group | Smoking Group      | N     | %     | Ever Quit (N) | Ever Quit % | Mean Yrs Quit | Short Term (n) | Short Term % |
| 0                                            | 30-34     | Never Any          | 5287  | 50.36 |               |             |               |                |              |
| 0                                            | 30-34     | CC                 | 3326  | 31.68 | 0             | 0.00        |               |                |              |
| 0                                            | 30-34     | Ecig               | 0     | 0.00  |               |             |               |                |              |
| 0                                            | 30-34     | Dual               | 0     | 0.00  |               |             |               |                |              |
| 0                                            | 30-34     | Former             | 1886  | 17.96 |               |             | 4.36          | 566            | 30.01        |
| Year of Follow-up: 1990, Age Group: 35-39    |           |                    |       |       |               |             |               |                |              |
| Period                                       | Age Group | Smoking Group      | N     | %     | Ever Quit (N) | Ever Quit % | Mean Yrs Quit | Short Term (n) | Short Term % |
| 0                                            | 35-39     | Never Any          | 5018  | 52.27 |               |             |               |                |              |
| 0                                            | 35-39     | CC                 | 2653  | 27.64 | 0             | 0.00        |               |                |              |
| 0                                            | 35-39     | Ecig               | 0     | 0.00  |               |             |               |                |              |
| 0                                            | 35-39     | Dual               | 0     | 0.00  |               |             |               |                |              |
| 0                                            | 35-39     | Former             | 1929  | 20.09 |               |             | 7.96          | 324            | 16.80        |
| Year of Follow-up: 1990, Age Group: 40-44    |           |                    |       |       |               |             |               |                |              |
| Period                                       | Age Group | Smoking Group      | N     | %     | Ever Quit (N) | Ever Quit % | Mean Yrs Quit | Short Term (n) | Short Term % |
| 0                                            | 40-44     | Never Any          | 4356  | 51.27 |               |             |               |                |              |
| 0                                            | 40-44     | CC                 | 2397  | 28.21 | 0             | 0.00        |               |                |              |
| 0                                            | 40-44     | Ecig               | 0     | 0.00  |               |             |               |                |              |
| 0                                            | 40-44     | Dual               | 0     | 0.00  |               |             |               |                |              |
| 0                                            | 40-44     | Former             | 1744  | 20.52 |               |             | 7.33          | 339            | 19.44        |
| Year of Follow-up: 1990, Age Group: 45-49    |           |                    |       |       |               |             |               |                |              |
| Period                                       | Age Group | Smoking Group      | N     | %     | Ever Quit (N) | Ever Quit % | Mean Yrs Quit | Short Term (n) | Short Term % |
| 0                                            | 45-49     | Never Any          | 3116  | 47.67 |               |             |               |                |              |
| 0                                            | 45-49     | CC                 | 1875  | 28.69 | 0             | 0.00        |               |                |              |
| 0                                            | 45-49     | Ecig               | 0     | 0.00  |               |             |               |                |              |
| 0                                            | 45-49     | Dual               | 0     | 0.00  |               |             |               |                |              |
| 0                                            | 45-49     | Former             | 1545  | 23.64 |               |             | 12.55         | 194            | 12.56        |
| Year of Follow-up: 1990, Age Group: 50-54    |           |                    |       |       |               |             |               |                |              |
| Period                                       | Age Group | Smoking Group      | N     | %     | Ever Quit (N) | Ever Quit % | Mean Yrs Quit | Short Term (n) | Short Term % |
| 0                                            | 50-54     | Never Any          | 2684  | 48.50 |               |             |               |                |              |
| 0                                            | 50-54     | CC                 | 1572  | 28.41 | 0             | 0.00        |               |                |              |

**Results for PHIM for Run 6 (Sensitivity\_Analysis\_1.RTF)**

|                                              |           |               |       |       |               |             |               |                |              |
|----------------------------------------------|-----------|---------------|-------|-------|---------------|-------------|---------------|----------------|--------------|
| 0                                            | 50-54     | Ecig          | 0     | 0.00  |               |             |               |                |              |
| 0                                            | 50-54     | Dual          | 0     | 0.00  |               |             |               |                |              |
| 0                                            | 50-54     | Former        | 1278  | 23.09 |               |             | 13.28         | 126            | 9.86         |
| Year of Follow-up: 1990, Age Group: 55-59    |           |               |       |       |               |             |               |                |              |
| Period                                       | Age Group | Smoking Group | N     | %     | Ever Quit (N) | Ever Quit % | Mean Yrs Quit | Short Term (n) | Short Term % |
| 0                                            | 55-59     | Never Any     | 2732  | 51.90 |               |             |               |                |              |
| 0                                            | 55-59     | CC            | 1295  | 24.60 | 0             | 0.00        |               |                |              |
| 0                                            | 55-59     | Ecig          | 0     | 0.00  |               |             |               |                |              |
| 0                                            | 55-59     | Dual          | 0     | 0.00  |               |             |               |                |              |
| 0                                            | 55-59     | Former        | 1237  | 23.50 |               |             | 17.26         | 90             | 7.28         |
| Year of Follow-up: 1990, Age Group: 60-64    |           |               |       |       |               |             |               |                |              |
| Period                                       | Age Group | Smoking Group | N     | %     | Ever Quit (N) | Ever Quit % | Mean Yrs Quit | Short Term (n) | Short Term % |
| 0                                            | 60-64     | Never Any     | 3078  | 55.72 |               |             |               |                |              |
| 0                                            | 60-64     | CC            | 1249  | 22.61 | 0             | 0.00        |               |                |              |
| 0                                            | 60-64     | Ecig          | 0     | 0.00  |               |             |               |                |              |
| 0                                            | 60-64     | Dual          | 0     | 0.00  |               |             |               |                |              |
| 0                                            | 60-64     | Former        | 1197  | 21.67 |               |             | 18.28         | 61             | 5.10         |
| Year of Follow-up: 1990, Age Group: 65-69    |           |               |       |       |               |             |               |                |              |
| Period                                       | Age Group | Smoking Group | N     | %     | Ever Quit (N) | Ever Quit % | Mean Yrs Quit | Short Term (n) | Short Term % |
| 0                                            | 65-69     | Never Any     | 3042  | 57.36 |               |             |               |                |              |
| 0                                            | 65-69     | CC            | 976   | 18.40 | 0             | 0.00        |               |                |              |
| 0                                            | 65-69     | Ecig          | 0     | 0.00  |               |             |               |                |              |
| 0                                            | 65-69     | Dual          | 0     | 0.00  |               |             |               |                |              |
| 0                                            | 65-69     | Former        | 1285  | 24.23 |               |             | 20.65         | 68             | 5.29         |
| Year of Follow-up: 1990, Age Group: 70-74    |           |               |       |       |               |             |               |                |              |
| Period                                       | Age Group | Smoking Group | N     | %     | Ever Quit (N) | Ever Quit % | Mean Yrs Quit | Short Term (n) | Short Term % |
| 0                                            | 70-74     | Never Any     | 2738  | 61.05 |               |             |               |                |              |
| 0                                            | 70-74     | CC            | 610   | 13.60 | 0             | 0.00        |               |                |              |
| 0                                            | 70-74     | Ecig          | 0     | 0.00  |               |             |               |                |              |
| 0                                            | 70-74     | Dual          | 0     | 0.00  |               |             |               |                |              |
| 0                                            | 70-74     | Former        | 1137  | 25.35 |               |             | 24.48         | 27             | 2.37         |
| Year of Follow-up: 1990, Age Group: 75-79    |           |               |       |       |               |             |               |                |              |
| Period                                       | Age Group | Smoking Group | N     | %     | Ever Quit (N) | Ever Quit % | Mean Yrs Quit | Short Term (n) | Short Term % |
| 0                                            | 75-79     | Never Any     | 2483  | 68.84 |               |             |               |                |              |
| 0                                            | 75-79     | CC            | 354   | 9.81  | 0             | 0.00        |               |                |              |
| 0                                            | 75-79     | Ecig          | 0     | 0.00  |               |             |               |                |              |
| 0                                            | 75-79     | Dual          | 0     | 0.00  |               |             |               |                |              |
| 0                                            | 75-79     | Former        | 770   | 21.35 |               |             | 24.48         | 24             | 3.12         |
| Year of Follow-up: 1995, Age Group: All Ages |           |               |       |       |               |             |               |                |              |
| Period                                       | Age Group | Smoking Group | N     | %     | Ever Quit (N) | Ever Quit % | Mean Yrs Quit | Short Term (n) | Short Term % |
| 5                                            | All Ages  | Never Any     | 50887 | 55.53 |               |             |               |                |              |
| 5                                            | All Ages  | CC            | 10659 | 11.63 | 0             | 0.00        |               |                |              |
| 5                                            | All Ages  | Ecig          | 11697 | 12.76 |               |             |               |                |              |
| 5                                            | All Ages  | Dual          | 0     | 0.00  |               |             |               |                |              |
| 5                                            | All Ages  | Former        | 18396 | 20.07 |               |             | 14.19         | 1129           | 6.14         |
| Year of Follow-up: 1995, Age Group: 18-19    |           |               |       |       |               |             |               |                |              |
| Period                                       | Age Group | Smoking Group | N     | %     | Ever Quit (N) | Ever Quit % | Mean Yrs Quit | Short Term (n) | Short Term % |
| 5                                            | 18-19     | Never Any     | 2434  | 76.64 |               |             |               |                |              |
| 5                                            | 18-19     | CC            | 233   | 7.34  | 0             | 0.00        |               |                |              |
| 5                                            | 18-19     | Ecig          | 427   | 13.44 |               |             |               |                |              |
| 5                                            | 18-19     | Dual          | 0     | 0.00  |               |             |               |                |              |
| 5                                            | 18-19     | Former        | 82    | 2.58  |               |             | 1.15          | 52             | 63.41        |
| Year of Follow-up: 1995, Age Group: 20-24    |           |               |       |       |               |             |               |                |              |
| Period                                       | Age Group | Smoking Group | N     | %     | Ever Quit (N) | Ever Quit % | Mean Yrs Quit | Short Term (n) | Short Term % |
| 5                                            | 20-24     | Never Any     | 5794  | 69.39 |               |             |               |                |              |
| 5                                            | 20-24     | CC            | 862   | 10.32 | 0             | 0.00        |               |                |              |
| 5                                            | 20-24     | Ecig          | 1250  | 14.97 |               |             |               |                |              |
| 5                                            | 20-24     | Dual          | 0     | 0.00  |               |             |               |                |              |
| 5                                            | 20-24     | Former        | 444   | 5.32  |               |             | 3.23          | 106            | 23.87        |
| Year of Follow-up: 1995, Age Group: 25-29    |           |               |       |       |               |             |               |                |              |
| Period                                       | Age Group | Smoking Group | N     | %     | Ever Quit (N) | Ever Quit % | Mean Yrs Quit | Short Term (n) | Short Term % |
| 5                                            | 25-29     | Never Any     | 5313  | 60.42 |               |             |               |                |              |
| 5                                            | 25-29     | CC            | 1062  | 12.08 | 0             | 0.00        |               |                |              |
| 5                                            | 25-29     | Ecig          | 1395  | 15.86 |               |             |               |                |              |
| 5                                            | 25-29     | Dual          | 0     | 0.00  |               |             |               |                |              |
| 5                                            | 25-29     | Former        | 1023  | 11.63 |               |             | 5.94          | 54             | 5.28         |
| Year of Follow-up: 1995, Age Group: 30-34    |           |               |       |       |               |             |               |                |              |
| Period                                       | Age Group | Smoking Group | N     | %     | Ever Quit (N) | Ever Quit % | Mean Yrs Quit | Short Term (n) | Short Term % |

**Results for PHIM for Run 6 (Sensitivity\_Analysis\_1.RTF)**

|                                              |           |               |      |       |               |             |               |                |              |
|----------------------------------------------|-----------|---------------|------|-------|---------------|-------------|---------------|----------------|--------------|
| 5                                            | 30-34     | Never Any     | 5304 | 52.63 |               |             |               |                |              |
| 5                                            | 30-34     | CC            | 1373 | 13.62 | 0             | 0.00        |               |                |              |
| 5                                            | 30-34     | Ecig          | 1802 | 17.88 |               |             |               |                |              |
| 5                                            | 30-34     | Dual          | 0    | 0.00  |               |             |               |                |              |
| 5                                            | 30-34     | Former        | 1599 | 15.87 |               |             | 8.16          | 67             | 4.19         |
| Year of Follow-up: 1995, Age Group: 35-39    |           |               |      |       |               |             |               |                |              |
| Period                                       | Age Group | Smoking Group | N    | %     | Ever Quit (N) | Ever Quit % | Mean Yrs Quit | Short Term (n) | Short Term % |
| 5                                            | 35-39     | Never Any     | 5278 | 50.27 |               |             |               |                |              |
| 5                                            | 35-39     | CC            | 1410 | 13.43 | 0             | 0.00        |               |                |              |
| 5                                            | 35-39     | Ecig          | 1746 | 16.63 |               |             |               |                |              |
| 5                                            | 35-39     | Dual          | 0    | 0.00  |               |             |               |                |              |
| 5                                            | 35-39     | Former        | 2065 | 19.67 |               |             | 8.75          | 62             | 3.00         |
| Year of Follow-up: 1995, Age Group: 40-44    |           |               |      |       |               |             |               |                |              |
| Period                                       | Age Group | Smoking Group | N    | %     | Ever Quit (N) | Ever Quit % | Mean Yrs Quit | Short Term (n) | Short Term % |
| 5                                            | 40-44     | Never Any     | 5018 | 52.27 |               |             |               |                |              |
| 5                                            | 40-44     | CC            | 1135 | 11.82 | 0             | 0.00        |               |                |              |
| 5                                            | 40-44     | Ecig          | 1356 | 14.13 |               |             |               |                |              |
| 5                                            | 40-44     | Dual          | 0    | 0.00  |               |             |               |                |              |
| 5                                            | 40-44     | Former        | 2091 | 21.78 |               |             | 12.09         | 81             | 3.87         |
| Year of Follow-up: 1995, Age Group: 45-49    |           |               |      |       |               |             |               |                |              |
| Period                                       | Age Group | Smoking Group | N    | %     | Ever Quit (N) | Ever Quit % | Mean Yrs Quit | Short Term (n) | Short Term % |
| 5                                            | 45-49     | Never Any     | 4356 | 51.27 |               |             |               |                |              |
| 5                                            | 45-49     | CC            | 974  | 11.46 | 0             | 0.00        |               |                |              |
| 5                                            | 45-49     | Ecig          | 1161 | 13.66 |               |             |               |                |              |
| 5                                            | 45-49     | Dual          | 0    | 0.00  |               |             |               |                |              |
| 5                                            | 45-49     | Former        | 2006 | 23.61 |               |             | 10.93         | 133            | 6.63         |
| Year of Follow-up: 1995, Age Group: 50-54    |           |               |      |       |               |             |               |                |              |
| Period                                       | Age Group | Smoking Group | N    | %     | Ever Quit (N) | Ever Quit % | Mean Yrs Quit | Short Term (n) | Short Term % |
| 5                                            | 50-54     | Never Any     | 3116 | 47.67 |               |             |               |                |              |
| 5                                            | 50-54     | CC            | 739  | 11.31 | 0             | 0.00        |               |                |              |
| 5                                            | 50-54     | Ecig          | 826  | 12.64 |               |             |               |                |              |
| 5                                            | 50-54     | Dual          | 0    | 0.00  |               |             |               |                |              |
| 5                                            | 50-54     | Former        | 1855 | 28.38 |               |             | 14.92         | 140            | 7.55         |
| Year of Follow-up: 1995, Age Group: 55-59    |           |               |      |       |               |             |               |                |              |
| Period                                       | Age Group | Smoking Group | N    | %     | Ever Quit (N) | Ever Quit % | Mean Yrs Quit | Short Term (n) | Short Term % |
| 5                                            | 55-59     | Never Any     | 2684 | 48.50 |               |             |               |                |              |
| 5                                            | 55-59     | CC            | 722  | 13.05 | 0             | 0.00        |               |                |              |
| 5                                            | 55-59     | Ecig          | 627  | 11.33 |               |             |               |                |              |
| 5                                            | 55-59     | Dual          | 0    | 0.00  |               |             |               |                |              |
| 5                                            | 55-59     | Former        | 1501 | 27.12 |               |             | 15.84         | 93             | 6.20         |
| Year of Follow-up: 1995, Age Group: 60-64    |           |               |      |       |               |             |               |                |              |
| Period                                       | Age Group | Smoking Group | N    | %     | Ever Quit (N) | Ever Quit % | Mean Yrs Quit | Short Term (n) | Short Term % |
| 5                                            | 60-64     | Never Any     | 2732 | 51.90 |               |             |               |                |              |
| 5                                            | 60-64     | CC            | 633  | 12.03 | 0             | 0.00        |               |                |              |
| 5                                            | 60-64     | Ecig          | 444  | 8.43  |               |             |               |                |              |
| 5                                            | 60-64     | Dual          | 0    | 0.00  |               |             |               |                |              |
| 5                                            | 60-64     | Former        | 1455 | 27.64 |               |             | 19.22         | 87             | 5.98         |
| Year of Follow-up: 1995, Age Group: 65-69    |           |               |      |       |               |             |               |                |              |
| Period                                       | Age Group | Smoking Group | N    | %     | Ever Quit (N) | Ever Quit % | Mean Yrs Quit | Short Term (n) | Short Term % |
| 5                                            | 65-69     | Never Any     | 3078 | 55.72 |               |             |               |                |              |
| 5                                            | 65-69     | CC            | 602  | 10.90 | 0             | 0.00        |               |                |              |
| 5                                            | 65-69     | Ecig          | 374  | 6.77  |               |             |               |                |              |
| 5                                            | 65-69     | Dual          | 0    | 0.00  |               |             |               |                |              |
| 5                                            | 65-69     | Former        | 1470 | 26.61 |               |             | 19.34         | 107            | 7.28         |
| Year of Follow-up: 1995, Age Group: 70-74    |           |               |      |       |               |             |               |                |              |
| Period                                       | Age Group | Smoking Group | N    | %     | Ever Quit (N) | Ever Quit % | Mean Yrs Quit | Short Term (n) | Short Term % |
| 5                                            | 70-74     | Never Any     | 3042 | 57.36 |               |             |               |                |              |
| 5                                            | 70-74     | CC            | 577  | 10.88 | 0             | 0.00        |               |                |              |
| 5                                            | 70-74     | Ecig          | 188  | 3.55  |               |             |               |                |              |
| 5                                            | 70-74     | Dual          | 0    | 0.00  |               |             |               |                |              |
| 5                                            | 70-74     | Former        | 1496 | 28.21 |               |             | 22.32         | 77             | 5.15         |
| Year of Follow-up: 1995, Age Group: 75-79    |           |               |      |       |               |             |               |                |              |
| Period                                       | Age Group | Smoking Group | N    | %     | Ever Quit (N) | Ever Quit % | Mean Yrs Quit | Short Term (n) | Short Term % |
| 5                                            | 75-79     | Never Any     | 2738 | 61.05 |               |             |               |                |              |
| 5                                            | 75-79     | CC            | 337  | 7.51  | 0             | 0.00        |               |                |              |
| 5                                            | 75-79     | Ecig          | 101  | 2.25  |               |             |               |                |              |
| 5                                            | 75-79     | Dual          | 0    | 0.00  |               |             |               |                |              |
| 5                                            | 75-79     | Former        | 1309 | 29.19 |               |             | 25.87         | 70             | 5.35         |
| Year of Follow-up: 2000, Age Group: All Ages |           |               |      |       |               |             |               |                |              |

**Results for PHIM for Run 6 (Sensitivity\_Analysis\_1.RTF)**

| Period                                    | Age Group | Smoking Group | N     | %     | Ever Quit (N) | Ever Quit % | Mean Yrs Quit | Short Term (n) | Short Term % |
|-------------------------------------------|-----------|---------------|-------|-------|---------------|-------------|---------------|----------------|--------------|
| 10                                        | All Ages  | Never Any     | 50423 | 54.86 |               |             |               |                |              |
| 10                                        | All Ages  | CC            | 4595  | 5.00  | 0             | 0.00        |               |                |              |
| 10                                        | All Ages  | Ecig          | 15644 | 17.02 |               |             |               |                |              |
| 10                                        | All Ages  | Dual          | 0     | 0.00  |               |             |               |                |              |
| 10                                        | All Ages  | Former        | 21246 | 23.12 |               |             | 15.11         | 1717           | 8.08         |
| Year of Follow-up: 2000, Age Group: 18-19 |           |               |       |       |               |             |               |                |              |
| Period                                    | Age Group | Smoking Group | N     | %     | Ever Quit (N) | Ever Quit % | Mean Yrs Quit | Short Term (n) | Short Term % |
| 10                                        | 18-19     | Never Any     | 0     | .     |               |             |               |                |              |
| 10                                        | 18-19     | CC            | 0     | .     | 0             | .           |               |                |              |
| 10                                        | 18-19     | Ecig          | 0     | .     |               |             |               |                |              |
| 10                                        | 18-19     | Dual          | 0     | .     |               |             |               |                |              |
| 10                                        | 18-19     | Former        | 0     | .     |               |             |               | 0              | .            |
| Year of Follow-up: 2000, Age Group: 20-24 |           |               |       |       |               |             |               |                |              |
| Period                                    | Age Group | Smoking Group | N     | %     | Ever Quit (N) | Ever Quit % | Mean Yrs Quit | Short Term (n) | Short Term % |
| 10                                        | 20-24     | Never Any     | 5128  | 64.67 |               |             |               |                |              |
| 10                                        | 20-24     | CC            | 370   | 4.67  | 0             | 0.00        |               |                |              |
| 10                                        | 20-24     | Ecig          | 1780  | 22.45 |               |             |               |                |              |
| 10                                        | 20-24     | Dual          | 0     | 0.00  |               |             |               |                |              |
| 10                                        | 20-24     | Former        | 652   | 8.22  |               |             | 3.55          | 169            | 25.92        |
| Year of Follow-up: 2000, Age Group: 25-29 |           |               |       |       |               |             |               |                |              |
| Period                                    | Age Group | Smoking Group | N     | %     | Ever Quit (N) | Ever Quit % | Mean Yrs Quit | Short Term (n) | Short Term % |
| 10                                        | 25-29     | Never Any     | 5493  | 65.78 |               |             |               |                |              |
| 10                                        | 25-29     | CC            | 400   | 4.79  | 0             | 0.00        |               |                |              |
| 10                                        | 25-29     | Ecig          | 1690  | 20.24 |               |             |               |                |              |
| 10                                        | 25-29     | Dual          | 0     | 0.00  |               |             |               |                |              |
| 10                                        | 25-29     | Former        | 767   | 9.19  |               |             | 5.59          | 126            | 16.43        |
| Year of Follow-up: 2000, Age Group: 30-34 |           |               |       |       |               |             |               |                |              |
| Period                                    | Age Group | Smoking Group | N     | %     | Ever Quit (N) | Ever Quit % | Mean Yrs Quit | Short Term (n) | Short Term % |
| 10                                        | 30-34     | Never Any     | 5214  | 59.30 |               |             |               |                |              |
| 10                                        | 30-34     | CC            | 417   | 4.74  | 0             | 0.00        |               |                |              |
| 10                                        | 30-34     | Ecig          | 1908  | 21.70 |               |             |               |                |              |
| 10                                        | 30-34     | Dual          | 0     | 0.00  |               |             |               |                |              |
| 10                                        | 30-34     | Former        | 1254  | 14.26 |               |             | 9.28          | 91             | 7.26         |
| Year of Follow-up: 2000, Age Group: 35-39 |           |               |       |       |               |             |               |                |              |
| Period                                    | Age Group | Smoking Group | N     | %     | Ever Quit (N) | Ever Quit % | Mean Yrs Quit | Short Term (n) | Short Term % |
| 10                                        | 35-39     | Never Any     | 5284  | 52.43 |               |             |               |                |              |
| 10                                        | 35-39     | CC            | 561   | 5.57  | 0             | 0.00        |               |                |              |
| 10                                        | 35-39     | Ecig          | 2413  | 23.94 |               |             |               |                |              |
| 10                                        | 35-39     | Dual          | 0     | 0.00  |               |             |               |                |              |
| 10                                        | 35-39     | Former        | 1820  | 18.06 |               |             | 11.77         | 105            | 5.77         |
| Year of Follow-up: 2000, Age Group: 40-44 |           |               |       |       |               |             |               |                |              |
| Period                                    | Age Group | Smoking Group | N     | %     | Ever Quit (N) | Ever Quit % | Mean Yrs Quit | Short Term (n) | Short Term % |
| 10                                        | 40-44     | Never Any     | 5278  | 50.27 |               |             |               |                |              |
| 10                                        | 40-44     | CC            | 584   | 5.56  | 0             | 0.00        |               |                |              |
| 10                                        | 40-44     | Ecig          | 2292  | 21.83 |               |             |               |                |              |
| 10                                        | 40-44     | Dual          | 0     | 0.00  |               |             |               |                |              |
| 10                                        | 40-44     | Former        | 2345  | 22.34 |               |             | 12.30         | 143            | 6.10         |
| Year of Follow-up: 2000, Age Group: 45-49 |           |               |       |       |               |             |               |                |              |
| Period                                    | Age Group | Smoking Group | N     | %     | Ever Quit (N) | Ever Quit % | Mean Yrs Quit | Short Term (n) | Short Term % |
| 10                                        | 45-49     | Never Any     | 5018  | 52.27 |               |             |               |                |              |
| 10                                        | 45-49     | CC            | 446   | 4.65  | 0             | 0.00        |               |                |              |
| 10                                        | 45-49     | Ecig          | 1673  | 17.43 |               |             |               |                |              |
| 10                                        | 45-49     | Dual          | 0     | 0.00  |               |             |               |                |              |
| 10                                        | 45-49     | Former        | 2463  | 25.66 |               |             | 14.76         | 181            | 7.35         |
| Year of Follow-up: 2000, Age Group: 50-54 |           |               |       |       |               |             |               |                |              |
| Period                                    | Age Group | Smoking Group | N     | %     | Ever Quit (N) | Ever Quit % | Mean Yrs Quit | Short Term (n) | Short Term % |
| 10                                        | 50-54     | Never Any     | 4356  | 51.27 |               |             |               |                |              |
| 10                                        | 50-54     | CC            | 378   | 4.45  | 0             | 0.00        |               |                |              |
| 10                                        | 50-54     | Ecig          | 1299  | 15.29 |               |             |               |                |              |
| 10                                        | 50-54     | Dual          | 0     | 0.00  |               |             |               |                |              |
| 10                                        | 50-54     | Former        | 2464  | 29.00 |               |             | 13.32         | 188            | 7.63         |
| Year of Follow-up: 2000, Age Group: 55-59 |           |               |       |       |               |             |               |                |              |
| Period                                    | Age Group | Smoking Group | N     | %     | Ever Quit (N) | Ever Quit % | Mean Yrs Quit | Short Term (n) | Short Term % |
| 10                                        | 55-59     | Never Any     | 3116  | 47.67 |               |             |               |                |              |
| 10                                        | 55-59     | CC            | 283   | 4.33  | 0             | 0.00        |               |                |              |
| 10                                        | 55-59     | Ecig          | 912   | 13.95 |               |             |               |                |              |
| 10                                        | 55-59     | Dual          | 0     | 0.00  |               |             |               |                |              |

**Results for PHIM for Run 6 (Sensitivity\_Analysis\_1.RTF)**

| Year of Follow-up: 2000, Age Group: 60-64    | Period   | Age Group | Smoking Group | N     | %     | Ever Quit (N) | Ever Quit % | Mean Yrs Quit | Short Term (n) | Short Term % |
|----------------------------------------------|----------|-----------|---------------|-------|-------|---------------|-------------|---------------|----------------|--------------|
| 10                                           | 55-59    | Former    |               | 2225  | 34.04 |               |             | 16.92         | 157            | 7.06         |
| 10                                           | 60-64    | Never Any |               | 2684  | 48.50 |               |             |               |                |              |
| 10                                           | 60-64    | CC        |               | 334   | 6.04  | 0             | 0.00        |               |                |              |
| 10                                           | 60-64    | Ecig      |               | 663   | 11.98 |               |             |               |                |              |
| 10                                           | 60-64    | Dual      |               | 0     | 0.00  |               |             |               |                |              |
| 10                                           | 60-64    | Former    |               | 1853  | 33.48 |               |             | 17.23         | 149            | 8.04         |
| Year of Follow-up: 2000, Age Group: 65-69    | Period   | Age Group | Smoking Group | N     | %     | Ever Quit (N) | Ever Quit % | Mean Yrs Quit | Short Term (n) | Short Term % |
| 10                                           | 65-69    | Never Any |               | 2732  | 51.90 |               |             |               |                |              |
| 10                                           | 65-69    | CC        |               | 280   | 5.32  | 0             | 0.00        |               |                |              |
| 10                                           | 65-69    | Ecig      |               | 443   | 8.42  |               |             |               |                |              |
| 10                                           | 65-69    | Dual      |               | 0     | 0.00  |               |             |               |                |              |
| 10                                           | 65-69    | Former    |               | 1809  | 34.37 |               |             | 19.85         | 146            | 8.07         |
| Year of Follow-up: 2000, Age Group: 70-74    | Period   | Age Group | Smoking Group | N     | %     | Ever Quit (N) | Ever Quit % | Mean Yrs Quit | Short Term (n) | Short Term % |
| 10                                           | 70-74    | Never Any |               | 3078  | 55.72 |               |             |               |                |              |
| 10                                           | 70-74    | CC        |               | 274   | 4.96  | 0             | 0.00        |               |                |              |
| 10                                           | 70-74    | Ecig      |               | 368   | 6.66  |               |             |               |                |              |
| 10                                           | 70-74    | Dual      |               | 0     | 0.00  |               |             |               |                |              |
| 10                                           | 70-74    | Former    |               | 1804  | 32.66 |               |             | 20.18         | 154            | 8.54         |
| Year of Follow-up: 2000, Age Group: 75-79    | Period   | Age Group | Smoking Group | N     | %     | Ever Quit (N) | Ever Quit % | Mean Yrs Quit | Short Term (n) | Short Term % |
| 10                                           | 75-79    | Never Any |               | 3042  | 57.36 |               |             |               |                |              |
| 10                                           | 75-79    | CC        |               | 268   | 5.05  | 0             | 0.00        |               |                |              |
| 10                                           | 75-79    | Ecig      |               | 203   | 3.83  |               |             |               |                |              |
| 10                                           | 75-79    | Dual      |               | 0     | 0.00  |               |             |               |                |              |
| 10                                           | 75-79    | Former    |               | 1790  | 33.75 |               |             | 23.17         | 108            | 6.03         |
| Year of Follow-up: 2005, Age Group: All Ages | Period   | Age Group | Smoking Group | N     | %     | Ever Quit (N) | Ever Quit % | Mean Yrs Quit | Short Term (n) | Short Term % |
| 15                                           | All Ages | Never Any |               | 47002 | 54.27 |               |             |               |                |              |
| 15                                           | All Ages | CC        |               | 1890  | 2.18  | 0             | 0.00        |               |                |              |
| 15                                           | All Ages | Ecig      |               | 15617 | 18.03 |               |             |               |                |              |
| 15                                           | All Ages | Dual      |               | 0     | 0.00  |               |             |               |                |              |
| 15                                           | All Ages | Former    |               | 22096 | 25.51 |               |             | 17.32         | 941            | 4.26         |
| Year of Follow-up: 2005, Age Group: 18-19    | Period   | Age Group | Smoking Group | N     | %     | Ever Quit (N) | Ever Quit % | Mean Yrs Quit | Short Term (n) | Short Term % |
| 15                                           | 18-19    | Never Any |               | 0     | .     |               |             |               |                |              |
| 15                                           | 18-19    | CC        |               | 0     | .     | 0             | .           |               |                |              |
| 15                                           | 18-19    | Ecig      |               | 0     | .     |               |             |               |                |              |
| 15                                           | 18-19    | Dual      |               | 0     | .     |               |             |               |                |              |
| 15                                           | 18-19    | Former    |               | 0     | .     |               |             | .             | 0              | .            |
| Year of Follow-up: 2005, Age Group: 20-24    | Period   | Age Group | Smoking Group | N     | %     | Ever Quit (N) | Ever Quit % | Mean Yrs Quit | Short Term (n) | Short Term % |
| 15                                           | 20-24    | Never Any |               | 0     | .     |               |             |               |                |              |
| 15                                           | 20-24    | CC        |               | 0     | .     | 0             | .           |               |                |              |
| 15                                           | 20-24    | Ecig      |               | 0     | .     |               |             |               |                |              |
| 15                                           | 20-24    | Dual      |               | 0     | .     |               |             |               |                |              |
| 15                                           | 20-24    | Former    |               | 0     | .     |               |             | .             | 0              | .            |
| Year of Follow-up: 2005, Age Group: 25-29    | Period   | Age Group | Smoking Group | N     | %     | Ever Quit (N) | Ever Quit % | Mean Yrs Quit | Short Term (n) | Short Term % |
| 15                                           | 25-29    | Never Any |               | 4860  | 61.29 |               |             |               |                |              |
| 15                                           | 25-29    | CC        |               | 166   | 2.09  | 0             | 0.00        |               |                |              |
| 15                                           | 25-29    | Ecig      |               | 1941  | 24.48 |               |             |               |                |              |
| 15                                           | 25-29    | Dual      |               | 0     | 0.00  |               |             |               |                |              |
| 15                                           | 25-29    | Former    |               | 963   | 12.14 |               |             | 6.57          | 96             | 9.97         |
| Year of Follow-up: 2005, Age Group: 30-34    | Period   | Age Group | Smoking Group | N     | %     | Ever Quit (N) | Ever Quit % | Mean Yrs Quit | Short Term (n) | Short Term % |
| 15                                           | 30-34    | Never Any |               | 5407  | 64.75 |               |             |               |                |              |
| 15                                           | 30-34    | CC        |               | 149   | 1.78  | 0             | 0.00        |               |                |              |
| 15                                           | 30-34    | Ecig      |               | 1822  | 21.82 |               |             |               |                |              |
| 15                                           | 30-34    | Dual      |               | 0     | 0.00  |               |             |               |                |              |
| 15                                           | 30-34    | Former    |               | 972   | 11.64 |               |             | 8.77          | 80             | 8.23         |
| Year of Follow-up: 2005, Age Group: 35-39    | Period   | Age Group | Smoking Group | N     | %     | Ever Quit (N) | Ever Quit % | Mean Yrs Quit | Short Term (n) | Short Term % |
| 15                                           | 35-39    | Never Any |               | 5189  | 59.01 |               |             |               |                |              |
| 15                                           | 35-39    | CC        |               | 167   | 1.90  | 0             | 0.00        |               |                |              |

**Results for PHIM for Run 6 (Sensitivity\_Analysis\_1.RTF)**

|                                              |           |               |       |       |               |             |               |                |              |
|----------------------------------------------|-----------|---------------|-------|-------|---------------|-------------|---------------|----------------|--------------|
| 15                                           | 35-39     | Ecig          | 2002  | 22.77 |               |             |               |                |              |
| 15                                           | 35-39     | Dual          | 0     | 0.00  |               |             |               |                |              |
| 15                                           | 35-39     | Former        | 1435  | 16.32 |               |             | 12.75         | 66             | 4.60         |
| Year of Follow-up: 2005, Age Group: 40-44    |           |               |       |       |               |             |               |                |              |
| Period                                       | Age Group | Smoking Group | N     | %     | Ever Quit (N) | Ever Quit % | Mean Yrs Quit | Short Term (n) | Short Term % |
| 15                                           | 40-44     | Never Any     | 5284  | 52.43 |               |             |               |                |              |
| 15                                           | 40-44     | CC            | 238   | 2.36  | 0             | 0.00        |               |                |              |
| 15                                           | 40-44     | Ecig          | 2500  | 24.81 |               |             |               |                |              |
| 15                                           | 40-44     | Dual          | 0     | 0.00  |               |             |               |                |              |
| 15                                           | 40-44     | Former        | 2056  | 20.40 |               |             | 15.08         | 101            | 4.91         |
| Year of Follow-up: 2005, Age Group: 45-49    |           |               |       |       |               |             |               |                |              |
| Period                                       | Age Group | Smoking Group | N     | %     | Ever Quit (N) | Ever Quit % | Mean Yrs Quit | Short Term (n) | Short Term % |
| 15                                           | 45-49     | Never Any     | 5278  | 50.27 |               |             |               |                |              |
| 15                                           | 45-49     | CC            | 237   | 2.26  | 0             | 0.00        |               |                |              |
| 15                                           | 45-49     | Ecig          | 2318  | 22.08 |               |             |               |                |              |
| 15                                           | 45-49     | Dual          | 0     | 0.00  |               |             |               |                |              |
| 15                                           | 45-49     | Former        | 2666  | 25.39 |               |             | 15.45         | 135            | 5.06         |
| Year of Follow-up: 2005, Age Group: 50-54    |           |               |       |       |               |             |               |                |              |
| Period                                       | Age Group | Smoking Group | N     | %     | Ever Quit (N) | Ever Quit % | Mean Yrs Quit | Short Term (n) | Short Term % |
| 15                                           | 50-54     | Never Any     | 5018  | 52.27 |               |             |               |                |              |
| 15                                           | 50-54     | CC            | 191   | 1.99  | 0             | 0.00        |               |                |              |
| 15                                           | 50-54     | Ecig          | 1622  | 16.90 |               |             |               |                |              |
| 15                                           | 50-54     | Dual          | 0     | 0.00  |               |             |               |                |              |
| 15                                           | 50-54     | Former        | 2769  | 28.84 |               |             | 17.84         | 99             | 3.58         |
| Year of Follow-up: 2005, Age Group: 55-59    |           |               |       |       |               |             |               |                |              |
| Period                                       | Age Group | Smoking Group | N     | %     | Ever Quit (N) | Ever Quit % | Mean Yrs Quit | Short Term (n) | Short Term % |
| 15                                           | 55-59     | Never Any     | 4356  | 51.27 |               |             |               |                |              |
| 15                                           | 55-59     | CC            | 166   | 1.95  | 0             | 0.00        |               |                |              |
| 15                                           | 55-59     | Ecig          | 1281  | 15.08 |               |             |               |                |              |
| 15                                           | 55-59     | Dual          | 0     | 0.00  |               |             |               |                |              |
| 15                                           | 55-59     | Former        | 2694  | 31.71 |               |             | 16.95         | 78             | 2.90         |
| Year of Follow-up: 2005, Age Group: 60-64    |           |               |       |       |               |             |               |                |              |
| Period                                       | Age Group | Smoking Group | N     | %     | Ever Quit (N) | Ever Quit % | Mean Yrs Quit | Short Term (n) | Short Term % |
| 15                                           | 60-64     | Never Any     | 3116  | 47.67 |               |             |               |                |              |
| 15                                           | 60-64     | CC            | 131   | 2.00  | 0             | 0.00        |               |                |              |
| 15                                           | 60-64     | Ecig          | 852   | 13.04 |               |             |               |                |              |
| 15                                           | 60-64     | Dual          | 0     | 0.00  |               |             |               |                |              |
| 15                                           | 60-64     | Former        | 2437  | 37.29 |               |             | 20.18         | 93             | 3.82         |
| Year of Follow-up: 2005, Age Group: 65-69    |           |               |       |       |               |             |               |                |              |
| Period                                       | Age Group | Smoking Group | N     | %     | Ever Quit (N) | Ever Quit % | Mean Yrs Quit | Short Term (n) | Short Term % |
| 15                                           | 65-69     | Never Any     | 2684  | 48.50 |               |             |               |                |              |
| 15                                           | 65-69     | CC            | 160   | 2.89  | 0             | 0.00        |               |                |              |
| 15                                           | 65-69     | Ecig          | 591   | 10.68 |               |             |               |                |              |
| 15                                           | 65-69     | Dual          | 0     | 0.00  |               |             |               |                |              |
| 15                                           | 65-69     | Former        | 2099  | 37.93 |               |             | 19.92         | 68             | 3.24         |
| Year of Follow-up: 2005, Age Group: 70-74    |           |               |       |       |               |             |               |                |              |
| Period                                       | Age Group | Smoking Group | N     | %     | Ever Quit (N) | Ever Quit % | Mean Yrs Quit | Short Term (n) | Short Term % |
| 15                                           | 70-74     | Never Any     | 2732  | 51.90 |               |             |               |                |              |
| 15                                           | 70-74     | CC            | 139   | 2.64  | 0             | 0.00        |               |                |              |
| 15                                           | 70-74     | Ecig          | 391   | 7.43  |               |             |               |                |              |
| 15                                           | 70-74     | Dual          | 0     | 0.00  |               |             |               |                |              |
| 15                                           | 70-74     | Former        | 2002  | 38.03 |               |             | 22.67         | 69             | 3.45         |
| Year of Follow-up: 2005, Age Group: 75-79    |           |               |       |       |               |             |               |                |              |
| Period                                       | Age Group | Smoking Group | N     | %     | Ever Quit (N) | Ever Quit % | Mean Yrs Quit | Short Term (n) | Short Term % |
| 15                                           | 75-79     | Never Any     | 3078  | 55.72 |               |             |               |                |              |
| 15                                           | 75-79     | CC            | 146   | 2.64  | 0             | 0.00        |               |                |              |
| 15                                           | 75-79     | Ecig          | 297   | 5.38  |               |             |               |                |              |
| 15                                           | 75-79     | Dual          | 0     | 0.00  |               |             |               |                |              |
| 15                                           | 75-79     | Former        | 2003  | 36.26 |               |             | 22.91         | 56             | 2.80         |
| Year of Follow-up: 2010, Age Group: All Ages |           |               |       |       |               |             |               |                |              |
| Period                                       | Age Group | Smoking Group | N     | %     | Ever Quit (N) | Ever Quit % | Mean Yrs Quit | Short Term (n) | Short Term % |
| 20                                           | All Ages  | Never Any     | 43759 | 53.97 |               |             |               |                |              |
| 20                                           | All Ages  | CC            | 765   | 0.94  | 0             | 0.00        |               |                |              |
| 20                                           | All Ages  | Ecig          | 13785 | 17.00 |               |             |               |                |              |
| 20                                           | All Ages  | Dual          | 0     | 0.00  |               |             |               |                |              |
| 20                                           | All Ages  | Former        | 22772 | 28.09 |               |             | 19.42         | 1117           | 4.91         |
| Year of Follow-up: 2010, Age Group: 18-19    |           |               |       |       |               |             |               |                |              |
| Period                                       | Age Group | Smoking Group | N     | %     | Ever Quit (N) | Ever Quit % | Mean Yrs Quit | Short Term (n) | Short Term % |

**Results for PHIM for Run 6 (Sensitivity\_Analysis\_1.RTF)**

|                                           |           |               |      |       |               |             |               |                |              |
|-------------------------------------------|-----------|---------------|------|-------|---------------|-------------|---------------|----------------|--------------|
| 20                                        | 18-19     | Never Any     | 0    | .     |               |             |               |                |              |
| 20                                        | 18-19     | CC            | 0    | .     | 0             | .           |               |                |              |
| 20                                        | 18-19     | Ecig          | 0    | .     |               |             |               |                |              |
| 20                                        | 18-19     | Dual          | 0    | .     |               |             |               |                |              |
| 20                                        | 18-19     | Former        | 0    | .     |               |             | 0             | .              |              |
| Year of Follow-up: 2010, Age Group: 20-24 |           |               |      |       |               |             |               |                |              |
| Period                                    | Age Group | Smoking Group | N    | %     | Ever Quit (N) | Ever Quit % | Mean Yrs Quit | Short Term (n) | Short Term % |
| 20                                        | 20-24     | Never Any     | 0    | .     |               |             |               |                |              |
| 20                                        | 20-24     | CC            | 0    | .     | 0             | .           |               |                |              |
| 20                                        | 20-24     | Ecig          | 0    | .     |               |             |               |                |              |
| 20                                        | 20-24     | Dual          | 0    | .     |               |             |               |                |              |
| 20                                        | 20-24     | Former        | 0    | .     |               |             |               | 0              | .            |
| Year of Follow-up: 2010, Age Group: 25-29 |           |               |      |       |               |             |               |                |              |
| Period                                    | Age Group | Smoking Group | N    | %     | Ever Quit (N) | Ever Quit % | Mean Yrs Quit | Short Term (n) | Short Term % |
| 20                                        | 25-29     | Never Any     | 0    | .     |               |             |               |                |              |
| 20                                        | 25-29     | CC            | 0    | .     | 0             | .           |               |                |              |
| 20                                        | 25-29     | Ecig          | 0    | .     |               |             |               |                |              |
| 20                                        | 25-29     | Dual          | 0    | .     |               |             |               |                |              |
| 20                                        | 25-29     | Former        | 0    | .     |               |             |               | 0              | .            |
| Year of Follow-up: 2010, Age Group: 30-34 |           |               |      |       |               |             |               |                |              |
| Period                                    | Age Group | Smoking Group | N    | %     | Ever Quit (N) | Ever Quit % | Mean Yrs Quit | Short Term (n) | Short Term % |
| 20                                        | 30-34     | Never Any     | 4743 | 59.81 |               |             |               |                |              |
| 20                                        | 30-34     | CC            | 65   | 0.82  | 0             | 0.00        |               |                |              |
| 20                                        | 30-34     | Ecig          | 1881 | 23.72 |               |             |               |                |              |
| 20                                        | 30-34     | Dual          | 0    | 0.00  |               |             |               |                |              |
| 20                                        | 30-34     | Former        | 1241 | 15.65 |               |             | 9.36          | 130            | 10.48        |
| Year of Follow-up: 2010, Age Group: 35-39 |           |               |      |       |               |             |               |                |              |
| Period                                    | Age Group | Smoking Group | N    | %     | Ever Quit (N) | Ever Quit % | Mean Yrs Quit | Short Term (n) | Short Term % |
| 20                                        | 35-39     | Never Any     | 5359 | 64.18 |               |             |               |                |              |
| 20                                        | 35-39     | CC            | 58   | 0.69  | 0             | 0.00        |               |                |              |
| 20                                        | 35-39     | Ecig          | 1717 | 20.56 |               |             |               |                |              |
| 20                                        | 35-39     | Dual          | 0    | 0.00  |               |             |               |                |              |
| 20                                        | 35-39     | Former        | 1216 | 14.56 |               |             | 11.38         | 98             | 8.06         |
| Year of Follow-up: 2010, Age Group: 40-44 |           |               |      |       |               |             |               |                |              |
| Period                                    | Age Group | Smoking Group | N    | %     | Ever Quit (N) | Ever Quit % | Mean Yrs Quit | Short Term (n) | Short Term % |
| 20                                        | 40-44     | Never Any     | 5189 | 59.01 |               |             |               |                |              |
| 20                                        | 40-44     | CC            | 64   | 0.73  | 0             | 0.00        |               |                |              |
| 20                                        | 40-44     | Ecig          | 1849 | 21.03 |               |             |               |                |              |
| 20                                        | 40-44     | Dual          | 0    | 0.00  |               |             |               |                |              |
| 20                                        | 40-44     | Former        | 1691 | 19.23 |               |             | 15.34         | 112            | 6.62         |
| Year of Follow-up: 2010, Age Group: 45-49 |           |               |      |       |               |             |               |                |              |
| Period                                    | Age Group | Smoking Group | N    | %     | Ever Quit (N) | Ever Quit % | Mean Yrs Quit | Short Term (n) | Short Term % |
| 20                                        | 45-49     | Never Any     | 5284 | 52.43 |               |             |               |                |              |
| 20                                        | 45-49     | CC            | 105  | 1.04  | 0             | 0.00        |               |                |              |
| 20                                        | 45-49     | Ecig          | 2327 | 23.09 |               |             |               |                |              |
| 20                                        | 45-49     | Dual          | 0    | 0.00  |               |             |               |                |              |
| 20                                        | 45-49     | Former        | 2362 | 23.44 |               |             | 17.71         | 131            | 5.55         |
| Year of Follow-up: 2010, Age Group: 50-54 |           |               |      |       |               |             |               |                |              |
| Period                                    | Age Group | Smoking Group | N    | %     | Ever Quit (N) | Ever Quit % | Mean Yrs Quit | Short Term (n) | Short Term % |
| 20                                        | 50-54     | Never Any     | 5278 | 50.27 |               |             |               |                |              |
| 20                                        | 50-54     | CC            | 101  | 0.96  | 0             | 0.00        |               |                |              |
| 20                                        | 50-54     | Ecig          | 2101 | 20.01 |               |             |               |                |              |
| 20                                        | 50-54     | Dual          | 0    | 0.00  |               |             |               |                |              |
| 20                                        | 50-54     | Former        | 3019 | 28.76 |               |             | 18.27         | 163            | 5.40         |
| Year of Follow-up: 2010, Age Group: 55-59 |           |               |      |       |               |             |               |                |              |
| Period                                    | Age Group | Smoking Group | N    | %     | Ever Quit (N) | Ever Quit % | Mean Yrs Quit | Short Term (n) | Short Term % |
| 20                                        | 55-59     | Never Any     | 5018 | 52.27 |               |             |               |                |              |
| 20                                        | 55-59     | CC            | 91   | 0.95  | 0             | 0.00        |               |                |              |
| 20                                        | 55-59     | Ecig          | 1433 | 14.93 |               |             |               |                |              |
| 20                                        | 55-59     | Dual          | 0    | 0.00  |               |             |               |                |              |
| 20                                        | 55-59     | Former        | 3058 | 31.85 |               |             | 20.88         | 103            | 3.37         |
| Year of Follow-up: 2010, Age Group: 60-64 |           |               |      |       |               |             |               |                |              |
| Period                                    | Age Group | Smoking Group | N    | %     | Ever Quit (N) | Ever Quit % | Mean Yrs Quit | Short Term (n) | Short Term % |
| 20                                        | 60-64     | Never Any     | 4356 | 51.27 |               |             |               |                |              |
| 20                                        | 60-64     | CC            | 71   | 0.84  | 0             | 0.00        |               |                |              |
| 20                                        | 60-64     | Ecig          | 1079 | 12.70 |               |             |               |                |              |
| 20                                        | 60-64     | Dual          | 0    | 0.00  |               |             |               |                |              |
| 20                                        | 60-64     | Former        | 2991 | 35.20 |               |             | 19.94         | 144            | 4.81         |
| Year of Follow-up: 2010, Age Group: 65-69 |           |               |      |       |               |             |               |                |              |

**Results for PHIM for Run 6 (Sensitivity\_Analysis\_1.RTF)**

| Period                                       | Age Group | Smoking Group | N     | %     | Ever Quit (N) | Ever Quit % | Mean Yrs Quit | Short Term (n) | Short Term % |
|----------------------------------------------|-----------|---------------|-------|-------|---------------|-------------|---------------|----------------|--------------|
| 20                                           | 65-69     | Never Any     | 3116  | 47.67 |               |             |               |                |              |
| 20                                           | 65-69     | CC            | 47    | 0.72  | 0             | 0.00        |               |                |              |
| 20                                           | 65-69     | Ecig          | 645   | 9.87  |               |             |               |                |              |
| 20                                           | 65-69     | Dual          | 0     | 0.00  |               |             |               |                |              |
| 20                                           | 65-69     | Former        | 2728  | 41.74 |               |             | 22.72         | 95             | 3.48         |
| Year of Follow-up: 2010, Age Group: 70-74    |           |               |       |       |               |             |               |                |              |
| Period                                       | Age Group | Smoking Group | N     | %     | Ever Quit (N) | Ever Quit % | Mean Yrs Quit | Short Term (n) | Short Term % |
| 20                                           | 70-74     | Never Any     | 2684  | 48.50 |               |             |               |                |              |
| 20                                           | 70-74     | CC            | 88    | 1.59  | 0             | 0.00        |               |                |              |
| 20                                           | 70-74     | Ecig          | 477   | 8.62  |               |             |               |                |              |
| 20                                           | 70-74     | Dual          | 0     | 0.00  |               |             |               |                |              |
| 20                                           | 70-74     | Former        | 2285  | 41.29 |               |             | 23.05         | 69             | 3.02         |
| Year of Follow-up: 2010, Age Group: 75-79    |           |               |       |       |               |             |               |                |              |
| Period                                       | Age Group | Smoking Group | N     | %     | Ever Quit (N) | Ever Quit % | Mean Yrs Quit | Short Term (n) | Short Term % |
| 20                                           | 75-79     | Never Any     | 2732  | 51.90 |               |             |               |                |              |
| 20                                           | 75-79     | CC            | 75    | 1.42  | 0             | 0.00        |               |                |              |
| 20                                           | 75-79     | Ecig          | 276   | 5.24  |               |             |               |                |              |
| 20                                           | 75-79     | Dual          | 0     | 0.00  |               |             |               |                |              |
| 20                                           | 75-79     | Former        | 2181  | 41.43 |               |             | 25.56         | 72             | 3.30         |
| Year of Follow-up: 2015, Age Group: All Ages |           |               |       |       |               |             |               |                |              |
| Period                                       | Age Group | Smoking Group | N     | %     | Ever Quit (N) | Ever Quit % | Mean Yrs Quit | Short Term (n) | Short Term % |
| 25                                           | All Ages  | Never Any     | 41010 | 54.09 |               |             |               |                |              |
| 25                                           | All Ages  | CC            | 340   | 0.45  | 0             | 0.00        |               |                |              |
| 25                                           | All Ages  | Ecig          | 11438 | 15.09 |               |             |               |                |              |
| 25                                           | All Ages  | Dual          | 0     | 0.00  |               |             |               |                |              |
| 25                                           | All Ages  | Former        | 23029 | 30.37 |               |             | 21.48         | 914            | 3.97         |
| Year of Follow-up: 2015, Age Group: 18-19    |           |               |       |       |               |             |               |                |              |
| Period                                       | Age Group | Smoking Group | N     | %     | Ever Quit (N) | Ever Quit % | Mean Yrs Quit | Short Term (n) | Short Term % |
| 25                                           | 18-19     | Never Any     | 0     | .     |               |             |               |                |              |
| 25                                           | 18-19     | CC            | 0     | .     | 0             | .           |               |                |              |
| 25                                           | 18-19     | Ecig          | 0     | .     |               |             |               |                |              |
| 25                                           | 18-19     | Dual          | 0     | .     |               |             |               |                |              |
| 25                                           | 18-19     | Former        | 0     | .     |               |             | .             | 0              | .            |
| Year of Follow-up: 2015, Age Group: 20-24    |           |               |       |       |               |             |               |                |              |
| Period                                       | Age Group | Smoking Group | N     | %     | Ever Quit (N) | Ever Quit % | Mean Yrs Quit | Short Term (n) | Short Term % |
| 25                                           | 20-24     | Never Any     | 0     | .     |               |             |               |                |              |
| 25                                           | 20-24     | CC            | 0     | .     | 0             | .           |               |                |              |
| 25                                           | 20-24     | Ecig          | 0     | .     |               |             |               |                |              |
| 25                                           | 20-24     | Dual          | 0     | .     |               |             |               |                |              |
| 25                                           | 20-24     | Former        | 0     | .     |               |             | .             | 0              | .            |
| Year of Follow-up: 2015, Age Group: 25-29    |           |               |       |       |               |             |               |                |              |
| Period                                       | Age Group | Smoking Group | N     | %     | Ever Quit (N) | Ever Quit % | Mean Yrs Quit | Short Term (n) | Short Term % |
| 25                                           | 25-29     | Never Any     | 0     | .     |               |             |               |                |              |
| 25                                           | 25-29     | CC            | 0     | .     | 0             | .           |               |                |              |
| 25                                           | 25-29     | Ecig          | 0     | .     |               |             |               |                |              |
| 25                                           | 25-29     | Dual          | 0     | .     |               |             |               |                |              |
| 25                                           | 25-29     | Former        | 0     | .     |               |             | .             | 0              | .            |
| Year of Follow-up: 2015, Age Group: 30-34    |           |               |       |       |               |             |               |                |              |
| Period                                       | Age Group | Smoking Group | N     | %     | Ever Quit (N) | Ever Quit % | Mean Yrs Quit | Short Term (n) | Short Term % |
| 25                                           | 30-34     | Never Any     | 0     | .     |               |             |               |                |              |
| 25                                           | 30-34     | CC            | 0     | .     | 0             | .           |               |                |              |
| 25                                           | 30-34     | Ecig          | 0     | .     |               |             |               |                |              |
| 25                                           | 30-34     | Dual          | 0     | .     |               |             |               |                |              |
| 25                                           | 30-34     | Former        | 0     | .     |               |             | .             | 0              | .            |
| Year of Follow-up: 2015, Age Group: 35-39    |           |               |       |       |               |             |               |                |              |
| Period                                       | Age Group | Smoking Group | N     | %     | Ever Quit (N) | Ever Quit % | Mean Yrs Quit | Short Term (n) | Short Term % |
| 25                                           | 35-39     | Never Any     | 4726  | 59.60 |               |             |               |                |              |
| 25                                           | 35-39     | CC            | 20    | 0.25  | 0             | 0.00        |               |                |              |
| 25                                           | 35-39     | Ecig          | 1567  | 19.76 |               |             |               |                |              |
| 25                                           | 35-39     | Dual          | 0     | 0.00  |               |             |               |                |              |
| 25                                           | 35-39     | Former        | 1617  | 20.39 |               |             | 11.52         | 129            | 7.98         |
| Year of Follow-up: 2015, Age Group: 40-44    |           |               |       |       |               |             |               |                |              |
| Period                                       | Age Group | Smoking Group | N     | %     | Ever Quit (N) | Ever Quit % | Mean Yrs Quit | Short Term (n) | Short Term % |
| 25                                           | 40-44     | Never Any     | 5359  | 64.18 |               |             |               |                |              |
| 25                                           | 40-44     | CC            | 33    | 0.40  | 0             | 0.00        |               |                |              |
| 25                                           | 40-44     | Ecig          | 1502  | 17.99 |               |             |               |                |              |
| 25                                           | 40-44     | Dual          | 0     | 0.00  |               |             |               |                |              |



**Results for PHIM for Run 6 (Sensitivity\_Analysis\_1.RTF)**

|                                              |           |               |       |       |               |             |               |                |              |
|----------------------------------------------|-----------|---------------|-------|-------|---------------|-------------|---------------|----------------|--------------|
| 25                                           | 40-44     | Former        | 1456  | 17.44 |               |             | 14.00         | 103            | 7.07         |
| Year of Follow-up: 2015, Age Group: 45-49    |           |               |       |       |               |             |               |                |              |
| Period                                       | Age Group | Smoking Group | N     | %     | Ever Quit (N) | Ever Quit % | Mean Yrs Quit | Short Term (n) | Short Term % |
| 25                                           | 45-49     | Never Any     | 5189  | 59.01 |               |             |               |                |              |
| 25                                           | 45-49     | CC            | 32    | 0.36  | 0             | 0.00        |               |                |              |
| 25                                           | 45-49     | Ecig          | 1627  | 18.50 |               |             |               |                |              |
| 25                                           | 45-49     | Dual          | 0     | 0.00  |               |             |               |                |              |
| 25                                           | 45-49     | Former        | 1945  | 22.12 |               |             | 17.95         | 96             | 4.94         |
| Year of Follow-up: 2015, Age Group: 50-54    |           |               |       |       |               |             |               |                |              |
| Period                                       | Age Group | Smoking Group | N     | %     | Ever Quit (N) | Ever Quit % | Mean Yrs Quit | Short Term (n) | Short Term % |
| 25                                           | 50-54     | Never Any     | 5284  | 52.43 |               |             |               |                |              |
| 25                                           | 50-54     | CC            | 45    | 0.45  | 0             | 0.00        |               |                |              |
| 25                                           | 50-54     | Ecig          | 2059  | 20.43 |               |             |               |                |              |
| 25                                           | 50-54     | Dual          | 0     | 0.00  |               |             |               |                |              |
| 25                                           | 50-54     | Former        | 2690  | 26.69 |               |             | 20.17         | 150            | 5.58         |
| Year of Follow-up: 2015, Age Group: 55-59    |           |               |       |       |               |             |               |                |              |
| Period                                       | Age Group | Smoking Group | N     | %     | Ever Quit (N) | Ever Quit % | Mean Yrs Quit | Short Term (n) | Short Term % |
| 25                                           | 55-59     | Never Any     | 5278  | 50.27 |               |             |               |                |              |
| 25                                           | 55-59     | CC            | 37    | 0.35  | 0             | 0.00        |               |                |              |
| 25                                           | 55-59     | Ecig          | 1773  | 16.89 |               |             |               |                |              |
| 25                                           | 55-59     | Dual          | 0     | 0.00  |               |             |               |                |              |
| 25                                           | 55-59     | Former        | 3411  | 32.49 |               |             | 20.84         | 140            | 4.10         |
| Year of Follow-up: 2015, Age Group: 60-64    |           |               |       |       |               |             |               |                |              |
| Period                                       | Age Group | Smoking Group | N     | %     | Ever Quit (N) | Ever Quit % | Mean Yrs Quit | Short Term (n) | Short Term % |
| 25                                           | 60-64     | Never Any     | 5018  | 52.27 |               |             |               |                |              |
| 25                                           | 60-64     | CC            | 42    | 0.44  | 0             | 0.00        |               |                |              |
| 25                                           | 60-64     | Ecig          | 1154  | 12.02 |               |             |               |                |              |
| 25                                           | 60-64     | Dual          | 0     | 0.00  |               |             |               |                |              |
| 25                                           | 60-64     | Former        | 3386  | 35.27 |               |             | 23.56         | 144            | 4.25         |
| Year of Follow-up: 2015, Age Group: 65-69    |           |               |       |       |               |             |               |                |              |
| Period                                       | Age Group | Smoking Group | N     | %     | Ever Quit (N) | Ever Quit % | Mean Yrs Quit | Short Term (n) | Short Term % |
| 25                                           | 65-69     | Never Any     | 4356  | 51.27 |               |             |               |                |              |
| 25                                           | 65-69     | CC            | 41    | 0.48  | 0             | 0.00        |               |                |              |
| 25                                           | 65-69     | Ecig          | 844   | 9.93  |               |             |               |                |              |
| 25                                           | 65-69     | Dual          | 0     | 0.00  |               |             |               |                |              |
| 25                                           | 65-69     | Former        | 3256  | 38.32 |               |             | 23.12         | 70             | 2.15         |
| Year of Follow-up: 2015, Age Group: 70-74    |           |               |       |       |               |             |               |                |              |
| Period                                       | Age Group | Smoking Group | N     | %     | Ever Quit (N) | Ever Quit % | Mean Yrs Quit | Short Term (n) | Short Term % |
| 25                                           | 70-74     | Never Any     | 3116  | 47.67 |               |             |               |                |              |
| 25                                           | 70-74     | CC            | 31    | 0.47  | 0             | 0.00        |               |                |              |
| 25                                           | 70-74     | Ecig          | 527   | 8.06  |               |             |               |                |              |
| 25                                           | 70-74     | Dual          | 0     | 0.00  |               |             |               |                |              |
| 25                                           | 70-74     | Former        | 2862  | 43.79 |               |             | 26.54         | 42             | 1.47         |
| Year of Follow-up: 2015, Age Group: 75-79    |           |               |       |       |               |             |               |                |              |
| Period                                       | Age Group | Smoking Group | N     | %     | Ever Quit (N) | Ever Quit % | Mean Yrs Quit | Short Term (n) | Short Term % |
| 25                                           | 75-79     | Never Any     | 2684  | 48.50 |               |             |               |                |              |
| 25                                           | 75-79     | CC            | 59    | 1.07  | 0             | 0.00        |               |                |              |
| 25                                           | 75-79     | Ecig          | 385   | 6.96  |               |             |               |                |              |
| 25                                           | 75-79     | Dual          | 0     | 0.00  |               |             |               |                |              |
| 25                                           | 75-79     | Former        | 2406  | 43.48 |               |             | 26.76         | 40             | 1.66         |
| Year of Follow-up: 2020, Age Group: All Ages |           |               |       |       |               |             |               |                |              |
| Period                                       | Age Group | Smoking Group | N     | %     | Ever Quit (N) | Ever Quit % | Mean Yrs Quit | Short Term (n) | Short Term % |
| 30                                           | All Ages  | Never Any     | 38326 | 54.53 |               |             |               |                |              |
| 30                                           | All Ages  | CC            | 115   | 0.16  | 0             | 0.00        |               |                |              |
| 30                                           | All Ages  | Ecig          | 9272  | 13.19 |               |             |               |                |              |
| 30                                           | All Ages  | Dual          | 0     | 0.00  |               |             |               |                |              |
| 30                                           | All Ages  | Former        | 22570 | 32.11 |               |             | 23.81         | 756            | 3.35         |
| Year of Follow-up: 2020, Age Group: 18-19    |           |               |       |       |               |             |               |                |              |
| Period                                       | Age Group | Smoking Group | N     | %     | Ever Quit (N) | Ever Quit % | Mean Yrs Quit | Short Term (n) | Short Term % |
| 30                                           | 18-19     | Never Any     | 0     | .     |               |             |               |                |              |
| 30                                           | 18-19     | CC            | 0     | .     | 0             | .           |               |                |              |
| 30                                           | 18-19     | Ecig          | 0     | .     |               |             |               |                |              |
| 30                                           | 18-19     | Dual          | 0     | .     |               |             |               |                |              |
| 30                                           | 18-19     | Former        | 0     | .     |               |             | .             | 0              | .            |
| Year of Follow-up: 2020, Age Group: 20-24    |           |               |       |       |               |             |               |                |              |
| Period                                       | Age Group | Smoking Group | N     | %     | Ever Quit (N) | Ever Quit % | Mean Yrs Quit | Short Term (n) | Short Term % |
| 30                                           | 20-24     | Never Any     | 0     | .     |               |             |               |                |              |
| 30                                           | 20-24     | CC            | 0     | .     | 0             | .           |               |                |              |

**Results for PHIM for Run 6 (Sensitivity\_Analysis\_1.RTF)**

|                                           |           |               |      |       |               |             |               |                |              |
|-------------------------------------------|-----------|---------------|------|-------|---------------|-------------|---------------|----------------|--------------|
| 30                                        | 20-24     | Ecig          | 0    | .     |               |             |               |                |              |
| 30                                        | 20-24     | Dual          | 0    | .     |               |             |               |                |              |
| 30                                        | 20-24     | Former        | 0    | .     |               |             | 0             | .              |              |
| Year of Follow-up: 2020, Age Group: 25-29 |           |               |      |       |               |             |               |                |              |
| Period                                    | Age Group | Smoking Group | N    | %     | Ever Quit (N) | Ever Quit % | Mean Yrs Quit | Short Term (n) | Short Term % |
| 30                                        | 25-29     | Never Any     | 0    | .     |               |             |               |                |              |
| 30                                        | 25-29     | CC            | 0    | .     | 0             | .           |               |                |              |
| 30                                        | 25-29     | Ecig          | 0    | .     |               |             |               |                |              |
| 30                                        | 25-29     | Dual          | 0    | .     |               |             |               |                |              |
| 30                                        | 25-29     | Former        | 0    | .     |               |             | 0             | .              |              |
| Year of Follow-up: 2020, Age Group: 30-34 |           |               |      |       |               |             |               |                |              |
| Period                                    | Age Group | Smoking Group | N    | %     | Ever Quit (N) | Ever Quit % | Mean Yrs Quit | Short Term (n) | Short Term % |
| 30                                        | 30-34     | Never Any     | 0    | .     |               |             |               |                |              |
| 30                                        | 30-34     | CC            | 0    | .     | 0             | .           |               |                |              |
| 30                                        | 30-34     | Ecig          | 0    | .     |               |             |               |                |              |
| 30                                        | 30-34     | Dual          | 0    | .     |               |             |               |                |              |
| 30                                        | 30-34     | Former        | 0    | .     |               |             | 0             | .              |              |
| Year of Follow-up: 2020, Age Group: 35-39 |           |               |      |       |               |             |               |                |              |
| Period                                    | Age Group | Smoking Group | N    | %     | Ever Quit (N) | Ever Quit % | Mean Yrs Quit | Short Term (n) | Short Term % |
| 30                                        | 35-39     | Never Any     | 0    | .     |               |             |               |                |              |
| 30                                        | 35-39     | CC            | 0    | .     | 0             | .           |               |                |              |
| 30                                        | 35-39     | Ecig          | 0    | .     |               |             |               |                |              |
| 30                                        | 35-39     | Dual          | 0    | .     |               |             |               |                |              |
| 30                                        | 35-39     | Former        | 0    | .     |               |             | 0             | .              |              |
| Year of Follow-up: 2020, Age Group: 40-44 |           |               |      |       |               |             |               |                |              |
| Period                                    | Age Group | Smoking Group | N    | %     | Ever Quit (N) | Ever Quit % | Mean Yrs Quit | Short Term (n) | Short Term % |
| 30                                        | 40-44     | Never Any     | 4726 | 59.60 |               |             |               |                |              |
| 30                                        | 40-44     | CC            | 6    | 0.08  | 0             | 0.00        |               |                |              |
| 30                                        | 40-44     | Ecig          | 1345 | 16.96 |               |             |               |                |              |
| 30                                        | 40-44     | Dual          | 0    | 0.00  |               |             |               |                |              |
| 30                                        | 40-44     | Former        | 1853 | 23.37 |               |             | 14.68         | 82             | 4.43         |
| Year of Follow-up: 2020, Age Group: 45-49 |           |               |      |       |               |             |               |                |              |
| Period                                    | Age Group | Smoking Group | N    | %     | Ever Quit (N) | Ever Quit % | Mean Yrs Quit | Short Term (n) | Short Term % |
| 30                                        | 45-49     | Never Any     | 5359 | 64.18 |               |             |               |                |              |
| 30                                        | 45-49     | CC            | 13   | 0.16  | 0             | 0.00        |               |                |              |
| 30                                        | 45-49     | Ecig          | 1317 | 15.77 |               |             |               |                |              |
| 30                                        | 45-49     | Dual          | 0    | 0.00  |               |             |               |                |              |
| 30                                        | 45-49     | Former        | 1661 | 19.89 |               |             | 16.93         | 71             | 4.27         |
| Year of Follow-up: 2020, Age Group: 50-54 |           |               |      |       |               |             |               |                |              |
| Period                                    | Age Group | Smoking Group | N    | %     | Ever Quit (N) | Ever Quit % | Mean Yrs Quit | Short Term (n) | Short Term % |
| 30                                        | 50-54     | Never Any     | 5189 | 59.01 |               |             |               |                |              |
| 30                                        | 50-54     | CC            | 9    | 0.10  | 0             | 0.00        |               |                |              |
| 30                                        | 50-54     | Ecig          | 1395 | 15.86 |               |             |               |                |              |
| 30                                        | 50-54     | Dual          | 0    | 0.00  |               |             |               |                |              |
| 30                                        | 50-54     | Former        | 2200 | 25.02 |               |             | 20.50         | 121            | 5.50         |
| Year of Follow-up: 2020, Age Group: 55-59 |           |               |      |       |               |             |               |                |              |
| Period                                    | Age Group | Smoking Group | N    | %     | Ever Quit (N) | Ever Quit % | Mean Yrs Quit | Short Term (n) | Short Term % |
| 30                                        | 55-59     | Never Any     | 5284 | 52.43 |               |             |               |                |              |
| 30                                        | 55-59     | CC            | 14   | 0.14  | 0             | 0.00        |               |                |              |
| 30                                        | 55-59     | Ecig          | 1708 | 16.95 |               |             |               |                |              |
| 30                                        | 55-59     | Dual          | 0    | 0.00  |               |             |               |                |              |
| 30                                        | 55-59     | Former        | 3072 | 30.48 |               |             | 22.30         | 140            | 4.56         |
| Year of Follow-up: 2020, Age Group: 60-64 |           |               |      |       |               |             |               |                |              |
| Period                                    | Age Group | Smoking Group | N    | %     | Ever Quit (N) | Ever Quit % | Mean Yrs Quit | Short Term (n) | Short Term % |
| 30                                        | 60-64     | Never Any     | 5278 | 50.27 |               |             |               |                |              |
| 30                                        | 60-64     | CC            | 15   | 0.14  | 0             | 0.00        |               |                |              |
| 30                                        | 60-64     | Ecig          | 1428 | 13.60 |               |             |               |                |              |
| 30                                        | 60-64     | Dual          | 0    | 0.00  |               |             |               |                |              |
| 30                                        | 60-64     | Former        | 3778 | 35.98 |               |             | 23.52         | 153            | 4.05         |
| Year of Follow-up: 2020, Age Group: 65-69 |           |               |      |       |               |             |               |                |              |
| Period                                    | Age Group | Smoking Group | N    | %     | Ever Quit (N) | Ever Quit % | Mean Yrs Quit | Short Term (n) | Short Term % |
| 30                                        | 65-69     | Never Any     | 5018 | 52.27 |               |             |               |                |              |
| 30                                        | 65-69     | CC            | 18   | 0.19  | 0             | 0.00        |               |                |              |
| 30                                        | 65-69     | Ecig          | 917  | 9.55  |               |             |               |                |              |
| 30                                        | 65-69     | Dual          | 0    | 0.00  |               |             |               |                |              |
| 30                                        | 65-69     | Former        | 3647 | 37.99 |               |             | 26.68         | 75             | 2.06         |
| Year of Follow-up: 2020, Age Group: 70-74 |           |               |      |       |               |             |               |                |              |
| Period                                    | Age Group | Smoking Group | N    | %     | Ever Quit (N) | Ever Quit % | Mean Yrs Quit | Short Term (n) | Short Term % |

**Results for PHIM for Run 6 (Sensitivity\_Analysis\_1.RTF)**

|                                              |           |               |       |       |               |             |               |                |              |
|----------------------------------------------|-----------|---------------|-------|-------|---------------|-------------|---------------|----------------|--------------|
| 30                                           | 70-74     | Never Any     | 4356  | 51.27 |               |             |               |                |              |
| 30                                           | 70-74     | CC            | 22    | 0.26  | 0             | 0.00        |               |                |              |
| 30                                           | 70-74     | Ecig          | 727   | 8.56  |               |             |               |                |              |
| 30                                           | 70-74     | Dual          | 0     | 0.00  |               |             |               |                |              |
| 30                                           | 70-74     | Former        | 3392  | 39.92 |               |             | 27.06         | 66             | 1.95         |
| Year of Follow-up: 2020, Age Group: 75-79    |           |               |       |       |               |             |               |                |              |
| Period                                       | Age Group | Smoking Group | N     | %     | Ever Quit (N) | Ever Quit % | Mean Yrs Quit | Short Term (n) | Short Term % |
| 30                                           | 75-79     | Never Any     | 3116  | 47.67 |               |             |               |                |              |
| 30                                           | 75-79     | CC            | 18    | 0.28  | 0             | 0.00        |               |                |              |
| 30                                           | 75-79     | Ecig          | 435   | 6.66  |               |             |               |                |              |
| 30                                           | 75-79     | Dual          | 0     | 0.00  |               |             |               |                |              |
| 30                                           | 75-79     | Former        | 2967  | 45.39 |               |             | 30.49         | 48             | 1.62         |
| Year of Follow-up: 2025, Age Group: All Ages |           |               |       |       |               |             |               |                |              |
| Period                                       | Age Group | Smoking Group | N     | %     | Ever Quit (N) | Ever Quit % | Mean Yrs Quit | Short Term (n) | Short Term % |
| 35                                           | All Ages  | Never Any     | 35210 | 55.23 |               |             |               |                |              |
| 35                                           | All Ages  | CC            | 47    | 0.07  | 0             | 0.00        |               |                |              |
| 35                                           | All Ages  | Ecig          | 7305  | 11.46 |               |             |               |                |              |
| 35                                           | All Ages  | Dual          | 0     | 0.00  |               |             |               |                |              |
| 35                                           | All Ages  | Former        | 21185 | 33.23 |               |             | 25.87         | 616            | 2.91         |
| Year of Follow-up: 2025, Age Group: 18-19    |           |               |       |       |               |             |               |                |              |
| Period                                       | Age Group | Smoking Group | N     | %     | Ever Quit (N) | Ever Quit % | Mean Yrs Quit | Short Term (n) | Short Term % |
| 35                                           | 18-19     | Never Any     | 0     | .     |               |             |               |                |              |
| 35                                           | 18-19     | CC            | 0     | .     | 0             | .           |               |                |              |
| 35                                           | 18-19     | Ecig          | 0     | .     |               |             |               |                |              |
| 35                                           | 18-19     | Dual          | 0     | .     |               |             |               |                |              |
| 35                                           | 18-19     | Former        | 0     | .     |               |             | .             | 0              | .            |
| Year of Follow-up: 2025, Age Group: 20-24    |           |               |       |       |               |             |               |                |              |
| Period                                       | Age Group | Smoking Group | N     | %     | Ever Quit (N) | Ever Quit % | Mean Yrs Quit | Short Term (n) | Short Term % |
| 35                                           | 20-24     | Never Any     | 0     | .     |               |             |               |                |              |
| 35                                           | 20-24     | CC            | 0     | .     | 0             | .           |               |                |              |
| 35                                           | 20-24     | Ecig          | 0     | .     |               |             |               |                |              |
| 35                                           | 20-24     | Dual          | 0     | .     |               |             |               |                |              |
| 35                                           | 20-24     | Former        | 0     | .     |               |             | .             | 0              | .            |
| Year of Follow-up: 2025, Age Group: 25-29    |           |               |       |       |               |             |               |                |              |
| Period                                       | Age Group | Smoking Group | N     | %     | Ever Quit (N) | Ever Quit % | Mean Yrs Quit | Short Term (n) | Short Term % |
| 35                                           | 25-29     | Never Any     | 0     | .     |               |             |               |                |              |
| 35                                           | 25-29     | CC            | 0     | .     | 0             | .           |               |                |              |
| 35                                           | 25-29     | Ecig          | 0     | .     |               |             |               |                |              |
| 35                                           | 25-29     | Dual          | 0     | .     |               |             |               |                |              |
| 35                                           | 25-29     | Former        | 0     | .     |               |             | .             | 0              | .            |
| Year of Follow-up: 2025, Age Group: 30-34    |           |               |       |       |               |             |               |                |              |
| Period                                       | Age Group | Smoking Group | N     | %     | Ever Quit (N) | Ever Quit % | Mean Yrs Quit | Short Term (n) | Short Term % |
| 35                                           | 30-34     | Never Any     | 0     | .     |               |             |               |                |              |
| 35                                           | 30-34     | CC            | 0     | .     | 0             | .           |               |                |              |
| 35                                           | 30-34     | Ecig          | 0     | .     |               |             |               |                |              |
| 35                                           | 30-34     | Dual          | 0     | .     |               |             |               |                |              |
| 35                                           | 30-34     | Former        | 0     | .     |               |             | .             | 0              | .            |
| Year of Follow-up: 2025, Age Group: 35-39    |           |               |       |       |               |             |               |                |              |
| Period                                       | Age Group | Smoking Group | N     | %     | Ever Quit (N) | Ever Quit % | Mean Yrs Quit | Short Term (n) | Short Term % |
| 35                                           | 35-39     | Never Any     | 0     | .     |               |             |               |                |              |
| 35                                           | 35-39     | CC            | 0     | .     | 0             | .           |               |                |              |
| 35                                           | 35-39     | Ecig          | 0     | .     |               |             |               |                |              |
| 35                                           | 35-39     | Dual          | 0     | .     |               |             |               |                |              |
| 35                                           | 35-39     | Former        | 0     | .     |               |             | .             | 0              | .            |
| Year of Follow-up: 2025, Age Group: 40-44    |           |               |       |       |               |             |               |                |              |
| Period                                       | Age Group | Smoking Group | N     | %     | Ever Quit (N) | Ever Quit % | Mean Yrs Quit | Short Term (n) | Short Term % |
| 35                                           | 40-44     | Never Any     | 0     | .     |               |             |               |                |              |
| 35                                           | 40-44     | CC            | 0     | .     | 0             | .           |               |                |              |
| 35                                           | 40-44     | Ecig          | 0     | .     |               |             |               |                |              |
| 35                                           | 40-44     | Dual          | 0     | .     |               |             |               |                |              |
| 35                                           | 40-44     | Former        | 0     | .     |               |             | .             | 0              | .            |
| Year of Follow-up: 2025, Age Group: 45-49    |           |               |       |       |               |             |               |                |              |
| Period                                       | Age Group | Smoking Group | N     | %     | Ever Quit (N) | Ever Quit % | Mean Yrs Quit | Short Term (n) | Short Term % |
| 35                                           | 45-49     | Never Any     | 4726  | 59.60 |               |             |               |                |              |
| 35                                           | 45-49     | CC            | 1     | 0.01  | 0             | 0.00        |               |                |              |
| 35                                           | 45-49     | Ecig          | 1146  | 14.45 |               |             |               |                |              |
| 35                                           | 45-49     | Dual          | 0     | 0.00  |               |             |               |                |              |
| 35                                           | 45-49     | Former        | 2057  | 25.94 |               |             | 17.95         | 74             | 3.60         |
| Year of Follow-up: 2025, Age Group: 50-54    |           |               |       |       |               |             |               |                |              |

**Results for PHIM for Run 6 (Sensitivity\_Analysis\_1.RTF)**

| Period                                       | Age Group | Smoking Group | N     | %     | Ever Quit (N) | Ever Quit % | Mean Yrs Quit | Short Term (n) | Short Term % |
|----------------------------------------------|-----------|---------------|-------|-------|---------------|-------------|---------------|----------------|--------------|
| 35                                           | 50-54     | Never Any     | 5359  | 64.18 |               |             |               |                |              |
| 35                                           | 50-54     | CC            | 3     | 0.04  | 0             | 0.00        |               |                |              |
| 35                                           | 50-54     | Ecig          | 1112  | 13.32 |               |             |               |                |              |
| 35                                           | 50-54     | Dual          | 0     | 0.00  |               |             |               |                |              |
| 35                                           | 50-54     | Former        | 1876  | 22.47 |               |             | 19.62         | 104            | 5.54         |
| Year of Follow-up: 2025, Age Group: 55-59    |           |               |       |       |               |             |               |                |              |
| Period                                       | Age Group | Smoking Group | N     | %     | Ever Quit (N) | Ever Quit % | Mean Yrs Quit | Short Term (n) | Short Term % |
| 35                                           | 55-59     | Never Any     | 5189  | 59.01 |               |             |               |                |              |
| 35                                           | 55-59     | CC            | 4     | 0.05  | 0             | 0.00        |               |                |              |
| 35                                           | 55-59     | Ecig          | 1153  | 13.11 |               |             |               |                |              |
| 35                                           | 55-59     | Dual          | 0     | 0.00  |               |             |               |                |              |
| 35                                           | 55-59     | Former        | 2447  | 27.83 |               |             | 23.13         | 98             | 4.00         |
| Year of Follow-up: 2025, Age Group: 60-64    |           |               |       |       |               |             |               |                |              |
| Period                                       | Age Group | Smoking Group | N     | %     | Ever Quit (N) | Ever Quit % | Mean Yrs Quit | Short Term (n) | Short Term % |
| 35                                           | 60-64     | Never Any     | 5284  | 52.43 |               |             |               |                |              |
| 35                                           | 60-64     | CC            | 7     | 0.07  | 0             | 0.00        |               |                |              |
| 35                                           | 60-64     | Ecig          | 1378  | 13.67 |               |             |               |                |              |
| 35                                           | 60-64     | Dual          | 0     | 0.00  |               |             |               |                |              |
| 35                                           | 60-64     | Former        | 3409  | 33.83 |               |             | 24.79         | 139            | 4.08         |
| Year of Follow-up: 2025, Age Group: 65-69    |           |               |       |       |               |             |               |                |              |
| Period                                       | Age Group | Smoking Group | N     | %     | Ever Quit (N) | Ever Quit % | Mean Yrs Quit | Short Term (n) | Short Term % |
| 35                                           | 65-69     | Never Any     | 5278  | 50.27 |               |             |               |                |              |
| 35                                           | 65-69     | CC            | 7     | 0.07  | 0             | 0.00        |               |                |              |
| 35                                           | 65-69     | Ecig          | 1139  | 10.85 |               |             |               |                |              |
| 35                                           | 65-69     | Dual          | 0     | 0.00  |               |             |               |                |              |
| 35                                           | 65-69     | Former        | 4075  | 38.81 |               |             | 26.61         | 83             | 2.04         |
| Year of Follow-up: 2025, Age Group: 70-74    |           |               |       |       |               |             |               |                |              |
| Period                                       | Age Group | Smoking Group | N     | %     | Ever Quit (N) | Ever Quit % | Mean Yrs Quit | Short Term (n) | Short Term % |
| 35                                           | 70-74     | Never Any     | 5018  | 52.27 |               |             |               |                |              |
| 35                                           | 70-74     | CC            | 11    | 0.11  | 0             | 0.00        |               |                |              |
| 35                                           | 70-74     | Ecig          | 789   | 8.22  |               |             |               |                |              |
| 35                                           | 70-74     | Dual          | 0     | 0.00  |               |             |               |                |              |
| 35                                           | 70-74     | Former        | 3782  | 39.40 |               |             | 30.61         | 65             | 1.72         |
| Year of Follow-up: 2025, Age Group: 75-79    |           |               |       |       |               |             |               |                |              |
| Period                                       | Age Group | Smoking Group | N     | %     | Ever Quit (N) | Ever Quit % | Mean Yrs Quit | Short Term (n) | Short Term % |
| 35                                           | 75-79     | Never Any     | 4356  | 51.27 |               |             |               |                |              |
| 35                                           | 75-79     | CC            | 14    | 0.16  | 0             | 0.00        |               |                |              |
| 35                                           | 75-79     | Ecig          | 588   | 6.92  |               |             |               |                |              |
| 35                                           | 75-79     | Dual          | 0     | 0.00  |               |             |               |                |              |
| 35                                           | 75-79     | Former        | 3539  | 41.65 |               |             | 30.81         | 53             | 1.50         |
| Year of Follow-up: 2030, Age Group: All Ages |           |               |       |       |               |             |               |                |              |
| Period                                       | Age Group | Smoking Group | N     | %     | Ever Quit (N) | Ever Quit % | Mean Yrs Quit | Short Term (n) | Short Term % |
| 40                                           | All Ages  | Never Any     | 30854 | 55.84 |               |             |               |                |              |
| 40                                           | All Ages  | CC            | 14    | 0.03  | 0             | 0.00        |               |                |              |
| 40                                           | All Ages  | Ecig          | 5391  | 9.76  |               |             |               |                |              |
| 40                                           | All Ages  | Dual          | 0     | 0.00  |               |             |               |                |              |
| 40                                           | All Ages  | Former        | 18991 | 34.37 |               |             | 27.90         | 543            | 2.86         |
| Year of Follow-up: 2030, Age Group: 18-19    |           |               |       |       |               |             |               |                |              |
| Period                                       | Age Group | Smoking Group | N     | %     | Ever Quit (N) | Ever Quit % | Mean Yrs Quit | Short Term (n) | Short Term % |
| 40                                           | 18-19     | Never Any     | 0     | .     |               |             |               |                |              |
| 40                                           | 18-19     | CC            | 0     | .     | 0             | .           |               |                |              |
| 40                                           | 18-19     | Ecig          | 0     | .     |               |             |               |                |              |
| 40                                           | 18-19     | Dual          | 0     | .     |               |             |               |                |              |
| 40                                           | 18-19     | Former        | 0     | .     |               |             | .             | 0              | .            |
| Year of Follow-up: 2030, Age Group: 20-24    |           |               |       |       |               |             |               |                |              |
| Period                                       | Age Group | Smoking Group | N     | %     | Ever Quit (N) | Ever Quit % | Mean Yrs Quit | Short Term (n) | Short Term % |
| 40                                           | 20-24     | Never Any     | 0     | .     |               |             |               |                |              |
| 40                                           | 20-24     | CC            | 0     | .     | 0             | .           |               |                |              |
| 40                                           | 20-24     | Ecig          | 0     | .     |               |             |               |                |              |
| 40                                           | 20-24     | Dual          | 0     | .     |               |             |               |                |              |
| 40                                           | 20-24     | Former        | 0     | .     |               |             | .             | 0              | .            |
| Year of Follow-up: 2030, Age Group: 25-29    |           |               |       |       |               |             |               |                |              |
| Period                                       | Age Group | Smoking Group | N     | %     | Ever Quit (N) | Ever Quit % | Mean Yrs Quit | Short Term (n) | Short Term % |
| 40                                           | 25-29     | Never Any     | 0     | .     |               |             |               |                |              |
| 40                                           | 25-29     | CC            | 0     | .     | 0             | .           |               |                |              |
| 40                                           | 25-29     | Ecig          | 0     | .     |               |             |               |                |              |
| 40                                           | 25-29     | Dual          | 0     | .     |               |             |               |                |              |

### Results for PHIM for Run 6 (Sensitivity\_Analysis\_1.RTF)

| Year of Follow-up: 2030, Age Group: 30-34 | Period | Age Group | Smoking Group | N    | %     | Ever Quit (N) | Ever Quit % | Mean Yrs Quit | Short Term (n) | Short Term % |
|-------------------------------------------|--------|-----------|---------------|------|-------|---------------|-------------|---------------|----------------|--------------|
| Year of Follow-up: 2030, Age Group: 30-34 |        |           |               |      |       |               |             |               |                |              |
| 40                                        | 25-29  | Former    |               | 0    | .     |               |             |               | 0              | .            |
| 40                                        | 30-34  | Never Any |               | 0    | .     |               |             |               |                |              |
| 40                                        | 30-34  | CC        |               | 0    | .     | 0             | .           |               |                |              |
| 40                                        | 30-34  | Ecig      |               | 0    | .     |               |             |               |                |              |
| 40                                        | 30-34  | Dual      |               | 0    | .     |               |             |               |                |              |
| 40                                        | 30-34  | Former    |               | 0    | .     |               |             |               | 0              | .            |
| Year of Follow-up: 2030, Age Group: 35-39 |        |           |               |      |       |               |             |               |                |              |
| 40                                        | 35-39  | Never Any |               | 0    | .     |               |             |               |                |              |
| 40                                        | 35-39  | CC        |               | 0    | .     | 0             | .           |               |                |              |
| 40                                        | 35-39  | Ecig      |               | 0    | .     |               |             |               |                |              |
| 40                                        | 35-39  | Dual      |               | 0    | .     |               |             |               |                |              |
| 40                                        | 35-39  | Former    |               | 0    | .     |               |             |               | 0              | .            |
| Year of Follow-up: 2030, Age Group: 40-44 |        |           |               |      |       |               |             |               |                |              |
| 40                                        | 40-44  | Never Any |               | 0    | .     |               |             |               |                |              |
| 40                                        | 40-44  | CC        |               | 0    | .     | 0             | .           |               |                |              |
| 40                                        | 40-44  | Ecig      |               | 0    | .     |               |             |               |                |              |
| 40                                        | 40-44  | Dual      |               | 0    | .     |               |             |               |                |              |
| 40                                        | 40-44  | Former    |               | 0    | .     |               |             |               | 0              | .            |
| Year of Follow-up: 2030, Age Group: 45-49 |        |           |               |      |       |               |             |               |                |              |
| 40                                        | 45-49  | Never Any |               | 0    | .     |               |             |               |                |              |
| 40                                        | 45-49  | CC        |               | 0    | .     | 0             | .           |               |                |              |
| 40                                        | 45-49  | Ecig      |               | 0    | .     |               |             |               |                |              |
| 40                                        | 45-49  | Dual      |               | 0    | .     |               |             |               |                |              |
| 40                                        | 45-49  | Former    |               | 0    | .     |               |             |               | 0              | .            |
| Year of Follow-up: 2030, Age Group: 50-54 |        |           |               |      |       |               |             |               |                |              |
| 40                                        | 50-54  | Never Any |               | 4726 | 59.60 |               |             |               |                |              |
| 40                                        | 50-54  | CC        |               | 0    | 0.00  | 0             | 0.00        |               |                |              |
| 40                                        | 50-54  | Ecig      |               | 959  | 12.09 |               |             |               |                |              |
| 40                                        | 50-54  | Dual      |               | 0    | 0.00  |               |             |               |                |              |
| 40                                        | 50-54  | Former    |               | 2245 | 28.31 |               |             | 21.16         | 100            | 4.45         |
| Year of Follow-up: 2030, Age Group: 55-59 |        |           |               |      |       |               |             |               |                |              |
| 40                                        | 55-59  | Never Any |               | 5359 | 64.18 |               |             |               |                |              |
| 40                                        | 55-59  | CC        |               | 0    | 0.00  | 0             | 0.00        |               |                |              |
| 40                                        | 55-59  | Ecig      |               | 897  | 10.74 |               |             |               |                |              |
| 40                                        | 55-59  | Dual      |               | 0    | 0.00  |               |             |               |                |              |
| 40                                        | 55-59  | Former    |               | 2094 | 25.08 |               |             | 22.27         | 80             | 3.82         |
| Year of Follow-up: 2030, Age Group: 60-64 |        |           |               |      |       |               |             |               |                |              |
| 40                                        | 60-64  | Never Any |               | 5189 | 59.01 |               |             |               |                |              |
| 40                                        | 60-64  | CC        |               | 3    | 0.03  | 0             | 0.00        |               |                |              |
| 40                                        | 60-64  | Ecig      |               | 886  | 10.08 |               |             |               |                |              |
| 40                                        | 60-64  | Dual      |               | 0    | 0.00  |               |             |               |                |              |
| 40                                        | 60-64  | Former    |               | 2715 | 30.88 |               |             | 25.52         | 128            | 4.71         |
| Year of Follow-up: 2030, Age Group: 65-69 |        |           |               |      |       |               |             |               |                |              |
| 40                                        | 65-69  | Never Any |               | 5284 | 52.43 |               |             |               |                |              |
| 40                                        | 65-69  | CC        |               | 3    | 0.03  | 0             | 0.00        |               |                |              |
| 40                                        | 65-69  | Ecig      |               | 1080 | 10.72 |               |             |               |                |              |
| 40                                        | 65-69  | Dual      |               | 0    | 0.00  |               |             |               |                |              |
| 40                                        | 65-69  | Former    |               | 3711 | 36.82 |               |             | 27.57         | 73             | 1.97         |
| Year of Follow-up: 2030, Age Group: 70-74 |        |           |               |      |       |               |             |               |                |              |
| 40                                        | 70-74  | Never Any |               | 5278 | 50.27 |               |             |               |                |              |
| 40                                        | 70-74  | CC        |               | 4    | 0.04  | 0             | 0.00        |               |                |              |
| 40                                        | 70-74  | Ecig      |               | 957  | 9.12  |               |             |               |                |              |
| 40                                        | 70-74  | Dual      |               | 0    | 0.00  |               |             |               |                |              |
| 40                                        | 70-74  | Former    |               | 4260 | 40.58 |               |             | 30.32         | 86             | 2.02         |
| Year of Follow-up: 2030, Age Group: 75-79 |        |           |               |      |       |               |             |               |                |              |
| 40                                        | 75-79  | Never Any |               | 5018 | 52.27 |               |             |               |                |              |
| 40                                        | 75-79  | CC        |               | 4    | 0.04  | 0             | 0.00        |               |                |              |

**Results for PHIM for Run 6 (Sensitivity\_Analysis\_1.RTF)**

|                                              |           |               |       |       |               |             |               |                |              |
|----------------------------------------------|-----------|---------------|-------|-------|---------------|-------------|---------------|----------------|--------------|
| 40                                           | 75-79     | Ecig          | 612   | 6.38  |               |             |               |                |              |
| 40                                           | 75-79     | Dual          | 0     | 0.00  |               |             |               |                |              |
| 40                                           | 75-79     | Former        | 3966  | 41.31 |               |             | 34.05         | 76             | 1.92         |
| Year of Follow-up: 2035, Age Group: All Ages |           |               |       |       |               |             |               |                |              |
| Period                                       | Age Group | Smoking Group | N     | %     | Ever Quit (N) | Ever Quit % | Mean Yrs Quit | Short Term (n) | Short Term % |
| 45                                           | All Ages  | Never Any     | 25836 | 56.60 |               |             |               |                |              |
| 45                                           | All Ages  | CC            | 5     | 0.01  | 0             | 0.00        |               |                |              |
| 45                                           | All Ages  | Ecig          | 3886  | 8.51  |               |             |               |                |              |
| 45                                           | All Ages  | Dual          | 0     | 0.00  |               |             |               |                |              |
| 45                                           | All Ages  | Former        | 15923 | 34.88 |               |             | 29.63         | 351            | 2.20         |
| Year of Follow-up: 2035, Age Group: 18-19    |           |               |       |       |               |             |               |                |              |
| Period                                       | Age Group | Smoking Group | N     | %     | Ever Quit (N) | Ever Quit % | Mean Yrs Quit | Short Term (n) | Short Term % |
| 45                                           | 18-19     | Never Any     | 0     | .     |               |             |               |                |              |
| 45                                           | 18-19     | CC            | 0     | .     | 0             | .           |               |                |              |
| 45                                           | 18-19     | Ecig          | 0     | .     |               |             |               |                |              |
| 45                                           | 18-19     | Dual          | 0     | .     |               |             |               |                |              |
| 45                                           | 18-19     | Former        | 0     | .     |               |             | .             | 0              | .            |
| Year of Follow-up: 2035, Age Group: 20-24    |           |               |       |       |               |             |               |                |              |
| Period                                       | Age Group | Smoking Group | N     | %     | Ever Quit (N) | Ever Quit % | Mean Yrs Quit | Short Term (n) | Short Term % |
| 45                                           | 20-24     | Never Any     | 0     | .     |               |             |               |                |              |
| 45                                           | 20-24     | CC            | 0     | .     | 0             | .           |               |                |              |
| 45                                           | 20-24     | Ecig          | 0     | .     |               |             |               |                |              |
| 45                                           | 20-24     | Dual          | 0     | .     |               |             |               |                |              |
| 45                                           | 20-24     | Former        | 0     | .     |               |             | .             | 0              | .            |
| Year of Follow-up: 2035, Age Group: 25-29    |           |               |       |       |               |             |               |                |              |
| Period                                       | Age Group | Smoking Group | N     | %     | Ever Quit (N) | Ever Quit % | Mean Yrs Quit | Short Term (n) | Short Term % |
| 45                                           | 25-29     | Never Any     | 0     | .     |               |             |               |                |              |
| 45                                           | 25-29     | CC            | 0     | .     | 0             | .           |               |                |              |
| 45                                           | 25-29     | Ecig          | 0     | .     |               |             |               |                |              |
| 45                                           | 25-29     | Dual          | 0     | .     |               |             |               |                |              |
| 45                                           | 25-29     | Former        | 0     | .     |               |             | .             | 0              | .            |
| Year of Follow-up: 2035, Age Group: 30-34    |           |               |       |       |               |             |               |                |              |
| Period                                       | Age Group | Smoking Group | N     | %     | Ever Quit (N) | Ever Quit % | Mean Yrs Quit | Short Term (n) | Short Term % |
| 45                                           | 30-34     | Never Any     | 0     | .     |               |             |               |                |              |
| 45                                           | 30-34     | CC            | 0     | .     | 0             | .           |               |                |              |
| 45                                           | 30-34     | Ecig          | 0     | .     |               |             |               |                |              |
| 45                                           | 30-34     | Dual          | 0     | .     |               |             |               |                |              |
| 45                                           | 30-34     | Former        | 0     | .     |               |             | .             | 0              | .            |
| Year of Follow-up: 2035, Age Group: 35-39    |           |               |       |       |               |             |               |                |              |
| Period                                       | Age Group | Smoking Group | N     | %     | Ever Quit (N) | Ever Quit % | Mean Yrs Quit | Short Term (n) | Short Term % |
| 45                                           | 35-39     | Never Any     | 0     | .     |               |             |               |                |              |
| 45                                           | 35-39     | CC            | 0     | .     | 0             | .           |               |                |              |
| 45                                           | 35-39     | Ecig          | 0     | .     |               |             |               |                |              |
| 45                                           | 35-39     | Dual          | 0     | .     |               |             |               |                |              |
| 45                                           | 35-39     | Former        | 0     | .     |               |             | .             | 0              | .            |
| Year of Follow-up: 2035, Age Group: 40-44    |           |               |       |       |               |             |               |                |              |
| Period                                       | Age Group | Smoking Group | N     | %     | Ever Quit (N) | Ever Quit % | Mean Yrs Quit | Short Term (n) | Short Term % |
| 45                                           | 40-44     | Never Any     | 0     | .     |               |             |               |                |              |
| 45                                           | 40-44     | CC            | 0     | .     | 0             | .           |               |                |              |
| 45                                           | 40-44     | Ecig          | 0     | .     |               |             |               |                |              |
| 45                                           | 40-44     | Dual          | 0     | .     |               |             |               |                |              |
| 45                                           | 40-44     | Former        | 0     | .     |               |             | .             | 0              | .            |
| Year of Follow-up: 2035, Age Group: 45-49    |           |               |       |       |               |             |               |                |              |
| Period                                       | Age Group | Smoking Group | N     | %     | Ever Quit (N) | Ever Quit % | Mean Yrs Quit | Short Term (n) | Short Term % |
| 45                                           | 45-49     | Never Any     | 0     | .     |               |             |               |                |              |
| 45                                           | 45-49     | CC            | 0     | .     | 0             | .           |               |                |              |
| 45                                           | 45-49     | Ecig          | 0     | .     |               |             |               |                |              |
| 45                                           | 45-49     | Dual          | 0     | .     |               |             |               |                |              |
| 45                                           | 45-49     | Former        | 0     | .     |               |             | .             | 0              | .            |
| Year of Follow-up: 2035, Age Group: 50-54    |           |               |       |       |               |             |               |                |              |
| Period                                       | Age Group | Smoking Group | N     | %     | Ever Quit (N) | Ever Quit % | Mean Yrs Quit | Short Term (n) | Short Term % |
| 45                                           | 50-54     | Never Any     | 0     | .     |               |             |               |                |              |
| 45                                           | 50-54     | CC            | 0     | .     | 0             | .           |               |                |              |
| 45                                           | 50-54     | Ecig          | 0     | .     |               |             |               |                |              |
| 45                                           | 50-54     | Dual          | 0     | .     |               |             |               |                |              |
| 45                                           | 50-54     | Former        | 0     | .     |               |             | .             | 0              | .            |
| Year of Follow-up: 2035, Age Group: 55-59    |           |               |       |       |               |             |               |                |              |
| Period                                       | Age Group | Smoking Group | N     | %     | Ever Quit (N) | Ever Quit % | Mean Yrs Quit | Short Term (n) | Short Term % |

**Results for PHIM for Run 6 (Sensitivity\_Analysis\_1.RTF)**

|                                              |           |               |       |       |               |             |               |                |              |
|----------------------------------------------|-----------|---------------|-------|-------|---------------|-------------|---------------|----------------|--------------|
| 45                                           | 55-59     | Never Any     | 4726  | 59.60 |               |             |               |                |              |
| 45                                           | 55-59     | CC            | 0     | 0.00  | 0             | 0.00        |               |                |              |
| 45                                           | 55-59     | Ecig          | 792   | 9.99  |               |             |               |                |              |
| 45                                           | 55-59     | Dual          | 0     | 0.00  |               |             |               |                |              |
| 45                                           | 55-59     | Former        | 2412  | 30.42 |               |             | 24.49         | 64             | 2.65         |
| Year of Follow-up: 2035, Age Group: 60-64    |           |               |       |       |               |             |               |                |              |
| Period                                       | Age Group | Smoking Group | N     | %     | Ever Quit (N) | Ever Quit % | Mean Yrs Quit | Short Term (n) | Short Term % |
| 45                                           | 60-64     | Never Any     | 5359  | 64.18 |               |             |               |                |              |
| 45                                           | 60-64     | CC            | 0     | 0.00  | 0             | 0.00        |               |                |              |
| 45                                           | 60-64     | Ecig          | 719   | 8.61  |               |             |               |                |              |
| 45                                           | 60-64     | Dual          | 0     | 0.00  |               |             |               |                |              |
| 45                                           | 60-64     | Former        | 2272  | 27.21 |               |             | 25.28         | 77             | 3.39         |
| Year of Follow-up: 2035, Age Group: 65-69    |           |               |       |       |               |             |               |                |              |
| Period                                       | Age Group | Smoking Group | N     | %     | Ever Quit (N) | Ever Quit % | Mean Yrs Quit | Short Term (n) | Short Term % |
| 45                                           | 65-69     | Never Any     | 5189  | 59.01 |               |             |               |                |              |
| 45                                           | 65-69     | CC            | 3     | 0.03  | 0             | 0.00        |               |                |              |
| 45                                           | 65-69     | Ecig          | 694   | 7.89  |               |             |               |                |              |
| 45                                           | 65-69     | Dual          | 0     | 0.00  |               |             |               |                |              |
| 45                                           | 65-69     | Former        | 2907  | 33.06 |               |             | 28.66         | 55             | 1.89         |
| Year of Follow-up: 2035, Age Group: 70-74    |           |               |       |       |               |             |               |                |              |
| Period                                       | Age Group | Smoking Group | N     | %     | Ever Quit (N) | Ever Quit % | Mean Yrs Quit | Short Term (n) | Short Term % |
| 45                                           | 70-74     | Never Any     | 5284  | 52.43 |               |             |               |                |              |
| 45                                           | 70-74     | CC            | 1     | 0.01  | 0             | 0.00        |               |                |              |
| 45                                           | 70-74     | Ecig          | 934   | 9.27  |               |             |               |                |              |
| 45                                           | 70-74     | Dual          | 0     | 0.00  |               |             |               |                |              |
| 45                                           | 70-74     | Former        | 3859  | 38.29 |               |             | 31.38         | 76             | 1.97         |
| Year of Follow-up: 2035, Age Group: 75-79    |           |               |       |       |               |             |               |                |              |
| Period                                       | Age Group | Smoking Group | N     | %     | Ever Quit (N) | Ever Quit % | Mean Yrs Quit | Short Term (n) | Short Term % |
| 45                                           | 75-79     | Never Any     | 5278  | 50.27 |               |             |               |                |              |
| 45                                           | 75-79     | CC            | 1     | 0.01  | 0             | 0.00        |               |                |              |
| 45                                           | 75-79     | Ecig          | 747   | 7.11  |               |             |               |                |              |
| 45                                           | 75-79     | Dual          | 0     | 0.00  |               |             |               |                |              |
| 45                                           | 75-79     | Former        | 4473  | 42.60 |               |             | 33.73         | 79             | 1.77         |
| Year of Follow-up: 2040, Age Group: All Ages |           |               |       |       |               |             |               |                |              |
| Period                                       | Age Group | Smoking Group | N     | %     | Ever Quit (N) | Ever Quit % | Mean Yrs Quit | Short Term (n) | Short Term % |
| 50                                           | All Ages  | Never Any     | 20558 | 58.48 |               |             |               |                |              |
| 50                                           | All Ages  | CC            | 4     | 0.01  | 0             | 0.00        |               |                |              |
| 50                                           | All Ages  | Ecig          | 2497  | 7.10  |               |             |               |                |              |
| 50                                           | All Ages  | Dual          | 0     | 0.00  |               |             |               |                |              |
| 50                                           | All Ages  | Former        | 12092 | 34.40 |               |             | 31.39         | 238            | 1.97         |
| Year of Follow-up: 2040, Age Group: 18-19    |           |               |       |       |               |             |               |                |              |
| Period                                       | Age Group | Smoking Group | N     | %     | Ever Quit (N) | Ever Quit % | Mean Yrs Quit | Short Term (n) | Short Term % |
| 50                                           | 18-19     | Never Any     | 0     | .     |               |             |               |                |              |
| 50                                           | 18-19     | CC            | 0     | .     | 0             | .           |               |                |              |
| 50                                           | 18-19     | Ecig          | 0     | .     |               |             |               |                |              |
| 50                                           | 18-19     | Dual          | 0     | .     |               |             |               |                |              |
| 50                                           | 18-19     | Former        | 0     | .     |               |             | .             | 0              | .            |
| Year of Follow-up: 2040, Age Group: 20-24    |           |               |       |       |               |             |               |                |              |
| Period                                       | Age Group | Smoking Group | N     | %     | Ever Quit (N) | Ever Quit % | Mean Yrs Quit | Short Term (n) | Short Term % |
| 50                                           | 20-24     | Never Any     | 0     | .     |               |             |               |                |              |
| 50                                           | 20-24     | CC            | 0     | .     | 0             | .           |               |                |              |
| 50                                           | 20-24     | Ecig          | 0     | .     |               |             |               |                |              |
| 50                                           | 20-24     | Dual          | 0     | .     |               |             |               |                |              |
| 50                                           | 20-24     | Former        | 0     | .     |               |             | .             | 0              | .            |
| Year of Follow-up: 2040, Age Group: 25-29    |           |               |       |       |               |             |               |                |              |
| Period                                       | Age Group | Smoking Group | N     | %     | Ever Quit (N) | Ever Quit % | Mean Yrs Quit | Short Term (n) | Short Term % |
| 50                                           | 25-29     | Never Any     | 0     | .     |               |             |               |                |              |
| 50                                           | 25-29     | CC            | 0     | .     | 0             | .           |               |                |              |
| 50                                           | 25-29     | Ecig          | 0     | .     |               |             |               |                |              |
| 50                                           | 25-29     | Dual          | 0     | .     |               |             |               |                |              |
| 50                                           | 25-29     | Former        | 0     | .     |               |             | .             | 0              | .            |
| Year of Follow-up: 2040, Age Group: 30-34    |           |               |       |       |               |             |               |                |              |
| Period                                       | Age Group | Smoking Group | N     | %     | Ever Quit (N) | Ever Quit % | Mean Yrs Quit | Short Term (n) | Short Term % |
| 50                                           | 30-34     | Never Any     | 0     | .     |               |             |               |                |              |
| 50                                           | 30-34     | CC            | 0     | .     | 0             | .           |               |                |              |
| 50                                           | 30-34     | Ecig          | 0     | .     |               |             |               |                |              |
| 50                                           | 30-34     | Dual          | 0     | .     |               |             |               |                |              |
| 50                                           | 30-34     | Former        | 0     | .     |               |             | .             | 0              | .            |
| Year of Follow-up: 2040, Age Group: 35-39    |           |               |       |       |               |             |               |                |              |

**Results for PHIM for Run 6 (Sensitivity\_Analysis\_1.RTF)**

| Period                                    | Age Group | Smoking Group | N    | %     | Ever Quit (N) | Ever Quit % | Mean Yrs Quit | Short Term (n) | Short Term % |
|-------------------------------------------|-----------|---------------|------|-------|---------------|-------------|---------------|----------------|--------------|
| 50                                        | 35-39     | Never Any     | 0    | .     |               |             |               |                |              |
| 50                                        | 35-39     | CC            | 0    | .     | 0             | .           |               |                |              |
| 50                                        | 35-39     | Ecig          | 0    | .     |               |             |               |                |              |
| 50                                        | 35-39     | Dual          | 0    | .     |               |             |               |                |              |
| 50                                        | 35-39     | Former        | 0    | .     |               |             | .             | 0              | .            |
| Year of Follow-up: 2040, Age Group: 40-44 |           |               |      |       |               |             |               |                |              |
| Period                                    | Age Group | Smoking Group | N    | %     | Ever Quit (N) | Ever Quit % | Mean Yrs Quit | Short Term (n) | Short Term % |
| 50                                        | 40-44     | Never Any     | 0    | .     |               |             |               |                |              |
| 50                                        | 40-44     | CC            | 0    | .     | 0             | .           |               |                |              |
| 50                                        | 40-44     | Ecig          | 0    | .     |               |             |               |                |              |
| 50                                        | 40-44     | Dual          | 0    | .     |               |             |               |                |              |
| 50                                        | 40-44     | Former        | 0    | .     |               |             | .             | 0              | .            |
| Year of Follow-up: 2040, Age Group: 45-49 |           |               |      |       |               |             |               |                |              |
| Period                                    | Age Group | Smoking Group | N    | %     | Ever Quit (N) | Ever Quit % | Mean Yrs Quit | Short Term (n) | Short Term % |
| 50                                        | 45-49     | Never Any     | 0    | .     |               |             |               |                |              |
| 50                                        | 45-49     | CC            | 0    | .     | 0             | .           |               |                |              |
| 50                                        | 45-49     | Ecig          | 0    | .     |               |             |               |                |              |
| 50                                        | 45-49     | Dual          | 0    | .     |               |             |               |                |              |
| 50                                        | 45-49     | Former        | 0    | .     |               |             | .             | 0              | .            |
| Year of Follow-up: 2040, Age Group: 50-54 |           |               |      |       |               |             |               |                |              |
| Period                                    | Age Group | Smoking Group | N    | %     | Ever Quit (N) | Ever Quit % | Mean Yrs Quit | Short Term (n) | Short Term % |
| 50                                        | 50-54     | Never Any     | 0    | .     |               |             |               |                |              |
| 50                                        | 50-54     | CC            | 0    | .     | 0             | .           |               |                |              |
| 50                                        | 50-54     | Ecig          | 0    | .     |               |             |               |                |              |
| 50                                        | 50-54     | Dual          | 0    | .     |               |             |               |                |              |
| 50                                        | 50-54     | Former        | 0    | .     |               |             | .             | 0              | .            |
| Year of Follow-up: 2040, Age Group: 55-59 |           |               |      |       |               |             |               |                |              |
| Period                                    | Age Group | Smoking Group | N    | %     | Ever Quit (N) | Ever Quit % | Mean Yrs Quit | Short Term (n) | Short Term % |
| 50                                        | 55-59     | Never Any     | 0    | .     |               |             |               |                |              |
| 50                                        | 55-59     | CC            | 0    | .     | 0             | .           |               |                |              |
| 50                                        | 55-59     | Ecig          | 0    | .     |               |             |               |                |              |
| 50                                        | 55-59     | Dual          | 0    | .     |               |             |               |                |              |
| 50                                        | 55-59     | Former        | 0    | .     |               |             | .             | 0              | .            |
| Year of Follow-up: 2040, Age Group: 60-64 |           |               |      |       |               |             |               |                |              |
| Period                                    | Age Group | Smoking Group | N    | %     | Ever Quit (N) | Ever Quit % | Mean Yrs Quit | Short Term (n) | Short Term % |
| 50                                        | 60-64     | Never Any     | 4726 | 59.60 |               |             |               |                |              |
| 50                                        | 60-64     | CC            | 0    | 0.00  | 0             | 0.00        |               |                |              |
| 50                                        | 60-64     | Ecig          | 613  | 7.73  |               |             |               |                |              |
| 50                                        | 60-64     | Dual          | 0    | 0.00  |               |             |               |                |              |
| 50                                        | 60-64     | Former        | 2591 | 32.67 |               |             | 27.58         | 77             | 2.97         |
| Year of Follow-up: 2040, Age Group: 65-69 |           |               |      |       |               |             |               |                |              |
| Period                                    | Age Group | Smoking Group | N    | %     | Ever Quit (N) | Ever Quit % | Mean Yrs Quit | Short Term (n) | Short Term % |
| 50                                        | 65-69     | Never Any     | 5359 | 64.18 |               |             |               |                |              |
| 50                                        | 65-69     | CC            | 0    | 0.00  | 0             | 0.00        |               |                |              |
| 50                                        | 65-69     | Ecig          | 578  | 6.92  |               |             |               |                |              |
| 50                                        | 65-69     | Dual          | 0    | 0.00  |               |             |               |                |              |
| 50                                        | 65-69     | Former        | 2413 | 28.90 |               |             | 28.67         | 34             | 1.41         |
| Year of Follow-up: 2040, Age Group: 70-74 |           |               |      |       |               |             |               |                |              |
| Period                                    | Age Group | Smoking Group | N    | %     | Ever Quit (N) | Ever Quit % | Mean Yrs Quit | Short Term (n) | Short Term % |
| 50                                        | 70-74     | Never Any     | 5189 | 59.01 |               |             |               |                |              |
| 50                                        | 70-74     | CC            | 3    | 0.03  | 0             | 0.00        |               |                |              |
| 50                                        | 70-74     | Ecig          | 583  | 6.63  |               |             |               |                |              |
| 50                                        | 70-74     | Dual          | 0    | 0.00  |               |             |               |                |              |
| 50                                        | 70-74     | Former        | 3018 | 34.32 |               |             | 32.48         | 56             | 1.86         |
| Year of Follow-up: 2040, Age Group: 75-79 |           |               |      |       |               |             |               |                |              |
| Period                                    | Age Group | Smoking Group | N    | %     | Ever Quit (N) | Ever Quit % | Mean Yrs Quit | Short Term (n) | Short Term % |
| 50                                        | 75-79     | Never Any     | 5284 | 52.43 |               |             |               |                |              |
| 50                                        | 75-79     | CC            | 1    | 0.01  | 0             | 0.00        |               |                |              |
| 50                                        | 75-79     | Ecig          | 723  | 7.17  |               |             |               |                |              |
| 50                                        | 75-79     | Dual          | 0    | 0.00  |               |             |               |                |              |
| 50                                        | 75-79     | Former        | 4070 | 40.38 |               |             | 34.61         | 71             | 1.74         |



## Results for PHIM for Run 6 (Sensitivity\_Analysis\_1.RTF)

\*\*\*\*\*

### Main Results for E-Component for Run: 6, Simulation: 1, COD: Four Diseases Combined

| Variable Parameter          | Value                                  |
|-----------------------------|----------------------------------------|
| 1. Country                  | US (United States)                     |
| 2. Sex                      | F (Females)                            |
| 3. Year of start of process | 1990                                   |
| 4. Cause of Death           | Four Diseases Combined                 |
| 5. Effective Dose NULL      | CC:1                                   |
| 6. Effective Dose Ecig      | CC:1 Ecig:0.1 Dual:0.55                |
| Note:                       | Death rates are per million population |

#### Results for Age Groups Combined and Years combined, Population unadjusted for deaths in Ecig scenario,

| Age Group:All |         | NULL        | Ecig        | %Drop    |        |        | NULL    | Ecig    | Drop    |         |
|---------------|---------|-------------|-------------|----------|--------|--------|---------|---------|---------|---------|
| Year          | Number  | Attrib      | Attrib      | Drop     | %Drop  | Attrib | Death   | Attrib  | Attrib  | Drop    |
|               | Deaths  | Deaths      | Deaths      | Deaths   | Deaths | Deaths | Rate    | Rates   | Rates   | Rates   |
| All Comb      | 9082078 | 2946250.006 | 2025402.456 | 920847.5 | 10.139 | 31.255 | 2493.45 | 808.881 | 556.066 | 252.815 |

#### Results for Age Groups Combined, Population unadjusted for deaths in Ecig scenario,

| Age Group:All |        | NULL      | Ecig      | %Drop    |        |        | NULL    | Ecig    | Drop    |         |
|---------------|--------|-----------|-----------|----------|--------|--------|---------|---------|---------|---------|
| Year          | Number | Attrib    | Attrib    | Drop     | %Drop  | Attrib | Death   | Attrib  | Attrib  | Drop    |
|               | Deaths | Deaths    | Deaths    | Deaths   | Deaths | Deaths | Rate    | Rates   | Rates   | Rates   |
| 1990          | 199848 | 57524.822 | 57524.822 | 0.000    | 0.000  | 0.000  | 2926.84 | 842.471 | 842.471 | 0.000   |
| 1991          | 199162 | 59078.486 | 58918.742 | 159.743  | 0.080  | 0.270  | 2877.87 | 853.678 | 851.370 | 2.308   |
| 1992          | 198532 | 60494.150 | 60047.677 | 446.472  | 0.225  | 0.738  | 2829.84 | 862.271 | 855.907 | 6.364   |
| 1993          | 202512 | 62694.848 | 61826.443 | 868.404  | 0.429  | 1.385  | 2845.85 | 881.034 | 868.830 | 12.203  |
| 1994          | 200658 | 63202.598 | 61831.711 | 1370.887 | 0.683  | 2.169  | 2777.87 | 874.966 | 855.987 | 18.978  |
| 1995          | 201023 | 63766.862 | 61787.276 | 1979.586 | 0.985  | 3.104  | 2739.80 | 869.097 | 842.117 | 26.980  |
| 1996          | 201180 | 64591.163 | 61880.925 | 2710.238 | 1.347  | 4.196  | 2706.36 | 868.908 | 832.449 | 36.459  |
| 1997          | 198639 | 64686.912 | 61295.660 | 3391.252 | 1.707  | 5.243  | 2635.18 | 858.147 | 813.158 | 44.989  |
| 1998          | 197573 | 65295.961 | 61115.834 | 4180.127 | 2.116  | 6.402  | 2584.18 | 854.046 | 799.372 | 54.674  |
| 1999          | 211329 | 67327.521 | 61933.766 | 5393.755 | 2.552  | 8.011  | 2726.91 | 868.771 | 799.171 | 69.599  |
| 2000          | 208496 | 67596.897 | 61316.457 | 6280.439 | 3.012  | 9.291  | 2656.96 | 861.419 | 781.385 | 80.035  |
| 2001          | 203606 | 67008.811 | 59793.938 | 7214.873 | 3.544  | 10.767 | 2565.88 | 844.458 | 753.535 | 90.923  |
| 2002          | 200828 | 67067.744 | 58810.715 | 8257.028 | 4.111  | 12.311 | 2506.09 | 836.925 | 733.887 | 103.038 |
| 2003          | 196352 | 66756.217 | 57559.978 | 9196.239 | 4.684  | 13.776 | 2427.31 | 825.244 | 711.560 | 113.684 |
| 2004          | 188160 | 65058.725 | 55072.987 | 9985.738 | 5.307  | 15.349 | 2302.83 | 796.234 | 674.022 | 122.212 |
| 2005          | 186416 | 65214.724 | 54164.690 | 11050.03 | 5.928  | 16.944 | 2256.27 | 789.321 | 655.578 | 133.743 |
| 2006          | 180088 | 63771.146 | 51919.709 | 11851.44 | 6.581  | 18.584 | 2160.67 | 765.117 | 622.925 | 142.192 |
| 2007          | 175644 | 63110.718 | 50438.489 | 12672.23 | 7.215  | 20.079 | 2086.36 | 749.650 | 599.125 | 150.525 |
| 2008          | 177570 | 63718.624 | 49853.115 | 13865.51 | 7.808  | 21.761 | 2086.39 | 748.674 | 585.758 | 162.915 |
| 2009          | 172806 | 62794.698 | 48168.666 | 14626.03 | 8.464  | 23.292 | 2007.57 | 729.515 | 559.598 | 169.917 |
| 2010          | 170489 | 61917.074 | 46496.886 | 15420.19 | 9.045  | 24.905 | 1957.97 | 711.083 | 533.991 | 177.092 |
| 2011          | 170305 | 61680.114 | 45184.631 | 16495.48 | 9.686  | 26.744 | 1937.46 | 701.700 | 514.040 | 187.660 |
| 2012          | 171421 | 62023.127 | 44341.940 | 17681.19 | 10.314 | 28.507 | 1930.22 | 698.386 | 499.294 | 199.092 |
| 2013          | 172699 | 62037.765 | 43285.199 | 18752.57 | 10.859 | 30.228 | 1923.75 | 691.059 | 482.168 | 208.891 |
| 2014          | 174169 | 61921.017 | 41996.682 | 19924.34 | 11.440 | 32.177 | 1918.85 | 682.195 | 462.685 | 219.510 |
| 2015          | 177354 | 61856.204 | 40938.560 | 20917.64 | 11.794 | 33.817 | 2184.51 | 761.899 | 504.251 | 257.648 |
| 2016          | 176853 | 60464.119 | 38751.917 | 21712.20 | 12.277 | 35.909 | 2157.59 | 737.655 | 472.769 | 264.886 |
| 2017          | 179309 | 60243.839 | 37456.732 | 22787.11 | 12.708 | 37.825 | 2166.86 | 728.017 | 452.646 | 275.371 |
| 2018          | 177157 | 60713.327 | 36970.863 | 23742.46 | 13.402 | 39.106 | 2120.51 | 726.721 | 442.530 | 284.190 |
| 2019          | 179227 | 61148.172 | 36165.541 | 24982.63 | 13.939 | 40.856 | 2124.53 | 724.841 | 428.701 | 296.140 |
| 2020          | 180467 | 61149.317 | 35326.252 | 25823.06 | 14.309 | 42.230 | 2424.25 | 821.432 | 474.545 | 346.887 |
| 2021          | 178116 | 58727.786 | 32539.274 | 26188.51 | 14.703 | 44.593 | 2375.42 | 783.216 | 433.956 | 349.260 |
| 2022          | 179408 | 58848.802 | 31630.884 | 27217.92 | 15.171 | 46.251 | 2374.52 | 778.881 | 418.644 | 360.237 |
| 2023          | 180640 | 58816.149 | 30698.802 | 28117.35 | 15.565 | 47.805 | 2372.26 | 772.407 | 403.154 | 369.253 |
| 2024          | 181610 | 58955.232 | 29791.167 | 29164.06 | 16.059 | 49.468 | 2366.77 | 768.316 | 388.244 | 380.072 |
| 2025          | 180418 | 58297.744 | 28705.640 | 29592.10 | 16.402 | 50.760 | 2713.69 | 876.861 | 431.764 | 445.097 |
| 2026          | 180313 | 56469.971 | 26674.228 | 29795.74 | 16.524 | 52.764 | 2701.83 | 846.150 | 399.688 | 446.461 |
| 2027          | 179619 | 56209.427 | 25625.497 | 30583.93 | 17.027 | 54.411 | 2680.68 | 838.883 | 382.441 | 456.442 |
| 2028          | 178762 | 55733.105 | 24516.879 | 31216.23 | 17.462 | 56.010 | 2656.74 | 828.298 | 364.367 | 463.931 |
| 2029          | 177808 | 55145.838 | 23377.371 | 31768.47 | 17.867 | 57.608 | 2630.89 | 815.951 | 345.897 | 470.054 |
| 2030          | 173587 | 53615.097 | 22112.847 | 31502.25 | 18.148 | 58.756 | 3040.33 | 939.056 | 387.301 | 551.755 |
| 2031          | 174985 | 52046.561 | 20843.241 | 31203.32 | 17.832 | 59.953 | 3060.73 | 910.364 | 364.576 | 545.788 |
| 2032          | 173400 | 51582.636 | 19919.411 | 31663.22 | 18.260 | 61.383 | 3027.10 | 900.496 | 347.740 | 552.756 |
| 2033          | 171756 | 50839.758 | 18966.858 | 31872.90 | 18.557 | 62.693 | 2991.14 | 885.375 | 330.308 | 555.067 |
| 2034          | 169973 | 50215.451 | 18047.119 | 32168.33 | 18.926 | 64.061 | 2951.96 | 872.104 | 313.429 | 558.675 |
| 2035          | 162644 | 47773.075 | 16809.969 | 30963.11 | 19.037 | 64.813 | 3459.14 | 1016.05 | 357.517 | 658.528 |
| 2036          | 156254 | 43298.709 | 14572.432 | 28726.28 | 18.384 | 66.344 | 3328.25 | 922.274 | 310.397 | 611.877 |
| 2037          | 153593 | 42241.563 | 13606.907 | 28634.66 | 18.643 | 67.788 | 3274.10 | 900.450 | 290.054 | 610.396 |
| 2038          | 150947 | 41356.353 | 12837.243 | 28519.11 | 18.893 | 68.959 | 3217.50 | 881.531 | 273.632 | 607.899 |
| 2039          | 148373 | 40161.050 | 11949.885 | 28211.16 | 19.014 | 70.245 | 3159.42 | 855.178 | 254.457 | 600.720 |

## Results for PHIM for Run 6 (Sensitivity\_Analysis\_1.RTF)

\*\*\*\*\*

### Main Results for E-Component for Run: 6, Simulation: 1, COD: LUNG CANCER

| Variable Parameter          | Value                                  |
|-----------------------------|----------------------------------------|
| 1. Country                  | US (United States)                     |
| 2. Sex                      | F (Females)                            |
| 3. Year of start of process | 1990                                   |
| 4. Cause of Death           | LUNG CANCER                            |
| 5. Effective Dose NULL      | CC:1                                   |
| 6. Effective Dose Ecig      | CC:1 Ecig:0.1 Dual:0.55                |
| Note:                       | Death rates are per million population |

#### Results for Age Groups Combined and Years combined, Population unadjusted for deaths in Ecig scenario,

| Age Group:All | NULL    | Ecig        | %Drop       |          |        | NULL   | Ecig    | Drop    |         |         |
|---------------|---------|-------------|-------------|----------|--------|--------|---------|---------|---------|---------|
| Year          | Number  | Attrib      | Attrib      | Drop     | %Drop  | Attrib | Death   | Attrib  | Attrib  | Drop    |
|               | Deaths  | Deaths      | Deaths      | Deaths   | Deaths | Deaths | Rate    | Rates   | Rates   | Rates   |
| All Comb      | 2327764 | 1580465.217 | 1185643.707 | 394821.5 | 16.961 | 24.981 | 639.078 | 433.910 | 325.514 | 108.397 |

#### Results for Age Groups Combined, Population unadjusted for deaths in Ecig scenario,

| Age Group:All | NULL   | Ecig      | %Drop     |          |        | NULL   | Ecig    | Drop    |         |         |
|---------------|--------|-----------|-----------|----------|--------|--------|---------|---------|---------|---------|
| Year          | Number | Attrib    | Attrib    | Drop     | %Drop  | Attrib | Death   | Attrib  | Attrib  | Drop    |
|               | Deaths | Deaths    | Deaths    | Deaths   | Deaths | Deaths | Rate    | Rates   | Rates   | Rates   |
| 1990          | 42690  | 30614.201 | 30614.201 | 0.000    | 0.000  | 0.000  | 625.210 | 448.355 | 448.355 | 0.000   |
| 1991          | 43692  | 31412.010 | 31381.330 | 30.680   | 0.070  | 0.098  | 631.345 | 453.901 | 453.457 | 0.443   |
| 1992          | 45423  | 32782.407 | 32693.404 | 89.003   | 0.196  | 0.271  | 647.450 | 467.274 | 466.005 | 1.269   |
| 1993          | 46291  | 33491.183 | 33315.253 | 175.931  | 0.380  | 0.525  | 650.515 | 470.643 | 468.170 | 2.472   |
| 1994          | 47017  | 34074.347 | 33789.310 | 285.037  | 0.606  | 0.837  | 650.895 | 471.719 | 467.773 | 3.946   |
| 1995          | 47840  | 34694.454 | 34264.615 | 429.839  | 0.898  | 1.239  | 652.025 | 472.861 | 467.002 | 5.858   |
| 1996          | 48244  | 35027.269 | 34432.860 | 594.408  | 1.232  | 1.697  | 648.999 | 471.202 | 463.206 | 7.996   |
| 1997          | 49035  | 35590.763 | 34800.607 | 790.156  | 1.611  | 2.220  | 650.506 | 472.153 | 461.670 | 10.482  |
| 1998          | 49686  | 36100.785 | 35079.413 | 1021.371 | 2.056  | 2.829  | 649.874 | 472.184 | 458.825 | 13.359  |
| 1999          | 48883  | 35451.030 | 34221.965 | 1229.064 | 2.514  | 3.467  | 630.769 | 457.448 | 441.588 | 15.859  |
| 2000          | 50331  | 36447.986 | 34910.251 | 1537.735 | 3.055  | 4.219  | 641.392 | 464.474 | 444.878 | 19.596  |
| 2001          | 50389  | 36411.326 | 34561.884 | 1849.443 | 3.670  | 5.079  | 635.012 | 458.863 | 435.556 | 23.307  |
| 2002          | 51445  | 37078.545 | 34842.310 | 2236.235 | 4.347  | 6.031  | 641.972 | 462.696 | 434.790 | 27.906  |
| 2003          | 51408  | 36999.876 | 34395.541 | 2604.335 | 5.066  | 7.039  | 635.509 | 457.395 | 425.200 | 32.195  |
| 2004          | 51399  | 36861.555 | 33850.860 | 3010.695 | 5.857  | 8.168  | 629.057 | 451.138 | 414.291 | 36.847  |
| 2005          | 51421  | 36689.529 | 33250.555 | 3438.974 | 6.688  | 9.373  | 622.370 | 444.069 | 402.445 | 41.623  |
| 2006          | 51355  | 36504.774 | 32617.934 | 3886.840 | 7.569  | 10.647 | 616.150 | 437.979 | 391.345 | 46.634  |
| 2007          | 51839  | 36663.202 | 32243.482 | 4419.720 | 8.526  | 12.055 | 615.761 | 435.498 | 382.999 | 52.499  |
| 2008          | 50976  | 35898.803 | 31082.458 | 4816.346 | 9.448  | 13.416 | 598.952 | 421.800 | 365.209 | 56.591  |
| 2009          | 51193  | 35934.525 | 30550.082 | 5384.443 | 10.518 | 14.984 | 594.733 | 417.468 | 354.914 | 62.554  |
| 2010          | 50853  | 35502.829 | 29657.737 | 5845.093 | 11.494 | 16.464 | 584.018 | 407.730 | 340.602 | 67.128  |
| 2011          | 50509  | 35136.342 | 28754.605 | 6381.737 | 12.635 | 18.163 | 574.613 | 399.726 | 327.125 | 72.601  |
| 2012          | 51245  | 35450.201 | 28402.167 | 7048.034 | 13.754 | 19.882 | 577.023 | 399.173 | 319.811 | 79.362  |
| 2013          | 51069  | 35123.224 | 27490.871 | 7632.353 | 14.945 | 21.730 | 568.874 | 391.249 | 306.230 | 85.019  |
| 2014          | 51251  | 35079.370 | 26824.198 | 8255.172 | 16.107 | 23.533 | 564.641 | 386.476 | 295.527 | 90.949  |
| 2015          | 50443  | 34324.171 | 25670.086 | 8654.085 | 17.156 | 25.213 | 621.319 | 422.780 | 316.185 | 106.595 |
| 2016          | 48854  | 33054.753 | 24055.255 | 8999.498 | 18.421 | 27.226 | 596.013 | 403.264 | 293.471 | 109.793 |
| 2017          | 48325  | 32471.234 | 22965.940 | 9505.294 | 19.670 | 29.273 | 583.983 | 392.399 | 277.532 | 114.867 |
| 2018          | 50465  | 33657.595 | 23055.181 | 10602.41 | 21.009 | 31.501 | 604.052 | 402.871 | 275.964 | 126.908 |
| 2019          | 51036  | 33863.424 | 22489.194 | 11374.23 | 22.287 | 33.589 | 604.975 | 401.412 | 266.583 | 134.828 |
| 2020          | 51444  | 33910.830 | 21903.585 | 12007.24 | 23.341 | 35.408 | 691.053 | 455.532 | 294.236 | 161.296 |
| 2021          | 48037  | 31531.880 | 19675.090 | 11856.79 | 24.683 | 37.603 | 640.639 | 420.521 | 262.394 | 158.127 |
| 2022          | 48335  | 31560.212 | 19041.377 | 12518.84 | 25.900 | 39.667 | 639.727 | 417.708 | 252.018 | 165.690 |
| 2023          | 48599  | 31508.781 | 18389.410 | 13119.37 | 26.995 | 41.637 | 638.227 | 413.791 | 241.500 | 172.291 |
| 2024          | 48784  | 31517.293 | 17743.687 | 13773.61 | 28.234 | 43.702 | 635.757 | 410.740 | 231.239 | 179.500 |
| 2025          | 48477  | 31175.389 | 17002.511 | 14172.88 | 29.237 | 45.462 | 729.141 | 468.912 | 255.736 | 213.175 |
| 2026          | 45324  | 29044.598 | 15268.331 | 13776.27 | 30.395 | 47.431 | 679.138 | 435.206 | 228.782 | 206.425 |
| 2027          | 45107  | 28825.765 | 14577.285 | 14248.48 | 31.588 | 49.430 | 673.191 | 430.203 | 217.555 | 212.648 |
| 2028          | 44842  | 28513.846 | 13866.123 | 14647.72 | 32.665 | 51.371 | 666.430 | 423.769 | 206.077 | 217.693 |
| 2029          | 44539  | 28148.109 | 13141.126 | 15006.98 | 33.694 | 53.314 | 659.013 | 416.486 | 194.439 | 222.047 |
| 2030          | 43393  | 27314.475 | 12341.048 | 14973.43 | 34.507 | 54.819 | 760.018 | 478.407 | 216.151 | 262.256 |
| 2031          | 40748  | 25423.102 | 11176.374 | 14246.73 | 34.963 | 56.039 | 712.731 | 444.684 | 195.490 | 249.194 |
| 2032          | 40325  | 25085.902 | 10601.994 | 14483.91 | 35.918 | 57.737 | 703.969 | 437.933 | 185.083 | 252.851 |
| 2033          | 39882  | 24645.067 | 10031.091 | 14613.98 | 36.643 | 59.298 | 694.543 | 429.194 | 174.691 | 254.502 |
| 2034          | 39404  | 24239.126 | 9483.000  | 14756.13 | 37.448 | 60.877 | 684.347 | 420.967 | 164.694 | 256.273 |
| 2035          | 37454  | 22944.147 | 8738.957  | 14205.19 | 37.927 | 61.912 | 796.588 | 487.980 | 185.862 | 302.118 |
| 2036          | 32988  | 19950.581 | 7298.440  | 12652.14 | 38.353 | 63.417 | 702.663 | 424.953 | 155.459 | 269.494 |
| 2037          | 32403  | 19415.334 | 6788.054  | 12627.28 | 38.969 | 65.038 | 690.731 | 413.871 | 144.699 | 269.172 |
| 2038          | 31820  | 18939.317 | 6383.291  | 12556.03 | 39.460 | 66.296 | 678.257 | 403.701 | 136.063 | 267.638 |
| 2039          | 31251  | 18379.752 | 5929.386  | 12450.37 | 39.839 | 67.740 | 665.457 | 391.373 | 126.259 | 265.114 |

## Results for PHIM for Run 6 (Sensitivity\_Analysis\_1.RTF)

\*\*\*\*\*

### Main Results for E-Component for Run: 6, Simulation: 1, COD: IHD

| Variable Parameter          | Value                                  |
|-----------------------------|----------------------------------------|
| 1. Country                  | US (United States)                     |
| 2. Sex                      | F (Females)                            |
| 3. Year of start of process | 1990                                   |
| 4. Cause of Death           | IHD                                    |
| 5. Effective Dose NULL      | CC:1                                   |
| 6. Effective Dose Ecig      | CC:1 Ecig:0.1 Dual:0.55                |
| Note:                       | Death rates are per million population |

#### Results for Age Groups Combined and Years combined, Population unadjusted for deaths in Ecig scenario,

| Age Group:All |         | NULL       | Ecig       | %Drop    |        |        | NULL    | Ecig    | Drop   |        |
|---------------|---------|------------|------------|----------|--------|--------|---------|---------|--------|--------|
| Year          | Number  | Attrib     | Attrib     | Drop     | %Drop  | Attrib | Death   | Attrib  | Attrib | Drop   |
|               | Deaths  | Deaths     | Deaths     | Deaths   | Deaths | Deaths | Rate    | Rates   | Rates  | Rates  |
| All Comb      | 3242167 | 398833.796 | 212062.316 | 186771.5 | 5.761  | 46.829 | 890.124 | 109.498 | 58.221 | 51.277 |

#### Results for Age Groups Combined, Population unadjusted for deaths in Ecig scenario,

| Age Group:All |        | NULL      | Ecig      | %Drop    |        |        | NULL    | Ecig    | Drop    |        |
|---------------|--------|-----------|-----------|----------|--------|--------|---------|---------|---------|--------|
| Year          | Number | Attrib    | Attrib    | Drop     | %Drop  | Attrib | Death   | Attrib  | Attrib  | Drop   |
|               | Deaths | Deaths    | Deaths    | Deaths   | Deaths | Deaths | Rate    | Rates   | Rates   | Rates  |
| 1990          | 98916  | 12922.892 | 12922.892 | 0.000    | 0.000  | 0.000  | 1448.66 | 189.260 | 189.260 | 0.000  |
| 1991          | 96403  | 12856.479 | 12770.826 | 85.653   | 0.089  | 0.666  | 1393.01 | 185.775 | 184.537 | 1.238  |
| 1992          | 93721  | 12662.244 | 12425.222 | 237.021  | 0.253  | 1.872  | 1335.88 | 180.485 | 177.107 | 3.378  |
| 1993          | 93679  | 12730.613 | 12278.638 | 451.975  | 0.482  | 3.550  | 1316.45 | 178.900 | 172.548 | 6.351  |
| 1994          | 90832  | 12495.323 | 11792.090 | 703.233  | 0.774  | 5.628  | 1257.46 | 172.983 | 163.248 | 9.735  |
| 1995          | 89698  | 12365.590 | 11372.529 | 993.061  | 1.107  | 8.031  | 1222.52 | 168.534 | 155.000 | 13.535 |
| 1996          | 88286  | 12290.551 | 10937.948 | 1352.603 | 1.532  | 11.005 | 1187.66 | 165.338 | 147.142 | 18.196 |
| 1997          | 84777  | 11719.531 | 10091.960 | 1627.571 | 1.920  | 13.888 | 1124.67 | 155.473 | 133.882 | 21.592 |
| 1998          | 82517  | 11416.794 | 9469.837  | 1946.958 | 2.359  | 17.053 | 1079.29 | 149.327 | 123.862 | 25.465 |
| 1999          | 93939  | 13028.038 | 10350.205 | 2677.833 | 2.851  | 20.554 | 1212.16 | 168.109 | 133.555 | 34.554 |
| 2000          | 90039  | 12426.299 | 9437.910  | 2988.389 | 3.319  | 24.049 | 1147.41 | 158.354 | 120.272 | 38.082 |
| 2001          | 86119  | 11939.281 | 8574.080  | 3365.202 | 3.908  | 28.186 | 1085.29 | 150.461 | 108.052 | 42.409 |
| 2002          | 83014  | 11528.794 | 7796.134  | 3732.660 | 4.496  | 32.377 | 1035.91 | 143.865 | 97.286  | 46.579 |
| 2003          | 79302  | 11048.407 | 7038.629  | 4009.778 | 5.056  | 36.293 | 980.336 | 136.581 | 87.012  | 49.569 |
| 2004          | 73861  | 10375.132 | 6179.200  | 4195.931 | 5.681  | 40.442 | 903.963 | 126.978 | 75.625  | 51.353 |
| 2005          | 71649  | 10051.029 | 5601.937  | 4449.092 | 6.210  | 44.265 | 867.197 | 121.652 | 67.803  | 53.849 |
| 2006          | 67551  | 9542.523  | 4932.261  | 4610.262 | 6.825  | 48.313 | 810.467 | 114.490 | 59.177  | 55.313 |
| 2007          | 63503  | 8936.533  | 4295.643  | 4640.890 | 7.308  | 51.932 | 754.310 | 106.151 | 51.025  | 55.126 |
| 2008          | 63171  | 8944.180  | 3993.003  | 4951.178 | 7.838  | 55.356 | 742.239 | 105.091 | 46.917  | 58.175 |
| 2009          | 59747  | 8390.033  | 3500.327  | 4889.707 | 8.184  | 58.280 | 694.108 | 97.471  | 40.665  | 56.806 |
| 2010          | 58008  | 8157.570  | 3170.297  | 4987.272 | 8.598  | 61.137 | 666.189 | 93.685  | 36.409  | 57.276 |
| 2011          | 57368  | 8035.356  | 2889.574  | 5145.782 | 8.970  | 64.039 | 652.644 | 91.414  | 32.873  | 58.541 |
| 2012          | 57411  | 7970.766  | 2647.005  | 5323.761 | 9.273  | 66.791 | 646.453 | 89.752  | 29.806  | 59.946 |
| 2013          | 57067  | 7743.216  | 2402.764  | 5340.452 | 9.358  | 68.969 | 635.688 | 86.254  | 26.765  | 59.489 |
| 2014          | 57538  | 7774.935  | 2238.053  | 5536.882 | 9.623  | 71.215 | 633.906 | 85.658  | 24.657  | 61.001 |
| 2015          | 58395  | 7722.535  | 2098.695  | 5623.840 | 9.631  | 72.824 | 719.266 | 95.120  | 25.850  | 69.270 |
| 2016          | 58658  | 7600.353  | 1921.489  | 5678.865 | 9.681  | 74.718 | 715.621 | 92.723  | 23.442  | 69.281 |
| 2017          | 59004  | 7470.266  | 1768.015  | 5702.252 | 9.664  | 76.333 | 713.034 | 90.274  | 21.366  | 68.909 |
| 2018          | 56077  | 6907.050  | 1531.832  | 5375.218 | 9.585  | 77.822 | 671.224 | 82.675  | 18.336  | 64.340 |
| 2019          | 55886  | 6732.046  | 1408.584  | 5323.462 | 9.526  | 79.076 | 662.462 | 79.801  | 16.697  | 63.104 |
| 2020          | 55313  | 6429.836  | 1282.207  | 5147.629 | 9.306  | 80.058 | 743.037 | 86.373  | 17.224  | 69.149 |
| 2021          | 56292  | 6562.016  | 1221.243  | 5340.772 | 9.488  | 81.389 | 750.730 | 87.513  | 16.287  | 71.227 |
| 2022          | 55827  | 6352.366  | 1124.854  | 5227.511 | 9.364  | 82.292 | 738.885 | 84.075  | 14.888  | 69.188 |
| 2023          | 55338  | 6134.123  | 1041.960  | 5092.163 | 9.202  | 83.014 | 726.728 | 80.557  | 13.684  | 66.873 |
| 2024          | 54770  | 5922.193  | 963.654   | 4958.538 | 9.053  | 83.728 | 713.771 | 77.179  | 12.559  | 64.621 |
| 2025          | 53295  | 5504.188  | 866.549   | 4637.638 | 8.702  | 84.257 | 801.612 | 82.789  | 13.034  | 69.755 |
| 2026          | 55278  | 5641.075  | 853.981   | 4787.095 | 8.660  | 84.861 | 828.283 | 84.526  | 12.796  | 71.730 |
| 2027          | 54199  | 5426.216  | 795.542   | 4630.674 | 8.544  | 85.339 | 808.875 | 80.982  | 11.873  | 69.109 |
| 2028          | 53090  | 5197.830  | 739.597   | 4458.233 | 8.397  | 85.771 | 789.020 | 77.249  | 10.992  | 66.258 |
| 2029          | 51974  | 4973.547  | 689.428   | 4284.119 | 8.243  | 86.138 | 769.023 | 73.590  | 10.201  | 63.389 |
| 2030          | 49479  | 4450.618  | 599.216   | 3851.402 | 7.784  | 86.536 | 866.605 | 77.952  | 10.495  | 67.456 |
| 2031          | 51987  | 4555.052  | 603.094   | 3951.958 | 7.602  | 86.760 | 909.317 | 79.674  | 10.549  | 69.125 |
| 2032          | 50677  | 4349.999  | 564.220   | 3785.780 | 7.470  | 87.029 | 884.689 | 75.939  | 9.850   | 66.090 |
| 2033          | 49380  | 4147.948  | 531.717   | 3616.231 | 7.323  | 87.181 | 859.955 | 72.237  | 9.260   | 62.977 |
| 2034          | 48076  | 3966.133  | 500.523   | 3465.610 | 7.209  | 87.380 | 834.943 | 68.881  | 8.693   | 60.188 |
| 2035          | 44518  | 3289.064  | 404.021   | 2885.044 | 6.481  | 87.716 | 946.825 | 69.952  | 8.593   | 61.360 |
| 2036          | 46347  | 3313.192  | 399.000   | 2914.193 | 6.288  | 87.957 | 987.211 | 70.572  | 8.499   | 62.073 |
| 2037          | 44841  | 3117.951  | 370.446   | 2747.505 | 6.127  | 88.119 | 955.859 | 66.464  | 7.897   | 58.568 |
| 2038          | 43378  | 2949.775  | 348.059   | 2601.716 | 5.998  | 88.200 | 924.621 | 62.876  | 7.419   | 55.457 |
| 2039          | 41973  | 2766.312  | 325.424   | 2440.888 | 5.815  | 88.236 | 893.753 | 58.905  | 6.929   | 51.976 |

## Results for PHIM for Run 6 (Sensitivity\_Analysis\_1.RTF)

\*\*\*\*\*

### Main Results for E-Component for Run: 6, Simulation: 1, COD: STROKE

| Variable Parameter          | Value                                  |
|-----------------------------|----------------------------------------|
| 1. Country                  | US (United States)                     |
| 2. Sex                      | F (Females)                            |
| 3. Year of start of process | 1990                                   |
| 4. Cause of Death           | STROKE                                 |
| 5. Effective Dose NULL      | CC:1                                   |
| 6. Effective Dose Ecig      | CC:1 Ecig:0.1 Dual:0.55                |
| Note:                       | Death rates are per million population |

#### Results for Age Groups Combined and Years combined, Population unadjusted for deaths in Ecig scenario,

| Age Group:All | NULL    | Ecig       | %Drop     |          |        | NULL   | Ecig    | Drop   |        |        |
|---------------|---------|------------|-----------|----------|--------|--------|---------|--------|--------|--------|
| Year          | Number  | Attrib     | Attrib    | Drop     | %Drop  | Attrib | Death   | Attrib | Attrib | Drop   |
|               | Deaths  | Deaths     | Deaths    | Deaths   | Deaths | Deaths | Rate    | Rates  | Rates  | Rates  |
| All Comb      | 1352207 | 104899.750 | 54615.614 | 50284.14 | 3.719  | 47.935 | 371.243 | 28.800 | 14.995 | 13.805 |

#### Results for Age Groups Combined, Population unadjusted for deaths in Ecig scenario,

| Age Group:All | NULL   | Ecig     | %Drop    |          |        | NULL   | Ecig    | Drop   |        |        |
|---------------|--------|----------|----------|----------|--------|--------|---------|--------|--------|--------|
| Year          | Number | Attrib   | Attrib   | Drop     | %Drop  | Attrib | Death   | Attrib | Attrib | Drop   |
|               | Deaths | Deaths   | Deaths   | Deaths   | Deaths | Deaths | Rate    | Rates  | Rates  | Rates  |
| 1990          | 33504  | 3293.017 | 3293.017 | 0.000    | 0.000  | 0.000  | 490.678 | 48.227 | 48.227 | 0.000  |
| 1991          | 32505  | 3207.063 | 3180.986 | 26.077   | 0.080  | 0.813  | 469.694 | 46.342 | 45.965 | 0.377  |
| 1992          | 32560  | 3218.125 | 3145.290 | 72.835   | 0.224  | 2.263  | 464.104 | 45.871 | 44.832 | 1.038  |
| 1993          | 32768  | 3226.680 | 3088.849 | 137.831  | 0.421  | 4.272  | 460.480 | 45.344 | 43.407 | 1.937  |
| 1994          | 33005  | 3277.266 | 3057.660 | 219.606  | 0.665  | 6.701  | 456.915 | 45.370 | 42.330 | 3.040  |
| 1995          | 33730  | 3309.378 | 2994.867 | 314.511  | 0.932  | 9.504  | 459.716 | 45.104 | 40.818 | 4.287  |
| 1996          | 33750  | 3312.987 | 2887.919 | 425.068  | 1.259  | 12.830 | 454.019 | 44.568 | 38.850 | 5.718  |
| 1997          | 33699  | 3267.066 | 2735.153 | 531.913  | 1.578  | 16.281 | 447.056 | 43.341 | 36.285 | 7.056  |
| 1998          | 33274  | 3178.725 | 2544.811 | 633.913  | 1.905  | 19.942 | 435.211 | 41.577 | 33.285 | 8.291  |
| 1999          | 33891  | 3120.351 | 2382.803 | 737.548  | 2.176  | 23.637 | 437.317 | 40.264 | 30.747 | 9.517  |
| 2000          | 33827  | 3142.808 | 2280.569 | 862.239  | 2.549  | 27.435 | 431.074 | 40.050 | 29.062 | 10.988 |
| 2001          | 32506  | 2961.588 | 2036.209 | 925.379  | 2.847  | 31.246 | 409.647 | 37.323 | 25.661 | 11.662 |
| 2002          | 32078  | 2940.627 | 1900.619 | 1040.008 | 3.242  | 35.367 | 400.295 | 36.695 | 23.717 | 12.978 |
| 2003          | 30568  | 2819.545 | 1712.872 | 1106.673 | 3.620  | 39.250 | 377.883 | 34.855 | 21.175 | 13.681 |
| 2004          | 29388  | 2730.466 | 1552.683 | 1177.783 | 4.008  | 43.135 | 359.671 | 33.417 | 19.003 | 14.415 |
| 2005          | 27954  | 2670.510 | 1421.385 | 1249.125 | 4.469  | 46.775 | 338.339 | 32.322 | 17.204 | 15.119 |
| 2006          | 27201  | 2623.285 | 1304.912 | 1318.373 | 4.847  | 50.257 | 326.354 | 31.474 | 15.656 | 15.818 |
| 2007          | 26302  | 2536.599 | 1176.902 | 1359.697 | 5.170  | 53.603 | 312.424 | 30.131 | 13.980 | 16.151 |
| 2008          | 25998  | 2469.443 | 1071.119 | 1398.324 | 5.379  | 56.625 | 305.468 | 29.015 | 12.585 | 16.430 |
| 2009          | 25040  | 2386.945 | 966.653  | 1420.292 | 5.672  | 59.503 | 290.901 | 27.730 | 11.230 | 16.500 |
| 2010          | 24840  | 2329.274 | 881.552  | 1447.723 | 5.828  | 62.153 | 285.273 | 26.750 | 10.124 | 16.626 |
| 2011          | 24792  | 2286.581 | 804.618  | 1481.963 | 5.978  | 64.811 | 282.045 | 26.013 | 9.154  | 16.859 |
| 2012          | 24500  | 2243.311 | 734.371  | 1508.940 | 6.159  | 67.264 | 275.872 | 25.260 | 8.269  | 16.991 |
| 2013          | 24451  | 2176.503 | 663.640  | 1512.863 | 6.187  | 69.509 | 272.368 | 24.245 | 7.393  | 16.852 |
| 2014          | 25296  | 2211.619 | 629.778  | 1581.841 | 6.253  | 71.524 | 278.691 | 24.366 | 6.938  | 17.427 |
| 2015          | 26316  | 2237.016 | 601.422  | 1635.594 | 6.215  | 73.115 | 324.141 | 27.554 | 7.408  | 20.146 |
| 2016          | 26735  | 2229.057 | 563.086  | 1665.971 | 6.231  | 74.739 | 326.164 | 27.194 | 6.870  | 20.325 |
| 2017          | 27616  | 2221.649 | 528.893  | 1692.756 | 6.130  | 76.194 | 333.726 | 26.848 | 6.391  | 20.456 |
| 2018          | 25256  | 1939.420 | 437.383  | 1502.037 | 5.947  | 77.448 | 302.304 | 23.214 | 5.235  | 17.979 |
| 2019          | 25429  | 1904.400 | 404.859  | 1499.540 | 5.897  | 78.741 | 301.434 | 22.574 | 4.799  | 17.775 |
| 2020          | 25379  | 1806.054 | 365.705  | 1440.349 | 5.675  | 79.751 | 340.922 | 24.261 | 4.913  | 19.349 |
| 2021          | 25448  | 1748.172 | 334.869  | 1413.304 | 5.554  | 80.845 | 339.386 | 23.314 | 4.466  | 18.848 |
| 2022          | 25539  | 1701.148 | 310.226  | 1398.922 | 5.446  | 81.764 | 338.015 | 22.515 | 4.106  | 18.409 |
| 2023          | 25620  | 1652.087 | 288.951  | 1363.136 | 5.321  | 82.510 | 336.461 | 21.696 | 3.795  | 17.901 |
| 2024          | 25659  | 1597.127 | 267.248  | 1329.878 | 5.183  | 83.267 | 334.391 | 20.814 | 3.483  | 17.331 |
| 2025          | 25260  | 1467.622 | 236.928  | 1230.694 | 4.872  | 83.856 | 379.931 | 22.075 | 3.564  | 18.511 |
| 2026          | 25480  | 1390.505 | 216.692  | 1173.814 | 4.607  | 84.416 | 381.790 | 20.835 | 3.247  | 17.589 |
| 2027          | 25264  | 1342.095 | 201.865  | 1140.231 | 4.513  | 84.959 | 377.042 | 20.030 | 3.013  | 17.017 |
| 2028          | 25022  | 1289.536 | 188.176  | 1101.360 | 4.402  | 85.407 | 371.870 | 19.165 | 2.797  | 16.368 |
| 2029          | 24767  | 1242.216 | 176.023  | 1066.193 | 4.305  | 85.830 | 366.459 | 18.380 | 2.604  | 15.776 |
| 2030          | 23959  | 1096.803 | 150.322  | 946.481  | 3.950  | 86.295 | 419.641 | 19.210 | 2.633  | 16.577 |
| 2031          | 23963  | 1019.991 | 137.038  | 882.953  | 3.685  | 86.565 | 419.142 | 17.841 | 2.397  | 15.444 |
| 2032          | 23615  | 977.406  | 128.334  | 849.072  | 3.595  | 86.870 | 412.259 | 17.063 | 2.240  | 14.823 |
| 2033          | 23259  | 937.450  | 121.330  | 816.120  | 3.509  | 87.057 | 405.051 | 16.326 | 2.113  | 14.213 |
| 2034          | 22879  | 900.763  | 114.446  | 786.317  | 3.437  | 87.295 | 397.339 | 15.644 | 1.988  | 13.656 |
| 2035          | 21733  | 745.023  | 92.421   | 652.603  | 3.003  | 87.595 | 462.224 | 15.845 | 1.966  | 13.880 |
| 2036          | 20904  | 680.360  | 82.347   | 598.013  | 2.861  | 87.897 | 445.263 | 14.492 | 1.754  | 12.738 |
| 2037          | 20397  | 644.109  | 76.989   | 567.121  | 2.780  | 88.047 | 434.791 | 13.730 | 1.641  | 12.089 |
| 2038          | 19890  | 612.448  | 72.589   | 539.859  | 2.714  | 88.148 | 423.966 | 13.055 | 1.547  | 11.507 |
| 2039          | 19392  | 577.529  | 68.235   | 509.294  | 2.626  | 88.185 | 412.930 | 12.298 | 1.453  | 10.845 |

## Results for PHIM for Run 6 (Sensitivity\_Analysis\_1.RTF)

\*\*\*\*\*

### Main Results for E-Component for Run: 6, Simulation: 1, COD: COPD

| Variable Parameter          | Value                                  |
|-----------------------------|----------------------------------------|
| 1. Country                  | US (United States)                     |
| 2. Sex                      | F (Females)                            |
| 3. Year of start of process | 1990                                   |
| 4. Cause of Death           | COPD                                   |
| 5. Effective Dose NULL      | CC:1                                   |
| 6. Effective Dose Ecig      | CC:1 Ecig:0.1 Dual:0.55                |
| Note:                       | Death rates are per million population |

#### Results for Age Groups Combined and Years combined, Population unadjusted for deaths in Ecig scenario,

| Age Group:All |         | NULL       | Ecig       | %Drop    |        |        | NULL    | Ecig    | Drop    |        |
|---------------|---------|------------|------------|----------|--------|--------|---------|---------|---------|--------|
| Year          | Number  | Attrib     | Attrib     | Drop     | %Drop  | Attrib | Death   | Attrib  | Attrib  | Drop   |
|               | Deaths  | Deaths     | Deaths     | Deaths   | Deaths | Deaths | Rate    | Rates   | Rates   | Rates  |
| All Comb      | 2159941 | 862051.244 | 573080.819 | 288970.4 | 13.379 | 33.521 | 593.003 | 236.673 | 157.337 | 79.336 |

#### Results for Age Groups Combined, Population unadjusted for deaths in Ecig scenario,

| Age Group:All |        | NULL      | Ecig      | %Drop    |        |        | NULL    | Ecig    | Drop    |         |
|---------------|--------|-----------|-----------|----------|--------|--------|---------|---------|---------|---------|
| Year          | Number | Attrib    | Attrib    | Drop     | %Drop  | Attrib | Death   | Attrib  | Attrib  | Drop    |
|               | Deaths | Deaths    | Deaths    | Deaths   | Deaths | Deaths | Rate    | Rates   | Rates   | Rates   |
| 1990          | 24738  | 10694.712 | 10694.712 | 0.000    | 0.000  | 0.000  | 362.296 | 156.628 | 156.628 | 0.000   |
| 1991          | 26562  | 11602.933 | 11585.600 | 17.333   | 0.065  | 0.149  | 383.818 | 167.661 | 167.411 | 0.250   |
| 1992          | 26828  | 11831.375 | 11783.762 | 47.613   | 0.177  | 0.402  | 382.401 | 168.642 | 167.963 | 0.679   |
| 1993          | 29774  | 13246.371 | 13143.703 | 102.668  | 0.345  | 0.775  | 418.406 | 186.148 | 184.705 | 1.443   |
| 1994          | 29804  | 13355.662 | 13192.651 | 163.011  | 0.547  | 1.221  | 412.601 | 184.893 | 182.637 | 2.257   |
| 1995          | 29755  | 13397.439 | 13155.264 | 242.175  | 0.814  | 1.808  | 405.540 | 182.598 | 179.297 | 3.301   |
| 1996          | 30900  | 13960.356 | 13622.197 | 338.158  | 1.094  | 2.422  | 415.680 | 187.801 | 183.252 | 4.549   |
| 1997          | 31128  | 14109.552 | 13667.941 | 441.612  | 1.419  | 3.130  | 412.949 | 187.180 | 181.321 | 5.858   |
| 1998          | 32096  | 14599.657 | 14021.772 | 577.885  | 1.800  | 3.958  | 419.803 | 190.958 | 183.399 | 7.559   |
| 1999          | 34616  | 15728.102 | 14978.792 | 749.310  | 2.165  | 4.764  | 446.673 | 202.950 | 193.281 | 9.669   |
| 2000          | 34299  | 15579.803 | 14687.727 | 892.076  | 2.601  | 5.726  | 437.088 | 198.541 | 187.173 | 11.368  |
| 2001          | 34592  | 15696.614 | 14621.765 | 1074.850 | 3.107  | 6.848  | 435.935 | 197.812 | 184.266 | 13.545  |
| 2002          | 34291  | 15519.777 | 14271.652 | 1248.125 | 3.640  | 8.042  | 427.910 | 193.668 | 178.093 | 15.575  |
| 2003          | 35074  | 15888.389 | 14412.936 | 1475.453 | 4.207  | 9.286  | 433.587 | 196.413 | 178.174 | 18.240  |
| 2004          | 33512  | 15091.573 | 13490.243 | 1601.330 | 4.778  | 10.611 | 410.143 | 184.701 | 165.103 | 19.598  |
| 2005          | 35392  | 15803.656 | 13890.812 | 1912.843 | 5.405  | 12.104 | 428.364 | 191.278 | 168.126 | 23.152  |
| 2006          | 33981  | 15100.563 | 13064.602 | 2035.962 | 5.991  | 13.483 | 407.699 | 181.174 | 156.747 | 24.427  |
| 2007          | 34000  | 14974.384 | 12722.462 | 2251.922 | 6.623  | 15.038 | 403.863 | 177.871 | 151.122 | 26.749  |
| 2008          | 37425  | 16406.197 | 13706.536 | 2699.662 | 7.214  | 16.455 | 439.732 | 192.768 | 161.047 | 31.720  |
| 2009          | 36826  | 16083.194 | 13151.604 | 2931.590 | 7.961  | 18.228 | 427.825 | 186.846 | 152.788 | 34.058  |
| 2010          | 36788  | 15927.400 | 12787.300 | 3140.100 | 8.536  | 19.715 | 422.489 | 182.917 | 146.855 | 36.062  |
| 2011          | 37636  | 16221.836 | 12735.835 | 3486.000 | 9.262  | 21.490 | 428.164 | 184.547 | 144.888 | 39.658  |
| 2012          | 38265  | 16358.849 | 12558.396 | 3800.453 | 9.932  | 23.232 | 430.867 | 184.202 | 141.409 | 42.793  |
| 2013          | 40112  | 16994.822 | 12727.924 | 4266.899 | 10.637 | 25.107 | 446.821 | 189.311 | 141.780 | 47.530  |
| 2014          | 40084  | 16855.093 | 12304.653 | 4550.441 | 11.352 | 26.997 | 441.613 | 185.696 | 135.563 | 50.133  |
| 2015          | 42200  | 17572.483 | 12568.358 | 5004.125 | 11.858 | 28.477 | 519.788 | 216.445 | 154.808 | 61.637  |
| 2016          | 42606  | 17579.955 | 12212.087 | 5367.868 | 12.599 | 30.534 | 519.788 | 214.473 | 148.986 | 65.487  |
| 2017          | 44364  | 18080.688 | 12193.884 | 5886.805 | 13.269 | 32.559 | 536.117 | 218.496 | 147.357 | 71.139  |
| 2018          | 45359  | 18209.262 | 11946.467 | 6262.795 | 13.807 | 34.393 | 542.932 | 217.960 | 142.996 | 74.964  |
| 2019          | 46876  | 18648.302 | 11862.904 | 6785.398 | 14.475 | 36.386 | 555.657 | 221.054 | 140.621 | 80.433  |
| 2020          | 48331  | 19002.597 | 11774.754 | 7227.843 | 14.955 | 38.036 | 649.239 | 255.266 | 158.173 | 97.093  |
| 2021          | 48338  | 18885.717 | 11308.072 | 7577.645 | 15.676 | 40.124 | 644.660 | 251.867 | 150.809 | 101.058 |
| 2022          | 49708  | 19235.076 | 11154.426 | 8080.650 | 16.256 | 42.010 | 657.895 | 254.582 | 147.632 | 106.950 |
| 2023          | 51083  | 19521.158 | 10978.481 | 8542.677 | 16.723 | 43.761 | 670.849 | 256.363 | 144.176 | 112.187 |
| 2024          | 52397  | 19918.620 | 10816.578 | 9102.042 | 17.371 | 45.696 | 682.854 | 259.583 | 140.964 | 118.620 |
| 2025          | 53387  | 20150.545 | 10599.651 | 9550.894 | 17.890 | 47.398 | 803.004 | 303.086 | 159.430 | 143.656 |
| 2026          | 54232  | 20393.792 | 10335.225 | 10058.57 | 18.547 | 49.322 | 812.615 | 305.582 | 154.864 | 150.718 |
| 2027          | 55049  | 20615.351 | 10050.805 | 10564.55 | 19.191 | 51.246 | 821.568 | 307.668 | 150.001 | 157.668 |
| 2028          | 55809  | 20731.894 | 9722.983  | 11008.91 | 19.726 | 53.101 | 829.419 | 308.115 | 144.502 | 163.613 |
| 2029          | 56527  | 20781.967 | 9370.794  | 11411.17 | 20.187 | 54.909 | 836.392 | 307.495 | 138.652 | 168.842 |
| 2030          | 56756  | 20753.201 | 9022.261  | 11730.94 | 20.669 | 56.526 | 994.067 | 363.487 | 158.023 | 205.465 |
| 2031          | 58288  | 21048.417 | 8926.736  | 12121.68 | 20.796 | 57.590 | 1019.54 | 368.165 | 156.140 | 212.024 |
| 2032          | 58782  | 21169.329 | 8624.865  | 12544.46 | 21.341 | 59.258 | 1026.18 | 369.560 | 150.567 | 218.993 |
| 2033          | 59236  | 21109.293 | 8282.720  | 12826.57 | 21.654 | 60.763 | 1031.59 | 367.618 | 144.244 | 223.375 |
| 2034          | 59614  | 21109.429 | 7949.149  | 13160.28 | 22.076 | 62.343 | 1035.33 | 366.613 | 138.055 | 228.558 |
| 2035          | 58938  | 20794.840 | 7574.571  | 13220.27 | 22.431 | 63.575 | 1253.51 | 442.268 | 161.097 | 281.171 |
| 2036          | 56014  | 19354.577 | 6792.646  | 12561.93 | 22.426 | 64.904 | 1193.11 | 412.258 | 144.685 | 267.573 |
| 2037          | 55953  | 19064.169 | 6371.418  | 12692.75 | 22.685 | 66.579 | 1192.72 | 406.385 | 135.818 | 270.567 |
| 2038          | 55859  | 18854.812 | 6033.303  | 12821.51 | 22.953 | 68.001 | 1190.66 | 401.900 | 128.603 | 273.297 |
| 2039          | 55757  | 18437.457 | 5626.839  | 12810.62 | 22.976 | 69.481 | 1187.28 | 392.602 | 119.816 | 272.786 |

## Results for PHIM for Run 6 (Sensitivity\_Analysis\_1.RTF)

\*\*\*\*\*

### Main Results for E-Component for Run: 6, Simulation: 1, COD: Four Diseases Combined, Adjusted

| Variable Parameter          | Value                                  |
|-----------------------------|----------------------------------------|
| 1. Country                  | US (United States)                     |
| 2. Sex                      | F (Females)                            |
| 3. Year of start of process | 1990                                   |
| 4. Cause of Death           | Four Diseases Combined                 |
| 5. Effective Dose NULL      | CC:1                                   |
| 6. Effective Dose Ecig      | CC:1 Ecig:0.1 Dual:0.55                |
| Note:                       | Death rates are per million population |

#### Results for Age Groups Combined and Years combined, Population and Number deaths adjusted for Ecig scenario,

| Age Group:All |         | NULL        | Ecig        | %Drop    |        |        | NULL    | Ecig    | Drop    |         |
|---------------|---------|-------------|-------------|----------|--------|--------|---------|---------|---------|---------|
| Year          | Number  | Attrib      | Attrib      | Drop     | %Drop  | Attrib | Death   | Attrib  | Drop    |         |
|               | Deaths  | Deaths      | Deaths      | Deaths   | Deaths | Deaths | Rate    | Rates   | Rates   |         |
| All Comb      | 9143821 | 2946250.006 | 2034522.086 | 911727.9 | 9.971  | 30.945 | 2499.23 | 808.881 | 556.084 | 252.798 |

#### Results for Age Groups Combined, Population and Number deaths adjusted for Ecig scenario,

| Age Group:All |        | NULL      | Ecig      | %Drop    |        |        | NULL    | Ecig    | Drop    |
|---------------|--------|-----------|-----------|----------|--------|--------|---------|---------|---------|
| Year          | Number | Attrib    | Attrib    | Drop     | %Drop  | Attrib | Death   | Attrib  | Drop    |
|               | Deaths | Deaths    | Deaths    | Deaths   | Deaths | Deaths | Rate    | Rates   | Rates   |
| 1990          | 199848 | 57524.822 | 57524.822 | 0.000    | 0.000  | 0.000  | 2926.84 | 842.471 | 0.000   |
| 1991          | 199162 | 59078.486 | 58918.742 | 159.743  | 0.080  | 0.270  | 2877.87 | 853.678 | 851.370 |
| 1992          | 198533 | 60494.150 | 60047.891 | 446.258  | 0.225  | 0.738  | 2829.84 | 862.271 | 855.909 |
| 1993          | 202515 | 62694.848 | 61827.277 | 867.571  | 0.428  | 1.384  | 2845.86 | 881.034 | 868.834 |
| 1994          | 200664 | 63202.598 | 61833.757 | 1368.841 | 0.682  | 2.166  | 2777.91 | 874.966 | 855.998 |
| 1995          | 201035 | 63766.862 | 61791.203 | 1975.659 | 0.983  | 3.098  | 2739.86 | 869.097 | 842.137 |
| 1996          | 201201 | 64591.163 | 61887.611 | 2703.551 | 1.344  | 4.186  | 2706.46 | 868.908 | 832.482 |
| 1997          | 198672 | 64686.912 | 61306.029 | 3380.883 | 1.702  | 5.227  | 2635.33 | 858.147 | 813.210 |
| 1998          | 197620 | 65295.961 | 61130.977 | 4164.984 | 2.108  | 6.379  | 2584.41 | 854.046 | 799.449 |
| 1999          | 211400 | 67327.521 | 61955.149 | 5372.372 | 2.541  | 7.979  | 2727.26 | 868.771 | 799.282 |
| 2000          | 208591 | 67596.897 | 61345.201 | 6251.696 | 2.997  | 9.248  | 2657.43 | 861.419 | 781.533 |
| 2001          | 203727 | 67008.811 | 59830.638 | 7178.173 | 3.523  | 10.712 | 2566.48 | 844.458 | 753.725 |
| 2002          | 200981 | 67067.744 | 58856.557 | 8211.186 | 4.086  | 12.243 | 2506.86 | 836.925 | 734.124 |
| 2003          | 196539 | 66756.217 | 57616.052 | 9140.165 | 4.651  | 13.692 | 2428.26 | 825.244 | 711.851 |
| 2004          | 188381 | 65058.725 | 55138.743 | 9919.982 | 5.266  | 15.248 | 2303.96 | 796.234 | 674.365 |
| 2005          | 186678 | 65214.724 | 54242.012 | 10972.71 | 5.878  | 16.826 | 2257.60 | 789.321 | 655.979 |
| 2006          | 180388 | 63771.146 | 52007.445 | 11763.70 | 6.521  | 18.447 | 2162.20 | 765.117 | 623.381 |
| 2007          | 175985 | 63110.718 | 50537.935 | 12572.78 | 7.144  | 19.922 | 2088.09 | 749.650 | 599.640 |
| 2008          | 177969 | 63718.624 | 49966.749 | 13751.88 | 7.727  | 21.582 | 2088.41 | 748.674 | 586.346 |
| 2009          | 173250 | 62794.698 | 48294.270 | 14500.43 | 8.370  | 23.092 | 2009.81 | 729.515 | 560.243 |
| 2010          | 170985 | 61917.074 | 46634.170 | 15282.90 | 8.938  | 24.683 | 1960.45 | 711.083 | 534.690 |
| 2011          | 170861 | 61680.114 | 45334.248 | 16345.87 | 9.567  | 26.501 | 1940.23 | 701.700 | 514.798 |
| 2012          | 172045 | 62023.127 | 44505.822 | 17517.31 | 10.182 | 28.243 | 1933.29 | 698.386 | 500.119 |
| 2013          | 173398 | 62037.765 | 43463.061 | 18574.70 | 10.712 | 29.941 | 1927.18 | 691.059 | 483.057 |
| 2014          | 174948 | 61921.017 | 42187.471 | 19733.55 | 11.280 | 31.869 | 1922.64 | 682.195 | 463.631 |
| 2015          | 178230 | 61856.204 | 41143.939 | 20712.26 | 11.621 | 33.485 | 2188.59 | 761.899 | 505.230 |
| 2016          | 177809 | 60464.119 | 38964.801 | 21499.32 | 12.091 | 35.557 | 2162.00 | 737.655 | 473.777 |
| 2017          | 180369 | 60243.839 | 37681.959 | 22561.88 | 12.509 | 37.451 | 2171.75 | 728.017 | 453.712 |
| 2018          | 178300 | 60713.327 | 37213.304 | 23500.02 | 13.180 | 38.707 | 2125.79 | 726.721 | 443.677 |
| 2019          | 180485 | 61148.172 | 36423.813 | 24724.36 | 13.699 | 40.434 | 2130.34 | 724.841 | 429.926 |
| 2020          | 181848 | 61149.317 | 35600.730 | 25548.59 | 14.049 | 41.781 | 2430.19 | 821.432 | 475.764 |
| 2021          | 179584 | 58727.786 | 32812.004 | 25915.78 | 14.431 | 44.129 | 2381.74 | 783.216 | 435.170 |
| 2022          | 180998 | 58848.802 | 31915.986 | 26932.82 | 14.880 | 45.766 | 2381.39 | 778.881 | 419.918 |
| 2023          | 182357 | 58816.149 | 30995.692 | 27820.46 | 15.256 | 47.301 | 2379.71 | 772.407 | 404.487 |
| 2024          | 183455 | 58955.232 | 30099.607 | 28855.62 | 15.729 | 48.945 | 2374.82 | 768.316 | 389.637 |
| 2025          | 182393 | 58297.744 | 29024.613 | 29273.13 | 16.049 | 50.213 | 2721.39 | 876.861 | 433.061 |
| 2026          | 182425 | 56469.971 | 26992.886 | 29477.08 | 16.158 | 52.200 | 2710.29 | 846.150 | 401.033 |
| 2027          | 181854 | 56209.427 | 25951.556 | 30257.87 | 16.639 | 53.831 | 2689.78 | 838.883 | 383.845 |
| 2028          | 181123 | 55733.105 | 24848.121 | 30884.98 | 17.052 | 55.416 | 2666.51 | 828.298 | 365.817 |
| 2029          | 180295 | 55145.838 | 23712.410 | 31433.43 | 17.434 | 57.001 | 2641.35 | 815.951 | 347.392 |
| 2030          | 176190 | 53615.097 | 22451.445 | 31163.65 | 17.688 | 58.125 | 3049.83 | 939.056 | 388.633 |
| 2031          | 177783 | 52046.561 | 21185.589 | 30860.97 | 17.359 | 59.295 | 3071.59 | 910.364 | 366.027 |
| 2032          | 176324 | 51582.636 | 20265.333 | 31317.30 | 17.761 | 60.713 | 3038.80 | 900.496 | 349.257 |
| 2033          | 174806 | 50839.758 | 19314.401 | 31525.36 | 18.034 | 62.009 | 3003.71 | 885.375 | 331.881 |
| 2034          | 173144 | 50215.451 | 18395.407 | 31820.04 | 18.378 | 63.367 | 2965.39 | 872.104 | 315.053 |
| 2035          | 165899 | 47773.075 | 17156.808 | 30616.27 | 18.455 | 64.087 | 3471.07 | 1016.05 | 358.969 |
| 2036          | 159533 | 43298.709 | 14888.444 | 28410.27 | 17.808 | 65.615 | 3340.82 | 922.274 | 311.783 |
| 2037          | 156957 | 42241.563 | 13915.028 | 28326.54 | 18.047 | 67.058 | 3287.53 | 900.450 | 291.457 |
| 2038          | 154390 | 41356.353 | 13140.695 | 28215.66 | 18.276 | 68.226 | 3231.78 | 881.531 | 275.069 |
| 2039          | 151894 | 40161.050 | 12243.680 | 27917.37 | 18.380 | 69.514 | 3174.53 | 855.178 | 255.889 |

## Results for PHIM for Run 6 (Sensitivity\_Analysis\_1.RTF)

\*\*\*\*\*

### Main Results for E-Component for Run: 6, Simulation: 1, COD: LUNG CANCER, Adjusted

| Variable Parameter          | Value                                  |
|-----------------------------|----------------------------------------|
| 1. Country                  | US (United States)                     |
| 2. Sex                      | F (Females)                            |
| 3. Year of start of process | 1990                                   |
| 4. Cause of Death           | LUNG CANCER                            |
| 5. Effective Dose NULL      | CC:1                                   |
| 6. Effective Dose Ecig      | CC:1 Ecig:0.1 Dual:0.55                |
| Note:                       | Death rates are per million population |

#### Results for Age Groups Combined and Years combined, Population and Number deaths adjusted for Ecig scenario,

| Age Group:All | NULL    | Ecig        | %Drop       |          |        |        | NULL    | Ecig    | Drop    |         |
|---------------|---------|-------------|-------------|----------|--------|--------|---------|---------|---------|---------|
| Year          | Number  | Attrib      | Attrib      | Drop     | %Drop  | Attrib | Death   | Attrib  | Attrib  | Drop    |
|               | Deaths  | Deaths      | Deaths      | Deaths   | Deaths | Deaths | Rate    | Rates   | Rates   | Rates   |
| All Comb      | 2342820 | 1580465.217 | 1190837.525 | 389627.7 | 16.631 | 24.653 | 640.349 | 433.910 | 325.485 | 108.426 |

#### Results for Age Groups Combined, Population and Number deaths adjusted for Ecig scenario,

| Age Group:All | NULL   | Ecig      | %Drop     |          |        |        | NULL    | Ecig    | Drop    |         |
|---------------|--------|-----------|-----------|----------|--------|--------|---------|---------|---------|---------|
| Year          | Number | Attrib    | Attrib    | Drop     | %Drop  | Attrib | Death   | Attrib  | Attrib  | Drop    |
|               | Deaths | Deaths    | Deaths    | Deaths   | Deaths | Deaths | Rate    | Rates   | Rates   | Rates   |
| 1990          | 42690  | 30614.201 | 30614.201 | 0.000    | 0.000  | 0.000  | 625.210 | 448.355 | 448.355 | 0.000   |
| 1991          | 43692  | 31412.010 | 31381.330 | 30.680   | 0.070  | 0.098  | 631.345 | 453.901 | 453.457 | 0.443   |
| 1992          | 45423  | 32782.407 | 32693.521 | 88.886   | 0.196  | 0.271  | 647.451 | 467.274 | 466.006 | 1.268   |
| 1993          | 46292  | 33491.183 | 33315.705 | 175.478  | 0.379  | 0.524  | 650.518 | 470.643 | 468.173 | 2.470   |
| 1994          | 47019  | 34074.347 | 33790.439 | 283.909  | 0.604  | 0.833  | 650.903 | 471.719 | 467.779 | 3.940   |
| 1995          | 47843  | 34694.454 | 34266.814 | 427.640  | 0.894  | 1.233  | 652.041 | 472.861 | 467.014 | 5.847   |
| 1996          | 48249  | 35027.269 | 34436.621 | 590.647  | 1.224  | 1.686  | 649.026 | 471.202 | 463.225 | 7.977   |
| 1997          | 49043  | 35590.763 | 34806.538 | 784.225  | 1.599  | 2.203  | 650.548 | 472.153 | 461.701 | 10.452  |
| 1998          | 49698  | 36100.785 | 35088.162 | 1012.623 | 2.038  | 2.805  | 649.937 | 472.184 | 458.870 | 13.314  |
| 1999          | 48900  | 35451.030 | 34233.832 | 1217.197 | 2.489  | 3.433  | 630.856 | 457.448 | 441.650 | 15.798  |
| 2000          | 50355  | 36447.986 | 34926.687 | 1521.299 | 3.021  | 4.174  | 641.514 | 464.474 | 444.963 | 19.511  |
| 2001          | 50420  | 36411.326 | 34583.147 | 1828.180 | 3.626  | 5.021  | 635.171 | 458.863 | 435.666 | 23.197  |
| 2002          | 51485  | 37078.545 | 34869.547 | 2208.998 | 4.291  | 5.958  | 642.179 | 462.696 | 434.931 | 27.764  |
| 2003          | 51458  | 36999.876 | 34429.117 | 2570.759 | 4.996  | 6.948  | 635.768 | 457.395 | 425.375 | 32.020  |
| 2004          | 51460  | 36861.555 | 33891.317 | 2970.238 | 5.772  | 8.058  | 629.374 | 451.138 | 414.502 | 36.636  |
| 2005          | 51494  | 36689.529 | 33298.003 | 3391.525 | 6.586  | 9.244  | 622.745 | 444.069 | 402.691 | 41.377  |
| 2006          | 51441  | 36504.774 | 32672.980 | 3831.794 | 7.449  | 10.497 | 616.591 | 437.979 | 391.631 | 46.348  |
| 2007          | 51940  | 36663.202 | 32306.942 | 4356.260 | 8.387  | 11.882 | 616.277 | 435.498 | 383.327 | 52.171  |
| 2008          | 51091  | 35898.803 | 31153.063 | 4745.740 | 9.289  | 13.220 | 599.534 | 421.800 | 365.572 | 56.227  |
| 2009          | 51324  | 35934.525 | 30629.503 | 5305.022 | 10.336 | 14.763 | 595.395 | 417.468 | 355.321 | 62.147  |
| 2010          | 51001  | 35502.829 | 29744.979 | 5757.850 | 11.290 | 16.218 | 584.754 | 407.730 | 341.045 | 66.685  |
| 2011          | 50673  | 35136.342 | 28849.438 | 6286.903 | 12.407 | 17.893 | 575.425 | 399.726 | 327.603 | 72.124  |
| 2012          | 51431  | 35450.201 | 28506.749 | 6943.452 | 13.501 | 19.586 | 577.936 | 399.173 | 320.335 | 78.838  |
| 2013          | 51275  | 35123.224 | 27603.343 | 7519.881 | 14.666 | 21.410 | 569.876 | 391.249 | 306.789 | 84.460  |
| 2014          | 51479  | 35079.370 | 26945.630 | 8133.740 | 15.800 | 23.187 | 565.745 | 386.476 | 296.127 | 90.349  |
| 2015          | 50691  | 34324.171 | 25798.337 | 8525.833 | 16.819 | 24.839 | 622.461 | 422.780 | 316.792 | 105.987 |
| 2016          | 49117  | 33054.753 | 24186.953 | 8867.799 | 18.055 | 26.828 | 597.214 | 403.264 | 294.091 | 109.173 |
| 2017          | 48609  | 32471.234 | 23103.575 | 9367.660 | 19.271 | 28.849 | 585.283 | 392.399 | 278.180 | 114.219 |
| 2018          | 50787  | 33657.595 | 23205.359 | 10452.24 | 20.580 | 31.055 | 605.513 | 402.871 | 276.667 | 126.205 |
| 2019          | 51390  | 33863.424 | 22648.634 | 11214.79 | 21.823 | 33.118 | 606.578 | 401.412 | 267.331 | 134.081 |
| 2020          | 51831  | 33910.830 | 22072.375 | 11838.45 | 22.840 | 34.911 | 692.666 | 455.532 | 294.973 | 160.559 |
| 2021          | 48428  | 31531.880 | 19838.760 | 11693.12 | 24.145 | 37.083 | 642.275 | 420.521 | 263.112 | 157.409 |
| 2022          | 48757  | 31560.212 | 19211.675 | 12348.54 | 25.326 | 39.127 | 641.500 | 417.708 | 252.768 | 164.941 |
| 2023          | 49054  | 31508.781 | 18565.828 | 12942.95 | 26.385 | 41.077 | 640.145 | 413.791 | 242.280 | 171.511 |
| 2024          | 49272  | 31517.293 | 17925.864 | 13591.43 | 27.584 | 43.124 | 637.822 | 410.740 | 232.049 | 178.691 |
| 2025          | 48998  | 31175.389 | 17189.776 | 13985.61 | 28.543 | 44.861 | 731.074 | 468.912 | 256.480 | 212.432 |
| 2026          | 45848  | 29044.598 | 15449.233 | 13595.36 | 29.653 | 46.809 | 681.164 | 435.206 | 229.529 | 205.677 |
| 2027          | 45661  | 28825.765 | 14761.151 | 14064.61 | 30.802 | 48.792 | 675.367 | 430.203 | 218.330 | 211.873 |
| 2028          | 45426  | 28513.846 | 14051.731 | 14462.11 | 31.837 | 50.720 | 668.761 | 423.769 | 206.871 | 216.898 |
| 2029          | 45153  | 28148.109 | 13327.605 | 14820.50 | 32.823 | 52.652 | 661.503 | 416.486 | 195.252 | 221.234 |
| 2030          | 44034  | 27314.475 | 12528.172 | 14786.30 | 33.579 | 54.134 | 762.225 | 478.407 | 216.862 | 261.545 |
| 2031          | 41393  | 25423.102 | 11358.255 | 14064.85 | 33.979 | 55.323 | 715.150 | 444.684 | 196.239 | 248.445 |
| 2032          | 40998  | 25085.902 | 10784.230 | 14301.67 | 34.884 | 57.011 | 706.563 | 437.933 | 185.858 | 252.075 |
| 2033          | 40582  | 24645.067 | 10212.852 | 14432.22 | 35.563 | 58.560 | 697.319 | 429.194 | 175.488 | 253.706 |
| 2034          | 40130  | 24239.126 | 9663.790  | 14575.34 | 36.320 | 60.131 | 687.301 | 420.967 | 165.509 | 255.458 |
| 2035          | 38196  | 22944.147 | 8917.356  | 14026.79 | 36.723 | 61.135 | 799.169 | 487.980 | 186.576 | 301.404 |
| 2036          | 33672  | 19950.581 | 7454.614  | 12495.97 | 37.111 | 62.635 | 705.125 | 424.953 | 156.109 | 268.844 |
| 2037          | 33103  | 19415.334 | 6939.485  | 12475.85 | 37.688 | 64.258 | 693.350 | 413.871 | 145.351 | 268.520 |
| 2038          | 32535  | 18939.317 | 6531.736  | 12407.58 | 38.137 | 65.512 | 681.032 | 403.701 | 136.726 | 266.975 |
| 2039          | 31981  | 18379.752 | 6072.567  | 12307.18 | 38.483 | 66.961 | 668.384 | 391.373 | 126.915 | 264.458 |

## Results for PHIM for Run 6 (Sensitivity\_Analysis\_1.RTF)

\*\*\*\*\*

### Main Results for E-Component for Run: 6, Simulation: 1, COD: IHD, Adjusted

| Variable Parameter          | Value                                  |
|-----------------------------|----------------------------------------|
| 1. Country                  | US (United States)                     |
| 2. Sex                      | F (Females)                            |
| 3. Year of start of process | 1990                                   |
| 4. Cause of Death           | IHD                                    |
| 5. Effective Dose NULL      | CC:1                                   |
| 6. Effective Dose Ecig      | CC:1 Ecig:0.1 Dual:0.55                |
| Note:                       | Death rates are per million population |

#### Results for Age Groups Combined and Years combined, Population and Number deaths adjusted for Ecig scenario,

| Age Group:All | NULL    | Ecig       | %Drop      |          |        |        | NULL    | Ecig    | Drop   |        |
|---------------|---------|------------|------------|----------|--------|--------|---------|---------|--------|--------|
| Year          | Number  | Attrib     | Attrib     | Drop     | %Drop  | Attrib | Death   | Attrib  | Attrib | Drop   |
|               | Deaths  | Deaths     | Deaths     | Deaths   | Deaths | Deaths | Rate    | Rates   | Rates  | Rates  |
| All Comb      | 3260296 | 398833.796 | 212396.898 | 186436.9 | 5.718  | 46.746 | 891.117 | 109.498 | 58.053 | 51.445 |

#### Results for Age Groups Combined, Population and Number deaths adjusted for Ecig scenario,

| Age Group:All | NULL   | Ecig      | %Drop     |          |        |        | NULL    | Ecig    | Drop    |        |
|---------------|--------|-----------|-----------|----------|--------|--------|---------|---------|---------|--------|
| Year          | Number | Attrib    | Attrib    | Drop     | %Drop  | Attrib | Death   | Attrib  | Attrib  | Drop   |
|               | Deaths | Deaths    | Deaths    | Deaths   | Deaths | Deaths | Rate    | Rates   | Rates   | Rates  |
| 1990          | 98916  | 12922.892 | 12922.892 | 0.000    | 0.000  | 0.000  | 1448.66 | 189.260 | 189.260 | 0.000  |
| 1991          | 96403  | 12856.479 | 12770.826 | 85.653   | 0.089  | 0.666  | 1393.01 | 185.775 | 184.537 | 1.238  |
| 1992          | 93721  | 12662.244 | 12425.266 | 236.977  | 0.253  | 1.872  | 1335.88 | 180.485 | 177.107 | 3.378  |
| 1993          | 93680  | 12730.613 | 12278.803 | 451.809  | 0.482  | 3.549  | 1316.45 | 178.900 | 172.549 | 6.351  |
| 1994          | 90835  | 12495.323 | 11792.480 | 702.843  | 0.774  | 5.625  | 1257.48 | 172.983 | 163.250 | 9.733  |
| 1995          | 89703  | 12365.590 | 11373.253 | 992.338  | 1.106  | 8.025  | 1222.55 | 168.534 | 155.003 | 13.531 |
| 1996          | 88295  | 12290.551 | 10939.128 | 1351.424 | 1.531  | 10.996 | 1187.70 | 165.338 | 147.148 | 18.190 |
| 1997          | 84791  | 11719.531 | 10093.676 | 1625.855 | 1.917  | 13.873 | 1124.73 | 155.473 | 133.890 | 21.583 |
| 1998          | 82537  | 11416.794 | 9472.200  | 1944.594 | 2.356  | 17.033 | 1079.38 | 149.327 | 123.874 | 25.453 |
| 1999          | 93970  | 13028.038 | 10353.814 | 2674.224 | 2.846  | 20.527 | 1212.31 | 168.109 | 133.574 | 34.535 |
| 2000          | 90080  | 12426.299 | 9442.378  | 2983.921 | 3.313  | 24.013 | 1147.61 | 158.354 | 120.295 | 38.059 |
| 2001          | 86170  | 11939.281 | 8579.381  | 3359.900 | 3.899  | 28.142 | 1085.54 | 150.461 | 108.080 | 42.381 |
| 2002          | 83077  | 11528.794 | 7802.226  | 3726.568 | 4.486  | 32.324 | 1036.23 | 143.865 | 97.318  | 46.548 |
| 2003          | 79377  | 11048.407 | 7045.475  | 4002.932 | 5.043  | 36.231 | 980.711 | 136.581 | 87.047  | 49.534 |
| 2004          | 73947  | 10375.132 | 6186.524  | 4188.608 | 5.664  | 40.372 | 904.397 | 126.978 | 75.663  | 51.315 |
| 2005          | 71749  | 10051.029 | 5609.852  | 4441.177 | 6.190  | 44.186 | 867.703 | 121.652 | 67.843  | 53.809 |
| 2006          | 67663  | 9542.523  | 4940.450  | 4602.073 | 6.801  | 48.227 | 811.033 | 114.490 | 59.218  | 55.272 |
| 2007          | 63626  | 8936.533  | 4303.910  | 4632.623 | 7.281  | 51.839 | 754.927 | 106.151 | 51.067  | 55.085 |
| 2008          | 63312  | 8944.180  | 4001.797  | 4942.383 | 7.806  | 55.258 | 742.943 | 105.091 | 46.960  | 58.131 |
| 2009          | 59899  | 8390.033  | 3509.118  | 4880.916 | 8.149  | 58.175 | 694.867 | 97.471  | 40.708  | 56.763 |
| 2010          | 58175  | 8157.570  | 3179.247  | 4978.322 | 8.557  | 61.027 | 667.014 | 93.685  | 36.452  | 57.233 |
| 2011          | 57553  | 8035.356  | 2898.661  | 5136.695 | 8.925  | 63.926 | 653.553 | 91.414  | 32.916  | 58.498 |
| 2012          | 57617  | 7970.766  | 2656.163  | 5314.603 | 9.224  | 66.676 | 647.453 | 89.752  | 29.848  | 59.904 |
| 2013          | 57295  | 7743.216  | 2411.941  | 5331.275 | 9.305  | 68.851 | 636.792 | 86.254  | 26.807  | 59.447 |
| 2014          | 57792  | 7774.935  | 2247.402  | 5527.533 | 9.565  | 71.094 | 635.119 | 85.658  | 24.698  | 60.959 |
| 2015          | 58679  | 7722.535  | 2108.338  | 5614.197 | 9.568  | 72.699 | 720.555 | 95.120  | 25.889  | 69.231 |
| 2016          | 58971  | 7600.353  | 1931.090  | 5669.263 | 9.614  | 74.592 | 717.029 | 92.723  | 23.480  | 69.243 |
| 2017          | 59347  | 7470.266  | 1777.590  | 5692.676 | 9.592  | 76.204 | 714.575 | 90.274  | 21.403  | 68.871 |
| 2018          | 56432  | 6907.050  | 1540.766  | 5366.284 | 9.509  | 77.693 | 672.813 | 82.675  | 18.370  | 64.306 |
| 2019          | 56271  | 6732.046  | 1417.449  | 5314.597 | 9.445  | 78.945 | 664.188 | 79.801  | 16.731  | 63.070 |
| 2020          | 55729  | 6429.836  | 1291.000  | 5138.835 | 9.221  | 79.922 | 744.762 | 86.373  | 17.253  | 69.121 |
| 2021          | 56746  | 6562.016  | 1230.118  | 5331.897 | 9.396  | 81.254 | 752.588 | 87.513  | 16.314  | 71.199 |
| 2022          | 56310  | 6352.366  | 1133.574  | 5218.792 | 9.268  | 82.155 | 740.874 | 84.075  | 14.914  | 69.161 |
| 2023          | 55852  | 6134.123  | 1050.552  | 5083.571 | 9.102  | 82.874 | 728.852 | 80.557  | 13.709  | 66.847 |
| 2024          | 55314  | 5922.193  | 972.079   | 4950.114 | 8.949  | 83.586 | 716.029 | 77.179  | 12.583  | 64.596 |
| 2025          | 53867  | 5504.188  | 874.823   | 4629.365 | 8.594  | 84.106 | 803.720 | 82.789  | 13.053  | 69.736 |
| 2026          | 55907  | 5641.075  | 862.594   | 4778.481 | 8.547  | 84.709 | 830.612 | 84.526  | 12.816  | 71.711 |
| 2027          | 54854  | 5426.216  | 804.025   | 4622.190 | 8.426  | 85.183 | 811.339 | 80.982  | 11.892  | 69.090 |
| 2028          | 53771  | 5197.830  | 747.889   | 4449.941 | 8.276  | 85.612 | 791.623 | 77.249  | 11.011  | 66.239 |
| 2029          | 52679  | 4973.547  | 697.550   | 4275.997 | 8.117  | 85.975 | 771.765 | 73.590  | 10.219  | 63.371 |
| 2030          | 50203  | 4450.618  | 607.055   | 3843.563 | 7.656  | 86.360 | 869.010 | 77.952  | 10.508  | 67.443 |
| 2031          | 52790  | 4555.052  | 611.350   | 3943.702 | 7.470  | 86.579 | 912.071 | 79.674  | 10.562  | 69.112 |
| 2032          | 51502  | 4349.999  | 572.289   | 3777.710 | 7.335  | 86.844 | 887.603 | 75.939  | 9.863   | 66.076 |
| 2033          | 50226  | 4147.948  | 539.665   | 3608.283 | 7.184  | 86.990 | 863.030 | 72.237  | 9.273   | 62.963 |
| 2034          | 48939  | 3966.133  | 508.308   | 3457.826 | 7.066  | 87.184 | 838.171 | 68.881  | 8.706   | 60.175 |
| 2035          | 45384  | 3289.064  | 411.266   | 2877.798 | 6.341  | 87.496 | 949.564 | 69.952  | 8.605   | 61.348 |
| 2036          | 47288  | 3313.192  | 406.359   | 2906.833 | 6.147  | 87.735 | 990.274 | 70.572  | 8.510   | 62.062 |
| 2037          | 45789  | 3117.951  | 377.481   | 2740.470 | 5.985  | 87.893 | 959.069 | 66.464  | 7.907   | 58.558 |
| 2038          | 44331  | 2949.775  | 354.870   | 2594.905 | 5.853  | 87.970 | 927.970 | 62.876  | 7.428   | 55.448 |
| 2039          | 42930  | 2766.312  | 331.953   | 2434.359 | 5.670  | 88.000 | 897.232 | 58.905  | 6.938   | 51.967 |



## Results for PHIM for Run 6 (Sensitivity\_Analysis\_1.RTF)

\*\*\*\*\*

### Main Results for E-Component for Run: 6, Simulation: 1, COD: STROKE, Adjusted

| Variable Parameter          | Value                                  |
|-----------------------------|----------------------------------------|
| 1. Country                  | US (United States)                     |
| 2. Sex                      | F (Females)                            |
| 3. Year of start of process | 1990                                   |
| 4. Cause of Death           | STROKE                                 |
| 5. Effective Dose NULL      | CC:1                                   |
| 6. Effective Dose Ecig      | CC:1 Ecig:0.1 Dual:0.55                |
| Note:                       | Death rates are per million population |

#### Results for Age Groups Combined and Years combined, Population and Number deaths adjusted for Ecig scenario,

| Age Group:All | NULL    | Ecig       | %Drop     |          |        |        | NULL    | Ecig   | Drop   |        |
|---------------|---------|------------|-----------|----------|--------|--------|---------|--------|--------|--------|
| Year          | Number  | Attrib     | Attrib    | Drop     | %Drop  | Attrib | Death   | Attrib | Attrib | Drop   |
|               | Deaths  | Deaths     | Deaths    | Deaths   | Deaths | Deaths | Rate    | Rates  | Rates  | Rates  |
| All Comb      | 1360845 | 104899.750 | 54692.466 | 50207.28 | 3.689  | 47.862 | 371.952 | 28.800 | 14.949 | 13.851 |

#### Results for Age Groups Combined, Population and Number deaths adjusted for Ecig scenario,

| Age Group:All | NULL   | Ecig     | %Drop    |          |        |        | NULL    | Ecig   | Drop   |        |
|---------------|--------|----------|----------|----------|--------|--------|---------|--------|--------|--------|
| Year          | Number | Attrib   | Attrib   | Drop     | %Drop  | Attrib | Death   | Attrib | Attrib | Drop   |
|               | Deaths | Deaths   | Deaths   | Deaths   | Deaths | Deaths | Rate    | Rates  | Rates  | Rates  |
| 1990          | 33504  | 3293.017 | 3293.017 | 0.000    | 0.000  | 0.000  | 490.678 | 48.227 | 48.227 | 0.000  |
| 1991          | 32505  | 3207.063 | 3180.986 | 26.077   | 0.080  | 0.813  | 469.694 | 46.342 | 45.965 | 0.377  |
| 1992          | 32560  | 3218.125 | 3145.300 | 72.825   | 0.224  | 2.263  | 464.104 | 45.871 | 44.832 | 1.038  |
| 1993          | 32768  | 3226.680 | 3088.888 | 137.793  | 0.421  | 4.270  | 460.482 | 45.344 | 43.407 | 1.937  |
| 1994          | 33006  | 3277.266 | 3057.752 | 219.514  | 0.665  | 6.698  | 456.920 | 45.370 | 42.330 | 3.040  |
| 1995          | 33732  | 3309.378 | 2995.041 | 314.337  | 0.932  | 9.498  | 459.725 | 45.104 | 40.819 | 4.286  |
| 1996          | 33753  | 3312.987 | 2888.201 | 424.786  | 1.258  | 12.822 | 454.034 | 44.568 | 38.851 | 5.717  |
| 1997          | 33704  | 3267.066 | 2735.571 | 531.495  | 1.577  | 16.268 | 447.079 | 43.341 | 36.287 | 7.055  |
| 1998          | 33282  | 3178.725 | 2545.381 | 633.344  | 1.903  | 19.924 | 435.244 | 41.577 | 33.288 | 8.289  |
| 1999          | 33902  | 3120.351 | 2383.543 | 736.808  | 2.173  | 23.613 | 437.366 | 40.264 | 30.750 | 9.514  |
| 2000          | 33842  | 3142.808 | 2281.523 | 861.285  | 2.545  | 27.405 | 431.139 | 40.050 | 29.066 | 10.984 |
| 2001          | 32524  | 2961.588 | 2037.317 | 924.272  | 2.842  | 31.209 | 409.731 | 37.323 | 25.665 | 11.657 |
| 2002          | 32101  | 2940.627 | 1901.910 | 1038.718 | 3.236  | 35.323 | 400.403 | 36.695 | 23.723 | 12.973 |
| 2003          | 30596  | 2819.545 | 1714.303 | 1105.242 | 3.612  | 39.199 | 378.014 | 34.855 | 21.180 | 13.675 |
| 2004          | 29421  | 2730.466 | 1554.245 | 1176.221 | 3.998  | 43.078 | 359.829 | 33.417 | 19.009 | 14.408 |
| 2005          | 27992  | 2670.510 | 1423.058 | 1247.452 | 4.457  | 46.712 | 338.519 | 32.322 | 17.210 | 15.112 |
| 2006          | 27245  | 2623.285 | 1306.720 | 1316.565 | 4.832  | 50.188 | 326.566 | 31.474 | 15.663 | 15.811 |
| 2007          | 26351  | 2536.599 | 1178.778 | 1357.821 | 5.153  | 53.529 | 312.662 | 30.131 | 13.986 | 16.144 |
| 2008          | 26054  | 2469.443 | 1073.073 | 1396.370 | 5.359  | 56.546 | 305.742 | 29.015 | 12.592 | 16.423 |
| 2009          | 25102  | 2386.945 | 968.655  | 1418.290 | 5.650  | 59.419 | 291.204 | 27.730 | 11.237 | 16.493 |
| 2010          | 24910  | 2329.274 | 883.608  | 1445.666 | 5.803  | 62.065 | 285.614 | 26.750 | 10.131 | 16.619 |
| 2011          | 24871  | 2286.581 | 806.711  | 1479.870 | 5.950  | 64.720 | 282.426 | 26.013 | 9.161  | 16.852 |
| 2012          | 24587  | 2243.311 | 736.472  | 1506.839 | 6.129  | 67.170 | 276.292 | 25.260 | 8.276  | 16.984 |
| 2013          | 24548  | 2176.503 | 665.738  | 1510.766 | 6.154  | 69.413 | 272.833 | 24.245 | 7.399  | 16.846 |
| 2014          | 25407  | 2211.619 | 631.970  | 1579.649 | 6.217  | 71.425 | 279.223 | 24.366 | 6.945  | 17.421 |
| 2015          | 26444  | 2237.016 | 603.738  | 1633.278 | 6.176  | 73.011 | 324.726 | 27.554 | 7.414  | 20.140 |
| 2016          | 26878  | 2229.057 | 565.456  | 1663.601 | 6.189  | 74.632 | 326.811 | 27.194 | 6.875  | 20.319 |
| 2017          | 27778  | 2221.649 | 531.341  | 1690.308 | 6.085  | 76.083 | 334.462 | 26.848 | 6.398  | 20.450 |
| 2018          | 25418  | 1939.420 | 439.600  | 1499.820 | 5.901  | 77.333 | 303.046 | 23.214 | 5.241  | 19.773 |
| 2019          | 25607  | 1904.400 | 407.078  | 1497.321 | 5.847  | 78.624 | 302.251 | 22.574 | 4.805  | 17.770 |
| 2020          | 25574  | 1806.054 | 367.916  | 1438.139 | 5.624  | 79.629 | 341.762 | 24.261 | 4.917  | 19.344 |
| 2021          | 25660  | 1748.172 | 337.064  | 1411.108 | 5.499  | 80.719 | 340.312 | 23.314 | 4.470  | 18.844 |
| 2022          | 25767  | 1701.148 | 312.404  | 1388.744 | 5.390  | 81.636 | 339.018 | 22.515 | 4.110  | 18.405 |
| 2023          | 25866  | 1652.087 | 291.115  | 1360.971 | 5.262  | 82.379 | 337.544 | 21.696 | 3.799  | 17.897 |
| 2024          | 25922  | 1597.127 | 269.373  | 1327.754 | 5.122  | 83.134 | 335.556 | 20.814 | 3.487  | 17.327 |
| 2025          | 25540  | 1467.622 | 239.013  | 1228.609 | 4.811  | 83.714 | 381.062 | 22.075 | 3.566  | 18.508 |
| 2026          | 25782  | 1390.505 | 218.737  | 1171.768 | 4.545  | 84.269 | 383.049 | 20.835 | 3.250  | 17.586 |
| 2027          | 25583  | 1342.095 | 203.879  | 1138.216 | 4.449  | 84.809 | 378.388 | 20.030 | 3.016  | 17.014 |
| 2028          | 25357  | 1289.536 | 190.152  | 1099.384 | 4.336  | 85.254 | 373.306 | 19.165 | 2.799  | 16.365 |
| 2029          | 25118  | 1242.216 | 177.966  | 1064.250 | 4.237  | 85.674 | 367.988 | 18.380 | 2.607  | 15.773 |
| 2030          | 24325  | 1096.803 | 152.187  | 944.616  | 3.883  | 86.124 | 421.063 | 19.210 | 2.634  | 16.576 |
| 2031          | 24352  | 1019.991 | 138.827  | 881.164  | 3.619  | 86.389 | 420.725 | 17.841 | 2.399  | 15.442 |
| 2032          | 24019  | 977.406  | 130.082  | 847.324  | 3.528  | 86.691 | 413.957 | 17.063 | 2.242  | 14.821 |
| 2033          | 23678  | 937.450  | 123.057  | 814.392  | 3.439  | 86.873 | 406.865 | 16.326 | 2.114  | 14.211 |
| 2034          | 23312  | 900.763  | 116.139  | 784.624  | 3.366  | 87.107 | 399.266 | 15.644 | 1.989  | 13.655 |
| 2035          | 22176  | 745.023  | 93.994   | 651.029  | 2.936  | 87.384 | 463.978 | 15.845 | 1.967  | 13.879 |
| 2036          | 21351  | 680.360  | 83.784   | 596.575  | 2.794  | 87.685 | 447.121 | 14.492 | 1.755  | 12.737 |
| 2037          | 20852  | 644.109  | 78.367   | 565.742  | 2.713  | 87.833 | 436.763 | 13.730 | 1.641  | 12.089 |
| 2038          | 20353  | 612.448  | 73.923   | 538.525  | 2.646  | 87.930 | 426.050 | 13.055 | 1.547  | 11.507 |
| 2039          | 19862  | 577.529  | 69.514   | 508.015  | 2.558  | 87.964 | 415.120 | 12.298 | 1.453  | 10.845 |

## Results for PHIM for Run 6 (Sensitivity\_Analysis\_1.RTF)

\*\*\*\*\*

### Main Results for E-Component for Run: 6, Simulation: 1, COD: COPD, Adjusted

| Variable Parameter          | Value                                  |
|-----------------------------|----------------------------------------|
| 1. Country                  | US (United States)                     |
| 2. Sex                      | F (Females)                            |
| 3. Year of start of process | 1990                                   |
| 4. Cause of Death           | COPD                                   |
| 5. Effective Dose NULL      | CC:1                                   |
| 6. Effective Dose Ecig      | CC:1 Ecig:0.1 Dual:0.55                |
| Note:                       | Death rates are per million population |

#### Results for Age Groups Combined and Years combined, Population and Number deaths adjusted for Ecig scenario,

| Age Group:All | NULL    | Ecig       | %Drop      |          |        | NULL   | Ecig    | Drop    |         |        |
|---------------|---------|------------|------------|----------|--------|--------|---------|---------|---------|--------|
| Year          | Number  | Attrib     | Attrib     | Drop     | %Drop  | Attrib | Death   | Attrib  | Attrib  | Drop   |
|               | Deaths  | Deaths     | Deaths     | Deaths   | Deaths | Deaths | Rate    | Rates   | Rates   | Rates  |
| All Comb      | 2179861 | 862051.244 | 576595.197 | 285456.0 | 13.095 | 33.114 | 595.808 | 236.673 | 157.597 | 79.075 |

#### Results for Age Groups Combined, Population and Number deaths adjusted for Ecig scenario,

| Age Group:All | NULL   | Ecig      | %Drop     |          |        | NULL   | Ecig    | Drop    |         |         |
|---------------|--------|-----------|-----------|----------|--------|--------|---------|---------|---------|---------|
| Year          | Number | Attrib    | Attrib    | Drop     | %Drop  | Attrib | Death   | Attrib  | Attrib  | Drop    |
|               | Deaths | Deaths    | Deaths    | Deaths   | Deaths | Deaths | Rate    | Rates   | Rates   | Rates   |
| 1990          | 24738  | 10694.712 | 10694.712 | 0.000    | 0.000  | 0.000  | 362.296 | 156.628 | 156.628 | 0.000   |
| 1991          | 26562  | 11602.933 | 11585.600 | 17.333   | 0.065  | 0.149  | 383.818 | 167.661 | 167.411 | 0.250   |
| 1992          | 26828  | 11831.375 | 11783.804 | 47.571   | 0.177  | 0.402  | 382.401 | 168.642 | 167.964 | 0.678   |
| 1993          | 29774  | 13246.371 | 13143.880 | 102.491  | 0.344  | 0.774  | 418.408 | 186.148 | 184.706 | 1.442   |
| 1994          | 29805  | 13355.662 | 13193.087 | 162.575  | 0.545  | 1.217  | 412.606 | 184.893 | 182.639 | 2.255   |
| 1995          | 29757  | 13397.439 | 13156.096 | 241.344  | 0.811  | 1.801  | 405.549 | 182.598 | 179.301 | 3.297   |
| 1996          | 30903  | 13960.356 | 13623.662 | 336.694  | 1.090  | 2.412  | 415.696 | 187.801 | 183.259 | 4.542   |
| 1997          | 31133  | 14109.552 | 13670.245 | 439.308  | 1.411  | 3.114  | 412.975 | 187.180 | 181.333 | 5.847   |
| 1998          | 32104  | 14599.657 | 14025.234 | 574.423  | 1.789  | 3.934  | 419.842 | 190.958 | 183.417 | 7.541   |
| 1999          | 34628  | 15728.102 | 14983.960 | 744.142  | 2.149  | 4.731  | 446.732 | 202.950 | 193.308 | 9.642   |
| 2000          | 34315  | 15579.803 | 14694.613 | 885.191  | 2.580  | 5.682  | 437.170 | 198.541 | 187.208 | 11.333  |
| 2001          | 34613  | 15696.614 | 14630.793 | 1065.821 | 3.079  | 6.790  | 436.044 | 197.812 | 184.313 | 13.498  |
| 2002          | 34318  | 15519.777 | 14282.875 | 1236.902 | 3.604  | 7.970  | 428.049 | 193.668 | 178.152 | 15.516  |
| 2003          | 35108  | 15888.389 | 14427.156 | 1461.233 | 4.162  | 9.197  | 433.767 | 196.413 | 178.249 | 18.164  |
| 2004          | 33552  | 15091.573 | 13506.657 | 1584.916 | 4.724  | 10.502 | 410.358 | 184.701 | 165.191 | 19.510  |
| 2005          | 35443  | 15803.656 | 13911.098 | 1892.557 | 5.340  | 11.975 | 428.635 | 191.278 | 168.235 | 23.044  |
| 2006          | 34040  | 15100.563 | 13087.295 | 2013.268 | 5.915  | 13.332 | 408.011 | 181.174 | 156.869 | 24.305  |
| 2007          | 34068  | 14974.384 | 12748.304 | 2226.079 | 6.534  | 14.866 | 404.227 | 177.871 | 151.261 | 26.610  |
| 2008          | 37512  | 16406.197 | 13738.816 | 2667.382 | 7.111  | 16.258 | 440.196 | 192.768 | 161.221 | 31.546  |
| 2009          | 36924  | 16083.194 | 13186.995 | 2896.199 | 7.844  | 18.008 | 428.340 | 186.846 | 152.977 | 33.869  |
| 2010          | 36899  | 15927.400 | 12826.335 | 3101.065 | 8.404  | 19.470 | 423.069 | 182.917 | 147.062 | 35.855  |
| 2011          | 37763  | 16221.836 | 12779.437 | 3442.398 | 9.116  | 21.221 | 428.823 | 184.547 | 145.118 | 39.428  |
| 2012          | 38409  | 16358.849 | 12606.438 | 3752.412 | 9.770  | 22.938 | 431.613 | 184.202 | 141.661 | 42.542  |
| 2013          | 40280  | 16994.822 | 12782.039 | 4212.783 | 10.459 | 24.789 | 447.683 | 189.311 | 142.062 | 47.249  |
| 2014          | 40270  | 16855.093 | 12362.469 | 4492.624 | 11.156 | 26.654 | 442.555 | 185.696 | 135.861 | 49.835  |
| 2015          | 42416  | 17572.483 | 12633.526 | 4938.957 | 11.644 | 28.106 | 520.850 | 216.445 | 155.134 | 61.311  |
| 2016          | 42844  | 17579.955 | 12281.301 | 5298.654 | 12.367 | 30.140 | 520.945 | 214.473 | 149.329 | 65.144  |
| 2017          | 44635  | 18080.688 | 12269.452 | 5811.236 | 13.020 | 32.141 | 537.428 | 218.496 | 147.731 | 70.765  |
| 2018          | 45663  | 18209.262 | 12027.579 | 6181.683 | 13.538 | 33.948 | 544.414 | 217.960 | 143.399 | 74.560  |
| 2019          | 47217  | 18648.302 | 11950.652 | 6697.650 | 14.185 | 35.916 | 557.322 | 221.054 | 141.059 | 79.996  |
| 2020          | 48714  | 19002.597 | 11869.439 | 7133.158 | 14.643 | 37.538 | 651.002 | 255.266 | 158.622 | 96.644  |
| 2021          | 48751  | 18885.717 | 11406.061 | 7479.656 | 15.343 | 39.605 | 646.561 | 251.867 | 151.273 | 100.594 |
| 2022          | 50163  | 19235.076 | 11258.333 | 7976.743 | 15.901 | 41.470 | 660.000 | 254.582 | 148.126 | 106.456 |
| 2023          | 51585  | 19521.158 | 11088.196 | 8432.962 | 16.348 | 43.199 | 673.173 | 256.363 | 144.699 | 111.664 |
| 2024          | 52948  | 19918.620 | 10932.292 | 8986.328 | 16.972 | 45.115 | 685.410 | 259.583 | 141.518 | 118.066 |
| 2025          | 53988  | 20150.545 | 10721.002 | 9429.543 | 17.466 | 46.795 | 805.534 | 303.086 | 159.962 | 143.124 |
| 2026          | 54887  | 20393.792 | 10462.322 | 9931.470 | 18.094 | 48.698 | 815.463 | 305.582 | 155.439 | 150.143 |
| 2027          | 55756  | 20615.351 | 10182.501 | 10432.85 | 18.711 | 50.607 | 824.684 | 307.668 | 150.608 | 157.061 |
| 2028          | 56569  | 20731.894 | 9858.350  | 10873.54 | 19.222 | 52.448 | 832.821 | 308.115 | 145.136 | 162.979 |
| 2029          | 57344  | 20781.967 | 9509.289  | 11272.68 | 19.658 | 54.243 | 840.096 | 307.495 | 139.313 | 168.182 |
| 2030          | 57628  | 20753.201 | 9164.031  | 11589.17 | 20.110 | 55.843 | 997.534 | 363.487 | 158.629 | 204.859 |
| 2031          | 59248  | 21048.417 | 9077.157  | 11971.26 | 20.205 | 56.875 | 1023.64 | 368.165 | 156.828 | 211.337 |
| 2032          | 59804  | 21169.329 | 8778.731  | 12390.60 | 20.719 | 58.531 | 1030.68 | 369.560 | 151.295 | 218.266 |
| 2033          | 60321  | 21109.293 | 8438.827  | 12670.47 | 21.005 | 60.023 | 1036.49 | 367.618 | 145.005 | 222.613 |
| 2034          | 60762  | 21109.429 | 8107.170  | 13002.26 | 21.399 | 61.595 | 1040.65 | 366.613 | 138.849 | 227.763 |
| 2035          | 60143  | 20794.840 | 7734.192  | 13060.65 | 21.716 | 62.807 | 1258.36 | 442.268 | 161.821 | 280.447 |
| 2036          | 57222  | 19354.577 | 6943.687  | 12410.89 | 21.689 | 64.124 | 1198.30 | 412.258 | 145.410 | 266.848 |
| 2037          | 57213  | 19064.169 | 6519.695  | 12544.47 | 21.926 | 65.801 | 1198.35 | 406.385 | 136.558 | 269.827 |
| 2038          | 57171  | 18854.812 | 6180.166  | 12674.65 | 22.170 | 67.222 | 1196.73 | 401.900 | 129.367 | 272.533 |
| 2039          | 57120  | 18437.457 | 5769.646  | 12667.81 | 22.177 | 68.707 | 1193.80 | 392.602 | 120.584 | 272.018 |

## Results for PHIM for Run 7 (Sensitivity\_Analysis\_1.RTF)

---

### Control File Details for Run: 7

| Variable Parameter                                       | Value                  |
|----------------------------------------------------------|------------------------|
| 1. Name for Reference Scenario                           | NULL                   |
| 2. Name for Test Scenario                                | Ecig                   |
| 3. Name for Product 1                                    | CC                     |
| 4. Name for Product 2                                    | Ecig                   |
| 5. Name for Product 3                                    | -                      |
| 6. Name for Product 4                                    | Dual                   |
| 7. Country                                               | US (United States)     |
| 8. Sex                                                   | M (Males)              |
| 9. Year of start of process                              | 1990                   |
| 10. Number of months of follow-up                        | 600                    |
| 11. Follow-up interval length (in months)                | 12                     |
| 12. Lower age for risk estimation                        | 10                     |
| 13. Upper age for risk estimation                        | 79                     |
| 14. The effective dose for Product 1 (F1) - Ref          | 1                      |
| 15. The effective dose for Product 2 (F2) - Ref          | -                      |
| 16. The effective dose for Product 3 (F3) - Ref          | -                      |
| 17. The effective dose for Product 4 (F4) - Ref          | -                      |
| 18. The effective dose for Product 1 (F1) - Test         | 1                      |
| 19. The effective dose for Product 2 (F2) - Test         | 0.2                    |
| 20. The effective dose for Product 3 (F3) - Test         | -                      |
| 21. The effective dose for Product 4 (F4) - Test         | FROMF2                 |
| 22. Number in population to be simulated                 | 100000                 |
| 23. Number of MC simulations                             | 1                      |
| 24. The random number seed for the first simulation      | 15975263               |
| 25. Source for the population file (POP)                 | UN4                    |
| 26. Source for the socioeconomic prevalence file (SEP)   | -                      |
| 27. Source for the current smoking prevalence file (CSP) | ISS3                   |
| 28. Source for the former smoking prevalence file (FSP)  | ISS3                   |
| 29. Source for the quit-time distribution file (QTD)     | NHIS2006               |
| 30. Source for the death file (MORT)                     | APR-20                 |
| 31. Source for the relative risk file (RR)               | PNLEST                 |
| 32. Source for the half-life file (H)                    | PNLEST                 |
| 33. Assumption Set for TTP Factor Reference              | F1                     |
| 34. Assumption Set for TTP Factor Test                   | F1                     |
| 35. Assumption Set for TTP Reference                     | ISS3                   |
| 36. Assumption Set for TTP Test                          | ISS3                   |
| 37. Assumption Set for TP for socioeconomic group        | -                      |
| 38. Source for Output Choice file (OUTC)                 | BASIC                  |
| 39. Output for DTP P1                                    | N                      |
| 40. Output for DTP P2                                    | N                      |
| 41. Output for Main P Component                          | Y                      |
| 42. Output for DTP E1                                    | N                      |
| 43. Output for DTP E2                                    | N                      |
| 44. Output for DTP E3                                    | N                      |
| 45. Output for Main E Component                          | Y                      |
| 46. Output file name                                     | Sensitivity_Analysis_1 |
| 47. Run number for P-Component                           | -                      |
| 48. Results file for E-Component                         | -                      |
| 49. Components required                                  | PE                     |
| 50. Results folder for P to be used in E-Component       | -                      |
| 51. Fixed age of starting product use                    | 16                     |
| 52. Output absolute risk file?                           | N                      |

## Results for PHIM for Run 7 (Sensitivity\_Analysis\_1.RTF)

\*\*\*\*\*

TTP values for Run: 7, Scenario: NULL

| Variable Parameter | Value               |
|--------------------|---------------------|
| 1. Country         | US (United States)  |
| 2. Sex             | M (Males)           |
| 3. Assumption Set  | ISS3                |
| Note:              | Period is in Months |

| Age   | Period  | Initiation  | Cessation    | Re-initiation |
|-------|---------|-------------|--------------|---------------|
|       |         | Never<br>CC | CC<br>Former | Former<br>CC  |
| 10-14 | 1-12    | 0.003842    | 0.008742     | 0.000000      |
| 15-19 | 1-12    | 0.004720    | 0.003614     | 0.000000      |
| 20-24 | 1-12    | 0.000376    | 0.000943     | 0.000000      |
| 25-29 | 1-12    | 0.000187    | 0.001143     | 0.000000      |
| 30-34 | 1-12    | 0.000093    | 0.000871     | 0.000000      |
| 35-39 | 1-12    | 0.000000    | 0.000867     | 0.000000      |
| 40-44 | 1-12    | 0.000000    | 0.001399     | 0.000000      |
| 45-49 | 1-12    | 0.000000    | 0.002033     | 0.000000      |
| 50-54 | 1-12    | 0.000000    | 0.003209     | 0.000000      |
| 55-59 | 1-12    | 0.000000    | 0.003574     | 0.000000      |
| 60-64 | 1-12    | 0.000000    | 0.003460     | 0.000000      |
| 65-69 | 1-12    | 0.000000    | 0.004136     | 0.000000      |
| 70-74 | 1-12    | 0.000000    | 0.005592     | 0.000000      |
| 75-79 | 1-12    | 0.000000    | 0.005592     | 0.000000      |
| 10-14 | 13-72   | 0.004906    | 0.008742     | 0.000000      |
| 15-19 | 13-72   | 0.006989    | 0.004426     | 0.000000      |
| 20-24 | 13-72   | 0.000687    | 0.001527     | 0.000000      |
| 25-29 | 13-72   | 0.000962    | 0.001515     | 0.000000      |
| 30-34 | 13-72   | 0.000364    | 0.001227     | 0.000000      |
| 35-39 | 13-72   | 0.000000    | 0.001630     | 0.000000      |
| 40-44 | 13-72   | 0.000000    | 0.001852     | 0.000000      |
| 45-49 | 13-72   | 0.000000    | 0.002667     | 0.000000      |
| 50-54 | 13-72   | 0.000000    | 0.003208     | 0.000000      |
| 55-59 | 13-72   | 0.000000    | 0.003978     | 0.000000      |
| 60-64 | 13-72   | 0.000000    | 0.005771     | 0.000000      |
| 65-69 | 13-72   | 0.000000    | 0.010432     | 0.000000      |
| 70-74 | 13-72   | 0.000000    | 0.007079     | 0.000000      |
| 75-79 | 13-72   | 0.000000    | 0.007079     | 0.000000      |
| 10-14 | 73-132  | 0.004312    | 0.008742     | 0.000000      |
| 15-19 | 73-132  | 0.005330    | 0.003289     | 0.000000      |
| 20-24 | 73-132  | 0.002456    | 0.003844     | 0.000000      |
| 25-29 | 73-132  | 0.000839    | 0.002006     | 0.000000      |
| 30-34 | 73-132  | 0.000414    | 0.001329     | 0.000000      |
| 35-39 | 73-132  | 0.000000    | 0.001278     | 0.000000      |
| 40-44 | 73-132  | 0.000000    | 0.001691     | 0.000000      |
| 45-49 | 73-132  | 0.000000    | 0.002904     | 0.000000      |
| 50-54 | 73-132  | 0.000000    | 0.003319     | 0.000000      |
| 55-59 | 73-132  | 0.000000    | 0.003976     | 0.000000      |
| 60-64 | 73-132  | 0.000000    | 0.005235     | 0.000000      |
| 65-69 | 73-132  | 0.000000    | 0.005901     | 0.000000      |
| 70-74 | 73-132  | 0.000000    | 0.005615     | 0.000000      |
| 75-79 | 73-132  | 0.000000    | 0.005615     | 0.000000      |
| 10-14 | 133-192 | 0.003468    | 0.008742     | 0.000000      |
| 15-19 | 133-192 | 0.004675    | 0.003732     | 0.000000      |
| 20-24 | 133-192 | 0.000062    | 0.002260     | 0.000000      |
| 25-29 | 133-192 | 0.001422    | 0.002822     | 0.000000      |
| 30-34 | 133-192 | 0.000696    | 0.002610     | 0.000000      |
| 35-39 | 133-192 | 0.000000    | 0.002058     | 0.000000      |
| 40-44 | 133-192 | 0.000000    | 0.002310     | 0.000000      |
| 45-49 | 133-192 | 0.000000    | 0.002256     | 0.000000      |
| 50-54 | 133-192 | 0.000000    | 0.002663     | 0.000000      |
| 55-59 | 133-192 | 0.000000    | 0.001746     | 0.000000      |
| 60-64 | 133-192 | 0.000000    | 0.005809     | 0.000000      |
| 65-69 | 133-192 | 0.000000    | 0.005896     | 0.000000      |
| 70-74 | 133-192 | 0.000000    | 0.007323     | 0.000000      |
| 75-79 | 133-192 | 0.000000    | 0.007323     | 0.000000      |
| 10-14 | 193-252 | 0.002314    | 0.008742     | 0.000000      |
| 15-19 | 193-252 | 0.003987    | 0.005036     | 0.000000      |
| 20-24 | 193-252 | 0.000320    | 0.002857     | 0.000000      |
| 25-29 | 193-252 | 0.000251    | 0.002314     | 0.000000      |
| 30-34 | 193-252 | 0.000125    | 0.004343     | 0.000000      |
| 35-39 | 193-252 | 0.000000    | 0.002092     | 0.000000      |
| 40-44 | 193-252 | 0.000000    | 0.002566     | 0.000000      |
| 45-49 | 193-252 | 0.000000    | 0.002311     | 0.000000      |
| 50-54 | 193-252 | 0.000000    | 0.003209     | 0.000000      |

### Results for PHIM for Run 7 (Sensitivity\_Analysis\_1.RTF)

|       |         |          |          |          |
|-------|---------|----------|----------|----------|
| 55-59 | 193-252 | 0.000000 | 0.004057 | 0.000000 |
| 60-64 | 193-252 | 0.000000 | 0.007166 | 0.000000 |
| 65-69 | 193-252 | 0.000000 | 0.004281 | 0.000000 |
| 70-74 | 193-252 | 0.000000 | 0.004580 | 0.000000 |
| 75-79 | 193-252 | 0.000000 | 0.004580 | 0.000000 |
| 10-14 | 253+    | 0.001325 | 0.008742 | 0.000000 |
| 15-19 | 253+    | 0.002984 | 0.010602 | 0.000000 |
| 20-24 | 253+    | 0.000452 | 0.004314 | 0.000000 |
| 25-29 | 253+    | 0.000225 | 0.003645 | 0.000000 |
| 30-34 | 253+    | 0.000112 | 0.004512 | 0.000000 |
| 35-39 | 253+    | 0.000000 | 0.002147 | 0.000000 |
| 40-44 | 253+    | 0.000000 | 0.002636 | 0.000000 |
| 45-49 | 253+    | 0.000000 | 0.001051 | 0.000000 |
| 50-54 | 253+    | 0.000000 | 0.002519 | 0.000000 |
| 55-59 | 253+    | 0.000000 | 0.003693 | 0.000000 |
| 60-64 | 253+    | 0.000000 | 0.005888 | 0.000000 |
| 65-69 | 253+    | 0.000000 | 0.004823 | 0.000000 |
| 70-74 | 253+    | 0.000000 | 0.004733 | 0.000000 |
| 75-79 | 253+    | 0.000000 | 0.004733 | 0.000000 |

## Results for PHIM for Run 7 (Sensitivity\_Analysis\_1.RTF)

\*\*\*\*\*

TTP values for Run: 7, Scenario: Ecig

| Variable Parameter | Value               |
|--------------------|---------------------|
| 1. Country         | US (United States)  |
| 2. Sex             | M (Males)           |
| 3. Assumption Set  | ISS3                |
| Note:              | Period is in Months |

| Age   | Period  | Initiation  |               |               | Cessation    |                |                | Re-initiation |                |                |
|-------|---------|-------------|---------------|---------------|--------------|----------------|----------------|---------------|----------------|----------------|
|       |         | Never<br>CC | Never<br>Ecig | Never<br>Dual | CC<br>Former | Ecig<br>Former | Dual<br>Former | Former<br>CC  | Former<br>Ecig | Former<br>Dual |
| 10-14 | 1-12    | 0.001921    | 0.001921      | 0.000000      | 0.008742     | 0.008742       | 0.000000       | 0.000000      | 0.000000       | 0.000000       |
| 15-19 | 1-12    | 0.002360    | 0.002360      | 0.000000      | 0.003614     | 0.003614       | 0.000000       | 0.000000      | 0.000000       | 0.000000       |
| 20-24 | 1-12    | 0.000188    | 0.000188      | 0.000000      | 0.000943     | 0.000943       | 0.000000       | 0.000000      | 0.000000       | 0.000000       |
| 25-29 | 1-12    | 0.000093    | 0.000093      | 0.000000      | 0.001143     | 0.001143       | 0.000000       | 0.000000      | 0.000000       | 0.000000       |
| 30-34 | 1-12    | 0.000047    | 0.000047      | 0.000000      | 0.000871     | 0.000871       | 0.000000       | 0.000000      | 0.000000       | 0.000000       |
| 35-39 | 1-12    | 0.000000    | 0.000000      | 0.000000      | 0.000867     | 0.000867       | 0.000000       | 0.000000      | 0.000000       | 0.000000       |
| 40-44 | 1-12    | 0.000000    | 0.000000      | 0.000000      | 0.001399     | 0.001399       | 0.000000       | 0.000000      | 0.000000       | 0.000000       |
| 45-49 | 1-12    | 0.000000    | 0.000000      | 0.000000      | 0.002033     | 0.002033       | 0.000000       | 0.000000      | 0.000000       | 0.000000       |
| 50-54 | 1-12    | 0.000000    | 0.000000      | 0.000000      | 0.003209     | 0.003209       | 0.000000       | 0.000000      | 0.000000       | 0.000000       |
| 55-59 | 1-12    | 0.000000    | 0.000000      | 0.000000      | 0.003574     | 0.003574       | 0.000000       | 0.000000      | 0.000000       | 0.000000       |
| 60-64 | 1-12    | 0.000000    | 0.000000      | 0.000000      | 0.003460     | 0.003460       | 0.000000       | 0.000000      | 0.000000       | 0.000000       |
| 65-69 | 1-12    | 0.000000    | 0.000000      | 0.000000      | 0.004136     | 0.004136       | 0.000000       | 0.000000      | 0.000000       | 0.000000       |
| 70-74 | 1-12    | 0.000000    | 0.000000      | 0.000000      | 0.005592     | 0.005592       | 0.000000       | 0.000000      | 0.000000       | 0.000000       |
| 75-79 | 1-12    | 0.000000    | 0.000000      | 0.000000      | 0.005592     | 0.005592       | 0.000000       | 0.000000      | 0.000000       | 0.000000       |
| 10-14 | 13-72   | 0.001962    | 0.002944      | 0.000000      | 0.008742     | 0.008742       | 0.000000       | 0.000000      | 0.000000       | 0.000000       |
| 15-19 | 13-72   | 0.002796    | 0.004193      | 0.000000      | 0.004426     | 0.004426       | 0.000000       | 0.000000      | 0.000000       | 0.000000       |
| 20-24 | 13-72   | 0.000275    | 0.000412      | 0.000000      | 0.001527     | 0.001527       | 0.000000       | 0.000000      | 0.000000       | 0.000000       |
| 25-29 | 13-72   | 0.000385    | 0.000578      | 0.000000      | 0.001515     | 0.001515       | 0.000000       | 0.000000      | 0.000000       | 0.000000       |
| 30-34 | 13-72   | 0.000146    | 0.000218      | 0.000000      | 0.001227     | 0.001227       | 0.000000       | 0.000000      | 0.000000       | 0.000000       |
| 35-39 | 13-72   | 0.000000    | 0.000000      | 0.000000      | 0.001630     | 0.001630       | 0.000000       | 0.000000      | 0.000000       | 0.000000       |
| 40-44 | 13-72   | 0.000000    | 0.000000      | 0.000000      | 0.001852     | 0.001852       | 0.000000       | 0.000000      | 0.000000       | 0.000000       |
| 45-49 | 13-72   | 0.000000    | 0.000000      | 0.000000      | 0.002667     | 0.002667       | 0.000000       | 0.000000      | 0.000000       | 0.000000       |
| 50-54 | 13-72   | 0.000000    | 0.000000      | 0.000000      | 0.003208     | 0.003208       | 0.000000       | 0.000000      | 0.000000       | 0.000000       |
| 55-59 | 13-72   | 0.000000    | 0.000000      | 0.000000      | 0.003978     | 0.003978       | 0.000000       | 0.000000      | 0.000000       | 0.000000       |
| 60-64 | 13-72   | 0.000000    | 0.000000      | 0.000000      | 0.005771     | 0.005771       | 0.000000       | 0.000000      | 0.000000       | 0.000000       |
| 65-69 | 13-72   | 0.000000    | 0.000000      | 0.000000      | 0.010432     | 0.010432       | 0.000000       | 0.000000      | 0.000000       | 0.000000       |
| 70-74 | 13-72   | 0.000000    | 0.000000      | 0.000000      | 0.007079     | 0.007079       | 0.000000       | 0.000000      | 0.000000       | 0.000000       |
| 75-79 | 13-72   | 0.000000    | 0.000000      | 0.000000      | 0.007079     | 0.007079       | 0.000000       | 0.000000      | 0.000000       | 0.000000       |
| 10-14 | 73-132  | 0.000862    | 0.003449      | 0.000000      | 0.008742     | 0.008742       | 0.000000       | 0.000000      | 0.000000       | 0.000000       |
| 15-19 | 73-132  | 0.001066    | 0.004264      | 0.000000      | 0.003289     | 0.003289       | 0.000000       | 0.000000      | 0.000000       | 0.000000       |
| 20-24 | 73-132  | 0.000491    | 0.001965      | 0.000000      | 0.003844     | 0.003844       | 0.000000       | 0.000000      | 0.000000       | 0.000000       |
| 25-29 | 73-132  | 0.000168    | 0.000671      | 0.000000      | 0.002006     | 0.002006       | 0.000000       | 0.000000      | 0.000000       | 0.000000       |
| 30-34 | 73-132  | 0.000083    | 0.000332      | 0.000000      | 0.001329     | 0.001329       | 0.000000       | 0.000000      | 0.000000       | 0.000000       |
| 35-39 | 73-132  | 0.000000    | 0.000000      | 0.000000      | 0.001278     | 0.001278       | 0.000000       | 0.000000      | 0.000000       | 0.000000       |
| 40-44 | 73-132  | 0.000000    | 0.000000      | 0.000000      | 0.001691     | 0.001691       | 0.000000       | 0.000000      | 0.000000       | 0.000000       |
| 45-49 | 73-132  | 0.000000    | 0.000000      | 0.000000      | 0.002904     | 0.002904       | 0.000000       | 0.000000      | 0.000000       | 0.000000       |
| 50-54 | 73-132  | 0.000000    | 0.000000      | 0.000000      | 0.003319     | 0.003319       | 0.000000       | 0.000000      | 0.000000       | 0.000000       |
| 55-59 | 73-132  | 0.000000    | 0.000000      | 0.000000      | 0.003976     | 0.003976       | 0.000000       | 0.000000      | 0.000000       | 0.000000       |
| 60-64 | 73-132  | 0.000000    | 0.000000      | 0.000000      | 0.005235     | 0.005235       | 0.000000       | 0.000000      | 0.000000       | 0.000000       |
| 65-69 | 73-132  | 0.000000    | 0.000000      | 0.000000      | 0.005901     | 0.005901       | 0.000000       | 0.000000      | 0.000000       | 0.000000       |
| 70-74 | 73-132  | 0.000000    | 0.000000      | 0.000000      | 0.005615     | 0.005615       | 0.000000       | 0.000000      | 0.000000       | 0.000000       |
| 75-79 | 73-132  | 0.000000    | 0.000000      | 0.000000      | 0.005615     | 0.005615       | 0.000000       | 0.000000      | 0.000000       | 0.000000       |
| 10-14 | 133-192 | 0.000173    | 0.003294      | 0.000000      | 0.008742     | 0.008742       | 0.000000       | 0.000000      | 0.000000       | 0.000000       |
| 15-19 | 133-192 | 0.000234    | 0.004442      | 0.000000      | 0.003732     | 0.003732       | 0.000000       | 0.000000      | 0.000000       | 0.000000       |
| 20-24 | 133-192 | 0.000003    | 0.000059      | 0.000000      | 0.002260     | 0.002260       | 0.000000       | 0.000000      | 0.000000       | 0.000000       |
| 25-29 | 133-192 | 0.000071    | 0.001351      | 0.000000      | 0.002822     | 0.002822       | 0.000000       | 0.000000      | 0.000000       | 0.000000       |
| 30-34 | 133-192 | 0.000035    | 0.000661      | 0.000000      | 0.002610     | 0.002610       | 0.000000       | 0.000000      | 0.000000       | 0.000000       |
| 35-39 | 133-192 | 0.000000    | 0.000000      | 0.000000      | 0.002058     | 0.002058       | 0.000000       | 0.000000      | 0.000000       | 0.000000       |
| 40-44 | 133-192 | 0.000000    | 0.000000      | 0.000000      | 0.002310     | 0.002310       | 0.000000       | 0.000000      | 0.000000       | 0.000000       |
| 45-49 | 133-192 | 0.000000    | 0.000000      | 0.000000      | 0.002256     | 0.002256       | 0.000000       | 0.000000      | 0.000000       | 0.000000       |
| 50-54 | 133-192 | 0.000000    | 0.000000      | 0.000000      | 0.002663     | 0.002663       | 0.000000       | 0.000000      | 0.000000       | 0.000000       |
| 55-59 | 133-192 | 0.000000    | 0.000000      | 0.000000      | 0.001747     | 0.001747       | 0.000000       | 0.000000      | 0.000000       | 0.000000       |
| 60-64 | 133-192 | 0.000000    | 0.000000      | 0.000000      | 0.005809     | 0.005809       | 0.000000       | 0.000000      | 0.000000       | 0.000000       |
| 65-69 | 133-192 | 0.000000    | 0.000000      | 0.000000      | 0.005896     | 0.005896       | 0.000000       | 0.000000      | 0.000000       | 0.000000       |
| 70-74 | 133-192 | 0.000000    | 0.000000      | 0.000000      | 0.007323     | 0.007323       | 0.000000       | 0.000000      | 0.000000       | 0.000000       |
| 75-79 | 133-192 | 0.000000    | 0.000000      | 0.000000      | 0.007323     | 0.007323       | 0.000000       | 0.000000      | 0.000000       | 0.000000       |
| 10-14 | 193-252 | 0.000116    | 0.002198      | 0.000000      | 0.008742     | 0.008742       | 0.000000       | 0.000000      | 0.000000       | 0.000000       |
| 15-19 | 193-252 | 0.000199    | 0.003788      | 0.000000      | 0.005036     | 0.005036       | 0.000000       | 0.000000      | 0.000000       | 0.000000       |
| 20-24 | 193-252 | 0.000016    | 0.000304      | 0.000000      | 0.002857     | 0.002857       | 0.000000       | 0.000000      | 0.000000       | 0.000000       |
| 25-29 | 193-252 | 0.000013    | 0.000239      | 0.000000      | 0.002314     | 0.002314       | 0.000000       | 0.000000      | 0.000000       | 0.000000       |
| 30-34 | 193-252 | 0.000006    | 0.000119      | 0.000000      | 0.004343     | 0.004343       | 0.000000       | 0.000000      | 0.000000       | 0.000000       |
| 35-39 | 193-252 | 0.000000    | 0.000000      | 0.000000      | 0.002092     | 0.002092       | 0.000000       | 0.000000      | 0.000000       | 0.000000       |
| 40-44 | 193-252 | 0.000000    | 0.000000      | 0.000000      | 0.002566     | 0.002566       | 0.000000       | 0.000000      | 0.000000       | 0.000000       |
| 45-49 | 193-252 | 0.000000    | 0.000000      | 0.000000      | 0.002311     | 0.002311       | 0.000000       | 0.000000      | 0.000000       | 0.000000       |
| 50-54 | 193-252 | 0.000000    | 0.000000      | 0.000000      | 0.003209     | 0.003209       | 0.000000       | 0.000000      | 0.000000       | 0.000000       |

### Results for PHIM for Run 7 (Sensitivity\_Analysis\_1.RTF)

|       |         |          |          |          |          |          |          |          |          |          |
|-------|---------|----------|----------|----------|----------|----------|----------|----------|----------|----------|
| 55-59 | 193-252 | 0.000000 | 0.000000 | 0.000000 | 0.004057 | 0.004057 | 0.000000 | 0.000000 | 0.000000 | 0.000000 |
| 60-64 | 193-252 | 0.000000 | 0.000000 | 0.000000 | 0.007166 | 0.007166 | 0.000000 | 0.000000 | 0.000000 | 0.000000 |
| 65-69 | 193-252 | 0.000000 | 0.000000 | 0.000000 | 0.004281 | 0.004281 | 0.000000 | 0.000000 | 0.000000 | 0.000000 |
| 70-74 | 193-252 | 0.000000 | 0.000000 | 0.000000 | 0.004580 | 0.004580 | 0.000000 | 0.000000 | 0.000000 | 0.000000 |
| 75-79 | 193-252 | 0.000000 | 0.000000 | 0.000000 | 0.004580 | 0.004580 | 0.000000 | 0.000000 | 0.000000 | 0.000000 |
| 10-14 | 253+    | 0.000066 | 0.001259 | 0.000000 | 0.008742 | 0.008742 | 0.000000 | 0.000000 | 0.000000 | 0.000000 |
| 15-19 | 253+    | 0.000149 | 0.002835 | 0.000000 | 0.010602 | 0.010602 | 0.000000 | 0.000000 | 0.000000 | 0.000000 |
| 20-24 | 253+    | 0.000023 | 0.000430 | 0.000000 | 0.004314 | 0.004314 | 0.000000 | 0.000000 | 0.000000 | 0.000000 |
| 25-29 | 253+    | 0.000011 | 0.000213 | 0.000000 | 0.003645 | 0.003645 | 0.000000 | 0.000000 | 0.000000 | 0.000000 |
| 30-34 | 253+    | 0.000006 | 0.000106 | 0.000000 | 0.004512 | 0.004512 | 0.000000 | 0.000000 | 0.000000 | 0.000000 |
| 35-39 | 253+    | 0.000000 | 0.000000 | 0.000000 | 0.002147 | 0.002147 | 0.000000 | 0.000000 | 0.000000 | 0.000000 |
| 40-44 | 253+    | 0.000000 | 0.000000 | 0.000000 | 0.002636 | 0.002636 | 0.000000 | 0.000000 | 0.000000 | 0.000000 |
| 45-49 | 253+    | 0.000000 | 0.000000 | 0.000000 | 0.001051 | 0.001051 | 0.000000 | 0.000000 | 0.000000 | 0.000000 |
| 50-54 | 253+    | 0.000000 | 0.000000 | 0.000000 | 0.002519 | 0.002519 | 0.000000 | 0.000000 | 0.000000 | 0.000000 |
| 55-59 | 253+    | 0.000000 | 0.000000 | 0.000000 | 0.003693 | 0.003693 | 0.000000 | 0.000000 | 0.000000 | 0.000000 |
| 60-64 | 253+    | 0.000000 | 0.000000 | 0.000000 | 0.005888 | 0.005888 | 0.000000 | 0.000000 | 0.000000 | 0.000000 |
| 65-69 | 253+    | 0.000000 | 0.000000 | 0.000000 | 0.004823 | 0.004823 | 0.000000 | 0.000000 | 0.000000 | 0.000000 |
| 70-74 | 253+    | 0.000000 | 0.000000 | 0.000000 | 0.004733 | 0.004733 | 0.000000 | 0.000000 | 0.000000 | 0.000000 |
| 75-79 | 253+    | 0.000000 | 0.000000 | 0.000000 | 0.004733 | 0.004733 | 0.000000 | 0.000000 | 0.000000 | 0.000000 |





**Results for PHIM for Run 7 (Sensitivity\_Analysis\_1.RTF)**

|       |      |          |          |          |          |          |          |
|-------|------|----------|----------|----------|----------|----------|----------|
| 25-29 | 253+ | 0.015212 | 0.000000 | 0.000000 | 0.000000 | 0.000000 | 0.000000 |
| 30-34 | 253+ | 0.015460 | 0.000000 | 0.000000 | 0.000000 | 0.000000 | 0.000000 |
| 35-39 | 253+ | 0.014711 | 0.000000 | 0.000000 | 0.000000 | 0.000000 | 0.000000 |
| 40-44 | 253+ | 0.014241 | 0.000000 | 0.000000 | 0.000000 | 0.000000 | 0.000000 |
| 45-49 | 253+ | 0.013014 | 0.000000 | 0.000000 | 0.000000 | 0.000000 | 0.000000 |
| 50-54 | 253+ | 0.011768 | 0.000000 | 0.000000 | 0.000000 | 0.000000 | 0.000000 |
| 55-59 | 253+ | 0.011032 | 0.000000 | 0.000000 | 0.000000 | 0.000000 | 0.000000 |
| 60-64 | 253+ | 0.009525 | 0.000000 | 0.000000 | 0.000000 | 0.000000 | 0.000000 |
| 65-69 | 253+ | 0.006897 | 0.000000 | 0.000000 | 0.000000 | 0.000000 | 0.000000 |
| 70-74 | 253+ | 0.005435 | 0.000000 | 0.000000 | 0.000000 | 0.000000 | 0.000000 |
| 75-79 | 253+ | 0.005435 | 0.000000 | 0.000000 | 0.000000 | 0.000000 | 0.000000 |

## Results for PHIM for Run 7 (Sensitivity\_Analysis\_1.RTF)

\*\*\*\*\*

### Main Output for the Tobacco History for Run: 7, Simulation: 1, Scenario: NULL

| Variable Parameter          | Value              |
|-----------------------------|--------------------|
| 1. Country                  | US (United States) |
| 2. Sex                      | M (Males)          |
| 3. Year of start of process | 1990               |

Year of Follow-up: 2040, Age Group: All Ages  
 Period    Age Group    Smoking Group            N            %

|    |          |           |       |       |
|----|----------|-----------|-------|-------|
| 50 | All Ages | Never Any | 19445 | 50.68 |
| 50 | All Ages | CC        | 3024  | 7.88  |
| 50 | All Ages | Former    | 15896 | 41.43 |

Year of Follow-up: 2040, Age Group: 18-19  
 Period    Age Group    Smoking Group            N            %

|    |       |           |   |   |
|----|-------|-----------|---|---|
| 50 | 18-19 | Never Any | 0 | . |
| 50 | 18-19 | CC        | 0 | . |
| 50 | 18-19 | Former    | 0 | . |

Year of Follow-up: 2040, Age Group: 20-24  
 Period    Age Group    Smoking Group            N            %

|    |       |           |   |   |
|----|-------|-----------|---|---|
| 50 | 20-24 | Never Any | 0 | . |
| 50 | 20-24 | CC        | 0 | . |
| 50 | 20-24 | Former    | 0 | . |

Year of Follow-up: 2040, Age Group: 25-29  
 Period    Age Group    Smoking Group            N            %

|    |       |           |   |   |
|----|-------|-----------|---|---|
| 50 | 25-29 | Never Any | 0 | . |
| 50 | 25-29 | CC        | 0 | . |
| 50 | 25-29 | Former    | 0 | . |

Year of Follow-up: 2040, Age Group: 30-34  
 Period    Age Group    Smoking Group            N            %

|    |       |           |   |   |
|----|-------|-----------|---|---|
| 50 | 30-34 | Never Any | 0 | . |
| 50 | 30-34 | CC        | 0 | . |
| 50 | 30-34 | Former    | 0 | . |

Year of Follow-up: 2040, Age Group: 35-39  
 Period    Age Group    Smoking Group            N            %

|    |       |           |   |   |
|----|-------|-----------|---|---|
| 50 | 35-39 | Never Any | 0 | . |
| 50 | 35-39 | CC        | 0 | . |
| 50 | 35-39 | Former    | 0 | . |

Year of Follow-up: 2040, Age Group: 40-44  
 Period    Age Group    Smoking Group            N            %

|    |       |           |   |   |
|----|-------|-----------|---|---|
| 50 | 40-44 | Never Any | 0 | . |
| 50 | 40-44 | CC        | 0 | . |
| 50 | 40-44 | Former    | 0 | . |

Year of Follow-up: 2040, Age Group: 45-49  
 Period    Age Group    Smoking Group            N            %

|    |       |           |   |   |
|----|-------|-----------|---|---|
| 50 | 45-49 | Never Any | 0 | . |
| 50 | 45-49 | CC        | 0 | . |
| 50 | 45-49 | Former    | 0 | . |

Year of Follow-up: 2040, Age Group: 50-54  
 Period    Age Group    Smoking Group            N            %

|    |       |           |   |   |
|----|-------|-----------|---|---|
| 50 | 50-54 | Never Any | 0 | . |
| 50 | 50-54 | CC        | 0 | . |
| 50 | 50-54 | Former    | 0 | . |

Year of Follow-up: 2040, Age Group: 55-59  
 Period    Age Group    Smoking Group            N            %

|    |       |           |   |   |
|----|-------|-----------|---|---|
| 50 | 55-59 | Never Any | 0 | . |
| 50 | 55-59 | CC        | 0 | . |
| 50 | 55-59 | Former    | 0 | . |

Year of Follow-up: 2040, Age Group: 60-64  
 Period    Age Group    Smoking Group            N            %

### Results for PHIM for Run 7 (Sensitivity\_Analysis\_1.RTF)

|                                           |           |               |      |       |
|-------------------------------------------|-----------|---------------|------|-------|
| 50                                        | 60-64     | Never Any     | 4363 | 49.33 |
| 50                                        | 60-64     | CC            | 934  | 10.56 |
| 50                                        | 60-64     | Former        | 3548 | 40.11 |
| Year of Follow-up: 2040, Age Group: 65-69 |           |               |      |       |
| Period                                    | Age Group | Smoking Group | N    | %     |
| 50                                        | 65-69     | Never Any     | 4948 | 54.73 |
| 50                                        | 65-69     | CC            | 734  | 8.12  |
| 50                                        | 65-69     | Former        | 3358 | 37.15 |
| Year of Follow-up: 2040, Age Group: 70-74 |           |               |      |       |
| Period                                    | Age Group | Smoking Group | N    | %     |
| 50                                        | 70-74     | Never Any     | 5145 | 52.41 |
| 50                                        | 70-74     | CC            | 688  | 7.01  |
| 50                                        | 70-74     | Former        | 3983 | 40.58 |
| Year of Follow-up: 2040, Age Group: 75-79 |           |               |      |       |
| Period                                    | Age Group | Smoking Group | N    | %     |
| 50                                        | 75-79     | Never Any     | 4989 | 46.78 |
| 50                                        | 75-79     | CC            | 668  | 6.26  |
| 50                                        | 75-79     | Former        | 5007 | 46.95 |

## Results for PHIM for Run 7 (Sensitivity\_Analysis\_1.RTF)

\*\*\*\*\*

### Main Output for the Tobacco History for Run: 7, Simulation: 1, Scenario: Ecig

| Variable Parameter                           |           |               | Value              |       |               |             |               |                |              |
|----------------------------------------------|-----------|---------------|--------------------|-------|---------------|-------------|---------------|----------------|--------------|
| 1. Country                                   |           |               | US (United States) |       |               |             |               |                |              |
| 2. Sex                                       |           |               | M (Males)          |       |               |             |               |                |              |
| 3. Year of start of process                  |           |               | 1990               |       |               |             |               |                |              |
| Year of Follow-up: 1990, Age Group: All Ages |           |               |                    |       |               |             |               |                |              |
| Period                                       | Age Group | Smoking Group | N                  | %     | Ever Quit (N) | Ever Quit % | Mean Yrs Quit | Short Term (n) | Short Term % |
| 0                                            | All Ages  | Never Any     | 34075              | 39.78 |               |             |               |                |              |
| 0                                            | All Ages  | CC            | 27323              | 31.90 | 0             | 0.00        |               |                |              |
| 0                                            | All Ages  | Ecig          | 0                  | 0.00  |               |             |               |                |              |
| 0                                            | All Ages  | Dual          | 0                  | 0.00  |               |             |               |                |              |
| 0                                            | All Ages  | Former        | 24266              | 28.33 |               |             | 13.08         | 3623           | 14.93        |
| Year of Follow-up: 1990, Age Group: 18-19    |           |               |                    |       |               |             |               |                |              |
| Period                                       | Age Group | Smoking Group | N                  | %     | Ever Quit (N) | Ever Quit % | Mean Yrs Quit | Short Term (n) | Short Term % |
| 0                                            | 18-19     | Never Any     | 2783               | 78.42 |               |             |               |                |              |
| 0                                            | 18-19     | CC            | 634                | 17.86 | 0             | 0.00        |               |                |              |
| 0                                            | 18-19     | Ecig          | 0                  | 0.00  |               |             |               |                |              |
| 0                                            | 18-19     | Dual          | 0                  | 0.00  |               |             |               |                |              |
| 0                                            | 18-19     | Former        | 132                | 3.72  |               |             | 0.11          | 132            | 100.00       |
| Year of Follow-up: 1990, Age Group: 20-24    |           |               |                    |       |               |             |               |                |              |
| Period                                       | Age Group | Smoking Group | N                  | %     | Ever Quit (N) | Ever Quit % | Mean Yrs Quit | Short Term (n) | Short Term % |
| 0                                            | 20-24     | Never Any     | 5722               | 58.29 |               |             |               |                |              |
| 0                                            | 20-24     | CC            | 3199               | 32.59 | 0             | 0.00        |               |                |              |
| 0                                            | 20-24     | Ecig          | 0                  | 0.00  |               |             |               |                |              |
| 0                                            | 20-24     | Dual          | 0                  | 0.00  |               |             |               |                |              |
| 0                                            | 20-24     | Former        | 895                | 9.12  |               |             | 1.46          | 506            | 56.54        |
| Year of Follow-up: 1990, Age Group: 25-29    |           |               |                    |       |               |             |               |                |              |
| Period                                       | Age Group | Smoking Group | N                  | %     | Ever Quit (N) | Ever Quit % | Mean Yrs Quit | Short Term (n) | Short Term % |
| 0                                            | 25-29     | Never Any     | 5232               | 49.06 |               |             |               |                |              |
| 0                                            | 25-29     | CC            | 3914               | 36.70 | 0             | 0.00        |               |                |              |
| 0                                            | 25-29     | Ecig          | 0                  | 0.00  |               |             |               |                |              |
| 0                                            | 25-29     | Dual          | 0                  | 0.00  |               |             |               |                |              |
| 0                                            | 25-29     | Former        | 1518               | 14.23 |               |             | 2.87          | 643            | 42.36        |
| Year of Follow-up: 1990, Age Group: 30-34    |           |               |                    |       |               |             |               |                |              |
| Period                                       | Age Group | Smoking Group | N                  | %     | Ever Quit (N) | Ever Quit % | Mean Yrs Quit | Short Term (n) | Short Term % |
| 0                                            | 30-34     | Never Any     | 4765               | 43.65 |               |             |               |                |              |
| 0                                            | 30-34     | CC            | 4023               | 36.85 | 0             | 0.00        |               |                |              |
| 0                                            | 30-34     | Ecig          | 0                  | 0.00  |               |             |               |                |              |
| 0                                            | 30-34     | Dual          | 0                  | 0.00  |               |             |               |                |              |
| 0                                            | 30-34     | Former        | 2128               | 19.49 |               |             | 4.06          | 592            | 27.82        |
| Year of Follow-up: 1990, Age Group: 35-39    |           |               |                    |       |               |             |               |                |              |
| Period                                       | Age Group | Smoking Group | N                  | %     | Ever Quit (N) | Ever Quit % | Mean Yrs Quit | Short Term (n) | Short Term % |
| 0                                            | 35-39     | Never Any     | 3941               | 39.85 |               |             |               |                |              |
| 0                                            | 35-39     | CC            | 3474               | 35.13 | 0             | 0.00        |               |                |              |
| 0                                            | 35-39     | Ecig          | 0                  | 0.00  |               |             |               |                |              |
| 0                                            | 35-39     | Dual          | 0                  | 0.00  |               |             |               |                |              |
| 0                                            | 35-39     | Former        | 2474               | 25.02 |               |             | 8.31          | 425            | 17.18        |
| Year of Follow-up: 1990, Age Group: 40-44    |           |               |                    |       |               |             |               |                |              |
| Period                                       | Age Group | Smoking Group | N                  | %     | Ever Quit (N) | Ever Quit % | Mean Yrs Quit | Short Term (n) | Short Term % |
| 0                                            | 40-44     | Never Any     | 2912               | 33.65 |               |             |               |                |              |
| 0                                            | 40-44     | CC            | 3113               | 35.97 | 0             | 0.00        |               |                |              |
| 0                                            | 40-44     | Ecig          | 0                  | 0.00  |               |             |               |                |              |
| 0                                            | 40-44     | Dual          | 0                  | 0.00  |               |             |               |                |              |
| 0                                            | 40-44     | Former        | 2630               | 30.39 |               |             | 10.69         | 317            | 12.05        |
| Year of Follow-up: 1990, Age Group: 45-49    |           |               |                    |       |               |             |               |                |              |
| Period                                       | Age Group | Smoking Group | N                  | %     | Ever Quit (N) | Ever Quit % | Mean Yrs Quit | Short Term (n) | Short Term % |
| 0                                            | 45-49     | Never Any     | 1919               | 29.46 |               |             |               |                |              |
| 0                                            | 45-49     | CC            | 2318               | 35.58 | 0             | 0.00        |               |                |              |
| 0                                            | 45-49     | Ecig          | 0                  | 0.00  |               |             |               |                |              |
| 0                                            | 45-49     | Dual          | 0                  | 0.00  |               |             |               |                |              |
| 0                                            | 45-49     | Former        | 2278               | 34.97 |               |             | 13.26         | 221            | 9.70         |
| Year of Follow-up: 1990, Age Group: 50-54    |           |               |                    |       |               |             |               |                |              |
| Period                                       | Age Group | Smoking Group | N                  | %     | Ever Quit (N) | Ever Quit % | Mean Yrs Quit | Short Term (n) | Short Term % |
| 0                                            | 50-54     | Never Any     | 1611               | 29.41 |               |             |               |                |              |
| 0                                            | 50-54     | CC            | 1816               | 33.16 | 0             | 0.00        |               |                |              |

**Results for PHIM for Run 7 (Sensitivity\_Analysis\_1.RTF)**

|                                              |           |               |       |       |               |             |               |                |              |
|----------------------------------------------|-----------|---------------|-------|-------|---------------|-------------|---------------|----------------|--------------|
| 0                                            | 50-54     | Ecig          | 0     | 0.00  |               |             |               |                |              |
| 0                                            | 50-54     | Dual          | 0     | 0.00  |               |             |               |                |              |
| 0                                            | 50-54     | Former        | 2050  | 37.43 |               |             | 14.55         | 261            | 12.73        |
| Year of Follow-up: 1990, Age Group: 55-59    |           |               |       |       |               |             |               |                |              |
| Period                                       | Age Group | Smoking Group | N     | %     | Ever Quit (N) | Ever Quit % | Mean Yrs Quit | Short Term (n) | Short Term % |
| 0                                            | 55-59     | Never Any     | 1337  | 26.83 |               |             |               |                |              |
| 0                                            | 55-59     | CC            | 1520  | 30.50 | 0             | 0.00        |               |                |              |
| 0                                            | 55-59     | Ecig          | 0     | 0.00  |               |             |               |                |              |
| 0                                            | 55-59     | Dual          | 0     | 0.00  |               |             |               |                |              |
| 0                                            | 55-59     | Former        | 2126  | 42.67 |               |             | 14.80         | 216            | 10.16        |
| Year of Follow-up: 1990, Age Group: 60-64    |           |               |       |       |               |             |               |                |              |
| Period                                       | Age Group | Smoking Group | N     | %     | Ever Quit (N) | Ever Quit % | Mean Yrs Quit | Short Term (n) | Short Term % |
| 0                                            | 60-64     | Never Any     | 1169  | 23.83 |               |             |               |                |              |
| 0                                            | 60-64     | CC            | 1287  | 26.24 | 0             | 0.00        |               |                |              |
| 0                                            | 60-64     | Ecig          | 0     | 0.00  |               |             |               |                |              |
| 0                                            | 60-64     | Dual          | 0     | 0.00  |               |             |               |                |              |
| 0                                            | 60-64     | Former        | 2449  | 49.93 |               |             | 18.87         | 106            | 4.33         |
| Year of Follow-up: 1990, Age Group: 65-69    |           |               |       |       |               |             |               |                |              |
| Period                                       | Age Group | Smoking Group | N     | %     | Ever Quit (N) | Ever Quit % | Mean Yrs Quit | Short Term (n) | Short Term % |
| 0                                            | 65-69     | Never Any     | 1023  | 23.32 |               |             |               |                |              |
| 0                                            | 65-69     | CC            | 979   | 22.32 | 0             | 0.00        |               |                |              |
| 0                                            | 65-69     | Ecig          | 0     | 0.00  |               |             |               |                |              |
| 0                                            | 65-69     | Dual          | 0     | 0.00  |               |             |               |                |              |
| 0                                            | 65-69     | Former        | 2385  | 54.37 |               |             | 19.91         | 113            | 4.74         |
| Year of Follow-up: 1990, Age Group: 70-74    |           |               |       |       |               |             |               |                |              |
| Period                                       | Age Group | Smoking Group | N     | %     | Ever Quit (N) | Ever Quit % | Mean Yrs Quit | Short Term (n) | Short Term % |
| 0                                            | 70-74     | Never Any     | 961   | 27.46 |               |             |               |                |              |
| 0                                            | 70-74     | CC            | 675   | 19.29 | 0             | 0.00        |               |                |              |
| 0                                            | 70-74     | Ecig          | 0     | 0.00  |               |             |               |                |              |
| 0                                            | 70-74     | Dual          | 0     | 0.00  |               |             |               |                |              |
| 0                                            | 70-74     | Former        | 1863  | 53.24 |               |             | 20.69         | 23             | 1.23         |
| Year of Follow-up: 1990, Age Group: 75-79    |           |               |       |       |               |             |               |                |              |
| Period                                       | Age Group | Smoking Group | N     | %     | Ever Quit (N) | Ever Quit % | Mean Yrs Quit | Short Term (n) | Short Term % |
| 0                                            | 75-79     | Never Any     | 700   | 29.06 |               |             |               |                |              |
| 0                                            | 75-79     | CC            | 371   | 15.40 | 0             | 0.00        |               |                |              |
| 0                                            | 75-79     | Ecig          | 0     | 0.00  |               |             |               |                |              |
| 0                                            | 75-79     | Dual          | 0     | 0.00  |               |             |               |                |              |
| 0                                            | 75-79     | Former        | 1338  | 55.54 |               |             | 22.88         | 68             | 5.08         |
| Year of Follow-up: 1995, Age Group: All Ages |           |               |       |       |               |             |               |                |              |
| Period                                       | Age Group | Smoking Group | N     | %     | Ever Quit (N) | Ever Quit % | Mean Yrs Quit | Short Term (n) | Short Term % |
| 5                                            | All Ages  | Never Any     | 38368 | 41.57 |               |             |               |                |              |
| 5                                            | All Ages  | CC            | 11508 | 12.47 | 0             | 0.00        |               |                |              |
| 5                                            | All Ages  | Ecig          | 15517 | 16.81 |               |             |               |                |              |
| 5                                            | All Ages  | Dual          | 0     | 0.00  |               |             |               |                |              |
| 5                                            | All Ages  | Former        | 26897 | 29.14 |               |             | 15.19         | 1705           | 6.34         |
| Year of Follow-up: 1995, Age Group: 18-19    |           |               |       |       |               |             |               |                |              |
| Period                                       | Age Group | Smoking Group | N     | %     | Ever Quit (N) | Ever Quit % | Mean Yrs Quit | Short Term (n) | Short Term % |
| 5                                            | 18-19     | Never Any     | 2448  | 69.07 |               |             |               |                |              |
| 5                                            | 18-19     | CC            | 320   | 9.03  | 0             | 0.00        |               |                |              |
| 5                                            | 18-19     | Ecig          | 659   | 18.59 |               |             |               |                |              |
| 5                                            | 18-19     | Dual          | 0     | 0.00  |               |             |               |                |              |
| 5                                            | 18-19     | Former        | 117   | 3.30  |               |             | 1.11          | 80             | 68.38        |
| Year of Follow-up: 1995, Age Group: 20-24    |           |               |       |       |               |             |               |                |              |
| Period                                       | Age Group | Smoking Group | N     | %     | Ever Quit (N) | Ever Quit % | Mean Yrs Quit | Short Term (n) | Short Term % |
| 5                                            | 20-24     | Never Any     | 5787  | 64.02 |               |             |               |                |              |
| 5                                            | 20-24     | CC            | 946   | 10.46 | 0             | 0.00        |               |                |              |
| 5                                            | 20-24     | Ecig          | 1826  | 20.20 |               |             |               |                |              |
| 5                                            | 20-24     | Dual          | 0     | 0.00  |               |             |               |                |              |
| 5                                            | 20-24     | Former        | 481   | 5.32  |               |             | 2.81          | 142            | 29.52        |
| Year of Follow-up: 1995, Age Group: 25-29    |           |               |       |       |               |             |               |                |              |
| Period                                       | Age Group | Smoking Group | N     | %     | Ever Quit (N) | Ever Quit % | Mean Yrs Quit | Short Term (n) | Short Term % |
| 5                                            | 25-29     | Never Any     | 5471  | 55.74 |               |             |               |                |              |
| 5                                            | 25-29     | CC            | 1255  | 12.79 | 0             | 0.00        |               |                |              |
| 5                                            | 25-29     | Ecig          | 1942  | 19.78 |               |             |               |                |              |
| 5                                            | 25-29     | Dual          | 0     | 0.00  |               |             |               |                |              |
| 5                                            | 25-29     | Former        | 1148  | 11.70 |               |             | 5.43          | 115            | 10.02        |
| Year of Follow-up: 1995, Age Group: 30-34    |           |               |       |       |               |             |               |                |              |
| Period                                       | Age Group | Smoking Group | N     | %     | Ever Quit (N) | Ever Quit % | Mean Yrs Quit | Short Term (n) | Short Term % |

**Results for PHIM for Run 7 (Sensitivity\_Analysis\_1.RTF)**

|                                              |           |               |      |       |               |             |               |                |              |
|----------------------------------------------|-----------|---------------|------|-------|---------------|-------------|---------------|----------------|--------------|
| 5                                            | 30-34     | Never Any     | 5065 | 47.50 |               |             |               |                |              |
| 5                                            | 30-34     | CC            | 1480 | 13.88 | 0             | 0.00        |               |                |              |
| 5                                            | 30-34     | Ecig          | 2319 | 21.75 |               |             |               |                |              |
| 5                                            | 30-34     | Dual          | 0    | 0.00  |               |             |               |                |              |
| 5                                            | 30-34     | Former        | 1800 | 16.88 |               |             | 6.94          | 106            | 5.89         |
| Year of Follow-up: 1995, Age Group: 35-39    |           |               |      |       |               |             |               |                |              |
| Period                                       | Age Group | Smoking Group | N    | %     | Ever Quit (N) | Ever Quit % | Mean Yrs Quit | Short Term (n) | Short Term % |
| 5                                            | 35-39     | Never Any     | 4724 | 43.28 |               |             |               |                |              |
| 5                                            | 35-39     | CC            | 1496 | 13.70 | 0             | 0.00        |               |                |              |
| 5                                            | 35-39     | Ecig          | 2275 | 20.84 |               |             |               |                |              |
| 5                                            | 35-39     | Dual          | 0    | 0.00  |               |             |               |                |              |
| 5                                            | 35-39     | Former        | 2421 | 22.18 |               |             | 8.20          | 114            | 4.71         |
| Year of Follow-up: 1995, Age Group: 40-44    |           |               |      |       |               |             |               |                |              |
| Period                                       | Age Group | Smoking Group | N    | %     | Ever Quit (N) | Ever Quit % | Mean Yrs Quit | Short Term (n) | Short Term % |
| 5                                            | 40-44     | Never Any     | 3941 | 39.85 |               |             |               |                |              |
| 5                                            | 40-44     | CC            | 1280 | 12.94 | 0             | 0.00        |               |                |              |
| 5                                            | 40-44     | Ecig          | 1894 | 19.15 |               |             |               |                |              |
| 5                                            | 40-44     | Dual          | 0    | 0.00  |               |             |               |                |              |
| 5                                            | 40-44     | Former        | 2774 | 28.05 |               |             | 12.06         | 130            | 4.69         |
| Year of Follow-up: 1995, Age Group: 45-49    |           |               |      |       |               |             |               |                |              |
| Period                                       | Age Group | Smoking Group | N    | %     | Ever Quit (N) | Ever Quit % | Mean Yrs Quit | Short Term (n) | Short Term % |
| 5                                            | 45-49     | Never Any     | 2912 | 33.65 |               |             |               |                |              |
| 5                                            | 45-49     | CC            | 1236 | 14.28 | 0             | 0.00        |               |                |              |
| 5                                            | 45-49     | Ecig          | 1562 | 18.05 |               |             |               |                |              |
| 5                                            | 45-49     | Dual          | 0    | 0.00  |               |             |               |                |              |
| 5                                            | 45-49     | Former        | 2945 | 34.03 |               |             | 14.20         | 148            | 5.03         |
| Year of Follow-up: 1995, Age Group: 50-54    |           |               |      |       |               |             |               |                |              |
| Period                                       | Age Group | Smoking Group | N    | %     | Ever Quit (N) | Ever Quit % | Mean Yrs Quit | Short Term (n) | Short Term % |
| 5                                            | 50-54     | Never Any     | 1919 | 29.46 |               |             |               |                |              |
| 5                                            | 50-54     | CC            | 940  | 14.43 | 0             | 0.00        |               |                |              |
| 5                                            | 50-54     | Ecig          | 1015 | 15.58 |               |             |               |                |              |
| 5                                            | 50-54     | Dual          | 0    | 0.00  |               |             |               |                |              |
| 5                                            | 50-54     | Former        | 2641 | 40.54 |               |             | 15.98         | 175            | 6.63         |
| Year of Follow-up: 1995, Age Group: 55-59    |           |               |      |       |               |             |               |                |              |
| Period                                       | Age Group | Smoking Group | N    | %     | Ever Quit (N) | Ever Quit % | Mean Yrs Quit | Short Term (n) | Short Term % |
| 5                                            | 55-59     | Never Any     | 1611 | 29.41 |               |             |               |                |              |
| 5                                            | 55-59     | CC            | 740  | 13.51 | 0             | 0.00        |               |                |              |
| 5                                            | 55-59     | Ecig          | 762  | 13.91 |               |             |               |                |              |
| 5                                            | 55-59     | Dual          | 0    | 0.00  |               |             |               |                |              |
| 5                                            | 55-59     | Former        | 2364 | 43.16 |               |             | 17.21         | 122            | 5.16         |
| Year of Follow-up: 1995, Age Group: 60-64    |           |               |      |       |               |             |               |                |              |
| Period                                       | Age Group | Smoking Group | N    | %     | Ever Quit (N) | Ever Quit % | Mean Yrs Quit | Short Term (n) | Short Term % |
| 5                                            | 60-64     | Never Any     | 1337 | 26.83 |               |             |               |                |              |
| 5                                            | 60-64     | CC            | 597  | 11.98 | 0             | 0.00        |               |                |              |
| 5                                            | 60-64     | Ecig          | 572  | 11.48 |               |             |               |                |              |
| 5                                            | 60-64     | Dual          | 0    | 0.00  |               |             |               |                |              |
| 5                                            | 60-64     | Former        | 2477 | 49.71 |               |             | 17.27         | 143            | 5.77         |
| Year of Follow-up: 1995, Age Group: 65-69    |           |               |      |       |               |             |               |                |              |
| Period                                       | Age Group | Smoking Group | N    | %     | Ever Quit (N) | Ever Quit % | Mean Yrs Quit | Short Term (n) | Short Term % |
| 5                                            | 65-69     | Never Any     | 1169 | 23.83 |               |             |               |                |              |
| 5                                            | 65-69     | CC            | 477  | 9.72  | 0             | 0.00        |               |                |              |
| 5                                            | 65-69     | Ecig          | 360  | 7.34  |               |             |               |                |              |
| 5                                            | 65-69     | Dual          | 0    | 0.00  |               |             |               |                |              |
| 5                                            | 65-69     | Former        | 2899 | 59.10 |               |             | 20.44         | 196            | 6.76         |
| Year of Follow-up: 1995, Age Group: 70-74    |           |               |      |       |               |             |               |                |              |
| Period                                       | Age Group | Smoking Group | N    | %     | Ever Quit (N) | Ever Quit % | Mean Yrs Quit | Short Term (n) | Short Term % |
| 5                                            | 70-74     | Never Any     | 1023 | 23.32 |               |             |               |                |              |
| 5                                            | 70-74     | CC            | 438  | 9.98  | 0             | 0.00        |               |                |              |
| 5                                            | 70-74     | Ecig          | 196  | 4.47  |               |             |               |                |              |
| 5                                            | 70-74     | Dual          | 0    | 0.00  |               |             |               |                |              |
| 5                                            | 70-74     | Former        | 2730 | 62.23 |               |             | 22.00         | 137            | 5.02         |
| Year of Follow-up: 1995, Age Group: 75-79    |           |               |      |       |               |             |               |                |              |
| Period                                       | Age Group | Smoking Group | N    | %     | Ever Quit (N) | Ever Quit % | Mean Yrs Quit | Short Term (n) | Short Term % |
| 5                                            | 75-79     | Never Any     | 961  | 27.46 |               |             |               |                |              |
| 5                                            | 75-79     | CC            | 303  | 8.66  | 0             | 0.00        |               |                |              |
| 5                                            | 75-79     | Ecig          | 135  | 3.86  |               |             |               |                |              |
| 5                                            | 75-79     | Dual          | 0    | 0.00  |               |             |               |                |              |
| 5                                            | 75-79     | Former        | 2100 | 60.02 |               |             | 23.02         | 97             | 4.62         |
| Year of Follow-up: 2000, Age Group: All Ages |           |               |      |       |               |             |               |                |              |

**Results for PHIM for Run 7 (Sensitivity\_Analysis\_1.RTF)**

| Period                                    | Age Group | Smoking Group | N     | %     | Ever Quit (N) | Ever Quit % | Mean Yrs Quit | Short Term (n) | Short Term % |
|-------------------------------------------|-----------|---------------|-------|-------|---------------|-------------|---------------|----------------|--------------|
| 10                                        | All Ages  | Never Any     | 39177 | 41.64 |               |             |               |                |              |
| 10                                        | All Ages  | CC            | 4843  | 5.15  | 0             | 0.00        |               |                |              |
| 10                                        | All Ages  | Ecig          | 20724 | 22.03 |               |             |               |                |              |
| 10                                        | All Ages  | Dual          | 0     | 0.00  |               |             |               |                |              |
| 10                                        | All Ages  | Former        | 29348 | 31.19 |               |             | 16.84         | 1724           | 5.87         |
| Year of Follow-up: 2000, Age Group: 18-19 |           |               |       |       |               |             |               |                |              |
| Period                                    | Age Group | Smoking Group | N     | %     | Ever Quit (N) | Ever Quit % | Mean Yrs Quit | Short Term (n) | Short Term % |
| 10                                        | 18-19     | Never Any     | 0     | .     |               |             |               |                |              |
| 10                                        | 18-19     | CC            | 0     | .     | 0             | .           |               |                |              |
| 10                                        | 18-19     | Ecig          | 0     | .     |               |             |               |                |              |
| 10                                        | 18-19     | Dual          | 0     | .     |               |             |               |                |              |
| 10                                        | 18-19     | Former        | 0     | .     |               |             |               | 0              | .            |
| Year of Follow-up: 2000, Age Group: 20-24 |           |               |       |       |               |             |               |                |              |
| Period                                    | Age Group | Smoking Group | N     | %     | Ever Quit (N) | Ever Quit % | Mean Yrs Quit | Short Term (n) | Short Term % |
| 10                                        | 20-24     | Never Any     | 4927  | 55.70 |               |             |               |                |              |
| 10                                        | 20-24     | CC            | 462   | 5.22  | 0             | 0.00        |               |                |              |
| 10                                        | 20-24     | Ecig          | 2544  | 28.76 |               |             |               |                |              |
| 10                                        | 20-24     | Dual          | 0     | 0.00  |               |             |               |                |              |
| 10                                        | 20-24     | Former        | 912   | 10.31 |               |             | 3.41          | 258            | 28.29        |
| Year of Follow-up: 2000, Age Group: 25-29 |           |               |       |       |               |             |               |                |              |
| Period                                    | Age Group | Smoking Group | N     | %     | Ever Quit (N) | Ever Quit % | Mean Yrs Quit | Short Term (n) | Short Term % |
| 10                                        | 25-29     | Never Any     | 5341  | 59.08 |               |             |               |                |              |
| 10                                        | 25-29     | CC            | 404   | 4.47  | 0             | 0.00        |               |                |              |
| 10                                        | 25-29     | Ecig          | 2359  | 26.10 |               |             |               |                |              |
| 10                                        | 25-29     | Dual          | 0     | 0.00  |               |             |               |                |              |
| 10                                        | 25-29     | Former        | 936   | 10.35 |               |             | 4.91          | 195            | 20.83        |
| Year of Follow-up: 2000, Age Group: 30-34 |           |               |       |       |               |             |               |                |              |
| Period                                    | Age Group | Smoking Group | N     | %     | Ever Quit (N) | Ever Quit % | Mean Yrs Quit | Short Term (n) | Short Term % |
| 10                                        | 30-34     | Never Any     | 5276  | 53.75 |               |             |               |                |              |
| 10                                        | 30-34     | CC            | 481   | 4.90  | 0             | 0.00        |               |                |              |
| 10                                        | 30-34     | Ecig          | 2608  | 26.57 |               |             |               |                |              |
| 10                                        | 30-34     | Dual          | 0     | 0.00  |               |             |               |                |              |
| 10                                        | 30-34     | Former        | 1451  | 14.78 |               |             | 8.66          | 118            | 8.13         |
| Year of Follow-up: 2000, Age Group: 35-39 |           |               |       |       |               |             |               |                |              |
| Period                                    | Age Group | Smoking Group | N     | %     | Ever Quit (N) | Ever Quit % | Mean Yrs Quit | Short Term (n) | Short Term % |
| 10                                        | 35-39     | Never Any     | 4997  | 46.86 |               |             |               |                |              |
| 10                                        | 35-39     | CC            | 609   | 5.71  | 0             | 0.00        |               |                |              |
| 10                                        | 35-39     | Ecig          | 2980  | 27.94 |               |             |               |                |              |
| 10                                        | 35-39     | Dual          | 0     | 0.00  |               |             |               |                |              |
| 10                                        | 35-39     | Former        | 2078  | 19.49 |               |             | 10.61         | 109            | 5.25         |
| Year of Follow-up: 2000, Age Group: 40-44 |           |               |       |       |               |             |               |                |              |
| Period                                    | Age Group | Smoking Group | N     | %     | Ever Quit (N) | Ever Quit % | Mean Yrs Quit | Short Term (n) | Short Term % |
| 10                                        | 40-44     | Never Any     | 4724  | 43.28 |               |             |               |                |              |
| 10                                        | 40-44     | CC            | 567   | 5.19  | 0             | 0.00        |               |                |              |
| 10                                        | 40-44     | Ecig          | 2857  | 26.17 |               |             |               |                |              |
| 10                                        | 40-44     | Dual          | 0     | 0.00  |               |             |               |                |              |
| 10                                        | 40-44     | Former        | 2768  | 25.36 |               |             | 11.82         | 124            | 4.48         |
| Year of Follow-up: 2000, Age Group: 45-49 |           |               |       |       |               |             |               |                |              |
| Period                                    | Age Group | Smoking Group | N     | %     | Ever Quit (N) | Ever Quit % | Mean Yrs Quit | Short Term (n) | Short Term % |
| 10                                        | 45-49     | Never Any     | 3941  | 39.85 |               |             |               |                |              |
| 10                                        | 45-49     | CC            | 484   | 4.89  | 0             | 0.00        |               |                |              |
| 10                                        | 45-49     | Ecig          | 2312  | 23.38 |               |             |               |                |              |
| 10                                        | 45-49     | Dual          | 0     | 0.00  |               |             |               |                |              |
| 10                                        | 45-49     | Former        | 3152  | 31.87 |               |             | 15.25         | 163            | 5.17         |
| Year of Follow-up: 2000, Age Group: 50-54 |           |               |       |       |               |             |               |                |              |
| Period                                    | Age Group | Smoking Group | N     | %     | Ever Quit (N) | Ever Quit % | Mean Yrs Quit | Short Term (n) | Short Term % |
| 10                                        | 50-54     | Never Any     | 2912  | 33.65 |               |             |               |                |              |
| 10                                        | 50-54     | CC            | 473   | 5.47  | 0             | 0.00        |               |                |              |
| 10                                        | 50-54     | Ecig          | 1859  | 21.48 |               |             |               |                |              |
| 10                                        | 50-54     | Dual          | 0     | 0.00  |               |             |               |                |              |
| 10                                        | 50-54     | Former        | 3411  | 39.41 |               |             | 16.85         | 186            | 5.45         |
| Year of Follow-up: 2000, Age Group: 55-59 |           |               |       |       |               |             |               |                |              |
| Period                                    | Age Group | Smoking Group | N     | %     | Ever Quit (N) | Ever Quit % | Mean Yrs Quit | Short Term (n) | Short Term % |
| 10                                        | 55-59     | Never Any     | 1919  | 29.46 |               |             |               |                |              |
| 10                                        | 55-59     | CC            | 363   | 5.57  | 0             | 0.00        |               |                |              |
| 10                                        | 55-59     | Ecig          | 1194  | 18.33 |               |             |               |                |              |
| 10                                        | 55-59     | Dual          | 0     | 0.00  |               |             |               |                |              |

**Results for PHIM for Run 7 (Sensitivity\_Analysis\_1.RTF)**

| Year of Follow-up: 2000, Age Group: 60-64    | Period   | Age Group | Smoking Group | N     | %     | Ever Quit (N) | Ever Quit % | Mean Yrs Quit | Short Term (n) | Short Term % |
|----------------------------------------------|----------|-----------|---------------|-------|-------|---------------|-------------|---------------|----------------|--------------|
| 10                                           | 55-59    | Former    |               | 3039  | 46.65 |               |             | 18.50         | 146            | 4.80         |
| 10                                           | 60-64    | Never Any |               | 1611  | 29.41 |               |             |               |                |              |
| 10                                           | 60-64    | CC        |               | 306   | 5.59  | 0             | 0.00        |               |                |              |
| 10                                           | 60-64    | Ecig      |               | 852   | 15.56 |               |             |               |                |              |
| 10                                           | 60-64    | Dual      |               | 0     | 0.00  |               |             |               |                |              |
| 10                                           | 60-64    | Former    |               | 2708  | 49.44 |               |             | 19.63         | 144            | 5.32         |
| Year of Follow-up: 2000, Age Group: 65-69    | Period   | Age Group | Smoking Group | N     | %     | Ever Quit (N) | Ever Quit % | Mean Yrs Quit | Short Term (n) | Short Term % |
| 10                                           | 65-69    | Never Any |               | 1337  | 26.83 |               |             |               |                |              |
| 10                                           | 65-69    | CC        |               | 244   | 4.90  | 0             | 0.00        |               |                |              |
| 10                                           | 65-69    | Ecig      |               | 603   | 12.10 |               |             |               |                |              |
| 10                                           | 65-69    | Dual      |               | 0     | 0.00  |               |             |               |                |              |
| 10                                           | 65-69    | Former    |               | 2799  | 56.17 |               |             | 19.95         | 120            | 4.29         |
| Year of Follow-up: 2000, Age Group: 70-74    | Period   | Age Group | Smoking Group | N     | %     | Ever Quit (N) | Ever Quit % | Mean Yrs Quit | Short Term (n) | Short Term % |
| 10                                           | 70-74    | Never Any |               | 1169  | 23.83 |               |             |               |                |              |
| 10                                           | 70-74    | CC        |               | 236   | 4.81  | 0             | 0.00        |               |                |              |
| 10                                           | 70-74    | Ecig      |               | 327   | 6.67  |               |             |               |                |              |
| 10                                           | 70-74    | Dual      |               | 0     | 0.00  |               |             |               |                |              |
| 10                                           | 70-74    | Former    |               | 3173  | 64.69 |               |             | 23.44         | 94             | 2.96         |
| Year of Follow-up: 2000, Age Group: 75-79    | Period   | Age Group | Smoking Group | N     | %     | Ever Quit (N) | Ever Quit % | Mean Yrs Quit | Short Term (n) | Short Term % |
| 10                                           | 75-79    | Never Any |               | 1023  | 23.32 |               |             |               |                |              |
| 10                                           | 75-79    | CC        |               | 214   | 4.88  | 0             | 0.00        |               |                |              |
| 10                                           | 75-79    | Ecig      |               | 229   | 5.22  |               |             |               |                |              |
| 10                                           | 75-79    | Dual      |               | 0     | 0.00  |               |             |               |                |              |
| 10                                           | 75-79    | Former    |               | 2921  | 66.58 |               |             | 25.38         | 67             | 2.29         |
| Year of Follow-up: 2005, Age Group: All Ages | Period   | Age Group | Smoking Group | N     | %     | Ever Quit (N) | Ever Quit % | Mean Yrs Quit | Short Term (n) | Short Term % |
| 15                                           | All Ages | Never Any |               | 37449 | 41.75 |               |             |               |                |              |
| 15                                           | All Ages | CC        |               | 1911  | 2.13  | 0             | 0.00        |               |                |              |
| 15                                           | All Ages | Ecig      |               | 20003 | 22.30 |               |             |               |                |              |
| 15                                           | All Ages | Dual      |               | 0     | 0.00  |               |             |               |                |              |
| 15                                           | All Ages | Former    |               | 30342 | 33.82 |               |             | 18.46         | 1574           | 5.19         |
| Year of Follow-up: 2005, Age Group: 18-19    | Period   | Age Group | Smoking Group | N     | %     | Ever Quit (N) | Ever Quit % | Mean Yrs Quit | Short Term (n) | Short Term % |
| 15                                           | 18-19    | Never Any |               | 0     | .     |               |             |               |                |              |
| 15                                           | 18-19    | CC        |               | 0     | .     | 0             | .           |               |                |              |
| 15                                           | 18-19    | Ecig      |               | 0     | .     |               |             |               |                |              |
| 15                                           | 18-19    | Dual      |               | 0     | .     |               |             |               |                |              |
| 15                                           | 18-19    | Former    |               | 0     | .     |               |             | .             | 0              | .            |
| Year of Follow-up: 2005, Age Group: 20-24    | Period   | Age Group | Smoking Group | N     | %     | Ever Quit (N) | Ever Quit % | Mean Yrs Quit | Short Term (n) | Short Term % |
| 15                                           | 20-24    | Never Any |               | 0     | .     |               |             |               |                |              |
| 15                                           | 20-24    | CC        |               | 0     | .     | 0             | .           |               |                |              |
| 15                                           | 20-24    | Ecig      |               | 0     | .     |               |             |               |                |              |
| 15                                           | 20-24    | Dual      |               | 0     | .     |               |             |               |                |              |
| 15                                           | 20-24    | Former    |               | 0     | .     |               |             | .             | 0              | .            |
| Year of Follow-up: 2005, Age Group: 25-29    | Period   | Age Group | Smoking Group | N     | %     | Ever Quit (N) | Ever Quit % | Mean Yrs Quit | Short Term (n) | Short Term % |
| 15                                           | 25-29    | Never Any |               | 4634  | 52.39 |               |             |               |                |              |
| 15                                           | 25-29    | CC        |               | 179   | 2.02  | 0             | 0.00        |               |                |              |
| 15                                           | 25-29    | Ecig      |               | 2661  | 30.08 |               |             |               |                |              |
| 15                                           | 25-29    | Dual      |               | 0     | 0.00  |               |             |               |                |              |
| 15                                           | 25-29    | Former    |               | 1371  | 15.50 |               |             | 6.32          | 174            | 12.69        |
| Year of Follow-up: 2005, Age Group: 30-34    | Period   | Age Group | Smoking Group | N     | %     | Ever Quit (N) | Ever Quit % | Mean Yrs Quit | Short Term (n) | Short Term % |
| 15                                           | 30-34    | Never Any |               | 5042  | 55.77 |               |             |               |                |              |
| 15                                           | 30-34    | CC        |               | 153   | 1.69  | 0             | 0.00        |               |                |              |
| 15                                           | 30-34    | Ecig      |               | 2479  | 27.42 |               |             |               |                |              |
| 15                                           | 30-34    | Dual      |               | 0     | 0.00  |               |             |               |                |              |
| 15                                           | 30-34    | Former    |               | 1366  | 15.11 |               |             | 7.38          | 171            | 12.52        |
| Year of Follow-up: 2005, Age Group: 35-39    | Period   | Age Group | Smoking Group | N     | %     | Ever Quit (N) | Ever Quit % | Mean Yrs Quit | Short Term (n) | Short Term % |
| 15                                           | 35-39    | Never Any |               | 5163  | 52.60 |               |             |               |                |              |
| 15                                           | 35-39    | CC        |               | 188   | 1.92  | 0             | 0.00        |               |                |              |



**Results for PHIM for Run 7 (Sensitivity\_Analysis\_1.RTF)**

|                                              |           |               |       |       |               |             |               |                |              |
|----------------------------------------------|-----------|---------------|-------|-------|---------------|-------------|---------------|----------------|--------------|
| 15                                           | 35-39     | Ecig          | 2654  | 27.04 |               |             |               |                |              |
| 15                                           | 35-39     | Dual          | 0     | 0.00  |               |             |               |                |              |
| 15                                           | 35-39     | Former        | 1811  | 18.45 |               |             | 11.33         | 147            | 8.12         |
| Year of Follow-up: 2005, Age Group: 40-44    |           |               |       |       |               |             |               |                |              |
| Period                                       | Age Group | Smoking Group | N     | %     | Ever Quit (N) | Ever Quit % | Mean Yrs Quit | Short Term (n) | Short Term % |
| 15                                           | 40-44     | Never Any     | 4997  | 46.86 |               |             |               |                |              |
| 15                                           | 40-44     | CC            | 231   | 2.17  | 0             | 0.00        |               |                |              |
| 15                                           | 40-44     | Ecig          | 2948  | 27.64 |               |             |               |                |              |
| 15                                           | 40-44     | Dual          | 0     | 0.00  |               |             |               |                |              |
| 15                                           | 40-44     | Former        | 2488  | 23.33 |               |             | 13.32         | 199            | 8.00         |
| Year of Follow-up: 2005, Age Group: 45-49    |           |               |       |       |               |             |               |                |              |
| Period                                       | Age Group | Smoking Group | N     | %     | Ever Quit (N) | Ever Quit % | Mean Yrs Quit | Short Term (n) | Short Term % |
| 15                                           | 45-49     | Never Any     | 4724  | 43.28 |               |             |               |                |              |
| 15                                           | 45-49     | CC            | 216   | 1.98  | 0             | 0.00        |               |                |              |
| 15                                           | 45-49     | Ecig          | 2793  | 25.59 |               |             |               |                |              |
| 15                                           | 45-49     | Dual          | 0     | 0.00  |               |             |               |                |              |
| 15                                           | 45-49     | Former        | 3183  | 29.16 |               |             | 14.88         | 160            | 5.03         |
| Year of Follow-up: 2005, Age Group: 50-54    |           |               |       |       |               |             |               |                |              |
| Period                                       | Age Group | Smoking Group | N     | %     | Ever Quit (N) | Ever Quit % | Mean Yrs Quit | Short Term (n) | Short Term % |
| 15                                           | 50-54     | Never Any     | 3941  | 39.85 |               |             |               |                |              |
| 15                                           | 50-54     | CC            | 213   | 2.15  | 0             | 0.00        |               |                |              |
| 15                                           | 50-54     | Ecig          | 2180  | 22.04 |               |             |               |                |              |
| 15                                           | 50-54     | Dual          | 0     | 0.00  |               |             |               |                |              |
| 15                                           | 50-54     | Former        | 3555  | 35.95 |               |             | 18.19         | 154            | 4.33         |
| Year of Follow-up: 2005, Age Group: 55-59    |           |               |       |       |               |             |               |                |              |
| Period                                       | Age Group | Smoking Group | N     | %     | Ever Quit (N) | Ever Quit % | Mean Yrs Quit | Short Term (n) | Short Term % |
| 15                                           | 55-59     | Never Any     | 2912  | 33.65 |               |             |               |                |              |
| 15                                           | 55-59     | CC            | 215   | 2.48  | 0             | 0.00        |               |                |              |
| 15                                           | 55-59     | Ecig          | 1781  | 20.58 |               |             |               |                |              |
| 15                                           | 55-59     | Dual          | 0     | 0.00  |               |             |               |                |              |
| 15                                           | 55-59     | Former        | 3747  | 43.29 |               |             | 20.09         | 117            | 3.12         |
| Year of Follow-up: 2005, Age Group: 60-64    |           |               |       |       |               |             |               |                |              |
| Period                                       | Age Group | Smoking Group | N     | %     | Ever Quit (N) | Ever Quit % | Mean Yrs Quit | Short Term (n) | Short Term % |
| 15                                           | 60-64     | Never Any     | 1919  | 29.46 |               |             |               |                |              |
| 15                                           | 60-64     | CC            | 143   | 2.19  | 0             | 0.00        |               |                |              |
| 15                                           | 60-64     | Ecig          | 1100  | 16.88 |               |             |               |                |              |
| 15                                           | 60-64     | Dual          | 0     | 0.00  |               |             |               |                |              |
| 15                                           | 60-64     | Former        | 3353  | 51.47 |               |             | 21.47         | 156            | 4.65         |
| Year of Follow-up: 2005, Age Group: 65-69    |           |               |       |       |               |             |               |                |              |
| Period                                       | Age Group | Smoking Group | N     | %     | Ever Quit (N) | Ever Quit % | Mean Yrs Quit | Short Term (n) | Short Term % |
| 15                                           | 65-69     | Never Any     | 1611  | 29.41 |               |             |               |                |              |
| 15                                           | 65-69     | CC            | 124   | 2.26  | 0             | 0.00        |               |                |              |
| 15                                           | 65-69     | Ecig          | 705   | 12.87 |               |             |               |                |              |
| 15                                           | 65-69     | Dual          | 0     | 0.00  |               |             |               |                |              |
| 15                                           | 65-69     | Former        | 3037  | 55.45 |               |             | 22.19         | 118            | 3.89         |
| Year of Follow-up: 2005, Age Group: 70-74    |           |               |       |       |               |             |               |                |              |
| Period                                       | Age Group | Smoking Group | N     | %     | Ever Quit (N) | Ever Quit % | Mean Yrs Quit | Short Term (n) | Short Term % |
| 15                                           | 70-74     | Never Any     | 1337  | 26.83 |               |             |               |                |              |
| 15                                           | 70-74     | CC            | 129   | 2.59  | 0             | 0.00        |               |                |              |
| 15                                           | 70-74     | Ecig          | 441   | 8.85  |               |             |               |                |              |
| 15                                           | 70-74     | Dual          | 0     | 0.00  |               |             |               |                |              |
| 15                                           | 70-74     | Former        | 3076  | 61.73 |               |             | 22.89         | 112            | 3.64         |
| Year of Follow-up: 2005, Age Group: 75-79    |           |               |       |       |               |             |               |                |              |
| Period                                       | Age Group | Smoking Group | N     | %     | Ever Quit (N) | Ever Quit % | Mean Yrs Quit | Short Term (n) | Short Term % |
| 15                                           | 75-79     | Never Any     | 1169  | 23.83 |               |             |               |                |              |
| 15                                           | 75-79     | CC            | 120   | 2.45  | 0             | 0.00        |               |                |              |
| 15                                           | 75-79     | Ecig          | 261   | 5.32  |               |             |               |                |              |
| 15                                           | 75-79     | Dual          | 0     | 0.00  |               |             |               |                |              |
| 15                                           | 75-79     | Former        | 3355  | 68.40 |               |             | 27.01         | 66             | 1.97         |
| Year of Follow-up: 2010, Age Group: All Ages |           |               |       |       |               |             |               |                |              |
| Period                                       | Age Group | Smoking Group | N     | %     | Ever Quit (N) | Ever Quit % | Mean Yrs Quit | Short Term (n) | Short Term % |
| 20                                           | All Ages  | Never Any     | 36103 | 42.57 |               |             |               |                |              |
| 20                                           | All Ages  | CC            | 738   | 0.87  | 0             | 0.00        |               |                |              |
| 20                                           | All Ages  | Ecig          | 17076 | 20.14 |               |             |               |                |              |
| 20                                           | All Ages  | Dual          | 0     | 0.00  |               |             |               |                |              |
| 20                                           | All Ages  | Former        | 30883 | 36.42 |               |             | 19.82         | 1518           | 4.92         |
| Year of Follow-up: 2010, Age Group: 18-19    |           |               |       |       |               |             |               |                |              |
| Period                                       | Age Group | Smoking Group | N     | %     | Ever Quit (N) | Ever Quit % | Mean Yrs Quit | Short Term (n) | Short Term % |

**Results for PHIM for Run 7 (Sensitivity\_Analysis\_1.RTF)**

|                                           |           |               |      |       |               |             |               |                |              |
|-------------------------------------------|-----------|---------------|------|-------|---------------|-------------|---------------|----------------|--------------|
| 20                                        | 18-19     | Never Any     | 0    | .     |               |             |               |                |              |
| 20                                        | 18-19     | CC            | 0    | .     | 0             | .           |               |                |              |
| 20                                        | 18-19     | Ecig          | 0    | .     |               |             |               |                |              |
| 20                                        | 18-19     | Dual          | 0    | .     |               |             |               |                |              |
| 20                                        | 18-19     | Former        | 0    | .     |               |             | 0             | .              |              |
| Year of Follow-up: 2010, Age Group: 20-24 |           |               |      |       |               |             |               |                |              |
| Period                                    | Age Group | Smoking Group | N    | %     | Ever Quit (N) | Ever Quit % | Mean Yrs Quit | Short Term (n) | Short Term % |
| 20                                        | 20-24     | Never Any     | 0    | .     |               |             |               |                |              |
| 20                                        | 20-24     | CC            | 0    | .     | 0             | .           |               |                |              |
| 20                                        | 20-24     | Ecig          | 0    | .     |               |             |               |                |              |
| 20                                        | 20-24     | Dual          | 0    | .     |               |             |               |                |              |
| 20                                        | 20-24     | Former        | 0    | .     |               |             |               | 0              | .            |
| Year of Follow-up: 2010, Age Group: 25-29 |           |               |      |       |               |             |               |                |              |
| Period                                    | Age Group | Smoking Group | N    | %     | Ever Quit (N) | Ever Quit % | Mean Yrs Quit | Short Term (n) | Short Term % |
| 20                                        | 25-29     | Never Any     | 0    | .     |               |             |               |                |              |
| 20                                        | 25-29     | CC            | 0    | .     | 0             | .           |               |                |              |
| 20                                        | 25-29     | Ecig          | 0    | .     |               |             |               |                |              |
| 20                                        | 25-29     | Dual          | 0    | .     |               |             |               |                |              |
| 20                                        | 25-29     | Former        | 0    | .     |               |             |               | 0              | .            |
| Year of Follow-up: 2010, Age Group: 30-34 |           |               |      |       |               |             |               |                |              |
| Period                                    | Age Group | Smoking Group | N    | %     | Ever Quit (N) | Ever Quit % | Mean Yrs Quit | Short Term (n) | Short Term % |
| 20                                        | 30-34     | Never Any     | 4508 | 50.97 |               |             |               |                |              |
| 20                                        | 30-34     | CC            | 71   | 0.80  | 0             | 0.00        |               |                |              |
| 20                                        | 30-34     | Ecig          | 2376 | 26.86 |               |             |               |                |              |
| 20                                        | 30-34     | Dual          | 0    | 0.00  |               |             |               |                |              |
| 20                                        | 30-34     | Former        | 1890 | 21.37 |               |             | 8.72          | 230            | 12.17        |
| Year of Follow-up: 2010, Age Group: 35-39 |           |               |      |       |               |             |               |                |              |
| Period                                    | Age Group | Smoking Group | N    | %     | Ever Quit (N) | Ever Quit % | Mean Yrs Quit | Short Term (n) | Short Term % |
| 20                                        | 35-39     | Never Any     | 4991 | 55.21 |               |             |               |                |              |
| 20                                        | 35-39     | CC            | 59   | 0.65  | 0             | 0.00        |               |                |              |
| 20                                        | 35-39     | Ecig          | 2154 | 23.83 |               |             |               |                |              |
| 20                                        | 35-39     | Dual          | 0    | 0.00  |               |             |               |                |              |
| 20                                        | 35-39     | Former        | 1836 | 20.31 |               |             | 9.77          | 141            | 7.68         |
| Year of Follow-up: 2010, Age Group: 40-44 |           |               |      |       |               |             |               |                |              |
| Period                                    | Age Group | Smoking Group | N    | %     | Ever Quit (N) | Ever Quit % | Mean Yrs Quit | Short Term (n) | Short Term % |
| 20                                        | 40-44     | Never Any     | 5163 | 52.60 |               |             |               |                |              |
| 20                                        | 40-44     | CC            | 68   | 0.69  | 0             | 0.00        |               |                |              |
| 20                                        | 40-44     | Ecig          | 2416 | 24.61 |               |             |               |                |              |
| 20                                        | 40-44     | Dual          | 0    | 0.00  |               |             |               |                |              |
| 20                                        | 40-44     | Former        | 2169 | 22.10 |               |             | 13.96         | 143            | 6.59         |
| Year of Follow-up: 2010, Age Group: 45-49 |           |               |      |       |               |             |               |                |              |
| Period                                    | Age Group | Smoking Group | N    | %     | Ever Quit (N) | Ever Quit % | Mean Yrs Quit | Short Term (n) | Short Term % |
| 20                                        | 45-49     | Never Any     | 4997 | 46.86 |               |             |               |                |              |
| 20                                        | 45-49     | CC            | 89   | 0.83  | 0             | 0.00        |               |                |              |
| 20                                        | 45-49     | Ecig          | 2619 | 24.56 |               |             |               |                |              |
| 20                                        | 45-49     | Dual          | 0    | 0.00  |               |             |               |                |              |
| 20                                        | 45-49     | Former        | 2959 | 27.75 |               |             | 15.74         | 171            | 5.78         |
| Year of Follow-up: 2010, Age Group: 50-54 |           |               |      |       |               |             |               |                |              |
| Period                                    | Age Group | Smoking Group | N    | %     | Ever Quit (N) | Ever Quit % | Mean Yrs Quit | Short Term (n) | Short Term % |
| 20                                        | 50-54     | Never Any     | 4724 | 43.28 |               |             |               |                |              |
| 20                                        | 50-54     | CC            | 87   | 0.80  | 0             | 0.00        |               |                |              |
| 20                                        | 50-54     | Ecig          | 2490 | 22.81 |               |             |               |                |              |
| 20                                        | 50-54     | Dual          | 0    | 0.00  |               |             |               |                |              |
| 20                                        | 50-54     | Former        | 3615 | 33.12 |               |             | 17.75         | 174            | 4.81         |
| Year of Follow-up: 2010, Age Group: 55-59 |           |               |      |       |               |             |               |                |              |
| Period                                    | Age Group | Smoking Group | N    | %     | Ever Quit (N) | Ever Quit % | Mean Yrs Quit | Short Term (n) | Short Term % |
| 20                                        | 55-59     | Never Any     | 3941 | 39.85 |               |             |               |                |              |
| 20                                        | 55-59     | CC            | 85   | 0.86  | 0             | 0.00        |               |                |              |
| 20                                        | 55-59     | Ecig          | 1859 | 18.80 |               |             |               |                |              |
| 20                                        | 55-59     | Dual          | 0    | 0.00  |               |             |               |                |              |
| 20                                        | 55-59     | Former        | 4004 | 40.49 |               |             | 20.81         | 181            | 4.52         |
| Year of Follow-up: 2010, Age Group: 60-64 |           |               |      |       |               |             |               |                |              |
| Period                                    | Age Group | Smoking Group | N    | %     | Ever Quit (N) | Ever Quit % | Mean Yrs Quit | Short Term (n) | Short Term % |
| 20                                        | 60-64     | Never Any     | 2912 | 33.65 |               |             |               |                |              |
| 20                                        | 60-64     | CC            | 87   | 1.01  | 0             | 0.00        |               |                |              |
| 20                                        | 60-64     | Ecig          | 1428 | 16.50 |               |             |               |                |              |
| 20                                        | 60-64     | Dual          | 0    | 0.00  |               |             |               |                |              |
| 20                                        | 60-64     | Former        | 4228 | 48.85 |               |             | 22.41         | 241            | 5.70         |
| Year of Follow-up: 2010, Age Group: 65-69 |           |               |      |       |               |             |               |                |              |

**Results for PHIM for Run 7 (Sensitivity\_Analysis\_1.RTF)**

| Period                                       | Age Group | Smoking Group | N     | %     | Ever Quit (N) | Ever Quit % | Mean Yrs Quit | Short Term (n) | Short Term % |
|----------------------------------------------|-----------|---------------|-------|-------|---------------|-------------|---------------|----------------|--------------|
| 20                                           | 65-69     | Never Any     | 1919  | 29.46 |               |             |               |                |              |
| 20                                           | 65-69     | CC            | 60    | 0.92  | 0             | 0.00        |               |                |              |
| 20                                           | 65-69     | Ecig          | 809   | 12.42 |               |             |               |                |              |
| 20                                           | 65-69     | Dual          | 0     | 0.00  |               |             |               |                |              |
| 20                                           | 65-69     | Former        | 3727  | 57.21 |               |             | 24.03         | 133            | 3.57         |
| Year of Follow-up: 2010, Age Group: 70-74    |           |               |       |       |               |             |               |                |              |
| Period                                       | Age Group | Smoking Group | N     | %     | Ever Quit (N) | Ever Quit % | Mean Yrs Quit | Short Term (n) | Short Term % |
| 20                                           | 70-74     | Never Any     | 1611  | 29.41 |               |             |               |                |              |
| 20                                           | 70-74     | CC            | 69    | 1.26  | 0             | 0.00        |               |                |              |
| 20                                           | 70-74     | Ecig          | 574   | 10.48 |               |             |               |                |              |
| 20                                           | 70-74     | Dual          | 0     | 0.00  |               |             |               |                |              |
| 20                                           | 70-74     | Former        | 3223  | 58.85 |               |             | 25.75         | 61             | 1.89         |
| Year of Follow-up: 2010, Age Group: 75-79    |           |               |       |       |               |             |               |                |              |
| Period                                       | Age Group | Smoking Group | N     | %     | Ever Quit (N) | Ever Quit % | Mean Yrs Quit | Short Term (n) | Short Term % |
| 20                                           | 75-79     | Never Any     | 1337  | 26.83 |               |             |               |                |              |
| 20                                           | 75-79     | CC            | 63    | 1.26  | 0             | 0.00        |               |                |              |
| 20                                           | 75-79     | Ecig          | 351   | 7.04  |               |             |               |                |              |
| 20                                           | 75-79     | Dual          | 0     | 0.00  |               |             |               |                |              |
| 20                                           | 75-79     | Former        | 3232  | 64.86 |               |             | 26.66         | 43             | 1.33         |
| Year of Follow-up: 2015, Age Group: All Ages |           |               |       |       |               |             |               |                |              |
| Period                                       | Age Group | Smoking Group | N     | %     | Ever Quit (N) | Ever Quit % | Mean Yrs Quit | Short Term (n) | Short Term % |
| 25                                           | All Ages  | Never Any     | 34747 | 43.53 |               |             |               |                |              |
| 25                                           | All Ages  | CC            | 289   | 0.36  | 0             | 0.00        |               |                |              |
| 25                                           | All Ages  | Ecig          | 14107 | 17.67 |               |             |               |                |              |
| 25                                           | All Ages  | Dual          | 0     | 0.00  |               |             |               |                |              |
| 25                                           | All Ages  | Former        | 30674 | 38.43 |               |             | 21.87         | 1088           | 3.55         |
| Year of Follow-up: 2015, Age Group: 18-19    |           |               |       |       |               |             |               |                |              |
| Period                                       | Age Group | Smoking Group | N     | %     | Ever Quit (N) | Ever Quit % | Mean Yrs Quit | Short Term (n) | Short Term % |
| 25                                           | 18-19     | Never Any     | 0     | .     |               |             |               |                |              |
| 25                                           | 18-19     | CC            | 0     | .     | 0             | .           |               |                |              |
| 25                                           | 18-19     | Ecig          | 0     | .     |               |             |               |                |              |
| 25                                           | 18-19     | Dual          | 0     | .     |               |             |               |                |              |
| 25                                           | 18-19     | Former        | 0     | .     |               |             |               | 0              | .            |
| Year of Follow-up: 2015, Age Group: 20-24    |           |               |       |       |               |             |               |                |              |
| Period                                       | Age Group | Smoking Group | N     | %     | Ever Quit (N) | Ever Quit % | Mean Yrs Quit | Short Term (n) | Short Term % |
| 25                                           | 20-24     | Never Any     | 0     | .     |               |             |               |                |              |
| 25                                           | 20-24     | CC            | 0     | .     | 0             | .           |               |                |              |
| 25                                           | 20-24     | Ecig          | 0     | .     |               |             |               |                |              |
| 25                                           | 20-24     | Dual          | 0     | .     |               |             |               |                |              |
| 25                                           | 20-24     | Former        | 0     | .     |               |             |               | 0              | .            |
| Year of Follow-up: 2015, Age Group: 25-29    |           |               |       |       |               |             |               |                |              |
| Period                                       | Age Group | Smoking Group | N     | %     | Ever Quit (N) | Ever Quit % | Mean Yrs Quit | Short Term (n) | Short Term % |
| 25                                           | 25-29     | Never Any     | 0     | .     |               |             |               |                |              |
| 25                                           | 25-29     | CC            | 0     | .     | 0             | .           |               |                |              |
| 25                                           | 25-29     | Ecig          | 0     | .     |               |             |               |                |              |
| 25                                           | 25-29     | Dual          | 0     | .     |               |             |               |                |              |
| 25                                           | 25-29     | Former        | 0     | .     |               |             |               | 0              | .            |
| Year of Follow-up: 2015, Age Group: 30-34    |           |               |       |       |               |             |               |                |              |
| Period                                       | Age Group | Smoking Group | N     | %     | Ever Quit (N) | Ever Quit % | Mean Yrs Quit | Short Term (n) | Short Term % |
| 25                                           | 30-34     | Never Any     | 0     | .     |               |             |               |                |              |
| 25                                           | 30-34     | CC            | 0     | .     | 0             | .           |               |                |              |
| 25                                           | 30-34     | Ecig          | 0     | .     |               |             |               |                |              |
| 25                                           | 30-34     | Dual          | 0     | .     |               |             |               |                |              |
| 25                                           | 30-34     | Former        | 0     | .     |               |             |               | 0              | .            |
| Year of Follow-up: 2015, Age Group: 35-39    |           |               |       |       |               |             |               |                |              |
| Period                                       | Age Group | Smoking Group | N     | %     | Ever Quit (N) | Ever Quit % | Mean Yrs Quit | Short Term (n) | Short Term % |
| 25                                           | 35-39     | Never Any     | 4489  | 50.75 |               |             |               |                |              |
| 25                                           | 35-39     | CC            | 28    | 0.32  | 0             | 0.00        |               |                |              |
| 25                                           | 35-39     | Ecig          | 1990  | 22.50 |               |             |               |                |              |
| 25                                           | 35-39     | Dual          | 0     | 0.00  |               |             |               |                |              |
| 25                                           | 35-39     | Former        | 2338  | 26.43 |               |             | 11.53         | 142            | 6.07         |
| Year of Follow-up: 2015, Age Group: 40-44    |           |               |       |       |               |             |               |                |              |
| Period                                       | Age Group | Smoking Group | N     | %     | Ever Quit (N) | Ever Quit % | Mean Yrs Quit | Short Term (n) | Short Term % |
| 25                                           | 40-44     | Never Any     | 4991  | 55.21 |               |             |               |                |              |
| 25                                           | 40-44     | CC            | 20    | 0.22  | 0             | 0.00        |               |                |              |
| 25                                           | 40-44     | Ecig          | 1897  | 20.98 |               |             |               |                |              |
| 25                                           | 40-44     | Dual          | 0     | 0.00  |               |             |               |                |              |

**Results for PHIM for Run 7 (Sensitivity\_Analysis\_1.RTF)**

| Year of Follow-up: 2015, Age Group: 45-49    | Period   | Age Group | Smoking Group | N     | %     | Ever Quit (N) | Ever Quit % | Mean Yrs Quit | Short Term (n) | Short Term % |
|----------------------------------------------|----------|-----------|---------------|-------|-------|---------------|-------------|---------------|----------------|--------------|
| 25                                           | 40-44    | Former    |               | 2132  | 23.58 |               |             | 13.01         | 112            | 5.25         |
| 25                                           | 45-49    | Never Any |               | 5163  | 52.60 |               |             |               |                |              |
| 25                                           | 45-49    | CC        |               | 29    | 0.30  | 0             | 0.00        |               |                |              |
| 25                                           | 45-49    | Ecig      |               | 2195  | 22.36 |               |             |               |                |              |
| 25                                           | 45-49    | Dual      |               | 0     | 0.00  |               |             |               |                |              |
| 25                                           | 45-49    | Former    |               | 2429  | 24.75 |               |             | 17.18         | 81             | 3.33         |
| Year of Follow-up: 2015, Age Group: 50-54    | Period   | Age Group | Smoking Group | N     | %     | Ever Quit (N) | Ever Quit % | Mean Yrs Quit | Short Term (n) | Short Term % |
| 25                                           | 50-54    | Never Any |               | 4997  | 46.86 |               |             |               |                |              |
| 25                                           | 50-54    | CC        |               | 37    | 0.35  | 0             | 0.00        |               |                |              |
| 25                                           | 50-54    | Ecig      |               | 2387  | 22.38 |               |             |               |                |              |
| 25                                           | 50-54    | Dual      |               | 0     | 0.00  |               |             |               |                |              |
| 25                                           | 50-54    | Former    |               | 3243  | 30.41 |               |             | 19.10         | 130            | 4.01         |
| Year of Follow-up: 2015, Age Group: 55-59    | Period   | Age Group | Smoking Group | N     | %     | Ever Quit (N) | Ever Quit % | Mean Yrs Quit | Short Term (n) | Short Term % |
| 25                                           | 55-59    | Never Any |               | 4724  | 43.28 |               |             |               |                |              |
| 25                                           | 55-59    | CC        |               | 33    | 0.30  | 0             | 0.00        |               |                |              |
| 25                                           | 55-59    | Ecig      |               | 2103  | 19.27 |               |             |               |                |              |
| 25                                           | 55-59    | Dual      |               | 0     | 0.00  |               |             |               |                |              |
| 25                                           | 55-59    | Former    |               | 4056  | 37.16 |               |             | 20.50         | 162            | 3.99         |
| Year of Follow-up: 2015, Age Group: 60-64    | Period   | Age Group | Smoking Group | N     | %     | Ever Quit (N) | Ever Quit % | Mean Yrs Quit | Short Term (n) | Short Term % |
| 25                                           | 60-64    | Never Any |               | 3941  | 39.85 |               |             |               |                |              |
| 25                                           | 60-64    | CC        |               | 28    | 0.28  | 0             | 0.00        |               |                |              |
| 25                                           | 60-64    | Ecig      |               | 1443  | 14.59 |               |             |               |                |              |
| 25                                           | 60-64    | Dual      |               | 0     | 0.00  |               |             |               |                |              |
| 25                                           | 60-64    | Former    |               | 4477  | 45.27 |               |             | 23.28         | 205            | 4.58         |
| Year of Follow-up: 2015, Age Group: 65-69    | Period   | Age Group | Smoking Group | N     | %     | Ever Quit (N) | Ever Quit % | Mean Yrs Quit | Short Term (n) | Short Term % |
| 25                                           | 65-69    | Never Any |               | 2912  | 33.65 |               |             |               |                |              |
| 25                                           | 65-69    | CC        |               | 43    | 0.50  | 0             | 0.00        |               |                |              |
| 25                                           | 65-69    | Ecig      |               | 1019  | 11.77 |               |             |               |                |              |
| 25                                           | 65-69    | Dual      |               | 0     | 0.00  |               |             |               |                |              |
| 25                                           | 65-69    | Former    |               | 4681  | 54.08 |               |             | 24.99         | 134            | 2.86         |
| Year of Follow-up: 2015, Age Group: 70-74    | Period   | Age Group | Smoking Group | N     | %     | Ever Quit (N) | Ever Quit % | Mean Yrs Quit | Short Term (n) | Short Term % |
| 25                                           | 70-74    | Never Any |               | 1919  | 29.46 |               |             |               |                |              |
| 25                                           | 70-74    | CC        |               | 35    | 0.54  | 0             | 0.00        |               |                |              |
| 25                                           | 70-74    | Ecig      |               | 616   | 9.46  |               |             |               |                |              |
| 25                                           | 70-74    | Dual      |               | 0     | 0.00  |               |             |               |                |              |
| 25                                           | 70-74    | Former    |               | 3945  | 60.55 |               |             | 27.55         | 70             | 1.77         |
| Year of Follow-up: 2015, Age Group: 75-79    | Period   | Age Group | Smoking Group | N     | %     | Ever Quit (N) | Ever Quit % | Mean Yrs Quit | Short Term (n) | Short Term % |
| 25                                           | 75-79    | Never Any |               | 1611  | 29.41 |               |             |               |                |              |
| 25                                           | 75-79    | CC        |               | 36    | 0.66  | 0             | 0.00        |               |                |              |
| 25                                           | 75-79    | Ecig      |               | 457   | 8.34  |               |             |               |                |              |
| 25                                           | 75-79    | Dual      |               | 0     | 0.00  |               |             |               |                |              |
| 25                                           | 75-79    | Former    |               | 3373  | 61.58 |               |             | 29.48         | 52             | 1.54         |
| Year of Follow-up: 2020, Age Group: All Ages | Period   | Age Group | Smoking Group | N     | %     | Ever Quit (N) | Ever Quit % | Mean Yrs Quit | Short Term (n) | Short Term % |
| 30                                           | All Ages | Never Any |               | 33136 | 44.57 |               |             |               |                |              |
| 30                                           | All Ages | CC        |               | 100   | 0.13  | 0             | 0.00        |               |                |              |
| 30                                           | All Ages | Ecig      |               | 11358 | 15.28 |               |             |               |                |              |
| 30                                           | All Ages | Dual      |               | 0     | 0.00  |               |             |               |                |              |
| 30                                           | All Ages | Former    |               | 29746 | 40.01 |               |             | 23.97         | 918            | 3.09         |
| Year of Follow-up: 2020, Age Group: 18-19    | Period   | Age Group | Smoking Group | N     | %     | Ever Quit (N) | Ever Quit % | Mean Yrs Quit | Short Term (n) | Short Term % |
| 30                                           | 18-19    | Never Any |               | 0     | .     |               |             |               |                |              |
| 30                                           | 18-19    | CC        |               | 0     | .     | 0             | .           |               |                |              |
| 30                                           | 18-19    | Ecig      |               | 0     | .     |               |             |               |                |              |
| 30                                           | 18-19    | Dual      |               | 0     | .     |               |             |               |                |              |
| 30                                           | 18-19    | Former    |               | 0     | .     |               |             | .             | 0              | .            |
| Year of Follow-up: 2020, Age Group: 20-24    | Period   | Age Group | Smoking Group | N     | %     | Ever Quit (N) | Ever Quit % | Mean Yrs Quit | Short Term (n) | Short Term % |
| 30                                           | 20-24    | Never Any |               | 0     | .     |               |             |               |                |              |
| 30                                           | 20-24    | CC        |               | 0     | .     | 0             | .           |               |                |              |

**Results for PHIM for Run 7 (Sensitivity\_Analysis\_1.RTF)**

|                                           |           |               |      |       |               |             |               |                |              |
|-------------------------------------------|-----------|---------------|------|-------|---------------|-------------|---------------|----------------|--------------|
| 30                                        | 20-24     | Ecig          | 0    | .     |               |             |               |                |              |
| 30                                        | 20-24     | Dual          | 0    | .     |               |             |               |                |              |
| 30                                        | 20-24     | Former        | 0    | .     |               |             | 0             | .              |              |
| Year of Follow-up: 2020, Age Group: 25-29 |           |               |      |       |               |             |               |                |              |
| Period                                    | Age Group | Smoking Group | N    | %     | Ever Quit (N) | Ever Quit % | Mean Yrs Quit | Short Term (n) | Short Term % |
| 30                                        | 25-29     | Never Any     | 0    | .     |               |             |               |                |              |
| 30                                        | 25-29     | CC            | 0    | .     | 0             | .           |               |                |              |
| 30                                        | 25-29     | Ecig          | 0    | .     |               |             |               |                |              |
| 30                                        | 25-29     | Dual          | 0    | .     |               |             |               |                |              |
| 30                                        | 25-29     | Former        | 0    | .     |               |             | 0             | .              |              |
| Year of Follow-up: 2020, Age Group: 30-34 |           |               |      |       |               |             |               |                |              |
| Period                                    | Age Group | Smoking Group | N    | %     | Ever Quit (N) | Ever Quit % | Mean Yrs Quit | Short Term (n) | Short Term % |
| 30                                        | 30-34     | Never Any     | 0    | .     |               |             |               |                |              |
| 30                                        | 30-34     | CC            | 0    | .     | 0             | .           |               |                |              |
| 30                                        | 30-34     | Ecig          | 0    | .     |               |             |               |                |              |
| 30                                        | 30-34     | Dual          | 0    | .     |               |             |               |                |              |
| 30                                        | 30-34     | Former        | 0    | .     |               |             | 0             | .              |              |
| Year of Follow-up: 2020, Age Group: 35-39 |           |               |      |       |               |             |               |                |              |
| Period                                    | Age Group | Smoking Group | N    | %     | Ever Quit (N) | Ever Quit % | Mean Yrs Quit | Short Term (n) | Short Term % |
| 30                                        | 35-39     | Never Any     | 0    | .     |               |             |               |                |              |
| 30                                        | 35-39     | CC            | 0    | .     | 0             | .           |               |                |              |
| 30                                        | 35-39     | Ecig          | 0    | .     |               |             |               |                |              |
| 30                                        | 35-39     | Dual          | 0    | .     |               |             |               |                |              |
| 30                                        | 35-39     | Former        | 0    | .     |               |             | 0             | .              |              |
| Year of Follow-up: 2020, Age Group: 40-44 |           |               |      |       |               |             |               |                |              |
| Period                                    | Age Group | Smoking Group | N    | %     | Ever Quit (N) | Ever Quit % | Mean Yrs Quit | Short Term (n) | Short Term % |
| 30                                        | 40-44     | Never Any     | 4489 | 50.75 |               |             |               |                |              |
| 30                                        | 40-44     | CC            | 12   | 0.14  | 0             | 0.00        |               |                |              |
| 30                                        | 40-44     | Ecig          | 1743 | 19.71 |               |             |               |                |              |
| 30                                        | 40-44     | Dual          | 0    | 0.00  |               |             |               |                |              |
| 30                                        | 40-44     | Former        | 2601 | 29.41 |               |             | 15.05         | 107            | 4.11         |
| Year of Follow-up: 2020, Age Group: 45-49 |           |               |      |       |               |             |               |                |              |
| Period                                    | Age Group | Smoking Group | N    | %     | Ever Quit (N) | Ever Quit % | Mean Yrs Quit | Short Term (n) | Short Term % |
| 30                                        | 45-49     | Never Any     | 4991 | 55.21 |               |             |               |                |              |
| 30                                        | 45-49     | CC            | 5    | 0.06  | 0             | 0.00        |               |                |              |
| 30                                        | 45-49     | Ecig          | 1690 | 18.69 |               |             |               |                |              |
| 30                                        | 45-49     | Dual          | 0    | 0.00  |               |             |               |                |              |
| 30                                        | 45-49     | Former        | 2354 | 26.04 |               |             | 16.54         | 63             | 2.68         |
| Year of Follow-up: 2020, Age Group: 50-54 |           |               |      |       |               |             |               |                |              |
| Period                                    | Age Group | Smoking Group | N    | %     | Ever Quit (N) | Ever Quit % | Mean Yrs Quit | Short Term (n) | Short Term % |
| 30                                        | 50-54     | Never Any     | 5163 | 52.60 |               |             |               |                |              |
| 30                                        | 50-54     | CC            | 9    | 0.09  | 0             | 0.00        |               |                |              |
| 30                                        | 50-54     | Ecig          | 2021 | 20.59 |               |             |               |                |              |
| 30                                        | 50-54     | Dual          | 0    | 0.00  |               |             |               |                |              |
| 30                                        | 50-54     | Former        | 2623 | 26.72 |               |             | 20.66         | 99             | 3.77         |
| Year of Follow-up: 2020, Age Group: 55-59 |           |               |      |       |               |             |               |                |              |
| Period                                    | Age Group | Smoking Group | N    | %     | Ever Quit (N) | Ever Quit % | Mean Yrs Quit | Short Term (n) | Short Term % |
| 30                                        | 55-59     | Never Any     | 4997 | 46.86 |               |             |               |                |              |
| 30                                        | 55-59     | CC            | 18   | 0.17  | 0             | 0.00        |               |                |              |
| 30                                        | 55-59     | Ecig          | 2002 | 18.77 |               |             |               |                |              |
| 30                                        | 55-59     | Dual          | 0    | 0.00  |               |             |               |                |              |
| 30                                        | 55-59     | Former        | 3647 | 34.20 |               |             | 21.65         | 157            | 4.30         |
| Year of Follow-up: 2020, Age Group: 60-64 |           |               |      |       |               |             |               |                |              |
| Period                                    | Age Group | Smoking Group | N    | %     | Ever Quit (N) | Ever Quit % | Mean Yrs Quit | Short Term (n) | Short Term % |
| 30                                        | 60-64     | Never Any     | 4724 | 43.28 |               |             |               |                |              |
| 30                                        | 60-64     | CC            | 10   | 0.09  | 0             | 0.00        |               |                |              |
| 30                                        | 60-64     | Ecig          | 1614 | 14.79 |               |             |               |                |              |
| 30                                        | 60-64     | Dual          | 0    | 0.00  |               |             |               |                |              |
| 30                                        | 60-64     | Former        | 4568 | 41.85 |               |             | 22.87         | 203            | 4.44         |
| Year of Follow-up: 2020, Age Group: 65-69 |           |               |      |       |               |             |               |                |              |
| Period                                    | Age Group | Smoking Group | N    | %     | Ever Quit (N) | Ever Quit % | Mean Yrs Quit | Short Term (n) | Short Term % |
| 30                                        | 65-69     | Never Any     | 3941 | 39.85 |               |             |               |                |              |
| 30                                        | 65-69     | CC            | 13   | 0.13  | 0             | 0.00        |               |                |              |
| 30                                        | 65-69     | Ecig          | 1039 | 10.51 |               |             |               |                |              |
| 30                                        | 65-69     | Dual          | 0    | 0.00  |               |             |               |                |              |
| 30                                        | 65-69     | Former        | 4896 | 49.51 |               |             | 26.05         | 145            | 2.96         |
| Year of Follow-up: 2020, Age Group: 70-74 |           |               |      |       |               |             |               |                |              |
| Period                                    | Age Group | Smoking Group | N    | %     | Ever Quit (N) | Ever Quit % | Mean Yrs Quit | Short Term (n) | Short Term % |

### Results for PHIM for Run 7 (Sensitivity\_Analysis\_1.RTF)

|                                              |           |               |       |       |               |             |               |                |              |
|----------------------------------------------|-----------|---------------|-------|-------|---------------|-------------|---------------|----------------|--------------|
| 30                                           | 70-74     | Never Any     | 2912  | 33.65 |               |             |               |                |              |
| 30                                           | 70-74     | CC            | 18    | 0.21  | 0             | 0.00        |               |                |              |
| 30                                           | 70-74     | Ecig          | 770   | 8.90  |               |             |               |                |              |
| 30                                           | 70-74     | Dual          | 0     | 0.00  |               |             |               |                |              |
| 30                                           | 70-74     | Former        | 4955  | 57.25 |               |             | 28.45         | 93             | 1.88         |
| Year of Follow-up: 2020, Age Group: 75-79    |           |               |       |       |               |             |               |                |              |
| Period                                       | Age Group | Smoking Group | N     | %     | Ever Quit (N) | Ever Quit % | Mean Yrs Quit | Short Term (n) | Short Term % |
| 30                                           | 75-79     | Never Any     | 1919  | 29.46 |               |             |               |                |              |
| 30                                           | 75-79     | CC            | 15    | 0.23  | 0             | 0.00        |               |                |              |
| 30                                           | 75-79     | Ecig          | 479   | 7.35  |               |             |               |                |              |
| 30                                           | 75-79     | Dual          | 0     | 0.00  |               |             |               |                |              |
| 30                                           | 75-79     | Former        | 4102  | 62.96 |               |             | 31.39         | 51             | 1.24         |
| Year of Follow-up: 2025, Age Group: All Ages |           |               |       |       |               |             |               |                |              |
| Period                                       | Age Group | Smoking Group | N     | %     | Ever Quit (N) | Ever Quit % | Mean Yrs Quit | Short Term (n) | Short Term % |
| 35                                           | All Ages  | Never Any     | 31217 | 46.03 |               |             |               |                |              |
| 35                                           | All Ages  | CC            | 38    | 0.06  | 0             | 0.00        |               |                |              |
| 35                                           | All Ages  | Ecig          | 8864  | 13.07 |               |             |               |                |              |
| 35                                           | All Ages  | Dual          | 0     | 0.00  |               |             |               |                |              |
| 35                                           | All Ages  | Former        | 27706 | 40.85 |               |             | 25.87         | 785            | 2.83         |
| Year of Follow-up: 2025, Age Group: 18-19    |           |               |       |       |               |             |               |                |              |
| Period                                       | Age Group | Smoking Group | N     | %     | Ever Quit (N) | Ever Quit % | Mean Yrs Quit | Short Term (n) | Short Term % |
| 35                                           | 18-19     | Never Any     | 0     | .     |               |             |               |                |              |
| 35                                           | 18-19     | CC            | 0     | .     | 0             | .           |               |                |              |
| 35                                           | 18-19     | Ecig          | 0     | .     |               |             |               |                |              |
| 35                                           | 18-19     | Dual          | 0     | .     |               |             |               |                |              |
| 35                                           | 18-19     | Former        | 0     | .     |               |             | .             | 0              | .            |
| Year of Follow-up: 2025, Age Group: 20-24    |           |               |       |       |               |             |               |                |              |
| Period                                       | Age Group | Smoking Group | N     | %     | Ever Quit (N) | Ever Quit % | Mean Yrs Quit | Short Term (n) | Short Term % |
| 35                                           | 20-24     | Never Any     | 0     | .     |               |             |               |                |              |
| 35                                           | 20-24     | CC            | 0     | .     | 0             | .           |               |                |              |
| 35                                           | 20-24     | Ecig          | 0     | .     |               |             |               |                |              |
| 35                                           | 20-24     | Dual          | 0     | .     |               |             |               |                |              |
| 35                                           | 20-24     | Former        | 0     | .     |               |             | .             | 0              | .            |
| Year of Follow-up: 2025, Age Group: 25-29    |           |               |       |       |               |             |               |                |              |
| Period                                       | Age Group | Smoking Group | N     | %     | Ever Quit (N) | Ever Quit % | Mean Yrs Quit | Short Term (n) | Short Term % |
| 35                                           | 25-29     | Never Any     | 0     | .     |               |             |               |                |              |
| 35                                           | 25-29     | CC            | 0     | .     | 0             | .           |               |                |              |
| 35                                           | 25-29     | Ecig          | 0     | .     |               |             |               |                |              |
| 35                                           | 25-29     | Dual          | 0     | .     |               |             |               |                |              |
| 35                                           | 25-29     | Former        | 0     | .     |               |             | .             | 0              | .            |
| Year of Follow-up: 2025, Age Group: 30-34    |           |               |       |       |               |             |               |                |              |
| Period                                       | Age Group | Smoking Group | N     | %     | Ever Quit (N) | Ever Quit % | Mean Yrs Quit | Short Term (n) | Short Term % |
| 35                                           | 30-34     | Never Any     | 0     | .     |               |             |               |                |              |
| 35                                           | 30-34     | CC            | 0     | .     | 0             | .           |               |                |              |
| 35                                           | 30-34     | Ecig          | 0     | .     |               |             |               |                |              |
| 35                                           | 30-34     | Dual          | 0     | .     |               |             |               |                |              |
| 35                                           | 30-34     | Former        | 0     | .     |               |             | .             | 0              | .            |
| Year of Follow-up: 2025, Age Group: 35-39    |           |               |       |       |               |             |               |                |              |
| Period                                       | Age Group | Smoking Group | N     | %     | Ever Quit (N) | Ever Quit % | Mean Yrs Quit | Short Term (n) | Short Term % |
| 35                                           | 35-39     | Never Any     | 0     | .     |               |             |               |                |              |
| 35                                           | 35-39     | CC            | 0     | .     | 0             | .           |               |                |              |
| 35                                           | 35-39     | Ecig          | 0     | .     |               |             |               |                |              |
| 35                                           | 35-39     | Dual          | 0     | .     |               |             |               |                |              |
| 35                                           | 35-39     | Former        | 0     | .     |               |             | .             | 0              | .            |
| Year of Follow-up: 2025, Age Group: 40-44    |           |               |       |       |               |             |               |                |              |
| Period                                       | Age Group | Smoking Group | N     | %     | Ever Quit (N) | Ever Quit % | Mean Yrs Quit | Short Term (n) | Short Term % |
| 35                                           | 40-44     | Never Any     | 0     | .     |               |             |               |                |              |
| 35                                           | 40-44     | CC            | 0     | .     | 0             | .           |               |                |              |
| 35                                           | 40-44     | Ecig          | 0     | .     |               |             |               |                |              |
| 35                                           | 40-44     | Dual          | 0     | .     |               |             |               |                |              |
| 35                                           | 40-44     | Former        | 0     | .     |               |             | .             | 0              | .            |
| Year of Follow-up: 2025, Age Group: 45-49    |           |               |       |       |               |             |               |                |              |
| Period                                       | Age Group | Smoking Group | N     | %     | Ever Quit (N) | Ever Quit % | Mean Yrs Quit | Short Term (n) | Short Term % |
| 35                                           | 45-49     | Never Any     | 4489  | 50.75 |               |             |               |                |              |
| 35                                           | 45-49     | CC            | 7     | 0.08  | 0             | 0.00        |               |                |              |
| 35                                           | 45-49     | Ecig          | 1541  | 17.42 |               |             |               |                |              |
| 35                                           | 45-49     | Dual          | 0     | 0.00  |               |             |               |                |              |
| 35                                           | 45-49     | Former        | 2808  | 31.75 |               |             | 18.76         | 60             | 2.14         |
| Year of Follow-up: 2025, Age Group: 50-54    |           |               |       |       |               |             |               |                |              |

**Results for PHIM for Run 7 (Sensitivity\_Analysis\_1.RTF)**

| Period                                       | Age Group | Smoking Group | N     | %     | Ever Quit (N) | Ever Quit % | Mean Yrs Quit | Short Term (n) | Short Term % |
|----------------------------------------------|-----------|---------------|-------|-------|---------------|-------------|---------------|----------------|--------------|
| 35                                           | 50-54     | Never Any     | 4991  | 55.21 |               |             |               |                |              |
| 35                                           | 50-54     | CC            | 3     | 0.03  | 0             | 0.00        |               |                |              |
| 35                                           | 50-54     | Ecig          | 1554  | 17.19 |               |             |               |                |              |
| 35                                           | 50-54     | Dual          | 0     | 0.00  |               |             |               |                |              |
| 35                                           | 50-54     | Former        | 2492  | 27.57 |               |             | 20.44         | 75             | 3.01         |
| Year of Follow-up: 2025, Age Group: 55-59    |           |               |       |       |               |             |               |                |              |
| Period                                       | Age Group | Smoking Group | N     | %     | Ever Quit (N) | Ever Quit % | Mean Yrs Quit | Short Term (n) | Short Term % |
| 35                                           | 55-59     | Never Any     | 5163  | 52.60 |               |             |               |                |              |
| 35                                           | 55-59     | CC            | 0     | 0.00  | 0             | 0.00        |               |                |              |
| 35                                           | 55-59     | Ecig          | 1664  | 16.95 |               |             |               |                |              |
| 35                                           | 55-59     | Dual          | 0     | 0.00  |               |             |               |                |              |
| 35                                           | 55-59     | Former        | 2989  | 30.45 |               |             | 22.76         | 155            | 5.19         |
| Year of Follow-up: 2025, Age Group: 60-64    |           |               |       |       |               |             |               |                |              |
| Period                                       | Age Group | Smoking Group | N     | %     | Ever Quit (N) | Ever Quit % | Mean Yrs Quit | Short Term (n) | Short Term % |
| 35                                           | 60-64     | Never Any     | 4997  | 46.86 |               |             |               |                |              |
| 35                                           | 60-64     | CC            | 9     | 0.08  | 0             | 0.00        |               |                |              |
| 35                                           | 60-64     | Ecig          | 1532  | 14.37 |               |             |               |                |              |
| 35                                           | 60-64     | Dual          | 0     | 0.00  |               |             |               |                |              |
| 35                                           | 60-64     | Former        | 4126  | 38.69 |               |             | 23.79         | 186            | 4.51         |
| Year of Follow-up: 2025, Age Group: 65-69    |           |               |       |       |               |             |               |                |              |
| Period                                       | Age Group | Smoking Group | N     | %     | Ever Quit (N) | Ever Quit % | Mean Yrs Quit | Short Term (n) | Short Term % |
| 35                                           | 65-69     | Never Any     | 4724  | 43.28 |               |             |               |                |              |
| 35                                           | 65-69     | CC            | 5     | 0.05  | 0             | 0.00        |               |                |              |
| 35                                           | 65-69     | Ecig          | 1169  | 10.71 |               |             |               |                |              |
| 35                                           | 65-69     | Dual          | 0     | 0.00  |               |             |               |                |              |
| 35                                           | 65-69     | Former        | 5018  | 45.97 |               |             | 25.57         | 158            | 3.15         |
| Year of Follow-up: 2025, Age Group: 70-74    |           |               |       |       |               |             |               |                |              |
| Period                                       | Age Group | Smoking Group | N     | %     | Ever Quit (N) | Ever Quit % | Mean Yrs Quit | Short Term (n) | Short Term % |
| 35                                           | 70-74     | Never Any     | 3941  | 39.85 |               |             |               |                |              |
| 35                                           | 70-74     | CC            | 5     | 0.05  | 0             | 0.00        |               |                |              |
| 35                                           | 70-74     | Ecig          | 811   | 8.20  |               |             |               |                |              |
| 35                                           | 70-74     | Dual          | 0     | 0.00  |               |             |               |                |              |
| 35                                           | 70-74     | Former        | 5132  | 51.90 |               |             | 29.73         | 79             | 1.54         |
| Year of Follow-up: 2025, Age Group: 75-79    |           |               |       |       |               |             |               |                |              |
| Period                                       | Age Group | Smoking Group | N     | %     | Ever Quit (N) | Ever Quit % | Mean Yrs Quit | Short Term (n) | Short Term % |
| 35                                           | 75-79     | Never Any     | 2912  | 33.65 |               |             |               |                |              |
| 35                                           | 75-79     | CC            | 9     | 0.10  | 0             | 0.00        |               |                |              |
| 35                                           | 75-79     | Ecig          | 593   | 6.85  |               |             |               |                |              |
| 35                                           | 75-79     | Dual          | 0     | 0.00  |               |             |               |                |              |
| 35                                           | 75-79     | Former        | 5141  | 59.40 |               |             | 32.31         | 72             | 1.40         |
| Year of Follow-up: 2030, Age Group: All Ages |           |               |       |       |               |             |               |                |              |
| Period                                       | Age Group | Smoking Group | N     | %     | Ever Quit (N) | Ever Quit % | Mean Yrs Quit | Short Term (n) | Short Term % |
| 40                                           | All Ages  | Never Any     | 28305 | 47.84 |               |             |               |                |              |
| 40                                           | All Ages  | CC            | 15    | 0.03  | 0             | 0.00        |               |                |              |
| 40                                           | All Ages  | Ecig          | 6535  | 11.04 |               |             |               |                |              |
| 40                                           | All Ages  | Dual          | 0     | 0.00  |               |             |               |                |              |
| 40                                           | All Ages  | Former        | 24315 | 41.09 |               |             | 27.43         | 691            | 2.84         |
| Year of Follow-up: 2030, Age Group: 18-19    |           |               |       |       |               |             |               |                |              |
| Period                                       | Age Group | Smoking Group | N     | %     | Ever Quit (N) | Ever Quit % | Mean Yrs Quit | Short Term (n) | Short Term % |
| 40                                           | 18-19     | Never Any     | 0     | .     |               |             |               |                |              |
| 40                                           | 18-19     | CC            | 0     | .     | 0             | .           |               |                |              |
| 40                                           | 18-19     | Ecig          | 0     | .     |               |             |               |                |              |
| 40                                           | 18-19     | Dual          | 0     | .     |               |             |               |                |              |
| 40                                           | 18-19     | Former        | 0     | .     |               |             | .             | 0              | .            |
| Year of Follow-up: 2030, Age Group: 20-24    |           |               |       |       |               |             |               |                |              |
| Period                                       | Age Group | Smoking Group | N     | %     | Ever Quit (N) | Ever Quit % | Mean Yrs Quit | Short Term (n) | Short Term % |
| 40                                           | 20-24     | Never Any     | 0     | .     |               |             |               |                |              |
| 40                                           | 20-24     | CC            | 0     | .     | 0             | .           |               |                |              |
| 40                                           | 20-24     | Ecig          | 0     | .     |               |             |               |                |              |
| 40                                           | 20-24     | Dual          | 0     | .     |               |             |               |                |              |
| 40                                           | 20-24     | Former        | 0     | .     |               |             | .             | 0              | .            |
| Year of Follow-up: 2030, Age Group: 25-29    |           |               |       |       |               |             |               |                |              |
| Period                                       | Age Group | Smoking Group | N     | %     | Ever Quit (N) | Ever Quit % | Mean Yrs Quit | Short Term (n) | Short Term % |
| 40                                           | 25-29     | Never Any     | 0     | .     |               |             |               |                |              |
| 40                                           | 25-29     | CC            | 0     | .     | 0             | .           |               |                |              |
| 40                                           | 25-29     | Ecig          | 0     | .     |               |             |               |                |              |
| 40                                           | 25-29     | Dual          | 0     | .     |               |             |               |                |              |

**Results for PHIM for Run 7 (Sensitivity\_Analysis\_1.RTF)**

| Year of Follow-up: 2030, Age Group: 30-34 | Period | Age Group | Smoking Group | N    | %     | Ever Quit (N) | Ever Quit % | Mean Yrs Quit | Short Term (n) | Short Term % |
|-------------------------------------------|--------|-----------|---------------|------|-------|---------------|-------------|---------------|----------------|--------------|
| Year of Follow-up: 2030, Age Group: 30-34 |        |           |               |      |       |               |             |               |                |              |
| 40                                        | 25-29  | Former    |               | 0    | .     |               |             |               | 0              | .            |
| 40                                        | 30-34  | Never Any |               | 0    | .     |               |             |               |                |              |
| 40                                        | 30-34  | CC        |               | 0    | .     | 0             | .           |               |                |              |
| 40                                        | 30-34  | Ecig      |               | 0    | .     |               |             |               |                |              |
| 40                                        | 30-34  | Dual      |               | 0    | .     |               |             |               |                |              |
| 40                                        | 30-34  | Former    |               | 0    | .     |               |             |               | 0              | .            |
| Year of Follow-up: 2030, Age Group: 35-39 |        |           |               |      |       |               |             |               |                |              |
| 40                                        | 35-39  | Never Any |               | 0    | .     |               |             |               |                |              |
| 40                                        | 35-39  | CC        |               | 0    | .     | 0             | .           |               |                |              |
| 40                                        | 35-39  | Ecig      |               | 0    | .     |               |             |               |                |              |
| 40                                        | 35-39  | Dual      |               | 0    | .     |               |             |               |                |              |
| 40                                        | 35-39  | Former    |               | 0    | .     |               |             |               | 0              | .            |
| Year of Follow-up: 2030, Age Group: 40-44 |        |           |               |      |       |               |             |               |                |              |
| 40                                        | 40-44  | Never Any |               | 0    | .     |               |             |               |                |              |
| 40                                        | 40-44  | CC        |               | 0    | .     | 0             | .           |               |                |              |
| 40                                        | 40-44  | Ecig      |               | 0    | .     |               |             |               |                |              |
| 40                                        | 40-44  | Dual      |               | 0    | .     |               |             |               |                |              |
| 40                                        | 40-44  | Former    |               | 0    | .     |               |             |               | 0              | .            |
| Year of Follow-up: 2030, Age Group: 45-49 |        |           |               |      |       |               |             |               |                |              |
| 40                                        | 45-49  | Never Any |               | 0    | .     |               |             |               |                |              |
| 40                                        | 45-49  | CC        |               | 0    | .     | 0             | .           |               |                |              |
| 40                                        | 45-49  | Ecig      |               | 0    | .     |               |             |               |                |              |
| 40                                        | 45-49  | Dual      |               | 0    | .     |               |             |               |                |              |
| 40                                        | 45-49  | Former    |               | 0    | .     |               |             |               | 0              | .            |
| Year of Follow-up: 2030, Age Group: 50-54 |        |           |               |      |       |               |             |               |                |              |
| 40                                        | 50-54  | Never Any |               | 4489 | 50.75 |               |             |               |                |              |
| 40                                        | 50-54  | CC        |               | 3    | 0.03  | 0             | 0.00        |               |                |              |
| 40                                        | 50-54  | Ecig      |               | 1392 | 15.74 |               |             |               |                |              |
| 40                                        | 50-54  | Dual      |               | 0    | 0.00  |               |             |               |                |              |
| 40                                        | 50-54  | Former    |               | 2961 | 33.48 |               |             | 22.61         | 80             | 2.70         |
| Year of Follow-up: 2030, Age Group: 55-59 |        |           |               |      |       |               |             |               |                |              |
| 40                                        | 55-59  | Never Any |               | 4991 | 55.21 |               |             |               |                |              |
| 40                                        | 55-59  | CC        |               | 2    | 0.02  | 0             | 0.00        |               |                |              |
| 40                                        | 55-59  | Ecig      |               | 1291 | 14.28 |               |             |               |                |              |
| 40                                        | 55-59  | Dual      |               | 0    | 0.00  |               |             |               |                |              |
| 40                                        | 55-59  | Former    |               | 2756 | 30.49 |               |             | 23.19         | 114            | 4.14         |
| Year of Follow-up: 2030, Age Group: 60-64 |        |           |               |      |       |               |             |               |                |              |
| 40                                        | 60-64  | Never Any |               | 5163 | 52.60 |               |             |               |                |              |
| 40                                        | 60-64  | CC        |               | 0    | 0.00  | 0             | 0.00        |               |                |              |
| 40                                        | 60-64  | Ecig      |               | 1238 | 12.61 |               |             |               |                |              |
| 40                                        | 60-64  | Dual      |               | 0    | 0.00  |               |             |               |                |              |
| 40                                        | 60-64  | Former    |               | 3415 | 34.79 |               |             | 24.53         | 183            | 5.36         |
| Year of Follow-up: 2030, Age Group: 65-69 |        |           |               |      |       |               |             |               |                |              |
| 40                                        | 65-69  | Never Any |               | 4997 | 46.86 |               |             |               |                |              |
| 40                                        | 65-69  | CC        |               | 4    | 0.04  | 0             | 0.00        |               |                |              |
| 40                                        | 65-69  | Ecig      |               | 1119 | 10.49 |               |             |               |                |              |
| 40                                        | 65-69  | Dual      |               | 0    | 0.00  |               |             |               |                |              |
| 40                                        | 65-69  | Former    |               | 4544 | 42.61 |               |             | 26.35         | 136            | 2.99         |
| Year of Follow-up: 2030, Age Group: 70-74 |        |           |               |      |       |               |             |               |                |              |
| 40                                        | 70-74  | Never Any |               | 4724 | 43.28 |               |             |               |                |              |
| 40                                        | 70-74  | CC        |               | 3    | 0.03  | 0             | 0.00        |               |                |              |
| 40                                        | 70-74  | Ecig      |               | 880  | 8.06  |               |             |               |                |              |
| 40                                        | 70-74  | Dual      |               | 0    | 0.00  |               |             |               |                |              |
| 40                                        | 70-74  | Former    |               | 5309 | 48.64 |               |             | 29.01         | 95             | 1.79         |
| Year of Follow-up: 2030, Age Group: 75-79 |        |           |               |      |       |               |             |               |                |              |
| 40                                        | 75-79  | Never Any |               | 3941 | 39.85 |               |             |               |                |              |
| 40                                        | 75-79  | CC        |               | 3    | 0.03  | 0             | 0.00        |               |                |              |



**Results for PHIM for Run 7 (Sensitivity\_Analysis\_1.RTF)**

|                                              |           |               |       |       |               |             |               |                |              |
|----------------------------------------------|-----------|---------------|-------|-------|---------------|-------------|---------------|----------------|--------------|
| 40                                           | 75-79     | Ecig          | 615   | 6.22  |               |             |               |                |              |
| 40                                           | 75-79     | Dual          | 0     | 0.00  |               |             |               |                |              |
| 40                                           | 75-79     | Former        | 5330  | 53.90 |               |             | 33.51         | 83             | 1.56         |
| Year of Follow-up: 2035, Age Group: All Ages |           |               |       |       |               |             |               |                |              |
| Period                                       | Age Group | Smoking Group | N     | %     | Ever Quit (N) | Ever Quit % | Mean Yrs Quit | Short Term (n) | Short Term % |
| 45                                           | All Ages  | Never Any     | 24364 | 49.44 |               |             |               |                |              |
| 45                                           | All Ages  | CC            | 6     | 0.01  | 0             | 0.00        |               |                |              |
| 45                                           | All Ages  | Ecig          | 4578  | 9.29  |               |             |               |                |              |
| 45                                           | All Ages  | Dual          | 0     | 0.00  |               |             |               |                |              |
| 45                                           | All Ages  | Former        | 20333 | 41.26 |               |             | 28.82         | 538            | 2.65         |
| Year of Follow-up: 2035, Age Group: 18-19    |           |               |       |       |               |             |               |                |              |
| Period                                       | Age Group | Smoking Group | N     | %     | Ever Quit (N) | Ever Quit % | Mean Yrs Quit | Short Term (n) | Short Term % |
| 45                                           | 18-19     | Never Any     | 0     | .     |               |             |               |                |              |
| 45                                           | 18-19     | CC            | 0     | .     | 0             | .           |               |                |              |
| 45                                           | 18-19     | Ecig          | 0     | .     |               |             |               |                |              |
| 45                                           | 18-19     | Dual          | 0     | .     |               |             |               |                |              |
| 45                                           | 18-19     | Former        | 0     | .     |               |             | .             | 0              | .            |
| Year of Follow-up: 2035, Age Group: 20-24    |           |               |       |       |               |             |               |                |              |
| Period                                       | Age Group | Smoking Group | N     | %     | Ever Quit (N) | Ever Quit % | Mean Yrs Quit | Short Term (n) | Short Term % |
| 45                                           | 20-24     | Never Any     | 0     | .     |               |             |               |                |              |
| 45                                           | 20-24     | CC            | 0     | .     | 0             | .           |               |                |              |
| 45                                           | 20-24     | Ecig          | 0     | .     |               |             |               |                |              |
| 45                                           | 20-24     | Dual          | 0     | .     |               |             |               |                |              |
| 45                                           | 20-24     | Former        | 0     | .     |               |             | .             | 0              | .            |
| Year of Follow-up: 2035, Age Group: 25-29    |           |               |       |       |               |             |               |                |              |
| Period                                       | Age Group | Smoking Group | N     | %     | Ever Quit (N) | Ever Quit % | Mean Yrs Quit | Short Term (n) | Short Term % |
| 45                                           | 25-29     | Never Any     | 0     | .     |               |             |               |                |              |
| 45                                           | 25-29     | CC            | 0     | .     | 0             | .           |               |                |              |
| 45                                           | 25-29     | Ecig          | 0     | .     |               |             |               |                |              |
| 45                                           | 25-29     | Dual          | 0     | .     |               |             |               |                |              |
| 45                                           | 25-29     | Former        | 0     | .     |               |             | .             | 0              | .            |
| Year of Follow-up: 2035, Age Group: 30-34    |           |               |       |       |               |             |               |                |              |
| Period                                       | Age Group | Smoking Group | N     | %     | Ever Quit (N) | Ever Quit % | Mean Yrs Quit | Short Term (n) | Short Term % |
| 45                                           | 30-34     | Never Any     | 0     | .     |               |             |               |                |              |
| 45                                           | 30-34     | CC            | 0     | .     | 0             | .           |               |                |              |
| 45                                           | 30-34     | Ecig          | 0     | .     |               |             |               |                |              |
| 45                                           | 30-34     | Dual          | 0     | .     |               |             |               |                |              |
| 45                                           | 30-34     | Former        | 0     | .     |               |             | .             | 0              | .            |
| Year of Follow-up: 2035, Age Group: 35-39    |           |               |       |       |               |             |               |                |              |
| Period                                       | Age Group | Smoking Group | N     | %     | Ever Quit (N) | Ever Quit % | Mean Yrs Quit | Short Term (n) | Short Term % |
| 45                                           | 35-39     | Never Any     | 0     | .     |               |             |               |                |              |
| 45                                           | 35-39     | CC            | 0     | .     | 0             | .           |               |                |              |
| 45                                           | 35-39     | Ecig          | 0     | .     |               |             |               |                |              |
| 45                                           | 35-39     | Dual          | 0     | .     |               |             |               |                |              |
| 45                                           | 35-39     | Former        | 0     | .     |               |             | .             | 0              | .            |
| Year of Follow-up: 2035, Age Group: 40-44    |           |               |       |       |               |             |               |                |              |
| Period                                       | Age Group | Smoking Group | N     | %     | Ever Quit (N) | Ever Quit % | Mean Yrs Quit | Short Term (n) | Short Term % |
| 45                                           | 40-44     | Never Any     | 0     | .     |               |             |               |                |              |
| 45                                           | 40-44     | CC            | 0     | .     | 0             | .           |               |                |              |
| 45                                           | 40-44     | Ecig          | 0     | .     |               |             |               |                |              |
| 45                                           | 40-44     | Dual          | 0     | .     |               |             |               |                |              |
| 45                                           | 40-44     | Former        | 0     | .     |               |             | .             | 0              | .            |
| Year of Follow-up: 2035, Age Group: 45-49    |           |               |       |       |               |             |               |                |              |
| Period                                       | Age Group | Smoking Group | N     | %     | Ever Quit (N) | Ever Quit % | Mean Yrs Quit | Short Term (n) | Short Term % |
| 45                                           | 45-49     | Never Any     | 0     | .     |               |             |               |                |              |
| 45                                           | 45-49     | CC            | 0     | .     | 0             | .           |               |                |              |
| 45                                           | 45-49     | Ecig          | 0     | .     |               |             |               |                |              |
| 45                                           | 45-49     | Dual          | 0     | .     |               |             |               |                |              |
| 45                                           | 45-49     | Former        | 0     | .     |               |             | .             | 0              | .            |
| Year of Follow-up: 2035, Age Group: 50-54    |           |               |       |       |               |             |               |                |              |
| Period                                       | Age Group | Smoking Group | N     | %     | Ever Quit (N) | Ever Quit % | Mean Yrs Quit | Short Term (n) | Short Term % |
| 45                                           | 50-54     | Never Any     | 0     | .     |               |             |               |                |              |
| 45                                           | 50-54     | CC            | 0     | .     | 0             | .           |               |                |              |
| 45                                           | 50-54     | Ecig          | 0     | .     |               |             |               |                |              |
| 45                                           | 50-54     | Dual          | 0     | .     |               |             |               |                |              |
| 45                                           | 50-54     | Former        | 0     | .     |               |             | .             | 0              | .            |
| Year of Follow-up: 2035, Age Group: 55-59    |           |               |       |       |               |             |               |                |              |
| Period                                       | Age Group | Smoking Group | N     | %     | Ever Quit (N) | Ever Quit % | Mean Yrs Quit | Short Term (n) | Short Term % |

**Results for PHIM for Run 7 (Sensitivity\_Analysis\_1.RTF)**

|                                              |           |               |       |       |               |             |               |                |              |
|----------------------------------------------|-----------|---------------|-------|-------|---------------|-------------|---------------|----------------|--------------|
| 45                                           | 55-59     | Never Any     | 4489  | 50.75 |               |             |               |                |              |
| 45                                           | 55-59     | CC            | 2     | 0.02  | 0             | 0.00        |               |                |              |
| 45                                           | 55-59     | Ecig          | 1171  | 13.24 |               |             |               |                |              |
| 45                                           | 55-59     | Dual          | 0     | 0.00  |               |             |               |                |              |
| 45                                           | 55-59     | Former        | 3183  | 35.99 |               |             | 25.82         | 100            | 3.14         |
| Year of Follow-up: 2035, Age Group: 60-64    |           |               |       |       |               |             |               |                |              |
| Period                                       | Age Group | Smoking Group | N     | %     | Ever Quit (N) | Ever Quit % | Mean Yrs Quit | Short Term (n) | Short Term % |
| 45                                           | 60-64     | Never Any     | 4991  | 55.21 |               |             |               |                |              |
| 45                                           | 60-64     | CC            | 0     | 0.00  | 0             | 0.00        |               |                |              |
| 45                                           | 60-64     | Ecig          | 1020  | 11.28 |               |             |               |                |              |
| 45                                           | 60-64     | Dual          | 0     | 0.00  |               |             |               |                |              |
| 45                                           | 60-64     | Former        | 3029  | 33.51 |               |             | 25.81         | 129            | 4.26         |
| Year of Follow-up: 2035, Age Group: 65-69    |           |               |       |       |               |             |               |                |              |
| Period                                       | Age Group | Smoking Group | N     | %     | Ever Quit (N) | Ever Quit % | Mean Yrs Quit | Short Term (n) | Short Term % |
| 45                                           | 65-69     | Never Any     | 5163  | 52.60 |               |             |               |                |              |
| 45                                           | 65-69     | CC            | 0     | 0.00  | 0             | 0.00        |               |                |              |
| 45                                           | 65-69     | Ecig          | 902   | 9.19  |               |             |               |                |              |
| 45                                           | 65-69     | Dual          | 0     | 0.00  |               |             |               |                |              |
| 45                                           | 65-69     | Former        | 3751  | 38.21 |               |             | 27.09         | 106            | 2.83         |
| Year of Follow-up: 2035, Age Group: 70-74    |           |               |       |       |               |             |               |                |              |
| Period                                       | Age Group | Smoking Group | N     | %     | Ever Quit (N) | Ever Quit % | Mean Yrs Quit | Short Term (n) | Short Term % |
| 45                                           | 70-74     | Never Any     | 4997  | 46.86 |               |             |               |                |              |
| 45                                           | 70-74     | CC            | 1     | 0.01  | 0             | 0.00        |               |                |              |
| 45                                           | 70-74     | Ecig          | 850   | 7.97  |               |             |               |                |              |
| 45                                           | 70-74     | Dual          | 0     | 0.00  |               |             |               |                |              |
| 45                                           | 70-74     | Former        | 4816  | 45.16 |               |             | 29.70         | 104            | 2.16         |
| Year of Follow-up: 2035, Age Group: 75-79    |           |               |       |       |               |             |               |                |              |
| Period                                       | Age Group | Smoking Group | N     | %     | Ever Quit (N) | Ever Quit % | Mean Yrs Quit | Short Term (n) | Short Term % |
| 45                                           | 75-79     | Never Any     | 4724  | 43.28 |               |             |               |                |              |
| 45                                           | 75-79     | CC            | 3     | 0.03  | 0             | 0.00        |               |                |              |
| 45                                           | 75-79     | Ecig          | 635   | 5.82  |               |             |               |                |              |
| 45                                           | 75-79     | Dual          | 0     | 0.00  |               |             |               |                |              |
| 45                                           | 75-79     | Former        | 5554  | 50.88 |               |             | 32.60         | 99             | 1.78         |
| Year of Follow-up: 2040, Age Group: All Ages |           |               |       |       |               |             |               |                |              |
| Period                                       | Age Group | Smoking Group | N     | %     | Ever Quit (N) | Ever Quit % | Mean Yrs Quit | Short Term (n) | Short Term % |
| 50                                           | All Ages  | Never Any     | 19640 | 51.19 |               |             |               |                |              |
| 50                                           | All Ages  | CC            | 1     | 0.00  | 0             | 0.00        |               |                |              |
| 50                                           | All Ages  | Ecig          | 2868  | 7.48  |               |             |               |                |              |
| 50                                           | All Ages  | Dual          | 0     | 0.00  |               |             |               |                |              |
| 50                                           | All Ages  | Former        | 15856 | 41.33 |               |             | 30.34         | 408            | 2.57         |
| Year of Follow-up: 2040, Age Group: 18-19    |           |               |       |       |               |             |               |                |              |
| Period                                       | Age Group | Smoking Group | N     | %     | Ever Quit (N) | Ever Quit % | Mean Yrs Quit | Short Term (n) | Short Term % |
| 50                                           | 18-19     | Never Any     | 0     | .     |               |             |               |                |              |
| 50                                           | 18-19     | CC            | 0     | .     | 0             | .           |               |                |              |
| 50                                           | 18-19     | Ecig          | 0     | .     |               |             |               |                |              |
| 50                                           | 18-19     | Dual          | 0     | .     |               |             |               |                |              |
| 50                                           | 18-19     | Former        | 0     | .     |               |             | .             | 0              | .            |
| Year of Follow-up: 2040, Age Group: 20-24    |           |               |       |       |               |             |               |                |              |
| Period                                       | Age Group | Smoking Group | N     | %     | Ever Quit (N) | Ever Quit % | Mean Yrs Quit | Short Term (n) | Short Term % |
| 50                                           | 20-24     | Never Any     | 0     | .     |               |             |               |                |              |
| 50                                           | 20-24     | CC            | 0     | .     | 0             | .           |               |                |              |
| 50                                           | 20-24     | Ecig          | 0     | .     |               |             |               |                |              |
| 50                                           | 20-24     | Dual          | 0     | .     |               |             |               |                |              |
| 50                                           | 20-24     | Former        | 0     | .     |               |             | .             | 0              | .            |
| Year of Follow-up: 2040, Age Group: 25-29    |           |               |       |       |               |             |               |                |              |
| Period                                       | Age Group | Smoking Group | N     | %     | Ever Quit (N) | Ever Quit % | Mean Yrs Quit | Short Term (n) | Short Term % |
| 50                                           | 25-29     | Never Any     | 0     | .     |               |             |               |                |              |
| 50                                           | 25-29     | CC            | 0     | .     | 0             | .           |               |                |              |
| 50                                           | 25-29     | Ecig          | 0     | .     |               |             |               |                |              |
| 50                                           | 25-29     | Dual          | 0     | .     |               |             |               |                |              |
| 50                                           | 25-29     | Former        | 0     | .     |               |             | .             | 0              | .            |
| Year of Follow-up: 2040, Age Group: 30-34    |           |               |       |       |               |             |               |                |              |
| Period                                       | Age Group | Smoking Group | N     | %     | Ever Quit (N) | Ever Quit % | Mean Yrs Quit | Short Term (n) | Short Term % |
| 50                                           | 30-34     | Never Any     | 0     | .     |               |             |               |                |              |
| 50                                           | 30-34     | CC            | 0     | .     | 0             | .           |               |                |              |
| 50                                           | 30-34     | Ecig          | 0     | .     |               |             |               |                |              |
| 50                                           | 30-34     | Dual          | 0     | .     |               |             |               |                |              |
| 50                                           | 30-34     | Former        | 0     | .     |               |             | .             | 0              | .            |
| Year of Follow-up: 2040, Age Group: 35-39    |           |               |       |       |               |             |               |                |              |

**Results for PHIM for Run 7 (Sensitivity\_Analysis\_1.RTF)**

| Period                                    | Age Group | Smoking Group | N    | %     | Ever Quit (N) | Ever Quit % | Mean Yrs Quit | Short Term (n) | Short Term % |
|-------------------------------------------|-----------|---------------|------|-------|---------------|-------------|---------------|----------------|--------------|
| 50                                        | 35-39     | Never Any     | 0    | .     |               |             |               |                |              |
| 50                                        | 35-39     | CC            | 0    | .     | 0             | .           |               |                |              |
| 50                                        | 35-39     | Ecig          | 0    | .     |               |             |               |                |              |
| 50                                        | 35-39     | Dual          | 0    | .     |               |             |               |                |              |
| 50                                        | 35-39     | Former        | 0    | .     |               |             | .             | 0              | .            |
| Year of Follow-up: 2040, Age Group: 40-44 |           |               |      |       |               |             |               |                |              |
| Period                                    | Age Group | Smoking Group | N    | %     | Ever Quit (N) | Ever Quit % | Mean Yrs Quit | Short Term (n) | Short Term % |
| 50                                        | 40-44     | Never Any     | 0    | .     |               |             |               |                |              |
| 50                                        | 40-44     | CC            | 0    | .     | 0             | .           |               |                |              |
| 50                                        | 40-44     | Ecig          | 0    | .     |               |             |               |                |              |
| 50                                        | 40-44     | Dual          | 0    | .     |               |             |               |                |              |
| 50                                        | 40-44     | Former        | 0    | .     |               |             | .             | 0              | .            |
| Year of Follow-up: 2040, Age Group: 45-49 |           |               |      |       |               |             |               |                |              |
| Period                                    | Age Group | Smoking Group | N    | %     | Ever Quit (N) | Ever Quit % | Mean Yrs Quit | Short Term (n) | Short Term % |
| 50                                        | 45-49     | Never Any     | 0    | .     |               |             |               |                |              |
| 50                                        | 45-49     | CC            | 0    | .     | 0             | .           |               |                |              |
| 50                                        | 45-49     | Ecig          | 0    | .     |               |             |               |                |              |
| 50                                        | 45-49     | Dual          | 0    | .     |               |             |               |                |              |
| 50                                        | 45-49     | Former        | 0    | .     |               |             | .             | 0              | .            |
| Year of Follow-up: 2040, Age Group: 50-54 |           |               |      |       |               |             |               |                |              |
| Period                                    | Age Group | Smoking Group | N    | %     | Ever Quit (N) | Ever Quit % | Mean Yrs Quit | Short Term (n) | Short Term % |
| 50                                        | 50-54     | Never Any     | 0    | .     |               |             |               |                |              |
| 50                                        | 50-54     | CC            | 0    | .     | 0             | .           |               |                |              |
| 50                                        | 50-54     | Ecig          | 0    | .     |               |             |               |                |              |
| 50                                        | 50-54     | Dual          | 0    | .     |               |             |               |                |              |
| 50                                        | 50-54     | Former        | 0    | .     |               |             | .             | 0              | .            |
| Year of Follow-up: 2040, Age Group: 55-59 |           |               |      |       |               |             |               |                |              |
| Period                                    | Age Group | Smoking Group | N    | %     | Ever Quit (N) | Ever Quit % | Mean Yrs Quit | Short Term (n) | Short Term % |
| 50                                        | 55-59     | Never Any     | 0    | .     |               |             |               |                |              |
| 50                                        | 55-59     | CC            | 0    | .     | 0             | .           |               |                |              |
| 50                                        | 55-59     | Ecig          | 0    | .     |               |             |               |                |              |
| 50                                        | 55-59     | Dual          | 0    | .     |               |             |               |                |              |
| 50                                        | 55-59     | Former        | 0    | .     |               |             | .             | 0              | .            |
| Year of Follow-up: 2040, Age Group: 60-64 |           |               |      |       |               |             |               |                |              |
| Period                                    | Age Group | Smoking Group | N    | %     | Ever Quit (N) | Ever Quit % | Mean Yrs Quit | Short Term (n) | Short Term % |
| 50                                        | 60-64     | Never Any     | 4489 | 50.75 |               |             |               |                |              |
| 50                                        | 60-64     | CC            | 0    | 0.00  | 0             | 0.00        |               |                |              |
| 50                                        | 60-64     | Ecig          | 865  | 9.78  |               |             |               |                |              |
| 50                                        | 60-64     | Dual          | 0    | 0.00  |               |             |               |                |              |
| 50                                        | 60-64     | Former        | 3491 | 39.47 |               |             | 28.27         | 129            | 3.70         |
| Year of Follow-up: 2040, Age Group: 65-69 |           |               |      |       |               |             |               |                |              |
| Period                                    | Age Group | Smoking Group | N    | %     | Ever Quit (N) | Ever Quit % | Mean Yrs Quit | Short Term (n) | Short Term % |
| 50                                        | 65-69     | Never Any     | 4991 | 55.21 |               |             |               |                |              |
| 50                                        | 65-69     | CC            | 0    | 0.00  | 0             | 0.00        |               |                |              |
| 50                                        | 65-69     | Ecig          | 705  | 7.80  |               |             |               |                |              |
| 50                                        | 65-69     | Dual          | 0    | 0.00  |               |             |               |                |              |
| 50                                        | 65-69     | Former        | 3344 | 36.99 |               |             | 28.11         | 120            | 3.59         |
| Year of Follow-up: 2040, Age Group: 70-74 |           |               |      |       |               |             |               |                |              |
| Period                                    | Age Group | Smoking Group | N    | %     | Ever Quit (N) | Ever Quit % | Mean Yrs Quit | Short Term (n) | Short Term % |
| 50                                        | 70-74     | Never Any     | 5163 | 52.60 |               |             |               |                |              |
| 50                                        | 70-74     | CC            | 0    | 0.00  | 0             | 0.00        |               |                |              |
| 50                                        | 70-74     | Ecig          | 665  | 6.77  |               |             |               |                |              |
| 50                                        | 70-74     | Dual          | 0    | 0.00  |               |             |               |                |              |
| 50                                        | 70-74     | Former        | 3988 | 40.63 |               |             | 30.31         | 80             | 2.01         |
| Year of Follow-up: 2040, Age Group: 75-79 |           |               |      |       |               |             |               |                |              |
| Period                                    | Age Group | Smoking Group | N    | %     | Ever Quit (N) | Ever Quit % | Mean Yrs Quit | Short Term (n) | Short Term % |
| 50                                        | 75-79     | Never Any     | 4997 | 46.86 |               |             |               |                |              |
| 50                                        | 75-79     | CC            | 1    | 0.01  | 0             | 0.00        |               |                |              |
| 50                                        | 75-79     | Ecig          | 633  | 5.94  |               |             |               |                |              |
| 50                                        | 75-79     | Dual          | 0    | 0.00  |               |             |               |                |              |
| 50                                        | 75-79     | Former        | 5033 | 47.20 |               |             | 33.29         | 79             | 1.57         |

## Results for PHIM for Run 7 (Sensitivity\_Analysis\_1.RTF)

\*\*\*\*\*

### Main Results for E-Component for Run: 7, Simulation: 1, COD: Four Diseases Combined

| Variable Parameter          | Value                                  |
|-----------------------------|----------------------------------------|
| 1. Country                  | US (United States)                     |
| 2. Sex                      | M (Males)                              |
| 3. Year of start of process | 1990                                   |
| 4. Cause of Death           | Four Diseases Combined                 |
| 5. Effective Dose NULL      | CC:1                                   |
| 6. Effective Dose Ecig      | CC:1 Ecig:0.2 Dual:0.6                 |
| Note:                       | Death rates are per million population |

#### Results for Age Groups Combined and Years combined, Population unadjusted for deaths in Ecig scenario,

| Age Group:All |          | NULL        | Ecig        | %Drop   |        |        | NULL    | Ecig    | Drop    |         |
|---------------|----------|-------------|-------------|---------|--------|--------|---------|---------|---------|---------|
| Year          | Number   | Attrib      | Attrib      | Drop    | %Drop  | Attrib | Death   | Attrib  | Drop    |         |
|               | Deaths   | Deaths      | Deaths      | Deaths  | Deaths | Deaths | Rate    | Rates   | Rates   |         |
| All Comb      | 13148871 | 4509390.583 | 3321394.806 | 1187996 | 9.035  | 26.345 | 3806.31 | 1305.37 | 961.472 | 343.899 |

#### Results for Age Groups Combined, Population unadjusted for deaths in Ecig scenario,

| Age Group:All |        | NULL       | Ecig       | %Drop    |        |        | NULL    | Ecig    | Drop    |         |
|---------------|--------|------------|------------|----------|--------|--------|---------|---------|---------|---------|
| Year          | Number | Attrib     | Attrib     | Drop     | %Drop  | Attrib | Death   | Attrib  | Drop    |         |
|               | Deaths | Deaths     | Deaths     | Deaths   | Deaths | Deaths | Rate    | Rates   | Rates   |         |
| 1990          | 317161 | 125773.065 | 125773.065 | 0.000    | 0.000  | 0.000  | 5027.71 | 1993.78 | 0.000   |         |
| 1991          | 313217 | 123999.442 | 123641.992 | 357.450  | 0.114  | 0.288  | 4883.81 | 1933.45 | 1927.88 | 5.574   |
| 1992          | 308577 | 122014.015 | 121063.481 | 950.534  | 0.308  | 0.779  | 4729.73 | 1870.18 | 1855.61 | 14.569  |
| 1993          | 311713 | 122810.618 | 121033.114 | 1777.504 | 0.570  | 1.447  | 4692.62 | 1848.83 | 1822.07 | 26.759  |
| 1994          | 305700 | 119925.592 | 117207.023 | 2718.569 | 0.889  | 2.267  | 4516.19 | 1771.69 | 1731.53 | 40.162  |
| 1995          | 303225 | 117896.496 | 114082.194 | 3814.302 | 1.258  | 3.235  | 4393.80 | 1708.35 | 1653.08 | 55.270  |
| 1996          | 299559 | 115698.645 | 110684.311 | 5014.334 | 1.674  | 4.334  | 4273.16 | 1650.42 | 1578.89 | 71.529  |
| 1997          | 294226 | 113359.847 | 107144.862 | 6214.985 | 2.112  | 5.483  | 4128.67 | 1590.70 | 1503.49 | 87.211  |
| 1998          | 289258 | 111444.212 | 104025.477 | 7418.735 | 2.565  | 6.657  | 3992.19 | 1538.10 | 1435.71 | 102.390 |
| 1999          | 311002 | 114877.722 | 104991.040 | 9886.681 | 3.179  | 8.606  | 4224.60 | 1560.48 | 1426.18 | 134.299 |
| 2000          | 303786 | 112379.704 | 101143.973 | 11235.73 | 3.699  | 9.998  | 4066.21 | 1504.22 | 1353.82 | 150.392 |
| 2001          | 296294 | 110024.943 | 97332.273  | 12692.67 | 4.284  | 11.536 | 3914.28 | 1453.52 | 1285.84 | 167.680 |
| 2002          | 291898 | 108289.173 | 93977.063  | 14312.11 | 4.903  | 13.217 | 3813.00 | 1414.56 | 1227.60 | 186.956 |
| 2003          | 285865 | 106539.023 | 90806.355  | 15732.67 | 5.504  | 14.767 | 3695.36 | 1377.22 | 1173.85 | 203.375 |
| 2004          | 274177 | 103037.251 | 86255.208  | 16782.04 | 6.121  | 16.287 | 3506.10 | 1317.61 | 1103.01 | 214.604 |
| 2005          | 272379 | 103044.562 | 84758.306  | 18286.26 | 6.714  | 17.746 | 3442.69 | 1302.41 | 1071.29 | 231.126 |
| 2006          | 264118 | 99672.555  | 80119.314  | 19553.24 | 7.403  | 19.617 | 3307.76 | 1248.28 | 1003.40 | 244.881 |
| 2007          | 258419 | 97839.152  | 77221.300  | 20617.85 | 7.978  | 21.073 | 3203.20 | 1212.75 | 957.186 | 255.566 |
| 2008          | 259461 | 98075.852  | 76116.971  | 21958.88 | 8.463  | 22.390 | 3180.09 | 1202.07 | 932.931 | 269.140 |
| 2009          | 253907 | 95617.338  | 72734.997  | 22882.34 | 9.012  | 23.931 | 3075.31 | 1158.11 | 880.964 | 277.150 |
| 2010          | 251878 | 94607.988  | 70694.153  | 23913.83 | 9.494  | 25.277 | 3013.72 | 1131.98 | 845.855 | 286.129 |
| 2011          | 251779 | 93633.119  | 68437.826  | 25195.29 | 10.007 | 26.909 | 2982.76 | 1109.25 | 810.766 | 298.483 |
| 2012          | 252643 | 92775.175  | 66328.017  | 26447.16 | 10.468 | 28.507 | 2960.61 | 1087.19 | 777.267 | 309.922 |
| 2013          | 256175 | 92345.780  | 64614.004  | 27731.78 | 10.825 | 30.030 | 2967.76 | 1069.82 | 748.546 | 321.270 |
| 2014          | 257393 | 91379.215  | 62584.365  | 28794.85 | 11.187 | 31.511 | 2947.05 | 1046.26 | 716.567 | 329.690 |
| 2015          | 259782 | 90750.242  | 61021.778  | 29728.46 | 11.444 | 32.759 | 3346.10 | 1168.90 | 785.986 | 382.915 |
| 2016          | 261453 | 88811.996  | 58126.847  | 30685.15 | 11.736 | 34.551 | 3336.15 | 1133.24 | 741.701 | 391.544 |
| 2017          | 263685 | 87325.126  | 55754.536  | 31570.59 | 11.973 | 36.153 | 3333.85 | 1104.08 | 704.922 | 399.157 |
| 2018          | 258714 | 87612.144  | 55377.477  | 32234.67 | 12.460 | 36.792 | 3240.73 | 1097.46 | 693.675 | 403.781 |
| 2019          | 261438 | 87797.760  | 54464.973  | 33332.79 | 12.750 | 37.965 | 3242.99 | 1089.08 | 675.607 | 413.474 |
| 2020          | 262288 | 87221.042  | 53284.248  | 33936.79 | 12.939 | 38.909 | 3715.29 | 1235.48 | 754.767 | 480.712 |
| 2021          | 255079 | 82001.292  | 48414.437  | 33586.85 | 13.167 | 40.959 | 3587.82 | 1153.39 | 680.973 | 472.416 |
| 2022          | 257097 | 81915.977  | 47306.705  | 34609.27 | 13.462 | 42.250 | 3588.53 | 1143.37 | 660.302 | 483.073 |
| 2023          | 259080 | 81810.810  | 46246.484  | 35564.33 | 13.727 | 43.471 | 3586.88 | 1132.64 | 640.268 | 492.377 |
| 2024          | 260719 | 81528.303  | 45171.789  | 36356.51 | 13.945 | 44.594 | 3579.65 | 1119.38 | 620.206 | 499.173 |
| 2025          | 257308 | 79599.213  | 43551.202  | 36048.01 | 14.010 | 45.287 | 4112.08 | 1272.09 | 695.999 | 576.089 |
| 2026          | 251528 | 75082.462  | 39653.136  | 35429.33 | 14.086 | 47.187 | 4003.24 | 1194.99 | 631.107 | 563.882 |
| 2027          | 250988 | 74444.425  | 38419.502  | 36024.92 | 14.353 | 48.392 | 3976.53 | 1179.46 | 608.700 | 570.761 |
| 2028          | 250285 | 73699.585  | 37111.148  | 36588.44 | 14.619 | 49.645 | 3945.35 | 1161.76 | 585.000 | 576.760 |
| 2029          | 249525 | 72819.703  | 35814.884  | 37004.82 | 14.830 | 50.817 | 3910.99 | 1141.36 | 561.353 | 580.004 |
| 2030          | 240528 | 69309.277  | 33789.418  | 35519.86 | 14.767 | 51.248 | 4504.36 | 1297.95 | 632.772 | 665.178 |
| 2031          | 235442 | 65433.368  | 30805.529  | 34627.84 | 14.708 | 52.921 | 4397.65 | 1222.18 | 575.394 | 646.788 |
| 2032          | 234017 | 64643.552  | 29668.435  | 34975.12 | 14.946 | 54.105 | 4356.12 | 1203.31 | 552.264 | 651.045 |
| 2033          | 232559 | 63793.514  | 28636.116  | 35157.40 | 15.118 | 55.111 | 4310.93 | 1182.54 | 530.826 | 651.710 |
| 2034          | 230963 | 63032.151  | 27642.544  | 35389.61 | 15.323 | 56.145 | 4260.75 | 1162.80 | 509.942 | 652.858 |
| 2035          | 215822 | 57653.301  | 25339.963  | 32313.34 | 14.972 | 56.048 | 4924.38 | 1315.47 | 578.180 | 737.291 |
| 2036          | 208183 | 52988.733  | 22171.518  | 30817.22 | 14.803 | 58.158 | 4748.94 | 1208.75 | 505.763 | 702.983 |
| 2037          | 205491 | 52026.921  | 21200.515  | 30826.41 | 15.001 | 59.251 | 4682.40 | 1185.50 | 483.082 | 702.421 |
| 2038          | 202834 | 50943.211  | 20229.619  | 30713.59 | 15.142 | 60.290 | 4612.18 | 1158.38 | 459.996 | 698.388 |
| 2039          | 200251 | 50085.991  | 19421.317  | 30664.67 | 15.313 | 61.224 | 4538.65 | 1135.19 | 440.181 | 695.010 |

## Results for PHIM for Run 7 (Sensitivity\_Analysis\_1.RTF)

\*\*\*\*\*

### Main Results for E-Component for Run: 7, Simulation: 1, COD: LUNG CANCER

| Variable Parameter          | Value                                  |
|-----------------------------|----------------------------------------|
| 1. Country                  | US (United States)                     |
| 2. Sex                      | M (Males)                              |
| 3. Year of start of process | 1990                                   |
| 4. Cause of Death           | LUNG CANCER                            |
| 5. Effective Dose NULL      | CC:1                                   |
| 6. Effective Dose Ecig      | CC:1 Ecig:0.2 Dual:0.6                 |
| Note:                       | Death rates are per million population |

#### Results for Age Groups Combined and Years combined, Population unadjusted for deaths in Ecig scenario,

| Age Group:All | NULL    | Ecig        | %Drop       |          |        | NULL   | Ecig    | Drop    |         |         |
|---------------|---------|-------------|-------------|----------|--------|--------|---------|---------|---------|---------|
| Year          | Number  | Attrib      | Attrib      | Drop     | %Drop  | Attrib | Death   | Attrib  | Attrib  | Drop    |
|               | Deaths  | Deaths      | Deaths      | Deaths   | Deaths | Deaths | Rate    | Rates   | Rates   | Rates   |
| All Comb      | 3065988 | 2244988.113 | 1865456.758 | 379531.4 | 12.379 | 16.906 | 887.537 | 649.875 | 540.009 | 109.866 |

#### Results for Age Groups Combined, Population unadjusted for deaths in Ecig scenario,

| Age Group:All | NULL   | Ecig      | %Drop     |          |        | NULL   | Ecig    | Drop    |         |         |
|---------------|--------|-----------|-----------|----------|--------|--------|---------|---------|---------|---------|
| Year          | Number | Attrib    | Attrib    | Drop     | %Drop  | Attrib | Death   | Attrib  | Attrib  | Drop    |
|               | Deaths | Deaths    | Deaths    | Deaths   | Deaths | Deaths | Rate    | Rates   | Rates   | Rates   |
| 1990          | 78822  | 63385.736 | 63385.736 | 0.000    | 0.000  | 0.000  | 1249.50 | 1004.81 | 1004.81 | 0.000   |
| 1991          | 78462  | 62918.402 | 62877.538 | 40.864   | 0.052  | 0.065  | 1223.41 | 981.049 | 980.412 | 0.637   |
| 1992          | 77987  | 62366.766 | 62258.172 | 108.594  | 0.139  | 0.174  | 1195.35 | 955.930 | 954.265 | 1.664   |
| 1993          | 78542  | 62652.888 | 62439.832 | 213.055  | 0.271  | 0.340  | 1182.39 | 943.195 | 939.987 | 3.207   |
| 1994          | 77437  | 61565.227 | 61230.931 | 334.296  | 0.432  | 0.543  | 1144.00 | 909.520 | 904.582 | 4.939   |
| 1995          | 76904  | 60851.961 | 60366.768 | 485.193  | 0.631  | 0.797  | 1114.36 | 881.759 | 874.728 | 7.031   |
| 1996          | 76232  | 60122.922 | 59448.470 | 674.451  | 0.885  | 1.122  | 1087.44 | 857.643 | 848.022 | 9.621   |
| 1997          | 75473  | 59237.155 | 58361.318 | 875.836  | 1.160  | 1.479  | 1059.06 | 831.234 | 818.944 | 12.290  |
| 1998          | 75381  | 58906.696 | 57779.638 | 1127.058 | 1.495  | 1.913  | 1040.37 | 813.001 | 797.445 | 15.555  |
| 1999          | 73159  | 56930.073 | 55561.265 | 1368.808 | 1.871  | 2.404  | 993.781 | 773.329 | 754.736 | 18.594  |
| 2000          | 73784  | 57137.121 | 55457.590 | 1679.531 | 2.276  | 2.939  | 987.608 | 764.787 | 742.307 | 22.481  |
| 2001          | 73294  | 56481.726 | 54449.350 | 2032.376 | 2.773  | 3.598  | 968.273 | 746.169 | 719.320 | 26.849  |
| 2002          | 72442  | 55588.365 | 53192.322 | 2396.043 | 3.308  | 4.310  | 946.293 | 726.138 | 694.839 | 31.299  |
| 2003          | 71942  | 54945.856 | 52151.672 | 2794.184 | 3.884  | 5.085  | 929.989 | 710.281 | 674.161 | 36.120  |
| 2004          | 71301  | 54203.126 | 50967.599 | 3235.526 | 4.538  | 5.969  | 911.778 | 693.135 | 651.760 | 41.375  |
| 2005          | 70964  | 53744.603 | 50063.791 | 3680.812 | 5.187  | 6.849  | 896.937 | 679.296 | 632.773 | 46.523  |
| 2006          | 69658  | 52535.572 | 48390.458 | 4145.113 | 5.951  | 7.890  | 872.383 | 657.945 | 606.032 | 51.913  |
| 2007          | 68565  | 51492.124 | 46894.073 | 4598.051 | 6.706  | 8.930  | 849.888 | 638.264 | 581.269 | 56.994  |
| 2008          | 68226  | 51030.736 | 45891.725 | 5139.011 | 7.532  | 10.070 | 836.215 | 625.460 | 562.474 | 62.986  |
| 2009          | 67509  | 50276.199 | 44597.551 | 5678.648 | 8.412  | 11.295 | 817.667 | 608.943 | 540.164 | 68.780  |
| 2010          | 67196  | 49840.933 | 43627.078 | 6213.855 | 9.247  | 12.467 | 804.000 | 596.347 | 521.998 | 74.349  |
| 2011          | 66506  | 49072.841 | 42272.800 | 6800.041 | 10.225 | 13.857 | 787.880 | 581.354 | 500.796 | 80.558  |
| 2012          | 66155  | 48539.512 | 41114.523 | 7424.989 | 11.224 | 15.297 | 775.240 | 568.812 | 481.802 | 87.010  |
| 2013          | 65333  | 47675.741 | 39704.876 | 7970.864 | 12.200 | 16.719 | 756.876 | 552.318 | 459.977 | 92.342  |
| 2014          | 65033  | 47194.534 | 38651.523 | 8543.011 | 13.136 | 18.102 | 744.602 | 540.359 | 442.545 | 97.814  |
| 2015          | 64145  | 46305.842 | 37284.336 | 9021.506 | 14.064 | 19.482 | 826.215 | 596.439 | 480.238 | 116.201 |
| 2016          | 61618  | 44208.867 | 34938.654 | 9270.213 | 15.045 | 20.969 | 786.248 | 564.107 | 445.819 | 118.288 |
| 2017          | 59897  | 42702.624 | 33110.621 | 9592.003 | 16.014 | 22.462 | 757.297 | 539.903 | 418.628 | 121.275 |
| 2018          | 62468  | 44321.202 | 33604.148 | 10717.05 | 17.156 | 24.180 | 782.490 | 555.181 | 420.936 | 134.245 |
| 2019          | 63045  | 44493.088 | 33038.889 | 11454.20 | 18.168 | 25.744 | 782.035 | 551.912 | 409.829 | 142.083 |
| 2020          | 63466  | 44529.551 | 32389.126 | 12140.43 | 19.129 | 27.264 | 898.991 | 630.757 | 458.789 | 171.968 |
| 2021          | 57113  | 39852.556 | 28329.209 | 11523.35 | 20.176 | 28.915 | 803.323 | 560.546 | 398.464 | 162.082 |
| 2022          | 57440  | 39853.685 | 27648.267 | 12205.42 | 21.249 | 30.626 | 801.745 | 556.274 | 385.912 | 170.362 |
| 2023          | 57738  | 39847.050 | 26982.798 | 12864.25 | 22.280 | 32.284 | 799.366 | 551.670 | 373.568 | 178.102 |
| 2024          | 57942  | 39726.010 | 26284.623 | 13441.39 | 23.198 | 33.835 | 795.539 | 545.435 | 360.886 | 184.549 |
| 2025          | 57521  | 39207.348 | 25390.890 | 13816.46 | 24.020 | 35.239 | 919.257 | 626.579 | 405.776 | 220.803 |
| 2026          | 51428  | 34803.960 | 21987.419 | 12816.54 | 24.921 | 36.825 | 818.510 | 553.929 | 349.945 | 203.984 |
| 2027          | 51172  | 34484.595 | 21221.637 | 13262.96 | 25.918 | 38.461 | 810.740 | 546.357 | 336.225 | 210.132 |
| 2028          | 50870  | 34100.638 | 20430.369 | 13670.27 | 26.873 | 40.088 | 801.884 | 537.544 | 322.053 | 215.491 |
| 2029          | 50540  | 33669.838 | 19650.193 | 14019.64 | 27.740 | 41.639 | 792.146 | 527.732 | 307.992 | 219.740 |
| 2030          | 49109  | 32557.688 | 18608.118 | 13949.57 | 28.405 | 42.846 | 919.662 | 609.705 | 348.473 | 261.233 |
| 2031          | 43585  | 28646.393 | 15989.726 | 12656.67 | 29.039 | 44.182 | 814.096 | 535.065 | 298.660 | 236.404 |
| 2032          | 43163  | 28227.160 | 15340.652 | 12886.51 | 29.856 | 45.653 | 803.454 | 525.435 | 285.559 | 239.876 |
| 2033          | 42725  | 27786.623 | 14752.117 | 13034.51 | 30.508 | 46.909 | 791.996 | 515.079 | 273.459 | 241.620 |
| 2034          | 42256  | 27348.299 | 14178.166 | 13170.13 | 31.168 | 48.157 | 779.523 | 504.514 | 261.555 | 242.959 |
| 2035          | 39748  | 25570.077 | 13075.166 | 12494.91 | 31.435 | 48.865 | 906.933 | 583.430 | 298.335 | 285.095 |
| 2036          | 34030  | 21717.319 | 10746.032 | 10971.29 | 32.240 | 50.519 | 776.269 | 495.402 | 245.132 | 250.270 |
| 2037          | 33454  | 21256.024 | 10242.183 | 11013.84 | 32.923 | 51.815 | 762.289 | 484.347 | 233.382 | 250.965 |
| 2038          | 32883  | 20747.175 | 9751.990  | 10995.18 | 33.437 | 52.996 | 747.720 | 471.764 | 221.748 | 250.016 |
| 2039          | 32325  | 20327.688 | 9344.830  | 10982.86 | 33.976 | 54.029 | 732.644 | 460.724 | 211.799 | 248.925 |

## Results for PHIM for Run 7 (Sensitivity\_Analysis\_1.RTF)

\*\*\*\*\*

### Main Results for E-Component for Run: 7, Simulation: 1, COD: IHD

| Variable Parameter          | Value                                  |
|-----------------------------|----------------------------------------|
| 1. Country                  | US (United States)                     |
| 2. Sex                      | M (Males)                              |
| 3. Year of start of process | 1990                                   |
| 4. Cause of Death           | IHD                                    |
| 5. Effective Dose NULL      | CC:1                                   |
| 6. Effective Dose Ecig      | CC:1 Ecig:0.2 Dual:0.6                 |
| Note:                       | Death rates are per million population |

#### Results for Age Groups Combined and Years combined, Population unadjusted for deaths in Ecig scenario,

| Age Group:All |         | NULL        | Ecig       | %Drop    |        |        | NULL    | Ecig    | Drop    |         |
|---------------|---------|-------------|------------|----------|--------|--------|---------|---------|---------|---------|
| Year          | Number  | Attrib      | Attrib     | Drop     | %Drop  | Attrib | Death   | Attrib  | Attrib  | Drop    |
|               | Deaths  | Deaths      | Deaths     | Deaths   | Deaths | Deaths | Rate    | Rates   | Rates   | Rates   |
| All Comb      | 6360041 | 1098877.421 | 626490.867 | 472386.6 | 7.427  | 42.988 | 1841.09 | 318.101 | 181.356 | 136.746 |

#### Results for Age Groups Combined, Population unadjusted for deaths in Ecig scenario,

| Age Group:All |        | NULL      | Ecig      | %Drop    |        |        | NULL    | Ecig    | Drop    |         |
|---------------|--------|-----------|-----------|----------|--------|--------|---------|---------|---------|---------|
| Year          | Number | Attrib    | Attrib    | Drop     | %Drop  | Attrib | Death   | Attrib  | Attrib  | Drop    |
|               | Deaths | Deaths    | Deaths    | Deaths   | Deaths | Deaths | Rate    | Rates   | Rates   | Rates   |
| 1990          | 171484 | 38511.725 | 38511.725 | 0.000    | 0.000  | 0.000  | 2718.40 | 610.497 | 610.497 | 0.000   |
| 1991          | 168044 | 37309.838 | 37046.106 | 263.731  | 0.157  | 0.707  | 2620.21 | 581.750 | 577.638 | 4.112   |
| 1992          | 164548 | 36137.488 | 35432.669 | 704.819  | 0.428  | 1.950  | 2522.12 | 553.899 | 543.096 | 10.803  |
| 1993          | 164362 | 35599.588 | 34301.092 | 1298.495 | 0.790  | 3.648  | 2474.35 | 535.926 | 516.379 | 19.548  |
| 1994          | 159866 | 34336.757 | 32365.523 | 1971.234 | 1.233  | 5.741  | 2361.75 | 507.267 | 478.145 | 29.122  |
| 1995          | 158083 | 33455.759 | 30714.079 | 2741.680 | 1.734  | 8.195  | 2290.66 | 484.782 | 445.054 | 39.728  |
| 1996          | 154875 | 32193.824 | 28640.623 | 3553.201 | 2.294  | 11.037 | 2209.26 | 459.239 | 408.553 | 50.686  |
| 1997          | 149970 | 30665.509 | 26331.291 | 4334.218 | 2.890  | 14.134 | 2104.43 | 430.308 | 369.489 | 60.819  |
| 1998          | 145407 | 29188.430 | 24127.607 | 5060.824 | 3.480  | 17.338 | 2006.83 | 402.844 | 332.997 | 69.847  |
| 1999          | 165952 | 33375.386 | 26357.045 | 7018.341 | 4.229  | 21.028 | 2254.27 | 453.366 | 358.030 | 95.336  |
| 2000          | 160260 | 32024.754 | 24195.249 | 7829.505 | 4.886  | 24.448 | 2145.10 | 428.655 | 323.856 | 104.799 |
| 2001          | 154444 | 30682.393 | 22004.370 | 8678.022 | 5.619  | 28.283 | 2040.33 | 405.339 | 290.696 | 114.644 |
| 2002          | 151887 | 30218.370 | 20549.170 | 9669.199 | 6.366  | 31.998 | 1984.06 | 394.736 | 268.429 | 126.307 |
| 2003          | 146733 | 29175.202 | 18782.068 | 10393.13 | 7.083  | 35.623 | 1896.81 | 377.146 | 242.794 | 134.351 |
| 2004          | 138381 | 27488.687 | 16716.395 | 10772.29 | 7.785  | 39.188 | 1769.58 | 351.518 | 213.765 | 137.753 |
| 2005          | 135881 | 27017.439 | 15558.387 | 11459.05 | 8.433  | 42.414 | 1717.44 | 341.482 | 196.648 | 144.835 |
| 2006          | 131922 | 26231.435 | 14192.255 | 12039.18 | 9.126  | 45.896 | 1652.16 | 328.517 | 177.741 | 150.776 |
| 2007          | 126502 | 25103.049 | 12815.673 | 12287.38 | 9.713  | 48.948 | 1568.04 | 311.161 | 158.855 | 152.306 |
| 2008          | 125859 | 24621.740 | 11946.543 | 12675.20 | 10.071 | 51.480 | 1542.60 | 301.777 | 146.423 | 155.354 |
| 2009          | 122428 | 23741.177 | 10934.247 | 12806.93 | 10.461 | 53.944 | 1482.84 | 287.552 | 132.435 | 155.117 |
| 2010          | 120537 | 23189.160 | 10176.767 | 13012.39 | 10.795 | 56.114 | 1442.22 | 277.458 | 121.765 | 155.693 |
| 2011          | 120221 | 22786.927 | 9480.741  | 13306.19 | 11.068 | 58.394 | 1424.23 | 269.951 | 112.316 | 157.635 |
| 2012          | 120927 | 22485.295 | 8909.765  | 13575.53 | 11.226 | 60.375 | 1417.09 | 263.495 | 104.409 | 159.085 |
| 2013          | 122648 | 22251.884 | 8429.437  | 13822.45 | 11.270 | 62.118 | 1420.86 | 257.786 | 97.654  | 160.132 |
| 2014          | 123229 | 21894.593 | 7943.926  | 13950.67 | 11.321 | 63.717 | 1410.92 | 250.685 | 90.955  | 159.730 |
| 2015          | 123774 | 21471.109 | 7503.713  | 13967.40 | 11.285 | 65.052 | 1594.26 | 276.557 | 96.651  | 179.906 |
| 2016          | 126218 | 21411.568 | 7179.570  | 14232.00 | 11.276 | 66.469 | 1610.55 | 273.213 | 91.612  | 181.601 |
| 2017          | 128265 | 21169.399 | 6831.994  | 14337.41 | 11.178 | 67.727 | 1621.69 | 267.651 | 86.379  | 181.272 |
| 2018          | 121429 | 19830.576 | 6163.312  | 13667.26 | 11.255 | 68.920 | 1521.05 | 248.404 | 77.203  | 171.200 |
| 2019          | 121832 | 19431.014 | 5863.342  | 13567.67 | 11.136 | 69.825 | 1511.26 | 241.031 | 72.731  | 168.299 |
| 2020          | 120811 | 18532.612 | 5437.392  | 13095.22 | 10.839 | 70.660 | 1711.27 | 262.513 | 77.020  | 185.493 |
| 2021          | 119407 | 18234.128 | 5177.868  | 13056.26 | 10.934 | 71.603 | 1679.51 | 256.472 | 72.829  | 183.643 |
| 2022          | 119438 | 17812.559 | 4910.651  | 12901.91 | 10.802 | 72.432 | 1667.10 | 248.626 | 68.542  | 180.084 |
| 2023          | 119445 | 17361.668 | 4659.420  | 12702.25 | 10.634 | 73.163 | 1653.68 | 240.367 | 64.508  | 175.859 |
| 2024          | 119305 | 16929.676 | 4447.851  | 12481.82 | 10.462 | 73.727 | 1638.05 | 232.443 | 61.069  | 171.375 |
| 2025          | 115685 | 15501.666 | 3991.700  | 11509.97 | 9.949  | 74.250 | 1848.78 | 247.735 | 63.792  | 183.943 |
| 2026          | 115073 | 15523.814 | 3931.647  | 11592.17 | 10.074 | 74.673 | 1831.46 | 247.072 | 62.575  | 184.497 |
| 2027          | 113989 | 15073.070 | 3758.855  | 11314.22 | 9.926  | 75.062 | 1805.98 | 238.810 | 59.553  | 179.257 |
| 2028          | 112855 | 14636.710 | 3580.291  | 11056.42 | 9.797  | 75.539 | 1778.98 | 230.725 | 56.438  | 174.287 |
| 2029          | 111718 | 14180.166 | 3422.117  | 10758.05 | 9.630  | 75.867 | 1751.04 | 222.256 | 53.637  | 168.619 |
| 2030          | 104851 | 12111.772 | 2878.066  | 9233.706 | 8.807  | 76.237 | 1963.54 | 226.816 | 53.897  | 172.919 |
| 2031          | 105289 | 12417.367 | 2933.296  | 9484.070 | 9.008  | 76.377 | 1966.62 | 231.935 | 54.789  | 177.146 |
| 2032          | 103879 | 12054.064 | 2804.407  | 9249.657 | 8.904  | 76.735 | 1933.67 | 224.381 | 52.203  | 172.178 |
| 2033          | 102485 | 11672.389 | 2671.328  | 9001.061 | 8.783  | 77.114 | 1899.76 | 216.370 | 49.518  | 166.852 |
| 2034          | 101070 | 11365.762 | 2582.178  | 8783.584 | 8.691  | 77.281 | 1864.51 | 209.673 | 47.635  | 162.037 |
| 2035          | 90820  | 8580.360  | 1908.790  | 6671.570 | 7.346  | 77.754 | 2072.23 | 195.777 | 43.553  | 152.225 |
| 2036          | 92117  | 8948.841  | 1971.907  | 6976.934 | 7.574  | 77.965 | 2101.31 | 204.135 | 44.982  | 159.153 |
| 2037          | 90327  | 8624.570  | 1895.704  | 6728.866 | 7.449  | 78.020 | 2058.21 | 196.522 | 43.196  | 153.326 |
| 2038          | 88590  | 8315.017  | 1800.586  | 6514.431 | 7.353  | 78.345 | 2014.42 | 189.073 | 40.943  | 148.130 |
| 2039          | 86921  | 8001.132  | 1722.126  | 6279.006 | 7.224  | 78.476 | 1970.05 | 181.344 | 39.032  | 142.313 |

## Results for PHIM for Run 7 (Sensitivity\_Analysis\_1.RTF)

\*\*\*\*\*

### Main Results for E-Component for Run: 7, Simulation: 1, COD: STROKE

| Variable Parameter          | Value                                  |
|-----------------------------|----------------------------------------|
| 1. Country                  | US (United States)                     |
| 2. Sex                      | M (Males)                              |
| 3. Year of start of process | 1990                                   |
| 4. Cause of Death           | STROKE                                 |
| 5. Effective Dose NULL      | CC:1                                   |
| 6. Effective Dose Ecig      | CC:1 Ecig:0.2 Dual:0.6                 |
| Note:                       | Death rates are per million population |

#### Results for Age Groups Combined and Years combined, Population unadjusted for deaths in Ecig scenario,

| Age Group:All |         | NULL       | Ecig      | %Drop    |        | NULL   | Ecig    | Drop   |        |        |
|---------------|---------|------------|-----------|----------|--------|--------|---------|--------|--------|--------|
| Year          | Number  | Attrib     | Attrib    | Drop     | %Drop  | Attrib | Death   | Attrib | Attrib | Drop   |
|               | Deaths  | Deaths     | Deaths    | Deaths   | Deaths | Deaths | Rate    | Rates  | Rates  | Rates  |
| All Comb      | 1489699 | 149918.462 | 83934.815 | 65983.65 | 4.429  | 44.013 | 431.236 | 43.398 | 24.297 | 19.101 |

#### Results for Age Groups Combined, Population unadjusted for deaths in Ecig scenario,

| Age Group:All |        | NULL     | Ecig     | %Drop    |        | NULL   | Ecig    | Drop   |        |        |
|---------------|--------|----------|----------|----------|--------|--------|---------|--------|--------|--------|
| Year          | Number | Attrib   | Attrib   | Drop     | %Drop  | Attrib | Death   | Attrib | Attrib | Drop   |
|               | Deaths | Deaths   | Deaths   | Deaths   | Deaths | Deaths | Rate    | Rates  | Rates  | Rates  |
| 1990          | 32862  | 4613.166 | 4613.166 | 0.000    | 0.000  | 0.000  | 520.936 | 73.129 | 73.129 | 0.000  |
| 1991          | 32619  | 4555.566 | 4521.675 | 33.891   | 0.104  | 0.744  | 508.609 | 71.032 | 70.504 | 0.528  |
| 1992          | 32100  | 4453.572 | 4365.394 | 88.179   | 0.275  | 1.980  | 492.014 | 68.262 | 66.911 | 1.352  |
| 1993          | 32896  | 4462.473 | 4296.324 | 166.149  | 0.505  | 3.723  | 495.226 | 67.179 | 64.678 | 2.501  |
| 1994          | 33323  | 4499.513 | 4238.299 | 261.215  | 0.784  | 5.805  | 492.290 | 66.473 | 62.614 | 3.859  |
| 1995          | 33569  | 4472.774 | 4103.315 | 369.459  | 1.101  | 8.260  | 486.422 | 64.812 | 59.458 | 5.354  |
| 1996          | 33870  | 4406.878 | 3918.001 | 488.877  | 1.443  | 11.094 | 483.150 | 62.863 | 55.890 | 6.974  |
| 1997          | 33516  | 4288.158 | 3678.210 | 609.948  | 1.820  | 14.224 | 470.307 | 60.173 | 51.614 | 8.559  |
| 1998          | 32795  | 4120.148 | 3400.121 | 720.028  | 2.196  | 17.476 | 452.620 | 56.864 | 46.927 | 9.937  |
| 1999          | 33375  | 3982.443 | 3152.580 | 829.862  | 2.486  | 20.838 | 453.361 | 54.097 | 42.824 | 11.273 |
| 2000          | 33459  | 4021.411 | 3049.079 | 972.332  | 2.906  | 24.179 | 447.853 | 53.827 | 40.812 | 13.015 |
| 2001          | 32275  | 3848.092 | 2779.877 | 1068.215 | 3.310  | 27.760 | 426.379 | 50.836 | 36.724 | 14.112 |
| 2002          | 31586  | 3783.081 | 2603.509 | 1179.572 | 3.734  | 31.180 | 412.601 | 49.418 | 34.009 | 15.408 |
| 2003          | 30985  | 3754.415 | 2452.658 | 1301.757 | 4.201  | 34.673 | 400.541 | 48.533 | 31.705 | 16.828 |
| 2004          | 29884  | 3666.274 | 2271.334 | 1394.940 | 4.668  | 38.048 | 382.149 | 46.883 | 29.045 | 17.838 |
| 2005          | 28708  | 3589.688 | 2106.331 | 1483.357 | 5.167  | 41.323 | 362.850 | 45.371 | 26.623 | 18.749 |
| 2006          | 28188  | 3596.985 | 1992.126 | 1604.859 | 5.693  | 44.617 | 353.021 | 45.048 | 24.949 | 20.099 |
| 2007          | 28026  | 3560.798 | 1865.540 | 1695.257 | 6.049  | 47.609 | 347.392 | 44.137 | 23.124 | 21.013 |
| 2008          | 27128  | 3417.001 | 1696.746 | 1720.255 | 6.341  | 50.344 | 332.495 | 41.881 | 20.796 | 21.084 |
| 2009          | 27068  | 3394.390 | 1599.869 | 1794.521 | 6.630  | 52.867 | 327.847 | 41.113 | 19.378 | 21.735 |
| 2010          | 26911  | 3340.137 | 1500.577 | 1839.560 | 6.836  | 55.074 | 321.990 | 39.965 | 17.954 | 22.010 |
| 2011          | 26959  | 3285.435 | 1405.418 | 1880.017 | 6.974  | 57.223 | 319.377 | 38.922 | 16.650 | 22.272 |
| 2012          | 27057  | 3259.209 | 1323.599 | 1935.611 | 7.154  | 59.389 | 317.068 | 38.193 | 15.511 | 22.683 |
| 2013          | 27904  | 3274.703 | 1267.224 | 2007.479 | 7.194  | 61.303 | 323.265 | 37.937 | 14.681 | 23.256 |
| 2014          | 28792  | 3298.083 | 1216.845 | 2081.238 | 7.229  | 63.104 | 329.657 | 37.762 | 13.932 | 23.829 |
| 2015          | 29560  | 3244.406 | 1149.423 | 2094.983 | 7.087  | 64.572 | 380.745 | 41.789 | 14.805 | 26.984 |
| 2016          | 30513  | 3314.836 | 1127.796 | 2187.040 | 7.168  | 65.977 | 389.347 | 42.297 | 14.391 | 27.907 |
| 2017          | 31416  | 3333.314 | 1088.388 | 2244.926 | 7.146  | 67.348 | 397.202 | 42.144 | 13.761 | 28.383 |
| 2018          | 29348  | 2925.242 | 921.821  | 2003.421 | 6.826  | 68.487 | 367.626 | 36.642 | 11.547 | 25.095 |
| 2019          | 29598  | 2864.628 | 874.188  | 1990.440 | 6.725  | 69.483 | 367.149 | 35.534 | 10.844 | 24.690 |
| 2020          | 29592  | 2730.366 | 809.022  | 1921.345 | 6.493  | 70.369 | 419.174 | 38.675 | 11.460 | 27.216 |
| 2021          | 30097  | 2647.911 | 759.718  | 1888.192 | 6.274  | 71.309 | 423.328 | 37.244 | 10.686 | 26.558 |
| 2022          | 30304  | 2586.165 | 718.436  | 1867.729 | 6.163  | 72.220 | 422.974 | 36.097 | 10.028 | 26.070 |
| 2023          | 30505  | 2517.960 | 680.555  | 1837.406 | 6.023  | 72.972 | 422.337 | 34.860 | 9.422  | 25.438 |
| 2024          | 30661  | 2454.161 | 647.829  | 1806.332 | 5.891  | 73.603 | 420.968 | 33.695 | 8.895  | 24.801 |
| 2025          | 30254  | 2275.364 | 586.968  | 1688.396 | 5.581  | 74.203 | 483.488 | 36.363 | 9.380  | 26.983 |
| 2026          | 30685  | 2183.166 | 552.550  | 1630.616 | 5.314  | 74.690 | 488.380 | 34.747 | 8.794  | 25.952 |
| 2027          | 30561  | 2112.345 | 525.707  | 1586.638 | 5.192  | 75.113 | 484.196 | 33.467 | 8.329  | 25.138 |
| 2028          | 30412  | 2046.677 | 500.372  | 1546.305 | 5.085  | 75.552 | 479.392 | 32.263 | 7.888  | 24.375 |
| 2029          | 30254  | 1977.671 | 476.432  | 1501.239 | 4.962  | 75.909 | 474.195 | 30.997 | 7.467  | 23.530 |
| 2030          | 29330  | 1744.457 | 413.789  | 1330.668 | 4.537  | 76.280 | 549.260 | 32.668 | 7.749  | 24.919 |
| 2031          | 28976  | 1653.738 | 387.232  | 1266.506 | 4.371  | 76.584 | 541.223 | 30.889 | 7.233  | 23.656 |
| 2032          | 28724  | 1603.120 | 367.725  | 1235.395 | 4.301  | 77.062 | 534.690 | 29.841 | 6.845  | 22.996 |
| 2033          | 28464  | 1548.245 | 350.619  | 1197.626 | 4.208  | 77.354 | 527.627 | 28.700 | 6.499  | 22.200 |
| 2034          | 28178  | 1511.985 | 337.939  | 1174.045 | 4.166  | 77.649 | 519.826 | 27.893 | 6.234  | 21.658 |
| 2035          | 26737  | 1239.866 | 274.048  | 965.818  | 3.612  | 77.897 | 610.065 | 28.290 | 6.253  | 22.037 |
| 2036          | 25591  | 1182.522 | 258.021  | 924.501  | 3.613  | 78.180 | 583.762 | 26.975 | 5.886  | 21.089 |
| 2037          | 25143  | 1134.483 | 248.360  | 886.123  | 3.524  | 78.108 | 572.916 | 25.851 | 5.659  | 20.192 |
| 2038          | 24693  | 1093.537 | 235.757  | 857.779  | 3.474  | 78.441 | 561.491 | 24.866 | 5.361  | 19.505 |
| 2039          | 24247  | 1047.905 | 224.304  | 823.601  | 3.397  | 78.595 | 549.553 | 23.751 | 5.084  | 18.667 |

## Results for PHIM for Run 7 (Sensitivity\_Analysis\_1.RTF)

\*\*\*\*\*

### Main Results for E-Component for Run: 7, Simulation: 1, COD: COPD

| Variable Parameter          | Value                                  |
|-----------------------------|----------------------------------------|
| 1. Country                  | US (United States)                     |
| 2. Sex                      | M (Males)                              |
| 3. Year of start of process | 1990                                   |
| 4. Cause of Death           | COPD                                   |
| 5. Effective Dose NULL      | CC:1                                   |
| 6. Effective Dose Ecig      | CC:1 Ecig:0.2 Dual:0.6                 |
| Note:                       | Death rates are per million population |

#### Results for Age Groups Combined and Years combined, Population unadjusted for deaths in Ecig scenario,

| Age Group:All | NULL    | Ecig        | %Drop      |          |        |        | NULL    | Ecig    | Drop    |        |
|---------------|---------|-------------|------------|----------|--------|--------|---------|---------|---------|--------|
| Year          | Number  | Attrib      | Attrib     | Drop     | %Drop  | Attrib | Death   | Attrib  | Attrib  | Drop   |
|               | Deaths  | Deaths      | Deaths     | Deaths   | Deaths | Deaths | Rate    | Rates   | Rates   | Rates  |
| All Comb      | 2233143 | 1015606.587 | 745512.366 | 270094.2 | 12.095 | 26.594 | 646.447 | 293.996 | 215.810 | 78.186 |

#### Results for Age Groups Combined, Population unadjusted for deaths in Ecig scenario,

| Age Group:All | NULL   | Ecig      | %Drop     |          |        |        | NULL    | Ecig    | Drop    |         |
|---------------|--------|-----------|-----------|----------|--------|--------|---------|---------|---------|---------|
| Year          | Number | Attrib    | Attrib    | Drop     | %Drop  | Attrib | Death   | Attrib  | Attrib  | Drop    |
|               | Deaths | Deaths    | Deaths    | Deaths   | Deaths | Deaths | Rate    | Rates   | Rates   | Rates   |
| 1990          | 33993  | 19262.437 | 19262.437 | 0.000    | 0.000  | 0.000  | 538.865 | 305.353 | 305.353 | 0.000   |
| 1991          | 34092  | 19215.636 | 19196.673 | 18.963   | 0.056  | 0.099  | 531.576 | 299.618 | 299.322 | 0.296   |
| 1992          | 33942  | 19056.189 | 19007.247 | 48.942   | 0.144  | 0.257  | 520.248 | 292.085 | 291.335 | 0.750   |
| 1993          | 35913  | 20095.670 | 19995.866 | 99.804   | 0.278  | 0.497  | 540.645 | 302.526 | 301.024 | 1.502   |
| 1994          | 35074  | 19524.095 | 19372.270 | 151.824  | 0.433  | 0.778  | 518.158 | 288.435 | 286.192 | 2.243   |
| 1995          | 34669  | 19116.002 | 18898.032 | 217.970  | 0.629  | 1.140  | 502.362 | 276.995 | 273.837 | 3.158   |
| 1996          | 34582  | 18975.021 | 18677.217 | 297.804  | 0.861  | 1.569  | 493.306 | 270.675 | 266.427 | 4.248   |
| 1997          | 35267  | 19169.025 | 18774.042 | 394.982  | 1.120  | 2.061  | 494.878 | 268.986 | 263.443 | 5.543   |
| 1998          | 35675  | 19228.937 | 18718.112 | 510.826  | 1.432  | 2.657  | 492.368 | 265.388 | 258.338 | 7.050   |
| 1999          | 38516  | 20589.820 | 19920.150 | 669.670  | 1.739  | 3.252  | 523.195 | 279.689 | 270.592 | 9.097   |
| 2000          | 36283  | 19196.417 | 18442.055 | 754.363  | 2.079  | 3.930  | 485.652 | 256.946 | 246.849 | 10.097  |
| 2001          | 36281  | 19012.731 | 18098.676 | 914.056  | 2.519  | 4.808  | 479.301 | 251.174 | 239.098 | 12.075  |
| 2002          | 35983  | 18699.357 | 17632.061 | 1067.296 | 2.966  | 5.708  | 470.038 | 244.265 | 230.324 | 13.942  |
| 2003          | 36205  | 18663.550 | 17419.956 | 1243.593 | 3.435  | 6.663  | 468.019 | 241.262 | 225.186 | 16.076  |
| 2004          | 34611  | 17679.164 | 16299.880 | 1379.284 | 3.985  | 7.802  | 442.596 | 226.076 | 208.438 | 17.638  |
| 2005          | 36826  | 18692.832 | 17029.796 | 1663.036 | 4.516  | 8.897  | 465.456 | 236.265 | 215.245 | 21.020  |
| 2006          | 34350  | 17308.564 | 15544.475 | 1764.089 | 5.136  | 10.192 | 430.192 | 216.769 | 194.676 | 22.093  |
| 2007          | 35326  | 17683.181 | 15646.013 | 2037.168 | 5.767  | 11.520 | 437.879 | 219.189 | 193.938 | 25.251  |
| 2008          | 38248  | 19006.374 | 16581.957 | 2424.417 | 6.339  | 12.756 | 468.788 | 232.952 | 203.237 | 29.715  |
| 2009          | 36902  | 18205.573 | 15603.331 | 2602.242 | 7.052  | 14.294 | 446.956 | 220.505 | 188.987 | 31.518  |
| 2010          | 37234  | 18237.758 | 15389.731 | 2848.027 | 7.649  | 15.616 | 445.505 | 218.215 | 184.138 | 34.077  |
| 2011          | 38093  | 18487.916 | 15278.866 | 3209.050 | 8.424  | 17.358 | 451.279 | 219.022 | 181.005 | 38.017  |
| 2012          | 38504  | 18491.158 | 14980.131 | 3511.027 | 9.119  | 18.988 | 451.211 | 216.689 | 175.545 | 41.144  |
| 2013          | 40290  | 19143.452 | 15212.466 | 3930.986 | 9.757  | 20.534 | 466.755 | 221.775 | 176.235 | 45.540  |
| 2014          | 40339  | 18992.005 | 14772.071 | 4219.934 | 10.461 | 22.220 | 461.866 | 217.451 | 169.134 | 48.317  |
| 2015          | 42303  | 19728.885 | 15084.306 | 4644.579 | 10.979 | 23.542 | 544.880 | 254.116 | 194.292 | 59.824  |
| 2016          | 43104  | 19876.724 | 14880.827 | 4995.898 | 11.590 | 25.134 | 550.009 | 253.628 | 189.880 | 63.748  |
| 2017          | 44107  | 20119.790 | 14723.534 | 5396.257 | 12.234 | 26.821 | 557.659 | 254.381 | 186.154 | 68.227  |
| 2018          | 45469  | 20535.123 | 14688.196 | 5846.927 | 12.859 | 28.473 | 569.564 | 257.229 | 183.989 | 73.240  |
| 2019          | 46963  | 21009.029 | 14688.553 | 6320.476 | 13.458 | 30.085 | 582.552 | 260.605 | 182.203 | 78.402  |
| 2020          | 48419  | 21428.512 | 14648.708 | 6779.804 | 14.002 | 31.639 | 685.853 | 303.533 | 207.498 | 96.035  |
| 2021          | 48463  | 21266.697 | 14147.642 | 7119.056 | 14.690 | 33.475 | 681.652 | 299.127 | 198.994 | 100.133 |
| 2022          | 49915  | 21663.568 | 14029.351 | 7634.217 | 15.294 | 35.240 | 696.712 | 302.378 | 195.820 | 106.558 |
| 2023          | 51391  | 22084.131 | 13923.711 | 8160.420 | 15.879 | 36.952 | 711.491 | 305.748 | 192.769 | 112.978 |
| 2024          | 52811  | 22418.456 | 13791.485 | 8626.970 | 16.336 | 38.482 | 725.093 | 307.804 | 189.356 | 118.448 |
| 2025          | 53848  | 22614.834 | 13581.644 | 9033.190 | 16.775 | 39.944 | 860.553 | 361.411 | 217.050 | 144.361 |
| 2026          | 54342  | 22571.522 | 13181.520 | 9390.002 | 17.280 | 41.601 | 864.886 | 359.241 | 209.793 | 149.448 |
| 2027          | 55267  | 22774.416 | 12913.304 | 9861.112 | 17.843 | 43.299 | 875.619 | 360.827 | 204.592 | 156.235 |
| 2028          | 56149  | 22915.561 | 12600.115 | 10315.45 | 18.372 | 45.015 | 885.102 | 361.228 | 198.621 | 162.607 |
| 2029          | 57014  | 22992.027 | 12266.142 | 10725.89 | 18.813 | 46.650 | 893.616 | 360.371 | 192.256 | 168.115 |
| 2030          | 57238  | 22895.360 | 11889.447 | 11005.91 | 19.228 | 48.070 | 1071.90 | 428.760 | 222.653 | 206.107 |
| 2031          | 57592  | 22715.871 | 11495.275 | 11220.60 | 19.483 | 49.395 | 1075.71 | 424.293 | 214.712 | 209.581 |
| 2032          | 58251  | 22759.207 | 11155.651 | 11603.56 | 19.920 | 50.984 | 1084.31 | 423.652 | 207.657 | 215.995 |
| 2033          | 58885  | 22786.258 | 10862.053 | 11924.20 | 20.250 | 52.331 | 1091.54 | 422.387 | 201.349 | 221.038 |
| 2034          | 59460  | 22806.106 | 10544.260 | 12261.85 | 20.622 | 53.766 | 1096.89 | 420.721 | 194.518 | 226.203 |
| 2035          | 58516  | 22262.998 | 10081.958 | 12181.04 | 20.817 | 54.714 | 1335.15 | 507.973 | 230.039 | 277.934 |
| 2036          | 56446  | 21140.051 | 9195.558  | 11944.49 | 21.161 | 56.502 | 1287.60 | 482.234 | 209.763 | 272.470 |
| 2037          | 56568  | 21011.845 | 8814.270  | 12197.58 | 21.563 | 58.051 | 1288.98 | 478.783 | 200.845 | 277.938 |
| 2038          | 56668  | 20787.483 | 8441.286  | 12346.20 | 21.787 | 59.392 | 1288.55 | 472.681 | 191.944 | 280.737 |
| 2039          | 56758  | 20709.267 | 8130.058  | 12579.21 | 22.163 | 60.742 | 1286.40 | 469.372 | 184.266 | 285.106 |



## Results for PHIM for Run 7 (Sensitivity\_Analysis\_1.RTF)

\*\*\*\*\*

### Main Results for E-Component for Run: 7, Simulation: 1, COD: Four Diseases Combined, Adjusted

| Variable Parameter          | Value                                  |
|-----------------------------|----------------------------------------|
| 1. Country                  | US (United States)                     |
| 2. Sex                      | M (Males)                              |
| 3. Year of start of process | 1990                                   |
| 4. Cause of Death           | Four Diseases Combined                 |
| 5. Effective Dose NULL      | CC:1                                   |
| 6. Effective Dose Ecig      | CC:1 Ecig:0.2 Dual:0.6                 |
| Note:                       | Death rates are per million population |

#### Results for Age Groups Combined and Years combined, Population and Number deaths adjusted for Ecig scenario,

| Age Group:All | NULL     | Ecig        |             |         |        |        | NULL    | Ecig    |         |         |
|---------------|----------|-------------|-------------|---------|--------|--------|---------|---------|---------|---------|
| Year          | Number   | Attrib      | Attrib      | Drop    | %Drop  | Attrib | Death   | Attrib  | Attrib  | Drop    |
|               | Deaths   | Deaths      | Deaths      | Deaths  | Deaths | Deaths | Rate    | Rates   | Rates   | Rates   |
| All Comb      | 13262538 | 4509390.583 | 3340187.142 | 1169203 | 8.816  | 25.928 | 3813.88 | 1305.37 | 960.531 | 344.840 |

#### Results for Age Groups Combined, Population and Number deaths adjusted for Ecig scenario,

| Age Group:All | NULL   | Ecig       |            |          |        |        | NULL    | Ecig    |         |         |
|---------------|--------|------------|------------|----------|--------|--------|---------|---------|---------|---------|
| Year          | Number | Attrib     | Attrib     | Drop     | %Drop  | Attrib | Death   | Attrib  | Attrib  | Drop    |
|               | Deaths | Deaths     | Deaths     | Deaths   | Deaths | Deaths | Rate    | Rates   | Rates   | Rates   |
| 1990          | 317161 | 125773.065 | 125773.065 | 0.000    | 0.000  | 0.000  | 5027.71 | 1993.78 | 1993.78 | 0.000   |
| 1991          | 313217 | 123999.442 | 123641.992 | 357.450  | 0.114  | 0.288  | 4883.81 | 1933.45 | 1927.88 | 5.574   |
| 1992          | 308579 | 122014.015 | 121064.435 | 949.580  | 0.308  | 0.778  | 4729.74 | 1870.18 | 1855.61 | 14.565  |
| 1993          | 311721 | 122810.618 | 121036.492 | 1774.126 | 0.569  | 1.445  | 4692.65 | 1848.83 | 1822.08 | 26.746  |
| 1994          | 305719 | 119925.592 | 117214.772 | 2710.820 | 0.887  | 2.260  | 4516.26 | 1771.69 | 1731.56 | 40.130  |
| 1995          | 303261 | 117896.496 | 114096.215 | 3800.281 | 1.253  | 3.223  | 4393.93 | 1708.35 | 1653.13 | 55.214  |
| 1996          | 299617 | 115698.645 | 110706.697 | 4991.948 | 1.666  | 4.315  | 4273.37 | 1650.42 | 1578.98 | 71.439  |
| 1997          | 294313 | 113359.847 | 107177.788 | 6182.058 | 2.101  | 5.453  | 4128.99 | 1590.70 | 1503.62 | 87.078  |
| 1998          | 289380 | 111444.212 | 104071.087 | 7373.125 | 2.548  | 6.616  | 3992.64 | 1538.10 | 1435.89 | 102.205 |
| 1999          | 311182 | 114877.722 | 105054.009 | 9823.713 | 3.157  | 8.551  | 4225.28 | 1560.48 | 1426.44 | 134.039 |
| 2000          | 304023 | 112379.704 | 101225.782 | 11153.92 | 3.669  | 9.925  | 4067.12 | 1504.22 | 1354.16 | 150.052 |
| 2001          | 296592 | 110024.943 | 97433.762  | 12591.18 | 4.245  | 11.444 | 3915.42 | 1453.52 | 1286.26 | 167.262 |
| 2002          | 292268 | 108289.173 | 94100.396  | 14188.78 | 4.855  | 13.103 | 3814.42 | 1414.56 | 1228.11 | 186.444 |
| 2003          | 286312 | 106539.023 | 90952.866  | 15586.16 | 5.444  | 14.630 | 3697.08 | 1377.22 | 1174.45 | 202.768 |
| 2004          | 274695 | 103037.251 | 86423.099  | 16614.15 | 6.048  | 16.124 | 3508.11 | 1317.61 | 1103.70 | 213.909 |
| 2005          | 272989 | 103044.562 | 84953.644  | 18090.92 | 6.627  | 17.556 | 3445.07 | 1302.41 | 1072.10 | 230.317 |
| 2006          | 264811 | 99672.555  | 80335.066  | 19337.49 | 7.302  | 19.401 | 3310.47 | 1248.28 | 1004.29 | 243.988 |
| 2007          | 259204 | 97839.152  | 77461.636  | 20377.52 | 7.862  | 20.828 | 3206.29 | 1212.75 | 958.181 | 254.571 |
| 2008          | 260364 | 98075.852  | 76387.762  | 21688.09 | 8.330  | 22.114 | 3183.67 | 1202.07 | 934.051 | 268.020 |
| 2009          | 254911 | 95617.338  | 73028.803  | 22588.53 | 8.861  | 23.624 | 3079.31 | 1158.11 | 882.182 | 275.932 |
| 2010          | 252997 | 94607.988  | 71015.211  | 23592.78 | 9.325  | 24.937 | 3018.18 | 1131.98 | 847.189 | 284.796 |
| 2011          | 253028 | 93633.119  | 68784.622  | 24848.50 | 9.820  | 26.538 | 2987.78 | 1109.25 | 812.216 | 297.033 |
| 2012          | 254034 | 92775.175  | 66700.541  | 26074.63 | 10.264 | 28.105 | 2966.23 | 1087.19 | 778.830 | 308.360 |
| 2013          | 257733 | 92345.780  | 65014.823  | 27330.96 | 10.604 | 29.596 | 2974.11 | 1069.82 | 750.237 | 319.579 |
| 2014          | 259115 | 91379.215  | 63011.534  | 28367.68 | 10.948 | 31.044 | 2954.10 | 1046.26 | 718.380 | 327.877 |
| 2015          | 261690 | 90750.242  | 61477.911  | 29272.33 | 11.186 | 32.256 | 3353.13 | 1168.90 | 787.739 | 381.162 |
| 2016          | 263542 | 88811.996  | 58599.827  | 30212.17 | 11.464 | 34.018 | 3343.91 | 1133.24 | 743.536 | 389.709 |
| 2017          | 265972 | 87325.126  | 56246.581  | 31078.55 | 11.685 | 35.589 | 3342.47 | 1104.08 | 706.851 | 397.228 |
| 2018          | 261129 | 87612.144  | 55904.520  | 31707.62 | 12.142 | 36.191 | 3249.85 | 1097.46 | 695.752 | 401.704 |
| 2019          | 264066 | 87797.760  | 55023.077  | 32774.68 | 12.412 | 37.330 | 3253.02 | 1089.08 | 677.828 | 411.254 |
| 2020          | 265139 | 87221.042  | 53873.108  | 33347.93 | 12.578 | 38.234 | 3724.58 | 1235.48 | 756.789 | 478.689 |
| 2021          | 258036 | 82001.292  | 48986.272  | 33015.02 | 12.795 | 40.262 | 3597.53 | 1153.39 | 682.965 | 470.424 |
| 2022          | 260270 | 81915.977  | 47901.595  | 34014.38 | 13.069 | 41.524 | 3599.14 | 1143.37 | 662.406 | 480.969 |
| 2023          | 262478 | 81810.810  | 46864.443  | 34946.37 | 13.314 | 42.716 | 3598.43 | 1132.64 | 642.485 | 490.160 |
| 2024          | 264348 | 81528.303  | 45812.015  | 35716.29 | 13.511 | 43.808 | 3592.20 | 1119.38 | 622.536 | 496.842 |
| 2025          | 261155 | 79599.213  | 44210.921  | 35388.29 | 13.551 | 44.458 | 4122.90 | 1272.09 | 697.965 | 574.122 |
| 2026          | 255483 | 75082.462  | 40287.574  | 34794.89 | 13.619 | 46.342 | 4014.46 | 1194.99 | 633.048 | 561.940 |
| 2027          | 255144 | 74444.425  | 39066.963  | 35377.46 | 13.866 | 47.522 | 3988.69 | 1179.46 | 610.736 | 568.724 |
| 2028          | 254643 | 73699.585  | 37769.515  | 35930.07 | 14.110 | 48.752 | 3958.48 | 1161.76 | 587.135 | 574.625 |
| 2029          | 254089 | 72819.703  | 36481.857  | 36337.85 | 14.301 | 49.901 | 3925.14 | 1141.36 | 563.568 | 577.788 |
| 2030          | 245245 | 69309.277  | 34460.790  | 34848.49 | 14.210 | 50.280 | 4516.01 | 1297.95 | 634.570 | 663.380 |
| 2031          | 240239 | 65433.368  | 31442.207  | 33991.16 | 14.149 | 51.948 | 4409.41 | 1222.18 | 577.098 | 645.083 |
| 2032          | 238994 | 64643.552  | 30308.143  | 34335.41 | 14.367 | 53.115 | 4368.81 | 1203.31 | 554.031 | 649.277 |
| 2033          | 237715 | 63793.514  | 29280.546  | 34512.97 | 14.519 | 54.101 | 4324.57 | 1182.54 | 532.678 | 649.858 |
| 2034          | 236295 | 63032.151  | 28290.438  | 34741.71 | 14.703 | 55.117 | 4275.36 | 1162.80 | 511.868 | 650.932 |
| 2035          | 221159 | 57653.301  | 25975.428  | 31677.87 | 14.324 | 54.945 | 4936.59 | 1315.47 | 579.808 | 735.662 |
| 2036          | 213454 | 52988.733  | 22740.072  | 30248.66 | 14.171 | 57.085 | 4760.08 | 1208.75 | 507.110 | 701.636 |
| 2037          | 210871 | 52026.921  | 21762.743  | 30264.18 | 14.352 | 58.170 | 4694.21 | 1185.50 | 484.463 | 701.040 |
| 2038          | 208318 | 50943.211  | 20784.182  | 30159.03 | 14.477 | 59.201 | 4624.70 | 1158.38 | 461.412 | 696.971 |
| 2039          | 205837 | 50085.991  | 19970.312  | 30115.68 | 14.631 | 60.128 | 4551.86 | 1135.19 | 441.622 | 693.569 |

## Results for PHIM for Run 7 (Sensitivity\_Analysis\_1.RTF)

\*\*\*\*\*

### Main Results for E-Component for Run: 7, Simulation: 1, COD: LUNG CANCER, Adjusted

| Variable Parameter          | Value                                  |
|-----------------------------|----------------------------------------|
| 1. Country                  | US (United States)                     |
| 2. Sex                      | M (Males)                              |
| 3. Year of start of process | 1990                                   |
| 4. Cause of Death           | LUNG CANCER                            |
| 5. Effective Dose NULL      | CC:1                                   |
| 6. Effective Dose Ecig      | CC:1 Ecig:0.2 Dual:0.6                 |
| Note:                       | Death rates are per million population |

#### Results for Age Groups Combined and Years combined, Population and Number deaths adjusted for Ecig scenario,

| Age Group:All | NULL    | Ecig        | %Drop       |          |        |        | NULL    | Ecig    | Drop    |         |
|---------------|---------|-------------|-------------|----------|--------|--------|---------|---------|---------|---------|
| Year          | Number  | Attrib      | Attrib      | Drop     | %Drop  | Attrib | Death   | Attrib  | Attrib  | Drop    |
|               | Deaths  | Deaths      | Deaths      | Deaths   | Deaths | Deaths | Rate    | Rates   | Rates   | Rates   |
| All Comb      | 3089737 | 2244988.113 | 1876108.007 | 368880.1 | 11.939 | 16.431 | 888.510 | 649.875 | 539.509 | 110.367 |

#### Results for Age Groups Combined, Population and Number deaths adjusted for Ecig scenario,

| Age Group:All | NULL   | Ecig      | %Drop     |          |        |        | NULL    | Ecig    | Drop    |         |
|---------------|--------|-----------|-----------|----------|--------|--------|---------|---------|---------|---------|
| Year          | Number | Attrib    | Attrib    | Drop     | %Drop  | Attrib | Death   | Attrib  | Attrib  | Drop    |
|               | Deaths | Deaths    | Deaths    | Deaths   | Deaths | Deaths | Rate    | Rates   | Rates   | Rates   |
| 1990          | 78822  | 63385.736 | 63385.736 | 0.000    | 0.000  | 0.000  | 1249.50 | 1004.81 | 1004.81 | 0.000   |
| 1991          | 78462  | 62918.402 | 62877.538 | 40.864   | 0.052  | 0.065  | 1223.41 | 981.049 | 980.412 | 0.637   |
| 1992          | 77988  | 62366.766 | 62258.668 | 108.098  | 0.139  | 0.173  | 1195.35 | 955.930 | 954.267 | 1.662   |
| 1993          | 78544  | 62652.888 | 62441.587 | 211.301  | 0.269  | 0.337  | 1182.40 | 943.195 | 939.994 | 3.200   |
| 1994          | 77442  | 61565.227 | 61235.008 | 330.219  | 0.426  | 0.536  | 1144.02 | 909.520 | 904.599 | 4.922   |
| 1995          | 76913  | 60851.961 | 60374.235 | 477.726  | 0.621  | 0.785  | 1114.39 | 881.759 | 874.759 | 7.000   |
| 1996          | 76247  | 60122.922 | 59460.572 | 662.349  | 0.869  | 1.102  | 1087.50 | 857.643 | 848.071 | 9.572   |
| 1997          | 75496  | 59237.155 | 58379.368 | 857.787  | 1.136  | 1.448  | 1059.16 | 831.234 | 819.018 | 12.216  |
| 1998          | 75414  | 58906.696 | 57805.149 | 1101.547 | 1.461  | 1.870  | 1040.51 | 813.001 | 797.550 | 15.450  |
| 1999          | 73203  | 56930.073 | 55594.855 | 1335.217 | 1.824  | 2.345  | 993.965 | 773.329 | 754.877 | 18.452  |
| 2000          | 73844  | 57137.121 | 55502.747 | 1634.374 | 2.213  | 2.860  | 987.858 | 764.787 | 742.497 | 22.291  |
| 2001          | 73371  | 56481.726 | 54506.553 | 1975.173 | 2.692  | 3.497  | 968.593 | 746.169 | 719.560 | 26.609  |
| 2002          | 72538  | 55588.365 | 53262.760 | 2325.606 | 3.206  | 4.184  | 946.695 | 726.138 | 695.137 | 31.001  |
| 2003          | 72059  | 54945.856 | 52236.511 | 2709.345 | 3.760  | 4.931  | 930.477 | 710.281 | 674.519 | 35.762  |
| 2004          | 71441  | 54203.126 | 51067.704 | 3135.421 | 4.389  | 5.785  | 912.362 | 693.135 | 652.182 | 40.952  |
| 2005          | 71129  | 53744.603 | 50180.314 | 3564.289 | 5.011  | 6.632  | 897.627 | 679.296 | 633.265 | 46.031  |
| 2006          | 69847  | 52535.572 | 48522.184 | 4013.387 | 5.746  | 7.639  | 873.176 | 657.945 | 606.589 | 51.355  |
| 2007          | 68780  | 51492.124 | 47041.691 | 4450.433 | 6.471  | 8.643  | 850.794 | 638.264 | 581.894 | 56.370  |
| 2008          | 68471  | 51030.736 | 46056.851 | 4973.885 | 7.264  | 9.747  | 837.244 | 625.460 | 563.172 | 62.288  |
| 2009          | 67784  | 50276.199 | 44779.715 | 5496.483 | 8.109  | 10.933 | 818.824 | 608.943 | 540.935 | 68.008  |
| 2010          | 67504  | 49840.933 | 43827.550 | 6013.383 | 8.908  | 12.065 | 805.298 | 596.347 | 522.849 | 73.498  |
| 2011          | 66846  | 49072.841 | 42489.694 | 6583.147 | 9.848  | 13.415 | 789.325 | 581.354 | 501.723 | 79.631  |
| 2012          | 66529  | 48539.512 | 41348.236 | 7191.276 | 10.809 | 14.815 | 776.832 | 568.812 | 482.803 | 86.009  |
| 2013          | 65741  | 47675.741 | 39954.095 | 7721.645 | 11.746 | 16.196 | 758.618 | 552.318 | 461.049 | 91.269  |
| 2014          | 65480  | 47194.534 | 38918.718 | 8275.815 | 12.639 | 17.536 | 746.524 | 540.359 | 443.703 | 96.656  |
| 2015          | 64628  | 46305.842 | 37566.191 | 8739.651 | 13.523 | 18.874 | 728.096 | 526.439 | 421.349 | 115.089 |
| 2016          | 62123  | 44208.867 | 35226.401 | 8982.465 | 14.459 | 20.318 | 708.234 | 514.107 | 406.966 | 128.241 |
| 2017          | 60429  | 42702.624 | 33406.383 | 9296.240 | 15.384 | 21.770 | 691.412 | 503.903 | 419.818 | 120.085 |
| 2018          | 63066  | 44321.202 | 33928.020 | 10393.18 | 16.480 | 23.450 | 674.876 | 500.181 | 422.246 | 132.934 |
| 2019          | 63694  | 44493.088 | 33381.678 | 11111.41 | 17.445 | 24.973 | 661.646 | 500.181 | 411.228 | 140.684 |
| 2020          | 64169  | 44529.551 | 32750.582 | 11778.97 | 18.356 | 26.452 | 651.425 | 500.181 | 400.068 | 150.689 |
| 2021          | 57791  | 39852.556 | 28668.126 | 11184.43 | 19.353 | 28.065 | 641.719 | 500.181 | 399.690 | 160.856 |
| 2022          | 58166  | 39853.685 | 28000.402 | 11853.28 | 20.378 | 29.742 | 632.343 | 500.181 | 387.203 | 169.071 |
| 2023          | 58513  | 39847.050 | 27347.878 | 12499.17 | 21.361 | 31.368 | 623.177 | 500.181 | 374.924 | 176.746 |
| 2024          | 58766  | 39726.010 | 26661.801 | 13064.21 | 22.231 | 32.886 | 614.572 | 500.181 | 362.305 | 183.130 |
| 2025          | 58394  | 39207.348 | 25778.725 | 13428.62 | 22.997 | 34.250 | 605.872 | 500.181 | 350.973 | 190.606 |
| 2026          | 52253  | 34803.960 | 22343.180 | 12460.78 | 23.847 | 35.803 | 597.059 | 500.181 | 340.084 | 200.845 |
| 2027          | 52036  | 34484.595 | 21583.285 | 12901.31 | 24.793 | 37.412 | 588.480 | 500.181 | 330.413 | 208.944 |
| 2028          | 51773  | 34100.638 | 20796.745 | 13303.89 | 25.697 | 39.014 | 579.823 | 500.181 | 321.290 | 214.254 |
| 2029          | 51482  | 33669.838 | 20020.079 | 13649.76 | 26.514 | 40.540 | 571.288 | 500.181 | 312.268 | 218.464 |
| 2030          | 50083  | 32557.688 | 18979.923 | 13577.77 | 27.111 | 41.704 | 562.240 | 500.181 | 303.501 | 220.204 |
| 2031          | 44486  | 28646.393 | 16322.725 | 12323.67 | 27.703 | 43.020 | 553.499 | 500.181 | 294.591 | 235.474 |
| 2032          | 44093  | 28227.160 | 15673.925 | 12553.24 | 28.470 | 44.472 | 544.723 | 500.181 | 285.518 | 238.917 |
| 2033          | 43686  | 27786.623 | 15086.447 | 12700.18 | 29.072 | 45.706 | 536.073 | 500.181 | 276.456 | 240.623 |
| 2034          | 43244  | 27348.299 | 14512.782 | 12835.52 | 29.681 | 46.934 | 527.434 | 500.181 | 267.385 | 241.929 |
| 2035          | 40739  | 25570.077 | 13403.508 | 12166.57 | 29.864 | 47.581 | 518.783 | 500.181 | 258.315 | 244.245 |
| 2036          | 34894  | 21717.319 | 11021.067 | 10696.25 | 30.653 | 49.252 | 510.147 | 500.181 | 249.402 | 249.629 |
| 2037          | 34332  | 21256.024 | 10513.200 | 10742.82 | 31.291 | 50.540 | 501.268 | 500.181 | 240.335 | 250.311 |
| 2038          | 33775  | 20747.175 | 10018.661 | 10728.51 | 31.765 | 51.711 | 492.803 | 500.181 | 231.264 | 249.348 |
| 2039          | 33229  | 20327.688 | 9608.252  | 10719.44 | 32.259 | 52.733 | 484.827 | 500.181 | 222.193 | 248.248 |

## Results for PHIM for Run 7 (Sensitivity\_Analysis\_1.RTF)

\*\*\*\*\*

### Main Results for E-Component for Run: 7, Simulation: 1, COD: IHD, Adjusted

| Variable Parameter          | Value                                  |
|-----------------------------|----------------------------------------|
| 1. Country                  | US (United States)                     |
| 2. Sex                      | M (Males)                              |
| 3. Year of start of process | 1990                                   |
| 4. Cause of Death           | IHD                                    |
| 5. Effective Dose NULL      | CC:1                                   |
| 6. Effective Dose Ecig      | CC:1 Ecig:0.2 Dual:0.6                 |
| Note:                       | Death rates are per million population |

#### Results for Age Groups Combined and Years combined, Population and Number deaths adjusted for Ecig scenario,

| Age Group:All |         | NULL        | Ecig       | %Drop    |        | NULL   | Ecig    | Drop    |         |         |
|---------------|---------|-------------|------------|----------|--------|--------|---------|---------|---------|---------|
| Year          | Number  | Attrib      | Attrib     | Drop     | %Drop  | Attrib | Death   | Attrib  | Attrib  | Drop    |
|               | Deaths  | Deaths      | Deaths     | Deaths   | Deaths | Deaths | Rate    | Rates   | Rates   | Rates   |
| All Comb      | 6410242 | 1098877.421 | 628375.665 | 470501.8 | 7.340  | 42.817 | 1843.38 | 318.101 | 180.701 | 137.400 |

#### Results for Age Groups Combined, Population and Number deaths adjusted for Ecig scenario,

| Age Group:All |        | NULL      | Ecig      | %Drop    |        | NULL   | Ecig    | Drop    |         |         |
|---------------|--------|-----------|-----------|----------|--------|--------|---------|---------|---------|---------|
| Year          | Number | Attrib    | Attrib    | Drop     | %Drop  | Attrib | Death   | Attrib  | Attrib  | Drop    |
|               | Deaths | Deaths    | Deaths    | Deaths   | Deaths | Deaths | Rate    | Rates   | Rates   | Rates   |
| 1990          | 171484 | 38511.725 | 38511.725 | 0.000    | 0.000  | 0.000  | 2718.40 | 610.497 | 610.497 | 0.000   |
| 1991          | 168044 | 37309.838 | 37046.106 | 263.731  | 0.157  | 0.707  | 2620.21 | 581.750 | 577.638 | 4.112   |
| 1992          | 164549 | 36137.488 | 35432.951 | 704.537  | 0.428  | 1.950  | 2522.12 | 553.899 | 543.097 | 10.802  |
| 1993          | 164366 | 35599.588 | 34302.070 | 1297.517 | 0.789  | 3.645  | 2474.37 | 535.926 | 516.383 | 19.544  |
| 1994          | 159876 | 34336.757 | 32367.704 | 1969.053 | 1.232  | 5.735  | 2361.78 | 507.267 | 478.154 | 29.112  |
| 1995          | 158102 | 33455.759 | 30717.946 | 2737.813 | 1.732  | 8.183  | 2290.72 | 484.782 | 445.071 | 39.711  |
| 1996          | 154905 | 32193.824 | 28646.565 | 3547.260 | 2.290  | 11.018 | 2209.37 | 459.239 | 408.579 | 50.660  |
| 1997          | 150014 | 30665.509 | 26339.601 | 4325.908 | 2.884  | 14.107 | 2104.58 | 430.308 | 369.525 | 60.784  |
| 1998          | 145468 | 29188.430 | 24138.463 | 5049.968 | 3.472  | 17.301 | 2007.05 | 402.844 | 333.044 | 69.800  |
| 1999          | 166048 | 33375.386 | 26373.190 | 7002.196 | 4.217  | 20.980 | 2254.62 | 453.366 | 358.100 | 95.266  |
| 2000          | 160385 | 32024.754 | 24215.236 | 7809.518 | 4.869  | 24.386 | 2145.57 | 428.655 | 323.943 | 104.712 |
| 2001          | 154599 | 30682.393 | 22027.764 | 8654.629 | 5.598  | 28.207 | 2040.91 | 405.339 | 290.796 | 114.543 |
| 2002          | 152078 | 30218.370 | 20576.529 | 9641.840 | 6.340  | 31.907 | 1984.79 | 394.736 | 268.546 | 126.190 |
| 2003          | 146961 | 29175.202 | 18812.667 | 10362.54 | 7.051  | 35.518 | 1897.67 | 377.146 | 242.924 | 134.222 |
| 2004          | 138640 | 27488.687 | 16749.060 | 10739.63 | 7.746  | 39.069 | 1770.56 | 351.518 | 213.901 | 137.617 |
| 2005          | 136183 | 27017.439 | 15594.157 | 11423.28 | 8.388  | 42.281 | 1718.59 | 341.482 | 196.795 | 144.687 |
| 2006          | 132264 | 26231.435 | 14230.054 | 12001.38 | 9.074  | 45.752 | 1653.47 | 328.517 | 177.894 | 150.623 |
| 2007          | 126882 | 25103.049 | 12854.843 | 12248.21 | 9.653  | 48.792 | 1569.50 | 311.161 | 159.011 | 152.150 |
| 2008          | 126292 | 24621.740 | 11988.086 | 12633.65 | 10.004 | 51.311 | 1544.27 | 301.777 | 146.587 | 155.190 |
| 2009          | 122906 | 23741.177 | 10977.103 | 12764.07 | 10.385 | 53.763 | 1484.70 | 287.552 | 132.603 | 154.950 |
| 2010          | 121065 | 23189.160 | 10221.157 | 12968.00 | 10.712 | 55.923 | 1444.26 | 277.458 | 121.935 | 155.523 |
| 2011          | 120807 | 22786.927 | 9526.438  | 13260.49 | 10.977 | 58.193 | 1426.50 | 269.951 | 112.489 | 157.462 |
| 2012          | 121582 | 22485.295 | 8957.100  | 13528.19 | 11.127 | 60.165 | 1419.65 | 263.495 | 104.588 | 158.907 |
| 2013          | 123382 | 22251.884 | 8478.487  | 13773.40 | 11.163 | 61.898 | 1423.76 | 257.786 | 97.837  | 159.948 |
| 2014          | 124039 | 21894.593 | 7994.335  | 13900.26 | 11.206 | 63.487 | 1414.14 | 250.685 | 91.142  | 159.543 |
| 2015          | 124667 | 21471.109 | 7555.716  | 13915.39 | 11.162 | 64.810 | 1597.41 | 276.557 | 96.814  | 179.743 |
| 2016          | 127209 | 21411.568 | 7233.381  | 14178.19 | 11.146 | 66.217 | 1614.07 | 273.213 | 91.780  | 181.433 |
| 2017          | 129358 | 21169.399 | 6887.231  | 14282.17 | 11.041 | 67.466 | 1625.65 | 267.651 | 86.552  | 181.100 |
| 2018          | 122535 | 19830.576 | 6215.743  | 13614.83 | 11.111 | 68.656 | 1524.99 | 248.404 | 77.357  | 171.047 |
| 2019          | 123026 | 19431.014 | 5916.553  | 13514.46 | 10.985 | 69.551 | 1515.55 | 241.031 | 72.886  | 168.145 |
| 2020          | 122095 | 18532.612 | 5491.172  | 13041.44 | 10.681 | 70.370 | 1715.14 | 262.513 | 77.138  | 185.375 |
| 2021          | 120752 | 18234.128 | 5231.160  | 13002.97 | 10.768 | 71.311 | 1683.53 | 256.472 | 72.933  | 183.539 |
| 2022          | 120870 | 17812.559 | 4963.941  | 12848.62 | 10.630 | 72.132 | 1671.44 | 248.626 | 68.644  | 179.982 |
| 2023          | 120966 | 17361.668 | 4712.726  | 12648.94 | 10.457 | 72.856 | 1658.38 | 240.367 | 64.609  | 175.758 |
| 2024          | 120916 | 16929.676 | 4501.344  | 12428.33 | 10.279 | 73.412 | 1643.11 | 232.443 | 61.168  | 171.275 |
| 2025          | 117375 | 15501.666 | 4044.680  | 11456.99 | 9.761  | 73.908 | 1853.02 | 247.735 | 63.854  | 183.880 |
| 2026          | 116826 | 15523.814 | 3984.986  | 11538.83 | 9.877  | 74.330 | 1835.72 | 247.072 | 62.617  | 184.455 |
| 2027          | 115816 | 15073.070 | 3812.088  | 11260.98 | 9.723  | 74.709 | 1810.55 | 238.810 | 59.595  | 179.216 |
| 2028          | 114754 | 14636.710 | 3633.315  | 11003.39 | 9.589  | 75.177 | 1783.88 | 230.725 | 56.481  | 174.244 |
| 2029          | 113690 | 14180.166 | 3474.806  | 10705.36 | 9.416  | 75.495 | 1756.28 | 222.256 | 53.678  | 168.578 |
| 2030          | 106859 | 12111.772 | 2927.981  | 9183.791 | 8.594  | 75.825 | 1967.73 | 226.816 | 53.917  | 172.900 |
| 2031          | 107369 | 12417.367 | 2984.573  | 9432.794 | 8.785  | 75.965 | 1970.68 | 231.935 | 54.780  | 177.155 |
| 2032          | 106019 | 12054.064 | 2855.051  | 9199.013 | 8.677  | 76.315 | 1938.01 | 224.381 | 52.190  | 172.190 |
| 2033          | 104682 | 11672.389 | 2721.427  | 8950.962 | 8.551  | 76.685 | 1904.40 | 216.370 | 49.509  | 166.862 |
| 2034          | 103322 | 11365.762 | 2632.230  | 8733.531 | 8.453  | 76.841 | 1869.43 | 209.673 | 47.626  | 162.047 |
| 2035          | 93017  | 8580.360  | 1951.708  | 6628.652 | 7.126  | 77.254 | 2076.27 | 195.777 | 43.565  | 152.212 |
| 2036          | 94387  | 8948.841  | 2016.444  | 6932.397 | 7.345  | 77.467 | 2104.85 | 204.135 | 44.967  | 159.168 |
| 2037          | 92625  | 8624.570  | 1939.812  | 6684.758 | 7.217  | 77.508 | 2061.94 | 196.522 | 43.182  | 153.340 |
| 2038          | 90915  | 8315.017  | 1843.757  | 6471.260 | 7.118  | 77.826 | 2018.33 | 189.073 | 40.932  | 148.141 |
| 2039          | 89272  | 8001.132  | 1764.497  | 6236.635 | 6.986  | 77.947 | 1974.15 | 181.344 | 39.020  | 142.324 |

## Results for PHIM for Run 7 (Sensitivity\_Analysis\_1.RTF)

\*\*\*\*\*

### Main Results for E-Component for Run: 7, Simulation: 1, COD: STROKE, Adjusted

| Variable Parameter          | Value                                  |
|-----------------------------|----------------------------------------|
| 1. Country                  | US (United States)                     |
| 2. Sex                      | M (Males)                              |
| 3. Year of start of process | 1990                                   |
| 4. Cause of Death           | STROKE                                 |
| 5. Effective Dose NULL      | CC:1                                   |
| 6. Effective Dose Ecig      | CC:1 Ecig:0.2 Dual:0.6                 |
| Note:                       | Death rates are per million population |

#### Results for Age Groups Combined and Years combined, Population and Number deaths adjusted for Ecig scenario,

| Age Group:All | NULL    | Ecig       | %Drop     |          |        |        | NULL    | Ecig   | Drop   |        |
|---------------|---------|------------|-----------|----------|--------|--------|---------|--------|--------|--------|
| Year          | Number  | Attrib     | Attrib    | Drop     | %Drop  | Attrib | Death   | Attrib | Attrib | Drop   |
|               | Deaths  | Deaths     | Deaths    | Deaths   | Deaths | Deaths | Rate    | Rates  | Rates  | Rates  |
| All Comb      | 1503332 | 149918.462 | 84200.730 | 65717.73 | 4.371  | 43.836 | 432.310 | 43.398 | 24.213 | 19.185 |

#### Results for Age Groups Combined, Population and Number deaths adjusted for Ecig scenario,

| Age Group:All | NULL   | Ecig     | %Drop    |          |        |        | NULL    | Ecig   | Drop   |        |
|---------------|--------|----------|----------|----------|--------|--------|---------|--------|--------|--------|
| Year          | Number | Attrib   | Attrib   | Drop     | %Drop  | Attrib | Death   | Attrib | Attrib | Drop   |
|               | Deaths | Deaths   | Deaths   | Deaths   | Deaths | Deaths | Rate    | Rates  | Rates  | Rates  |
| 1990          | 32862  | 4613.166 | 4613.166 | 0.000    | 0.000  | 0.000  | 520.936 | 73.129 | 73.129 | 0.000  |
| 1991          | 32619  | 4555.566 | 4521.675 | 33.891   | 0.104  | 0.744  | 508.609 | 71.032 | 70.504 | 0.528  |
| 1992          | 32100  | 4453.572 | 4365.428 | 88.144   | 0.275  | 1.979  | 492.015 | 68.262 | 66.911 | 1.351  |
| 1993          | 32897  | 4462.473 | 4296.446 | 166.027  | 0.505  | 3.721  | 495.228 | 67.179 | 64.679 | 2.501  |
| 1994          | 33325  | 4499.513 | 4238.581 | 260.932  | 0.783  | 5.799  | 492.296 | 66.473 | 62.615 | 3.858  |
| 1995          | 33573  | 4472.774 | 4103.827 | 368.947  | 1.099  | 8.249  | 486.434 | 64.812 | 59.460 | 5.351  |
| 1996          | 33876  | 4406.878 | 3918.807 | 488.071  | 1.441  | 11.075 | 483.169 | 62.863 | 55.893 | 6.970  |
| 1997          | 33525  | 4288.158 | 3679.361 | 608.797  | 1.816  | 14.197 | 470.336 | 60.173 | 51.619 | 8.554  |
| 1998          | 32808  | 4120.148 | 3401.637 | 718.511  | 2.190  | 17.439 | 452.662 | 56.864 | 46.933 | 9.931  |
| 1999          | 33393  | 3982.443 | 3154.485 | 827.958  | 2.479  | 20.790 | 453.421 | 54.097 | 42.832 | 11.265 |
| 2000          | 33484  | 4021.411 | 3051.567 | 969.844  | 2.896  | 24.117 | 447.937 | 53.827 | 40.823 | 13.004 |
| 2001          | 32306  | 3848.092 | 2782.786 | 1065.306 | 3.298  | 27.684 | 426.483 | 50.836 | 36.737 | 14.100 |
| 2002          | 31624  | 3783.081 | 2606.932 | 1176.149 | 3.719  | 31.090 | 412.733 | 49.418 | 34.023 | 15.394 |
| 2003          | 31031  | 3754.415 | 2456.562 | 1297.853 | 4.182  | 34.569 | 400.700 | 48.533 | 31.721 | 16.812 |
| 2004          | 29938  | 3666.274 | 2275.672 | 1390.602 | 4.645  | 37.930 | 382.339 | 46.883 | 29.062 | 17.821 |
| 2005          | 28770  | 3589.688 | 2111.057 | 1478.631 | 5.139  | 41.191 | 363.071 | 45.371 | 26.641 | 18.730 |
| 2006          | 28259  | 3596.985 | 1997.297 | 1599.687 | 5.661  | 44.473 | 353.280 | 45.048 | 24.969 | 20.079 |
| 2007          | 28108  | 3560.798 | 1871.080 | 1689.718 | 6.011  | 47.453 | 347.693 | 44.137 | 23.145 | 20.993 |
| 2008          | 27219  | 3417.001 | 1702.453 | 1714.549 | 6.299  | 50.177 | 332.831 | 41.881 | 20.817 | 21.063 |
| 2009          | 27172  | 3394.390 | 1605.915 | 1788.475 | 6.582  | 52.689 | 328.230 | 41.113 | 19.399 | 21.713 |
| 2010          | 27027  | 3340.137 | 1506.902 | 1833.236 | 6.783  | 54.885 | 322.423 | 39.965 | 17.977 | 21.988 |
| 2011          | 27089  | 3285.435 | 1412.008 | 1873.427 | 6.916  | 57.022 | 319.871 | 38.922 | 16.673 | 22.249 |
| 2012          | 27202  | 3259.209 | 1330.370 | 1928.840 | 7.091  | 59.181 | 317.623 | 38.193 | 15.534 | 22.659 |
| 2013          | 28070  | 3274.703 | 1274.342 | 2000.360 | 7.126  | 61.085 | 323.909 | 37.937 | 14.705 | 23.232 |
| 2014          | 28980  | 3298.083 | 1224.239 | 2073.844 | 7.156  | 62.880 | 330.390 | 37.762 | 13.957 | 23.805 |
| 2015          | 29773  | 3244.406 | 1157.123 | 2087.283 | 7.011  | 64.335 | 381.490 | 41.789 | 14.827 | 26.963 |
| 2016          | 30752  | 3314.836 | 1135.916 | 2178.921 | 7.086  | 65.732 | 390.188 | 42.297 | 14.413 | 27.885 |
| 2017          | 31683  | 3333.314 | 1096.816 | 2236.497 | 7.059  | 67.095 | 398.157 | 42.144 | 13.784 | 28.360 |
| 2018          | 29620  | 2925.242 | 929.623  | 1995.619 | 6.737  | 68.221 | 368.637 | 36.642 | 11.569 | 25.073 |
| 2019          | 29894  | 2864.628 | 882.074  | 1982.553 | 6.632  | 69.208 | 368.263 | 35.534 | 10.866 | 24.668 |
| 2020          | 29913  | 2730.366 | 816.974  | 1913.392 | 6.397  | 70.078 | 420.206 | 38.675 | 11.477 | 27.199 |
| 2021          | 30447  | 2647.911 | 767.648  | 1880.263 | 6.175  | 71.009 | 424.496 | 37.244 | 10.703 | 26.542 |
| 2022          | 30679  | 2586.165 | 726.342  | 1859.823 | 6.062  | 71.914 | 424.250 | 36.097 | 10.044 | 26.053 |
| 2023          | 30908  | 2517.960 | 688.448  | 1829.512 | 5.919  | 72.658 | 423.728 | 34.860 | 9.438  | 25.422 |
| 2024          | 31090  | 2454.161 | 655.725  | 1798.436 | 5.785  | 73.281 | 422.480 | 33.695 | 8.911  | 24.785 |
| 2025          | 30709  | 2275.364 | 594.789  | 1680.575 | 5.473  | 73.860 | 484.802 | 36.363 | 9.390  | 26.973 |
| 2026          | 31174  | 2183.166 | 560.269  | 1622.897 | 5.206  | 74.337 | 489.850 | 34.747 | 8.804  | 25.943 |
| 2027          | 31074  | 2112.345 | 533.374  | 1578.970 | 5.081  | 74.750 | 485.786 | 33.467 | 8.338  | 25.129 |
| 2028          | 30949  | 2046.677 | 507.997  | 1538.680 | 4.972  | 75.179 | 481.108 | 32.263 | 7.897  | 24.366 |
| 2029          | 30816  | 1977.671 | 483.970  | 1493.701 | 4.847  | 75.528 | 476.043 | 30.997 | 7.476  | 23.521 |
| 2030          | 29911  | 1744.457 | 420.995  | 1323.461 | 4.425  | 75.867 | 550.797 | 32.668 | 7.752  | 24.916 |
| 2031          | 29578  | 1653.738 | 394.186  | 1259.552 | 4.258  | 76.164 | 542.877 | 30.889 | 7.235  | 23.654 |
| 2032          | 29348  | 1603.120 | 374.539  | 1228.582 | 4.186  | 76.637 | 536.471 | 29.841 | 6.847  | 22.995 |
| 2033          | 29108  | 1548.245 | 357.350  | 1190.894 | 4.091  | 76.919 | 529.537 | 28.700 | 6.501  | 22.199 |
| 2034          | 28843  | 1511.985 | 344.644  | 1167.341 | 4.047  | 77.206 | 521.867 | 27.893 | 6.236  | 21.657 |
| 2035          | 27408  | 1239.866 | 280.110  | 959.756  | 3.502  | 77.408 | 611.777 | 28.290 | 6.252  | 22.037 |
| 2036          | 26256  | 1182.522 | 263.861  | 918.661  | 3.499  | 77.687 | 585.505 | 26.975 | 5.884  | 21.091 |
| 2037          | 25819  | 1134.483 | 254.148  | 880.335  | 3.410  | 77.598 | 574.754 | 25.851 | 5.658  | 20.193 |
| 2038          | 25379  | 1093.537 | 241.406  | 852.131  | 3.358  | 77.924 | 563.426 | 24.866 | 5.359  | 19.506 |
| 2039          | 24943  | 1047.905 | 229.808  | 818.097  | 3.280  | 78.070 | 551.582 | 23.751 | 5.082  | 18.669 |

## Results for PHIM for Run 7 (Sensitivity\_Analysis\_1.RTF)

\*\*\*\*\*

### Main Results for E-Component for Run: 7, Simulation: 1, COD: COPD, Adjusted

| Variable Parameter          | Value                                  |
|-----------------------------|----------------------------------------|
| 1. Country                  | US (United States)                     |
| 2. Sex                      | M (Males)                              |
| 3. Year of start of process | 1990                                   |
| 4. Cause of Death           | COPD                                   |
| 5. Effective Dose NULL      | CC:1                                   |
| 6. Effective Dose Ecig      | CC:1 Ecig:0.2 Dual:0.6                 |
| Note:                       | Death rates are per million population |

#### Results for Age Groups Combined and Years combined, Population and Number deaths adjusted for Ecig scenario,

| Age Group:All | NULL    | Ecig        | %Drop      |          |        |        | NULL    | Ecig    | Drop    |        |
|---------------|---------|-------------|------------|----------|--------|--------|---------|---------|---------|--------|
| Year          | Number  | Attrib      | Attrib     | Drop     | %Drop  | Attrib | Death   | Attrib  | Attrib  | Drop   |
|               | Deaths  | Deaths      | Deaths     | Deaths   | Deaths | Deaths | Rate    | Rates   | Rates   | Rates  |
| All Comb      | 2259228 | 1015606.587 | 751502.739 | 264103.8 | 11.690 | 26.005 | 649.682 | 293.996 | 216.108 | 77.888 |

#### Results for Age Groups Combined, Population and Number deaths adjusted for Ecig scenario,

| Age Group:All | NULL   | Ecig      | %Drop     |          |        |        | NULL    | Ecig    | Drop    |         |
|---------------|--------|-----------|-----------|----------|--------|--------|---------|---------|---------|---------|
| Year          | Number | Attrib    | Attrib    | Drop     | %Drop  | Attrib | Death   | Attrib  | Attrib  | Drop    |
|               | Deaths | Deaths    | Deaths    | Deaths   | Deaths | Deaths | Rate    | Rates   | Rates   | Rates   |
| 1990          | 33993  | 19262.437 | 19262.437 | 0.000    | 0.000  | 0.000  | 538.865 | 305.353 | 305.353 | 0.000   |
| 1991          | 34092  | 19215.636 | 19196.673 | 18.963   | 0.056  | 0.099  | 531.576 | 299.618 | 299.322 | 0.296   |
| 1992          | 33942  | 19056.189 | 19007.388 | 48.801   | 0.144  | 0.256  | 520.249 | 292.085 | 291.335 | 0.750   |
| 1993          | 35914  | 20095.670 | 19996.389 | 99.280   | 0.276  | 0.494  | 540.648 | 302.526 | 301.025 | 1.501   |
| 1994          | 35076  | 19524.095 | 19373.478 | 150.617  | 0.429  | 0.771  | 518.165 | 288.435 | 286.196 | 2.239   |
| 1995          | 34673  | 19116.002 | 18900.207 | 215.795  | 0.622  | 1.129  | 502.374 | 276.995 | 273.844 | 3.151   |
| 1996          | 34589  | 18975.021 | 18680.753 | 294.268  | 0.851  | 1.551  | 493.327 | 270.675 | 266.439 | 4.236   |
| 1997          | 35277  | 19169.025 | 18779.458 | 389.566  | 1.104  | 2.032  | 494.911 | 268.986 | 263.462 | 5.524   |
| 1998          | 35690  | 19228.937 | 18725.839 | 503.099  | 1.410  | 2.616  | 492.417 | 265.388 | 258.364 | 7.024   |
| 1999          | 38538  | 20589.820 | 19931.478 | 658.342  | 1.708  | 3.197  | 523.273 | 279.689 | 270.633 | 9.056   |
| 2000          | 36311  | 19196.417 | 18456.231 | 740.186  | 2.038  | 3.856  | 485.752 | 256.946 | 246.901 | 10.045  |
| 2001          | 36317  | 19012.731 | 18116.659 | 896.072  | 2.467  | 4.713  | 479.430 | 251.174 | 239.164 | 12.009  |
| 2002          | 36028  | 18699.357 | 17654.175 | 1045.182 | 2.901  | 5.589  | 470.202 | 244.265 | 230.406 | 13.859  |
| 2003          | 36261  | 18663.550 | 17447.126 | 1216.423 | 3.355  | 6.518  | 468.230 | 241.262 | 225.291 | 15.971  |
| 2004          | 34676  | 17679.164 | 16330.661 | 1348.502 | 3.889  | 7.628  | 442.842 | 226.076 | 208.558 | 17.519  |
| 2005          | 36908  | 18692.832 | 17068.116 | 1624.716 | 4.402  | 8.692  | 465.773 | 236.265 | 215.396 | 20.869  |
| 2006          | 34440  | 17308.564 | 15585.530 | 1723.033 | 5.003  | 9.955  | 430.545 | 216.769 | 194.839 | 21.930  |
| 2007          | 35434  | 17683.181 | 15694.023 | 1989.158 | 5.614  | 11.249 | 438.307 | 219.189 | 194.131 | 25.058  |
| 2008          | 38382  | 19006.374 | 16640.373 | 2366.001 | 6.164  | 12.448 | 469.327 | 232.952 | 203.474 | 29.478  |
| 2009          | 37050  | 18205.573 | 15666.070 | 2539.503 | 6.854  | 13.949 | 447.557 | 220.505 | 189.245 | 31.260  |
| 2010          | 37402  | 18237.758 | 15459.602 | 2778.156 | 7.428  | 15.233 | 446.195 | 218.215 | 184.428 | 33.787  |
| 2011          | 38285  | 18487.916 | 15356.483 | 3131.433 | 8.179  | 16.938 | 452.078 | 219.022 | 181.331 | 37.691  |
| 2012          | 38720  | 18491.158 | 15064.835 | 3426.324 | 8.849  | 18.530 | 452.118 | 216.689 | 175.905 | 40.785  |
| 2013          | 40541  | 19143.452 | 15307.898 | 3835.554 | 9.461  | 20.036 | 467.821 | 221.775 | 176.645 | 45.130  |
| 2014          | 40616  | 18992.005 | 14874.241 | 4117.764 | 10.138 | 21.682 | 463.050 | 217.451 | 169.578 | 47.873  |
| 2015          | 42622  | 19728.885 | 15198.882 | 4530.003 | 10.628 | 22.961 | 546.136 | 254.116 | 194.749 | 59.368  |
| 2016          | 43458  | 19876.724 | 15004.129 | 4872.595 | 11.212 | 24.514 | 551.417 | 253.628 | 190.378 | 63.250  |
| 2017          | 44501  | 20119.790 | 14856.150 | 5263.641 | 11.828 | 26.162 | 559.250 | 254.381 | 186.697 | 67.684  |
| 2018          | 45908  | 20535.123 | 14831.134 | 5703.989 | 12.425 | 27.777 | 571.344 | 257.229 | 184.579 | 72.650  |
| 2019          | 47452  | 21009.029 | 14842.771 | 6166.258 | 12.995 | 29.351 | 584.558 | 260.605 | 182.848 | 77.757  |
| 2020          | 48962  | 21428.512 | 14814.380 | 6614.132 | 13.509 | 30.866 | 687.802 | 303.533 | 208.107 | 95.426  |
| 2021          | 49046  | 21266.697 | 14319.337 | 6947.360 | 14.165 | 32.668 | 683.793 | 299.127 | 199.640 | 99.487  |
| 2022          | 50555  | 21663.568 | 14210.910 | 7452.658 | 14.742 | 34.402 | 699.098 | 302.378 | 196.515 | 105.863 |
| 2023          | 52091  | 22084.131 | 14115.390 | 7968.741 | 15.298 | 36.084 | 714.144 | 305.748 | 193.514 | 112.234 |
| 2024          | 53576  | 22418.456 | 13993.146 | 8425.309 | 15.726 | 37.582 | 728.035 | 307.804 | 190.152 | 117.652 |
| 2025          | 54678  | 22614.834 | 13792.727 | 8822.107 | 16.135 | 39.010 | 863.208 | 361.411 | 217.748 | 143.663 |
| 2026          | 55230  | 22571.522 | 13399.140 | 9172.382 | 16.608 | 40.637 | 867.835 | 359.241 | 210.544 | 148.697 |
| 2027          | 56219  | 22774.416 | 13138.216 | 9636.199 | 17.141 | 42.312 | 878.868 | 360.827 | 205.391 | 155.436 |
| 2028          | 57167  | 22915.561 | 12831.458 | 10084.10 | 17.640 | 44.005 | 888.672 | 361.228 | 199.468 | 161.761 |
| 2029          | 58100  | 22992.027 | 12503.001 | 10489.03 | 18.053 | 45.620 | 897.529 | 360.371 | 193.145 | 167.226 |
| 2030          | 58392  | 22895.360 | 12131.891 | 10763.47 | 18.433 | 47.012 | 1075.25 | 428.760 | 223.400 | 205.360 |
| 2031          | 58807  | 22715.871 | 11740.723 | 10975.15 | 18.663 | 48.315 | 1079.36 | 424.293 | 215.492 | 208.801 |
| 2032          | 59535  | 22759.207 | 11404.628 | 11354.58 | 19.072 | 49.890 | 1088.30 | 423.652 | 208.476 | 215.176 |
| 2033          | 60240  | 22786.258 | 11115.322 | 11670.94 | 19.374 | 51.219 | 1095.89 | 422.387 | 202.212 | 220.175 |
| 2034          | 60886  | 22806.106 | 10800.782 | 12005.32 | 19.718 | 52.641 | 1101.63 | 420.721 | 195.422 | 225.299 |
| 2035          | 59995  | 22262.998 | 10340.102 | 11922.90 | 19.873 | 53.555 | 1339.18 | 507.973 | 230.806 | 277.167 |
| 2036          | 57918  | 21140.051 | 9438.700  | 11701.35 | 20.203 | 55.352 | 1291.58 | 482.234 | 210.486 | 271.748 |
| 2037          | 58095  | 21011.845 | 9055.583  | 11956.26 | 20.581 | 56.902 | 1293.25 | 478.783 | 201.587 | 277.196 |
| 2038          | 58249  | 20787.483 | 8680.358  | 12107.13 | 20.785 | 58.242 | 1293.13 | 472.681 | 192.705 | 279.975 |
| 2039          | 58393  | 20709.267 | 8367.756  | 12341.51 | 21.135 | 59.594 | 1291.30 | 469.372 | 185.044 | 284.328 |

## Results for PHIM for Run 8 (Sensitivity\_Analysis\_1.RTF)

---

### Control File Details for Run: 8

| Variable Parameter                                       | Value                  |
|----------------------------------------------------------|------------------------|
| 1. Name for Reference Scenario                           | NULL                   |
| 2. Name for Test Scenario                                | Ecig                   |
| 3. Name for Product 1                                    | CC                     |
| 4. Name for Product 2                                    | Ecig                   |
| 5. Name for Product 3                                    | -                      |
| 6. Name for Product 4                                    | Dual                   |
| 7. Country                                               | US (United States)     |
| 8. Sex                                                   | F (Females)            |
| 9. Year of start of process                              | 1990                   |
| 10. Number of months of follow-up                        | 600                    |
| 11. Follow-up interval length (in months)                | 12                     |
| 12. Lower age for risk estimation                        | 10                     |
| 13. Upper age for risk estimation                        | 79                     |
| 14. The effective dose for Product 1 (F1) - Ref          | 1                      |
| 15. The effective dose for Product 2 (F2) - Ref          | -                      |
| 16. The effective dose for Product 3 (F3) - Ref          | -                      |
| 17. The effective dose for Product 4 (F4) - Ref          | -                      |
| 18. The effective dose for Product 1 (F1) - Test         | 1                      |
| 19. The effective dose for Product 2 (F2) - Test         | 0.2                    |
| 20. The effective dose for Product 3 (F3) - Test         | -                      |
| 21. The effective dose for Product 4 (F4) - Test         | FROMF2                 |
| 22. Number in population to be simulated                 | 100000                 |
| 23. Number of MC simulations                             | 1                      |
| 24. The random number seed for the first simulation      | 15975263               |
| 25. Source for the population file (POP)                 | UN4                    |
| 26. Source for the socioeconomic prevalence file (SEP)   | -                      |
| 27. Source for the current smoking prevalence file (CSP) | ISS3                   |
| 28. Source for the former smoking prevalence file (FSP)  | ISS3                   |
| 29. Source for the quit-time distribution file (QTD)     | NHIS2006               |
| 30. Source for the death file (MORT)                     | APR-20                 |
| 31. Source for the relative risk file (RR)               | PNLEST                 |
| 32. Source for the half-life file (H)                    | PNLEST                 |
| 33. Assumption Set for TTP Factor Reference              | F1                     |
| 34. Assumption Set for TTP Factor Test                   | F1                     |
| 35. Assumption Set for TTP Reference                     | ISS3                   |
| 36. Assumption Set for TTP Test                          | ISS3                   |
| 37. Assumption Set for TP for socioeconomic group        | -                      |
| 38. Source for Output Choice file (OUTC)                 | BASIC                  |
| 39. Output for DTP P1                                    | N                      |
| 40. Output for DTP P2                                    | N                      |
| 41. Output for Main P Component                          | Y                      |
| 42. Output for DTP E1                                    | N                      |
| 43. Output for DTP E2                                    | N                      |
| 44. Output for DTP E3                                    | N                      |
| 45. Output for Main E Component                          | Y                      |
| 46. Output file name                                     | Sensitivity_Analysis_1 |
| 47. Run number for P-Component                           | -                      |
| 48. Results file for E-Component                         | -                      |
| 49. Components required                                  | PE                     |
| 50. Results folder for P to be used in E-Component       | -                      |
| 51. Fixed age of starting product use                    | 16                     |
| 52. Output absolute risk file?                           | N                      |

## Results for PHIM for Run 8 (Sensitivity\_Analysis\_1.RTF)

\*\*\*\*\*

TTP values for Run: 8, Scenario: NULL

| Variable Parameter | Value               |
|--------------------|---------------------|
| 1. Country         | US (United States)  |
| 2. Sex             | F (Females)         |
| 3. Assumption Set  | ISS3                |
| Note:              | Period is in Months |

| Age   | Period  | Initiation  | Cessation    | Re-initiation |
|-------|---------|-------------|--------------|---------------|
|       |         | Never<br>CC | CC<br>Former | Former<br>CC  |
| 10-14 | 1-12    | 0.003758    | 0.008742     | 0.000000      |
| 15-19 | 1-12    | 0.003469    | 0.002515     | 0.000000      |
| 20-24 | 1-12    | 0.000276    | 0.000761     | 0.000000      |
| 25-29 | 1-12    | 0.000137    | 0.001375     | 0.000000      |
| 30-34 | 1-12    | 0.000069    | 0.001149     | 0.000000      |
| 35-39 | 1-12    | 0.000000    | 0.000991     | 0.000000      |
| 40-44 | 1-12    | 0.000000    | 0.000833     | 0.000000      |
| 45-49 | 1-12    | 0.000000    | 0.001723     | 0.000000      |
| 50-54 | 1-12    | 0.000000    | 0.002336     | 0.000000      |
| 55-59 | 1-12    | 0.000000    | 0.002233     | 0.000000      |
| 60-64 | 1-12    | 0.000000    | 0.004634     | 0.000000      |
| 65-69 | 1-12    | 0.000000    | 0.003505     | 0.000000      |
| 70-74 | 1-12    | 0.000000    | 0.004329     | 0.000000      |
| 75-79 | 1-12    | 0.000000    | 0.004329     | 0.000000      |
| 10-14 | 13-72   | 0.004794    | 0.008742     | 0.000000      |
| 15-19 | 13-72   | 0.004527    | 0.004082     | 0.000000      |
| 20-24 | 13-72   | 0.000105    | 0.001261     | 0.000000      |
| 25-29 | 13-72   | 0.000053    | 0.000952     | 0.000000      |
| 30-34 | 13-72   | 0.000026    | 0.000733     | 0.000000      |
| 35-39 | 13-72   | 0.000000    | 0.000753     | 0.000000      |
| 40-44 | 13-72   | 0.000000    | 0.001535     | 0.000000      |
| 45-49 | 13-72   | 0.000000    | 0.002998     | 0.000000      |
| 50-54 | 13-72   | 0.000000    | 0.003159     | 0.000000      |
| 55-59 | 13-72   | 0.000000    | 0.002965     | 0.000000      |
| 60-64 | 13-72   | 0.000000    | 0.003633     | 0.000000      |
| 65-69 | 13-72   | 0.000000    | 0.004522     | 0.000000      |
| 70-74 | 13-72   | 0.000000    | 0.005208     | 0.000000      |
| 75-79 | 13-72   | 0.000000    | 0.005208     | 0.000000      |
| 10-14 | 73-132  | 0.003969    | 0.008742     | 0.000000      |
| 15-19 | 73-132  | 0.003056    | 0.003373     | 0.000000      |
| 20-24 | 73-132  | 0.001459    | 0.003881     | 0.000000      |
| 25-29 | 73-132  | 0.000714    | 0.001953     | 0.000000      |
| 30-34 | 73-132  | 0.000111    | 0.001338     | 0.000000      |
| 35-39 | 73-132  | 0.000000    | 0.001507     | 0.000000      |
| 40-44 | 73-132  | 0.000000    | 0.002080     | 0.000000      |
| 45-49 | 73-132  | 0.000000    | 0.003809     | 0.000000      |
| 50-54 | 73-132  | 0.000000    | 0.004871     | 0.000000      |
| 55-59 | 73-132  | 0.000000    | 0.004560     | 0.000000      |
| 60-64 | 73-132  | 0.000000    | 0.007192     | 0.000000      |
| 65-69 | 73-132  | 0.000000    | 0.007033     | 0.000000      |
| 70-74 | 73-132  | 0.000000    | 0.008206     | 0.000000      |
| 75-79 | 73-132  | 0.000000    | 0.008206     | 0.000000      |
| 10-14 | 133-192 | 0.002861    | 0.008742     | 0.000000      |
| 15-19 | 133-192 | 0.002594    | 0.003996     | 0.000000      |
| 20-24 | 133-192 | 0.001247    | 0.002805     | 0.000000      |
| 25-29 | 133-192 | 0.000289    | 0.001574     | 0.000000      |
| 30-34 | 133-192 | 0.000132    | 0.001293     | 0.000000      |
| 35-39 | 133-192 | 0.000000    | 0.001219     | 0.000000      |
| 40-44 | 133-192 | 0.000000    | 0.001657     | 0.000000      |
| 45-49 | 133-192 | 0.000000    | 0.001995     | 0.000000      |
| 50-54 | 133-192 | 0.000000    | 0.002154     | 0.000000      |
| 55-59 | 133-192 | 0.000000    | 0.002072     | 0.000000      |
| 60-64 | 133-192 | 0.000000    | 0.005049     | 0.000000      |
| 65-69 | 133-192 | 0.000000    | 0.003680     | 0.000000      |
| 70-74 | 133-192 | 0.000000    | 0.006144     | 0.000000      |
| 75-79 | 133-192 | 0.000000    | 0.006144     | 0.000000      |
| 10-14 | 193-252 | 0.001859    | 0.008742     | 0.000000      |
| 15-19 | 193-252 | 0.002232    | 0.005770     | 0.000000      |
| 20-24 | 193-252 | 0.001079    | 0.003262     | 0.000000      |
| 25-29 | 193-252 | 0.000531    | 0.002002     | 0.000000      |
| 30-34 | 193-252 | 0.000263    | 0.003240     | 0.000000      |
| 35-39 | 193-252 | 0.000000    | 0.001771     | 0.000000      |
| 40-44 | 193-252 | 0.000000    | 0.002173     | 0.000000      |
| 45-49 | 193-252 | 0.000000    | 0.002075     | 0.000000      |
| 50-54 | 193-252 | 0.000000    | 0.003431     | 0.000000      |

### Results for PHIM for Run 8 (Sensitivity\_Analysis\_1.RTF)

|       |         |          |          |          |
|-------|---------|----------|----------|----------|
| 55-59 | 193-252 | 0.000000 | 0.002906 | 0.000000 |
| 60-64 | 193-252 | 0.000000 | 0.007139 | 0.000000 |
| 65-69 | 193-252 | 0.000000 | 0.004963 | 0.000000 |
| 70-74 | 193-252 | 0.000000 | 0.006269 | 0.000000 |
| 75-79 | 193-252 | 0.000000 | 0.006269 | 0.000000 |
| 10-14 | 253+    | 0.000931 | 0.008742 | 0.000000 |
| 15-19 | 253+    | 0.001798 | 0.009440 | 0.000000 |
| 20-24 | 253+    | 0.000023 | 0.002831 | 0.000000 |
| 25-29 | 253+    | 0.000073 | 0.002655 | 0.000000 |
| 30-34 | 253+    | 0.000037 | 0.004614 | 0.000000 |
| 35-39 | 253+    | 0.000000 | 0.002607 | 0.000000 |
| 40-44 | 253+    | 0.000000 | 0.003115 | 0.000000 |
| 45-49 | 253+    | 0.000000 | 0.002132 | 0.000000 |
| 50-54 | 253+    | 0.000000 | 0.003497 | 0.000000 |
| 55-59 | 253+    | 0.000000 | 0.002942 | 0.000000 |
| 60-64 | 253+    | 0.000000 | 0.005376 | 0.000000 |
| 65-69 | 253+    | 0.000000 | 0.001789 | 0.000000 |
| 70-74 | 253+    | 0.000000 | 0.004077 | 0.000000 |
| 75-79 | 253+    | 0.000000 | 0.004077 | 0.000000 |



## Results for PHIM for Run 8 (Sensitivity\_Analysis\_1.RTF)

\*\*\*\*\*

TTP values for Run: 8, Scenario: Ecig

Variable Parameter

Value

- 1. Country
  - 2. Sex
  - 3. Assumption Set
- Note:

US (United States)  
 F (Females)  
 ISS3  
 Period is in Months

| Age   | Period  | Initiation  |               |               | Cessation    |                |                | Re-initiation |                |                |
|-------|---------|-------------|---------------|---------------|--------------|----------------|----------------|---------------|----------------|----------------|
|       |         | Never<br>CC | Never<br>Ecig | Never<br>Dual | CC<br>Former | Ecig<br>Former | Dual<br>Former | Former<br>CC  | Former<br>Ecig | Former<br>Dual |
| 10-14 | 1-12    | 0.001879    | 0.001879      | 0.000000      | 0.008742     | 0.008742       | 0.000000       | 0.000000      | 0.000000       | 0.000000       |
| 15-19 | 1-12    | 0.001735    | 0.001735      | 0.000000      | 0.002515     | 0.002515       | 0.000000       | 0.000000      | 0.000000       | 0.000000       |
| 20-24 | 1-12    | 0.000138    | 0.000138      | 0.000000      | 0.000761     | 0.000761       | 0.000000       | 0.000000      | 0.000000       | 0.000000       |
| 25-29 | 1-12    | 0.000069    | 0.000069      | 0.000000      | 0.001376     | 0.001376       | 0.000000       | 0.000000      | 0.000000       | 0.000000       |
| 30-34 | 1-12    | 0.000034    | 0.000034      | 0.000000      | 0.001149     | 0.001149       | 0.000000       | 0.000000      | 0.000000       | 0.000000       |
| 35-39 | 1-12    | 0.000000    | 0.000000      | 0.000000      | 0.000991     | 0.000991       | 0.000000       | 0.000000      | 0.000000       | 0.000000       |
| 40-44 | 1-12    | 0.000000    | 0.000000      | 0.000000      | 0.000833     | 0.000833       | 0.000000       | 0.000000      | 0.000000       | 0.000000       |
| 45-49 | 1-12    | 0.000000    | 0.000000      | 0.000000      | 0.001723     | 0.001723       | 0.000000       | 0.000000      | 0.000000       | 0.000000       |
| 50-54 | 1-12    | 0.000000    | 0.000000      | 0.000000      | 0.002336     | 0.002336       | 0.000000       | 0.000000      | 0.000000       | 0.000000       |
| 55-59 | 1-12    | 0.000000    | 0.000000      | 0.000000      | 0.002233     | 0.002233       | 0.000000       | 0.000000      | 0.000000       | 0.000000       |
| 60-64 | 1-12    | 0.000000    | 0.000000      | 0.000000      | 0.004635     | 0.004635       | 0.000000       | 0.000000      | 0.000000       | 0.000000       |
| 65-69 | 1-12    | 0.000000    | 0.000000      | 0.000000      | 0.003505     | 0.003505       | 0.000000       | 0.000000      | 0.000000       | 0.000000       |
| 70-74 | 1-12    | 0.000000    | 0.000000      | 0.000000      | 0.004329     | 0.004329       | 0.000000       | 0.000000      | 0.000000       | 0.000000       |
| 75-79 | 1-12    | 0.000000    | 0.000000      | 0.000000      | 0.004329     | 0.004329       | 0.000000       | 0.000000      | 0.000000       | 0.000000       |
| 10-14 | 13-72   | 0.001918    | 0.002877      | 0.000000      | 0.008742     | 0.008742       | 0.000000       | 0.000000      | 0.000000       | 0.000000       |
| 15-19 | 13-72   | 0.001811    | 0.002716      | 0.000000      | 0.004083     | 0.004083       | 0.000000       | 0.000000      | 0.000000       | 0.000000       |
| 20-24 | 13-72   | 0.000042    | 0.000063      | 0.000000      | 0.001261     | 0.001261       | 0.000000       | 0.000000      | 0.000000       | 0.000000       |
| 25-29 | 13-72   | 0.000021    | 0.000032      | 0.000000      | 0.000952     | 0.000952       | 0.000000       | 0.000000      | 0.000000       | 0.000000       |
| 30-34 | 13-72   | 0.000011    | 0.000016      | 0.000000      | 0.000733     | 0.000733       | 0.000000       | 0.000000      | 0.000000       | 0.000000       |
| 35-39 | 13-72   | 0.000000    | 0.000000      | 0.000000      | 0.000754     | 0.000754       | 0.000000       | 0.000000      | 0.000000       | 0.000000       |
| 40-44 | 13-72   | 0.000000    | 0.000000      | 0.000000      | 0.001535     | 0.001535       | 0.000000       | 0.000000      | 0.000000       | 0.000000       |
| 45-49 | 13-72   | 0.000000    | 0.000000      | 0.000000      | 0.002998     | 0.002998       | 0.000000       | 0.000000      | 0.000000       | 0.000000       |
| 50-54 | 13-72   | 0.000000    | 0.000000      | 0.000000      | 0.003160     | 0.003160       | 0.000000       | 0.000000      | 0.000000       | 0.000000       |
| 55-59 | 13-72   | 0.000000    | 0.000000      | 0.000000      | 0.002965     | 0.002965       | 0.000000       | 0.000000      | 0.000000       | 0.000000       |
| 60-64 | 13-72   | 0.000000    | 0.000000      | 0.000000      | 0.003633     | 0.003633       | 0.000000       | 0.000000      | 0.000000       | 0.000000       |
| 65-69 | 13-72   | 0.000000    | 0.000000      | 0.000000      | 0.004522     | 0.004522       | 0.000000       | 0.000000      | 0.000000       | 0.000000       |
| 70-74 | 13-72   | 0.000000    | 0.000000      | 0.000000      | 0.005208     | 0.005208       | 0.000000       | 0.000000      | 0.000000       | 0.000000       |
| 75-79 | 13-72   | 0.000000    | 0.000000      | 0.000000      | 0.005208     | 0.005208       | 0.000000       | 0.000000      | 0.000000       | 0.000000       |
| 10-14 | 73-132  | 0.000794    | 0.003175      | 0.000000      | 0.008742     | 0.008742       | 0.000000       | 0.000000      | 0.000000       | 0.000000       |
| 15-19 | 73-132  | 0.000611    | 0.002445      | 0.000000      | 0.003373     | 0.003373       | 0.000000       | 0.000000      | 0.000000       | 0.000000       |
| 20-24 | 73-132  | 0.000292    | 0.001167      | 0.000000      | 0.003881     | 0.003881       | 0.000000       | 0.000000      | 0.000000       | 0.000000       |
| 25-29 | 73-132  | 0.000143    | 0.000571      | 0.000000      | 0.001954     | 0.001954       | 0.000000       | 0.000000      | 0.000000       | 0.000000       |
| 30-34 | 73-132  | 0.000022    | 0.000089      | 0.000000      | 0.001338     | 0.001338       | 0.000000       | 0.000000      | 0.000000       | 0.000000       |
| 35-39 | 73-132  | 0.000000    | 0.000000      | 0.000000      | 0.001507     | 0.001507       | 0.000000       | 0.000000      | 0.000000       | 0.000000       |
| 40-44 | 73-132  | 0.000000    | 0.000000      | 0.000000      | 0.002080     | 0.002080       | 0.000000       | 0.000000      | 0.000000       | 0.000000       |
| 45-49 | 73-132  | 0.000000    | 0.000000      | 0.000000      | 0.003809     | 0.003809       | 0.000000       | 0.000000      | 0.000000       | 0.000000       |
| 50-54 | 73-132  | 0.000000    | 0.000000      | 0.000000      | 0.004871     | 0.004871       | 0.000000       | 0.000000      | 0.000000       | 0.000000       |
| 55-59 | 73-132  | 0.000000    | 0.000000      | 0.000000      | 0.004560     | 0.004560       | 0.000000       | 0.000000      | 0.000000       | 0.000000       |
| 60-64 | 73-132  | 0.000000    | 0.000000      | 0.000000      | 0.007192     | 0.007192       | 0.000000       | 0.000000      | 0.000000       | 0.000000       |
| 65-69 | 73-132  | 0.000000    | 0.000000      | 0.000000      | 0.007033     | 0.007033       | 0.000000       | 0.000000      | 0.000000       | 0.000000       |
| 70-74 | 73-132  | 0.000000    | 0.000000      | 0.000000      | 0.008206     | 0.008206       | 0.000000       | 0.000000      | 0.000000       | 0.000000       |
| 75-79 | 73-132  | 0.000000    | 0.000000      | 0.000000      | 0.008206     | 0.008206       | 0.000000       | 0.000000      | 0.000000       | 0.000000       |
| 10-14 | 133-192 | 0.000143    | 0.002718      | 0.000000      | 0.008742     | 0.008742       | 0.000000       | 0.000000      | 0.000000       | 0.000000       |
| 15-19 | 133-192 | 0.000130    | 0.002465      | 0.000000      | 0.003996     | 0.003996       | 0.000000       | 0.000000      | 0.000000       | 0.000000       |
| 20-24 | 133-192 | 0.000062    | 0.001185      | 0.000000      | 0.002805     | 0.002805       | 0.000000       | 0.000000      | 0.000000       | 0.000000       |
| 25-29 | 133-192 | 0.000015    | 0.000275      | 0.000000      | 0.001574     | 0.001574       | 0.000000       | 0.000000      | 0.000000       | 0.000000       |
| 30-34 | 133-192 | 0.000007    | 0.000125      | 0.000000      | 0.001293     | 0.001293       | 0.000000       | 0.000000      | 0.000000       | 0.000000       |
| 35-39 | 133-192 | 0.000000    | 0.000000      | 0.000000      | 0.001219     | 0.001219       | 0.000000       | 0.000000      | 0.000000       | 0.000000       |
| 40-44 | 133-192 | 0.000000    | 0.000000      | 0.000000      | 0.001657     | 0.001657       | 0.000000       | 0.000000      | 0.000000       | 0.000000       |
| 45-49 | 133-192 | 0.000000    | 0.000000      | 0.000000      | 0.001995     | 0.001995       | 0.000000       | 0.000000      | 0.000000       | 0.000000       |
| 50-54 | 133-192 | 0.000000    | 0.000000      | 0.000000      | 0.002154     | 0.002154       | 0.000000       | 0.000000      | 0.000000       | 0.000000       |
| 55-59 | 133-192 | 0.000000    | 0.000000      | 0.000000      | 0.002072     | 0.002072       | 0.000000       | 0.000000      | 0.000000       | 0.000000       |
| 60-64 | 133-192 | 0.000000    | 0.000000      | 0.000000      | 0.005049     | 0.005049       | 0.000000       | 0.000000      | 0.000000       | 0.000000       |
| 65-69 | 133-192 | 0.000000    | 0.000000      | 0.000000      | 0.003681     | 0.003681       | 0.000000       | 0.000000      | 0.000000       | 0.000000       |
| 70-74 | 133-192 | 0.000000    | 0.000000      | 0.000000      | 0.006144     | 0.006144       | 0.000000       | 0.000000      | 0.000000       | 0.000000       |
| 75-79 | 133-192 | 0.000000    | 0.000000      | 0.000000      | 0.006144     | 0.006144       | 0.000000       | 0.000000      | 0.000000       | 0.000000       |
| 10-14 | 193-252 | 0.000093    | 0.001766      | 0.000000      | 0.008742     | 0.008742       | 0.000000       | 0.000000      | 0.000000       | 0.000000       |
| 15-19 | 193-252 | 0.000112    | 0.002120      | 0.000000      | 0.005770     | 0.005770       | 0.000000       | 0.000000      | 0.000000       | 0.000000       |
| 20-24 | 193-252 | 0.000054    | 0.001025      | 0.000000      | 0.003262     | 0.003262       | 0.000000       | 0.000000      | 0.000000       | 0.000000       |
| 25-29 | 193-252 | 0.000027    | 0.000504      | 0.000000      | 0.002002     | 0.002002       | 0.000000       | 0.000000      | 0.000000       | 0.000000       |
| 30-34 | 193-252 | 0.000013    | 0.000250      | 0.000000      | 0.003241     | 0.003241       | 0.000000       | 0.000000      | 0.000000       | 0.000000       |
| 35-39 | 193-252 | 0.000000    | 0.000000      | 0.000000      | 0.001771     | 0.001771       | 0.000000       | 0.000000      | 0.000000       | 0.000000       |
| 40-44 | 193-252 | 0.000000    | 0.000000      | 0.000000      | 0.002173     | 0.002173       | 0.000000       | 0.000000      | 0.000000       | 0.000000       |
| 45-49 | 193-252 | 0.000000    | 0.000000      | 0.000000      | 0.002075     | 0.002075       | 0.000000       | 0.000000      | 0.000000       | 0.000000       |
| 50-54 | 193-252 | 0.000000    | 0.000000      | 0.000000      | 0.003432     | 0.003432       | 0.000000       | 0.000000      | 0.000000       | 0.000000       |

### Results for PHIM for Run 8 (Sensitivity\_Analysis\_1.RTF)

|       |         |          |          |          |          |          |          |          |          |          |
|-------|---------|----------|----------|----------|----------|----------|----------|----------|----------|----------|
| 55-59 | 193-252 | 0.000000 | 0.000000 | 0.000000 | 0.002906 | 0.002906 | 0.000000 | 0.000000 | 0.000000 | 0.000000 |
| 60-64 | 193-252 | 0.000000 | 0.000000 | 0.000000 | 0.007139 | 0.007139 | 0.000000 | 0.000000 | 0.000000 | 0.000000 |
| 65-69 | 193-252 | 0.000000 | 0.000000 | 0.000000 | 0.004963 | 0.004963 | 0.000000 | 0.000000 | 0.000000 | 0.000000 |
| 70-74 | 193-252 | 0.000000 | 0.000000 | 0.000000 | 0.006269 | 0.006269 | 0.000000 | 0.000000 | 0.000000 | 0.000000 |
| 75-79 | 193-252 | 0.000000 | 0.000000 | 0.000000 | 0.006269 | 0.006269 | 0.000000 | 0.000000 | 0.000000 | 0.000000 |
| 10-14 | 253+    | 0.000047 | 0.000884 | 0.000000 | 0.008742 | 0.008742 | 0.000000 | 0.000000 | 0.000000 | 0.000000 |
| 15-19 | 253+    | 0.000090 | 0.001708 | 0.000000 | 0.009440 | 0.009440 | 0.000000 | 0.000000 | 0.000000 | 0.000000 |
| 20-24 | 253+    | 0.000001 | 0.000022 | 0.000000 | 0.002831 | 0.002831 | 0.000000 | 0.000000 | 0.000000 | 0.000000 |
| 25-29 | 253+    | 0.000004 | 0.000070 | 0.000000 | 0.002656 | 0.002656 | 0.000000 | 0.000000 | 0.000000 | 0.000000 |
| 30-34 | 253+    | 0.000002 | 0.000035 | 0.000000 | 0.004614 | 0.004614 | 0.000000 | 0.000000 | 0.000000 | 0.000000 |
| 35-39 | 253+    | 0.000000 | 0.000000 | 0.000000 | 0.002608 | 0.002608 | 0.000000 | 0.000000 | 0.000000 | 0.000000 |
| 40-44 | 253+    | 0.000000 | 0.000000 | 0.000000 | 0.003115 | 0.003115 | 0.000000 | 0.000000 | 0.000000 | 0.000000 |
| 45-49 | 253+    | 0.000000 | 0.000000 | 0.000000 | 0.002132 | 0.002132 | 0.000000 | 0.000000 | 0.000000 | 0.000000 |
| 50-54 | 253+    | 0.000000 | 0.000000 | 0.000000 | 0.003497 | 0.003497 | 0.000000 | 0.000000 | 0.000000 | 0.000000 |
| 55-59 | 253+    | 0.000000 | 0.000000 | 0.000000 | 0.002942 | 0.002942 | 0.000000 | 0.000000 | 0.000000 | 0.000000 |
| 60-64 | 253+    | 0.000000 | 0.000000 | 0.000000 | 0.005376 | 0.005376 | 0.000000 | 0.000000 | 0.000000 | 0.000000 |
| 65-69 | 253+    | 0.000000 | 0.000000 | 0.000000 | 0.001789 | 0.001789 | 0.000000 | 0.000000 | 0.000000 | 0.000000 |
| 70-74 | 253+    | 0.000000 | 0.000000 | 0.000000 | 0.004077 | 0.004077 | 0.000000 | 0.000000 | 0.000000 | 0.000000 |
| 75-79 | 253+    | 0.000000 | 0.000000 | 0.000000 | 0.004077 | 0.004077 | 0.000000 | 0.000000 | 0.000000 | 0.000000 |



### Results for PHIM for Run 8 (Sensitivity\_Analysis\_1.RTF)

|       |      |          |          |          |          |          |          |
|-------|------|----------|----------|----------|----------|----------|----------|
| 25-29 | 253+ | 0.014127 | 0.000000 | 0.000000 | 0.000000 | 0.000000 | 0.000000 |
| 30-34 | 253+ | 0.013889 | 0.000000 | 0.000000 | 0.000000 | 0.000000 | 0.000000 |
| 35-39 | 253+ | 0.012929 | 0.000000 | 0.000000 | 0.000000 | 0.000000 | 0.000000 |
| 40-44 | 253+ | 0.012785 | 0.000000 | 0.000000 | 0.000000 | 0.000000 | 0.000000 |
| 45-49 | 253+ | 0.012295 | 0.000000 | 0.000000 | 0.000000 | 0.000000 | 0.000000 |
| 50-54 | 253+ | 0.011536 | 0.000000 | 0.000000 | 0.000000 | 0.000000 | 0.000000 |
| 55-59 | 253+ | 0.008988 | 0.000000 | 0.000000 | 0.000000 | 0.000000 | 0.000000 |
| 60-64 | 253+ | 0.008098 | 0.000000 | 0.000000 | 0.000000 | 0.000000 | 0.000000 |
| 65-69 | 253+ | 0.006274 | 0.000000 | 0.000000 | 0.000000 | 0.000000 | 0.000000 |
| 70-74 | 253+ | 0.004141 | 0.000000 | 0.000000 | 0.000000 | 0.000000 | 0.000000 |
| 75-79 | 253+ | 0.004141 | 0.000000 | 0.000000 | 0.000000 | 0.000000 | 0.000000 |

## Results for PHIM for Run 8 (Sensitivity\_Analysis\_1.RTF)

\*\*\*\*\*

### Main Output for the Tobacco History for Run: 8, Simulation: 1, Scenario: NULL

| Variable Parameter          | Value              |
|-----------------------------|--------------------|
| 1. Country                  | US (United States) |
| 2. Sex                      | F (Females)        |
| 3. Year of start of process | 1990               |

Year of Follow-up: 2040, Age Group: All Ages  
 Period    Age Group    Smoking Group            N            %

|    |          |           |       |       |
|----|----------|-----------|-------|-------|
| 50 | All Ages | Never Any | 20670 | 58.80 |
| 50 | All Ages | CC        | 2462  | 7.00  |
| 50 | All Ages | Former    | 12019 | 34.19 |

Year of Follow-up: 2040, Age Group: 18-19  
 Period    Age Group    Smoking Group            N            %

|    |       |           |   |   |
|----|-------|-----------|---|---|
| 50 | 18-19 | Never Any | 0 | . |
| 50 | 18-19 | CC        | 0 | . |
| 50 | 18-19 | Former    | 0 | . |

Year of Follow-up: 2040, Age Group: 20-24  
 Period    Age Group    Smoking Group            N            %

|    |       |           |   |   |
|----|-------|-----------|---|---|
| 50 | 20-24 | Never Any | 0 | . |
| 50 | 20-24 | CC        | 0 | . |
| 50 | 20-24 | Former    | 0 | . |

Year of Follow-up: 2040, Age Group: 25-29  
 Period    Age Group    Smoking Group            N            %

|    |       |           |   |   |
|----|-------|-----------|---|---|
| 50 | 25-29 | Never Any | 0 | . |
| 50 | 25-29 | CC        | 0 | . |
| 50 | 25-29 | Former    | 0 | . |

Year of Follow-up: 2040, Age Group: 30-34  
 Period    Age Group    Smoking Group            N            %

|    |       |           |   |   |
|----|-------|-----------|---|---|
| 50 | 30-34 | Never Any | 0 | . |
| 50 | 30-34 | CC        | 0 | . |
| 50 | 30-34 | Former    | 0 | . |

Year of Follow-up: 2040, Age Group: 35-39  
 Period    Age Group    Smoking Group            N            %

|    |       |           |   |   |
|----|-------|-----------|---|---|
| 50 | 35-39 | Never Any | 0 | . |
| 50 | 35-39 | CC        | 0 | . |
| 50 | 35-39 | Former    | 0 | . |

Year of Follow-up: 2040, Age Group: 40-44  
 Period    Age Group    Smoking Group            N            %

|    |       |           |   |   |
|----|-------|-----------|---|---|
| 50 | 40-44 | Never Any | 0 | . |
| 50 | 40-44 | CC        | 0 | . |
| 50 | 40-44 | Former    | 0 | . |

Year of Follow-up: 2040, Age Group: 45-49  
 Period    Age Group    Smoking Group            N            %

|    |       |           |   |   |
|----|-------|-----------|---|---|
| 50 | 45-49 | Never Any | 0 | . |
| 50 | 45-49 | CC        | 0 | . |
| 50 | 45-49 | Former    | 0 | . |

Year of Follow-up: 2040, Age Group: 50-54  
 Period    Age Group    Smoking Group            N            %

|    |       |           |   |   |
|----|-------|-----------|---|---|
| 50 | 50-54 | Never Any | 0 | . |
| 50 | 50-54 | CC        | 0 | . |
| 50 | 50-54 | Former    | 0 | . |

Year of Follow-up: 2040, Age Group: 55-59  
 Period    Age Group    Smoking Group            N            %

|    |       |           |   |   |
|----|-------|-----------|---|---|
| 50 | 55-59 | Never Any | 0 | . |
| 50 | 55-59 | CC        | 0 | . |
| 50 | 55-59 | Former    | 0 | . |

Year of Follow-up: 2040, Age Group: 60-64  
 Period    Age Group    Smoking Group            N            %

### Results for PHIM for Run 8 (Sensitivity\_Analysis\_1.RTF)

|                                           |           |               |      |       |
|-------------------------------------------|-----------|---------------|------|-------|
| 50                                        | 60-64     | Never Any     | 4803 | 60.57 |
| 50                                        | 60-64     | CC            | 621  | 7.83  |
| 50                                        | 60-64     | Former        | 2506 | 31.60 |
| Year of Follow-up: 2040, Age Group: 65-69 |           |               |      |       |
| Period                                    | Age Group | Smoking Group | N    | %     |
| 50                                        | 65-69     | Never Any     | 5407 | 64.75 |
| 50                                        | 65-69     | CC            | 538  | 6.44  |
| 50                                        | 65-69     | Former        | 2405 | 28.80 |
| Year of Follow-up: 2040, Age Group: 70-74 |           |               |      |       |
| Period                                    | Age Group | Smoking Group | N    | %     |
| 50                                        | 70-74     | Never Any     | 5181 | 58.92 |
| 50                                        | 70-74     | CC            | 605  | 6.88  |
| 50                                        | 70-74     | Former        | 3007 | 34.20 |
| Year of Follow-up: 2040, Age Group: 75-79 |           |               |      |       |
| Period                                    | Age Group | Smoking Group | N    | %     |
| 50                                        | 75-79     | Never Any     | 5279 | 52.38 |
| 50                                        | 75-79     | CC            | 698  | 6.93  |
| 50                                        | 75-79     | Former        | 4101 | 40.69 |

## Results for PHIM for Run 8 (Sensitivity\_Analysis\_1.RTF)

\*\*\*\*\*

### Main Output for the Tobacco History for Run: 8, Simulation: 1, Scenario: Ecig

| Variable Parameter                           |           |               | Value              |       |               |             |               |                |              |
|----------------------------------------------|-----------|---------------|--------------------|-------|---------------|-------------|---------------|----------------|--------------|
| 1. Country                                   |           |               | US (United States) |       |               |             |               |                |              |
| 2. Sex                                       |           |               | F (Females)        |       |               |             |               |                |              |
| 3. Year of start of process                  |           |               | 1990               |       |               |             |               |                |              |
| Year of Follow-up: 1990, Age Group: All Ages |           |               |                    |       |               |             |               |                |              |
| Period                                       | Age Group | Smoking Group | N                  | %     | Ever Quit (N) | Ever Quit % | Mean Yrs Quit | Short Term (n) | Short Term % |
| 0                                            | All Ages  | Never Any     | 47776              | 54.92 |               |             |               |                |              |
| 0                                            | All Ages  | CC            | 22737              | 26.14 | 0             | 0.00        |               |                |              |
| 0                                            | All Ages  | Ecig          | 0                  | 0.00  |               |             |               |                |              |
| 0                                            | All Ages  | Dual          | 0                  | 0.00  |               |             |               |                |              |
| 0                                            | All Ages  | Former        | 16484              | 18.95 |               |             | 11.90         | 2815           | 17.08        |
| Year of Follow-up: 1990, Age Group: 18-19    |           |               |                    |       |               |             |               |                |              |
| Period                                       | Age Group | Smoking Group | N                  | %     | Ever Quit (N) | Ever Quit % | Mean Yrs Quit | Short Term (n) | Short Term % |
| 0                                            | 18-19     | Never Any     | 2570               | 78.43 |               |             |               |                |              |
| 0                                            | 18-19     | CC            | 535                | 16.33 | 0             | 0.00        |               |                |              |
| 0                                            | 18-19     | Ecig          | 0                  | 0.00  |               |             |               |                |              |
| 0                                            | 18-19     | Dual          | 0                  | 0.00  |               |             |               |                |              |
| 0                                            | 18-19     | Former        | 172                | 5.25  |               |             | 0.20          | 172            | 100.00       |
| Year of Follow-up: 1990, Age Group: 20-24    |           |               |                    |       |               |             |               |                |              |
| Period                                       | Age Group | Smoking Group | N                  | %     | Ever Quit (N) | Ever Quit % | Mean Yrs Quit | Short Term (n) | Short Term % |
| 0                                            | 20-24     | Never Any     | 5354               | 60.89 |               |             |               |                |              |
| 0                                            | 20-24     | CC            | 2560               | 29.11 | 0             | 0.00        |               |                |              |
| 0                                            | 20-24     | Ecig          | 0                  | 0.00  |               |             |               |                |              |
| 0                                            | 20-24     | Dual          | 0                  | 0.00  |               |             |               |                |              |
| 0                                            | 20-24     | Former        | 879                | 10.00 |               |             | 1.58          | 420            | 47.78        |
| Year of Follow-up: 1990, Age Group: 25-29    |           |               |                    |       |               |             |               |                |              |
| Period                                       | Age Group | Smoking Group | N                  | %     | Ever Quit (N) | Ever Quit % | Mean Yrs Quit | Short Term (n) | Short Term % |
| 0                                            | 25-29     | Never Any     | 5318               | 52.77 |               |             |               |                |              |
| 0                                            | 25-29     | CC            | 3335               | 33.09 | 0             | 0.00        |               |                |              |
| 0                                            | 25-29     | Ecig          | 0                  | 0.00  |               |             |               |                |              |
| 0                                            | 25-29     | Dual          | 0                  | 0.00  |               |             |               |                |              |
| 0                                            | 25-29     | Former        | 1425               | 14.14 |               |             | 3.91          | 404            | 28.35        |
| Year of Follow-up: 1990, Age Group: 30-34    |           |               |                    |       |               |             |               |                |              |
| Period                                       | Age Group | Smoking Group | N                  | %     | Ever Quit (N) | Ever Quit % | Mean Yrs Quit | Short Term (n) | Short Term % |
| 0                                            | 30-34     | Never Any     | 5287               | 50.36 |               |             |               |                |              |
| 0                                            | 30-34     | CC            | 3326               | 31.68 | 0             | 0.00        |               |                |              |
| 0                                            | 30-34     | Ecig          | 0                  | 0.00  |               |             |               |                |              |
| 0                                            | 30-34     | Dual          | 0                  | 0.00  |               |             |               |                |              |
| 0                                            | 30-34     | Former        | 1886               | 17.96 |               |             | 4.36          | 566            | 30.01        |
| Year of Follow-up: 1990, Age Group: 35-39    |           |               |                    |       |               |             |               |                |              |
| Period                                       | Age Group | Smoking Group | N                  | %     | Ever Quit (N) | Ever Quit % | Mean Yrs Quit | Short Term (n) | Short Term % |
| 0                                            | 35-39     | Never Any     | 5018               | 52.27 |               |             |               |                |              |
| 0                                            | 35-39     | CC            | 2653               | 27.64 | 0             | 0.00        |               |                |              |
| 0                                            | 35-39     | Ecig          | 0                  | 0.00  |               |             |               |                |              |
| 0                                            | 35-39     | Dual          | 0                  | 0.00  |               |             |               |                |              |
| 0                                            | 35-39     | Former        | 1929               | 20.09 |               |             | 7.96          | 324            | 16.80        |
| Year of Follow-up: 1990, Age Group: 40-44    |           |               |                    |       |               |             |               |                |              |
| Period                                       | Age Group | Smoking Group | N                  | %     | Ever Quit (N) | Ever Quit % | Mean Yrs Quit | Short Term (n) | Short Term % |
| 0                                            | 40-44     | Never Any     | 4356               | 51.27 |               |             |               |                |              |
| 0                                            | 40-44     | CC            | 2397               | 28.21 | 0             | 0.00        |               |                |              |
| 0                                            | 40-44     | Ecig          | 0                  | 0.00  |               |             |               |                |              |
| 0                                            | 40-44     | Dual          | 0                  | 0.00  |               |             |               |                |              |
| 0                                            | 40-44     | Former        | 1744               | 20.52 |               |             | 7.33          | 339            | 19.44        |
| Year of Follow-up: 1990, Age Group: 45-49    |           |               |                    |       |               |             |               |                |              |
| Period                                       | Age Group | Smoking Group | N                  | %     | Ever Quit (N) | Ever Quit % | Mean Yrs Quit | Short Term (n) | Short Term % |
| 0                                            | 45-49     | Never Any     | 3116               | 47.67 |               |             |               |                |              |
| 0                                            | 45-49     | CC            | 1875               | 28.69 | 0             | 0.00        |               |                |              |
| 0                                            | 45-49     | Ecig          | 0                  | 0.00  |               |             |               |                |              |
| 0                                            | 45-49     | Dual          | 0                  | 0.00  |               |             |               |                |              |
| 0                                            | 45-49     | Former        | 1545               | 23.64 |               |             | 12.55         | 194            | 12.56        |
| Year of Follow-up: 1990, Age Group: 50-54    |           |               |                    |       |               |             |               |                |              |
| Period                                       | Age Group | Smoking Group | N                  | %     | Ever Quit (N) | Ever Quit % | Mean Yrs Quit | Short Term (n) | Short Term % |
| 0                                            | 50-54     | Never Any     | 2684               | 48.50 |               |             |               |                |              |
| 0                                            | 50-54     | CC            | 1572               | 28.41 | 0             | 0.00        |               |                |              |

**Results for PHIM for Run 8 (Sensitivity\_Analysis\_1.RTF)**

|                                              |           |               |       |       |               |             |               |                |              |
|----------------------------------------------|-----------|---------------|-------|-------|---------------|-------------|---------------|----------------|--------------|
| 0                                            | 50-54     | Ecig          | 0     | 0.00  |               |             |               |                |              |
| 0                                            | 50-54     | Dual          | 0     | 0.00  |               |             |               |                |              |
| 0                                            | 50-54     | Former        | 1278  | 23.09 |               |             | 13.28         | 126            | 9.86         |
| Year of Follow-up: 1990, Age Group: 55-59    |           |               |       |       |               |             |               |                |              |
| Period                                       | Age Group | Smoking Group | N     | %     | Ever Quit (N) | Ever Quit % | Mean Yrs Quit | Short Term (n) | Short Term % |
| 0                                            | 55-59     | Never Any     | 2732  | 51.90 |               |             |               |                |              |
| 0                                            | 55-59     | CC            | 1295  | 24.60 | 0             | 0.00        |               |                |              |
| 0                                            | 55-59     | Ecig          | 0     | 0.00  |               |             |               |                |              |
| 0                                            | 55-59     | Dual          | 0     | 0.00  |               |             |               |                |              |
| 0                                            | 55-59     | Former        | 1237  | 23.50 |               |             | 17.26         | 90             | 7.28         |
| Year of Follow-up: 1990, Age Group: 60-64    |           |               |       |       |               |             |               |                |              |
| Period                                       | Age Group | Smoking Group | N     | %     | Ever Quit (N) | Ever Quit % | Mean Yrs Quit | Short Term (n) | Short Term % |
| 0                                            | 60-64     | Never Any     | 3078  | 55.72 |               |             |               |                |              |
| 0                                            | 60-64     | CC            | 1249  | 22.61 | 0             | 0.00        |               |                |              |
| 0                                            | 60-64     | Ecig          | 0     | 0.00  |               |             |               |                |              |
| 0                                            | 60-64     | Dual          | 0     | 0.00  |               |             |               |                |              |
| 0                                            | 60-64     | Former        | 1197  | 21.67 |               |             | 18.28         | 61             | 5.10         |
| Year of Follow-up: 1990, Age Group: 65-69    |           |               |       |       |               |             |               |                |              |
| Period                                       | Age Group | Smoking Group | N     | %     | Ever Quit (N) | Ever Quit % | Mean Yrs Quit | Short Term (n) | Short Term % |
| 0                                            | 65-69     | Never Any     | 3042  | 57.36 |               |             |               |                |              |
| 0                                            | 65-69     | CC            | 976   | 18.40 | 0             | 0.00        |               |                |              |
| 0                                            | 65-69     | Ecig          | 0     | 0.00  |               |             |               |                |              |
| 0                                            | 65-69     | Dual          | 0     | 0.00  |               |             |               |                |              |
| 0                                            | 65-69     | Former        | 1285  | 24.23 |               |             | 20.65         | 68             | 5.29         |
| Year of Follow-up: 1990, Age Group: 70-74    |           |               |       |       |               |             |               |                |              |
| Period                                       | Age Group | Smoking Group | N     | %     | Ever Quit (N) | Ever Quit % | Mean Yrs Quit | Short Term (n) | Short Term % |
| 0                                            | 70-74     | Never Any     | 2738  | 61.05 |               |             |               |                |              |
| 0                                            | 70-74     | CC            | 610   | 13.60 | 0             | 0.00        |               |                |              |
| 0                                            | 70-74     | Ecig          | 0     | 0.00  |               |             |               |                |              |
| 0                                            | 70-74     | Dual          | 0     | 0.00  |               |             |               |                |              |
| 0                                            | 70-74     | Former        | 1137  | 25.35 |               |             | 24.48         | 27             | 2.37         |
| Year of Follow-up: 1990, Age Group: 75-79    |           |               |       |       |               |             |               |                |              |
| Period                                       | Age Group | Smoking Group | N     | %     | Ever Quit (N) | Ever Quit % | Mean Yrs Quit | Short Term (n) | Short Term % |
| 0                                            | 75-79     | Never Any     | 2483  | 68.84 |               |             |               |                |              |
| 0                                            | 75-79     | CC            | 354   | 9.81  | 0             | 0.00        |               |                |              |
| 0                                            | 75-79     | Ecig          | 0     | 0.00  |               |             |               |                |              |
| 0                                            | 75-79     | Dual          | 0     | 0.00  |               |             |               |                |              |
| 0                                            | 75-79     | Former        | 770   | 21.35 |               |             | 24.48         | 24             | 3.12         |
| Year of Follow-up: 1995, Age Group: All Ages |           |               |       |       |               |             |               |                |              |
| Period                                       | Age Group | Smoking Group | N     | %     | Ever Quit (N) | Ever Quit % | Mean Yrs Quit | Short Term (n) | Short Term % |
| 5                                            | All Ages  | Never Any     | 50887 | 55.53 |               |             |               |                |              |
| 5                                            | All Ages  | CC            | 10659 | 11.63 | 0             | 0.00        |               |                |              |
| 5                                            | All Ages  | Ecig          | 11697 | 12.76 |               |             |               |                |              |
| 5                                            | All Ages  | Dual          | 0     | 0.00  |               |             |               |                |              |
| 5                                            | All Ages  | Former        | 18396 | 20.07 |               |             | 14.19         | 1129           | 6.14         |
| Year of Follow-up: 1995, Age Group: 18-19    |           |               |       |       |               |             |               |                |              |
| Period                                       | Age Group | Smoking Group | N     | %     | Ever Quit (N) | Ever Quit % | Mean Yrs Quit | Short Term (n) | Short Term % |
| 5                                            | 18-19     | Never Any     | 2434  | 76.64 |               |             |               |                |              |
| 5                                            | 18-19     | CC            | 233   | 7.34  | 0             | 0.00        |               |                |              |
| 5                                            | 18-19     | Ecig          | 427   | 13.44 |               |             |               |                |              |
| 5                                            | 18-19     | Dual          | 0     | 0.00  |               |             |               |                |              |
| 5                                            | 18-19     | Former        | 82    | 2.58  |               |             | 1.15          | 52             | 63.41        |
| Year of Follow-up: 1995, Age Group: 20-24    |           |               |       |       |               |             |               |                |              |
| Period                                       | Age Group | Smoking Group | N     | %     | Ever Quit (N) | Ever Quit % | Mean Yrs Quit | Short Term (n) | Short Term % |
| 5                                            | 20-24     | Never Any     | 5794  | 69.39 |               |             |               |                |              |
| 5                                            | 20-24     | CC            | 862   | 10.32 | 0             | 0.00        |               |                |              |
| 5                                            | 20-24     | Ecig          | 1250  | 14.97 |               |             |               |                |              |
| 5                                            | 20-24     | Dual          | 0     | 0.00  |               |             |               |                |              |
| 5                                            | 20-24     | Former        | 444   | 5.32  |               |             | 3.23          | 106            | 23.87        |
| Year of Follow-up: 1995, Age Group: 25-29    |           |               |       |       |               |             |               |                |              |
| Period                                       | Age Group | Smoking Group | N     | %     | Ever Quit (N) | Ever Quit % | Mean Yrs Quit | Short Term (n) | Short Term % |
| 5                                            | 25-29     | Never Any     | 5313  | 60.42 |               |             |               |                |              |
| 5                                            | 25-29     | CC            | 1062  | 12.08 | 0             | 0.00        |               |                |              |
| 5                                            | 25-29     | Ecig          | 1395  | 15.86 |               |             |               |                |              |
| 5                                            | 25-29     | Dual          | 0     | 0.00  |               |             |               |                |              |
| 5                                            | 25-29     | Former        | 1023  | 11.63 |               |             | 5.94          | 54             | 5.28         |
| Year of Follow-up: 1995, Age Group: 30-34    |           |               |       |       |               |             |               |                |              |
| Period                                       | Age Group | Smoking Group | N     | %     | Ever Quit (N) | Ever Quit % | Mean Yrs Quit | Short Term (n) | Short Term % |



**Results for PHIM for Run 8 (Sensitivity\_Analysis\_1.RTF)**

|                                              |           |               |      |       |               |             |               |                |              |
|----------------------------------------------|-----------|---------------|------|-------|---------------|-------------|---------------|----------------|--------------|
| 5                                            | 30-34     | Never Any     | 5304 | 52.63 |               |             |               |                |              |
| 5                                            | 30-34     | CC            | 1373 | 13.62 | 0             | 0.00        |               |                |              |
| 5                                            | 30-34     | Ecig          | 1802 | 17.88 |               |             |               |                |              |
| 5                                            | 30-34     | Dual          | 0    | 0.00  |               |             |               |                |              |
| 5                                            | 30-34     | Former        | 1599 | 15.87 |               |             | 8.16          | 67             | 4.19         |
| Year of Follow-up: 1995, Age Group: 35-39    |           |               |      |       |               |             |               |                |              |
| Period                                       | Age Group | Smoking Group | N    | %     | Ever Quit (N) | Ever Quit % | Mean Yrs Quit | Short Term (n) | Short Term % |
| 5                                            | 35-39     | Never Any     | 5278 | 50.27 |               |             |               |                |              |
| 5                                            | 35-39     | CC            | 1410 | 13.43 | 0             | 0.00        |               |                |              |
| 5                                            | 35-39     | Ecig          | 1746 | 16.63 |               |             |               |                |              |
| 5                                            | 35-39     | Dual          | 0    | 0.00  |               |             |               |                |              |
| 5                                            | 35-39     | Former        | 2065 | 19.67 |               |             | 8.75          | 62             | 3.00         |
| Year of Follow-up: 1995, Age Group: 40-44    |           |               |      |       |               |             |               |                |              |
| Period                                       | Age Group | Smoking Group | N    | %     | Ever Quit (N) | Ever Quit % | Mean Yrs Quit | Short Term (n) | Short Term % |
| 5                                            | 40-44     | Never Any     | 5018 | 52.27 |               |             |               |                |              |
| 5                                            | 40-44     | CC            | 1135 | 11.82 | 0             | 0.00        |               |                |              |
| 5                                            | 40-44     | Ecig          | 1356 | 14.13 |               |             |               |                |              |
| 5                                            | 40-44     | Dual          | 0    | 0.00  |               |             |               |                |              |
| 5                                            | 40-44     | Former        | 2091 | 21.78 |               |             | 12.09         | 81             | 3.87         |
| Year of Follow-up: 1995, Age Group: 45-49    |           |               |      |       |               |             |               |                |              |
| Period                                       | Age Group | Smoking Group | N    | %     | Ever Quit (N) | Ever Quit % | Mean Yrs Quit | Short Term (n) | Short Term % |
| 5                                            | 45-49     | Never Any     | 4356 | 51.27 |               |             |               |                |              |
| 5                                            | 45-49     | CC            | 974  | 11.46 | 0             | 0.00        |               |                |              |
| 5                                            | 45-49     | Ecig          | 1161 | 13.66 |               |             |               |                |              |
| 5                                            | 45-49     | Dual          | 0    | 0.00  |               |             |               |                |              |
| 5                                            | 45-49     | Former        | 2006 | 23.61 |               |             | 10.93         | 133            | 6.63         |
| Year of Follow-up: 1995, Age Group: 50-54    |           |               |      |       |               |             |               |                |              |
| Period                                       | Age Group | Smoking Group | N    | %     | Ever Quit (N) | Ever Quit % | Mean Yrs Quit | Short Term (n) | Short Term % |
| 5                                            | 50-54     | Never Any     | 3116 | 47.67 |               |             |               |                |              |
| 5                                            | 50-54     | CC            | 739  | 11.31 | 0             | 0.00        |               |                |              |
| 5                                            | 50-54     | Ecig          | 826  | 12.64 |               |             |               |                |              |
| 5                                            | 50-54     | Dual          | 0    | 0.00  |               |             |               |                |              |
| 5                                            | 50-54     | Former        | 1855 | 28.38 |               |             | 14.92         | 140            | 7.55         |
| Year of Follow-up: 1995, Age Group: 55-59    |           |               |      |       |               |             |               |                |              |
| Period                                       | Age Group | Smoking Group | N    | %     | Ever Quit (N) | Ever Quit % | Mean Yrs Quit | Short Term (n) | Short Term % |
| 5                                            | 55-59     | Never Any     | 2684 | 48.50 |               |             |               |                |              |
| 5                                            | 55-59     | CC            | 722  | 13.05 | 0             | 0.00        |               |                |              |
| 5                                            | 55-59     | Ecig          | 627  | 11.33 |               |             |               |                |              |
| 5                                            | 55-59     | Dual          | 0    | 0.00  |               |             |               |                |              |
| 5                                            | 55-59     | Former        | 1501 | 27.12 |               |             | 15.84         | 93             | 6.20         |
| Year of Follow-up: 1995, Age Group: 60-64    |           |               |      |       |               |             |               |                |              |
| Period                                       | Age Group | Smoking Group | N    | %     | Ever Quit (N) | Ever Quit % | Mean Yrs Quit | Short Term (n) | Short Term % |
| 5                                            | 60-64     | Never Any     | 2732 | 51.90 |               |             |               |                |              |
| 5                                            | 60-64     | CC            | 633  | 12.03 | 0             | 0.00        |               |                |              |
| 5                                            | 60-64     | Ecig          | 444  | 8.43  |               |             |               |                |              |
| 5                                            | 60-64     | Dual          | 0    | 0.00  |               |             |               |                |              |
| 5                                            | 60-64     | Former        | 1455 | 27.64 |               |             | 19.22         | 87             | 5.98         |
| Year of Follow-up: 1995, Age Group: 65-69    |           |               |      |       |               |             |               |                |              |
| Period                                       | Age Group | Smoking Group | N    | %     | Ever Quit (N) | Ever Quit % | Mean Yrs Quit | Short Term (n) | Short Term % |
| 5                                            | 65-69     | Never Any     | 3078 | 55.72 |               |             |               |                |              |
| 5                                            | 65-69     | CC            | 602  | 10.90 | 0             | 0.00        |               |                |              |
| 5                                            | 65-69     | Ecig          | 374  | 6.77  |               |             |               |                |              |
| 5                                            | 65-69     | Dual          | 0    | 0.00  |               |             |               |                |              |
| 5                                            | 65-69     | Former        | 1470 | 26.61 |               |             | 19.34         | 107            | 7.28         |
| Year of Follow-up: 1995, Age Group: 70-74    |           |               |      |       |               |             |               |                |              |
| Period                                       | Age Group | Smoking Group | N    | %     | Ever Quit (N) | Ever Quit % | Mean Yrs Quit | Short Term (n) | Short Term % |
| 5                                            | 70-74     | Never Any     | 3042 | 57.36 |               |             |               |                |              |
| 5                                            | 70-74     | CC            | 577  | 10.88 | 0             | 0.00        |               |                |              |
| 5                                            | 70-74     | Ecig          | 188  | 3.55  |               |             |               |                |              |
| 5                                            | 70-74     | Dual          | 0    | 0.00  |               |             |               |                |              |
| 5                                            | 70-74     | Former        | 1496 | 28.21 |               |             | 22.32         | 77             | 5.15         |
| Year of Follow-up: 1995, Age Group: 75-79    |           |               |      |       |               |             |               |                |              |
| Period                                       | Age Group | Smoking Group | N    | %     | Ever Quit (N) | Ever Quit % | Mean Yrs Quit | Short Term (n) | Short Term % |
| 5                                            | 75-79     | Never Any     | 2738 | 61.05 |               |             |               |                |              |
| 5                                            | 75-79     | CC            | 337  | 7.51  | 0             | 0.00        |               |                |              |
| 5                                            | 75-79     | Ecig          | 101  | 2.25  |               |             |               |                |              |
| 5                                            | 75-79     | Dual          | 0    | 0.00  |               |             |               |                |              |
| 5                                            | 75-79     | Former        | 1309 | 29.19 |               |             | 25.87         | 70             | 5.35         |
| Year of Follow-up: 2000, Age Group: All Ages |           |               |      |       |               |             |               |                |              |

**Results for PHIM for Run 8 (Sensitivity\_Analysis\_1.RTF)**

| Period                                    | Age Group | Smoking Group | N     | %     | Ever Quit (N) | Ever Quit % | Mean Yrs Quit | Short Term (n) | Short Term % |
|-------------------------------------------|-----------|---------------|-------|-------|---------------|-------------|---------------|----------------|--------------|
| 10                                        | All Ages  | Never Any     | 50423 | 54.86 |               |             |               |                |              |
| 10                                        | All Ages  | CC            | 4595  | 5.00  | 0             | 0.00        |               |                |              |
| 10                                        | All Ages  | Ecig          | 15644 | 17.02 |               |             |               |                |              |
| 10                                        | All Ages  | Dual          | 0     | 0.00  |               |             |               |                |              |
| 10                                        | All Ages  | Former        | 21246 | 23.12 |               |             | 15.11         | 1717           | 8.08         |
| Year of Follow-up: 2000, Age Group: 18-19 |           |               |       |       |               |             |               |                |              |
| Period                                    | Age Group | Smoking Group | N     | %     | Ever Quit (N) | Ever Quit % | Mean Yrs Quit | Short Term (n) | Short Term % |
| 10                                        | 18-19     | Never Any     | 0     | .     |               |             |               |                |              |
| 10                                        | 18-19     | CC            | 0     | .     | 0             | .           |               |                |              |
| 10                                        | 18-19     | Ecig          | 0     | .     |               |             |               |                |              |
| 10                                        | 18-19     | Dual          | 0     | .     |               |             |               |                |              |
| 10                                        | 18-19     | Former        | 0     | .     |               |             |               | 0              | .            |
| Year of Follow-up: 2000, Age Group: 20-24 |           |               |       |       |               |             |               |                |              |
| Period                                    | Age Group | Smoking Group | N     | %     | Ever Quit (N) | Ever Quit % | Mean Yrs Quit | Short Term (n) | Short Term % |
| 10                                        | 20-24     | Never Any     | 5128  | 64.67 |               |             |               |                |              |
| 10                                        | 20-24     | CC            | 370   | 4.67  | 0             | 0.00        |               |                |              |
| 10                                        | 20-24     | Ecig          | 1780  | 22.45 |               |             |               |                |              |
| 10                                        | 20-24     | Dual          | 0     | 0.00  |               |             |               |                |              |
| 10                                        | 20-24     | Former        | 652   | 8.22  |               |             | 3.55          | 169            | 25.92        |
| Year of Follow-up: 2000, Age Group: 25-29 |           |               |       |       |               |             |               |                |              |
| Period                                    | Age Group | Smoking Group | N     | %     | Ever Quit (N) | Ever Quit % | Mean Yrs Quit | Short Term (n) | Short Term % |
| 10                                        | 25-29     | Never Any     | 5493  | 65.78 |               |             |               |                |              |
| 10                                        | 25-29     | CC            | 400   | 4.79  | 0             | 0.00        |               |                |              |
| 10                                        | 25-29     | Ecig          | 1690  | 20.24 |               |             |               |                |              |
| 10                                        | 25-29     | Dual          | 0     | 0.00  |               |             |               |                |              |
| 10                                        | 25-29     | Former        | 767   | 9.19  |               |             | 5.59          | 126            | 16.43        |
| Year of Follow-up: 2000, Age Group: 30-34 |           |               |       |       |               |             |               |                |              |
| Period                                    | Age Group | Smoking Group | N     | %     | Ever Quit (N) | Ever Quit % | Mean Yrs Quit | Short Term (n) | Short Term % |
| 10                                        | 30-34     | Never Any     | 5214  | 59.30 |               |             |               |                |              |
| 10                                        | 30-34     | CC            | 417   | 4.74  | 0             | 0.00        |               |                |              |
| 10                                        | 30-34     | Ecig          | 1908  | 21.70 |               |             |               |                |              |
| 10                                        | 30-34     | Dual          | 0     | 0.00  |               |             |               |                |              |
| 10                                        | 30-34     | Former        | 1254  | 14.26 |               |             | 9.28          | 91             | 7.26         |
| Year of Follow-up: 2000, Age Group: 35-39 |           |               |       |       |               |             |               |                |              |
| Period                                    | Age Group | Smoking Group | N     | %     | Ever Quit (N) | Ever Quit % | Mean Yrs Quit | Short Term (n) | Short Term % |
| 10                                        | 35-39     | Never Any     | 5284  | 52.43 |               |             |               |                |              |
| 10                                        | 35-39     | CC            | 561   | 5.57  | 0             | 0.00        |               |                |              |
| 10                                        | 35-39     | Ecig          | 2413  | 23.94 |               |             |               |                |              |
| 10                                        | 35-39     | Dual          | 0     | 0.00  |               |             |               |                |              |
| 10                                        | 35-39     | Former        | 1820  | 18.06 |               |             | 11.77         | 105            | 5.77         |
| Year of Follow-up: 2000, Age Group: 40-44 |           |               |       |       |               |             |               |                |              |
| Period                                    | Age Group | Smoking Group | N     | %     | Ever Quit (N) | Ever Quit % | Mean Yrs Quit | Short Term (n) | Short Term % |
| 10                                        | 40-44     | Never Any     | 5278  | 50.27 |               |             |               |                |              |
| 10                                        | 40-44     | CC            | 584   | 5.56  | 0             | 0.00        |               |                |              |
| 10                                        | 40-44     | Ecig          | 2292  | 21.83 |               |             |               |                |              |
| 10                                        | 40-44     | Dual          | 0     | 0.00  |               |             |               |                |              |
| 10                                        | 40-44     | Former        | 2345  | 22.34 |               |             | 12.30         | 143            | 6.10         |
| Year of Follow-up: 2000, Age Group: 45-49 |           |               |       |       |               |             |               |                |              |
| Period                                    | Age Group | Smoking Group | N     | %     | Ever Quit (N) | Ever Quit % | Mean Yrs Quit | Short Term (n) | Short Term % |
| 10                                        | 45-49     | Never Any     | 5018  | 52.27 |               |             |               |                |              |
| 10                                        | 45-49     | CC            | 446   | 4.65  | 0             | 0.00        |               |                |              |
| 10                                        | 45-49     | Ecig          | 1673  | 17.43 |               |             |               |                |              |
| 10                                        | 45-49     | Dual          | 0     | 0.00  |               |             |               |                |              |
| 10                                        | 45-49     | Former        | 2463  | 25.66 |               |             | 14.76         | 181            | 7.35         |
| Year of Follow-up: 2000, Age Group: 50-54 |           |               |       |       |               |             |               |                |              |
| Period                                    | Age Group | Smoking Group | N     | %     | Ever Quit (N) | Ever Quit % | Mean Yrs Quit | Short Term (n) | Short Term % |
| 10                                        | 50-54     | Never Any     | 4356  | 51.27 |               |             |               |                |              |
| 10                                        | 50-54     | CC            | 378   | 4.45  | 0             | 0.00        |               |                |              |
| 10                                        | 50-54     | Ecig          | 1299  | 15.29 |               |             |               |                |              |
| 10                                        | 50-54     | Dual          | 0     | 0.00  |               |             |               |                |              |
| 10                                        | 50-54     | Former        | 2464  | 29.00 |               |             | 13.32         | 188            | 7.63         |
| Year of Follow-up: 2000, Age Group: 55-59 |           |               |       |       |               |             |               |                |              |
| Period                                    | Age Group | Smoking Group | N     | %     | Ever Quit (N) | Ever Quit % | Mean Yrs Quit | Short Term (n) | Short Term % |
| 10                                        | 55-59     | Never Any     | 3116  | 47.67 |               |             |               |                |              |
| 10                                        | 55-59     | CC            | 283   | 4.33  | 0             | 0.00        |               |                |              |
| 10                                        | 55-59     | Ecig          | 912   | 13.95 |               |             |               |                |              |
| 10                                        | 55-59     | Dual          | 0     | 0.00  |               |             |               |                |              |

**Results for PHIM for Run 8 (Sensitivity\_Analysis\_1.RTF)**

| Year of Follow-up: 2000, Age Group: 60-64    | Period   | Age Group | Smoking Group | N     | %     | Ever Quit (N) | Ever Quit % | Mean Yrs Quit | Short Term (n) | Short Term % |
|----------------------------------------------|----------|-----------|---------------|-------|-------|---------------|-------------|---------------|----------------|--------------|
| 10                                           | 55-59    | Former    |               | 2225  | 34.04 |               |             | 16.92         | 157            | 7.06         |
| 10                                           | 60-64    | Never Any |               | 2684  | 48.50 |               |             |               |                |              |
| 10                                           | 60-64    | CC        |               | 334   | 6.04  | 0             | 0.00        |               |                |              |
| 10                                           | 60-64    | Ecig      |               | 663   | 11.98 |               |             |               |                |              |
| 10                                           | 60-64    | Dual      |               | 0     | 0.00  |               |             |               |                |              |
| 10                                           | 60-64    | Former    |               | 1853  | 33.48 |               |             | 17.23         | 149            | 8.04         |
| Year of Follow-up: 2000, Age Group: 65-69    | Period   | Age Group | Smoking Group | N     | %     | Ever Quit (N) | Ever Quit % | Mean Yrs Quit | Short Term (n) | Short Term % |
| 10                                           | 65-69    | Never Any |               | 2732  | 51.90 |               |             |               |                |              |
| 10                                           | 65-69    | CC        |               | 280   | 5.32  | 0             | 0.00        |               |                |              |
| 10                                           | 65-69    | Ecig      |               | 443   | 8.42  |               |             |               |                |              |
| 10                                           | 65-69    | Dual      |               | 0     | 0.00  |               |             |               |                |              |
| 10                                           | 65-69    | Former    |               | 1809  | 34.37 |               |             | 19.85         | 146            | 8.07         |
| Year of Follow-up: 2000, Age Group: 70-74    | Period   | Age Group | Smoking Group | N     | %     | Ever Quit (N) | Ever Quit % | Mean Yrs Quit | Short Term (n) | Short Term % |
| 10                                           | 70-74    | Never Any |               | 3078  | 55.72 |               |             |               |                |              |
| 10                                           | 70-74    | CC        |               | 274   | 4.96  | 0             | 0.00        |               |                |              |
| 10                                           | 70-74    | Ecig      |               | 368   | 6.66  |               |             |               |                |              |
| 10                                           | 70-74    | Dual      |               | 0     | 0.00  |               |             |               |                |              |
| 10                                           | 70-74    | Former    |               | 1804  | 32.66 |               |             | 20.18         | 154            | 8.54         |
| Year of Follow-up: 2000, Age Group: 75-79    | Period   | Age Group | Smoking Group | N     | %     | Ever Quit (N) | Ever Quit % | Mean Yrs Quit | Short Term (n) | Short Term % |
| 10                                           | 75-79    | Never Any |               | 3042  | 57.36 |               |             |               |                |              |
| 10                                           | 75-79    | CC        |               | 268   | 5.05  | 0             | 0.00        |               |                |              |
| 10                                           | 75-79    | Ecig      |               | 203   | 3.83  |               |             |               |                |              |
| 10                                           | 75-79    | Dual      |               | 0     | 0.00  |               |             |               |                |              |
| 10                                           | 75-79    | Former    |               | 1790  | 33.75 |               |             | 23.17         | 108            | 6.03         |
| Year of Follow-up: 2005, Age Group: All Ages | Period   | Age Group | Smoking Group | N     | %     | Ever Quit (N) | Ever Quit % | Mean Yrs Quit | Short Term (n) | Short Term % |
| 15                                           | All Ages | Never Any |               | 47002 | 54.27 |               |             |               |                |              |
| 15                                           | All Ages | CC        |               | 1890  | 2.18  | 0             | 0.00        |               |                |              |
| 15                                           | All Ages | Ecig      |               | 15617 | 18.03 |               |             |               |                |              |
| 15                                           | All Ages | Dual      |               | 0     | 0.00  |               |             |               |                |              |
| 15                                           | All Ages | Former    |               | 22096 | 25.51 |               |             | 17.32         | 941            | 4.26         |
| Year of Follow-up: 2005, Age Group: 18-19    | Period   | Age Group | Smoking Group | N     | %     | Ever Quit (N) | Ever Quit % | Mean Yrs Quit | Short Term (n) | Short Term % |
| 15                                           | 18-19    | Never Any |               | 0     | .     |               |             |               |                |              |
| 15                                           | 18-19    | CC        |               | 0     | .     | 0             | .           |               |                |              |
| 15                                           | 18-19    | Ecig      |               | 0     | .     |               |             |               |                |              |
| 15                                           | 18-19    | Dual      |               | 0     | .     |               |             |               |                |              |
| 15                                           | 18-19    | Former    |               | 0     | .     |               |             | .             | 0              | .            |
| Year of Follow-up: 2005, Age Group: 20-24    | Period   | Age Group | Smoking Group | N     | %     | Ever Quit (N) | Ever Quit % | Mean Yrs Quit | Short Term (n) | Short Term % |
| 15                                           | 20-24    | Never Any |               | 0     | .     |               |             |               |                |              |
| 15                                           | 20-24    | CC        |               | 0     | .     | 0             | .           |               |                |              |
| 15                                           | 20-24    | Ecig      |               | 0     | .     |               |             |               |                |              |
| 15                                           | 20-24    | Dual      |               | 0     | .     |               |             |               |                |              |
| 15                                           | 20-24    | Former    |               | 0     | .     |               |             | .             | 0              | .            |
| Year of Follow-up: 2005, Age Group: 25-29    | Period   | Age Group | Smoking Group | N     | %     | Ever Quit (N) | Ever Quit % | Mean Yrs Quit | Short Term (n) | Short Term % |
| 15                                           | 25-29    | Never Any |               | 4860  | 61.29 |               |             |               |                |              |
| 15                                           | 25-29    | CC        |               | 166   | 2.09  | 0             | 0.00        |               |                |              |
| 15                                           | 25-29    | Ecig      |               | 1941  | 24.48 |               |             |               |                |              |
| 15                                           | 25-29    | Dual      |               | 0     | 0.00  |               |             |               |                |              |
| 15                                           | 25-29    | Former    |               | 963   | 12.14 |               |             | 6.57          | 96             | 9.97         |
| Year of Follow-up: 2005, Age Group: 30-34    | Period   | Age Group | Smoking Group | N     | %     | Ever Quit (N) | Ever Quit % | Mean Yrs Quit | Short Term (n) | Short Term % |
| 15                                           | 30-34    | Never Any |               | 5407  | 64.75 |               |             |               |                |              |
| 15                                           | 30-34    | CC        |               | 149   | 1.78  | 0             | 0.00        |               |                |              |
| 15                                           | 30-34    | Ecig      |               | 1822  | 21.82 |               |             |               |                |              |
| 15                                           | 30-34    | Dual      |               | 0     | 0.00  |               |             |               |                |              |
| 15                                           | 30-34    | Former    |               | 972   | 11.64 |               |             | 8.77          | 80             | 8.23         |
| Year of Follow-up: 2005, Age Group: 35-39    | Period   | Age Group | Smoking Group | N     | %     | Ever Quit (N) | Ever Quit % | Mean Yrs Quit | Short Term (n) | Short Term % |
| 15                                           | 35-39    | Never Any |               | 5189  | 59.01 |               |             |               |                |              |
| 15                                           | 35-39    | CC        |               | 167   | 1.90  | 0             | 0.00        |               |                |              |

**Results for PHIM for Run 8 (Sensitivity\_Analysis\_1.RTF)**

|                                              |           |               |       |       |               |             |               |                |              |
|----------------------------------------------|-----------|---------------|-------|-------|---------------|-------------|---------------|----------------|--------------|
| 15                                           | 35-39     | Ecig          | 2002  | 22.77 |               |             |               |                |              |
| 15                                           | 35-39     | Dual          | 0     | 0.00  |               |             |               |                |              |
| 15                                           | 35-39     | Former        | 1435  | 16.32 |               |             | 12.75         | 66             | 4.60         |
| Year of Follow-up: 2005, Age Group: 40-44    |           |               |       |       |               |             |               |                |              |
| Period                                       | Age Group | Smoking Group | N     | %     | Ever Quit (N) | Ever Quit % | Mean Yrs Quit | Short Term (n) | Short Term % |
| 15                                           | 40-44     | Never Any     | 5284  | 52.43 |               |             |               |                |              |
| 15                                           | 40-44     | CC            | 238   | 2.36  | 0             | 0.00        |               |                |              |
| 15                                           | 40-44     | Ecig          | 2500  | 24.81 |               |             |               |                |              |
| 15                                           | 40-44     | Dual          | 0     | 0.00  |               |             |               |                |              |
| 15                                           | 40-44     | Former        | 2056  | 20.40 |               |             | 15.08         | 101            | 4.91         |
| Year of Follow-up: 2005, Age Group: 45-49    |           |               |       |       |               |             |               |                |              |
| Period                                       | Age Group | Smoking Group | N     | %     | Ever Quit (N) | Ever Quit % | Mean Yrs Quit | Short Term (n) | Short Term % |
| 15                                           | 45-49     | Never Any     | 5278  | 50.27 |               |             |               |                |              |
| 15                                           | 45-49     | CC            | 237   | 2.26  | 0             | 0.00        |               |                |              |
| 15                                           | 45-49     | Ecig          | 2318  | 22.08 |               |             |               |                |              |
| 15                                           | 45-49     | Dual          | 0     | 0.00  |               |             |               |                |              |
| 15                                           | 45-49     | Former        | 2666  | 25.39 |               |             | 15.45         | 135            | 5.06         |
| Year of Follow-up: 2005, Age Group: 50-54    |           |               |       |       |               |             |               |                |              |
| Period                                       | Age Group | Smoking Group | N     | %     | Ever Quit (N) | Ever Quit % | Mean Yrs Quit | Short Term (n) | Short Term % |
| 15                                           | 50-54     | Never Any     | 5018  | 52.27 |               |             |               |                |              |
| 15                                           | 50-54     | CC            | 191   | 1.99  | 0             | 0.00        |               |                |              |
| 15                                           | 50-54     | Ecig          | 1622  | 16.90 |               |             |               |                |              |
| 15                                           | 50-54     | Dual          | 0     | 0.00  |               |             |               |                |              |
| 15                                           | 50-54     | Former        | 2769  | 28.84 |               |             | 17.84         | 99             | 3.58         |
| Year of Follow-up: 2005, Age Group: 55-59    |           |               |       |       |               |             |               |                |              |
| Period                                       | Age Group | Smoking Group | N     | %     | Ever Quit (N) | Ever Quit % | Mean Yrs Quit | Short Term (n) | Short Term % |
| 15                                           | 55-59     | Never Any     | 4356  | 51.27 |               |             |               |                |              |
| 15                                           | 55-59     | CC            | 166   | 1.95  | 0             | 0.00        |               |                |              |
| 15                                           | 55-59     | Ecig          | 1281  | 15.08 |               |             |               |                |              |
| 15                                           | 55-59     | Dual          | 0     | 0.00  |               |             |               |                |              |
| 15                                           | 55-59     | Former        | 2694  | 31.71 |               |             | 16.95         | 78             | 2.90         |
| Year of Follow-up: 2005, Age Group: 60-64    |           |               |       |       |               |             |               |                |              |
| Period                                       | Age Group | Smoking Group | N     | %     | Ever Quit (N) | Ever Quit % | Mean Yrs Quit | Short Term (n) | Short Term % |
| 15                                           | 60-64     | Never Any     | 3116  | 47.67 |               |             |               |                |              |
| 15                                           | 60-64     | CC            | 131   | 2.00  | 0             | 0.00        |               |                |              |
| 15                                           | 60-64     | Ecig          | 852   | 13.04 |               |             |               |                |              |
| 15                                           | 60-64     | Dual          | 0     | 0.00  |               |             |               |                |              |
| 15                                           | 60-64     | Former        | 2437  | 37.29 |               |             | 20.18         | 93             | 3.82         |
| Year of Follow-up: 2005, Age Group: 65-69    |           |               |       |       |               |             |               |                |              |
| Period                                       | Age Group | Smoking Group | N     | %     | Ever Quit (N) | Ever Quit % | Mean Yrs Quit | Short Term (n) | Short Term % |
| 15                                           | 65-69     | Never Any     | 2684  | 48.50 |               |             |               |                |              |
| 15                                           | 65-69     | CC            | 160   | 2.89  | 0             | 0.00        |               |                |              |
| 15                                           | 65-69     | Ecig          | 591   | 10.68 |               |             |               |                |              |
| 15                                           | 65-69     | Dual          | 0     | 0.00  |               |             |               |                |              |
| 15                                           | 65-69     | Former        | 2099  | 37.93 |               |             | 19.92         | 68             | 3.24         |
| Year of Follow-up: 2005, Age Group: 70-74    |           |               |       |       |               |             |               |                |              |
| Period                                       | Age Group | Smoking Group | N     | %     | Ever Quit (N) | Ever Quit % | Mean Yrs Quit | Short Term (n) | Short Term % |
| 15                                           | 70-74     | Never Any     | 2732  | 51.90 |               |             |               |                |              |
| 15                                           | 70-74     | CC            | 139   | 2.64  | 0             | 0.00        |               |                |              |
| 15                                           | 70-74     | Ecig          | 391   | 7.43  |               |             |               |                |              |
| 15                                           | 70-74     | Dual          | 0     | 0.00  |               |             |               |                |              |
| 15                                           | 70-74     | Former        | 2002  | 38.03 |               |             | 22.67         | 69             | 3.45         |
| Year of Follow-up: 2005, Age Group: 75-79    |           |               |       |       |               |             |               |                |              |
| Period                                       | Age Group | Smoking Group | N     | %     | Ever Quit (N) | Ever Quit % | Mean Yrs Quit | Short Term (n) | Short Term % |
| 15                                           | 75-79     | Never Any     | 3078  | 55.72 |               |             |               |                |              |
| 15                                           | 75-79     | CC            | 146   | 2.64  | 0             | 0.00        |               |                |              |
| 15                                           | 75-79     | Ecig          | 297   | 5.38  |               |             |               |                |              |
| 15                                           | 75-79     | Dual          | 0     | 0.00  |               |             |               |                |              |
| 15                                           | 75-79     | Former        | 2003  | 36.26 |               |             | 22.91         | 56             | 2.80         |
| Year of Follow-up: 2010, Age Group: All Ages |           |               |       |       |               |             |               |                |              |
| Period                                       | Age Group | Smoking Group | N     | %     | Ever Quit (N) | Ever Quit % | Mean Yrs Quit | Short Term (n) | Short Term % |
| 20                                           | All Ages  | Never Any     | 43759 | 53.97 |               |             |               |                |              |
| 20                                           | All Ages  | CC            | 765   | 0.94  | 0             | 0.00        |               |                |              |
| 20                                           | All Ages  | Ecig          | 13785 | 17.00 |               |             |               |                |              |
| 20                                           | All Ages  | Dual          | 0     | 0.00  |               |             |               |                |              |
| 20                                           | All Ages  | Former        | 22772 | 28.09 |               |             | 19.42         | 1117           | 4.91         |
| Year of Follow-up: 2010, Age Group: 18-19    |           |               |       |       |               |             |               |                |              |
| Period                                       | Age Group | Smoking Group | N     | %     | Ever Quit (N) | Ever Quit % | Mean Yrs Quit | Short Term (n) | Short Term % |

**Results for PHIM for Run 8 (Sensitivity\_Analysis\_1.RTF)**

|                                           |           |               |      |       |               |             |               |                |              |
|-------------------------------------------|-----------|---------------|------|-------|---------------|-------------|---------------|----------------|--------------|
| 20                                        | 18-19     | Never Any     | 0    | .     |               |             |               |                |              |
| 20                                        | 18-19     | CC            | 0    | .     | 0             | .           |               |                |              |
| 20                                        | 18-19     | Ecig          | 0    | .     |               |             |               |                |              |
| 20                                        | 18-19     | Dual          | 0    | .     |               |             |               |                |              |
| 20                                        | 18-19     | Former        | 0    | .     |               |             | 0             | .              |              |
| Year of Follow-up: 2010, Age Group: 20-24 |           |               |      |       |               |             |               |                |              |
| Period                                    | Age Group | Smoking Group | N    | %     | Ever Quit (N) | Ever Quit % | Mean Yrs Quit | Short Term (n) | Short Term % |
| 20                                        | 20-24     | Never Any     | 0    | .     |               |             |               |                |              |
| 20                                        | 20-24     | CC            | 0    | .     | 0             | .           |               |                |              |
| 20                                        | 20-24     | Ecig          | 0    | .     |               |             |               |                |              |
| 20                                        | 20-24     | Dual          | 0    | .     |               |             |               |                |              |
| 20                                        | 20-24     | Former        | 0    | .     |               |             |               | 0              | .            |
| Year of Follow-up: 2010, Age Group: 25-29 |           |               |      |       |               |             |               |                |              |
| Period                                    | Age Group | Smoking Group | N    | %     | Ever Quit (N) | Ever Quit % | Mean Yrs Quit | Short Term (n) | Short Term % |
| 20                                        | 25-29     | Never Any     | 0    | .     |               |             |               |                |              |
| 20                                        | 25-29     | CC            | 0    | .     | 0             | .           |               |                |              |
| 20                                        | 25-29     | Ecig          | 0    | .     |               |             |               |                |              |
| 20                                        | 25-29     | Dual          | 0    | .     |               |             |               |                |              |
| 20                                        | 25-29     | Former        | 0    | .     |               |             |               | 0              | .            |
| Year of Follow-up: 2010, Age Group: 30-34 |           |               |      |       |               |             |               |                |              |
| Period                                    | Age Group | Smoking Group | N    | %     | Ever Quit (N) | Ever Quit % | Mean Yrs Quit | Short Term (n) | Short Term % |
| 20                                        | 30-34     | Never Any     | 4743 | 59.81 |               |             |               |                |              |
| 20                                        | 30-34     | CC            | 65   | 0.82  | 0             | 0.00        |               |                |              |
| 20                                        | 30-34     | Ecig          | 1881 | 23.72 |               |             |               |                |              |
| 20                                        | 30-34     | Dual          | 0    | 0.00  |               |             |               |                |              |
| 20                                        | 30-34     | Former        | 1241 | 15.65 |               |             | 9.36          | 130            | 10.48        |
| Year of Follow-up: 2010, Age Group: 35-39 |           |               |      |       |               |             |               |                |              |
| Period                                    | Age Group | Smoking Group | N    | %     | Ever Quit (N) | Ever Quit % | Mean Yrs Quit | Short Term (n) | Short Term % |
| 20                                        | 35-39     | Never Any     | 5359 | 64.18 |               |             |               |                |              |
| 20                                        | 35-39     | CC            | 58   | 0.69  | 0             | 0.00        |               |                |              |
| 20                                        | 35-39     | Ecig          | 1717 | 20.56 |               |             |               |                |              |
| 20                                        | 35-39     | Dual          | 0    | 0.00  |               |             |               |                |              |
| 20                                        | 35-39     | Former        | 1216 | 14.56 |               |             | 11.38         | 98             | 8.06         |
| Year of Follow-up: 2010, Age Group: 40-44 |           |               |      |       |               |             |               |                |              |
| Period                                    | Age Group | Smoking Group | N    | %     | Ever Quit (N) | Ever Quit % | Mean Yrs Quit | Short Term (n) | Short Term % |
| 20                                        | 40-44     | Never Any     | 5189 | 59.01 |               |             |               |                |              |
| 20                                        | 40-44     | CC            | 64   | 0.73  | 0             | 0.00        |               |                |              |
| 20                                        | 40-44     | Ecig          | 1849 | 21.03 |               |             |               |                |              |
| 20                                        | 40-44     | Dual          | 0    | 0.00  |               |             |               |                |              |
| 20                                        | 40-44     | Former        | 1691 | 19.23 |               |             | 15.34         | 112            | 6.62         |
| Year of Follow-up: 2010, Age Group: 45-49 |           |               |      |       |               |             |               |                |              |
| Period                                    | Age Group | Smoking Group | N    | %     | Ever Quit (N) | Ever Quit % | Mean Yrs Quit | Short Term (n) | Short Term % |
| 20                                        | 45-49     | Never Any     | 5284 | 52.43 |               |             |               |                |              |
| 20                                        | 45-49     | CC            | 105  | 1.04  | 0             | 0.00        |               |                |              |
| 20                                        | 45-49     | Ecig          | 2327 | 23.09 |               |             |               |                |              |
| 20                                        | 45-49     | Dual          | 0    | 0.00  |               |             |               |                |              |
| 20                                        | 45-49     | Former        | 2362 | 23.44 |               |             | 17.71         | 131            | 5.55         |
| Year of Follow-up: 2010, Age Group: 50-54 |           |               |      |       |               |             |               |                |              |
| Period                                    | Age Group | Smoking Group | N    | %     | Ever Quit (N) | Ever Quit % | Mean Yrs Quit | Short Term (n) | Short Term % |
| 20                                        | 50-54     | Never Any     | 5278 | 50.27 |               |             |               |                |              |
| 20                                        | 50-54     | CC            | 101  | 0.96  | 0             | 0.00        |               |                |              |
| 20                                        | 50-54     | Ecig          | 2101 | 20.01 |               |             |               |                |              |
| 20                                        | 50-54     | Dual          | 0    | 0.00  |               |             |               |                |              |
| 20                                        | 50-54     | Former        | 3019 | 28.76 |               |             | 18.27         | 163            | 5.40         |
| Year of Follow-up: 2010, Age Group: 55-59 |           |               |      |       |               |             |               |                |              |
| Period                                    | Age Group | Smoking Group | N    | %     | Ever Quit (N) | Ever Quit % | Mean Yrs Quit | Short Term (n) | Short Term % |
| 20                                        | 55-59     | Never Any     | 5018 | 52.27 |               |             |               |                |              |
| 20                                        | 55-59     | CC            | 91   | 0.95  | 0             | 0.00        |               |                |              |
| 20                                        | 55-59     | Ecig          | 1433 | 14.93 |               |             |               |                |              |
| 20                                        | 55-59     | Dual          | 0    | 0.00  |               |             |               |                |              |
| 20                                        | 55-59     | Former        | 3058 | 31.85 |               |             | 20.88         | 103            | 3.37         |
| Year of Follow-up: 2010, Age Group: 60-64 |           |               |      |       |               |             |               |                |              |
| Period                                    | Age Group | Smoking Group | N    | %     | Ever Quit (N) | Ever Quit % | Mean Yrs Quit | Short Term (n) | Short Term % |
| 20                                        | 60-64     | Never Any     | 4356 | 51.27 |               |             |               |                |              |
| 20                                        | 60-64     | CC            | 71   | 0.84  | 0             | 0.00        |               |                |              |
| 20                                        | 60-64     | Ecig          | 1079 | 12.70 |               |             |               |                |              |
| 20                                        | 60-64     | Dual          | 0    | 0.00  |               |             |               |                |              |
| 20                                        | 60-64     | Former        | 2991 | 35.20 |               |             | 19.94         | 144            | 4.81         |
| Year of Follow-up: 2010, Age Group: 65-69 |           |               |      |       |               |             |               |                |              |

**Results for PHIM for Run 8 (Sensitivity\_Analysis\_1.RTF)**

| Period                                       | Age Group | Smoking Group | N     | %     | Ever Quit (N) | Ever Quit % | Mean Yrs Quit | Short Term (n) | Short Term % |
|----------------------------------------------|-----------|---------------|-------|-------|---------------|-------------|---------------|----------------|--------------|
| 20                                           | 65-69     | Never Any     | 3116  | 47.67 |               |             |               |                |              |
| 20                                           | 65-69     | CC            | 47    | 0.72  | 0             | 0.00        |               |                |              |
| 20                                           | 65-69     | Ecig          | 645   | 9.87  |               |             |               |                |              |
| 20                                           | 65-69     | Dual          | 0     | 0.00  |               |             |               |                |              |
| 20                                           | 65-69     | Former        | 2728  | 41.74 |               |             | 22.72         | 95             | 3.48         |
| Year of Follow-up: 2010, Age Group: 70-74    |           |               |       |       |               |             |               |                |              |
| Period                                       | Age Group | Smoking Group | N     | %     | Ever Quit (N) | Ever Quit % | Mean Yrs Quit | Short Term (n) | Short Term % |
| 20                                           | 70-74     | Never Any     | 2684  | 48.50 |               |             |               |                |              |
| 20                                           | 70-74     | CC            | 88    | 1.59  | 0             | 0.00        |               |                |              |
| 20                                           | 70-74     | Ecig          | 477   | 8.62  |               |             |               |                |              |
| 20                                           | 70-74     | Dual          | 0     | 0.00  |               |             |               |                |              |
| 20                                           | 70-74     | Former        | 2285  | 41.29 |               |             | 23.05         | 69             | 3.02         |
| Year of Follow-up: 2010, Age Group: 75-79    |           |               |       |       |               |             |               |                |              |
| Period                                       | Age Group | Smoking Group | N     | %     | Ever Quit (N) | Ever Quit % | Mean Yrs Quit | Short Term (n) | Short Term % |
| 20                                           | 75-79     | Never Any     | 2732  | 51.90 |               |             |               |                |              |
| 20                                           | 75-79     | CC            | 75    | 1.42  | 0             | 0.00        |               |                |              |
| 20                                           | 75-79     | Ecig          | 276   | 5.24  |               |             |               |                |              |
| 20                                           | 75-79     | Dual          | 0     | 0.00  |               |             |               |                |              |
| 20                                           | 75-79     | Former        | 2181  | 41.43 |               |             | 25.56         | 72             | 3.30         |
| Year of Follow-up: 2015, Age Group: All Ages |           |               |       |       |               |             |               |                |              |
| Period                                       | Age Group | Smoking Group | N     | %     | Ever Quit (N) | Ever Quit % | Mean Yrs Quit | Short Term (n) | Short Term % |
| 25                                           | All Ages  | Never Any     | 41010 | 54.09 |               |             |               |                |              |
| 25                                           | All Ages  | CC            | 340   | 0.45  | 0             | 0.00        |               |                |              |
| 25                                           | All Ages  | Ecig          | 11438 | 15.09 |               |             |               |                |              |
| 25                                           | All Ages  | Dual          | 0     | 0.00  |               |             |               |                |              |
| 25                                           | All Ages  | Former        | 23029 | 30.37 |               |             | 21.48         | 914            | 3.97         |
| Year of Follow-up: 2015, Age Group: 18-19    |           |               |       |       |               |             |               |                |              |
| Period                                       | Age Group | Smoking Group | N     | %     | Ever Quit (N) | Ever Quit % | Mean Yrs Quit | Short Term (n) | Short Term % |
| 25                                           | 18-19     | Never Any     | 0     | .     |               |             |               |                |              |
| 25                                           | 18-19     | CC            | 0     | .     | 0             | .           |               |                |              |
| 25                                           | 18-19     | Ecig          | 0     | .     |               |             |               |                |              |
| 25                                           | 18-19     | Dual          | 0     | .     |               |             |               |                |              |
| 25                                           | 18-19     | Former        | 0     | .     |               |             | .             | 0              | .            |
| Year of Follow-up: 2015, Age Group: 20-24    |           |               |       |       |               |             |               |                |              |
| Period                                       | Age Group | Smoking Group | N     | %     | Ever Quit (N) | Ever Quit % | Mean Yrs Quit | Short Term (n) | Short Term % |
| 25                                           | 20-24     | Never Any     | 0     | .     |               |             |               |                |              |
| 25                                           | 20-24     | CC            | 0     | .     | 0             | .           |               |                |              |
| 25                                           | 20-24     | Ecig          | 0     | .     |               |             |               |                |              |
| 25                                           | 20-24     | Dual          | 0     | .     |               |             |               |                |              |
| 25                                           | 20-24     | Former        | 0     | .     |               |             | .             | 0              | .            |
| Year of Follow-up: 2015, Age Group: 25-29    |           |               |       |       |               |             |               |                |              |
| Period                                       | Age Group | Smoking Group | N     | %     | Ever Quit (N) | Ever Quit % | Mean Yrs Quit | Short Term (n) | Short Term % |
| 25                                           | 25-29     | Never Any     | 0     | .     |               |             |               |                |              |
| 25                                           | 25-29     | CC            | 0     | .     | 0             | .           |               |                |              |
| 25                                           | 25-29     | Ecig          | 0     | .     |               |             |               |                |              |
| 25                                           | 25-29     | Dual          | 0     | .     |               |             |               |                |              |
| 25                                           | 25-29     | Former        | 0     | .     |               |             | .             | 0              | .            |
| Year of Follow-up: 2015, Age Group: 30-34    |           |               |       |       |               |             |               |                |              |
| Period                                       | Age Group | Smoking Group | N     | %     | Ever Quit (N) | Ever Quit % | Mean Yrs Quit | Short Term (n) | Short Term % |
| 25                                           | 30-34     | Never Any     | 0     | .     |               |             |               |                |              |
| 25                                           | 30-34     | CC            | 0     | .     | 0             | .           |               |                |              |
| 25                                           | 30-34     | Ecig          | 0     | .     |               |             |               |                |              |
| 25                                           | 30-34     | Dual          | 0     | .     |               |             |               |                |              |
| 25                                           | 30-34     | Former        | 0     | .     |               |             | .             | 0              | .            |
| Year of Follow-up: 2015, Age Group: 35-39    |           |               |       |       |               |             |               |                |              |
| Period                                       | Age Group | Smoking Group | N     | %     | Ever Quit (N) | Ever Quit % | Mean Yrs Quit | Short Term (n) | Short Term % |
| 25                                           | 35-39     | Never Any     | 4726  | 59.60 |               |             |               |                |              |
| 25                                           | 35-39     | CC            | 20    | 0.25  | 0             | 0.00        |               |                |              |
| 25                                           | 35-39     | Ecig          | 1567  | 19.76 |               |             |               |                |              |
| 25                                           | 35-39     | Dual          | 0     | 0.00  |               |             |               |                |              |
| 25                                           | 35-39     | Former        | 1617  | 20.39 |               |             | 11.52         | 129            | 7.98         |
| Year of Follow-up: 2015, Age Group: 40-44    |           |               |       |       |               |             |               |                |              |
| Period                                       | Age Group | Smoking Group | N     | %     | Ever Quit (N) | Ever Quit % | Mean Yrs Quit | Short Term (n) | Short Term % |
| 25                                           | 40-44     | Never Any     | 5359  | 64.18 |               |             |               |                |              |
| 25                                           | 40-44     | CC            | 33    | 0.40  | 0             | 0.00        |               |                |              |
| 25                                           | 40-44     | Ecig          | 1502  | 17.99 |               |             |               |                |              |
| 25                                           | 40-44     | Dual          | 0     | 0.00  |               |             |               |                |              |

**Results for PHIM for Run 8 (Sensitivity\_Analysis\_1.RTF)**

|                                              |           |               |       |       |               |             |               |                |              |
|----------------------------------------------|-----------|---------------|-------|-------|---------------|-------------|---------------|----------------|--------------|
| 25                                           | 40-44     | Former        | 1456  | 17.44 |               |             | 14.00         | 103            | 7.07         |
| Year of Follow-up: 2015, Age Group: 45-49    |           |               |       |       |               |             |               |                |              |
| Period                                       | Age Group | Smoking Group | N     | %     | Ever Quit (N) | Ever Quit % | Mean Yrs Quit | Short Term (n) | Short Term % |
| 25                                           | 45-49     | Never Any     | 5189  | 59.01 |               |             |               |                |              |
| 25                                           | 45-49     | CC            | 32    | 0.36  | 0             | 0.00        |               |                |              |
| 25                                           | 45-49     | Ecig          | 1627  | 18.50 |               |             |               |                |              |
| 25                                           | 45-49     | Dual          | 0     | 0.00  |               |             |               |                |              |
| 25                                           | 45-49     | Former        | 1945  | 22.12 |               |             | 17.95         | 96             | 4.94         |
| Year of Follow-up: 2015, Age Group: 50-54    |           |               |       |       |               |             |               |                |              |
| Period                                       | Age Group | Smoking Group | N     | %     | Ever Quit (N) | Ever Quit % | Mean Yrs Quit | Short Term (n) | Short Term % |
| 25                                           | 50-54     | Never Any     | 5284  | 52.43 |               |             |               |                |              |
| 25                                           | 50-54     | CC            | 45    | 0.45  | 0             | 0.00        |               |                |              |
| 25                                           | 50-54     | Ecig          | 2059  | 20.43 |               |             |               |                |              |
| 25                                           | 50-54     | Dual          | 0     | 0.00  |               |             |               |                |              |
| 25                                           | 50-54     | Former        | 2690  | 26.69 |               |             | 20.17         | 150            | 5.58         |
| Year of Follow-up: 2015, Age Group: 55-59    |           |               |       |       |               |             |               |                |              |
| Period                                       | Age Group | Smoking Group | N     | %     | Ever Quit (N) | Ever Quit % | Mean Yrs Quit | Short Term (n) | Short Term % |
| 25                                           | 55-59     | Never Any     | 5278  | 50.27 |               |             |               |                |              |
| 25                                           | 55-59     | CC            | 37    | 0.35  | 0             | 0.00        |               |                |              |
| 25                                           | 55-59     | Ecig          | 1773  | 16.89 |               |             |               |                |              |
| 25                                           | 55-59     | Dual          | 0     | 0.00  |               |             |               |                |              |
| 25                                           | 55-59     | Former        | 3411  | 32.49 |               |             | 20.84         | 140            | 4.10         |
| Year of Follow-up: 2015, Age Group: 60-64    |           |               |       |       |               |             |               |                |              |
| Period                                       | Age Group | Smoking Group | N     | %     | Ever Quit (N) | Ever Quit % | Mean Yrs Quit | Short Term (n) | Short Term % |
| 25                                           | 60-64     | Never Any     | 5018  | 52.27 |               |             |               |                |              |
| 25                                           | 60-64     | CC            | 42    | 0.44  | 0             | 0.00        |               |                |              |
| 25                                           | 60-64     | Ecig          | 1154  | 12.02 |               |             |               |                |              |
| 25                                           | 60-64     | Dual          | 0     | 0.00  |               |             |               |                |              |
| 25                                           | 60-64     | Former        | 3386  | 35.27 |               |             | 23.56         | 144            | 4.25         |
| Year of Follow-up: 2015, Age Group: 65-69    |           |               |       |       |               |             |               |                |              |
| Period                                       | Age Group | Smoking Group | N     | %     | Ever Quit (N) | Ever Quit % | Mean Yrs Quit | Short Term (n) | Short Term % |
| 25                                           | 65-69     | Never Any     | 4356  | 51.27 |               |             |               |                |              |
| 25                                           | 65-69     | CC            | 41    | 0.48  | 0             | 0.00        |               |                |              |
| 25                                           | 65-69     | Ecig          | 844   | 9.93  |               |             |               |                |              |
| 25                                           | 65-69     | Dual          | 0     | 0.00  |               |             |               |                |              |
| 25                                           | 65-69     | Former        | 3256  | 38.32 |               |             | 23.12         | 70             | 2.15         |
| Year of Follow-up: 2015, Age Group: 70-74    |           |               |       |       |               |             |               |                |              |
| Period                                       | Age Group | Smoking Group | N     | %     | Ever Quit (N) | Ever Quit % | Mean Yrs Quit | Short Term (n) | Short Term % |
| 25                                           | 70-74     | Never Any     | 3116  | 47.67 |               |             |               |                |              |
| 25                                           | 70-74     | CC            | 31    | 0.47  | 0             | 0.00        |               |                |              |
| 25                                           | 70-74     | Ecig          | 527   | 8.06  |               |             |               |                |              |
| 25                                           | 70-74     | Dual          | 0     | 0.00  |               |             |               |                |              |
| 25                                           | 70-74     | Former        | 2862  | 43.79 |               |             | 26.54         | 42             | 1.47         |
| Year of Follow-up: 2015, Age Group: 75-79    |           |               |       |       |               |             |               |                |              |
| Period                                       | Age Group | Smoking Group | N     | %     | Ever Quit (N) | Ever Quit % | Mean Yrs Quit | Short Term (n) | Short Term % |
| 25                                           | 75-79     | Never Any     | 2684  | 48.50 |               |             |               |                |              |
| 25                                           | 75-79     | CC            | 59    | 1.07  | 0             | 0.00        |               |                |              |
| 25                                           | 75-79     | Ecig          | 385   | 6.96  |               |             |               |                |              |
| 25                                           | 75-79     | Dual          | 0     | 0.00  |               |             |               |                |              |
| 25                                           | 75-79     | Former        | 2406  | 43.48 |               |             | 26.76         | 40             | 1.66         |
| Year of Follow-up: 2020, Age Group: All Ages |           |               |       |       |               |             |               |                |              |
| Period                                       | Age Group | Smoking Group | N     | %     | Ever Quit (N) | Ever Quit % | Mean Yrs Quit | Short Term (n) | Short Term % |
| 30                                           | All Ages  | Never Any     | 38326 | 54.53 |               |             |               |                |              |
| 30                                           | All Ages  | CC            | 115   | 0.16  | 0             | 0.00        |               |                |              |
| 30                                           | All Ages  | Ecig          | 9272  | 13.19 |               |             |               |                |              |
| 30                                           | All Ages  | Dual          | 0     | 0.00  |               |             |               |                |              |
| 30                                           | All Ages  | Former        | 22570 | 32.11 |               |             | 23.81         | 756            | 3.35         |
| Year of Follow-up: 2020, Age Group: 18-19    |           |               |       |       |               |             |               |                |              |
| Period                                       | Age Group | Smoking Group | N     | %     | Ever Quit (N) | Ever Quit % | Mean Yrs Quit | Short Term (n) | Short Term % |
| 30                                           | 18-19     | Never Any     | 0     | .     |               |             |               |                |              |
| 30                                           | 18-19     | CC            | 0     | .     | 0             | .           |               |                |              |
| 30                                           | 18-19     | Ecig          | 0     | .     |               |             |               |                |              |
| 30                                           | 18-19     | Dual          | 0     | .     |               |             |               |                |              |
| 30                                           | 18-19     | Former        | 0     | .     |               |             | .             | 0              | .            |
| Year of Follow-up: 2020, Age Group: 20-24    |           |               |       |       |               |             |               |                |              |
| Period                                       | Age Group | Smoking Group | N     | %     | Ever Quit (N) | Ever Quit % | Mean Yrs Quit | Short Term (n) | Short Term % |
| 30                                           | 20-24     | Never Any     | 0     | .     |               |             |               |                |              |
| 30                                           | 20-24     | CC            | 0     | .     | 0             | .           |               |                |              |

**Results for PHIM for Run 8 (Sensitivity\_Analysis\_1.RTF)**

| 30                                        | 20-24     | Ecig          | 0    | .     |               |             |               |                |              |
|-------------------------------------------|-----------|---------------|------|-------|---------------|-------------|---------------|----------------|--------------|
| 30                                        | 20-24     | Dual          | 0    | .     |               |             |               |                |              |
| 30                                        | 20-24     | Former        | 0    | .     |               |             | 0             | .              |              |
| Year of Follow-up: 2020, Age Group: 25-29 |           |               |      |       |               |             |               |                |              |
| Period                                    | Age Group | Smoking Group | N    | %     | Ever Quit (N) | Ever Quit % | Mean Yrs Quit | Short Term (n) | Short Term % |
| 30                                        | 25-29     | Never Any     | 0    | .     |               |             |               |                |              |
| 30                                        | 25-29     | CC            | 0    | .     | 0             | .           |               |                |              |
| 30                                        | 25-29     | Ecig          | 0    | .     |               |             |               |                |              |
| 30                                        | 25-29     | Dual          | 0    | .     |               |             |               |                |              |
| 30                                        | 25-29     | Former        | 0    | .     |               |             |               | 0              | .            |
| Year of Follow-up: 2020, Age Group: 30-34 |           |               |      |       |               |             |               |                |              |
| Period                                    | Age Group | Smoking Group | N    | %     | Ever Quit (N) | Ever Quit % | Mean Yrs Quit | Short Term (n) | Short Term % |
| 30                                        | 30-34     | Never Any     | 0    | .     |               |             |               |                |              |
| 30                                        | 30-34     | CC            | 0    | .     | 0             | .           |               |                |              |
| 30                                        | 30-34     | Ecig          | 0    | .     |               |             |               |                |              |
| 30                                        | 30-34     | Dual          | 0    | .     |               |             |               |                |              |
| 30                                        | 30-34     | Former        | 0    | .     |               |             |               | 0              | .            |
| Year of Follow-up: 2020, Age Group: 35-39 |           |               |      |       |               |             |               |                |              |
| Period                                    | Age Group | Smoking Group | N    | %     | Ever Quit (N) | Ever Quit % | Mean Yrs Quit | Short Term (n) | Short Term % |
| 30                                        | 35-39     | Never Any     | 0    | .     |               |             |               |                |              |
| 30                                        | 35-39     | CC            | 0    | .     | 0             | .           |               |                |              |
| 30                                        | 35-39     | Ecig          | 0    | .     |               |             |               |                |              |
| 30                                        | 35-39     | Dual          | 0    | .     |               |             |               |                |              |
| 30                                        | 35-39     | Former        | 0    | .     |               |             |               | 0              | .            |
| Year of Follow-up: 2020, Age Group: 40-44 |           |               |      |       |               |             |               |                |              |
| Period                                    | Age Group | Smoking Group | N    | %     | Ever Quit (N) | Ever Quit % | Mean Yrs Quit | Short Term (n) | Short Term % |
| 30                                        | 40-44     | Never Any     | 4726 | 59.60 |               |             |               |                |              |
| 30                                        | 40-44     | CC            | 6    | 0.08  | 0             | 0.00        |               |                |              |
| 30                                        | 40-44     | Ecig          | 1345 | 16.96 |               |             |               |                |              |
| 30                                        | 40-44     | Dual          | 0    | 0.00  |               |             |               |                |              |
| 30                                        | 40-44     | Former        | 1853 | 23.37 |               |             | 14.68         | 82             | 4.43         |
| Year of Follow-up: 2020, Age Group: 45-49 |           |               |      |       |               |             |               |                |              |
| Period                                    | Age Group | Smoking Group | N    | %     | Ever Quit (N) | Ever Quit % | Mean Yrs Quit | Short Term (n) | Short Term % |
| 30                                        | 45-49     | Never Any     | 5359 | 64.18 |               |             |               |                |              |
| 30                                        | 45-49     | CC            | 13   | 0.16  | 0             | 0.00        |               |                |              |
| 30                                        | 45-49     | Ecig          | 1317 | 15.77 |               |             |               |                |              |
| 30                                        | 45-49     | Dual          | 0    | 0.00  |               |             |               |                |              |
| 30                                        | 45-49     | Former        | 1661 | 19.89 |               |             | 16.93         | 71             | 4.27         |
| Year of Follow-up: 2020, Age Group: 50-54 |           |               |      |       |               |             |               |                |              |
| Period                                    | Age Group | Smoking Group | N    | %     | Ever Quit (N) | Ever Quit % | Mean Yrs Quit | Short Term (n) | Short Term % |
| 30                                        | 50-54     | Never Any     | 5189 | 59.01 |               |             |               |                |              |
| 30                                        | 50-54     | CC            | 9    | 0.10  | 0             | 0.00        |               |                |              |
| 30                                        | 50-54     | Ecig          | 1395 | 15.86 |               |             |               |                |              |
| 30                                        | 50-54     | Dual          | 0    | 0.00  |               |             |               |                |              |
| 30                                        | 50-54     | Former        | 2200 | 25.02 |               |             | 20.50         | 121            | 5.50         |
| Year of Follow-up: 2020, Age Group: 55-59 |           |               |      |       |               |             |               |                |              |
| Period                                    | Age Group | Smoking Group | N    | %     | Ever Quit (N) | Ever Quit % | Mean Yrs Quit | Short Term (n) | Short Term % |
| 30                                        | 55-59     | Never Any     | 5284 | 52.43 |               |             |               |                |              |
| 30                                        | 55-59     | CC            | 14   | 0.14  | 0             | 0.00        |               |                |              |
| 30                                        | 55-59     | Ecig          | 1708 | 16.95 |               |             |               |                |              |
| 30                                        | 55-59     | Dual          | 0    | 0.00  |               |             |               |                |              |
| 30                                        | 55-59     | Former        | 3072 | 30.48 |               |             | 22.30         | 140            | 4.56         |
| Year of Follow-up: 2020, Age Group: 60-64 |           |               |      |       |               |             |               |                |              |
| Period                                    | Age Group | Smoking Group | N    | %     | Ever Quit (N) | Ever Quit % | Mean Yrs Quit | Short Term (n) | Short Term % |
| 30                                        | 60-64     | Never Any     | 5278 | 50.27 |               |             |               |                |              |
| 30                                        | 60-64     | CC            | 15   | 0.14  | 0             | 0.00        |               |                |              |
| 30                                        | 60-64     | Ecig          | 1428 | 13.60 |               |             |               |                |              |
| 30                                        | 60-64     | Dual          | 0    | 0.00  |               |             |               |                |              |
| 30                                        | 60-64     | Former        | 3778 | 35.98 |               |             | 23.52         | 153            | 4.05         |
| Year of Follow-up: 2020, Age Group: 65-69 |           |               |      |       |               |             |               |                |              |
| Period                                    | Age Group | Smoking Group | N    | %     | Ever Quit (N) | Ever Quit % | Mean Yrs Quit | Short Term (n) | Short Term % |
| 30                                        | 65-69     | Never Any     | 5018 | 52.27 |               |             |               |                |              |
| 30                                        | 65-69     | CC            | 18   | 0.19  | 0             | 0.00        |               |                |              |
| 30                                        | 65-69     | Ecig          | 917  | 9.55  |               |             |               |                |              |
| 30                                        | 65-69     | Dual          | 0    | 0.00  |               |             |               |                |              |
| 30                                        | 65-69     | Former        | 3647 | 37.99 |               |             | 26.68         | 75             | 2.06         |
| Year of Follow-up: 2020, Age Group: 70-74 |           |               |      |       |               |             |               |                |              |
| Period                                    | Age Group | Smoking Group | N    | %     | Ever Quit (N) | Ever Quit % | Mean Yrs Quit | Short Term (n) | Short Term % |



**Results for PHIM for Run 8 (Sensitivity\_Analysis\_1.RTF)**

|                                              |           |               |       |       |               |             |               |                |              |
|----------------------------------------------|-----------|---------------|-------|-------|---------------|-------------|---------------|----------------|--------------|
| 30                                           | 70-74     | Never Any     | 4356  | 51.27 |               |             |               |                |              |
| 30                                           | 70-74     | CC            | 22    | 0.26  | 0             | 0.00        |               |                |              |
| 30                                           | 70-74     | Ecig          | 727   | 8.56  |               |             |               |                |              |
| 30                                           | 70-74     | Dual          | 0     | 0.00  |               |             |               |                |              |
| 30                                           | 70-74     | Former        | 3392  | 39.92 |               |             | 27.06         | 66             | 1.95         |
| Year of Follow-up: 2020, Age Group: 75-79    |           |               |       |       |               |             |               |                |              |
| Period                                       | Age Group | Smoking Group | N     | %     | Ever Quit (N) | Ever Quit % | Mean Yrs Quit | Short Term (n) | Short Term % |
| 30                                           | 75-79     | Never Any     | 3116  | 47.67 |               |             |               |                |              |
| 30                                           | 75-79     | CC            | 18    | 0.28  | 0             | 0.00        |               |                |              |
| 30                                           | 75-79     | Ecig          | 435   | 6.66  |               |             |               |                |              |
| 30                                           | 75-79     | Dual          | 0     | 0.00  |               |             |               |                |              |
| 30                                           | 75-79     | Former        | 2967  | 45.39 |               |             | 30.49         | 48             | 1.62         |
| Year of Follow-up: 2025, Age Group: All Ages |           |               |       |       |               |             |               |                |              |
| Period                                       | Age Group | Smoking Group | N     | %     | Ever Quit (N) | Ever Quit % | Mean Yrs Quit | Short Term (n) | Short Term % |
| 35                                           | All Ages  | Never Any     | 35210 | 55.23 |               |             |               |                |              |
| 35                                           | All Ages  | CC            | 47    | 0.07  | 0             | 0.00        |               |                |              |
| 35                                           | All Ages  | Ecig          | 7305  | 11.46 |               |             |               |                |              |
| 35                                           | All Ages  | Dual          | 0     | 0.00  |               |             |               |                |              |
| 35                                           | All Ages  | Former        | 21185 | 33.23 |               |             | 25.87         | 616            | 2.91         |
| Year of Follow-up: 2025, Age Group: 18-19    |           |               |       |       |               |             |               |                |              |
| Period                                       | Age Group | Smoking Group | N     | %     | Ever Quit (N) | Ever Quit % | Mean Yrs Quit | Short Term (n) | Short Term % |
| 35                                           | 18-19     | Never Any     | 0     | .     |               |             |               |                |              |
| 35                                           | 18-19     | CC            | 0     | .     | 0             | .           |               |                |              |
| 35                                           | 18-19     | Ecig          | 0     | .     |               |             |               |                |              |
| 35                                           | 18-19     | Dual          | 0     | .     |               |             |               |                |              |
| 35                                           | 18-19     | Former        | 0     | .     |               |             | .             | 0              | .            |
| Year of Follow-up: 2025, Age Group: 20-24    |           |               |       |       |               |             |               |                |              |
| Period                                       | Age Group | Smoking Group | N     | %     | Ever Quit (N) | Ever Quit % | Mean Yrs Quit | Short Term (n) | Short Term % |
| 35                                           | 20-24     | Never Any     | 0     | .     |               |             |               |                |              |
| 35                                           | 20-24     | CC            | 0     | .     | 0             | .           |               |                |              |
| 35                                           | 20-24     | Ecig          | 0     | .     |               |             |               |                |              |
| 35                                           | 20-24     | Dual          | 0     | .     |               |             |               |                |              |
| 35                                           | 20-24     | Former        | 0     | .     |               |             | .             | 0              | .            |
| Year of Follow-up: 2025, Age Group: 25-29    |           |               |       |       |               |             |               |                |              |
| Period                                       | Age Group | Smoking Group | N     | %     | Ever Quit (N) | Ever Quit % | Mean Yrs Quit | Short Term (n) | Short Term % |
| 35                                           | 25-29     | Never Any     | 0     | .     |               |             |               |                |              |
| 35                                           | 25-29     | CC            | 0     | .     | 0             | .           |               |                |              |
| 35                                           | 25-29     | Ecig          | 0     | .     |               |             |               |                |              |
| 35                                           | 25-29     | Dual          | 0     | .     |               |             |               |                |              |
| 35                                           | 25-29     | Former        | 0     | .     |               |             | .             | 0              | .            |
| Year of Follow-up: 2025, Age Group: 30-34    |           |               |       |       |               |             |               |                |              |
| Period                                       | Age Group | Smoking Group | N     | %     | Ever Quit (N) | Ever Quit % | Mean Yrs Quit | Short Term (n) | Short Term % |
| 35                                           | 30-34     | Never Any     | 0     | .     |               |             |               |                |              |
| 35                                           | 30-34     | CC            | 0     | .     | 0             | .           |               |                |              |
| 35                                           | 30-34     | Ecig          | 0     | .     |               |             |               |                |              |
| 35                                           | 30-34     | Dual          | 0     | .     |               |             |               |                |              |
| 35                                           | 30-34     | Former        | 0     | .     |               |             | .             | 0              | .            |
| Year of Follow-up: 2025, Age Group: 35-39    |           |               |       |       |               |             |               |                |              |
| Period                                       | Age Group | Smoking Group | N     | %     | Ever Quit (N) | Ever Quit % | Mean Yrs Quit | Short Term (n) | Short Term % |
| 35                                           | 35-39     | Never Any     | 0     | .     |               |             |               |                |              |
| 35                                           | 35-39     | CC            | 0     | .     | 0             | .           |               |                |              |
| 35                                           | 35-39     | Ecig          | 0     | .     |               |             |               |                |              |
| 35                                           | 35-39     | Dual          | 0     | .     |               |             |               |                |              |
| 35                                           | 35-39     | Former        | 0     | .     |               |             | .             | 0              | .            |
| Year of Follow-up: 2025, Age Group: 40-44    |           |               |       |       |               |             |               |                |              |
| Period                                       | Age Group | Smoking Group | N     | %     | Ever Quit (N) | Ever Quit % | Mean Yrs Quit | Short Term (n) | Short Term % |
| 35                                           | 40-44     | Never Any     | 0     | .     |               |             |               |                |              |
| 35                                           | 40-44     | CC            | 0     | .     | 0             | .           |               |                |              |
| 35                                           | 40-44     | Ecig          | 0     | .     |               |             |               |                |              |
| 35                                           | 40-44     | Dual          | 0     | .     |               |             |               |                |              |
| 35                                           | 40-44     | Former        | 0     | .     |               |             | .             | 0              | .            |
| Year of Follow-up: 2025, Age Group: 45-49    |           |               |       |       |               |             |               |                |              |
| Period                                       | Age Group | Smoking Group | N     | %     | Ever Quit (N) | Ever Quit % | Mean Yrs Quit | Short Term (n) | Short Term % |
| 35                                           | 45-49     | Never Any     | 4726  | 59.60 |               |             |               |                |              |
| 35                                           | 45-49     | CC            | 1     | 0.01  | 0             | 0.00        |               |                |              |
| 35                                           | 45-49     | Ecig          | 1146  | 14.45 |               |             |               |                |              |
| 35                                           | 45-49     | Dual          | 0     | 0.00  |               |             |               |                |              |
| 35                                           | 45-49     | Former        | 2057  | 25.94 |               |             | 17.95         | 74             | 3.60         |
| Year of Follow-up: 2025, Age Group: 50-54    |           |               |       |       |               |             |               |                |              |

**Results for PHIM for Run 8 (Sensitivity\_Analysis\_1.RTF)**

| Period                                       | Age Group | Smoking Group | N     | %     | Ever Quit (N) | Ever Quit % | Mean Yrs Quit | Short Term (n) | Short Term % |
|----------------------------------------------|-----------|---------------|-------|-------|---------------|-------------|---------------|----------------|--------------|
| 35                                           | 50-54     | Never Any     | 5359  | 64.18 |               |             |               |                |              |
| 35                                           | 50-54     | CC            | 3     | 0.04  | 0             | 0.00        |               |                |              |
| 35                                           | 50-54     | Ecig          | 1112  | 13.32 |               |             |               |                |              |
| 35                                           | 50-54     | Dual          | 0     | 0.00  |               |             |               |                |              |
| 35                                           | 50-54     | Former        | 1876  | 22.47 |               |             | 19.62         | 104            | 5.54         |
| Year of Follow-up: 2025, Age Group: 55-59    |           |               |       |       |               |             |               |                |              |
| Period                                       | Age Group | Smoking Group | N     | %     | Ever Quit (N) | Ever Quit % | Mean Yrs Quit | Short Term (n) | Short Term % |
| 35                                           | 55-59     | Never Any     | 5189  | 59.01 |               |             |               |                |              |
| 35                                           | 55-59     | CC            | 4     | 0.05  | 0             | 0.00        |               |                |              |
| 35                                           | 55-59     | Ecig          | 1153  | 13.11 |               |             |               |                |              |
| 35                                           | 55-59     | Dual          | 0     | 0.00  |               |             |               |                |              |
| 35                                           | 55-59     | Former        | 2447  | 27.83 |               |             | 23.13         | 98             | 4.00         |
| Year of Follow-up: 2025, Age Group: 60-64    |           |               |       |       |               |             |               |                |              |
| Period                                       | Age Group | Smoking Group | N     | %     | Ever Quit (N) | Ever Quit % | Mean Yrs Quit | Short Term (n) | Short Term % |
| 35                                           | 60-64     | Never Any     | 5284  | 52.43 |               |             |               |                |              |
| 35                                           | 60-64     | CC            | 7     | 0.07  | 0             | 0.00        |               |                |              |
| 35                                           | 60-64     | Ecig          | 1378  | 13.67 |               |             |               |                |              |
| 35                                           | 60-64     | Dual          | 0     | 0.00  |               |             |               |                |              |
| 35                                           | 60-64     | Former        | 3409  | 33.83 |               |             | 24.79         | 139            | 4.08         |
| Year of Follow-up: 2025, Age Group: 65-69    |           |               |       |       |               |             |               |                |              |
| Period                                       | Age Group | Smoking Group | N     | %     | Ever Quit (N) | Ever Quit % | Mean Yrs Quit | Short Term (n) | Short Term % |
| 35                                           | 65-69     | Never Any     | 5278  | 50.27 |               |             |               |                |              |
| 35                                           | 65-69     | CC            | 7     | 0.07  | 0             | 0.00        |               |                |              |
| 35                                           | 65-69     | Ecig          | 1139  | 10.85 |               |             |               |                |              |
| 35                                           | 65-69     | Dual          | 0     | 0.00  |               |             |               |                |              |
| 35                                           | 65-69     | Former        | 4075  | 38.81 |               |             | 26.61         | 83             | 2.04         |
| Year of Follow-up: 2025, Age Group: 70-74    |           |               |       |       |               |             |               |                |              |
| Period                                       | Age Group | Smoking Group | N     | %     | Ever Quit (N) | Ever Quit % | Mean Yrs Quit | Short Term (n) | Short Term % |
| 35                                           | 70-74     | Never Any     | 5018  | 52.27 |               |             |               |                |              |
| 35                                           | 70-74     | CC            | 11    | 0.11  | 0             | 0.00        |               |                |              |
| 35                                           | 70-74     | Ecig          | 789   | 8.22  |               |             |               |                |              |
| 35                                           | 70-74     | Dual          | 0     | 0.00  |               |             |               |                |              |
| 35                                           | 70-74     | Former        | 3782  | 39.40 |               |             | 30.61         | 65             | 1.72         |
| Year of Follow-up: 2025, Age Group: 75-79    |           |               |       |       |               |             |               |                |              |
| Period                                       | Age Group | Smoking Group | N     | %     | Ever Quit (N) | Ever Quit % | Mean Yrs Quit | Short Term (n) | Short Term % |
| 35                                           | 75-79     | Never Any     | 4356  | 51.27 |               |             |               |                |              |
| 35                                           | 75-79     | CC            | 14    | 0.16  | 0             | 0.00        |               |                |              |
| 35                                           | 75-79     | Ecig          | 588   | 6.92  |               |             |               |                |              |
| 35                                           | 75-79     | Dual          | 0     | 0.00  |               |             |               |                |              |
| 35                                           | 75-79     | Former        | 3539  | 41.65 |               |             | 30.81         | 53             | 1.50         |
| Year of Follow-up: 2030, Age Group: All Ages |           |               |       |       |               |             |               |                |              |
| Period                                       | Age Group | Smoking Group | N     | %     | Ever Quit (N) | Ever Quit % | Mean Yrs Quit | Short Term (n) | Short Term % |
| 40                                           | All Ages  | Never Any     | 30854 | 55.84 |               |             |               |                |              |
| 40                                           | All Ages  | CC            | 14    | 0.03  | 0             | 0.00        |               |                |              |
| 40                                           | All Ages  | Ecig          | 5391  | 9.76  |               |             |               |                |              |
| 40                                           | All Ages  | Dual          | 0     | 0.00  |               |             |               |                |              |
| 40                                           | All Ages  | Former        | 18991 | 34.37 |               |             | 27.90         | 543            | 2.86         |
| Year of Follow-up: 2030, Age Group: 18-19    |           |               |       |       |               |             |               |                |              |
| Period                                       | Age Group | Smoking Group | N     | %     | Ever Quit (N) | Ever Quit % | Mean Yrs Quit | Short Term (n) | Short Term % |
| 40                                           | 18-19     | Never Any     | 0     | .     |               |             |               |                |              |
| 40                                           | 18-19     | CC            | 0     | .     | 0             | .           |               |                |              |
| 40                                           | 18-19     | Ecig          | 0     | .     |               |             |               |                |              |
| 40                                           | 18-19     | Dual          | 0     | .     |               |             |               |                |              |
| 40                                           | 18-19     | Former        | 0     | .     |               |             | .             | 0              | .            |
| Year of Follow-up: 2030, Age Group: 20-24    |           |               |       |       |               |             |               |                |              |
| Period                                       | Age Group | Smoking Group | N     | %     | Ever Quit (N) | Ever Quit % | Mean Yrs Quit | Short Term (n) | Short Term % |
| 40                                           | 20-24     | Never Any     | 0     | .     |               |             |               |                |              |
| 40                                           | 20-24     | CC            | 0     | .     | 0             | .           |               |                |              |
| 40                                           | 20-24     | Ecig          | 0     | .     |               |             |               |                |              |
| 40                                           | 20-24     | Dual          | 0     | .     |               |             |               |                |              |
| 40                                           | 20-24     | Former        | 0     | .     |               |             | .             | 0              | .            |
| Year of Follow-up: 2030, Age Group: 25-29    |           |               |       |       |               |             |               |                |              |
| Period                                       | Age Group | Smoking Group | N     | %     | Ever Quit (N) | Ever Quit % | Mean Yrs Quit | Short Term (n) | Short Term % |
| 40                                           | 25-29     | Never Any     | 0     | .     |               |             |               |                |              |
| 40                                           | 25-29     | CC            | 0     | .     | 0             | .           |               |                |              |
| 40                                           | 25-29     | Ecig          | 0     | .     |               |             |               |                |              |
| 40                                           | 25-29     | Dual          | 0     | .     |               |             |               |                |              |

**Results for PHIM for Run 8 (Sensitivity\_Analysis\_1.RTF)**

| Year of Follow-up: 2030, Age Group: 30-34 | Period | Age Group | Smoking Group | N    | %     | Ever Quit (N) | Ever Quit % | Mean Yrs Quit | Short Term (n) | Short Term % |
|-------------------------------------------|--------|-----------|---------------|------|-------|---------------|-------------|---------------|----------------|--------------|
| Year of Follow-up: 2030, Age Group: 30-34 |        |           |               |      |       |               |             |               |                |              |
| 40                                        | 25-29  | Former    |               | 0    | .     |               |             |               | 0              | .            |
| 40                                        | 30-34  | Never Any |               | 0    | .     |               |             |               |                |              |
| 40                                        | 30-34  | CC        |               | 0    | .     | 0             | .           |               |                |              |
| 40                                        | 30-34  | Ecig      |               | 0    | .     |               |             |               |                |              |
| 40                                        | 30-34  | Dual      |               | 0    | .     |               |             |               |                |              |
| 40                                        | 30-34  | Former    |               | 0    | .     |               |             |               | 0              | .            |
| Year of Follow-up: 2030, Age Group: 35-39 |        |           |               |      |       |               |             |               |                |              |
| 40                                        | 35-39  | Never Any |               | 0    | .     |               |             |               |                |              |
| 40                                        | 35-39  | CC        |               | 0    | .     | 0             | .           |               |                |              |
| 40                                        | 35-39  | Ecig      |               | 0    | .     |               |             |               |                |              |
| 40                                        | 35-39  | Dual      |               | 0    | .     |               |             |               |                |              |
| 40                                        | 35-39  | Former    |               | 0    | .     |               |             |               | 0              | .            |
| Year of Follow-up: 2030, Age Group: 40-44 |        |           |               |      |       |               |             |               |                |              |
| 40                                        | 40-44  | Never Any |               | 0    | .     |               |             |               |                |              |
| 40                                        | 40-44  | CC        |               | 0    | .     | 0             | .           |               |                |              |
| 40                                        | 40-44  | Ecig      |               | 0    | .     |               |             |               |                |              |
| 40                                        | 40-44  | Dual      |               | 0    | .     |               |             |               |                |              |
| 40                                        | 40-44  | Former    |               | 0    | .     |               |             |               | 0              | .            |
| Year of Follow-up: 2030, Age Group: 45-49 |        |           |               |      |       |               |             |               |                |              |
| 40                                        | 45-49  | Never Any |               | 0    | .     |               |             |               |                |              |
| 40                                        | 45-49  | CC        |               | 0    | .     | 0             | .           |               |                |              |
| 40                                        | 45-49  | Ecig      |               | 0    | .     |               |             |               |                |              |
| 40                                        | 45-49  | Dual      |               | 0    | .     |               |             |               |                |              |
| 40                                        | 45-49  | Former    |               | 0    | .     |               |             |               | 0              | .            |
| Year of Follow-up: 2030, Age Group: 50-54 |        |           |               |      |       |               |             |               |                |              |
| 40                                        | 50-54  | Never Any |               | 4726 | 59.60 |               |             |               |                |              |
| 40                                        | 50-54  | CC        |               | 0    | 0.00  | 0             | 0.00        |               |                |              |
| 40                                        | 50-54  | Ecig      |               | 959  | 12.09 |               |             |               |                |              |
| 40                                        | 50-54  | Dual      |               | 0    | 0.00  |               |             |               |                |              |
| 40                                        | 50-54  | Former    |               | 2245 | 28.31 |               |             | 21.16         | 100            | 4.45         |
| Year of Follow-up: 2030, Age Group: 55-59 |        |           |               |      |       |               |             |               |                |              |
| 40                                        | 55-59  | Never Any |               | 5359 | 64.18 |               |             |               |                |              |
| 40                                        | 55-59  | CC        |               | 0    | 0.00  | 0             | 0.00        |               |                |              |
| 40                                        | 55-59  | Ecig      |               | 897  | 10.74 |               |             |               |                |              |
| 40                                        | 55-59  | Dual      |               | 0    | 0.00  |               |             |               |                |              |
| 40                                        | 55-59  | Former    |               | 2094 | 25.08 |               |             | 22.27         | 80             | 3.82         |
| Year of Follow-up: 2030, Age Group: 60-64 |        |           |               |      |       |               |             |               |                |              |
| 40                                        | 60-64  | Never Any |               | 5189 | 59.01 |               |             |               |                |              |
| 40                                        | 60-64  | CC        |               | 3    | 0.03  | 0             | 0.00        |               |                |              |
| 40                                        | 60-64  | Ecig      |               | 886  | 10.08 |               |             |               |                |              |
| 40                                        | 60-64  | Dual      |               | 0    | 0.00  |               |             |               |                |              |
| 40                                        | 60-64  | Former    |               | 2715 | 30.88 |               |             | 25.52         | 128            | 4.71         |
| Year of Follow-up: 2030, Age Group: 65-69 |        |           |               |      |       |               |             |               |                |              |
| 40                                        | 65-69  | Never Any |               | 5284 | 52.43 |               |             |               |                |              |
| 40                                        | 65-69  | CC        |               | 3    | 0.03  | 0             | 0.00        |               |                |              |
| 40                                        | 65-69  | Ecig      |               | 1080 | 10.72 |               |             |               |                |              |
| 40                                        | 65-69  | Dual      |               | 0    | 0.00  |               |             |               |                |              |
| 40                                        | 65-69  | Former    |               | 3711 | 36.82 |               |             | 27.57         | 73             | 1.97         |
| Year of Follow-up: 2030, Age Group: 70-74 |        |           |               |      |       |               |             |               |                |              |
| 40                                        | 70-74  | Never Any |               | 5278 | 50.27 |               |             |               |                |              |
| 40                                        | 70-74  | CC        |               | 4    | 0.04  | 0             | 0.00        |               |                |              |
| 40                                        | 70-74  | Ecig      |               | 957  | 9.12  |               |             |               |                |              |
| 40                                        | 70-74  | Dual      |               | 0    | 0.00  |               |             |               |                |              |
| 40                                        | 70-74  | Former    |               | 4260 | 40.58 |               |             | 30.32         | 86             | 2.02         |
| Year of Follow-up: 2030, Age Group: 75-79 |        |           |               |      |       |               |             |               |                |              |
| 40                                        | 75-79  | Never Any |               | 5018 | 52.27 |               |             |               |                |              |
| 40                                        | 75-79  | CC        |               | 4    | 0.04  | 0             | 0.00        |               |                |              |

**Results for PHIM for Run 8 (Sensitivity\_Analysis\_1.RTF)**

|                                              |           |               |       |       |               |             |               |                |              |
|----------------------------------------------|-----------|---------------|-------|-------|---------------|-------------|---------------|----------------|--------------|
| 40                                           | 75-79     | Ecig          | 612   | 6.38  |               |             |               |                |              |
| 40                                           | 75-79     | Dual          | 0     | 0.00  |               |             |               |                |              |
| 40                                           | 75-79     | Former        | 3966  | 41.31 |               |             | 34.05         | 76             | 1.92         |
| Year of Follow-up: 2035, Age Group: All Ages |           |               |       |       |               |             |               |                |              |
| Period                                       | Age Group | Smoking Group | N     | %     | Ever Quit (N) | Ever Quit % | Mean Yrs Quit | Short Term (n) | Short Term % |
| 45                                           | All Ages  | Never Any     | 25836 | 56.60 |               |             |               |                |              |
| 45                                           | All Ages  | CC            | 5     | 0.01  | 0             | 0.00        |               |                |              |
| 45                                           | All Ages  | Ecig          | 3886  | 8.51  |               |             |               |                |              |
| 45                                           | All Ages  | Dual          | 0     | 0.00  |               |             |               |                |              |
| 45                                           | All Ages  | Former        | 15923 | 34.88 |               |             | 29.63         | 351            | 2.20         |
| Year of Follow-up: 2035, Age Group: 18-19    |           |               |       |       |               |             |               |                |              |
| Period                                       | Age Group | Smoking Group | N     | %     | Ever Quit (N) | Ever Quit % | Mean Yrs Quit | Short Term (n) | Short Term % |
| 45                                           | 18-19     | Never Any     | 0     | .     |               |             |               |                |              |
| 45                                           | 18-19     | CC            | 0     | .     | 0             | .           |               |                |              |
| 45                                           | 18-19     | Ecig          | 0     | .     |               |             |               |                |              |
| 45                                           | 18-19     | Dual          | 0     | .     |               |             |               |                |              |
| 45                                           | 18-19     | Former        | 0     | .     |               |             | .             | 0              | .            |
| Year of Follow-up: 2035, Age Group: 20-24    |           |               |       |       |               |             |               |                |              |
| Period                                       | Age Group | Smoking Group | N     | %     | Ever Quit (N) | Ever Quit % | Mean Yrs Quit | Short Term (n) | Short Term % |
| 45                                           | 20-24     | Never Any     | 0     | .     |               |             |               |                |              |
| 45                                           | 20-24     | CC            | 0     | .     | 0             | .           |               |                |              |
| 45                                           | 20-24     | Ecig          | 0     | .     |               |             |               |                |              |
| 45                                           | 20-24     | Dual          | 0     | .     |               |             |               |                |              |
| 45                                           | 20-24     | Former        | 0     | .     |               |             | .             | 0              | .            |
| Year of Follow-up: 2035, Age Group: 25-29    |           |               |       |       |               |             |               |                |              |
| Period                                       | Age Group | Smoking Group | N     | %     | Ever Quit (N) | Ever Quit % | Mean Yrs Quit | Short Term (n) | Short Term % |
| 45                                           | 25-29     | Never Any     | 0     | .     |               |             |               |                |              |
| 45                                           | 25-29     | CC            | 0     | .     | 0             | .           |               |                |              |
| 45                                           | 25-29     | Ecig          | 0     | .     |               |             |               |                |              |
| 45                                           | 25-29     | Dual          | 0     | .     |               |             |               |                |              |
| 45                                           | 25-29     | Former        | 0     | .     |               |             | .             | 0              | .            |
| Year of Follow-up: 2035, Age Group: 30-34    |           |               |       |       |               |             |               |                |              |
| Period                                       | Age Group | Smoking Group | N     | %     | Ever Quit (N) | Ever Quit % | Mean Yrs Quit | Short Term (n) | Short Term % |
| 45                                           | 30-34     | Never Any     | 0     | .     |               |             |               |                |              |
| 45                                           | 30-34     | CC            | 0     | .     | 0             | .           |               |                |              |
| 45                                           | 30-34     | Ecig          | 0     | .     |               |             |               |                |              |
| 45                                           | 30-34     | Dual          | 0     | .     |               |             |               |                |              |
| 45                                           | 30-34     | Former        | 0     | .     |               |             | .             | 0              | .            |
| Year of Follow-up: 2035, Age Group: 35-39    |           |               |       |       |               |             |               |                |              |
| Period                                       | Age Group | Smoking Group | N     | %     | Ever Quit (N) | Ever Quit % | Mean Yrs Quit | Short Term (n) | Short Term % |
| 45                                           | 35-39     | Never Any     | 0     | .     |               |             |               |                |              |
| 45                                           | 35-39     | CC            | 0     | .     | 0             | .           |               |                |              |
| 45                                           | 35-39     | Ecig          | 0     | .     |               |             |               |                |              |
| 45                                           | 35-39     | Dual          | 0     | .     |               |             |               |                |              |
| 45                                           | 35-39     | Former        | 0     | .     |               |             | .             | 0              | .            |
| Year of Follow-up: 2035, Age Group: 40-44    |           |               |       |       |               |             |               |                |              |
| Period                                       | Age Group | Smoking Group | N     | %     | Ever Quit (N) | Ever Quit % | Mean Yrs Quit | Short Term (n) | Short Term % |
| 45                                           | 40-44     | Never Any     | 0     | .     |               |             |               |                |              |
| 45                                           | 40-44     | CC            | 0     | .     | 0             | .           |               |                |              |
| 45                                           | 40-44     | Ecig          | 0     | .     |               |             |               |                |              |
| 45                                           | 40-44     | Dual          | 0     | .     |               |             |               |                |              |
| 45                                           | 40-44     | Former        | 0     | .     |               |             | .             | 0              | .            |
| Year of Follow-up: 2035, Age Group: 45-49    |           |               |       |       |               |             |               |                |              |
| Period                                       | Age Group | Smoking Group | N     | %     | Ever Quit (N) | Ever Quit % | Mean Yrs Quit | Short Term (n) | Short Term % |
| 45                                           | 45-49     | Never Any     | 0     | .     |               |             |               |                |              |
| 45                                           | 45-49     | CC            | 0     | .     | 0             | .           |               |                |              |
| 45                                           | 45-49     | Ecig          | 0     | .     |               |             |               |                |              |
| 45                                           | 45-49     | Dual          | 0     | .     |               |             |               |                |              |
| 45                                           | 45-49     | Former        | 0     | .     |               |             | .             | 0              | .            |
| Year of Follow-up: 2035, Age Group: 50-54    |           |               |       |       |               |             |               |                |              |
| Period                                       | Age Group | Smoking Group | N     | %     | Ever Quit (N) | Ever Quit % | Mean Yrs Quit | Short Term (n) | Short Term % |
| 45                                           | 50-54     | Never Any     | 0     | .     |               |             |               |                |              |
| 45                                           | 50-54     | CC            | 0     | .     | 0             | .           |               |                |              |
| 45                                           | 50-54     | Ecig          | 0     | .     |               |             |               |                |              |
| 45                                           | 50-54     | Dual          | 0     | .     |               |             |               |                |              |
| 45                                           | 50-54     | Former        | 0     | .     |               |             | .             | 0              | .            |
| Year of Follow-up: 2035, Age Group: 55-59    |           |               |       |       |               |             |               |                |              |
| Period                                       | Age Group | Smoking Group | N     | %     | Ever Quit (N) | Ever Quit % | Mean Yrs Quit | Short Term (n) | Short Term % |

**Results for PHIM for Run 8 (Sensitivity\_Analysis\_1.RTF)**

|                                              |           |               |       |       |               |             |               |                |              |
|----------------------------------------------|-----------|---------------|-------|-------|---------------|-------------|---------------|----------------|--------------|
| 45                                           | 55-59     | Never Any     | 4726  | 59.60 |               |             |               |                |              |
| 45                                           | 55-59     | CC            | 0     | 0.00  | 0             | 0.00        |               |                |              |
| 45                                           | 55-59     | Ecig          | 792   | 9.99  |               |             |               |                |              |
| 45                                           | 55-59     | Dual          | 0     | 0.00  |               |             |               |                |              |
| 45                                           | 55-59     | Former        | 2412  | 30.42 |               |             | 24.49         | 64             | 2.65         |
| Year of Follow-up: 2035, Age Group: 60-64    |           |               |       |       |               |             |               |                |              |
| Period                                       | Age Group | Smoking Group | N     | %     | Ever Quit (N) | Ever Quit % | Mean Yrs Quit | Short Term (n) | Short Term % |
| 45                                           | 60-64     | Never Any     | 5359  | 64.18 |               |             |               |                |              |
| 45                                           | 60-64     | CC            | 0     | 0.00  | 0             | 0.00        |               |                |              |
| 45                                           | 60-64     | Ecig          | 719   | 8.61  |               |             |               |                |              |
| 45                                           | 60-64     | Dual          | 0     | 0.00  |               |             |               |                |              |
| 45                                           | 60-64     | Former        | 2272  | 27.21 |               |             | 25.28         | 77             | 3.39         |
| Year of Follow-up: 2035, Age Group: 65-69    |           |               |       |       |               |             |               |                |              |
| Period                                       | Age Group | Smoking Group | N     | %     | Ever Quit (N) | Ever Quit % | Mean Yrs Quit | Short Term (n) | Short Term % |
| 45                                           | 65-69     | Never Any     | 5189  | 59.01 |               |             |               |                |              |
| 45                                           | 65-69     | CC            | 3     | 0.03  | 0             | 0.00        |               |                |              |
| 45                                           | 65-69     | Ecig          | 694   | 7.89  |               |             |               |                |              |
| 45                                           | 65-69     | Dual          | 0     | 0.00  |               |             |               |                |              |
| 45                                           | 65-69     | Former        | 2907  | 33.06 |               |             | 28.66         | 55             | 1.89         |
| Year of Follow-up: 2035, Age Group: 70-74    |           |               |       |       |               |             |               |                |              |
| Period                                       | Age Group | Smoking Group | N     | %     | Ever Quit (N) | Ever Quit % | Mean Yrs Quit | Short Term (n) | Short Term % |
| 45                                           | 70-74     | Never Any     | 5284  | 52.43 |               |             |               |                |              |
| 45                                           | 70-74     | CC            | 1     | 0.01  | 0             | 0.00        |               |                |              |
| 45                                           | 70-74     | Ecig          | 934   | 9.27  |               |             |               |                |              |
| 45                                           | 70-74     | Dual          | 0     | 0.00  |               |             |               |                |              |
| 45                                           | 70-74     | Former        | 3859  | 38.29 |               |             | 31.38         | 76             | 1.97         |
| Year of Follow-up: 2035, Age Group: 75-79    |           |               |       |       |               |             |               |                |              |
| Period                                       | Age Group | Smoking Group | N     | %     | Ever Quit (N) | Ever Quit % | Mean Yrs Quit | Short Term (n) | Short Term % |
| 45                                           | 75-79     | Never Any     | 5278  | 50.27 |               |             |               |                |              |
| 45                                           | 75-79     | CC            | 1     | 0.01  | 0             | 0.00        |               |                |              |
| 45                                           | 75-79     | Ecig          | 747   | 7.11  |               |             |               |                |              |
| 45                                           | 75-79     | Dual          | 0     | 0.00  |               |             |               |                |              |
| 45                                           | 75-79     | Former        | 4473  | 42.60 |               |             | 33.73         | 79             | 1.77         |
| Year of Follow-up: 2040, Age Group: All Ages |           |               |       |       |               |             |               |                |              |
| Period                                       | Age Group | Smoking Group | N     | %     | Ever Quit (N) | Ever Quit % | Mean Yrs Quit | Short Term (n) | Short Term % |
| 50                                           | All Ages  | Never Any     | 20558 | 58.48 |               |             |               |                |              |
| 50                                           | All Ages  | CC            | 4     | 0.01  | 0             | 0.00        |               |                |              |
| 50                                           | All Ages  | Ecig          | 2497  | 7.10  |               |             |               |                |              |
| 50                                           | All Ages  | Dual          | 0     | 0.00  |               |             |               |                |              |
| 50                                           | All Ages  | Former        | 12092 | 34.40 |               |             | 31.39         | 238            | 1.97         |
| Year of Follow-up: 2040, Age Group: 18-19    |           |               |       |       |               |             |               |                |              |
| Period                                       | Age Group | Smoking Group | N     | %     | Ever Quit (N) | Ever Quit % | Mean Yrs Quit | Short Term (n) | Short Term % |
| 50                                           | 18-19     | Never Any     | 0     | .     |               |             |               |                |              |
| 50                                           | 18-19     | CC            | 0     | .     | 0             | .           |               |                |              |
| 50                                           | 18-19     | Ecig          | 0     | .     |               |             |               |                |              |
| 50                                           | 18-19     | Dual          | 0     | .     |               |             |               |                |              |
| 50                                           | 18-19     | Former        | 0     | .     |               |             | .             | 0              | .            |
| Year of Follow-up: 2040, Age Group: 20-24    |           |               |       |       |               |             |               |                |              |
| Period                                       | Age Group | Smoking Group | N     | %     | Ever Quit (N) | Ever Quit % | Mean Yrs Quit | Short Term (n) | Short Term % |
| 50                                           | 20-24     | Never Any     | 0     | .     |               |             |               |                |              |
| 50                                           | 20-24     | CC            | 0     | .     | 0             | .           |               |                |              |
| 50                                           | 20-24     | Ecig          | 0     | .     |               |             |               |                |              |
| 50                                           | 20-24     | Dual          | 0     | .     |               |             |               |                |              |
| 50                                           | 20-24     | Former        | 0     | .     |               |             | .             | 0              | .            |
| Year of Follow-up: 2040, Age Group: 25-29    |           |               |       |       |               |             |               |                |              |
| Period                                       | Age Group | Smoking Group | N     | %     | Ever Quit (N) | Ever Quit % | Mean Yrs Quit | Short Term (n) | Short Term % |
| 50                                           | 25-29     | Never Any     | 0     | .     |               |             |               |                |              |
| 50                                           | 25-29     | CC            | 0     | .     | 0             | .           |               |                |              |
| 50                                           | 25-29     | Ecig          | 0     | .     |               |             |               |                |              |
| 50                                           | 25-29     | Dual          | 0     | .     |               |             |               |                |              |
| 50                                           | 25-29     | Former        | 0     | .     |               |             | .             | 0              | .            |
| Year of Follow-up: 2040, Age Group: 30-34    |           |               |       |       |               |             |               |                |              |
| Period                                       | Age Group | Smoking Group | N     | %     | Ever Quit (N) | Ever Quit % | Mean Yrs Quit | Short Term (n) | Short Term % |
| 50                                           | 30-34     | Never Any     | 0     | .     |               |             |               |                |              |
| 50                                           | 30-34     | CC            | 0     | .     | 0             | .           |               |                |              |
| 50                                           | 30-34     | Ecig          | 0     | .     |               |             |               |                |              |
| 50                                           | 30-34     | Dual          | 0     | .     |               |             |               |                |              |
| 50                                           | 30-34     | Former        | 0     | .     |               |             | .             | 0              | .            |
| Year of Follow-up: 2040, Age Group: 35-39    |           |               |       |       |               |             |               |                |              |

**Results for PHIM for Run 8 (Sensitivity\_Analysis\_1.RTF)**

| Period                                    | Age Group | Smoking Group | N    | %     | Ever Quit (N) | Ever Quit % | Mean Yrs Quit | Short Term (n) | Short Term % |
|-------------------------------------------|-----------|---------------|------|-------|---------------|-------------|---------------|----------------|--------------|
| 50                                        | 35-39     | Never Any     | 0    | .     |               |             |               |                |              |
| 50                                        | 35-39     | CC            | 0    | .     | 0             | .           |               |                |              |
| 50                                        | 35-39     | Ecig          | 0    | .     |               |             |               |                |              |
| 50                                        | 35-39     | Dual          | 0    | .     |               |             |               |                |              |
| 50                                        | 35-39     | Former        | 0    | .     |               |             | .             | 0              | .            |
| Year of Follow-up: 2040, Age Group: 40-44 |           |               |      |       |               |             |               |                |              |
| Period                                    | Age Group | Smoking Group | N    | %     | Ever Quit (N) | Ever Quit % | Mean Yrs Quit | Short Term (n) | Short Term % |
| 50                                        | 40-44     | Never Any     | 0    | .     |               |             |               |                |              |
| 50                                        | 40-44     | CC            | 0    | .     | 0             | .           |               |                |              |
| 50                                        | 40-44     | Ecig          | 0    | .     |               |             |               |                |              |
| 50                                        | 40-44     | Dual          | 0    | .     |               |             |               |                |              |
| 50                                        | 40-44     | Former        | 0    | .     |               |             | .             | 0              | .            |
| Year of Follow-up: 2040, Age Group: 45-49 |           |               |      |       |               |             |               |                |              |
| Period                                    | Age Group | Smoking Group | N    | %     | Ever Quit (N) | Ever Quit % | Mean Yrs Quit | Short Term (n) | Short Term % |
| 50                                        | 45-49     | Never Any     | 0    | .     |               |             |               |                |              |
| 50                                        | 45-49     | CC            | 0    | .     | 0             | .           |               |                |              |
| 50                                        | 45-49     | Ecig          | 0    | .     |               |             |               |                |              |
| 50                                        | 45-49     | Dual          | 0    | .     |               |             |               |                |              |
| 50                                        | 45-49     | Former        | 0    | .     |               |             | .             | 0              | .            |
| Year of Follow-up: 2040, Age Group: 50-54 |           |               |      |       |               |             |               |                |              |
| Period                                    | Age Group | Smoking Group | N    | %     | Ever Quit (N) | Ever Quit % | Mean Yrs Quit | Short Term (n) | Short Term % |
| 50                                        | 50-54     | Never Any     | 0    | .     |               |             |               |                |              |
| 50                                        | 50-54     | CC            | 0    | .     | 0             | .           |               |                |              |
| 50                                        | 50-54     | Ecig          | 0    | .     |               |             |               |                |              |
| 50                                        | 50-54     | Dual          | 0    | .     |               |             |               |                |              |
| 50                                        | 50-54     | Former        | 0    | .     |               |             | .             | 0              | .            |
| Year of Follow-up: 2040, Age Group: 55-59 |           |               |      |       |               |             |               |                |              |
| Period                                    | Age Group | Smoking Group | N    | %     | Ever Quit (N) | Ever Quit % | Mean Yrs Quit | Short Term (n) | Short Term % |
| 50                                        | 55-59     | Never Any     | 0    | .     |               |             |               |                |              |
| 50                                        | 55-59     | CC            | 0    | .     | 0             | .           |               |                |              |
| 50                                        | 55-59     | Ecig          | 0    | .     |               |             |               |                |              |
| 50                                        | 55-59     | Dual          | 0    | .     |               |             |               |                |              |
| 50                                        | 55-59     | Former        | 0    | .     |               |             | .             | 0              | .            |
| Year of Follow-up: 2040, Age Group: 60-64 |           |               |      |       |               |             |               |                |              |
| Period                                    | Age Group | Smoking Group | N    | %     | Ever Quit (N) | Ever Quit % | Mean Yrs Quit | Short Term (n) | Short Term % |
| 50                                        | 60-64     | Never Any     | 4726 | 59.60 |               |             |               |                |              |
| 50                                        | 60-64     | CC            | 0    | 0.00  | 0             | 0.00        |               |                |              |
| 50                                        | 60-64     | Ecig          | 613  | 7.73  |               |             |               |                |              |
| 50                                        | 60-64     | Dual          | 0    | 0.00  |               |             |               |                |              |
| 50                                        | 60-64     | Former        | 2591 | 32.67 |               |             | 27.58         | 77             | 2.97         |
| Year of Follow-up: 2040, Age Group: 65-69 |           |               |      |       |               |             |               |                |              |
| Period                                    | Age Group | Smoking Group | N    | %     | Ever Quit (N) | Ever Quit % | Mean Yrs Quit | Short Term (n) | Short Term % |
| 50                                        | 65-69     | Never Any     | 5359 | 64.18 |               |             |               |                |              |
| 50                                        | 65-69     | CC            | 0    | 0.00  | 0             | 0.00        |               |                |              |
| 50                                        | 65-69     | Ecig          | 578  | 6.92  |               |             |               |                |              |
| 50                                        | 65-69     | Dual          | 0    | 0.00  |               |             |               |                |              |
| 50                                        | 65-69     | Former        | 2413 | 28.90 |               |             | 28.67         | 34             | 1.41         |
| Year of Follow-up: 2040, Age Group: 70-74 |           |               |      |       |               |             |               |                |              |
| Period                                    | Age Group | Smoking Group | N    | %     | Ever Quit (N) | Ever Quit % | Mean Yrs Quit | Short Term (n) | Short Term % |
| 50                                        | 70-74     | Never Any     | 5189 | 59.01 |               |             |               |                |              |
| 50                                        | 70-74     | CC            | 3    | 0.03  | 0             | 0.00        |               |                |              |
| 50                                        | 70-74     | Ecig          | 583  | 6.63  |               |             |               |                |              |
| 50                                        | 70-74     | Dual          | 0    | 0.00  |               |             |               |                |              |
| 50                                        | 70-74     | Former        | 3018 | 34.32 |               |             | 32.48         | 56             | 1.86         |
| Year of Follow-up: 2040, Age Group: 75-79 |           |               |      |       |               |             |               |                |              |
| Period                                    | Age Group | Smoking Group | N    | %     | Ever Quit (N) | Ever Quit % | Mean Yrs Quit | Short Term (n) | Short Term % |
| 50                                        | 75-79     | Never Any     | 5284 | 52.43 |               |             |               |                |              |
| 50                                        | 75-79     | CC            | 1    | 0.01  | 0             | 0.00        |               |                |              |
| 50                                        | 75-79     | Ecig          | 723  | 7.17  |               |             |               |                |              |
| 50                                        | 75-79     | Dual          | 0    | 0.00  |               |             |               |                |              |
| 50                                        | 75-79     | Former        | 4070 | 40.38 |               |             | 34.61         | 71             | 1.74         |

## Results for PHIM for Run 8 (Sensitivity\_Analysis\_1.RTF)

\*\*\*\*\*

### Main Results for E-Component for Run: 8, Simulation: 1, COD: Four Diseases Combined

| Variable Parameter          | Value                                  |
|-----------------------------|----------------------------------------|
| 1. Country                  | US (United States)                     |
| 2. Sex                      | F (Females)                            |
| 3. Year of start of process | 1990                                   |
| 4. Cause of Death           | Four Diseases Combined                 |
| 5. Effective Dose NULL      | CC:1                                   |
| 6. Effective Dose Ecig      | CC:1 Ecig:0.2 Dual:0.6                 |
| Note:                       | Death rates are per million population |

#### Results for Age Groups Combined and Years combined, Population unadjusted for deaths in Ecig scenario,

| Age Group:All |         | NULL        | Ecig        | %Drop    |        | NULL   | Ecig    | Drop    |         |         |
|---------------|---------|-------------|-------------|----------|--------|--------|---------|---------|---------|---------|
| Year          | Number  | Attrib      | Attrib      | Drop     | %Drop  | Attrib | Death   | Attrib  | Drop    |         |
|               | Deaths  | Deaths      | Deaths      | Deaths   | Deaths | Deaths | Rate    | Rates   | Rates   |         |
| All Comb      | 9082078 | 2946250.006 | 2170073.493 | 776176.5 | 8.546  | 26.345 | 2493.45 | 808.881 | 595.785 | 213.096 |

#### Results for Age Groups Combined, Population unadjusted for deaths in Ecig scenario,

| Age Group:All |        | NULL      | Ecig      | %Drop    |        | NULL   | Ecig    | Drop    |         |
|---------------|--------|-----------|-----------|----------|--------|--------|---------|---------|---------|
| Year          | Number | Attrib    | Attrib    | Drop     | %Drop  | Attrib | Death   | Attrib  | Drop    |
|               | Deaths | Deaths    | Deaths    | Deaths   | Deaths | Deaths | Rate    | Rates   | Rates   |
| 1990          | 199848 | 57524.822 | 57524.822 | 0.000    | 0.000  | 0.000  | 2926.84 | 842.471 | 0.000   |
| 1991          | 199162 | 59078.486 | 58936.164 | 142.321  | 0.071  | 0.241  | 2877.87 | 853.678 | 2.057   |
| 1992          | 198532 | 60494.150 | 60097.977 | 396.173  | 0.200  | 0.655  | 2829.84 | 862.271 | 5.647   |
| 1993          | 202512 | 62694.848 | 61925.353 | 769.495  | 0.380  | 1.227  | 2845.85 | 881.034 | 10.814  |
| 1994          | 200658 | 63202.598 | 61990.375 | 1212.223 | 0.604  | 1.918  | 2777.87 | 874.966 | 16.782  |
| 1995          | 201023 | 63766.862 | 62018.047 | 1748.815 | 0.870  | 2.743  | 2739.80 | 869.097 | 23.835  |
| 1996          | 201180 | 64591.163 | 62201.585 | 2389.577 | 1.188  | 3.700  | 2706.36 | 868.908 | 32.146  |
| 1997          | 198639 | 64686.912 | 61703.324 | 2983.588 | 1.502  | 4.612  | 2635.18 | 858.147 | 39.581  |
| 1998          | 197573 | 65295.961 | 61623.631 | 3672.331 | 1.859  | 5.624  | 2584.18 | 854.046 | 48.033  |
| 1999          | 211329 | 67327.521 | 62600.793 | 4726.728 | 2.237  | 7.020  | 2726.91 | 868.771 | 60.992  |
| 2000          | 208496 | 67596.897 | 62096.309 | 5500.587 | 2.638  | 8.137  | 2656.96 | 861.419 | 70.097  |
| 2001          | 203606 | 67008.811 | 60699.929 | 6308.882 | 3.099  | 9.415  | 2565.88 | 844.458 | 79.506  |
| 2002          | 200828 | 67067.744 | 59854.945 | 7212.799 | 3.592  | 10.754 | 2506.09 | 836.925 | 90.007  |
| 2003          | 196352 | 66756.217 | 58733.249 | 8022.968 | 4.086  | 12.018 | 2427.31 | 825.244 | 99.180  |
| 2004          | 188160 | 65058.725 | 56362.800 | 8695.926 | 4.622  | 13.366 | 2302.83 | 796.234 | 106.427 |
| 2005          | 186416 | 65214.724 | 55611.518 | 9603.206 | 5.151  | 14.726 | 2256.27 | 789.321 | 116.232 |
| 2006          | 180088 | 63771.146 | 53494.336 | 10276.81 | 5.707  | 16.115 | 2160.67 | 765.117 | 123.300 |
| 2007          | 175644 | 63110.718 | 52147.453 | 10963.26 | 6.242  | 17.371 | 2086.36 | 749.650 | 130.225 |
| 2008          | 177570 | 63718.624 | 51746.765 | 11971.86 | 6.742  | 18.789 | 2086.39 | 748.674 | 140.666 |
| 2009          | 172806 | 62794.698 | 50192.850 | 12601.85 | 7.292  | 20.068 | 2007.57 | 729.515 | 146.401 |
| 2010          | 170489 | 61917.074 | 48667.138 | 13249.94 | 7.772  | 21.399 | 1957.97 | 711.083 | 152.168 |
| 2011          | 170305 | 61680.114 | 47533.364 | 14146.75 | 8.307  | 22.936 | 1937.46 | 701.700 | 160.940 |
| 2012          | 171421 | 62023.127 | 46900.265 | 15122.86 | 8.822  | 24.383 | 1930.22 | 698.386 | 170.285 |
| 2013          | 172699 | 62037.765 | 46023.191 | 16014.57 | 9.273  | 25.814 | 1923.75 | 691.059 | 178.392 |
| 2014          | 174169 | 61921.017 | 44937.969 | 16983.05 | 9.751  | 27.427 | 1918.85 | 682.195 | 187.105 |
| 2015          | 177354 | 61856.204 | 44060.860 | 17795.34 | 10.034 | 28.769 | 2184.51 | 761.899 | 219.190 |
| 2016          | 176853 | 60464.119 | 42020.387 | 18443.73 | 10.429 | 30.504 | 2157.59 | 737.655 | 225.011 |
| 2017          | 179309 | 60243.839 | 40913.129 | 19330.71 | 10.781 | 32.087 | 2166.86 | 728.017 | 233.602 |
| 2018          | 177157 | 60713.327 | 40616.439 | 20096.89 | 11.344 | 33.101 | 2120.51 | 726.721 | 240.554 |
| 2019          | 179227 | 61148.172 | 40035.287 | 21112.88 | 11.780 | 34.527 | 2124.53 | 724.841 | 250.269 |
| 2020          | 180467 | 61149.317 | 39385.275 | 21764.04 | 12.060 | 35.592 | 2424.25 | 821.432 | 292.361 |
| 2021          | 178116 | 58727.786 | 36654.946 | 22072.84 | 12.392 | 37.585 | 2375.42 | 783.216 | 488.844 |
| 2022          | 179408 | 58848.802 | 35962.373 | 22886.43 | 12.757 | 38.890 | 2374.52 | 778.881 | 475.972 |
| 2023          | 180640 | 58816.149 | 35221.844 | 23594.31 | 13.062 | 40.115 | 2372.26 | 772.407 | 462.553 |
| 2024          | 181610 | 58955.232 | 34532.496 | 24422.74 | 13.448 | 41.426 | 2366.77 | 768.316 | 450.034 |
| 2025          | 180418 | 58297.744 | 33559.273 | 24738.47 | 13.712 | 42.435 | 2713.69 | 876.861 | 504.768 |
| 2026          | 180313 | 56469.971 | 31546.796 | 24923.17 | 13.822 | 44.135 | 2701.83 | 846.150 | 472.699 |
| 2027          | 179619 | 56209.427 | 30660.514 | 25548.91 | 14.224 | 45.453 | 2680.68 | 838.883 | 457.585 |
| 2028          | 178762 | 55733.105 | 29704.308 | 26028.80 | 14.561 | 46.703 | 2656.74 | 828.298 | 441.462 |
| 2029          | 177808 | 55145.838 | 28691.944 | 26453.89 | 14.878 | 47.971 | 2630.89 | 815.951 | 424.533 |
| 2030          | 173587 | 53615.097 | 27385.834 | 26229.26 | 15.110 | 48.921 | 3040.33 | 939.056 | 479.656 |
| 2031          | 174985 | 52046.561 | 26050.220 | 25996.34 | 14.856 | 49.948 | 3060.73 | 910.364 | 455.653 |
| 2032          | 173400 | 51582.636 | 25233.991 | 26348.64 | 15.195 | 51.080 | 3027.10 | 900.496 | 440.518 |
| 2033          | 171756 | 50839.758 | 24363.144 | 26476.61 | 15.415 | 52.079 | 2991.14 | 885.375 | 424.284 |
| 2034          | 169973 | 50215.451 | 23532.050 | 26683.40 | 15.699 | 53.138 | 2951.96 | 872.104 | 408.687 |
| 2035          | 162644 | 47773.075 | 22080.893 | 25692.18 | 15.797 | 53.780 | 3459.14 | 1016.05 | 469.620 |
| 2036          | 156254 | 43298.709 | 19407.149 | 23891.56 | 15.290 | 55.178 | 3328.25 | 922.274 | 413.378 |
| 2037          | 153593 | 42241.563 | 18432.179 | 23809.38 | 15.502 | 56.365 | 3274.10 | 900.450 | 392.913 |
| 2038          | 150947 | 41356.353 | 17663.091 | 23693.26 | 15.696 | 57.291 | 3217.50 | 881.531 | 376.497 |
| 2039          | 148373 | 40161.050 | 16734.922 | 23426.13 | 15.789 | 58.330 | 3159.42 | 855.178 | 356.348 |

## Results for PHIM for Run 8 (Sensitivity\_Analysis\_1.RTF)

\*\*\*\*\*

### Main Results for E-Component for Run: 8, Simulation: 1, COD: LUNG CANCER

| Variable Parameter          | Value                                  |
|-----------------------------|----------------------------------------|
| 1. Country                  | US (United States)                     |
| 2. Sex                      | F (Females)                            |
| 3. Year of start of process | 1990                                   |
| 4. Cause of Death           | LUNG CANCER                            |
| 5. Effective Dose NULL      | CC:1                                   |
| 6. Effective Dose Ecig      | CC:1 Ecig:0.2 Dual:0.6                 |
| Note:                       | Death rates are per million population |

#### Results for Age Groups Combined and Years combined, Population unadjusted for deaths in Ecig scenario,

| Age Group:All | NULL    | Ecig        | %Drop       |          |        | NULL   | Ecig    | Drop    |         |        |
|---------------|---------|-------------|-------------|----------|--------|--------|---------|---------|---------|--------|
| Year          | Number  | Attrib      | Attrib      | Drop     | %Drop  | Attrib | Death   | Attrib  | Attrib  | Drop   |
|               | Deaths  | Deaths      | Deaths      | Deaths   | Deaths | Deaths | Rate    | Rates   | Rates   | Rates  |
| All Comb      | 2327764 | 1580465.217 | 1258988.001 | 321477.2 | 13.811 | 20.341 | 639.078 | 433.910 | 345.650 | 88.260 |

#### Results for Age Groups Combined, Population unadjusted for deaths in Ecig scenario,

| Age Group:All | NULL   | Ecig      | %Drop     |          |        | NULL   | Ecig    | Drop    |         |         |
|---------------|--------|-----------|-----------|----------|--------|--------|---------|---------|---------|---------|
| Year          | Number | Attrib    | Attrib    | Drop     | %Drop  | Attrib | Death   | Attrib  | Attrib  | Drop    |
|               | Deaths | Deaths    | Deaths    | Deaths   | Deaths | Deaths | Rate    | Rates   | Rates   | Rates   |
| 1990          | 42690  | 30614.201 | 30614.201 | 0.000    | 0.000  | 0.000  | 625.210 | 448.355 | 448.355 | 0.000   |
| 1991          | 43692  | 31412.010 | 31384.620 | 27.390   | 0.063  | 0.087  | 631.345 | 453.901 | 453.505 | 0.396   |
| 1992          | 45423  | 32782.407 | 32703.340 | 79.066   | 0.174  | 0.241  | 647.450 | 467.274 | 466.147 | 1.127   |
| 1993          | 46291  | 33491.183 | 33335.020 | 156.163  | 0.337  | 0.466  | 650.515 | 470.643 | 468.448 | 2.195   |
| 1994          | 47017  | 34074.347 | 33821.907 | 252.440  | 0.537  | 0.741  | 650.895 | 471.719 | 468.225 | 3.495   |
| 1995          | 47840  | 34694.454 | 34313.987 | 380.467  | 0.795  | 1.097  | 652.025 | 472.861 | 467.675 | 5.185   |
| 1996          | 48244  | 35027.269 | 34502.443 | 524.826  | 1.088  | 1.498  | 648.999 | 471.202 | 464.142 | 7.060   |
| 1997          | 49035  | 35590.763 | 34895.139 | 695.624  | 1.419  | 1.955  | 650.506 | 472.153 | 462.925 | 9.228   |
| 1998          | 49686  | 36100.785 | 35203.698 | 897.086  | 1.806  | 2.485  | 649.874 | 472.184 | 460.451 | 11.734  |
| 1999          | 48883  | 35451.030 | 34375.320 | 1075.709 | 2.201  | 3.034  | 630.769 | 457.448 | 443.567 | 13.881  |
| 2000          | 50331  | 36447.986 | 35103.798 | 1344.188 | 2.671  | 3.688  | 641.392 | 464.474 | 447.344 | 17.130  |
| 2001          | 50389  | 36411.326 | 34798.592 | 1612.734 | 3.201  | 4.429  | 635.012 | 458.863 | 438.539 | 20.324  |
| 2002          | 51445  | 37078.545 | 35133.226 | 1945.319 | 3.781  | 5.246  | 641.972 | 462.696 | 438.420 | 24.275  |
| 2003          | 51408  | 36999.876 | 34740.421 | 2259.455 | 4.395  | 6.107  | 635.509 | 457.395 | 429.463 | 27.932  |
| 2004          | 51399  | 36861.555 | 34258.583 | 2602.972 | 5.064  | 7.061  | 629.057 | 451.138 | 419.281 | 31.857  |
| 2005          | 51421  | 36689.529 | 33727.198 | 2962.330 | 5.761  | 8.074  | 622.370 | 444.069 | 408.214 | 35.854  |
| 2006          | 51355  | 36504.774 | 33170.083 | 3334.690 | 6.493  | 9.135  | 616.150 | 437.979 | 397.970 | 40.009  |
| 2007          | 51839  | 36663.202 | 32885.639 | 3777.563 | 7.287  | 10.303 | 615.761 | 435.498 | 390.627 | 44.871  |
| 2008          | 50976  | 35898.803 | 31798.678 | 4100.125 | 8.043  | 11.421 | 598.952 | 421.800 | 373.624 | 48.175  |
| 2009          | 51193  | 35934.525 | 31368.127 | 4566.398 | 8.920  | 12.708 | 594.733 | 417.468 | 364.418 | 53.050  |
| 2010          | 50853  | 35502.829 | 30567.524 | 4935.306 | 9.705  | 13.901 | 584.018 | 407.730 | 351.051 | 56.679  |
| 2011          | 50509  | 35136.342 | 29768.901 | 5367.441 | 10.627 | 15.276 | 574.613 | 399.726 | 338.664 | 61.062  |
| 2012          | 51245  | 35450.201 | 29549.252 | 5900.949 | 11.515 | 16.646 | 577.023 | 399.173 | 332.727 | 66.445  |
| 2013          | 51069  | 35123.224 | 28752.744 | 6370.480 | 12.474 | 18.138 | 568.874 | 391.249 | 320.286 | 70.963  |
| 2014          | 51251  | 35079.370 | 28212.969 | 6866.401 | 13.398 | 19.574 | 564.641 | 386.476 | 310.827 | 75.648  |
| 2015          | 50443  | 34324.171 | 27153.240 | 7170.931 | 14.216 | 20.892 | 621.319 | 422.780 | 334.453 | 88.326  |
| 2016          | 48854  | 33054.753 | 25621.919 | 7432.833 | 15.214 | 22.486 | 596.013 | 403.264 | 312.584 | 90.680  |
| 2017          | 48325  | 32471.234 | 24642.251 | 7828.984 | 16.201 | 24.111 | 583.983 | 392.399 | 297.579 | 94.609  |
| 2018          | 50465  | 33657.595 | 24944.514 | 8713.081 | 17.266 | 25.887 | 604.052 | 402.871 | 298.788 | 104.293 |
| 2019          | 51036  | 33863.424 | 24539.583 | 9323.841 | 18.269 | 27.534 | 604.975 | 401.412 | 290.888 | 110.523 |
| 2020          | 51444  | 33910.830 | 24103.152 | 9807.677 | 19.065 | 28.922 | 691.053 | 455.532 | 323.783 | 131.749 |
| 2021          | 48037  | 31531.880 | 21864.298 | 9667.582 | 20.125 | 30.660 | 640.639 | 420.521 | 291.590 | 128.930 |
| 2022          | 48335  | 31560.212 | 21386.162 | 10174.05 | 21.049 | 32.237 | 639.727 | 417.708 | 283.052 | 134.656 |
| 2023          | 48599  | 31508.781 | 20874.921 | 10633.86 | 21.881 | 33.749 | 638.227 | 413.791 | 274.141 | 139.650 |
| 2024          | 48784  | 31517.293 | 20383.604 | 11133.69 | 22.823 | 35.326 | 635.757 | 410.740 | 265.643 | 145.096 |
| 2025          | 48477  | 31175.389 | 19742.193 | 11433.20 | 23.585 | 36.674 | 729.141 | 468.912 | 296.944 | 171.968 |
| 2026          | 45324  | 29044.598 | 17942.569 | 11102.03 | 24.495 | 38.224 | 679.138 | 435.206 | 268.853 | 166.354 |
| 2027          | 45107  | 28825.765 | 17365.275 | 11460.49 | 25.407 | 39.758 | 673.191 | 430.203 | 259.164 | 171.039 |
| 2028          | 44842  | 28513.846 | 16760.287 | 11753.56 | 26.211 | 41.221 | 666.430 | 423.769 | 249.089 | 174.680 |
| 2029          | 44539  | 28148.109 | 16126.307 | 12021.80 | 26.991 | 42.709 | 659.013 | 416.486 | 238.609 | 177.877 |
| 2030          | 43393  | 27314.475 | 15321.669 | 11992.81 | 27.638 | 43.906 | 760.018 | 478.407 | 268.355 | 210.051 |
| 2031          | 40748  | 25423.102 | 14018.279 | 11404.82 | 27.989 | 44.860 | 712.731 | 444.684 | 245.198 | 199.486 |
| 2032          | 40325  | 25085.902 | 13509.403 | 11576.50 | 28.708 | 46.147 | 703.969 | 437.933 | 235.838 | 202.095 |
| 2033          | 39882  | 24645.067 | 12987.841 | 11657.23 | 29.229 | 47.300 | 694.543 | 429.194 | 226.183 | 203.011 |
| 2034          | 39404  | 24239.126 | 12489.126 | 11750.00 | 29.819 | 48.475 | 684.347 | 420.967 | 216.902 | 204.065 |
| 2035          | 37454  | 22944.147 | 11625.865 | 11318.28 | 30.219 | 49.330 | 796.588 | 487.980 | 247.261 | 240.719 |
| 2036          | 32988  | 19950.581 | 9859.635  | 10090.95 | 30.589 | 50.580 | 702.663 | 424.953 | 210.013 | 214.940 |
| 2037          | 32403  | 19415.334 | 9345.667  | 10069.67 | 31.076 | 51.865 | 690.731 | 413.871 | 199.219 | 214.652 |
| 2038          | 31820  | 18939.317 | 8935.720  | 10003.60 | 31.438 | 52.819 | 678.257 | 403.701 | 190.469 | 213.232 |
| 2039          | 31251  | 18379.752 | 8459.107  | 9920.645 | 31.745 | 53.976 | 665.457 | 391.373 | 180.126 | 211.247 |



## Results for PHIM for Run 8 (Sensitivity\_Analysis\_1.RTF)

\*\*\*\*\*

### Main Results for E-Component for Run: 8, Simulation: 1, COD: IHD

| Variable Parameter          | Value                                  |
|-----------------------------|----------------------------------------|
| 1. Country                  | US (United States)                     |
| 2. Sex                      | F (Females)                            |
| 3. Year of start of process | 1990                                   |
| 4. Cause of Death           | IHD                                    |
| 5. Effective Dose NULL      | CC:1                                   |
| 6. Effective Dose Ecig      | CC:1 Ecig:0.2 Dual:0.6                 |
| Note:                       | Death rates are per million population |

#### Results for Age Groups Combined and Years combined, Population unadjusted for deaths in Ecig scenario,

| Age Group:All |         | NULL       | Ecig       | %Drop    |        |        | NULL    | Ecig    | Drop   |        |
|---------------|---------|------------|------------|----------|--------|--------|---------|---------|--------|--------|
| Year          | Number  | Attrib     | Attrib     | Drop     | %Drop  | Attrib | Death   | Attrib  | Attrib | Drop   |
|               | Deaths  | Deaths     | Deaths     | Deaths   | Deaths | Deaths | Rate    | Rates   | Rates  | Rates  |
| All Comb      | 3242167 | 398833.796 | 236394.756 | 162439.0 | 5.010  | 40.729 | 890.124 | 109.498 | 64.901 | 44.597 |

#### Results for Age Groups Combined, Population unadjusted for deaths in Ecig scenario,

| Age Group:All |        | NULL      | Ecig      | %Drop    |        |        | NULL    | Ecig    | Drop    |        |
|---------------|--------|-----------|-----------|----------|--------|--------|---------|---------|---------|--------|
| Year          | Number | Attrib    | Attrib    | Drop     | %Drop  | Attrib | Death   | Attrib  | Attrib  | Drop   |
|               | Deaths | Deaths    | Deaths    | Deaths   | Deaths | Deaths | Rate    | Rates   | Rates   | Rates  |
| 1990          | 98916  | 12922.892 | 12922.892 | 0.000    | 0.000  | 0.000  | 1448.66 | 189.260 | 189.260 | 0.000  |
| 1991          | 96403  | 12856.479 | 12780.313 | 76.166   | 0.079  | 0.592  | 1393.01 | 185.775 | 184.674 | 1.101  |
| 1992          | 93721  | 12662.244 | 12452.261 | 209.983  | 0.224  | 1.658  | 1335.88 | 180.485 | 177.492 | 2.993  |
| 1993          | 93679  | 12730.613 | 12330.998 | 399.615  | 0.427  | 3.139  | 1316.45 | 178.900 | 173.284 | 5.616  |
| 1994          | 90832  | 12495.323 | 11874.881 | 620.442  | 0.683  | 4.965  | 1257.46 | 172.983 | 164.394 | 8.589  |
| 1995          | 89698  | 12365.590 | 11490.809 | 874.781  | 0.975  | 7.074  | 1222.52 | 168.534 | 156.612 | 11.923 |
| 1996          | 88286  | 12290.551 | 11101.693 | 1188.858 | 1.347  | 9.673  | 1187.66 | 165.338 | 149.345 | 15.993 |
| 1997          | 84777  | 11719.531 | 10291.923 | 1427.608 | 1.684  | 12.181 | 1124.67 | 155.473 | 136.534 | 18.939 |
| 1998          | 82517  | 11416.794 | 9711.695  | 1705.099 | 2.066  | 14.935 | 1079.29 | 149.327 | 127.025 | 22.302 |
| 1999          | 93939  | 13028.038 | 10687.442 | 2340.597 | 2.492  | 17.966 | 1212.16 | 168.109 | 137.907 | 30.202 |
| 2000          | 90039  | 12426.299 | 9816.461  | 2609.838 | 2.899  | 21.003 | 1147.41 | 158.354 | 125.096 | 33.258 |
| 2001          | 86119  | 11939.281 | 9005.388  | 2933.894 | 3.407  | 24.573 | 1085.29 | 150.461 | 113.488 | 36.974 |
| 2002          | 83014  | 11528.794 | 8276.896  | 3251.898 | 3.917  | 28.207 | 1035.91 | 143.865 | 103.286 | 40.580 |
| 2003          | 79302  | 11048.407 | 7558.191  | 3490.215 | 4.401  | 31.590 | 980.336 | 136.581 | 93.435  | 43.146 |
| 2004          | 73861  | 10375.132 | 6726.435  | 3648.696 | 4.940  | 35.168 | 903.963 | 126.978 | 82.323  | 44.655 |
| 2005          | 71649  | 10051.029 | 6187.414  | 3863.616 | 5.392  | 38.440 | 867.197 | 121.652 | 74.889  | 46.763 |
| 2006          | 67551  | 9542.523  | 5542.975  | 3999.548 | 5.921  | 41.913 | 810.467 | 114.490 | 66.504  | 47.986 |
| 2007          | 63503  | 8936.533  | 4915.194  | 4021.339 | 6.333  | 44.999 | 754.310 | 106.151 | 58.384  | 47.767 |
| 2008          | 63171  | 8944.180  | 4657.102  | 4287.079 | 6.786  | 47.931 | 742.239 | 105.091 | 54.719  | 50.372 |
| 2009          | 59747  | 8390.033  | 4157.532  | 4232.501 | 7.084  | 50.447 | 694.108 | 97.471  | 48.300  | 49.171 |
| 2010          | 58008  | 8157.570  | 3845.227  | 4312.343 | 7.434  | 52.863 | 666.189 | 93.685  | 44.160  | 49.525 |
| 2011          | 57368  | 8035.356  | 3584.796  | 4450.560 | 7.758  | 55.387 | 652.644 | 91.414  | 40.782  | 50.632 |
| 2012          | 57411  | 7970.766  | 3366.314  | 4604.452 | 8.020  | 57.767 | 646.453 | 89.752  | 37.905  | 51.847 |
| 2013          | 57067  | 7743.216  | 3121.625  | 4621.591 | 8.099  | 59.686 | 635.688 | 86.254  | 34.773  | 51.481 |
| 2014          | 57538  | 7774.935  | 2982.277  | 4792.658 | 8.330  | 61.642 | 633.906 | 85.658  | 32.856  | 52.802 |
| 2015          | 58395  | 7722.535  | 2853.826  | 4868.709 | 8.338  | 63.045 | 719.266 | 95.120  | 35.151  | 59.969 |
| 2016          | 58658  | 7600.353  | 2680.417  | 4919.937 | 8.387  | 64.733 | 715.621 | 92.723  | 32.701  | 60.023 |
| 2017          | 59004  | 7470.266  | 2527.571  | 4942.695 | 8.377  | 66.165 | 713.034 | 90.274  | 30.544  | 59.730 |
| 2018          | 56077  | 6907.050  | 2245.024  | 4662.026 | 8.314  | 67.497 | 671.224 | 82.675  | 26.872  | 55.803 |
| 2019          | 55886  | 6732.046  | 2112.805  | 4619.242 | 8.265  | 68.616 | 662.462 | 79.801  | 25.045  | 54.756 |
| 2020          | 55313  | 6429.836  | 1960.012  | 4469.824 | 8.081  | 69.517 | 743.037 | 86.373  | 26.329  | 60.044 |
| 2021          | 56292  | 6562.016  | 1921.298  | 4640.718 | 8.244  | 70.721 | 750.730 | 87.513  | 25.623  | 61.890 |
| 2022          | 55827  | 6352.366  | 1807.719  | 4544.647 | 8.141  | 71.543 | 738.885 | 84.075  | 23.926  | 60.150 |
| 2023          | 55338  | 6134.123  | 1706.957  | 4427.166 | 8.000  | 72.173 | 726.728 | 80.557  | 22.417  | 58.140 |
| 2024          | 54770  | 5922.193  | 1609.797  | 4312.395 | 7.874  | 72.818 | 713.771 | 77.179  | 20.979  | 56.200 |
| 2025          | 53295  | 5504.188  | 1465.848  | 4038.340 | 7.577  | 73.369 | 801.612 | 82.789  | 22.048  | 60.741 |
| 2026          | 55278  | 5641.075  | 1471.627  | 4169.449 | 7.543  | 73.912 | 828.283 | 84.526  | 22.051  | 62.475 |
| 2027          | 54199  | 5426.216  | 1391.222  | 4034.994 | 7.445  | 74.361 | 808.875 | 80.982  | 20.763  | 60.219 |
| 2028          | 53090  | 5197.830  | 1313.359  | 3884.471 | 7.317  | 74.733 | 789.020 | 77.249  | 19.519  | 57.730 |
| 2029          | 51974  | 4973.547  | 1240.772  | 3732.775 | 7.182  | 75.053 | 769.023 | 73.590  | 18.359  | 55.231 |
| 2030          | 49479  | 4450.618  | 1085.466  | 3365.152 | 6.801  | 75.611 | 866.605 | 77.952  | 19.012  | 58.940 |
| 2031          | 51987  | 4555.052  | 1104.080  | 3450.972 | 6.638  | 75.761 | 909.317 | 79.674  | 19.312  | 60.362 |
| 2032          | 50677  | 4349.999  | 1044.337  | 3305.662 | 6.523  | 75.992 | 884.689 | 75.939  | 18.231  | 57.708 |
| 2033          | 49380  | 4147.948  | 992.466   | 3155.482 | 6.390  | 76.073 | 859.955 | 72.237  | 17.284  | 54.953 |
| 2034          | 48076  | 3966.133  | 941.999   | 3024.134 | 6.290  | 76.249 | 834.943 | 68.881  | 16.360  | 52.521 |
| 2035          | 44518  | 3289.064  | 761.843   | 2527.221 | 5.677  | 76.837 | 946.825 | 69.952  | 16.203  | 53.749 |
| 2036          | 46347  | 3313.192  | 758.751   | 2554.441 | 5.512  | 77.099 | 987.211 | 70.572  | 16.162  | 54.410 |
| 2037          | 44841  | 3117.951  | 709.740   | 2408.211 | 5.371  | 77.237 | 955.859 | 66.464  | 15.129  | 51.335 |
| 2038          | 43378  | 2949.775  | 670.108   | 2279.667 | 5.255  | 77.283 | 924.621 | 62.876  | 14.284  | 48.592 |
| 2039          | 41973  | 2766.312  | 628.980   | 2137.332 | 5.092  | 77.263 | 893.753 | 58.905  | 13.393  | 45.512 |

## Results for PHIM for Run 8 (Sensitivity\_Analysis\_1.RTF)

\*\*\*\*\*

### Main Results for E-Component for Run: 8, Simulation: 1, COD: STROKE

| Variable Parameter          | Value                                  |
|-----------------------------|----------------------------------------|
| 1. Country                  | US (United States)                     |
| 2. Sex                      | F (Females)                            |
| 3. Year of start of process | 1990                                   |
| 4. Cause of Death           | STROKE                                 |
| 5. Effective Dose NULL      | CC:1                                   |
| 6. Effective Dose Ecig      | CC:1 Ecig:0.2 Dual:0.6                 |
| Note:                       | Death rates are per million population |

#### Results for Age Groups Combined and Years combined, Population unadjusted for deaths in Ecig scenario,

| Age Group:All | NULL    | Ecig       | %Drop     |          |        | NULL   | Ecig    | Drop   |        |        |
|---------------|---------|------------|-----------|----------|--------|--------|---------|--------|--------|--------|
| Year          | Number  | Attrib     | Attrib    | Drop     | %Drop  | Attrib | Death   | Attrib | Attrib | Drop   |
|               | Deaths  | Deaths     | Deaths    | Deaths   | Deaths | Deaths | Rate    | Rates  | Rates  | Rates  |
| All Comb      | 1352207 | 104899.750 | 60916.485 | 43983.26 | 3.253  | 41.929 | 371.243 | 28.800 | 16.724 | 12.075 |

#### Results for Age Groups Combined, Population unadjusted for deaths in Ecig scenario,

| Age Group:All | NULL   | Ecig     | %Drop    |          |        | NULL   | Ecig    | Drop   |        |        |
|---------------|--------|----------|----------|----------|--------|--------|---------|--------|--------|--------|
| Year          | Number | Attrib   | Attrib   | Drop     | %Drop  | Attrib | Death   | Attrib | Attrib | Drop   |
|               | Deaths | Deaths   | Deaths   | Deaths   | Deaths | Deaths | Rate    | Rates  | Rates  | Rates  |
| 1990          | 33504  | 3293.017 | 3293.017 | 0.000    | 0.000  | 0.000  | 490.678 | 48.227 | 48.227 | 0.000  |
| 1991          | 32505  | 3207.063 | 3183.844 | 23.219   | 0.071  | 0.724  | 469.694 | 46.342 | 46.006 | 0.336  |
| 1992          | 32560  | 3218.125 | 3153.407 | 64.718   | 0.199  | 2.011  | 464.104 | 45.871 | 44.948 | 0.922  |
| 1993          | 32768  | 3226.680 | 3104.364 | 122.316  | 0.373  | 3.791  | 460.480 | 45.344 | 43.625 | 1.719  |
| 1994          | 33005  | 3277.266 | 3082.743 | 194.523  | 0.589  | 5.936  | 456.915 | 45.370 | 42.677 | 2.693  |
| 1995          | 33730  | 3309.378 | 3031.117 | 278.261  | 0.825  | 8.408  | 459.716 | 45.104 | 41.312 | 3.793  |
| 1996          | 33750  | 3312.987 | 2937.156 | 375.831  | 1.114  | 11.344 | 454.019 | 44.568 | 39.512 | 5.056  |
| 1997          | 33699  | 3267.066 | 2797.412 | 469.654  | 1.394  | 14.375 | 447.056 | 43.341 | 37.111 | 6.231  |
| 1998          | 33274  | 3178.725 | 2619.350 | 559.375  | 1.681  | 17.597 | 435.211 | 41.577 | 34.260 | 7.316  |
| 1999          | 33891  | 3120.351 | 2470.229 | 650.123  | 1.918  | 20.835 | 437.317 | 40.264 | 31.875 | 8.389  |
| 2000          | 33827  | 3142.808 | 2383.408 | 759.400  | 2.245  | 24.163 | 431.074 | 40.050 | 30.373 | 9.677  |
| 2001          | 32506  | 2961.588 | 2147.366 | 814.222  | 2.505  | 27.493 | 409.647 | 37.323 | 27.062 | 10.261 |
| 2002          | 32078  | 2940.627 | 2025.831 | 914.797  | 2.852  | 31.109 | 400.295 | 36.695 | 25.280 | 11.416 |
| 2003          | 30568  | 2819.545 | 1847.216 | 972.329  | 3.181  | 34.485 | 377.883 | 34.855 | 22.835 | 12.020 |
| 2004          | 29388  | 2730.466 | 1696.460 | 1034.006 | 3.518  | 37.869 | 359.671 | 33.417 | 20.762 | 12.655 |
| 2005          | 27954  | 2670.510 | 1575.963 | 1094.547 | 3.916  | 40.986 | 338.339 | 32.322 | 19.075 | 13.248 |
| 2006          | 27201  | 2623.285 | 1468.961 | 1154.325 | 4.244  | 44.003 | 326.354 | 31.474 | 17.624 | 13.849 |
| 2007          | 26302  | 2536.599 | 1348.111 | 1188.488 | 4.519  | 46.854 | 312.424 | 30.131 | 16.013 | 14.117 |
| 2008          | 25998  | 2469.443 | 1247.957 | 1221.487 | 4.698  | 49.464 | 305.468 | 29.015 | 14.663 | 14.352 |
| 2009          | 25040  | 2386.945 | 1147.667 | 1239.278 | 4.949  | 51.919 | 290.901 | 27.730 | 13.333 | 14.397 |
| 2010          | 24840  | 2329.274 | 1067.380 | 1261.895 | 5.080  | 54.175 | 285.273 | 26.750 | 12.258 | 14.492 |
| 2011          | 24792  | 2286.581 | 995.336  | 1291.245 | 5.208  | 56.471 | 282.045 | 26.013 | 11.323 | 14.690 |
| 2012          | 24500  | 2243.311 | 928.615  | 1314.696 | 5.366  | 58.605 | 275.872 | 25.260 | 10.456 | 14.804 |
| 2013          | 24451  | 2176.503 | 857.948  | 1318.555 | 5.393  | 60.581 | 272.368 | 24.245 | 9.557  | 14.688 |
| 2014          | 25296  | 2211.619 | 832.459  | 1379.160 | 5.452  | 62.360 | 278.691 | 24.366 | 9.171  | 15.194 |
| 2015          | 26316  | 2237.016 | 811.543  | 1425.473 | 5.417  | 63.722 | 324.141 | 27.554 | 9.996  | 17.558 |
| 2016          | 26735  | 2229.057 | 777.145  | 1451.912 | 5.431  | 65.136 | 326.164 | 27.194 | 9.481  | 17.713 |
| 2017          | 27616  | 2221.649 | 746.309  | 1475.341 | 5.342  | 66.407 | 333.726 | 26.848 | 9.019  | 17.829 |
| 2018          | 25256  | 1939.420 | 630.187  | 1309.233 | 5.184  | 67.506 | 302.304 | 23.214 | 7.543  | 15.671 |
| 2019          | 25429  | 1904.400 | 597.155  | 1307.245 | 5.141  | 68.643 | 301.434 | 22.574 | 7.079  | 15.496 |
| 2020          | 25379  | 1806.054 | 549.866  | 1256.189 | 4.950  | 69.554 | 340.922 | 24.261 | 7.386  | 16.875 |
| 2021          | 25448  | 1748.172 | 514.155  | 1234.018 | 4.849  | 70.589 | 339.386 | 23.314 | 6.857  | 16.457 |
| 2022          | 25539  | 1701.148 | 486.343  | 1214.804 | 4.757  | 71.411 | 338.015 | 22.515 | 6.437  | 16.078 |
| 2023          | 25620  | 1652.087 | 461.997  | 1190.090 | 4.645  | 72.036 | 336.461 | 21.696 | 6.067  | 15.629 |
| 2024          | 25659  | 1597.127 | 435.895  | 1161.232 | 4.526  | 72.708 | 334.391 | 20.814 | 5.681  | 15.133 |
| 2025          | 25260  | 1467.622 | 391.918  | 1075.704 | 4.259  | 73.296 | 379.931 | 22.075 | 5.895  | 16.180 |
| 2026          | 25480  | 1390.505 | 364.284  | 1026.222 | 4.028  | 73.802 | 381.790 | 20.835 | 5.458  | 15.377 |
| 2027          | 25264  | 1342.095 | 344.962  | 997.134  | 3.947  | 74.297 | 377.042 | 20.030 | 5.148  | 14.881 |
| 2028          | 25022  | 1289.536 | 326.543  | 962.993  | 3.849  | 74.677 | 371.870 | 19.165 | 4.853  | 14.312 |
| 2029          | 24767  | 1242.216 | 310.035  | 932.181  | 3.764  | 75.042 | 366.459 | 18.380 | 4.587  | 13.793 |
| 2030          | 23959  | 1096.803 | 267.200  | 829.603  | 3.463  | 75.638 | 419.641 | 19.210 | 4.680  | 14.530 |
| 2031          | 23963  | 1019.991 | 246.522  | 773.469  | 3.228  | 75.831 | 419.142 | 17.841 | 4.312  | 13.529 |
| 2032          | 23615  | 977.406  | 233.720  | 743.686  | 3.149  | 76.088 | 412.259 | 17.063 | 4.080  | 12.983 |
| 2033          | 23259  | 937.450  | 223.058  | 714.392  | 3.071  | 76.206 | 405.051 | 16.326 | 3.885  | 12.441 |
| 2034          | 22879  | 900.763  | 212.400  | 688.363  | 3.009  | 76.420 | 397.339 | 15.644 | 3.689  | 11.955 |
| 2035          | 21733  | 745.023  | 172.364  | 572.659  | 2.635  | 76.865 | 462.224 | 15.845 | 3.666  | 12.179 |
| 2036          | 20904  | 680.360  | 154.943  | 525.416  | 2.513  | 77.226 | 445.263 | 14.492 | 3.300  | 11.192 |
| 2037          | 20397  | 644.109  | 145.844  | 498.266  | 2.443  | 77.357 | 434.791 | 13.730 | 3.109  | 10.621 |
| 2038          | 19890  | 612.448  | 138.240  | 474.208  | 2.384  | 77.428 | 423.966 | 13.055 | 2.947  | 10.108 |
| 2039          | 19392  | 577.529  | 130.542  | 446.988  | 2.305  | 77.397 | 412.930 | 12.298 | 2.780  | 9.518  |

## Results for PHIM for Run 8 (Sensitivity\_Analysis\_1.RTF)

\*\*\*\*\*

### Main Results for E-Component for Run: 8, Simulation: 1, COD: COPD

| Variable Parameter          | Value                                  |
|-----------------------------|----------------------------------------|
| 1. Country                  | US (United States)                     |
| 2. Sex                      | F (Females)                            |
| 3. Year of start of process | 1990                                   |
| 4. Cause of Death           | COPD                                   |
| 5. Effective Dose NULL      | CC:1                                   |
| 6. Effective Dose Ecig      | CC:1 Ecig:0.2 Dual:0.6                 |
| Note:                       | Death rates are per million population |

#### Results for Age Groups Combined and Years combined, Population unadjusted for deaths in Ecig scenario,

| Age Group:All | NULL    | Ecig       | %Drop      |          |        |        | NULL    | Ecig    | Drop    |        |
|---------------|---------|------------|------------|----------|--------|--------|---------|---------|---------|--------|
| Year          | Number  | Attrib     | Attrib     | Drop     | %Drop  | Attrib | Death   | Attrib  | Attrib  | Drop   |
|               | Deaths  | Deaths     | Deaths     | Deaths   | Deaths | Deaths | Rate    | Rates   | Rates   | Rates  |
| All Comb      | 2159941 | 862051.244 | 613774.250 | 248277.0 | 11.495 | 28.801 | 593.003 | 236.673 | 168.509 | 68.163 |

#### Results for Age Groups Combined, Population unadjusted for deaths in Ecig scenario,

| Age Group:All | NULL   | Ecig      | %Drop     |          |        |        | NULL    | Ecig    | Drop    |         |
|---------------|--------|-----------|-----------|----------|--------|--------|---------|---------|---------|---------|
| Year          | Number | Attrib    | Attrib    | Drop     | %Drop  | Attrib | Death   | Attrib  | Attrib  | Drop    |
|               | Deaths | Deaths    | Deaths    | Deaths   | Deaths | Deaths | Rate    | Rates   | Rates   | Rates   |
| 1990          | 24738  | 10694.712 | 10694.712 | 0.000    | 0.000  | 0.000  | 362.296 | 156.628 | 156.628 | 0.000   |
| 1991          | 26562  | 11602.933 | 11587.387 | 15.546   | 0.059  | 0.134  | 383.818 | 167.661 | 167.437 | 0.225   |
| 1992          | 26828  | 11831.375 | 11788.968 | 42.406   | 0.158  | 0.358  | 382.401 | 168.642 | 168.038 | 0.604   |
| 1993          | 29774  | 13246.371 | 13154.970 | 91.401   | 0.307  | 0.690  | 418.406 | 186.148 | 184.863 | 1.284   |
| 1994          | 29804  | 13355.662 | 13210.844 | 144.818  | 0.486  | 1.084  | 412.601 | 184.893 | 182.889 | 2.005   |
| 1995          | 29755  | 13397.439 | 13182.134 | 215.306  | 0.724  | 1.607  | 405.540 | 182.598 | 179.663 | 2.934   |
| 1996          | 30900  | 13960.356 | 13660.294 | 300.062  | 0.971  | 2.149  | 415.680 | 187.801 | 183.764 | 4.037   |
| 1997          | 31128  | 14109.552 | 13718.850 | 390.703  | 1.255  | 2.769  | 412.949 | 187.180 | 181.996 | 5.183   |
| 1998          | 32096  | 14599.657 | 14088.887 | 510.770  | 1.591  | 3.499  | 419.803 | 190.958 | 184.277 | 6.681   |
| 1999          | 34616  | 15728.102 | 15067.803 | 660.299  | 1.907  | 4.198  | 446.673 | 202.950 | 194.430 | 8.520   |
| 2000          | 34299  | 15579.803 | 14792.641 | 787.162  | 2.295  | 5.052  | 437.088 | 198.541 | 188.510 | 10.031  |
| 2001          | 34592  | 15696.614 | 14748.583 | 948.031  | 2.741  | 6.040  | 435.935 | 197.812 | 185.865 | 11.947  |
| 2002          | 34291  | 15519.777 | 14418.992 | 1100.785 | 3.210  | 7.093  | 427.910 | 193.668 | 179.932 | 13.736  |
| 2003          | 35074  | 15888.389 | 14587.421 | 1300.969 | 3.709  | 8.188  | 433.587 | 196.413 | 180.331 | 16.083  |
| 2004          | 33512  | 15091.573 | 13681.321 | 1410.252 | 4.208  | 9.345  | 410.143 | 184.701 | 167.442 | 17.260  |
| 2005          | 35392  | 15803.656 | 14120.943 | 1682.713 | 4.755  | 10.648 | 428.364 | 191.278 | 170.912 | 20.367  |
| 2006          | 33981  | 15100.563 | 13312.316 | 1788.247 | 5.262  | 11.842 | 407.699 | 181.174 | 159.719 | 21.455  |
| 2007          | 34000  | 14974.384 | 12998.509 | 1975.875 | 5.811  | 13.195 | 403.863 | 177.871 | 154.401 | 23.470  |
| 2008          | 37425  | 16406.197 | 14043.028 | 2363.169 | 6.314  | 14.404 | 439.732 | 192.768 | 165.001 | 27.766  |
| 2009          | 36826  | 16083.194 | 13519.523 | 2563.671 | 6.962  | 15.940 | 427.825 | 186.846 | 157.063 | 29.783  |
| 2010          | 36788  | 15927.400 | 13187.008 | 2740.392 | 7.449  | 17.206 | 422.489 | 182.917 | 151.445 | 31.472  |
| 2011          | 37636  | 16221.836 | 13184.331 | 3037.504 | 8.071  | 18.725 | 428.164 | 184.547 | 149.991 | 34.556  |
| 2012          | 38265  | 16358.849 | 13056.084 | 3302.766 | 8.631  | 20.189 | 430.867 | 184.202 | 147.013 | 37.189  |
| 2013          | 40112  | 16994.822 | 13290.874 | 3703.948 | 9.234  | 21.795 | 446.821 | 189.311 | 148.051 | 41.259  |
| 2014          | 40084  | 16855.093 | 12910.264 | 3944.829 | 9.841  | 23.404 | 441.613 | 185.696 | 142.235 | 43.461  |
| 2015          | 42200  | 17572.483 | 13242.252 | 4330.231 | 10.261 | 24.642 | 519.788 | 216.445 | 163.108 | 53.337  |
| 2016          | 42606  | 17579.955 | 12940.906 | 4639.049 | 10.888 | 26.388 | 519.788 | 214.473 | 157.878 | 56.596  |
| 2017          | 44364  | 18080.688 | 12996.998 | 5083.691 | 11.459 | 28.117 | 536.117 | 218.496 | 157.062 | 61.434  |
| 2018          | 45359  | 18209.262 | 12796.714 | 5412.548 | 11.933 | 29.724 | 542.932 | 217.960 | 153.173 | 64.787  |
| 2019          | 46876  | 18648.302 | 12785.745 | 5862.557 | 12.507 | 31.437 | 555.657 | 221.054 | 151.560 | 69.494  |
| 2020          | 48331  | 19002.597 | 12772.245 | 6230.352 | 12.891 | 32.787 | 649.239 | 255.266 | 171.572 | 83.694  |
| 2021          | 48338  | 18885.717 | 12355.195 | 6530.523 | 13.510 | 34.579 | 644.660 | 251.867 | 164.773 | 87.093  |
| 2022          | 49708  | 19235.076 | 12282.149 | 6952.928 | 13.988 | 36.147 | 657.895 | 254.582 | 162.558 | 92.024  |
| 2023          | 51083  | 19521.158 | 12177.969 | 7343.189 | 14.375 | 37.617 | 670.849 | 256.363 | 159.928 | 96.435  |
| 2024          | 52397  | 19918.620 | 12103.200 | 7815.420 | 14.916 | 39.237 | 682.854 | 259.583 | 157.731 | 101.852 |
| 2025          | 53387  | 20150.545 | 11959.314 | 8191.231 | 15.343 | 40.650 | 803.004 | 303.086 | 179.881 | 123.205 |
| 2026          | 54232  | 20393.792 | 11768.317 | 8625.476 | 15.905 | 42.295 | 812.615 | 305.582 | 176.337 | 129.245 |
| 2027          | 55049  | 20615.351 | 11559.057 | 9056.295 | 16.451 | 43.930 | 821.568 | 307.668 | 172.510 | 135.158 |
| 2028          | 55809  | 20731.894 | 11304.118 | 9427.775 | 16.893 | 45.475 | 829.419 | 308.115 | 168.000 | 140.114 |
| 2029          | 56527  | 20781.967 | 11014.830 | 9767.137 | 17.279 | 46.998 | 836.392 | 307.495 | 162.978 | 144.517 |
| 2030          | 56756  | 20753.201 | 10711.500 | 10041.70 | 17.693 | 48.386 | 994.067 | 363.487 | 187.609 | 175.878 |
| 2031          | 58288  | 21048.417 | 10681.339 | 10367.08 | 17.786 | 49.253 | 1019.54 | 368.165 | 186.831 | 181.334 |
| 2032          | 58782  | 21169.329 | 10446.531 | 10722.80 | 18.242 | 50.653 | 1026.18 | 369.560 | 182.369 | 187.192 |
| 2033          | 59236  | 21109.293 | 10159.779 | 10949.51 | 18.485 | 51.871 | 1031.59 | 367.618 | 176.933 | 190.686 |
| 2034          | 59614  | 21109.429 | 9888.524  | 11220.91 | 18.823 | 53.156 | 1035.33 | 366.613 | 171.736 | 194.876 |
| 2035          | 58938  | 20794.840 | 9520.820  | 11274.02 | 19.129 | 54.215 | 1253.51 | 442.268 | 202.490 | 239.778 |
| 2036          | 56014  | 19354.577 | 8633.819  | 10720.76 | 19.139 | 55.391 | 1193.11 | 412.258 | 183.903 | 228.355 |
| 2037          | 55953  | 19064.169 | 8230.928  | 10833.24 | 19.361 | 56.825 | 1192.72 | 406.385 | 175.456 | 230.929 |
| 2038          | 55859  | 18854.812 | 7919.023  | 10935.79 | 19.578 | 58.000 | 1190.66 | 401.900 | 168.798 | 233.102 |
| 2039          | 55757  | 18437.457 | 7516.293  | 10921.16 | 19.587 | 59.234 | 1187.28 | 392.602 | 160.050 | 232.552 |

## Results for PHIM for Run 8 (Sensitivity\_Analysis\_1.RTF)

\*\*\*\*\*

### Main Results for E-Component for Run: 8, Simulation: 1, COD: Four Diseases Combined, Adjusted

| Variable Parameter          | Value                                  |
|-----------------------------|----------------------------------------|
| 1. Country                  | US (United States)                     |
| 2. Sex                      | F (Females)                            |
| 3. Year of start of process | 1990                                   |
| 4. Cause of Death           | Four Diseases Combined                 |
| 5. Effective Dose NULL      | CC:1                                   |
| 6. Effective Dose Ecig      | CC:1 Ecig:0.2 Dual:0.6                 |
| Note:                       | Death rates are per million population |

#### Results for Age Groups Combined and Years combined, Population and Number deaths adjusted for Ecig scenario,

| Age Group:All | NULL    | Ecig        |             |          | %Drop  | NULL   | Ecig    |         |         |         |
|---------------|---------|-------------|-------------|----------|--------|--------|---------|---------|---------|---------|
| Year          | Number  | Attrib      | Attrib      | Drop     | %Drop  | Attrib | Death   | Attrib  | Attrib  | Drop    |
|               | Deaths  | Deaths      | Deaths      | Deaths   | Deaths | Deaths | Rate    | Rates   | Rates   | Rates   |
| All Comb      | 9135179 | 2946250.006 | 2179295.236 | 766954.8 | 8.396  | 26.032 | 2498.47 | 808.881 | 596.038 | 212.843 |

#### Results for Age Groups Combined, Population and Number deaths adjusted for Ecig scenario,

| Age Group:All | NULL   | Ecig      |           |          | %Drop  | NULL   | Ecig    |         |         |         |
|---------------|--------|-----------|-----------|----------|--------|--------|---------|---------|---------|---------|
| Year          | Number | Attrib    | Attrib    | Drop     | %Drop  | Attrib | Death   | Attrib  | Attrib  | Drop    |
|               | Deaths | Deaths    | Deaths    | Deaths   | Deaths | Deaths | Rate    | Rates   | Rates   | Rates   |
| 1990          | 199848 | 57524.822 | 57524.822 | 0.000    | 0.000  | 0.000  | 2926.84 | 842.471 | 842.471 | 0.000   |
| 1991          | 199162 | 59078.486 | 58936.164 | 142.321  | 0.071  | 0.241  | 2877.87 | 853.678 | 851.622 | 2.057   |
| 1992          | 198533 | 60494.150 | 60098.169 | 395.981  | 0.199  | 0.655  | 2829.84 | 862.271 | 856.625 | 5.646   |
| 1993          | 202514 | 62694.848 | 61926.097 | 768.750  | 0.380  | 1.226  | 2845.86 | 881.034 | 870.224 | 10.810  |
| 1994          | 200664 | 63202.598 | 61992.201 | 1210.397 | 0.603  | 1.915  | 2777.90 | 874.966 | 858.193 | 16.773  |
| 1995          | 201034 | 63766.862 | 62021.549 | 1745.313 | 0.868  | 2.737  | 2739.85 | 869.097 | 845.280 | 23.818  |
| 1996          | 201199 | 64591.163 | 62207.552 | 2383.610 | 1.185  | 3.690  | 2706.45 | 868.908 | 836.793 | 32.115  |
| 1997          | 198668 | 64686.912 | 61712.583 | 2974.329 | 1.497  | 4.598  | 2635.32 | 858.147 | 818.613 | 39.534  |
| 1998          | 197615 | 65295.961 | 61637.153 | 3658.808 | 1.851  | 5.603  | 2584.38 | 854.046 | 806.083 | 47.963  |
| 1999          | 211392 | 67327.521 | 62619.907 | 4707.614 | 2.227  | 6.992  | 2727.23 | 868.771 | 807.878 | 60.893  |
| 2000          | 208580 | 67596.897 | 62122.007 | 5474.889 | 2.625  | 8.099  | 2657.38 | 861.419 | 791.456 | 69.963  |
| 2001          | 203713 | 67008.811 | 60732.782 | 6276.029 | 3.081  | 9.366  | 2566.42 | 844.458 | 765.123 | 79.335  |
| 2002          | 200963 | 67067.744 | 59896.042 | 7171.702 | 3.569  | 10.693 | 2506.77 | 836.925 | 747.131 | 89.794  |
| 2003          | 196517 | 66756.217 | 58783.607 | 7972.609 | 4.057  | 11.943 | 2428.16 | 825.244 | 726.327 | 98.918  |
| 2004          | 188355 | 65058.725 | 56421.970 | 8636.755 | 4.585  | 13.275 | 2303.84 | 796.234 | 690.118 | 106.117 |
| 2005          | 186647 | 65214.724 | 55681.240 | 9533.484 | 5.108  | 14.619 | 2257.46 | 789.321 | 673.452 | 115.868 |
| 2006          | 180353 | 63771.146 | 53573.618 | 10197.53 | 5.654  | 15.991 | 2162.03 | 765.117 | 642.230 | 122.887 |
| 2007          | 175945 | 63110.718 | 52237.519 | 10873.20 | 6.180  | 17.229 | 2087.90 | 749.650 | 619.893 | 129.758 |
| 2008          | 177921 | 63718.624 | 51849.938 | 11868.69 | 6.671  | 18.627 | 2088.19 | 748.674 | 608.543 | 140.131 |
| 2009          | 173197 | 62794.698 | 50307.136 | 12487.56 | 7.210  | 19.886 | 2009.56 | 729.515 | 583.702 | 145.813 |
| 2010          | 170925 | 61917.074 | 48792.390 | 13124.68 | 7.679  | 21.197 | 1960.18 | 711.083 | 559.554 | 151.529 |
| 2011          | 170793 | 61680.114 | 47670.325 | 14009.79 | 8.203  | 22.714 | 1939.92 | 701.700 | 541.454 | 160.246 |
| 2012          | 171968 | 62023.127 | 47050.813 | 14972.31 | 8.706  | 24.140 | 1932.95 | 698.386 | 528.859 | 169.528 |
| 2013          | 173311 | 62037.765 | 46187.151 | 15850.61 | 9.146  | 25.550 | 1926.79 | 691.059 | 513.486 | 177.573 |
| 2014          | 174850 | 61921.017 | 45114.574 | 16806.44 | 9.612  | 27.142 | 1922.20 | 682.195 | 495.964 | 186.231 |
| 2015          | 178119 | 61856.204 | 44251.782 | 17604.42 | 9.884  | 28.460 | 2188.13 | 761.899 | 543.616 | 218.283 |
| 2016          | 177687 | 60464.119 | 42219.352 | 18244.77 | 10.268 | 30.175 | 2161.49 | 737.655 | 513.581 | 224.074 |
| 2017          | 180233 | 60243.839 | 41124.805 | 19119.03 | 10.608 | 31.736 | 2171.18 | 728.017 | 495.411 | 232.606 |
| 2018          | 178151 | 60713.327 | 40845.250 | 19868.08 | 11.152 | 32.724 | 2125.16 | 726.721 | 487.242 | 239.478 |
| 2019          | 180320 | 61148.172 | 40280.445 | 20867.73 | 11.573 | 34.126 | 2129.65 | 724.841 | 475.726 | 249.115 |
| 2020          | 181666 | 61149.317 | 39647.423 | 21501.89 | 11.836 | 35.163 | 2429.50 | 821.432 | 530.223 | 291.209 |
| 2021          | 179388 | 58727.786 | 36917.641 | 21810.14 | 12.158 | 37.138 | 2380.99 | 783.216 | 490.000 | 293.215 |
| 2022          | 180785 | 58848.802 | 36239.063 | 22609.74 | 12.506 | 38.420 | 2380.57 | 778.881 | 477.194 | 301.686 |
| 2023          | 182124 | 58816.149 | 35512.054 | 23304.10 | 12.796 | 39.622 | 2378.81 | 772.407 | 463.839 | 308.568 |
| 2024          | 183204 | 58955.232 | 34836.546 | 24118.69 | 13.165 | 40.910 | 2373.83 | 768.316 | 451.388 | 316.928 |
| 2025          | 182122 | 58297.744 | 33876.366 | 24421.38 | 13.409 | 41.891 | 2720.47 | 876.861 | 506.033 | 370.828 |
| 2026          | 182133 | 56469.971 | 31866.863 | 24603.11 | 13.508 | 43.568 | 2709.26 | 846.150 | 474.026 | 372.124 |
| 2027          | 181543 | 56209.427 | 30991.203 | 25218.22 | 13.891 | 44.865 | 2688.66 | 838.883 | 458.982 | 379.901 |
| 2028          | 180791 | 55733.105 | 30043.856 | 25689.25 | 14.209 | 46.093 | 2665.29 | 828.298 | 442.918 | 385.380 |
| 2029          | 179942 | 55145.838 | 29039.157 | 26106.68 | 14.508 | 47.341 | 2640.02 | 815.951 | 426.048 | 389.902 |
| 2030          | 175818 | 53615.097 | 27740.289 | 25874.81 | 14.717 | 48.260 | 3048.66 | 939.056 | 481.012 | 458.044 |
| 2031          | 177382 | 52046.561 | 26411.596 | 25634.97 | 14.452 | 49.254 | 3070.24 | 910.364 | 457.148 | 453.216 |
| 2032          | 175902 | 51582.636 | 25603.448 | 25979.19 | 14.769 | 50.364 | 3037.32 | 900.496 | 442.098 | 458.397 |
| 2033          | 174363 | 50839.758 | 24738.794 | 26100.96 | 14.969 | 51.340 | 3002.09 | 885.375 | 425.939 | 459.435 |
| 2034          | 172680 | 50215.451 | 23913.486 | 26301.97 | 15.232 | 52.378 | 2963.63 | 872.104 | 410.417 | 461.687 |
| 2035          | 165419 | 47773.075 | 22464.539 | 25308.54 | 15.300 | 52.977 | 3469.53 | 1016.05 | 471.174 | 544.872 |
| 2036          | 159047 | 43298.709 | 19760.664 | 23538.05 | 14.799 | 54.362 | 3339.18 | 922.274 | 414.873 | 507.402 |
| 2037          | 156456 | 42241.563 | 18782.156 | 23459.41 | 14.994 | 55.536 | 3285.74 | 900.450 | 394.446 | 506.004 |
| 2038          | 153874 | 41356.353 | 18012.529 | 23343.82 | 15.171 | 56.446 | 3229.86 | 881.531 | 378.087 | 503.444 |
| 2039          | 151364 | 40161.050 | 17078.619 | 23082.43 | 15.250 | 57.475 | 3172.47 | 855.178 | 357.955 | 497.222 |

## Results for PHIM for Run 8 (Sensitivity\_Analysis\_1.RTF)

\*\*\*\*\*

### Main Results for E-Component for Run: 8, Simulation: 1, COD: LUNG CANCER, Adjusted

| Variable Parameter          | Value                                  |
|-----------------------------|----------------------------------------|
| 1. Country                  | US (United States)                     |
| 2. Sex                      | F (Females)                            |
| 3. Year of start of process | 1990                                   |
| 4. Cause of Death           | LUNG CANCER                            |
| 5. Effective Dose NULL      | CC:1                                   |
| 6. Effective Dose Ecig      | CC:1 Ecig:0.2 Dual:0.6                 |
| Note:                       | Death rates are per million population |

#### Results for Age Groups Combined and Years combined, Population and Number deaths adjusted for Ecig scenario,

| Age Group: | NULL    | Ecig        | %Drop       |          |        |        | NULL    | Ecig    | Drop    |        |
|------------|---------|-------------|-------------|----------|--------|--------|---------|---------|---------|--------|
| Year       | Number  | Attrib      | Attrib      | Drop     | %Drop  | Attrib | Death   | Attrib  | Attrib  | Drop   |
|            | Deaths  | Deaths      | Deaths      | Deaths   | Deaths | Deaths | Rate    | Rates   | Rates   | Rates  |
| All Comb   | 2340718 | 1580465.217 | 1264197.811 | 316267.4 | 13.512 | 20.011 | 640.187 | 433.910 | 345.759 | 88.152 |

#### Results for Age Groups Combined, Population and Number deaths adjusted for Ecig scenario,

| Age Group: | NULL   | Ecig      | %Drop     |          |        |        | NULL    | Ecig    | Drop    |         |
|------------|--------|-----------|-----------|----------|--------|--------|---------|---------|---------|---------|
| Year       | Number | Attrib    | Attrib    | Drop     | %Drop  | Attrib | Death   | Attrib  | Attrib  | Drop    |
|            | Deaths | Deaths    | Deaths    | Deaths   | Deaths | Deaths | Rate    | Rates   | Rates   | Rates   |
| 1990       | 42690  | 30614.201 | 30614.201 | 0.000    | 0.000  | 0.000  | 625.210 | 448.355 | 448.355 | 0.000   |
| 1991       | 43692  | 31412.010 | 31384.620 | 27.390   | 0.063  | 0.087  | 631.345 | 453.901 | 453.505 | 0.396   |
| 1992       | 45423  | 32782.407 | 32703.446 | 78.961   | 0.174  | 0.241  | 647.451 | 467.274 | 466.147 | 1.126   |
| 1993       | 46292  | 33491.183 | 33335.424 | 155.760  | 0.336  | 0.465  | 650.518 | 470.643 | 468.450 | 2.192   |
| 1994       | 47018  | 34074.347 | 33822.913 | 251.435  | 0.535  | 0.738  | 650.902 | 471.719 | 468.230 | 3.490   |
| 1995       | 47843  | 34694.454 | 34315.944 | 378.510  | 0.791  | 1.091  | 652.039 | 472.861 | 467.685 | 5.176   |
| 1996       | 48249  | 35027.269 | 34505.789 | 521.479  | 1.081  | 1.489  | 649.023 | 471.202 | 464.159 | 7.043   |
| 1997       | 49042  | 35590.763 | 34900.417 | 690.346  | 1.408  | 1.940  | 650.544 | 472.153 | 462.952 | 9.201   |
| 1998       | 49697  | 36100.785 | 35211.479 | 889.306  | 1.789  | 2.463  | 649.930 | 472.184 | 460.491 | 11.693  |
| 1999       | 48898  | 35451.030 | 34385.872 | 1065.157 | 2.178  | 3.005  | 630.847 | 457.448 | 443.622 | 13.825  |
| 2000       | 50352  | 36447.986 | 35118.406 | 1329.580 | 2.641  | 3.648  | 641.500 | 464.474 | 447.421 | 17.053  |
| 2001       | 50416  | 36411.326 | 34817.499 | 1593.827 | 3.161  | 4.377  | 635.154 | 458.863 | 438.637 | 20.225  |
| 2002       | 51480  | 37078.545 | 35157.462 | 1921.083 | 3.732  | 5.181  | 642.156 | 462.696 | 438.547 | 24.149  |
| 2003       | 51452  | 36999.876 | 34770.331 | 2229.545 | 4.333  | 6.026  | 635.739 | 457.395 | 429.620 | 27.775  |
| 2004       | 51453  | 36861.555 | 34294.668 | 2566.887 | 4.989  | 6.964  | 629.339 | 451.138 | 419.471 | 31.667  |
| 2005       | 51485  | 36689.529 | 33769.575 | 2919.954 | 5.671  | 7.959  | 622.704 | 444.069 | 408.436 | 35.633  |
| 2006       | 51431  | 36504.774 | 33219.318 | 3285.456 | 6.388  | 9.000  | 616.543 | 437.979 | 398.227 | 39.752  |
| 2007       | 51928  | 36663.202 | 32942.503 | 3720.698 | 7.165  | 10.148 | 616.220 | 435.498 | 390.922 | 44.575  |
| 2008       | 51077  | 35898.803 | 31862.060 | 4036.744 | 7.903  | 11.245 | 599.470 | 421.800 | 373.953 | 47.847  |
| 2009       | 51309  | 35934.525 | 31439.561 | 4494.964 | 8.761  | 12.509 | 595.321 | 417.468 | 364.786 | 52.682  |
| 2010       | 50983  | 35502.829 | 30646.167 | 4856.662 | 9.526  | 13.680 | 584.671 | 407.730 | 351.452 | 56.278  |
| 2011       | 50653  | 35136.342 | 29854.627 | 5281.715 | 10.427 | 15.032 | 575.333 | 399.726 | 339.098 | 60.628  |
| 2012       | 51408  | 35450.201 | 29644.095 | 5806.105 | 11.294 | 16.378 | 577.832 | 399.173 | 333.204 | 65.968  |
| 2013       | 51249  | 35123.224 | 28855.090 | 6268.134 | 12.231 | 17.846 | 569.761 | 391.249 | 320.797 | 70.452  |
| 2014       | 51450  | 35079.370 | 28323.876 | 6755.494 | 13.130 | 19.258 | 565.616 | 386.476 | 311.377 | 75.099  |
| 2015       | 50659  | 34324.171 | 27270.840 | 7053.330 | 13.923 | 20.549 | 622.329 | 422.780 | 335.012 | 87.768  |
| 2016       | 49083  | 33054.753 | 25743.277 | 7311.476 | 14.896 | 22.119 | 597.074 | 403.264 | 313.156 | 90.108  |
| 2017       | 48572  | 32471.234 | 24769.790 | 7701.445 | 15.856 | 23.718 | 585.129 | 392.399 | 298.390 | 94.009  |
| 2018       | 50745  | 33657.595 | 25084.508 | 8573.086 | 16.894 | 25.471 | 605.339 | 402.871 | 299.233 | 103.639 |
| 2019       | 51343  | 33863.424 | 24689.167 | 9174.257 | 17.868 | 27.092 | 606.385 | 401.412 | 291.588 | 109.824 |
| 2020       | 51780  | 33910.830 | 24262.604 | 9648.226 | 18.633 | 28.452 | 692.475 | 455.532 | 324.475 | 131.057 |
| 2021       | 48376  | 31531.880 | 22020.204 | 9511.676 | 19.662 | 30.165 | 642.079 | 420.521 | 292.270 | 128.251 |
| 2022       | 48700  | 31560.212 | 21549.800 | 10010.41 | 20.555 | 31.718 | 641.285 | 417.708 | 283.767 | 133.942 |
| 2023       | 48992  | 31508.781 | 21045.894 | 10462.89 | 21.356 | 33.206 | 639.909 | 413.791 | 274.890 | 138.901 |
| 2024       | 49205  | 31517.293 | 20561.913 | 10955.38 | 22.265 | 34.760 | 637.566 | 410.740 | 266.427 | 144.312 |
| 2025       | 48926  | 31175.389 | 19927.312 | 11248.08 | 22.990 | 36.080 | 730.840 | 468.912 | 297.667 | 171.245 |
| 2026       | 45775  | 29044.598 | 18123.376 | 10921.22 | 23.858 | 37.602 | 680.915 | 435.206 | 269.589 | 165.617 |
| 2027       | 45584  | 28825.765 | 17551.175 | 11274.59 | 24.734 | 39.113 | 675.095 | 430.203 | 259.934 | 170.269 |
| 2028       | 45343  | 28513.846 | 16950.328 | 11563.52 | 25.502 | 40.554 | 668.466 | 423.769 | 249.888 | 173.881 |
| 2029       | 45066  | 28148.109 | 16319.745 | 11828.36 | 26.247 | 42.022 | 661.183 | 416.486 | 239.435 | 177.051 |
| 2030       | 43942  | 27314.475 | 15518.150 | 11796.32 | 26.845 | 43.187 | 761.948 | 478.407 | 269.082 | 209.325 |
| 2031       | 41300  | 25423.102 | 14211.077 | 11212.02 | 27.148 | 44.102 | 714.846 | 444.684 | 245.974 | 198.710 |
| 2032       | 40900  | 25085.902 | 13705.300 | 11380.60 | 27.825 | 45.367 | 706.232 | 437.933 | 236.651 | 201.282 |
| 2033       | 40480  | 24645.067 | 13185.992 | 11459.08 | 28.308 | 46.496 | 696.958 | 429.194 | 227.029 | 202.165 |
| 2034       | 40024  | 24239.126 | 12689.240 | 11549.89 | 28.858 | 47.650 | 686.910 | 420.967 | 217.780 | 203.187 |
| 2035       | 38087  | 22944.147 | 11825.742 | 11118.40 | 29.192 | 48.459 | 798.831 | 487.980 | 248.035 | 239.945 |
| 2036       | 33570  | 19950.581 | 10036.860 | 9913.721 | 29.531 | 49.691 | 704.802 | 424.953 | 210.723 | 214.230 |
| 2037       | 32998  | 19415.334 | 9520.542  | 9894.792 | 29.986 | 50.964 | 693.001 | 413.871 | 199.942 | 213.929 |
| 2038       | 32427  | 18939.317 | 9109.730  | 9829.587 | 30.313 | 51.900 | 680.657 | 403.701 | 191.215 | 212.485 |
| 2039       | 31871  | 18379.752 | 8629.902  | 9749.850 | 30.592 | 53.047 | 667.983 | 391.373 | 180.876 | 210.497 |

## Results for PHIM for Run 8 (Sensitivity\_Analysis\_1.RTF)

\*\*\*\*\*

### Main Results for E-Component for Run: 8, Simulation: 1, COD: IHD, Adjusted

| Variable Parameter          | Value                                  |
|-----------------------------|----------------------------------------|
| 1. Country                  | US (United States)                     |
| 2. Sex                      | F (Females)                            |
| 3. Year of start of process | 1990                                   |
| 4. Cause of Death           | IHD                                    |
| 5. Effective Dose NULL      | CC:1                                   |
| 6. Effective Dose Ecig      | CC:1 Ecig:0.2 Dual:0.6                 |
| Note:                       | Death rates are per million population |

#### Results for Age Groups Combined and Years combined, Population and Number deaths adjusted for Ecig scenario,

| Age Group:All | NULL    | Ecig       | %Drop      |          |        |        | NULL    | Ecig    | Drop   |        |
|---------------|---------|------------|------------|----------|--------|--------|---------|---------|--------|--------|
| Year          | Number  | Attrib     | Attrib     | Drop     | %Drop  | Attrib | Death   | Attrib  | Attrib | Drop   |
|               | Deaths  | Deaths     | Deaths     | Deaths   | Deaths | Deaths | Rate    | Rates   | Rates  | Rates  |
| All Comb      | 3257764 | 398833.796 | 236813.796 | 162020.0 | 4.973  | 40.623 | 891.000 | 109.498 | 64.769 | 44.730 |

#### Results for Age Groups Combined, Population and Number deaths adjusted for Ecig scenario,

| Age Group:All | NULL   | Ecig      | %Drop     |          |        |        | NULL    | Ecig    | Drop    |        |
|---------------|--------|-----------|-----------|----------|--------|--------|---------|---------|---------|--------|
| Year          | Number | Attrib    | Attrib    | Drop     | %Drop  | Attrib | Death   | Attrib  | Attrib  | Drop   |
|               | Deaths | Deaths    | Deaths    | Deaths   | Deaths | Deaths | Rate    | Rates   | Rates   | Rates  |
| 1990          | 98916  | 12922.892 | 12922.892 | 0.000    | 0.000  | 0.000  | 1448.66 | 189.260 | 189.260 | 0.000  |
| 1991          | 96403  | 12856.479 | 12780.313 | 76.166   | 0.079  | 0.592  | 1393.01 | 185.775 | 184.674 | 1.101  |
| 1992          | 93721  | 12662.244 | 12452.300 | 209.943  | 0.224  | 1.658  | 1335.88 | 180.485 | 177.492 | 2.993  |
| 1993          | 93680  | 12730.613 | 12331.146 | 399.467  | 0.426  | 3.138  | 1316.45 | 178.900 | 173.285 | 5.615  |
| 1994          | 90835  | 12495.323 | 11875.230 | 620.093  | 0.683  | 4.963  | 1257.47 | 172.983 | 164.396 | 8.588  |
| 1995          | 89703  | 12365.590 | 11491.457 | 874.133  | 0.974  | 7.069  | 1222.54 | 168.534 | 156.615 | 11.919 |
| 1996          | 88294  | 12290.551 | 11102.753 | 1187.799 | 1.345  | 9.664  | 1187.70 | 165.338 | 149.350 | 15.988 |
| 1997          | 84789  | 11719.531 | 10293.470 | 1426.061 | 1.682  | 12.168 | 1124.72 | 155.473 | 136.542 | 18.931 |
| 1998          | 82534  | 11416.794 | 9713.832  | 1702.962 | 2.063  | 14.916 | 1079.37 | 149.327 | 127.036 | 22.291 |
| 1999          | 93967  | 13028.038 | 10690.719 | 2337.319 | 2.487  | 17.941 | 1212.29 | 168.109 | 137.924 | 30.185 |
| 2000          | 90075  | 12426.299 | 9820.538  | 2605.761 | 2.893  | 20.970 | 1147.59 | 158.354 | 125.117 | 33.237 |
| 2001          | 86164  | 11939.281 | 9010.257  | 2929.024 | 3.399  | 24.533 | 1085.51 | 150.461 | 113.513 | 36.948 |
| 2002          | 83069  | 11528.794 | 8282.535  | 3246.259 | 3.908  | 28.158 | 1036.19 | 143.865 | 103.315 | 40.551 |
| 2003          | 79368  | 11048.407 | 7564.581  | 3483.826 | 4.389  | 31.532 | 980.670 | 136.581 | 93.467  | 43.114 |
| 2004          | 73937  | 10375.132 | 6733.338  | 3641.794 | 4.926  | 35.101 | 904.350 | 126.978 | 82.358  | 44.620 |
| 2005          | 71737  | 10051.029 | 6194.954  | 3856.076 | 5.375  | 38.365 | 867.648 | 121.652 | 74.927  | 46.725 |
| 2006          | 67650  | 9542.523  | 5550.874  | 3991.649 | 5.900  | 41.830 | 810.972 | 114.490 | 66.543  | 47.947 |
| 2007          | 63611  | 8936.533  | 4923.281  | 4013.252 | 6.309  | 44.908 | 754.860 | 106.151 | 58.424  | 47.727 |
| 2008          | 63295  | 8944.180  | 4665.826  | 4278.355 | 6.759  | 47.834 | 742.866 | 105.091 | 54.761  | 50.330 |
| 2009          | 59881  | 8390.033  | 4166.376  | 4223.657 | 7.053  | 50.341 | 694.784 | 97.471  | 48.341  | 49.129 |
| 2010          | 58155  | 8157.570  | 3854.376  | 4303.194 | 7.400  | 52.751 | 666.923 | 93.685  | 44.202  | 49.483 |
| 2011          | 57531  | 8035.356  | 3594.262  | 4441.093 | 7.720  | 55.269 | 653.452 | 91.414  | 40.825  | 50.589 |
| 2012          | 57592  | 7970.766  | 3376.049  | 4594.717 | 7.978  | 57.645 | 647.341 | 89.752  | 37.947  | 51.804 |
| 2013          | 57267  | 7743.216  | 3131.566  | 4611.649 | 8.053  | 59.557 | 636.666 | 86.254  | 34.815  | 51.439 |
| 2014          | 57760  | 7774.935  | 2992.622  | 4782.313 | 8.280  | 61.509 | 634.979 | 85.658  | 32.899  | 52.759 |
| 2015          | 58643  | 7722.535  | 2864.705  | 4857.829 | 8.284  | 62.905 | 720.408 | 95.120  | 35.192  | 59.929 |
| 2016          | 58931  | 7600.353  | 2691.519  | 4908.835 | 8.330  | 64.587 | 716.866 | 92.723  | 32.741  | 59.982 |
| 2017          | 59303  | 7470.266  | 2538.909  | 4931.357 | 8.316  | 66.013 | 714.395 | 90.274  | 30.585  | 59.689 |
| 2018          | 56386  | 6907.050  | 2255.850  | 4651.200 | 8.249  | 67.340 | 672.625 | 82.675  | 26.910  | 55.765 |
| 2019          | 56220  | 6732.046  | 2123.793  | 4608.253 | 8.197  | 68.452 | 663.982 | 79.801  | 25.083  | 54.718 |
| 2020          | 55674  | 6429.836  | 1971.150  | 4458.685 | 8.008  | 69.344 | 744.561 | 86.373  | 26.361  | 60.012 |
| 2021          | 56685  | 6562.016  | 1932.875  | 4629.140 | 8.166  | 70.544 | 752.367 | 87.513  | 25.655  | 61.859 |
| 2022          | 56245  | 6352.366  | 1819.342  | 4533.024 | 8.059  | 71.360 | 740.635 | 84.075  | 23.957  | 60.118 |
| 2023          | 55782  | 6134.123  | 1718.637  | 4415.486 | 7.916  | 71.982 | 728.594 | 80.557  | 22.448  | 58.109 |
| 2024          | 55239  | 5922.193  | 1621.484  | 4300.709 | 7.786  | 72.620 | 715.752 | 77.179  | 21.010  | 56.169 |
| 2025          | 53788  | 5504.188  | 1477.525  | 4026.663 | 7.486  | 73.156 | 803.468 | 82.789  | 22.071  | 60.718 |
| 2026          | 55820  | 5641.075  | 1484.021  | 4157.055 | 7.447  | 73.693 | 830.329 | 84.526  | 22.075  | 62.451 |
| 2027          | 54762  | 5426.216  | 1403.611  | 4022.605 | 7.346  | 74.133 | 811.035 | 80.982  | 20.788  | 60.195 |
| 2028          | 53675  | 5197.830  | 1325.669  | 3872.161 | 7.214  | 74.496 | 791.297 | 77.249  | 19.544  | 57.706 |
| 2029          | 52579  | 4973.547  | 1253.006  | 3720.541 | 7.076  | 74.807 | 771.417 | 73.590  | 18.383  | 55.206 |
| 2030          | 50099  | 4450.618  | 1097.404  | 3353.214 | 6.693  | 75.343 | 868.713 | 77.952  | 19.029  | 58.923 |
| 2031          | 52675  | 4555.052  | 1116.784  | 3438.269 | 6.527  | 75.483 | 911.727 | 79.674  | 19.330  | 60.344 |
| 2032          | 51383  | 4349.999  | 1056.899  | 3293.100 | 6.409  | 75.703 | 887.233 | 75.939  | 18.250  | 57.690 |
| 2033          | 50102  | 4147.948  | 1004.941  | 3143.007 | 6.273  | 75.773 | 862.633 | 72.237  | 17.303  | 54.934 |
| 2034          | 48812  | 3966.133  | 954.326   | 3011.807 | 6.170  | 75.938 | 837.747 | 68.881  | 16.379  | 52.502 |
| 2035          | 45256  | 3289.064  | 773.371   | 2515.693 | 5.559  | 76.487 | 949.209 | 69.952  | 16.221  | 53.732 |
| 2036          | 47148  | 3313.192  | 770.552   | 2542.641 | 5.393  | 76.743 | 989.872 | 70.572  | 16.178  | 54.394 |
| 2037          | 45647  | 3117.951  | 721.106   | 2396.845 | 5.251  | 76.872 | 958.641 | 66.464  | 15.144  | 51.320 |
| 2038          | 44188  | 2949.775  | 681.160   | 2268.615 | 5.134  | 76.908 | 927.517 | 62.876  | 14.298  | 48.578 |
| 2039          | 42786  | 2766.312  | 639.612   | 2126.700 | 4.971  | 76.879 | 896.755 | 58.905  | 13.406  | 45.499 |

## Results for PHIM for Run 8 (Sensitivity\_Analysis\_1.RTF)

\*\*\*\*\*

### Main Results for E-Component for Run: 8, Simulation: 1, COD: STROKE, Adjusted

| Variable Parameter          | Value                                  |
|-----------------------------|----------------------------------------|
| 1. Country                  | US (United States)                     |
| 2. Sex                      | F (Females)                            |
| 3. Year of start of process | 1990                                   |
| 4. Cause of Death           | STROKE                                 |
| 5. Effective Dose NULL      | CC:1                                   |
| 6. Effective Dose Ecig      | CC:1 Ecig:0.2 Dual:0.6                 |
| Note:                       | Death rates are per million population |

#### Results for Age Groups Combined and Years combined, Population and Number deaths adjusted for Ecig scenario,

| Age Group:All | NULL    | Ecig       | %Drop     |          |        |        | NULL    | Ecig   | Drop   |        |
|---------------|---------|------------|-----------|----------|--------|--------|---------|--------|--------|--------|
| Year          | Number  | Attrib     | Attrib    | Drop     | %Drop  | Attrib | Death   | Attrib | Attrib | Drop   |
|               | Deaths  | Deaths     | Deaths    | Deaths   | Deaths | Deaths | Rate    | Rates  | Rates  | Rates  |
| All Comb      | 1359642 | 104899.750 | 61012.637 | 43887.11 | 3.228  | 41.837 | 371.863 | 28.800 | 16.687 | 12.113 |

#### Results for Age Groups Combined, Population and Number deaths adjusted for Ecig scenario,

| Age Group:All | NULL   | Ecig     | %Drop    |          |        |        | NULL    | Ecig   | Drop   |        |
|---------------|--------|----------|----------|----------|--------|--------|---------|--------|--------|--------|
| Year          | Number | Attrib   | Attrib   | Drop     | %Drop  | Attrib | Death   | Attrib | Attrib | Drop   |
|               | Deaths | Deaths   | Deaths   | Deaths   | Deaths | Deaths | Rate    | Rates  | Rates  | Rates  |
| 1990          | 33504  | 3293.017 | 3293.017 | 0.000    | 0.000  | 0.000  | 490.678 | 48.227 | 48.227 | 0.000  |
| 1991          | 32505  | 3207.063 | 3183.844 | 23.219   | 0.071  | 0.724  | 469.694 | 46.342 | 46.006 | 0.336  |
| 1992          | 32560  | 3218.125 | 3153.416 | 64.709   | 0.199  | 2.011  | 464.104 | 45.871 | 44.948 | 0.922  |
| 1993          | 32768  | 3226.680 | 3104.399 | 122.282  | 0.373  | 3.790  | 460.481 | 45.344 | 43.625 | 1.719  |
| 1994          | 33006  | 3277.266 | 3082.825 | 194.441  | 0.589  | 5.933  | 456.919 | 45.370 | 42.677 | 2.693  |
| 1995          | 33732  | 3309.378 | 3031.272 | 278.106  | 0.824  | 8.404  | 459.724 | 45.104 | 41.313 | 3.792  |
| 1996          | 33753  | 3312.987 | 2937.410 | 375.577  | 1.113  | 11.337 | 454.033 | 44.568 | 39.513 | 5.055  |
| 1997          | 33704  | 3267.066 | 2797.790 | 469.276  | 1.392  | 14.364 | 447.077 | 43.341 | 37.112 | 6.229  |
| 1998          | 33281  | 3178.725 | 2619.868 | 558.857  | 1.679  | 17.581 | 435.241 | 41.577 | 34.262 | 7.314  |
| 1999          | 33901  | 3120.351 | 2470.904 | 649.447  | 1.916  | 20.813 | 437.361 | 40.264 | 31.878 | 8.386  |
| 2000          | 33840  | 3142.808 | 2384.285 | 758.524  | 2.242  | 24.135 | 431.132 | 40.050 | 30.377 | 9.674  |
| 2001          | 32522  | 2961.588 | 2148.391 | 813.197  | 2.500  | 27.458 | 409.722 | 37.323 | 27.066 | 10.257 |
| 2002          | 32099  | 2940.627 | 2027.035 | 913.592  | 2.846  | 31.068 | 400.392 | 36.695 | 25.285 | 11.411 |
| 2003          | 30593  | 2819.545 | 1848.565 | 970.980  | 3.174  | 34.437 | 378.000 | 34.855 | 22.841 | 12.015 |
| 2004          | 29417  | 2730.466 | 1697.949 | 1032.517 | 3.510  | 37.815 | 359.812 | 33.417 | 20.768 | 12.649 |
| 2005          | 27987  | 2670.510 | 1577.577 | 1092.933 | 3.905  | 40.926 | 338.500 | 32.322 | 19.080 | 13.242 |
| 2006          | 27240  | 2623.285 | 1470.728 | 1152.558 | 4.231  | 43.936 | 326.543 | 31.474 | 17.631 | 13.843 |
| 2007          | 26345  | 2536.599 | 1349.972 | 1186.627 | 4.504  | 46.780 | 312.637 | 30.131 | 16.020 | 14.111 |
| 2008          | 26048  | 2469.443 | 1249.922 | 1219.522 | 4.682  | 49.384 | 305.712 | 29.015 | 14.670 | 14.345 |
| 2009          | 25095  | 2386.945 | 1149.713 | 1237.232 | 4.930  | 51.833 | 291.170 | 27.730 | 13.340 | 14.390 |
| 2010          | 24902  | 2329.274 | 1069.516 | 1259.759 | 5.059  | 54.084 | 285.576 | 26.750 | 12.265 | 14.485 |
| 2011          | 24861  | 2286.581 | 997.553  | 1289.028 | 5.185  | 56.374 | 282.384 | 26.013 | 11.331 | 14.683 |
| 2012          | 24577  | 2243.311 | 930.885  | 1312.426 | 5.340  | 58.504 | 276.245 | 25.260 | 10.463 | 14.797 |
| 2013          | 24536  | 2176.503 | 860.260  | 1316.243 | 5.365  | 60.475 | 272.780 | 24.245 | 9.564  | 14.681 |
| 2014          | 25394  | 2211.619 | 834.923  | 1376.696 | 5.421  | 62.248 | 279.162 | 24.366 | 9.179  | 15.187 |
| 2015          | 26428  | 2237.016 | 814.199  | 1422.816 | 5.384  | 63.603 | 324.660 | 27.554 | 10.002 | 17.552 |
| 2016          | 26860  | 2229.057 | 779.919  | 1449.138 | 5.395  | 65.011 | 326.737 | 27.194 | 9.487  | 17.707 |
| 2017          | 27757  | 2221.649 | 749.236  | 1472.413 | 5.305  | 66.276 | 334.377 | 26.848 | 9.026  | 17.822 |
| 2018          | 25397  | 1939.420 | 632.889  | 1306.531 | 5.144  | 67.367 | 302.959 | 23.214 | 7.550  | 15.665 |
| 2019          | 25584  | 1904.400 | 599.921  | 1304.479 | 5.099  | 68.498 | 302.154 | 22.574 | 7.085  | 15.489 |
| 2020          | 25548  | 1806.054 | 552.679  | 1253.375 | 4.906  | 69.399 | 341.665 | 24.261 | 7.391  | 16.870 |
| 2021          | 25632  | 1748.172 | 517.007  | 1231.165 | 4.803  | 70.426 | 340.203 | 23.314 | 6.862  | 16.452 |
| 2022          | 25737  | 1701.148 | 489.228  | 1211.920 | 4.709  | 71.241 | 338.899 | 22.515 | 6.442  | 16.073 |
| 2023          | 25833  | 1652.087 | 464.918  | 1187.169 | 4.596  | 71.859 | 337.414 | 21.696 | 6.073  | 15.624 |
| 2024          | 25886  | 1597.127 | 438.816  | 1158.311 | 4.475  | 72.525 | 335.414 | 20.814 | 5.686  | 15.128 |
| 2025          | 25501  | 1467.622 | 394.834  | 1072.789 | 4.207  | 73.097 | 380.929 | 22.075 | 5.898  | 16.177 |
| 2026          | 25741  | 1390.505 | 367.188  | 1023.317 | 3.975  | 73.593 | 382.898 | 20.835 | 5.462  | 15.373 |
| 2027          | 25538  | 1342.095 | 347.867  | 994.228  | 3.893  | 74.080 | 378.224 | 20.030 | 5.152  | 14.878 |
| 2028          | 25310  | 1289.536 | 329.435  | 960.101  | 3.793  | 74.453 | 373.129 | 19.165 | 4.857  | 14.308 |
| 2029          | 25069  | 1242.216 | 312.922  | 929.294  | 3.707  | 74.809 | 367.797 | 18.380 | 4.591  | 13.789 |
| 2030          | 24273  | 1096.803 | 270.004  | 826.799  | 3.406  | 75.383 | 420.890 | 19.210 | 4.682  | 14.528 |
| 2031          | 24296  | 1019.991 | 249.242  | 770.748  | 3.172  | 75.564 | 420.531 | 17.841 | 4.314  | 13.527 |
| 2032          | 23961  | 977.406  | 236.412  | 740.994  | 3.092  | 75.812 | 413.745 | 17.063 | 4.082  | 12.981 |
| 2033          | 23618  | 937.450  | 225.740  | 711.709  | 3.013  | 75.920 | 406.634 | 16.326 | 3.887  | 12.439 |
| 2034          | 23249  | 900.763  | 215.053  | 685.710  | 2.949  | 76.125 | 399.017 | 15.644 | 3.691  | 11.953 |
| 2035          | 22111  | 745.023  | 174.846  | 570.177  | 2.579  | 76.531 | 463.754 | 15.845 | 3.667  | 12.178 |
| 2036          | 21285  | 680.360  | 157.228  | 523.131  | 2.458  | 76.890 | 446.880 | 14.492 | 3.301  | 11.191 |
| 2037          | 20785  | 644.109  | 148.049  | 496.060  | 2.387  | 77.015 | 436.503 | 13.730 | 3.109  | 10.621 |
| 2038          | 20284  | 612.448  | 140.382  | 472.066  | 2.327  | 77.079 | 425.770 | 13.055 | 2.947  | 10.108 |
| 2039          | 19792  | 577.529  | 132.605  | 444.925  | 2.248  | 77.039 | 414.822 | 12.298 | 2.779  | 9.518  |

## Results for PHIM for Run 8 (Sensitivity\_Analysis\_1.RTF)

\*\*\*\*\*

### Main Results for E-Component for Run: 8, Simulation: 1, COD: COPD, Adjusted

| Variable Parameter          | Value                                  |
|-----------------------------|----------------------------------------|
| 1. Country                  | US (United States)                     |
| 2. Sex                      | F (Females)                            |
| 3. Year of start of process | 1990                                   |
| 4. Cause of Death           | COPD                                   |
| 5. Effective Dose NULL      | CC:1                                   |
| 6. Effective Dose Ecig      | CC:1 Ecig:0.2 Dual:0.6                 |
| Note:                       | Death rates are per million population |

#### Results for Age Groups Combined and Years combined, Population and Number deaths adjusted for Ecig scenario,

| Age Group:All | NULL    | Ecig       | %Drop      |          |        |        | NULL    | Ecig    | Drop    |        |
|---------------|---------|------------|------------|----------|--------|--------|---------|---------|---------|--------|
| Year          | Number  | Attrib     | Attrib     | Drop     | %Drop  | Attrib | Death   | Attrib  | Attrib  | Drop   |
|               | Deaths  | Deaths     | Deaths     | Deaths   | Deaths | Deaths | Rate    | Rates   | Rates   | Rates  |
| All Comb      | 2177055 | 862051.244 | 617270.992 | 244780.3 | 11.244 | 28.395 | 595.425 | 236.673 | 168.824 | 67.849 |

#### Results for Age Groups Combined, Population and Number deaths adjusted for Ecig scenario,

| Age Group:All | NULL   | Ecig      | %Drop     |          |        |        | NULL    | Ecig    | Drop    |         |
|---------------|--------|-----------|-----------|----------|--------|--------|---------|---------|---------|---------|
| Year          | Number | Attrib    | Attrib    | Drop     | %Drop  | Attrib | Death   | Attrib  | Attrib  | Drop    |
|               | Deaths | Deaths    | Deaths    | Deaths   | Deaths | Deaths | Rate    | Rates   | Rates   | Rates   |
| 1990          | 24738  | 10694.712 | 10694.712 | 0.000    | 0.000  | 0.000  | 362.296 | 156.628 | 156.628 | 0.000   |
| 1991          | 26562  | 11602.933 | 11587.387 | 15.546   | 0.059  | 0.134  | 383.818 | 167.661 | 167.437 | 0.225   |
| 1992          | 26828  | 11831.375 | 11789.006 | 42.368   | 0.158  | 0.358  | 382.401 | 168.642 | 168.038 | 0.604   |
| 1993          | 29774  | 13246.371 | 13155.128 | 91.243   | 0.306  | 0.689  | 418.408 | 186.148 | 184.864 | 1.284   |
| 1994          | 29805  | 13355.662 | 13211.233 | 144.429  | 0.485  | 1.081  | 412.606 | 184.893 | 182.891 | 2.003   |
| 1995          | 29757  | 13397.439 | 13182.875 | 214.564  | 0.721  | 1.602  | 405.548 | 182.598 | 179.667 | 2.931   |
| 1996          | 30903  | 13960.356 | 13661.601 | 298.755  | 0.967  | 2.140  | 415.695 | 187.801 | 183.771 | 4.030   |
| 1997          | 31133  | 14109.552 | 13720.906 | 388.646  | 1.248  | 2.754  | 412.972 | 187.180 | 182.007 | 5.173   |
| 1998          | 32103  | 14599.657 | 14091.974 | 507.683  | 1.581  | 3.477  | 419.838 | 190.958 | 184.293 | 6.665   |
| 1999          | 34626  | 15728.102 | 15072.411 | 655.691  | 1.894  | 4.169  | 446.726 | 202.950 | 194.454 | 8.496   |
| 2000          | 34313  | 15579.803 | 14798.778 | 781.025  | 2.276  | 5.013  | 437.161 | 198.541 | 188.542 | 9.999   |
| 2001          | 34611  | 15696.614 | 14756.634 | 939.980  | 2.716  | 5.988  | 436.032 | 197.812 | 185.907 | 11.905  |
| 2002          | 34315  | 15519.777 | 14429.010 | 1090.767 | 3.179  | 7.028  | 428.034 | 193.668 | 179.985 | 13.684  |
| 2003          | 35104  | 15888.389 | 14600.132 | 1288.257 | 3.670  | 8.108  | 433.748 | 196.413 | 180.398 | 16.015  |
| 2004          | 33548  | 15091.573 | 13696.016 | 1395.557 | 4.160  | 9.247  | 410.335 | 184.701 | 167.521 | 17.180  |
| 2005          | 35437  | 15803.656 | 14139.134 | 1664.522 | 4.697  | 10.533 | 428.606 | 191.278 | 171.010 | 20.268  |
| 2006          | 34033  | 15100.563 | 13332.698 | 1767.865 | 5.195  | 11.707 | 407.977 | 181.174 | 159.830 | 21.345  |
| 2007          | 34060  | 14974.384 | 13021.763 | 1952.620 | 5.733  | 13.040 | 404.187 | 177.871 | 154.527 | 23.344  |
| 2008          | 37502  | 16406.197 | 14072.131 | 2334.067 | 6.224  | 14.227 | 440.145 | 192.768 | 165.159 | 27.608  |
| 2009          | 36912  | 16083.194 | 13551.486 | 2531.708 | 6.859  | 15.741 | 428.284 | 186.846 | 157.235 | 29.611  |
| 2010          | 36886  | 15927.400 | 13222.331 | 2705.069 | 7.334  | 16.984 | 423.005 | 182.917 | 151.634 | 31.283  |
| 2011          | 37748  | 16221.836 | 13223.882 | 2997.953 | 7.942  | 18.481 | 428.750 | 184.547 | 150.201 | 34.346  |
| 2012          | 38392  | 16358.849 | 13099.783 | 3259.066 | 8.489  | 19.922 | 431.530 | 184.202 | 147.244 | 36.959  |
| 2013          | 40259  | 16994.822 | 13340.235 | 3654.587 | 9.078  | 21.504 | 447.585 | 189.311 | 148.310 | 41.001  |
| 2014          | 40246  | 16855.093 | 12963.153 | 3891.941 | 9.670  | 23.091 | 442.447 | 185.696 | 142.510 | 43.186  |
| 2015          | 42389  | 17572.483 | 13302.037 | 4270.446 | 10.074 | 24.302 | 520.729 | 216.445 | 163.410 | 53.034  |
| 2016          | 42814  | 17579.955 | 13004.637 | 4575.318 | 10.687 | 26.026 | 520.812 | 214.473 | 158.196 | 56.277  |
| 2017          | 44600  | 18080.688 | 13066.870 | 5013.819 | 11.242 | 27.730 | 537.275 | 218.496 | 157.410 | 61.086  |
| 2018          | 45623  | 18209.262 | 12872.003 | 5337.259 | 11.699 | 29.311 | 544.240 | 217.960 | 153.550 | 64.410  |
| 2019          | 47173  | 18648.302 | 12867.564 | 5780.738 | 12.254 | 30.999 | 557.125 | 221.054 | 151.971 | 69.084  |
| 2020          | 48663  | 19002.597 | 12860.990 | 6141.607 | 12.621 | 32.320 | 650.797 | 255.266 | 171.996 | 83.270  |
| 2021          | 48696  | 18885.717 | 12447.555 | 6438.163 | 13.221 | 34.090 | 646.337 | 251.867 | 165.214 | 86.653  |
| 2022          | 50103  | 19235.076 | 12380.693 | 6854.383 | 13.681 | 35.635 | 659.749 | 254.582 | 163.028 | 91.553  |
| 2023          | 51517  | 19521.158 | 12282.606 | 7238.552 | 14.051 | 37.081 | 672.893 | 256.363 | 160.429 | 95.934  |
| 2024          | 52873  | 19918.620 | 12214.333 | 7704.287 | 14.571 | 38.679 | 685.098 | 259.583 | 158.265 | 101.318 |
| 2025          | 53906  | 20150.545 | 12076.696 | 8073.849 | 14.978 | 40.068 | 805.233 | 303.086 | 180.397 | 122.689 |
| 2026          | 54797  | 20393.792 | 11892.278 | 8501.515 | 15.515 | 41.687 | 815.119 | 305.582 | 176.900 | 128.682 |
| 2027          | 55658  | 20615.351 | 11688.551 | 8926.800 | 16.039 | 43.302 | 824.301 | 307.668 | 173.108 | 134.560 |
| 2028          | 56463  | 20731.894 | 11438.425 | 9293.469 | 16.459 | 44.827 | 832.397 | 308.115 | 168.630 | 139.485 |
| 2029          | 57228  | 20781.967 | 11153.484 | 9628.483 | 16.825 | 46.331 | 839.627 | 307.495 | 163.639 | 143.856 |
| 2030          | 57504  | 20753.201 | 10854.731 | 9898.470 | 17.214 | 47.696 | 997.106 | 363.487 | 188.219 | 175.268 |
| 2031          | 59111  | 21048.417 | 10834.493 | 10213.92 | 17.279 | 48.526 | 1023.14 | 368.165 | 187.530 | 180.635 |
| 2032          | 59657  | 21169.329 | 10604.838 | 10564.49 | 17.709 | 49.905 | 1030.11 | 369.560 | 183.115 | 186.445 |
| 2033          | 60163  | 21109.293 | 10322.122 | 10787.17 | 17.930 | 51.102 | 1035.86 | 367.618 | 177.721 | 189.898 |
| 2034          | 60594  | 21109.429 | 10054.868 | 11054.56 | 18.244 | 52.368 | 1039.96 | 366.613 | 172.567 | 194.045 |
| 2035          | 59966  | 20794.840 | 9690.579  | 11104.26 | 18.518 | 53.399 | 1257.73 | 442.268 | 203.251 | 239.017 |
| 2036          | 57044  | 19354.577 | 8796.024  | 10558.55 | 18.510 | 54.553 | 1197.62 | 412.258 | 184.671 | 227.586 |
| 2037          | 57026  | 19064.169 | 8392.460  | 10671.71 | 18.714 | 55.978 | 1197.60 | 406.385 | 176.251 | 230.134 |
| 2038          | 56975  | 18854.812 | 8081.257  | 10773.56 | 18.909 | 57.140 | 1195.91 | 401.900 | 169.627 | 232.272 |
| 2039          | 56916  | 18437.457 | 7676.500  | 10760.96 | 18.907 | 58.365 | 1192.91 | 392.602 | 160.894 | 231.708 |



## Results for PHIM for Run 9 (Sensitivity\_Analysis\_1.RTF)

---

### Control File Details for Run: 9

| Variable Parameter                                       | Value                  |
|----------------------------------------------------------|------------------------|
| 1. Name for Reference Scenario                           | NULL                   |
| 2. Name for Test Scenario                                | Ecig                   |
| 3. Name for Product 1                                    | CC                     |
| 4. Name for Product 2                                    | Ecig                   |
| 5. Name for Product 3                                    | -                      |
| 6. Name for Product 4                                    | Dual                   |
| 7. Country                                               | US (United States)     |
| 8. Sex                                                   | M (Males)              |
| 9. Year of start of process                              | 1990                   |
| 10. Number of months of follow-up                        | 600                    |
| 11. Follow-up interval length (in months)                | 12                     |
| 12. Lower age for risk estimation                        | 10                     |
| 13. Upper age for risk estimation                        | 79                     |
| 14. The effective dose for Product 1 (F1) - Ref          | 1                      |
| 15. The effective dose for Product 2 (F2) - Ref          | -                      |
| 16. The effective dose for Product 3 (F3) - Ref          | -                      |
| 17. The effective dose for Product 4 (F4) - Ref          | -                      |
| 18. The effective dose for Product 1 (F1) - Test         | 1                      |
| 19. The effective dose for Product 2 (F2) - Test         | 0.3                    |
| 20. The effective dose for Product 3 (F3) - Test         | -                      |
| 21. The effective dose for Product 4 (F4) - Test         | FROMF2                 |
| 22. Number in population to be simulated                 | 100000                 |
| 23. Number of MC simulations                             | 1                      |
| 24. The random number seed for the first simulation      | 15975263               |
| 25. Source for the population file (POP)                 | UN4                    |
| 26. Source for the socioeconomic prevalence file (SEP)   | -                      |
| 27. Source for the current smoking prevalence file (CSP) | ISS3                   |
| 28. Source for the former smoking prevalence file (FSP)  | ISS3                   |
| 29. Source for the quit-time distribution file (QTD)     | NHIS2006               |
| 30. Source for the death file (MORT)                     | APR-20                 |
| 31. Source for the relative risk file (RR)               | PNLEST                 |
| 32. Source for the half-life file (H)                    | PNLEST                 |
| 33. Assumption Set for TTP Factor Reference              | F1                     |
| 34. Assumption Set for TTP Factor Test                   | F1                     |
| 35. Assumption Set for TTP Reference                     | ISS3                   |
| 36. Assumption Set for TTP Test                          | ISS3                   |
| 37. Assumption Set for TP for socioeconomic group        | -                      |
| 38. Source for Output Choice file (OUTC)                 | BASIC                  |
| 39. Output for DTP P1                                    | N                      |
| 40. Output for DTP P2                                    | N                      |
| 41. Output for Main P Component                          | Y                      |
| 42. Output for DTP E1                                    | N                      |
| 43. Output for DTP E2                                    | N                      |
| 44. Output for DTP E3                                    | N                      |
| 45. Output for Main E Component                          | Y                      |
| 46. Output file name                                     | Sensitivity_Analysis_1 |
| 47. Run number for P-Component                           | -                      |
| 48. Results file for E-Component                         | -                      |
| 49. Components required                                  | PE                     |
| 50. Results folder for P to be used in E-Component       | -                      |
| 51. Fixed age of starting product use                    | 16                     |
| 52. Output absolute risk file?                           | N                      |

## Results for PHIM for Run 9 (Sensitivity\_Analysis\_1.RTF)

\*\*\*\*\*

TTP values for Run: 9, Scenario: NULL

| Variable Parameter | Value               |
|--------------------|---------------------|
| 1. Country         | US (United States)  |
| 2. Sex             | M (Males)           |
| 3. Assumption Set  | ISS3                |
| Note:              | Period is in Months |

| Age   | Period  | Initiation  | Cessation    | Re-initiation |
|-------|---------|-------------|--------------|---------------|
|       |         | Never<br>CC | CC<br>Former | Former<br>CC  |
| 10-14 | 1-12    | 0.003842    | 0.008742     | 0.000000      |
| 15-19 | 1-12    | 0.004720    | 0.003614     | 0.000000      |
| 20-24 | 1-12    | 0.000376    | 0.000943     | 0.000000      |
| 25-29 | 1-12    | 0.000187    | 0.001143     | 0.000000      |
| 30-34 | 1-12    | 0.000093    | 0.000871     | 0.000000      |
| 35-39 | 1-12    | 0.000000    | 0.000867     | 0.000000      |
| 40-44 | 1-12    | 0.000000    | 0.001399     | 0.000000      |
| 45-49 | 1-12    | 0.000000    | 0.002033     | 0.000000      |
| 50-54 | 1-12    | 0.000000    | 0.003209     | 0.000000      |
| 55-59 | 1-12    | 0.000000    | 0.003574     | 0.000000      |
| 60-64 | 1-12    | 0.000000    | 0.003460     | 0.000000      |
| 65-69 | 1-12    | 0.000000    | 0.004136     | 0.000000      |
| 70-74 | 1-12    | 0.000000    | 0.005592     | 0.000000      |
| 75-79 | 1-12    | 0.000000    | 0.005592     | 0.000000      |
| 10-14 | 13-72   | 0.004906    | 0.008742     | 0.000000      |
| 15-19 | 13-72   | 0.006989    | 0.004426     | 0.000000      |
| 20-24 | 13-72   | 0.000687    | 0.001527     | 0.000000      |
| 25-29 | 13-72   | 0.000962    | 0.001515     | 0.000000      |
| 30-34 | 13-72   | 0.000364    | 0.001227     | 0.000000      |
| 35-39 | 13-72   | 0.000000    | 0.001630     | 0.000000      |
| 40-44 | 13-72   | 0.000000    | 0.001852     | 0.000000      |
| 45-49 | 13-72   | 0.000000    | 0.002667     | 0.000000      |
| 50-54 | 13-72   | 0.000000    | 0.003208     | 0.000000      |
| 55-59 | 13-72   | 0.000000    | 0.003978     | 0.000000      |
| 60-64 | 13-72   | 0.000000    | 0.005771     | 0.000000      |
| 65-69 | 13-72   | 0.000000    | 0.010432     | 0.000000      |
| 70-74 | 13-72   | 0.000000    | 0.007079     | 0.000000      |
| 75-79 | 13-72   | 0.000000    | 0.007079     | 0.000000      |
| 10-14 | 73-132  | 0.004312    | 0.008742     | 0.000000      |
| 15-19 | 73-132  | 0.005330    | 0.003289     | 0.000000      |
| 20-24 | 73-132  | 0.002456    | 0.003844     | 0.000000      |
| 25-29 | 73-132  | 0.000839    | 0.002006     | 0.000000      |
| 30-34 | 73-132  | 0.000414    | 0.001329     | 0.000000      |
| 35-39 | 73-132  | 0.000000    | 0.001278     | 0.000000      |
| 40-44 | 73-132  | 0.000000    | 0.001691     | 0.000000      |
| 45-49 | 73-132  | 0.000000    | 0.002904     | 0.000000      |
| 50-54 | 73-132  | 0.000000    | 0.003319     | 0.000000      |
| 55-59 | 73-132  | 0.000000    | 0.003976     | 0.000000      |
| 60-64 | 73-132  | 0.000000    | 0.005235     | 0.000000      |
| 65-69 | 73-132  | 0.000000    | 0.005901     | 0.000000      |
| 70-74 | 73-132  | 0.000000    | 0.005615     | 0.000000      |
| 75-79 | 73-132  | 0.000000    | 0.005615     | 0.000000      |
| 10-14 | 133-192 | 0.003468    | 0.008742     | 0.000000      |
| 15-19 | 133-192 | 0.004675    | 0.003732     | 0.000000      |
| 20-24 | 133-192 | 0.000062    | 0.002260     | 0.000000      |
| 25-29 | 133-192 | 0.001422    | 0.002822     | 0.000000      |
| 30-34 | 133-192 | 0.000696    | 0.002610     | 0.000000      |
| 35-39 | 133-192 | 0.000000    | 0.002058     | 0.000000      |
| 40-44 | 133-192 | 0.000000    | 0.002310     | 0.000000      |
| 45-49 | 133-192 | 0.000000    | 0.002256     | 0.000000      |
| 50-54 | 133-192 | 0.000000    | 0.002663     | 0.000000      |
| 55-59 | 133-192 | 0.000000    | 0.001746     | 0.000000      |
| 60-64 | 133-192 | 0.000000    | 0.005809     | 0.000000      |
| 65-69 | 133-192 | 0.000000    | 0.005896     | 0.000000      |
| 70-74 | 133-192 | 0.000000    | 0.007323     | 0.000000      |
| 75-79 | 133-192 | 0.000000    | 0.007323     | 0.000000      |
| 10-14 | 193-252 | 0.002314    | 0.008742     | 0.000000      |
| 15-19 | 193-252 | 0.003987    | 0.005036     | 0.000000      |
| 20-24 | 193-252 | 0.000320    | 0.002857     | 0.000000      |
| 25-29 | 193-252 | 0.000251    | 0.002314     | 0.000000      |
| 30-34 | 193-252 | 0.000125    | 0.004343     | 0.000000      |
| 35-39 | 193-252 | 0.000000    | 0.002092     | 0.000000      |
| 40-44 | 193-252 | 0.000000    | 0.002566     | 0.000000      |
| 45-49 | 193-252 | 0.000000    | 0.002311     | 0.000000      |
| 50-54 | 193-252 | 0.000000    | 0.003209     | 0.000000      |

### Results for PHIM for Run 9 (Sensitivity\_Analysis\_1.RTF)

|       |         |          |          |          |
|-------|---------|----------|----------|----------|
| 55-59 | 193-252 | 0.000000 | 0.004057 | 0.000000 |
| 60-64 | 193-252 | 0.000000 | 0.007166 | 0.000000 |
| 65-69 | 193-252 | 0.000000 | 0.004281 | 0.000000 |
| 70-74 | 193-252 | 0.000000 | 0.004580 | 0.000000 |
| 75-79 | 193-252 | 0.000000 | 0.004580 | 0.000000 |
| 10-14 | 253+    | 0.001325 | 0.008742 | 0.000000 |
| 15-19 | 253+    | 0.002984 | 0.010602 | 0.000000 |
| 20-24 | 253+    | 0.000452 | 0.004314 | 0.000000 |
| 25-29 | 253+    | 0.000225 | 0.003645 | 0.000000 |
| 30-34 | 253+    | 0.000112 | 0.004512 | 0.000000 |
| 35-39 | 253+    | 0.000000 | 0.002147 | 0.000000 |
| 40-44 | 253+    | 0.000000 | 0.002636 | 0.000000 |
| 45-49 | 253+    | 0.000000 | 0.001051 | 0.000000 |
| 50-54 | 253+    | 0.000000 | 0.002519 | 0.000000 |
| 55-59 | 253+    | 0.000000 | 0.003693 | 0.000000 |
| 60-64 | 253+    | 0.000000 | 0.005888 | 0.000000 |
| 65-69 | 253+    | 0.000000 | 0.004823 | 0.000000 |
| 70-74 | 253+    | 0.000000 | 0.004733 | 0.000000 |
| 75-79 | 253+    | 0.000000 | 0.004733 | 0.000000 |

Results for PHIM for Run 9 (Sensitivity\_Analysis\_1.RTF)

\*\*\*\*\*

TTP values for Run: 9, Scenario: Ecig

Table with 2 columns: Variable Parameter and Value. Parameters include Country (US), Sex (Males), Assumption Set (ISS3), and Note (Period is in Months).

Main data table with columns: Age, Period, Initiation (Never CC, Never Ecig, Never Dual), Cessation (CC Former, Ecig Former, Dual Former), and Re-initiation (Former CC, Former Ecig, Former Dual). Rows list age groups and periods with corresponding numerical values.

### Results for PHIM for Run 9 (Sensitivity\_Analysis\_1.RTF)

|       |         |          |          |          |          |          |          |          |          |          |
|-------|---------|----------|----------|----------|----------|----------|----------|----------|----------|----------|
| 55-59 | 193-252 | 0.000000 | 0.000000 | 0.000000 | 0.004057 | 0.004057 | 0.000000 | 0.000000 | 0.000000 | 0.000000 |
| 60-64 | 193-252 | 0.000000 | 0.000000 | 0.000000 | 0.007166 | 0.007166 | 0.000000 | 0.000000 | 0.000000 | 0.000000 |
| 65-69 | 193-252 | 0.000000 | 0.000000 | 0.000000 | 0.004281 | 0.004281 | 0.000000 | 0.000000 | 0.000000 | 0.000000 |
| 70-74 | 193-252 | 0.000000 | 0.000000 | 0.000000 | 0.004580 | 0.004580 | 0.000000 | 0.000000 | 0.000000 | 0.000000 |
| 75-79 | 193-252 | 0.000000 | 0.000000 | 0.000000 | 0.004580 | 0.004580 | 0.000000 | 0.000000 | 0.000000 | 0.000000 |
| 10-14 | 253+    | 0.000066 | 0.001259 | 0.000000 | 0.008742 | 0.008742 | 0.000000 | 0.000000 | 0.000000 | 0.000000 |
| 15-19 | 253+    | 0.000149 | 0.002835 | 0.000000 | 0.010602 | 0.010602 | 0.000000 | 0.000000 | 0.000000 | 0.000000 |
| 20-24 | 253+    | 0.000023 | 0.000430 | 0.000000 | 0.004314 | 0.004314 | 0.000000 | 0.000000 | 0.000000 | 0.000000 |
| 25-29 | 253+    | 0.000011 | 0.000213 | 0.000000 | 0.003645 | 0.003645 | 0.000000 | 0.000000 | 0.000000 | 0.000000 |
| 30-34 | 253+    | 0.000006 | 0.000106 | 0.000000 | 0.004512 | 0.004512 | 0.000000 | 0.000000 | 0.000000 | 0.000000 |
| 35-39 | 253+    | 0.000000 | 0.000000 | 0.000000 | 0.002147 | 0.002147 | 0.000000 | 0.000000 | 0.000000 | 0.000000 |
| 40-44 | 253+    | 0.000000 | 0.000000 | 0.000000 | 0.002636 | 0.002636 | 0.000000 | 0.000000 | 0.000000 | 0.000000 |
| 45-49 | 253+    | 0.000000 | 0.000000 | 0.000000 | 0.001051 | 0.001051 | 0.000000 | 0.000000 | 0.000000 | 0.000000 |
| 50-54 | 253+    | 0.000000 | 0.000000 | 0.000000 | 0.002519 | 0.002519 | 0.000000 | 0.000000 | 0.000000 | 0.000000 |
| 55-59 | 253+    | 0.000000 | 0.000000 | 0.000000 | 0.003693 | 0.003693 | 0.000000 | 0.000000 | 0.000000 | 0.000000 |
| 60-64 | 253+    | 0.000000 | 0.000000 | 0.000000 | 0.005888 | 0.005888 | 0.000000 | 0.000000 | 0.000000 | 0.000000 |
| 65-69 | 253+    | 0.000000 | 0.000000 | 0.000000 | 0.004823 | 0.004823 | 0.000000 | 0.000000 | 0.000000 | 0.000000 |
| 70-74 | 253+    | 0.000000 | 0.000000 | 0.000000 | 0.004733 | 0.004733 | 0.000000 | 0.000000 | 0.000000 | 0.000000 |
| 75-79 | 253+    | 0.000000 | 0.000000 | 0.000000 | 0.004733 | 0.004733 | 0.000000 | 0.000000 | 0.000000 | 0.000000 |



### Results for PHIM for Run 9 (Sensitivity\_Analysis\_1.RTF)

|       |      |          |          |          |          |          |          |
|-------|------|----------|----------|----------|----------|----------|----------|
| 25-29 | 253+ | 0.015212 | 0.000000 | 0.000000 | 0.000000 | 0.000000 | 0.000000 |
| 30-34 | 253+ | 0.015460 | 0.000000 | 0.000000 | 0.000000 | 0.000000 | 0.000000 |
| 35-39 | 253+ | 0.014711 | 0.000000 | 0.000000 | 0.000000 | 0.000000 | 0.000000 |
| 40-44 | 253+ | 0.014241 | 0.000000 | 0.000000 | 0.000000 | 0.000000 | 0.000000 |
| 45-49 | 253+ | 0.013014 | 0.000000 | 0.000000 | 0.000000 | 0.000000 | 0.000000 |
| 50-54 | 253+ | 0.011768 | 0.000000 | 0.000000 | 0.000000 | 0.000000 | 0.000000 |
| 55-59 | 253+ | 0.011032 | 0.000000 | 0.000000 | 0.000000 | 0.000000 | 0.000000 |
| 60-64 | 253+ | 0.009525 | 0.000000 | 0.000000 | 0.000000 | 0.000000 | 0.000000 |
| 65-69 | 253+ | 0.006897 | 0.000000 | 0.000000 | 0.000000 | 0.000000 | 0.000000 |
| 70-74 | 253+ | 0.005435 | 0.000000 | 0.000000 | 0.000000 | 0.000000 | 0.000000 |
| 75-79 | 253+ | 0.005435 | 0.000000 | 0.000000 | 0.000000 | 0.000000 | 0.000000 |

## Results for PHIM for Run 9 (Sensitivity\_Analysis\_1.RTF)

\*\*\*\*\*

### Main Output for the Tobacco History for Run: 9, Simulation: 1, Scenario: NULL

| Variable Parameter          | Value              |
|-----------------------------|--------------------|
| 1. Country                  | US (United States) |
| 2. Sex                      | M (Males)          |
| 3. Year of start of process | 1990               |

Year of Follow-up: 2040, Age Group: All Ages  
 Period    Age Group    Smoking Group            N            %

|    |          |           |       |       |
|----|----------|-----------|-------|-------|
| 50 | All Ages | Never Any | 19445 | 50.68 |
| 50 | All Ages | CC        | 3024  | 7.88  |
| 50 | All Ages | Former    | 15896 | 41.43 |

Year of Follow-up: 2040, Age Group: 18-19  
 Period    Age Group    Smoking Group            N            %

|    |       |           |   |   |
|----|-------|-----------|---|---|
| 50 | 18-19 | Never Any | 0 | . |
| 50 | 18-19 | CC        | 0 | . |
| 50 | 18-19 | Former    | 0 | . |

Year of Follow-up: 2040, Age Group: 20-24  
 Period    Age Group    Smoking Group            N            %

|    |       |           |   |   |
|----|-------|-----------|---|---|
| 50 | 20-24 | Never Any | 0 | . |
| 50 | 20-24 | CC        | 0 | . |
| 50 | 20-24 | Former    | 0 | . |

Year of Follow-up: 2040, Age Group: 25-29  
 Period    Age Group    Smoking Group            N            %

|    |       |           |   |   |
|----|-------|-----------|---|---|
| 50 | 25-29 | Never Any | 0 | . |
| 50 | 25-29 | CC        | 0 | . |
| 50 | 25-29 | Former    | 0 | . |

Year of Follow-up: 2040, Age Group: 30-34  
 Period    Age Group    Smoking Group            N            %

|    |       |           |   |   |
|----|-------|-----------|---|---|
| 50 | 30-34 | Never Any | 0 | . |
| 50 | 30-34 | CC        | 0 | . |
| 50 | 30-34 | Former    | 0 | . |

Year of Follow-up: 2040, Age Group: 35-39  
 Period    Age Group    Smoking Group            N            %

|    |       |           |   |   |
|----|-------|-----------|---|---|
| 50 | 35-39 | Never Any | 0 | . |
| 50 | 35-39 | CC        | 0 | . |
| 50 | 35-39 | Former    | 0 | . |

Year of Follow-up: 2040, Age Group: 40-44  
 Period    Age Group    Smoking Group            N            %

|    |       |           |   |   |
|----|-------|-----------|---|---|
| 50 | 40-44 | Never Any | 0 | . |
| 50 | 40-44 | CC        | 0 | . |
| 50 | 40-44 | Former    | 0 | . |

Year of Follow-up: 2040, Age Group: 45-49  
 Period    Age Group    Smoking Group            N            %

|    |       |           |   |   |
|----|-------|-----------|---|---|
| 50 | 45-49 | Never Any | 0 | . |
| 50 | 45-49 | CC        | 0 | . |
| 50 | 45-49 | Former    | 0 | . |

Year of Follow-up: 2040, Age Group: 50-54  
 Period    Age Group    Smoking Group            N            %

|    |       |           |   |   |
|----|-------|-----------|---|---|
| 50 | 50-54 | Never Any | 0 | . |
| 50 | 50-54 | CC        | 0 | . |
| 50 | 50-54 | Former    | 0 | . |

Year of Follow-up: 2040, Age Group: 55-59  
 Period    Age Group    Smoking Group            N            %

|    |       |           |   |   |
|----|-------|-----------|---|---|
| 50 | 55-59 | Never Any | 0 | . |
| 50 | 55-59 | CC        | 0 | . |
| 50 | 55-59 | Former    | 0 | . |

Year of Follow-up: 2040, Age Group: 60-64  
 Period    Age Group    Smoking Group            N            %



### Results for PHIM for Run 9 (Sensitivity\_Analysis\_1.RTF)

|                                           |           |               |      |       |
|-------------------------------------------|-----------|---------------|------|-------|
| 50                                        | 60-64     | Never Any     | 4363 | 49.33 |
| 50                                        | 60-64     | CC            | 934  | 10.56 |
| 50                                        | 60-64     | Former        | 3548 | 40.11 |
| Year of Follow-up: 2040, Age Group: 65-69 |           |               |      |       |
| Period                                    | Age Group | Smoking Group | N    | %     |
| 50                                        | 65-69     | Never Any     | 4948 | 54.73 |
| 50                                        | 65-69     | CC            | 734  | 8.12  |
| 50                                        | 65-69     | Former        | 3358 | 37.15 |
| Year of Follow-up: 2040, Age Group: 70-74 |           |               |      |       |
| Period                                    | Age Group | Smoking Group | N    | %     |
| 50                                        | 70-74     | Never Any     | 5145 | 52.41 |
| 50                                        | 70-74     | CC            | 688  | 7.01  |
| 50                                        | 70-74     | Former        | 3983 | 40.58 |
| Year of Follow-up: 2040, Age Group: 75-79 |           |               |      |       |
| Period                                    | Age Group | Smoking Group | N    | %     |
| 50                                        | 75-79     | Never Any     | 4989 | 46.78 |
| 50                                        | 75-79     | CC            | 668  | 6.26  |
| 50                                        | 75-79     | Former        | 5007 | 46.95 |

## Results for PHIM for Run 9 (Sensitivity\_Analysis\_1.RTF)

\*\*\*\*\*

### Main Output for the Tobacco History for Run: 9, Simulation: 1, Scenario: Ecig

| Variable Parameter                           |           | Value              |       |       |               |             |               |                |              |
|----------------------------------------------|-----------|--------------------|-------|-------|---------------|-------------|---------------|----------------|--------------|
| 1. Country                                   |           | US (United States) |       |       |               |             |               |                |              |
| 2. Sex                                       |           | M (Males)          |       |       |               |             |               |                |              |
| 3. Year of start of process                  |           | 1990               |       |       |               |             |               |                |              |
| Year of Follow-up: 1990, Age Group: All Ages |           |                    |       |       |               |             |               |                |              |
| Period                                       | Age Group | Smoking Group      | N     | %     | Ever Quit (N) | Ever Quit % | Mean Yrs Quit | Short Term (n) | Short Term % |
| 0                                            | All Ages  | Never Any          | 34075 | 39.78 |               |             |               |                |              |
| 0                                            | All Ages  | CC                 | 27323 | 31.90 | 0             | 0.00        |               |                |              |
| 0                                            | All Ages  | Ecig               | 0     | 0.00  |               |             |               |                |              |
| 0                                            | All Ages  | Dual               | 0     | 0.00  |               |             |               |                |              |
| 0                                            | All Ages  | Former             | 24266 | 28.33 |               |             | 13.08         | 3623           | 14.93        |
| Year of Follow-up: 1990, Age Group: 18-19    |           |                    |       |       |               |             |               |                |              |
| Period                                       | Age Group | Smoking Group      | N     | %     | Ever Quit (N) | Ever Quit % | Mean Yrs Quit | Short Term (n) | Short Term % |
| 0                                            | 18-19     | Never Any          | 2783  | 78.42 |               |             |               |                |              |
| 0                                            | 18-19     | CC                 | 634   | 17.86 | 0             | 0.00        |               |                |              |
| 0                                            | 18-19     | Ecig               | 0     | 0.00  |               |             |               |                |              |
| 0                                            | 18-19     | Dual               | 0     | 0.00  |               |             |               |                |              |
| 0                                            | 18-19     | Former             | 132   | 3.72  |               |             | 0.11          | 132            | 100.00       |
| Year of Follow-up: 1990, Age Group: 20-24    |           |                    |       |       |               |             |               |                |              |
| Period                                       | Age Group | Smoking Group      | N     | %     | Ever Quit (N) | Ever Quit % | Mean Yrs Quit | Short Term (n) | Short Term % |
| 0                                            | 20-24     | Never Any          | 5722  | 58.29 |               |             |               |                |              |
| 0                                            | 20-24     | CC                 | 3199  | 32.59 | 0             | 0.00        |               |                |              |
| 0                                            | 20-24     | Ecig               | 0     | 0.00  |               |             |               |                |              |
| 0                                            | 20-24     | Dual               | 0     | 0.00  |               |             |               |                |              |
| 0                                            | 20-24     | Former             | 895   | 9.12  |               |             | 1.46          | 506            | 56.54        |
| Year of Follow-up: 1990, Age Group: 25-29    |           |                    |       |       |               |             |               |                |              |
| Period                                       | Age Group | Smoking Group      | N     | %     | Ever Quit (N) | Ever Quit % | Mean Yrs Quit | Short Term (n) | Short Term % |
| 0                                            | 25-29     | Never Any          | 5232  | 49.06 |               |             |               |                |              |
| 0                                            | 25-29     | CC                 | 3914  | 36.70 | 0             | 0.00        |               |                |              |
| 0                                            | 25-29     | Ecig               | 0     | 0.00  |               |             |               |                |              |
| 0                                            | 25-29     | Dual               | 0     | 0.00  |               |             |               |                |              |
| 0                                            | 25-29     | Former             | 1518  | 14.23 |               |             | 2.87          | 643            | 42.36        |
| Year of Follow-up: 1990, Age Group: 30-34    |           |                    |       |       |               |             |               |                |              |
| Period                                       | Age Group | Smoking Group      | N     | %     | Ever Quit (N) | Ever Quit % | Mean Yrs Quit | Short Term (n) | Short Term % |
| 0                                            | 30-34     | Never Any          | 4765  | 43.65 |               |             |               |                |              |
| 0                                            | 30-34     | CC                 | 4023  | 36.85 | 0             | 0.00        |               |                |              |
| 0                                            | 30-34     | Ecig               | 0     | 0.00  |               |             |               |                |              |
| 0                                            | 30-34     | Dual               | 0     | 0.00  |               |             |               |                |              |
| 0                                            | 30-34     | Former             | 2128  | 19.49 |               |             | 4.06          | 592            | 27.82        |
| Year of Follow-up: 1990, Age Group: 35-39    |           |                    |       |       |               |             |               |                |              |
| Period                                       | Age Group | Smoking Group      | N     | %     | Ever Quit (N) | Ever Quit % | Mean Yrs Quit | Short Term (n) | Short Term % |
| 0                                            | 35-39     | Never Any          | 3941  | 39.85 |               |             |               |                |              |
| 0                                            | 35-39     | CC                 | 3474  | 35.13 | 0             | 0.00        |               |                |              |
| 0                                            | 35-39     | Ecig               | 0     | 0.00  |               |             |               |                |              |
| 0                                            | 35-39     | Dual               | 0     | 0.00  |               |             |               |                |              |
| 0                                            | 35-39     | Former             | 2474  | 25.02 |               |             | 8.31          | 425            | 17.18        |
| Year of Follow-up: 1990, Age Group: 40-44    |           |                    |       |       |               |             |               |                |              |
| Period                                       | Age Group | Smoking Group      | N     | %     | Ever Quit (N) | Ever Quit % | Mean Yrs Quit | Short Term (n) | Short Term % |
| 0                                            | 40-44     | Never Any          | 2912  | 33.65 |               |             |               |                |              |
| 0                                            | 40-44     | CC                 | 3113  | 35.97 | 0             | 0.00        |               |                |              |
| 0                                            | 40-44     | Ecig               | 0     | 0.00  |               |             |               |                |              |
| 0                                            | 40-44     | Dual               | 0     | 0.00  |               |             |               |                |              |
| 0                                            | 40-44     | Former             | 2630  | 30.39 |               |             | 10.69         | 317            | 12.05        |
| Year of Follow-up: 1990, Age Group: 45-49    |           |                    |       |       |               |             |               |                |              |
| Period                                       | Age Group | Smoking Group      | N     | %     | Ever Quit (N) | Ever Quit % | Mean Yrs Quit | Short Term (n) | Short Term % |
| 0                                            | 45-49     | Never Any          | 1919  | 29.46 |               |             |               |                |              |
| 0                                            | 45-49     | CC                 | 2318  | 35.58 | 0             | 0.00        |               |                |              |
| 0                                            | 45-49     | Ecig               | 0     | 0.00  |               |             |               |                |              |
| 0                                            | 45-49     | Dual               | 0     | 0.00  |               |             |               |                |              |
| 0                                            | 45-49     | Former             | 2278  | 34.97 |               |             | 13.26         | 221            | 9.70         |
| Year of Follow-up: 1990, Age Group: 50-54    |           |                    |       |       |               |             |               |                |              |
| Period                                       | Age Group | Smoking Group      | N     | %     | Ever Quit (N) | Ever Quit % | Mean Yrs Quit | Short Term (n) | Short Term % |
| 0                                            | 50-54     | Never Any          | 1611  | 29.41 |               |             |               |                |              |
| 0                                            | 50-54     | CC                 | 1816  | 33.16 | 0             | 0.00        |               |                |              |

**Results for PHIM for Run 9 (Sensitivity\_Analysis\_1.RTF)**

|                                              |           |               |       |       |               |             |               |                |              |
|----------------------------------------------|-----------|---------------|-------|-------|---------------|-------------|---------------|----------------|--------------|
| 0                                            | 50-54     | Ecig          | 0     | 0.00  |               |             |               |                |              |
| 0                                            | 50-54     | Dual          | 0     | 0.00  |               |             |               |                |              |
| 0                                            | 50-54     | Former        | 2050  | 37.43 |               |             | 14.55         | 261            | 12.73        |
| Year of Follow-up: 1990, Age Group: 55-59    |           |               |       |       |               |             |               |                |              |
| Period                                       | Age Group | Smoking Group | N     | %     | Ever Quit (N) | Ever Quit % | Mean Yrs Quit | Short Term (n) | Short Term % |
| 0                                            | 55-59     | Never Any     | 1337  | 26.83 |               |             |               |                |              |
| 0                                            | 55-59     | CC            | 1520  | 30.50 | 0             | 0.00        |               |                |              |
| 0                                            | 55-59     | Ecig          | 0     | 0.00  |               |             |               |                |              |
| 0                                            | 55-59     | Dual          | 0     | 0.00  |               |             |               |                |              |
| 0                                            | 55-59     | Former        | 2126  | 42.67 |               |             | 14.80         | 216            | 10.16        |
| Year of Follow-up: 1990, Age Group: 60-64    |           |               |       |       |               |             |               |                |              |
| Period                                       | Age Group | Smoking Group | N     | %     | Ever Quit (N) | Ever Quit % | Mean Yrs Quit | Short Term (n) | Short Term % |
| 0                                            | 60-64     | Never Any     | 1169  | 23.83 |               |             |               |                |              |
| 0                                            | 60-64     | CC            | 1287  | 26.24 | 0             | 0.00        |               |                |              |
| 0                                            | 60-64     | Ecig          | 0     | 0.00  |               |             |               |                |              |
| 0                                            | 60-64     | Dual          | 0     | 0.00  |               |             |               |                |              |
| 0                                            | 60-64     | Former        | 2449  | 49.93 |               |             | 18.87         | 106            | 4.33         |
| Year of Follow-up: 1990, Age Group: 65-69    |           |               |       |       |               |             |               |                |              |
| Period                                       | Age Group | Smoking Group | N     | %     | Ever Quit (N) | Ever Quit % | Mean Yrs Quit | Short Term (n) | Short Term % |
| 0                                            | 65-69     | Never Any     | 1023  | 23.32 |               |             |               |                |              |
| 0                                            | 65-69     | CC            | 979   | 22.32 | 0             | 0.00        |               |                |              |
| 0                                            | 65-69     | Ecig          | 0     | 0.00  |               |             |               |                |              |
| 0                                            | 65-69     | Dual          | 0     | 0.00  |               |             |               |                |              |
| 0                                            | 65-69     | Former        | 2385  | 54.37 |               |             | 19.91         | 113            | 4.74         |
| Year of Follow-up: 1990, Age Group: 70-74    |           |               |       |       |               |             |               |                |              |
| Period                                       | Age Group | Smoking Group | N     | %     | Ever Quit (N) | Ever Quit % | Mean Yrs Quit | Short Term (n) | Short Term % |
| 0                                            | 70-74     | Never Any     | 961   | 27.46 |               |             |               |                |              |
| 0                                            | 70-74     | CC            | 675   | 19.29 | 0             | 0.00        |               |                |              |
| 0                                            | 70-74     | Ecig          | 0     | 0.00  |               |             |               |                |              |
| 0                                            | 70-74     | Dual          | 0     | 0.00  |               |             |               |                |              |
| 0                                            | 70-74     | Former        | 1863  | 53.24 |               |             | 20.69         | 23             | 1.23         |
| Year of Follow-up: 1990, Age Group: 75-79    |           |               |       |       |               |             |               |                |              |
| Period                                       | Age Group | Smoking Group | N     | %     | Ever Quit (N) | Ever Quit % | Mean Yrs Quit | Short Term (n) | Short Term % |
| 0                                            | 75-79     | Never Any     | 700   | 29.06 |               |             |               |                |              |
| 0                                            | 75-79     | CC            | 371   | 15.40 | 0             | 0.00        |               |                |              |
| 0                                            | 75-79     | Ecig          | 0     | 0.00  |               |             |               |                |              |
| 0                                            | 75-79     | Dual          | 0     | 0.00  |               |             |               |                |              |
| 0                                            | 75-79     | Former        | 1338  | 55.54 |               |             | 22.88         | 68             | 5.08         |
| Year of Follow-up: 1995, Age Group: All Ages |           |               |       |       |               |             |               |                |              |
| Period                                       | Age Group | Smoking Group | N     | %     | Ever Quit (N) | Ever Quit % | Mean Yrs Quit | Short Term (n) | Short Term % |
| 5                                            | All Ages  | Never Any     | 38368 | 41.57 |               |             |               |                |              |
| 5                                            | All Ages  | CC            | 11508 | 12.47 | 0             | 0.00        |               |                |              |
| 5                                            | All Ages  | Ecig          | 15517 | 16.81 |               |             |               |                |              |
| 5                                            | All Ages  | Dual          | 0     | 0.00  |               |             |               |                |              |
| 5                                            | All Ages  | Former        | 26897 | 29.14 |               |             | 15.19         | 1705           | 6.34         |
| Year of Follow-up: 1995, Age Group: 18-19    |           |               |       |       |               |             |               |                |              |
| Period                                       | Age Group | Smoking Group | N     | %     | Ever Quit (N) | Ever Quit % | Mean Yrs Quit | Short Term (n) | Short Term % |
| 5                                            | 18-19     | Never Any     | 2448  | 69.07 |               |             |               |                |              |
| 5                                            | 18-19     | CC            | 320   | 9.03  | 0             | 0.00        |               |                |              |
| 5                                            | 18-19     | Ecig          | 659   | 18.59 |               |             |               |                |              |
| 5                                            | 18-19     | Dual          | 0     | 0.00  |               |             |               |                |              |
| 5                                            | 18-19     | Former        | 117   | 3.30  |               |             | 1.11          | 80             | 68.38        |
| Year of Follow-up: 1995, Age Group: 20-24    |           |               |       |       |               |             |               |                |              |
| Period                                       | Age Group | Smoking Group | N     | %     | Ever Quit (N) | Ever Quit % | Mean Yrs Quit | Short Term (n) | Short Term % |
| 5                                            | 20-24     | Never Any     | 5787  | 64.02 |               |             |               |                |              |
| 5                                            | 20-24     | CC            | 946   | 10.46 | 0             | 0.00        |               |                |              |
| 5                                            | 20-24     | Ecig          | 1826  | 20.20 |               |             |               |                |              |
| 5                                            | 20-24     | Dual          | 0     | 0.00  |               |             |               |                |              |
| 5                                            | 20-24     | Former        | 481   | 5.32  |               |             | 2.81          | 142            | 29.52        |
| Year of Follow-up: 1995, Age Group: 25-29    |           |               |       |       |               |             |               |                |              |
| Period                                       | Age Group | Smoking Group | N     | %     | Ever Quit (N) | Ever Quit % | Mean Yrs Quit | Short Term (n) | Short Term % |
| 5                                            | 25-29     | Never Any     | 5471  | 55.74 |               |             |               |                |              |
| 5                                            | 25-29     | CC            | 1255  | 12.79 | 0             | 0.00        |               |                |              |
| 5                                            | 25-29     | Ecig          | 1942  | 19.78 |               |             |               |                |              |
| 5                                            | 25-29     | Dual          | 0     | 0.00  |               |             |               |                |              |
| 5                                            | 25-29     | Former        | 1148  | 11.70 |               |             | 5.43          | 115            | 10.02        |
| Year of Follow-up: 1995, Age Group: 30-34    |           |               |       |       |               |             |               |                |              |
| Period                                       | Age Group | Smoking Group | N     | %     | Ever Quit (N) | Ever Quit % | Mean Yrs Quit | Short Term (n) | Short Term % |

**Results for PHIM for Run 9 (Sensitivity\_Analysis\_1.RTF)**

|                                              |           |               |      |       |               |             |               |                |              |
|----------------------------------------------|-----------|---------------|------|-------|---------------|-------------|---------------|----------------|--------------|
| 5                                            | 30-34     | Never Any     | 5065 | 47.50 |               |             |               |                |              |
| 5                                            | 30-34     | CC            | 1480 | 13.88 | 0             | 0.00        |               |                |              |
| 5                                            | 30-34     | Ecig          | 2319 | 21.75 |               |             |               |                |              |
| 5                                            | 30-34     | Dual          | 0    | 0.00  |               |             |               |                |              |
| 5                                            | 30-34     | Former        | 1800 | 16.88 |               |             | 6.94          | 106            | 5.89         |
| Year of Follow-up: 1995, Age Group: 35-39    |           |               |      |       |               |             |               |                |              |
| Period                                       | Age Group | Smoking Group | N    | %     | Ever Quit (N) | Ever Quit % | Mean Yrs Quit | Short Term (n) | Short Term % |
| 5                                            | 35-39     | Never Any     | 4724 | 43.28 |               |             |               |                |              |
| 5                                            | 35-39     | CC            | 1496 | 13.70 | 0             | 0.00        |               |                |              |
| 5                                            | 35-39     | Ecig          | 2275 | 20.84 |               |             |               |                |              |
| 5                                            | 35-39     | Dual          | 0    | 0.00  |               |             |               |                |              |
| 5                                            | 35-39     | Former        | 2421 | 22.18 |               |             | 8.20          | 114            | 4.71         |
| Year of Follow-up: 1995, Age Group: 40-44    |           |               |      |       |               |             |               |                |              |
| Period                                       | Age Group | Smoking Group | N    | %     | Ever Quit (N) | Ever Quit % | Mean Yrs Quit | Short Term (n) | Short Term % |
| 5                                            | 40-44     | Never Any     | 3941 | 39.85 |               |             |               |                |              |
| 5                                            | 40-44     | CC            | 1280 | 12.94 | 0             | 0.00        |               |                |              |
| 5                                            | 40-44     | Ecig          | 1894 | 19.15 |               |             |               |                |              |
| 5                                            | 40-44     | Dual          | 0    | 0.00  |               |             |               |                |              |
| 5                                            | 40-44     | Former        | 2774 | 28.05 |               |             | 12.06         | 130            | 4.69         |
| Year of Follow-up: 1995, Age Group: 45-49    |           |               |      |       |               |             |               |                |              |
| Period                                       | Age Group | Smoking Group | N    | %     | Ever Quit (N) | Ever Quit % | Mean Yrs Quit | Short Term (n) | Short Term % |
| 5                                            | 45-49     | Never Any     | 2912 | 33.65 |               |             |               |                |              |
| 5                                            | 45-49     | CC            | 1236 | 14.28 | 0             | 0.00        |               |                |              |
| 5                                            | 45-49     | Ecig          | 1562 | 18.05 |               |             |               |                |              |
| 5                                            | 45-49     | Dual          | 0    | 0.00  |               |             |               |                |              |
| 5                                            | 45-49     | Former        | 2945 | 34.03 |               |             | 14.20         | 148            | 5.03         |
| Year of Follow-up: 1995, Age Group: 50-54    |           |               |      |       |               |             |               |                |              |
| Period                                       | Age Group | Smoking Group | N    | %     | Ever Quit (N) | Ever Quit % | Mean Yrs Quit | Short Term (n) | Short Term % |
| 5                                            | 50-54     | Never Any     | 1919 | 29.46 |               |             |               |                |              |
| 5                                            | 50-54     | CC            | 940  | 14.43 | 0             | 0.00        |               |                |              |
| 5                                            | 50-54     | Ecig          | 1015 | 15.58 |               |             |               |                |              |
| 5                                            | 50-54     | Dual          | 0    | 0.00  |               |             |               |                |              |
| 5                                            | 50-54     | Former        | 2641 | 40.54 |               |             | 15.98         | 175            | 6.63         |
| Year of Follow-up: 1995, Age Group: 55-59    |           |               |      |       |               |             |               |                |              |
| Period                                       | Age Group | Smoking Group | N    | %     | Ever Quit (N) | Ever Quit % | Mean Yrs Quit | Short Term (n) | Short Term % |
| 5                                            | 55-59     | Never Any     | 1611 | 29.41 |               |             |               |                |              |
| 5                                            | 55-59     | CC            | 740  | 13.51 | 0             | 0.00        |               |                |              |
| 5                                            | 55-59     | Ecig          | 762  | 13.91 |               |             |               |                |              |
| 5                                            | 55-59     | Dual          | 0    | 0.00  |               |             |               |                |              |
| 5                                            | 55-59     | Former        | 2364 | 43.16 |               |             | 17.21         | 122            | 5.16         |
| Year of Follow-up: 1995, Age Group: 60-64    |           |               |      |       |               |             |               |                |              |
| Period                                       | Age Group | Smoking Group | N    | %     | Ever Quit (N) | Ever Quit % | Mean Yrs Quit | Short Term (n) | Short Term % |
| 5                                            | 60-64     | Never Any     | 1337 | 26.83 |               |             |               |                |              |
| 5                                            | 60-64     | CC            | 597  | 11.98 | 0             | 0.00        |               |                |              |
| 5                                            | 60-64     | Ecig          | 572  | 11.48 |               |             |               |                |              |
| 5                                            | 60-64     | Dual          | 0    | 0.00  |               |             |               |                |              |
| 5                                            | 60-64     | Former        | 2477 | 49.71 |               |             | 17.27         | 143            | 5.77         |
| Year of Follow-up: 1995, Age Group: 65-69    |           |               |      |       |               |             |               |                |              |
| Period                                       | Age Group | Smoking Group | N    | %     | Ever Quit (N) | Ever Quit % | Mean Yrs Quit | Short Term (n) | Short Term % |
| 5                                            | 65-69     | Never Any     | 1169 | 23.83 |               |             |               |                |              |
| 5                                            | 65-69     | CC            | 477  | 9.72  | 0             | 0.00        |               |                |              |
| 5                                            | 65-69     | Ecig          | 360  | 7.34  |               |             |               |                |              |
| 5                                            | 65-69     | Dual          | 0    | 0.00  |               |             |               |                |              |
| 5                                            | 65-69     | Former        | 2899 | 59.10 |               |             | 20.44         | 196            | 6.76         |
| Year of Follow-up: 1995, Age Group: 70-74    |           |               |      |       |               |             |               |                |              |
| Period                                       | Age Group | Smoking Group | N    | %     | Ever Quit (N) | Ever Quit % | Mean Yrs Quit | Short Term (n) | Short Term % |
| 5                                            | 70-74     | Never Any     | 1023 | 23.32 |               |             |               |                |              |
| 5                                            | 70-74     | CC            | 438  | 9.98  | 0             | 0.00        |               |                |              |
| 5                                            | 70-74     | Ecig          | 196  | 4.47  |               |             |               |                |              |
| 5                                            | 70-74     | Dual          | 0    | 0.00  |               |             |               |                |              |
| 5                                            | 70-74     | Former        | 2730 | 62.23 |               |             | 22.00         | 137            | 5.02         |
| Year of Follow-up: 1995, Age Group: 75-79    |           |               |      |       |               |             |               |                |              |
| Period                                       | Age Group | Smoking Group | N    | %     | Ever Quit (N) | Ever Quit % | Mean Yrs Quit | Short Term (n) | Short Term % |
| 5                                            | 75-79     | Never Any     | 961  | 27.46 |               |             |               |                |              |
| 5                                            | 75-79     | CC            | 303  | 8.66  | 0             | 0.00        |               |                |              |
| 5                                            | 75-79     | Ecig          | 135  | 3.86  |               |             |               |                |              |
| 5                                            | 75-79     | Dual          | 0    | 0.00  |               |             |               |                |              |
| 5                                            | 75-79     | Former        | 2100 | 60.02 |               |             | 23.02         | 97             | 4.62         |
| Year of Follow-up: 2000, Age Group: All Ages |           |               |      |       |               |             |               |                |              |

**Results for PHIM for Run 9 (Sensitivity\_Analysis\_1.RTF)**

| Period                                    | Age Group | Smoking Group | N     | %     | Ever Quit (N) | Ever Quit % | Mean Yrs Quit | Short Term (n) | Short Term % |
|-------------------------------------------|-----------|---------------|-------|-------|---------------|-------------|---------------|----------------|--------------|
| 10                                        | All Ages  | Never Any     | 39177 | 41.64 |               |             |               |                |              |
| 10                                        | All Ages  | CC            | 4843  | 5.15  | 0             | 0.00        |               |                |              |
| 10                                        | All Ages  | Ecig          | 20724 | 22.03 |               |             |               |                |              |
| 10                                        | All Ages  | Dual          | 0     | 0.00  |               |             |               |                |              |
| 10                                        | All Ages  | Former        | 29348 | 31.19 |               |             | 16.84         | 1724           | 5.87         |
| Year of Follow-up: 2000, Age Group: 18-19 |           |               |       |       |               |             |               |                |              |
| Period                                    | Age Group | Smoking Group | N     | %     | Ever Quit (N) | Ever Quit % | Mean Yrs Quit | Short Term (n) | Short Term % |
| 10                                        | 18-19     | Never Any     | 0     | .     |               |             |               |                |              |
| 10                                        | 18-19     | CC            | 0     | .     | 0             | .           |               |                |              |
| 10                                        | 18-19     | Ecig          | 0     | .     |               |             |               |                |              |
| 10                                        | 18-19     | Dual          | 0     | .     |               |             |               |                |              |
| 10                                        | 18-19     | Former        | 0     | .     |               |             |               | 0              | .            |
| Year of Follow-up: 2000, Age Group: 20-24 |           |               |       |       |               |             |               |                |              |
| Period                                    | Age Group | Smoking Group | N     | %     | Ever Quit (N) | Ever Quit % | Mean Yrs Quit | Short Term (n) | Short Term % |
| 10                                        | 20-24     | Never Any     | 4927  | 55.70 |               |             |               |                |              |
| 10                                        | 20-24     | CC            | 462   | 5.22  | 0             | 0.00        |               |                |              |
| 10                                        | 20-24     | Ecig          | 2544  | 28.76 |               |             |               |                |              |
| 10                                        | 20-24     | Dual          | 0     | 0.00  |               |             |               |                |              |
| 10                                        | 20-24     | Former        | 912   | 10.31 |               |             | 3.41          | 258            | 28.29        |
| Year of Follow-up: 2000, Age Group: 25-29 |           |               |       |       |               |             |               |                |              |
| Period                                    | Age Group | Smoking Group | N     | %     | Ever Quit (N) | Ever Quit % | Mean Yrs Quit | Short Term (n) | Short Term % |
| 10                                        | 25-29     | Never Any     | 5341  | 59.08 |               |             |               |                |              |
| 10                                        | 25-29     | CC            | 404   | 4.47  | 0             | 0.00        |               |                |              |
| 10                                        | 25-29     | Ecig          | 2359  | 26.10 |               |             |               |                |              |
| 10                                        | 25-29     | Dual          | 0     | 0.00  |               |             |               |                |              |
| 10                                        | 25-29     | Former        | 936   | 10.35 |               |             | 4.91          | 195            | 20.83        |
| Year of Follow-up: 2000, Age Group: 30-34 |           |               |       |       |               |             |               |                |              |
| Period                                    | Age Group | Smoking Group | N     | %     | Ever Quit (N) | Ever Quit % | Mean Yrs Quit | Short Term (n) | Short Term % |
| 10                                        | 30-34     | Never Any     | 5276  | 53.75 |               |             |               |                |              |
| 10                                        | 30-34     | CC            | 481   | 4.90  | 0             | 0.00        |               |                |              |
| 10                                        | 30-34     | Ecig          | 2608  | 26.57 |               |             |               |                |              |
| 10                                        | 30-34     | Dual          | 0     | 0.00  |               |             |               |                |              |
| 10                                        | 30-34     | Former        | 1451  | 14.78 |               |             | 8.66          | 118            | 8.13         |
| Year of Follow-up: 2000, Age Group: 35-39 |           |               |       |       |               |             |               |                |              |
| Period                                    | Age Group | Smoking Group | N     | %     | Ever Quit (N) | Ever Quit % | Mean Yrs Quit | Short Term (n) | Short Term % |
| 10                                        | 35-39     | Never Any     | 4997  | 46.86 |               |             |               |                |              |
| 10                                        | 35-39     | CC            | 609   | 5.71  | 0             | 0.00        |               |                |              |
| 10                                        | 35-39     | Ecig          | 2980  | 27.94 |               |             |               |                |              |
| 10                                        | 35-39     | Dual          | 0     | 0.00  |               |             |               |                |              |
| 10                                        | 35-39     | Former        | 2078  | 19.49 |               |             | 10.61         | 109            | 5.25         |
| Year of Follow-up: 2000, Age Group: 40-44 |           |               |       |       |               |             |               |                |              |
| Period                                    | Age Group | Smoking Group | N     | %     | Ever Quit (N) | Ever Quit % | Mean Yrs Quit | Short Term (n) | Short Term % |
| 10                                        | 40-44     | Never Any     | 4724  | 43.28 |               |             |               |                |              |
| 10                                        | 40-44     | CC            | 567   | 5.19  | 0             | 0.00        |               |                |              |
| 10                                        | 40-44     | Ecig          | 2857  | 26.17 |               |             |               |                |              |
| 10                                        | 40-44     | Dual          | 0     | 0.00  |               |             |               |                |              |
| 10                                        | 40-44     | Former        | 2768  | 25.36 |               |             | 11.82         | 124            | 4.48         |
| Year of Follow-up: 2000, Age Group: 45-49 |           |               |       |       |               |             |               |                |              |
| Period                                    | Age Group | Smoking Group | N     | %     | Ever Quit (N) | Ever Quit % | Mean Yrs Quit | Short Term (n) | Short Term % |
| 10                                        | 45-49     | Never Any     | 3941  | 39.85 |               |             |               |                |              |
| 10                                        | 45-49     | CC            | 484   | 4.89  | 0             | 0.00        |               |                |              |
| 10                                        | 45-49     | Ecig          | 2312  | 23.38 |               |             |               |                |              |
| 10                                        | 45-49     | Dual          | 0     | 0.00  |               |             |               |                |              |
| 10                                        | 45-49     | Former        | 3152  | 31.87 |               |             | 15.25         | 163            | 5.17         |
| Year of Follow-up: 2000, Age Group: 50-54 |           |               |       |       |               |             |               |                |              |
| Period                                    | Age Group | Smoking Group | N     | %     | Ever Quit (N) | Ever Quit % | Mean Yrs Quit | Short Term (n) | Short Term % |
| 10                                        | 50-54     | Never Any     | 2912  | 33.65 |               |             |               |                |              |
| 10                                        | 50-54     | CC            | 473   | 5.47  | 0             | 0.00        |               |                |              |
| 10                                        | 50-54     | Ecig          | 1859  | 21.48 |               |             |               |                |              |
| 10                                        | 50-54     | Dual          | 0     | 0.00  |               |             |               |                |              |
| 10                                        | 50-54     | Former        | 3411  | 39.41 |               |             | 16.85         | 186            | 5.45         |
| Year of Follow-up: 2000, Age Group: 55-59 |           |               |       |       |               |             |               |                |              |
| Period                                    | Age Group | Smoking Group | N     | %     | Ever Quit (N) | Ever Quit % | Mean Yrs Quit | Short Term (n) | Short Term % |
| 10                                        | 55-59     | Never Any     | 1919  | 29.46 |               |             |               |                |              |
| 10                                        | 55-59     | CC            | 363   | 5.57  | 0             | 0.00        |               |                |              |
| 10                                        | 55-59     | Ecig          | 1194  | 18.33 |               |             |               |                |              |
| 10                                        | 55-59     | Dual          | 0     | 0.00  |               |             |               |                |              |

**Results for PHIM for Run 9 (Sensitivity\_Analysis\_1.RTF)**

| Year of Follow-up: 2000, Age Group: 60-64    | Period   | Age Group | Smoking Group | N     | %     | Ever Quit (N) | Ever Quit % | Mean Yrs Quit | Short Term (n) | Short Term % |
|----------------------------------------------|----------|-----------|---------------|-------|-------|---------------|-------------|---------------|----------------|--------------|
| 10                                           | 55-59    | Former    |               | 3039  | 46.65 |               |             | 18.50         | 146            | 4.80         |
| 10                                           | 60-64    | Never Any |               | 1611  | 29.41 |               |             |               |                |              |
| 10                                           | 60-64    | CC        |               | 306   | 5.59  | 0             | 0.00        |               |                |              |
| 10                                           | 60-64    | Ecig      |               | 852   | 15.56 |               |             |               |                |              |
| 10                                           | 60-64    | Dual      |               | 0     | 0.00  |               |             |               |                |              |
| 10                                           | 60-64    | Former    |               | 2708  | 49.44 |               |             | 19.63         | 144            | 5.32         |
| Year of Follow-up: 2000, Age Group: 65-69    | Period   | Age Group | Smoking Group | N     | %     | Ever Quit (N) | Ever Quit % | Mean Yrs Quit | Short Term (n) | Short Term % |
| 10                                           | 65-69    | Never Any |               | 1337  | 26.83 |               |             |               |                |              |
| 10                                           | 65-69    | CC        |               | 244   | 4.90  | 0             | 0.00        |               |                |              |
| 10                                           | 65-69    | Ecig      |               | 603   | 12.10 |               |             |               |                |              |
| 10                                           | 65-69    | Dual      |               | 0     | 0.00  |               |             |               |                |              |
| 10                                           | 65-69    | Former    |               | 2799  | 56.17 |               |             | 19.95         | 120            | 4.29         |
| Year of Follow-up: 2000, Age Group: 70-74    | Period   | Age Group | Smoking Group | N     | %     | Ever Quit (N) | Ever Quit % | Mean Yrs Quit | Short Term (n) | Short Term % |
| 10                                           | 70-74    | Never Any |               | 1169  | 23.83 |               |             |               |                |              |
| 10                                           | 70-74    | CC        |               | 236   | 4.81  | 0             | 0.00        |               |                |              |
| 10                                           | 70-74    | Ecig      |               | 327   | 6.67  |               |             |               |                |              |
| 10                                           | 70-74    | Dual      |               | 0     | 0.00  |               |             |               |                |              |
| 10                                           | 70-74    | Former    |               | 3173  | 64.69 |               |             | 23.44         | 94             | 2.96         |
| Year of Follow-up: 2000, Age Group: 75-79    | Period   | Age Group | Smoking Group | N     | %     | Ever Quit (N) | Ever Quit % | Mean Yrs Quit | Short Term (n) | Short Term % |
| 10                                           | 75-79    | Never Any |               | 1023  | 23.32 |               |             |               |                |              |
| 10                                           | 75-79    | CC        |               | 214   | 4.88  | 0             | 0.00        |               |                |              |
| 10                                           | 75-79    | Ecig      |               | 229   | 5.22  |               |             |               |                |              |
| 10                                           | 75-79    | Dual      |               | 0     | 0.00  |               |             |               |                |              |
| 10                                           | 75-79    | Former    |               | 2921  | 66.58 |               |             | 25.38         | 67             | 2.29         |
| Year of Follow-up: 2005, Age Group: All Ages | Period   | Age Group | Smoking Group | N     | %     | Ever Quit (N) | Ever Quit % | Mean Yrs Quit | Short Term (n) | Short Term % |
| 15                                           | All Ages | Never Any |               | 37449 | 41.75 |               |             |               |                |              |
| 15                                           | All Ages | CC        |               | 1911  | 2.13  | 0             | 0.00        |               |                |              |
| 15                                           | All Ages | Ecig      |               | 20003 | 22.30 |               |             |               |                |              |
| 15                                           | All Ages | Dual      |               | 0     | 0.00  |               |             |               |                |              |
| 15                                           | All Ages | Former    |               | 30342 | 33.82 |               |             | 18.46         | 1574           | 5.19         |
| Year of Follow-up: 2005, Age Group: 18-19    | Period   | Age Group | Smoking Group | N     | %     | Ever Quit (N) | Ever Quit % | Mean Yrs Quit | Short Term (n) | Short Term % |
| 15                                           | 18-19    | Never Any |               | 0     | .     |               |             |               |                |              |
| 15                                           | 18-19    | CC        |               | 0     | .     | 0             | .           |               |                |              |
| 15                                           | 18-19    | Ecig      |               | 0     | .     |               |             |               |                |              |
| 15                                           | 18-19    | Dual      |               | 0     | .     |               |             |               |                |              |
| 15                                           | 18-19    | Former    |               | 0     | .     |               |             | .             | 0              | .            |
| Year of Follow-up: 2005, Age Group: 20-24    | Period   | Age Group | Smoking Group | N     | %     | Ever Quit (N) | Ever Quit % | Mean Yrs Quit | Short Term (n) | Short Term % |
| 15                                           | 20-24    | Never Any |               | 0     | .     |               |             |               |                |              |
| 15                                           | 20-24    | CC        |               | 0     | .     | 0             | .           |               |                |              |
| 15                                           | 20-24    | Ecig      |               | 0     | .     |               |             |               |                |              |
| 15                                           | 20-24    | Dual      |               | 0     | .     |               |             |               |                |              |
| 15                                           | 20-24    | Former    |               | 0     | .     |               |             | .             | 0              | .            |
| Year of Follow-up: 2005, Age Group: 25-29    | Period   | Age Group | Smoking Group | N     | %     | Ever Quit (N) | Ever Quit % | Mean Yrs Quit | Short Term (n) | Short Term % |
| 15                                           | 25-29    | Never Any |               | 4634  | 52.39 |               |             |               |                |              |
| 15                                           | 25-29    | CC        |               | 179   | 2.02  | 0             | 0.00        |               |                |              |
| 15                                           | 25-29    | Ecig      |               | 2661  | 30.08 |               |             |               |                |              |
| 15                                           | 25-29    | Dual      |               | 0     | 0.00  |               |             |               |                |              |
| 15                                           | 25-29    | Former    |               | 1371  | 15.50 |               |             | 6.32          | 174            | 12.69        |
| Year of Follow-up: 2005, Age Group: 30-34    | Period   | Age Group | Smoking Group | N     | %     | Ever Quit (N) | Ever Quit % | Mean Yrs Quit | Short Term (n) | Short Term % |
| 15                                           | 30-34    | Never Any |               | 5042  | 55.77 |               |             |               |                |              |
| 15                                           | 30-34    | CC        |               | 153   | 1.69  | 0             | 0.00        |               |                |              |
| 15                                           | 30-34    | Ecig      |               | 2479  | 27.42 |               |             |               |                |              |
| 15                                           | 30-34    | Dual      |               | 0     | 0.00  |               |             |               |                |              |
| 15                                           | 30-34    | Former    |               | 1366  | 15.11 |               |             | 7.38          | 171            | 12.52        |
| Year of Follow-up: 2005, Age Group: 35-39    | Period   | Age Group | Smoking Group | N     | %     | Ever Quit (N) | Ever Quit % | Mean Yrs Quit | Short Term (n) | Short Term % |
| 15                                           | 35-39    | Never Any |               | 5163  | 52.60 |               |             |               |                |              |
| 15                                           | 35-39    | CC        |               | 188   | 1.92  | 0             | 0.00        |               |                |              |

**Results for PHIM for Run 9 (Sensitivity\_Analysis\_1.RTF)**

|                                              |           |               |       |       |               |             |               |                |              |
|----------------------------------------------|-----------|---------------|-------|-------|---------------|-------------|---------------|----------------|--------------|
| 15                                           | 35-39     | Ecig          | 2654  | 27.04 |               |             |               |                |              |
| 15                                           | 35-39     | Dual          | 0     | 0.00  |               |             |               |                |              |
| 15                                           | 35-39     | Former        | 1811  | 18.45 |               |             | 11.33         | 147            | 8.12         |
| Year of Follow-up: 2005, Age Group: 40-44    |           |               |       |       |               |             |               |                |              |
| Period                                       | Age Group | Smoking Group | N     | %     | Ever Quit (N) | Ever Quit % | Mean Yrs Quit | Short Term (n) | Short Term % |
| 15                                           | 40-44     | Never Any     | 4997  | 46.86 |               |             |               |                |              |
| 15                                           | 40-44     | CC            | 231   | 2.17  | 0             | 0.00        |               |                |              |
| 15                                           | 40-44     | Ecig          | 2948  | 27.64 |               |             |               |                |              |
| 15                                           | 40-44     | Dual          | 0     | 0.00  |               |             |               |                |              |
| 15                                           | 40-44     | Former        | 2488  | 23.33 |               |             | 13.32         | 199            | 8.00         |
| Year of Follow-up: 2005, Age Group: 45-49    |           |               |       |       |               |             |               |                |              |
| Period                                       | Age Group | Smoking Group | N     | %     | Ever Quit (N) | Ever Quit % | Mean Yrs Quit | Short Term (n) | Short Term % |
| 15                                           | 45-49     | Never Any     | 4724  | 43.28 |               |             |               |                |              |
| 15                                           | 45-49     | CC            | 216   | 1.98  | 0             | 0.00        |               |                |              |
| 15                                           | 45-49     | Ecig          | 2793  | 25.59 |               |             |               |                |              |
| 15                                           | 45-49     | Dual          | 0     | 0.00  |               |             |               |                |              |
| 15                                           | 45-49     | Former        | 3183  | 29.16 |               |             | 14.88         | 160            | 5.03         |
| Year of Follow-up: 2005, Age Group: 50-54    |           |               |       |       |               |             |               |                |              |
| Period                                       | Age Group | Smoking Group | N     | %     | Ever Quit (N) | Ever Quit % | Mean Yrs Quit | Short Term (n) | Short Term % |
| 15                                           | 50-54     | Never Any     | 3941  | 39.85 |               |             |               |                |              |
| 15                                           | 50-54     | CC            | 213   | 2.15  | 0             | 0.00        |               |                |              |
| 15                                           | 50-54     | Ecig          | 2180  | 22.04 |               |             |               |                |              |
| 15                                           | 50-54     | Dual          | 0     | 0.00  |               |             |               |                |              |
| 15                                           | 50-54     | Former        | 3555  | 35.95 |               |             | 18.19         | 154            | 4.33         |
| Year of Follow-up: 2005, Age Group: 55-59    |           |               |       |       |               |             |               |                |              |
| Period                                       | Age Group | Smoking Group | N     | %     | Ever Quit (N) | Ever Quit % | Mean Yrs Quit | Short Term (n) | Short Term % |
| 15                                           | 55-59     | Never Any     | 2912  | 33.65 |               |             |               |                |              |
| 15                                           | 55-59     | CC            | 215   | 2.48  | 0             | 0.00        |               |                |              |
| 15                                           | 55-59     | Ecig          | 1781  | 20.58 |               |             |               |                |              |
| 15                                           | 55-59     | Dual          | 0     | 0.00  |               |             |               |                |              |
| 15                                           | 55-59     | Former        | 3747  | 43.29 |               |             | 20.09         | 117            | 3.12         |
| Year of Follow-up: 2005, Age Group: 60-64    |           |               |       |       |               |             |               |                |              |
| Period                                       | Age Group | Smoking Group | N     | %     | Ever Quit (N) | Ever Quit % | Mean Yrs Quit | Short Term (n) | Short Term % |
| 15                                           | 60-64     | Never Any     | 1919  | 29.46 |               |             |               |                |              |
| 15                                           | 60-64     | CC            | 143   | 2.19  | 0             | 0.00        |               |                |              |
| 15                                           | 60-64     | Ecig          | 1100  | 16.88 |               |             |               |                |              |
| 15                                           | 60-64     | Dual          | 0     | 0.00  |               |             |               |                |              |
| 15                                           | 60-64     | Former        | 3353  | 51.47 |               |             | 21.47         | 156            | 4.65         |
| Year of Follow-up: 2005, Age Group: 65-69    |           |               |       |       |               |             |               |                |              |
| Period                                       | Age Group | Smoking Group | N     | %     | Ever Quit (N) | Ever Quit % | Mean Yrs Quit | Short Term (n) | Short Term % |
| 15                                           | 65-69     | Never Any     | 1611  | 29.41 |               |             |               |                |              |
| 15                                           | 65-69     | CC            | 124   | 2.26  | 0             | 0.00        |               |                |              |
| 15                                           | 65-69     | Ecig          | 705   | 12.87 |               |             |               |                |              |
| 15                                           | 65-69     | Dual          | 0     | 0.00  |               |             |               |                |              |
| 15                                           | 65-69     | Former        | 3037  | 55.45 |               |             | 22.19         | 118            | 3.89         |
| Year of Follow-up: 2005, Age Group: 70-74    |           |               |       |       |               |             |               |                |              |
| Period                                       | Age Group | Smoking Group | N     | %     | Ever Quit (N) | Ever Quit % | Mean Yrs Quit | Short Term (n) | Short Term % |
| 15                                           | 70-74     | Never Any     | 1337  | 26.83 |               |             |               |                |              |
| 15                                           | 70-74     | CC            | 129   | 2.59  | 0             | 0.00        |               |                |              |
| 15                                           | 70-74     | Ecig          | 441   | 8.85  |               |             |               |                |              |
| 15                                           | 70-74     | Dual          | 0     | 0.00  |               |             |               |                |              |
| 15                                           | 70-74     | Former        | 3076  | 61.73 |               |             | 22.89         | 112            | 3.64         |
| Year of Follow-up: 2005, Age Group: 75-79    |           |               |       |       |               |             |               |                |              |
| Period                                       | Age Group | Smoking Group | N     | %     | Ever Quit (N) | Ever Quit % | Mean Yrs Quit | Short Term (n) | Short Term % |
| 15                                           | 75-79     | Never Any     | 1169  | 23.83 |               |             |               |                |              |
| 15                                           | 75-79     | CC            | 120   | 2.45  | 0             | 0.00        |               |                |              |
| 15                                           | 75-79     | Ecig          | 261   | 5.32  |               |             |               |                |              |
| 15                                           | 75-79     | Dual          | 0     | 0.00  |               |             |               |                |              |
| 15                                           | 75-79     | Former        | 3355  | 68.40 |               |             | 27.01         | 66             | 1.97         |
| Year of Follow-up: 2010, Age Group: All Ages |           |               |       |       |               |             |               |                |              |
| Period                                       | Age Group | Smoking Group | N     | %     | Ever Quit (N) | Ever Quit % | Mean Yrs Quit | Short Term (n) | Short Term % |
| 20                                           | All Ages  | Never Any     | 36103 | 42.57 |               |             |               |                |              |
| 20                                           | All Ages  | CC            | 738   | 0.87  | 0             | 0.00        |               |                |              |
| 20                                           | All Ages  | Ecig          | 17076 | 20.14 |               |             |               |                |              |
| 20                                           | All Ages  | Dual          | 0     | 0.00  |               |             |               |                |              |
| 20                                           | All Ages  | Former        | 30883 | 36.42 |               |             | 19.82         | 1518           | 4.92         |
| Year of Follow-up: 2010, Age Group: 18-19    |           |               |       |       |               |             |               |                |              |
| Period                                       | Age Group | Smoking Group | N     | %     | Ever Quit (N) | Ever Quit % | Mean Yrs Quit | Short Term (n) | Short Term % |

**Results for PHIM for Run 9 (Sensitivity\_Analysis\_1.RTF)**

|                                           |           |               |      |       |               |             |               |                |              |
|-------------------------------------------|-----------|---------------|------|-------|---------------|-------------|---------------|----------------|--------------|
| 20                                        | 18-19     | Never Any     | 0    | .     |               |             |               |                |              |
| 20                                        | 18-19     | CC            | 0    | .     | 0             | .           |               |                |              |
| 20                                        | 18-19     | Ecig          | 0    | .     |               |             |               |                |              |
| 20                                        | 18-19     | Dual          | 0    | .     |               |             |               |                |              |
| 20                                        | 18-19     | Former        | 0    | .     |               |             | 0             | .              |              |
| Year of Follow-up: 2010, Age Group: 20-24 |           |               |      |       |               |             |               |                |              |
| Period                                    | Age Group | Smoking Group | N    | %     | Ever Quit (N) | Ever Quit % | Mean Yrs Quit | Short Term (n) | Short Term % |
| 20                                        | 20-24     | Never Any     | 0    | .     |               |             |               |                |              |
| 20                                        | 20-24     | CC            | 0    | .     | 0             | .           |               |                |              |
| 20                                        | 20-24     | Ecig          | 0    | .     |               |             |               |                |              |
| 20                                        | 20-24     | Dual          | 0    | .     |               |             |               |                |              |
| 20                                        | 20-24     | Former        | 0    | .     |               |             |               | 0              | .            |
| Year of Follow-up: 2010, Age Group: 25-29 |           |               |      |       |               |             |               |                |              |
| Period                                    | Age Group | Smoking Group | N    | %     | Ever Quit (N) | Ever Quit % | Mean Yrs Quit | Short Term (n) | Short Term % |
| 20                                        | 25-29     | Never Any     | 0    | .     |               |             |               |                |              |
| 20                                        | 25-29     | CC            | 0    | .     | 0             | .           |               |                |              |
| 20                                        | 25-29     | Ecig          | 0    | .     |               |             |               |                |              |
| 20                                        | 25-29     | Dual          | 0    | .     |               |             |               |                |              |
| 20                                        | 25-29     | Former        | 0    | .     |               |             |               | 0              | .            |
| Year of Follow-up: 2010, Age Group: 30-34 |           |               |      |       |               |             |               |                |              |
| Period                                    | Age Group | Smoking Group | N    | %     | Ever Quit (N) | Ever Quit % | Mean Yrs Quit | Short Term (n) | Short Term % |
| 20                                        | 30-34     | Never Any     | 4508 | 50.97 |               |             |               |                |              |
| 20                                        | 30-34     | CC            | 71   | 0.80  | 0             | 0.00        |               |                |              |
| 20                                        | 30-34     | Ecig          | 2376 | 26.86 |               |             |               |                |              |
| 20                                        | 30-34     | Dual          | 0    | 0.00  |               |             |               |                |              |
| 20                                        | 30-34     | Former        | 1890 | 21.37 |               |             | 8.72          | 230            | 12.17        |
| Year of Follow-up: 2010, Age Group: 35-39 |           |               |      |       |               |             |               |                |              |
| Period                                    | Age Group | Smoking Group | N    | %     | Ever Quit (N) | Ever Quit % | Mean Yrs Quit | Short Term (n) | Short Term % |
| 20                                        | 35-39     | Never Any     | 4991 | 55.21 |               |             |               |                |              |
| 20                                        | 35-39     | CC            | 59   | 0.65  | 0             | 0.00        |               |                |              |
| 20                                        | 35-39     | Ecig          | 2154 | 23.83 |               |             |               |                |              |
| 20                                        | 35-39     | Dual          | 0    | 0.00  |               |             |               |                |              |
| 20                                        | 35-39     | Former        | 1836 | 20.31 |               |             | 9.77          | 141            | 7.68         |
| Year of Follow-up: 2010, Age Group: 40-44 |           |               |      |       |               |             |               |                |              |
| Period                                    | Age Group | Smoking Group | N    | %     | Ever Quit (N) | Ever Quit % | Mean Yrs Quit | Short Term (n) | Short Term % |
| 20                                        | 40-44     | Never Any     | 5163 | 52.60 |               |             |               |                |              |
| 20                                        | 40-44     | CC            | 68   | 0.69  | 0             | 0.00        |               |                |              |
| 20                                        | 40-44     | Ecig          | 2416 | 24.61 |               |             |               |                |              |
| 20                                        | 40-44     | Dual          | 0    | 0.00  |               |             |               |                |              |
| 20                                        | 40-44     | Former        | 2169 | 22.10 |               |             | 13.96         | 143            | 6.59         |
| Year of Follow-up: 2010, Age Group: 45-49 |           |               |      |       |               |             |               |                |              |
| Period                                    | Age Group | Smoking Group | N    | %     | Ever Quit (N) | Ever Quit % | Mean Yrs Quit | Short Term (n) | Short Term % |
| 20                                        | 45-49     | Never Any     | 4997 | 46.86 |               |             |               |                |              |
| 20                                        | 45-49     | CC            | 89   | 0.83  | 0             | 0.00        |               |                |              |
| 20                                        | 45-49     | Ecig          | 2619 | 24.56 |               |             |               |                |              |
| 20                                        | 45-49     | Dual          | 0    | 0.00  |               |             |               |                |              |
| 20                                        | 45-49     | Former        | 2959 | 27.75 |               |             | 15.74         | 171            | 5.78         |
| Year of Follow-up: 2010, Age Group: 50-54 |           |               |      |       |               |             |               |                |              |
| Period                                    | Age Group | Smoking Group | N    | %     | Ever Quit (N) | Ever Quit % | Mean Yrs Quit | Short Term (n) | Short Term % |
| 20                                        | 50-54     | Never Any     | 4724 | 43.28 |               |             |               |                |              |
| 20                                        | 50-54     | CC            | 87   | 0.80  | 0             | 0.00        |               |                |              |
| 20                                        | 50-54     | Ecig          | 2490 | 22.81 |               |             |               |                |              |
| 20                                        | 50-54     | Dual          | 0    | 0.00  |               |             |               |                |              |
| 20                                        | 50-54     | Former        | 3615 | 33.12 |               |             | 17.75         | 174            | 4.81         |
| Year of Follow-up: 2010, Age Group: 55-59 |           |               |      |       |               |             |               |                |              |
| Period                                    | Age Group | Smoking Group | N    | %     | Ever Quit (N) | Ever Quit % | Mean Yrs Quit | Short Term (n) | Short Term % |
| 20                                        | 55-59     | Never Any     | 3941 | 39.85 |               |             |               |                |              |
| 20                                        | 55-59     | CC            | 85   | 0.86  | 0             | 0.00        |               |                |              |
| 20                                        | 55-59     | Ecig          | 1859 | 18.80 |               |             |               |                |              |
| 20                                        | 55-59     | Dual          | 0    | 0.00  |               |             |               |                |              |
| 20                                        | 55-59     | Former        | 4004 | 40.49 |               |             | 20.81         | 181            | 4.52         |
| Year of Follow-up: 2010, Age Group: 60-64 |           |               |      |       |               |             |               |                |              |
| Period                                    | Age Group | Smoking Group | N    | %     | Ever Quit (N) | Ever Quit % | Mean Yrs Quit | Short Term (n) | Short Term % |
| 20                                        | 60-64     | Never Any     | 2912 | 33.65 |               |             |               |                |              |
| 20                                        | 60-64     | CC            | 87   | 1.01  | 0             | 0.00        |               |                |              |
| 20                                        | 60-64     | Ecig          | 1428 | 16.50 |               |             |               |                |              |
| 20                                        | 60-64     | Dual          | 0    | 0.00  |               |             |               |                |              |
| 20                                        | 60-64     | Former        | 4228 | 48.85 |               |             | 22.41         | 241            | 5.70         |
| Year of Follow-up: 2010, Age Group: 65-69 |           |               |      |       |               |             |               |                |              |



**Results for PHIM for Run 9 (Sensitivity\_Analysis\_1.RTF)**

| Period                                       | Age Group | Smoking Group | N     | %     | Ever Quit (N) | Ever Quit % | Mean Yrs Quit | Short Term (n) | Short Term % |
|----------------------------------------------|-----------|---------------|-------|-------|---------------|-------------|---------------|----------------|--------------|
| 20                                           | 65-69     | Never Any     | 1919  | 29.46 |               |             |               |                |              |
| 20                                           | 65-69     | CC            | 60    | 0.92  | 0             | 0.00        |               |                |              |
| 20                                           | 65-69     | Ecig          | 809   | 12.42 |               |             |               |                |              |
| 20                                           | 65-69     | Dual          | 0     | 0.00  |               |             |               |                |              |
| 20                                           | 65-69     | Former        | 3727  | 57.21 |               |             | 24.03         | 133            | 3.57         |
| Year of Follow-up: 2010, Age Group: 70-74    |           |               |       |       |               |             |               |                |              |
| Period                                       | Age Group | Smoking Group | N     | %     | Ever Quit (N) | Ever Quit % | Mean Yrs Quit | Short Term (n) | Short Term % |
| 20                                           | 70-74     | Never Any     | 1611  | 29.41 |               |             |               |                |              |
| 20                                           | 70-74     | CC            | 69    | 1.26  | 0             | 0.00        |               |                |              |
| 20                                           | 70-74     | Ecig          | 574   | 10.48 |               |             |               |                |              |
| 20                                           | 70-74     | Dual          | 0     | 0.00  |               |             |               |                |              |
| 20                                           | 70-74     | Former        | 3223  | 58.85 |               |             | 25.75         | 61             | 1.89         |
| Year of Follow-up: 2010, Age Group: 75-79    |           |               |       |       |               |             |               |                |              |
| Period                                       | Age Group | Smoking Group | N     | %     | Ever Quit (N) | Ever Quit % | Mean Yrs Quit | Short Term (n) | Short Term % |
| 20                                           | 75-79     | Never Any     | 1337  | 26.83 |               |             |               |                |              |
| 20                                           | 75-79     | CC            | 63    | 1.26  | 0             | 0.00        |               |                |              |
| 20                                           | 75-79     | Ecig          | 351   | 7.04  |               |             |               |                |              |
| 20                                           | 75-79     | Dual          | 0     | 0.00  |               |             |               |                |              |
| 20                                           | 75-79     | Former        | 3232  | 64.86 |               |             | 26.66         | 43             | 1.33         |
| Year of Follow-up: 2015, Age Group: All Ages |           |               |       |       |               |             |               |                |              |
| Period                                       | Age Group | Smoking Group | N     | %     | Ever Quit (N) | Ever Quit % | Mean Yrs Quit | Short Term (n) | Short Term % |
| 25                                           | All Ages  | Never Any     | 34747 | 43.53 |               |             |               |                |              |
| 25                                           | All Ages  | CC            | 289   | 0.36  | 0             | 0.00        |               |                |              |
| 25                                           | All Ages  | Ecig          | 14107 | 17.67 |               |             |               |                |              |
| 25                                           | All Ages  | Dual          | 0     | 0.00  |               |             |               |                |              |
| 25                                           | All Ages  | Former        | 30674 | 38.43 |               |             | 21.87         | 1088           | 3.55         |
| Year of Follow-up: 2015, Age Group: 18-19    |           |               |       |       |               |             |               |                |              |
| Period                                       | Age Group | Smoking Group | N     | %     | Ever Quit (N) | Ever Quit % | Mean Yrs Quit | Short Term (n) | Short Term % |
| 25                                           | 18-19     | Never Any     | 0     | .     |               |             |               |                |              |
| 25                                           | 18-19     | CC            | 0     | .     | 0             | .           |               |                |              |
| 25                                           | 18-19     | Ecig          | 0     | .     |               |             |               |                |              |
| 25                                           | 18-19     | Dual          | 0     | .     |               |             |               |                |              |
| 25                                           | 18-19     | Former        | 0     | .     |               |             |               | 0              | .            |
| Year of Follow-up: 2015, Age Group: 20-24    |           |               |       |       |               |             |               |                |              |
| Period                                       | Age Group | Smoking Group | N     | %     | Ever Quit (N) | Ever Quit % | Mean Yrs Quit | Short Term (n) | Short Term % |
| 25                                           | 20-24     | Never Any     | 0     | .     |               |             |               |                |              |
| 25                                           | 20-24     | CC            | 0     | .     | 0             | .           |               |                |              |
| 25                                           | 20-24     | Ecig          | 0     | .     |               |             |               |                |              |
| 25                                           | 20-24     | Dual          | 0     | .     |               |             |               |                |              |
| 25                                           | 20-24     | Former        | 0     | .     |               |             |               | 0              | .            |
| Year of Follow-up: 2015, Age Group: 25-29    |           |               |       |       |               |             |               |                |              |
| Period                                       | Age Group | Smoking Group | N     | %     | Ever Quit (N) | Ever Quit % | Mean Yrs Quit | Short Term (n) | Short Term % |
| 25                                           | 25-29     | Never Any     | 0     | .     |               |             |               |                |              |
| 25                                           | 25-29     | CC            | 0     | .     | 0             | .           |               |                |              |
| 25                                           | 25-29     | Ecig          | 0     | .     |               |             |               |                |              |
| 25                                           | 25-29     | Dual          | 0     | .     |               |             |               |                |              |
| 25                                           | 25-29     | Former        | 0     | .     |               |             |               | 0              | .            |
| Year of Follow-up: 2015, Age Group: 30-34    |           |               |       |       |               |             |               |                |              |
| Period                                       | Age Group | Smoking Group | N     | %     | Ever Quit (N) | Ever Quit % | Mean Yrs Quit | Short Term (n) | Short Term % |
| 25                                           | 30-34     | Never Any     | 0     | .     |               |             |               |                |              |
| 25                                           | 30-34     | CC            | 0     | .     | 0             | .           |               |                |              |
| 25                                           | 30-34     | Ecig          | 0     | .     |               |             |               |                |              |
| 25                                           | 30-34     | Dual          | 0     | .     |               |             |               |                |              |
| 25                                           | 30-34     | Former        | 0     | .     |               |             |               | 0              | .            |
| Year of Follow-up: 2015, Age Group: 35-39    |           |               |       |       |               |             |               |                |              |
| Period                                       | Age Group | Smoking Group | N     | %     | Ever Quit (N) | Ever Quit % | Mean Yrs Quit | Short Term (n) | Short Term % |
| 25                                           | 35-39     | Never Any     | 4489  | 50.75 |               |             |               |                |              |
| 25                                           | 35-39     | CC            | 28    | 0.32  | 0             | 0.00        |               |                |              |
| 25                                           | 35-39     | Ecig          | 1990  | 22.50 |               |             |               |                |              |
| 25                                           | 35-39     | Dual          | 0     | 0.00  |               |             |               |                |              |
| 25                                           | 35-39     | Former        | 2338  | 26.43 |               |             | 11.53         | 142            | 6.07         |
| Year of Follow-up: 2015, Age Group: 40-44    |           |               |       |       |               |             |               |                |              |
| Period                                       | Age Group | Smoking Group | N     | %     | Ever Quit (N) | Ever Quit % | Mean Yrs Quit | Short Term (n) | Short Term % |
| 25                                           | 40-44     | Never Any     | 4991  | 55.21 |               |             |               |                |              |
| 25                                           | 40-44     | CC            | 20    | 0.22  | 0             | 0.00        |               |                |              |
| 25                                           | 40-44     | Ecig          | 1897  | 20.98 |               |             |               |                |              |
| 25                                           | 40-44     | Dual          | 0     | 0.00  |               |             |               |                |              |

**Results for PHIM for Run 9 (Sensitivity\_Analysis\_1.RTF)**

| Year of Follow-up: 2015, Age Group: 45-49    | Period   | Age Group | Smoking Group | N     | %     | Ever Quit (N) | Ever Quit % | Mean Yrs Quit | Short Term (n) | Short Term % |
|----------------------------------------------|----------|-----------|---------------|-------|-------|---------------|-------------|---------------|----------------|--------------|
| 25                                           | 40-44    | Former    |               | 2132  | 23.58 |               |             | 13.01         | 112            | 5.25         |
| 25                                           | 45-49    | Never Any |               | 5163  | 52.60 |               |             |               |                |              |
| 25                                           | 45-49    | CC        |               | 29    | 0.30  | 0             | 0.00        |               |                |              |
| 25                                           | 45-49    | Ecig      |               | 2195  | 22.36 |               |             |               |                |              |
| 25                                           | 45-49    | Dual      |               | 0     | 0.00  |               |             |               |                |              |
| 25                                           | 45-49    | Former    |               | 2429  | 24.75 |               |             | 17.18         | 81             | 3.33         |
| Year of Follow-up: 2015, Age Group: 50-54    | Period   | Age Group | Smoking Group | N     | %     | Ever Quit (N) | Ever Quit % | Mean Yrs Quit | Short Term (n) | Short Term % |
| 25                                           | 50-54    | Never Any |               | 4997  | 46.86 |               |             |               |                |              |
| 25                                           | 50-54    | CC        |               | 37    | 0.35  | 0             | 0.00        |               |                |              |
| 25                                           | 50-54    | Ecig      |               | 2387  | 22.38 |               |             |               |                |              |
| 25                                           | 50-54    | Dual      |               | 0     | 0.00  |               |             |               |                |              |
| 25                                           | 50-54    | Former    |               | 3243  | 30.41 |               |             | 19.10         | 130            | 4.01         |
| Year of Follow-up: 2015, Age Group: 55-59    | Period   | Age Group | Smoking Group | N     | %     | Ever Quit (N) | Ever Quit % | Mean Yrs Quit | Short Term (n) | Short Term % |
| 25                                           | 55-59    | Never Any |               | 4724  | 43.28 |               |             |               |                |              |
| 25                                           | 55-59    | CC        |               | 33    | 0.30  | 0             | 0.00        |               |                |              |
| 25                                           | 55-59    | Ecig      |               | 2103  | 19.27 |               |             |               |                |              |
| 25                                           | 55-59    | Dual      |               | 0     | 0.00  |               |             |               |                |              |
| 25                                           | 55-59    | Former    |               | 4056  | 37.16 |               |             | 20.50         | 162            | 3.99         |
| Year of Follow-up: 2015, Age Group: 60-64    | Period   | Age Group | Smoking Group | N     | %     | Ever Quit (N) | Ever Quit % | Mean Yrs Quit | Short Term (n) | Short Term % |
| 25                                           | 60-64    | Never Any |               | 3941  | 39.85 |               |             |               |                |              |
| 25                                           | 60-64    | CC        |               | 28    | 0.28  | 0             | 0.00        |               |                |              |
| 25                                           | 60-64    | Ecig      |               | 1443  | 14.59 |               |             |               |                |              |
| 25                                           | 60-64    | Dual      |               | 0     | 0.00  |               |             |               |                |              |
| 25                                           | 60-64    | Former    |               | 4477  | 45.27 |               |             | 23.28         | 205            | 4.58         |
| Year of Follow-up: 2015, Age Group: 65-69    | Period   | Age Group | Smoking Group | N     | %     | Ever Quit (N) | Ever Quit % | Mean Yrs Quit | Short Term (n) | Short Term % |
| 25                                           | 65-69    | Never Any |               | 2912  | 33.65 |               |             |               |                |              |
| 25                                           | 65-69    | CC        |               | 43    | 0.50  | 0             | 0.00        |               |                |              |
| 25                                           | 65-69    | Ecig      |               | 1019  | 11.77 |               |             |               |                |              |
| 25                                           | 65-69    | Dual      |               | 0     | 0.00  |               |             |               |                |              |
| 25                                           | 65-69    | Former    |               | 4681  | 54.08 |               |             | 24.99         | 134            | 2.86         |
| Year of Follow-up: 2015, Age Group: 70-74    | Period   | Age Group | Smoking Group | N     | %     | Ever Quit (N) | Ever Quit % | Mean Yrs Quit | Short Term (n) | Short Term % |
| 25                                           | 70-74    | Never Any |               | 1919  | 29.46 |               |             |               |                |              |
| 25                                           | 70-74    | CC        |               | 35    | 0.54  | 0             | 0.00        |               |                |              |
| 25                                           | 70-74    | Ecig      |               | 616   | 9.46  |               |             |               |                |              |
| 25                                           | 70-74    | Dual      |               | 0     | 0.00  |               |             |               |                |              |
| 25                                           | 70-74    | Former    |               | 3945  | 60.55 |               |             | 27.55         | 70             | 1.77         |
| Year of Follow-up: 2015, Age Group: 75-79    | Period   | Age Group | Smoking Group | N     | %     | Ever Quit (N) | Ever Quit % | Mean Yrs Quit | Short Term (n) | Short Term % |
| 25                                           | 75-79    | Never Any |               | 1611  | 29.41 |               |             |               |                |              |
| 25                                           | 75-79    | CC        |               | 36    | 0.66  | 0             | 0.00        |               |                |              |
| 25                                           | 75-79    | Ecig      |               | 457   | 8.34  |               |             |               |                |              |
| 25                                           | 75-79    | Dual      |               | 0     | 0.00  |               |             |               |                |              |
| 25                                           | 75-79    | Former    |               | 3373  | 61.58 |               |             | 29.48         | 52             | 1.54         |
| Year of Follow-up: 2020, Age Group: All Ages | Period   | Age Group | Smoking Group | N     | %     | Ever Quit (N) | Ever Quit % | Mean Yrs Quit | Short Term (n) | Short Term % |
| 30                                           | All Ages | Never Any |               | 33136 | 44.57 |               |             |               |                |              |
| 30                                           | All Ages | CC        |               | 100   | 0.13  | 0             | 0.00        |               |                |              |
| 30                                           | All Ages | Ecig      |               | 11358 | 15.28 |               |             |               |                |              |
| 30                                           | All Ages | Dual      |               | 0     | 0.00  |               |             |               |                |              |
| 30                                           | All Ages | Former    |               | 29746 | 40.01 |               |             | 23.97         | 918            | 3.09         |
| Year of Follow-up: 2020, Age Group: 18-19    | Period   | Age Group | Smoking Group | N     | %     | Ever Quit (N) | Ever Quit % | Mean Yrs Quit | Short Term (n) | Short Term % |
| 30                                           | 18-19    | Never Any |               | 0     | .     |               |             |               |                |              |
| 30                                           | 18-19    | CC        |               | 0     | .     | 0             | .           |               |                |              |
| 30                                           | 18-19    | Ecig      |               | 0     | .     |               |             |               |                |              |
| 30                                           | 18-19    | Dual      |               | 0     | .     |               |             |               |                |              |
| 30                                           | 18-19    | Former    |               | 0     | .     |               |             | .             | 0              | .            |
| Year of Follow-up: 2020, Age Group: 20-24    | Period   | Age Group | Smoking Group | N     | %     | Ever Quit (N) | Ever Quit % | Mean Yrs Quit | Short Term (n) | Short Term % |
| 30                                           | 20-24    | Never Any |               | 0     | .     |               |             |               |                |              |
| 30                                           | 20-24    | CC        |               | 0     | .     | 0             | .           |               |                |              |

**Results for PHIM for Run 9 (Sensitivity\_Analysis\_1.RTF)**

|                                           |           |               |      |       |               |             |               |                |              |
|-------------------------------------------|-----------|---------------|------|-------|---------------|-------------|---------------|----------------|--------------|
| 30                                        | 20-24     | Ecig          | 0    | .     |               |             |               |                |              |
| 30                                        | 20-24     | Dual          | 0    | .     |               |             |               |                |              |
| 30                                        | 20-24     | Former        | 0    | .     |               |             | 0             | .              |              |
| Year of Follow-up: 2020, Age Group: 25-29 |           |               |      |       |               |             |               |                |              |
| Period                                    | Age Group | Smoking Group | N    | %     | Ever Quit (N) | Ever Quit % | Mean Yrs Quit | Short Term (n) | Short Term % |
| 30                                        | 25-29     | Never Any     | 0    | .     |               |             |               |                |              |
| 30                                        | 25-29     | CC            | 0    | .     | 0             | .           |               |                |              |
| 30                                        | 25-29     | Ecig          | 0    | .     |               |             |               |                |              |
| 30                                        | 25-29     | Dual          | 0    | .     |               |             |               |                |              |
| 30                                        | 25-29     | Former        | 0    | .     |               |             |               | 0              | .            |
| Year of Follow-up: 2020, Age Group: 30-34 |           |               |      |       |               |             |               |                |              |
| Period                                    | Age Group | Smoking Group | N    | %     | Ever Quit (N) | Ever Quit % | Mean Yrs Quit | Short Term (n) | Short Term % |
| 30                                        | 30-34     | Never Any     | 0    | .     |               |             |               |                |              |
| 30                                        | 30-34     | CC            | 0    | .     | 0             | .           |               |                |              |
| 30                                        | 30-34     | Ecig          | 0    | .     |               |             |               |                |              |
| 30                                        | 30-34     | Dual          | 0    | .     |               |             |               |                |              |
| 30                                        | 30-34     | Former        | 0    | .     |               |             |               | 0              | .            |
| Year of Follow-up: 2020, Age Group: 35-39 |           |               |      |       |               |             |               |                |              |
| Period                                    | Age Group | Smoking Group | N    | %     | Ever Quit (N) | Ever Quit % | Mean Yrs Quit | Short Term (n) | Short Term % |
| 30                                        | 35-39     | Never Any     | 0    | .     |               |             |               |                |              |
| 30                                        | 35-39     | CC            | 0    | .     | 0             | .           |               |                |              |
| 30                                        | 35-39     | Ecig          | 0    | .     |               |             |               |                |              |
| 30                                        | 35-39     | Dual          | 0    | .     |               |             |               |                |              |
| 30                                        | 35-39     | Former        | 0    | .     |               |             |               | 0              | .            |
| Year of Follow-up: 2020, Age Group: 40-44 |           |               |      |       |               |             |               |                |              |
| Period                                    | Age Group | Smoking Group | N    | %     | Ever Quit (N) | Ever Quit % | Mean Yrs Quit | Short Term (n) | Short Term % |
| 30                                        | 40-44     | Never Any     | 4489 | 50.75 |               |             |               |                |              |
| 30                                        | 40-44     | CC            | 12   | 0.14  | 0             | 0.00        |               |                |              |
| 30                                        | 40-44     | Ecig          | 1743 | 19.71 |               |             |               |                |              |
| 30                                        | 40-44     | Dual          | 0    | 0.00  |               |             |               |                |              |
| 30                                        | 40-44     | Former        | 2601 | 29.41 |               |             | 15.05         | 107            | 4.11         |
| Year of Follow-up: 2020, Age Group: 45-49 |           |               |      |       |               |             |               |                |              |
| Period                                    | Age Group | Smoking Group | N    | %     | Ever Quit (N) | Ever Quit % | Mean Yrs Quit | Short Term (n) | Short Term % |
| 30                                        | 45-49     | Never Any     | 4991 | 55.21 |               |             |               |                |              |
| 30                                        | 45-49     | CC            | 5    | 0.06  | 0             | 0.00        |               |                |              |
| 30                                        | 45-49     | Ecig          | 1690 | 18.69 |               |             |               |                |              |
| 30                                        | 45-49     | Dual          | 0    | 0.00  |               |             |               |                |              |
| 30                                        | 45-49     | Former        | 2354 | 26.04 |               |             | 16.54         | 63             | 2.68         |
| Year of Follow-up: 2020, Age Group: 50-54 |           |               |      |       |               |             |               |                |              |
| Period                                    | Age Group | Smoking Group | N    | %     | Ever Quit (N) | Ever Quit % | Mean Yrs Quit | Short Term (n) | Short Term % |
| 30                                        | 50-54     | Never Any     | 5163 | 52.60 |               |             |               |                |              |
| 30                                        | 50-54     | CC            | 9    | 0.09  | 0             | 0.00        |               |                |              |
| 30                                        | 50-54     | Ecig          | 2021 | 20.59 |               |             |               |                |              |
| 30                                        | 50-54     | Dual          | 0    | 0.00  |               |             |               |                |              |
| 30                                        | 50-54     | Former        | 2623 | 26.72 |               |             | 20.66         | 99             | 3.77         |
| Year of Follow-up: 2020, Age Group: 55-59 |           |               |      |       |               |             |               |                |              |
| Period                                    | Age Group | Smoking Group | N    | %     | Ever Quit (N) | Ever Quit % | Mean Yrs Quit | Short Term (n) | Short Term % |
| 30                                        | 55-59     | Never Any     | 4997 | 46.86 |               |             |               |                |              |
| 30                                        | 55-59     | CC            | 18   | 0.17  | 0             | 0.00        |               |                |              |
| 30                                        | 55-59     | Ecig          | 2002 | 18.77 |               |             |               |                |              |
| 30                                        | 55-59     | Dual          | 0    | 0.00  |               |             |               |                |              |
| 30                                        | 55-59     | Former        | 3647 | 34.20 |               |             | 21.65         | 157            | 4.30         |
| Year of Follow-up: 2020, Age Group: 60-64 |           |               |      |       |               |             |               |                |              |
| Period                                    | Age Group | Smoking Group | N    | %     | Ever Quit (N) | Ever Quit % | Mean Yrs Quit | Short Term (n) | Short Term % |
| 30                                        | 60-64     | Never Any     | 4724 | 43.28 |               |             |               |                |              |
| 30                                        | 60-64     | CC            | 10   | 0.09  | 0             | 0.00        |               |                |              |
| 30                                        | 60-64     | Ecig          | 1614 | 14.79 |               |             |               |                |              |
| 30                                        | 60-64     | Dual          | 0    | 0.00  |               |             |               |                |              |
| 30                                        | 60-64     | Former        | 4568 | 41.85 |               |             | 22.87         | 203            | 4.44         |
| Year of Follow-up: 2020, Age Group: 65-69 |           |               |      |       |               |             |               |                |              |
| Period                                    | Age Group | Smoking Group | N    | %     | Ever Quit (N) | Ever Quit % | Mean Yrs Quit | Short Term (n) | Short Term % |
| 30                                        | 65-69     | Never Any     | 3941 | 39.85 |               |             |               |                |              |
| 30                                        | 65-69     | CC            | 13   | 0.13  | 0             | 0.00        |               |                |              |
| 30                                        | 65-69     | Ecig          | 1039 | 10.51 |               |             |               |                |              |
| 30                                        | 65-69     | Dual          | 0    | 0.00  |               |             |               |                |              |
| 30                                        | 65-69     | Former        | 4896 | 49.51 |               |             | 26.05         | 145            | 2.96         |
| Year of Follow-up: 2020, Age Group: 70-74 |           |               |      |       |               |             |               |                |              |
| Period                                    | Age Group | Smoking Group | N    | %     | Ever Quit (N) | Ever Quit % | Mean Yrs Quit | Short Term (n) | Short Term % |

**Results for PHIM for Run 9 (Sensitivity\_Analysis\_1.RTF)**

|                                              |           |               |       |       |               |             |               |                |              |
|----------------------------------------------|-----------|---------------|-------|-------|---------------|-------------|---------------|----------------|--------------|
| 30                                           | 70-74     | Never Any     | 2912  | 33.65 |               |             |               |                |              |
| 30                                           | 70-74     | CC            | 18    | 0.21  | 0             | 0.00        |               |                |              |
| 30                                           | 70-74     | Ecig          | 770   | 8.90  |               |             |               |                |              |
| 30                                           | 70-74     | Dual          | 0     | 0.00  |               |             |               |                |              |
| 30                                           | 70-74     | Former        | 4955  | 57.25 |               |             | 28.45         | 93             | 1.88         |
| Year of Follow-up: 2020, Age Group: 75-79    |           |               |       |       |               |             |               |                |              |
| Period                                       | Age Group | Smoking Group | N     | %     | Ever Quit (N) | Ever Quit % | Mean Yrs Quit | Short Term (n) | Short Term % |
| 30                                           | 75-79     | Never Any     | 1919  | 29.46 |               |             |               |                |              |
| 30                                           | 75-79     | CC            | 15    | 0.23  | 0             | 0.00        |               |                |              |
| 30                                           | 75-79     | Ecig          | 479   | 7.35  |               |             |               |                |              |
| 30                                           | 75-79     | Dual          | 0     | 0.00  |               |             |               |                |              |
| 30                                           | 75-79     | Former        | 4102  | 62.96 |               |             | 31.39         | 51             | 1.24         |
| Year of Follow-up: 2025, Age Group: All Ages |           |               |       |       |               |             |               |                |              |
| Period                                       | Age Group | Smoking Group | N     | %     | Ever Quit (N) | Ever Quit % | Mean Yrs Quit | Short Term (n) | Short Term % |
| 35                                           | All Ages  | Never Any     | 31217 | 46.03 |               |             |               |                |              |
| 35                                           | All Ages  | CC            | 38    | 0.06  | 0             | 0.00        |               |                |              |
| 35                                           | All Ages  | Ecig          | 8864  | 13.07 |               |             |               |                |              |
| 35                                           | All Ages  | Dual          | 0     | 0.00  |               |             |               |                |              |
| 35                                           | All Ages  | Former        | 27706 | 40.85 |               |             | 25.87         | 785            | 2.83         |
| Year of Follow-up: 2025, Age Group: 18-19    |           |               |       |       |               |             |               |                |              |
| Period                                       | Age Group | Smoking Group | N     | %     | Ever Quit (N) | Ever Quit % | Mean Yrs Quit | Short Term (n) | Short Term % |
| 35                                           | 18-19     | Never Any     | 0     | .     |               |             |               |                |              |
| 35                                           | 18-19     | CC            | 0     | .     | 0             | .           |               |                |              |
| 35                                           | 18-19     | Ecig          | 0     | .     |               |             |               |                |              |
| 35                                           | 18-19     | Dual          | 0     | .     |               |             |               |                |              |
| 35                                           | 18-19     | Former        | 0     | .     |               |             | .             | 0              | .            |
| Year of Follow-up: 2025, Age Group: 20-24    |           |               |       |       |               |             |               |                |              |
| Period                                       | Age Group | Smoking Group | N     | %     | Ever Quit (N) | Ever Quit % | Mean Yrs Quit | Short Term (n) | Short Term % |
| 35                                           | 20-24     | Never Any     | 0     | .     |               |             |               |                |              |
| 35                                           | 20-24     | CC            | 0     | .     | 0             | .           |               |                |              |
| 35                                           | 20-24     | Ecig          | 0     | .     |               |             |               |                |              |
| 35                                           | 20-24     | Dual          | 0     | .     |               |             |               |                |              |
| 35                                           | 20-24     | Former        | 0     | .     |               |             | .             | 0              | .            |
| Year of Follow-up: 2025, Age Group: 25-29    |           |               |       |       |               |             |               |                |              |
| Period                                       | Age Group | Smoking Group | N     | %     | Ever Quit (N) | Ever Quit % | Mean Yrs Quit | Short Term (n) | Short Term % |
| 35                                           | 25-29     | Never Any     | 0     | .     |               |             |               |                |              |
| 35                                           | 25-29     | CC            | 0     | .     | 0             | .           |               |                |              |
| 35                                           | 25-29     | Ecig          | 0     | .     |               |             |               |                |              |
| 35                                           | 25-29     | Dual          | 0     | .     |               |             |               |                |              |
| 35                                           | 25-29     | Former        | 0     | .     |               |             | .             | 0              | .            |
| Year of Follow-up: 2025, Age Group: 30-34    |           |               |       |       |               |             |               |                |              |
| Period                                       | Age Group | Smoking Group | N     | %     | Ever Quit (N) | Ever Quit % | Mean Yrs Quit | Short Term (n) | Short Term % |
| 35                                           | 30-34     | Never Any     | 0     | .     |               |             |               |                |              |
| 35                                           | 30-34     | CC            | 0     | .     | 0             | .           |               |                |              |
| 35                                           | 30-34     | Ecig          | 0     | .     |               |             |               |                |              |
| 35                                           | 30-34     | Dual          | 0     | .     |               |             |               |                |              |
| 35                                           | 30-34     | Former        | 0     | .     |               |             | .             | 0              | .            |
| Year of Follow-up: 2025, Age Group: 35-39    |           |               |       |       |               |             |               |                |              |
| Period                                       | Age Group | Smoking Group | N     | %     | Ever Quit (N) | Ever Quit % | Mean Yrs Quit | Short Term (n) | Short Term % |
| 35                                           | 35-39     | Never Any     | 0     | .     |               |             |               |                |              |
| 35                                           | 35-39     | CC            | 0     | .     | 0             | .           |               |                |              |
| 35                                           | 35-39     | Ecig          | 0     | .     |               |             |               |                |              |
| 35                                           | 35-39     | Dual          | 0     | .     |               |             |               |                |              |
| 35                                           | 35-39     | Former        | 0     | .     |               |             | .             | 0              | .            |
| Year of Follow-up: 2025, Age Group: 40-44    |           |               |       |       |               |             |               |                |              |
| Period                                       | Age Group | Smoking Group | N     | %     | Ever Quit (N) | Ever Quit % | Mean Yrs Quit | Short Term (n) | Short Term % |
| 35                                           | 40-44     | Never Any     | 0     | .     |               |             |               |                |              |
| 35                                           | 40-44     | CC            | 0     | .     | 0             | .           |               |                |              |
| 35                                           | 40-44     | Ecig          | 0     | .     |               |             |               |                |              |
| 35                                           | 40-44     | Dual          | 0     | .     |               |             |               |                |              |
| 35                                           | 40-44     | Former        | 0     | .     |               |             | .             | 0              | .            |
| Year of Follow-up: 2025, Age Group: 45-49    |           |               |       |       |               |             |               |                |              |
| Period                                       | Age Group | Smoking Group | N     | %     | Ever Quit (N) | Ever Quit % | Mean Yrs Quit | Short Term (n) | Short Term % |
| 35                                           | 45-49     | Never Any     | 4489  | 50.75 |               |             |               |                |              |
| 35                                           | 45-49     | CC            | 7     | 0.08  | 0             | 0.00        |               |                |              |
| 35                                           | 45-49     | Ecig          | 1541  | 17.42 |               |             |               |                |              |
| 35                                           | 45-49     | Dual          | 0     | 0.00  |               |             |               |                |              |
| 35                                           | 45-49     | Former        | 2808  | 31.75 |               |             | 18.76         | 60             | 2.14         |
| Year of Follow-up: 2025, Age Group: 50-54    |           |               |       |       |               |             |               |                |              |

**Results for PHIM for Run 9 (Sensitivity\_Analysis\_1.RTF)**

| Period                                       | Age Group | Smoking Group | N     | %     | Ever Quit (N) | Ever Quit % | Mean Yrs Quit | Short Term (n) | Short Term % |
|----------------------------------------------|-----------|---------------|-------|-------|---------------|-------------|---------------|----------------|--------------|
| 35                                           | 50-54     | Never Any     | 4991  | 55.21 |               |             |               |                |              |
| 35                                           | 50-54     | CC            | 3     | 0.03  | 0             | 0.00        |               |                |              |
| 35                                           | 50-54     | Ecig          | 1554  | 17.19 |               |             |               |                |              |
| 35                                           | 50-54     | Dual          | 0     | 0.00  |               |             |               |                |              |
| 35                                           | 50-54     | Former        | 2492  | 27.57 |               |             | 20.44         | 75             | 3.01         |
| Year of Follow-up: 2025, Age Group: 55-59    |           |               |       |       |               |             |               |                |              |
| Period                                       | Age Group | Smoking Group | N     | %     | Ever Quit (N) | Ever Quit % | Mean Yrs Quit | Short Term (n) | Short Term % |
| 35                                           | 55-59     | Never Any     | 5163  | 52.60 |               |             |               |                |              |
| 35                                           | 55-59     | CC            | 0     | 0.00  | 0             | 0.00        |               |                |              |
| 35                                           | 55-59     | Ecig          | 1664  | 16.95 |               |             |               |                |              |
| 35                                           | 55-59     | Dual          | 0     | 0.00  |               |             |               |                |              |
| 35                                           | 55-59     | Former        | 2989  | 30.45 |               |             | 22.76         | 155            | 5.19         |
| Year of Follow-up: 2025, Age Group: 60-64    |           |               |       |       |               |             |               |                |              |
| Period                                       | Age Group | Smoking Group | N     | %     | Ever Quit (N) | Ever Quit % | Mean Yrs Quit | Short Term (n) | Short Term % |
| 35                                           | 60-64     | Never Any     | 4997  | 46.86 |               |             |               |                |              |
| 35                                           | 60-64     | CC            | 9     | 0.08  | 0             | 0.00        |               |                |              |
| 35                                           | 60-64     | Ecig          | 1532  | 14.37 |               |             |               |                |              |
| 35                                           | 60-64     | Dual          | 0     | 0.00  |               |             |               |                |              |
| 35                                           | 60-64     | Former        | 4126  | 38.69 |               |             | 23.79         | 186            | 4.51         |
| Year of Follow-up: 2025, Age Group: 65-69    |           |               |       |       |               |             |               |                |              |
| Period                                       | Age Group | Smoking Group | N     | %     | Ever Quit (N) | Ever Quit % | Mean Yrs Quit | Short Term (n) | Short Term % |
| 35                                           | 65-69     | Never Any     | 4724  | 43.28 |               |             |               |                |              |
| 35                                           | 65-69     | CC            | 5     | 0.05  | 0             | 0.00        |               |                |              |
| 35                                           | 65-69     | Ecig          | 1169  | 10.71 |               |             |               |                |              |
| 35                                           | 65-69     | Dual          | 0     | 0.00  |               |             |               |                |              |
| 35                                           | 65-69     | Former        | 5018  | 45.97 |               |             | 25.57         | 158            | 3.15         |
| Year of Follow-up: 2025, Age Group: 70-74    |           |               |       |       |               |             |               |                |              |
| Period                                       | Age Group | Smoking Group | N     | %     | Ever Quit (N) | Ever Quit % | Mean Yrs Quit | Short Term (n) | Short Term % |
| 35                                           | 70-74     | Never Any     | 3941  | 39.85 |               |             |               |                |              |
| 35                                           | 70-74     | CC            | 5     | 0.05  | 0             | 0.00        |               |                |              |
| 35                                           | 70-74     | Ecig          | 811   | 8.20  |               |             |               |                |              |
| 35                                           | 70-74     | Dual          | 0     | 0.00  |               |             |               |                |              |
| 35                                           | 70-74     | Former        | 5132  | 51.90 |               |             | 29.73         | 79             | 1.54         |
| Year of Follow-up: 2025, Age Group: 75-79    |           |               |       |       |               |             |               |                |              |
| Period                                       | Age Group | Smoking Group | N     | %     | Ever Quit (N) | Ever Quit % | Mean Yrs Quit | Short Term (n) | Short Term % |
| 35                                           | 75-79     | Never Any     | 2912  | 33.65 |               |             |               |                |              |
| 35                                           | 75-79     | CC            | 9     | 0.10  | 0             | 0.00        |               |                |              |
| 35                                           | 75-79     | Ecig          | 593   | 6.85  |               |             |               |                |              |
| 35                                           | 75-79     | Dual          | 0     | 0.00  |               |             |               |                |              |
| 35                                           | 75-79     | Former        | 5141  | 59.40 |               |             | 32.31         | 72             | 1.40         |
| Year of Follow-up: 2030, Age Group: All Ages |           |               |       |       |               |             |               |                |              |
| Period                                       | Age Group | Smoking Group | N     | %     | Ever Quit (N) | Ever Quit % | Mean Yrs Quit | Short Term (n) | Short Term % |
| 40                                           | All Ages  | Never Any     | 28305 | 47.84 |               |             |               |                |              |
| 40                                           | All Ages  | CC            | 15    | 0.03  | 0             | 0.00        |               |                |              |
| 40                                           | All Ages  | Ecig          | 6535  | 11.04 |               |             |               |                |              |
| 40                                           | All Ages  | Dual          | 0     | 0.00  |               |             |               |                |              |
| 40                                           | All Ages  | Former        | 24315 | 41.09 |               |             | 27.43         | 691            | 2.84         |
| Year of Follow-up: 2030, Age Group: 18-19    |           |               |       |       |               |             |               |                |              |
| Period                                       | Age Group | Smoking Group | N     | %     | Ever Quit (N) | Ever Quit % | Mean Yrs Quit | Short Term (n) | Short Term % |
| 40                                           | 18-19     | Never Any     | 0     | .     |               |             |               |                |              |
| 40                                           | 18-19     | CC            | 0     | .     | 0             | .           |               |                |              |
| 40                                           | 18-19     | Ecig          | 0     | .     |               |             |               |                |              |
| 40                                           | 18-19     | Dual          | 0     | .     |               |             |               |                |              |
| 40                                           | 18-19     | Former        | 0     | .     |               |             | .             | 0              | .            |
| Year of Follow-up: 2030, Age Group: 20-24    |           |               |       |       |               |             |               |                |              |
| Period                                       | Age Group | Smoking Group | N     | %     | Ever Quit (N) | Ever Quit % | Mean Yrs Quit | Short Term (n) | Short Term % |
| 40                                           | 20-24     | Never Any     | 0     | .     |               |             |               |                |              |
| 40                                           | 20-24     | CC            | 0     | .     | 0             | .           |               |                |              |
| 40                                           | 20-24     | Ecig          | 0     | .     |               |             |               |                |              |
| 40                                           | 20-24     | Dual          | 0     | .     |               |             |               |                |              |
| 40                                           | 20-24     | Former        | 0     | .     |               |             | .             | 0              | .            |
| Year of Follow-up: 2030, Age Group: 25-29    |           |               |       |       |               |             |               |                |              |
| Period                                       | Age Group | Smoking Group | N     | %     | Ever Quit (N) | Ever Quit % | Mean Yrs Quit | Short Term (n) | Short Term % |
| 40                                           | 25-29     | Never Any     | 0     | .     |               |             |               |                |              |
| 40                                           | 25-29     | CC            | 0     | .     | 0             | .           |               |                |              |
| 40                                           | 25-29     | Ecig          | 0     | .     |               |             |               |                |              |
| 40                                           | 25-29     | Dual          | 0     | .     |               |             |               |                |              |

### Results for PHIM for Run 9 (Sensitivity\_Analysis\_1.RTF)

| Year of Follow-up: 2030, Age Group: 30-34 | Period | Age Group | Smoking Group | N    | %     | Ever Quit (N) | Ever Quit % | Mean Yrs Quit | Short Term (n) | Short Term % |
|-------------------------------------------|--------|-----------|---------------|------|-------|---------------|-------------|---------------|----------------|--------------|
| Year of Follow-up: 2030, Age Group: 30-34 |        |           |               |      |       |               |             |               |                |              |
| 40                                        | 25-29  | Former    |               | 0    | .     |               |             |               | 0              | .            |
| Year of Follow-up: 2030, Age Group: 35-39 |        |           |               |      |       |               |             |               |                |              |
| 40                                        | 30-34  | Never Any |               | 0    | .     |               |             |               | 0              | .            |
| 40                                        | 30-34  | CC        |               | 0    | .     | 0             | .           |               |                |              |
| 40                                        | 30-34  | Ecig      |               | 0    | .     |               |             |               |                |              |
| 40                                        | 30-34  | Dual      |               | 0    | .     |               |             |               |                |              |
| 40                                        | 30-34  | Former    |               | 0    | .     |               |             |               | 0              | .            |
| Year of Follow-up: 2030, Age Group: 40-44 |        |           |               |      |       |               |             |               |                |              |
| 40                                        | 35-39  | Never Any |               | 0    | .     |               |             |               |                |              |
| 40                                        | 35-39  | CC        |               | 0    | .     | 0             | .           |               |                |              |
| 40                                        | 35-39  | Ecig      |               | 0    | .     |               |             |               |                |              |
| 40                                        | 35-39  | Dual      |               | 0    | .     |               |             |               |                |              |
| 40                                        | 35-39  | Former    |               | 0    | .     |               |             |               | 0              | .            |
| Year of Follow-up: 2030, Age Group: 45-49 |        |           |               |      |       |               |             |               |                |              |
| 40                                        | 40-44  | Never Any |               | 0    | .     |               |             |               |                |              |
| 40                                        | 40-44  | CC        |               | 0    | .     | 0             | .           |               |                |              |
| 40                                        | 40-44  | Ecig      |               | 0    | .     |               |             |               |                |              |
| 40                                        | 40-44  | Dual      |               | 0    | .     |               |             |               |                |              |
| 40                                        | 40-44  | Former    |               | 0    | .     |               |             |               | 0              | .            |
| Year of Follow-up: 2030, Age Group: 50-54 |        |           |               |      |       |               |             |               |                |              |
| 40                                        | 45-49  | Never Any |               | 0    | .     |               |             |               |                |              |
| 40                                        | 45-49  | CC        |               | 0    | .     | 0             | .           |               |                |              |
| 40                                        | 45-49  | Ecig      |               | 0    | .     |               |             |               |                |              |
| 40                                        | 45-49  | Dual      |               | 0    | .     |               |             |               |                |              |
| 40                                        | 45-49  | Former    |               | 0    | .     |               |             |               | 0              | .            |
| Year of Follow-up: 2030, Age Group: 55-59 |        |           |               |      |       |               |             |               |                |              |
| 40                                        | 50-54  | Never Any |               | 4489 | 50.75 |               |             |               |                |              |
| 40                                        | 50-54  | CC        |               | 3    | 0.03  | 0             | 0.00        |               |                |              |
| 40                                        | 50-54  | Ecig      |               | 1392 | 15.74 |               |             |               |                |              |
| 40                                        | 50-54  | Dual      |               | 0    | 0.00  |               |             |               |                |              |
| 40                                        | 50-54  | Former    |               | 2961 | 33.48 |               |             | 22.61         | 80             | 2.70         |
| Year of Follow-up: 2030, Age Group: 60-64 |        |           |               |      |       |               |             |               |                |              |
| 40                                        | 55-59  | Never Any |               | 4991 | 55.21 |               |             |               |                |              |
| 40                                        | 55-59  | CC        |               | 2    | 0.02  | 0             | 0.00        |               |                |              |
| 40                                        | 55-59  | Ecig      |               | 1291 | 14.28 |               |             |               |                |              |
| 40                                        | 55-59  | Dual      |               | 0    | 0.00  |               |             |               |                |              |
| 40                                        | 55-59  | Former    |               | 2756 | 30.49 |               |             | 23.19         | 114            | 4.14         |
| Year of Follow-up: 2030, Age Group: 65-69 |        |           |               |      |       |               |             |               |                |              |
| 40                                        | 60-64  | Never Any |               | 5163 | 52.60 |               |             |               |                |              |
| 40                                        | 60-64  | CC        |               | 0    | 0.00  | 0             | 0.00        |               |                |              |
| 40                                        | 60-64  | Ecig      |               | 1238 | 12.61 |               |             |               |                |              |
| 40                                        | 60-64  | Dual      |               | 0    | 0.00  |               |             |               |                |              |
| 40                                        | 60-64  | Former    |               | 3415 | 34.79 |               |             | 24.53         | 183            | 5.36         |
| Year of Follow-up: 2030, Age Group: 70-74 |        |           |               |      |       |               |             |               |                |              |
| 40                                        | 65-69  | Never Any |               | 4997 | 46.86 |               |             |               |                |              |
| 40                                        | 65-69  | CC        |               | 4    | 0.04  | 0             | 0.00        |               |                |              |
| 40                                        | 65-69  | Ecig      |               | 1119 | 10.49 |               |             |               |                |              |
| 40                                        | 65-69  | Dual      |               | 0    | 0.00  |               |             |               |                |              |
| 40                                        | 65-69  | Former    |               | 4544 | 42.61 |               |             | 26.35         | 136            | 2.99         |
| Year of Follow-up: 2030, Age Group: 75-79 |        |           |               |      |       |               |             |               |                |              |
| 40                                        | 70-74  | Never Any |               | 4724 | 43.28 |               |             |               |                |              |
| 40                                        | 70-74  | CC        |               | 3    | 0.03  | 0             | 0.00        |               |                |              |
| 40                                        | 70-74  | Ecig      |               | 880  | 8.06  |               |             |               |                |              |
| 40                                        | 70-74  | Dual      |               | 0    | 0.00  |               |             |               |                |              |
| 40                                        | 70-74  | Former    |               | 5309 | 48.64 |               |             | 29.01         | 95             | 1.79         |
| Year of Follow-up: 2030, Age Group: 75-79 |        |           |               |      |       |               |             |               |                |              |
| 40                                        | 75-79  | Never Any |               | 3941 | 39.85 |               |             |               |                |              |
| 40                                        | 75-79  | CC        |               | 3    | 0.03  | 0             | 0.00        |               |                |              |

**Results for PHIM for Run 9 (Sensitivity\_Analysis\_1.RTF)**

|                                              |           |               |       |       |               |             |               |                |              |
|----------------------------------------------|-----------|---------------|-------|-------|---------------|-------------|---------------|----------------|--------------|
| 40                                           | 75-79     | Ecig          | 615   | 6.22  |               |             |               |                |              |
| 40                                           | 75-79     | Dual          | 0     | 0.00  |               |             |               |                |              |
| 40                                           | 75-79     | Former        | 5330  | 53.90 |               |             | 33.51         | 83             | 1.56         |
| Year of Follow-up: 2035, Age Group: All Ages |           |               |       |       |               |             |               |                |              |
| Period                                       | Age Group | Smoking Group | N     | %     | Ever Quit (N) | Ever Quit % | Mean Yrs Quit | Short Term (n) | Short Term % |
| 45                                           | All Ages  | Never Any     | 24364 | 49.44 |               |             |               |                |              |
| 45                                           | All Ages  | CC            | 6     | 0.01  | 0             | 0.00        |               |                |              |
| 45                                           | All Ages  | Ecig          | 4578  | 9.29  |               |             |               |                |              |
| 45                                           | All Ages  | Dual          | 0     | 0.00  |               |             |               |                |              |
| 45                                           | All Ages  | Former        | 20333 | 41.26 |               |             | 28.82         | 538            | 2.65         |
| Year of Follow-up: 2035, Age Group: 18-19    |           |               |       |       |               |             |               |                |              |
| Period                                       | Age Group | Smoking Group | N     | %     | Ever Quit (N) | Ever Quit % | Mean Yrs Quit | Short Term (n) | Short Term % |
| 45                                           | 18-19     | Never Any     | 0     | .     |               |             |               |                |              |
| 45                                           | 18-19     | CC            | 0     | .     | 0             | .           |               |                |              |
| 45                                           | 18-19     | Ecig          | 0     | .     |               |             |               |                |              |
| 45                                           | 18-19     | Dual          | 0     | .     |               |             |               |                |              |
| 45                                           | 18-19     | Former        | 0     | .     |               |             | .             | 0              | .            |
| Year of Follow-up: 2035, Age Group: 20-24    |           |               |       |       |               |             |               |                |              |
| Period                                       | Age Group | Smoking Group | N     | %     | Ever Quit (N) | Ever Quit % | Mean Yrs Quit | Short Term (n) | Short Term % |
| 45                                           | 20-24     | Never Any     | 0     | .     |               |             |               |                |              |
| 45                                           | 20-24     | CC            | 0     | .     | 0             | .           |               |                |              |
| 45                                           | 20-24     | Ecig          | 0     | .     |               |             |               |                |              |
| 45                                           | 20-24     | Dual          | 0     | .     |               |             |               |                |              |
| 45                                           | 20-24     | Former        | 0     | .     |               |             | .             | 0              | .            |
| Year of Follow-up: 2035, Age Group: 25-29    |           |               |       |       |               |             |               |                |              |
| Period                                       | Age Group | Smoking Group | N     | %     | Ever Quit (N) | Ever Quit % | Mean Yrs Quit | Short Term (n) | Short Term % |
| 45                                           | 25-29     | Never Any     | 0     | .     |               |             |               |                |              |
| 45                                           | 25-29     | CC            | 0     | .     | 0             | .           |               |                |              |
| 45                                           | 25-29     | Ecig          | 0     | .     |               |             |               |                |              |
| 45                                           | 25-29     | Dual          | 0     | .     |               |             |               |                |              |
| 45                                           | 25-29     | Former        | 0     | .     |               |             | .             | 0              | .            |
| Year of Follow-up: 2035, Age Group: 30-34    |           |               |       |       |               |             |               |                |              |
| Period                                       | Age Group | Smoking Group | N     | %     | Ever Quit (N) | Ever Quit % | Mean Yrs Quit | Short Term (n) | Short Term % |
| 45                                           | 30-34     | Never Any     | 0     | .     |               |             |               |                |              |
| 45                                           | 30-34     | CC            | 0     | .     | 0             | .           |               |                |              |
| 45                                           | 30-34     | Ecig          | 0     | .     |               |             |               |                |              |
| 45                                           | 30-34     | Dual          | 0     | .     |               |             |               |                |              |
| 45                                           | 30-34     | Former        | 0     | .     |               |             | .             | 0              | .            |
| Year of Follow-up: 2035, Age Group: 35-39    |           |               |       |       |               |             |               |                |              |
| Period                                       | Age Group | Smoking Group | N     | %     | Ever Quit (N) | Ever Quit % | Mean Yrs Quit | Short Term (n) | Short Term % |
| 45                                           | 35-39     | Never Any     | 0     | .     |               |             |               |                |              |
| 45                                           | 35-39     | CC            | 0     | .     | 0             | .           |               |                |              |
| 45                                           | 35-39     | Ecig          | 0     | .     |               |             |               |                |              |
| 45                                           | 35-39     | Dual          | 0     | .     |               |             |               |                |              |
| 45                                           | 35-39     | Former        | 0     | .     |               |             | .             | 0              | .            |
| Year of Follow-up: 2035, Age Group: 40-44    |           |               |       |       |               |             |               |                |              |
| Period                                       | Age Group | Smoking Group | N     | %     | Ever Quit (N) | Ever Quit % | Mean Yrs Quit | Short Term (n) | Short Term % |
| 45                                           | 40-44     | Never Any     | 0     | .     |               |             |               |                |              |
| 45                                           | 40-44     | CC            | 0     | .     | 0             | .           |               |                |              |
| 45                                           | 40-44     | Ecig          | 0     | .     |               |             |               |                |              |
| 45                                           | 40-44     | Dual          | 0     | .     |               |             |               |                |              |
| 45                                           | 40-44     | Former        | 0     | .     |               |             | .             | 0              | .            |
| Year of Follow-up: 2035, Age Group: 45-49    |           |               |       |       |               |             |               |                |              |
| Period                                       | Age Group | Smoking Group | N     | %     | Ever Quit (N) | Ever Quit % | Mean Yrs Quit | Short Term (n) | Short Term % |
| 45                                           | 45-49     | Never Any     | 0     | .     |               |             |               |                |              |
| 45                                           | 45-49     | CC            | 0     | .     | 0             | .           |               |                |              |
| 45                                           | 45-49     | Ecig          | 0     | .     |               |             |               |                |              |
| 45                                           | 45-49     | Dual          | 0     | .     |               |             |               |                |              |
| 45                                           | 45-49     | Former        | 0     | .     |               |             | .             | 0              | .            |
| Year of Follow-up: 2035, Age Group: 50-54    |           |               |       |       |               |             |               |                |              |
| Period                                       | Age Group | Smoking Group | N     | %     | Ever Quit (N) | Ever Quit % | Mean Yrs Quit | Short Term (n) | Short Term % |
| 45                                           | 50-54     | Never Any     | 0     | .     |               |             |               |                |              |
| 45                                           | 50-54     | CC            | 0     | .     | 0             | .           |               |                |              |
| 45                                           | 50-54     | Ecig          | 0     | .     |               |             |               |                |              |
| 45                                           | 50-54     | Dual          | 0     | .     |               |             |               |                |              |
| 45                                           | 50-54     | Former        | 0     | .     |               |             | .             | 0              | .            |
| Year of Follow-up: 2035, Age Group: 55-59    |           |               |       |       |               |             |               |                |              |
| Period                                       | Age Group | Smoking Group | N     | %     | Ever Quit (N) | Ever Quit % | Mean Yrs Quit | Short Term (n) | Short Term % |

**Results for PHIM for Run 9 (Sensitivity\_Analysis\_1.RTF)**

|                                              |           |               |       |       |               |             |               |                |              |
|----------------------------------------------|-----------|---------------|-------|-------|---------------|-------------|---------------|----------------|--------------|
| 45                                           | 55-59     | Never Any     | 4489  | 50.75 |               |             |               |                |              |
| 45                                           | 55-59     | CC            | 2     | 0.02  | 0             | 0.00        |               |                |              |
| 45                                           | 55-59     | Ecig          | 1171  | 13.24 |               |             |               |                |              |
| 45                                           | 55-59     | Dual          | 0     | 0.00  |               |             |               |                |              |
| 45                                           | 55-59     | Former        | 3183  | 35.99 |               |             | 25.82         | 100            | 3.14         |
| Year of Follow-up: 2035, Age Group: 60-64    |           |               |       |       |               |             |               |                |              |
| Period                                       | Age Group | Smoking Group | N     | %     | Ever Quit (N) | Ever Quit % | Mean Yrs Quit | Short Term (n) | Short Term % |
| 45                                           | 60-64     | Never Any     | 4991  | 55.21 |               |             |               |                |              |
| 45                                           | 60-64     | CC            | 0     | 0.00  | 0             | 0.00        |               |                |              |
| 45                                           | 60-64     | Ecig          | 1020  | 11.28 |               |             |               |                |              |
| 45                                           | 60-64     | Dual          | 0     | 0.00  |               |             |               |                |              |
| 45                                           | 60-64     | Former        | 3029  | 33.51 |               |             | 25.81         | 129            | 4.26         |
| Year of Follow-up: 2035, Age Group: 65-69    |           |               |       |       |               |             |               |                |              |
| Period                                       | Age Group | Smoking Group | N     | %     | Ever Quit (N) | Ever Quit % | Mean Yrs Quit | Short Term (n) | Short Term % |
| 45                                           | 65-69     | Never Any     | 5163  | 52.60 |               |             |               |                |              |
| 45                                           | 65-69     | CC            | 0     | 0.00  | 0             | 0.00        |               |                |              |
| 45                                           | 65-69     | Ecig          | 902   | 9.19  |               |             |               |                |              |
| 45                                           | 65-69     | Dual          | 0     | 0.00  |               |             |               |                |              |
| 45                                           | 65-69     | Former        | 3751  | 38.21 |               |             | 27.09         | 106            | 2.83         |
| Year of Follow-up: 2035, Age Group: 70-74    |           |               |       |       |               |             |               |                |              |
| Period                                       | Age Group | Smoking Group | N     | %     | Ever Quit (N) | Ever Quit % | Mean Yrs Quit | Short Term (n) | Short Term % |
| 45                                           | 70-74     | Never Any     | 4997  | 46.86 |               |             |               |                |              |
| 45                                           | 70-74     | CC            | 1     | 0.01  | 0             | 0.00        |               |                |              |
| 45                                           | 70-74     | Ecig          | 850   | 7.97  |               |             |               |                |              |
| 45                                           | 70-74     | Dual          | 0     | 0.00  |               |             |               |                |              |
| 45                                           | 70-74     | Former        | 4816  | 45.16 |               |             | 29.70         | 104            | 2.16         |
| Year of Follow-up: 2035, Age Group: 75-79    |           |               |       |       |               |             |               |                |              |
| Period                                       | Age Group | Smoking Group | N     | %     | Ever Quit (N) | Ever Quit % | Mean Yrs Quit | Short Term (n) | Short Term % |
| 45                                           | 75-79     | Never Any     | 4724  | 43.28 |               |             |               |                |              |
| 45                                           | 75-79     | CC            | 3     | 0.03  | 0             | 0.00        |               |                |              |
| 45                                           | 75-79     | Ecig          | 635   | 5.82  |               |             |               |                |              |
| 45                                           | 75-79     | Dual          | 0     | 0.00  |               |             |               |                |              |
| 45                                           | 75-79     | Former        | 5554  | 50.88 |               |             | 32.60         | 99             | 1.78         |
| Year of Follow-up: 2040, Age Group: All Ages |           |               |       |       |               |             |               |                |              |
| Period                                       | Age Group | Smoking Group | N     | %     | Ever Quit (N) | Ever Quit % | Mean Yrs Quit | Short Term (n) | Short Term % |
| 50                                           | All Ages  | Never Any     | 19640 | 51.19 |               |             |               |                |              |
| 50                                           | All Ages  | CC            | 1     | 0.00  | 0             | 0.00        |               |                |              |
| 50                                           | All Ages  | Ecig          | 2868  | 7.48  |               |             |               |                |              |
| 50                                           | All Ages  | Dual          | 0     | 0.00  |               |             |               |                |              |
| 50                                           | All Ages  | Former        | 15856 | 41.33 |               |             | 30.34         | 408            | 2.57         |
| Year of Follow-up: 2040, Age Group: 18-19    |           |               |       |       |               |             |               |                |              |
| Period                                       | Age Group | Smoking Group | N     | %     | Ever Quit (N) | Ever Quit % | Mean Yrs Quit | Short Term (n) | Short Term % |
| 50                                           | 18-19     | Never Any     | 0     | .     |               |             |               |                |              |
| 50                                           | 18-19     | CC            | 0     | .     | 0             | .           |               |                |              |
| 50                                           | 18-19     | Ecig          | 0     | .     |               |             |               |                |              |
| 50                                           | 18-19     | Dual          | 0     | .     |               |             |               |                |              |
| 50                                           | 18-19     | Former        | 0     | .     |               |             | .             | 0              | .            |
| Year of Follow-up: 2040, Age Group: 20-24    |           |               |       |       |               |             |               |                |              |
| Period                                       | Age Group | Smoking Group | N     | %     | Ever Quit (N) | Ever Quit % | Mean Yrs Quit | Short Term (n) | Short Term % |
| 50                                           | 20-24     | Never Any     | 0     | .     |               |             |               |                |              |
| 50                                           | 20-24     | CC            | 0     | .     | 0             | .           |               |                |              |
| 50                                           | 20-24     | Ecig          | 0     | .     |               |             |               |                |              |
| 50                                           | 20-24     | Dual          | 0     | .     |               |             |               |                |              |
| 50                                           | 20-24     | Former        | 0     | .     |               |             | .             | 0              | .            |
| Year of Follow-up: 2040, Age Group: 25-29    |           |               |       |       |               |             |               |                |              |
| Period                                       | Age Group | Smoking Group | N     | %     | Ever Quit (N) | Ever Quit % | Mean Yrs Quit | Short Term (n) | Short Term % |
| 50                                           | 25-29     | Never Any     | 0     | .     |               |             |               |                |              |
| 50                                           | 25-29     | CC            | 0     | .     | 0             | .           |               |                |              |
| 50                                           | 25-29     | Ecig          | 0     | .     |               |             |               |                |              |
| 50                                           | 25-29     | Dual          | 0     | .     |               |             |               |                |              |
| 50                                           | 25-29     | Former        | 0     | .     |               |             | .             | 0              | .            |
| Year of Follow-up: 2040, Age Group: 30-34    |           |               |       |       |               |             |               |                |              |
| Period                                       | Age Group | Smoking Group | N     | %     | Ever Quit (N) | Ever Quit % | Mean Yrs Quit | Short Term (n) | Short Term % |
| 50                                           | 30-34     | Never Any     | 0     | .     |               |             |               |                |              |
| 50                                           | 30-34     | CC            | 0     | .     | 0             | .           |               |                |              |
| 50                                           | 30-34     | Ecig          | 0     | .     |               |             |               |                |              |
| 50                                           | 30-34     | Dual          | 0     | .     |               |             |               |                |              |
| 50                                           | 30-34     | Former        | 0     | .     |               |             | .             | 0              | .            |
| Year of Follow-up: 2040, Age Group: 35-39    |           |               |       |       |               |             |               |                |              |



**Results for PHIM for Run 9 (Sensitivity\_Analysis\_1.RTF)**

| Period                                    | Age Group | Smoking Group | N    | %     | Ever Quit (N) | Ever Quit % | Mean Yrs Quit | Short Term (n) | Short Term % |
|-------------------------------------------|-----------|---------------|------|-------|---------------|-------------|---------------|----------------|--------------|
| 50                                        | 35-39     | Never Any     | 0    | .     |               |             |               |                |              |
| 50                                        | 35-39     | CC            | 0    | .     | 0             | .           |               |                |              |
| 50                                        | 35-39     | Ecig          | 0    | .     |               |             |               |                |              |
| 50                                        | 35-39     | Dual          | 0    | .     |               |             |               |                |              |
| 50                                        | 35-39     | Former        | 0    | .     |               |             | .             | 0              | .            |
| Year of Follow-up: 2040, Age Group: 40-44 |           |               |      |       |               |             |               |                |              |
| Period                                    | Age Group | Smoking Group | N    | %     | Ever Quit (N) | Ever Quit % | Mean Yrs Quit | Short Term (n) | Short Term % |
| 50                                        | 40-44     | Never Any     | 0    | .     |               |             |               |                |              |
| 50                                        | 40-44     | CC            | 0    | .     | 0             | .           |               |                |              |
| 50                                        | 40-44     | Ecig          | 0    | .     |               |             |               |                |              |
| 50                                        | 40-44     | Dual          | 0    | .     |               |             |               |                |              |
| 50                                        | 40-44     | Former        | 0    | .     |               |             | .             | 0              | .            |
| Year of Follow-up: 2040, Age Group: 45-49 |           |               |      |       |               |             |               |                |              |
| Period                                    | Age Group | Smoking Group | N    | %     | Ever Quit (N) | Ever Quit % | Mean Yrs Quit | Short Term (n) | Short Term % |
| 50                                        | 45-49     | Never Any     | 0    | .     |               |             |               |                |              |
| 50                                        | 45-49     | CC            | 0    | .     | 0             | .           |               |                |              |
| 50                                        | 45-49     | Ecig          | 0    | .     |               |             |               |                |              |
| 50                                        | 45-49     | Dual          | 0    | .     |               |             |               |                |              |
| 50                                        | 45-49     | Former        | 0    | .     |               |             | .             | 0              | .            |
| Year of Follow-up: 2040, Age Group: 50-54 |           |               |      |       |               |             |               |                |              |
| Period                                    | Age Group | Smoking Group | N    | %     | Ever Quit (N) | Ever Quit % | Mean Yrs Quit | Short Term (n) | Short Term % |
| 50                                        | 50-54     | Never Any     | 0    | .     |               |             |               |                |              |
| 50                                        | 50-54     | CC            | 0    | .     | 0             | .           |               |                |              |
| 50                                        | 50-54     | Ecig          | 0    | .     |               |             |               |                |              |
| 50                                        | 50-54     | Dual          | 0    | .     |               |             |               |                |              |
| 50                                        | 50-54     | Former        | 0    | .     |               |             | .             | 0              | .            |
| Year of Follow-up: 2040, Age Group: 55-59 |           |               |      |       |               |             |               |                |              |
| Period                                    | Age Group | Smoking Group | N    | %     | Ever Quit (N) | Ever Quit % | Mean Yrs Quit | Short Term (n) | Short Term % |
| 50                                        | 55-59     | Never Any     | 0    | .     |               |             |               |                |              |
| 50                                        | 55-59     | CC            | 0    | .     | 0             | .           |               |                |              |
| 50                                        | 55-59     | Ecig          | 0    | .     |               |             |               |                |              |
| 50                                        | 55-59     | Dual          | 0    | .     |               |             |               |                |              |
| 50                                        | 55-59     | Former        | 0    | .     |               |             | .             | 0              | .            |
| Year of Follow-up: 2040, Age Group: 60-64 |           |               |      |       |               |             |               |                |              |
| Period                                    | Age Group | Smoking Group | N    | %     | Ever Quit (N) | Ever Quit % | Mean Yrs Quit | Short Term (n) | Short Term % |
| 50                                        | 60-64     | Never Any     | 4489 | 50.75 |               |             |               |                |              |
| 50                                        | 60-64     | CC            | 0    | 0.00  | 0             | 0.00        |               |                |              |
| 50                                        | 60-64     | Ecig          | 865  | 9.78  |               |             |               |                |              |
| 50                                        | 60-64     | Dual          | 0    | 0.00  |               |             |               |                |              |
| 50                                        | 60-64     | Former        | 3491 | 39.47 |               |             | 28.27         | 129            | 3.70         |
| Year of Follow-up: 2040, Age Group: 65-69 |           |               |      |       |               |             |               |                |              |
| Period                                    | Age Group | Smoking Group | N    | %     | Ever Quit (N) | Ever Quit % | Mean Yrs Quit | Short Term (n) | Short Term % |
| 50                                        | 65-69     | Never Any     | 4991 | 55.21 |               |             |               |                |              |
| 50                                        | 65-69     | CC            | 0    | 0.00  | 0             | 0.00        |               |                |              |
| 50                                        | 65-69     | Ecig          | 705  | 7.80  |               |             |               |                |              |
| 50                                        | 65-69     | Dual          | 0    | 0.00  |               |             |               |                |              |
| 50                                        | 65-69     | Former        | 3344 | 36.99 |               |             | 28.11         | 120            | 3.59         |
| Year of Follow-up: 2040, Age Group: 70-74 |           |               |      |       |               |             |               |                |              |
| Period                                    | Age Group | Smoking Group | N    | %     | Ever Quit (N) | Ever Quit % | Mean Yrs Quit | Short Term (n) | Short Term % |
| 50                                        | 70-74     | Never Any     | 5163 | 52.60 |               |             |               |                |              |
| 50                                        | 70-74     | CC            | 0    | 0.00  | 0             | 0.00        |               |                |              |
| 50                                        | 70-74     | Ecig          | 665  | 6.77  |               |             |               |                |              |
| 50                                        | 70-74     | Dual          | 0    | 0.00  |               |             |               |                |              |
| 50                                        | 70-74     | Former        | 3988 | 40.63 |               |             | 30.31         | 80             | 2.01         |
| Year of Follow-up: 2040, Age Group: 75-79 |           |               |      |       |               |             |               |                |              |
| Period                                    | Age Group | Smoking Group | N    | %     | Ever Quit (N) | Ever Quit % | Mean Yrs Quit | Short Term (n) | Short Term % |
| 50                                        | 75-79     | Never Any     | 4997 | 46.86 |               |             |               |                |              |
| 50                                        | 75-79     | CC            | 1    | 0.01  | 0             | 0.00        |               |                |              |
| 50                                        | 75-79     | Ecig          | 633  | 5.94  |               |             |               |                |              |
| 50                                        | 75-79     | Dual          | 0    | 0.00  |               |             |               |                |              |
| 50                                        | 75-79     | Former        | 5033 | 47.20 |               |             | 33.29         | 79             | 1.57         |

## Results for PHIM for Run 9 (Sensitivity\_Analysis\_1.RTF)

\*\*\*\*\*

### Main Results for E-Component for Run: 9, Simulation: 1, COD: Four Diseases Combined

| Variable Parameter          | Value                                  |
|-----------------------------|----------------------------------------|
| 1. Country                  | US (United States)                     |
| 2. Sex                      | M (Males)                              |
| 3. Year of start of process | 1990                                   |
| 4. Cause of Death           | Four Diseases Combined                 |
| 5. Effective Dose NULL      | CC:1                                   |
| 6. Effective Dose Ecig      | CC:1 Ecig:0.3 Dual:0.65                |
| Note:                       | Death rates are per million population |

#### Results for Age Groups Combined and Years combined, Population unadjusted for deaths in Ecig scenario,

| Age Group:All |          | NULL        | Ecig        | %Drop    |        |        | NULL    | Ecig    | Drop    |         |
|---------------|----------|-------------|-------------|----------|--------|--------|---------|---------|---------|---------|
| Year          | Number   | Attrib      | Attrib      | Drop     | %Drop  | Attrib | Death   | Attrib  | Drop    |         |
|               | Deaths   | Deaths      | Deaths      | Deaths   | Deaths | Deaths | Rate    | Rates   | Rates   |         |
| All Comb      | 13148871 | 4509390.583 | 3515835.120 | 993555.5 | 7.556  | 22.033 | 3806.31 | 1305.37 | 1017.76 | 287.613 |

#### Results for Age Groups Combined, Population unadjusted for deaths in Ecig scenario,

| Age Group:All |        | NULL       | Ecig       | %Drop    |        |        | NULL    | Ecig    | Drop    |
|---------------|--------|------------|------------|----------|--------|--------|---------|---------|---------|
| Year          | Number | Attrib     | Attrib     | Drop     | %Drop  | Attrib | Death   | Attrib  | Drop    |
|               | Deaths | Deaths     | Deaths     | Deaths   | Deaths | Deaths | Rate    | Rates   | Rates   |
| 1990          | 317161 | 125773.065 | 125773.065 | 0.000    | 0.000  | 0.000  | 5027.71 | 1993.78 | 0.000   |
| 1991          | 313217 | 123999.442 | 123686.342 | 313.101  | 0.100  | 0.253  | 4883.81 | 1933.45 | 4.882   |
| 1992          | 308577 | 122014.015 | 121186.599 | 827.416  | 0.268  | 0.678  | 4729.73 | 1870.18 | 12.682  |
| 1993          | 311713 | 122810.618 | 121268.308 | 1542.310 | 0.495  | 1.256  | 4692.62 | 1848.83 | 23.218  |
| 1994          | 305700 | 119925.592 | 117575.794 | 2349.798 | 0.769  | 1.959  | 4516.19 | 1771.69 | 34.714  |
| 1995          | 303225 | 117896.496 | 114608.616 | 3287.880 | 1.084  | 2.789  | 4393.80 | 1708.35 | 47.642  |
| 1996          | 299559 | 115698.645 | 111386.884 | 4311.761 | 1.439  | 3.727  | 4273.16 | 1650.42 | 61.507  |
| 1997          | 294226 | 113359.847 | 108027.784 | 5332.062 | 1.812  | 4.704  | 4128.67 | 1590.70 | 74.821  |
| 1998          | 289258 | 111444.212 | 105087.407 | 6356.805 | 2.198  | 5.704  | 3992.19 | 1538.10 | 87.733  |
| 1999          | 311002 | 114877.722 | 106425.909 | 8451.812 | 2.718  | 7.357  | 4224.60 | 1560.48 | 114.808 |
| 2000          | 303786 | 112379.704 | 102802.108 | 9577.596 | 3.153  | 8.523  | 4066.21 | 1504.22 | 128.197 |
| 2001          | 296294 | 110024.943 | 99218.560  | 10806.38 | 3.647  | 9.822  | 3914.28 | 1453.52 | 142.761 |
| 2002          | 291898 | 108289.173 | 96127.981  | 12161.19 | 4.166  | 11.230 | 3813.00 | 1414.56 | 158.859 |
| 2003          | 285865 | 106539.023 | 93195.782  | 13343.24 | 4.668  | 12.524 | 3695.36 | 1377.22 | 172.487 |
| 2004          | 274177 | 103037.251 | 88811.267  | 14225.98 | 5.189  | 13.807 | 3506.10 | 1317.61 | 181.918 |
| 2005          | 272379 | 103044.562 | 87561.392  | 15483.17 | 5.684  | 15.026 | 3442.69 | 1302.41 | 195.697 |
| 2006          | 264118 | 99672.555  | 83135.691  | 16536.86 | 6.261  | 16.591 | 3307.76 | 1248.28 | 207.104 |
| 2007          | 258419 | 97839.152  | 80417.422  | 17421.73 | 6.742  | 17.807 | 3203.20 | 1212.75 | 215.949 |
| 2008          | 259461 | 98075.852  | 79544.783  | 18531.07 | 7.142  | 18.895 | 3180.09 | 1202.07 | 227.127 |
| 2009          | 253907 | 95617.338  | 76325.548  | 19291.79 | 7.598  | 20.176 | 3075.31 | 1158.11 | 233.661 |
| 2010          | 251878 | 94607.988  | 74470.829  | 20137.16 | 7.995  | 21.285 | 3013.72 | 1131.98 | 240.941 |
| 2011          | 251779 | 93633.119  | 72433.944  | 21199.18 | 8.420  | 22.641 | 2982.76 | 1109.25 | 251.141 |
| 2012          | 252643 | 92775.175  | 70536.487  | 22238.69 | 8.802  | 23.971 | 2960.61 | 1087.19 | 260.605 |
| 2013          | 256175 | 92345.780  | 69038.109  | 23307.67 | 9.098  | 25.240 | 2967.76 | 1069.82 | 270.017 |
| 2014          | 257393 | 91379.215  | 67190.099  | 24189.12 | 9.398  | 26.471 | 2947.05 | 1046.26 | 276.956 |
| 2015          | 259782 | 90750.242  | 65802.274  | 24947.97 | 9.603  | 27.491 | 3346.10 | 1168.90 | 321.340 |
| 2016          | 261453 | 88811.996  | 63093.190  | 25718.81 | 9.837  | 28.959 | 3336.15 | 1133.24 | 328.173 |
| 2017          | 263685 | 87325.126  | 60859.796  | 26465.33 | 10.037 | 30.307 | 3333.85 | 1104.08 | 334.609 |
| 2018          | 258714 | 87612.144  | 60651.529  | 26960.61 | 10.421 | 30.773 | 3240.73 | 1097.46 | 337.717 |
| 2019          | 261438 | 87797.760  | 59950.666  | 27847.09 | 10.652 | 31.717 | 3242.99 | 1089.08 | 345.428 |
| 2020          | 262288 | 87221.042  | 58897.257  | 28323.79 | 10.799 | 32.474 | 3715.29 | 1235.48 | 401.204 |
| 2021          | 255079 | 82001.292  | 53965.121  | 28036.17 | 10.991 | 34.190 | 3587.82 | 1153.39 | 394.343 |
| 2022          | 257097 | 81915.977  | 53039.953  | 28876.02 | 11.232 | 35.251 | 3588.53 | 1143.37 | 403.049 |
| 2023          | 259080 | 81810.810  | 52164.950  | 29645.86 | 11.443 | 36.237 | 3586.88 | 1132.64 | 410.438 |
| 2024          | 260719 | 81528.303  | 51259.243  | 30269.06 | 11.610 | 37.127 | 3579.65 | 1119.38 | 415.592 |
| 2025          | 257308 | 79599.213  | 49634.397  | 29964.82 | 11.646 | 37.645 | 4112.08 | 1272.09 | 478.872 |
| 2026          | 251528 | 75082.462  | 45609.995  | 29472.47 | 11.717 | 39.253 | 4003.24 | 1194.99 | 469.074 |
| 2027          | 250988 | 74444.425  | 44496.200  | 29948.22 | 11.932 | 40.229 | 3976.53 | 1179.46 | 474.485 |
| 2028          | 250285 | 73699.585  | 43304.383  | 30395.20 | 12.144 | 41.242 | 3945.35 | 1161.76 | 479.133 |
| 2029          | 249525 | 72819.703  | 42097.735  | 30721.97 | 12.312 | 42.189 | 3910.99 | 1141.36 | 481.528 |
| 2030          | 240528 | 69309.277  | 39855.909  | 29453.37 | 12.245 | 42.496 | 4504.36 | 1297.95 | 551.571 |
| 2031          | 235442 | 65433.368  | 36694.727  | 28738.64 | 12.206 | 43.920 | 4397.65 | 1222.18 | 536.788 |
| 2032          | 234017 | 64643.552  | 35597.799  | 29045.75 | 12.412 | 44.932 | 4356.12 | 1203.31 | 540.673 |
| 2033          | 232559 | 63793.514  | 34624.315  | 29169.20 | 12.543 | 45.724 | 4310.93 | 1182.54 | 540.708 |
| 2034          | 230963 | 63032.151  | 33674.973  | 29357.18 | 12.711 | 46.575 | 4260.75 | 1162.80 | 541.573 |
| 2035          | 215822 | 57653.301  | 30912.841  | 26740.46 | 12.390 | 46.381 | 4924.38 | 1315.47 | 610.135 |
| 2036          | 208183 | 52988.733  | 27398.234  | 25590.50 | 12.292 | 48.294 | 4748.94 | 1208.75 | 583.754 |
| 2037          | 205491 | 52026.921  | 26409.194  | 25617.73 | 12.467 | 49.239 | 4682.40 | 1185.50 | 583.734 |
| 2038          | 202834 | 50943.211  | 25413.764  | 25529.45 | 12.586 | 50.114 | 4612.18 | 1158.38 | 580.507 |
| 2039          | 200251 | 50085.991  | 24589.967  | 25496.02 | 12.732 | 50.905 | 4538.65 | 1135.19 | 577.863 |

## Results for PHIM for Run 9 (Sensitivity\_Analysis\_1.RTF)

\*\*\*\*\*

### Main Results for E-Component for Run: 9, Simulation: 1, COD: LUNG CANCER

| Variable Parameter          | Value                                  |
|-----------------------------|----------------------------------------|
| 1. Country                  | US (United States)                     |
| 2. Sex                      | M (Males)                              |
| 3. Year of start of process | 1990                                   |
| 4. Cause of Death           | LUNG CANCER                            |
| 5. Effective Dose NULL      | CC:1                                   |
| 6. Effective Dose Ecig      | CC:1 Ecig:0.3 Dual:0.65                |
| Note:                       | Death rates are per million population |

#### Results for Age Groups Combined and Years combined, Population unadjusted for deaths in Ecig scenario,

| Age Group:All |         | NULL        | Ecig        | %Drop    |        |        | NULL    | Ecig    | Drop    |        |
|---------------|---------|-------------|-------------|----------|--------|--------|---------|---------|---------|--------|
| Year          | Number  | Attrib      | Attrib      | Drop     | %Drop  | Attrib | Death   | Attrib  | Attrib  | Drop   |
|               | Deaths  | Deaths      | Deaths      | Deaths   | Deaths | Deaths | Rate    | Rates   | Rates   | Rates  |
| All Comb      | 3065988 | 2244988.113 | 1939845.841 | 305142.3 | 9.952  | 13.592 | 887.537 | 649.875 | 561.543 | 88.332 |

#### Results for Age Groups Combined, Population unadjusted for deaths in Ecig scenario,

| Age Group:All |        | NULL      | Ecig      | %Drop    |        |        | NULL    | Ecig    | Drop    |         |
|---------------|--------|-----------|-----------|----------|--------|--------|---------|---------|---------|---------|
| Year          | Number | Attrib    | Attrib    | Drop     | %Drop  | Attrib | Death   | Attrib  | Attrib  | Drop    |
|               | Deaths | Deaths    | Deaths    | Deaths   | Deaths | Deaths | Rate    | Rates   | Rates   | Rates   |
| 1990          | 78822  | 63385.736 | 63385.736 | 0.000    | 0.000  | 0.000  | 1249.50 | 1004.81 | 1004.81 | 0.000   |
| 1991          | 78462  | 62918.402 | 62882.368 | 36.034   | 0.046  | 0.057  | 1223.41 | 981.049 | 980.488 | 0.562   |
| 1992          | 77987  | 62366.766 | 62271.861 | 94.905   | 0.122  | 0.152  | 1195.35 | 955.930 | 954.475 | 1.455   |
| 1993          | 78542  | 62652.888 | 62467.207 | 185.680  | 0.236  | 0.296  | 1182.39 | 943.195 | 940.399 | 2.795   |
| 1994          | 77437  | 61565.227 | 61275.226 | 290.001  | 0.374  | 0.471  | 1144.00 | 909.520 | 905.236 | 4.284   |
| 1995          | 76904  | 60851.961 | 60431.772 | 420.189  | 0.546  | 0.691  | 1114.36 | 881.759 | 875.670 | 6.089   |
| 1996          | 76232  | 60122.922 | 59539.910 | 583.011  | 0.765  | 0.970  | 1087.44 | 857.643 | 849.326 | 8.317   |
| 1997          | 75473  | 59237.155 | 58482.285 | 754.870  | 1.000  | 1.274  | 1059.06 | 831.234 | 820.642 | 10.593  |
| 1998          | 75381  | 58906.696 | 57935.987 | 970.709  | 1.288  | 1.648  | 1040.37 | 813.001 | 799.603 | 13.397  |
| 1999          | 73159  | 56930.073 | 55754.929 | 1175.144 | 1.606  | 2.064  | 993.781 | 773.329 | 757.366 | 15.963  |
| 2000          | 73784  | 57137.121 | 55702.138 | 1434.983 | 1.945  | 2.511  | 987.608 | 764.787 | 745.580 | 19.207  |
| 2001          | 73294  | 56481.726 | 54749.070 | 1732.657 | 2.364  | 3.068  | 968.273 | 746.169 | 723.280 | 22.890  |
| 2002          | 72442  | 55588.365 | 53553.435 | 2034.930 | 2.809  | 3.661  | 946.293 | 726.138 | 699.556 | 26.582  |
| 2003          | 71942  | 54945.856 | 52582.178 | 2363.679 | 3.286  | 4.302  | 929.989 | 710.281 | 679.726 | 30.555  |
| 2004          | 71301  | 54203.126 | 51472.015 | 2731.111 | 3.830  | 5.039  | 911.778 | 693.135 | 658.210 | 34.925  |
| 2005          | 70964  | 53744.603 | 50649.954 | 3094.649 | 4.361  | 5.758  | 896.937 | 679.296 | 640.181 | 39.114  |
| 2006          | 69658  | 52535.572 | 49062.097 | 3473.474 | 4.986  | 6.612  | 872.383 | 657.945 | 614.444 | 43.501  |
| 2007          | 68565  | 51492.124 | 47652.574 | 3839.549 | 5.600  | 7.457  | 849.888 | 638.264 | 590.671 | 47.593  |
| 2008          | 68226  | 51030.736 | 46758.537 | 4272.199 | 6.262  | 8.372  | 836.215 | 625.460 | 573.098 | 52.362  |
| 2009          | 67509  | 50276.199 | 45571.616 | 4704.583 | 6.969  | 9.357  | 817.667 | 608.943 | 551.962 | 56.982  |
| 2010          | 67196  | 49840.933 | 44710.606 | 5130.326 | 7.635  | 10.293 | 804.000 | 596.347 | 534.962 | 61.384  |
| 2011          | 66506  | 49072.841 | 43477.197 | 5595.644 | 8.414  | 11.403 | 787.880 | 581.354 | 515.064 | 66.290  |
| 2012          | 66155  | 48539.512 | 42448.724 | 6090.788 | 9.207  | 12.548 | 775.240 | 568.812 | 497.437 | 71.375  |
| 2013          | 65333  | 47675.741 | 41156.667 | 6519.074 | 9.978  | 13.674 | 756.876 | 552.318 | 476.796 | 75.523  |
| 2014          | 65033  | 47194.534 | 40225.152 | 6969.382 | 10.717 | 14.767 | 744.602 | 540.359 | 460.562 | 79.797  |
| 2015          | 64145  | 46305.842 | 38970.003 | 7335.839 | 11.436 | 15.842 | 726.215 | 526.439 | 501.950 | 94.489  |
| 2016          | 61618  | 44208.867 | 36698.734 | 7510.133 | 12.188 | 16.988 | 786.248 | 564.107 | 468.277 | 95.830  |
| 2017          | 59897  | 42702.624 | 34944.287 | 7758.337 | 12.953 | 18.168 | 757.297 | 539.903 | 441.812 | 98.091  |
| 2018          | 62468  | 44321.202 | 35675.999 | 8645.203 | 13.839 | 19.506 | 782.490 | 555.181 | 446.888 | 108.292 |
| 2019          | 63045  | 44493.088 | 35272.135 | 9220.953 | 14.626 | 20.724 | 782.035 | 551.912 | 437.531 | 114.381 |
| 2020          | 63466  | 44529.551 | 34771.991 | 9757.560 | 15.374 | 21.913 | 898.991 | 630.757 | 492.542 | 138.215 |
| 2021          | 57113  | 39852.556 | 30611.817 | 9240.739 | 16.180 | 23.187 | 803.323 | 560.546 | 430.571 | 129.976 |
| 2022          | 57440  | 39853.685 | 30079.020 | 9774.665 | 17.017 | 24.526 | 801.745 | 556.274 | 419.840 | 136.434 |
| 2023          | 57738  | 39847.050 | 29563.079 | 10283.97 | 17.811 | 25.809 | 799.366 | 551.670 | 409.292 | 142.378 |
| 2024          | 57942  | 39726.010 | 29001.562 | 10724.45 | 18.509 | 26.996 | 795.539 | 545.435 | 398.190 | 147.246 |
| 2025          | 57521  | 39207.348 | 28203.403 | 11003.94 | 19.130 | 28.066 | 919.257 | 626.579 | 450.723 | 175.856 |
| 2026          | 51428  | 34803.960 | 24608.556 | 10195.40 | 19.825 | 29.294 | 818.510 | 553.929 | 391.662 | 162.267 |
| 2027          | 51172  | 34484.595 | 23942.017 | 10542.58 | 20.602 | 30.572 | 810.740 | 546.357 | 379.325 | 167.031 |
| 2028          | 50870  | 34100.638 | 23249.173 | 10851.47 | 21.332 | 31.822 | 801.884 | 537.544 | 366.487 | 171.057 |
| 2029          | 50540  | 33669.838 | 22548.352 | 11121.49 | 22.005 | 33.031 | 792.146 | 527.732 | 353.417 | 174.315 |
| 2030          | 49109  | 32557.688 | 21496.578 | 11061.11 | 22.524 | 33.974 | 919.662 | 609.705 | 402.565 | 207.141 |
| 2031          | 43585  | 28646.393 | 18626.511 | 10019.88 | 22.989 | 34.978 | 814.096 | 535.065 | 347.911 | 187.154 |
| 2032          | 43163  | 28227.160 | 18019.707 | 10207.45 | 23.649 | 36.162 | 803.454 | 525.435 | 335.428 | 190.007 |
| 2033          | 42725  | 27786.623 | 17478.802 | 10307.82 | 24.126 | 37.096 | 791.996 | 515.079 | 324.003 | 191.075 |
| 2034          | 42256  | 27348.299 | 16935.489 | 10412.81 | 24.642 | 38.075 | 779.523 | 504.514 | 312.421 | 192.093 |
| 2035          | 39748  | 25570.077 | 15700.894 | 9869.183 | 24.829 | 38.597 | 906.933 | 583.430 | 358.246 | 225.184 |
| 2036          | 34030  | 21717.319 | 13045.800 | 8671.520 | 25.482 | 39.929 | 776.269 | 495.402 | 297.593 | 197.809 |
| 2037          | 33454  | 21256.024 | 12536.354 | 8719.670 | 26.065 | 41.022 | 762.289 | 484.347 | 285.658 | 198.689 |
| 2038          | 32883  | 20747.175 | 12040.422 | 8706.753 | 26.478 | 41.966 | 747.720 | 471.764 | 273.784 | 197.980 |
| 2039          | 32325  | 20327.688 | 11625.914 | 8701.774 | 26.920 | 42.807 | 732.644 | 460.724 | 263.499 | 197.224 |

## Results for PHIM for Run 9 (Sensitivity\_Analysis\_1.RTF)

\*\*\*\*\*

### Main Results for E-Component for Run: 9, Simulation: 1, COD: IHD

| Variable Parameter          | Value                                  |
|-----------------------------|----------------------------------------|
| 1. Country                  | US (United States)                     |
| 2. Sex                      | M (Males)                              |
| 3. Year of start of process | 1990                                   |
| 4. Cause of Death           | IHD                                    |
| 5. Effective Dose NULL      | CC:1                                   |
| 6. Effective Dose Ecig      | CC:1 Ecig:0.3 Dual:0.65                |
| Note:                       | Death rates are per million population |

#### Results for Age Groups Combined and Years combined, Population unadjusted for deaths in Ecig scenario,

| Age Group:All |         | NULL        | Ecig       | %Drop    |        | Death  |         | NULL    | Ecig    | Drop    |
|---------------|---------|-------------|------------|----------|--------|--------|---------|---------|---------|---------|
| Year          | Number  | Attrib      | Attrib     | Drop     | %Drop  | Attrib | Rate    | Attrib  | Attrib  | Drop    |
|               | Deaths  | Deaths      | Deaths     | Deaths   | Deaths | Deaths |         | Rates   | Rates   | Rates   |
| All Comb      | 6360041 | 1098877.421 | 695456.737 | 403420.7 | 6.343  | 36.712 | 1841.09 | 318.101 | 201.320 | 116.782 |

#### Results for Age Groups Combined, Population unadjusted for deaths in Ecig scenario,

| Age Group:All |        | NULL      | Ecig      | %Drop    |        | Death  |         | NULL    | Ecig    | Drop    |
|---------------|--------|-----------|-----------|----------|--------|--------|---------|---------|---------|---------|
| Year          | Number | Attrib    | Attrib    | Drop     | %Drop  | Attrib | Rate    | Attrib  | Attrib  | Drop    |
|               | Deaths | Deaths    | Deaths    | Deaths   | Deaths | Deaths |         | Rates   | Rates   | Rates   |
| 1990          | 171484 | 38511.725 | 38511.725 | 0.000    | 0.000  | 0.000  | 2718.40 | 610.497 | 610.497 | 0.000   |
| 1991          | 168044 | 37309.838 | 37079.370 | 230.467  | 0.137  | 0.618  | 2620.21 | 581.750 | 578.157 | 3.594   |
| 1992          | 164548 | 36137.488 | 35524.865 | 612.622  | 0.372  | 1.695  | 2522.12 | 553.899 | 544.509 | 9.390   |
| 1993          | 164362 | 35599.588 | 34474.826 | 1124.761 | 0.684  | 3.159  | 2474.35 | 535.926 | 518.994 | 16.932  |
| 1994          | 159866 | 34336.757 | 32635.456 | 1701.302 | 1.064  | 4.955  | 2361.75 | 507.267 | 482.133 | 25.134  |
| 1995          | 158083 | 33455.759 | 31097.578 | 2358.181 | 1.492  | 7.049  | 2290.66 | 484.782 | 450.611 | 34.171  |
| 1996          | 154875 | 32193.824 | 29146.645 | 3047.179 | 1.968  | 9.465  | 2209.26 | 459.239 | 415.772 | 43.467  |
| 1997          | 149970 | 30665.509 | 26957.902 | 3707.608 | 2.472  | 12.090 | 2104.43 | 430.308 | 378.282 | 52.026  |
| 1998          | 145407 | 29188.430 | 24868.385 | 4320.046 | 2.971  | 14.801 | 2006.83 | 402.844 | 343.221 | 59.623  |
| 1999          | 165952 | 33375.386 | 27395.825 | 5979.561 | 3.603  | 17.916 | 2254.27 | 453.366 | 372.141 | 81.225  |
| 2000          | 160260 | 32024.754 | 25370.628 | 6654.126 | 4.152  | 20.778 | 2145.10 | 428.655 | 339.589 | 89.066  |
| 2001          | 154444 | 30682.393 | 23316.924 | 7365.469 | 4.769  | 24.006 | 2040.33 | 405.339 | 308.035 | 97.304  |
| 2002          | 151887 | 30218.370 | 22025.109 | 8193.261 | 5.394  | 27.114 | 1984.06 | 394.736 | 287.709 | 107.027 |
| 2003          | 146733 | 29175.202 | 20381.311 | 8793.891 | 5.993  | 30.142 | 1896.81 | 377.146 | 263.468 | 113.678 |
| 2004          | 138381 | 27488.687 | 18376.102 | 9112.585 | 6.585  | 33.150 | 1769.58 | 351.518 | 234.989 | 116.529 |
| 2005          | 135881 | 27017.439 | 17327.284 | 9690.155 | 7.131  | 35.866 | 1717.44 | 341.482 | 219.005 | 122.477 |
| 2006          | 131922 | 26231.435 | 16055.486 | 10175.95 | 7.714  | 38.793 | 1652.16 | 328.517 | 201.076 | 127.442 |
| 2007          | 126502 | 25103.049 | 14716.791 | 10386.26 | 8.210  | 41.374 | 1568.04 | 311.161 | 182.420 | 128.741 |
| 2008          | 125859 | 24621.740 | 13906.206 | 10715.53 | 8.514  | 43.521 | 1542.60 | 301.777 | 170.442 | 131.335 |
| 2009          | 122428 | 23741.177 | 12909.186 | 10831.99 | 8.848  | 45.625 | 1482.84 | 287.552 | 156.356 | 131.197 |
| 2010          | 120537 | 23189.160 | 12181.657 | 11007.50 | 9.132  | 47.468 | 1442.22 | 277.458 | 145.753 | 131.705 |
| 2011          | 120221 | 22786.927 | 11522.742 | 11264.19 | 9.370  | 49.433 | 1424.23 | 269.951 | 136.507 | 133.444 |
| 2012          | 120927 | 22485.295 | 10979.148 | 11506.15 | 9.515  | 51.172 | 1417.09 | 263.495 | 128.660 | 134.835 |
| 2013          | 122648 | 22251.884 | 10522.481 | 11729.40 | 9.563  | 52.712 | 1420.86 | 257.786 | 121.902 | 135.884 |
| 2014          | 123229 | 21894.593 | 10040.675 | 11853.92 | 9.619  | 54.141 | 1410.92 | 250.685 | 114.962 | 135.723 |
| 2015          | 123774 | 21471.109 | 9592.703  | 11878.41 | 9.597  | 55.323 | 1594.26 | 276.557 | 123.558 | 152.999 |
| 2016          | 126218 | 21411.568 | 9303.942  | 12107.63 | 9.593  | 56.547 | 1610.55 | 273.213 | 118.719 | 154.494 |
| 2017          | 128265 | 21169.399 | 8954.168  | 12215.23 | 9.523  | 57.702 | 1621.69 | 267.651 | 113.210 | 154.441 |
| 2018          | 121429 | 19830.576 | 8181.121  | 11649.45 | 9.594  | 58.745 | 1521.05 | 248.404 | 102.479 | 145.925 |
| 2019          | 121832 | 19431.014 | 7858.830  | 11572.18 | 9.498  | 59.555 | 1511.26 | 241.031 | 97.484  | 143.546 |
| 2020          | 120811 | 18532.612 | 7350.396  | 11182.22 | 9.256  | 60.338 | 1711.27 | 262.513 | 104.118 | 158.395 |
| 2021          | 119407 | 18234.128 | 7077.051  | 11157.08 | 9.344  | 61.188 | 1679.51 | 256.472 | 99.542  | 156.930 |
| 2022          | 119438 | 17812.559 | 6770.020  | 11042.54 | 9.245  | 61.993 | 1667.10 | 248.626 | 94.495  | 154.131 |
| 2023          | 119445 | 17361.668 | 6477.108  | 10884.56 | 9.113  | 62.693 | 1653.68 | 240.367 | 89.674  | 150.693 |
| 2024          | 119305 | 16929.676 | 6224.113  | 10705.56 | 8.973  | 63.235 | 1638.05 | 232.443 | 85.457  | 146.987 |
| 2025          | 115685 | 15501.666 | 5616.057  | 9885.609 | 8.545  | 63.771 | 1848.78 | 247.735 | 89.751  | 157.983 |
| 2026          | 115073 | 15523.814 | 5570.029  | 9953.785 | 8.650  | 64.119 | 1831.46 | 247.072 | 88.651  | 158.421 |
| 2027          | 113989 | 15073.070 | 5351.195  | 9721.875 | 8.529  | 64.498 | 1805.98 | 238.810 | 84.782  | 154.029 |
| 2028          | 112855 | 14636.710 | 5123.861  | 9512.849 | 8.429  | 64.993 | 1778.98 | 230.725 | 80.770  | 149.955 |
| 2029          | 111718 | 14180.166 | 4918.857  | 9261.309 | 8.290  | 65.312 | 1751.04 | 222.256 | 77.097  | 145.159 |
| 2030          | 104851 | 12111.772 | 4150.549  | 7961.224 | 7.593  | 65.731 | 1963.54 | 226.816 | 77.727  | 149.089 |
| 2031          | 105289 | 12417.367 | 4242.401  | 8174.965 | 7.764  | 65.835 | 1966.62 | 231.935 | 79.241  | 152.694 |
| 2032          | 103879 | 12054.064 | 4066.241  | 7987.824 | 7.690  | 66.267 | 1933.67 | 224.381 | 75.691  | 148.689 |
| 2033          | 102485 | 11672.389 | 3886.325  | 7786.064 | 7.597  | 66.705 | 1899.76 | 216.370 | 72.041  | 144.330 |
| 2034          | 101070 | 11365.762 | 3764.492  | 7601.269 | 7.521  | 66.879 | 1864.51 | 209.673 | 69.446  | 140.226 |
| 2035          | 90820  | 8580.360  | 2793.771  | 5786.589 | 6.371  | 67.440 | 2072.23 | 195.777 | 63.745  | 132.032 |
| 2036          | 92117  | 8948.841  | 2891.792  | 6057.048 | 6.575  | 67.685 | 2101.31 | 204.135 | 65.966  | 138.170 |
| 2037          | 90327  | 8624.570  | 2782.918  | 5841.652 | 6.467  | 67.733 | 2058.21 | 196.522 | 63.412  | 133.110 |
| 2038          | 88590  | 8315.017  | 2647.447  | 5667.569 | 6.398  | 68.161 | 2014.42 | 189.073 | 60.200  | 128.873 |
| 2039          | 86921  | 8001.132  | 2537.041  | 5464.090 | 6.286  | 68.291 | 1970.05 | 181.344 | 57.502  | 123.843 |

## Results for PHIM for Run 9 (Sensitivity\_Analysis\_1.RTF)

\*\*\*\*\*

### Main Results for E-Component for Run: 9, Simulation: 1, COD: STROKE

| Variable Parameter          | Value                                  |
|-----------------------------|----------------------------------------|
| 1. Country                  | US (United States)                     |
| 2. Sex                      | M (Males)                              |
| 3. Year of start of process | 1990                                   |
| 4. Cause of Death           | STROKE                                 |
| 5. Effective Dose NULL      | CC:1                                   |
| 6. Effective Dose Ecig      | CC:1 Ecig:0.3 Dual:0.65                |
| Note:                       | Death rates are per million population |

#### Results for Age Groups Combined and Years combined, Population unadjusted for deaths in Ecig scenario,

| Age Group:All |         | NULL       | Ecig      | %Drop    |        | NULL   | Ecig    | Drop   |        |        |
|---------------|---------|------------|-----------|----------|--------|--------|---------|--------|--------|--------|
| Year          | Number  | Attrib     | Attrib    | Drop     | %Drop  | Attrib | Death   | Attrib | Drop   |        |
|               | Deaths  | Deaths     | Deaths    | Deaths   | Deaths | Deaths | Rate    | Rates  | Rates  |        |
| All Comb      | 1489699 | 149918.462 | 93101.617 | 56816.85 | 3.814  | 37.898 | 431.236 | 43.398 | 26.951 | 16.447 |

#### Results for Age Groups Combined, Population unadjusted for deaths in Ecig scenario,

| Age Group:All |        | NULL     | Ecig     | %Drop    |        | NULL   | Ecig    | Drop   |        |        |
|---------------|--------|----------|----------|----------|--------|--------|---------|--------|--------|--------|
| Year          | Number | Attrib   | Attrib   | Drop     | %Drop  | Attrib | Death   | Attrib | Drop   |        |
|               | Deaths | Deaths   | Deaths   | Deaths   | Deaths | Deaths | Rate    | Rates  | Rates  |        |
| 1990          | 32862  | 4613.166 | 4613.166 | 0.000    | 0.000  | 0.000  | 520.936 | 73.129 | 0.000  |        |
| 1991          | 32619  | 4555.566 | 4525.781 | 29.785   | 0.091  | 0.654  | 508.609 | 71.032 | 70.568 | 0.464  |
| 1992          | 32100  | 4453.572 | 4376.620 | 76.952   | 0.240  | 1.728  | 492.014 | 68.262 | 67.083 | 1.179  |
| 1993          | 32896  | 4462.473 | 4317.793 | 144.681  | 0.440  | 3.242  | 495.226 | 67.179 | 65.001 | 2.178  |
| 1994          | 33323  | 4499.513 | 4272.786 | 226.728  | 0.680  | 5.039  | 492.290 | 66.473 | 63.123 | 3.350  |
| 1995          | 33569  | 4472.774 | 4152.667 | 320.107  | 0.954  | 7.157  | 486.422 | 64.812 | 60.173 | 4.638  |
| 1996          | 33870  | 4406.878 | 3983.857 | 423.021  | 1.249  | 9.599  | 483.150 | 62.863 | 56.829 | 6.034  |
| 1997          | 33516  | 4288.158 | 3760.758 | 527.400  | 1.574  | 12.299 | 470.307 | 60.173 | 52.772 | 7.401  |
| 1998          | 32795  | 4120.148 | 3498.103 | 622.046  | 1.897  | 15.098 | 452.620 | 56.864 | 48.279 | 8.585  |
| 1999          | 33375  | 3982.443 | 3265.758 | 716.684  | 2.147  | 17.996 | 453.361 | 54.097 | 44.362 | 9.735  |
| 2000          | 33459  | 4021.411 | 3183.701 | 837.711  | 2.504  | 20.831 | 447.853 | 53.827 | 42.614 | 11.213 |
| 2001          | 32275  | 3848.092 | 2928.657 | 919.435  | 2.849  | 23.893 | 426.379 | 50.836 | 38.690 | 12.146 |
| 2002          | 31586  | 3783.081 | 2769.294 | 1013.787 | 3.210  | 26.798 | 412.601 | 49.418 | 36.175 | 13.243 |
| 2003          | 30985  | 3754.415 | 2637.833 | 1116.582 | 3.604  | 29.741 | 400.541 | 48.533 | 34.099 | 14.434 |
| 2004          | 29884  | 3666.274 | 2470.486 | 1195.788 | 4.001  | 32.616 | 382.149 | 46.883 | 31.592 | 15.291 |
| 2005          | 28708  | 3589.688 | 2318.893 | 1270.796 | 4.427  | 35.401 | 362.850 | 45.371 | 29.309 | 16.062 |
| 2006          | 28188  | 3596.985 | 2222.951 | 1374.033 | 4.875  | 38.200 | 353.021 | 45.048 | 27.840 | 17.208 |
| 2007          | 28026  | 3560.798 | 2109.630 | 1451.168 | 5.178  | 40.754 | 347.392 | 44.137 | 26.150 | 17.988 |
| 2008          | 27128  | 3417.001 | 1944.970 | 1472.032 | 5.426  | 43.080 | 332.495 | 41.881 | 23.839 | 18.042 |
| 2009          | 27068  | 3394.390 | 1859.409 | 1534.981 | 5.671  | 45.221 | 327.847 | 41.113 | 22.521 | 18.592 |
| 2010          | 26911  | 3340.137 | 1767.271 | 1572.866 | 5.845  | 47.090 | 321.990 | 39.965 | 21.145 | 18.819 |
| 2011          | 26959  | 3285.435 | 1677.965 | 1607.469 | 5.963  | 48.927 | 319.377 | 38.922 | 19.878 | 19.043 |
| 2012          | 27057  | 3259.209 | 1603.218 | 1655.991 | 6.120  | 50.810 | 317.068 | 38.193 | 18.787 | 19.406 |
| 2013          | 27904  | 3274.703 | 1555.598 | 1719.105 | 6.161  | 52.497 | 323.265 | 37.937 | 18.021 | 19.916 |
| 2014          | 28792  | 3298.083 | 1514.314 | 1783.769 | 6.195  | 54.085 | 329.657 | 37.762 | 17.338 | 20.423 |
| 2015          | 29560  | 3244.406 | 1447.339 | 1797.067 | 6.079  | 55.390 | 380.745 | 41.789 | 18.642 | 23.147 |
| 2016          | 30513  | 3314.836 | 1439.441 | 1875.395 | 6.146  | 56.576 | 389.347 | 42.297 | 18.367 | 23.930 |
| 2017          | 31416  | 3333.314 | 1406.065 | 1927.249 | 6.135  | 57.818 | 397.202 | 42.144 | 17.777 | 24.367 |
| 2018          | 29348  | 2925.242 | 1203.539 | 1721.703 | 5.866  | 58.857 | 367.626 | 36.642 | 15.076 | 21.567 |
| 2019          | 29598  | 2864.628 | 1153.615 | 1711.013 | 5.781  | 59.729 | 367.149 | 35.534 | 14.310 | 21.224 |
| 2020          | 29592  | 2730.366 | 1078.214 | 1652.152 | 5.583  | 60.510 | 419.174 | 38.675 | 15.273 | 23.403 |
| 2021          | 30097  | 2647.911 | 1022.256 | 1625.655 | 5.401  | 61.394 | 423.328 | 37.244 | 14.379 | 22.866 |
| 2022          | 30304  | 2586.165 | 976.082  | 1610.082 | 5.313  | 62.258 | 422.974 | 36.097 | 13.624 | 22.473 |
| 2023          | 30505  | 2517.960 | 933.117  | 1584.843 | 5.195  | 62.942 | 422.337 | 34.860 | 12.919 | 21.942 |
| 2024          | 30661  | 2454.161 | 895.003  | 1559.158 | 5.085  | 63.531 | 420.968 | 33.695 | 12.288 | 21.407 |
| 2025          | 30254  | 2275.364 | 816.544  | 1458.820 | 4.822  | 64.114 | 483.488 | 36.363 | 13.049 | 23.314 |
| 2026          | 30685  | 2183.166 | 774.219  | 1408.947 | 4.592  | 64.537 | 488.380 | 34.747 | 12.322 | 22.424 |
| 2027          | 30561  | 2112.345 | 741.111  | 1371.233 | 4.487  | 64.915 | 484.196 | 33.467 | 11.742 | 21.725 |
| 2028          | 30412  | 2046.677 | 709.664  | 1337.013 | 4.396  | 65.326 | 479.392 | 32.263 | 11.187 | 21.076 |
| 2029          | 30254  | 1977.671 | 679.333  | 1298.339 | 4.291  | 65.650 | 474.195 | 30.997 | 10.648 | 20.350 |
| 2030          | 29330  | 1744.457 | 592.740  | 1151.717 | 3.927  | 66.021 | 549.260 | 32.668 | 11.100 | 21.568 |
| 2031          | 28976  | 1653.738 | 556.716  | 1097.022 | 3.786  | 66.336 | 541.223 | 30.889 | 10.398 | 20.490 |
| 2032          | 28724  | 1603.120 | 530.634  | 1072.486 | 3.734  | 66.900 | 534.690 | 29.841 | 9.878  | 19.964 |
| 2033          | 28464  | 1548.245 | 507.913  | 1040.332 | 3.655  | 67.194 | 527.627 | 28.700 | 9.415  | 19.285 |
| 2034          | 28178  | 1511.985 | 490.865  | 1021.120 | 3.624  | 67.535 | 519.826 | 27.893 | 9.055  | 18.837 |
| 2035          | 26737  | 1239.866 | 399.501  | 840.365  | 3.143  | 67.779 | 610.065 | 28.290 | 9.115  | 19.175 |
| 2036          | 25591  | 1182.522 | 377.022  | 805.500  | 3.148  | 68.117 | 583.762 | 26.975 | 8.600  | 18.375 |
| 2037          | 25143  | 1134.483 | 363.610  | 770.873  | 3.066  | 67.949 | 572.916 | 25.851 | 8.285  | 17.565 |
| 2038          | 24693  | 1093.537 | 345.796  | 747.740  | 3.028  | 68.378 | 561.491 | 24.866 | 7.863  | 17.003 |
| 2039          | 24247  | 1047.905 | 329.800  | 718.105  | 2.962  | 68.528 | 549.553 | 23.751 | 7.475  | 16.276 |

## Results for PHIM for Run 9 (Sensitivity\_Analysis\_1.RTF)

\*\*\*\*\*

### Main Results for E-Component for Run: 9, Simulation: 1, COD: COPD

| Variable Parameter          | Value                                  |
|-----------------------------|----------------------------------------|
| 1. Country                  | US (United States)                     |
| 2. Sex                      | M (Males)                              |
| 3. Year of start of process | 1990                                   |
| 4. Cause of Death           | COPD                                   |
| 5. Effective Dose NULL      | CC:1                                   |
| 6. Effective Dose Ecig      | CC:1 Ecig:0.3 Dual:0.65                |
| Note:                       | Death rates are per million population |

#### Results for Age Groups Combined and Years combined, Population unadjusted for deaths in Ecig scenario,

| Age Group:All |         | NULL        | Ecig       | %Drop    |        | Death  |         | NULL    | Ecig    | Drop   |
|---------------|---------|-------------|------------|----------|--------|--------|---------|---------|---------|--------|
| Year          | Number  | Attrib      | Attrib     | Drop     | %Drop  | Attrib | Rate    | Attrib  | Attrib  | Rates  |
|               | Deaths  | Deaths      | Deaths     | Deaths   | Deaths | Deaths |         | Rates   | Rates   | Rates  |
| All Comb      | 2233143 | 1015606.587 | 787430.925 | 228175.7 | 10.218 | 22.467 | 646.447 | 293.996 | 227.944 | 66.052 |

#### Results for Age Groups Combined, Population unadjusted for deaths in Ecig scenario,

| Age Group:All |        | NULL      | Ecig      | %Drop    |        | Death  |         | NULL    | Ecig    | Drop    |
|---------------|--------|-----------|-----------|----------|--------|--------|---------|---------|---------|---------|
| Year          | Number | Attrib    | Attrib    | Drop     | %Drop  | Attrib | Rate    | Attrib  | Attrib  | Rates   |
|               | Deaths | Deaths    | Deaths    | Deaths   | Deaths | Deaths |         | Rates   | Rates   | Rates   |
| 1990          | 33993  | 19262.437 | 19262.437 | 0.000    | 0.000  | 0.000  | 538.865 | 305.353 | 305.353 | 0.000   |
| 1991          | 34092  | 19215.636 | 19198.822 | 16.814   | 0.049  | 0.088  | 531.576 | 299.618 | 299.356 | 0.262   |
| 1992          | 33942  | 19056.189 | 19013.253 | 42.937   | 0.127  | 0.225  | 520.248 | 292.085 | 291.427 | 0.658   |
| 1993          | 35913  | 20095.670 | 20008.482 | 87.188   | 0.243  | 0.434  | 540.645 | 302.526 | 301.213 | 1.313   |
| 1994          | 35074  | 19524.095 | 19392.327 | 131.768  | 0.376  | 0.675  | 518.158 | 288.435 | 286.488 | 1.947   |
| 1995          | 34669  | 19116.002 | 18926.599 | 189.403  | 0.546  | 0.991  | 502.362 | 276.995 | 274.251 | 2.744   |
| 1996          | 34582  | 18975.021 | 18716.472 | 258.549  | 0.748  | 1.363  | 493.306 | 270.675 | 266.987 | 3.688   |
| 1997          | 35267  | 19169.025 | 18826.840 | 342.184  | 0.970  | 1.785  | 494.878 | 268.986 | 264.184 | 4.802   |
| 1998          | 35675  | 19228.937 | 18784.933 | 444.005  | 1.245  | 2.309  | 492.368 | 265.388 | 259.260 | 6.128   |
| 1999          | 38516  | 20589.820 | 20009.397 | 580.423  | 1.507  | 2.819  | 523.195 | 279.689 | 271.805 | 7.884   |
| 2000          | 36283  | 19196.417 | 18545.641 | 650.776  | 1.794  | 3.390  | 485.652 | 256.946 | 248.236 | 8.711   |
| 2001          | 36281  | 19012.731 | 18223.909 | 788.822  | 2.174  | 4.149  | 479.301 | 251.174 | 240.753 | 10.421  |
| 2002          | 35983  | 18699.357 | 17780.142 | 919.215  | 2.555  | 4.916  | 470.038 | 244.265 | 232.258 | 12.007  |
| 2003          | 36205  | 18663.550 | 17594.461 | 1069.088 | 2.953  | 5.728  | 468.019 | 241.262 | 227.442 | 13.820  |
| 2004          | 34611  | 17679.164 | 16492.664 | 1186.500 | 3.428  | 6.711  | 442.596 | 226.076 | 210.904 | 15.173  |
| 2005          | 36826  | 18692.832 | 17265.261 | 1427.571 | 3.877  | 7.637  | 465.456 | 236.265 | 218.221 | 18.044  |
| 2006          | 34350  | 17308.564 | 15795.157 | 1513.407 | 4.406  | 8.744  | 430.192 | 216.769 | 197.815 | 18.954  |
| 2007          | 35326  | 17683.181 | 15938.426 | 1744.755 | 4.939  | 9.867  | 437.879 | 219.189 | 197.563 | 21.627  |
| 2008          | 38248  | 19006.374 | 16935.070 | 2071.304 | 5.415  | 10.898 | 468.788 | 232.952 | 207.565 | 25.387  |
| 2009          | 36902  | 18205.573 | 15985.337 | 2220.235 | 6.017  | 12.195 | 446.956 | 220.505 | 193.614 | 26.891  |
| 2010          | 37234  | 18237.758 | 15811.294 | 2426.465 | 6.517  | 13.305 | 445.505 | 218.215 | 189.182 | 29.033  |
| 2011          | 38093  | 18487.916 | 15756.040 | 2731.876 | 7.172  | 14.777 | 451.279 | 219.022 | 186.658 | 32.364  |
| 2012          | 38504  | 18491.158 | 15505.397 | 2985.762 | 7.754  | 16.147 | 451.211 | 216.689 | 181.701 | 34.989  |
| 2013          | 40290  | 19143.452 | 15803.364 | 3340.088 | 8.290  | 17.448 | 466.755 | 221.775 | 183.080 | 38.695  |
| 2014          | 40339  | 18992.005 | 15409.957 | 3582.047 | 8.880  | 18.861 | 461.866 | 217.451 | 176.438 | 41.013  |
| 2015          | 42303  | 19728.885 | 15792.230 | 3936.655 | 9.306  | 19.954 | 544.880 | 254.116 | 203.411 | 50.706  |
| 2016          | 43104  | 19876.724 | 15651.072 | 4225.652 | 9.803  | 21.259 | 550.009 | 253.628 | 199.708 | 53.919  |
| 2017          | 44107  | 20119.790 | 15555.276 | 4564.515 | 10.349 | 22.687 | 557.659 | 254.381 | 196.670 | 57.711  |
| 2018          | 45469  | 20535.123 | 15590.869 | 4944.254 | 10.874 | 24.077 | 569.564 | 257.229 | 195.296 | 61.933  |
| 2019          | 46963  | 21009.029 | 15666.085 | 5342.944 | 11.377 | 25.432 | 582.552 | 260.605 | 194.329 | 66.276  |
| 2020          | 48419  | 21428.512 | 15696.655 | 5731.857 | 11.838 | 26.749 | 685.853 | 303.533 | 222.342 | 81.191  |
| 2021          | 48463  | 21266.697 | 15253.996 | 6012.701 | 12.407 | 28.273 | 681.652 | 299.127 | 214.555 | 84.572  |
| 2022          | 49915  | 21663.568 | 15214.830 | 6448.738 | 12.919 | 29.768 | 696.712 | 302.378 | 212.367 | 90.011  |
| 2023          | 51391  | 22084.131 | 15191.645 | 6892.486 | 13.412 | 31.210 | 711.491 | 305.748 | 210.324 | 95.424  |
| 2024          | 52811  | 22418.456 | 15138.565 | 7279.891 | 13.785 | 32.473 | 725.093 | 307.804 | 207.851 | 99.952  |
| 2025          | 53848  | 22614.834 | 14998.393 | 7616.442 | 14.144 | 33.679 | 860.553 | 361.411 | 239.692 | 121.720 |
| 2026          | 54342  | 22571.522 | 14657.191 | 7914.330 | 14.564 | 35.063 | 864.886 | 359.241 | 233.279 | 125.962 |
| 2027          | 55267  | 22774.416 | 14461.877 | 8312.539 | 15.041 | 36.499 | 875.619 | 360.827 | 229.127 | 131.700 |
| 2028          | 56149  | 22915.561 | 14221.685 | 8693.875 | 15.484 | 37.939 | 885.102 | 361.228 | 224.183 | 137.045 |
| 2029          | 57014  | 22992.027 | 13951.194 | 9040.834 | 15.857 | 39.322 | 893.616 | 360.371 | 218.667 | 141.704 |
| 2030          | 57238  | 22895.360 | 13616.042 | 9279.317 | 16.212 | 40.529 | 1071.90 | 428.760 | 254.987 | 173.773 |
| 2031          | 57592  | 22715.871 | 13269.099 | 9446.772 | 16.403 | 41.587 | 1075.71 | 424.293 | 247.844 | 176.449 |
| 2032          | 58251  | 22759.207 | 12981.217 | 9777.990 | 16.786 | 42.963 | 1084.31 | 423.652 | 241.639 | 182.013 |
| 2033          | 58885  | 22786.258 | 12751.275 | 10034.98 | 17.042 | 44.040 | 1091.54 | 422.387 | 236.370 | 186.018 |
| 2034          | 59460  | 22806.106 | 12484.126 | 10321.98 | 17.360 | 45.260 | 1096.89 | 420.721 | 230.304 | 190.417 |
| 2035          | 58516  | 22262.998 | 12018.675 | 10244.32 | 17.507 | 46.015 | 1335.15 | 507.973 | 274.229 | 233.744 |
| 2036          | 56446  | 21140.051 | 11083.621 | 10056.43 | 17.816 | 47.571 | 1287.60 | 482.234 | 252.833 | 229.401 |
| 2037          | 56568  | 21011.845 | 10726.313 | 10285.53 | 18.183 | 48.951 | 1288.98 | 478.783 | 244.413 | 234.370 |
| 2038          | 56668  | 20787.483 | 10380.098 | 10407.39 | 18.366 | 50.066 | 1288.55 | 472.681 | 236.030 | 236.651 |
| 2039          | 56758  | 20709.267 | 10097.212 | 10612.06 | 18.697 | 51.243 | 1286.40 | 469.372 | 228.852 | 240.521 |

## Results for PHIM for Run 9 (Sensitivity\_Analysis\_1.RTF)

\*\*\*\*\*

### Main Results for E-Component for Run: 9, Simulation: 1, COD: Four Diseases Combined, Adjusted

| Variable Parameter          | Value                                  |
|-----------------------------|----------------------------------------|
| 1. Country                  | US (United States)                     |
| 2. Sex                      | M (Males)                              |
| 3. Year of start of process | 1990                                   |
| 4. Cause of Death           | Four Diseases Combined                 |
| 5. Effective Dose NULL      | CC:1                                   |
| 6. Effective Dose Ecig      | CC:1 Ecig:0.3 Dual:0.65                |
| Note:                       | Death rates are per million population |

#### Results for Age Groups Combined and Years combined, Population and Number deaths adjusted for Ecig scenario,

| Age Group:All | NULL     | Ecig        |             |          |        |        | NULL    | Ecig    |         |         |
|---------------|----------|-------------|-------------|----------|--------|--------|---------|---------|---------|---------|
| Year          | Number   | Attrib      | Attrib      | Drop     | %Drop  | Attrib | Death   | Attrib  | Attrib  | Drop    |
|               | Deaths   | Deaths      | Deaths      | Deaths   | Deaths | Deaths | Rate    | Rates   | Rates   | Rates   |
| All Comb      | 13244957 | 4509390.583 | 3533875.057 | 975515.5 | 7.365  | 21.633 | 3812.79 | 1305.37 | 1017.29 | 288.083 |

#### Results for Age Groups Combined, Population and Number deaths adjusted for Ecig scenario,

| Age Group:All | NULL   | Ecig       |            |          |        |        | NULL    | Ecig    |         |         |
|---------------|--------|------------|------------|----------|--------|--------|---------|---------|---------|---------|
| Year          | Number | Attrib     | Attrib     | Drop     | %Drop  | Attrib | Death   | Attrib  | Attrib  | Drop    |
|               | Deaths | Deaths     | Deaths     | Deaths   | Deaths | Deaths | Rate    | Rates   | Rates   | Rates   |
| 1990          | 317161 | 125773.065 | 125773.065 | 0.000    | 0.000  | 0.000  | 5027.71 | 1993.78 | 1993.78 | 0.000   |
| 1991          | 313217 | 123999.442 | 123686.342 | 313.101  | 0.100  | 0.253  | 4883.81 | 1933.45 | 1928.57 | 4.882   |
| 1992          | 308579 | 122014.015 | 121187.444 | 826.572  | 0.268  | 0.677  | 4729.74 | 1870.18 | 1857.50 | 12.679  |
| 1993          | 311720 | 122810.618 | 121271.280 | 1539.338 | 0.494  | 1.253  | 4692.64 | 1848.83 | 1825.62 | 23.206  |
| 1994          | 305717 | 119925.592 | 117582.592 | 2343.000 | 0.766  | 1.954  | 4516.26 | 1771.69 | 1737.01 | 34.686  |
| 1995          | 303256 | 117896.496 | 114620.886 | 3275.610 | 1.080  | 2.778  | 4393.91 | 1708.35 | 1660.75 | 47.592  |
| 1996          | 299610 | 115698.645 | 111406.467 | 4292.178 | 1.433  | 3.710  | 4273.34 | 1650.42 | 1588.99 | 61.427  |
| 1997          | 294301 | 113359.847 | 108056.598 | 5303.249 | 1.802  | 4.678  | 4128.95 | 1590.70 | 1516.00 | 74.704  |
| 1998          | 289364 | 111444.212 | 105127.338 | 6316.874 | 2.183  | 5.668  | 3992.59 | 1538.10 | 1450.53 | 87.570  |
| 1999          | 311158 | 114877.722 | 106481.193 | 8396.529 | 2.698  | 7.309  | 4225.21 | 1560.48 | 1445.91 | 114.576 |
| 2000          | 303991 | 112379.704 | 102874.058 | 9505.646 | 3.127  | 8.459  | 4067.01 | 1504.22 | 1376.32 | 127.894 |
| 2001          | 296552 | 110024.943 | 99307.940  | 10717.00 | 3.614  | 9.741  | 3915.28 | 1453.52 | 1311.13 | 142.386 |
| 2002          | 292218 | 108289.173 | 96236.836  | 12052.34 | 4.124  | 11.130 | 3814.25 | 1414.56 | 1256.16 | 158.400 |
| 2003          | 286250 | 106539.023 | 93325.339  | 13213.68 | 4.616  | 12.403 | 3696.87 | 1377.22 | 1205.28 | 171.941 |
| 2004          | 274623 | 103037.251 | 88959.980  | 14077.27 | 5.126  | 13.662 | 3507.87 | 1317.61 | 1136.32 | 181.293 |
| 2005          | 272905 | 103044.562 | 87734.790  | 15309.77 | 5.610  | 14.857 | 3444.78 | 1302.41 | 1107.45 | 194.969 |
| 2006          | 264714 | 99672.555  | 83327.803  | 16344.75 | 6.174  | 16.398 | 3310.14 | 1248.28 | 1041.98 | 206.298 |
| 2007          | 259094 | 97839.152  | 80631.987  | 17207.17 | 6.641  | 17.587 | 3205.91 | 1212.75 | 997.703 | 215.049 |
| 2008          | 260237 | 98075.852  | 79787.130  | 18288.72 | 7.028  | 18.648 | 3183.22 | 1202.07 | 975.959 | 226.112 |
| 2009          | 254769 | 95617.338  | 76589.194  | 19028.14 | 7.469  | 19.900 | 3078.80 | 1158.11 | 925.558 | 232.556 |
| 2010          | 252837 | 94607.988  | 74759.636  | 19848.35 | 7.850  | 20.980 | 3017.61 | 1131.98 | 892.254 | 239.730 |
| 2011          | 252848 | 93633.119  | 72746.928  | 20886.19 | 8.260  | 22.306 | 2987.13 | 1109.25 | 859.426 | 249.822 |
| 2012          | 253833 | 92775.175  | 70873.855  | 21901.32 | 8.628  | 23.607 | 2965.49 | 1087.19 | 828.009 | 259.180 |
| 2013          | 257507 | 92345.780  | 69402.340  | 22943.44 | 8.910  | 24.845 | 2973.26 | 1069.82 | 801.344 | 268.472 |
| 2014          | 258863 | 91379.215  | 67579.593  | 23799.62 | 9.194  | 26.045 | 2953.16 | 1046.26 | 770.960 | 275.296 |
| 2015          | 261410 | 90750.242  | 66219.682  | 24530.56 | 9.384  | 27.031 | 3352.21 | 1168.90 | 849.173 | 319.729 |
| 2016          | 263233 | 88811.996  | 63528.295  | 25283.70 | 9.605  | 28.469 | 3342.88 | 1133.24 | 806.765 | 326.480 |
| 2017          | 265633 | 87325.126  | 61314.468  | 26010.66 | 9.792  | 29.786 | 3341.30 | 1104.08 | 771.255 | 332.824 |
| 2018          | 260769 | 87612.144  | 61139.441  | 26472.70 | 10.152 | 30.216 | 3248.60 | 1097.46 | 761.661 | 335.795 |
| 2019          | 263672 | 87797.760  | 60469.264  | 27328.50 | 10.365 | 31.127 | 3251.63 | 1089.08 | 745.714 | 343.368 |
| 2020          | 264710 | 87221.042  | 59446.565  | 27774.48 | 10.492 | 31.844 | 3723.33 | 1235.48 | 836.157 | 399.322 |
| 2021          | 257589 | 82001.292  | 54501.910  | 27499.38 | 10.676 | 33.535 | 3596.21 | 1153.39 | 760.904 | 392.485 |
| 2022          | 259787 | 81915.977  | 53601.081  | 28314.90 | 10.899 | 34.566 | 3597.67 | 1143.37 | 742.295 | 401.080 |
| 2023          | 261959 | 81810.810  | 52750.794  | 29060.02 | 11.093 | 35.521 | 3596.81 | 1132.64 | 724.291 | 408.354 |
| 2024          | 263791 | 81528.303  | 51869.203  | 29659.10 | 11.243 | 36.379 | 3590.43 | 1119.38 | 705.985 | 413.393 |
| 2025          | 260563 | 79599.213  | 50266.113  | 29333.10 | 11.258 | 36.851 | 4121.41 | 1272.09 | 795.078 | 477.010 |
| 2026          | 254871 | 75082.462  | 46221.783  | 28860.68 | 11.324 | 38.439 | 4012.90 | 1194.99 | 727.755 | 467.233 |
| 2027          | 254498 | 74444.425  | 45124.206  | 29320.22 | 11.521 | 39.385 | 3986.97 | 1179.46 | 706.917 | 472.544 |
| 2028          | 253963 | 73699.585  | 43947.119  | 29752.47 | 11.715 | 40.370 | 3956.61 | 1161.76 | 684.672 | 477.087 |
| 2029          | 253373 | 72819.703  | 42752.923  | 30066.78 | 11.867 | 41.289 | 3923.09 | 1141.36 | 661.963 | 479.394 |
| 2030          | 244503 | 69309.277  | 40518.810  | 28790.47 | 11.775 | 41.539 | 4514.36 | 1297.95 | 748.114 | 549.835 |
| 2031          | 239482 | 65433.368  | 37328.214  | 28105.15 | 11.736 | 42.952 | 4407.73 | 1222.18 | 687.036 | 535.145 |
| 2032          | 238206 | 64643.552  | 36238.334  | 28405.22 | 11.925 | 43.941 | 4366.97 | 1203.31 | 664.349 | 538.959 |
| 2033          | 236895 | 63793.514  | 35274.087  | 28519.43 | 12.039 | 44.706 | 4322.57 | 1182.54 | 643.638 | 538.898 |
| 2034          | 235444 | 63032.151  | 34332.523  | 28699.63 | 12.190 | 45.532 | 4273.19 | 1162.80 | 623.119 | 539.681 |
| 2035          | 220305 | 57653.301  | 31560.361  | 26092.94 | 11.844 | 45.258 | 4934.76 | 1315.47 | 706.940 | 608.530 |
| 2036          | 212607 | 52988.733  | 27983.937  | 25004.80 | 11.761 | 47.189 | 4758.40 | 1208.75 | 626.313 | 582.433 |
| 2037          | 210004 | 52026.921  | 26992.742  | 25034.18 | 11.921 | 48.118 | 4692.41 | 1185.50 | 603.135 | 582.367 |
| 2038          | 207433 | 50943.211  | 25993.967  | 24949.24 | 12.028 | 48.975 | 4622.78 | 1158.38 | 579.293 | 579.090 |
| 2039          | 204933 | 50085.991  | 25168.619  | 24917.37 | 12.159 | 49.749 | 4549.82 | 1135.19 | 558.781 | 576.410 |

## Results for PHIM for Run 9 (Sensitivity\_Analysis\_1.RTF)

\*\*\*\*\*

### Main Results for E-Component for Run: 9, Simulation: 1, COD: LUNG CANCER, Adjusted

| Variable Parameter          | Value                                  |
|-----------------------------|----------------------------------------|
| 1. Country                  | US (United States)                     |
| 2. Sex                      | M (Males)                              |
| 3. Year of start of process | 1990                                   |
| 4. Cause of Death           | LUNG CANCER                            |
| 5. Effective Dose NULL      | CC:1                                   |
| 6. Effective Dose Ecig      | CC:1 Ecig:0.3 Dual:0.65                |
| Note:                       | Death rates are per million population |

#### Results for Age Groups Combined and Years combined, Population and Number deaths adjusted for Ecig scenario,

| Age Group:All |         | NULL        | Ecig        | %Drop    |        | NULL   | Ecig    | Drop    |         |        |
|---------------|---------|-------------|-------------|----------|--------|--------|---------|---------|---------|--------|
| Year          | Number  | Attrib      | Attrib      | Drop     | %Drop  | Attrib | Death   | Attrib  | Drop    |        |
|               | Deaths  | Deaths      | Deaths      | Deaths   | Deaths | Deaths | Rate    | Rates   | Rates   |        |
| All Comb      | 3086089 | 2244988.113 | 1949816.078 | 295172.0 | 9.565  | 13.148 | 888.385 | 649.875 | 561.289 | 88.587 |

#### Results for Age Groups Combined, Population and Number deaths adjusted for Ecig scenario,

| Age Group:All |        | NULL      | Ecig      | %Drop    |        | NULL   | Ecig    | Drop    |         |
|---------------|--------|-----------|-----------|----------|--------|--------|---------|---------|---------|
| Year          | Number | Attrib    | Attrib    | Drop     | %Drop  | Attrib | Death   | Attrib  | Drop    |
|               | Deaths | Deaths    | Deaths    | Deaths   | Deaths | Deaths | Rate    | Rates   | Rates   |
| 1990          | 78822  | 63385.736 | 63385.736 | 0.000    | 0.000  | 0.000  | 1249.50 | 1004.81 | 0.000   |
| 1991          | 78462  | 62918.402 | 62882.368 | 36.034   | 0.046  | 0.057  | 1223.41 | 981.049 | 0.562   |
| 1992          | 77988  | 62366.766 | 62272.300 | 94.466   | 0.121  | 0.151  | 1195.35 | 955.930 | 1.453   |
| 1993          | 78544  | 62652.888 | 62468.749 | 184.138  | 0.234  | 0.294  | 1182.40 | 943.195 | 2.789   |
| 1994          | 77442  | 61565.227 | 61278.797 | 286.430  | 0.370  | 0.465  | 1144.02 | 909.520 | 4.269   |
| 1995          | 76912  | 60851.961 | 60438.289 | 413.672  | 0.538  | 0.680  | 1114.39 | 881.759 | 6.062   |
| 1996          | 76245  | 60122.922 | 59550.453 | 572.468  | 0.751  | 0.952  | 1087.49 | 857.643 | 8.273   |
| 1997          | 75493  | 59237.155 | 58497.996 | 739.159  | 0.979  | 1.248  | 1059.14 | 831.234 | 10.527  |
| 1998          | 75410  | 58906.696 | 57958.174 | 948.522  | 1.258  | 1.610  | 1040.49 | 813.001 | 13.305  |
| 1999          | 73197  | 56930.073 | 55784.158 | 1145.915 | 1.566  | 2.013  | 993.943 | 773.329 | 15.838  |
| 2000          | 73836  | 57137.121 | 55741.437 | 1395.684 | 1.890  | 2.443  | 987.829 | 764.787 | 19.039  |
| 2001          | 73360  | 56481.726 | 54798.836 | 1682.890 | 2.294  | 2.980  | 968.555 | 746.169 | 22.677  |
| 2002          | 72525  | 55588.365 | 53614.733 | 1973.632 | 2.721  | 3.550  | 946.647 | 726.138 | 26.318  |
| 2003          | 72043  | 54945.856 | 52656.025 | 2289.831 | 3.178  | 4.167  | 930.419 | 710.281 | 30.238  |
| 2004          | 71421  | 54203.126 | 51559.179 | 2643.946 | 3.702  | 4.878  | 912.292 | 693.135 | 34.550  |
| 2005          | 71106  | 53744.603 | 50751.495 | 2993.108 | 4.209  | 5.569  | 897.542 | 679.296 | 38.677  |
| 2006          | 69821  | 52535.572 | 49177.018 | 3358.553 | 4.810  | 6.393  | 873.079 | 657.945 | 43.006  |
| 2007          | 68750  | 51492.124 | 47781.548 | 3710.576 | 5.397  | 7.206  | 850.682 | 638.264 | 47.037  |
| 2008          | 68436  | 51030.736 | 46903.037 | 4127.698 | 6.031  | 8.089  | 837.115 | 625.460 | 51.741  |
| 2009          | 67745  | 50276.199 | 45731.294 | 4544.904 | 6.709  | 9.040  | 818.677 | 608.943 | 56.294  |
| 2010          | 67460  | 49840.933 | 44886.648 | 4954.285 | 7.344  | 9.940  | 805.132 | 596.347 | 60.626  |
| 2011          | 66797  | 49072.841 | 43668.116 | 5404.725 | 8.091  | 11.014 | 789.137 | 581.354 | 65.462  |
| 2012          | 66475  | 48539.512 | 42654.990 | 5884.522 | 8.852  | 12.123 | 776.623 | 568.812 | 70.480  |
| 2013          | 65682  | 47675.741 | 41377.237 | 6298.503 | 9.589  | 13.211 | 758.386 | 552.318 | 74.562  |
| 2014          | 65415  | 47194.534 | 40462.315 | 6732.219 | 10.292 | 14.265 | 746.266 | 540.359 | 78.758  |
| 2015          | 64557  | 46305.842 | 39221.007 | 7084.835 | 10.975 | 15.300 | 727.848 | 526.439 | 83.486  |
| 2016          | 62048  | 44208.867 | 36955.980 | 7252.887 | 11.689 | 16.406 | 707.969 | 514.107 | 88.792  |
| 2017          | 60350  | 42702.624 | 35209.685 | 7492.939 | 12.416 | 17.547 | 689.126 | 502.903 | 94.112  |
| 2018          | 62977  | 44321.202 | 35967.933 | 8353.269 | 13.264 | 18.847 | 671.549 | 491.181 | 100.000 |
| 2019          | 63597  | 44493.088 | 35582.466 | 8910.622 | 14.011 | 20.027 | 654.284 | 480.912 | 106.114 |
| 2020          | 64063  | 44529.551 | 35100.723 | 9428.828 | 14.718 | 21.174 | 638.095 | 470.757 | 112.042 |
| 2021          | 57688  | 39852.556 | 30921.686 | 8930.870 | 15.481 | 22.410 | 622.391 | 460.546 | 118.847 |
| 2022          | 58056  | 39853.685 | 30402.813 | 9450.872 | 16.279 | 23.714 | 606.983 | 450.274 | 125.240 |
| 2023          | 58395  | 39847.050 | 29900.802 | 9946.248 | 17.033 | 24.961 | 592.782 | 440.670 | 131.119 |
| 2024          | 58640  | 39726.010 | 29352.566 | 10373.44 | 17.690 | 26.112 | 583.143 | 431.435 | 137.921 |
| 2025          | 58259  | 39207.348 | 28566.585 | 10640.76 | 18.264 | 27.140 | 573.511 | 422.579 | 144.731 |
| 2026          | 52125  | 34803.960 | 24943.772 | 9860.188 | 18.916 | 28.331 | 563.702 | 413.929 | 151.193 |
| 2027          | 51902  | 34484.595 | 24285.156 | 10199.44 | 19.651 | 29.577 | 554.092 | 405.357 | 157.905 |
| 2028          | 51632  | 34100.638 | 23599.441 | 10501.20 | 20.338 | 30.795 | 544.402 | 396.544 | 164.877 |
| 2029          | 51334  | 33669.838 | 22904.571 | 10765.27 | 20.971 | 31.973 | 534.832 | 387.732 | 171.990 |
| 2030          | 49930  | 32557.688 | 21857.126 | 10700.56 | 21.431 | 32.866 | 525.873 | 379.705 | 179.149 |
| 2031          | 44343  | 28646.393 | 18951.657 | 9694.736 | 21.863 | 33.843 | 516.154 | 371.065 | 186.254 |
| 2032          | 43946  | 28227.160 | 18347.562 | 9879.598 | 22.481 | 35.000 | 506.650 | 362.435 | 193.073 |
| 2033          | 43533  | 27786.623 | 17810.304 | 9976.319 | 22.917 | 35.903 | 497.335 | 353.979 | 199.098 |
| 2034          | 43087  | 27348.299 | 17269.674 | 10078.62 | 23.392 | 36.853 | 488.002 | 345.514 | 205.077 |
| 2035          | 40581  | 25570.077 | 16030.859 | 9539.218 | 23.507 | 37.306 | 478.994 | 337.430 | 211.345 |
| 2036          | 34755  | 21717.319 | 13324.766 | 8392.553 | 24.148 | 38.645 | 469.863 | 329.402 | 217.178 |
| 2037          | 34191  | 21256.024 | 12813.377 | 8442.646 | 24.693 | 39.719 | 460.966 | 321.347 | 223.040 |
| 2038          | 33631  | 20747.175 | 12315.251 | 8431.924 | 25.072 | 40.641 | 452.484 | 313.764 | 228.311 |
| 2039          | 33083  | 20327.688 | 11899.385 | 8428.303 | 25.476 | 41.462 | 444.490 | 306.724 | 233.540 |



## Results for PHIM for Run 9 (Sensitivity\_Analysis\_1.RTF)

\*\*\*\*\*

### Main Results for E-Component for Run: 9, Simulation: 1, COD: IHD, Adjusted

| Variable Parameter          | Value                                  |
|-----------------------------|----------------------------------------|
| 1. Country                  | US (United States)                     |
| 2. Sex                      | M (Males)                              |
| 3. Year of start of process | 1990                                   |
| 4. Cause of Death           | IHD                                    |
| 5. Effective Dose NULL      | CC:1                                   |
| 6. Effective Dose Ecig      | CC:1 Ecig:0.3 Dual:0.65                |
| Note:                       | Death rates are per million population |

### Results for Age Groups Combined and Years combined, Population and Number deaths adjusted for Ecig scenario,

| Age Group:All |         | NULL        | Ecig       | %Drop    |        | NULL   | Ecig    | Drop    |         |         |
|---------------|---------|-------------|------------|----------|--------|--------|---------|---------|---------|---------|
| Year          | Number  | Attrib      | Attrib     | Drop     | %Drop  | Attrib | Death   | Attrib  | Drop    |         |
|               | Deaths  | Deaths      | Deaths     | Deaths   | Deaths | Deaths | Rate    | Rates   | Rates   |         |
| All Comb      | 6402472 | 1098877.421 | 697553.323 | 401324.1 | 6.268  | 36.521 | 1843.06 | 318.101 | 200.803 | 117.298 |

### Results for Age Groups Combined, Population and Number deaths adjusted for Ecig scenario,

| Age Group:All |        | NULL      | Ecig      | %Drop    |        | NULL   | Ecig    | Drop    |         |
|---------------|--------|-----------|-----------|----------|--------|--------|---------|---------|---------|
| Year          | Number | Attrib    | Attrib    | Drop     | %Drop  | Attrib | Death   | Attrib  | Drop    |
|               | Deaths | Deaths    | Deaths    | Deaths   | Deaths | Deaths | Rate    | Rates   | Rates   |
| 1990          | 171484 | 38511.725 | 38511.725 | 0.000    | 0.000  | 0.000  | 2718.40 | 610.497 | 0.000   |
| 1991          | 168044 | 37309.838 | 37079.370 | 230.467  | 0.137  | 0.618  | 2620.21 | 581.750 | 3.594   |
| 1992          | 164549 | 36137.488 | 35525.115 | 612.373  | 0.372  | 1.695  | 2522.12 | 553.899 | 9.389   |
| 1993          | 164366 | 35599.588 | 34475.688 | 1123.900 | 0.684  | 3.157  | 2474.37 | 535.926 | 16.929  |
| 1994          | 159875 | 34336.757 | 32637.375 | 1699.383 | 1.063  | 4.949  | 2361.78 | 507.267 | 25.125  |
| 1995          | 158099 | 33455.759 | 31100.981 | 2354.778 | 1.489  | 7.038  | 2290.72 | 484.782 | 34.156  |
| 1996          | 154901 | 32193.824 | 29151.888 | 3041.936 | 1.964  | 9.449  | 2209.36 | 459.239 | 43.445  |
| 1997          | 150008 | 30665.509 | 26965.265 | 3700.245 | 2.467  | 12.066 | 2104.57 | 430.308 | 51.995  |
| 1998          | 145460 | 29188.430 | 24878.049 | 4310.381 | 2.963  | 14.767 | 2007.03 | 402.844 | 59.581  |
| 1999          | 166035 | 33375.386 | 27410.294 | 5965.092 | 3.593  | 17.873 | 2254.58 | 453.366 | 81.162  |
| 2000          | 160368 | 32024.754 | 25388.667 | 6636.088 | 4.138  | 20.722 | 2145.51 | 428.655 | 88.988  |
| 2001          | 154578 | 30682.393 | 23338.207 | 7344.186 | 4.751  | 23.936 | 2040.84 | 405.339 | 97.212  |
| 2002          | 152052 | 30218.370 | 22050.230 | 8168.140 | 5.372  | 27.030 | 1984.70 | 394.736 | 106.919 |
| 2003          | 146929 | 29175.202 | 20409.687 | 8765.515 | 5.966  | 30.044 | 1897.57 | 377.146 | 113.558 |
| 2004          | 138604 | 27488.687 | 18406.710 | 9081.977 | 6.552  | 33.039 | 1770.44 | 351.518 | 116.402 |
| 2005          | 136140 | 27017.439 | 17361.169 | 9656.270 | 7.093  | 35.741 | 1718.45 | 341.482 | 122.338 |
| 2006          | 132216 | 26231.435 | 16091.786 | 10139.65 | 7.669  | 38.655 | 1653.31 | 328.517 | 127.296 |
| 2007          | 126828 | 25103.049 | 14754.913 | 10348.14 | 8.159  | 41.223 | 1569.32 | 311.161 | 128.591 |
| 2008          | 126230 | 24621.740 | 13947.136 | 10674.60 | 8.456  | 43.354 | 1544.05 | 301.777 | 131.175 |
| 2009          | 122838 | 23741.177 | 12951.936 | 10789.24 | 8.783  | 45.445 | 1484.46 | 287.552 | 131.032 |
| 2010          | 120989 | 23189.160 | 12226.467 | 10962.69 | 9.061  | 47.275 | 1444.00 | 277.458 | 131.536 |
| 2011          | 120722 | 22786.927 | 11569.507 | 11217.42 | 9.292  | 49.227 | 1426.21 | 269.951 | 133.270 |
| 2012          | 121487 | 22485.295 | 11028.221 | 11457.07 | 9.431  | 50.954 | 1419.31 | 263.495 | 134.654 |
| 2013          | 123274 | 22251.884 | 10573.946 | 11677.94 | 9.473  | 52.481 | 1423.37 | 257.786 | 135.695 |
| 2014          | 123920 | 21894.593 | 10094.182 | 11800.41 | 9.523  | 53.896 | 1413.70 | 250.685 | 135.528 |
| 2015          | 124535 | 21471.109 | 9648.522  | 11822.59 | 9.493  | 55.063 | 1596.99 | 276.557 | 152.828 |
| 2016          | 127062 | 21411.568 | 9362.484  | 12049.08 | 9.483  | 56.274 | 1613.60 | 273.213 | 154.315 |
| 2017          | 129196 | 21169.399 | 9014.943  | 12154.46 | 9.408  | 57.415 | 1625.11 | 267.651 | 154.255 |
| 2018          | 122369 | 19830.576 | 8239.455  | 11591.12 | 9.472  | 58.451 | 1524.45 | 248.404 | 145.759 |
| 2019          | 122846 | 19431.014 | 7918.592  | 11512.42 | 9.371  | 59.248 | 1514.96 | 241.031 | 143.378 |
| 2020          | 121901 | 18532.612 | 7411.367  | 11121.25 | 9.123  | 60.009 | 1714.62 | 262.513 | 158.267 |
| 2021          | 120548 | 18234.128 | 7138.071  | 11096.06 | 9.205  | 60.853 | 1682.98 | 256.472 | 156.817 |
| 2022          | 120651 | 17812.559 | 6831.595  | 10980.96 | 9.101  | 61.647 | 1670.84 | 248.626 | 154.018 |
| 2023          | 120733 | 17361.668 | 6539.233  | 10822.44 | 8.964  | 62.335 | 1657.72 | 240.367 | 150.580 |
| 2024          | 120668 | 16929.676 | 6286.870  | 10642.81 | 8.820  | 62.865 | 1642.40 | 232.443 | 146.874 |
| 2025          | 117114 | 15501.666 | 5678.627  | 9823.039 | 8.388  | 63.368 | 1852.44 | 247.735 | 89.821  |
| 2026          | 116554 | 15523.814 | 5633.438  | 9890.375 | 8.486  | 63.711 | 1835.13 | 247.072 | 88.698  |
| 2027          | 115531 | 15073.070 | 5414.802  | 9658.268 | 8.360  | 64.076 | 1809.91 | 238.810 | 84.828  |
| 2028          | 114457 | 14636.710 | 5187.550  | 9449.160 | 8.256  | 64.558 | 1783.18 | 230.725 | 80.819  |
| 2029          | 113380 | 14180.166 | 4982.414  | 9197.752 | 8.112  | 64.863 | 1755.52 | 222.256 | 77.145  |
| 2030          | 106542 | 12111.772 | 4211.002  | 7900.770 | 7.416  | 65.232 | 1967.13 | 226.816 | 77.749  |
| 2031          | 107040 | 12417.367 | 4304.637  | 8112.730 | 7.579  | 65.334 | 1970.10 | 231.935 | 79.228  |
| 2032          | 105679 | 12054.064 | 4127.864  | 7926.200 | 7.500  | 65.755 | 1937.38 | 224.381 | 75.675  |
| 2033          | 104332 | 11672.389 | 3947.474  | 7724.915 | 7.404  | 66.181 | 1903.72 | 216.370 | 72.029  |
| 2034          | 102961 | 11365.762 | 3825.682  | 7540.079 | 7.323  | 66.340 | 1868.70 | 209.673 | 69.434  |
| 2035          | 92665  | 8580.360  | 2846.460  | 5733.900 | 6.188  | 66.826 | 2075.67 | 195.777 | 63.760  |
| 2036          | 94022  | 8948.841  | 2946.552  | 6002.289 | 6.384  | 67.073 | 2104.31 | 204.135 | 65.947  |
| 2037          | 92255  | 8624.570  | 2837.199  | 5787.371 | 6.273  | 67.103 | 2061.37 | 196.522 | 63.395  |
| 2038          | 90540  | 8315.017  | 2700.643  | 5614.374 | 6.201  | 67.521 | 2017.73 | 189.073 | 60.186  |
| 2039          | 88891  | 8001.132  | 2589.334  | 5411.797 | 6.088  | 67.638 | 1973.52 | 181.344 | 57.487  |

## Results for PHIM for Run 9 (Sensitivity\_Analysis\_1.RTF)

\*\*\*\*\*

### Main Results for E-Component for Run: 9, Simulation: 1, COD: STROKE, Adjusted

| Variable Parameter          | Value                                  |
|-----------------------------|----------------------------------------|
| 1. Country                  | US (United States)                     |
| 2. Sex                      | M (Males)                              |
| 3. Year of start of process | 1990                                   |
| 4. Cause of Death           | STROKE                                 |
| 5. Effective Dose NULL      | CC:1                                   |
| 6. Effective Dose Ecig      | CC:1 Ecig:0.3 Dual:0.65                |
| Note:                       | Death rates are per million population |

#### Results for Age Groups Combined and Years combined, Population and Number deaths adjusted for Ecig scenario,

| Age Group:All | NULL    | Ecig       | %Drop     |          |        |        | NULL    | Ecig   | Drop   |        |
|---------------|---------|------------|-----------|----------|--------|--------|---------|--------|--------|--------|
| Year          | Number  | Attrib     | Attrib    | Drop     | %Drop  | Attrib | Death   | Attrib | Attrib | Drop   |
|               | Deaths  | Deaths     | Deaths    | Deaths   | Deaths | Deaths | Rate    | Rates  | Rates  | Rates  |
| All Comb      | 1501221 | 149918.462 | 93395.111 | 56523.35 | 3.765  | 37.703 | 432.153 | 43.398 | 26.885 | 16.513 |

#### Results for Age Groups Combined, Population and Number deaths adjusted for Ecig scenario,

| Age Group:All | NULL   | Ecig     | %Drop    |          |        |        | NULL    | Ecig   | Drop   |        |
|---------------|--------|----------|----------|----------|--------|--------|---------|--------|--------|--------|
| Year          | Number | Attrib   | Attrib   | Drop     | %Drop  | Attrib | Death   | Attrib | Attrib | Drop   |
|               | Deaths | Deaths   | Deaths   | Deaths   | Deaths | Deaths | Rate    | Rates  | Rates  | Rates  |
| 1990          | 32862  | 4613.166 | 4613.166 | 0.000    | 0.000  | 0.000  | 520.936 | 73.129 | 73.129 | 0.000  |
| 1991          | 32619  | 4555.566 | 4525.781 | 29.785   | 0.091  | 0.654  | 508.609 | 71.032 | 70.568 | 0.464  |
| 1992          | 32100  | 4453.572 | 4376.651 | 76.922   | 0.240  | 1.727  | 492.015 | 68.262 | 67.083 | 1.179  |
| 1993          | 32897  | 4462.473 | 4317.900 | 144.574  | 0.439  | 3.240  | 495.228 | 67.179 | 65.002 | 2.178  |
| 1994          | 33325  | 4499.513 | 4273.034 | 226.479  | 0.680  | 5.033  | 492.296 | 66.473 | 63.124 | 3.348  |
| 1995          | 33572  | 4472.774 | 4153.116 | 319.658  | 0.952  | 7.147  | 486.433 | 64.812 | 60.175 | 4.637  |
| 1996          | 33875  | 4406.878 | 3984.568 | 422.310  | 1.247  | 9.583  | 483.167 | 62.863 | 56.832 | 6.031  |
| 1997          | 33524  | 4288.158 | 3761.775 | 526.383  | 1.570  | 12.275 | 470.333 | 60.173 | 52.776 | 7.396  |
| 1998          | 32806  | 4120.148 | 3499.449 | 620.699  | 1.892  | 15.065 | 452.657 | 56.864 | 48.285 | 8.579  |
| 1999          | 33391  | 3982.443 | 3267.460 | 714.983  | 2.141  | 17.953 | 453.415 | 54.097 | 44.369 | 9.728  |
| 2000          | 33481  | 4021.411 | 3185.938 | 835.474  | 2.495  | 20.776 | 447.928 | 53.827 | 42.624 | 11.203 |
| 2001          | 32302  | 3848.092 | 2931.291 | 916.802  | 2.838  | 23.825 | 426.471 | 50.836 | 38.701 | 12.135 |
| 2002          | 31619  | 3783.081 | 2772.418 | 1010.663 | 3.196  | 26.715 | 412.718 | 49.418 | 36.188 | 13.230 |
| 2003          | 31025  | 3754.415 | 2641.427 | 1112.988 | 3.587  | 29.645 | 400.682 | 48.533 | 34.114 | 14.419 |
| 2004          | 29931  | 3666.274 | 2474.518 | 1191.756 | 3.982  | 32.506 | 382.317 | 46.883 | 31.608 | 15.275 |
| 2005          | 28761  | 3589.688 | 2323.329 | 1266.359 | 4.403  | 35.278 | 363.045 | 45.371 | 29.327 | 16.045 |
| 2006          | 28249  | 3596.985 | 2227.865 | 1369.120 | 4.847  | 38.063 | 353.248 | 45.048 | 27.859 | 17.189 |
| 2007          | 28097  | 3560.798 | 2114.956 | 1445.842 | 5.146  | 40.604 | 347.657 | 44.137 | 26.169 | 17.968 |
| 2008          | 27206  | 3417.001 | 1950.522 | 1466.480 | 5.390  | 42.917 | 332.790 | 41.881 | 23.859 | 18.022 |
| 2009          | 27157  | 3394.390 | 1865.364 | 1529.026 | 5.630  | 45.046 | 328.183 | 41.113 | 22.542 | 18.570 |
| 2010          | 27010  | 3340.137 | 1773.575 | 1566.563 | 5.800  | 46.901 | 322.368 | 39.965 | 21.168 | 18.797 |
| 2011          | 27070  | 3285.435 | 1684.617 | 1600.818 | 5.914  | 48.725 | 319.807 | 38.922 | 19.902 | 19.020 |
| 2012          | 27181  | 3259.209 | 1610.142 | 1649.067 | 6.067  | 50.597 | 317.551 | 38.193 | 18.811 | 19.382 |
| 2013          | 28046  | 3274.703 | 1562.969 | 1711.734 | 6.103  | 52.271 | 323.824 | 37.937 | 18.047 | 19.890 |
| 2014          | 28952  | 3298.083 | 1522.067 | 1776.016 | 6.134  | 53.850 | 330.293 | 37.762 | 17.364 | 20.398 |
| 2015          | 29742  | 3244.406 | 1455.510 | 1788.896 | 6.015  | 55.138 | 381.394 | 41.789 | 18.665 | 23.124 |
| 2016          | 30716  | 3314.836 | 1448.168 | 1866.668 | 6.077  | 56.313 | 390.078 | 42.297 | 18.391 | 23.907 |
| 2017          | 31643  | 3333.314 | 1415.229 | 1918.085 | 6.062  | 57.543 | 398.030 | 42.144 | 17.802 | 24.342 |
| 2018          | 29580  | 2925.242 | 1212.114 | 1713.127 | 5.792  | 58.564 | 368.501 | 36.642 | 15.100 | 21.542 |
| 2019          | 29850  | 2864.628 | 1162.371 | 1702.257 | 5.703  | 59.423 | 368.110 | 35.534 | 14.334 | 21.200 |
| 2020          | 29865  | 2730.366 | 1087.134 | 1643.232 | 5.502  | 60.184 | 420.069 | 38.675 | 15.291 | 23.384 |
| 2021          | 30394  | 2647.911 | 1031.230 | 1616.681 | 5.319  | 61.055 | 424.338 | 37.244 | 14.397 | 22.847 |
| 2022          | 30622  | 2586.165 | 985.115  | 1601.050 | 5.228  | 61.908 | 424.075 | 36.097 | 13.642 | 22.455 |
| 2023          | 30846  | 2517.960 | 942.216  | 1575.744 | 5.108  | 62.580 | 423.535 | 34.860 | 12.937 | 21.923 |
| 2024          | 31024  | 2454.161 | 904.168  | 1549.992 | 4.996  | 63.158 | 422.268 | 33.695 | 12.307 | 21.389 |
| 2025          | 30639  | 2275.364 | 825.689  | 1449.675 | 4.732  | 63.712 | 484.623 | 36.363 | 13.060 | 23.303 |
| 2026          | 31099  | 2183.166 | 783.310  | 1399.857 | 4.501  | 64.120 | 489.647 | 34.747 | 12.333 | 22.413 |
| 2027          | 30995  | 2112.345 | 750.195  | 1362.150 | 4.395  | 64.485 | 485.563 | 33.467 | 11.753 | 21.714 |
| 2028          | 30865  | 2046.677 | 718.749  | 1327.928 | 4.302  | 64.882 | 480.864 | 32.263 | 11.198 | 21.065 |
| 2029          | 30728  | 1977.671 | 688.359  | 1289.312 | 4.196  | 65.193 | 475.777 | 30.997 | 10.658 | 20.339 |
| 2030          | 29820  | 1744.457 | 601.411  | 1143.046 | 3.833  | 65.524 | 550.580 | 32.668 | 11.104 | 21.564 |
| 2031          | 29483  | 1653.738 | 565.107  | 1088.630 | 3.692  | 65.828 | 542.641 | 30.889 | 10.401 | 20.488 |
| 2032          | 29249  | 1603.120 | 538.884  | 1064.236 | 3.639  | 66.385 | 536.214 | 29.841 | 9.879  | 19.962 |
| 2033          | 29006  | 1548.245 | 516.094  | 1032.151 | 3.558  | 66.666 | 529.258 | 28.700 | 9.417  | 19.283 |
| 2034          | 28737  | 1511.985 | 499.031  | 1012.954 | 3.525  | 66.995 | 521.564 | 27.893 | 9.057  | 18.836 |
| 2035          | 27300  | 1239.866 | 406.913  | 832.952  | 3.051  | 67.181 | 611.521 | 28.290 | 9.115  | 19.175 |
| 2036          | 26149  | 1182.522 | 384.178  | 798.344  | 3.053  | 67.512 | 585.241 | 26.975 | 8.598  | 18.377 |
| 2037          | 25710  | 1134.483 | 370.716  | 763.767  | 2.971  | 67.323 | 574.473 | 25.851 | 8.283  | 17.567 |
| 2038          | 25269  | 1093.537 | 352.741  | 740.795  | 2.932  | 67.743 | 563.129 | 24.866 | 7.861  | 17.005 |
| 2039          | 24830  | 1047.905 | 336.582  | 711.322  | 2.865  | 67.880 | 551.268 | 23.751 | 7.473  | 16.278 |

## Results for PHIM for Run 9 (Sensitivity\_Analysis\_1.RTF)

\*\*\*\*\*

### Main Results for E-Component for Run: 9, Simulation: 1, COD: COPD, Adjusted

| Variable Parameter          | Value                                  |
|-----------------------------|----------------------------------------|
| 1. Country                  | US (United States)                     |
| 2. Sex                      | M (Males)                              |
| 3. Year of start of process | 1990                                   |
| 4. Cause of Death           | COPD                                   |
| 5. Effective Dose NULL      | CC:1                                   |
| 6. Effective Dose Ecig      | CC:1 Ecig:0.3 Dual:0.65                |
| Note:                       | Death rates are per million population |

#### Results for Age Groups Combined and Years combined, Population and Number deaths adjusted for Ecig scenario,

| Age Group:All | NULL    | Ecig        | %Drop      |          |        |        | NULL    | Ecig    | Drop    |        |
|---------------|---------|-------------|------------|----------|--------|--------|---------|---------|---------|--------|
| Year          | Number  | Attrib      | Attrib     | Drop     | %Drop  | Attrib | Death   | Attrib  | Attrib  | Drop   |
|               | Deaths  | Deaths      | Deaths     | Deaths   | Deaths | Deaths | Rate    | Rates   | Rates   | Rates  |
| All Comb      | 2255175 | 1015606.587 | 793110.545 | 222496.0 | 9.866  | 21.908 | 649.191 | 293.996 | 228.311 | 65.685 |

#### Results for Age Groups Combined, Population and Number deaths adjusted for Ecig scenario,

| Age Group:All | NULL   | Ecig      | %Drop     |          |        |        | NULL    | Ecig    | Drop    |         |
|---------------|--------|-----------|-----------|----------|--------|--------|---------|---------|---------|---------|
| Year          | Number | Attrib    | Attrib    | Drop     | %Drop  | Attrib | Death   | Attrib  | Attrib  | Drop    |
|               | Deaths | Deaths    | Deaths    | Deaths   | Deaths | Deaths | Rate    | Rates   | Rates   | Rates   |
| 1990          | 33993  | 19262.437 | 19262.437 | 0.000    | 0.000  | 0.000  | 538.865 | 305.353 | 305.353 | 0.000   |
| 1991          | 34092  | 19215.636 | 19198.822 | 16.814   | 0.049  | 0.088  | 531.576 | 299.618 | 299.356 | 0.262   |
| 1992          | 33942  | 19056.189 | 19013.378 | 42.811   | 0.126  | 0.225  | 520.248 | 292.085 | 291.427 | 0.658   |
| 1993          | 35914  | 20095.670 | 20008.943 | 86.726   | 0.241  | 0.432  | 540.647 | 302.526 | 301.215 | 1.311   |
| 1994          | 35076  | 19524.095 | 19393.387 | 130.708  | 0.373  | 0.669  | 518.165 | 288.435 | 286.492 | 1.943   |
| 1995          | 34672  | 19116.002 | 18928.499 | 187.503  | 0.541  | 0.981  | 502.373 | 276.995 | 274.257 | 2.738   |
| 1996          | 34588  | 18975.021 | 18719.558 | 255.464  | 0.739  | 1.346  | 493.325 | 270.675 | 266.998 | 3.678   |
| 1997          | 35276  | 19169.025 | 18831.563 | 337.462  | 0.957  | 1.760  | 494.907 | 268.986 | 264.200 | 4.785   |
| 1998          | 35688  | 19228.937 | 18791.665 | 437.272  | 1.225  | 2.274  | 492.412 | 265.388 | 259.284 | 6.104   |
| 1999          | 38535  | 20589.820 | 20019.281 | 570.539  | 1.481  | 2.771  | 523.264 | 279.689 | 271.841 | 7.848   |
| 2000          | 36307  | 19196.417 | 18558.017 | 638.400  | 1.758  | 3.326  | 485.741 | 256.946 | 248.282 | 8.664   |
| 2001          | 36312  | 19012.731 | 18239.606 | 773.125  | 2.129  | 4.066  | 479.416 | 251.174 | 240.812 | 10.362  |
| 2002          | 36022  | 18699.357 | 17799.455 | 899.902  | 2.498  | 4.812  | 470.184 | 244.265 | 232.332 | 11.933  |
| 2003          | 36253  | 18663.550 | 17618.200 | 1045.349 | 2.883  | 5.601  | 468.207 | 241.262 | 227.536 | 13.726  |
| 2004          | 34667  | 17679.164 | 16519.573 | 1159.591 | 3.345  | 6.559  | 442.814 | 226.076 | 211.011 | 15.066  |
| 2005          | 36897  | 18692.832 | 17298.797 | 1394.035 | 3.778  | 7.458  | 465.737 | 236.265 | 218.357 | 17.908  |
| 2006          | 34428  | 17308.564 | 15831.134 | 1477.429 | 4.291  | 8.536  | 430.504 | 216.769 | 197.962 | 18.807  |
| 2007          | 35419  | 17683.181 | 15980.570 | 1702.611 | 4.807  | 9.628  | 438.256 | 219.189 | 197.736 | 21.453  |
| 2008          | 38363  | 19006.374 | 16986.435 | 2019.939 | 5.265  | 10.628 | 469.263 | 232.952 | 207.779 | 25.174  |
| 2009          | 37029  | 18205.573 | 16040.600 | 2164.973 | 5.847  | 11.892 | 447.484 | 220.505 | 193.846 | 26.659  |
| 2010          | 37378  | 18237.758 | 15872.947 | 2364.811 | 6.327  | 12.967 | 446.110 | 218.215 | 189.443 | 28.772  |
| 2011          | 38258  | 18487.916 | 15824.689 | 2663.227 | 6.961  | 14.405 | 451.978 | 219.022 | 186.952 | 32.070  |
| 2012          | 38689  | 18491.158 | 15580.502 | 2910.656 | 7.523  | 15.741 | 452.003 | 216.689 | 182.025 | 34.665  |
| 2013          | 40505  | 19143.452 | 15888.188 | 3255.265 | 8.037  | 17.005 | 467.683 | 221.775 | 183.451 | 38.324  |
| 2014          | 40576  | 18992.005 | 15501.029 | 3490.976 | 8.604  | 18.381 | 462.895 | 217.451 | 176.839 | 40.612  |
| 2015          | 42576  | 19728.885 | 15894.643 | 3834.242 | 9.006  | 19.435 | 545.975 | 254.116 | 203.826 | 50.290  |
| 2016          | 43407  | 19876.724 | 15761.662 | 4115.062 | 9.480  | 20.703 | 551.234 | 253.628 | 200.162 | 53.466  |
| 2017          | 44443  | 20119.790 | 15674.612 | 4445.179 | 10.002 | 22.094 | 559.039 | 254.381 | 197.166 | 57.215  |
| 2018          | 45843  | 20535.123 | 15719.939 | 4815.184 | 10.504 | 23.449 | 571.105 | 257.229 | 195.835 | 61.394  |
| 2019          | 47379  | 21009.029 | 15805.835 | 5203.195 | 10.982 | 24.766 | 584.284 | 260.605 | 194.919 | 65.686  |
| 2020          | 48881  | 21428.512 | 15847.341 | 5581.171 | 11.418 | 26.046 | 687.543 | 303.533 | 222.904 | 80.629  |
| 2021          | 48958  | 21266.697 | 15410.923 | 5855.774 | 11.961 | 27.535 | 683.503 | 299.127 | 215.153 | 83.974  |
| 2022          | 50458  | 21663.568 | 15381.559 | 6282.009 | 12.450 | 28.998 | 698.771 | 302.378 | 213.012 | 89.366  |
| 2023          | 51985  | 22084.131 | 15368.543 | 6715.588 | 12.918 | 30.409 | 713.776 | 305.748 | 211.017 | 94.731  |
| 2024          | 53459  | 22418.456 | 15325.599 | 7092.857 | 13.268 | 31.638 | 727.622 | 307.804 | 208.595 | 99.209  |
| 2025          | 54550  | 22614.834 | 15195.212 | 7419.622 | 13.601 | 32.809 | 862.845 | 361.411 | 240.348 | 121.063 |
| 2026          | 55093  | 22571.522 | 14861.263 | 7710.259 | 13.995 | 34.159 | 867.426 | 359.241 | 233.988 | 125.253 |
| 2027          | 56071  | 22774.416 | 14674.053 | 8100.363 | 14.447 | 35.568 | 878.411 | 360.827 | 229.884 | 130.943 |
| 2028          | 57009  | 22915.561 | 14441.379 | 8474.181 | 14.865 | 36.980 | 888.163 | 361.228 | 224.989 | 136.239 |
| 2029          | 57931  | 22992.027 | 14177.579 | 8814.448 | 15.216 | 38.337 | 896.965 | 360.371 | 219.518 | 140.853 |
| 2030          | 58211  | 22895.360 | 13849.271 | 9046.089 | 15.540 | 39.511 | 1074.77 | 428.760 | 255.704 | 173.055 |
| 2031          | 58616  | 22715.871 | 13506.813 | 9209.058 | 15.711 | 40.540 | 1078.84 | 424.293 | 248.597 | 175.696 |
| 2032          | 59332  | 22759.207 | 13224.023 | 9535.184 | 16.071 | 41.896 | 1087.72 | 423.652 | 242.433 | 181.219 |
| 2033          | 60025  | 22786.258 | 13000.216 | 9786.042 | 16.303 | 42.947 | 1095.26 | 422.387 | 237.212 | 185.176 |
| 2034          | 60659  | 22806.106 | 12738.136 | 10067.97 | 16.598 | 44.146 | 1100.92 | 420.721 | 231.191 | 189.530 |
| 2035          | 59759  | 22262.998 | 12276.129 | 9986.869 | 16.712 | 44.859 | 1338.58 | 507.973 | 274.981 | 232.992 |
| 2036          | 57681  | 21140.051 | 11328.441 | 9811.610 | 17.010 | 46.412 | 1290.98 | 482.234 | 253.543 | 228.690 |
| 2037          | 57849  | 21011.845 | 10971.449 | 10040.40 | 17.356 | 47.784 | 1292.60 | 478.783 | 245.150 | 233.633 |
| 2038          | 57994  | 20787.483 | 10625.332 | 10162.15 | 17.523 | 48.886 | 1292.43 | 472.681 | 236.793 | 235.888 |
| 2039          | 58129  | 20709.267 | 10343.318 | 10365.95 | 17.833 | 50.055 | 1290.54 | 469.372 | 229.637 | 239.735 |

## Results for PHIM for Run 10 (Sensitivity\_Analysis\_1.RTF)

---

### Control File Details for Run: 10

| Variable Parameter                                       | Value                  |
|----------------------------------------------------------|------------------------|
| 1. Name for Reference Scenario                           | NULL                   |
| 2. Name for Test Scenario                                | Ecig                   |
| 3. Name for Product 1                                    | CC                     |
| 4. Name for Product 2                                    | Ecig                   |
| 5. Name for Product 3                                    | -                      |
| 6. Name for Product 4                                    | Dual                   |
| 7. Country                                               | US (United States)     |
| 8. Sex                                                   | F (Females)            |
| 9. Year of start of process                              | 1990                   |
| 10. Number of months of follow-up                        | 600                    |
| 11. Follow-up interval length (in months)                | 12                     |
| 12. Lower age for risk estimation                        | 10                     |
| 13. Upper age for risk estimation                        | 79                     |
| 14. The effective dose for Product 1 (F1) - Ref          | 1                      |
| 15. The effective dose for Product 2 (F2) - Ref          | -                      |
| 16. The effective dose for Product 3 (F3) - Ref          | -                      |
| 17. The effective dose for Product 4 (F4) - Ref          | -                      |
| 18. The effective dose for Product 1 (F1) - Test         | 1                      |
| 19. The effective dose for Product 2 (F2) - Test         | 0.3                    |
| 20. The effective dose for Product 3 (F3) - Test         | -                      |
| 21. The effective dose for Product 4 (F4) - Test         | FROMF2                 |
| 22. Number in population to be simulated                 | 100000                 |
| 23. Number of MC simulations                             | 1                      |
| 24. The random number seed for the first simulation      | 15975263               |
| 25. Source for the population file (POP)                 | UN4                    |
| 26. Source for the socioeconomic prevalence file (SEP)   | -                      |
| 27. Source for the current smoking prevalence file (CSP) | ISS3                   |
| 28. Source for the former smoking prevalence file (FSP)  | ISS3                   |
| 29. Source for the quit-time distribution file (QTD)     | NHIS2006               |
| 30. Source for the death file (MORT)                     | APR-20                 |
| 31. Source for the relative risk file (RR)               | PNLEST                 |
| 32. Source for the half-life file (H)                    | PNLEST                 |
| 33. Assumption Set for TTP Factor Reference              | F1                     |
| 34. Assumption Set for TTP Factor Test                   | F1                     |
| 35. Assumption Set for TTP Reference                     | ISS3                   |
| 36. Assumption Set for TTP Test                          | ISS3                   |
| 37. Assumption Set for TP for socioeconomic group        | -                      |
| 38. Source for Output Choice file (OUTC)                 | BASIC                  |
| 39. Output for DTP P1                                    | N                      |
| 40. Output for DTP P2                                    | N                      |
| 41. Output for Main P Component                          | Y                      |
| 42. Output for DTP E1                                    | N                      |
| 43. Output for DTP E2                                    | N                      |
| 44. Output for DTP E3                                    | N                      |
| 45. Output for Main E Component                          | Y                      |
| 46. Output file name                                     | Sensitivity_Analysis_1 |
| 47. Run number for P-Component                           | -                      |
| 48. Results file for E-Component                         | -                      |
| 49. Components required                                  | PE                     |
| 50. Results folder for P to be used in E-Component       | -                      |
| 51. Fixed age of starting product use                    | 16                     |
| 52. Output absolute risk file?                           | N                      |

## Results for PHIM for Run 10 (Sensitivity\_Analysis\_1.RTF)

\*\*\*\*\*

TTP values for Run: 10, Scenario: NULL

| Variable Parameter | Value               |
|--------------------|---------------------|
| 1. Country         | US (United States)  |
| 2. Sex             | F (Females)         |
| 3. Assumption Set  | ISS3                |
| Note:              | Period is in Months |

| Age   | Period  | Initiation  | Cessation    | Re-initiation |
|-------|---------|-------------|--------------|---------------|
|       |         | Never<br>CC | CC<br>Former | Former<br>CC  |
| 10-14 | 1-12    | 0.003758    | 0.008742     | 0.000000      |
| 15-19 | 1-12    | 0.003469    | 0.002515     | 0.000000      |
| 20-24 | 1-12    | 0.000276    | 0.000761     | 0.000000      |
| 25-29 | 1-12    | 0.000137    | 0.001375     | 0.000000      |
| 30-34 | 1-12    | 0.000069    | 0.001149     | 0.000000      |
| 35-39 | 1-12    | 0.000000    | 0.000991     | 0.000000      |
| 40-44 | 1-12    | 0.000000    | 0.000833     | 0.000000      |
| 45-49 | 1-12    | 0.000000    | 0.001723     | 0.000000      |
| 50-54 | 1-12    | 0.000000    | 0.002336     | 0.000000      |
| 55-59 | 1-12    | 0.000000    | 0.002233     | 0.000000      |
| 60-64 | 1-12    | 0.000000    | 0.004634     | 0.000000      |
| 65-69 | 1-12    | 0.000000    | 0.003505     | 0.000000      |
| 70-74 | 1-12    | 0.000000    | 0.004329     | 0.000000      |
| 75-79 | 1-12    | 0.000000    | 0.004329     | 0.000000      |
| 10-14 | 13-72   | 0.004794    | 0.008742     | 0.000000      |
| 15-19 | 13-72   | 0.004527    | 0.004082     | 0.000000      |
| 20-24 | 13-72   | 0.000105    | 0.001261     | 0.000000      |
| 25-29 | 13-72   | 0.000053    | 0.000952     | 0.000000      |
| 30-34 | 13-72   | 0.000026    | 0.000733     | 0.000000      |
| 35-39 | 13-72   | 0.000000    | 0.000753     | 0.000000      |
| 40-44 | 13-72   | 0.000000    | 0.001535     | 0.000000      |
| 45-49 | 13-72   | 0.000000    | 0.002998     | 0.000000      |
| 50-54 | 13-72   | 0.000000    | 0.003159     | 0.000000      |
| 55-59 | 13-72   | 0.000000    | 0.002965     | 0.000000      |
| 60-64 | 13-72   | 0.000000    | 0.003633     | 0.000000      |
| 65-69 | 13-72   | 0.000000    | 0.004522     | 0.000000      |
| 70-74 | 13-72   | 0.000000    | 0.005208     | 0.000000      |
| 75-79 | 13-72   | 0.000000    | 0.005208     | 0.000000      |
| 10-14 | 73-132  | 0.003969    | 0.008742     | 0.000000      |
| 15-19 | 73-132  | 0.003056    | 0.003373     | 0.000000      |
| 20-24 | 73-132  | 0.001459    | 0.003881     | 0.000000      |
| 25-29 | 73-132  | 0.000714    | 0.001953     | 0.000000      |
| 30-34 | 73-132  | 0.000111    | 0.001338     | 0.000000      |
| 35-39 | 73-132  | 0.000000    | 0.001507     | 0.000000      |
| 40-44 | 73-132  | 0.000000    | 0.002080     | 0.000000      |
| 45-49 | 73-132  | 0.000000    | 0.003809     | 0.000000      |
| 50-54 | 73-132  | 0.000000    | 0.004871     | 0.000000      |
| 55-59 | 73-132  | 0.000000    | 0.004560     | 0.000000      |
| 60-64 | 73-132  | 0.000000    | 0.007192     | 0.000000      |
| 65-69 | 73-132  | 0.000000    | 0.007033     | 0.000000      |
| 70-74 | 73-132  | 0.000000    | 0.008206     | 0.000000      |
| 75-79 | 73-132  | 0.000000    | 0.008206     | 0.000000      |
| 10-14 | 133-192 | 0.002861    | 0.008742     | 0.000000      |
| 15-19 | 133-192 | 0.002594    | 0.003996     | 0.000000      |
| 20-24 | 133-192 | 0.001247    | 0.002805     | 0.000000      |
| 25-29 | 133-192 | 0.000289    | 0.001574     | 0.000000      |
| 30-34 | 133-192 | 0.000132    | 0.001293     | 0.000000      |
| 35-39 | 133-192 | 0.000000    | 0.001219     | 0.000000      |
| 40-44 | 133-192 | 0.000000    | 0.001657     | 0.000000      |
| 45-49 | 133-192 | 0.000000    | 0.001995     | 0.000000      |
| 50-54 | 133-192 | 0.000000    | 0.002154     | 0.000000      |
| 55-59 | 133-192 | 0.000000    | 0.002072     | 0.000000      |
| 60-64 | 133-192 | 0.000000    | 0.005049     | 0.000000      |
| 65-69 | 133-192 | 0.000000    | 0.003680     | 0.000000      |
| 70-74 | 133-192 | 0.000000    | 0.006144     | 0.000000      |
| 75-79 | 133-192 | 0.000000    | 0.006144     | 0.000000      |
| 10-14 | 193-252 | 0.001859    | 0.008742     | 0.000000      |
| 15-19 | 193-252 | 0.002232    | 0.005770     | 0.000000      |
| 20-24 | 193-252 | 0.001079    | 0.003262     | 0.000000      |
| 25-29 | 193-252 | 0.000531    | 0.002002     | 0.000000      |
| 30-34 | 193-252 | 0.000263    | 0.003240     | 0.000000      |
| 35-39 | 193-252 | 0.000000    | 0.001771     | 0.000000      |
| 40-44 | 193-252 | 0.000000    | 0.002173     | 0.000000      |
| 45-49 | 193-252 | 0.000000    | 0.002075     | 0.000000      |
| 50-54 | 193-252 | 0.000000    | 0.003431     | 0.000000      |

**Results for PHIM for Run 10 (Sensitivity\_Analysis\_1.RTF)**

|       |         |          |          |          |
|-------|---------|----------|----------|----------|
| 55-59 | 193-252 | 0.000000 | 0.002906 | 0.000000 |
| 60-64 | 193-252 | 0.000000 | 0.007139 | 0.000000 |
| 65-69 | 193-252 | 0.000000 | 0.004963 | 0.000000 |
| 70-74 | 193-252 | 0.000000 | 0.006269 | 0.000000 |
| 75-79 | 193-252 | 0.000000 | 0.006269 | 0.000000 |
| 10-14 | 253+    | 0.000931 | 0.008742 | 0.000000 |
| 15-19 | 253+    | 0.001798 | 0.009440 | 0.000000 |
| 20-24 | 253+    | 0.000023 | 0.002831 | 0.000000 |
| 25-29 | 253+    | 0.000073 | 0.002655 | 0.000000 |
| 30-34 | 253+    | 0.000037 | 0.004614 | 0.000000 |
| 35-39 | 253+    | 0.000000 | 0.002607 | 0.000000 |
| 40-44 | 253+    | 0.000000 | 0.003115 | 0.000000 |
| 45-49 | 253+    | 0.000000 | 0.002132 | 0.000000 |
| 50-54 | 253+    | 0.000000 | 0.003497 | 0.000000 |
| 55-59 | 253+    | 0.000000 | 0.002942 | 0.000000 |
| 60-64 | 253+    | 0.000000 | 0.005376 | 0.000000 |
| 65-69 | 253+    | 0.000000 | 0.001789 | 0.000000 |
| 70-74 | 253+    | 0.000000 | 0.004077 | 0.000000 |
| 75-79 | 253+    | 0.000000 | 0.004077 | 0.000000 |

## Results for PHIM for Run 10 (Sensitivity\_Analysis\_1.RTF)

\*\*\*\*\*

TTP values for Run: 10, Scenario: Ecig

Variable Parameter

Value

- 1. Country
  - 2. Sex
  - 3. Assumption Set
- Note:

US (United States)  
 F (Females)  
 ISS3  
 Period is in Months

| Age   | Period  | Initiation  |               |               | Cessation    |                |                | Re-initiation |                |                |
|-------|---------|-------------|---------------|---------------|--------------|----------------|----------------|---------------|----------------|----------------|
|       |         | Never<br>CC | Never<br>Ecig | Never<br>Dual | CC<br>Former | Ecig<br>Former | Dual<br>Former | Former<br>CC  | Former<br>Ecig | Former<br>Dual |
| 10-14 | 1-12    | 0.001879    | 0.001879      | 0.000000      | 0.008742     | 0.008742       | 0.000000       | 0.000000      | 0.000000       | 0.000000       |
| 15-19 | 1-12    | 0.001735    | 0.001735      | 0.000000      | 0.002515     | 0.002515       | 0.000000       | 0.000000      | 0.000000       | 0.000000       |
| 20-24 | 1-12    | 0.000138    | 0.000138      | 0.000000      | 0.000761     | 0.000761       | 0.000000       | 0.000000      | 0.000000       | 0.000000       |
| 25-29 | 1-12    | 0.000069    | 0.000069      | 0.000000      | 0.001376     | 0.001376       | 0.000000       | 0.000000      | 0.000000       | 0.000000       |
| 30-34 | 1-12    | 0.000034    | 0.000034      | 0.000000      | 0.001149     | 0.001149       | 0.000000       | 0.000000      | 0.000000       | 0.000000       |
| 35-39 | 1-12    | 0.000000    | 0.000000      | 0.000000      | 0.000991     | 0.000991       | 0.000000       | 0.000000      | 0.000000       | 0.000000       |
| 40-44 | 1-12    | 0.000000    | 0.000000      | 0.000000      | 0.000833     | 0.000833       | 0.000000       | 0.000000      | 0.000000       | 0.000000       |
| 45-49 | 1-12    | 0.000000    | 0.000000      | 0.000000      | 0.001723     | 0.001723       | 0.000000       | 0.000000      | 0.000000       | 0.000000       |
| 50-54 | 1-12    | 0.000000    | 0.000000      | 0.000000      | 0.002336     | 0.002336       | 0.000000       | 0.000000      | 0.000000       | 0.000000       |
| 55-59 | 1-12    | 0.000000    | 0.000000      | 0.000000      | 0.002233     | 0.002233       | 0.000000       | 0.000000      | 0.000000       | 0.000000       |
| 60-64 | 1-12    | 0.000000    | 0.000000      | 0.000000      | 0.004635     | 0.004635       | 0.000000       | 0.000000      | 0.000000       | 0.000000       |
| 65-69 | 1-12    | 0.000000    | 0.000000      | 0.000000      | 0.003505     | 0.003505       | 0.000000       | 0.000000      | 0.000000       | 0.000000       |
| 70-74 | 1-12    | 0.000000    | 0.000000      | 0.000000      | 0.004329     | 0.004329       | 0.000000       | 0.000000      | 0.000000       | 0.000000       |
| 75-79 | 1-12    | 0.000000    | 0.000000      | 0.000000      | 0.004329     | 0.004329       | 0.000000       | 0.000000      | 0.000000       | 0.000000       |
| 10-14 | 13-72   | 0.001918    | 0.002877      | 0.000000      | 0.008742     | 0.008742       | 0.000000       | 0.000000      | 0.000000       | 0.000000       |
| 15-19 | 13-72   | 0.001811    | 0.002716      | 0.000000      | 0.004083     | 0.004083       | 0.000000       | 0.000000      | 0.000000       | 0.000000       |
| 20-24 | 13-72   | 0.000042    | 0.000063      | 0.000000      | 0.001261     | 0.001261       | 0.000000       | 0.000000      | 0.000000       | 0.000000       |
| 25-29 | 13-72   | 0.000021    | 0.000032      | 0.000000      | 0.000952     | 0.000952       | 0.000000       | 0.000000      | 0.000000       | 0.000000       |
| 30-34 | 13-72   | 0.000011    | 0.000016      | 0.000000      | 0.000733     | 0.000733       | 0.000000       | 0.000000      | 0.000000       | 0.000000       |
| 35-39 | 13-72   | 0.000000    | 0.000000      | 0.000000      | 0.000754     | 0.000754       | 0.000000       | 0.000000      | 0.000000       | 0.000000       |
| 40-44 | 13-72   | 0.000000    | 0.000000      | 0.000000      | 0.001535     | 0.001535       | 0.000000       | 0.000000      | 0.000000       | 0.000000       |
| 45-49 | 13-72   | 0.000000    | 0.000000      | 0.000000      | 0.002998     | 0.002998       | 0.000000       | 0.000000      | 0.000000       | 0.000000       |
| 50-54 | 13-72   | 0.000000    | 0.000000      | 0.000000      | 0.003160     | 0.003160       | 0.000000       | 0.000000      | 0.000000       | 0.000000       |
| 55-59 | 13-72   | 0.000000    | 0.000000      | 0.000000      | 0.002965     | 0.002965       | 0.000000       | 0.000000      | 0.000000       | 0.000000       |
| 60-64 | 13-72   | 0.000000    | 0.000000      | 0.000000      | 0.003633     | 0.003633       | 0.000000       | 0.000000      | 0.000000       | 0.000000       |
| 65-69 | 13-72   | 0.000000    | 0.000000      | 0.000000      | 0.004522     | 0.004522       | 0.000000       | 0.000000      | 0.000000       | 0.000000       |
| 70-74 | 13-72   | 0.000000    | 0.000000      | 0.000000      | 0.005208     | 0.005208       | 0.000000       | 0.000000      | 0.000000       | 0.000000       |
| 75-79 | 13-72   | 0.000000    | 0.000000      | 0.000000      | 0.005208     | 0.005208       | 0.000000       | 0.000000      | 0.000000       | 0.000000       |
| 10-14 | 73-132  | 0.000794    | 0.003175      | 0.000000      | 0.008742     | 0.008742       | 0.000000       | 0.000000      | 0.000000       | 0.000000       |
| 15-19 | 73-132  | 0.000611    | 0.002445      | 0.000000      | 0.003373     | 0.003373       | 0.000000       | 0.000000      | 0.000000       | 0.000000       |
| 20-24 | 73-132  | 0.000292    | 0.001167      | 0.000000      | 0.003881     | 0.003881       | 0.000000       | 0.000000      | 0.000000       | 0.000000       |
| 25-29 | 73-132  | 0.000143    | 0.000571      | 0.000000      | 0.001954     | 0.001954       | 0.000000       | 0.000000      | 0.000000       | 0.000000       |
| 30-34 | 73-132  | 0.000022    | 0.000089      | 0.000000      | 0.001338     | 0.001338       | 0.000000       | 0.000000      | 0.000000       | 0.000000       |
| 35-39 | 73-132  | 0.000000    | 0.000000      | 0.000000      | 0.001507     | 0.001507       | 0.000000       | 0.000000      | 0.000000       | 0.000000       |
| 40-44 | 73-132  | 0.000000    | 0.000000      | 0.000000      | 0.002080     | 0.002080       | 0.000000       | 0.000000      | 0.000000       | 0.000000       |
| 45-49 | 73-132  | 0.000000    | 0.000000      | 0.000000      | 0.003809     | 0.003809       | 0.000000       | 0.000000      | 0.000000       | 0.000000       |
| 50-54 | 73-132  | 0.000000    | 0.000000      | 0.000000      | 0.004871     | 0.004871       | 0.000000       | 0.000000      | 0.000000       | 0.000000       |
| 55-59 | 73-132  | 0.000000    | 0.000000      | 0.000000      | 0.004560     | 0.004560       | 0.000000       | 0.000000      | 0.000000       | 0.000000       |
| 60-64 | 73-132  | 0.000000    | 0.000000      | 0.000000      | 0.007192     | 0.007192       | 0.000000       | 0.000000      | 0.000000       | 0.000000       |
| 65-69 | 73-132  | 0.000000    | 0.000000      | 0.000000      | 0.007033     | 0.007033       | 0.000000       | 0.000000      | 0.000000       | 0.000000       |
| 70-74 | 73-132  | 0.000000    | 0.000000      | 0.000000      | 0.008206     | 0.008206       | 0.000000       | 0.000000      | 0.000000       | 0.000000       |
| 75-79 | 73-132  | 0.000000    | 0.000000      | 0.000000      | 0.008206     | 0.008206       | 0.000000       | 0.000000      | 0.000000       | 0.000000       |
| 10-14 | 133-192 | 0.000143    | 0.002718      | 0.000000      | 0.008742     | 0.008742       | 0.000000       | 0.000000      | 0.000000       | 0.000000       |
| 15-19 | 133-192 | 0.000130    | 0.002465      | 0.000000      | 0.003996     | 0.003996       | 0.000000       | 0.000000      | 0.000000       | 0.000000       |
| 20-24 | 133-192 | 0.000062    | 0.001185      | 0.000000      | 0.002805     | 0.002805       | 0.000000       | 0.000000      | 0.000000       | 0.000000       |
| 25-29 | 133-192 | 0.000015    | 0.000275      | 0.000000      | 0.001574     | 0.001574       | 0.000000       | 0.000000      | 0.000000       | 0.000000       |
| 30-34 | 133-192 | 0.000007    | 0.000125      | 0.000000      | 0.001293     | 0.001293       | 0.000000       | 0.000000      | 0.000000       | 0.000000       |
| 35-39 | 133-192 | 0.000000    | 0.000000      | 0.000000      | 0.001219     | 0.001219       | 0.000000       | 0.000000      | 0.000000       | 0.000000       |
| 40-44 | 133-192 | 0.000000    | 0.000000      | 0.000000      | 0.001657     | 0.001657       | 0.000000       | 0.000000      | 0.000000       | 0.000000       |
| 45-49 | 133-192 | 0.000000    | 0.000000      | 0.000000      | 0.001995     | 0.001995       | 0.000000       | 0.000000      | 0.000000       | 0.000000       |
| 50-54 | 133-192 | 0.000000    | 0.000000      | 0.000000      | 0.002154     | 0.002154       | 0.000000       | 0.000000      | 0.000000       | 0.000000       |
| 55-59 | 133-192 | 0.000000    | 0.000000      | 0.000000      | 0.002072     | 0.002072       | 0.000000       | 0.000000      | 0.000000       | 0.000000       |
| 60-64 | 133-192 | 0.000000    | 0.000000      | 0.000000      | 0.005049     | 0.005049       | 0.000000       | 0.000000      | 0.000000       | 0.000000       |
| 65-69 | 133-192 | 0.000000    | 0.000000      | 0.000000      | 0.003681     | 0.003681       | 0.000000       | 0.000000      | 0.000000       | 0.000000       |
| 70-74 | 133-192 | 0.000000    | 0.000000      | 0.000000      | 0.006144     | 0.006144       | 0.000000       | 0.000000      | 0.000000       | 0.000000       |
| 75-79 | 133-192 | 0.000000    | 0.000000      | 0.000000      | 0.006144     | 0.006144       | 0.000000       | 0.000000      | 0.000000       | 0.000000       |
| 10-14 | 193-252 | 0.000093    | 0.001766      | 0.000000      | 0.008742     | 0.008742       | 0.000000       | 0.000000      | 0.000000       | 0.000000       |
| 15-19 | 193-252 | 0.000112    | 0.002120      | 0.000000      | 0.005770     | 0.005770       | 0.000000       | 0.000000      | 0.000000       | 0.000000       |
| 20-24 | 193-252 | 0.000054    | 0.001025      | 0.000000      | 0.003262     | 0.003262       | 0.000000       | 0.000000      | 0.000000       | 0.000000       |
| 25-29 | 193-252 | 0.000027    | 0.000504      | 0.000000      | 0.002002     | 0.002002       | 0.000000       | 0.000000      | 0.000000       | 0.000000       |
| 30-34 | 193-252 | 0.000013    | 0.000250      | 0.000000      | 0.003241     | 0.003241       | 0.000000       | 0.000000      | 0.000000       | 0.000000       |
| 35-39 | 193-252 | 0.000000    | 0.000000      | 0.000000      | 0.001771     | 0.001771       | 0.000000       | 0.000000      | 0.000000       | 0.000000       |
| 40-44 | 193-252 | 0.000000    | 0.000000      | 0.000000      | 0.002173     | 0.002173       | 0.000000       | 0.000000      | 0.000000       | 0.000000       |
| 45-49 | 193-252 | 0.000000    | 0.000000      | 0.000000      | 0.002075     | 0.002075       | 0.000000       | 0.000000      | 0.000000       | 0.000000       |
| 50-54 | 193-252 | 0.000000    | 0.000000      | 0.000000      | 0.003432     | 0.003432       | 0.000000       | 0.000000      | 0.000000       | 0.000000       |

### Results for PHIM for Run 10 (Sensitivity\_Analysis\_1.RTF)

|       |         |          |          |          |          |          |          |          |          |          |
|-------|---------|----------|----------|----------|----------|----------|----------|----------|----------|----------|
| 55-59 | 193-252 | 0.000000 | 0.000000 | 0.000000 | 0.002906 | 0.002906 | 0.000000 | 0.000000 | 0.000000 | 0.000000 |
| 60-64 | 193-252 | 0.000000 | 0.000000 | 0.000000 | 0.007139 | 0.007139 | 0.000000 | 0.000000 | 0.000000 | 0.000000 |
| 65-69 | 193-252 | 0.000000 | 0.000000 | 0.000000 | 0.004963 | 0.004963 | 0.000000 | 0.000000 | 0.000000 | 0.000000 |
| 70-74 | 193-252 | 0.000000 | 0.000000 | 0.000000 | 0.006269 | 0.006269 | 0.000000 | 0.000000 | 0.000000 | 0.000000 |
| 75-79 | 193-252 | 0.000000 | 0.000000 | 0.000000 | 0.006269 | 0.006269 | 0.000000 | 0.000000 | 0.000000 | 0.000000 |
| 10-14 | 253+    | 0.000047 | 0.000884 | 0.000000 | 0.008742 | 0.008742 | 0.000000 | 0.000000 | 0.000000 | 0.000000 |
| 15-19 | 253+    | 0.000090 | 0.001708 | 0.000000 | 0.009440 | 0.009440 | 0.000000 | 0.000000 | 0.000000 | 0.000000 |
| 20-24 | 253+    | 0.000001 | 0.000022 | 0.000000 | 0.002831 | 0.002831 | 0.000000 | 0.000000 | 0.000000 | 0.000000 |
| 25-29 | 253+    | 0.000004 | 0.000070 | 0.000000 | 0.002656 | 0.002656 | 0.000000 | 0.000000 | 0.000000 | 0.000000 |
| 30-34 | 253+    | 0.000002 | 0.000035 | 0.000000 | 0.004614 | 0.004614 | 0.000000 | 0.000000 | 0.000000 | 0.000000 |
| 35-39 | 253+    | 0.000000 | 0.000000 | 0.000000 | 0.002608 | 0.002608 | 0.000000 | 0.000000 | 0.000000 | 0.000000 |
| 40-44 | 253+    | 0.000000 | 0.000000 | 0.000000 | 0.003115 | 0.003115 | 0.000000 | 0.000000 | 0.000000 | 0.000000 |
| 45-49 | 253+    | 0.000000 | 0.000000 | 0.000000 | 0.002132 | 0.002132 | 0.000000 | 0.000000 | 0.000000 | 0.000000 |
| 50-54 | 253+    | 0.000000 | 0.000000 | 0.000000 | 0.003497 | 0.003497 | 0.000000 | 0.000000 | 0.000000 | 0.000000 |
| 55-59 | 253+    | 0.000000 | 0.000000 | 0.000000 | 0.002942 | 0.002942 | 0.000000 | 0.000000 | 0.000000 | 0.000000 |
| 60-64 | 253+    | 0.000000 | 0.000000 | 0.000000 | 0.005376 | 0.005376 | 0.000000 | 0.000000 | 0.000000 | 0.000000 |
| 65-69 | 253+    | 0.000000 | 0.000000 | 0.000000 | 0.001789 | 0.001789 | 0.000000 | 0.000000 | 0.000000 | 0.000000 |
| 70-74 | 253+    | 0.000000 | 0.000000 | 0.000000 | 0.004077 | 0.004077 | 0.000000 | 0.000000 | 0.000000 | 0.000000 |
| 75-79 | 253+    | 0.000000 | 0.000000 | 0.000000 | 0.004077 | 0.004077 | 0.000000 | 0.000000 | 0.000000 | 0.000000 |





**Results for PHIM for Run 10 (Sensitivity\_Analysis\_1.RTF)**

|       |      |          |          |          |          |          |          |
|-------|------|----------|----------|----------|----------|----------|----------|
| 25-29 | 253+ | 0.014127 | 0.000000 | 0.000000 | 0.000000 | 0.000000 | 0.000000 |
| 30-34 | 253+ | 0.013889 | 0.000000 | 0.000000 | 0.000000 | 0.000000 | 0.000000 |
| 35-39 | 253+ | 0.012929 | 0.000000 | 0.000000 | 0.000000 | 0.000000 | 0.000000 |
| 40-44 | 253+ | 0.012785 | 0.000000 | 0.000000 | 0.000000 | 0.000000 | 0.000000 |
| 45-49 | 253+ | 0.012295 | 0.000000 | 0.000000 | 0.000000 | 0.000000 | 0.000000 |
| 50-54 | 253+ | 0.011536 | 0.000000 | 0.000000 | 0.000000 | 0.000000 | 0.000000 |
| 55-59 | 253+ | 0.008988 | 0.000000 | 0.000000 | 0.000000 | 0.000000 | 0.000000 |
| 60-64 | 253+ | 0.008098 | 0.000000 | 0.000000 | 0.000000 | 0.000000 | 0.000000 |
| 65-69 | 253+ | 0.006274 | 0.000000 | 0.000000 | 0.000000 | 0.000000 | 0.000000 |
| 70-74 | 253+ | 0.004141 | 0.000000 | 0.000000 | 0.000000 | 0.000000 | 0.000000 |
| 75-79 | 253+ | 0.004141 | 0.000000 | 0.000000 | 0.000000 | 0.000000 | 0.000000 |

## Results for PHIM for Run 10 (Sensitivity\_Analysis\_1.RTF)

\*\*\*\*\*

**Main Output for the Tobacco History for Run: 10, Simulation: 1, Scenario: NULL**

| Variable Parameter          | Value              |
|-----------------------------|--------------------|
| 1. Country                  | US (United States) |
| 2. Sex                      | F (Females)        |
| 3. Year of start of process | 1990               |

Year of Follow-up: 2040, Age Group: All Ages

| Period | Age Group | Smoking Group | N | % |
|--------|-----------|---------------|---|---|
|--------|-----------|---------------|---|---|

|    |          |           |       |       |
|----|----------|-----------|-------|-------|
| 50 | All Ages | Never Any | 20670 | 58.80 |
| 50 | All Ages | CC        | 2462  | 7.00  |
| 50 | All Ages | Former    | 12019 | 34.19 |

Year of Follow-up: 2040, Age Group: 18-19

| Period | Age Group | Smoking Group | N | % |
|--------|-----------|---------------|---|---|
|--------|-----------|---------------|---|---|

|    |       |           |   |   |
|----|-------|-----------|---|---|
| 50 | 18-19 | Never Any | 0 | . |
| 50 | 18-19 | CC        | 0 | . |
| 50 | 18-19 | Former    | 0 | . |

Year of Follow-up: 2040, Age Group: 20-24

| Period | Age Group | Smoking Group | N | % |
|--------|-----------|---------------|---|---|
|--------|-----------|---------------|---|---|

|    |       |           |   |   |
|----|-------|-----------|---|---|
| 50 | 20-24 | Never Any | 0 | . |
| 50 | 20-24 | CC        | 0 | . |
| 50 | 20-24 | Former    | 0 | . |

Year of Follow-up: 2040, Age Group: 25-29

| Period | Age Group | Smoking Group | N | % |
|--------|-----------|---------------|---|---|
|--------|-----------|---------------|---|---|

|    |       |           |   |   |
|----|-------|-----------|---|---|
| 50 | 25-29 | Never Any | 0 | . |
| 50 | 25-29 | CC        | 0 | . |
| 50 | 25-29 | Former    | 0 | . |

Year of Follow-up: 2040, Age Group: 30-34

| Period | Age Group | Smoking Group | N | % |
|--------|-----------|---------------|---|---|
|--------|-----------|---------------|---|---|

|    |       |           |   |   |
|----|-------|-----------|---|---|
| 50 | 30-34 | Never Any | 0 | . |
| 50 | 30-34 | CC        | 0 | . |
| 50 | 30-34 | Former    | 0 | . |

Year of Follow-up: 2040, Age Group: 35-39

| Period | Age Group | Smoking Group | N | % |
|--------|-----------|---------------|---|---|
|--------|-----------|---------------|---|---|

|    |       |           |   |   |
|----|-------|-----------|---|---|
| 50 | 35-39 | Never Any | 0 | . |
| 50 | 35-39 | CC        | 0 | . |
| 50 | 35-39 | Former    | 0 | . |

Year of Follow-up: 2040, Age Group: 40-44

| Period | Age Group | Smoking Group | N | % |
|--------|-----------|---------------|---|---|
|--------|-----------|---------------|---|---|

|    |       |           |   |   |
|----|-------|-----------|---|---|
| 50 | 40-44 | Never Any | 0 | . |
| 50 | 40-44 | CC        | 0 | . |
| 50 | 40-44 | Former    | 0 | . |

Year of Follow-up: 2040, Age Group: 45-49

| Period | Age Group | Smoking Group | N | % |
|--------|-----------|---------------|---|---|
|--------|-----------|---------------|---|---|

|    |       |           |   |   |
|----|-------|-----------|---|---|
| 50 | 45-49 | Never Any | 0 | . |
| 50 | 45-49 | CC        | 0 | . |
| 50 | 45-49 | Former    | 0 | . |

Year of Follow-up: 2040, Age Group: 50-54

| Period | Age Group | Smoking Group | N | % |
|--------|-----------|---------------|---|---|
|--------|-----------|---------------|---|---|

|    |       |           |   |   |
|----|-------|-----------|---|---|
| 50 | 50-54 | Never Any | 0 | . |
| 50 | 50-54 | CC        | 0 | . |
| 50 | 50-54 | Former    | 0 | . |

Year of Follow-up: 2040, Age Group: 55-59

| Period | Age Group | Smoking Group | N | % |
|--------|-----------|---------------|---|---|
|--------|-----------|---------------|---|---|

|    |       |           |   |   |
|----|-------|-----------|---|---|
| 50 | 55-59 | Never Any | 0 | . |
| 50 | 55-59 | CC        | 0 | . |
| 50 | 55-59 | Former    | 0 | . |

Year of Follow-up: 2040, Age Group: 60-64

| Period | Age Group | Smoking Group | N | % |
|--------|-----------|---------------|---|---|
|--------|-----------|---------------|---|---|

**Results for PHIM for Run 10 (Sensitivity\_Analysis\_1.RTF)**

|                                           |           |               |      |       |
|-------------------------------------------|-----------|---------------|------|-------|
| 50                                        | 60-64     | Never Any     | 4803 | 60.57 |
| 50                                        | 60-64     | CC            | 621  | 7.83  |
| 50                                        | 60-64     | Former        | 2506 | 31.60 |
| Year of Follow-up: 2040, Age Group: 65-69 |           |               |      |       |
| Period                                    | Age Group | Smoking Group | N    | %     |
| 50                                        | 65-69     | Never Any     | 5407 | 64.75 |
| 50                                        | 65-69     | CC            | 538  | 6.44  |
| 50                                        | 65-69     | Former        | 2405 | 28.80 |
| Year of Follow-up: 2040, Age Group: 70-74 |           |               |      |       |
| Period                                    | Age Group | Smoking Group | N    | %     |
| 50                                        | 70-74     | Never Any     | 5181 | 58.92 |
| 50                                        | 70-74     | CC            | 605  | 6.88  |
| 50                                        | 70-74     | Former        | 3007 | 34.20 |
| Year of Follow-up: 2040, Age Group: 75-79 |           |               |      |       |
| Period                                    | Age Group | Smoking Group | N    | %     |
| 50                                        | 75-79     | Never Any     | 5279 | 52.38 |
| 50                                        | 75-79     | CC            | 698  | 6.93  |
| 50                                        | 75-79     | Former        | 4101 | 40.69 |

## Results for PHIM for Run 10 (Sensitivity\_Analysis\_1.RTF)

\*\*\*\*\*

### Main Output for the Tobacco History for Run: 10, Simulation: 1, Scenario: Ecig

| Variable Parameter                           |           |               | Value              |       |               |             |               |                |              |
|----------------------------------------------|-----------|---------------|--------------------|-------|---------------|-------------|---------------|----------------|--------------|
| 1. Country                                   |           |               | US (United States) |       |               |             |               |                |              |
| 2. Sex                                       |           |               | F (Females)        |       |               |             |               |                |              |
| 3. Year of start of process                  |           |               | 1990               |       |               |             |               |                |              |
| Year of Follow-up: 1990, Age Group: All Ages |           |               |                    |       |               |             |               |                |              |
| Period                                       | Age Group | Smoking Group | N                  | %     | Ever Quit (N) | Ever Quit % | Mean Yrs Quit | Short Term (n) | Short Term % |
| 0                                            | All Ages  | Never Any     | 47776              | 54.92 |               |             |               |                |              |
| 0                                            | All Ages  | CC            | 22737              | 26.14 | 0             | 0.00        |               |                |              |
| 0                                            | All Ages  | Ecig          | 0                  | 0.00  |               |             |               |                |              |
| 0                                            | All Ages  | Dual          | 0                  | 0.00  |               |             |               |                |              |
| 0                                            | All Ages  | Former        | 16484              | 18.95 |               |             | 11.90         | 2815           | 17.08        |
| Year of Follow-up: 1990, Age Group: 18-19    |           |               |                    |       |               |             |               |                |              |
| Period                                       | Age Group | Smoking Group | N                  | %     | Ever Quit (N) | Ever Quit % | Mean Yrs Quit | Short Term (n) | Short Term % |
| 0                                            | 18-19     | Never Any     | 2570               | 78.43 |               |             |               |                |              |
| 0                                            | 18-19     | CC            | 535                | 16.33 | 0             | 0.00        |               |                |              |
| 0                                            | 18-19     | Ecig          | 0                  | 0.00  |               |             |               |                |              |
| 0                                            | 18-19     | Dual          | 0                  | 0.00  |               |             |               |                |              |
| 0                                            | 18-19     | Former        | 172                | 5.25  |               |             | 0.20          | 172            | 100.00       |
| Year of Follow-up: 1990, Age Group: 20-24    |           |               |                    |       |               |             |               |                |              |
| Period                                       | Age Group | Smoking Group | N                  | %     | Ever Quit (N) | Ever Quit % | Mean Yrs Quit | Short Term (n) | Short Term % |
| 0                                            | 20-24     | Never Any     | 5354               | 60.89 |               |             |               |                |              |
| 0                                            | 20-24     | CC            | 2560               | 29.11 | 0             | 0.00        |               |                |              |
| 0                                            | 20-24     | Ecig          | 0                  | 0.00  |               |             |               |                |              |
| 0                                            | 20-24     | Dual          | 0                  | 0.00  |               |             |               |                |              |
| 0                                            | 20-24     | Former        | 879                | 10.00 |               |             | 1.58          | 420            | 47.78        |
| Year of Follow-up: 1990, Age Group: 25-29    |           |               |                    |       |               |             |               |                |              |
| Period                                       | Age Group | Smoking Group | N                  | %     | Ever Quit (N) | Ever Quit % | Mean Yrs Quit | Short Term (n) | Short Term % |
| 0                                            | 25-29     | Never Any     | 5318               | 52.77 |               |             |               |                |              |
| 0                                            | 25-29     | CC            | 3335               | 33.09 | 0             | 0.00        |               |                |              |
| 0                                            | 25-29     | Ecig          | 0                  | 0.00  |               |             |               |                |              |
| 0                                            | 25-29     | Dual          | 0                  | 0.00  |               |             |               |                |              |
| 0                                            | 25-29     | Former        | 1425               | 14.14 |               |             | 3.91          | 404            | 28.35        |
| Year of Follow-up: 1990, Age Group: 30-34    |           |               |                    |       |               |             |               |                |              |
| Period                                       | Age Group | Smoking Group | N                  | %     | Ever Quit (N) | Ever Quit % | Mean Yrs Quit | Short Term (n) | Short Term % |
| 0                                            | 30-34     | Never Any     | 5287               | 50.36 |               |             |               |                |              |
| 0                                            | 30-34     | CC            | 3326               | 31.68 | 0             | 0.00        |               |                |              |
| 0                                            | 30-34     | Ecig          | 0                  | 0.00  |               |             |               |                |              |
| 0                                            | 30-34     | Dual          | 0                  | 0.00  |               |             |               |                |              |
| 0                                            | 30-34     | Former        | 1886               | 17.96 |               |             | 4.36          | 566            | 30.01        |
| Year of Follow-up: 1990, Age Group: 35-39    |           |               |                    |       |               |             |               |                |              |
| Period                                       | Age Group | Smoking Group | N                  | %     | Ever Quit (N) | Ever Quit % | Mean Yrs Quit | Short Term (n) | Short Term % |
| 0                                            | 35-39     | Never Any     | 5018               | 52.27 |               |             |               |                |              |
| 0                                            | 35-39     | CC            | 2653               | 27.64 | 0             | 0.00        |               |                |              |
| 0                                            | 35-39     | Ecig          | 0                  | 0.00  |               |             |               |                |              |
| 0                                            | 35-39     | Dual          | 0                  | 0.00  |               |             |               |                |              |
| 0                                            | 35-39     | Former        | 1929               | 20.09 |               |             | 7.96          | 324            | 16.80        |
| Year of Follow-up: 1990, Age Group: 40-44    |           |               |                    |       |               |             |               |                |              |
| Period                                       | Age Group | Smoking Group | N                  | %     | Ever Quit (N) | Ever Quit % | Mean Yrs Quit | Short Term (n) | Short Term % |
| 0                                            | 40-44     | Never Any     | 4356               | 51.27 |               |             |               |                |              |
| 0                                            | 40-44     | CC            | 2397               | 28.21 | 0             | 0.00        |               |                |              |
| 0                                            | 40-44     | Ecig          | 0                  | 0.00  |               |             |               |                |              |
| 0                                            | 40-44     | Dual          | 0                  | 0.00  |               |             |               |                |              |
| 0                                            | 40-44     | Former        | 1744               | 20.52 |               |             | 7.33          | 339            | 19.44        |
| Year of Follow-up: 1990, Age Group: 45-49    |           |               |                    |       |               |             |               |                |              |
| Period                                       | Age Group | Smoking Group | N                  | %     | Ever Quit (N) | Ever Quit % | Mean Yrs Quit | Short Term (n) | Short Term % |
| 0                                            | 45-49     | Never Any     | 3116               | 47.67 |               |             |               |                |              |
| 0                                            | 45-49     | CC            | 1875               | 28.69 | 0             | 0.00        |               |                |              |
| 0                                            | 45-49     | Ecig          | 0                  | 0.00  |               |             |               |                |              |
| 0                                            | 45-49     | Dual          | 0                  | 0.00  |               |             |               |                |              |
| 0                                            | 45-49     | Former        | 1545               | 23.64 |               |             | 12.55         | 194            | 12.56        |
| Year of Follow-up: 1990, Age Group: 50-54    |           |               |                    |       |               |             |               |                |              |
| Period                                       | Age Group | Smoking Group | N                  | %     | Ever Quit (N) | Ever Quit % | Mean Yrs Quit | Short Term (n) | Short Term % |
| 0                                            | 50-54     | Never Any     | 2684               | 48.50 |               |             |               |                |              |
| 0                                            | 50-54     | CC            | 1572               | 28.41 | 0             | 0.00        |               |                |              |

**Results for PHIM for Run 10 (Sensitivity\_Analysis\_1.RTF)**

|                                              |           |               |       |       |               |             |               |                |              |
|----------------------------------------------|-----------|---------------|-------|-------|---------------|-------------|---------------|----------------|--------------|
| 0                                            | 50-54     | Ecig          | 0     | 0.00  |               |             |               |                |              |
| 0                                            | 50-54     | Dual          | 0     | 0.00  |               |             |               |                |              |
| 0                                            | 50-54     | Former        | 1278  | 23.09 |               |             | 13.28         | 126            | 9.86         |
| Year of Follow-up: 1990, Age Group: 55-59    |           |               |       |       |               |             |               |                |              |
| Period                                       | Age Group | Smoking Group | N     | %     | Ever Quit (N) | Ever Quit % | Mean Yrs Quit | Short Term (n) | Short Term % |
| 0                                            | 55-59     | Never Any     | 2732  | 51.90 |               |             |               |                |              |
| 0                                            | 55-59     | CC            | 1295  | 24.60 | 0             | 0.00        |               |                |              |
| 0                                            | 55-59     | Ecig          | 0     | 0.00  |               |             |               |                |              |
| 0                                            | 55-59     | Dual          | 0     | 0.00  |               |             |               |                |              |
| 0                                            | 55-59     | Former        | 1237  | 23.50 |               |             | 17.26         | 90             | 7.28         |
| Year of Follow-up: 1990, Age Group: 60-64    |           |               |       |       |               |             |               |                |              |
| Period                                       | Age Group | Smoking Group | N     | %     | Ever Quit (N) | Ever Quit % | Mean Yrs Quit | Short Term (n) | Short Term % |
| 0                                            | 60-64     | Never Any     | 3078  | 55.72 |               |             |               |                |              |
| 0                                            | 60-64     | CC            | 1249  | 22.61 | 0             | 0.00        |               |                |              |
| 0                                            | 60-64     | Ecig          | 0     | 0.00  |               |             |               |                |              |
| 0                                            | 60-64     | Dual          | 0     | 0.00  |               |             |               |                |              |
| 0                                            | 60-64     | Former        | 1197  | 21.67 |               |             | 18.28         | 61             | 5.10         |
| Year of Follow-up: 1990, Age Group: 65-69    |           |               |       |       |               |             |               |                |              |
| Period                                       | Age Group | Smoking Group | N     | %     | Ever Quit (N) | Ever Quit % | Mean Yrs Quit | Short Term (n) | Short Term % |
| 0                                            | 65-69     | Never Any     | 3042  | 57.36 |               |             |               |                |              |
| 0                                            | 65-69     | CC            | 976   | 18.40 | 0             | 0.00        |               |                |              |
| 0                                            | 65-69     | Ecig          | 0     | 0.00  |               |             |               |                |              |
| 0                                            | 65-69     | Dual          | 0     | 0.00  |               |             |               |                |              |
| 0                                            | 65-69     | Former        | 1285  | 24.23 |               |             | 20.65         | 68             | 5.29         |
| Year of Follow-up: 1990, Age Group: 70-74    |           |               |       |       |               |             |               |                |              |
| Period                                       | Age Group | Smoking Group | N     | %     | Ever Quit (N) | Ever Quit % | Mean Yrs Quit | Short Term (n) | Short Term % |
| 0                                            | 70-74     | Never Any     | 2738  | 61.05 |               |             |               |                |              |
| 0                                            | 70-74     | CC            | 610   | 13.60 | 0             | 0.00        |               |                |              |
| 0                                            | 70-74     | Ecig          | 0     | 0.00  |               |             |               |                |              |
| 0                                            | 70-74     | Dual          | 0     | 0.00  |               |             |               |                |              |
| 0                                            | 70-74     | Former        | 1137  | 25.35 |               |             | 24.48         | 27             | 2.37         |
| Year of Follow-up: 1990, Age Group: 75-79    |           |               |       |       |               |             |               |                |              |
| Period                                       | Age Group | Smoking Group | N     | %     | Ever Quit (N) | Ever Quit % | Mean Yrs Quit | Short Term (n) | Short Term % |
| 0                                            | 75-79     | Never Any     | 2483  | 68.84 |               |             |               |                |              |
| 0                                            | 75-79     | CC            | 354   | 9.81  | 0             | 0.00        |               |                |              |
| 0                                            | 75-79     | Ecig          | 0     | 0.00  |               |             |               |                |              |
| 0                                            | 75-79     | Dual          | 0     | 0.00  |               |             |               |                |              |
| 0                                            | 75-79     | Former        | 770   | 21.35 |               |             | 24.48         | 24             | 3.12         |
| Year of Follow-up: 1995, Age Group: All Ages |           |               |       |       |               |             |               |                |              |
| Period                                       | Age Group | Smoking Group | N     | %     | Ever Quit (N) | Ever Quit % | Mean Yrs Quit | Short Term (n) | Short Term % |
| 5                                            | All Ages  | Never Any     | 50887 | 55.53 |               |             |               |                |              |
| 5                                            | All Ages  | CC            | 10659 | 11.63 | 0             | 0.00        |               |                |              |
| 5                                            | All Ages  | Ecig          | 11697 | 12.76 |               |             |               |                |              |
| 5                                            | All Ages  | Dual          | 0     | 0.00  |               |             |               |                |              |
| 5                                            | All Ages  | Former        | 18396 | 20.07 |               |             | 14.19         | 1129           | 6.14         |
| Year of Follow-up: 1995, Age Group: 18-19    |           |               |       |       |               |             |               |                |              |
| Period                                       | Age Group | Smoking Group | N     | %     | Ever Quit (N) | Ever Quit % | Mean Yrs Quit | Short Term (n) | Short Term % |
| 5                                            | 18-19     | Never Any     | 2434  | 76.64 |               |             |               |                |              |
| 5                                            | 18-19     | CC            | 233   | 7.34  | 0             | 0.00        |               |                |              |
| 5                                            | 18-19     | Ecig          | 427   | 13.44 |               |             |               |                |              |
| 5                                            | 18-19     | Dual          | 0     | 0.00  |               |             |               |                |              |
| 5                                            | 18-19     | Former        | 82    | 2.58  |               |             | 1.15          | 52             | 63.41        |
| Year of Follow-up: 1995, Age Group: 20-24    |           |               |       |       |               |             |               |                |              |
| Period                                       | Age Group | Smoking Group | N     | %     | Ever Quit (N) | Ever Quit % | Mean Yrs Quit | Short Term (n) | Short Term % |
| 5                                            | 20-24     | Never Any     | 5794  | 69.39 |               |             |               |                |              |
| 5                                            | 20-24     | CC            | 862   | 10.32 | 0             | 0.00        |               |                |              |
| 5                                            | 20-24     | Ecig          | 1250  | 14.97 |               |             |               |                |              |
| 5                                            | 20-24     | Dual          | 0     | 0.00  |               |             |               |                |              |
| 5                                            | 20-24     | Former        | 444   | 5.32  |               |             | 3.23          | 106            | 23.87        |
| Year of Follow-up: 1995, Age Group: 25-29    |           |               |       |       |               |             |               |                |              |
| Period                                       | Age Group | Smoking Group | N     | %     | Ever Quit (N) | Ever Quit % | Mean Yrs Quit | Short Term (n) | Short Term % |
| 5                                            | 25-29     | Never Any     | 5313  | 60.42 |               |             |               |                |              |
| 5                                            | 25-29     | CC            | 1062  | 12.08 | 0             | 0.00        |               |                |              |
| 5                                            | 25-29     | Ecig          | 1395  | 15.86 |               |             |               |                |              |
| 5                                            | 25-29     | Dual          | 0     | 0.00  |               |             |               |                |              |
| 5                                            | 25-29     | Former        | 1023  | 11.63 |               |             | 5.94          | 54             | 5.28         |
| Year of Follow-up: 1995, Age Group: 30-34    |           |               |       |       |               |             |               |                |              |
| Period                                       | Age Group | Smoking Group | N     | %     | Ever Quit (N) | Ever Quit % | Mean Yrs Quit | Short Term (n) | Short Term % |

**Results for PHIM for Run 10 (Sensitivity\_Analysis\_1.RTF)**

|                                              |           |               |      |       |               |             |               |                |              |
|----------------------------------------------|-----------|---------------|------|-------|---------------|-------------|---------------|----------------|--------------|
| 5                                            | 30-34     | Never Any     | 5304 | 52.63 |               |             |               |                |              |
| 5                                            | 30-34     | CC            | 1373 | 13.62 | 0             | 0.00        |               |                |              |
| 5                                            | 30-34     | Ecig          | 1802 | 17.88 |               |             |               |                |              |
| 5                                            | 30-34     | Dual          | 0    | 0.00  |               |             |               |                |              |
| 5                                            | 30-34     | Former        | 1599 | 15.87 |               |             | 8.16          | 67             | 4.19         |
| Year of Follow-up: 1995, Age Group: 35-39    |           |               |      |       |               |             |               |                |              |
| Period                                       | Age Group | Smoking Group | N    | %     | Ever Quit (N) | Ever Quit % | Mean Yrs Quit | Short Term (n) | Short Term % |
| 5                                            | 35-39     | Never Any     | 5278 | 50.27 |               |             |               |                |              |
| 5                                            | 35-39     | CC            | 1410 | 13.43 | 0             | 0.00        |               |                |              |
| 5                                            | 35-39     | Ecig          | 1746 | 16.63 |               |             |               |                |              |
| 5                                            | 35-39     | Dual          | 0    | 0.00  |               |             |               |                |              |
| 5                                            | 35-39     | Former        | 2065 | 19.67 |               |             | 8.75          | 62             | 3.00         |
| Year of Follow-up: 1995, Age Group: 40-44    |           |               |      |       |               |             |               |                |              |
| Period                                       | Age Group | Smoking Group | N    | %     | Ever Quit (N) | Ever Quit % | Mean Yrs Quit | Short Term (n) | Short Term % |
| 5                                            | 40-44     | Never Any     | 5018 | 52.27 |               |             |               |                |              |
| 5                                            | 40-44     | CC            | 1135 | 11.82 | 0             | 0.00        |               |                |              |
| 5                                            | 40-44     | Ecig          | 1356 | 14.13 |               |             |               |                |              |
| 5                                            | 40-44     | Dual          | 0    | 0.00  |               |             |               |                |              |
| 5                                            | 40-44     | Former        | 2091 | 21.78 |               |             | 12.09         | 81             | 3.87         |
| Year of Follow-up: 1995, Age Group: 45-49    |           |               |      |       |               |             |               |                |              |
| Period                                       | Age Group | Smoking Group | N    | %     | Ever Quit (N) | Ever Quit % | Mean Yrs Quit | Short Term (n) | Short Term % |
| 5                                            | 45-49     | Never Any     | 4356 | 51.27 |               |             |               |                |              |
| 5                                            | 45-49     | CC            | 974  | 11.46 | 0             | 0.00        |               |                |              |
| 5                                            | 45-49     | Ecig          | 1161 | 13.66 |               |             |               |                |              |
| 5                                            | 45-49     | Dual          | 0    | 0.00  |               |             |               |                |              |
| 5                                            | 45-49     | Former        | 2006 | 23.61 |               |             | 10.93         | 133            | 6.63         |
| Year of Follow-up: 1995, Age Group: 50-54    |           |               |      |       |               |             |               |                |              |
| Period                                       | Age Group | Smoking Group | N    | %     | Ever Quit (N) | Ever Quit % | Mean Yrs Quit | Short Term (n) | Short Term % |
| 5                                            | 50-54     | Never Any     | 3116 | 47.67 |               |             |               |                |              |
| 5                                            | 50-54     | CC            | 739  | 11.31 | 0             | 0.00        |               |                |              |
| 5                                            | 50-54     | Ecig          | 826  | 12.64 |               |             |               |                |              |
| 5                                            | 50-54     | Dual          | 0    | 0.00  |               |             |               |                |              |
| 5                                            | 50-54     | Former        | 1855 | 28.38 |               |             | 14.92         | 140            | 7.55         |
| Year of Follow-up: 1995, Age Group: 55-59    |           |               |      |       |               |             |               |                |              |
| Period                                       | Age Group | Smoking Group | N    | %     | Ever Quit (N) | Ever Quit % | Mean Yrs Quit | Short Term (n) | Short Term % |
| 5                                            | 55-59     | Never Any     | 2684 | 48.50 |               |             |               |                |              |
| 5                                            | 55-59     | CC            | 722  | 13.05 | 0             | 0.00        |               |                |              |
| 5                                            | 55-59     | Ecig          | 627  | 11.33 |               |             |               |                |              |
| 5                                            | 55-59     | Dual          | 0    | 0.00  |               |             |               |                |              |
| 5                                            | 55-59     | Former        | 1501 | 27.12 |               |             | 15.84         | 93             | 6.20         |
| Year of Follow-up: 1995, Age Group: 60-64    |           |               |      |       |               |             |               |                |              |
| Period                                       | Age Group | Smoking Group | N    | %     | Ever Quit (N) | Ever Quit % | Mean Yrs Quit | Short Term (n) | Short Term % |
| 5                                            | 60-64     | Never Any     | 2732 | 51.90 |               |             |               |                |              |
| 5                                            | 60-64     | CC            | 633  | 12.03 | 0             | 0.00        |               |                |              |
| 5                                            | 60-64     | Ecig          | 444  | 8.43  |               |             |               |                |              |
| 5                                            | 60-64     | Dual          | 0    | 0.00  |               |             |               |                |              |
| 5                                            | 60-64     | Former        | 1455 | 27.64 |               |             | 19.22         | 87             | 5.98         |
| Year of Follow-up: 1995, Age Group: 65-69    |           |               |      |       |               |             |               |                |              |
| Period                                       | Age Group | Smoking Group | N    | %     | Ever Quit (N) | Ever Quit % | Mean Yrs Quit | Short Term (n) | Short Term % |
| 5                                            | 65-69     | Never Any     | 3078 | 55.72 |               |             |               |                |              |
| 5                                            | 65-69     | CC            | 602  | 10.90 | 0             | 0.00        |               |                |              |
| 5                                            | 65-69     | Ecig          | 374  | 6.77  |               |             |               |                |              |
| 5                                            | 65-69     | Dual          | 0    | 0.00  |               |             |               |                |              |
| 5                                            | 65-69     | Former        | 1470 | 26.61 |               |             | 19.34         | 107            | 7.28         |
| Year of Follow-up: 1995, Age Group: 70-74    |           |               |      |       |               |             |               |                |              |
| Period                                       | Age Group | Smoking Group | N    | %     | Ever Quit (N) | Ever Quit % | Mean Yrs Quit | Short Term (n) | Short Term % |
| 5                                            | 70-74     | Never Any     | 3042 | 57.36 |               |             |               |                |              |
| 5                                            | 70-74     | CC            | 577  | 10.88 | 0             | 0.00        |               |                |              |
| 5                                            | 70-74     | Ecig          | 188  | 3.55  |               |             |               |                |              |
| 5                                            | 70-74     | Dual          | 0    | 0.00  |               |             |               |                |              |
| 5                                            | 70-74     | Former        | 1496 | 28.21 |               |             | 22.32         | 77             | 5.15         |
| Year of Follow-up: 1995, Age Group: 75-79    |           |               |      |       |               |             |               |                |              |
| Period                                       | Age Group | Smoking Group | N    | %     | Ever Quit (N) | Ever Quit % | Mean Yrs Quit | Short Term (n) | Short Term % |
| 5                                            | 75-79     | Never Any     | 2738 | 61.05 |               |             |               |                |              |
| 5                                            | 75-79     | CC            | 337  | 7.51  | 0             | 0.00        |               |                |              |
| 5                                            | 75-79     | Ecig          | 101  | 2.25  |               |             |               |                |              |
| 5                                            | 75-79     | Dual          | 0    | 0.00  |               |             |               |                |              |
| 5                                            | 75-79     | Former        | 1309 | 29.19 |               |             | 25.87         | 70             | 5.35         |
| Year of Follow-up: 2000, Age Group: All Ages |           |               |      |       |               |             |               |                |              |

**Results for PHIM for Run 10 (Sensitivity\_Analysis\_1.RTF)**

| Period                                    | Age Group | Smoking Group | N     | %     | Ever Quit (N) | Ever Quit % | Mean Yrs Quit | Short Term (n) | Short Term % |
|-------------------------------------------|-----------|---------------|-------|-------|---------------|-------------|---------------|----------------|--------------|
| 10                                        | All Ages  | Never Any     | 50423 | 54.86 |               |             |               |                |              |
| 10                                        | All Ages  | CC            | 4595  | 5.00  | 0             | 0.00        |               |                |              |
| 10                                        | All Ages  | Ecig          | 15644 | 17.02 |               |             |               |                |              |
| 10                                        | All Ages  | Dual          | 0     | 0.00  |               |             |               |                |              |
| 10                                        | All Ages  | Former        | 21246 | 23.12 |               |             | 15.11         | 1717           | 8.08         |
| Year of Follow-up: 2000, Age Group: 18-19 |           |               |       |       |               |             |               |                |              |
| Period                                    | Age Group | Smoking Group | N     | %     | Ever Quit (N) | Ever Quit % | Mean Yrs Quit | Short Term (n) | Short Term % |
| 10                                        | 18-19     | Never Any     | 0     | .     |               |             |               |                |              |
| 10                                        | 18-19     | CC            | 0     | .     | 0             | .           |               |                |              |
| 10                                        | 18-19     | Ecig          | 0     | .     |               |             |               |                |              |
| 10                                        | 18-19     | Dual          | 0     | .     |               |             |               |                |              |
| 10                                        | 18-19     | Former        | 0     | .     |               |             |               | 0              | .            |
| Year of Follow-up: 2000, Age Group: 20-24 |           |               |       |       |               |             |               |                |              |
| Period                                    | Age Group | Smoking Group | N     | %     | Ever Quit (N) | Ever Quit % | Mean Yrs Quit | Short Term (n) | Short Term % |
| 10                                        | 20-24     | Never Any     | 5128  | 64.67 |               |             |               |                |              |
| 10                                        | 20-24     | CC            | 370   | 4.67  | 0             | 0.00        |               |                |              |
| 10                                        | 20-24     | Ecig          | 1780  | 22.45 |               |             |               |                |              |
| 10                                        | 20-24     | Dual          | 0     | 0.00  |               |             |               |                |              |
| 10                                        | 20-24     | Former        | 652   | 8.22  |               |             | 3.55          | 169            | 25.92        |
| Year of Follow-up: 2000, Age Group: 25-29 |           |               |       |       |               |             |               |                |              |
| Period                                    | Age Group | Smoking Group | N     | %     | Ever Quit (N) | Ever Quit % | Mean Yrs Quit | Short Term (n) | Short Term % |
| 10                                        | 25-29     | Never Any     | 5493  | 65.78 |               |             |               |                |              |
| 10                                        | 25-29     | CC            | 400   | 4.79  | 0             | 0.00        |               |                |              |
| 10                                        | 25-29     | Ecig          | 1690  | 20.24 |               |             |               |                |              |
| 10                                        | 25-29     | Dual          | 0     | 0.00  |               |             |               |                |              |
| 10                                        | 25-29     | Former        | 767   | 9.19  |               |             | 5.59          | 126            | 16.43        |
| Year of Follow-up: 2000, Age Group: 30-34 |           |               |       |       |               |             |               |                |              |
| Period                                    | Age Group | Smoking Group | N     | %     | Ever Quit (N) | Ever Quit % | Mean Yrs Quit | Short Term (n) | Short Term % |
| 10                                        | 30-34     | Never Any     | 5214  | 59.30 |               |             |               |                |              |
| 10                                        | 30-34     | CC            | 417   | 4.74  | 0             | 0.00        |               |                |              |
| 10                                        | 30-34     | Ecig          | 1908  | 21.70 |               |             |               |                |              |
| 10                                        | 30-34     | Dual          | 0     | 0.00  |               |             |               |                |              |
| 10                                        | 30-34     | Former        | 1254  | 14.26 |               |             | 9.28          | 91             | 7.26         |
| Year of Follow-up: 2000, Age Group: 35-39 |           |               |       |       |               |             |               |                |              |
| Period                                    | Age Group | Smoking Group | N     | %     | Ever Quit (N) | Ever Quit % | Mean Yrs Quit | Short Term (n) | Short Term % |
| 10                                        | 35-39     | Never Any     | 5284  | 52.43 |               |             |               |                |              |
| 10                                        | 35-39     | CC            | 561   | 5.57  | 0             | 0.00        |               |                |              |
| 10                                        | 35-39     | Ecig          | 2413  | 23.94 |               |             |               |                |              |
| 10                                        | 35-39     | Dual          | 0     | 0.00  |               |             |               |                |              |
| 10                                        | 35-39     | Former        | 1820  | 18.06 |               |             | 11.77         | 105            | 5.77         |
| Year of Follow-up: 2000, Age Group: 40-44 |           |               |       |       |               |             |               |                |              |
| Period                                    | Age Group | Smoking Group | N     | %     | Ever Quit (N) | Ever Quit % | Mean Yrs Quit | Short Term (n) | Short Term % |
| 10                                        | 40-44     | Never Any     | 5278  | 50.27 |               |             |               |                |              |
| 10                                        | 40-44     | CC            | 584   | 5.56  | 0             | 0.00        |               |                |              |
| 10                                        | 40-44     | Ecig          | 2292  | 21.83 |               |             |               |                |              |
| 10                                        | 40-44     | Dual          | 0     | 0.00  |               |             |               |                |              |
| 10                                        | 40-44     | Former        | 2345  | 22.34 |               |             | 12.30         | 143            | 6.10         |
| Year of Follow-up: 2000, Age Group: 45-49 |           |               |       |       |               |             |               |                |              |
| Period                                    | Age Group | Smoking Group | N     | %     | Ever Quit (N) | Ever Quit % | Mean Yrs Quit | Short Term (n) | Short Term % |
| 10                                        | 45-49     | Never Any     | 5018  | 52.27 |               |             |               |                |              |
| 10                                        | 45-49     | CC            | 446   | 4.65  | 0             | 0.00        |               |                |              |
| 10                                        | 45-49     | Ecig          | 1673  | 17.43 |               |             |               |                |              |
| 10                                        | 45-49     | Dual          | 0     | 0.00  |               |             |               |                |              |
| 10                                        | 45-49     | Former        | 2463  | 25.66 |               |             | 14.76         | 181            | 7.35         |
| Year of Follow-up: 2000, Age Group: 50-54 |           |               |       |       |               |             |               |                |              |
| Period                                    | Age Group | Smoking Group | N     | %     | Ever Quit (N) | Ever Quit % | Mean Yrs Quit | Short Term (n) | Short Term % |
| 10                                        | 50-54     | Never Any     | 4356  | 51.27 |               |             |               |                |              |
| 10                                        | 50-54     | CC            | 378   | 4.45  | 0             | 0.00        |               |                |              |
| 10                                        | 50-54     | Ecig          | 1299  | 15.29 |               |             |               |                |              |
| 10                                        | 50-54     | Dual          | 0     | 0.00  |               |             |               |                |              |
| 10                                        | 50-54     | Former        | 2464  | 29.00 |               |             | 13.32         | 188            | 7.63         |
| Year of Follow-up: 2000, Age Group: 55-59 |           |               |       |       |               |             |               |                |              |
| Period                                    | Age Group | Smoking Group | N     | %     | Ever Quit (N) | Ever Quit % | Mean Yrs Quit | Short Term (n) | Short Term % |
| 10                                        | 55-59     | Never Any     | 3116  | 47.67 |               |             |               |                |              |
| 10                                        | 55-59     | CC            | 283   | 4.33  | 0             | 0.00        |               |                |              |
| 10                                        | 55-59     | Ecig          | 912   | 13.95 |               |             |               |                |              |
| 10                                        | 55-59     | Dual          | 0     | 0.00  |               |             |               |                |              |



**Results for PHIM for Run 10 (Sensitivity\_Analysis\_1.RTF)**

| Year of Follow-up: 2000, Age Group: 60-64    | Period   | Age Group | Smoking Group | N     | %     | Ever Quit (N) | Ever Quit % | Mean Yrs Quit | Short Term (n) | Short Term % |
|----------------------------------------------|----------|-----------|---------------|-------|-------|---------------|-------------|---------------|----------------|--------------|
| 10                                           | 55-59    | Former    |               | 2225  | 34.04 |               |             | 16.92         | 157            | 7.06         |
| 10                                           | 60-64    | Never Any |               | 2684  | 48.50 |               |             |               |                |              |
| 10                                           | 60-64    | CC        |               | 334   | 6.04  | 0             | 0.00        |               |                |              |
| 10                                           | 60-64    | Ecig      |               | 663   | 11.98 |               |             |               |                |              |
| 10                                           | 60-64    | Dual      |               | 0     | 0.00  |               |             |               |                |              |
| 10                                           | 60-64    | Former    |               | 1853  | 33.48 |               |             | 17.23         | 149            | 8.04         |
| Year of Follow-up: 2000, Age Group: 65-69    | Period   | Age Group | Smoking Group | N     | %     | Ever Quit (N) | Ever Quit % | Mean Yrs Quit | Short Term (n) | Short Term % |
| 10                                           | 65-69    | Never Any |               | 2732  | 51.90 |               |             |               |                |              |
| 10                                           | 65-69    | CC        |               | 280   | 5.32  | 0             | 0.00        |               |                |              |
| 10                                           | 65-69    | Ecig      |               | 443   | 8.42  |               |             |               |                |              |
| 10                                           | 65-69    | Dual      |               | 0     | 0.00  |               |             |               |                |              |
| 10                                           | 65-69    | Former    |               | 1809  | 34.37 |               |             | 19.85         | 146            | 8.07         |
| Year of Follow-up: 2000, Age Group: 70-74    | Period   | Age Group | Smoking Group | N     | %     | Ever Quit (N) | Ever Quit % | Mean Yrs Quit | Short Term (n) | Short Term % |
| 10                                           | 70-74    | Never Any |               | 3078  | 55.72 |               |             |               |                |              |
| 10                                           | 70-74    | CC        |               | 274   | 4.96  | 0             | 0.00        |               |                |              |
| 10                                           | 70-74    | Ecig      |               | 368   | 6.66  |               |             |               |                |              |
| 10                                           | 70-74    | Dual      |               | 0     | 0.00  |               |             |               |                |              |
| 10                                           | 70-74    | Former    |               | 1804  | 32.66 |               |             | 20.18         | 154            | 8.54         |
| Year of Follow-up: 2000, Age Group: 75-79    | Period   | Age Group | Smoking Group | N     | %     | Ever Quit (N) | Ever Quit % | Mean Yrs Quit | Short Term (n) | Short Term % |
| 10                                           | 75-79    | Never Any |               | 3042  | 57.36 |               |             |               |                |              |
| 10                                           | 75-79    | CC        |               | 268   | 5.05  | 0             | 0.00        |               |                |              |
| 10                                           | 75-79    | Ecig      |               | 203   | 3.83  |               |             |               |                |              |
| 10                                           | 75-79    | Dual      |               | 0     | 0.00  |               |             |               |                |              |
| 10                                           | 75-79    | Former    |               | 1790  | 33.75 |               |             | 23.17         | 108            | 6.03         |
| Year of Follow-up: 2005, Age Group: All Ages | Period   | Age Group | Smoking Group | N     | %     | Ever Quit (N) | Ever Quit % | Mean Yrs Quit | Short Term (n) | Short Term % |
| 15                                           | All Ages | Never Any |               | 47002 | 54.27 |               |             |               |                |              |
| 15                                           | All Ages | CC        |               | 1890  | 2.18  | 0             | 0.00        |               |                |              |
| 15                                           | All Ages | Ecig      |               | 15617 | 18.03 |               |             |               |                |              |
| 15                                           | All Ages | Dual      |               | 0     | 0.00  |               |             |               |                |              |
| 15                                           | All Ages | Former    |               | 22096 | 25.51 |               |             | 17.32         | 941            | 4.26         |
| Year of Follow-up: 2005, Age Group: 18-19    | Period   | Age Group | Smoking Group | N     | %     | Ever Quit (N) | Ever Quit % | Mean Yrs Quit | Short Term (n) | Short Term % |
| 15                                           | 18-19    | Never Any |               | 0     | .     |               |             |               |                |              |
| 15                                           | 18-19    | CC        |               | 0     | .     | 0             | .           |               |                |              |
| 15                                           | 18-19    | Ecig      |               | 0     | .     |               |             |               |                |              |
| 15                                           | 18-19    | Dual      |               | 0     | .     |               |             |               |                |              |
| 15                                           | 18-19    | Former    |               | 0     | .     |               |             | .             | 0              | .            |
| Year of Follow-up: 2005, Age Group: 20-24    | Period   | Age Group | Smoking Group | N     | %     | Ever Quit (N) | Ever Quit % | Mean Yrs Quit | Short Term (n) | Short Term % |
| 15                                           | 20-24    | Never Any |               | 0     | .     |               |             |               |                |              |
| 15                                           | 20-24    | CC        |               | 0     | .     | 0             | .           |               |                |              |
| 15                                           | 20-24    | Ecig      |               | 0     | .     |               |             |               |                |              |
| 15                                           | 20-24    | Dual      |               | 0     | .     |               |             |               |                |              |
| 15                                           | 20-24    | Former    |               | 0     | .     |               |             | .             | 0              | .            |
| Year of Follow-up: 2005, Age Group: 25-29    | Period   | Age Group | Smoking Group | N     | %     | Ever Quit (N) | Ever Quit % | Mean Yrs Quit | Short Term (n) | Short Term % |
| 15                                           | 25-29    | Never Any |               | 4860  | 61.29 |               |             |               |                |              |
| 15                                           | 25-29    | CC        |               | 166   | 2.09  | 0             | 0.00        |               |                |              |
| 15                                           | 25-29    | Ecig      |               | 1941  | 24.48 |               |             |               |                |              |
| 15                                           | 25-29    | Dual      |               | 0     | 0.00  |               |             |               |                |              |
| 15                                           | 25-29    | Former    |               | 963   | 12.14 |               |             | 6.57          | 96             | 9.97         |
| Year of Follow-up: 2005, Age Group: 30-34    | Period   | Age Group | Smoking Group | N     | %     | Ever Quit (N) | Ever Quit % | Mean Yrs Quit | Short Term (n) | Short Term % |
| 15                                           | 30-34    | Never Any |               | 5407  | 64.75 |               |             |               |                |              |
| 15                                           | 30-34    | CC        |               | 149   | 1.78  | 0             | 0.00        |               |                |              |
| 15                                           | 30-34    | Ecig      |               | 1822  | 21.82 |               |             |               |                |              |
| 15                                           | 30-34    | Dual      |               | 0     | 0.00  |               |             |               |                |              |
| 15                                           | 30-34    | Former    |               | 972   | 11.64 |               |             | 8.77          | 80             | 8.23         |
| Year of Follow-up: 2005, Age Group: 35-39    | Period   | Age Group | Smoking Group | N     | %     | Ever Quit (N) | Ever Quit % | Mean Yrs Quit | Short Term (n) | Short Term % |
| 15                                           | 35-39    | Never Any |               | 5189  | 59.01 |               |             |               |                |              |
| 15                                           | 35-39    | CC        |               | 167   | 1.90  | 0             | 0.00        |               |                |              |

**Results for PHIM for Run 10 (Sensitivity\_Analysis\_1.RTF)**

|                                              |           |               |       |       |               |             |               |                |              |
|----------------------------------------------|-----------|---------------|-------|-------|---------------|-------------|---------------|----------------|--------------|
| 15                                           | 35-39     | Ecig          | 2002  | 22.77 |               |             |               |                |              |
| 15                                           | 35-39     | Dual          | 0     | 0.00  |               |             |               |                |              |
| 15                                           | 35-39     | Former        | 1435  | 16.32 |               |             | 12.75         | 66             | 4.60         |
| Year of Follow-up: 2005, Age Group: 40-44    |           |               |       |       |               |             |               |                |              |
| Period                                       | Age Group | Smoking Group | N     | %     | Ever Quit (N) | Ever Quit % | Mean Yrs Quit | Short Term (n) | Short Term % |
| 15                                           | 40-44     | Never Any     | 5284  | 52.43 |               |             |               |                |              |
| 15                                           | 40-44     | CC            | 238   | 2.36  | 0             | 0.00        |               |                |              |
| 15                                           | 40-44     | Ecig          | 2500  | 24.81 |               |             |               |                |              |
| 15                                           | 40-44     | Dual          | 0     | 0.00  |               |             |               |                |              |
| 15                                           | 40-44     | Former        | 2056  | 20.40 |               |             | 15.08         | 101            | 4.91         |
| Year of Follow-up: 2005, Age Group: 45-49    |           |               |       |       |               |             |               |                |              |
| Period                                       | Age Group | Smoking Group | N     | %     | Ever Quit (N) | Ever Quit % | Mean Yrs Quit | Short Term (n) | Short Term % |
| 15                                           | 45-49     | Never Any     | 5278  | 50.27 |               |             |               |                |              |
| 15                                           | 45-49     | CC            | 237   | 2.26  | 0             | 0.00        |               |                |              |
| 15                                           | 45-49     | Ecig          | 2318  | 22.08 |               |             |               |                |              |
| 15                                           | 45-49     | Dual          | 0     | 0.00  |               |             |               |                |              |
| 15                                           | 45-49     | Former        | 2666  | 25.39 |               |             | 15.45         | 135            | 5.06         |
| Year of Follow-up: 2005, Age Group: 50-54    |           |               |       |       |               |             |               |                |              |
| Period                                       | Age Group | Smoking Group | N     | %     | Ever Quit (N) | Ever Quit % | Mean Yrs Quit | Short Term (n) | Short Term % |
| 15                                           | 50-54     | Never Any     | 5018  | 52.27 |               |             |               |                |              |
| 15                                           | 50-54     | CC            | 191   | 1.99  | 0             | 0.00        |               |                |              |
| 15                                           | 50-54     | Ecig          | 1622  | 16.90 |               |             |               |                |              |
| 15                                           | 50-54     | Dual          | 0     | 0.00  |               |             |               |                |              |
| 15                                           | 50-54     | Former        | 2769  | 28.84 |               |             | 17.84         | 99             | 3.58         |
| Year of Follow-up: 2005, Age Group: 55-59    |           |               |       |       |               |             |               |                |              |
| Period                                       | Age Group | Smoking Group | N     | %     | Ever Quit (N) | Ever Quit % | Mean Yrs Quit | Short Term (n) | Short Term % |
| 15                                           | 55-59     | Never Any     | 4356  | 51.27 |               |             |               |                |              |
| 15                                           | 55-59     | CC            | 166   | 1.95  | 0             | 0.00        |               |                |              |
| 15                                           | 55-59     | Ecig          | 1281  | 15.08 |               |             |               |                |              |
| 15                                           | 55-59     | Dual          | 0     | 0.00  |               |             |               |                |              |
| 15                                           | 55-59     | Former        | 2694  | 31.71 |               |             | 16.95         | 78             | 2.90         |
| Year of Follow-up: 2005, Age Group: 60-64    |           |               |       |       |               |             |               |                |              |
| Period                                       | Age Group | Smoking Group | N     | %     | Ever Quit (N) | Ever Quit % | Mean Yrs Quit | Short Term (n) | Short Term % |
| 15                                           | 60-64     | Never Any     | 3116  | 47.67 |               |             |               |                |              |
| 15                                           | 60-64     | CC            | 131   | 2.00  | 0             | 0.00        |               |                |              |
| 15                                           | 60-64     | Ecig          | 852   | 13.04 |               |             |               |                |              |
| 15                                           | 60-64     | Dual          | 0     | 0.00  |               |             |               |                |              |
| 15                                           | 60-64     | Former        | 2437  | 37.29 |               |             | 20.18         | 93             | 3.82         |
| Year of Follow-up: 2005, Age Group: 65-69    |           |               |       |       |               |             |               |                |              |
| Period                                       | Age Group | Smoking Group | N     | %     | Ever Quit (N) | Ever Quit % | Mean Yrs Quit | Short Term (n) | Short Term % |
| 15                                           | 65-69     | Never Any     | 2684  | 48.50 |               |             |               |                |              |
| 15                                           | 65-69     | CC            | 160   | 2.89  | 0             | 0.00        |               |                |              |
| 15                                           | 65-69     | Ecig          | 591   | 10.68 |               |             |               |                |              |
| 15                                           | 65-69     | Dual          | 0     | 0.00  |               |             |               |                |              |
| 15                                           | 65-69     | Former        | 2099  | 37.93 |               |             | 19.92         | 68             | 3.24         |
| Year of Follow-up: 2005, Age Group: 70-74    |           |               |       |       |               |             |               |                |              |
| Period                                       | Age Group | Smoking Group | N     | %     | Ever Quit (N) | Ever Quit % | Mean Yrs Quit | Short Term (n) | Short Term % |
| 15                                           | 70-74     | Never Any     | 2732  | 51.90 |               |             |               |                |              |
| 15                                           | 70-74     | CC            | 139   | 2.64  | 0             | 0.00        |               |                |              |
| 15                                           | 70-74     | Ecig          | 391   | 7.43  |               |             |               |                |              |
| 15                                           | 70-74     | Dual          | 0     | 0.00  |               |             |               |                |              |
| 15                                           | 70-74     | Former        | 2002  | 38.03 |               |             | 22.67         | 69             | 3.45         |
| Year of Follow-up: 2005, Age Group: 75-79    |           |               |       |       |               |             |               |                |              |
| Period                                       | Age Group | Smoking Group | N     | %     | Ever Quit (N) | Ever Quit % | Mean Yrs Quit | Short Term (n) | Short Term % |
| 15                                           | 75-79     | Never Any     | 3078  | 55.72 |               |             |               |                |              |
| 15                                           | 75-79     | CC            | 146   | 2.64  | 0             | 0.00        |               |                |              |
| 15                                           | 75-79     | Ecig          | 297   | 5.38  |               |             |               |                |              |
| 15                                           | 75-79     | Dual          | 0     | 0.00  |               |             |               |                |              |
| 15                                           | 75-79     | Former        | 2003  | 36.26 |               |             | 22.91         | 56             | 2.80         |
| Year of Follow-up: 2010, Age Group: All Ages |           |               |       |       |               |             |               |                |              |
| Period                                       | Age Group | Smoking Group | N     | %     | Ever Quit (N) | Ever Quit % | Mean Yrs Quit | Short Term (n) | Short Term % |
| 20                                           | All Ages  | Never Any     | 43759 | 53.97 |               |             |               |                |              |
| 20                                           | All Ages  | CC            | 765   | 0.94  | 0             | 0.00        |               |                |              |
| 20                                           | All Ages  | Ecig          | 13785 | 17.00 |               |             |               |                |              |
| 20                                           | All Ages  | Dual          | 0     | 0.00  |               |             |               |                |              |
| 20                                           | All Ages  | Former        | 22772 | 28.09 |               |             | 19.42         | 1117           | 4.91         |
| Year of Follow-up: 2010, Age Group: 18-19    |           |               |       |       |               |             |               |                |              |
| Period                                       | Age Group | Smoking Group | N     | %     | Ever Quit (N) | Ever Quit % | Mean Yrs Quit | Short Term (n) | Short Term % |

**Results for PHIM for Run 10 (Sensitivity\_Analysis\_1.RTF)**

|                                           |           |               |      |       |               |             |               |                |              |
|-------------------------------------------|-----------|---------------|------|-------|---------------|-------------|---------------|----------------|--------------|
| 20                                        | 18-19     | Never Any     | 0    | .     |               |             |               |                |              |
| 20                                        | 18-19     | CC            | 0    | .     | 0             | .           |               |                |              |
| 20                                        | 18-19     | Ecig          | 0    | .     |               |             |               |                |              |
| 20                                        | 18-19     | Dual          | 0    | .     |               |             |               |                |              |
| 20                                        | 18-19     | Former        | 0    | .     |               |             | 0             | .              |              |
| Year of Follow-up: 2010, Age Group: 20-24 |           |               |      |       |               |             |               |                |              |
| Period                                    | Age Group | Smoking Group | N    | %     | Ever Quit (N) | Ever Quit % | Mean Yrs Quit | Short Term (n) | Short Term % |
| 20                                        | 20-24     | Never Any     | 0    | .     |               |             |               |                |              |
| 20                                        | 20-24     | CC            | 0    | .     | 0             | .           |               |                |              |
| 20                                        | 20-24     | Ecig          | 0    | .     |               |             |               |                |              |
| 20                                        | 20-24     | Dual          | 0    | .     |               |             |               |                |              |
| 20                                        | 20-24     | Former        | 0    | .     |               |             |               | 0              | .            |
| Year of Follow-up: 2010, Age Group: 25-29 |           |               |      |       |               |             |               |                |              |
| Period                                    | Age Group | Smoking Group | N    | %     | Ever Quit (N) | Ever Quit % | Mean Yrs Quit | Short Term (n) | Short Term % |
| 20                                        | 25-29     | Never Any     | 0    | .     |               |             |               |                |              |
| 20                                        | 25-29     | CC            | 0    | .     | 0             | .           |               |                |              |
| 20                                        | 25-29     | Ecig          | 0    | .     |               |             |               |                |              |
| 20                                        | 25-29     | Dual          | 0    | .     |               |             |               |                |              |
| 20                                        | 25-29     | Former        | 0    | .     |               |             |               | 0              | .            |
| Year of Follow-up: 2010, Age Group: 30-34 |           |               |      |       |               |             |               |                |              |
| Period                                    | Age Group | Smoking Group | N    | %     | Ever Quit (N) | Ever Quit % | Mean Yrs Quit | Short Term (n) | Short Term % |
| 20                                        | 30-34     | Never Any     | 4743 | 59.81 |               |             |               |                |              |
| 20                                        | 30-34     | CC            | 65   | 0.82  | 0             | 0.00        |               |                |              |
| 20                                        | 30-34     | Ecig          | 1881 | 23.72 |               |             |               |                |              |
| 20                                        | 30-34     | Dual          | 0    | 0.00  |               |             |               |                |              |
| 20                                        | 30-34     | Former        | 1241 | 15.65 |               |             | 9.36          | 130            | 10.48        |
| Year of Follow-up: 2010, Age Group: 35-39 |           |               |      |       |               |             |               |                |              |
| Period                                    | Age Group | Smoking Group | N    | %     | Ever Quit (N) | Ever Quit % | Mean Yrs Quit | Short Term (n) | Short Term % |
| 20                                        | 35-39     | Never Any     | 5359 | 64.18 |               |             |               |                |              |
| 20                                        | 35-39     | CC            | 58   | 0.69  | 0             | 0.00        |               |                |              |
| 20                                        | 35-39     | Ecig          | 1717 | 20.56 |               |             |               |                |              |
| 20                                        | 35-39     | Dual          | 0    | 0.00  |               |             |               |                |              |
| 20                                        | 35-39     | Former        | 1216 | 14.56 |               |             | 11.38         | 98             | 8.06         |
| Year of Follow-up: 2010, Age Group: 40-44 |           |               |      |       |               |             |               |                |              |
| Period                                    | Age Group | Smoking Group | N    | %     | Ever Quit (N) | Ever Quit % | Mean Yrs Quit | Short Term (n) | Short Term % |
| 20                                        | 40-44     | Never Any     | 5189 | 59.01 |               |             |               |                |              |
| 20                                        | 40-44     | CC            | 64   | 0.73  | 0             | 0.00        |               |                |              |
| 20                                        | 40-44     | Ecig          | 1849 | 21.03 |               |             |               |                |              |
| 20                                        | 40-44     | Dual          | 0    | 0.00  |               |             |               |                |              |
| 20                                        | 40-44     | Former        | 1691 | 19.23 |               |             | 15.34         | 112            | 6.62         |
| Year of Follow-up: 2010, Age Group: 45-49 |           |               |      |       |               |             |               |                |              |
| Period                                    | Age Group | Smoking Group | N    | %     | Ever Quit (N) | Ever Quit % | Mean Yrs Quit | Short Term (n) | Short Term % |
| 20                                        | 45-49     | Never Any     | 5284 | 52.43 |               |             |               |                |              |
| 20                                        | 45-49     | CC            | 105  | 1.04  | 0             | 0.00        |               |                |              |
| 20                                        | 45-49     | Ecig          | 2327 | 23.09 |               |             |               |                |              |
| 20                                        | 45-49     | Dual          | 0    | 0.00  |               |             |               |                |              |
| 20                                        | 45-49     | Former        | 2362 | 23.44 |               |             | 17.71         | 131            | 5.55         |
| Year of Follow-up: 2010, Age Group: 50-54 |           |               |      |       |               |             |               |                |              |
| Period                                    | Age Group | Smoking Group | N    | %     | Ever Quit (N) | Ever Quit % | Mean Yrs Quit | Short Term (n) | Short Term % |
| 20                                        | 50-54     | Never Any     | 5278 | 50.27 |               |             |               |                |              |
| 20                                        | 50-54     | CC            | 101  | 0.96  | 0             | 0.00        |               |                |              |
| 20                                        | 50-54     | Ecig          | 2101 | 20.01 |               |             |               |                |              |
| 20                                        | 50-54     | Dual          | 0    | 0.00  |               |             |               |                |              |
| 20                                        | 50-54     | Former        | 3019 | 28.76 |               |             | 18.27         | 163            | 5.40         |
| Year of Follow-up: 2010, Age Group: 55-59 |           |               |      |       |               |             |               |                |              |
| Period                                    | Age Group | Smoking Group | N    | %     | Ever Quit (N) | Ever Quit % | Mean Yrs Quit | Short Term (n) | Short Term % |
| 20                                        | 55-59     | Never Any     | 5018 | 52.27 |               |             |               |                |              |
| 20                                        | 55-59     | CC            | 91   | 0.95  | 0             | 0.00        |               |                |              |
| 20                                        | 55-59     | Ecig          | 1433 | 14.93 |               |             |               |                |              |
| 20                                        | 55-59     | Dual          | 0    | 0.00  |               |             |               |                |              |
| 20                                        | 55-59     | Former        | 3058 | 31.85 |               |             | 20.88         | 103            | 3.37         |
| Year of Follow-up: 2010, Age Group: 60-64 |           |               |      |       |               |             |               |                |              |
| Period                                    | Age Group | Smoking Group | N    | %     | Ever Quit (N) | Ever Quit % | Mean Yrs Quit | Short Term (n) | Short Term % |
| 20                                        | 60-64     | Never Any     | 4356 | 51.27 |               |             |               |                |              |
| 20                                        | 60-64     | CC            | 71   | 0.84  | 0             | 0.00        |               |                |              |
| 20                                        | 60-64     | Ecig          | 1079 | 12.70 |               |             |               |                |              |
| 20                                        | 60-64     | Dual          | 0    | 0.00  |               |             |               |                |              |
| 20                                        | 60-64     | Former        | 2991 | 35.20 |               |             | 19.94         | 144            | 4.81         |
| Year of Follow-up: 2010, Age Group: 65-69 |           |               |      |       |               |             |               |                |              |

**Results for PHIM for Run 10 (Sensitivity\_Analysis\_1.RTF)**

| Period                                       | Age Group | Smoking Group | N     | %     | Ever Quit (N) | Ever Quit % | Mean Yrs Quit | Short Term (n) | Short Term % |
|----------------------------------------------|-----------|---------------|-------|-------|---------------|-------------|---------------|----------------|--------------|
| 20                                           | 65-69     | Never Any     | 3116  | 47.67 |               |             |               |                |              |
| 20                                           | 65-69     | CC            | 47    | 0.72  | 0             | 0.00        |               |                |              |
| 20                                           | 65-69     | Ecig          | 645   | 9.87  |               |             |               |                |              |
| 20                                           | 65-69     | Dual          | 0     | 0.00  |               |             |               |                |              |
| 20                                           | 65-69     | Former        | 2728  | 41.74 |               |             | 22.72         | 95             | 3.48         |
| Year of Follow-up: 2010, Age Group: 70-74    |           |               |       |       |               |             |               |                |              |
| Period                                       | Age Group | Smoking Group | N     | %     | Ever Quit (N) | Ever Quit % | Mean Yrs Quit | Short Term (n) | Short Term % |
| 20                                           | 70-74     | Never Any     | 2684  | 48.50 |               |             |               |                |              |
| 20                                           | 70-74     | CC            | 88    | 1.59  | 0             | 0.00        |               |                |              |
| 20                                           | 70-74     | Ecig          | 477   | 8.62  |               |             |               |                |              |
| 20                                           | 70-74     | Dual          | 0     | 0.00  |               |             |               |                |              |
| 20                                           | 70-74     | Former        | 2285  | 41.29 |               |             | 23.05         | 69             | 3.02         |
| Year of Follow-up: 2010, Age Group: 75-79    |           |               |       |       |               |             |               |                |              |
| Period                                       | Age Group | Smoking Group | N     | %     | Ever Quit (N) | Ever Quit % | Mean Yrs Quit | Short Term (n) | Short Term % |
| 20                                           | 75-79     | Never Any     | 2732  | 51.90 |               |             |               |                |              |
| 20                                           | 75-79     | CC            | 75    | 1.42  | 0             | 0.00        |               |                |              |
| 20                                           | 75-79     | Ecig          | 276   | 5.24  |               |             |               |                |              |
| 20                                           | 75-79     | Dual          | 0     | 0.00  |               |             |               |                |              |
| 20                                           | 75-79     | Former        | 2181  | 41.43 |               |             | 25.56         | 72             | 3.30         |
| Year of Follow-up: 2015, Age Group: All Ages |           |               |       |       |               |             |               |                |              |
| Period                                       | Age Group | Smoking Group | N     | %     | Ever Quit (N) | Ever Quit % | Mean Yrs Quit | Short Term (n) | Short Term % |
| 25                                           | All Ages  | Never Any     | 41010 | 54.09 |               |             |               |                |              |
| 25                                           | All Ages  | CC            | 340   | 0.45  | 0             | 0.00        |               |                |              |
| 25                                           | All Ages  | Ecig          | 11438 | 15.09 |               |             |               |                |              |
| 25                                           | All Ages  | Dual          | 0     | 0.00  |               |             |               |                |              |
| 25                                           | All Ages  | Former        | 23029 | 30.37 |               |             | 21.48         | 914            | 3.97         |
| Year of Follow-up: 2015, Age Group: 18-19    |           |               |       |       |               |             |               |                |              |
| Period                                       | Age Group | Smoking Group | N     | %     | Ever Quit (N) | Ever Quit % | Mean Yrs Quit | Short Term (n) | Short Term % |
| 25                                           | 18-19     | Never Any     | 0     | .     |               |             |               |                |              |
| 25                                           | 18-19     | CC            | 0     | .     | 0             | .           |               |                |              |
| 25                                           | 18-19     | Ecig          | 0     | .     |               |             |               |                |              |
| 25                                           | 18-19     | Dual          | 0     | .     |               |             |               |                |              |
| 25                                           | 18-19     | Former        | 0     | .     |               |             | .             | 0              | .            |
| Year of Follow-up: 2015, Age Group: 20-24    |           |               |       |       |               |             |               |                |              |
| Period                                       | Age Group | Smoking Group | N     | %     | Ever Quit (N) | Ever Quit % | Mean Yrs Quit | Short Term (n) | Short Term % |
| 25                                           | 20-24     | Never Any     | 0     | .     |               |             |               |                |              |
| 25                                           | 20-24     | CC            | 0     | .     | 0             | .           |               |                |              |
| 25                                           | 20-24     | Ecig          | 0     | .     |               |             |               |                |              |
| 25                                           | 20-24     | Dual          | 0     | .     |               |             |               |                |              |
| 25                                           | 20-24     | Former        | 0     | .     |               |             | .             | 0              | .            |
| Year of Follow-up: 2015, Age Group: 25-29    |           |               |       |       |               |             |               |                |              |
| Period                                       | Age Group | Smoking Group | N     | %     | Ever Quit (N) | Ever Quit % | Mean Yrs Quit | Short Term (n) | Short Term % |
| 25                                           | 25-29     | Never Any     | 0     | .     |               |             |               |                |              |
| 25                                           | 25-29     | CC            | 0     | .     | 0             | .           |               |                |              |
| 25                                           | 25-29     | Ecig          | 0     | .     |               |             |               |                |              |
| 25                                           | 25-29     | Dual          | 0     | .     |               |             |               |                |              |
| 25                                           | 25-29     | Former        | 0     | .     |               |             | .             | 0              | .            |
| Year of Follow-up: 2015, Age Group: 30-34    |           |               |       |       |               |             |               |                |              |
| Period                                       | Age Group | Smoking Group | N     | %     | Ever Quit (N) | Ever Quit % | Mean Yrs Quit | Short Term (n) | Short Term % |
| 25                                           | 30-34     | Never Any     | 0     | .     |               |             |               |                |              |
| 25                                           | 30-34     | CC            | 0     | .     | 0             | .           |               |                |              |
| 25                                           | 30-34     | Ecig          | 0     | .     |               |             |               |                |              |
| 25                                           | 30-34     | Dual          | 0     | .     |               |             |               |                |              |
| 25                                           | 30-34     | Former        | 0     | .     |               |             | .             | 0              | .            |
| Year of Follow-up: 2015, Age Group: 35-39    |           |               |       |       |               |             |               |                |              |
| Period                                       | Age Group | Smoking Group | N     | %     | Ever Quit (N) | Ever Quit % | Mean Yrs Quit | Short Term (n) | Short Term % |
| 25                                           | 35-39     | Never Any     | 4726  | 59.60 |               |             |               |                |              |
| 25                                           | 35-39     | CC            | 20    | 0.25  | 0             | 0.00        |               |                |              |
| 25                                           | 35-39     | Ecig          | 1567  | 19.76 |               |             |               |                |              |
| 25                                           | 35-39     | Dual          | 0     | 0.00  |               |             |               |                |              |
| 25                                           | 35-39     | Former        | 1617  | 20.39 |               |             | 11.52         | 129            | 7.98         |
| Year of Follow-up: 2015, Age Group: 40-44    |           |               |       |       |               |             |               |                |              |
| Period                                       | Age Group | Smoking Group | N     | %     | Ever Quit (N) | Ever Quit % | Mean Yrs Quit | Short Term (n) | Short Term % |
| 25                                           | 40-44     | Never Any     | 5359  | 64.18 |               |             |               |                |              |
| 25                                           | 40-44     | CC            | 33    | 0.40  | 0             | 0.00        |               |                |              |
| 25                                           | 40-44     | Ecig          | 1502  | 17.99 |               |             |               |                |              |
| 25                                           | 40-44     | Dual          | 0     | 0.00  |               |             |               |                |              |

**Results for PHIM for Run 10 (Sensitivity\_Analysis\_1.RTF)**

| Year of Follow-up: 2015, Age Group: 45-49    | Period   | Age Group | Smoking Group | N     | %     | Ever Quit (N) | Ever Quit % | Mean Yrs Quit | Short Term (n) | Short Term % |
|----------------------------------------------|----------|-----------|---------------|-------|-------|---------------|-------------|---------------|----------------|--------------|
| 25                                           | 40-44    | Former    |               | 1456  | 17.44 |               |             | 14.00         | 103            | 7.07         |
| 25                                           | 45-49    | Never Any |               | 5189  | 59.01 |               |             |               |                |              |
| 25                                           | 45-49    | CC        |               | 32    | 0.36  | 0             | 0.00        |               |                |              |
| 25                                           | 45-49    | Ecig      |               | 1627  | 18.50 |               |             |               |                |              |
| 25                                           | 45-49    | Dual      |               | 0     | 0.00  |               |             |               |                |              |
| 25                                           | 45-49    | Former    |               | 1945  | 22.12 |               |             | 17.95         | 96             | 4.94         |
| Year of Follow-up: 2015, Age Group: 50-54    | Period   | Age Group | Smoking Group | N     | %     | Ever Quit (N) | Ever Quit % | Mean Yrs Quit | Short Term (n) | Short Term % |
| 25                                           | 50-54    | Never Any |               | 5284  | 52.43 |               |             |               |                |              |
| 25                                           | 50-54    | CC        |               | 45    | 0.45  | 0             | 0.00        |               |                |              |
| 25                                           | 50-54    | Ecig      |               | 2059  | 20.43 |               |             |               |                |              |
| 25                                           | 50-54    | Dual      |               | 0     | 0.00  |               |             |               |                |              |
| 25                                           | 50-54    | Former    |               | 2690  | 26.69 |               |             | 20.17         | 150            | 5.58         |
| Year of Follow-up: 2015, Age Group: 55-59    | Period   | Age Group | Smoking Group | N     | %     | Ever Quit (N) | Ever Quit % | Mean Yrs Quit | Short Term (n) | Short Term % |
| 25                                           | 55-59    | Never Any |               | 5278  | 50.27 |               |             |               |                |              |
| 25                                           | 55-59    | CC        |               | 37    | 0.35  | 0             | 0.00        |               |                |              |
| 25                                           | 55-59    | Ecig      |               | 1773  | 16.89 |               |             |               |                |              |
| 25                                           | 55-59    | Dual      |               | 0     | 0.00  |               |             |               |                |              |
| 25                                           | 55-59    | Former    |               | 3411  | 32.49 |               |             | 20.84         | 140            | 4.10         |
| Year of Follow-up: 2015, Age Group: 60-64    | Period   | Age Group | Smoking Group | N     | %     | Ever Quit (N) | Ever Quit % | Mean Yrs Quit | Short Term (n) | Short Term % |
| 25                                           | 60-64    | Never Any |               | 5018  | 52.27 |               |             |               |                |              |
| 25                                           | 60-64    | CC        |               | 42    | 0.44  | 0             | 0.00        |               |                |              |
| 25                                           | 60-64    | Ecig      |               | 1154  | 12.02 |               |             |               |                |              |
| 25                                           | 60-64    | Dual      |               | 0     | 0.00  |               |             |               |                |              |
| 25                                           | 60-64    | Former    |               | 3386  | 35.27 |               |             | 23.56         | 144            | 4.25         |
| Year of Follow-up: 2015, Age Group: 65-69    | Period   | Age Group | Smoking Group | N     | %     | Ever Quit (N) | Ever Quit % | Mean Yrs Quit | Short Term (n) | Short Term % |
| 25                                           | 65-69    | Never Any |               | 4356  | 51.27 |               |             |               |                |              |
| 25                                           | 65-69    | CC        |               | 41    | 0.48  | 0             | 0.00        |               |                |              |
| 25                                           | 65-69    | Ecig      |               | 844   | 9.93  |               |             |               |                |              |
| 25                                           | 65-69    | Dual      |               | 0     | 0.00  |               |             |               |                |              |
| 25                                           | 65-69    | Former    |               | 3256  | 38.32 |               |             | 23.12         | 70             | 2.15         |
| Year of Follow-up: 2015, Age Group: 70-74    | Period   | Age Group | Smoking Group | N     | %     | Ever Quit (N) | Ever Quit % | Mean Yrs Quit | Short Term (n) | Short Term % |
| 25                                           | 70-74    | Never Any |               | 3116  | 47.67 |               |             |               |                |              |
| 25                                           | 70-74    | CC        |               | 31    | 0.47  | 0             | 0.00        |               |                |              |
| 25                                           | 70-74    | Ecig      |               | 527   | 8.06  |               |             |               |                |              |
| 25                                           | 70-74    | Dual      |               | 0     | 0.00  |               |             |               |                |              |
| 25                                           | 70-74    | Former    |               | 2862  | 43.79 |               |             | 26.54         | 42             | 1.47         |
| Year of Follow-up: 2015, Age Group: 75-79    | Period   | Age Group | Smoking Group | N     | %     | Ever Quit (N) | Ever Quit % | Mean Yrs Quit | Short Term (n) | Short Term % |
| 25                                           | 75-79    | Never Any |               | 2684  | 48.50 |               |             |               |                |              |
| 25                                           | 75-79    | CC        |               | 59    | 1.07  | 0             | 0.00        |               |                |              |
| 25                                           | 75-79    | Ecig      |               | 385   | 6.96  |               |             |               |                |              |
| 25                                           | 75-79    | Dual      |               | 0     | 0.00  |               |             |               |                |              |
| 25                                           | 75-79    | Former    |               | 2406  | 43.48 |               |             | 26.76         | 40             | 1.66         |
| Year of Follow-up: 2020, Age Group: All Ages | Period   | Age Group | Smoking Group | N     | %     | Ever Quit (N) | Ever Quit % | Mean Yrs Quit | Short Term (n) | Short Term % |
| 30                                           | All Ages | Never Any |               | 38326 | 54.53 |               |             |               |                |              |
| 30                                           | All Ages | CC        |               | 115   | 0.16  | 0             | 0.00        |               |                |              |
| 30                                           | All Ages | Ecig      |               | 9272  | 13.19 |               |             |               |                |              |
| 30                                           | All Ages | Dual      |               | 0     | 0.00  |               |             |               |                |              |
| 30                                           | All Ages | Former    |               | 22570 | 32.11 |               |             | 23.81         | 756            | 3.35         |
| Year of Follow-up: 2020, Age Group: 18-19    | Period   | Age Group | Smoking Group | N     | %     | Ever Quit (N) | Ever Quit % | Mean Yrs Quit | Short Term (n) | Short Term % |
| 30                                           | 18-19    | Never Any |               | 0     | .     |               |             |               |                |              |
| 30                                           | 18-19    | CC        |               | 0     | .     | 0             | .           |               |                |              |
| 30                                           | 18-19    | Ecig      |               | 0     | .     |               |             |               |                |              |
| 30                                           | 18-19    | Dual      |               | 0     | .     |               |             |               |                |              |
| 30                                           | 18-19    | Former    |               | 0     | .     |               |             | .             | 0              | .            |
| Year of Follow-up: 2020, Age Group: 20-24    | Period   | Age Group | Smoking Group | N     | %     | Ever Quit (N) | Ever Quit % | Mean Yrs Quit | Short Term (n) | Short Term % |
| 30                                           | 20-24    | Never Any |               | 0     | .     |               |             |               |                |              |
| 30                                           | 20-24    | CC        |               | 0     | .     | 0             | .           |               |                |              |

**Results for PHIM for Run 10 (Sensitivity\_Analysis\_1.RTF)**

|                                           |           |               |      |       |               |             |               |                |              |
|-------------------------------------------|-----------|---------------|------|-------|---------------|-------------|---------------|----------------|--------------|
| 30                                        | 20-24     | Ecig          | 0    | .     |               |             |               |                |              |
| 30                                        | 20-24     | Dual          | 0    | .     |               |             |               |                |              |
| 30                                        | 20-24     | Former        | 0    | .     |               |             | 0             | .              |              |
| Year of Follow-up: 2020, Age Group: 25-29 |           |               |      |       |               |             |               |                |              |
| Period                                    | Age Group | Smoking Group | N    | %     | Ever Quit (N) | Ever Quit % | Mean Yrs Quit | Short Term (n) | Short Term % |
| 30                                        | 25-29     | Never Any     | 0    | .     |               |             |               |                |              |
| 30                                        | 25-29     | CC            | 0    | .     | 0             | .           |               |                |              |
| 30                                        | 25-29     | Ecig          | 0    | .     |               |             |               |                |              |
| 30                                        | 25-29     | Dual          | 0    | .     |               |             |               |                |              |
| 30                                        | 25-29     | Former        | 0    | .     |               |             |               | 0              | .            |
| Year of Follow-up: 2020, Age Group: 30-34 |           |               |      |       |               |             |               |                |              |
| Period                                    | Age Group | Smoking Group | N    | %     | Ever Quit (N) | Ever Quit % | Mean Yrs Quit | Short Term (n) | Short Term % |
| 30                                        | 30-34     | Never Any     | 0    | .     |               |             |               |                |              |
| 30                                        | 30-34     | CC            | 0    | .     | 0             | .           |               |                |              |
| 30                                        | 30-34     | Ecig          | 0    | .     |               |             |               |                |              |
| 30                                        | 30-34     | Dual          | 0    | .     |               |             |               |                |              |
| 30                                        | 30-34     | Former        | 0    | .     |               |             |               | 0              | .            |
| Year of Follow-up: 2020, Age Group: 35-39 |           |               |      |       |               |             |               |                |              |
| Period                                    | Age Group | Smoking Group | N    | %     | Ever Quit (N) | Ever Quit % | Mean Yrs Quit | Short Term (n) | Short Term % |
| 30                                        | 35-39     | Never Any     | 0    | .     |               |             |               |                |              |
| 30                                        | 35-39     | CC            | 0    | .     | 0             | .           |               |                |              |
| 30                                        | 35-39     | Ecig          | 0    | .     |               |             |               |                |              |
| 30                                        | 35-39     | Dual          | 0    | .     |               |             |               |                |              |
| 30                                        | 35-39     | Former        | 0    | .     |               |             |               | 0              | .            |
| Year of Follow-up: 2020, Age Group: 40-44 |           |               |      |       |               |             |               |                |              |
| Period                                    | Age Group | Smoking Group | N    | %     | Ever Quit (N) | Ever Quit % | Mean Yrs Quit | Short Term (n) | Short Term % |
| 30                                        | 40-44     | Never Any     | 4726 | 59.60 |               |             |               |                |              |
| 30                                        | 40-44     | CC            | 6    | 0.08  | 0             | 0.00        |               |                |              |
| 30                                        | 40-44     | Ecig          | 1345 | 16.96 |               |             |               |                |              |
| 30                                        | 40-44     | Dual          | 0    | 0.00  |               |             |               |                |              |
| 30                                        | 40-44     | Former        | 1853 | 23.37 |               |             | 14.68         | 82             | 4.43         |
| Year of Follow-up: 2020, Age Group: 45-49 |           |               |      |       |               |             |               |                |              |
| Period                                    | Age Group | Smoking Group | N    | %     | Ever Quit (N) | Ever Quit % | Mean Yrs Quit | Short Term (n) | Short Term % |
| 30                                        | 45-49     | Never Any     | 5359 | 64.18 |               |             |               |                |              |
| 30                                        | 45-49     | CC            | 13   | 0.16  | 0             | 0.00        |               |                |              |
| 30                                        | 45-49     | Ecig          | 1317 | 15.77 |               |             |               |                |              |
| 30                                        | 45-49     | Dual          | 0    | 0.00  |               |             |               |                |              |
| 30                                        | 45-49     | Former        | 1661 | 19.89 |               |             | 16.93         | 71             | 4.27         |
| Year of Follow-up: 2020, Age Group: 50-54 |           |               |      |       |               |             |               |                |              |
| Period                                    | Age Group | Smoking Group | N    | %     | Ever Quit (N) | Ever Quit % | Mean Yrs Quit | Short Term (n) | Short Term % |
| 30                                        | 50-54     | Never Any     | 5189 | 59.01 |               |             |               |                |              |
| 30                                        | 50-54     | CC            | 9    | 0.10  | 0             | 0.00        |               |                |              |
| 30                                        | 50-54     | Ecig          | 1395 | 15.86 |               |             |               |                |              |
| 30                                        | 50-54     | Dual          | 0    | 0.00  |               |             |               |                |              |
| 30                                        | 50-54     | Former        | 2200 | 25.02 |               |             | 20.50         | 121            | 5.50         |
| Year of Follow-up: 2020, Age Group: 55-59 |           |               |      |       |               |             |               |                |              |
| Period                                    | Age Group | Smoking Group | N    | %     | Ever Quit (N) | Ever Quit % | Mean Yrs Quit | Short Term (n) | Short Term % |
| 30                                        | 55-59     | Never Any     | 5284 | 52.43 |               |             |               |                |              |
| 30                                        | 55-59     | CC            | 14   | 0.14  | 0             | 0.00        |               |                |              |
| 30                                        | 55-59     | Ecig          | 1708 | 16.95 |               |             |               |                |              |
| 30                                        | 55-59     | Dual          | 0    | 0.00  |               |             |               |                |              |
| 30                                        | 55-59     | Former        | 3072 | 30.48 |               |             | 22.30         | 140            | 4.56         |
| Year of Follow-up: 2020, Age Group: 60-64 |           |               |      |       |               |             |               |                |              |
| Period                                    | Age Group | Smoking Group | N    | %     | Ever Quit (N) | Ever Quit % | Mean Yrs Quit | Short Term (n) | Short Term % |
| 30                                        | 60-64     | Never Any     | 5278 | 50.27 |               |             |               |                |              |
| 30                                        | 60-64     | CC            | 15   | 0.14  | 0             | 0.00        |               |                |              |
| 30                                        | 60-64     | Ecig          | 1428 | 13.60 |               |             |               |                |              |
| 30                                        | 60-64     | Dual          | 0    | 0.00  |               |             |               |                |              |
| 30                                        | 60-64     | Former        | 3778 | 35.98 |               |             | 23.52         | 153            | 4.05         |
| Year of Follow-up: 2020, Age Group: 65-69 |           |               |      |       |               |             |               |                |              |
| Period                                    | Age Group | Smoking Group | N    | %     | Ever Quit (N) | Ever Quit % | Mean Yrs Quit | Short Term (n) | Short Term % |
| 30                                        | 65-69     | Never Any     | 5018 | 52.27 |               |             |               |                |              |
| 30                                        | 65-69     | CC            | 18   | 0.19  | 0             | 0.00        |               |                |              |
| 30                                        | 65-69     | Ecig          | 917  | 9.55  |               |             |               |                |              |
| 30                                        | 65-69     | Dual          | 0    | 0.00  |               |             |               |                |              |
| 30                                        | 65-69     | Former        | 3647 | 37.99 |               |             | 26.68         | 75             | 2.06         |
| Year of Follow-up: 2020, Age Group: 70-74 |           |               |      |       |               |             |               |                |              |
| Period                                    | Age Group | Smoking Group | N    | %     | Ever Quit (N) | Ever Quit % | Mean Yrs Quit | Short Term (n) | Short Term % |

**Results for PHIM for Run 10 (Sensitivity\_Analysis\_1.RTF)**

|                                              |           |               |       |       |               |             |               |                |              |
|----------------------------------------------|-----------|---------------|-------|-------|---------------|-------------|---------------|----------------|--------------|
| 30                                           | 70-74     | Never Any     | 4356  | 51.27 |               |             |               |                |              |
| 30                                           | 70-74     | CC            | 22    | 0.26  | 0             | 0.00        |               |                |              |
| 30                                           | 70-74     | Ecig          | 727   | 8.56  |               |             |               |                |              |
| 30                                           | 70-74     | Dual          | 0     | 0.00  |               |             |               |                |              |
| 30                                           | 70-74     | Former        | 3392  | 39.92 |               |             | 27.06         | 66             | 1.95         |
| Year of Follow-up: 2020, Age Group: 75-79    |           |               |       |       |               |             |               |                |              |
| Period                                       | Age Group | Smoking Group | N     | %     | Ever Quit (N) | Ever Quit % | Mean Yrs Quit | Short Term (n) | Short Term % |
| 30                                           | 75-79     | Never Any     | 3116  | 47.67 |               |             |               |                |              |
| 30                                           | 75-79     | CC            | 18    | 0.28  | 0             | 0.00        |               |                |              |
| 30                                           | 75-79     | Ecig          | 435   | 6.66  |               |             |               |                |              |
| 30                                           | 75-79     | Dual          | 0     | 0.00  |               |             |               |                |              |
| 30                                           | 75-79     | Former        | 2967  | 45.39 |               |             | 30.49         | 48             | 1.62         |
| Year of Follow-up: 2025, Age Group: All Ages |           |               |       |       |               |             |               |                |              |
| Period                                       | Age Group | Smoking Group | N     | %     | Ever Quit (N) | Ever Quit % | Mean Yrs Quit | Short Term (n) | Short Term % |
| 35                                           | All Ages  | Never Any     | 35210 | 55.23 |               |             |               |                |              |
| 35                                           | All Ages  | CC            | 47    | 0.07  | 0             | 0.00        |               |                |              |
| 35                                           | All Ages  | Ecig          | 7305  | 11.46 |               |             |               |                |              |
| 35                                           | All Ages  | Dual          | 0     | 0.00  |               |             |               |                |              |
| 35                                           | All Ages  | Former        | 21185 | 33.23 |               |             | 25.87         | 616            | 2.91         |
| Year of Follow-up: 2025, Age Group: 18-19    |           |               |       |       |               |             |               |                |              |
| Period                                       | Age Group | Smoking Group | N     | %     | Ever Quit (N) | Ever Quit % | Mean Yrs Quit | Short Term (n) | Short Term % |
| 35                                           | 18-19     | Never Any     | 0     | .     |               |             |               |                |              |
| 35                                           | 18-19     | CC            | 0     | .     | 0             | .           |               |                |              |
| 35                                           | 18-19     | Ecig          | 0     | .     |               |             |               |                |              |
| 35                                           | 18-19     | Dual          | 0     | .     |               |             |               |                |              |
| 35                                           | 18-19     | Former        | 0     | .     |               |             | .             | 0              | .            |
| Year of Follow-up: 2025, Age Group: 20-24    |           |               |       |       |               |             |               |                |              |
| Period                                       | Age Group | Smoking Group | N     | %     | Ever Quit (N) | Ever Quit % | Mean Yrs Quit | Short Term (n) | Short Term % |
| 35                                           | 20-24     | Never Any     | 0     | .     |               |             |               |                |              |
| 35                                           | 20-24     | CC            | 0     | .     | 0             | .           |               |                |              |
| 35                                           | 20-24     | Ecig          | 0     | .     |               |             |               |                |              |
| 35                                           | 20-24     | Dual          | 0     | .     |               |             |               |                |              |
| 35                                           | 20-24     | Former        | 0     | .     |               |             | .             | 0              | .            |
| Year of Follow-up: 2025, Age Group: 25-29    |           |               |       |       |               |             |               |                |              |
| Period                                       | Age Group | Smoking Group | N     | %     | Ever Quit (N) | Ever Quit % | Mean Yrs Quit | Short Term (n) | Short Term % |
| 35                                           | 25-29     | Never Any     | 0     | .     |               |             |               |                |              |
| 35                                           | 25-29     | CC            | 0     | .     | 0             | .           |               |                |              |
| 35                                           | 25-29     | Ecig          | 0     | .     |               |             |               |                |              |
| 35                                           | 25-29     | Dual          | 0     | .     |               |             |               |                |              |
| 35                                           | 25-29     | Former        | 0     | .     |               |             | .             | 0              | .            |
| Year of Follow-up: 2025, Age Group: 30-34    |           |               |       |       |               |             |               |                |              |
| Period                                       | Age Group | Smoking Group | N     | %     | Ever Quit (N) | Ever Quit % | Mean Yrs Quit | Short Term (n) | Short Term % |
| 35                                           | 30-34     | Never Any     | 0     | .     |               |             |               |                |              |
| 35                                           | 30-34     | CC            | 0     | .     | 0             | .           |               |                |              |
| 35                                           | 30-34     | Ecig          | 0     | .     |               |             |               |                |              |
| 35                                           | 30-34     | Dual          | 0     | .     |               |             |               |                |              |
| 35                                           | 30-34     | Former        | 0     | .     |               |             | .             | 0              | .            |
| Year of Follow-up: 2025, Age Group: 35-39    |           |               |       |       |               |             |               |                |              |
| Period                                       | Age Group | Smoking Group | N     | %     | Ever Quit (N) | Ever Quit % | Mean Yrs Quit | Short Term (n) | Short Term % |
| 35                                           | 35-39     | Never Any     | 0     | .     |               |             |               |                |              |
| 35                                           | 35-39     | CC            | 0     | .     | 0             | .           |               |                |              |
| 35                                           | 35-39     | Ecig          | 0     | .     |               |             |               |                |              |
| 35                                           | 35-39     | Dual          | 0     | .     |               |             |               |                |              |
| 35                                           | 35-39     | Former        | 0     | .     |               |             | .             | 0              | .            |
| Year of Follow-up: 2025, Age Group: 40-44    |           |               |       |       |               |             |               |                |              |
| Period                                       | Age Group | Smoking Group | N     | %     | Ever Quit (N) | Ever Quit % | Mean Yrs Quit | Short Term (n) | Short Term % |
| 35                                           | 40-44     | Never Any     | 0     | .     |               |             |               |                |              |
| 35                                           | 40-44     | CC            | 0     | .     | 0             | .           |               |                |              |
| 35                                           | 40-44     | Ecig          | 0     | .     |               |             |               |                |              |
| 35                                           | 40-44     | Dual          | 0     | .     |               |             |               |                |              |
| 35                                           | 40-44     | Former        | 0     | .     |               |             | .             | 0              | .            |
| Year of Follow-up: 2025, Age Group: 45-49    |           |               |       |       |               |             |               |                |              |
| Period                                       | Age Group | Smoking Group | N     | %     | Ever Quit (N) | Ever Quit % | Mean Yrs Quit | Short Term (n) | Short Term % |
| 35                                           | 45-49     | Never Any     | 4726  | 59.60 |               |             |               |                |              |
| 35                                           | 45-49     | CC            | 1     | 0.01  | 0             | 0.00        |               |                |              |
| 35                                           | 45-49     | Ecig          | 1146  | 14.45 |               |             |               |                |              |
| 35                                           | 45-49     | Dual          | 0     | 0.00  |               |             |               |                |              |
| 35                                           | 45-49     | Former        | 2057  | 25.94 |               |             | 17.95         | 74             | 3.60         |
| Year of Follow-up: 2025, Age Group: 50-54    |           |               |       |       |               |             |               |                |              |

**Results for PHIM for Run 10 (Sensitivity\_Analysis\_1.RTF)**

| Period                                       | Age Group | Smoking Group | N     | %     | Ever Quit (N) | Ever Quit % | Mean Yrs Quit | Short Term (n) | Short Term % |
|----------------------------------------------|-----------|---------------|-------|-------|---------------|-------------|---------------|----------------|--------------|
| 35                                           | 50-54     | Never Any     | 5359  | 64.18 |               |             |               |                |              |
| 35                                           | 50-54     | CC            | 3     | 0.04  | 0             | 0.00        |               |                |              |
| 35                                           | 50-54     | Ecig          | 1112  | 13.32 |               |             |               |                |              |
| 35                                           | 50-54     | Dual          | 0     | 0.00  |               |             |               |                |              |
| 35                                           | 50-54     | Former        | 1876  | 22.47 |               |             | 19.62         | 104            | 5.54         |
| Year of Follow-up: 2025, Age Group: 55-59    |           |               |       |       |               |             |               |                |              |
| Period                                       | Age Group | Smoking Group | N     | %     | Ever Quit (N) | Ever Quit % | Mean Yrs Quit | Short Term (n) | Short Term % |
| 35                                           | 55-59     | Never Any     | 5189  | 59.01 |               |             |               |                |              |
| 35                                           | 55-59     | CC            | 4     | 0.05  | 0             | 0.00        |               |                |              |
| 35                                           | 55-59     | Ecig          | 1153  | 13.11 |               |             |               |                |              |
| 35                                           | 55-59     | Dual          | 0     | 0.00  |               |             |               |                |              |
| 35                                           | 55-59     | Former        | 2447  | 27.83 |               |             | 23.13         | 98             | 4.00         |
| Year of Follow-up: 2025, Age Group: 60-64    |           |               |       |       |               |             |               |                |              |
| Period                                       | Age Group | Smoking Group | N     | %     | Ever Quit (N) | Ever Quit % | Mean Yrs Quit | Short Term (n) | Short Term % |
| 35                                           | 60-64     | Never Any     | 5284  | 52.43 |               |             |               |                |              |
| 35                                           | 60-64     | CC            | 7     | 0.07  | 0             | 0.00        |               |                |              |
| 35                                           | 60-64     | Ecig          | 1378  | 13.67 |               |             |               |                |              |
| 35                                           | 60-64     | Dual          | 0     | 0.00  |               |             |               |                |              |
| 35                                           | 60-64     | Former        | 3409  | 33.83 |               |             | 24.79         | 139            | 4.08         |
| Year of Follow-up: 2025, Age Group: 65-69    |           |               |       |       |               |             |               |                |              |
| Period                                       | Age Group | Smoking Group | N     | %     | Ever Quit (N) | Ever Quit % | Mean Yrs Quit | Short Term (n) | Short Term % |
| 35                                           | 65-69     | Never Any     | 5278  | 50.27 |               |             |               |                |              |
| 35                                           | 65-69     | CC            | 7     | 0.07  | 0             | 0.00        |               |                |              |
| 35                                           | 65-69     | Ecig          | 1139  | 10.85 |               |             |               |                |              |
| 35                                           | 65-69     | Dual          | 0     | 0.00  |               |             |               |                |              |
| 35                                           | 65-69     | Former        | 4075  | 38.81 |               |             | 26.61         | 83             | 2.04         |
| Year of Follow-up: 2025, Age Group: 70-74    |           |               |       |       |               |             |               |                |              |
| Period                                       | Age Group | Smoking Group | N     | %     | Ever Quit (N) | Ever Quit % | Mean Yrs Quit | Short Term (n) | Short Term % |
| 35                                           | 70-74     | Never Any     | 5018  | 52.27 |               |             |               |                |              |
| 35                                           | 70-74     | CC            | 11    | 0.11  | 0             | 0.00        |               |                |              |
| 35                                           | 70-74     | Ecig          | 789   | 8.22  |               |             |               |                |              |
| 35                                           | 70-74     | Dual          | 0     | 0.00  |               |             |               |                |              |
| 35                                           | 70-74     | Former        | 3782  | 39.40 |               |             | 30.61         | 65             | 1.72         |
| Year of Follow-up: 2025, Age Group: 75-79    |           |               |       |       |               |             |               |                |              |
| Period                                       | Age Group | Smoking Group | N     | %     | Ever Quit (N) | Ever Quit % | Mean Yrs Quit | Short Term (n) | Short Term % |
| 35                                           | 75-79     | Never Any     | 4356  | 51.27 |               |             |               |                |              |
| 35                                           | 75-79     | CC            | 14    | 0.16  | 0             | 0.00        |               |                |              |
| 35                                           | 75-79     | Ecig          | 588   | 6.92  |               |             |               |                |              |
| 35                                           | 75-79     | Dual          | 0     | 0.00  |               |             |               |                |              |
| 35                                           | 75-79     | Former        | 3539  | 41.65 |               |             | 30.81         | 53             | 1.50         |
| Year of Follow-up: 2030, Age Group: All Ages |           |               |       |       |               |             |               |                |              |
| Period                                       | Age Group | Smoking Group | N     | %     | Ever Quit (N) | Ever Quit % | Mean Yrs Quit | Short Term (n) | Short Term % |
| 40                                           | All Ages  | Never Any     | 30854 | 55.84 |               |             |               |                |              |
| 40                                           | All Ages  | CC            | 14    | 0.03  | 0             | 0.00        |               |                |              |
| 40                                           | All Ages  | Ecig          | 5391  | 9.76  |               |             |               |                |              |
| 40                                           | All Ages  | Dual          | 0     | 0.00  |               |             |               |                |              |
| 40                                           | All Ages  | Former        | 18991 | 34.37 |               |             | 27.90         | 543            | 2.86         |
| Year of Follow-up: 2030, Age Group: 18-19    |           |               |       |       |               |             |               |                |              |
| Period                                       | Age Group | Smoking Group | N     | %     | Ever Quit (N) | Ever Quit % | Mean Yrs Quit | Short Term (n) | Short Term % |
| 40                                           | 18-19     | Never Any     | 0     | .     |               |             |               |                |              |
| 40                                           | 18-19     | CC            | 0     | .     | 0             | .           |               |                |              |
| 40                                           | 18-19     | Ecig          | 0     | .     |               |             |               |                |              |
| 40                                           | 18-19     | Dual          | 0     | .     |               |             |               |                |              |
| 40                                           | 18-19     | Former        | 0     | .     |               |             | .             | 0              | .            |
| Year of Follow-up: 2030, Age Group: 20-24    |           |               |       |       |               |             |               |                |              |
| Period                                       | Age Group | Smoking Group | N     | %     | Ever Quit (N) | Ever Quit % | Mean Yrs Quit | Short Term (n) | Short Term % |
| 40                                           | 20-24     | Never Any     | 0     | .     |               |             |               |                |              |
| 40                                           | 20-24     | CC            | 0     | .     | 0             | .           |               |                |              |
| 40                                           | 20-24     | Ecig          | 0     | .     |               |             |               |                |              |
| 40                                           | 20-24     | Dual          | 0     | .     |               |             |               |                |              |
| 40                                           | 20-24     | Former        | 0     | .     |               |             | .             | 0              | .            |
| Year of Follow-up: 2030, Age Group: 25-29    |           |               |       |       |               |             |               |                |              |
| Period                                       | Age Group | Smoking Group | N     | %     | Ever Quit (N) | Ever Quit % | Mean Yrs Quit | Short Term (n) | Short Term % |
| 40                                           | 25-29     | Never Any     | 0     | .     |               |             |               |                |              |
| 40                                           | 25-29     | CC            | 0     | .     | 0             | .           |               |                |              |
| 40                                           | 25-29     | Ecig          | 0     | .     |               |             |               |                |              |
| 40                                           | 25-29     | Dual          | 0     | .     |               |             |               |                |              |



**Results for PHIM for Run 10 (Sensitivity\_Analysis\_1.RTF)**

| Year of Follow-up: 2030, Age Group: 30-34 | Period | Age Group | Smoking Group | N    | %     | Ever Quit (N) | Ever Quit % | Mean Yrs Quit | Short Term (n) | Short Term % |
|-------------------------------------------|--------|-----------|---------------|------|-------|---------------|-------------|---------------|----------------|--------------|
| Year of Follow-up: 2030, Age Group: 30-34 |        |           |               |      |       |               |             |               |                |              |
| 40                                        | 25-29  | Former    |               | 0    | .     |               |             |               | 0              | .            |
| 40                                        | 30-34  | Never Any |               | 0    | .     |               |             |               |                |              |
| 40                                        | 30-34  | CC        |               | 0    | .     | 0             | .           |               |                |              |
| 40                                        | 30-34  | Ecig      |               | 0    | .     |               |             |               |                |              |
| 40                                        | 30-34  | Dual      |               | 0    | .     |               |             |               |                |              |
| 40                                        | 30-34  | Former    |               | 0    | .     |               |             |               | 0              | .            |
| Year of Follow-up: 2030, Age Group: 35-39 |        |           |               |      |       |               |             |               |                |              |
| 40                                        | 35-39  | Never Any |               | 0    | .     |               |             |               |                |              |
| 40                                        | 35-39  | CC        |               | 0    | .     | 0             | .           |               |                |              |
| 40                                        | 35-39  | Ecig      |               | 0    | .     |               |             |               |                |              |
| 40                                        | 35-39  | Dual      |               | 0    | .     |               |             |               |                |              |
| 40                                        | 35-39  | Former    |               | 0    | .     |               |             |               | 0              | .            |
| Year of Follow-up: 2030, Age Group: 40-44 |        |           |               |      |       |               |             |               |                |              |
| 40                                        | 40-44  | Never Any |               | 0    | .     |               |             |               |                |              |
| 40                                        | 40-44  | CC        |               | 0    | .     | 0             | .           |               |                |              |
| 40                                        | 40-44  | Ecig      |               | 0    | .     |               |             |               |                |              |
| 40                                        | 40-44  | Dual      |               | 0    | .     |               |             |               |                |              |
| 40                                        | 40-44  | Former    |               | 0    | .     |               |             |               | 0              | .            |
| Year of Follow-up: 2030, Age Group: 45-49 |        |           |               |      |       |               |             |               |                |              |
| 40                                        | 45-49  | Never Any |               | 0    | .     |               |             |               |                |              |
| 40                                        | 45-49  | CC        |               | 0    | .     | 0             | .           |               |                |              |
| 40                                        | 45-49  | Ecig      |               | 0    | .     |               |             |               |                |              |
| 40                                        | 45-49  | Dual      |               | 0    | .     |               |             |               |                |              |
| 40                                        | 45-49  | Former    |               | 0    | .     |               |             |               | 0              | .            |
| Year of Follow-up: 2030, Age Group: 50-54 |        |           |               |      |       |               |             |               |                |              |
| 40                                        | 50-54  | Never Any |               | 4726 | 59.60 |               |             |               |                |              |
| 40                                        | 50-54  | CC        |               | 0    | 0.00  | 0             | 0.00        |               |                |              |
| 40                                        | 50-54  | Ecig      |               | 959  | 12.09 |               |             |               |                |              |
| 40                                        | 50-54  | Dual      |               | 0    | 0.00  |               |             |               |                |              |
| 40                                        | 50-54  | Former    |               | 2245 | 28.31 |               |             | 21.16         | 100            | 4.45         |
| Year of Follow-up: 2030, Age Group: 55-59 |        |           |               |      |       |               |             |               |                |              |
| 40                                        | 55-59  | Never Any |               | 5359 | 64.18 |               |             |               |                |              |
| 40                                        | 55-59  | CC        |               | 0    | 0.00  | 0             | 0.00        |               |                |              |
| 40                                        | 55-59  | Ecig      |               | 897  | 10.74 |               |             |               |                |              |
| 40                                        | 55-59  | Dual      |               | 0    | 0.00  |               |             |               |                |              |
| 40                                        | 55-59  | Former    |               | 2094 | 25.08 |               |             | 22.27         | 80             | 3.82         |
| Year of Follow-up: 2030, Age Group: 60-64 |        |           |               |      |       |               |             |               |                |              |
| 40                                        | 60-64  | Never Any |               | 5189 | 59.01 |               |             |               |                |              |
| 40                                        | 60-64  | CC        |               | 3    | 0.03  | 0             | 0.00        |               |                |              |
| 40                                        | 60-64  | Ecig      |               | 886  | 10.08 |               |             |               |                |              |
| 40                                        | 60-64  | Dual      |               | 0    | 0.00  |               |             |               |                |              |
| 40                                        | 60-64  | Former    |               | 2715 | 30.88 |               |             | 25.52         | 128            | 4.71         |
| Year of Follow-up: 2030, Age Group: 65-69 |        |           |               |      |       |               |             |               |                |              |
| 40                                        | 65-69  | Never Any |               | 5284 | 52.43 |               |             |               |                |              |
| 40                                        | 65-69  | CC        |               | 3    | 0.03  | 0             | 0.00        |               |                |              |
| 40                                        | 65-69  | Ecig      |               | 1080 | 10.72 |               |             |               |                |              |
| 40                                        | 65-69  | Dual      |               | 0    | 0.00  |               |             |               |                |              |
| 40                                        | 65-69  | Former    |               | 3711 | 36.82 |               |             | 27.57         | 73             | 1.97         |
| Year of Follow-up: 2030, Age Group: 70-74 |        |           |               |      |       |               |             |               |                |              |
| 40                                        | 70-74  | Never Any |               | 5278 | 50.27 |               |             |               |                |              |
| 40                                        | 70-74  | CC        |               | 4    | 0.04  | 0             | 0.00        |               |                |              |
| 40                                        | 70-74  | Ecig      |               | 957  | 9.12  |               |             |               |                |              |
| 40                                        | 70-74  | Dual      |               | 0    | 0.00  |               |             |               |                |              |
| 40                                        | 70-74  | Former    |               | 4260 | 40.58 |               |             | 30.32         | 86             | 2.02         |
| Year of Follow-up: 2030, Age Group: 75-79 |        |           |               |      |       |               |             |               |                |              |
| 40                                        | 75-79  | Never Any |               | 5018 | 52.27 |               |             |               |                |              |
| 40                                        | 75-79  | CC        |               | 4    | 0.04  | 0             | 0.00        |               |                |              |

**Results for PHIM for Run 10 (Sensitivity\_Analysis\_1.RTF)**

|                                              |           |               |       |       |               |             |               |                |              |
|----------------------------------------------|-----------|---------------|-------|-------|---------------|-------------|---------------|----------------|--------------|
| 40                                           | 75-79     | Ecig          | 612   | 6.38  |               |             |               |                |              |
| 40                                           | 75-79     | Dual          | 0     | 0.00  |               |             |               |                |              |
| 40                                           | 75-79     | Former        | 3966  | 41.31 |               |             | 34.05         | 76             | 1.92         |
| Year of Follow-up: 2035, Age Group: All Ages |           |               |       |       |               |             |               |                |              |
| Period                                       | Age Group | Smoking Group | N     | %     | Ever Quit (N) | Ever Quit % | Mean Yrs Quit | Short Term (n) | Short Term % |
| 45                                           | All Ages  | Never Any     | 25836 | 56.60 |               |             |               |                |              |
| 45                                           | All Ages  | CC            | 5     | 0.01  | 0             | 0.00        |               |                |              |
| 45                                           | All Ages  | Ecig          | 3886  | 8.51  |               |             |               |                |              |
| 45                                           | All Ages  | Dual          | 0     | 0.00  |               |             |               |                |              |
| 45                                           | All Ages  | Former        | 15923 | 34.88 |               |             | 29.63         | 351            | 2.20         |
| Year of Follow-up: 2035, Age Group: 18-19    |           |               |       |       |               |             |               |                |              |
| Period                                       | Age Group | Smoking Group | N     | %     | Ever Quit (N) | Ever Quit % | Mean Yrs Quit | Short Term (n) | Short Term % |
| 45                                           | 18-19     | Never Any     | 0     | .     |               |             |               |                |              |
| 45                                           | 18-19     | CC            | 0     | .     | 0             | .           |               |                |              |
| 45                                           | 18-19     | Ecig          | 0     | .     |               |             |               |                |              |
| 45                                           | 18-19     | Dual          | 0     | .     |               |             |               |                |              |
| 45                                           | 18-19     | Former        | 0     | .     |               |             |               | 0              | .            |
| Year of Follow-up: 2035, Age Group: 20-24    |           |               |       |       |               |             |               |                |              |
| Period                                       | Age Group | Smoking Group | N     | %     | Ever Quit (N) | Ever Quit % | Mean Yrs Quit | Short Term (n) | Short Term % |
| 45                                           | 20-24     | Never Any     | 0     | .     |               |             |               |                |              |
| 45                                           | 20-24     | CC            | 0     | .     | 0             | .           |               |                |              |
| 45                                           | 20-24     | Ecig          | 0     | .     |               |             |               |                |              |
| 45                                           | 20-24     | Dual          | 0     | .     |               |             |               |                |              |
| 45                                           | 20-24     | Former        | 0     | .     |               |             |               | 0              | .            |
| Year of Follow-up: 2035, Age Group: 25-29    |           |               |       |       |               |             |               |                |              |
| Period                                       | Age Group | Smoking Group | N     | %     | Ever Quit (N) | Ever Quit % | Mean Yrs Quit | Short Term (n) | Short Term % |
| 45                                           | 25-29     | Never Any     | 0     | .     |               |             |               |                |              |
| 45                                           | 25-29     | CC            | 0     | .     | 0             | .           |               |                |              |
| 45                                           | 25-29     | Ecig          | 0     | .     |               |             |               |                |              |
| 45                                           | 25-29     | Dual          | 0     | .     |               |             |               |                |              |
| 45                                           | 25-29     | Former        | 0     | .     |               |             |               | 0              | .            |
| Year of Follow-up: 2035, Age Group: 30-34    |           |               |       |       |               |             |               |                |              |
| Period                                       | Age Group | Smoking Group | N     | %     | Ever Quit (N) | Ever Quit % | Mean Yrs Quit | Short Term (n) | Short Term % |
| 45                                           | 30-34     | Never Any     | 0     | .     |               |             |               |                |              |
| 45                                           | 30-34     | CC            | 0     | .     | 0             | .           |               |                |              |
| 45                                           | 30-34     | Ecig          | 0     | .     |               |             |               |                |              |
| 45                                           | 30-34     | Dual          | 0     | .     |               |             |               |                |              |
| 45                                           | 30-34     | Former        | 0     | .     |               |             |               | 0              | .            |
| Year of Follow-up: 2035, Age Group: 35-39    |           |               |       |       |               |             |               |                |              |
| Period                                       | Age Group | Smoking Group | N     | %     | Ever Quit (N) | Ever Quit % | Mean Yrs Quit | Short Term (n) | Short Term % |
| 45                                           | 35-39     | Never Any     | 0     | .     |               |             |               |                |              |
| 45                                           | 35-39     | CC            | 0     | .     | 0             | .           |               |                |              |
| 45                                           | 35-39     | Ecig          | 0     | .     |               |             |               |                |              |
| 45                                           | 35-39     | Dual          | 0     | .     |               |             |               |                |              |
| 45                                           | 35-39     | Former        | 0     | .     |               |             |               | 0              | .            |
| Year of Follow-up: 2035, Age Group: 40-44    |           |               |       |       |               |             |               |                |              |
| Period                                       | Age Group | Smoking Group | N     | %     | Ever Quit (N) | Ever Quit % | Mean Yrs Quit | Short Term (n) | Short Term % |
| 45                                           | 40-44     | Never Any     | 0     | .     |               |             |               |                |              |
| 45                                           | 40-44     | CC            | 0     | .     | 0             | .           |               |                |              |
| 45                                           | 40-44     | Ecig          | 0     | .     |               |             |               |                |              |
| 45                                           | 40-44     | Dual          | 0     | .     |               |             |               |                |              |
| 45                                           | 40-44     | Former        | 0     | .     |               |             |               | 0              | .            |
| Year of Follow-up: 2035, Age Group: 45-49    |           |               |       |       |               |             |               |                |              |
| Period                                       | Age Group | Smoking Group | N     | %     | Ever Quit (N) | Ever Quit % | Mean Yrs Quit | Short Term (n) | Short Term % |
| 45                                           | 45-49     | Never Any     | 0     | .     |               |             |               |                |              |
| 45                                           | 45-49     | CC            | 0     | .     | 0             | .           |               |                |              |
| 45                                           | 45-49     | Ecig          | 0     | .     |               |             |               |                |              |
| 45                                           | 45-49     | Dual          | 0     | .     |               |             |               |                |              |
| 45                                           | 45-49     | Former        | 0     | .     |               |             |               | 0              | .            |
| Year of Follow-up: 2035, Age Group: 50-54    |           |               |       |       |               |             |               |                |              |
| Period                                       | Age Group | Smoking Group | N     | %     | Ever Quit (N) | Ever Quit % | Mean Yrs Quit | Short Term (n) | Short Term % |
| 45                                           | 50-54     | Never Any     | 0     | .     |               |             |               |                |              |
| 45                                           | 50-54     | CC            | 0     | .     | 0             | .           |               |                |              |
| 45                                           | 50-54     | Ecig          | 0     | .     |               |             |               |                |              |
| 45                                           | 50-54     | Dual          | 0     | .     |               |             |               |                |              |
| 45                                           | 50-54     | Former        | 0     | .     |               |             |               | 0              | .            |
| Year of Follow-up: 2035, Age Group: 55-59    |           |               |       |       |               |             |               |                |              |
| Period                                       | Age Group | Smoking Group | N     | %     | Ever Quit (N) | Ever Quit % | Mean Yrs Quit | Short Term (n) | Short Term % |

**Results for PHIM for Run 10 (Sensitivity\_Analysis\_1.RTF)**

|                                              |           |               |       |       |               |             |               |                |              |
|----------------------------------------------|-----------|---------------|-------|-------|---------------|-------------|---------------|----------------|--------------|
| 45                                           | 55-59     | Never Any     | 4726  | 59.60 |               |             |               |                |              |
| 45                                           | 55-59     | CC            | 0     | 0.00  | 0             | 0.00        |               |                |              |
| 45                                           | 55-59     | Ecig          | 792   | 9.99  |               |             |               |                |              |
| 45                                           | 55-59     | Dual          | 0     | 0.00  |               |             |               |                |              |
| 45                                           | 55-59     | Former        | 2412  | 30.42 |               |             | 24.49         | 64             | 2.65         |
| Year of Follow-up: 2035, Age Group: 60-64    |           |               |       |       |               |             |               |                |              |
| Period                                       | Age Group | Smoking Group | N     | %     | Ever Quit (N) | Ever Quit % | Mean Yrs Quit | Short Term (n) | Short Term % |
| 45                                           | 60-64     | Never Any     | 5359  | 64.18 |               |             |               |                |              |
| 45                                           | 60-64     | CC            | 0     | 0.00  | 0             | 0.00        |               |                |              |
| 45                                           | 60-64     | Ecig          | 719   | 8.61  |               |             |               |                |              |
| 45                                           | 60-64     | Dual          | 0     | 0.00  |               |             |               |                |              |
| 45                                           | 60-64     | Former        | 2272  | 27.21 |               |             | 25.28         | 77             | 3.39         |
| Year of Follow-up: 2035, Age Group: 65-69    |           |               |       |       |               |             |               |                |              |
| Period                                       | Age Group | Smoking Group | N     | %     | Ever Quit (N) | Ever Quit % | Mean Yrs Quit | Short Term (n) | Short Term % |
| 45                                           | 65-69     | Never Any     | 5189  | 59.01 |               |             |               |                |              |
| 45                                           | 65-69     | CC            | 3     | 0.03  | 0             | 0.00        |               |                |              |
| 45                                           | 65-69     | Ecig          | 694   | 7.89  |               |             |               |                |              |
| 45                                           | 65-69     | Dual          | 0     | 0.00  |               |             |               |                |              |
| 45                                           | 65-69     | Former        | 2907  | 33.06 |               |             | 28.66         | 55             | 1.89         |
| Year of Follow-up: 2035, Age Group: 70-74    |           |               |       |       |               |             |               |                |              |
| Period                                       | Age Group | Smoking Group | N     | %     | Ever Quit (N) | Ever Quit % | Mean Yrs Quit | Short Term (n) | Short Term % |
| 45                                           | 70-74     | Never Any     | 5284  | 52.43 |               |             |               |                |              |
| 45                                           | 70-74     | CC            | 1     | 0.01  | 0             | 0.00        |               |                |              |
| 45                                           | 70-74     | Ecig          | 934   | 9.27  |               |             |               |                |              |
| 45                                           | 70-74     | Dual          | 0     | 0.00  |               |             |               |                |              |
| 45                                           | 70-74     | Former        | 3859  | 38.29 |               |             | 31.38         | 76             | 1.97         |
| Year of Follow-up: 2035, Age Group: 75-79    |           |               |       |       |               |             |               |                |              |
| Period                                       | Age Group | Smoking Group | N     | %     | Ever Quit (N) | Ever Quit % | Mean Yrs Quit | Short Term (n) | Short Term % |
| 45                                           | 75-79     | Never Any     | 5278  | 50.27 |               |             |               |                |              |
| 45                                           | 75-79     | CC            | 1     | 0.01  | 0             | 0.00        |               |                |              |
| 45                                           | 75-79     | Ecig          | 747   | 7.11  |               |             |               |                |              |
| 45                                           | 75-79     | Dual          | 0     | 0.00  |               |             |               |                |              |
| 45                                           | 75-79     | Former        | 4473  | 42.60 |               |             | 33.73         | 79             | 1.77         |
| Year of Follow-up: 2040, Age Group: All Ages |           |               |       |       |               |             |               |                |              |
| Period                                       | Age Group | Smoking Group | N     | %     | Ever Quit (N) | Ever Quit % | Mean Yrs Quit | Short Term (n) | Short Term % |
| 50                                           | All Ages  | Never Any     | 20558 | 58.48 |               |             |               |                |              |
| 50                                           | All Ages  | CC            | 4     | 0.01  | 0             | 0.00        |               |                |              |
| 50                                           | All Ages  | Ecig          | 2497  | 7.10  |               |             |               |                |              |
| 50                                           | All Ages  | Dual          | 0     | 0.00  |               |             |               |                |              |
| 50                                           | All Ages  | Former        | 12092 | 34.40 |               |             | 31.39         | 238            | 1.97         |
| Year of Follow-up: 2040, Age Group: 18-19    |           |               |       |       |               |             |               |                |              |
| Period                                       | Age Group | Smoking Group | N     | %     | Ever Quit (N) | Ever Quit % | Mean Yrs Quit | Short Term (n) | Short Term % |
| 50                                           | 18-19     | Never Any     | 0     | .     |               |             |               |                |              |
| 50                                           | 18-19     | CC            | 0     | .     | 0             | .           |               |                |              |
| 50                                           | 18-19     | Ecig          | 0     | .     |               |             |               |                |              |
| 50                                           | 18-19     | Dual          | 0     | .     |               |             |               |                |              |
| 50                                           | 18-19     | Former        | 0     | .     |               |             | .             | 0              | .            |
| Year of Follow-up: 2040, Age Group: 20-24    |           |               |       |       |               |             |               |                |              |
| Period                                       | Age Group | Smoking Group | N     | %     | Ever Quit (N) | Ever Quit % | Mean Yrs Quit | Short Term (n) | Short Term % |
| 50                                           | 20-24     | Never Any     | 0     | .     |               |             |               |                |              |
| 50                                           | 20-24     | CC            | 0     | .     | 0             | .           |               |                |              |
| 50                                           | 20-24     | Ecig          | 0     | .     |               |             |               |                |              |
| 50                                           | 20-24     | Dual          | 0     | .     |               |             |               |                |              |
| 50                                           | 20-24     | Former        | 0     | .     |               |             | .             | 0              | .            |
| Year of Follow-up: 2040, Age Group: 25-29    |           |               |       |       |               |             |               |                |              |
| Period                                       | Age Group | Smoking Group | N     | %     | Ever Quit (N) | Ever Quit % | Mean Yrs Quit | Short Term (n) | Short Term % |
| 50                                           | 25-29     | Never Any     | 0     | .     |               |             |               |                |              |
| 50                                           | 25-29     | CC            | 0     | .     | 0             | .           |               |                |              |
| 50                                           | 25-29     | Ecig          | 0     | .     |               |             |               |                |              |
| 50                                           | 25-29     | Dual          | 0     | .     |               |             |               |                |              |
| 50                                           | 25-29     | Former        | 0     | .     |               |             | .             | 0              | .            |
| Year of Follow-up: 2040, Age Group: 30-34    |           |               |       |       |               |             |               |                |              |
| Period                                       | Age Group | Smoking Group | N     | %     | Ever Quit (N) | Ever Quit % | Mean Yrs Quit | Short Term (n) | Short Term % |
| 50                                           | 30-34     | Never Any     | 0     | .     |               |             |               |                |              |
| 50                                           | 30-34     | CC            | 0     | .     | 0             | .           |               |                |              |
| 50                                           | 30-34     | Ecig          | 0     | .     |               |             |               |                |              |
| 50                                           | 30-34     | Dual          | 0     | .     |               |             |               |                |              |
| 50                                           | 30-34     | Former        | 0     | .     |               |             | .             | 0              | .            |
| Year of Follow-up: 2040, Age Group: 35-39    |           |               |       |       |               |             |               |                |              |

**Results for PHIM for Run 10 (Sensitivity\_Analysis\_1.RTF)**

| Period                                    | Age Group | Smoking Group | N    | %     | Ever Quit (N) | Ever Quit % | Mean Yrs Quit | Short Term (n) | Short Term % |
|-------------------------------------------|-----------|---------------|------|-------|---------------|-------------|---------------|----------------|--------------|
| 50                                        | 35-39     | Never Any     | 0    | .     |               |             |               |                |              |
| 50                                        | 35-39     | CC            | 0    | .     | 0             | .           |               |                |              |
| 50                                        | 35-39     | Ecig          | 0    | .     |               |             |               |                |              |
| 50                                        | 35-39     | Dual          | 0    | .     |               |             |               |                |              |
| 50                                        | 35-39     | Former        | 0    | .     |               |             | .             | 0              | .            |
| Year of Follow-up: 2040, Age Group: 40-44 |           |               |      |       |               |             |               |                |              |
| Period                                    | Age Group | Smoking Group | N    | %     | Ever Quit (N) | Ever Quit % | Mean Yrs Quit | Short Term (n) | Short Term % |
| 50                                        | 40-44     | Never Any     | 0    | .     |               |             |               |                |              |
| 50                                        | 40-44     | CC            | 0    | .     | 0             | .           |               |                |              |
| 50                                        | 40-44     | Ecig          | 0    | .     |               |             |               |                |              |
| 50                                        | 40-44     | Dual          | 0    | .     |               |             |               |                |              |
| 50                                        | 40-44     | Former        | 0    | .     |               |             | .             | 0              | .            |
| Year of Follow-up: 2040, Age Group: 45-49 |           |               |      |       |               |             |               |                |              |
| Period                                    | Age Group | Smoking Group | N    | %     | Ever Quit (N) | Ever Quit % | Mean Yrs Quit | Short Term (n) | Short Term % |
| 50                                        | 45-49     | Never Any     | 0    | .     |               |             |               |                |              |
| 50                                        | 45-49     | CC            | 0    | .     | 0             | .           |               |                |              |
| 50                                        | 45-49     | Ecig          | 0    | .     |               |             |               |                |              |
| 50                                        | 45-49     | Dual          | 0    | .     |               |             |               |                |              |
| 50                                        | 45-49     | Former        | 0    | .     |               |             | .             | 0              | .            |
| Year of Follow-up: 2040, Age Group: 50-54 |           |               |      |       |               |             |               |                |              |
| Period                                    | Age Group | Smoking Group | N    | %     | Ever Quit (N) | Ever Quit % | Mean Yrs Quit | Short Term (n) | Short Term % |
| 50                                        | 50-54     | Never Any     | 0    | .     |               |             |               |                |              |
| 50                                        | 50-54     | CC            | 0    | .     | 0             | .           |               |                |              |
| 50                                        | 50-54     | Ecig          | 0    | .     |               |             |               |                |              |
| 50                                        | 50-54     | Dual          | 0    | .     |               |             |               |                |              |
| 50                                        | 50-54     | Former        | 0    | .     |               |             | .             | 0              | .            |
| Year of Follow-up: 2040, Age Group: 55-59 |           |               |      |       |               |             |               |                |              |
| Period                                    | Age Group | Smoking Group | N    | %     | Ever Quit (N) | Ever Quit % | Mean Yrs Quit | Short Term (n) | Short Term % |
| 50                                        | 55-59     | Never Any     | 0    | .     |               |             |               |                |              |
| 50                                        | 55-59     | CC            | 0    | .     | 0             | .           |               |                |              |
| 50                                        | 55-59     | Ecig          | 0    | .     |               |             |               |                |              |
| 50                                        | 55-59     | Dual          | 0    | .     |               |             |               |                |              |
| 50                                        | 55-59     | Former        | 0    | .     |               |             | .             | 0              | .            |
| Year of Follow-up: 2040, Age Group: 60-64 |           |               |      |       |               |             |               |                |              |
| Period                                    | Age Group | Smoking Group | N    | %     | Ever Quit (N) | Ever Quit % | Mean Yrs Quit | Short Term (n) | Short Term % |
| 50                                        | 60-64     | Never Any     | 4726 | 59.60 |               |             |               |                |              |
| 50                                        | 60-64     | CC            | 0    | 0.00  | 0             | 0.00        |               |                |              |
| 50                                        | 60-64     | Ecig          | 613  | 7.73  |               |             |               |                |              |
| 50                                        | 60-64     | Dual          | 0    | 0.00  |               |             |               |                |              |
| 50                                        | 60-64     | Former        | 2591 | 32.67 |               |             | 27.58         | 77             | 2.97         |
| Year of Follow-up: 2040, Age Group: 65-69 |           |               |      |       |               |             |               |                |              |
| Period                                    | Age Group | Smoking Group | N    | %     | Ever Quit (N) | Ever Quit % | Mean Yrs Quit | Short Term (n) | Short Term % |
| 50                                        | 65-69     | Never Any     | 5359 | 64.18 |               |             |               |                |              |
| 50                                        | 65-69     | CC            | 0    | 0.00  | 0             | 0.00        |               |                |              |
| 50                                        | 65-69     | Ecig          | 578  | 6.92  |               |             |               |                |              |
| 50                                        | 65-69     | Dual          | 0    | 0.00  |               |             |               |                |              |
| 50                                        | 65-69     | Former        | 2413 | 28.90 |               |             | 28.67         | 34             | 1.41         |
| Year of Follow-up: 2040, Age Group: 70-74 |           |               |      |       |               |             |               |                |              |
| Period                                    | Age Group | Smoking Group | N    | %     | Ever Quit (N) | Ever Quit % | Mean Yrs Quit | Short Term (n) | Short Term % |
| 50                                        | 70-74     | Never Any     | 5189 | 59.01 |               |             |               |                |              |
| 50                                        | 70-74     | CC            | 3    | 0.03  | 0             | 0.00        |               |                |              |
| 50                                        | 70-74     | Ecig          | 583  | 6.63  |               |             |               |                |              |
| 50                                        | 70-74     | Dual          | 0    | 0.00  |               |             |               |                |              |
| 50                                        | 70-74     | Former        | 3018 | 34.32 |               |             | 32.48         | 56             | 1.86         |
| Year of Follow-up: 2040, Age Group: 75-79 |           |               |      |       |               |             |               |                |              |
| Period                                    | Age Group | Smoking Group | N    | %     | Ever Quit (N) | Ever Quit % | Mean Yrs Quit | Short Term (n) | Short Term % |
| 50                                        | 75-79     | Never Any     | 5284 | 52.43 |               |             |               |                |              |
| 50                                        | 75-79     | CC            | 1    | 0.01  | 0             | 0.00        |               |                |              |
| 50                                        | 75-79     | Ecig          | 723  | 7.17  |               |             |               |                |              |
| 50                                        | 75-79     | Dual          | 0    | 0.00  |               |             |               |                |              |
| 50                                        | 75-79     | Former        | 4070 | 40.38 |               |             | 34.61         | 71             | 1.74         |

## Results for PHIM for Run 10 (Sensitivity\_Analysis\_1.RTF)

\*\*\*\*\*

### Main Results for E-Component for Run: 10, Simulation: 1, COD: Four Diseases Combined

| Variable Parameter          | Value                                  |
|-----------------------------|----------------------------------------|
| 1. Country                  | US (United States)                     |
| 2. Sex                      | F (Females)                            |
| 3. Year of start of process | 1990                                   |
| 4. Cause of Death           | Four Diseases Combined                 |
| 5. Effective Dose NULL      | CC:1                                   |
| 6. Effective Dose Ecig      | CC:1 Ecig:0.3 Dual:0.65                |
| Note:                       | Death rates are per million population |

#### Results for Age Groups Combined and Years combined, Population unadjusted for deaths in Ecig scenario,

| Age Group:All |         | NULL        | Ecig        | %Drop    |        |        | NULL    | Ecig    | Drop    |         |
|---------------|---------|-------------|-------------|----------|--------|--------|---------|---------|---------|---------|
| Year          | Number  | Attrib      | Attrib      | Drop     | %Drop  | Attrib | Death   | Attrib  | Attrib  | Drop    |
|               | Deaths  | Deaths      | Deaths      | Deaths   | Deaths | Deaths | Rate    | Rates   | Rates   | Rates   |
| All Comb      | 9082078 | 2946250.006 | 2299417.687 | 646832.3 | 7.122  | 21.954 | 2493.45 | 808.881 | 631.296 | 177.585 |

#### Results for Age Groups Combined, Population unadjusted for deaths in Ecig scenario,

| Age Group:All |        | NULL      | Ecig      | %Drop    |        |        | NULL    | Ecig    | Drop    |         |
|---------------|--------|-----------|-----------|----------|--------|--------|---------|---------|---------|---------|
| Year          | Number | Attrib    | Attrib    | Drop     | %Drop  | Attrib | Death   | Attrib  | Attrib  | Drop    |
|               | Deaths | Deaths    | Deaths    | Deaths   | Deaths | Deaths | Rate    | Rates   | Rates   | Rates   |
| 1990          | 199848 | 57524.822 | 57524.822 | 0.000    | 0.000  | 0.000  | 2926.84 | 842.471 | 842.471 | 0.000   |
| 1991          | 199162 | 59078.486 | 58953.560 | 124.926  | 0.063  | 0.211  | 2877.87 | 853.678 | 851.873 | 1.805   |
| 1992          | 198532 | 60494.150 | 60148.082 | 346.067  | 0.174  | 0.572  | 2829.84 | 862.271 | 857.339 | 4.933   |
| 1993          | 202512 | 62694.848 | 62023.607 | 671.241  | 0.331  | 1.071  | 2845.85 | 881.034 | 871.601 | 9.433   |
| 1994          | 200658 | 63202.598 | 62147.490 | 1055.107 | 0.526  | 1.669  | 2777.87 | 874.966 | 860.359 | 14.607  |
| 1995          | 201023 | 63766.862 | 62245.784 | 1521.078 | 0.757  | 2.385  | 2739.80 | 869.097 | 848.366 | 20.731  |
| 1996          | 201180 | 64591.163 | 62516.792 | 2074.371 | 1.031  | 3.212  | 2706.36 | 868.908 | 841.003 | 27.905  |
| 1997          | 198639 | 64686.912 | 62102.821 | 2584.091 | 1.301  | 3.995  | 2635.18 | 858.147 | 823.866 | 34.281  |
| 1998          | 197573 | 65295.961 | 62119.689 | 3176.273 | 1.608  | 4.864  | 2584.18 | 854.046 | 812.502 | 41.544  |
| 1999          | 211329 | 67327.521 | 63249.935 | 4077.587 | 1.929  | 6.056  | 2726.91 | 868.771 | 816.155 | 52.616  |
| 2000          | 208496 | 67596.897 | 62852.774 | 4744.123 | 2.275  | 7.018  | 2656.96 | 861.419 | 800.963 | 60.457  |
| 2001          | 203606 | 67008.811 | 61575.237 | 5433.573 | 2.669  | 8.109  | 2565.88 | 844.458 | 775.983 | 68.475  |
| 2002          | 200828 | 67067.744 | 60860.080 | 6207.664 | 3.091  | 9.256  | 2506.09 | 836.925 | 759.461 | 77.464  |
| 2003          | 196352 | 66756.217 | 59858.796 | 6897.421 | 3.513  | 10.332 | 2427.31 | 825.244 | 739.978 | 85.266  |
| 2004          | 188160 | 65058.725 | 57595.375 | 7463.351 | 3.966  | 11.472 | 2302.83 | 796.234 | 704.893 | 91.342  |
| 2005          | 186416 | 65214.724 | 56989.015 | 8225.709 | 4.413  | 12.613 | 2256.27 | 789.321 | 689.762 | 99.559  |
| 2006          | 180088 | 63771.146 | 54986.716 | 8784.430 | 4.878  | 13.775 | 2160.67 | 765.117 | 659.723 | 105.394 |
| 2007          | 175644 | 63110.718 | 53760.142 | 9350.576 | 5.324  | 14.816 | 2086.36 | 749.650 | 638.581 | 111.069 |
| 2008          | 177570 | 63718.624 | 53527.635 | 10190.99 | 5.739  | 15.994 | 2086.39 | 748.674 | 628.933 | 119.741 |
| 2009          | 172806 | 62794.698 | 52087.231 | 10707.47 | 6.196  | 17.052 | 2007.57 | 729.515 | 605.121 | 124.394 |
| 2010          | 170489 | 61917.074 | 50689.262 | 11227.81 | 6.586  | 18.134 | 1957.97 | 711.083 | 582.138 | 128.945 |
| 2011          | 170305 | 61680.114 | 49713.005 | 11967.11 | 7.027  | 19.402 | 1937.46 | 701.700 | 565.557 | 136.143 |
| 2012          | 171421 | 62023.127 | 49263.920 | 12759.21 | 7.443  | 20.572 | 1930.22 | 698.386 | 554.716 | 143.670 |
| 2013          | 172699 | 62037.765 | 48542.844 | 13494.92 | 7.814  | 21.753 | 1923.75 | 691.059 | 540.734 | 150.324 |
| 2014          | 174169 | 61921.017 | 47633.279 | 14287.74 | 8.203  | 23.074 | 1918.85 | 682.195 | 524.784 | 157.411 |
| 2015          | 177354 | 61856.204 | 46914.068 | 14942.14 | 8.425  | 24.156 | 2184.51 | 761.899 | 577.853 | 184.046 |
| 2016          | 176853 | 60464.119 | 44997.246 | 15466.87 | 8.746  | 25.580 | 2157.59 | 737.655 | 548.961 | 188.694 |
| 2017          | 179309 | 60243.839 | 44051.501 | 16192.34 | 9.030  | 26.878 | 2166.86 | 728.017 | 532.340 | 195.676 |
| 2018          | 177157 | 60713.327 | 43905.426 | 16807.90 | 9.488  | 27.684 | 2120.51 | 726.721 | 525.535 | 201.186 |
| 2019          | 179227 | 61148.172 | 43511.529 | 17636.64 | 9.840  | 28.842 | 2124.53 | 724.841 | 515.779 | 209.062 |
| 2020          | 180467 | 61149.317 | 43017.876 | 18131.44 | 10.047 | 29.651 | 2424.25 | 821.432 | 577.869 | 243.564 |
| 2021          | 178116 | 58727.786 | 40334.223 | 18393.56 | 10.327 | 31.320 | 2375.42 | 783.216 | 537.912 | 245.303 |
| 2022          | 179408 | 58848.802 | 39818.499 | 19030.30 | 10.607 | 32.338 | 2374.52 | 778.881 | 527.009 | 251.871 |
| 2023          | 180640 | 58816.149 | 39233.027 | 19583.12 | 10.841 | 33.295 | 2372.26 | 772.407 | 515.230 | 257.177 |
| 2024          | 181610 | 58955.232 | 38721.231 | 20234.00 | 11.141 | 34.321 | 2366.77 | 768.316 | 504.623 | 263.693 |
| 2025          | 180418 | 58297.744 | 37834.891 | 20462.85 | 11.342 | 35.101 | 2713.69 | 876.861 | 569.078 | 307.783 |
| 2026          | 180313 | 56469.971 | 35843.445 | 20626.53 | 11.439 | 36.527 | 2701.83 | 846.150 | 537.081 | 309.069 |
| 2027          | 179619 | 56209.427 | 35085.900 | 21123.53 | 11.760 | 37.580 | 2680.68 | 838.883 | 523.630 | 315.253 |
| 2028          | 178762 | 55733.105 | 34249.540 | 21483.57 | 12.018 | 38.547 | 2656.74 | 828.298 | 509.012 | 319.286 |
| 2029          | 177808 | 55145.838 | 33336.468 | 21809.37 | 12.266 | 39.549 | 2630.89 | 815.951 | 493.254 | 322.697 |
| 2030          | 173587 | 53615.097 | 31987.349 | 21627.75 | 12.459 | 40.339 | 3040.33 | 939.056 | 560.251 | 378.805 |
| 2031          | 174985 | 52046.561 | 30609.390 | 21437.17 | 12.251 | 41.188 | 3060.73 | 910.364 | 535.399 | 374.965 |
| 2032          | 173400 | 51582.636 | 29877.654 | 21704.98 | 12.517 | 42.078 | 3027.10 | 900.496 | 521.584 | 378.911 |
| 2033          | 171756 | 50839.758 | 29069.678 | 21770.08 | 12.675 | 42.821 | 2991.14 | 885.375 | 506.249 | 379.126 |
| 2034          | 169973 | 50215.451 | 28307.763 | 21907.69 | 12.889 | 43.627 | 2951.96 | 872.104 | 491.628 | 380.476 |
| 2035          | 162644 | 47773.075 | 26669.679 | 21103.40 | 12.975 | 44.174 | 3459.14 | 1016.05 | 567.215 | 448.830 |
| 2036          | 156254 | 43298.709 | 23632.932 | 19665.78 | 12.586 | 45.419 | 3328.25 | 922.274 | 503.388 | 418.886 |
| 2037          | 153593 | 42241.563 | 22648.537 | 19593.03 | 12.756 | 46.383 | 3274.10 | 900.450 | 482.792 | 417.659 |
| 2038          | 150947 | 41356.353 | 21876.988 | 19479.36 | 12.905 | 47.101 | 3217.50 | 881.531 | 466.319 | 415.212 |
| 2039          | 148373 | 40161.050 | 20914.957 | 19246.09 | 12.971 | 47.922 | 3159.42 | 855.178 | 445.357 | 409.821 |

## Results for PHIM for Run 10 (Sensitivity\_Analysis\_1.RTF)

\*\*\*\*\*

### Main Results for E-Component for Run: 10, Simulation: 1, COD: LUNG CANCER

| Variable Parameter          | Value                                  |
|-----------------------------|----------------------------------------|
| 1. Country                  | US (United States)                     |
| 2. Sex                      | F (Females)                            |
| 3. Year of start of process | 1990                                   |
| 4. Cause of Death           | LUNG CANCER                            |
| 5. Effective Dose NULL      | CC:1                                   |
| 6. Effective Dose Ecig      | CC:1 Ecig:0.3 Dual:0.65                |
| Note:                       | Death rates are per million population |

#### Results for Age Groups Combined and Years combined, Population unadjusted for deaths in Ecig scenario,

| Age Group:All |         | NULL        | Ecig        | %Drop    |        |        | NULL    | Ecig    | Drop    |        |
|---------------|---------|-------------|-------------|----------|--------|--------|---------|---------|---------|--------|
| Year          | Number  | Attrib      | Attrib      | Drop     | %Drop  | Attrib | Death   | Attrib  | Drop    |        |
|               | Deaths  | Deaths      | Deaths      | Deaths   | Deaths | Deaths | Rate    | Rates   | Rates   |        |
| All Comb      | 2327764 | 1580465.217 | 1320735.539 | 259729.7 | 11.158 | 16.434 | 639.078 | 433.910 | 362.603 | 71.308 |

#### Results for Age Groups Combined, Population unadjusted for deaths in Ecig scenario,

| Age Group:All |        | NULL      | Ecig      | %Drop    |        |        | NULL    | Ecig    | Drop    |
|---------------|--------|-----------|-----------|----------|--------|--------|---------|---------|---------|
| Year          | Number | Attrib    | Attrib    | Drop     | %Drop  | Attrib | Death   | Attrib  | Drop    |
|               | Deaths | Deaths    | Deaths    | Deaths   | Deaths | Deaths | Rate    | Rates   | Rates   |
| 1990          | 42690  | 30614.201 | 30614.201 | 0.000    | 0.000  | 0.000  | 625.210 | 448.355 | 0.000   |
| 1991          | 43692  | 31412.010 | 31387.908 | 24.103   | 0.055  | 0.077  | 631.345 | 453.901 | 0.348   |
| 1992          | 45423  | 32782.407 | 32713.254 | 69.152   | 0.152  | 0.211  | 647.450 | 467.274 | 0.986   |
| 1993          | 46291  | 33491.183 | 33354.700 | 136.483  | 0.295  | 0.408  | 650.515 | 470.643 | 1.918   |
| 1994          | 47017  | 34074.347 | 33854.273 | 220.074  | 0.468  | 0.646  | 650.895 | 471.719 | 3.047   |
| 1995          | 47840  | 34694.454 | 34362.845 | 331.609  | 0.693  | 0.956  | 652.025 | 472.861 | 4.520   |
| 1996          | 48244  | 35027.269 | 34571.035 | 456.233  | 0.946  | 1.303  | 648.999 | 471.202 | 6.137   |
| 1997          | 49035  | 35590.763 | 34987.935 | 602.828  | 1.229  | 1.694  | 650.506 | 472.153 | 7.997   |
| 1998          | 49686  | 36100.785 | 35325.143 | 775.642  | 1.561  | 2.149  | 649.874 | 472.184 | 10.145  |
| 1999          | 48883  | 35451.030 | 34524.405 | 926.624  | 1.896  | 2.614  | 630.769 | 457.448 | 11.957  |
| 2000          | 50331  | 36447.986 | 35290.945 | 1157.041 | 2.299  | 3.175  | 641.392 | 464.474 | 14.745  |
| 2001          | 50389  | 36411.326 | 35026.090 | 1385.236 | 2.749  | 3.804  | 635.012 | 458.863 | 17.457  |
| 2002          | 51445  | 37078.545 | 35411.051 | 1667.494 | 3.241  | 4.497  | 641.972 | 462.696 | 20.808  |
| 2003          | 51408  | 36999.876 | 35067.703 | 1932.173 | 3.759  | 5.222  | 635.509 | 457.395 | 23.886  |
| 2004          | 51399  | 36861.555 | 34642.788 | 2218.767 | 4.317  | 6.019  | 629.057 | 451.138 | 27.155  |
| 2005          | 51421  | 36689.529 | 34173.103 | 2516.426 | 4.894  | 6.859  | 622.370 | 444.069 | 30.457  |
| 2006          | 51355  | 36504.774 | 33682.520 | 2822.254 | 5.496  | 7.731  | 616.150 | 437.979 | 33.861  |
| 2007          | 51839  | 36663.202 | 33477.155 | 3186.047 | 6.146  | 8.690  | 615.761 | 435.498 | 37.845  |
| 2008          | 50976  | 35898.803 | 32453.790 | 3445.013 | 6.758  | 9.596  | 598.952 | 421.800 | 40.478  |
| 2009          | 51193  | 35934.525 | 32110.238 | 3824.287 | 7.470  | 10.642 | 594.733 | 417.468 | 44.429  |
| 2010          | 50853  | 35502.829 | 31386.931 | 4115.898 | 8.094  | 11.593 | 584.018 | 407.730 | 47.269  |
| 2011          | 50509  | 35136.342 | 30675.659 | 4460.682 | 8.831  | 12.695 | 574.613 | 399.726 | 50.747  |
| 2012          | 51245  | 35450.201 | 30567.644 | 4882.557 | 9.528  | 13.773 | 577.023 | 399.173 | 54.978  |
| 2013          | 51069  | 35123.224 | 29865.820 | 5257.404 | 10.295 | 14.968 | 568.874 | 391.249 | 58.564  |
| 2014          | 51251  | 35079.370 | 29429.918 | 5649.452 | 11.023 | 16.105 | 564.641 | 386.476 | 62.241  |
| 2015          | 50443  | 34324.171 | 28445.511 | 5878.660 | 11.654 | 17.127 | 621.319 | 422.780 | 72.409  |
| 2016          | 48854  | 33054.753 | 26978.578 | 6076.175 | 12.437 | 18.382 | 596.013 | 403.264 | 74.129  |
| 2017          | 48325  | 32471.234 | 26086.235 | 6384.999 | 13.213 | 19.664 | 583.983 | 392.399 | 77.160  |
| 2018          | 50465  | 33657.595 | 26562.304 | 7095.291 | 14.060 | 21.081 | 604.052 | 402.871 | 84.929  |
| 2019          | 51036  | 33863.424 | 26285.658 | 7577.766 | 14.848 | 22.377 | 604.975 | 401.412 | 89.826  |
| 2020          | 51444  | 33910.830 | 25968.051 | 7942.779 | 15.440 | 23.423 | 691.053 | 455.532 | 106.697 |
| 2021          | 48037  | 31531.880 | 23713.240 | 7818.640 | 16.276 | 24.796 | 640.639 | 420.521 | 104.272 |
| 2022          | 48335  | 31560.212 | 23356.717 | 8203.496 | 16.972 | 25.993 | 639.727 | 417.708 | 108.576 |
| 2023          | 48599  | 31508.781 | 22954.404 | 8554.378 | 17.602 | 27.149 | 638.227 | 413.791 | 112.341 |
| 2024          | 48784  | 31517.293 | 22582.595 | 8934.699 | 18.315 | 28.349 | 635.757 | 410.740 | 116.439 |
| 2025          | 48477  | 31175.389 | 22017.974 | 9157.415 | 18.890 | 29.374 | 729.141 | 468.912 | 137.737 |
| 2026          | 45324  | 29044.598 | 20160.583 | 8884.014 | 19.601 | 30.587 | 679.138 | 435.206 | 133.119 |
| 2027          | 45107  | 28825.765 | 19668.879 | 9156.886 | 20.300 | 31.766 | 673.191 | 430.203 | 136.660 |
| 2028          | 44842  | 28513.846 | 19143.127 | 9370.719 | 20.897 | 32.864 | 666.430 | 423.769 | 139.266 |
| 2029          | 44539  | 28148.109 | 18576.954 | 9571.155 | 21.489 | 34.003 | 659.013 | 416.486 | 141.617 |
| 2030          | 43393  | 27314.475 | 17766.212 | 9548.263 | 22.004 | 34.957 | 760.018 | 478.407 | 167.236 |
| 2031          | 40748  | 25423.102 | 16351.661 | 9071.440 | 22.262 | 35.682 | 712.731 | 444.684 | 158.672 |
| 2032          | 40325  | 25085.902 | 15890.867 | 9195.034 | 22.802 | 36.654 | 703.969 | 437.933 | 160.521 |
| 2033          | 39882  | 24645.067 | 15404.664 | 9240.403 | 23.169 | 37.494 | 694.543 | 429.194 | 160.922 |
| 2034          | 39404  | 24239.126 | 14941.442 | 9297.684 | 23.595 | 38.358 | 684.347 | 420.967 | 161.475 |
| 2035          | 37454  | 22944.147 | 13982.324 | 8961.823 | 23.927 | 39.059 | 796.588 | 487.980 | 190.602 |
| 2036          | 32988  | 19950.581 | 11953.895 | 7996.686 | 24.241 | 40.082 | 702.663 | 424.953 | 170.332 |
| 2037          | 32403  | 19415.334 | 11437.121 | 7978.212 | 24.622 | 41.092 | 690.731 | 413.871 | 170.069 |
| 2038          | 31820  | 18939.317 | 11021.349 | 7917.968 | 24.884 | 41.807 | 678.257 | 403.701 | 168.775 |
| 2039          | 31251  | 18379.752 | 10528.140 | 7851.612 | 25.124 | 42.719 | 665.457 | 391.373 | 167.190 |

## Results for PHIM for Run 10 (Sensitivity\_Analysis\_1.RTF)

\*\*\*\*\*

### Main Results for E-Component for Run: 10, Simulation: 1, COD: IHD

| Variable Parameter          | Value                                  |
|-----------------------------|----------------------------------------|
| 1. Country                  | US (United States)                     |
| 2. Sex                      | F (Females)                            |
| 3. Year of start of process | 1990                                   |
| 4. Cause of Death           | IHD                                    |
| 5. Effective Dose NULL      | CC:1                                   |
| 6. Effective Dose Ecig      | CC:1 Ecig:0.3 Dual:0.65                |
| Note:                       | Death rates are per million population |

#### Results for Age Groups Combined and Years combined, Population unadjusted for deaths in Ecig scenario,

| Age Group:All | NULL    | Ecig       | %Drop      |          |        | NULL   | Ecig    | Drop    |        |        |
|---------------|---------|------------|------------|----------|--------|--------|---------|---------|--------|--------|
| Year          | Number  | Attrib     | Attrib     | Drop     | %Drop  | Attrib | Death   | Attrib  | Attrib | Drop   |
|               | Deaths  | Deaths     | Deaths     | Deaths   | Deaths | Deaths | Rate    | Rates   | Rates  | Rates  |
| All Comb      | 3242167 | 398833.796 | 259738.429 | 139095.4 | 4.290  | 34.876 | 890.124 | 109.498 | 71.310 | 38.188 |

#### Results for Age Groups Combined, Population unadjusted for deaths in Ecig scenario,

| Age Group:All | NULL   | Ecig      | %Drop     |          |        | NULL   | Ecig    | Drop    |         |        |
|---------------|--------|-----------|-----------|----------|--------|--------|---------|---------|---------|--------|
| Year          | Number | Attrib    | Attrib    | Drop     | %Drop  | Attrib | Death   | Attrib  | Attrib  | Drop   |
|               | Deaths | Deaths    | Deaths    | Deaths   | Deaths | Deaths | Rate    | Rates   | Rates   | Rates  |
| 1990          | 98916  | 12922.892 | 12922.892 | 0.000    | 0.000  | 0.000  | 1448.66 | 189.260 | 189.260 | 0.000  |
| 1991          | 96403  | 12856.479 | 12789.779 | 66.701   | 0.069  | 0.519  | 1393.01 | 185.775 | 184.811 | 0.964  |
| 1992          | 93721  | 12662.244 | 12479.149 | 183.095  | 0.195  | 1.446  | 1335.88 | 180.485 | 177.875 | 2.610  |
| 1993          | 93679  | 12730.613 | 12382.864 | 347.749  | 0.371  | 2.732  | 1316.45 | 178.900 | 174.013 | 4.887  |
| 1994          | 90832  | 12495.323 | 11956.545 | 538.778  | 0.593  | 4.312  | 1257.46 | 172.983 | 165.524 | 7.459  |
| 1995          | 89698  | 12365.590 | 11606.960 | 758.630  | 0.846  | 6.135  | 1222.52 | 168.534 | 158.195 | 10.340 |
| 1996          | 88286  | 12290.551 | 11261.682 | 1028.870 | 1.165  | 8.371  | 1187.66 | 165.338 | 151.497 | 13.841 |
| 1997          | 84777  | 11719.531 | 10486.595 | 1232.936 | 1.454  | 10.520 | 1124.67 | 155.473 | 139.117 | 16.356 |
| 1998          | 82517  | 11416.794 | 9946.336  | 1470.458 | 1.782  | 12.880 | 1079.29 | 149.327 | 130.094 | 19.233 |
| 1999          | 93939  | 13028.038 | 11013.484 | 2014.554 | 2.145  | 15.463 | 1212.16 | 168.109 | 142.114 | 25.995 |
| 2000          | 90039  | 12426.299 | 10181.319 | 2244.980 | 2.493  | 18.066 | 1147.41 | 158.354 | 129.745 | 28.609 |
| 2001          | 86119  | 11939.281 | 9419.464  | 2519.817 | 2.926  | 21.105 | 1085.29 | 150.461 | 118.706 | 31.755 |
| 2002          | 83014  | 11528.794 | 8737.098  | 2791.696 | 3.363  | 24.215 | 1035.91 | 143.865 | 109.028 | 34.837 |
| 2003          | 79302  | 11048.407 | 8054.411  | 2993.996 | 3.775  | 27.099 | 980.336 | 136.581 | 99.569  | 37.012 |
| 2004          | 73861  | 10375.132 | 7248.000  | 3127.131 | 4.234  | 30.141 | 903.963 | 126.978 | 88.706  | 38.272 |
| 2005          | 71649  | 10051.029 | 6744.423  | 3306.606 | 4.615  | 32.898 | 867.197 | 121.652 | 81.631  | 40.021 |
| 2006          | 67551  | 9542.523  | 6122.859  | 3419.665 | 5.062  | 35.836 | 810.467 | 114.490 | 73.461  | 41.029 |
| 2007          | 63503  | 8936.533  | 5502.726  | 3433.807 | 5.407  | 38.424 | 754.310 | 106.151 | 65.363  | 40.788 |
| 2008          | 63171  | 8944.180  | 5286.082  | 3658.099 | 5.791  | 40.899 | 742.239 | 105.091 | 62.110  | 42.981 |
| 2009          | 59747  | 8390.033  | 4779.888  | 3610.146 | 6.042  | 43.029 | 694.108 | 97.471  | 55.530  | 41.941 |
| 2010          | 58008  | 8157.570  | 4483.784  | 3673.786 | 6.333  | 45.035 | 666.189 | 93.685  | 51.494  | 42.191 |
| 2011          | 57368  | 8035.356  | 4243.083  | 3792.273 | 6.610  | 47.195 | 652.644 | 91.414  | 48.271  | 43.143 |
| 2012          | 57411  | 7970.766  | 4047.652  | 3923.114 | 6.833  | 49.219 | 646.453 | 89.752  | 45.577  | 44.175 |
| 2013          | 57067  | 7743.216  | 3803.017  | 3940.199 | 6.905  | 50.886 | 635.688 | 86.254  | 42.363  | 43.891 |
| 2014          | 57538  | 7774.935  | 3688.102  | 4086.833 | 7.103  | 52.564 | 633.906 | 85.658  | 40.632  | 45.025 |
| 2015          | 58395  | 7722.535  | 3571.100  | 4151.435 | 7.109  | 53.757 | 719.266 | 95.120  | 43.986  | 51.134 |
| 2016          | 58658  | 7600.353  | 3402.571  | 4197.782 | 7.156  | 55.231 | 715.621 | 92.723  | 41.511  | 51.212 |
| 2017          | 59004  | 7470.266  | 3251.526  | 4218.740 | 7.150  | 56.474 | 713.034 | 90.274  | 39.293  | 50.981 |
| 2018          | 56077  | 6907.050  | 2925.483  | 3981.567 | 7.100  | 57.645 | 671.224 | 82.675  | 35.017  | 47.658 |
| 2019          | 55886  | 6732.046  | 2785.610  | 3946.437 | 7.062  | 58.622 | 662.462 | 79.801  | 33.020  | 46.780 |
| 2020          | 55313  | 6429.836  | 2609.086  | 3820.749 | 6.907  | 59.422 | 743.037 | 86.373  | 35.048  | 51.325 |
| 2021          | 56292  | 6562.016  | 2592.435  | 3969.581 | 7.052  | 60.493 | 750.730 | 87.513  | 34.574  | 52.940 |
| 2022          | 55827  | 6352.366  | 2463.169  | 3889.197 | 6.967  | 61.224 | 738.885 | 84.075  | 32.601  | 51.475 |
| 2023          | 55338  | 6134.123  | 2345.784  | 3788.339 | 6.846  | 61.758 | 726.728 | 80.557  | 30.806  | 49.751 |
| 2024          | 54770  | 5922.193  | 2231.176  | 3691.016 | 6.739  | 62.325 | 713.771 | 77.179  | 29.077  | 48.102 |
| 2025          | 53295  | 5504.188  | 2043.680  | 3460.508 | 6.493  | 62.870 | 801.612 | 82.789  | 30.739  | 52.050 |
| 2026          | 55278  | 5641.075  | 2067.796  | 3573.279 | 6.464  | 63.344 | 828.283 | 84.526  | 30.984  | 53.542 |
| 2027          | 54199  | 5426.216  | 1966.756  | 3459.460 | 6.383  | 63.755 | 808.875 | 80.982  | 29.352  | 51.630 |
| 2028          | 53090  | 5197.830  | 1868.198  | 3329.631 | 6.272  | 64.058 | 789.020 | 77.249  | 27.765  | 49.485 |
| 2029          | 51974  | 4973.547  | 1774.420  | 3199.127 | 6.155  | 64.323 | 769.023 | 73.590  | 26.255  | 47.335 |
| 2030          | 49479  | 4450.618  | 1557.923  | 2892.695 | 5.846  | 64.995 | 866.605 | 77.952  | 27.287  | 50.665 |
| 2031          | 51987  | 4555.052  | 1591.114  | 2963.938 | 5.701  | 65.069 | 909.317 | 79.674  | 27.831  | 51.843 |
| 2032          | 50677  | 4349.999  | 1511.309  | 2838.690 | 5.602  | 65.257 | 884.689 | 75.939  | 26.383  | 49.556 |
| 2033          | 49380  | 4147.948  | 1440.761  | 2707.187 | 5.482  | 65.266 | 859.955 | 72.237  | 25.091  | 47.146 |
| 2034          | 48076  | 3966.133  | 1371.698  | 2594.436 | 5.397  | 65.415 | 834.943 | 68.881  | 23.823  | 45.058 |
| 2035          | 44518  | 3289.064  | 1112.334  | 2176.730 | 4.890  | 66.181 | 946.825 | 69.952  | 23.657  | 46.295 |
| 2036          | 46347  | 3313.192  | 1111.255  | 2201.938 | 4.751  | 66.460 | 987.211 | 70.572  | 23.670  | 46.902 |
| 2037          | 44841  | 3117.951  | 1042.346  | 2075.605 | 4.629  | 66.570 | 955.859 | 66.464  | 22.219  | 44.245 |
| 2038          | 43378  | 2949.775  | 985.926   | 1963.849 | 4.527  | 66.576 | 924.621 | 62.876  | 21.015  | 41.860 |
| 2039          | 41973  | 2766.312  | 926.782   | 1839.530 | 4.383  | 66.498 | 893.753 | 58.905  | 19.735  | 39.170 |

## Results for PHIM for Run 10 (Sensitivity\_Analysis\_1.RTF)

\*\*\*\*\*

### Main Results for E-Component for Run: 10, Simulation: 1, COD: STROKE

| Variable Parameter          | Value                                  |
|-----------------------------|----------------------------------------|
| 1. Country                  | US (United States)                     |
| 2. Sex                      | F (Females)                            |
| 3. Year of start of process | 1990                                   |
| 4. Cause of Death           | STROKE                                 |
| 5. Effective Dose NULL      | CC:1                                   |
| 6. Effective Dose Ecig      | CC:1 Ecig:0.3 Dual:0.65                |
| Note:                       | Death rates are per million population |

#### Results for Age Groups Combined and Years combined, Population unadjusted for deaths in Ecig scenario,

| Age Group:All | NULL    | Ecig       | %Drop     |          |        | NULL   | Ecig    | Drop   |        |        |
|---------------|---------|------------|-----------|----------|--------|--------|---------|--------|--------|--------|
| Year          | Number  | Attrib     | Attrib    | Drop     | %Drop  | Attrib | Death   | Attrib | Attrib | Drop   |
|               | Deaths  | Deaths     | Deaths    | Deaths   | Deaths | Deaths | Rate    | Rates  | Rates  | Rates  |
| All Comb      | 1352207 | 104899.750 | 67036.409 | 37863.34 | 2.800  | 36.095 | 371.243 | 28.800 | 18.405 | 10.395 |

#### Results for Age Groups Combined, Population unadjusted for deaths in Ecig scenario,

| Age Group:All | NULL   | Ecig     | %Drop    |          |        | NULL   | Ecig    | Drop   |        |        |
|---------------|--------|----------|----------|----------|--------|--------|---------|--------|--------|--------|
| Year          | Number | Attrib   | Attrib   | Drop     | %Drop  | Attrib | Death   | Attrib | Attrib | Drop   |
|               | Deaths | Deaths   | Deaths   | Deaths   | Deaths | Deaths | Rate    | Rates  | Rates  | Rates  |
| 1990          | 33504  | 3293.017 | 3293.017 | 0.000    | 0.000  | 0.000  | 490.678 | 48.227 | 48.227 | 0.000  |
| 1991          | 32505  | 3207.063 | 3186.699 | 20.364   | 0.063  | 0.635  | 469.694 | 46.342 | 46.047 | 0.294  |
| 1992          | 32560  | 3218.125 | 3161.509 | 56.616   | 0.174  | 1.759  | 464.104 | 45.871 | 45.064 | 0.807  |
| 1993          | 32768  | 3226.680 | 3119.826 | 106.855  | 0.326  | 3.312  | 460.480 | 45.344 | 43.842 | 1.502  |
| 1994          | 33005  | 3277.266 | 3107.690 | 169.576  | 0.514  | 5.174  | 456.915 | 45.370 | 43.022 | 2.348  |
| 1995          | 33730  | 3309.378 | 3067.094 | 242.285  | 0.718  | 7.321  | 459.716 | 45.104 | 41.802 | 3.302  |
| 1996          | 33750  | 3312.987 | 2985.908 | 327.079  | 0.969  | 9.873  | 454.019 | 44.568 | 40.168 | 4.400  |
| 1997          | 33699  | 3267.066 | 2858.914 | 408.151  | 1.211  | 12.493 | 447.056 | 43.341 | 37.927 | 5.415  |
| 1998          | 33274  | 3178.725 | 2692.826 | 485.899  | 1.460  | 15.286 | 435.211 | 41.577 | 35.221 | 6.355  |
| 1999          | 33891  | 3120.351 | 2556.220 | 564.131  | 1.665  | 18.079 | 437.317 | 40.264 | 32.985 | 7.279  |
| 2000          | 33827  | 3142.808 | 2484.319 | 658.490  | 1.947  | 20.952 | 431.074 | 40.050 | 31.659 | 8.391  |
| 2001          | 32506  | 2961.588 | 2256.192 | 705.397  | 2.170  | 23.818 | 409.647 | 37.323 | 28.433 | 8.890  |
| 2002          | 32078  | 2940.627 | 2148.139 | 792.488  | 2.471  | 26.950 | 400.295 | 36.695 | 26.806 | 9.889  |
| 2003          | 30568  | 2819.545 | 1978.175 | 841.369  | 2.752  | 29.841 | 377.883 | 34.855 | 24.454 | 10.401 |
| 2004          | 29388  | 2730.466 | 1836.344 | 894.122  | 3.042  | 32.746 | 359.671 | 33.417 | 22.474 | 10.943 |
| 2005          | 27954  | 2670.510 | 1726.004 | 944.507  | 3.379  | 35.368 | 338.339 | 32.322 | 20.891 | 11.432 |
| 2006          | 27201  | 2623.285 | 1627.959 | 995.326  | 3.659  | 37.942 | 326.354 | 31.474 | 19.532 | 11.942 |
| 2007          | 26302  | 2536.599 | 1513.783 | 1022.816 | 3.889  | 40.322 | 312.424 | 30.131 | 17.981 | 12.149 |
| 2008          | 25998  | 2469.443 | 1418.896 | 1050.548 | 4.041  | 42.542 | 305.468 | 29.015 | 16.672 | 12.344 |
| 2009          | 25040  | 2386.945 | 1322.386 | 1064.559 | 4.251  | 44.599 | 290.901 | 27.730 | 15.363 | 12.367 |
| 2010          | 24840  | 2329.274 | 1246.581 | 1082.694 | 4.359  | 46.482 | 285.273 | 26.750 | 14.316 | 12.434 |
| 2011          | 24792  | 2286.581 | 1179.172 | 1107.409 | 4.467  | 48.431 | 282.045 | 26.013 | 13.415 | 12.598 |
| 2012          | 24500  | 2243.311 | 1115.733 | 1127.578 | 4.602  | 50.264 | 275.872 | 25.260 | 12.563 | 12.697 |
| 2013          | 24451  | 2176.503 | 1045.091 | 1131.412 | 4.627  | 51.983 | 272.368 | 24.245 | 11.642 | 12.603 |
| 2014          | 25296  | 2211.619 | 1027.662 | 1183.957 | 4.680  | 53.534 | 278.691 | 24.366 | 11.322 | 13.044 |
| 2015          | 26316  | 2237.016 | 1013.967 | 1223.049 | 4.648  | 54.673 | 324.141 | 27.554 | 12.489 | 15.065 |
| 2016          | 26735  | 2229.057 | 983.436  | 1245.621 | 4.659  | 55.881 | 326.164 | 27.194 | 11.998 | 15.196 |
| 2017          | 27616  | 2221.649 | 955.993  | 1265.657 | 4.583  | 56.969 | 333.726 | 26.848 | 11.553 | 15.295 |
| 2018          | 25256  | 1939.420 | 816.241  | 1123.179 | 4.447  | 57.913 | 302.304 | 23.214 | 9.770  | 13.444 |
| 2019          | 25429  | 1904.400 | 782.787  | 1121.613 | 4.411  | 58.896 | 301.434 | 22.574 | 9.279  | 13.295 |
| 2020          | 25379  | 1806.054 | 727.880  | 1078.174 | 4.248  | 59.698 | 340.922 | 24.261 | 9.778  | 14.483 |
| 2021          | 25448  | 1748.172 | 687.708  | 1060.465 | 4.167  | 60.661 | 339.386 | 23.314 | 9.172  | 14.143 |
| 2022          | 25539  | 1701.148 | 656.932  | 1044.216 | 4.089  | 61.383 | 338.015 | 22.515 | 8.695  | 13.820 |
| 2023          | 25620  | 1652.087 | 629.664  | 1022.423 | 3.991  | 61.887 | 336.461 | 21.696 | 8.269  | 13.427 |
| 2024          | 25659  | 1597.127 | 599.407  | 997.719  | 3.888  | 62.470 | 334.391 | 20.814 | 7.812  | 13.002 |
| 2025          | 25260  | 1467.622 | 542.487  | 925.135  | 3.663  | 63.036 | 379.931 | 22.075 | 8.160  | 13.915 |
| 2026          | 25480  | 1390.505 | 507.902  | 882.603  | 3.464  | 63.474 | 381.790 | 20.835 | 7.610  | 13.225 |
| 2027          | 25264  | 1342.095 | 484.333  | 857.763  | 3.395  | 63.912 | 377.042 | 20.030 | 7.228  | 12.801 |
| 2028          | 25022  | 1289.536 | 461.408  | 828.128  | 3.310  | 64.219 | 371.870 | 19.165 | 6.857  | 12.308 |
| 2029          | 24767  | 1242.216 | 440.759  | 801.457  | 3.236  | 64.518 | 366.459 | 18.380 | 6.522  | 11.859 |
| 2030          | 23959  | 1096.803 | 381.580  | 715.224  | 2.985  | 65.210 | 419.641 | 19.210 | 6.683  | 12.527 |
| 2031          | 23963  | 1019.991 | 353.743  | 666.248  | 2.780  | 65.319 | 419.142 | 17.841 | 6.187  | 11.654 |
| 2032          | 23615  | 977.406  | 336.977  | 640.429  | 2.712  | 65.523 | 412.259 | 17.063 | 5.883  | 11.180 |
| 2033          | 23259  | 937.450  | 322.767  | 614.683  | 2.643  | 65.570 | 405.051 | 16.326 | 5.621  | 10.705 |
| 2034          | 22879  | 900.763  | 308.431  | 592.332  | 2.589  | 65.759 | 397.339 | 15.644 | 5.357  | 10.287 |
| 2035          | 21733  | 745.023  | 251.060  | 493.963  | 2.273  | 66.302 | 462.224 | 15.845 | 5.340  | 10.506 |
| 2036          | 20904  | 680.360  | 226.403  | 453.956  | 2.172  | 66.723 | 445.263 | 14.492 | 4.822  | 9.669  |
| 2037          | 20397  | 644.109  | 213.631  | 430.479  | 2.111  | 66.833 | 434.791 | 13.730 | 4.554  | 9.176  |
| 2038          | 19890  | 612.448  | 202.880  | 409.568  | 2.059  | 66.874 | 423.966 | 13.055 | 4.324  | 8.730  |
| 2039          | 19392  | 577.529  | 191.896  | 385.634  | 1.989  | 66.773 | 412.930 | 12.298 | 4.086  | 8.212  |



## Results for PHIM for Run 10 (Sensitivity\_Analysis\_1.RTF)

\*\*\*\*\*

### Main Results for E-Component for Run: 10, Simulation: 1, COD: COPD

| Variable Parameter          | Value                                  |
|-----------------------------|----------------------------------------|
| 1. Country                  | US (United States)                     |
| 2. Sex                      | F (Females)                            |
| 3. Year of start of process | 1990                                   |
| 4. Cause of Death           | COPD                                   |
| 5. Effective Dose NULL      | CC:1                                   |
| 6. Effective Dose Ecig      | CC:1 Ecig:0.3 Dual:0.65                |
| Note:                       | Death rates are per million population |

#### Results for Age Groups Combined and Years combined, Population unadjusted for deaths in Ecig scenario,

| Age Group:All |         | NULL       | Ecig       | %Drop    |        |        | NULL    | Ecig    | Drop    |        |
|---------------|---------|------------|------------|----------|--------|--------|---------|---------|---------|--------|
| Year          | Number  | Attrib     | Attrib     | Drop     | %Drop  | Attrib | Death   | Attrib  | Attrib  | Drop   |
|               | Deaths  | Deaths     | Deaths     | Deaths   | Deaths | Deaths | Rate    | Rates   | Rates   | Rates  |
| All Comb      | 2159941 | 862051.244 | 651907.310 | 210143.9 | 9.729  | 24.377 | 593.003 | 236.673 | 178.979 | 57.694 |

#### Results for Age Groups Combined, Population unadjusted for deaths in Ecig scenario,

| Age Group:All |        | NULL      | Ecig      | %Drop    |        |        | NULL    | Ecig    | Drop    |         |
|---------------|--------|-----------|-----------|----------|--------|--------|---------|---------|---------|---------|
| Year          | Number | Attrib    | Attrib    | Drop     | %Drop  | Attrib | Death   | Attrib  | Attrib  | Drop    |
|               | Deaths | Deaths    | Deaths    | Deaths   | Deaths | Deaths | Rate    | Rates   | Rates   | Rates   |
| 1990          | 24738  | 10694.712 | 10694.712 | 0.000    | 0.000  | 0.000  | 362.296 | 156.628 | 156.628 | 0.000   |
| 1991          | 26562  | 11602.933 | 11589.174 | 13.759   | 0.052  | 0.119  | 383.818 | 167.661 | 167.462 | 0.199   |
| 1992          | 26828  | 11831.375 | 11794.170 | 37.205   | 0.139  | 0.314  | 382.401 | 168.642 | 168.112 | 0.530   |
| 1993          | 29774  | 13246.371 | 13166.217 | 80.155   | 0.269  | 0.605  | 418.406 | 186.148 | 185.021 | 1.126   |
| 1994          | 29804  | 13355.662 | 13228.982 | 126.679  | 0.425  | 0.949  | 412.601 | 184.893 | 183.140 | 1.754   |
| 1995          | 29755  | 13397.439 | 13208.886 | 188.554  | 0.634  | 1.407  | 405.540 | 182.598 | 180.028 | 2.570   |
| 1996          | 30900  | 13960.356 | 13698.167 | 262.189  | 0.849  | 1.878  | 415.680 | 187.801 | 184.274 | 3.527   |
| 1997          | 31128  | 14109.552 | 13769.377 | 340.175  | 1.093  | 2.411  | 412.949 | 187.180 | 182.667 | 4.513   |
| 1998          | 32096  | 14599.657 | 14155.384 | 444.273  | 1.384  | 3.043  | 419.803 | 190.958 | 185.147 | 5.811   |
| 1999          | 34616  | 15728.102 | 15155.825 | 572.277  | 1.653  | 3.639  | 446.673 | 202.950 | 195.565 | 7.384   |
| 2000          | 34299  | 15579.803 | 14896.192 | 683.611  | 1.993  | 4.388  | 437.088 | 198.541 | 189.829 | 8.712   |
| 2001          | 34592  | 15696.614 | 14873.492 | 823.123  | 2.380  | 5.244  | 435.935 | 197.812 | 187.439 | 10.373  |
| 2002          | 34291  | 15519.777 | 14563.792 | 955.986  | 2.788  | 6.160  | 427.910 | 193.668 | 181.739 | 11.930  |
| 2003          | 35074  | 15888.389 | 14758.507 | 1129.882 | 3.221  | 7.111  | 433.587 | 196.413 | 182.446 | 13.968  |
| 2004          | 33512  | 15091.573 | 13868.242 | 1223.331 | 3.650  | 8.106  | 410.143 | 184.701 | 169.729 | 14.972  |
| 2005          | 35392  | 15803.656 | 14345.485 | 1458.170 | 4.120  | 9.227  | 428.364 | 191.278 | 173.629 | 17.649  |
| 2006          | 33981  | 15100.563 | 13553.379 | 1547.185 | 4.553  | 10.246 | 407.699 | 181.174 | 162.611 | 18.563  |
| 2007          | 34000  | 14974.384 | 13266.477 | 1707.906 | 5.023  | 11.406 | 403.863 | 177.871 | 157.584 | 20.287  |
| 2008          | 37425  | 16406.197 | 14368.868 | 2037.329 | 5.444  | 12.418 | 439.732 | 192.768 | 168.830 | 23.938  |
| 2009          | 36826  | 16083.194 | 13874.720 | 2208.474 | 5.997  | 13.732 | 427.825 | 186.846 | 161.189 | 25.657  |
| 2010          | 36788  | 15927.400 | 13571.966 | 2355.434 | 6.403  | 14.789 | 422.489 | 182.917 | 155.866 | 27.051  |
| 2011          | 37636  | 16221.836 | 13615.091 | 2606.745 | 6.926  | 16.069 | 428.164 | 184.547 | 154.891 | 29.655  |
| 2012          | 38265  | 16358.849 | 13532.891 | 2825.959 | 7.385  | 17.275 | 430.867 | 184.202 | 152.382 | 31.821  |
| 2013          | 40112  | 16994.822 | 13828.917 | 3165.906 | 7.893  | 18.629 | 446.821 | 189.311 | 154.045 | 35.266  |
| 2014          | 40084  | 16855.093 | 13487.598 | 3367.495 | 8.401  | 19.979 | 441.613 | 185.696 | 148.595 | 37.100  |
| 2015          | 42200  | 17572.483 | 13883.491 | 3688.992 | 8.742  | 20.993 | 519.788 | 216.445 | 171.006 | 45.438  |
| 2016          | 42606  | 17579.955 | 13632.661 | 3947.294 | 9.265  | 22.453 | 519.788 | 214.473 | 166.317 | 48.157  |
| 2017          | 44364  | 18080.688 | 13757.747 | 4322.941 | 9.744  | 23.909 | 536.117 | 218.496 | 166.255 | 52.241  |
| 2018          | 45359  | 18209.262 | 13601.398 | 4607.865 | 10.159 | 25.305 | 542.932 | 217.960 | 162.805 | 55.155  |
| 2019          | 46876  | 18648.302 | 13657.474 | 4990.827 | 10.647 | 26.763 | 555.657 | 221.054 | 161.894 | 59.161  |
| 2020          | 48331  | 19002.597 | 13712.858 | 5289.739 | 10.945 | 27.837 | 649.239 | 255.266 | 184.208 | 71.058  |
| 2021          | 48338  | 18885.717 | 13340.840 | 5544.878 | 11.471 | 29.360 | 644.660 | 251.867 | 177.918 | 73.949  |
| 2022          | 49708  | 19235.076 | 13341.681 | 5893.395 | 11.856 | 30.639 | 657.895 | 254.582 | 176.581 | 78.001  |
| 2023          | 51083  | 19521.158 | 13303.174 | 6217.984 | 12.172 | 31.853 | 670.849 | 256.363 | 174.705 | 81.658  |
| 2024          | 52397  | 19918.620 | 13308.052 | 6610.567 | 12.616 | 33.188 | 682.854 | 259.583 | 173.433 | 86.150  |
| 2025          | 53387  | 20150.545 | 13230.750 | 6919.795 | 12.961 | 34.340 | 803.004 | 303.086 | 199.005 | 104.081 |
| 2026          | 54232  | 20393.792 | 13107.163 | 7286.630 | 13.436 | 35.730 | 812.615 | 305.582 | 196.399 | 109.183 |
| 2027          | 55049  | 20615.351 | 12965.933 | 7649.418 | 13.896 | 37.105 | 821.568 | 307.668 | 193.507 | 114.162 |
| 2028          | 55809  | 20731.894 | 12776.806 | 7955.087 | 14.254 | 38.371 | 829.419 | 308.115 | 189.887 | 118.227 |
| 2029          | 56527  | 20781.967 | 12544.335 | 8237.632 | 14.573 | 39.638 | 836.392 | 307.495 | 185.609 | 121.886 |
| 2030          | 56756  | 20753.201 | 12281.634 | 8471.566 | 14.926 | 40.821 | 994.067 | 363.487 | 215.110 | 148.377 |
| 2031          | 58288  | 21048.417 | 12312.872 | 8735.545 | 14.987 | 41.502 | 1019.54 | 368.165 | 215.369 | 152.796 |
| 2032          | 58782  | 21169.329 | 12138.500 | 9030.829 | 15.363 | 42.660 | 1026.18 | 369.560 | 211.906 | 157.654 |
| 2033          | 59236  | 21109.293 | 11901.486 | 9207.807 | 15.544 | 43.620 | 1031.59 | 367.618 | 207.264 | 160.354 |
| 2034          | 59614  | 21109.429 | 11686.192 | 9423.237 | 15.807 | 44.640 | 1035.33 | 366.613 | 202.957 | 163.656 |
| 2035          | 58938  | 20794.840 | 11323.961 | 9470.879 | 16.069 | 45.544 | 1253.51 | 442.268 | 240.840 | 201.428 |
| 2036          | 56014  | 19354.577 | 10341.379 | 9013.198 | 16.091 | 46.569 | 1193.11 | 412.258 | 220.274 | 191.984 |
| 2037          | 55953  | 19064.169 | 9955.439  | 9108.730 | 16.279 | 47.779 | 1192.72 | 406.385 | 212.217 | 194.168 |
| 2038          | 55859  | 18854.812 | 9666.833  | 9187.979 | 16.449 | 48.730 | 1190.66 | 401.900 | 206.053 | 195.846 |
| 2039          | 55757  | 18437.457 | 9268.140  | 9169.317 | 16.445 | 49.732 | 1187.28 | 392.602 | 197.353 | 195.249 |

## Results for PHIM for Run 10 (Sensitivity\_Analysis\_1.RTF)

\*\*\*\*\*

### Main Results for E-Component for Run: 10, Simulation: 1, COD: Four Diseases Combined, Adjusted

| Variable Parameter          | Value                                  |
|-----------------------------|----------------------------------------|
| 1. Country                  | US (United States)                     |
| 2. Sex                      | F (Females)                            |
| 3. Year of start of process | 1990                                   |
| 4. Cause of Death           | Four Diseases Combined                 |
| 5. Effective Dose NULL      | CC:1                                   |
| 6. Effective Dose Ecig      | CC:1 Ecig:0.3 Dual:0.65                |
| Note:                       | Death rates are per million population |

#### Results for Age Groups Combined and Years combined, Population and Number deaths adjusted for Ecig scenario,

| Age Group:All |         | NULL        | Ecig        | %Drop    |        |        | NULL    | Ecig    | Drop    |         |
|---------------|---------|-------------|-------------|----------|--------|--------|---------|---------|---------|---------|
| Year          | Number  | Attrib      | Attrib      | Drop     | %Drop  | Attrib | Death   | Attrib  | Attrib  | Drop    |
|               | Deaths  | Deaths      | Deaths      | Deaths   | Deaths | Deaths | Rate    | Rates   | Rates   | Rates   |
| All Comb      | 9127140 | 2946250.006 | 2308269.703 | 637980.3 | 6.990  | 21.654 | 2497.76 | 808.881 | 631.687 | 177.194 |

#### Results for Age Groups Combined, Population and Number deaths adjusted for Ecig scenario,

| Age Group:All |        | NULL      | Ecig      | %Drop    |        |        | NULL    | Ecig    | Drop    |         |
|---------------|--------|-----------|-----------|----------|--------|--------|---------|---------|---------|---------|
| Year          | Number | Attrib    | Attrib    | Drop     | %Drop  | Attrib | Death   | Attrib  | Attrib  | Drop    |
|               | Deaths | Deaths    | Deaths    | Deaths   | Deaths | Deaths | Rate    | Rates   | Rates   | Rates   |
| 1990          | 199848 | 57524.822 | 57524.822 | 0.000    | 0.000  | 0.000  | 2926.84 | 842.471 | 842.471 | 0.000   |
| 1991          | 199162 | 59078.486 | 58953.560 | 124.926  | 0.063  | 0.211  | 2877.87 | 853.678 | 851.873 | 1.805   |
| 1992          | 198533 | 60494.150 | 60148.252 | 345.898  | 0.174  | 0.572  | 2829.84 | 862.271 | 857.340 | 4.932   |
| 1993          | 202514 | 62694.848 | 62024.262 | 670.585  | 0.331  | 1.070  | 2845.86 | 881.034 | 871.604 | 9.429   |
| 1994          | 200663 | 63202.598 | 62149.095 | 1053.503 | 0.525  | 1.667  | 2777.90 | 874.966 | 860.367 | 14.599  |
| 1995          | 201033 | 63766.862 | 62248.859 | 1518.003 | 0.755  | 2.381  | 2739.85 | 869.097 | 848.382 | 20.716  |
| 1996          | 201196 | 64591.163 | 62522.035 | 2069.128 | 1.028  | 3.203  | 2706.44 | 868.908 | 841.029 | 27.879  |
| 1997          | 198664 | 64686.912 | 62110.962 | 2575.950 | 1.297  | 3.982  | 2635.30 | 858.147 | 823.908 | 34.239  |
| 1998          | 197610 | 65295.961 | 62131.575 | 3164.387 | 1.601  | 4.846  | 2584.36 | 854.046 | 812.563 | 41.483  |
| 1999          | 211384 | 67327.521 | 63266.749 | 4060.773 | 1.921  | 6.031  | 2727.19 | 868.771 | 816.242 | 52.528  |
| 2000          | 208569 | 67596.897 | 62875.377 | 4721.520 | 2.264  | 6.985  | 2657.33 | 861.419 | 801.080 | 60.339  |
| 2001          | 203699 | 67008.811 | 61604.167 | 5404.644 | 2.653  | 8.066  | 2566.35 | 844.458 | 776.134 | 68.324  |
| 2002          | 200946 | 67067.744 | 60896.319 | 6171.425 | 3.071  | 9.202  | 2506.69 | 836.925 | 759.649 | 77.275  |
| 2003          | 196496 | 66756.217 | 59903.278 | 6852.939 | 3.488  | 10.266 | 2428.05 | 825.244 | 740.211 | 85.033  |
| 2004          | 188329 | 65058.725 | 57647.738 | 7410.988 | 3.935  | 11.391 | 2303.71 | 796.234 | 705.168 | 91.066  |
| 2005          | 186617 | 65214.724 | 57050.832 | 8163.892 | 4.375  | 12.518 | 2257.31 | 789.321 | 690.085 | 99.236  |
| 2006          | 180318 | 63771.146 | 55057.145 | 8714.001 | 4.833  | 13.664 | 2161.87 | 765.117 | 660.091 | 105.026 |
| 2007          | 175905 | 63110.718 | 53840.305 | 9270.413 | 5.270  | 14.689 | 2087.71 | 749.650 | 638.999 | 110.651 |
| 2008          | 177875 | 63718.624 | 53619.661 | 10098.96 | 5.678  | 15.849 | 2087.97 | 748.674 | 629.412 | 119.262 |
| 2009          | 173144 | 62794.698 | 52189.339 | 10605.36 | 6.125  | 16.889 | 2009.31 | 729.515 | 605.648 | 123.867 |
| 2010          | 170866 | 61917.074 | 50801.409 | 11115.66 | 6.505  | 17.953 | 1959.90 | 711.083 | 582.711 | 128.372 |
| 2011          | 170727 | 61680.114 | 49835.959 | 11844.15 | 6.937  | 19.203 | 1939.61 | 701.700 | 566.181 | 135.519 |
| 2012          | 171893 | 62023.127 | 49399.438 | 12623.69 | 7.344  | 20.353 | 1932.60 | 698.386 | 555.399 | 142.987 |
| 2013          | 173227 | 62037.765 | 48690.821 | 13346.94 | 7.705  | 21.514 | 1926.40 | 691.059 | 541.474 | 149.585 |
| 2014          | 174756 | 61921.017 | 47793.157 | 14127.86 | 8.084  | 22.816 | 1921.77 | 682.195 | 525.576 | 156.619 |
| 2015          | 178012 | 61856.204 | 47087.455 | 14768.75 | 8.296  | 23.876 | 2187.66 | 761.899 | 578.676 | 183.223 |
| 2016          | 177570 | 60464.119 | 45178.651 | 15285.47 | 8.608  | 25.280 | 2160.98 | 737.655 | 549.814 | 187.841 |
| 2017          | 180102 | 60243.839 | 44245.276 | 15998.56 | 8.883  | 26.556 | 2170.61 | 728.017 | 533.250 | 194.767 |
| 2018          | 178009 | 60713.327 | 44115.466 | 16597.86 | 9.324  | 27.338 | 2124.55 | 726.721 | 526.520 | 200.201 |
| 2019          | 180163 | 61148.172 | 43737.478 | 17410.69 | 9.664  | 28.473 | 2128.96 | 724.841 | 516.840 | 208.002 |
| 2020          | 181492 | 61149.317 | 43260.513 | 17888.80 | 9.857  | 29.254 | 2428.81 | 821.432 | 578.931 | 242.502 |
| 2021          | 179203 | 58727.786 | 40578.813 | 18148.97 | 10.128 | 30.904 | 2380.25 | 783.216 | 538.983 | 244.232 |
| 2022          | 180584 | 58848.802 | 40077.407 | 18771.40 | 10.395 | 31.898 | 2379.76 | 778.881 | 528.146 | 250.734 |
| 2023          | 181906 | 58816.149 | 39505.841 | 19310.31 | 10.616 | 32.832 | 2377.92 | 772.407 | 516.432 | 255.975 |
| 2024          | 182967 | 58955.232 | 39008.586 | 19946.65 | 10.902 | 33.834 | 2372.87 | 768.316 | 505.894 | 262.422 |
| 2025          | 181867 | 58297.744 | 38136.142 | 20161.60 | 11.086 | 34.584 | 2719.56 | 876.861 | 570.270 | 306.592 |
| 2026          | 181859 | 56469.971 | 36149.593 | 20320.38 | 11.174 | 35.984 | 2708.25 | 846.150 | 538.340 | 307.810 |
| 2027          | 181252 | 56209.427 | 35404.042 | 20805.39 | 11.479 | 37.014 | 2687.56 | 838.883 | 524.963 | 313.920 |
| 2028          | 180482 | 55733.105 | 34578.265 | 21154.84 | 11.721 | 37.957 | 2664.10 | 828.298 | 510.410 | 317.888 |
| 2029          | 179615 | 55145.838 | 33674.738 | 21471.10 | 11.954 | 38.935 | 2638.74 | 815.951 | 494.718 | 321.233 |
| 2030          | 175475 | 53615.097 | 32334.648 | 21280.45 | 12.127 | 39.691 | 3047.51 | 939.056 | 561.563 | 377.493 |
| 2031          | 177012 | 52046.561 | 30965.395 | 21081.17 | 11.909 | 40.504 | 3068.92 | 910.364 | 536.858 | 373.505 |
| 2032          | 175513 | 51582.636 | 30243.971 | 21338.66 | 12.158 | 41.368 | 3035.88 | 900.496 | 523.136 | 377.360 |
| 2033          | 173956 | 50839.758 | 29444.536 | 21395.22 | 12.299 | 42.084 | 3000.53 | 885.375 | 507.883 | 377.491 |
| 2034          | 172254 | 50215.451 | 28691.036 | 21524.41 | 12.496 | 42.864 | 2961.95 | 872.104 | 493.348 | 378.756 |
| 2035          | 164981 | 47773.075 | 27057.146 | 20715.93 | 12.557 | 43.363 | 3468.04 | 1016.05 | 568.764 | 447.282 |
| 2036          | 158604 | 43298.709 | 23992.372 | 19306.34 | 12.173 | 44.589 | 3337.60 | 922.274 | 504.886 | 417.388 |
| 2037          | 155999 | 42241.563 | 23007.213 | 19234.35 | 12.330 | 45.534 | 3284.04 | 900.450 | 484.340 | 416.111 |
| 2038          | 153405 | 41356.353 | 22237.567 | 19118.79 | 12.463 | 46.229 | 3228.03 | 881.531 | 467.934 | 413.597 |
| 2039          | 150882 | 40161.050 | 21272.439 | 18888.61 | 12.519 | 47.032 | 3170.52 | 855.178 | 447.001 | 408.176 |

## Results for PHIM for Run 10 (Sensitivity\_Analysis\_1.RTF)

\*\*\*\*\*

### Main Results for E-Component for Run: 10, Simulation: 1, COD: LUNG CANCER, Adjusted

| Variable Parameter          | Value                                  |
|-----------------------------|----------------------------------------|
| 1. Country                  | US (United States)                     |
| 2. Sex                      | F (Females)                            |
| 3. Year of start of process | 1990                                   |
| 4. Cause of Death           | LUNG CANCER                            |
| 5. Effective Dose NULL      | CC:1                                   |
| 6. Effective Dose Ecig      | CC:1 Ecig:0.3 Dual:0.65                |
| Note:                       | Death rates are per million population |

#### Results for Age Groups Combined and Years combined, Population and Number deaths adjusted for Ecig scenario,

| Age Group:All | NULL    | Ecig        | %Drop       |          |        |        | NULL    | Ecig    | Drop    |        |
|---------------|---------|-------------|-------------|----------|--------|--------|---------|---------|---------|--------|
| Year          | Number  | Attrib      | Attrib      | Drop     | %Drop  | Attrib | Death   | Attrib  | Attrib  | Drop   |
|               | Deaths  | Deaths      | Deaths      | Deaths   | Deaths | Deaths | Rate    | Rates   | Rates   | Rates  |
| All Comb      | 2338762 | 1580465.217 | 1325678.382 | 254786.8 | 10.894 | 16.121 | 640.032 | 433.910 | 362.789 | 71.122 |

#### Results for Age Groups Combined, Population and Number deaths adjusted for Ecig scenario,

| Age Group:All | NULL   | Ecig      | %Drop     |          |        |        | NULL    | Ecig    | Drop    |         |
|---------------|--------|-----------|-----------|----------|--------|--------|---------|---------|---------|---------|
| Year          | Number | Attrib    | Attrib    | Drop     | %Drop  | Attrib | Death   | Attrib  | Attrib  | Drop    |
|               | Deaths | Deaths    | Deaths    | Deaths   | Deaths | Deaths | Rate    | Rates   | Rates   | Rates   |
| 1990          | 42690  | 30614.201 | 30614.201 | 0.000    | 0.000  | 0.000  | 625.210 | 448.355 | 448.355 | 0.000   |
| 1991          | 43692  | 31412.010 | 31387.908 | 24.103   | 0.055  | 0.077  | 631.345 | 453.901 | 453.552 | 0.348   |
| 1992          | 45423  | 32782.407 | 32713.347 | 69.059   | 0.152  | 0.211  | 647.451 | 467.274 | 466.289 | 0.985   |
| 1993          | 46291  | 33491.183 | 33355.055 | 136.128  | 0.294  | 0.406  | 650.517 | 470.643 | 468.726 | 1.916   |
| 1994          | 47018  | 34074.347 | 33855.156 | 219.192  | 0.466  | 0.643  | 650.901 | 471.719 | 468.677 | 3.042   |
| 1995          | 47842  | 34694.454 | 34364.559 | 329.895  | 0.690  | 0.951  | 652.038 | 472.861 | 468.350 | 4.511   |
| 1996          | 48248  | 35027.269 | 34573.968 | 453.301  | 0.940  | 1.294  | 649.020 | 471.202 | 465.080 | 6.122   |
| 1997          | 49041  | 35590.763 | 34992.559 | 598.204  | 1.220  | 1.681  | 650.539 | 472.153 | 464.180 | 7.973   |
| 1998          | 49696  | 36100.785 | 35331.954 | 768.830  | 1.547  | 2.130  | 649.923 | 472.184 | 462.075 | 10.109  |
| 1999          | 48896  | 35451.030 | 34533.641 | 917.389  | 1.876  | 2.588  | 630.837 | 457.448 | 445.539 | 11.908  |
| 2000          | 50349  | 36447.986 | 35303.721 | 1144.265 | 2.273  | 3.139  | 641.487 | 464.474 | 449.796 | 14.678  |
| 2001          | 50413  | 36411.326 | 35042.633 | 1368.694 | 2.715  | 3.759  | 635.136 | 458.863 | 441.493 | 17.370  |
| 2002          | 51476  | 37078.545 | 35432.271 | 1646.274 | 3.198  | 4.440  | 642.133 | 462.696 | 441.999 | 20.697  |
| 2003          | 51446  | 36999.876 | 35093.919 | 1905.957 | 3.705  | 5.151  | 635.711 | 457.395 | 433.647 | 23.747  |
| 2004          | 51446  | 36861.555 | 34674.456 | 2187.099 | 4.251  | 5.933  | 629.305 | 451.138 | 424.151 | 26.987  |
| 2005          | 51477  | 36689.529 | 34210.338 | 2479.191 | 4.816  | 6.757  | 622.662 | 444.069 | 413.807 | 30.261  |
| 2006          | 51421  | 36504.774 | 33725.838 | 2778.936 | 5.404  | 7.613  | 616.494 | 437.979 | 404.346 | 33.633  |
| 2007          | 51916  | 36663.202 | 33527.264 | 3135.938 | 6.040  | 8.553  | 616.163 | 435.498 | 397.915 | 37.582  |
| 2008          | 51063  | 35898.803 | 32509.725 | 3389.078 | 6.637  | 9.441  | 599.405 | 421.800 | 381.614 | 40.186  |
| 2009          | 51293  | 35934.525 | 32173.373 | 3761.153 | 7.333  | 10.467 | 595.247 | 417.468 | 373.367 | 44.101  |
| 2010          | 50965  | 35502.829 | 31456.557 | 4046.272 | 7.939  | 11.397 | 584.589 | 407.730 | 360.818 | 46.912  |
| 2011          | 50633  | 35136.342 | 30751.717 | 4384.625 | 8.660  | 12.479 | 575.241 | 399.726 | 349.367 | 50.359  |
| 2012          | 51386  | 35450.201 | 30651.995 | 4798.206 | 9.338  | 13.535 | 577.728 | 399.173 | 344.621 | 54.552  |
| 2013          | 51224  | 35123.224 | 29957.067 | 5166.157 | 10.085 | 14.709 | 569.646 | 391.249 | 333.142 | 58.107  |
| 2014          | 51423  | 35079.370 | 29529.059 | 5550.311 | 10.794 | 15.822 | 565.489 | 386.476 | 324.728 | 61.748  |
| 2015          | 50629  | 34324.171 | 28550.929 | 5773.242 | 11.403 | 16.820 | 622.198 | 422.780 | 350.873 | 71.906  |
| 2016          | 49051  | 33054.753 | 27087.737 | 5967.015 | 12.165 | 18.052 | 596.935 | 403.264 | 329.652 | 73.612  |
| 2017          | 48537  | 32471.234 | 26201.402 | 6269.832 | 12.918 | 19.309 | 584.978 | 392.399 | 315.783 | 76.616  |
| 2018          | 50705  | 33657.595 | 26689.238 | 6968.357 | 13.743 | 20.704 | 605.167 | 402.871 | 318.537 | 84.334  |
| 2019          | 51299  | 33863.424 | 26421.878 | 7441.546 | 14.506 | 21.975 | 606.195 | 401.412 | 312.224 | 89.188  |
| 2020          | 51731  | 33910.830 | 26113.932 | 7796.897 | 15.072 | 22.992 | 692.287 | 455.532 | 349.468 | 106.064 |
| 2021          | 48326  | 31531.880 | 23856.656 | 7675.224 | 15.882 | 24.341 | 641.886 | 420.521 | 316.873 | 103.648 |
| 2022          | 48647  | 31560.212 | 23508.091 | 8052.122 | 16.552 | 25.514 | 641.075 | 417.708 | 309.793 | 107.915 |
| 2023          | 48934  | 31508.781 | 23113.408 | 8395.373 | 17.157 | 26.645 | 639.680 | 413.791 | 302.145 | 111.646 |
| 2024          | 49142  | 31517.293 | 22749.430 | 8767.863 | 17.842 | 27.819 | 637.317 | 410.740 | 295.032 | 115.707 |
| 2025          | 48859  | 31175.389 | 22192.212 | 8983.177 | 18.386 | 28.815 | 730.610 | 468.912 | 331.852 | 137.060 |
| 2026          | 45707  | 29044.598 | 20331.901 | 8712.696 | 19.062 | 29.998 | 680.672 | 435.206 | 302.783 | 132.423 |
| 2027          | 45511  | 28825.765 | 19846.181 | 8979.583 | 19.730 | 31.151 | 674.831 | 430.203 | 294.275 | 135.928 |
| 2028          | 45267  | 28513.846 | 19325.664 | 9188.181 | 20.298 | 32.224 | 668.180 | 423.769 | 285.267 | 138.503 |
| 2029          | 44985  | 28148.109 | 18764.084 | 9384.025 | 20.860 | 33.338 | 660.875 | 416.486 | 275.664 | 140.822 |
| 2030          | 43857  | 27314.475 | 17957.527 | 9356.948 | 21.335 | 34.256 | 761.678 | 478.407 | 311.872 | 166.534 |
| 2031          | 41214  | 25423.102 | 16540.428 | 8882.673 | 21.552 | 34.939 | 714.550 | 444.684 | 286.767 | 157.916 |
| 2032          | 40811  | 25085.902 | 16084.050 | 9001.851 | 22.058 | 35.884 | 705.911 | 437.933 | 278.209 | 159.724 |
| 2033          | 40386  | 24645.067 | 15601.447 | 9043.620 | 22.393 | 36.695 | 696.612 | 429.194 | 269.106 | 160.087 |
| 2034          | 39926  | 24239.126 | 15141.652 | 9097.475 | 22.786 | 37.532 | 686.538 | 420.967 | 260.364 | 160.603 |
| 2035          | 37986  | 22944.147 | 14183.459 | 8760.688 | 23.063 | 38.183 | 798.507 | 487.980 | 298.148 | 189.832 |
| 2036          | 33478  | 19950.581 | 12133.425 | 7817.155 | 23.350 | 39.183 | 704.493 | 424.953 | 255.331 | 169.622 |
| 2037          | 32903  | 19415.334 | 11615.776 | 7799.558 | 23.705 | 40.172 | 692.668 | 413.871 | 244.531 | 169.339 |
| 2038          | 32330  | 18939.317 | 11200.334 | 7738.983 | 23.938 | 40.862 | 680.301 | 403.701 | 235.683 | 168.018 |
| 2039          | 31771  | 18379.752 | 10705.259 | 7674.492 | 24.156 | 41.755 | 667.605 | 391.373 | 224.951 | 166.422 |

## Results for PHIM for Run 10 (Sensitivity\_Analysis\_1.RTF)

\*\*\*\*\*

### Main Results for E-Component for Run: 10, Simulation: 1, COD: IHD, Adjusted

| Variable Parameter          | Value                                  |
|-----------------------------|----------------------------------------|
| 1. Country                  | US (United States)                     |
| 2. Sex                      | F (Females)                            |
| 3. Year of start of process | 1990                                   |
| 4. Cause of Death           | IHD                                    |
| 5. Effective Dose NULL      | CC:1                                   |
| 6. Effective Dose Ecig      | CC:1 Ecig:0.3 Dual:0.65                |
| Note:                       | Death rates are per million population |

### Results for Age Groups Combined and Years combined, Population and Number deaths adjusted for Ecig scenario,

| Age Group:All | NULL    | Ecig       | %Drop      |          |        |        | NULL    | Ecig    | Drop   |        |
|---------------|---------|------------|------------|----------|--------|--------|---------|---------|--------|--------|
| Year          | Number  | Attrib     | Attrib     | Drop     | %Drop  | Attrib | Death   | Attrib  | Attrib | Drop   |
|               | Deaths  | Deaths     | Deaths     | Deaths   | Deaths | Deaths | Rate    | Rates   | Rates  | Rates  |
| All Comb      | 3255407 | 398833.796 | 260201.587 | 138632.2 | 4.259  | 34.759 | 890.883 | 109.498 | 71.207 | 38.291 |

### Results for Age Groups Combined, Population and Number deaths adjusted for Ecig scenario,

| Age Group:All | NULL   | Ecig      | %Drop     |          |        |        | NULL    | Ecig    | Drop    |        |
|---------------|--------|-----------|-----------|----------|--------|--------|---------|---------|---------|--------|
| Year          | Number | Attrib    | Attrib    | Drop     | %Drop  | Attrib | Death   | Attrib  | Attrib  | Drop   |
|               | Deaths | Deaths    | Deaths    | Deaths   | Deaths | Deaths | Rate    | Rates   | Rates   | Rates  |
| 1990          | 98916  | 12922.892 | 12922.892 | 0.000    | 0.000  | 0.000  | 1448.66 | 189.260 | 189.260 | 0.000  |
| 1991          | 96403  | 12856.479 | 12789.779 | 66.701   | 0.069  | 0.519  | 1393.01 | 185.775 | 184.811 | 0.964  |
| 1992          | 93721  | 12662.244 | 12479.184 | 183.060  | 0.195  | 1.446  | 1335.88 | 180.485 | 177.875 | 2.610  |
| 1993          | 93680  | 12730.613 | 12382.995 | 347.618  | 0.371  | 2.731  | 1316.45 | 178.900 | 174.014 | 4.886  |
| 1994          | 90834  | 12495.323 | 11956.852 | 538.471  | 0.593  | 4.309  | 1257.47 | 172.983 | 165.526 | 7.457  |
| 1995          | 89702  | 12365.590 | 11607.532 | 758.058  | 0.845  | 6.130  | 1222.54 | 168.534 | 158.198 | 10.337 |
| 1996          | 88293  | 12290.551 | 11262.619 | 1027.933 | 1.164  | 8.364  | 1187.70 | 165.338 | 151.502 | 13.836 |
| 1997          | 84788  | 11719.531 | 10487.968 | 1231.564 | 1.453  | 10.509 | 1124.72 | 155.473 | 139.124 | 16.349 |
| 1998          | 82532  | 11416.794 | 9948.237  | 1468.558 | 1.779  | 12.863 | 1079.36 | 149.327 | 130.104 | 19.223 |
| 1999          | 93963  | 13028.038 | 11016.411 | 2011.627 | 2.141  | 15.441 | 1212.28 | 168.109 | 142.129 | 25.980 |
| 2000          | 90070  | 12426.299 | 10184.973 | 2241.326 | 2.488  | 18.037 | 1147.56 | 158.354 | 129.764 | 28.590 |
| 2001          | 86158  | 11939.281 | 9423.854  | 2515.428 | 2.920  | 21.069 | 1085.48 | 150.461 | 118.729 | 31.733 |
| 2002          | 83062  | 11528.794 | 8742.215  | 2786.579 | 3.355  | 24.171 | 1036.16 | 143.865 | 109.055 | 34.811 |
| 2003          | 79360  | 11048.407 | 8060.251  | 2988.156 | 3.765  | 27.046 | 980.629 | 136.581 | 99.599  | 36.982 |
| 2004          | 73927  | 10375.132 | 7254.363  | 3120.769 | 4.221  | 30.079 | 904.303 | 126.978 | 88.738  | 38.240 |
| 2005          | 71726  | 10051.029 | 6751.435  | 3299.594 | 4.600  | 32.828 | 867.593 | 121.652 | 81.665  | 39.987 |
| 2006          | 67637  | 9542.523  | 6130.278  | 3412.246 | 5.045  | 35.758 | 810.910 | 114.490 | 73.497  | 40.993 |
| 2007          | 63597  | 8936.533  | 5510.405  | 3426.129 | 5.387  | 38.338 | 754.792 | 106.151 | 65.400  | 40.751 |
| 2008          | 63278  | 8944.180  | 5294.452  | 3649.728 | 5.768  | 40.806 | 742.789 | 105.091 | 62.149  | 42.943 |
| 2009          | 59863  | 8390.033  | 4788.461  | 3601.572 | 6.016  | 42.927 | 694.700 | 97.471  | 55.569  | 41.902 |
| 2010          | 58135  | 8157.570  | 4492.753  | 3664.816 | 6.304  | 44.925 | 666.832 | 93.685  | 51.534  | 42.152 |
| 2011          | 57509  | 8035.356  | 4252.485  | 3782.871 | 6.578  | 47.078 | 653.350 | 91.414  | 48.312  | 43.102 |
| 2012          | 57567  | 7970.766  | 4057.451  | 3913.315 | 6.798  | 49.096 | 647.229 | 89.752  | 45.618  | 44.134 |
| 2013          | 57239  | 7743.216  | 3813.146  | 3930.070 | 6.866  | 50.755 | 636.541 | 86.254  | 42.405  | 43.849 |
| 2014          | 57729  | 7774.935  | 3698.782  | 4076.153 | 7.061  | 52.427 | 634.840 | 85.658  | 40.675  | 44.983 |
| 2015          | 58608  | 7722.535  | 3582.464  | 4140.071 | 7.064  | 53.610 | 720.261 | 95.120  | 44.026  | 51.094 |
| 2016          | 58892  | 7600.353  | 3414.336  | 4186.018 | 7.108  | 55.077 | 716.705 | 92.723  | 41.552  | 51.172 |
| 2017          | 59261  | 7470.266  | 3263.703  | 4206.563 | 7.098  | 56.311 | 714.216 | 90.274  | 39.335  | 50.940 |
| 2018          | 56342  | 6907.050  | 2937.255  | 3969.795 | 7.046  | 57.475 | 672.439 | 82.675  | 35.056  | 47.619 |
| 2019          | 56172  | 6732.046  | 2797.702  | 3934.345 | 7.004  | 58.442 | 663.778 | 79.801  | 33.060  | 46.741 |
| 2020          | 55622  | 6429.836  | 2621.478  | 3808.358 | 6.847  | 59.229 | 744.361 | 86.373  | 35.082  | 51.292 |
| 2021          | 56628  | 6562.016  | 2605.499  | 3956.517 | 6.987  | 60.294 | 752.149 | 87.513  | 34.607  | 52.906 |
| 2022          | 56184  | 6352.366  | 2476.417  | 3875.949 | 6.899  | 61.016 | 740.400 | 84.075  | 32.635  | 51.441 |
| 2023          | 55716  | 6134.123  | 2359.212  | 3774.911 | 6.775  | 61.540 | 728.341 | 80.557  | 30.840  | 49.716 |
| 2024          | 55169  | 5922.193  | 2244.730  | 3677.462 | 6.666  | 62.096 | 715.481 | 77.179  | 29.111  | 48.068 |
| 2025          | 53714  | 5504.188  | 2057.323  | 3446.864 | 6.417  | 62.623 | 803.219 | 82.789  | 30.764  | 52.025 |
| 2026          | 55738  | 5641.075  | 2082.394  | 3558.682 | 6.385  | 63.085 | 830.050 | 84.526  | 31.011  | 53.515 |
| 2027          | 54677  | 5426.216  | 1981.434  | 3444.781 | 6.300  | 63.484 | 810.738 | 80.982  | 29.380  | 51.602 |
| 2028          | 53586  | 5197.830  | 1882.875  | 3314.955 | 6.186  | 63.776 | 790.980 | 77.249  | 27.793  | 49.456 |
| 2029          | 52486  | 4973.547  | 1789.087  | 3184.460 | 6.067  | 64.028 | 771.080 | 73.590  | 26.284  | 47.306 |
| 2030          | 50004  | 4450.618  | 1572.298  | 2878.320 | 5.756  | 64.672 | 868.422 | 77.952  | 27.306  | 50.645 |
| 2031          | 52568  | 4555.052  | 1606.469  | 2948.583 | 5.609  | 64.732 | 911.392 | 79.674  | 27.852  | 51.822 |
| 2032          | 51273  | 4349.999  | 1526.554  | 2823.445 | 5.507  | 64.907 | 886.874 | 75.939  | 26.405  | 49.534 |
| 2033          | 49989  | 4147.948  | 1455.942  | 2692.006 | 5.385  | 64.900 | 862.250 | 72.237  | 25.113  | 47.123 |
| 2034          | 48696  | 3966.133  | 1386.741  | 2579.392 | 5.297  | 65.035 | 837.342 | 68.881  | 23.845  | 45.036 |
| 2035          | 45139  | 3289.064  | 1126.440  | 2162.625 | 4.791  | 65.752 | 948.867 | 69.952  | 23.679  | 46.274 |
| 2036          | 47021  | 3313.192  | 1125.728  | 2187.464 | 4.652  | 66.023 | 989.487 | 70.572  | 23.689  | 46.883 |
| 2037          | 45518  | 3117.951  | 1056.320  | 2061.632 | 4.529  | 66.121 | 958.233 | 66.464  | 22.237  | 44.227 |
| 2038          | 44058  | 2949.775  | 999.532   | 1950.243 | 4.427  | 66.115 | 927.088 | 62.876  | 21.033  | 41.843 |
| 2039          | 42654  | 2766.312  | 939.883   | 1826.429 | 4.282  | 66.024 | 896.305 | 58.905  | 19.750  | 39.155 |

## Results for PHIM for Run 10 (Sensitivity\_Analysis\_1.RTF)

\*\*\*\*\*

### Main Results for E-Component for Run: 10, Simulation: 1, COD: STROKE, Adjusted

| Variable Parameter          | Value                                  |
|-----------------------------|----------------------------------------|
| 1. Country                  | US (United States)                     |
| 2. Sex                      | F (Females)                            |
| 3. Year of start of process | 1990                                   |
| 4. Cause of Death           | STROKE                                 |
| 5. Effective Dose NULL      | CC:1                                   |
| 6. Effective Dose Ecig      | CC:1 Ecig:0.3 Dual:0.65                |
| Note:                       | Death rates are per million population |

#### Results for Age Groups Combined and Years combined, Population and Number deaths adjusted for Ecig scenario,

| Age Group:All | NULL    | Ecig       | %Drop     |          |        |        | NULL    | Ecig   | Drop   |        |
|---------------|---------|------------|-----------|----------|--------|--------|---------|--------|--------|--------|
| Year          | Number  | Attrib     | Attrib    | Drop     | %Drop  | Attrib | Death   | Attrib | Attrib | Drop   |
|               | Deaths  | Deaths     | Deaths    | Deaths   | Deaths | Deaths | Rate    | Rates  | Rates  | Rates  |
| All Comb      | 1358521 | 104899.750 | 67142.779 | 37756.97 | 2.779  | 35.993 | 371.777 | 28.800 | 18.374 | 10.425 |

#### Results for Age Groups Combined, Population and Number deaths adjusted for Ecig scenario,

| Age Group:All | NULL   | Ecig     | %Drop    |          |        |        | NULL    | Ecig   | Drop   |        |
|---------------|--------|----------|----------|----------|--------|--------|---------|--------|--------|--------|
| Year          | Number | Attrib   | Attrib   | Drop     | %Drop  | Attrib | Death   | Attrib | Attrib | Drop   |
|               | Deaths | Deaths   | Deaths   | Deaths   | Deaths | Deaths | Rate    | Rates  | Rates  | Rates  |
| 1990          | 33504  | 3293.017 | 3293.017 | 0.000    | 0.000  | 0.000  | 490.678 | 48.227 | 48.227 | 0.000  |
| 1991          | 32505  | 3207.063 | 3186.699 | 20.364   | 0.063  | 0.635  | 469.694 | 46.342 | 46.047 | 0.294  |
| 1992          | 32560  | 3218.125 | 3161.517 | 56.608   | 0.174  | 1.759  | 464.104 | 45.871 | 45.064 | 0.807  |
| 1993          | 32768  | 3226.680 | 3119.856 | 106.824  | 0.326  | 3.311  | 460.481 | 45.344 | 43.842 | 1.501  |
| 1994          | 33006  | 3277.266 | 3107.763 | 169.503  | 0.514  | 5.172  | 456.919 | 45.370 | 43.023 | 2.347  |
| 1995          | 33732  | 3309.378 | 3067.231 | 242.147  | 0.718  | 7.317  | 459.723 | 45.104 | 41.803 | 3.302  |
| 1996          | 33753  | 3312.987 | 2986.133 | 326.854  | 0.968  | 9.866  | 454.031 | 44.568 | 40.169 | 4.399  |
| 1997          | 33703  | 3267.066 | 2859.250 | 407.816  | 1.210  | 12.483 | 447.075 | 43.341 | 37.928 | 5.413  |
| 1998          | 33280  | 3178.725 | 2693.288 | 485.437  | 1.459  | 15.271 | 435.238 | 41.577 | 35.223 | 6.353  |
| 1999          | 33899  | 3120.351 | 2556.826 | 563.525  | 1.662  | 18.060 | 437.356 | 40.264 | 32.987 | 7.277  |
| 2000          | 33838  | 3142.808 | 2485.109 | 657.699  | 1.944  | 20.927 | 431.125 | 40.050 | 31.662 | 8.388  |
| 2001          | 32520  | 2961.588 | 2257.122 | 704.466  | 2.166  | 23.787 | 409.713 | 37.323 | 28.437 | 8.886  |
| 2002          | 32096  | 2940.627 | 2149.242 | 791.386  | 2.466  | 26.912 | 400.380 | 36.695 | 26.811 | 9.885  |
| 2003          | 30589  | 2819.545 | 1979.421 | 840.124  | 2.746  | 29.796 | 377.986 | 34.855 | 24.459 | 10.396 |
| 2004          | 29413  | 2730.466 | 1837.731 | 892.735  | 3.035  | 32.695 | 359.795 | 33.417 | 22.480 | 10.938 |
| 2005          | 27983  | 2670.510 | 1727.522 | 942.988  | 3.370  | 35.311 | 338.480 | 32.322 | 20.896 | 11.426 |
| 2006          | 27234  | 2623.285 | 1629.638 | 993.648  | 3.648  | 37.878 | 326.520 | 31.474 | 19.538 | 11.936 |
| 2007          | 26340  | 2536.599 | 1515.571 | 1021.029 | 3.876  | 40.252 | 312.611 | 30.131 | 17.987 | 12.143 |
| 2008          | 26041  | 2469.443 | 1420.803 | 1048.640 | 4.027  | 42.465 | 305.683 | 29.015 | 16.678 | 12.337 |
| 2009          | 25088  | 2386.945 | 1324.394 | 1062.551 | 4.235  | 44.515 | 291.137 | 27.730 | 15.369 | 12.361 |
| 2010          | 24894  | 2329.274 | 1248.702 | 1080.573 | 4.341  | 46.391 | 285.539 | 26.750 | 14.323 | 12.427 |
| 2011          | 24852  | 2286.581 | 1181.403 | 1105.178 | 4.447  | 48.333 | 282.342 | 26.013 | 13.422 | 12.591 |
| 2012          | 24566  | 2243.311 | 1118.046 | 1125.265 | 4.581  | 50.161 | 276.198 | 25.260 | 12.570 | 12.690 |
| 2013          | 24524  | 2176.503 | 1047.477 | 1129.027 | 4.604  | 51.873 | 272.728 | 24.245 | 11.649 | 12.596 |
| 2014          | 25380  | 2211.619 | 1030.235 | 1181.384 | 4.655  | 53.417 | 279.102 | 24.366 | 11.329 | 13.036 |
| 2015          | 26413  | 2237.016 | 1016.773 | 1220.243 | 4.620  | 54.548 | 324.594 | 27.554 | 12.496 | 15.058 |
| 2016          | 26842  | 2229.057 | 986.400  | 1242.657 | 4.629  | 55.748 | 326.663 | 27.194 | 12.004 | 15.190 |
| 2017          | 27737  | 2221.649 | 959.159  | 1262.491 | 4.552  | 56.827 | 334.292 | 26.848 | 11.560 | 15.288 |
| 2018          | 25377  | 1939.420 | 819.194  | 1120.226 | 4.414  | 57.761 | 302.873 | 23.214 | 9.777  | 13.437 |
| 2019          | 25562  | 1904.400 | 785.843  | 1118.556 | 4.376  | 58.735 | 302.059 | 22.574 | 9.286  | 13.288 |
| 2020          | 25524  | 1806.054 | 731.022  | 1075.032 | 4.212  | 59.524 | 341.568 | 24.261 | 9.783  | 14.478 |
| 2021          | 25605  | 1748.172 | 690.925  | 1057.248 | 4.129  | 60.477 | 340.095 | 23.314 | 9.177  | 14.137 |
| 2022          | 25708  | 1701.148 | 660.214  | 1040.934 | 4.049  | 61.190 | 338.782 | 22.515 | 8.700  | 13.815 |
| 2023          | 25802  | 1652.087 | 633.015  | 1019.072 | 3.950  | 61.684 | 337.286 | 21.696 | 8.275  | 13.421 |
| 2024          | 25853  | 1597.127 | 602.786  | 994.340  | 3.846  | 62.258 | 335.276 | 20.814 | 7.817  | 12.997 |
| 2025          | 25465  | 1467.622 | 545.883  | 921.739  | 3.620  | 62.805 | 380.796 | 22.075 | 8.163  | 13.912 |
| 2026          | 25702  | 1390.505 | 511.309  | 879.196  | 3.421  | 63.229 | 382.749 | 20.835 | 7.614  | 13.221 |
| 2027          | 25497  | 1342.095 | 487.762  | 854.333  | 3.351  | 63.657 | 378.063 | 20.030 | 7.232  | 12.797 |
| 2028          | 25266  | 1289.536 | 464.842  | 824.694  | 3.264  | 63.953 | 372.956 | 19.165 | 6.862  | 12.303 |
| 2029          | 25023  | 1242.216 | 444.207  | 798.009  | 3.189  | 64.241 | 367.611 | 18.380 | 6.526  | 11.854 |
| 2030          | 24225  | 1096.803 | 384.944  | 711.859  | 2.939  | 64.903 | 420.720 | 19.210 | 6.685  | 12.525 |
| 2031          | 24245  | 1019.991 | 357.022  | 662.969  | 2.734  | 64.998 | 420.341 | 17.841 | 6.190  | 11.651 |
| 2032          | 23908  | 977.406  | 340.235  | 637.171  | 2.665  | 65.190 | 413.538 | 17.063 | 5.885  | 11.178 |
| 2033          | 23562  | 937.450  | 326.023  | 611.427  | 2.595  | 65.222 | 406.410 | 16.326 | 5.624  | 10.702 |
| 2034          | 23191  | 900.763  | 311.660  | 589.103  | 2.540  | 65.400 | 398.777 | 15.644 | 5.359  | 10.285 |
| 2035          | 22051  | 745.023  | 254.091  | 490.933  | 2.226  | 65.895 | 463.537 | 15.845 | 5.341  | 10.504 |
| 2036          | 21225  | 680.360  | 229.200  | 451.159  | 2.126  | 66.312 | 446.648 | 14.492 | 4.823  | 9.669  |
| 2037          | 20723  | 644.109  | 216.335  | 427.774  | 2.064  | 66.413 | 436.254 | 13.730 | 4.554  | 9.176  |
| 2038          | 20221  | 612.448  | 205.510  | 406.938  | 2.012  | 66.444 | 425.505 | 13.055 | 4.324  | 8.730  |
| 2039          | 19728  | 577.529  | 194.431  | 383.099  | 1.942  | 66.334 | 414.540 | 12.298 | 4.086  | 8.212  |

## Results for PHIM for Run 10 (Sensitivity\_Analysis\_1.RTF)

\*\*\*\*\*

### Main Results for E-Component for Run: 10, Simulation: 1, COD: COPD, Adjusted

| Variable Parameter          | Value                                  |
|-----------------------------|----------------------------------------|
| 1. Country                  | US (United States)                     |
| 2. Sex                      | F (Females)                            |
| 3. Year of start of process | 1990                                   |
| 4. Cause of Death           | COPD                                   |
| 5. Effective Dose NULL      | CC:1                                   |
| 6. Effective Dose Ecig      | CC:1 Ecig:0.3 Dual:0.65                |
| Note:                       | Death rates are per million population |

#### Results for Age Groups Combined and Years combined, Population and Number deaths adjusted for Ecig scenario,

| Age Group:All | NULL    | Ecig       | %Drop      |          |        |        | NULL    | Ecig    | Drop    |        |
|---------------|---------|------------|------------|----------|--------|--------|---------|---------|---------|--------|
| Year          | Number  | Attrib     | Attrib     | Drop     | %Drop  | Attrib | Death   | Attrib  | Attrib  | Drop   |
|               | Deaths  | Deaths     | Deaths     | Deaths   | Deaths | Deaths | Rate    | Rates   | Rates   | Rates  |
| All Comb      | 2174450 | 862051.244 | 655246.955 | 206804.3 | 9.511  | 23.990 | 595.066 | 236.673 | 179.317 | 57.356 |

#### Results for Age Groups Combined, Population and Number deaths adjusted for Ecig scenario,

| Age Group:All | NULL   | Ecig      | %Drop     |          |        |        | NULL    | Ecig    | Drop    |         |
|---------------|--------|-----------|-----------|----------|--------|--------|---------|---------|---------|---------|
| Year          | Number | Attrib    | Attrib    | Drop     | %Drop  | Attrib | Death   | Attrib  | Attrib  | Drop    |
|               | Deaths | Deaths    | Deaths    | Deaths   | Deaths | Deaths | Rate    | Rates   | Rates   | Rates   |
| 1990          | 24738  | 10694.712 | 10694.712 | 0.000    | 0.000  | 0.000  | 362.296 | 156.628 | 156.628 | 0.000   |
| 1991          | 26562  | 11602.933 | 11589.174 | 13.759   | 0.052  | 0.119  | 383.818 | 167.661 | 167.462 | 0.199   |
| 1992          | 26828  | 11831.375 | 11794.204 | 37.171   | 0.139  | 0.314  | 382.401 | 168.642 | 168.112 | 0.530   |
| 1993          | 29774  | 13246.371 | 13166.356 | 80.015   | 0.269  | 0.604  | 418.408 | 186.148 | 185.022 | 1.126   |
| 1994          | 29805  | 13355.662 | 13229.325 | 126.337  | 0.424  | 0.946  | 412.605 | 184.893 | 183.141 | 1.752   |
| 1995          | 29756  | 13397.439 | 13209.537 | 187.902  | 0.631  | 1.403  | 405.547 | 182.598 | 180.031 | 2.567   |
| 1996          | 30903  | 13960.356 | 13699.316 | 261.040  | 0.845  | 1.870  | 415.693 | 187.801 | 184.279 | 3.521   |
| 1997          | 31132  | 14109.552 | 13771.185 | 338.367  | 1.087  | 2.398  | 412.969 | 187.180 | 182.676 | 4.504   |
| 1998          | 32102  | 14599.657 | 14158.096 | 441.562  | 1.375  | 3.024  | 419.834 | 190.958 | 185.161 | 5.797   |
| 1999          | 34625  | 15728.102 | 15159.871 | 568.232  | 1.641  | 3.613  | 446.720 | 202.950 | 195.587 | 7.363   |
| 2000          | 34311  | 15579.803 | 14901.573 | 678.230  | 1.977  | 4.353  | 437.152 | 198.541 | 189.857 | 8.683   |
| 2001          | 34608  | 15696.614 | 14880.557 | 816.057  | 2.358  | 5.199  | 436.020 | 197.812 | 187.476 | 10.336  |
| 2002          | 34312  | 15519.777 | 14572.591 | 947.186  | 2.761  | 6.103  | 428.019 | 193.668 | 181.785 | 11.883  |
| 2003          | 35100  | 15888.389 | 14769.687 | 1118.702 | 3.187  | 7.041  | 433.728 | 196.413 | 182.506 | 13.908  |
| 2004          | 33543  | 15091.573 | 13881.188 | 1210.385 | 3.608  | 8.020  | 410.312 | 184.701 | 169.800 | 14.902  |
| 2005          | 35431  | 15803.656 | 14361.537 | 1442.119 | 4.070  | 9.125  | 428.577 | 191.278 | 173.717 | 17.562  |
| 2006          | 34026  | 15100.563 | 13571.392 | 1529.172 | 4.494  | 10.127 | 407.943 | 181.174 | 162.710 | 18.464  |
| 2007          | 34052  | 14974.384 | 13287.066 | 1687.317 | 4.955  | 11.268 | 404.148 | 177.871 | 157.696 | 20.174  |
| 2008          | 37492  | 16406.197 | 14394.680 | 2011.517 | 5.365  | 12.261 | 440.095 | 192.768 | 168.971 | 23.796  |
| 2009          | 36901  | 16083.194 | 13903.111 | 2180.083 | 5.908  | 13.555 | 428.227 | 186.846 | 161.343 | 25.503  |
| 2010          | 36872  | 15927.400 | 13603.397 | 2324.004 | 6.303  | 14.591 | 422.941 | 182.917 | 156.036 | 26.881  |
| 2011          | 37733  | 16221.836 | 13650.355 | 2571.481 | 6.815  | 15.852 | 428.677 | 184.547 | 155.080 | 29.466  |
| 2012          | 38375  | 16358.849 | 13571.946 | 2786.903 | 7.262  | 17.036 | 431.446 | 184.202 | 152.590 | 31.613  |
| 2013          | 40239  | 16994.822 | 13873.131 | 3121.691 | 7.758  | 18.368 | 447.488 | 189.311 | 154.278 | 35.032  |
| 2014          | 40224  | 16855.093 | 13535.082 | 3320.012 | 8.254  | 19.697 | 442.340 | 185.696 | 148.844 | 36.852  |
| 2015          | 42363  | 17572.483 | 13937.289 | 3635.193 | 8.581  | 20.687 | 520.609 | 216.445 | 171.281 | 45.164  |
| 2016          | 42785  | 17579.955 | 13690.177 | 3889.778 | 9.092  | 22.126 | 520.679 | 214.473 | 166.606 | 47.867  |
| 2017          | 44567  | 18080.688 | 13821.012 | 4259.676 | 9.558  | 23.559 | 537.124 | 218.496 | 166.573 | 51.923  |
| 2018          | 45586  | 18209.262 | 13669.779 | 4539.483 | 9.958  | 24.930 | 544.068 | 217.960 | 163.149 | 54.810  |
| 2019          | 47130  | 18648.302 | 13732.054 | 4916.247 | 10.431 | 26.363 | 556.930 | 221.054 | 162.270 | 58.784  |
| 2020          | 48616  | 19002.597 | 13794.081 | 5208.516 | 10.714 | 27.409 | 650.594 | 255.266 | 184.598 | 70.668  |
| 2021          | 48644  | 18885.717 | 13425.733 | 5459.985 | 11.224 | 28.911 | 646.115 | 251.867 | 178.326 | 73.541  |
| 2022          | 50045  | 19235.076 | 13432.685 | 5802.391 | 11.594 | 30.166 | 659.501 | 254.582 | 177.018 | 77.564  |
| 2023          | 51454  | 19521.158 | 13400.206 | 6120.952 | 11.896 | 31.355 | 672.617 | 256.363 | 175.171 | 81.191  |
| 2024          | 52803  | 19918.620 | 13411.639 | 6506.981 | 12.323 | 32.668 | 684.793 | 259.583 | 173.933 | 85.651  |
| 2025          | 53829  | 20150.545 | 13340.723 | 6809.821 | 12.651 | 33.795 | 804.935 | 303.086 | 199.491 | 103.595 |
| 2026          | 54713  | 20393.792 | 13223.989 | 7169.804 | 13.104 | 35.157 | 814.779 | 305.582 | 196.932 | 108.650 |
| 2027          | 55566  | 20615.351 | 13088.663 | 7526.688 | 13.545 | 36.510 | 823.926 | 307.668 | 194.076 | 113.593 |
| 2028          | 56364  | 20731.894 | 12904.884 | 7827.010 | 13.887 | 37.753 | 831.984 | 308.115 | 190.489 | 117.625 |
| 2029          | 57121  | 20781.967 | 12677.361 | 8104.606 | 14.188 | 38.998 | 839.173 | 307.495 | 186.244 | 121.251 |
| 2030          | 57389  | 20753.201 | 12419.879 | 8333.321 | 14.521 | 40.154 | 996.687 | 363.487 | 215.699 | 147.789 |
| 2031          | 58985  | 21048.417 | 12461.476 | 8586.941 | 14.558 | 40.796 | 1022.64 | 368.165 | 216.049 | 152.116 |
| 2032          | 59522  | 21169.329 | 12293.131 | 8876.198 | 14.913 | 41.930 | 1029.56 | 369.560 | 212.637 | 156.923 |
| 2033          | 60019  | 21109.293 | 12061.124 | 9048.169 | 15.076 | 42.863 | 1035.25 | 367.618 | 208.040 | 159.578 |
| 2034          | 60441  | 21109.429 | 11850.983 | 9258.446 | 15.318 | 43.859 | 1039.29 | 366.613 | 203.780 | 162.833 |
| 2035          | 59804  | 20794.840 | 11493.157 | 9301.683 | 15.554 | 44.731 | 1257.13 | 442.268 | 241.596 | 200.672 |
| 2036          | 56881  | 19354.577 | 10504.018 | 8850.558 | 15.560 | 45.729 | 1196.97 | 412.258 | 221.042 | 191.215 |
| 2037          | 56855  | 19064.169 | 10118.782 | 8945.387 | 15.734 | 46.923 | 1196.89 | 406.385 | 213.017 | 193.368 |
| 2038          | 56796  | 18854.812 | 9832.191  | 9022.621 | 15.886 | 47.853 | 1195.14 | 401.900 | 206.894 | 195.006 |
| 2039          | 56730  | 18437.457 | 9432.866  | 9004.591 | 15.873 | 48.839 | 1192.07 | 392.602 | 198.214 | 194.387 |

## Results for PHIM for Run 2 (ELL Summary Sensitivity\_Analysis\_1.RTF)

\*\*\*\*\*

### Estimated Loss of Life from the E Component for Run: 2, Simulation: 1

Country: US (United States)  
 Follow-up Period: 1990 to 2039

**Table 1: Estimated Loss of Life, at the end of follow-up, all age groups combined, Population unadjusted for deaths in Ecig scenario**

| Disease      | Sex    | Year | Years of life lost<br>NULL | Years of life lost<br>Ecig | Years of life<br>Saved |
|--------------|--------|------|----------------------------|----------------------------|------------------------|
| All Diseases | Males  | 2039 | 42093547.949               | 32891881.475               | 9201666.47             |
|              | Female | 2039 | 23817891.273               | 19137133.006               | 4680758.27             |
| Lung cancer  | Males  | 2039 | 18222549.860               | 16184047.638               | 2038502.22             |
|              | Female | 2039 | 12512468.845               | 10883917.797               | 1628551.05             |
| IHD          | Males  | 2039 | 15635992.616               | 10418363.359               | 5217629.26             |
|              | Female | 2039 | 4798769.065                | 3231600.633                | 1567168.43             |
| Stroke       | Males  | 2039 | 2389546.238                | 1649131.959                | 740414.278             |
|              | Female | 2039 | 1665361.569                | 1181080.738                | 484280.831             |
| COPD         | Males  | 2039 | 5845459.234                | 4640338.519                | 1205120.71             |
|              | Female | 2039 | 4841291.793                | 3840533.838                | 1000757.96             |

## Results for PHIM for Run 2 (ELL Summary Sensitivity\_Analysis\_1.RTF)

\*\*\*\*\*

**Table 2: Estimated Loss of Life, at the end of follow-up, all age groups combined, Population and Number deaths adjusted for Ecig scenario**

| Disease      | Sex    | Year | Years of life lost<br>NULL | Years of life lost<br>Ecig | Years of life<br>Saved |
|--------------|--------|------|----------------------------|----------------------------|------------------------|
| All Diseases | Males  | 2039 | 42093547.949               | 32994665.302               | 9098882.65             |
|              | Female | 2039 | 23817891.273               | 19173555.872               | 4644335.40             |
| Lung cancer  | Males  | 2039 | 18222549.860               | 16237404.896               | 1985144.96             |
|              | Female | 2039 | 12512468.845               | 10905064.701               | 1607404.14             |
| IHD          | Males  | 2039 | 15635992.616               | 10441503.235               | 5194489.38             |
|              | Female | 2039 | 4798769.065                | 3235313.905                | 1563455.16             |
| Stroke       | Males  | 2039 | 2389546.238                | 1652674.703                | 736871.535             |
|              | Female | 2039 | 1665361.569                | 1182163.346                | 483198.224             |
| COPD         | Males  | 2039 | 5845459.234                | 4663082.467                | 1182376.77             |
|              | Female | 2039 | 4841291.793                | 3851013.921                | 990277.872             |



## Results for PHIM for Run 2 (ELL Summary Sensitivity\_Analysis\_1.RTF)

\*\*\*\*\*

**Table 3: Estimated Loss of Life, All age groups combined, Population unadjusted for deaths in Ecig scenario, cumulative over years**

| Disease      | Sex          | Year         | Years of life lost<br>NULL | Years of life lost<br>Ecig | Years of life<br>Saved |
|--------------|--------------|--------------|----------------------------|----------------------------|------------------------|
| All Diseases | Males        | 1990         | 1304839.645                | 1304839.645                | 0.000                  |
|              |              | 1991         | 2579865.358                | 2574467.250                | 5398.108               |
|              |              | 1992         | 3830683.831                | 3810804.424                | 19879.407              |
|              |              | 1993         | 5076567.803                | 5030359.128                | 46208.675              |
|              |              | 1994         | 6292145.526                | 6205991.499                | 86154.027              |
|              |              | 1995         | 7485537.010                | 7344156.770                | 141380.239             |
|              |              | 1996         | 8655955.028                | 8443687.119                | 212267.908             |
|              |              | 1997         | 9791729.713                | 9493745.720                | 297983.993             |
|              |              | 1998         | 10899134.186               | 10501834.322               | 397299.863             |
|              |              | 1999         | 12070409.674               | 11541591.570               | 528818.104             |
|              |              | 2000         | 13231384.595               | 12555132.505               | 676252.090             |
|              |              | 2001         | 14371761.018               | 13532591.023               | 839169.995             |
|              |              | 2002         | 15508906.386               | 14488660.502               | 1020245.88             |
|              |              | 2003         | 16638100.422               | 15421671.209               | 1216429.21             |
|              |              | 2004         | 17736465.088               | 16315292.125               | 1421172.96             |
|              |              | 2005         | 18834658.606               | 17195219.631               | 1639438.98             |
|              |              | 2006         | 19909100.501               | 18040315.720               | 1868784.78             |
|              |              | 2007         | 20958321.463               | 18853564.758               | 2104756.71             |
|              |              | 2008         | 22000068.148               | 19651157.862               | 2348910.29             |
|              |              | 2009         | 23018816.903               | 20421280.923               | 2597535.98             |
|              |              | 2010         | 24018480.537               | 21166589.838               | 2851890.70             |
|              |              | 2011         | 25003034.574               | 21890725.098               | 3112309.48             |
|              |              | 2012         | 25969871.429               | 22591635.822               | 3378235.61             |
|              |              | 2013         | 26920275.180               | 23271142.779               | 3649132.40             |
|              |              | 2014         | 27849005.227               | 23925881.253               | 3923123.97             |
|              |              | 2015         | 28749620.400               | 24555031.490               | 4194588.91             |
|              |              | 2016         | 29622417.562               | 25153829.716               | 4468587.85             |
|              |              | 2017         | 30462559.724               | 25720911.456               | 4741648.27             |
|              |              | 2018         | 31293299.299               | 26279286.315               | 5014012.98             |
|              |              | 2019         | 32109993.427               | 26822992.191               | 5287001.24             |
|              |              | 2020         | 32883323.977               | 27336445.932               | 5546878.05             |
|              |              | 2021         | 33610102.554               | 27807335.866               | 5802766.69             |
|              |              | 2022         | 34322010.448               | 28263542.530               | 6058467.92             |
|              |              | 2023         | 35018383.550               | 28705190.808               | 6313192.74             |
|              |              | 2024         | 35700177.955               | 29133502.888               | 6566675.07             |
|              |              | 2025         | 36315500.346               | 29521625.212               | 6793875.13             |
|              |              | 2026         | 36896159.343               | 29877487.331               | 7018672.01             |
|              |              | 2027         | 37462570.116               | 30221266.293               | 7241303.82             |
|              |              | 2028         | 38015337.780               | 30552569.204               | 7462768.58             |
|              |              | 2029         | 38554814.764               | 30873286.028               | 7681528.74             |
|              |              | 2030         | 39003805.400               | 31143415.191               | 7860390.21             |
|              |              | 2031         | 39436509.703               | 31395944.213               | 8040565.49             |
| 2032         | 39858470.458 | 31639668.742 | 8218801.72                 |                            |                        |
| 2033         | 40270147.082 | 31873668.874 | 8396478.21                 |                            |                        |
| 2034         | 40672665.743 | 32100956.638 | 8571709.10                 |                            |                        |
| 2035         | 40962732.664 | 32267666.087 | 8695066.58                 |                            |                        |
| 2036         | 41255021.653 | 32431591.084 | 8823430.57                 |                            |                        |
| 2037         | 41540573.023 | 32590444.217 | 8950128.81                 |                            |                        |
| 2038         | 41820158.066 | 32743303.682 | 9076854.38                 |                            |                        |
| 2039         | 42093547.949 | 32891881.475 | 9201666.47                 |                            |                        |
|              | Female       | 1990         | 588979.406                 | 588979.406                 | 0.000                  |
|              |              | 1991         | 1182571.252                | 1180712.624                | 1858.629               |
|              |              | 1992         | 1777346.679                | 1770334.323                | 7012.356               |
|              |              | 1993         | 2380261.899                | 2363517.914                | 16743.985              |
|              |              | 1994         | 2983130.039                | 2951145.250                | 31984.789              |
|              |              | 1995         | 3588982.584                | 3535552.875                | 53429.709              |
|              |              | 1996         | 4195430.235                | 4113098.876                | 82331.359              |
|              |              | 1997         | 4793866.694                | 4676530.625                | 117336.070             |
|              |              | 1998         | 5389747.381                | 5230686.473                | 159060.908             |
|              |              | 1999         | 6006722.467                | 5793971.895                | 212750.572             |
|              |              | 2000         | 6625758.871                | 6352164.418                | 273594.453             |
|              |              | 2001         | 7245135.411                | 6902374.332                | 342761.079             |
|              |              | 2002         | 7867492.021                | 7447028.796                | 420463.225             |
|              |              | 2003         | 8485051.793                | 7980089.782                | 504962.011             |
|              |              | 2004         | 9092994.774                | 8497689.612                | 595305.162             |
|              |              | 2005         | 9706032.803                | 9012910.615                | 693122.188             |
|              |              | 2006         | 10311907.548               | 9514940.629                | 796966.920             |
|              |              | 2007         | 10909437.502               | 10004583.835               | 904853.668             |
|              |              | 2008         | 11506462.491               | 10486076.812               | 1020385.68             |
|              |              | 2009         | 12098393.287               | 10958973.302               | 1139419.98             |
|              |              | 2010         | 12681188.981               | 11418873.756               | 1262315.22             |

**Results for PHIM for Run 2 (ELL Summary Sensitivity\_Analysis\_1.RTF)**

|             |       |      |              |              |            |
|-------------|-------|------|--------------|--------------|------------|
|             |       | 2011 | 13260062.991 | 11869462.778 | 1390600.21 |
|             |       | 2012 | 13839417.441 | 12314417.467 | 1524999.97 |
|             |       | 2013 | 14409614.758 | 12747625.529 | 1661989.23 |
|             |       | 2014 | 14976658.746 | 13172032.750 | 1804626.00 |
|             |       | 2015 | 15529977.821 | 13581668.661 | 1948309.16 |
|             |       | 2016 | 16066640.764 | 13973190.774 | 2093449.99 |
|             |       | 2017 | 16590035.078 | 14350103.195 | 2239931.88 |
|             |       | 2018 | 17098716.137 | 14715109.126 | 2383607.01 |
|             |       | 2019 | 17599868.850 | 15070962.794 | 2528906.06 |
|             |       | 2020 | 18081346.241 | 15410705.976 | 2670640.27 |
|             |       | 2021 | 18537594.460 | 15727411.524 | 2810182.94 |
|             |       | 2022 | 18985300.234 | 16035113.194 | 2950187.04 |
|             |       | 2023 | 19423958.747 | 16334041.072 | 3089917.68 |
|             |       | 2024 | 19853347.772 | 16623686.106 | 3229661.67 |
|             |       | 2025 | 20252822.245 | 16892220.195 | 3360602.05 |
|             |       | 2026 | 20619307.063 | 17134383.073 | 3484923.99 |
|             |       | 2027 | 20976063.406 | 17368006.647 | 3608056.76 |
|             |       | 2028 | 21323641.947 | 17593962.153 | 3729679.79 |
|             |       | 2029 | 21662117.106 | 17811843.222 | 3850273.88 |
|             |       | 2030 | 21960971.694 | 18003696.320 | 3957275.37 |
|             |       | 2031 | 22224951.983 | 18169862.754 | 4055089.23 |
|             |       | 2032 | 22480397.853 | 18329316.539 | 4151081.31 |
|             |       | 2033 | 22728639.455 | 18483128.064 | 4245511.39 |
|             |       | 2034 | 22970448.888 | 18631150.097 | 4339298.79 |
|             |       | 2035 | 23164154.188 | 18749174.708 | 4414979.48 |
|             |       | 2036 | 23334538.616 | 18851188.011 | 4483350.61 |
|             |       | 2037 | 23499760.723 | 18949501.405 | 4550259.32 |
|             |       | 2038 | 23660308.401 | 19044686.029 | 4615622.37 |
|             |       | 2039 | 23817891.273 | 19137133.006 | 4680758.27 |
| Lung cancer | Males | 1990 | 595621.791   | 595621.791   | 0.000      |
|             |       | 1991 | 1177744.113  | 1177333.965  | 410.148    |
|             |       | 1992 | 1750034.892  | 1748507.718  | 1527.173   |
|             |       | 1993 | 2319752.308  | 2316057.199  | 3695.108   |
|             |       | 1994 | 2872597.339  | 2865478.829  | 7118.510   |
|             |       | 1995 | 3411494.825  | 3399468.422  | 12026.403  |
|             |       | 1996 | 3945569.726  | 3926696.932  | 18872.793  |
|             |       | 1997 | 4463316.362  | 4435718.428  | 27597.934  |
|             |       | 1998 | 4975301.180  | 4936762.371  | 38538.809  |
|             |       | 1999 | 5473691.125  | 5421897.923  | 51793.202  |
|             |       | 2000 | 5977500.570  | 5909386.193  | 68114.377  |
|             |       | 2001 | 6474795.516  | 6387409.996  | 87385.520  |
|             |       | 2002 | 6968769.705  | 6858859.532  | 109910.173 |
|             |       | 2003 | 7460282.140  | 7324310.879  | 135971.261 |
|             |       | 2004 | 7947048.275  | 7781624.667  | 165423.609 |
|             |       | 2005 | 8430571.669  | 8232193.502  | 198378.167 |
|             |       | 2006 | 8903945.390  | 8669369.080  | 234576.310 |
|             |       | 2007 | 9364177.982  | 9090534.297  | 273643.685 |
|             |       | 2008 | 9822525.458  | 9505789.330  | 316736.128 |
|             |       | 2009 | 10275228.886 | 9911891.988  | 363336.898 |
|             |       | 2010 | 10720275.500 | 10307226.469 | 413049.031 |
|             |       | 2011 | 11155356.373 | 10689808.565 | 465547.809 |
|             |       | 2012 | 11582611.617 | 11061141.800 | 521469.816 |
|             |       | 2013 | 11998803.791 | 11418823.799 | 579979.992 |
|             |       | 2014 | 12402087.090 | 11761623.977 | 640463.113 |
|             |       | 2015 | 12793451.706 | 12090850.390 | 702601.315 |
|             |       | 2016 | 13160101.653 | 12395724.654 | 764376.999 |
|             |       | 2017 | 13503583.414 | 12677968.695 | 825614.719 |
|             |       | 2018 | 13859755.737 | 12966724.795 | 893030.942 |
|             |       | 2019 | 14211625.176 | 13248620.560 | 963004.616 |
|             |       | 2020 | 14553935.288 | 13520108.335 | 1033826.95 |
|             |       | 2021 | 14851747.495 | 13753438.739 | 1098308.76 |
|             |       | 2022 | 15144531.004 | 13979994.669 | 1164536.34 |
|             |       | 2023 | 15431932.496 | 14199878.390 | 1232054.11 |
|             |       | 2024 | 15713920.740 | 14413201.812 | 1300718.93 |
|             |       | 2025 | 15979112.816 | 14612329.920 | 1366782.90 |
|             |       | 2026 | 16206550.153 | 14780680.710 | 1425869.44 |
|             |       | 2027 | 16428826.050 | 14943233.418 | 1485592.63 |
|             |       | 2028 | 16645902.186 | 15100155.658 | 1545746.53 |
|             |       | 2029 | 16858126.517 | 15252037.686 | 1606088.83 |
|             |       | 2030 | 17045220.687 | 15385395.609 | 1659825.08 |
|             |       | 2031 | 17208482.610 | 15499983.896 | 1708498.71 |
|             |       | 2032 | 17367586.074 | 15610560.438 | 1757025.64 |
|             |       | 2033 | 17522716.280 | 15716963.799 | 1805752.48 |
|             |       | 2034 | 17674226.555 | 15820062.795 | 1854163.76 |
|             |       | 2035 | 17792201.734 | 15900091.215 | 1892110.52 |
|             |       | 2036 | 17903508.236 | 15974687.065 | 1928821.17 |
|             |       | 2037 | 18012162.345 | 16046890.323 | 1965272.02 |
|             |       | 2038 | 18118464.470 | 16116426.686 | 2002037.78 |

**Results for PHIM for Run 2 (ELL Summary Sensitivity\_Analysis\_1.RTF)**

|     |        |      |              |              |            |
|-----|--------|------|--------------|--------------|------------|
|     |        | 2039 | 18222549.860 | 16184047.638 | 2038502.22 |
|     | Female | 1990 | 307897.357   | 307897.357   | 0.000      |
|     |        | 1991 | 616547.418   | 616287.110   | 260.307    |
|     |        | 1992 | 931086.773   | 930058.102   | 1028.671   |
|     |        | 1993 | 1246155.671  | 1243627.088  | 2528.583   |
|     |        | 1994 | 1561212.934  | 1556250.276  | 4962.658   |
|     |        | 1995 | 1879967.742  | 1871365.419  | 8602.323   |
|     |        | 1996 | 2197488.109  | 2183884.273  | 13603.836  |
|     |        | 1997 | 2515698.453  | 2495492.332  | 20206.120  |
|     |        | 1998 | 2836249.556  | 2807683.556  | 28566.000  |
|     |        | 1999 | 3150201.390  | 3111562.259  | 38639.131  |
|     |        | 2000 | 3472722.342  | 3421757.475  | 50964.868  |
|     |        | 2001 | 3796994.889  | 3731314.577  | 65680.313  |
|     |        | 2002 | 4126619.935  | 4043502.955  | 83116.980  |
|     |        | 2003 | 4454982.533  | 4351974.869  | 103007.664 |
|     |        | 2004 | 4784343.030  | 4658647.404  | 125695.627 |
|     |        | 2005 | 5113443.121  | 4962396.119  | 151047.002 |
|     |        | 2006 | 5442543.963  | 5263061.717  | 179482.246 |
|     |        | 2007 | 5772441.497  | 5561491.527  | 210949.969 |
|     |        | 2008 | 6091911.943  | 5847439.431  | 244472.512 |
|     |        | 2009 | 6413671.330  | 6132254.566  | 281416.764 |
|     |        | 2010 | 6730763.530  | 6410200.224  | 320563.306 |
|     |        | 2011 | 7043614.101  | 6681317.220  | 362296.881 |
|     |        | 2012 | 7356270.780  | 6949228.418  | 407042.362 |
|     |        | 2013 | 7662551.964  | 7208689.252  | 453862.712 |
|     |        | 2014 | 7964551.465  | 7461650.149  | 502901.315 |
|     |        | 2015 | 8254895.403  | 7702503.222  | 552392.180 |
|     |        | 2016 | 8530661.848  | 7928502.260  | 602159.588 |
|     |        | 2017 | 8795826.122  | 8143386.593  | 652439.529 |
|     |        | 2018 | 9067233.707  | 8360624.754  | 706608.953 |
|     |        | 2019 | 9335343.270  | 8572708.634  | 762634.636 |
|     |        | 2020 | 9596110.883  | 8776912.887  | 819197.996 |
|     |        | 2021 | 9833186.859  | 8960661.827  | 872525.031 |
|     |        | 2022 | 10066452.037 | 9139386.215  | 927065.822 |
|     |        | 2023 | 10295503.609 | 9313106.187  | 982397.423 |
|     |        | 2024 | 10520125.318 | 9481550.661  | 1038574.66 |
|     |        | 2025 | 10731915.863 | 9639023.904  | 1092891.96 |
|     |        | 2026 | 10917495.549 | 9775549.129  | 1141946.42 |
|     |        | 2027 | 11098620.885 | 9907369.910  | 1191250.98 |
|     |        | 2028 | 11275441.234 | 10034925.672 | 1240515.56 |
|     |        | 2029 | 11447962.710 | 10158000.826 | 1289961.88 |
|     |        | 2030 | 11601867.623 | 10267010.511 | 1334857.11 |
|     |        | 2031 | 11731666.516 | 10357830.926 | 1373835.59 |
|     |        | 2032 | 11857585.969 | 10445086.660 | 1412499.31 |
|     |        | 2033 | 11980128.625 | 10529282.379 | 1450846.25 |
|     |        | 2034 | 12099562.464 | 10610366.752 | 1489195.71 |
|     |        | 2035 | 12195919.946 | 10675154.632 | 1520765.31 |
|     |        | 2036 | 12278201.969 | 10729937.630 | 1548264.34 |
|     |        | 2037 | 12358146.336 | 10782837.552 | 1575308.78 |
|     |        | 2038 | 12435978.633 | 10834096.492 | 1601882.14 |
|     |        | 2039 | 12512468.845 | 10883917.797 | 1628551.05 |
| IHD | Males  | 1990 | 517209.093   | 517209.093   | 0.000      |
|     |        | 1991 | 1019219.395  | 1014814.667  | 4404.728   |
|     |        | 1992 | 1509598.614  | 1493391.252  | 16207.362  |
|     |        | 1993 | 1992735.299  | 1955337.584  | 37397.715  |
|     |        | 1994 | 2462877.575  | 2393735.080  | 69142.494  |
|     |        | 1995 | 2928249.390  | 2815580.158  | 112669.232 |
|     |        | 1996 | 3377377.730  | 3209641.940  | 167735.790 |
|     |        | 1997 | 3809062.472  | 3575624.589  | 233437.883 |
|     |        | 1998 | 4222213.867  | 3913811.954  | 308401.914 |
|     |        | 1999 | 4708317.743  | 4297383.718  | 410934.026 |
|     |        | 2000 | 5182084.396  | 4658490.814  | 523593.582 |
|     |        | 2001 | 5644097.705  | 4997604.165  | 646493.539 |
|     |        | 2002 | 6107232.129  | 5325466.069  | 781766.060 |
|     |        | 2003 | 6561785.704  | 5636255.984  | 925529.719 |
|     |        | 2004 | 6996156.348  | 5923672.620  | 1072483.73 |
|     |        | 2005 | 7426261.361  | 6199830.061  | 1226431.30 |
|     |        | 2006 | 7849012.694  | 6463035.311  | 1385977.38 |
|     |        | 2007 | 8255300.530  | 6709037.563  | 1546262.97 |
|     |        | 2008 | 8650662.040  | 6942510.267  | 1708151.77 |
|     |        | 2009 | 9030818.513  | 7161928.066  | 1868890.45 |
|     |        | 2010 | 9403026.327  | 7372265.196  | 2030761.13 |
|     |        | 2011 | 9767535.506  | 7573912.896  | 2193622.61 |
|     |        | 2012 | 10123044.281 | 7766717.146  | 2356327.13 |
|     |        | 2013 | 10470104.786 | 7951508.110  | 2518596.68 |
|     |        | 2014 | 10807756.112 | 8128329.244  | 2679426.87 |
|     |        | 2015 | 11130681.425 | 8295094.831  | 2835586.59 |
|     |        | 2016 | 11448966.506 | 8457258.222  | 2991708.28 |

**Results for PHIM for Run 2 (ELL Summary Sensitivity\_Analysis\_1.RTF)**

|        |        |      |              |              |            |
|--------|--------|------|--------------|--------------|------------|
|        |        | 2017 | 11758164.882 | 8612698.250  | 3145466.63 |
|        |        | 2018 | 12054448.241 | 8759954.368  | 3294493.87 |
|        |        | 2019 | 12341606.261 | 8901465.643  | 3440140.62 |
|        |        | 2020 | 12600728.939 | 9027848.640  | 3572880.30 |
|        |        | 2021 | 12861767.105 | 9154084.037  | 3707683.07 |
|        |        | 2022 | 13114168.616 | 9274888.836  | 3839279.78 |
|        |        | 2023 | 13357894.797 | 9390271.426  | 3967623.37 |
|        |        | 2024 | 13593848.521 | 9501274.531  | 4092573.99 |
|        |        | 2025 | 13789177.359 | 9592461.165  | 4196716.19 |
|        |        | 2026 | 13993401.656 | 9687419.772  | 4305981.88 |
|        |        | 2027 | 14190519.224 | 9778699.249  | 4411819.98 |
|        |        | 2028 | 14381193.356 | 9865681.110  | 4515512.25 |
|        |        | 2029 | 14565171.927 | 9949353.775  | 4615818.15 |
|        |        | 2030 | 14697381.605 | 10009114.024 | 4688267.58 |
|        |        | 2031 | 14842203.512 | 10074535.707 | 4767667.80 |
|        |        | 2032 | 14982485.826 | 10137388.948 | 4845096.88 |
|        |        | 2033 | 15118410.647 | 10196979.081 | 4921431.57 |
|        |        | 2034 | 15250284.398 | 10254876.980 | 4995407.42 |
|        |        | 2035 | 15322911.166 | 10286151.914 | 5036759.25 |
|        |        | 2036 | 15405115.031 | 10321356.171 | 5083758.86 |
|        |        | 2037 | 15484709.137 | 10355293.528 | 5129415.61 |
|        |        | 2038 | 15561812.193 | 10387465.650 | 5174346.54 |
|        |        | 2039 | 15635992.616 | 10418363.359 | 5217629.26 |
|        | Female | 1990 | 147299.110   | 147299.110   | 0.000      |
|        |        | 1991 | 295122.462   | 293952.394   | 1170.068   |
|        |        | 1992 | 439962.920   | 435619.217   | 4343.704   |
|        |        | 1993 | 584735.615   | 574510.156   | 10225.459  |
|        |        | 1994 | 727640.783   | 708421.539   | 19219.244  |
|        |        | 1995 | 868486.937   | 836938.960   | 31547.977  |
|        |        | 1996 | 1010321.847  | 962247.269   | 48074.579  |
|        |        | 1997 | 1144230.930  | 1077006.628  | 67224.301  |
|        |        | 1998 | 1274513.622  | 1184952.245  | 89561.377  |
|        |        | 1999 | 1426725.938  | 1306806.112  | 119919.826 |
|        |        | 2000 | 1573462.680  | 1420454.679  | 153008.000 |
|        |        | 2001 | 1719132.015  | 1528872.442  | 190259.573 |
|        |        | 2002 | 1863006.732  | 1631959.977  | 231046.755 |
|        |        | 2003 | 2002943.227  | 1728644.287  | 274298.940 |
|        |        | 2004 | 2137798.705  | 1818640.747  | 319157.958 |
|        |        | 2005 | 2271071.245  | 1905005.558  | 366065.688 |
|        |        | 2006 | 2400707.731  | 1986292.898  | 414414.833 |
|        |        | 2007 | 2523634.512  | 2061316.822  | 462317.690 |
|        |        | 2008 | 2648752.232  | 2135652.576  | 513099.656 |
|        |        | 2009 | 2765973.961  | 2203836.611  | 562137.350 |
|        |        | 2010 | 2881329.235  | 2269611.303  | 611717.932 |
|        |        | 2011 | 2994972.694  | 2332980.274  | 661992.419 |
|        |        | 2012 | 3108958.829  | 2395290.503  | 713668.325 |
|        |        | 2013 | 3218140.416  | 2454176.824  | 763963.592 |
|        |        | 2014 | 3328387.914  | 2512716.529  | 815671.385 |
|        |        | 2015 | 3435342.796  | 2568786.677  | 866556.119 |
|        |        | 2016 | 3539189.408  | 2622500.366  | 916689.042 |
|        |        | 2017 | 3640041.363  | 2674014.884  | 966026.479 |
|        |        | 2018 | 3732645.362  | 2720865.663  | 1011779.70 |
|        |        | 2019 | 3821421.978  | 2765371.105  | 1056050.87 |
|        |        | 2020 | 3902115.950  | 2805319.072  | 1096796.88 |
|        |        | 2021 | 3984301.053  | 2845701.215  | 1138599.84 |
|        |        | 2022 | 4062629.299  | 2883922.936  | 1178706.36 |
|        |        | 2023 | 4137348.729  | 2920251.977  | 1217096.75 |
|        |        | 2024 | 4208611.493  | 2954685.972  | 1253925.52 |
|        |        | 2025 | 4269419.492  | 2983774.889  | 1285644.60 |
|        |        | 2026 | 4330969.998  | 3013099.596  | 1317870.40 |
|        |        | 2027 | 4389134.306  | 3040778.576  | 1348355.73 |
|        |        | 2028 | 4444222.970  | 3067000.956  | 1377222.01 |
|        |        | 2029 | 4496447.877  | 3091809.765  | 1404638.11 |
|        |        | 2030 | 4536975.698  | 3110668.458  | 1426307.24 |
|        |        | 2031 | 4578338.586  | 3129982.753  | 1448355.83 |
|        |        | 2032 | 4617397.784  | 3148301.231  | 1469096.55 |
|        |        | 2033 | 4654407.697  | 3165744.379  | 1488663.32 |
|        |        | 2034 | 4689913.454  | 3182384.563  | 1507528.89 |
|        |        | 2035 | 4712518.190  | 3192537.029  | 1519981.16 |
|        |        | 2036 | 4735845.827  | 3203001.013  | 1532844.81 |
|        |        | 2037 | 4757958.806  | 3212958.964  | 1544999.84 |
|        |        | 2038 | 4778813.806  | 3222478.961  | 1556334.84 |
|        |        | 2039 | 4798769.065  | 3231600.633  | 1567168.43 |
| Stroke | Males  | 1990 | 75005.854    | 75005.854    | 0.000      |
|        |        | 1991 | 149463.017   | 149009.873   | 453.145    |
|        |        | 1992 | 222966.278   | 221294.818   | 1671.460   |
|        |        | 1993 | 296801.879   | 292841.740   | 3960.139   |
|        |        | 1994 | 372453.706   | 364821.499   | 7632.206   |

**Results for PHIM for Run 2 (ELL Summary Sensitivity\_Analysis\_1.RTF)**

|        |      |             |             |            |
|--------|------|-------------|-------------|------------|
|        | 1995 | 448401.338  | 435552.610  | 12848.728  |
|        | 1996 | 523536.301  | 503857.351  | 19678.950  |
|        | 1997 | 596763.211  | 568644.408  | 28118.803  |
|        | 1998 | 667546.681  | 629517.732  | 38028.950  |
|        | 1999 | 734925.407  | 685764.544  | 49160.863  |
|        | 2000 | 803749.361  | 741537.225  | 62212.136  |
|        | 2001 | 870081.588  | 793574.380  | 76507.208  |
|        | 2002 | 935347.140  | 843167.628  | 92179.512  |
|        | 2003 | 1001627.349 | 891861.870  | 109765.480 |
|        | 2004 | 1066587.976 | 938106.357  | 128481.619 |
|        | 2005 | 1130548.052 | 982186.134  | 148361.918 |
|        | 2006 | 1195132.454 | 1025313.376 | 169819.078 |
|        | 2007 | 1258974.043 | 1066652.326 | 192321.717 |
|        | 2008 | 1320124.867 | 1105062.171 | 215062.696 |
|        | 2009 | 1380776.123 | 1142129.065 | 238647.058 |
|        | 2010 | 1440048.533 | 1177441.766 | 262606.767 |
|        | 2011 | 1497484.847 | 1210823.227 | 286661.619 |
|        | 2012 | 1554496.526 | 1243094.534 | 311401.992 |
|        | 2013 | 1610819.598 | 1274230.412 | 336589.186 |
|        | 2014 | 1667484.890 | 1304844.473 | 362640.417 |
|        | 2015 | 1720948.287 | 1333208.531 | 387739.756 |
|        | 2016 | 1775699.228 | 1361729.893 | 413969.335 |
|        | 2017 | 1830250.175 | 1389635.046 | 440615.129 |
|        | 2018 | 1875958.950 | 1412639.250 | 463319.700 |
|        | 2019 | 1920359.232 | 1434686.895 | 485672.337 |
|        | 2020 | 1960605.297 | 1454442.585 | 506162.712 |
|        | 2021 | 1998912.887 | 1472980.546 | 525932.341 |
|        | 2022 | 2036003.696 | 1490674.592 | 545329.104 |
|        | 2023 | 2071857.536 | 1507573.967 | 564283.570 |
|        | 2024 | 2106636.468 | 1523814.675 | 582821.794 |
|        | 2025 | 2136450.873 | 1537611.573 | 598839.301 |
|        | 2026 | 2164796.470 | 1550598.754 | 614197.716 |
|        | 2027 | 2192079.608 | 1563033.162 | 629046.446 |
|        | 2028 | 2218404.367 | 1574871.511 | 643532.856 |
|        | 2029 | 2243769.140 | 1586231.082 | 657538.058 |
|        | 2030 | 2263570.213 | 1595031.202 | 668539.011 |
|        | 2031 | 2282521.590 | 1603401.399 | 679120.191 |
|        | 2032 | 2300804.945 | 1611406.165 | 689398.779 |
|        | 2033 | 2318464.018 | 1619025.935 | 699438.083 |
|        | 2034 | 2335611.973 | 1626400.002 | 709211.971 |
|        | 2035 | 2347097.290 | 1631311.474 | 715785.816 |
|        | 2036 | 2358248.747 | 1636045.872 | 722202.875 |
|        | 2037 | 2369033.655 | 1640616.033 | 728417.622 |
|        | 2038 | 2379490.114 | 1644965.843 | 734524.271 |
|        | 2039 | 2389546.238 | 1649131.959 | 740414.278 |
| Female | 1990 | 56348.092   | 56348.092   | 0.000      |
|        | 1991 | 110871.862  | 110549.122  | 322.740    |
|        | 1992 | 165654.454  | 164415.051  | 1239.403   |
|        | 1993 | 220008.519  | 217052.441  | 2956.079   |
|        | 1994 | 275706.807  | 269971.391  | 5735.416   |
|        | 1995 | 331417.547  | 321768.328  | 9649.219   |
|        | 1996 | 387580.161  | 372684.378  | 14895.783  |
|        | 1997 | 442778.242  | 421406.246  | 21371.996  |
|        | 1998 | 496117.305  | 467174.452  | 28942.853  |
|        | 1999 | 548268.214  | 510617.200  | 37651.015  |
|        | 2000 | 601693.202  | 553842.105  | 47851.097  |
|        | 2001 | 652221.103  | 593463.075  | 58758.028  |
|        | 2002 | 703022.600  | 632012.499  | 71010.102  |
|        | 2003 | 752023.351  | 668000.325  | 84023.026  |
|        | 2004 | 799826.733  | 701961.727  | 97865.006  |
|        | 2005 | 847563.928  | 734873.288  | 112690.640 |
|        | 2006 | 894205.027  | 766039.479  | 128165.548 |
|        | 2007 | 939571.282  | 795458.141  | 144113.141 |
|        | 2008 | 983437.578  | 823109.600  | 160327.978 |
|        | 2009 | 1025803.786 | 849147.017  | 176656.769 |
|        | 2010 | 1066964.934 | 873805.139  | 193159.795 |
|        | 2011 | 1106954.044 | 897174.363  | 209779.681 |
|        | 2012 | 1146108.461 | 919537.094  | 226571.367 |
|        | 2013 | 1183544.689 | 940501.914  | 243042.776 |
|        | 2014 | 1221220.945 | 961151.856  | 260069.089 |
|        | 2015 | 1258289.311 | 981140.836  | 277148.475 |
|        | 2016 | 1294830.207 | 1000525.571 | 294304.636 |
|        | 2017 | 1330332.626 | 1019055.892 | 311276.734 |
|        | 2018 | 1360571.987 | 1034645.523 | 325926.464 |
|        | 2019 | 1389848.723 | 1049526.685 | 340322.038 |
|        | 2020 | 1416046.192 | 1062660.945 | 353385.247 |
|        | 2021 | 1440588.850 | 1074816.089 | 365772.760 |
|        | 2022 | 1464157.934 | 1086382.597 | 377775.337 |

**Results for PHIM for Run 2 (ELL Summary Sensitivity\_Analysis\_1.RTF)**

|      |             |             |             |             |            |
|------|-------------|-------------|-------------|-------------|------------|
|      |             | 2023        | 1486810.237 | 1097442.124 | 389368.113 |
|      |             | 2024        | 1508591.729 | 1107974.548 | 400617.181 |
|      |             | 2025        | 1526875.621 | 1116729.209 | 410146.412 |
|      |             | 2026        | 1543659.810 | 1124706.283 | 418953.527 |
|      |             | 2027        | 1559623.774 | 1132271.775 | 427351.999 |
|      |             | 2028        | 1574852.850 | 1139471.866 | 435380.984 |
|      |             | 2029        | 1589437.452 | 1146326.635 | 443110.818 |
|      |             | 2030        | 1600568.199 | 1151466.781 | 449101.418 |
|      |             | 2031        | 1610776.297 | 1156188.119 | 454588.177 |
|      |             | 2032        | 1620483.563 | 1160686.470 | 459797.093 |
|      |             | 2033        | 1629745.442 | 1164990.309 | 464755.133 |
|      |             | 2034        | 1638721.425 | 1169122.199 | 469599.226 |
|      |             | 2035        | 1644649.404 | 1171773.968 | 472875.436 |
|      |             | 2036        | 1650181.590 | 1174238.034 | 475943.556 |
|      |             | 2037        | 1655476.066 | 1176601.744 | 478874.322 |
|      |             | 2038        | 1660507.914 | 1178880.001 | 481627.913 |
|      |             | 2039        | 1665361.569 | 1181080.738 | 484280.831 |
| COPD | Males       | 1990        | 117002.906  | 117002.906  | 0.000      |
|      |             | 1991        | 233438.833  | 233308.745  | 130.087    |
|      |             | 1992        | 348084.047  | 347610.636  | 473.411    |
|      |             | 1993        | 467278.318  | 466122.605  | 1155.713   |
|      |             | 1994        | 584216.907  | 581956.090  | 2260.816   |
|      |             | 1995        | 697391.457  | 693555.580  | 3835.877   |
|      |             | 1996        | 809471.271  | 803490.896  | 5980.374   |
|      |             | 1997        | 922587.668  | 913758.295  | 8829.373   |
|      |             | 1998        | 1034072.457 | 1021742.266 | 12330.191  |
|      |             | 1999        | 1153475.399 | 1136545.386 | 16930.013  |
|      |             | 2000        | 1268050.268 | 1245718.273 | 22331.995  |
|      |             | 2001        | 1382786.209 | 1354002.481 | 28783.728  |
|      |             | 2002        | 1497557.412 | 1461167.274 | 36390.138  |
|      |             | 2003        | 1614405.229 | 1569242.476 | 45162.753  |
|      |             | 2004        | 1726672.489 | 1671888.482 | 54784.008  |
|      |             | 2005        | 1847277.524 | 1781009.935 | 66267.589  |
|      |             | 2006        | 1961009.963 | 1882597.952 | 78412.011  |
|      |             | 2007        | 2079868.908 | 1987340.571 | 92528.337  |
|      |             | 2008        | 2206755.783 | 2097796.094 | 108959.688 |
|      |             | 2009        | 2331993.380 | 2205331.804 | 126661.577 |
|      |             | 2010        | 2455130.176 | 2309656.408 | 145473.769 |
|      |             | 2011        | 2582657.849 | 2416180.410 | 166477.439 |
|      |             | 2012        | 2709719.005 | 2520682.341 | 189036.664 |
|      |             | 2013        | 2840547.005 | 2626580.458 | 213966.547 |
|      |             | 2014        | 2971677.135 | 2731083.559 | 240593.577 |
|      |             | 2015        | 3104538.983 | 2835877.737 | 268661.246 |
|      |             | 2016        | 3237650.175 | 2939116.947 | 298533.228 |
|      |             | 2017        | 3370561.253 | 3040609.464 | 329951.788 |
|      |             | 2018        | 3503136.371 | 3139967.902 | 363168.469 |
|      |             | 2019        | 3636402.758 | 3238219.093 | 398183.665 |
|      |             | 2020        | 3768054.453 | 3334046.371 | 434008.082 |
|      |             | 2021        | 3897675.067 | 3426832.543 | 470842.523 |
|      |             | 2022        | 4027307.132 | 3517984.433 | 509322.699 |
|      |             | 2023        | 4156698.720 | 3607467.025 | 549231.695 |
|      |             | 2024        | 4285772.226 | 3695211.870 | 590560.356 |
|      |             | 2025        | 4410759.298 | 3779222.554 | 631536.744 |
|      |             | 2026        | 4531411.064 | 3858788.094 | 672622.970 |
|      |             | 2027        | 4651145.233 | 3936300.463 | 714844.770 |
|      |             | 2028        | 4769837.872 | 4011860.925 | 757976.946 |
|      |             | 2029        | 4887747.179 | 4085663.486 | 802083.693 |
| 2030 | 4997632.895 | 4153874.357 | 843758.539  |             |            |
| 2031 | 5103301.991 | 4218023.211 | 885278.781  |             |            |
| 2032 | 5207593.613 | 4280313.191 | 927280.422  |             |            |
| 2033 | 5310556.138 | 4340700.060 | 969856.078  |             |            |
| 2034 | 5412542.816 | 4399616.861 | 1012925.96  |             |            |
| 2035 | 5500522.473 | 4450111.484 | 1050410.99  |             |            |
| 2036 | 5588149.640 | 4499501.976 | 1088647.66  |             |            |
| 2037 | 5674667.886 | 4547644.333 | 1127023.55  |             |            |
| 2038 | 5760391.289 | 4594445.504 | 1165945.78  |             |            |
| 2039 | 5845459.234 | 4640338.519 | 1205120.71  |             |            |
|      | Female      | 1990        | 77434.846   | 77434.846   | 0.000      |
|      |             | 1991        | 160029.510  | 159923.998  | 105.513    |
|      |             | 1992        | 240642.531  | 240241.953  | 400.578    |
|      |             | 1993        | 329362.093  | 328328.229  | 1033.864   |
|      |             | 1994        | 418569.515  | 416502.044  | 2067.471   |
|      |             | 1995        | 509110.357  | 505480.167  | 3630.190   |
|      |             | 1996        | 600040.117  | 594282.957  | 5757.160   |
|      |             | 1997        | 691159.071  | 682625.418  | 8533.653   |
|      |             | 1998        | 782866.899  | 770876.220  | 11990.678  |
|      |             | 1999        | 881526.925  | 864986.324  | 16540.601  |
|      |             | 2000        | 977880.647  | 956110.159  | 21770.488  |

**Results for PHIM for Run 2 (ELL Summary Sensitivity\_Analysis\_1.RTF)**

|      |             |             |            |
|------|-------------|-------------|------------|
| 2001 | 1076787.404 | 1048724.238 | 28063.166  |
| 2002 | 1174842.754 | 1139553.364 | 35289.389  |
| 2003 | 1275102.681 | 1231470.300 | 43632.381  |
| 2004 | 1371026.306 | 1318439.735 | 52586.571  |
| 2005 | 1473954.509 | 1410635.651 | 63318.858  |
| 2006 | 1574450.828 | 1499546.535 | 74904.293  |
| 2007 | 1673790.211 | 1586317.344 | 87472.867  |
| 2008 | 1782360.738 | 1679875.205 | 102485.532 |
| 2009 | 1892944.209 | 1773735.108 | 119209.102 |
| 2010 | 2002131.282 | 1865257.090 | 136874.192 |
| 2011 | 2114522.152 | 1957990.920 | 156531.232 |
| 2012 | 2228079.372 | 2050361.451 | 177717.920 |
| 2013 | 2345377.689 | 2144257.540 | 201120.149 |
| 2014 | 2462498.422 | 2236514.216 | 225984.206 |
| 2015 | 2581450.312 | 2329237.925 | 252212.387 |
| 2016 | 2701959.301 | 2421662.576 | 280296.725 |
| 2017 | 2823834.967 | 2513645.826 | 310189.142 |
| 2018 | 2938265.081 | 2598973.186 | 339291.894 |
| 2019 | 3053254.880 | 2683356.371 | 369898.509 |
| 2020 | 3167073.216 | 2765813.073 | 401260.143 |
| 2021 | 3279517.699 | 2846232.393 | 433285.306 |
| 2022 | 3392060.964 | 2925421.446 | 466639.518 |
| 2023 | 3504296.171 | 3003240.784 | 501055.387 |
| 2024 | 3616019.231 | 3079474.924 | 536544.307 |
| 2025 | 3724611.269 | 3152692.192 | 571919.077 |
| 2026 | 3827181.707 | 3221028.065 | 606153.642 |
| 2027 | 3928684.441 | 3287586.386 | 641098.055 |
| 2028 | 4029124.892 | 3352563.658 | 676561.234 |
| 2029 | 4128269.068 | 3415705.996 | 712563.071 |
| 2030 | 4221560.174 | 3474550.570 | 747009.603 |
| 2031 | 4304170.584 | 3525860.956 | 778309.628 |
| 2032 | 4384930.537 | 3575242.178 | 809688.360 |
| 2033 | 4464357.691 | 3623110.996 | 841246.695 |
| 2034 | 4542251.545 | 3669276.582 | 872974.963 |
| 2035 | 4611066.648 | 3709709.079 | 901357.569 |
| 2036 | 4670309.230 | 3744011.334 | 926297.897 |
| 2037 | 4728179.514 | 3777103.145 | 951076.369 |
| 2038 | 4785008.048 | 3809230.575 | 975777.473 |
| 2039 | 4841291.793 | 3840533.838 | 1000757.96 |

---

## Results for PHIM for Run 2 (ELL Summary Sensitivity\_Analysis\_1.RTF)

\*\*\*\*\*

**Table 4: Estimated Loss of Life, All age groups combined, Population and Number deaths adjusted for Ecig scenario, cumulative over years**

| Disease      | Sex          | Year         | Years of life lost<br>NULL | Years of life lost<br>Ecig | Years of life<br>Saved |
|--------------|--------------|--------------|----------------------------|----------------------------|------------------------|
| All Diseases | Males        | 1990         | 1304839.645                | 1304839.645                | 0.000                  |
|              |              | 1991         | 2579865.358                | 2574467.250                | 5398.108               |
|              |              | 1992         | 3830683.831                | 3810812.095                | 19871.736              |
|              |              | 1993         | 5076567.803                | 5030393.630                | 46174.173              |
|              |              | 1994         | 6292145.526                | 6206086.332                | 86059.194              |
|              |              | 1995         | 7485537.010                | 7344360.633                | 141176.376             |
|              |              | 1996         | 8655955.028                | 8444064.339                | 211890.688             |
|              |              | 1997         | 9791729.713                | 9494373.525                | 297356.188             |
|              |              | 1998         | 10899134.186               | 10502801.866               | 396332.320             |
|              |              | 1999         | 12070409.674               | 11543027.588               | 527382.086             |
|              |              | 2000         | 13231384.595               | 12557175.281               | 674209.314             |
|              |              | 2001         | 14371761.018               | 13535380.837               | 836380.181             |
|              |              | 2002         | 15508906.386               | 14492357.209               | 1016549.18             |
|              |              | 2003         | 16638100.422               | 15426440.972               | 1211659.45             |
|              |              | 2004         | 17736465.088               | 16321287.654               | 1415177.43             |
|              |              | 2005         | 18834658.606               | 17202628.590               | 1632030.02             |
|              |              | 2006         | 19909100.501               | 18049289.955               | 1859810.55             |
|              |              | 2007         | 20958321.463               | 18864262.868               | 2094058.60             |
|              |              | 2008         | 22000068.148               | 19663770.961               | 2336297.19             |
|              |              | 2009         | 23018816.903               | 20435966.578               | 2582850.33             |
|              |              | 2010         | 24018480.537               | 21183504.098               | 2834976.44             |
|              |              | 2011         | 25003034.574               | 21910030.888               | 3093003.69             |
|              |              | 2012         | 25969871.429               | 22613474.438               | 3356396.99             |
|              |              | 2013         | 26920275.180               | 23295663.398               | 3624611.78             |
|              |              | 2014         | 27849005.227               | 23953208.717               | 3895796.51             |
|              |              | 2015         | 28749620.400               | 24585316.264               | 4164304.14             |
|              |              | 2016         | 29622417.562               | 25187143.357               | 4435274.21             |
|              |              | 2017         | 30462559.724               | 25757312.215               | 4705247.51             |
|              |              | 2018         | 31293299.299               | 26318904.686               | 4974394.61             |
|              |              | 2019         | 32109993.427               | 26865944.399               | 5244049.03             |
|              |              | 2020         | 32883323.977               | 27382835.322               | 5500488.66             |
|              |              | 2021         | 33610102.554               | 27857011.809               | 5753090.74             |
|              |              | 2022         | 34322010.448               | 28316572.783               | 6005437.67             |
|              |              | 2023         | 35018383.550               | 28761641.004               | 6256742.55             |
|              |              | 2024         | 35700177.955               | 29193432.611               | 6506745.34             |
|              |              | 2025         | 36315500.346               | 29585039.889               | 6730460.46             |
|              |              | 2026         | 36896159.343               | 29944151.100               | 6952008.24             |
|              |              | 2027         | 37462570.116               | 30291197.313               | 7171372.80             |
|              |              | 2028         | 38015337.780               | 30625779.054               | 7389558.73             |
|              |              | 2029         | 38554814.764               | 30949784.974               | 7605029.79             |
|              |              | 2030         | 39003805.400               | 31223032.088               | 7780773.31             |
|              |              | 2031         | 39436509.703               | 31478470.911               | 7958038.79             |
| 2032         | 39858470.458 | 31725085.587 | 8133384.87                 |                            |                        |
| 2033         | 40270147.082 | 31961946.560 | 8308200.52                 |                            |                        |
| 2034         | 40672665.743 | 32192089.402 | 8480576.34                 |                            |                        |
| 2035         | 40962732.664 | 32361196.577 | 8610536.09                 |                            |                        |
| 2036         | 41255021.653 | 32527466.229 | 8727555.42                 |                            |                        |
| 2037         | 41540573.023 | 32688648.379 | 8851924.64                 |                            |                        |
| 2038         | 41820158.066 | 32843806.554 | 8976351.51                 |                            |                        |
| 2039         | 42093547.949 | 32994665.302 | 9098882.65                 |                            |                        |
|              | Female       | 1990         | 588979.406                 | 588979.406                 | 0.000                  |
| 1991         |              | 1182571.252  | 1180712.624                | 1858.629                   |                        |
| 1992         |              | 1777346.679  | 1770335.595                | 7011.084                   |                        |
| 1993         |              | 2380261.899  | 2363524.109                | 16737.790                  |                        |
| 1994         |              | 2983130.039  | 2951163.356                | 31966.683                  |                        |
| 1995         |              | 3588982.584  | 3535593.746                | 53388.838                  |                        |
| 1996         |              | 4195430.235  | 4113177.683                | 82252.551                  |                        |
| 1997         |              | 4793866.694  | 4676666.828                | 117199.866                 |                        |
| 1998         |              | 5389747.381  | 5230904.443                | 158842.938                 |                        |
| 1999         |              | 6006722.467  | 5794303.251                | 212419.216                 |                        |
| 2000         |              | 6625758.871  | 6352646.625                | 273112.245                 |                        |
| 2001         |              | 7245135.411  | 6903047.038                | 342088.373                 |                        |
| 2002         |              | 7867492.021  | 7447936.156                | 419555.865                 |                        |
| 2003         |              | 8485051.793  | 7981279.977                | 503771.816                 |                        |
| 2004         |              | 9092994.774  | 8499208.846                | 593785.928                 |                        |
| 2005         |              | 9706032.803  | 9014813.874                | 691218.929                 |                        |
| 2006         |              | 10311907.548 | 9517277.767                | 794629.782                 |                        |
| 2007         |              | 10909437.502 | 10007408.343               | 902029.160                 |                        |
| 2008         |              | 11506462.491 | 10489446.858               | 1017015.63                 |                        |
| 2009         |              | 12098393.287 | 10962946.151               | 1135447.14                 |                        |
| 2010         | 12681188.981 | 11423502.319 | 1257686.66                 |                            |                        |



**Results for PHIM for Run 2 (ELL Summary Sensitivity\_Analysis\_1.RTF)**

|             |       |      |              |              |            |
|-------------|-------|------|--------------|--------------|------------|
|             |       | 2011 | 13260062.991 | 11874804.050 | 1385258.94 |
|             |       | 2012 | 13839417.441 | 12320534.571 | 1518882.87 |
|             |       | 2013 | 14409614.758 | 12754573.979 | 1655040.78 |
|             |       | 2014 | 14976658.746 | 13179871.036 | 1796787.71 |
|             |       | 2015 | 15529977.821 | 13590456.027 | 1939521.79 |
|             |       | 2016 | 16066640.764 | 13982966.901 | 2083673.86 |
|             |       | 2017 | 16590035.078 | 14360917.492 | 2229117.59 |
|             |       | 2018 | 17098716.137 | 14727008.731 | 2371707.41 |
|             |       | 2019 | 17599868.850 | 15083999.789 | 2515869.06 |
|             |       | 2020 | 18081346.241 | 15424929.053 | 2656417.19 |
|             |       | 2021 | 18537594.460 | 15742834.161 | 2794760.30 |
|             |       | 2022 | 18985300.234 | 16051778.344 | 2933521.89 |
|             |       | 2023 | 19423958.747 | 16351988.800 | 3071969.95 |
|             |       | 2024 | 19853347.772 | 16642950.018 | 3210397.75 |
|             |       | 2025 | 20252822.245 | 16912824.233 | 3339998.01 |
|             |       | 2026 | 20619307.063 | 17156274.274 | 3463032.79 |
|             |       | 2027 | 20976063.406 | 17391203.330 | 3584860.08 |
|             |       | 2028 | 21323641.947 | 17618482.985 | 3705158.96 |
|             |       | 2029 | 21662117.106 | 17837699.399 | 3824417.71 |
|             |       | 2030 | 21960971.694 | 18030866.169 | 3930105.52 |
|             |       | 2031 | 22224951.983 | 18198207.044 | 4026744.94 |
|             |       | 2032 | 22480397.853 | 18358825.669 | 4121572.18 |
|             |       | 2033 | 22728639.455 | 18513798.850 | 4214840.60 |
|             |       | 2034 | 22970448.888 | 18662971.540 | 4307477.35 |
|             |       | 2035 | 23164154.188 | 18782053.201 | 4382100.99 |
|             |       | 2036 | 23334538.616 | 18884975.300 | 4449563.32 |
|             |       | 2037 | 23499760.723 | 18984179.934 | 4515580.79 |
|             |       | 2038 | 23660308.401 | 19080242.741 | 4580065.66 |
|             |       | 2039 | 23817891.273 | 19173555.872 | 4644335.40 |
| Lung cancer | Males | 1990 | 595621.791   | 595621.791   | 0.000      |
|             |       | 1991 | 1177744.113  | 1177333.965  | 410.148    |
|             |       | 1992 | 1750034.892  | 1748511.430  | 1523.462   |
|             |       | 1993 | 2319752.308  | 2316073.880  | 3678.428   |
|             |       | 1994 | 2872597.339  | 2865524.851  | 7072.488   |
|             |       | 1995 | 3411494.825  | 3399567.795  | 11927.031  |
|             |       | 1996 | 3945569.726  | 3926882.756  | 18686.970  |
|             |       | 1997 | 4463316.362  | 4436030.816  | 27285.546  |
|             |       | 1998 | 4975301.180  | 4937250.770  | 38050.411  |
|             |       | 1999 | 5473691.125  | 5422615.168  | 51075.957  |
|             |       | 2000 | 5977500.570  | 5910408.408  | 67092.162  |
|             |       | 2001 | 6474795.516  | 6388815.391  | 85980.125  |
|             |       | 2002 | 6968769.705  | 6860735.564  | 108034.141 |
|             |       | 2003 | 7460282.140  | 7326750.611  | 133531.529 |
|             |       | 2004 | 7947048.275  | 7784726.035  | 162322.240 |
|             |       | 2005 | 8430571.669  | 8236057.774  | 194513.895 |
|             |       | 2006 | 8903945.390  | 8674090.495  | 229854.895 |
|             |       | 2007 | 9364177.982  | 9096202.038  | 267975.944 |
|             |       | 2008 | 9822525.458  | 9512510.687  | 310014.771 |
|             |       | 2009 | 10275228.886 | 9919769.002  | 355459.885 |
|             |       | 2010 | 10720275.500 | 10316356.875 | 403918.625 |
|             |       | 2011 | 11155356.373 | 10700281.823 | 455074.550 |
|             |       | 2012 | 11582611.617 | 11073039.931 | 509571.686 |
|             |       | 2013 | 11998803.791 | 11432221.802 | 566581.989 |
|             |       | 2014 | 12402087.090 | 11776587.553 | 625499.537 |
|             |       | 2015 | 12793451.706 | 12107451.409 | 686000.297 |
|             |       | 2016 | 13160101.653 | 12413964.886 | 746136.767 |
|             |       | 2017 | 13503583.414 | 12697845.251 | 805738.163 |
|             |       | 2018 | 13859755.737 | 12988379.751 | 871375.985 |
|             |       | 2019 | 14211625.176 | 13272123.917 | 939501.259 |
|             |       | 2020 | 14553935.288 | 13545525.578 | 1008409.71 |
|             |       | 2021 | 14851747.495 | 13780595.102 | 1071152.39 |
|             |       | 2022 | 15144531.004 | 14008931.267 | 1135599.74 |
|             |       | 2023 | 15431932.496 | 14230633.829 | 1201298.67 |
|             |       | 2024 | 15713920.740 | 14445809.287 | 1268111.45 |
|             |       | 2025 | 15979112.816 | 14646806.607 | 1332306.21 |
|             |       | 2026 | 16206550.153 | 14816778.576 | 1389771.58 |
|             |       | 2027 | 16428826.050 | 14980961.454 | 1447864.60 |
|             |       | 2028 | 16645902.186 | 15139521.559 | 1506380.63 |
|             |       | 2029 | 16858126.517 | 15293047.474 | 1565079.04 |
|             |       | 2030 | 17045220.687 | 15427993.816 | 1617226.87 |
|             |       | 2031 | 17208482.610 | 15543944.220 | 1664538.39 |
|             |       | 2032 | 17367586.074 | 15655874.008 | 1711712.07 |
|             |       | 2033 | 17522716.280 | 15763618.683 | 1759097.60 |
|             |       | 2034 | 17674226.555 | 15868053.375 | 1806173.18 |
|             |       | 2035 | 17792201.734 | 15949245.490 | 1842956.24 |
|             |       | 2036 | 17903508.236 | 16024907.665 | 1878600.57 |
|             |       | 2037 | 18012162.345 | 16098168.334 | 1913994.01 |
|             |       | 2038 | 18118464.470 | 16168748.202 | 1949716.27 |

**Results for PHIM for Run 2 (ELL Summary Sensitivity\_Analysis\_1.RTF)**

|     |        |      |              |              |            |
|-----|--------|------|--------------|--------------|------------|
|     |        | 2039 | 18222549.860 | 16237404.896 | 1985144.96 |
|     | Female | 1990 | 307897.357   | 307897.357   | 0.000      |
|     |        | 1991 | 616547.418   | 616287.110   | 260.307    |
|     |        | 1992 | 931086.773   | 930058.798   | 1027.975   |
|     |        | 1993 | 1246155.671  | 1243630.464  | 2525.207   |
|     |        | 1994 | 1561212.934  | 1556260.197  | 4952.737   |
|     |        | 1995 | 1879967.742  | 1871388.026  | 8579.716   |
|     |        | 1996 | 2197488.109  | 2183928.108  | 13560.001  |
|     |        | 1997 | 2515698.453  | 2495568.830  | 20129.622  |
|     |        | 1998 | 2836249.556  | 2807807.415  | 28442.141  |
|     |        | 1999 | 3150201.390  | 3111748.914  | 38452.475  |
|     |        | 2000 | 3472722.342  | 3422030.283  | 50692.059  |
|     |        | 2001 | 3796994.889  | 3731697.385  | 65297.505  |
|     |        | 2002 | 4126619.935  | 4044024.211  | 82595.724  |
|     |        | 2003 | 4454982.533  | 4352664.800  | 102317.734 |
|     |        | 2004 | 4784343.030  | 4659538.112  | 124804.918 |
|     |        | 2005 | 5113443.121  | 4963519.901  | 149923.220 |
|     |        | 2006 | 5442543.963  | 5264453.206  | 178090.756 |
|     |        | 2007 | 5772441.497  | 5563188.929  | 209252.568 |
|     |        | 2008 | 6091911.943  | 5849470.818  | 242441.125 |
|     |        | 2009 | 6413671.330  | 6134659.512  | 279011.818 |
|     |        | 2010 | 6730763.530  | 6413013.600  | 317749.930 |
|     |        | 2011 | 7043614.101  | 6684572.816  | 359041.285 |
|     |        | 2012 | 7356270.780  | 6952966.590  | 403304.189 |
|     |        | 2013 | 7662551.964  | 7212941.259  | 449610.705 |
|     |        | 2014 | 7964551.465  | 7466451.715  | 498099.749 |
|     |        | 2015 | 8254895.403  | 7707880.628  | 547014.775 |
|     |        | 2016 | 8530661.848  | 7934469.151  | 596192.696 |
|     |        | 2017 | 8795826.122  | 8149965.547  | 645860.575 |
|     |        | 2018 | 9067233.707  | 8367864.727  | 699368.980 |
|     |        | 2019 | 9335343.270  | 8580641.462  | 754701.808 |
|     |        | 2020 | 9596110.883  | 8785568.594  | 810542.289 |
|     |        | 2021 | 9833186.859  | 8970026.462  | 863160.397 |
|     |        | 2022 | 10066452.037 | 9149485.254  | 916966.783 |
|     |        | 2023 | 10295503.609 | 9323962.969  | 971540.641 |
|     |        | 2024 | 10520125.318 | 9493185.007  | 1026940.31 |
|     |        | 2025 | 10731915.863 | 9651450.294  | 1080465.57 |
|     |        | 2026 | 10917495.549 | 9788708.073  | 1128787.48 |
|     |        | 2027 | 11098620.885 | 9921271.813  | 1177349.07 |
|     |        | 2028 | 11275441.234 | 10049580.913 | 1225860.32 |
|     |        | 2029 | 11447962.710 | 10173415.572 | 1274547.14 |
|     |        | 2030 | 11601867.623 | 10283173.061 | 1318694.56 |
|     |        | 2031 | 11731666.516 | 10374634.136 | 1357032.38 |
|     |        | 2032 | 11857585.969 | 10462525.703 | 1395060.27 |
|     |        | 2033 | 11980128.625 | 10547355.186 | 1432773.44 |
|     |        | 2034 | 12099562.464 | 10629067.498 | 1470494.97 |
|     |        | 2035 | 12195919.946 | 10694432.191 | 1501487.76 |
|     |        | 2036 | 12278201.969 | 10749693.528 | 1528508.44 |
|     |        | 2037 | 12358146.336 | 10803063.447 | 1555082.89 |
|     |        | 2038 | 12435978.633 | 10854785.843 | 1581192.79 |
|     |        | 2039 | 12512468.845 | 10905064.701 | 1607404.14 |
| IHD | Males  | 1990 | 517209.093   | 517209.093   | 0.000      |
|     |        | 1991 | 1019219.395  | 1014814.667  | 4404.728   |
|     |        | 1992 | 1509598.614  | 1493394.072  | 16204.542  |
|     |        | 1993 | 1992735.299  | 1955350.166  | 37385.133  |
|     |        | 1994 | 2462877.575  | 2393769.235  | 69108.340  |
|     |        | 1995 | 2928249.390  | 2815652.975  | 112596.415 |
|     |        | 1996 | 3377377.730  | 3209774.120  | 167603.610 |
|     |        | 1997 | 3809062.472  | 3575839.908  | 233222.564 |
|     |        | 1998 | 4222213.867  | 3914135.073  | 308078.794 |
|     |        | 1999 | 4708317.743  | 4297869.584  | 410448.159 |
|     |        | 2000 | 5182084.396  | 4659180.162  | 522904.235 |
|     |        | 2001 | 5644097.705  | 4998535.023  | 645562.682 |
|     |        | 2002 | 6107232.129  | 5326684.099  | 780548.030 |
|     |        | 2003 | 6561785.704  | 5637801.382  | 923984.322 |
|     |        | 2004 | 6996156.348  | 5925575.836  | 1070580.51 |
|     |        | 2005 | 7426261.361  | 6202133.616  | 1224127.75 |
|     |        | 2006 | 7849012.694  | 6465774.849  | 1383237.85 |
|     |        | 2007 | 8255300.530  | 6712240.444  | 1543060.09 |
|     |        | 2008 | 8650662.040  | 6946209.595  | 1704452.44 |
|     |        | 2009 | 9030818.513  | 7166147.410  | 1864671.10 |
|     |        | 2010 | 9403026.327  | 7377032.358  | 2025993.97 |
|     |        | 2011 | 9767535.506  | 7579254.659  | 2188280.85 |
|     |        | 2012 | 10123044.281 | 7772660.177  | 2350384.10 |
|     |        | 2013 | 10470104.786 | 7958077.348  | 2512027.44 |
|     |        | 2014 | 10807756.112 | 8135546.547  | 2672209.57 |
|     |        | 2015 | 11130681.425 | 8302984.002  | 2827697.42 |
|     |        | 2016 | 11448966.506 | 8465848.526  | 2983117.98 |

**Results for PHIM for Run 2 (ELL Summary Sensitivity\_Analysis\_1.RTF)**

|        |        |      |              |              |            |
|--------|--------|------|--------------|--------------|------------|
|        |        | 2017 | 11758164.882 | 8622009.160  | 3136155.72 |
|        |        | 2018 | 12054448.241 | 8769959.232  | 3284489.01 |
|        |        | 2019 | 12341606.261 | 8912174.604  | 3429431.66 |
|        |        | 2020 | 12600728.939 | 9039264.814  | 3561464.13 |
|        |        | 2021 | 12861767.105 | 9166214.834  | 3695552.27 |
|        |        | 2022 | 13114168.616 | 9287734.014  | 3826434.60 |
|        |        | 2023 | 13357894.797 | 9403831.746  | 3954063.05 |
|        |        | 2024 | 13593848.521 | 9515552.183  | 4078296.34 |
|        |        | 2025 | 13789177.359 | 9607426.853  | 4181750.51 |
|        |        | 2026 | 13993401.656 | 9703099.191  | 4290302.46 |
|        |        | 2027 | 14190519.224 | 9795089.147  | 4395430.08 |
|        |        | 2028 | 14381193.356 | 9882773.442  | 4498419.91 |
|        |        | 2029 | 14565171.927 | 9967141.911  | 4598030.02 |
|        |        | 2030 | 14697381.605 | 10027498.312 | 4669883.29 |
|        |        | 2031 | 14842203.512 | 10093568.360 | 4748635.15 |
|        |        | 2032 | 14982485.826 | 10157060.664 | 4825425.16 |
|        |        | 2033 | 15118410.647 | 10217275.118 | 4901135.53 |
|        |        | 2034 | 15250284.398 | 10275794.784 | 4974489.61 |
|        |        | 2035 | 15322911.166 | 10307481.590 | 5015429.58 |
|        |        | 2036 | 15405115.031 | 10343149.951 | 5061965.08 |
|        |        | 2037 | 15484709.137 | 10377546.538 | 5107162.60 |
|        |        | 2038 | 15561812.193 | 10410166.449 | 5151645.74 |
|        |        | 2039 | 15635992.616 | 10441503.235 | 5194489.38 |
|        | Female | 1990 | 147299.110   | 147299.110   | 0.000      |
|        |        | 1991 | 295122.462   | 293952.394   | 1170.068   |
|        |        | 1992 | 439962.920   | 435619.512   | 4343.408   |
|        |        | 1993 | 584735.615   | 574511.561   | 10224.054  |
|        |        | 1994 | 727640.783   | 708425.553   | 19215.229  |
|        |        | 1995 | 868486.937   | 836947.795   | 31539.143  |
|        |        | 1996 | 1010321.847  | 962263.965   | 48057.882  |
|        |        | 1997 | 1144230.930  | 1077034.545  | 67196.385  |
|        |        | 1998 | 1274513.622  | 1184995.258  | 89518.364  |
|        |        | 1999 | 1426725.938  | 1306872.377  | 119853.561 |
|        |        | 2000 | 1573462.680  | 1420549.877  | 152912.802 |
|        |        | 2001 | 1719132.015  | 1529002.378  | 190129.637 |
|        |        | 2002 | 1863006.732  | 1632130.490  | 230876.242 |
|        |        | 2003 | 2002943.227  | 1728860.714  | 274082.514 |
|        |        | 2004 | 2137798.705  | 1818907.822  | 318890.883 |
|        |        | 2005 | 2271071.245  | 1905329.397  | 365741.848 |
|        |        | 2006 | 2400707.731  | 1986677.703  | 414030.028 |
|        |        | 2007 | 2523634.512  | 2061765.739  | 461868.773 |
|        |        | 2008 | 2648752.232  | 2136172.287  | 512579.945 |
|        |        | 2009 | 2765973.961  | 2204429.252  | 561544.709 |
|        |        | 2010 | 2881329.235  | 2270281.947  | 611047.288 |
|        |        | 2011 | 2994972.694  | 2333733.882  | 661238.811 |
|        |        | 2012 | 3108958.829  | 2396132.543  | 712826.286 |
|        |        | 2013 | 3218140.416  | 2455110.669  | 763029.747 |
|        |        | 2014 | 3328387.914  | 2513749.002  | 814638.912 |
|        |        | 2015 | 3435342.796  | 2569924.633  | 865418.162 |
|        |        | 2016 | 3539189.408  | 2623748.776  | 915440.632 |
|        |        | 2017 | 3640041.363  | 2675377.838  | 964663.525 |
|        |        | 2018 | 3732645.362  | 2722339.561  | 1010305.80 |
|        |        | 2019 | 3821421.978  | 2766957.731  | 1054464.25 |
|        |        | 2020 | 3902115.950  | 2807019.249  | 1095096.70 |
|        |        | 2021 | 3984301.053  | 2847523.071  | 1136777.98 |
|        |        | 2022 | 4062629.299  | 2885866.732  | 1176762.57 |
|        |        | 2023 | 4137348.729  | 2922318.276  | 1215030.45 |
|        |        | 2024 | 4208611.493  | 2956874.288  | 1251737.21 |
|        |        | 2025 | 4269419.492  | 2986082.124  | 1283337.37 |
|        |        | 2026 | 4330969.998  | 3015530.954  | 1315439.04 |
|        |        | 2027 | 4389134.306  | 3043331.604  | 1345802.70 |
|        |        | 2028 | 4444222.970  | 3069673.584  | 1374549.39 |
|        |        | 2029 | 4496447.877  | 3094599.405  | 1401848.47 |
|        |        | 2030 | 4536975.698  | 3113564.396  | 1423411.30 |
|        |        | 2031 | 4578338.586  | 3132989.263  | 1445349.32 |
|        |        | 2032 | 4617397.784  | 3151414.888  | 1465982.90 |
|        |        | 2033 | 4654407.697  | 3168962.522  | 1485445.17 |
|        |        | 2034 | 4689913.454  | 3185704.400  | 1504209.05 |
|        |        | 2035 | 4712518.190  | 3195936.291  | 1516581.90 |
|        |        | 2036 | 4735845.827  | 3206482.702  | 1529363.12 |
|        |        | 2037 | 4757958.806  | 3216520.223  | 1541438.58 |
|        |        | 2038 | 4778813.806  | 3226117.362  | 1552696.44 |
|        |        | 2039 | 4798769.065  | 3235313.905  | 1563455.16 |
| Stroke | Males  | 1990 | 75005.854    | 75005.854    | 0.000      |
|        |        | 1991 | 149463.017   | 149009.873   | 453.145    |
|        |        | 1992 | 222966.278   | 221295.212   | 1671.066   |
|        |        | 1993 | 296801.879   | 292843.535   | 3958.343   |
|        |        | 1994 | 372453.706   | 364826.564   | 7627.141   |

**Results for PHIM for Run 2 (ELL Summary Sensitivity\_Analysis\_1.RTF)**

|        |      |             |             |            |
|--------|------|-------------|-------------|------------|
|        | 1995 | 448401.338  | 435563.640  | 12837.698  |
|        | 1996 | 523536.301  | 503877.889  | 19658.412  |
|        | 1997 | 596763.211  | 568678.500  | 28084.712  |
|        | 1998 | 667546.681  | 629569.722  | 37976.959  |
|        | 1999 | 734925.407  | 685838.678  | 49086.729  |
|        | 2000 | 803749.361  | 741640.668  | 62108.693  |
|        | 2001 | 870081.588  | 793712.381  | 76369.207  |
|        | 2002 | 935347.140  | 843346.808  | 92000.332  |
|        | 2003 | 1001627.349 | 892089.140  | 109538.209 |
|        | 2004 | 1066587.976 | 938388.230  | 128199.746 |
|        | 2005 | 1130548.052 | 982528.840  | 148019.212 |
|        | 2006 | 1195132.454 | 1025724.529 | 169407.925 |
|        | 2007 | 1258974.043 | 1067138.043 | 191836.001 |
|        | 2008 | 1320124.867 | 1105625.412 | 214499.455 |
|        | 2009 | 1380776.123 | 1142775.752 | 238000.372 |
|        | 2010 | 1440048.533 | 1178176.610 | 261871.923 |
|        | 2011 | 1497484.847 | 1211650.674 | 285834.172 |
|        | 2012 | 1554496.526 | 1244018.337 | 310478.189 |
|        | 2013 | 1610819.598 | 1275256.169 | 335563.428 |
|        | 2014 | 1667484.890 | 1305976.974 | 361507.916 |
|        | 2015 | 1720948.287 | 1334452.279 | 386496.007 |
|        | 2016 | 1775699.228 | 1363092.212 | 412607.016 |
|        | 2017 | 1830250.175 | 1391121.423 | 439128.752 |
|        | 2018 | 1875958.950 | 1414237.494 | 461721.456 |
|        | 2019 | 1920359.232 | 1436398.382 | 483960.850 |
|        | 2020 | 1960605.297 | 1456267.937 | 504337.360 |
|        | 2021 | 1998912.887 | 1474917.612 | 523995.276 |
|        | 2022 | 2036003.696 | 1492723.126 | 543280.570 |
|        | 2023 | 2071857.536 | 1509734.033 | 562123.504 |
|        | 2024 | 2106636.468 | 1526086.511 | 580549.957 |
|        | 2025 | 2136450.873 | 1539991.834 | 596459.040 |
|        | 2026 | 2164796.470 | 1553084.234 | 611712.236 |
|        | 2027 | 2192079.608 | 1565622.995 | 626456.613 |
|        | 2028 | 2218404.367 | 1577564.253 | 640840.114 |
|        | 2029 | 2243769.140 | 1589025.484 | 654743.657 |
|        | 2030 | 2263570.213 | 1597916.404 | 665653.808 |
|        | 2031 | 2282521.590 | 1606374.737 | 676146.853 |
|        | 2032 | 2300804.945 | 1614465.907 | 686339.038 |
|        | 2033 | 2318464.018 | 1622170.344 | 696293.674 |
|        | 2034 | 2335611.973 | 1629628.473 | 705983.500 |
|        | 2035 | 2347097.290 | 1634604.947 | 712492.344 |
|        | 2036 | 2358248.747 | 1639403.109 | 718845.638 |
|        | 2037 | 2369033.655 | 1644036.470 | 724997.185 |
|        | 2038 | 2379490.114 | 1648448.115 | 731041.998 |
|        | 2039 | 2389546.238 | 1652674.703 | 736871.535 |
| Female | 1990 | 56348.092   | 56348.092   | 0.000      |
|        | 1991 | 110871.862  | 110549.122  | 322.740    |
|        | 1992 | 165654.454  | 164415.146  | 1239.308   |
|        | 1993 | 220008.519  | 217052.891  | 2955.628   |
|        | 1994 | 275706.807  | 269972.689  | 5734.118   |
|        | 1995 | 331417.547  | 321771.225  | 9646.322   |
|        | 1996 | 387580.161  | 372689.899  | 14890.262  |
|        | 1997 | 442778.242  | 421415.610  | 21362.632  |
|        | 1998 | 496117.305  | 467189.029  | 28928.276  |
|        | 1999 | 548268.214  | 510638.493  | 37629.721  |
|        | 2000 | 601693.202  | 553872.263  | 47820.939  |
|        | 2001 | 652221.103  | 593503.633  | 58717.470  |
|        | 2002 | 703022.600  | 632065.500  | 70957.100  |
|        | 2003 | 752023.351  | 668067.544  | 83955.807  |
|        | 2004 | 799826.733  | 702044.918  | 97781.815  |
|        | 2005 | 847563.928  | 734974.483  | 112589.445 |
|        | 2006 | 894205.027  | 766160.676  | 128044.351 |
|        | 2007 | 939571.282  | 795600.901  | 143970.381 |
|        | 2008 | 983437.578  | 823275.333  | 160162.245 |
|        | 2009 | 1025803.786 | 849337.169  | 176466.617 |
|        | 2010 | 1066964.934 | 874021.022  | 192943.912 |
|        | 2011 | 1106954.044 | 897417.456  | 209536.588 |
|        | 2012 | 1146108.461 | 919808.795  | 226299.666 |
|        | 2013 | 1183544.689 | 940803.219  | 242741.471 |
|        | 2014 | 1221220.945 | 961485.008  | 259735.937 |
|        | 2015 | 1258289.311 | 981508.609  | 276780.702 |
|        | 2016 | 1294830.207 | 1000929.720 | 293900.488 |
|        | 2017 | 1330332.626 | 1019498.123 | 310834.503 |
|        | 2018 | 1360571.987 | 1035122.673 | 325449.314 |
|        | 2019 | 1389848.723 | 1050039.458 | 339809.264 |
|        | 2020 | 1416046.192 | 1063209.644 | 352836.549 |
|        | 2021 | 1440588.850 | 1075400.395 | 365188.455 |
|        | 2022 | 1464157.934 | 1087002.711 | 377155.223 |

**Results for PHIM for Run 2 (ELL Summary Sensitivity\_Analysis\_1.RTF)**

|      |             |             |             |             |            |
|------|-------------|-------------|-------------|-------------|------------|
|      |             | 2023        | 1486810.237 | 1098098.383 | 388711.854 |
|      |             | 2024        | 1508591.729 | 1108666.897 | 399924.832 |
|      |             | 2025        | 1526875.621 | 1117456.666 | 409418.955 |
|      |             | 2026        | 1543659.810 | 1125466.991 | 418192.819 |
|      |             | 2027        | 1559623.774 | 1133065.146 | 426558.628 |
|      |             | 2028        | 1574852.850 | 1140297.417 | 434555.434 |
|      |             | 2029        | 1589437.452 | 1147183.795 | 442253.657 |
|      |             | 2030        | 1600568.199 | 1152352.538 | 448215.661 |
|      |             | 2031        | 1610776.297 | 1157100.703 | 453675.594 |
|      |             | 2032        | 1620483.563 | 1161625.187 | 458858.376 |
|      |             | 2033        | 1629745.442 | 1165954.651 | 463790.792 |
|      |             | 2034        | 1638721.425 | 1170111.663 | 468609.762 |
|      |             | 2035        | 1644649.404 | 1172783.598 | 471865.807 |
|      |             | 2036        | 1650181.590 | 1175266.585 | 474915.005 |
|      |             | 2037        | 1655476.066 | 1177648.713 | 477827.353 |
|      |             | 2038        | 1660507.914 | 1179944.982 | 480562.931 |
|      |             | 2039        | 1665361.569 | 1182163.346 | 483198.224 |
| COPD | Males       | 1990        | 117002.906  | 117002.906  | 0.000      |
|      |             | 1991        | 233438.833  | 233308.745  | 130.087    |
|      |             | 1992        | 348084.047  | 347611.381  | 472.666    |
|      |             | 1993        | 467278.318  | 466126.049  | 1152.268   |
|      |             | 1994        | 584216.907  | 581965.682  | 2251.224   |
|      |             | 1995        | 697391.457  | 693576.224  | 3815.233   |
|      |             | 1996        | 809471.271  | 803529.574  | 5941.697   |
|      |             | 1997        | 922587.668  | 913824.301  | 8763.367   |
|      |             | 1998        | 1034072.457 | 1021846.301 | 12226.156  |
|      |             | 1999        | 1153475.399 | 1136704.158 | 16771.241  |
|      |             | 2000        | 1268050.268 | 1245946.043 | 22104.225  |
|      |             | 2001        | 1382786.209 | 1354318.042 | 28468.167  |
|      |             | 2002        | 1497557.412 | 1461590.738 | 35966.674  |
|      |             | 2003        | 1614405.229 | 1569799.839 | 44605.390  |
|      |             | 2004        | 1726672.489 | 1672597.553 | 54074.936  |
|      |             | 2005        | 1847277.524 | 1781908.360 | 65369.164  |
|      |             | 2006        | 1961009.963 | 1883700.082 | 77309.881  |
|      |             | 2007        | 2079868.908 | 1988682.343 | 91186.565  |
|      |             | 2008        | 2206755.783 | 2099425.266 | 107330.516 |
|      |             | 2009        | 2331993.380 | 2207274.414 | 124718.966 |
|      |             | 2010        | 2455130.176 | 2311938.255 | 143191.922 |
|      |             | 2011        | 2582657.849 | 2418843.731 | 163814.118 |
|      |             | 2012        | 2709719.005 | 2523755.993 | 185963.012 |
|      |             | 2013        | 2840547.005 | 2630108.080 | 210438.926 |
|      |             | 2014        | 2971677.135 | 2735097.644 | 236579.492 |
|      |             | 2015        | 3104538.983 | 2840428.573 | 264110.409 |
|      |             | 2016        | 3237650.175 | 2944237.733 | 293412.443 |
|      |             | 2017        | 3370561.253 | 3046336.381 | 324224.871 |
|      |             | 2018        | 3503136.371 | 3146328.208 | 356808.163 |
|      |             | 2019        | 3636402.758 | 3245247.496 | 391155.262 |
|      |             | 2020        | 3768054.453 | 3341776.993 | 426277.460 |
|      |             | 2021        | 3897675.067 | 3435284.261 | 462390.806 |
|      |             | 2022        | 4027307.132 | 3527184.377 | 500122.756 |
|      |             | 2023        | 4156698.720 | 3617441.397 | 539257.323 |
|      |             | 2024        | 4285772.226 | 3705984.630 | 579787.595 |
|      |             | 2025        | 4410759.298 | 3790814.596 | 619944.702 |
|      |             | 2026        | 4531411.064 | 3871189.098 | 660221.966 |
|      |             | 2027        | 4651145.233 | 3949523.716 | 701621.517 |
|      |             | 2028        | 4769837.872 | 4025919.801 | 743918.071 |
|      |             | 2029        | 4887747.179 | 4100570.105 | 787177.074 |
| 2030 | 4997632.895 | 4169623.556 | 828009.339  |             |            |
| 2031 | 5103301.991 | 4234583.594 | 868718.398  |             |            |
| 2032 | 5207593.613 | 4297685.009 | 909908.604  |             |            |
| 2033 | 5310556.138 | 4358882.416 | 951673.722  |             |            |
| 2034 | 5412542.816 | 4418612.771 | 993930.045  |             |            |
| 2035 | 5500522.473 | 4469864.550 | 1030657.92  |             |            |
| 2036 | 5588149.640 | 4520005.503 | 1068144.14  |             |            |
| 2037 | 5674667.886 | 4568897.036 | 1105770.85  |             |            |
| 2038 | 5760391.289 | 4616443.788 | 1143947.50  |             |            |
| 2039 | 5845459.234 | 4663082.467 | 1182376.77  |             |            |
|      | Female      | 1990        | 77434.846   | 77434.846   | 0.000      |
|      |             | 1991        | 160029.510  | 159923.998  | 105.513    |
|      |             | 1992        | 240642.531  | 240242.138  | 400.393    |
|      |             | 1993        | 329362.093  | 328329.192  | 1032.901   |
|      |             | 1994        | 418569.515  | 416504.917  | 2064.599   |
|      |             | 1995        | 509110.357  | 505486.700  | 3623.657   |
|      |             | 1996        | 600040.117  | 594295.711  | 5744.406   |
|      |             | 1997        | 691159.071  | 682647.843  | 8511.227   |
|      |             | 1998        | 782866.899  | 770912.741  | 11954.157  |
|      |             | 1999        | 881526.925  | 865043.466  | 16483.459  |
|      |             | 2000        | 977880.647  | 956194.203  | 21686.445  |

**Results for PHIM for Run 2 (ELL Summary Sensitivity\_Analysis\_1.RTF)**

|      |             |             |            |
|------|-------------|-------------|------------|
| 2001 | 1076787.404 | 1048843.642 | 27943.761  |
| 2002 | 1174842.754 | 1139715.955 | 35126.799  |
| 2003 | 1275102.681 | 1231686.920 | 43415.761  |
| 2004 | 1371026.306 | 1318717.995 | 52308.311  |
| 2005 | 1473954.509 | 1410990.094 | 62964.415  |
| 2006 | 1574450.828 | 1499986.182 | 74464.646  |
| 2007 | 1673790.211 | 1586852.774 | 86937.438  |
| 2008 | 1782360.738 | 1680528.420 | 101832.318 |
| 2009 | 1892944.209 | 1774520.218 | 118423.991 |
| 2010 | 2002131.282 | 1866185.751 | 135945.531 |
| 2011 | 2114522.152 | 1959079.895 | 155442.257 |
| 2012 | 2228079.372 | 2051626.644 | 176452.728 |
| 2013 | 2345377.689 | 2145718.832 | 199658.857 |
| 2014 | 2462498.422 | 2238185.311 | 224313.111 |
| 2015 | 2581450.312 | 2331142.156 | 250308.155 |
| 2016 | 2701959.301 | 2423819.254 | 278140.047 |
| 2017 | 2823834.967 | 2516075.984 | 307758.983 |
| 2018 | 2938265.081 | 2601681.770 | 336583.311 |
| 2019 | 3053254.880 | 2686361.138 | 366893.741 |
| 2020 | 3167073.216 | 2769131.566 | 397941.650 |
| 2021 | 3279517.699 | 2849884.233 | 429633.466 |
| 2022 | 3392060.964 | 2929423.647 | 462637.317 |
| 2023 | 3504296.171 | 3007609.172 | 496686.999 |
| 2024 | 3616019.231 | 3084223.826 | 531795.405 |
| 2025 | 3724611.269 | 3157835.148 | 566776.121 |
| 2026 | 3827181.707 | 3226568.256 | 600613.451 |
| 2027 | 3928684.441 | 3293534.766 | 635149.674 |
| 2028 | 4029124.892 | 3358931.072 | 670193.821 |
| 2029 | 4128269.068 | 3422500.626 | 705768.441 |
| 2030 | 4221560.174 | 3481776.175 | 739783.999 |
| 2031 | 4304170.584 | 3533482.943 | 770687.642 |
| 2032 | 4384930.537 | 3583259.892 | 801670.646 |
| 2033 | 4464357.691 | 3631526.492 | 832831.199 |
| 2034 | 4542251.545 | 3678087.979 | 864163.566 |
| 2035 | 4611066.648 | 3718901.122 | 892165.526 |
| 2036 | 4670309.230 | 3753532.485 | 916776.746 |
| 2037 | 4728179.514 | 3786947.551 | 941231.964 |
| 2038 | 4785008.048 | 3819394.553 | 965613.495 |
| 2039 | 4841291.793 | 3851013.921 | 990277.872 |

---

## Results for PHIM for Run 2 (ELL Summary Sensitivity\_Analysis\_1.RTF)

\*\*\*\*\*

**Table 5: Estimated Loss of Life, at the end of follow-up, Population unadjusted for deaths in Ecig scenario**

| Disease      | Sex    | Age Group   | Years of life lost<br>NULL | Years of life lost<br>Ecig | Years of life<br>Saved |
|--------------|--------|-------------|----------------------------|----------------------------|------------------------|
| All Diseases | Males  | 30-34       | 443911.034                 | 333506.679                 | 110404.355             |
|              |        | 35-39       | 1146798.555                | 858580.534                 | 288218.021             |
|              |        | 40-44       | 2609591.408                | 1936796.039                | 672795.369             |
|              |        | 45-49       | 4775841.753                | 3528945.800                | 1246895.95             |
|              |        | 50-54       | 7446969.205                | 5590455.226                | 1856513.98             |
|              |        | 55-59       | 8240205.925                | 6377674.831                | 1862531.09             |
|              |        | 60-64       | 8772829.118                | 7018936.333                | 1753892.78             |
|              |        | 65-69       | 6161494.678                | 5139158.551                | 1022336.13             |
|              | 70-74  | 2495906.274 | 2107827.482                | 388078.792                 |                        |
|              | 75-79  | 0.000       | 0.000                      | 0.000                      |                        |
|              | Female | 30-34       | 229140.561                 | 182292.394                 | 46848.167              |
|              |        | 35-39       | 570217.942                 | 451632.565                 | 118585.377             |
|              |        | 40-44       | 1267538.938                | 996025.910                 | 271513.028             |
|              |        | 45-49       | 2340070.698                | 1834179.908                | 505890.790             |
|              |        | 50-54       | 3743803.613                | 2946238.642                | 797564.972             |
|              |        | 55-59       | 4591478.168                | 3668458.774                | 923019.394             |
|              |        | 60-64       | 5207367.788                | 4207665.485                | 999702.302             |
| 65-69        |        | 4092181.394 | 3380681.884                | 711499.511                 |                        |
| 70-74        |        | 1776092.171 | 1469957.444                | 306134.727                 |                        |
| 75-79        | 0.000  | 0.000       | 0.000                      |                            |                        |
| Lung cancer  | Males  | 30-34       | 66065.017                  | 59728.699                  | 6336.318               |
|              |        | 35-39       | 232509.414                 | 210924.074                 | 21585.340              |
|              |        | 40-44       | 688628.041                 | 619640.632                 | 68987.410              |
|              |        | 45-49       | 1528300.367                | 1359127.001                | 169173.366             |
|              |        | 50-54       | 2730187.229                | 2413910.153                | 316277.076             |
|              |        | 55-59       | 3909101.673                | 3444969.186                | 464132.487             |
|              |        | 60-64       | 4287716.660                | 3809873.136                | 477843.524             |
|              |        | 65-69       | 3467897.115                | 3092277.651                | 375619.464             |
|              | 70-74  | 1312144.343 | 1173597.106                | 138547.237                 |                        |
|              | 75-79  | 0.000       | 0.000                      | 0.000                      |                        |
|              | Female | 30-34       | 51913.113                  | 46830.866                  | 5082.247               |
|              |        | 35-39       | 189792.904                 | 171350.622                 | 18442.283              |
|              |        | 40-44       | 527596.573                 | 469194.779                 | 58401.794              |
|              |        | 45-49       | 1122524.269                | 984966.791                 | 137557.478             |
|              |        | 50-54       | 1882214.322                | 1638121.479                | 244092.843             |
|              |        | 55-59       | 2595581.943                | 2244479.141                | 351102.802             |
|              |        | 60-64       | 2846273.090                | 2468135.105                | 378137.985             |
| 65-69        |        | 2358758.394 | 2046478.030                | 312280.364                 |                        |
| 70-74        |        | 937814.238  | 814360.984                 | 123453.254                 |                        |
| 75-79        | 0.000  | 0.000       | 0.000                      |                            |                        |
| IHD          | Males  | 30-34       | 263834.566                 | 185469.256                 | 78365.310              |
|              |        | 35-39       | 692140.150                 | 477202.507                 | 214937.643             |
|              |        | 40-44       | 1519708.432                | 1014104.059                | 505604.373             |
|              |        | 45-49       | 2568546.697                | 1663265.192                | 905281.505             |
|              |        | 50-54       | 3632929.903                | 2377573.731                | 1255356.17             |
|              |        | 55-59       | 2807892.356                | 1806638.180                | 1001254.18             |
|              |        | 60-64       | 2599825.934                | 1773307.342                | 826518.592             |
|              |        | 65-69       | 1113578.307                | 790723.191                 | 322855.116             |
|              | 70-74  | 437536.271  | 330079.901                 | 107456.369                 |                        |
|              | 75-79  | 0.000       | 0.000                      | 0.000                      |                        |
|              | Female | 30-34       | 79649.097                  | 57142.554                  | 22506.543              |
|              |        | 35-39       | 193965.908                 | 133284.420                 | 60681.487              |
|              |        | 40-44       | 403380.974                 | 267021.098                 | 136359.876             |
|              |        | 45-49       | 671385.408                 | 433509.592                 | 237875.816             |
|              |        | 50-54       | 1011875.989                | 663991.967                 | 347884.022             |
|              |        | 55-59       | 849875.715                 | 554709.172                 | 295166.543             |
|              |        | 60-64       | 925490.876                 | 636754.815                 | 288736.061             |
| 65-69        |        | 455463.881  | 327871.982                 | 127591.899                 |                        |
| 70-74        |        | 207681.216  | 157315.032                 | 50366.184                  |                        |
| 75-79        | 0.000  | 0.000       | 0.000                      |                            |                        |
| Stroke       | Males  | 30-34       | 73463.650                  | 55884.486                  | 17579.164              |
|              |        | 35-39       | 151934.057                 | 113994.341                 | 37939.716              |
|              |        | 40-44       | 262845.974                 | 192549.530                 | 70296.445              |
|              |        | 45-49       | 383421.246                 | 272894.586                 | 110526.660             |
|              |        | 50-54       | 479872.634                 | 328604.372                 | 151268.262             |
|              |        | 55-59       | 437124.903                 | 287166.683                 | 149958.220             |
|              |        | 60-64       | 419457.235                 | 277126.656                 | 142330.578             |
|              |        | 65-69       | 128180.574                 | 84472.799                  | 43707.775              |
|              | 70-74  | 53245.965   | 36438.507                  | 16807.458                  |                        |
|              | 75-79  | 0.000       | 0.000                      | 0.000                      |                        |
|              | Female | 30-34       | 62919.090                  | 49797.878                  | 13121.212              |

**Results for PHIM for Run 2 (ELL Summary Sensitivity\_Analysis\_1.RTF)**

|      |        |       |             |             |            |
|------|--------|-------|-------------|-------------|------------|
|      |        | 35-39 | 120806.205  | 93154.027   | 27652.178  |
|      |        | 40-44 | 203391.885  | 151655.426  | 51736.459  |
|      |        | 45-49 | 278172.097  | 201029.340  | 77142.757  |
|      |        | 50-54 | 325979.181  | 228689.773  | 97289.408  |
|      |        | 55-59 | 275161.340  | 186185.707  | 88975.633  |
|      |        | 60-64 | 268920.493  | 182095.625  | 86824.868  |
|      |        | 65-69 | 87956.054   | 59555.447   | 28400.606  |
|      |        | 70-74 | 42055.224   | 28917.514   | 13137.710  |
|      |        | 75-79 | 0.000       | 0.000       | 0.000      |
| COPD | Males  | 30-34 | 40547.801   | 32424.238   | 8123.563   |
|      |        | 35-39 | 70214.933   | 56459.611   | 13755.322  |
|      |        | 40-44 | 138408.960  | 110501.818  | 27907.142  |
|      |        | 45-49 | 295573.443  | 233659.021  | 61914.422  |
|      |        | 50-54 | 603979.438  | 470366.971  | 133612.467 |
|      |        | 55-59 | 1086086.992 | 838900.782  | 247186.210 |
|      |        | 60-64 | 1465829.290 | 1158629.200 | 307200.090 |
|      |        | 65-69 | 1451838.682 | 1171684.910 | 280153.772 |
|      |        | 70-74 | 692979.695  | 567711.968  | 125267.727 |
|      |        | 75-79 | 0.000       | 0.000       | 0.000      |
|      | Female | 30-34 | 34659.261   | 28521.096   | 6138.165   |
|      |        | 35-39 | 65652.924   | 53843.496   | 11809.429  |
|      |        | 40-44 | 133169.505  | 108154.607  | 25014.899  |
|      |        | 45-49 | 267988.924  | 214674.185  | 53314.739  |
|      |        | 50-54 | 523734.121  | 415435.422  | 108298.698 |
|      |        | 55-59 | 870859.170  | 683084.754  | 187774.416 |
|      |        | 60-64 | 1166683.329 | 920679.940  | 246003.389 |
|      |        | 65-69 | 1190003.066 | 946776.424  | 243226.642 |
|      |        | 70-74 | 588541.493  | 469363.914  | 119177.579 |
|      |        | 75-79 | 0.000       | 0.000       | 0.000      |

---



## Results for PHIM for Run 2 (ELL Summary Sensitivity\_Analysis\_1.RTF)

\*\*\*\*\*

**Table 6: Estimated Loss of Life, at the end of follow-up, Population and Number deaths adjusted for Ecig scenario**

| Disease      | Sex    | Age Group   | Years of life lost<br>NULL | Years of life lost<br>Ecig | Years of life<br>Saved |
|--------------|--------|-------------|----------------------------|----------------------------|------------------------|
| All Diseases | Males  | 30-34       | 443911.034                 | 333526.825                 | 110384.209             |
|              |        | 35-39       | 1146798.555                | 858732.442                 | 288066.113             |
|              |        | 40-44       | 2609591.408                | 1937773.093                | 671818.315             |
|              |        | 45-49       | 4775841.753                | 3533196.264                | 1242645.49             |
|              |        | 50-54       | 7446969.205                | 5603117.940                | 1843851.26             |
|              |        | 55-59       | 8240205.925                | 6396919.981                | 1843285.94             |
|              |        | 60-64       | 8772829.118                | 7048950.780                | 1723878.34             |
|              |        | 65-69       | 6161494.678                | 5162352.757                | 999141.921             |
|              |        | 70-74       | 2495906.274                | 2120095.220                | 375811.054             |
|              | 75-79  | 0.000       | 0.000                      | 0.000                      |                        |
|              | Female | 30-34       | 229140.561                 | 182296.840                 | 46843.721              |
|              |        | 35-39       | 570217.942                 | 451665.217                 | 118552.725             |
|              |        | 40-44       | 1267538.938                | 996231.766                 | 271307.172             |
|              |        | 45-49       | 2340070.698                | 1835081.136                | 504989.562             |
|              |        | 50-54       | 3743803.613                | 2949117.394                | 794686.219             |
|              |        | 55-59       | 4591478.168                | 3673939.542                | 917538.626             |
|              |        | 60-64       | 5207367.788                | 4217777.500                | 989590.288             |
|              |        | 65-69       | 4092181.394                | 3390968.690                | 701212.705             |
| 70-74        |        | 1776092.171 | 1476477.789                | 299614.382                 |                        |
| 75-79        | 0.000  | 0.000       | 0.000                      |                            |                        |
| Lung cancer  | Males  | 30-34       | 66065.017                  | 59731.859                  | 6333.159               |
|              |        | 35-39       | 232509.414                 | 210957.852                 | 21551.563              |
|              |        | 40-44       | 688628.041                 | 619932.966                 | 68695.075              |
|              |        | 45-49       | 1528300.367                | 1360694.574                | 167605.794             |
|              |        | 50-54       | 2730187.229                | 2419138.218                | 311049.011             |
|              |        | 55-59       | 3909101.673                | 3455068.366                | 454033.307             |
|              |        | 60-64       | 4287716.660                | 3825807.208                | 461909.452             |
|              |        | 65-69       | 3467897.115                | 3105796.195                | 362100.919             |
|              |        | 70-74       | 1312144.343                | 1180277.658                | 131866.685             |
|              | 75-79  | 0.000       | 0.000                      | 0.000                      |                        |
|              | Female | 30-34       | 51913.113                  | 46831.985                  | 5081.128               |
|              |        | 35-39       | 189792.904                 | 171362.385                 | 18430.519              |
|              |        | 40-44       | 527596.573                 | 469290.488                 | 58306.085              |
|              |        | 45-49       | 1122524.269                | 985446.372                 | 137077.897             |
|              |        | 50-54       | 1882214.322                | 1639713.978                | 242500.344             |
|              |        | 55-59       | 2595581.943                | 2247826.625                | 347755.319             |
|              |        | 60-64       | 2846273.090                | 2474077.754                | 372195.336             |
|              |        | 65-69       | 2358758.394                | 2052595.087                | 306163.307             |
| 70-74        |        | 937814.238  | 817920.026                 | 119894.211                 |                        |
| 75-79        | 0.000  | 0.000       | 0.000                      |                            |                        |
| IHD          | Males  | 30-34       | 263834.566                 | 185481.168                 | 78353.398              |
|              |        | 35-39       | 692140.150                 | 477290.306                 | 214849.845             |
|              |        | 40-44       | 1519708.432                | 1014632.001                | 505076.431             |
|              |        | 45-49       | 2568546.697                | 1665296.220                | 903250.477             |
|              |        | 50-54       | 3632929.903                | 2382927.707                | 1250002.20             |
|              |        | 55-59       | 2807892.356                | 1811622.302                | 996270.054             |
|              |        | 60-64       | 2599825.934                | 1779702.648                | 820123.286             |
|              |        | 65-69       | 1113578.307                | 793258.030                 | 320320.278             |
|              |        | 70-74       | 437536.271                 | 331292.854                 | 106243.417             |
|              | 75-79  | 0.000       | 0.000                      | 0.000                      |                        |
|              | Female | 30-34       | 79649.097                  | 57144.103                  | 22504.994              |
|              |        | 35-39       | 193965.908                 | 133295.097                 | 60670.811              |
|              |        | 40-44       | 403380.974                 | 267079.422                 | 136301.553             |
|              |        | 45-49       | 671385.408                 | 433724.000                 | 237661.408             |
|              |        | 50-54       | 1011875.989                | 664609.330                 | 347266.660             |
|              |        | 55-59       | 849875.715                 | 555399.827                 | 294475.888             |
|              |        | 60-64       | 925490.876                 | 637898.070                 | 287592.806             |
|              |        | 65-69       | 455463.881                 | 328475.421                 | 126988.460             |
| 70-74        |        | 207681.216  | 157688.637                 | 49992.580                  |                        |
| 75-79        | 0.000  | 0.000       | 0.000                      |                            |                        |
| Stroke       | Males  | 30-34       | 73463.650                  | 55887.480                  | 17576.170              |
|              |        | 35-39       | 151934.057                 | 114013.132                 | 37920.925              |
|              |        | 40-44       | 262845.974                 | 192638.961                 | 70207.014              |
|              |        | 45-49       | 383421.246                 | 273197.449                 | 110223.797             |
|              |        | 50-54       | 479872.634                 | 329309.170                 | 150563.463             |
|              |        | 55-59       | 437124.903                 | 287988.313                 | 149136.590             |
|              |        | 60-64       | 419457.235                 | 278250.919                 | 141206.316             |
|              |        | 65-69       | 128180.574                 | 84790.706                  | 43389.868              |
|              |        | 70-74       | 53245.965                  | 36598.573                  | 16647.392              |
|              | 75-79  | 0.000       | 0.000                      | 0.000                      |                        |
|              | Female | 30-34       | 62919.090                  | 49798.919                  | 13120.171              |

**Results for PHIM for Run 2 (ELL Summary Sensitivity\_Analysis\_1.RTF)**

|      |        |       |             |             |            |
|------|--------|-------|-------------|-------------|------------|
|      |        | 35-39 | 120806.205  | 93159.921   | 27646.284  |
|      |        | 40-44 | 203391.885  | 151682.184  | 51709.701  |
|      |        | 45-49 | 278172.097  | 201113.206  | 77058.891  |
|      |        | 50-54 | 325979.181  | 228878.358  | 97100.823  |
|      |        | 55-59 | 275161.340  | 186411.607  | 88749.733  |
|      |        | 60-64 | 268920.493  | 182441.576  | 86478.917  |
|      |        | 65-69 | 87956.054   | 59678.677   | 28277.377  |
|      |        | 70-74 | 42055.224   | 28998.897   | 13056.327  |
|      |        | 75-79 | 0.000       | 0.000       | 0.000      |
| COPD | Males  | 30-34 | 40547.801   | 32426.319   | 8121.482   |
|      |        | 35-39 | 70214.933   | 56471.153   | 13743.781  |
|      |        | 40-44 | 138408.960  | 110569.165  | 27839.795  |
|      |        | 45-49 | 295573.443  | 234008.021  | 61565.422  |
|      |        | 50-54 | 603979.438  | 471742.845  | 132236.593 |
|      |        | 55-59 | 1086086.992 | 842240.999  | 243845.993 |
|      |        | 60-64 | 1465829.290 | 1165190.005 | 300639.285 |
|      |        | 65-69 | 1451838.682 | 1178507.826 | 273330.856 |
|      |        | 70-74 | 692979.695  | 571926.134  | 121053.560 |
|      |        | 75-79 | 0.000       | 0.000       | 0.000      |
|      | Female | 30-34 | 34659.261   | 28521.833   | 6137.428   |
|      |        | 35-39 | 65652.924   | 53847.813   | 11805.111  |
|      |        | 40-44 | 133169.505  | 108179.672  | 24989.833  |
|      |        | 45-49 | 267988.924  | 214797.559  | 53191.366  |
|      |        | 50-54 | 523734.121  | 415915.728  | 107818.393 |
|      |        | 55-59 | 870859.170  | 684301.483  | 186557.686 |
|      |        | 60-64 | 1166683.329 | 923360.100  | 243323.229 |
|      |        | 65-69 | 1190003.066 | 950219.504  | 239783.561 |
|      |        | 70-74 | 588541.493  | 471870.229  | 116671.265 |
|      |        | 75-79 | 0.000       | 0.000       | 0.000      |

---

## Results for PHIM for Run 4 (ELL Summary Sensitivity\_Analysis\_1.RTF)

\*\*\*\*\*

### Estimated Loss of Life from the E Component for Run: 4, Simulation: 1

Country: US (United States)

Follow-up Period: 1990 to 2039

**Table 1: Estimated Loss of Life, at the end of follow-up, all age groups combined, Population unadjusted for deaths in Ecig scenario**

| Disease      | Sex    | Year | Years of life lost<br>NULL | Years of life lost<br>Ecig | Years of life<br>Saved |
|--------------|--------|------|----------------------------|----------------------------|------------------------|
| All Diseases | Males  | 2039 | 42093547.949               | 23375187.907               | 18718360.0             |
|              | Female | 2039 | 23817891.273               | 14050671.845               | 9767219.43             |
| Lung cancer  | Males  | 2039 | 18222549.860               | 13116112.698               | 5106437.16             |
|              | Female | 2039 | 12512468.845               | 8533202.409                | 3979266.44             |
| IHD          | Males  | 2039 | 15635992.616               | 5724950.875                | 9911041.74             |
|              | Female | 2039 | 4798769.065                | 1837998.768                | 2960770.30             |
| Stroke       | Males  | 2039 | 2389546.238                | 1049991.990                | 1339554.25             |
|              | Female | 2039 | 1665361.569                | 785736.357                 | 879625.213             |
| COPD         | Males  | 2039 | 5845459.234                | 3484132.344                | 2361326.89             |
|              | Female | 2039 | 4841291.793                | 2893734.311                | 1947557.48             |

## Results for PHIM for Run 4 (ELL Summary Sensitivity\_Analysis\_1.RTF)

\*\*\*\*\*

**Table 2: Estimated Loss of Life, at the end of follow-up, all age groups combined, Population and Number deaths adjusted for Ecig scenario**

| Disease      | Sex    | Year | Years of life lost<br>NULL | Years of life lost<br>Ecig | Years of life<br>Saved |
|--------------|--------|------|----------------------------|----------------------------|------------------------|
| All Diseases | Males  | 2039 | 42093547.949               | 23464047.638               | 18629500.3             |
|              | Female | 2039 | 23817891.273               | 14084764.134               | 9733127.14             |
| Lung cancer  | Males  | 2039 | 18222549.860               | 13172905.900               | 5049643.96             |
|              | Female | 2039 | 12512468.845               | 8554596.122                | 3957872.72             |
| IHD          | Males  | 2039 | 15635992.616               | 5731942.468                | 9904050.15             |
|              | Female | 2039 | 4798769.065                | 1839222.266                | 2959546.80             |
| Stroke       | Males  | 2039 | 2389546.238                | 1051636.941                | 1337909.30             |
|              | Female | 2039 | 1665361.569                | 786252.308                 | 879109.261             |
| COPD         | Males  | 2039 | 5845459.234                | 3507562.329                | 2337896.90             |
|              | Female | 2039 | 4841291.793                | 2904693.438                | 1936598.36             |

## Results for PHIM for Run 4 (ELL Summary Sensitivity\_Analysis\_1.RTF)

\*\*\*\*\*

**Table 3: Estimated Loss of Life, All age groups combined, Population unadjusted for deaths in Ecig scenario, cumulative over years**

| Disease      | Sex          | Year         | Years of life lost<br>NULL | Years of life lost<br>Ecig | Years of life<br>Saved |
|--------------|--------------|--------------|----------------------------|----------------------------|------------------------|
| All Diseases | Males        | 1990         | 1304839.645                | 1304839.645                | 0.000                  |
|              |              | 1991         | 2579865.358                | 2570720.217                | 9145.141               |
|              |              | 1992         | 3830683.831                | 3796639.592                | 34044.239              |
|              |              | 1993         | 5076567.803                | 4996637.870                | 79929.932              |
|              |              | 1994         | 6292145.526                | 6141686.165                | 150459.362             |
|              |              | 1995         | 7485537.010                | 7236093.248                | 249443.762             |
|              |              | 1996         | 8655955.028                | 8277661.105                | 378293.923             |
|              |              | 1997         | 9791729.713                | 9255920.717                | 535808.996             |
|              |              | 1998         | 10899134.186               | 10178528.159               | 720606.027             |
|              |              | 1999         | 12070409.674               | 11102361.285               | 968048.390             |
|              |              | 2000         | 13231384.595               | 11983168.753               | 1248215.84             |
|              |              | 2001         | 14371761.018               | 12811147.372               | 1560613.65             |
|              |              | 2002         | 15508906.386               | 13598509.587               | 1910396.80             |
|              |              | 2003         | 16638100.422               | 14345867.476               | 2292232.95             |
|              |              | 2004         | 17736465.088               | 15043874.661               | 2692590.43             |
|              |              | 2005         | 18834658.606               | 15713258.281               | 3121400.32             |
|              |              | 2006         | 19909100.501               | 16334315.777               | 3574784.72             |
|              |              | 2007         | 20958321.463               | 16915691.833               | 4042629.63             |
|              |              | 2008         | 22000068.148               | 17471262.349               | 4528805.80             |
|              |              | 2009         | 23018816.903               | 17992927.092               | 5025889.81             |
|              |              | 2010         | 24018480.537               | 18481967.244               | 5536513.29             |
|              |              | 2011         | 25003034.574               | 18942225.668               | 6060808.91             |
|              |              | 2012         | 25969871.429               | 19372425.543               | 6597445.89             |
|              |              | 2013         | 26920275.180               | 19774781.434               | 7145493.75             |
|              |              | 2014         | 27849005.227               | 20147910.756               | 7701094.47             |
|              |              | 2015         | 28749620.400               | 20496189.359               | 8253431.04             |
|              |              | 2016         | 29622417.562               | 20810452.887               | 8811964.68             |
|              |              | 2017         | 30462559.724               | 21094131.201               | 9368428.52             |
|              |              | 2018         | 31293299.299               | 21363067.765               | 9930231.53             |
|              |              | 2019         | 32109993.427               | 21613338.971               | 10496654.5             |
|              |              | 2020         | 32883323.977               | 21843834.265               | 11039489.7             |
|              |              | 2021         | 33610102.554               | 22038462.435               | 11571640.1             |
|              |              | 2022         | 34322010.448               | 22217423.560               | 12104586.9             |
|              |              | 2023         | 35018383.550               | 22380824.417               | 12637559.1             |
|              |              | 2024         | 35700177.955               | 22529956.564               | 13170221.4             |
|              |              | 2025         | 36315500.346               | 22663480.356               | 13652020.0             |
|              |              | 2026         | 36896159.343               | 22771731.643               | 14124427.7             |
|              |              | 2027         | 37462570.116               | 22869223.071               | 14593347.0             |
|              |              | 2028         | 38015337.780               | 22956234.174               | 15059103.6             |
|              |              | 2029         | 38554814.764               | 23034011.918               | 15520802.8             |
|              |              | 2030         | 39003805.400               | 23100899.615               | 15902905.8             |
|              |              | 2031         | 39436509.703               | 23153355.954               | 16283153.7             |
| 2032         | 39858470.458 | 23199620.618 | 16658849.8                 |                            |                        |
| 2033         | 40270147.082 | 23239739.801 | 17030407.3                 |                            |                        |
| 2034         | 40672665.743 | 23274682.008 | 17397983.7                 |                            |                        |
| 2035         | 40962732.664 | 23302384.933 | 17660347.7                 |                            |                        |
| 2036         | 41255021.653 | 23324766.772 | 17930254.9                 |                            |                        |
| 2037         | 41540573.023 | 23344237.670 | 18196335.4                 |                            |                        |
| 2038         | 41820158.066 | 23360871.697 | 18459286.4                 |                            |                        |
| 2039         | 42093547.949 | 23375187.907 | 18718360.0                 |                            |                        |
|              | Female       | 1990         | 588979.406                 | 588979.406                 | 0.000                  |
| 1991         |              | 1182571.252  | 1179447.497                | 3123.755                   |                        |
| 1992         |              | 1777346.679  | 1765484.717                | 11861.962                  |                        |
| 1993         |              | 2380261.899  | 2351773.952                | 28487.947                  |                        |
| 1994         |              | 2983130.039  | 2928421.698                | 54708.341                  |                        |
| 1995         |              | 3588982.584  | 3497007.088                | 91975.496                  |                        |
| 1996         |              | 4195430.235  | 4052764.651                | 142665.584                 |                        |
| 1997         |              | 4793866.694  | 4589335.226                | 204531.469                 |                        |
| 1998         |              | 5389747.381  | 5110850.557                | 278896.824                 |                        |
| 1999         |              | 6006722.467  | 5631292.559                | 375429.908                 |                        |
| 2000         |              | 6625758.871  | 6139892.704                | 485866.167                 |                        |
| 2001         |              | 7245135.411  | 6632502.320                | 612633.091                 |                        |
| 2002         |              | 7867492.021  | 7111199.571                | 756292.449                 |                        |
| 2003         |              | 8485051.793  | 7571388.049                | 913663.743                 |                        |
| 2004         |              | 9092994.774  | 8009701.330                | 1083293.44                 |                        |
| 2005         |              | 9706032.803  | 8437077.078                | 1268955.73                 |                        |
| 2006         |              | 10311907.548 | 8843984.693                | 1467922.86                 |                        |
| 2007         |              | 10909437.502 | 9232688.439                | 1676749.06                 |                        |
| 2008         |              | 11506462.491 | 9604681.616                | 1901780.87                 |                        |
| 2009         |              | 12098393.287 | 9962111.032                | 2136282.25                 |                        |
| 2010         |              | 12681188.981 | 10300214.058               | 2380974.92                 |                        |

**Results for PHIM for Run 4 (ELL Summary Sensitivity\_Analysis\_1.RTF)**

|             |       |      |              |              |            |
|-------------|-------|------|--------------|--------------|------------|
|             |       | 2011 | 13260062.991 | 10621896.915 | 2638166.08 |
|             |       | 2012 | 13839417.441 | 10929552.045 | 2909865.40 |
|             |       | 2013 | 14409614.758 | 11220480.896 | 3189133.86 |
|             |       | 2014 | 14976658.746 | 11494687.124 | 3481971.62 |
|             |       | 2015 | 15529977.821 | 11751562.962 | 3778414.86 |
|             |       | 2016 | 16066640.764 | 11987269.899 | 4079370.86 |
|             |       | 2017 | 16590035.078 | 12205431.494 | 4384603.58 |
|             |       | 2018 | 17098716.137 | 12409311.303 | 4689404.83 |
|             |       | 2019 | 17599868.850 | 12599334.216 | 5000534.63 |
|             |       | 2020 | 18081346.241 | 12775390.586 | 5305955.66 |
|             |       | 2021 | 18537594.460 | 12931591.192 | 5606003.27 |
|             |       | 2022 | 18985300.234 | 13075742.651 | 5909557.58 |
|             |       | 2023 | 19423958.747 | 13208293.357 | 6215665.39 |
|             |       | 2024 | 19853347.772 | 13329198.834 | 6524148.94 |
|             |       | 2025 | 20252822.245 | 13438449.089 | 6814373.16 |
|             |       | 2026 | 20619307.063 | 13530828.717 | 7088478.35 |
|             |       | 2027 | 20976063.406 | 13614137.665 | 7361925.74 |
|             |       | 2028 | 21323641.947 | 13689339.015 | 7634302.93 |
|             |       | 2029 | 21662117.106 | 13756431.673 | 7905685.43 |
|             |       | 2030 | 21960971.694 | 13814981.384 | 8145990.31 |
|             |       | 2031 | 22224951.983 | 13860505.430 | 8364446.55 |
|             |       | 2032 | 22480397.853 | 13900447.305 | 8579950.55 |
|             |       | 2033 | 22728639.455 | 13935644.438 | 8792995.02 |
|             |       | 2034 | 22970448.888 | 13966194.995 | 9004253.89 |
|             |       | 2035 | 23164154.188 | 13991148.269 | 9173005.92 |
|             |       | 2036 | 23334538.616 | 14009493.025 | 9325045.59 |
|             |       | 2037 | 23499760.723 | 14025338.218 | 9474422.50 |
|             |       | 2038 | 23660308.401 | 14038974.440 | 9621333.96 |
|             |       | 2039 | 23817891.273 | 14050671.845 | 9767219.43 |
| Lung cancer | Males | 1990 | 595621.791   | 595621.791   | 0.000      |
|             |       | 1991 | 1177744.113  | 1177062.162  | 681.951    |
|             |       | 1992 | 1750034.892  | 1747456.394  | 2578.498   |
|             |       | 1993 | 2319752.308  | 2313466.508  | 6285.799   |
|             |       | 1994 | 2872597.339  | 2860400.811  | 12196.527  |
|             |       | 1995 | 3411494.825  | 3390721.087  | 20773.739  |
|             |       | 1996 | 3945569.726  | 3912695.185  | 32874.541  |
|             |       | 1997 | 4463316.362  | 4414822.300  | 48494.062  |
|             |       | 1998 | 4975301.180  | 4906907.447  | 68393.734  |
|             |       | 1999 | 5473691.125  | 5380856.771  | 92834.354  |
|             |       | 2000 | 5977500.570  | 5854028.928  | 123471.642 |
|             |       | 2001 | 6474795.516  | 6314511.902  | 160283.614 |
|             |       | 2002 | 6968769.705  | 6764709.866  | 204059.839 |
|             |       | 2003 | 7460282.140  | 7204535.036  | 255747.104 |
|             |       | 2004 | 7947048.275  | 7631863.347  | 315184.928 |
|             |       | 2005 | 8430571.669  | 8047558.141  | 383013.527 |
|             |       | 2006 | 8903945.390  | 8444869.829  | 459075.561 |
|             |       | 2007 | 9364177.982  | 8821608.154  | 542569.828 |
|             |       | 2008 | 9822525.458  | 9186036.338  | 636489.121 |
|             |       | 2009 | 10275228.886 | 9535288.728  | 739940.158 |
|             |       | 2010 | 10720275.500 | 9868094.944  | 852180.557 |
|             |       | 2011 | 11155356.373 | 10182581.562 | 972774.811 |
|             |       | 2012 | 11582611.617 | 10479214.128 | 1103397.49 |
|             |       | 2013 | 11998803.791 | 10756631.748 | 1242172.04 |
|             |       | 2014 | 12402087.090 | 11014324.455 | 1387762.64 |
|             |       | 2015 | 12793451.706 | 11254209.895 | 1539241.81 |
|             |       | 2016 | 13160101.653 | 11468028.542 | 1692073.11 |
|             |       | 2017 | 13503583.414 | 11658379.633 | 1845203.78 |
|             |       | 2018 | 13859755.737 | 11843109.160 | 2016646.58 |
|             |       | 2019 | 14211625.176 | 12014941.449 | 2196683.73 |
|             |       | 2020 | 14553935.288 | 12173190.597 | 2380744.69 |
|             |       | 2021 | 14851747.495 | 12301722.676 | 2550024.82 |
|             |       | 2022 | 15144531.004 | 12419390.756 | 2725140.25 |
|             |       | 2023 | 15431932.496 | 12526328.802 | 2905603.69 |
|             |       | 2024 | 15713920.740 | 12623342.717 | 3090578.02 |
|             |       | 2025 | 15979112.816 | 12709569.267 | 3269543.55 |
|             |       | 2026 | 16206550.153 | 12775929.502 | 3430620.65 |
|             |       | 2027 | 16428826.050 | 12835134.711 | 3593691.34 |
|             |       | 2028 | 16645902.186 | 12887486.191 | 3758415.99 |
|             |       | 2029 | 16858126.517 | 12933864.893 | 3924261.62 |
|             |       | 2030 | 17045220.687 | 12973097.450 | 4072123.24 |
|             |       | 2031 | 17208482.610 | 13001898.009 | 4206584.60 |
|             |       | 2032 | 17367586.074 | 13027005.865 | 4340580.21 |
|             |       | 2033 | 17522716.280 | 13048540.815 | 4474175.46 |
|             |       | 2034 | 17674226.555 | 13067138.475 | 4607088.08 |
|             |       | 2035 | 17792201.734 | 13081413.967 | 4710787.77 |
|             |       | 2036 | 17903508.236 | 13092221.194 | 4811287.04 |
|             |       | 2037 | 18012162.345 | 13101545.897 | 4910616.45 |
|             |       | 2038 | 18118464.470 | 13109397.471 | 5009067.00 |

**Results for PHIM for Run 4 (ELL Summary Sensitivity\_Analysis\_1.RTF)**

|     |        |      |              |              |            |
|-----|--------|------|--------------|--------------|------------|
|     | Female | 2039 | 18222549.860 | 13116112.698 | 5106437.16 |
|     |        | 1990 | 307897.357   | 307897.357   | 0.000      |
|     |        | 1991 | 616547.418   | 616108.559   | 438.859    |
|     |        | 1992 | 931086.773   | 929347.871   | 1738.902   |
|     |        | 1993 | 1246155.671  | 1241872.381  | 4283.290   |
|     |        | 1994 | 1561212.934  | 1552773.197  | 8439.737   |
|     |        | 1995 | 1879967.742  | 1865253.501  | 14714.241  |
|     |        | 1996 | 2197488.109  | 2174073.194  | 23414.915  |
|     |        | 1997 | 2515698.453  | 2480697.927  | 35000.526  |
|     |        | 1998 | 2836249.556  | 2786396.499  | 49853.057  |
|     |        | 1999 | 3150201.390  | 3082225.937  | 67975.453  |
|     |        | 2000 | 3472722.342  | 3382215.603  | 90506.740  |
|     |        | 2001 | 3796994.889  | 3679168.530  | 117826.359 |
|     |        | 2002 | 4126619.935  | 3975848.948  | 150770.987 |
|     |        | 2003 | 4454982.533  | 4266053.328  | 188929.206 |
|     |        | 2004 | 4784343.030  | 4551109.849  | 233233.181 |
|     |        | 2005 | 5113443.121  | 4829607.893  | 283835.227 |
|     |        | 2006 | 5442543.963  | 5100839.403  | 341704.560 |
|     |        | 2007 | 5772441.497  | 5365455.347  | 406986.149 |
|     |        | 2008 | 6091911.943  | 5614303.620  | 477608.323 |
|     |        | 2009 | 6413671.330  | 5856624.067  | 557047.263 |
|     |        | 2010 | 6730763.530  | 6087865.121  | 642898.408 |
|     |        | 2011 | 7043614.101  | 6307706.790  | 735907.311 |
|     |        | 2012 | 7356270.780  | 6518912.290  | 837358.490 |
|     |        | 2013 | 7662551.964  | 6717456.275  | 945095.689 |
|     |        | 2014 | 7964551.465  | 6904836.047  | 1059715.42 |
|     |        | 2015 | 8254895.403  | 7077973.870  | 1176921.53 |
|     |        | 2016 | 8530661.848  | 7234287.334  | 1296374.51 |
|     |        | 2017 | 8795826.122  | 7377328.833  | 1418497.29 |
|     |        | 2018 | 9067233.707  | 7514694.752  | 1552538.96 |
|     |        | 2019 | 9335343.270  | 7642245.535  | 1693097.74 |
|     |        | 2020 | 9596110.883  | 7759930.205  | 1836180.68 |
|     |        | 2021 | 9833186.859  | 7861374.098  | 1971812.76 |
|     |        | 2022 | 10066452.037 | 7954391.571  | 2112060.47 |
|     |        | 2023 | 10295503.609 | 8039321.721  | 2256181.89 |
|     |        | 2024 | 10520125.318 | 8116163.300  | 2403962.02 |
|     |        | 2025 | 10731915.863 | 8184867.988  | 2547047.88 |
|     |        | 2026 | 10917495.549 | 8240876.865  | 2676618.68 |
|     |        | 2027 | 11098620.885 | 8290856.947  | 2807763.94 |
|     |        | 2028 | 11275441.234 | 8335495.827  | 2939945.41 |
|     |        | 2029 | 11447962.710 | 8374840.243  | 3073122.47 |
|     |        | 2030 | 11601867.623 | 8408588.116  | 3193279.51 |
|     |        | 2031 | 11731666.516 | 8433772.999  | 3297893.52 |
|     |        | 2032 | 11857585.969 | 8455615.959  | 3401970.01 |
|     |        | 2033 | 11980128.625 | 8474628.313  | 3505500.31 |
|     |        | 2034 | 12099562.464 | 8490920.596  | 3608641.87 |
|     |        | 2035 | 12195919.946 | 8503856.773  | 3692063.17 |
|     |        | 2036 | 12278201.969 | 8513016.654  | 3765185.32 |
|     |        | 2037 | 12358146.336 | 8520862.962  | 3837283.37 |
|     |        | 2038 | 12435978.633 | 8527540.419  | 3908438.21 |
|     |        | 2039 | 12512468.845 | 8533202.409  | 3979266.44 |
| IHD | Males  | 1990 | 517209.093   | 517209.093   | 0.000      |
|     |        | 1991 | 1019219.395  | 1011727.745  | 7491.649   |
|     |        | 1992 | 1509598.614  | 1481745.433  | 27853.182  |
|     |        | 1993 | 1992735.299  | 1927760.329  | 64974.970  |
|     |        | 1994 | 2462877.575  | 2341474.159  | 121403.416 |
|     |        | 1995 | 2928249.390  | 2728157.894  | 200091.495 |
|     |        | 1996 | 3377377.730  | 3076131.879  | 301245.851 |
|     |        | 1997 | 3809062.472  | 3385638.421  | 423424.051 |
|     |        | 1998 | 4222213.867  | 3657489.343  | 564724.525 |
|     |        | 1999 | 4708317.743  | 3948401.277  | 759916.467 |
|     |        | 2000 | 5182084.396  | 4205525.708  | 976558.689 |
|     |        | 2001 | 5644097.705  | 4429179.328  | 1214918.38 |
|     |        | 2002 | 6107232.129  | 4628299.438  | 1478932.69 |
|     |        | 2003 | 6561785.704  | 4800595.286  | 1761190.42 |
|     |        | 2004 | 6996156.348  | 4945751.356  | 2050404.99 |
|     |        | 2005 | 7426261.361  | 5072358.857  | 2353902.50 |
|     |        | 2006 | 7849012.694  | 5179723.968  | 2669288.73 |
|     |        | 2007 | 8255300.530  | 5269375.875  | 2985924.65 |
|     |        | 2008 | 8650662.040  | 5345204.421  | 3305457.62 |
|     |        | 2009 | 9030818.513  | 5408638.258  | 3622180.25 |
|     |        | 2010 | 9403026.327  | 5462386.257  | 3940640.07 |
|     |        | 2011 | 9767535.506  | 5507675.692  | 4259859.81 |
|     |        | 2012 | 10123044.281 | 5545959.014  | 4577085.27 |
|     |        | 2013 | 10470104.786 | 5577964.409  | 4892140.38 |
|     |        | 2014 | 10807756.112 | 5604826.796  | 5202929.32 |
|     |        | 2015 | 11130681.425 | 5627101.620  | 5503579.80 |
|     |        | 2016 | 11448966.506 | 5645739.520  | 5803226.99 |

**Results for PHIM for Run 4 (ELL Summary Sensitivity\_Analysis\_1.RTF)**

|        |        |      |              |             |            |
|--------|--------|------|--------------|-------------|------------|
|        |        | 2017 | 11758164.882 | 5661378.518 | 6096786.36 |
|        |        | 2018 | 12054448.241 | 5673476.526 | 6380971.72 |
|        |        | 2019 | 12341606.261 | 5683479.123 | 6658127.14 |
|        |        | 2020 | 12600728.939 | 5691364.355 | 6909364.58 |
|        |        | 2021 | 12861767.105 | 5697891.000 | 7163876.10 |
|        |        | 2022 | 13114168.616 | 5703312.999 | 7410855.62 |
|        |        | 2023 | 13357894.797 | 5707654.862 | 7650239.94 |
|        |        | 2024 | 13593848.521 | 5711226.775 | 7882621.75 |
|        |        | 2025 | 13789177.359 | 5713934.804 | 8075242.56 |
|        |        | 2026 | 13993401.656 | 5716150.083 | 8277251.57 |
|        |        | 2027 | 14190519.224 | 5718034.454 | 8472484.77 |
|        |        | 2028 | 14381193.356 | 5719498.341 | 8661695.02 |
|        |        | 2029 | 14565171.927 | 5720628.585 | 8844543.34 |
|        |        | 2030 | 14697381.605 | 5721500.656 | 8975880.95 |
|        |        | 2031 | 14842203.512 | 5722299.378 | 9119904.13 |
|        |        | 2032 | 14982485.826 | 5723042.449 | 9259443.38 |
|        |        | 2033 | 15118410.647 | 5723575.557 | 9394835.09 |
|        |        | 2034 | 15250284.398 | 5723924.964 | 9526359.43 |
|        |        | 2035 | 15322911.166 | 5724182.333 | 9598728.83 |
|        |        | 2036 | 15405115.031 | 5724412.990 | 9680702.04 |
|        |        | 2037 | 15484709.137 | 5724642.815 | 9760066.32 |
|        |        | 2038 | 15561812.193 | 5724837.704 | 9836974.49 |
|        |        | 2039 | 15635992.616 | 5724950.875 | 9911041.74 |
|        | Female | 1990 | 147299.110   | 147299.110  | 0.000      |
|        |        | 1991 | 295122.462   | 293157.428  | 1965.034   |
|        |        | 1992 | 439962.920   | 432598.361  | 7364.559   |
|        |        | 1993 | 584735.615   | 567251.868  | 17483.748  |
|        |        | 1994 | 727640.783   | 694544.484  | 33096.299  |
|        |        | 1995 | 868486.937   | 813721.308  | 54765.629  |
|        |        | 1996 | 1010321.847  | 926170.743  | 84151.105  |
|        |        | 1997 | 1144230.930  | 1025687.986 | 118542.944 |
|        |        | 1998 | 1274513.622  | 1115471.784 | 159041.838 |
|        |        | 1999 | 1426725.938  | 1212228.496 | 214497.442 |
|        |        | 2000 | 1573462.680  | 1297974.966 | 275487.713 |
|        |        | 2001 | 1719132.015  | 1374361.397 | 344770.618 |
|        |        | 2002 | 1863006.732  | 1441881.273 | 421125.459 |
|        |        | 2003 | 2002943.227  | 1500451.526 | 502491.701 |
|        |        | 2004 | 2137798.705  | 1550556.116 | 587242.589 |
|        |        | 2005 | 2271071.245  | 1594655.654 | 676415.591 |
|        |        | 2006 | 2400707.731  | 1632015.616 | 768692.115 |
|        |        | 2007 | 2523634.512  | 1663143.488 | 860491.024 |
|        |        | 2008 | 2648752.232  | 1690703.678 | 958048.555 |
|        |        | 2009 | 2765973.961  | 1713452.867 | 1052521.09 |
|        |        | 2010 | 2881329.235  | 1733020.560 | 1148308.67 |
|        |        | 2011 | 2994972.694  | 1749716.000 | 1245256.69 |
|        |        | 2012 | 3108958.829  | 1764116.382 | 1344842.45 |
|        |        | 2013 | 3218140.416  | 1776293.328 | 1441847.09 |
|        |        | 2014 | 3328387.914  | 1786871.492 | 1541516.42 |
|        |        | 2015 | 3435342.796  | 1796040.706 | 1639302.09 |
|        |        | 2016 | 3539189.408  | 1803810.539 | 1735378.87 |
|        |        | 2017 | 3640041.363  | 1810355.865 | 1829685.50 |
|        |        | 2018 | 3732645.362  | 1815493.669 | 1917151.69 |
|        |        | 2019 | 3821421.978  | 1819720.801 | 2001701.18 |
|        |        | 2020 | 3902115.950  | 1823153.841 | 2078962.11 |
|        |        | 2021 | 3984301.053  | 1826142.048 | 2158159.00 |
|        |        | 2022 | 4062629.299  | 1828547.923 | 2234081.38 |
|        |        | 2023 | 4137348.729  | 1830502.793 | 2306845.94 |
|        |        | 2024 | 4208611.493  | 1832054.376 | 2376557.12 |
|        |        | 2025 | 4269419.492  | 1833302.366 | 2436117.13 |
|        |        | 2026 | 4330969.998  | 1834346.849 | 2496623.15 |
|        |        | 2027 | 4389134.306  | 1835159.085 | 2553975.22 |
|        |        | 2028 | 4444222.970  | 1835795.300 | 2608427.67 |
|        |        | 2029 | 4496447.877  | 1836304.021 | 2660143.86 |
|        |        | 2030 | 4536975.698  | 1836706.790 | 2700268.91 |
|        |        | 2031 | 4578338.586  | 1837038.926 | 2741299.66 |
|        |        | 2032 | 4617397.784  | 1837291.259 | 2780106.53 |
|        |        | 2033 | 4654407.697  | 1837486.867 | 2816920.83 |
|        |        | 2034 | 4689913.454  | 1837640.197 | 2852273.26 |
|        |        | 2035 | 4712518.190  | 1837756.097 | 2874762.09 |
|        |        | 2036 | 4735845.827  | 1837846.470 | 2897999.36 |
|        |        | 2037 | 4757958.806  | 1837913.238 | 2920045.57 |
|        |        | 2038 | 4778813.806  | 1837960.782 | 2940853.02 |
|        |        | 2039 | 4798769.065  | 1837998.768 | 2960770.30 |
| Stroke | Males  | 1990 | 75005.854    | 75005.854   | 0.000      |
|        |        | 1991 | 149463.017   | 148704.941  | 758.077    |
|        |        | 1992 | 222966.278   | 220145.105  | 2821.173   |
|        |        | 1993 | 296801.879   | 290077.159  | 6724.720   |
|        |        | 1994 | 372453.706   | 359420.711  | 13032.995  |



**Results for PHIM for Run 4 (ELL Summary Sensitivity\_Analysis\_1.RTF)**

|        |      |             |             |            |
|--------|------|-------------|-------------|------------|
|        | 1995 | 448401.338  | 426350.496  | 22050.842  |
|        | 1996 | 523536.301  | 489580.484  | 33955.818  |
|        | 1997 | 596763.211  | 548025.965  | 48737.246  |
|        | 1998 | 667546.681  | 601326.600  | 66220.081  |
|        | 1999 | 734925.407  | 648963.332  | 85962.075  |
|        | 2000 | 803749.361  | 694452.846  | 109296.515 |
|        | 2001 | 870081.588  | 735050.089  | 135031.499 |
|        | 2002 | 935347.140  | 771964.758  | 163382.382 |
|        | 2003 | 1001627.349 | 806218.677  | 195408.672 |
|        | 2004 | 1066587.976 | 836975.714  | 229612.261 |
|        | 2005 | 1130548.052 | 864493.124  | 266054.928 |
|        | 2006 | 1195132.454 | 889572.278  | 305560.175 |
|        | 2007 | 1258974.043 | 911918.570  | 347055.474 |
|        | 2008 | 1320124.867 | 931050.261  | 389074.605 |
|        | 2009 | 1380776.123 | 948060.569  | 432715.554 |
|        | 2010 | 1440048.533 | 962965.567  | 477082.966 |
|        | 2011 | 1497484.847 | 975890.999  | 521593.847 |
|        | 2012 | 1554496.526 | 987197.572  | 567298.954 |
|        | 2013 | 1610819.598 | 997104.400  | 613715.198 |
|        | 2014 | 1667484.890 | 1005843.440 | 661641.450 |
|        | 2015 | 1720948.287 | 1013253.472 | 707694.814 |
|        | 2016 | 1775699.228 | 1019874.190 | 755825.038 |
|        | 2017 | 1830250.175 | 1025671.495 | 804578.679 |
|        | 2018 | 1875958.950 | 1029967.501 | 845991.449 |
|        | 2019 | 1920359.232 | 1033627.923 | 886731.309 |
|        | 2020 | 1960605.297 | 1036593.704 | 924011.594 |
|        | 2021 | 1998912.887 | 1039054.358 | 959858.530 |
|        | 2022 | 2036003.696 | 1041123.968 | 994879.728 |
|        | 2023 | 2071857.536 | 1042848.914 | 1029008.62 |
|        | 2024 | 2106636.468 | 1044311.958 | 1062324.51 |
|        | 2025 | 2136450.873 | 1045433.284 | 1091017.59 |
|        | 2026 | 2164796.470 | 1046346.479 | 1118449.99 |
|        | 2027 | 2192079.608 | 1047115.219 | 1144964.39 |
|        | 2028 | 2218404.367 | 1047745.786 | 1170658.58 |
|        | 2029 | 2243769.140 | 1048268.392 | 1195500.75 |
|        | 2030 | 2263570.213 | 1048635.589 | 1214934.62 |
|        | 2031 | 2282521.590 | 1048943.363 | 1233578.23 |
|        | 2032 | 2300804.945 | 1049204.464 | 1251600.48 |
|        | 2033 | 2318464.018 | 1049415.494 | 1269048.52 |
|        | 2034 | 2335611.973 | 1049590.673 | 1286021.30 |
|        | 2035 | 2347097.290 | 1049698.364 | 1297398.93 |
|        | 2036 | 2358248.747 | 1049788.725 | 1308460.02 |
|        | 2037 | 2369033.655 | 1049868.501 | 1319165.15 |
|        | 2038 | 2379490.114 | 1049937.130 | 1329552.98 |
|        | 2039 | 2389546.238 | 1049991.990 | 1339554.25 |
| Female | 1990 | 56348.092   | 56348.092   | 0.000      |
|        | 1991 | 110871.862  | 110329.153  | 542.709    |
|        | 1992 | 165654.454  | 163570.563  | 2083.892   |
|        | 1993 | 220008.519  | 215028.984  | 4979.536   |
|        | 1994 | 275706.807  | 266025.987  | 9680.820   |
|        | 1995 | 331417.547  | 315069.933  | 16347.615  |
|        | 1996 | 387580.161  | 362254.222  | 25325.939  |
|        | 1997 | 442778.242  | 406295.603  | 36482.639  |
|        | 1998 | 496117.305  | 446536.794  | 49580.510  |
|        | 1999 | 548268.214  | 483545.646  | 64722.569  |
|        | 2000 | 601693.202  | 519098.258  | 82594.943  |
|        | 2001 | 652221.103  | 550396.670  | 101824.432 |
|        | 2002 | 703022.600  | 579478.873  | 123543.727 |
|        | 2003 | 752023.351  | 605312.065  | 146711.286 |
|        | 2004 | 799826.733  | 628376.945  | 171449.788 |
|        | 2005 | 847563.928  | 649431.058  | 198132.870 |
|        | 2006 | 894205.027  | 668123.786  | 226081.241 |
|        | 2007 | 939571.282  | 684555.900  | 255015.382 |
|        | 2008 | 983437.578  | 698923.209  | 284514.369 |
|        | 2009 | 1025803.786 | 711426.597  | 314377.189 |
|        | 2010 | 1066964.934 | 722296.057  | 344668.877 |
|        | 2011 | 1106954.044 | 731726.334  | 375227.710 |
|        | 2012 | 1146108.461 | 739986.280  | 406122.181 |
|        | 2013 | 1183544.689 | 747051.627  | 436493.062 |
|        | 2014 | 1221220.945 | 753353.809  | 467867.136 |
|        | 2015 | 1258289.311 | 758959.646  | 499329.666 |
|        | 2016 | 1294830.207 | 763854.820  | 530975.387 |
|        | 2017 | 1330332.626 | 768072.271  | 562260.355 |
|        | 2018 | 1360571.987 | 771266.711  | 589305.276 |
|        | 2019 | 1389848.723 | 773970.137  | 615878.586 |
|        | 2020 | 1416046.192 | 776165.421  | 639880.772 |
|        | 2021 | 1440588.850 | 777971.538  | 662617.312 |
|        | 2022 | 1464157.934 | 779481.381  | 684676.553 |

**Results for PHIM for Run 4 (ELL Summary Sensitivity\_Analysis\_1.RTF)**

|      |             |             |             |             |            |
|------|-------------|-------------|-------------|-------------|------------|
|      |             | 2023        | 1486810.237 | 780753.005  | 706057.232 |
|      |             | 2024        | 1508591.729 | 781809.570  | 726782.159 |
|      |             | 2025        | 1526875.621 | 782625.542  | 744250.079 |
|      |             | 2026        | 1543659.810 | 783273.425  | 760386.384 |
|      |             | 2027        | 1559623.774 | 783805.994  | 775817.781 |
|      |             | 2028        | 1574852.850 | 784247.241  | 790605.609 |
|      |             | 2029        | 1589437.452 | 784611.445  | 804826.007 |
|      |             | 2030        | 1600568.199 | 784870.780  | 815697.419 |
|      |             | 2031        | 1610776.297 | 785075.719  | 825700.578 |
|      |             | 2032        | 1620483.563 | 785244.259  | 835239.304 |
|      |             | 2033        | 1629745.442 | 785382.770  | 844362.672 |
|      |             | 2034        | 1638721.425 | 785496.374  | 853225.051 |
|      |             | 2035        | 1644649.404 | 785567.044  | 859082.360 |
|      |             | 2036        | 1650181.590 | 785622.238  | 864559.352 |
|      |             | 2037        | 1655476.066 | 785667.760  | 869808.306 |
|      |             | 2038        | 1660507.914 | 785705.197  | 874802.717 |
|      |             | 2039        | 1665361.569 | 785736.357  | 879625.213 |
| COPD | Males       | 1990        | 117002.906  | 117002.906  | 0.000      |
|      |             | 1991        | 233438.833  | 233225.369  | 213.464    |
|      |             | 1992        | 348084.047  | 347292.660  | 791.387    |
|      |             | 1993        | 467278.318  | 465333.875  | 1944.443   |
|      |             | 1994        | 584216.907  | 580390.483  | 3826.424   |
|      |             | 1995        | 697391.457  | 690863.771  | 6527.686   |
|      |             | 1996        | 809471.271  | 799253.557  | 10217.713  |
|      |             | 1997        | 922587.668  | 907434.030  | 15153.637  |
|      |             | 1998        | 1034072.457 | 1012804.770 | 21267.687  |
|      |             | 1999        | 1153475.399 | 1124139.905 | 29335.494  |
|      |             | 2000        | 1268050.268 | 1229161.271 | 38888.997  |
|      |             | 2001        | 1382786.209 | 1332406.053 | 50380.156  |
|      |             | 2002        | 1497557.412 | 1433535.525 | 64021.886  |
|      |             | 2003        | 1614405.229 | 1534518.477 | 79886.752  |
|      |             | 2004        | 1726672.489 | 1629284.243 | 97388.246  |
|      |             | 2005        | 1847277.524 | 1728848.159 | 118429.366 |
|      |             | 2006        | 1961009.963 | 1820149.701 | 140860.262 |
|      |             | 2007        | 2079868.908 | 1912789.234 | 167079.674 |
|      |             | 2008        | 2206755.783 | 2008971.329 | 197784.454 |
|      |             | 2009        | 2331993.380 | 2100939.537 | 231053.844 |
|      |             | 2010        | 2455130.176 | 2188520.477 | 266609.700 |
|      |             | 2011        | 2582657.849 | 2276077.414 | 306580.434 |
|      |             | 2012        | 2709719.005 | 2360054.829 | 349664.176 |
|      |             | 2013        | 2840547.005 | 2443080.877 | 397466.128 |
|      |             | 2014        | 2971677.135 | 2522916.066 | 448761.069 |
|      |             | 2015        | 3104538.983 | 2601624.371 | 502914.611 |
|      |             | 2016        | 3237650.175 | 2676810.635 | 560839.540 |
|      |             | 2017        | 3370561.253 | 2748701.555 | 621859.698 |
|      |             | 2018        | 3503136.371 | 2816514.578 | 686621.793 |
|      |             | 2019        | 3636402.758 | 2881290.476 | 755112.282 |
|      |             | 2020        | 3768054.453 | 2942685.609 | 825368.843 |
|      |             | 2021        | 3897675.067 | 2999794.401 | 897880.665 |
|      |             | 2022        | 4027307.132 | 3053595.837 | 973711.295 |
|      |             | 2023        | 4156698.720 | 3103991.839 | 1052706.88 |
|      |             | 2024        | 4285772.226 | 3151075.115 | 1134697.11 |
|      |             | 2025        | 4410759.298 | 3194543.001 | 1216216.30 |
|      |             | 2026        | 4531411.064 | 3233305.579 | 1298105.49 |
|      |             | 2027        | 4651145.233 | 3268938.686 | 1382206.55 |
|      |             | 2028        | 4769837.872 | 3301503.856 | 1468334.02 |
|      |             | 2029        | 4887747.179 | 3331250.048 | 1556497.13 |
| 2030 | 4997632.895 | 3357665.920 | 1639966.97  |             |            |
| 2031 | 5103301.991 | 3380215.204 | 1723086.79  |             |            |
| 2032 | 5207593.613 | 3400367.839 | 1807225.77  |             |            |
| 2033 | 5310556.138 | 3418207.936 | 1892348.20  |             |            |
| 2034 | 5412542.816 | 3434027.896 | 1978514.92  |             |            |
| 2035 | 5500522.473 | 3447090.269 | 2053432.20  |             |            |
| 2036 | 5588149.640 | 3458343.863 | 2129805.78  |             |            |
| 2037 | 5674667.886 | 3468180.456 | 2206487.43  |             |            |
| 2038 | 5760391.289 | 3476699.393 | 2283691.90  |             |            |
| 2039 | 5845459.234 | 3484132.344 | 2361326.89  |             |            |
|      | Female      | 1990        | 77434.846   | 77434.846   | 0.000      |
|      |             | 1991        | 160029.510  | 159852.357  | 177.153    |
|      |             | 1992        | 240642.531  | 239967.922  | 674.610    |
|      |             | 1993        | 329362.093  | 327620.720  | 1741.374   |
|      |             | 1994        | 418569.515  | 415078.030  | 3491.485   |
|      |             | 1995        | 509110.357  | 502962.346  | 6148.012   |
|      |             | 1996        | 600040.117  | 590266.492  | 9773.625   |
|      |             | 1997        | 691159.071  | 676653.710  | 14505.361  |
|      |             | 1998        | 782866.899  | 762445.479  | 20421.419  |
|      |             | 1999        | 881526.925  | 853292.480  | 28234.445  |
|      |             | 2000        | 977880.647  | 940603.877  | 37276.770  |

**Results for PHIM for Run 4 (ELL Summary Sensitivity\_Analysis\_1.RTF)**

|      |             |             |            |
|------|-------------|-------------|------------|
| 2001 | 1076787.404 | 1028575.723 | 48211.681  |
| 2002 | 1174842.754 | 1113990.478 | 60852.276  |
| 2003 | 1275102.681 | 1199571.131 | 75531.550  |
| 2004 | 1371026.306 | 1279658.420 | 91367.886  |
| 2005 | 1473954.509 | 1363382.472 | 110572.037 |
| 2006 | 1574450.828 | 1443005.889 | 131444.939 |
| 2007 | 1673790.211 | 1519533.704 | 154256.508 |
| 2008 | 1782360.738 | 1600751.110 | 181609.627 |
| 2009 | 1892944.209 | 1680607.501 | 212336.708 |
| 2010 | 2002131.282 | 1757032.320 | 245098.962 |
| 2011 | 2114522.152 | 1832747.790 | 281774.362 |
| 2012 | 2228079.372 | 1906537.092 | 321542.279 |
| 2013 | 2345377.689 | 1979679.667 | 365698.022 |
| 2014 | 2462498.422 | 2049625.775 | 412872.647 |
| 2015 | 2581450.312 | 2118588.740 | 462861.572 |
| 2016 | 2701959.301 | 2185317.207 | 516642.094 |
| 2017 | 2823834.967 | 2249674.525 | 574160.442 |
| 2018 | 2938265.081 | 2307856.171 | 630408.909 |
| 2019 | 3053254.880 | 2363397.743 | 689857.136 |
| 2020 | 3167073.216 | 2416141.119 | 750932.097 |
| 2021 | 3279517.699 | 2466103.508 | 813414.191 |
| 2022 | 3392060.964 | 2513321.775 | 878739.189 |
| 2023 | 3504296.171 | 2557715.837 | 946580.334 |
| 2024 | 3616019.231 | 2599171.588 | 1016847.64 |
| 2025 | 3724611.269 | 2637653.193 | 1086958.08 |
| 2026 | 3827181.707 | 2672331.579 | 1154850.13 |
| 2027 | 3928684.441 | 2704315.639 | 1224368.80 |
| 2028 | 4029124.892 | 2733800.647 | 1295324.25 |
| 2029 | 4128269.068 | 2760675.963 | 1367593.10 |
| 2030 | 4221560.174 | 2784815.698 | 1436744.48 |
| 2031 | 4304170.584 | 2804617.786 | 1499552.80 |
| 2032 | 4384930.537 | 2822295.829 | 1562634.71 |
| 2033 | 4464357.691 | 2838146.488 | 1626211.20 |
| 2034 | 4542251.545 | 2852137.827 | 1690113.72 |
| 2035 | 4611066.648 | 2863968.355 | 1747098.29 |
| 2036 | 4670309.230 | 2873007.664 | 1797301.57 |
| 2037 | 4728179.514 | 2880894.258 | 1847285.26 |
| 2038 | 4785008.048 | 2887768.042 | 1897240.01 |
| 2039 | 4841291.793 | 2893734.311 | 1947557.48 |

---

## Results for PHIM for Run 4 (ELL Summary Sensitivity\_Analysis\_1.RTF)

\*\*\*\*\*

**Table 4: Estimated Loss of Life, All age groups combined, Population and Number deaths adjusted for Ecig scenario, cumulative over years**

| Disease      | Sex          | Year         | Years of life lost<br>NULL | Years of life lost<br>Ecig | Years of life<br>Saved |
|--------------|--------------|--------------|----------------------------|----------------------------|------------------------|
| All Diseases | Males        | 1990         | 1304839.645                | 1304839.645                | 0.000                  |
|              |              | 1991         | 2579865.358                | 2570720.217                | 9145.141               |
|              |              | 1992         | 3830683.831                | 3796652.137                | 34031.695              |
|              |              | 1993         | 5076567.803                | 4996694.927                | 79872.876              |
|              |              | 1994         | 6292145.526                | 6141843.477                | 150302.049             |
|              |              | 1995         | 7485537.010                | 7236431.401                | 249105.609             |
|              |              | 1996         | 8655955.028                | 8278285.276                | 377669.752             |
|              |              | 1997         | 9791729.713                | 9256954.968                | 534774.745             |
|              |              | 1998         | 10899134.186               | 10180113.782               | 719020.404             |
|              |              | 1999         | 12070409.674               | 11104694.035               | 965715.639             |
|              |              | 2000         | 13231384.595               | 11986457.721               | 1244926.87             |
|              |              | 2001         | 14371761.018               | 12815597.035               | 1556163.98             |
|              |              | 2002         | 15508906.386               | 13604343.483               | 1904562.90             |
|              |              | 2003         | 16638100.422               | 14353311.318               | 2284789.10             |
|              |              | 2004         | 17736465.088               | 15053129.112               | 2683335.98             |
|              |              | 2005         | 18834658.606               | 15724563.240               | 3110095.37             |
|              |              | 2006         | 19909100.501               | 16347836.374               | 3561264.13             |
|              |              | 2007         | 20958321.463               | 16931604.016               | 4026717.45             |
|              |              | 2008         | 22000068.148               | 17489781.351               | 4510286.80             |
|              |              | 2009         | 23018816.903               | 18014212.148               | 5004604.76             |
|              |              | 2010         | 24018480.537               | 18506161.900               | 5512318.64             |
|              |              | 2011         | 25003034.574               | 18969467.029               | 6033567.54             |
|              |              | 2012         | 25969871.429               | 19402807.630               | 6567063.80             |
|              |              | 2013         | 26920275.180               | 19808395.362               | 7111879.82             |
|              |              | 2014         | 27849005.227               | 20184810.787               | 7664194.44             |
|              |              | 2015         | 28749620.400               | 20536450.816               | 8213169.58             |
|              |              | 2016         | 29622417.562               | 20854012.114               | 8768405.45             |
|              |              | 2017         | 30462559.724               | 21140922.734               | 9321636.99             |
|              |              | 2018         | 31293299.299               | 21413160.934               | 9880138.36             |
|              |              | 2019         | 32109993.427               | 21666732.936               | 10443260.5             |
|              |              | 2020         | 32883323.977               | 21900509.494               | 10982814.5             |
|              |              | 2021         | 33610102.554               | 22098107.915               | 11511994.6             |
|              |              | 2022         | 34322010.448               | 22279974.310               | 12042036.1             |
|              |              | 2023         | 35018383.550               | 22446195.714               | 12572187.8             |
|              |              | 2024         | 35700177.955               | 22598059.170               | 13102118.8             |
|              |              | 2025         | 36315500.346               | 22734203.736               | 13581296.6             |
|              |              | 2026         | 36896159.343               | 22844692.512               | 14051466.8             |
|              |              | 2027         | 37462570.116               | 22944304.006               | 14518266.1             |
|              |              | 2028         | 38015337.780               | 23033309.054               | 14982028.7             |
|              |              | 2029         | 38554814.764               | 23112956.586               | 15441858.2             |
|              |              | 2030         | 39003805.400               | 23181565.525               | 15822239.9             |
|              |              | 2031         | 39436509.703               | 23235418.509               | 16201091.2             |
| 2032         | 39858470.458 | 23282961.633 | 16575508.8                 |                            |                        |
| 2033         | 40270147.082 | 23324233.943 | 16945913.1                 |                            |                        |
| 2034         | 40672665.743 | 23360218.075 | 17312447.7                 |                            |                        |
| 2035         | 40962732.664 | 23388810.122 | 17573922.5                 |                            |                        |
| 2036         | 41255021.653 | 23411916.502 | 17843105.2                 |                            |                        |
| 2037         | 41540573.023 | 23432032.807 | 18108540.2                 |                            |                        |
| 2038         | 41820158.066 | 23449234.219 | 18370923.8                 |                            |                        |
| 2039         | 42093547.949 | 23464047.638 | 18629500.3                 |                            |                        |
|              | Female       | 1990         | 588979.406                 | 588979.406                 | 0.000                  |
| 1991         |              | 1182571.252  | 1179447.497                | 3123.755                   |                        |
| 1992         |              | 1777346.679  | 1765486.854                | 11859.825                  |                        |
| 1993         |              | 2380261.899  | 2351784.342                | 28477.557                  |                        |
| 1994         |              | 2983130.039  | 2928451.956                | 54678.083                  |                        |
| 1995         |              | 3588982.584  | 3497075.179                | 91907.404                  |                        |
| 1996         |              | 4195430.235  | 4052895.448                | 142534.786                 |                        |
| 1997         |              | 4793866.694  | 4589560.381                | 204306.313                 |                        |
| 1998         |              | 5389747.381  | 5111209.241                | 278538.140                 |                        |
| 1999         |              | 6006722.467  | 5631834.279                | 374888.188                 |                        |
| 2000         |              | 6625758.871  | 6140676.194                | 485082.677                 |                        |
| 2001         |              | 7245135.411  | 6633588.361                | 611547.050                 |                        |
| 2002         |              | 7867492.021  | 7112654.382                | 754837.638                 |                        |
| 2003         |              | 8485051.793  | 7573282.750                | 911769.043                 |                        |
| 2004         |              | 9092994.774  | 8012101.931                | 1080892.84                 |                        |
| 2005         |              | 9706032.803  | 8440060.786                | 1265972.02                 |                        |
| 2006         |              | 10311907.548 | 8847618.242                | 1464289.31                 |                        |
| 2007         |              | 10909437.502 | 9237042.657                | 1672394.84                 |                        |
| 2008         |              | 11506462.491 | 9609829.649                | 1896632.84                 |                        |
| 2009         |              | 12098393.287 | 9968124.455                | 2130268.83                 |                        |
| 2010         | 12681188.981 | 10307151.953 | 2374037.03                 |                            |                        |

**Results for PHIM for Run 4 (ELL Summary Sensitivity\_Analysis\_1.RTF)**

|             |       |      |              |              |            |
|-------------|-------|------|--------------|--------------|------------|
|             |       | 2011 | 13260062.991 | 10629819.168 | 2630243.82 |
|             |       | 2012 | 13839417.441 | 10938523.219 | 2900894.22 |
|             |       | 2013 | 14409614.758 | 11230553.371 | 3179061.39 |
|             |       | 2014 | 14976658.746 | 11505906.378 | 3470752.37 |
|             |       | 2015 | 15529977.821 | 11763972.518 | 3766005.30 |
|             |       | 2016 | 16066640.764 | 12000880.470 | 4065760.29 |
|             |       | 2017 | 16590035.078 | 12220265.968 | 4369769.11 |
|             |       | 2018 | 17098716.137 | 12425394.468 | 4673321.67 |
|             |       | 2019 | 17599868.850 | 12616682.895 | 4983185.95 |
|             |       | 2020 | 18081346.241 | 12794016.766 | 5287329.48 |
|             |       | 2021 | 18537594.460 | 12951460.830 | 5586133.63 |
|             |       | 2022 | 18985300.234 | 13096850.098 | 5888450.14 |
|             |       | 2023 | 19423958.747 | 13230625.292 | 6193333.45 |
|             |       | 2024 | 19853347.772 | 13352730.328 | 6500617.44 |
|             |       | 2025 | 20252822.245 | 13463153.388 | 6789668.86 |
|             |       | 2026 | 20619307.063 | 13556611.784 | 7062695.28 |
|             |       | 2027 | 20976063.406 | 13640958.591 | 7335104.81 |
|             |       | 2028 | 21323641.947 | 13717157.594 | 7606484.35 |
|             |       | 2029 | 21662117.106 | 13785196.666 | 7876920.44 |
|             |       | 2030 | 21960971.694 | 13844640.090 | 8116331.60 |
|             |       | 2031 | 22224951.983 | 13890905.561 | 8334046.42 |
|             |       | 2032 | 22480397.853 | 13931530.150 | 8548867.70 |
|             |       | 2033 | 22728639.455 | 13967359.420 | 8761280.04 |
|             |       | 2034 | 22970448.888 | 13998484.294 | 8971964.59 |
|             |       | 2035 | 23164154.188 | 14023947.963 | 9140206.23 |
|             |       | 2036 | 23334538.616 | 14042677.560 | 9291861.06 |
|             |       | 2037 | 23499760.723 | 14058863.991 | 9440896.73 |
|             |       | 2038 | 23660308.401 | 14072801.863 | 9587506.54 |
|             |       | 2039 | 23817891.273 | 14084764.134 | 9733127.14 |
| Lung cancer | Males | 1990 | 595621.791   | 595621.791   | 0.000      |
|             |       | 1991 | 1177744.113  | 1177062.162  | 681.951    |
|             |       | 1992 | 1750034.892  | 1747462.471  | 2572.421   |
|             |       | 1993 | 2319752.308  | 2313494.282  | 6258.026   |
|             |       | 1994 | 2872597.339  | 2860478.077  | 12119.262  |
|             |       | 1995 | 3411494.825  | 3390888.902  | 20605.923  |
|             |       | 1996 | 3945569.726  | 3913010.380  | 32559.345  |
|             |       | 1997 | 4463316.362  | 4415353.750  | 47962.613  |
|             |       | 1998 | 4975301.180  | 4907740.363  | 67560.818  |
|             |       | 1999 | 5473691.125  | 5382082.389  | 91608.735  |
|             |       | 2000 | 5977500.570  | 5855778.433  | 121722.137 |
|             |       | 2001 | 6474795.516  | 6316919.354  | 157876.162 |
|             |       | 2002 | 6968769.705  | 6767923.618  | 200846.087 |
|             |       | 2003 | 7460282.140  | 7208711.234  | 251570.906 |
|             |       | 2004 | 7947048.275  | 7637164.038  | 309884.237 |
|             |       | 2005 | 8430571.669  | 8054147.151  | 376424.518 |
|             |       | 2006 | 8903945.390  | 8452893.077  | 451052.313 |
|             |       | 2007 | 9364177.982  | 8831198.696  | 532979.286 |
|             |       | 2008 | 9822525.458  | 9197350.273  | 625175.185 |
|             |       | 2009 | 10275228.886 | 9548467.193  | 726761.694 |
|             |       | 2010 | 10720275.500 | 9883265.361  | 837010.139 |
|             |       | 2011 | 11155356.373 | 10199845.751 | 955510.622 |
|             |       | 2012 | 11582611.617 | 10498653.937 | 1083957.68 |
|             |       | 2013 | 11998803.791 | 10778307.718 | 1220496.07 |
|             |       | 2014 | 12402087.090 | 11038278.956 | 1363808.13 |
|             |       | 2015 | 12793451.706 | 11280482.736 | 1512968.97 |
|             |       | 2016 | 13160101.653 | 11496549.053 | 1663552.60 |
|             |       | 2017 | 13503583.414 | 11689072.402 | 1814511.01 |
|             |       | 2018 | 13859755.737 | 11876070.441 | 1983685.30 |
|             |       | 2019 | 14211625.176 | 12050168.450 | 2161456.73 |
|             |       | 2020 | 14553935.288 | 12210665.242 | 2343270.05 |
|             |       | 2021 | 14851747.495 | 12341156.170 | 2510591.32 |
|             |       | 2022 | 15144531.004 | 12460731.813 | 2683799.19 |
|             |       | 2023 | 15431932.496 | 12569512.118 | 2862420.38 |
|             |       | 2024 | 15713920.740 | 12668298.286 | 3045622.45 |
|             |       | 2025 | 15979112.816 | 12756212.115 | 3222900.70 |
|             |       | 2026 | 16206550.153 | 12823938.093 | 3382612.06 |
|             |       | 2027 | 16428826.050 | 12884424.893 | 3544401.16 |
|             |       | 2028 | 16645902.186 | 12937969.371 | 3707932.81 |
|             |       | 2029 | 16858126.517 | 12985455.393 | 3872671.12 |
|             |       | 2030 | 17045220.687 | 13025693.021 | 4019527.67 |
|             |       | 2031 | 17208482.610 | 13055253.477 | 4153229.13 |
|             |       | 2032 | 17367586.074 | 13081048.507 | 4286537.57 |
|             |       | 2033 | 17522716.280 | 13103195.802 | 4419520.48 |
|             |       | 2034 | 17674226.555 | 13122340.612 | 4551885.94 |
|             |       | 2035 | 17792201.734 | 13137071.358 | 4655130.38 |
|             |       | 2036 | 17903508.236 | 13148221.874 | 4755286.36 |
|             |       | 2037 | 18012162.345 | 13157849.227 | 4854313.12 |
|             |       | 2038 | 18118464.470 | 13165963.090 | 4952501.38 |

**Results for PHIM for Run 4 (ELL Summary Sensitivity\_Analysis\_1.RTF)**

|     |        |      |              |              |            |
|-----|--------|------|--------------|--------------|------------|
|     | Female | 2039 | 18222549.860 | 13172905.900 | 5049643.96 |
|     |        | 1990 | 307897.357   | 307897.357   | 0.000      |
|     |        | 1991 | 616547.418   | 616108.559   | 438.859    |
|     |        | 1992 | 931086.773   | 929349.047   | 1737.727   |
|     |        | 1993 | 1246155.671  | 1241878.084  | 4277.587   |
|     |        | 1994 | 1561212.934  | 1552789.931  | 8423.003   |
|     |        | 1995 | 1879967.742  | 1865291.624  | 14676.118  |
|     |        | 1996 | 2197488.109  | 2174147.100  | 23341.009  |
|     |        | 1997 | 2515698.453  | 2480826.845  | 34871.607  |
|     |        | 1998 | 2836249.556  | 2786604.991  | 49644.565  |
|     |        | 1999 | 3150201.390  | 3082539.677  | 67661.713  |
|     |        | 2000 | 3472722.342  | 3382673.402  | 90048.941  |
|     |        | 2001 | 3796994.889  | 3679809.745  | 117185.144 |
|     |        | 2002 | 4126619.935  | 3976720.047  | 149899.888 |
|     |        | 2003 | 4454982.533  | 4267203.040  | 187779.494 |
|     |        | 2004 | 4784343.030  | 4552589.174  | 231753.857 |
|     |        | 2005 | 5113443.121  | 4831467.191  | 281975.930 |
|     |        | 2006 | 5442543.963  | 5103131.547  | 339412.415 |
|     |        | 2007 | 5772441.497  | 5368237.289  | 404204.207 |
|     |        | 2008 | 6091911.943  | 5617614.741  | 474297.202 |
|     |        | 2009 | 6413671.330  | 5860519.365  | 553151.965 |
|     |        | 2010 | 6730763.530  | 6092390.212  | 638373.317 |
|     |        | 2011 | 7043614.101  | 6312901.961  | 730712.140 |
|     |        | 2012 | 7356270.780  | 6524824.887  | 831445.893 |
|     |        | 2013 | 7662551.964  | 6724117.246  | 938434.717 |
|     |        | 2014 | 7964551.465  | 6912278.577  | 1052272.89 |
|     |        | 2015 | 8254895.403  | 7086215.627  | 1168679.78 |
|     |        | 2016 | 8530661.848  | 7243323.083  | 1287338.76 |
|     |        | 2017 | 8795826.122  | 7387164.443  | 1408661.68 |
|     |        | 2018 | 9067233.707  | 7525363.962  | 1541869.74 |
|     |        | 2019 | 9335343.270  | 7653756.010  | 1681587.26 |
|     |        | 2020 | 9596110.883  | 7772285.648  | 1823825.23 |
|     |        | 2021 | 9833186.859  | 7874529.239  | 1958657.62 |
|     |        | 2022 | 10066452.037 | 7968337.232  | 2098114.80 |
|     |        | 2023 | 10295503.609 | 8054043.536  | 2241460.07 |
|     |        | 2024 | 10520125.318 | 8131638.976  | 2388486.34 |
|     |        | 2025 | 10731915.863 | 8201073.497  | 2530842.37 |
|     |        | 2026 | 10917495.549 | 8257728.931  | 2659766.62 |
|     |        | 2027 | 11098620.885 | 8308323.765  | 2790297.12 |
|     |        | 2028 | 11275441.234 | 8353546.830  | 2921894.40 |
|     |        | 2029 | 11447962.710 | 8393438.226  | 3054524.48 |
|     |        | 2030 | 11601867.623 | 8427695.122  | 3174172.50 |
|     |        | 2031 | 11731666.516 | 8453283.761  | 3278382.75 |
|     |        | 2032 | 11857585.969 | 8475493.452  | 3382092.52 |
|     |        | 2033 | 11980128.625 | 8494840.710  | 3485287.92 |
|     |        | 2034 | 12099562.464 | 8511432.919  | 3588129.55 |
|     |        | 2035 | 12195919.946 | 8524630.372  | 3671289.57 |
|     |        | 2036 | 12278201.969 | 8533977.978  | 3744223.99 |
|     |        | 2037 | 12358146.336 | 8541988.831  | 3816157.50 |
|     |        | 2038 | 12435978.633 | 8548809.754  | 3887168.88 |
|     |        | 2039 | 12512468.845 | 8554596.122  | 3957872.72 |
| IHD | Males  | 1990 | 517209.093   | 517209.093   | 0.000      |
|     |        | 1991 | 1019219.395  | 1011727.745  | 7491.649   |
|     |        | 1992 | 1509598.614  | 1481750.043  | 27848.571  |
|     |        | 1993 | 1992735.299  | 1927780.946  | 64954.353  |
|     |        | 1994 | 2462877.575  | 2341529.839  | 121347.736 |
|     |        | 1995 | 2928249.390  | 2728275.453  | 199973.936 |
|     |        | 1996 | 3377377.730  | 3076342.166  | 301035.563 |
|     |        | 1997 | 3809062.472  | 3385974.697  | 423087.775 |
|     |        | 1998 | 4222213.867  | 3657983.190  | 564230.677 |
|     |        | 1999 | 4708317.743  | 3949123.103  | 759194.640 |
|     |        | 2000 | 5182084.396  | 4206519.585  | 975564.811 |
|     |        | 2001 | 5644097.705  | 4430478.044  | 1213619.66 |
|     |        | 2002 | 6107232.129  | 4629937.493  | 1477294.64 |
|     |        | 2003 | 6561785.704  | 4802592.811  | 1759192.89 |
|     |        | 2004 | 6996156.348  | 4948113.020  | 2048043.33 |
|     |        | 2005 | 7426261.361  | 5075095.927  | 2351165.43 |
|     |        | 2006 | 7849012.694  | 5182830.452  | 2666182.24 |
|     |        | 2007 | 8255300.530  | 5272837.509  | 2982463.02 |
|     |        | 2008 | 8650662.040  | 5349009.710  | 3301652.33 |
|     |        | 2009 | 9030818.513  | 5412768.830  | 3618049.68 |
|     |        | 2010 | 9403026.327  | 5466824.985  | 3936201.34 |
|     |        | 2011 | 9767535.506  | 5512402.710  | 4255132.80 |
|     |        | 2012 | 10123044.281 | 5550955.035  | 4572089.25 |
|     |        | 2013 | 10470104.786 | 5583207.700  | 4886897.09 |
|     |        | 2014 | 10807756.112 | 5610296.998  | 5197459.11 |
|     |        | 2015 | 11130681.425 | 5632778.653  | 5497902.77 |
|     |        | 2016 | 11448966.506 | 5651604.234  | 5797362.27 |

**Results for PHIM for Run 4 (ELL Summary Sensitivity\_Analysis\_1.RTF)**

|        |        |      |              |             |            |
|--------|--------|------|--------------|-------------|------------|
|        |        | 2017 | 11758164.882 | 5667412.934 | 6090751.95 |
|        |        | 2018 | 12054448.241 | 5679649.695 | 6374798.55 |
|        |        | 2019 | 12341606.261 | 5689774.594 | 6651831.67 |
|        |        | 2020 | 12600728.939 | 5697766.386 | 6902962.55 |
|        |        | 2021 | 12861767.105 | 5704385.760 | 7157381.35 |
|        |        | 2022 | 13114168.616 | 5709887.870 | 7404280.75 |
|        |        | 2023 | 13357894.797 | 5714297.729 | 7643597.07 |
|        |        | 2024 | 13593848.521 | 5717928.868 | 7875919.65 |
|        |        | 2025 | 13789177.359 | 5720686.662 | 8068490.70 |
|        |        | 2026 | 13993401.656 | 5722943.151 | 8270458.50 |
|        |        | 2027 | 14190519.224 | 5724863.384 | 8465655.84 |
|        |        | 2028 | 14381193.356 | 5726357.231 | 8654836.12 |
|        |        | 2029 | 14565171.927 | 5727512.037 | 8837659.89 |
|        |        | 2030 | 14697381.605 | 5728404.146 | 8968977.46 |
|        |        | 2031 | 14842203.512 | 5729221.440 | 9112982.07 |
|        |        | 2032 | 14982485.826 | 5729981.589 | 9252504.24 |
|        |        | 2033 | 15118410.647 | 5730527.728 | 9387882.92 |
|        |        | 2034 | 15250284.398 | 5730886.651 | 9519397.75 |
|        |        | 2035 | 15322911.166 | 5731151.434 | 9591759.73 |
|        |        | 2036 | 15405115.031 | 5731388.653 | 9673726.38 |
|        |        | 2037 | 15484709.137 | 5731624.919 | 9753084.22 |
|        |        | 2038 | 15561812.193 | 5731825.509 | 9829986.68 |
|        |        | 2039 | 15635992.616 | 5731942.468 | 9904050.15 |
|        | Female | 1990 | 147299.110   | 147299.110  | 0.000      |
|        |        | 1991 | 295122.462   | 293157.428  | 1965.034   |
|        |        | 1992 | 439962.920   | 432598.855  | 7364.065   |
|        |        | 1993 | 584735.615   | 567254.192  | 17481.424  |
|        |        | 1994 | 727640.783   | 694551.053  | 33089.730  |
|        |        | 1995 | 868486.937   | 813735.592  | 54751.345  |
|        |        | 1996 | 1010321.847  | 926197.342  | 84124.505  |
|        |        | 1997 | 1144230.930  | 1025731.750 | 118499.180 |
|        |        | 1998 | 1274513.622  | 1115538.047 | 158975.575 |
|        |        | 1999 | 1426725.938  | 1212328.308 | 214397.630 |
|        |        | 2000 | 1573462.680  | 1298115.129 | 275347.551 |
|        |        | 2001 | 1719132.015  | 1374547.840 | 344584.175 |
|        |        | 2002 | 1863006.732  | 1442119.017 | 420887.715 |
|        |        | 2003 | 2002943.227  | 1500744.157 | 502199.070 |
|        |        | 2004 | 2137798.705  | 1550905.556 | 586893.149 |
|        |        | 2005 | 2271071.245  | 1595064.665 | 676006.580 |
|        |        | 2006 | 2400707.731  | 1632483.449 | 768224.282 |
|        |        | 2007 | 2523634.512  | 1663668.134 | 859966.378 |
|        |        | 2008 | 2648752.232  | 1691285.686 | 957466.547 |
|        |        | 2009 | 2765973.961  | 1714089.047 | 1051884.91 |
|        |        | 2010 | 2881329.235  | 1733709.211 | 1147620.02 |
|        |        | 2011 | 2994972.694  | 1750454.713 | 1244517.98 |
|        |        | 2012 | 3108958.829  | 1764902.737 | 1344056.09 |
|        |        | 2013 | 3218140.416  | 1777124.397 | 1441016.02 |
|        |        | 2014 | 3328387.914  | 1787745.231 | 1540642.68 |
|        |        | 2015 | 3435342.796  | 1796955.497 | 1638387.30 |
|        |        | 2016 | 3539189.408  | 1804763.582 | 1734425.83 |
|        |        | 2017 | 3640041.363  | 1811344.280 | 1828697.08 |
|        |        | 2018 | 3732645.362  | 1816512.255 | 1916133.11 |
|        |        | 2019 | 3821421.978  | 1820766.330 | 2000655.65 |
|        |        | 2020 | 3902115.950  | 1824223.426 | 2077892.52 |
|        |        | 2021 | 3984301.053  | 1827234.253 | 2157066.80 |
|        |        | 2022 | 4062629.299  | 1829659.837 | 2232969.46 |
|        |        | 2023 | 4137348.729  | 1831632.054 | 2305716.68 |
|        |        | 2024 | 4208611.493  | 1833198.484 | 2375413.01 |
|        |        | 2025 | 4269419.492  | 1834459.461 | 2434960.03 |
|        |        | 2026 | 4330969.998  | 1835515.687 | 2495454.31 |
|        |        | 2027 | 4389134.306  | 1836337.726 | 2552796.58 |
|        |        | 2028 | 4444222.970  | 1836982.170 | 2607240.80 |
|        |        | 2029 | 4496447.877  | 1837497.886 | 2658949.99 |
|        |        | 2030 | 4536975.698  | 1837906.607 | 2699069.09 |
|        |        | 2031 | 4578338.586  | 1838244.016 | 2740094.57 |
|        |        | 2032 | 4617397.784  | 1838500.548 | 2778897.24 |
|        |        | 2033 | 4654407.697  | 1838699.647 | 2815708.05 |
|        |        | 2034 | 4689913.454  | 1838855.855 | 2851057.60 |
|        |        | 2035 | 4712518.190  | 1838974.107 | 2873544.08 |
|        |        | 2036 | 4735845.827  | 1839066.418 | 2896779.41 |
|        |        | 2037 | 4757958.806  | 1839134.678 | 2918824.13 |
|        |        | 2038 | 4778813.806  | 1839183.342 | 2939630.46 |
|        |        | 2039 | 4798769.065  | 1839222.266 | 2959546.80 |
|        | Males  | 1990 | 75005.854    | 75005.854   | 0.000      |
|        |        | 1991 | 149463.017   | 148704.941  | 758.077    |
|        |        | 1992 | 222966.278   | 220145.755  | 2820.523   |
|        |        | 1993 | 296801.879   | 290080.134  | 6721.745   |
|        |        | 1994 | 372453.706   | 359429.104  | 13024.602  |
| Stroke |        |      |              |             |            |

**Results for PHIM for Run 4 (ELL Summary Sensitivity\_Analysis\_1.RTF)**

|        |      |             |             |            |
|--------|------|-------------|-------------|------------|
|        | 1995 | 448401.338  | 426368.696  | 22032.642  |
|        | 1996 | 523536.301  | 489614.120  | 33922.181  |
|        | 1997 | 596763.211  | 548081.234  | 48681.977  |
|        | 1998 | 667546.681  | 601409.852  | 66136.829  |
|        | 1999 | 734925.407  | 649080.339  | 85845.068  |
|        | 2000 | 803749.361  | 694613.319  | 109136.042 |
|        | 2001 | 870081.588  | 735260.164  | 134821.424 |
|        | 2002 | 935347.140  | 772231.729  | 163115.411 |
|        | 2003 | 1001627.349 | 806549.229  | 195078.120 |
|        | 2004 | 1066587.976 | 837375.141  | 229212.834 |
|        | 2005 | 1130548.052 | 864965.343  | 265582.709 |
|        | 2006 | 1195132.454 | 890121.501  | 305010.953 |
|        | 2007 | 1258974.043 | 912546.490  | 346427.554 |
|        | 2008 | 1320124.867 | 931754.559  | 388370.308 |
|        | 2009 | 1380776.123 | 948841.471  | 431934.653 |
|        | 2010 | 1440048.533 | 963821.625  | 476226.908 |
|        | 2011 | 1497484.847 | 976820.068  | 520664.779 |
|        | 2012 | 1554496.526 | 988196.314  | 566300.213 |
|        | 2013 | 1610819.598 | 998170.562  | 612649.036 |
|        | 2014 | 1667484.890 | 1006973.897 | 660510.993 |
|        | 2015 | 1720948.287 | 1014444.685 | 706503.602 |
|        | 2016 | 1775699.228 | 1021123.622 | 754575.606 |
|        | 2017 | 1830250.175 | 1026975.836 | 803274.339 |
|        | 2018 | 1875958.950 | 1031316.426 | 844642.523 |
|        | 2019 | 1920359.232 | 1035017.265 | 885341.967 |
|        | 2020 | 1960605.297 | 1038019.310 | 922585.987 |
|        | 2021 | 1998912.887 | 1040511.859 | 958401.028 |
|        | 2022 | 2036003.696 | 1042609.647 | 993394.049 |
|        | 2023 | 2071857.536 | 1044359.392 | 1027498.14 |
|        | 2024 | 2106636.468 | 1045844.489 | 1060791.98 |
|        | 2025 | 2136450.873 | 1046984.751 | 1089466.12 |
|        | 2026 | 2164796.470 | 1047913.899 | 1116882.57 |
|        | 2027 | 2192079.608 | 1048696.531 | 1143383.08 |
|        | 2028 | 2218404.367 | 1049339.008 | 1169065.36 |
|        | 2029 | 2243769.140 | 1049871.711 | 1193897.43 |
|        | 2030 | 2263570.213 | 1050246.938 | 1213323.27 |
|        | 2031 | 2282521.590 | 1050561.654 | 1231959.94 |
|        | 2032 | 2300804.945 | 1050828.751 | 1249976.19 |
|        | 2033 | 2318464.018 | 1051044.776 | 1267419.24 |
|        | 2034 | 2335611.973 | 1051224.204 | 1284387.77 |
|        | 2035 | 2347097.290 | 1051334.859 | 1295762.43 |
|        | 2036 | 2358248.747 | 1051427.753 | 1306820.99 |
|        | 2037 | 2369033.655 | 1051509.786 | 1317523.87 |
|        | 2038 | 2379490.114 | 1051580.420 | 1327909.69 |
|        | 2039 | 2389546.238 | 1051636.941 | 1337909.30 |
| Female | 1990 | 56348.092   | 56348.092   | 0.000      |
|        | 1991 | 110871.862  | 110329.153  | 542.709    |
|        | 1992 | 165654.454  | 163570.722  | 2083.733   |
|        | 1993 | 220008.519  | 215029.733  | 4978.787   |
|        | 1994 | 275706.807  | 266028.124  | 9678.683   |
|        | 1995 | 331417.547  | 315074.653  | 16342.894  |
|        | 1996 | 387580.161  | 362263.117  | 25317.044  |
|        | 1997 | 442778.242  | 406310.498  | 36467.743  |
|        | 1998 | 496117.305  | 446559.660  | 49557.645  |
|        | 1999 | 548268.214  | 483578.530  | 64689.684  |
|        | 2000 | 601693.202  | 519144.030  | 82549.171  |
|        | 2001 | 652221.103  | 550457.102  | 101764.000 |
|        | 2002 | 703022.600  | 579556.223  | 123466.377 |
|        | 2003 | 752023.351  | 605407.965  | 146615.386 |
|        | 2004 | 799826.733  | 628492.764  | 171333.968 |
|        | 2005 | 847563.928  | 649568.260  | 197995.668 |
|        | 2006 | 894205.027  | 668283.508  | 225921.519 |
|        | 2007 | 939571.282  | 684738.518  | 254832.764 |
|        | 2008 | 983437.578  | 699128.812  | 284308.766 |
|        | 2009 | 1025803.786 | 711655.058  | 314148.728 |
|        | 2010 | 1066964.934 | 722546.962  | 344417.972 |
|        | 2011 | 1106954.044 | 731999.206  | 374954.838 |
|        | 2012 | 1146108.461 | 740280.499  | 405827.962 |
|        | 2013 | 1183544.689 | 747366.273  | 436178.417 |
|        | 2014 | 1221220.945 | 753688.627  | 467532.318 |
|        | 2015 | 1258289.311 | 759314.559  | 498974.753 |
|        | 2016 | 1294830.207 | 764228.982  | 530601.225 |
|        | 2017 | 1330332.626 | 768464.778  | 561867.848 |
|        | 2018 | 1360571.987 | 771674.511  | 588897.476 |
|        | 2019 | 1389848.723 | 774391.936  | 615456.787 |
|        | 2020 | 1416046.192 | 776599.987  | 639446.206 |
|        | 2021 | 1440588.850 | 778417.526  | 662171.323 |
|        | 2022 | 1464157.934 | 779937.572  | 684220.363 |



**Results for PHIM for Run 4 (ELL Summary Sensitivity\_Analysis\_1.RTF)**

|      |             |             |             |             |            |
|------|-------------|-------------|-------------|-------------|------------|
|      |             | 2023        | 1486810.237 | 781218.389  | 705591.849 |
|      |             | 2024        | 1508591.729 | 782283.083  | 726308.647 |
|      |             | 2025        | 1526875.621 | 783106.188  | 743769.433 |
|      |             | 2026        | 1543659.810 | 783760.073  | 759899.737 |
|      |             | 2027        | 1559623.774 | 784297.798  | 775325.977 |
|      |             | 2028        | 1574852.850 | 784743.529  | 790109.321 |
|      |             | 2029        | 1589437.452 | 785111.614  | 804325.838 |
|      |             | 2030        | 1600568.199 | 785374.154  | 815194.046 |
|      |             | 2031        | 1610776.297 | 785581.727  | 825194.569 |
|      |             | 2032        | 1620483.563 | 785752.494  | 834731.070 |
|      |             | 2033        | 1629745.442 | 785892.902  | 843852.540 |
|      |             | 2034        | 1638721.425 | 786008.119  | 852713.306 |
|      |             | 2035        | 1644649.404 | 786079.989  | 858569.415 |
|      |             | 2036        | 1650181.590 | 786136.137  | 864045.452 |
|      |             | 2037        | 1655476.066 | 786182.459  | 869293.607 |
|      |             | 2038        | 1660507.914 | 786220.569  | 874287.344 |
|      |             | 2039        | 1665361.569 | 786252.308  | 879109.261 |
| COPD | Males       | 1990        | 117002.906  | 117002.906  | 0.000      |
|      |             | 1991        | 233438.833  | 233225.369  | 213.464    |
|      |             | 1992        | 348084.047  | 347293.867  | 790.180    |
|      |             | 1993        | 467278.318  | 465339.566  | 1938.752   |
|      |             | 1994        | 584216.907  | 580406.458  | 3810.449   |
|      |             | 1995        | 697391.457  | 690898.349  | 6493.107   |
|      |             | 1996        | 809471.271  | 799318.608  | 10152.662  |
|      |             | 1997        | 922587.668  | 907545.288  | 15042.380  |
|      |             | 1998        | 1034072.457 | 1012980.376 | 21092.080  |
|      |             | 1999        | 1153475.399 | 1124408.204 | 29067.195  |
|      |             | 2000        | 1268050.268 | 1229546.384 | 38503.884  |
|      |             | 2001        | 1382786.209 | 1332939.472 | 49846.737  |
|      |             | 2002        | 1497557.412 | 1434250.644 | 63306.768  |
|      |             | 2003        | 1614405.229 | 1535458.043 | 78947.186  |
|      |             | 2004        | 1726672.489 | 1630476.913 | 96195.577  |
|      |             | 2005        | 1847277.524 | 1730354.819 | 116922.705 |
|      |             | 2006        | 1961009.963 | 1821991.344 | 139018.619 |
|      |             | 2007        | 2079868.908 | 1915021.321 | 164847.587 |
|      |             | 2008        | 2206755.783 | 2011666.809 | 195088.974 |
|      |             | 2009        | 2331993.380 | 2104134.655 | 227858.726 |
|      |             | 2010        | 2455130.176 | 2192249.930 | 262880.247 |
|      |             | 2011        | 2582657.849 | 2280398.501 | 302259.348 |
|      |             | 2012        | 2709719.005 | 2365002.344 | 344716.661 |
|      |             | 2013        | 2840547.005 | 2448709.382 | 391837.624 |
|      |             | 2014        | 2971677.135 | 2529260.936 | 442416.199 |
|      |             | 2015        | 3104538.983 | 2608744.742 | 495794.241 |
|      |             | 2016        | 3237650.175 | 2684735.205 | 552914.970 |
|      |             | 2017        | 3370561.253 | 2757461.562 | 613099.690 |
|      |             | 2018        | 3503136.371 | 2826124.372 | 677011.999 |
|      |             | 2019        | 3636402.758 | 2891772.627 | 744630.131 |
|      |             | 2020        | 3768054.453 | 2954058.556 | 813995.897 |
|      |             | 2021        | 3897675.067 | 3012054.126 | 885620.941 |
|      |             | 2022        | 4027307.132 | 3066744.980 | 960562.152 |
|      |             | 2023        | 4156698.720 | 3118026.475 | 1038672.24 |
|      |             | 2024        | 4285772.226 | 3165987.526 | 1119784.70 |
|      |             | 2025        | 4410759.298 | 3210320.209 | 1200439.09 |
|      |             | 2026        | 4531411.064 | 3249897.369 | 1281513.70 |
|      |             | 2027        | 4651145.233 | 3286319.198 | 1364826.03 |
|      |             | 2028        | 4769837.872 | 3319643.443 | 1450194.43 |
|      |             | 2029        | 4887747.179 | 3350117.446 | 1537629.73 |
| 2030 | 4997632.895 | 3377221.420 | 1620411.48  |             |            |
| 2031 | 5103301.991 | 3400381.938 | 1702920.05  |             |            |
| 2032 | 5207593.613 | 3421102.785 | 1786490.83  |             |            |
| 2033 | 5310556.138 | 3439465.637 | 1871090.50  |             |            |
| 2034 | 5412542.816 | 3455766.608 | 1956776.21  |             |            |
| 2035 | 5500522.473 | 3469252.470 | 2031270.00  |             |            |
| 2036 | 5588149.640 | 3480878.222 | 2107271.42  |             |            |
| 2037 | 5674667.886 | 3491048.875 | 2183619.01  |             |            |
| 2038 | 5760391.289 | 3499865.200 | 2260526.09  |             |            |
| 2039 | 5845459.234 | 3507562.329 | 2337896.90  |             |            |
|      | Female      | 1990        | 77434.846   | 77434.846   | 0.000      |
|      |             | 1991        | 160029.510  | 159852.357  | 177.153    |
|      |             | 1992        | 240642.531  | 239968.230  | 674.301    |
|      |             | 1993        | 329362.093  | 327622.334  | 1739.759   |
|      |             | 1994        | 418569.515  | 415082.848  | 3486.667   |
|      |             | 1995        | 509110.357  | 502973.310  | 6137.047   |
|      |             | 1996        | 600040.117  | 590287.889  | 9752.228   |
|      |             | 1997        | 691159.071  | 676691.288  | 14467.783  |
|      |             | 1998        | 782866.899  | 762506.544  | 20360.355  |
|      |             | 1999        | 881526.925  | 853387.764  | 28139.161  |
|      |             | 2000        | 977880.647  | 940743.633  | 37137.014  |

**Results for PHIM for Run 4 (ELL Summary Sensitivity\_Analysis\_1.RTF)**

|      |             |             |            |
|------|-------------|-------------|------------|
| 2001 | 1076787.404 | 1028773.673 | 48013.730  |
| 2002 | 1174842.754 | 1114259.095 | 60583.658  |
| 2003 | 1275102.681 | 1199927.588 | 75175.093  |
| 2004 | 1371026.306 | 1280114.437 | 90911.869  |
| 2005 | 1473954.509 | 1363960.670 | 109993.839 |
| 2006 | 1574450.828 | 1443719.738 | 130731.090 |
| 2007 | 1673790.211 | 1520398.716 | 153391.495 |
| 2008 | 1782360.738 | 1601800.411 | 180560.327 |
| 2009 | 1892944.209 | 1681860.985 | 211083.224 |
| 2010 | 2002131.282 | 1758505.567 | 243625.715 |
| 2011 | 2114522.152 | 1834463.287 | 280058.865 |
| 2012 | 2228079.372 | 1908515.096 | 319564.276 |
| 2013 | 2345377.689 | 1981945.455 | 363432.234 |
| 2014 | 2462498.422 | 2052193.943 | 410304.479 |
| 2015 | 2581450.312 | 2121486.836 | 459963.475 |
| 2016 | 2701959.301 | 2188564.823 | 513394.478 |
| 2017 | 2823834.967 | 2253292.466 | 570542.501 |
| 2018 | 2938265.081 | 2311843.739 | 626421.341 |
| 2019 | 3053254.880 | 2367768.620 | 685486.260 |
| 2020 | 3167073.216 | 2420907.704 | 746165.512 |
| 2021 | 3279517.699 | 2471279.812 | 808237.887 |
| 2022 | 3392060.964 | 2518915.458 | 873145.506 |
| 2023 | 3504296.171 | 2563731.315 | 940564.857 |
| 2024 | 3616019.231 | 2605609.785 | 1010409.45 |
| 2025 | 3724611.269 | 2644514.242 | 1080097.03 |
| 2026 | 3827181.707 | 2679607.094 | 1147574.61 |
| 2027 | 3928684.441 | 2711999.301 | 1216685.14 |
| 2028 | 4029124.892 | 2741885.064 | 1287239.83 |
| 2029 | 4128269.068 | 2769148.940 | 1359120.13 |
| 2030 | 4221560.174 | 2793664.208 | 1427895.97 |
| 2031 | 4304170.584 | 2813796.056 | 1490374.53 |
| 2032 | 4384930.537 | 2831783.656 | 1553146.88 |
| 2033 | 4464357.691 | 2847926.160 | 1616431.53 |
| 2034 | 4542251.545 | 2862187.402 | 1680064.14 |
| 2035 | 4611066.648 | 2874263.495 | 1736803.15 |
| 2036 | 4670309.230 | 2883497.026 | 1786812.20 |
| 2037 | 4728179.514 | 2891558.022 | 1836621.49 |
| 2038 | 4785008.048 | 2898588.198 | 1886419.85 |
| 2039 | 4841291.793 | 2904693.438 | 1936598.36 |

---

## Results for PHIM for Run 4 (ELL Summary Sensitivity\_Analysis\_1.RTF)

\*\*\*\*\*

**Table 5: Estimated Loss of Life, at the end of follow-up, Population unadjusted for deaths in Ecig scenario**

| Disease      | Sex    | Age Group   | Years of life lost<br>NULL | Years of life lost<br>Ecig | Years of life<br>Saved |
|--------------|--------|-------------|----------------------------|----------------------------|------------------------|
| All Diseases | Males  | 30-34       | 443911.034                 | 221916.237                 | 221994.797             |
|              |        | 35-39       | 1146798.555                | 566066.154                 | 580732.401             |
|              |        | 40-44       | 2609591.408                | 1243377.701                | 1366213.71             |
|              |        | 45-49       | 4775841.753                | 2227971.526                | 2547870.23             |
|              |        | 50-54       | 7446969.205                | 3619802.505                | 3827166.70             |
|              |        | 55-59       | 8240205.925                | 4475359.419                | 3764846.51             |
|              |        | 60-64       | 8772829.118                | 5221990.937                | 3550838.18             |
|              |        | 65-69       | 6161494.678                | 4078732.566                | 2082762.11             |
|              |        | 70-74       | 2495906.274                | 1719970.861                | 775935.412             |
|              | 75-79  | 0.000       | 0.000                      | 0.000                      |                        |
|              | Female | 30-34       | 229140.561                 | 135172.142                 | 93968.419              |
|              |        | 35-39       | 570217.942                 | 328687.705                 | 241530.237             |
|              |        | 40-44       | 1267538.938                | 703790.375                 | 563748.563             |
|              |        | 45-49       | 2340070.698                | 1271475.744                | 1068594.95             |
|              |        | 50-54       | 3743803.613                | 2048797.330                | 1695006.28             |
|              |        | 55-59       | 4591478.168                | 2646075.267                | 1945402.90             |
|              |        | 60-64       | 5207367.788                | 3139235.008                | 2068132.78             |
|              |        | 65-69       | 4092181.394                | 2619049.035                | 1473132.36             |
| 70-74        |        | 1776092.171 | 1158389.239                | 617702.932                 |                        |
| Lung cancer  | Males  | 30-34       | 66065.017                  | 49875.036                  | 16189.981              |
|              |        | 35-39       | 232509.414                 | 177134.650                 | 55374.764              |
|              |        | 40-44       | 688628.041                 | 511057.163                 | 177570.878             |
|              |        | 45-49       | 1528300.367                | 1092395.560                | 435904.807             |
|              |        | 50-54       | 2730187.229                | 1914376.381                | 815810.848             |
|              |        | 55-59       | 3909101.673                | 2722399.674                | 1186702.00             |
|              |        | 60-64       | 4287716.660                | 3094258.621                | 1193458.04             |
|              |        | 65-69       | 3467897.115                | 2564197.927                | 903699.188             |
|              |        | 70-74       | 1312144.343                | 990417.686                 | 321726.657             |
|              | 75-79  | 0.000       | 0.000                      | 0.000                      |                        |
|              | Female | 30-34       | 51913.113                  | 39308.062                  | 12605.051              |
|              |        | 35-39       | 189792.904                 | 143965.253                 | 45827.651              |
|              |        | 40-44       | 527596.573                 | 380732.614                 | 146863.959             |
|              |        | 45-49       | 1122524.269                | 774600.593                 | 347923.676             |
|              |        | 50-54       | 1882214.322                | 1265131.381                | 617082.941             |
|              |        | 55-59       | 2595581.943                | 1718862.257                | 876719.686             |
|              |        | 60-64       | 2846273.090                | 1930908.781                | 915364.309             |
|              |        | 65-69       | 2358758.394                | 1623995.237                | 734763.157             |
| 70-74        |        | 937814.238  | 655698.232                 | 282116.006                 |                        |
| IHD          | Males  | 30-34       | 263834.566                 | 106205.536                 | 157629.030             |
|              |        | 35-39       | 692140.150                 | 263657.235                 | 428482.915             |
|              |        | 40-44       | 1519708.432                | 515622.867                 | 1004085.56             |
|              |        | 45-49       | 2568546.697                | 782535.017                 | 1786011.68             |
|              |        | 50-54       | 3632929.903                | 1164786.860                | 2468143.04             |
|              |        | 55-59       | 2807892.356                | 986972.263                 | 1820920.09             |
|              |        | 60-64       | 2599825.934                | 1101110.099                | 1498715.83             |
|              |        | 65-69       | 1113578.307                | 552723.893                 | 560854.414             |
|              |        | 70-74       | 437536.271                 | 251337.104                 | 186199.166             |
|              | 75-79  | 0.000       | 0.000                      | 0.000                      |                        |
|              | Female | 30-34       | 79649.097                  | 34585.150                  | 45063.947              |
|              |        | 35-39       | 193965.908                 | 72693.698                  | 121272.210             |
|              |        | 40-44       | 403380.974                 | 131598.118                 | 271782.856             |
|              |        | 45-49       | 671385.408                 | 199257.025                 | 472128.383             |
|              |        | 50-54       | 1011875.989                | 328270.322                 | 683605.667             |
|              |        | 55-59       | 849875.715                 | 311423.709                 | 538452.006             |
|              |        | 60-64       | 925490.876                 | 405421.384                 | 520069.492             |
|              |        | 65-69       | 455463.881                 | 233915.867                 | 221548.014             |
| 70-74        |        | 207681.216  | 120833.496                 | 86847.721                  |                        |
| Stroke       | Males  | 30-34       | 73463.650                  | 41020.095                  | 32443.554              |
|              |        | 35-39       | 151934.057                 | 81980.649                  | 69953.407              |
|              |        | 40-44       | 262845.974                 | 133279.444                 | 129566.530             |
|              |        | 45-49       | 383421.246                 | 179816.558                 | 203604.688             |
|              |        | 50-54       | 479872.634                 | 201362.725                 | 278509.908             |
|              |        | 55-59       | 437124.903                 | 168594.940                 | 268529.963             |
|              |        | 60-64       | 419457.235                 | 165537.361                 | 253919.873             |
|              |        | 65-69       | 128180.574                 | 53792.917                  | 74387.657              |
|              |        | 70-74       | 53245.965                  | 24607.299                  | 28638.666              |
|              | 75-79  | 0.000       | 0.000                      | 0.000                      |                        |
|              | Female | 30-34       | 62919.090                  | 38540.536                  | 24378.554              |

**Results for PHIM for Run 4 (ELL Summary Sensitivity\_Analysis\_1.RTF)**

|      |        |       |             |            |            |
|------|--------|-------|-------------|------------|------------|
|      |        | 35-39 | 120806.205  | 69487.417  | 51318.788  |
|      |        | 40-44 | 203391.885  | 107520.224 | 95871.661  |
|      |        | 45-49 | 278172.097  | 135035.375 | 143136.723 |
|      |        | 50-54 | 325979.181  | 146087.845 | 179891.336 |
|      |        | 55-59 | 275161.340  | 115340.162 | 159821.178 |
|      |        | 60-64 | 268920.493  | 114589.414 | 154331.079 |
|      |        | 65-69 | 87956.054   | 39412.425  | 48543.629  |
|      |        | 70-74 | 42055.224   | 19722.958  | 22332.266  |
|      |        | 75-79 | 0.000       | 0.000      | 0.000      |
| COPD | Males  | 30-34 | 40547.801   | 24815.570  | 15732.231  |
|      |        | 35-39 | 70214.933   | 43293.620  | 26921.314  |
|      |        | 40-44 | 138408.960  | 83418.227  | 54990.733  |
|      |        | 45-49 | 295573.443  | 173224.390 | 122349.053 |
|      |        | 50-54 | 603979.438  | 339276.539 | 264702.900 |
|      |        | 55-59 | 1086086.992 | 597392.542 | 488694.450 |
|      |        | 60-64 | 1465829.290 | 861084.856 | 604744.434 |
|      |        | 65-69 | 1451838.682 | 908017.829 | 543820.853 |
|      |        | 70-74 | 692979.695  | 453608.771 | 239370.923 |
|      |        | 75-79 | 0.000       | 0.000      | 0.000      |
|      | Female | 30-34 | 34659.261   | 22738.394  | 11920.867  |
|      |        | 35-39 | 65652.924   | 42541.336  | 23111.588  |
|      |        | 40-44 | 133169.505  | 83939.419  | 49230.087  |
|      |        | 45-49 | 267988.924  | 162582.752 | 105406.172 |
|      |        | 50-54 | 523734.121  | 309307.782 | 214426.338 |
|      |        | 55-59 | 870859.170  | 500449.138 | 370410.031 |
|      |        | 60-64 | 1166683.329 | 688315.429 | 478367.900 |
|      |        | 65-69 | 1190003.066 | 721725.506 | 468277.559 |
|      |        | 70-74 | 588541.493  | 362134.553 | 226406.940 |
|      |        | 75-79 | 0.000       | 0.000      | 0.000      |

---

## Results for PHIM for Run 4 (ELL Summary Sensitivity\_Analysis\_1.RTF)

\*\*\*\*\*

**Table 6: Estimated Loss of Life, at the end of follow-up, Population and Number deaths adjusted for Ecig scenario**

| Disease      | Sex    | Age Group   | Years of life lost<br>NULL | Years of life lost<br>Ecig | Years of life<br>Saved |
|--------------|--------|-------------|----------------------------|----------------------------|------------------------|
| All Diseases | Males  | 30-34       | 443911.034                 | 221928.510                 | 221982.524             |
|              |        | 35-39       | 1146798.555                | 566159.342                 | 580639.213             |
|              |        | 40-44       | 2609591.408                | 1243984.551                | 1365606.86             |
|              |        | 45-49       | 4775841.753                | 2230720.193                | 2545121.56             |
|              |        | 50-54       | 7446969.205                | 3628264.395                | 3818704.81             |
|              |        | 55-59       | 8240205.925                | 4489885.586                | 3750320.34             |
|              |        | 60-64       | 8772829.118                | 5247916.477                | 3524912.64             |
|              |        | 65-69       | 6161494.678                | 4102115.274                | 2059379.40             |
|              |        | 70-74       | 2495906.274                | 1733073.310                | 762832.964             |
|              | 75-79  | 0.000       | 0.000                      | 0.000                      |                        |
|              | Female | 30-34       | 229140.561                 | 135175.576                 | 93964.984              |
|              |        | 35-39       | 570217.942                 | 328713.444                 | 241504.498             |
|              |        | 40-44       | 1267538.938                | 703956.113                 | 563582.825             |
|              |        | 45-49       | 2340070.698                | 1272217.022                | 1067853.68             |
|              |        | 50-54       | 3743803.613                | 2051143.404                | 1692660.21             |
|              |        | 55-59       | 4591478.168                | 2650698.852                | 1940779.32             |
|              |        | 60-64       | 5207367.788                | 3148453.100                | 2058914.69             |
|              |        | 65-69       | 4092181.394                | 2629305.379                | 1462876.02             |
| 70-74        |        | 1776092.171 | 1165101.243                | 610990.928                 |                        |
| Lung cancer  | Males  | 30-34       | 66065.017                  | 49878.368                  | 16186.650              |
|              |        | 35-39       | 232509.414                 | 177171.345                 | 55338.069              |
|              |        | 40-44       | 688628.041                 | 511375.496                 | 177252.545             |
|              |        | 45-49       | 1528300.367                | 1094086.307                | 434214.060             |
|              |        | 50-54       | 2730187.229                | 1919817.950                | 810369.279             |
|              |        | 55-59       | 3909101.673                | 2732305.698                | 1176795.98             |
|              |        | 60-64       | 4287716.660                | 3111116.024                | 1176600.64             |
|              |        | 65-69       | 3467897.115                | 2579092.200                | 888804.915             |
|              |        | 70-74       | 1312144.343                | 998062.512                 | 314081.831             |
|              | 75-79  | 0.000       | 0.000                      | 0.000                      |                        |
|              | Female | 30-34       | 51913.113                  | 39309.265                  | 12603.848              |
|              |        | 35-39       | 189792.904                 | 143978.242                 | 45814.662              |
|              |        | 40-44       | 527596.573                 | 380835.533                 | 146761.041             |
|              |        | 45-49       | 1122524.269                | 775101.067                 | 347423.202             |
|              |        | 50-54       | 1882214.322                | 1266720.732                | 615493.590             |
|              |        | 55-59       | 2595581.943                | 1722027.087                | 873554.857             |
|              |        | 60-64       | 2846273.090                | 1936867.954                | 909405.136             |
|              |        | 65-69       | 2358758.394                | 1630292.002                | 728466.392             |
| 70-74        |        | 937814.238  | 659464.242                 | 278349.996                 |                        |
| IHD          | Males  | 30-34       | 263834.566                 | 106210.512                 | 157624.054             |
|              |        | 35-39       | 692140.150                 | 263689.635                 | 428450.516             |
|              |        | 40-44       | 1519708.432                | 515782.842                 | 1003925.59             |
|              |        | 45-49       | 2568546.697                | 783043.848                 | 1785502.85             |
|              |        | 50-54       | 3632929.903                | 1166082.763                | 2466847.14             |
|              |        | 55-59       | 2807892.356                | 988231.335                 | 1819661.02             |
|              |        | 60-64       | 2599825.934                | 1103216.281                | 1496609.65             |
|              |        | 65-69       | 1113578.307                | 553749.570                 | 559828.738             |
|              |        | 70-74       | 437536.271                 | 251935.682                 | 185600.589             |
|              | 75-79  | 0.000       | 0.000                      | 0.000                      |                        |
|              | Female | 30-34       | 79649.097                  | 34585.871                  | 45063.226              |
|              |        | 35-39       | 193965.908                 | 72697.746                  | 121268.161             |
|              |        | 40-44       | 403380.974                 | 131616.005                 | 271764.969             |
|              |        | 45-49       | 671385.408                 | 199312.298                 | 472073.110             |
|              |        | 50-54       | 1011875.989                | 328425.781                 | 683450.208             |
|              |        | 55-59       | 849875.715                 | 311603.768                 | 538271.947             |
|              |        | 60-64       | 925490.876                 | 405803.107                 | 519687.769             |
|              |        | 65-69       | 455463.881                 | 234158.633                 | 221305.248             |
| 70-74        |        | 207681.216  | 121019.055                 | 86662.161                  |                        |
| Stroke       | Males  | 30-34       | 73463.650                  | 41022.190                  | 32441.460              |
|              |        | 35-39       | 151934.057                 | 81993.775                  | 69940.282              |
|              |        | 40-44       | 262845.974                 | 133341.302                 | 129504.673             |
|              |        | 45-49       | 383421.246                 | 180014.076                 | 203407.170             |
|              |        | 50-54       | 479872.634                 | 201743.209                 | 278129.425             |
|              |        | 55-59       | 437124.903                 | 168945.977                 | 268178.927             |
|              |        | 60-64       | 419457.235                 | 165992.932                 | 253464.302             |
|              |        | 65-69       | 128180.574                 | 53915.472                  | 74265.102              |
|              |        | 70-74       | 53245.965                  | 24668.008                  | 28577.957              |
|              | 75-79  | 0.000       | 0.000                      | 0.000                      |                        |
|              | Female | 30-34       | 62919.090                  | 38541.341                  | 24377.750              |

**Results for PHIM for Run 4 (ELL Summary Sensitivity\_Analysis\_1.RTF)**

|      |       |        |             |             |            |            |
|------|-------|--------|-------------|-------------|------------|------------|
|      |       | 35-39  | 120806.205  | 69491.797   | 51314.409  |            |
|      |       | 40-44  | 203391.885  | 107539.350  | 95852.535  |            |
|      |       | 45-49  | 278172.097  | 135090.337  | 143081.760 |            |
|      |       | 50-54  | 325979.181  | 146192.386  | 179786.795 |            |
|      |       | 55-59  | 275161.340  | 115442.556  | 159718.784 |            |
|      |       | 60-64  | 268920.493  | 114737.850  | 154182.643 |            |
|      |       | 65-69  | 87956.054   | 39462.075   | 48493.978  |            |
|      |       | 70-74  | 42055.224   | 19754.617   | 22300.607  |            |
|      |       | 75-79  | 0.000       | 0.000       | 0.000      |            |
| COPD | Males | 30-34  | 40547.801   | 24817.440   | 15730.361  |            |
|      |       | 35-39  | 70214.933   | 43304.587   | 26910.346  |            |
|      |       | 40-44  | 138408.960  | 83484.911   | 54924.049  |            |
|      |       | 45-49  | 295573.443  | 173575.961  | 121997.482 |            |
|      |       | 50-54  | 603979.438  | 340620.472  | 263358.966 |            |
|      |       | 55-59  | 1086086.992 | 600402.577  | 485684.415 |            |
|      |       | 60-64  | 1465829.290 | 867591.240  | 598238.050 |            |
|      |       | 65-69  | 1451838.682 | 915358.033  | 536480.649 |            |
|      |       | 70-74  | 692979.695  | 458407.108  | 234572.587 |            |
|      |       | 75-79  | 0.000       | 0.000       | 0.000      |            |
|      |       | Female | 30-34       | 34659.261   | 22739.100  | 11920.161  |
|      |       |        | 35-39       | 65652.924   | 42545.659  | 23107.265  |
|      |       |        | 40-44       | 133169.505  | 83965.225  | 49204.280  |
|      |       |        | 45-49       | 267988.924  | 162713.320 | 105275.604 |
|      |       |        | 50-54       | 523734.121  | 309804.505 | 213929.615 |
|      |       |        | 55-59       | 870859.170  | 501625.441 | 369233.728 |
|      |       |        | 60-64       | 1166683.329 | 691044.189 | 475639.139 |
|      |       |        | 65-69       | 1190003.066 | 725392.668 | 464610.397 |
|      |       |        | 70-74       | 588541.493  | 364863.330 | 223678.164 |
|      |       | 75-79  | 0.000       | 0.000       | 0.000      |            |

---

## Results for PHIM for Run 6 (ELL Summary Sensitivity\_Analysis\_1.RTF)

\*\*\*\*\*

### Estimated Loss of Life from the E Component for Run: 6, Simulation: 1

Country: US (United States)  
 Follow-up Period: 1990 to 2039

**Table 1: Estimated Loss of Life, at the end of follow-up, all age groups combined, Population unadjusted for deaths in Ecig scenario**

| Disease      | Sex    | Year | Years of life lost<br>NULL | Years of life lost<br>Ecig | Years of life<br>Saved |
|--------------|--------|------|----------------------------|----------------------------|------------------------|
| All Diseases | Males  | 2039 | 42093547.949               | 26210724.656               | 15882823.3             |
|              | Female | 2039 | 23817891.273               | 15574829.838               | 8243061.43             |
| Lung cancer  | Males  | 2039 | 18222549.860               | 14160762.383               | 4061787.48             |
|              | Female | 2039 | 12512468.845               | 9309175.712                | 3203293.13             |
| IHD          | Males  | 2039 | 15635992.616               | 7028033.022                | 8607959.59             |
|              | Female | 2039 | 4798769.065                | 2218042.106                | 2580726.96             |
| Stroke       | Males  | 2039 | 2389546.238                | 1210009.542                | 1179536.70             |
|              | Female | 2039 | 1665361.569                | 890330.258                 | 775031.311             |
| COPD         | Males  | 2039 | 5845459.234                | 3811919.709                | 2033539.53             |
|              | Female | 2039 | 4841291.793                | 3157281.762                | 1684010.03             |

## Results for PHIM for Run 6 (ELL Summary Sensitivity\_Analysis\_1.RTF)

\*\*\*\*\*

**Table 2: Estimated Loss of Life, at the end of follow-up, all age groups combined, Population and Number deaths adjusted for Ecig scenario**

| Disease      | Sex    | Year | Years of life lost<br>NULL | Years of life lost<br>Ecig | Years of life<br>Saved |
|--------------|--------|------|----------------------------|----------------------------|------------------------|
| All Diseases | Males  | 2039 | 42093547.949               | 26316858.136               | 15776689.8             |
|              | Female | 2039 | 23817891.273               | 15613942.676               | 8203948.60             |
| Lung cancer  | Males  | 2039 | 18222549.860               | 14223851.840               | 3998698.02             |
|              | Female | 2039 | 12512468.845               | 9333309.802                | 3179159.04             |
| IHD          | Males  | 2039 | 15635992.616               | 7043073.042                | 8592919.57             |
|              | Female | 2039 | 4798769.065                | 2220481.670                | 2578287.40             |
| Stroke       | Males  | 2039 | 2389546.238                | 1212638.098                | 1176908.14             |
|              | Female | 2039 | 1665361.569                | 891135.836                 | 774225.733             |
| COPD         | Males  | 2039 | 5845459.234                | 3837295.157                | 2008164.08             |
|              | Female | 2039 | 4841291.793                | 3169015.368                | 1672276.42             |



## Results for PHIM for Run 6 (ELL Summary Sensitivity\_Analysis\_1.RTF)

\*\*\*\*\*

**Table 3: Estimated Loss of Life, All age groups combined, Population unadjusted for deaths in Ecig scenario, cumulative over years**

| Disease      | Sex          | Year         | Years of life lost<br>NULL | Years of life lost<br>Ecig | Years of life<br>Saved |
|--------------|--------------|--------------|----------------------------|----------------------------|------------------------|
| All Diseases | Males        | 1990         | 1304839.645                | 1304839.645                | 0.000                  |
|              |              | 1991         | 2579865.358                | 2571662.055                | 8203.302               |
|              |              | 1992         | 3830683.831                | 3800221.966                | 30461.866              |
|              |              | 1993         | 5076567.803                | 5005225.690                | 71342.113              |
|              |              | 1994         | 6292145.526                | 6158185.088                | 133960.439             |
|              |              | 1995         | 7485537.010                | 7264037.209                | 221499.801             |
|              |              | 1996         | 8655955.028                | 8320933.924                | 335021.104             |
|              |              | 1997         | 9791729.713                | 9318371.802                | 473357.910             |
|              |              | 1998         | 10899134.186               | 10264028.816               | 635105.369             |
|              |              | 1999         | 12070409.674               | 11219416.666               | 850993.009             |
|              |              | 2000         | 13231384.595               | 12136623.648               | 1094760.95             |
|              |              | 2001         | 14371761.018               | 13005880.108               | 1365880.91             |
|              |              | 2002         | 15508906.386               | 13840125.627               | 1668780.76             |
|              |              | 2003         | 16638100.422               | 14639374.583               | 1998725.84             |
|              |              | 2004         | 17736465.088               | 15392316.267               | 2344148.82             |
|              |              | 2005         | 18834658.606               | 16121107.450               | 2713551.16             |
|              |              | 2006         | 19909100.501               | 16805686.990               | 3103413.51             |
|              |              | 2007         | 20958321.463               | 17453044.979               | 3505276.48             |
|              |              | 2008         | 22000068.148               | 18077809.223               | 3922258.93             |
|              |              | 2009         | 23018816.903               | 18670842.700               | 4347974.20             |
|              |              | 2010         | 24018480.537               | 19233877.419               | 4784603.12             |
|              |              | 2011         | 25003034.574               | 19770577.216               | 5232457.36             |
|              |              | 2012         | 25969871.429               | 20279613.940               | 5690257.49             |
|              |              | 2013         | 26920275.180               | 20763058.834               | 6157216.35             |
|              |              | 2014         | 27849005.227               | 21218992.446               | 6630012.78             |
|              |              | 2015         | 28749620.400               | 21650265.264               | 7099355.14             |
|              |              | 2016         | 29622417.562               | 22048861.897               | 7573555.66             |
|              |              | 2017         | 30462559.724               | 22416797.626               | 8045762.10             |
|              |              | 2018         | 31293299.299               | 22772854.947               | 8520444.35             |
|              |              | 2019         | 32109993.427               | 23112019.164               | 8997974.26             |
|              |              | 2020         | 32883323.977               | 23428821.178               | 9454502.80             |
|              |              | 2021         | 33610102.554               | 23707558.951               | 9902543.60             |
|              |              | 2022         | 34322010.448               | 23971380.126               | 10350630.3             |
|              |              | 2023         | 35018383.550               | 24220410.785               | 10797972.8             |
|              |              | 2024         | 35700177.955               | 24455907.272               | 11244270.7             |
|              |              | 2025         | 36315500.346               | 24668724.085               | 11646776.3             |
|              |              | 2026         | 36896159.343               | 24853710.371               | 12042449.0             |
|              |              | 2027         | 37462570.116               | 25027798.067               | 12434772.0             |
|              |              | 2028         | 38015337.780               | 25190998.580               | 12824339.2             |
|              |              | 2029         | 38554814.764               | 25344751.059               | 13210063.7             |
|              |              | 2030         | 39003805.400               | 25475568.255               | 13528237.1             |
|              |              | 2031         | 39436509.703               | 25590542.166               | 13845967.5             |
| 2032         | 39858470.458 | 25698579.027 | 14159891.4                 |                            |                        |
| 2033         | 40270147.082 | 25799334.167 | 14470812.9                 |                            |                        |
| 2034         | 40672665.743 | 25894469.426 | 14778196.3                 |                            |                        |
| 2035         | 40962732.664 | 25965864.479 | 14996868.2                 |                            |                        |
| 2036         | 41255021.653 | 26032515.949 | 15222505.7                 |                            |                        |
| 2037         | 41540573.023 | 26095542.084 | 15445030.9                 |                            |                        |
| 2038         | 41820158.066 | 26154631.499 | 15665526.6                 |                            |                        |
| 2039         | 42093547.949 | 26210724.656 | 15882823.3                 |                            |                        |
|              | Female       | 1990         | 588979.406                 | 588979.406                 | 0.000                  |
| 1991         |              | 1182571.252  | 1179764.878                | 2806.374                   |                        |
| 1992         |              | 1777346.679  | 1766706.264                | 10640.415                  |                        |
| 1993         |              | 2380261.899  | 2354745.867                | 25516.032                  |                        |
| 1994         |              | 2983130.039  | 2934200.507                | 48929.532                  |                        |
| 1995         |              | 3588982.584  | 3506861.324                | 82121.260                  |                        |
| 1996         |              | 4195430.235  | 4068278.196                | 127152.039                 |                        |
| 1997         |              | 4793866.694  | 4611873.098                | 181993.597                 |                        |
| 1998         |              | 5389747.381  | 5141985.236                | 247762.145                 |                        |
| 1999         |              | 6006722.467  | 5673796.148                | 332926.319                 |                        |
| 2000         |              | 6625758.871  | 6195639.110                | 430119.760                 |                        |
| 2001         |              | 7245135.411  | 6703748.403                | 541387.008                 |                        |
| 2002         |              | 7867492.021  | 7200314.520                | 667177.500                 |                        |
| 2003         |              | 8485051.793  | 7680371.860                | 804679.933                 |                        |
| 2004         |              | 9092994.774  | 8140447.798                | 952546.976                 |                        |
| 2005         |              | 9706032.803  | 8592095.970                | 1113936.83                 |                        |
| 2006         |              | 10311907.548 | 9025484.463                | 1286423.09                 |                        |
| 2007         |              | 10909437.502 | 9442497.684                | 1466939.82                 |                        |
| 2008         |              | 11506462.491 | 9845396.934                | 1661065.56                 |                        |
| 2009         |              | 12098393.287 | 10235696.038               | 1862697.25                 |                        |
| 2010         |              | 12681188.981 | 10608734.485               | 2072454.50                 |                        |

**Results for PHIM for Run 6 (ELL Summary Sensitivity\_Analysis\_1.RTF)**

|             |       |      |              |              |            |
|-------------|-------|------|--------------|--------------|------------|
|             |       | 2011 | 13260062.991 | 10967621.132 | 2292441.86 |
|             |       | 2012 | 13839417.441 | 11315191.812 | 2524225.63 |
|             |       | 2013 | 14409614.758 | 11647787.550 | 2761827.21 |
|             |       | 2014 | 14976658.746 | 11966260.999 | 3010397.75 |
|             |       | 2015 | 15529977.821 | 12268343.098 | 3261634.72 |
|             |       | 2016 | 16066640.764 | 12550365.154 | 3516275.61 |
|             |       | 2017 | 16590035.078 | 12815924.041 | 3774111.04 |
|             |       | 2018 | 17098716.137 | 13068591.769 | 4030124.37 |
|             |       | 2019 | 17599868.850 | 13309203.858 | 4290664.99 |
|             |       | 2020 | 18081346.241 | 13535500.477 | 4545845.76 |
|             |       | 2021 | 18537594.460 | 13740867.669 | 4796726.79 |
|             |       | 2022 | 18985300.234 | 13935431.122 | 5049869.11 |
|             |       | 2023 | 19423958.747 | 14119588.897 | 5304369.85 |
|             |       | 2024 | 19853347.772 | 14293130.465 | 5560217.31 |
|             |       | 2025 | 20252822.245 | 14452229.796 | 5800592.45 |
|             |       | 2026 | 20619307.063 | 14591279.487 | 6028027.58 |
|             |       | 2027 | 20976063.406 | 14721588.638 | 6254474.77 |
|             |       | 2028 | 21323641.947 | 14844098.312 | 6479543.63 |
|             |       | 2029 | 21662117.106 | 14958636.245 | 6703480.86 |
|             |       | 2030 | 21960971.694 | 15059094.792 | 6901876.90 |
|             |       | 2031 | 22224951.983 | 15142357.976 | 7082594.01 |
|             |       | 2032 | 22480397.853 | 15219712.639 | 7260685.21 |
|             |       | 2033 | 22728639.455 | 15292075.152 | 7436564.30 |
|             |       | 2034 | 22970448.888 | 15359437.603 | 7611011.28 |
|             |       | 2035 | 23164154.188 | 15413389.444 | 7750764.74 |
|             |       | 2036 | 23334538.616 | 15457724.153 | 7876814.46 |
|             |       | 2037 | 23499760.723 | 15499168.066 | 8000592.66 |
|             |       | 2038 | 23660308.401 | 15538100.492 | 8122207.91 |
|             |       | 2039 | 23817891.273 | 15574829.838 | 8243061.43 |
| Lung cancer | Males | 1990 | 595621.791   | 595621.791   | 0.000      |
|             |       | 1991 | 1177744.113  | 1177130.246  | 613.867    |
|             |       | 1992 | 1750034.892  | 1747720.449  | 2314.443   |
|             |       | 1993 | 2319752.308  | 2314119.536  | 5632.772   |
|             |       | 1994 | 2872597.339  | 2861686.348  | 10910.991  |
|             |       | 1995 | 3411494.825  | 3392946.917  | 18547.909  |
|             |       | 1996 | 3945569.726  | 3916280.180  | 29289.545  |
|             |       | 1997 | 4463316.362  | 4420208.298  | 43108.065  |
|             |       | 1998 | 4975301.180  | 4914659.562  | 60641.619  |
|             |       | 1999 | 5473691.125  | 5391597.838  | 82093.287  |
|             |       | 2000 | 5977500.570  | 5868646.884  | 108853.686 |
|             |       | 2001 | 6474795.516  | 6333944.039  | 140851.477 |
|             |       | 2002 | 6968769.705  | 6790055.278  | 178714.427 |
|             |       | 2003 | 7460282.140  | 7237121.159  | 223160.981 |
|             |       | 2004 | 7947048.275  | 7673042.858  | 274005.417 |
|             |       | 2005 | 8430571.669  | 8098883.938  | 331687.731 |
|             |       | 2006 | 8903945.390  | 8507967.431  | 395977.959 |
|             |       | 2007 | 9364177.982  | 8898004.576  | 466173.406 |
|             |       | 2008 | 9822525.458  | 9277876.825  | 544648.634 |
|             |       | 2009 | 10275228.886 | 9644649.002  | 630579.884 |
|             |       | 2010 | 10720275.500 | 9996984.923  | 723290.577 |
|             |       | 2011 | 11155356.373 | 10332978.095 | 822378.278 |
|             |       | 2012 | 11582611.617 | 10653529.211 | 929082.405 |
|             |       | 2013 | 11998803.791 | 10956942.872 | 1041860.92 |
|             |       | 2014 | 12402087.090 | 11242513.587 | 1159573.50 |
|             |       | 2015 | 12793451.706 | 11511938.789 | 1281512.92 |
|             |       | 2016 | 13160101.653 | 11756160.900 | 1403940.75 |
|             |       | 2017 | 13503583.414 | 11977466.169 | 1526117.25 |
|             |       | 2018 | 13859755.737 | 12197661.187 | 1662094.55 |
|             |       | 2019 | 14211625.176 | 12407336.336 | 1804288.84 |
|             |       | 2020 | 14553935.288 | 12604769.331 | 1949165.96 |
|             |       | 2021 | 14851747.495 | 12769800.533 | 2081946.96 |
|             |       | 2022 | 15144531.004 | 12925621.586 | 2218909.42 |
|             |       | 2023 | 15431932.496 | 13072366.565 | 2359565.93 |
|             |       | 2024 | 15713920.740 | 13210596.070 | 2503324.67 |
|             |       | 2025 | 15979112.816 | 13336911.851 | 2642200.97 |
|             |       | 2026 | 16206550.153 | 13439661.543 | 2766888.61 |
|             |       | 2027 | 16428826.050 | 13535841.897 | 2892984.15 |
|             |       | 2028 | 16645902.186 | 13625672.455 | 3020229.73 |
|             |       | 2029 | 16858126.517 | 13709953.803 | 3148172.71 |
|             |       | 2030 | 17045220.687 | 13782933.100 | 3262287.59 |
|             |       | 2031 | 17208482.610 | 13842624.775 | 3365857.84 |
|             |       | 2032 | 17367586.074 | 13898515.062 | 3469071.01 |
|             |       | 2033 | 17522716.280 | 13950554.132 | 3572162.15 |
|             |       | 2034 | 17674226.555 | 13999514.593 | 3674711.96 |
|             |       | 2035 | 17792201.734 | 14037270.448 | 3754931.29 |
|             |       | 2036 | 17903508.236 | 14070921.916 | 3832586.32 |
|             |       | 2037 | 18012162.345 | 14102711.780 | 3909450.56 |
|             |       | 2038 | 18118464.470 | 14132478.936 | 3985985.53 |

**Results for PHIM for Run 6 (ELL Summary Sensitivity\_Analysis\_1.RTF)**

|     |        |      |              |              |            |
|-----|--------|------|--------------|--------------|------------|
|     | Female | 2039 | 18222549.860 | 14160762.383 | 4061787.48 |
|     |        | 1990 | 307897.357   | 307897.357   | 0.000      |
|     |        | 1991 | 616547.418   | 616153.276   | 394.142    |
|     |        | 1992 | 931086.773   | 929526.178   | 1560.596   |
|     |        | 1993 | 1246155.671  | 1242314.314  | 3841.357   |
|     |        | 1994 | 1561212.934  | 1553652.347  | 7560.588   |
|     |        | 1995 | 1879967.742  | 1866806.255  | 13161.487  |
|     |        | 1996 | 2197488.109  | 2176579.461  | 20908.648  |
|     |        | 1997 | 2515698.453  | 2484500.411  | 31198.042  |
|     |        | 1998 | 2836249.556  | 2791904.243  | 44345.313  |
|     |        | 1999 | 3150201.390  | 3089870.175  | 60331.214  |
|     |        | 2000 | 3472722.342  | 3392598.485  | 80123.857  |
|     |        | 2001 | 3796994.889  | 3692976.647  | 104018.243 |
|     |        | 2002 | 4126619.935  | 3993925.203  | 132694.732 |
|     |        | 2003 | 4454982.533  | 4289217.606  | 165764.928 |
|     |        | 2004 | 4784343.030  | 4580376.163  | 203966.867 |
|     |        | 2005 | 5113443.121  | 4866103.056  | 247340.064 |
|     |        | 2006 | 5442543.963  | 5145883.100  | 296660.863 |
|     |        | 2007 | 5772441.497  | 5420450.766  | 351990.731 |
|     |        | 2008 | 6091911.943  | 5680359.180  | 411552.763 |
|     |        | 2009 | 6413671.330  | 5935531.248  | 478140.082 |
|     |        | 2010 | 6730763.530  | 6181074.196  | 549689.334 |
|     |        | 2011 | 7043614.101  | 6416796.016  | 626818.085 |
|     |        | 2012 | 7356270.780  | 6645769.571  | 710501.209 |
|     |        | 2013 | 7662551.964  | 6863610.139  | 798941.824 |
|     |        | 2014 | 7964551.465  | 7071983.535  | 892567.929 |
|     |        | 2015 | 8254895.403  | 7266968.624  | 987926.779 |
|     |        | 2016 | 8530661.848  | 7445960.119  | 1084701.73 |
|     |        | 2017 | 8795826.122  | 7612560.940  | 1183265.18 |
|     |        | 2018 | 9067233.707  | 7776419.891  | 1290813.82 |
|     |        | 2019 | 9335343.270  | 7932246.727  | 1403096.54 |
|     |        | 2020 | 9596110.883  | 8079014.479  | 1517096.40 |
|     |        | 2021 | 9833186.859  | 8208198.053  | 1624988.81 |
|     |        | 2022 | 10066452.037 | 8330280.552  | 1736171.48 |
|     |        | 2023 | 10295503.609 | 8445513.856  | 1849989.75 |
|     |        | 2024 | 10520125.318 | 8553785.634  | 1966339.68 |
|     |        | 2025 | 10731915.863 | 8652956.523  | 2078959.34 |
|     |        | 2026 | 10917495.549 | 8736613.954  | 2180881.59 |
|     |        | 2027 | 11098620.885 | 8814770.136  | 2283850.75 |
|     |        | 2028 | 11275441.234 | 8888042.519  | 2387398.71 |
|     |        | 2029 | 11447962.710 | 8956353.686  | 2491609.02 |
|     |        | 2030 | 11601867.623 | 9016019.879  | 2585847.74 |
|     |        | 2031 | 11731666.516 | 9063819.098  | 2667847.42 |
|     |        | 2032 | 11857585.969 | 9108189.388  | 2749396.58 |
|     |        | 2033 | 11980128.625 | 9149651.122  | 2830477.50 |
|     |        | 2034 | 12099562.464 | 9188237.991  | 2911324.47 |
|     |        | 2035 | 12195919.946 | 9218829.145  | 2977090.80 |
|     |        | 2036 | 12278201.969 | 9243536.871  | 3034665.10 |
|     |        | 2037 | 12358146.336 | 9266711.139  | 3091435.20 |
|     |        | 2038 | 12435978.633 | 9288533.276  | 3147445.36 |
|     |        | 2039 | 12512468.845 | 9309175.712  | 3203293.13 |
| IHD | Males  | 1990 | 517209.093   | 517209.093   | 0.000      |
|     |        | 1991 | 1019219.395  | 1012504.275  | 6715.119   |
|     |        | 1992 | 1509598.614  | 1484695.548  | 24903.066  |
|     |        | 1993 | 1992735.299  | 1934801.483  | 57933.816  |
|     |        | 1994 | 2462877.575  | 2354930.401  | 107947.174 |
|     |        | 1995 | 2928249.390  | 2750866.331  | 177383.059 |
|     |        | 1996 | 3377377.730  | 3111118.713  | 266259.016 |
|     |        | 1997 | 3809062.472  | 3435838.291  | 373224.181 |
|     |        | 1998 | 4222213.867  | 3725743.773  | 496470.094 |
|     |        | 1999 | 4708317.743  | 4042090.068  | 666227.675 |
|     |        | 2000 | 5182084.396  | 4327974.984  | 854109.413 |
|     |        | 2001 | 5644097.705  | 4583775.801  | 1060321.90 |
|     |        | 2002 | 6107232.129  | 4818941.745  | 1288290.38 |
|     |        | 2003 | 6561785.704  | 5030194.158  | 1531591.55 |
|     |        | 2004 | 6996156.348  | 5215485.635  | 1780670.71 |
|     |        | 2005 | 7426261.361  | 5384390.374  | 2041870.99 |
|     |        | 2006 | 7849012.694  | 5535918.906  | 2313093.79 |
|     |        | 2007 | 8255300.530  | 5669897.601  | 2585402.93 |
|     |        | 2008 | 8650662.040  | 5790427.893  | 2860234.15 |
|     |        | 2009 | 9030818.513  | 5898072.200  | 3132746.31 |
|     |        | 2010 | 9403026.327  | 5996201.821  | 3406824.51 |
|     |        | 2011 | 9767535.506  | 6085698.048  | 3681837.46 |
|     |        | 2012 | 10123044.281 | 6167576.040  | 3955468.24 |
|     |        | 2013 | 10470104.786 | 6242603.487  | 4227501.30 |
|     |        | 2014 | 10807756.112 | 6311617.952  | 4496138.16 |
|     |        | 2015 | 11130681.425 | 6374419.340  | 4756262.09 |
|     |        | 2016 | 11448966.506 | 6433221.184  | 5015745.32 |

**Results for PHIM for Run 6 (ELL Summary Sensitivity\_Analysis\_1.RTF)**

|        |        |      |              |             |            |
|--------|--------|------|--------------|-------------|------------|
|        |        | 2017 | 11758164.882 | 6487885.716 | 5270279.17 |
|        |        | 2018 | 12054448.241 | 6537707.291 | 5516740.95 |
|        |        | 2019 | 12341606.261 | 6584343.766 | 5757262.49 |
|        |        | 2020 | 12600728.939 | 6625081.762 | 5975647.18 |
|        |        | 2021 | 12861767.105 | 6664768.037 | 6196999.07 |
|        |        | 2022 | 13114168.616 | 6702069.270 | 6412099.35 |
|        |        | 2023 | 13357894.797 | 6737007.843 | 6620886.95 |
|        |        | 2024 | 13593848.521 | 6770133.558 | 6823714.96 |
|        |        | 2025 | 13789177.359 | 6797040.552 | 6992136.81 |
|        |        | 2026 | 13993401.656 | 6824666.351 | 7168735.30 |
|        |        | 2027 | 14190519.224 | 6851020.010 | 7339499.21 |
|        |        | 2028 | 14381193.356 | 6875831.952 | 7505361.40 |
|        |        | 2029 | 14565171.927 | 6899450.248 | 7665721.68 |
|        |        | 2030 | 14697381.605 | 6916225.162 | 7781156.44 |
|        |        | 2031 | 14842203.512 | 6934512.645 | 7907690.87 |
|        |        | 2032 | 14982485.826 | 6952030.755 | 8030455.07 |
|        |        | 2033 | 15118410.647 | 6968455.691 | 8149954.96 |
|        |        | 2034 | 15250284.398 | 6984288.454 | 8265995.94 |
|        |        | 2035 | 15322911.166 | 6992710.776 | 8330200.39 |
|        |        | 2036 | 15405115.031 | 7002153.039 | 8402961.99 |
|        |        | 2037 | 15484709.137 | 7011253.427 | 8473455.71 |
|        |        | 2038 | 15561812.193 | 7019846.925 | 8541965.27 |
|        |        | 2039 | 15635992.616 | 7028033.022 | 8607959.59 |
|        | Female | 1990 | 147299.110   | 147299.110  | 0.000      |
|        |        | 1991 | 295122.462   | 293357.101  | 1765.361   |
|        |        | 1992 | 439962.920   | 433361.185  | 6601.735   |
|        |        | 1993 | 584735.615   | 569095.816  | 15639.800  |
|        |        | 1994 | 727640.783   | 698092.092  | 29548.691  |
|        |        | 1995 | 868486.937   | 819695.979  | 48790.959  |
|        |        | 1996 | 1010321.847  | 935520.278  | 74801.569  |
|        |        | 1997 | 1144230.930  | 1039069.912 | 105161.018 |
|        |        | 1998 | 1274513.622  | 1133696.253 | 140817.368 |
|        |        | 1999 | 1426725.938  | 1237187.422 | 189538.516 |
|        |        | 2000 | 1573462.680  | 1330466.744 | 242995.936 |
|        |        | 2001 | 1719132.015  | 1415559.807 | 303572.208 |
|        |        | 2002 | 1863006.732  | 1492798.479 | 370208.252 |
|        |        | 2003 | 2002943.227  | 1561831.832 | 441111.395 |
|        |        | 2004 | 2137798.705  | 1622924.497 | 514874.208 |
|        |        | 2005 | 2271071.245  | 1678701.747 | 592369.498 |
|        |        | 2006 | 2400707.731  | 1728230.858 | 672476.873 |
|        |        | 2007 | 2523634.512  | 1771542.759 | 752091.754 |
|        |        | 2008 | 2648752.232  | 1812116.326 | 836635.906 |
|        |        | 2009 | 2765973.961  | 1847512.266 | 918461.695 |
|        |        | 2010 | 2881329.235  | 1879955.992 | 1001373.24 |
|        |        | 2011 | 2994972.694  | 1909635.125 | 1085337.57 |
|        |        | 2012 | 3108958.829  | 1937352.199 | 1171606.63 |
|        |        | 2013 | 3218140.416  | 1962504.476 | 1255635.94 |
|        |        | 2014 | 3328387.914  | 1986388.863 | 1341999.05 |
|        |        | 2015 | 3435342.796  | 2008530.077 | 1426812.72 |
|        |        | 2016 | 3539189.408  | 2028965.883 | 1510223.53 |
|        |        | 2017 | 3640041.363  | 2047870.703 | 1592170.66 |
|        |        | 2018 | 3732645.362  | 2064454.816 | 1668190.55 |
|        |        | 2019 | 3821421.978  | 2079708.807 | 1741713.17 |
|        |        | 2020 | 3902115.950  | 2093090.377 | 1809025.57 |
|        |        | 2021 | 3984301.053  | 2106242.200 | 1878058.85 |
|        |        | 2022 | 4062629.299  | 2118364.186 | 1944265.11 |
|        |        | 2023 | 4137348.729  | 2129630.151 | 2007718.58 |
|        |        | 2024 | 4208611.493  | 2140075.978 | 2068535.52 |
|        |        | 2025 | 4269419.492  | 2148812.137 | 2120607.35 |
|        |        | 2026 | 4330969.998  | 2157454.487 | 2173515.51 |
|        |        | 2027 | 4389134.306  | 2165475.923 | 2223658.38 |
|        |        | 2028 | 4444222.970  | 2172969.237 | 2271253.73 |
|        |        | 2029 | 4496447.877  | 2179980.849 | 2316467.03 |
|        |        | 2030 | 4536975.698  | 2185278.023 | 2351697.67 |
|        |        | 2031 | 4578338.586  | 2190644.771 | 2387693.81 |
|        |        | 2032 | 4617397.784  | 2195688.006 | 2421709.78 |
|        |        | 2033 | 4654407.697  | 2200455.691 | 2453952.01 |
|        |        | 2034 | 4689913.454  | 2204978.911 | 2484934.54 |
|        |        | 2035 | 4712518.190  | 2207705.932 | 2504812.26 |
|        |        | 2036 | 4735845.827  | 2210494.736 | 2525351.09 |
|        |        | 2037 | 4757958.806  | 2213133.612 | 2544825.19 |
|        |        | 2038 | 4778813.806  | 2215643.634 | 2563170.17 |
|        |        | 2039 | 4798769.065  | 2218042.106 | 2580726.96 |
| Stroke | Males  | 1990 | 75005.854    | 75005.854   | 0.000      |
|        |        | 1991 | 149463.017   | 148781.303  | 681.714    |
|        |        | 1992 | 222966.278   | 220433.646  | 2532.633   |
|        |        | 1993 | 296801.879   | 290772.884  | 6028.995   |
|        |        | 1994 | 372453.706   | 360784.205  | 11669.501  |

**Results for PHIM for Run 6 (ELL Summary Sensitivity\_Analysis\_1.RTF)**

|        |      |             |             |            |
|--------|------|-------------|-------------|------------|
|        | 1995 | 448401.338  | 428681.785  | 19719.553  |
|        | 1996 | 523536.301  | 493210.820  | 30325.481  |
|        | 1997 | 596763.211  | 553288.510  | 43474.701  |
|        | 1998 | 667546.681  | 608548.942  | 58997.739  |
|        | 1999 | 734925.407  | 658425.167  | 76500.240  |
|        | 2000 | 803749.361  | 706603.128  | 97146.233  |
|        | 2001 | 870081.588  | 750206.341  | 119875.247 |
|        | 2002 | 935347.140  | 790466.729  | 144880.411 |
|        | 2003 | 1001627.349 | 828550.022  | 173077.327 |
|        | 2004 | 1066587.976 | 863429.243  | 203158.733 |
|        | 2005 | 1130548.052 | 895370.655  | 235177.396 |
|        | 2006 | 1195132.454 | 925286.506  | 269845.948 |
|        | 2007 | 1258974.043 | 952735.211  | 306238.832 |
|        | 2008 | 1320124.867 | 977058.847  | 343066.020 |
|        | 2009 | 1380776.123 | 999480.251  | 381295.872 |
|        | 2010 | 1440048.533 | 1019898.622 | 420149.911 |
|        | 2011 | 1497484.847 | 1038351.085 | 459133.762 |
|        | 2012 | 1554496.526 | 1055327.105 | 499169.421 |
|        | 2013 | 1610819.598 | 1070974.262 | 539845.336 |
|        | 2014 | 1667484.890 | 1085630.830 | 581854.060 |
|        | 2015 | 1720948.287 | 1098702.602 | 622245.685 |
|        | 2016 | 1775699.228 | 1111241.842 | 664457.387 |
|        | 2017 | 1830250.175 | 1123010.708 | 707239.466 |
|        | 2018 | 1875958.950 | 1132350.431 | 743608.519 |
|        | 2019 | 1920359.232 | 1140965.126 | 779394.106 |
|        | 2020 | 1960605.297 | 1148445.173 | 812160.124 |
|        | 2021 | 1998912.887 | 1155222.532 | 843690.355 |
|        | 2022 | 2036003.696 | 1161482.653 | 874521.043 |
|        | 2023 | 2071857.536 | 1167272.295 | 904585.241 |
|        | 2024 | 2106636.468 | 1172690.861 | 933945.608 |
|        | 2025 | 2136450.873 | 1177194.213 | 959256.661 |
|        | 2026 | 2164796.470 | 1181326.953 | 983469.517 |
|        | 2027 | 2192079.608 | 1185204.166 | 1006875.44 |
|        | 2028 | 2218404.367 | 1188816.350 | 1029588.02 |
|        | 2029 | 2243769.140 | 1192218.294 | 1051550.85 |
|        | 2030 | 2263570.213 | 1194814.404 | 1068755.81 |
|        | 2031 | 2282521.590 | 1197251.813 | 1085269.78 |
|        | 2032 | 2300804.945 | 1199555.559 | 1101249.39 |
|        | 2033 | 2318464.018 | 1201717.250 | 1116746.77 |
|        | 2034 | 2335611.973 | 1203786.717 | 1131825.26 |
|        | 2035 | 2347097.290 | 1205148.186 | 1141949.10 |
|        | 2036 | 2358248.747 | 1206450.684 | 1151798.06 |
|        | 2037 | 2369033.655 | 1207701.781 | 1161331.87 |
|        | 2038 | 2379490.114 | 1208885.471 | 1170604.64 |
|        | 2039 | 2389546.238 | 1210009.542 | 1179536.70 |
| Female | 1990 | 56348.092   | 56348.092   | 0.000      |
|        | 1991 | 110871.862  | 110384.220  | 487.642    |
|        | 1992 | 165654.454  | 163782.349  | 1872.106   |
|        | 1993 | 220008.519  | 215537.564  | 4470.956   |
|        | 1994 | 275706.807  | 267020.248  | 8686.559   |
|        | 1995 | 331417.547  | 316762.772  | 14654.775  |
|        | 1996 | 387580.161  | 364898.330  | 22681.831  |
|        | 1997 | 442778.242  | 410138.320  | 32639.921  |
|        | 1998 | 496117.305  | 451800.966  | 44316.338  |
|        | 1999 | 548268.214  | 490471.560  | 57796.655  |
|        | 2000 | 601693.202  | 528014.507  | 73678.694  |
|        | 2001 | 652221.103  | 561480.751  | 90740.351  |
|        | 2002 | 703022.600  | 593038.853  | 109983.747 |
|        | 2003 | 752023.351  | 621537.228  | 130486.123 |
|        | 2004 | 799826.733  | 647471.852  | 152354.881 |
|        | 2005 | 847563.928  | 671660.556  | 175903.372 |
|        | 2006 | 894205.027  | 693658.844  | 200546.183 |
|        | 2007 | 939571.282  | 713541.880  | 226029.402 |
|        | 2008 | 983437.578  | 731447.021  | 251990.557 |
|        | 2009 | 1025803.786 | 747563.127  | 278240.659 |
|        | 2010 | 1066964.934 | 762119.563  | 304845.371 |
|        | 2011 | 1106954.044 | 775279.421  | 331674.623 |
|        | 2012 | 1146108.461 | 787316.305  | 358792.156 |
|        | 2013 | 1183544.689 | 798106.264  | 385438.425 |
|        | 2014 | 1221220.945 | 808253.962  | 412966.984 |
|        | 2015 | 1258289.311 | 817711.844  | 440577.468 |
|        | 2016 | 1294830.207 | 826485.143  | 468345.064 |
|        | 2017 | 1330332.626 | 834529.065  | 495803.561 |
|        | 2018 | 1360571.987 | 841035.133  | 519536.855 |
|        | 2019 | 1389848.723 | 846990.402  | 542858.320 |
|        | 2020 | 1416046.192 | 852098.858  | 563947.334 |
|        | 2021 | 1440588.850 | 856656.545  | 583932.304 |
|        | 2022 | 1464157.934 | 860838.011  | 603319.923 |

**Results for PHIM for Run 6 (ELL Summary Sensitivity\_Analysis\_1.RTF)**

|      |             |             |             |             |            |
|------|-------------|-------------|-------------|-------------|------------|
| COPD | Males       | 2023        | 1486810.237 | 864708.481  | 622101.757 |
|      |             | 2024        | 1508591.729 | 868278.981  | 640312.749 |
|      |             | 2025        | 1526875.621 | 871192.685  | 655682.936 |
|      |             | 2026        | 1543659.810 | 873774.767  | 669885.042 |
|      |             | 2027        | 1559623.774 | 876161.494  | 683462.281 |
|      |             | 2028        | 1574852.850 | 878382.940  | 696469.911 |
|      |             | 2029        | 1589437.452 | 880454.994  | 708982.458 |
|      |             | 2030        | 1600568.199 | 881990.030  | 718578.170 |
|      |             | 2031        | 1610776.297 | 883374.951  | 727401.345 |
|      |             | 2032        | 1620483.563 | 884674.239  | 735809.324 |
|      |             | 2033        | 1629745.442 | 885899.959  | 743845.483 |
|      |             | 2034        | 1638721.425 | 887062.175  | 751659.250 |
|      |             | 2035        | 1644649.404 | 887799.847  | 756849.558 |
|      |             | 2036        | 1650181.590 | 888477.615  | 761703.975 |
|      |             | 2037        | 1655476.066 | 889122.199  | 766353.867 |
|      |             | 2038        | 1660507.914 | 889738.623  | 770769.291 |
|      |             | 2039        | 1665361.569 | 890330.258  | 775031.311 |
|      |             | 1990        | 117002.906  | 117002.906  | 0.000      |
|      |             | 1991        | 233438.833  | 233246.232  | 192.601    |
|      |             | 1992        | 348084.047  | 347372.323  | 711.724    |
|      |             | 1993        | 467278.318  | 465531.788  | 1746.530   |
|      |             | 1994        | 584216.907  | 580784.135  | 3432.772   |
|      |             | 1995        | 697391.457  | 691542.177  | 5849.280   |
|      |             | 1996        | 809471.271  | 800324.210  | 9147.061   |
|      |             | 1997        | 922587.668  | 909036.703  | 13550.964  |
|      |             | 1998        | 1034072.457 | 1015076.539 | 18995.917  |
|      |             | 1999        | 1153475.399 | 1127303.593 | 26171.807  |
|      |             | 2000        | 1268050.268 | 1233398.653 | 34651.615  |
|      |             | 2001        | 1382786.209 | 1337953.927 | 44832.283  |
|      |             | 2002        | 1497557.412 | 1440661.875 | 56895.537  |
|      |             | 2003        | 1614405.229 | 1543509.244 | 70895.985  |
|      |             | 2004        | 1726672.489 | 1640358.531 | 86313.958  |
|      |             | 2005        | 1847277.524 | 1742462.482 | 104815.043 |
|      |             | 2006        | 1961009.963 | 1836514.147 | 124495.816 |
|      |             | 2007        | 2079868.908 | 1932407.591 | 147461.317 |
|      |             | 2008        | 2206755.783 | 2032445.658 | 174310.125 |
|      |             | 2009        | 2331993.380 | 2128641.247 | 203352.133 |
|      |             | 2010        | 2455130.176 | 2220792.053 | 234338.123 |
|      |             | 2011        | 2582657.849 | 2313549.988 | 269107.861 |
|      |             | 2012        | 2709719.005 | 2403181.584 | 306537.421 |
| 2013 | 2840547.005 | 2492538.213 | 348008.793  |             |            |
| 2014 | 2971677.135 | 2579230.077 | 392447.058  |             |            |
| 2015 | 3104538.983 | 2665204.533 | 439334.449  |             |            |
| 2016 | 3237650.175 | 2748237.972 | 489412.203  |             |            |
| 2017 | 3370561.253 | 2828435.033 | 542126.219  |             |            |
| 2018 | 3503136.371 | 2905136.039 | 598000.333  |             |            |
| 2019 | 3636402.758 | 2979373.936 | 657028.822  |             |            |
| 2020 | 3768054.453 | 3050524.912 | 717529.541  |             |            |
| 2021 | 3897675.067 | 3117767.849 | 779907.218  |             |            |
| 2022 | 4027307.132 | 3182206.618 | 845100.514  |             |            |
| 2023 | 4156698.720 | 3243764.083 | 912934.637  |             |            |
| 2024 | 4285772.226 | 3302486.783 | 983285.442  |             |            |
| 2025 | 4410759.298 | 3357577.470 | 1053181.83  |             |            |
| 2026 | 4531411.064 | 3408055.524 | 1123355.54  |             |            |
| 2027 | 4651145.233 | 3455731.995 | 1195413.24  |             |            |
| 2028 | 4769837.872 | 3500677.823 | 1269160.05  |             |            |
| 2029 | 4887747.179 | 3543128.713 | 1344618.47  |             |            |
| 2030 | 4997632.895 | 3581595.590 | 1416037.31  |             |            |
| 2031 | 5103301.991 | 3616152.933 | 1487149.06  |             |            |
| 2032 | 5207593.613 | 3648477.651 | 1559115.96  |             |            |
| 2033 | 5310556.138 | 3678607.095 | 1631949.04  |             |            |
| 2034 | 5412542.816 | 3706879.662 | 1705663.15  |             |            |
| 2035 | 5500522.473 | 3730735.069 | 1769787.40  |             |            |
| 2036 | 5588149.640 | 3752990.310 | 1835159.33  |             |            |
| 2037 | 5674667.886 | 3773875.095 | 1900792.79  |             |            |
| 2038 | 5760391.289 | 3793420.167 | 1966971.12  |             |            |
| 2039 | 5845459.234 | 3811919.709 | 2033539.53  |             |            |
| 1990 | 77434.846   | 77434.846   | 0.000       |             |            |
| 1991 | 160029.510  | 159870.281  | 159.229     |             |            |
| 1992 | 240642.531  | 240036.553  | 605.978     |             |            |
| 1993 | 329362.093  | 327798.174  | 1563.919    |             |            |
| 1994 | 418569.515  | 415435.821  | 3133.694    |             |            |
| 1995 | 509110.357  | 503596.319  | 5514.039    |             |            |
| 1996 | 600040.117  | 591280.126  | 8759.991    |             |            |
| 1997 | 691159.071  | 678164.454  | 12994.616   |             |            |
| 1998 | 782866.899  | 764583.773  | 18283.125   |             |            |
| 1999 | 881526.925  | 856266.991  | 25259.934   |             |            |
| 2000 | 977880.647  | 944559.374  | 33321.273   |             |            |

Female

**Results for PHIM for Run 6 (ELL Summary Sensitivity\_Analysis\_1.RTF)**

|      |             |             |            |
|------|-------------|-------------|------------|
| 2001 | 1076787.404 | 1033731.198 | 43056.206  |
| 2002 | 1174842.754 | 1120551.984 | 54290.769  |
| 2003 | 1275102.681 | 1207785.195 | 67317.486  |
| 2004 | 1371026.306 | 1289675.285 | 81351.020  |
| 2005 | 1473954.509 | 1375630.610 | 98323.899  |
| 2006 | 1574450.828 | 1457711.661 | 116739.167 |
| 2007 | 1673790.211 | 1536962.280 | 136827.931 |
| 2008 | 1782360.738 | 1621474.407 | 160886.330 |
| 2009 | 1892944.209 | 1705089.397 | 187854.812 |
| 2010 | 2002131.282 | 1785584.734 | 216546.548 |
| 2011 | 2114522.152 | 1865910.570 | 248611.583 |
| 2012 | 2228079.372 | 1944753.737 | 283325.635 |
| 2013 | 2345377.689 | 2023566.671 | 321811.018 |
| 2014 | 2462498.422 | 2099634.639 | 362863.783 |
| 2015 | 2581450.312 | 2175132.553 | 406317.758 |
| 2016 | 2701959.301 | 2248954.009 | 453005.292 |
| 2017 | 2823834.967 | 2320963.333 | 502871.634 |
| 2018 | 2938265.081 | 2386681.929 | 551583.152 |
| 2019 | 3053254.880 | 2450257.922 | 602996.958 |
| 2020 | 3167073.216 | 2511296.763 | 655776.452 |
| 2021 | 3279517.699 | 2569770.871 | 709746.829 |
| 2022 | 3392060.964 | 2625948.373 | 766112.591 |
| 2023 | 3504296.171 | 2679736.409 | 824559.762 |
| 2024 | 3616019.231 | 2730989.872 | 885029.359 |
| 2025 | 3724611.269 | 2779268.451 | 945342.819 |
| 2026 | 3827181.707 | 2823436.279 | 1003745.43 |
| 2027 | 3928684.441 | 2865181.084 | 1063503.36 |
| 2028 | 4029124.892 | 2904703.616 | 1124421.28 |
| 2029 | 4128269.068 | 2941846.715 | 1186422.35 |
| 2030 | 4221560.174 | 2975806.861 | 1245753.31 |
| 2031 | 4304170.584 | 3004519.156 | 1299651.43 |
| 2032 | 4384930.537 | 3031161.006 | 1353769.53 |
| 2033 | 4464357.691 | 3056068.380 | 1408289.31 |
| 2034 | 4542251.545 | 3079158.525 | 1463093.02 |
| 2035 | 4611066.648 | 3099054.520 | 1512012.13 |
| 2036 | 4670309.230 | 3115214.931 | 1555094.30 |
| 2037 | 4728179.514 | 3130201.116 | 1597978.40 |
| 2038 | 4785008.048 | 3144184.960 | 1640823.09 |
| 2039 | 4841291.793 | 3157281.762 | 1684010.03 |

---

## Results for PHIM for Run 6 (ELL Summary Sensitivity\_Analysis\_1.RTF)

\*\*\*\*\*

**Table 4: Estimated Loss of Life, All age groups combined, Population and Number deaths adjusted for Ecig scenario, cumulative over years**

| Disease      | Sex          | Year         | Years of life lost<br>NULL | Years of life lost<br>Ecig | Years of life<br>Saved |
|--------------|--------------|--------------|----------------------------|----------------------------|------------------------|
| All Diseases | Males        | 1990         | 1304839.645                | 1304839.645                | 0.000                  |
|              |              | 1991         | 2579865.358                | 2571662.055                | 8203.302               |
|              |              | 1992         | 3830683.831                | 3800233.296                | 30450.535              |
|              |              | 1993         | 5076567.803                | 5005277.141                | 71290.662              |
|              |              | 1994         | 6292145.526                | 6158326.919                | 133818.607             |
|              |              | 1995         | 7485537.010                | 7264342.229                | 221194.780             |
|              |              | 1996         | 8655955.028                | 8321497.512                | 334457.516             |
|              |              | 1997         | 9791729.713                | 9319307.060                | 472422.652             |
|              |              | 1998         | 10899134.186               | 10265465.164               | 633669.021             |
|              |              | 1999         | 12070409.674               | 11221535.802               | 848873.873             |
|              |              | 2000         | 13231384.595               | 12139620.132               | 1091764.46             |
|              |              | 2001         | 14371761.018               | 13009946.719               | 1361814.30             |
|              |              | 2002         | 15508906.386               | 13845476.209               | 1663430.18             |
|              |              | 2003         | 16638100.422               | 14646227.482               | 1991872.94             |
|              |              | 2004         | 17736465.088               | 15400868.204               | 2335596.88             |
|              |              | 2005         | 18834658.606               | 16131596.011               | 2703062.60             |
|              |              | 2006         | 19909100.501               | 16818286.806               | 3090813.69             |
|              |              | 2007         | 20958321.463               | 17467940.776               | 3490380.69             |
|              |              | 2008         | 22000068.148               | 18095225.979               | 3904842.17             |
|              |              | 2009         | 23018816.903               | 18690955.163               | 4327861.74             |
|              |              | 2010         | 24018480.537               | 19256850.534               | 4761630.00             |
|              |              | 2011         | 25003034.574               | 19796575.087               | 5206459.49             |
|              |              | 2012         | 25969871.429               | 20308764.696               | 5661106.73             |
|              |              | 2013         | 26920275.180               | 20795493.139               | 6124782.04             |
|              |              | 2014         | 27849005.227               | 21254806.909               | 6594198.32             |
|              |              | 2015         | 28749620.400               | 21689582.991               | 7060037.41             |
|              |              | 2016         | 29622417.562               | 22091681.696               | 7530735.87             |
|              |              | 2017         | 30462559.724               | 22463110.864               | 7999448.86             |
|              |              | 2018         | 31293299.299               | 22822777.883               | 8470521.42             |
|              |              | 2019         | 32109993.427               | 23165615.910               | 8944377.52             |
|              |              | 2020         | 32883323.977               | 23486139.354               | 9397184.62             |
|              |              | 2021         | 33610102.554               | 23768334.862               | 9841767.69             |
|              |              | 2022         | 34322010.448               | 24035615.854               | 10286394.6             |
|              |              | 2023         | 35018383.550               | 24288096.913               | 10730286.6             |
|              |              | 2024         | 35700177.955               | 24527029.499               | 11173148.5             |
|              |              | 2025         | 36315500.346               | 24743228.035               | 11572272.3             |
|              |              | 2026         | 36896159.343               | 24931242.647               | 11964916.7             |
|              |              | 2027         | 37462570.116               | 25108305.096               | 12354265.0             |
|              |              | 2028         | 38015337.780               | 25274417.945               | 12740919.8             |
|              |              | 2029         | 38554814.764               | 25431021.011               | 13123793.8             |
|              |              | 2030         | 39003805.400               | 25564515.823               | 13439289.6             |
| 2031         | 39436509.703 | 25681860.133 | 13754649.6                 |                            |                        |
| 2032         | 39858470.458 | 25792190.605 | 14066279.9                 |                            |                        |
| 2033         | 40270147.082 | 25895151.968 | 14374995.1                 |                            |                        |
| 2034         | 40672665.743 | 25992428.077 | 14680237.7                 |                            |                        |
| 2035         | 40962732.664 | 26065629.448 | 14897103.2                 |                            |                        |
| 2036         | 41255021.653 | 26133957.915 | 15121063.7                 |                            |                        |
| 2037         | 41540573.023 | 26198606.969 | 15341966.1                 |                            |                        |
| 2038         | 41820158.066 | 26259256.378 | 15560901.7                 |                            |                        |
| 2039         | 42093547.949 | 26316858.136 | 15776689.8                 |                            |                        |
|              | Female       | 1990         | 588979.406                 | 588979.406                 | 0.000                  |
| 1991         |              | 1182571.252  | 1179764.878                | 2806.374                   |                        |
| 1992         |              | 1777346.679  | 1766708.185                | 10638.494                  |                        |
| 1993         |              | 2380261.899  | 2354755.212                | 25506.687                  |                        |
| 1994         |              | 2983130.039  | 2934227.743                | 48902.296                  |                        |
| 1995         |              | 3588982.584  | 3506922.664                | 82059.920                  |                        |
| 1996         |              | 4195430.235  | 4068396.139                | 127034.096                 |                        |
| 1997         |              | 4793866.694  | 4612076.337                | 181790.357                 |                        |
| 1998         |              | 5389747.381  | 5142309.386                | 247437.995                 |                        |
| 1999         |              | 6006722.467  | 5674286.560                | 332435.907                 |                        |
| 2000         |              | 6625758.871  | 6196349.584                | 429409.286                 |                        |
| 2001         |              | 7245135.411  | 6704735.016                | 540400.395                 |                        |
| 2002         |              | 7867492.021  | 7201638.786                | 665853.234                 |                        |
| 2003         |              | 8485051.793  | 7682100.186                | 802951.606                 |                        |
| 2004         |              | 9092994.774  | 8142642.519                | 950352.255                 |                        |
| 2005         |              | 9706032.803  | 8594830.465                | 1111202.34                 |                        |
| 2006         |              | 10311907.548 | 9028823.368                | 1283084.18                 |                        |
| 2007         |              | 10909437.502 | 9446509.976                | 1462927.53                 |                        |
| 2008         |              | 11506462.491 | 9850155.259                | 1656307.23                 |                        |
| 2009         |              | 12098393.287 | 10241271.875               | 1857121.41                 |                        |
| 2010         |              | 12681188.981 | 10615189.666               | 2065999.31                 |                        |



**Results for PHIM for Run 6 (ELL Summary Sensitivity\_Analysis\_1.RTF)**

|             |       |      |              |              |            |
|-------------|-------|------|--------------|--------------|------------|
|             |       | 2011 | 13260062.991 | 10975020.076 | 2285042.92 |
|             |       | 2012 | 13839417.441 | 11323604.974 | 2515812.47 |
|             |       | 2013 | 14409614.758 | 11657274.555 | 2752340.20 |
|             |       | 2014 | 14976658.746 | 11976878.831 | 2999779.91 |
|             |       | 2015 | 15529977.821 | 12280147.898 | 3249829.92 |
|             |       | 2016 | 16066640.764 | 12563383.847 | 3503256.92 |
|             |       | 2017 | 16590035.078 | 12830195.879 | 3759839.20 |
|             |       | 2018 | 17098716.137 | 13084157.849 | 4014558.29 |
|             |       | 2019 | 17599868.850 | 13326102.582 | 4273766.27 |
|             |       | 2020 | 18081346.241 | 13553766.036 | 4527580.20 |
|             |       | 2021 | 18537594.460 | 13760486.550 | 4777107.91 |
|             |       | 2022 | 18985300.234 | 13956424.524 | 5028875.71 |
|             |       | 2023 | 19423958.747 | 14141972.520 | 5281986.23 |
|             |       | 2024 | 19853347.772 | 14316910.159 | 5536437.61 |
|             |       | 2025 | 20252822.245 | 14477405.309 | 5775416.94 |
|             |       | 2026 | 20619307.063 | 14617766.345 | 6001540.72 |
|             |       | 2027 | 20976063.406 | 14749374.826 | 6226688.58 |
|             |       | 2028 | 21323641.947 | 14873172.895 | 6450469.05 |
|             |       | 2029 | 21662117.106 | 14988977.680 | 6673139.43 |
|             |       | 2030 | 21960971.694 | 15090662.094 | 6870309.60 |
|             |       | 2031 | 22224951.983 | 15174985.973 | 7049966.01 |
|             |       | 2032 | 22480397.853 | 15253362.993 | 7227034.86 |
|             |       | 2033 | 22728639.455 | 15326718.074 | 7401921.38 |
|             |       | 2034 | 22970448.888 | 15395034.417 | 7575414.47 |
|             |       | 2035 | 23164154.188 | 15449850.782 | 7714303.41 |
|             |       | 2036 | 23334538.616 | 15494896.375 | 7839642.24 |
|             |       | 2037 | 23499760.723 | 15537016.386 | 7962744.34 |
|             |       | 2038 | 23660308.401 | 15576594.998 | 8083713.40 |
|             |       | 2039 | 23817891.273 | 15613942.676 | 8203948.60 |
| Lung cancer | Males | 1990 | 595621.791   | 595621.791   | 0.000      |
|             |       | 1991 | 1177744.113  | 1177130.246  | 613.867    |
|             |       | 1992 | 1750034.892  | 1747725.934  | 2308.958   |
|             |       | 1993 | 2319752.308  | 2314144.529  | 5607.778   |
|             |       | 1994 | 2872597.339  | 2861755.774  | 10841.565  |
|             |       | 1995 | 3411494.825  | 3393097.534  | 18397.291  |
|             |       | 1996 | 3945569.726  | 3916562.826  | 29006.899  |
|             |       | 1997 | 4463316.362  | 4420684.572  | 42631.790  |
|             |       | 1998 | 4975301.180  | 4915405.637  | 59895.543  |
|             |       | 1999 | 5473691.125  | 5392695.268  | 80995.857  |
|             |       | 2000 | 5977500.570  | 5870212.978  | 107287.592 |
|             |       | 2001 | 6474795.516  | 6336098.948  | 138696.568 |
|             |       | 2002 | 6968769.705  | 6792932.406  | 175837.299 |
|             |       | 2003 | 7460282.140  | 7240861.502  | 219420.638 |
|             |       | 2004 | 7947048.275  | 7677793.520  | 269254.756 |
|             |       | 2005 | 8430571.669  | 8104794.826  | 325776.843 |
|             |       | 2006 | 8903945.390  | 8515174.264  | 388771.126 |
|             |       | 2007 | 9364177.982  | 8906632.939  | 457545.043 |
|             |       | 2008 | 9822525.458  | 9288075.672  | 534449.787 |
|             |       | 2009 | 10275228.886 | 9656555.853  | 618673.033 |
|             |       | 2010 | 10720275.500 | 10010727.250 | 709548.250 |
|             |       | 2011 | 11155356.373 | 10348664.143 | 806692.231 |
|             |       | 2012 | 11582611.617 | 10671252.126 | 911359.491 |
|             |       | 2013 | 11998803.791 | 10976779.897 | 1022023.89 |
|             |       | 2014 | 12402087.090 | 11264526.552 | 1137560.54 |
|             |       | 2015 | 12793451.706 | 11536192.075 | 1257259.63 |
|             |       | 2016 | 13160101.653 | 11782616.841 | 1377484.81 |
|             |       | 2017 | 13503583.414 | 12006081.859 | 1497501.56 |
|             |       | 2018 | 13859755.737 | 12228574.453 | 1631181.28 |
|             |       | 2019 | 14211625.176 | 12440588.412 | 1771036.76 |
|             |       | 2020 | 14553935.288 | 12640391.260 | 1913544.03 |
|             |       | 2021 | 14851747.495 | 12807530.661 | 2044216.83 |
|             |       | 2022 | 15144531.004 | 12965458.041 | 2179072.96 |
|             |       | 2023 | 15431932.496 | 13114299.033 | 2317633.46 |
|             |       | 2024 | 15713920.740 | 13254609.022 | 2459311.72 |
|             |       | 2025 | 15979112.816 | 13382972.152 | 2596140.66 |
|             |       | 2026 | 16206550.153 | 13487446.485 | 2719103.67 |
|             |       | 2027 | 16428826.050 | 13585313.111 | 2843512.94 |
|             |       | 2028 | 16645902.186 | 13676788.214 | 2969113.97 |
|             |       | 2029 | 16858126.517 | 13762673.426 | 3095453.09 |
|             |       | 2030 | 17045220.687 | 13837167.327 | 3208053.36 |
|             |       | 2031 | 17208482.610 | 13898105.376 | 3310377.23 |
|             |       | 2032 | 17367586.074 | 13955197.746 | 3412388.33 |
|             |       | 2033 | 17522716.280 | 14008390.720 | 3514325.56 |
|             |       | 2034 | 17674226.555 | 14058467.040 | 3615759.51 |
|             |       | 2035 | 17792201.734 | 14097179.433 | 3695022.30 |
|             |       | 2036 | 17903508.236 | 14131669.466 | 3771838.77 |
|             |       | 2037 | 18012162.345 | 14164269.932 | 3847892.41 |
|             |       | 2038 | 18118464.470 | 14194815.295 | 3923649.18 |

**Results for PHIM for Run 6 (ELL Summary Sensitivity\_Analysis\_1.RTF)**

|     |        |      |              |              |            |
|-----|--------|------|--------------|--------------|------------|
|     |        | 2039 | 18222549.860 | 14223851.840 | 3998698.02 |
|     | Female | 1990 | 307897.357   | 307897.357   | 0.000      |
|     |        | 1991 | 616547.418   | 616153.276   | 394.142    |
|     |        | 1992 | 931086.773   | 929527.233   | 1559.540   |
|     |        | 1993 | 1246155.671  | 1242319.434  | 3836.237   |
|     |        | 1994 | 1561212.934  | 1553667.375  | 7545.560   |
|     |        | 1995 | 1879967.742  | 1866840.492  | 13127.250  |
|     |        | 1996 | 2197488.109  | 2176645.834  | 20842.275  |
|     |        | 1997 | 2515698.453  | 2484616.196  | 31082.256  |
|     |        | 1998 | 2836249.556  | 2792091.535  | 44158.021  |
|     |        | 1999 | 3150201.390  | 3090152.098  | 60049.292  |
|     |        | 2000 | 3472722.342  | 3393010.010  | 79712.332  |
|     |        | 2001 | 3796994.889  | 3693553.319  | 103441.570 |
|     |        | 2002 | 4126619.935  | 3994709.121  | 131910.815 |
|     |        | 2003 | 4454982.533  | 4290253.098  | 164729.435 |
|     |        | 2004 | 4784343.030  | 4581709.863  | 202633.167 |
|     |        | 2005 | 5113443.121  | 4867781.330  | 245661.791 |
|     |        | 2006 | 5442543.963  | 5147955.056  | 294588.906 |
|     |        | 2007 | 5772441.497  | 5422969.786  | 349471.710 |
|     |        | 2008 | 6091911.943  | 5683363.112  | 408548.830 |
|     |        | 2009 | 6413671.330  | 5939073.156  | 474598.174 |
|     |        | 2010 | 6730763.530  | 6185199.242  | 545564.288 |
|     |        | 2011 | 7043614.101  | 6421545.812  | 622068.289 |
|     |        | 2012 | 7356270.780  | 6651193.388  | 705077.392 |
|     |        | 2013 | 7662551.964  | 6869743.049  | 792808.915 |
|     |        | 2014 | 7964551.465  | 7078864.398  | 885687.067 |
|     |        | 2015 | 8254895.403  | 7274622.336  | 980273.066 |
|     |        | 2016 | 8530661.848  | 7454391.713  | 1076270.13 |
|     |        | 2017 | 8795826.122  | 7621786.769  | 1174039.35 |
|     |        | 2018 | 9067233.707  | 7786487.286  | 1280746.42 |
|     |        | 2019 | 9335343.270  | 7943178.899  | 1392164.37 |
|     |        | 2020 | 9596110.883  | 8090831.643  | 1505279.24 |
|     |        | 2021 | 9833186.859  | 8220867.021  | 1612319.84 |
|     |        | 2022 | 10066452.037 | 8343811.933  | 1722640.10 |
|     |        | 2023 | 10295503.609 | 8459914.511  | 1835589.10 |
|     |        | 2024 | 10520125.318 | 8569056.137  | 1951069.18 |
|     |        | 2025 | 10731915.863 | 8669093.415  | 2062822.45 |
|     |        | 2026 | 10917495.549 | 8753536.263  | 2163959.29 |
|     |        | 2027 | 11098620.885 | 8832467.296  | 2266153.59 |
|     |        | 2028 | 11275441.234 | 8906505.054  | 2368936.18 |
|     |        | 2029 | 11447962.710 | 8975565.761  | 2472396.95 |
|     |        | 2030 | 11601867.623 | 9035953.953  | 2565913.67 |
|     |        | 2031 | 11731666.516 | 9084354.064  | 2647312.45 |
|     |        | 2032 | 11857585.969 | 9129302.090  | 2728283.88 |
|     |        | 2033 | 11980128.625 | 9171323.294  | 2808805.33 |
|     |        | 2034 | 12099562.464 | 9210446.996  | 2889115.47 |
|     |        | 2035 | 12195919.946 | 9241521.594  | 2954398.35 |
|     |        | 2036 | 12278201.969 | 9266614.736  | 3011587.23 |
|     |        | 2037 | 12358146.336 | 9290156.333  | 3067990.00 |
|     |        | 2038 | 12435978.633 | 9312330.075  | 3123648.56 |
|     |        | 2039 | 12512468.845 | 9333309.802  | 3179159.04 |
| IHD | Males  | 1990 | 517209.093   | 517209.093   | 0.000      |
|     |        | 1991 | 1019219.395  | 1012504.275  | 6715.119   |
|     |        | 1992 | 1509598.614  | 1484699.716  | 24898.898  |
|     |        | 1993 | 1992735.299  | 1934820.127  | 57915.172  |
|     |        | 1994 | 2462877.575  | 2354980.857  | 107896.718 |
|     |        | 1995 | 2928249.390  | 2750973.200  | 177276.190 |
|     |        | 1996 | 3377377.730  | 3111310.751  | 266066.978 |
|     |        | 1997 | 3809062.472  | 3436147.158  | 372915.313 |
|     |        | 1998 | 4222213.867  | 3726200.484  | 496013.383 |
|     |        | 1999 | 4708317.743  | 4042763.793  | 665553.950 |
|     |        | 2000 | 5182084.396  | 4328911.981  | 853172.415 |
|     |        | 2001 | 5644097.705  | 4585014.121  | 1059083.58 |
|     |        | 2002 | 6107232.129  | 4820524.114  | 1286708.01 |
|     |        | 2003 | 6561785.704  | 5032151.897  | 1529633.81 |
|     |        | 2004 | 6996156.348  | 5217835.957  | 1778320.39 |
|     |        | 2005 | 7426261.361  | 5387160.243  | 2039101.12 |
|     |        | 2006 | 7849012.694  | 5539121.400  | 2309891.29 |
|     |        | 2007 | 8255300.530  | 5673536.755  | 2581763.77 |
|     |        | 2008 | 8650662.040  | 5794512.174  | 2856149.87 |
|     |        | 2009 | 9030818.513  | 5902601.284  | 3128217.23 |
|     |        | 2010 | 9403026.327  | 6001178.313  | 3401848.01 |
|     |        | 2011 | 9767535.506  | 6091121.766  | 3676413.74 |
|     |        | 2012 | 10123044.281 | 6173447.173  | 3949597.11 |
|     |        | 2013 | 10470104.786 | 6248919.949  | 4221184.84 |
|     |        | 2014 | 10807756.112 | 6318377.070  | 4489379.04 |
|     |        | 2015 | 11130681.425 | 6381619.643  | 4749061.78 |
|     |        | 2016 | 11448966.506 | 6440863.911  | 5008102.60 |

**Results for PHIM for Run 6 (ELL Summary Sensitivity\_Analysis\_1.RTF)**

|        |        |      |              |             |            |
|--------|--------|------|--------------|-------------|------------|
|        |        | 2017 | 11758164.882 | 6495968.231 | 5262196.65 |
|        |        | 2018 | 12054448.241 | 6546198.200 | 5508250.04 |
|        |        | 2019 | 12341606.261 | 6593237.364 | 5748368.90 |
|        |        | 2020 | 12600728.939 | 6634369.104 | 5966359.83 |
|        |        | 2021 | 12861767.105 | 6674444.116 | 6187322.99 |
|        |        | 2022 | 13114168.616 | 6712125.633 | 6402042.98 |
|        |        | 2023 | 13357894.797 | 6747436.984 | 6610457.81 |
|        |        | 2024 | 13593848.521 | 6780931.072 | 6812917.45 |
|        |        | 2025 | 13789177.359 | 6808186.107 | 6980991.25 |
|        |        | 2026 | 13993401.656 | 6836167.857 | 7157233.80 |
|        |        | 2027 | 14190519.224 | 6862872.830 | 7327646.39 |
|        |        | 2028 | 14381193.356 | 6888028.456 | 7493164.90 |
|        |        | 2029 | 14565171.927 | 6911983.677 | 7653188.25 |
|        |        | 2030 | 14697381.605 | 6929044.621 | 7768336.98 |
|        |        | 2031 | 14842203.512 | 6947642.597 | 7894560.92 |
|        |        | 2032 | 14982485.826 | 6965465.745 | 8017020.08 |
|        |        | 2033 | 15118410.647 | 6982185.736 | 8136224.91 |
|        |        | 2034 | 15250284.398 | 6998310.356 | 8251974.04 |
|        |        | 2035 | 15322911.166 | 7006922.302 | 8315988.86 |
|        |        | 2036 | 15405115.031 | 7016577.565 | 8388537.47 |
|        |        | 2037 | 15484709.137 | 7025888.730 | 8458820.41 |
|        |        | 2038 | 15561812.193 | 7034687.244 | 8527124.95 |
|        |        | 2039 | 15635992.616 | 7043073.042 | 8592919.57 |
|        | Female | 1990 | 147299.110   | 147299.110  | 0.000      |
|        |        | 1991 | 295122.462   | 293357.101  | 1765.361   |
|        |        | 1992 | 439962.920   | 433361.629  | 6601.291   |
|        |        | 1993 | 584735.615   | 569097.913  | 15637.702  |
|        |        | 1994 | 727640.783   | 698098.037  | 29542.746  |
|        |        | 1995 | 868486.937   | 819708.947  | 48777.990  |
|        |        | 1996 | 1010321.847  | 935544.527  | 74777.321  |
|        |        | 1997 | 1144230.930  | 1039109.988 | 105120.942 |
|        |        | 1998 | 1274513.622  | 1133757.238 | 140756.384 |
|        |        | 1999 | 1426725.938  | 1237279.891 | 189446.047 |
|        |        | 2000 | 1573462.680  | 1330597.494 | 242865.186 |
|        |        | 2001 | 1719132.015  | 1415735.139 | 303396.876 |
|        |        | 2002 | 1863006.732  | 1493024.134 | 369982.598 |
|        |        | 2003 | 2002943.227  | 1562112.416 | 440830.811 |
|        |        | 2004 | 2137798.705  | 1623263.304 | 514535.401 |
|        |        | 2005 | 2271071.245  | 1679103.224 | 591968.021 |
|        |        | 2006 | 2400707.731  | 1728696.412 | 672011.319 |
|        |        | 2007 | 2523634.512  | 1772072.551 | 751561.961 |
|        |        | 2008 | 2648752.232  | 1812713.734 | 836038.498 |
|        |        | 2009 | 2765973.961  | 1848176.264 | 917797.697 |
|        |        | 2010 | 2881329.235  | 1880687.860 | 1000641.37 |
|        |        | 2011 | 2994972.694  | 1910435.583 | 1084537.11 |
|        |        | 2012 | 3108958.829  | 1938222.231 | 1170736.60 |
|        |        | 2013 | 3218140.416  | 1963443.837 | 1254696.58 |
|        |        | 2014 | 3328387.914  | 1987399.395 | 1340988.52 |
|        |        | 2015 | 3435342.796  | 2009613.883 | 1425728.91 |
|        |        | 2016 | 3539189.408  | 2030123.408 | 1509066.00 |
|        |        | 2017 | 3640041.363  | 2049101.941 | 1590939.42 |
|        |        | 2018 | 3732645.362  | 2065754.926 | 1666890.44 |
|        |        | 2019 | 3821421.978  | 2081076.578 | 1740345.40 |
|        |        | 2020 | 3902115.950  | 2094524.368 | 1807591.58 |
|        |        | 2021 | 3984301.053  | 2107745.164 | 1876555.89 |
|        |        | 2022 | 4062629.299  | 2119934.437 | 1942694.86 |
|        |        | 2023 | 4137348.729  | 2131266.532 | 2006082.20 |
|        |        | 2024 | 4208611.493  | 2141776.783 | 2066834.71 |
|        |        | 2025 | 4269419.492  | 2150574.787 | 2118844.71 |
|        |        | 2026 | 4330969.998  | 2159280.628 | 2171689.37 |
|        |        | 2027 | 4389134.306  | 2167363.270 | 2221771.04 |
|        |        | 2028 | 4444222.970  | 2174915.923 | 2269307.05 |
|        |        | 2029 | 4496447.877  | 2181984.971 | 2314462.91 |
|        |        | 2030 | 4536975.698  | 2187333.821 | 2349641.88 |
|        |        | 2031 | 4578338.586  | 2192753.884 | 2385584.70 |
|        |        | 2032 | 4617397.784  | 2197848.296 | 2419549.49 |
|        |        | 2033 | 4654407.697  | 2202665.585 | 2451742.11 |
|        |        | 2034 | 4689913.454  | 2207236.850 | 2482676.60 |
|        |        | 2035 | 4712518.190  | 2210000.888 | 2502517.30 |
|        |        | 2036 | 4735845.827  | 2212827.889 | 2523017.94 |
|        |        | 2037 | 4757958.806  | 2215503.451 | 2542455.36 |
|        |        | 2038 | 4778813.806  | 2218048.881 | 2560764.93 |
|        |        | 2039 | 4798769.065  | 2220481.670 | 2578287.40 |
| Stroke | Males  | 1990 | 75005.854    | 75005.854   | 0.000      |
|        |        | 1991 | 149463.017   | 148781.303  | 681.714    |
|        |        | 1992 | 222966.278   | 220434.232  | 2532.046   |
|        |        | 1993 | 296801.879   | 290775.566  | 6026.312   |
|        |        | 1994 | 372453.706   | 360791.776  | 11661.929  |

**Results for PHIM for Run 6 (ELL Summary Sensitivity\_Analysis\_1.RTF)**

|        |      |             |             |            |
|--------|------|-------------|-------------|------------|
|        | 1995 | 448401.338  | 428698.228  | 19703.110  |
|        | 1996 | 523536.301  | 493241.277  | 30295.024  |
|        | 1997 | 596763.211  | 553338.701  | 43424.510  |
|        | 1998 | 667546.681  | 608624.815  | 58921.866  |
|        | 1999 | 734925.407  | 658532.254  | 76393.153  |
|        | 2000 | 803749.361  | 706750.749  | 96998.612  |
|        | 2001 | 870081.588  | 750400.711  | 119680.877 |
|        | 2002 | 935347.140  | 790715.400  | 144631.740 |
|        | 2003 | 1001627.349 | 828860.301  | 172767.048 |
|        | 2004 | 1066587.976 | 863807.384  | 202780.591 |
|        | 2005 | 1130548.052 | 895821.922  | 234726.130 |
|        | 2006 | 1195132.454 | 925816.969  | 269315.485 |
|        | 2007 | 1258974.043 | 953348.695  | 305625.348 |
|        | 2008 | 1320124.867 | 977755.236  | 342369.631 |
|        | 2009 | 1380776.123 | 1000262.375 | 380513.749 |
|        | 2010 | 1440048.533 | 1020767.718 | 419280.815 |
|        | 2011 | 1497484.847 | 1039307.791 | 458177.055 |
|        | 2012 | 1554496.526 | 1056371.032 | 498125.494 |
|        | 2013 | 1610819.598 | 1072106.520 | 538713.078 |
|        | 2014 | 1667484.890 | 1086851.624 | 580633.266 |
|        | 2015 | 1720948.287 | 1100011.737 | 620936.550 |
|        | 2016 | 1775699.228 | 1112641.045 | 663058.183 |
|        | 2017 | 1830250.175 | 1124500.388 | 705749.787 |
|        | 2018 | 1875958.950 | 1133918.512 | 742040.438 |
|        | 2019 | 1920359.232 | 1142609.631 | 777749.601 |
|        | 2020 | 1960605.297 | 1150163.777 | 810441.520 |
|        | 2021 | 1998912.887 | 1157011.505 | 841901.382 |
|        | 2022 | 2036003.696 | 1163339.544 | 872664.152 |
|        | 2023 | 2071857.536 | 1169195.015 | 902662.522 |
|        | 2024 | 2106636.468 | 1174677.836 | 931958.633 |
|        | 2025 | 2136450.873 | 1179241.932 | 957208.941 |
|        | 2026 | 2164796.470 | 1183432.140 | 981364.330 |
|        | 2027 | 2192079.608 | 1187365.170 | 1004714.44 |
|        | 2028 | 2218404.367 | 1191031.273 | 1027373.09 |
|        | 2029 | 2243769.140 | 1194485.434 | 1049283.71 |
|        | 2030 | 2263570.213 | 1197127.402 | 1066442.81 |
|        | 2031 | 2282521.590 | 1199608.826 | 1082912.76 |
|        | 2032 | 2300804.945 | 1201955.204 | 1098849.74 |
|        | 2033 | 2318464.018 | 1204158.093 | 1114305.92 |
|        | 2034 | 2335611.973 | 1206268.035 | 1129343.94 |
|        | 2035 | 2347097.290 | 1207660.307 | 1139436.98 |
|        | 2036 | 2358248.747 | 1208992.823 | 1149255.92 |
|        | 2037 | 2369033.655 | 1210273.524 | 1158760.13 |
|        | 2038 | 2379490.114 | 1211486.045 | 1168004.07 |
|        | 2039 | 2389546.238 | 1212638.098 | 1176908.14 |
| Female | 1990 | 56348.092   | 56348.092   | 0.000      |
|        | 1991 | 110871.862  | 110384.220  | 487.642    |
|        | 1992 | 165654.454  | 163782.492  | 1871.963   |
|        | 1993 | 220008.519  | 215538.239  | 4470.281   |
|        | 1994 | 275706.807  | 267022.178  | 8684.628   |
|        | 1995 | 331417.547  | 316767.048  | 14650.500  |
|        | 1996 | 387580.161  | 364906.411  | 22673.750  |
|        | 1997 | 442778.242  | 410151.898  | 32626.344  |
|        | 1998 | 496117.305  | 451821.888  | 44295.417  |
|        | 1999 | 548268.214  | 490501.780  | 57766.434  |
|        | 2000 | 601693.202  | 528056.781  | 73636.420  |
|        | 2001 | 652221.103  | 561536.869  | 90684.233  |
|        | 2002 | 703022.600  | 593111.133  | 109911.467 |
|        | 2003 | 752023.351  | 621627.470  | 130395.881 |
|        | 2004 | 799826.733  | 647581.682  | 152245.050 |
|        | 2005 | 847563.928  | 671791.785  | 175772.144 |
|        | 2006 | 894205.027  | 693813.057  | 200391.970 |
|        | 2007 | 939571.282  | 713719.998  | 225851.284 |
|        | 2008 | 983437.578  | 731649.720  | 251787.858 |
|        | 2009 | 1025803.786 | 747790.968  | 278012.818 |
|        | 2010 | 1066964.934 | 762372.867  | 304592.067 |
|        | 2011 | 1106954.044 | 775558.537  | 331395.508 |
|        | 2012 | 1146108.461 | 787621.477  | 358486.984 |
|        | 2013 | 1183544.689 | 798437.362  | 385107.328 |
|        | 2014 | 1221220.945 | 808611.826  | 412609.119 |
|        | 2015 | 1258289.311 | 818097.672  | 440191.639 |
|        | 2016 | 1294830.207 | 826899.190  | 467931.017 |
|        | 2017 | 1330332.626 | 834971.507  | 495361.119 |
|        | 2018 | 1360571.987 | 841502.660  | 519069.327 |
|        | 2019 | 1389848.723 | 847482.532  | 542366.190 |
|        | 2020 | 1416046.192 | 852614.966  | 563431.227 |
|        | 2021 | 1440588.850 | 857195.638  | 583393.212 |
|        | 2022 | 1464157.934 | 861399.427  | 602758.508 |

**Results for PHIM for Run 6 (ELL Summary Sensitivity\_Analysis\_1.RTF)**

|      |             |             |             |             |            |
|------|-------------|-------------|-------------|-------------|------------|
|      |             | 2023        | 1486810.237 | 865291.764  | 621518.473 |
|      |             | 2024        | 1508591.729 | 868883.466  | 639708.263 |
|      |             | 2025        | 1526875.621 | 871817.314  | 655058.307 |
|      |             | 2026        | 1543659.810 | 874418.010  | 669241.799 |
|      |             | 2027        | 1559623.774 | 876822.571  | 682801.203 |
|      |             | 2028        | 1574852.850 | 879061.231  | 695791.620 |
|      |             | 2029        | 1589437.452 | 881149.880  | 708287.572 |
|      |             | 2030        | 1600568.199 | 882699.683  | 717868.516 |
|      |             | 2031        | 1610776.297 | 884098.250  | 726678.047 |
|      |             | 2032        | 1620483.563 | 885410.631  | 735072.932 |
|      |             | 2033        | 1629745.442 | 886649.029  | 743096.413 |
|      |             | 2034        | 1638721.425 | 887823.541  | 750897.884 |
|      |             | 2035        | 1644649.404 | 888570.930  | 756078.474 |
|      |             | 2036        | 1650181.590 | 889257.732  | 760923.857 |
|      |             | 2037        | 1655476.066 | 889911.042  | 765565.025 |
|      |             | 2038        | 1660507.914 | 890535.942  | 769971.971 |
|      |             | 2039        | 1665361.569 | 891135.836  | 774225.733 |
| COPD | Males       | 1990        | 117002.906  | 117002.906  | 0.000      |
|      |             | 1991        | 233438.833  | 233246.232  | 192.601    |
|      |             | 1992        | 348084.047  | 347373.414  | 710.633    |
|      |             | 1993        | 467278.318  | 465536.918  | 1741.400   |
|      |             | 1994        | 584216.907  | 580798.512  | 3418.395   |
|      |             | 1995        | 697391.457  | 691573.267  | 5818.190   |
|      |             | 1996        | 809471.271  | 800382.657  | 9088.614   |
|      |             | 1997        | 922587.668  | 909136.628  | 13451.039  |
|      |             | 1998        | 1034072.457 | 1015234.227 | 18838.229  |
|      |             | 1999        | 1153475.399 | 1127544.487 | 25930.912  |
|      |             | 2000        | 1268050.268 | 1233744.423 | 34305.845  |
|      |             | 2001        | 1382786.209 | 1338432.939 | 44353.270  |
|      |             | 2002        | 1497557.412 | 1441304.288 | 56253.124  |
|      |             | 2003        | 1614405.229 | 1544353.781 | 70051.448  |
|      |             | 2004        | 1726672.489 | 1641431.343 | 85241.146  |
|      |             | 2005        | 1847277.524 | 1743819.020 | 103458.504 |
|      |             | 2006        | 1961009.963 | 1838174.174 | 122835.789 |
|      |             | 2007        | 2079868.908 | 1934422.387 | 145446.522 |
|      |             | 2008        | 2206755.783 | 2034882.897 | 171872.886 |
|      |             | 2009        | 2331993.380 | 2131535.651 | 200457.729 |
|      |             | 2010        | 2455130.176 | 2224177.253 | 230952.924 |
|      |             | 2011        | 2582657.849 | 2317481.387 | 265176.462 |
|      |             | 2012        | 2709719.005 | 2407694.365 | 302024.640 |
|      |             | 2013        | 2840547.005 | 2497686.773 | 342860.233 |
|      |             | 2014        | 2971677.135 | 2585051.663 | 386625.472 |
|      |             | 2015        | 3104538.983 | 2671759.536 | 432779.447 |
|      |             | 2016        | 3237650.175 | 2755559.899 | 482090.276 |
|      |             | 2017        | 3370561.253 | 2836560.387 | 534000.866 |
|      |             | 2018        | 3503136.371 | 2914086.719 | 589049.652 |
|      |             | 2019        | 3636402.758 | 2989180.503 | 647222.255 |
|      |             | 2020        | 3768054.453 | 3061215.212 | 706839.240 |
|      |             | 2021        | 3897675.067 | 3129348.580 | 768326.487 |
|      |             | 2022        | 4027307.132 | 3194692.635 | 832614.497 |
|      |             | 2023        | 4156698.720 | 3257165.880 | 899532.840 |
|      |             | 2024        | 4285772.226 | 3316811.570 | 968960.656 |
|      |             | 2025        | 4410759.298 | 3372827.844 | 1037931.45 |
|      |             | 2026        | 4531411.064 | 3424196.165 | 1107214.90 |
|      |             | 2027        | 4651145.233 | 3472753.984 | 1178391.25 |
|      |             | 2028        | 4769837.872 | 3518570.002 | 1251267.87 |
|      |             | 2029        | 4887747.179 | 3561878.474 | 1325868.71 |
| 2030 | 4997632.895 | 3601176.473 | 1396456.42  |             |            |
| 2031 | 5103301.991 | 3636503.334 | 1466798.66  |             |            |
| 2032 | 5207593.613 | 3669571.908 | 1538021.70  |             |            |
| 2033 | 5310556.138 | 3700417.418 | 1610138.72  |             |            |
| 2034 | 5412542.816 | 3729382.646 | 1683160.17  |             |            |
| 2035 | 5500522.473 | 3753867.406 | 1746655.07  |             |            |
| 2036 | 5588149.640 | 3776718.062 | 1811431.58  |             |            |
| 2037 | 5674667.886 | 3798174.783 | 1876493.10  |             |            |
| 2038 | 5760391.289 | 3818267.794 | 1942123.49  |             |            |
| 2039 | 5845459.234 | 3837295.157 | 2008164.08  |             |            |
|      | Female      | 1990        | 77434.846   | 77434.846   | 0.000      |
|      |             | 1991        | 160029.510  | 159870.281  | 159.229    |
|      |             | 1992        | 240642.531  | 240036.831  | 605.700    |
|      |             | 1993        | 329362.093  | 327799.626  | 1562.468   |
|      |             | 1994        | 418569.515  | 415440.153  | 3129.362   |
|      |             | 1995        | 509110.357  | 503606.177  | 5504.180   |
|      |             | 1996        | 600040.117  | 591299.367  | 8740.750   |
|      |             | 1997        | 691159.071  | 678198.255  | 12960.815  |
|      |             | 1998        | 782866.899  | 764638.726  | 18228.173  |
|      |             | 1999        | 881526.925  | 856352.790  | 25174.135  |
|      |             | 2000        | 977880.647  | 944685.299  | 33195.348  |

**Results for PHIM for Run 6 (ELL Summary Sensitivity\_Analysis\_1.RTF)**

|      |             |             |            |
|------|-------------|-------------|------------|
| 2001 | 1076787.404 | 1033909.688 | 42877.716  |
| 2002 | 1174842.754 | 1120794.399 | 54048.355  |
| 2003 | 1275102.681 | 1208107.202 | 66995.479  |
| 2004 | 1371026.306 | 1290087.669 | 80938.637  |
| 2005 | 1473954.509 | 1376154.127 | 97800.382  |
| 2006 | 1574450.828 | 1458358.843 | 116091.985 |
| 2007 | 1673790.211 | 1537747.641 | 136042.570 |
| 2008 | 1782360.738 | 1622428.692 | 159932.046 |
| 2009 | 1892944.209 | 1706231.486 | 186712.723 |
| 2010 | 2002131.282 | 1786929.697 | 215201.585 |
| 2011 | 2114522.152 | 1867480.145 | 247042.008 |
| 2012 | 2228079.372 | 1946567.877 | 281511.495 |
| 2013 | 2345377.689 | 2025650.308 | 319727.381 |
| 2014 | 2462498.422 | 2102003.212 | 360495.210 |
| 2015 | 2581450.312 | 2177814.007 | 403636.305 |
| 2016 | 2701959.301 | 2251969.536 | 449989.765 |
| 2017 | 2823834.967 | 2324335.663 | 499499.304 |
| 2018 | 2938265.081 | 2390412.978 | 547852.103 |
| 2019 | 3053254.880 | 2454364.572 | 598890.307 |
| 2020 | 3167073.216 | 2515795.059 | 651278.156 |
| 2021 | 3279517.699 | 2574678.727 | 704838.973 |
| 2022 | 3392060.964 | 2631278.727 | 760782.237 |
| 2023 | 3504296.171 | 2685499.713 | 818796.459 |
| 2024 | 3616019.231 | 2737193.772 | 878825.459 |
| 2025 | 3724611.269 | 2785919.793 | 938691.476 |
| 2026 | 3827181.707 | 2830531.443 | 996650.264 |
| 2027 | 3928684.441 | 2872721.687 | 1055962.75 |
| 2028 | 4029124.892 | 2912690.686 | 1116434.21 |
| 2029 | 4128269.068 | 2950277.067 | 1177992.00 |
| 2030 | 4221560.174 | 2984674.636 | 1236885.54 |
| 2031 | 4304170.584 | 3013779.776 | 1290390.81 |
| 2032 | 4384930.537 | 3040801.976 | 1344128.56 |
| 2033 | 4464357.691 | 3066080.166 | 1398277.52 |
| 2034 | 4542251.545 | 3089527.030 | 1452724.51 |
| 2035 | 4611066.648 | 3109757.369 | 1501309.28 |
| 2036 | 4670309.230 | 3126196.019 | 1544113.21 |
| 2037 | 4728179.514 | 3141445.561 | 1586733.95 |
| 2038 | 4785008.048 | 3155680.100 | 1629327.95 |
| 2039 | 4841291.793 | 3169015.368 | 1672276.42 |

---

## Results for PHIM for Run 6 (ELL Summary Sensitivity\_Analysis\_1.RTF)

\*\*\*\*\*

**Table 5: Estimated Loss of Life, at the end of follow-up, Population unadjusted for deaths in Ecig scenario**

| Disease      | Sex    | Age Group   | Years of life lost<br>NULL | Years of life lost<br>Ecig | Years of life<br>Saved |
|--------------|--------|-------------|----------------------------|----------------------------|------------------------|
| All Diseases | Males  | 30-34       | 443911.034                 | 254470.839                 | 189440.195             |
|              |        | 35-39       | 1146798.555                | 651735.161                 | 495063.394             |
|              |        | 40-44       | 2609591.408                | 1448096.483                | 1161494.93             |
|              |        | 45-49       | 4775841.753                | 2614623.791                | 2161217.96             |
|              |        | 50-54       | 7446969.205                | 4209925.703                | 3237043.50             |
|              |        | 55-59       | 8240205.925                | 5045092.026                | 3195113.90             |
|              |        | 60-64       | 8772829.118                | 5757421.199                | 3015407.92             |
|              |        | 65-69       | 6161494.678                | 4395791.351                | 1765703.33             |
|              |        | 70-74       | 2495906.274                | 1833568.104                | 662338.170             |
|              | 75-79  | 0.000       | 0.000                      | 0.000                      |                        |
|              | Female | 30-34       | 229140.561                 | 148688.189                 | 80452.372              |
|              |        | 35-39       | 570217.942                 | 364498.099                 | 205719.843             |
|              |        | 40-44       | 1267538.938                | 790453.940                 | 477084.998             |
|              |        | 45-49       | 2340070.698                | 1440445.018                | 899625.680             |
|              |        | 50-54       | 3743803.613                | 2319809.190                | 1423994.42             |
|              |        | 55-59       | 4591478.168                | 2955708.088                | 1635770.08             |
|              |        | 60-64       | 5207367.788                | 3458970.702                | 1748397.09             |
|              |        | 65-69       | 4092181.394                | 2846541.021                | 1245640.37             |
| 70-74        |        | 1776092.171 | 1249715.590                | 526376.580                 |                        |
| 75-79        | 0.000  | 0.000       | 0.000                      |                            |                        |
| Lung cancer  | Males  | 30-34       | 66065.017                  | 53301.189                  | 12763.829              |
|              |        | 35-39       | 232509.414                 | 188953.107                 | 43556.307              |
|              |        | 40-44       | 688628.041                 | 549080.026                 | 139548.016             |
|              |        | 45-49       | 1528300.367                | 1185428.937                | 342871.430             |
|              |        | 50-54       | 2730187.229                | 2088149.721                | 642037.508             |
|              |        | 55-59       | 3909101.673                | 2971893.254                | 937208.419             |
|              |        | 60-64       | 4287716.660                | 3336651.343                | 951065.317             |
|              |        | 65-69       | 3467897.115                | 2738147.018                | 729750.096             |
|              |        | 70-74       | 1312144.343                | 1049157.788                | 262986.555             |
|              | 75-79  | 0.000       | 0.000                      | 0.000                      |                        |
|              | Female | 30-34       | 51913.113                  | 41824.845                  | 10088.268              |
|              |        | 35-39       | 189792.904                 | 153162.634                 | 36630.271              |
|              |        | 40-44       | 527596.573                 | 410583.878                 | 117012.695             |
|              |        | 45-49       | 1122524.269                | 845516.899                 | 277007.370             |
|              |        | 50-54       | 1882214.322                | 1390590.859                | 491623.463             |
|              |        | 55-59       | 2595581.943                | 1894256.392                | 701325.551             |
|              |        | 60-64       | 2846273.090                | 2107300.210                | 738972.880             |
|              |        | 65-69       | 2358758.394                | 1760040.670                | 598717.724             |
| 70-74        |        | 937814.238  | 705899.324                 | 231914.913                 |                        |
| 75-79        | 0.000  | 0.000       | 0.000                      |                            |                        |
| IHD          | Males  | 30-34       | 263834.566                 | 129154.461                 | 134680.104             |
|              |        | 35-39       | 692140.150                 | 325074.672                 | 367065.479             |
|              |        | 40-44       | 1519708.432                | 658509.693                 | 861198.739             |
|              |        | 45-49       | 2568546.697                | 1033645.924                | 1534900.77             |
|              |        | 50-54       | 3632929.903                | 1509148.287                | 2123781.62             |
|              |        | 55-59       | 2807892.356                | 1206683.953                | 1601208.40             |
|              |        | 60-64       | 2599825.934                | 1280224.688                | 1319601.25             |
|              |        | 65-69       | 1113578.307                | 614042.105                 | 499536.202             |
|              |        | 70-74       | 437536.271                 | 271549.240                 | 165987.031             |
|              | 75-79  | 0.000       | 0.000                      | 0.000                      |                        |
|              | Female | 30-34       | 79649.097                  | 40973.517                  | 38675.580              |
|              |        | 35-39       | 193965.908                 | 89819.086                  | 104146.821             |
|              |        | 40-44       | 403380.974                 | 169807.905                 | 233573.069             |
|              |        | 45-49       | 671385.408                 | 265021.874                 | 406363.534             |
|              |        | 50-54       | 1011875.989                | 421950.013                 | 589925.976             |
|              |        | 55-59       | 849875.715                 | 375903.594                 | 473972.121             |
|              |        | 60-64       | 925490.876                 | 466402.591                 | 459088.286             |
|              |        | 65-69       | 455463.881                 | 258002.264                 | 197461.617             |
| 70-74        |        | 207681.216  | 130161.261                 | 77519.955                  |                        |
| 75-79        | 0.000  | 0.000       | 0.000                      |                            |                        |
| Stroke       | Males  | 30-34       | 73463.650                  | 45056.749                  | 28406.900              |
|              |        | 35-39       | 151934.057                 | 90670.208                  | 61263.849              |
|              |        | 40-44       | 262845.974                 | 149350.429                 | 113495.546             |
|              |        | 45-49       | 383421.246                 | 205021.574                 | 178399.672             |
|              |        | 50-54       | 479872.634                 | 235778.542                 | 244094.091             |
|              |        | 55-59       | 437124.903                 | 200007.750                 | 237117.154             |
|              |        | 60-64       | 419457.235                 | 194936.252                 | 224520.982             |
|              |        | 65-69       | 128180.574                 | 61584.795                  | 66595.780              |
|              |        | 70-74       | 53245.965                  | 27603.244                  | 25642.722              |
|              | 75-79  | 0.000       | 0.000                      | 0.000                      |                        |
|              | Female | 30-34       | 62919.090                  | 41553.476                  | 21365.614              |

**Results for PHIM for Run 6 (ELL Summary Sensitivity\_Analysis\_1.RTF)**

|      |        |       |             |            |            |
|------|--------|-------|-------------|------------|------------|
|      |        | 35-39 | 120806.205  | 75827.088  | 44979.118  |
|      |        | 40-44 | 203391.885  | 119348.058 | 84043.827  |
|      |        | 45-49 | 278172.097  | 152716.532 | 125455.566 |
|      |        | 50-54 | 325979.181  | 168174.049 | 157805.132 |
|      |        | 55-59 | 275161.340  | 133929.353 | 141231.987 |
|      |        | 60-64 | 268920.493  | 132218.659 | 136701.834 |
|      |        | 65-69 | 87956.054   | 44515.304  | 43440.750  |
|      |        | 70-74 | 42055.224   | 22047.740  | 20007.483  |
|      |        | 75-79 | 0.000       | 0.000      | 0.000      |
| COPD | Males  | 30-34 | 40547.801   | 26958.440  | 13589.361  |
|      |        | 35-39 | 70214.933   | 47037.174  | 23177.759  |
|      |        | 40-44 | 138408.960  | 91156.336  | 47252.624  |
|      |        | 45-49 | 295573.443  | 190527.356 | 105046.087 |
|      |        | 50-54 | 603979.438  | 376849.152 | 227130.286 |
|      |        | 55-59 | 1086086.992 | 666507.069 | 419579.923 |
|      |        | 60-64 | 1465829.290 | 945608.916 | 520220.374 |
|      |        | 65-69 | 1451838.682 | 982017.433 | 469821.249 |
|      |        | 70-74 | 692979.695  | 485257.832 | 207721.862 |
|      |        | 75-79 | 0.000       | 0.000      | 0.000      |
|      | Female | 30-34 | 34659.261   | 24336.352  | 10322.909  |
|      |        | 35-39 | 65652.924   | 45689.291  | 19963.633  |
|      |        | 40-44 | 133169.505  | 90714.098  | 42455.407  |
|      |        | 45-49 | 267988.924  | 177189.713 | 90799.211  |
|      |        | 50-54 | 523734.121  | 339094.269 | 184639.851 |
|      |        | 55-59 | 870859.170  | 551618.749 | 319240.421 |
|      |        | 60-64 | 1166683.329 | 753049.242 | 413634.087 |
|      |        | 65-69 | 1190003.066 | 783982.784 | 406020.282 |
|      |        | 70-74 | 588541.493  | 391607.264 | 196934.229 |
|      |        | 75-79 | 0.000       | 0.000      | 0.000      |

---



## Results for PHIM for Run 6 (ELL Summary Sensitivity\_Analysis\_1.RTF)

\*\*\*\*\*

**Table 6: Estimated Loss of Life, at the end of follow-up, Population and Number deaths adjusted for Ecig scenario**

| Disease      | Sex    | Age Group   | Years of life lost<br>NULL | Years of life lost<br>Ecig | Years of life<br>Saved |
|--------------|--------|-------------|----------------------------|----------------------------|------------------------|
| All Diseases | Males  | 30-34       | 443911.034                 | 254488.415                 | 189422.619             |
|              |        | 35-39       | 1146798.555                | 651868.351                 | 494930.204             |
|              |        | 40-44       | 2609591.408                | 1448962.832                | 1160628.58             |
|              |        | 45-49       | 4775841.753                | 2618478.310                | 2157363.44             |
|              |        | 50-54       | 7446969.205                | 4221626.951                | 3225342.25             |
|              |        | 55-59       | 8240205.925                | 5063721.917                | 3176484.01             |
|              |        | 60-64       | 8772829.118                | 5788363.466                | 2984465.65             |
|              |        | 65-69       | 6161494.678                | 4421700.996                | 1739793.68             |
|              |        | 70-74       | 2495906.274                | 1847646.898                | 648259.376             |
|              | 75-79  | 0.000       | 0.000                      | 0.000                      |                        |
|              | Female | 30-34       | 229140.561                 | 148692.475                 | 80448.086              |
|              |        | 35-39       | 570217.942                 | 364530.118                 | 205687.824             |
|              |        | 40-44       | 1267538.938                | 790659.800                 | 476879.138             |
|              |        | 45-49       | 2340070.698                | 1441361.591                | 898709.107             |
|              |        | 50-54       | 3743803.613                | 2322726.197                | 1421077.42             |
|              |        | 55-59       | 4591478.168                | 2961328.164                | 1630150.00             |
|              |        | 60-64       | 5207367.788                | 3469675.554                | 1737692.23             |
|              |        | 65-69       | 4092181.394                | 2857946.639                | 1234234.76             |
| 70-74        |        | 1776092.171 | 1257022.138                | 519070.033                 |                        |
| Lung cancer  | Males  | 30-34       | 66065.017                  | 53304.954                  | 12760.064              |
|              |        | 35-39       | 232509.414                 | 188994.027                 | 43515.387              |
|              |        | 40-44       | 688628.041                 | 549435.241                 | 139192.801             |
|              |        | 45-49       | 1528300.367                | 1187325.061                | 340975.307             |
|              |        | 50-54       | 2730187.229                | 2094364.599                | 635822.631             |
|              |        | 55-59       | 3909101.673                | 2983422.744                | 925678.929             |
|              |        | 60-64       | 4287716.660                | 3355437.838                | 932278.821             |
|              |        | 65-69       | 3467897.115                | 2754304.878                | 713592.236             |
|              |        | 70-74       | 1312144.343                | 1057262.498                | 254881.845             |
|              | 75-79  | 0.000       | 0.000                      | 0.000                      |                        |
|              | Female | 30-34       | 51913.113                  | 41826.176                  | 10086.937              |
|              |        | 35-39       | 189792.904                 | 153176.852                 | 36616.053              |
|              |        | 40-44       | 527596.573                 | 410698.372                 | 116898.201             |
|              |        | 45-49       | 1122524.269                | 846082.729                 | 276441.540             |
|              |        | 50-54       | 1882214.322                | 1392425.141                | 489789.181             |
|              |        | 55-59       | 2595581.943                | 1897979.531                | 697602.412             |
|              |        | 60-64       | 2846273.090                | 2114054.064                | 732219.025             |
|              |        | 65-69       | 2358758.394                | 1767054.538                | 591703.856             |
| 70-74        |        | 937814.238  | 710012.400                 | 227801.838                 |                        |
| IHD          | Males  | 30-34       | 263834.566                 | 129163.409                 | 134671.157             |
|              |        | 35-39       | 692140.150                 | 325137.620                 | 367002.530             |
|              |        | 40-44       | 1519708.432                | 658866.502                 | 860841.930             |
|              |        | 45-49       | 2568546.697                | 1034951.729                | 1533594.97             |
|              |        | 50-54       | 3632929.903                | 1512562.692                | 2120367.21             |
|              |        | 55-59       | 2807892.356                | 1209722.651                | 1598169.71             |
|              |        | 60-64       | 2599825.934                | 1284420.808                | 1315405.13             |
|              |        | 65-69       | 1113578.307                | 615793.358                 | 497784.950             |
|              |        | 70-74       | 437536.271                 | 272454.273                 | 165081.998             |
|              | 75-79  | 0.000       | 0.000                      | 0.000                      |                        |
|              | Female | 30-34       | 79649.097                  | 40974.706                  | 38674.391              |
|              |        | 35-39       | 193965.908                 | 89826.705                  | 104139.203             |
|              |        | 40-44       | 403380.974                 | 169846.970                 | 233534.004             |
|              |        | 45-49       | 671385.408                 | 265159.140                 | 406226.268             |
|              |        | 50-54       | 1011875.989                | 422341.513                 | 589534.476             |
|              |        | 55-59       | 849875.715                 | 376326.571                 | 473549.144             |
|              |        | 60-64       | 925490.876                 | 467150.191                 | 458340.685             |
|              |        | 65-69       | 455463.881                 | 258416.915                 | 197046.966             |
| 70-74        |        | 207681.216  | 130438.959                 | 77242.258                  |                        |
| Stroke       | Males  | 30-34       | 73463.650                  | 45059.453                  | 28404.197              |
|              |        | 35-39       | 151934.057                 | 90687.155                  | 61246.902              |
|              |        | 40-44       | 262845.974                 | 149430.747                 | 113415.227             |
|              |        | 45-49       | 383421.246                 | 205286.364                 | 178134.882             |
|              |        | 50-54       | 479872.634                 | 236345.566                 | 243527.068             |
|              |        | 55-59       | 437124.903                 | 200596.463                 | 236528.440             |
|              |        | 60-64       | 419457.235                 | 195723.505                 | 223733.729             |
|              |        | 65-69       | 128180.574                 | 61798.836                  | 66381.738              |
|              |        | 70-74       | 53245.965                  | 27710.009                  | 25535.957              |
|              | 75-79  | 0.000       | 0.000                      | 0.000                      |                        |
|              | Female | 30-34       | 62919.090                  | 41554.456                  | 21364.634              |

**Results for PHIM for Run 6 (ELL Summary Sensitivity\_Analysis\_1.RTF)**

|      |        |       |             |            |            |
|------|--------|-------|-------------|------------|------------|
|      |        | 35-39 | 120806.205  | 75832.533  | 44973.672  |
|      |        | 40-44 | 203391.885  | 119372.347 | 84019.539  |
|      |        | 45-49 | 278172.097  | 152789.682 | 125382.416 |
|      |        | 50-54 | 325979.181  | 168326.295 | 157652.886 |
|      |        | 55-59 | 275161.340  | 134094.431 | 141066.908 |
|      |        | 60-64 | 268920.493  | 132464.513 | 136455.980 |
|      |        | 65-69 | 87956.054   | 44599.409  | 43356.645  |
|      |        | 70-74 | 42055.224   | 22102.170  | 19953.053  |
|      |        | 75-79 | 0.000       | 0.000      | 0.000      |
| COPD | Males  | 30-34 | 40547.801   | 26960.599  | 13587.202  |
|      |        | 35-39 | 70214.933   | 47049.548  | 23165.385  |
|      |        | 40-44 | 138408.960  | 91230.342  | 47178.618  |
|      |        | 45-49 | 295573.443  | 190915.157 | 104658.286 |
|      |        | 50-54 | 603979.438  | 378354.095 | 225625.344 |
|      |        | 55-59 | 1086086.992 | 669980.059 | 416106.933 |
|      |        | 60-64 | 1465829.290 | 952781.315 | 513047.975 |
|      |        | 65-69 | 1451838.682 | 989803.924 | 462034.758 |
|      |        | 70-74 | 692979.695  | 490220.118 | 202759.577 |
|      |        | 75-79 | 0.000       | 0.000      | 0.000      |
|      | Female | 30-34 | 34659.261   | 24337.138  | 10322.123  |
|      |        | 35-39 | 65652.924   | 45694.028  | 19958.896  |
|      |        | 40-44 | 133169.505  | 90742.111  | 42427.394  |
|      |        | 45-49 | 267988.924  | 177330.041 | 90658.884  |
|      |        | 50-54 | 523734.121  | 339633.249 | 184100.872 |
|      |        | 55-59 | 870859.170  | 552927.630 | 317931.540 |
|      |        | 60-64 | 1166683.329 | 756006.785 | 410676.544 |
|      |        | 65-69 | 1190003.066 | 787875.777 | 402127.289 |
|      |        | 70-74 | 588541.493  | 394468.609 | 194072.884 |
|      |        | 75-79 | 0.000       | 0.000      | 0.000      |

---

## Results for PHIM for Run 8 (ELL Summary Sensitivity\_Analysis\_1.RTF)

\*\*\*\*\*

### Estimated Loss of Life from the E Component for Run: 8, Simulation: 1

Country: US (United States)  
 Follow-up Period: 1990 to 2039

**Table 1: Estimated Loss of Life, at the end of follow-up, all age groups combined, Population unadjusted for deaths in Ecig scenario**

| Disease      | Sex    | Year | Years of life lost<br>NULL | Years of life lost<br>Ecig | Years of life<br>Saved |
|--------------|--------|------|----------------------------|----------------------------|------------------------|
| All Diseases | Males  | 2039 | 42093547.949               | 28689066.694               | 13404481.3             |
|              | Female | 2039 | 23817891.273               | 16901479.702               | 6916411.57             |
| Lung cancer  | Males  | 2039 | 18222549.860               | 14977158.661               | 3245391.20             |
|              | Female | 2039 | 12512468.845               | 9933525.866                | 2578942.98             |
| IHD          | Males  | 2039 | 15635992.616               | 8237510.462                | 7398482.15             |
|              | Female | 2039 | 4798769.065                | 2575496.752                | 2223272.31             |
| Stroke       | Males  | 2039 | 2389546.238                | 1362862.833                | 1026683.40             |
|              | Female | 2039 | 1665361.569                | 990917.776                 | 674443.793             |
| COPD         | Males  | 2039 | 5845459.234                | 4111534.737                | 1733924.50             |
|              | Female | 2039 | 4841291.793                | 3401539.308                | 1439752.48             |

## Results for PHIM for Run 8 (ELL Summary Sensitivity\_Analysis\_1.RTF)

\*\*\*\*\*

**Table 2: Estimated Loss of Life, at the end of follow-up, all age groups combined, Population and Number deaths adjusted for Ecig scenario**

| Disease      | Sex    | Year | Years of life lost<br>NULL | Years of life lost<br>Ecig | Years of life<br>Saved |
|--------------|--------|------|----------------------------|----------------------------|------------------------|
| All Diseases | Males  | 2039 | 42093547.949               | 28801171.398               | 13292376.6             |
|              | Female | 2039 | 23817891.273               | 16941976.028               | 6875915.24             |
| Lung cancer  | Males  | 2039 | 18222549.860               | 15040313.502               | 3182236.36             |
|              | Female | 2039 | 12512468.845               | 9958008.328                | 2554460.52             |
| IHD          | Males  | 2039 | 15635992.616               | 8257558.569                | 7378434.05             |
|              | Female | 2039 | 4798769.065                | 2578707.451                | 2220061.61             |
| Stroke       | Males  | 2039 | 2389546.238                | 1366094.898                | 1023451.34             |
|              | Female | 2039 | 1665361.569                | 991903.153                 | 673458.416             |
| COPD         | Males  | 2039 | 5845459.234                | 4137204.429                | 1708254.81             |
|              | Female | 2039 | 4841291.793                | 3413357.096                | 1427934.70             |

## Results for PHIM for Run 8 (ELL Summary Sensitivity\_Analysis\_1.RTF)

\*\*\*\*\*

**Table 3: Estimated Loss of Life, All age groups combined, Population unadjusted for deaths in Ecig scenario, cumulative over years**

| Disease      | Sex          | Year         | Years of life lost<br>NULL | Years of life lost<br>Ecig | Years of life<br>Saved |
|--------------|--------------|--------------|----------------------------|----------------------------|------------------------|
| All Diseases | Males        | 1990         | 1304839.645                | 1304839.645                | 0.000                  |
|              |              | 1991         | 2579865.358                | 2572600.490                | 7264.867               |
|              |              | 1992         | 3830683.831                | 3803776.582                | 26907.249              |
|              |              | 1993         | 5076567.803                | 5013706.580                | 62861.223              |
|              |              | 1994         | 6292145.526                | 6174395.095                | 117750.431             |
|              |              | 1995         | 7485537.010                | 7291342.158                | 194194.852             |
|              |              | 1996         | 8655955.028                | 8362982.371                | 292972.657             |
|              |              | 1997         | 9791729.713                | 9378734.268                | 412995.445             |
|              |              | 1998         | 10899134.186               | 10346251.465               | 552882.721             |
|              |              | 1999         | 12070409.674               | 11331360.251               | 739049.424             |
|              |              | 2000         | 13231384.595               | 12282663.505               | 948721.090             |
|              |              | 2001         | 14371761.018               | 13190386.787               | 1181374.23             |
|              |              | 2002         | 15508906.386               | 14068116.644               | 1440789.74             |
|              |              | 2003         | 16638100.422               | 14915285.421               | 1722815.00             |
|              |              | 2004         | 17736465.088               | 15718774.881               | 2017690.21             |
|              |              | 2005         | 18834658.606               | 16502029.569               | 2332629.04             |
|              |              | 2006         | 19909100.501               | 17244626.046               | 2664474.45             |
|              |              | 2007         | 20958321.463               | 17952073.537               | 3006247.93             |
|              |              | 2008         | 22000068.148               | 18639613.129               | 3360455.02             |
|              |              | 2009         | 23018816.903               | 19297142.925               | 3721673.98             |
|              |              | 2010         | 24018480.537               | 19926758.330               | 4091722.21             |
|              |              | 2011         | 25003034.574               | 20532047.541               | 4470987.03             |
|              |              | 2012         | 25969871.429               | 21111498.323               | 4858373.11             |
|              |              | 2013         | 26920275.180               | 21667075.421               | 5253199.76             |
|              |              | 2014         | 27849005.227               | 22196341.926               | 5652663.30             |
|              |              | 2015         | 28749620.400               | 22700796.097               | 6048824.30             |
|              |              | 2016         | 29622417.562               | 23173543.764               | 6448873.80             |
|              |              | 2017         | 30462559.724               | 23615348.707               | 6847211.02             |
|              |              | 2018         | 31293299.299               | 24046975.489               | 7246323.81             |
|              |              | 2019         | 32109993.427               | 24462804.323               | 7647189.10             |
|              |              | 2020         | 32883323.977               | 24853586.269               | 8029737.71             |
|              |              | 2021         | 33610102.554               | 25204511.930               | 8405590.62             |
|              |              | 2022         | 34322010.448               | 25540815.286               | 8781195.16             |
|              |              | 2023         | 35018383.550               | 25862630.335               | 9155753.21             |
|              |              | 2024         | 35700177.955               | 26171193.787               | 9528984.17             |
|              |              | 2025         | 36315500.346               | 26450700.354               | 9864799.99             |
|              |              | 2026         | 36896159.343               | 26700484.848               | 10195674.5             |
|              |              | 2027         | 37462570.116               | 26939050.533               | 10523519.6             |
|              |              | 2028         | 38015337.780               | 27166228.276               | 10849109.5             |
|              |              | 2029         | 38554814.764               | 27383622.882               | 11171191.9             |
|              |              | 2030         | 39003805.400               | 27567731.591               | 11436073.8             |
|              |              | 2031         | 39436509.703               | 27735101.354               | 11701408.3             |
| 2032         | 39858470.458 | 27894857.692 | 11963612.8                 |                            |                        |
| 2033         | 40270147.082 | 28046397.515 | 12223749.6                 |                            |                        |
| 2034         | 40672665.743 | 28191926.115 | 12480739.6                 |                            |                        |
| 2035         | 40962732.664 | 28299770.427 | 12662962.2                 |                            |                        |
| 2036         | 41255021.653 | 28403497.263 | 12851524.4                 |                            |                        |
| 2037         | 41540573.023 | 28503034.416 | 13037538.6                 |                            |                        |
| 2038         | 41820158.066 | 28597805.923 | 13222352.1                 |                            |                        |
| 2039         | 42093547.949 | 28689066.694 | 13404481.3                 |                            |                        |
|              | Female       | 1990         | 588979.406                 | 588979.406                 | 0.000                  |
|              |              | 1991         | 1182571.252                | 1180081.523                | 2489.729               |
|              |              | 1992         | 1777346.679                | 1767921.662                | 9425.017               |
|              |              | 1993         | 2380261.899                | 2357693.505                | 22568.394              |
|              |              | 1994         | 2983130.039                | 2939912.809                | 43217.230              |
|              |              | 1995         | 3588982.584                | 3516566.878                | 72415.706              |
|              |              | 1996         | 4195430.235                | 4083496.627                | 111933.607             |
|              |              | 1997         | 4793866.694                | 4633901.475                | 159965.220             |
|              |              | 1998         | 5389747.381                | 5172305.856                | 217441.525             |
|              |              | 1999         | 6006722.467                | 5715024.340                | 291698.127             |
|              |              | 2000         | 6625758.871                | 6249515.216                | 376243.655             |
|              |              | 2001         | 7245135.411                | 6772345.828                | 472789.583             |
|              |              | 2002         | 7867492.021                | 7285799.532                | 581692.489             |
|              |              | 2003         | 8485051.793                | 7784545.664                | 700506.129             |
|              |              | 2004         | 9092994.774                | 8264989.575                | 828005.199             |
|              |              | 2005         | 9706032.803                | 8739240.285                | 966792.518             |
|              |              | 2006         | 10311907.548               | 9197146.465                | 1114761.08             |
|              |              | 2007         | 10909437.502               | 9640219.554                | 1269217.95             |
|              |              | 2008         | 11506462.491               | 10071425.662               | 1435036.83             |
|              |              | 2009         | 12098393.287               | 10491624.431               | 1606768.86             |
|              |              | 2010         | 12681188.981               | 10896246.929               | 1784942.05             |

**Results for PHIM for Run 8 (ELL Summary Sensitivity\_Analysis\_1.RTF)**

|             |       |      |              |              |            |
|-------------|-------|------|--------------|--------------|------------|
|             |       | 2011 | 13260062.991 | 11288598.174 | 1971464.82 |
|             |       | 2012 | 13839417.441 | 11671856.883 | 2167560.56 |
|             |       | 2013 | 14409614.758 | 12041478.871 | 2368135.89 |
|             |       | 2014 | 14976658.746 | 12399077.731 | 2577581.01 |
|             |       | 2015 | 15529977.821 | 12740972.960 | 2789004.86 |
|             |       | 2016 | 16066640.764 | 13063627.759 | 3003013.00 |
|             |       | 2017 | 16590035.078 | 13370609.682 | 3219425.40 |
|             |       | 2018 | 17098716.137 | 13665409.214 | 3433306.92 |
|             |       | 2019 | 17599868.850 | 13949427.043 | 3650441.81 |
|             |       | 2020 | 18081346.241 | 14218607.112 | 3862739.13 |
|             |       | 2021 | 18537594.460 | 14466003.720 | 4071590.74 |
|             |       | 2022 | 18985300.234 | 14703432.247 | 4281867.99 |
|             |       | 2023 | 19423958.747 | 14931232.486 | 4492726.26 |
|             |       | 2024 | 19853347.772 | 15149070.218 | 4704277.55 |
|             |       | 2025 | 20252822.245 | 15350011.681 | 4902810.56 |
|             |       | 2026 | 20619307.063 | 15528373.906 | 5090933.16 |
|             |       | 2027 | 20976063.406 | 15698156.898 | 5277906.51 |
|             |       | 2028 | 21323641.947 | 15860276.753 | 5463365.19 |
|             |       | 2029 | 21662117.106 | 16014450.801 | 5647666.31 |
|             |       | 2030 | 21960971.694 | 16149958.782 | 5811012.91 |
|             |       | 2031 | 22224951.983 | 16264909.652 | 5960042.33 |
|             |       | 2032 | 22480397.853 | 16373660.946 | 6106736.91 |
|             |       | 2033 | 22728639.455 | 16477190.930 | 6251448.53 |
|             |       | 2034 | 22970448.888 | 16575423.778 | 6395025.11 |
|             |       | 2035 | 23164154.188 | 16653826.520 | 6510327.67 |
|             |       | 2036 | 23334538.616 | 16720125.157 | 6614413.46 |
|             |       | 2037 | 23499760.723 | 16783216.834 | 6716543.89 |
|             |       | 2038 | 23660308.401 | 16843555.004 | 6816753.40 |
|             |       | 2039 | 23817891.273 | 16901479.702 | 6916411.57 |
| Lung cancer | Males | 1990 | 595621.791   | 595621.791   | 0.000      |
|             |       | 1991 | 1177744.113  | 1177198.240  | 545.872    |
|             |       | 1992 | 1750034.892  | 1747983.685  | 2051.207   |
|             |       | 1993 | 2319752.308  | 2314768.966  | 4983.341   |
|             |       | 1994 | 2872597.339  | 2862961.072  | 9636.267   |
|             |       | 1995 | 3411494.825  | 3395146.325  | 16348.501  |
|             |       | 1996 | 3945569.726  | 3919807.563  | 25762.163  |
|             |       | 1997 | 4463316.362  | 4425483.299  | 37833.063  |
|             |       | 1998 | 4975301.180  | 4922212.788  | 53088.393  |
|             |       | 1999 | 5473691.125  | 5402005.132  | 71685.993  |
|             |       | 2000 | 5977500.570  | 5882720.209  | 94780.361  |
|             |       | 2001 | 6474795.516  | 6352525.048  | 122270.468 |
|             |       | 2002 | 6968769.705  | 6814116.512  | 154653.193 |
|             |       | 2003 | 7460282.140  | 7267815.060  | 192467.080 |
|             |       | 2004 | 7947048.275  | 7711522.799  | 235525.476 |
|             |       | 2005 | 8430571.669  | 8146448.391  | 284123.278 |
|             |       | 2006 | 8903945.390  | 8565947.880  | 337997.510 |
|             |       | 2007 | 9364177.982  | 8967623.723  | 396554.259 |
|             |       | 2008 | 9822525.458  | 9360847.719  | 461677.740 |
|             |       | 2009 | 10275228.886 | 9742588.700  | 532640.186 |
|             |       | 2010 | 10720275.500 | 10111422.045 | 608853.456 |
|             |       | 2011 | 11155356.373 | 10465414.122 | 689942.251 |
|             |       | 2012 | 11582611.617 | 10805746.362 | 776865.254 |
|             |       | 2013 | 11998803.791 | 11130447.636 | 868356.155 |
|             |       | 2014 | 12402087.090 | 11438618.941 | 963468.149 |
|             |       | 2015 | 12793451.706 | 11731795.252 | 1061656.45 |
|             |       | 2016 | 13160101.653 | 12000250.318 | 1159851.33 |
|             |       | 2017 | 13503583.414 | 12246032.302 | 1257551.11 |
|             |       | 2018 | 13859755.737 | 12493963.712 | 1365792.02 |
|             |       | 2019 | 14211625.176 | 12733004.645 | 1478620.53 |
|             |       | 2020 | 14553935.288 | 12960668.935 | 1593266.35 |
|             |       | 2021 | 14851747.495 | 13153688.112 | 1698059.38 |
|             |       | 2022 | 15144531.004 | 13338601.675 | 1805929.33 |
|             |       | 2023 | 15431932.496 | 13515537.911 | 1916394.59 |
|             |       | 2024 | 15713920.740 | 13684868.342 | 2029052.40 |
|             |       | 2025 | 15979112.816 | 13841383.753 | 2137729.06 |
|             |       | 2026 | 16206550.153 | 13971417.859 | 2235132.29 |
|             |       | 2027 | 16428826.050 | 14095249.793 | 2333576.26 |
|             |       | 2028 | 16645902.186 | 14213065.958 | 2432836.23 |
|             |       | 2029 | 16858126.517 | 14325588.210 | 2532538.31 |
|             |       | 2030 | 17045220.687 | 14423766.903 | 2621453.78 |
|             |       | 2031 | 17208482.610 | 14506427.797 | 2702054.81 |
|             |       | 2032 | 17367586.074 | 14585202.792 | 2782383.28 |
|             |       | 2033 | 17522716.280 | 14659967.277 | 2862749.00 |
|             |       | 2034 | 17674226.555 | 14731557.643 | 2942668.91 |
|             |       | 2035 | 17792201.734 | 14786921.198 | 3005280.54 |
|             |       | 2036 | 17903508.236 | 14837655.714 | 3065852.52 |
|             |       | 2037 | 18012162.345 | 14886283.893 | 3125878.45 |
|             |       | 2038 | 18118464.470 | 14932567.544 | 3185896.93 |

**Results for PHIM for Run 8 (ELL Summary Sensitivity\_Analysis\_1.RTF)**

|     |        |      |              |              |            |
|-----|--------|------|--------------|--------------|------------|
|     | Female | 2039 | 18222549.860 | 14977158.661 | 3245391.20 |
|     |        | 1990 | 307897.357   | 307897.357   | 0.000      |
|     |        | 1991 | 616547.418   | 616197.940   | 349.478    |
|     |        | 1992 | 931086.773   | 929703.983   | 1382.790   |
|     |        | 1993 | 1246155.671  | 1242754.061  | 3401.610   |
|     |        | 1994 | 1561212.934  | 1554524.842  | 6688.092   |
|     |        | 1995 | 1879967.742  | 1868342.252  | 11625.490  |
|     |        | 1996 | 2197488.109  | 2179049.368  | 18438.741  |
|     |        | 1997 | 2515698.453  | 2488231.913  | 27466.539  |
|     |        | 1998 | 2836249.556  | 2797284.185  | 38965.371  |
|     |        | 1999 | 3150201.390  | 3097300.010  | 52901.380  |
|     |        | 2000 | 3472722.342  | 3402635.313  | 70087.029  |
|     |        | 2001 | 3796994.889  | 3706244.209  | 90750.680  |
|     |        | 2002 | 4126619.935  | 4011180.961  | 115438.974 |
|     |        | 2003 | 4454982.533  | 4311185.214  | 143797.319 |
|     |        | 2004 | 4784343.030  | 4607937.301  | 176405.729 |
|     |        | 2005 | 5113443.121  | 4900219.199  | 213223.921 |
|     |        | 2006 | 5442543.963  | 5187664.194  | 254879.769 |
|     |        | 2007 | 5772441.497  | 5471061.584  | 301379.912 |
|     |        | 2008 | 6091911.943  | 5740681.472  | 351230.471 |
|     |        | 2009 | 6413671.330  | 6007006.594  | 406664.736 |
|     |        | 2010 | 6730763.530  | 6264833.572  | 465929.958 |
|     |        | 2011 | 7043614.101  | 6514068.137  | 529545.964 |
|     |        | 2012 | 7356270.780  | 6758012.865  | 598257.914 |
|     |        | 2013 | 7662551.964  | 6991962.079  | 670589.885 |
|     |        | 2014 | 7964551.465  | 7217703.211  | 746848.254 |
|     |        | 2015 | 8254895.403  | 7430641.525  | 824253.877 |
|     |        | 2016 | 8530661.848  | 7628131.023  | 902530.825 |
|     |        | 2017 | 8795826.122  | 7813822.293  | 982003.829 |
|     |        | 2018 | 9067233.707  | 7998931.177  | 1068302.53 |
|     |        | 2019 | 9335343.270  | 8177268.725  | 1158074.55 |
|     |        | 2020 | 9596110.883  | 8347091.751  | 1249019.13 |
|     |        | 2021 | 9833186.859  | 8498214.602  | 1334972.26 |
|     |        | 2022 | 10066452.037 | 8643159.509  | 1423292.53 |
|     |        | 2023 | 10295503.609 | 8782092.066  | 1513411.54 |
|     |        | 2024 | 10520125.318 | 8914826.803  | 1605298.51 |
|     |        | 2025 | 10731915.863 | 9037710.414  | 1694205.45 |
|     |        | 2026 | 10917495.549 | 9142876.694  | 1774618.85 |
|     |        | 2027 | 11098620.885 | 9242902.205  | 1855718.68 |
|     |        | 2028 | 11275441.234 | 9338338.067  | 1937103.17 |
|     |        | 2029 | 11447962.710 | 9429034.962  | 2018927.75 |
|     |        | 2030 | 11601867.623 | 9508821.131  | 2093046.49 |
|     |        | 2031 | 11731666.516 | 9574166.612  | 2157499.90 |
|     |        | 2032 | 11857585.969 | 9636022.958  | 2221563.01 |
|     |        | 2033 | 11980128.625 | 9694909.903  | 2285218.72 |
|     |        | 2034 | 12099562.464 | 9750816.127  | 2348746.34 |
|     |        | 2035 | 12195919.946 | 9795259.348  | 2400660.60 |
|     |        | 2036 | 12278201.969 | 9832155.629  | 2446046.34 |
|     |        | 2037 | 12358146.336 | 9867363.855  | 2490782.48 |
|     |        | 2038 | 12435978.633 | 9901091.966  | 2534886.67 |
|     |        | 2039 | 12512468.845 | 9933525.866  | 2578942.98 |
| IHD | Males  | 1990 | 517209.093   | 517209.093   | 0.000      |
|     |        | 1991 | 1019219.395  | 1013277.589  | 5941.806   |
|     |        | 1992 | 1509598.614  | 1487619.583  | 21979.031  |
|     |        | 1993 | 1992735.299  | 1941742.863  | 50992.437  |
|     |        | 1994 | 2462877.575  | 2368118.983  | 94758.592  |
|     |        | 1995 | 2928249.390  | 2772986.572  | 155262.817 |
|     |        | 1996 | 3377377.730  | 3144987.728  | 232390.001 |
|     |        | 1997 | 3809062.472  | 3484148.308  | 324914.164 |
|     |        | 1998 | 4222213.867  | 3791063.107  | 431150.760 |
|     |        | 1999 | 4708317.743  | 4131221.483  | 577096.260 |
|     |        | 2000 | 5182084.396  | 4443879.973  | 738204.423 |
|     |        | 2001 | 5644097.705  | 4729459.061  | 914638.644 |
|     |        | 2002 | 6107232.129  | 4997874.888  | 1109357.24 |
|     |        | 2003 | 6561785.704  | 5244936.242  | 1316849.46 |
|     |        | 2004 | 6996156.348  | 5467036.936  | 1529119.41 |
|     |        | 2005 | 7426261.361  | 5674659.537  | 1751601.82 |
|     |        | 2006 | 7849012.694  | 5866554.300  | 1982458.39 |
|     |        | 2007 | 8255300.530  | 6041036.006  | 2214264.52 |
|     |        | 2008 | 8650662.040  | 6202406.074  | 2448255.97 |
|     |        | 2009 | 9030818.513  | 6350455.581  | 2680362.93 |
|     |        | 2010 | 9403026.327  | 6489147.085  | 2913879.24 |
|     |        | 2011 | 9767535.506  | 6619123.018  | 3148412.49 |
|     |        | 2012 | 10123044.281 | 6740984.916  | 3382059.36 |
|     |        | 2013 | 10470104.786 | 6855529.143  | 3614575.64 |
|     |        | 2014 | 10807756.112 | 6963312.459  | 3844443.65 |
|     |        | 2015 | 11130681.425 | 7063448.730  | 4067232.70 |
|     |        | 2016 | 11448966.506 | 7159315.304  | 4289651.20 |

**Results for PHIM for Run 8 (ELL Summary Sensitivity\_Analysis\_1.RTF)**

|        |        |      |              |             |            |
|--------|--------|------|--------------|-------------|------------|
|        |        | 2017 | 11758164.882 | 7250060.612 | 4508104.27 |
|        |        | 2018 | 12054448.241 | 7334765.388 | 4719682.85 |
|        |        | 2019 | 12341606.261 | 7415327.405 | 4926278.86 |
|        |        | 2020 | 12600728.939 | 7486598.630 | 5114130.31 |
|        |        | 2021 | 12861767.105 | 7557124.797 | 5304642.31 |
|        |        | 2022 | 13114168.616 | 7624132.621 | 5490036.00 |
|        |        | 2023 | 13357894.797 | 7687640.446 | 5670254.35 |
|        |        | 2024 | 13593848.521 | 7748395.332 | 5845453.19 |
|        |        | 2025 | 13789177.359 | 7798022.081 | 5991155.28 |
|        |        | 2026 | 13993401.656 | 7849473.907 | 6143927.75 |
|        |        | 2027 | 14190519.224 | 7898787.195 | 6291732.03 |
|        |        | 2028 | 14381193.356 | 7945548.120 | 6435645.24 |
|        |        | 2029 | 14565171.927 | 7990340.366 | 6574831.56 |
|        |        | 2030 | 14697381.605 | 8022184.372 | 6675197.23 |
|        |        | 2031 | 14842203.512 | 8057018.247 | 6785185.27 |
|        |        | 2032 | 14982485.826 | 8090430.969 | 6892054.86 |
|        |        | 2033 | 15118410.647 | 8121954.620 | 6996456.03 |
|        |        | 2034 | 15250284.398 | 8152499.531 | 7097784.87 |
|        |        | 2035 | 15322911.166 | 8168803.113 | 7154108.05 |
|        |        | 2036 | 15405115.031 | 8187133.381 | 7217981.65 |
|        |        | 2037 | 15484709.137 | 8204797.856 | 7279911.28 |
|        |        | 2038 | 15561812.193 | 8221511.057 | 7340301.14 |
|        |        | 2039 | 15635992.616 | 8237510.462 | 7398482.15 |
|        | Female | 1990 | 147299.110   | 147299.110  | 0.000      |
|        |        | 1991 | 295122.462   | 293556.150  | 1566.312   |
|        |        | 1992 | 439962.920   | 434118.886  | 5844.034   |
|        |        | 1993 | 584735.615   | 570919.876  | 13815.740  |
|        |        | 1994 | 727640.783   | 701586.352  | 26054.430  |
|        |        | 1995 | 868486.937   | 825554.025  | 42932.912  |
|        |        | 1996 | 1010321.847  | 944642.123  | 65679.725  |
|        |        | 1997 | 1144230.930  | 1052069.315 | 92161.615  |
|        |        | 1998 | 1274513.622  | 1151326.131 | 123187.491 |
|        |        | 1999 | 1426725.938  | 1261227.256 | 165498.682 |
|        |        | 2000 | 1573462.680  | 1361644.640 | 211818.039 |
|        |        | 2001 | 1719132.015  | 1454947.280 | 264184.735 |
|        |        | 2002 | 1863006.732  | 1541314.473 | 321692.259 |
|        |        | 2003 | 2002943.227  | 1620141.463 | 382801.765 |
|        |        | 2004 | 2137798.705  | 1691493.522 | 446305.183 |
|        |        | 2005 | 2271071.245  | 1758148.981 | 512922.265 |
|        |        | 2006 | 2400707.731  | 1818992.007 | 581715.724 |
|        |        | 2007 | 2523634.512  | 1873615.425 | 650019.087 |
|        |        | 2008 | 2648752.232  | 1926249.472 | 722502.760 |
|        |        | 2009 | 2765973.961  | 1973361.507 | 792612.454 |
|        |        | 2010 | 2881329.235  | 2017723.786 | 863605.449 |
|        |        | 2011 | 2994972.694  | 2059437.071 | 935535.622 |
|        |        | 2012 | 3108958.829  | 2099504.955 | 1009453.87 |
|        |        | 2013 | 3218140.416  | 2136696.668 | 1081443.75 |
|        |        | 2014 | 3328387.914  | 2172939.532 | 1155448.38 |
|        |        | 2015 | 3435342.796  | 2207156.539 | 1228186.26 |
|        |        | 2016 | 3539189.408  | 2239412.175 | 1299777.23 |
|        |        | 2017 | 3640041.363  | 2269877.639 | 1370163.72 |
|        |        | 2018 | 3732645.362  | 2297181.188 | 1435464.17 |
|        |        | 2019 | 3821421.978  | 2322780.040 | 1498641.94 |
|        |        | 2020 | 3902115.950  | 2345528.385 | 1556587.57 |
|        |        | 2021 | 3984301.053  | 2368266.365 | 1616034.69 |
|        |        | 2022 | 4062629.299  | 2389565.269 | 1673064.03 |
|        |        | 2023 | 4137348.729  | 2409635.302 | 1727713.43 |
|        |        | 2024 | 4208611.493  | 2428499.792 | 1780111.70 |
|        |        | 2025 | 4269419.492  | 2444352.891 | 1825066.60 |
|        |        | 2026 | 4330969.998  | 2460222.070 | 1870747.93 |
|        |        | 2027 | 4389134.306  | 2475106.639 | 1914027.67 |
|        |        | 2028 | 4444222.970  | 2489133.659 | 1955089.31 |
|        |        | 2029 | 4496447.877  | 2502347.988 | 1994099.89 |
|        |        | 2030 | 4536975.698  | 2512344.098 | 2024631.60 |
|        |        | 2031 | 4578338.586  | 2522543.912 | 2055794.67 |
|        |        | 2032 | 4617397.784  | 2532186.672 | 2085211.11 |
|        |        | 2033 | 4654407.697  | 2541344.937 | 2113062.76 |
|        |        | 2034 | 4689913.454  | 2550064.896 | 2139848.56 |
|        |        | 2035 | 4712518.190  | 2555333.140 | 2157185.05 |
|        |        | 2036 | 4735845.827  | 2560748.390 | 2175097.44 |
|        |        | 2037 | 4757958.806  | 2565891.315 | 2192067.49 |
|        |        | 2038 | 4778813.806  | 2570799.153 | 2208014.65 |
|        |        | 2039 | 4798769.065  | 2575496.752 | 2223272.31 |
|        | Males  | 1990 | 75005.854    | 75005.854   | 0.000      |
|        |        | 1991 | 149463.017   | 148857.579  | 605.438    |
|        |        | 1992 | 222966.278   | 220721.442  | 2244.836   |
|        |        | 1993 | 296801.879   | 291465.538  | 5336.340   |
|        |        | 1994 | 372453.706   | 362138.761  | 10314.944  |
| Stroke |        |      |              |             |            |



**Results for PHIM for Run 8 (ELL Summary Sensitivity\_Analysis\_1.RTF)**

|        |      |             |             |            |
|--------|------|-------------|-------------|------------|
|        | 1995 | 448401.338  | 430992.340  | 17408.998  |
|        | 1996 | 523536.301  | 496799.834  | 26736.467  |
|        | 1997 | 596763.211  | 558477.862  | 38285.349  |
|        | 1998 | 667546.681  | 615652.556  | 51894.125  |
|        | 1999 | 734925.407  | 667708.618  | 67216.789  |
|        | 2000 | 803749.361  | 718494.030  | 85255.330  |
|        | 2001 | 870081.588  | 765002.365  | 105079.224 |
|        | 2002 | 935347.140  | 808486.480  | 126860.660 |
|        | 2003 | 1001627.349 | 850246.720  | 151380.630 |
|        | 2004 | 1066587.976 | 889073.689  | 177514.286 |
|        | 2005 | 1130548.052 | 925241.122  | 205306.930 |
|        | 2006 | 1195132.454 | 959766.378  | 235366.076 |
|        | 2007 | 1258974.043 | 992069.091  | 266904.952 |
|        | 2008 | 1320124.867 | 1021323.073 | 298801.794 |
|        | 2009 | 1380776.123 | 1048876.399 | 331899.724 |
|        | 2010 | 1440048.533 | 1074518.474 | 365530.059 |
|        | 2011 | 1497484.847 | 1098207.165 | 399277.682 |
|        | 2012 | 1554496.526 | 1120550.921 | 433945.605 |
|        | 2013 | 1610819.598 | 1141633.323 | 469186.275 |
|        | 2014 | 1667484.890 | 1161891.156 | 505593.734 |
|        | 2015 | 1720948.287 | 1180326.591 | 540621.696 |
|        | 2016 | 1775699.228 | 1198472.079 | 577227.149 |
|        | 2017 | 1830250.175 | 1215899.454 | 614350.721 |
|        | 2018 | 1875958.950 | 1230024.996 | 645933.954 |
|        | 2019 | 1920359.232 | 1243342.656 | 677016.575 |
|        | 2020 | 1960605.297 | 1255114.610 | 705490.687 |
|        | 2021 | 1998912.887 | 1266000.097 | 732912.790 |
|        | 2022 | 2036003.696 | 1276251.406 | 759752.289 |
|        | 2023 | 2071857.536 | 1285915.926 | 785941.611 |
|        | 2024 | 2106636.468 | 1295107.290 | 811529.178 |
|        | 2025 | 2136450.873 | 1302843.818 | 833607.056 |
|        | 2026 | 2164796.470 | 1310055.723 | 854740.747 |
|        | 2027 | 2192079.608 | 1316907.357 | 875172.251 |
|        | 2028 | 2218404.367 | 1323375.884 | 895028.482 |
|        | 2029 | 2243769.140 | 1329538.691 | 914230.449 |
|        | 2030 | 2263570.213 | 1334279.908 | 929290.305 |
|        | 2031 | 2282521.590 | 1338767.803 | 943753.787 |
|        | 2032 | 2300804.945 | 1343040.189 | 957764.756 |
|        | 2033 | 2318464.018 | 1347084.371 | 971379.647 |
|        | 2034 | 2335611.973 | 1350982.690 | 984629.283 |
|        | 2035 | 2347097.290 | 1353561.584 | 993535.707 |
|        | 2036 | 2358248.747 | 1356041.042 | 1002207.70 |
|        | 2037 | 2369033.655 | 1358429.953 | 1010603.70 |
|        | 2038 | 2379490.114 | 1360697.955 | 1018792.16 |
|        | 2039 | 2389546.238 | 1362862.833 | 1026683.40 |
| Female | 1990 | 56348.092   | 56348.092   | 0.000      |
|        | 1991 | 110871.862  | 110439.237  | 432.625    |
|        | 1992 | 165654.454  | 163993.691  | 1660.764   |
|        | 1993 | 220008.519  | 216044.325  | 3964.194   |
|        | 1994 | 275706.807  | 268009.200  | 7697.607   |
|        | 1995 | 331417.547  | 318443.340  | 12974.208  |
|        | 1996 | 387580.161  | 367517.773  | 20062.388  |
|        | 1997 | 442778.242  | 413937.047  | 28841.195  |
|        | 1998 | 496117.305  | 456994.131  | 39123.173  |
|        | 1999 | 548268.214  | 497290.107  | 50978.107  |
|        | 2000 | 601693.202  | 536773.908  | 64919.293  |
|        | 2001 | 652221.103  | 572348.111  | 79872.992  |
|        | 2002 | 703022.600  | 606306.988  | 96715.613  |
|        | 2003 | 752023.351  | 637383.187  | 114640.164 |
|        | 2004 | 799826.733  | 666086.776  | 133739.957 |
|        | 2005 | 847563.928  | 693291.951  | 154271.977 |
|        | 2006 | 894205.027  | 718465.686  | 175739.341 |
|        | 2007 | 939571.282  | 741657.393  | 197913.889 |
|        | 2008 | 983437.578  | 762949.139  | 220488.439 |
|        | 2009 | 1025803.786 | 782517.834  | 243285.952 |
|        | 2010 | 1066964.934 | 800593.500  | 266371.434 |
|        | 2011 | 1106954.044 | 817311.611  | 289642.433 |
|        | 2012 | 1146108.461 | 832949.545  | 313158.916 |
|        | 2013 | 1183544.689 | 847289.182  | 336255.507 |
|        | 2014 | 1221220.945 | 861101.245  | 360119.700 |
|        | 2015 | 1258289.311 | 874231.747  | 384057.564 |
|        | 2016 | 1294830.207 | 886704.210  | 408125.998 |
|        | 2017 | 1330332.626 | 898401.039  | 431931.586 |
|        | 2018 | 1360571.987 | 908070.002  | 452501.986 |
|        | 2019 | 1389848.723 | 917132.246  | 472716.476 |
|        | 2020 | 1416046.192 | 925029.506  | 491016.687 |
|        | 2021 | 1440588.850 | 932224.327  | 508364.523 |
|        | 2022 | 1464157.934 | 938967.807  | 525190.127 |

**Results for PHIM for Run 8 (ELL Summary Sensitivity\_Analysis\_1.RTF)**

|      |             |             |             |             |            |
|------|-------------|-------------|-------------|-------------|------------|
|      |             | 2023        | 1486810.237 | 945331.444  | 541478.793 |
|      |             | 2024        | 1508591.729 | 951315.044  | 557276.685 |
|      |             | 2025        | 1526875.621 | 956248.056  | 570627.565 |
|      |             | 2026        | 1543659.810 | 960693.681  | 582966.129 |
|      |             | 2027        | 1559623.774 | 964868.078  | 594755.697 |
|      |             | 2028        | 1574852.850 | 968807.036  | 606045.815 |
|      |             | 2029        | 1589437.452 | 972527.941  | 616909.511 |
|      |             | 2030        | 1600568.199 | 975300.428  | 625267.772 |
|      |             | 2031        | 1610776.297 | 977830.273  | 632946.024 |
|      |             | 2032        | 1620483.563 | 980227.033  | 640256.530 |
|      |             | 2033        | 1629745.442 | 982508.364  | 647237.078 |
|      |             | 2034        | 1638721.425 | 984688.861  | 654032.564 |
|      |             | 2035        | 1644649.404 | 986078.688  | 658570.716 |
|      |             | 2036        | 1650181.590 | 987365.122  | 662816.467 |
|      |             | 2037        | 1655476.066 | 988595.435  | 666880.631 |
|      |             | 2038        | 1660507.914 | 989778.015  | 670729.899 |
|      |             | 2039        | 1665361.569 | 990917.776  | 674443.793 |
| COPD | Males       | 1990        | 117002.906  | 117002.906  | 0.000      |
|      |             | 1991        | 233438.833  | 233267.082  | 171.751    |
|      |             | 1992        | 348084.047  | 347451.873  | 632.175    |
|      |             | 1993        | 467278.318  | 465729.213  | 1549.105   |
|      |             | 1994        | 584216.907  | 581176.279  | 3040.628   |
|      |             | 1995        | 697391.457  | 692216.921  | 5174.536   |
|      |             | 1996        | 809471.271  | 801387.246  | 8084.025   |
|      |             | 1997        | 922587.668  | 910624.798  | 11962.870  |
|      |             | 1998        | 1034072.457 | 1017323.014 | 16749.443  |
|      |             | 1999        | 1153475.399 | 1130425.017 | 23050.382  |
|      |             | 2000        | 1268050.268 | 1237569.292 | 30480.976  |
|      |             | 2001        | 1382786.209 | 1343400.314 | 39385.896  |
|      |             | 2002        | 1497557.412 | 1447638.765 | 49918.647  |
|      |             | 2003        | 1614405.229 | 1552287.400 | 62117.830  |
|      |             | 2004        | 1726672.489 | 1651141.457 | 75531.032  |
|      |             | 2005        | 1847277.524 | 1755680.519 | 91597.005  |
|      |             | 2006        | 1961009.963 | 1852357.488 | 108652.475 |
|      |             | 2007        | 2079868.908 | 1951344.717 | 128524.191 |
|      |             | 2008        | 2206755.783 | 2055036.264 | 151719.519 |
|      |             | 2009        | 2331993.380 | 2155222.245 | 176771.135 |
|      |             | 2010        | 2455130.176 | 2251670.727 | 203459.450 |
|      |             | 2011        | 2582657.849 | 2349303.236 | 233354.613 |
|      |             | 2012        | 2709719.005 | 2444216.123 | 265502.882 |
|      |             | 2013        | 2840547.005 | 2539465.319 | 301081.687 |
|      |             | 2014        | 2971677.135 | 2632519.371 | 339157.765 |
|      |             | 2015        | 3104538.983 | 2725225.525 | 379313.458 |
|      |             | 2016        | 3237650.175 | 2815506.063 | 422144.112 |
|      |             | 2017        | 3370561.253 | 2903356.340 | 467204.913 |
|      |             | 2018        | 3503136.371 | 2988221.394 | 514914.978 |
|      |             | 2019        | 3636402.758 | 3071129.617 | 565273.141 |
|      |             | 2020        | 3768054.453 | 3151204.094 | 616850.359 |
|      |             | 2021        | 3897675.067 | 3227698.924 | 669976.142 |
|      |             | 2022        | 4027307.132 | 3301829.584 | 725477.548 |
|      |             | 2023        | 4156698.720 | 3373536.053 | 783162.668 |
|      |             | 2024        | 4285772.226 | 3442822.823 | 842949.403 |
|      |             | 2025        | 4410759.298 | 3508450.702 | 902308.595 |
|      |             | 2026        | 4531411.064 | 3569537.358 | 961873.707 |
|      |             | 2027        | 4651145.233 | 3628106.188 | 1023039.05 |
|      |             | 2028        | 4769837.872 | 3684238.314 | 1085599.56 |
|      |             | 2029        | 4887747.179 | 3738155.614 | 1149591.56 |
| 2030 | 4997632.895 | 3787500.409 | 1210132.49  |             |            |
| 2031 | 5103301.991 | 3832887.507 | 1270414.48  |             |            |
| 2032 | 5207593.613 | 3876183.742 | 1331409.87  |             |            |
| 2033 | 5310556.138 | 3917391.248 | 1393164.89  |             |            |
| 2034 | 5412542.816 | 3956886.252 | 1455656.56  |             |            |
| 2035 | 5500522.473 | 3990484.532 | 1510037.94  |             |            |
| 2036 | 5588149.640 | 4022667.126 | 1565482.51  |             |            |
| 2037 | 5674667.886 | 4053522.714 | 1621145.17  |             |            |
| 2038 | 5760391.289 | 4083029.367 | 1677361.92  |             |            |
| 2039 | 5845459.234 | 4111534.737 | 1733924.50  |             |            |
|      | Female      | 1990        | 77434.846   | 77434.846   | 0.000      |
|      |             | 1991        | 160029.510  | 159888.196  | 141.314    |
|      |             | 1992        | 240642.531  | 240105.102  | 537.429    |
|      |             | 1993        | 329362.093  | 327975.243  | 1386.851   |
|      |             | 1994        | 418569.515  | 415792.415  | 2777.100   |
|      |             | 1995        | 509110.357  | 504227.261  | 4883.096   |
|      |             | 1996        | 600040.117  | 592287.363  | 7752.754   |
|      |             | 1997        | 691159.071  | 679663.199  | 11495.871  |
|      |             | 1998        | 782866.899  | 766701.409  | 16165.489  |
|      |             | 1999        | 881526.925  | 859206.967  | 22319.959  |
|      |             | 2000        | 977880.647  | 948461.355  | 29419.293  |

**Results for PHIM for Run 8 (ELL Summary Sensitivity\_Analysis\_1.RTF)**

|      |             |             |            |
|------|-------------|-------------|------------|
| 2001 | 1076787.404 | 1038806.227 | 37981.177  |
| 2002 | 1174842.754 | 1126997.110 | 47845.644  |
| 2003 | 1275102.681 | 1215835.800 | 59266.881  |
| 2004 | 1371026.306 | 1299471.976 | 71554.329  |
| 2005 | 1473954.509 | 1387580.154 | 86374.355  |
| 2006 | 1574450.828 | 1472024.579 | 102426.249 |
| 2007 | 1673790.211 | 1553885.152 | 119905.059 |
| 2008 | 1782360.738 | 1641545.579 | 140815.159 |
| 2009 | 1892944.209 | 1728738.497 | 164205.713 |
| 2010 | 2002131.282 | 1813096.072 | 189035.210 |
| 2011 | 2114522.152 | 1897781.354 | 216740.799 |
| 2012 | 2228079.372 | 1981389.517 | 246689.855 |
| 2013 | 2345377.689 | 2065530.942 | 279846.747 |
| 2014 | 2462498.422 | 2147333.742 | 315164.680 |
| 2015 | 2581450.312 | 2228943.148 | 352507.163 |
| 2016 | 2701959.301 | 2309380.352 | 392578.949 |
| 2017 | 2823834.967 | 2388508.711 | 435326.256 |
| 2018 | 2938265.081 | 2461226.847 | 477038.233 |
| 2019 | 3053254.880 | 2532246.032 | 521008.848 |
| 2020 | 3167073.216 | 2600957.472 | 566115.744 |
| 2021 | 3279517.699 | 2667298.427 | 612219.273 |
| 2022 | 3392060.964 | 2731739.661 | 660321.302 |
| 2023 | 3504296.171 | 2794173.674 | 710122.497 |
| 2024 | 3616019.231 | 2854428.579 | 761590.652 |
| 2025 | 3724611.269 | 2911700.320 | 812910.950 |
| 2026 | 3827181.707 | 2964581.460 | 862600.247 |
| 2027 | 3928684.441 | 3015279.977 | 913404.464 |
| 2028 | 4029124.892 | 3063997.991 | 965126.901 |
| 2029 | 4128269.068 | 3110539.909 | 1017729.16 |
| 2030 | 4221560.174 | 3153493.125 | 1068067.05 |
| 2031 | 4304170.584 | 3190368.856 | 1113801.73 |
| 2032 | 4384930.537 | 3225224.283 | 1159706.25 |
| 2033 | 4464357.691 | 3258427.726 | 1205929.97 |
| 2034 | 4542251.545 | 3289853.894 | 1252397.65 |
| 2035 | 4611066.648 | 3317155.343 | 1293911.30 |
| 2036 | 4670309.230 | 3339856.016 | 1330453.21 |
| 2037 | 4728179.514 | 3361366.230 | 1366813.28 |
| 2038 | 4785008.048 | 3381885.870 | 1403122.18 |
| 2039 | 4841291.793 | 3401539.308 | 1439752.48 |

---

## Results for PHIM for Run 8 (ELL Summary Sensitivity\_Analysis\_1.RTF)

\*\*\*\*\*

**Table 4: Estimated Loss of Life, All age groups combined, Population and Number deaths adjusted for Ecig scenario, cumulative over years**

| Disease      | Sex          | Year         | Years of life lost<br>NULL | Years of life lost<br>Ecig | Years of life<br>Saved |
|--------------|--------------|--------------|----------------------------|----------------------------|------------------------|
| All Diseases | Males        | 1990         | 1304839.645                | 1304839.645                | 0.000                  |
|              |              | 1991         | 2579865.358                | 2572600.490                | 7264.867               |
|              |              | 1992         | 3830683.831                | 3803786.696                | 26897.136              |
|              |              | 1993         | 5076567.803                | 5013752.402                | 62815.401              |
|              |              | 1994         | 6292145.526                | 6174521.349                | 117624.177             |
|              |              | 1995         | 7485537.010                | 7291613.736                | 193923.274             |
|              |              | 1996         | 8655955.028                | 8363484.555                | 292470.473             |
|              |              | 1997         | 9791729.713                | 9379568.653                | 412161.060             |
|              |              | 1998         | 10899134.186               | 10347534.742               | 551599.444             |
|              |              | 1999         | 12070409.674               | 11333258.066               | 737151.608             |
|              |              | 2000         | 13231384.595               | 12285353.508               | 946031.087             |
|              |              | 2001         | 14371761.018               | 13194046.777               | 1177714.24             |
|              |              | 2002         | 15508906.386               | 14072946.052               | 1435960.33             |
|              |              | 2003         | 16638100.422               | 14921489.488               | 1716610.93             |
|              |              | 2004         | 17736465.088               | 15726540.215               | 2009924.87             |
|              |              | 2005         | 18834658.606               | 16511583.186               | 2323075.42             |
|              |              | 2006         | 19909100.501               | 17256142.180               | 2652958.32             |
|              |              | 2007         | 20958321.463               | 17965735.523               | 2992585.94             |
|              |              | 2008         | 22000068.148               | 18655643.356               | 3344424.79             |
|              |              | 2009         | 23018816.903               | 19315719.113               | 3703097.79             |
|              |              | 2010         | 24018480.537               | 19948052.335               | 4070428.20             |
|              |              | 2011         | 25003034.574               | 20556234.236               | 4446800.34             |
|              |              | 2012         | 25969871.429               | 21138722.121               | 4831149.31             |
|              |              | 2013         | 26920275.180               | 21697486.402               | 5222788.78             |
|              |              | 2014         | 27849005.227               | 22230059.027               | 5618946.20             |
|              |              | 2015         | 28749620.400               | 22737966.499               | 6011653.90             |
|              |              | 2016         | 29622417.562               | 23214205.443               | 6408212.12             |
|              |              | 2017         | 30462559.724               | 23659528.665               | 6803031.06             |
|              |              | 2018         | 31293299.299               | 24094809.457               | 7198489.84             |
|              |              | 2019         | 32109993.427               | 24514391.156               | 7595602.27             |
|              |              | 2020         | 32883323.977               | 24909009.567               | 7974314.41             |
|              |              | 2021         | 33610102.554               | 25263549.502               | 8346553.05             |
|              |              | 2022         | 34322010.448               | 25603507.201               | 8718503.25             |
|              |              | 2023         | 35018383.550               | 25929009.915               | 9089373.63             |
|              |              | 2024         | 35700177.955               | 26241288.843               | 9458889.11             |
|              |              | 2025         | 36315500.346               | 26524488.285               | 9791012.06             |
|              |              | 2026         | 36896159.343               | 26777648.507               | 10118510.8             |
|              |              | 2027         | 37462570.116               | 27019573.996               | 10442996.1             |
|              |              | 2028         | 38015337.780               | 27250087.259               | 10765250.5             |
|              |              | 2029         | 38554814.764               | 27470792.778               | 11084022.0             |
|              |              | 2030         | 39003805.400               | 27658029.394               | 11345776.0             |
|              |              | 2031         | 39436509.703               | 27828248.187               | 11608261.5             |
| 2032         | 39858470.458 | 27990803.552 | 11867666.9                 |                            |                        |
| 2033         | 40270147.082 | 28145081.038 | 12125066.0                 |                            |                        |
| 2034         | 40672665.743 | 28293310.977 | 12379354.8                 |                            |                        |
| 2035         | 40962732.664 | 28403428.313 | 12559304.4                 |                            |                        |
| 2036         | 41255021.653 | 28509328.687 | 12745693.0                 |                            |                        |
| 2037         | 41540573.023 | 28611002.642 | 12929570.4                 |                            |                        |
| 2038         | 41820158.066 | 28707860.903 | 13112297.2                 |                            |                        |
| 2039         | 42093547.949 | 28801171.398 | 13292376.6                 |                            |                        |
|              | Female       | 1990         | 588979.406                 | 588979.406                 | 0.000                  |
| 1991         |              | 1182571.252  | 1180081.523                | 2489.729                   |                        |
| 1992         |              | 1777346.679  | 1767923.367                | 9423.312                   |                        |
| 1993         |              | 2380261.899  | 2357701.802                | 22560.097                  |                        |
| 1994         |              | 2983130.039  | 2939937.013                | 43193.026                  |                        |
| 1995         |              | 3588982.584  | 3516621.429                | 72361.155                  |                        |
| 1996         |              | 4195430.235  | 4083601.617                | 111828.618                 |                        |
| 1997         |              | 4793866.694  | 4634082.573                | 159784.122                 |                        |
| 1998         |              | 5389747.381  | 5172595.020                | 217152.361                 |                        |
| 1999         |              | 6006722.467  | 5715462.537                | 291259.930                 |                        |
| 2000         |              | 6625758.871  | 6250151.036                | 375607.835                 |                        |
| 2001         |              | 7245135.411  | 6773230.219                | 471905.192                 |                        |
| 2002         |              | 7867492.021  | 7286988.707                | 580503.314                 |                        |
| 2003         |              | 8485051.793  | 7786100.560                | 698951.233                 |                        |
| 2004         |              | 9092994.774  | 8266967.897                | 826026.877                 |                        |
| 2005         |              | 9706032.803  | 8741710.284                | 964322.520                 |                        |
| 2006         |              | 10311907.548 | 9200169.066                | 1111738.48                 |                        |
| 2007         |              | 10909437.502 | 9643859.975                | 1265577.53                 |                        |
| 2008         |              | 11506462.491 | 10075753.555               | 1430708.94                 |                        |
| 2009         |              | 12098393.287 | 10496708.454               | 1601684.83                 |                        |
| 2010         |              | 12681188.981 | 10902148.293               | 1779040.69                 |                        |

**Results for PHIM for Run 8 (ELL Summary Sensitivity\_Analysis\_1.RTF)**

|             |       |      |              |              |            |
|-------------|-------|------|--------------|--------------|------------|
|             |       | 2011 | 13260062.991 | 11295381.691 | 1964681.30 |
|             |       | 2012 | 13839417.441 | 11679593.934 | 2159823.51 |
|             |       | 2013 | 14409614.758 | 12050231.126 | 2359383.63 |
|             |       | 2014 | 14976658.746 | 12408907.031 | 2567751.71 |
|             |       | 2015 | 15529977.821 | 12751941.063 | 2778036.76 |
|             |       | 2016 | 16066640.764 | 13075770.530 | 2990870.23 |
|             |       | 2017 | 16590035.078 | 13383974.805 | 3206060.27 |
|             |       | 2018 | 17098716.137 | 13680044.979 | 3418671.16 |
|             |       | 2019 | 17599868.850 | 13965382.745 | 3634486.10 |
|             |       | 2020 | 18081346.241 | 14235928.155 | 3845418.09 |
|             |       | 2021 | 18537594.460 | 14484690.173 | 4052904.29 |
|             |       | 2022 | 18985300.234 | 14723519.725 | 4261780.51 |
|             |       | 2023 | 19423958.747 | 14952752.328 | 4471206.42 |
|             |       | 2024 | 19853347.772 | 15172045.215 | 4681302.56 |
|             |       | 2025 | 20252822.245 | 15374456.127 | 4878366.12 |
|             |       | 2026 | 20619307.063 | 15554213.791 | 5065093.27 |
|             |       | 2027 | 20976063.406 | 15725397.080 | 5250666.33 |
|             |       | 2028 | 21323641.947 | 15888923.024 | 5434718.92 |
|             |       | 2029 | 21662117.106 | 16044499.235 | 5617617.87 |
|             |       | 2030 | 21960971.694 | 16181376.617 | 5779595.08 |
|             |       | 2031 | 22224951.983 | 16297532.651 | 5927419.33 |
|             |       | 2032 | 22480397.853 | 16407464.328 | 6072933.53 |
|             |       | 2033 | 22728639.455 | 16512158.087 | 6216481.37 |
|             |       | 2034 | 22970448.888 | 16611528.933 | 6358919.95 |
|             |       | 2035 | 23164154.188 | 16690970.259 | 6473183.93 |
|             |       | 2036 | 23334538.616 | 16758144.519 | 6576394.10 |
|             |       | 2037 | 23499760.723 | 16822084.022 | 6677676.70 |
|             |       | 2038 | 23660308.401 | 16883247.318 | 6777061.08 |
|             |       | 2039 | 23817891.273 | 16941976.028 | 6875915.24 |
| Lung cancer | Males | 1990 | 595621.791   | 595621.791   | 0.000      |
|             |       | 1991 | 1177744.113  | 1177198.240  | 545.872    |
|             |       | 1992 | 1750034.892  | 1747988.578  | 2046.314   |
|             |       | 1993 | 2319752.308  | 2314791.185  | 4961.123   |
|             |       | 1994 | 2872597.339  | 2863022.678  | 9574.661   |
|             |       | 1995 | 3411494.825  | 3395279.804  | 16215.022  |
|             |       | 1996 | 3945569.726  | 3920057.798  | 25511.928  |
|             |       | 1997 | 4463316.362  | 4425904.675  | 37411.688  |
|             |       | 1998 | 4975301.180  | 4922872.498  | 52428.682  |
|             |       | 1999 | 5473691.125  | 5402975.098  | 70716.026  |
|             |       | 2000 | 5977500.570  | 5884103.927  | 93396.643  |
|             |       | 2001 | 6474795.516  | 6354428.686  | 120366.830 |
|             |       | 2002 | 6968769.705  | 6816658.282  | 152111.423 |
|             |       | 2003 | 7460282.140  | 7271120.277  | 189161.863 |
|             |       | 2004 | 7947048.275  | 7715722.719  | 231325.556 |
|             |       | 2005 | 8430571.669  | 8151677.579  | 278894.090 |
|             |       | 2006 | 8903945.390  | 8572329.622  | 331615.768 |
|             |       | 2007 | 9364177.982  | 8975273.259  | 388904.723 |
|             |       | 2008 | 9822525.458  | 9369902.664  | 452622.795 |
|             |       | 2009 | 10275228.886 | 9753177.840  | 522051.046 |
|             |       | 2010 | 10720275.500 | 10123666.653 | 596608.847 |
|             |       | 2011 | 11155356.373 | 10479420.924 | 675935.449 |
|             |       | 2012 | 11582611.617 | 10821610.302 | 761001.314 |
|             |       | 2013 | 11998803.791 | 11148251.570 | 850552.221 |
|             |       | 2014 | 12402087.090 | 11458432.550 | 943654.540 |
|             |       | 2015 | 12793451.706 | 11753693.275 | 1039758.43 |
|             |       | 2016 | 13160101.653 | 12024215.232 | 1135886.42 |
|             |       | 2017 | 13503583.414 | 12272041.248 | 1231542.17 |
|             |       | 2018 | 13859755.737 | 12522169.975 | 1337585.76 |
|             |       | 2019 | 14211625.176 | 12763470.874 | 1448154.30 |
|             |       | 2020 | 14553935.288 | 12993450.393 | 1560484.90 |
|             |       | 2021 | 14851747.495 | 13188551.204 | 1663196.29 |
|             |       | 2022 | 15144531.004 | 13375570.728 | 1768960.28 |
|             |       | 2023 | 15431932.496 | 13554631.848 | 1877300.65 |
|             |       | 2024 | 15713920.740 | 13726100.470 | 1987820.27 |
|             |       | 2025 | 15979112.816 | 13884749.186 | 2094363.63 |
|             |       | 2026 | 16206550.153 | 14016609.203 | 2189940.95 |
|             |       | 2027 | 16428826.050 | 14142254.313 | 2286571.74 |
|             |       | 2028 | 16645902.186 | 14261868.463 | 2384033.72 |
|             |       | 2029 | 16858126.517 | 14376173.188 | 2481953.33 |
|             |       | 2030 | 17045220.687 | 14476057.030 | 2569163.66 |
|             |       | 2031 | 17208482.610 | 14560155.513 | 2648327.10 |
|             |       | 2032 | 17367586.074 | 14640341.179 | 2727244.90 |
|             |       | 2033 | 17522716.280 | 14716485.356 | 2806230.92 |
|             |       | 2034 | 17674226.555 | 14789433.634 | 2884792.92 |
|             |       | 2035 | 17792201.734 | 14845970.979 | 2946230.76 |
|             |       | 2036 | 17903508.236 | 14897763.203 | 3005745.03 |
|             |       | 2037 | 18012162.345 | 14947429.759 | 3064732.59 |
|             |       | 2038 | 18118464.470 | 14994726.702 | 3123737.77 |

**Results for PHIM for Run 8 (ELL Summary Sensitivity\_Analysis\_1.RTF)**

|     |        |      |              |              |            |
|-----|--------|------|--------------|--------------|------------|
|     | Female | 2039 | 18222549.860 | 15040313.502 | 3182236.36 |
|     |        | 1990 | 307897.357   | 307897.357   | 0.000      |
|     |        | 1991 | 616547.418   | 616197.940   | 349.478    |
|     |        | 1992 | 931086.773   | 929704.919   | 1381.855   |
|     |        | 1993 | 1246155.671  | 1242758.600  | 3397.071   |
|     |        | 1994 | 1561212.934  | 1554538.166  | 6674.768   |
|     |        | 1995 | 1879967.742  | 1868372.608  | 11595.134  |
|     |        | 1996 | 2197488.109  | 2179108.218  | 18379.891  |
|     |        | 1997 | 2515698.453  | 2488334.583  | 27363.869  |
|     |        | 1998 | 2836249.556  | 2797450.302  | 38799.254  |
|     |        | 1999 | 3150201.390  | 3097550.140  | 52651.249  |
|     |        | 2000 | 3472722.342  | 3403000.568  | 69721.775  |
|     |        | 2001 | 3796994.889  | 3706756.269  | 90238.620  |
|     |        | 2002 | 4126619.935  | 4011877.447  | 114742.488 |
|     |        | 2003 | 4454982.533  | 4312105.879  | 142876.654 |
|     |        | 2004 | 4784343.030  | 4609124.130  | 175218.900 |
|     |        | 2005 | 5113443.121  | 4901714.150  | 211728.970 |
|     |        | 2006 | 5442543.963  | 5189511.979  | 253031.984 |
|     |        | 2007 | 5772441.497  | 5473311.123  | 299130.373 |
|     |        | 2008 | 6091911.943  | 5743368.038  | 348543.905 |
|     |        | 2009 | 6413671.330  | 6010179.754  | 403491.576 |
|     |        | 2010 | 6730763.530  | 6268536.211  | 462227.319 |
|     |        | 2011 | 7043614.101  | 6518340.771  | 525273.330 |
|     |        | 2012 | 7356270.780  | 6762903.663  | 593367.117 |
|     |        | 2013 | 7662551.964  | 6997506.856  | 665045.108 |
|     |        | 2014 | 7964551.465  | 7223942.283  | 740609.182 |
|     |        | 2015 | 8254895.403  | 7437602.737  | 817292.666 |
|     |        | 2016 | 8530661.848  | 7635824.979  | 894836.869 |
|     |        | 2017 | 8795826.122  | 7822270.477  | 973555.645 |
|     |        | 2018 | 9067233.707  | 8008186.138  | 1059047.57 |
|     |        | 2019 | 9335343.270  | 8187361.031  | 1147982.24 |
|     |        | 2020 | 9596110.883  | 8358049.520  | 1238061.36 |
|     |        | 2021 | 9833186.859  | 8510013.124  | 1323173.74 |
|     |        | 2022 | 10066452.037 | 8655819.521  | 1410632.52 |
|     |        | 2023 | 10295503.609 | 8795631.306  | 1499872.30 |
|     |        | 2024 | 10520125.318 | 8929257.879  | 1590867.44 |
|     |        | 2025 | 10731915.863 | 9053040.784  | 1678875.08 |
|     |        | 2026 | 10917495.549 | 9159030.869  | 1758464.68 |
|     |        | 2027 | 11098620.885 | 9259881.536  | 1838739.35 |
|     |        | 2028 | 11275441.234 | 9356144.584  | 1919296.65 |
|     |        | 2029 | 11447962.710 | 9447664.972  | 2000297.74 |
|     |        | 2030 | 11601867.623 | 9528254.180  | 2073613.44 |
|     |        | 2031 | 11731666.516 | 9594279.001  | 2137387.52 |
|     |        | 2032 | 11857585.969 | 9656800.425  | 2200785.54 |
|     |        | 2033 | 11980128.625 | 9716342.411  | 2263786.21 |
|     |        | 2034 | 12099562.464 | 9772889.067  | 2326673.40 |
|     |        | 2035 | 12195919.946 | 9817915.024  | 2378004.92 |
|     |        | 2036 | 12278201.969 | 9855287.107  | 2422914.86 |
|     |        | 2037 | 12358146.336 | 9890957.070  | 2467189.27 |
|     |        | 2038 | 12435978.633 | 9925135.159  | 2510843.47 |
|     |        | 2039 | 12512468.845 | 9958008.328  | 2554460.52 |
| IHD | Males  | 1990 | 517209.093   | 517209.093   | 0.000      |
|     |        | 1991 | 1019219.395  | 1013277.589  | 5941.806   |
|     |        | 1992 | 1509598.614  | 1487623.304  | 21975.310  |
|     |        | 1993 | 1992735.299  | 1941759.510  | 50975.789  |
|     |        | 1994 | 2462877.575  | 2368164.106  | 94713.469  |
|     |        | 1995 | 2928249.390  | 2773082.404  | 155166.985 |
|     |        | 1996 | 3377377.730  | 3145160.614  | 232217.115 |
|     |        | 1997 | 3809062.472  | 3484427.749  | 324634.723 |
|     |        | 1998 | 4222213.867  | 3791478.696  | 430735.172 |
|     |        | 1999 | 4708317.743  | 4131839.219  | 576478.525 |
|     |        | 2000 | 5182084.396  | 4444746.048  | 737338.348 |
|     |        | 2001 | 5644097.705  | 4730613.824  | 913483.880 |
|     |        | 2002 | 6107232.129  | 4999365.195  | 1107866.93 |
|     |        | 2003 | 6561785.704  | 5246799.928  | 1314985.78 |
|     |        | 2004 | 6996156.348  | 5469299.125  | 1526857.22 |
|     |        | 2005 | 7426261.361  | 5677356.900  | 1748904.46 |
|     |        | 2006 | 7849012.694  | 5869712.386  | 1979300.31 |
|     |        | 2007 | 8255300.530  | 6044671.139  | 2210629.39 |
|     |        | 2008 | 8650662.040  | 6206539.965  | 2444122.07 |
|     |        | 2009 | 9030818.513  | 6355100.189  | 2675718.32 |
|     |        | 2010 | 9403026.327  | 6494318.234  | 2908708.09 |
|     |        | 2011 | 9767535.506  | 6624834.181  | 3142701.32 |
|     |        | 2012 | 10123044.281 | 6747249.738  | 3375794.54 |
|     |        | 2013 | 10470104.786 | 6862359.136  | 3607745.65 |
|     |        | 2014 | 10807756.112 | 6970717.216  | 3837038.90 |
|     |        | 2015 | 11130681.425 | 7071439.552  | 4059241.87 |
|     |        | 2016 | 11448966.506 | 7167907.563  | 4281058.94 |

**Results for PHIM for Run 8 (ELL Summary Sensitivity\_Analysis\_1.RTF)**

|        |        |      |              |             |            |
|--------|--------|------|--------------|-------------|------------|
|        |        | 2017 | 11758164.882 | 7259262.519 | 4498902.36 |
|        |        | 2018 | 12054448.241 | 7344546.142 | 4709902.10 |
|        |        | 2019 | 12341606.261 | 7425688.908 | 4915917.35 |
|        |        | 2020 | 12600728.939 | 7497537.223 | 5103191.72 |
|        |        | 2021 | 12861767.105 | 7568641.526 | 5293125.58 |
|        |        | 2022 | 13114168.616 | 7636222.417 | 5477946.20 |
|        |        | 2023 | 13357894.797 | 7700299.344 | 5657595.45 |
|        |        | 2024 | 13593848.521 | 7761621.974 | 5832226.55 |
|        |        | 2025 | 13789177.359 | 7811789.869 | 5977387.49 |
|        |        | 2026 | 13993401.656 | 7863800.867 | 6129600.79 |
|        |        | 2027 | 14190519.224 | 7913669.144 | 6276850.08 |
|        |        | 2028 | 14381193.356 | 7960976.575 | 6420216.78 |
|        |        | 2029 | 14565171.927 | 8006308.006 | 6558863.92 |
|        |        | 2030 | 14697381.605 | 8038611.461 | 6658770.14 |
|        |        | 2031 | 14842203.512 | 8073945.359 | 6768258.15 |
|        |        | 2032 | 14982485.826 | 8107850.206 | 6874635.62 |
|        |        | 2033 | 15118410.647 | 8139852.616 | 6978558.03 |
|        |        | 2034 | 15250284.398 | 8170873.252 | 7079411.15 |
|        |        | 2035 | 15322911.166 | 8187487.637 | 7135423.53 |
|        |        | 2036 | 15405115.031 | 8206167.935 | 7198947.10 |
|        |        | 2037 | 15484709.137 | 8224178.758 | 7260530.38 |
|        |        | 2038 | 15561812.193 | 8241229.284 | 7320582.91 |
|        |        | 2039 | 15635992.616 | 8257558.569 | 7378434.05 |
|        | Female | 1990 | 147299.110   | 147299.110  | 0.000      |
|        |        | 1991 | 295122.462   | 293556.150  | 1566.312   |
|        |        | 1992 | 439962.920   | 434119.281  | 5843.639   |
|        |        | 1993 | 584735.615   | 570921.745  | 13813.871  |
|        |        | 1994 | 727640.783   | 701591.664  | 26049.119  |
|        |        | 1995 | 868486.937   | 825565.646  | 42921.291  |
|        |        | 1996 | 1010321.847  | 944663.934  | 65657.913  |
|        |        | 1997 | 1144230.930  | 1052105.512 | 92125.417  |
|        |        | 1998 | 1274513.622  | 1151381.463 | 123132.159 |
|        |        | 1999 | 1426725.938  | 1261311.647 | 165414.290 |
|        |        | 2000 | 1573462.680  | 1361764.684 | 211697.996 |
|        |        | 2001 | 1719132.015  | 1455109.357 | 264022.658 |
|        |        | 2002 | 1863006.732  | 1541524.664 | 321482.067 |
|        |        | 2003 | 2002943.227  | 1620404.971 | 382538.257 |
|        |        | 2004 | 2137798.705  | 1691814.519 | 445984.186 |
|        |        | 2005 | 2271071.245  | 1758532.971 | 512538.274 |
|        |        | 2006 | 2400707.731  | 1819441.871 | 581265.860 |
|        |        | 2007 | 2523634.512  | 1874132.834 | 649501.678 |
|        |        | 2008 | 2648752.232  | 1926839.659 | 721912.574 |
|        |        | 2009 | 2765973.961  | 1974024.984 | 791948.977 |
|        |        | 2010 | 2881329.235  | 2018463.839 | 862865.395 |
|        |        | 2011 | 2994972.694  | 2060256.588 | 934716.105 |
|        |        | 2012 | 3108958.829  | 2100407.247 | 1008551.58 |
|        |        | 2013 | 3218140.416  | 2137683.327 | 1080457.09 |
|        |        | 2014 | 3328387.914  | 2174015.024 | 1154372.89 |
|        |        | 2015 | 3435342.796  | 2208325.480 | 1227017.32 |
|        |        | 2016 | 3539189.408  | 2240677.283 | 1298512.12 |
|        |        | 2017 | 3640041.363  | 2271240.941 | 1368800.42 |
|        |        | 2018 | 3732645.362  | 2298638.221 | 1434007.14 |
|        |        | 2019 | 3821421.978  | 2324331.033 | 1497090.95 |
|        |        | 2020 | 3902115.950  | 2347172.948 | 1554943.00 |
|        |        | 2021 | 3984301.053  | 2370010.089 | 1614290.96 |
|        |        | 2022 | 4062629.299  | 2391407.358 | 1671221.94 |
|        |        | 2023 | 4137348.729  | 2411575.429 | 1725773.30 |
|        |        | 2024 | 4208611.493  | 2430536.804 | 1778074.69 |
|        |        | 2025 | 4269419.492  | 2446483.793 | 1822935.70 |
|        |        | 2026 | 4330969.998  | 2462450.414 | 1868519.58 |
|        |        | 2027 | 4389134.306  | 2477429.945 | 1911704.36 |
|        |        | 2028 | 4444222.970  | 2491549.879 | 1952673.09 |
|        |        | 2029 | 4496447.877  | 2504854.785 | 1991593.09 |
|        |        | 2030 | 4536975.698  | 2514932.766 | 2022042.93 |
|        |        | 2031 | 4578338.586  | 2525217.567 | 2053121.02 |
|        |        | 2032 | 4617397.784  | 2534942.452 | 2082455.33 |
|        |        | 2033 | 4654407.697  | 2544180.675 | 2110227.02 |
|        |        | 2034 | 4689913.454  | 2552978.373 | 2136935.08 |
|        |        | 2035 | 4712518.190  | 2558306.748 | 2154211.44 |
|        |        | 2036 | 4735845.827  | 2563784.328 | 2172061.50 |
|        |        | 2037 | 4757958.806  | 2568987.344 | 2188971.46 |
|        |        | 2038 | 4778813.806  | 2573953.376 | 2204860.43 |
|        |        | 2039 | 4798769.065  | 2578707.451 | 2220061.61 |
| Stroke | Males  | 1990 | 75005.854    | 75005.854   | 0.000      |
|        |        | 1991 | 149463.017   | 148857.579  | 605.438    |
|        |        | 1992 | 222966.278   | 220721.965  | 2244.314   |
|        |        | 1993 | 296801.879   | 291467.927  | 5333.952   |
|        |        | 1994 | 372453.706   | 362145.505  | 10308.201  |

**Results for PHIM for Run 8 (ELL Summary Sensitivity\_Analysis\_1.RTF)**

|        |      |             |             |            |
|--------|------|-------------|-------------|------------|
|        | 1995 | 448401.338  | 431007.002  | 17394.336  |
|        | 1996 | 523536.301  | 496827.046  | 26709.255  |
|        | 1997 | 596763.211  | 558522.825  | 38240.386  |
|        | 1998 | 667546.681  | 615720.747  | 51825.934  |
|        | 1999 | 734925.407  | 667805.227  | 67120.180  |
|        | 2000 | 803749.361  | 718627.813  | 85121.548  |
|        | 2001 | 870081.588  | 765179.394  | 104902.194 |
|        | 2002 | 935347.140  | 808714.260  | 126632.880 |
|        | 2003 | 1001627.349 | 850532.765  | 151094.584 |
|        | 2004 | 1066587.976 | 889424.734  | 177163.242 |
|        | 2005 | 1130548.052 | 925663.208  | 204884.844 |
|        | 2006 | 1195132.454 | 960266.693  | 234865.761 |
|        | 2007 | 1258974.043 | 992652.828  | 266321.215 |
|        | 2008 | 1320124.867 | 1021991.662 | 298133.205 |
|        | 2009 | 1380776.123 | 1049634.391 | 331141.732 |
|        | 2010 | 1440048.533 | 1075368.935 | 364679.598 |
|        | 2011 | 1497484.847 | 1099152.675 | 398332.172 |
|        | 2012 | 1554496.526 | 1121593.155 | 432903.371 |
|        | 2013 | 1610819.598 | 1142775.708 | 468043.890 |
|        | 2014 | 1667484.890 | 1163136.212 | 504348.678 |
|        | 2015 | 1720948.287 | 1181676.465 | 539271.822 |
|        | 2016 | 1775699.228 | 1199931.408 | 575767.820 |
|        | 2017 | 1830250.175 | 1217471.218 | 612778.957 |
|        | 2018 | 1875958.950 | 1231696.331 | 644262.619 |
|        | 2019 | 1920359.232 | 1245113.160 | 675246.072 |
|        | 2020 | 1960605.297 | 1256983.300 | 703621.997 |
|        | 2021 | 1998912.887 | 1267963.808 | 730949.080 |
|        | 2022 | 2036003.696 | 1278308.644 | 757695.052 |
|        | 2023 | 2071857.536 | 1288065.556 | 783791.981 |
|        | 2024 | 2106636.468 | 1297348.571 | 809287.898 |
|        | 2025 | 2136450.873 | 1305173.094 | 831277.779 |
|        | 2026 | 2164796.470 | 1312469.581 | 852326.889 |
|        | 2027 | 2192079.608 | 1319404.454 | 872675.154 |
|        | 2028 | 2218404.367 | 1325954.434 | 892449.933 |
|        | 2029 | 2243769.140 | 1332197.113 | 911572.028 |
|        | 2030 | 2263570.213 | 1337009.147 | 926561.065 |
|        | 2031 | 2282521.590 | 1341565.518 | 940956.072 |
|        | 2032 | 2300804.945 | 1345904.733 | 954900.212 |
|        | 2033 | 2318464.018 | 1350014.061 | 968449.957 |
|        | 2034 | 2335611.973 | 1353976.823 | 981635.149 |
|        | 2035 | 2347097.290 | 1356605.120 | 990492.171 |
|        | 2036 | 2358248.747 | 1359132.942 | 999115.805 |
|        | 2037 | 2369033.655 | 1361569.708 | 1007463.95 |
|        | 2038 | 2379490.114 | 1363884.448 | 1015605.67 |
|        | 2039 | 2389546.238 | 1366094.898 | 1023451.34 |
| Female | 1990 | 56348.092   | 56348.092   | 0.000      |
|        | 1991 | 110871.862  | 110439.237  | 432.625    |
|        | 1992 | 165654.454  | 163993.818  | 1660.637   |
|        | 1993 | 220008.519  | 216044.926  | 3963.593   |
|        | 1994 | 275706.807  | 268010.922  | 7695.885   |
|        | 1995 | 331417.547  | 318447.163  | 12970.384  |
|        | 1996 | 387580.161  | 367525.020  | 20055.141  |
|        | 1997 | 442778.242  | 413949.262  | 28828.979  |
|        | 1998 | 496117.305  | 457013.021  | 39104.283  |
|        | 1999 | 548268.214  | 497317.503  | 50950.712  |
|        | 2000 | 601693.202  | 536812.404  | 64880.798  |
|        | 2001 | 652221.103  | 572399.460  | 79821.643  |
|        | 2002 | 703022.600  | 606373.487  | 96649.113  |
|        | 2003 | 752023.351  | 637466.712  | 114556.639 |
|        | 2004 | 799826.733  | 666189.091  | 133637.641 |
|        | 2005 | 847563.928  | 693415.065  | 154148.863 |
|        | 2006 | 894205.027  | 718611.466  | 175593.561 |
|        | 2007 | 939571.282  | 741827.122  | 197744.160 |
|        | 2008 | 983437.578  | 763143.891  | 220293.687 |
|        | 2009 | 1025803.786 | 782738.638  | 243065.148 |
|        | 2010 | 1066964.934 | 800841.190  | 266123.744 |
|        | 2011 | 1106954.044 | 817587.113  | 289366.931 |
|        | 2012 | 1146108.461 | 833253.697  | 312854.764 |
|        | 2013 | 1183544.689 | 847622.412  | 335922.277 |
|        | 2014 | 1221220.945 | 861465.139  | 359755.807 |
|        | 2015 | 1258289.311 | 874628.356  | 383660.956 |
|        | 2016 | 1294830.207 | 887134.550  | 407695.657 |
|        | 2017 | 1330332.626 | 898866.053  | 431466.573 |
|        | 2018 | 1360571.987 | 908566.284  | 452005.703 |
|        | 2019 | 1389848.723 | 917659.889  | 472188.834 |
|        | 2020 | 1416046.192 | 925588.319  | 490457.873 |
|        | 2021 | 1440588.850 | 932813.597  | 507775.253 |
|        | 2022 | 1464157.934 | 939587.274  | 524570.661 |



**Results for PHIM for Run 8 (ELL Summary Sensitivity\_Analysis\_1.RTF)**

|      |             |             |             |             |            |
|------|-------------|-------------|-------------|-------------|------------|
| COPD | Males       | 2023        | 1486810.237 | 945981.036  | 540829.201 |
|      |             | 2024        | 1508591.729 | 951994.377  | 556597.352 |
|      |             | 2025        | 1526875.621 | 956956.053  | 569919.568 |
|      |             | 2026        | 1543659.810 | 961428.572  | 582231.237 |
|      |             | 2027        | 1559623.774 | 965629.144  | 593994.631 |
|      |             | 2028        | 1574852.850 | 969593.698  | 605259.152 |
|      |             | 2029        | 1589437.452 | 973339.580  | 616097.872 |
|      |             | 2030        | 1600568.199 | 976134.496  | 624433.704 |
|      |             | 2031        | 1610776.297 | 978685.277  | 632091.019 |
|      |             | 2032        | 1620483.563 | 981102.332  | 639381.231 |
|      |             | 2033        | 1629745.442 | 983403.481  | 646341.962 |
|      |             | 2034        | 1638721.425 | 985603.346  | 653118.079 |
|      |             | 2035        | 1644649.404 | 987008.584  | 657640.820 |
|      |             | 2036        | 1650181.590 | 988309.443  | 661872.147 |
|      |             | 2037        | 1655476.066 | 989553.766  | 665922.300 |
|      |             | 2038        | 1660507.914 | 990750.023  | 669757.891 |
|      |             | 2039        | 1665361.569 | 991903.153  | 673458.416 |
|      |             | 1990        | 117002.906  | 117002.906  | 0.000      |
|      |             | 1991        | 233438.833  | 233267.082  | 171.751    |
|      |             | 1992        | 348084.047  | 347452.849  | 631.199    |
|      |             | 1993        | 467278.318  | 465733.780  | 1544.537   |
|      |             | 1994        | 584216.907  | 581189.060  | 3027.847   |
|      |             | 1995        | 697391.457  | 692244.526  | 5146.931   |
|      |             | 1996        | 809471.271  | 801439.096  | 8032.175   |
|      |             | 1997        | 922587.668  | 910713.404  | 11874.264  |
|      |             | 1998        | 1034072.457 | 1017462.801 | 16609.656  |
|      |             | 1999        | 1153475.399 | 1130638.522 | 22836.877  |
|      |             | 2000        | 1268050.268 | 1237875.721 | 30174.547  |
|      |             | 2001        | 1382786.209 | 1343824.873 | 38961.337  |
|      |             | 2002        | 1497557.412 | 1448208.314 | 49349.097  |
|      |             | 2003        | 1614405.229 | 1553036.518 | 61368.711  |
|      |             | 2004        | 1726672.489 | 1652093.638 | 74578.851  |
|      |             | 2005        | 1847277.524 | 1756885.500 | 90392.025  |
|      |             | 2006        | 1961009.963 | 1853833.480 | 107176.484 |
|      |             | 2007        | 2079868.908 | 1953138.296 | 126730.612 |
|      |             | 2008        | 2206755.783 | 2057209.066 | 149546.717 |
|      |             | 2009        | 2331993.380 | 2157806.692 | 174186.688 |
|      |             | 2010        | 2455130.176 | 2254698.513 | 200431.663 |
|      |             | 2011        | 2582657.849 | 2352826.457 | 229831.392 |
|      |             | 2012        | 2709719.005 | 2448268.926 | 261450.079 |
| 2013 | 2840547.005 | 2544099.988 | 296447.017  |             |            |
| 2014 | 2971677.135 | 2637773.048 | 333904.087  |             |            |
| 2015 | 3104538.983 | 2731157.208 | 373381.775  |             |            |
| 2016 | 3237650.175 | 2822151.240 | 415498.936  |             |            |
| 2017 | 3370561.253 | 2910753.680 | 459807.573  |             |            |
| 2018 | 3503136.371 | 2996397.009 | 506739.362  |             |            |
| 2019 | 3636402.758 | 3080118.214 | 556284.544  |             |            |
| 2020 | 3768054.453 | 3161038.652 | 607015.801  |             |            |
| 2021 | 3897675.067 | 3238392.964 | 659282.102  |             |            |
| 2022 | 4027307.132 | 3313405.411 | 713901.721  |             |            |
| 2023 | 4156698.720 | 3386013.168 | 770685.552  |             |            |
| 2024 | 4285772.226 | 3456217.828 | 829554.398  |             |            |
| 2025 | 4410759.298 | 3522776.136 | 887983.162  |             |            |
| 2026 | 4531411.064 | 3584768.857 | 946642.208  |             |            |
| 2027 | 4651145.233 | 3644246.085 | 1006899.15  |             |            |
| 2028 | 4769837.872 | 3701287.788 | 1068550.08  |             |            |
| 2029 | 4887747.179 | 3756114.471 | 1131632.71  |             |            |
| 2030 | 4997632.895 | 3806351.755 | 1191281.14  |             |            |
| 2031 | 5103301.991 | 3852581.797 | 1250720.19  |             |            |
| 2032 | 5207593.613 | 3896707.434 | 1310886.18  |             |            |
| 2033 | 5310556.138 | 3938729.005 | 1371827.13  |             |            |
| 2034 | 5412542.816 | 3979027.268 | 1433515.55  |             |            |
| 2035 | 5500522.473 | 4013364.578 | 1487157.90  |             |            |
| 2036 | 5588149.640 | 4046264.606 | 1541885.03  |             |            |
| 2037 | 5674667.886 | 4077824.418 | 1596843.47  |             |            |
| 2038 | 5760391.289 | 4108020.469 | 1652370.82  |             |            |
| 2039 | 5845459.234 | 4137204.429 | 1708254.81  |             |            |
| 1990 | 77434.846   | 77434.846   | 0.000       |             |            |
| 1991 | 160029.510  | 159888.196  | 141.314     |             |            |
| 1992 | 240642.531  | 240105.349  | 537.182     |             |            |
| 1993 | 329362.093  | 327976.532  | 1385.562    |             |            |
| 1994 | 418569.515  | 415796.261  | 2773.254    |             |            |
| 1995 | 509110.357  | 504236.012  | 4874.345    |             |            |
| 1996 | 600040.117  | 592304.444  | 7735.673    |             |            |
| 1997 | 691159.071  | 679693.215  | 11465.855   |             |            |
| 1998 | 782866.899  | 766750.234  | 16116.665   |             |            |
| 1999 | 881526.925  | 859283.246  | 22243.679   |             |            |
| 2000 | 977880.647  | 948573.381  | 29307.266   |             |            |

Female

**Results for PHIM for Run 8 (ELL Summary Sensitivity\_Analysis\_1.RTF)**

|      |             |             |            |
|------|-------------|-------------|------------|
| 2001 | 1076787.404 | 1038965.134 | 37822.270  |
| 2002 | 1174842.754 | 1127213.108 | 47629.646  |
| 2003 | 1275102.681 | 1216122.999 | 58979.682  |
| 2004 | 1371026.306 | 1299840.157 | 71186.149  |
| 2005 | 1473954.509 | 1388048.096 | 85906.413  |
| 2006 | 1574450.828 | 1472603.750 | 101847.078 |
| 2007 | 1673790.211 | 1554588.896 | 119201.316 |
| 2008 | 1782360.738 | 1642401.967 | 139958.770 |
| 2009 | 1892944.209 | 1729765.078 | 163179.132 |
| 2010 | 2002131.282 | 1814307.053 | 187824.229 |
| 2011 | 2114522.152 | 1899197.218 | 215324.935 |
| 2012 | 2228079.372 | 1983029.326 | 245050.045 |
| 2013 | 2345377.689 | 2067418.531 | 277959.158 |
| 2014 | 2462498.422 | 2149484.585 | 313013.837 |
| 2015 | 2581450.312 | 2231384.491 | 350065.821 |
| 2016 | 2701959.301 | 2312133.718 | 389825.583 |
| 2017 | 2823834.967 | 2391597.334 | 432237.633 |
| 2018 | 2938265.081 | 2464654.336 | 473610.744 |
| 2019 | 3053254.880 | 2536030.792 | 517224.087 |
| 2020 | 3167073.216 | 2605117.367 | 561955.848 |
| 2021 | 3279517.699 | 2671853.363 | 607664.336 |
| 2022 | 3392060.964 | 2736705.572 | 655355.391 |
| 2023 | 3504296.171 | 2799564.556 | 704731.616 |
| 2024 | 3616019.231 | 2860256.154 | 755763.077 |
| 2025 | 3724611.269 | 2917975.498 | 806635.772 |
| 2026 | 3827181.707 | 2971303.935 | 855877.772 |
| 2027 | 3928684.441 | 3022456.455 | 906227.985 |
| 2028 | 4029124.892 | 3071634.863 | 957490.030 |
| 2029 | 4128269.068 | 3118639.898 | 1009629.17 |
| 2030 | 4221560.174 | 3162055.176 | 1059505.00 |
| 2031 | 4304170.584 | 3199350.806 | 1104819.78 |
| 2032 | 4384930.537 | 3234619.119 | 1150311.42 |
| 2033 | 4464357.691 | 3268231.520 | 1196126.17 |
| 2034 | 4542251.545 | 3300058.147 | 1242193.40 |
| 2035 | 4611066.648 | 3327739.903 | 1283326.75 |
| 2036 | 4670309.230 | 3350763.641 | 1319545.59 |
| 2037 | 4728179.514 | 3372585.843 | 1355593.67 |
| 2038 | 4785008.048 | 3393408.760 | 1391599.29 |
| 2039 | 4841291.793 | 3413357.096 | 1427934.70 |

---

## Results for PHIM for Run 8 (ELL Summary Sensitivity\_Analysis\_1.RTF)

\*\*\*\*\*

**Table 5: Estimated Loss of Life, at the end of follow-up, Population unadjusted for deaths in Ecig scenario**

| Disease      | Sex    | Age Group   | Years of life lost<br>NULL | Years of life lost<br>Ecig | Years of life<br>Saved |
|--------------|--------|-------------|----------------------------|----------------------------|------------------------|
| All Diseases | Males  | 30-34       | 443911.034                 | 283513.526                 | 160397.508             |
|              |        | 35-39       | 1146798.555                | 727878.348                 | 418920.207             |
|              |        | 40-44       | 2609591.408                | 1628749.640                | 980841.768             |
|              |        | 45-49       | 4775841.753                | 2953797.370                | 1822044.38             |
|              |        | 50-54       | 7446969.205                | 4724153.214                | 2722815.99             |
|              |        | 55-59       | 8240205.925                | 5539925.361                | 2700280.56             |
|              |        | 60-64       | 8772829.118                | 6224787.137                | 2548041.98             |
|              |        | 65-69       | 6161494.678                | 4671962.439                | 1489532.24             |
|              |        | 70-74       | 2495906.274                | 1934299.659                | 561606.615             |
|              | 75-79  | 0.000       | 0.000                      | 0.000                      |                        |
|              | Female | 30-34       | 229140.561                 | 160891.837                 | 68248.724              |
|              |        | 35-39       | 570217.942                 | 396419.543                 | 173798.399             |
|              |        | 40-44       | 1267538.938                | 866551.970                 | 400986.968             |
|              |        | 45-49       | 2340070.698                | 1587299.227                | 752771.471             |
|              |        | 50-54       | 3743803.613                | 2554271.088                | 1189532.52             |
|              |        | 55-59       | 4591478.168                | 3222652.995                | 1368825.17             |
|              |        | 60-64       | 5207367.788                | 3737506.825                | 1469860.96             |
|              |        | 65-69       | 4092181.394                | 3045173.491                | 1047007.90             |
| 70-74        |        | 1776092.171 | 1330712.725                | 445379.446                 |                        |
| Lung cancer  | Males  | 30-34       | 66065.017                  | 55923.424                  | 10141.594              |
|              |        | 35-39       | 232509.414                 | 197942.556                 | 34566.858              |
|              |        | 40-44       | 688628.041                 | 577977.753                 | 110650.288             |
|              |        | 45-49       | 1528300.367                | 1256476.601                | 271823.766             |
|              |        | 50-54       | 2730187.229                | 2221271.851                | 508915.379             |
|              |        | 55-59       | 3909101.673                | 3164448.008                | 744653.665             |
|              |        | 60-64       | 4287716.660                | 3527101.325                | 760615.335             |
|              |        | 65-69       | 3467897.115                | 2878363.954                | 589533.161             |
|              |        | 70-74       | 1312144.343                | 1097653.190                | 214491.153             |
|              | 75-79  | 0.000       | 0.000                      | 0.000                      |                        |
|              | Female | 30-34       | 51913.113                  | 43821.526                  | 8091.587               |
|              |        | 35-39       | 189792.904                 | 160431.387                 | 29361.517              |
|              |        | 40-44       | 527596.573                 | 434094.706                 | 93501.867              |
|              |        | 45-49       | 1122524.269                | 901483.801                 | 221040.468             |
|              |        | 50-54       | 1882214.322                | 1489859.661                | 392354.661             |
|              |        | 55-59       | 2595581.943                | 2034081.135                | 561500.808             |
|              |        | 60-64       | 2846273.090                | 2249959.482                | 596313.608             |
|              |        | 65-69       | 2358758.394                | 1871965.494                | 486792.899             |
| 70-74        |        | 937814.238  | 747828.673                 | 189985.564                 |                        |
| IHD          | Males  | 30-34       | 263834.566                 | 149796.859                 | 114037.707             |
|              |        | 35-39       | 692140.150                 | 380610.015                 | 311530.135             |
|              |        | 40-44       | 1519708.432                | 788048.033                 | 731660.400             |
|              |        | 45-49       | 2568546.697                | 1262234.215                | 1306312.48             |
|              |        | 50-54       | 3632929.903                | 1823612.815                | 1809317.09             |
|              |        | 55-59       | 2807892.356                | 1416050.153                | 1391842.20             |
|              |        | 60-64       | 2599825.934                | 1451632.196                | 1148193.74             |
|              |        | 65-69       | 1113578.307                | 674122.336                 | 439455.971             |
|              |        | 70-74       | 437536.271                 | 291403.841                 | 146132.430             |
|              | 75-79  | 0.000       | 0.000                      | 0.000                      |                        |
|              | Female | 30-34       | 79649.097                  | 46818.087                  | 32831.009              |
|              |        | 35-39       | 193965.908                 | 105512.829                 | 88453.079              |
|              |        | 40-44       | 403380.974                 | 204868.837                 | 198512.137             |
|              |        | 45-49       | 671385.408                 | 325592.497                 | 345792.911             |
|              |        | 50-54       | 1011875.989                | 508623.517                 | 503252.473             |
|              |        | 55-59       | 849875.715                 | 437843.253                 | 412032.463             |
|              |        | 60-64       | 925490.876                 | 525205.976                 | 400284.901             |
|              |        | 65-69       | 455463.881                 | 281683.242                 | 173780.639             |
| 70-74        |        | 207681.216  | 139348.514                 | 68332.703                  |                        |
| Stroke       | Males  | 30-34       | 73463.650                  | 48866.726                  | 24596.924              |
|              |        | 35-39       | 151934.057                 | 98875.261                  | 53058.796              |
|              |        | 40-44       | 262845.974                 | 164537.534                 | 98308.441              |
|              |        | 45-49       | 383421.246                 | 228863.438                 | 154557.808             |
|              |        | 50-54       | 479872.634                 | 268361.358                 | 211511.275             |
|              |        | 55-59       | 437124.903                 | 230192.861                 | 206932.042             |
|              |        | 60-64       | 419457.235                 | 223297.609                 | 196159.625             |
|              |        | 65-69       | 128180.574                 | 69294.513                  | 58886.061              |
|              |        | 70-74       | 53245.965                  | 30573.533                  | 22672.432              |
|              | 75-79  | 0.000       | 0.000                      | 0.000                      |                        |
|              | Female | 30-34       | 62919.090                  | 44427.246                  | 18491.844              |

**Results for PHIM for Run 8 (ELL Summary Sensitivity\_Analysis\_1.RTF)**

|      |        |       |             |             |            |
|------|--------|-------|-------------|-------------|------------|
|      |        | 35-39 | 120806.205  | 81870.597   | 38935.609  |
|      |        | 40-44 | 203391.885  | 130620.369  | 72771.516  |
|      |        | 45-49 | 278172.097  | 169570.488  | 108601.610 |
|      |        | 50-54 | 325979.181  | 189257.248  | 136721.933 |
|      |        | 55-59 | 275161.340  | 151913.223  | 123248.117 |
|      |        | 60-64 | 268920.493  | 149330.635  | 119589.858 |
|      |        | 65-69 | 87956.054   | 49573.016   | 38383.037  |
|      |        | 70-74 | 42055.224   | 24354.955   | 17700.269  |
|      |        | 75-79 | 0.000       | 0.000       | 0.000      |
| COPD | Males  | 30-34 | 40547.801   | 28926.517   | 11621.284  |
|      |        | 35-39 | 70214.933   | 50450.515   | 19764.418  |
|      |        | 40-44 | 138408.960  | 98186.321   | 40222.640  |
|      |        | 45-49 | 295573.443  | 206223.116  | 89350.327  |
|      |        | 50-54 | 603979.438  | 410907.190  | 193072.248 |
|      |        | 55-59 | 1086086.992 | 729234.339  | 356852.653 |
|      |        | 60-64 | 1465829.290 | 1022756.008 | 443073.282 |
|      |        | 65-69 | 1451838.682 | 1050181.636 | 401657.046 |
|      |        | 70-74 | 692979.695  | 514669.095  | 178310.599 |
|      |        | 75-79 | 0.000       | 0.000       | 0.000      |
|      | Female | 30-34 | 34659.261   | 25824.977   | 8834.284   |
|      |        | 35-39 | 65652.924   | 48604.731   | 17048.194  |
|      |        | 40-44 | 133169.505  | 96968.058   | 36201.447  |
|      |        | 45-49 | 267988.924  | 190652.442  | 77336.483  |
|      |        | 50-54 | 523734.121  | 366530.662  | 157203.458 |
|      |        | 55-59 | 870859.170  | 598815.385  | 272043.785 |
|      |        | 60-64 | 1166683.329 | 813010.733  | 353672.596 |
|      |        | 65-69 | 1190003.066 | 841951.738  | 348051.328 |
|      |        | 70-74 | 588541.493  | 419180.583  | 169360.910 |
|      |        | 75-79 | 0.000       | 0.000       | 0.000      |

---

## Results for PHIM for Run 8 (ELL Summary Sensitivity\_Analysis\_1.RTF)

\*\*\*\*\*

**Table 6: Estimated Loss of Life, at the end of follow-up, Population and Number deaths adjusted for Ecig scenario**

| Disease      | Sex    | Age Group   | Years of life lost<br>NULL | Years of life lost<br>Ecig | Years of life<br>Saved |
|--------------|--------|-------------|----------------------------|----------------------------|------------------------|
| All Diseases | Males  | 30-34       | 443911.034                 | 283533.737                 | 160377.297             |
|              |        | 35-39       | 1146798.555                | 728031.146                 | 418767.409             |
|              |        | 40-44       | 2609591.408                | 1629739.737                | 979851.671             |
|              |        | 45-49       | 4775841.753                | 2958159.795                | 1817681.96             |
|              |        | 50-54       | 7446969.205                | 4737290.061                | 2709679.14             |
|              |        | 55-59       | 8240205.925                | 5560248.758                | 2679957.17             |
|              |        | 60-64       | 8772829.118                | 6257475.672                | 2515353.45             |
|              |        | 65-69       | 6161494.678                | 4698289.641                | 1463205.04             |
|              |        | 70-74       | 2495906.274                | 1948402.852                | 547503.421             |
|              | 75-79  | 0.000       | 0.000                      | 0.000                      |                        |
|              | Female | 30-34       | 229140.561                 | 160896.501                 | 68244.060              |
|              |        | 35-39       | 570217.942                 | 396454.180                 | 173763.762             |
|              |        | 40-44       | 1267538.938                | 866773.267                 | 400765.670             |
|              |        | 45-49       | 2340070.698                | 1588278.926                | 751791.772             |
|              |        | 50-54       | 3743803.613                | 2557395.308                | 1186408.30             |
|              |        | 55-59       | 4591478.168                | 3228620.118                | 1362858.05             |
|              |        | 60-64       | 5207367.788                | 3748663.479                | 1458704.31             |
|              |        | 65-69       | 4092181.394                | 3056795.802                | 1035385.59             |
| 70-74        |        | 1776092.171 | 1338098.446                | 437993.725                 |                        |
| Lung cancer  | Males  | 30-34       | 66065.017                  | 55927.195                  | 10137.822              |
|              |        | 35-39       | 232509.414                 | 197983.232                 | 34526.183              |
|              |        | 40-44       | 688628.041                 | 578330.639                 | 110297.403             |
|              |        | 45-49       | 1528300.367                | 1258365.639                | 269934.728             |
|              |        | 50-54       | 2730187.229                | 2227519.492                | 502667.737             |
|              |        | 55-59       | 3909101.673                | 3176214.838                | 732886.835             |
|              |        | 60-64       | 4287716.660                | 3545936.208                | 741780.452             |
|              |        | 65-69       | 3467897.115                | 2894407.569                | 573489.546             |
|              |        | 70-74       | 1312144.343                | 1105628.691                | 206515.653             |
|              | 75-79  | 0.000       | 0.000                      | 0.000                      |                        |
|              | Female | 30-34       | 51913.113                  | 43822.855                  | 8090.257               |
|              |        | 35-39       | 189792.904                 | 160445.486                 | 29347.418              |
|              |        | 40-44       | 527596.573                 | 434208.972                 | 93387.602              |
|              |        | 45-49       | 1122524.269                | 902052.848                 | 220471.421             |
|              |        | 50-54       | 1882214.322                | 1491724.974                | 390489.348             |
|              |        | 55-59       | 2595581.943                | 2037918.920                | 557663.023             |
|              |        | 60-64       | 2846273.090                | 2256825.452                | 589447.637             |
|              |        | 65-69       | 2358758.394                | 1879052.199                | 479706.195             |
| 70-74        |        | 937814.238  | 751956.622                 | 185857.616                 |                        |
| IHD          | Males  | 30-34       | 263834.566                 | 149808.016                 | 114026.550             |
|              |        | 35-39       | 692140.150                 | 380690.427                 | 311449.724             |
|              |        | 40-44       | 1519708.432                | 788519.675                 | 731188.757             |
|              |        | 45-49       | 2568546.697                | 1264012.196                | 1304534.50             |
|              |        | 50-54       | 3632929.903                | 1828285.115                | 1804644.79             |
|              |        | 55-59       | 2807892.356                | 1420233.199                | 1387659.16             |
|              |        | 60-64       | 2599825.934                | 1457160.471                | 1142665.46             |
|              |        | 65-69       | 1113578.307                | 676344.771                 | 437233.536             |
|              |        | 70-74       | 437536.271                 | 292504.699                 | 145031.572             |
|              | 75-79  | 0.000       | 0.000                      | 0.000                      |                        |
|              | Female | 30-34       | 79649.097                  | 46819.543                  | 32829.554              |
|              |        | 35-39       | 193965.908                 | 105522.543                 | 88443.365              |
|              |        | 40-44       | 403380.974                 | 204920.532                 | 198460.442             |
|              |        | 45-49       | 671385.408                 | 325779.141                 | 345606.267             |
|              |        | 50-54       | 1011875.989                | 509157.987                 | 502718.003             |
|              |        | 55-59       | 849875.715                 | 438422.817                 | 411452.898             |
|              |        | 60-64       | 925490.876                 | 526189.092                 | 399301.784             |
|              |        | 65-69       | 455463.881                 | 282210.076                 | 173253.806             |
| 70-74        |        | 207681.216  | 139685.721                 | 67995.495                  |                        |
| Stroke       | Males  | 30-34       | 73463.650                  | 48869.745                  | 24593.905              |
|              |        | 35-39       | 151934.057                 | 98894.191                  | 53039.866              |
|              |        | 40-44       | 262845.974                 | 164627.468                 | 98218.506              |
|              |        | 45-49       | 383421.246                 | 229164.222                 | 154257.024             |
|              |        | 50-54       | 479872.634                 | 269034.434                 | 210838.199             |
|              |        | 55-59       | 437124.903                 | 230929.838                 | 206195.066             |
|              |        | 60-64       | 419457.235                 | 224294.742                 | 195162.492             |
|              |        | 65-69       | 128180.574                 | 69569.132                  | 58611.442              |
|              |        | 70-74       | 53245.965                  | 30711.126                  | 22534.839              |
|              | 75-79  | 0.000       | 0.000                      | 0.000                      |                        |
|              | Female | 30-34       | 62919.090                  | 44428.314                  | 18490.776              |

**Results for PHIM for Run 8 (ELL Summary Sensitivity\_Analysis\_1.RTF)**

|      |        |       |             |             |            |
|------|--------|-------|-------------|-------------|------------|
|      |        | 35-39 | 120806.205  | 81876.591   | 38929.614  |
|      |        | 40-44 | 203391.885  | 130647.359  | 72744.526  |
|      |        | 45-49 | 278172.097  | 169653.514  | 108518.583 |
|      |        | 50-54 | 325979.181  | 189436.981  | 136542.200 |
|      |        | 55-59 | 275161.340  | 152117.284  | 123044.056 |
|      |        | 60-64 | 268920.493  | 149638.432  | 119282.061 |
|      |        | 65-69 | 87956.054   | 49679.938   | 38276.116  |
|      |        | 70-74 | 42055.224   | 24424.740   | 17630.484  |
|      |        | 75-79 | 0.000       | 0.000       | 0.000      |
| COPD | Males  | 30-34 | 40547.801   | 28928.781   | 11619.020  |
|      |        | 35-39 | 70214.933   | 50463.296   | 19751.637  |
|      |        | 40-44 | 138408.960  | 98261.955   | 40147.006  |
|      |        | 45-49 | 295573.443  | 206617.738  | 88955.705  |
|      |        | 50-54 | 603979.438  | 412451.019  | 191528.419 |
|      |        | 55-59 | 1086086.992 | 732870.883  | 353216.109 |
|      |        | 60-64 | 1465829.290 | 1030084.251 | 435745.039 |
|      |        | 65-69 | 1451838.682 | 1057968.169 | 393870.513 |
|      |        | 70-74 | 692979.695  | 519558.337  | 173421.357 |
|      |        | 75-79 | 0.000       | 0.000       | 0.000      |
|      | Female | 30-34 | 34659.261   | 25825.788   | 8833.473   |
|      |        | 35-39 | 65652.924   | 48609.560   | 17043.365  |
|      |        | 40-44 | 133169.505  | 96996.404   | 36173.101  |
|      |        | 45-49 | 267988.924  | 190793.424  | 77195.500  |
|      |        | 50-54 | 523734.121  | 367075.367  | 156658.754 |
|      |        | 55-59 | 870859.170  | 600161.097  | 270698.073 |
|      |        | 60-64 | 1166683.329 | 816010.503  | 350672.826 |
|      |        | 65-69 | 1190003.066 | 845853.589  | 344149.476 |
|      |        | 70-74 | 588541.493  | 422031.364  | 166510.130 |
|      |        | 75-79 | 0.000       | 0.000       | 0.000      |

---

## Results for PHIM for Run 10 (ELL Summary Sensitivity\_Analysis\_1.RTF)

\*\*\*\*\*

### Estimated Loss of Life from the E Component for Run: 10, Simulation: 1

Country: US (United States)  
 Follow-up Period: 1990 to 2039

**Table 1: Estimated Loss of Life, at the end of follow-up, all age groups combined, Population unadjusted for deaths in Ecig scenario**

| Disease      | Sex    | Year | Years of life lost<br>NULL | Years of life lost<br>Ecig | Years of life<br>Saved |
|--------------|--------|------|----------------------------|----------------------------|------------------------|
| All Diseases | Males  | 2039 | 42093547.949               | 30897261.850               | 11196286.1             |
|              | Female | 2039 | 23817891.273               | 18078316.674               | 5739574.60             |
| Lung cancer  | Males  | 2039 | 18222549.860               | 15637008.994               | 2585540.87             |
|              | Female | 2039 | 12512468.845               | 10449198.497               | 2063270.35             |
| IHD          | Males  | 2039 | 15635992.616               | 9364515.440                | 6271477.18             |
|              | Female | 2039 | 4798769.065                | 2912686.826                | 1886082.24             |
| Stroke       | Males  | 2039 | 2389546.238                | 1509079.047                | 880467.191             |
|              | Female | 2039 | 1665361.569                | 1087756.438                | 577605.132             |
| COPD         | Males  | 2039 | 5845459.234                | 4386658.369                | 1458800.86             |
|              | Female | 2039 | 4841291.793                | 3628674.913                | 1212616.88             |

## Results for PHIM for Run 10 (ELL Summary Sensitivity\_Analysis\_1.RTF)

\*\*\*\*\*

**Table 2: Estimated Loss of Life, at the end of follow-up, all age groups combined, Population and Number deaths adjusted for Ecig scenario**

| Disease      | Sex    | Year | Years of life lost<br>NULL | Years of life lost<br>Ecig | Years of life<br>Saved |
|--------------|--------|------|----------------------------|----------------------------|------------------------|
| All Diseases | Males  | 2039 | 42093547.949               | 31007525.489               | 11086022.5             |
|              | Female | 2039 | 23817891.273               | 18117679.616               | 5700211.66             |
| Lung cancer  | Males  | 2039 | 18222549.860               | 15696452.746               | 2526097.11             |
|              | Female | 2039 | 12512468.845               | 10472510.247               | 2039958.60             |
| IHD          | Males  | 2039 | 15635992.616               | 9387116.215                | 6248876.40             |
|              | Female | 2039 | 4798769.065                | 2916302.206                | 1882466.86             |
| Stroke       | Males  | 2039 | 2389546.238                | 1512599.236                | 876947.002             |
|              | Female | 2039 | 1665361.569                | 1088829.596                | 576531.973             |
| COPD         | Males  | 2039 | 5845459.234                | 4411357.293                | 1434101.94             |
|              | Female | 2039 | 4841291.793                | 3640037.567                | 1201254.23             |



## Results for PHIM for Run 10 (ELL Summary Sensitivity\_Analysis\_1.RTF)

\*\*\*\*\*

**Table 3: Estimated Loss of Life, All age groups combined, Population unadjusted for deaths in Ecig scenario, cumulative over years**

| Disease      | Sex          | Year         | Years of life lost<br>NULL | Years of life lost<br>Ecig | Years of life<br>Saved |
|--------------|--------------|--------------|----------------------------|----------------------------|------------------------|
| All Diseases | Males        | 1990         | 1304839.645                | 1304839.645                | 0.000                  |
|              |              | 1991         | 2579865.358                | 2573535.547                | 6329.810               |
|              |              | 1992         | 3830683.831                | 3807303.915                | 23379.916              |
|              |              | 1993         | 5076567.803                | 5022083.459                | 54484.343              |
|              |              | 1994         | 6292145.526                | 6190327.127                | 101818.399             |
|              |              | 1995         | 7485537.010                | 7318039.097                | 167497.913             |
|              |              | 1996         | 8655955.028                | 8403878.256                | 252076.772             |
|              |              | 1997         | 9791729.713                | 9437149.750                | 354579.963             |
|              |              | 1998         | 10899134.186               | 10425445.965               | 473688.221             |
|              |              | 1999         | 12070409.674               | 11438625.184               | 631784.491             |
|              |              | 2000         | 13231384.595               | 12421969.320               | 809415.276             |
|              |              | 2001         | 14371761.018               | 13365669.589               | 1006091.43             |
|              |              | 2002         | 15508906.386               | 14283893.463               | 1225012.92             |
|              |              | 2003         | 16638100.422               | 15175511.221               | 1462589.20             |
|              |              | 2004         | 17736465.088               | 16025736.363               | 1710728.73             |
|              |              | 2005         | 18834658.606               | 16859186.657               | 1975471.95             |
|              |              | 2006         | 19909100.501               | 17655078.646               | 2254021.86             |
|              |              | 2007         | 20958321.463               | 18417592.799               | 2540728.66             |
|              |              | 2008         | 22000068.148               | 19162482.847               | 2837585.30             |
|              |              | 2009         | 23018816.903               | 19878755.789               | 3140061.11             |
|              |              | 2010         | 24018480.537               | 20568809.583               | 3449670.95             |
|              |              | 2011         | 25003034.574               | 21236231.270               | 3766803.30             |
|              |              | 2012         | 25969871.429               | 21879256.148               | 4090615.28             |
|              |              | 2013         | 26920275.180               | 22499767.699               | 4420507.48             |
|              |              | 2014         | 27849005.227               | 23094846.243               | 4754158.98             |
|              |              | 2015         | 28749620.400               | 23664774.627               | 5084845.77             |
|              |              | 2016         | 29622417.562               | 24203744.280               | 5418673.28             |
|              |              | 2017         | 30462559.724               | 24711400.112               | 5751159.61             |
|              |              | 2018         | 31293299.299               | 25209851.671               | 6083447.63             |
|              |              | 2019         | 32109993.427               | 25693196.545               | 6416796.88             |
|              |              | 2020         | 32883323.977               | 26148844.212               | 6734479.77             |
|              |              | 2021         | 33610102.554               | 26563159.190               | 7046943.36             |
|              |              | 2022         | 34322010.448               | 26962893.715               | 7359116.73             |
|              |              | 2023         | 35018383.550               | 27348180.315               | 7670203.23             |
|              |              | 2024         | 35700177.955               | 27720245.918               | 7979932.04             |
|              |              | 2025         | 36315500.346               | 28057446.715               | 8258053.63             |
|              |              | 2026         | 36896159.343               | 28363493.362               | 8532665.98             |
|              |              | 2027         | 37462570.116               | 28657910.647               | 8804659.47             |
|              |              | 2028         | 38015337.780               | 28940400.340               | 9074937.44             |
|              |              | 2029         | 38554814.764               | 29212716.209               | 9342098.56             |
|              |              | 2030         | 39003805.400               | 29442622.563               | 9561182.84             |
| 2031         | 39436509.703 | 29655240.396 | 9781269.31                 |                            |                        |
| 2032         | 39858470.458 | 29859625.092 | 9998845.37                 |                            |                        |
| 2033         | 40270147.082 | 30054991.079 | 10215156.0                 |                            |                        |
| 2034         | 40672665.743 | 30243984.638 | 10428681.1                 |                            |                        |
| 2035         | 40962732.664 | 30383163.550 | 10579569.1                 |                            |                        |
| 2036         | 41255021.653 | 30518882.612 | 10736139.0                 |                            |                        |
| 2037         | 41540573.023 | 30649939.995 | 10890633.0                 |                            |                        |
| 2038         | 41820158.066 | 30775564.867 | 11044593.2                 |                            |                        |
| 2039         | 42093547.949 | 30897261.850 | 11196286.1                 |                            |                        |
|              | Female       | 1990         | 588979.406                 | 588979.406                 | 0.000                  |
|              |              | 1991         | 1182571.252                | 1180397.437                | 2173.815               |
|              |              | 1992         | 1777346.679                | 1769130.989                | 8215.690               |
|              |              | 1993         | 2380261.899                | 2360617.361                | 19644.538              |
|              |              | 1994         | 2983130.039                | 2945560.465                | 37569.574              |
|              |              | 1995         | 3588982.584                | 3526129.060                | 62853.524              |
|              |              | 1996         | 4195430.235                | 4098432.850                | 96997.385              |
|              |              | 1997         | 4793866.694                | 4655446.084                | 138420.610             |
|              |              | 1998         | 5389747.381                | 5201858.830                | 187888.551             |
|              |              | 1999         | 6006722.467                | 5755058.459                | 251664.008             |
|              |              | 2000         | 6625758.871                | 6301651.442                | 324107.428             |
|              |              | 2001         | 7245135.411                | 6838495.209                | 406640.202             |
|              |              | 2002         | 7867492.021                | 7367950.889                | 499541.131             |
|              |              | 2003         | 8485051.793                | 7884329.748                | 600722.045             |
|              |              | 2004         | 9092994.774                | 8383904.278                | 709090.496             |
|              |              | 2005         | 9706032.803                | 8879290.150                | 826742.653             |
|              |              | 2006         | 10311907.548               | 9360007.372                | 951900.176             |
|              | 2007         | 10909437.502 | 9827206.452                | 1082231.05                 |                        |
|              | 2008         | 11506462.491 | 10284508.874               | 1221953.62                 |                        |
|              | 2009         | 12098393.287 | 10732117.413               | 1366275.87                 |                        |
|              | 2010         | 12681188.981 | 11165549.356               | 1515639.62                 |                        |

**Results for PHIM for Run 10 (ELL Summary Sensitivity\_Analysis\_1.RTF)**

|             |       |      |              |              |            |
|-------------|-------|------|--------------|--------------|------------|
|             |       | 2011 | 13260062.991 | 11588301.354 | 1671761.64 |
|             |       | 2012 | 13839417.441 | 12003826.075 | 1835591.37 |
|             |       | 2013 | 14409614.758 | 12406763.716 | 2002851.04 |
|             |       | 2014 | 14976658.746 | 12799421.327 | 2177237.42 |
|             |       | 2015 | 15529977.821 | 13176897.881 | 2353079.94 |
|             |       | 2016 | 16066640.764 | 13535763.046 | 2530877.72 |
|             |       | 2017 | 16590035.078 | 13879553.178 | 2710481.90 |
|             |       | 2018 | 17098716.137 | 14211439.517 | 2887276.62 |
|             |       | 2019 | 17599868.850 | 14533475.511 | 3066393.34 |
|             |       | 2020 | 18081346.241 | 14840059.689 | 3241286.55 |
|             |       | 2021 | 18537594.460 | 15124170.608 | 3413423.85 |
|             |       | 2022 | 18985300.234 | 15398884.603 | 3586415.63 |
|             |       | 2023 | 19423958.747 | 15664484.455 | 3759474.29 |
|             |       | 2024 | 19853347.772 | 15920539.309 | 3932808.46 |
|             |       | 2025 | 20252822.245 | 16157491.948 | 4095330.30 |
|             |       | 2026 | 20619307.063 | 16369798.246 | 4249508.82 |
|             |       | 2027 | 20976063.406 | 16573580.042 | 4402483.36 |
|             |       | 2028 | 21323641.947 | 16769729.689 | 4553912.26 |
|             |       | 2029 | 21662117.106 | 16957890.917 | 4704226.19 |
|             |       | 2030 | 21960971.694 | 17123460.803 | 4837510.89 |
|             |       | 2031 | 22224951.983 | 17265692.280 | 4959259.70 |
|             |       | 2032 | 22480397.853 | 17401458.184 | 5078939.67 |
|             |       | 2033 | 22728639.455 | 17531786.980 | 5196852.47 |
|             |       | 2034 | 22970448.888 | 17656559.152 | 5313889.74 |
|             |       | 2035 | 23164154.188 | 17756057.640 | 5408096.55 |
|             |       | 2036 | 23334538.616 | 17841350.846 | 5493187.77 |
|             |       | 2037 | 23499760.723 | 17923172.281 | 5576588.44 |
|             |       | 2038 | 23660308.401 | 18002038.495 | 5658269.91 |
|             |       | 2039 | 23817891.273 | 18078316.674 | 5739574.60 |
| Lung cancer | Males | 1990 | 595621.791   | 595621.791   | 0.000      |
|             |       | 1991 | 1177744.113  | 1177266.147  | 477.966    |
|             |       | 1992 | 1750034.892  | 1748246.106  | 1788.786   |
|             |       | 1993 | 2319752.308  | 2315414.841  | 4337.467   |
|             |       | 1994 | 2872597.339  | 2864225.172  | 8372.167   |
|             |       | 1995 | 3411494.825  | 3397319.954  | 14174.871  |
|             |       | 1996 | 3945569.726  | 3923279.217  | 22290.509  |
|             |       | 1997 | 4463316.362  | 4430651.908  | 32664.454  |
|             |       | 1998 | 4975301.180  | 4929577.274  | 45723.906  |
|             |       | 1999 | 5473691.125  | 5412099.008  | 61592.117  |
|             |       | 2000 | 5977500.570  | 5896288.290  | 81212.280  |
|             |       | 2001 | 6474795.516  | 6370326.246  | 104469.270 |
|             |       | 2002 | 6968769.705  | 6837016.179  | 131753.526 |
|             |       | 2003 | 7460282.140  | 7296821.008  | 163461.132 |
|             |       | 2004 | 7947048.275  | 7747627.518  | 199420.757 |
|             |       | 2005 | 8430571.669  | 8190750.447  | 239821.222 |
|             |       | 2006 | 8903945.390  | 8619552.548  | 284392.842 |
|             |       | 2007 | 9364177.982  | 9031525.390  | 332652.592 |
|             |       | 2008 | 9822525.458  | 9436439.116  | 386086.342 |
|             |       | 2009 | 10275228.886 | 9831157.387  | 444071.499 |
|             |       | 2010 | 10720275.500 | 10214159.910 | 506115.590 |
|             |       | 2011 | 11155356.373 | 10583487.637 | 571868.736 |
|             |       | 2012 | 11582611.617 | 10940511.472 | 642100.145 |
|             |       | 2013 | 11998803.791 | 11283027.879 | 715775.912 |
|             |       | 2014 | 12402087.090 | 11609961.664 | 792125.426 |
|             |       | 2015 | 12793451.706 | 11922721.840 | 870729.866 |
|             |       | 2016 | 13160101.653 | 12211015.658 | 949085.995 |
|             |       | 2017 | 13503583.414 | 12476707.964 | 1026875.45 |
|             |       | 2018 | 13859755.737 | 12747004.487 | 1112751.25 |
|             |       | 2019 | 14211625.176 | 13009577.128 | 1202048.05 |
|             |       | 2020 | 14553935.288 | 13261349.569 | 1292585.72 |
|             |       | 2021 | 14851747.495 | 13476582.743 | 1375164.75 |
|             |       | 2022 | 15144531.004 | 13684482.608 | 1460048.40 |
|             |       | 2023 | 15431932.496 | 13885166.161 | 1546766.33 |
|             |       | 2024 | 15713920.740 | 14078858.935 | 1635061.81 |
|             |       | 2025 | 15979112.816 | 14258989.620 | 1720123.20 |
|             |       | 2026 | 16206550.153 | 14410284.374 | 1796265.78 |
|             |       | 2027 | 16428826.050 | 14555617.838 | 1873208.21 |
|             |       | 2028 | 16645902.186 | 14695162.890 | 1950739.30 |
|             |       | 2029 | 16858126.517 | 14829570.897 | 2028555.62 |
|             |       | 2030 | 17045220.687 | 14947303.818 | 2097916.87 |
|             |       | 2031 | 17208482.610 | 15047731.230 | 2160751.38 |
|             |       | 2032 | 17367586.074 | 15144204.153 | 2223381.92 |
|             |       | 2033 | 17522716.280 | 15236568.260 | 2286148.02 |
|             |       | 2034 | 17674226.555 | 15325686.175 | 2348540.38 |
|             |       | 2035 | 17792201.734 | 15394749.163 | 2397452.57 |
|             |       | 2036 | 17903508.236 | 15458746.693 | 2444761.54 |
|             |       | 2037 | 18012162.345 | 15520470.769 | 2491691.58 |
|             |       | 2038 | 18118464.470 | 15579652.891 | 2538811.58 |

**Results for PHIM for Run 10 (ELL Summary Sensitivity\_Analysis\_1.RTF)**

|     |        |      |              |              |            |
|-----|--------|------|--------------|--------------|------------|
|     | Female | 2039 | 18222549.860 | 15637008.994 | 2585540.87 |
|     |        | 1990 | 307897.357   | 307897.357   | 0.000      |
|     |        | 1991 | 616547.418   | 616242.551   | 304.866    |
|     |        | 1992 | 931086.773   | 929881.290   | 1205.483   |
|     |        | 1993 | 1246155.671  | 1243191.646  | 2964.025   |
|     |        | 1994 | 1561212.934  | 1555390.786  | 5822.149   |
|     |        | 1995 | 1879967.742  | 1869861.857  | 10105.885  |
|     |        | 1996 | 2197488.109  | 2181483.970  | 16004.139  |
|     |        | 1997 | 2515698.453  | 2491895.062  | 23803.391  |
|     |        | 1998 | 2836249.556  | 2802542.150  | 33707.406  |
|     |        | 1999 | 3150201.390  | 3104527.133  | 45674.257  |
|     |        | 2000 | 3472722.342  | 3412348.296  | 60374.046  |
|     |        | 2001 | 3796994.889  | 3719011.581  | 77983.309  |
|     |        | 2002 | 4126619.935  | 4027686.459  | 98933.477  |
|     |        | 2003 | 4454982.533  | 4332071.369  | 122911.164 |
|     |        | 2004 | 4784343.030  | 4633976.310  | 150366.720 |
|     |        | 2005 | 5113443.121  | 4932238.961  | 181204.159 |
|     |        | 2006 | 5442543.963  | 5226608.511  | 215935.452 |
|     |        | 2007 | 5772441.497  | 5517909.836  | 254531.661 |
|     |        | 2008 | 6091911.943  | 5796146.151  | 295765.792 |
|     |        | 2009 | 6413671.330  | 6072268.466  | 341402.864 |
|     |        | 2010 | 6730763.530  | 6340792.889  | 389970.641 |
|     |        | 2011 | 7043614.101  | 6601700.884  | 441913.217 |
|     |        | 2012 | 7356270.780  | 6858472.836  | 497797.944 |
|     |        | 2013 | 7662551.964  | 7106117.737  | 556434.227 |
|     |        | 2014 | 7964551.465  | 7346514.711  | 618036.754 |
|     |        | 2015 | 8254895.403  | 7574517.065  | 680378.337 |
|     |        | 2016 | 8530661.848  | 7787430.261  | 743231.587 |
|     |        | 2017 | 8795826.122  | 7988950.163  | 806875.959 |
|     |        | 2018 | 9067233.707  | 8191533.955  | 875699.752 |
|     |        | 2019 | 9335343.270  | 8388269.370  | 947073.900 |
|     |        | 2020 | 9596110.883  | 8576864.694  | 1019246.19 |
|     |        | 2021 | 9833186.859  | 8745815.783  | 1087371.08 |
|     |        | 2022 | 10066452.037 | 8909252.877  | 1157199.16 |
|     |        | 2023 | 10295503.609 | 9067263.735  | 1228239.87 |
|     |        | 2024 | 10520125.318 | 9219612.740  | 1300512.58 |
|     |        | 2025 | 10731915.863 | 9361500.780  | 1370415.08 |
|     |        | 2026 | 10917495.549 | 9483898.829  | 1433596.72 |
|     |        | 2027 | 11098620.885 | 9601409.842  | 1497211.04 |
|     |        | 2028 | 11275441.234 | 9714525.438  | 1560915.80 |
|     |        | 2029 | 11447962.710 | 9823054.259  | 1624908.45 |
|     |        | 2030 | 11601867.623 | 9918918.174  | 1682949.45 |
|     |        | 2031 | 11731666.516 | 9998280.343  | 1733386.17 |
|     |        | 2032 | 11857585.969 | 10074110.064 | 1783475.90 |
|     |        | 2033 | 11980128.625 | 10146920.992 | 1833207.63 |
|     |        | 2034 | 12099562.464 | 10216675.890 | 1882886.57 |
|     |        | 2035 | 12195919.946 | 10272279.315 | 1923640.63 |
|     |        | 2036 | 12278201.969 | 10318989.527 | 1959212.44 |
|     |        | 2037 | 12358146.336 | 10363899.735 | 1994246.60 |
|     |        | 2038 | 12435978.633 | 10407237.451 | 2028741.18 |
|     |        | 2039 | 12512468.845 | 10449198.497 | 2063270.35 |
| IHD | Males  | 1990 | 517209.093   | 517209.093   | 0.000      |
|     |        | 1991 | 1019219.395  | 1014047.711  | 5171.683   |
|     |        | 1992 | 1509598.614  | 1490518.000  | 19080.614  |
|     |        | 1993 | 1992735.299  | 1948587.319  | 44147.980  |
|     |        | 1994 | 2462877.575  | 2381050.538  | 81827.037  |
|     |        | 1995 | 2928249.390  | 2794548.597  | 133700.792 |
|     |        | 1996 | 3377377.730  | 3177807.869  | 199569.861 |
|     |        | 1997 | 3809062.472  | 3530703.371  | 278359.101 |
|     |        | 1998 | 4222213.867  | 3853682.931  | 368530.937 |
|     |        | 1999 | 4708317.743  | 4216201.103  | 492116.640 |
|     |        | 2000 | 5182084.396  | 4553870.260  | 628214.137 |
|     |        | 2001 | 5644097.705  | 4867141.058  | 776956.646 |
|     |        | 2002 | 6107232.129  | 5166358.762  | 940873.367 |
|     |        | 2003 | 6561785.704  | 5446487.195  | 1115298.51 |
|     |        | 2004 | 6996156.348  | 5702509.109  | 1293647.24 |
|     |        | 2005 | 7426261.361  | 5945750.969  | 1480510.39 |
|     |        | 2006 | 7849012.694  | 6174730.412  | 1674282.28 |
|     |        | 2007 | 8255300.530  | 6386411.298  | 1868889.23 |
|     |        | 2008 | 8650662.040  | 6585285.234  | 2065376.81 |
|     |        | 2009 | 9030818.513  | 6770451.442  | 2260367.07 |
|     |        | 2010 | 9403026.327  | 6946403.802  | 2456622.52 |
|     |        | 2011 | 9767535.506  | 7113627.719  | 2653907.79 |
|     |        | 2012 | 10123044.281 | 7272335.138  | 2850709.14 |
|     |        | 2013 | 10470104.786 | 7423342.623  | 3046762.16 |
|     |        | 2014 | 10807756.112 | 7566942.431  | 3240813.68 |
|     |        | 2015 | 11130681.425 | 7701622.482  | 3429058.94 |
|     |        | 2016 | 11448966.506 | 7831836.741  | 3617129.77 |

**Results for PHIM for Run 10 (ELL Summary Sensitivity\_Analysis\_1.RTF)**

|        |        |      |              |             |            |
|--------|--------|------|--------------|-------------|------------|
|        |        | 2017 | 11758164.882 | 7956074.567 | 3802090.32 |
|        |        | 2018 | 12054448.241 | 8073162.452 | 3981285.79 |
|        |        | 2019 | 12341606.261 | 8185260.114 | 4156346.15 |
|        |        | 2020 | 12600728.939 | 8285005.962 | 4315722.98 |
|        |        | 2021 | 12861767.105 | 8384309.029 | 4477458.08 |
|        |        | 2022 | 13114168.616 | 8479084.723 | 4635083.89 |
|        |        | 2023 | 13357894.797 | 8569346.493 | 4788548.30 |
|        |        | 2024 | 13593848.521 | 8656003.720 | 4937844.80 |
|        |        | 2025 | 13789177.359 | 8727015.313 | 5062162.05 |
|        |        | 2026 | 13993401.656 | 8800866.030 | 5192535.63 |
|        |        | 2027 | 14190519.224 | 8871778.269 | 5318740.95 |
|        |        | 2028 | 14381193.356 | 8939223.566 | 5441969.79 |
|        |        | 2029 | 14565171.927 | 9003998.264 | 5561173.66 |
|        |        | 2030 | 14697381.605 | 9050149.616 | 5647231.99 |
|        |        | 2031 | 14842203.512 | 9100670.593 | 5741532.92 |
|        |        | 2032 | 14982485.826 | 9149172.887 | 5833312.94 |
|        |        | 2033 | 15118410.647 | 9195066.016 | 5923344.63 |
|        |        | 2034 | 15250284.398 | 9239614.191 | 6010670.21 |
|        |        | 2035 | 15322911.166 | 9263530.595 | 6059380.57 |
|        |        | 2036 | 15405115.031 | 9290442.781 | 6114672.25 |
|        |        | 2037 | 15484709.137 | 9316381.192 | 6168327.95 |
|        |        | 2038 | 15561812.193 | 9340949.496 | 6220862.70 |
|        |        | 2039 | 15635992.616 | 9364515.440 | 6271477.18 |
|        | Female | 1990 | 147299.110   | 147299.110  | 0.000      |
|        |        | 1991 | 295122.462   | 293754.580  | 1367.882   |
|        |        | 1992 | 439962.920   | 434871.539  | 5091.381   |
|        |        | 1993 | 584735.615   | 572724.508  | 12011.108  |
|        |        | 1994 | 727640.783   | 705028.963  | 22611.820  |
|        |        | 1995 | 868486.937   | 831300.198  | 37186.739  |
|        |        | 1996 | 1010321.847  | 953547.616  | 56774.231  |
|        |        | 1997 | 1144230.930  | 1064708.175 | 79522.754  |
|        |        | 1998 | 1274513.622  | 1168399.854 | 106113.768 |
|        |        | 1999 | 1426725.938  | 1284413.815 | 142312.123 |
|        |        | 2000 | 1573462.680  | 1391610.461 | 181852.219 |
|        |        | 2001 | 1719132.015  | 1492674.018 | 226457.997 |
|        |        | 2002 | 1863006.732  | 1587640.110 | 275366.621 |
|        |        | 2003 | 2002943.227  | 1675663.538 | 327279.689 |
|        |        | 2004 | 2137798.705  | 1756627.283 | 381171.422 |
|        |        | 2005 | 2271071.245  | 1833452.862 | 437618.383 |
|        |        | 2006 | 2400707.731  | 1904854.033 | 495853.698 |
|        |        | 2007 | 2523634.512  | 1970019.299 | 553615.213 |
|        |        | 2008 | 2648752.232  | 2033875.418 | 614876.814 |
|        |        | 2009 | 2765973.961  | 2091885.423 | 674088.538 |
|        |        | 2010 | 2881329.235  | 2147325.506 | 734003.729 |
|        |        | 2011 | 2994972.694  | 2200236.995 | 794735.699 |
|        |        | 2012 | 3108958.829  | 2251803.959 | 857154.870 |
|        |        | 2013 | 3218140.416  | 2300209.462 | 917930.954 |
|        |        | 2014 | 3328387.914  | 2347973.176 | 980414.738 |
|        |        | 2015 | 3435342.796  | 2393471.227 | 1041871.57 |
|        |        | 2016 | 3539189.408  | 2436793.230 | 1102396.18 |
|        |        | 2017 | 3640041.363  | 2478104.597 | 1161936.77 |
|        |        | 2018 | 3732645.362  | 2515475.590 | 1217169.77 |
|        |        | 2019 | 3821421.978  | 2550805.337 | 1270616.64 |
|        |        | 2020 | 3902115.950  | 2582393.281 | 1319722.67 |
|        |        | 2021 | 3984301.053  | 2614192.658 | 1370108.39 |
|        |        | 2022 | 4062629.299  | 2644177.395 | 1418451.90 |
|        |        | 2023 | 4137348.729  | 2672588.784 | 1464759.95 |
|        |        | 2024 | 4208611.493  | 2699437.294 | 1509174.20 |
|        |        | 2025 | 4269419.492  | 2722065.831 | 1547353.66 |
|        |        | 2026 | 4330969.998  | 2744820.364 | 1586149.63 |
|        |        | 2027 | 4389134.306  | 2766249.338 | 1622884.97 |
|        |        | 2028 | 4444222.970  | 2786511.892 | 1657711.08 |
|        |        | 2029 | 4496447.877  | 2805651.777 | 1690796.10 |
|        |        | 2030 | 4536975.698  | 2820164.448 | 1716811.25 |
|        |        | 2031 | 4578338.586  | 2835009.358 | 1743329.23 |
|        |        | 2032 | 4617397.784  | 2849073.284 | 1768324.50 |
|        |        | 2033 | 4654407.697  | 2862452.991 | 1791954.71 |
|        |        | 2034 | 4689913.454  | 2875208.382 | 1814705.07 |
|        |        | 2035 | 4712518.190  | 2882950.859 | 1829567.33 |
|        |        | 2036 | 4735845.827  | 2890923.562 | 1844922.26 |
|        |        | 2037 | 4757958.806  | 2898505.292 | 1859453.51 |
|        |        | 2038 | 4778813.806  | 2905748.951 | 1873064.85 |
|        |        | 2039 | 4798769.065  | 2912686.826 | 1886082.24 |
| Stroke | Males  | 1990 | 75005.854    | 75005.854   | 0.000      |
|        |        | 1991 | 149463.017   | 148933.769  | 529.249    |
|        |        | 1992 | 222966.278   | 221008.498  | 1957.780   |
|        |        | 1993 | 296801.879   | 292155.149  | 4646.730   |
|        |        | 1994 | 372453.706   | 363484.491  | 8969.215   |

**Results for PHIM for Run 10 (ELL Summary Sensitivity\_Analysis\_1.RTF)**

|        |      |             |             |            |
|--------|------|-------------|-------------|------------|
|        | 1995 | 448401.338  | 433282.503  | 15118.835  |
|        | 1996 | 523536.301  | 500348.396  | 23187.905  |
|        | 1997 | 596763.211  | 563595.894  | 33167.317  |
|        | 1998 | 667546.681  | 622641.014  | 44905.667  |
|        | 1999 | 734925.407  | 676819.805  | 58105.602  |
|        | 2000 | 803749.361  | 730135.576  | 73613.784  |
|        | 2001 | 870081.588  | 779453.561  | 90628.027  |
|        | 2002 | 935347.140  | 826046.463  | 109300.677 |
|        | 2003 | 1001627.349 | 871340.772  | 130286.577 |
|        | 2004 | 1066587.976 | 913952.647  | 152635.329 |
|        | 2005 | 1130548.052 | 954162.008  | 176386.044 |
|        | 2006 | 1195132.454 | 993086.053  | 202046.401 |
|        | 2007 | 1258974.043 | 1030013.208 | 228960.836 |
|        | 2008 | 1320124.867 | 1063956.470 | 256168.397 |
|        | 2009 | 1380776.123 | 1096384.959 | 284391.165 |
|        | 2010 | 1440048.533 | 1126984.775 | 313063.758 |
|        | 2011 | 1497484.847 | 1155642.729 | 341842.118 |
|        | 2012 | 1554496.526 | 1183077.507 | 371419.019 |
|        | 2013 | 1610819.598 | 1209315.332 | 401504.266 |
|        | 2014 | 1667484.890 | 1234884.525 | 432600.365 |
|        | 2015 | 1720948.287 | 1258410.107 | 462538.179 |
|        | 2016 | 1775699.228 | 1281875.333 | 493823.895 |
|        | 2017 | 1830250.175 | 1304673.851 | 525576.324 |
|        | 2018 | 1875958.950 | 1323348.056 | 552610.894 |
|        | 2019 | 1920359.232 | 1341137.405 | 579221.827 |
|        | 2020 | 1960605.297 | 1356996.103 | 603609.194 |
|        | 2021 | 1998912.887 | 1371797.035 | 627115.853 |
|        | 2022 | 2036003.696 | 1385855.169 | 650148.527 |
|        | 2023 | 2071857.536 | 1399218.732 | 672638.805 |
|        | 2024 | 2106636.468 | 1412013.476 | 694622.993 |
|        | 2025 | 2136450.873 | 1422844.715 | 713606.159 |
|        | 2026 | 2164796.470 | 1433005.155 | 731791.315 |
|        | 2027 | 2192079.608 | 1442706.394 | 749373.214 |
|        | 2028 | 2218404.367 | 1451914.423 | 766489.944 |
|        | 2029 | 2243769.140 | 1460727.406 | 783041.734 |
|        | 2030 | 2263570.213 | 1467535.059 | 796035.154 |
|        | 2031 | 2282521.590 | 1473999.084 | 808522.506 |
|        | 2032 | 2300804.945 | 1480170.472 | 820634.472 |
|        | 2033 | 2318464.018 | 1486032.828 | 832431.190 |
|        | 2034 | 2335611.973 | 1491698.220 | 843913.753 |
|        | 2035 | 2347097.290 | 1495459.911 | 851637.379 |
|        | 2036 | 2358248.747 | 1499082.817 | 859165.930 |
|        | 2037 | 2369033.655 | 1502577.595 | 866456.060 |
|        | 2038 | 2379490.114 | 1505900.538 | 873589.576 |
|        | 2039 | 2389546.238 | 1509079.047 | 880467.191 |
| Female | 1990 | 56348.092   | 56348.092   | 0.000      |
|        | 1991 | 110871.862  | 110494.205  | 377.657    |
|        | 1992 | 165654.454  | 164204.591  | 1449.863   |
|        | 1993 | 220008.519  | 216549.280  | 3459.239   |
|        | 1994 | 275706.807  | 268992.897  | 6713.910   |
|        | 1995 | 331417.547  | 320111.803  | 11305.744  |
|        | 1996 | 387580.161  | 370112.983  | 17467.178  |
|        | 1997 | 442778.242  | 417692.720  | 25085.522  |
|        | 1998 | 496117.305  | 462118.058  | 33999.246  |
|        | 1999 | 548268.214  | 504004.344  | 44263.870  |
|        | 2000 | 601693.202  | 545381.505  | 56311.696  |
|        | 2001 | 652221.103  | 583006.451  | 69214.652  |
|        | 2002 | 703022.600  | 619294.632  | 83727.969  |
|        | 2003 | 752023.351  | 652865.894  | 99157.457  |
|        | 2004 | 799826.733  | 684243.332  | 115583.400 |
|        | 2005 | 847563.928  | 714353.954  | 133209.974 |
|        | 2006 | 894205.027  | 742581.172  | 151623.855 |
|        | 2007 | 939571.282  | 768948.596  | 170622.686 |
|        | 2008 | 983437.578  | 793486.004  | 189951.574 |
|        | 2009 | 1025803.786 | 816358.408  | 209445.378 |
|        | 2010 | 1066964.934 | 837797.662  | 229167.272 |
|        | 2011 | 1106954.044 | 857915.152  | 249038.892 |
|        | 2012 | 1146108.461 | 876991.157  | 269117.304 |
|        | 2013 | 1183544.689 | 894718.520  | 288826.169 |
|        | 2014 | 1221220.945 | 912027.288  | 309193.657 |
|        | 2015 | 1258289.311 | 928664.191  | 329625.121 |
|        | 2016 | 1294830.207 | 944669.882  | 350160.325 |
|        | 2017 | 1330332.626 | 959858.446  | 370474.180 |
|        | 2018 | 1360571.987 | 972552.090  | 388019.897 |
|        | 2019 | 1389848.723 | 984586.572  | 405262.151 |
|        | 2020 | 1416046.192 | 995156.577  | 420889.615 |
|        | 2021 | 1440588.850 | 1004881.602 | 435707.247 |
|        | 2022 | 1464157.934 | 1014084.600 | 450073.334 |

**Results for PHIM for Run 10 (ELL Summary Sensitivity\_Analysis\_1.RTF)**

|      |             |             |             |             |            |
|------|-------------|-------------|-------------|-------------|------------|
|      |             | 2023        | 1486810.237 | 1022842.521 | 463967.716 |
|      |             | 2024        | 1508591.729 | 1031144.807 | 477446.923 |
|      |             | 2025        | 1526875.621 | 1038023.372 | 488852.249 |
|      |             | 2026        | 1543659.810 | 1044266.050 | 499393.760 |
|      |             | 2027        | 1559623.774 | 1050165.511 | 509458.263 |
|      |             | 2028        | 1574852.850 | 1055762.909 | 519089.942 |
|      |             | 2029        | 1589437.452 | 1061077.021 | 528360.432 |
|      |             | 2030        | 1600568.199 | 1065050.619 | 535517.580 |
|      |             | 2031        | 1610776.297 | 1068692.064 | 542084.233 |
|      |             | 2032        | 1620483.563 | 1072154.668 | 548328.895 |
|      |             | 2033        | 1629745.442 | 1075461.558 | 554283.884 |
|      |             | 2034        | 1638721.425 | 1078631.488 | 560089.938 |
|      |             | 2035        | 1644649.404 | 1080659.173 | 563990.231 |
|      |             | 2036        | 1650181.590 | 1082540.877 | 567640.713 |
|      |             | 2037        | 1655476.066 | 1084344.076 | 571131.990 |
|      |             | 2038        | 1660507.914 | 1086080.452 | 574427.462 |
|      |             | 2039        | 1665361.569 | 1087756.438 | 577605.132 |
| COPD | Males       | 1990        | 117002.906  | 117002.906  | 0.000      |
|      |             | 1991        | 233438.833  | 233287.920  | 150.913    |
|      |             | 1992        | 348084.047  | 347531.310  | 552.737    |
|      |             | 1993        | 467278.318  | 465926.151  | 1352.167   |
|      |             | 1994        | 584216.907  | 581566.927  | 2649.980   |
|      |             | 1995        | 697391.457  | 692888.042  | 4503.414   |
|      |             | 1996        | 809471.271  | 802442.773  | 7028.498   |
|      |             | 1997        | 922587.668  | 912198.577  | 10389.091  |
|      |             | 1998        | 1034072.457 | 1019544.745 | 14527.711  |
|      |             | 1999        | 1153475.399 | 1133505.267 | 19970.132  |
|      |             | 2000        | 1268050.268 | 1241675.194 | 26375.074  |
|      |             | 2001        | 1382786.209 | 1348748.724 | 34037.486  |
|      |             | 2002        | 1497557.412 | 1454472.058 | 43085.353  |
|      |             | 2003        | 1614405.229 | 1560862.246 | 53542.983  |
|      |             | 2004        | 1726672.489 | 1661647.089 | 65025.400  |
|      |             | 2005        | 1847277.524 | 1768523.233 | 78754.292  |
|      |             | 2006        | 1961009.963 | 1867709.633 | 93300.330  |
|      |             | 2007        | 2079868.908 | 1969642.903 | 110226.005 |
|      |             | 2008        | 2206755.783 | 2076802.028 | 129953.755 |
|      |             | 2009        | 2331993.380 | 2180762.001 | 151231.379 |
|      | 2010        | 2455130.176 | 2281261.096 | 173869.080  |            |
|      | 2011        | 2582657.849 | 2383473.185 | 199184.664  |            |
|      | 2012        | 2709719.005 | 2483332.031 | 226386.974  |            |
|      | 2013        | 2840547.005 | 2584081.865 | 256465.140  |            |
|      | 2014        | 2971677.135 | 2683057.624 | 288619.512  |            |
|      | 2015        | 3104538.983 | 2782020.198 | 322518.785  |            |
|      | 2016        | 3237650.175 | 2879016.548 | 358633.627  |            |
|      | 2017        | 3370561.253 | 2973943.730 | 396617.523  |            |
|      | 2018        | 3503136.371 | 3066336.676 | 436799.696  |            |
|      | 2019        | 3636402.758 | 3157221.897 | 479180.861  |            |
|      | 2020        | 3768054.453 | 3245492.577 | 522561.875  |            |
|      | 2021        | 3897675.067 | 3330470.384 | 567204.683  |            |
|      | 2022        | 4027307.132 | 3413471.216 | 613835.917  |            |
|      | 2023        | 4156698.720 | 3494448.928 | 662249.792  |            |
|      | 2024        | 4285772.226 | 3573369.787 | 712402.438  |            |
|      | 2025        | 4410759.298 | 3648597.068 | 762162.230  |            |
|      | 2026        | 4531411.064 | 3719337.803 | 812073.262  |            |
|      | 2027        | 4651145.233 | 3787808.144 | 863337.089  |            |
|      | 2028        | 4769837.872 | 3854099.462 | 915738.410  |            |
|      | 2029        | 4887747.179 | 3918419.642 | 969327.537  |            |
| 2030 | 4997632.895 | 3977634.069 | 1019998.83  |             |            |
| 2031 | 5103301.991 | 4032839.488 | 1070462.50  |             |            |
| 2032 | 5207593.613 | 4086077.580 | 1121516.03  |             |            |
| 2033 | 5310556.138 | 4137323.975 | 1173232.16  |             |            |
| 2034 | 5412542.816 | 4186986.053 | 1225556.76  |             |            |
| 2035 | 5500522.473 | 4229423.881 | 1271098.59  |             |            |
| 2036 | 5588149.640 | 4270610.322 | 1317539.32  |             |            |
| 2037 | 5674667.886 | 4310510.439 | 1364157.45  |             |            |
| 2038 | 5760391.289 | 4349061.942 | 1411329.35  |             |            |
| 2039 | 5845459.234 | 4386658.369 | 1458800.86  |             |            |
|      | Female      | 1990        | 77434.846   | 77434.846   | 0.000      |
|      |             | 1991        | 160029.510  | 159906.101  | 123.409    |
|      |             | 1992        | 240642.531  | 240173.569  | 468.963    |
|      |             | 1993        | 329362.093  | 328151.927  | 1210.166   |
|      |             | 1994        | 418569.515  | 416147.820  | 2421.695   |
|      |             | 1995        | 509110.357  | 504855.201  | 4255.156   |
|      |             | 1996        | 600040.117  | 593288.281  | 6751.836   |
|      |             | 1997        | 691159.071  | 681150.127  | 10008.943  |
|      |             | 1998        | 782866.899  | 768798.768  | 14068.131  |
|      |             | 1999        | 881526.925  | 862113.167  | 19413.759  |
|      |             | 2000        | 977880.647  | 952311.180  | 25569.467  |

**Results for PHIM for Run 10 (ELL Summary Sensitivity\_Analysis\_1.RTF)**

|      |             |             |            |
|------|-------------|-------------|------------|
| 2001 | 1076787.404 | 1043803.159 | 32984.245  |
| 2002 | 1174842.754 | 1133329.688 | 41513.065  |
| 2003 | 1275102.681 | 1223728.946 | 51373.735  |
| 2004 | 1371026.306 | 1309057.352 | 61968.954  |
| 2005 | 1473954.509 | 1399244.372 | 74710.137  |
| 2006 | 1574450.828 | 1485963.657 | 88487.171  |
| 2007 | 1673790.211 | 1570328.721 | 103461.490 |
| 2008 | 1782360.738 | 1661001.301 | 121359.437 |
| 2009 | 1892944.209 | 1751605.116 | 141339.093 |
| 2010 | 2002131.282 | 1839633.299 | 162497.984 |
| 2011 | 2114522.152 | 1928448.323 | 186073.829 |
| 2012 | 2228079.372 | 2016558.123 | 211521.248 |
| 2013 | 2345377.689 | 2105717.997 | 239659.692 |
| 2014 | 2462498.422 | 2192906.152 | 269592.270 |
| 2015 | 2581450.312 | 2280245.398 | 301204.914 |
| 2016 | 2701959.301 | 2366869.673 | 335089.628 |
| 2017 | 2823834.967 | 2452639.973 | 371194.995 |
| 2018 | 2938265.081 | 2531877.883 | 406387.198 |
| 2019 | 3053254.880 | 2609814.231 | 443440.648 |
| 2020 | 3167073.216 | 2685645.137 | 481428.079 |
| 2021 | 3279517.699 | 2759280.564 | 520237.135 |
| 2022 | 3392060.964 | 2831369.730 | 560691.234 |
| 2023 | 3504296.171 | 2901789.416 | 602506.755 |
| 2024 | 3616019.231 | 2970344.468 | 645674.763 |
| 2025 | 3724611.269 | 3035901.965 | 688709.304 |
| 2026 | 3827181.707 | 3096813.002 | 730368.705 |
| 2027 | 3928684.441 | 3155755.350 | 772929.091 |
| 2028 | 4029124.892 | 3212929.450 | 816195.442 |
| 2029 | 4128269.068 | 3268107.862 | 860161.206 |
| 2030 | 4221560.174 | 3319327.562 | 902232.612 |
| 2031 | 4304170.584 | 3363710.516 | 940460.069 |
| 2032 | 4384930.537 | 3406120.167 | 978810.370 |
| 2033 | 4464357.691 | 3446951.440 | 1017406.25 |
| 2034 | 4542251.545 | 3486043.393 | 1056208.15 |
| 2035 | 4611066.648 | 3520168.293 | 1090898.36 |
| 2036 | 4670309.230 | 3548896.879 | 1121412.35 |
| 2037 | 4728179.514 | 3576423.177 | 1151756.34 |
| 2038 | 4785008.048 | 3602971.641 | 1182036.41 |
| 2039 | 4841291.793 | 3628674.913 | 1212616.88 |

---

## Results for PHIM for Run 10 (ELL Summary Sensitivity\_Analysis\_1.RTF)

\*\*\*\*\*

**Table 4: Estimated Loss of Life, All age groups combined, Population and Number deaths adjusted for Ecig scenario, cumulative over years**

| Disease      | Sex          | Year         | Years of life lost<br>NULL | Years of life lost<br>Ecig | Years of life<br>Saved |
|--------------|--------------|--------------|----------------------------|----------------------------|------------------------|
| All Diseases | Males        | 1990         | 1304839.645                | 1304839.645                | 0.000                  |
|              |              | 1991         | 2579865.358                | 2573535.547                | 6329.810               |
|              |              | 1992         | 3830683.831                | 3807312.808                | 23371.023              |
|              |              | 1993         | 5076567.803                | 5022123.632                | 54444.171              |
|              |              | 1994         | 6292145.526                | 6190437.713                | 101707.813             |
|              |              | 1995         | 7485537.010                | 7318276.948                | 167260.062             |
|              |              | 1996         | 8655955.028                | 8404318.293                | 251636.735             |
|              |              | 1997         | 9791729.713                | 9437881.589                | 353848.123             |
|              |              | 1998         | 10899134.186               | 10426572.839               | 472561.347             |
|              |              | 1999         | 12070409.674               | 11440295.000               | 630114.674             |
|              |              | 2000         | 13231384.595               | 12424340.856               | 807043.739             |
|              |              | 2001         | 14371761.018               | 13368902.984               | 1002858.03             |
|              |              | 2002         | 15508906.386               | 14288169.912               | 1220736.47             |
|              |              | 2003         | 16638100.422               | 15181018.271               | 1457082.15             |
|              |              | 2004         | 17736465.088               | 16032645.624               | 1703819.46             |
|              |              | 2005         | 18834658.606               | 16867708.054               | 1966950.55             |
|              |              | 2006         | 19909100.501               | 17665378.275               | 2243722.23             |
|              |              | 2007         | 20958321.463               | 18429844.718               | 2528476.75             |
|              |              | 2008         | 22000068.148               | 19176897.441               | 2823170.71             |
|              |              | 2009         | 23018816.903               | 19895504.310               | 3123312.59             |
|              |              | 2010         | 24018480.537               | 20588060.047               | 3430420.49             |
|              |              | 2011         | 25003034.574               | 21258157.194               | 3744877.38             |
|              |              | 2012         | 25969871.429               | 21904005.244               | 4065866.19             |
|              |              | 2013         | 26920275.180               | 22527494.963               | 4392780.22             |
|              |              | 2014         | 27849005.227               | 23125678.758               | 4723326.47             |
|              |              | 2015         | 28749620.400               | 23698867.162               | 5050753.24             |
|              |              | 2016         | 29622417.562               | 24241157.600               | 5381259.96             |
|              |              | 2017         | 30462559.724               | 24752182.169               | 5710377.56             |
|              |              | 2018         | 31293299.299               | 25254140.874               | 6039158.43             |
|              |              | 2019         | 32109993.427               | 25741107.021               | 6368886.41             |
|              |              | 2020         | 32883323.977               | 26200475.933               | 6682848.04             |
|              |              | 2021         | 33610102.554               | 26618327.350               | 6991775.20             |
|              |              | 2022         | 34322010.448               | 27021658.215               | 7300352.23             |
|              |              | 2023         | 35018383.550               | 27410597.155               | 7607786.39             |
|              |              | 2024         | 35700177.955               | 27786365.158               | 7913812.80             |
|              |              | 2025         | 36315500.346               | 28127263.819               | 8188236.53             |
|              |              | 2026         | 36896159.343               | 28436730.950               | 8459428.39             |
|              |              | 2027         | 37462570.116               | 28734574.788               | 8727995.33             |
|              |              | 2028         | 38015337.780               | 29020489.546               | 8994848.23             |
|              |              | 2029         | 38554814.764               | 29296228.024               | 9258586.74             |
|              |              | 2030         | 39003805.400               | 29529375.355               | 9474430.04             |
|              |              | 2031         | 39436509.703               | 29744989.309               | 9691520.39             |
| 2032         | 39858470.458 | 29952338.105 | 9906132.35                 |                            |                        |
| 2033         | 40270147.082 | 30150625.336 | 10119521.7                 |                            |                        |
| 2034         | 40672665.743 | 30342522.470 | 10330143.3                 |                            |                        |
| 2035         | 40962732.664 | 30484141.544 | 10478591.1                 |                            |                        |
| 2036         | 41255021.653 | 30622226.540 | 10632795.1                 |                            |                        |
| 2037         | 41540573.023 | 30755625.398 | 10784947.6                 |                            |                        |
| 2038         | 41820158.066 | 30883552.440 | 10936605.6                 |                            |                        |
| 2039         | 42093547.949 | 31007525.489 | 11086022.5                 |                            |                        |
|              | Female       | 1990         | 588979.406                 | 588979.406                 | 0.000                  |
|              |              | 1991         | 1182571.252                | 1180397.437                | 2173.815               |
|              |              | 1992         | 1777346.679                | 1769132.478                | 8214.202               |
|              |              | 1993         | 2380261.899                | 2360624.608                | 19637.291              |
|              |              | 1994         | 2983130.039                | 2945581.625                | 37548.414              |
|              |              | 1995         | 3588982.584                | 3526176.787                | 62805.797              |
|              |              | 1996         | 4195430.235                | 4098524.792                | 96905.443              |
|              |              | 1997         | 4793866.694                | 4655604.832                | 138261.862             |
|              |              | 1998         | 5389747.381                | 5202112.590                | 187634.791             |
|              |              | 1999         | 6006722.467                | 5755443.613                | 251278.854             |
|              |              | 2000         | 6625758.871                | 6302211.127                | 323547.744             |
|              |              | 2001         | 7245135.411                | 6839274.878                | 405860.533             |
|              |              | 2002         | 7867492.021                | 7369000.945                | 498491.075             |
|              |              | 2003         | 8485051.793                | 7885705.020                | 599346.773             |
|              |              | 2004         | 9092994.774                | 8385657.050                | 707337.724             |
|              |              | 2005         | 9706032.803                | 8881482.479                | 824550.324             |
|              |              | 2006         | 10311907.548               | 9362695.175                | 949212.374             |
|              |              | 2007         | 10909437.502               | 9830449.681                | 1078987.82             |
|              |              | 2008         | 11506462.491               | 10288372.223               | 1218090.27             |
|              |              | 2009         | 12098393.287               | 10736664.644               | 1361728.64             |
|              |              | 2010         | 12681188.981               | 11170838.508               | 1510350.47             |



**Results for PHIM for Run 10 (ELL Summary Sensitivity\_Analysis\_1.RTF)**

|             |       |      |              |              |            |
|-------------|-------|------|--------------|--------------|------------|
|             |       | 2011 | 13260062.991 | 11594394.523 | 1665668.47 |
|             |       | 2012 | 13839417.441 | 12010791.897 | 1828625.54 |
|             |       | 2013 | 14409614.758 | 12414662.163 | 1994952.60 |
|             |       | 2014 | 14976658.746 | 12808314.324 | 2168344.42 |
|             |       | 2015 | 15529977.821 | 13186847.784 | 2343130.04 |
|             |       | 2016 | 16066640.764 | 13546809.509 | 2519831.26 |
|             |       | 2017 | 16590035.078 | 13891746.761 | 2698288.32 |
|             |       | 2018 | 17098716.137 | 14224829.862 | 2873886.27 |
|             |       | 2019 | 17599868.850 | 14548115.735 | 3051753.12 |
|             |       | 2020 | 18081346.241 | 14855999.256 | 3225346.99 |
|             |       | 2021 | 18537594.460 | 15141418.165 | 3396176.29 |
|             |       | 2022 | 18985300.234 | 15417482.136 | 3567818.10 |
|             |       | 2023 | 19423958.747 | 15684470.462 | 3739488.29 |
|             |       | 2024 | 19853347.772 | 15941944.834 | 3911402.94 |
|             |       | 2025 | 20252822.245 | 16180338.469 | 4072483.78 |
|             |       | 2026 | 20619307.063 | 16394022.382 | 4225284.68 |
|             |       | 2027 | 20976063.406 | 16599195.895 | 4376867.51 |
|             |       | 2028 | 21323641.947 | 16796752.004 | 4526889.94 |
|             |       | 2029 | 21662117.106 | 16986325.803 | 4675791.30 |
|             |       | 2030 | 21960971.694 | 17153281.656 | 4807690.04 |
|             |       | 2031 | 22224951.983 | 17296744.526 | 4928207.46 |
|             |       | 2032 | 22480397.853 | 17433726.143 | 5046671.71 |
|             |       | 2033 | 22728639.455 | 17565262.367 | 5163377.09 |
|             |       | 2034 | 22970448.888 | 17691224.978 | 5279223.91 |
|             |       | 2035 | 23164154.188 | 17791814.160 | 5372340.03 |
|             |       | 2036 | 23334538.616 | 17878038.210 | 5456500.41 |
|             |       | 2037 | 23499760.723 | 17960768.323 | 5538992.40 |
|             |       | 2038 | 23660308.401 | 18040525.975 | 5619782.43 |
|             |       | 2039 | 23817891.273 | 18117679.616 | 5700211.66 |
| Lung cancer | Males | 1990 | 595621.791   | 595621.791   | 0.000      |
|             |       | 1991 | 1177744.113  | 1177266.147  | 477.966    |
|             |       | 1992 | 1750034.892  | 1748250.409  | 1784.483   |
|             |       | 1993 | 2319752.308  | 2315434.288  | 4318.020   |
|             |       | 1994 | 2872597.339  | 2864278.977  | 8318.362   |
|             |       | 1995 | 3411494.825  | 3397436.351  | 14058.474  |
|             |       | 1996 | 3945569.726  | 3923497.179  | 22072.547  |
|             |       | 1997 | 4463316.362  | 4431018.655  | 32297.707  |
|             |       | 1998 | 4975301.180  | 4930151.093  | 45150.087  |
|             |       | 1999 | 5473691.125  | 5412942.244  | 60748.881  |
|             |       | 2000 | 5977500.570  | 5897490.703  | 80009.867  |
|             |       | 2001 | 6474795.516  | 6371980.014  | 102815.502 |
|             |       | 2002 | 6968769.705  | 6839224.170  | 129545.534 |
|             |       | 2003 | 7460282.140  | 7299692.512  | 160589.628 |
|             |       | 2004 | 7947048.275  | 7751277.332  | 195770.943 |
|             |       | 2005 | 8430571.669  | 8195296.813  | 235274.855 |
|             |       | 2006 | 8903945.390  | 8625104.766  | 278840.624 |
|             |       | 2007 | 9364177.982  | 9038186.361  | 325991.621 |
|             |       | 2008 | 9822525.458  | 9444332.262  | 378193.196 |
|             |       | 2009 | 10275228.886 | 9840399.298  | 434829.588 |
|             |       | 2010 | 10720275.500 | 10224861.494 | 495414.006 |
|             |       | 2011 | 11155356.373 | 10595748.787 | 559607.586 |
|             |       | 2012 | 11582611.617 | 10954422.731 | 628188.886 |
|             |       | 2013 | 11998803.791 | 11298670.544 | 700133.247 |
|             |       | 2014 | 12402087.090 | 11627405.858 | 774681.232 |
|             |       | 2015 | 12793451.706 | 11942043.747 | 851407.958 |
|             |       | 2016 | 13160101.653 | 12232209.947 | 927891.705 |
|             |       | 2017 | 13503583.414 | 12499764.196 | 1003819.22 |
|             |       | 2018 | 13859755.737 | 12772075.411 | 1087680.33 |
|             |       | 2019 | 14211625.176 | 13036733.281 | 1174891.90 |
|             |       | 2020 | 14553935.288 | 13290655.806 | 1263279.48 |
|             |       | 2021 | 14851747.495 | 13507834.508 | 1343912.99 |
|             |       | 2022 | 15144531.004 | 13717716.805 | 1426814.20 |
|             |       | 2023 | 15431932.496 | 13920416.063 | 1511516.43 |
|             |       | 2024 | 15713920.740 | 14116152.134 | 1597768.61 |
|             |       | 2025 | 15979112.816 | 14298336.190 | 1680776.63 |
|             |       | 2026 | 16206550.153 | 14451403.036 | 1755147.12 |
|             |       | 2027 | 16428826.050 | 14598510.118 | 1830315.93 |
|             |       | 2028 | 16645902.186 | 14739828.523 | 1906073.66 |
|             |       | 2029 | 16858126.517 | 14876008.425 | 1982118.09 |
|             |       | 2030 | 17045220.687 | 14995447.106 | 2049773.58 |
|             |       | 2031 | 17208482.610 | 15097328.452 | 2111154.16 |
|             |       | 2032 | 17367586.074 | 15195239.371 | 2172346.70 |
|             |       | 2033 | 17522716.280 | 15289021.880 | 2233694.40 |
|             |       | 2034 | 17674226.555 | 15379546.395 | 2294680.16 |
|             |       | 2035 | 17792201.734 | 15449830.935 | 2342370.80 |
|             |       | 2036 | 17903508.236 | 15514941.372 | 2388566.86 |
|             |       | 2037 | 18012162.345 | 15577765.081 | 2434397.26 |
|             |       | 2038 | 18118464.470 | 15638027.904 | 2480436.57 |

**Results for PHIM for Run 10 (ELL Summary Sensitivity\_Analysis\_1.RTF)**

|     |        |      |              |              |            |
|-----|--------|------|--------------|--------------|------------|
|     | Female | 2039 | 18222549.860 | 15696452.746 | 2526097.11 |
|     |        | 1990 | 307897.357   | 307897.357   | 0.000      |
|     |        | 1991 | 616547.418   | 616242.551   | 304.866    |
|     |        | 1992 | 931086.773   | 929882.106   | 1204.667   |
|     |        | 1993 | 1246155.671  | 1243195.603  | 2960.068   |
|     |        | 1994 | 1561212.934  | 1555402.408  | 5810.527   |
|     |        | 1995 | 1879967.742  | 1869888.336  | 10079.406  |
|     |        | 1996 | 2197488.109  | 2181535.307  | 15952.802  |
|     |        | 1997 | 2515698.453  | 2491984.635  | 23713.817  |
|     |        | 1998 | 2836249.556  | 2802687.122  | 33562.434  |
|     |        | 1999 | 3150201.390  | 3104745.505  | 45455.885  |
|     |        | 2000 | 3472722.342  | 3412667.306  | 60055.037  |
|     |        | 2001 | 3796994.889  | 3719459.005  | 77535.884  |
|     |        | 2002 | 4126619.935  | 4028295.362  | 98324.573  |
|     |        | 2003 | 4454982.533  | 4332876.794  | 122105.740 |
|     |        | 2004 | 4784343.030  | 4635015.378  | 149327.652 |
|     |        | 2005 | 5113443.121  | 4933548.915  | 179894.206 |
|     |        | 2006 | 5442543.963  | 5228229.196  | 214314.767 |
|     |        | 2007 | 5772441.497  | 5519885.054  | 252556.442 |
|     |        | 2008 | 6091911.943  | 5798507.850  | 293404.093 |
|     |        | 2009 | 6413671.330  | 6075061.611  | 338609.719 |
|     |        | 2010 | 6730763.530  | 6344056.809  | 386706.721 |
|     |        | 2011 | 7043614.101  | 6605473.321  | 438140.780 |
|     |        | 2012 | 7356270.780  | 6862798.776  | 493472.004 |
|     |        | 2013 | 7662551.964  | 7111031.487  | 551520.477 |
|     |        | 2014 | 7964551.465  | 7352055.238  | 612496.227 |
|     |        | 2015 | 8254895.403  | 7580712.368  | 674183.034 |
|     |        | 2016 | 8530661.848  | 7794293.475  | 736368.372 |
|     |        | 2017 | 8795826.122  | 7996504.457  | 799321.665 |
|     |        | 2018 | 9067233.707  | 8199831.803  | 867401.904 |
|     |        | 2019 | 9335343.270  | 8397343.607  | 937999.663 |
|     |        | 2020 | 9596110.883  | 8586746.059  | 1009364.82 |
|     |        | 2021 | 9833186.859  | 8756485.723  | 1076701.14 |
|     |        | 2022 | 10066452.037 | 8920736.356  | 1145715.68 |
|     |        | 2023 | 10295503.609 | 9079583.198  | 1215920.41 |
|     |        | 2024 | 10520125.318 | 9232786.386  | 1287338.93 |
|     |        | 2025 | 10731915.863 | 9375541.308  | 1356374.55 |
|     |        | 2026 | 10917495.549 | 9498738.159  | 1418757.39 |
|     |        | 2027 | 11098620.885 | 9617055.610  | 1481565.28 |
|     |        | 2028 | 11275441.234 | 9730985.560  | 1544455.67 |
|     |        | 2029 | 11447962.710 | 9840331.675  | 1607631.03 |
|     |        | 2030 | 11601867.623 | 9936997.461  | 1664870.16 |
|     |        | 2031 | 11731666.516 | 10017043.446 | 1714623.07 |
|     |        | 2032 | 11857585.969 | 10093548.468 | 1764037.50 |
|     |        | 2033 | 11980128.625 | 10167029.659 | 1813098.97 |
|     |        | 2034 | 12099562.464 | 10237445.503 | 1862116.96 |
|     |        | 2035 | 12195919.946 | 10293653.745 | 1902266.20 |
|     |        | 2036 | 12278201.969 | 10340862.835 | 1937339.13 |
|     |        | 2037 | 12358146.336 | 10386261.040 | 1971885.30 |
|     |        | 2038 | 12435978.633 | 10430077.967 | 2005900.67 |
|     |        | 2039 | 12512468.845 | 10472510.247 | 2039958.60 |
| IHD | Males  | 1990 | 517209.093   | 517209.093   | 0.000      |
|     |        | 1991 | 1019219.395  | 1014047.711  | 5171.683   |
|     |        | 1992 | 1509598.614  | 1490521.272  | 19077.342  |
|     |        | 1993 | 1992735.299  | 1948601.945  | 44133.354  |
|     |        | 1994 | 2462877.575  | 2381090.225  | 81787.350  |
|     |        | 1995 | 2928249.390  | 2794633.071  | 133616.319 |
|     |        | 1996 | 3377377.730  | 3177960.779  | 199416.951 |
|     |        | 1997 | 3809062.472  | 3530951.569  | 278110.902 |
|     |        | 1998 | 4222213.867  | 3854053.859  | 368160.008 |
|     |        | 1999 | 4708317.743  | 4216755.941  | 491561.803 |
|     |        | 2000 | 5182084.396  | 4554653.255  | 627431.141 |
|     |        | 2001 | 5644097.705  | 4868192.416  | 775905.289 |
|     |        | 2002 | 6107232.129  | 5167726.118  | 939506.011 |
|     |        | 2003 | 6561785.704  | 5448211.108  | 1113574.60 |
|     |        | 2004 | 6996156.348  | 5704618.886  | 1291537.46 |
|     |        | 2005 | 7426261.361  | 5948288.162  | 1477973.20 |
|     |        | 2006 | 7849012.694  | 6177727.755  | 1671284.94 |
|     |        | 2007 | 8255300.530  | 6389892.584  | 1865407.95 |
|     |        | 2008 | 8650662.040  | 6589280.041  | 2061382.00 |
|     |        | 2009 | 9030818.513  | 6774979.400  | 2255839.11 |
|     |        | 2010 | 9403026.327  | 6951488.793  | 2451537.53 |
|     |        | 2011 | 9767535.506  | 7119291.922  | 2648243.58 |
|     |        | 2012 | 10123044.281 | 7278600.735  | 2844443.55 |
|     |        | 2013 | 10470104.786 | 7430229.842  | 3039874.94 |
|     |        | 2014 | 10807756.112 | 7574468.775  | 3233287.34 |
|     |        | 2015 | 11130681.425 | 7709807.381  | 3420874.04 |
|     |        | 2016 | 11448966.506 | 7840704.617  | 3608261.89 |

**Results for PHIM for Run 10 (ELL Summary Sensitivity\_Analysis\_1.RTF)**

|        |        |      |              |             |            |
|--------|--------|------|--------------|-------------|------------|
|        |        | 2017 | 11758164.882 | 7965640.795 | 3792524.09 |
|        |        | 2018 | 12054448.241 | 8083397.839 | 3971050.40 |
|        |        | 2019 | 12341606.261 | 8196171.689 | 4145434.57 |
|        |        | 2020 | 12600728.939 | 8296594.040 | 4304134.90 |
|        |        | 2021 | 12861767.105 | 8396578.641 | 4465188.46 |
|        |        | 2022 | 13114168.616 | 8492033.517 | 4622135.10 |
|        |        | 2023 | 13357894.797 | 8582973.216 | 4774921.58 |
|        |        | 2024 | 13593848.521 | 8670309.137 | 4923539.38 |
|        |        | 2025 | 13789177.359 | 8741970.109 | 5047207.25 |
|        |        | 2026 | 13993401.656 | 8816493.761 | 5176907.89 |
|        |        | 2027 | 14190519.224 | 8888075.181 | 5302444.04 |
|        |        | 2028 | 14381193.356 | 8956181.086 | 5425012.27 |
|        |        | 2029 | 14565171.927 | 9021609.162 | 5543562.77 |
|        |        | 2030 | 14697381.605 | 9068318.885 | 5629062.72 |
|        |        | 2031 | 14842203.512 | 9119447.497 | 5722756.01 |
|        |        | 2032 | 14982485.826 | 9168548.326 | 5813937.50 |
|        |        | 2033 | 15118410.647 | 9215025.192 | 5903385.45 |
|        |        | 2034 | 15250284.398 | 9260154.260 | 5990130.14 |
|        |        | 2035 | 15322911.166 | 9284452.818 | 6038458.35 |
|        |        | 2036 | 15405115.031 | 9311795.597 | 6093319.43 |
|        |        | 2037 | 15484709.137 | 9338160.056 | 6146549.08 |
|        |        | 2038 | 15561812.193 | 9363143.573 | 6198668.62 |
|        |        | 2039 | 15635992.616 | 9387116.215 | 6248876.40 |
|        | Female | 1990 | 147299.110   | 147299.110  | 0.000      |
|        |        | 1991 | 295122.462   | 293754.580  | 1367.882   |
|        |        | 1992 | 439962.920   | 434871.885  | 5091.035   |
|        |        | 1993 | 584735.615   | 572726.146  | 12009.469  |
|        |        | 1994 | 727640.783   | 705033.630  | 22607.152  |
|        |        | 1995 | 868486.937   | 831310.440  | 37176.497  |
|        |        | 1996 | 1010321.847  | 953566.909  | 56754.939  |
|        |        | 1997 | 1144230.930  | 1064740.315 | 79490.614  |
|        |        | 1998 | 1274513.622  | 1168449.187 | 106064.435 |
|        |        | 1999 | 1426725.938  | 1284489.454 | 142236.484 |
|        |        | 2000 | 1573462.680  | 1391718.619 | 181744.060 |
|        |        | 2001 | 1719132.015  | 1492820.901 | 226311.114 |
|        |        | 2002 | 1863006.732  | 1587831.819 | 275174.913 |
|        |        | 2003 | 2002943.227  | 1675905.500 | 327037.727 |
|        |        | 2004 | 2137798.705  | 1756924.132 | 380874.573 |
|        |        | 2005 | 2271071.245  | 1833810.631 | 437260.614 |
|        |        | 2006 | 2400707.731  | 1905276.503 | 495431.228 |
|        |        | 2007 | 2523634.512  | 1970509.107 | 553125.405 |
|        |        | 2008 | 2648752.232  | 2034438.853 | 614313.379 |
|        |        | 2009 | 2765973.961  | 2092524.021 | 673449.940 |
|        |        | 2010 | 2881329.235  | 2148043.770 | 733285.465 |
|        |        | 2011 | 2994972.694  | 2201039.183 | 793933.510 |
|        |        | 2012 | 3108958.829  | 2252694.826 | 856264.003 |
|        |        | 2013 | 3218140.416  | 2301191.765 | 916948.651 |
|        |        | 2014 | 3328387.914  | 2349052.979 | 979334.934 |
|        |        | 2015 | 3435342.796  | 2394654.675 | 1040688.12 |
|        |        | 2016 | 3539189.408  | 2438084.508 | 1101104.90 |
|        |        | 2017 | 3640041.363  | 2479507.061 | 1160534.30 |
|        |        | 2018 | 3732645.362  | 2516985.188 | 1215660.17 |
|        |        | 2019 | 3821421.978  | 2552423.270 | 1268998.71 |
|        |        | 2020 | 3902115.950  | 2584119.896 | 1317996.05 |
|        |        | 2021 | 3984301.053  | 2616035.278 | 1368265.78 |
|        |        | 2022 | 4062629.299  | 2646135.856 | 1416493.44 |
|        |        | 2023 | 4137348.729  | 2674663.310 | 1462685.42 |
|        |        | 2024 | 4208611.493  | 2701627.125 | 1506984.37 |
|        |        | 2025 | 4269419.492  | 2724367.812 | 1545051.68 |
|        |        | 2026 | 4330969.998  | 2747239.185 | 1583730.81 |
|        |        | 2027 | 4389134.306  | 2768782.467 | 1620351.84 |
|        |        | 2028 | 4444222.970  | 2789157.216 | 1655065.75 |
|        |        | 2029 | 4496447.877  | 2808406.739 | 1688041.14 |
|        |        | 2030 | 4536975.698  | 2823018.786 | 1713956.91 |
|        |        | 2031 | 4578338.586  | 2837967.021 | 1740371.57 |
|        |        | 2032 | 4617397.784  | 2852130.994 | 1765266.79 |
|        |        | 2033 | 4654407.697  | 2865608.226 | 1788799.47 |
|        |        | 2034 | 4689913.454  | 2878458.521 | 1811454.93 |
|        |        | 2035 | 4712518.190  | 2886274.758 | 1826243.43 |
|        |        | 2036 | 4735845.827  | 2894323.998 | 1841521.83 |
|        |        | 2037 | 4757958.806  | 2901979.589 | 1855979.22 |
|        |        | 2038 | 4778813.806  | 2909294.839 | 1869518.97 |
|        |        | 2039 | 4798769.065  | 2916302.206 | 1882466.86 |
| Stroke | Males  | 1990 | 75005.854    | 75005.854   | 0.000      |
|        |        | 1991 | 149463.017   | 148933.769  | 529.249    |
|        |        | 1992 | 222966.278   | 221008.957  | 1957.321   |
|        |        | 1993 | 296801.879   | 292157.242  | 4644.637   |
|        |        | 1994 | 372453.706   | 363490.398  | 8963.307   |

**Results for PHIM for Run 10 (ELL Summary Sensitivity\_Analysis\_1.RTF)**

|        |      |             |             |            |
|--------|------|-------------|-------------|------------|
|        | 1995 | 448401.338  | 433295.360  | 15105.977  |
|        | 1996 | 523536.301  | 500372.302  | 23164.000  |
|        | 1997 | 596763.211  | 563635.488  | 33127.723  |
|        | 1998 | 667546.681  | 622701.239  | 44845.442  |
|        | 1999 | 734925.407  | 676905.418  | 58019.989  |
|        | 2000 | 803749.361  | 730254.609  | 73494.752  |
|        | 2001 | 870081.588  | 779611.759  | 90469.829  |
|        | 2002 | 935347.140  | 826251.008  | 109096.132 |
|        | 2003 | 1001627.349 | 871599.030  | 130028.319 |
|        | 2004 | 1066587.976 | 914271.418  | 152316.558 |
|        | 2005 | 1130548.052 | 954547.636  | 176000.416 |
|        | 2006 | 1195132.454 | 993546.205  | 201586.248 |
|        | 2007 | 1258974.043 | 1030553.811 | 228420.233 |
|        | 2008 | 1320124.867 | 1064579.947 | 255544.919 |
|        | 2009 | 1380776.123 | 1097096.854 | 283679.269 |
|        | 2010 | 1440048.533 | 1127789.273 | 312259.260 |
|        | 2011 | 1497484.847 | 1156543.640 | 340941.206 |
|        | 2012 | 1554496.526 | 1184077.850 | 370418.677 |
|        | 2013 | 1610819.598 | 1210419.980 | 400399.618 |
|        | 2014 | 1667484.890 | 1236097.479 | 431387.410 |
|        | 2015 | 1720948.287 | 1259735.036 | 461213.251 |
|        | 2016 | 1775699.228 | 1283318.675 | 492380.553 |
|        | 2017 | 1830250.175 | 1306240.226 | 524009.949 |
|        | 2018 | 1875958.950 | 1325024.605 | 550934.345 |
|        | 2019 | 1920359.232 | 1342924.813 | 577434.418 |
|        | 2020 | 1960605.297 | 1358894.348 | 601710.950 |
|        | 2021 | 1998912.887 | 1373803.472 | 625109.415 |
|        | 2022 | 2036003.696 | 1387969.025 | 648034.671 |
|        | 2023 | 2071857.536 | 1401439.572 | 670417.964 |
|        | 2024 | 2106636.468 | 1414341.143 | 692295.325 |
|        | 2025 | 2136450.873 | 1425275.621 | 711175.252 |
|        | 2026 | 2164796.470 | 1435535.914 | 729260.556 |
|        | 2027 | 2192079.608 | 1445335.915 | 746743.693 |
|        | 2028 | 2218404.367 | 1454641.070 | 763763.297 |
|        | 2029 | 2243769.140 | 1463549.750 | 780219.391 |
|        | 2030 | 2263570.213 | 1470442.627 | 793127.586 |
|        | 2031 | 2282521.590 | 1476989.268 | 805532.322 |
|        | 2032 | 2300804.945 | 1483241.516 | 817563.428 |
|        | 2033 | 2318464.018 | 1489182.957 | 829281.061 |
|        | 2034 | 2335611.973 | 1494926.769 | 840685.204 |
|        | 2035 | 2347097.290 | 1498748.862 | 848348.429 |
|        | 2036 | 2358248.747 | 1502430.982 | 855817.765 |
|        | 2037 | 2369033.655 | 1505984.416 | 863049.239 |
|        | 2038 | 2379490.114 | 1509364.708 | 870125.406 |
|        | 2039 | 2389546.238 | 1512599.236 | 876947.002 |
| Female | 1990 | 56348.092   | 56348.092   | 0.000      |
|        | 1991 | 110871.862  | 110494.205  | 377.657    |
|        | 1992 | 165654.454  | 164204.702  | 1449.752   |
|        | 1993 | 220008.519  | 216549.806  | 3458.713   |
|        | 1994 | 275706.807  | 268994.408  | 6712.399   |
|        | 1995 | 331417.547  | 320115.167  | 11302.380  |
|        | 1996 | 387580.161  | 370119.376  | 17460.785  |
|        | 1997 | 442778.242  | 417703.530  | 25074.712  |
|        | 1998 | 496117.305  | 462134.832  | 33982.472  |
|        | 1999 | 548268.214  | 504028.762  | 44239.453  |
|        | 2000 | 601693.202  | 545415.957  | 56277.245  |
|        | 2001 | 652221.103  | 583052.604  | 69168.498  |
|        | 2002 | 703022.600  | 619354.690  | 83667.910  |
|        | 2003 | 752023.351  | 652941.720  | 99081.631  |
|        | 2004 | 799826.733  | 684336.731  | 115490.002 |
|        | 2005 | 847563.928  | 714467.002  | 133096.926 |
|        | 2006 | 894205.027  | 742715.867  | 151489.160 |
|        | 2007 | 939571.282  | 769106.428  | 170464.854 |
|        | 2008 | 983437.578  | 793668.283  | 189769.295 |
|        | 2009 | 1025803.786 | 816566.450  | 209237.336 |
|        | 2010 | 1066964.934 | 838032.622  | 228932.312 |
|        | 2011 | 1106954.044 | 858178.322  | 248775.722 |
|        | 2012 | 1146108.461 | 877283.747  | 268824.713 |
|        | 2013 | 1183544.689 | 895041.325  | 288503.365 |
|        | 2014 | 1221220.945 | 912382.343  | 308838.603 |
|        | 2015 | 1258289.311 | 929054.055  | 329235.257 |
|        | 2016 | 1294830.207 | 945096.057  | 349734.150 |
|        | 2017 | 1330332.626 | 960322.371  | 370010.255 |
|        | 2018 | 1360571.987 | 973050.415  | 387521.572 |
|        | 2019 | 1389848.723 | 985119.771  | 404728.951 |
|        | 2020 | 1416046.192 | 995724.763  | 420321.430 |
|        | 2021 | 1440588.850 | 1005484.281 | 435104.568 |
|        | 2022 | 1464157.934 | 1014721.792 | 449436.142 |

**Results for PHIM for Run 10 (ELL Summary Sensitivity\_Analysis\_1.RTF)**

|      |             |             |             |             |            |
|------|-------------|-------------|-------------|-------------|------------|
|      |             | 2023        | 1486810.237 | 1023514.409 | 463295.828 |
|      |             | 2024        | 1508591.729 | 1031851.204 | 476740.526 |
|      |             | 2025        | 1526875.621 | 1038763.228 | 488112.394 |
|      |             | 2026        | 1543659.810 | 1045037.491 | 498622.318 |
|      |             | 2027        | 1559623.774 | 1050967.882 | 508655.893 |
|      |             | 2028        | 1574852.850 | 1056595.674 | 518257.176 |
|      |             | 2029        | 1589437.452 | 1061939.578 | 527497.874 |
|      |             | 2030        | 1600568.199 | 1065940.046 | 534628.153 |
|      |             | 2031        | 1610776.297 | 1069606.660 | 541169.637 |
|      |             | 2032        | 1620483.563 | 1073093.744 | 547389.819 |
|      |             | 2033        | 1629745.442 | 1076424.608 | 553320.835 |
|      |             | 2034        | 1638721.425 | 1079618.020 | 559103.405 |
|      |             | 2035        | 1644649.404 | 1081664.479 | 562984.926 |
|      |             | 2036        | 1650181.590 | 1083563.788 | 566617.802 |
|      |             | 2037        | 1655476.066 | 1085384.114 | 570091.952 |
|      |             | 2038        | 1660507.914 | 1087137.231 | 573370.683 |
|      |             | 2039        | 1665361.569 | 1088829.596 | 576531.973 |
| COPD | Males       | 1990        | 117002.906  | 117002.906  | 0.000      |
|      |             | 1991        | 233438.833  | 233287.920  | 150.913    |
|      |             | 1992        | 348084.047  | 347532.171  | 551.876    |
|      |             | 1993        | 467278.318  | 465930.157  | 1348.161   |
|      |             | 1994        | 584216.907  | 581578.113  | 2638.794   |
|      |             | 1995        | 697391.457  | 692912.165  | 4479.291   |
|      |             | 1996        | 809471.271  | 802488.034  | 6983.237   |
|      |             | 1997        | 922587.668  | 912275.877  | 10311.791  |
|      |             | 1998        | 1034072.457 | 1019666.648 | 14405.809  |
|      |             | 1999        | 1153475.399 | 1133691.397 | 19784.002  |
|      |             | 2000        | 1268050.268 | 1241942.288 | 26107.980  |
|      |             | 2001        | 1382786.209 | 1349118.795 | 33667.414  |
|      |             | 2002        | 1497557.412 | 1454968.616 | 42588.795  |
|      |             | 2003        | 1614405.229 | 1561515.621 | 52889.608  |
|      |             | 2004        | 1726672.489 | 1662477.988 | 64194.502  |
|      |             | 2005        | 1847277.524 | 1769575.443 | 77702.081  |
|      |             | 2006        | 1961009.963 | 1868999.549 | 92010.414  |
|      |             | 2007        | 2079868.908 | 1971211.962 | 108656.947 |
|      |             | 2008        | 2206755.783 | 2078705.191 | 128050.592 |
|      |             | 2009        | 2331993.380 | 2183028.757 | 148964.623 |
|      |             | 2010        | 2455130.176 | 2283920.487 | 171209.689 |
|      |             | 2011        | 2582657.849 | 2386572.845 | 196085.003 |
|      |             | 2012        | 2709719.005 | 2486903.928 | 222815.076 |
|      |             | 2013        | 2840547.005 | 2588174.597 | 252372.408 |
|      |             | 2014        | 2971677.135 | 2687706.645 | 283970.491 |
|      |             | 2015        | 3104538.983 | 2787280.998 | 317257.985 |
|      |             | 2016        | 3237650.175 | 2884924.361 | 352725.815 |
|      |             | 2017        | 3370561.253 | 2980536.952 | 390024.301 |
|      |             | 2018        | 3503136.371 | 3073643.019 | 429493.352 |
|      |             | 2019        | 3636402.758 | 3165277.237 | 471125.521 |
|      |             | 2020        | 3768054.453 | 3254331.739 | 513722.714 |
|      |             | 2021        | 3897675.067 | 3340110.729 | 557564.338 |
|      |             | 2022        | 4027307.132 | 3423938.867 | 603368.265 |
|      |             | 2023        | 4156698.720 | 3505768.305 | 650930.416 |
|      |             | 2024        | 4285772.226 | 3585562.743 | 700209.483 |
|      |             | 2025        | 4410759.298 | 3661681.900 | 749077.398 |
|      |             | 2026        | 4531411.064 | 3733298.238 | 798112.826 |
|      |             | 2027        | 4651145.233 | 3802653.574 | 848491.659 |
|      |             | 2028        | 4769837.872 | 3869838.867 | 899999.005 |
|      |             | 2029        | 4887747.179 | 3935060.688 | 952686.492 |
| 2030 | 4997632.895 | 3995166.738 | 1002466.16  |             |            |
| 2031 | 5103301.991 | 4051224.092 | 1052077.90  |             |            |
| 2032 | 5207593.613 | 4105308.892 | 1102284.72  |             |            |
| 2033 | 5310556.138 | 4157395.307 | 1153160.83  |             |            |
| 2034 | 5412542.816 | 4207895.047 | 1204647.77  |             |            |
| 2035 | 5500522.473 | 4251108.929 | 1249413.54  |             |            |
| 2036 | 5588149.640 | 4293058.589 | 1295091.05  |             |            |
| 2037 | 5674667.886 | 4333715.845 | 1340952.04  |             |            |
| 2038 | 5760391.289 | 4373016.256 | 1387375.03  |             |            |
| 2039 | 5845459.234 | 4411357.293 | 1434101.94  |             |            |
|      | Female      | 1990        | 77434.846   | 77434.846   | 0.000      |
|      |             | 1991        | 160029.510  | 159906.101  | 123.409    |
|      |             | 1992        | 240642.531  | 240173.785  | 468.747    |
|      |             | 1993        | 329362.093  | 328153.053  | 1209.040   |
|      |             | 1994        | 418569.515  | 416151.179  | 2418.336   |
|      |             | 1995        | 509110.357  | 504862.844  | 4247.514   |
|      |             | 1996        | 600040.117  | 593303.200  | 6736.917   |
|      |             | 1997        | 691159.071  | 681176.351  | 9982.719   |
|      |             | 1998        | 782866.899  | 768841.449  | 14025.450  |
|      |             | 1999        | 881526.925  | 862179.893  | 19347.032  |
|      |             | 2000        | 977880.647  | 952409.245  | 25471.402  |

## Results for PHIM for Run 10 (ELL Summary Sensitivity\_Analysis\_1.RTF)

|      |             |             |            |
|------|-------------|-------------|------------|
| 2001 | 1076787.404 | 1043942.368 | 32845.036  |
| 2002 | 1174842.754 | 1133519.074 | 41323.680  |
| 2003 | 1275102.681 | 1223981.007 | 51121.674  |
| 2004 | 1371026.306 | 1309380.809 | 61645.497  |
| 2005 | 1473954.509 | 1399655.931 | 74298.578  |
| 2006 | 1574450.828 | 1486473.609 | 87977.220  |
| 2007 | 1673790.211 | 1570949.092 | 102841.120 |
| 2008 | 1782360.738 | 1661757.237 | 120603.501 |
| 2009 | 1892944.209 | 1752512.562 | 140431.647 |
| 2010 | 2002131.282 | 1840705.308 | 161425.975 |
| 2011 | 2114522.152 | 1929703.697 | 184818.456 |
| 2012 | 2228079.372 | 2018014.548 | 210064.824 |
| 2013 | 2345377.689 | 2107397.586 | 237980.103 |
| 2014 | 2462498.422 | 2194823.764 | 267674.658 |
| 2015 | 2581450.312 | 2282426.686 | 299023.626 |
| 2016 | 2701959.301 | 2369335.468 | 332623.833 |
| 2017 | 2823834.967 | 2455412.872 | 368422.095 |
| 2018 | 2938265.081 | 2534962.456 | 403302.624 |
| 2019 | 3053254.880 | 2613229.087 | 440025.793 |
| 2020 | 3167073.216 | 2689408.537 | 477664.679 |
| 2021 | 3279517.699 | 2763412.883 | 516104.816 |
| 2022 | 3392060.964 | 2835888.132 | 556172.832 |
| 2023 | 3504296.171 | 2906709.545 | 597586.626 |
| 2024 | 3616019.231 | 2975680.119 | 640339.112 |
| 2025 | 3724611.269 | 3041666.122 | 682945.147 |
| 2026 | 3827181.707 | 3103007.547 | 724174.160 |
| 2027 | 3928684.441 | 3162389.936 | 766294.504 |
| 2028 | 4029124.892 | 3220013.553 | 809111.339 |
| 2029 | 4128269.068 | 3275647.810 | 852621.257 |
| 2030 | 4221560.174 | 3327325.362 | 894234.811 |
| 2031 | 4304170.584 | 3372127.399 | 932043.185 |
| 2032 | 4384930.537 | 3414952.937 | 969977.601 |
| 2033 | 4464357.691 | 3456199.874 | 1008157.82 |
| 2034 | 4542251.545 | 3495702.934 | 1046548.61 |
| 2035 | 4611066.648 | 3530221.178 | 1080845.47 |
| 2036 | 4670309.230 | 3559287.589 | 1111021.64 |
| 2037 | 4728179.514 | 3587143.580 | 1141035.93 |
| 2038 | 4785008.048 | 3614015.937 | 1170992.11 |
| 2039 | 4841291.793 | 3640037.567 | 1201254.23 |

---

## Results for PHIM for Run 10 (ELL Summary Sensitivity\_Analysis\_1.RTF)

\*\*\*\*\*

**Table 5: Estimated Loss of Life, at the end of follow-up, Population unadjusted for deaths in Ecig scenario**

| Disease      | Sex    | Age Group   | Years of life lost<br>NULL | Years of life lost<br>Ecig | Years of life<br>Saved |
|--------------|--------|-------------|----------------------------|----------------------------|------------------------|
| All Diseases | Males  | 30-34       | 443911.034                 | 309701.407                 | 134209.627             |
|              |        | 35-39       | 1146798.555                | 796388.690                 | 350409.865             |
|              |        | 40-44       | 2609591.408                | 1790493.385                | 819098.024             |
|              |        | 45-49       | 4775841.753                | 3256208.075                | 1519633.68             |
|              |        | 50-54       | 7446969.205                | 5180423.872                | 2266545.33             |
|              |        | 55-59       | 8240205.925                | 5979938.540                | 2260267.38             |
|              |        | 60-64       | 8772829.118                | 6641561.125                | 2131267.99             |
|              |        | 65-69       | 6161494.678                | 4917492.198                | 1244002.48             |
|              |        | 70-74       | 2495906.274                | 2025054.558                | 470851.715             |
|              | 75-79  | 0.000       | 0.000                      | 0.000                      |                        |
|              | Female | 30-34       | 229140.561                 | 172034.625                 | 57105.936              |
|              |        | 35-39       | 570217.942                 | 425278.738                 | 144939.203             |
|              |        | 40-44       | 1267538.938                | 934537.227                 | 333001.711             |
|              |        | 45-49       | 2340070.698                | 1717374.010                | 622696.689             |
|              |        | 50-54       | 3743803.613                | 2761116.206                | 982687.407             |
|              |        | 55-59       | 4591478.168                | 3457848.315                | 1133629.85             |
|              |        | 60-64       | 5207367.788                | 3984840.516                | 1222527.27             |
|              |        | 65-69       | 4092181.394                | 3221681.730                | 870499.664             |
| 70-74        |        | 1776092.171 | 1403605.305                | 372486.865                 |                        |
| Lung cancer  | Males  | 30-34       | 66065.017                  | 58013.026                  | 8051.992               |
|              |        | 35-39       | 232509.414                 | 205079.040                 | 27430.375              |
|              |        | 40-44       | 688628.041                 | 600894.404                 | 87733.637              |
|              |        | 45-49       | 1528300.367                | 1312931.163                | 215369.204             |
|              |        | 50-54       | 2730187.229                | 2327197.908                | 402989.321             |
|              |        | 55-59       | 3909101.673                | 3318446.131                | 590655.542             |
|              |        | 60-64       | 4287716.660                | 3681549.724                | 606166.936             |
|              |        | 65-69       | 3467897.115                | 2994357.080                | 473540.035             |
|              |        | 70-74       | 1312144.343                | 1138540.519                | 173603.824             |
|              | 75-79  | 0.000       | 0.000                      | 0.000                      |                        |
|              | Female | 30-34       | 51913.113                  | 45457.460                  | 6455.653               |
|              |        | 35-39       | 189792.904                 | 166372.168                 | 23420.737              |
|              |        | 40-44       | 527596.573                 | 453230.402                 | 74366.171              |
|              |        | 45-49       | 1122524.269                | 947026.232                 | 175498.037             |
|              |        | 50-54       | 1882214.322                | 1570729.537                | 311484.785             |
|              |        | 55-59       | 2595581.943                | 2148622.373                | 446959.570             |
|              |        | 60-64       | 2846273.090                | 2368203.419                | 478069.670             |
|              |        | 65-69       | 2358758.394                | 1966039.654                | 392718.739             |
| 70-74        |        | 937814.238  | 783517.252                 | 154296.986                 |                        |
| IHD          | Males  | 30-34       | 263834.566                 | 168476.055                 | 95358.510              |
|              |        | 35-39       | 692140.150                 | 431093.055                 | 261047.095             |
|              |        | 40-44       | 1519708.432                | 906076.023                 | 613632.409             |
|              |        | 45-49       | 2568546.697                | 1471283.805                | 1097262.89             |
|              |        | 50-54       | 3632929.903                | 2112021.524                | 1520908.38             |
|              |        | 55-59       | 2807892.356                | 1615811.503                | 1192080.85             |
|              |        | 60-64       | 2599825.934                | 1615839.023                | 983986.911             |
|              |        | 65-69       | 1113578.307                | 733003.585                 | 380574.723             |
|              |        | 70-74       | 437536.271                 | 310910.867                 | 126625.404             |
|              | 75-79  | 0.000       | 0.000                      | 0.000                      |                        |
|              | Female | 30-34       | 79649.097                  | 52188.455                  | 27460.642              |
|              |        | 35-39       | 193965.908                 | 119951.758                 | 74014.150              |
|              |        | 40-44       | 403380.974                 | 237165.427                 | 166215.547             |
|              |        | 45-49       | 671385.408                 | 381582.295                 | 289803.113             |
|              |        | 50-54       | 1011875.989                | 589080.164                 | 422795.825             |
|              |        | 55-59       | 849875.715                 | 497397.697                 | 352478.019             |
|              |        | 60-64       | 925490.876                 | 581952.699                 | 343538.178             |
|              |        | 65-69       | 455463.881                 | 304969.661                 | 150494.220             |
| 70-74        |        | 207681.216  | 148398.670                 | 59282.546                  |                        |
| Stroke       | Males  | 30-34       | 73463.650                  | 52470.080                  | 20993.569              |
|              |        | 35-39       | 151934.057                 | 106637.634                 | 45296.423              |
|              |        | 40-44       | 262845.974                 | 178915.192                 | 83930.783              |
|              |        | 45-49       | 383421.246                 | 251454.430                 | 131966.816             |
|              |        | 50-54       | 479872.634                 | 299259.229                 | 180613.404             |
|              |        | 55-59       | 437124.903                 | 259223.399                 | 177901.504             |
|              |        | 60-64       | 419457.235                 | 250677.162                 | 168780.072             |
|              |        | 65-69       | 128180.574                 | 76923.412                  | 51257.162              |
|              |        | 70-74       | 53245.965                  | 33518.509                  | 19727.457              |
|              | 75-79  | 0.000       | 0.000                      | 0.000                      |                        |
|              | Female | 30-34       | 62919.090                  | 47172.264                  | 15746.827              |

**Results for PHIM for Run 10 (ELL Summary Sensitivity\_Analysis\_1.RTF)**

|      |        |       |             |             |            |
|------|--------|-------|-------------|-------------|------------|
|      |        | 35-39 | 120806.205  | 87639.708   | 33166.498  |
|      |        | 40-44 | 203391.885  | 141377.377  | 62014.509  |
|      |        | 45-49 | 278172.097  | 185656.808  | 92515.289  |
|      |        | 50-54 | 325979.181  | 209407.888  | 116571.293 |
|      |        | 55-59 | 275161.340  | 169322.476  | 105838.864 |
|      |        | 60-64 | 268920.493  | 165948.916  | 102971.577 |
|      |        | 65-69 | 87956.054   | 54586.192   | 33369.862  |
|      |        | 70-74 | 42055.224   | 26644.810   | 15410.413  |
|      |        | 75-79 | 0.000       | 0.000       | 0.000      |
| COPD | Males  | 30-34 | 40547.801   | 30742.245   | 9805.556   |
|      |        | 35-39 | 70214.933   | 53578.962   | 16635.972  |
|      |        | 40-44 | 138408.960  | 104607.766  | 33801.194  |
|      |        | 45-49 | 295573.443  | 220538.677  | 75034.766  |
|      |        | 50-54 | 603979.438  | 441945.211  | 162034.227 |
|      |        | 55-59 | 1086086.992 | 786457.507  | 299629.485 |
|      |        | 60-64 | 1465829.290 | 1093495.216 | 372334.074 |
|      |        | 65-69 | 1451838.682 | 1113208.123 | 338630.559 |
|      |        | 70-74 | 692979.695  | 542084.663  | 150895.031 |
|      |        | 75-79 | 0.000       | 0.000       | 0.000      |
|      | Female | 30-34 | 34659.261   | 27216.447   | 7442.814   |
|      |        | 35-39 | 65652.924   | 51315.105   | 14337.819  |
|      |        | 40-44 | 133169.505  | 102764.022  | 30405.484  |
|      |        | 45-49 | 267988.924  | 203108.674  | 64880.250  |
|      |        | 50-54 | 523734.121  | 391898.617  | 131835.503 |
|      |        | 55-59 | 870859.170  | 642505.770  | 228353.400 |
|      |        | 60-64 | 1166683.329 | 868735.482  | 297947.846 |
|      |        | 65-69 | 1190003.066 | 896086.223  | 293916.843 |
|      |        | 70-74 | 588541.493  | 445044.573  | 143496.920 |
|      |        | 75-79 | 0.000       | 0.000       | 0.000      |

---



## Results for PHIM for Run 10 (ELL Summary Sensitivity\_Analysis\_1.RTF)

\*\*\*\*\*

**Table 6: Estimated Loss of Life, at the end of follow-up, Population and Number deaths adjusted for Ecig scenario**

| Disease      | Sex    | Age Group   | Years of life lost<br>NULL | Years of life lost<br>Ecig | Years of life<br>Saved |
|--------------|--------|-------------|----------------------------|----------------------------|------------------------|
| All Diseases | Males  | 30-34       | 443911.034                 | 309722.308                 | 134188.726             |
|              |        | 35-39       | 1146798.555                | 796546.442                 | 350252.113             |
|              |        | 40-44       | 2609591.408                | 1791511.658                | 818079.750             |
|              |        | 45-49       | 4775841.753                | 3260663.490                | 1515178.26             |
|              |        | 50-54       | 7446969.205                | 5193761.923                | 2253207.28             |
|              |        | 55-59       | 8240205.925                | 6000312.577                | 2239893.35             |
|              |        | 60-64       | 8772829.118                | 6673732.712                | 2099096.41             |
|              |        | 65-69       | 6161494.678                | 4942778.624                | 1218716.05             |
|              |        | 70-74       | 2495906.274                | 2038495.755                | 457410.519             |
|              | 75-79  | 0.000       | 0.000                      | 0.000                      |                        |
|              | Female | 30-34       | 229140.561                 | 172039.315                 | 57101.246              |
|              |        | 35-39       | 570217.942                 | 425313.360                 | 144904.582             |
|              |        | 40-44       | 1267538.938                | 934756.914                 | 332782.024             |
|              |        | 45-49       | 2340070.698                | 1718341.057                | 621729.641             |
|              |        | 50-54       | 3743803.613                | 2764203.065                | 979600.549             |
|              |        | 55-59       | 4591478.168                | 3463725.629                | 1127752.54             |
|              |        | 60-64       | 5207367.788                | 3995732.451                | 1211635.34             |
|              |        | 65-69       | 4092181.394                | 3232870.601                | 859310.794             |
| 70-74        |        | 1776092.171 | 1410697.225                | 365394.946                 |                        |
| Lung cancer  | Males  | 30-34       | 66065.017                  | 58016.562                  | 8048.455               |
|              |        | 35-39       | 232509.414                 | 205116.982                 | 27392.433              |
|              |        | 40-44       | 688628.041                 | 601223.229                 | 87404.813              |
|              |        | 45-49       | 1528300.367                | 1314693.916                | 213606.451             |
|              |        | 50-54       | 2730187.229                | 2333058.489                | 397128.740             |
|              |        | 55-59       | 3909101.673                | 3329631.392                | 579470.282             |
|              |        | 60-64       | 4287716.660                | 3699292.885                | 588423.775             |
|              |        | 65-69       | 3467897.115                | 3009419.920                | 458477.195             |
|              |        | 70-74       | 1312144.343                | 1145999.371                | 166144.972             |
|              | 75-79  | 0.000       | 0.000                      | 0.000                      |                        |
|              | Female | 30-34       | 51913.113                  | 45458.709                  | 6454.404               |
|              |        | 35-39       | 189792.904                 | 166385.345                 | 23407.559              |
|              |        | 40-44       | 527596.573                 | 453337.496                 | 74259.078              |
|              |        | 45-49       | 1122524.269                | 947561.734                 | 174962.535             |
|              |        | 50-54       | 1882214.322                | 1572497.858                | 309716.464             |
|              |        | 55-59       | 2595581.943                | 2152301.837                | 443280.106             |
|              |        | 60-64       | 2846273.090                | 2374748.967                | 471524.123             |
|              |        | 65-69       | 2358758.394                | 1972781.013                | 385977.381             |
| 70-74        |        | 937814.238  | 787437.288                 | 150376.949                 |                        |
| IHD          | Males  | 30-34       | 263834.566                 | 168488.093                 | 95346.472              |
|              |        | 35-39       | 692140.150                 | 431180.975                 | 260959.175             |
|              |        | 40-44       | 1519708.432                | 906599.908                 | 613108.525             |
|              |        | 45-49       | 2568546.697                | 1473284.791                | 1095261.91             |
|              |        | 50-54       | 3632929.903                | 2117291.038                | 1515638.87             |
|              |        | 55-59       | 2807892.356                | 1620614.763                | 1187277.59             |
|              |        | 60-64       | 2599825.934                | 1622067.833                | 977758.100             |
|              |        | 65-69       | 1113578.307                | 735478.119                 | 378100.188             |
|              |        | 70-74       | 437536.271                 | 312110.695                 | 125425.575             |
|              | 75-79  | 0.000       | 0.000                      | 0.000                      |                        |
|              | Female | 30-34       | 79649.097                  | 52190.020                  | 27459.077              |
|              |        | 35-39       | 193965.908                 | 119962.411                 | 74003.496              |
|              |        | 40-44       | 403380.974                 | 237223.072                 | 166157.902             |
|              |        | 45-49       | 671385.408                 | 381792.866                 | 289592.542             |
|              |        | 50-54       | 1011875.989                | 589684.874                 | 422191.115             |
|              |        | 55-59       | 849875.715                 | 498062.674                 | 351813.042             |
|              |        | 60-64       | 925490.876                 | 583062.241                 | 342428.636             |
|              |        | 65-69       | 455463.881                 | 305557.276                 | 149906.606             |
| 70-74        |        | 207681.216  | 148766.773                 | 58914.444                  |                        |
| Stroke       | Males  | 30-34       | 73463.650                  | 52473.181                  | 20990.469              |
|              |        | 35-39       | 151934.057                 | 106657.081                 | 45276.976              |
|              |        | 40-44       | 262845.974                 | 179007.699                 | 83838.275              |
|              |        | 45-49       | 383421.246                 | 251766.280                 | 131654.966             |
|              |        | 50-54       | 479872.634                 | 299974.096                 | 179898.538             |
|              |        | 55-59       | 437124.903                 | 260034.192                 | 177090.712             |
|              |        | 60-64       | 419457.235                 | 251781.648                 | 167675.586             |
|              |        | 65-69       | 128180.574                 | 77231.643                  | 50948.931              |
|              |        | 70-74       | 53245.965                  | 33673.415                  | 19572.550              |
|              | 75-79  | 0.000       | 0.000                      | 0.000                      |                        |
|              | Female | 30-34       | 62919.090                  | 47173.348                  | 15745.742              |

**Results for PHIM for Run 10 (ELL Summary Sensitivity\_Analysis\_1.RTF)**

|      |        |       |             |             |            |
|------|--------|-------|-------------|-------------|------------|
|      |        | 35-39 | 120806.205  | 87645.827   | 33160.379  |
|      |        | 40-44 | 203391.885  | 141405.070  | 61986.815  |
|      |        | 45-49 | 278172.097  | 185742.997  | 92429.100  |
|      |        | 50-54 | 325979.181  | 209598.752  | 116380.429 |
|      |        | 55-59 | 275161.340  | 169545.804  | 105615.536 |
|      |        | 60-64 | 268920.493  | 166288.665  | 102631.828 |
|      |        | 65-69 | 87956.054   | 54705.773   | 33250.281  |
|      |        | 70-74 | 42055.224   | 26723.360   | 15331.864  |
|      |        | 75-79 | 0.000       | 0.000       | 0.000      |
| COPD | Males  | 30-34 | 40547.801   | 30744.471   | 9803.330   |
|      |        | 35-39 | 70214.933   | 53591.404   | 16623.530  |
|      |        | 40-44 | 138408.960  | 104680.822  | 33728.138  |
|      |        | 45-49 | 295573.443  | 220918.503  | 74654.940  |
|      |        | 50-54 | 603979.438  | 443438.301  | 160541.137 |
|      |        | 55-59 | 1086086.992 | 790032.231  | 296054.761 |
|      |        | 60-64 | 1465829.290 | 1100590.346 | 365238.944 |
|      |        | 65-69 | 1451838.682 | 1120648.942 | 331189.740 |
|      |        | 70-74 | 692979.695  | 546712.273  | 146267.421 |
|      |        | 75-79 | 0.000       | 0.000       | 0.000      |
|      | Female | 30-34 | 34659.261   | 27217.238   | 7442.023   |
|      |        | 35-39 | 65652.924   | 51319.776   | 14333.148  |
|      |        | 40-44 | 133169.505  | 102791.276  | 30378.230  |
|      |        | 45-49 | 267988.924  | 203243.460  | 64745.464  |
|      |        | 50-54 | 523734.121  | 392421.581  | 131312.540 |
|      |        | 55-59 | 870859.170  | 643815.314  | 227043.856 |
|      |        | 60-64 | 1166683.329 | 871632.578  | 295050.750 |
|      |        | 65-69 | 1190003.066 | 899826.540  | 290176.526 |
|      |        | 70-74 | 588541.493  | 447769.804  | 140771.689 |
|      |        | 75-79 | 0.000       | 0.000       | 0.000      |

---

## Results for PHIM for Run 1 (Sensitivity\_Analysis\_2.RTF)

System Date and Time: 20210220T092236  
User: JohnS  
SAS Version: 9.4  
Project: Population Health Impact Model 7.3

The System is running in Test Mode

Maximum Upper Age for P Component = 79  
Upper Age for ELL Calculations = 75  
Report in E-component: Social Classes A and B combined  
Description: Sensitivity Analysis 2 for VeneBio, Change Switch rate  
Assumption Files:  
Options Control File: C:\VeneBio\OG\_Test\US\_Control\_V\_S2.CSV  
TTP Test File: C:\VeneBio\OG\_Test\TTP\_Test\_MAS2.csv  
TTP Reference File: C:\VeneBio\OG\_Test\TTP\_Reference\_V.csv  
TTP Factor Test File: C:\VeneBio\OG\_Test\TTP\_FACTOR\_Test.csv  
TTP Factor Reference File: C:\VeneBio\OG\_Test\TTP\_FACTOR\_Test.csv  
TP Socioeconomic Groups: Not Used  
Output Choices:C:\VeneBio\OG\_Test\OUTC\_PA.csv

Main Results will be sent to the folder C:\VeneBio\Main\_Results\  
Plots will be sent to the folder C:\VeneBio\Plot\_Results\Plots\_20210220T092236  
Saved P, E and/or A Component results will be sent to the folder C:\VeneBio\SAVED\Saved\_20210220T092236\

### Table of Contents

|                                                                                                               |     |
|---------------------------------------------------------------------------------------------------------------|-----|
| <a href="#">Control File Details for Run: 1</a>                                                               | 670 |
| <a href="#">TTP values for Run: 1, Scenario: NULL</a>                                                         | 671 |
| <a href="#">TTP values for Run: 1, Scenario: Ecig</a>                                                         | 673 |
| <a href="#">Main Output for the Tobacco History for Run: 1, Simulation: 1, Scenario: NULL</a>                 | 677 |
| <a href="#">Main Output for the Tobacco History for Run: 1, Simulation: 1, Scenario: Ecig</a>                 | 679 |
| <a href="#">Main Results for E-Component for Run: 1, Simulation: 1, COD: Four Diseases Combined</a>           | 695 |
| <a href="#">Main Results for E-Component for Run: 1, Simulation: 1, COD: LUNG CANCER</a>                      | 696 |
| <a href="#">Main Results for E-Component for Run: 1, Simulation: 1, COD: IHD</a>                              | 697 |
| <a href="#">Main Results for E-Component for Run: 1, Simulation: 1, COD: STROKE</a>                           | 698 |
| <a href="#">Main Results for E-Component for Run: 1, Simulation: 1, COD: COPD</a>                             | 699 |
| <a href="#">Main Results for E-Component for Run: 1, Simulation: 1, COD: Four Diseases Combined, Adjusted</a> | 700 |
| <a href="#">Main Results for E-Component for Run: 1, Simulation: 1, COD: LUNG CANCER, Adjusted</a>            | 701 |
| <a href="#">Main Results for E-Component for Run: 1, Simulation: 1, COD: IHD, Adjusted</a>                    | 702 |
| <a href="#">Main Results for E-Component for Run: 1, Simulation: 1, COD: STROKE, Adjusted</a>                 | 703 |
| <a href="#">Main Results for E-Component for Run: 1, Simulation: 1, COD: COPD, Adjusted</a>                   | 704 |
| <a href="#">Control File Details for Run: 2</a>                                                               | 705 |
| <a href="#">TTP values for Run: 2, Scenario: NULL</a>                                                         | 706 |
| <a href="#">TTP values for Run: 2, Scenario: Ecig</a>                                                         | 708 |
| <a href="#">Main Output for the Tobacco History for Run: 2, Simulation: 1, Scenario: NULL</a>                 | 712 |
| <a href="#">Main Output for the Tobacco History for Run: 2, Simulation: 1, Scenario: Ecig</a>                 | 714 |
| <a href="#">Main Results for E-Component for Run: 2, Simulation: 1, COD: Four Diseases Combined</a>           | 730 |
| <a href="#">Main Results for E-Component for Run: 2, Simulation: 1, COD: LUNG CANCER</a>                      | 731 |
| <a href="#">Main Results for E-Component for Run: 2, Simulation: 1, COD: IHD</a>                              | 732 |
| <a href="#">Main Results for E-Component for Run: 2, Simulation: 1, COD: STROKE</a>                           | 733 |
| <a href="#">Main Results for E-Component for Run: 2, Simulation: 1, COD: COPD</a>                             | 734 |
| <a href="#">Main Results for E-Component for Run: 2, Simulation: 1, COD: Four Diseases Combined, Adjusted</a> | 735 |
| <a href="#">Main Results for E-Component for Run: 2, Simulation: 1, COD: LUNG CANCER, Adjusted</a>            | 736 |
| <a href="#">Main Results for E-Component for Run: 2, Simulation: 1, COD: IHD, Adjusted</a>                    | 737 |
| <a href="#">Main Results for E-Component for Run: 2, Simulation: 1, COD: STROKE, Adjusted</a>                 | 738 |
| <a href="#">Main Results for E-Component for Run: 2, Simulation: 1, COD: COPD, Adjusted</a>                   | 739 |
| <a href="#">Control File Details for Run: 3</a>                                                               | 740 |
| <a href="#">TTP values for Run: 3, Scenario: NULL</a>                                                         | 741 |
| <a href="#">TTP values for Run: 3, Scenario: Ecig</a>                                                         | 743 |
| <a href="#">Main Output for the Tobacco History for Run: 3, Simulation: 1, Scenario: NULL</a>                 | 747 |
| <a href="#">Main Output for the Tobacco History for Run: 3, Simulation: 1, Scenario: Ecig</a>                 | 749 |
| <a href="#">Main Results for E-Component for Run: 3, Simulation: 1, COD: Four Diseases Combined</a>           | 765 |
| <a href="#">Main Results for E-Component for Run: 3, Simulation: 1, COD: LUNG CANCER</a>                      | 766 |
| <a href="#">Main Results for E-Component for Run: 3, Simulation: 1, COD: IHD</a>                              | 767 |
| <a href="#">Main Results for E-Component for Run: 3, Simulation: 1, COD: STROKE</a>                           | 768 |
| <a href="#">Main Results for E-Component for Run: 3, Simulation: 1, COD: COPD</a>                             | 769 |
| <a href="#">Main Results for E-Component for Run: 3, Simulation: 1, COD: Four Diseases Combined, Adjusted</a> | 770 |
| <a href="#">Main Results for E-Component for Run: 3, Simulation: 1, COD: LUNG CANCER, Adjusted</a>            | 771 |
| <a href="#">Main Results for E-Component for Run: 3, Simulation: 1, COD: IHD, Adjusted</a>                    | 772 |
| <a href="#">Main Results for E-Component for Run: 3, Simulation: 1, COD: STROKE, Adjusted</a>                 | 773 |
| <a href="#">Main Results for E-Component for Run: 3, Simulation: 1, COD: COPD, Adjusted</a>                   | 774 |
| <a href="#">Control File Details for Run: 4</a>                                                               | 775 |
| <a href="#">TTP values for Run: 4, Scenario: NULL</a>                                                         | 776 |

## Results for PHIM for Run 1 (Sensitivity\_Analysis\_2.RTF)

|                                                                                                               |     |
|---------------------------------------------------------------------------------------------------------------|-----|
| <a href="#">TTP values for Run: 4, Scenario: Ecig</a>                                                         | 778 |
| <a href="#">Main Output for the Tobacco History for Run: 4, Simulation: 1, Scenario: NULL</a>                 | 782 |
| <a href="#">Main Output for the Tobacco History for Run: 4, Simulation: 1, Scenario: Ecig</a>                 | 784 |
| <a href="#">Main Results for E-Component for Run: 4, Simulation: 1, COD: Four Diseases Combined</a>           | 800 |
| <a href="#">Main Results for E-Component for Run: 4, Simulation: 1, COD: LUNG CANCER</a>                      | 801 |
| <a href="#">Main Results for E-Component for Run: 4, Simulation: 1, COD: IHD</a>                              | 802 |
| <a href="#">Main Results for E-Component for Run: 4, Simulation: 1, COD: STROKE</a>                           | 803 |
| <a href="#">Main Results for E-Component for Run: 4, Simulation: 1, COD: COPD</a>                             | 804 |
| <a href="#">Main Results for E-Component for Run: 4, Simulation: 1, COD: Four Diseases Combined, Adjusted</a> | 805 |
| <a href="#">Main Results for E-Component for Run: 4, Simulation: 1, COD: LUNG CANCER, Adjusted</a>            | 806 |
| <a href="#">Main Results for E-Component for Run: 4, Simulation: 1, COD: IHD, Adjusted</a>                    | 807 |
| <a href="#">Main Results for E-Component for Run: 4, Simulation: 1, COD: STROKE, Adjusted</a>                 | 808 |
| <a href="#">Main Results for E-Component for Run: 4, Simulation: 1, COD: COPD, Adjusted</a>                   | 809 |
| <a href="#">Control File Details for Run: 5</a>                                                               | 810 |
| <a href="#">TTP values for Run: 5, Scenario: NULL</a>                                                         | 811 |
| <a href="#">TTP values for Run: 5, Scenario: Ecig</a>                                                         | 813 |
| <a href="#">Main Output for the Tobacco History for Run: 5, Simulation: 1, Scenario: NULL</a>                 | 817 |
| <a href="#">Main Output for the Tobacco History for Run: 5, Simulation: 1, Scenario: Ecig</a>                 | 819 |
| <a href="#">Main Results for E-Component for Run: 5, Simulation: 1, COD: Four Diseases Combined</a>           | 835 |
| <a href="#">Main Results for E-Component for Run: 5, Simulation: 1, COD: LUNG CANCER</a>                      | 836 |
| <a href="#">Main Results for E-Component for Run: 5, Simulation: 1, COD: IHD</a>                              | 837 |
| <a href="#">Main Results for E-Component for Run: 5, Simulation: 1, COD: STROKE</a>                           | 838 |
| <a href="#">Main Results for E-Component for Run: 5, Simulation: 1, COD: COPD</a>                             | 839 |
| <a href="#">Main Results for E-Component for Run: 5, Simulation: 1, COD: Four Diseases Combined, Adjusted</a> | 840 |
| <a href="#">Main Results for E-Component for Run: 5, Simulation: 1, COD: LUNG CANCER, Adjusted</a>            | 841 |
| <a href="#">Main Results for E-Component for Run: 5, Simulation: 1, COD: IHD, Adjusted</a>                    | 842 |
| <a href="#">Main Results for E-Component for Run: 5, Simulation: 1, COD: STROKE, Adjusted</a>                 | 843 |
| <a href="#">Main Results for E-Component for Run: 5, Simulation: 1, COD: COPD, Adjusted</a>                   | 844 |
| <a href="#">Control File Details for Run: 6</a>                                                               | 845 |
| <a href="#">TTP values for Run: 6, Scenario: NULL</a>                                                         | 846 |
| <a href="#">TTP values for Run: 6, Scenario: Ecig</a>                                                         | 848 |
| <a href="#">Main Output for the Tobacco History for Run: 6, Simulation: 1, Scenario: NULL</a>                 | 852 |
| <a href="#">Main Output for the Tobacco History for Run: 6, Simulation: 1, Scenario: Ecig</a>                 | 854 |
| <a href="#">Main Results for E-Component for Run: 6, Simulation: 1, COD: Four Diseases Combined</a>           | 870 |
| <a href="#">Main Results for E-Component for Run: 6, Simulation: 1, COD: LUNG CANCER</a>                      | 871 |
| <a href="#">Main Results for E-Component for Run: 6, Simulation: 1, COD: IHD</a>                              | 872 |
| <a href="#">Main Results for E-Component for Run: 6, Simulation: 1, COD: STROKE</a>                           | 873 |
| <a href="#">Main Results for E-Component for Run: 6, Simulation: 1, COD: COPD</a>                             | 874 |
| <a href="#">Main Results for E-Component for Run: 6, Simulation: 1, COD: Four Diseases Combined, Adjusted</a> | 875 |
| <a href="#">Main Results for E-Component for Run: 6, Simulation: 1, COD: LUNG CANCER, Adjusted</a>            | 876 |
| <a href="#">Main Results for E-Component for Run: 6, Simulation: 1, COD: IHD, Adjusted</a>                    | 877 |
| <a href="#">Main Results for E-Component for Run: 6, Simulation: 1, COD: STROKE, Adjusted</a>                 | 878 |
| <a href="#">Main Results for E-Component for Run: 6, Simulation: 1, COD: COPD, Adjusted</a>                   | 879 |
| <a href="#">Control File Details for Run: 7</a>                                                               | 880 |
| <a href="#">TTP values for Run: 7, Scenario: NULL</a>                                                         | 881 |
| <a href="#">TTP values for Run: 7, Scenario: Ecig</a>                                                         | 883 |
| <a href="#">Main Output for the Tobacco History for Run: 7, Simulation: 1, Scenario: NULL</a>                 | 887 |
| <a href="#">Main Output for the Tobacco History for Run: 7, Simulation: 1, Scenario: Ecig</a>                 | 889 |
| <a href="#">Main Results for E-Component for Run: 7, Simulation: 1, COD: Four Diseases Combined</a>           | 905 |
| <a href="#">Main Results for E-Component for Run: 7, Simulation: 1, COD: LUNG CANCER</a>                      | 906 |
| <a href="#">Main Results for E-Component for Run: 7, Simulation: 1, COD: IHD</a>                              | 907 |
| <a href="#">Main Results for E-Component for Run: 7, Simulation: 1, COD: STROKE</a>                           | 908 |
| <a href="#">Main Results for E-Component for Run: 7, Simulation: 1, COD: COPD</a>                             | 909 |
| <a href="#">Main Results for E-Component for Run: 7, Simulation: 1, COD: Four Diseases Combined, Adjusted</a> | 910 |
| <a href="#">Main Results for E-Component for Run: 7, Simulation: 1, COD: LUNG CANCER, Adjusted</a>            | 911 |
| <a href="#">Main Results for E-Component for Run: 7, Simulation: 1, COD: IHD, Adjusted</a>                    | 912 |
| <a href="#">Main Results for E-Component for Run: 7, Simulation: 1, COD: STROKE, Adjusted</a>                 | 913 |
| <a href="#">Main Results for E-Component for Run: 7, Simulation: 1, COD: COPD, Adjusted</a>                   | 914 |
| <a href="#">Control File Details for Run: 8</a>                                                               | 915 |
| <a href="#">TTP values for Run: 8, Scenario: NULL</a>                                                         | 916 |
| <a href="#">TTP values for Run: 8, Scenario: Ecig</a>                                                         | 918 |
| <a href="#">Main Output for the Tobacco History for Run: 8, Simulation: 1, Scenario: NULL</a>                 | 922 |
| <a href="#">Main Output for the Tobacco History for Run: 8, Simulation: 1, Scenario: Ecig</a>                 | 924 |
| <a href="#">Main Results for E-Component for Run: 8, Simulation: 1, COD: Four Diseases Combined</a>           | 940 |
| <a href="#">Main Results for E-Component for Run: 8, Simulation: 1, COD: LUNG CANCER</a>                      | 941 |
| <a href="#">Main Results for E-Component for Run: 8, Simulation: 1, COD: IHD</a>                              | 942 |
| <a href="#">Main Results for E-Component for Run: 8, Simulation: 1, COD: STROKE</a>                           | 943 |
| <a href="#">Main Results for E-Component for Run: 8, Simulation: 1, COD: COPD</a>                             | 944 |
| <a href="#">Main Results for E-Component for Run: 8, Simulation: 1, COD: Four Diseases Combined, Adjusted</a> | 945 |
| <a href="#">Main Results for E-Component for Run: 8, Simulation: 1, COD: LUNG CANCER, Adjusted</a>            | 946 |
| <a href="#">Main Results for E-Component for Run: 8, Simulation: 1, COD: IHD, Adjusted</a>                    | 947 |
| <a href="#">Main Results for E-Component for Run: 8, Simulation: 1, COD: STROKE, Adjusted</a>                 | 948 |
| <a href="#">Main Results for E-Component for Run: 8, Simulation: 1, COD: COPD, Adjusted</a>                   | 949 |

## Results for PHIM for Run 1 (Sensitivity\_Analysis\_2.RTF)

|                                                                                                                                                            |      |
|------------------------------------------------------------------------------------------------------------------------------------------------------------|------|
| <a href="#">Control File Details for Run: 9</a>                                                                                                            | 950  |
| <a href="#">TTP values for Run: 9, Scenario: NULL</a>                                                                                                      | 951  |
| <a href="#">TTP values for Run: 9, Scenario: Ecig</a>                                                                                                      | 953  |
| <a href="#">Main Output for the Tobacco History for Run: 9, Simulation: 1, Scenario: NULL</a>                                                              | 957  |
| <a href="#">Main Output for the Tobacco History for Run: 9, Simulation: 1, Scenario: Ecig</a>                                                              | 959  |
| <a href="#">Main Results for E-Component for Run: 9, Simulation: 1, COD: Four Diseases Combined</a>                                                        | 975  |
| <a href="#">Main Results for E-Component for Run: 9, Simulation: 1, COD: LUNG CANCER</a>                                                                   | 976  |
| <a href="#">Main Results for E-Component for Run: 9, Simulation: 1, COD: IHD</a>                                                                           | 977  |
| <a href="#">Main Results for E-Component for Run: 9, Simulation: 1, COD: STROKE</a>                                                                        | 978  |
| <a href="#">Main Results for E-Component for Run: 9, Simulation: 1, COD: COPD</a>                                                                          | 979  |
| <a href="#">Main Results for E-Component for Run: 9, Simulation: 1, COD: Four Diseases Combined, Adjusted</a>                                              | 980  |
| <a href="#">Main Results for E-Component for Run: 9, Simulation: 1, COD: LUNG CANCER, Adjusted</a>                                                         | 981  |
| <a href="#">Main Results for E-Component for Run: 9, Simulation: 1, COD: IHD, Adjusted</a>                                                                 | 982  |
| <a href="#">Main Results for E-Component for Run: 9, Simulation: 1, COD: STROKE, Adjusted</a>                                                              | 983  |
| <a href="#">Main Results for E-Component for Run: 9, Simulation: 1, COD: COPD, Adjusted</a>                                                                | 984  |
| <a href="#">Control File Details for Run: 10</a>                                                                                                           | 985  |
| <a href="#">TTP values for Run: 10, Scenario: NULL</a>                                                                                                     | 986  |
| <a href="#">TTP values for Run: 10, Scenario: Ecig</a>                                                                                                     | 988  |
| <a href="#">Main Output for the Tobacco History for Run: 10, Simulation: 1, Scenario: NULL</a>                                                             | 992  |
| <a href="#">Main Output for the Tobacco History for Run: 10, Simulation: 1, Scenario: Ecig</a>                                                             | 994  |
| <a href="#">Main Results for E-Component for Run: 10, Simulation: 1, COD: Four Diseases Combined</a>                                                       | 1010 |
| <a href="#">Main Results for E-Component for Run: 10, Simulation: 1, COD: LUNG CANCER</a>                                                                  | 1011 |
| <a href="#">Main Results for E-Component for Run: 10, Simulation: 1, COD: IHD</a>                                                                          | 1012 |
| <a href="#">Main Results for E-Component for Run: 10, Simulation: 1, COD: STROKE</a>                                                                       | 1013 |
| <a href="#">Main Results for E-Component for Run: 10, Simulation: 1, COD: COPD</a>                                                                         | 1014 |
| <a href="#">Main Results for E-Component for Run: 10, Simulation: 1, COD: Four Diseases Combined, Adjusted</a>                                             | 1015 |
| <a href="#">Main Results for E-Component for Run: 10, Simulation: 1, COD: LUNG CANCER, Adjusted</a>                                                        | 1016 |
| <a href="#">Main Results for E-Component for Run: 10, Simulation: 1, COD: IHD, Adjusted</a>                                                                | 1017 |
| <a href="#">Main Results for E-Component for Run: 10, Simulation: 1, COD: STROKE, Adjusted</a>                                                             | 1018 |
| <a href="#">Main Results for E-Component for Run: 10, Simulation: 1, COD: COPD, Adjusted</a>                                                               | 1019 |
| <a href="#">Estimated Loss of Life from the E Component for Run: 2, Simulation: 1</a>                                                                      | 1020 |
| <a href="#">Table 1: Estimated Loss of Life, at the end of follow-up, all age groups combined, Population unadjusted for deaths in Ecig scenario</a>       | 1020 |
| <a href="#">Table 2: Estimated Loss of Life, at the end of follow-up, all age groups combined, Population and Number deaths adjusted for Ecig scenario</a> | 1021 |
| <a href="#">Table 3: Estimated Loss of Life, All age groups combined, Population unadjusted for deaths in Ecig scenario, cumulative over years</a>         | 1022 |
| <a href="#">Table 4: Estimated Loss of Life, All age groups combined, Population and Number deaths adjusted for Ecig scenario, cumulative over years</a>   | 1029 |
| <a href="#">Table 5: Estimated Loss of Life, at the end of follow-up, Population unadjusted for deaths in Ecig scenario</a>                                | 1036 |
| <a href="#">Table 6: Estimated Loss of Life, at the end of follow-up, Population and Number deaths adjusted for Ecig scenario</a>                          | 1038 |
| <a href="#">Estimated Loss of Life from the E Component for Run: 4, Simulation: 1</a>                                                                      | 1040 |
| <a href="#">Table 1: Estimated Loss of Life, at the end of follow-up, all age groups combined, Population unadjusted for deaths in Ecig scenario</a>       | 1040 |
| <a href="#">Table 2: Estimated Loss of Life, at the end of follow-up, all age groups combined, Population and Number deaths adjusted for Ecig scenario</a> | 1041 |
| <a href="#">Table 3: Estimated Loss of Life, All age groups combined, Population unadjusted for deaths in Ecig scenario, cumulative over years</a>         | 1042 |
| <a href="#">Table 4: Estimated Loss of Life, All age groups combined, Population and Number deaths adjusted for Ecig scenario, cumulative over years</a>   | 1049 |
| <a href="#">Table 5: Estimated Loss of Life, at the end of follow-up, Population unadjusted for deaths in Ecig scenario</a>                                | 1056 |
| <a href="#">Table 6: Estimated Loss of Life, at the end of follow-up, Population and Number deaths adjusted for Ecig scenario</a>                          | 1058 |
| <a href="#">Estimated Loss of Life from the E Component for Run: 6, Simulation: 1</a>                                                                      | 1060 |
| <a href="#">Table 1: Estimated Loss of Life, at the end of follow-up, all age groups combined, Population unadjusted for deaths in Ecig scenario</a>       | 1060 |
| <a href="#">Table 2: Estimated Loss of Life, at the end of follow-up, all age groups combined, Population and Number deaths adjusted for Ecig scenario</a> | 1061 |
| <a href="#">Table 3: Estimated Loss of Life, All age groups combined, Population unadjusted for deaths in Ecig scenario, cumulative over years</a>         | 1062 |
| <a href="#">Table 4: Estimated Loss of Life, All age groups combined, Population and Number deaths adjusted for Ecig scenario, cumulative over years</a>   | 1069 |
| <a href="#">Table 5: Estimated Loss of Life, at the end of follow-up, Population unadjusted for deaths in Ecig scenario</a>                                | 1076 |
| <a href="#">Table 6: Estimated Loss of Life, at the end of follow-up, Population and Number deaths adjusted for Ecig scenario</a>                          | 1078 |
| <a href="#">Estimated Loss of Life from the E Component for Run: 8, Simulation: 1</a>                                                                      | 1080 |
| <a href="#">Table 1: Estimated Loss of Life, at the end of follow-up, all age groups combined, Population unadjusted for deaths in Ecig scenario</a>       | 1080 |
| <a href="#">Table 2: Estimated Loss of Life, at the end of follow-up, all age groups combined, Population and Number deaths adjusted for Ecig scenario</a> | 1081 |
| <a href="#">Table 3: Estimated Loss of Life, All age groups combined, Population unadjusted for deaths in Ecig scenario, cumulative over years</a>         | 1082 |
| <a href="#">Table 4: Estimated Loss of Life, All age groups combined, Population and Number deaths adjusted for Ecig scenario, cumulative over years</a>   | 1089 |
| <a href="#">Table 5: Estimated Loss of Life, at the end of follow-up, Population unadjusted for deaths in Ecig scenario</a>                                | 1096 |
| <a href="#">Table 6: Estimated Loss of Life, at the end of follow-up, Population and Number deaths adjusted for Ecig scenario</a>                          | 1098 |
| <a href="#">Estimated Loss of Life from the E Component for Run: 10, Simulation: 1</a>                                                                     | 1100 |
| <a href="#">Table 1: Estimated Loss of Life, at the end of follow-up, all age groups combined, Population unadjusted for deaths in Ecig scenario</a>       | 1100 |
| <a href="#">Table 2: Estimated Loss of Life, at the end of follow-up, all age groups combined, Population and Number deaths adjusted for Ecig scenario</a> | 1101 |
| <a href="#">Table 3: Estimated Loss of Life, All age groups combined, Population unadjusted for deaths in Ecig scenario, cumulative over years</a>         | 1102 |
| <a href="#">Table 4: Estimated Loss of Life, All age groups combined, Population and Number deaths adjusted for Ecig scenario, cumulative over years</a>   | 1109 |
| <a href="#">Table 5: Estimated Loss of Life, at the end of follow-up, Population unadjusted for deaths in Ecig scenario</a>                                | 1116 |
| <a href="#">Table 6: Estimated Loss of Life, at the end of follow-up, Population and Number deaths adjusted for Ecig scenario</a>                          | 1118 |

## Results for PHIM for Run 1 (Sensitivity\_Analysis\_2.RTF)

---

### Control File Details for Run: 1

| Variable Parameter                                       | Value                  |
|----------------------------------------------------------|------------------------|
| 1. Name for Reference Scenario                           | NULL                   |
| 2. Name for Test Scenario                                | Ecig                   |
| 3. Name for Product 1                                    | CC                     |
| 4. Name for Product 2                                    | Ecig                   |
| 5. Name for Product 3                                    | -                      |
| 6. Name for Product 4                                    | Dual                   |
| 7. Country                                               | US (United States)     |
| 8. Sex                                                   | M (Males)              |
| 9. Year of start of process                              | 1990                   |
| 10. Number of months of follow-up                        | 600                    |
| 11. Follow-up interval length (in months)                | 12                     |
| 12. Lower age for risk estimation                        | 10                     |
| 13. Upper age for risk estimation                        | 79                     |
| 14. The effective dose for Product 1 (F1) - Ref          | 1                      |
| 15. The effective dose for Product 2 (F2) - Ref          | -                      |
| 16. The effective dose for Product 3 (F3) - Ref          | -                      |
| 17. The effective dose for Product 4 (F4) - Ref          | -                      |
| 18. The effective dose for Product 1 (F1) - Test         | 1                      |
| 19. The effective dose for Product 2 (F2) - Test         | 0.05                   |
| 20. The effective dose for Product 3 (F3) - Test         | -                      |
| 21. The effective dose for Product 4 (F4) - Test         | FROMF2                 |
| 22. Number in population to be simulated                 | 100000                 |
| 23. Number of MC simulations                             | 1                      |
| 24. The random number seed for the first simulation      | 15975263               |
| 25. Source for the population file (POP)                 | UN4                    |
| 26. Source for the socioeconomic prevalence file (SEP)   | -                      |
| 27. Source for the current smoking prevalence file (CSP) | ISS3                   |
| 28. Source for the former smoking prevalence file (FSP)  | ISS3                   |
| 29. Source for the quit-time distribution file (QTD)     | NHIS2006               |
| 30. Source for the death file (MORT)                     | APR-20                 |
| 31. Source for the relative risk file (RR)               | PNLEST                 |
| 32. Source for the half-life file (H)                    | PNLEST                 |
| 33. Assumption Set for TTP Factor Reference              | F1                     |
| 34. Assumption Set for TTP Factor Test                   | F1                     |
| 35. Assumption Set for TTP Reference                     | ISS3                   |
| 36. Assumption Set for TTP Test                          | S2A                    |
| 37. Assumption Set for TP for socioeconomic group        | -                      |
| 38. Source for Output Choice file (OUTC)                 | BASIC                  |
| 39. Output for DTP P1                                    | N                      |
| 40. Output for DTP P2                                    | N                      |
| 41. Output for Main P Component                          | Y                      |
| 42. Output for DTP E1                                    | N                      |
| 43. Output for DTP E2                                    | N                      |
| 44. Output for DTP E3                                    | N                      |
| 45. Output for Main E Component                          | Y                      |
| 46. Output file name                                     | Sensitivity_Analysis_2 |
| 47. Run number for P-Component                           | -                      |
| 48. Results file for E-Component                         | -                      |
| 49. Components required                                  | PE                     |
| 50. Results folder for P to be used in E-Component       | -                      |
| 51. Fixed age of starting product use                    | 16                     |
| 52. Output absolute risk file?                           | N                      |

## Results for PHIM for Run 1 (Sensitivity\_Analysis\_2.RTF)

\*\*\*\*\*

TTP values for Run: 1, Scenario: NULL

| Variable Parameter | Value               |
|--------------------|---------------------|
| 1. Country         | US (United States)  |
| 2. Sex             | M (Males)           |
| 3. Assumption Set  | ISS3                |
| Note:              | Period is in Months |

| Age   | Period  | Initiation  | Cessation    | Re-initiation |
|-------|---------|-------------|--------------|---------------|
|       |         | Never<br>CC | CC<br>Former | Former<br>CC  |
| 10-14 | 1-12    | 0.003842    | 0.008742     | 0.000000      |
| 15-19 | 1-12    | 0.004720    | 0.003614     | 0.000000      |
| 20-24 | 1-12    | 0.000376    | 0.000943     | 0.000000      |
| 25-29 | 1-12    | 0.000187    | 0.001143     | 0.000000      |
| 30-34 | 1-12    | 0.000093    | 0.000871     | 0.000000      |
| 35-39 | 1-12    | 0.000000    | 0.000867     | 0.000000      |
| 40-44 | 1-12    | 0.000000    | 0.001399     | 0.000000      |
| 45-49 | 1-12    | 0.000000    | 0.002033     | 0.000000      |
| 50-54 | 1-12    | 0.000000    | 0.003209     | 0.000000      |
| 55-59 | 1-12    | 0.000000    | 0.003574     | 0.000000      |
| 60-64 | 1-12    | 0.000000    | 0.003460     | 0.000000      |
| 65-69 | 1-12    | 0.000000    | 0.004136     | 0.000000      |
| 70-74 | 1-12    | 0.000000    | 0.005592     | 0.000000      |
| 75-79 | 1-12    | 0.000000    | 0.005592     | 0.000000      |
| 10-14 | 13-72   | 0.004906    | 0.008742     | 0.000000      |
| 15-19 | 13-72   | 0.006989    | 0.004426     | 0.000000      |
| 20-24 | 13-72   | 0.000687    | 0.001527     | 0.000000      |
| 25-29 | 13-72   | 0.000962    | 0.001515     | 0.000000      |
| 30-34 | 13-72   | 0.000364    | 0.001227     | 0.000000      |
| 35-39 | 13-72   | 0.000000    | 0.001630     | 0.000000      |
| 40-44 | 13-72   | 0.000000    | 0.001852     | 0.000000      |
| 45-49 | 13-72   | 0.000000    | 0.002667     | 0.000000      |
| 50-54 | 13-72   | 0.000000    | 0.003208     | 0.000000      |
| 55-59 | 13-72   | 0.000000    | 0.003978     | 0.000000      |
| 60-64 | 13-72   | 0.000000    | 0.005771     | 0.000000      |
| 65-69 | 13-72   | 0.000000    | 0.010432     | 0.000000      |
| 70-74 | 13-72   | 0.000000    | 0.007079     | 0.000000      |
| 75-79 | 13-72   | 0.000000    | 0.007079     | 0.000000      |
| 10-14 | 73-132  | 0.004312    | 0.008742     | 0.000000      |
| 15-19 | 73-132  | 0.005330    | 0.003289     | 0.000000      |
| 20-24 | 73-132  | 0.002456    | 0.003844     | 0.000000      |
| 25-29 | 73-132  | 0.000839    | 0.002006     | 0.000000      |
| 30-34 | 73-132  | 0.000414    | 0.001329     | 0.000000      |
| 35-39 | 73-132  | 0.000000    | 0.001278     | 0.000000      |
| 40-44 | 73-132  | 0.000000    | 0.001691     | 0.000000      |
| 45-49 | 73-132  | 0.000000    | 0.002904     | 0.000000      |
| 50-54 | 73-132  | 0.000000    | 0.003319     | 0.000000      |
| 55-59 | 73-132  | 0.000000    | 0.003976     | 0.000000      |
| 60-64 | 73-132  | 0.000000    | 0.005235     | 0.000000      |
| 65-69 | 73-132  | 0.000000    | 0.005901     | 0.000000      |
| 70-74 | 73-132  | 0.000000    | 0.005615     | 0.000000      |
| 75-79 | 73-132  | 0.000000    | 0.005615     | 0.000000      |
| 10-14 | 133-192 | 0.003468    | 0.008742     | 0.000000      |
| 15-19 | 133-192 | 0.004675    | 0.003732     | 0.000000      |
| 20-24 | 133-192 | 0.000062    | 0.002260     | 0.000000      |
| 25-29 | 133-192 | 0.001422    | 0.002822     | 0.000000      |
| 30-34 | 133-192 | 0.000696    | 0.002610     | 0.000000      |
| 35-39 | 133-192 | 0.000000    | 0.002058     | 0.000000      |
| 40-44 | 133-192 | 0.000000    | 0.002310     | 0.000000      |
| 45-49 | 133-192 | 0.000000    | 0.002256     | 0.000000      |
| 50-54 | 133-192 | 0.000000    | 0.002663     | 0.000000      |
| 55-59 | 133-192 | 0.000000    | 0.001746     | 0.000000      |
| 60-64 | 133-192 | 0.000000    | 0.005809     | 0.000000      |
| 65-69 | 133-192 | 0.000000    | 0.005896     | 0.000000      |
| 70-74 | 133-192 | 0.000000    | 0.007323     | 0.000000      |
| 75-79 | 133-192 | 0.000000    | 0.007323     | 0.000000      |
| 10-14 | 193-252 | 0.002314    | 0.008742     | 0.000000      |
| 15-19 | 193-252 | 0.003987    | 0.005036     | 0.000000      |
| 20-24 | 193-252 | 0.000320    | 0.002857     | 0.000000      |
| 25-29 | 193-252 | 0.000251    | 0.002314     | 0.000000      |
| 30-34 | 193-252 | 0.000125    | 0.004343     | 0.000000      |
| 35-39 | 193-252 | 0.000000    | 0.002092     | 0.000000      |
| 40-44 | 193-252 | 0.000000    | 0.002566     | 0.000000      |
| 45-49 | 193-252 | 0.000000    | 0.002311     | 0.000000      |
| 50-54 | 193-252 | 0.000000    | 0.003209     | 0.000000      |

### Results for PHIM for Run 1 (Sensitivity\_Analysis\_2.RTF)

|       |         |          |          |          |
|-------|---------|----------|----------|----------|
| 55-59 | 193-252 | 0.000000 | 0.004057 | 0.000000 |
| 60-64 | 193-252 | 0.000000 | 0.007166 | 0.000000 |
| 65-69 | 193-252 | 0.000000 | 0.004281 | 0.000000 |
| 70-74 | 193-252 | 0.000000 | 0.004580 | 0.000000 |
| 75-79 | 193-252 | 0.000000 | 0.004580 | 0.000000 |
| 10-14 | 253+    | 0.001325 | 0.008742 | 0.000000 |
| 15-19 | 253+    | 0.002984 | 0.010602 | 0.000000 |
| 20-24 | 253+    | 0.000452 | 0.004314 | 0.000000 |
| 25-29 | 253+    | 0.000225 | 0.003645 | 0.000000 |
| 30-34 | 253+    | 0.000112 | 0.004512 | 0.000000 |
| 35-39 | 253+    | 0.000000 | 0.002147 | 0.000000 |
| 40-44 | 253+    | 0.000000 | 0.002636 | 0.000000 |
| 45-49 | 253+    | 0.000000 | 0.001051 | 0.000000 |
| 50-54 | 253+    | 0.000000 | 0.002519 | 0.000000 |
| 55-59 | 253+    | 0.000000 | 0.003693 | 0.000000 |
| 60-64 | 253+    | 0.000000 | 0.005888 | 0.000000 |
| 65-69 | 253+    | 0.000000 | 0.004823 | 0.000000 |
| 70-74 | 253+    | 0.000000 | 0.004733 | 0.000000 |
| 75-79 | 253+    | 0.000000 | 0.004733 | 0.000000 |



## Results for PHIM for Run 1 (Sensitivity\_Analysis\_2.RTF)

\*\*\*\*\*

TTP values for Run: 1, Scenario: Ecig

**Variable Parameter**

**Value**

- 1. Country
  - 2. Sex
  - 3. Assumption Set
- Note:

US (United States)  
M (Males)  
S2A  
Period is in Months

| Age   | Period  | Initiation |            |            | Cessation |             |             | Re-initiation |             |             |
|-------|---------|------------|------------|------------|-----------|-------------|-------------|---------------|-------------|-------------|
|       |         | Never CC   | Never Ecig | Never Dual | CC Former | Ecig Former | Dual Former | Former CC     | Former Ecig | Former Dual |
| 10-14 | 1-12    | 0.001921   | 0.001921   | 0.000000   | 0.008742  | 0.008742    | 0.000000    | 0.000000      | 0.000000    | 0.000000    |
| 15-19 | 1-12    | 0.002360   | 0.002360   | 0.000000   | 0.003614  | 0.003614    | 0.000000    | 0.000000      | 0.000000    | 0.000000    |
| 20-24 | 1-12    | 0.000188   | 0.000188   | 0.000000   | 0.000943  | 0.000943    | 0.000000    | 0.000000      | 0.000000    | 0.000000    |
| 25-29 | 1-12    | 0.000093   | 0.000093   | 0.000000   | 0.001143  | 0.001143    | 0.000000    | 0.000000      | 0.000000    | 0.000000    |
| 30-34 | 1-12    | 0.000047   | 0.000047   | 0.000000   | 0.000871  | 0.000871    | 0.000000    | 0.000000      | 0.000000    | 0.000000    |
| 35-39 | 1-12    | 0.000000   | 0.000000   | 0.000000   | 0.000867  | 0.000867    | 0.000000    | 0.000000      | 0.000000    | 0.000000    |
| 40-44 | 1-12    | 0.000000   | 0.000000   | 0.000000   | 0.001399  | 0.001399    | 0.000000    | 0.000000      | 0.000000    | 0.000000    |
| 45-49 | 1-12    | 0.000000   | 0.000000   | 0.000000   | 0.002033  | 0.002033    | 0.000000    | 0.000000      | 0.000000    | 0.000000    |
| 50-54 | 1-12    | 0.000000   | 0.000000   | 0.000000   | 0.003209  | 0.003209    | 0.000000    | 0.000000      | 0.000000    | 0.000000    |
| 55-59 | 1-12    | 0.000000   | 0.000000   | 0.000000   | 0.003574  | 0.003574    | 0.000000    | 0.000000      | 0.000000    | 0.000000    |
| 60-64 | 1-12    | 0.000000   | 0.000000   | 0.000000   | 0.003460  | 0.003460    | 0.000000    | 0.000000      | 0.000000    | 0.000000    |
| 65-69 | 1-12    | 0.000000   | 0.000000   | 0.000000   | 0.004136  | 0.004136    | 0.000000    | 0.000000      | 0.000000    | 0.000000    |
| 70-74 | 1-12    | 0.000000   | 0.000000   | 0.000000   | 0.005592  | 0.005592    | 0.000000    | 0.000000      | 0.000000    | 0.000000    |
| 75-79 | 1-12    | 0.000000   | 0.000000   | 0.000000   | 0.005592  | 0.005592    | 0.000000    | 0.000000      | 0.000000    | 0.000000    |
| 10-14 | 13-72   | 0.001962   | 0.002944   | 0.000000   | 0.008742  | 0.008742    | 0.000000    | 0.000000      | 0.000000    | 0.000000    |
| 15-19 | 13-72   | 0.002796   | 0.004193   | 0.000000   | 0.004426  | 0.004426    | 0.000000    | 0.000000      | 0.000000    | 0.000000    |
| 20-24 | 13-72   | 0.000275   | 0.000412   | 0.000000   | 0.001527  | 0.001527    | 0.000000    | 0.000000      | 0.000000    | 0.000000    |
| 25-29 | 13-72   | 0.000385   | 0.000578   | 0.000000   | 0.001515  | 0.001515    | 0.000000    | 0.000000      | 0.000000    | 0.000000    |
| 30-34 | 13-72   | 0.000146   | 0.000218   | 0.000000   | 0.001227  | 0.001227    | 0.000000    | 0.000000      | 0.000000    | 0.000000    |
| 35-39 | 13-72   | 0.000000   | 0.000000   | 0.000000   | 0.001630  | 0.001630    | 0.000000    | 0.000000      | 0.000000    | 0.000000    |
| 40-44 | 13-72   | 0.000000   | 0.000000   | 0.000000   | 0.001852  | 0.001852    | 0.000000    | 0.000000      | 0.000000    | 0.000000    |
| 45-49 | 13-72   | 0.000000   | 0.000000   | 0.000000   | 0.002667  | 0.002667    | 0.000000    | 0.000000      | 0.000000    | 0.000000    |
| 50-54 | 13-72   | 0.000000   | 0.000000   | 0.000000   | 0.003208  | 0.003208    | 0.000000    | 0.000000      | 0.000000    | 0.000000    |
| 55-59 | 13-72   | 0.000000   | 0.000000   | 0.000000   | 0.003978  | 0.003978    | 0.000000    | 0.000000      | 0.000000    | 0.000000    |
| 60-64 | 13-72   | 0.000000   | 0.000000   | 0.000000   | 0.005771  | 0.005771    | 0.000000    | 0.000000      | 0.000000    | 0.000000    |
| 65-69 | 13-72   | 0.000000   | 0.000000   | 0.000000   | 0.010432  | 0.010432    | 0.000000    | 0.000000      | 0.000000    | 0.000000    |
| 70-74 | 13-72   | 0.000000   | 0.000000   | 0.000000   | 0.007079  | 0.007079    | 0.000000    | 0.000000      | 0.000000    | 0.000000    |
| 75-79 | 13-72   | 0.000000   | 0.000000   | 0.000000   | 0.007079  | 0.007079    | 0.000000    | 0.000000      | 0.000000    | 0.000000    |
| 10-14 | 73-132  | 0.000862   | 0.003449   | 0.000000   | 0.008742  | 0.008742    | 0.000000    | 0.000000      | 0.000000    | 0.000000    |
| 15-19 | 73-132  | 0.001066   | 0.004264   | 0.000000   | 0.003289  | 0.003289    | 0.000000    | 0.000000      | 0.000000    | 0.000000    |
| 20-24 | 73-132  | 0.000491   | 0.001965   | 0.000000   | 0.003844  | 0.003844    | 0.000000    | 0.000000      | 0.000000    | 0.000000    |
| 25-29 | 73-132  | 0.000168   | 0.000671   | 0.000000   | 0.002006  | 0.002006    | 0.000000    | 0.000000      | 0.000000    | 0.000000    |
| 30-34 | 73-132  | 0.000083   | 0.000332   | 0.000000   | 0.001329  | 0.001329    | 0.000000    | 0.000000      | 0.000000    | 0.000000    |
| 35-39 | 73-132  | 0.000000   | 0.000000   | 0.000000   | 0.001278  | 0.001278    | 0.000000    | 0.000000      | 0.000000    | 0.000000    |
| 40-44 | 73-132  | 0.000000   | 0.000000   | 0.000000   | 0.001691  | 0.001691    | 0.000000    | 0.000000      | 0.000000    | 0.000000    |
| 45-49 | 73-132  | 0.000000   | 0.000000   | 0.000000   | 0.002904  | 0.002904    | 0.000000    | 0.000000      | 0.000000    | 0.000000    |
| 50-54 | 73-132  | 0.000000   | 0.000000   | 0.000000   | 0.003319  | 0.003319    | 0.000000    | 0.000000      | 0.000000    | 0.000000    |
| 55-59 | 73-132  | 0.000000   | 0.000000   | 0.000000   | 0.003976  | 0.003976    | 0.000000    | 0.000000      | 0.000000    | 0.000000    |
| 60-64 | 73-132  | 0.000000   | 0.000000   | 0.000000   | 0.005235  | 0.005235    | 0.000000    | 0.000000      | 0.000000    | 0.000000    |
| 65-69 | 73-132  | 0.000000   | 0.000000   | 0.000000   | 0.005901  | 0.005901    | 0.000000    | 0.000000      | 0.000000    | 0.000000    |
| 70-74 | 73-132  | 0.000000   | 0.000000   | 0.000000   | 0.005615  | 0.005615    | 0.000000    | 0.000000      | 0.000000    | 0.000000    |
| 75-79 | 73-132  | 0.000000   | 0.000000   | 0.000000   | 0.005615  | 0.005615    | 0.000000    | 0.000000      | 0.000000    | 0.000000    |
| 10-14 | 133-192 | 0.000173   | 0.003294   | 0.000000   | 0.008742  | 0.008742    | 0.000000    | 0.000000      | 0.000000    | 0.000000    |
| 15-19 | 133-192 | 0.000234   | 0.004442   | 0.000000   | 0.003732  | 0.003732    | 0.000000    | 0.000000      | 0.000000    | 0.000000    |
| 20-24 | 133-192 | 0.000003   | 0.000059   | 0.000000   | 0.002260  | 0.002260    | 0.000000    | 0.000000      | 0.000000    | 0.000000    |
| 25-29 | 133-192 | 0.000071   | 0.001351   | 0.000000   | 0.002822  | 0.002822    | 0.000000    | 0.000000      | 0.000000    | 0.000000    |
| 30-34 | 133-192 | 0.000035   | 0.000661   | 0.000000   | 0.002610  | 0.002610    | 0.000000    | 0.000000      | 0.000000    | 0.000000    |
| 35-39 | 133-192 | 0.000000   | 0.000000   | 0.000000   | 0.002058  | 0.002058    | 0.000000    | 0.000000      | 0.000000    | 0.000000    |
| 40-44 | 133-192 | 0.000000   | 0.000000   | 0.000000   | 0.002310  | 0.002310    | 0.000000    | 0.000000      | 0.000000    | 0.000000    |
| 45-49 | 133-192 | 0.000000   | 0.000000   | 0.000000   | 0.002256  | 0.002256    | 0.000000    | 0.000000      | 0.000000    | 0.000000    |
| 50-54 | 133-192 | 0.000000   | 0.000000   | 0.000000   | 0.002663  | 0.002663    | 0.000000    | 0.000000      | 0.000000    | 0.000000    |
| 55-59 | 133-192 | 0.000000   | 0.000000   | 0.000000   | 0.001747  | 0.001747    | 0.000000    | 0.000000      | 0.000000    | 0.000000    |
| 60-64 | 133-192 | 0.000000   | 0.000000   | 0.000000   | 0.005809  | 0.005809    | 0.000000    | 0.000000      | 0.000000    | 0.000000    |
| 65-69 | 133-192 | 0.000000   | 0.000000   | 0.000000   | 0.005896  | 0.005896    | 0.000000    | 0.000000      | 0.000000    | 0.000000    |
| 70-74 | 133-192 | 0.000000   | 0.000000   | 0.000000   | 0.007323  | 0.007323    | 0.000000    | 0.000000      | 0.000000    | 0.000000    |
| 75-79 | 133-192 | 0.000000   | 0.000000   | 0.000000   | 0.007323  | 0.007323    | 0.000000    | 0.000000      | 0.000000    | 0.000000    |
| 10-14 | 193-252 | 0.000116   | 0.002198   | 0.000000   | 0.008742  | 0.008742    | 0.000000    | 0.000000      | 0.000000    | 0.000000    |
| 15-19 | 193-252 | 0.000199   | 0.003788   | 0.000000   | 0.005036  | 0.005036    | 0.000000    | 0.000000      | 0.000000    | 0.000000    |
| 20-24 | 193-252 | 0.000016   | 0.000304   | 0.000000   | 0.002857  | 0.002857    | 0.000000    | 0.000000      | 0.000000    | 0.000000    |
| 25-29 | 193-252 | 0.000013   | 0.000239   | 0.000000   | 0.002314  | 0.002314    | 0.000000    | 0.000000      | 0.000000    | 0.000000    |
| 30-34 | 193-252 | 0.000006   | 0.000119   | 0.000000   | 0.004343  | 0.004343    | 0.000000    | 0.000000      | 0.000000    | 0.000000    |
| 35-39 | 193-252 | 0.000000   | 0.000000   | 0.000000   | 0.002092  | 0.002092    | 0.000000    | 0.000000      | 0.000000    | 0.000000    |
| 40-44 | 193-252 | 0.000000   | 0.000000   | 0.000000   | 0.002566  | 0.002566    | 0.000000    | 0.000000      | 0.000000    | 0.000000    |
| 45-49 | 193-252 | 0.000000   | 0.000000   | 0.000000   | 0.002311  | 0.002311    | 0.000000    | 0.000000      | 0.000000    | 0.000000    |
| 50-54 | 193-252 | 0.000000   | 0.000000   | 0.000000   | 0.003209  | 0.003209    | 0.000000    | 0.000000      | 0.000000    | 0.000000    |

### Results for PHIM for Run 1 (Sensitivity\_Analysis\_2.RTF)

|       |         |          |          |          |          |          |          |          |          |          |
|-------|---------|----------|----------|----------|----------|----------|----------|----------|----------|----------|
| 55-59 | 193-252 | 0.000000 | 0.000000 | 0.000000 | 0.004057 | 0.004057 | 0.000000 | 0.000000 | 0.000000 | 0.000000 |
| 60-64 | 193-252 | 0.000000 | 0.000000 | 0.000000 | 0.007166 | 0.007166 | 0.000000 | 0.000000 | 0.000000 | 0.000000 |
| 65-69 | 193-252 | 0.000000 | 0.000000 | 0.000000 | 0.004281 | 0.004281 | 0.000000 | 0.000000 | 0.000000 | 0.000000 |
| 70-74 | 193-252 | 0.000000 | 0.000000 | 0.000000 | 0.004580 | 0.004580 | 0.000000 | 0.000000 | 0.000000 | 0.000000 |
| 75-79 | 193-252 | 0.000000 | 0.000000 | 0.000000 | 0.004580 | 0.004580 | 0.000000 | 0.000000 | 0.000000 | 0.000000 |
| 10-14 | 253+    | 0.000066 | 0.001259 | 0.000000 | 0.008742 | 0.008742 | 0.000000 | 0.000000 | 0.000000 | 0.000000 |
| 15-19 | 253+    | 0.000149 | 0.002835 | 0.000000 | 0.010602 | 0.010602 | 0.000000 | 0.000000 | 0.000000 | 0.000000 |
| 20-24 | 253+    | 0.000023 | 0.000430 | 0.000000 | 0.004314 | 0.004314 | 0.000000 | 0.000000 | 0.000000 | 0.000000 |
| 25-29 | 253+    | 0.000011 | 0.000213 | 0.000000 | 0.003645 | 0.003645 | 0.000000 | 0.000000 | 0.000000 | 0.000000 |
| 30-34 | 253+    | 0.000006 | 0.000106 | 0.000000 | 0.004512 | 0.004512 | 0.000000 | 0.000000 | 0.000000 | 0.000000 |
| 35-39 | 253+    | 0.000000 | 0.000000 | 0.000000 | 0.002147 | 0.002147 | 0.000000 | 0.000000 | 0.000000 | 0.000000 |
| 40-44 | 253+    | 0.000000 | 0.000000 | 0.000000 | 0.002636 | 0.002636 | 0.000000 | 0.000000 | 0.000000 | 0.000000 |
| 45-49 | 253+    | 0.000000 | 0.000000 | 0.000000 | 0.001051 | 0.001051 | 0.000000 | 0.000000 | 0.000000 | 0.000000 |
| 50-54 | 253+    | 0.000000 | 0.000000 | 0.000000 | 0.002519 | 0.002519 | 0.000000 | 0.000000 | 0.000000 | 0.000000 |
| 55-59 | 253+    | 0.000000 | 0.000000 | 0.000000 | 0.003693 | 0.003693 | 0.000000 | 0.000000 | 0.000000 | 0.000000 |
| 60-64 | 253+    | 0.000000 | 0.000000 | 0.000000 | 0.005888 | 0.005888 | 0.000000 | 0.000000 | 0.000000 | 0.000000 |
| 65-69 | 253+    | 0.000000 | 0.000000 | 0.000000 | 0.004823 | 0.004823 | 0.000000 | 0.000000 | 0.000000 | 0.000000 |
| 70-74 | 253+    | 0.000000 | 0.000000 | 0.000000 | 0.004733 | 0.004733 | 0.000000 | 0.000000 | 0.000000 | 0.000000 |
| 75-79 | 253+    | 0.000000 | 0.000000 | 0.000000 | 0.004733 | 0.004733 | 0.000000 | 0.000000 | 0.000000 | 0.000000 |



**Results for PHIM for Run 1 (Sensitivity\_Analysis\_2.RTF)**

|       |      |          |          |          |          |          |          |
|-------|------|----------|----------|----------|----------|----------|----------|
| 25-29 | 253+ | 0.263125 | 0.000000 | 0.000000 | 0.000000 | 0.000000 | 0.000000 |
| 30-34 | 253+ | 0.065616 | 0.000000 | 0.000000 | 0.000000 | 0.000000 | 0.000000 |
| 35-39 | 253+ | 0.064745 | 0.000000 | 0.000000 | 0.000000 | 0.000000 | 0.000000 |
| 40-44 | 253+ | 0.064298 | 0.000000 | 0.000000 | 0.000000 | 0.000000 | 0.000000 |
| 45-49 | 253+ | 0.063133 | 0.000000 | 0.000000 | 0.000000 | 0.000000 | 0.000000 |
| 50-54 | 253+ | 0.061951 | 0.000000 | 0.000000 | 0.000000 | 0.000000 | 0.000000 |
| 55-59 | 253+ | 0.061252 | 0.000000 | 0.000000 | 0.000000 | 0.000000 | 0.000000 |
| 60-64 | 253+ | 0.059822 | 0.000000 | 0.000000 | 0.000000 | 0.000000 | 0.000000 |
| 65-69 | 253+ | 0.057327 | 0.000000 | 0.000000 | 0.000000 | 0.000000 | 0.000000 |
| 70-74 | 253+ | 0.055939 | 0.000000 | 0.000000 | 0.000000 | 0.000000 | 0.000000 |
| 75-79 | 253+ | 0.055939 | 0.000000 | 0.000000 | 0.000000 | 0.000000 | 0.000000 |

## Results for PHIM for Run 1 (Sensitivity\_Analysis\_2.RTF)

\*\*\*\*\*

### Main Output for the Tobacco History for Run: 1, Simulation: 1, Scenario: NULL

| Variable Parameter          | Value              |
|-----------------------------|--------------------|
| 1. Country                  | US (United States) |
| 2. Sex                      | M (Males)          |
| 3. Year of start of process | 1990               |

Year of Follow-up: 2040, Age Group: All Ages  
 Period    Age Group    Smoking Group            N            %

|    |          |           |       |       |
|----|----------|-----------|-------|-------|
| 50 | All Ages | Never Any | 19445 | 50.68 |
| 50 | All Ages | CC        | 3024  | 7.88  |
| 50 | All Ages | Former    | 15896 | 41.43 |

Year of Follow-up: 2040, Age Group: 18-19  
 Period    Age Group    Smoking Group            N            %

|    |       |           |   |   |
|----|-------|-----------|---|---|
| 50 | 18-19 | Never Any | 0 | . |
| 50 | 18-19 | CC        | 0 | . |
| 50 | 18-19 | Former    | 0 | . |

Year of Follow-up: 2040, Age Group: 20-24  
 Period    Age Group    Smoking Group            N            %

|    |       |           |   |   |
|----|-------|-----------|---|---|
| 50 | 20-24 | Never Any | 0 | . |
| 50 | 20-24 | CC        | 0 | . |
| 50 | 20-24 | Former    | 0 | . |

Year of Follow-up: 2040, Age Group: 25-29  
 Period    Age Group    Smoking Group            N            %

|    |       |           |   |   |
|----|-------|-----------|---|---|
| 50 | 25-29 | Never Any | 0 | . |
| 50 | 25-29 | CC        | 0 | . |
| 50 | 25-29 | Former    | 0 | . |

Year of Follow-up: 2040, Age Group: 30-34  
 Period    Age Group    Smoking Group            N            %

|    |       |           |   |   |
|----|-------|-----------|---|---|
| 50 | 30-34 | Never Any | 0 | . |
| 50 | 30-34 | CC        | 0 | . |
| 50 | 30-34 | Former    | 0 | . |

Year of Follow-up: 2040, Age Group: 35-39  
 Period    Age Group    Smoking Group            N            %

|    |       |           |   |   |
|----|-------|-----------|---|---|
| 50 | 35-39 | Never Any | 0 | . |
| 50 | 35-39 | CC        | 0 | . |
| 50 | 35-39 | Former    | 0 | . |

Year of Follow-up: 2040, Age Group: 40-44  
 Period    Age Group    Smoking Group            N            %

|    |       |           |   |   |
|----|-------|-----------|---|---|
| 50 | 40-44 | Never Any | 0 | . |
| 50 | 40-44 | CC        | 0 | . |
| 50 | 40-44 | Former    | 0 | . |

Year of Follow-up: 2040, Age Group: 45-49  
 Period    Age Group    Smoking Group            N            %

|    |       |           |   |   |
|----|-------|-----------|---|---|
| 50 | 45-49 | Never Any | 0 | . |
| 50 | 45-49 | CC        | 0 | . |
| 50 | 45-49 | Former    | 0 | . |

Year of Follow-up: 2040, Age Group: 50-54  
 Period    Age Group    Smoking Group            N            %

|    |       |           |   |   |
|----|-------|-----------|---|---|
| 50 | 50-54 | Never Any | 0 | . |
| 50 | 50-54 | CC        | 0 | . |
| 50 | 50-54 | Former    | 0 | . |

Year of Follow-up: 2040, Age Group: 55-59  
 Period    Age Group    Smoking Group            N            %

|    |       |           |   |   |
|----|-------|-----------|---|---|
| 50 | 55-59 | Never Any | 0 | . |
| 50 | 55-59 | CC        | 0 | . |
| 50 | 55-59 | Former    | 0 | . |

Year of Follow-up: 2040, Age Group: 60-64  
 Period    Age Group    Smoking Group            N            %

### Results for PHIM for Run 1 (Sensitivity\_Analysis\_2.RTF)

|                                           |           |               |      |       |
|-------------------------------------------|-----------|---------------|------|-------|
| 50                                        | 60-64     | Never Any     | 4363 | 49.33 |
| 50                                        | 60-64     | CC            | 934  | 10.56 |
| 50                                        | 60-64     | Former        | 3548 | 40.11 |
| Year of Follow-up: 2040, Age Group: 65-69 |           |               |      |       |
| Period                                    | Age Group | Smoking Group | N    | %     |
| 50                                        | 65-69     | Never Any     | 4948 | 54.73 |
| 50                                        | 65-69     | CC            | 734  | 8.12  |
| 50                                        | 65-69     | Former        | 3358 | 37.15 |
| Year of Follow-up: 2040, Age Group: 70-74 |           |               |      |       |
| Period                                    | Age Group | Smoking Group | N    | %     |
| 50                                        | 70-74     | Never Any     | 5145 | 52.41 |
| 50                                        | 70-74     | CC            | 688  | 7.01  |
| 50                                        | 70-74     | Former        | 3983 | 40.58 |
| Year of Follow-up: 2040, Age Group: 75-79 |           |               |      |       |
| Period                                    | Age Group | Smoking Group | N    | %     |
| 50                                        | 75-79     | Never Any     | 4989 | 46.78 |
| 50                                        | 75-79     | CC            | 668  | 6.26  |
| 50                                        | 75-79     | Former        | 5007 | 46.95 |

## Results for PHIM for Run 1 (Sensitivity\_Analysis\_2.RTF)

\*\*\*\*\*

### Main Output for the Tobacco History for Run: 1, Simulation: 1, Scenario: Ecig

| Variable Parameter                           |           | Value              |       |       |               |             |               |                |              |
|----------------------------------------------|-----------|--------------------|-------|-------|---------------|-------------|---------------|----------------|--------------|
| 1. Country                                   |           | US (United States) |       |       |               |             |               |                |              |
| 2. Sex                                       |           | M (Males)          |       |       |               |             |               |                |              |
| 3. Year of start of process                  |           | 1990               |       |       |               |             |               |                |              |
| Year of Follow-up: 1990, Age Group: All Ages |           |                    |       |       |               |             |               |                |              |
| Period                                       | Age Group | Smoking Group      | N     | %     | Ever Quit (N) | Ever Quit % | Mean Yrs Quit | Short Term (n) | Short Term % |
| 0                                            | All Ages  | Never Any          | 34075 | 39.78 |               |             |               |                |              |
| 0                                            | All Ages  | CC                 | 27323 | 31.90 | 0             | 0.00        |               |                |              |
| 0                                            | All Ages  | Ecig               | 0     | 0.00  |               |             |               |                |              |
| 0                                            | All Ages  | Dual               | 0     | 0.00  |               |             |               |                |              |
| 0                                            | All Ages  | Former             | 24266 | 28.33 |               |             | 13.08         | 3623           | 14.93        |
| Year of Follow-up: 1990, Age Group: 18-19    |           |                    |       |       |               |             |               |                |              |
| Period                                       | Age Group | Smoking Group      | N     | %     | Ever Quit (N) | Ever Quit % | Mean Yrs Quit | Short Term (n) | Short Term % |
| 0                                            | 18-19     | Never Any          | 2783  | 78.42 |               |             |               |                |              |
| 0                                            | 18-19     | CC                 | 634   | 17.86 | 0             | 0.00        |               |                |              |
| 0                                            | 18-19     | Ecig               | 0     | 0.00  |               |             |               |                |              |
| 0                                            | 18-19     | Dual               | 0     | 0.00  |               |             |               |                |              |
| 0                                            | 18-19     | Former             | 132   | 3.72  |               |             | 0.11          | 132            | 100.00       |
| Year of Follow-up: 1990, Age Group: 20-24    |           |                    |       |       |               |             |               |                |              |
| Period                                       | Age Group | Smoking Group      | N     | %     | Ever Quit (N) | Ever Quit % | Mean Yrs Quit | Short Term (n) | Short Term % |
| 0                                            | 20-24     | Never Any          | 5722  | 58.29 |               |             |               |                |              |
| 0                                            | 20-24     | CC                 | 3199  | 32.59 | 0             | 0.00        |               |                |              |
| 0                                            | 20-24     | Ecig               | 0     | 0.00  |               |             |               |                |              |
| 0                                            | 20-24     | Dual               | 0     | 0.00  |               |             |               |                |              |
| 0                                            | 20-24     | Former             | 895   | 9.12  |               |             | 1.46          | 506            | 56.54        |
| Year of Follow-up: 1990, Age Group: 25-29    |           |                    |       |       |               |             |               |                |              |
| Period                                       | Age Group | Smoking Group      | N     | %     | Ever Quit (N) | Ever Quit % | Mean Yrs Quit | Short Term (n) | Short Term % |
| 0                                            | 25-29     | Never Any          | 5232  | 49.06 |               |             |               |                |              |
| 0                                            | 25-29     | CC                 | 3914  | 36.70 | 0             | 0.00        |               |                |              |
| 0                                            | 25-29     | Ecig               | 0     | 0.00  |               |             |               |                |              |
| 0                                            | 25-29     | Dual               | 0     | 0.00  |               |             |               |                |              |
| 0                                            | 25-29     | Former             | 1518  | 14.23 |               |             | 2.87          | 643            | 42.36        |
| Year of Follow-up: 1990, Age Group: 30-34    |           |                    |       |       |               |             |               |                |              |
| Period                                       | Age Group | Smoking Group      | N     | %     | Ever Quit (N) | Ever Quit % | Mean Yrs Quit | Short Term (n) | Short Term % |
| 0                                            | 30-34     | Never Any          | 4765  | 43.65 |               |             |               |                |              |
| 0                                            | 30-34     | CC                 | 4023  | 36.85 | 0             | 0.00        |               |                |              |
| 0                                            | 30-34     | Ecig               | 0     | 0.00  |               |             |               |                |              |
| 0                                            | 30-34     | Dual               | 0     | 0.00  |               |             |               |                |              |
| 0                                            | 30-34     | Former             | 2128  | 19.49 |               |             | 4.06          | 592            | 27.82        |
| Year of Follow-up: 1990, Age Group: 35-39    |           |                    |       |       |               |             |               |                |              |
| Period                                       | Age Group | Smoking Group      | N     | %     | Ever Quit (N) | Ever Quit % | Mean Yrs Quit | Short Term (n) | Short Term % |
| 0                                            | 35-39     | Never Any          | 3941  | 39.85 |               |             |               |                |              |
| 0                                            | 35-39     | CC                 | 3474  | 35.13 | 0             | 0.00        |               |                |              |
| 0                                            | 35-39     | Ecig               | 0     | 0.00  |               |             |               |                |              |
| 0                                            | 35-39     | Dual               | 0     | 0.00  |               |             |               |                |              |
| 0                                            | 35-39     | Former             | 2474  | 25.02 |               |             | 8.31          | 425            | 17.18        |
| Year of Follow-up: 1990, Age Group: 40-44    |           |                    |       |       |               |             |               |                |              |
| Period                                       | Age Group | Smoking Group      | N     | %     | Ever Quit (N) | Ever Quit % | Mean Yrs Quit | Short Term (n) | Short Term % |
| 0                                            | 40-44     | Never Any          | 2912  | 33.65 |               |             |               |                |              |
| 0                                            | 40-44     | CC                 | 3113  | 35.97 | 0             | 0.00        |               |                |              |
| 0                                            | 40-44     | Ecig               | 0     | 0.00  |               |             |               |                |              |
| 0                                            | 40-44     | Dual               | 0     | 0.00  |               |             |               |                |              |
| 0                                            | 40-44     | Former             | 2630  | 30.39 |               |             | 10.69         | 317            | 12.05        |
| Year of Follow-up: 1990, Age Group: 45-49    |           |                    |       |       |               |             |               |                |              |
| Period                                       | Age Group | Smoking Group      | N     | %     | Ever Quit (N) | Ever Quit % | Mean Yrs Quit | Short Term (n) | Short Term % |
| 0                                            | 45-49     | Never Any          | 1919  | 29.46 |               |             |               |                |              |
| 0                                            | 45-49     | CC                 | 2318  | 35.58 | 0             | 0.00        |               |                |              |
| 0                                            | 45-49     | Ecig               | 0     | 0.00  |               |             |               |                |              |
| 0                                            | 45-49     | Dual               | 0     | 0.00  |               |             |               |                |              |
| 0                                            | 45-49     | Former             | 2278  | 34.97 |               |             | 13.26         | 221            | 9.70         |
| Year of Follow-up: 1990, Age Group: 50-54    |           |                    |       |       |               |             |               |                |              |
| Period                                       | Age Group | Smoking Group      | N     | %     | Ever Quit (N) | Ever Quit % | Mean Yrs Quit | Short Term (n) | Short Term % |
| 0                                            | 50-54     | Never Any          | 1611  | 29.41 |               |             |               |                |              |
| 0                                            | 50-54     | CC                 | 1816  | 33.16 | 0             | 0.00        |               |                |              |

**Results for PHIM for Run 1 (Sensitivity\_Analysis\_2.RTF)**

|                                              |           |               |       |       |               |             |               |                |              |
|----------------------------------------------|-----------|---------------|-------|-------|---------------|-------------|---------------|----------------|--------------|
| 0                                            | 50-54     | Ecig          | 0     | 0.00  |               |             |               |                |              |
| 0                                            | 50-54     | Dual          | 0     | 0.00  |               |             |               |                |              |
| 0                                            | 50-54     | Former        | 2050  | 37.43 |               |             | 14.55         | 261            | 12.73        |
| Year of Follow-up: 1990, Age Group: 55-59    |           |               |       |       |               |             |               |                |              |
| Period                                       | Age Group | Smoking Group | N     | %     | Ever Quit (N) | Ever Quit % | Mean Yrs Quit | Short Term (n) | Short Term % |
| 0                                            | 55-59     | Never Any     | 1337  | 26.83 |               |             |               |                |              |
| 0                                            | 55-59     | CC            | 1520  | 30.50 | 0             | 0.00        |               |                |              |
| 0                                            | 55-59     | Ecig          | 0     | 0.00  |               |             |               |                |              |
| 0                                            | 55-59     | Dual          | 0     | 0.00  |               |             |               |                |              |
| 0                                            | 55-59     | Former        | 2126  | 42.67 |               |             | 14.80         | 216            | 10.16        |
| Year of Follow-up: 1990, Age Group: 60-64    |           |               |       |       |               |             |               |                |              |
| Period                                       | Age Group | Smoking Group | N     | %     | Ever Quit (N) | Ever Quit % | Mean Yrs Quit | Short Term (n) | Short Term % |
| 0                                            | 60-64     | Never Any     | 1169  | 23.83 |               |             |               |                |              |
| 0                                            | 60-64     | CC            | 1287  | 26.24 | 0             | 0.00        |               |                |              |
| 0                                            | 60-64     | Ecig          | 0     | 0.00  |               |             |               |                |              |
| 0                                            | 60-64     | Dual          | 0     | 0.00  |               |             |               |                |              |
| 0                                            | 60-64     | Former        | 2449  | 49.93 |               |             | 18.87         | 106            | 4.33         |
| Year of Follow-up: 1990, Age Group: 65-69    |           |               |       |       |               |             |               |                |              |
| Period                                       | Age Group | Smoking Group | N     | %     | Ever Quit (N) | Ever Quit % | Mean Yrs Quit | Short Term (n) | Short Term % |
| 0                                            | 65-69     | Never Any     | 1023  | 23.32 |               |             |               |                |              |
| 0                                            | 65-69     | CC            | 979   | 22.32 | 0             | 0.00        |               |                |              |
| 0                                            | 65-69     | Ecig          | 0     | 0.00  |               |             |               |                |              |
| 0                                            | 65-69     | Dual          | 0     | 0.00  |               |             |               |                |              |
| 0                                            | 65-69     | Former        | 2385  | 54.37 |               |             | 19.91         | 113            | 4.74         |
| Year of Follow-up: 1990, Age Group: 70-74    |           |               |       |       |               |             |               |                |              |
| Period                                       | Age Group | Smoking Group | N     | %     | Ever Quit (N) | Ever Quit % | Mean Yrs Quit | Short Term (n) | Short Term % |
| 0                                            | 70-74     | Never Any     | 961   | 27.46 |               |             |               |                |              |
| 0                                            | 70-74     | CC            | 675   | 19.29 | 0             | 0.00        |               |                |              |
| 0                                            | 70-74     | Ecig          | 0     | 0.00  |               |             |               |                |              |
| 0                                            | 70-74     | Dual          | 0     | 0.00  |               |             |               |                |              |
| 0                                            | 70-74     | Former        | 1863  | 53.24 |               |             | 20.69         | 23             | 1.23         |
| Year of Follow-up: 1990, Age Group: 75-79    |           |               |       |       |               |             |               |                |              |
| Period                                       | Age Group | Smoking Group | N     | %     | Ever Quit (N) | Ever Quit % | Mean Yrs Quit | Short Term (n) | Short Term % |
| 0                                            | 75-79     | Never Any     | 700   | 29.06 |               |             |               |                |              |
| 0                                            | 75-79     | CC            | 371   | 15.40 | 0             | 0.00        |               |                |              |
| 0                                            | 75-79     | Ecig          | 0     | 0.00  |               |             |               |                |              |
| 0                                            | 75-79     | Dual          | 0     | 0.00  |               |             |               |                |              |
| 0                                            | 75-79     | Former        | 1338  | 55.54 |               |             | 22.88         | 68             | 5.08         |
| Year of Follow-up: 1995, Age Group: All Ages |           |               |       |       |               |             |               |                |              |
| Period                                       | Age Group | Smoking Group | N     | %     | Ever Quit (N) | Ever Quit % | Mean Yrs Quit | Short Term (n) | Short Term % |
| 5                                            | All Ages  | Never Any     | 38368 | 41.57 |               |             |               |                |              |
| 5                                            | All Ages  | CC            | 476   | 0.52  | 0             | 0.00        |               |                |              |
| 5                                            | All Ages  | Ecig          | 26784 | 29.02 |               |             |               |                |              |
| 5                                            | All Ages  | Dual          | 0     | 0.00  |               |             |               |                |              |
| 5                                            | All Ages  | Former        | 26662 | 28.89 |               |             | 15.29         | 1755           | 6.58         |
| Year of Follow-up: 1995, Age Group: 18-19    |           |               |       |       |               |             |               |                |              |
| Period                                       | Age Group | Smoking Group | N     | %     | Ever Quit (N) | Ever Quit % | Mean Yrs Quit | Short Term (n) | Short Term % |
| 5                                            | 18-19     | Never Any     | 2448  | 69.07 |               |             |               |                |              |
| 5                                            | 18-19     | CC            | 83    | 2.34  | 0             | 0.00        |               |                |              |
| 5                                            | 18-19     | Ecig          | 919   | 25.93 |               |             |               |                |              |
| 5                                            | 18-19     | Dual          | 0     | 0.00  |               |             |               |                |              |
| 5                                            | 18-19     | Former        | 94    | 2.65  |               |             | 0.98          | 69             | 73.40        |
| Year of Follow-up: 1995, Age Group: 20-24    |           |               |       |       |               |             |               |                |              |
| Period                                       | Age Group | Smoking Group | N     | %     | Ever Quit (N) | Ever Quit % | Mean Yrs Quit | Short Term (n) | Short Term % |
| 5                                            | 20-24     | Never Any     | 5787  | 64.02 |               |             |               |                |              |
| 5                                            | 20-24     | CC            | 45    | 0.50  | 0             | 0.00        |               |                |              |
| 5                                            | 20-24     | Ecig          | 2740  | 30.31 |               |             |               |                |              |
| 5                                            | 20-24     | Dual          | 0     | 0.00  |               |             |               |                |              |
| 5                                            | 20-24     | Former        | 468   | 5.18  |               |             | 2.75          | 140            | 29.91        |
| Year of Follow-up: 1995, Age Group: 25-29    |           |               |       |       |               |             |               |                |              |
| Period                                       | Age Group | Smoking Group | N     | %     | Ever Quit (N) | Ever Quit % | Mean Yrs Quit | Short Term (n) | Short Term % |
| 5                                            | 25-29     | Never Any     | 5471  | 55.74 |               |             |               |                |              |
| 5                                            | 25-29     | CC            | 22    | 0.22  | 0             | 0.00        |               |                |              |
| 5                                            | 25-29     | Ecig          | 3192  | 32.52 |               |             |               |                |              |
| 5                                            | 25-29     | Dual          | 0     | 0.00  |               |             |               |                |              |
| 5                                            | 25-29     | Former        | 1131  | 11.52 |               |             | 5.48          | 107            | 9.46         |
| Year of Follow-up: 1995, Age Group: 30-34    |           |               |       |       |               |             |               |                |              |
| Period                                       | Age Group | Smoking Group | N     | %     | Ever Quit (N) | Ever Quit % | Mean Yrs Quit | Short Term (n) | Short Term % |



**Results for PHIM for Run 1 (Sensitivity\_Analysis\_2.RTF)**

|                                              |           |               |      |       |               |             |               |                |              |
|----------------------------------------------|-----------|---------------|------|-------|---------------|-------------|---------------|----------------|--------------|
| 5                                            | 30-34     | Never Any     | 5065 | 47.50 |               |             |               |                |              |
| 5                                            | 30-34     | CC            | 12   | 0.11  | 0             | 0.00        |               |                |              |
| 5                                            | 30-34     | Ecig          | 3792 | 35.56 |               |             |               |                |              |
| 5                                            | 30-34     | Dual          | 0    | 0.00  |               |             |               |                |              |
| 5                                            | 30-34     | Former        | 1795 | 16.83 |               |             | 6.91          | 128            | 7.13         |
| Year of Follow-up: 1995, Age Group: 35-39    |           |               |      |       |               |             |               |                |              |
| Period                                       | Age Group | Smoking Group | N    | %     | Ever Quit (N) | Ever Quit % | Mean Yrs Quit | Short Term (n) | Short Term % |
| 5                                            | 35-39     | Never Any     | 4724 | 43.28 |               |             |               |                |              |
| 5                                            | 35-39     | CC            | 57   | 0.52  | 0             | 0.00        |               |                |              |
| 5                                            | 35-39     | Ecig          | 3737 | 34.23 |               |             |               |                |              |
| 5                                            | 35-39     | Dual          | 0    | 0.00  |               |             |               |                |              |
| 5                                            | 35-39     | Former        | 2398 | 21.97 |               |             | 8.24          | 125            | 5.21         |
| Year of Follow-up: 1995, Age Group: 40-44    |           |               |      |       |               |             |               |                |              |
| Period                                       | Age Group | Smoking Group | N    | %     | Ever Quit (N) | Ever Quit % | Mean Yrs Quit | Short Term (n) | Short Term % |
| 5                                            | 40-44     | Never Any     | 3941 | 39.85 |               |             |               |                |              |
| 5                                            | 40-44     | CC            | 50   | 0.51  | 0             | 0.00        |               |                |              |
| 5                                            | 40-44     | Ecig          | 3131 | 31.66 |               |             |               |                |              |
| 5                                            | 40-44     | Dual          | 0    | 0.00  |               |             |               |                |              |
| 5                                            | 40-44     | Former        | 2767 | 27.98 |               |             | 12.07         | 146            | 5.28         |
| Year of Follow-up: 1995, Age Group: 45-49    |           |               |      |       |               |             |               |                |              |
| Period                                       | Age Group | Smoking Group | N    | %     | Ever Quit (N) | Ever Quit % | Mean Yrs Quit | Short Term (n) | Short Term % |
| 5                                            | 45-49     | Never Any     | 2912 | 33.65 |               |             |               |                |              |
| 5                                            | 45-49     | CC            | 51   | 0.59  | 0             | 0.00        |               |                |              |
| 5                                            | 45-49     | Ecig          | 2740 | 31.66 |               |             |               |                |              |
| 5                                            | 45-49     | Dual          | 0    | 0.00  |               |             |               |                |              |
| 5                                            | 45-49     | Former        | 2952 | 34.11 |               |             | 14.16         | 164            | 5.56         |
| Year of Follow-up: 1995, Age Group: 50-54    |           |               |      |       |               |             |               |                |              |
| Period                                       | Age Group | Smoking Group | N    | %     | Ever Quit (N) | Ever Quit % | Mean Yrs Quit | Short Term (n) | Short Term % |
| 5                                            | 50-54     | Never Any     | 1919 | 29.46 |               |             |               |                |              |
| 5                                            | 50-54     | CC            | 43   | 0.66  | 0             | 0.00        |               |                |              |
| 5                                            | 50-54     | Ecig          | 1952 | 29.96 |               |             |               |                |              |
| 5                                            | 50-54     | Dual          | 0    | 0.00  |               |             |               |                |              |
| 5                                            | 50-54     | Former        | 2601 | 39.92 |               |             | 16.18         | 162            | 6.23         |
| Year of Follow-up: 1995, Age Group: 55-59    |           |               |      |       |               |             |               |                |              |
| Period                                       | Age Group | Smoking Group | N    | %     | Ever Quit (N) | Ever Quit % | Mean Yrs Quit | Short Term (n) | Short Term % |
| 5                                            | 55-59     | Never Any     | 1611 | 29.41 |               |             |               |                |              |
| 5                                            | 55-59     | CC            | 34   | 0.62  | 0             | 0.00        |               |                |              |
| 5                                            | 55-59     | Ecig          | 1499 | 27.37 |               |             |               |                |              |
| 5                                            | 55-59     | Dual          | 0    | 0.00  |               |             |               |                |              |
| 5                                            | 55-59     | Former        | 2333 | 42.60 |               |             | 17.39         | 126            | 5.40         |
| Year of Follow-up: 1995, Age Group: 60-64    |           |               |      |       |               |             |               |                |              |
| Period                                       | Age Group | Smoking Group | N    | %     | Ever Quit (N) | Ever Quit % | Mean Yrs Quit | Short Term (n) | Short Term % |
| 5                                            | 60-64     | Never Any     | 1337 | 26.83 |               |             |               |                |              |
| 5                                            | 60-64     | CC            | 30   | 0.60  | 0             | 0.00        |               |                |              |
| 5                                            | 60-64     | Ecig          | 1175 | 23.58 |               |             |               |                |              |
| 5                                            | 60-64     | Dual          | 0    | 0.00  |               |             |               |                |              |
| 5                                            | 60-64     | Former        | 2441 | 48.99 |               |             | 17.48         | 137            | 5.61         |
| Year of Follow-up: 1995, Age Group: 65-69    |           |               |      |       |               |             |               |                |              |
| Period                                       | Age Group | Smoking Group | N    | %     | Ever Quit (N) | Ever Quit % | Mean Yrs Quit | Short Term (n) | Short Term % |
| 5                                            | 65-69     | Never Any     | 1169 | 23.83 |               |             |               |                |              |
| 5                                            | 65-69     | CC            | 19   | 0.39  | 0             | 0.00        |               |                |              |
| 5                                            | 65-69     | Ecig          | 842  | 17.17 |               |             |               |                |              |
| 5                                            | 65-69     | Dual          | 0    | 0.00  |               |             |               |                |              |
| 5                                            | 65-69     | Former        | 2875 | 58.61 |               |             | 20.56         | 218            | 7.58         |
| Year of Follow-up: 1995, Age Group: 70-74    |           |               |      |       |               |             |               |                |              |
| Period                                       | Age Group | Smoking Group | N    | %     | Ever Quit (N) | Ever Quit % | Mean Yrs Quit | Short Term (n) | Short Term % |
| 5                                            | 70-74     | Never Any     | 1023 | 23.32 |               |             |               |                |              |
| 5                                            | 70-74     | CC            | 18   | 0.41  | 0             | 0.00        |               |                |              |
| 5                                            | 70-74     | Ecig          | 624  | 14.22 |               |             |               |                |              |
| 5                                            | 70-74     | Dual          | 0    | 0.00  |               |             |               |                |              |
| 5                                            | 70-74     | Former        | 2722 | 62.05 |               |             | 22.05         | 132            | 4.85         |
| Year of Follow-up: 1995, Age Group: 75-79    |           |               |      |       |               |             |               |                |              |
| Period                                       | Age Group | Smoking Group | N    | %     | Ever Quit (N) | Ever Quit % | Mean Yrs Quit | Short Term (n) | Short Term % |
| 5                                            | 75-79     | Never Any     | 961  | 27.46 |               |             |               |                |              |
| 5                                            | 75-79     | CC            | 12   | 0.34  | 0             | 0.00        |               |                |              |
| 5                                            | 75-79     | Ecig          | 441  | 12.60 |               |             |               |                |              |
| 5                                            | 75-79     | Dual          | 0    | 0.00  |               |             |               |                |              |
| 5                                            | 75-79     | Former        | 2085 | 59.59 |               |             | 23.15         | 101            | 4.84         |
| Year of Follow-up: 2000, Age Group: All Ages |           |               |      |       |               |             |               |                |              |

**Results for PHIM for Run 1 (Sensitivity\_Analysis\_2.RTF)**

| Period                                    | Age Group | Smoking Group | N     | %     | Ever Quit (N) | Ever Quit % | Mean Yrs Quit | Short Term (n) | Short Term % |
|-------------------------------------------|-----------|---------------|-------|-------|---------------|-------------|---------------|----------------|--------------|
| 10                                        | All Ages  | Never Any     | 39177 | 41.64 |               |             |               |                |              |
| 10                                        | All Ages  | CC            | 58    | 0.06  | 0             | 0.00        |               |                |              |
| 10                                        | All Ages  | Ecig          | 25630 | 27.24 |               |             |               |                |              |
| 10                                        | All Ages  | Dual          | 0     | 0.00  |               |             |               |                |              |
| 10                                        | All Ages  | Former        | 29227 | 31.06 |               |             | 16.85         | 1744           | 5.97         |
| Year of Follow-up: 2000, Age Group: 18-19 |           |               |       |       |               |             |               |                |              |
| Period                                    | Age Group | Smoking Group | N     | %     | Ever Quit (N) | Ever Quit % | Mean Yrs Quit | Short Term (n) | Short Term % |
| 10                                        | 18-19     | Never Any     | 0     | .     |               |             |               |                |              |
| 10                                        | 18-19     | CC            | 0     | .     | 0             | .           |               |                |              |
| 10                                        | 18-19     | Ecig          | 0     | .     |               |             |               |                |              |
| 10                                        | 18-19     | Dual          | 0     | .     |               |             |               |                |              |
| 10                                        | 18-19     | Former        | 0     | .     |               |             |               | 0              | .            |
| Year of Follow-up: 2000, Age Group: 20-24 |           |               |       |       |               |             |               |                |              |
| Period                                    | Age Group | Smoking Group | N     | %     | Ever Quit (N) | Ever Quit % | Mean Yrs Quit | Short Term (n) | Short Term % |
| 10                                        | 20-24     | Never Any     | 4927  | 55.70 |               |             |               |                |              |
| 10                                        | 20-24     | CC            | 30    | 0.34  | 0             | 0.00        |               |                |              |
| 10                                        | 20-24     | Ecig          | 2998  | 33.89 |               |             |               |                |              |
| 10                                        | 20-24     | Dual          | 0     | 0.00  |               |             |               |                |              |
| 10                                        | 20-24     | Former        | 890   | 10.06 |               |             | 3.20          | 271            | 30.45        |
| Year of Follow-up: 2000, Age Group: 25-29 |           |               |       |       |               |             |               |                |              |
| Period                                    | Age Group | Smoking Group | N     | %     | Ever Quit (N) | Ever Quit % | Mean Yrs Quit | Short Term (n) | Short Term % |
| 10                                        | 25-29     | Never Any     | 5341  | 59.08 |               |             |               |                |              |
| 10                                        | 25-29     | CC            | 11    | 0.12  | 0             | 0.00        |               |                |              |
| 10                                        | 25-29     | Ecig          | 2768  | 30.62 |               |             |               |                |              |
| 10                                        | 25-29     | Dual          | 0     | 0.00  |               |             |               |                |              |
| 10                                        | 25-29     | Former        | 920   | 10.18 |               |             | 4.86          | 187            | 20.33        |
| Year of Follow-up: 2000, Age Group: 30-34 |           |               |       |       |               |             |               |                |              |
| Period                                    | Age Group | Smoking Group | N     | %     | Ever Quit (N) | Ever Quit % | Mean Yrs Quit | Short Term (n) | Short Term % |
| 10                                        | 30-34     | Never Any     | 5276  | 53.75 |               |             |               |                |              |
| 10                                        | 30-34     | CC            | 9     | 0.09  | 0             | 0.00        |               |                |              |
| 10                                        | 30-34     | Ecig          | 3105  | 31.63 |               |             |               |                |              |
| 10                                        | 30-34     | Dual          | 0     | 0.00  |               |             |               |                |              |
| 10                                        | 30-34     | Former        | 1426  | 14.53 |               |             | 8.73          | 105            | 7.36         |
| Year of Follow-up: 2000, Age Group: 35-39 |           |               |       |       |               |             |               |                |              |
| Period                                    | Age Group | Smoking Group | N     | %     | Ever Quit (N) | Ever Quit % | Mean Yrs Quit | Short Term (n) | Short Term % |
| 10                                        | 35-39     | Never Any     | 4997  | 46.86 |               |             |               |                |              |
| 10                                        | 35-39     | CC            | 4     | 0.04  | 0             | 0.00        |               |                |              |
| 10                                        | 35-39     | Ecig          | 3574  | 33.51 |               |             |               |                |              |
| 10                                        | 35-39     | Dual          | 0     | 0.00  |               |             |               |                |              |
| 10                                        | 35-39     | Former        | 2089  | 19.59 |               |             | 10.51         | 119            | 5.70         |
| Year of Follow-up: 2000, Age Group: 40-44 |           |               |       |       |               |             |               |                |              |
| Period                                    | Age Group | Smoking Group | N     | %     | Ever Quit (N) | Ever Quit % | Mean Yrs Quit | Short Term (n) | Short Term % |
| 10                                        | 40-44     | Never Any     | 4724  | 43.28 |               |             |               |                |              |
| 10                                        | 40-44     | CC            | 1     | 0.01  | 0             | 0.00        |               |                |              |
| 10                                        | 40-44     | Ecig          | 3438  | 31.50 |               |             |               |                |              |
| 10                                        | 40-44     | Dual          | 0     | 0.00  |               |             |               |                |              |
| 10                                        | 40-44     | Former        | 2753  | 25.22 |               |             | 11.80         | 135            | 4.90         |
| Year of Follow-up: 2000, Age Group: 45-49 |           |               |       |       |               |             |               |                |              |
| Period                                    | Age Group | Smoking Group | N     | %     | Ever Quit (N) | Ever Quit % | Mean Yrs Quit | Short Term (n) | Short Term % |
| 10                                        | 45-49     | Never Any     | 3941  | 39.85 |               |             |               |                |              |
| 10                                        | 45-49     | CC            | 0     | 0.00  | 0             | 0.00        |               |                |              |
| 10                                        | 45-49     | Ecig          | 2776  | 28.07 |               |             |               |                |              |
| 10                                        | 45-49     | Dual          | 0     | 0.00  |               |             |               |                |              |
| 10                                        | 45-49     | Former        | 3172  | 32.08 |               |             | 15.14         | 165            | 5.20         |
| Year of Follow-up: 2000, Age Group: 50-54 |           |               |       |       |               |             |               |                |              |
| Period                                    | Age Group | Smoking Group | N     | %     | Ever Quit (N) | Ever Quit % | Mean Yrs Quit | Short Term (n) | Short Term % |
| 10                                        | 50-54     | Never Any     | 2912  | 33.65 |               |             |               |                |              |
| 10                                        | 50-54     | CC            | 0     | 0.00  | 0             | 0.00        |               |                |              |
| 10                                        | 50-54     | Ecig          | 2310  | 26.69 |               |             |               |                |              |
| 10                                        | 50-54     | Dual          | 0     | 0.00  |               |             |               |                |              |
| 10                                        | 50-54     | Former        | 3433  | 39.66 |               |             | 16.74         | 194            | 5.65         |
| Year of Follow-up: 2000, Age Group: 55-59 |           |               |       |       |               |             |               |                |              |
| Period                                    | Age Group | Smoking Group | N     | %     | Ever Quit (N) | Ever Quit % | Mean Yrs Quit | Short Term (n) | Short Term % |
| 10                                        | 55-59     | Never Any     | 1919  | 29.46 |               |             |               |                |              |
| 10                                        | 55-59     | CC            | 1     | 0.02  | 0             | 0.00        |               |                |              |
| 10                                        | 55-59     | Ecig          | 1603  | 24.60 |               |             |               |                |              |
| 10                                        | 55-59     | Dual          | 0     | 0.00  |               |             |               |                |              |

**Results for PHIM for Run 1 (Sensitivity\_Analysis\_2.RTF)**

| Year of Follow-up: 2000, Age Group: 60-64    | Period   | Age Group | Smoking Group | N     | %     | Ever Quit (N) | Ever Quit % | Mean Yrs Quit | Short Term (n) | Short Term % |
|----------------------------------------------|----------|-----------|---------------|-------|-------|---------------|-------------|---------------|----------------|--------------|
| 10                                           | 55-59    | Former    |               | 2992  | 45.92 |               |             | 18.69         | 135            | 4.51         |
| 10                                           | 60-64    | Never Any |               | 1611  | 29.41 |               |             |               |                |              |
| 10                                           | 60-64    | CC        |               | 0     | 0.00  | 0             | 0.00        |               |                |              |
| 10                                           | 60-64    | Ecig      |               | 1177  | 21.49 |               |             |               |                |              |
| 10                                           | 60-64    | Dual      |               | 0     | 0.00  |               |             |               |                |              |
| 10                                           | 60-64    | Former    |               | 2689  | 49.10 |               |             | 19.69         | 141            | 5.24         |
| Year of Follow-up: 2000, Age Group: 65-69    | Period   | Age Group | Smoking Group | N     | %     | Ever Quit (N) | Ever Quit % | Mean Yrs Quit | Short Term (n) | Short Term % |
| 10                                           | 65-69    | Never Any |               | 1337  | 26.83 |               |             |               |                |              |
| 10                                           | 65-69    | CC        |               | 0     | 0.00  | 0             | 0.00        |               |                |              |
| 10                                           | 65-69    | Ecig      |               | 865   | 17.36 |               |             |               |                |              |
| 10                                           | 65-69    | Dual      |               | 0     | 0.00  |               |             |               |                |              |
| 10                                           | 65-69    | Former    |               | 2781  | 55.81 |               |             | 19.98         | 136            | 4.89         |
| Year of Follow-up: 2000, Age Group: 70-74    | Period   | Age Group | Smoking Group | N     | %     | Ever Quit (N) | Ever Quit % | Mean Yrs Quit | Short Term (n) | Short Term % |
| 10                                           | 70-74    | Never Any |               | 1169  | 23.83 |               |             |               |                |              |
| 10                                           | 70-74    | CC        |               | 2     | 0.04  | 0             | 0.00        |               |                |              |
| 10                                           | 70-74    | Ecig      |               | 581   | 11.85 |               |             |               |                |              |
| 10                                           | 70-74    | Dual      |               | 0     | 0.00  |               |             |               |                |              |
| 10                                           | 70-74    | Former    |               | 3153  | 64.28 |               |             | 23.52         | 84             | 2.66         |
| Year of Follow-up: 2000, Age Group: 75-79    | Period   | Age Group | Smoking Group | N     | %     | Ever Quit (N) | Ever Quit % | Mean Yrs Quit | Short Term (n) | Short Term % |
| 10                                           | 75-79    | Never Any |               | 1023  | 23.32 |               |             |               |                |              |
| 10                                           | 75-79    | CC        |               | 0     | 0.00  | 0             | 0.00        |               |                |              |
| 10                                           | 75-79    | Ecig      |               | 435   | 9.92  |               |             |               |                |              |
| 10                                           | 75-79    | Dual      |               | 0     | 0.00  |               |             |               |                |              |
| 10                                           | 75-79    | Former    |               | 2929  | 66.77 |               |             | 25.30         | 72             | 2.46         |
| Year of Follow-up: 2005, Age Group: All Ages | Period   | Age Group | Smoking Group | N     | %     | Ever Quit (N) | Ever Quit % | Mean Yrs Quit | Short Term (n) | Short Term % |
| 15                                           | All Ages | Never Any |               | 37449 | 41.75 |               |             |               |                |              |
| 15                                           | All Ages | CC        |               | 13    | 0.01  | 0             | 0.00        |               |                |              |
| 15                                           | All Ages | Ecig      |               | 21975 | 24.50 |               |             |               |                |              |
| 15                                           | All Ages | Dual      |               | 0     | 0.00  |               |             |               |                |              |
| 15                                           | All Ages | Former    |               | 30268 | 33.74 |               |             | 18.43         | 1541           | 5.09         |
| Year of Follow-up: 2005, Age Group: 18-19    | Period   | Age Group | Smoking Group | N     | %     | Ever Quit (N) | Ever Quit % | Mean Yrs Quit | Short Term (n) | Short Term % |
| 15                                           | 18-19    | Never Any |               | 0     | .     |               |             |               |                |              |
| 15                                           | 18-19    | CC        |               | 0     | .     | 0             | .           |               |                |              |
| 15                                           | 18-19    | Ecig      |               | 0     | .     |               |             |               |                |              |
| 15                                           | 18-19    | Dual      |               | 0     | .     |               |             |               |                |              |
| 15                                           | 18-19    | Former    |               | 0     | .     |               |             | .             | 0              | .            |
| Year of Follow-up: 2005, Age Group: 20-24    | Period   | Age Group | Smoking Group | N     | %     | Ever Quit (N) | Ever Quit % | Mean Yrs Quit | Short Term (n) | Short Term % |
| 15                                           | 20-24    | Never Any |               | 0     | .     |               |             |               |                |              |
| 15                                           | 20-24    | CC        |               | 0     | .     | 0             | .           |               |                |              |
| 15                                           | 20-24    | Ecig      |               | 0     | .     |               |             |               |                |              |
| 15                                           | 20-24    | Dual      |               | 0     | .     |               |             |               |                |              |
| 15                                           | 20-24    | Former    |               | 0     | .     |               |             | .             | 0              | .            |
| Year of Follow-up: 2005, Age Group: 25-29    | Period   | Age Group | Smoking Group | N     | %     | Ever Quit (N) | Ever Quit % | Mean Yrs Quit | Short Term (n) | Short Term % |
| 15                                           | 25-29    | Never Any |               | 4634  | 52.39 |               |             |               |                |              |
| 15                                           | 25-29    | CC        |               | 8     | 0.09  | 0             | 0.00        |               |                |              |
| 15                                           | 25-29    | Ecig      |               | 2848  | 32.20 |               |             |               |                |              |
| 15                                           | 25-29    | Dual      |               | 0     | 0.00  |               |             |               |                |              |
| 15                                           | 25-29    | Former    |               | 1355  | 15.32 |               |             | 6.13          | 175            | 12.92        |
| Year of Follow-up: 2005, Age Group: 30-34    | Period   | Age Group | Smoking Group | N     | %     | Ever Quit (N) | Ever Quit % | Mean Yrs Quit | Short Term (n) | Short Term % |
| 15                                           | 30-34    | Never Any |               | 5042  | 55.77 |               |             |               |                |              |
| 15                                           | 30-34    | CC        |               | 4     | 0.04  | 0             | 0.00        |               |                |              |
| 15                                           | 30-34    | Ecig      |               | 2647  | 29.28 |               |             |               |                |              |
| 15                                           | 30-34    | Dual      |               | 0     | 0.00  |               |             |               |                |              |
| 15                                           | 30-34    | Former    |               | 1347  | 14.90 |               |             | 7.34          | 166            | 12.32        |
| Year of Follow-up: 2005, Age Group: 35-39    | Period   | Age Group | Smoking Group | N     | %     | Ever Quit (N) | Ever Quit % | Mean Yrs Quit | Short Term (n) | Short Term % |
| 15                                           | 35-39    | Never Any |               | 5163  | 52.60 |               |             |               |                |              |
| 15                                           | 35-39    | CC        |               | 1     | 0.01  | 0             | 0.00        |               |                |              |

**Results for PHIM for Run 1 (Sensitivity\_Analysis\_2.RTF)**

|                                              |           |               |       |       |               |             |               |                |              |
|----------------------------------------------|-----------|---------------|-------|-------|---------------|-------------|---------------|----------------|--------------|
| 15                                           | 35-39     | Ecig          | 2854  | 29.07 |               |             |               |                |              |
| 15                                           | 35-39     | Dual          | 0     | 0.00  |               |             |               |                |              |
| 15                                           | 35-39     | Former        | 1798  | 18.32 |               |             | 11.30         | 148            | 8.23         |
| Year of Follow-up: 2005, Age Group: 40-44    |           |               |       |       |               |             |               |                |              |
| Period                                       | Age Group | Smoking Group | N     | %     | Ever Quit (N) | Ever Quit % | Mean Yrs Quit | Short Term (n) | Short Term % |
| 15                                           | 40-44     | Never Any     | 4997  | 46.86 |               |             |               |                |              |
| 15                                           | 40-44     | CC            | 0     | 0.00  | 0             | 0.00        |               |                |              |
| 15                                           | 40-44     | Ecig          | 3159  | 29.62 |               |             |               |                |              |
| 15                                           | 40-44     | Dual          | 0     | 0.00  |               |             |               |                |              |
| 15                                           | 40-44     | Former        | 2508  | 23.52 |               |             | 13.21         | 200            | 7.97         |
| Year of Follow-up: 2005, Age Group: 45-49    |           |               |       |       |               |             |               |                |              |
| Period                                       | Age Group | Smoking Group | N     | %     | Ever Quit (N) | Ever Quit % | Mean Yrs Quit | Short Term (n) | Short Term % |
| 15                                           | 45-49     | Never Any     | 4724  | 43.28 |               |             |               |                |              |
| 15                                           | 45-49     | CC            | 0     | 0.00  | 0             | 0.00        |               |                |              |
| 15                                           | 45-49     | Ecig          | 3021  | 27.67 |               |             |               |                |              |
| 15                                           | 45-49     | Dual          | 0     | 0.00  |               |             |               |                |              |
| 15                                           | 45-49     | Former        | 3171  | 29.05 |               |             | 14.84         | 156            | 4.92         |
| Year of Follow-up: 2005, Age Group: 50-54    |           |               |       |       |               |             |               |                |              |
| Period                                       | Age Group | Smoking Group | N     | %     | Ever Quit (N) | Ever Quit % | Mean Yrs Quit | Short Term (n) | Short Term % |
| 15                                           | 50-54     | Never Any     | 3941  | 39.85 |               |             |               |                |              |
| 15                                           | 50-54     | CC            | 0     | 0.00  | 0             | 0.00        |               |                |              |
| 15                                           | 50-54     | Ecig          | 2384  | 24.11 |               |             |               |                |              |
| 15                                           | 50-54     | Dual          | 0     | 0.00  |               |             |               |                |              |
| 15                                           | 50-54     | Former        | 3564  | 36.04 |               |             | 18.17         | 129            | 3.62         |
| Year of Follow-up: 2005, Age Group: 55-59    |           |               |       |       |               |             |               |                |              |
| Period                                       | Age Group | Smoking Group | N     | %     | Ever Quit (N) | Ever Quit % | Mean Yrs Quit | Short Term (n) | Short Term % |
| 15                                           | 55-59     | Never Any     | 2912  | 33.65 |               |             |               |                |              |
| 15                                           | 55-59     | CC            | 0     | 0.00  | 0             | 0.00        |               |                |              |
| 15                                           | 55-59     | Ecig          | 1980  | 22.88 |               |             |               |                |              |
| 15                                           | 55-59     | Dual          | 0     | 0.00  |               |             |               |                |              |
| 15                                           | 55-59     | Former        | 3763  | 43.48 |               |             | 20.04         | 106            | 2.82         |
| Year of Follow-up: 2005, Age Group: 60-64    |           |               |       |       |               |             |               |                |              |
| Period                                       | Age Group | Smoking Group | N     | %     | Ever Quit (N) | Ever Quit % | Mean Yrs Quit | Short Term (n) | Short Term % |
| 15                                           | 60-64     | Never Any     | 1919  | 29.46 |               |             |               |                |              |
| 15                                           | 60-64     | CC            | 0     | 0.00  | 0             | 0.00        |               |                |              |
| 15                                           | 60-64     | Ecig          | 1266  | 19.43 |               |             |               |                |              |
| 15                                           | 60-64     | Dual          | 0     | 0.00  |               |             |               |                |              |
| 15                                           | 60-64     | Former        | 3330  | 51.11 |               |             | 21.47         | 169            | 5.08         |
| Year of Follow-up: 2005, Age Group: 65-69    |           |               |       |       |               |             |               |                |              |
| Period                                       | Age Group | Smoking Group | N     | %     | Ever Quit (N) | Ever Quit % | Mean Yrs Quit | Short Term (n) | Short Term % |
| 15                                           | 65-69     | Never Any     | 1611  | 29.41 |               |             |               |                |              |
| 15                                           | 65-69     | CC            | 0     | 0.00  | 0             | 0.00        |               |                |              |
| 15                                           | 65-69     | Ecig          | 838   | 15.30 |               |             |               |                |              |
| 15                                           | 65-69     | Dual          | 0     | 0.00  |               |             |               |                |              |
| 15                                           | 65-69     | Former        | 3028  | 55.29 |               |             | 22.15         | 124            | 4.10         |
| Year of Follow-up: 2005, Age Group: 70-74    |           |               |       |       |               |             |               |                |              |
| Period                                       | Age Group | Smoking Group | N     | %     | Ever Quit (N) | Ever Quit % | Mean Yrs Quit | Short Term (n) | Short Term % |
| 15                                           | 70-74     | Never Any     | 1337  | 26.83 |               |             |               |                |              |
| 15                                           | 70-74     | CC            | 0     | 0.00  | 0             | 0.00        |               |                |              |
| 15                                           | 70-74     | Ecig          | 588   | 11.80 |               |             |               |                |              |
| 15                                           | 70-74     | Dual          | 0     | 0.00  |               |             |               |                |              |
| 15                                           | 70-74     | Former        | 3058  | 61.37 |               |             | 22.91         | 99             | 3.24         |
| Year of Follow-up: 2005, Age Group: 75-79    |           |               |       |       |               |             |               |                |              |
| Period                                       | Age Group | Smoking Group | N     | %     | Ever Quit (N) | Ever Quit % | Mean Yrs Quit | Short Term (n) | Short Term % |
| 15                                           | 75-79     | Never Any     | 1169  | 23.83 |               |             |               |                |              |
| 15                                           | 75-79     | CC            | 0     | 0.00  | 0             | 0.00        |               |                |              |
| 15                                           | 75-79     | Ecig          | 390   | 7.95  |               |             |               |                |              |
| 15                                           | 75-79     | Dual          | 0     | 0.00  |               |             |               |                |              |
| 15                                           | 75-79     | Former        | 3346  | 68.22 |               |             | 27.00         | 69             | 2.06         |
| Year of Follow-up: 2010, Age Group: All Ages |           |               |       |       |               |             |               |                |              |
| Period                                       | Age Group | Smoking Group | N     | %     | Ever Quit (N) | Ever Quit % | Mean Yrs Quit | Short Term (n) | Short Term % |
| 20                                           | All Ages  | Never Any     | 36103 | 42.57 |               |             |               |                |              |
| 20                                           | All Ages  | CC            | 1     | 0.00  | 0             | 0.00        |               |                |              |
| 20                                           | All Ages  | Ecig          | 17817 | 21.01 |               |             |               |                |              |
| 20                                           | All Ages  | Dual          | 0     | 0.00  |               |             |               |                |              |
| 20                                           | All Ages  | Former        | 30879 | 36.41 |               |             | 19.76         | 1552           | 5.03         |
| Year of Follow-up: 2010, Age Group: 18-19    |           |               |       |       |               |             |               |                |              |
| Period                                       | Age Group | Smoking Group | N     | %     | Ever Quit (N) | Ever Quit % | Mean Yrs Quit | Short Term (n) | Short Term % |

**Results for PHIM for Run 1 (Sensitivity\_Analysis\_2.RTF)**

|                                           |           |               |      |       |               |             |               |                |              |
|-------------------------------------------|-----------|---------------|------|-------|---------------|-------------|---------------|----------------|--------------|
| 20                                        | 18-19     | Never Any     | 0    | .     |               |             |               |                |              |
| 20                                        | 18-19     | CC            | 0    | .     | 0             | .           |               |                |              |
| 20                                        | 18-19     | Ecig          | 0    | .     |               |             |               |                |              |
| 20                                        | 18-19     | Dual          | 0    | .     |               |             |               |                |              |
| 20                                        | 18-19     | Former        | 0    | .     |               |             | 0             | .              |              |
| Year of Follow-up: 2010, Age Group: 20-24 |           |               |      |       |               |             |               |                |              |
| Period                                    | Age Group | Smoking Group | N    | %     | Ever Quit (N) | Ever Quit % | Mean Yrs Quit | Short Term (n) | Short Term % |
| 20                                        | 20-24     | Never Any     | 0    | .     |               |             |               |                |              |
| 20                                        | 20-24     | CC            | 0    | .     | 0             | .           |               |                |              |
| 20                                        | 20-24     | Ecig          | 0    | .     |               |             |               |                |              |
| 20                                        | 20-24     | Dual          | 0    | .     |               |             |               |                |              |
| 20                                        | 20-24     | Former        | 0    | .     |               |             |               | 0              | .            |
| Year of Follow-up: 2010, Age Group: 25-29 |           |               |      |       |               |             |               |                |              |
| Period                                    | Age Group | Smoking Group | N    | %     | Ever Quit (N) | Ever Quit % | Mean Yrs Quit | Short Term (n) | Short Term % |
| 20                                        | 25-29     | Never Any     | 0    | .     |               |             |               |                |              |
| 20                                        | 25-29     | CC            | 0    | .     | 0             | .           |               |                |              |
| 20                                        | 25-29     | Ecig          | 0    | .     |               |             |               |                |              |
| 20                                        | 25-29     | Dual          | 0    | .     |               |             |               |                |              |
| 20                                        | 25-29     | Former        | 0    | .     |               |             |               | 0              | .            |
| Year of Follow-up: 2010, Age Group: 30-34 |           |               |      |       |               |             |               |                |              |
| Period                                    | Age Group | Smoking Group | N    | %     | Ever Quit (N) | Ever Quit % | Mean Yrs Quit | Short Term (n) | Short Term % |
| 20                                        | 30-34     | Never Any     | 4508 | 50.97 |               |             |               |                |              |
| 20                                        | 30-34     | CC            | 1    | 0.01  | 0             | 0.00        |               |                |              |
| 20                                        | 30-34     | Ecig          | 2450 | 27.70 |               |             |               |                |              |
| 20                                        | 30-34     | Dual          | 0    | 0.00  |               |             |               |                |              |
| 20                                        | 30-34     | Former        | 1886 | 21.32 |               |             | 8.52          | 236            | 12.51        |
| Year of Follow-up: 2010, Age Group: 35-39 |           |               |      |       |               |             |               |                |              |
| Period                                    | Age Group | Smoking Group | N    | %     | Ever Quit (N) | Ever Quit % | Mean Yrs Quit | Short Term (n) | Short Term % |
| 20                                        | 35-39     | Never Any     | 4991 | 55.21 |               |             |               |                |              |
| 20                                        | 35-39     | CC            | 0    | 0.00  | 0             | 0.00        |               |                |              |
| 20                                        | 35-39     | Ecig          | 2250 | 24.89 |               |             |               |                |              |
| 20                                        | 35-39     | Dual          | 0    | 0.00  |               |             |               |                |              |
| 20                                        | 35-39     | Former        | 1799 | 19.90 |               |             | 9.78          | 140            | 7.78         |
| Year of Follow-up: 2010, Age Group: 40-44 |           |               |      |       |               |             |               |                |              |
| Period                                    | Age Group | Smoking Group | N    | %     | Ever Quit (N) | Ever Quit % | Mean Yrs Quit | Short Term (n) | Short Term % |
| 20                                        | 40-44     | Never Any     | 5163 | 52.60 |               |             |               |                |              |
| 20                                        | 40-44     | CC            | 0    | 0.00  | 0             | 0.00        |               |                |              |
| 20                                        | 40-44     | Ecig          | 2499 | 25.46 |               |             |               |                |              |
| 20                                        | 40-44     | Dual          | 0    | 0.00  |               |             |               |                |              |
| 20                                        | 40-44     | Former        | 2154 | 21.94 |               |             | 13.92         | 147            | 6.82         |
| Year of Follow-up: 2010, Age Group: 45-49 |           |               |      |       |               |             |               |                |              |
| Period                                    | Age Group | Smoking Group | N    | %     | Ever Quit (N) | Ever Quit % | Mean Yrs Quit | Short Term (n) | Short Term % |
| 20                                        | 45-49     | Never Any     | 4997 | 46.86 |               |             |               |                |              |
| 20                                        | 45-49     | CC            | 0    | 0.00  | 0             | 0.00        |               |                |              |
| 20                                        | 45-49     | Ecig          | 2686 | 25.19 |               |             |               |                |              |
| 20                                        | 45-49     | Dual          | 0    | 0.00  |               |             |               |                |              |
| 20                                        | 45-49     | Former        | 2981 | 27.95 |               |             | 15.66         | 169            | 5.67         |
| Year of Follow-up: 2010, Age Group: 50-54 |           |               |      |       |               |             |               |                |              |
| Period                                    | Age Group | Smoking Group | N    | %     | Ever Quit (N) | Ever Quit % | Mean Yrs Quit | Short Term (n) | Short Term % |
| 20                                        | 50-54     | Never Any     | 4724 | 43.28 |               |             |               |                |              |
| 20                                        | 50-54     | CC            | 0    | 0.00  | 0             | 0.00        |               |                |              |
| 20                                        | 50-54     | Ecig          | 2591 | 23.74 |               |             |               |                |              |
| 20                                        | 50-54     | Dual          | 0    | 0.00  |               |             |               |                |              |
| 20                                        | 50-54     | Former        | 3601 | 32.99 |               |             | 17.72         | 171            | 4.75         |
| Year of Follow-up: 2010, Age Group: 55-59 |           |               |      |       |               |             |               |                |              |
| Period                                    | Age Group | Smoking Group | N    | %     | Ever Quit (N) | Ever Quit % | Mean Yrs Quit | Short Term (n) | Short Term % |
| 20                                        | 55-59     | Never Any     | 3941 | 39.85 |               |             |               |                |              |
| 20                                        | 55-59     | CC            | 0    | 0.00  | 0             | 0.00        |               |                |              |
| 20                                        | 55-59     | Ecig          | 1919 | 19.41 |               |             |               |                |              |
| 20                                        | 55-59     | Dual          | 0    | 0.00  |               |             |               |                |              |
| 20                                        | 55-59     | Former        | 4029 | 40.74 |               |             | 20.72         | 185            | 4.59         |
| Year of Follow-up: 2010, Age Group: 60-64 |           |               |      |       |               |             |               |                |              |
| Period                                    | Age Group | Smoking Group | N    | %     | Ever Quit (N) | Ever Quit % | Mean Yrs Quit | Short Term (n) | Short Term % |
| 20                                        | 60-64     | Never Any     | 2912 | 33.65 |               |             |               |                |              |
| 20                                        | 60-64     | CC            | 0    | 0.00  | 0             | 0.00        |               |                |              |
| 20                                        | 60-64     | Ecig          | 1491 | 17.23 |               |             |               |                |              |
| 20                                        | 60-64     | Dual          | 0    | 0.00  |               |             |               |                |              |
| 20                                        | 60-64     | Former        | 4252 | 49.13 |               |             | 22.34         | 241            | 5.67         |
| Year of Follow-up: 2010, Age Group: 65-69 |           |               |      |       |               |             |               |                |              |

**Results for PHIM for Run 1 (Sensitivity\_Analysis\_2.RTF)**

| Period                                       | Age Group | Smoking Group | N     | %     | Ever Quit (N) | Ever Quit % | Mean Yrs Quit | Short Term (n) | Short Term % |
|----------------------------------------------|-----------|---------------|-------|-------|---------------|-------------|---------------|----------------|--------------|
| 20                                           | 65-69     | Never Any     | 1919  | 29.46 |               |             |               |                |              |
| 20                                           | 65-69     | CC            | 0     | 0.00  | 0             | 0.00        |               |                |              |
| 20                                           | 65-69     | Ecig          | 874   | 13.42 |               |             |               |                |              |
| 20                                           | 65-69     | Dual          | 0     | 0.00  |               |             |               |                |              |
| 20                                           | 65-69     | Former        | 3722  | 57.13 |               |             | 23.91         | 138            | 3.71         |
| Year of Follow-up: 2010, Age Group: 70-74    |           |               |       |       |               |             |               |                |              |
| Period                                       | Age Group | Smoking Group | N     | %     | Ever Quit (N) | Ever Quit % | Mean Yrs Quit | Short Term (n) | Short Term % |
| 20                                           | 70-74     | Never Any     | 1611  | 29.41 |               |             |               |                |              |
| 20                                           | 70-74     | CC            | 0     | 0.00  | 0             | 0.00        |               |                |              |
| 20                                           | 70-74     | Ecig          | 637   | 11.63 |               |             |               |                |              |
| 20                                           | 70-74     | Dual          | 0     | 0.00  |               |             |               |                |              |
| 20                                           | 70-74     | Former        | 3229  | 58.96 |               |             | 25.61         | 68             | 2.11         |
| Year of Follow-up: 2010, Age Group: 75-79    |           |               |       |       |               |             |               |                |              |
| Period                                       | Age Group | Smoking Group | N     | %     | Ever Quit (N) | Ever Quit % | Mean Yrs Quit | Short Term (n) | Short Term % |
| 20                                           | 75-79     | Never Any     | 1337  | 26.83 |               |             |               |                |              |
| 20                                           | 75-79     | CC            | 0     | 0.00  | 0             | 0.00        |               |                |              |
| 20                                           | 75-79     | Ecig          | 420   | 8.43  |               |             |               |                |              |
| 20                                           | 75-79     | Dual          | 0     | 0.00  |               |             |               |                |              |
| 20                                           | 75-79     | Former        | 3226  | 64.74 |               |             | 26.57         | 57             | 1.77         |
| Year of Follow-up: 2015, Age Group: All Ages |           |               |       |       |               |             |               |                |              |
| Period                                       | Age Group | Smoking Group | N     | %     | Ever Quit (N) | Ever Quit % | Mean Yrs Quit | Short Term (n) | Short Term % |
| 25                                           | All Ages  | Never Any     | 34747 | 43.53 |               |             |               |                |              |
| 25                                           | All Ages  | CC            | 0     | 0.00  | 0             | 0.00        |               |                |              |
| 25                                           | All Ages  | Ecig          | 14403 | 18.05 |               |             |               |                |              |
| 25                                           | All Ages  | Dual          | 0     | 0.00  |               |             |               |                |              |
| 25                                           | All Ages  | Former        | 30667 | 38.42 |               |             | 21.82         | 1097           | 3.58         |
| Year of Follow-up: 2015, Age Group: 18-19    |           |               |       |       |               |             |               |                |              |
| Period                                       | Age Group | Smoking Group | N     | %     | Ever Quit (N) | Ever Quit % | Mean Yrs Quit | Short Term (n) | Short Term % |
| 25                                           | 18-19     | Never Any     | 0     | .     |               |             |               |                |              |
| 25                                           | 18-19     | CC            | 0     | .     | 0             | .           |               |                |              |
| 25                                           | 18-19     | Ecig          | 0     | .     |               |             |               |                |              |
| 25                                           | 18-19     | Dual          | 0     | .     |               |             |               |                |              |
| 25                                           | 18-19     | Former        | 0     | .     |               |             | .             | 0              | .            |
| Year of Follow-up: 2015, Age Group: 20-24    |           |               |       |       |               |             |               |                |              |
| Period                                       | Age Group | Smoking Group | N     | %     | Ever Quit (N) | Ever Quit % | Mean Yrs Quit | Short Term (n) | Short Term % |
| 25                                           | 20-24     | Never Any     | 0     | .     |               |             |               |                |              |
| 25                                           | 20-24     | CC            | 0     | .     | 0             | .           |               |                |              |
| 25                                           | 20-24     | Ecig          | 0     | .     |               |             |               |                |              |
| 25                                           | 20-24     | Dual          | 0     | .     |               |             |               |                |              |
| 25                                           | 20-24     | Former        | 0     | .     |               |             | .             | 0              | .            |
| Year of Follow-up: 2015, Age Group: 25-29    |           |               |       |       |               |             |               |                |              |
| Period                                       | Age Group | Smoking Group | N     | %     | Ever Quit (N) | Ever Quit % | Mean Yrs Quit | Short Term (n) | Short Term % |
| 25                                           | 25-29     | Never Any     | 0     | .     |               |             |               |                |              |
| 25                                           | 25-29     | CC            | 0     | .     | 0             | .           |               |                |              |
| 25                                           | 25-29     | Ecig          | 0     | .     |               |             |               |                |              |
| 25                                           | 25-29     | Dual          | 0     | .     |               |             |               |                |              |
| 25                                           | 25-29     | Former        | 0     | .     |               |             | .             | 0              | .            |
| Year of Follow-up: 2015, Age Group: 30-34    |           |               |       |       |               |             |               |                |              |
| Period                                       | Age Group | Smoking Group | N     | %     | Ever Quit (N) | Ever Quit % | Mean Yrs Quit | Short Term (n) | Short Term % |
| 25                                           | 30-34     | Never Any     | 0     | .     |               |             |               |                |              |
| 25                                           | 30-34     | CC            | 0     | .     | 0             | .           |               |                |              |
| 25                                           | 30-34     | Ecig          | 0     | .     |               |             |               |                |              |
| 25                                           | 30-34     | Dual          | 0     | .     |               |             |               |                |              |
| 25                                           | 30-34     | Former        | 0     | .     |               |             | .             | 0              | .            |
| Year of Follow-up: 2015, Age Group: 35-39    |           |               |       |       |               |             |               |                |              |
| Period                                       | Age Group | Smoking Group | N     | %     | Ever Quit (N) | Ever Quit % | Mean Yrs Quit | Short Term (n) | Short Term % |
| 25                                           | 35-39     | Never Any     | 4489  | 50.75 |               |             |               |                |              |
| 25                                           | 35-39     | CC            | 0     | 0.00  | 0             | 0.00        |               |                |              |
| 25                                           | 35-39     | Ecig          | 2025  | 22.89 |               |             |               |                |              |
| 25                                           | 35-39     | Dual          | 0     | 0.00  |               |             |               |                |              |
| 25                                           | 35-39     | Former        | 2331  | 26.35 |               |             | 11.38         | 141            | 6.05         |
| Year of Follow-up: 2015, Age Group: 40-44    |           |               |       |       |               |             |               |                |              |
| Period                                       | Age Group | Smoking Group | N     | %     | Ever Quit (N) | Ever Quit % | Mean Yrs Quit | Short Term (n) | Short Term % |
| 25                                           | 40-44     | Never Any     | 4991  | 55.21 |               |             |               |                |              |
| 25                                           | 40-44     | CC            | 0     | 0.00  | 0             | 0.00        |               |                |              |
| 25                                           | 40-44     | Ecig          | 1950  | 21.57 |               |             |               |                |              |
| 25                                           | 40-44     | Dual          | 0     | 0.00  |               |             |               |                |              |

**Results for PHIM for Run 1 (Sensitivity\_Analysis\_2.RTF)**

|                                              |           |               |       |       |               |             |               |                |              |
|----------------------------------------------|-----------|---------------|-------|-------|---------------|-------------|---------------|----------------|--------------|
| 25                                           | 40-44     | Former        | 2099  | 23.22 |               |             | 12.97         | 113            | 5.38         |
| Year of Follow-up: 2015, Age Group: 45-49    |           |               |       |       |               |             |               |                |              |
| Period                                       | Age Group | Smoking Group | N     | %     | Ever Quit (N) | Ever Quit % | Mean Yrs Quit | Short Term (n) | Short Term % |
| 25                                           | 45-49     | Never Any     | 5163  | 52.60 |               |             |               |                |              |
| 25                                           | 45-49     | CC            | 0     | 0.00  | 0             | 0.00        |               |                |              |
| 25                                           | 45-49     | Ecig          | 2246  | 22.88 |               |             |               |                |              |
| 25                                           | 45-49     | Dual          | 0     | 0.00  |               |             |               |                |              |
| 25                                           | 45-49     | Former        | 2407  | 24.52 |               |             | 17.17         | 82             | 3.41         |
| Year of Follow-up: 2015, Age Group: 50-54    |           |               |       |       |               |             |               |                |              |
| Period                                       | Age Group | Smoking Group | N     | %     | Ever Quit (N) | Ever Quit % | Mean Yrs Quit | Short Term (n) | Short Term % |
| 25                                           | 50-54     | Never Any     | 4997  | 46.86 |               |             |               |                |              |
| 25                                           | 50-54     | CC            | 0     | 0.00  | 0             | 0.00        |               |                |              |
| 25                                           | 50-54     | Ecig          | 2402  | 22.52 |               |             |               |                |              |
| 25                                           | 50-54     | Dual          | 0     | 0.00  |               |             |               |                |              |
| 25                                           | 50-54     | Former        | 3265  | 30.62 |               |             | 19.03         | 135            | 4.13         |
| Year of Follow-up: 2015, Age Group: 55-59    |           |               |       |       |               |             |               |                |              |
| Period                                       | Age Group | Smoking Group | N     | %     | Ever Quit (N) | Ever Quit % | Mean Yrs Quit | Short Term (n) | Short Term % |
| 25                                           | 55-59     | Never Any     | 4724  | 43.28 |               |             |               |                |              |
| 25                                           | 55-59     | CC            | 0     | 0.00  | 0             | 0.00        |               |                |              |
| 25                                           | 55-59     | Ecig          | 2150  | 19.70 |               |             |               |                |              |
| 25                                           | 55-59     | Dual          | 0     | 0.00  |               |             |               |                |              |
| 25                                           | 55-59     | Former        | 4042  | 37.03 |               |             | 20.47         | 157            | 3.88         |
| Year of Follow-up: 2015, Age Group: 60-64    |           |               |       |       |               |             |               |                |              |
| Period                                       | Age Group | Smoking Group | N     | %     | Ever Quit (N) | Ever Quit % | Mean Yrs Quit | Short Term (n) | Short Term % |
| 25                                           | 60-64     | Never Any     | 3941  | 39.85 |               |             |               |                |              |
| 25                                           | 60-64     | CC            | 0     | 0.00  | 0             | 0.00        |               |                |              |
| 25                                           | 60-64     | Ecig          | 1457  | 14.73 |               |             |               |                |              |
| 25                                           | 60-64     | Dual          | 0     | 0.00  |               |             |               |                |              |
| 25                                           | 60-64     | Former        | 4491  | 45.41 |               |             | 23.27         | 204            | 4.54         |
| Year of Follow-up: 2015, Age Group: 65-69    |           |               |       |       |               |             |               |                |              |
| Period                                       | Age Group | Smoking Group | N     | %     | Ever Quit (N) | Ever Quit % | Mean Yrs Quit | Short Term (n) | Short Term % |
| 25                                           | 65-69     | Never Any     | 2912  | 33.65 |               |             |               |                |              |
| 25                                           | 65-69     | CC            | 0     | 0.00  | 0             | 0.00        |               |                |              |
| 25                                           | 65-69     | Ecig          | 1036  | 11.97 |               |             |               |                |              |
| 25                                           | 65-69     | Dual          | 0     | 0.00  |               |             |               |                |              |
| 25                                           | 65-69     | Former        | 4707  | 54.38 |               |             | 24.93         | 138            | 2.93         |
| Year of Follow-up: 2015, Age Group: 70-74    |           |               |       |       |               |             |               |                |              |
| Period                                       | Age Group | Smoking Group | N     | %     | Ever Quit (N) | Ever Quit % | Mean Yrs Quit | Short Term (n) | Short Term % |
| 25                                           | 70-74     | Never Any     | 1919  | 29.46 |               |             |               |                |              |
| 25                                           | 70-74     | CC            | 0     | 0.00  | 0             | 0.00        |               |                |              |
| 25                                           | 70-74     | Ecig          | 652   | 10.01 |               |             |               |                |              |
| 25                                           | 70-74     | Dual          | 0     | 0.00  |               |             |               |                |              |
| 25                                           | 70-74     | Former        | 3944  | 60.54 |               |             | 27.40         | 78             | 1.98         |
| Year of Follow-up: 2015, Age Group: 75-79    |           |               |       |       |               |             |               |                |              |
| Period                                       | Age Group | Smoking Group | N     | %     | Ever Quit (N) | Ever Quit % | Mean Yrs Quit | Short Term (n) | Short Term % |
| 25                                           | 75-79     | Never Any     | 1611  | 29.41 |               |             |               |                |              |
| 25                                           | 75-79     | CC            | 0     | 0.00  | 0             | 0.00        |               |                |              |
| 25                                           | 75-79     | Ecig          | 485   | 8.86  |               |             |               |                |              |
| 25                                           | 75-79     | Dual          | 0     | 0.00  |               |             |               |                |              |
| 25                                           | 75-79     | Former        | 3381  | 61.73 |               |             | 29.33         | 49             | 1.45         |
| Year of Follow-up: 2020, Age Group: All Ages |           |               |       |       |               |             |               |                |              |
| Period                                       | Age Group | Smoking Group | N     | %     | Ever Quit (N) | Ever Quit % | Mean Yrs Quit | Short Term (n) | Short Term % |
| 30                                           | All Ages  | Never Any     | 33136 | 44.57 |               |             |               |                |              |
| 30                                           | All Ages  | CC            | 0     | 0.00  | 0             | 0.00        |               |                |              |
| 30                                           | All Ages  | Ecig          | 11434 | 15.38 |               |             |               |                |              |
| 30                                           | All Ages  | Dual          | 0     | 0.00  |               |             |               |                |              |
| 30                                           | All Ages  | Former        | 29770 | 40.05 |               |             | 23.90         | 934            | 3.14         |
| Year of Follow-up: 2020, Age Group: 18-19    |           |               |       |       |               |             |               |                |              |
| Period                                       | Age Group | Smoking Group | N     | %     | Ever Quit (N) | Ever Quit % | Mean Yrs Quit | Short Term (n) | Short Term % |
| 30                                           | 18-19     | Never Any     | 0     | .     |               |             |               |                |              |
| 30                                           | 18-19     | CC            | 0     | .     | 0             | .           |               |                |              |
| 30                                           | 18-19     | Ecig          | 0     | .     |               |             |               |                |              |
| 30                                           | 18-19     | Dual          | 0     | .     |               |             |               |                |              |
| 30                                           | 18-19     | Former        | 0     | .     |               |             | .             | 0              | .            |
| Year of Follow-up: 2020, Age Group: 20-24    |           |               |       |       |               |             |               |                |              |
| Period                                       | Age Group | Smoking Group | N     | %     | Ever Quit (N) | Ever Quit % | Mean Yrs Quit | Short Term (n) | Short Term % |
| 30                                           | 20-24     | Never Any     | 0     | .     |               |             |               |                |              |
| 30                                           | 20-24     | CC            | 0     | .     | 0             | .           |               |                |              |

**Results for PHIM for Run 1 (Sensitivity\_Analysis\_2.RTF)**

| 30                                        | 20-24     | Ecig          | 0    | .     |               |             |               |                |              |
|-------------------------------------------|-----------|---------------|------|-------|---------------|-------------|---------------|----------------|--------------|
| 30                                        | 20-24     | Dual          | 0    | .     |               |             |               |                |              |
| 30                                        | 20-24     | Former        | 0    | .     |               |             | 0             | .              |              |
| Year of Follow-up: 2020, Age Group: 25-29 |           |               |      |       |               |             |               |                |              |
| Period                                    | Age Group | Smoking Group | N    | %     | Ever Quit (N) | Ever Quit % | Mean Yrs Quit | Short Term (n) | Short Term % |
| 30                                        | 25-29     | Never Any     | 0    | .     |               |             |               |                |              |
| 30                                        | 25-29     | CC            | 0    | .     | 0             | .           |               |                |              |
| 30                                        | 25-29     | Ecig          | 0    | .     |               |             |               |                |              |
| 30                                        | 25-29     | Dual          | 0    | .     |               |             |               |                |              |
| 30                                        | 25-29     | Former        | 0    | .     |               |             |               | 0              | .            |
| Year of Follow-up: 2020, Age Group: 30-34 |           |               |      |       |               |             |               |                |              |
| Period                                    | Age Group | Smoking Group | N    | %     | Ever Quit (N) | Ever Quit % | Mean Yrs Quit | Short Term (n) | Short Term % |
| 30                                        | 30-34     | Never Any     | 0    | .     |               |             |               |                |              |
| 30                                        | 30-34     | CC            | 0    | .     | 0             | .           |               |                |              |
| 30                                        | 30-34     | Ecig          | 0    | .     |               |             |               |                |              |
| 30                                        | 30-34     | Dual          | 0    | .     |               |             |               |                |              |
| 30                                        | 30-34     | Former        | 0    | .     |               |             |               | 0              | .            |
| Year of Follow-up: 2020, Age Group: 35-39 |           |               |      |       |               |             |               |                |              |
| Period                                    | Age Group | Smoking Group | N    | %     | Ever Quit (N) | Ever Quit % | Mean Yrs Quit | Short Term (n) | Short Term % |
| 30                                        | 35-39     | Never Any     | 0    | .     |               |             |               |                |              |
| 30                                        | 35-39     | CC            | 0    | .     | 0             | .           |               |                |              |
| 30                                        | 35-39     | Ecig          | 0    | .     |               |             |               |                |              |
| 30                                        | 35-39     | Dual          | 0    | .     |               |             |               |                |              |
| 30                                        | 35-39     | Former        | 0    | .     |               |             |               | 0              | .            |
| Year of Follow-up: 2020, Age Group: 40-44 |           |               |      |       |               |             |               |                |              |
| Period                                    | Age Group | Smoking Group | N    | %     | Ever Quit (N) | Ever Quit % | Mean Yrs Quit | Short Term (n) | Short Term % |
| 30                                        | 40-44     | Never Any     | 4489 | 50.75 |               |             |               |                |              |
| 30                                        | 40-44     | CC            | 0    | 0.00  | 0             | 0.00        |               |                |              |
| 30                                        | 40-44     | Ecig          | 1756 | 19.85 |               |             |               |                |              |
| 30                                        | 40-44     | Dual          | 0    | 0.00  |               |             |               |                |              |
| 30                                        | 40-44     | Former        | 2600 | 29.40 |               |             | 14.89         | 107            | 4.12         |
| Year of Follow-up: 2020, Age Group: 45-49 |           |               |      |       |               |             |               |                |              |
| Period                                    | Age Group | Smoking Group | N    | %     | Ever Quit (N) | Ever Quit % | Mean Yrs Quit | Short Term (n) | Short Term % |
| 30                                        | 45-49     | Never Any     | 4991 | 55.21 |               |             |               |                |              |
| 30                                        | 45-49     | CC            | 0    | 0.00  | 0             | 0.00        |               |                |              |
| 30                                        | 45-49     | Ecig          | 1725 | 19.08 |               |             |               |                |              |
| 30                                        | 45-49     | Dual          | 0    | 0.00  |               |             |               |                |              |
| 30                                        | 45-49     | Former        | 2324 | 25.71 |               |             | 16.47         | 63             | 2.71         |
| Year of Follow-up: 2020, Age Group: 50-54 |           |               |      |       |               |             |               |                |              |
| Period                                    | Age Group | Smoking Group | N    | %     | Ever Quit (N) | Ever Quit % | Mean Yrs Quit | Short Term (n) | Short Term % |
| 30                                        | 50-54     | Never Any     | 5163 | 52.60 |               |             |               |                |              |
| 30                                        | 50-54     | CC            | 0    | 0.00  | 0             | 0.00        |               |                |              |
| 30                                        | 50-54     | Ecig          | 2041 | 20.79 |               |             |               |                |              |
| 30                                        | 50-54     | Dual          | 0    | 0.00  |               |             |               |                |              |
| 30                                        | 50-54     | Former        | 2612 | 26.61 |               |             | 20.56         | 106            | 4.06         |
| Year of Follow-up: 2020, Age Group: 55-59 |           |               |      |       |               |             |               |                |              |
| Period                                    | Age Group | Smoking Group | N    | %     | Ever Quit (N) | Ever Quit % | Mean Yrs Quit | Short Term (n) | Short Term % |
| 30                                        | 55-59     | Never Any     | 4997 | 46.86 |               |             |               |                |              |
| 30                                        | 55-59     | CC            | 0    | 0.00  | 0             | 0.00        |               |                |              |
| 30                                        | 55-59     | Ecig          | 1970 | 18.47 |               |             |               |                |              |
| 30                                        | 55-59     | Dual          | 0    | 0.00  |               |             |               |                |              |
| 30                                        | 55-59     | Former        | 3697 | 34.67 |               |             | 21.46         | 162            | 4.38         |
| Year of Follow-up: 2020, Age Group: 60-64 |           |               |      |       |               |             |               |                |              |
| Period                                    | Age Group | Smoking Group | N    | %     | Ever Quit (N) | Ever Quit % | Mean Yrs Quit | Short Term (n) | Short Term % |
| 30                                        | 60-64     | Never Any     | 4724 | 43.28 |               |             |               |                |              |
| 30                                        | 60-64     | CC            | 0    | 0.00  | 0             | 0.00        |               |                |              |
| 30                                        | 60-64     | Ecig          | 1632 | 14.95 |               |             |               |                |              |
| 30                                        | 60-64     | Dual          | 0    | 0.00  |               |             |               |                |              |
| 30                                        | 60-64     | Former        | 4560 | 41.77 |               |             | 22.80         | 217            | 4.76         |
| Year of Follow-up: 2020, Age Group: 65-69 |           |               |      |       |               |             |               |                |              |
| Period                                    | Age Group | Smoking Group | N    | %     | Ever Quit (N) | Ever Quit % | Mean Yrs Quit | Short Term (n) | Short Term % |
| 30                                        | 65-69     | Never Any     | 3941 | 39.85 |               |             |               |                |              |
| 30                                        | 65-69     | CC            | 0    | 0.00  | 0             | 0.00        |               |                |              |
| 30                                        | 65-69     | Ecig          | 1052 | 10.64 |               |             |               |                |              |
| 30                                        | 65-69     | Dual          | 0    | 0.00  |               |             |               |                |              |
| 30                                        | 65-69     | Former        | 4896 | 49.51 |               |             | 26.12         | 137            | 2.80         |
| Year of Follow-up: 2020, Age Group: 70-74 |           |               |      |       |               |             |               |                |              |
| Period                                    | Age Group | Smoking Group | N    | %     | Ever Quit (N) | Ever Quit % | Mean Yrs Quit | Short Term (n) | Short Term % |



**Results for PHIM for Run 1 (Sensitivity\_Analysis\_2.RTF)**

|                                              |           |               |       |       |               |             |               |                |              |
|----------------------------------------------|-----------|---------------|-------|-------|---------------|-------------|---------------|----------------|--------------|
| 30                                           | 70-74     | Never Any     | 2912  | 33.65 |               |             |               |                |              |
| 30                                           | 70-74     | CC            | 0     | 0.00  | 0             | 0.00        |               |                |              |
| 30                                           | 70-74     | Ecig          | 767   | 8.86  |               |             |               |                |              |
| 30                                           | 70-74     | Dual          | 0     | 0.00  |               |             |               |                |              |
| 30                                           | 70-74     | Former        | 4976  | 57.49 |               |             | 28.43         | 91             | 1.83         |
| Year of Follow-up: 2020, Age Group: 75-79    |           |               |       |       |               |             |               |                |              |
| Period                                       | Age Group | Smoking Group | N     | %     | Ever Quit (N) | Ever Quit % | Mean Yrs Quit | Short Term (n) | Short Term % |
| 30                                           | 75-79     | Never Any     | 1919  | 29.46 |               |             |               |                |              |
| 30                                           | 75-79     | CC            | 0     | 0.00  | 0             | 0.00        |               |                |              |
| 30                                           | 75-79     | Ecig          | 491   | 7.54  |               |             |               |                |              |
| 30                                           | 75-79     | Dual          | 0     | 0.00  |               |             |               |                |              |
| 30                                           | 75-79     | Former        | 4105  | 63.01 |               |             | 31.22         | 51             | 1.24         |
| Year of Follow-up: 2025, Age Group: All Ages |           |               |       |       |               |             |               |                |              |
| Period                                       | Age Group | Smoking Group | N     | %     | Ever Quit (N) | Ever Quit % | Mean Yrs Quit | Short Term (n) | Short Term % |
| 35                                           | All Ages  | Never Any     | 31217 | 46.03 |               |             |               |                |              |
| 35                                           | All Ages  | CC            | 0     | 0.00  | 0             | 0.00        |               |                |              |
| 35                                           | All Ages  | Ecig          | 8908  | 13.13 |               |             |               |                |              |
| 35                                           | All Ages  | Dual          | 0     | 0.00  |               |             |               |                |              |
| 35                                           | All Ages  | Former        | 27700 | 40.84 |               |             | 25.84         | 778            | 2.81         |
| Year of Follow-up: 2025, Age Group: 18-19    |           |               |       |       |               |             |               |                |              |
| Period                                       | Age Group | Smoking Group | N     | %     | Ever Quit (N) | Ever Quit % | Mean Yrs Quit | Short Term (n) | Short Term % |
| 35                                           | 18-19     | Never Any     | 0     | .     |               |             |               |                |              |
| 35                                           | 18-19     | CC            | 0     | .     | 0             | .           |               |                |              |
| 35                                           | 18-19     | Ecig          | 0     | .     |               |             |               |                |              |
| 35                                           | 18-19     | Dual          | 0     | .     |               |             |               |                |              |
| 35                                           | 18-19     | Former        | 0     | .     |               |             | .             | 0              | .            |
| Year of Follow-up: 2025, Age Group: 20-24    |           |               |       |       |               |             |               |                |              |
| Period                                       | Age Group | Smoking Group | N     | %     | Ever Quit (N) | Ever Quit % | Mean Yrs Quit | Short Term (n) | Short Term % |
| 35                                           | 20-24     | Never Any     | 0     | .     |               |             |               |                |              |
| 35                                           | 20-24     | CC            | 0     | .     | 0             | .           |               |                |              |
| 35                                           | 20-24     | Ecig          | 0     | .     |               |             |               |                |              |
| 35                                           | 20-24     | Dual          | 0     | .     |               |             |               |                |              |
| 35                                           | 20-24     | Former        | 0     | .     |               |             | .             | 0              | .            |
| Year of Follow-up: 2025, Age Group: 25-29    |           |               |       |       |               |             |               |                |              |
| Period                                       | Age Group | Smoking Group | N     | %     | Ever Quit (N) | Ever Quit % | Mean Yrs Quit | Short Term (n) | Short Term % |
| 35                                           | 25-29     | Never Any     | 0     | .     |               |             |               |                |              |
| 35                                           | 25-29     | CC            | 0     | .     | 0             | .           |               |                |              |
| 35                                           | 25-29     | Ecig          | 0     | .     |               |             |               |                |              |
| 35                                           | 25-29     | Dual          | 0     | .     |               |             |               |                |              |
| 35                                           | 25-29     | Former        | 0     | .     |               |             | .             | 0              | .            |
| Year of Follow-up: 2025, Age Group: 30-34    |           |               |       |       |               |             |               |                |              |
| Period                                       | Age Group | Smoking Group | N     | %     | Ever Quit (N) | Ever Quit % | Mean Yrs Quit | Short Term (n) | Short Term % |
| 35                                           | 30-34     | Never Any     | 0     | .     |               |             |               |                |              |
| 35                                           | 30-34     | CC            | 0     | .     | 0             | .           |               |                |              |
| 35                                           | 30-34     | Ecig          | 0     | .     |               |             |               |                |              |
| 35                                           | 30-34     | Dual          | 0     | .     |               |             |               |                |              |
| 35                                           | 30-34     | Former        | 0     | .     |               |             | .             | 0              | .            |
| Year of Follow-up: 2025, Age Group: 35-39    |           |               |       |       |               |             |               |                |              |
| Period                                       | Age Group | Smoking Group | N     | %     | Ever Quit (N) | Ever Quit % | Mean Yrs Quit | Short Term (n) | Short Term % |
| 35                                           | 35-39     | Never Any     | 0     | .     |               |             |               |                |              |
| 35                                           | 35-39     | CC            | 0     | .     | 0             | .           |               |                |              |
| 35                                           | 35-39     | Ecig          | 0     | .     |               |             |               |                |              |
| 35                                           | 35-39     | Dual          | 0     | .     |               |             |               |                |              |
| 35                                           | 35-39     | Former        | 0     | .     |               |             | .             | 0              | .            |
| Year of Follow-up: 2025, Age Group: 40-44    |           |               |       |       |               |             |               |                |              |
| Period                                       | Age Group | Smoking Group | N     | %     | Ever Quit (N) | Ever Quit % | Mean Yrs Quit | Short Term (n) | Short Term % |
| 35                                           | 40-44     | Never Any     | 0     | .     |               |             |               |                |              |
| 35                                           | 40-44     | CC            | 0     | .     | 0             | .           |               |                |              |
| 35                                           | 40-44     | Ecig          | 0     | .     |               |             |               |                |              |
| 35                                           | 40-44     | Dual          | 0     | .     |               |             |               |                |              |
| 35                                           | 40-44     | Former        | 0     | .     |               |             | .             | 0              | .            |
| Year of Follow-up: 2025, Age Group: 45-49    |           |               |       |       |               |             |               |                |              |
| Period                                       | Age Group | Smoking Group | N     | %     | Ever Quit (N) | Ever Quit % | Mean Yrs Quit | Short Term (n) | Short Term % |
| 35                                           | 45-49     | Never Any     | 4489  | 50.75 |               |             |               |                |              |
| 35                                           | 45-49     | CC            | 0     | 0.00  | 0             | 0.00        |               |                |              |
| 35                                           | 45-49     | Ecig          | 1549  | 17.51 |               |             |               |                |              |
| 35                                           | 45-49     | Dual          | 0     | 0.00  |               |             |               |                |              |
| 35                                           | 45-49     | Former        | 2807  | 31.74 |               |             | 18.60         | 61             | 2.17         |
| Year of Follow-up: 2025, Age Group: 50-54    |           |               |       |       |               |             |               |                |              |

**Results for PHIM for Run 1 (Sensitivity\_Analysis\_2.RTF)**

| Period                                       | Age Group | Smoking Group | N     | %     | Ever Quit (N) | Ever Quit % | Mean Yrs Quit | Short Term (n) | Short Term % |
|----------------------------------------------|-----------|---------------|-------|-------|---------------|-------------|---------------|----------------|--------------|
| 35                                           | 50-54     | Never Any     | 4991  | 55.21 |               |             |               |                |              |
| 35                                           | 50-54     | CC            | 0     | 0.00  | 0             | 0.00        |               |                |              |
| 35                                           | 50-54     | Ecig          | 1590  | 17.59 |               |             |               |                |              |
| 35                                           | 50-54     | Dual          | 0     | 0.00  |               |             |               |                |              |
| 35                                           | 50-54     | Former        | 2459  | 27.20 |               |             | 20.37         | 73             | 2.97         |
| Year of Follow-up: 2025, Age Group: 55-59    |           |               |       |       |               |             |               |                |              |
| Period                                       | Age Group | Smoking Group | N     | %     | Ever Quit (N) | Ever Quit % | Mean Yrs Quit | Short Term (n) | Short Term % |
| 35                                           | 55-59     | Never Any     | 5163  | 52.60 |               |             |               |                |              |
| 35                                           | 55-59     | CC            | 0     | 0.00  | 0             | 0.00        |               |                |              |
| 35                                           | 55-59     | Ecig          | 1688  | 17.20 |               |             |               |                |              |
| 35                                           | 55-59     | Dual          | 0     | 0.00  |               |             |               |                |              |
| 35                                           | 55-59     | Former        | 2965  | 30.21 |               |             | 22.75         | 148            | 4.99         |
| Year of Follow-up: 2025, Age Group: 60-64    |           |               |       |       |               |             |               |                |              |
| Period                                       | Age Group | Smoking Group | N     | %     | Ever Quit (N) | Ever Quit % | Mean Yrs Quit | Short Term (n) | Short Term % |
| 35                                           | 60-64     | Never Any     | 4997  | 46.86 |               |             |               |                |              |
| 35                                           | 60-64     | CC            | 0     | 0.00  | 0             | 0.00        |               |                |              |
| 35                                           | 60-64     | Ecig          | 1486  | 13.93 |               |             |               |                |              |
| 35                                           | 60-64     | Dual          | 0     | 0.00  |               |             |               |                |              |
| 35                                           | 60-64     | Former        | 4181  | 39.21 |               |             | 23.62         | 197            | 4.71         |
| Year of Follow-up: 2025, Age Group: 65-69    |           |               |       |       |               |             |               |                |              |
| Period                                       | Age Group | Smoking Group | N     | %     | Ever Quit (N) | Ever Quit % | Mean Yrs Quit | Short Term (n) | Short Term % |
| 35                                           | 65-69     | Never Any     | 4724  | 43.28 |               |             |               |                |              |
| 35                                           | 65-69     | CC            | 0     | 0.00  | 0             | 0.00        |               |                |              |
| 35                                           | 65-69     | Ecig          | 1186  | 10.86 |               |             |               |                |              |
| 35                                           | 65-69     | Dual          | 0     | 0.00  |               |             |               |                |              |
| 35                                           | 65-69     | Former        | 5006  | 45.86 |               |             | 25.52         | 151            | 3.02         |
| Year of Follow-up: 2025, Age Group: 70-74    |           |               |       |       |               |             |               |                |              |
| Period                                       | Age Group | Smoking Group | N     | %     | Ever Quit (N) | Ever Quit % | Mean Yrs Quit | Short Term (n) | Short Term % |
| 35                                           | 70-74     | Never Any     | 3941  | 39.85 |               |             |               |                |              |
| 35                                           | 70-74     | CC            | 0     | 0.00  | 0             | 0.00        |               |                |              |
| 35                                           | 70-74     | Ecig          | 810   | 8.19  |               |             |               |                |              |
| 35                                           | 70-74     | Dual          | 0     | 0.00  |               |             |               |                |              |
| 35                                           | 70-74     | Former        | 5138  | 51.96 |               |             | 29.75         | 80             | 1.56         |
| Year of Follow-up: 2025, Age Group: 75-79    |           |               |       |       |               |             |               |                |              |
| Period                                       | Age Group | Smoking Group | N     | %     | Ever Quit (N) | Ever Quit % | Mean Yrs Quit | Short Term (n) | Short Term % |
| 35                                           | 75-79     | Never Any     | 2912  | 33.65 |               |             |               |                |              |
| 35                                           | 75-79     | CC            | 0     | 0.00  | 0             | 0.00        |               |                |              |
| 35                                           | 75-79     | Ecig          | 599   | 6.92  |               |             |               |                |              |
| 35                                           | 75-79     | Dual          | 0     | 0.00  |               |             |               |                |              |
| 35                                           | 75-79     | Former        | 5144  | 59.43 |               |             | 32.41         | 68             | 1.32         |
| Year of Follow-up: 2030, Age Group: All Ages |           |               |       |       |               |             |               |                |              |
| Period                                       | Age Group | Smoking Group | N     | %     | Ever Quit (N) | Ever Quit % | Mean Yrs Quit | Short Term (n) | Short Term % |
| 40                                           | All Ages  | Never Any     | 28305 | 47.84 |               |             |               |                |              |
| 40                                           | All Ages  | CC            | 0     | 0.00  | 0             | 0.00        |               |                |              |
| 40                                           | All Ages  | Ecig          | 6555  | 11.08 |               |             |               |                |              |
| 40                                           | All Ages  | Dual          | 0     | 0.00  |               |             |               |                |              |
| 40                                           | All Ages  | Former        | 24310 | 41.09 |               |             | 27.38         | 685            | 2.82         |
| Year of Follow-up: 2030, Age Group: 18-19    |           |               |       |       |               |             |               |                |              |
| Period                                       | Age Group | Smoking Group | N     | %     | Ever Quit (N) | Ever Quit % | Mean Yrs Quit | Short Term (n) | Short Term % |
| 40                                           | 18-19     | Never Any     | 0     | .     |               |             |               |                |              |
| 40                                           | 18-19     | CC            | 0     | .     | 0             | .           |               |                |              |
| 40                                           | 18-19     | Ecig          | 0     | .     |               |             |               |                |              |
| 40                                           | 18-19     | Dual          | 0     | .     |               |             |               |                |              |
| 40                                           | 18-19     | Former        | 0     | .     |               |             | .             | 0              | .            |
| Year of Follow-up: 2030, Age Group: 20-24    |           |               |       |       |               |             |               |                |              |
| Period                                       | Age Group | Smoking Group | N     | %     | Ever Quit (N) | Ever Quit % | Mean Yrs Quit | Short Term (n) | Short Term % |
| 40                                           | 20-24     | Never Any     | 0     | .     |               |             |               |                |              |
| 40                                           | 20-24     | CC            | 0     | .     | 0             | .           |               |                |              |
| 40                                           | 20-24     | Ecig          | 0     | .     |               |             |               |                |              |
| 40                                           | 20-24     | Dual          | 0     | .     |               |             |               |                |              |
| 40                                           | 20-24     | Former        | 0     | .     |               |             | .             | 0              | .            |
| Year of Follow-up: 2030, Age Group: 25-29    |           |               |       |       |               |             |               |                |              |
| Period                                       | Age Group | Smoking Group | N     | %     | Ever Quit (N) | Ever Quit % | Mean Yrs Quit | Short Term (n) | Short Term % |
| 40                                           | 25-29     | Never Any     | 0     | .     |               |             |               |                |              |
| 40                                           | 25-29     | CC            | 0     | .     | 0             | .           |               |                |              |
| 40                                           | 25-29     | Ecig          | 0     | .     |               |             |               |                |              |
| 40                                           | 25-29     | Dual          | 0     | .     |               |             |               |                |              |

### Results for PHIM for Run 1 (Sensitivity\_Analysis\_2.RTF)

| Year of Follow-up: 2030, Age Group: 30-34 | Period | Age Group | Smoking Group | N    | %     | Ever Quit (N) | Ever Quit % | Mean Yrs Quit | Short Term (n) | Short Term % |
|-------------------------------------------|--------|-----------|---------------|------|-------|---------------|-------------|---------------|----------------|--------------|
| Year of Follow-up: 2030, Age Group: 30-34 |        |           |               |      |       |               |             |               |                |              |
| 40                                        | 25-29  | Former    |               | 0    | .     |               |             |               | 0              | .            |
| 40                                        | 30-34  | Never Any |               | 0    | .     |               |             |               |                |              |
| 40                                        | 30-34  | CC        |               | 0    | .     | 0             | .           |               |                |              |
| 40                                        | 30-34  | Ecig      |               | 0    | .     |               |             |               |                |              |
| 40                                        | 30-34  | Dual      |               | 0    | .     |               |             |               |                |              |
| 40                                        | 30-34  | Former    |               | 0    | .     |               |             |               | 0              | .            |
| Year of Follow-up: 2030, Age Group: 35-39 |        |           |               |      |       |               |             |               |                |              |
| 40                                        | 35-39  | Never Any |               | 0    | .     |               |             |               |                |              |
| 40                                        | 35-39  | CC        |               | 0    | .     | 0             | .           |               |                |              |
| 40                                        | 35-39  | Ecig      |               | 0    | .     |               |             |               |                |              |
| 40                                        | 35-39  | Dual      |               | 0    | .     |               |             |               |                |              |
| 40                                        | 35-39  | Former    |               | 0    | .     |               |             |               | 0              | .            |
| Year of Follow-up: 2030, Age Group: 40-44 |        |           |               |      |       |               |             |               |                |              |
| 40                                        | 40-44  | Never Any |               | 0    | .     |               |             |               |                |              |
| 40                                        | 40-44  | CC        |               | 0    | .     | 0             | .           |               |                |              |
| 40                                        | 40-44  | Ecig      |               | 0    | .     |               |             |               |                |              |
| 40                                        | 40-44  | Dual      |               | 0    | .     |               |             |               |                |              |
| 40                                        | 40-44  | Former    |               | 0    | .     |               |             |               | 0              | .            |
| Year of Follow-up: 2030, Age Group: 45-49 |        |           |               |      |       |               |             |               |                |              |
| 40                                        | 45-49  | Never Any |               | 0    | .     |               |             |               |                |              |
| 40                                        | 45-49  | CC        |               | 0    | .     | 0             | .           |               |                |              |
| 40                                        | 45-49  | Ecig      |               | 0    | .     |               |             |               |                |              |
| 40                                        | 45-49  | Dual      |               | 0    | .     |               |             |               |                |              |
| 40                                        | 45-49  | Former    |               | 0    | .     |               |             |               | 0              | .            |
| Year of Follow-up: 2030, Age Group: 50-54 |        |           |               |      |       |               |             |               |                |              |
| 40                                        | 50-54  | Never Any |               | 4489 | 50.75 |               |             |               |                |              |
| 40                                        | 50-54  | CC        |               | 0    | 0.00  | 0             | 0.00        |               |                |              |
| 40                                        | 50-54  | Ecig      |               | 1396 | 15.78 |               |             |               |                |              |
| 40                                        | 50-54  | Dual      |               | 0    | 0.00  |               |             |               |                |              |
| 40                                        | 50-54  | Former    |               | 2960 | 33.47 |               |             | 22.46         | 84             | 2.84         |
| Year of Follow-up: 2030, Age Group: 55-59 |        |           |               |      |       |               |             |               |                |              |
| 40                                        | 55-59  | Never Any |               | 4991 | 55.21 |               |             |               |                |              |
| 40                                        | 55-59  | CC        |               | 0    | 0.00  | 0             | 0.00        |               |                |              |
| 40                                        | 55-59  | Ecig      |               | 1327 | 14.68 |               |             |               |                |              |
| 40                                        | 55-59  | Dual      |               | 0    | 0.00  |               |             |               |                |              |
| 40                                        | 55-59  | Former    |               | 2722 | 30.11 |               |             | 23.11         | 112            | 4.11         |
| Year of Follow-up: 2030, Age Group: 60-64 |        |           |               |      |       |               |             |               |                |              |
| 40                                        | 60-64  | Never Any |               | 5163 | 52.60 |               |             |               |                |              |
| 40                                        | 60-64  | CC        |               | 0    | 0.00  | 0             | 0.00        |               |                |              |
| 40                                        | 60-64  | Ecig      |               | 1264 | 12.88 |               |             |               |                |              |
| 40                                        | 60-64  | Dual      |               | 0    | 0.00  |               |             |               |                |              |
| 40                                        | 60-64  | Former    |               | 3389 | 34.53 |               |             | 24.52         | 182            | 5.37         |
| Year of Follow-up: 2030, Age Group: 65-69 |        |           |               |      |       |               |             |               |                |              |
| 40                                        | 65-69  | Never Any |               | 4997 | 46.86 |               |             |               |                |              |
| 40                                        | 65-69  | CC        |               | 0    | 0.00  | 0             | 0.00        |               |                |              |
| 40                                        | 65-69  | Ecig      |               | 1078 | 10.11 |               |             |               |                |              |
| 40                                        | 65-69  | Dual      |               | 0    | 0.00  |               |             |               |                |              |
| 40                                        | 65-69  | Former    |               | 4589 | 43.03 |               |             | 26.28         | 130            | 2.83         |
| Year of Follow-up: 2030, Age Group: 70-74 |        |           |               |      |       |               |             |               |                |              |
| 40                                        | 70-74  | Never Any |               | 4724 | 43.28 |               |             |               |                |              |
| 40                                        | 70-74  | CC        |               | 0    | 0.00  | 0             | 0.00        |               |                |              |
| 40                                        | 70-74  | Ecig      |               | 880  | 8.06  |               |             |               |                |              |
| 40                                        | 70-74  | Dual      |               | 0    | 0.00  |               |             |               |                |              |
| 40                                        | 70-74  | Former    |               | 5312 | 48.66 |               |             | 28.89         | 99             | 1.86         |
| Year of Follow-up: 2030, Age Group: 75-79 |        |           |               |      |       |               |             |               |                |              |
| 40                                        | 75-79  | Never Any |               | 3941 | 39.85 |               |             |               |                |              |
| 40                                        | 75-79  | CC        |               | 0    | 0.00  | 0             | 0.00        |               |                |              |

**Results for PHIM for Run 1 (Sensitivity\_Analysis\_2.RTF)**

|                                              |           |               |       |       |               |             |               |                |              |
|----------------------------------------------|-----------|---------------|-------|-------|---------------|-------------|---------------|----------------|--------------|
| 40                                           | 75-79     | Ecig          | 610   | 6.17  |               |             |               |                |              |
| 40                                           | 75-79     | Dual          | 0     | 0.00  |               |             |               |                |              |
| 40                                           | 75-79     | Former        | 5338  | 53.98 |               |             | 33.53         | 78             | 1.46         |
| Year of Follow-up: 2035, Age Group: All Ages |           |               |       |       |               |             |               |                |              |
| Period                                       | Age Group | Smoking Group | N     | %     | Ever Quit (N) | Ever Quit % | Mean Yrs Quit | Short Term (n) | Short Term % |
| 45                                           | All Ages  | Never Any     | 24364 | 49.44 |               |             |               |                |              |
| 45                                           | All Ages  | CC            | 0     | 0.00  | 0             | 0.00        |               |                |              |
| 45                                           | All Ages  | Ecig          | 4596  | 9.33  |               |             |               |                |              |
| 45                                           | All Ages  | Dual          | 0     | 0.00  |               |             |               |                |              |
| 45                                           | All Ages  | Former        | 20321 | 41.23 |               |             | 28.75         | 544            | 2.68         |
| Year of Follow-up: 2035, Age Group: 18-19    |           |               |       |       |               |             |               |                |              |
| Period                                       | Age Group | Smoking Group | N     | %     | Ever Quit (N) | Ever Quit % | Mean Yrs Quit | Short Term (n) | Short Term % |
| 45                                           | 18-19     | Never Any     | 0     | .     |               |             |               |                |              |
| 45                                           | 18-19     | CC            | 0     | .     | 0             | .           |               |                |              |
| 45                                           | 18-19     | Ecig          | 0     | .     |               |             |               |                |              |
| 45                                           | 18-19     | Dual          | 0     | .     |               |             |               |                |              |
| 45                                           | 18-19     | Former        | 0     | .     |               |             | .             | 0              | .            |
| Year of Follow-up: 2035, Age Group: 20-24    |           |               |       |       |               |             |               |                |              |
| Period                                       | Age Group | Smoking Group | N     | %     | Ever Quit (N) | Ever Quit % | Mean Yrs Quit | Short Term (n) | Short Term % |
| 45                                           | 20-24     | Never Any     | 0     | .     |               |             |               |                |              |
| 45                                           | 20-24     | CC            | 0     | .     | 0             | .           |               |                |              |
| 45                                           | 20-24     | Ecig          | 0     | .     |               |             |               |                |              |
| 45                                           | 20-24     | Dual          | 0     | .     |               |             |               |                |              |
| 45                                           | 20-24     | Former        | 0     | .     |               |             | .             | 0              | .            |
| Year of Follow-up: 2035, Age Group: 25-29    |           |               |       |       |               |             |               |                |              |
| Period                                       | Age Group | Smoking Group | N     | %     | Ever Quit (N) | Ever Quit % | Mean Yrs Quit | Short Term (n) | Short Term % |
| 45                                           | 25-29     | Never Any     | 0     | .     |               |             |               |                |              |
| 45                                           | 25-29     | CC            | 0     | .     | 0             | .           |               |                |              |
| 45                                           | 25-29     | Ecig          | 0     | .     |               |             |               |                |              |
| 45                                           | 25-29     | Dual          | 0     | .     |               |             |               |                |              |
| 45                                           | 25-29     | Former        | 0     | .     |               |             | .             | 0              | .            |
| Year of Follow-up: 2035, Age Group: 30-34    |           |               |       |       |               |             |               |                |              |
| Period                                       | Age Group | Smoking Group | N     | %     | Ever Quit (N) | Ever Quit % | Mean Yrs Quit | Short Term (n) | Short Term % |
| 45                                           | 30-34     | Never Any     | 0     | .     |               |             |               |                |              |
| 45                                           | 30-34     | CC            | 0     | .     | 0             | .           |               |                |              |
| 45                                           | 30-34     | Ecig          | 0     | .     |               |             |               |                |              |
| 45                                           | 30-34     | Dual          | 0     | .     |               |             |               |                |              |
| 45                                           | 30-34     | Former        | 0     | .     |               |             | .             | 0              | .            |
| Year of Follow-up: 2035, Age Group: 35-39    |           |               |       |       |               |             |               |                |              |
| Period                                       | Age Group | Smoking Group | N     | %     | Ever Quit (N) | Ever Quit % | Mean Yrs Quit | Short Term (n) | Short Term % |
| 45                                           | 35-39     | Never Any     | 0     | .     |               |             |               |                |              |
| 45                                           | 35-39     | CC            | 0     | .     | 0             | .           |               |                |              |
| 45                                           | 35-39     | Ecig          | 0     | .     |               |             |               |                |              |
| 45                                           | 35-39     | Dual          | 0     | .     |               |             |               |                |              |
| 45                                           | 35-39     | Former        | 0     | .     |               |             | .             | 0              | .            |
| Year of Follow-up: 2035, Age Group: 40-44    |           |               |       |       |               |             |               |                |              |
| Period                                       | Age Group | Smoking Group | N     | %     | Ever Quit (N) | Ever Quit % | Mean Yrs Quit | Short Term (n) | Short Term % |
| 45                                           | 40-44     | Never Any     | 0     | .     |               |             |               |                |              |
| 45                                           | 40-44     | CC            | 0     | .     | 0             | .           |               |                |              |
| 45                                           | 40-44     | Ecig          | 0     | .     |               |             |               |                |              |
| 45                                           | 40-44     | Dual          | 0     | .     |               |             |               |                |              |
| 45                                           | 40-44     | Former        | 0     | .     |               |             | .             | 0              | .            |
| Year of Follow-up: 2035, Age Group: 45-49    |           |               |       |       |               |             |               |                |              |
| Period                                       | Age Group | Smoking Group | N     | %     | Ever Quit (N) | Ever Quit % | Mean Yrs Quit | Short Term (n) | Short Term % |
| 45                                           | 45-49     | Never Any     | 0     | .     |               |             |               |                |              |
| 45                                           | 45-49     | CC            | 0     | .     | 0             | .           |               |                |              |
| 45                                           | 45-49     | Ecig          | 0     | .     |               |             |               |                |              |
| 45                                           | 45-49     | Dual          | 0     | .     |               |             |               |                |              |
| 45                                           | 45-49     | Former        | 0     | .     |               |             | .             | 0              | .            |
| Year of Follow-up: 2035, Age Group: 50-54    |           |               |       |       |               |             |               |                |              |
| Period                                       | Age Group | Smoking Group | N     | %     | Ever Quit (N) | Ever Quit % | Mean Yrs Quit | Short Term (n) | Short Term % |
| 45                                           | 50-54     | Never Any     | 0     | .     |               |             |               |                |              |
| 45                                           | 50-54     | CC            | 0     | .     | 0             | .           |               |                |              |
| 45                                           | 50-54     | Ecig          | 0     | .     |               |             |               |                |              |
| 45                                           | 50-54     | Dual          | 0     | .     |               |             |               |                |              |
| 45                                           | 50-54     | Former        | 0     | .     |               |             | .             | 0              | .            |
| Year of Follow-up: 2035, Age Group: 55-59    |           |               |       |       |               |             |               |                |              |
| Period                                       | Age Group | Smoking Group | N     | %     | Ever Quit (N) | Ever Quit % | Mean Yrs Quit | Short Term (n) | Short Term % |

**Results for PHIM for Run 1 (Sensitivity\_Analysis\_2.RTF)**

|                                              |           |               |       |       |               |             |               |                |              |
|----------------------------------------------|-----------|---------------|-------|-------|---------------|-------------|---------------|----------------|--------------|
| 45                                           | 55-59     | Never Any     | 4489  | 50.75 |               |             |               |                |              |
| 45                                           | 55-59     | CC            | 0     | 0.00  | 0             | 0.00        |               |                |              |
| 45                                           | 55-59     | Ecig          | 1171  | 13.24 |               |             |               |                |              |
| 45                                           | 55-59     | Dual          | 0     | 0.00  |               |             |               |                |              |
| 45                                           | 55-59     | Former        | 3185  | 36.01 |               |             | 25.65         | 102            | 3.20         |
| Year of Follow-up: 2035, Age Group: 60-64    |           |               |       |       |               |             |               |                |              |
| Period                                       | Age Group | Smoking Group | N     | %     | Ever Quit (N) | Ever Quit % | Mean Yrs Quit | Short Term (n) | Short Term % |
| 45                                           | 60-64     | Never Any     | 4991  | 55.21 |               |             |               |                |              |
| 45                                           | 60-64     | CC            | 0     | 0.00  | 0             | 0.00        |               |                |              |
| 45                                           | 60-64     | Ecig          | 1045  | 11.56 |               |             |               |                |              |
| 45                                           | 60-64     | Dual          | 0     | 0.00  |               |             |               |                |              |
| 45                                           | 60-64     | Former        | 3004  | 33.23 |               |             | 25.64         | 130            | 4.33         |
| Year of Follow-up: 2035, Age Group: 65-69    |           |               |       |       |               |             |               |                |              |
| Period                                       | Age Group | Smoking Group | N     | %     | Ever Quit (N) | Ever Quit % | Mean Yrs Quit | Short Term (n) | Short Term % |
| 45                                           | 65-69     | Never Any     | 5163  | 52.60 |               |             |               |                |              |
| 45                                           | 65-69     | CC            | 0     | 0.00  | 0             | 0.00        |               |                |              |
| 45                                           | 65-69     | Ecig          | 919   | 9.36  |               |             |               |                |              |
| 45                                           | 65-69     | Dual          | 0     | 0.00  |               |             |               |                |              |
| 45                                           | 65-69     | Former        | 3734  | 38.04 |               |             | 27.00         | 114            | 3.05         |
| Year of Follow-up: 2035, Age Group: 70-74    |           |               |       |       |               |             |               |                |              |
| Period                                       | Age Group | Smoking Group | N     | %     | Ever Quit (N) | Ever Quit % | Mean Yrs Quit | Short Term (n) | Short Term % |
| 45                                           | 70-74     | Never Any     | 4997  | 46.86 |               |             |               |                |              |
| 45                                           | 70-74     | CC            | 0     | 0.00  | 0             | 0.00        |               |                |              |
| 45                                           | 70-74     | Ecig          | 826   | 7.75  |               |             |               |                |              |
| 45                                           | 70-74     | Dual          | 0     | 0.00  |               |             |               |                |              |
| 45                                           | 70-74     | Former        | 4841  | 45.40 |               |             | 29.76         | 100            | 2.07         |
| Year of Follow-up: 2035, Age Group: 75-79    |           |               |       |       |               |             |               |                |              |
| Period                                       | Age Group | Smoking Group | N     | %     | Ever Quit (N) | Ever Quit % | Mean Yrs Quit | Short Term (n) | Short Term % |
| 45                                           | 75-79     | Never Any     | 4724  | 43.28 |               |             |               |                |              |
| 45                                           | 75-79     | CC            | 0     | 0.00  | 0             | 0.00        |               |                |              |
| 45                                           | 75-79     | Ecig          | 635   | 5.82  |               |             |               |                |              |
| 45                                           | 75-79     | Dual          | 0     | 0.00  |               |             |               |                |              |
| 45                                           | 75-79     | Former        | 5557  | 50.91 |               |             | 32.49         | 98             | 1.76         |
| Year of Follow-up: 2040, Age Group: All Ages |           |               |       |       |               |             |               |                |              |
| Period                                       | Age Group | Smoking Group | N     | %     | Ever Quit (N) | Ever Quit % | Mean Yrs Quit | Short Term (n) | Short Term % |
| 50                                           | All Ages  | Never Any     | 19640 | 51.19 |               |             |               |                |              |
| 50                                           | All Ages  | CC            | 0     | 0.00  | 0             | 0.00        |               |                |              |
| 50                                           | All Ages  | Ecig          | 2885  | 7.52  |               |             |               |                |              |
| 50                                           | All Ages  | Dual          | 0     | 0.00  |               |             |               |                |              |
| 50                                           | All Ages  | Former        | 15840 | 41.29 |               |             | 30.28         | 417            | 2.63         |
| Year of Follow-up: 2040, Age Group: 18-19    |           |               |       |       |               |             |               |                |              |
| Period                                       | Age Group | Smoking Group | N     | %     | Ever Quit (N) | Ever Quit % | Mean Yrs Quit | Short Term (n) | Short Term % |
| 50                                           | 18-19     | Never Any     | 0     | .     |               |             |               |                |              |
| 50                                           | 18-19     | CC            | 0     | .     | 0             | .           |               |                |              |
| 50                                           | 18-19     | Ecig          | 0     | .     |               |             |               |                |              |
| 50                                           | 18-19     | Dual          | 0     | .     |               |             |               |                |              |
| 50                                           | 18-19     | Former        | 0     | .     |               |             | .             | 0              | .            |
| Year of Follow-up: 2040, Age Group: 20-24    |           |               |       |       |               |             |               |                |              |
| Period                                       | Age Group | Smoking Group | N     | %     | Ever Quit (N) | Ever Quit % | Mean Yrs Quit | Short Term (n) | Short Term % |
| 50                                           | 20-24     | Never Any     | 0     | .     |               |             |               |                |              |
| 50                                           | 20-24     | CC            | 0     | .     | 0             | .           |               |                |              |
| 50                                           | 20-24     | Ecig          | 0     | .     |               |             |               |                |              |
| 50                                           | 20-24     | Dual          | 0     | .     |               |             |               |                |              |
| 50                                           | 20-24     | Former        | 0     | .     |               |             | .             | 0              | .            |
| Year of Follow-up: 2040, Age Group: 25-29    |           |               |       |       |               |             |               |                |              |
| Period                                       | Age Group | Smoking Group | N     | %     | Ever Quit (N) | Ever Quit % | Mean Yrs Quit | Short Term (n) | Short Term % |
| 50                                           | 25-29     | Never Any     | 0     | .     |               |             |               |                |              |
| 50                                           | 25-29     | CC            | 0     | .     | 0             | .           |               |                |              |
| 50                                           | 25-29     | Ecig          | 0     | .     |               |             |               |                |              |
| 50                                           | 25-29     | Dual          | 0     | .     |               |             |               |                |              |
| 50                                           | 25-29     | Former        | 0     | .     |               |             | .             | 0              | .            |
| Year of Follow-up: 2040, Age Group: 30-34    |           |               |       |       |               |             |               |                |              |
| Period                                       | Age Group | Smoking Group | N     | %     | Ever Quit (N) | Ever Quit % | Mean Yrs Quit | Short Term (n) | Short Term % |
| 50                                           | 30-34     | Never Any     | 0     | .     |               |             |               |                |              |
| 50                                           | 30-34     | CC            | 0     | .     | 0             | .           |               |                |              |
| 50                                           | 30-34     | Ecig          | 0     | .     |               |             |               |                |              |
| 50                                           | 30-34     | Dual          | 0     | .     |               |             |               |                |              |
| 50                                           | 30-34     | Former        | 0     | .     |               |             | .             | 0              | .            |
| Year of Follow-up: 2040, Age Group: 35-39    |           |               |       |       |               |             |               |                |              |

**Results for PHIM for Run 1 (Sensitivity\_Analysis\_2.RTF)**

| Period                                    | Age Group | Smoking Group | N    | %     | Ever Quit (N) | Ever Quit % | Mean Yrs Quit | Short Term (n) | Short Term % |
|-------------------------------------------|-----------|---------------|------|-------|---------------|-------------|---------------|----------------|--------------|
| 50                                        | 35-39     | Never Any     | 0    | .     |               |             |               |                |              |
| 50                                        | 35-39     | CC            | 0    | .     | 0             | .           |               |                |              |
| 50                                        | 35-39     | Ecig          | 0    | .     |               |             |               |                |              |
| 50                                        | 35-39     | Dual          | 0    | .     |               |             |               |                |              |
| 50                                        | 35-39     | Former        | 0    | .     |               |             | .             | 0              | .            |
| Year of Follow-up: 2040, Age Group: 40-44 |           |               |      |       |               |             |               |                |              |
| Period                                    | Age Group | Smoking Group | N    | %     | Ever Quit (N) | Ever Quit % | Mean Yrs Quit | Short Term (n) | Short Term % |
| 50                                        | 40-44     | Never Any     | 0    | .     |               |             |               |                |              |
| 50                                        | 40-44     | CC            | 0    | .     | 0             | .           |               |                |              |
| 50                                        | 40-44     | Ecig          | 0    | .     |               |             |               |                |              |
| 50                                        | 40-44     | Dual          | 0    | .     |               |             |               |                |              |
| 50                                        | 40-44     | Former        | 0    | .     |               |             | .             | 0              | .            |
| Year of Follow-up: 2040, Age Group: 45-49 |           |               |      |       |               |             |               |                |              |
| Period                                    | Age Group | Smoking Group | N    | %     | Ever Quit (N) | Ever Quit % | Mean Yrs Quit | Short Term (n) | Short Term % |
| 50                                        | 45-49     | Never Any     | 0    | .     |               |             |               |                |              |
| 50                                        | 45-49     | CC            | 0    | .     | 0             | .           |               |                |              |
| 50                                        | 45-49     | Ecig          | 0    | .     |               |             |               |                |              |
| 50                                        | 45-49     | Dual          | 0    | .     |               |             |               |                |              |
| 50                                        | 45-49     | Former        | 0    | .     |               |             | .             | 0              | .            |
| Year of Follow-up: 2040, Age Group: 50-54 |           |               |      |       |               |             |               |                |              |
| Period                                    | Age Group | Smoking Group | N    | %     | Ever Quit (N) | Ever Quit % | Mean Yrs Quit | Short Term (n) | Short Term % |
| 50                                        | 50-54     | Never Any     | 0    | .     |               |             |               |                |              |
| 50                                        | 50-54     | CC            | 0    | .     | 0             | .           |               |                |              |
| 50                                        | 50-54     | Ecig          | 0    | .     |               |             |               |                |              |
| 50                                        | 50-54     | Dual          | 0    | .     |               |             |               |                |              |
| 50                                        | 50-54     | Former        | 0    | .     |               |             | .             | 0              | .            |
| Year of Follow-up: 2040, Age Group: 55-59 |           |               |      |       |               |             |               |                |              |
| Period                                    | Age Group | Smoking Group | N    | %     | Ever Quit (N) | Ever Quit % | Mean Yrs Quit | Short Term (n) | Short Term % |
| 50                                        | 55-59     | Never Any     | 0    | .     |               |             |               |                |              |
| 50                                        | 55-59     | CC            | 0    | .     | 0             | .           |               |                |              |
| 50                                        | 55-59     | Ecig          | 0    | .     |               |             |               |                |              |
| 50                                        | 55-59     | Dual          | 0    | .     |               |             |               |                |              |
| 50                                        | 55-59     | Former        | 0    | .     |               |             | .             | 0              | .            |
| Year of Follow-up: 2040, Age Group: 60-64 |           |               |      |       |               |             |               |                |              |
| Period                                    | Age Group | Smoking Group | N    | %     | Ever Quit (N) | Ever Quit % | Mean Yrs Quit | Short Term (n) | Short Term % |
| 50                                        | 60-64     | Never Any     | 4489 | 50.75 |               |             |               |                |              |
| 50                                        | 60-64     | CC            | 0    | 0.00  | 0             | 0.00        |               |                |              |
| 50                                        | 60-64     | Ecig          | 863  | 9.76  |               |             |               |                |              |
| 50                                        | 60-64     | Dual          | 0    | 0.00  |               |             |               |                |              |
| 50                                        | 60-64     | Former        | 3493 | 39.49 |               |             | 28.12         | 134            | 3.84         |
| Year of Follow-up: 2040, Age Group: 65-69 |           |               |      |       |               |             |               |                |              |
| Period                                    | Age Group | Smoking Group | N    | %     | Ever Quit (N) | Ever Quit % | Mean Yrs Quit | Short Term (n) | Short Term % |
| 50                                        | 65-69     | Never Any     | 4991 | 55.21 |               |             |               |                |              |
| 50                                        | 65-69     | CC            | 0    | 0.00  | 0             | 0.00        |               |                |              |
| 50                                        | 65-69     | Ecig          | 719  | 7.95  |               |             |               |                |              |
| 50                                        | 65-69     | Dual          | 0    | 0.00  |               |             |               |                |              |
| 50                                        | 65-69     | Former        | 3330 | 36.84 |               |             | 27.85         | 124            | 3.72         |
| Year of Follow-up: 2040, Age Group: 70-74 |           |               |      |       |               |             |               |                |              |
| Period                                    | Age Group | Smoking Group | N    | %     | Ever Quit (N) | Ever Quit % | Mean Yrs Quit | Short Term (n) | Short Term % |
| 50                                        | 70-74     | Never Any     | 5163 | 52.60 |               |             |               |                |              |
| 50                                        | 70-74     | CC            | 0    | 0.00  | 0             | 0.00        |               |                |              |
| 50                                        | 70-74     | Ecig          | 674  | 6.87  |               |             |               |                |              |
| 50                                        | 70-74     | Dual          | 0    | 0.00  |               |             |               |                |              |
| 50                                        | 70-74     | Former        | 3979 | 40.54 |               |             | 30.16         | 83             | 2.09         |
| Year of Follow-up: 2040, Age Group: 75-79 |           |               |      |       |               |             |               |                |              |
| Period                                    | Age Group | Smoking Group | N    | %     | Ever Quit (N) | Ever Quit % | Mean Yrs Quit | Short Term (n) | Short Term % |
| 50                                        | 75-79     | Never Any     | 4997 | 46.86 |               |             |               |                |              |
| 50                                        | 75-79     | CC            | 0    | 0.00  | 0             | 0.00        |               |                |              |
| 50                                        | 75-79     | Ecig          | 629  | 5.90  |               |             |               |                |              |
| 50                                        | 75-79     | Dual          | 0    | 0.00  |               |             |               |                |              |
| 50                                        | 75-79     | Former        | 5038 | 47.24 |               |             | 33.48         | 76             | 1.51         |

## Results for PHIM for Run 1 (Sensitivity\_Analysis\_2.RTF)

\*\*\*\*\*

### Main Results for E-Component for Run: 1, Simulation: 1, COD: Four Diseases Combined

| Variable Parameter          | Value                                  |
|-----------------------------|----------------------------------------|
| 1. Country                  | US (United States)                     |
| 2. Sex                      | M (Males)                              |
| 3. Year of start of process | 1990                                   |
| 4. Cause of Death           | Four Diseases Combined                 |
| 5. Effective Dose NULL      | CC:1                                   |
| 6. Effective Dose Ecig      | CC:1 Ecig:0.05 Dual:0.525              |
| Note:                       | Death rates are per million population |

#### Results for Age Groups Combined and Years combined, Population unadjusted for deaths in Ecig scenario,

| Age Group:All |          | NULL        | Ecig        | %Drop   |        | NULL   | Ecig    | Drop    |         |         |
|---------------|----------|-------------|-------------|---------|--------|--------|---------|---------|---------|---------|
| Year          | Number   | Attrib      | Attrib      | Drop    | %Drop  | Attrib | Death   | Attrib  | Attrib  | Drop    |
|               | Deaths   | Deaths      | Deaths      | Deaths  | Deaths | Deaths | Rate    | Rates   | Rates   | Rates   |
| All Comb      | 13148871 | 4509390.583 | 2589804.397 | 1919586 | 14.599 | 42.569 | 3806.31 | 1305.37 | 749.692 | 555.679 |

#### Results for Age Groups Combined, Population unadjusted for deaths in Ecig scenario,

| Age Group:All |        | NULL       | Ecig       | %Drop    |        | NULL   | Ecig    | Drop    |         |         |
|---------------|--------|------------|------------|----------|--------|--------|---------|---------|---------|---------|
| Year          | Number | Attrib     | Attrib     | Drop     | %Drop  | Attrib | Death   | Attrib  | Attrib  | Drop    |
|               | Deaths | Deaths     | Deaths     | Deaths   | Deaths | Deaths | Rate    | Rates   | Rates   | Rates   |
| 1990          | 317161 | 125773.065 | 125773.065 | 0.000    | 0.000  | 0.000  | 5027.71 | 1993.78 | 1993.78 | 0.000   |
| 1991          | 313217 | 123999.442 | 122162.507 | 1836.935 | 0.586  | 1.481  | 4883.81 | 1933.45 | 1904.81 | 28.642  |
| 1992          | 308577 | 122014.015 | 117532.701 | 4481.314 | 1.452  | 3.673  | 4729.73 | 1870.18 | 1801.49 | 68.688  |
| 1993          | 311713 | 122810.618 | 115309.661 | 7500.957 | 2.406  | 6.108  | 4692.62 | 1848.83 | 1735.90 | 112.922 |
| 1994          | 305700 | 119925.592 | 109543.163 | 10382.43 | 3.396  | 8.657  | 4516.19 | 1771.69 | 1618.31 | 153.383 |
| 1995          | 303225 | 117896.496 | 104671.434 | 13225.06 | 4.361  | 11.218 | 4393.80 | 1708.35 | 1516.71 | 191.634 |
| 1996          | 299559 | 115698.645 | 99856.841  | 15841.80 | 5.288  | 13.692 | 4273.16 | 1650.42 | 1424.44 | 225.981 |
| 1997          | 294226 | 113359.847 | 95298.981  | 18060.87 | 6.138  | 15.932 | 4128.67 | 1590.70 | 1337.27 | 253.436 |
| 1998          | 289258 | 111444.212 | 91410.528  | 20033.68 | 6.926  | 17.976 | 3992.19 | 1538.10 | 1261.60 | 276.495 |
| 1999          | 311002 | 114877.722 | 90020.685  | 24857.04 | 7.993  | 21.638 | 4224.60 | 1560.48 | 1222.83 | 337.654 |
| 2000          | 303786 | 112379.704 | 85692.891  | 26686.81 | 8.785  | 23.747 | 4066.21 | 1504.22 | 1147.01 | 357.206 |
| 2001          | 296294 | 110024.943 | 81566.780  | 28458.16 | 9.605  | 25.865 | 3914.28 | 1453.52 | 1077.56 | 375.955 |
| 2002          | 291898 | 108289.173 | 77767.269  | 30521.90 | 10.456 | 28.186 | 3813.00 | 1414.56 | 1015.86 | 398.701 |
| 2003          | 285865 | 106539.023 | 74365.619  | 32173.40 | 11.255 | 30.199 | 3695.36 | 1377.22 | 961.319 | 415.903 |
| 2004          | 274177 | 103037.251 | 70034.891  | 33002.36 | 12.037 | 32.030 | 3506.10 | 1317.61 | 895.587 | 422.025 |
| 2005          | 272379 | 103044.562 | 68218.866  | 34825.70 | 12.786 | 33.797 | 3442.69 | 1302.41 | 862.241 | 440.173 |
| 2006          | 264118 | 99672.555  | 63632.093  | 36040.46 | 13.646 | 36.159 | 3307.76 | 1248.28 | 796.915 | 451.363 |
| 2007          | 258419 | 97839.152  | 60773.326  | 37065.83 | 14.343 | 37.884 | 3203.20 | 1212.75 | 753.307 | 459.444 |
| 2008          | 259461 | 98075.852  | 59353.800  | 38722.05 | 14.924 | 39.482 | 3180.09 | 1202.07 | 727.472 | 474.598 |
| 2009          | 253907 | 95617.338  | 56088.651  | 39528.69 | 15.568 | 41.341 | 3075.31 | 1158.11 | 679.344 | 478.770 |
| 2010          | 251878 | 94607.988  | 53932.877  | 40675.11 | 16.149 | 42.993 | 3013.72 | 1131.98 | 645.307 | 486.678 |
| 2011          | 251779 | 93633.119  | 51508.030  | 42125.09 | 16.731 | 44.990 | 2982.76 | 1109.25 | 610.203 | 499.046 |
| 2012          | 252643 | 92775.175  | 49200.144  | 43575.03 | 17.248 | 46.968 | 2960.61 | 1087.19 | 576.554 | 510.636 |
| 2013          | 256175 | 92345.780  | 47208.178  | 45137.60 | 17.620 | 48.879 | 2967.76 | 1069.82 | 546.902 | 522.914 |
| 2014          | 257393 | 91379.215  | 45069.943  | 46309.27 | 17.992 | 50.678 | 2947.05 | 1046.26 | 516.033 | 530.223 |
| 2015          | 259782 | 90750.242  | 43280.335  | 47469.91 | 18.273 | 52.308 | 3346.10 | 1168.90 | 557.469 | 611.432 |
| 2016          | 261453 | 88811.996  | 40402.449  | 48409.55 | 18.516 | 54.508 | 3336.15 | 1133.24 | 515.537 | 617.708 |
| 2017          | 263685 | 87325.126  | 38102.969  | 49222.16 | 18.667 | 56.367 | 3333.85 | 1104.08 | 481.748 | 622.331 |
| 2018          | 258714 | 87612.144  | 37407.935  | 50204.21 | 19.405 | 57.303 | 3240.73 | 1097.46 | 468.583 | 628.873 |
| 2019          | 261438 | 87797.760  | 36125.389  | 51672.37 | 19.765 | 58.854 | 3242.99 | 1089.08 | 448.115 | 640.967 |
| 2020          | 262288 | 87221.042  | 34818.366  | 52402.68 | 19.979 | 60.080 | 3715.29 | 1235.48 | 493.199 | 742.280 |
| 2021          | 255079 | 82001.292  | 30824.733  | 51176.56 | 20.063 | 62.409 | 3587.82 | 1153.39 | 433.565 | 719.824 |
| 2022          | 257097 | 81915.977  | 29506.653  | 52409.32 | 20.385 | 63.979 | 3588.53 | 1143.37 | 411.851 | 731.524 |
| 2023          | 259080 | 81810.810  | 28220.370  | 53590.44 | 20.685 | 65.505 | 3586.88 | 1132.64 | 390.702 | 741.943 |
| 2024          | 260719 | 81528.303  | 26946.163  | 54582.14 | 20.935 | 66.949 | 3579.65 | 1119.38 | 369.969 | 749.409 |
| 2025          | 257308 | 79599.213  | 25537.044  | 54062.17 | 21.011 | 67.918 | 4112.08 | 1272.09 | 408.111 | 863.976 |
| 2026          | 251528 | 75082.462  | 22627.006  | 52455.46 | 20.855 | 69.864 | 4003.24 | 1194.99 | 360.124 | 834.864 |
| 2027          | 250988 | 74444.425  | 21391.924  | 53052.50 | 21.137 | 71.265 | 3976.53 | 1179.46 | 338.923 | 840.538 |
| 2028          | 250285 | 73699.585  | 20134.590  | 53565.00 | 21.402 | 72.680 | 3945.35 | 1161.76 | 317.391 | 844.369 |
| 2029          | 249525 | 72819.703  | 18903.271  | 53916.43 | 21.608 | 74.041 | 3910.99 | 1141.36 | 296.285 | 845.072 |
| 2030          | 240528 | 69309.277  | 17544.936  | 51764.34 | 21.521 | 74.686 | 4504.36 | 1297.95 | 328.563 | 969.387 |
| 2031          | 235442 | 65433.368  | 15545.638  | 49887.73 | 21.189 | 76.242 | 4397.65 | 1222.18 | 290.365 | 931.816 |
| 2032          | 234017 | 64643.552  | 14544.279  | 50099.27 | 21.408 | 77.501 | 4356.12 | 1203.31 | 270.735 | 932.574 |
| 2033          | 232559 | 63793.514  | 13614.656  | 50178.86 | 21.577 | 78.658 | 4310.93 | 1182.54 | 252.374 | 930.162 |
| 2034          | 230963 | 63032.151  | 12727.589  | 50304.56 | 21.780 | 79.808 | 4260.75 | 1162.80 | 234.795 | 928.005 |
| 2035          | 215822 | 57653.301  | 11505.624  | 46147.68 | 21.382 | 80.043 | 4924.38 | 1315.47 | 262.523 | 1052.95 |
| 2036          | 208183 | 52988.733  | 9606.555   | 43382.18 | 20.838 | 81.871 | 4748.94 | 1208.75 | 219.139 | 989.607 |
| 2037          | 205491 | 52026.921  | 8863.837   | 43163.08 | 21.005 | 82.963 | 4682.40 | 1185.50 | 201.974 | 983.528 |
| 2038          | 202834 | 50943.211  | 8129.322   | 42813.89 | 21.108 | 84.042 | 4612.18 | 1158.38 | 184.850 | 973.533 |
| 2039          | 200251 | 50085.991  | 7499.843   | 42586.15 | 21.266 | 85.026 | 4538.65 | 1135.19 | 169.983 | 965.208 |

## Results for PHIM for Run 1 (Sensitivity\_Analysis\_2.RTF)

\*\*\*\*\*

### Main Results for E-Component for Run: 1, Simulation: 1, COD: LUNG CANCER

| Variable Parameter          | Value                                  |
|-----------------------------|----------------------------------------|
| 1. Country                  | US (United States)                     |
| 2. Sex                      | M (Males)                              |
| 3. Year of start of process | 1990                                   |
| 4. Cause of Death           | LUNG CANCER                            |
| 5. Effective Dose NULL      | CC:1                                   |
| 6. Effective Dose Ecig      | CC:1 Ecig:0.05 Dual:0.525              |
| Note:                       | Death rates are per million population |

#### Results for Age Groups Combined and Years combined, Population unadjusted for deaths in Ecig scenario,

| Age Group:All | NULL    | Ecig        | %Drop       |          |        | NULL   | Ecig    | Drop    |         |         |
|---------------|---------|-------------|-------------|----------|--------|--------|---------|---------|---------|---------|
| Year          | Number  | Attrib      | Attrib      | Drop     | %Drop  | Attrib | Death   | Attrib  | Attrib  | Drop    |
|               | Deaths  | Deaths      | Deaths      | Deaths   | Deaths | Deaths | Rate    | Rates   | Rates   | Rates   |
| All Comb      | 3065988 | 2244988.113 | 1558068.696 | 686919.4 | 22.405 | 30.598 | 887.537 | 649.875 | 451.027 | 198.848 |

#### Results for Age Groups Combined, Population unadjusted for deaths in Ecig scenario,

| Age Group:All | NULL   | Ecig      | %Drop     |          |        | NULL   | Ecig    | Drop    |         |         |
|---------------|--------|-----------|-----------|----------|--------|--------|---------|---------|---------|---------|
| Year          | Number | Attrib    | Attrib    | Drop     | %Drop  | Attrib | Death   | Attrib  | Attrib  | Drop    |
|               | Deaths | Deaths    | Deaths    | Deaths   | Deaths | Deaths | Rate    | Rates   | Rates   | Rates   |
| 1990          | 78822  | 63385.736 | 63385.736 | 0.000    | 0.000  | 0.000  | 1249.50 | 1004.81 | 1004.81 | 0.000   |
| 1991          | 78462  | 62918.402 | 62688.694 | 229.708  | 0.293  | 0.365  | 1223.41 | 981.049 | 977.468 | 3.582   |
| 1992          | 77987  | 62366.766 | 61794.914 | 571.852  | 0.733  | 0.917  | 1195.35 | 955.930 | 947.165 | 8.765   |
| 1993          | 78542  | 62652.888 | 61663.311 | 989.577  | 1.260  | 1.579  | 1182.39 | 943.195 | 928.297 | 14.897  |
| 1994          | 77437  | 61565.227 | 60150.303 | 1414.924 | 1.827  | 2.298  | 1144.00 | 909.520 | 888.617 | 20.903  |
| 1995          | 76904  | 60851.961 | 58978.216 | 1873.745 | 2.436  | 3.079  | 1114.36 | 881.759 | 854.608 | 27.151  |
| 1996          | 76232  | 60122.922 | 57739.544 | 2383.378 | 3.126  | 3.964  | 1087.44 | 857.643 | 823.644 | 33.998  |
| 1997          | 75473  | 59237.155 | 56352.354 | 2884.801 | 3.822  | 4.870  | 1059.06 | 831.234 | 790.754 | 40.480  |
| 1998          | 75381  | 58906.696 | 55432.297 | 3474.399 | 4.609  | 5.898  | 1040.37 | 813.001 | 765.049 | 47.952  |
| 1999          | 73159  | 56930.073 | 52934.920 | 3995.153 | 5.461  | 7.018  | 993.781 | 773.329 | 719.060 | 54.270  |
| 2000          | 73784  | 57137.121 | 52448.129 | 4688.992 | 6.355  | 8.207  | 987.608 | 764.787 | 702.025 | 62.763  |
| 2001          | 73294  | 56481.726 | 51087.897 | 5393.830 | 7.359  | 9.550  | 968.273 | 746.169 | 674.912 | 71.257  |
| 2002          | 72442  | 55588.365 | 49485.751 | 6102.614 | 8.424  | 10.978 | 946.293 | 726.138 | 646.421 | 79.717  |
| 2003          | 71942  | 54945.856 | 48056.492 | 6889.364 | 9.576  | 12.538 | 929.989 | 710.281 | 621.223 | 89.058  |
| 2004          | 71301  | 54203.126 | 46512.345 | 7690.781 | 10.786 | 14.189 | 911.778 | 693.135 | 594.787 | 98.348  |
| 2005          | 70964  | 53744.603 | 45228.057 | 8516.546 | 12.001 | 15.846 | 896.937 | 679.296 | 571.652 | 107.643 |
| 2006          | 69658  | 52535.572 | 43208.047 | 9327.524 | 13.390 | 17.755 | 872.383 | 657.945 | 541.129 | 116.816 |
| 2007          | 68565  | 51492.124 | 41379.804 | 10112.32 | 14.749 | 19.639 | 849.888 | 638.264 | 512.918 | 125.346 |
| 2008          | 68226  | 51030.736 | 39953.222 | 11077.51 | 16.236 | 21.708 | 836.215 | 625.460 | 489.688 | 135.772 |
| 2009          | 67509  | 50276.199 | 38301.552 | 11974.65 | 17.738 | 23.818 | 817.667 | 608.943 | 463.907 | 145.036 |
| 2010          | 67196  | 49840.933 | 36951.586 | 12889.35 | 19.182 | 25.861 | 804.000 | 596.347 | 442.126 | 154.221 |
| 2011          | 66506  | 49072.841 | 35225.722 | 13847.12 | 20.821 | 28.217 | 787.880 | 581.354 | 417.311 | 164.043 |
| 2012          | 66155  | 48539.512 | 33673.504 | 14866.01 | 22.471 | 30.627 | 775.240 | 568.812 | 394.604 | 174.208 |
| 2013          | 65333  | 47675.741 | 31924.248 | 15751.49 | 24.110 | 33.039 | 756.876 | 552.318 | 369.839 | 182.479 |
| 2014          | 65033  | 47194.534 | 30549.614 | 16644.92 | 25.595 | 35.269 | 744.602 | 540.359 | 349.781 | 190.578 |
| 2015          | 64145  | 46305.842 | 28892.665 | 17413.18 | 27.147 | 37.605 | 726.215 | 526.439 | 372.150 | 224.289 |
| 2016          | 61618  | 44208.867 | 26518.590 | 17690.28 | 28.710 | 40.015 | 786.248 | 564.107 | 338.378 | 225.729 |
| 2017          | 59897  | 42702.624 | 24653.472 | 18049.15 | 30.134 | 42.267 | 757.297 | 539.903 | 311.702 | 228.201 |
| 2018          | 62468  | 44321.202 | 24409.598 | 19911.60 | 31.875 | 44.926 | 782.490 | 555.181 | 305.762 | 249.419 |
| 2019          | 63045  | 44493.088 | 23424.497 | 21068.59 | 33.418 | 47.353 | 782.035 | 551.912 | 290.568 | 261.344 |
| 2020          | 63466  | 44529.551 | 22444.473 | 22085.08 | 34.798 | 49.596 | 898.991 | 630.757 | 317.924 | 312.833 |
| 2021          | 57113  | 39852.556 | 19112.466 | 20740.09 | 36.314 | 52.042 | 803.323 | 560.546 | 268.826 | 291.720 |
| 2022          | 57440  | 39853.685 | 18143.517 | 21710.17 | 37.796 | 54.475 | 801.745 | 556.274 | 253.245 | 303.028 |
| 2023          | 57738  | 39847.050 | 17194.573 | 22652.48 | 39.233 | 56.849 | 799.366 | 551.670 | 238.053 | 313.616 |
| 2024          | 57942  | 39726.010 | 16259.320 | 23466.69 | 40.500 | 59.071 | 795.539 | 545.435 | 223.239 | 322.196 |
| 2025          | 57521  | 39207.348 | 15293.340 | 23914.01 | 41.574 | 60.994 | 919.257 | 626.579 | 244.405 | 382.174 |
| 2026          | 51428  | 34803.960 | 12857.305 | 21946.66 | 42.675 | 63.058 | 818.510 | 553.929 | 204.633 | 349.296 |
| 2027          | 51172  | 34484.595 | 12028.884 | 22455.71 | 43.883 | 65.118 | 810.740 | 546.357 | 190.580 | 355.777 |
| 2028          | 50870  | 34100.638 | 11206.566 | 22894.07 | 45.005 | 67.137 | 801.884 | 537.544 | 176.654 | 360.890 |
| 2029          | 50540  | 33669.838 | 10419.315 | 23250.52 | 46.004 | 69.054 | 792.146 | 527.732 | 163.310 | 364.423 |
| 2030          | 49109  | 32557.688 | 9609.923  | 22947.77 | 46.728 | 70.483 | 919.662 | 609.705 | 179.964 | 429.741 |
| 2031          | 43585  | 28646.393 | 8010.052  | 20636.34 | 47.347 | 72.038 | 814.096 | 535.065 | 149.614 | 385.451 |
| 2032          | 43163  | 28227.160 | 7427.534  | 20799.63 | 48.189 | 73.687 | 803.454 | 525.435 | 138.260 | 387.175 |
| 2033          | 42725  | 27786.623 | 6894.556  | 20892.07 | 48.899 | 75.188 | 791.996 | 515.079 | 127.804 | 387.275 |
| 2034          | 42256  | 27348.299 | 6395.393  | 20952.91 | 49.586 | 76.615 | 779.523 | 504.514 | 117.980 | 386.534 |
| 2035          | 39748  | 25570.077 | 5761.583  | 19808.49 | 49.835 | 77.467 | 906.933 | 583.430 | 131.462 | 451.969 |
| 2036          | 34030  | 21717.319 | 4519.671  | 17197.65 | 50.537 | 79.189 | 776.269 | 495.402 | 103.100 | 392.302 |
| 2037          | 33454  | 21256.024 | 4157.743  | 17098.28 | 51.110 | 80.440 | 762.289 | 484.347 | 94.740  | 389.607 |
| 2038          | 32883  | 20747.175 | 3809.309  | 16937.87 | 51.509 | 81.639 | 747.720 | 471.764 | 86.619  | 385.145 |
| 2039          | 32325  | 20327.688 | 3518.091  | 16809.60 | 52.002 | 82.693 | 732.644 | 460.724 | 79.737  | 380.987 |



## Results for PHIM for Run 1 (Sensitivity\_Analysis\_2.RTF)

\*\*\*\*\*

### Main Results for E-Component for Run: 1, Simulation: 1, COD: IHD

| Variable Parameter          | Value                                  |
|-----------------------------|----------------------------------------|
| 1. Country                  | US (United States)                     |
| 2. Sex                      | M (Males)                              |
| 3. Year of start of process | 1990                                   |
| 4. Cause of Death           | IHD                                    |
| 5. Effective Dose NULL      | CC:1                                   |
| 6. Effective Dose Ecig      | CC:1 Ecig:0.05 Dual:0.525              |
| Note:                       | Death rates are per million population |

#### Results for Age Groups Combined and Years combined, Population unadjusted for deaths in Ecig scenario,

| Age Group:All |         | NULL        | Ecig       | %Drop    |        | NULL   | Ecig    | Drop    |         |         |
|---------------|---------|-------------|------------|----------|--------|--------|---------|---------|---------|---------|
| Year          | Number  | Attrib      | Attrib     | Drop     | %Drop  | Attrib | Death   | Attrib  | Drop    |         |
|               | Deaths  | Deaths      | Deaths     | Deaths   | Deaths | Deaths | Rate    | Rates   | Rates   |         |
| All Comb      | 6360041 | 1098877.421 | 380319.866 | 718557.6 | 11.298 | 65.390 | 1841.09 | 318.101 | 110.094 | 208.007 |

#### Results for Age Groups Combined, Population unadjusted for deaths in Ecig scenario,

| Age Group:All |        | NULL      | Ecig      | %Drop    |        | NULL   | Ecig    | Drop    |         |         |
|---------------|--------|-----------|-----------|----------|--------|--------|---------|---------|---------|---------|
| Year          | Number | Attrib    | Attrib    | Drop     | %Drop  | Attrib | Death   | Attrib  | Drop    |         |
|               | Deaths | Deaths    | Deaths    | Deaths   | Deaths | Deaths | Rate    | Rates   | Rates   |         |
| 1990          | 171484 | 38511.725 | 38511.725 | 0.000    | 0.000  | 0.000  | 2718.40 | 610.497 | 0.000   |         |
| 1991          | 168044 | 37309.838 | 35999.316 | 1310.522 | 0.780  | 3.513  | 2620.21 | 581.750 | 561.316 | 20.434  |
| 1992          | 164548 | 36137.488 | 32935.174 | 3202.314 | 1.946  | 8.861  | 2522.12 | 553.899 | 504.815 | 49.084  |
| 1993          | 164362 | 35599.588 | 30288.818 | 5310.769 | 3.231  | 14.918 | 2474.35 | 535.926 | 455.977 | 79.950  |
| 1994          | 159866 | 34336.757 | 27041.907 | 7294.850 | 4.563  | 21.245 | 2361.75 | 507.267 | 399.498 | 107.769 |
| 1995          | 158083 | 33455.759 | 24234.223 | 9221.536 | 5.833  | 27.563 | 2290.66 | 484.782 | 351.159 | 133.622 |
| 1996          | 154875 | 32193.824 | 21313.756 | 10880.07 | 7.025  | 33.796 | 2209.26 | 459.239 | 304.037 | 155.202 |
| 1997          | 149970 | 30665.509 | 18503.639 | 12161.87 | 8.110  | 39.660 | 2104.43 | 430.308 | 259.649 | 170.659 |
| 1998          | 145407 | 29188.430 | 16045.236 | 13143.19 | 9.039  | 45.029 | 2006.83 | 402.844 | 221.448 | 181.396 |
| 1999          | 165952 | 33375.386 | 16443.101 | 16932.28 | 10.203 | 50.733 | 2254.27 | 453.366 | 223.361 | 230.006 |
| 2000          | 160260 | 32024.754 | 14283.291 | 17741.46 | 11.070 | 55.399 | 2145.10 | 428.655 | 191.184 | 237.472 |
| 2001          | 154444 | 30682.393 | 12215.373 | 18467.02 | 11.957 | 60.188 | 2040.33 | 405.339 | 161.375 | 243.964 |
| 2002          | 151887 | 30218.370 | 10747.323 | 19471.05 | 12.819 | 64.434 | 1984.06 | 394.736 | 140.390 | 254.346 |
| 2003          | 146733 | 29175.202 | 9258.005  | 19917.20 | 13.574 | 68.268 | 1896.81 | 377.146 | 119.678 | 257.468 |
| 2004          | 138381 | 27488.687 | 7761.220  | 19727.47 | 14.256 | 71.766 | 1769.58 | 351.518 | 99.248  | 252.270 |
| 2005          | 135881 | 27017.439 | 6838.742  | 20178.70 | 14.850 | 74.688 | 1717.44 | 341.482 | 86.437  | 255.045 |
| 2006          | 131922 | 26231.435 | 5826.242  | 20405.19 | 15.468 | 77.789 | 1652.16 | 328.517 | 72.967  | 255.551 |
| 2007          | 126502 | 25103.049 | 4949.810  | 20153.24 | 15.931 | 80.282 | 1568.04 | 311.161 | 61.355  | 249.807 |
| 2008          | 125859 | 24621.740 | 4394.460  | 20227.28 | 16.071 | 82.152 | 1542.60 | 301.777 | 53.861  | 247.916 |
| 2009          | 122428 | 23741.177 | 3833.167  | 19908.01 | 16.261 | 83.854 | 1482.84 | 287.552 | 46.427  | 241.125 |
| 2010          | 120537 | 23189.160 | 3407.018  | 19782.14 | 16.412 | 85.308 | 1442.22 | 277.458 | 40.765  | 236.693 |
| 2011          | 120221 | 22786.927 | 3015.929  | 19771.00 | 16.446 | 86.765 | 1424.23 | 269.951 | 35.729  | 234.222 |
| 2012          | 120927 | 22485.295 | 2716.254  | 19769.04 | 16.348 | 87.920 | 1417.09 | 263.495 | 31.831  | 231.664 |
| 2013          | 122648 | 22251.884 | 2481.705  | 19770.18 | 16.119 | 88.847 | 1420.86 | 257.786 | 28.750  | 229.035 |
| 2014          | 123229 | 21894.593 | 2260.421  | 19634.17 | 15.933 | 89.676 | 1410.92 | 250.685 | 25.881  | 224.804 |
| 2015          | 123774 | 21471.109 | 2066.930  | 19404.18 | 15.677 | 90.373 | 1594.26 | 276.557 | 26.623  | 249.934 |
| 2016          | 126218 | 21411.568 | 1901.104  | 19510.46 | 15.458 | 91.121 | 1610.55 | 273.213 | 24.258  | 248.954 |
| 2017          | 128265 | 21169.399 | 1760.599  | 19408.80 | 15.132 | 91.683 | 1621.69 | 267.651 | 22.260  | 245.392 |
| 2018          | 121429 | 19830.576 | 1553.325  | 18277.25 | 15.052 | 92.167 | 1521.05 | 248.404 | 19.457  | 228.946 |
| 2019          | 121832 | 19431.014 | 1449.080  | 17981.93 | 14.760 | 92.542 | 1511.26 | 241.031 | 17.975  | 223.056 |
| 2020          | 120811 | 18532.612 | 1325.211  | 17207.40 | 14.243 | 92.849 | 1711.27 | 262.513 | 18.772  | 243.741 |
| 2021          | 119407 | 18234.128 | 1245.398  | 16988.73 | 14.228 | 93.170 | 1679.51 | 256.472 | 17.517  | 238.955 |
| 2022          | 119438 | 17812.559 | 1173.543  | 16639.02 | 13.931 | 93.412 | 1667.10 | 248.626 | 16.380  | 232.246 |
| 2023          | 119445 | 17361.668 | 1112.647  | 16249.02 | 13.604 | 93.591 | 1653.68 | 240.367 | 15.404  | 224.963 |
| 2024          | 119305 | 16929.676 | 1064.483  | 15865.19 | 13.298 | 93.712 | 1638.05 | 232.443 | 14.615  | 217.828 |
| 2025          | 115685 | 15501.666 | 953.589   | 14548.08 | 12.576 | 93.848 | 1848.78 | 247.735 | 15.239  | 232.495 |
| 2026          | 115073 | 15523.814 | 950.778   | 14573.04 | 12.664 | 93.875 | 1831.46 | 247.072 | 15.132  | 231.940 |
| 2027          | 113989 | 15073.070 | 915.686   | 14157.38 | 12.420 | 93.925 | 1805.98 | 238.810 | 14.508  | 224.303 |
| 2028          | 112855 | 14636.710 | 880.090   | 13756.62 | 12.190 | 93.987 | 1778.98 | 230.725 | 13.873  | 216.852 |
| 2029          | 111718 | 14180.166 | 848.660   | 13331.51 | 11.933 | 94.015 | 1751.04 | 222.256 | 13.302  | 208.954 |
| 2030          | 104851 | 12111.772 | 710.000   | 11401.77 | 10.874 | 94.138 | 1963.54 | 226.816 | 13.296  | 213.520 |
| 2031          | 105289 | 12417.367 | 730.366   | 11687.00 | 11.100 | 94.118 | 1966.62 | 231.935 | 13.642  | 218.293 |
| 2032          | 103879 | 12054.064 | 702.448   | 11351.62 | 10.928 | 94.173 | 1933.67 | 224.381 | 13.076  | 211.305 |
| 2033          | 102485 | 11672.389 | 672.415   | 10999.97 | 10.733 | 94.239 | 1899.76 | 216.370 | 12.465  | 203.906 |
| 2034          | 101070 | 11365.762 | 655.469   | 10710.29 | 10.597 | 94.233 | 1864.51 | 209.673 | 12.092  | 197.581 |
| 2035          | 90820  | 8580.360  | 475.837   | 8104.523 | 8.924  | 94.454 | 2072.23 | 195.777 | 10.857  | 184.920 |
| 2036          | 92117  | 8948.841  | 495.274   | 8453.566 | 9.177  | 94.465 | 2101.31 | 204.135 | 11.298  | 192.837 |
| 2037          | 90327  | 8624.570  | 477.514   | 8147.055 | 9.020  | 94.463 | 2058.21 | 196.522 | 10.881  | 185.642 |
| 2038          | 88590  | 8315.017  | 455.528   | 7859.488 | 8.872  | 94.522 | 2014.42 | 189.073 | 10.358  | 178.715 |
| 2039          | 86921  | 8001.132  | 438.035   | 7563.096 | 8.701  | 94.525 | 1970.05 | 181.344 | 9.928   | 171.416 |

## Results for PHIM for Run 1 (Sensitivity\_Analysis\_2.RTF)

\*\*\*\*\*

### Main Results for E-Component for Run: 1, Simulation: 1, COD: STROKE

| Variable Parameter          | Value                                  |
|-----------------------------|----------------------------------------|
| 1. Country                  | US (United States)                     |
| 2. Sex                      | M (Males)                              |
| 3. Year of start of process | 1990                                   |
| 4. Cause of Death           | STROKE                                 |
| 5. Effective Dose NULL      | CC:1                                   |
| 6. Effective Dose Ecig      | CC:1 Ecig:0.05 Dual:0.525              |
| Note:                       | Death rates are per million population |

#### Results for Age Groups Combined and Years combined, Population unadjusted for deaths in Ecig scenario,

| Age Group:All |         | NULL       | Ecig      | %Drop    |        | NULL   | Ecig    | Drop   |        |        |
|---------------|---------|------------|-----------|----------|--------|--------|---------|--------|--------|--------|
| Year          | Number  | Attrib     | Attrib    | Drop     | %Drop  | Attrib | Death   | Attrib | Drop   |        |
|               | Deaths  | Deaths     | Deaths    | Deaths   | Deaths | Deaths | Rate    | Rates  | Rates  |        |
| All Comb      | 1489699 | 149918.462 | 51781.016 | 98137.45 | 6.588  | 65.461 | 431.236 | 43.398 | 14.989 | 28.409 |

#### Results for Age Groups Combined, Population unadjusted for deaths in Ecig scenario,

| Age Group:All |        | NULL     | Ecig     | %Drop    |        | NULL   | Ecig    | Drop   |        |        |
|---------------|--------|----------|----------|----------|--------|--------|---------|--------|--------|--------|
| Year          | Number | Attrib   | Attrib   | Drop     | %Drop  | Attrib | Death   | Attrib | Drop   |        |
|               | Deaths | Deaths   | Deaths   | Deaths   | Deaths | Deaths | Rate    | Rates  | Rates  |        |
| 1990          | 32862  | 4613.166 | 4613.166 | 0.000    | 0.000  | 0.000  | 520.936 | 73.129 | 0.000  |        |
| 1991          | 32619  | 4555.566 | 4377.143 | 178.423  | 0.547  | 3.917  | 508.609 | 71.032 | 68.250 | 2.782  |
| 1992          | 32100  | 4453.572 | 4035.038 | 418.534  | 1.304  | 9.398  | 492.014 | 68.262 | 61.847 | 6.415  |
| 1993          | 32896  | 4462.473 | 3773.421 | 689.052  | 2.095  | 15.441 | 495.226 | 67.179 | 56.806 | 10.373 |
| 1994          | 33323  | 4499.513 | 3533.699 | 965.814  | 2.898  | 21.465 | 492.290 | 66.473 | 52.204 | 14.268 |
| 1995          | 33569  | 4472.774 | 3249.629 | 1223.145 | 3.644  | 27.346 | 486.422 | 64.812 | 47.088 | 17.724 |
| 1996          | 33870  | 4406.878 | 2947.955 | 1458.923 | 4.307  | 33.106 | 483.150 | 62.863 | 42.052 | 20.811 |
| 1997          | 33516  | 4288.158 | 2631.870 | 1656.288 | 4.942  | 38.625 | 470.307 | 60.173 | 36.931 | 23.242 |
| 1998          | 32795  | 4120.148 | 2311.809 | 1808.339 | 5.514  | 43.890 | 452.620 | 56.864 | 31.906 | 24.958 |
| 1999          | 33375  | 3982.443 | 2039.697 | 1942.746 | 5.821  | 48.783 | 453.361 | 54.097 | 27.707 | 26.390 |
| 2000          | 33459  | 4021.411 | 1878.693 | 2142.718 | 6.404  | 53.283 | 447.853 | 53.827 | 25.147 | 28.681 |
| 2001          | 32275  | 3848.092 | 1632.198 | 2215.895 | 6.866  | 57.584 | 426.379 | 50.836 | 21.563 | 29.274 |
| 2002          | 31586  | 3783.081 | 1458.780 | 2324.301 | 7.359  | 61.439 | 412.601 | 49.418 | 19.056 | 30.362 |
| 2003          | 30985  | 3754.415 | 1309.997 | 2444.418 | 7.889  | 65.108 | 400.541 | 48.533 | 16.934 | 31.599 |
| 2004          | 29884  | 3666.274 | 1160.669 | 2505.605 | 8.384  | 68.342 | 382.149 | 46.883 | 14.842 | 32.041 |
| 2005          | 28708  | 3589.688 | 1030.039 | 2559.649 | 8.916  | 71.306 | 362.850 | 45.371 | 13.019 | 32.352 |
| 2006          | 28188  | 3596.985 | 931.198  | 2665.787 | 9.457  | 74.112 | 353.021 | 45.048 | 11.662 | 33.386 |
| 2007          | 28026  | 3560.798 | 834.681  | 2726.116 | 9.727  | 76.559 | 347.392 | 44.137 | 10.346 | 33.791 |
| 2008          | 27128  | 3417.001 | 725.899  | 2691.102 | 9.920  | 78.756 | 332.495 | 41.881 | 8.897  | 32.984 |
| 2009          | 27068  | 3394.390 | 657.044  | 2737.346 | 10.113 | 80.643 | 327.847 | 41.113 | 7.958  | 33.155 |
| 2010          | 26911  | 3340.137 | 591.626  | 2748.511 | 10.213 | 82.287 | 321.990 | 39.965 | 7.079  | 32.886 |
| 2011          | 26959  | 3285.435 | 534.348  | 2751.087 | 10.205 | 83.736 | 319.377 | 38.922 | 6.330  | 32.591 |
| 2012          | 27057  | 3259.209 | 484.620  | 2774.590 | 10.255 | 85.131 | 317.068 | 38.193 | 5.679  | 32.514 |
| 2013          | 27904  | 3274.703 | 449.233  | 2825.469 | 10.126 | 86.282 | 323.265 | 37.937 | 5.204  | 32.733 |
| 2014          | 28792  | 3298.083 | 416.733  | 2881.350 | 10.007 | 87.364 | 329.657 | 37.762 | 4.771  | 32.990 |
| 2015          | 29560  | 3244.406 | 383.772  | 2860.634 | 9.677  | 88.171 | 380.745 | 41.789 | 4.943  | 36.846 |
| 2016          | 30513  | 3314.836 | 364.750  | 2950.086 | 9.668  | 88.996 | 389.347 | 42.297 | 4.654  | 37.643 |
| 2017          | 31416  | 3333.314 | 342.989  | 2990.325 | 9.518  | 89.710 | 397.202 | 42.144 | 4.337  | 37.808 |
| 2018          | 29348  | 2925.242 | 284.360  | 2640.882 | 8.998  | 90.279 | 367.626 | 36.642 | 3.562  | 33.080 |
| 2019          | 29598  | 2864.628 | 262.925  | 2601.703 | 8.790  | 90.822 | 367.149 | 35.534 | 3.261  | 32.273 |
| 2020          | 29592  | 2730.366 | 239.127  | 2491.239 | 8.419  | 91.242 | 419.174 | 38.675 | 3.387  | 35.288 |
| 2021          | 30097  | 2647.911 | 219.628  | 2428.282 | 8.068  | 91.706 | 423.328 | 37.244 | 3.089  | 34.155 |
| 2022          | 30304  | 2586.165 | 203.956  | 2382.209 | 7.861  | 92.114 | 422.974 | 36.097 | 2.847  | 33.251 |
| 2023          | 30505  | 2517.960 | 189.972  | 2327.988 | 7.631  | 92.455 | 422.337 | 34.860 | 2.630  | 32.230 |
| 2024          | 30661  | 2454.161 | 177.865  | 2276.296 | 7.424  | 92.753 | 420.968 | 33.695 | 2.442  | 31.253 |
| 2025          | 30254  | 2275.364 | 159.514  | 2115.851 | 6.994  | 92.990 | 483.488 | 36.363 | 2.549  | 33.814 |
| 2026          | 30685  | 2183.166 | 148.656  | 2034.510 | 6.630  | 93.191 | 488.380 | 34.747 | 2.366  | 32.381 |
| 2027          | 30561  | 2112.345 | 140.127  | 1972.218 | 6.453  | 93.366 | 484.196 | 33.467 | 2.220  | 31.247 |
| 2028          | 30412  | 2046.677 | 132.393  | 1914.284 | 6.295  | 93.531 | 479.392 | 32.263 | 2.087  | 30.176 |
| 2029          | 30254  | 1977.671 | 125.256  | 1852.416 | 6.123  | 93.667 | 474.195 | 30.997 | 1.963  | 29.034 |
| 2030          | 29330  | 1744.457 | 108.408  | 1636.048 | 5.578  | 93.786 | 549.260 | 32.668 | 2.030  | 30.638 |
| 2031          | 28976  | 1653.738 | 100.568  | 1553.170 | 5.360  | 93.919 | 541.223 | 30.889 | 1.878  | 29.011 |
| 2032          | 28724  | 1603.120 | 95.060   | 1508.061 | 5.250  | 94.070 | 534.690 | 29.841 | 1.769  | 28.072 |
| 2033          | 28464  | 1548.245 | 90.178   | 1458.067 | 5.123  | 94.175 | 527.627 | 28.700 | 1.672  | 27.028 |
| 2034          | 28178  | 1511.985 | 86.754   | 1425.230 | 5.058  | 94.262 | 519.826 | 27.893 | 1.600  | 26.292 |
| 2035          | 26737  | 1239.866 | 69.800   | 1170.066 | 4.376  | 94.370 | 610.065 | 28.290 | 1.593  | 26.697 |
| 2036          | 25591  | 1182.522 | 65.629   | 1116.892 | 4.364  | 94.450 | 583.762 | 26.975 | 1.497  | 25.478 |
| 2037          | 25143  | 1134.483 | 63.050   | 1071.433 | 4.261  | 94.442 | 572.916 | 25.851 | 1.437  | 24.414 |
| 2038          | 24693  | 1093.537 | 59.943   | 1033.593 | 4.186  | 94.518 | 561.491 | 24.866 | 1.363  | 23.503 |
| 2039          | 24247  | 1047.905 | 57.154   | 990.751  | 4.086  | 94.546 | 549.553 | 23.751 | 1.295  | 22.455 |

## Results for PHIM for Run 1 (Sensitivity\_Analysis\_2.RTF)

\*\*\*\*\*

### Main Results for E-Component for Run: 1, Simulation: 1, COD: COPD

| Variable Parameter          | Value                                  |
|-----------------------------|----------------------------------------|
| 1. Country                  | US (United States)                     |
| 2. Sex                      | M (Males)                              |
| 3. Year of start of process | 1990                                   |
| 4. Cause of Death           | COPD                                   |
| 5. Effective Dose NULL      | CC:1                                   |
| 6. Effective Dose Ecig      | CC:1 Ecig:0.05 Dual:0.525              |
| Note:                       | Death rates are per million population |

#### Results for Age Groups Combined and Years combined, Population unadjusted for deaths in Ecig scenario,

| Age Group:All |         | NULL        | Ecig       | %Drop    |        | NULL   | Ecig    | Drop    |         |         |
|---------------|---------|-------------|------------|----------|--------|--------|---------|---------|---------|---------|
| Year          | Number  | Attrib      | Attrib     | Drop     | %Drop  | Attrib | Death   | Attrib  | Drop    |         |
|               | Deaths  | Deaths      | Deaths     | Deaths   | Deaths | Deaths | Rate    | Rates   | Rates   |         |
| All Comb      | 2233143 | 1015606.587 | 599634.819 | 415971.8 | 18.627 | 40.958 | 646.447 | 293.996 | 173.581 | 120.415 |

#### Results for Age Groups Combined, Population unadjusted for deaths in Ecig scenario,

| Age Group:All |        | NULL      | Ecig      | %Drop    |        | NULL   | Ecig    | Drop    |         |
|---------------|--------|-----------|-----------|----------|--------|--------|---------|---------|---------|
| Year          | Number | Attrib    | Attrib    | Drop     | %Drop  | Attrib | Death   | Attrib  | Drop    |
|               | Deaths | Deaths    | Deaths    | Deaths   | Deaths | Deaths | Rate    | Rates   | Rates   |
| 1990          | 33993  | 19262.437 | 19262.437 | 0.000    | 0.000  | 0.000  | 538.865 | 305.353 | 0.000   |
| 1991          | 34092  | 19215.636 | 19097.354 | 118.283  | 0.347  | 0.616  | 531.576 | 299.618 | 1.844   |
| 1992          | 33942  | 19056.189 | 18767.574 | 288.615  | 0.850  | 1.515  | 520.248 | 292.085 | 4.424   |
| 1993          | 35913  | 20095.670 | 19584.111 | 511.559  | 1.424  | 2.546  | 540.645 | 302.526 | 7.701   |
| 1994          | 35074  | 19524.095 | 18817.254 | 706.840  | 2.015  | 3.620  | 518.158 | 288.435 | 10.442  |
| 1995          | 34669  | 19116.002 | 18209.366 | 906.636  | 2.615  | 4.743  | 502.362 | 276.995 | 13.137  |
| 1996          | 34582  | 18975.021 | 17855.586 | 1119.435 | 3.237  | 5.900  | 493.306 | 270.675 | 15.969  |
| 1997          | 35267  | 19169.025 | 17811.118 | 1357.906 | 3.850  | 7.084  | 494.878 | 268.986 | 19.055  |
| 1998          | 35675  | 19228.937 | 17621.186 | 1607.752 | 4.507  | 8.361  | 492.368 | 265.388 | 22.189  |
| 1999          | 38516  | 20589.820 | 18602.967 | 1986.853 | 5.159  | 9.650  | 523.195 | 279.689 | 26.989  |
| 2000          | 36283  | 19196.417 | 17082.778 | 2113.640 | 5.825  | 11.011 | 485.652 | 256.946 | 28.291  |
| 2001          | 36281  | 19012.731 | 16631.312 | 2381.419 | 6.564  | 12.525 | 479.301 | 251.174 | 31.460  |
| 2002          | 35983  | 18699.357 | 16075.416 | 2623.942 | 7.292  | 14.032 | 470.038 | 244.265 | 34.276  |
| 2003          | 36205  | 18663.550 | 15741.125 | 2922.425 | 8.072  | 15.658 | 468.019 | 241.262 | 37.778  |
| 2004          | 34611  | 17679.164 | 14600.658 | 3078.506 | 8.895  | 17.413 | 442.596 | 226.076 | 39.367  |
| 2005          | 36826  | 18692.832 | 15122.028 | 3570.804 | 9.696  | 19.103 | 465.456 | 236.265 | 45.133  |
| 2006          | 34350  | 17308.564 | 13666.606 | 3641.957 | 10.602 | 21.041 | 430.192 | 216.769 | 45.611  |
| 2007          | 35326  | 17683.181 | 13609.030 | 4074.151 | 11.533 | 23.040 | 437.879 | 219.189 | 50.501  |
| 2008          | 38248  | 19006.374 | 14280.219 | 4726.155 | 12.357 | 24.866 | 468.788 | 232.952 | 57.926  |
| 2009          | 36902  | 18205.573 | 13296.887 | 4908.685 | 13.302 | 26.963 | 446.956 | 220.505 | 59.454  |
| 2010          | 37234  | 18237.758 | 12982.646 | 5255.112 | 14.114 | 28.814 | 445.505 | 218.215 | 62.877  |
| 2011          | 38093  | 18487.916 | 12732.031 | 5755.885 | 15.110 | 31.133 | 451.279 | 219.022 | 68.189  |
| 2012          | 38504  | 18491.158 | 12325.766 | 6165.392 | 16.012 | 33.342 | 451.211 | 216.689 | 72.249  |
| 2013          | 40290  | 19143.452 | 12352.991 | 6790.461 | 16.854 | 35.471 | 466.755 | 221.775 | 78.667  |
| 2014          | 40339  | 18992.005 | 11843.175 | 7148.830 | 17.722 | 37.641 | 461.866 | 217.451 | 81.851  |
| 2015          | 42303  | 19728.885 | 11936.967 | 7791.917 | 18.419 | 39.495 | 544.880 | 254.116 | 100.363 |
| 2016          | 43104  | 19876.724 | 11618.005 | 8258.719 | 19.160 | 41.550 | 550.009 | 253.628 | 105.382 |
| 2017          | 44107  | 20119.790 | 11345.909 | 8773.881 | 19.892 | 43.608 | 557.659 | 254.381 | 110.931 |
| 2018          | 45469  | 20535.123 | 11160.652 | 9374.472 | 20.617 | 45.651 | 569.564 | 257.229 | 117.427 |
| 2019          | 46963  | 21009.029 | 10988.887 | 10020.14 | 21.336 | 47.694 | 582.552 | 260.605 | 124.294 |
| 2020          | 48419  | 21428.512 | 10809.554 | 10618.96 | 21.931 | 49.555 | 685.853 | 303.533 | 150.417 |
| 2021          | 48463  | 21266.697 | 10247.240 | 11019.46 | 22.738 | 51.816 | 681.652 | 299.127 | 144.133 |
| 2022          | 49915  | 21663.568 | 9985.637  | 11677.93 | 23.396 | 53.906 | 696.712 | 302.378 | 162.999 |
| 2023          | 51391  | 22084.131 | 9723.178  | 12360.95 | 24.053 | 55.972 | 711.491 | 305.748 | 171.133 |
| 2024          | 52811  | 22418.456 | 9444.494  | 12973.96 | 24.567 | 57.872 | 725.093 | 307.804 | 178.132 |
| 2025          | 53848  | 22614.834 | 9130.602  | 13484.23 | 25.041 | 59.626 | 860.553 | 361.411 | 215.494 |
| 2026          | 54342  | 22571.522 | 8670.268  | 13901.25 | 25.581 | 61.588 | 864.886 | 359.241 | 221.248 |
| 2027          | 55267  | 22774.416 | 8307.228  | 14467.19 | 26.177 | 63.524 | 875.619 | 360.827 | 229.211 |
| 2028          | 56149  | 22915.561 | 7915.541  | 15000.02 | 26.715 | 65.458 | 885.102 | 361.228 | 236.452 |
| 2029          | 57014  | 22992.027 | 7510.041  | 15481.99 | 27.155 | 67.336 | 893.616 | 360.371 | 242.661 |
| 2030          | 57238  | 22895.360 | 7116.604  | 15778.76 | 27.567 | 68.917 | 1071.90 | 428.760 | 295.488 |
| 2031          | 57592  | 22715.871 | 6704.652  | 16011.22 | 27.801 | 70.485 | 1075.71 | 424.293 | 299.062 |
| 2032          | 58251  | 22759.207 | 6319.238  | 16439.97 | 28.223 | 72.234 | 1084.31 | 423.652 | 306.022 |
| 2033          | 58885  | 22786.258 | 5957.508  | 16828.75 | 28.579 | 73.855 | 1091.54 | 422.387 | 311.953 |
| 2034          | 59460  | 22806.106 | 5589.973  | 17216.13 | 28.954 | 75.489 | 1096.89 | 420.721 | 317.599 |
| 2035          | 58516  | 22262.998 | 5198.405  | 17064.59 | 29.162 | 76.650 | 1335.15 | 507.973 | 389.361 |
| 2036          | 56446  | 21140.051 | 4525.980  | 16614.07 | 29.434 | 78.590 | 1287.60 | 482.234 | 378.990 |
| 2037          | 56568  | 21011.845 | 4165.530  | 16846.32 | 29.781 | 80.175 | 1288.98 | 478.783 | 383.866 |
| 2038          | 56668  | 20787.483 | 3804.542  | 16982.94 | 29.969 | 81.698 | 1288.55 | 472.681 | 386.170 |
| 2039          | 56758  | 20709.267 | 3486.563  | 17222.70 | 30.344 | 83.164 | 1286.40 | 469.372 | 390.350 |

## Results for PHIM for Run 1 (Sensitivity\_Analysis\_2.RTF)

\*\*\*\*\*

### Main Results for E-Component for Run: 1, Simulation: 1, COD: Four Diseases Combined, Adjusted

| Variable Parameter          | Value                                  |
|-----------------------------|----------------------------------------|
| 1. Country                  | US (United States)                     |
| 2. Sex                      | M (Males)                              |
| 3. Year of start of process | 1990                                   |
| 4. Cause of Death           | Four Diseases Combined                 |
| 5. Effective Dose NULL      | CC:1                                   |
| 6. Effective Dose Ecig      | CC:1 Ecig:0.05 Dual:0.525              |
| Note:                       | Death rates are per million population |

#### Results for Age Groups Combined and Years combined, Population and Number deaths adjusted for Ecig scenario,

| Age Group:All | NULL     | Ecig        |             |         |        |        | NULL    | Ecig    |         |         |
|---------------|----------|-------------|-------------|---------|--------|--------|---------|---------|---------|---------|
| Year          | Number   | Attrib      | Attrib      | Drop    | %Drop  | Attrib | Death   | Attrib  | Attrib  | Drop    |
|               | Deaths   | Deaths      | Deaths      | Deaths  | Deaths | Deaths | Rate    | Rates   | Rates   | Rates   |
| All Comb      | 13371617 | 4509390.583 | 2614326.714 | 1895064 | 14.172 | 42.025 | 3823.33 | 1305.37 | 747.511 | 557.859 |

#### Results for Age Groups Combined, Population and Number deaths adjusted for Ecig scenario,

| Age Group:All | NULL   | Ecig       |            |          |        |        | NULL    | Ecig    |         |         |
|---------------|--------|------------|------------|----------|--------|--------|---------|---------|---------|---------|
| Year          | Number | Attrib     | Attrib     | Drop     | %Drop  | Attrib | Death   | Attrib  | Attrib  | Drop    |
|               | Deaths | Deaths     | Deaths     | Deaths   | Deaths | Deaths | Rate    | Rates   | Rates   | Rates   |
| 1990          | 317161 | 125773.065 | 125773.065 | 0.000    | 0.000  | 0.000  | 5027.71 | 1993.78 | 1993.78 | 0.000   |
| 1991          | 313217 | 123999.442 | 122162.507 | 1836.935 | 0.586  | 1.481  | 4883.81 | 1933.45 | 1904.81 | 28.642  |
| 1992          | 308592 | 122014.015 | 117538.230 | 4475.786 | 1.450  | 3.668  | 4729.81 | 1870.18 | 1801.52 | 68.655  |
| 1993          | 311763 | 122810.618 | 115328.131 | 7482.487 | 2.400  | 6.093  | 4692.90 | 1848.83 | 1736.01 | 112.815 |
| 1994          | 305807 | 119925.592 | 109581.610 | 10343.98 | 3.383  | 8.625  | 4516.80 | 1771.69 | 1618.53 | 153.161 |
| 1995          | 303409 | 117896.496 | 104735.482 | 13161.01 | 4.338  | 11.163 | 4394.83 | 1708.35 | 1517.08 | 191.268 |
| 1996          | 299837 | 115698.645 | 99950.638  | 15748.01 | 5.252  | 13.611 | 4274.69 | 1650.42 | 1424.97 | 225.451 |
| 1997          | 294612 | 113359.847 | 95426.238  | 17933.61 | 6.087  | 15.820 | 4130.78 | 1590.70 | 1337.98 | 252.721 |
| 1998          | 289766 | 111444.212 | 91574.103  | 19870.11 | 6.857  | 17.830 | 3994.95 | 1538.10 | 1262.52 | 275.581 |
| 1999          | 311701 | 114877.722 | 90227.712  | 24650.01 | 7.908  | 21.458 | 4228.38 | 1560.48 | 1223.98 | 336.500 |
| 2000          | 304650 | 112379.704 | 85942.705  | 26437.00 | 8.678  | 23.525 | 4070.82 | 1504.22 | 1148.39 | 355.826 |
| 2001          | 297324 | 110024.943 | 81858.217  | 28166.73 | 9.473  | 25.600 | 3919.70 | 1453.52 | 1079.16 | 374.360 |
| 2002          | 293109 | 108289.173 | 78099.955  | 30189.22 | 10.300 | 27.878 | 3819.31 | 1414.56 | 1017.67 | 396.890 |
| 2003          | 287255 | 106539.023 | 74739.326  | 31799.70 | 11.070 | 29.848 | 3702.50 | 1377.22 | 963.334 | 413.888 |
| 2004          | 275717 | 103037.251 | 70442.202  | 32595.05 | 11.822 | 31.634 | 3513.92 | 1317.61 | 897.763 | 419.850 |
| 2005          | 274121 | 103044.562 | 68671.496  | 34373.07 | 12.539 | 33.357 | 3451.42 | 1302.41 | 864.634 | 437.779 |
| 2006          | 266018 | 99672.555  | 64107.978  | 35564.58 | 13.369 | 35.681 | 3317.16 | 1248.28 | 799.407 | 448.872 |
| 2007          | 260496 | 97839.152  | 61281.525  | 36557.63 | 14.034 | 37.365 | 3213.36 | 1212.75 | 755.942 | 456.810 |
| 2008          | 261775 | 98075.852  | 59904.466  | 38171.39 | 14.582 | 38.920 | 3191.31 | 1202.07 | 730.298 | 471.772 |
| 2009          | 256403 | 95617.338  | 56662.848  | 38954.49 | 15.193 | 40.740 | 3087.28 | 1158.11 | 682.262 | 475.852 |
| 2010          | 254587 | 94607.988  | 54538.627  | 40069.36 | 15.739 | 42.353 | 3026.55 | 1131.98 | 648.361 | 483.623 |
| 2011          | 254726 | 93633.119  | 52138.675  | 41494.44 | 16.290 | 44.316 | 2996.65 | 1109.25 | 613.369 | 495.880 |
| 2012          | 255849 | 92775.175  | 49853.835  | 42921.34 | 16.776 | 46.264 | 2975.62 | 1087.19 | 579.817 | 507.372 |
| 2013          | 259693 | 92345.780  | 47887.352  | 44458.43 | 17.120 | 48.143 | 2984.17 | 1069.82 | 550.279 | 519.536 |
| 2014          | 261204 | 91379.215  | 45770.472  | 45608.74 | 17.461 | 49.912 | 2964.74 | 1046.26 | 519.508 | 526.749 |
| 2015          | 263927 | 90750.242  | 44003.312  | 46746.93 | 17.712 | 51.512 | 3363.99 | 1168.90 | 560.861 | 608.040 |
| 2016          | 265915 | 88811.996  | 41126.014  | 47685.98 | 17.933 | 53.693 | 3355.35 | 1133.24 | 518.933 | 614.311 |
| 2017          | 268499 | 87325.126  | 38832.682  | 48492.44 | 18.061 | 55.531 | 3354.64 | 1104.08 | 485.178 | 618.901 |
| 2018          | 263727 | 87612.144  | 38170.699  | 49441.44 | 18.747 | 56.432 | 3262.26 | 1097.46 | 472.166 | 625.290 |
| 2019          | 266820 | 87797.760  | 36908.890  | 50888.87 | 19.072 | 57.961 | 3266.13 | 1089.08 | 451.801 | 637.281 |
| 2020          | 268057 | 87221.042  | 35621.542  | 51599.50 | 19.249 | 59.159 | 3737.38 | 1235.48 | 496.653 | 738.826 |
| 2021          | 260989 | 82001.292  | 31577.261  | 50424.03 | 19.320 | 61.492 | 3610.37 | 1153.39 | 436.821 | 716.568 |
| 2022          | 263372 | 81915.977  | 30265.995  | 51649.98 | 19.611 | 63.052 | 3612.63 | 1143.37 | 415.155 | 728.220 |
| 2023          | 265732 | 81810.810  | 28984.616  | 52826.19 | 19.880 | 64.571 | 3612.60 | 1132.64 | 394.044 | 738.601 |
| 2024          | 267752 | 81528.303  | 27713.189  | 53815.11 | 20.099 | 66.008 | 3607.06 | 1119.38 | 373.342 | 746.036 |
| 2025          | 264697 | 79599.213  | 26303.738  | 53295.47 | 20.135 | 66.955 | 4136.60 | 1272.09 | 411.066 | 861.022 |
| 2026          | 259057 | 75082.462  | 23341.703  | 51740.76 | 19.973 | 68.912 | 4028.23 | 1194.99 | 362.954 | 832.034 |
| 2027          | 258831 | 74444.425  | 22098.169  | 52346.26 | 20.224 | 70.316 | 4003.03 | 1179.46 | 341.765 | 837.695 |
| 2028          | 258440 | 73699.585  | 20829.025  | 52870.56 | 20.458 | 71.738 | 3973.39 | 1161.76 | 320.236 | 841.523 |
| 2029          | 257993 | 72819.703  | 19582.784  | 53236.92 | 20.635 | 73.108 | 3940.61 | 1141.36 | 299.110 | 842.247 |
| 2030          | 249221 | 69309.277  | 18208.667  | 51100.61 | 20.504 | 73.728 | 4529.60 | 1297.95 | 330.943 | 967.006 |
| 2031          | 244216 | 65433.368  | 16156.265  | 49277.10 | 20.178 | 75.309 | 4422.79 | 1222.18 | 292.592 | 929.589 |
| 2032          | 243054 | 64643.552  | 15136.482  | 49507.07 | 20.369 | 76.585 | 4382.67 | 1203.31 | 272.936 | 930.372 |
| 2033          | 241854 | 63793.514  | 14189.011  | 49604.50 | 20.510 | 77.758 | 4338.92 | 1182.54 | 254.554 | 927.983 |
| 2034          | 240508 | 63032.151  | 13282.912  | 49749.24 | 20.685 | 78.927 | 4290.18 | 1162.80 | 236.941 | 925.860 |
| 2035          | 225336 | 57653.301  | 12034.886  | 45618.41 | 20.245 | 79.125 | 4949.47 | 1315.47 | 264.345 | 1051.13 |
| 2036          | 217506 | 52988.733  | 10057.505  | 42931.23 | 19.738 | 81.020 | 4771.58 | 1208.75 | 220.638 | 988.107 |
| 2037          | 214949 | 52026.921  | 9291.487   | 42735.43 | 19.882 | 82.141 | 4706.01 | 1185.50 | 203.424 | 982.078 |
| 2038          | 212418 | 50943.211  | 8532.072   | 42411.14 | 19.966 | 83.252 | 4636.78 | 1158.38 | 186.242 | 972.141 |
| 2039          | 209957 | 50085.991  | 7880.413   | 42205.58 | 20.102 | 84.266 | 4564.22 | 1135.19 | 171.311 | 963.880 |

## Results for PHIM for Run 1 (Sensitivity\_Analysis\_2.RTF)

\*\*\*\*\*

### Main Results for E-Component for Run: 1, Simulation: 1, COD: LUNG CANCER, Adjusted

| Variable Parameter          | Value                                  |
|-----------------------------|----------------------------------------|
| 1. Country                  | US (United States)                     |
| 2. Sex                      | M (Males)                              |
| 3. Year of start of process | 1990                                   |
| 4. Cause of Death           | LUNG CANCER                            |
| 5. Effective Dose NULL      | CC:1                                   |
| 6. Effective Dose Ecig      | CC:1 Ecig:0.05 Dual:0.525              |
| Note:                       | Death rates are per million population |

#### Results for Age Groups Combined and Years combined, Population and Number deaths adjusted for Ecig scenario,

| Age Group:All | NULL    | Ecig        | %Drop       |          |        | NULL   | Ecig    | Drop    |         |         |
|---------------|---------|-------------|-------------|----------|--------|--------|---------|---------|---------|---------|
| Year          | Number  | Attrib      | Attrib      | Drop     | %Drop  | Attrib | Death   | Attrib  | Attrib  | Drop    |
|               | Deaths  | Deaths      | Deaths      | Deaths   | Deaths | Deaths | Rate    | Rates   | Rates   | Rates   |
| All Comb      | 3113304 | 2244988.113 | 1572949.496 | 672038.6 | 21.586 | 29.935 | 890.183 | 649.875 | 449.752 | 200.124 |

#### Results for Age Groups Combined, Population and Number deaths adjusted for Ecig scenario,

| Age Group:All | NULL   | Ecig      | %Drop     |          |        | NULL   | Ecig    | Drop    |         |         |
|---------------|--------|-----------|-----------|----------|--------|--------|---------|---------|---------|---------|
| Year          | Number | Attrib    | Attrib    | Drop     | %Drop  | Attrib | Death   | Attrib  | Attrib  | Drop    |
|               | Deaths | Deaths    | Deaths    | Deaths   | Deaths | Deaths | Rate    | Rates   | Rates   | Rates   |
| 1990          | 78822  | 63385.736 | 63385.736 | 0.000    | 0.000  | 0.000  | 1249.50 | 1004.81 | 1004.81 | 0.000   |
| 1991          | 78462  | 62918.402 | 62688.694 | 229.708  | 0.293  | 0.365  | 1223.41 | 981.049 | 977.468 | 3.582   |
| 1992          | 77991  | 62366.766 | 61797.866 | 568.900  | 0.729  | 0.912  | 1195.37 | 955.930 | 947.182 | 8.747   |
| 1993          | 78555  | 62652.888 | 61673.301 | 979.586  | 1.247  | 1.564  | 1182.47 | 943.195 | 928.356 | 14.839  |
| 1994          | 77464  | 61565.227 | 60171.605 | 1393.621 | 1.799  | 2.264  | 1144.16 | 909.520 | 888.742 | 20.779  |
| 1995          | 76951  | 60851.961 | 59014.541 | 1837.420 | 2.388  | 3.019  | 1114.63 | 881.759 | 854.817 | 26.941  |
| 1996          | 76304  | 60122.922 | 57793.958 | 2328.963 | 3.052  | 3.874  | 1087.84 | 857.643 | 823.953 | 33.690  |
| 1997          | 75574  | 59237.155 | 56427.703 | 2809.452 | 3.717  | 4.743  | 1059.63 | 831.234 | 791.178 | 40.057  |
| 1998          | 75516  | 58906.696 | 55531.505 | 3375.191 | 4.470  | 5.730  | 1041.12 | 813.001 | 765.603 | 47.398  |
| 1999          | 73327  | 56930.073 | 53056.503 | 3873.570 | 5.283  | 6.804  | 994.710 | 773.329 | 719.736 | 53.593  |
| 2000          | 73998  | 57137.121 | 52600.737 | 4536.384 | 6.130  | 7.939  | 988.780 | 764.787 | 702.865 | 61.922  |
| 2001          | 73554  | 56481.726 | 51270.046 | 5211.681 | 7.086  | 9.227  | 969.683 | 746.169 | 675.907 | 70.262  |
| 2002          | 72749  | 55588.365 | 49697.009 | 5891.356 | 8.098  | 10.598 | 947.946 | 726.138 | 647.567 | 78.571  |
| 2003          | 72300  | 54945.856 | 48297.310 | 6648.547 | 9.196  | 12.100 | 931.888 | 710.281 | 622.516 | 87.765  |
| 2004          | 71711  | 54203.126 | 46782.282 | 7420.843 | 10.348 | 13.691 | 913.932 | 693.135 | 596.225 | 96.910  |
| 2005          | 71429  | 53744.603 | 45527.643 | 8216.960 | 11.504 | 15.289 | 899.353 | 679.296 | 573.233 | 106.063 |
| 2006          | 70172  | 52535.572 | 43530.999 | 9004.573 | 12.832 | 17.140 | 875.028 | 657.945 | 542.818 | 115.126 |
| 2007          | 69131  | 51492.124 | 41725.976 | 9766.148 | 14.127 | 18.966 | 852.774 | 638.264 | 514.713 | 123.550 |
| 2008          | 68850  | 51030.736 | 40323.871 | 10706.86 | 15.551 | 20.981 | 839.355 | 625.460 | 491.590 | 133.870 |
| 2009          | 68189  | 50276.199 | 38693.793 | 11582.41 | 16.986 | 23.038 | 821.051 | 608.943 | 465.902 | 143.042 |
| 2010          | 67938  | 49840.933 | 37366.792 | 12474.14 | 18.361 | 25.028 | 807.656 | 596.347 | 444.221 | 152.126 |
| 2011          | 67306  | 49072.841 | 35657.581 | 13415.26 | 19.932 | 27.337 | 791.805 | 581.354 | 419.483 | 161.871 |
| 2012          | 67017  | 48539.512 | 34121.458 | 14418.05 | 21.514 | 29.704 | 779.429 | 568.812 | 396.844 | 171.968 |
| 2013          | 66253  | 47675.741 | 32383.886 | 15291.85 | 23.081 | 32.075 | 761.317 | 552.318 | 372.127 | 180.191 |
| 2014          | 66022  | 47194.534 | 31025.569 | 16168.96 | 24.490 | 34.260 | 749.366 | 540.359 | 352.149 | 188.210 |
| 2015          | 65192  | 46305.842 | 29376.025 | 16929.82 | 25.969 | 36.561 | 730.927 | 526.439 | 327.424 | 222.015 |
| 2016          | 62695  | 44208.867 | 26994.620 | 17214.25 | 27.457 | 38.938 | 710.094 | 514.107 | 310.622 | 223.485 |
| 2017          | 61017  | 42702.624 | 25127.010 | 17575.61 | 28.804 | 41.158 | 702.350 | 503.903 | 303.939 | 225.964 |
| 2018          | 63707  | 44321.202 | 24908.732 | 19412.47 | 30.471 | 43.800 | 788.047 | 555.181 | 308.117 | 247.063 |
| 2019          | 64373  | 44493.088 | 23933.956 | 20559.13 | 31.938 | 46.207 | 787.984 | 551.912 | 292.975 | 258.937 |
| 2020          | 64886  | 44529.551 | 22963.124 | 21566.43 | 33.237 | 48.432 | 904.676 | 630.757 | 320.163 | 310.595 |
| 2021          | 58467  | 39852.556 | 19580.682 | 20271.87 | 34.673 | 50.867 | 808.793 | 560.546 | 270.868 | 289.678 |
| 2022          | 58873  | 39853.685 | 18611.992 | 21241.69 | 36.080 | 53.299 | 807.556 | 556.274 | 255.298 | 300.976 |
| 2023          | 59252  | 39847.050 | 17661.680 | 22185.37 | 37.442 | 55.676 | 805.531 | 551.670 | 240.109 | 311.561 |
| 2024          | 59537  | 39726.010 | 16723.513 | 23002.50 | 38.635 | 57.903 | 802.068 | 545.435 | 225.293 | 320.142 |
| 2025          | 59194  | 39207.348 | 15752.974 | 23454.37 | 39.623 | 59.821 | 925.064 | 626.579 | 246.182 | 380.397 |
| 2026          | 52997  | 34803.960 | 13264.547 | 21539.41 | 40.642 | 61.888 | 824.088 | 553.929 | 206.258 | 347.670 |
| 2027          | 52802  | 34484.595 | 12426.999 | 22057.60 | 41.775 | 63.964 | 816.616 | 546.357 | 192.193 | 354.164 |
| 2028          | 52559  | 34100.638 | 11593.860 | 22506.78 | 42.822 | 66.001 | 808.064 | 537.544 | 178.250 | 359.294 |
| 2029          | 52287  | 33669.838 | 10794.480 | 22875.36 | 43.750 | 67.940 | 798.632 | 527.732 | 164.876 | 362.856 |
| 2030          | 50902  | 32557.688 | 9973.099  | 22584.59 | 44.369 | 69.368 | 925.137 | 609.705 | 181.261 | 428.444 |
| 2031          | 45233  | 28646.393 | 8324.737  | 20321.66 | 44.927 | 70.940 | 819.177 | 535.065 | 150.762 | 384.303 |
| 2032          | 44853  | 28227.160 | 7729.801  | 20497.36 | 45.699 | 72.616 | 808.781 | 525.435 | 139.381 | 386.054 |
| 2033          | 44457  | 27786.623 | 7185.013  | 20601.61 | 46.340 | 74.142 | 797.572 | 515.079 | 128.901 | 386.178 |
| 2034          | 44026  | 27348.299 | 6673.886  | 20674.41 | 46.959 | 75.597 | 785.343 | 504.514 | 119.049 | 385.465 |
| 2035          | 41515  | 25570.077 | 6025.377  | 19544.70 | 47.079 | 76.436 | 911.863 | 583.430 | 132.347 | 451.084 |
| 2036          | 35559  | 21717.319 | 4730.006  | 16987.31 | 47.772 | 78.220 | 780.082 | 495.402 | 103.765 | 391.637 |
| 2037          | 34998  | 21256.024 | 4356.419  | 16899.60 | 48.287 | 79.505 | 766.240 | 484.347 | 95.378  | 388.969 |
| 2038          | 34442  | 20747.175 | 3996.048  | 16751.13 | 48.636 | 80.739 | 751.811 | 471.764 | 87.228  | 384.536 |
| 2039          | 33896  | 20327.688 | 3694.548  | 16633.14 | 49.071 | 81.825 | 736.867 | 460.724 | 80.315  | 380.409 |

## Results for PHIM for Run 1 (Sensitivity\_Analysis\_2.RTF)

\*\*\*\*\*

### Main Results for E-Component for Run: 1, Simulation: 1, COD: IHD, Adjusted

| Variable Parameter          | Value                                  |
|-----------------------------|----------------------------------------|
| 1. Country                  | US (United States)                     |
| 2. Sex                      | M (Males)                              |
| 3. Year of start of process | 1990                                   |
| 4. Cause of Death           | IHD                                    |
| 5. Effective Dose NULL      | CC:1                                   |
| 6. Effective Dose Ecig      | CC:1 Ecig:0.05 Dual:0.525              |
| Note:                       | Death rates are per million population |

### Results for Age Groups Combined and Years combined, Population and Number deaths adjusted for Ecig scenario,

| Age Group:All |         | NULL        | Ecig       | %Drop    |        |        | NULL    | Ecig    | Drop    |         |
|---------------|---------|-------------|------------|----------|--------|--------|---------|---------|---------|---------|
| Year          | Number  | Attrib      | Attrib     | Drop     | %Drop  | Attrib | Death   | Attrib  | Drop    |         |
|               | Deaths  | Deaths      | Deaths     | Deaths   | Deaths | Deaths | Rate    | Rates   | Rates   |         |
| All Comb      | 6458452 | 1098877.421 | 381642.115 | 717235.3 | 11.105 | 65.270 | 1846.66 | 318.101 | 109.122 | 208.979 |

### Results for Age Groups Combined, Population and Number deaths adjusted for Ecig scenario,

| Age Group:All |        | NULL      | Ecig      | %Drop    |        |        | NULL    | Ecig    | Drop    |         |
|---------------|--------|-----------|-----------|----------|--------|--------|---------|---------|---------|---------|
| Year          | Number | Attrib    | Attrib    | Drop     | %Drop  | Attrib | Death   | Attrib  | Drop    |         |
|               | Deaths | Deaths    | Deaths    | Deaths   | Deaths | Deaths | Rate    | Rates   | Rates   |         |
| 1990          | 171484 | 38511.725 | 38511.725 | 0.000    | 0.000  | 0.000  | 2718.40 | 610.497 | 0.000   |         |
| 1991          | 168044 | 37309.838 | 35999.316 | 1310.522 | 0.780  | 3.513  | 2620.21 | 581.750 | 561.316 | 20.434  |
| 1992          | 164556 | 36137.488 | 32936.672 | 3200.816 | 1.945  | 8.857  | 2522.16 | 553.899 | 504.824 | 49.075  |
| 1993          | 164388 | 35599.588 | 30293.538 | 5306.050 | 3.228  | 14.905 | 2474.50 | 535.926 | 456.002 | 79.924  |
| 1994          | 159921 | 34336.757 | 27051.194 | 7285.563 | 4.556  | 21.218 | 2362.06 | 507.267 | 399.549 | 107.717 |
| 1995          | 158178 | 33455.759 | 24248.852 | 9206.906 | 5.821  | 27.520 | 2291.19 | 484.782 | 351.241 | 133.540 |
| 1996          | 155017 | 32193.824 | 21333.700 | 10860.12 | 7.006  | 33.734 | 2210.04 | 459.239 | 304.149 | 155.090 |
| 1997          | 150165 | 30665.509 | 18528.371 | 12137.14 | 8.083  | 39.579 | 2105.48 | 430.308 | 259.788 | 170.520 |
| 1998          | 145660 | 29188.430 | 16074.098 | 13114.33 | 9.003  | 44.930 | 2008.18 | 402.844 | 221.611 | 181.233 |
| 1999          | 166321 | 33375.386 | 16481.154 | 16894.23 | 10.158 | 50.619 | 2256.22 | 453.366 | 223.575 | 229.791 |
| 2000          | 160711 | 32024.754 | 14325.383 | 17699.37 | 11.013 | 55.268 | 2147.46 | 428.655 | 191.420 | 237.236 |
| 2001          | 154974 | 30682.393 | 12259.611 | 18422.78 | 11.888 | 60.043 | 2043.06 | 405.339 | 161.622 | 243.717 |
| 2002          | 152508 | 30218.370 | 10793.945 | 19424.42 | 12.737 | 64.280 | 1987.23 | 394.736 | 140.648 | 254.087 |
| 2003          | 147435 | 29175.202 | 9305.158  | 19870.04 | 13.477 | 68.106 | 1900.33 | 377.146 | 119.937 | 257.209 |
| 2004          | 139144 | 27488.687 | 7806.806  | 19681.88 | 14.145 | 71.600 | 1773.35 | 351.518 | 99.495  | 252.023 |
| 2005          | 136733 | 27017.439 | 6884.304  | 20133.14 | 14.724 | 74.519 | 1721.59 | 341.482 | 86.679  | 254.803 |
| 2006          | 132851 | 26231.435 | 5869.589  | 20361.85 | 15.327 | 77.624 | 1656.61 | 328.517 | 73.192  | 255.325 |
| 2007          | 127496 | 25103.049 | 4990.531  | 20112.52 | 15.775 | 80.120 | 1572.73 | 311.161 | 61.561  | 249.600 |
| 2008          | 126956 | 24621.740 | 4434.218  | 20187.52 | 15.901 | 81.991 | 1547.72 | 301.777 | 54.058  | 247.720 |
| 2009          | 123604 | 23741.177 | 3871.093  | 19870.08 | 16.076 | 83.695 | 1488.28 | 287.552 | 46.611  | 240.941 |
| 2010          | 121800 | 23189.160 | 3443.488  | 19745.67 | 16.212 | 85.150 | 1447.97 | 277.458 | 40.937  | 236.522 |
| 2011          | 121590 | 22786.927 | 3050.658  | 19736.27 | 16.232 | 86.612 | 1430.41 | 269.951 | 35.889  | 234.063 |
| 2012          | 122422 | 22485.295 | 2749.823  | 19735.47 | 16.121 | 87.771 | 1423.81 | 263.495 | 31.981  | 231.513 |
| 2013          | 124289 | 22251.884 | 2514.480  | 19737.40 | 15.880 | 88.700 | 1428.22 | 257.786 | 28.894  | 228.891 |
| 2014          | 125006 | 21894.593 | 2292.152  | 19602.44 | 15.681 | 89.531 | 1418.85 | 250.685 | 26.017  | 224.668 |
| 2015          | 125698 | 21471.109 | 2097.799  | 19373.31 | 15.413 | 90.230 | 1602.13 | 276.557 | 26.738  | 249.819 |
| 2016          | 128317 | 21411.568 | 1930.931  | 19480.64 | 15.182 | 90.982 | 1619.13 | 273.213 | 24.365  | 248.848 |
| 2017          | 130549 | 21169.399 | 1789.672  | 19379.73 | 14.845 | 91.546 | 1631.09 | 267.651 | 22.360  | 245.291 |
| 2018          | 123707 | 19830.576 | 1579.636  | 18250.94 | 14.753 | 92.034 | 1530.24 | 248.404 | 19.540  | 228.864 |
| 2019          | 124260 | 19431.014 | 1474.715  | 17956.30 | 14.451 | 92.411 | 1521.06 | 241.031 | 18.052  | 222.979 |
| 2020          | 123392 | 18532.612 | 1350.340  | 17182.27 | 13.925 | 92.714 | 1720.39 | 262.513 | 18.827  | 243.686 |
| 2021          | 122078 | 18234.128 | 1269.464  | 16964.66 | 13.897 | 93.038 | 1688.76 | 256.472 | 17.561  | 238.911 |
| 2022          | 122252 | 17812.559 | 1197.114  | 16615.44 | 13.591 | 93.279 | 1676.91 | 248.626 | 16.421  | 232.205 |
| 2023          | 122404 | 17361.668 | 1135.916  | 16225.75 | 13.256 | 93.457 | 1664.08 | 240.367 | 15.443  | 224.924 |
| 2024          | 122409 | 16929.676 | 1087.623  | 15842.05 | 12.942 | 93.576 | 1649.05 | 232.443 | 14.652  | 217.791 |
| 2025          | 118914 | 15501.666 | 976.414   | 14525.25 | 12.215 | 93.701 | 1858.35 | 247.735 | 15.259  | 232.475 |
| 2026          | 118390 | 15523.814 | 973.787   | 14550.03 | 12.290 | 93.727 | 1840.92 | 247.072 | 15.142  | 231.930 |
| 2027          | 117416 | 15073.070 | 938.664   | 14134.41 | 12.038 | 93.773 | 1815.93 | 238.810 | 14.517  | 224.293 |
| 2028          | 116390 | 14636.710 | 903.049   | 13733.66 | 11.800 | 93.830 | 1789.43 | 230.725 | 13.884  | 216.841 |
| 2029          | 115359 | 14180.166 | 871.509   | 13308.66 | 11.537 | 93.854 | 1762.00 | 222.256 | 13.312  | 208.945 |
| 2030          | 108535 | 12111.772 | 731.667   | 11380.11 | 10.485 | 93.959 | 1972.63 | 226.816 | 13.298  | 213.518 |
| 2031          | 109071 | 12417.367 | 752.607   | 11664.76 | 10.695 | 93.939 | 1975.29 | 231.935 | 13.630  | 218.305 |
| 2032          | 107741 | 12054.064 | 724.428   | 11329.64 | 10.516 | 93.990 | 1942.76 | 224.381 | 13.063  | 211.318 |
| 2033          | 106424 | 11672.389 | 694.144   | 10978.25 | 10.316 | 94.053 | 1909.27 | 216.370 | 12.453  | 203.917 |
| 2034          | 105080 | 11365.762 | 677.195   | 10688.57 | 10.172 | 94.042 | 1874.43 | 209.673 | 12.080  | 197.593 |
| 2035          | 94722  | 8580.360  | 494.330   | 8086.030 | 8.537  | 94.239 | 2080.55 | 195.777 | 10.858  | 184.919 |
| 2036          | 96114  | 8948.841  | 514.457   | 8434.384 | 8.775  | 94.251 | 2108.52 | 204.135 | 11.286  | 192.849 |
| 2037          | 94351  | 8624.570  | 496.472   | 8128.097 | 8.615  | 94.244 | 2065.68 | 196.522 | 10.870  | 185.653 |
| 2038          | 92637  | 8315.017  | 474.082   | 7840.935 | 8.464  | 94.298 | 2022.13 | 189.073 | 10.349  | 178.724 |
| 2039          | 90989  | 8001.132  | 456.239   | 7544.892 | 8.292  | 94.298 | 1978.00 | 181.344 | 9.918   | 171.426 |

## Results for PHIM for Run 1 (Sensitivity\_Analysis\_2.RTF)

\*\*\*\*\*

### Main Results for E-Component for Run: 1, Simulation: 1, COD: STROKE, Adjusted

| Variable Parameter          | Value                                  |
|-----------------------------|----------------------------------------|
| 1. Country                  | US (United States)                     |
| 2. Sex                      | M (Males)                              |
| 3. Year of start of process | 1990                                   |
| 4. Cause of Death           | STROKE                                 |
| 5. Effective Dose NULL      | CC:1                                   |
| 6. Effective Dose Ecig      | CC:1 Ecig:0.05 Dual:0.525              |
| Note:                       | Death rates are per million population |

#### Results for Age Groups Combined and Years combined, Population and Number deaths adjusted for Ecig scenario,

| Age Group:All | NULL    | Ecig       | %Drop     |          |        |        | NULL    | Ecig   | Drop   |        |
|---------------|---------|------------|-----------|----------|--------|--------|---------|--------|--------|--------|
| Year          | Number  | Attrib     | Attrib    | Drop     | %Drop  | Attrib | Death   | Attrib | Attrib | Drop   |
|               | Deaths  | Deaths     | Deaths    | Deaths   | Deaths | Deaths | Rate    | Rates  | Rates  | Rates  |
| All Comb      | 1516395 | 149918.462 | 51976.693 | 97941.77 | 6.459  | 65.330 | 433.581 | 43.398 | 14.862 | 28.537 |

#### Results for Age Groups Combined, Population and Number deaths adjusted for Ecig scenario,

| Age Group:All | NULL   | Ecig     | %Drop    |          |        |        | NULL    | Ecig   | Drop   |        |
|---------------|--------|----------|----------|----------|--------|--------|---------|--------|--------|--------|
| Year          | Number | Attrib   | Attrib   | Drop     | %Drop  | Attrib | Death   | Attrib | Attrib | Drop   |
|               | Deaths | Deaths   | Deaths   | Deaths   | Deaths | Deaths | Rate    | Rates  | Rates  | Rates  |
| 1990          | 32862  | 4613.166 | 4613.166 | 0.000    | 0.000  | 0.000  | 520.936 | 73.129 | 73.129 | 0.000  |
| 1991          | 32619  | 4555.566 | 4377.143 | 178.423  | 0.547  | 3.917  | 508.609 | 71.032 | 68.250 | 2.782  |
| 1992          | 32101  | 4453.572 | 4035.211 | 418.361  | 1.303  | 9.394  | 492.023 | 68.262 | 61.848 | 6.414  |
| 1993          | 32901  | 4462.473 | 3773.968 | 688.505  | 2.093  | 15.429 | 495.254 | 67.179 | 56.809 | 10.371 |
| 1994          | 33334  | 4499.513 | 3534.812 | 964.701  | 2.894  | 21.440 | 492.353 | 66.473 | 52.210 | 14.263 |
| 1995          | 33589  | 4472.774 | 3251.410 | 1221.364 | 3.636  | 27.307 | 486.530 | 64.812 | 47.096 | 17.715 |
| 1996          | 33901  | 4406.878 | 2950.441 | 1456.437 | 4.296  | 33.049 | 483.313 | 62.863 | 42.064 | 20.800 |
| 1997          | 33559  | 4288.158 | 2635.022 | 1653.136 | 4.926  | 38.551 | 470.534 | 60.173 | 36.946 | 23.227 |
| 1998          | 32851  | 4120.148 | 2315.505 | 1804.643 | 5.493  | 43.800 | 452.913 | 56.864 | 31.923 | 24.941 |
| 1999          | 33449  | 3982.443 | 2043.888 | 1938.555 | 5.796  | 48.678 | 453.748 | 54.097 | 27.726 | 26.371 |
| 2000          | 33553  | 4021.411 | 1883.583 | 2137.828 | 6.372  | 53.161 | 448.339 | 53.827 | 25.169 | 28.658 |
| 2001          | 32385  | 3848.092 | 1637.388 | 2210.704 | 6.826  | 57.449 | 426.945 | 50.836 | 21.586 | 29.250 |
| 2002          | 31715  | 3783.081 | 1464.332 | 2318.749 | 7.311  | 61.293 | 413.258 | 49.418 | 19.081 | 30.337 |
| 2003          | 31133  | 3754.415 | 1315.791 | 2438.624 | 7.833  | 64.953 | 401.280 | 48.533 | 16.960 | 31.573 |
| 2004          | 30049  | 3666.274 | 1166.593 | 2499.681 | 8.319  | 68.180 | 382.963 | 46.883 | 14.868 | 32.015 |
| 2005          | 28888  | 3589.688 | 1036.012 | 2553.676 | 8.840  | 71.139 | 363.727 | 45.371 | 13.044 | 32.327 |
| 2006          | 28387  | 3596.985 | 937.246  | 2659.738 | 9.370  | 73.944 | 353.974 | 45.048 | 11.687 | 33.361 |
| 2007          | 28247  | 3560.798 | 840.708  | 2720.089 | 9.630  | 76.390 | 348.439 | 44.137 | 10.371 | 33.767 |
| 2008          | 27365  | 3417.001 | 731.694  | 2685.308 | 9.813  | 78.587 | 333.605 | 41.881 | 8.920  | 32.961 |
| 2009          | 27328  | 3394.390 | 662.802  | 2731.588 | 9.995  | 80.474 | 329.055 | 41.113 | 7.981  | 33.132 |
| 2010          | 27195  | 3340.137 | 597.283  | 2742.854 | 10.086 | 82.118 | 323.292 | 39.965 | 7.101  | 32.864 |
| 2011          | 27269  | 3285.435 | 539.918  | 2745.517 | 10.068 | 83.566 | 320.802 | 38.922 | 6.352  | 32.570 |
| 2012          | 27394  | 3259.209 | 490.048  | 2769.161 | 10.109 | 84.964 | 318.602 | 38.193 | 5.699  | 32.494 |
| 2013          | 28281  | 3274.703 | 454.666  | 2820.037 | 9.971  | 86.116 | 324.981 | 37.937 | 5.225  | 32.712 |
| 2014          | 29211  | 3298.083 | 422.111  | 2875.972 | 9.846  | 87.201 | 331.551 | 37.762 | 4.791  | 32.971 |
| 2015          | 30026  | 3244.406 | 389.134  | 2855.272 | 9.509  | 88.006 | 382.712 | 41.789 | 4.960  | 36.829 |
| 2016          | 31026  | 3314.836 | 370.153  | 2944.683 | 9.491  | 88.833 | 391.496 | 42.297 | 4.671  | 37.627 |
| 2017          | 31981  | 3333.314 | 348.380  | 2984.933 | 9.333  | 89.549 | 399.574 | 42.144 | 4.353  | 37.791 |
| 2018          | 29917  | 2925.242 | 289.179  | 2636.063 | 8.811  | 90.114 | 370.068 | 36.642 | 3.577  | 33.065 |
| 2019          | 30208  | 2864.628 | 267.620  | 2597.008 | 8.597  | 90.658 | 369.773 | 35.534 | 3.276  | 32.258 |
| 2020          | 30245  | 2730.366 | 243.710  | 2486.656 | 8.222  | 91.074 | 421.690 | 38.675 | 3.398  | 35.277 |
| 2021          | 30802  | 2647.911 | 224.057  | 2423.854 | 7.869  | 91.538 | 426.100 | 37.244 | 3.099  | 34.145 |
| 2022          | 31052  | 2586.165 | 208.249  | 2377.916 | 7.658  | 91.948 | 425.934 | 36.097 | 2.857  | 33.241 |
| 2023          | 31298  | 2517.960 | 194.143  | 2323.818 | 7.425  | 92.290 | 425.494 | 34.860 | 2.639  | 32.221 |
| 2024          | 31498  | 2454.161 | 181.925  | 2272.235 | 7.214  | 92.587 | 424.328 | 33.695 | 2.451  | 31.245 |
| 2025          | 31132  | 2275.364 | 163.447  | 2111.917 | 6.784  | 92.817 | 486.526 | 36.363 | 2.554  | 33.809 |
| 2026          | 31623  | 2183.166 | 152.474  | 2030.692 | 6.422  | 93.016 | 491.720 | 34.747 | 2.371  | 32.376 |
| 2027          | 31536  | 2112.345 | 143.855  | 1968.490 | 6.242  | 93.190 | 487.728 | 33.467 | 2.225  | 31.242 |
| 2028          | 31423  | 2046.677 | 136.043  | 1910.633 | 6.080  | 93.353 | 483.120 | 32.263 | 2.092  | 30.171 |
| 2029          | 31303  | 1977.671 | 128.813  | 1848.859 | 5.906  | 93.487 | 478.123 | 30.997 | 1.967  | 29.030 |
| 2030          | 30407  | 1744.457 | 111.780  | 1632.677 | 5.369  | 93.592 | 552.653 | 32.668 | 2.032  | 30.637 |
| 2031          | 30083  | 1653.738 | 103.766  | 1549.972 | 5.152  | 93.725 | 544.802 | 30.889 | 1.879  | 29.010 |
| 2032          | 29862  | 1603.120 | 98.157   | 1504.963 | 5.040  | 93.877 | 538.457 | 29.841 | 1.770  | 28.071 |
| 2033          | 29631  | 1548.245 | 93.198   | 1455.046 | 4.911  | 93.980 | 531.584 | 28.700 | 1.672  | 27.028 |
| 2034          | 29374  | 1511.985 | 89.733   | 1422.252 | 4.842  | 94.065 | 523.972 | 27.893 | 1.601  | 26.292 |
| 2035          | 27937  | 1239.866 | 72.471   | 1167.394 | 4.179  | 94.155 | 613.622 | 28.290 | 1.592  | 26.698 |
| 2036          | 26772  | 1182.522 | 68.184   | 1114.338 | 4.162  | 94.234 | 587.310 | 26.975 | 1.496  | 25.479 |
| 2037          | 26336  | 1134.483 | 65.563   | 1068.920 | 4.059  | 94.221 | 576.594 | 25.851 | 1.435  | 24.415 |
| 2038          | 25897  | 1093.537 | 62.388   | 1031.149 | 3.982  | 94.295 | 565.298 | 24.866 | 1.362  | 23.504 |
| 2039          | 25461  | 1047.905 | 59.528   | 988.377  | 3.882  | 94.319 | 553.484 | 23.751 | 1.294  | 22.457 |

## Results for PHIM for Run 1 (Sensitivity\_Analysis\_2.RTF)

\*\*\*\*\*

### Main Results for E-Component for Run: 1, Simulation: 1, COD: COPD, Adjusted

| Variable Parameter          | Value                                  |
|-----------------------------|----------------------------------------|
| 1. Country                  | US (United States)                     |
| 2. Sex                      | M (Males)                              |
| 3. Year of start of process | 1990                                   |
| 4. Cause of Death           | COPD                                   |
| 5. Effective Dose NULL      | CC:1                                   |
| 6. Effective Dose Ecig      | CC:1 Ecig:0.05 Dual:0.525              |
| Note:                       | Death rates are per million population |

### Results for Age Groups Combined and Years combined, Population and Number deaths adjusted for Ecig scenario,

| Age Group:All | NULL    | Ecig        | %Drop      |          |        |        | NULL    | Ecig    | Drop    |         |
|---------------|---------|-------------|------------|----------|--------|--------|---------|---------|---------|---------|
| Year          | Number  | Attrib      | Attrib     | Drop     | %Drop  | Attrib | Death   | Attrib  | Attrib  | Drop    |
|               | Deaths  | Deaths      | Deaths     | Deaths   | Deaths | Deaths | Rate    | Rates   | Rates   | Rates   |
| All Comb      | 2283465 | 1015606.587 | 607758.410 | 407848.2 | 17.861 | 40.158 | 652.909 | 293.996 | 173.776 | 120.220 |

### Results for Age Groups Combined, Population and Number deaths adjusted for Ecig scenario,

| Age Group:All | NULL   | Ecig      | %Drop     |          |        |        | NULL    | Ecig    | Drop    |         |
|---------------|--------|-----------|-----------|----------|--------|--------|---------|---------|---------|---------|
| Year          | Number | Attrib    | Attrib    | Drop     | %Drop  | Attrib | Death   | Attrib  | Attrib  | Drop    |
|               | Deaths | Deaths    | Deaths    | Deaths   | Deaths | Deaths | Rate    | Rates   | Rates   | Rates   |
| 1990          | 33993  | 19262.437 | 19262.437 | 0.000    | 0.000  | 0.000  | 538.865 | 305.353 | 305.353 | 0.000   |
| 1991          | 34092  | 19215.636 | 19097.354 | 118.283  | 0.347  | 0.616  | 531.576 | 299.618 | 297.774 | 1.844   |
| 1992          | 33944  | 19056.189 | 18768.480 | 287.709  | 0.848  | 1.510  | 520.258 | 292.085 | 287.666 | 4.418   |
| 1993          | 35919  | 20095.670 | 19587.324 | 508.346  | 1.415  | 2.530  | 540.680 | 302.526 | 294.844 | 7.682   |
| 1994          | 35087  | 19524.095 | 18823.998 | 700.096  | 1.995  | 3.586  | 518.232 | 288.435 | 278.033 | 10.402  |
| 1995          | 34690  | 19116.002 | 18220.678 | 895.324  | 2.581  | 4.684  | 502.487 | 276.995 | 263.924 | 13.071  |
| 1996          | 34615  | 18975.021 | 17872.538 | 1102.483 | 3.185  | 5.810  | 493.493 | 270.675 | 254.804 | 15.871  |
| 1997          | 35314  | 19169.025 | 17835.142 | 1333.883 | 3.777  | 6.959  | 495.146 | 268.986 | 250.068 | 18.918  |
| 1998          | 35739  | 19228.937 | 17652.994 | 1575.943 | 4.410  | 8.196  | 492.729 | 265.388 | 243.379 | 22.009  |
| 1999          | 38605  | 20589.820 | 18646.167 | 1943.654 | 5.035  | 9.440  | 523.697 | 279.689 | 252.944 | 26.745  |
| 2000          | 36389  | 19196.417 | 17133.002 | 2063.415 | 5.670  | 10.749 | 486.242 | 256.946 | 228.936 | 28.011  |
| 2001          | 36411  | 19012.731 | 16691.172 | 2321.559 | 6.376  | 12.211 | 480.013 | 251.174 | 220.044 | 31.129  |
| 2002          | 36137  | 18699.357 | 16144.668 | 2554.689 | 7.069  | 13.662 | 470.874 | 244.265 | 210.370 | 33.895  |
| 2003          | 36387  | 18663.550 | 15821.066 | 2842.483 | 7.812  | 15.230 | 469.005 | 241.262 | 203.922 | 37.341  |
| 2004          | 34813  | 17679.164 | 14686.521 | 2992.643 | 8.596  | 16.928 | 443.675 | 226.076 | 187.175 | 38.901  |
| 2005          | 37071  | 18692.832 | 15223.537 | 3469.295 | 9.359  | 18.559 | 466.753 | 236.265 | 191.678 | 44.587  |
| 2006          | 34607  | 17308.564 | 13770.144 | 3538.419 | 10.224 | 20.443 | 431.545 | 216.769 | 171.710 | 45.059  |
| 2007          | 35622  | 17683.181 | 13724.309 | 3958.872 | 11.114 | 22.388 | 439.417 | 219.189 | 169.297 | 49.892  |
| 2008          | 38604  | 19006.374 | 14414.683 | 4591.691 | 11.894 | 24.159 | 470.626 | 232.952 | 175.730 | 57.222  |
| 2009          | 37281  | 18205.573 | 13435.160 | 4770.412 | 12.796 | 26.203 | 448.892 | 220.505 | 161.769 | 58.736  |
| 2010          | 37654  | 18237.758 | 13131.063 | 5106.695 | 13.562 | 28.001 | 447.636 | 218.215 | 156.104 | 62.111  |
| 2011          | 38560  | 18487.916 | 12890.518 | 5597.398 | 14.516 | 30.276 | 453.631 | 219.022 | 151.647 | 67.375  |
| 2012          | 39016  | 18491.158 | 12492.506 | 5998.653 | 15.375 | 32.441 | 453.775 | 216.689 | 145.292 | 71.397  |
| 2013          | 40871  | 19143.452 | 12534.320 | 6609.132 | 16.171 | 34.524 | 469.653 | 221.775 | 144.033 | 77.741  |
| 2014          | 40965  | 18992.005 | 12030.640 | 6961.365 | 16.993 | 36.654 | 464.964 | 217.451 | 136.551 | 80.900  |
| 2015          | 43011  | 19728.885 | 12140.354 | 7588.530 | 17.643 | 38.464 | 548.213 | 254.116 | 154.740 | 99.377  |
| 2016          | 43876  | 19876.724 | 11830.310 | 8046.415 | 18.339 | 40.482 | 553.631 | 253.628 | 149.276 | 104.351 |
| 2017          | 44952  | 20119.790 | 11567.620 | 8552.170 | 19.025 | 42.506 | 561.628 | 254.381 | 144.527 | 109.854 |
| 2018          | 46395  | 20535.123 | 11393.152 | 9141.971 | 19.705 | 44.519 | 573.903 | 257.229 | 140.932 | 116.298 |
| 2019          | 47980  | 21009.029 | 11232.599 | 9776.430 | 20.376 | 46.534 | 587.316 | 260.605 | 137.498 | 123.107 |
| 2020          | 49534  | 21428.512 | 11064.368 | 10364.14 | 20.923 | 48.366 | 690.623 | 303.533 | 154.265 | 149.268 |
| 2021          | 49642  | 21266.697 | 10503.058 | 10763.64 | 21.682 | 50.613 | 686.724 | 299.127 | 145.293 | 153.834 |
| 2022          | 51195  | 21663.568 | 10248.640 | 11414.93 | 22.297 | 52.692 | 702.236 | 302.378 | 140.579 | 161.799 |
| 2023          | 52777  | 22084.131 | 9992.877  | 12091.25 | 22.910 | 54.751 | 717.500 | 305.748 | 135.852 | 169.895 |
| 2024          | 54308  | 22418.456 | 9720.127  | 12698.33 | 23.382 | 56.642 | 731.617 | 307.804 | 130.946 | 176.858 |
| 2025          | 55456  | 22614.834 | 9410.903  | 13203.93 | 23.810 | 58.386 | 866.655 | 361.411 | 147.070 | 214.341 |
| 2026          | 56047  | 22571.522 | 8950.894  | 13620.63 | 24.302 | 60.344 | 871.506 | 359.241 | 139.183 | 220.058 |
| 2027          | 57078  | 22774.416 | 8588.651  | 14185.76 | 24.853 | 62.288 | 882.753 | 360.827 | 132.830 | 227.996 |
| 2028          | 58069  | 22915.561 | 8196.072  | 14719.49 | 25.348 | 64.234 | 892.775 | 361.228 | 126.011 | 235.218 |
| 2029          | 59045  | 22992.027 | 7787.982  | 15204.05 | 25.750 | 66.127 | 901.855 | 360.371 | 118.955 | 241.416 |
| 2030          | 59377  | 22895.360 | 7392.121  | 15503.24 | 26.110 | 67.713 | 1079.18 | 428.760 | 134.352 | 294.408 |
| 2031          | 59829  | 22715.871 | 6975.156  | 15740.72 | 26.309 | 69.294 | 1083.52 | 424.293 | 126.321 | 297.972 |
| 2032          | 60598  | 22759.207 | 6584.096  | 16175.11 | 26.693 | 71.071 | 1092.68 | 423.652 | 118.722 | 304.929 |
| 2033          | 61342  | 22786.258 | 6216.656  | 16569.60 | 27.012 | 72.718 | 1100.49 | 422.387 | 111.528 | 310.859 |
| 2034          | 62027  | 22806.106 | 5842.099  | 16964.01 | 27.349 | 74.384 | 1106.44 | 420.721 | 104.211 | 316.510 |
| 2035          | 61163  | 22262.998 | 5442.708  | 16820.29 | 27.501 | 75.553 | 1343.44 | 507.973 | 119.548 | 388.425 |
| 2036          | 59061  | 21140.051 | 4744.858  | 16395.19 | 27.760 | 77.555 | 1295.67 | 482.234 | 104.091 | 378.142 |
| 2037          | 59264  | 21011.845 | 4373.033  | 16638.81 | 28.076 | 79.188 | 1297.50 | 478.783 | 95.742  | 383.041 |
| 2038          | 59443  | 20787.483 | 3999.554  | 16787.93 | 28.242 | 80.760 | 1297.54 | 472.681 | 87.304  | 385.376 |
| 2039          | 59611  | 20709.267 | 3670.098  | 17039.17 | 28.584 | 82.278 | 1295.87 | 469.372 | 79.784  | 389.589 |



## Results for PHIM for Run 2 (Sensitivity\_Analysis\_2.RTF)

---

### Control File Details for Run: 2

| Variable Parameter                                       | Value                  |
|----------------------------------------------------------|------------------------|
| 1. Name for Reference Scenario                           | NULL                   |
| 2. Name for Test Scenario                                | Ecig                   |
| 3. Name for Product 1                                    | CC                     |
| 4. Name for Product 2                                    | Ecig                   |
| 5. Name for Product 3                                    | -                      |
| 6. Name for Product 4                                    | Dual                   |
| 7. Country                                               | US (United States)     |
| 8. Sex                                                   | F (Females)            |
| 9. Year of start of process                              | 1990                   |
| 10. Number of months of follow-up                        | 600                    |
| 11. Follow-up interval length (in months)                | 12                     |
| 12. Lower age for risk estimation                        | 10                     |
| 13. Upper age for risk estimation                        | 79                     |
| 14. The effective dose for Product 1 (F1) - Ref          | 1                      |
| 15. The effective dose for Product 2 (F2) - Ref          | -                      |
| 16. The effective dose for Product 3 (F3) - Ref          | -                      |
| 17. The effective dose for Product 4 (F4) - Ref          | -                      |
| 18. The effective dose for Product 1 (F1) - Test         | 1                      |
| 19. The effective dose for Product 2 (F2) - Test         | 0.05                   |
| 20. The effective dose for Product 3 (F3) - Test         | -                      |
| 21. The effective dose for Product 4 (F4) - Test         | FROMF2                 |
| 22. Number in population to be simulated                 | 100000                 |
| 23. Number of MC simulations                             | 1                      |
| 24. The random number seed for the first simulation      | 15975263               |
| 25. Source for the population file (POP)                 | UN4                    |
| 26. Source for the socioeconomic prevalence file (SEP)   | -                      |
| 27. Source for the current smoking prevalence file (CSP) | ISS3                   |
| 28. Source for the former smoking prevalence file (FSP)  | ISS3                   |
| 29. Source for the quit-time distribution file (QTD)     | NHIS2006               |
| 30. Source for the death file (MORT)                     | APR-20                 |
| 31. Source for the relative risk file (RR)               | PNLEST                 |
| 32. Source for the half-life file (H)                    | PNLEST                 |
| 33. Assumption Set for TTP Factor Reference              | F1                     |
| 34. Assumption Set for TTP Factor Test                   | F1                     |
| 35. Assumption Set for TTP Reference                     | ISS3                   |
| 36. Assumption Set for TTP Test                          | S2A                    |
| 37. Assumption Set for TP for socioeconomic group        | -                      |
| 38. Source for Output Choice file (OUTC)                 | BASIC                  |
| 39. Output for DTP P1                                    | N                      |
| 40. Output for DTP P2                                    | N                      |
| 41. Output for Main P Component                          | Y                      |
| 42. Output for DTP E1                                    | N                      |
| 43. Output for DTP E2                                    | N                      |
| 44. Output for DTP E3                                    | N                      |
| 45. Output for Main E Component                          | Y                      |
| 46. Output file name                                     | Sensitivity_Analysis_2 |
| 47. Run number for P-Component                           | -                      |
| 48. Results file for E-Component                         | -                      |
| 49. Components required                                  | PE                     |
| 50. Results folder for P to be used in E-Component       | -                      |
| 51. Fixed age of starting product use                    | 16                     |
| 52. Output absolute risk file?                           | N                      |

## Results for PHIM for Run 2 (Sensitivity\_Analysis\_2.RTF)

\*\*\*\*\*

TTP values for Run: 2, Scenario: NULL

| Variable Parameter | Value               |
|--------------------|---------------------|
| 1. Country         | US (United States)  |
| 2. Sex             | F (Females)         |
| 3. Assumption Set  | ISS3                |
| Note:              | Period is in Months |

| Age   | Period  | Initiation  | Cessation    | Re-initiation |
|-------|---------|-------------|--------------|---------------|
|       |         | Never<br>CC | CC<br>Former | Former<br>CC  |
| 10-14 | 1-12    | 0.003758    | 0.008742     | 0.000000      |
| 15-19 | 1-12    | 0.003469    | 0.002515     | 0.000000      |
| 20-24 | 1-12    | 0.000276    | 0.000761     | 0.000000      |
| 25-29 | 1-12    | 0.000137    | 0.001375     | 0.000000      |
| 30-34 | 1-12    | 0.000069    | 0.001149     | 0.000000      |
| 35-39 | 1-12    | 0.000000    | 0.000991     | 0.000000      |
| 40-44 | 1-12    | 0.000000    | 0.000833     | 0.000000      |
| 45-49 | 1-12    | 0.000000    | 0.001723     | 0.000000      |
| 50-54 | 1-12    | 0.000000    | 0.002336     | 0.000000      |
| 55-59 | 1-12    | 0.000000    | 0.002233     | 0.000000      |
| 60-64 | 1-12    | 0.000000    | 0.004634     | 0.000000      |
| 65-69 | 1-12    | 0.000000    | 0.003505     | 0.000000      |
| 70-74 | 1-12    | 0.000000    | 0.004329     | 0.000000      |
| 75-79 | 1-12    | 0.000000    | 0.004329     | 0.000000      |
| 10-14 | 13-72   | 0.004794    | 0.008742     | 0.000000      |
| 15-19 | 13-72   | 0.004527    | 0.004082     | 0.000000      |
| 20-24 | 13-72   | 0.000105    | 0.001261     | 0.000000      |
| 25-29 | 13-72   | 0.000053    | 0.000952     | 0.000000      |
| 30-34 | 13-72   | 0.000026    | 0.000733     | 0.000000      |
| 35-39 | 13-72   | 0.000000    | 0.000753     | 0.000000      |
| 40-44 | 13-72   | 0.000000    | 0.001535     | 0.000000      |
| 45-49 | 13-72   | 0.000000    | 0.002998     | 0.000000      |
| 50-54 | 13-72   | 0.000000    | 0.003159     | 0.000000      |
| 55-59 | 13-72   | 0.000000    | 0.002965     | 0.000000      |
| 60-64 | 13-72   | 0.000000    | 0.003633     | 0.000000      |
| 65-69 | 13-72   | 0.000000    | 0.004522     | 0.000000      |
| 70-74 | 13-72   | 0.000000    | 0.005208     | 0.000000      |
| 75-79 | 13-72   | 0.000000    | 0.005208     | 0.000000      |
| 10-14 | 73-132  | 0.003969    | 0.008742     | 0.000000      |
| 15-19 | 73-132  | 0.003056    | 0.003373     | 0.000000      |
| 20-24 | 73-132  | 0.001459    | 0.003881     | 0.000000      |
| 25-29 | 73-132  | 0.000714    | 0.001953     | 0.000000      |
| 30-34 | 73-132  | 0.000111    | 0.001338     | 0.000000      |
| 35-39 | 73-132  | 0.000000    | 0.001507     | 0.000000      |
| 40-44 | 73-132  | 0.000000    | 0.002080     | 0.000000      |
| 45-49 | 73-132  | 0.000000    | 0.003809     | 0.000000      |
| 50-54 | 73-132  | 0.000000    | 0.004871     | 0.000000      |
| 55-59 | 73-132  | 0.000000    | 0.004560     | 0.000000      |
| 60-64 | 73-132  | 0.000000    | 0.007192     | 0.000000      |
| 65-69 | 73-132  | 0.000000    | 0.007033     | 0.000000      |
| 70-74 | 73-132  | 0.000000    | 0.008206     | 0.000000      |
| 75-79 | 73-132  | 0.000000    | 0.008206     | 0.000000      |
| 10-14 | 133-192 | 0.002861    | 0.008742     | 0.000000      |
| 15-19 | 133-192 | 0.002594    | 0.003996     | 0.000000      |
| 20-24 | 133-192 | 0.001247    | 0.002805     | 0.000000      |
| 25-29 | 133-192 | 0.000289    | 0.001574     | 0.000000      |
| 30-34 | 133-192 | 0.000132    | 0.001293     | 0.000000      |
| 35-39 | 133-192 | 0.000000    | 0.001219     | 0.000000      |
| 40-44 | 133-192 | 0.000000    | 0.001657     | 0.000000      |
| 45-49 | 133-192 | 0.000000    | 0.001995     | 0.000000      |
| 50-54 | 133-192 | 0.000000    | 0.002154     | 0.000000      |
| 55-59 | 133-192 | 0.000000    | 0.002072     | 0.000000      |
| 60-64 | 133-192 | 0.000000    | 0.005049     | 0.000000      |
| 65-69 | 133-192 | 0.000000    | 0.003680     | 0.000000      |
| 70-74 | 133-192 | 0.000000    | 0.006144     | 0.000000      |
| 75-79 | 133-192 | 0.000000    | 0.006144     | 0.000000      |
| 10-14 | 193-252 | 0.001859    | 0.008742     | 0.000000      |
| 15-19 | 193-252 | 0.002232    | 0.005770     | 0.000000      |
| 20-24 | 193-252 | 0.001079    | 0.003262     | 0.000000      |
| 25-29 | 193-252 | 0.000531    | 0.002002     | 0.000000      |
| 30-34 | 193-252 | 0.000263    | 0.003240     | 0.000000      |
| 35-39 | 193-252 | 0.000000    | 0.001771     | 0.000000      |
| 40-44 | 193-252 | 0.000000    | 0.002173     | 0.000000      |
| 45-49 | 193-252 | 0.000000    | 0.002075     | 0.000000      |
| 50-54 | 193-252 | 0.000000    | 0.003431     | 0.000000      |

### Results for PHIM for Run 2 (Sensitivity\_Analysis\_2.RTF)

|       |         |          |          |          |
|-------|---------|----------|----------|----------|
| 55-59 | 193-252 | 0.000000 | 0.002906 | 0.000000 |
| 60-64 | 193-252 | 0.000000 | 0.007139 | 0.000000 |
| 65-69 | 193-252 | 0.000000 | 0.004963 | 0.000000 |
| 70-74 | 193-252 | 0.000000 | 0.006269 | 0.000000 |
| 75-79 | 193-252 | 0.000000 | 0.006269 | 0.000000 |
| 10-14 | 253+    | 0.000931 | 0.008742 | 0.000000 |
| 15-19 | 253+    | 0.001798 | 0.009440 | 0.000000 |
| 20-24 | 253+    | 0.000023 | 0.002831 | 0.000000 |
| 25-29 | 253+    | 0.000073 | 0.002655 | 0.000000 |
| 30-34 | 253+    | 0.000037 | 0.004614 | 0.000000 |
| 35-39 | 253+    | 0.000000 | 0.002607 | 0.000000 |
| 40-44 | 253+    | 0.000000 | 0.003115 | 0.000000 |
| 45-49 | 253+    | 0.000000 | 0.002132 | 0.000000 |
| 50-54 | 253+    | 0.000000 | 0.003497 | 0.000000 |
| 55-59 | 253+    | 0.000000 | 0.002942 | 0.000000 |
| 60-64 | 253+    | 0.000000 | 0.005376 | 0.000000 |
| 65-69 | 253+    | 0.000000 | 0.001789 | 0.000000 |
| 70-74 | 253+    | 0.000000 | 0.004077 | 0.000000 |
| 75-79 | 253+    | 0.000000 | 0.004077 | 0.000000 |

## Results for PHIM for Run 2 (Sensitivity\_Analysis\_2.RTF)

\*\*\*\*\*

TTP values for Run: 2, Scenario: Ecig

| Variable Parameter | Value               |
|--------------------|---------------------|
| 1. Country         | US (United States)  |
| 2. Sex             | F (Females)         |
| 3. Assumption Set  | S2A                 |
| Note:              | Period is in Months |

| Age   | Period  | Initiation  |               |               | Cessation    |                |                | Re-initiation |                |                |
|-------|---------|-------------|---------------|---------------|--------------|----------------|----------------|---------------|----------------|----------------|
|       |         | Never<br>CC | Never<br>Ecig | Never<br>Dual | CC<br>Former | Ecig<br>Former | Dual<br>Former | Former<br>CC  | Former<br>Ecig | Former<br>Dual |
| 10-14 | 1-12    | 0.001879    | 0.001879      | 0.000000      | 0.008742     | 0.008742       | 0.000000       | 0.000000      | 0.000000       | 0.000000       |
| 15-19 | 1-12    | 0.001735    | 0.001735      | 0.000000      | 0.002515     | 0.002515       | 0.000000       | 0.000000      | 0.000000       | 0.000000       |
| 20-24 | 1-12    | 0.000138    | 0.000138      | 0.000000      | 0.000761     | 0.000761       | 0.000000       | 0.000000      | 0.000000       | 0.000000       |
| 25-29 | 1-12    | 0.000069    | 0.000069      | 0.000000      | 0.001376     | 0.001376       | 0.000000       | 0.000000      | 0.000000       | 0.000000       |
| 30-34 | 1-12    | 0.000034    | 0.000034      | 0.000000      | 0.001149     | 0.001149       | 0.000000       | 0.000000      | 0.000000       | 0.000000       |
| 35-39 | 1-12    | 0.000000    | 0.000000      | 0.000000      | 0.000991     | 0.000991       | 0.000000       | 0.000000      | 0.000000       | 0.000000       |
| 40-44 | 1-12    | 0.000000    | 0.000000      | 0.000000      | 0.000833     | 0.000833       | 0.000000       | 0.000000      | 0.000000       | 0.000000       |
| 45-49 | 1-12    | 0.000000    | 0.000000      | 0.000000      | 0.001723     | 0.001723       | 0.000000       | 0.000000      | 0.000000       | 0.000000       |
| 50-54 | 1-12    | 0.000000    | 0.000000      | 0.000000      | 0.002336     | 0.002336       | 0.000000       | 0.000000      | 0.000000       | 0.000000       |
| 55-59 | 1-12    | 0.000000    | 0.000000      | 0.000000      | 0.002233     | 0.002233       | 0.000000       | 0.000000      | 0.000000       | 0.000000       |
| 60-64 | 1-12    | 0.000000    | 0.000000      | 0.000000      | 0.004635     | 0.004635       | 0.000000       | 0.000000      | 0.000000       | 0.000000       |
| 65-69 | 1-12    | 0.000000    | 0.000000      | 0.000000      | 0.003505     | 0.003505       | 0.000000       | 0.000000      | 0.000000       | 0.000000       |
| 70-74 | 1-12    | 0.000000    | 0.000000      | 0.000000      | 0.004329     | 0.004329       | 0.000000       | 0.000000      | 0.000000       | 0.000000       |
| 75-79 | 1-12    | 0.000000    | 0.000000      | 0.000000      | 0.004329     | 0.004329       | 0.000000       | 0.000000      | 0.000000       | 0.000000       |
| 10-14 | 13-72   | 0.001918    | 0.002877      | 0.000000      | 0.008742     | 0.008742       | 0.000000       | 0.000000      | 0.000000       | 0.000000       |
| 15-19 | 13-72   | 0.001811    | 0.002716      | 0.000000      | 0.004083     | 0.004083       | 0.000000       | 0.000000      | 0.000000       | 0.000000       |
| 20-24 | 13-72   | 0.000042    | 0.000063      | 0.000000      | 0.001261     | 0.001261       | 0.000000       | 0.000000      | 0.000000       | 0.000000       |
| 25-29 | 13-72   | 0.000021    | 0.000032      | 0.000000      | 0.000952     | 0.000952       | 0.000000       | 0.000000      | 0.000000       | 0.000000       |
| 30-34 | 13-72   | 0.000011    | 0.000016      | 0.000000      | 0.000733     | 0.000733       | 0.000000       | 0.000000      | 0.000000       | 0.000000       |
| 35-39 | 13-72   | 0.000000    | 0.000000      | 0.000000      | 0.000754     | 0.000754       | 0.000000       | 0.000000      | 0.000000       | 0.000000       |
| 40-44 | 13-72   | 0.000000    | 0.000000      | 0.000000      | 0.001535     | 0.001535       | 0.000000       | 0.000000      | 0.000000       | 0.000000       |
| 45-49 | 13-72   | 0.000000    | 0.000000      | 0.000000      | 0.002998     | 0.002998       | 0.000000       | 0.000000      | 0.000000       | 0.000000       |
| 50-54 | 13-72   | 0.000000    | 0.000000      | 0.000000      | 0.003160     | 0.003160       | 0.000000       | 0.000000      | 0.000000       | 0.000000       |
| 55-59 | 13-72   | 0.000000    | 0.000000      | 0.000000      | 0.002965     | 0.002965       | 0.000000       | 0.000000      | 0.000000       | 0.000000       |
| 60-64 | 13-72   | 0.000000    | 0.000000      | 0.000000      | 0.003633     | 0.003633       | 0.000000       | 0.000000      | 0.000000       | 0.000000       |
| 65-69 | 13-72   | 0.000000    | 0.000000      | 0.000000      | 0.004522     | 0.004522       | 0.000000       | 0.000000      | 0.000000       | 0.000000       |
| 70-74 | 13-72   | 0.000000    | 0.000000      | 0.000000      | 0.005208     | 0.005208       | 0.000000       | 0.000000      | 0.000000       | 0.000000       |
| 75-79 | 13-72   | 0.000000    | 0.000000      | 0.000000      | 0.005208     | 0.005208       | 0.000000       | 0.000000      | 0.000000       | 0.000000       |
| 10-14 | 73-132  | 0.000794    | 0.003175      | 0.000000      | 0.008742     | 0.008742       | 0.000000       | 0.000000      | 0.000000       | 0.000000       |
| 15-19 | 73-132  | 0.000611    | 0.002445      | 0.000000      | 0.003373     | 0.003373       | 0.000000       | 0.000000      | 0.000000       | 0.000000       |
| 20-24 | 73-132  | 0.000292    | 0.001167      | 0.000000      | 0.003881     | 0.003881       | 0.000000       | 0.000000      | 0.000000       | 0.000000       |
| 25-29 | 73-132  | 0.000143    | 0.000571      | 0.000000      | 0.001954     | 0.001954       | 0.000000       | 0.000000      | 0.000000       | 0.000000       |
| 30-34 | 73-132  | 0.000022    | 0.000089      | 0.000000      | 0.001338     | 0.001338       | 0.000000       | 0.000000      | 0.000000       | 0.000000       |
| 35-39 | 73-132  | 0.000000    | 0.000000      | 0.000000      | 0.001507     | 0.001507       | 0.000000       | 0.000000      | 0.000000       | 0.000000       |
| 40-44 | 73-132  | 0.000000    | 0.000000      | 0.000000      | 0.002080     | 0.002080       | 0.000000       | 0.000000      | 0.000000       | 0.000000       |
| 45-49 | 73-132  | 0.000000    | 0.000000      | 0.000000      | 0.003809     | 0.003809       | 0.000000       | 0.000000      | 0.000000       | 0.000000       |
| 50-54 | 73-132  | 0.000000    | 0.000000      | 0.000000      | 0.004871     | 0.004871       | 0.000000       | 0.000000      | 0.000000       | 0.000000       |
| 55-59 | 73-132  | 0.000000    | 0.000000      | 0.000000      | 0.004560     | 0.004560       | 0.000000       | 0.000000      | 0.000000       | 0.000000       |
| 60-64 | 73-132  | 0.000000    | 0.000000      | 0.000000      | 0.007192     | 0.007192       | 0.000000       | 0.000000      | 0.000000       | 0.000000       |
| 65-69 | 73-132  | 0.000000    | 0.000000      | 0.000000      | 0.007033     | 0.007033       | 0.000000       | 0.000000      | 0.000000       | 0.000000       |
| 70-74 | 73-132  | 0.000000    | 0.000000      | 0.000000      | 0.008206     | 0.008206       | 0.000000       | 0.000000      | 0.000000       | 0.000000       |
| 75-79 | 73-132  | 0.000000    | 0.000000      | 0.000000      | 0.008206     | 0.008206       | 0.000000       | 0.000000      | 0.000000       | 0.000000       |
| 10-14 | 133-192 | 0.000143    | 0.002718      | 0.000000      | 0.008742     | 0.008742       | 0.000000       | 0.000000      | 0.000000       | 0.000000       |
| 15-19 | 133-192 | 0.000130    | 0.002465      | 0.000000      | 0.003996     | 0.003996       | 0.000000       | 0.000000      | 0.000000       | 0.000000       |
| 20-24 | 133-192 | 0.000062    | 0.001185      | 0.000000      | 0.002805     | 0.002805       | 0.000000       | 0.000000      | 0.000000       | 0.000000       |
| 25-29 | 133-192 | 0.000015    | 0.000275      | 0.000000      | 0.001574     | 0.001574       | 0.000000       | 0.000000      | 0.000000       | 0.000000       |
| 30-34 | 133-192 | 0.000007    | 0.000125      | 0.000000      | 0.001293     | 0.001293       | 0.000000       | 0.000000      | 0.000000       | 0.000000       |
| 35-39 | 133-192 | 0.000000    | 0.000000      | 0.000000      | 0.001219     | 0.001219       | 0.000000       | 0.000000      | 0.000000       | 0.000000       |
| 40-44 | 133-192 | 0.000000    | 0.000000      | 0.000000      | 0.001657     | 0.001657       | 0.000000       | 0.000000      | 0.000000       | 0.000000       |
| 45-49 | 133-192 | 0.000000    | 0.000000      | 0.000000      | 0.001995     | 0.001995       | 0.000000       | 0.000000      | 0.000000       | 0.000000       |
| 50-54 | 133-192 | 0.000000    | 0.000000      | 0.000000      | 0.002154     | 0.002154       | 0.000000       | 0.000000      | 0.000000       | 0.000000       |
| 55-59 | 133-192 | 0.000000    | 0.000000      | 0.000000      | 0.002072     | 0.002072       | 0.000000       | 0.000000      | 0.000000       | 0.000000       |
| 60-64 | 133-192 | 0.000000    | 0.000000      | 0.000000      | 0.005049     | 0.005049       | 0.000000       | 0.000000      | 0.000000       | 0.000000       |
| 65-69 | 133-192 | 0.000000    | 0.000000      | 0.000000      | 0.003681     | 0.003681       | 0.000000       | 0.000000      | 0.000000       | 0.000000       |
| 70-74 | 133-192 | 0.000000    | 0.000000      | 0.000000      | 0.006144     | 0.006144       | 0.000000       | 0.000000      | 0.000000       | 0.000000       |
| 75-79 | 133-192 | 0.000000    | 0.000000      | 0.000000      | 0.006144     | 0.006144       | 0.000000       | 0.000000      | 0.000000       | 0.000000       |
| 10-14 | 193-252 | 0.000093    | 0.001766      | 0.000000      | 0.008742     | 0.008742       | 0.000000       | 0.000000      | 0.000000       | 0.000000       |
| 15-19 | 193-252 | 0.000112    | 0.002120      | 0.000000      | 0.005770     | 0.005770       | 0.000000       | 0.000000      | 0.000000       | 0.000000       |
| 20-24 | 193-252 | 0.000054    | 0.001025      | 0.000000      | 0.003262     | 0.003262       | 0.000000       | 0.000000      | 0.000000       | 0.000000       |
| 25-29 | 193-252 | 0.000027    | 0.000504      | 0.000000      | 0.002002     | 0.002002       | 0.000000       | 0.000000      | 0.000000       | 0.000000       |
| 30-34 | 193-252 | 0.000013    | 0.000250      | 0.000000      | 0.003241     | 0.003241       | 0.000000       | 0.000000      | 0.000000       | 0.000000       |
| 35-39 | 193-252 | 0.000000    | 0.000000      | 0.000000      | 0.001771     | 0.001771       | 0.000000       | 0.000000      | 0.000000       | 0.000000       |
| 40-44 | 193-252 | 0.000000    | 0.000000      | 0.000000      | 0.002173     | 0.002173       | 0.000000       | 0.000000      | 0.000000       | 0.000000       |
| 45-49 | 193-252 | 0.000000    | 0.000000      | 0.000000      | 0.002075     | 0.002075       | 0.000000       | 0.000000      | 0.000000       | 0.000000       |
| 50-54 | 193-252 | 0.000000    | 0.000000      | 0.000000      | 0.003432     | 0.003432       | 0.000000       | 0.000000      | 0.000000       | 0.000000       |

### Results for PHIM for Run 2 (Sensitivity\_Analysis\_2.RTF)

|       |         |          |          |          |          |          |          |          |          |          |
|-------|---------|----------|----------|----------|----------|----------|----------|----------|----------|----------|
| 55-59 | 193-252 | 0.000000 | 0.000000 | 0.000000 | 0.002906 | 0.002906 | 0.000000 | 0.000000 | 0.000000 | 0.000000 |
| 60-64 | 193-252 | 0.000000 | 0.000000 | 0.000000 | 0.007139 | 0.007139 | 0.000000 | 0.000000 | 0.000000 | 0.000000 |
| 65-69 | 193-252 | 0.000000 | 0.000000 | 0.000000 | 0.004963 | 0.004963 | 0.000000 | 0.000000 | 0.000000 | 0.000000 |
| 70-74 | 193-252 | 0.000000 | 0.000000 | 0.000000 | 0.006269 | 0.006269 | 0.000000 | 0.000000 | 0.000000 | 0.000000 |
| 75-79 | 193-252 | 0.000000 | 0.000000 | 0.000000 | 0.006269 | 0.006269 | 0.000000 | 0.000000 | 0.000000 | 0.000000 |
| 10-14 | 253+    | 0.000047 | 0.000884 | 0.000000 | 0.008742 | 0.008742 | 0.000000 | 0.000000 | 0.000000 | 0.000000 |
| 15-19 | 253+    | 0.000090 | 0.001708 | 0.000000 | 0.009440 | 0.009440 | 0.000000 | 0.000000 | 0.000000 | 0.000000 |
| 20-24 | 253+    | 0.000001 | 0.000022 | 0.000000 | 0.002831 | 0.002831 | 0.000000 | 0.000000 | 0.000000 | 0.000000 |
| 25-29 | 253+    | 0.000004 | 0.000070 | 0.000000 | 0.002656 | 0.002656 | 0.000000 | 0.000000 | 0.000000 | 0.000000 |
| 30-34 | 253+    | 0.000002 | 0.000035 | 0.000000 | 0.004614 | 0.004614 | 0.000000 | 0.000000 | 0.000000 | 0.000000 |
| 35-39 | 253+    | 0.000000 | 0.000000 | 0.000000 | 0.002608 | 0.002608 | 0.000000 | 0.000000 | 0.000000 | 0.000000 |
| 40-44 | 253+    | 0.000000 | 0.000000 | 0.000000 | 0.003115 | 0.003115 | 0.000000 | 0.000000 | 0.000000 | 0.000000 |
| 45-49 | 253+    | 0.000000 | 0.000000 | 0.000000 | 0.002132 | 0.002132 | 0.000000 | 0.000000 | 0.000000 | 0.000000 |
| 50-54 | 253+    | 0.000000 | 0.000000 | 0.000000 | 0.003497 | 0.003497 | 0.000000 | 0.000000 | 0.000000 | 0.000000 |
| 55-59 | 253+    | 0.000000 | 0.000000 | 0.000000 | 0.002942 | 0.002942 | 0.000000 | 0.000000 | 0.000000 | 0.000000 |
| 60-64 | 253+    | 0.000000 | 0.000000 | 0.000000 | 0.005376 | 0.005376 | 0.000000 | 0.000000 | 0.000000 | 0.000000 |
| 65-69 | 253+    | 0.000000 | 0.000000 | 0.000000 | 0.001789 | 0.001789 | 0.000000 | 0.000000 | 0.000000 | 0.000000 |
| 70-74 | 253+    | 0.000000 | 0.000000 | 0.000000 | 0.004077 | 0.004077 | 0.000000 | 0.000000 | 0.000000 | 0.000000 |
| 75-79 | 253+    | 0.000000 | 0.000000 | 0.000000 | 0.004077 | 0.004077 | 0.000000 | 0.000000 | 0.000000 | 0.000000 |



**Results for PHIM for Run 2 (Sensitivity\_Analysis\_2.RTF)**

|       |      |          |          |          |          |          |          |
|-------|------|----------|----------|----------|----------|----------|----------|
| 25-29 | 253+ | 0.140981 | 0.000000 | 0.000000 | 0.000000 | 0.000000 | 0.000000 |
| 30-34 | 253+ | 0.064119 | 0.000000 | 0.000000 | 0.000000 | 0.000000 | 0.000000 |
| 35-39 | 253+ | 0.063053 | 0.000000 | 0.000000 | 0.000000 | 0.000000 | 0.000000 |
| 40-44 | 253+ | 0.062916 | 0.000000 | 0.000000 | 0.000000 | 0.000000 | 0.000000 |
| 45-49 | 253+ | 0.062451 | 0.000000 | 0.000000 | 0.000000 | 0.000000 | 0.000000 |
| 50-54 | 253+ | 0.061730 | 0.000000 | 0.000000 | 0.000000 | 0.000000 | 0.000000 |
| 55-59 | 253+ | 0.059312 | 0.000000 | 0.000000 | 0.000000 | 0.000000 | 0.000000 |
| 60-64 | 253+ | 0.058467 | 0.000000 | 0.000000 | 0.000000 | 0.000000 | 0.000000 |
| 65-69 | 253+ | 0.056736 | 0.000000 | 0.000000 | 0.000000 | 0.000000 | 0.000000 |
| 70-74 | 253+ | 0.054712 | 0.000000 | 0.000000 | 0.000000 | 0.000000 | 0.000000 |
| 75-79 | 253+ | 0.054712 | 0.000000 | 0.000000 | 0.000000 | 0.000000 | 0.000000 |

## Results for PHIM for Run 2 (Sensitivity\_Analysis\_2.RTF)

\*\*\*\*\*

### Main Output for the Tobacco History for Run: 2, Simulation: 1, Scenario: NULL

| Variable Parameter          | Value              |
|-----------------------------|--------------------|
| 1. Country                  | US (United States) |
| 2. Sex                      | F (Females)        |
| 3. Year of start of process | 1990               |

Year of Follow-up: 2040, Age Group: All Ages  
 Period    Age Group    Smoking Group            N            %

|    |          |           |       |       |
|----|----------|-----------|-------|-------|
| 50 | All Ages | Never Any | 20670 | 58.80 |
| 50 | All Ages | CC        | 2462  | 7.00  |
| 50 | All Ages | Former    | 12019 | 34.19 |

Year of Follow-up: 2040, Age Group: 18-19  
 Period    Age Group    Smoking Group            N            %

|    |       |           |   |   |
|----|-------|-----------|---|---|
| 50 | 18-19 | Never Any | 0 | . |
| 50 | 18-19 | CC        | 0 | . |
| 50 | 18-19 | Former    | 0 | . |

Year of Follow-up: 2040, Age Group: 20-24  
 Period    Age Group    Smoking Group            N            %

|    |       |           |   |   |
|----|-------|-----------|---|---|
| 50 | 20-24 | Never Any | 0 | . |
| 50 | 20-24 | CC        | 0 | . |
| 50 | 20-24 | Former    | 0 | . |

Year of Follow-up: 2040, Age Group: 25-29  
 Period    Age Group    Smoking Group            N            %

|    |       |           |   |   |
|----|-------|-----------|---|---|
| 50 | 25-29 | Never Any | 0 | . |
| 50 | 25-29 | CC        | 0 | . |
| 50 | 25-29 | Former    | 0 | . |

Year of Follow-up: 2040, Age Group: 30-34  
 Period    Age Group    Smoking Group            N            %

|    |       |           |   |   |
|----|-------|-----------|---|---|
| 50 | 30-34 | Never Any | 0 | . |
| 50 | 30-34 | CC        | 0 | . |
| 50 | 30-34 | Former    | 0 | . |

Year of Follow-up: 2040, Age Group: 35-39  
 Period    Age Group    Smoking Group            N            %

|    |       |           |   |   |
|----|-------|-----------|---|---|
| 50 | 35-39 | Never Any | 0 | . |
| 50 | 35-39 | CC        | 0 | . |
| 50 | 35-39 | Former    | 0 | . |

Year of Follow-up: 2040, Age Group: 40-44  
 Period    Age Group    Smoking Group            N            %

|    |       |           |   |   |
|----|-------|-----------|---|---|
| 50 | 40-44 | Never Any | 0 | . |
| 50 | 40-44 | CC        | 0 | . |
| 50 | 40-44 | Former    | 0 | . |

Year of Follow-up: 2040, Age Group: 45-49  
 Period    Age Group    Smoking Group            N            %

|    |       |           |   |   |
|----|-------|-----------|---|---|
| 50 | 45-49 | Never Any | 0 | . |
| 50 | 45-49 | CC        | 0 | . |
| 50 | 45-49 | Former    | 0 | . |

Year of Follow-up: 2040, Age Group: 50-54  
 Period    Age Group    Smoking Group            N            %

|    |       |           |   |   |
|----|-------|-----------|---|---|
| 50 | 50-54 | Never Any | 0 | . |
| 50 | 50-54 | CC        | 0 | . |
| 50 | 50-54 | Former    | 0 | . |

Year of Follow-up: 2040, Age Group: 55-59  
 Period    Age Group    Smoking Group            N            %

|    |       |           |   |   |
|----|-------|-----------|---|---|
| 50 | 55-59 | Never Any | 0 | . |
| 50 | 55-59 | CC        | 0 | . |
| 50 | 55-59 | Former    | 0 | . |

Year of Follow-up: 2040, Age Group: 60-64  
 Period    Age Group    Smoking Group            N            %



### Results for PHIM for Run 2 (Sensitivity\_Analysis\_2.RTF)

|                                           |           |               |      |       |
|-------------------------------------------|-----------|---------------|------|-------|
| 50                                        | 60-64     | Never Any     | 4803 | 60.57 |
| 50                                        | 60-64     | CC            | 621  | 7.83  |
| 50                                        | 60-64     | Former        | 2506 | 31.60 |
| Year of Follow-up: 2040, Age Group: 65-69 |           |               |      |       |
| Period                                    | Age Group | Smoking Group | N    | %     |
| 50                                        | 65-69     | Never Any     | 5407 | 64.75 |
| 50                                        | 65-69     | CC            | 538  | 6.44  |
| 50                                        | 65-69     | Former        | 2405 | 28.80 |
| Year of Follow-up: 2040, Age Group: 70-74 |           |               |      |       |
| Period                                    | Age Group | Smoking Group | N    | %     |
| 50                                        | 70-74     | Never Any     | 5181 | 58.92 |
| 50                                        | 70-74     | CC            | 605  | 6.88  |
| 50                                        | 70-74     | Former        | 3007 | 34.20 |
| Year of Follow-up: 2040, Age Group: 75-79 |           |               |      |       |
| Period                                    | Age Group | Smoking Group | N    | %     |
| 50                                        | 75-79     | Never Any     | 5279 | 52.38 |
| 50                                        | 75-79     | CC            | 698  | 6.93  |
| 50                                        | 75-79     | Former        | 4101 | 40.69 |

## Results for PHIM for Run 2 (Sensitivity\_Analysis\_2.RTF)

\*\*\*\*\*

### Main Output for the Tobacco History for Run: 2, Simulation: 1, Scenario: Ecig

| Variable Parameter                           |           | Value              |       |       |               |             |               |                |              |
|----------------------------------------------|-----------|--------------------|-------|-------|---------------|-------------|---------------|----------------|--------------|
| 1. Country                                   |           | US (United States) |       |       |               |             |               |                |              |
| 2. Sex                                       |           | F (Females)        |       |       |               |             |               |                |              |
| 3. Year of start of process                  |           | 1990               |       |       |               |             |               |                |              |
| Year of Follow-up: 1990, Age Group: All Ages |           |                    |       |       |               |             |               |                |              |
| Period                                       | Age Group | Smoking Group      | N     | %     | Ever Quit (N) | Ever Quit % | Mean Yrs Quit | Short Term (n) | Short Term % |
| 0                                            | All Ages  | Never Any          | 47776 | 54.92 |               |             |               |                |              |
| 0                                            | All Ages  | CC                 | 22737 | 26.14 | 0             | 0.00        |               |                |              |
| 0                                            | All Ages  | Ecig               | 0     | 0.00  |               |             |               |                |              |
| 0                                            | All Ages  | Dual               | 0     | 0.00  |               |             |               |                |              |
| 0                                            | All Ages  | Former             | 16484 | 18.95 |               |             | 11.90         | 2815           | 17.08        |
| Year of Follow-up: 1990, Age Group: 18-19    |           |                    |       |       |               |             |               |                |              |
| Period                                       | Age Group | Smoking Group      | N     | %     | Ever Quit (N) | Ever Quit % | Mean Yrs Quit | Short Term (n) | Short Term % |
| 0                                            | 18-19     | Never Any          | 2570  | 78.43 |               |             |               |                |              |
| 0                                            | 18-19     | CC                 | 535   | 16.33 | 0             | 0.00        |               |                |              |
| 0                                            | 18-19     | Ecig               | 0     | 0.00  |               |             |               |                |              |
| 0                                            | 18-19     | Dual               | 0     | 0.00  |               |             |               |                |              |
| 0                                            | 18-19     | Former             | 172   | 5.25  |               |             | 0.20          | 172            | 100.00       |
| Year of Follow-up: 1990, Age Group: 20-24    |           |                    |       |       |               |             |               |                |              |
| Period                                       | Age Group | Smoking Group      | N     | %     | Ever Quit (N) | Ever Quit % | Mean Yrs Quit | Short Term (n) | Short Term % |
| 0                                            | 20-24     | Never Any          | 5354  | 60.89 |               |             |               |                |              |
| 0                                            | 20-24     | CC                 | 2560  | 29.11 | 0             | 0.00        |               |                |              |
| 0                                            | 20-24     | Ecig               | 0     | 0.00  |               |             |               |                |              |
| 0                                            | 20-24     | Dual               | 0     | 0.00  |               |             |               |                |              |
| 0                                            | 20-24     | Former             | 879   | 10.00 |               |             | 1.58          | 420            | 47.78        |
| Year of Follow-up: 1990, Age Group: 25-29    |           |                    |       |       |               |             |               |                |              |
| Period                                       | Age Group | Smoking Group      | N     | %     | Ever Quit (N) | Ever Quit % | Mean Yrs Quit | Short Term (n) | Short Term % |
| 0                                            | 25-29     | Never Any          | 5318  | 52.77 |               |             |               |                |              |
| 0                                            | 25-29     | CC                 | 3335  | 33.09 | 0             | 0.00        |               |                |              |
| 0                                            | 25-29     | Ecig               | 0     | 0.00  |               |             |               |                |              |
| 0                                            | 25-29     | Dual               | 0     | 0.00  |               |             |               |                |              |
| 0                                            | 25-29     | Former             | 1425  | 14.14 |               |             | 3.91          | 404            | 28.35        |
| Year of Follow-up: 1990, Age Group: 30-34    |           |                    |       |       |               |             |               |                |              |
| Period                                       | Age Group | Smoking Group      | N     | %     | Ever Quit (N) | Ever Quit % | Mean Yrs Quit | Short Term (n) | Short Term % |
| 0                                            | 30-34     | Never Any          | 5287  | 50.36 |               |             |               |                |              |
| 0                                            | 30-34     | CC                 | 3326  | 31.68 | 0             | 0.00        |               |                |              |
| 0                                            | 30-34     | Ecig               | 0     | 0.00  |               |             |               |                |              |
| 0                                            | 30-34     | Dual               | 0     | 0.00  |               |             |               |                |              |
| 0                                            | 30-34     | Former             | 1886  | 17.96 |               |             | 4.36          | 566            | 30.01        |
| Year of Follow-up: 1990, Age Group: 35-39    |           |                    |       |       |               |             |               |                |              |
| Period                                       | Age Group | Smoking Group      | N     | %     | Ever Quit (N) | Ever Quit % | Mean Yrs Quit | Short Term (n) | Short Term % |
| 0                                            | 35-39     | Never Any          | 5018  | 52.27 |               |             |               |                |              |
| 0                                            | 35-39     | CC                 | 2653  | 27.64 | 0             | 0.00        |               |                |              |
| 0                                            | 35-39     | Ecig               | 0     | 0.00  |               |             |               |                |              |
| 0                                            | 35-39     | Dual               | 0     | 0.00  |               |             |               |                |              |
| 0                                            | 35-39     | Former             | 1929  | 20.09 |               |             | 7.96          | 324            | 16.80        |
| Year of Follow-up: 1990, Age Group: 40-44    |           |                    |       |       |               |             |               |                |              |
| Period                                       | Age Group | Smoking Group      | N     | %     | Ever Quit (N) | Ever Quit % | Mean Yrs Quit | Short Term (n) | Short Term % |
| 0                                            | 40-44     | Never Any          | 4356  | 51.27 |               |             |               |                |              |
| 0                                            | 40-44     | CC                 | 2397  | 28.21 | 0             | 0.00        |               |                |              |
| 0                                            | 40-44     | Ecig               | 0     | 0.00  |               |             |               |                |              |
| 0                                            | 40-44     | Dual               | 0     | 0.00  |               |             |               |                |              |
| 0                                            | 40-44     | Former             | 1744  | 20.52 |               |             | 7.33          | 339            | 19.44        |
| Year of Follow-up: 1990, Age Group: 45-49    |           |                    |       |       |               |             |               |                |              |
| Period                                       | Age Group | Smoking Group      | N     | %     | Ever Quit (N) | Ever Quit % | Mean Yrs Quit | Short Term (n) | Short Term % |
| 0                                            | 45-49     | Never Any          | 3116  | 47.67 |               |             |               |                |              |
| 0                                            | 45-49     | CC                 | 1875  | 28.69 | 0             | 0.00        |               |                |              |
| 0                                            | 45-49     | Ecig               | 0     | 0.00  |               |             |               |                |              |
| 0                                            | 45-49     | Dual               | 0     | 0.00  |               |             |               |                |              |
| 0                                            | 45-49     | Former             | 1545  | 23.64 |               |             | 12.55         | 194            | 12.56        |
| Year of Follow-up: 1990, Age Group: 50-54    |           |                    |       |       |               |             |               |                |              |
| Period                                       | Age Group | Smoking Group      | N     | %     | Ever Quit (N) | Ever Quit % | Mean Yrs Quit | Short Term (n) | Short Term % |
| 0                                            | 50-54     | Never Any          | 2684  | 48.50 |               |             |               |                |              |
| 0                                            | 50-54     | CC                 | 1572  | 28.41 | 0             | 0.00        |               |                |              |

## Results for PHIM for Run 2 (Sensitivity\_Analysis\_2.RTF)

|                                              |           |               |       |       |               |             |               |                |              |
|----------------------------------------------|-----------|---------------|-------|-------|---------------|-------------|---------------|----------------|--------------|
| 0                                            | 50-54     | Ecig          | 0     | 0.00  |               |             |               |                |              |
| 0                                            | 50-54     | Dual          | 0     | 0.00  |               |             |               |                |              |
| 0                                            | 50-54     | Former        | 1278  | 23.09 |               |             | 13.28         | 126            | 9.86         |
| Year of Follow-up: 1990, Age Group: 55-59    |           |               |       |       |               |             |               |                |              |
| Period                                       | Age Group | Smoking Group | N     | %     | Ever Quit (N) | Ever Quit % | Mean Yrs Quit | Short Term (n) | Short Term % |
| 0                                            | 55-59     | Never Any     | 2732  | 51.90 |               |             |               |                |              |
| 0                                            | 55-59     | CC            | 1295  | 24.60 | 0             | 0.00        |               |                |              |
| 0                                            | 55-59     | Ecig          | 0     | 0.00  |               |             |               |                |              |
| 0                                            | 55-59     | Dual          | 0     | 0.00  |               |             |               |                |              |
| 0                                            | 55-59     | Former        | 1237  | 23.50 |               |             | 17.26         | 90             | 7.28         |
| Year of Follow-up: 1990, Age Group: 60-64    |           |               |       |       |               |             |               |                |              |
| Period                                       | Age Group | Smoking Group | N     | %     | Ever Quit (N) | Ever Quit % | Mean Yrs Quit | Short Term (n) | Short Term % |
| 0                                            | 60-64     | Never Any     | 3078  | 55.72 |               |             |               |                |              |
| 0                                            | 60-64     | CC            | 1249  | 22.61 | 0             | 0.00        |               |                |              |
| 0                                            | 60-64     | Ecig          | 0     | 0.00  |               |             |               |                |              |
| 0                                            | 60-64     | Dual          | 0     | 0.00  |               |             |               |                |              |
| 0                                            | 60-64     | Former        | 1197  | 21.67 |               |             | 18.28         | 61             | 5.10         |
| Year of Follow-up: 1990, Age Group: 65-69    |           |               |       |       |               |             |               |                |              |
| Period                                       | Age Group | Smoking Group | N     | %     | Ever Quit (N) | Ever Quit % | Mean Yrs Quit | Short Term (n) | Short Term % |
| 0                                            | 65-69     | Never Any     | 3042  | 57.36 |               |             |               |                |              |
| 0                                            | 65-69     | CC            | 976   | 18.40 | 0             | 0.00        |               |                |              |
| 0                                            | 65-69     | Ecig          | 0     | 0.00  |               |             |               |                |              |
| 0                                            | 65-69     | Dual          | 0     | 0.00  |               |             |               |                |              |
| 0                                            | 65-69     | Former        | 1285  | 24.23 |               |             | 20.65         | 68             | 5.29         |
| Year of Follow-up: 1990, Age Group: 70-74    |           |               |       |       |               |             |               |                |              |
| Period                                       | Age Group | Smoking Group | N     | %     | Ever Quit (N) | Ever Quit % | Mean Yrs Quit | Short Term (n) | Short Term % |
| 0                                            | 70-74     | Never Any     | 2738  | 61.05 |               |             |               |                |              |
| 0                                            | 70-74     | CC            | 610   | 13.60 | 0             | 0.00        |               |                |              |
| 0                                            | 70-74     | Ecig          | 0     | 0.00  |               |             |               |                |              |
| 0                                            | 70-74     | Dual          | 0     | 0.00  |               |             |               |                |              |
| 0                                            | 70-74     | Former        | 1137  | 25.35 |               |             | 24.48         | 27             | 2.37         |
| Year of Follow-up: 1990, Age Group: 75-79    |           |               |       |       |               |             |               |                |              |
| Period                                       | Age Group | Smoking Group | N     | %     | Ever Quit (N) | Ever Quit % | Mean Yrs Quit | Short Term (n) | Short Term % |
| 0                                            | 75-79     | Never Any     | 2483  | 68.84 |               |             |               |                |              |
| 0                                            | 75-79     | CC            | 354   | 9.81  | 0             | 0.00        |               |                |              |
| 0                                            | 75-79     | Ecig          | 0     | 0.00  |               |             |               |                |              |
| 0                                            | 75-79     | Dual          | 0     | 0.00  |               |             |               |                |              |
| 0                                            | 75-79     | Former        | 770   | 21.35 |               |             | 24.48         | 24             | 3.12         |
| Year of Follow-up: 1995, Age Group: All Ages |           |               |       |       |               |             |               |                |              |
| Period                                       | Age Group | Smoking Group | N     | %     | Ever Quit (N) | Ever Quit % | Mean Yrs Quit | Short Term (n) | Short Term % |
| 5                                            | All Ages  | Never Any     | 50887 | 55.53 |               |             |               |                |              |
| 5                                            | All Ages  | CC            | 420   | 0.46  | 0             | 0.00        |               |                |              |
| 5                                            | All Ages  | Ecig          | 22151 | 24.17 |               |             |               |                |              |
| 5                                            | All Ages  | Dual          | 0     | 0.00  |               |             |               |                |              |
| 5                                            | All Ages  | Former        | 18181 | 19.84 |               |             | 14.31         | 1158           | 6.37         |
| Year of Follow-up: 1995, Age Group: 18-19    |           |               |       |       |               |             |               |                |              |
| Period                                       | Age Group | Smoking Group | N     | %     | Ever Quit (N) | Ever Quit % | Mean Yrs Quit | Short Term (n) | Short Term % |
| 5                                            | 18-19     | Never Any     | 2434  | 76.64 |               |             |               |                |              |
| 5                                            | 18-19     | CC            | 63    | 1.98  | 0             | 0.00        |               |                |              |
| 5                                            | 18-19     | Ecig          | 612   | 19.27 |               |             |               |                |              |
| 5                                            | 18-19     | Dual          | 0     | 0.00  |               |             |               |                |              |
| 5                                            | 18-19     | Former        | 67    | 2.11  |               |             | 0.97          | 47             | 70.15        |
| Year of Follow-up: 1995, Age Group: 20-24    |           |               |       |       |               |             |               |                |              |
| Period                                       | Age Group | Smoking Group | N     | %     | Ever Quit (N) | Ever Quit % | Mean Yrs Quit | Short Term (n) | Short Term % |
| 5                                            | 20-24     | Never Any     | 5794  | 69.39 |               |             |               |                |              |
| 5                                            | 20-24     | CC            | 34    | 0.41  | 0             | 0.00        |               |                |              |
| 5                                            | 20-24     | Ecig          | 2106  | 25.22 |               |             |               |                |              |
| 5                                            | 20-24     | Dual          | 0     | 0.00  |               |             |               |                |              |
| 5                                            | 20-24     | Former        | 416   | 4.98  |               |             | 3.16          | 102            | 24.52        |
| Year of Follow-up: 1995, Age Group: 25-29    |           |               |       |       |               |             |               |                |              |
| Period                                       | Age Group | Smoking Group | N     | %     | Ever Quit (N) | Ever Quit % | Mean Yrs Quit | Short Term (n) | Short Term % |
| 5                                            | 25-29     | Never Any     | 5313  | 60.42 |               |             |               |                |              |
| 5                                            | 25-29     | CC            | 2     | 0.02  | 0             | 0.00        |               |                |              |
| 5                                            | 25-29     | Ecig          | 2453  | 27.90 |               |             |               |                |              |
| 5                                            | 25-29     | Dual          | 0     | 0.00  |               |             |               |                |              |
| 5                                            | 25-29     | Former        | 1025  | 11.66 |               |             | 5.88          | 69             | 6.73         |
| Year of Follow-up: 1995, Age Group: 30-34    |           |               |       |       |               |             |               |                |              |
| Period                                       | Age Group | Smoking Group | N     | %     | Ever Quit (N) | Ever Quit % | Mean Yrs Quit | Short Term (n) | Short Term % |

**Results for PHIM for Run 2 (Sensitivity\_Analysis\_2.RTF)**

|                                              |           |               |      |       |               |             |               |                |              |
|----------------------------------------------|-----------|---------------|------|-------|---------------|-------------|---------------|----------------|--------------|
| 5                                            | 30-34     | Never Any     | 5304 | 52.63 |               |             |               |                |              |
| 5                                            | 30-34     | CC            | 4    | 0.04  | 0             | 0.00        |               |                |              |
| 5                                            | 30-34     | Ecig          | 3183 | 31.58 |               |             |               |                |              |
| 5                                            | 30-34     | Dual          | 0    | 0.00  |               |             |               |                |              |
| 5                                            | 30-34     | Former        | 1587 | 15.75 |               |             | 8.21          | 62             | 3.91         |
| Year of Follow-up: 1995, Age Group: 35-39    |           |               |      |       |               |             |               |                |              |
| Period                                       | Age Group | Smoking Group | N    | %     | Ever Quit (N) | Ever Quit % | Mean Yrs Quit | Short Term (n) | Short Term % |
| 5                                            | 35-39     | Never Any     | 5278 | 50.27 |               |             |               |                |              |
| 5                                            | 35-39     | CC            | 63   | 0.60  | 0             | 0.00        |               |                |              |
| 5                                            | 35-39     | Ecig          | 3128 | 29.79 |               |             |               |                |              |
| 5                                            | 35-39     | Dual          | 0    | 0.00  |               |             |               |                |              |
| 5                                            | 35-39     | Former        | 2030 | 19.34 |               |             | 8.85          | 55             | 2.71         |
| Year of Follow-up: 1995, Age Group: 40-44    |           |               |      |       |               |             |               |                |              |
| Period                                       | Age Group | Smoking Group | N    | %     | Ever Quit (N) | Ever Quit % | Mean Yrs Quit | Short Term (n) | Short Term % |
| 5                                            | 40-44     | Never Any     | 5018 | 52.27 |               |             |               |                |              |
| 5                                            | 40-44     | CC            | 54   | 0.56  | 0             | 0.00        |               |                |              |
| 5                                            | 40-44     | Ecig          | 2456 | 25.58 |               |             |               |                |              |
| 5                                            | 40-44     | Dual          | 0    | 0.00  |               |             |               |                |              |
| 5                                            | 40-44     | Former        | 2072 | 21.58 |               |             | 12.18         | 73             | 3.52         |
| Year of Follow-up: 1995, Age Group: 45-49    |           |               |      |       |               |             |               |                |              |
| Period                                       | Age Group | Smoking Group | N    | %     | Ever Quit (N) | Ever Quit % | Mean Yrs Quit | Short Term (n) | Short Term % |
| 5                                            | 45-49     | Never Any     | 4356 | 51.27 |               |             |               |                |              |
| 5                                            | 45-49     | CC            | 45   | 0.53  | 0             | 0.00        |               |                |              |
| 5                                            | 45-49     | Ecig          | 2099 | 24.70 |               |             |               |                |              |
| 5                                            | 45-49     | Dual          | 0    | 0.00  |               |             |               |                |              |
| 5                                            | 45-49     | Former        | 1997 | 23.50 |               |             | 10.95         | 133            | 6.66         |
| Year of Follow-up: 1995, Age Group: 50-54    |           |               |      |       |               |             |               |                |              |
| Period                                       | Age Group | Smoking Group | N    | %     | Ever Quit (N) | Ever Quit % | Mean Yrs Quit | Short Term (n) | Short Term % |
| 5                                            | 50-54     | Never Any     | 3116 | 47.67 |               |             |               |                |              |
| 5                                            | 50-54     | CC            | 26   | 0.40  | 0             | 0.00        |               |                |              |
| 5                                            | 50-54     | Ecig          | 1569 | 24.01 |               |             |               |                |              |
| 5                                            | 50-54     | Dual          | 0    | 0.00  |               |             |               |                |              |
| 5                                            | 50-54     | Former        | 1825 | 27.92 |               |             | 15.11         | 143            | 7.84         |
| Year of Follow-up: 1995, Age Group: 55-59    |           |               |      |       |               |             |               |                |              |
| Period                                       | Age Group | Smoking Group | N    | %     | Ever Quit (N) | Ever Quit % | Mean Yrs Quit | Short Term (n) | Short Term % |
| 5                                            | 55-59     | Never Any     | 2684 | 48.50 |               |             |               |                |              |
| 5                                            | 55-59     | CC            | 27   | 0.49  | 0             | 0.00        |               |                |              |
| 5                                            | 55-59     | Ecig          | 1331 | 24.05 |               |             |               |                |              |
| 5                                            | 55-59     | Dual          | 0    | 0.00  |               |             |               |                |              |
| 5                                            | 55-59     | Former        | 1492 | 26.96 |               |             | 15.91         | 96             | 6.43         |
| Year of Follow-up: 1995, Age Group: 60-64    |           |               |      |       |               |             |               |                |              |
| Period                                       | Age Group | Smoking Group | N    | %     | Ever Quit (N) | Ever Quit % | Mean Yrs Quit | Short Term (n) | Short Term % |
| 5                                            | 60-64     | Never Any     | 2732 | 51.90 |               |             |               |                |              |
| 5                                            | 60-64     | CC            | 28   | 0.53  | 0             | 0.00        |               |                |              |
| 5                                            | 60-64     | Ecig          | 1061 | 20.16 |               |             |               |                |              |
| 5                                            | 60-64     | Dual          | 0    | 0.00  |               |             |               |                |              |
| 5                                            | 60-64     | Former        | 1443 | 27.41 |               |             | 19.33         | 103            | 7.14         |
| Year of Follow-up: 1995, Age Group: 65-69    |           |               |      |       |               |             |               |                |              |
| Period                                       | Age Group | Smoking Group | N    | %     | Ever Quit (N) | Ever Quit % | Mean Yrs Quit | Short Term (n) | Short Term % |
| 5                                            | 65-69     | Never Any     | 3078 | 55.72 |               |             |               |                |              |
| 5                                            | 65-69     | CC            | 28   | 0.51  | 0             | 0.00        |               |                |              |
| 5                                            | 65-69     | Ecig          | 961  | 17.40 |               |             |               |                |              |
| 5                                            | 65-69     | Dual          | 0    | 0.00  |               |             |               |                |              |
| 5                                            | 65-69     | Former        | 1457 | 26.38 |               |             | 19.47         | 115            | 7.89         |
| Year of Follow-up: 1995, Age Group: 70-74    |           |               |      |       |               |             |               |                |              |
| Period                                       | Age Group | Smoking Group | N    | %     | Ever Quit (N) | Ever Quit % | Mean Yrs Quit | Short Term (n) | Short Term % |
| 5                                            | 70-74     | Never Any     | 3042 | 57.36 |               |             |               |                |              |
| 5                                            | 70-74     | CC            | 29   | 0.55  | 0             | 0.00        |               |                |              |
| 5                                            | 70-74     | Ecig          | 728  | 13.73 |               |             |               |                |              |
| 5                                            | 70-74     | Dual          | 0    | 0.00  |               |             |               |                |              |
| 5                                            | 70-74     | Former        | 1504 | 28.36 |               |             | 22.17         | 95             | 6.32         |
| Year of Follow-up: 1995, Age Group: 75-79    |           |               |      |       |               |             |               |                |              |
| Period                                       | Age Group | Smoking Group | N    | %     | Ever Quit (N) | Ever Quit % | Mean Yrs Quit | Short Term (n) | Short Term % |
| 5                                            | 75-79     | Never Any     | 2738 | 61.05 |               |             |               |                |              |
| 5                                            | 75-79     | CC            | 17   | 0.38  | 0             | 0.00        |               |                |              |
| 5                                            | 75-79     | Ecig          | 464  | 10.35 |               |             |               |                |              |
| 5                                            | 75-79     | Dual          | 0    | 0.00  |               |             |               |                |              |
| 5                                            | 75-79     | Former        | 1266 | 28.23 |               |             | 26.65         | 65             | 5.13         |
| Year of Follow-up: 2000, Age Group: All Ages |           |               |      |       |               |             |               |                |              |

**Results for PHIM for Run 2 (Sensitivity\_Analysis\_2.RTF)**

| Period                                    | Age Group | Smoking Group | N     | %     | Ever Quit (N) | Ever Quit % | Mean Yrs Quit | Short Term (n) | Short Term % |
|-------------------------------------------|-----------|---------------|-------|-------|---------------|-------------|---------------|----------------|--------------|
| 10                                        | All Ages  | Never Any     | 50423 | 54.86 |               |             |               |                |              |
| 10                                        | All Ages  | CC            | 54    | 0.06  | 0             | 0.00        |               |                |              |
| 10                                        | All Ages  | Ecig          | 20282 | 22.07 |               |             |               |                |              |
| 10                                        | All Ages  | Dual          | 0     | 0.00  |               |             |               |                |              |
| 10                                        | All Ages  | Former        | 21149 | 23.01 |               |             | 15.12         | 1687           | 7.98         |
| Year of Follow-up: 2000, Age Group: 18-19 |           |               |       |       |               |             |               |                |              |
| Period                                    | Age Group | Smoking Group | N     | %     | Ever Quit (N) | Ever Quit % | Mean Yrs Quit | Short Term (n) | Short Term % |
| 10                                        | 18-19     | Never Any     | 0     | .     |               |             |               |                |              |
| 10                                        | 18-19     | CC            | 0     | .     | 0             | .           |               |                |              |
| 10                                        | 18-19     | Ecig          | 0     | .     |               |             |               |                |              |
| 10                                        | 18-19     | Dual          | 0     | .     |               |             |               |                |              |
| 10                                        | 18-19     | Former        | 0     | .     |               |             |               | 0              | .            |
| Year of Follow-up: 2000, Age Group: 20-24 |           |               |       |       |               |             |               |                |              |
| Period                                    | Age Group | Smoking Group | N     | %     | Ever Quit (N) | Ever Quit % | Mean Yrs Quit | Short Term (n) | Short Term % |
| 10                                        | 20-24     | Never Any     | 5128  | 64.67 |               |             |               |                |              |
| 10                                        | 20-24     | CC            | 24    | 0.30  | 0             | 0.00        |               |                |              |
| 10                                        | 20-24     | Ecig          | 2150  | 27.11 |               |             |               |                |              |
| 10                                        | 20-24     | Dual          | 0     | 0.00  |               |             |               |                |              |
| 10                                        | 20-24     | Former        | 628   | 7.92  |               |             | 3.44          | 166            | 26.43        |
| Year of Follow-up: 2000, Age Group: 25-29 |           |               |       |       |               |             |               |                |              |
| Period                                    | Age Group | Smoking Group | N     | %     | Ever Quit (N) | Ever Quit % | Mean Yrs Quit | Short Term (n) | Short Term % |
| 10                                        | 25-29     | Never Any     | 5493  | 65.78 |               |             |               |                |              |
| 10                                        | 25-29     | CC            | 21    | 0.25  | 0             | 0.00        |               |                |              |
| 10                                        | 25-29     | Ecig          | 2076  | 24.86 |               |             |               |                |              |
| 10                                        | 25-29     | Dual          | 0     | 0.00  |               |             |               |                |              |
| 10                                        | 25-29     | Former        | 760   | 9.10  |               |             | 5.35          | 133            | 17.50        |
| Year of Follow-up: 2000, Age Group: 30-34 |           |               |       |       |               |             |               |                |              |
| Period                                    | Age Group | Smoking Group | N     | %     | Ever Quit (N) | Ever Quit % | Mean Yrs Quit | Short Term (n) | Short Term % |
| 10                                        | 30-34     | Never Any     | 5214  | 59.30 |               |             |               |                |              |
| 10                                        | 30-34     | CC            | 5     | 0.06  | 0             | 0.00        |               |                |              |
| 10                                        | 30-34     | Ecig          | 2331  | 26.51 |               |             |               |                |              |
| 10                                        | 30-34     | Dual          | 0     | 0.00  |               |             |               |                |              |
| 10                                        | 30-34     | Former        | 1243  | 14.14 |               |             | 9.28          | 94             | 7.56         |
| Year of Follow-up: 2000, Age Group: 35-39 |           |               |       |       |               |             |               |                |              |
| Period                                    | Age Group | Smoking Group | N     | %     | Ever Quit (N) | Ever Quit % | Mean Yrs Quit | Short Term (n) | Short Term % |
| 10                                        | 35-39     | Never Any     | 5284  | 52.43 |               |             |               |                |              |
| 10                                        | 35-39     | CC            | 1     | 0.01  | 0             | 0.00        |               |                |              |
| 10                                        | 35-39     | Ecig          | 2959  | 29.36 |               |             |               |                |              |
| 10                                        | 35-39     | Dual          | 0     | 0.00  |               |             |               |                |              |
| 10                                        | 35-39     | Former        | 1834  | 18.20 |               |             | 11.67         | 113            | 6.16         |
| Year of Follow-up: 2000, Age Group: 40-44 |           |               |       |       |               |             |               |                |              |
| Period                                    | Age Group | Smoking Group | N     | %     | Ever Quit (N) | Ever Quit % | Mean Yrs Quit | Short Term (n) | Short Term % |
| 10                                        | 40-44     | Never Any     | 5278  | 50.27 |               |             |               |                |              |
| 10                                        | 40-44     | CC            | 0     | 0.00  | 0             | 0.00        |               |                |              |
| 10                                        | 40-44     | Ecig          | 2904  | 27.66 |               |             |               |                |              |
| 10                                        | 40-44     | Dual          | 0     | 0.00  |               |             |               |                |              |
| 10                                        | 40-44     | Former        | 2317  | 22.07 |               |             | 12.33         | 143            | 6.17         |
| Year of Follow-up: 2000, Age Group: 45-49 |           |               |       |       |               |             |               |                |              |
| Period                                    | Age Group | Smoking Group | N     | %     | Ever Quit (N) | Ever Quit % | Mean Yrs Quit | Short Term (n) | Short Term % |
| 10                                        | 45-49     | Never Any     | 5018  | 52.27 |               |             |               |                |              |
| 10                                        | 45-49     | CC            | 2     | 0.02  | 0             | 0.00        |               |                |              |
| 10                                        | 45-49     | Ecig          | 2126  | 22.15 |               |             |               |                |              |
| 10                                        | 45-49     | Dual          | 0     | 0.00  |               |             |               |                |              |
| 10                                        | 45-49     | Former        | 2454  | 25.56 |               |             | 14.78         | 182            | 7.42         |
| Year of Follow-up: 2000, Age Group: 50-54 |           |               |       |       |               |             |               |                |              |
| Period                                    | Age Group | Smoking Group | N     | %     | Ever Quit (N) | Ever Quit % | Mean Yrs Quit | Short Term (n) | Short Term % |
| 10                                        | 50-54     | Never Any     | 4356  | 51.27 |               |             |               |                |              |
| 10                                        | 50-54     | CC            | 0     | 0.00  | 0             | 0.00        |               |                |              |
| 10                                        | 50-54     | Ecig          | 1660  | 19.54 |               |             |               |                |              |
| 10                                        | 50-54     | Dual          | 0     | 0.00  |               |             |               |                |              |
| 10                                        | 50-54     | Former        | 2481  | 29.20 |               |             | 13.21         | 204            | 8.22         |
| Year of Follow-up: 2000, Age Group: 55-59 |           |               |       |       |               |             |               |                |              |
| Period                                    | Age Group | Smoking Group | N     | %     | Ever Quit (N) | Ever Quit % | Mean Yrs Quit | Short Term (n) | Short Term % |
| 10                                        | 55-59     | Never Any     | 3116  | 47.67 |               |             |               |                |              |
| 10                                        | 55-59     | CC            | 0     | 0.00  | 0             | 0.00        |               |                |              |
| 10                                        | 55-59     | Ecig          | 1204  | 18.42 |               |             |               |                |              |
| 10                                        | 55-59     | Dual          | 0     | 0.00  |               |             |               |                |              |

**Results for PHIM for Run 2 (Sensitivity\_Analysis\_2.RTF)**

| Year of Follow-up: 2000, Age Group: 60-64    | Period   | Age Group | Smoking Group | N     | %     | Ever Quit (N) | Ever Quit % | Mean Yrs Quit | Short Term (n) | Short Term % |
|----------------------------------------------|----------|-----------|---------------|-------|-------|---------------|-------------|---------------|----------------|--------------|
| 10                                           | 55-59    | Former    |               | 2216  | 33.90 |               |             | 16.91         | 149            | 6.72         |
| 10                                           | 60-64    | Never Any |               | 2684  | 48.50 |               |             |               |                |              |
| 10                                           | 60-64    | CC        |               | 0     | 0.00  | 0             | 0.00        |               |                |              |
| 10                                           | 60-64    | Ecig      |               | 1004  | 18.14 |               |             |               |                |              |
| 10                                           | 60-64    | Dual      |               | 0     | 0.00  |               |             |               |                |              |
| 10                                           | 60-64    | Former    |               | 1846  | 33.36 |               |             | 17.27         | 140            | 7.58         |
| Year of Follow-up: 2000, Age Group: 65-69    | Period   | Age Group | Smoking Group | N     | %     | Ever Quit (N) | Ever Quit % | Mean Yrs Quit | Short Term (n) | Short Term % |
| 10                                           | 65-69    | Never Any |               | 2732  | 51.90 |               |             |               |                |              |
| 10                                           | 65-69    | CC        |               | 1     | 0.02  | 0             | 0.00        |               |                |              |
| 10                                           | 65-69    | Ecig      |               | 759   | 14.42 |               |             |               |                |              |
| 10                                           | 65-69    | Dual      |               | 0     | 0.00  |               |             |               |                |              |
| 10                                           | 65-69    | Former    |               | 1772  | 33.66 |               |             | 20.19         | 111            | 6.26         |
| Year of Follow-up: 2000, Age Group: 70-74    | Period   | Age Group | Smoking Group | N     | %     | Ever Quit (N) | Ever Quit % | Mean Yrs Quit | Short Term (n) | Short Term % |
| 10                                           | 70-74    | Never Any |               | 3078  | 55.72 |               |             |               |                |              |
| 10                                           | 70-74    | CC        |               | 0     | 0.00  | 0             | 0.00        |               |                |              |
| 10                                           | 70-74    | Ecig      |               | 657   | 11.89 |               |             |               |                |              |
| 10                                           | 70-74    | Dual      |               | 0     | 0.00  |               |             |               |                |              |
| 10                                           | 70-74    | Former    |               | 1789  | 32.39 |               |             | 20.27         | 149            | 8.33         |
| Year of Follow-up: 2000, Age Group: 75-79    | Period   | Age Group | Smoking Group | N     | %     | Ever Quit (N) | Ever Quit % | Mean Yrs Quit | Short Term (n) | Short Term % |
| 10                                           | 75-79    | Never Any |               | 3042  | 57.36 |               |             |               |                |              |
| 10                                           | 75-79    | CC        |               | 0     | 0.00  | 0             | 0.00        |               |                |              |
| 10                                           | 75-79    | Ecig      |               | 452   | 8.52  |               |             |               |                |              |
| 10                                           | 75-79    | Dual      |               | 0     | 0.00  |               |             |               |                |              |
| 10                                           | 75-79    | Former    |               | 1809  | 34.11 |               |             | 22.95         | 103            | 5.69         |
| Year of Follow-up: 2005, Age Group: All Ages | Period   | Age Group | Smoking Group | N     | %     | Ever Quit (N) | Ever Quit % | Mean Yrs Quit | Short Term (n) | Short Term % |
| 15                                           | All Ages | Never Any |               | 47002 | 54.27 |               |             |               |                |              |
| 15                                           | All Ages | CC        |               | 3     | 0.00  | 0             | 0.00        |               |                |              |
| 15                                           | All Ages | Ecig      |               | 17559 | 20.27 |               |             |               |                |              |
| 15                                           | All Ages | Dual      |               | 0     | 0.00  |               |             |               |                |              |
| 15                                           | All Ages | Former    |               | 22041 | 25.45 |               |             | 17.28         | 998            | 4.53         |
| Year of Follow-up: 2005, Age Group: 18-19    | Period   | Age Group | Smoking Group | N     | %     | Ever Quit (N) | Ever Quit % | Mean Yrs Quit | Short Term (n) | Short Term % |
| 15                                           | 18-19    | Never Any |               | 0     | .     |               |             |               |                |              |
| 15                                           | 18-19    | CC        |               | 0     | .     | 0             | .           |               |                |              |
| 15                                           | 18-19    | Ecig      |               | 0     | .     |               |             |               |                |              |
| 15                                           | 18-19    | Dual      |               | 0     | .     |               |             |               |                |              |
| 15                                           | 18-19    | Former    |               | 0     | .     |               |             | .             | 0              | .            |
| Year of Follow-up: 2005, Age Group: 20-24    | Period   | Age Group | Smoking Group | N     | %     | Ever Quit (N) | Ever Quit % | Mean Yrs Quit | Short Term (n) | Short Term % |
| 15                                           | 20-24    | Never Any |               | 0     | .     |               |             |               |                |              |
| 15                                           | 20-24    | CC        |               | 0     | .     | 0             | .           |               |                |              |
| 15                                           | 20-24    | Ecig      |               | 0     | .     |               |             |               |                |              |
| 15                                           | 20-24    | Dual      |               | 0     | .     |               |             |               |                |              |
| 15                                           | 20-24    | Former    |               | 0     | .     |               |             | .             | 0              | .            |
| Year of Follow-up: 2005, Age Group: 25-29    | Period   | Age Group | Smoking Group | N     | %     | Ever Quit (N) | Ever Quit % | Mean Yrs Quit | Short Term (n) | Short Term % |
| 15                                           | 25-29    | Never Any |               | 4860  | 61.29 |               |             |               |                |              |
| 15                                           | 25-29    | CC        |               | 2     | 0.03  | 0             | 0.00        |               |                |              |
| 15                                           | 25-29    | Ecig      |               | 2134  | 26.91 |               |             |               |                |              |
| 15                                           | 25-29    | Dual      |               | 0     | 0.00  |               |             |               |                |              |
| 15                                           | 25-29    | Former    |               | 934   | 11.78 |               |             | 6.45          | 101            | 10.81        |
| Year of Follow-up: 2005, Age Group: 30-34    | Period   | Age Group | Smoking Group | N     | %     | Ever Quit (N) | Ever Quit % | Mean Yrs Quit | Short Term (n) | Short Term % |
| 15                                           | 30-34    | Never Any |               | 5407  | 64.75 |               |             |               |                |              |
| 15                                           | 30-34    | CC        |               | 1     | 0.01  | 0             | 0.00        |               |                |              |
| 15                                           | 30-34    | Ecig      |               | 1985  | 23.77 |               |             |               |                |              |
| 15                                           | 30-34    | Dual      |               | 0     | 0.00  |               |             |               |                |              |
| 15                                           | 30-34    | Former    |               | 957   | 11.46 |               |             | 8.64          | 76             | 7.94         |
| Year of Follow-up: 2005, Age Group: 35-39    | Period   | Age Group | Smoking Group | N     | %     | Ever Quit (N) | Ever Quit % | Mean Yrs Quit | Short Term (n) | Short Term % |
| 15                                           | 35-39    | Never Any |               | 5189  | 59.01 |               |             |               |                |              |
| 15                                           | 35-39    | CC        |               | 0     | 0.00  | 0             | 0.00        |               |                |              |

**Results for PHIM for Run 2 (Sensitivity\_Analysis\_2.RTF)**

|                                              |           |               |       |       |               |             |               |                |              |
|----------------------------------------------|-----------|---------------|-------|-------|---------------|-------------|---------------|----------------|--------------|
| 15                                           | 35-39     | Ecig          | 2165  | 24.62 |               |             |               |                |              |
| 15                                           | 35-39     | Dual          | 0     | 0.00  |               |             |               |                |              |
| 15                                           | 35-39     | Former        | 1439  | 16.37 |               |             | 12.62         | 79             | 5.49         |
| Year of Follow-up: 2005, Age Group: 40-44    |           |               |       |       |               |             |               |                |              |
| Period                                       | Age Group | Smoking Group | N     | %     | Ever Quit (N) | Ever Quit % | Mean Yrs Quit | Short Term (n) | Short Term % |
| 15                                           | 40-44     | Never Any     | 5284  | 52.43 |               |             |               |                |              |
| 15                                           | 40-44     | CC            | 0     | 0.00  | 0             | 0.00        |               |                |              |
| 15                                           | 40-44     | Ecig          | 2710  | 26.89 |               |             |               |                |              |
| 15                                           | 40-44     | Dual          | 0     | 0.00  |               |             |               |                |              |
| 15                                           | 40-44     | Former        | 2084  | 20.68 |               |             | 14.92         | 101            | 4.85         |
| Year of Follow-up: 2005, Age Group: 45-49    |           |               |       |       |               |             |               |                |              |
| Period                                       | Age Group | Smoking Group | N     | %     | Ever Quit (N) | Ever Quit % | Mean Yrs Quit | Short Term (n) | Short Term % |
| 15                                           | 45-49     | Never Any     | 5278  | 50.27 |               |             |               |                |              |
| 15                                           | 45-49     | CC            | 0     | 0.00  | 0             | 0.00        |               |                |              |
| 15                                           | 45-49     | Ecig          | 2571  | 24.49 |               |             |               |                |              |
| 15                                           | 45-49     | Dual          | 0     | 0.00  |               |             |               |                |              |
| 15                                           | 45-49     | Former        | 2650  | 25.24 |               |             | 15.39         | 146            | 5.51         |
| Year of Follow-up: 2005, Age Group: 50-54    |           |               |       |       |               |             |               |                |              |
| Period                                       | Age Group | Smoking Group | N     | %     | Ever Quit (N) | Ever Quit % | Mean Yrs Quit | Short Term (n) | Short Term % |
| 15                                           | 50-54     | Never Any     | 5018  | 52.27 |               |             |               |                |              |
| 15                                           | 50-54     | CC            | 0     | 0.00  | 0             | 0.00        |               |                |              |
| 15                                           | 50-54     | Ecig          | 1831  | 19.07 |               |             |               |                |              |
| 15                                           | 50-54     | Dual          | 0     | 0.00  |               |             |               |                |              |
| 15                                           | 50-54     | Former        | 2751  | 28.66 |               |             | 17.89         | 100            | 3.64         |
| Year of Follow-up: 2005, Age Group: 55-59    |           |               |       |       |               |             |               |                |              |
| Period                                       | Age Group | Smoking Group | N     | %     | Ever Quit (N) | Ever Quit % | Mean Yrs Quit | Short Term (n) | Short Term % |
| 15                                           | 55-59     | Never Any     | 4356  | 51.27 |               |             |               |                |              |
| 15                                           | 55-59     | CC            | 0     | 0.00  | 0             | 0.00        |               |                |              |
| 15                                           | 55-59     | Ecig          | 1444  | 16.99 |               |             |               |                |              |
| 15                                           | 55-59     | Dual          | 0     | 0.00  |               |             |               |                |              |
| 15                                           | 55-59     | Former        | 2697  | 31.74 |               |             | 16.95         | 71             | 2.63         |
| Year of Follow-up: 2005, Age Group: 60-64    |           |               |       |       |               |             |               |                |              |
| Period                                       | Age Group | Smoking Group | N     | %     | Ever Quit (N) | Ever Quit % | Mean Yrs Quit | Short Term (n) | Short Term % |
| 15                                           | 60-64     | Never Any     | 3116  | 47.67 |               |             |               |                |              |
| 15                                           | 60-64     | CC            | 0     | 0.00  | 0             | 0.00        |               |                |              |
| 15                                           | 60-64     | Ecig          | 980   | 14.99 |               |             |               |                |              |
| 15                                           | 60-64     | Dual          | 0     | 0.00  |               |             |               |                |              |
| 15                                           | 60-64     | Former        | 2440  | 37.33 |               |             | 20.07         | 106            | 4.34         |
| Year of Follow-up: 2005, Age Group: 65-69    |           |               |       |       |               |             |               |                |              |
| Period                                       | Age Group | Smoking Group | N     | %     | Ever Quit (N) | Ever Quit % | Mean Yrs Quit | Short Term (n) | Short Term % |
| 15                                           | 65-69     | Never Any     | 2684  | 48.50 |               |             |               |                |              |
| 15                                           | 65-69     | CC            | 0     | 0.00  | 0             | 0.00        |               |                |              |
| 15                                           | 65-69     | Ecig          | 757   | 13.68 |               |             |               |                |              |
| 15                                           | 65-69     | Dual          | 0     | 0.00  |               |             |               |                |              |
| 15                                           | 65-69     | Former        | 2093  | 37.82 |               |             | 19.94         | 69             | 3.30         |
| Year of Follow-up: 2005, Age Group: 70-74    |           |               |       |       |               |             |               |                |              |
| Period                                       | Age Group | Smoking Group | N     | %     | Ever Quit (N) | Ever Quit % | Mean Yrs Quit | Short Term (n) | Short Term % |
| 15                                           | 70-74     | Never Any     | 2732  | 51.90 |               |             |               |                |              |
| 15                                           | 70-74     | CC            | 0     | 0.00  | 0             | 0.00        |               |                |              |
| 15                                           | 70-74     | Ecig          | 529   | 10.05 |               |             |               |                |              |
| 15                                           | 70-74     | Dual          | 0     | 0.00  |               |             |               |                |              |
| 15                                           | 70-74     | Former        | 2003  | 38.05 |               |             | 22.54         | 82             | 4.09         |
| Year of Follow-up: 2005, Age Group: 75-79    |           |               |       |       |               |             |               |                |              |
| Period                                       | Age Group | Smoking Group | N     | %     | Ever Quit (N) | Ever Quit % | Mean Yrs Quit | Short Term (n) | Short Term % |
| 15                                           | 75-79     | Never Any     | 3078  | 55.72 |               |             |               |                |              |
| 15                                           | 75-79     | CC            | 0     | 0.00  | 0             | 0.00        |               |                |              |
| 15                                           | 75-79     | Ecig          | 453   | 8.20  |               |             |               |                |              |
| 15                                           | 75-79     | Dual          | 0     | 0.00  |               |             |               |                |              |
| 15                                           | 75-79     | Former        | 1993  | 36.08 |               |             | 22.92         | 67             | 3.36         |
| Year of Follow-up: 2010, Age Group: All Ages |           |               |       |       |               |             |               |                |              |
| Period                                       | Age Group | Smoking Group | N     | %     | Ever Quit (N) | Ever Quit % | Mean Yrs Quit | Short Term (n) | Short Term % |
| 20                                           | All Ages  | Never Any     | 43759 | 53.97 |               |             |               |                |              |
| 20                                           | All Ages  | CC            | 1     | 0.00  | 0             | 0.00        |               |                |              |
| 20                                           | All Ages  | Ecig          | 14559 | 17.96 |               |             |               |                |              |
| 20                                           | All Ages  | Dual          | 0     | 0.00  |               |             |               |                |              |
| 20                                           | All Ages  | Former        | 22762 | 28.07 |               |             | 19.35         | 1128           | 4.96         |
| Year of Follow-up: 2010, Age Group: 18-19    |           |               |       |       |               |             |               |                |              |
| Period                                       | Age Group | Smoking Group | N     | %     | Ever Quit (N) | Ever Quit % | Mean Yrs Quit | Short Term (n) | Short Term % |

**Results for PHIM for Run 2 (Sensitivity\_Analysis\_2.RTF)**

|                                           |           |               |      |       |               |             |               |                |              |
|-------------------------------------------|-----------|---------------|------|-------|---------------|-------------|---------------|----------------|--------------|
| 20                                        | 18-19     | Never Any     | 0    | .     |               |             |               |                |              |
| 20                                        | 18-19     | CC            | 0    | .     | 0             | .           |               |                |              |
| 20                                        | 18-19     | Ecig          | 0    | .     |               |             |               |                |              |
| 20                                        | 18-19     | Dual          | 0    | .     |               |             |               |                |              |
| 20                                        | 18-19     | Former        | 0    | .     |               |             | 0             | .              |              |
| Year of Follow-up: 2010, Age Group: 20-24 |           |               |      |       |               |             |               |                |              |
| Period                                    | Age Group | Smoking Group | N    | %     | Ever Quit (N) | Ever Quit % | Mean Yrs Quit | Short Term (n) | Short Term % |
| 20                                        | 20-24     | Never Any     | 0    | .     |               |             |               |                |              |
| 20                                        | 20-24     | CC            | 0    | .     | 0             | .           |               |                |              |
| 20                                        | 20-24     | Ecig          | 0    | .     |               |             |               |                |              |
| 20                                        | 20-24     | Dual          | 0    | .     |               |             |               |                |              |
| 20                                        | 20-24     | Former        | 0    | .     |               |             |               | 0              | .            |
| Year of Follow-up: 2010, Age Group: 25-29 |           |               |      |       |               |             |               |                |              |
| Period                                    | Age Group | Smoking Group | N    | %     | Ever Quit (N) | Ever Quit % | Mean Yrs Quit | Short Term (n) | Short Term % |
| 20                                        | 25-29     | Never Any     | 0    | .     |               |             |               |                |              |
| 20                                        | 25-29     | CC            | 0    | .     | 0             | .           |               |                |              |
| 20                                        | 25-29     | Ecig          | 0    | .     |               |             |               |                |              |
| 20                                        | 25-29     | Dual          | 0    | .     |               |             |               |                |              |
| 20                                        | 25-29     | Former        | 0    | .     |               |             |               | 0              | .            |
| Year of Follow-up: 2010, Age Group: 30-34 |           |               |      |       |               |             |               |                |              |
| Period                                    | Age Group | Smoking Group | N    | %     | Ever Quit (N) | Ever Quit % | Mean Yrs Quit | Short Term (n) | Short Term % |
| 20                                        | 30-34     | Never Any     | 4743 | 59.81 |               |             |               |                |              |
| 20                                        | 30-34     | CC            | 0    | 0.00  | 0             | 0.00        |               |                |              |
| 20                                        | 30-34     | Ecig          | 1967 | 24.80 |               |             |               |                |              |
| 20                                        | 30-34     | Dual          | 0    | 0.00  |               |             |               |                |              |
| 20                                        | 30-34     | Former        | 1220 | 15.38 |               |             | 9.18          | 134            | 10.98        |
| Year of Follow-up: 2010, Age Group: 35-39 |           |               |      |       |               |             |               |                |              |
| Period                                    | Age Group | Smoking Group | N    | %     | Ever Quit (N) | Ever Quit % | Mean Yrs Quit | Short Term (n) | Short Term % |
| 20                                        | 35-39     | Never Any     | 5359 | 64.18 |               |             |               |                |              |
| 20                                        | 35-39     | CC            | 1    | 0.01  | 0             | 0.00        |               |                |              |
| 20                                        | 35-39     | Ecig          | 1775 | 21.26 |               |             |               |                |              |
| 20                                        | 35-39     | Dual          | 0    | 0.00  |               |             |               |                |              |
| 20                                        | 35-39     | Former        | 1215 | 14.55 |               |             | 11.14         | 103            | 8.48         |
| Year of Follow-up: 2010, Age Group: 40-44 |           |               |      |       |               |             |               |                |              |
| Period                                    | Age Group | Smoking Group | N    | %     | Ever Quit (N) | Ever Quit % | Mean Yrs Quit | Short Term (n) | Short Term % |
| 20                                        | 40-44     | Never Any     | 5189 | 59.01 |               |             |               |                |              |
| 20                                        | 40-44     | CC            | 0    | 0.00  | 0             | 0.00        |               |                |              |
| 20                                        | 40-44     | Ecig          | 1916 | 21.79 |               |             |               |                |              |
| 20                                        | 40-44     | Dual          | 0    | 0.00  |               |             |               |                |              |
| 20                                        | 40-44     | Former        | 1688 | 19.20 |               |             | 15.28         | 109            | 6.46         |
| Year of Follow-up: 2010, Age Group: 45-49 |           |               |      |       |               |             |               |                |              |
| Period                                    | Age Group | Smoking Group | N    | %     | Ever Quit (N) | Ever Quit % | Mean Yrs Quit | Short Term (n) | Short Term % |
| 20                                        | 45-49     | Never Any     | 5284 | 52.43 |               |             |               |                |              |
| 20                                        | 45-49     | CC            | 0    | 0.00  | 0             | 0.00        |               |                |              |
| 20                                        | 45-49     | Ecig          | 2392 | 23.73 |               |             |               |                |              |
| 20                                        | 45-49     | Dual          | 0    | 0.00  |               |             |               |                |              |
| 20                                        | 45-49     | Former        | 2402 | 23.83 |               |             | 17.52         | 135            | 5.62         |
| Year of Follow-up: 2010, Age Group: 50-54 |           |               |      |       |               |             |               |                |              |
| Period                                    | Age Group | Smoking Group | N    | %     | Ever Quit (N) | Ever Quit % | Mean Yrs Quit | Short Term (n) | Short Term % |
| 20                                        | 50-54     | Never Any     | 5278 | 50.27 |               |             |               |                |              |
| 20                                        | 50-54     | CC            | 0    | 0.00  | 0             | 0.00        |               |                |              |
| 20                                        | 50-54     | Ecig          | 2206 | 21.01 |               |             |               |                |              |
| 20                                        | 50-54     | Dual          | 0    | 0.00  |               |             |               |                |              |
| 20                                        | 50-54     | Former        | 3015 | 28.72 |               |             | 18.14         | 169            | 5.61         |
| Year of Follow-up: 2010, Age Group: 55-59 |           |               |      |       |               |             |               |                |              |
| Period                                    | Age Group | Smoking Group | N    | %     | Ever Quit (N) | Ever Quit % | Mean Yrs Quit | Short Term (n) | Short Term % |
| 20                                        | 55-59     | Never Any     | 5018 | 52.27 |               |             |               |                |              |
| 20                                        | 55-59     | CC            | 0    | 0.00  | 0             | 0.00        |               |                |              |
| 20                                        | 55-59     | Ecig          | 1540 | 16.04 |               |             |               |                |              |
| 20                                        | 55-59     | Dual          | 0    | 0.00  |               |             |               |                |              |
| 20                                        | 55-59     | Former        | 3042 | 31.69 |               |             | 20.91         | 96             | 3.16         |
| Year of Follow-up: 2010, Age Group: 60-64 |           |               |      |       |               |             |               |                |              |
| Period                                    | Age Group | Smoking Group | N    | %     | Ever Quit (N) | Ever Quit % | Mean Yrs Quit | Short Term (n) | Short Term % |
| 20                                        | 60-64     | Never Any     | 4356 | 51.27 |               |             |               |                |              |
| 20                                        | 60-64     | CC            | 0    | 0.00  | 0             | 0.00        |               |                |              |
| 20                                        | 60-64     | Ecig          | 1138 | 13.39 |               |             |               |                |              |
| 20                                        | 60-64     | Dual          | 0    | 0.00  |               |             |               |                |              |
| 20                                        | 60-64     | Former        | 3003 | 35.34 |               |             | 19.87         | 155            | 5.16         |
| Year of Follow-up: 2010, Age Group: 65-69 |           |               |      |       |               |             |               |                |              |



**Results for PHIM for Run 2 (Sensitivity\_Analysis\_2.RTF)**

| Period                                       | Age Group | Smoking Group | N     | %     | Ever Quit (N) | Ever Quit % | Mean Yrs Quit | Short Term (n) | Short Term % |
|----------------------------------------------|-----------|---------------|-------|-------|---------------|-------------|---------------|----------------|--------------|
| 20                                           | 65-69     | Never Any     | 3116  | 47.67 |               |             |               |                |              |
| 20                                           | 65-69     | CC            | 0     | 0.00  | 0             | 0.00        |               |                |              |
| 20                                           | 65-69     | Ecig          | 697   | 10.66 |               |             |               |                |              |
| 20                                           | 65-69     | Dual          | 0     | 0.00  |               |             |               |                |              |
| 20                                           | 65-69     | Former        | 2723  | 41.66 |               |             | 22.69         | 93             | 3.42         |
| Year of Follow-up: 2010, Age Group: 70-74    |           |               |       |       |               |             |               |                |              |
| Period                                       | Age Group | Smoking Group | N     | %     | Ever Quit (N) | Ever Quit % | Mean Yrs Quit | Short Term (n) | Short Term % |
| 20                                           | 70-74     | Never Any     | 2684  | 48.50 |               |             |               |                |              |
| 20                                           | 70-74     | CC            | 0     | 0.00  | 0             | 0.00        |               |                |              |
| 20                                           | 70-74     | Ecig          | 557   | 10.07 |               |             |               |                |              |
| 20                                           | 70-74     | Dual          | 0     | 0.00  |               |             |               |                |              |
| 20                                           | 70-74     | Former        | 2293  | 41.43 |               |             | 22.94         | 77             | 3.36         |
| Year of Follow-up: 2010, Age Group: 75-79    |           |               |       |       |               |             |               |                |              |
| Period                                       | Age Group | Smoking Group | N     | %     | Ever Quit (N) | Ever Quit % | Mean Yrs Quit | Short Term (n) | Short Term % |
| 20                                           | 75-79     | Never Any     | 2732  | 51.90 |               |             |               |                |              |
| 20                                           | 75-79     | CC            | 0     | 0.00  | 0             | 0.00        |               |                |              |
| 20                                           | 75-79     | Ecig          | 371   | 7.05  |               |             |               |                |              |
| 20                                           | 75-79     | Dual          | 0     | 0.00  |               |             |               |                |              |
| 20                                           | 75-79     | Former        | 2161  | 41.05 |               |             | 25.69         | 57             | 2.64         |
| Year of Follow-up: 2015, Age Group: All Ages |           |               |       |       |               |             |               |                |              |
| Period                                       | Age Group | Smoking Group | N     | %     | Ever Quit (N) | Ever Quit % | Mean Yrs Quit | Short Term (n) | Short Term % |
| 25                                           | All Ages  | Never Any     | 41010 | 54.09 |               |             |               |                |              |
| 25                                           | All Ages  | CC            | 0     | 0.00  | 0             | 0.00        |               |                |              |
| 25                                           | All Ages  | Ecig          | 11747 | 15.49 |               |             |               |                |              |
| 25                                           | All Ages  | Dual          | 0     | 0.00  |               |             |               |                |              |
| 25                                           | All Ages  | Former        | 23060 | 30.42 |               |             | 21.39         | 913            | 3.96         |
| Year of Follow-up: 2015, Age Group: 18-19    |           |               |       |       |               |             |               |                |              |
| Period                                       | Age Group | Smoking Group | N     | %     | Ever Quit (N) | Ever Quit % | Mean Yrs Quit | Short Term (n) | Short Term % |
| 25                                           | 18-19     | Never Any     | 0     | .     |               |             |               |                |              |
| 25                                           | 18-19     | CC            | 0     | .     | 0             | .           |               |                |              |
| 25                                           | 18-19     | Ecig          | 0     | .     |               |             |               |                |              |
| 25                                           | 18-19     | Dual          | 0     | .     |               |             |               |                |              |
| 25                                           | 18-19     | Former        | 0     | .     |               |             | .             | 0              | .            |
| Year of Follow-up: 2015, Age Group: 20-24    |           |               |       |       |               |             |               |                |              |
| Period                                       | Age Group | Smoking Group | N     | %     | Ever Quit (N) | Ever Quit % | Mean Yrs Quit | Short Term (n) | Short Term % |
| 25                                           | 20-24     | Never Any     | 0     | .     |               |             |               |                |              |
| 25                                           | 20-24     | CC            | 0     | .     | 0             | .           |               |                |              |
| 25                                           | 20-24     | Ecig          | 0     | .     |               |             |               |                |              |
| 25                                           | 20-24     | Dual          | 0     | .     |               |             |               |                |              |
| 25                                           | 20-24     | Former        | 0     | .     |               |             | .             | 0              | .            |
| Year of Follow-up: 2015, Age Group: 25-29    |           |               |       |       |               |             |               |                |              |
| Period                                       | Age Group | Smoking Group | N     | %     | Ever Quit (N) | Ever Quit % | Mean Yrs Quit | Short Term (n) | Short Term % |
| 25                                           | 25-29     | Never Any     | 0     | .     |               |             |               |                |              |
| 25                                           | 25-29     | CC            | 0     | .     | 0             | .           |               |                |              |
| 25                                           | 25-29     | Ecig          | 0     | .     |               |             |               |                |              |
| 25                                           | 25-29     | Dual          | 0     | .     |               |             |               |                |              |
| 25                                           | 25-29     | Former        | 0     | .     |               |             | .             | 0              | .            |
| Year of Follow-up: 2015, Age Group: 30-34    |           |               |       |       |               |             |               |                |              |
| Period                                       | Age Group | Smoking Group | N     | %     | Ever Quit (N) | Ever Quit % | Mean Yrs Quit | Short Term (n) | Short Term % |
| 25                                           | 30-34     | Never Any     | 0     | .     |               |             |               |                |              |
| 25                                           | 30-34     | CC            | 0     | .     | 0             | .           |               |                |              |
| 25                                           | 30-34     | Ecig          | 0     | .     |               |             |               |                |              |
| 25                                           | 30-34     | Dual          | 0     | .     |               |             |               |                |              |
| 25                                           | 30-34     | Former        | 0     | .     |               |             | .             | 0              | .            |
| Year of Follow-up: 2015, Age Group: 35-39    |           |               |       |       |               |             |               |                |              |
| Period                                       | Age Group | Smoking Group | N     | %     | Ever Quit (N) | Ever Quit % | Mean Yrs Quit | Short Term (n) | Short Term % |
| 25                                           | 35-39     | Never Any     | 4726  | 59.60 |               |             |               |                |              |
| 25                                           | 35-39     | CC            | 0     | 0.00  | 0             | 0.00        |               |                |              |
| 25                                           | 35-39     | Ecig          | 1602  | 20.20 |               |             |               |                |              |
| 25                                           | 35-39     | Dual          | 0     | 0.00  |               |             |               |                |              |
| 25                                           | 35-39     | Former        | 1602  | 20.20 |               |             | 11.30         | 128            | 7.99         |
| Year of Follow-up: 2015, Age Group: 40-44    |           |               |       |       |               |             |               |                |              |
| Period                                       | Age Group | Smoking Group | N     | %     | Ever Quit (N) | Ever Quit % | Mean Yrs Quit | Short Term (n) | Short Term % |
| 25                                           | 40-44     | Never Any     | 5359  | 64.18 |               |             |               |                |              |
| 25                                           | 40-44     | CC            | 0     | 0.00  | 0             | 0.00        |               |                |              |
| 25                                           | 40-44     | Ecig          | 1527  | 18.29 |               |             |               |                |              |
| 25                                           | 40-44     | Dual          | 0     | 0.00  |               |             |               |                |              |

**Results for PHIM for Run 2 (Sensitivity\_Analysis\_2.RTF)**

|                                              |           |               |       |       |               |             |               |                |              |
|----------------------------------------------|-----------|---------------|-------|-------|---------------|-------------|---------------|----------------|--------------|
| 25                                           | 40-44     | Former        | 1464  | 17.53 |               |             | 13.73         | 103            | 7.04         |
| Year of Follow-up: 2015, Age Group: 45-49    |           |               |       |       |               |             |               |                |              |
| Period                                       | Age Group | Smoking Group | N     | %     | Ever Quit (N) | Ever Quit % | Mean Yrs Quit | Short Term (n) | Short Term % |
| 25                                           | 45-49     | Never Any     | 5189  | 59.01 |               |             |               |                |              |
| 25                                           | 45-49     | CC            | 0     | 0.00  | 0             | 0.00        |               |                |              |
| 25                                           | 45-49     | Ecig          | 1654  | 18.81 |               |             |               |                |              |
| 25                                           | 45-49     | Dual          | 0     | 0.00  |               |             |               |                |              |
| 25                                           | 45-49     | Former        | 1950  | 22.18 |               |             | 17.84         | 94             | 4.82         |
| Year of Follow-up: 2015, Age Group: 50-54    |           |               |       |       |               |             |               |                |              |
| Period                                       | Age Group | Smoking Group | N     | %     | Ever Quit (N) | Ever Quit % | Mean Yrs Quit | Short Term (n) | Short Term % |
| 25                                           | 50-54     | Never Any     | 5284  | 52.43 |               |             |               |                |              |
| 25                                           | 50-54     | CC            | 0     | 0.00  | 0             | 0.00        |               |                |              |
| 25                                           | 50-54     | Ecig          | 2069  | 20.53 |               |             |               |                |              |
| 25                                           | 50-54     | Dual          | 0     | 0.00  |               |             |               |                |              |
| 25                                           | 50-54     | Former        | 2725  | 27.04 |               |             | 20.08         | 147            | 5.39         |
| Year of Follow-up: 2015, Age Group: 55-59    |           |               |       |       |               |             |               |                |              |
| Period                                       | Age Group | Smoking Group | N     | %     | Ever Quit (N) | Ever Quit % | Mean Yrs Quit | Short Term (n) | Short Term % |
| 25                                           | 55-59     | Never Any     | 5278  | 50.27 |               |             |               |                |              |
| 25                                           | 55-59     | CC            | 0     | 0.00  | 0             | 0.00        |               |                |              |
| 25                                           | 55-59     | Ecig          | 1810  | 17.24 |               |             |               |                |              |
| 25                                           | 55-59     | Dual          | 0     | 0.00  |               |             |               |                |              |
| 25                                           | 55-59     | Former        | 3411  | 32.49 |               |             | 20.70         | 139            | 4.08         |
| Year of Follow-up: 2015, Age Group: 60-64    |           |               |       |       |               |             |               |                |              |
| Period                                       | Age Group | Smoking Group | N     | %     | Ever Quit (N) | Ever Quit % | Mean Yrs Quit | Short Term (n) | Short Term % |
| 25                                           | 60-64     | Never Any     | 5018  | 52.27 |               |             |               |                |              |
| 25                                           | 60-64     | CC            | 0     | 0.00  | 0             | 0.00        |               |                |              |
| 25                                           | 60-64     | Ecig          | 1209  | 12.59 |               |             |               |                |              |
| 25                                           | 60-64     | Dual          | 0     | 0.00  |               |             |               |                |              |
| 25                                           | 60-64     | Former        | 3373  | 35.14 |               |             | 23.55         | 154            | 4.57         |
| Year of Follow-up: 2015, Age Group: 65-69    |           |               |       |       |               |             |               |                |              |
| Period                                       | Age Group | Smoking Group | N     | %     | Ever Quit (N) | Ever Quit % | Mean Yrs Quit | Short Term (n) | Short Term % |
| 25                                           | 65-69     | Never Any     | 4356  | 51.27 |               |             |               |                |              |
| 25                                           | 65-69     | CC            | 0     | 0.00  | 0             | 0.00        |               |                |              |
| 25                                           | 65-69     | Ecig          | 886   | 10.43 |               |             |               |                |              |
| 25                                           | 65-69     | Dual          | 0     | 0.00  |               |             |               |                |              |
| 25                                           | 65-69     | Former        | 3255  | 38.31 |               |             | 23.14         | 68             | 2.09         |
| Year of Follow-up: 2015, Age Group: 70-74    |           |               |       |       |               |             |               |                |              |
| Period                                       | Age Group | Smoking Group | N     | %     | Ever Quit (N) | Ever Quit % | Mean Yrs Quit | Short Term (n) | Short Term % |
| 25                                           | 70-74     | Never Any     | 3116  | 47.67 |               |             |               |                |              |
| 25                                           | 70-74     | CC            | 0     | 0.00  | 0             | 0.00        |               |                |              |
| 25                                           | 70-74     | Ecig          | 557   | 8.52  |               |             |               |                |              |
| 25                                           | 70-74     | Dual          | 0     | 0.00  |               |             |               |                |              |
| 25                                           | 70-74     | Former        | 2863  | 43.80 |               |             | 26.45         | 48             | 1.68         |
| Year of Follow-up: 2015, Age Group: 75-79    |           |               |       |       |               |             |               |                |              |
| Period                                       | Age Group | Smoking Group | N     | %     | Ever Quit (N) | Ever Quit % | Mean Yrs Quit | Short Term (n) | Short Term % |
| 25                                           | 75-79     | Never Any     | 2684  | 48.50 |               |             |               |                |              |
| 25                                           | 75-79     | CC            | 0     | 0.00  | 0             | 0.00        |               |                |              |
| 25                                           | 75-79     | Ecig          | 433   | 7.82  |               |             |               |                |              |
| 25                                           | 75-79     | Dual          | 0     | 0.00  |               |             |               |                |              |
| 25                                           | 75-79     | Former        | 2417  | 43.68 |               |             | 26.64         | 32             | 1.32         |
| Year of Follow-up: 2020, Age Group: All Ages |           |               |       |       |               |             |               |                |              |
| Period                                       | Age Group | Smoking Group | N     | %     | Ever Quit (N) | Ever Quit % | Mean Yrs Quit | Short Term (n) | Short Term % |
| 30                                           | All Ages  | Never Any     | 38326 | 54.53 |               |             |               |                |              |
| 30                                           | All Ages  | CC            | 0     | 0.00  | 0             | 0.00        |               |                |              |
| 30                                           | All Ages  | Ecig          | 9372  | 13.33 |               |             |               |                |              |
| 30                                           | All Ages  | Dual          | 0     | 0.00  |               |             |               |                |              |
| 30                                           | All Ages  | Former        | 22585 | 32.13 |               |             | 23.73         | 764            | 3.38         |
| Year of Follow-up: 2020, Age Group: 18-19    |           |               |       |       |               |             |               |                |              |
| Period                                       | Age Group | Smoking Group | N     | %     | Ever Quit (N) | Ever Quit % | Mean Yrs Quit | Short Term (n) | Short Term % |
| 30                                           | 18-19     | Never Any     | 0     | .     |               |             |               |                |              |
| 30                                           | 18-19     | CC            | 0     | .     | 0             | .           |               |                |              |
| 30                                           | 18-19     | Ecig          | 0     | .     |               |             |               |                |              |
| 30                                           | 18-19     | Dual          | 0     | .     |               |             |               |                |              |
| 30                                           | 18-19     | Former        | 0     | .     |               |             | .             | 0              | .            |
| Year of Follow-up: 2020, Age Group: 20-24    |           |               |       |       |               |             |               |                |              |
| Period                                       | Age Group | Smoking Group | N     | %     | Ever Quit (N) | Ever Quit % | Mean Yrs Quit | Short Term (n) | Short Term % |
| 30                                           | 20-24     | Never Any     | 0     | .     |               |             |               |                |              |
| 30                                           | 20-24     | CC            | 0     | .     | 0             | .           |               |                |              |

**Results for PHIM for Run 2 (Sensitivity\_Analysis\_2.RTF)**

|                                           |           |               |      |       |               |             |               |                |              |
|-------------------------------------------|-----------|---------------|------|-------|---------------|-------------|---------------|----------------|--------------|
| 30                                        | 20-24     | Ecig          | 0    | .     |               |             |               |                |              |
| 30                                        | 20-24     | Dual          | 0    | .     |               |             |               |                |              |
| 30                                        | 20-24     | Former        | 0    | .     |               |             | 0             | .              |              |
| Year of Follow-up: 2020, Age Group: 25-29 |           |               |      |       |               |             |               |                |              |
| Period                                    | Age Group | Smoking Group | N    | %     | Ever Quit (N) | Ever Quit % | Mean Yrs Quit | Short Term (n) | Short Term % |
| 30                                        | 25-29     | Never Any     | 0    | .     |               |             |               |                |              |
| 30                                        | 25-29     | CC            | 0    | .     | 0             | .           |               |                |              |
| 30                                        | 25-29     | Ecig          | 0    | .     |               |             |               |                |              |
| 30                                        | 25-29     | Dual          | 0    | .     |               |             |               |                |              |
| 30                                        | 25-29     | Former        | 0    | .     |               |             | 0             | .              |              |
| Year of Follow-up: 2020, Age Group: 30-34 |           |               |      |       |               |             |               |                |              |
| Period                                    | Age Group | Smoking Group | N    | %     | Ever Quit (N) | Ever Quit % | Mean Yrs Quit | Short Term (n) | Short Term % |
| 30                                        | 30-34     | Never Any     | 0    | .     |               |             |               |                |              |
| 30                                        | 30-34     | CC            | 0    | .     | 0             | .           |               |                |              |
| 30                                        | 30-34     | Ecig          | 0    | .     |               |             |               |                |              |
| 30                                        | 30-34     | Dual          | 0    | .     |               |             |               |                |              |
| 30                                        | 30-34     | Former        | 0    | .     |               |             | 0             | .              |              |
| Year of Follow-up: 2020, Age Group: 35-39 |           |               |      |       |               |             |               |                |              |
| Period                                    | Age Group | Smoking Group | N    | %     | Ever Quit (N) | Ever Quit % | Mean Yrs Quit | Short Term (n) | Short Term % |
| 30                                        | 35-39     | Never Any     | 0    | .     |               |             |               |                |              |
| 30                                        | 35-39     | CC            | 0    | .     | 0             | .           |               |                |              |
| 30                                        | 35-39     | Ecig          | 0    | .     |               |             |               |                |              |
| 30                                        | 35-39     | Dual          | 0    | .     |               |             |               |                |              |
| 30                                        | 35-39     | Former        | 0    | .     |               |             | 0             | .              |              |
| Year of Follow-up: 2020, Age Group: 40-44 |           |               |      |       |               |             |               |                |              |
| Period                                    | Age Group | Smoking Group | N    | %     | Ever Quit (N) | Ever Quit % | Mean Yrs Quit | Short Term (n) | Short Term % |
| 30                                        | 40-44     | Never Any     | 4726 | 59.60 |               |             |               |                |              |
| 30                                        | 40-44     | CC            | 0    | 0.00  | 0             | 0.00        |               |                |              |
| 30                                        | 40-44     | Ecig          | 1370 | 17.28 |               |             |               |                |              |
| 30                                        | 40-44     | Dual          | 0    | 0.00  |               |             |               |                |              |
| 30                                        | 40-44     | Former        | 1834 | 23.13 |               |             | 14.50         | 83             | 4.53         |
| Year of Follow-up: 2020, Age Group: 45-49 |           |               |      |       |               |             |               |                |              |
| Period                                    | Age Group | Smoking Group | N    | %     | Ever Quit (N) | Ever Quit % | Mean Yrs Quit | Short Term (n) | Short Term % |
| 30                                        | 45-49     | Never Any     | 5359 | 64.18 |               |             |               |                |              |
| 30                                        | 45-49     | CC            | 0    | 0.00  | 0             | 0.00        |               |                |              |
| 30                                        | 45-49     | Ecig          | 1313 | 15.72 |               |             |               |                |              |
| 30                                        | 45-49     | Dual          | 0    | 0.00  |               |             |               |                |              |
| 30                                        | 45-49     | Former        | 1678 | 20.10 |               |             | 16.62         | 75             | 4.47         |
| Year of Follow-up: 2020, Age Group: 50-54 |           |               |      |       |               |             |               |                |              |
| Period                                    | Age Group | Smoking Group | N    | %     | Ever Quit (N) | Ever Quit % | Mean Yrs Quit | Short Term (n) | Short Term % |
| 30                                        | 50-54     | Never Any     | 5189 | 59.01 |               |             |               |                |              |
| 30                                        | 50-54     | CC            | 0    | 0.00  | 0             | 0.00        |               |                |              |
| 30                                        | 50-54     | Ecig          | 1395 | 15.86 |               |             |               |                |              |
| 30                                        | 50-54     | Dual          | 0    | 0.00  |               |             |               |                |              |
| 30                                        | 50-54     | Former        | 2209 | 25.12 |               |             | 20.37         | 126            | 5.70         |
| Year of Follow-up: 2020, Age Group: 55-59 |           |               |      |       |               |             |               |                |              |
| Period                                    | Age Group | Smoking Group | N    | %     | Ever Quit (N) | Ever Quit % | Mean Yrs Quit | Short Term (n) | Short Term % |
| 30                                        | 55-59     | Never Any     | 5284 | 52.43 |               |             |               |                |              |
| 30                                        | 55-59     | CC            | 0    | 0.00  | 0             | 0.00        |               |                |              |
| 30                                        | 55-59     | Ecig          | 1693 | 16.80 |               |             |               |                |              |
| 30                                        | 55-59     | Dual          | 0    | 0.00  |               |             |               |                |              |
| 30                                        | 55-59     | Former        | 3101 | 30.77 |               |             | 22.29         | 141            | 4.55         |
| Year of Follow-up: 2020, Age Group: 60-64 |           |               |      |       |               |             |               |                |              |
| Period                                    | Age Group | Smoking Group | N    | %     | Ever Quit (N) | Ever Quit % | Mean Yrs Quit | Short Term (n) | Short Term % |
| 30                                        | 60-64     | Never Any     | 5278 | 50.27 |               |             |               |                |              |
| 30                                        | 60-64     | CC            | 0    | 0.00  | 0             | 0.00        |               |                |              |
| 30                                        | 60-64     | Ecig          | 1450 | 13.81 |               |             |               |                |              |
| 30                                        | 60-64     | Dual          | 0    | 0.00  |               |             |               |                |              |
| 30                                        | 60-64     | Former        | 3771 | 35.92 |               |             | 23.44         | 148            | 3.92         |
| Year of Follow-up: 2020, Age Group: 65-69 |           |               |      |       |               |             |               |                |              |
| Period                                    | Age Group | Smoking Group | N    | %     | Ever Quit (N) | Ever Quit % | Mean Yrs Quit | Short Term (n) | Short Term % |
| 30                                        | 65-69     | Never Any     | 5018 | 52.27 |               |             |               |                |              |
| 30                                        | 65-69     | CC            | 0    | 0.00  | 0             | 0.00        |               |                |              |
| 30                                        | 65-69     | Ecig          | 954  | 9.94  |               |             |               |                |              |
| 30                                        | 65-69     | Dual          | 0    | 0.00  |               |             |               |                |              |
| 30                                        | 65-69     | Former        | 3628 | 37.79 |               |             | 26.71         | 73             | 2.01         |
| Year of Follow-up: 2020, Age Group: 70-74 |           |               |      |       |               |             |               |                |              |
| Period                                    | Age Group | Smoking Group | N    | %     | Ever Quit (N) | Ever Quit % | Mean Yrs Quit | Short Term (n) | Short Term % |

**Results for PHIM for Run 2 (Sensitivity\_Analysis\_2.RTF)**

|                                              |           |               |       |       |               |             |               |                |              |
|----------------------------------------------|-----------|---------------|-------|-------|---------------|-------------|---------------|----------------|--------------|
| 30                                           | 70-74     | Never Any     | 4356  | 51.27 |               |             |               |                |              |
| 30                                           | 70-74     | CC            | 0     | 0.00  | 0             | 0.00        |               |                |              |
| 30                                           | 70-74     | Ecig          | 748   | 8.80  |               |             |               |                |              |
| 30                                           | 70-74     | Dual          | 0     | 0.00  |               |             |               |                |              |
| 30                                           | 70-74     | Former        | 3393  | 39.93 |               |             | 27.06         | 70             | 2.06         |
| Year of Follow-up: 2020, Age Group: 75-79    |           |               |       |       |               |             |               |                |              |
| Period                                       | Age Group | Smoking Group | N     | %     | Ever Quit (N) | Ever Quit % | Mean Yrs Quit | Short Term (n) | Short Term % |
| 30                                           | 75-79     | Never Any     | 3116  | 47.67 |               |             |               |                |              |
| 30                                           | 75-79     | CC            | 0     | 0.00  | 0             | 0.00        |               |                |              |
| 30                                           | 75-79     | Ecig          | 449   | 6.87  |               |             |               |                |              |
| 30                                           | 75-79     | Dual          | 0     | 0.00  |               |             |               |                |              |
| 30                                           | 75-79     | Former        | 2971  | 45.46 |               |             | 30.38         | 48             | 1.62         |
| Year of Follow-up: 2025, Age Group: All Ages |           |               |       |       |               |             |               |                |              |
| Period                                       | Age Group | Smoking Group | N     | %     | Ever Quit (N) | Ever Quit % | Mean Yrs Quit | Short Term (n) | Short Term % |
| 35                                           | All Ages  | Never Any     | 35210 | 55.23 |               |             |               |                |              |
| 35                                           | All Ages  | CC            | 0     | 0.00  | 0             | 0.00        |               |                |              |
| 35                                           | All Ages  | Ecig          | 7323  | 11.49 |               |             |               |                |              |
| 35                                           | All Ages  | Dual          | 0     | 0.00  |               |             |               |                |              |
| 35                                           | All Ages  | Former        | 21214 | 33.28 |               |             | 25.79         | 615            | 2.90         |
| Year of Follow-up: 2025, Age Group: 18-19    |           |               |       |       |               |             |               |                |              |
| Period                                       | Age Group | Smoking Group | N     | %     | Ever Quit (N) | Ever Quit % | Mean Yrs Quit | Short Term (n) | Short Term % |
| 35                                           | 18-19     | Never Any     | 0     | .     |               |             |               |                |              |
| 35                                           | 18-19     | CC            | 0     | .     | 0             | .           |               |                |              |
| 35                                           | 18-19     | Ecig          | 0     | .     |               |             |               |                |              |
| 35                                           | 18-19     | Dual          | 0     | .     |               |             |               |                |              |
| 35                                           | 18-19     | Former        | 0     | .     |               |             | .             | 0              | .            |
| Year of Follow-up: 2025, Age Group: 20-24    |           |               |       |       |               |             |               |                |              |
| Period                                       | Age Group | Smoking Group | N     | %     | Ever Quit (N) | Ever Quit % | Mean Yrs Quit | Short Term (n) | Short Term % |
| 35                                           | 20-24     | Never Any     | 0     | .     |               |             |               |                |              |
| 35                                           | 20-24     | CC            | 0     | .     | 0             | .           |               |                |              |
| 35                                           | 20-24     | Ecig          | 0     | .     |               |             |               |                |              |
| 35                                           | 20-24     | Dual          | 0     | .     |               |             |               |                |              |
| 35                                           | 20-24     | Former        | 0     | .     |               |             | .             | 0              | .            |
| Year of Follow-up: 2025, Age Group: 25-29    |           |               |       |       |               |             |               |                |              |
| Period                                       | Age Group | Smoking Group | N     | %     | Ever Quit (N) | Ever Quit % | Mean Yrs Quit | Short Term (n) | Short Term % |
| 35                                           | 25-29     | Never Any     | 0     | .     |               |             |               |                |              |
| 35                                           | 25-29     | CC            | 0     | .     | 0             | .           |               |                |              |
| 35                                           | 25-29     | Ecig          | 0     | .     |               |             |               |                |              |
| 35                                           | 25-29     | Dual          | 0     | .     |               |             |               |                |              |
| 35                                           | 25-29     | Former        | 0     | .     |               |             | .             | 0              | .            |
| Year of Follow-up: 2025, Age Group: 30-34    |           |               |       |       |               |             |               |                |              |
| Period                                       | Age Group | Smoking Group | N     | %     | Ever Quit (N) | Ever Quit % | Mean Yrs Quit | Short Term (n) | Short Term % |
| 35                                           | 30-34     | Never Any     | 0     | .     |               |             |               |                |              |
| 35                                           | 30-34     | CC            | 0     | .     | 0             | .           |               |                |              |
| 35                                           | 30-34     | Ecig          | 0     | .     |               |             |               |                |              |
| 35                                           | 30-34     | Dual          | 0     | .     |               |             |               |                |              |
| 35                                           | 30-34     | Former        | 0     | .     |               |             | .             | 0              | .            |
| Year of Follow-up: 2025, Age Group: 35-39    |           |               |       |       |               |             |               |                |              |
| Period                                       | Age Group | Smoking Group | N     | %     | Ever Quit (N) | Ever Quit % | Mean Yrs Quit | Short Term (n) | Short Term % |
| 35                                           | 35-39     | Never Any     | 0     | .     |               |             |               |                |              |
| 35                                           | 35-39     | CC            | 0     | .     | 0             | .           |               |                |              |
| 35                                           | 35-39     | Ecig          | 0     | .     |               |             |               |                |              |
| 35                                           | 35-39     | Dual          | 0     | .     |               |             |               |                |              |
| 35                                           | 35-39     | Former        | 0     | .     |               |             | .             | 0              | .            |
| Year of Follow-up: 2025, Age Group: 40-44    |           |               |       |       |               |             |               |                |              |
| Period                                       | Age Group | Smoking Group | N     | %     | Ever Quit (N) | Ever Quit % | Mean Yrs Quit | Short Term (n) | Short Term % |
| 35                                           | 40-44     | Never Any     | 0     | .     |               |             |               |                |              |
| 35                                           | 40-44     | CC            | 0     | .     | 0             | .           |               |                |              |
| 35                                           | 40-44     | Ecig          | 0     | .     |               |             |               |                |              |
| 35                                           | 40-44     | Dual          | 0     | .     |               |             |               |                |              |
| 35                                           | 40-44     | Former        | 0     | .     |               |             | .             | 0              | .            |
| Year of Follow-up: 2025, Age Group: 45-49    |           |               |       |       |               |             |               |                |              |
| Period                                       | Age Group | Smoking Group | N     | %     | Ever Quit (N) | Ever Quit % | Mean Yrs Quit | Short Term (n) | Short Term % |
| 35                                           | 45-49     | Never Any     | 4726  | 59.60 |               |             |               |                |              |
| 35                                           | 45-49     | CC            | 0     | 0.00  | 0             | 0.00        |               |                |              |
| 35                                           | 45-49     | Ecig          | 1161  | 14.64 |               |             |               |                |              |
| 35                                           | 45-49     | Dual          | 0     | 0.00  |               |             |               |                |              |
| 35                                           | 45-49     | Former        | 2043  | 25.76 |               |             | 17.73         | 73             | 3.57         |
| Year of Follow-up: 2025, Age Group: 50-54    |           |               |       |       |               |             |               |                |              |

**Results for PHIM for Run 2 (Sensitivity\_Analysis\_2.RTF)**

| Period                                       | Age Group | Smoking Group | N     | %     | Ever Quit (N) | Ever Quit % | Mean Yrs Quit | Short Term (n) | Short Term % |
|----------------------------------------------|-----------|---------------|-------|-------|---------------|-------------|---------------|----------------|--------------|
| 35                                           | 50-54     | Never Any     | 5359  | 64.18 |               |             |               |                |              |
| 35                                           | 50-54     | CC            | 0     | 0.00  | 0             | 0.00        |               |                |              |
| 35                                           | 50-54     | Ecig          | 1099  | 13.16 |               |             |               |                |              |
| 35                                           | 50-54     | Dual          | 0     | 0.00  |               |             |               |                |              |
| 35                                           | 50-54     | Former        | 1892  | 22.66 |               |             | 19.38         | 104            | 5.50         |
| Year of Follow-up: 2025, Age Group: 55-59    |           |               |       |       |               |             |               |                |              |
| Period                                       | Age Group | Smoking Group | N     | %     | Ever Quit (N) | Ever Quit % | Mean Yrs Quit | Short Term (n) | Short Term % |
| 35                                           | 55-59     | Never Any     | 5189  | 59.01 |               |             |               |                |              |
| 35                                           | 55-59     | CC            | 0     | 0.00  | 0             | 0.00        |               |                |              |
| 35                                           | 55-59     | Ecig          | 1141  | 12.98 |               |             |               |                |              |
| 35                                           | 55-59     | Dual          | 0     | 0.00  |               |             |               |                |              |
| 35                                           | 55-59     | Former        | 2463  | 28.01 |               |             | 22.96         | 100            | 4.06         |
| Year of Follow-up: 2025, Age Group: 60-64    |           |               |       |       |               |             |               |                |              |
| Period                                       | Age Group | Smoking Group | N     | %     | Ever Quit (N) | Ever Quit % | Mean Yrs Quit | Short Term (n) | Short Term % |
| 35                                           | 60-64     | Never Any     | 5284  | 52.43 |               |             |               |                |              |
| 35                                           | 60-64     | CC            | 0     | 0.00  | 0             | 0.00        |               |                |              |
| 35                                           | 60-64     | Ecig          | 1356  | 13.46 |               |             |               |                |              |
| 35                                           | 60-64     | Dual          | 0     | 0.00  |               |             |               |                |              |
| 35                                           | 60-64     | Former        | 3438  | 34.11 |               |             | 24.81         | 139            | 4.04         |
| Year of Follow-up: 2025, Age Group: 65-69    |           |               |       |       |               |             |               |                |              |
| Period                                       | Age Group | Smoking Group | N     | %     | Ever Quit (N) | Ever Quit % | Mean Yrs Quit | Short Term (n) | Short Term % |
| 35                                           | 65-69     | Never Any     | 5278  | 50.27 |               |             |               |                |              |
| 35                                           | 65-69     | CC            | 0     | 0.00  | 0             | 0.00        |               |                |              |
| 35                                           | 65-69     | Ecig          | 1155  | 11.00 |               |             |               |                |              |
| 35                                           | 65-69     | Dual          | 0     | 0.00  |               |             |               |                |              |
| 35                                           | 65-69     | Former        | 4066  | 38.73 |               |             | 26.55         | 79             | 1.94         |
| Year of Follow-up: 2025, Age Group: 70-74    |           |               |       |       |               |             |               |                |              |
| Period                                       | Age Group | Smoking Group | N     | %     | Ever Quit (N) | Ever Quit % | Mean Yrs Quit | Short Term (n) | Short Term % |
| 35                                           | 70-74     | Never Any     | 5018  | 52.27 |               |             |               |                |              |
| 35                                           | 70-74     | CC            | 0     | 0.00  | 0             | 0.00        |               |                |              |
| 35                                           | 70-74     | Ecig          | 820   | 8.54  |               |             |               |                |              |
| 35                                           | 70-74     | Dual          | 0     | 0.00  |               |             |               |                |              |
| 35                                           | 70-74     | Former        | 3762  | 39.19 |               |             | 30.64         | 65             | 1.73         |
| Year of Follow-up: 2025, Age Group: 75-79    |           |               |       |       |               |             |               |                |              |
| Period                                       | Age Group | Smoking Group | N     | %     | Ever Quit (N) | Ever Quit % | Mean Yrs Quit | Short Term (n) | Short Term % |
| 35                                           | 75-79     | Never Any     | 4356  | 51.27 |               |             |               |                |              |
| 35                                           | 75-79     | CC            | 0     | 0.00  | 0             | 0.00        |               |                |              |
| 35                                           | 75-79     | Ecig          | 591   | 6.96  |               |             |               |                |              |
| 35                                           | 75-79     | Dual          | 0     | 0.00  |               |             |               |                |              |
| 35                                           | 75-79     | Former        | 3550  | 41.78 |               |             | 30.74         | 55             | 1.55         |
| Year of Follow-up: 2030, Age Group: All Ages |           |               |       |       |               |             |               |                |              |
| Period                                       | Age Group | Smoking Group | N     | %     | Ever Quit (N) | Ever Quit % | Mean Yrs Quit | Short Term (n) | Short Term % |
| 40                                           | All Ages  | Never Any     | 30854 | 55.84 |               |             |               |                |              |
| 40                                           | All Ages  | CC            | 0     | 0.00  | 0             | 0.00        |               |                |              |
| 40                                           | All Ages  | Ecig          | 5389  | 9.75  |               |             |               |                |              |
| 40                                           | All Ages  | Dual          | 0     | 0.00  |               |             |               |                |              |
| 40                                           | All Ages  | Former        | 19007 | 34.40 |               |             | 27.83         | 547            | 2.88         |
| Year of Follow-up: 2030, Age Group: 18-19    |           |               |       |       |               |             |               |                |              |
| Period                                       | Age Group | Smoking Group | N     | %     | Ever Quit (N) | Ever Quit % | Mean Yrs Quit | Short Term (n) | Short Term % |
| 40                                           | 18-19     | Never Any     | 0     | .     |               |             |               |                |              |
| 40                                           | 18-19     | CC            | 0     | .     | 0             | .           |               |                |              |
| 40                                           | 18-19     | Ecig          | 0     | .     |               |             |               |                |              |
| 40                                           | 18-19     | Dual          | 0     | .     |               |             |               |                |              |
| 40                                           | 18-19     | Former        | 0     | .     |               |             | .             | 0              | .            |
| Year of Follow-up: 2030, Age Group: 20-24    |           |               |       |       |               |             |               |                |              |
| Period                                       | Age Group | Smoking Group | N     | %     | Ever Quit (N) | Ever Quit % | Mean Yrs Quit | Short Term (n) | Short Term % |
| 40                                           | 20-24     | Never Any     | 0     | .     |               |             |               |                |              |
| 40                                           | 20-24     | CC            | 0     | .     | 0             | .           |               |                |              |
| 40                                           | 20-24     | Ecig          | 0     | .     |               |             |               |                |              |
| 40                                           | 20-24     | Dual          | 0     | .     |               |             |               |                |              |
| 40                                           | 20-24     | Former        | 0     | .     |               |             | .             | 0              | .            |
| Year of Follow-up: 2030, Age Group: 25-29    |           |               |       |       |               |             |               |                |              |
| Period                                       | Age Group | Smoking Group | N     | %     | Ever Quit (N) | Ever Quit % | Mean Yrs Quit | Short Term (n) | Short Term % |
| 40                                           | 25-29     | Never Any     | 0     | .     |               |             |               |                |              |
| 40                                           | 25-29     | CC            | 0     | .     | 0             | .           |               |                |              |
| 40                                           | 25-29     | Ecig          | 0     | .     |               |             |               |                |              |
| 40                                           | 25-29     | Dual          | 0     | .     |               |             |               |                |              |

**Results for PHIM for Run 2 (Sensitivity\_Analysis\_2.RTF)**

| Year of Follow-up: 2030, Age Group: 30-34 | Period | Age Group | Smoking Group | N    | %     | Ever Quit (N) | Ever Quit % | Mean Yrs Quit | Short Term (n) | Short Term % |
|-------------------------------------------|--------|-----------|---------------|------|-------|---------------|-------------|---------------|----------------|--------------|
| Year of Follow-up: 2030, Age Group: 30-34 |        |           |               |      |       |               |             |               |                |              |
| 40                                        | 25-29  | Former    |               | 0    | .     |               |             |               | 0              | .            |
| Year of Follow-up: 2030, Age Group: 35-39 |        |           |               |      |       |               |             |               |                |              |
| 40                                        | 30-34  | Never Any |               | 0    | .     |               |             |               | 0              | .            |
| 40                                        | 30-34  | CC        |               | 0    | .     | 0             | .           |               |                |              |
| 40                                        | 30-34  | Ecig      |               | 0    | .     |               |             |               |                |              |
| 40                                        | 30-34  | Dual      |               | 0    | .     |               |             |               |                |              |
| 40                                        | 30-34  | Former    |               | 0    | .     |               |             |               | 0              | .            |
| Year of Follow-up: 2030, Age Group: 40-44 |        |           |               |      |       |               |             |               |                |              |
| 40                                        | 35-39  | Never Any |               | 0    | .     |               |             |               |                |              |
| 40                                        | 35-39  | CC        |               | 0    | .     | 0             | .           |               |                |              |
| 40                                        | 35-39  | Ecig      |               | 0    | .     |               |             |               |                |              |
| 40                                        | 35-39  | Dual      |               | 0    | .     |               |             |               |                |              |
| 40                                        | 35-39  | Former    |               | 0    | .     |               |             |               | 0              | .            |
| Year of Follow-up: 2030, Age Group: 45-49 |        |           |               |      |       |               |             |               |                |              |
| 40                                        | 40-44  | Never Any |               | 0    | .     |               |             |               |                |              |
| 40                                        | 40-44  | CC        |               | 0    | .     | 0             | .           |               |                |              |
| 40                                        | 40-44  | Ecig      |               | 0    | .     |               |             |               |                |              |
| 40                                        | 40-44  | Dual      |               | 0    | .     |               |             |               |                |              |
| 40                                        | 40-44  | Former    |               | 0    | .     |               |             |               | 0              | .            |
| Year of Follow-up: 2030, Age Group: 50-54 |        |           |               |      |       |               |             |               |                |              |
| 40                                        | 45-49  | Never Any |               | 0    | .     |               |             |               |                |              |
| 40                                        | 45-49  | CC        |               | 0    | .     | 0             | .           |               |                |              |
| 40                                        | 45-49  | Ecig      |               | 0    | .     |               |             |               |                |              |
| 40                                        | 45-49  | Dual      |               | 0    | .     |               |             |               |                |              |
| 40                                        | 45-49  | Former    |               | 0    | .     |               |             |               | 0              | .            |
| Year of Follow-up: 2030, Age Group: 55-59 |        |           |               |      |       |               |             |               |                |              |
| 40                                        | 50-54  | Never Any |               | 4726 | 59.60 |               |             |               |                |              |
| 40                                        | 50-54  | CC        |               | 0    | 0.00  | 0             | 0.00        |               |                |              |
| 40                                        | 50-54  | Ecig      |               | 960  | 12.11 |               |             |               |                |              |
| 40                                        | 50-54  | Dual      |               | 0    | 0.00  |               |             |               |                |              |
| 40                                        | 50-54  | Former    |               | 2244 | 28.30 |               |             | 20.85         | 106            | 4.72         |
| Year of Follow-up: 2030, Age Group: 60-64 |        |           |               |      |       |               |             |               |                |              |
| 40                                        | 55-59  | Never Any |               | 5359 | 64.18 |               |             |               |                |              |
| 40                                        | 55-59  | CC        |               | 0    | 0.00  | 0             | 0.00        |               |                |              |
| 40                                        | 55-59  | Ecig      |               | 874  | 10.47 |               |             |               |                |              |
| 40                                        | 55-59  | Dual      |               | 0    | 0.00  |               |             |               |                |              |
| 40                                        | 55-59  | Former    |               | 2117 | 25.35 |               |             | 22.01         | 80             | 3.78         |
| Year of Follow-up: 2030, Age Group: 65-69 |        |           |               |      |       |               |             |               |                |              |
| 40                                        | 60-64  | Never Any |               | 5189 | 59.01 |               |             |               |                |              |
| 40                                        | 60-64  | CC        |               | 0    | 0.00  | 0             | 0.00        |               |                |              |
| 40                                        | 60-64  | Ecig      |               | 884  | 10.05 |               |             |               |                |              |
| 40                                        | 60-64  | Dual      |               | 0    | 0.00  |               |             |               |                |              |
| 40                                        | 60-64  | Former    |               | 2720 | 30.93 |               |             | 25.48         | 123            | 4.52         |
| Year of Follow-up: 2030, Age Group: 70-74 |        |           |               |      |       |               |             |               |                |              |
| 40                                        | 65-69  | Never Any |               | 5284 | 52.43 |               |             |               |                |              |
| 40                                        | 65-69  | CC        |               | 0    | 0.00  | 0             | 0.00        |               |                |              |
| 40                                        | 65-69  | Ecig      |               | 1071 | 10.63 |               |             |               |                |              |
| 40                                        | 65-69  | Dual      |               | 0    | 0.00  |               |             |               |                |              |
| 40                                        | 65-69  | Former    |               | 3723 | 36.94 |               |             | 27.71         | 72             | 1.93         |
| Year of Follow-up: 2030, Age Group: 75-79 |        |           |               |      |       |               |             |               |                |              |
| 40                                        | 70-74  | Never Any |               | 5278 | 50.27 |               |             |               |                |              |
| 40                                        | 70-74  | CC        |               | 0    | 0.00  | 0             | 0.00        |               |                |              |
| 40                                        | 70-74  | Ecig      |               | 965  | 9.19  |               |             |               |                |              |
| 40                                        | 70-74  | Dual      |               | 0    | 0.00  |               |             |               |                |              |
| 40                                        | 70-74  | Former    |               | 4256 | 40.54 |               |             | 30.21         | 92             | 2.16         |
| Year of Follow-up: 2030, Age Group: 75-79 |        |           |               |      |       |               |             |               |                |              |
| 40                                        | 75-79  | Never Any |               | 5018 | 52.27 |               |             |               |                |              |
| 40                                        | 75-79  | CC        |               | 0    | 0.00  | 0             | 0.00        |               |                |              |

**Results for PHIM for Run 2 (Sensitivity\_Analysis\_2.RTF)**

|                                              |           |               |       |       |               |             |               |                |              |
|----------------------------------------------|-----------|---------------|-------|-------|---------------|-------------|---------------|----------------|--------------|
| 40                                           | 75-79     | Ecig          | 635   | 6.61  |               |             |               |                |              |
| 40                                           | 75-79     | Dual          | 0     | 0.00  |               |             |               |                |              |
| 40                                           | 75-79     | Former        | 3947  | 41.11 |               |             | 34.06         | 74             | 1.87         |
| Year of Follow-up: 2035, Age Group: All Ages |           |               |       |       |               |             |               |                |              |
| Period                                       | Age Group | Smoking Group | N     | %     | Ever Quit (N) | Ever Quit % | Mean Yrs Quit | Short Term (n) | Short Term % |
| 45                                           | All Ages  | Never Any     | 25836 | 56.60 |               |             |               |                |              |
| 45                                           | All Ages  | CC            | 0     | 0.00  | 0             | 0.00        |               |                |              |
| 45                                           | All Ages  | Ecig          | 3864  | 8.46  |               |             |               |                |              |
| 45                                           | All Ages  | Dual          | 0     | 0.00  |               |             |               |                |              |
| 45                                           | All Ages  | Former        | 15950 | 34.94 |               |             | 29.57         | 333            | 2.09         |
| Year of Follow-up: 2035, Age Group: 18-19    |           |               |       |       |               |             |               |                |              |
| Period                                       | Age Group | Smoking Group | N     | %     | Ever Quit (N) | Ever Quit % | Mean Yrs Quit | Short Term (n) | Short Term % |
| 45                                           | 18-19     | Never Any     | 0     | .     |               |             |               |                |              |
| 45                                           | 18-19     | CC            | 0     | .     | 0             | .           |               |                |              |
| 45                                           | 18-19     | Ecig          | 0     | .     |               |             |               |                |              |
| 45                                           | 18-19     | Dual          | 0     | .     |               |             |               |                |              |
| 45                                           | 18-19     | Former        | 0     | .     |               |             | .             | 0              | .            |
| Year of Follow-up: 2035, Age Group: 20-24    |           |               |       |       |               |             |               |                |              |
| Period                                       | Age Group | Smoking Group | N     | %     | Ever Quit (N) | Ever Quit % | Mean Yrs Quit | Short Term (n) | Short Term % |
| 45                                           | 20-24     | Never Any     | 0     | .     |               |             |               |                |              |
| 45                                           | 20-24     | CC            | 0     | .     | 0             | .           |               |                |              |
| 45                                           | 20-24     | Ecig          | 0     | .     |               |             |               |                |              |
| 45                                           | 20-24     | Dual          | 0     | .     |               |             |               |                |              |
| 45                                           | 20-24     | Former        | 0     | .     |               |             | .             | 0              | .            |
| Year of Follow-up: 2035, Age Group: 25-29    |           |               |       |       |               |             |               |                |              |
| Period                                       | Age Group | Smoking Group | N     | %     | Ever Quit (N) | Ever Quit % | Mean Yrs Quit | Short Term (n) | Short Term % |
| 45                                           | 25-29     | Never Any     | 0     | .     |               |             |               |                |              |
| 45                                           | 25-29     | CC            | 0     | .     | 0             | .           |               |                |              |
| 45                                           | 25-29     | Ecig          | 0     | .     |               |             |               |                |              |
| 45                                           | 25-29     | Dual          | 0     | .     |               |             |               |                |              |
| 45                                           | 25-29     | Former        | 0     | .     |               |             | .             | 0              | .            |
| Year of Follow-up: 2035, Age Group: 30-34    |           |               |       |       |               |             |               |                |              |
| Period                                       | Age Group | Smoking Group | N     | %     | Ever Quit (N) | Ever Quit % | Mean Yrs Quit | Short Term (n) | Short Term % |
| 45                                           | 30-34     | Never Any     | 0     | .     |               |             |               |                |              |
| 45                                           | 30-34     | CC            | 0     | .     | 0             | .           |               |                |              |
| 45                                           | 30-34     | Ecig          | 0     | .     |               |             |               |                |              |
| 45                                           | 30-34     | Dual          | 0     | .     |               |             |               |                |              |
| 45                                           | 30-34     | Former        | 0     | .     |               |             | .             | 0              | .            |
| Year of Follow-up: 2035, Age Group: 35-39    |           |               |       |       |               |             |               |                |              |
| Period                                       | Age Group | Smoking Group | N     | %     | Ever Quit (N) | Ever Quit % | Mean Yrs Quit | Short Term (n) | Short Term % |
| 45                                           | 35-39     | Never Any     | 0     | .     |               |             |               |                |              |
| 45                                           | 35-39     | CC            | 0     | .     | 0             | .           |               |                |              |
| 45                                           | 35-39     | Ecig          | 0     | .     |               |             |               |                |              |
| 45                                           | 35-39     | Dual          | 0     | .     |               |             |               |                |              |
| 45                                           | 35-39     | Former        | 0     | .     |               |             | .             | 0              | .            |
| Year of Follow-up: 2035, Age Group: 40-44    |           |               |       |       |               |             |               |                |              |
| Period                                       | Age Group | Smoking Group | N     | %     | Ever Quit (N) | Ever Quit % | Mean Yrs Quit | Short Term (n) | Short Term % |
| 45                                           | 40-44     | Never Any     | 0     | .     |               |             |               |                |              |
| 45                                           | 40-44     | CC            | 0     | .     | 0             | .           |               |                |              |
| 45                                           | 40-44     | Ecig          | 0     | .     |               |             |               |                |              |
| 45                                           | 40-44     | Dual          | 0     | .     |               |             |               |                |              |
| 45                                           | 40-44     | Former        | 0     | .     |               |             | .             | 0              | .            |
| Year of Follow-up: 2035, Age Group: 45-49    |           |               |       |       |               |             |               |                |              |
| Period                                       | Age Group | Smoking Group | N     | %     | Ever Quit (N) | Ever Quit % | Mean Yrs Quit | Short Term (n) | Short Term % |
| 45                                           | 45-49     | Never Any     | 0     | .     |               |             |               |                |              |
| 45                                           | 45-49     | CC            | 0     | .     | 0             | .           |               |                |              |
| 45                                           | 45-49     | Ecig          | 0     | .     |               |             |               |                |              |
| 45                                           | 45-49     | Dual          | 0     | .     |               |             |               |                |              |
| 45                                           | 45-49     | Former        | 0     | .     |               |             | .             | 0              | .            |
| Year of Follow-up: 2035, Age Group: 50-54    |           |               |       |       |               |             |               |                |              |
| Period                                       | Age Group | Smoking Group | N     | %     | Ever Quit (N) | Ever Quit % | Mean Yrs Quit | Short Term (n) | Short Term % |
| 45                                           | 50-54     | Never Any     | 0     | .     |               |             |               |                |              |
| 45                                           | 50-54     | CC            | 0     | .     | 0             | .           |               |                |              |
| 45                                           | 50-54     | Ecig          | 0     | .     |               |             |               |                |              |
| 45                                           | 50-54     | Dual          | 0     | .     |               |             |               |                |              |
| 45                                           | 50-54     | Former        | 0     | .     |               |             | .             | 0              | .            |
| Year of Follow-up: 2035, Age Group: 55-59    |           |               |       |       |               |             |               |                |              |
| Period                                       | Age Group | Smoking Group | N     | %     | Ever Quit (N) | Ever Quit % | Mean Yrs Quit | Short Term (n) | Short Term % |

## Results for PHIM for Run 2 (Sensitivity\_Analysis\_2.RTF)

|                                              |           |               |       |       |               |             |               |                |              |
|----------------------------------------------|-----------|---------------|-------|-------|---------------|-------------|---------------|----------------|--------------|
| 45                                           | 55-59     | Never Any     | 4726  | 59.60 |               |             |               |                |              |
| 45                                           | 55-59     | CC            | 0     | 0.00  | 0             | 0.00        |               |                |              |
| 45                                           | 55-59     | Ecig          | 788   | 9.94  |               |             |               |                |              |
| 45                                           | 55-59     | Dual          | 0     | 0.00  |               |             |               |                |              |
| 45                                           | 55-59     | Former        | 2416  | 30.47 |               |             | 24.15         | 63             | 2.61         |
| Year of Follow-up: 2035, Age Group: 60-64    |           |               |       |       |               |             |               |                |              |
| Period                                       | Age Group | Smoking Group | N     | %     | Ever Quit (N) | Ever Quit % | Mean Yrs Quit | Short Term (n) | Short Term % |
| 45                                           | 60-64     | Never Any     | 5359  | 64.18 |               |             |               |                |              |
| 45                                           | 60-64     | CC            | 0     | 0.00  | 0             | 0.00        |               |                |              |
| 45                                           | 60-64     | Ecig          | 697   | 8.35  |               |             |               |                |              |
| 45                                           | 60-64     | Dual          | 0     | 0.00  |               |             |               |                |              |
| 45                                           | 60-64     | Former        | 2294  | 27.47 |               |             | 25.08         | 69             | 3.01         |
| Year of Follow-up: 2035, Age Group: 65-69    |           |               |       |       |               |             |               |                |              |
| Period                                       | Age Group | Smoking Group | N     | %     | Ever Quit (N) | Ever Quit % | Mean Yrs Quit | Short Term (n) | Short Term % |
| 45                                           | 65-69     | Never Any     | 5189  | 59.01 |               |             |               |                |              |
| 45                                           | 65-69     | CC            | 0     | 0.00  | 0             | 0.00        |               |                |              |
| 45                                           | 65-69     | Ecig          | 697   | 7.93  |               |             |               |                |              |
| 45                                           | 65-69     | Dual          | 0     | 0.00  |               |             |               |                |              |
| 45                                           | 65-69     | Former        | 2907  | 33.06 |               |             | 28.67         | 57             | 1.96         |
| Year of Follow-up: 2035, Age Group: 70-74    |           |               |       |       |               |             |               |                |              |
| Period                                       | Age Group | Smoking Group | N     | %     | Ever Quit (N) | Ever Quit % | Mean Yrs Quit | Short Term (n) | Short Term % |
| 45                                           | 70-74     | Never Any     | 5284  | 52.43 |               |             |               |                |              |
| 45                                           | 70-74     | CC            | 0     | 0.00  | 0             | 0.00        |               |                |              |
| 45                                           | 70-74     | Ecig          | 929   | 9.22  |               |             |               |                |              |
| 45                                           | 70-74     | Dual          | 0     | 0.00  |               |             |               |                |              |
| 45                                           | 70-74     | Former        | 3865  | 38.35 |               |             | 31.57         | 71             | 1.84         |
| Year of Follow-up: 2035, Age Group: 75-79    |           |               |       |       |               |             |               |                |              |
| Period                                       | Age Group | Smoking Group | N     | %     | Ever Quit (N) | Ever Quit % | Mean Yrs Quit | Short Term (n) | Short Term % |
| 45                                           | 75-79     | Never Any     | 5278  | 50.27 |               |             |               |                |              |
| 45                                           | 75-79     | CC            | 0     | 0.00  | 0             | 0.00        |               |                |              |
| 45                                           | 75-79     | Ecig          | 753   | 7.17  |               |             |               |                |              |
| 45                                           | 75-79     | Dual          | 0     | 0.00  |               |             |               |                |              |
| 45                                           | 75-79     | Former        | 4468  | 42.56 |               |             | 33.64         | 73             | 1.63         |
| Year of Follow-up: 2040, Age Group: All Ages |           |               |       |       |               |             |               |                |              |
| Period                                       | Age Group | Smoking Group | N     | %     | Ever Quit (N) | Ever Quit % | Mean Yrs Quit | Short Term (n) | Short Term % |
| 50                                           | All Ages  | Never Any     | 20558 | 58.48 |               |             |               |                |              |
| 50                                           | All Ages  | CC            | 0     | 0.00  | 0             | 0.00        |               |                |              |
| 50                                           | All Ages  | Ecig          | 2474  | 7.04  |               |             |               |                |              |
| 50                                           | All Ages  | Dual          | 0     | 0.00  |               |             |               |                |              |
| 50                                           | All Ages  | Former        | 12119 | 34.48 |               |             | 31.35         | 239            | 1.97         |
| Year of Follow-up: 2040, Age Group: 18-19    |           |               |       |       |               |             |               |                |              |
| Period                                       | Age Group | Smoking Group | N     | %     | Ever Quit (N) | Ever Quit % | Mean Yrs Quit | Short Term (n) | Short Term % |
| 50                                           | 18-19     | Never Any     | 0     | .     |               |             |               |                |              |
| 50                                           | 18-19     | CC            | 0     | .     | 0             | .           |               |                |              |
| 50                                           | 18-19     | Ecig          | 0     | .     |               |             |               |                |              |
| 50                                           | 18-19     | Dual          | 0     | .     |               |             |               |                |              |
| 50                                           | 18-19     | Former        | 0     | .     |               |             | .             | 0              | .            |
| Year of Follow-up: 2040, Age Group: 20-24    |           |               |       |       |               |             |               |                |              |
| Period                                       | Age Group | Smoking Group | N     | %     | Ever Quit (N) | Ever Quit % | Mean Yrs Quit | Short Term (n) | Short Term % |
| 50                                           | 20-24     | Never Any     | 0     | .     |               |             |               |                |              |
| 50                                           | 20-24     | CC            | 0     | .     | 0             | .           |               |                |              |
| 50                                           | 20-24     | Ecig          | 0     | .     |               |             |               |                |              |
| 50                                           | 20-24     | Dual          | 0     | .     |               |             |               |                |              |
| 50                                           | 20-24     | Former        | 0     | .     |               |             | .             | 0              | .            |
| Year of Follow-up: 2040, Age Group: 25-29    |           |               |       |       |               |             |               |                |              |
| Period                                       | Age Group | Smoking Group | N     | %     | Ever Quit (N) | Ever Quit % | Mean Yrs Quit | Short Term (n) | Short Term % |
| 50                                           | 25-29     | Never Any     | 0     | .     |               |             |               |                |              |
| 50                                           | 25-29     | CC            | 0     | .     | 0             | .           |               |                |              |
| 50                                           | 25-29     | Ecig          | 0     | .     |               |             |               |                |              |
| 50                                           | 25-29     | Dual          | 0     | .     |               |             |               |                |              |
| 50                                           | 25-29     | Former        | 0     | .     |               |             | .             | 0              | .            |
| Year of Follow-up: 2040, Age Group: 30-34    |           |               |       |       |               |             |               |                |              |
| Period                                       | Age Group | Smoking Group | N     | %     | Ever Quit (N) | Ever Quit % | Mean Yrs Quit | Short Term (n) | Short Term % |
| 50                                           | 30-34     | Never Any     | 0     | .     |               |             |               |                |              |
| 50                                           | 30-34     | CC            | 0     | .     | 0             | .           |               |                |              |
| 50                                           | 30-34     | Ecig          | 0     | .     |               |             |               |                |              |
| 50                                           | 30-34     | Dual          | 0     | .     |               |             |               |                |              |
| 50                                           | 30-34     | Former        | 0     | .     |               |             | .             | 0              | .            |
| Year of Follow-up: 2040, Age Group: 35-39    |           |               |       |       |               |             |               |                |              |



**Results for PHIM for Run 2 (Sensitivity\_Analysis\_2.RTF)**

| Period                                    | Age Group | Smoking Group | N    | %     | Ever Quit (N) | Ever Quit % | Mean Yrs Quit | Short Term (n) | Short Term % |
|-------------------------------------------|-----------|---------------|------|-------|---------------|-------------|---------------|----------------|--------------|
| 50                                        | 35-39     | Never Any     | 0    | .     |               |             |               |                |              |
| 50                                        | 35-39     | CC            | 0    | .     | 0             | .           |               |                |              |
| 50                                        | 35-39     | Ecig          | 0    | .     |               |             |               |                |              |
| 50                                        | 35-39     | Dual          | 0    | .     |               |             |               |                |              |
| 50                                        | 35-39     | Former        | 0    | .     |               |             | .             | 0              | .            |
| Year of Follow-up: 2040, Age Group: 40-44 |           |               |      |       |               |             |               |                |              |
| Period                                    | Age Group | Smoking Group | N    | %     | Ever Quit (N) | Ever Quit % | Mean Yrs Quit | Short Term (n) | Short Term % |
| 50                                        | 40-44     | Never Any     | 0    | .     |               |             |               |                |              |
| 50                                        | 40-44     | CC            | 0    | .     | 0             | .           |               |                |              |
| 50                                        | 40-44     | Ecig          | 0    | .     |               |             |               |                |              |
| 50                                        | 40-44     | Dual          | 0    | .     |               |             |               |                |              |
| 50                                        | 40-44     | Former        | 0    | .     |               |             | .             | 0              | .            |
| Year of Follow-up: 2040, Age Group: 45-49 |           |               |      |       |               |             |               |                |              |
| Period                                    | Age Group | Smoking Group | N    | %     | Ever Quit (N) | Ever Quit % | Mean Yrs Quit | Short Term (n) | Short Term % |
| 50                                        | 45-49     | Never Any     | 0    | .     |               |             |               |                |              |
| 50                                        | 45-49     | CC            | 0    | .     | 0             | .           |               |                |              |
| 50                                        | 45-49     | Ecig          | 0    | .     |               |             |               |                |              |
| 50                                        | 45-49     | Dual          | 0    | .     |               |             |               |                |              |
| 50                                        | 45-49     | Former        | 0    | .     |               |             | .             | 0              | .            |
| Year of Follow-up: 2040, Age Group: 50-54 |           |               |      |       |               |             |               |                |              |
| Period                                    | Age Group | Smoking Group | N    | %     | Ever Quit (N) | Ever Quit % | Mean Yrs Quit | Short Term (n) | Short Term % |
| 50                                        | 50-54     | Never Any     | 0    | .     |               |             |               |                |              |
| 50                                        | 50-54     | CC            | 0    | .     | 0             | .           |               |                |              |
| 50                                        | 50-54     | Ecig          | 0    | .     |               |             |               |                |              |
| 50                                        | 50-54     | Dual          | 0    | .     |               |             |               |                |              |
| 50                                        | 50-54     | Former        | 0    | .     |               |             | .             | 0              | .            |
| Year of Follow-up: 2040, Age Group: 55-59 |           |               |      |       |               |             |               |                |              |
| Period                                    | Age Group | Smoking Group | N    | %     | Ever Quit (N) | Ever Quit % | Mean Yrs Quit | Short Term (n) | Short Term % |
| 50                                        | 55-59     | Never Any     | 0    | .     |               |             |               |                |              |
| 50                                        | 55-59     | CC            | 0    | .     | 0             | .           |               |                |              |
| 50                                        | 55-59     | Ecig          | 0    | .     |               |             |               |                |              |
| 50                                        | 55-59     | Dual          | 0    | .     |               |             |               |                |              |
| 50                                        | 55-59     | Former        | 0    | .     |               |             | .             | 0              | .            |
| Year of Follow-up: 2040, Age Group: 60-64 |           |               |      |       |               |             |               |                |              |
| Period                                    | Age Group | Smoking Group | N    | %     | Ever Quit (N) | Ever Quit % | Mean Yrs Quit | Short Term (n) | Short Term % |
| 50                                        | 60-64     | Never Any     | 4726 | 59.60 |               |             |               |                |              |
| 50                                        | 60-64     | CC            | 0    | 0.00  | 0             | 0.00        |               |                |              |
| 50                                        | 60-64     | Ecig          | 609  | 7.68  |               |             |               |                |              |
| 50                                        | 60-64     | Dual          | 0    | 0.00  |               |             |               |                |              |
| 50                                        | 60-64     | Former        | 2595 | 32.72 |               |             | 27.27         | 79             | 3.04         |
| Year of Follow-up: 2040, Age Group: 65-69 |           |               |      |       |               |             |               |                |              |
| Period                                    | Age Group | Smoking Group | N    | %     | Ever Quit (N) | Ever Quit % | Mean Yrs Quit | Short Term (n) | Short Term % |
| 50                                        | 65-69     | Never Any     | 5359 | 64.18 |               |             |               |                |              |
| 50                                        | 65-69     | CC            | 0    | 0.00  | 0             | 0.00        |               |                |              |
| 50                                        | 65-69     | Ecig          | 561  | 6.72  |               |             |               |                |              |
| 50                                        | 65-69     | Dual          | 0    | 0.00  |               |             |               |                |              |
| 50                                        | 65-69     | Former        | 2430 | 29.10 |               |             | 28.54         | 35             | 1.44         |
| Year of Follow-up: 2040, Age Group: 70-74 |           |               |      |       |               |             |               |                |              |
| Period                                    | Age Group | Smoking Group | N    | %     | Ever Quit (N) | Ever Quit % | Mean Yrs Quit | Short Term (n) | Short Term % |
| 50                                        | 70-74     | Never Any     | 5189 | 59.01 |               |             |               |                |              |
| 50                                        | 70-74     | CC            | 0    | 0.00  | 0             | 0.00        |               |                |              |
| 50                                        | 70-74     | Ecig          | 586  | 6.66  |               |             |               |                |              |
| 50                                        | 70-74     | Dual          | 0    | 0.00  |               |             |               |                |              |
| 50                                        | 70-74     | Former        | 3018 | 34.32 |               |             | 32.49         | 53             | 1.76         |
| Year of Follow-up: 2040, Age Group: 75-79 |           |               |      |       |               |             |               |                |              |
| Period                                    | Age Group | Smoking Group | N    | %     | Ever Quit (N) | Ever Quit % | Mean Yrs Quit | Short Term (n) | Short Term % |
| 50                                        | 75-79     | Never Any     | 5284 | 52.43 |               |             |               |                |              |
| 50                                        | 75-79     | CC            | 0    | 0.00  | 0             | 0.00        |               |                |              |
| 50                                        | 75-79     | Ecig          | 718  | 7.12  |               |             |               |                |              |
| 50                                        | 75-79     | Dual          | 0    | 0.00  |               |             |               |                |              |
| 50                                        | 75-79     | Former        | 4076 | 40.44 |               |             | 34.79         | 72             | 1.77         |

## Results for PHIM for Run 2 (Sensitivity\_Analysis\_2.RTF)

\*\*\*\*\*

### Main Results for E-Component for Run: 2, Simulation: 1, COD: Four Diseases Combined

| Variable Parameter          | Value                                  |
|-----------------------------|----------------------------------------|
| 1. Country                  | US (United States)                     |
| 2. Sex                      | F (Females)                            |
| 3. Year of start of process | 1990                                   |
| 4. Cause of Death           | Four Diseases Combined                 |
| 5. Effective Dose NULL      | CC:1                                   |
| 6. Effective Dose Ecig      | CC:1 Ecig:0.05 Dual:0.525              |
| Note:                       | Death rates are per million population |

#### Results for Age Groups Combined and Years combined, Population unadjusted for deaths in Ecig scenario,

| Age Group:All |         | NULL        | Ecig        | %Drop   |        |        | NULL    | Ecig    | Drop    |         |
|---------------|---------|-------------|-------------|---------|--------|--------|---------|---------|---------|---------|
| Year          | Number  | Attrib      | Attrib      | Drop    | %Drop  | Attrib | Death   | Attrib  | Attrib  | Drop    |
|               | Deaths  | Deaths      | Deaths      | Deaths  | Deaths | Deaths | Rate    | Rates   | Rates   | Rates   |
| All Comb      | 9082078 | 2946250.006 | 1645905.618 | 1300344 | 14.318 | 44.136 | 2493.45 | 808.881 | 451.877 | 357.004 |

#### Results for Age Groups Combined, Population unadjusted for deaths in Ecig scenario,

| Age Group:All |        | NULL      | Ecig      | %Drop    |        |        | NULL    | Ecig    | Drop    |         |
|---------------|--------|-----------|-----------|----------|--------|--------|---------|---------|---------|---------|
| Year          | Number | Attrib    | Attrib    | Drop     | %Drop  | Attrib | Death   | Attrib  | Attrib  | Drop    |
|               | Deaths | Deaths    | Deaths    | Deaths   | Deaths | Deaths | Rate    | Rates   | Rates   | Rates   |
| 1990          | 199848 | 57524.822 | 57524.822 | 0.000    | 0.000  | 0.000  | 2926.84 | 842.471 | 842.471 | 0.000   |
| 1991          | 199162 | 59078.486 | 58202.005 | 876.481  | 0.440  | 1.484  | 2877.87 | 853.678 | 841.013 | 12.665  |
| 1992          | 198532 | 60494.150 | 58312.054 | 2182.096 | 1.099  | 3.607  | 2829.84 | 862.271 | 831.168 | 31.103  |
| 1993          | 202512 | 62694.848 | 58953.474 | 3741.373 | 1.847  | 5.968  | 2845.85 | 881.034 | 828.457 | 52.577  |
| 1994          | 200658 | 63202.598 | 57895.857 | 5306.741 | 2.645  | 8.396  | 2777.87 | 874.966 | 801.500 | 73.466  |
| 1995          | 201023 | 63766.862 | 56880.299 | 6886.563 | 3.426  | 10.800 | 2739.80 | 869.097 | 775.238 | 93.859  |
| 1996          | 201180 | 64591.163 | 56033.129 | 8558.034 | 4.254  | 13.250 | 2706.36 | 868.908 | 753.782 | 115.126 |
| 1997          | 198639 | 64686.912 | 54808.228 | 9878.684 | 4.973  | 15.272 | 2635.18 | 858.147 | 727.095 | 131.052 |
| 1998          | 197573 | 65295.961 | 54051.782 | 11244.18 | 5.691  | 17.220 | 2584.18 | 854.046 | 706.977 | 147.070 |
| 1999          | 211329 | 67327.521 | 53819.319 | 13508.20 | 6.392  | 20.063 | 2726.91 | 868.771 | 694.465 | 174.305 |
| 2000          | 208496 | 67596.897 | 52836.775 | 14760.12 | 7.079  | 21.836 | 2656.96 | 861.419 | 673.324 | 188.095 |
| 2001          | 203606 | 67008.811 | 51117.564 | 15891.25 | 7.805  | 23.715 | 2565.88 | 844.458 | 644.194 | 200.265 |
| 2002          | 200828 | 67067.744 | 49893.184 | 17174.56 | 8.552  | 25.608 | 2506.09 | 836.925 | 622.607 | 214.318 |
| 2003          | 196352 | 66756.217 | 48545.658 | 18210.56 | 9.274  | 27.279 | 2427.31 | 825.244 | 600.124 | 225.120 |
| 2004          | 188160 | 65058.725 | 46139.216 | 18919.51 | 10.055 | 29.081 | 2302.83 | 796.234 | 564.684 | 231.550 |
| 2005          | 186416 | 65214.724 | 45069.037 | 20145.69 | 10.807 | 30.891 | 2256.27 | 789.321 | 545.489 | 243.832 |
| 2006          | 180088 | 63771.146 | 42868.731 | 20902.42 | 11.607 | 32.777 | 2160.67 | 765.117 | 514.333 | 250.784 |
| 2007          | 175644 | 63110.718 | 41434.884 | 21675.83 | 12.341 | 34.346 | 2086.36 | 749.650 | 492.177 | 257.473 |
| 2008          | 177570 | 63718.624 | 40615.039 | 23103.59 | 13.011 | 36.259 | 2086.39 | 748.674 | 477.214 | 271.460 |
| 2009          | 172806 | 62794.698 | 39011.614 | 23783.08 | 13.763 | 37.874 | 2007.57 | 729.515 | 453.216 | 276.299 |
| 2010          | 170489 | 61917.074 | 37364.277 | 24552.80 | 14.401 | 39.654 | 1957.97 | 711.083 | 429.108 | 281.975 |
| 2011          | 170305 | 61680.114 | 35997.709 | 25682.41 | 15.080 | 41.638 | 1937.46 | 701.700 | 409.526 | 292.174 |
| 2012          | 171421 | 62023.127 | 35066.466 | 26956.66 | 15.725 | 43.462 | 1930.22 | 698.386 | 394.852 | 303.535 |
| 2013          | 172699 | 62037.765 | 33968.722 | 28069.04 | 16.253 | 45.245 | 1923.75 | 691.059 | 378.389 | 312.670 |
| 2014          | 174169 | 61921.017 | 32640.711 | 29280.31 | 16.811 | 47.287 | 1918.85 | 682.195 | 359.609 | 322.586 |
| 2015          | 177354 | 61856.204 | 31525.832 | 30330.37 | 17.102 | 49.034 | 2184.51 | 761.899 | 388.312 | 373.587 |
| 2016          | 176853 | 60464.119 | 29521.069 | 30943.05 | 17.496 | 51.176 | 2157.59 | 737.655 | 360.154 | 377.502 |
| 2017          | 179309 | 60243.839 | 28273.731 | 31970.11 | 17.830 | 53.068 | 2166.86 | 728.017 | 341.674 | 386.343 |
| 2018          | 177157 | 60713.327 | 27732.399 | 32980.93 | 18.617 | 54.322 | 2120.51 | 726.721 | 331.949 | 394.772 |
| 2019          | 179227 | 61148.172 | 26850.887 | 34297.28 | 19.136 | 56.089 | 2124.53 | 724.841 | 318.286 | 406.555 |
| 2020          | 180467 | 61149.317 | 25953.960 | 35195.36 | 19.502 | 57.556 | 2424.25 | 821.432 | 348.645 | 472.787 |
| 2021          | 178116 | 58727.786 | 23544.251 | 35183.53 | 19.753 | 59.910 | 2375.42 | 783.216 | 313.995 | 469.221 |
| 2022          | 179408 | 58848.802 | 22570.827 | 36277.98 | 20.221 | 61.646 | 2374.52 | 778.881 | 298.731 | 480.149 |
| 2023          | 180640 | 58816.149 | 21572.210 | 37243.94 | 20.618 | 63.323 | 2372.26 | 772.407 | 283.298 | 489.108 |
| 2024          | 181610 | 58955.232 | 20666.863 | 38288.37 | 21.083 | 64.945 | 2366.77 | 768.316 | 269.335 | 498.982 |
| 2025          | 180418 | 58297.744 | 19705.153 | 38592.59 | 21.391 | 66.199 | 2713.69 | 876.861 | 296.387 | 580.474 |
| 2026          | 180313 | 56469.971 | 18073.932 | 38396.04 | 21.294 | 67.994 | 2701.83 | 846.150 | 270.821 | 575.329 |
| 2027          | 179619 | 56209.427 | 17073.790 | 39135.64 | 21.788 | 69.625 | 2680.68 | 838.883 | 254.813 | 584.070 |
| 2028          | 178762 | 55733.105 | 16074.544 | 39658.56 | 22.185 | 71.158 | 2656.74 | 828.298 | 238.898 | 589.400 |
| 2029          | 177808 | 55145.838 | 15102.207 | 40043.63 | 22.521 | 72.614 | 2630.89 | 815.951 | 223.456 | 592.495 |
| 2030          | 173587 | 53615.097 | 14107.155 | 39507.94 | 22.760 | 73.688 | 3040.33 | 939.056 | 247.084 | 691.972 |
| 2031          | 174985 | 52046.561 | 13204.178 | 38842.38 | 22.197 | 74.630 | 3060.73 | 910.364 | 230.959 | 679.405 |
| 2032          | 173400 | 51582.636 | 12423.828 | 39158.81 | 22.583 | 75.915 | 3027.10 | 900.496 | 216.887 | 683.609 |
| 2033          | 171756 | 50839.758 | 11637.233 | 39202.53 | 22.825 | 77.110 | 2991.14 | 885.375 | 202.662 | 682.712 |
| 2034          | 169973 | 50215.451 | 10886.889 | 39328.56 | 23.138 | 78.320 | 2951.96 | 872.104 | 189.075 | 683.029 |
| 2035          | 162644 | 47773.075 | 10029.299 | 37743.78 | 23.206 | 79.006 | 3459.14 | 1016.05 | 213.305 | 802.741 |
| 2036          | 156254 | 43298.709 | 8599.432  | 34699.28 | 22.207 | 80.139 | 3328.25 | 922.274 | 183.170 | 739.104 |
| 2037          | 153593 | 42241.563 | 7881.919  | 34359.64 | 22.371 | 81.341 | 3274.10 | 900.450 | 168.016 | 732.434 |
| 2038          | 150947 | 41356.353 | 7251.073  | 34105.28 | 22.594 | 82.467 | 3217.50 | 881.531 | 154.560 | 726.971 |
| 2039          | 148373 | 40161.050 | 6592.401  | 33568.65 | 22.624 | 83.585 | 3159.42 | 855.178 | 140.377 | 714.801 |

## Results for PHIM for Run 2 (Sensitivity\_Analysis\_2.RTF)

\*\*\*\*\*

### Main Results for E-Component for Run: 2, Simulation: 1, COD: LUNG CANCER

| Variable Parameter          | Value                                  |
|-----------------------------|----------------------------------------|
| 1. Country                  | US (United States)                     |
| 2. Sex                      | F (Females)                            |
| 3. Year of start of process | 1990                                   |
| 4. Cause of Death           | LUNG CANCER                            |
| 5. Effective Dose NULL      | CC:1                                   |
| 6. Effective Dose Ecig      | CC:1 Ecig:0.05 Dual:0.525              |
| Note:                       | Death rates are per million population |

#### Results for Age Groups Combined and Years combined, Population unadjusted for deaths in Ecig scenario,

| Age Group:All |         | NULL        | Ecig       | %Drop    |        |        | NULL    | Ecig    | Drop    |         |
|---------------|---------|-------------|------------|----------|--------|--------|---------|---------|---------|---------|
| Year          | Number  | Attrib      | Attrib     | Drop     | %Drop  | Attrib | Death   | Attrib  | Drop    |         |
|               | Deaths  | Deaths      | Deaths     | Deaths   | Deaths | Deaths | Rate    | Rates   | Rates   |         |
| All Comb      | 2327764 | 1580465.217 | 994358.036 | 586107.2 | 25.179 | 37.084 | 639.078 | 433.910 | 272.997 | 160.913 |

#### Results for Age Groups Combined, Population unadjusted for deaths in Ecig scenario,

| Age Group:All |        | NULL      | Ecig      | %Drop    |        |        | NULL    | Ecig    | Drop    |
|---------------|--------|-----------|-----------|----------|--------|--------|---------|---------|---------|
| Year          | Number | Attrib    | Attrib    | Drop     | %Drop  | Attrib | Death   | Attrib  | Drop    |
|               | Deaths | Deaths    | Deaths    | Deaths   | Deaths | Deaths | Rate    | Rates   | Rates   |
| 1990          | 42690  | 30614.201 | 30614.201 | 0.000    | 0.000  | 0.000  | 625.210 | 448.355 | 0.000   |
| 1991          | 43692  | 31412.010 | 31228.583 | 183.428  | 0.420  | 0.584  | 631.345 | 453.901 | 2.651   |
| 1992          | 45423  | 32782.407 | 32303.756 | 478.651  | 1.054  | 1.460  | 647.450 | 467.274 | 6.823   |
| 1993          | 46291  | 33491.183 | 32659.141 | 832.043  | 1.797  | 2.484  | 650.515 | 470.643 | 11.692  |
| 1994          | 47017  | 34074.347 | 32852.612 | 1221.735 | 2.598  | 3.585  | 650.895 | 471.719 | 16.913  |
| 1995          | 47840  | 34694.454 | 33038.286 | 1656.168 | 3.462  | 4.774  | 652.025 | 472.861 | 22.572  |
| 1996          | 48244  | 35027.269 | 32921.789 | 2105.479 | 4.364  | 6.011  | 648.999 | 471.202 | 28.324  |
| 1997          | 49035  | 35590.763 | 32998.819 | 2591.944 | 5.286  | 7.283  | 650.506 | 472.153 | 34.385  |
| 1998          | 49686  | 36100.785 | 33001.624 | 3099.161 | 6.237  | 8.585  | 649.874 | 472.184 | 40.536  |
| 1999          | 48883  | 35451.030 | 31931.530 | 3519.499 | 7.200  | 9.928  | 630.769 | 457.448 | 45.414  |
| 2000          | 50331  | 36447.986 | 32308.928 | 4139.058 | 8.224  | 11.356 | 641.392 | 464.474 | 52.746  |
| 2001          | 50389  | 36411.326 | 31732.061 | 4679.266 | 9.286  | 12.851 | 635.012 | 458.863 | 58.969  |
| 2002          | 51445  | 37078.545 | 31712.830 | 5365.715 | 10.430 | 14.471 | 641.972 | 462.696 | 66.958  |
| 2003          | 51408  | 36999.876 | 31054.109 | 5945.767 | 11.566 | 16.070 | 635.509 | 457.395 | 73.502  |
| 2004          | 51399  | 36861.555 | 30283.065 | 6578.490 | 12.799 | 17.846 | 629.057 | 451.138 | 80.512  |
| 2005          | 51421  | 36689.529 | 29468.057 | 7221.472 | 14.044 | 19.683 | 622.370 | 444.069 | 87.404  |
| 2006          | 51355  | 36504.774 | 28609.052 | 7895.721 | 15.375 | 21.629 | 616.150 | 437.979 | 94.732  |
| 2007          | 51839  | 36663.202 | 28005.297 | 8657.905 | 16.702 | 23.615 | 615.761 | 435.498 | 102.841 |
| 2008          | 50976  | 35898.803 | 26716.026 | 9182.777 | 18.014 | 25.580 | 598.952 | 421.800 | 107.895 |
| 2009          | 51193  | 35934.525 | 25977.122 | 9957.404 | 19.451 | 27.710 | 594.733 | 417.468 | 115.680 |
| 2010          | 50853  | 35502.829 | 24943.547 | 10559.28 | 20.764 | 29.742 | 584.018 | 407.730 | 121.267 |
| 2011          | 50509  | 35136.342 | 23890.802 | 11245.54 | 22.264 | 32.005 | 574.613 | 399.726 | 127.934 |
| 2012          | 51245  | 35450.201 | 23328.201 | 12122.00 | 23.655 | 34.194 | 577.023 | 399.173 | 136.495 |
| 2013          | 51069  | 35123.224 | 22307.463 | 12815.76 | 25.095 | 36.488 | 568.874 | 391.249 | 142.759 |
| 2014          | 51251  | 35079.370 | 21497.213 | 13582.16 | 26.501 | 38.718 | 564.641 | 386.476 | 149.637 |
| 2015          | 50443  | 34324.171 | 20320.678 | 14003.49 | 27.761 | 40.798 | 621.319 | 422.780 | 172.485 |
| 2016          | 48854  | 33054.753 | 18773.562 | 14281.19 | 29.232 | 43.205 | 596.013 | 403.264 | 174.229 |
| 2017          | 48325  | 32471.234 | 17678.385 | 14792.85 | 30.611 | 45.557 | 583.983 | 392.399 | 178.764 |
| 2018          | 50465  | 33657.595 | 17490.577 | 16167.02 | 32.036 | 48.034 | 604.052 | 402.871 | 193.514 |
| 2019          | 51036  | 33863.424 | 16805.825 | 17057.60 | 33.423 | 50.372 | 604.975 | 401.412 | 202.198 |
| 2020          | 51444  | 33910.830 | 16121.911 | 17788.92 | 34.579 | 52.458 | 691.053 | 455.532 | 238.963 |
| 2021          | 48037  | 31531.880 | 14203.034 | 17328.85 | 36.074 | 54.957 | 640.639 | 420.521 | 231.104 |
| 2022          | 48335  | 31560.212 | 13484.967 | 18075.25 | 37.396 | 57.272 | 639.727 | 417.708 | 239.231 |
| 2023          | 48599  | 31508.781 | 12761.740 | 18747.04 | 38.575 | 59.498 | 638.227 | 413.791 | 246.197 |
| 2024          | 48784  | 31517.293 | 12097.769 | 19419.52 | 39.808 | 61.615 | 635.757 | 410.740 | 253.079 |
| 2025          | 48477  | 31175.389 | 11420.455 | 19754.93 | 40.751 | 63.367 | 729.141 | 468.912 | 297.136 |
| 2026          | 45324  | 29044.598 | 10076.854 | 18967.74 | 41.849 | 65.306 | 679.138 | 435.206 | 284.214 |
| 2027          | 45107  | 28825.765 | 9422.001  | 19403.76 | 43.017 | 67.314 | 673.191 | 430.203 | 289.586 |
| 2028          | 44842  | 28513.846 | 8784.416  | 19729.43 | 43.998 | 69.192 | 666.430 | 423.769 | 293.216 |
| 2029          | 44539  | 28148.109 | 8175.274  | 19972.83 | 44.843 | 70.956 | 659.013 | 416.486 | 295.523 |
| 2030          | 43393  | 27314.475 | 7558.954  | 19755.52 | 45.527 | 72.326 | 760.018 | 478.407 | 346.013 |
| 2031          | 40748  | 25423.102 | 6775.640  | 18647.46 | 45.763 | 73.348 | 712.731 | 444.684 | 326.169 |
| 2032          | 40325  | 25085.902 | 6314.881  | 18771.02 | 46.549 | 74.827 | 703.969 | 437.933 | 327.692 |
| 2033          | 39882  | 24645.067 | 5868.563  | 18776.50 | 47.080 | 76.188 | 694.543 | 429.194 | 326.993 |
| 2034          | 39404  | 24239.126 | 5452.197  | 18786.93 | 47.677 | 77.507 | 684.347 | 420.967 | 326.277 |
| 2035          | 37454  | 22944.147 | 4963.926  | 17980.22 | 48.006 | 78.365 | 796.588 | 487.980 | 382.406 |
| 2036          | 32988  | 19950.581 | 4095.543  | 15855.04 | 48.062 | 79.472 | 702.663 | 424.953 | 337.717 |
| 2037          | 32403  | 19415.334 | 3745.086  | 15670.25 | 48.360 | 80.711 | 690.731 | 413.871 | 334.038 |
| 2038          | 31820  | 18939.317 | 3443.804  | 15495.51 | 48.698 | 81.817 | 678.257 | 403.701 | 330.294 |
| 2039          | 31251  | 18379.752 | 3137.882  | 15241.87 | 48.772 | 82.928 | 665.457 | 391.373 | 324.556 |

## Results for PHIM for Run 2 (Sensitivity\_Analysis\_2.RTF)

\*\*\*\*\*

### Main Results for E-Component for Run: 2, Simulation: 1, COD: IHD

| Variable Parameter          | Value                                  |
|-----------------------------|----------------------------------------|
| 1. Country                  | US (United States)                     |
| 2. Sex                      | F (Females)                            |
| 3. Year of start of process | 1990                                   |
| 4. Cause of Death           | IHD                                    |
| 5. Effective Dose NULL      | CC:1                                   |
| 6. Effective Dose Ecig      | CC:1 Ecig:0.05 Dual:0.525              |
| Note:                       | Death rates are per million population |

#### Results for Age Groups Combined and Years combined, Population unadjusted for deaths in Ecig scenario,

| Age Group:All |         | NULL       | Ecig       | %Drop    |        | Death  |         | NULL    | Ecig   | Drop   |
|---------------|---------|------------|------------|----------|--------|--------|---------|---------|--------|--------|
| Year          | Number  | Attrib     | Attrib     | Drop     | %Drop  | Attrib | Rate    | Attrib  | Attrib | Rates  |
|               | Deaths  | Deaths     | Deaths     | Deaths   | Deaths | Deaths |         | Rates   | Rates  | Rates  |
| All Comb      | 3242167 | 398833.796 | 143969.532 | 254864.3 | 7.861  | 63.902 | 890.124 | 109.498 | 39.526 | 69.972 |

#### Results for Age Groups Combined, Population unadjusted for deaths in Ecig scenario,

| Age Group:All |        | NULL      | Ecig      | %Drop    |        | Death  |         | NULL    | Ecig    | Drop   |
|---------------|--------|-----------|-----------|----------|--------|--------|---------|---------|---------|--------|
| Year          | Number | Attrib    | Attrib    | Drop     | %Drop  | Attrib | Rate    | Attrib  | Attrib  | Rates  |
|               | Deaths | Deaths    | Deaths    | Deaths   | Deaths | Deaths |         | Rates   | Rates   | Rates  |
| 1990          | 98916  | 12922.892 | 12922.892 | 0.000    | 0.000  | 0.000  | 1448.66 | 189.260 | 189.260 | 0.000  |
| 1991          | 96403  | 12856.479 | 12413.199 | 443.280  | 0.460  | 3.448  | 1393.01 | 185.775 | 179.370 | 6.405  |
| 1992          | 93721  | 12662.244 | 11575.255 | 1086.988 | 1.160  | 8.584  | 1335.88 | 180.485 | 164.991 | 15.494 |
| 1993          | 93679  | 12730.613 | 10900.924 | 1829.689 | 1.953  | 14.372 | 1316.45 | 178.900 | 153.188 | 25.712 |
| 1994          | 90832  | 12495.323 | 9942.857  | 2552.466 | 2.810  | 20.427 | 1257.46 | 172.983 | 137.647 | 35.336 |
| 1995          | 89698  | 12365.590 | 9123.100  | 3242.491 | 3.615  | 26.222 | 1222.52 | 168.534 | 124.341 | 44.193 |
| 1996          | 88286  | 12290.551 | 8307.781  | 3982.770 | 4.511  | 32.405 | 1187.66 | 165.338 | 111.760 | 53.578 |
| 1997          | 84777  | 11719.531 | 7320.262  | 4399.270 | 5.189  | 37.538 | 1124.67 | 155.473 | 97.112  | 58.361 |
| 1998          | 82517  | 11416.794 | 6577.010  | 4839.784 | 5.865  | 42.392 | 1079.29 | 149.327 | 86.025  | 63.303 |
| 1999          | 93939  | 13028.038 | 6852.565  | 6175.473 | 6.574  | 47.401 | 1212.16 | 168.109 | 88.423  | 79.686 |
| 2000          | 90039  | 12426.299 | 5997.653  | 6428.646 | 7.140  | 51.734 | 1147.41 | 158.354 | 76.431  | 81.923 |
| 2001          | 86119  | 11939.281 | 5198.857  | 6740.425 | 7.827  | 56.456 | 1085.29 | 150.461 | 65.517  | 84.944 |
| 2002          | 83014  | 11528.794 | 4526.070  | 7002.724 | 8.436  | 60.741 | 1035.91 | 143.865 | 56.480  | 87.386 |
| 2003          | 79302  | 11048.407 | 3930.921  | 7117.486 | 8.975  | 64.421 | 980.336 | 136.581 | 48.594  | 87.987 |
| 2004          | 73861  | 10375.132 | 3301.405  | 7073.727 | 9.577  | 68.180 | 903.963 | 126.978 | 40.405  | 86.573 |
| 2005          | 71649  | 10051.029 | 2872.875  | 7178.155 | 10.018 | 71.417 | 867.197 | 121.652 | 34.772  | 86.880 |
| 2006          | 67551  | 9542.523  | 2406.746  | 7135.778 | 10.564 | 74.779 | 810.467 | 114.490 | 28.876  | 85.614 |
| 2007          | 63503  | 8936.533  | 2014.479  | 6922.054 | 10.900 | 77.458 | 754.310 | 106.151 | 23.929  | 82.222 |
| 2008          | 63171  | 8944.180  | 1798.779  | 7145.401 | 11.311 | 79.889 | 742.239 | 105.091 | 21.135  | 83.956 |
| 2009          | 59747  | 8390.033  | 1532.856  | 6857.178 | 11.477 | 81.730 | 694.108 | 97.471  | 17.808  | 79.663 |
| 2010          | 58008  | 8157.570  | 1347.604  | 6809.966 | 11.740 | 83.480 | 666.189 | 93.685  | 15.476  | 78.209 |
| 2011          | 57368  | 8035.356  | 1192.283  | 6843.073 | 11.928 | 85.162 | 652.644 | 91.414  | 13.564  | 77.850 |
| 2012          | 57411  | 7970.766  | 1066.356  | 6904.409 | 12.026 | 86.622 | 646.453 | 89.752  | 12.007  | 77.744 |
| 2013          | 57067  | 7743.216  | 949.171   | 6794.045 | 11.905 | 87.742 | 635.688 | 86.254  | 10.573  | 75.681 |
| 2014          | 57538  | 7774.935  | 867.267   | 6907.668 | 12.005 | 88.845 | 633.906 | 85.658  | 9.555   | 76.103 |
| 2015          | 58395  | 7722.535  | 797.260   | 6925.275 | 11.859 | 89.676 | 719.266 | 95.120  | 9.820   | 85.300 |
| 2016          | 58658  | 7600.353  | 711.531   | 6888.823 | 11.744 | 90.638 | 715.621 | 92.723  | 8.681   | 84.043 |
| 2017          | 59004  | 7470.266  | 646.641   | 6823.625 | 11.565 | 91.344 | 713.034 | 90.274  | 7.814   | 82.460 |
| 2018          | 56077  | 6907.050  | 557.770   | 6349.280 | 11.322 | 91.925 | 671.224 | 82.675  | 6.676   | 75.999 |
| 2019          | 55886  | 6732.046  | 513.004   | 6219.042 | 11.128 | 92.380 | 662.462 | 79.801  | 6.081   | 73.720 |
| 2020          | 55313  | 6429.836  | 467.090   | 5962.746 | 10.780 | 92.736 | 743.037 | 86.373  | 6.275   | 80.099 |
| 2021          | 56292  | 6562.016  | 445.987   | 6116.029 | 10.865 | 93.204 | 750.730 | 87.513  | 5.948   | 81.566 |
| 2022          | 55827  | 6352.366  | 415.557   | 5936.809 | 10.634 | 93.458 | 738.885 | 84.075  | 5.500   | 78.575 |
| 2023          | 55338  | 6134.123  | 390.340   | 5743.783 | 10.379 | 93.637 | 726.728 | 80.557  | 5.126   | 75.431 |
| 2024          | 54770  | 5922.193  | 369.882   | 5552.310 | 10.138 | 93.754 | 713.771 | 77.179  | 4.820   | 72.359 |
| 2025          | 53295  | 5504.188  | 336.847   | 5167.340 | 9.696  | 93.880 | 801.612 | 82.789  | 5.067   | 77.722 |
| 2026          | 55278  | 5641.075  | 340.788   | 5300.287 | 9.588  | 93.959 | 828.283 | 84.526  | 5.106   | 79.420 |
| 2027          | 54199  | 5426.216  | 324.514   | 5101.702 | 9.413  | 94.020 | 808.875 | 80.982  | 4.843   | 76.139 |
| 2028          | 53090  | 5197.830  | 309.068   | 4888.762 | 9.208  | 94.054 | 789.020 | 77.249  | 4.593   | 72.656 |
| 2029          | 51974  | 4973.547  | 295.047   | 4678.500 | 9.002  | 94.068 | 769.023 | 73.590  | 4.366   | 69.224 |
| 2030          | 49479  | 4450.618  | 258.116   | 4192.502 | 8.473  | 94.200 | 866.605 | 77.952  | 4.521   | 73.431 |
| 2031          | 51987  | 4555.052  | 264.247   | 4290.805 | 8.254  | 94.199 | 909.317 | 79.674  | 4.622   | 75.052 |
| 2032          | 50677  | 4349.999  | 252.428   | 4097.571 | 8.086  | 94.197 | 884.689 | 75.939  | 4.407   | 71.533 |
| 2033          | 49380  | 4147.948  | 240.814   | 3907.134 | 7.912  | 94.194 | 859.955 | 72.237  | 4.194   | 68.043 |
| 2034          | 48076  | 3966.133  | 230.177   | 3735.957 | 7.771  | 94.196 | 834.943 | 68.881  | 3.998   | 64.883 |
| 2035          | 44518  | 3289.064  | 184.247   | 3104.817 | 6.974  | 94.398 | 946.825 | 69.952  | 3.919   | 66.034 |
| 2036          | 46347  | 3313.192  | 185.157   | 3128.036 | 6.749  | 94.412 | 987.211 | 70.572  | 3.944   | 66.628 |
| 2037          | 44841  | 3117.951  | 174.219   | 2943.732 | 6.565  | 94.412 | 955.859 | 66.464  | 3.714   | 62.751 |
| 2038          | 43378  | 2949.775  | 164.539   | 2785.236 | 6.421  | 94.422 | 924.621 | 62.876  | 3.507   | 59.369 |
| 2039          | 41973  | 2766.312  | 155.098   | 2611.214 | 6.221  | 94.393 | 893.753 | 58.905  | 3.303   | 55.602 |

## Results for PHIM for Run 2 (Sensitivity\_Analysis\_2.RTF)

\*\*\*\*\*

### Main Results for E-Component for Run: 2, Simulation: 1, COD: STROKE

| Variable Parameter          | Value                                  |
|-----------------------------|----------------------------------------|
| 1. Country                  | US (United States)                     |
| 2. Sex                      | F (Females)                            |
| 3. Year of start of process | 1990                                   |
| 4. Cause of Death           | STROKE                                 |
| 5. Effective Dose NULL      | CC:1                                   |
| 6. Effective Dose Ecig      | CC:1 Ecig:0.05 Dual:0.525              |
| Note:                       | Death rates are per million population |

#### Results for Age Groups Combined and Years combined, Population unadjusted for deaths in Ecig scenario,

| Age Group:All | NULL    | Ecig       | %Drop     |          |        | NULL   | Ecig    | Drop   |        |        |
|---------------|---------|------------|-----------|----------|--------|--------|---------|--------|--------|--------|
| Year          | Number  | Attrib     | Attrib    | Drop     | %Drop  | Attrib | Death   | Attrib | Attrib | Drop   |
|               | Deaths  | Deaths     | Deaths    | Deaths   | Deaths | Deaths | Rate    | Rates  | Rates  | Rates  |
| All Comb      | 1352207 | 104899.750 | 36551.992 | 68347.76 | 5.055  | 65.155 | 371.243 | 28.800 | 10.035 | 18.765 |

#### Results for Age Groups Combined, Population unadjusted for deaths in Ecig scenario,

| Age Group:All | NULL   | Ecig     | %Drop    |          |        | NULL   | Ecig    | Drop   |        |        |
|---------------|--------|----------|----------|----------|--------|--------|---------|--------|--------|--------|
| Year          | Number | Attrib   | Attrib   | Drop     | %Drop  | Attrib | Death   | Attrib | Attrib | Drop   |
|               | Deaths | Deaths   | Deaths   | Deaths   | Deaths | Deaths | Rate    | Rates  | Rates  | Rates  |
| 1990          | 33504  | 3293.017 | 3293.017 | 0.000    | 0.000  | 0.000  | 490.678 | 48.227 | 48.227 | 0.000  |
| 1991          | 32505  | 3207.063 | 3067.279 | 139.784  | 0.430  | 4.359  | 469.694 | 46.342 | 44.322 | 2.020  |
| 1992          | 32560  | 3218.125 | 2880.026 | 338.099  | 1.038  | 10.506 | 464.104 | 45.871 | 41.051 | 4.819  |
| 1993          | 32768  | 3226.680 | 2670.176 | 556.504  | 1.698  | 17.247 | 460.480 | 45.344 | 37.523 | 7.820  |
| 1994          | 33005  | 3277.266 | 2493.031 | 784.235  | 2.376  | 23.930 | 456.915 | 45.370 | 34.513 | 10.857 |
| 1995          | 33730  | 3309.378 | 2303.690 | 1005.688 | 2.982  | 30.389 | 459.716 | 45.104 | 31.398 | 13.707 |
| 1996          | 33750  | 3312.987 | 2105.030 | 1207.956 | 3.579  | 36.461 | 454.019 | 44.568 | 28.318 | 16.250 |
| 1997          | 33699  | 3267.066 | 1890.730 | 1376.336 | 4.084  | 42.128 | 447.056 | 43.341 | 25.083 | 18.259 |
| 1998          | 33274  | 3178.725 | 1677.884 | 1500.841 | 4.511  | 47.215 | 435.211 | 41.577 | 21.946 | 19.630 |
| 1999          | 33891  | 3120.351 | 1501.959 | 1618.393 | 4.775  | 51.866 | 437.317 | 40.264 | 19.381 | 20.883 |
| 2000          | 33827  | 3142.808 | 1380.485 | 1762.324 | 5.210  | 56.075 | 431.074 | 40.050 | 17.592 | 22.458 |
| 2001          | 32506  | 2961.588 | 1186.872 | 1774.716 | 5.460  | 59.924 | 409.647 | 37.323 | 14.957 | 22.365 |
| 2002          | 32078  | 2940.627 | 1070.554 | 1870.073 | 5.830  | 63.594 | 400.295 | 36.695 | 13.359 | 23.336 |
| 2003          | 30568  | 2819.545 | 933.391  | 1886.154 | 6.170  | 66.896 | 377.883 | 34.855 | 11.539 | 23.317 |
| 2004          | 29388  | 2730.466 | 820.058  | 1910.408 | 6.501  | 69.966 | 359.671 | 33.417 | 10.036 | 23.381 |
| 2005          | 27954  | 2670.510 | 729.011  | 1941.500 | 6.945  | 72.701 | 338.339 | 32.322 | 8.824  | 23.499 |
| 2006          | 27201  | 2623.285 | 650.620  | 1972.665 | 7.252  | 75.198 | 326.354 | 31.474 | 7.806  | 23.668 |
| 2007          | 26302  | 2536.599 | 572.212  | 1964.387 | 7.469  | 77.442 | 312.424 | 30.131 | 6.797  | 23.334 |
| 2008          | 25998  | 2469.443 | 508.250  | 1961.193 | 7.544  | 79.418 | 305.468 | 29.015 | 5.972  | 23.043 |
| 2009          | 25040  | 2386.945 | 449.168  | 1937.777 | 7.739  | 81.182 | 290.901 | 27.730 | 5.218  | 22.512 |
| 2010          | 24840  | 2329.274 | 402.399  | 1926.875 | 7.757  | 82.724 | 285.273 | 26.750 | 4.621  | 22.129 |
| 2011          | 24792  | 2286.581 | 362.332  | 1924.249 | 7.762  | 84.154 | 282.045 | 26.013 | 4.122  | 21.891 |
| 2012          | 24500  | 2243.311 | 326.671  | 1916.640 | 7.823  | 85.438 | 275.872 | 25.260 | 3.678  | 21.582 |
| 2013          | 24451  | 2176.503 | 292.475  | 1884.028 | 7.705  | 86.562 | 272.368 | 24.245 | 3.258  | 20.987 |
| 2014          | 25296  | 2211.619 | 275.052  | 1936.566 | 7.656  | 87.563 | 278.691 | 24.366 | 3.030  | 21.335 |
| 2015          | 26316  | 2237.016 | 260.284  | 1976.732 | 7.512  | 88.365 | 324.141 | 27.554 | 3.206  | 24.348 |
| 2016          | 26735  | 2229.057 | 242.038  | 1987.019 | 7.432  | 89.142 | 326.164 | 27.194 | 2.953  | 24.241 |
| 2017          | 27616  | 2221.649 | 226.934  | 1994.716 | 7.223  | 89.785 | 333.726 | 26.848 | 2.742  | 24.105 |
| 2018          | 25256  | 1939.420 | 187.492  | 1751.928 | 6.937  | 90.333 | 302.304 | 23.214 | 2.244  | 20.970 |
| 2019          | 25429  | 1904.400 | 173.852  | 1730.547 | 6.805  | 90.871 | 301.434 | 22.574 | 2.061  | 20.514 |
| 2020          | 25379  | 1806.054 | 157.712  | 1648.343 | 6.495  | 91.268 | 340.922 | 24.261 | 2.119  | 22.143 |
| 2021          | 25448  | 1748.172 | 144.693  | 1603.480 | 6.301  | 91.723 | 339.386 | 23.314 | 1.930  | 21.385 |
| 2022          | 25539  | 1701.148 | 134.395  | 1566.753 | 6.135  | 92.100 | 338.015 | 22.515 | 1.779  | 20.736 |
| 2023          | 25620  | 1652.087 | 125.323  | 1526.764 | 5.959  | 92.414 | 336.461 | 21.696 | 1.646  | 20.050 |
| 2024          | 25659  | 1597.127 | 116.873  | 1480.254 | 5.769  | 92.682 | 334.391 | 20.814 | 1.523  | 19.291 |
| 2025          | 25260  | 1467.622 | 104.071  | 1363.552 | 5.398  | 92.909 | 379.931 | 22.075 | 1.565  | 20.509 |
| 2026          | 25480  | 1390.505 | 95.834   | 1294.672 | 5.081  | 93.108 | 381.790 | 20.835 | 1.436  | 19.399 |
| 2027          | 25264  | 1342.095 | 89.966   | 1252.129 | 4.956  | 93.297 | 377.042 | 20.030 | 1.343  | 18.687 |
| 2028          | 25022  | 1289.536 | 84.553   | 1204.983 | 4.816  | 93.443 | 371.870 | 19.165 | 1.257  | 17.908 |
| 2029          | 24767  | 1242.216 | 79.886   | 1162.330 | 4.693  | 93.569 | 366.459 | 18.380 | 1.182  | 17.198 |
| 2030          | 23959  | 1096.803 | 68.535   | 1028.268 | 4.292  | 93.751 | 419.641 | 19.210 | 1.200  | 18.010 |
| 2031          | 23963  | 1019.991 | 62.798   | 957.192  | 3.994  | 93.843 | 419.142 | 17.841 | 1.098  | 16.743 |
| 2032          | 23615  | 977.406  | 59.422   | 917.984  | 3.887  | 93.920 | 412.259 | 17.063 | 1.037  | 16.026 |
| 2033          | 23259  | 937.450  | 56.305   | 881.144  | 3.788  | 93.994 | 405.051 | 16.326 | 0.981  | 15.345 |
| 2034          | 22879  | 900.763  | 53.492   | 847.271  | 3.703  | 94.061 | 397.339 | 15.644 | 0.929  | 14.715 |
| 2035          | 21733  | 745.023  | 43.029   | 701.995  | 3.230  | 94.224 | 462.224 | 15.845 | 0.915  | 14.930 |
| 2036          | 20904  | 680.360  | 38.789   | 641.571  | 3.069  | 94.299 | 445.263 | 14.492 | 0.826  | 13.666 |
| 2037          | 20397  | 644.109  | 36.465   | 607.645  | 2.979  | 94.339 | 434.791 | 13.730 | 0.777  | 12.953 |
| 2038          | 19890  | 612.448  | 34.389   | 578.059  | 2.906  | 94.385 | 423.966 | 13.055 | 0.733  | 12.322 |
| 2039          | 19392  | 577.529  | 32.491   | 545.038  | 2.811  | 94.374 | 412.930 | 12.298 | 0.692  | 11.606 |

## Results for PHIM for Run 2 (Sensitivity\_Analysis\_2.RTF)

\*\*\*\*\*

### Main Results for E-Component for Run: 2, Simulation: 1, COD: COPD

| Variable Parameter          | Value                                  |
|-----------------------------|----------------------------------------|
| 1. Country                  | US (United States)                     |
| 2. Sex                      | F (Females)                            |
| 3. Year of start of process | 1990                                   |
| 4. Cause of Death           | COPD                                   |
| 5. Effective Dose NULL      | CC:1                                   |
| 6. Effective Dose Ecig      | CC:1 Ecig:0.05 Dual:0.525              |
| Note:                       | Death rates are per million population |

#### Results for Age Groups Combined and Years combined, Population unadjusted for deaths in Ecig scenario,

| Age Group:All |         | NULL       | Ecig       | %Drop    |        | NULL   | Ecig    | Drop    |         |         |
|---------------|---------|------------|------------|----------|--------|--------|---------|---------|---------|---------|
| Year          | Number  | Attrib     | Attrib     | Drop     | %Drop  | Attrib | Death   | Attrib  | Attrib  | Drop    |
|               | Deaths  | Deaths     | Deaths     | Deaths   | Deaths | Deaths | Rate    | Rates   | Rates   | Rates   |
| All Comb      | 2159941 | 862051.244 | 471026.058 | 391025.2 | 18.104 | 45.360 | 593.003 | 236.673 | 129.318 | 107.354 |

#### Results for Age Groups Combined, Population unadjusted for deaths in Ecig scenario,

| Age Group:All |        | NULL      | Ecig      | %Drop    |        | NULL   | Ecig    | Drop    |         |         |
|---------------|--------|-----------|-----------|----------|--------|--------|---------|---------|---------|---------|
| Year          | Number | Attrib    | Attrib    | Drop     | %Drop  | Attrib | Death   | Attrib  | Attrib  | Drop    |
|               | Deaths | Deaths    | Deaths    | Deaths   | Deaths | Deaths | Rate    | Rates   | Rates   | Rates   |
| 1990          | 24738  | 10694.712 | 10694.712 | 0.000    | 0.000  | 0.000  | 362.296 | 156.628 | 0.000   |         |
| 1991          | 26562  | 11602.933 | 11492.944 | 109.989  | 0.414  | 0.948  | 383.818 | 167.661 | 166.072 | 1.589   |
| 1992          | 26828  | 11831.375 | 11553.016 | 278.358  | 1.038  | 2.353  | 382.401 | 168.642 | 164.674 | 3.968   |
| 1993          | 29774  | 13246.371 | 12723.233 | 523.138  | 1.757  | 3.949  | 418.406 | 186.148 | 178.796 | 7.352   |
| 1994          | 29804  | 13355.662 | 12607.357 | 748.304  | 2.511  | 5.603  | 412.601 | 184.893 | 174.534 | 10.359  |
| 1995          | 29755  | 13397.439 | 12415.223 | 982.216  | 3.301  | 7.331  | 405.540 | 182.598 | 169.211 | 13.387  |
| 1996          | 30900  | 13960.356 | 12698.528 | 1261.828 | 4.084  | 9.039  | 415.680 | 187.801 | 170.826 | 16.975  |
| 1997          | 31128  | 14109.552 | 12598.418 | 1511.134 | 4.855  | 10.710 | 412.949 | 187.180 | 167.133 | 20.047  |
| 1998          | 32096  | 14599.657 | 12795.263 | 1804.394 | 5.622  | 12.359 | 419.803 | 190.958 | 167.357 | 23.601  |
| 1999          | 34616  | 15728.102 | 13533.265 | 2194.837 | 6.341  | 13.955 | 446.673 | 202.950 | 174.628 | 28.321  |
| 2000          | 34299  | 15579.803 | 13149.710 | 2430.094 | 7.085  | 15.598 | 437.088 | 198.541 | 167.573 | 30.968  |
| 2001          | 34592  | 15696.614 | 12999.774 | 2696.840 | 7.796  | 17.181 | 435.935 | 197.812 | 163.826 | 33.986  |
| 2002          | 34291  | 15519.777 | 12583.729 | 2936.048 | 8.562  | 18.918 | 427.910 | 193.668 | 157.030 | 36.638  |
| 2003          | 35074  | 15888.389 | 12627.237 | 3261.152 | 9.298  | 20.525 | 433.587 | 196.413 | 156.099 | 40.315  |
| 2004          | 33512  | 15091.573 | 11734.688 | 3356.885 | 10.017 | 22.243 | 410.143 | 184.701 | 143.617 | 41.084  |
| 2005          | 35392  | 15803.656 | 11999.095 | 3804.561 | 10.750 | 24.074 | 428.364 | 191.278 | 145.230 | 46.048  |
| 2006          | 33981  | 15100.563 | 11202.312 | 3898.251 | 11.472 | 25.815 | 407.699 | 181.174 | 134.404 | 46.771  |
| 2007          | 34000  | 14974.384 | 10842.896 | 4131.488 | 12.151 | 27.590 | 403.863 | 177.871 | 128.796 | 49.075  |
| 2008          | 37425  | 16406.197 | 11591.984 | 4814.214 | 12.864 | 29.344 | 439.732 | 192.768 | 136.202 | 56.565  |
| 2009          | 36826  | 16083.194 | 11052.468 | 5030.725 | 13.661 | 31.279 | 427.825 | 186.846 | 128.402 | 58.444  |
| 2010          | 36788  | 15927.400 | 10670.727 | 5256.673 | 14.289 | 33.004 | 422.489 | 182.917 | 122.547 | 60.370  |
| 2011          | 37636  | 16221.836 | 10552.293 | 5669.543 | 15.064 | 34.950 | 428.164 | 184.547 | 120.048 | 64.499  |
| 2012          | 38265  | 16358.849 | 10345.238 | 6013.612 | 15.716 | 36.761 | 430.867 | 184.202 | 116.488 | 67.714  |
| 2013          | 40112  | 16994.822 | 10419.614 | 6575.208 | 16.392 | 38.689 | 446.821 | 189.311 | 116.067 | 73.243  |
| 2014          | 40084  | 16855.093 | 10001.179 | 6853.914 | 17.099 | 40.664 | 441.613 | 185.696 | 110.185 | 75.511  |
| 2015          | 42200  | 17572.483 | 10147.611 | 7424.872 | 17.594 | 42.253 | 519.788 | 216.445 | 124.991 | 91.454  |
| 2016          | 42606  | 17579.955 | 9793.938  | 7786.018 | 18.274 | 44.289 | 519.788 | 214.473 | 119.485 | 94.989  |
| 2017          | 44364  | 18080.688 | 9721.771  | 8358.917 | 18.842 | 46.231 | 536.117 | 218.496 | 117.483 | 101.013 |
| 2018          | 45359  | 18209.262 | 9496.561  | 8712.701 | 19.208 | 47.848 | 542.932 | 217.960 | 113.671 | 104.288 |
| 2019          | 46876  | 18648.302 | 9358.206  | 9290.095 | 19.819 | 49.817 | 555.657 | 221.054 | 110.931 | 110.123 |
| 2020          | 48331  | 19002.597 | 9207.248  | 9795.349 | 20.267 | 51.547 | 649.239 | 255.266 | 123.683 | 131.583 |
| 2021          | 48338  | 18885.717 | 8750.538  | 10135.18 | 20.967 | 53.666 | 644.660 | 251.867 | 116.700 | 135.167 |
| 2022          | 49708  | 19235.076 | 8535.908  | 10699.17 | 21.524 | 55.623 | 657.895 | 254.582 | 112.975 | 141.607 |
| 2023          | 51083  | 19521.158 | 8294.808  | 11226.35 | 21.977 | 57.509 | 670.849 | 256.363 | 108.932 | 147.431 |
| 2024          | 52397  | 19918.620 | 8082.339  | 11836.28 | 22.589 | 59.423 | 682.854 | 259.583 | 105.331 | 154.253 |
| 2025          | 53387  | 20150.545 | 7843.781  | 12306.76 | 23.052 | 61.074 | 803.004 | 303.086 | 117.979 | 185.107 |
| 2026          | 54232  | 20393.792 | 7560.456  | 12833.34 | 23.664 | 62.928 | 812.615 | 305.582 | 113.286 | 192.296 |
| 2027          | 55049  | 20615.351 | 7237.309  | 13378.04 | 24.302 | 64.894 | 821.568 | 307.668 | 108.011 | 199.657 |
| 2028          | 55809  | 20731.894 | 6896.507  | 13835.39 | 24.791 | 66.735 | 829.419 | 308.115 | 102.495 | 205.620 |
| 2029          | 56527  | 20781.967 | 6552.000  | 14229.97 | 25.174 | 68.473 | 836.392 | 307.495 | 96.945  | 210.550 |
| 2030          | 56756  | 20753.201 | 6221.551  | 14531.65 | 25.604 | 70.021 | 994.067 | 363.487 | 108.969 | 254.518 |
| 2031          | 58288  | 21048.417 | 6101.493  | 14946.92 | 25.643 | 71.012 | 1019.54 | 368.165 | 106.723 | 261.442 |
| 2032          | 58782  | 21169.329 | 5797.097  | 15372.23 | 26.151 | 72.616 | 1026.18 | 369.560 | 101.202 | 268.358 |
| 2033          | 59236  | 21109.293 | 5471.550  | 15637.74 | 26.399 | 74.080 | 1031.59 | 367.618 | 95.287  | 272.331 |
| 2034          | 59614  | 21109.429 | 5151.023  | 15958.41 | 26.770 | 75.598 | 1035.33 | 366.613 | 89.459  | 277.153 |
| 2035          | 58938  | 20794.840 | 4838.096  | 15956.74 | 27.074 | 76.734 | 1253.51 | 442.268 | 102.897 | 339.371 |
| 2036          | 56014  | 19354.577 | 4279.943  | 15074.63 | 26.912 | 77.887 | 1193.11 | 412.258 | 91.164  | 321.094 |
| 2037          | 55953  | 19064.169 | 3926.149  | 15138.02 | 27.055 | 79.406 | 1192.72 | 406.385 | 83.693  | 322.693 |
| 2038          | 55859  | 18854.812 | 3608.341  | 15246.47 | 27.295 | 80.862 | 1190.66 | 401.900 | 76.914  | 324.986 |
| 2039          | 55757  | 18437.457 | 3266.930  | 15170.53 | 27.208 | 82.281 | 1187.28 | 392.602 | 69.565  | 323.037 |

## Results for PHIM for Run 2 (Sensitivity\_Analysis\_2.RTF)

\*\*\*\*\*

### Main Results for E-Component for Run: 2, Simulation: 1, COD: Four Diseases Combined, Adjusted

| Variable Parameter          | Value                                  |
|-----------------------------|----------------------------------------|
| 1. Country                  | US (United States)                     |
| 2. Sex                      | F (Females)                            |
| 3. Year of start of process | 1990                                   |
| 4. Cause of Death           | Four Diseases Combined                 |
| 5. Effective Dose NULL      | CC:1                                   |
| 6. Effective Dose Ecig      | CC:1 Ecig:0.05 Dual:0.525              |
| Note:                       | Death rates are per million population |

### Results for Age Groups Combined and Years combined, Population and Number deaths adjusted for Ecig scenario,

| Age Group:All |         | NULL        | Ecig        | %Drop   |        |        | NULL    | Ecig    | Drop    |         |
|---------------|---------|-------------|-------------|---------|--------|--------|---------|---------|---------|---------|
| Year          | Number  | Attrib      | Attrib      | Drop    | %Drop  | Attrib | Death   | Attrib  | Attrib  | Drop    |
|               | Deaths  | Deaths      | Deaths      | Deaths  | Deaths | Deaths | Rate    | Rates   | Rates   | Rates   |
| All Comb      | 9190920 | 2946250.006 | 1658149.980 | 1288100 | 14.015 | 43.720 | 2504.64 | 808.881 | 451.866 | 357.015 |

### Results for Age Groups Combined, Population and Number deaths adjusted for Ecig scenario,

| Age Group:All |        | NULL      | Ecig      | %Drop    |        |        | NULL    | Ecig    | Drop    |         |
|---------------|--------|-----------|-----------|----------|--------|--------|---------|---------|---------|---------|
| Year          | Number | Attrib    | Attrib    | Drop     | %Drop  | Attrib | Death   | Attrib  | Attrib  | Drop    |
|               | Deaths | Deaths    | Deaths    | Deaths   | Deaths | Deaths | Rate    | Rates   | Rates   | Rates   |
| 1990          | 199848 | 57524.822 | 57524.822 | 0.000    | 0.000  | 0.000  | 2926.84 | 842.471 | 842.471 | 0.000   |
| 1991          | 199162 | 59078.486 | 58202.005 | 876.481  | 0.440  | 1.484  | 2877.87 | 853.678 | 841.013 | 12.665  |
| 1992          | 198537 | 60494.150 | 58313.383 | 2180.766 | 1.098  | 3.605  | 2829.86 | 862.271 | 831.177 | 31.095  |
| 1993          | 202529 | 62694.848 | 58958.243 | 3736.605 | 1.845  | 5.960  | 2845.96 | 881.034 | 828.488 | 52.546  |
| 1994          | 200695 | 63202.598 | 57906.407 | 5296.190 | 2.639  | 8.380  | 2778.12 | 874.966 | 801.568 | 73.397  |
| 1995          | 201090 | 63766.862 | 56898.830 | 6868.032 | 3.415  | 10.771 | 2740.24 | 869.097 | 775.358 | 93.739  |
| 1996          | 201285 | 64591.163 | 56061.972 | 8529.191 | 4.237  | 13.205 | 2707.05 | 868.908 | 753.969 | 114.939 |
| 1997          | 198790 | 64686.912 | 54849.327 | 9837.585 | 4.949  | 15.208 | 2636.17 | 858.147 | 727.362 | 130.785 |
| 1998          | 197778 | 65295.961 | 54107.456 | 11188.50 | 5.657  | 17.135 | 2585.53 | 854.046 | 707.340 | 146.707 |
| 1999          | 211616 | 67327.521 | 53891.795 | 13435.73 | 6.349  | 19.956 | 2728.80 | 868.771 | 694.937 | 173.833 |
| 2000          | 208857 | 67596.897 | 52927.709 | 14669.19 | 7.024  | 21.701 | 2659.32 | 861.419 | 673.913 | 187.507 |
| 2001          | 204042 | 67008.811 | 51226.403 | 15782.41 | 7.735  | 23.553 | 2568.70 | 844.458 | 644.895 | 199.563 |
| 2002          | 201345 | 67067.744 | 50021.240 | 17046.50 | 8.466  | 25.417 | 2509.42 | 836.925 | 623.428 | 213.497 |
| 2003          | 196950 | 66756.217 | 48693.578 | 18062.64 | 9.171  | 27.058 | 2431.14 | 825.244 | 601.069 | 224.175 |
| 2004          | 188827 | 65058.725 | 46303.227 | 18755.50 | 9.933  | 28.829 | 2307.06 | 796.234 | 565.725 | 230.509 |
| 2005          | 187171 | 65214.724 | 45252.569 | 19962.16 | 10.665 | 30.610 | 2260.98 | 789.321 | 546.641 | 242.680 |
| 2006          | 180912 | 63771.146 | 43066.803 | 20704.34 | 11.444 | 32.467 | 2165.75 | 765.117 | 515.565 | 249.552 |
| 2007          | 176544 | 63110.718 | 41650.240 | 21460.48 | 12.156 | 34.004 | 2091.84 | 749.650 | 493.505 | 256.145 |
| 2008          | 178583 | 63718.624 | 40851.240 | 22867.38 | 12.805 | 35.888 | 2092.48 | 748.674 | 478.659 | 270.014 |
| 2009          | 173894 | 62794.698 | 39262.860 | 23531.84 | 13.532 | 37.474 | 2014.00 | 729.515 | 454.733 | 274.782 |
| 2010          | 171666 | 61917.074 | 37629.037 | 24288.04 | 14.148 | 39.227 | 1964.81 | 711.083 | 430.686 | 280.397 |
| 2011          | 171585 | 61680.114 | 36276.565 | 25403.55 | 14.805 | 41.186 | 1944.80 | 701.700 | 411.170 | 290.530 |
| 2012          | 172819 | 62023.127 | 35362.460 | 26660.67 | 15.427 | 42.985 | 1938.11 | 698.386 | 396.579 | 301.808 |
| 2013          | 174227 | 62037.765 | 34280.410 | 27757.35 | 15.932 | 44.743 | 1932.27 | 691.059 | 380.188 | 310.871 |
| 2014          | 175829 | 61921.017 | 32964.470 | 28956.55 | 16.469 | 46.764 | 1927.96 | 682.195 | 361.453 | 320.742 |
| 2015          | 179179 | 61856.204 | 31863.405 | 29992.80 | 16.739 | 48.488 | 2194.32 | 761.899 | 390.216 | 371.683 |
| 2016          | 178801 | 60464.119 | 29860.296 | 30603.82 | 17.116 | 50.615 | 2167.89 | 737.655 | 362.043 | 375.612 |
| 2017          | 181428 | 60243.839 | 28622.504 | 31621.33 | 17.429 | 52.489 | 2177.97 | 728.017 | 343.601 | 384.416 |
| 2018          | 179401 | 60713.327 | 28099.444 | 32613.88 | 18.179 | 53.718 | 2132.21 | 726.721 | 333.966 | 392.755 |
| 2019          | 181650 | 61148.172 | 27230.882 | 33917.29 | 18.672 | 55.467 | 2137.05 | 724.841 | 320.362 | 404.479 |
| 2020          | 183079 | 61149.317 | 26346.337 | 34802.98 | 19.010 | 56.915 | 2437.15 | 821.432 | 350.722 | 470.711 |
| 2021          | 180840 | 58727.786 | 23920.391 | 34807.39 | 19.248 | 59.269 | 2388.68 | 783.216 | 315.960 | 467.255 |
| 2022          | 182313 | 58848.802 | 22952.597 | 35896.21 | 19.689 | 60.997 | 2388.60 | 778.881 | 300.717 | 478.163 |
| 2023          | 183730 | 58816.149 | 21957.944 | 36858.21 | 20.061 | 62.667 | 2387.19 | 772.407 | 285.297 | 487.109 |
| 2024          | 184887 | 58955.232 | 21057.336 | 37897.90 | 20.498 | 64.282 | 2382.56 | 768.316 | 271.356 | 496.960 |
| 2025          | 183879 | 58297.744 | 20099.073 | 38198.67 | 20.774 | 65.523 | 2729.02 | 876.861 | 298.298 | 578.564 |
| 2026          | 183967 | 56469.971 | 18456.732 | 38013.24 | 20.663 | 67.316 | 2718.26 | 846.150 | 272.714 | 573.436 |
| 2027          | 183437 | 56209.427 | 17453.978 | 38755.45 | 21.127 | 68.948 | 2697.96 | 838.883 | 256.710 | 582.173 |
| 2028          | 182744 | 55733.105 | 16450.153 | 39282.95 | 21.496 | 70.484 | 2674.90 | 828.298 | 240.788 | 587.510 |
| 2029          | 181952 | 55145.838 | 15472.370 | 39673.47 | 21.804 | 71.943 | 2649.94 | 815.951 | 225.338 | 590.612 |
| 2030          | 177878 | 53615.097 | 14472.026 | 39143.07 | 22.006 | 73.008 | 3057.84 | 939.056 | 248.784 | 690.272 |
| 2031          | 179560 | 52046.561 | 13567.424 | 38479.14 | 21.430 | 73.932 | 3080.46 | 910.364 | 232.757 | 677.606 |
| 2032          | 178129 | 51582.636 | 12781.495 | 38801.14 | 21.783 | 75.221 | 3047.89 | 900.496 | 218.699 | 681.797 |
| 2033          | 176637 | 50839.758 | 11987.084 | 38852.67 | 21.996 | 76.422 | 3013.01 | 885.375 | 204.471 | 680.904 |
| 2034          | 174998 | 50215.451 | 11228.306 | 38987.15 | 22.279 | 77.640 | 2974.89 | 872.104 | 190.877 | 681.227 |
| 2035          | 167756 | 47773.075 | 10361.796 | 37411.28 | 22.301 | 78.310 | 3479.59 | 1016.05 | 214.924 | 801.121 |
| 2036          | 161364 | 43298.709 | 8897.019  | 34401.69 | 21.319 | 79.452 | 3349.54 | 922.274 | 184.681 | 737.593 |
| 2037          | 158788 | 42241.563 | 8164.328  | 34077.24 | 21.461 | 80.672 | 3296.40 | 900.450 | 169.489 | 730.961 |
| 2038          | 156220 | 41356.353 | 7519.764  | 33836.59 | 21.660 | 81.817 | 3240.79 | 881.531 | 155.998 | 725.533 |
| 2039          | 153721 | 40161.050 | 6844.246  | 33316.80 | 21.674 | 82.958 | 3183.66 | 855.178 | 141.749 | 713.428 |

## Results for PHIM for Run 2 (Sensitivity\_Analysis\_2.RTF)

\*\*\*\*\*

### Main Results for E-Component for Run: 2, Simulation: 1, COD: LUNG CANCER, Adjusted

| Variable Parameter          | Value                                  |
|-----------------------------|----------------------------------------|
| 1. Country                  | US (United States)                     |
| 2. Sex                      | F (Females)                            |
| 3. Year of start of process | 1990                                   |
| 4. Cause of Death           | LUNG CANCER                            |
| 5. Effective Dose NULL      | CC:1                                   |
| 6. Effective Dose Ecig      | CC:1 Ecig:0.05 Dual:0.525              |
| Note:                       | Death rates are per million population |

#### Results for Age Groups Combined and Years combined, Population and Number deaths adjusted for Ecig scenario,

| Age Group:All | NULL    | Ecig        | %Drop       |          |        |        | NULL    | Ecig    | Drop    |         |
|---------------|---------|-------------|-------------|----------|--------|--------|---------|---------|---------|---------|
| Year          | Number  | Attrib      | Attrib      | Drop     | %Drop  | Attrib | Death   | Attrib  | Attrib  | Drop    |
|               | Deaths  | Deaths      | Deaths      | Deaths   | Deaths | Deaths | Rate    | Rates   | Rates   | Rates   |
| All Comb      | 2354430 | 1580465.217 | 1001440.765 | 579024.5 | 24.593 | 36.636 | 641.611 | 433.910 | 272.905 | 161.006 |

#### Results for Age Groups Combined, Population and Number deaths adjusted for Ecig scenario,

| Age Group:All | NULL   | Ecig      | %Drop     |          |        |        | NULL    | Ecig    | Drop    |         |
|---------------|--------|-----------|-----------|----------|--------|--------|---------|---------|---------|---------|
| Year          | Number | Attrib    | Attrib    | Drop     | %Drop  | Attrib | Death   | Attrib  | Attrib  | Drop    |
|               | Deaths | Deaths    | Deaths    | Deaths   | Deaths | Deaths | Rate    | Rates   | Rates   | Rates   |
| 1990          | 42690  | 30614.201 | 30614.201 | 0.000    | 0.000  | 0.000  | 625.210 | 448.355 | 448.355 | 0.000   |
| 1991          | 43692  | 31412.010 | 31228.583 | 183.428  | 0.420  | 0.584  | 631.345 | 453.901 | 451.250 | 2.651   |
| 1992          | 45424  | 32782.407 | 32304.497 | 477.910  | 1.052  | 1.458  | 647.457 | 467.274 | 460.456 | 6.818   |
| 1993          | 46295  | 33491.183 | 32661.783 | 829.400  | 1.792  | 2.476  | 650.539 | 470.643 | 458.967 | 11.676  |
| 1994          | 47026  | 34074.347 | 32858.593 | 1215.754 | 2.585  | 3.568  | 650.951 | 471.719 | 454.844 | 16.875  |
| 1995          | 47856  | 34694.454 | 33049.012 | 1645.442 | 3.438  | 4.743  | 652.126 | 472.861 | 450.358 | 22.503  |
| 1996          | 48269  | 35027.269 | 32938.629 | 2088.640 | 4.327  | 5.963  | 649.159 | 471.202 | 442.987 | 28.215  |
| 1997          | 49072  | 35590.763 | 33023.347 | 2567.416 | 5.232  | 7.214  | 650.741 | 472.153 | 437.925 | 34.227  |
| 1998          | 49737  | 36100.785 | 33035.213 | 3065.571 | 6.164  | 8.492  | 650.199 | 472.184 | 431.865 | 40.319  |
| 1999          | 48948  | 35451.030 | 31973.895 | 3477.135 | 7.104  | 9.808  | 631.184 | 457.448 | 412.305 | 45.143  |
| 2000          | 50416  | 36447.986 | 32363.674 | 4084.312 | 8.101  | 11.206 | 641.932 | 464.474 | 412.077 | 52.397  |
| 2001          | 50494  | 36411.326 | 31798.483 | 4612.844 | 9.135  | 12.669 | 635.674 | 458.863 | 400.315 | 58.548  |
| 2002          | 51574  | 37078.545 | 31792.912 | 5285.633 | 10.249 | 14.255 | 642.781 | 462.696 | 396.244 | 66.452  |
| 2003          | 51561  | 36999.876 | 31147.150 | 5852.725 | 11.351 | 15.818 | 636.458 | 457.395 | 384.478 | 72.917  |
| 2004          | 51576  | 36861.555 | 30388.939 | 6472.616 | 12.550 | 17.559 | 630.152 | 451.138 | 371.287 | 79.851  |
| 2005          | 51624  | 36689.529 | 29586.086 | 7103.442 | 13.760 | 19.361 | 623.604 | 444.069 | 357.393 | 86.675  |
| 2006          | 51584  | 36504.774 | 28739.201 | 7765.573 | 15.054 | 21.273 | 617.528 | 437.979 | 344.045 | 93.934  |
| 2007          | 52098  | 36663.202 | 28148.681 | 8514.521 | 16.343 | 23.224 | 617.303 | 435.498 | 333.528 | 101.970 |
| 2008          | 51260  | 35898.803 | 26868.934 | 9029.869 | 17.616 | 25.154 | 600.621 | 421.800 | 314.827 | 106.973 |
| 2009          | 51508  | 35934.525 | 26142.175 | 9792.351 | 19.011 | 27.251 | 596.555 | 417.468 | 302.773 | 114.695 |
| 2010          | 51196  | 35502.829 | 25117.891 | 10384.94 | 20.285 | 29.251 | 585.969 | 407.730 | 287.489 | 120.241 |
| 2011          | 50880  | 35136.342 | 24073.457 | 11062.88 | 21.743 | 31.486 | 576.694 | 399.726 | 272.856 | 126.870 |
| 2012          | 51655  | 35450.201 | 23522.798 | 11927.40 | 23.091 | 33.646 | 579.290 | 399.173 | 263.801 | 135.372 |
| 2013          | 51511  | 35123.224 | 22509.748 | 12613.48 | 24.487 | 35.912 | 571.288 | 391.249 | 249.645 | 141.604 |
| 2014          | 51731  | 35079.370 | 21708.333 | 13371.04 | 25.847 | 38.117 | 567.222 | 386.476 | 238.030 | 148.445 |
| 2015          | 50952  | 34324.171 | 20536.063 | 13788.11 | 27.061 | 40.170 | 623.985 | 422.780 | 251.495 | 171.284 |
| 2016          | 49383  | 33054.753 | 18987.543 | 14067.21 | 28.486 | 42.557 | 598.746 | 403.264 | 230.216 | 173.049 |
| 2017          | 48886  | 32471.234 | 17894.741 | 14576.49 | 29.817 | 44.890 | 586.860 | 392.399 | 214.819 | 177.580 |
| 2018          | 51091  | 33657.595 | 17719.608 | 15937.99 | 31.196 | 47.353 | 607.218 | 402.871 | 210.600 | 192.271 |
| 2019          | 51711  | 33863.424 | 17041.153 | 16822.27 | 32.532 | 49.677 | 608.359 | 401.412 | 200.483 | 200.929 |
| 2020          | 52170  | 33910.830 | 16363.015 | 17547.81 | 33.636 | 51.747 | 694.481 | 455.532 | 217.824 | 237.708 |
| 2021          | 48756  | 31531.880 | 14427.644 | 17104.24 | 35.082 | 54.244 | 644.005 | 420.521 | 190.572 | 229.949 |
| 2022          | 49100  | 31560.212 | 13710.709 | 17849.50 | 36.353 | 56.557 | 643.293 | 417.708 | 179.633 | 238.075 |
| 2023          | 49412  | 31508.781 | 12987.510 | 18521.27 | 37.484 | 58.781 | 642.000 | 413.791 | 168.745 | 245.046 |
| 2024          | 49644  | 31517.293 | 12323.821 | 19193.47 | 38.662 | 60.898 | 639.740 | 410.740 | 158.811 | 251.928 |
| 2025          | 49384  | 31175.389 | 11646.150 | 19529.24 | 39.546 | 62.643 | 732.919 | 468.912 | 172.845 | 296.067 |
| 2026          | 46225  | 29044.598 | 10287.924 | 18756.67 | 40.577 | 64.579 | 683.007 | 435.206 | 152.013 | 283.193 |
| 2027          | 46047  | 28825.765 | 9629.353  | 19196.41 | 41.689 | 66.595 | 677.256 | 430.203 | 141.627 | 288.576 |
| 2028          | 45821  | 28513.846 | 8987.108  | 19526.74 | 42.616 | 68.482 | 670.695 | 423.769 | 131.548 | 292.221 |
| 2029          | 45556  | 28148.109 | 8372.965  | 19775.14 | 43.408 | 70.254 | 663.480 | 416.486 | 121.943 | 294.543 |
| 2030          | 44444  | 27314.475 | 7751.866  | 19562.61 | 44.017 | 71.620 | 764.018 | 478.407 | 133.260 | 345.147 |
| 2031          | 41799  | 25423.102 | 6959.698  | 18463.40 | 44.172 | 72.625 | 717.081 | 444.684 | 119.398 | 325.286 |
| 2032          | 41409  | 25085.902 | 6494.166  | 18591.74 | 44.898 | 74.112 | 708.536 | 437.933 | 111.119 | 326.814 |
| 2033          | 40998  | 24645.067 | 6042.305  | 18602.76 | 45.375 | 75.483 | 699.331 | 429.194 | 103.067 | 326.127 |
| 2034          | 40551  | 24239.126 | 5620.320  | 18618.81 | 45.915 | 76.813 | 689.349 | 420.967 | 95.543  | 325.424 |
| 2035          | 38616  | 22944.147 | 5126.032  | 17818.11 | 46.142 | 77.659 | 800.972 | 487.980 | 106.324 | 381.656 |
| 2036          | 34051  | 19950.581 | 4234.781  | 15715.80 | 46.154 | 78.774 | 706.822 | 424.953 | 87.904  | 337.049 |
| 2037          | 33482  | 19415.334 | 3876.619  | 15538.71 | 46.410 | 80.033 | 695.071 | 413.871 | 80.477  | 333.393 |
| 2038          | 32913  | 18939.317 | 3568.625  | 15370.69 | 46.702 | 81.158 | 682.773 | 403.701 | 74.031  | 329.669 |
| 2039          | 32357  | 18379.752 | 3254.829  | 15124.92 | 46.743 | 82.291 | 670.143 | 391.373 | 67.410  | 323.963 |



## Results for PHIM for Run 2 (Sensitivity\_Analysis\_2.RTF)

\*\*\*\*\*

### Main Results for E-Component for Run: 2, Simulation: 1, COD: IHD, Adjusted

| Variable Parameter          | Value                                  |
|-----------------------------|----------------------------------------|
| 1. Country                  | US (United States)                     |
| 2. Sex                      | F (Females)                            |
| 3. Year of start of process | 1990                                   |
| 4. Cause of Death           | IHD                                    |
| 5. Effective Dose NULL      | CC:1                                   |
| 6. Effective Dose Ecig      | CC:1 Ecig:0.05 Dual:0.525              |
| Note:                       | Death rates are per million population |

### Results for Age Groups Combined and Years combined, Population and Number deaths adjusted for Ecig scenario,

| Age Group: | NULL    | Ecig       | %Drop      |          |        |        | NULL    | Ecig    | Drop   |        |
|------------|---------|------------|------------|----------|--------|--------|---------|---------|--------|--------|
| Year       | Number  | Attrib     | Attrib     | Drop     | %Drop  | Attrib | Death   | Attrib  | Attrib | Drop   |
|            | Deaths  | Deaths     | Deaths     | Deaths   | Deaths | Deaths | Rate    | Rates   | Rates  | Rates  |
| All Comb   | 3274574 | 398833.796 | 144298.445 | 254535.4 | 7.773  | 63.820 | 892.361 | 109.498 | 39.323 | 70.175 |

### Results for Age Groups Combined, Population and Number deaths adjusted for Ecig scenario,

| Age Group: | NULL   | Ecig      | %Drop     |          |        |        | NULL    | Ecig    | Drop    |        |
|------------|--------|-----------|-----------|----------|--------|--------|---------|---------|---------|--------|
| Year       | Number | Attrib    | Attrib    | Drop     | %Drop  | Attrib | Death   | Attrib  | Attrib  | Drop   |
|            | Deaths | Deaths    | Deaths    | Deaths   | Deaths | Deaths | Rate    | Rates   | Rates   | Rates  |
| 1990       | 98916  | 12922.892 | 12922.892 | 0.000    | 0.000  | 0.000  | 1448.66 | 189.260 | 189.260 | 0.000  |
| 1991       | 96403  | 12856.479 | 12413.199 | 443.280  | 0.460  | 3.448  | 1393.01 | 185.775 | 179.370 | 6.405  |
| 1992       | 93723  | 12662.244 | 11575.515 | 1086.728 | 1.160  | 8.582  | 1335.89 | 180.485 | 164.993 | 15.492 |
| 1993       | 93687  | 12730.613 | 10901.796 | 1828.817 | 1.952  | 14.366 | 1316.50 | 178.900 | 153.193 | 25.707 |
| 1994       | 90849  | 12495.323 | 9944.662  | 2550.661 | 2.808  | 20.413 | 1257.58 | 172.983 | 137.659 | 35.324 |
| 1995       | 89728  | 12365.590 | 9126.100  | 3239.490 | 3.610  | 26.198 | 1222.72 | 168.534 | 124.361 | 44.173 |
| 1996       | 88333  | 12290.551 | 8312.131  | 3978.421 | 4.504  | 32.370 | 1187.97 | 165.338 | 111.789 | 53.549 |
| 1997       | 84842  | 11719.531 | 7325.906  | 4393.626 | 5.179  | 37.490 | 1125.10 | 155.473 | 97.149  | 58.324 |
| 1998       | 82604  | 11416.794 | 6584.038  | 4832.756 | 5.851  | 42.330 | 1079.87 | 149.327 | 86.072  | 63.255 |
| 1999       | 94068  | 13028.038 | 6862.161  | 6165.877 | 6.555  | 47.328 | 1213.01 | 168.109 | 88.488  | 79.621 |
| 2000       | 90196  | 12426.299 | 6008.433  | 6417.866 | 7.115  | 51.647 | 1148.44 | 158.354 | 76.504  | 81.851 |
| 2001       | 86305  | 11939.281 | 5210.481  | 6728.801 | 7.797  | 56.359 | 1086.50 | 150.461 | 65.595  | 84.866 |
| 2002       | 83229  | 11528.794 | 4538.285  | 6990.509 | 8.399  | 60.635 | 1037.31 | 143.865 | 56.562  | 87.304 |
| 2003       | 79545  | 11048.407 | 3943.520  | 7104.886 | 8.932  | 64.307 | 981.901 | 136.581 | 48.678  | 87.903 |
| 2004       | 74124  | 10375.132 | 3313.730  | 7061.401 | 9.526  | 68.061 | 905.636 | 126.978 | 40.487  | 86.492 |
| 2005       | 71940  | 10051.029 | 2885.118  | 7165.912 | 9.961  | 71.295 | 869.023 | 121.652 | 34.852  | 86.800 |
| 2006       | 67861  | 9542.523  | 2418.344  | 7124.179 | 10.498 | 74.657 | 812.382 | 114.490 | 28.951  | 85.539 |
| 2007       | 63829  | 8936.533  | 2025.310  | 6911.224 | 10.828 | 77.337 | 756.292 | 106.151 | 23.997  | 82.154 |
| 2008       | 63529  | 8944.180  | 1809.453  | 7134.727 | 11.231 | 79.769 | 744.381 | 105.091 | 21.202  | 83.890 |
| 2009       | 60122  | 8390.033  | 1542.862  | 6847.171 | 11.389 | 81.611 | 696.314 | 97.471  | 17.869  | 79.602 |
| 2010       | 58405  | 8157.570  | 1357.147  | 6800.422 | 11.643 | 83.363 | 668.483 | 93.685  | 15.533  | 78.152 |
| 2011       | 57796  | 8035.356  | 1201.396  | 6833.960 | 11.824 | 85.049 | 655.074 | 91.414  | 13.617  | 77.797 |
| 2012       | 57873  | 7970.766  | 1075.023  | 6895.743 | 11.915 | 86.513 | 649.031 | 89.752  | 12.056  | 77.696 |
| 2013       | 57566  | 7743.216  | 957.396   | 6785.820 | 11.788 | 87.636 | 638.439 | 86.254  | 10.618  | 75.636 |
| 2014       | 58078  | 7774.935  | 875.161   | 6899.774 | 11.880 | 88.744 | 636.824 | 85.658  | 9.596   | 76.062 |
| 2015       | 58986  | 7722.535  | 804.929   | 6917.605 | 11.728 | 89.577 | 722.371 | 95.120  | 9.858   | 85.263 |
| 2016       | 59294  | 7600.353  | 718.650   | 6881.703 | 11.606 | 90.545 | 718.910 | 92.723  | 8.713   | 84.010 |
| 2017       | 59689  | 7470.266  | 653.379   | 6816.888 | 11.421 | 91.254 | 716.537 | 90.274  | 7.844   | 82.431 |
| 2018       | 56772  | 6907.050  | 563.788   | 6343.262 | 11.173 | 91.837 | 674.744 | 82.675  | 6.701   | 75.975 |
| 2019       | 56625  | 6732.046  | 518.776   | 6213.270 | 10.973 | 92.294 | 666.177 | 79.801  | 6.103   | 73.697 |
| 2020       | 56098  | 6429.836  | 472.679   | 5957.157 | 10.619 | 92.649 | 746.782 | 86.373  | 6.292   | 80.081 |
| 2021       | 57130  | 6562.016  | 451.439   | 6110.576 | 10.696 | 93.120 | 754.624 | 87.513  | 5.963   | 81.550 |
| 2022       | 56707  | 6352.366  | 420.840   | 5931.526 | 10.460 | 93.375 | 742.955 | 84.075  | 5.514   | 78.562 |
| 2023       | 56260  | 6134.123  | 395.508   | 5738.615 | 10.200 | 93.552 | 730.979 | 80.557  | 5.139   | 75.418 |
| 2024       | 55732  | 5922.193  | 375.000   | 5547.193 | 9.953  | 93.668 | 718.199 | 77.179  | 4.832   | 72.347 |
| 2025       | 54295  | 5504.188  | 341.940   | 5162.247 | 9.508  | 93.788 | 805.808 | 82.789  | 5.075   | 77.714 |
| 2026       | 56363  | 5641.075  | 346.174   | 5294.902 | 9.394  | 93.863 | 832.803 | 84.526  | 5.115   | 79.411 |
| 2027       | 55314  | 5426.216  | 329.885   | 5096.331 | 9.213  | 93.921 | 813.553 | 80.982  | 4.852   | 76.130 |
| 2028       | 54235  | 5197.830  | 314.413   | 4883.417 | 9.004  | 93.951 | 793.856 | 77.249  | 4.602   | 72.647 |
| 2029       | 53146  | 4973.547  | 300.379   | 4673.168 | 8.793  | 93.960 | 774.015 | 73.590  | 4.375   | 69.215 |
| 2030       | 50670  | 4450.618  | 263.332   | 4187.286 | 8.264  | 94.083 | 871.048 | 77.952  | 4.527   | 73.425 |
| 2031       | 53295  | 4555.052  | 269.789   | 4285.263 | 8.041  | 94.077 | 914.305 | 79.674  | 4.628   | 75.046 |
| 2032       | 52006  | 4349.999  | 257.927   | 4092.072 | 7.868  | 94.071 | 889.853 | 75.939  | 4.413   | 71.526 |
| 2033       | 50728  | 4147.948  | 246.261   | 3901.687 | 7.691  | 94.063 | 865.293 | 72.237  | 4.201   | 68.036 |
| 2034       | 49439  | 3966.133  | 235.563   | 3730.570 | 7.546  | 94.061 | 840.442 | 68.881  | 4.004   | 64.876 |
| 2035       | 45874  | 3289.064  | 189.255   | 3099.810 | 6.757  | 94.246 | 951.519 | 69.952  | 3.926   | 66.027 |
| 2036       | 47808  | 3313.192  | 190.295   | 3122.897 | 6.532  | 94.256 | 992.382 | 70.572  | 3.950   | 66.622 |
| 2037       | 46300  | 3117.951  | 179.167   | 2938.784 | 6.347  | 94.254 | 961.175 | 66.464  | 3.719   | 62.745 |
| 2038       | 44833  | 2949.775  | 169.324   | 2780.451 | 6.202  | 94.260 | 930.069 | 62.876  | 3.513   | 59.363 |
| 2039       | 43423  | 2766.312  | 159.692   | 2606.620 | 6.003  | 94.227 | 899.321 | 58.905  | 3.307   | 55.598 |

## Results for PHIM for Run 2 (Sensitivity\_Analysis\_2.RTF)

\*\*\*\*\*

### Main Results for E-Component for Run: 2, Simulation: 1, COD: STROKE, Adjusted

| Variable Parameter          | Value                                  |
|-----------------------------|----------------------------------------|
| 1. Country                  | US (United States)                     |
| 2. Sex                      | F (Females)                            |
| 3. Year of start of process | 1990                                   |
| 4. Cause of Death           | STROKE                                 |
| 5. Effective Dose NULL      | CC:1                                   |
| 6. Effective Dose Ecig      | CC:1 Ecig:0.05 Dual:0.525              |
| Note:                       | Death rates are per million population |

#### Results for Age Groups Combined and Years combined, Population and Number deaths adjusted for Ecig scenario,

| Age Group:All | NULL    | Ecig       | %Drop     | NULL     | Ecig   | Drop   |
|---------------|---------|------------|-----------|----------|--------|--------|
| Year          | Number  | Attrib     | Attrib    | Death    | Attrib | Drop   |
|               | Deaths  | Deaths     | Deaths    | Rate     | Rates  | Rates  |
| All Comb      | 1367611 | 104899.750 | 36623.709 | 68276.04 | 4.992  | 65.087 |

#### Results for Age Groups Combined, Population and Number deaths adjusted for Ecig scenario,

| Age Group:All | NULL   | Ecig     | %Drop    | NULL     | Ecig   | Drop   |
|---------------|--------|----------|----------|----------|--------|--------|
| Year          | Number | Attrib   | Attrib   | Death    | Attrib | Drop   |
|               | Deaths | Deaths   | Deaths   | Rate     | Rates  | Rates  |
| 1990          | 33504  | 3293.017 | 3293.017 | 0.000    | 0.000  | 0.000  |
| 1991          | 32505  | 3207.063 | 3067.279 | 139.784  | 0.430  | 4.359  |
| 1992          | 32561  | 3218.125 | 2880.080 | 338.045  | 1.038  | 10.504 |
| 1993          | 32771  | 3226.680 | 2670.352 | 556.328  | 1.698  | 17.242 |
| 1994          | 33011  | 3277.266 | 2493.392 | 783.873  | 2.375  | 23.919 |
| 1995          | 33741  | 3309.378 | 2304.286 | 1005.092 | 2.979  | 30.371 |
| 1996          | 33767  | 3312.987 | 2105.877 | 1207.109 | 3.575  | 36.436 |
| 1997          | 33724  | 3267.066 | 1891.832 | 1375.234 | 4.078  | 42.094 |
| 1998          | 33308  | 3178.725 | 1679.218 | 1499.507 | 4.502  | 47.173 |
| 1999          | 33936  | 3120.351 | 1503.510 | 1616.842 | 4.764  | 51.816 |
| 2000          | 33884  | 3142.808 | 1382.278 | 1760.530 | 5.196  | 56.018 |
| 2001          | 32574  | 2961.588 | 1188.768 | 1772.820 | 5.442  | 59.860 |
| 2002          | 32159  | 2940.627 | 1072.585 | 1868.042 | 5.809  | 63.525 |
| 2003          | 30659  | 2819.545 | 935.461  | 1884.084 | 6.145  | 66.822 |
| 2004          | 29490  | 2730.466 | 822.158  | 1908.308 | 6.471  | 69.889 |
| 2005          | 28065  | 2670.510 | 731.102  | 1939.408 | 6.911  | 72.623 |
| 2006          | 27323  | 2623.285 | 652.740  | 1970.545 | 7.212  | 75.117 |
| 2007          | 26434  | 2536.599 | 574.291  | 1962.308 | 7.423  | 77.360 |
| 2008          | 26143  | 2469.443 | 510.307  | 1959.136 | 7.494  | 79.335 |
| 2009          | 25195  | 2386.945 | 451.177  | 1935.767 | 7.683  | 81.098 |
| 2010          | 25009  | 2329.274 | 404.384  | 1924.891 | 7.697  | 82.639 |
| 2011          | 24977  | 2286.581 | 364.286  | 1922.295 | 7.696  | 84.069 |
| 2012          | 24698  | 2243.311 | 328.570  | 1914.741 | 7.753  | 85.353 |
| 2013          | 24666  | 2176.503 | 294.318  | 1882.185 | 7.631  | 86.477 |
| 2014          | 25536  | 2211.619 | 276.925  | 1934.694 | 7.576  | 87.479 |
| 2015          | 26587  | 2237.016 | 262.200  | 1974.815 | 7.428  | 88.279 |
| 2016          | 27029  | 2229.057 | 243.951  | 1985.106 | 7.344  | 89.056 |
| 2017          | 27943  | 2221.649 | 228.874  | 1992.776 | 7.132  | 89.698 |
| 2018          | 25577  | 1939.420 | 189.217  | 1750.203 | 6.843  | 90.244 |
| 2019          | 25775  | 1904.400 | 175.558  | 1728.842 | 6.707  | 90.781 |
| 2020          | 25750  | 1806.054 | 159.394  | 1646.660 | 6.395  | 91.174 |
| 2021          | 25844  | 1748.172 | 146.345  | 1601.827 | 6.198  | 91.629 |
| 2022          | 25959  | 1701.148 | 136.013  | 1565.135 | 6.029  | 92.005 |
| 2023          | 26066  | 1652.087 | 126.909  | 1525.178 | 5.851  | 92.318 |
| 2024          | 26130  | 1597.127 | 118.423  | 1478.703 | 5.659  | 92.585 |
| 2025          | 25754  | 1467.622 | 105.586  | 1362.037 | 5.289  | 92.806 |
| 2026          | 26008  | 1390.505 | 97.317   | 1293.188 | 4.972  | 93.001 |
| 2027          | 25813  | 1342.095 | 91.423   | 1250.672 | 4.845  | 93.188 |
| 2028          | 25591  | 1289.536 | 85.980   | 1203.556 | 4.703  | 93.332 |
| 2029          | 25357  | 1242.216 | 81.290   | 1160.926 | 4.578  | 93.456 |
| 2030          | 24566  | 1096.803 | 69.885   | 1026.919 | 4.180  | 93.628 |
| 2031          | 24602  | 1019.991 | 64.087   | 955.903  | 3.885  | 93.717 |
| 2032          | 24272  | 977.406  | 60.685   | 916.721  | 3.777  | 93.791 |
| 2033          | 23933  | 937.450  | 57.543   | 879.907  | 3.676  | 93.862 |
| 2034          | 23569  | 900.763  | 54.702   | 846.061  | 3.590  | 93.927 |
| 2035          | 22431  | 745.023  | 44.148   | 700.876  | 3.125  | 94.074 |
| 2036          | 21603  | 680.360  | 39.815   | 640.544  | 2.965  | 94.148 |
| 2037          | 21103  | 644.109  | 37.447   | 606.663  | 2.875  | 94.186 |
| 2038          | 20601  | 612.448  | 35.332   | 577.116  | 2.801  | 94.231 |
| 2039          | 20108  | 577.529  | 33.392   | 544.137  | 2.706  | 94.218 |

## Results for PHIM for Run 2 (Sensitivity\_Analysis\_2.RTF)

\*\*\*\*\*

### Main Results for E-Component for Run: 2, Simulation: 1, COD: COPD, Adjusted

| Variable Parameter          | Value                                  |
|-----------------------------|----------------------------------------|
| 1. Country                  | US (United States)                     |
| 2. Sex                      | F (Females)                            |
| 3. Year of start of process | 1990                                   |
| 4. Cause of Death           | COPD                                   |
| 5. Effective Dose NULL      | CC:1                                   |
| 6. Effective Dose Ecig      | CC:1 Ecig:0.05 Dual:0.525              |
| Note:                       | Death rates are per million population |

### Results for Age Groups Combined and Years combined, Population and Number deaths adjusted for Ecig scenario,

| Age Group:All | NULL    | Ecig       | %Drop      |          |        |        | NULL    | Ecig    | Drop    |         |
|---------------|---------|------------|------------|----------|--------|--------|---------|---------|---------|---------|
| Year          | Number  | Attrib     | Attrib     | Drop     | %Drop  | Attrib | Death   | Attrib  | Attrib  | Drop    |
|               | Deaths  | Deaths     | Deaths     | Deaths   | Deaths | Deaths | Rate    | Rates   | Rates   | Rates   |
| All Comb      | 2194306 | 862051.244 | 475787.060 | 386264.2 | 17.603 | 44.808 | 597.975 | 236.673 | 129.658 | 107.015 |

### Results for Age Groups Combined, Population and Number deaths adjusted for Ecig scenario,

| Age Group:All | NULL   | Ecig      | %Drop     |          |        |        | NULL    | Ecig    | Drop    |         |
|---------------|--------|-----------|-----------|----------|--------|--------|---------|---------|---------|---------|
| Year          | Number | Attrib    | Attrib    | Drop     | %Drop  | Attrib | Death   | Attrib  | Attrib  | Drop    |
|               | Deaths | Deaths    | Deaths    | Deaths   | Deaths | Deaths | Rate    | Rates   | Rates   | Rates   |
| 1990          | 24738  | 10694.712 | 10694.712 | 0.000    | 0.000  | 0.000  | 362.296 | 156.628 | 156.628 | 0.000   |
| 1991          | 26562  | 11602.933 | 11492.944 | 109.989  | 0.414  | 0.948  | 383.818 | 167.661 | 166.072 | 1.589   |
| 1992          | 26829  | 11831.375 | 11553.291 | 278.084  | 1.037  | 2.350  | 382.405 | 168.642 | 164.676 | 3.966   |
| 1993          | 29777  | 13246.371 | 12724.311 | 522.060  | 1.753  | 3.941  | 418.423 | 186.148 | 178.803 | 7.344   |
| 1994          | 29810  | 13355.662 | 12609.759 | 745.902  | 2.502  | 5.585  | 412.640 | 184.893 | 174.550 | 10.343  |
| 1995          | 29765  | 13397.439 | 12419.432 | 978.007  | 3.286  | 7.300  | 405.608 | 182.598 | 169.239 | 13.359  |
| 1996          | 30917  | 13960.356 | 12705.335 | 1255.021 | 4.059  | 8.990  | 415.792 | 187.801 | 170.872 | 16.929  |
| 1997          | 31152  | 14109.552 | 12608.243 | 1501.309 | 4.819  | 10.640 | 413.113 | 187.180 | 167.199 | 19.981  |
| 1998          | 32130  | 14599.657 | 12808.987 | 1790.671 | 5.573  | 12.265 | 420.036 | 190.958 | 167.450 | 23.508  |
| 1999          | 34664  | 15728.102 | 13552.230 | 2175.872 | 6.277  | 13.834 | 447.000 | 202.950 | 174.757 | 28.193  |
| 2000          | 34361  | 15579.803 | 13173.324 | 2406.479 | 7.004  | 15.446 | 437.503 | 198.541 | 167.732 | 30.809  |
| 2001          | 34669  | 15696.614 | 13028.672 | 2667.943 | 7.696  | 16.997 | 436.449 | 197.812 | 164.019 | 33.792  |
| 2002          | 34383  | 15519.777 | 12617.458 | 2902.319 | 8.441  | 18.701 | 428.521 | 193.668 | 157.255 | 36.413  |
| 2003          | 35185  | 15888.389 | 12667.446 | 3220.943 | 9.154  | 20.272 | 434.325 | 196.413 | 156.366 | 40.047  |
| 2004          | 33636  | 15091.573 | 11778.399 | 3313.174 | 9.850  | 21.954 | 410.962 | 184.701 | 143.906 | 40.795  |
| 2005          | 35542  | 15803.656 | 12050.263 | 3753.393 | 10.560 | 23.750 | 429.339 | 191.278 | 145.564 | 45.714  |
| 2006          | 34144  | 15100.563 | 11256.517 | 3844.046 | 11.258 | 25.456 | 408.749 | 181.174 | 134.755 | 46.419  |
| 2007          | 34183  | 14974.384 | 10901.958 | 4072.425 | 11.913 | 27.196 | 405.031 | 177.871 | 129.175 | 48.696  |
| 2008          | 37650  | 16406.197 | 11662.545 | 4743.653 | 12.599 | 28.914 | 441.149 | 192.768 | 136.652 | 56.116  |
| 2009          | 37069  | 16083.194 | 11126.645 | 4956.549 | 13.371 | 30.818 | 429.325 | 186.846 | 128.866 | 57.980  |
| 2010          | 37055  | 15927.400 | 10749.616 | 5177.785 | 13.973 | 32.509 | 424.114 | 182.917 | 123.035 | 59.882  |
| 2011          | 37933  | 16221.836 | 10637.425 | 5584.410 | 14.722 | 34.425 | 429.944 | 184.547 | 120.568 | 63.979  |
| 2012          | 38593  | 16358.849 | 10436.070 | 5922.779 | 15.347 | 36.205 | 432.805 | 184.202 | 117.037 | 67.165  |
| 2013          | 40484  | 16994.822 | 10518.948 | 6475.874 | 15.996 | 38.105 | 448.989 | 189.311 | 116.661 | 72.650  |
| 2014          | 40484  | 16855.093 | 10104.051 | 6751.043 | 16.676 | 40.053 | 443.905 | 185.696 | 110.790 | 74.905  |
| 2015          | 42655  | 17572.483 | 10260.212 | 7312.271 | 17.143 | 41.612 | 522.373 | 216.445 | 125.652 | 90.793  |
| 2016          | 43096  | 17579.955 | 9910.151  | 7669.804 | 17.797 | 43.628 | 522.514 | 214.473 | 120.156 | 94.317  |
| 2017          | 44910  | 18080.688 | 9845.511  | 8235.178 | 18.337 | 45.547 | 539.124 | 218.496 | 118.191 | 100.305 |
| 2018          | 45962  | 18209.262 | 9626.830  | 8582.433 | 18.673 | 47.132 | 546.259 | 217.960 | 114.416 | 103.543 |
| 2019          | 47540  | 18648.302 | 9495.395  | 9152.907 | 19.253 | 49.082 | 559.287 | 221.054 | 111.710 | 109.344 |
| 2020          | 49061  | 19002.597 | 9351.250  | 9651.347 | 19.672 | 50.790 | 653.102 | 255.266 | 124.484 | 130.783 |
| 2021          | 49110  | 18885.717 | 8894.962  | 9990.755 | 20.344 | 52.901 | 648.681 | 251.867 | 117.492 | 134.375 |
| 2022          | 50546  | 19235.076 | 8685.035  | 10550.04 | 20.872 | 54.848 | 662.240 | 254.582 | 113.788 | 140.793 |
| 2023          | 51993  | 19521.158 | 8448.016  | 11073.14 | 21.297 | 56.724 | 675.538 | 256.363 | 109.764 | 146.599 |
| 2024          | 53381  | 19918.620 | 8240.092  | 11678.53 | 21.878 | 58.631 | 687.902 | 259.583 | 106.186 | 153.397 |
| 2025          | 54447  | 20150.545 | 8005.397  | 12145.15 | 22.306 | 60.272 | 808.065 | 303.086 | 118.811 | 184.275 |
| 2026          | 55372  | 20393.792 | 7725.317  | 12668.48 | 22.879 | 62.119 | 818.165 | 305.582 | 114.148 | 191.434 |
| 2027          | 56263  | 20615.351 | 7403.317  | 13212.03 | 23.483 | 64.088 | 827.503 | 307.668 | 108.887 | 198.782 |
| 2028          | 57097  | 20731.894 | 7062.652  | 13669.24 | 23.940 | 65.933 | 835.758 | 308.115 | 103.379 | 204.736 |
| 2029          | 57893  | 20781.967 | 6717.736  | 14064.23 | 24.293 | 67.675 | 843.152 | 307.495 | 97.837  | 209.658 |
| 2030          | 58198  | 20753.201 | 6386.944  | 14366.26 | 24.685 | 69.224 | 1000.47 | 363.487 | 109.796 | 253.692 |
| 2031          | 59865  | 21048.417 | 6273.850  | 14774.57 | 24.680 | 70.193 | 1027.02 | 368.165 | 107.632 | 260.533 |
| 2032          | 60441  | 21169.329 | 5968.717  | 15200.61 | 25.149 | 71.805 | 1034.19 | 369.560 | 102.128 | 267.432 |
| 2033          | 60978  | 21109.293 | 5640.974  | 15468.32 | 25.367 | 73.277 | 1040.14 | 367.618 | 96.221  | 271.397 |
| 2034          | 61439  | 21109.429 | 5317.720  | 15791.71 | 25.703 | 74.809 | 1044.43 | 366.613 | 90.399  | 276.213 |
| 2035          | 60835  | 20794.840 | 5002.362  | 15792.48 | 25.960 | 75.944 | 1261.84 | 442.268 | 103.759 | 338.509 |
| 2036          | 57902  | 19354.577 | 4432.128  | 14922.45 | 25.772 | 77.100 | 1201.91 | 412.258 | 92.001  | 320.257 |
| 2037          | 57904  | 19064.169 | 4071.095  | 14993.07 | 25.893 | 78.645 | 1202.07 | 406.385 | 84.515  | 321.870 |
| 2038          | 57872  | 18854.812 | 3746.483  | 15108.33 | 26.106 | 80.130 | 1200.57 | 401.900 | 77.721  | 324.179 |
| 2039          | 57832  | 18437.457 | 3396.333  | 15041.12 | 26.008 | 81.579 | 1197.75 | 392.602 | 70.341  | 322.261 |

## Results for PHIM for Run 3 (Sensitivity\_Analysis\_2.RTF)

---

### Control File Details for Run: 3

| Variable Parameter                                       | Value                  |
|----------------------------------------------------------|------------------------|
| 1. Name for Reference Scenario                           | NULL                   |
| 2. Name for Test Scenario                                | Ecig                   |
| 3. Name for Product 1                                    | CC                     |
| 4. Name for Product 2                                    | Ecig                   |
| 5. Name for Product 3                                    | -                      |
| 6. Name for Product 4                                    | Dual                   |
| 7. Country                                               | US (United States)     |
| 8. Sex                                                   | M (Males)              |
| 9. Year of start of process                              | 1990                   |
| 10. Number of months of follow-up                        | 600                    |
| 11. Follow-up interval length (in months)                | 12                     |
| 12. Lower age for risk estimation                        | 10                     |
| 13. Upper age for risk estimation                        | 79                     |
| 14. The effective dose for Product 1 (F1) - Ref          | 1                      |
| 15. The effective dose for Product 2 (F2) - Ref          | -                      |
| 16. The effective dose for Product 3 (F3) - Ref          | -                      |
| 17. The effective dose for Product 4 (F4) - Ref          | -                      |
| 18. The effective dose for Product 1 (F1) - Test         | 1                      |
| 19. The effective dose for Product 2 (F2) - Test         | 0.05                   |
| 20. The effective dose for Product 3 (F3) - Test         | -                      |
| 21. The effective dose for Product 4 (F4) - Test         | FROMF2                 |
| 22. Number in population to be simulated                 | 100000                 |
| 23. Number of MC simulations                             | 1                      |
| 24. The random number seed for the first simulation      | 15975263               |
| 25. Source for the population file (POP)                 | UN4                    |
| 26. Source for the socioeconomic prevalence file (SEP)   | -                      |
| 27. Source for the current smoking prevalence file (CSP) | ISS3                   |
| 28. Source for the former smoking prevalence file (FSP)  | ISS3                   |
| 29. Source for the quit-time distribution file (QTD)     | NHIS2006               |
| 30. Source for the death file (MORT)                     | APR-20                 |
| 31. Source for the relative risk file (RR)               | PNLEST                 |
| 32. Source for the half-life file (H)                    | PNLEST                 |
| 33. Assumption Set for TTP Factor Reference              | F1                     |
| 34. Assumption Set for TTP Factor Test                   | F1                     |
| 35. Assumption Set for TTP Reference                     | ISS3                   |
| 36. Assumption Set for TTP Test                          | S2B                    |
| 37. Assumption Set for TP for socioeconomic group        | -                      |
| 38. Source for Output Choice file (OUTC)                 | BASIC                  |
| 39. Output for DTP P1                                    | N                      |
| 40. Output for DTP P2                                    | N                      |
| 41. Output for Main P Component                          | Y                      |
| 42. Output for DTP E1                                    | N                      |
| 43. Output for DTP E2                                    | N                      |
| 44. Output for DTP E3                                    | N                      |
| 45. Output for Main E Component                          | Y                      |
| 46. Output file name                                     | Sensitivity_Analysis_2 |
| 47. Run number for P-Component                           | -                      |
| 48. Results file for E-Component                         | -                      |
| 49. Components required                                  | PE                     |
| 50. Results folder for P to be used in E-Component       | -                      |
| 51. Fixed age of starting product use                    | 16                     |
| 52. Output absolute risk file?                           | N                      |

## Results for PHIM for Run 3 (Sensitivity\_Analysis\_2.RTF)

\*\*\*\*\*

TTP values for Run: 3, Scenario: NULL

| Variable Parameter | Value               |
|--------------------|---------------------|
| 1. Country         | US (United States)  |
| 2. Sex             | M (Males)           |
| 3. Assumption Set  | ISS3                |
| Note:              | Period is in Months |

| Age   | Period  | Initiation  | Cessation    | Re-initiation |
|-------|---------|-------------|--------------|---------------|
|       |         | Never<br>CC | CC<br>Former | Former<br>CC  |
| 10-14 | 1-12    | 0.003842    | 0.008742     | 0.000000      |
| 15-19 | 1-12    | 0.004720    | 0.003614     | 0.000000      |
| 20-24 | 1-12    | 0.000376    | 0.000943     | 0.000000      |
| 25-29 | 1-12    | 0.000187    | 0.001143     | 0.000000      |
| 30-34 | 1-12    | 0.000093    | 0.000871     | 0.000000      |
| 35-39 | 1-12    | 0.000000    | 0.000867     | 0.000000      |
| 40-44 | 1-12    | 0.000000    | 0.001399     | 0.000000      |
| 45-49 | 1-12    | 0.000000    | 0.002033     | 0.000000      |
| 50-54 | 1-12    | 0.000000    | 0.003209     | 0.000000      |
| 55-59 | 1-12    | 0.000000    | 0.003574     | 0.000000      |
| 60-64 | 1-12    | 0.000000    | 0.003460     | 0.000000      |
| 65-69 | 1-12    | 0.000000    | 0.004136     | 0.000000      |
| 70-74 | 1-12    | 0.000000    | 0.005592     | 0.000000      |
| 75-79 | 1-12    | 0.000000    | 0.005592     | 0.000000      |
| 10-14 | 13-72   | 0.004906    | 0.008742     | 0.000000      |
| 15-19 | 13-72   | 0.006989    | 0.004426     | 0.000000      |
| 20-24 | 13-72   | 0.000687    | 0.001527     | 0.000000      |
| 25-29 | 13-72   | 0.000962    | 0.001515     | 0.000000      |
| 30-34 | 13-72   | 0.000364    | 0.001227     | 0.000000      |
| 35-39 | 13-72   | 0.000000    | 0.001630     | 0.000000      |
| 40-44 | 13-72   | 0.000000    | 0.001852     | 0.000000      |
| 45-49 | 13-72   | 0.000000    | 0.002667     | 0.000000      |
| 50-54 | 13-72   | 0.000000    | 0.003208     | 0.000000      |
| 55-59 | 13-72   | 0.000000    | 0.003978     | 0.000000      |
| 60-64 | 13-72   | 0.000000    | 0.005771     | 0.000000      |
| 65-69 | 13-72   | 0.000000    | 0.010432     | 0.000000      |
| 70-74 | 13-72   | 0.000000    | 0.007079     | 0.000000      |
| 75-79 | 13-72   | 0.000000    | 0.007079     | 0.000000      |
| 10-14 | 73-132  | 0.004312    | 0.008742     | 0.000000      |
| 15-19 | 73-132  | 0.005330    | 0.003289     | 0.000000      |
| 20-24 | 73-132  | 0.002456    | 0.003844     | 0.000000      |
| 25-29 | 73-132  | 0.000839    | 0.002006     | 0.000000      |
| 30-34 | 73-132  | 0.000414    | 0.001329     | 0.000000      |
| 35-39 | 73-132  | 0.000000    | 0.001278     | 0.000000      |
| 40-44 | 73-132  | 0.000000    | 0.001691     | 0.000000      |
| 45-49 | 73-132  | 0.000000    | 0.002904     | 0.000000      |
| 50-54 | 73-132  | 0.000000    | 0.003319     | 0.000000      |
| 55-59 | 73-132  | 0.000000    | 0.003976     | 0.000000      |
| 60-64 | 73-132  | 0.000000    | 0.005235     | 0.000000      |
| 65-69 | 73-132  | 0.000000    | 0.005901     | 0.000000      |
| 70-74 | 73-132  | 0.000000    | 0.005615     | 0.000000      |
| 75-79 | 73-132  | 0.000000    | 0.005615     | 0.000000      |
| 10-14 | 133-192 | 0.003468    | 0.008742     | 0.000000      |
| 15-19 | 133-192 | 0.004675    | 0.003732     | 0.000000      |
| 20-24 | 133-192 | 0.000062    | 0.002260     | 0.000000      |
| 25-29 | 133-192 | 0.001422    | 0.002822     | 0.000000      |
| 30-34 | 133-192 | 0.000696    | 0.002610     | 0.000000      |
| 35-39 | 133-192 | 0.000000    | 0.002058     | 0.000000      |
| 40-44 | 133-192 | 0.000000    | 0.002310     | 0.000000      |
| 45-49 | 133-192 | 0.000000    | 0.002256     | 0.000000      |
| 50-54 | 133-192 | 0.000000    | 0.002663     | 0.000000      |
| 55-59 | 133-192 | 0.000000    | 0.001746     | 0.000000      |
| 60-64 | 133-192 | 0.000000    | 0.005809     | 0.000000      |
| 65-69 | 133-192 | 0.000000    | 0.005896     | 0.000000      |
| 70-74 | 133-192 | 0.000000    | 0.007323     | 0.000000      |
| 75-79 | 133-192 | 0.000000    | 0.007323     | 0.000000      |
| 10-14 | 193-252 | 0.002314    | 0.008742     | 0.000000      |
| 15-19 | 193-252 | 0.003987    | 0.005036     | 0.000000      |
| 20-24 | 193-252 | 0.000320    | 0.002857     | 0.000000      |
| 25-29 | 193-252 | 0.000251    | 0.002314     | 0.000000      |
| 30-34 | 193-252 | 0.000125    | 0.004343     | 0.000000      |
| 35-39 | 193-252 | 0.000000    | 0.002092     | 0.000000      |
| 40-44 | 193-252 | 0.000000    | 0.002566     | 0.000000      |
| 45-49 | 193-252 | 0.000000    | 0.002311     | 0.000000      |
| 50-54 | 193-252 | 0.000000    | 0.003209     | 0.000000      |

### Results for PHIM for Run 3 (Sensitivity\_Analysis\_2.RTF)

|       |         |          |          |          |
|-------|---------|----------|----------|----------|
| 55-59 | 193-252 | 0.000000 | 0.004057 | 0.000000 |
| 60-64 | 193-252 | 0.000000 | 0.007166 | 0.000000 |
| 65-69 | 193-252 | 0.000000 | 0.004281 | 0.000000 |
| 70-74 | 193-252 | 0.000000 | 0.004580 | 0.000000 |
| 75-79 | 193-252 | 0.000000 | 0.004580 | 0.000000 |
| 10-14 | 253+    | 0.001325 | 0.008742 | 0.000000 |
| 15-19 | 253+    | 0.002984 | 0.010602 | 0.000000 |
| 20-24 | 253+    | 0.000452 | 0.004314 | 0.000000 |
| 25-29 | 253+    | 0.000225 | 0.003645 | 0.000000 |
| 30-34 | 253+    | 0.000112 | 0.004512 | 0.000000 |
| 35-39 | 253+    | 0.000000 | 0.002147 | 0.000000 |
| 40-44 | 253+    | 0.000000 | 0.002636 | 0.000000 |
| 45-49 | 253+    | 0.000000 | 0.001051 | 0.000000 |
| 50-54 | 253+    | 0.000000 | 0.002519 | 0.000000 |
| 55-59 | 253+    | 0.000000 | 0.003693 | 0.000000 |
| 60-64 | 253+    | 0.000000 | 0.005888 | 0.000000 |
| 65-69 | 253+    | 0.000000 | 0.004823 | 0.000000 |
| 70-74 | 253+    | 0.000000 | 0.004733 | 0.000000 |
| 75-79 | 253+    | 0.000000 | 0.004733 | 0.000000 |

## Results for PHIM for Run 3 (Sensitivity\_Analysis\_2.RTF)

\*\*\*\*\*

TTP values for Run: 3, Scenario: Ecig

| Variable Parameter | Value               |
|--------------------|---------------------|
| 1. Country         | US (United States)  |
| 2. Sex             | M (Males)           |
| 3. Assumption Set  | S2B                 |
| Note:              | Period is in Months |

| Age   | Period  | Initiation  |               | Cessation     |              |                | Re-initiation  |              |                |                |
|-------|---------|-------------|---------------|---------------|--------------|----------------|----------------|--------------|----------------|----------------|
|       |         | Never<br>CC | Never<br>Ecig | Never<br>Dual | CC<br>Former | Ecig<br>Former | Dual<br>Former | Former<br>CC | Former<br>Ecig | Former<br>Dual |
| 10-14 | 1-12    | 0.001921    | 0.001921      | 0.000000      | 0.008742     | 0.008742       | 0.000000       | 0.000000     | 0.000000       | 0.000000       |
| 15-19 | 1-12    | 0.002360    | 0.002360      | 0.000000      | 0.003614     | 0.003614       | 0.000000       | 0.000000     | 0.000000       | 0.000000       |
| 20-24 | 1-12    | 0.000188    | 0.000188      | 0.000000      | 0.000943     | 0.000943       | 0.000000       | 0.000000     | 0.000000       | 0.000000       |
| 25-29 | 1-12    | 0.000093    | 0.000093      | 0.000000      | 0.001143     | 0.001143       | 0.000000       | 0.000000     | 0.000000       | 0.000000       |
| 30-34 | 1-12    | 0.000047    | 0.000047      | 0.000000      | 0.000871     | 0.000871       | 0.000000       | 0.000000     | 0.000000       | 0.000000       |
| 35-39 | 1-12    | 0.000000    | 0.000000      | 0.000000      | 0.000867     | 0.000867       | 0.000000       | 0.000000     | 0.000000       | 0.000000       |
| 40-44 | 1-12    | 0.000000    | 0.000000      | 0.000000      | 0.001399     | 0.001399       | 0.000000       | 0.000000     | 0.000000       | 0.000000       |
| 45-49 | 1-12    | 0.000000    | 0.000000      | 0.000000      | 0.002033     | 0.002033       | 0.000000       | 0.000000     | 0.000000       | 0.000000       |
| 50-54 | 1-12    | 0.000000    | 0.000000      | 0.000000      | 0.003209     | 0.003209       | 0.000000       | 0.000000     | 0.000000       | 0.000000       |
| 55-59 | 1-12    | 0.000000    | 0.000000      | 0.000000      | 0.003574     | 0.003574       | 0.000000       | 0.000000     | 0.000000       | 0.000000       |
| 60-64 | 1-12    | 0.000000    | 0.000000      | 0.000000      | 0.003460     | 0.003460       | 0.000000       | 0.000000     | 0.000000       | 0.000000       |
| 65-69 | 1-12    | 0.000000    | 0.000000      | 0.000000      | 0.004136     | 0.004136       | 0.000000       | 0.000000     | 0.000000       | 0.000000       |
| 70-74 | 1-12    | 0.000000    | 0.000000      | 0.000000      | 0.005592     | 0.005592       | 0.000000       | 0.000000     | 0.000000       | 0.000000       |
| 75-79 | 1-12    | 0.000000    | 0.000000      | 0.000000      | 0.005592     | 0.005592       | 0.000000       | 0.000000     | 0.000000       | 0.000000       |
| 10-14 | 13-72   | 0.001962    | 0.002944      | 0.000000      | 0.008742     | 0.008742       | 0.000000       | 0.000000     | 0.000000       | 0.000000       |
| 15-19 | 13-72   | 0.002796    | 0.004193      | 0.000000      | 0.004426     | 0.004426       | 0.000000       | 0.000000     | 0.000000       | 0.000000       |
| 20-24 | 13-72   | 0.000275    | 0.000412      | 0.000000      | 0.001527     | 0.001527       | 0.000000       | 0.000000     | 0.000000       | 0.000000       |
| 25-29 | 13-72   | 0.000385    | 0.000578      | 0.000000      | 0.001515     | 0.001515       | 0.000000       | 0.000000     | 0.000000       | 0.000000       |
| 30-34 | 13-72   | 0.000146    | 0.000218      | 0.000000      | 0.001227     | 0.001227       | 0.000000       | 0.000000     | 0.000000       | 0.000000       |
| 35-39 | 13-72   | 0.000000    | 0.000000      | 0.000000      | 0.001630     | 0.001630       | 0.000000       | 0.000000     | 0.000000       | 0.000000       |
| 40-44 | 13-72   | 0.000000    | 0.000000      | 0.000000      | 0.001852     | 0.001852       | 0.000000       | 0.000000     | 0.000000       | 0.000000       |
| 45-49 | 13-72   | 0.000000    | 0.000000      | 0.000000      | 0.002667     | 0.002667       | 0.000000       | 0.000000     | 0.000000       | 0.000000       |
| 50-54 | 13-72   | 0.000000    | 0.000000      | 0.000000      | 0.003208     | 0.003208       | 0.000000       | 0.000000     | 0.000000       | 0.000000       |
| 55-59 | 13-72   | 0.000000    | 0.000000      | 0.000000      | 0.003978     | 0.003978       | 0.000000       | 0.000000     | 0.000000       | 0.000000       |
| 60-64 | 13-72   | 0.000000    | 0.000000      | 0.000000      | 0.005771     | 0.005771       | 0.000000       | 0.000000     | 0.000000       | 0.000000       |
| 65-69 | 13-72   | 0.000000    | 0.000000      | 0.000000      | 0.010432     | 0.010432       | 0.000000       | 0.000000     | 0.000000       | 0.000000       |
| 70-74 | 13-72   | 0.000000    | 0.000000      | 0.000000      | 0.007079     | 0.007079       | 0.000000       | 0.000000     | 0.000000       | 0.000000       |
| 75-79 | 13-72   | 0.000000    | 0.000000      | 0.000000      | 0.007079     | 0.007079       | 0.000000       | 0.000000     | 0.000000       | 0.000000       |
| 10-14 | 73-132  | 0.000862    | 0.003449      | 0.000000      | 0.008742     | 0.008742       | 0.000000       | 0.000000     | 0.000000       | 0.000000       |
| 15-19 | 73-132  | 0.001066    | 0.004264      | 0.000000      | 0.003289     | 0.003289       | 0.000000       | 0.000000     | 0.000000       | 0.000000       |
| 20-24 | 73-132  | 0.000491    | 0.001965      | 0.000000      | 0.003844     | 0.003844       | 0.000000       | 0.000000     | 0.000000       | 0.000000       |
| 25-29 | 73-132  | 0.000168    | 0.000671      | 0.000000      | 0.002006     | 0.002006       | 0.000000       | 0.000000     | 0.000000       | 0.000000       |
| 30-34 | 73-132  | 0.000083    | 0.000332      | 0.000000      | 0.001329     | 0.001329       | 0.000000       | 0.000000     | 0.000000       | 0.000000       |
| 35-39 | 73-132  | 0.000000    | 0.000000      | 0.000000      | 0.001278     | 0.001278       | 0.000000       | 0.000000     | 0.000000       | 0.000000       |
| 40-44 | 73-132  | 0.000000    | 0.000000      | 0.000000      | 0.001691     | 0.001691       | 0.000000       | 0.000000     | 0.000000       | 0.000000       |
| 45-49 | 73-132  | 0.000000    | 0.000000      | 0.000000      | 0.002904     | 0.002904       | 0.000000       | 0.000000     | 0.000000       | 0.000000       |
| 50-54 | 73-132  | 0.000000    | 0.000000      | 0.000000      | 0.003319     | 0.003319       | 0.000000       | 0.000000     | 0.000000       | 0.000000       |
| 55-59 | 73-132  | 0.000000    | 0.000000      | 0.000000      | 0.003976     | 0.003976       | 0.000000       | 0.000000     | 0.000000       | 0.000000       |
| 60-64 | 73-132  | 0.000000    | 0.000000      | 0.000000      | 0.005235     | 0.005235       | 0.000000       | 0.000000     | 0.000000       | 0.000000       |
| 65-69 | 73-132  | 0.000000    | 0.000000      | 0.000000      | 0.005901     | 0.005901       | 0.000000       | 0.000000     | 0.000000       | 0.000000       |
| 70-74 | 73-132  | 0.000000    | 0.000000      | 0.000000      | 0.005615     | 0.005615       | 0.000000       | 0.000000     | 0.000000       | 0.000000       |
| 75-79 | 73-132  | 0.000000    | 0.000000      | 0.000000      | 0.005615     | 0.005615       | 0.000000       | 0.000000     | 0.000000       | 0.000000       |
| 10-14 | 133-192 | 0.000173    | 0.003294      | 0.000000      | 0.008742     | 0.008742       | 0.000000       | 0.000000     | 0.000000       | 0.000000       |
| 15-19 | 133-192 | 0.000234    | 0.004442      | 0.000000      | 0.003732     | 0.003732       | 0.000000       | 0.000000     | 0.000000       | 0.000000       |
| 20-24 | 133-192 | 0.000003    | 0.000059      | 0.000000      | 0.002260     | 0.002260       | 0.000000       | 0.000000     | 0.000000       | 0.000000       |
| 25-29 | 133-192 | 0.000071    | 0.001351      | 0.000000      | 0.002822     | 0.002822       | 0.000000       | 0.000000     | 0.000000       | 0.000000       |
| 30-34 | 133-192 | 0.000035    | 0.000661      | 0.000000      | 0.002610     | 0.002610       | 0.000000       | 0.000000     | 0.000000       | 0.000000       |
| 35-39 | 133-192 | 0.000000    | 0.000000      | 0.000000      | 0.002058     | 0.002058       | 0.000000       | 0.000000     | 0.000000       | 0.000000       |
| 40-44 | 133-192 | 0.000000    | 0.000000      | 0.000000      | 0.002310     | 0.002310       | 0.000000       | 0.000000     | 0.000000       | 0.000000       |
| 45-49 | 133-192 | 0.000000    | 0.000000      | 0.000000      | 0.002256     | 0.002256       | 0.000000       | 0.000000     | 0.000000       | 0.000000       |
| 50-54 | 133-192 | 0.000000    | 0.000000      | 0.000000      | 0.002663     | 0.002663       | 0.000000       | 0.000000     | 0.000000       | 0.000000       |
| 55-59 | 133-192 | 0.000000    | 0.000000      | 0.000000      | 0.001747     | 0.001747       | 0.000000       | 0.000000     | 0.000000       | 0.000000       |
| 60-64 | 133-192 | 0.000000    | 0.000000      | 0.000000      | 0.005809     | 0.005809       | 0.000000       | 0.000000     | 0.000000       | 0.000000       |
| 65-69 | 133-192 | 0.000000    | 0.000000      | 0.000000      | 0.005896     | 0.005896       | 0.000000       | 0.000000     | 0.000000       | 0.000000       |
| 70-74 | 133-192 | 0.000000    | 0.000000      | 0.000000      | 0.007323     | 0.007323       | 0.000000       | 0.000000     | 0.000000       | 0.000000       |
| 75-79 | 133-192 | 0.000000    | 0.000000      | 0.000000      | 0.007323     | 0.007323       | 0.000000       | 0.000000     | 0.000000       | 0.000000       |
| 10-14 | 193-252 | 0.000116    | 0.002198      | 0.000000      | 0.008742     | 0.008742       | 0.000000       | 0.000000     | 0.000000       | 0.000000       |
| 15-19 | 193-252 | 0.000199    | 0.003788      | 0.000000      | 0.005036     | 0.005036       | 0.000000       | 0.000000     | 0.000000       | 0.000000       |
| 20-24 | 193-252 | 0.000016    | 0.000304      | 0.000000      | 0.002857     | 0.002857       | 0.000000       | 0.000000     | 0.000000       | 0.000000       |
| 25-29 | 193-252 | 0.000013    | 0.000239      | 0.000000      | 0.002314     | 0.002314       | 0.000000       | 0.000000     | 0.000000       | 0.000000       |
| 30-34 | 193-252 | 0.000006    | 0.000119      | 0.000000      | 0.004343     | 0.004343       | 0.000000       | 0.000000     | 0.000000       | 0.000000       |
| 35-39 | 193-252 | 0.000000    | 0.000000      | 0.000000      | 0.002092     | 0.002092       | 0.000000       | 0.000000     | 0.000000       | 0.000000       |
| 40-44 | 193-252 | 0.000000    | 0.000000      | 0.000000      | 0.002566     | 0.002566       | 0.000000       | 0.000000     | 0.000000       | 0.000000       |
| 45-49 | 193-252 | 0.000000    | 0.000000      | 0.000000      | 0.002311     | 0.002311       | 0.000000       | 0.000000     | 0.000000       | 0.000000       |
| 50-54 | 193-252 | 0.000000    | 0.000000      | 0.000000      | 0.003209     | 0.003209       | 0.000000       | 0.000000     | 0.000000       | 0.000000       |

### Results for PHIM for Run 3 (Sensitivity\_Analysis\_2.RTF)

|       |         |          |          |          |          |          |          |          |          |          |
|-------|---------|----------|----------|----------|----------|----------|----------|----------|----------|----------|
| 55-59 | 193-252 | 0.000000 | 0.000000 | 0.000000 | 0.004057 | 0.004057 | 0.000000 | 0.000000 | 0.000000 | 0.000000 |
| 60-64 | 193-252 | 0.000000 | 0.000000 | 0.000000 | 0.007166 | 0.007166 | 0.000000 | 0.000000 | 0.000000 | 0.000000 |
| 65-69 | 193-252 | 0.000000 | 0.000000 | 0.000000 | 0.004281 | 0.004281 | 0.000000 | 0.000000 | 0.000000 | 0.000000 |
| 70-74 | 193-252 | 0.000000 | 0.000000 | 0.000000 | 0.004580 | 0.004580 | 0.000000 | 0.000000 | 0.000000 | 0.000000 |
| 75-79 | 193-252 | 0.000000 | 0.000000 | 0.000000 | 0.004580 | 0.004580 | 0.000000 | 0.000000 | 0.000000 | 0.000000 |
| 10-14 | 253+    | 0.000066 | 0.001259 | 0.000000 | 0.008742 | 0.008742 | 0.000000 | 0.000000 | 0.000000 | 0.000000 |
| 15-19 | 253+    | 0.000149 | 0.002835 | 0.000000 | 0.010602 | 0.010602 | 0.000000 | 0.000000 | 0.000000 | 0.000000 |
| 20-24 | 253+    | 0.000023 | 0.000430 | 0.000000 | 0.004314 | 0.004314 | 0.000000 | 0.000000 | 0.000000 | 0.000000 |
| 25-29 | 253+    | 0.000011 | 0.000213 | 0.000000 | 0.003645 | 0.003645 | 0.000000 | 0.000000 | 0.000000 | 0.000000 |
| 30-34 | 253+    | 0.000006 | 0.000106 | 0.000000 | 0.004512 | 0.004512 | 0.000000 | 0.000000 | 0.000000 | 0.000000 |
| 35-39 | 253+    | 0.000000 | 0.000000 | 0.000000 | 0.002147 | 0.002147 | 0.000000 | 0.000000 | 0.000000 | 0.000000 |
| 40-44 | 253+    | 0.000000 | 0.000000 | 0.000000 | 0.002636 | 0.002636 | 0.000000 | 0.000000 | 0.000000 | 0.000000 |
| 45-49 | 253+    | 0.000000 | 0.000000 | 0.000000 | 0.001051 | 0.001051 | 0.000000 | 0.000000 | 0.000000 | 0.000000 |
| 50-54 | 253+    | 0.000000 | 0.000000 | 0.000000 | 0.002519 | 0.002519 | 0.000000 | 0.000000 | 0.000000 | 0.000000 |
| 55-59 | 253+    | 0.000000 | 0.000000 | 0.000000 | 0.003693 | 0.003693 | 0.000000 | 0.000000 | 0.000000 | 0.000000 |
| 60-64 | 253+    | 0.000000 | 0.000000 | 0.000000 | 0.005888 | 0.005888 | 0.000000 | 0.000000 | 0.000000 | 0.000000 |
| 65-69 | 253+    | 0.000000 | 0.000000 | 0.000000 | 0.004823 | 0.004823 | 0.000000 | 0.000000 | 0.000000 | 0.000000 |
| 70-74 | 253+    | 0.000000 | 0.000000 | 0.000000 | 0.004733 | 0.004733 | 0.000000 | 0.000000 | 0.000000 | 0.000000 |
| 75-79 | 253+    | 0.000000 | 0.000000 | 0.000000 | 0.004733 | 0.004733 | 0.000000 | 0.000000 | 0.000000 | 0.000000 |





### Results for PHIM for Run 3 (Sensitivity\_Analysis\_2.RTF)

|       |      |          |          |          |          |          |          |
|-------|------|----------|----------|----------|----------|----------|----------|
| 25-29 | 253+ | 0.020946 | 0.000000 | 0.000000 | 0.000000 | 0.000000 | 0.000000 |
| 30-34 | 253+ | 0.021137 | 0.000000 | 0.000000 | 0.000000 | 0.000000 | 0.000000 |
| 35-39 | 253+ | 0.020386 | 0.000000 | 0.000000 | 0.000000 | 0.000000 | 0.000000 |
| 40-44 | 253+ | 0.019918 | 0.000000 | 0.000000 | 0.000000 | 0.000000 | 0.000000 |
| 45-49 | 253+ | 0.018698 | 0.000000 | 0.000000 | 0.000000 | 0.000000 | 0.000000 |
| 50-54 | 253+ | 0.017459 | 0.000000 | 0.000000 | 0.000000 | 0.000000 | 0.000000 |
| 55-59 | 253+ | 0.016728 | 0.000000 | 0.000000 | 0.000000 | 0.000000 | 0.000000 |
| 60-64 | 253+ | 0.015230 | 0.000000 | 0.000000 | 0.000000 | 0.000000 | 0.000000 |
| 65-69 | 253+ | 0.012617 | 0.000000 | 0.000000 | 0.000000 | 0.000000 | 0.000000 |
| 70-74 | 253+ | 0.011163 | 0.000000 | 0.000000 | 0.000000 | 0.000000 | 0.000000 |
| 75-79 | 253+ | 0.011163 | 0.000000 | 0.000000 | 0.000000 | 0.000000 | 0.000000 |

## Results for PHIM for Run 3 (Sensitivity\_Analysis\_2.RTF)

\*\*\*\*\*

### Main Output for the Tobacco History for Run: 3, Simulation: 1, Scenario: NULL

| Variable Parameter          | Value              |
|-----------------------------|--------------------|
| 1. Country                  | US (United States) |
| 2. Sex                      | M (Males)          |
| 3. Year of start of process | 1990               |

Year of Follow-up: 2040, Age Group: All Ages  
 Period    Age Group    Smoking Group            N            %

|    |          |           |       |       |
|----|----------|-----------|-------|-------|
| 50 | All Ages | Never Any | 19445 | 50.68 |
| 50 | All Ages | CC        | 3024  | 7.88  |
| 50 | All Ages | Former    | 15896 | 41.43 |

Year of Follow-up: 2040, Age Group: 18-19  
 Period    Age Group    Smoking Group            N            %

|    |       |           |   |   |
|----|-------|-----------|---|---|
| 50 | 18-19 | Never Any | 0 | . |
| 50 | 18-19 | CC        | 0 | . |
| 50 | 18-19 | Former    | 0 | . |

Year of Follow-up: 2040, Age Group: 20-24  
 Period    Age Group    Smoking Group            N            %

|    |       |           |   |   |
|----|-------|-----------|---|---|
| 50 | 20-24 | Never Any | 0 | . |
| 50 | 20-24 | CC        | 0 | . |
| 50 | 20-24 | Former    | 0 | . |

Year of Follow-up: 2040, Age Group: 25-29  
 Period    Age Group    Smoking Group            N            %

|    |       |           |   |   |
|----|-------|-----------|---|---|
| 50 | 25-29 | Never Any | 0 | . |
| 50 | 25-29 | CC        | 0 | . |
| 50 | 25-29 | Former    | 0 | . |

Year of Follow-up: 2040, Age Group: 30-34  
 Period    Age Group    Smoking Group            N            %

|    |       |           |   |   |
|----|-------|-----------|---|---|
| 50 | 30-34 | Never Any | 0 | . |
| 50 | 30-34 | CC        | 0 | . |
| 50 | 30-34 | Former    | 0 | . |

Year of Follow-up: 2040, Age Group: 35-39  
 Period    Age Group    Smoking Group            N            %

|    |       |           |   |   |
|----|-------|-----------|---|---|
| 50 | 35-39 | Never Any | 0 | . |
| 50 | 35-39 | CC        | 0 | . |
| 50 | 35-39 | Former    | 0 | . |

Year of Follow-up: 2040, Age Group: 40-44  
 Period    Age Group    Smoking Group            N            %

|    |       |           |   |   |
|----|-------|-----------|---|---|
| 50 | 40-44 | Never Any | 0 | . |
| 50 | 40-44 | CC        | 0 | . |
| 50 | 40-44 | Former    | 0 | . |

Year of Follow-up: 2040, Age Group: 45-49  
 Period    Age Group    Smoking Group            N            %

|    |       |           |   |   |
|----|-------|-----------|---|---|
| 50 | 45-49 | Never Any | 0 | . |
| 50 | 45-49 | CC        | 0 | . |
| 50 | 45-49 | Former    | 0 | . |

Year of Follow-up: 2040, Age Group: 50-54  
 Period    Age Group    Smoking Group            N            %

|    |       |           |   |   |
|----|-------|-----------|---|---|
| 50 | 50-54 | Never Any | 0 | . |
| 50 | 50-54 | CC        | 0 | . |
| 50 | 50-54 | Former    | 0 | . |

Year of Follow-up: 2040, Age Group: 55-59  
 Period    Age Group    Smoking Group            N            %

|    |       |           |   |   |
|----|-------|-----------|---|---|
| 50 | 55-59 | Never Any | 0 | . |
| 50 | 55-59 | CC        | 0 | . |
| 50 | 55-59 | Former    | 0 | . |

Year of Follow-up: 2040, Age Group: 60-64  
 Period    Age Group    Smoking Group            N            %

### Results for PHIM for Run 3 (Sensitivity\_Analysis\_2.RTF)

|                                           |           |               |      |       |
|-------------------------------------------|-----------|---------------|------|-------|
| 50                                        | 60-64     | Never Any     | 4363 | 49.33 |
| 50                                        | 60-64     | CC            | 934  | 10.56 |
| 50                                        | 60-64     | Former        | 3548 | 40.11 |
| Year of Follow-up: 2040, Age Group: 65-69 |           |               |      |       |
| Period                                    | Age Group | Smoking Group | N    | %     |
| 50                                        | 65-69     | Never Any     | 4948 | 54.73 |
| 50                                        | 65-69     | CC            | 734  | 8.12  |
| 50                                        | 65-69     | Former        | 3358 | 37.15 |
| Year of Follow-up: 2040, Age Group: 70-74 |           |               |      |       |
| Period                                    | Age Group | Smoking Group | N    | %     |
| 50                                        | 70-74     | Never Any     | 5145 | 52.41 |
| 50                                        | 70-74     | CC            | 688  | 7.01  |
| 50                                        | 70-74     | Former        | 3983 | 40.58 |
| Year of Follow-up: 2040, Age Group: 75-79 |           |               |      |       |
| Period                                    | Age Group | Smoking Group | N    | %     |
| 50                                        | 75-79     | Never Any     | 4989 | 46.78 |
| 50                                        | 75-79     | CC            | 668  | 6.26  |
| 50                                        | 75-79     | Former        | 5007 | 46.95 |

## Results for PHIM for Run 3 (Sensitivity\_Analysis\_2.RTF)

\*\*\*\*\*

### Main Output for the Tobacco History for Run: 3, Simulation: 1, Scenario: Ecig

| Variable Parameter                           |           | Value              |       |       |               |             |               |                |              |
|----------------------------------------------|-----------|--------------------|-------|-------|---------------|-------------|---------------|----------------|--------------|
| 1. Country                                   |           | US (United States) |       |       |               |             |               |                |              |
| 2. Sex                                       |           | M (Males)          |       |       |               |             |               |                |              |
| 3. Year of start of process                  |           | 1990               |       |       |               |             |               |                |              |
| Year of Follow-up: 1990, Age Group: All Ages |           |                    |       |       |               |             |               |                |              |
| Period                                       | Age Group | Smoking Group      | N     | %     | Ever Quit (N) | Ever Quit % | Mean Yrs Quit | Short Term (n) | Short Term % |
| 0                                            | All Ages  | Never Any          | 34075 | 39.78 |               |             |               |                |              |
| 0                                            | All Ages  | CC                 | 27323 | 31.90 | 0             | 0.00        |               |                |              |
| 0                                            | All Ages  | Ecig               | 0     | 0.00  |               |             |               |                |              |
| 0                                            | All Ages  | Dual               | 0     | 0.00  |               |             |               |                |              |
| 0                                            | All Ages  | Former             | 24266 | 28.33 |               |             | 13.08         | 3623           | 14.93        |
| Year of Follow-up: 1990, Age Group: 18-19    |           |                    |       |       |               |             |               |                |              |
| Period                                       | Age Group | Smoking Group      | N     | %     | Ever Quit (N) | Ever Quit % | Mean Yrs Quit | Short Term (n) | Short Term % |
| 0                                            | 18-19     | Never Any          | 2783  | 78.42 |               |             |               |                |              |
| 0                                            | 18-19     | CC                 | 634   | 17.86 | 0             | 0.00        |               |                |              |
| 0                                            | 18-19     | Ecig               | 0     | 0.00  |               |             |               |                |              |
| 0                                            | 18-19     | Dual               | 0     | 0.00  |               |             |               |                |              |
| 0                                            | 18-19     | Former             | 132   | 3.72  |               |             | 0.11          | 132            | 100.00       |
| Year of Follow-up: 1990, Age Group: 20-24    |           |                    |       |       |               |             |               |                |              |
| Period                                       | Age Group | Smoking Group      | N     | %     | Ever Quit (N) | Ever Quit % | Mean Yrs Quit | Short Term (n) | Short Term % |
| 0                                            | 20-24     | Never Any          | 5722  | 58.29 |               |             |               |                |              |
| 0                                            | 20-24     | CC                 | 3199  | 32.59 | 0             | 0.00        |               |                |              |
| 0                                            | 20-24     | Ecig               | 0     | 0.00  |               |             |               |                |              |
| 0                                            | 20-24     | Dual               | 0     | 0.00  |               |             |               |                |              |
| 0                                            | 20-24     | Former             | 895   | 9.12  |               |             | 1.46          | 506            | 56.54        |
| Year of Follow-up: 1990, Age Group: 25-29    |           |                    |       |       |               |             |               |                |              |
| Period                                       | Age Group | Smoking Group      | N     | %     | Ever Quit (N) | Ever Quit % | Mean Yrs Quit | Short Term (n) | Short Term % |
| 0                                            | 25-29     | Never Any          | 5232  | 49.06 |               |             |               |                |              |
| 0                                            | 25-29     | CC                 | 3914  | 36.70 | 0             | 0.00        |               |                |              |
| 0                                            | 25-29     | Ecig               | 0     | 0.00  |               |             |               |                |              |
| 0                                            | 25-29     | Dual               | 0     | 0.00  |               |             |               |                |              |
| 0                                            | 25-29     | Former             | 1518  | 14.23 |               |             | 2.87          | 643            | 42.36        |
| Year of Follow-up: 1990, Age Group: 30-34    |           |                    |       |       |               |             |               |                |              |
| Period                                       | Age Group | Smoking Group      | N     | %     | Ever Quit (N) | Ever Quit % | Mean Yrs Quit | Short Term (n) | Short Term % |
| 0                                            | 30-34     | Never Any          | 4765  | 43.65 |               |             |               |                |              |
| 0                                            | 30-34     | CC                 | 4023  | 36.85 | 0             | 0.00        |               |                |              |
| 0                                            | 30-34     | Ecig               | 0     | 0.00  |               |             |               |                |              |
| 0                                            | 30-34     | Dual               | 0     | 0.00  |               |             |               |                |              |
| 0                                            | 30-34     | Former             | 2128  | 19.49 |               |             | 4.06          | 592            | 27.82        |
| Year of Follow-up: 1990, Age Group: 35-39    |           |                    |       |       |               |             |               |                |              |
| Period                                       | Age Group | Smoking Group      | N     | %     | Ever Quit (N) | Ever Quit % | Mean Yrs Quit | Short Term (n) | Short Term % |
| 0                                            | 35-39     | Never Any          | 3941  | 39.85 |               |             |               |                |              |
| 0                                            | 35-39     | CC                 | 3474  | 35.13 | 0             | 0.00        |               |                |              |
| 0                                            | 35-39     | Ecig               | 0     | 0.00  |               |             |               |                |              |
| 0                                            | 35-39     | Dual               | 0     | 0.00  |               |             |               |                |              |
| 0                                            | 35-39     | Former             | 2474  | 25.02 |               |             | 8.31          | 425            | 17.18        |
| Year of Follow-up: 1990, Age Group: 40-44    |           |                    |       |       |               |             |               |                |              |
| Period                                       | Age Group | Smoking Group      | N     | %     | Ever Quit (N) | Ever Quit % | Mean Yrs Quit | Short Term (n) | Short Term % |
| 0                                            | 40-44     | Never Any          | 2912  | 33.65 |               |             |               |                |              |
| 0                                            | 40-44     | CC                 | 3113  | 35.97 | 0             | 0.00        |               |                |              |
| 0                                            | 40-44     | Ecig               | 0     | 0.00  |               |             |               |                |              |
| 0                                            | 40-44     | Dual               | 0     | 0.00  |               |             |               |                |              |
| 0                                            | 40-44     | Former             | 2630  | 30.39 |               |             | 10.69         | 317            | 12.05        |
| Year of Follow-up: 1990, Age Group: 45-49    |           |                    |       |       |               |             |               |                |              |
| Period                                       | Age Group | Smoking Group      | N     | %     | Ever Quit (N) | Ever Quit % | Mean Yrs Quit | Short Term (n) | Short Term % |
| 0                                            | 45-49     | Never Any          | 1919  | 29.46 |               |             |               |                |              |
| 0                                            | 45-49     | CC                 | 2318  | 35.58 | 0             | 0.00        |               |                |              |
| 0                                            | 45-49     | Ecig               | 0     | 0.00  |               |             |               |                |              |
| 0                                            | 45-49     | Dual               | 0     | 0.00  |               |             |               |                |              |
| 0                                            | 45-49     | Former             | 2278  | 34.97 |               |             | 13.26         | 221            | 9.70         |
| Year of Follow-up: 1990, Age Group: 50-54    |           |                    |       |       |               |             |               |                |              |
| Period                                       | Age Group | Smoking Group      | N     | %     | Ever Quit (N) | Ever Quit % | Mean Yrs Quit | Short Term (n) | Short Term % |
| 0                                            | 50-54     | Never Any          | 1611  | 29.41 |               |             |               |                |              |
| 0                                            | 50-54     | CC                 | 1816  | 33.16 | 0             | 0.00        |               |                |              |

**Results for PHIM for Run 3 (Sensitivity\_Analysis\_2.RTF)**

|                                              |           |               |       |       |               |             |               |                |              |
|----------------------------------------------|-----------|---------------|-------|-------|---------------|-------------|---------------|----------------|--------------|
| 0                                            | 50-54     | Ecig          | 0     | 0.00  |               |             |               |                |              |
| 0                                            | 50-54     | Dual          | 0     | 0.00  |               |             |               |                |              |
| 0                                            | 50-54     | Former        | 2050  | 37.43 |               |             | 14.55         | 261            | 12.73        |
| Year of Follow-up: 1990, Age Group: 55-59    |           |               |       |       |               |             |               |                |              |
| Period                                       | Age Group | Smoking Group | N     | %     | Ever Quit (N) | Ever Quit % | Mean Yrs Quit | Short Term (n) | Short Term % |
| 0                                            | 55-59     | Never Any     | 1337  | 26.83 |               |             |               |                |              |
| 0                                            | 55-59     | CC            | 1520  | 30.50 | 0             | 0.00        |               |                |              |
| 0                                            | 55-59     | Ecig          | 0     | 0.00  |               |             |               |                |              |
| 0                                            | 55-59     | Dual          | 0     | 0.00  |               |             |               |                |              |
| 0                                            | 55-59     | Former        | 2126  | 42.67 |               |             | 14.80         | 216            | 10.16        |
| Year of Follow-up: 1990, Age Group: 60-64    |           |               |       |       |               |             |               |                |              |
| Period                                       | Age Group | Smoking Group | N     | %     | Ever Quit (N) | Ever Quit % | Mean Yrs Quit | Short Term (n) | Short Term % |
| 0                                            | 60-64     | Never Any     | 1169  | 23.83 |               |             |               |                |              |
| 0                                            | 60-64     | CC            | 1287  | 26.24 | 0             | 0.00        |               |                |              |
| 0                                            | 60-64     | Ecig          | 0     | 0.00  |               |             |               |                |              |
| 0                                            | 60-64     | Dual          | 0     | 0.00  |               |             |               |                |              |
| 0                                            | 60-64     | Former        | 2449  | 49.93 |               |             | 18.87         | 106            | 4.33         |
| Year of Follow-up: 1990, Age Group: 65-69    |           |               |       |       |               |             |               |                |              |
| Period                                       | Age Group | Smoking Group | N     | %     | Ever Quit (N) | Ever Quit % | Mean Yrs Quit | Short Term (n) | Short Term % |
| 0                                            | 65-69     | Never Any     | 1023  | 23.32 |               |             |               |                |              |
| 0                                            | 65-69     | CC            | 979   | 22.32 | 0             | 0.00        |               |                |              |
| 0                                            | 65-69     | Ecig          | 0     | 0.00  |               |             |               |                |              |
| 0                                            | 65-69     | Dual          | 0     | 0.00  |               |             |               |                |              |
| 0                                            | 65-69     | Former        | 2385  | 54.37 |               |             | 19.91         | 113            | 4.74         |
| Year of Follow-up: 1990, Age Group: 70-74    |           |               |       |       |               |             |               |                |              |
| Period                                       | Age Group | Smoking Group | N     | %     | Ever Quit (N) | Ever Quit % | Mean Yrs Quit | Short Term (n) | Short Term % |
| 0                                            | 70-74     | Never Any     | 961   | 27.46 |               |             |               |                |              |
| 0                                            | 70-74     | CC            | 675   | 19.29 | 0             | 0.00        |               |                |              |
| 0                                            | 70-74     | Ecig          | 0     | 0.00  |               |             |               |                |              |
| 0                                            | 70-74     | Dual          | 0     | 0.00  |               |             |               |                |              |
| 0                                            | 70-74     | Former        | 1863  | 53.24 |               |             | 20.69         | 23             | 1.23         |
| Year of Follow-up: 1990, Age Group: 75-79    |           |               |       |       |               |             |               |                |              |
| Period                                       | Age Group | Smoking Group | N     | %     | Ever Quit (N) | Ever Quit % | Mean Yrs Quit | Short Term (n) | Short Term % |
| 0                                            | 75-79     | Never Any     | 700   | 29.06 |               |             |               |                |              |
| 0                                            | 75-79     | CC            | 371   | 15.40 | 0             | 0.00        |               |                |              |
| 0                                            | 75-79     | Ecig          | 0     | 0.00  |               |             |               |                |              |
| 0                                            | 75-79     | Dual          | 0     | 0.00  |               |             |               |                |              |
| 0                                            | 75-79     | Former        | 1338  | 55.54 |               |             | 22.88         | 68             | 5.08         |
| Year of Follow-up: 1995, Age Group: All Ages |           |               |       |       |               |             |               |                |              |
| Period                                       | Age Group | Smoking Group | N     | %     | Ever Quit (N) | Ever Quit % | Mean Yrs Quit | Short Term (n) | Short Term % |
| 5                                            | All Ages  | Never Any     | 38368 | 41.57 |               |             |               |                |              |
| 5                                            | All Ages  | CC            | 8166  | 8.85  | 0             | 0.00        |               |                |              |
| 5                                            | All Ages  | Ecig          | 18940 | 20.52 |               |             |               |                |              |
| 5                                            | All Ages  | Dual          | 0     | 0.00  |               |             |               |                |              |
| 5                                            | All Ages  | Former        | 26816 | 29.06 |               |             | 15.23         | 1692           | 6.31         |
| Year of Follow-up: 1995, Age Group: 18-19    |           |               |       |       |               |             |               |                |              |
| Period                                       | Age Group | Smoking Group | N     | %     | Ever Quit (N) | Ever Quit % | Mean Yrs Quit | Short Term (n) | Short Term % |
| 5                                            | 18-19     | Never Any     | 2448  | 69.07 |               |             |               |                |              |
| 5                                            | 18-19     | CC            | 275   | 7.76  | 0             | 0.00        |               |                |              |
| 5                                            | 18-19     | Ecig          | 712   | 20.09 |               |             |               |                |              |
| 5                                            | 18-19     | Dual          | 0     | 0.00  |               |             |               |                |              |
| 5                                            | 18-19     | Former        | 109   | 3.08  |               |             | 1.07          | 76             | 69.72        |
| Year of Follow-up: 1995, Age Group: 20-24    |           |               |       |       |               |             |               |                |              |
| Period                                       | Age Group | Smoking Group | N     | %     | Ever Quit (N) | Ever Quit % | Mean Yrs Quit | Short Term (n) | Short Term % |
| 5                                            | 20-24     | Never Any     | 5787  | 64.02 |               |             |               |                |              |
| 5                                            | 20-24     | CC            | 703   | 7.78  | 0             | 0.00        |               |                |              |
| 5                                            | 20-24     | Ecig          | 2057  | 22.75 |               |             |               |                |              |
| 5                                            | 20-24     | Dual          | 0     | 0.00  |               |             |               |                |              |
| 5                                            | 20-24     | Former        | 493   | 5.45  |               |             | 2.89          | 128            | 25.96        |
| Year of Follow-up: 1995, Age Group: 25-29    |           |               |       |       |               |             |               |                |              |
| Period                                       | Age Group | Smoking Group | N     | %     | Ever Quit (N) | Ever Quit % | Mean Yrs Quit | Short Term (n) | Short Term % |
| 5                                            | 25-29     | Never Any     | 5471  | 55.74 |               |             |               |                |              |
| 5                                            | 25-29     | CC            | 896   | 9.13  | 0             | 0.00        |               |                |              |
| 5                                            | 25-29     | Ecig          | 2291  | 23.34 |               |             |               |                |              |
| 5                                            | 25-29     | Dual          | 0     | 0.00  |               |             |               |                |              |
| 5                                            | 25-29     | Former        | 1158  | 11.80 |               |             | 5.44          | 107            | 9.24         |
| Year of Follow-up: 1995, Age Group: 30-34    |           |               |       |       |               |             |               |                |              |
| Period                                       | Age Group | Smoking Group | N     | %     | Ever Quit (N) | Ever Quit % | Mean Yrs Quit | Short Term (n) | Short Term % |

**Results for PHIM for Run 3 (Sensitivity\_Analysis\_2.RTF)**

|                                              |           |               |      |       |               |             |               |                |              |
|----------------------------------------------|-----------|---------------|------|-------|---------------|-------------|---------------|----------------|--------------|
| 5                                            | 30-34     | Never Any     | 5065 | 47.50 |               |             |               |                |              |
| 5                                            | 30-34     | CC            | 1034 | 9.70  | 0             | 0.00        |               |                |              |
| 5                                            | 30-34     | Ecig          | 2756 | 25.84 |               |             |               |                |              |
| 5                                            | 30-34     | Dual          | 0    | 0.00  |               |             |               |                |              |
| 5                                            | 30-34     | Former        | 1809 | 16.96 |               |             | 6.91          | 117            | 6.47         |
| Year of Follow-up: 1995, Age Group: 35-39    |           |               |      |       |               |             |               |                |              |
| Period                                       | Age Group | Smoking Group | N    | %     | Ever Quit (N) | Ever Quit % | Mean Yrs Quit | Short Term (n) | Short Term % |
| 5                                            | 35-39     | Never Any     | 4724 | 43.28 |               |             |               |                |              |
| 5                                            | 35-39     | CC            | 1034 | 9.47  | 0             | 0.00        |               |                |              |
| 5                                            | 35-39     | Ecig          | 2756 | 25.25 |               |             |               |                |              |
| 5                                            | 35-39     | Dual          | 0    | 0.00  |               |             |               |                |              |
| 5                                            | 35-39     | Former        | 2402 | 22.00 |               |             | 8.24          | 118            | 4.91         |
| Year of Follow-up: 1995, Age Group: 40-44    |           |               |      |       |               |             |               |                |              |
| Period                                       | Age Group | Smoking Group | N    | %     | Ever Quit (N) | Ever Quit % | Mean Yrs Quit | Short Term (n) | Short Term % |
| 5                                            | 40-44     | Never Any     | 3941 | 39.85 |               |             |               |                |              |
| 5                                            | 40-44     | CC            | 908  | 9.18  | 0             | 0.00        |               |                |              |
| 5                                            | 40-44     | Ecig          | 2289 | 23.15 |               |             |               |                |              |
| 5                                            | 40-44     | Dual          | 0    | 0.00  |               |             |               |                |              |
| 5                                            | 40-44     | Former        | 2751 | 27.82 |               |             | 12.13         | 136            | 4.94         |
| Year of Follow-up: 1995, Age Group: 45-49    |           |               |      |       |               |             |               |                |              |
| Period                                       | Age Group | Smoking Group | N    | %     | Ever Quit (N) | Ever Quit % | Mean Yrs Quit | Short Term (n) | Short Term % |
| 5                                            | 45-49     | Never Any     | 2912 | 33.65 |               |             |               |                |              |
| 5                                            | 45-49     | CC            | 875  | 10.11 | 0             | 0.00        |               |                |              |
| 5                                            | 45-49     | Ecig          | 1896 | 21.91 |               |             |               |                |              |
| 5                                            | 45-49     | Dual          | 0    | 0.00  |               |             |               |                |              |
| 5                                            | 45-49     | Former        | 2972 | 34.34 |               |             | 14.09         | 161            | 5.42         |
| Year of Follow-up: 1995, Age Group: 50-54    |           |               |      |       |               |             |               |                |              |
| Period                                       | Age Group | Smoking Group | N    | %     | Ever Quit (N) | Ever Quit % | Mean Yrs Quit | Short Term (n) | Short Term % |
| 5                                            | 50-54     | Never Any     | 1919 | 29.46 |               |             |               |                |              |
| 5                                            | 50-54     | CC            | 673  | 10.33 | 0             | 0.00        |               |                |              |
| 5                                            | 50-54     | Ecig          | 1322 | 20.29 |               |             |               |                |              |
| 5                                            | 50-54     | Dual          | 0    | 0.00  |               |             |               |                |              |
| 5                                            | 50-54     | Former        | 2601 | 39.92 |               |             | 16.19         | 166            | 6.38         |
| Year of Follow-up: 1995, Age Group: 55-59    |           |               |      |       |               |             |               |                |              |
| Period                                       | Age Group | Smoking Group | N    | %     | Ever Quit (N) | Ever Quit % | Mean Yrs Quit | Short Term (n) | Short Term % |
| 5                                            | 55-59     | Never Any     | 1611 | 29.41 |               |             |               |                |              |
| 5                                            | 55-59     | CC            | 517  | 9.44  | 0             | 0.00        |               |                |              |
| 5                                            | 55-59     | Ecig          | 990  | 18.08 |               |             |               |                |              |
| 5                                            | 55-59     | Dual          | 0    | 0.00  |               |             |               |                |              |
| 5                                            | 55-59     | Former        | 2359 | 43.07 |               |             | 17.24         | 119            | 5.04         |
| Year of Follow-up: 1995, Age Group: 60-64    |           |               |      |       |               |             |               |                |              |
| Period                                       | Age Group | Smoking Group | N    | %     | Ever Quit (N) | Ever Quit % | Mean Yrs Quit | Short Term (n) | Short Term % |
| 5                                            | 60-64     | Never Any     | 1337 | 26.83 |               |             |               |                |              |
| 5                                            | 60-64     | CC            | 420  | 8.43  | 0             | 0.00        |               |                |              |
| 5                                            | 60-64     | Ecig          | 782  | 15.69 |               |             |               |                |              |
| 5                                            | 60-64     | Dual          | 0    | 0.00  |               |             |               |                |              |
| 5                                            | 60-64     | Former        | 2444 | 49.05 |               |             | 17.48         | 132            | 5.40         |
| Year of Follow-up: 1995, Age Group: 65-69    |           |               |      |       |               |             |               |                |              |
| Period                                       | Age Group | Smoking Group | N    | %     | Ever Quit (N) | Ever Quit % | Mean Yrs Quit | Short Term (n) | Short Term % |
| 5                                            | 65-69     | Never Any     | 1169 | 23.83 |               |             |               |                |              |
| 5                                            | 65-69     | CC            | 330  | 6.73  | 0             | 0.00        |               |                |              |
| 5                                            | 65-69     | Ecig          | 528  | 10.76 |               |             |               |                |              |
| 5                                            | 65-69     | Dual          | 0    | 0.00  |               |             |               |                |              |
| 5                                            | 65-69     | Former        | 2878 | 58.67 |               |             | 20.56         | 207            | 7.19         |
| Year of Follow-up: 1995, Age Group: 70-74    |           |               |      |       |               |             |               |                |              |
| Period                                       | Age Group | Smoking Group | N    | %     | Ever Quit (N) | Ever Quit % | Mean Yrs Quit | Short Term (n) | Short Term % |
| 5                                            | 70-74     | Never Any     | 1023 | 23.32 |               |             |               |                |              |
| 5                                            | 70-74     | CC            | 287  | 6.54  | 0             | 0.00        |               |                |              |
| 5                                            | 70-74     | Ecig          | 321  | 7.32  |               |             |               |                |              |
| 5                                            | 70-74     | Dual          | 0    | 0.00  |               |             |               |                |              |
| 5                                            | 70-74     | Former        | 2756 | 62.82 |               |             | 21.81         | 140            | 5.08         |
| Year of Follow-up: 1995, Age Group: 75-79    |           |               |      |       |               |             |               |                |              |
| Period                                       | Age Group | Smoking Group | N    | %     | Ever Quit (N) | Ever Quit % | Mean Yrs Quit | Short Term (n) | Short Term % |
| 5                                            | 75-79     | Never Any     | 961  | 27.46 |               |             |               |                |              |
| 5                                            | 75-79     | CC            | 214  | 6.12  | 0             | 0.00        |               |                |              |
| 5                                            | 75-79     | Ecig          | 240  | 6.86  |               |             |               |                |              |
| 5                                            | 75-79     | Dual          | 0    | 0.00  |               |             |               |                |              |
| 5                                            | 75-79     | Former        | 2084 | 59.56 |               |             | 23.18         | 85             | 4.08         |
| Year of Follow-up: 2000, Age Group: All Ages |           |               |      |       |               |             |               |                |              |

**Results for PHIM for Run 3 (Sensitivity\_Analysis\_2.RTF)**

| Period                                    | Age Group | Smoking Group | N     | %     | Ever Quit (N) | Ever Quit % | Mean Yrs Quit | Short Term (n) | Short Term % |
|-------------------------------------------|-----------|---------------|-------|-------|---------------|-------------|---------------|----------------|--------------|
| 10                                        | All Ages  | Never Any     | 39177 | 41.64 |               |             |               |                |              |
| 10                                        | All Ages  | CC            | 2490  | 2.65  | 0             | 0.00        |               |                |              |
| 10                                        | All Ages  | Ecig          | 23115 | 24.57 |               |             |               |                |              |
| 10                                        | All Ages  | Dual          | 0     | 0.00  |               |             |               |                |              |
| 10                                        | All Ages  | Former        | 29310 | 31.15 |               |             | 16.85         | 1714           | 5.85         |
| Year of Follow-up: 2000, Age Group: 18-19 |           |               |       |       |               |             |               |                |              |
| Period                                    | Age Group | Smoking Group | N     | %     | Ever Quit (N) | Ever Quit % | Mean Yrs Quit | Short Term (n) | Short Term % |
| 10                                        | 18-19     | Never Any     | 0     | .     |               |             |               |                |              |
| 10                                        | 18-19     | CC            | 0     | .     | 0             | .           |               |                |              |
| 10                                        | 18-19     | Ecig          | 0     | .     |               |             |               |                |              |
| 10                                        | 18-19     | Dual          | 0     | .     |               |             |               |                |              |
| 10                                        | 18-19     | Former        | 0     | .     |               |             |               | 0              | .            |
| Year of Follow-up: 2000, Age Group: 20-24 |           |               |       |       |               |             |               |                |              |
| Period                                    | Age Group | Smoking Group | N     | %     | Ever Quit (N) | Ever Quit % | Mean Yrs Quit | Short Term (n) | Short Term % |
| 10                                        | 20-24     | Never Any     | 4927  | 55.70 |               |             |               |                |              |
| 10                                        | 20-24     | CC            | 301   | 3.40  | 0             | 0.00        |               |                |              |
| 10                                        | 20-24     | Ecig          | 2693  | 30.45 |               |             |               |                |              |
| 10                                        | 20-24     | Dual          | 0     | 0.00  |               |             |               |                |              |
| 10                                        | 20-24     | Former        | 924   | 10.45 |               |             | 3.38          | 254            | 27.49        |
| Year of Follow-up: 2000, Age Group: 25-29 |           |               |       |       |               |             |               |                |              |
| Period                                    | Age Group | Smoking Group | N     | %     | Ever Quit (N) | Ever Quit % | Mean Yrs Quit | Short Term (n) | Short Term % |
| 10                                        | 25-29     | Never Any     | 5341  | 59.08 |               |             |               |                |              |
| 10                                        | 25-29     | CC            | 248   | 2.74  | 0             | 0.00        |               |                |              |
| 10                                        | 25-29     | Ecig          | 2526  | 27.94 |               |             |               |                |              |
| 10                                        | 25-29     | Dual          | 0     | 0.00  |               |             |               |                |              |
| 10                                        | 25-29     | Former        | 925   | 10.23 |               |             | 5.08          | 180            | 19.46        |
| Year of Follow-up: 2000, Age Group: 30-34 |           |               |       |       |               |             |               |                |              |
| Period                                    | Age Group | Smoking Group | N     | %     | Ever Quit (N) | Ever Quit % | Mean Yrs Quit | Short Term (n) | Short Term % |
| 10                                        | 30-34     | Never Any     | 5276  | 53.75 |               |             |               |                |              |
| 10                                        | 30-34     | CC            | 247   | 2.52  | 0             | 0.00        |               |                |              |
| 10                                        | 30-34     | Ecig          | 2841  | 28.94 |               |             |               |                |              |
| 10                                        | 30-34     | Dual          | 0     | 0.00  |               |             |               |                |              |
| 10                                        | 30-34     | Former        | 1452  | 14.79 |               |             | 8.73          | 106            | 7.30         |
| Year of Follow-up: 2000, Age Group: 35-39 |           |               |       |       |               |             |               |                |              |
| Period                                    | Age Group | Smoking Group | N     | %     | Ever Quit (N) | Ever Quit % | Mean Yrs Quit | Short Term (n) | Short Term % |
| 10                                        | 35-39     | Never Any     | 4997  | 46.86 |               |             |               |                |              |
| 10                                        | 35-39     | CC            | 299   | 2.80  | 0             | 0.00        |               |                |              |
| 10                                        | 35-39     | Ecig          | 3283  | 30.79 |               |             |               |                |              |
| 10                                        | 35-39     | Dual          | 0     | 0.00  |               |             |               |                |              |
| 10                                        | 35-39     | Former        | 2085  | 19.55 |               |             | 10.59         | 113            | 5.42         |
| Year of Follow-up: 2000, Age Group: 40-44 |           |               |       |       |               |             |               |                |              |
| Period                                    | Age Group | Smoking Group | N     | %     | Ever Quit (N) | Ever Quit % | Mean Yrs Quit | Short Term (n) | Short Term % |
| 10                                        | 40-44     | Never Any     | 4724  | 43.28 |               |             |               |                |              |
| 10                                        | 40-44     | CC            | 284   | 2.60  | 0             | 0.00        |               |                |              |
| 10                                        | 40-44     | Ecig          | 3174  | 29.08 |               |             |               |                |              |
| 10                                        | 40-44     | Dual          | 0     | 0.00  |               |             |               |                |              |
| 10                                        | 40-44     | Former        | 2734  | 25.05 |               |             | 11.88         | 136            | 4.97         |
| Year of Follow-up: 2000, Age Group: 45-49 |           |               |       |       |               |             |               |                |              |
| Period                                    | Age Group | Smoking Group | N     | %     | Ever Quit (N) | Ever Quit % | Mean Yrs Quit | Short Term (n) | Short Term % |
| 10                                        | 45-49     | Never Any     | 3941  | 39.85 |               |             |               |                |              |
| 10                                        | 45-49     | CC            | 232   | 2.35  | 0             | 0.00        |               |                |              |
| 10                                        | 45-49     | Ecig          | 2583  | 26.12 |               |             |               |                |              |
| 10                                        | 45-49     | Dual          | 0     | 0.00  |               |             |               |                |              |
| 10                                        | 45-49     | Former        | 3133  | 31.68 |               |             | 15.28         | 161            | 5.14         |
| Year of Follow-up: 2000, Age Group: 50-54 |           |               |       |       |               |             |               |                |              |
| Period                                    | Age Group | Smoking Group | N     | %     | Ever Quit (N) | Ever Quit % | Mean Yrs Quit | Short Term (n) | Short Term % |
| 10                                        | 50-54     | Never Any     | 2912  | 33.65 |               |             |               |                |              |
| 10                                        | 50-54     | CC            | 226   | 2.61  | 0             | 0.00        |               |                |              |
| 10                                        | 50-54     | Ecig          | 2049  | 23.67 |               |             |               |                |              |
| 10                                        | 50-54     | Dual          | 0     | 0.00  |               |             |               |                |              |
| 10                                        | 50-54     | Former        | 3468  | 40.07 |               |             | 16.64         | 201            | 5.80         |
| Year of Follow-up: 2000, Age Group: 55-59 |           |               |       |       |               |             |               |                |              |
| Period                                    | Age Group | Smoking Group | N     | %     | Ever Quit (N) | Ever Quit % | Mean Yrs Quit | Short Term (n) | Short Term % |
| 10                                        | 55-59     | Never Any     | 1919  | 29.46 |               |             |               |                |              |
| 10                                        | 55-59     | CC            | 180   | 2.76  | 0             | 0.00        |               |                |              |
| 10                                        | 55-59     | Ecig          | 1429  | 21.93 |               |             |               |                |              |
| 10                                        | 55-59     | Dual          | 0     | 0.00  |               |             |               |                |              |



**Results for PHIM for Run 3 (Sensitivity\_Analysis\_2.RTF)**

| Year of Follow-up: 2000, Age Group: 60-64    | Period   | Age Group | Smoking Group | N     | %     | Ever Quit (N) | Ever Quit % | Mean Yrs Quit | Short Term (n) | Short Term % |
|----------------------------------------------|----------|-----------|---------------|-------|-------|---------------|-------------|---------------|----------------|--------------|
| 10                                           | 55-59    | Former    |               | 2987  | 45.85 |               |             | 18.71         | 146            | 4.89         |
| 10                                           | 60-64    | Never Any |               | 1611  | 29.41 |               |             |               |                |              |
| 10                                           | 60-64    | CC        |               | 143   | 2.61  | 0             | 0.00        |               |                |              |
| 10                                           | 60-64    | Ecig      |               | 1017  | 18.57 |               |             |               |                |              |
| 10                                           | 60-64    | Dual      |               | 0     | 0.00  |               |             |               |                |              |
| 10                                           | 60-64    | Former    |               | 2706  | 49.41 |               |             | 19.65         | 138            | 5.10         |
| Year of Follow-up: 2000, Age Group: 65-69    | Period   | Age Group | Smoking Group | N     | %     | Ever Quit (N) | Ever Quit % | Mean Yrs Quit | Short Term (n) | Short Term % |
| 10                                           | 65-69    | Never Any |               | 1337  | 26.83 |               |             |               |                |              |
| 10                                           | 65-69    | CC        |               | 113   | 2.27  | 0             | 0.00        |               |                |              |
| 10                                           | 65-69    | Ecig      |               | 753   | 15.11 |               |             |               |                |              |
| 10                                           | 65-69    | Dual      |               | 0     | 0.00  |               |             |               |                |              |
| 10                                           | 65-69    | Former    |               | 2780  | 55.79 |               |             | 20.01         | 129            | 4.64         |
| Year of Follow-up: 2000, Age Group: 70-74    | Period   | Age Group | Smoking Group | N     | %     | Ever Quit (N) | Ever Quit % | Mean Yrs Quit | Short Term (n) | Short Term % |
| 10                                           | 70-74    | Never Any |               | 1169  | 23.83 |               |             |               |                |              |
| 10                                           | 70-74    | CC        |               | 122   | 2.49  | 0             | 0.00        |               |                |              |
| 10                                           | 70-74    | Ecig      |               | 452   | 9.22  |               |             |               |                |              |
| 10                                           | 70-74    | Dual      |               | 0     | 0.00  |               |             |               |                |              |
| 10                                           | 70-74    | Former    |               | 3162  | 64.46 |               |             | 23.47         | 85             | 2.69         |
| Year of Follow-up: 2000, Age Group: 75-79    | Period   | Age Group | Smoking Group | N     | %     | Ever Quit (N) | Ever Quit % | Mean Yrs Quit | Short Term (n) | Short Term % |
| 10                                           | 75-79    | Never Any |               | 1023  | 23.32 |               |             |               |                |              |
| 10                                           | 75-79    | CC        |               | 95    | 2.17  | 0             | 0.00        |               |                |              |
| 10                                           | 75-79    | Ecig      |               | 315   | 7.18  |               |             |               |                |              |
| 10                                           | 75-79    | Dual      |               | 0     | 0.00  |               |             |               |                |              |
| 10                                           | 75-79    | Former    |               | 2954  | 67.34 |               |             | 25.17         | 65             | 2.20         |
| Year of Follow-up: 2005, Age Group: All Ages | Period   | Age Group | Smoking Group | N     | %     | Ever Quit (N) | Ever Quit % | Mean Yrs Quit | Short Term (n) | Short Term % |
| 15                                           | All Ages | Never Any |               | 37449 | 41.75 |               |             |               |                |              |
| 15                                           | All Ages | CC        |               | 688   | 0.77  | 0             | 0.00        |               |                |              |
| 15                                           | All Ages | Ecig      |               | 21311 | 23.76 |               |             |               |                |              |
| 15                                           | All Ages | Dual      |               | 0     | 0.00  |               |             |               |                |              |
| 15                                           | All Ages | Former    |               | 30257 | 33.73 |               |             | 18.48         | 1558           | 5.15         |
| Year of Follow-up: 2005, Age Group: 18-19    | Period   | Age Group | Smoking Group | N     | %     | Ever Quit (N) | Ever Quit % | Mean Yrs Quit | Short Term (n) | Short Term % |
| 15                                           | 18-19    | Never Any |               | 0     | .     |               |             |               |                |              |
| 15                                           | 18-19    | CC        |               | 0     | .     | 0             | .           |               |                |              |
| 15                                           | 18-19    | Ecig      |               | 0     | .     |               |             |               |                |              |
| 15                                           | 18-19    | Dual      |               | 0     | .     |               |             |               |                |              |
| 15                                           | 18-19    | Former    |               | 0     | .     |               |             | .             | 0              | .            |
| Year of Follow-up: 2005, Age Group: 20-24    | Period   | Age Group | Smoking Group | N     | %     | Ever Quit (N) | Ever Quit % | Mean Yrs Quit | Short Term (n) | Short Term % |
| 15                                           | 20-24    | Never Any |               | 0     | .     |               |             |               |                |              |
| 15                                           | 20-24    | CC        |               | 0     | .     | 0             | .           |               |                |              |
| 15                                           | 20-24    | Ecig      |               | 0     | .     |               |             |               |                |              |
| 15                                           | 20-24    | Dual      |               | 0     | .     |               |             |               |                |              |
| 15                                           | 20-24    | Former    |               | 0     | .     |               |             | .             | 0              | .            |
| Year of Follow-up: 2005, Age Group: 25-29    | Period   | Age Group | Smoking Group | N     | %     | Ever Quit (N) | Ever Quit % | Mean Yrs Quit | Short Term (n) | Short Term % |
| 15                                           | 25-29    | Never Any |               | 4634  | 52.39 |               |             |               |                |              |
| 15                                           | 25-29    | CC        |               | 81    | 0.92  | 0             | 0.00        |               |                |              |
| 15                                           | 25-29    | Ecig      |               | 2755  | 31.15 |               |             |               |                |              |
| 15                                           | 25-29    | Dual      |               | 0     | 0.00  |               |             |               |                |              |
| 15                                           | 25-29    | Former    |               | 1375  | 15.55 |               |             | 6.33          | 174            | 12.65        |
| Year of Follow-up: 2005, Age Group: 30-34    | Period   | Age Group | Smoking Group | N     | %     | Ever Quit (N) | Ever Quit % | Mean Yrs Quit | Short Term (n) | Short Term % |
| 15                                           | 30-34    | Never Any |               | 5042  | 55.77 |               |             |               |                |              |
| 15                                           | 30-34    | CC        |               | 63    | 0.70  | 0             | 0.00        |               |                |              |
| 15                                           | 30-34    | Ecig      |               | 2575  | 28.48 |               |             |               |                |              |
| 15                                           | 30-34    | Dual      |               | 0     | 0.00  |               |             |               |                |              |
| 15                                           | 30-34    | Former    |               | 1360  | 15.04 |               |             | 7.48          | 165            | 12.13        |
| Year of Follow-up: 2005, Age Group: 35-39    | Period   | Age Group | Smoking Group | N     | %     | Ever Quit (N) | Ever Quit % | Mean Yrs Quit | Short Term (n) | Short Term % |
| 15                                           | 35-39    | Never Any |               | 5163  | 52.60 |               |             |               |                |              |
| 15                                           | 35-39    | CC        |               | 65    | 0.66  | 0             | 0.00        |               |                |              |

**Results for PHIM for Run 3 (Sensitivity\_Analysis\_2.RTF)**

|                                              |           |               |       |       |               |             |               |                |              |
|----------------------------------------------|-----------|---------------|-------|-------|---------------|-------------|---------------|----------------|--------------|
| 15                                           | 35-39     | Ecig          | 2783  | 28.35 |               |             |               |                |              |
| 15                                           | 35-39     | Dual          | 0     | 0.00  |               |             |               |                |              |
| 15                                           | 35-39     | Former        | 1805  | 18.39 |               |             | 11.42         | 143            | 7.92         |
| Year of Follow-up: 2005, Age Group: 40-44    |           |               |       |       |               |             |               |                |              |
| Period                                       | Age Group | Smoking Group | N     | %     | Ever Quit (N) | Ever Quit % | Mean Yrs Quit | Short Term (n) | Short Term % |
| 15                                           | 40-44     | Never Any     | 4997  | 46.86 |               |             |               |                |              |
| 15                                           | 40-44     | CC            | 87    | 0.82  | 0             | 0.00        |               |                |              |
| 15                                           | 40-44     | Ecig          | 3070  | 28.79 |               |             |               |                |              |
| 15                                           | 40-44     | Dual          | 0     | 0.00  |               |             |               |                |              |
| 15                                           | 40-44     | Former        | 2510  | 23.54 |               |             | 13.25         | 205            | 8.17         |
| Year of Follow-up: 2005, Age Group: 45-49    |           |               |       |       |               |             |               |                |              |
| Period                                       | Age Group | Smoking Group | N     | %     | Ever Quit (N) | Ever Quit % | Mean Yrs Quit | Short Term (n) | Short Term % |
| 15                                           | 45-49     | Never Any     | 4724  | 43.28 |               |             |               |                |              |
| 15                                           | 45-49     | CC            | 83    | 0.76  | 0             | 0.00        |               |                |              |
| 15                                           | 45-49     | Ecig          | 2966  | 27.17 |               |             |               |                |              |
| 15                                           | 45-49     | Dual          | 0     | 0.00  |               |             |               |                |              |
| 15                                           | 45-49     | Former        | 3143  | 28.79 |               |             | 14.93         | 161            | 5.12         |
| Year of Follow-up: 2005, Age Group: 50-54    |           |               |       |       |               |             |               |                |              |
| Period                                       | Age Group | Smoking Group | N     | %     | Ever Quit (N) | Ever Quit % | Mean Yrs Quit | Short Term (n) | Short Term % |
| 15                                           | 50-54     | Never Any     | 3941  | 39.85 |               |             |               |                |              |
| 15                                           | 50-54     | CC            | 63    | 0.64  | 0             | 0.00        |               |                |              |
| 15                                           | 50-54     | Ecig          | 2349  | 23.75 |               |             |               |                |              |
| 15                                           | 50-54     | Dual          | 0     | 0.00  |               |             |               |                |              |
| 15                                           | 50-54     | Former        | 3536  | 35.76 |               |             | 18.22         | 144            | 4.07         |
| Year of Follow-up: 2005, Age Group: 55-59    |           |               |       |       |               |             |               |                |              |
| Period                                       | Age Group | Smoking Group | N     | %     | Ever Quit (N) | Ever Quit % | Mean Yrs Quit | Short Term (n) | Short Term % |
| 15                                           | 55-59     | Never Any     | 2912  | 33.65 |               |             |               |                |              |
| 15                                           | 55-59     | CC            | 77    | 0.89  | 0             | 0.00        |               |                |              |
| 15                                           | 55-59     | Ecig          | 1889  | 21.83 |               |             |               |                |              |
| 15                                           | 55-59     | Dual          | 0     | 0.00  |               |             |               |                |              |
| 15                                           | 55-59     | Former        | 3777  | 43.64 |               |             | 20.05         | 106            | 2.81         |
| Year of Follow-up: 2005, Age Group: 60-64    |           |               |       |       |               |             |               |                |              |
| Period                                       | Age Group | Smoking Group | N     | %     | Ever Quit (N) | Ever Quit % | Mean Yrs Quit | Short Term (n) | Short Term % |
| 15                                           | 60-64     | Never Any     | 1919  | 29.46 |               |             |               |                |              |
| 15                                           | 60-64     | CC            | 43    | 0.66  | 0             | 0.00        |               |                |              |
| 15                                           | 60-64     | Ecig          | 1243  | 19.08 |               |             |               |                |              |
| 15                                           | 60-64     | Dual          | 0     | 0.00  |               |             |               |                |              |
| 15                                           | 60-64     | Former        | 3310  | 50.81 |               |             | 21.58         | 162            | 4.89         |
| Year of Follow-up: 2005, Age Group: 65-69    |           |               |       |       |               |             |               |                |              |
| Period                                       | Age Group | Smoking Group | N     | %     | Ever Quit (N) | Ever Quit % | Mean Yrs Quit | Short Term (n) | Short Term % |
| 15                                           | 65-69     | Never Any     | 1611  | 29.41 |               |             |               |                |              |
| 15                                           | 65-69     | CC            | 32    | 0.58  | 0             | 0.00        |               |                |              |
| 15                                           | 65-69     | Ecig          | 805   | 14.70 |               |             |               |                |              |
| 15                                           | 65-69     | Dual          | 0     | 0.00  |               |             |               |                |              |
| 15                                           | 65-69     | Former        | 3029  | 55.30 |               |             | 22.26         | 109            | 3.60         |
| Year of Follow-up: 2005, Age Group: 70-74    |           |               |       |       |               |             |               |                |              |
| Period                                       | Age Group | Smoking Group | N     | %     | Ever Quit (N) | Ever Quit % | Mean Yrs Quit | Short Term (n) | Short Term % |
| 15                                           | 70-74     | Never Any     | 1337  | 26.83 |               |             |               |                |              |
| 15                                           | 70-74     | CC            | 44    | 0.88  | 0             | 0.00        |               |                |              |
| 15                                           | 70-74     | Ecig          | 547   | 10.98 |               |             |               |                |              |
| 15                                           | 70-74     | Dual          | 0     | 0.00  |               |             |               |                |              |
| 15                                           | 70-74     | Former        | 3055  | 61.31 |               |             | 22.94         | 113            | 3.70         |
| Year of Follow-up: 2005, Age Group: 75-79    |           |               |       |       |               |             |               |                |              |
| Period                                       | Age Group | Smoking Group | N     | %     | Ever Quit (N) | Ever Quit % | Mean Yrs Quit | Short Term (n) | Short Term % |
| 15                                           | 75-79     | Never Any     | 1169  | 23.83 |               |             |               |                |              |
| 15                                           | 75-79     | CC            | 50    | 1.02  | 0             | 0.00        |               |                |              |
| 15                                           | 75-79     | Ecig          | 329   | 6.71  |               |             |               |                |              |
| 15                                           | 75-79     | Dual          | 0     | 0.00  |               |             |               |                |              |
| 15                                           | 75-79     | Former        | 3357  | 68.44 |               |             | 26.94         | 76             | 2.26         |
| Year of Follow-up: 2010, Age Group: All Ages |           |               |       |       |               |             |               |                |              |
| Period                                       | Age Group | Smoking Group | N     | %     | Ever Quit (N) | Ever Quit % | Mean Yrs Quit | Short Term (n) | Short Term % |
| 20                                           | All Ages  | Never Any     | 36103 | 42.57 |               |             |               |                |              |
| 20                                           | All Ages  | CC            | 185   | 0.22  | 0             | 0.00        |               |                |              |
| 20                                           | All Ages  | Ecig          | 17672 | 20.84 |               |             |               |                |              |
| 20                                           | All Ages  | Dual          | 0     | 0.00  |               |             |               |                |              |
| 20                                           | All Ages  | Former        | 30840 | 36.37 |               |             | 19.82         | 1523           | 4.94         |
| Year of Follow-up: 2010, Age Group: 18-19    |           |               |       |       |               |             |               |                |              |
| Period                                       | Age Group | Smoking Group | N     | %     | Ever Quit (N) | Ever Quit % | Mean Yrs Quit | Short Term (n) | Short Term % |

**Results for PHIM for Run 3 (Sensitivity\_Analysis\_2.RTF)**

|                                           |           |               |      |       |               |             |               |                |              |
|-------------------------------------------|-----------|---------------|------|-------|---------------|-------------|---------------|----------------|--------------|
| 20                                        | 18-19     | Never Any     | 0    | .     |               |             |               |                |              |
| 20                                        | 18-19     | CC            | 0    | .     | 0             | .           |               |                |              |
| 20                                        | 18-19     | Ecig          | 0    | .     |               |             |               |                |              |
| 20                                        | 18-19     | Dual          | 0    | .     |               |             |               |                |              |
| 20                                        | 18-19     | Former        | 0    | .     |               |             | 0             | .              |              |
| Year of Follow-up: 2010, Age Group: 20-24 |           |               |      |       |               |             |               |                |              |
| Period                                    | Age Group | Smoking Group | N    | %     | Ever Quit (N) | Ever Quit % | Mean Yrs Quit | Short Term (n) | Short Term % |
| 20                                        | 20-24     | Never Any     | 0    | .     |               |             |               |                |              |
| 20                                        | 20-24     | CC            | 0    | .     | 0             | .           |               |                |              |
| 20                                        | 20-24     | Ecig          | 0    | .     |               |             |               |                |              |
| 20                                        | 20-24     | Dual          | 0    | .     |               |             |               |                |              |
| 20                                        | 20-24     | Former        | 0    | .     |               |             |               | 0              | .            |
| Year of Follow-up: 2010, Age Group: 25-29 |           |               |      |       |               |             |               |                |              |
| Period                                    | Age Group | Smoking Group | N    | %     | Ever Quit (N) | Ever Quit % | Mean Yrs Quit | Short Term (n) | Short Term % |
| 20                                        | 25-29     | Never Any     | 0    | .     |               |             |               |                |              |
| 20                                        | 25-29     | CC            | 0    | .     | 0             | .           |               |                |              |
| 20                                        | 25-29     | Ecig          | 0    | .     |               |             |               |                |              |
| 20                                        | 25-29     | Dual          | 0    | .     |               |             |               |                |              |
| 20                                        | 25-29     | Former        | 0    | .     |               |             |               | 0              | .            |
| Year of Follow-up: 2010, Age Group: 30-34 |           |               |      |       |               |             |               |                |              |
| Period                                    | Age Group | Smoking Group | N    | %     | Ever Quit (N) | Ever Quit % | Mean Yrs Quit | Short Term (n) | Short Term % |
| 20                                        | 30-34     | Never Any     | 4508 | 50.97 |               |             |               |                |              |
| 20                                        | 30-34     | CC            | 19   | 0.21  | 0             | 0.00        |               |                |              |
| 20                                        | 30-34     | Ecig          | 2418 | 27.34 |               |             |               |                |              |
| 20                                        | 30-34     | Dual          | 0    | 0.00  |               |             |               |                |              |
| 20                                        | 30-34     | Former        | 1900 | 21.48 |               |             | 8.72          | 231            | 12.16        |
| Year of Follow-up: 2010, Age Group: 35-39 |           |               |      |       |               |             |               |                |              |
| Period                                    | Age Group | Smoking Group | N    | %     | Ever Quit (N) | Ever Quit % | Mean Yrs Quit | Short Term (n) | Short Term % |
| 20                                        | 35-39     | Never Any     | 4991 | 55.21 |               |             |               |                |              |
| 20                                        | 35-39     | CC            | 14   | 0.15  | 0             | 0.00        |               |                |              |
| 20                                        | 35-39     | Ecig          | 2209 | 24.44 |               |             |               |                |              |
| 20                                        | 35-39     | Dual          | 0    | 0.00  |               |             |               |                |              |
| 20                                        | 35-39     | Former        | 1826 | 20.20 |               |             | 9.85          | 147            | 8.05         |
| Year of Follow-up: 2010, Age Group: 40-44 |           |               |      |       |               |             |               |                |              |
| Period                                    | Age Group | Smoking Group | N    | %     | Ever Quit (N) | Ever Quit % | Mean Yrs Quit | Short Term (n) | Short Term % |
| 20                                        | 40-44     | Never Any     | 5163 | 52.60 |               |             |               |                |              |
| 20                                        | 40-44     | CC            | 13   | 0.13  | 0             | 0.00        |               |                |              |
| 20                                        | 40-44     | Ecig          | 2480 | 25.26 |               |             |               |                |              |
| 20                                        | 40-44     | Dual          | 0    | 0.00  |               |             |               |                |              |
| 20                                        | 40-44     | Former        | 2160 | 22.00 |               |             | 14.05         | 141            | 6.53         |
| Year of Follow-up: 2010, Age Group: 45-49 |           |               |      |       |               |             |               |                |              |
| Period                                    | Age Group | Smoking Group | N    | %     | Ever Quit (N) | Ever Quit % | Mean Yrs Quit | Short Term (n) | Short Term % |
| 20                                        | 45-49     | Never Any     | 4997 | 46.86 |               |             |               |                |              |
| 20                                        | 45-49     | CC            | 22   | 0.21  | 0             | 0.00        |               |                |              |
| 20                                        | 45-49     | Ecig          | 2658 | 24.92 |               |             |               |                |              |
| 20                                        | 45-49     | Dual          | 0    | 0.00  |               |             |               |                |              |
| 20                                        | 45-49     | Former        | 2987 | 28.01 |               |             | 15.68         | 168            | 5.62         |
| Year of Follow-up: 2010, Age Group: 50-54 |           |               |      |       |               |             |               |                |              |
| Period                                    | Age Group | Smoking Group | N    | %     | Ever Quit (N) | Ever Quit % | Mean Yrs Quit | Short Term (n) | Short Term % |
| 20                                        | 50-54     | Never Any     | 4724 | 43.28 |               |             |               |                |              |
| 20                                        | 50-54     | CC            | 33   | 0.30  | 0             | 0.00        |               |                |              |
| 20                                        | 50-54     | Ecig          | 2589 | 23.72 |               |             |               |                |              |
| 20                                        | 50-54     | Dual          | 0    | 0.00  |               |             |               |                |              |
| 20                                        | 50-54     | Former        | 3570 | 32.70 |               |             | 17.79         | 169            | 4.73         |
| Year of Follow-up: 2010, Age Group: 55-59 |           |               |      |       |               |             |               |                |              |
| Period                                    | Age Group | Smoking Group | N    | %     | Ever Quit (N) | Ever Quit % | Mean Yrs Quit | Short Term (n) | Short Term % |
| 20                                        | 55-59     | Never Any     | 3941 | 39.85 |               |             |               |                |              |
| 20                                        | 55-59     | CC            | 23   | 0.23  | 0             | 0.00        |               |                |              |
| 20                                        | 55-59     | Ecig          | 1923 | 19.45 |               |             |               |                |              |
| 20                                        | 55-59     | Dual          | 0    | 0.00  |               |             |               |                |              |
| 20                                        | 55-59     | Former        | 4002 | 40.47 |               |             | 20.74         | 193            | 4.82         |
| Year of Follow-up: 2010, Age Group: 60-64 |           |               |      |       |               |             |               |                |              |
| Period                                    | Age Group | Smoking Group | N    | %     | Ever Quit (N) | Ever Quit % | Mean Yrs Quit | Short Term (n) | Short Term % |
| 20                                        | 60-64     | Never Any     | 2912 | 33.65 |               |             |               |                |              |
| 20                                        | 60-64     | CC            | 21   | 0.24  | 0             | 0.00        |               |                |              |
| 20                                        | 60-64     | Ecig          | 1461 | 16.88 |               |             |               |                |              |
| 20                                        | 60-64     | Dual          | 0    | 0.00  |               |             |               |                |              |
| 20                                        | 60-64     | Former        | 4261 | 49.23 |               |             | 22.39         | 239            | 5.61         |
| Year of Follow-up: 2010, Age Group: 65-69 |           |               |      |       |               |             |               |                |              |

**Results for PHIM for Run 3 (Sensitivity\_Analysis\_2.RTF)**

| Period                                       | Age Group | Smoking Group | N     | %     | Ever Quit (N) | Ever Quit % | Mean Yrs Quit | Short Term (n) | Short Term % |
|----------------------------------------------|-----------|---------------|-------|-------|---------------|-------------|---------------|----------------|--------------|
| 20                                           | 65-69     | Never Any     | 1919  | 29.46 |               |             |               |                |              |
| 20                                           | 65-69     | CC            | 13    | 0.20  | 0             | 0.00        |               |                |              |
| 20                                           | 65-69     | Ecig          | 896   | 13.75 |               |             |               |                |              |
| 20                                           | 65-69     | Dual          | 0     | 0.00  |               |             |               |                |              |
| 20                                           | 65-69     | Former        | 3687  | 56.59 |               |             | 24.09         | 125            | 3.39         |
| Year of Follow-up: 2010, Age Group: 70-74    |           |               |       |       |               |             |               |                |              |
| Period                                       | Age Group | Smoking Group | N     | %     | Ever Quit (N) | Ever Quit % | Mean Yrs Quit | Short Term (n) | Short Term % |
| 20                                           | 70-74     | Never Any     | 1611  | 29.41 |               |             |               |                |              |
| 20                                           | 70-74     | CC            | 14    | 0.26  | 0             | 0.00        |               |                |              |
| 20                                           | 70-74     | Ecig          | 625   | 11.41 |               |             |               |                |              |
| 20                                           | 70-74     | Dual          | 0     | 0.00  |               |             |               |                |              |
| 20                                           | 70-74     | Former        | 3227  | 58.92 |               |             | 25.73         | 62             | 1.92         |
| Year of Follow-up: 2010, Age Group: 75-79    |           |               |       |       |               |             |               |                |              |
| Period                                       | Age Group | Smoking Group | N     | %     | Ever Quit (N) | Ever Quit % | Mean Yrs Quit | Short Term (n) | Short Term % |
| 20                                           | 75-79     | Never Any     | 1337  | 26.83 |               |             |               |                |              |
| 20                                           | 75-79     | CC            | 13    | 0.26  | 0             | 0.00        |               |                |              |
| 20                                           | 75-79     | Ecig          | 413   | 8.29  |               |             |               |                |              |
| 20                                           | 75-79     | Dual          | 0     | 0.00  |               |             |               |                |              |
| 20                                           | 75-79     | Former        | 3220  | 64.62 |               |             | 26.63         | 48             | 1.49         |
| Year of Follow-up: 2015, Age Group: All Ages |           |               |       |       |               |             |               |                |              |
| Period                                       | Age Group | Smoking Group | N     | %     | Ever Quit (N) | Ever Quit % | Mean Yrs Quit | Short Term (n) | Short Term % |
| 25                                           | All Ages  | Never Any     | 34747 | 43.53 |               |             |               |                |              |
| 25                                           | All Ages  | CC            | 47    | 0.06  | 0             | 0.00        |               |                |              |
| 25                                           | All Ages  | Ecig          | 14397 | 18.04 |               |             |               |                |              |
| 25                                           | All Ages  | Dual          | 0     | 0.00  |               |             |               |                |              |
| 25                                           | All Ages  | Former        | 30626 | 38.37 |               |             | 21.88         | 1094           | 3.57         |
| Year of Follow-up: 2015, Age Group: 18-19    |           |               |       |       |               |             |               |                |              |
| Period                                       | Age Group | Smoking Group | N     | %     | Ever Quit (N) | Ever Quit % | Mean Yrs Quit | Short Term (n) | Short Term % |
| 25                                           | 18-19     | Never Any     | 0     | .     |               |             |               |                |              |
| 25                                           | 18-19     | CC            | 0     | .     | 0             | .           |               |                |              |
| 25                                           | 18-19     | Ecig          | 0     | .     |               |             |               |                |              |
| 25                                           | 18-19     | Dual          | 0     | .     |               |             |               |                |              |
| 25                                           | 18-19     | Former        | 0     | .     |               |             | .             | 0              | .            |
| Year of Follow-up: 2015, Age Group: 20-24    |           |               |       |       |               |             |               |                |              |
| Period                                       | Age Group | Smoking Group | N     | %     | Ever Quit (N) | Ever Quit % | Mean Yrs Quit | Short Term (n) | Short Term % |
| 25                                           | 20-24     | Never Any     | 0     | .     |               |             |               |                |              |
| 25                                           | 20-24     | CC            | 0     | .     | 0             | .           |               |                |              |
| 25                                           | 20-24     | Ecig          | 0     | .     |               |             |               |                |              |
| 25                                           | 20-24     | Dual          | 0     | .     |               |             |               |                |              |
| 25                                           | 20-24     | Former        | 0     | .     |               |             | .             | 0              | .            |
| Year of Follow-up: 2015, Age Group: 25-29    |           |               |       |       |               |             |               |                |              |
| Period                                       | Age Group | Smoking Group | N     | %     | Ever Quit (N) | Ever Quit % | Mean Yrs Quit | Short Term (n) | Short Term % |
| 25                                           | 25-29     | Never Any     | 0     | .     |               |             |               |                |              |
| 25                                           | 25-29     | CC            | 0     | .     | 0             | .           |               |                |              |
| 25                                           | 25-29     | Ecig          | 0     | .     |               |             |               |                |              |
| 25                                           | 25-29     | Dual          | 0     | .     |               |             |               |                |              |
| 25                                           | 25-29     | Former        | 0     | .     |               |             | .             | 0              | .            |
| Year of Follow-up: 2015, Age Group: 30-34    |           |               |       |       |               |             |               |                |              |
| Period                                       | Age Group | Smoking Group | N     | %     | Ever Quit (N) | Ever Quit % | Mean Yrs Quit | Short Term (n) | Short Term % |
| 25                                           | 30-34     | Never Any     | 0     | .     |               |             |               |                |              |
| 25                                           | 30-34     | CC            | 0     | .     | 0             | .           |               |                |              |
| 25                                           | 30-34     | Ecig          | 0     | .     |               |             |               |                |              |
| 25                                           | 30-34     | Dual          | 0     | .     |               |             |               |                |              |
| 25                                           | 30-34     | Former        | 0     | .     |               |             | .             | 0              | .            |
| Year of Follow-up: 2015, Age Group: 35-39    |           |               |       |       |               |             |               |                |              |
| Period                                       | Age Group | Smoking Group | N     | %     | Ever Quit (N) | Ever Quit % | Mean Yrs Quit | Short Term (n) | Short Term % |
| 25                                           | 35-39     | Never Any     | 4489  | 50.75 |               |             |               |                |              |
| 25                                           | 35-39     | CC            | 4     | 0.05  | 0             | 0.00        |               |                |              |
| 25                                           | 35-39     | Ecig          | 2011  | 22.74 |               |             |               |                |              |
| 25                                           | 35-39     | Dual          | 0     | 0.00  |               |             |               |                |              |
| 25                                           | 35-39     | Former        | 2341  | 26.47 |               |             | 11.57         | 141            | 6.02         |
| Year of Follow-up: 2015, Age Group: 40-44    |           |               |       |       |               |             |               |                |              |
| Period                                       | Age Group | Smoking Group | N     | %     | Ever Quit (N) | Ever Quit % | Mean Yrs Quit | Short Term (n) | Short Term % |
| 25                                           | 40-44     | Never Any     | 4991  | 55.21 |               |             |               |                |              |
| 25                                           | 40-44     | CC            | 3     | 0.03  | 0             | 0.00        |               |                |              |
| 25                                           | 40-44     | Ecig          | 1928  | 21.33 |               |             |               |                |              |
| 25                                           | 40-44     | Dual          | 0     | 0.00  |               |             |               |                |              |

**Results for PHIM for Run 3 (Sensitivity\_Analysis\_2.RTF)**

|                                              |           |               |       |       |               |             |               |                |              |
|----------------------------------------------|-----------|---------------|-------|-------|---------------|-------------|---------------|----------------|--------------|
| 25                                           | 40-44     | Former        | 2118  | 23.43 |               |             | 13.09         | 112            | 5.29         |
| Year of Follow-up: 2015, Age Group: 45-49    |           |               |       |       |               |             |               |                |              |
| Period                                       | Age Group | Smoking Group | N     | %     | Ever Quit (N) | Ever Quit % | Mean Yrs Quit | Short Term (n) | Short Term % |
| 25                                           | 45-49     | Never Any     | 5163  | 52.60 |               |             |               |                |              |
| 25                                           | 45-49     | CC            | 4     | 0.04  | 0             | 0.00        |               |                |              |
| 25                                           | 45-49     | Ecig          | 2238  | 22.80 |               |             |               |                |              |
| 25                                           | 45-49     | Dual          | 0     | 0.00  |               |             |               |                |              |
| 25                                           | 45-49     | Former        | 2411  | 24.56 |               |             | 17.30         | 79             | 3.28         |
| Year of Follow-up: 2015, Age Group: 50-54    |           |               |       |       |               |             |               |                |              |
| Period                                       | Age Group | Smoking Group | N     | %     | Ever Quit (N) | Ever Quit % | Mean Yrs Quit | Short Term (n) | Short Term % |
| 25                                           | 50-54     | Never Any     | 4997  | 46.86 |               |             |               |                |              |
| 25                                           | 50-54     | CC            | 3     | 0.03  | 0             | 0.00        |               |                |              |
| 25                                           | 50-54     | Ecig          | 2402  | 22.52 |               |             |               |                |              |
| 25                                           | 50-54     | Dual          | 0     | 0.00  |               |             |               |                |              |
| 25                                           | 50-54     | Former        | 3262  | 30.59 |               |             | 19.09         | 127            | 3.89         |
| Year of Follow-up: 2015, Age Group: 55-59    |           |               |       |       |               |             |               |                |              |
| Period                                       | Age Group | Smoking Group | N     | %     | Ever Quit (N) | Ever Quit % | Mean Yrs Quit | Short Term (n) | Short Term % |
| 25                                           | 55-59     | Never Any     | 4724  | 43.28 |               |             |               |                |              |
| 25                                           | 55-59     | CC            | 8     | 0.07  | 0             | 0.00        |               |                |              |
| 25                                           | 55-59     | Ecig          | 2156  | 19.75 |               |             |               |                |              |
| 25                                           | 55-59     | Dual          | 0     | 0.00  |               |             |               |                |              |
| 25                                           | 55-59     | Former        | 4028  | 36.90 |               |             | 20.45         | 167            | 4.15         |
| Year of Follow-up: 2015, Age Group: 60-64    |           |               |       |       |               |             |               |                |              |
| Period                                       | Age Group | Smoking Group | N     | %     | Ever Quit (N) | Ever Quit % | Mean Yrs Quit | Short Term (n) | Short Term % |
| 25                                           | 60-64     | Never Any     | 3941  | 39.85 |               |             |               |                |              |
| 25                                           | 60-64     | CC            | 8     | 0.08  | 0             | 0.00        |               |                |              |
| 25                                           | 60-64     | Ecig          | 1479  | 14.96 |               |             |               |                |              |
| 25                                           | 60-64     | Dual          | 0     | 0.00  |               |             |               |                |              |
| 25                                           | 60-64     | Former        | 4461  | 45.11 |               |             | 23.29         | 202            | 4.53         |
| Year of Follow-up: 2015, Age Group: 65-69    |           |               |       |       |               |             |               |                |              |
| Period                                       | Age Group | Smoking Group | N     | %     | Ever Quit (N) | Ever Quit % | Mean Yrs Quit | Short Term (n) | Short Term % |
| 25                                           | 65-69     | Never Any     | 2912  | 33.65 |               |             |               |                |              |
| 25                                           | 65-69     | CC            | 12    | 0.14  | 0             | 0.00        |               |                |              |
| 25                                           | 65-69     | Ecig          | 1009  | 11.66 |               |             |               |                |              |
| 25                                           | 65-69     | Dual          | 0     | 0.00  |               |             |               |                |              |
| 25                                           | 65-69     | Former        | 4722  | 54.56 |               |             | 24.94         | 143            | 3.03         |
| Year of Follow-up: 2015, Age Group: 70-74    |           |               |       |       |               |             |               |                |              |
| Period                                       | Age Group | Smoking Group | N     | %     | Ever Quit (N) | Ever Quit % | Mean Yrs Quit | Short Term (n) | Short Term % |
| 25                                           | 70-74     | Never Any     | 1919  | 29.46 |               |             |               |                |              |
| 25                                           | 70-74     | CC            | 4     | 0.06  | 0             | 0.00        |               |                |              |
| 25                                           | 70-74     | Ecig          | 678   | 10.41 |               |             |               |                |              |
| 25                                           | 70-74     | Dual          | 0     | 0.00  |               |             |               |                |              |
| 25                                           | 70-74     | Former        | 3914  | 60.08 |               |             | 27.53         | 78             | 1.99         |
| Year of Follow-up: 2015, Age Group: 75-79    |           |               |       |       |               |             |               |                |              |
| Period                                       | Age Group | Smoking Group | N     | %     | Ever Quit (N) | Ever Quit % | Mean Yrs Quit | Short Term (n) | Short Term % |
| 25                                           | 75-79     | Never Any     | 1611  | 29.41 |               |             |               |                |              |
| 25                                           | 75-79     | CC            | 1     | 0.02  | 0             | 0.00        |               |                |              |
| 25                                           | 75-79     | Ecig          | 496   | 9.06  |               |             |               |                |              |
| 25                                           | 75-79     | Dual          | 0     | 0.00  |               |             |               |                |              |
| 25                                           | 75-79     | Former        | 3369  | 61.51 |               |             | 29.52         | 45             | 1.34         |
| Year of Follow-up: 2020, Age Group: All Ages |           |               |       |       |               |             |               |                |              |
| Period                                       | Age Group | Smoking Group | N     | %     | Ever Quit (N) | Ever Quit % | Mean Yrs Quit | Short Term (n) | Short Term % |
| 30                                           | All Ages  | Never Any     | 33136 | 44.57 |               |             |               |                |              |
| 30                                           | All Ages  | CC            | 10    | 0.01  | 0             | 0.00        |               |                |              |
| 30                                           | All Ages  | Ecig          | 11435 | 15.38 |               |             |               |                |              |
| 30                                           | All Ages  | Dual          | 0     | 0.00  |               |             |               |                |              |
| 30                                           | All Ages  | Former        | 29759 | 40.03 |               |             | 23.93         | 960            | 3.23         |
| Year of Follow-up: 2020, Age Group: 18-19    |           |               |       |       |               |             |               |                |              |
| Period                                       | Age Group | Smoking Group | N     | %     | Ever Quit (N) | Ever Quit % | Mean Yrs Quit | Short Term (n) | Short Term % |
| 30                                           | 18-19     | Never Any     | 0     | .     |               |             |               |                |              |
| 30                                           | 18-19     | CC            | 0     | .     | 0             | .           |               |                |              |
| 30                                           | 18-19     | Ecig          | 0     | .     |               |             |               |                |              |
| 30                                           | 18-19     | Dual          | 0     | .     |               |             |               |                |              |
| 30                                           | 18-19     | Former        | 0     | .     |               |             | .             | 0              | .            |
| Year of Follow-up: 2020, Age Group: 20-24    |           |               |       |       |               |             |               |                |              |
| Period                                       | Age Group | Smoking Group | N     | %     | Ever Quit (N) | Ever Quit % | Mean Yrs Quit | Short Term (n) | Short Term % |
| 30                                           | 20-24     | Never Any     | 0     | .     |               |             |               |                |              |
| 30                                           | 20-24     | CC            | 0     | .     | 0             | .           |               |                |              |

**Results for PHIM for Run 3 (Sensitivity\_Analysis\_2.RTF)**

|                                           |           |               |      |       |               |             |               |                |              |
|-------------------------------------------|-----------|---------------|------|-------|---------------|-------------|---------------|----------------|--------------|
| 30                                        | 20-24     | Ecig          | 0    | .     |               |             |               |                |              |
| 30                                        | 20-24     | Dual          | 0    | .     |               |             |               |                |              |
| 30                                        | 20-24     | Former        | 0    | .     |               |             | 0             | .              |              |
| Year of Follow-up: 2020, Age Group: 25-29 |           |               |      |       |               |             |               |                |              |
| Period                                    | Age Group | Smoking Group | N    | %     | Ever Quit (N) | Ever Quit % | Mean Yrs Quit | Short Term (n) | Short Term % |
| 30                                        | 25-29     | Never Any     | 0    | .     |               |             |               |                |              |
| 30                                        | 25-29     | CC            | 0    | .     | 0             | .           |               |                |              |
| 30                                        | 25-29     | Ecig          | 0    | .     |               |             |               |                |              |
| 30                                        | 25-29     | Dual          | 0    | .     |               |             |               |                |              |
| 30                                        | 25-29     | Former        | 0    | .     |               |             |               | 0              | .            |
| Year of Follow-up: 2020, Age Group: 30-34 |           |               |      |       |               |             |               |                |              |
| Period                                    | Age Group | Smoking Group | N    | %     | Ever Quit (N) | Ever Quit % | Mean Yrs Quit | Short Term (n) | Short Term % |
| 30                                        | 30-34     | Never Any     | 0    | .     |               |             |               |                |              |
| 30                                        | 30-34     | CC            | 0    | .     | 0             | .           |               |                |              |
| 30                                        | 30-34     | Ecig          | 0    | .     |               |             |               |                |              |
| 30                                        | 30-34     | Dual          | 0    | .     |               |             |               |                |              |
| 30                                        | 30-34     | Former        | 0    | .     |               |             |               | 0              | .            |
| Year of Follow-up: 2020, Age Group: 35-39 |           |               |      |       |               |             |               |                |              |
| Period                                    | Age Group | Smoking Group | N    | %     | Ever Quit (N) | Ever Quit % | Mean Yrs Quit | Short Term (n) | Short Term % |
| 30                                        | 35-39     | Never Any     | 0    | .     |               |             |               |                |              |
| 30                                        | 35-39     | CC            | 0    | .     | 0             | .           |               |                |              |
| 30                                        | 35-39     | Ecig          | 0    | .     |               |             |               |                |              |
| 30                                        | 35-39     | Dual          | 0    | .     |               |             |               |                |              |
| 30                                        | 35-39     | Former        | 0    | .     |               |             |               | 0              | .            |
| Year of Follow-up: 2020, Age Group: 40-44 |           |               |      |       |               |             |               |                |              |
| Period                                    | Age Group | Smoking Group | N    | %     | Ever Quit (N) | Ever Quit % | Mean Yrs Quit | Short Term (n) | Short Term % |
| 30                                        | 40-44     | Never Any     | 4489 | 50.75 |               |             |               |                |              |
| 30                                        | 40-44     | CC            | 1    | 0.01  | 0             | 0.00        |               |                |              |
| 30                                        | 40-44     | Ecig          | 1742 | 19.69 |               |             |               |                |              |
| 30                                        | 40-44     | Dual          | 0    | 0.00  |               |             |               |                |              |
| 30                                        | 40-44     | Former        | 2613 | 29.54 |               |             | 15.05         | 111            | 4.25         |
| Year of Follow-up: 2020, Age Group: 45-49 |           |               |      |       |               |             |               |                |              |
| Period                                    | Age Group | Smoking Group | N    | %     | Ever Quit (N) | Ever Quit % | Mean Yrs Quit | Short Term (n) | Short Term % |
| 30                                        | 45-49     | Never Any     | 4991 | 55.21 |               |             |               |                |              |
| 30                                        | 45-49     | CC            | 0    | 0.00  | 0             | 0.00        |               |                |              |
| 30                                        | 45-49     | Ecig          | 1703 | 18.84 |               |             |               |                |              |
| 30                                        | 45-49     | Dual          | 0    | 0.00  |               |             |               |                |              |
| 30                                        | 45-49     | Former        | 2346 | 25.95 |               |             | 16.57         | 62             | 2.64         |
| Year of Follow-up: 2020, Age Group: 50-54 |           |               |      |       |               |             |               |                |              |
| Period                                    | Age Group | Smoking Group | N    | %     | Ever Quit (N) | Ever Quit % | Mean Yrs Quit | Short Term (n) | Short Term % |
| 30                                        | 50-54     | Never Any     | 5163 | 52.60 |               |             |               |                |              |
| 30                                        | 50-54     | CC            | 1    | 0.01  | 0             | 0.00        |               |                |              |
| 30                                        | 50-54     | Ecig          | 2041 | 20.79 |               |             |               |                |              |
| 30                                        | 50-54     | Dual          | 0    | 0.00  |               |             |               |                |              |
| 30                                        | 50-54     | Former        | 2611 | 26.60 |               |             | 20.72         | 104            | 3.98         |
| Year of Follow-up: 2020, Age Group: 55-59 |           |               |      |       |               |             |               |                |              |
| Period                                    | Age Group | Smoking Group | N    | %     | Ever Quit (N) | Ever Quit % | Mean Yrs Quit | Short Term (n) | Short Term % |
| 30                                        | 55-59     | Never Any     | 4997 | 46.86 |               |             |               |                |              |
| 30                                        | 55-59     | CC            | 0    | 0.00  | 0             | 0.00        |               |                |              |
| 30                                        | 55-59     | Ecig          | 1982 | 18.59 |               |             |               |                |              |
| 30                                        | 55-59     | Dual          | 0    | 0.00  |               |             |               |                |              |
| 30                                        | 55-59     | Former        | 3685 | 34.56 |               |             | 21.56         | 166            | 4.50         |
| Year of Follow-up: 2020, Age Group: 60-64 |           |               |      |       |               |             |               |                |              |
| Period                                    | Age Group | Smoking Group | N    | %     | Ever Quit (N) | Ever Quit % | Mean Yrs Quit | Short Term (n) | Short Term % |
| 30                                        | 60-64     | Never Any     | 4724 | 43.28 |               |             |               |                |              |
| 30                                        | 60-64     | CC            | 1    | 0.01  | 0             | 0.00        |               |                |              |
| 30                                        | 60-64     | Ecig          | 1642 | 15.04 |               |             |               |                |              |
| 30                                        | 60-64     | Dual          | 0    | 0.00  |               |             |               |                |              |
| 30                                        | 60-64     | Former        | 4549 | 41.67 |               |             | 22.75         | 219            | 4.81         |
| Year of Follow-up: 2020, Age Group: 65-69 |           |               |      |       |               |             |               |                |              |
| Period                                    | Age Group | Smoking Group | N    | %     | Ever Quit (N) | Ever Quit % | Mean Yrs Quit | Short Term (n) | Short Term % |
| 30                                        | 65-69     | Never Any     | 3941 | 39.85 |               |             |               |                |              |
| 30                                        | 65-69     | CC            | 2    | 0.02  | 0             | 0.00        |               |                |              |
| 30                                        | 65-69     | Ecig          | 1065 | 10.77 |               |             |               |                |              |
| 30                                        | 65-69     | Dual          | 0    | 0.00  |               |             |               |                |              |
| 30                                        | 65-69     | Former        | 4881 | 49.36 |               |             | 26.05         | 142            | 2.91         |
| Year of Follow-up: 2020, Age Group: 70-74 |           |               |      |       |               |             |               |                |              |
| Period                                    | Age Group | Smoking Group | N    | %     | Ever Quit (N) | Ever Quit % | Mean Yrs Quit | Short Term (n) | Short Term % |

**Results for PHIM for Run 3 (Sensitivity\_Analysis\_2.RTF)**

|                                              |           |               |       |       |               |             |               |                |              |
|----------------------------------------------|-----------|---------------|-------|-------|---------------|-------------|---------------|----------------|--------------|
| 30                                           | 70-74     | Never Any     | 2912  | 33.65 |               |             |               |                |              |
| 30                                           | 70-74     | CC            | 3     | 0.03  | 0             | 0.00        |               |                |              |
| 30                                           | 70-74     | Ecig          | 746   | 8.62  |               |             |               |                |              |
| 30                                           | 70-74     | Dual          | 0     | 0.00  |               |             |               |                |              |
| 30                                           | 70-74     | Former        | 4994  | 57.70 |               |             | 28.43         | 96             | 1.92         |
| Year of Follow-up: 2020, Age Group: 75-79    |           |               |       |       |               |             |               |                |              |
| Period                                       | Age Group | Smoking Group | N     | %     | Ever Quit (N) | Ever Quit % | Mean Yrs Quit | Short Term (n) | Short Term % |
| 30                                           | 75-79     | Never Any     | 1919  | 29.46 |               |             |               |                |              |
| 30                                           | 75-79     | CC            | 2     | 0.03  | 0             | 0.00        |               |                |              |
| 30                                           | 75-79     | Ecig          | 514   | 7.89  |               |             |               |                |              |
| 30                                           | 75-79     | Dual          | 0     | 0.00  |               |             |               |                |              |
| 30                                           | 75-79     | Former        | 4080  | 62.62 |               |             | 31.29         | 60             | 1.47         |
| Year of Follow-up: 2025, Age Group: All Ages |           |               |       |       |               |             |               |                |              |
| Period                                       | Age Group | Smoking Group | N     | %     | Ever Quit (N) | Ever Quit % | Mean Yrs Quit | Short Term (n) | Short Term % |
| 35                                           | All Ages  | Never Any     | 31217 | 46.03 |               |             |               |                |              |
| 35                                           | All Ages  | CC            | 2     | 0.00  | 0             | 0.00        |               |                |              |
| 35                                           | All Ages  | Ecig          | 8863  | 13.07 |               |             |               |                |              |
| 35                                           | All Ages  | Dual          | 0     | 0.00  |               |             |               |                |              |
| 35                                           | All Ages  | Former        | 27743 | 40.90 |               |             | 25.84         | 793            | 2.86         |
| Year of Follow-up: 2025, Age Group: 18-19    |           |               |       |       |               |             |               |                |              |
| Period                                       | Age Group | Smoking Group | N     | %     | Ever Quit (N) | Ever Quit % | Mean Yrs Quit | Short Term (n) | Short Term % |
| 35                                           | 18-19     | Never Any     | 0     | .     |               |             |               |                |              |
| 35                                           | 18-19     | CC            | 0     | .     | 0             | .           |               |                |              |
| 35                                           | 18-19     | Ecig          | 0     | .     |               |             |               |                |              |
| 35                                           | 18-19     | Dual          | 0     | .     |               |             |               |                |              |
| 35                                           | 18-19     | Former        | 0     | .     |               |             | .             | 0              | .            |
| Year of Follow-up: 2025, Age Group: 20-24    |           |               |       |       |               |             |               |                |              |
| Period                                       | Age Group | Smoking Group | N     | %     | Ever Quit (N) | Ever Quit % | Mean Yrs Quit | Short Term (n) | Short Term % |
| 35                                           | 20-24     | Never Any     | 0     | .     |               |             |               |                |              |
| 35                                           | 20-24     | CC            | 0     | .     | 0             | .           |               |                |              |
| 35                                           | 20-24     | Ecig          | 0     | .     |               |             |               |                |              |
| 35                                           | 20-24     | Dual          | 0     | .     |               |             |               |                |              |
| 35                                           | 20-24     | Former        | 0     | .     |               |             | .             | 0              | .            |
| Year of Follow-up: 2025, Age Group: 25-29    |           |               |       |       |               |             |               |                |              |
| Period                                       | Age Group | Smoking Group | N     | %     | Ever Quit (N) | Ever Quit % | Mean Yrs Quit | Short Term (n) | Short Term % |
| 35                                           | 25-29     | Never Any     | 0     | .     |               |             |               |                |              |
| 35                                           | 25-29     | CC            | 0     | .     | 0             | .           |               |                |              |
| 35                                           | 25-29     | Ecig          | 0     | .     |               |             |               |                |              |
| 35                                           | 25-29     | Dual          | 0     | .     |               |             |               |                |              |
| 35                                           | 25-29     | Former        | 0     | .     |               |             | .             | 0              | .            |
| Year of Follow-up: 2025, Age Group: 30-34    |           |               |       |       |               |             |               |                |              |
| Period                                       | Age Group | Smoking Group | N     | %     | Ever Quit (N) | Ever Quit % | Mean Yrs Quit | Short Term (n) | Short Term % |
| 35                                           | 30-34     | Never Any     | 0     | .     |               |             |               |                |              |
| 35                                           | 30-34     | CC            | 0     | .     | 0             | .           |               |                |              |
| 35                                           | 30-34     | Ecig          | 0     | .     |               |             |               |                |              |
| 35                                           | 30-34     | Dual          | 0     | .     |               |             |               |                |              |
| 35                                           | 30-34     | Former        | 0     | .     |               |             | .             | 0              | .            |
| Year of Follow-up: 2025, Age Group: 35-39    |           |               |       |       |               |             |               |                |              |
| Period                                       | Age Group | Smoking Group | N     | %     | Ever Quit (N) | Ever Quit % | Mean Yrs Quit | Short Term (n) | Short Term % |
| 35                                           | 35-39     | Never Any     | 0     | .     |               |             |               |                |              |
| 35                                           | 35-39     | CC            | 0     | .     | 0             | .           |               |                |              |
| 35                                           | 35-39     | Ecig          | 0     | .     |               |             |               |                |              |
| 35                                           | 35-39     | Dual          | 0     | .     |               |             |               |                |              |
| 35                                           | 35-39     | Former        | 0     | .     |               |             | .             | 0              | .            |
| Year of Follow-up: 2025, Age Group: 40-44    |           |               |       |       |               |             |               |                |              |
| Period                                       | Age Group | Smoking Group | N     | %     | Ever Quit (N) | Ever Quit % | Mean Yrs Quit | Short Term (n) | Short Term % |
| 35                                           | 40-44     | Never Any     | 0     | .     |               |             |               |                |              |
| 35                                           | 40-44     | CC            | 0     | .     | 0             | .           |               |                |              |
| 35                                           | 40-44     | Ecig          | 0     | .     |               |             |               |                |              |
| 35                                           | 40-44     | Dual          | 0     | .     |               |             |               |                |              |
| 35                                           | 40-44     | Former        | 0     | .     |               |             | .             | 0              | .            |
| Year of Follow-up: 2025, Age Group: 45-49    |           |               |       |       |               |             |               |                |              |
| Period                                       | Age Group | Smoking Group | N     | %     | Ever Quit (N) | Ever Quit % | Mean Yrs Quit | Short Term (n) | Short Term % |
| 35                                           | 45-49     | Never Any     | 4489  | 50.75 |               |             |               |                |              |
| 35                                           | 45-49     | CC            | 0     | 0.00  | 0             | 0.00        |               |                |              |
| 35                                           | 45-49     | Ecig          | 1534  | 17.34 |               |             |               |                |              |
| 35                                           | 45-49     | Dual          | 0     | 0.00  |               |             |               |                |              |
| 35                                           | 45-49     | Former        | 2822  | 31.91 |               |             | 18.75         | 63             | 2.23         |
| Year of Follow-up: 2025, Age Group: 50-54    |           |               |       |       |               |             |               |                |              |

### Results for PHIM for Run 3 (Sensitivity\_Analysis\_2.RTF)

| Period                                       | Age Group | Smoking Group | N     | %     | Ever Quit (N) | Ever Quit % | Mean Yrs Quit | Short Term (n) | Short Term % |
|----------------------------------------------|-----------|---------------|-------|-------|---------------|-------------|---------------|----------------|--------------|
| 35                                           | 50-54     | Never Any     | 4991  | 55.21 |               |             |               |                |              |
| 35                                           | 50-54     | CC            | 0     | 0.00  | 0             | 0.00        |               |                |              |
| 35                                           | 50-54     | Ecig          | 1568  | 17.35 |               |             |               |                |              |
| 35                                           | 50-54     | Dual          | 0     | 0.00  |               |             |               |                |              |
| 35                                           | 50-54     | Former        | 2481  | 27.44 |               |             | 20.48         | 73             | 2.94         |
| Year of Follow-up: 2025, Age Group: 55-59    |           |               |       |       |               |             |               |                |              |
| Period                                       | Age Group | Smoking Group | N     | %     | Ever Quit (N) | Ever Quit % | Mean Yrs Quit | Short Term (n) | Short Term % |
| 35                                           | 55-59     | Never Any     | 5163  | 52.60 |               |             |               |                |              |
| 35                                           | 55-59     | CC            | 0     | 0.00  | 0             | 0.00        |               |                |              |
| 35                                           | 55-59     | Ecig          | 1688  | 17.20 |               |             |               |                |              |
| 35                                           | 55-59     | Dual          | 0     | 0.00  |               |             |               |                |              |
| 35                                           | 55-59     | Former        | 2965  | 30.21 |               |             | 22.89         | 150            | 5.06         |
| Year of Follow-up: 2025, Age Group: 60-64    |           |               |       |       |               |             |               |                |              |
| Period                                       | Age Group | Smoking Group | N     | %     | Ever Quit (N) | Ever Quit % | Mean Yrs Quit | Short Term (n) | Short Term % |
| 35                                           | 60-64     | Never Any     | 4997  | 46.86 |               |             |               |                |              |
| 35                                           | 60-64     | CC            | 0     | 0.00  | 0             | 0.00        |               |                |              |
| 35                                           | 60-64     | Ecig          | 1495  | 14.02 |               |             |               |                |              |
| 35                                           | 60-64     | Dual          | 0     | 0.00  |               |             |               |                |              |
| 35                                           | 60-64     | Former        | 4172  | 39.12 |               |             | 23.69         | 196            | 4.70         |
| Year of Follow-up: 2025, Age Group: 65-69    |           |               |       |       |               |             |               |                |              |
| Period                                       | Age Group | Smoking Group | N     | %     | Ever Quit (N) | Ever Quit % | Mean Yrs Quit | Short Term (n) | Short Term % |
| 35                                           | 65-69     | Never Any     | 4724  | 43.28 |               |             |               |                |              |
| 35                                           | 65-69     | CC            | 1     | 0.01  | 0             | 0.00        |               |                |              |
| 35                                           | 65-69     | Ecig          | 1186  | 10.86 |               |             |               |                |              |
| 35                                           | 65-69     | Dual          | 0     | 0.00  |               |             |               |                |              |
| 35                                           | 65-69     | Former        | 5005  | 45.85 |               |             | 25.42         | 157            | 3.14         |
| Year of Follow-up: 2025, Age Group: 70-74    |           |               |       |       |               |             |               |                |              |
| Period                                       | Age Group | Smoking Group | N     | %     | Ever Quit (N) | Ever Quit % | Mean Yrs Quit | Short Term (n) | Short Term % |
| 35                                           | 70-74     | Never Any     | 3941  | 39.85 |               |             |               |                |              |
| 35                                           | 70-74     | CC            | 0     | 0.00  | 0             | 0.00        |               |                |              |
| 35                                           | 70-74     | Ecig          | 824   | 8.33  |               |             |               |                |              |
| 35                                           | 70-74     | Dual          | 0     | 0.00  |               |             |               |                |              |
| 35                                           | 70-74     | Former        | 5124  | 51.82 |               |             | 29.68         | 82             | 1.60         |
| Year of Follow-up: 2025, Age Group: 75-79    |           |               |       |       |               |             |               |                |              |
| Period                                       | Age Group | Smoking Group | N     | %     | Ever Quit (N) | Ever Quit % | Mean Yrs Quit | Short Term (n) | Short Term % |
| 35                                           | 75-79     | Never Any     | 2912  | 33.65 |               |             |               |                |              |
| 35                                           | 75-79     | CC            | 1     | 0.01  | 0             | 0.00        |               |                |              |
| 35                                           | 75-79     | Ecig          | 568   | 6.56  |               |             |               |                |              |
| 35                                           | 75-79     | Dual          | 0     | 0.00  |               |             |               |                |              |
| 35                                           | 75-79     | Former        | 5174  | 59.78 |               |             | 32.34         | 72             | 1.39         |
| Year of Follow-up: 2030, Age Group: All Ages |           |               |       |       |               |             |               |                |              |
| Period                                       | Age Group | Smoking Group | N     | %     | Ever Quit (N) | Ever Quit % | Mean Yrs Quit | Short Term (n) | Short Term % |
| 40                                           | All Ages  | Never Any     | 28305 | 47.84 |               |             |               |                |              |
| 40                                           | All Ages  | CC            | 1     | 0.00  | 0             | 0.00        |               |                |              |
| 40                                           | All Ages  | Ecig          | 6545  | 11.06 |               |             |               |                |              |
| 40                                           | All Ages  | Dual          | 0     | 0.00  |               |             |               |                |              |
| 40                                           | All Ages  | Former        | 24319 | 41.10 |               |             | 27.39         | 688            | 2.83         |
| Year of Follow-up: 2030, Age Group: 18-19    |           |               |       |       |               |             |               |                |              |
| Period                                       | Age Group | Smoking Group | N     | %     | Ever Quit (N) | Ever Quit % | Mean Yrs Quit | Short Term (n) | Short Term % |
| 40                                           | 18-19     | Never Any     | 0     | .     |               |             |               |                |              |
| 40                                           | 18-19     | CC            | 0     | .     | 0             | .           |               |                |              |
| 40                                           | 18-19     | Ecig          | 0     | .     |               |             |               |                |              |
| 40                                           | 18-19     | Dual          | 0     | .     |               |             |               |                |              |
| 40                                           | 18-19     | Former        | 0     | .     |               |             | .             | 0              | .            |
| Year of Follow-up: 2030, Age Group: 20-24    |           |               |       |       |               |             |               |                |              |
| Period                                       | Age Group | Smoking Group | N     | %     | Ever Quit (N) | Ever Quit % | Mean Yrs Quit | Short Term (n) | Short Term % |
| 40                                           | 20-24     | Never Any     | 0     | .     |               |             |               |                |              |
| 40                                           | 20-24     | CC            | 0     | .     | 0             | .           |               |                |              |
| 40                                           | 20-24     | Ecig          | 0     | .     |               |             |               |                |              |
| 40                                           | 20-24     | Dual          | 0     | .     |               |             |               |                |              |
| 40                                           | 20-24     | Former        | 0     | .     |               |             | .             | 0              | .            |
| Year of Follow-up: 2030, Age Group: 25-29    |           |               |       |       |               |             |               |                |              |
| Period                                       | Age Group | Smoking Group | N     | %     | Ever Quit (N) | Ever Quit % | Mean Yrs Quit | Short Term (n) | Short Term % |
| 40                                           | 25-29     | Never Any     | 0     | .     |               |             |               |                |              |
| 40                                           | 25-29     | CC            | 0     | .     | 0             | .           |               |                |              |
| 40                                           | 25-29     | Ecig          | 0     | .     |               |             |               |                |              |
| 40                                           | 25-29     | Dual          | 0     | .     |               |             |               |                |              |



### Results for PHIM for Run 3 (Sensitivity\_Analysis\_2.RTF)

| Year of Follow-up: 2030, Age Group: 30-34 | Period | Age Group | Smoking Group | N    | %     | Ever Quit (N) | Ever Quit % | Mean Yrs Quit | Short Term (n) | Short Term % |
|-------------------------------------------|--------|-----------|---------------|------|-------|---------------|-------------|---------------|----------------|--------------|
| Year of Follow-up: 2030, Age Group: 30-34 |        |           |               |      |       |               |             |               |                |              |
| 40                                        | 25-29  | Former    |               | 0    | .     |               |             |               | 0              | .            |
| 40                                        | 30-34  | Never Any |               | 0    | .     |               |             |               |                |              |
| 40                                        | 30-34  | CC        |               | 0    | .     | 0             | .           |               |                |              |
| 40                                        | 30-34  | Ecig      |               | 0    | .     |               |             |               |                |              |
| 40                                        | 30-34  | Dual      |               | 0    | .     |               |             |               |                |              |
| 40                                        | 30-34  | Former    |               | 0    | .     |               |             |               | 0              | .            |
| Year of Follow-up: 2030, Age Group: 35-39 |        |           |               |      |       |               |             |               |                |              |
| 40                                        | 35-39  | Never Any |               | 0    | .     |               |             |               |                |              |
| 40                                        | 35-39  | CC        |               | 0    | .     | 0             | .           |               |                |              |
| 40                                        | 35-39  | Ecig      |               | 0    | .     |               |             |               |                |              |
| 40                                        | 35-39  | Dual      |               | 0    | .     |               |             |               |                |              |
| 40                                        | 35-39  | Former    |               | 0    | .     |               |             |               | 0              | .            |
| Year of Follow-up: 2030, Age Group: 40-44 |        |           |               |      |       |               |             |               |                |              |
| 40                                        | 40-44  | Never Any |               | 0    | .     |               |             |               |                |              |
| 40                                        | 40-44  | CC        |               | 0    | .     | 0             | .           |               |                |              |
| 40                                        | 40-44  | Ecig      |               | 0    | .     |               |             |               |                |              |
| 40                                        | 40-44  | Dual      |               | 0    | .     |               |             |               |                |              |
| 40                                        | 40-44  | Former    |               | 0    | .     |               |             |               | 0              | .            |
| Year of Follow-up: 2030, Age Group: 45-49 |        |           |               |      |       |               |             |               |                |              |
| 40                                        | 45-49  | Never Any |               | 0    | .     |               |             |               |                |              |
| 40                                        | 45-49  | CC        |               | 0    | .     | 0             | .           |               |                |              |
| 40                                        | 45-49  | Ecig      |               | 0    | .     |               |             |               |                |              |
| 40                                        | 45-49  | Dual      |               | 0    | .     |               |             |               |                |              |
| 40                                        | 45-49  | Former    |               | 0    | .     |               |             |               | 0              | .            |
| Year of Follow-up: 2030, Age Group: 50-54 |        |           |               |      |       |               |             |               |                |              |
| 40                                        | 50-54  | Never Any |               | 4489 | 50.75 |               |             |               |                |              |
| 40                                        | 50-54  | CC        |               | 0    | 0.00  | 0             | 0.00        |               |                |              |
| 40                                        | 50-54  | Ecig      |               | 1383 | 15.64 |               |             |               |                |              |
| 40                                        | 50-54  | Dual      |               | 0    | 0.00  |               |             |               |                |              |
| 40                                        | 50-54  | Former    |               | 2973 | 33.61 |               |             | 22.61         | 85             | 2.86         |
| Year of Follow-up: 2030, Age Group: 55-59 |        |           |               |      |       |               |             |               |                |              |
| 40                                        | 55-59  | Never Any |               | 4991 | 55.21 |               |             |               |                |              |
| 40                                        | 55-59  | CC        |               | 0    | 0.00  | 0             | 0.00        |               |                |              |
| 40                                        | 55-59  | Ecig      |               | 1306 | 14.45 |               |             |               |                |              |
| 40                                        | 55-59  | Dual      |               | 0    | 0.00  |               |             |               |                |              |
| 40                                        | 55-59  | Former    |               | 2743 | 30.34 |               |             | 23.24         | 110            | 4.01         |
| Year of Follow-up: 2030, Age Group: 60-64 |        |           |               |      |       |               |             |               |                |              |
| 40                                        | 60-64  | Never Any |               | 5163 | 52.60 |               |             |               |                |              |
| 40                                        | 60-64  | CC        |               | 0    | 0.00  | 0             | 0.00        |               |                |              |
| 40                                        | 60-64  | Ecig      |               | 1261 | 12.85 |               |             |               |                |              |
| 40                                        | 60-64  | Dual      |               | 0    | 0.00  |               |             |               |                |              |
| 40                                        | 60-64  | Former    |               | 3392 | 34.56 |               |             | 24.62         | 177            | 5.22         |
| Year of Follow-up: 2030, Age Group: 65-69 |        |           |               |      |       |               |             |               |                |              |
| 40                                        | 65-69  | Never Any |               | 4997 | 46.86 |               |             |               |                |              |
| 40                                        | 65-69  | CC        |               | 0    | 0.00  | 0             | 0.00        |               |                |              |
| 40                                        | 65-69  | Ecig      |               | 1088 | 10.20 |               |             |               |                |              |
| 40                                        | 65-69  | Dual      |               | 0    | 0.00  |               |             |               |                |              |
| 40                                        | 65-69  | Former    |               | 4579 | 42.94 |               |             | 26.34         | 138            | 3.01         |
| Year of Follow-up: 2030, Age Group: 70-74 |        |           |               |      |       |               |             |               |                |              |
| 40                                        | 70-74  | Never Any |               | 4724 | 43.28 |               |             |               |                |              |
| 40                                        | 70-74  | CC        |               | 1    | 0.01  | 0             | 0.00        |               |                |              |
| 40                                        | 70-74  | Ecig      |               | 881  | 8.07  |               |             |               |                |              |
| 40                                        | 70-74  | Dual      |               | 0    | 0.00  |               |             |               |                |              |
| 40                                        | 70-74  | Former    |               | 5310 | 48.64 |               |             | 28.80         | 98             | 1.85         |
| Year of Follow-up: 2030, Age Group: 75-79 |        |           |               |      |       |               |             |               |                |              |
| 40                                        | 75-79  | Never Any |               | 3941 | 39.85 |               |             |               |                |              |
| 40                                        | 75-79  | CC        |               | 0    | 0.00  | 0             | 0.00        |               |                |              |

### Results for PHIM for Run 3 (Sensitivity\_Analysis\_2.RTF)

|                                              |           |               |       |       |               |             |               |                |              |
|----------------------------------------------|-----------|---------------|-------|-------|---------------|-------------|---------------|----------------|--------------|
| 40                                           | 75-79     | Ecig          | 626   | 6.33  |               |             |               |                |              |
| 40                                           | 75-79     | Dual          | 0     | 0.00  |               |             |               |                |              |
| 40                                           | 75-79     | Former        | 5322  | 53.82 |               |             | 33.46         | 80             | 1.50         |
| Year of Follow-up: 2035, Age Group: All Ages |           |               |       |       |               |             |               |                |              |
| Period                                       | Age Group | Smoking Group | N     | %     | Ever Quit (N) | Ever Quit % | Mean Yrs Quit | Short Term (n) | Short Term % |
| 45                                           | All Ages  | Never Any     | 24364 | 49.44 |               |             |               |                |              |
| 45                                           | All Ages  | CC            | 0     | 0.00  | 0             | 0.00        |               |                |              |
| 45                                           | All Ages  | Ecig          | 4567  | 9.27  |               |             |               |                |              |
| 45                                           | All Ages  | Dual          | 0     | 0.00  |               |             |               |                |              |
| 45                                           | All Ages  | Former        | 20350 | 41.29 |               |             | 28.78         | 546            | 2.68         |
| Year of Follow-up: 2035, Age Group: 18-19    |           |               |       |       |               |             |               |                |              |
| Period                                       | Age Group | Smoking Group | N     | %     | Ever Quit (N) | Ever Quit % | Mean Yrs Quit | Short Term (n) | Short Term % |
| 45                                           | 18-19     | Never Any     | 0     | .     |               |             |               |                |              |
| 45                                           | 18-19     | CC            | 0     | .     | 0             | .           |               |                |              |
| 45                                           | 18-19     | Ecig          | 0     | .     |               |             |               |                |              |
| 45                                           | 18-19     | Dual          | 0     | .     |               |             |               |                |              |
| 45                                           | 18-19     | Former        | 0     | .     |               |             | .             | 0              | .            |
| Year of Follow-up: 2035, Age Group: 20-24    |           |               |       |       |               |             |               |                |              |
| Period                                       | Age Group | Smoking Group | N     | %     | Ever Quit (N) | Ever Quit % | Mean Yrs Quit | Short Term (n) | Short Term % |
| 45                                           | 20-24     | Never Any     | 0     | .     |               |             |               |                |              |
| 45                                           | 20-24     | CC            | 0     | .     | 0             | .           |               |                |              |
| 45                                           | 20-24     | Ecig          | 0     | .     |               |             |               |                |              |
| 45                                           | 20-24     | Dual          | 0     | .     |               |             |               |                |              |
| 45                                           | 20-24     | Former        | 0     | .     |               |             | .             | 0              | .            |
| Year of Follow-up: 2035, Age Group: 25-29    |           |               |       |       |               |             |               |                |              |
| Period                                       | Age Group | Smoking Group | N     | %     | Ever Quit (N) | Ever Quit % | Mean Yrs Quit | Short Term (n) | Short Term % |
| 45                                           | 25-29     | Never Any     | 0     | .     |               |             |               |                |              |
| 45                                           | 25-29     | CC            | 0     | .     | 0             | .           |               |                |              |
| 45                                           | 25-29     | Ecig          | 0     | .     |               |             |               |                |              |
| 45                                           | 25-29     | Dual          | 0     | .     |               |             |               |                |              |
| 45                                           | 25-29     | Former        | 0     | .     |               |             | .             | 0              | .            |
| Year of Follow-up: 2035, Age Group: 30-34    |           |               |       |       |               |             |               |                |              |
| Period                                       | Age Group | Smoking Group | N     | %     | Ever Quit (N) | Ever Quit % | Mean Yrs Quit | Short Term (n) | Short Term % |
| 45                                           | 30-34     | Never Any     | 0     | .     |               |             |               |                |              |
| 45                                           | 30-34     | CC            | 0     | .     | 0             | .           |               |                |              |
| 45                                           | 30-34     | Ecig          | 0     | .     |               |             |               |                |              |
| 45                                           | 30-34     | Dual          | 0     | .     |               |             |               |                |              |
| 45                                           | 30-34     | Former        | 0     | .     |               |             | .             | 0              | .            |
| Year of Follow-up: 2035, Age Group: 35-39    |           |               |       |       |               |             |               |                |              |
| Period                                       | Age Group | Smoking Group | N     | %     | Ever Quit (N) | Ever Quit % | Mean Yrs Quit | Short Term (n) | Short Term % |
| 45                                           | 35-39     | Never Any     | 0     | .     |               |             |               |                |              |
| 45                                           | 35-39     | CC            | 0     | .     | 0             | .           |               |                |              |
| 45                                           | 35-39     | Ecig          | 0     | .     |               |             |               |                |              |
| 45                                           | 35-39     | Dual          | 0     | .     |               |             |               |                |              |
| 45                                           | 35-39     | Former        | 0     | .     |               |             | .             | 0              | .            |
| Year of Follow-up: 2035, Age Group: 40-44    |           |               |       |       |               |             |               |                |              |
| Period                                       | Age Group | Smoking Group | N     | %     | Ever Quit (N) | Ever Quit % | Mean Yrs Quit | Short Term (n) | Short Term % |
| 45                                           | 40-44     | Never Any     | 0     | .     |               |             |               |                |              |
| 45                                           | 40-44     | CC            | 0     | .     | 0             | .           |               |                |              |
| 45                                           | 40-44     | Ecig          | 0     | .     |               |             |               |                |              |
| 45                                           | 40-44     | Dual          | 0     | .     |               |             |               |                |              |
| 45                                           | 40-44     | Former        | 0     | .     |               |             | .             | 0              | .            |
| Year of Follow-up: 2035, Age Group: 45-49    |           |               |       |       |               |             |               |                |              |
| Period                                       | Age Group | Smoking Group | N     | %     | Ever Quit (N) | Ever Quit % | Mean Yrs Quit | Short Term (n) | Short Term % |
| 45                                           | 45-49     | Never Any     | 0     | .     |               |             |               |                |              |
| 45                                           | 45-49     | CC            | 0     | .     | 0             | .           |               |                |              |
| 45                                           | 45-49     | Ecig          | 0     | .     |               |             |               |                |              |
| 45                                           | 45-49     | Dual          | 0     | .     |               |             |               |                |              |
| 45                                           | 45-49     | Former        | 0     | .     |               |             | .             | 0              | .            |
| Year of Follow-up: 2035, Age Group: 50-54    |           |               |       |       |               |             |               |                |              |
| Period                                       | Age Group | Smoking Group | N     | %     | Ever Quit (N) | Ever Quit % | Mean Yrs Quit | Short Term (n) | Short Term % |
| 45                                           | 50-54     | Never Any     | 0     | .     |               |             |               |                |              |
| 45                                           | 50-54     | CC            | 0     | .     | 0             | .           |               |                |              |
| 45                                           | 50-54     | Ecig          | 0     | .     |               |             |               |                |              |
| 45                                           | 50-54     | Dual          | 0     | .     |               |             |               |                |              |
| 45                                           | 50-54     | Former        | 0     | .     |               |             | .             | 0              | .            |
| Year of Follow-up: 2035, Age Group: 55-59    |           |               |       |       |               |             |               |                |              |
| Period                                       | Age Group | Smoking Group | N     | %     | Ever Quit (N) | Ever Quit % | Mean Yrs Quit | Short Term (n) | Short Term % |

### Results for PHIM for Run 3 (Sensitivity\_Analysis\_2.RTF)

|                                              |           |               |       |       |               |             |               |                |              |
|----------------------------------------------|-----------|---------------|-------|-------|---------------|-------------|---------------|----------------|--------------|
| 45                                           | 55-59     | Never Any     | 4489  | 50.75 |               |             |               |                |              |
| 45                                           | 55-59     | CC            | 0     | 0.00  | 0             | 0.00        |               |                |              |
| 45                                           | 55-59     | Ecig          | 1160  | 13.11 |               |             |               |                |              |
| 45                                           | 55-59     | Dual          | 0     | 0.00  |               |             |               |                |              |
| 45                                           | 55-59     | Former        | 3196  | 36.13 |               |             | 25.82         | 101            | 3.16         |
| Year of Follow-up: 2035, Age Group: 60-64    |           |               |       |       |               |             |               |                |              |
| Period                                       | Age Group | Smoking Group | N     | %     | Ever Quit (N) | Ever Quit % | Mean Yrs Quit | Short Term (n) | Short Term % |
| 45                                           | 60-64     | Never Any     | 4991  | 55.21 |               |             |               |                |              |
| 45                                           | 60-64     | CC            | 0     | 0.00  | 0             | 0.00        |               |                |              |
| 45                                           | 60-64     | Ecig          | 1028  | 11.37 |               |             |               |                |              |
| 45                                           | 60-64     | Dual          | 0     | 0.00  |               |             |               |                |              |
| 45                                           | 60-64     | Former        | 3021  | 33.42 |               |             | 25.81         | 130            | 4.30         |
| Year of Follow-up: 2035, Age Group: 65-69    |           |               |       |       |               |             |               |                |              |
| Period                                       | Age Group | Smoking Group | N     | %     | Ever Quit (N) | Ever Quit % | Mean Yrs Quit | Short Term (n) | Short Term % |
| 45                                           | 65-69     | Never Any     | 5163  | 52.60 |               |             |               |                |              |
| 45                                           | 65-69     | CC            | 0     | 0.00  | 0             | 0.00        |               |                |              |
| 45                                           | 65-69     | Ecig          | 920   | 9.37  |               |             |               |                |              |
| 45                                           | 65-69     | Dual          | 0     | 0.00  |               |             |               |                |              |
| 45                                           | 65-69     | Former        | 3733  | 38.03 |               |             | 27.12         | 111            | 2.97         |
| Year of Follow-up: 2035, Age Group: 70-74    |           |               |       |       |               |             |               |                |              |
| Period                                       | Age Group | Smoking Group | N     | %     | Ever Quit (N) | Ever Quit % | Mean Yrs Quit | Short Term (n) | Short Term % |
| 45                                           | 70-74     | Never Any     | 4997  | 46.86 |               |             |               |                |              |
| 45                                           | 70-74     | CC            | 0     | 0.00  | 0             | 0.00        |               |                |              |
| 45                                           | 70-74     | Ecig          | 826   | 7.75  |               |             |               |                |              |
| 45                                           | 70-74     | Dual          | 0     | 0.00  |               |             |               |                |              |
| 45                                           | 70-74     | Former        | 4841  | 45.40 |               |             | 29.75         | 104            | 2.15         |
| Year of Follow-up: 2035, Age Group: 75-79    |           |               |       |       |               |             |               |                |              |
| Period                                       | Age Group | Smoking Group | N     | %     | Ever Quit (N) | Ever Quit % | Mean Yrs Quit | Short Term (n) | Short Term % |
| 45                                           | 75-79     | Never Any     | 4724  | 43.28 |               |             |               |                |              |
| 45                                           | 75-79     | CC            | 0     | 0.00  | 0             | 0.00        |               |                |              |
| 45                                           | 75-79     | Ecig          | 633   | 5.80  |               |             |               |                |              |
| 45                                           | 75-79     | Dual          | 0     | 0.00  |               |             |               |                |              |
| 45                                           | 75-79     | Former        | 5559  | 50.93 |               |             | 32.38         | 100            | 1.80         |
| Year of Follow-up: 2040, Age Group: All Ages |           |               |       |       |               |             |               |                |              |
| Period                                       | Age Group | Smoking Group | N     | %     | Ever Quit (N) | Ever Quit % | Mean Yrs Quit | Short Term (n) | Short Term % |
| 50                                           | All Ages  | Never Any     | 19640 | 51.19 |               |             |               |                |              |
| 50                                           | All Ages  | CC            | 0     | 0.00  | 0             | 0.00        |               |                |              |
| 50                                           | All Ages  | Ecig          | 2872  | 7.49  |               |             |               |                |              |
| 50                                           | All Ages  | Dual          | 0     | 0.00  |               |             |               |                |              |
| 50                                           | All Ages  | Former        | 15853 | 41.32 |               |             | 30.40         | 407            | 2.57         |
| Year of Follow-up: 2040, Age Group: 18-19    |           |               |       |       |               |             |               |                |              |
| Period                                       | Age Group | Smoking Group | N     | %     | Ever Quit (N) | Ever Quit % | Mean Yrs Quit | Short Term (n) | Short Term % |
| 50                                           | 18-19     | Never Any     | 0     | .     |               |             |               |                |              |
| 50                                           | 18-19     | CC            | 0     | .     | 0             | .           |               |                |              |
| 50                                           | 18-19     | Ecig          | 0     | .     |               |             |               |                |              |
| 50                                           | 18-19     | Dual          | 0     | .     |               |             |               |                |              |
| 50                                           | 18-19     | Former        | 0     | .     |               |             | .             | 0              | .            |
| Year of Follow-up: 2040, Age Group: 20-24    |           |               |       |       |               |             |               |                |              |
| Period                                       | Age Group | Smoking Group | N     | %     | Ever Quit (N) | Ever Quit % | Mean Yrs Quit | Short Term (n) | Short Term % |
| 50                                           | 20-24     | Never Any     | 0     | .     |               |             |               |                |              |
| 50                                           | 20-24     | CC            | 0     | .     | 0             | .           |               |                |              |
| 50                                           | 20-24     | Ecig          | 0     | .     |               |             |               |                |              |
| 50                                           | 20-24     | Dual          | 0     | .     |               |             |               |                |              |
| 50                                           | 20-24     | Former        | 0     | .     |               |             | .             | 0              | .            |
| Year of Follow-up: 2040, Age Group: 25-29    |           |               |       |       |               |             |               |                |              |
| Period                                       | Age Group | Smoking Group | N     | %     | Ever Quit (N) | Ever Quit % | Mean Yrs Quit | Short Term (n) | Short Term % |
| 50                                           | 25-29     | Never Any     | 0     | .     |               |             |               |                |              |
| 50                                           | 25-29     | CC            | 0     | .     | 0             | .           |               |                |              |
| 50                                           | 25-29     | Ecig          | 0     | .     |               |             |               |                |              |
| 50                                           | 25-29     | Dual          | 0     | .     |               |             |               |                |              |
| 50                                           | 25-29     | Former        | 0     | .     |               |             | .             | 0              | .            |
| Year of Follow-up: 2040, Age Group: 30-34    |           |               |       |       |               |             |               |                |              |
| Period                                       | Age Group | Smoking Group | N     | %     | Ever Quit (N) | Ever Quit % | Mean Yrs Quit | Short Term (n) | Short Term % |
| 50                                           | 30-34     | Never Any     | 0     | .     |               |             |               |                |              |
| 50                                           | 30-34     | CC            | 0     | .     | 0             | .           |               |                |              |
| 50                                           | 30-34     | Ecig          | 0     | .     |               |             |               |                |              |
| 50                                           | 30-34     | Dual          | 0     | .     |               |             |               |                |              |
| 50                                           | 30-34     | Former        | 0     | .     |               |             | .             | 0              | .            |
| Year of Follow-up: 2040, Age Group: 35-39    |           |               |       |       |               |             |               |                |              |

**Results for PHIM for Run 3 (Sensitivity\_Analysis\_2.RTF)**

| Period                                    | Age Group | Smoking Group | N    | %     | Ever Quit (N) | Ever Quit % | Mean Yrs Quit | Short Term (n) | Short Term % |
|-------------------------------------------|-----------|---------------|------|-------|---------------|-------------|---------------|----------------|--------------|
| 50                                        | 35-39     | Never Any     | 0    | .     |               |             |               |                |              |
| 50                                        | 35-39     | CC            | 0    | .     | 0             | .           |               |                |              |
| 50                                        | 35-39     | Ecig          | 0    | .     |               |             |               |                |              |
| 50                                        | 35-39     | Dual          | 0    | .     |               |             |               |                |              |
| 50                                        | 35-39     | Former        | 0    | .     |               |             | .             | 0              | .            |
| Year of Follow-up: 2040, Age Group: 40-44 |           |               |      |       |               |             |               |                |              |
| Period                                    | Age Group | Smoking Group | N    | %     | Ever Quit (N) | Ever Quit % | Mean Yrs Quit | Short Term (n) | Short Term % |
| 50                                        | 40-44     | Never Any     | 0    | .     |               |             |               |                |              |
| 50                                        | 40-44     | CC            | 0    | .     | 0             | .           |               |                |              |
| 50                                        | 40-44     | Ecig          | 0    | .     |               |             |               |                |              |
| 50                                        | 40-44     | Dual          | 0    | .     |               |             |               |                |              |
| 50                                        | 40-44     | Former        | 0    | .     |               |             | .             | 0              | .            |
| Year of Follow-up: 2040, Age Group: 45-49 |           |               |      |       |               |             |               |                |              |
| Period                                    | Age Group | Smoking Group | N    | %     | Ever Quit (N) | Ever Quit % | Mean Yrs Quit | Short Term (n) | Short Term % |
| 50                                        | 45-49     | Never Any     | 0    | .     |               |             |               |                |              |
| 50                                        | 45-49     | CC            | 0    | .     | 0             | .           |               |                |              |
| 50                                        | 45-49     | Ecig          | 0    | .     |               |             |               |                |              |
| 50                                        | 45-49     | Dual          | 0    | .     |               |             |               |                |              |
| 50                                        | 45-49     | Former        | 0    | .     |               |             | .             | 0              | .            |
| Year of Follow-up: 2040, Age Group: 50-54 |           |               |      |       |               |             |               |                |              |
| Period                                    | Age Group | Smoking Group | N    | %     | Ever Quit (N) | Ever Quit % | Mean Yrs Quit | Short Term (n) | Short Term % |
| 50                                        | 50-54     | Never Any     | 0    | .     |               |             |               |                |              |
| 50                                        | 50-54     | CC            | 0    | .     | 0             | .           |               |                |              |
| 50                                        | 50-54     | Ecig          | 0    | .     |               |             |               |                |              |
| 50                                        | 50-54     | Dual          | 0    | .     |               |             |               |                |              |
| 50                                        | 50-54     | Former        | 0    | .     |               |             | .             | 0              | .            |
| Year of Follow-up: 2040, Age Group: 55-59 |           |               |      |       |               |             |               |                |              |
| Period                                    | Age Group | Smoking Group | N    | %     | Ever Quit (N) | Ever Quit % | Mean Yrs Quit | Short Term (n) | Short Term % |
| 50                                        | 55-59     | Never Any     | 0    | .     |               |             |               |                |              |
| 50                                        | 55-59     | CC            | 0    | .     | 0             | .           |               |                |              |
| 50                                        | 55-59     | Ecig          | 0    | .     |               |             |               |                |              |
| 50                                        | 55-59     | Dual          | 0    | .     |               |             |               |                |              |
| 50                                        | 55-59     | Former        | 0    | .     |               |             | .             | 0              | .            |
| Year of Follow-up: 2040, Age Group: 60-64 |           |               |      |       |               |             |               |                |              |
| Period                                    | Age Group | Smoking Group | N    | %     | Ever Quit (N) | Ever Quit % | Mean Yrs Quit | Short Term (n) | Short Term % |
| 50                                        | 60-64     | Never Any     | 4489 | 50.75 |               |             |               |                |              |
| 50                                        | 60-64     | CC            | 0    | 0.00  | 0             | 0.00        |               |                |              |
| 50                                        | 60-64     | Ecig          | 858  | 9.70  |               |             |               |                |              |
| 50                                        | 60-64     | Dual          | 0    | 0.00  |               |             |               |                |              |
| 50                                        | 60-64     | Former        | 3498 | 39.55 |               |             | 28.33         | 130            | 3.72         |
| Year of Follow-up: 2040, Age Group: 65-69 |           |               |      |       |               |             |               |                |              |
| Period                                    | Age Group | Smoking Group | N    | %     | Ever Quit (N) | Ever Quit % | Mean Yrs Quit | Short Term (n) | Short Term % |
| 50                                        | 65-69     | Never Any     | 4991 | 55.21 |               |             |               |                |              |
| 50                                        | 65-69     | CC            | 0    | 0.00  | 0             | 0.00        |               |                |              |
| 50                                        | 65-69     | Ecig          | 712  | 7.88  |               |             |               |                |              |
| 50                                        | 65-69     | Dual          | 0    | 0.00  |               |             |               |                |              |
| 50                                        | 65-69     | Former        | 3337 | 36.91 |               |             | 28.09         | 119            | 3.57         |
| Year of Follow-up: 2040, Age Group: 70-74 |           |               |      |       |               |             |               |                |              |
| Period                                    | Age Group | Smoking Group | N    | %     | Ever Quit (N) | Ever Quit % | Mean Yrs Quit | Short Term (n) | Short Term % |
| 50                                        | 70-74     | Never Any     | 5163 | 52.60 |               |             |               |                |              |
| 50                                        | 70-74     | CC            | 0    | 0.00  | 0             | 0.00        |               |                |              |
| 50                                        | 70-74     | Ecig          | 677  | 6.90  |               |             |               |                |              |
| 50                                        | 70-74     | Dual          | 0    | 0.00  |               |             |               |                |              |
| 50                                        | 70-74     | Former        | 3976 | 40.51 |               |             | 30.29         | 83             | 2.09         |
| Year of Follow-up: 2040, Age Group: 75-79 |           |               |      |       |               |             |               |                |              |
| Period                                    | Age Group | Smoking Group | N    | %     | Ever Quit (N) | Ever Quit % | Mean Yrs Quit | Short Term (n) | Short Term % |
| 50                                        | 75-79     | Never Any     | 4997 | 46.86 |               |             |               |                |              |
| 50                                        | 75-79     | CC            | 0    | 0.00  | 0             | 0.00        |               |                |              |
| 50                                        | 75-79     | Ecig          | 625  | 5.86  |               |             |               |                |              |
| 50                                        | 75-79     | Dual          | 0    | 0.00  |               |             |               |                |              |
| 50                                        | 75-79     | Former        | 5042 | 47.28 |               |             | 33.45         | 75             | 1.49         |

## Results for PHIM for Run 3 (Sensitivity\_Analysis\_2.RTF)

\*\*\*\*\*

### Main Results for E-Component for Run: 3, Simulation: 1, COD: Four Diseases Combined

| Variable Parameter          | Value                                  |
|-----------------------------|----------------------------------------|
| 1. Country                  | US (United States)                     |
| 2. Sex                      | M (Males)                              |
| 3. Year of start of process | 1990                                   |
| 4. Cause of Death           | Four Diseases Combined                 |
| 5. Effective Dose NULL      | CC:1                                   |
| 6. Effective Dose Ecig      | CC:1 Ecig:0.05 Dual:0.525              |
| Note:                       | Death rates are per million population |

#### Results for Age Groups Combined and Years combined, Population unadjusted for deaths in Ecig scenario,

| Age Group:All |          | NULL        | Ecig        | %Drop   |        |        | NULL    | Ecig    | Drop    |         |
|---------------|----------|-------------|-------------|---------|--------|--------|---------|---------|---------|---------|
| Year          | Number   | Attrib      | Attrib      | Drop    | %Drop  | Attrib | Death   | Attrib  | Drop    |         |
|               | Deaths   | Deaths      | Deaths      | Deaths  | Deaths | Deaths | Rate    | Rates   | Rates   |         |
| All Comb      | 13148871 | 4509390.583 | 2839085.087 | 1670305 | 12.703 | 37.041 | 3806.31 | 1305.37 | 821.854 | 483.517 |

#### Results for Age Groups Combined, Population unadjusted for deaths in Ecig scenario,

| Age Group:All |        | NULL       | Ecig       | %Drop    |        |        | NULL    | Ecig    | Drop    |         |
|---------------|--------|------------|------------|----------|--------|--------|---------|---------|---------|---------|
| Year          | Number | Attrib     | Attrib     | Drop     | %Drop  | Attrib | Death   | Attrib  | Drop    |         |
|               | Deaths | Deaths     | Deaths     | Deaths   | Deaths | Deaths | Rate    | Rates   | Rates   |         |
| 1990          | 317161 | 125773.065 | 125773.065 | 0.000    | 0.000  | 0.000  | 5027.71 | 1993.78 | 0.000   |         |
| 1991          | 313217 | 123999.442 | 123381.660 | 617.782  | 0.197  | 0.498  | 4883.81 | 1933.45 | 1923.82 | 9.633   |
| 1992          | 308577 | 122014.015 | 120354.489 | 1659.526 | 0.538  | 1.360  | 4729.73 | 1870.18 | 1844.74 | 25.436  |
| 1993          | 311713 | 122810.618 | 119744.820 | 3065.797 | 0.984  | 2.496  | 4692.62 | 1848.83 | 1802.67 | 46.153  |
| 1994          | 305700 | 119925.592 | 115271.267 | 4654.325 | 1.523  | 3.881  | 4516.19 | 1771.69 | 1702.93 | 68.760  |
| 1995          | 303225 | 117896.496 | 111432.112 | 6464.384 | 2.132  | 5.483  | 4393.80 | 1708.35 | 1614.68 | 93.670  |
| 1996          | 299559 | 115698.645 | 107304.383 | 8394.262 | 2.802  | 7.255  | 4273.16 | 1650.42 | 1530.68 | 119.743 |
| 1997          | 294226 | 113359.847 | 103096.456 | 10263.39 | 3.488  | 9.054  | 4128.67 | 1590.70 | 1446.68 | 144.019 |
| 1998          | 289258 | 111444.212 | 99339.274  | 12104.94 | 4.185  | 10.862 | 3992.19 | 1538.10 | 1371.03 | 167.066 |
| 1999          | 311002 | 114877.722 | 98951.949  | 15925.77 | 5.121  | 13.863 | 4224.60 | 1560.48 | 1344.15 | 216.333 |
| 2000          | 303786 | 112379.704 | 94480.775  | 17898.93 | 5.892  | 15.927 | 4066.21 | 1504.22 | 1264.64 | 239.579 |
| 2001          | 296294 | 110024.943 | 90082.492  | 19942.45 | 6.731  | 18.125 | 3914.28 | 1453.52 | 1190.06 | 263.456 |
| 2002          | 291898 | 108289.173 | 86107.012  | 22182.16 | 7.599  | 20.484 | 3813.00 | 1414.56 | 1124.80 | 289.760 |
| 2003          | 285865 | 106539.023 | 82421.594  | 24117.43 | 8.437  | 22.637 | 3695.36 | 1377.22 | 1065.46 | 311.764 |
| 2004          | 274177 | 103037.251 | 77654.950  | 25382.30 | 9.258  | 24.634 | 3506.10 | 1317.61 | 993.031 | 324.582 |
| 2005          | 272379 | 103044.562 | 75683.924  | 27360.64 | 10.045 | 26.552 | 3442.69 | 1302.41 | 956.594 | 345.820 |
| 2006          | 264118 | 99672.555  | 70729.823  | 28942.73 | 10.958 | 29.038 | 3307.76 | 1248.28 | 885.806 | 362.473 |
| 2007          | 258419 | 97839.152  | 67583.299  | 30255.85 | 11.708 | 30.924 | 3203.20 | 1212.75 | 837.719 | 375.032 |
| 2008          | 259461 | 98075.852  | 66056.658  | 32019.19 | 12.341 | 32.647 | 3180.09 | 1202.07 | 809.626 | 392.445 |
| 2009          | 253907 | 95617.338  | 62501.213  | 33116.13 | 13.043 | 34.634 | 3075.31 | 1158.11 | 757.012 | 401.101 |
| 2010          | 251878 | 94607.988  | 60160.758  | 34447.23 | 13.676 | 36.410 | 3013.72 | 1131.98 | 719.823 | 412.161 |
| 2011          | 251779 | 93633.119  | 57580.783  | 36052.34 | 14.319 | 38.504 | 2982.76 | 1109.25 | 682.146 | 427.103 |
| 2012          | 252643 | 92775.175  | 55141.631  | 37633.54 | 14.896 | 40.564 | 2960.61 | 1087.19 | 646.179 | 441.010 |
| 2013          | 256175 | 92345.780  | 53057.748  | 39288.03 | 15.336 | 42.544 | 2967.76 | 1069.82 | 614.668 | 455.148 |
| 2014          | 257393 | 91379.215  | 50768.275  | 40610.94 | 15.778 | 44.442 | 2947.05 | 1046.26 | 581.277 | 464.979 |
| 2015          | 259782 | 90750.242  | 48920.056  | 41830.19 | 16.102 | 46.094 | 3346.10 | 1168.90 | 630.111 | 538.790 |
| 2016          | 261453 | 88811.996  | 45822.779  | 42989.22 | 16.442 | 48.405 | 3336.15 | 1133.24 | 584.701 | 548.544 |
| 2017          | 263685 | 87325.126  | 43312.970  | 44012.16 | 16.691 | 50.400 | 3333.85 | 1104.08 | 547.619 | 556.460 |
| 2018          | 258714 | 87612.144  | 42621.443  | 44990.70 | 17.390 | 51.352 | 3240.73 | 1097.46 | 533.889 | 563.567 |
| 2019          | 261438 | 87797.760  | 41329.081  | 46468.68 | 17.774 | 52.927 | 3242.99 | 1089.08 | 512.664 | 576.418 |
| 2020          | 262288 | 87221.042  | 39953.791  | 47267.25 | 18.021 | 54.192 | 3715.29 | 1235.48 | 565.942 | 669.537 |
| 2021          | 255079 | 82001.292  | 35475.730  | 46525.56 | 18.240 | 56.738 | 3587.82 | 1153.39 | 498.984 | 654.405 |
| 2022          | 257097 | 81915.977  | 34060.989  | 47854.99 | 18.614 | 58.420 | 3588.53 | 1143.37 | 475.420 | 667.955 |
| 2023          | 259080 | 81810.810  | 32668.542  | 49142.27 | 18.968 | 60.068 | 3586.88 | 1132.64 | 452.286 | 680.359 |
| 2024          | 260719 | 81528.303  | 31301.686  | 50226.62 | 19.265 | 61.606 | 3579.65 | 1119.38 | 429.770 | 689.608 |
| 2025          | 257308 | 79599.213  | 29756.601  | 49842.61 | 19.371 | 62.617 | 4112.08 | 1272.09 | 475.545 | 769.543 |
| 2026          | 251528 | 75082.462  | 26401.692  | 48680.77 | 19.354 | 64.836 | 4003.24 | 1194.99 | 420.201 | 774.788 |
| 2027          | 250988 | 74444.425  | 25013.616  | 49430.81 | 19.694 | 66.400 | 3976.53 | 1179.46 | 396.303 | 783.157 |
| 2028          | 250285 | 73699.585  | 23577.685  | 50121.90 | 20.026 | 68.008 | 3945.35 | 1161.76 | 371.666 | 790.094 |
| 2029          | 249525 | 72819.703  | 22205.122  | 50614.58 | 20.284 | 69.507 | 3910.99 | 1141.36 | 348.037 | 793.319 |
| 2030          | 240528 | 69309.277  | 20680.856  | 48628.42 | 20.217 | 70.161 | 4504.36 | 1297.95 | 387.289 | 910.661 |
| 2031          | 235442 | 65433.368  | 18300.430  | 47132.94 | 20.019 | 72.032 | 4397.65 | 1222.18 | 341.820 | 880.361 |
| 2032          | 234017 | 64643.552  | 17173.124  | 47470.43 | 20.285 | 73.434 | 4356.12 | 1203.31 | 319.669 | 883.639 |
| 2033          | 232559 | 63793.514  | 16115.921  | 47677.59 | 20.501 | 74.737 | 4310.93 | 1182.54 | 298.740 | 883.797 |
| 2034          | 230963 | 63032.151  | 15120.720  | 47911.43 | 20.744 | 76.011 | 4260.75 | 1162.80 | 278.943 | 883.857 |
| 2035          | 215822 | 57653.301  | 13734.135  | 43919.17 | 20.350 | 76.178 | 4924.38 | 1315.47 | 313.371 | 1002.10 |
| 2036          | 208183 | 52988.733  | 11475.005  | 41513.73 | 19.941 | 78.344 | 4748.94 | 1208.75 | 261.761 | 946.985 |
| 2037          | 205491 | 52026.921  | 10612.507  | 41414.41 | 20.154 | 79.602 | 4682.40 | 1185.50 | 241.820 | 943.683 |
| 2038          | 202834 | 50943.211  | 9746.719   | 41196.49 | 20.310 | 80.867 | 4612.18 | 1158.38 | 221.628 | 936.755 |
| 2039          | 200251 | 50085.991  | 9043.479   | 41042.51 | 20.496 | 81.944 | 4538.65 | 1135.19 | 204.969 | 930.222 |

## Results for PHIM for Run 3 (Sensitivity\_Analysis\_2.RTF)

\*\*\*\*\*

### Main Results for E-Component for Run: 3, Simulation: 1, COD: LUNG CANCER

| Variable Parameter          | Value                                  |
|-----------------------------|----------------------------------------|
| 1. Country                  | US (United States)                     |
| 2. Sex                      | M (Males)                              |
| 3. Year of start of process | 1990                                   |
| 4. Cause of Death           | LUNG CANCER                            |
| 5. Effective Dose NULL      | CC:1                                   |
| 6. Effective Dose Ecig      | CC:1 Ecig:0.05 Dual:0.525              |
| Note:                       | Death rates are per million population |

#### Results for Age Groups Combined and Years combined, Population unadjusted for deaths in Ecig scenario,

| Age Group:All |         | NULL        | Ecig        | %Drop    |        |        | NULL    | Ecig    | Drop    |         |
|---------------|---------|-------------|-------------|----------|--------|--------|---------|---------|---------|---------|
| Year          | Number  | Attrib      | Attrib      | Drop     | %Drop  | Attrib | Death   | Attrib  | Attrib  | Drop    |
|               | Deaths  | Deaths      | Deaths      | Deaths   | Deaths | Deaths | Rate    | Rates   | Rates   | Rates   |
| All Comb      | 3065988 | 2244988.113 | 1662383.466 | 582604.6 | 19.002 | 25.951 | 887.537 | 649.875 | 481.224 | 168.651 |

#### Results for Age Groups Combined, Population unadjusted for deaths in Ecig scenario,

| Age Group:All |        | NULL      | Ecig      | %Drop    |        |        | NULL    | Ecig    | Drop    |         |
|---------------|--------|-----------|-----------|----------|--------|--------|---------|---------|---------|---------|
| Year          | Number | Attrib    | Attrib    | Drop     | %Drop  | Attrib | Death   | Attrib  | Attrib  | Drop    |
|               | Deaths | Deaths    | Deaths    | Deaths   | Deaths | Deaths | Rate    | Rates   | Rates   | Rates   |
| 1990          | 78822  | 63385.736 | 63385.736 | 0.000    | 0.000  | 0.000  | 1249.50 | 1004.81 | 1004.81 | 0.000   |
| 1991          | 78462  | 62918.402 | 62844.018 | 74.385   | 0.095  | 0.118  | 1223.41 | 981.049 | 979.890 | 1.160   |
| 1992          | 77987  | 62366.766 | 62165.316 | 201.450  | 0.258  | 0.323  | 1195.35 | 955.930 | 952.842 | 3.088   |
| 1993          | 78542  | 62652.888 | 62266.129 | 386.758  | 0.492  | 0.617  | 1182.39 | 943.195 | 937.372 | 5.822   |
| 1994          | 77437  | 61565.227 | 60963.661 | 601.565  | 0.777  | 0.977  | 1144.00 | 909.520 | 900.633 | 8.887   |
| 1995          | 76904  | 60851.961 | 59989.500 | 862.461  | 1.121  | 1.417  | 1114.36 | 881.759 | 869.261 | 12.497  |
| 1996          | 76232  | 60122.922 | 58944.426 | 1178.496 | 1.546  | 1.960  | 1087.44 | 857.643 | 840.832 | 16.811  |
| 1997          | 75473  | 59237.155 | 57725.970 | 1511.185 | 2.002  | 2.551  | 1059.06 | 831.234 | 810.029 | 21.205  |
| 1998          | 75381  | 58906.696 | 56991.311 | 1915.385 | 2.541  | 3.252  | 1040.37 | 813.001 | 786.565 | 26.435  |
| 1999          | 73159  | 56930.073 | 54623.262 | 2306.811 | 3.153  | 4.052  | 993.781 | 773.329 | 741.994 | 31.335  |
| 2000          | 73784  | 57137.121 | 54322.158 | 2814.963 | 3.815  | 4.927  | 987.608 | 764.787 | 727.109 | 37.679  |
| 2001          | 73294  | 56481.726 | 53116.321 | 3365.406 | 4.592  | 5.958  | 968.273 | 746.169 | 701.710 | 44.460  |
| 2002          | 72442  | 55588.365 | 51662.868 | 3925.497 | 5.419  | 7.062  | 946.293 | 726.138 | 674.860 | 51.278  |
| 2003          | 71942  | 54945.856 | 50388.206 | 4557.650 | 6.335  | 8.295  | 929.989 | 710.281 | 651.365 | 58.916  |
| 2004          | 71301  | 54203.126 | 48975.159 | 5227.966 | 7.332  | 9.645  | 911.778 | 693.135 | 626.281 | 66.854  |
| 2005          | 70964  | 53744.603 | 47832.095 | 5912.508 | 8.332  | 11.001 | 896.937 | 679.296 | 604.565 | 74.730  |
| 2006          | 69658  | 52535.572 | 45910.828 | 6624.744 | 9.510  | 12.610 | 872.383 | 657.945 | 574.978 | 82.967  |
| 2007          | 68565  | 51492.124 | 44167.776 | 7324.348 | 10.682 | 14.224 | 849.888 | 638.264 | 547.476 | 90.788  |
| 2008          | 68226  | 51030.736 | 42860.961 | 8169.775 | 11.975 | 16.010 | 836.215 | 625.460 | 525.327 | 100.133 |
| 2009          | 67509  | 50276.199 | 41288.554 | 8987.645 | 13.313 | 17.877 | 817.667 | 608.943 | 500.085 | 108.858 |
| 2010          | 67196  | 49840.933 | 40020.129 | 9820.803 | 14.615 | 19.704 | 804.000 | 596.347 | 478.841 | 117.506 |
| 2011          | 66506  | 49072.841 | 38365.820 | 10707.02 | 16.099 | 21.819 | 787.880 | 581.354 | 454.511 | 126.843 |
| 2012          | 66155  | 48539.512 | 36884.981 | 11654.53 | 17.617 | 24.010 | 775.240 | 568.812 | 432.238 | 136.574 |
| 2013          | 65333  | 47675.741 | 35179.307 | 12496.43 | 19.127 | 26.211 | 756.876 | 552.318 | 407.548 | 144.770 |
| 2014          | 65033  | 47194.534 | 33830.587 | 13363.95 | 20.549 | 28.317 | 744.602 | 540.359 | 387.347 | 153.012 |
| 2015          | 64145  | 46305.842 | 32196.217 | 14109.62 | 21.996 | 30.471 | 726.215 | 525.439 | 414.701 | 181.738 |
| 2016          | 61618  | 44208.867 | 29724.293 | 14484.57 | 23.507 | 32.764 | 786.248 | 564.107 | 379.283 | 184.824 |
| 2017          | 59897  | 42702.624 | 27766.583 | 14936.04 | 24.936 | 34.977 | 757.297 | 539.903 | 351.062 | 188.841 |
| 2018          | 62468  | 44321.202 | 27673.420 | 16647.78 | 26.650 | 37.562 | 782.490 | 555.181 | 346.646 | 208.535 |
| 2019          | 63045  | 44493.088 | 26736.765 | 17756.32 | 28.165 | 39.908 | 782.035 | 551.912 | 331.655 | 220.257 |
| 2020          | 63466  | 44529.551 | 25761.830 | 18767.72 | 29.571 | 42.147 | 898.991 | 630.757 | 364.914 | 265.843 |
| 2021          | 57113  | 39852.556 | 22065.655 | 17786.90 | 31.143 | 44.632 | 803.323 | 560.546 | 310.364 | 250.182 |
| 2022          | 57440  | 39853.685 | 21068.240 | 18785.44 | 32.704 | 47.136 | 801.745 | 556.274 | 294.068 | 262.205 |
| 2023          | 57738  | 39847.050 | 20076.513 | 19770.54 | 34.242 | 49.616 | 799.366 | 551.670 | 277.953 | 273.717 |
| 2024          | 57942  | 39726.010 | 19092.757 | 20633.25 | 35.610 | 51.939 | 795.539 | 545.435 | 262.142 | 283.293 |
| 2025          | 57521  | 39207.348 | 18039.829 | 21167.52 | 36.799 | 53.989 | 919.257 | 626.579 | 288.297 | 338.281 |
| 2026          | 51428  | 34803.960 | 15224.457 | 19579.50 | 38.072 | 56.257 | 818.510 | 553.929 | 242.308 | 311.621 |
| 2027          | 51172  | 34484.595 | 14291.439 | 20193.16 | 39.462 | 58.557 | 810.740 | 546.357 | 226.427 | 319.930 |
| 2028          | 50870  | 34100.638 | 13343.967 | 20756.67 | 40.803 | 60.869 | 801.884 | 537.544 | 210.347 | 327.197 |
| 2029          | 50540  | 33669.838 | 12452.184 | 21217.65 | 41.982 | 63.017 | 792.146 | 527.732 | 195.172 | 332.560 |
| 2030          | 49109  | 32557.688 | 11516.210 | 21041.48 | 42.846 | 64.628 | 919.662 | 609.705 | 215.663 | 394.042 |
| 2031          | 43585  | 28646.393 | 9591.970  | 19054.42 | 43.718 | 66.516 | 814.096 | 535.065 | 179.161 | 355.903 |
| 2032          | 43163  | 28227.160 | 8913.206  | 19313.95 | 44.747 | 68.423 | 803.454 | 525.435 | 165.915 | 359.520 |
| 2033          | 42725  | 27786.623 | 8283.509  | 19503.11 | 45.648 | 70.189 | 791.996 | 515.079 | 153.551 | 361.528 |
| 2034          | 42256  | 27348.299 | 7699.819  | 19648.48 | 46.499 | 71.845 | 779.523 | 504.514 | 142.044 | 362.470 |
| 2035          | 39748  | 25570.077 | 6947.171  | 18622.91 | 46.852 | 72.831 | 906.933 | 583.430 | 158.513 | 424.917 |
| 2036          | 34030  | 21717.319 | 5437.171  | 16280.15 | 47.841 | 74.964 | 776.269 | 495.402 | 124.029 | 371.373 |
| 2037          | 33454  | 21256.024 | 4995.195  | 16260.83 | 48.607 | 76.500 | 762.289 | 484.347 | 113.822 | 370.525 |
| 2038          | 32883  | 20747.175 | 4561.998  | 16185.18 | 49.220 | 78.011 | 747.720 | 471.764 | 103.734 | 368.030 |
| 2039          | 32325  | 20327.688 | 4217.986  | 16109.70 | 49.836 | 79.250 | 732.644 | 460.724 | 95.600  | 365.124 |

## Results for PHIM for Run 3 (Sensitivity\_Analysis\_2.RTF)

\*\*\*\*\*

### Main Results for E-Component for Run: 3, Simulation: 1, COD: IHD

| Variable Parameter          | Value                                  |
|-----------------------------|----------------------------------------|
| 1. Country                  | US (United States)                     |
| 2. Sex                      | M (Males)                              |
| 3. Year of start of process | 1990                                   |
| 4. Cause of Death           | IHD                                    |
| 5. Effective Dose NULL      | CC:1                                   |
| 6. Effective Dose Ecig      | CC:1 Ecig:0.05 Dual:0.525              |
| Note:                       | Death rates are per million population |

#### Results for Age Groups Combined and Years combined, Population unadjusted for deaths in Ecig scenario,

| Age Group:All |         | NULL        | Ecig       | %Drop    |        |        | NULL    | Ecig    | Drop    |         |
|---------------|---------|-------------|------------|----------|--------|--------|---------|---------|---------|---------|
| Year          | Number  | Attrib      | Attrib     | Drop     | %Drop  | Attrib | Death   | Attrib  | Attrib  | Drop    |
|               | Deaths  | Deaths      | Deaths     | Deaths   | Deaths | Deaths | Rate    | Rates   | Rates   | Rates   |
| All Comb      | 6360041 | 1098877.421 | 465660.416 | 633217.0 | 9.956  | 57.624 | 1841.09 | 318.101 | 134.799 | 183.303 |

#### Results for Age Groups Combined, Population unadjusted for deaths in Ecig scenario,

| Age Group:All |        | NULL      | Ecig      | %Drop    |        |        | NULL    | Ecig    | Drop    |         |
|---------------|--------|-----------|-----------|----------|--------|--------|---------|---------|---------|---------|
| Year          | Number | Attrib    | Attrib    | Drop     | %Drop  | Attrib | Death   | Attrib  | Attrib  | Drop    |
|               | Deaths | Deaths    | Deaths    | Deaths   | Deaths | Deaths | Rate    | Rates   | Rates   | Rates   |
| 1990          | 171484 | 38511.725 | 38511.725 | 0.000    | 0.000  | 0.000  | 2718.40 | 610.497 | 610.497 | 0.000   |
| 1991          | 168044 | 37309.838 | 36862.128 | 447.710  | 0.266  | 1.200  | 2620.21 | 581.750 | 574.769 | 6.981   |
| 1992          | 164548 | 36137.488 | 34932.561 | 1204.926 | 0.732  | 3.334  | 2522.12 | 553.899 | 535.431 | 18.469  |
| 1993          | 164362 | 35599.588 | 33400.782 | 2198.806 | 1.338  | 6.176  | 2474.35 | 535.926 | 502.825 | 33.101  |
| 1994          | 159866 | 34336.757 | 31019.139 | 3317.618 | 2.075  | 9.662  | 2361.75 | 507.267 | 458.254 | 49.012  |
| 1995          | 158083 | 33455.759 | 28881.075 | 4574.684 | 2.894  | 13.674 | 2290.66 | 484.782 | 418.493 | 66.288  |
| 1996          | 154875 | 32193.824 | 26324.770 | 5869.054 | 3.790  | 18.230 | 2209.26 | 459.239 | 375.518 | 83.721  |
| 1997          | 149970 | 30665.509 | 23597.952 | 7067.557 | 4.713  | 23.047 | 2104.43 | 430.308 | 331.134 | 99.174  |
| 1998          | 145407 | 29188.430 | 21023.119 | 8165.311 | 5.615  | 27.974 | 2006.83 | 402.844 | 290.150 | 112.694 |
| 1999          | 165952 | 33375.386 | 22199.246 | 11176.14 | 6.735  | 33.486 | 2254.27 | 453.366 | 301.551 | 151.815 |
| 2000          | 160260 | 32024.754 | 19716.047 | 12308.71 | 7.680  | 38.435 | 2145.10 | 428.655 | 263.902 | 164.754 |
| 2001          | 154444 | 30682.393 | 17232.997 | 13449.40 | 8.708  | 43.834 | 2040.33 | 405.339 | 227.662 | 177.677 |
| 2002          | 151887 | 30218.370 | 15446.920 | 14771.45 | 9.725  | 48.882 | 1984.06 | 394.736 | 201.780 | 192.956 |
| 2003          | 146733 | 29175.202 | 13515.462 | 15659.74 | 10.672 | 53.675 | 1896.81 | 377.146 | 174.713 | 202.432 |
| 2004          | 138381 | 27488.687 | 11511.922 | 15976.77 | 11.545 | 58.121 | 1769.58 | 351.518 | 147.211 | 204.307 |
| 2005          | 135881 | 27017.439 | 10251.468 | 16765.97 | 12.339 | 62.056 | 1717.44 | 341.482 | 129.572 | 211.911 |
| 2006          | 131922 | 26231.435 | 8856.750  | 17374.69 | 13.170 | 66.236 | 1652.16 | 328.517 | 110.920 | 217.597 |
| 2007          | 126502 | 25103.049 | 7598.716  | 17504.33 | 13.837 | 69.730 | 1568.04 | 311.161 | 94.189  | 216.973 |
| 2008          | 125859 | 24621.740 | 6767.999  | 17853.74 | 14.186 | 72.512 | 1542.60 | 301.777 | 82.952  | 218.825 |
| 2009          | 122428 | 23741.177 | 5904.245  | 17836.93 | 14.569 | 75.131 | 1482.84 | 287.552 | 71.512  | 216.040 |
| 2010          | 120537 | 23189.160 | 5232.027  | 17957.13 | 14.898 | 77.438 | 1442.22 | 277.458 | 62.601  | 214.857 |
| 2011          | 120221 | 22786.927 | 4615.412  | 18171.52 | 15.115 | 79.745 | 1424.23 | 269.951 | 54.678  | 215.274 |
| 2012          | 120927 | 22485.295 | 4125.952  | 18359.34 | 15.182 | 81.650 | 1417.09 | 263.495 | 48.350  | 215.145 |
| 2013          | 122648 | 22251.884 | 3724.549  | 18527.34 | 15.106 | 83.262 | 1420.86 | 257.786 | 43.148  | 214.637 |
| 2014          | 123229 | 21894.593 | 3359.122  | 18535.47 | 15.041 | 84.658 | 1410.92 | 250.685 | 38.461  | 212.224 |
| 2015          | 123774 | 21471.109 | 3044.546  | 18426.56 | 14.887 | 85.820 | 1594.26 | 276.557 | 39.215  | 237.342 |
| 2016          | 126218 | 21411.568 | 2764.337  | 18647.23 | 14.774 | 87.090 | 1610.55 | 273.213 | 35.273  | 237.939 |
| 2017          | 128265 | 21169.399 | 2516.097  | 18653.30 | 14.543 | 88.114 | 1621.69 | 267.651 | 31.812  | 235.840 |
| 2018          | 121429 | 19830.576 | 2163.850  | 17666.73 | 14.549 | 89.088 | 1521.05 | 248.404 | 27.105  | 221.299 |
| 2019          | 121832 | 19431.014 | 1982.066  | 17448.95 | 14.322 | 89.799 | 1511.26 | 241.031 | 24.586  | 216.444 |
| 2020          | 120811 | 18532.612 | 1782.211  | 16750.40 | 13.865 | 90.383 | 1711.27 | 262.513 | 25.245  | 237.268 |
| 2021          | 119407 | 18234.128 | 1619.962  | 16614.17 | 13.914 | 91.116 | 1679.51 | 256.472 | 22.786  | 233.687 |
| 2022          | 119438 | 17812.559 | 1483.958  | 16328.60 | 13.671 | 91.669 | 1667.10 | 248.626 | 20.713  | 227.913 |
| 2023          | 119445 | 17361.668 | 1361.338  | 16000.33 | 13.396 | 92.159 | 1653.68 | 240.367 | 18.847  | 221.520 |
| 2024          | 119305 | 16929.676 | 1268.848  | 15660.83 | 13.127 | 92.505 | 1638.05 | 232.443 | 17.421  | 215.022 |
| 2025          | 115685 | 15501.666 | 1119.292  | 14382.37 | 12.432 | 92.780 | 1848.78 | 247.735 | 17.888  | 229.847 |
| 2026          | 115073 | 15523.814 | 1079.181  | 14444.63 | 12.553 | 93.048 | 1831.46 | 247.072 | 17.176  | 229.896 |
| 2027          | 113989 | 15073.070 | 1016.001  | 14057.07 | 12.332 | 93.259 | 1805.98 | 238.810 | 16.097  | 222.713 |
| 2028          | 112855 | 14636.710 | 957.403   | 13679.31 | 12.121 | 93.459 | 1778.98 | 230.725 | 15.092  | 215.633 |
| 2029          | 111718 | 14180.166 | 909.831   | 13270.34 | 11.878 | 93.584 | 1751.04 | 222.256 | 14.260  | 207.996 |
| 2030          | 104851 | 12111.772 | 757.853   | 11353.92 | 10.829 | 93.743 | 1963.54 | 226.816 | 14.192  | 212.624 |
| 2031          | 105289 | 12417.367 | 765.394   | 11651.97 | 11.067 | 93.836 | 1966.62 | 231.935 | 14.296  | 217.639 |
| 2032          | 103879 | 12054.064 | 728.928   | 11325.14 | 10.902 | 93.953 | 1933.67 | 224.381 | 13.569  | 210.812 |
| 2033          | 102485 | 11672.389 | 690.979   | 10981.41 | 10.715 | 94.080 | 1899.76 | 216.370 | 12.809  | 203.562 |
| 2034          | 101070 | 11365.762 | 670.730   | 10695.03 | 10.582 | 94.099 | 1864.51 | 209.673 | 12.373  | 197.299 |
| 2035          | 90820  | 8580.360  | 486.097   | 8094.263 | 8.912  | 94.335 | 2072.23 | 195.777 | 11.091  | 184.686 |
| 2036          | 92117  | 8948.841  | 501.364   | 8447.477 | 9.170  | 94.397 | 2101.31 | 204.135 | 11.437  | 192.699 |
| 2037          | 90327  | 8624.570  | 481.150   | 8143.420 | 9.016  | 94.421 | 2058.21 | 196.522 | 10.964  | 185.559 |
| 2038          | 88590  | 8315.017  | 457.130   | 7857.887 | 8.870  | 94.502 | 2014.42 | 189.073 | 10.395  | 178.678 |
| 2039          | 86921  | 8001.132  | 439.786   | 7561.345 | 8.699  | 94.503 | 1970.05 | 181.344 | 9.968   | 171.377 |

## Results for PHIM for Run 3 (Sensitivity\_Analysis\_2.RTF)

\*\*\*\*\*

### Main Results for E-Component for Run: 3, Simulation: 1, COD: STROKE

| Variable Parameter          | Value                                  |
|-----------------------------|----------------------------------------|
| 1. Country                  | US (United States)                     |
| 2. Sex                      | M (Males)                              |
| 3. Year of start of process | 1990                                   |
| 4. Cause of Death           | STROKE                                 |
| 5. Effective Dose NULL      | CC:1                                   |
| 6. Effective Dose Ecig      | CC:1 Ecig:0.05 Dual:0.525              |
| Note:                       | Death rates are per million population |

#### Results for Age Groups Combined and Years combined, Population unadjusted for deaths in Ecig scenario,

| Age Group:All |         | NULL       | Ecig      | %Drop    |        |        | NULL    | Ecig   | Drop   |        |
|---------------|---------|------------|-----------|----------|--------|--------|---------|--------|--------|--------|
| Year          | Number  | Attrib     | Attrib    | Drop     | %Drop  | Attrib | Death   | Attrib | Attrib | Drop   |
|               | Deaths  | Deaths     | Deaths    | Deaths   | Deaths | Deaths | Rate    | Rates  | Rates  | Rates  |
| All Comb      | 1489699 | 149918.462 | 63032.223 | 86886.24 | 5.832  | 57.956 | 431.236 | 43.398 | 18.246 | 25.152 |

#### Results for Age Groups Combined, Population unadjusted for deaths in Ecig scenario,

| Age Group:All |        | NULL     | Ecig     | %Drop    |        |        | NULL    | Ecig   | Drop   |        |
|---------------|--------|----------|----------|----------|--------|--------|---------|--------|--------|--------|
| Year          | Number | Attrib   | Attrib   | Drop     | %Drop  | Attrib | Death   | Attrib | Attrib | Drop   |
|               | Deaths | Deaths   | Deaths   | Deaths   | Deaths | Deaths | Rate    | Rates  | Rates  | Rates  |
| 1990          | 32862  | 4613.166 | 4613.166 | 0.000    | 0.000  | 0.000  | 520.936 | 73.129 | 73.129 | 0.000  |
| 1991          | 32619  | 4555.566 | 4496.065 | 59.501   | 0.182  | 1.306  | 508.609 | 71.032 | 70.104 | 0.928  |
| 1992          | 32100  | 4453.572 | 4297.071 | 156.501  | 0.488  | 3.514  | 492.014 | 68.262 | 65.864 | 2.399  |
| 1993          | 32896  | 4462.473 | 4174.541 | 287.932  | 0.875  | 6.452  | 495.226 | 67.179 | 62.845 | 4.335  |
| 1994          | 33323  | 4499.513 | 4054.336 | 445.177  | 1.336  | 9.894  | 492.290 | 66.473 | 59.896 | 6.577  |
| 1995          | 33569  | 4472.774 | 3852.363 | 620.412  | 1.848  | 13.871 | 486.422 | 64.812 | 55.822 | 8.990  |
| 1996          | 33870  | 4406.878 | 3602.682 | 804.196  | 2.374  | 18.249 | 483.150 | 62.863 | 51.392 | 11.472 |
| 1997          | 33516  | 4288.158 | 3307.645 | 980.513  | 2.926  | 22.866 | 470.307 | 60.173 | 46.414 | 13.759 |
| 1998          | 32795  | 4120.148 | 2981.050 | 1139.098 | 3.473  | 27.647 | 452.620 | 56.864 | 41.143 | 15.721 |
| 1999          | 33375  | 3982.443 | 2688.583 | 1293.860 | 3.877  | 32.489 | 453.361 | 54.097 | 36.521 | 17.576 |
| 2000          | 33459  | 4021.411 | 2528.690 | 1492.721 | 4.461  | 37.119 | 447.853 | 53.827 | 33.847 | 19.980 |
| 2001          | 32275  | 3848.092 | 2234.397 | 1613.696 | 5.000  | 41.935 | 426.379 | 50.836 | 29.518 | 21.318 |
| 2002          | 31586  | 3783.081 | 2025.167 | 1757.914 | 5.565  | 46.468 | 412.601 | 49.418 | 26.454 | 22.963 |
| 2003          | 30985  | 3754.415 | 1841.639 | 1912.776 | 6.173  | 50.947 | 400.541 | 48.533 | 23.807 | 24.726 |
| 2004          | 29884  | 3666.274 | 1647.875 | 2018.400 | 6.754  | 55.053 | 382.149 | 46.883 | 21.073 | 25.811 |
| 2005          | 28708  | 3589.688 | 1471.417 | 2118.271 | 7.379  | 59.010 | 362.850 | 45.371 | 18.598 | 26.774 |
| 2006          | 28188  | 3596.985 | 1336.440 | 2260.544 | 8.020  | 62.846 | 353.021 | 45.048 | 16.737 | 28.311 |
| 2007          | 28026  | 3560.798 | 1201.901 | 2358.897 | 8.417  | 66.246 | 347.392 | 44.137 | 14.898 | 29.239 |
| 2008          | 27128  | 3417.001 | 1047.534 | 2369.467 | 8.734  | 69.343 | 332.495 | 41.881 | 12.839 | 29.041 |
| 2009          | 27068  | 3394.390 | 946.557  | 2447.833 | 9.043  | 72.114 | 327.847 | 41.113 | 11.465 | 29.648 |
| 2010          | 26911  | 3340.137 | 851.851  | 2488.286 | 9.246  | 74.497 | 321.990 | 39.965 | 10.192 | 29.772 |
| 2011          | 26959  | 3285.435 | 765.793  | 2519.642 | 9.346  | 76.691 | 319.377 | 38.922 | 9.072  | 29.850 |
| 2012          | 27057  | 3259.209 | 689.773  | 2569.436 | 9.496  | 78.836 | 317.068 | 38.193 | 8.083  | 30.110 |
| 2013          | 27904  | 3274.703 | 633.235  | 2641.468 | 9.466  | 80.663 | 323.265 | 37.937 | 7.336  | 30.601 |
| 2014          | 28792  | 3298.083 | 582.747  | 2715.335 | 9.431  | 82.331 | 329.657 | 37.762 | 6.672  | 31.090 |
| 2015          | 29560  | 3244.406 | 530.866  | 2713.540 | 9.180  | 83.637 | 380.745 | 41.789 | 6.838  | 34.952 |
| 2016          | 30513  | 3314.836 | 497.323  | 2817.514 | 9.234  | 84.997 | 389.347 | 42.297 | 6.346  | 35.952 |
| 2017          | 31416  | 3333.314 | 460.873  | 2872.441 | 9.143  | 86.174 | 397.202 | 42.144 | 5.827  | 36.317 |
| 2018          | 29348  | 2925.242 | 377.153  | 2548.088 | 8.682  | 87.107 | 367.626 | 36.642 | 4.724  | 31.918 |
| 2019          | 29598  | 2864.628 | 343.753  | 2520.875 | 8.517  | 88.000 | 367.149 | 35.534 | 4.264  | 31.270 |
| 2020          | 29592  | 2730.366 | 307.733  | 2422.633 | 8.187  | 88.729 | 419.174 | 38.675 | 4.359  | 34.316 |
| 2021          | 30097  | 2647.911 | 278.313  | 2369.598 | 7.873  | 89.489 | 423.328 | 37.244 | 3.915  | 33.330 |
| 2022          | 30304  | 2586.165 | 253.711  | 2332.454 | 7.697  | 90.190 | 422.974 | 36.097 | 3.541  | 32.556 |
| 2023          | 30505  | 2517.960 | 231.590  | 2286.370 | 7.495  | 90.802 | 422.337 | 34.860 | 3.206  | 31.654 |
| 2024          | 30661  | 2454.161 | 213.726  | 2240.434 | 7.307  | 91.291 | 420.968 | 33.695 | 2.934  | 30.761 |
| 2025          | 30254  | 2275.364 | 189.117  | 2086.247 | 6.896  | 91.689 | 483.488 | 36.363 | 3.022  | 33.341 |
| 2026          | 30685  | 2183.166 | 173.303  | 2009.863 | 6.550  | 92.062 | 488.380 | 34.747 | 2.758  | 31.988 |
| 2027          | 30561  | 2112.345 | 160.746  | 1951.599 | 6.386  | 92.390 | 484.196 | 33.467 | 2.547  | 30.920 |
| 2028          | 30412  | 2046.677 | 149.838  | 1896.838 | 6.237  | 92.679 | 479.392 | 32.263 | 2.362  | 29.901 |
| 2029          | 30254  | 1977.671 | 140.171  | 1837.501 | 6.074  | 92.912 | 474.195 | 30.997 | 2.197  | 28.800 |
| 2030          | 29330  | 1744.457 | 120.090  | 1624.367 | 5.538  | 93.116 | 549.260 | 32.668 | 2.249  | 30.419 |
| 2031          | 28976  | 1653.738 | 110.165  | 1543.573 | 5.327  | 93.338 | 541.223 | 30.889 | 2.058  | 28.831 |
| 2032          | 28724  | 1603.120 | 103.214  | 1499.907 | 5.222  | 93.562 | 534.690 | 29.841 | 1.921  | 27.920 |
| 2033          | 28464  | 1548.245 | 96.639   | 1451.606 | 5.100  | 93.758 | 527.627 | 28.700 | 1.791  | 26.908 |
| 2034          | 28178  | 1511.985 | 92.318   | 1419.667 | 5.038  | 93.894 | 519.826 | 27.893 | 1.703  | 26.190 |
| 2035          | 26737  | 1239.866 | 73.749   | 1166.117 | 4.361  | 94.052 | 610.065 | 28.290 | 1.683  | 26.607 |
| 2036          | 25591  | 1182.522 | 68.770   | 1113.752 | 4.352  | 94.184 | 583.762 | 26.975 | 1.569  | 25.406 |
| 2037          | 25143  | 1134.483 | 65.551   | 1068.932 | 4.251  | 94.222 | 572.916 | 25.851 | 1.494  | 24.357 |
| 2038          | 24693  | 1093.537 | 62.010   | 1031.526 | 4.177  | 94.329 | 561.491 | 24.866 | 1.410  | 23.456 |
| 2039          | 24247  | 1047.905 | 58.981   | 988.923  | 4.079  | 94.371 | 549.553 | 23.751 | 1.337  | 22.414 |



## Results for PHIM for Run 3 (Sensitivity\_Analysis\_2.RTF)

\*\*\*\*\*

### Main Results for E-Component for Run: 3, Simulation: 1, COD: COPD

| Variable Parameter          | Value                                  |
|-----------------------------|----------------------------------------|
| 1. Country                  | US (United States)                     |
| 2. Sex                      | M (Males)                              |
| 3. Year of start of process | 1990                                   |
| 4. Cause of Death           | COPD                                   |
| 5. Effective Dose NULL      | CC:1                                   |
| 6. Effective Dose Ecig      | CC:1 Ecig:0.05 Dual:0.525              |
| Note:                       | Death rates are per million population |

#### Results for Age Groups Combined and Years combined, Population unadjusted for deaths in Ecig scenario,

| Age Group:All | NULL    | Ecig        | %Drop      |          |        | NULL   | Ecig    | Drop    |         |         |
|---------------|---------|-------------|------------|----------|--------|--------|---------|---------|---------|---------|
| Year          | Number  | Attrib      | Attrib     | Drop     | %Drop  | Attrib | Death   | Attrib  | Attrib  | Drop    |
|               | Deaths  | Deaths      | Deaths     | Deaths   | Deaths | Deaths | Rate    | Rates   | Rates   | Rates   |
| All Comb      | 2233143 | 1015606.587 | 648008.982 | 367597.6 | 16.461 | 36.195 | 646.447 | 293.996 | 187.585 | 106.412 |

#### Results for Age Groups Combined, Population unadjusted for deaths in Ecig scenario,

| Age Group:All | NULL   | Ecig      | %Drop     |          |        | NULL   | Ecig    | Drop    |         |         |
|---------------|--------|-----------|-----------|----------|--------|--------|---------|---------|---------|---------|
| Year          | Number | Attrib    | Attrib    | Drop     | %Drop  | Attrib | Death   | Attrib  | Attrib  | Drop    |
|               | Deaths | Deaths    | Deaths    | Deaths   | Deaths | Deaths | Rate    | Rates   | Rates   | Rates   |
| 1990          | 33993  | 19262.437 | 19262.437 | 0.000    | 0.000  | 0.000  | 538.865 | 305.353 | 305.353 | 0.000   |
| 1991          | 34092  | 19215.636 | 19179.449 | 36.187   | 0.106  | 0.188  | 531.576 | 299.618 | 299.054 | 0.564   |
| 1992          | 33942  | 19056.189 | 18959.541 | 96.648   | 0.285  | 0.507  | 520.248 | 292.085 | 290.603 | 1.481   |
| 1993          | 35913  | 20095.670 | 19903.368 | 192.301  | 0.535  | 0.957  | 540.645 | 302.526 | 299.631 | 2.895   |
| 1994          | 35074  | 19524.095 | 19234.129 | 289.965  | 0.827  | 1.485  | 518.158 | 288.435 | 284.151 | 4.284   |
| 1995          | 34669  | 19116.002 | 18709.174 | 406.828  | 1.173  | 2.128  | 502.362 | 276.995 | 271.100 | 5.895   |
| 1996          | 34582  | 18975.021 | 18432.505 | 542.517  | 1.569  | 2.859  | 493.306 | 270.675 | 262.936 | 7.739   |
| 1997          | 35267  | 19169.025 | 18464.888 | 704.136  | 1.997  | 3.673  | 494.878 | 268.986 | 259.105 | 9.881   |
| 1998          | 35675  | 19228.937 | 18343.793 | 885.144  | 2.481  | 4.603  | 492.368 | 265.388 | 253.172 | 12.216  |
| 1999          | 38516  | 20589.820 | 19440.858 | 1148.962 | 2.983  | 5.580  | 523.195 | 279.689 | 264.082 | 15.607  |
| 2000          | 36283  | 19196.417 | 17913.880 | 1282.538 | 3.535  | 6.681  | 485.652 | 256.946 | 239.779 | 17.167  |
| 2001          | 36281  | 19012.731 | 17498.778 | 1513.954 | 4.173  | 7.963  | 479.301 | 251.174 | 231.173 | 20.001  |
| 2002          | 35983  | 18699.357 | 16972.057 | 1727.300 | 4.800  | 9.237  | 470.038 | 244.265 | 221.702 | 22.563  |
| 2003          | 36205  | 18663.550 | 16676.285 | 1987.264 | 5.489  | 10.648 | 468.019 | 241.262 | 215.573 | 25.689  |
| 2004          | 34611  | 17679.164 | 15519.994 | 2159.169 | 6.238  | 12.213 | 442.596 | 226.076 | 198.465 | 27.611  |
| 2005          | 36826  | 18692.832 | 16128.944 | 2563.888 | 6.962  | 13.716 | 465.456 | 236.265 | 203.859 | 32.406  |
| 2006          | 34350  | 17308.564 | 14625.805 | 2682.758 | 7.810  | 15.500 | 430.192 | 216.769 | 183.171 | 33.598  |
| 2007          | 35326  | 17683.181 | 14614.906 | 3068.275 | 8.686  | 17.351 | 437.879 | 219.189 | 181.157 | 38.032  |
| 2008          | 38248  | 19006.374 | 15380.164 | 3626.210 | 9.481  | 19.079 | 468.788 | 232.952 | 188.508 | 44.445  |
| 2009          | 36902  | 18205.573 | 14361.857 | 3843.716 | 10.416 | 21.113 | 446.956 | 220.505 | 173.950 | 46.555  |
| 2010          | 37234  | 18237.758 | 14056.751 | 4181.008 | 11.229 | 22.925 | 445.505 | 218.215 | 168.189 | 50.026  |
| 2011          | 38093  | 18487.916 | 13833.758 | 4654.158 | 12.218 | 25.174 | 451.279 | 219.022 | 163.885 | 55.137  |
| 2012          | 38504  | 18491.158 | 13440.925 | 5050.234 | 13.116 | 27.312 | 451.211 | 216.689 | 157.508 | 59.181  |
| 2013          | 40290  | 19143.452 | 13520.657 | 5622.796 | 13.956 | 29.372 | 466.755 | 221.775 | 156.635 | 65.139  |
| 2014          | 40339  | 18992.005 | 12995.819 | 5996.186 | 14.864 | 31.572 | 461.866 | 217.451 | 148.797 | 68.654  |
| 2015          | 42303  | 19728.885 | 13148.427 | 6580.458 | 15.556 | 33.354 | 544.880 | 254.116 | 169.357 | 84.759  |
| 2016          | 43104  | 19876.724 | 12836.825 | 7039.899 | 16.332 | 35.418 | 550.009 | 253.628 | 163.798 | 89.829  |
| 2017          | 44107  | 20119.790 | 12569.417 | 7550.373 | 17.118 | 37.527 | 557.659 | 254.381 | 158.919 | 95.462  |
| 2018          | 45469  | 20535.123 | 12407.020 | 8128.103 | 17.876 | 39.581 | 569.564 | 257.229 | 155.414 | 101.815 |
| 2019          | 46963  | 21009.029 | 12266.496 | 8742.533 | 18.616 | 41.613 | 582.552 | 260.605 | 152.159 | 108.446 |
| 2020          | 48419  | 21428.512 | 12102.016 | 9326.496 | 19.262 | 43.524 | 685.853 | 303.533 | 171.424 | 132.109 |
| 2021          | 48463  | 21266.697 | 11511.800 | 9754.897 | 20.129 | 45.869 | 681.652 | 299.127 | 161.919 | 137.208 |
| 2022          | 49915  | 21663.568 | 11255.079 | 10408.49 | 20.852 | 48.046 | 696.712 | 302.378 | 157.097 | 145.281 |
| 2023          | 51391  | 22084.131 | 10999.101 | 11085.03 | 21.570 | 50.195 | 711.491 | 305.748 | 152.279 | 153.469 |
| 2024          | 52811  | 22418.456 | 10726.355 | 11692.10 | 22.139 | 52.154 | 725.093 | 307.804 | 147.272 | 160.532 |
| 2025          | 53848  | 22614.834 | 10408.363 | 12206.47 | 22.668 | 53.976 | 860.553 | 361.411 | 166.338 | 195.074 |
| 2026          | 54342  | 22571.522 | 9924.752  | 12646.77 | 23.273 | 56.030 | 864.886 | 359.241 | 157.959 | 201.282 |
| 2027          | 55267  | 22774.416 | 9545.430  | 13228.99 | 23.937 | 58.087 | 875.619 | 360.827 | 151.233 | 209.594 |
| 2028          | 56149  | 22915.561 | 9126.477  | 13789.08 | 24.558 | 60.173 | 885.102 | 361.228 | 143.865 | 217.364 |
| 2029          | 57014  | 22992.027 | 8702.937  | 14289.09 | 25.063 | 62.148 | 893.616 | 360.371 | 136.408 | 223.963 |
| 2030          | 57238  | 22895.360 | 8286.703  | 14608.66 | 25.522 | 63.806 | 1071.90 | 428.760 | 155.184 | 273.575 |
| 2031          | 57592  | 22715.871 | 7832.902  | 14882.97 | 25.842 | 65.518 | 1075.71 | 424.293 | 146.305 | 277.988 |
| 2032          | 58251  | 22759.207 | 7427.775  | 15331.43 | 26.320 | 67.364 | 1084.31 | 423.652 | 138.264 | 285.387 |
| 2033          | 58885  | 22786.258 | 7044.794  | 15741.46 | 26.733 | 69.083 | 1091.54 | 422.387 | 130.589 | 291.799 |
| 2034          | 59460  | 22806.106 | 6657.853  | 16148.25 | 27.158 | 70.807 | 1096.89 | 420.721 | 122.822 | 297.899 |
| 2035          | 58516  | 22262.998 | 6227.118  | 16035.88 | 27.404 | 72.029 | 1335.15 | 507.973 | 142.084 | 365.889 |
| 2036          | 56446  | 21140.051 | 5467.701  | 15672.35 | 27.765 | 74.136 | 1287.60 | 482.234 | 124.726 | 357.508 |
| 2037          | 56568  | 21011.845 | 5070.611  | 15941.23 | 28.181 | 75.868 | 1288.98 | 478.783 | 115.541 | 363.242 |
| 2038          | 56668  | 20787.483 | 4665.581  | 16121.90 | 28.450 | 77.556 | 1288.55 | 472.681 | 106.089 | 366.591 |
| 2039          | 56758  | 20709.267 | 4326.725  | 16382.54 | 28.864 | 79.107 | 1286.40 | 469.372 | 98.065  | 371.308 |

## Results for PHIM for Run 3 (Sensitivity\_Analysis\_2.RTF)

\*\*\*\*\*

### Main Results for E-Component for Run: 3, Simulation: 1, COD: Four Diseases Combined, Adjusted

| Variable Parameter          | Value                                  |
|-----------------------------|----------------------------------------|
| 1. Country                  | US (United States)                     |
| 2. Sex                      | M (Males)                              |
| 3. Year of start of process | 1990                                   |
| 4. Cause of Death           | Four Diseases Combined                 |
| 5. Effective Dose NULL      | CC:1                                   |
| 6. Effective Dose Ecig      | CC:1 Ecig:0.05 Dual:0.525              |
| Note:                       | Death rates are per million population |

#### Results for Age Groups Combined and Years combined, Population and Number deaths adjusted for Ecig scenario,

| Age Group:All | NULL     | Ecig        |             |         | %Drop  | NULL   | Ecig    |         |         |         |
|---------------|----------|-------------|-------------|---------|--------|--------|---------|---------|---------|---------|
| Year          | Number   | Attrib      | Attrib      | Drop    | %Drop  | Attrib | Death   | Attrib  | Attrib  | Drop    |
|               | Deaths   | Deaths      | Deaths      | Deaths  | Deaths | Deaths | Rate    | Rates   | Rates   | Rates   |
| All Comb      | 13318846 | 4509390.583 | 2859275.372 | 1650115 | 12.389 | 36.593 | 3818.29 | 1305.37 | 819.705 | 485.665 |

#### Results for Age Groups Combined, Population and Number deaths adjusted for Ecig scenario,

| Age Group:All | NULL   | Ecig       |            |          | %Drop  | NULL   | Ecig    |         |         |         |
|---------------|--------|------------|------------|----------|--------|--------|---------|---------|---------|---------|
| Year          | Number | Attrib     | Attrib     | Drop     | %Drop  | Attrib | Death   | Attrib  | Attrib  | Drop    |
|               | Deaths | Deaths     | Deaths     | Deaths   | Deaths | Deaths | Rate    | Rates   | Rates   | Rates   |
| 1990          | 317161 | 125773.065 | 125773.065 | 0.000    | 0.000  | 0.000  | 5027.71 | 1993.78 | 1993.78 | 0.000   |
| 1991          | 313217 | 123999.442 | 123381.660 | 617.782  | 0.197  | 0.498  | 4883.81 | 1933.45 | 1923.82 | 9.633   |
| 1992          | 308581 | 122014.015 | 120356.255 | 1657.760 | 0.537  | 1.359  | 4729.75 | 1870.18 | 1844.75 | 25.427  |
| 1993          | 311729 | 122810.618 | 119751.185 | 3059.433 | 0.981  | 2.491  | 4692.70 | 1848.83 | 1802.70 | 46.122  |
| 1994          | 305738 | 119925.592 | 115285.686 | 4639.906 | 1.518  | 3.869  | 4516.37 | 1771.69 | 1703.01 | 68.687  |
| 1995          | 303294 | 117896.496 | 111457.938 | 6438.558 | 2.123  | 5.461  | 4394.13 | 1708.35 | 1614.80 | 93.543  |
| 1996          | 299670 | 115698.645 | 107345.038 | 8353.608 | 2.788  | 7.220  | 4273.68 | 1650.42 | 1530.88 | 119.544 |
| 1997          | 294390 | 113359.847 | 103155.231 | 10204.62 | 3.466  | 9.002  | 4129.43 | 1590.70 | 1446.97 | 143.733 |
| 1998          | 289485 | 111444.212 | 99419.142  | 12025.07 | 4.154  | 10.790 | 3993.24 | 1538.10 | 1371.42 | 166.680 |
| 1999          | 311331 | 114877.722 | 99059.179  | 15818.54 | 5.081  | 13.770 | 4226.13 | 1560.48 | 1344.67 | 215.813 |
| 2000          | 304213 | 112379.704 | 94617.004  | 17762.70 | 5.839  | 15.806 | 4068.17 | 1504.22 | 1265.29 | 238.924 |
| 2001          | 296824 | 110024.943 | 90248.301  | 19776.64 | 6.663  | 17.975 | 3916.68 | 1453.52 | 1190.85 | 262.666 |
| 2002          | 292547 | 108289.173 | 86304.189  | 21984.98 | 7.515  | 20.302 | 3815.92 | 1414.56 | 1125.73 | 288.824 |
| 2003          | 286637 | 106539.023 | 82651.045  | 23887.98 | 8.334  | 22.422 | 3698.80 | 1377.22 | 1066.54 | 310.682 |
| 2004          | 275060 | 103037.251 | 77913.033  | 25124.22 | 9.134  | 24.384 | 3510.02 | 1317.61 | 994.240 | 323.373 |
| 2005          | 273407 | 103044.562 | 75978.729  | 27065.83 | 9.899  | 26.266 | 3447.21 | 1302.41 | 957.965 | 344.449 |
| 2006          | 265270 | 99672.555  | 71048.435  | 28624.12 | 10.791 | 28.718 | 3312.79 | 1248.28 | 887.279 | 361.000 |
| 2007          | 259710 | 97839.152  | 67931.764  | 29907.39 | 11.516 | 30.568 | 3208.81 | 1212.75 | 839.321 | 373.431 |
| 2008          | 260931 | 98075.852  | 66442.661  | 31633.19 | 12.123 | 32.254 | 3186.46 | 1202.07 | 811.390 | 390.680 |
| 2009          | 255526 | 95617.338  | 62912.483  | 32704.86 | 12.799 | 34.204 | 3082.30 | 1158.11 | 758.886 | 399.228 |
| 2010          | 253668 | 94607.988  | 60602.929  | 34005.06 | 13.405 | 35.943 | 3021.41 | 1131.98 | 721.833 | 410.151 |
| 2011          | 253761 | 93633.119  | 58050.047  | 35583.07 | 14.022 | 38.003 | 2991.29 | 1109.25 | 684.284 | 424.965 |
| 2012          | 254834 | 92775.175  | 55636.849  | 37138.33 | 14.574 | 40.030 | 2970.03 | 1087.19 | 648.436 | 438.754 |
| 2013          | 258613 | 92345.780  | 53581.271  | 38764.51 | 14.989 | 41.978 | 2978.27 | 1069.82 | 617.059 | 452.757 |
| 2014          | 260070 | 91379.215  | 51316.883  | 40062.33 | 15.404 | 43.842 | 2958.60 | 1046.26 | 583.790 | 462.466 |
| 2015          | 262731 | 90750.242  | 49495.663  | 41254.58 | 15.702 | 45.459 | 3357.71 | 1168.90 | 632.555 | 536.346 |
| 2016          | 264665 | 88811.996  | 46407.521  | 42404.47 | 16.022 | 47.746 | 3348.84 | 1133.24 | 587.201 | 546.044 |
| 2017          | 267186 | 87325.126  | 43910.341  | 43414.78 | 16.249 | 49.716 | 3347.82 | 1104.08 | 550.192 | 553.887 |
| 2018          | 262396 | 87612.144  | 43253.789  | 44358.35 | 16.905 | 50.630 | 3255.40 | 1097.46 | 536.625 | 560.831 |
| 2019          | 265428 | 87797.760  | 41987.282  | 45810.48 | 17.259 | 52.177 | 3258.99 | 1089.08 | 515.531 | 573.551 |
| 2020          | 266601 | 87221.042  | 40636.461  | 46584.58 | 17.474 | 53.410 | 3730.33 | 1235.48 | 568.593 | 666.886 |
| 2021          | 259535 | 82001.292  | 36123.083  | 45878.21 | 17.677 | 55.948 | 3603.40 | 1153.39 | 501.536 | 651.854 |
| 2022          | 261863 | 81915.977  | 34721.201  | 47194.78 | 18.023 | 57.614 | 3605.40 | 1143.37 | 478.052 | 665.323 |
| 2023          | 264168 | 81810.810  | 33339.773  | 48471.04 | 18.349 | 59.248 | 3605.11 | 1132.64 | 454.990 | 677.655 |
| 2024          | 266136 | 81528.303  | 31982.568  | 49545.73 | 18.617 | 60.771 | 3599.33 | 1119.38 | 432.544 | 686.834 |
| 2025          | 263036 | 79599.213  | 30443.982  | 49155.23 | 18.688 | 61.753 | 4129.35 | 1272.09 | 477.934 | 794.154 |
| 2026          | 257402 | 75082.462  | 27047.327  | 48035.13 | 18.662 | 63.977 | 4021.04 | 1194.99 | 422.524 | 772.464 |
| 2027          | 257145 | 74444.425  | 25657.100  | 48787.32 | 18.973 | 65.535 | 3995.66 | 1179.46 | 398.674 | 780.787 |
| 2028          | 256725 | 73699.585  | 24215.465  | 49484.12 | 19.275 | 67.143 | 3965.85 | 1161.76 | 374.077 | 787.683 |
| 2029          | 256251 | 72819.703  | 22834.983  | 49984.72 | 19.506 | 68.642 | 3932.91 | 1141.36 | 350.468 | 790.888 |
| 2030          | 247467 | 69309.277  | 21301.390  | 48007.89 | 19.400 | 69.266 | 4522.73 | 1297.95 | 389.306 | 908.644 |
| 2031          | 242484 | 65433.368  | 18873.594  | 46559.77 | 19.201 | 71.156 | 4416.11 | 1222.18 | 343.726 | 878.456 |
| 2032          | 241307 | 64643.552  | 17734.033  | 46909.52 | 19.440 | 72.566 | 4375.86 | 1203.31 | 321.590 | 881.719 |
| 2033          | 240094 | 63793.514  | 16664.316  | 47129.20 | 19.629 | 73.878 | 4331.99 | 1182.54 | 300.672 | 881.864 |
| 2034          | 238738 | 63032.151  | 15656.022  | 47376.13 | 19.844 | 75.162 | 4283.15 | 1162.80 | 280.882 | 881.918 |
| 2035          | 223596 | 57653.301  | 14248.445  | 43404.86 | 19.412 | 75.286 | 4943.35 | 1315.47 | 315.010 | 1000.46 |
| 2036          | 215842 | 52988.733  | 11916.087  | 41072.65 | 19.029 | 77.512 | 4766.19 | 1208.75 | 263.130 | 945.616 |
| 2037          | 213292 | 52026.921  | 11033.853  | 40993.07 | 19.219 | 78.792 | 4700.56 | 1185.50 | 243.166 | 942.337 |
| 2038          | 210771 | 50943.211  | 10146.098  | 40797.11 | 19.356 | 80.084 | 4631.29 | 1158.38 | 222.941 | 935.442 |
| 2039          | 208320 | 50085.991  | 9424.992   | 40661.00 | 19.519 | 81.182 | 4558.69 | 1135.19 | 206.248 | 928.943 |

## Results for PHIM for Run 3 (Sensitivity\_Analysis\_2.RTF)

\*\*\*\*\*

### Main Results for E-Component for Run: 3, Simulation: 1, COD: LUNG CANCER, Adjusted

| Variable Parameter          | Value                                  |
|-----------------------------|----------------------------------------|
| 1. Country                  | US (United States)                     |
| 2. Sex                      | M (Males)                              |
| 3. Year of start of process | 1990                                   |
| 4. Cause of Death           | LUNG CANCER                            |
| 5. Effective Dose NULL      | CC:1                                   |
| 6. Effective Dose Ecig      | CC:1 Ecig:0.05 Dual:0.525              |
| Note:                       | Death rates are per million population |

#### Results for Age Groups Combined and Years combined, Population and Number deaths adjusted for Ecig scenario,

| Age Group: | All     | NULL        | Ecig        | %Drop    |        |        | NULL    | Ecig    | Drop    |         |
|------------|---------|-------------|-------------|----------|--------|--------|---------|---------|---------|---------|
| Year       | Number  | Attrib      | Attrib      | Drop     | %Drop  | Attrib | Death   | Attrib  | Drop    |         |
|            | Deaths  | Deaths      | Deaths      | Deaths   | Deaths | Deaths | Rate    | Rates   | Rates   |         |
| All Comb   | 3101656 | 2244988.113 | 1674430.095 | 570558.0 | 18.395 | 25.415 | 889.192 | 649.875 | 480.031 | 169.845 |

#### Results for Age Groups Combined, Population and Number deaths adjusted for Ecig scenario,

| Age Group: | All    | NULL      | Ecig      | %Drop    |        |        | NULL    | Ecig    | Drop    |
|------------|--------|-----------|-----------|----------|--------|--------|---------|---------|---------|
| Year       | Number | Attrib    | Attrib    | Drop     | %Drop  | Attrib | Death   | Attrib  | Drop    |
|            | Deaths | Deaths    | Deaths    | Deaths   | Deaths | Deaths | Rate    | Rates   | Rates   |
| 1990       | 78822  | 63385.736 | 63385.736 | 0.000    | 0.000  | 0.000  | 1249.50 | 1004.81 | 0.000   |
| 1991       | 78462  | 62918.402 | 62844.018 | 74.385   | 0.095  | 0.118  | 1223.41 | 981.049 | 979.890 |
| 1992       | 77988  | 62366.766 | 62166.243 | 200.523  | 0.257  | 0.322  | 1195.36 | 955.930 | 952.847 |
| 1993       | 78546  | 62652.888 | 62269.479 | 383.409  | 0.488  | 0.612  | 1182.42 | 943.195 | 937.389 |
| 1994       | 77447  | 61565.227 | 60971.378 | 593.849  | 0.767  | 0.965  | 1144.05 | 909.520 | 900.673 |
| 1995       | 76922  | 60851.961 | 60003.554 | 848.407  | 1.103  | 1.394  | 1114.45 | 881.759 | 869.332 |
| 1996       | 76261  | 60122.922 | 58966.958 | 1155.964 | 1.516  | 1.923  | 1087.58 | 857.643 | 840.944 |
| 1997       | 75516  | 59237.155 | 57759.130 | 1478.025 | 1.957  | 2.495  | 1059.27 | 831.234 | 810.193 |
| 1998       | 75442  | 58906.696 | 57037.452 | 1869.244 | 2.478  | 3.173  | 1040.67 | 813.001 | 786.792 |
| 1999       | 73239  | 56930.073 | 54682.856 | 2247.217 | 3.068  | 3.947  | 994.170 | 773.329 | 742.287 |
| 2000       | 73891  | 57137.121 | 54400.883 | 2736.238 | 3.703  | 4.789  | 988.123 | 764.787 | 727.491 |
| 2001       | 73429  | 56481.726 | 53214.548 | 3267.178 | 4.449  | 5.784  | 968.919 | 746.169 | 702.182 |
| 2002       | 72608  | 55588.365 | 51781.727 | 3806.638 | 5.243  | 6.848  | 947.083 | 726.138 | 675.429 |
| 2003       | 72142  | 54945.856 | 50528.922 | 4416.934 | 6.123  | 8.039  | 930.930 | 710.281 | 652.032 |
| 2004       | 71537  | 54203.126 | 49138.457 | 5064.669 | 7.080  | 9.344  | 912.882 | 693.135 | 627.050 |
| 2005       | 71240  | 53744.603 | 48019.046 | 5725.557 | 8.037  | 10.653 | 898.214 | 679.296 | 605.440 |
| 2006       | 69971  | 52535.572 | 46118.424 | 6417.147 | 9.171  | 12.215 | 873.823 | 657.945 | 575.944 |
| 2007       | 68918  | 51492.124 | 44396.444 | 7095.680 | 10.296 | 13.780 | 851.503 | 638.264 | 548.534 |
| 2008       | 68623  | 51030.736 | 43112.305 | 7918.430 | 11.539 | 15.517 | 838.021 | 625.460 | 526.483 |
| 2009       | 67951  | 50276.199 | 41561.122 | 8715.077 | 12.826 | 17.334 | 819.665 | 608.943 | 501.334 |
| 2010       | 67687  | 49840.933 | 40315.186 | 9525.747 | 14.073 | 19.112 | 806.212 | 596.347 | 480.189 |
| 2011       | 67045  | 49072.841 | 38679.562 | 10393.28 | 15.502 | 21.179 | 790.310 | 581.354 | 455.948 |
| 2012       | 66744  | 48539.512 | 37217.202 | 11322.31 | 16.964 | 23.326 | 777.888 | 568.812 | 433.758 |
| 2013       | 65971  | 47675.741 | 35527.164 | 12148.58 | 18.415 | 25.482 | 759.740 | 552.318 | 409.142 |
| 2014       | 65728  | 47194.534 | 34197.250 | 12997.28 | 19.774 | 27.540 | 747.731 | 540.359 | 389.034 |
| 2015       | 64890  | 46305.842 | 32575.752 | 13730.09 | 21.159 | 29.651 | 829.297 | 596.439 | 416.318 |
| 2016       | 62393  | 44208.867 | 30104.467 | 14104.40 | 22.606 | 31.904 | 789.472 | 564.107 | 380.916 |
| 2017       | 60711  | 42702.624 | 28150.448 | 14552.18 | 23.969 | 34.078 | 760.706 | 539.903 | 352.722 |
| 2018       | 63378  | 44321.202 | 28084.964 | 16236.24 | 25.618 | 36.633 | 786.301 | 555.181 | 348.434 |
| 2019       | 64030  | 44493.088 | 27163.524 | 17329.56 | 27.065 | 38.949 | 786.173 | 551.912 | 333.521 |
| 2020       | 64529  | 44529.551 | 26202.566 | 18326.99 | 28.401 | 41.157 | 902.895 | 630.757 | 366.631 |
| 2021       | 58134  | 39852.556 | 22469.370 | 17383.19 | 29.902 | 43.619 | 807.133 | 560.546 | 311.966 |
| 2022       | 58529  | 39853.685 | 21477.672 | 18376.01 | 31.396 | 46.109 | 805.845 | 556.274 | 295.711 |
| 2023       | 58897  | 39847.050 | 20490.043 | 19357.01 | 32.866 | 48.578 | 803.770 | 551.670 | 279.629 |
| 2024       | 59172  | 39726.010 | 19509.076 | 20216.93 | 34.167 | 50.891 | 800.259 | 545.435 | 263.848 |
| 2025       | 58819  | 39207.348 | 18456.931 | 20750.42 | 35.278 | 52.925 | 923.389 | 626.579 | 289.752 |
| 2026       | 52652  | 34803.960 | 15597.604 | 19206.36 | 36.478 | 55.184 | 822.517 | 553.929 | 243.660 |
| 2027       | 52451  | 34484.595 | 14659.868 | 19824.73 | 37.797 | 57.489 | 815.015 | 546.357 | 227.793 |
| 2028       | 52204  | 34100.638 | 13705.586 | 20395.05 | 39.068 | 59.808 | 806.436 | 537.544 | 211.722 |
| 2029       | 51928  | 33669.838 | 12805.975 | 20863.86 | 40.179 | 61.966 | 796.979 | 527.732 | 196.544 |
| 2030       | 50541  | 32557.688 | 11861.611 | 20696.08 | 40.949 | 63.567 | 923.686 | 609.705 | 216.784 |
| 2031       | 44907  | 28646.393 | 9892.547  | 18753.85 | 41.761 | 65.467 | 817.846 | 535.065 | 180.163 |
| 2032       | 44526  | 28227.160 | 9204.357  | 19022.80 | 42.723 | 67.392 | 807.433 | 525.435 | 166.912 |
| 2033       | 44129  | 27786.623 | 8565.246  | 19221.38 | 43.558 | 69.175 | 796.209 | 515.079 | 154.542 |
| 2034       | 43697  | 27348.299 | 7972.179  | 19376.12 | 44.342 | 70.849 | 783.968 | 504.514 | 143.027 |
| 2035       | 41192  | 25570.077 | 7206.591  | 18363.49 | 44.581 | 71.816 | 910.679 | 583.430 | 159.326 |
| 2036       | 35286  | 21717.319 | 5644.830  | 16072.49 | 45.550 | 74.008 | 779.175 | 495.402 | 124.649 |
| 2037       | 34727  | 21256.024 | 5192.094  | 16063.93 | 46.257 | 75.574 | 765.330 | 484.347 | 114.424 |
| 2038       | 34174  | 20747.175 | 4747.431  | 15999.74 | 46.819 | 77.118 | 750.898 | 471.764 | 104.316 |
| 2039       | 33631  | 20327.688 | 4394.318  | 15933.37 | 47.377 | 78.383 | 735.954 | 460.724 | 96.161  |

## Results for PHIM for Run 3 (Sensitivity\_Analysis\_2.RTF)

\*\*\*\*\*

### Main Results for E-Component for Run: 3, Simulation: 1, COD: IHD, Adjusted

| Variable Parameter          | Value                                  |
|-----------------------------|----------------------------------------|
| 1. Country                  | US (United States)                     |
| 2. Sex                      | M (Males)                              |
| 3. Year of start of process | 1990                                   |
| 4. Cause of Death           | IHD                                    |
| 5. Effective Dose NULL      | CC:1                                   |
| 6. Effective Dose Ecig      | CC:1 Ecig:0.05 Dual:0.525              |
| Note:                       | Death rates are per million population |

#### Results for Age Groups Combined and Years combined, Population and Number deaths adjusted for Ecig scenario,

| Age Group:All | NULL    | Ecig        | %Drop      |          |        |        | NULL    | Ecig    | Drop    |         |
|---------------|---------|-------------|------------|----------|--------|--------|---------|---------|---------|---------|
| Year          | Number  | Attrib      | Attrib     | Drop     | %Drop  | Attrib | Death   | Attrib  | Attrib  | Drop    |
|               | Deaths  | Deaths      | Deaths     | Deaths   | Deaths | Deaths | Rate    | Rates   | Rates   | Rates   |
| All Comb      | 6435050 | 1098877.421 | 466848.780 | 632028.6 | 9.822  | 57.516 | 1844.82 | 318.101 | 133.838 | 184.264 |

#### Results for Age Groups Combined, Population and Number deaths adjusted for Ecig scenario,

| Age Group:All | NULL   | Ecig      | %Drop     |          |        |        | NULL    | Ecig    | Drop    |         |
|---------------|--------|-----------|-----------|----------|--------|--------|---------|---------|---------|---------|
| Year          | Number | Attrib    | Attrib    | Drop     | %Drop  | Attrib | Death   | Attrib  | Attrib  | Drop    |
|               | Deaths | Deaths    | Deaths    | Deaths   | Deaths | Deaths | Rate    | Rates   | Rates   | Rates   |
| 1990          | 171484 | 38511.725 | 38511.725 | 0.000    | 0.000  | 0.000  | 2718.40 | 610.497 | 610.497 | 0.000   |
| 1991          | 168044 | 37309.838 | 36862.128 | 447.710  | 0.266  | 1.200  | 2620.21 | 581.750 | 574.769 | 6.981   |
| 1992          | 164550 | 36137.488 | 34933.066 | 1204.422 | 0.732  | 3.333  | 2522.13 | 553.899 | 535.433 | 18.466  |
| 1993          | 164371 | 35599.588 | 33402.543 | 2197.044 | 1.337  | 6.172  | 2474.39 | 535.926 | 502.834 | 33.093  |
| 1994          | 159886 | 34336.757 | 31022.982 | 3313.775 | 2.073  | 9.651  | 2361.84 | 507.267 | 458.273 | 48.993  |
| 1995          | 158119 | 33455.759 | 28887.730 | 4568.029 | 2.889  | 13.654 | 2290.83 | 484.782 | 418.526 | 66.256  |
| 1996          | 154932 | 32193.824 | 26334.736 | 5859.088 | 3.782  | 18.199 | 2209.53 | 459.239 | 375.567 | 83.672  |
| 1997          | 150053 | 30665.509 | 23611.434 | 7054.075 | 4.701  | 23.003 | 2104.81 | 430.308 | 331.200 | 99.108  |
| 1998          | 145520 | 29188.430 | 21040.089 | 8148.341 | 5.599  | 27.916 | 2007.35 | 402.844 | 290.233 | 112.611 |
| 1999          | 166126 | 33375.386 | 22223.376 | 11152.01 | 6.713  | 33.414 | 2255.06 | 453.366 | 301.669 | 151.697 |
| 2000          | 160483 | 32024.754 | 19744.675 | 12280.08 | 7.652  | 38.346 | 2146.11 | 428.655 | 264.041 | 164.614 |
| 2001          | 154718 | 30682.393 | 17264.990 | 13417.40 | 8.672  | 43.730 | 2041.55 | 405.339 | 227.817 | 177.523 |
| 2002          | 152221 | 30218.370 | 15482.590 | 14735.78 | 9.680  | 48.764 | 1985.54 | 394.736 | 201.951 | 192.784 |
| 2003          | 147125 | 29175.202 | 13553.430 | 15621.77 | 10.618 | 53.545 | 1898.52 | 377.146 | 174.895 | 202.250 |
| 2004          | 138821 | 27488.687 | 11550.470 | 15938.22 | 11.481 | 57.981 | 1771.48 | 351.518 | 147.394 | 204.124 |
| 2005          | 136387 | 27017.439 | 10291.581 | 16725.86 | 12.264 | 61.908 | 1719.61 | 341.482 | 129.760 | 211.723 |
| 2006          | 132489 | 26231.435 | 8896.643  | 17334.79 | 13.084 | 66.084 | 1654.57 | 328.517 | 111.105 | 217.413 |
| 2007          | 127124 | 25103.049 | 7637.707  | 17465.34 | 13.739 | 69.575 | 1570.66 | 311.161 | 94.367  | 216.795 |
| 2008          | 126560 | 24621.740 | 6807.245  | 17814.50 | 14.076 | 72.353 | 1545.54 | 301.777 | 83.129  | 218.648 |
| 2009          | 123195 | 23741.177 | 5942.607  | 17798.57 | 14.447 | 74.969 | 1486.05 | 287.552 | 71.683  | 215.869 |
| 2010          | 121377 | 23189.160 | 5269.703  | 17919.46 | 14.763 | 77.275 | 1445.70 | 277.458 | 62.767  | 214.691 |
| 2011          | 121147 | 22786.927 | 4651.993  | 18134.93 | 14.969 | 79.585 | 1428.06 | 269.951 | 54.837  | 215.114 |
| 2012          | 121954 | 22485.295 | 4161.804  | 18323.49 | 15.025 | 81.491 | 1421.35 | 263.495 | 48.505  | 214.990 |
| 2013          | 123791 | 22251.884 | 3759.858  | 18492.03 | 14.938 | 83.103 | 1425.62 | 257.786 | 43.300  | 214.486 |
| 2014          | 124484 | 21894.593 | 3393.690  | 18500.90 | 14.862 | 84.500 | 1416.15 | 250.685 | 38.607  | 212.077 |
| 2015          | 125150 | 21471.109 | 3078.518  | 18392.59 | 14.696 | 85.662 | 1599.42 | 276.557 | 39.343  | 237.213 |
| 2016          | 127737 | 21411.568 | 2797.452  | 18614.12 | 14.572 | 86.935 | 1616.27 | 273.213 | 35.397  | 237.816 |
| 2017          | 129934 | 21169.399 | 2548.382  | 18621.02 | 14.331 | 87.962 | 1628.06 | 267.651 | 31.931  | 235.720 |
| 2018          | 123110 | 19830.576 | 2193.013  | 17637.56 | 14.327 | 88.941 | 1527.35 | 248.404 | 27.207  | 221.196 |
| 2019          | 123639 | 19431.014 | 2010.356  | 17420.66 | 14.090 | 89.654 | 1518.08 | 241.031 | 24.684  | 216.347 |
| 2020          | 122748 | 18532.612 | 1809.608  | 16723.00 | 13.624 | 90.236 | 1717.51 | 262.513 | 25.320  | 237.193 |
| 2021          | 121429 | 18234.128 | 1645.731  | 16588.40 | 13.661 | 90.974 | 1685.93 | 256.472 | 22.849  | 233.623 |
| 2022          | 121583 | 17812.559 | 1508.633  | 16303.93 | 13.410 | 91.531 | 1673.99 | 248.626 | 20.771  | 227.855 |
| 2023          | 121717 | 17361.668 | 1384.972  | 15976.70 | 13.126 | 92.023 | 1661.08 | 240.367 | 18.901  | 221.466 |
| 2024          | 121704 | 16929.676 | 1291.809  | 15637.87 | 12.849 | 92.370 | 1645.97 | 232.443 | 17.471  | 214.972 |
| 2025          | 118196 | 15501.666 | 1141.459  | 14360.21 | 12.149 | 92.637 | 1855.53 | 247.735 | 17.920  | 229.815 |
| 2026          | 117670 | 15523.814 | 1100.907  | 14422.91 | 12.257 | 92.908 | 1838.21 | 247.072 | 17.198  | 229.874 |
| 2027          | 116688 | 15073.070 | 1037.228  | 14035.84 | 12.028 | 93.119 | 1813.17 | 238.810 | 16.117  | 222.693 |
| 2028          | 115655 | 14636.710 | 978.217   | 13658.49 | 11.810 | 93.317 | 1786.63 | 230.725 | 15.111  | 215.614 |
| 2029          | 114619 | 14180.166 | 930.266   | 13249.90 | 11.560 | 93.440 | 1759.16 | 222.256 | 14.278  | 207.979 |
| 2030          | 107799 | 12111.772 | 777.044   | 11334.73 | 10.515 | 93.584 | 1970.15 | 226.816 | 14.201  | 212.615 |
| 2031          | 108335 | 12417.367 | 784.825   | 11632.54 | 10.738 | 93.680 | 1972.99 | 231.935 | 14.293  | 217.642 |
| 2032          | 107005 | 12054.064 | 747.991   | 11306.07 | 10.566 | 93.795 | 1940.43 | 224.381 | 13.564  | 210.817 |
| 2033          | 105688 | 11672.389 | 709.639   | 10962.75 | 10.373 | 93.920 | 1906.92 | 216.370 | 12.804  | 203.566 |
| 2034          | 104346 | 11365.762 | 689.338   | 10676.42 | 10.232 | 93.935 | 1872.06 | 209.673 | 12.367  | 197.305 |
| 2035          | 94015  | 8580.360  | 501.840   | 8078.520 | 8.593  | 94.151 | 2078.52 | 195.777 | 11.095  | 184.682 |
| 2036          | 95408  | 8948.841  | 517.615   | 8431.226 | 8.837  | 94.216 | 2106.80 | 204.135 | 11.430  | 192.705 |
| 2037          | 93653  | 8624.570  | 497.177   | 8127.392 | 8.678  | 94.235 | 2063.95 | 196.522 | 10.957  | 185.565 |
| 2038          | 91949  | 8315.017  | 472.779   | 7842.237 | 8.529  | 94.314 | 2020.40 | 189.073 | 10.388  | 178.684 |
| 2039          | 90311  | 8001.132  | 455.184   | 7545.947 | 8.356  | 94.311 | 1976.28 | 181.344 | 9.961   | 171.384 |

## Results for PHIM for Run 3 (Sensitivity\_Analysis\_2.RTF)

\*\*\*\*\*

### Main Results for E-Component for Run: 3, Simulation: 1, COD: STROKE, Adjusted

| Variable Parameter          | Value                                  |
|-----------------------------|----------------------------------------|
| 1. Country                  | US (United States)                     |
| 2. Sex                      | M (Males)                              |
| 3. Year of start of process | 1990                                   |
| 4. Cause of Death           | STROKE                                 |
| 5. Effective Dose NULL      | CC:1                                   |
| 6. Effective Dose Ecig      | CC:1 Ecig:0.05 Dual:0.525              |
| Note:                       | Death rates are per million population |

#### Results for Age Groups Combined and Years combined, Population and Number deaths adjusted for Ecig scenario,

| Age Group:All | NULL    | Ecig       | %Drop     |          |        |        | NULL    | Ecig   | Drop   |        |
|---------------|---------|------------|-----------|----------|--------|--------|---------|--------|--------|--------|
| Year          | Number  | Attrib     | Attrib    | Drop     | %Drop  | Attrib | Death   | Attrib | Attrib | Drop   |
|               | Deaths  | Deaths     | Deaths    | Deaths   | Deaths | Deaths | Rate    | Rates  | Rates  | Rates  |
| All Comb      | 1510104 | 149918.462 | 63208.721 | 86709.74 | 5.742  | 57.838 | 432.921 | 43.398 | 18.121 | 25.277 |

#### Results for Age Groups Combined, Population and Number deaths adjusted for Ecig scenario,

| Age Group:All | NULL   | Ecig     | %Drop    |          |        |        | NULL    | Ecig   | Drop   |        |
|---------------|--------|----------|----------|----------|--------|--------|---------|--------|--------|--------|
| Year          | Number | Attrib   | Attrib   | Drop     | %Drop  | Attrib | Death   | Attrib | Attrib | Drop   |
|               | Deaths | Deaths   | Deaths   | Deaths   | Deaths | Deaths | Rate    | Rates  | Rates  | Rates  |
| 1990          | 32862  | 4613.166 | 4613.166 | 0.000    | 0.000  | 0.000  | 520.936 | 73.129 | 73.129 | 0.000  |
| 1991          | 32619  | 4555.566 | 4496.065 | 59.501   | 0.182  | 1.306  | 508.609 | 71.032 | 70.104 | 0.928  |
| 1992          | 32100  | 4453.572 | 4297.131 | 156.441  | 0.487  | 3.513  | 492.016 | 68.262 | 65.864 | 2.399  |
| 1993          | 32898  | 4462.473 | 4174.754 | 287.719  | 0.875  | 6.448  | 495.233 | 67.179 | 62.846 | 4.334  |
| 1994          | 33327  | 4499.513 | 4054.819 | 444.694  | 1.334  | 9.883  | 492.308 | 66.473 | 59.898 | 6.575  |
| 1995          | 33576  | 4472.774 | 3853.214 | 619.560  | 1.845  | 13.852 | 486.455 | 64.812 | 55.825 | 8.986  |
| 1996          | 33882  | 4406.878 | 3603.986 | 802.892  | 2.370  | 18.219 | 483.202 | 62.863 | 51.397 | 11.466 |
| 1997          | 33534  | 4288.158 | 3309.447 | 978.711  | 2.919  | 22.824 | 470.385 | 60.173 | 46.422 | 13.751 |
| 1998          | 32820  | 4120.148 | 2983.335 | 1136.813 | 3.464  | 27.592 | 452.727 | 56.864 | 41.153 | 15.711 |
| 1999          | 33409  | 3982.443 | 2691.352 | 1291.091 | 3.864  | 32.420 | 453.509 | 54.097 | 36.533 | 17.563 |
| 2000          | 33505  | 4021.411 | 2532.161 | 1489.250 | 4.445  | 37.033 | 448.049 | 53.827 | 33.862 | 19.965 |
| 2001          | 32331  | 3848.092 | 2238.296 | 1609.796 | 4.979  | 41.834 | 426.618 | 50.836 | 29.535 | 21.301 |
| 2002          | 31654  | 3783.081 | 2029.562 | 1753.519 | 5.540  | 46.352 | 412.893 | 49.418 | 26.473 | 22.944 |
| 2003          | 31066  | 3754.415 | 1846.440 | 1907.975 | 6.142  | 50.820 | 400.882 | 48.533 | 23.827 | 24.706 |
| 2004          | 29978  | 3666.274 | 1652.985 | 2013.289 | 6.716  | 54.914 | 382.541 | 46.883 | 21.094 | 25.790 |
| 2005          | 28813  | 3589.688 | 1476.734 | 2112.954 | 7.333  | 58.862 | 363.290 | 45.371 | 18.619 | 26.752 |
| 2006          | 28308  | 3596.985 | 1341.984 | 2255.001 | 7.966  | 62.691 | 353.518 | 45.048 | 16.759 | 28.289 |
| 2007          | 28162  | 3560.798 | 1207.567 | 2353.231 | 8.356  | 66.087 | 347.955 | 44.137 | 14.920 | 29.217 |
| 2008          | 27278  | 3417.001 | 1053.102 | 2363.899 | 8.666  | 69.181 | 333.110 | 41.881 | 12.860 | 29.020 |
| 2009          | 27236  | 3394.390 | 952.179  | 2442.211 | 8.967  | 71.948 | 328.536 | 41.113 | 11.486 | 29.627 |
| 2010          | 27097  | 3340.137 | 857.468  | 2482.669 | 9.162  | 74.328 | 322.754 | 39.965 | 10.213 | 29.752 |
| 2011          | 27167  | 3285.435 | 771.389  | 2514.046 | 9.254  | 76.521 | 320.234 | 38.922 | 9.093  | 29.829 |
| 2012          | 27286  | 3259.209 | 695.262  | 2563.947 | 9.396  | 78.668 | 318.015 | 38.193 | 8.103  | 30.090 |
| 2013          | 28164  | 3274.703 | 638.749  | 2635.954 | 9.359  | 80.494 | 324.348 | 37.937 | 7.356  | 30.581 |
| 2014          | 29085  | 3298.083 | 588.232  | 2709.851 | 9.317  | 82.164 | 330.876 | 37.762 | 6.692  | 31.070 |
| 2015          | 29890  | 3244.406 | 536.341  | 2708.065 | 9.060  | 83.469 | 381.999 | 41.789 | 6.854  | 34.935 |
| 2016          | 30881  | 3314.836 | 502.822  | 2812.014 | 9.106  | 84.831 | 390.745 | 42.297 | 6.362  | 35.935 |
| 2017          | 31826  | 3333.314 | 466.342  | 2866.971 | 9.008  | 86.010 | 398.774 | 42.144 | 5.843  | 36.301 |
| 2018          | 29765  | 2925.242 | 382.030  | 2543.212 | 8.544  | 86.940 | 369.272 | 36.642 | 4.740  | 31.903 |
| 2019          | 30049  | 2864.628 | 348.478  | 2516.150 | 8.374  | 87.835 | 368.945 | 35.534 | 4.279  | 31.255 |
| 2020          | 30079  | 2730.366 | 312.310  | 2418.057 | 8.039  | 88.562 | 420.867 | 38.675 | 4.370  | 34.306 |
| 2021          | 30627  | 2647.911 | 282.701  | 2365.210 | 7.723  | 89.324 | 425.223 | 37.244 | 3.925  | 33.319 |
| 2022          | 30870  | 2586.165 | 257.917  | 2328.248 | 7.542  | 90.027 | 425.025 | 36.097 | 3.551  | 32.546 |
| 2023          | 31110  | 2517.960 | 235.620  | 2282.340 | 7.336  | 90.642 | 424.554 | 34.860 | 3.216  | 31.645 |
| 2024          | 31303  | 2454.161 | 217.621  | 2236.539 | 7.145  | 91.133 | 423.359 | 33.695 | 2.943  | 30.752 |
| 2025          | 30933  | 2275.364 | 192.859  | 2082.505 | 6.732  | 91.524 | 485.607 | 36.363 | 3.028  | 33.335 |
| 2026          | 31414  | 2183.166 | 176.893  | 2006.273 | 6.387  | 91.897 | 490.736 | 34.747 | 2.763  | 31.983 |
| 2027          | 31324  | 2112.345 | 164.212  | 1948.132 | 6.219  | 92.226 | 486.722 | 33.467 | 2.552  | 30.915 |
| 2028          | 31208  | 2046.677 | 153.208  | 1893.469 | 6.067  | 92.514 | 482.094 | 32.263 | 2.367  | 29.896 |
| 2029          | 31084  | 1977.671 | 143.433  | 1834.239 | 5.901  | 92.747 | 477.080 | 30.997 | 2.201  | 28.796 |
| 2030          | 30187  | 1744.457 | 123.157  | 1621.300 | 5.371  | 92.940 | 551.707 | 32.668 | 2.251  | 30.417 |
| 2031          | 29861  | 1653.738 | 113.056  | 1540.681 | 5.159  | 93.164 | 543.835 | 30.889 | 2.059  | 28.830 |
| 2032          | 29639  | 1603.120 | 106.004  | 1497.117 | 5.051  | 93.388 | 537.477 | 29.841 | 1.922  | 27.919 |
| 2033          | 29407  | 1548.245 | 99.331   | 1448.914 | 4.927  | 93.584 | 530.591 | 28.700 | 1.792  | 26.907 |
| 2034          | 29150  | 1511.985 | 94.962   | 1417.023 | 4.861  | 93.719 | 522.968 | 27.893 | 1.704  | 26.189 |
| 2035          | 27715  | 1239.866 | 76.103   | 1163.763 | 4.199  | 93.862 | 612.740 | 28.290 | 1.683  | 26.607 |
| 2036          | 26559  | 1182.522 | 71.010   | 1111.511 | 4.185  | 93.995 | 586.464 | 26.975 | 1.568  | 25.407 |
| 2037          | 26125  | 1134.483 | 67.744   | 1066.739 | 4.083  | 94.029 | 575.744 | 25.851 | 1.493  | 24.358 |
| 2038          | 25688  | 1093.537 | 64.139   | 1029.398 | 4.007  | 94.135 | 564.446 | 24.866 | 1.409  | 23.456 |
| 2039          | 25254  | 1047.905 | 61.049   | 986.856  | 3.908  | 94.174 | 552.632 | 23.751 | 1.336  | 22.415 |

## Results for PHIM for Run 3 (Sensitivity\_Analysis\_2.RTF)

\*\*\*\*\*

### Main Results for E-Component for Run: 3, Simulation: 1, COD: COPD, Adjusted

| Variable Parameter          | Value                                  |
|-----------------------------|----------------------------------------|
| 1. Country                  | US (United States)                     |
| 2. Sex                      | M (Males)                              |
| 3. Year of start of process | 1990                                   |
| 4. Cause of Death           | COPD                                   |
| 5. Effective Dose NULL      | CC:1                                   |
| 6. Effective Dose Ecig      | CC:1 Ecig:0.05 Dual:0.525              |
| Note:                       | Death rates are per million population |

#### Results for Age Groups Combined and Years combined, Population and Number deaths adjusted for Ecig scenario,

| Age Group:All | NULL    | Ecig        | %Drop      |          |        |        | NULL    | Ecig    | Drop    |         |
|---------------|---------|-------------|------------|----------|--------|--------|---------|---------|---------|---------|
| Year          | Number  | Attrib      | Attrib     | Drop     | %Drop  | Attrib | Death   | Attrib  | Attrib  | Drop    |
|               | Deaths  | Deaths      | Deaths     | Deaths   | Deaths | Deaths | Rate    | Rates   | Rates   | Rates   |
| All Comb      | 2272036 | 1015606.587 | 654787.776 | 360818.8 | 15.881 | 35.527 | 651.354 | 293.996 | 187.716 | 106.280 |

#### Results for Age Groups Combined, Population and Number deaths adjusted for Ecig scenario,

| Age Group:All | NULL   | Ecig      | %Drop     |          |        |        | NULL    | Ecig    | Drop    |         |
|---------------|--------|-----------|-----------|----------|--------|--------|---------|---------|---------|---------|
| Year          | Number | Attrib    | Attrib    | Drop     | %Drop  | Attrib | Death   | Attrib  | Attrib  | Drop    |
|               | Deaths | Deaths    | Deaths    | Deaths   | Deaths | Deaths | Rate    | Rates   | Rates   | Rates   |
| 1990          | 33993  | 19262.437 | 19262.437 | 0.000    | 0.000  | 0.000  | 538.865 | 305.353 | 305.353 | 0.000   |
| 1991          | 34092  | 19215.636 | 19179.449 | 36.187   | 0.106  | 0.188  | 531.576 | 299.618 | 299.054 | 0.564   |
| 1992          | 33942  | 19056.189 | 18959.815 | 96.375   | 0.284  | 0.506  | 520.250 | 292.085 | 290.605 | 1.480   |
| 1993          | 35915  | 20095.670 | 19904.409 | 191.261  | 0.533  | 0.952  | 540.654 | 302.526 | 299.636 | 2.890   |
| 1994          | 35078  | 19524.095 | 19236.506 | 287.588  | 0.820  | 1.473  | 518.179 | 288.435 | 284.163 | 4.272   |
| 1995          | 34677  | 19116.002 | 18713.440 | 402.562  | 1.161  | 2.106  | 502.399 | 276.995 | 271.121 | 5.875   |
| 1996          | 34595  | 18975.021 | 18439.357 | 535.664  | 1.548  | 2.823  | 493.366 | 270.675 | 262.969 | 7.707   |
| 1997          | 35287  | 19169.025 | 18475.220 | 693.805  | 1.966  | 3.619  | 494.969 | 268.986 | 259.154 | 9.832   |
| 1998          | 35703  | 19228.937 | 18358.266 | 870.671  | 2.439  | 4.528  | 492.498 | 265.388 | 253.239 | 12.149  |
| 1999          | 38557  | 20589.820 | 19461.595 | 1128.225 | 2.926  | 5.480  | 523.387 | 279.689 | 264.179 | 15.510  |
| 2000          | 36334  | 19196.417 | 17939.285 | 1257.132 | 3.460  | 6.549  | 485.889 | 256.946 | 239.898 | 17.048  |
| 2001          | 36346  | 19012.731 | 17530.467 | 1482.264 | 4.078  | 7.796  | 479.600 | 251.174 | 231.320 | 19.854  |
| 2002          | 36064  | 18699.357 | 17010.310 | 1689.047 | 4.684  | 9.033  | 470.405 | 244.265 | 221.879 | 22.387  |
| 2003          | 36304  | 18663.550 | 16722.252 | 1941.297 | 5.347  | 10.402 | 468.472 | 241.262 | 215.786 | 25.476  |
| 2004          | 34724  | 17679.164 | 15571.122 | 2108.042 | 6.071  | 11.924 | 443.110 | 226.076 | 198.701 | 27.375  |
| 2005          | 36967  | 18692.832 | 16191.368 | 2501.464 | 6.767  | 13.382 | 466.097 | 236.265 | 204.146 | 32.119  |
| 2006          | 34503  | 17308.564 | 14691.383 | 2617.180 | 7.585  | 15.121 | 430.884 | 216.769 | 183.471 | 33.298  |
| 2007          | 35506  | 17683.181 | 14690.046 | 2993.135 | 8.430  | 16.926 | 438.693 | 219.189 | 181.501 | 37.689  |
| 2008          | 38470  | 19006.374 | 15470.008 | 3536.366 | 9.193  | 18.606 | 469.790 | 232.952 | 188.918 | 44.034  |
| 2009          | 37144  | 18205.573 | 14456.576 | 3748.997 | 10.093 | 20.593 | 448.047 | 220.505 | 174.383 | 46.122  |
| 2010          | 37507  | 18237.758 | 14160.572 | 4077.186 | 10.871 | 22.356 | 446.738 | 218.215 | 168.665 | 49.550  |
| 2011          | 38402  | 18487.916 | 13947.103 | 4540.813 | 11.824 | 24.561 | 452.679 | 219.022 | 164.406 | 54.616  |
| 2012          | 38849  | 18491.158 | 13562.581 | 4928.578 | 12.687 | 26.654 | 452.775 | 216.689 | 158.069 | 58.620  |
| 2013          | 40687  | 19143.452 | 13655.500 | 5487.952 | 13.488 | 28.668 | 468.564 | 221.775 | 157.261 | 64.514  |
| 2014          | 40773  | 18992.005 | 13137.712 | 5854.293 | 14.358 | 30.825 | 463.846 | 217.451 | 149.457 | 67.994  |
| 2015          | 42801  | 19728.885 | 13305.052 | 6423.832 | 15.009 | 32.561 | 546.998 | 254.116 | 170.039 | 84.078  |
| 2016          | 43654  | 19876.724 | 13002.780 | 6873.944 | 15.747 | 34.583 | 552.356 | 253.628 | 164.526 | 89.102  |
| 2017          | 44716  | 20119.790 | 12745.169 | 7374.621 | 16.492 | 36.654 | 560.281 | 254.381 | 159.696 | 94.685  |
| 2018          | 46143  | 20535.123 | 12593.782 | 7941.341 | 17.210 | 38.672 | 572.473 | 257.229 | 156.244 | 100.985 |
| 2019          | 47710  | 21009.029 | 12464.924 | 8544.105 | 17.908 | 40.669 | 585.798 | 260.605 | 153.048 | 107.557 |
| 2020          | 49246  | 21428.512 | 12311.978 | 9116.534 | 18.512 | 42.544 | 689.056 | 303.533 | 172.272 | 131.262 |
| 2021          | 49346  | 21266.697 | 11725.282 | 9541.416 | 19.336 | 44.866 | 685.120 | 299.127 | 162.795 | 136.332 |
| 2022          | 50881  | 21663.568 | 11476.979 | 10186.59 | 20.020 | 47.022 | 700.543 | 302.378 | 158.019 | 144.359 |
| 2023          | 52445  | 22084.131 | 11229.138 | 10854.99 | 20.698 | 49.153 | 715.715 | 305.748 | 153.245 | 152.503 |
| 2024          | 53957  | 22418.456 | 10964.062 | 11454.39 | 21.229 | 51.094 | 729.739 | 307.804 | 148.282 | 159.522 |
| 2025          | 55088  | 22614.834 | 10652.733 | 11962.10 | 21.714 | 52.895 | 864.821 | 361.411 | 167.235 | 194.176 |
| 2026          | 55665  | 22571.522 | 10171.923 | 12399.60 | 22.275 | 54.935 | 869.583 | 359.241 | 158.902 | 200.339 |
| 2027          | 56682  | 22774.416 | 9795.792  | 12978.62 | 22.897 | 56.988 | 880.749 | 360.827 | 152.212 | 208.614 |
| 2028          | 57658  | 22915.561 | 9378.454  | 13537.11 | 23.478 | 59.074 | 890.693 | 361.228 | 144.877 | 216.351 |
| 2029          | 58620  | 22992.027 | 8955.309  | 14036.72 | 23.945 | 61.050 | 899.695 | 360.371 | 137.445 | 222.926 |
| 2030          | 58940  | 22895.360 | 8539.579  | 14355.78 | 24.357 | 62.702 | 1077.19 | 428.760 | 156.070 | 272.690 |
| 2031          | 59381  | 22715.871 | 8083.166  | 14632.70 | 24.642 | 64.416 | 1081.44 | 424.293 | 147.210 | 277.082 |
| 2032          | 60137  | 22759.207 | 7675.682  | 15083.53 | 25.082 | 66.274 | 1090.52 | 423.652 | 139.191 | 284.461 |
| 2033          | 60870  | 22786.258 | 7290.100  | 15496.16 | 25.458 | 68.007 | 1098.27 | 422.387 | 131.534 | 290.853 |
| 2034          | 61544  | 22806.106 | 6899.542  | 15906.56 | 25.846 | 69.747 | 1104.15 | 420.721 | 123.783 | 296.938 |
| 2035          | 60674  | 22262.998 | 6463.911  | 15799.09 | 26.039 | 70.966 | 1341.41 | 507.973 | 142.907 | 365.066 |
| 2036          | 58589  | 21140.051 | 5682.631  | 15457.42 | 26.383 | 73.119 | 1293.76 | 482.234 | 125.483 | 356.750 |
| 2037          | 58786  | 21011.845 | 5276.837  | 15735.01 | 26.766 | 74.886 | 1295.54 | 478.783 | 116.292 | 362.491 |
| 2038          | 58960  | 20787.483 | 4861.748  | 15925.74 | 27.011 | 76.612 | 1295.54 | 472.681 | 106.828 | 365.853 |
| 2039          | 59124  | 20709.267 | 4514.442  | 16194.83 | 27.391 | 78.201 | 1293.83 | 469.372 | 98.790  | 370.582 |

## Results for PHIM for Run 4 (Sensitivity\_Analysis\_2.RTF)

---

### Control File Details for Run: 4

| Variable Parameter                                       | Value                  |
|----------------------------------------------------------|------------------------|
| 1. Name for Reference Scenario                           | NULL                   |
| 2. Name for Test Scenario                                | Ecig                   |
| 3. Name for Product 1                                    | CC                     |
| 4. Name for Product 2                                    | Ecig                   |
| 5. Name for Product 3                                    | -                      |
| 6. Name for Product 4                                    | Dual                   |
| 7. Country                                               | US (United States)     |
| 8. Sex                                                   | F (Females)            |
| 9. Year of start of process                              | 1990                   |
| 10. Number of months of follow-up                        | 600                    |
| 11. Follow-up interval length (in months)                | 12                     |
| 12. Lower age for risk estimation                        | 10                     |
| 13. Upper age for risk estimation                        | 79                     |
| 14. The effective dose for Product 1 (F1) - Ref          | 1                      |
| 15. The effective dose for Product 2 (F2) - Ref          | -                      |
| 16. The effective dose for Product 3 (F3) - Ref          | -                      |
| 17. The effective dose for Product 4 (F4) - Ref          | -                      |
| 18. The effective dose for Product 1 (F1) - Test         | 1                      |
| 19. The effective dose for Product 2 (F2) - Test         | 0.05                   |
| 20. The effective dose for Product 3 (F3) - Test         | -                      |
| 21. The effective dose for Product 4 (F4) - Test         | FROMF2                 |
| 22. Number in population to be simulated                 | 100000                 |
| 23. Number of MC simulations                             | 1                      |
| 24. The random number seed for the first simulation      | 15975263               |
| 25. Source for the population file (POP)                 | UN4                    |
| 26. Source for the socioeconomic prevalence file (SEP)   | -                      |
| 27. Source for the current smoking prevalence file (CSP) | ISS3                   |
| 28. Source for the former smoking prevalence file (FSP)  | ISS3                   |
| 29. Source for the quit-time distribution file (QTD)     | NHIS2006               |
| 30. Source for the death file (MORT)                     | APR-20                 |
| 31. Source for the relative risk file (RR)               | PNLEST                 |
| 32. Source for the half-life file (H)                    | PNLEST                 |
| 33. Assumption Set for TTP Factor Reference              | F1                     |
| 34. Assumption Set for TTP Factor Test                   | F1                     |
| 35. Assumption Set for TTP Reference                     | ISS3                   |
| 36. Assumption Set for TTP Test                          | S2B                    |
| 37. Assumption Set for TP for socioeconomic group        | -                      |
| 38. Source for Output Choice file (OUTC)                 | BASIC                  |
| 39. Output for DTP P1                                    | N                      |
| 40. Output for DTP P2                                    | N                      |
| 41. Output for Main P Component                          | Y                      |
| 42. Output for DTP E1                                    | N                      |
| 43. Output for DTP E2                                    | N                      |
| 44. Output for DTP E3                                    | N                      |
| 45. Output for Main E Component                          | Y                      |
| 46. Output file name                                     | Sensitivity_Analysis_2 |
| 47. Run number for P-Component                           | -                      |
| 48. Results file for E-Component                         | -                      |
| 49. Components required                                  | PE                     |
| 50. Results folder for P to be used in E-Component       | -                      |
| 51. Fixed age of starting product use                    | 16                     |
| 52. Output absolute risk file?                           | N                      |

## Results for PHIM for Run 4 (Sensitivity\_Analysis\_2.RTF)

\*\*\*\*\*

TTP values for Run: 4, Scenario: NULL

| Variable Parameter | Value               |
|--------------------|---------------------|
| 1. Country         | US (United States)  |
| 2. Sex             | F (Females)         |
| 3. Assumption Set  | ISS3                |
| Note:              | Period is in Months |

| Age   | Period  | Initiation  | Cessation    | Re-initiation |
|-------|---------|-------------|--------------|---------------|
|       |         | Never<br>CC | CC<br>Former | Former<br>CC  |
| 10-14 | 1-12    | 0.003758    | 0.008742     | 0.000000      |
| 15-19 | 1-12    | 0.003469    | 0.002515     | 0.000000      |
| 20-24 | 1-12    | 0.000276    | 0.000761     | 0.000000      |
| 25-29 | 1-12    | 0.000137    | 0.001375     | 0.000000      |
| 30-34 | 1-12    | 0.000069    | 0.001149     | 0.000000      |
| 35-39 | 1-12    | 0.000000    | 0.000991     | 0.000000      |
| 40-44 | 1-12    | 0.000000    | 0.000833     | 0.000000      |
| 45-49 | 1-12    | 0.000000    | 0.001723     | 0.000000      |
| 50-54 | 1-12    | 0.000000    | 0.002336     | 0.000000      |
| 55-59 | 1-12    | 0.000000    | 0.002233     | 0.000000      |
| 60-64 | 1-12    | 0.000000    | 0.004634     | 0.000000      |
| 65-69 | 1-12    | 0.000000    | 0.003505     | 0.000000      |
| 70-74 | 1-12    | 0.000000    | 0.004329     | 0.000000      |
| 75-79 | 1-12    | 0.000000    | 0.004329     | 0.000000      |
| 10-14 | 13-72   | 0.004794    | 0.008742     | 0.000000      |
| 15-19 | 13-72   | 0.004527    | 0.004082     | 0.000000      |
| 20-24 | 13-72   | 0.000105    | 0.001261     | 0.000000      |
| 25-29 | 13-72   | 0.000053    | 0.000952     | 0.000000      |
| 30-34 | 13-72   | 0.000026    | 0.000733     | 0.000000      |
| 35-39 | 13-72   | 0.000000    | 0.000753     | 0.000000      |
| 40-44 | 13-72   | 0.000000    | 0.001535     | 0.000000      |
| 45-49 | 13-72   | 0.000000    | 0.002998     | 0.000000      |
| 50-54 | 13-72   | 0.000000    | 0.003159     | 0.000000      |
| 55-59 | 13-72   | 0.000000    | 0.002965     | 0.000000      |
| 60-64 | 13-72   | 0.000000    | 0.003633     | 0.000000      |
| 65-69 | 13-72   | 0.000000    | 0.004522     | 0.000000      |
| 70-74 | 13-72   | 0.000000    | 0.005208     | 0.000000      |
| 75-79 | 13-72   | 0.000000    | 0.005208     | 0.000000      |
| 10-14 | 73-132  | 0.003969    | 0.008742     | 0.000000      |
| 15-19 | 73-132  | 0.003056    | 0.003373     | 0.000000      |
| 20-24 | 73-132  | 0.001459    | 0.003881     | 0.000000      |
| 25-29 | 73-132  | 0.000714    | 0.001953     | 0.000000      |
| 30-34 | 73-132  | 0.000111    | 0.001338     | 0.000000      |
| 35-39 | 73-132  | 0.000000    | 0.001507     | 0.000000      |
| 40-44 | 73-132  | 0.000000    | 0.002080     | 0.000000      |
| 45-49 | 73-132  | 0.000000    | 0.003809     | 0.000000      |
| 50-54 | 73-132  | 0.000000    | 0.004871     | 0.000000      |
| 55-59 | 73-132  | 0.000000    | 0.004560     | 0.000000      |
| 60-64 | 73-132  | 0.000000    | 0.007192     | 0.000000      |
| 65-69 | 73-132  | 0.000000    | 0.007033     | 0.000000      |
| 70-74 | 73-132  | 0.000000    | 0.008206     | 0.000000      |
| 75-79 | 73-132  | 0.000000    | 0.008206     | 0.000000      |
| 10-14 | 133-192 | 0.002861    | 0.008742     | 0.000000      |
| 15-19 | 133-192 | 0.002594    | 0.003996     | 0.000000      |
| 20-24 | 133-192 | 0.001247    | 0.002805     | 0.000000      |
| 25-29 | 133-192 | 0.000289    | 0.001574     | 0.000000      |
| 30-34 | 133-192 | 0.000132    | 0.001293     | 0.000000      |
| 35-39 | 133-192 | 0.000000    | 0.001219     | 0.000000      |
| 40-44 | 133-192 | 0.000000    | 0.001657     | 0.000000      |
| 45-49 | 133-192 | 0.000000    | 0.001995     | 0.000000      |
| 50-54 | 133-192 | 0.000000    | 0.002154     | 0.000000      |
| 55-59 | 133-192 | 0.000000    | 0.002072     | 0.000000      |
| 60-64 | 133-192 | 0.000000    | 0.005049     | 0.000000      |
| 65-69 | 133-192 | 0.000000    | 0.003680     | 0.000000      |
| 70-74 | 133-192 | 0.000000    | 0.006144     | 0.000000      |
| 75-79 | 133-192 | 0.000000    | 0.006144     | 0.000000      |
| 10-14 | 193-252 | 0.001859    | 0.008742     | 0.000000      |
| 15-19 | 193-252 | 0.002232    | 0.005770     | 0.000000      |
| 20-24 | 193-252 | 0.001079    | 0.003262     | 0.000000      |
| 25-29 | 193-252 | 0.000531    | 0.002002     | 0.000000      |
| 30-34 | 193-252 | 0.000263    | 0.003240     | 0.000000      |
| 35-39 | 193-252 | 0.000000    | 0.001771     | 0.000000      |
| 40-44 | 193-252 | 0.000000    | 0.002173     | 0.000000      |
| 45-49 | 193-252 | 0.000000    | 0.002075     | 0.000000      |
| 50-54 | 193-252 | 0.000000    | 0.003431     | 0.000000      |



### Results for PHIM for Run 4 (Sensitivity\_Analysis\_2.RTF)

|       |         |          |          |          |
|-------|---------|----------|----------|----------|
| 55-59 | 193-252 | 0.000000 | 0.002906 | 0.000000 |
| 60-64 | 193-252 | 0.000000 | 0.007139 | 0.000000 |
| 65-69 | 193-252 | 0.000000 | 0.004963 | 0.000000 |
| 70-74 | 193-252 | 0.000000 | 0.006269 | 0.000000 |
| 75-79 | 193-252 | 0.000000 | 0.006269 | 0.000000 |
| 10-14 | 253+    | 0.000931 | 0.008742 | 0.000000 |
| 15-19 | 253+    | 0.001798 | 0.009440 | 0.000000 |
| 20-24 | 253+    | 0.000023 | 0.002831 | 0.000000 |
| 25-29 | 253+    | 0.000073 | 0.002655 | 0.000000 |
| 30-34 | 253+    | 0.000037 | 0.004614 | 0.000000 |
| 35-39 | 253+    | 0.000000 | 0.002607 | 0.000000 |
| 40-44 | 253+    | 0.000000 | 0.003115 | 0.000000 |
| 45-49 | 253+    | 0.000000 | 0.002132 | 0.000000 |
| 50-54 | 253+    | 0.000000 | 0.003497 | 0.000000 |
| 55-59 | 253+    | 0.000000 | 0.002942 | 0.000000 |
| 60-64 | 253+    | 0.000000 | 0.005376 | 0.000000 |
| 65-69 | 253+    | 0.000000 | 0.001789 | 0.000000 |
| 70-74 | 253+    | 0.000000 | 0.004077 | 0.000000 |
| 75-79 | 253+    | 0.000000 | 0.004077 | 0.000000 |

## Results for PHIM for Run 4 (Sensitivity\_Analysis\_2.RTF)

\*\*\*\*\*

TTP values for Run: 4, Scenario: Ecig

Variable Parameter

Value

- 1. Country
  - 2. Sex
  - 3. Assumption Set
- Note:

US (United States)  
 F (Females)  
 S2B  
 Period is in Months

| Age   | Period  | Initiation  |               |               | Cessation    |                |                | Re-initiation |                |                |
|-------|---------|-------------|---------------|---------------|--------------|----------------|----------------|---------------|----------------|----------------|
|       |         | Never<br>CC | Never<br>Ecig | Never<br>Dual | CC<br>Former | Ecig<br>Former | Dual<br>Former | Former<br>CC  | Former<br>Ecig | Former<br>Dual |
| 10-14 | 1-12    | 0.001879    | 0.001879      | 0.000000      | 0.008742     | 0.008742       | 0.000000       | 0.000000      | 0.000000       | 0.000000       |
| 15-19 | 1-12    | 0.001735    | 0.001735      | 0.000000      | 0.002515     | 0.002515       | 0.000000       | 0.000000      | 0.000000       | 0.000000       |
| 20-24 | 1-12    | 0.000138    | 0.000138      | 0.000000      | 0.000761     | 0.000761       | 0.000000       | 0.000000      | 0.000000       | 0.000000       |
| 25-29 | 1-12    | 0.000069    | 0.000069      | 0.000000      | 0.001376     | 0.001376       | 0.000000       | 0.000000      | 0.000000       | 0.000000       |
| 30-34 | 1-12    | 0.000034    | 0.000034      | 0.000000      | 0.001149     | 0.001149       | 0.000000       | 0.000000      | 0.000000       | 0.000000       |
| 35-39 | 1-12    | 0.000000    | 0.000000      | 0.000000      | 0.000991     | 0.000991       | 0.000000       | 0.000000      | 0.000000       | 0.000000       |
| 40-44 | 1-12    | 0.000000    | 0.000000      | 0.000000      | 0.000833     | 0.000833       | 0.000000       | 0.000000      | 0.000000       | 0.000000       |
| 45-49 | 1-12    | 0.000000    | 0.000000      | 0.000000      | 0.001723     | 0.001723       | 0.000000       | 0.000000      | 0.000000       | 0.000000       |
| 50-54 | 1-12    | 0.000000    | 0.000000      | 0.000000      | 0.002336     | 0.002336       | 0.000000       | 0.000000      | 0.000000       | 0.000000       |
| 55-59 | 1-12    | 0.000000    | 0.000000      | 0.000000      | 0.002233     | 0.002233       | 0.000000       | 0.000000      | 0.000000       | 0.000000       |
| 60-64 | 1-12    | 0.000000    | 0.000000      | 0.000000      | 0.004635     | 0.004635       | 0.000000       | 0.000000      | 0.000000       | 0.000000       |
| 65-69 | 1-12    | 0.000000    | 0.000000      | 0.000000      | 0.003505     | 0.003505       | 0.000000       | 0.000000      | 0.000000       | 0.000000       |
| 70-74 | 1-12    | 0.000000    | 0.000000      | 0.000000      | 0.004329     | 0.004329       | 0.000000       | 0.000000      | 0.000000       | 0.000000       |
| 75-79 | 1-12    | 0.000000    | 0.000000      | 0.000000      | 0.004329     | 0.004329       | 0.000000       | 0.000000      | 0.000000       | 0.000000       |
| 10-14 | 13-72   | 0.001918    | 0.002877      | 0.000000      | 0.008742     | 0.008742       | 0.000000       | 0.000000      | 0.000000       | 0.000000       |
| 15-19 | 13-72   | 0.001811    | 0.002716      | 0.000000      | 0.004083     | 0.004083       | 0.000000       | 0.000000      | 0.000000       | 0.000000       |
| 20-24 | 13-72   | 0.000042    | 0.000063      | 0.000000      | 0.001261     | 0.001261       | 0.000000       | 0.000000      | 0.000000       | 0.000000       |
| 25-29 | 13-72   | 0.000021    | 0.000032      | 0.000000      | 0.000952     | 0.000952       | 0.000000       | 0.000000      | 0.000000       | 0.000000       |
| 30-34 | 13-72   | 0.000011    | 0.000016      | 0.000000      | 0.000733     | 0.000733       | 0.000000       | 0.000000      | 0.000000       | 0.000000       |
| 35-39 | 13-72   | 0.000000    | 0.000000      | 0.000000      | 0.000754     | 0.000754       | 0.000000       | 0.000000      | 0.000000       | 0.000000       |
| 40-44 | 13-72   | 0.000000    | 0.000000      | 0.000000      | 0.001535     | 0.001535       | 0.000000       | 0.000000      | 0.000000       | 0.000000       |
| 45-49 | 13-72   | 0.000000    | 0.000000      | 0.000000      | 0.002998     | 0.002998       | 0.000000       | 0.000000      | 0.000000       | 0.000000       |
| 50-54 | 13-72   | 0.000000    | 0.000000      | 0.000000      | 0.003160     | 0.003160       | 0.000000       | 0.000000      | 0.000000       | 0.000000       |
| 55-59 | 13-72   | 0.000000    | 0.000000      | 0.000000      | 0.002965     | 0.002965       | 0.000000       | 0.000000      | 0.000000       | 0.000000       |
| 60-64 | 13-72   | 0.000000    | 0.000000      | 0.000000      | 0.003633     | 0.003633       | 0.000000       | 0.000000      | 0.000000       | 0.000000       |
| 65-69 | 13-72   | 0.000000    | 0.000000      | 0.000000      | 0.004522     | 0.004522       | 0.000000       | 0.000000      | 0.000000       | 0.000000       |
| 70-74 | 13-72   | 0.000000    | 0.000000      | 0.000000      | 0.005208     | 0.005208       | 0.000000       | 0.000000      | 0.000000       | 0.000000       |
| 75-79 | 13-72   | 0.000000    | 0.000000      | 0.000000      | 0.005208     | 0.005208       | 0.000000       | 0.000000      | 0.000000       | 0.000000       |
| 10-14 | 73-132  | 0.000794    | 0.003175      | 0.000000      | 0.008742     | 0.008742       | 0.000000       | 0.000000      | 0.000000       | 0.000000       |
| 15-19 | 73-132  | 0.000611    | 0.002445      | 0.000000      | 0.003373     | 0.003373       | 0.000000       | 0.000000      | 0.000000       | 0.000000       |
| 20-24 | 73-132  | 0.000292    | 0.001167      | 0.000000      | 0.003881     | 0.003881       | 0.000000       | 0.000000      | 0.000000       | 0.000000       |
| 25-29 | 73-132  | 0.000143    | 0.000571      | 0.000000      | 0.001954     | 0.001954       | 0.000000       | 0.000000      | 0.000000       | 0.000000       |
| 30-34 | 73-132  | 0.000022    | 0.000089      | 0.000000      | 0.001338     | 0.001338       | 0.000000       | 0.000000      | 0.000000       | 0.000000       |
| 35-39 | 73-132  | 0.000000    | 0.000000      | 0.000000      | 0.001507     | 0.001507       | 0.000000       | 0.000000      | 0.000000       | 0.000000       |
| 40-44 | 73-132  | 0.000000    | 0.000000      | 0.000000      | 0.002080     | 0.002080       | 0.000000       | 0.000000      | 0.000000       | 0.000000       |
| 45-49 | 73-132  | 0.000000    | 0.000000      | 0.000000      | 0.003809     | 0.003809       | 0.000000       | 0.000000      | 0.000000       | 0.000000       |
| 50-54 | 73-132  | 0.000000    | 0.000000      | 0.000000      | 0.004871     | 0.004871       | 0.000000       | 0.000000      | 0.000000       | 0.000000       |
| 55-59 | 73-132  | 0.000000    | 0.000000      | 0.000000      | 0.004560     | 0.004560       | 0.000000       | 0.000000      | 0.000000       | 0.000000       |
| 60-64 | 73-132  | 0.000000    | 0.000000      | 0.000000      | 0.007192     | 0.007192       | 0.000000       | 0.000000      | 0.000000       | 0.000000       |
| 65-69 | 73-132  | 0.000000    | 0.000000      | 0.000000      | 0.007033     | 0.007033       | 0.000000       | 0.000000      | 0.000000       | 0.000000       |
| 70-74 | 73-132  | 0.000000    | 0.000000      | 0.000000      | 0.008206     | 0.008206       | 0.000000       | 0.000000      | 0.000000       | 0.000000       |
| 75-79 | 73-132  | 0.000000    | 0.000000      | 0.000000      | 0.008206     | 0.008206       | 0.000000       | 0.000000      | 0.000000       | 0.000000       |
| 10-14 | 133-192 | 0.000143    | 0.002718      | 0.000000      | 0.008742     | 0.008742       | 0.000000       | 0.000000      | 0.000000       | 0.000000       |
| 15-19 | 133-192 | 0.000130    | 0.002465      | 0.000000      | 0.003996     | 0.003996       | 0.000000       | 0.000000      | 0.000000       | 0.000000       |
| 20-24 | 133-192 | 0.000062    | 0.001185      | 0.000000      | 0.002805     | 0.002805       | 0.000000       | 0.000000      | 0.000000       | 0.000000       |
| 25-29 | 133-192 | 0.000015    | 0.000275      | 0.000000      | 0.001574     | 0.001574       | 0.000000       | 0.000000      | 0.000000       | 0.000000       |
| 30-34 | 133-192 | 0.000007    | 0.000125      | 0.000000      | 0.001293     | 0.001293       | 0.000000       | 0.000000      | 0.000000       | 0.000000       |
| 35-39 | 133-192 | 0.000000    | 0.000000      | 0.000000      | 0.001219     | 0.001219       | 0.000000       | 0.000000      | 0.000000       | 0.000000       |
| 40-44 | 133-192 | 0.000000    | 0.000000      | 0.000000      | 0.001657     | 0.001657       | 0.000000       | 0.000000      | 0.000000       | 0.000000       |
| 45-49 | 133-192 | 0.000000    | 0.000000      | 0.000000      | 0.001995     | 0.001995       | 0.000000       | 0.000000      | 0.000000       | 0.000000       |
| 50-54 | 133-192 | 0.000000    | 0.000000      | 0.000000      | 0.002154     | 0.002154       | 0.000000       | 0.000000      | 0.000000       | 0.000000       |
| 55-59 | 133-192 | 0.000000    | 0.000000      | 0.000000      | 0.002072     | 0.002072       | 0.000000       | 0.000000      | 0.000000       | 0.000000       |
| 60-64 | 133-192 | 0.000000    | 0.000000      | 0.000000      | 0.005049     | 0.005049       | 0.000000       | 0.000000      | 0.000000       | 0.000000       |
| 65-69 | 133-192 | 0.000000    | 0.000000      | 0.000000      | 0.003681     | 0.003681       | 0.000000       | 0.000000      | 0.000000       | 0.000000       |
| 70-74 | 133-192 | 0.000000    | 0.000000      | 0.000000      | 0.006144     | 0.006144       | 0.000000       | 0.000000      | 0.000000       | 0.000000       |
| 75-79 | 133-192 | 0.000000    | 0.000000      | 0.000000      | 0.006144     | 0.006144       | 0.000000       | 0.000000      | 0.000000       | 0.000000       |
| 10-14 | 193-252 | 0.000093    | 0.001766      | 0.000000      | 0.008742     | 0.008742       | 0.000000       | 0.000000      | 0.000000       | 0.000000       |
| 15-19 | 193-252 | 0.000112    | 0.002120      | 0.000000      | 0.005770     | 0.005770       | 0.000000       | 0.000000      | 0.000000       | 0.000000       |
| 20-24 | 193-252 | 0.000054    | 0.001025      | 0.000000      | 0.003262     | 0.003262       | 0.000000       | 0.000000      | 0.000000       | 0.000000       |
| 25-29 | 193-252 | 0.000027    | 0.000504      | 0.000000      | 0.002002     | 0.002002       | 0.000000       | 0.000000      | 0.000000       | 0.000000       |
| 30-34 | 193-252 | 0.000013    | 0.000250      | 0.000000      | 0.003241     | 0.003241       | 0.000000       | 0.000000      | 0.000000       | 0.000000       |
| 35-39 | 193-252 | 0.000000    | 0.000000      | 0.000000      | 0.001771     | 0.001771       | 0.000000       | 0.000000      | 0.000000       | 0.000000       |
| 40-44 | 193-252 | 0.000000    | 0.000000      | 0.000000      | 0.002173     | 0.002173       | 0.000000       | 0.000000      | 0.000000       | 0.000000       |
| 45-49 | 193-252 | 0.000000    | 0.000000      | 0.000000      | 0.002075     | 0.002075       | 0.000000       | 0.000000      | 0.000000       | 0.000000       |
| 50-54 | 193-252 | 0.000000    | 0.000000      | 0.000000      | 0.003432     | 0.003432       | 0.000000       | 0.000000      | 0.000000       | 0.000000       |

### Results for PHIM for Run 4 (Sensitivity\_Analysis\_2.RTF)

|       |         |          |          |          |          |          |          |          |          |          |
|-------|---------|----------|----------|----------|----------|----------|----------|----------|----------|----------|
| 55-59 | 193-252 | 0.000000 | 0.000000 | 0.000000 | 0.002906 | 0.002906 | 0.000000 | 0.000000 | 0.000000 | 0.000000 |
| 60-64 | 193-252 | 0.000000 | 0.000000 | 0.000000 | 0.007139 | 0.007139 | 0.000000 | 0.000000 | 0.000000 | 0.000000 |
| 65-69 | 193-252 | 0.000000 | 0.000000 | 0.000000 | 0.004963 | 0.004963 | 0.000000 | 0.000000 | 0.000000 | 0.000000 |
| 70-74 | 193-252 | 0.000000 | 0.000000 | 0.000000 | 0.006269 | 0.006269 | 0.000000 | 0.000000 | 0.000000 | 0.000000 |
| 75-79 | 193-252 | 0.000000 | 0.000000 | 0.000000 | 0.006269 | 0.006269 | 0.000000 | 0.000000 | 0.000000 | 0.000000 |
| 10-14 | 253+    | 0.000047 | 0.000884 | 0.000000 | 0.008742 | 0.008742 | 0.000000 | 0.000000 | 0.000000 | 0.000000 |
| 15-19 | 253+    | 0.000090 | 0.001708 | 0.000000 | 0.009440 | 0.009440 | 0.000000 | 0.000000 | 0.000000 | 0.000000 |
| 20-24 | 253+    | 0.000001 | 0.000022 | 0.000000 | 0.002831 | 0.002831 | 0.000000 | 0.000000 | 0.000000 | 0.000000 |
| 25-29 | 253+    | 0.000004 | 0.000070 | 0.000000 | 0.002656 | 0.002656 | 0.000000 | 0.000000 | 0.000000 | 0.000000 |
| 30-34 | 253+    | 0.000002 | 0.000035 | 0.000000 | 0.004614 | 0.004614 | 0.000000 | 0.000000 | 0.000000 | 0.000000 |
| 35-39 | 253+    | 0.000000 | 0.000000 | 0.000000 | 0.002608 | 0.002608 | 0.000000 | 0.000000 | 0.000000 | 0.000000 |
| 40-44 | 253+    | 0.000000 | 0.000000 | 0.000000 | 0.003115 | 0.003115 | 0.000000 | 0.000000 | 0.000000 | 0.000000 |
| 45-49 | 253+    | 0.000000 | 0.000000 | 0.000000 | 0.002132 | 0.002132 | 0.000000 | 0.000000 | 0.000000 | 0.000000 |
| 50-54 | 253+    | 0.000000 | 0.000000 | 0.000000 | 0.003497 | 0.003497 | 0.000000 | 0.000000 | 0.000000 | 0.000000 |
| 55-59 | 253+    | 0.000000 | 0.000000 | 0.000000 | 0.002942 | 0.002942 | 0.000000 | 0.000000 | 0.000000 | 0.000000 |
| 60-64 | 253+    | 0.000000 | 0.000000 | 0.000000 | 0.005376 | 0.005376 | 0.000000 | 0.000000 | 0.000000 | 0.000000 |
| 65-69 | 253+    | 0.000000 | 0.000000 | 0.000000 | 0.001789 | 0.001789 | 0.000000 | 0.000000 | 0.000000 | 0.000000 |
| 70-74 | 253+    | 0.000000 | 0.000000 | 0.000000 | 0.004077 | 0.004077 | 0.000000 | 0.000000 | 0.000000 | 0.000000 |
| 75-79 | 253+    | 0.000000 | 0.000000 | 0.000000 | 0.004077 | 0.004077 | 0.000000 | 0.000000 | 0.000000 | 0.000000 |



**Results for PHIM for Run 4 (Sensitivity\_Analysis\_2.RTF)**

|       |      |          |          |          |          |          |          |
|-------|------|----------|----------|----------|----------|----------|----------|
| 25-29 | 253+ | 0.019859 | 0.000000 | 0.000000 | 0.000000 | 0.000000 | 0.000000 |
| 30-34 | 253+ | 0.019574 | 0.000000 | 0.000000 | 0.000000 | 0.000000 | 0.000000 |
| 35-39 | 253+ | 0.018614 | 0.000000 | 0.000000 | 0.000000 | 0.000000 | 0.000000 |
| 40-44 | 253+ | 0.018471 | 0.000000 | 0.000000 | 0.000000 | 0.000000 | 0.000000 |
| 45-49 | 253+ | 0.017984 | 0.000000 | 0.000000 | 0.000000 | 0.000000 | 0.000000 |
| 50-54 | 253+ | 0.017229 | 0.000000 | 0.000000 | 0.000000 | 0.000000 | 0.000000 |
| 55-59 | 253+ | 0.014696 | 0.000000 | 0.000000 | 0.000000 | 0.000000 | 0.000000 |
| 60-64 | 253+ | 0.013811 | 0.000000 | 0.000000 | 0.000000 | 0.000000 | 0.000000 |
| 65-69 | 253+ | 0.011998 | 0.000000 | 0.000000 | 0.000000 | 0.000000 | 0.000000 |
| 70-74 | 253+ | 0.009877 | 0.000000 | 0.000000 | 0.000000 | 0.000000 | 0.000000 |
| 75-79 | 253+ | 0.009877 | 0.000000 | 0.000000 | 0.000000 | 0.000000 | 0.000000 |

## Results for PHIM for Run 4 (Sensitivity\_Analysis\_2.RTF)

\*\*\*\*\*

### Main Output for the Tobacco History for Run: 4, Simulation: 1, Scenario: NULL

| Variable Parameter          | Value              |
|-----------------------------|--------------------|
| 1. Country                  | US (United States) |
| 2. Sex                      | F (Females)        |
| 3. Year of start of process | 1990               |

Year of Follow-up: 2040, Age Group: All Ages  
 Period    Age Group    Smoking Group            N            %

|    |          |           |       |       |
|----|----------|-----------|-------|-------|
| 50 | All Ages | Never Any | 20670 | 58.80 |
| 50 | All Ages | CC        | 2462  | 7.00  |
| 50 | All Ages | Former    | 12019 | 34.19 |

Year of Follow-up: 2040, Age Group: 18-19  
 Period    Age Group    Smoking Group            N            %

|    |       |           |   |   |
|----|-------|-----------|---|---|
| 50 | 18-19 | Never Any | 0 | . |
| 50 | 18-19 | CC        | 0 | . |
| 50 | 18-19 | Former    | 0 | . |

Year of Follow-up: 2040, Age Group: 20-24  
 Period    Age Group    Smoking Group            N            %

|    |       |           |   |   |
|----|-------|-----------|---|---|
| 50 | 20-24 | Never Any | 0 | . |
| 50 | 20-24 | CC        | 0 | . |
| 50 | 20-24 | Former    | 0 | . |

Year of Follow-up: 2040, Age Group: 25-29  
 Period    Age Group    Smoking Group            N            %

|    |       |           |   |   |
|----|-------|-----------|---|---|
| 50 | 25-29 | Never Any | 0 | . |
| 50 | 25-29 | CC        | 0 | . |
| 50 | 25-29 | Former    | 0 | . |

Year of Follow-up: 2040, Age Group: 30-34  
 Period    Age Group    Smoking Group            N            %

|    |       |           |   |   |
|----|-------|-----------|---|---|
| 50 | 30-34 | Never Any | 0 | . |
| 50 | 30-34 | CC        | 0 | . |
| 50 | 30-34 | Former    | 0 | . |

Year of Follow-up: 2040, Age Group: 35-39  
 Period    Age Group    Smoking Group            N            %

|    |       |           |   |   |
|----|-------|-----------|---|---|
| 50 | 35-39 | Never Any | 0 | . |
| 50 | 35-39 | CC        | 0 | . |
| 50 | 35-39 | Former    | 0 | . |

Year of Follow-up: 2040, Age Group: 40-44  
 Period    Age Group    Smoking Group            N            %

|    |       |           |   |   |
|----|-------|-----------|---|---|
| 50 | 40-44 | Never Any | 0 | . |
| 50 | 40-44 | CC        | 0 | . |
| 50 | 40-44 | Former    | 0 | . |

Year of Follow-up: 2040, Age Group: 45-49  
 Period    Age Group    Smoking Group            N            %

|    |       |           |   |   |
|----|-------|-----------|---|---|
| 50 | 45-49 | Never Any | 0 | . |
| 50 | 45-49 | CC        | 0 | . |
| 50 | 45-49 | Former    | 0 | . |

Year of Follow-up: 2040, Age Group: 50-54  
 Period    Age Group    Smoking Group            N            %

|    |       |           |   |   |
|----|-------|-----------|---|---|
| 50 | 50-54 | Never Any | 0 | . |
| 50 | 50-54 | CC        | 0 | . |
| 50 | 50-54 | Former    | 0 | . |

Year of Follow-up: 2040, Age Group: 55-59  
 Period    Age Group    Smoking Group            N            %

|    |       |           |   |   |
|----|-------|-----------|---|---|
| 50 | 55-59 | Never Any | 0 | . |
| 50 | 55-59 | CC        | 0 | . |
| 50 | 55-59 | Former    | 0 | . |

Year of Follow-up: 2040, Age Group: 60-64  
 Period    Age Group    Smoking Group            N            %

### Results for PHIM for Run 4 (Sensitivity\_Analysis\_2.RTF)

|                                           |           |               |      |       |
|-------------------------------------------|-----------|---------------|------|-------|
| 50                                        | 60-64     | Never Any     | 4803 | 60.57 |
| 50                                        | 60-64     | CC            | 621  | 7.83  |
| 50                                        | 60-64     | Former        | 2506 | 31.60 |
| Year of Follow-up: 2040, Age Group: 65-69 |           |               |      |       |
| Period                                    | Age Group | Smoking Group | N    | %     |
| 50                                        | 65-69     | Never Any     | 5407 | 64.75 |
| 50                                        | 65-69     | CC            | 538  | 6.44  |
| 50                                        | 65-69     | Former        | 2405 | 28.80 |
| Year of Follow-up: 2040, Age Group: 70-74 |           |               |      |       |
| Period                                    | Age Group | Smoking Group | N    | %     |
| 50                                        | 70-74     | Never Any     | 5181 | 58.92 |
| 50                                        | 70-74     | CC            | 605  | 6.88  |
| 50                                        | 70-74     | Former        | 3007 | 34.20 |
| Year of Follow-up: 2040, Age Group: 75-79 |           |               |      |       |
| Period                                    | Age Group | Smoking Group | N    | %     |
| 50                                        | 75-79     | Never Any     | 5279 | 52.38 |
| 50                                        | 75-79     | CC            | 698  | 6.93  |
| 50                                        | 75-79     | Former        | 4101 | 40.69 |

## Results for PHIM for Run 4 (Sensitivity\_Analysis\_2.RTF)

\*\*\*\*\*

### Main Output for the Tobacco History for Run: 4, Simulation: 1, Scenario: Ecig

| Variable Parameter                           |           |               | Value              |       |               |             |               |                |              |
|----------------------------------------------|-----------|---------------|--------------------|-------|---------------|-------------|---------------|----------------|--------------|
| 1. Country                                   |           |               | US (United States) |       |               |             |               |                |              |
| 2. Sex                                       |           |               | F (Females)        |       |               |             |               |                |              |
| 3. Year of start of process                  |           |               | 1990               |       |               |             |               |                |              |
| Year of Follow-up: 1990, Age Group: All Ages |           |               |                    |       |               |             |               |                |              |
| Period                                       | Age Group | Smoking Group | N                  | %     | Ever Quit (N) | Ever Quit % | Mean Yrs Quit | Short Term (n) | Short Term % |
| 0                                            | All Ages  | Never Any     | 47776              | 54.92 |               |             |               |                |              |
| 0                                            | All Ages  | CC            | 22737              | 26.14 | 0             | 0.00        |               |                |              |
| 0                                            | All Ages  | Ecig          | 0                  | 0.00  |               |             |               |                |              |
| 0                                            | All Ages  | Dual          | 0                  | 0.00  |               |             |               |                |              |
| 0                                            | All Ages  | Former        | 16484              | 18.95 |               |             | 11.90         | 2815           | 17.08        |
| Year of Follow-up: 1990, Age Group: 18-19    |           |               |                    |       |               |             |               |                |              |
| Period                                       | Age Group | Smoking Group | N                  | %     | Ever Quit (N) | Ever Quit % | Mean Yrs Quit | Short Term (n) | Short Term % |
| 0                                            | 18-19     | Never Any     | 2570               | 78.43 |               |             |               |                |              |
| 0                                            | 18-19     | CC            | 535                | 16.33 | 0             | 0.00        |               |                |              |
| 0                                            | 18-19     | Ecig          | 0                  | 0.00  |               |             |               |                |              |
| 0                                            | 18-19     | Dual          | 0                  | 0.00  |               |             |               |                |              |
| 0                                            | 18-19     | Former        | 172                | 5.25  |               |             | 0.20          | 172            | 100.00       |
| Year of Follow-up: 1990, Age Group: 20-24    |           |               |                    |       |               |             |               |                |              |
| Period                                       | Age Group | Smoking Group | N                  | %     | Ever Quit (N) | Ever Quit % | Mean Yrs Quit | Short Term (n) | Short Term % |
| 0                                            | 20-24     | Never Any     | 5354               | 60.89 |               |             |               |                |              |
| 0                                            | 20-24     | CC            | 2560               | 29.11 | 0             | 0.00        |               |                |              |
| 0                                            | 20-24     | Ecig          | 0                  | 0.00  |               |             |               |                |              |
| 0                                            | 20-24     | Dual          | 0                  | 0.00  |               |             |               |                |              |
| 0                                            | 20-24     | Former        | 879                | 10.00 |               |             | 1.58          | 420            | 47.78        |
| Year of Follow-up: 1990, Age Group: 25-29    |           |               |                    |       |               |             |               |                |              |
| Period                                       | Age Group | Smoking Group | N                  | %     | Ever Quit (N) | Ever Quit % | Mean Yrs Quit | Short Term (n) | Short Term % |
| 0                                            | 25-29     | Never Any     | 5318               | 52.77 |               |             |               |                |              |
| 0                                            | 25-29     | CC            | 3335               | 33.09 | 0             | 0.00        |               |                |              |
| 0                                            | 25-29     | Ecig          | 0                  | 0.00  |               |             |               |                |              |
| 0                                            | 25-29     | Dual          | 0                  | 0.00  |               |             |               |                |              |
| 0                                            | 25-29     | Former        | 1425               | 14.14 |               |             | 3.91          | 404            | 28.35        |
| Year of Follow-up: 1990, Age Group: 30-34    |           |               |                    |       |               |             |               |                |              |
| Period                                       | Age Group | Smoking Group | N                  | %     | Ever Quit (N) | Ever Quit % | Mean Yrs Quit | Short Term (n) | Short Term % |
| 0                                            | 30-34     | Never Any     | 5287               | 50.36 |               |             |               |                |              |
| 0                                            | 30-34     | CC            | 3326               | 31.68 | 0             | 0.00        |               |                |              |
| 0                                            | 30-34     | Ecig          | 0                  | 0.00  |               |             |               |                |              |
| 0                                            | 30-34     | Dual          | 0                  | 0.00  |               |             |               |                |              |
| 0                                            | 30-34     | Former        | 1886               | 17.96 |               |             | 4.36          | 566            | 30.01        |
| Year of Follow-up: 1990, Age Group: 35-39    |           |               |                    |       |               |             |               |                |              |
| Period                                       | Age Group | Smoking Group | N                  | %     | Ever Quit (N) | Ever Quit % | Mean Yrs Quit | Short Term (n) | Short Term % |
| 0                                            | 35-39     | Never Any     | 5018               | 52.27 |               |             |               |                |              |
| 0                                            | 35-39     | CC            | 2653               | 27.64 | 0             | 0.00        |               |                |              |
| 0                                            | 35-39     | Ecig          | 0                  | 0.00  |               |             |               |                |              |
| 0                                            | 35-39     | Dual          | 0                  | 0.00  |               |             |               |                |              |
| 0                                            | 35-39     | Former        | 1929               | 20.09 |               |             | 7.96          | 324            | 16.80        |
| Year of Follow-up: 1990, Age Group: 40-44    |           |               |                    |       |               |             |               |                |              |
| Period                                       | Age Group | Smoking Group | N                  | %     | Ever Quit (N) | Ever Quit % | Mean Yrs Quit | Short Term (n) | Short Term % |
| 0                                            | 40-44     | Never Any     | 4356               | 51.27 |               |             |               |                |              |
| 0                                            | 40-44     | CC            | 2397               | 28.21 | 0             | 0.00        |               |                |              |
| 0                                            | 40-44     | Ecig          | 0                  | 0.00  |               |             |               |                |              |
| 0                                            | 40-44     | Dual          | 0                  | 0.00  |               |             |               |                |              |
| 0                                            | 40-44     | Former        | 1744               | 20.52 |               |             | 7.33          | 339            | 19.44        |
| Year of Follow-up: 1990, Age Group: 45-49    |           |               |                    |       |               |             |               |                |              |
| Period                                       | Age Group | Smoking Group | N                  | %     | Ever Quit (N) | Ever Quit % | Mean Yrs Quit | Short Term (n) | Short Term % |
| 0                                            | 45-49     | Never Any     | 3116               | 47.67 |               |             |               |                |              |
| 0                                            | 45-49     | CC            | 1875               | 28.69 | 0             | 0.00        |               |                |              |
| 0                                            | 45-49     | Ecig          | 0                  | 0.00  |               |             |               |                |              |
| 0                                            | 45-49     | Dual          | 0                  | 0.00  |               |             |               |                |              |
| 0                                            | 45-49     | Former        | 1545               | 23.64 |               |             | 12.55         | 194            | 12.56        |
| Year of Follow-up: 1990, Age Group: 50-54    |           |               |                    |       |               |             |               |                |              |
| Period                                       | Age Group | Smoking Group | N                  | %     | Ever Quit (N) | Ever Quit % | Mean Yrs Quit | Short Term (n) | Short Term % |
| 0                                            | 50-54     | Never Any     | 2684               | 48.50 |               |             |               |                |              |
| 0                                            | 50-54     | CC            | 1572               | 28.41 | 0             | 0.00        |               |                |              |



**Results for PHIM for Run 4 (Sensitivity\_Analysis\_2.RTF)**

|                                              |           |               |       |       |               |             |               |                |              |
|----------------------------------------------|-----------|---------------|-------|-------|---------------|-------------|---------------|----------------|--------------|
| 0                                            | 50-54     | Ecig          | 0     | 0.00  |               |             |               |                |              |
| 0                                            | 50-54     | Dual          | 0     | 0.00  |               |             |               |                |              |
| 0                                            | 50-54     | Former        | 1278  | 23.09 |               |             | 13.28         | 126            | 9.86         |
| Year of Follow-up: 1990, Age Group: 55-59    |           |               |       |       |               |             |               |                |              |
| Period                                       | Age Group | Smoking Group | N     | %     | Ever Quit (N) | Ever Quit % | Mean Yrs Quit | Short Term (n) | Short Term % |
| 0                                            | 55-59     | Never Any     | 2732  | 51.90 |               |             |               |                |              |
| 0                                            | 55-59     | CC            | 1295  | 24.60 | 0             | 0.00        |               |                |              |
| 0                                            | 55-59     | Ecig          | 0     | 0.00  |               |             |               |                |              |
| 0                                            | 55-59     | Dual          | 0     | 0.00  |               |             |               |                |              |
| 0                                            | 55-59     | Former        | 1237  | 23.50 |               |             | 17.26         | 90             | 7.28         |
| Year of Follow-up: 1990, Age Group: 60-64    |           |               |       |       |               |             |               |                |              |
| Period                                       | Age Group | Smoking Group | N     | %     | Ever Quit (N) | Ever Quit % | Mean Yrs Quit | Short Term (n) | Short Term % |
| 0                                            | 60-64     | Never Any     | 3078  | 55.72 |               |             |               |                |              |
| 0                                            | 60-64     | CC            | 1249  | 22.61 | 0             | 0.00        |               |                |              |
| 0                                            | 60-64     | Ecig          | 0     | 0.00  |               |             |               |                |              |
| 0                                            | 60-64     | Dual          | 0     | 0.00  |               |             |               |                |              |
| 0                                            | 60-64     | Former        | 1197  | 21.67 |               |             | 18.28         | 61             | 5.10         |
| Year of Follow-up: 1990, Age Group: 65-69    |           |               |       |       |               |             |               |                |              |
| Period                                       | Age Group | Smoking Group | N     | %     | Ever Quit (N) | Ever Quit % | Mean Yrs Quit | Short Term (n) | Short Term % |
| 0                                            | 65-69     | Never Any     | 3042  | 57.36 |               |             |               |                |              |
| 0                                            | 65-69     | CC            | 976   | 18.40 | 0             | 0.00        |               |                |              |
| 0                                            | 65-69     | Ecig          | 0     | 0.00  |               |             |               |                |              |
| 0                                            | 65-69     | Dual          | 0     | 0.00  |               |             |               |                |              |
| 0                                            | 65-69     | Former        | 1285  | 24.23 |               |             | 20.65         | 68             | 5.29         |
| Year of Follow-up: 1990, Age Group: 70-74    |           |               |       |       |               |             |               |                |              |
| Period                                       | Age Group | Smoking Group | N     | %     | Ever Quit (N) | Ever Quit % | Mean Yrs Quit | Short Term (n) | Short Term % |
| 0                                            | 70-74     | Never Any     | 2738  | 61.05 |               |             |               |                |              |
| 0                                            | 70-74     | CC            | 610   | 13.60 | 0             | 0.00        |               |                |              |
| 0                                            | 70-74     | Ecig          | 0     | 0.00  |               |             |               |                |              |
| 0                                            | 70-74     | Dual          | 0     | 0.00  |               |             |               |                |              |
| 0                                            | 70-74     | Former        | 1137  | 25.35 |               |             | 24.48         | 27             | 2.37         |
| Year of Follow-up: 1990, Age Group: 75-79    |           |               |       |       |               |             |               |                |              |
| Period                                       | Age Group | Smoking Group | N     | %     | Ever Quit (N) | Ever Quit % | Mean Yrs Quit | Short Term (n) | Short Term % |
| 0                                            | 75-79     | Never Any     | 2483  | 68.84 |               |             |               |                |              |
| 0                                            | 75-79     | CC            | 354   | 9.81  | 0             | 0.00        |               |                |              |
| 0                                            | 75-79     | Ecig          | 0     | 0.00  |               |             |               |                |              |
| 0                                            | 75-79     | Dual          | 0     | 0.00  |               |             |               |                |              |
| 0                                            | 75-79     | Former        | 770   | 21.35 |               |             | 24.48         | 24             | 3.12         |
| Year of Follow-up: 1995, Age Group: All Ages |           |               |       |       |               |             |               |                |              |
| Period                                       | Age Group | Smoking Group | N     | %     | Ever Quit (N) | Ever Quit % | Mean Yrs Quit | Short Term (n) | Short Term % |
| 5                                            | All Ages  | Never Any     | 50887 | 55.53 |               |             |               |                |              |
| 5                                            | All Ages  | CC            | 7573  | 8.26  | 0             | 0.00        |               |                |              |
| 5                                            | All Ages  | Ecig          | 14822 | 16.17 |               |             |               |                |              |
| 5                                            | All Ages  | Dual          | 0     | 0.00  |               |             |               |                |              |
| 5                                            | All Ages  | Former        | 18357 | 20.03 |               |             | 14.21         | 1123           | 6.12         |
| Year of Follow-up: 1995, Age Group: 18-19    |           |               |       |       |               |             |               |                |              |
| Period                                       | Age Group | Smoking Group | N     | %     | Ever Quit (N) | Ever Quit % | Mean Yrs Quit | Short Term (n) | Short Term % |
| 5                                            | 18-19     | Never Any     | 2434  | 76.64 |               |             |               |                |              |
| 5                                            | 18-19     | CC            | 199   | 6.27  | 0             | 0.00        |               |                |              |
| 5                                            | 18-19     | Ecig          | 463   | 14.58 |               |             |               |                |              |
| 5                                            | 18-19     | Dual          | 0     | 0.00  |               |             |               |                |              |
| 5                                            | 18-19     | Former        | 80    | 2.52  |               |             | 1.01          | 56             | 70.00        |
| Year of Follow-up: 1995, Age Group: 20-24    |           |               |       |       |               |             |               |                |              |
| Period                                       | Age Group | Smoking Group | N     | %     | Ever Quit (N) | Ever Quit % | Mean Yrs Quit | Short Term (n) | Short Term % |
| 5                                            | 20-24     | Never Any     | 5794  | 69.39 |               |             |               |                |              |
| 5                                            | 20-24     | CC            | 628   | 7.52  | 0             | 0.00        |               |                |              |
| 5                                            | 20-24     | Ecig          | 1489  | 17.83 |               |             |               |                |              |
| 5                                            | 20-24     | Dual          | 0     | 0.00  |               |             |               |                |              |
| 5                                            | 20-24     | Former        | 439   | 5.26  |               |             | 3.23          | 102            | 23.23        |
| Year of Follow-up: 1995, Age Group: 25-29    |           |               |       |       |               |             |               |                |              |
| Period                                       | Age Group | Smoking Group | N     | %     | Ever Quit (N) | Ever Quit % | Mean Yrs Quit | Short Term (n) | Short Term % |
| 5                                            | 25-29     | Never Any     | 5313  | 60.42 |               |             |               |                |              |
| 5                                            | 25-29     | CC            | 754   | 8.58  | 0             | 0.00        |               |                |              |
| 5                                            | 25-29     | Ecig          | 1715  | 19.50 |               |             |               |                |              |
| 5                                            | 25-29     | Dual          | 0     | 0.00  |               |             |               |                |              |
| 5                                            | 25-29     | Former        | 1011  | 11.50 |               |             | 5.96          | 51             | 5.04         |
| Year of Follow-up: 1995, Age Group: 30-34    |           |               |       |       |               |             |               |                |              |
| Period                                       | Age Group | Smoking Group | N     | %     | Ever Quit (N) | Ever Quit % | Mean Yrs Quit | Short Term (n) | Short Term % |

**Results for PHIM for Run 4 (Sensitivity\_Analysis\_2.RTF)**

|                                              |           |               |      |       |               |             |               |                |              |
|----------------------------------------------|-----------|---------------|------|-------|---------------|-------------|---------------|----------------|--------------|
| 5                                            | 30-34     | Never Any     | 5304 | 52.63 |               |             |               |                |              |
| 5                                            | 30-34     | CC            | 973  | 9.65  | 0             | 0.00        |               |                |              |
| 5                                            | 30-34     | Ecig          | 2206 | 21.89 |               |             |               |                |              |
| 5                                            | 30-34     | Dual          | 0    | 0.00  |               |             |               |                |              |
| 5                                            | 30-34     | Former        | 1595 | 15.83 |               |             | 8.22          | 49             | 3.07         |
| Year of Follow-up: 1995, Age Group: 35-39    |           |               |      |       |               |             |               |                |              |
| Period                                       | Age Group | Smoking Group | N    | %     | Ever Quit (N) | Ever Quit % | Mean Yrs Quit | Short Term (n) | Short Term % |
| 5                                            | 35-39     | Never Any     | 5278 | 50.27 |               |             |               |                |              |
| 5                                            | 35-39     | CC            | 1013 | 9.65  | 0             | 0.00        |               |                |              |
| 5                                            | 35-39     | Ecig          | 2168 | 20.65 |               |             |               |                |              |
| 5                                            | 35-39     | Dual          | 0    | 0.00  |               |             |               |                |              |
| 5                                            | 35-39     | Former        | 2040 | 19.43 |               |             | 8.81          | 62             | 3.04         |
| Year of Follow-up: 1995, Age Group: 40-44    |           |               |      |       |               |             |               |                |              |
| Period                                       | Age Group | Smoking Group | N    | %     | Ever Quit (N) | Ever Quit % | Mean Yrs Quit | Short Term (n) | Short Term % |
| 5                                            | 40-44     | Never Any     | 5018 | 52.27 |               |             |               |                |              |
| 5                                            | 40-44     | CC            | 775  | 8.07  | 0             | 0.00        |               |                |              |
| 5                                            | 40-44     | Ecig          | 1710 | 17.81 |               |             |               |                |              |
| 5                                            | 40-44     | Dual          | 0    | 0.00  |               |             |               |                |              |
| 5                                            | 40-44     | Former        | 2097 | 21.84 |               |             | 12.06         | 82             | 3.91         |
| Year of Follow-up: 1995, Age Group: 45-49    |           |               |      |       |               |             |               |                |              |
| Period                                       | Age Group | Smoking Group | N    | %     | Ever Quit (N) | Ever Quit % | Mean Yrs Quit | Short Term (n) | Short Term % |
| 5                                            | 45-49     | Never Any     | 4356 | 51.27 |               |             |               |                |              |
| 5                                            | 45-49     | CC            | 698  | 8.21  | 0             | 0.00        |               |                |              |
| 5                                            | 45-49     | Ecig          | 1443 | 16.98 |               |             |               |                |              |
| 5                                            | 45-49     | Dual          | 0    | 0.00  |               |             |               |                |              |
| 5                                            | 45-49     | Former        | 2000 | 23.54 |               |             | 10.94         | 135            | 6.75         |
| Year of Follow-up: 1995, Age Group: 50-54    |           |               |      |       |               |             |               |                |              |
| Period                                       | Age Group | Smoking Group | N    | %     | Ever Quit (N) | Ever Quit % | Mean Yrs Quit | Short Term (n) | Short Term % |
| 5                                            | 50-54     | Never Any     | 3116 | 47.67 |               |             |               |                |              |
| 5                                            | 50-54     | CC            | 524  | 8.02  | 0             | 0.00        |               |                |              |
| 5                                            | 50-54     | Ecig          | 1058 | 16.19 |               |             |               |                |              |
| 5                                            | 50-54     | Dual          | 0    | 0.00  |               |             |               |                |              |
| 5                                            | 50-54     | Former        | 1838 | 28.12 |               |             | 15.04         | 134            | 7.29         |
| Year of Follow-up: 1995, Age Group: 55-59    |           |               |      |       |               |             |               |                |              |
| Period                                       | Age Group | Smoking Group | N    | %     | Ever Quit (N) | Ever Quit % | Mean Yrs Quit | Short Term (n) | Short Term % |
| 5                                            | 55-59     | Never Any     | 2684 | 48.50 |               |             |               |                |              |
| 5                                            | 55-59     | CC            | 497  | 8.98  | 0             | 0.00        |               |                |              |
| 5                                            | 55-59     | Ecig          | 835  | 15.09 |               |             |               |                |              |
| 5                                            | 55-59     | Dual          | 0    | 0.00  |               |             |               |                |              |
| 5                                            | 55-59     | Former        | 1518 | 27.43 |               |             | 15.73         | 78             | 5.14         |
| Year of Follow-up: 1995, Age Group: 60-64    |           |               |      |       |               |             |               |                |              |
| Period                                       | Age Group | Smoking Group | N    | %     | Ever Quit (N) | Ever Quit % | Mean Yrs Quit | Short Term (n) | Short Term % |
| 5                                            | 60-64     | Never Any     | 2732 | 51.90 |               |             |               |                |              |
| 5                                            | 60-64     | CC            | 443  | 8.42  | 0             | 0.00        |               |                |              |
| 5                                            | 60-64     | Ecig          | 638  | 12.12 |               |             |               |                |              |
| 5                                            | 60-64     | Dual          | 0    | 0.00  |               |             |               |                |              |
| 5                                            | 60-64     | Former        | 1451 | 27.56 |               |             | 19.27         | 83             | 5.72         |
| Year of Follow-up: 1995, Age Group: 65-69    |           |               |      |       |               |             |               |                |              |
| Period                                       | Age Group | Smoking Group | N    | %     | Ever Quit (N) | Ever Quit % | Mean Yrs Quit | Short Term (n) | Short Term % |
| 5                                            | 65-69     | Never Any     | 3078 | 55.72 |               |             |               |                |              |
| 5                                            | 65-69     | CC            | 428  | 7.75  | 0             | 0.00        |               |                |              |
| 5                                            | 65-69     | Ecig          | 552  | 9.99  |               |             |               |                |              |
| 5                                            | 65-69     | Dual          | 0    | 0.00  |               |             |               |                |              |
| 5                                            | 65-69     | Former        | 1466 | 26.54 |               |             | 19.36         | 116            | 7.91         |
| Year of Follow-up: 1995, Age Group: 70-74    |           |               |      |       |               |             |               |                |              |
| Period                                       | Age Group | Smoking Group | N    | %     | Ever Quit (N) | Ever Quit % | Mean Yrs Quit | Short Term (n) | Short Term % |
| 5                                            | 70-74     | Never Any     | 3042 | 57.36 |               |             |               |                |              |
| 5                                            | 70-74     | CC            | 409  | 7.71  | 0             | 0.00        |               |                |              |
| 5                                            | 70-74     | Ecig          | 319  | 6.02  |               |             |               |                |              |
| 5                                            | 70-74     | Dual          | 0    | 0.00  |               |             |               |                |              |
| 5                                            | 70-74     | Former        | 1533 | 28.91 |               |             | 21.79         | 112            | 7.31         |
| Year of Follow-up: 1995, Age Group: 75-79    |           |               |      |       |               |             |               |                |              |
| Period                                       | Age Group | Smoking Group | N    | %     | Ever Quit (N) | Ever Quit % | Mean Yrs Quit | Short Term (n) | Short Term % |
| 5                                            | 75-79     | Never Any     | 2738 | 61.05 |               |             |               |                |              |
| 5                                            | 75-79     | CC            | 232  | 5.17  | 0             | 0.00        |               |                |              |
| 5                                            | 75-79     | Ecig          | 226  | 5.04  |               |             |               |                |              |
| 5                                            | 75-79     | Dual          | 0    | 0.00  |               |             |               |                |              |
| 5                                            | 75-79     | Former        | 1289 | 28.74 |               |             | 26.23         | 63             | 4.89         |
| Year of Follow-up: 2000, Age Group: All Ages |           |               |      |       |               |             |               |                |              |

**Results for PHIM for Run 4 (Sensitivity\_Analysis\_2.RTF)**

| Period                                    | Age Group | Smoking Group | N     | %     | Ever Quit (N) | Ever Quit % | Mean Yrs Quit | Short Term (n) | Short Term % |
|-------------------------------------------|-----------|---------------|-------|-------|---------------|-------------|---------------|----------------|--------------|
| 10                                        | All Ages  | Never Any     | 50423 | 54.86 |               |             |               |                |              |
| 10                                        | All Ages  | CC            | 2422  | 2.64  | 0             | 0.00        |               |                |              |
| 10                                        | All Ages  | Ecig          | 17873 | 19.45 |               |             |               |                |              |
| 10                                        | All Ages  | Dual          | 0     | 0.00  |               |             |               |                |              |
| 10                                        | All Ages  | Former        | 21190 | 23.06 |               |             | 15.14         | 1647           | 7.77         |
| Year of Follow-up: 2000, Age Group: 18-19 |           |               |       |       |               |             |               |                |              |
| Period                                    | Age Group | Smoking Group | N     | %     | Ever Quit (N) | Ever Quit % | Mean Yrs Quit | Short Term (n) | Short Term % |
| 10                                        | 18-19     | Never Any     | 0     | .     |               |             |               |                |              |
| 10                                        | 18-19     | CC            | 0     | .     | 0             | .           |               |                |              |
| 10                                        | 18-19     | Ecig          | 0     | .     |               |             |               |                |              |
| 10                                        | 18-19     | Dual          | 0     | .     |               |             |               |                |              |
| 10                                        | 18-19     | Former        | 0     | .     |               |             |               | 0              | .            |
| Year of Follow-up: 2000, Age Group: 20-24 |           |               |       |       |               |             |               |                |              |
| Period                                    | Age Group | Smoking Group | N     | %     | Ever Quit (N) | Ever Quit % | Mean Yrs Quit | Short Term (n) | Short Term % |
| 10                                        | 20-24     | Never Any     | 5128  | 64.67 |               |             |               |                |              |
| 10                                        | 20-24     | CC            | 239   | 3.01  | 0             | 0.00        |               |                |              |
| 10                                        | 20-24     | Ecig          | 1897  | 23.92 |               |             |               |                |              |
| 10                                        | 20-24     | Dual          | 0     | 0.00  |               |             |               |                |              |
| 10                                        | 20-24     | Former        | 666   | 8.40  |               |             | 3.48          | 169            | 25.38        |
| Year of Follow-up: 2000, Age Group: 25-29 |           |               |       |       |               |             |               |                |              |
| Period                                    | Age Group | Smoking Group | N     | %     | Ever Quit (N) | Ever Quit % | Mean Yrs Quit | Short Term (n) | Short Term % |
| 10                                        | 25-29     | Never Any     | 5493  | 65.78 |               |             |               |                |              |
| 10                                        | 25-29     | CC            | 229   | 2.74  | 0             | 0.00        |               |                |              |
| 10                                        | 25-29     | Ecig          | 1847  | 22.12 |               |             |               |                |              |
| 10                                        | 25-29     | Dual          | 0     | 0.00  |               |             |               |                |              |
| 10                                        | 25-29     | Former        | 781   | 9.35  |               |             | 5.49          | 129            | 16.52        |
| Year of Follow-up: 2000, Age Group: 30-34 |           |               |       |       |               |             |               |                |              |
| Period                                    | Age Group | Smoking Group | N     | %     | Ever Quit (N) | Ever Quit % | Mean Yrs Quit | Short Term (n) | Short Term % |
| 10                                        | 30-34     | Never Any     | 5214  | 59.30 |               |             |               |                |              |
| 10                                        | 30-34     | CC            | 225   | 2.56  | 0             | 0.00        |               |                |              |
| 10                                        | 30-34     | Ecig          | 2132  | 24.25 |               |             |               |                |              |
| 10                                        | 30-34     | Dual          | 0     | 0.00  |               |             |               |                |              |
| 10                                        | 30-34     | Former        | 1222  | 13.90 |               |             | 9.39          | 87             | 7.12         |
| Year of Follow-up: 2000, Age Group: 35-39 |           |               |       |       |               |             |               |                |              |
| Period                                    | Age Group | Smoking Group | N     | %     | Ever Quit (N) | Ever Quit % | Mean Yrs Quit | Short Term (n) | Short Term % |
| 10                                        | 35-39     | Never Any     | 5284  | 52.43 |               |             |               |                |              |
| 10                                        | 35-39     | CC            | 291   | 2.89  | 0             | 0.00        |               |                |              |
| 10                                        | 35-39     | Ecig          | 2662  | 26.41 |               |             |               |                |              |
| 10                                        | 35-39     | Dual          | 0     | 0.00  |               |             |               |                |              |
| 10                                        | 35-39     | Former        | 1841  | 18.27 |               |             | 11.69         | 111            | 6.03         |
| Year of Follow-up: 2000, Age Group: 40-44 |           |               |       |       |               |             |               |                |              |
| Period                                    | Age Group | Smoking Group | N     | %     | Ever Quit (N) | Ever Quit % | Mean Yrs Quit | Short Term (n) | Short Term % |
| 10                                        | 40-44     | Never Any     | 5278  | 50.27 |               |             |               |                |              |
| 10                                        | 40-44     | CC            | 308   | 2.93  | 0             | 0.00        |               |                |              |
| 10                                        | 40-44     | Ecig          | 2607  | 24.83 |               |             |               |                |              |
| 10                                        | 40-44     | Dual          | 0     | 0.00  |               |             |               |                |              |
| 10                                        | 40-44     | Former        | 2306  | 21.96 |               |             | 12.40         | 133            | 5.77         |
| Year of Follow-up: 2000, Age Group: 45-49 |           |               |       |       |               |             |               |                |              |
| Period                                    | Age Group | Smoking Group | N     | %     | Ever Quit (N) | Ever Quit % | Mean Yrs Quit | Short Term (n) | Short Term % |
| 10                                        | 45-49     | Never Any     | 5018  | 52.27 |               |             |               |                |              |
| 10                                        | 45-49     | CC            | 221   | 2.30  | 0             | 0.00        |               |                |              |
| 10                                        | 45-49     | Ecig          | 1902  | 19.81 |               |             |               |                |              |
| 10                                        | 45-49     | Dual          | 0     | 0.00  |               |             |               |                |              |
| 10                                        | 45-49     | Former        | 2459  | 25.61 |               |             | 14.80         | 173            | 7.04         |
| Year of Follow-up: 2000, Age Group: 50-54 |           |               |       |       |               |             |               |                |              |
| Period                                    | Age Group | Smoking Group | N     | %     | Ever Quit (N) | Ever Quit % | Mean Yrs Quit | Short Term (n) | Short Term % |
| 10                                        | 50-54     | Never Any     | 4356  | 51.27 |               |             |               |                |              |
| 10                                        | 50-54     | CC            | 184   | 2.17  | 0             | 0.00        |               |                |              |
| 10                                        | 50-54     | Ecig          | 1480  | 17.42 |               |             |               |                |              |
| 10                                        | 50-54     | Dual          | 0     | 0.00  |               |             |               |                |              |
| 10                                        | 50-54     | Former        | 2477  | 29.15 |               |             | 13.24         | 192            | 7.75         |
| Year of Follow-up: 2000, Age Group: 55-59 |           |               |       |       |               |             |               |                |              |
| Period                                    | Age Group | Smoking Group | N     | %     | Ever Quit (N) | Ever Quit % | Mean Yrs Quit | Short Term (n) | Short Term % |
| 10                                        | 55-59     | Never Any     | 3116  | 47.67 |               |             |               |                |              |
| 10                                        | 55-59     | CC            | 145   | 2.22  | 0             | 0.00        |               |                |              |
| 10                                        | 55-59     | Ecig          | 1072  | 16.40 |               |             |               |                |              |
| 10                                        | 55-59     | Dual          | 0     | 0.00  |               |             |               |                |              |

**Results for PHIM for Run 4 (Sensitivity\_Analysis\_2.RTF)**

| Year of Follow-up: 2000, Age Group: 60-64    | Period   | Age Group | Smoking Group | N     | %     | Ever Quit (N) | Ever Quit % | Mean Yrs Quit | Short Term (n) | Short Term % |
|----------------------------------------------|----------|-----------|---------------|-------|-------|---------------|-------------|---------------|----------------|--------------|
| 10                                           | 55-59    | Former    |               | 2203  | 33.71 |               |             | 17.04         | 146            | 6.63         |
| 10                                           | 60-64    | Never Any |               | 2684  | 48.50 |               |             |               |                |              |
| 10                                           | 60-64    | CC        |               | 169   | 3.05  | 0             | 0.00        |               |                |              |
| 10                                           | 60-64    | Ecig      |               | 821   | 14.84 |               |             |               |                |              |
| 10                                           | 60-64    | Dual      |               | 0     | 0.00  |               |             |               |                |              |
| 10                                           | 60-64    | Former    |               | 1860  | 33.61 |               |             | 17.26         | 139            | 7.47         |
| Year of Follow-up: 2000, Age Group: 65-69    | Period   | Age Group | Smoking Group | N     | %     | Ever Quit (N) | Ever Quit % | Mean Yrs Quit | Short Term (n) | Short Term % |
| 10                                           | 65-69    | Never Any |               | 2732  | 51.90 |               |             |               |                |              |
| 10                                           | 65-69    | CC        |               | 143   | 2.72  | 0             | 0.00        |               |                |              |
| 10                                           | 65-69    | Ecig      |               | 595   | 11.30 |               |             |               |                |              |
| 10                                           | 65-69    | Dual      |               | 0     | 0.00  |               |             |               |                |              |
| 10                                           | 65-69    | Former    |               | 1794  | 34.08 |               |             | 20.01         | 127            | 7.08         |
| Year of Follow-up: 2000, Age Group: 70-74    | Period   | Age Group | Smoking Group | N     | %     | Ever Quit (N) | Ever Quit % | Mean Yrs Quit | Short Term (n) | Short Term % |
| 10                                           | 70-74    | Never Any |               | 3078  | 55.72 |               |             |               |                |              |
| 10                                           | 70-74    | CC        |               | 136   | 2.46  | 0             | 0.00        |               |                |              |
| 10                                           | 70-74    | Ecig      |               | 509   | 9.21  |               |             |               |                |              |
| 10                                           | 70-74    | Dual      |               | 0     | 0.00  |               |             |               |                |              |
| 10                                           | 70-74    | Former    |               | 1801  | 32.60 |               |             | 20.17         | 149            | 8.27         |
| Year of Follow-up: 2000, Age Group: 75-79    | Period   | Age Group | Smoking Group | N     | %     | Ever Quit (N) | Ever Quit % | Mean Yrs Quit | Short Term (n) | Short Term % |
| 10                                           | 75-79    | Never Any |               | 3042  | 57.36 |               |             |               |                |              |
| 10                                           | 75-79    | CC        |               | 132   | 2.49  | 0             | 0.00        |               |                |              |
| 10                                           | 75-79    | Ecig      |               | 349   | 6.58  |               |             |               |                |              |
| 10                                           | 75-79    | Dual      |               | 0     | 0.00  |               |             |               |                |              |
| 10                                           | 75-79    | Former    |               | 1780  | 33.57 |               |             | 23.35         | 92             | 5.17         |
| Year of Follow-up: 2005, Age Group: All Ages | Period   | Age Group | Smoking Group | N     | %     | Ever Quit (N) | Ever Quit % | Mean Yrs Quit | Short Term (n) | Short Term % |
| 15                                           | All Ages | Never Any |               | 47002 | 54.27 |               |             |               |                |              |
| 15                                           | All Ages | CC        |               | 715   | 0.83  | 0             | 0.00        |               |                |              |
| 15                                           | All Ages | Ecig      |               | 16805 | 19.40 |               |             |               |                |              |
| 15                                           | All Ages | Dual      |               | 0     | 0.00  |               |             |               |                |              |
| 15                                           | All Ages | Former    |               | 22083 | 25.50 |               |             | 17.30         | 1005           | 4.55         |
| Year of Follow-up: 2005, Age Group: 18-19    | Period   | Age Group | Smoking Group | N     | %     | Ever Quit (N) | Ever Quit % | Mean Yrs Quit | Short Term (n) | Short Term % |
| 15                                           | 18-19    | Never Any |               | 0     | .     |               |             |               |                |              |
| 15                                           | 18-19    | CC        |               | 0     | .     | 0             | .           |               |                |              |
| 15                                           | 18-19    | Ecig      |               | 0     | .     |               |             |               |                |              |
| 15                                           | 18-19    | Dual      |               | 0     | .     |               |             |               |                |              |
| 15                                           | 18-19    | Former    |               | 0     | .     |               |             | .             | 0              | .            |
| Year of Follow-up: 2005, Age Group: 20-24    | Period   | Age Group | Smoking Group | N     | %     | Ever Quit (N) | Ever Quit % | Mean Yrs Quit | Short Term (n) | Short Term % |
| 15                                           | 20-24    | Never Any |               | 0     | .     |               |             |               |                |              |
| 15                                           | 20-24    | CC        |               | 0     | .     | 0             | .           |               |                |              |
| 15                                           | 20-24    | Ecig      |               | 0     | .     |               |             |               |                |              |
| 15                                           | 20-24    | Dual      |               | 0     | .     |               |             |               |                |              |
| 15                                           | 20-24    | Former    |               | 0     | .     |               |             | .             | 0              | .            |
| Year of Follow-up: 2005, Age Group: 25-29    | Period   | Age Group | Smoking Group | N     | %     | Ever Quit (N) | Ever Quit % | Mean Yrs Quit | Short Term (n) | Short Term % |
| 15                                           | 25-29    | Never Any |               | 4860  | 61.29 |               |             |               |                |              |
| 15                                           | 25-29    | CC        |               | 76    | 0.96  | 0             | 0.00        |               |                |              |
| 15                                           | 25-29    | Ecig      |               | 2021  | 25.49 |               |             |               |                |              |
| 15                                           | 25-29    | Dual      |               | 0     | 0.00  |               |             |               |                |              |
| 15                                           | 25-29    | Former    |               | 973   | 12.27 |               |             | 6.54          | 102            | 10.48        |
| Year of Follow-up: 2005, Age Group: 30-34    | Period   | Age Group | Smoking Group | N     | %     | Ever Quit (N) | Ever Quit % | Mean Yrs Quit | Short Term (n) | Short Term % |
| 15                                           | 30-34    | Never Any |               | 5407  | 64.75 |               |             |               |                |              |
| 15                                           | 30-34    | CC        |               | 60    | 0.72  | 0             | 0.00        |               |                |              |
| 15                                           | 30-34    | Ecig      |               | 1912  | 22.90 |               |             |               |                |              |
| 15                                           | 30-34    | Dual      |               | 0     | 0.00  |               |             |               |                |              |
| 15                                           | 30-34    | Former    |               | 971   | 11.63 |               |             | 8.82          | 78             | 8.03         |
| Year of Follow-up: 2005, Age Group: 35-39    | Period   | Age Group | Smoking Group | N     | %     | Ever Quit (N) | Ever Quit % | Mean Yrs Quit | Short Term (n) | Short Term % |
| 15                                           | 35-39    | Never Any |               | 5189  | 59.01 |               |             |               |                |              |
| 15                                           | 35-39    | CC        |               | 66    | 0.75  | 0             | 0.00        |               |                |              |

**Results for PHIM for Run 4 (Sensitivity\_Analysis\_2.RTF)**

|                                              |           |               |       |       |               |             |               |                |              |
|----------------------------------------------|-----------|---------------|-------|-------|---------------|-------------|---------------|----------------|--------------|
| 15                                           | 35-39     | Ecig          | 2132  | 24.25 |               |             |               |                |              |
| 15                                           | 35-39     | Dual          | 0     | 0.00  |               |             |               |                |              |
| 15                                           | 35-39     | Former        | 1406  | 15.99 |               |             | 12.79         | 68             | 4.84         |
| Year of Follow-up: 2005, Age Group: 40-44    |           |               |       |       |               |             |               |                |              |
| Period                                       | Age Group | Smoking Group | N     | %     | Ever Quit (N) | Ever Quit % | Mean Yrs Quit | Short Term (n) | Short Term % |
| 15                                           | 40-44     | Never Any     | 5284  | 52.43 |               |             |               |                |              |
| 15                                           | 40-44     | CC            | 88    | 0.87  | 0             | 0.00        |               |                |              |
| 15                                           | 40-44     | Ecig          | 2616  | 25.96 |               |             |               |                |              |
| 15                                           | 40-44     | Dual          | 0     | 0.00  |               |             |               |                |              |
| 15                                           | 40-44     | Former        | 2090  | 20.74 |               |             | 14.95         | 103            | 4.93         |
| Year of Follow-up: 2005, Age Group: 45-49    |           |               |       |       |               |             |               |                |              |
| Period                                       | Age Group | Smoking Group | N     | %     | Ever Quit (N) | Ever Quit % | Mean Yrs Quit | Short Term (n) | Short Term % |
| 15                                           | 45-49     | Never Any     | 5278  | 50.27 |               |             |               |                |              |
| 15                                           | 45-49     | CC            | 98    | 0.93  | 0             | 0.00        |               |                |              |
| 15                                           | 45-49     | Ecig          | 2494  | 23.75 |               |             |               |                |              |
| 15                                           | 45-49     | Dual          | 0     | 0.00  |               |             |               |                |              |
| 15                                           | 45-49     | Former        | 2629  | 25.04 |               |             | 15.49         | 145            | 5.52         |
| Year of Follow-up: 2005, Age Group: 50-54    |           |               |       |       |               |             |               |                |              |
| Period                                       | Age Group | Smoking Group | N     | %     | Ever Quit (N) | Ever Quit % | Mean Yrs Quit | Short Term (n) | Short Term % |
| 15                                           | 50-54     | Never Any     | 5018  | 52.27 |               |             |               |                |              |
| 15                                           | 50-54     | CC            | 69    | 0.72  | 0             | 0.00        |               |                |              |
| 15                                           | 50-54     | Ecig          | 1754  | 18.27 |               |             |               |                |              |
| 15                                           | 50-54     | Dual          | 0     | 0.00  |               |             |               |                |              |
| 15                                           | 50-54     | Former        | 2759  | 28.74 |               |             | 17.89         | 112            | 4.06         |
| Year of Follow-up: 2005, Age Group: 55-59    |           |               |       |       |               |             |               |                |              |
| Period                                       | Age Group | Smoking Group | N     | %     | Ever Quit (N) | Ever Quit % | Mean Yrs Quit | Short Term (n) | Short Term % |
| 15                                           | 55-59     | Never Any     | 4356  | 51.27 |               |             |               |                |              |
| 15                                           | 55-59     | CC            | 58    | 0.68  | 0             | 0.00        |               |                |              |
| 15                                           | 55-59     | Ecig          | 1381  | 16.25 |               |             |               |                |              |
| 15                                           | 55-59     | Dual          | 0     | 0.00  |               |             |               |                |              |
| 15                                           | 55-59     | Former        | 2702  | 31.80 |               |             | 16.92         | 75             | 2.78         |
| Year of Follow-up: 2005, Age Group: 60-64    |           |               |       |       |               |             |               |                |              |
| Period                                       | Age Group | Smoking Group | N     | %     | Ever Quit (N) | Ever Quit % | Mean Yrs Quit | Short Term (n) | Short Term % |
| 15                                           | 60-64     | Never Any     | 3116  | 47.67 |               |             |               |                |              |
| 15                                           | 60-64     | CC            | 44    | 0.67  | 0             | 0.00        |               |                |              |
| 15                                           | 60-64     | Ecig          | 945   | 14.46 |               |             |               |                |              |
| 15                                           | 60-64     | Dual          | 0     | 0.00  |               |             |               |                |              |
| 15                                           | 60-64     | Former        | 2431  | 37.19 |               |             | 20.15         | 107            | 4.40         |
| Year of Follow-up: 2005, Age Group: 65-69    |           |               |       |       |               |             |               |                |              |
| Period                                       | Age Group | Smoking Group | N     | %     | Ever Quit (N) | Ever Quit % | Mean Yrs Quit | Short Term (n) | Short Term % |
| 15                                           | 65-69     | Never Any     | 2684  | 48.50 |               |             |               |                |              |
| 15                                           | 65-69     | CC            | 60    | 1.08  | 0             | 0.00        |               |                |              |
| 15                                           | 65-69     | Ecig          | 684   | 12.36 |               |             |               |                |              |
| 15                                           | 65-69     | Dual          | 0     | 0.00  |               |             |               |                |              |
| 15                                           | 65-69     | Former        | 2106  | 38.06 |               |             | 19.93         | 76             | 3.61         |
| Year of Follow-up: 2005, Age Group: 70-74    |           |               |       |       |               |             |               |                |              |
| Period                                       | Age Group | Smoking Group | N     | %     | Ever Quit (N) | Ever Quit % | Mean Yrs Quit | Short Term (n) | Short Term % |
| 15                                           | 70-74     | Never Any     | 2732  | 51.90 |               |             |               |                |              |
| 15                                           | 70-74     | CC            | 42    | 0.80  | 0             | 0.00        |               |                |              |
| 15                                           | 70-74     | Ecig          | 466   | 8.85  |               |             |               |                |              |
| 15                                           | 70-74     | Dual          | 0     | 0.00  |               |             |               |                |              |
| 15                                           | 70-74     | Former        | 2024  | 38.45 |               |             | 22.43         | 78             | 3.85         |
| Year of Follow-up: 2005, Age Group: 75-79    |           |               |       |       |               |             |               |                |              |
| Period                                       | Age Group | Smoking Group | N     | %     | Ever Quit (N) | Ever Quit % | Mean Yrs Quit | Short Term (n) | Short Term % |
| 15                                           | 75-79     | Never Any     | 3078  | 55.72 |               |             |               |                |              |
| 15                                           | 75-79     | CC            | 54    | 0.98  | 0             | 0.00        |               |                |              |
| 15                                           | 75-79     | Ecig          | 400   | 7.24  |               |             |               |                |              |
| 15                                           | 75-79     | Dual          | 0     | 0.00  |               |             |               |                |              |
| 15                                           | 75-79     | Former        | 1992  | 36.06 |               |             | 22.98         | 61             | 3.06         |
| Year of Follow-up: 2010, Age Group: All Ages |           |               |       |       |               |             |               |                |              |
| Period                                       | Age Group | Smoking Group | N     | %     | Ever Quit (N) | Ever Quit % | Mean Yrs Quit | Short Term (n) | Short Term % |
| 20                                           | All Ages  | Never Any     | 43759 | 53.97 |               |             |               |                |              |
| 20                                           | All Ages  | CC            | 210   | 0.26  | 0             | 0.00        |               |                |              |
| 20                                           | All Ages  | Ecig          | 14349 | 17.70 |               |             |               |                |              |
| 20                                           | All Ages  | Dual          | 0     | 0.00  |               |             |               |                |              |
| 20                                           | All Ages  | Former        | 22763 | 28.07 |               |             | 19.41         | 1122           | 4.93         |
| Year of Follow-up: 2010, Age Group: 18-19    |           |               |       |       |               |             |               |                |              |
| Period                                       | Age Group | Smoking Group | N     | %     | Ever Quit (N) | Ever Quit % | Mean Yrs Quit | Short Term (n) | Short Term % |

**Results for PHIM for Run 4 (Sensitivity\_Analysis\_2.RTF)**

|                                           |           |               |      |       |               |             |               |                |              |
|-------------------------------------------|-----------|---------------|------|-------|---------------|-------------|---------------|----------------|--------------|
| 20                                        | 18-19     | Never Any     | 0    | .     |               |             |               |                |              |
| 20                                        | 18-19     | CC            | 0    | .     | 0             | .           |               |                |              |
| 20                                        | 18-19     | Ecig          | 0    | .     |               |             |               |                |              |
| 20                                        | 18-19     | Dual          | 0    | .     |               |             |               |                |              |
| 20                                        | 18-19     | Former        | 0    | .     |               |             | 0             | .              |              |
| Year of Follow-up: 2010, Age Group: 20-24 |           |               |      |       |               |             |               |                |              |
| Period                                    | Age Group | Smoking Group | N    | %     | Ever Quit (N) | Ever Quit % | Mean Yrs Quit | Short Term (n) | Short Term % |
| 20                                        | 20-24     | Never Any     | 0    | .     |               |             |               |                |              |
| 20                                        | 20-24     | CC            | 0    | .     | 0             | .           |               |                |              |
| 20                                        | 20-24     | Ecig          | 0    | .     |               |             |               |                |              |
| 20                                        | 20-24     | Dual          | 0    | .     |               |             |               |                |              |
| 20                                        | 20-24     | Former        | 0    | .     |               |             |               | 0              | .            |
| Year of Follow-up: 2010, Age Group: 25-29 |           |               |      |       |               |             |               |                |              |
| Period                                    | Age Group | Smoking Group | N    | %     | Ever Quit (N) | Ever Quit % | Mean Yrs Quit | Short Term (n) | Short Term % |
| 20                                        | 25-29     | Never Any     | 0    | .     |               |             |               |                |              |
| 20                                        | 25-29     | CC            | 0    | .     | 0             | .           |               |                |              |
| 20                                        | 25-29     | Ecig          | 0    | .     |               |             |               |                |              |
| 20                                        | 25-29     | Dual          | 0    | .     |               |             |               |                |              |
| 20                                        | 25-29     | Former        | 0    | .     |               |             |               | 0              | .            |
| Year of Follow-up: 2010, Age Group: 30-34 |           |               |      |       |               |             |               |                |              |
| Period                                    | Age Group | Smoking Group | N    | %     | Ever Quit (N) | Ever Quit % | Mean Yrs Quit | Short Term (n) | Short Term % |
| 20                                        | 30-34     | Never Any     | 4743 | 59.81 |               |             |               |                |              |
| 20                                        | 30-34     | CC            | 26   | 0.33  | 0             | 0.00        |               |                |              |
| 20                                        | 30-34     | Ecig          | 1904 | 24.01 |               |             |               |                |              |
| 20                                        | 30-34     | Dual          | 0    | 0.00  |               |             |               |                |              |
| 20                                        | 30-34     | Former        | 1257 | 15.85 |               |             | 9.32          | 136            | 10.82        |
| Year of Follow-up: 2010, Age Group: 35-39 |           |               |      |       |               |             |               |                |              |
| Period                                    | Age Group | Smoking Group | N    | %     | Ever Quit (N) | Ever Quit % | Mean Yrs Quit | Short Term (n) | Short Term % |
| 20                                        | 35-39     | Never Any     | 5359 | 64.18 |               |             |               |                |              |
| 20                                        | 35-39     | CC            | 15   | 0.18  | 0             | 0.00        |               |                |              |
| 20                                        | 35-39     | Ecig          | 1762 | 21.10 |               |             |               |                |              |
| 20                                        | 35-39     | Dual          | 0    | 0.00  |               |             |               |                |              |
| 20                                        | 35-39     | Former        | 1214 | 14.54 |               |             | 11.43         | 96             | 7.91         |
| Year of Follow-up: 2010, Age Group: 40-44 |           |               |      |       |               |             |               |                |              |
| Period                                    | Age Group | Smoking Group | N    | %     | Ever Quit (N) | Ever Quit % | Mean Yrs Quit | Short Term (n) | Short Term % |
| 20                                        | 40-44     | Never Any     | 5189 | 59.01 |               |             |               |                |              |
| 20                                        | 40-44     | CC            | 15   | 0.17  | 0             | 0.00        |               |                |              |
| 20                                        | 40-44     | Ecig          | 1931 | 21.96 |               |             |               |                |              |
| 20                                        | 40-44     | Dual          | 0    | 0.00  |               |             |               |                |              |
| 20                                        | 40-44     | Former        | 1658 | 18.86 |               |             | 15.35         | 115            | 6.94         |
| Year of Follow-up: 2010, Age Group: 45-49 |           |               |      |       |               |             |               |                |              |
| Period                                    | Age Group | Smoking Group | N    | %     | Ever Quit (N) | Ever Quit % | Mean Yrs Quit | Short Term (n) | Short Term % |
| 20                                        | 45-49     | Never Any     | 5284 | 52.43 |               |             |               |                |              |
| 20                                        | 45-49     | CC            | 30   | 0.30  | 0             | 0.00        |               |                |              |
| 20                                        | 45-49     | Ecig          | 2364 | 23.46 |               |             |               |                |              |
| 20                                        | 45-49     | Dual          | 0    | 0.00  |               |             |               |                |              |
| 20                                        | 45-49     | Former        | 2400 | 23.81 |               |             | 17.60         | 134            | 5.58         |
| Year of Follow-up: 2010, Age Group: 50-54 |           |               |      |       |               |             |               |                |              |
| Period                                    | Age Group | Smoking Group | N    | %     | Ever Quit (N) | Ever Quit % | Mean Yrs Quit | Short Term (n) | Short Term % |
| 20                                        | 50-54     | Never Any     | 5278 | 50.27 |               |             |               |                |              |
| 20                                        | 50-54     | CC            | 28   | 0.27  | 0             | 0.00        |               |                |              |
| 20                                        | 50-54     | Ecig          | 2204 | 20.99 |               |             |               |                |              |
| 20                                        | 50-54     | Dual          | 0    | 0.00  |               |             |               |                |              |
| 20                                        | 50-54     | Former        | 2989 | 28.47 |               |             | 18.24         | 167            | 5.59         |
| Year of Follow-up: 2010, Age Group: 55-59 |           |               |      |       |               |             |               |                |              |
| Period                                    | Age Group | Smoking Group | N    | %     | Ever Quit (N) | Ever Quit % | Mean Yrs Quit | Short Term (n) | Short Term % |
| 20                                        | 55-59     | Never Any     | 5018 | 52.27 |               |             |               |                |              |
| 20                                        | 55-59     | CC            | 21   | 0.22  | 0             | 0.00        |               |                |              |
| 20                                        | 55-59     | Ecig          | 1505 | 15.68 |               |             |               |                |              |
| 20                                        | 55-59     | Dual          | 0    | 0.00  |               |             |               |                |              |
| 20                                        | 55-59     | Former        | 3056 | 31.83 |               |             | 20.86         | 110            | 3.60         |
| Year of Follow-up: 2010, Age Group: 60-64 |           |               |      |       |               |             |               |                |              |
| Period                                    | Age Group | Smoking Group | N    | %     | Ever Quit (N) | Ever Quit % | Mean Yrs Quit | Short Term (n) | Short Term % |
| 20                                        | 60-64     | Never Any     | 4356 | 51.27 |               |             |               |                |              |
| 20                                        | 60-64     | CC            | 24   | 0.28  | 0             | 0.00        |               |                |              |
| 20                                        | 60-64     | Ecig          | 1117 | 13.15 |               |             |               |                |              |
| 20                                        | 60-64     | Dual          | 0    | 0.00  |               |             |               |                |              |
| 20                                        | 60-64     | Former        | 3000 | 35.31 |               |             | 19.90         | 147            | 4.90         |
| Year of Follow-up: 2010, Age Group: 65-69 |           |               |      |       |               |             |               |                |              |

**Results for PHIM for Run 4 (Sensitivity\_Analysis\_2.RTF)**

| Period                                       | Age Group | Smoking Group | N     | %     | Ever Quit (N) | Ever Quit % | Mean Yrs Quit | Short Term (n) | Short Term % |
|----------------------------------------------|-----------|---------------|-------|-------|---------------|-------------|---------------|----------------|--------------|
| 20                                           | 65-69     | Never Any     | 3116  | 47.67 |               |             |               |                |              |
| 20                                           | 65-69     | CC            | 15    | 0.23  | 0             | 0.00        |               |                |              |
| 20                                           | 65-69     | Ecig          | 692   | 10.59 |               |             |               |                |              |
| 20                                           | 65-69     | Dual          | 0     | 0.00  |               |             |               |                |              |
| 20                                           | 65-69     | Former        | 2713  | 41.51 |               |             | 22.76         | 87             | 3.21         |
| Year of Follow-up: 2010, Age Group: 70-74    |           |               |       |       |               |             |               |                |              |
| Period                                       | Age Group | Smoking Group | N     | %     | Ever Quit (N) | Ever Quit % | Mean Yrs Quit | Short Term (n) | Short Term % |
| 20                                           | 70-74     | Never Any     | 2684  | 48.50 |               |             |               |                |              |
| 20                                           | 70-74     | CC            | 23    | 0.42  | 0             | 0.00        |               |                |              |
| 20                                           | 70-74     | Ecig          | 534   | 9.65  |               |             |               |                |              |
| 20                                           | 70-74     | Dual          | 0     | 0.00  |               |             |               |                |              |
| 20                                           | 70-74     | Former        | 2293  | 41.43 |               |             | 23.07         | 71             | 3.10         |
| Year of Follow-up: 2010, Age Group: 75-79    |           |               |       |       |               |             |               |                |              |
| Period                                       | Age Group | Smoking Group | N     | %     | Ever Quit (N) | Ever Quit % | Mean Yrs Quit | Short Term (n) | Short Term % |
| 20                                           | 75-79     | Never Any     | 2732  | 51.90 |               |             |               |                |              |
| 20                                           | 75-79     | CC            | 13    | 0.25  | 0             | 0.00        |               |                |              |
| 20                                           | 75-79     | Ecig          | 336   | 6.38  |               |             |               |                |              |
| 20                                           | 75-79     | Dual          | 0     | 0.00  |               |             |               |                |              |
| 20                                           | 75-79     | Former        | 2183  | 41.47 |               |             | 25.59         | 59             | 2.70         |
| Year of Follow-up: 2015, Age Group: All Ages |           |               |       |       |               |             |               |                |              |
| Period                                       | Age Group | Smoking Group | N     | %     | Ever Quit (N) | Ever Quit % | Mean Yrs Quit | Short Term (n) | Short Term % |
| 25                                           | All Ages  | Never Any     | 41010 | 54.09 |               |             |               |                |              |
| 25                                           | All Ages  | CC            | 67    | 0.09  | 0             | 0.00        |               |                |              |
| 25                                           | All Ages  | Ecig          | 11703 | 15.44 |               |             |               |                |              |
| 25                                           | All Ages  | Dual          | 0     | 0.00  |               |             |               |                |              |
| 25                                           | All Ages  | Former        | 23037 | 30.39 |               |             | 21.45         | 905            | 3.93         |
| Year of Follow-up: 2015, Age Group: 18-19    |           |               |       |       |               |             |               |                |              |
| Period                                       | Age Group | Smoking Group | N     | %     | Ever Quit (N) | Ever Quit % | Mean Yrs Quit | Short Term (n) | Short Term % |
| 25                                           | 18-19     | Never Any     | 0     | .     |               |             |               |                |              |
| 25                                           | 18-19     | CC            | 0     | .     | 0             | .           |               |                |              |
| 25                                           | 18-19     | Ecig          | 0     | .     |               |             |               |                |              |
| 25                                           | 18-19     | Dual          | 0     | .     |               |             |               |                |              |
| 25                                           | 18-19     | Former        | 0     | .     |               |             | .             | 0              | .            |
| Year of Follow-up: 2015, Age Group: 20-24    |           |               |       |       |               |             |               |                |              |
| Period                                       | Age Group | Smoking Group | N     | %     | Ever Quit (N) | Ever Quit % | Mean Yrs Quit | Short Term (n) | Short Term % |
| 25                                           | 20-24     | Never Any     | 0     | .     |               |             |               |                |              |
| 25                                           | 20-24     | CC            | 0     | .     | 0             | .           |               |                |              |
| 25                                           | 20-24     | Ecig          | 0     | .     |               |             |               |                |              |
| 25                                           | 20-24     | Dual          | 0     | .     |               |             |               |                |              |
| 25                                           | 20-24     | Former        | 0     | .     |               |             | .             | 0              | .            |
| Year of Follow-up: 2015, Age Group: 25-29    |           |               |       |       |               |             |               |                |              |
| Period                                       | Age Group | Smoking Group | N     | %     | Ever Quit (N) | Ever Quit % | Mean Yrs Quit | Short Term (n) | Short Term % |
| 25                                           | 25-29     | Never Any     | 0     | .     |               |             |               |                |              |
| 25                                           | 25-29     | CC            | 0     | .     | 0             | .           |               |                |              |
| 25                                           | 25-29     | Ecig          | 0     | .     |               |             |               |                |              |
| 25                                           | 25-29     | Dual          | 0     | .     |               |             |               |                |              |
| 25                                           | 25-29     | Former        | 0     | .     |               |             | .             | 0              | .            |
| Year of Follow-up: 2015, Age Group: 30-34    |           |               |       |       |               |             |               |                |              |
| Period                                       | Age Group | Smoking Group | N     | %     | Ever Quit (N) | Ever Quit % | Mean Yrs Quit | Short Term (n) | Short Term % |
| 25                                           | 30-34     | Never Any     | 0     | .     |               |             |               |                |              |
| 25                                           | 30-34     | CC            | 0     | .     | 0             | .           |               |                |              |
| 25                                           | 30-34     | Ecig          | 0     | .     |               |             |               |                |              |
| 25                                           | 30-34     | Dual          | 0     | .     |               |             |               |                |              |
| 25                                           | 30-34     | Former        | 0     | .     |               |             | .             | 0              | .            |
| Year of Follow-up: 2015, Age Group: 35-39    |           |               |       |       |               |             |               |                |              |
| Period                                       | Age Group | Smoking Group | N     | %     | Ever Quit (N) | Ever Quit % | Mean Yrs Quit | Short Term (n) | Short Term % |
| 25                                           | 35-39     | Never Any     | 4726  | 59.60 |               |             |               |                |              |
| 25                                           | 35-39     | CC            | 7     | 0.09  | 0             | 0.00        |               |                |              |
| 25                                           | 35-39     | Ecig          | 1569  | 19.79 |               |             |               |                |              |
| 25                                           | 35-39     | Dual          | 0     | 0.00  |               |             |               |                |              |
| 25                                           | 35-39     | Former        | 1628  | 20.53 |               |             | 11.54         | 127            | 7.80         |
| Year of Follow-up: 2015, Age Group: 40-44    |           |               |       |       |               |             |               |                |              |
| Period                                       | Age Group | Smoking Group | N     | %     | Ever Quit (N) | Ever Quit % | Mean Yrs Quit | Short Term (n) | Short Term % |
| 25                                           | 40-44     | Never Any     | 5359  | 64.18 |               |             |               |                |              |
| 25                                           | 40-44     | CC            | 5     | 0.06  | 0             | 0.00        |               |                |              |
| 25                                           | 40-44     | Ecig          | 1521  | 18.22 |               |             |               |                |              |
| 25                                           | 40-44     | Dual          | 0     | 0.00  |               |             |               |                |              |

**Results for PHIM for Run 4 (Sensitivity\_Analysis\_2.RTF)**

|                                              |           |               |       |       |               |             |               |                |              |
|----------------------------------------------|-----------|---------------|-------|-------|---------------|-------------|---------------|----------------|--------------|
| 25                                           | 40-44     | Former        | 1465  | 17.54 |               |             | 13.95         | 105            | 7.17         |
| Year of Follow-up: 2015, Age Group: 45-49    |           |               |       |       |               |             |               |                |              |
| Period                                       | Age Group | Smoking Group | N     | %     | Ever Quit (N) | Ever Quit % | Mean Yrs Quit | Short Term (n) | Short Term % |
| 25                                           | 45-49     | Never Any     | 5189  | 59.01 |               |             |               |                |              |
| 25                                           | 45-49     | CC            | 6     | 0.07  | 0             | 0.00        |               |                |              |
| 25                                           | 45-49     | Ecig          | 1688  | 19.20 |               |             |               |                |              |
| 25                                           | 45-49     | Dual          | 0     | 0.00  |               |             |               |                |              |
| 25                                           | 45-49     | Former        | 1910  | 21.72 |               |             | 17.94         | 93             | 4.87         |
| Year of Follow-up: 2015, Age Group: 50-54    |           |               |       |       |               |             |               |                |              |
| Period                                       | Age Group | Smoking Group | N     | %     | Ever Quit (N) | Ever Quit % | Mean Yrs Quit | Short Term (n) | Short Term % |
| 25                                           | 50-54     | Never Any     | 5284  | 52.43 |               |             |               |                |              |
| 25                                           | 50-54     | CC            | 9     | 0.09  | 0             | 0.00        |               |                |              |
| 25                                           | 50-54     | Ecig          | 2054  | 20.38 |               |             |               |                |              |
| 25                                           | 50-54     | Dual          | 0     | 0.00  |               |             |               |                |              |
| 25                                           | 50-54     | Former        | 2731  | 27.10 |               |             | 20.09         | 147            | 5.38         |
| Year of Follow-up: 2015, Age Group: 55-59    |           |               |       |       |               |             |               |                |              |
| Period                                       | Age Group | Smoking Group | N     | %     | Ever Quit (N) | Ever Quit % | Mean Yrs Quit | Short Term (n) | Short Term % |
| 25                                           | 55-59     | Never Any     | 5278  | 50.27 |               |             |               |                |              |
| 25                                           | 55-59     | CC            | 7     | 0.07  | 0             | 0.00        |               |                |              |
| 25                                           | 55-59     | Ecig          | 1823  | 17.36 |               |             |               |                |              |
| 25                                           | 55-59     | Dual          | 0     | 0.00  |               |             |               |                |              |
| 25                                           | 55-59     | Former        | 3391  | 32.30 |               |             | 20.74         | 142            | 4.19         |
| Year of Follow-up: 2015, Age Group: 60-64    |           |               |       |       |               |             |               |                |              |
| Period                                       | Age Group | Smoking Group | N     | %     | Ever Quit (N) | Ever Quit % | Mean Yrs Quit | Short Term (n) | Short Term % |
| 25                                           | 60-64     | Never Any     | 5018  | 52.27 |               |             |               |                |              |
| 25                                           | 60-64     | CC            | 7     | 0.07  | 0             | 0.00        |               |                |              |
| 25                                           | 60-64     | Ecig          | 1188  | 12.38 |               |             |               |                |              |
| 25                                           | 60-64     | Dual          | 0     | 0.00  |               |             |               |                |              |
| 25                                           | 60-64     | Former        | 3387  | 35.28 |               |             | 23.52         | 147            | 4.34         |
| Year of Follow-up: 2015, Age Group: 65-69    |           |               |       |       |               |             |               |                |              |
| Period                                       | Age Group | Smoking Group | N     | %     | Ever Quit (N) | Ever Quit % | Mean Yrs Quit | Short Term (n) | Short Term % |
| 25                                           | 65-69     | Never Any     | 4356  | 51.27 |               |             |               |                |              |
| 25                                           | 65-69     | CC            | 11    | 0.13  | 0             | 0.00        |               |                |              |
| 25                                           | 65-69     | Ecig          | 874   | 10.29 |               |             |               |                |              |
| 25                                           | 65-69     | Dual          | 0     | 0.00  |               |             |               |                |              |
| 25                                           | 65-69     | Former        | 3256  | 38.32 |               |             | 23.15         | 65             | 2.00         |
| Year of Follow-up: 2015, Age Group: 70-74    |           |               |       |       |               |             |               |                |              |
| Period                                       | Age Group | Smoking Group | N     | %     | Ever Quit (N) | Ever Quit % | Mean Yrs Quit | Short Term (n) | Short Term % |
| 25                                           | 70-74     | Never Any     | 3116  | 47.67 |               |             |               |                |              |
| 25                                           | 70-74     | CC            | 7     | 0.11  | 0             | 0.00        |               |                |              |
| 25                                           | 70-74     | Ecig          | 555   | 8.49  |               |             |               |                |              |
| 25                                           | 70-74     | Dual          | 0     | 0.00  |               |             |               |                |              |
| 25                                           | 70-74     | Former        | 2858  | 43.73 |               |             | 26.48         | 43             | 1.50         |
| Year of Follow-up: 2015, Age Group: 75-79    |           |               |       |       |               |             |               |                |              |
| Period                                       | Age Group | Smoking Group | N     | %     | Ever Quit (N) | Ever Quit % | Mean Yrs Quit | Short Term (n) | Short Term % |
| 25                                           | 75-79     | Never Any     | 2684  | 48.50 |               |             |               |                |              |
| 25                                           | 75-79     | CC            | 8     | 0.14  | 0             | 0.00        |               |                |              |
| 25                                           | 75-79     | Ecig          | 431   | 7.79  |               |             |               |                |              |
| 25                                           | 75-79     | Dual          | 0     | 0.00  |               |             |               |                |              |
| 25                                           | 75-79     | Former        | 2411  | 43.57 |               |             | 26.82         | 36             | 1.49         |
| Year of Follow-up: 2020, Age Group: All Ages |           |               |       |       |               |             |               |                |              |
| Period                                       | Age Group | Smoking Group | N     | %     | Ever Quit (N) | Ever Quit % | Mean Yrs Quit | Short Term (n) | Short Term % |
| 30                                           | All Ages  | Never Any     | 38326 | 54.53 |               |             |               |                |              |
| 30                                           | All Ages  | CC            | 28    | 0.04  | 0             | 0.00        |               |                |              |
| 30                                           | All Ages  | Ecig          | 9344  | 13.29 |               |             |               |                |              |
| 30                                           | All Ages  | Dual          | 0     | 0.00  |               |             |               |                |              |
| 30                                           | All Ages  | Former        | 22585 | 32.13 |               |             | 23.76         | 767            | 3.40         |
| Year of Follow-up: 2020, Age Group: 18-19    |           |               |       |       |               |             |               |                |              |
| Period                                       | Age Group | Smoking Group | N     | %     | Ever Quit (N) | Ever Quit % | Mean Yrs Quit | Short Term (n) | Short Term % |
| 30                                           | 18-19     | Never Any     | 0     | .     |               |             |               |                |              |
| 30                                           | 18-19     | CC            | 0     | .     | 0             | .           |               |                |              |
| 30                                           | 18-19     | Ecig          | 0     | .     |               |             |               |                |              |
| 30                                           | 18-19     | Dual          | 0     | .     |               |             |               |                |              |
| 30                                           | 18-19     | Former        | 0     | .     |               |             | .             | 0              | .            |
| Year of Follow-up: 2020, Age Group: 20-24    |           |               |       |       |               |             |               |                |              |
| Period                                       | Age Group | Smoking Group | N     | %     | Ever Quit (N) | Ever Quit % | Mean Yrs Quit | Short Term (n) | Short Term % |
| 30                                           | 20-24     | Never Any     | 0     | .     |               |             |               |                |              |
| 30                                           | 20-24     | CC            | 0     | .     | 0             | .           |               |                |              |



**Results for PHIM for Run 4 (Sensitivity\_Analysis\_2.RTF)**

| 30                                        | 20-24     | Ecig          | 0    | .     |               |             |               |                |              |
|-------------------------------------------|-----------|---------------|------|-------|---------------|-------------|---------------|----------------|--------------|
| 30                                        | 20-24     | Dual          | 0    | .     |               |             |               |                |              |
| 30                                        | 20-24     | Former        | 0    | .     |               |             | 0             | .              |              |
| Year of Follow-up: 2020, Age Group: 25-29 |           |               |      |       |               |             |               |                |              |
| Period                                    | Age Group | Smoking Group | N    | %     | Ever Quit (N) | Ever Quit % | Mean Yrs Quit | Short Term (n) | Short Term % |
| 30                                        | 25-29     | Never Any     | 0    | .     |               |             |               |                |              |
| 30                                        | 25-29     | CC            | 0    | .     | 0             | .           |               |                |              |
| 30                                        | 25-29     | Ecig          | 0    | .     |               |             |               |                |              |
| 30                                        | 25-29     | Dual          | 0    | .     |               |             |               |                |              |
| 30                                        | 25-29     | Former        | 0    | .     |               |             |               | 0              | .            |
| Year of Follow-up: 2020, Age Group: 30-34 |           |               |      |       |               |             |               |                |              |
| Period                                    | Age Group | Smoking Group | N    | %     | Ever Quit (N) | Ever Quit % | Mean Yrs Quit | Short Term (n) | Short Term % |
| 30                                        | 30-34     | Never Any     | 0    | .     |               |             |               |                |              |
| 30                                        | 30-34     | CC            | 0    | .     | 0             | .           |               |                |              |
| 30                                        | 30-34     | Ecig          | 0    | .     |               |             |               |                |              |
| 30                                        | 30-34     | Dual          | 0    | .     |               |             |               |                |              |
| 30                                        | 30-34     | Former        | 0    | .     |               |             |               | 0              | .            |
| Year of Follow-up: 2020, Age Group: 35-39 |           |               |      |       |               |             |               |                |              |
| Period                                    | Age Group | Smoking Group | N    | %     | Ever Quit (N) | Ever Quit % | Mean Yrs Quit | Short Term (n) | Short Term % |
| 30                                        | 35-39     | Never Any     | 0    | .     |               |             |               |                |              |
| 30                                        | 35-39     | CC            | 0    | .     | 0             | .           |               |                |              |
| 30                                        | 35-39     | Ecig          | 0    | .     |               |             |               |                |              |
| 30                                        | 35-39     | Dual          | 0    | .     |               |             |               |                |              |
| 30                                        | 35-39     | Former        | 0    | .     |               |             |               | 0              | .            |
| Year of Follow-up: 2020, Age Group: 40-44 |           |               |      |       |               |             |               |                |              |
| Period                                    | Age Group | Smoking Group | N    | %     | Ever Quit (N) | Ever Quit % | Mean Yrs Quit | Short Term (n) | Short Term % |
| 30                                        | 40-44     | Never Any     | 4726 | 59.60 |               |             |               |                |              |
| 30                                        | 40-44     | CC            | 1    | 0.01  | 0             | 0.00        |               |                |              |
| 30                                        | 40-44     | Ecig          | 1344 | 16.95 |               |             |               |                |              |
| 30                                        | 40-44     | Dual          | 0    | 0.00  |               |             |               |                |              |
| 30                                        | 40-44     | Former        | 1859 | 23.44 |               |             | 14.74         | 81             | 4.36         |
| Year of Follow-up: 2020, Age Group: 45-49 |           |               |      |       |               |             |               |                |              |
| Period                                    | Age Group | Smoking Group | N    | %     | Ever Quit (N) | Ever Quit % | Mean Yrs Quit | Short Term (n) | Short Term % |
| 30                                        | 45-49     | Never Any     | 5359 | 64.18 |               |             |               |                |              |
| 30                                        | 45-49     | CC            | 2    | 0.02  | 0             | 0.00        |               |                |              |
| 30                                        | 45-49     | Ecig          | 1309 | 15.68 |               |             |               |                |              |
| 30                                        | 45-49     | Dual          | 0    | 0.00  |               |             |               |                |              |
| 30                                        | 45-49     | Former        | 1680 | 20.12 |               |             | 16.81         | 75             | 4.46         |
| Year of Follow-up: 2020, Age Group: 50-54 |           |               |      |       |               |             |               |                |              |
| Period                                    | Age Group | Smoking Group | N    | %     | Ever Quit (N) | Ever Quit % | Mean Yrs Quit | Short Term (n) | Short Term % |
| 30                                        | 50-54     | Never Any     | 5189 | 59.01 |               |             |               |                |              |
| 30                                        | 50-54     | CC            | 4    | 0.05  | 0             | 0.00        |               |                |              |
| 30                                        | 50-54     | Ecig          | 1427 | 16.23 |               |             |               |                |              |
| 30                                        | 50-54     | Dual          | 0    | 0.00  |               |             |               |                |              |
| 30                                        | 50-54     | Former        | 2173 | 24.71 |               |             | 20.38         | 130            | 5.98         |
| Year of Follow-up: 2020, Age Group: 55-59 |           |               |      |       |               |             |               |                |              |
| Period                                    | Age Group | Smoking Group | N    | %     | Ever Quit (N) | Ever Quit % | Mean Yrs Quit | Short Term (n) | Short Term % |
| 30                                        | 55-59     | Never Any     | 5284 | 52.43 |               |             |               |                |              |
| 30                                        | 55-59     | CC            | 3    | 0.03  | 0             | 0.00        |               |                |              |
| 30                                        | 55-59     | Ecig          | 1681 | 16.68 |               |             |               |                |              |
| 30                                        | 55-59     | Dual          | 0    | 0.00  |               |             |               |                |              |
| 30                                        | 55-59     | Former        | 3110 | 30.86 |               |             | 22.29         | 143            | 4.60         |
| Year of Follow-up: 2020, Age Group: 60-64 |           |               |      |       |               |             |               |                |              |
| Period                                    | Age Group | Smoking Group | N    | %     | Ever Quit (N) | Ever Quit % | Mean Yrs Quit | Short Term (n) | Short Term % |
| 30                                        | 60-64     | Never Any     | 5278 | 50.27 |               |             |               |                |              |
| 30                                        | 60-64     | CC            | 4    | 0.04  | 0             | 0.00        |               |                |              |
| 30                                        | 60-64     | Ecig          | 1469 | 13.99 |               |             |               |                |              |
| 30                                        | 60-64     | Dual          | 0    | 0.00  |               |             |               |                |              |
| 30                                        | 60-64     | Former        | 3748 | 35.70 |               |             | 23.47         | 147            | 3.92         |
| Year of Follow-up: 2020, Age Group: 65-69 |           |               |      |       |               |             |               |                |              |
| Period                                    | Age Group | Smoking Group | N    | %     | Ever Quit (N) | Ever Quit % | Mean Yrs Quit | Short Term (n) | Short Term % |
| 30                                        | 65-69     | Never Any     | 5018 | 52.27 |               |             |               |                |              |
| 30                                        | 65-69     | CC            | 3    | 0.03  | 0             | 0.00        |               |                |              |
| 30                                        | 65-69     | Ecig          | 932  | 9.71  |               |             |               |                |              |
| 30                                        | 65-69     | Dual          | 0    | 0.00  |               |             |               |                |              |
| 30                                        | 65-69     | Former        | 3647 | 37.99 |               |             | 26.66         | 74             | 2.03         |
| Year of Follow-up: 2020, Age Group: 70-74 |           |               |      |       |               |             |               |                |              |
| Period                                    | Age Group | Smoking Group | N    | %     | Ever Quit (N) | Ever Quit % | Mean Yrs Quit | Short Term (n) | Short Term % |

**Results for PHIM for Run 4 (Sensitivity\_Analysis\_2.RTF)**

|                                              |           |               |       |       |               |             |               |                |              |
|----------------------------------------------|-----------|---------------|-------|-------|---------------|-------------|---------------|----------------|--------------|
| 30                                           | 70-74     | Never Any     | 4356  | 51.27 |               |             |               |                |              |
| 30                                           | 70-74     | CC            | 6     | 0.07  | 0             | 0.00        |               |                |              |
| 30                                           | 70-74     | Ecig          | 740   | 8.71  |               |             |               |                |              |
| 30                                           | 70-74     | Dual          | 0     | 0.00  |               |             |               |                |              |
| 30                                           | 70-74     | Former        | 3395  | 39.96 |               |             | 27.06         | 70             | 2.06         |
| Year of Follow-up: 2020, Age Group: 75-79    |           |               |       |       |               |             |               |                |              |
| Period                                       | Age Group | Smoking Group | N     | %     | Ever Quit (N) | Ever Quit % | Mean Yrs Quit | Short Term (n) | Short Term % |
| 30                                           | 75-79     | Never Any     | 3116  | 47.67 |               |             |               |                |              |
| 30                                           | 75-79     | CC            | 5     | 0.08  | 0             | 0.00        |               |                |              |
| 30                                           | 75-79     | Ecig          | 442   | 6.76  |               |             |               |                |              |
| 30                                           | 75-79     | Dual          | 0     | 0.00  |               |             |               |                |              |
| 30                                           | 75-79     | Former        | 2973  | 45.49 |               |             | 30.34         | 47             | 1.58         |
| Year of Follow-up: 2025, Age Group: All Ages |           |               |       |       |               |             |               |                |              |
| Period                                       | Age Group | Smoking Group | N     | %     | Ever Quit (N) | Ever Quit % | Mean Yrs Quit | Short Term (n) | Short Term % |
| 35                                           | All Ages  | Never Any     | 35210 | 55.23 |               |             |               |                |              |
| 35                                           | All Ages  | CC            | 5     | 0.01  | 0             | 0.00        |               |                |              |
| 35                                           | All Ages  | Ecig          | 7346  | 11.52 |               |             |               |                |              |
| 35                                           | All Ages  | Dual          | 0     | 0.00  |               |             |               |                |              |
| 35                                           | All Ages  | Former        | 21186 | 33.23 |               |             | 25.85         | 606            | 2.86         |
| Year of Follow-up: 2025, Age Group: 18-19    |           |               |       |       |               |             |               |                |              |
| Period                                       | Age Group | Smoking Group | N     | %     | Ever Quit (N) | Ever Quit % | Mean Yrs Quit | Short Term (n) | Short Term % |
| 35                                           | 18-19     | Never Any     | 0     | .     |               |             |               |                |              |
| 35                                           | 18-19     | CC            | 0     | .     | 0             | .           |               |                |              |
| 35                                           | 18-19     | Ecig          | 0     | .     |               |             |               |                |              |
| 35                                           | 18-19     | Dual          | 0     | .     |               |             |               |                |              |
| 35                                           | 18-19     | Former        | 0     | .     |               |             | .             | 0              | .            |
| Year of Follow-up: 2025, Age Group: 20-24    |           |               |       |       |               |             |               |                |              |
| Period                                       | Age Group | Smoking Group | N     | %     | Ever Quit (N) | Ever Quit % | Mean Yrs Quit | Short Term (n) | Short Term % |
| 35                                           | 20-24     | Never Any     | 0     | .     |               |             |               |                |              |
| 35                                           | 20-24     | CC            | 0     | .     | 0             | .           |               |                |              |
| 35                                           | 20-24     | Ecig          | 0     | .     |               |             |               |                |              |
| 35                                           | 20-24     | Dual          | 0     | .     |               |             |               |                |              |
| 35                                           | 20-24     | Former        | 0     | .     |               |             | .             | 0              | .            |
| Year of Follow-up: 2025, Age Group: 25-29    |           |               |       |       |               |             |               |                |              |
| Period                                       | Age Group | Smoking Group | N     | %     | Ever Quit (N) | Ever Quit % | Mean Yrs Quit | Short Term (n) | Short Term % |
| 35                                           | 25-29     | Never Any     | 0     | .     |               |             |               |                |              |
| 35                                           | 25-29     | CC            | 0     | .     | 0             | .           |               |                |              |
| 35                                           | 25-29     | Ecig          | 0     | .     |               |             |               |                |              |
| 35                                           | 25-29     | Dual          | 0     | .     |               |             |               |                |              |
| 35                                           | 25-29     | Former        | 0     | .     |               |             | .             | 0              | .            |
| Year of Follow-up: 2025, Age Group: 30-34    |           |               |       |       |               |             |               |                |              |
| Period                                       | Age Group | Smoking Group | N     | %     | Ever Quit (N) | Ever Quit % | Mean Yrs Quit | Short Term (n) | Short Term % |
| 35                                           | 30-34     | Never Any     | 0     | .     |               |             |               |                |              |
| 35                                           | 30-34     | CC            | 0     | .     | 0             | .           |               |                |              |
| 35                                           | 30-34     | Ecig          | 0     | .     |               |             |               |                |              |
| 35                                           | 30-34     | Dual          | 0     | .     |               |             |               |                |              |
| 35                                           | 30-34     | Former        | 0     | .     |               |             | .             | 0              | .            |
| Year of Follow-up: 2025, Age Group: 35-39    |           |               |       |       |               |             |               |                |              |
| Period                                       | Age Group | Smoking Group | N     | %     | Ever Quit (N) | Ever Quit % | Mean Yrs Quit | Short Term (n) | Short Term % |
| 35                                           | 35-39     | Never Any     | 0     | .     |               |             |               |                |              |
| 35                                           | 35-39     | CC            | 0     | .     | 0             | .           |               |                |              |
| 35                                           | 35-39     | Ecig          | 0     | .     |               |             |               |                |              |
| 35                                           | 35-39     | Dual          | 0     | .     |               |             |               |                |              |
| 35                                           | 35-39     | Former        | 0     | .     |               |             | .             | 0              | .            |
| Year of Follow-up: 2025, Age Group: 40-44    |           |               |       |       |               |             |               |                |              |
| Period                                       | Age Group | Smoking Group | N     | %     | Ever Quit (N) | Ever Quit % | Mean Yrs Quit | Short Term (n) | Short Term % |
| 35                                           | 40-44     | Never Any     | 0     | .     |               |             |               |                |              |
| 35                                           | 40-44     | CC            | 0     | .     | 0             | .           |               |                |              |
| 35                                           | 40-44     | Ecig          | 0     | .     |               |             |               |                |              |
| 35                                           | 40-44     | Dual          | 0     | .     |               |             |               |                |              |
| 35                                           | 40-44     | Former        | 0     | .     |               |             | .             | 0              | .            |
| Year of Follow-up: 2025, Age Group: 45-49    |           |               |       |       |               |             |               |                |              |
| Period                                       | Age Group | Smoking Group | N     | %     | Ever Quit (N) | Ever Quit % | Mean Yrs Quit | Short Term (n) | Short Term % |
| 35                                           | 45-49     | Never Any     | 4726  | 59.60 |               |             |               |                |              |
| 35                                           | 45-49     | CC            | 0     | 0.00  | 0             | 0.00        |               |                |              |
| 35                                           | 45-49     | Ecig          | 1146  | 14.45 |               |             |               |                |              |
| 35                                           | 45-49     | Dual          | 0     | 0.00  |               |             |               |                |              |
| 35                                           | 45-49     | Former        | 2058  | 25.95 |               |             | 18.05         | 72             | 3.50         |
| Year of Follow-up: 2025, Age Group: 50-54    |           |               |       |       |               |             |               |                |              |

**Results for PHIM for Run 4 (Sensitivity\_Analysis\_2.RTF)**

| Period                                       | Age Group | Smoking Group | N     | %     | Ever Quit (N) | Ever Quit % | Mean Yrs Quit | Short Term (n) | Short Term % |
|----------------------------------------------|-----------|---------------|-------|-------|---------------|-------------|---------------|----------------|--------------|
| 35                                           | 50-54     | Never Any     | 5359  | 64.18 |               |             |               |                |              |
| 35                                           | 50-54     | CC            | 0     | 0.00  | 0             | 0.00        |               |                |              |
| 35                                           | 50-54     | Ecig          | 1108  | 13.27 |               |             |               |                |              |
| 35                                           | 50-54     | Dual          | 0     | 0.00  |               |             |               |                |              |
| 35                                           | 50-54     | Former        | 1883  | 22.55 |               |             | 19.64         | 99             | 5.26         |
| Year of Follow-up: 2025, Age Group: 55-59    |           |               |       |       |               |             |               |                |              |
| Period                                       | Age Group | Smoking Group | N     | %     | Ever Quit (N) | Ever Quit % | Mean Yrs Quit | Short Term (n) | Short Term % |
| 35                                           | 55-59     | Never Any     | 5189  | 59.01 |               |             |               |                |              |
| 35                                           | 55-59     | CC            | 0     | 0.00  | 0             | 0.00        |               |                |              |
| 35                                           | 55-59     | Ecig          | 1177  | 13.39 |               |             |               |                |              |
| 35                                           | 55-59     | Dual          | 0     | 0.00  |               |             |               |                |              |
| 35                                           | 55-59     | Former        | 2427  | 27.60 |               |             | 22.93         | 97             | 4.00         |
| Year of Follow-up: 2025, Age Group: 60-64    |           |               |       |       |               |             |               |                |              |
| Period                                       | Age Group | Smoking Group | N     | %     | Ever Quit (N) | Ever Quit % | Mean Yrs Quit | Short Term (n) | Short Term % |
| 35                                           | 60-64     | Never Any     | 5284  | 52.43 |               |             |               |                |              |
| 35                                           | 60-64     | CC            | 2     | 0.02  | 0             | 0.00        |               |                |              |
| 35                                           | 60-64     | Ecig          | 1346  | 13.36 |               |             |               |                |              |
| 35                                           | 60-64     | Dual          | 0     | 0.00  |               |             |               |                |              |
| 35                                           | 60-64     | Former        | 3446  | 34.19 |               |             | 24.82         | 140            | 4.06         |
| Year of Follow-up: 2025, Age Group: 65-69    |           |               |       |       |               |             |               |                |              |
| Period                                       | Age Group | Smoking Group | N     | %     | Ever Quit (N) | Ever Quit % | Mean Yrs Quit | Short Term (n) | Short Term % |
| 35                                           | 65-69     | Never Any     | 5278  | 50.27 |               |             |               |                |              |
| 35                                           | 65-69     | CC            | 1     | 0.01  | 0             | 0.00        |               |                |              |
| 35                                           | 65-69     | Ecig          | 1174  | 11.18 |               |             |               |                |              |
| 35                                           | 65-69     | Dual          | 0     | 0.00  |               |             |               |                |              |
| 35                                           | 65-69     | Former        | 4046  | 38.54 |               |             | 26.56         | 76             | 1.88         |
| Year of Follow-up: 2025, Age Group: 70-74    |           |               |       |       |               |             |               |                |              |
| Period                                       | Age Group | Smoking Group | N     | %     | Ever Quit (N) | Ever Quit % | Mean Yrs Quit | Short Term (n) | Short Term % |
| 35                                           | 70-74     | Never Any     | 5018  | 52.27 |               |             |               |                |              |
| 35                                           | 70-74     | CC            | 0     | 0.00  | 0             | 0.00        |               |                |              |
| 35                                           | 70-74     | Ecig          | 806   | 8.40  |               |             |               |                |              |
| 35                                           | 70-74     | Dual          | 0     | 0.00  |               |             |               |                |              |
| 35                                           | 70-74     | Former        | 3776  | 39.33 |               |             | 30.63         | 64             | 1.69         |
| Year of Follow-up: 2025, Age Group: 75-79    |           |               |       |       |               |             |               |                |              |
| Period                                       | Age Group | Smoking Group | N     | %     | Ever Quit (N) | Ever Quit % | Mean Yrs Quit | Short Term (n) | Short Term % |
| 35                                           | 75-79     | Never Any     | 4356  | 51.27 |               |             |               |                |              |
| 35                                           | 75-79     | CC            | 2     | 0.02  | 0             | 0.00        |               |                |              |
| 35                                           | 75-79     | Ecig          | 589   | 6.93  |               |             |               |                |              |
| 35                                           | 75-79     | Dual          | 0     | 0.00  |               |             |               |                |              |
| 35                                           | 75-79     | Former        | 3550  | 41.78 |               |             | 30.75         | 58             | 1.63         |
| Year of Follow-up: 2030, Age Group: All Ages |           |               |       |       |               |             |               |                |              |
| Period                                       | Age Group | Smoking Group | N     | %     | Ever Quit (N) | Ever Quit % | Mean Yrs Quit | Short Term (n) | Short Term % |
| 40                                           | All Ages  | Never Any     | 30854 | 55.84 |               |             |               |                |              |
| 40                                           | All Ages  | CC            | 0     | 0.00  | 0             | 0.00        |               |                |              |
| 40                                           | All Ages  | Ecig          | 5413  | 9.80  |               |             |               |                |              |
| 40                                           | All Ages  | Dual          | 0     | 0.00  |               |             |               |                |              |
| 40                                           | All Ages  | Former        | 18983 | 34.36 |               |             | 27.88         | 549            | 2.89         |
| Year of Follow-up: 2030, Age Group: 18-19    |           |               |       |       |               |             |               |                |              |
| Period                                       | Age Group | Smoking Group | N     | %     | Ever Quit (N) | Ever Quit % | Mean Yrs Quit | Short Term (n) | Short Term % |
| 40                                           | 18-19     | Never Any     | 0     | .     |               |             |               |                |              |
| 40                                           | 18-19     | CC            | 0     | .     | 0             | .           |               |                |              |
| 40                                           | 18-19     | Ecig          | 0     | .     |               |             |               |                |              |
| 40                                           | 18-19     | Dual          | 0     | .     |               |             |               |                |              |
| 40                                           | 18-19     | Former        | 0     | .     |               |             | .             | 0              | .            |
| Year of Follow-up: 2030, Age Group: 20-24    |           |               |       |       |               |             |               |                |              |
| Period                                       | Age Group | Smoking Group | N     | %     | Ever Quit (N) | Ever Quit % | Mean Yrs Quit | Short Term (n) | Short Term % |
| 40                                           | 20-24     | Never Any     | 0     | .     |               |             |               |                |              |
| 40                                           | 20-24     | CC            | 0     | .     | 0             | .           |               |                |              |
| 40                                           | 20-24     | Ecig          | 0     | .     |               |             |               |                |              |
| 40                                           | 20-24     | Dual          | 0     | .     |               |             |               |                |              |
| 40                                           | 20-24     | Former        | 0     | .     |               |             | .             | 0              | .            |
| Year of Follow-up: 2030, Age Group: 25-29    |           |               |       |       |               |             |               |                |              |
| Period                                       | Age Group | Smoking Group | N     | %     | Ever Quit (N) | Ever Quit % | Mean Yrs Quit | Short Term (n) | Short Term % |
| 40                                           | 25-29     | Never Any     | 0     | .     |               |             |               |                |              |
| 40                                           | 25-29     | CC            | 0     | .     | 0             | .           |               |                |              |
| 40                                           | 25-29     | Ecig          | 0     | .     |               |             |               |                |              |
| 40                                           | 25-29     | Dual          | 0     | .     |               |             |               |                |              |

### Results for PHIM for Run 4 (Sensitivity\_Analysis\_2.RTF)

| Year of Follow-up: 2030, Age Group: 30-34 | Period | Age Group | Smoking Group | N    | %     | Ever Quit (N) | Ever Quit % | Mean Yrs Quit | Short Term (n) | Short Term % |
|-------------------------------------------|--------|-----------|---------------|------|-------|---------------|-------------|---------------|----------------|--------------|
| Year of Follow-up: 2030, Age Group: 30-34 |        |           |               |      |       |               |             |               |                |              |
| 40                                        | 25-29  | Former    |               | 0    | .     |               |             |               | 0              | .            |
| Year of Follow-up: 2030, Age Group: 35-39 |        |           |               |      |       |               |             |               |                |              |
| 40                                        | 30-34  | Never Any |               | 0    | .     |               |             |               | 0              | .            |
| 40                                        | 30-34  | CC        |               | 0    | .     | 0             | .           |               |                |              |
| 40                                        | 30-34  | Ecig      |               | 0    | .     |               |             |               |                |              |
| 40                                        | 30-34  | Dual      |               | 0    | .     |               |             |               |                |              |
| 40                                        | 30-34  | Former    |               | 0    | .     |               |             |               | 0              | .            |
| Year of Follow-up: 2030, Age Group: 40-44 |        |           |               |      |       |               |             |               |                |              |
| 40                                        | 35-39  | Never Any |               | 0    | .     |               |             |               |                |              |
| 40                                        | 35-39  | CC        |               | 0    | .     | 0             | .           |               |                |              |
| 40                                        | 35-39  | Ecig      |               | 0    | .     |               |             |               |                |              |
| 40                                        | 35-39  | Dual      |               | 0    | .     |               |             |               |                |              |
| 40                                        | 35-39  | Former    |               | 0    | .     |               |             |               | 0              | .            |
| Year of Follow-up: 2030, Age Group: 45-49 |        |           |               |      |       |               |             |               |                |              |
| 40                                        | 40-44  | Never Any |               | 0    | .     |               |             |               |                |              |
| 40                                        | 40-44  | CC        |               | 0    | .     | 0             | .           |               |                |              |
| 40                                        | 40-44  | Ecig      |               | 0    | .     |               |             |               |                |              |
| 40                                        | 40-44  | Dual      |               | 0    | .     |               |             |               |                |              |
| 40                                        | 40-44  | Former    |               | 0    | .     |               |             |               | 0              | .            |
| Year of Follow-up: 2030, Age Group: 50-54 |        |           |               |      |       |               |             |               |                |              |
| 40                                        | 45-49  | Never Any |               | 0    | .     |               |             |               |                |              |
| 40                                        | 45-49  | CC        |               | 0    | .     | 0             | .           |               |                |              |
| 40                                        | 45-49  | Ecig      |               | 0    | .     |               |             |               |                |              |
| 40                                        | 45-49  | Dual      |               | 0    | .     |               |             |               |                |              |
| 40                                        | 45-49  | Former    |               | 0    | .     |               |             |               | 0              | .            |
| Year of Follow-up: 2030, Age Group: 55-59 |        |           |               |      |       |               |             |               |                |              |
| 40                                        | 50-54  | Never Any |               | 4726 | 59.60 |               |             |               |                |              |
| 40                                        | 50-54  | CC        |               | 0    | 0.00  | 0             | 0.00        |               |                |              |
| 40                                        | 50-54  | Ecig      |               | 943  | 11.89 |               |             |               |                |              |
| 40                                        | 50-54  | Dual      |               | 0    | 0.00  |               |             |               |                |              |
| 40                                        | 50-54  | Former    |               | 2261 | 28.51 |               |             | 21.13         | 107            | 4.73         |
| Year of Follow-up: 2030, Age Group: 60-64 |        |           |               |      |       |               |             |               |                |              |
| 40                                        | 55-59  | Never Any |               | 5359 | 64.18 |               |             |               |                |              |
| 40                                        | 55-59  | CC        |               | 0    | 0.00  | 0             | 0.00        |               |                |              |
| 40                                        | 55-59  | Ecig      |               | 889  | 10.65 |               |             |               |                |              |
| 40                                        | 55-59  | Dual      |               | 0    | 0.00  |               |             |               |                |              |
| 40                                        | 55-59  | Former    |               | 2102 | 25.17 |               |             | 22.30         | 77             | 3.66         |
| Year of Follow-up: 2030, Age Group: 65-69 |        |           |               |      |       |               |             |               |                |              |
| 40                                        | 60-64  | Never Any |               | 5189 | 59.01 |               |             |               |                |              |
| 40                                        | 60-64  | CC        |               | 0    | 0.00  | 0             | 0.00        |               |                |              |
| 40                                        | 60-64  | Ecig      |               | 910  | 10.35 |               |             |               |                |              |
| 40                                        | 60-64  | Dual      |               | 0    | 0.00  |               |             |               |                |              |
| 40                                        | 60-64  | Former    |               | 2694 | 30.64 |               |             | 25.33         | 126            | 4.68         |
| Year of Follow-up: 2030, Age Group: 70-74 |        |           |               |      |       |               |             |               |                |              |
| 40                                        | 65-69  | Never Any |               | 5284 | 52.43 |               |             |               |                |              |
| 40                                        | 65-69  | CC        |               | 0    | 0.00  | 0             | 0.00        |               |                |              |
| 40                                        | 65-69  | Ecig      |               | 1065 | 10.57 |               |             |               |                |              |
| 40                                        | 65-69  | Dual      |               | 0    | 0.00  |               |             |               |                |              |
| 40                                        | 65-69  | Former    |               | 3729 | 37.00 |               |             | 27.74         | 71             | 1.90         |
| Year of Follow-up: 2030, Age Group: 75-79 |        |           |               |      |       |               |             |               |                |              |
| 40                                        | 70-74  | Never Any |               | 5278 | 50.27 |               |             |               |                |              |
| 40                                        | 70-74  | CC        |               | 0    | 0.00  | 0             | 0.00        |               |                |              |
| 40                                        | 70-74  | Ecig      |               | 978  | 9.32  |               |             |               |                |              |
| 40                                        | 70-74  | Dual      |               | 0    | 0.00  |               |             |               |                |              |
| 40                                        | 70-74  | Former    |               | 4243 | 40.41 |               |             | 30.17         | 95             | 2.24         |
| Year of Follow-up: 2030, Age Group: 75-79 |        |           |               |      |       |               |             |               |                |              |
| 40                                        | 75-79  | Never Any |               | 5018 | 52.27 |               |             |               |                |              |
| 40                                        | 75-79  | CC        |               | 0    | 0.00  | 0             | 0.00        |               |                |              |

**Results for PHIM for Run 4 (Sensitivity\_Analysis\_2.RTF)**

|                                              |           |               |       |       |               |             |               |                |              |
|----------------------------------------------|-----------|---------------|-------|-------|---------------|-------------|---------------|----------------|--------------|
| 40                                           | 75-79     | Ecig          | 628   | 6.54  |               |             |               |                |              |
| 40                                           | 75-79     | Dual          | 0     | 0.00  |               |             |               |                |              |
| 40                                           | 75-79     | Former        | 3954  | 41.19 |               |             | 34.11         | 73             | 1.85         |
| Year of Follow-up: 2035, Age Group: All Ages |           |               |       |       |               |             |               |                |              |
| Period                                       | Age Group | Smoking Group | N     | %     | Ever Quit (N) | Ever Quit % | Mean Yrs Quit | Short Term (n) | Short Term % |
| 45                                           | All Ages  | Never Any     | 25836 | 56.60 |               |             |               |                |              |
| 45                                           | All Ages  | CC            | 0     | 0.00  | 0             | 0.00        |               |                |              |
| 45                                           | All Ages  | Ecig          | 3884  | 8.51  |               |             |               |                |              |
| 45                                           | All Ages  | Dual          | 0     | 0.00  |               |             |               |                |              |
| 45                                           | All Ages  | Former        | 15930 | 34.90 |               |             | 29.59         | 350            | 2.20         |
| Year of Follow-up: 2035, Age Group: 18-19    |           |               |       |       |               |             |               |                |              |
| Period                                       | Age Group | Smoking Group | N     | %     | Ever Quit (N) | Ever Quit % | Mean Yrs Quit | Short Term (n) | Short Term % |
| 45                                           | 18-19     | Never Any     | 0     | .     |               |             |               |                |              |
| 45                                           | 18-19     | CC            | 0     | .     | 0             | .           |               |                |              |
| 45                                           | 18-19     | Ecig          | 0     | .     |               |             |               |                |              |
| 45                                           | 18-19     | Dual          | 0     | .     |               |             |               |                |              |
| 45                                           | 18-19     | Former        | 0     | .     |               |             | .             | 0              | .            |
| Year of Follow-up: 2035, Age Group: 20-24    |           |               |       |       |               |             |               |                |              |
| Period                                       | Age Group | Smoking Group | N     | %     | Ever Quit (N) | Ever Quit % | Mean Yrs Quit | Short Term (n) | Short Term % |
| 45                                           | 20-24     | Never Any     | 0     | .     |               |             |               |                |              |
| 45                                           | 20-24     | CC            | 0     | .     | 0             | .           |               |                |              |
| 45                                           | 20-24     | Ecig          | 0     | .     |               |             |               |                |              |
| 45                                           | 20-24     | Dual          | 0     | .     |               |             |               |                |              |
| 45                                           | 20-24     | Former        | 0     | .     |               |             | .             | 0              | .            |
| Year of Follow-up: 2035, Age Group: 25-29    |           |               |       |       |               |             |               |                |              |
| Period                                       | Age Group | Smoking Group | N     | %     | Ever Quit (N) | Ever Quit % | Mean Yrs Quit | Short Term (n) | Short Term % |
| 45                                           | 25-29     | Never Any     | 0     | .     |               |             |               |                |              |
| 45                                           | 25-29     | CC            | 0     | .     | 0             | .           |               |                |              |
| 45                                           | 25-29     | Ecig          | 0     | .     |               |             |               |                |              |
| 45                                           | 25-29     | Dual          | 0     | .     |               |             |               |                |              |
| 45                                           | 25-29     | Former        | 0     | .     |               |             | .             | 0              | .            |
| Year of Follow-up: 2035, Age Group: 30-34    |           |               |       |       |               |             |               |                |              |
| Period                                       | Age Group | Smoking Group | N     | %     | Ever Quit (N) | Ever Quit % | Mean Yrs Quit | Short Term (n) | Short Term % |
| 45                                           | 30-34     | Never Any     | 0     | .     |               |             |               |                |              |
| 45                                           | 30-34     | CC            | 0     | .     | 0             | .           |               |                |              |
| 45                                           | 30-34     | Ecig          | 0     | .     |               |             |               |                |              |
| 45                                           | 30-34     | Dual          | 0     | .     |               |             |               |                |              |
| 45                                           | 30-34     | Former        | 0     | .     |               |             | .             | 0              | .            |
| Year of Follow-up: 2035, Age Group: 35-39    |           |               |       |       |               |             |               |                |              |
| Period                                       | Age Group | Smoking Group | N     | %     | Ever Quit (N) | Ever Quit % | Mean Yrs Quit | Short Term (n) | Short Term % |
| 45                                           | 35-39     | Never Any     | 0     | .     |               |             |               |                |              |
| 45                                           | 35-39     | CC            | 0     | .     | 0             | .           |               |                |              |
| 45                                           | 35-39     | Ecig          | 0     | .     |               |             |               |                |              |
| 45                                           | 35-39     | Dual          | 0     | .     |               |             |               |                |              |
| 45                                           | 35-39     | Former        | 0     | .     |               |             | .             | 0              | .            |
| Year of Follow-up: 2035, Age Group: 40-44    |           |               |       |       |               |             |               |                |              |
| Period                                       | Age Group | Smoking Group | N     | %     | Ever Quit (N) | Ever Quit % | Mean Yrs Quit | Short Term (n) | Short Term % |
| 45                                           | 40-44     | Never Any     | 0     | .     |               |             |               |                |              |
| 45                                           | 40-44     | CC            | 0     | .     | 0             | .           |               |                |              |
| 45                                           | 40-44     | Ecig          | 0     | .     |               |             |               |                |              |
| 45                                           | 40-44     | Dual          | 0     | .     |               |             |               |                |              |
| 45                                           | 40-44     | Former        | 0     | .     |               |             | .             | 0              | .            |
| Year of Follow-up: 2035, Age Group: 45-49    |           |               |       |       |               |             |               |                |              |
| Period                                       | Age Group | Smoking Group | N     | %     | Ever Quit (N) | Ever Quit % | Mean Yrs Quit | Short Term (n) | Short Term % |
| 45                                           | 45-49     | Never Any     | 0     | .     |               |             |               |                |              |
| 45                                           | 45-49     | CC            | 0     | .     | 0             | .           |               |                |              |
| 45                                           | 45-49     | Ecig          | 0     | .     |               |             |               |                |              |
| 45                                           | 45-49     | Dual          | 0     | .     |               |             |               |                |              |
| 45                                           | 45-49     | Former        | 0     | .     |               |             | .             | 0              | .            |
| Year of Follow-up: 2035, Age Group: 50-54    |           |               |       |       |               |             |               |                |              |
| Period                                       | Age Group | Smoking Group | N     | %     | Ever Quit (N) | Ever Quit % | Mean Yrs Quit | Short Term (n) | Short Term % |
| 45                                           | 50-54     | Never Any     | 0     | .     |               |             |               |                |              |
| 45                                           | 50-54     | CC            | 0     | .     | 0             | .           |               |                |              |
| 45                                           | 50-54     | Ecig          | 0     | .     |               |             |               |                |              |
| 45                                           | 50-54     | Dual          | 0     | .     |               |             |               |                |              |
| 45                                           | 50-54     | Former        | 0     | .     |               |             | .             | 0              | .            |
| Year of Follow-up: 2035, Age Group: 55-59    |           |               |       |       |               |             |               |                |              |
| Period                                       | Age Group | Smoking Group | N     | %     | Ever Quit (N) | Ever Quit % | Mean Yrs Quit | Short Term (n) | Short Term % |

**Results for PHIM for Run 4 (Sensitivity\_Analysis\_2.RTF)**

|                                              |           |               |       |       |               |             |               |                |              |
|----------------------------------------------|-----------|---------------|-------|-------|---------------|-------------|---------------|----------------|--------------|
| 45                                           | 55-59     | Never Any     | 4726  | 59.60 |               |             |               |                |              |
| 45                                           | 55-59     | CC            | 0     | 0.00  | 0             | 0.00        |               |                |              |
| 45                                           | 55-59     | Ecig          | 767   | 9.67  |               |             |               |                |              |
| 45                                           | 55-59     | Dual          | 0     | 0.00  |               |             |               |                |              |
| 45                                           | 55-59     | Former        | 2437  | 30.73 |               |             | 24.38         | 69             | 2.83         |
| Year of Follow-up: 2035, Age Group: 60-64    |           |               |       |       |               |             |               |                |              |
| Period                                       | Age Group | Smoking Group | N     | %     | Ever Quit (N) | Ever Quit % | Mean Yrs Quit | Short Term (n) | Short Term % |
| 45                                           | 60-64     | Never Any     | 5359  | 64.18 |               |             |               |                |              |
| 45                                           | 60-64     | CC            | 0     | 0.00  | 0             | 0.00        |               |                |              |
| 45                                           | 60-64     | Ecig          | 715   | 8.56  |               |             |               |                |              |
| 45                                           | 60-64     | Dual          | 0     | 0.00  |               |             |               |                |              |
| 45                                           | 60-64     | Former        | 2276  | 27.26 |               |             | 25.36         | 69             | 3.03         |
| Year of Follow-up: 2035, Age Group: 65-69    |           |               |       |       |               |             |               |                |              |
| Period                                       | Age Group | Smoking Group | N     | %     | Ever Quit (N) | Ever Quit % | Mean Yrs Quit | Short Term (n) | Short Term % |
| 45                                           | 65-69     | Never Any     | 5189  | 59.01 |               |             |               |                |              |
| 45                                           | 65-69     | CC            | 0     | 0.00  | 0             | 0.00        |               |                |              |
| 45                                           | 65-69     | Ecig          | 718   | 8.17  |               |             |               |                |              |
| 45                                           | 65-69     | Dual          | 0     | 0.00  |               |             |               |                |              |
| 45                                           | 65-69     | Former        | 2886  | 32.82 |               |             | 28.47         | 57             | 1.98         |
| Year of Follow-up: 2035, Age Group: 70-74    |           |               |       |       |               |             |               |                |              |
| Period                                       | Age Group | Smoking Group | N     | %     | Ever Quit (N) | Ever Quit % | Mean Yrs Quit | Short Term (n) | Short Term % |
| 45                                           | 70-74     | Never Any     | 5284  | 52.43 |               |             |               |                |              |
| 45                                           | 70-74     | CC            | 0     | 0.00  | 0             | 0.00        |               |                |              |
| 45                                           | 70-74     | Ecig          | 924   | 9.17  |               |             |               |                |              |
| 45                                           | 70-74     | Dual          | 0     | 0.00  |               |             |               |                |              |
| 45                                           | 70-74     | Former        | 3870  | 38.40 |               |             | 31.61         | 74             | 1.91         |
| Year of Follow-up: 2035, Age Group: 75-79    |           |               |       |       |               |             |               |                |              |
| Period                                       | Age Group | Smoking Group | N     | %     | Ever Quit (N) | Ever Quit % | Mean Yrs Quit | Short Term (n) | Short Term % |
| 45                                           | 75-79     | Never Any     | 5278  | 50.27 |               |             |               |                |              |
| 45                                           | 75-79     | CC            | 0     | 0.00  | 0             | 0.00        |               |                |              |
| 45                                           | 75-79     | Ecig          | 760   | 7.24  |               |             |               |                |              |
| 45                                           | 75-79     | Dual          | 0     | 0.00  |               |             |               |                |              |
| 45                                           | 75-79     | Former        | 4461  | 42.49 |               |             | 33.55         | 81             | 1.82         |
| Year of Follow-up: 2040, Age Group: All Ages |           |               |       |       |               |             |               |                |              |
| Period                                       | Age Group | Smoking Group | N     | %     | Ever Quit (N) | Ever Quit % | Mean Yrs Quit | Short Term (n) | Short Term % |
| 50                                           | All Ages  | Never Any     | 20558 | 58.48 |               |             |               |                |              |
| 50                                           | All Ages  | CC            | 0     | 0.00  | 0             | 0.00        |               |                |              |
| 50                                           | All Ages  | Ecig          | 2501  | 7.12  |               |             |               |                |              |
| 50                                           | All Ages  | Dual          | 0     | 0.00  |               |             |               |                |              |
| 50                                           | All Ages  | Former        | 12092 | 34.40 |               |             | 31.45         | 237            | 1.96         |
| Year of Follow-up: 2040, Age Group: 18-19    |           |               |       |       |               |             |               |                |              |
| Period                                       | Age Group | Smoking Group | N     | %     | Ever Quit (N) | Ever Quit % | Mean Yrs Quit | Short Term (n) | Short Term % |
| 50                                           | 18-19     | Never Any     | 0     | .     |               |             |               |                |              |
| 50                                           | 18-19     | CC            | 0     | .     | 0             | .           |               |                |              |
| 50                                           | 18-19     | Ecig          | 0     | .     |               |             |               |                |              |
| 50                                           | 18-19     | Dual          | 0     | .     |               |             |               |                |              |
| 50                                           | 18-19     | Former        | 0     | .     |               |             | .             | 0              | .            |
| Year of Follow-up: 2040, Age Group: 20-24    |           |               |       |       |               |             |               |                |              |
| Period                                       | Age Group | Smoking Group | N     | %     | Ever Quit (N) | Ever Quit % | Mean Yrs Quit | Short Term (n) | Short Term % |
| 50                                           | 20-24     | Never Any     | 0     | .     |               |             |               |                |              |
| 50                                           | 20-24     | CC            | 0     | .     | 0             | .           |               |                |              |
| 50                                           | 20-24     | Ecig          | 0     | .     |               |             |               |                |              |
| 50                                           | 20-24     | Dual          | 0     | .     |               |             |               |                |              |
| 50                                           | 20-24     | Former        | 0     | .     |               |             | .             | 0              | .            |
| Year of Follow-up: 2040, Age Group: 25-29    |           |               |       |       |               |             |               |                |              |
| Period                                       | Age Group | Smoking Group | N     | %     | Ever Quit (N) | Ever Quit % | Mean Yrs Quit | Short Term (n) | Short Term % |
| 50                                           | 25-29     | Never Any     | 0     | .     |               |             |               |                |              |
| 50                                           | 25-29     | CC            | 0     | .     | 0             | .           |               |                |              |
| 50                                           | 25-29     | Ecig          | 0     | .     |               |             |               |                |              |
| 50                                           | 25-29     | Dual          | 0     | .     |               |             |               |                |              |
| 50                                           | 25-29     | Former        | 0     | .     |               |             | .             | 0              | .            |
| Year of Follow-up: 2040, Age Group: 30-34    |           |               |       |       |               |             |               |                |              |
| Period                                       | Age Group | Smoking Group | N     | %     | Ever Quit (N) | Ever Quit % | Mean Yrs Quit | Short Term (n) | Short Term % |
| 50                                           | 30-34     | Never Any     | 0     | .     |               |             |               |                |              |
| 50                                           | 30-34     | CC            | 0     | .     | 0             | .           |               |                |              |
| 50                                           | 30-34     | Ecig          | 0     | .     |               |             |               |                |              |
| 50                                           | 30-34     | Dual          | 0     | .     |               |             |               |                |              |
| 50                                           | 30-34     | Former        | 0     | .     |               |             | .             | 0              | .            |
| Year of Follow-up: 2040, Age Group: 35-39    |           |               |       |       |               |             |               |                |              |

**Results for PHIM for Run 4 (Sensitivity\_Analysis\_2.RTF)**

| Period                                    | Age Group | Smoking Group | N    | %     | Ever Quit (N) | Ever Quit % | Mean Yrs Quit | Short Term (n) | Short Term % |
|-------------------------------------------|-----------|---------------|------|-------|---------------|-------------|---------------|----------------|--------------|
| 50                                        | 35-39     | Never Any     | 0    | .     |               |             |               |                |              |
| 50                                        | 35-39     | CC            | 0    | .     | 0             | .           |               |                |              |
| 50                                        | 35-39     | Ecig          | 0    | .     |               |             |               |                |              |
| 50                                        | 35-39     | Dual          | 0    | .     |               |             |               |                |              |
| 50                                        | 35-39     | Former        | 0    | .     |               |             | .             | 0              | .            |
| Year of Follow-up: 2040, Age Group: 40-44 |           |               |      |       |               |             |               |                |              |
| Period                                    | Age Group | Smoking Group | N    | %     | Ever Quit (N) | Ever Quit % | Mean Yrs Quit | Short Term (n) | Short Term % |
| 50                                        | 40-44     | Never Any     | 0    | .     |               |             |               |                |              |
| 50                                        | 40-44     | CC            | 0    | .     | 0             | .           |               |                |              |
| 50                                        | 40-44     | Ecig          | 0    | .     |               |             |               |                |              |
| 50                                        | 40-44     | Dual          | 0    | .     |               |             |               |                |              |
| 50                                        | 40-44     | Former        | 0    | .     |               |             | .             | 0              | .            |
| Year of Follow-up: 2040, Age Group: 45-49 |           |               |      |       |               |             |               |                |              |
| Period                                    | Age Group | Smoking Group | N    | %     | Ever Quit (N) | Ever Quit % | Mean Yrs Quit | Short Term (n) | Short Term % |
| 50                                        | 45-49     | Never Any     | 0    | .     |               |             |               |                |              |
| 50                                        | 45-49     | CC            | 0    | .     | 0             | .           |               |                |              |
| 50                                        | 45-49     | Ecig          | 0    | .     |               |             |               |                |              |
| 50                                        | 45-49     | Dual          | 0    | .     |               |             |               |                |              |
| 50                                        | 45-49     | Former        | 0    | .     |               |             | .             | 0              | .            |
| Year of Follow-up: 2040, Age Group: 50-54 |           |               |      |       |               |             |               |                |              |
| Period                                    | Age Group | Smoking Group | N    | %     | Ever Quit (N) | Ever Quit % | Mean Yrs Quit | Short Term (n) | Short Term % |
| 50                                        | 50-54     | Never Any     | 0    | .     |               |             |               |                |              |
| 50                                        | 50-54     | CC            | 0    | .     | 0             | .           |               |                |              |
| 50                                        | 50-54     | Ecig          | 0    | .     |               |             |               |                |              |
| 50                                        | 50-54     | Dual          | 0    | .     |               |             |               |                |              |
| 50                                        | 50-54     | Former        | 0    | .     |               |             | .             | 0              | .            |
| Year of Follow-up: 2040, Age Group: 55-59 |           |               |      |       |               |             |               |                |              |
| Period                                    | Age Group | Smoking Group | N    | %     | Ever Quit (N) | Ever Quit % | Mean Yrs Quit | Short Term (n) | Short Term % |
| 50                                        | 55-59     | Never Any     | 0    | .     |               |             |               |                |              |
| 50                                        | 55-59     | CC            | 0    | .     | 0             | .           |               |                |              |
| 50                                        | 55-59     | Ecig          | 0    | .     |               |             |               |                |              |
| 50                                        | 55-59     | Dual          | 0    | .     |               |             |               |                |              |
| 50                                        | 55-59     | Former        | 0    | .     |               |             | .             | 0              | .            |
| Year of Follow-up: 2040, Age Group: 60-64 |           |               |      |       |               |             |               |                |              |
| Period                                    | Age Group | Smoking Group | N    | %     | Ever Quit (N) | Ever Quit % | Mean Yrs Quit | Short Term (n) | Short Term % |
| 50                                        | 60-64     | Never Any     | 4726 | 59.60 |               |             |               |                |              |
| 50                                        | 60-64     | CC            | 0    | 0.00  | 0             | 0.00        |               |                |              |
| 50                                        | 60-64     | Ecig          | 599  | 7.55  |               |             |               |                |              |
| 50                                        | 60-64     | Dual          | 0    | 0.00  |               |             |               |                |              |
| 50                                        | 60-64     | Former        | 2605 | 32.85 |               |             | 27.60         | 76             | 2.92         |
| Year of Follow-up: 2040, Age Group: 65-69 |           |               |      |       |               |             |               |                |              |
| Period                                    | Age Group | Smoking Group | N    | %     | Ever Quit (N) | Ever Quit % | Mean Yrs Quit | Short Term (n) | Short Term % |
| 50                                        | 65-69     | Never Any     | 5359 | 64.18 |               |             |               |                |              |
| 50                                        | 65-69     | CC            | 0    | 0.00  | 0             | 0.00        |               |                |              |
| 50                                        | 65-69     | Ecig          | 582  | 6.97  |               |             |               |                |              |
| 50                                        | 65-69     | Dual          | 0    | 0.00  |               |             |               |                |              |
| 50                                        | 65-69     | Former        | 2409 | 28.85 |               |             | 28.83         | 36             | 1.49         |
| Year of Follow-up: 2040, Age Group: 70-74 |           |               |      |       |               |             |               |                |              |
| Period                                    | Age Group | Smoking Group | N    | %     | Ever Quit (N) | Ever Quit % | Mean Yrs Quit | Short Term (n) | Short Term % |
| 50                                        | 70-74     | Never Any     | 5189 | 59.01 |               |             |               |                |              |
| 50                                        | 70-74     | CC            | 0    | 0.00  | 0             | 0.00        |               |                |              |
| 50                                        | 70-74     | Ecig          | 603  | 6.86  |               |             |               |                |              |
| 50                                        | 70-74     | Dual          | 0    | 0.00  |               |             |               |                |              |
| 50                                        | 70-74     | Former        | 3001 | 34.13 |               |             | 32.25         | 56             | 1.87         |
| Year of Follow-up: 2040, Age Group: 75-79 |           |               |      |       |               |             |               |                |              |
| Period                                    | Age Group | Smoking Group | N    | %     | Ever Quit (N) | Ever Quit % | Mean Yrs Quit | Short Term (n) | Short Term % |
| 50                                        | 75-79     | Never Any     | 5284 | 52.43 |               |             |               |                |              |
| 50                                        | 75-79     | CC            | 0    | 0.00  | 0             | 0.00        |               |                |              |
| 50                                        | 75-79     | Ecig          | 717  | 7.11  |               |             |               |                |              |
| 50                                        | 75-79     | Dual          | 0    | 0.00  |               |             |               |                |              |
| 50                                        | 75-79     | Former        | 4077 | 40.45 |               |             | 34.86         | 69             | 1.69         |

## Results for PHIM for Run 4 (Sensitivity\_Analysis\_2.RTF)

\*\*\*\*\*

### Main Results for E-Component for Run: 4, Simulation: 1, COD: Four Diseases Combined

| Variable Parameter          | Value                                  |
|-----------------------------|----------------------------------------|
| 1. Country                  | US (United States)                     |
| 2. Sex                      | F (Females)                            |
| 3. Year of start of process | 1990                                   |
| 4. Cause of Death           | Four Diseases Combined                 |
| 5. Effective Dose NULL      | CC:1                                   |
| 6. Effective Dose Ecig      | CC:1 Ecig:0.05 Dual:0.525              |
| Note:                       | Death rates are per million population |

#### Results for Age Groups Combined and Years combined, Population unadjusted for deaths in Ecig scenario,

| Age Group:All |         | NULL        | Ecig        | %Drop   |        |        | NULL    | Ecig    | Drop    |         |
|---------------|---------|-------------|-------------|---------|--------|--------|---------|---------|---------|---------|
| Year          | Number  | Attrib      | Attrib      | Drop    | %Drop  | Attrib | Death   | Attrib  | Attrib  | Drop    |
|               | Deaths  | Deaths      | Deaths      | Deaths  | Deaths | Deaths | Rate    | Rates   | Rates   | Rates   |
| All Comb      | 9082078 | 2946250.006 | 1835652.061 | 1110598 | 12.228 | 37.695 | 2493.45 | 808.881 | 503.971 | 304.910 |

#### Results for Age Groups Combined, Population unadjusted for deaths in Ecig scenario,

| Age Group:All |        | NULL      | Ecig      | %Drop    |        |        | NULL    | Ecig    | Drop    |         |
|---------------|--------|-----------|-----------|----------|--------|--------|---------|---------|---------|---------|
| Year          | Number | Attrib    | Attrib    | Drop     | %Drop  | Attrib | Death   | Attrib  | Attrib  | Drop    |
|               | Deaths | Deaths    | Deaths    | Deaths   | Deaths | Deaths | Rate    | Rates   | Rates   | Rates   |
| 1990          | 199848 | 57524.822 | 57524.822 | 0.000    | 0.000  | 0.000  | 2926.84 | 842.471 | 842.471 | 0.000   |
| 1991          | 199162 | 59078.486 | 58811.894 | 266.592  | 0.134  | 0.451  | 2877.87 | 853.678 | 849.826 | 3.852   |
| 1992          | 198532 | 60494.150 | 59751.269 | 742.881  | 0.374  | 1.228  | 2829.84 | 862.271 | 851.683 | 10.589  |
| 1993          | 202512 | 62694.848 | 61280.639 | 1414.209 | 0.698  | 2.256  | 2845.85 | 881.034 | 861.160 | 19.873  |
| 1994          | 200658 | 63202.598 | 60992.408 | 2210.190 | 1.101  | 3.497  | 2777.87 | 874.966 | 844.368 | 30.597  |
| 1995          | 201023 | 63766.862 | 60622.827 | 3144.035 | 1.564  | 4.931  | 2739.80 | 869.097 | 826.246 | 42.851  |
| 1996          | 201180 | 64591.163 | 60377.025 | 4214.137 | 2.095  | 6.524  | 2706.36 | 868.908 | 812.218 | 56.690  |
| 1997          | 198639 | 64686.912 | 59509.908 | 5177.004 | 2.606  | 8.003  | 2635.18 | 858.147 | 789.468 | 68.679  |
| 1998          | 197573 | 65295.961 | 59027.687 | 6268.275 | 3.173  | 9.600  | 2584.18 | 854.046 | 772.059 | 81.987  |
| 1999          | 211329 | 67327.521 | 59374.879 | 7952.643 | 3.763  | 11.812 | 2726.91 | 868.771 | 766.152 | 102.618 |
| 2000          | 208496 | 67596.897 | 58491.927 | 9104.970 | 4.367  | 13.470 | 2656.96 | 861.419 | 745.390 | 116.029 |
| 2001          | 203606 | 67008.811 | 56749.386 | 10259.42 | 5.039  | 15.311 | 2565.88 | 844.458 | 715.167 | 129.291 |
| 2002          | 200828 | 67067.744 | 55513.843 | 11553.90 | 5.753  | 17.227 | 2506.09 | 836.925 | 692.746 | 144.179 |
| 2003          | 196352 | 66756.217 | 54102.789 | 12653.43 | 6.444  | 18.955 | 2427.31 | 825.244 | 668.822 | 156.422 |
| 2004          | 188160 | 65058.725 | 51536.886 | 13521.84 | 7.186  | 20.784 | 2302.83 | 796.234 | 630.745 | 165.490 |
| 2005          | 186416 | 65214.724 | 50447.658 | 14767.07 | 7.922  | 22.644 | 2256.27 | 789.321 | 610.589 | 178.732 |
| 2006          | 180088 | 63771.146 | 48106.551 | 15664.59 | 8.698  | 24.564 | 2160.67 | 765.117 | 577.176 | 187.942 |
| 2007          | 175644 | 63110.718 | 46536.923 | 16573.80 | 9.436  | 26.261 | 2086.36 | 749.650 | 552.781 | 196.869 |
| 2008          | 177570 | 63718.624 | 45754.516 | 17964.11 | 10.117 | 28.193 | 2086.39 | 748.674 | 537.601 | 211.073 |
| 2009          | 172806 | 62794.698 | 44019.735 | 18774.96 | 10.865 | 29.899 | 2007.57 | 729.515 | 511.398 | 218.117 |
| 2010          | 170489 | 61917.074 | 42254.949 | 19662.12 | 11.533 | 31.756 | 1957.97 | 711.083 | 485.274 | 225.808 |
| 2011          | 170305 | 61680.114 | 40843.672 | 20836.44 | 12.235 | 33.781 | 1937.46 | 701.700 | 464.656 | 237.045 |
| 2012          | 171421 | 62023.127 | 39904.773 | 22118.35 | 12.903 | 35.661 | 1930.22 | 698.386 | 449.331 | 249.055 |
| 2013          | 172699 | 62037.765 | 38718.476 | 23319.29 | 13.503 | 37.589 | 1923.75 | 691.059 | 431.298 | 259.761 |
| 2014          | 174169 | 61921.017 | 37322.814 | 24598.20 | 14.123 | 39.725 | 1918.85 | 682.195 | 411.192 | 271.003 |
| 2015          | 177354 | 61856.204 | 36163.057 | 25693.15 | 14.487 | 41.537 | 2184.51 | 761.899 | 445.430 | 316.469 |
| 2016          | 176853 | 60464.119 | 33982.861 | 26481.26 | 14.974 | 43.797 | 2157.59 | 737.655 | 414.587 | 323.068 |
| 2017          | 179309 | 60243.839 | 32635.196 | 27608.64 | 15.397 | 45.828 | 2166.86 | 728.017 | 394.380 | 333.637 |
| 2018          | 177157 | 60713.327 | 32065.410 | 28647.92 | 16.171 | 47.186 | 2120.51 | 726.721 | 383.814 | 342.907 |
| 2019          | 179227 | 61148.172 | 31172.182 | 29975.99 | 16.725 | 49.022 | 2124.53 | 724.841 | 369.510 | 355.331 |
| 2020          | 180467 | 61149.317 | 30236.218 | 30913.10 | 17.130 | 50.553 | 2424.25 | 821.432 | 406.170 | 415.263 |
| 2021          | 178116 | 58727.786 | 27522.202 | 31205.58 | 17.520 | 53.136 | 2375.42 | 783.216 | 367.046 | 416.169 |
| 2022          | 179408 | 58848.802 | 26488.374 | 32360.43 | 18.037 | 54.989 | 2374.52 | 778.881 | 350.581 | 428.299 |
| 2023          | 180640 | 58816.149 | 25442.068 | 33374.08 | 18.475 | 56.743 | 2372.26 | 772.407 | 334.120 | 438.287 |
| 2024          | 181610 | 58955.232 | 24461.316 | 34493.92 | 18.993 | 58.509 | 2366.77 | 768.316 | 318.785 | 449.531 |
| 2025          | 180418 | 58297.744 | 23407.161 | 34890.58 | 19.339 | 59.849 | 2713.69 | 876.861 | 352.069 | 524.792 |
| 2026          | 180313 | 56469.971 | 21518.980 | 34950.99 | 19.383 | 61.893 | 2701.83 | 846.150 | 322.442 | 523.708 |
| 2027          | 179619 | 56209.427 | 20410.440 | 35798.99 | 19.931 | 63.689 | 2680.68 | 838.883 | 304.610 | 534.273 |
| 2028          | 178762 | 55733.105 | 19281.610 | 36451.50 | 20.391 | 65.404 | 2656.74 | 828.298 | 286.561 | 541.737 |
| 2029          | 177808 | 55145.838 | 18184.874 | 36960.96 | 20.787 | 67.024 | 2630.89 | 815.951 | 269.068 | 546.883 |
| 2030          | 173587 | 53615.097 | 17042.073 | 36573.02 | 21.069 | 68.214 | 3040.33 | 939.056 | 298.488 | 640.568 |
| 2031          | 174985 | 52046.561 | 15939.818 | 36106.74 | 20.634 | 69.374 | 3060.73 | 910.364 | 278.809 | 631.555 |
| 2032          | 173400 | 51582.636 | 15035.611 | 36547.03 | 21.077 | 70.851 | 3027.10 | 900.496 | 262.482 | 638.014 |
| 2033          | 171756 | 50839.758 | 14139.304 | 36700.45 | 21.368 | 72.188 | 2991.14 | 885.375 | 246.236 | 639.138 |
| 2034          | 169973 | 50215.451 | 13280.815 | 36934.64 | 21.730 | 73.552 | 2951.96 | 872.104 | 230.651 | 641.453 |
| 2035          | 162644 | 47773.075 | 12290.226 | 35482.85 | 21.816 | 74.274 | 3459.14 | 1016.05 | 261.391 | 754.655 |
| 2036          | 156254 | 43298.709 | 10538.383 | 32760.33 | 20.966 | 75.661 | 3328.25 | 922.274 | 224.470 | 697.804 |
| 2037          | 153593 | 42241.563 | 9690.008  | 32551.56 | 21.193 | 77.060 | 3274.10 | 900.450 | 206.559 | 693.892 |
| 2038          | 150947 | 41356.353 | 8962.708  | 32393.64 | 21.460 | 78.328 | 3217.50 | 881.531 | 191.045 | 690.486 |
| 2039          | 148373 | 40161.050 | 8182.913  | 31978.14 | 21.552 | 79.625 | 3159.42 | 855.178 | 174.245 | 680.933 |



## Results for PHIM for Run 4 (Sensitivity\_Analysis\_2.RTF)

\*\*\*\*\*

### Main Results for E-Component for Run: 4, Simulation: 1, COD: LUNG CANCER

| Variable Parameter          | Value                                  |
|-----------------------------|----------------------------------------|
| 1. Country                  | US (United States)                     |
| 2. Sex                      | F (Females)                            |
| 3. Year of start of process | 1990                                   |
| 4. Cause of Death           | LUNG CANCER                            |
| 5. Effective Dose NULL      | CC:1                                   |
| 6. Effective Dose Ecig      | CC:1 Ecig:0.05 Dual:0.525              |
| Note:                       | Death rates are per million population |

#### Results for Age Groups Combined and Years combined, Population unadjusted for deaths in Ecig scenario,

| Age Group: | NULL    | Ecig        | %Drop       |          |        | NULL   | Ecig    | Drop    |         |         |
|------------|---------|-------------|-------------|----------|--------|--------|---------|---------|---------|---------|
| Year       | Number  | Attrib      | Attrib      | Drop     | %Drop  | Attrib | Death   | Attrib  | Attrib  | Drop    |
|            | Deaths  | Deaths      | Deaths      | Deaths   | Deaths | Deaths | Rate    | Rates   | Rates   | Rates   |
| All Comb   | 2327764 | 1580465.217 | 1088581.365 | 491883.9 | 21.131 | 31.123 | 639.078 | 433.910 | 298.866 | 135.045 |

#### Results for Age Groups Combined, Population unadjusted for deaths in Ecig scenario,

| Age Group: | NULL   | Ecig      | %Drop     |          |        | NULL   | Ecig    | Drop    |         |         |
|------------|--------|-----------|-----------|----------|--------|--------|---------|---------|---------|---------|
| Year       | Number | Attrib    | Attrib    | Drop     | %Drop  | Attrib | Death   | Attrib  | Attrib  | Drop    |
|            | Deaths | Deaths    | Deaths    | Deaths   | Deaths | Deaths | Rate    | Rates   | Rates   | Rates   |
| 1990       | 42690  | 30614.201 | 30614.201 | 0.000    | 0.000  | 0.000  | 625.210 | 448.355 | 448.355 | 0.000   |
| 1991       | 43692  | 31412.010 | 31358.568 | 53.443   | 0.122  | 0.170  | 631.345 | 453.901 | 453.128 | 0.772   |
| 1992       | 45423  | 32782.407 | 32627.128 | 155.278  | 0.342  | 0.474  | 647.450 | 467.274 | 465.061 | 2.213   |
| 1993       | 46291  | 33491.183 | 33192.977 | 298.207  | 0.644  | 0.890  | 650.515 | 470.643 | 466.452 | 4.191   |
| 1994       | 47017  | 34074.347 | 33593.912 | 480.436  | 1.022  | 1.410  | 650.895 | 471.719 | 465.068 | 6.651   |
| 1995       | 47840  | 34694.454 | 33982.912 | 711.542  | 1.487  | 2.051  | 652.025 | 472.861 | 463.163 | 9.698   |
| 1996       | 48244  | 35027.269 | 34060.943 | 966.325  | 2.003  | 2.759  | 648.999 | 471.202 | 458.202 | 12.999  |
| 1997       | 49035  | 35590.763 | 34332.396 | 1258.367 | 2.566  | 3.536  | 650.506 | 472.153 | 455.459 | 16.694  |
| 1998       | 49686  | 36100.785 | 34505.469 | 1595.315 | 3.211  | 4.419  | 649.874 | 472.184 | 451.318 | 20.866  |
| 1999       | 48883  | 35451.030 | 33555.604 | 1895.426 | 3.877  | 5.347  | 630.769 | 457.448 | 432.990 | 24.458  |
| 2000       | 50331  | 36447.986 | 34113.838 | 2334.148 | 4.638  | 6.404  | 641.392 | 464.474 | 434.729 | 29.745  |
| 2001       | 50389  | 36411.326 | 33656.097 | 2755.229 | 5.468  | 7.567  | 635.012 | 458.863 | 424.141 | 34.722  |
| 2002       | 51445  | 37078.545 | 33791.698 | 3286.847 | 6.389  | 8.865  | 641.972 | 462.696 | 421.680 | 41.016  |
| 2003       | 51408  | 36999.876 | 33234.793 | 3765.082 | 7.324  | 10.176 | 635.509 | 457.395 | 410.850 | 46.544  |
| 2004       | 51399  | 36861.555 | 32572.588 | 4288.967 | 8.344  | 11.635 | 629.057 | 451.138 | 398.646 | 52.491  |
| 2005       | 51421  | 36689.529 | 31853.092 | 4836.437 | 9.406  | 13.182 | 622.370 | 444.069 | 385.531 | 58.537  |
| 2006       | 51355  | 36504.774 | 31091.831 | 5412.943 | 10.540 | 14.828 | 616.150 | 437.979 | 373.035 | 64.944  |
| 2007       | 51839  | 36663.202 | 30577.111 | 6086.091 | 11.740 | 16.600 | 615.761 | 435.498 | 363.205 | 72.293  |
| 2008       | 50976  | 35898.803 | 29323.466 | 6575.337 | 12.899 | 18.316 | 598.952 | 421.800 | 344.541 | 77.258  |
| 2009       | 51193  | 35934.525 | 28659.834 | 7274.692 | 14.210 | 20.244 | 594.733 | 417.468 | 332.955 | 84.513  |
| 2010       | 50853  | 35502.829 | 27652.312 | 7850.517 | 15.438 | 22.112 | 584.018 | 407.730 | 317.571 | 90.159  |
| 2011       | 50509  | 35136.342 | 26641.420 | 8494.922 | 16.819 | 24.177 | 574.613 | 399.726 | 303.084 | 96.642  |
| 2012       | 51245  | 35450.201 | 26161.021 | 9289.180 | 18.127 | 26.203 | 577.023 | 399.173 | 294.576 | 104.597 |
| 2013       | 51069  | 35123.224 | 25134.832 | 9988.392 | 19.559 | 28.438 | 568.874 | 391.249 | 279.985 | 111.264 |
| 2014       | 51251  | 35079.370 | 24349.445 | 10729.92 | 20.936 | 30.588 | 564.641 | 386.476 | 268.262 | 118.213 |
| 2015       | 50443  | 34324.171 | 23138.809 | 11185.36 | 22.174 | 32.587 | 621.319 | 422.780 | 285.007 | 137.773 |
| 2016       | 48854  | 33054.753 | 21502.331 | 11552.42 | 23.647 | 34.949 | 596.013 | 403.264 | 262.326 | 140.938 |
| 2017       | 48325  | 32471.234 | 20357.247 | 12113.99 | 25.068 | 37.307 | 583.983 | 392.399 | 246.007 | 146.391 |
| 2018       | 50465  | 33657.595 | 20250.229 | 13407.37 | 26.568 | 39.835 | 604.052 | 402.871 | 242.389 | 160.482 |
| 2019       | 51036  | 33863.424 | 19582.646 | 14280.78 | 27.982 | 42.172 | 604.975 | 401.412 | 232.130 | 169.282 |
| 2020       | 51444  | 33910.830 | 18891.376 | 15019.45 | 29.196 | 44.291 | 691.053 | 455.532 | 253.772 | 201.760 |
| 2021       | 48037  | 31531.880 | 16748.087 | 14783.79 | 30.776 | 46.885 | 640.639 | 420.521 | 223.359 | 197.162 |
| 2022       | 48335  | 31560.212 | 16001.685 | 15558.53 | 32.189 | 49.298 | 639.727 | 417.708 | 211.787 | 205.922 |
| 2023       | 48599  | 31508.781 | 15251.847 | 16256.93 | 33.451 | 51.595 | 638.227 | 413.791 | 200.296 | 213.495 |
| 2024       | 48784  | 31517.293 | 14535.910 | 16981.38 | 34.810 | 53.880 | 635.757 | 410.740 | 189.435 | 221.305 |
| 2025       | 48477  | 31175.389 | 13788.204 | 17387.19 | 35.867 | 55.772 | 729.141 | 468.912 | 207.390 | 261.522 |
| 2026       | 45324  | 29044.598 | 12218.345 | 16826.25 | 37.124 | 57.932 | 679.138 | 435.206 | 183.080 | 252.126 |
| 2027       | 45107  | 28825.765 | 11479.249 | 17346.52 | 38.456 | 60.177 | 673.191 | 430.203 | 171.319 | 258.884 |
| 2028       | 44842  | 28513.846 | 10743.665 | 17770.18 | 39.629 | 62.321 | 666.430 | 423.769 | 159.671 | 264.098 |
| 2029       | 44539  | 28148.109 | 10036.670 | 18111.44 | 40.664 | 64.343 | 659.013 | 416.486 | 148.505 | 267.981 |
| 2030       | 43393  | 27314.475 | 9306.225  | 18008.25 | 41.500 | 65.929 | 760.018 | 478.407 | 162.996 | 315.410 |
| 2031       | 40748  | 25423.102 | 8339.797  | 17083.30 | 41.925 | 67.196 | 712.731 | 444.684 | 145.874 | 298.810 |
| 2032       | 40325  | 25085.902 | 7782.410  | 17303.49 | 42.910 | 68.977 | 703.969 | 437.933 | 135.860 | 302.073 |
| 2033       | 39882  | 24645.067 | 7249.165  | 17395.90 | 43.619 | 70.586 | 694.543 | 429.194 | 126.244 | 302.950 |
| 2034       | 39404  | 24239.126 | 6744.993  | 17494.13 | 44.396 | 72.173 | 684.347 | 420.967 | 117.142 | 303.825 |
| 2035       | 37454  | 22944.147 | 6156.773  | 16787.37 | 44.821 | 73.166 | 796.588 | 487.980 | 130.943 | 357.037 |
| 2036       | 32988  | 19950.581 | 5069.712  | 14880.87 | 45.109 | 74.589 | 702.663 | 424.953 | 107.986 | 316.967 |
| 2037       | 32403  | 19415.334 | 4631.387  | 14783.95 | 45.625 | 76.146 | 690.731 | 413.871 | 98.726  | 315.145 |
| 2038       | 31820  | 18939.317 | 4261.859  | 14677.46 | 46.127 | 77.497 | 678.257 | 403.701 | 90.844  | 312.857 |
| 2039       | 31251  | 18379.752 | 3875.254  | 14504.50 | 46.412 | 78.916 | 665.457 | 391.373 | 82.519  | 308.854 |

## Results for PHIM for Run 4 (Sensitivity\_Analysis\_2.RTF)

\*\*\*\*\*

### Main Results for E-Component for Run: 4, Simulation: 1, COD: IHD

| Variable Parameter          | Value                                  |
|-----------------------------|----------------------------------------|
| 1. Country                  | US (United States)                     |
| 2. Sex                      | F (Females)                            |
| 3. Year of start of process | 1990                                   |
| 4. Cause of Death           | IHD                                    |
| 5. Effective Dose NULL      | CC:1                                   |
| 6. Effective Dose Ecig      | CC:1 Ecig:0.05 Dual:0.525              |
| Note:                       | Death rates are per million population |

#### Results for Age Groups Combined and Years combined, Population unadjusted for deaths in Ecig scenario,

| Age Group:All |         | NULL       | Ecig       | %Drop    |        |        | NULL    | Ecig    | Drop   |        |
|---------------|---------|------------|------------|----------|--------|--------|---------|---------|--------|--------|
| Year          | Number  | Attrib     | Attrib     | Drop     | %Drop  | Attrib | Death   | Attrib  | Attrib | Drop   |
|               | Deaths  | Deaths     | Deaths     | Deaths   | Deaths | Deaths | Rate    | Rates   | Rates  | Rates  |
| All Comb      | 3242167 | 398833.796 | 179216.761 | 219617.0 | 6.774  | 55.065 | 890.124 | 109.498 | 49.203 | 60.295 |

#### Results for Age Groups Combined, Population unadjusted for deaths in Ecig scenario,

| Age Group:All |        | NULL      | Ecig      | %Drop    |        |        | NULL    | Ecig    | Drop    |        |
|---------------|--------|-----------|-----------|----------|--------|--------|---------|---------|---------|--------|
| Year          | Number | Attrib    | Attrib    | Drop     | %Drop  | Attrib | Death   | Attrib  | Attrib  | Drop   |
|               | Deaths | Deaths    | Deaths    | Deaths   | Deaths | Deaths | Rate    | Rates   | Rates   | Rates  |
| 1990          | 98916  | 12922.892 | 12922.892 | 0.000    | 0.000  | 0.000  | 1448.66 | 189.260 | 189.260 | 0.000  |
| 1991          | 96403  | 12856.479 | 12717.693 | 138.786  | 0.144  | 1.080  | 1393.01 | 185.775 | 183.769 | 2.005  |
| 1992          | 93721  | 12662.244 | 12280.396 | 381.848  | 0.407  | 3.016  | 1335.88 | 180.485 | 175.042 | 5.443  |
| 1993          | 93679  | 12730.613 | 12015.751 | 714.862  | 0.763  | 5.615  | 1316.45 | 178.900 | 168.854 | 10.046 |
| 1994          | 90832  | 12495.323 | 11396.739 | 1098.584 | 1.209  | 8.792  | 1257.46 | 172.983 | 157.774 | 15.209 |
| 1995          | 89698  | 12365.590 | 10835.313 | 1530.277 | 1.706  | 12.375 | 1222.52 | 168.534 | 147.678 | 20.857 |
| 1996          | 88286  | 12290.551 | 10251.119 | 2039.432 | 2.310  | 16.593 | 1187.66 | 165.338 | 137.902 | 27.435 |
| 1997          | 84777  | 11719.531 | 9306.056  | 2413.476 | 2.847  | 20.594 | 1124.67 | 155.473 | 123.456 | 32.018 |
| 1998          | 82517  | 11416.794 | 8580.958  | 2835.836 | 3.437  | 24.839 | 1079.29 | 149.327 | 112.236 | 37.092 |
| 1999          | 93939  | 13028.038 | 9194.904  | 3833.134 | 4.080  | 29.422 | 1212.16 | 168.109 | 118.648 | 49.461 |
| 2000          | 90039  | 12426.299 | 8228.241  | 4198.058 | 4.662  | 33.784 | 1147.41 | 158.354 | 104.856 | 53.498 |
| 2001          | 86119  | 11939.281 | 7306.981  | 4632.301 | 5.379  | 38.799 | 1085.29 | 150.461 | 92.084  | 58.377 |
| 2002          | 83014  | 11528.794 | 6487.630  | 5041.164 | 6.073  | 43.727 | 1035.91 | 143.865 | 80.958  | 62.908 |
| 2003          | 79302  | 11048.407 | 5732.082  | 5316.325 | 6.704  | 48.118 | 980.336 | 136.581 | 70.860  | 65.721 |
| 2004          | 73861  | 10375.132 | 4914.023  | 5461.108 | 7.394  | 52.637 | 903.963 | 126.978 | 60.141  | 66.837 |
| 2005          | 71649  | 10051.029 | 4343.664  | 5707.365 | 7.966  | 56.784 | 867.197 | 121.652 | 52.573  | 69.079 |
| 2006          | 67551  | 9542.523  | 3712.270  | 5830.254 | 8.631  | 61.098 | 810.467 | 114.490 | 44.539  | 69.951 |
| 2007          | 63503  | 8936.533  | 3147.337  | 5789.196 | 9.116  | 64.781 | 754.310 | 106.151 | 37.385  | 68.766 |
| 2008          | 63171  | 8944.180  | 2843.744  | 6100.437 | 9.657  | 68.206 | 742.239 | 105.091 | 33.413  | 71.678 |
| 2009          | 59747  | 8390.033  | 2433.557  | 5956.477 | 9.969  | 70.995 | 694.108 | 97.471  | 28.272  | 69.199 |
| 2010          | 58008  | 8157.570  | 2146.759  | 6010.810 | 10.362 | 73.684 | 666.189 | 93.685  | 24.654  | 69.031 |
| 2011          | 57368  | 8035.356  | 1905.142  | 6130.214 | 10.686 | 76.291 | 652.644 | 91.414  | 21.674  | 69.740 |
| 2012          | 57411  | 7970.766  | 1699.954  | 6270.812 | 10.923 | 78.673 | 646.453 | 89.752  | 19.142  | 70.610 |
| 2013          | 57067  | 7743.216  | 1500.103  | 6243.113 | 10.940 | 80.627 | 635.688 | 86.254  | 16.710  | 69.544 |
| 2014          | 57538  | 7774.935  | 1361.239  | 6413.696 | 11.147 | 82.492 | 633.906 | 85.658  | 14.997  | 70.661 |
| 2015          | 58395  | 7722.535  | 1245.376  | 6477.158 | 11.092 | 83.873 | 719.266 | 95.120  | 15.340  | 79.781 |
| 2016          | 58658  | 7600.353  | 1103.219  | 6497.134 | 11.076 | 85.485 | 715.621 | 92.723  | 13.459  | 79.264 |
| 2017          | 59004  | 7470.266  | 989.669   | 6480.597 | 10.983 | 86.752 | 713.034 | 90.274  | 11.960  | 78.315 |
| 2018          | 56077  | 6907.050  | 839.169   | 6067.881 | 10.821 | 87.851 | 671.224 | 82.675  | 10.045  | 72.631 |
| 2019          | 55886  | 6732.046  | 757.550   | 5974.496 | 10.691 | 88.747 | 662.462 | 79.801  | 8.980   | 70.821 |
| 2020          | 55313  | 6429.836  | 680.330   | 5749.505 | 10.394 | 89.419 | 743.037 | 86.373  | 9.139   | 77.234 |
| 2021          | 56292  | 6562.016  | 628.020   | 5933.996 | 10.541 | 90.429 | 750.730 | 87.513  | 8.376   | 79.138 |
| 2022          | 55827  | 6352.366  | 567.990   | 5784.376 | 10.361 | 91.059 | 738.885 | 84.075  | 7.518   | 76.558 |
| 2023          | 55338  | 6134.123  | 516.147   | 5617.976 | 10.152 | 91.586 | 726.728 | 80.557  | 6.778   | 73.778 |
| 2024          | 54770  | 5922.193  | 473.301   | 5448.891 | 9.949  | 92.008 | 713.771 | 77.179  | 6.168   | 71.011 |
| 2025          | 53295  | 5504.188  | 422.408   | 5081.779 | 9.535  | 92.326 | 801.612 | 82.789  | 6.353   | 76.435 |
| 2026          | 55278  | 5641.075  | 413.514   | 5227.561 | 9.457  | 92.670 | 828.283 | 84.526  | 6.196   | 78.330 |
| 2027          | 54199  | 5426.216  | 383.225   | 5042.991 | 9.305  | 92.938 | 808.875 | 80.982  | 5.719   | 75.263 |
| 2028          | 53090  | 5197.830  | 356.080   | 4841.750 | 9.120  | 93.149 | 789.020 | 77.249  | 5.292   | 71.957 |
| 2029          | 51974  | 4973.547  | 332.140   | 4641.407 | 8.930  | 93.322 | 769.023 | 73.590  | 4.914   | 68.675 |
| 2030          | 49479  | 4450.618  | 288.080   | 4162.538 | 8.413  | 93.527 | 866.605 | 77.952  | 5.046   | 72.906 |
| 2031          | 51987  | 4555.052  | 290.159   | 4264.894 | 8.204  | 93.630 | 909.317 | 79.674  | 5.075   | 74.599 |
| 2032          | 50677  | 4349.999  | 272.208   | 4077.791 | 8.047  | 93.742 | 884.689 | 75.939  | 4.752   | 71.187 |
| 2033          | 49380  | 4147.948  | 256.380   | 3891.568 | 7.881  | 93.819 | 859.955 | 72.237  | 4.465   | 67.772 |
| 2034          | 48076  | 3966.133  | 241.634   | 3724.499 | 7.747  | 93.908 | 834.943 | 68.881  | 4.197   | 64.684 |
| 2035          | 44518  | 3289.064  | 194.483   | 3094.581 | 6.951  | 94.087 | 946.825 | 69.952  | 4.136   | 65.816 |
| 2036          | 46347  | 3313.192  | 193.275   | 3119.917 | 6.732  | 94.167 | 987.211 | 70.572  | 4.117   | 66.455 |
| 2037          | 44841  | 3117.951  | 180.262   | 2937.689 | 6.551  | 94.219 | 955.859 | 66.464  | 3.843   | 62.622 |
| 2038          | 43378  | 2949.775  | 169.284   | 2780.491 | 6.410  | 94.261 | 924.621 | 62.876  | 3.608   | 59.268 |
| 2039          | 41973  | 2766.312  | 158.309   | 2608.003 | 6.214  | 94.277 | 893.753 | 58.905  | 3.371   | 55.534 |

## Results for PHIM for Run 4 (Sensitivity\_Analysis\_2.RTF)

\*\*\*\*\*

### Main Results for E-Component for Run: 4, Simulation: 1, COD: STROKE

| Variable Parameter          | Value                                  |
|-----------------------------|----------------------------------------|
| 1. Country                  | US (United States)                     |
| 2. Sex                      | F (Females)                            |
| 3. Year of start of process | 1990                                   |
| 4. Cause of Death           | STROKE                                 |
| 5. Effective Dose NULL      | CC:1                                   |
| 6. Effective Dose Ecig      | CC:1 Ecig:0.05 Dual:0.525              |
| Note:                       | Death rates are per million population |

#### Results for Age Groups Combined and Years combined, Population unadjusted for deaths in Ecig scenario,

| Age Group:All | NULL    | Ecig       | %Drop     |          |        | NULL   | Ecig    | Drop   |        |        |
|---------------|---------|------------|-----------|----------|--------|--------|---------|--------|--------|--------|
| Year          | Number  | Attrib     | Attrib    | Drop     | %Drop  | Attrib | Death   | Attrib | Attrib | Drop   |
|               | Deaths  | Deaths     | Deaths    | Deaths   | Deaths | Deaths | Rate    | Rates  | Rates  | Rates  |
| All Comb      | 1352207 | 104899.750 | 46041.643 | 58858.11 | 4.353  | 56.109 | 371.243 | 28.800 | 12.641 | 16.159 |

#### Results for Age Groups Combined, Population unadjusted for deaths in Ecig scenario,

| Age Group:All | NULL   | Ecig     | %Drop    |          |        | NULL   | Ecig    | Drop   |        |        |
|---------------|--------|----------|----------|----------|--------|--------|---------|--------|--------|--------|
| Year          | Number | Attrib   | Attrib   | Drop     | %Drop  | Attrib | Death   | Attrib | Attrib | Drop   |
|               | Deaths | Deaths   | Deaths   | Deaths   | Deaths | Deaths | Rate    | Rates  | Rates  | Rates  |
| 1990          | 33504  | 3293.017 | 3293.017 | 0.000    | 0.000  | 0.000  | 490.678 | 48.227 | 48.227 | 0.000  |
| 1991          | 32505  | 3207.063 | 3163.888 | 43.175   | 0.133  | 1.346  | 469.694 | 46.342 | 45.718 | 0.624  |
| 1992          | 32560  | 3218.125 | 3099.393 | 118.732  | 0.365  | 3.689  | 464.104 | 45.871 | 44.178 | 1.692  |
| 1993          | 32768  | 3226.680 | 3006.776 | 219.904  | 0.671  | 6.815  | 460.480 | 45.344 | 42.253 | 3.090  |
| 1994          | 33005  | 3277.266 | 2933.533 | 343.733  | 1.041  | 10.488 | 456.915 | 45.370 | 40.611 | 4.759  |
| 1995          | 33730  | 3309.378 | 2824.409 | 484.969  | 1.438  | 14.654 | 459.716 | 45.104 | 38.495 | 6.610  |
| 1996          | 33750  | 3312.987 | 2676.839 | 636.148  | 1.885  | 19.202 | 454.019 | 44.568 | 36.010 | 8.558  |
| 1997          | 33699  | 3267.066 | 2487.447 | 779.619  | 2.313  | 23.863 | 447.056 | 43.341 | 32.999 | 10.343 |
| 1998          | 33274  | 3178.725 | 2268.684 | 910.041  | 2.735  | 28.629 | 435.211 | 41.577 | 29.674 | 11.903 |
| 1999          | 33891  | 3120.351 | 2082.277 | 1038.074 | 3.063  | 33.268 | 437.317 | 40.264 | 26.869 | 13.395 |
| 2000          | 33827  | 3142.808 | 1955.290 | 1187.518 | 3.511  | 37.785 | 431.074 | 40.050 | 24.917 | 15.133 |
| 2001          | 32506  | 2961.588 | 1711.131 | 1250.457 | 3.847  | 42.223 | 409.647 | 37.323 | 21.564 | 15.759 |
| 2002          | 32078  | 2940.627 | 1563.463 | 1377.164 | 4.293  | 46.832 | 400.295 | 36.695 | 19.510 | 17.185 |
| 2003          | 30568  | 2819.545 | 1380.794 | 1438.750 | 4.707  | 51.028 | 377.883 | 34.855 | 17.069 | 17.786 |
| 2004          | 29388  | 2730.466 | 1226.590 | 1503.876 | 5.117  | 55.078 | 359.671 | 33.417 | 15.012 | 18.405 |
| 2005          | 27954  | 2670.510 | 1097.050 | 1573.460 | 5.629  | 58.920 | 338.339 | 32.322 | 13.278 | 19.044 |
| 2006          | 27201  | 2623.285 | 984.457  | 1638.828 | 6.025  | 62.472 | 326.354 | 31.474 | 11.811 | 19.662 |
| 2007          | 26302  | 2536.599 | 869.586  | 1667.013 | 6.338  | 65.718 | 312.424 | 30.131 | 10.329 | 19.801 |
| 2008          | 25998  | 2469.443 | 773.387  | 1696.057 | 6.524  | 68.682 | 305.468 | 29.015 | 9.087  | 19.928 |
| 2009          | 25040  | 2386.945 | 682.625  | 1704.320 | 6.806  | 71.402 | 290.901 | 27.730 | 7.930  | 19.800 |
| 2010          | 24840  | 2329.274 | 610.256  | 1719.018 | 6.920  | 73.801 | 285.273 | 26.750 | 7.008  | 19.742 |
| 2011          | 24792  | 2286.581 | 546.305  | 1740.276 | 7.020  | 76.108 | 282.045 | 26.013 | 6.215  | 19.798 |
| 2012          | 24500  | 2243.311 | 488.606  | 1754.705 | 7.162  | 78.219 | 275.872 | 25.260 | 5.502  | 19.758 |
| 2013          | 24451  | 2176.503 | 431.505  | 1744.998 | 7.137  | 80.174 | 272.368 | 24.245 | 4.807  | 19.438 |
| 2014          | 25296  | 2211.619 | 402.085  | 1809.534 | 7.153  | 81.819 | 278.691 | 24.366 | 4.430  | 19.936 |
| 2015          | 26316  | 2237.016 | 375.815  | 1861.201 | 7.073  | 83.200 | 324.141 | 27.554 | 4.629  | 22.925 |
| 2016          | 26735  | 2229.057 | 343.838  | 1885.220 | 7.052  | 84.575 | 326.164 | 27.194 | 4.195  | 22.999 |
| 2017          | 27616  | 2221.649 | 316.990  | 1904.659 | 6.897  | 85.732 | 333.726 | 26.848 | 3.831  | 23.017 |
| 2018          | 25256  | 1939.420 | 258.339  | 1681.081 | 6.656  | 86.680 | 302.304 | 23.214 | 3.092  | 20.122 |
| 2019          | 25429  | 1904.400 | 235.538  | 1668.862 | 6.563  | 87.632 | 301.434 | 22.574 | 2.792  | 19.782 |
| 2020          | 25379  | 1806.054 | 211.030  | 1595.024 | 6.285  | 88.315 | 340.922 | 24.261 | 2.835  | 21.426 |
| 2021          | 25448  | 1748.172 | 190.257  | 1557.915 | 6.122  | 89.117 | 339.386 | 23.314 | 2.537  | 20.777 |
| 2022          | 25539  | 1701.148 | 173.359  | 1527.789 | 5.982  | 89.809 | 338.015 | 22.515 | 2.294  | 20.221 |
| 2023          | 25620  | 1652.087 | 158.618  | 1493.469 | 5.829  | 90.399 | 336.461 | 21.696 | 2.083  | 19.613 |
| 2024          | 25659  | 1597.127 | 145.243  | 1451.883 | 5.658  | 90.906 | 334.391 | 20.814 | 1.893  | 18.921 |
| 2025          | 25260  | 1467.622 | 127.438  | 1340.184 | 5.306  | 91.317 | 379.931 | 22.075 | 1.917  | 20.158 |
| 2026          | 25480  | 1390.505 | 115.508  | 1274.997 | 5.004  | 91.693 | 381.790 | 20.835 | 1.731  | 19.105 |
| 2027          | 25264  | 1342.095 | 106.698  | 1235.398 | 4.890  | 92.050 | 377.042 | 20.030 | 1.592  | 18.437 |
| 2028          | 25022  | 1289.536 | 98.956   | 1190.579 | 4.758  | 92.326 | 371.870 | 19.165 | 1.471  | 17.694 |
| 2029          | 24767  | 1242.216 | 91.904   | 1150.312 | 4.645  | 92.602 | 366.459 | 18.380 | 1.360  | 17.020 |
| 2030          | 23959  | 1096.803 | 78.316   | 1018.487 | 4.251  | 92.860 | 419.641 | 19.210 | 1.372  | 17.839 |
| 2031          | 23963  | 1019.991 | 70.891   | 949.099  | 3.961  | 93.050 | 419.142 | 17.841 | 1.240  | 16.601 |
| 2032          | 23615  | 977.406  | 66.060   | 911.346  | 3.859  | 93.241 | 412.259 | 17.063 | 1.153  | 15.910 |
| 2033          | 23259  | 937.450  | 61.884   | 875.565  | 3.764  | 93.399 | 405.051 | 16.326 | 1.078  | 15.248 |
| 2034          | 22879  | 900.763  | 58.032   | 842.731  | 3.683  | 93.557 | 397.339 | 15.644 | 1.008  | 14.636 |
| 2035          | 21733  | 745.023  | 46.669   | 698.354  | 3.213  | 93.736 | 462.224 | 15.845 | 0.993  | 14.853 |
| 2036          | 20904  | 680.360  | 41.596   | 638.764  | 3.056  | 93.886 | 445.263 | 14.492 | 0.886  | 13.606 |
| 2037          | 20397  | 644.109  | 38.816   | 605.293  | 2.968  | 93.974 | 434.791 | 13.730 | 0.827  | 12.903 |
| 2038          | 19890  | 612.448  | 36.407   | 576.041  | 2.896  | 94.055 | 423.966 | 13.055 | 0.776  | 12.279 |
| 2039          | 19392  | 577.529  | 34.046   | 543.483  | 2.803  | 94.105 | 412.930 | 12.298 | 0.725  | 11.573 |

## Results for PHIM for Run 4 (Sensitivity\_Analysis\_2.RTF)

\*\*\*\*\*

### Main Results for E-Component for Run: 4, Simulation: 1, COD: COPD

| Variable Parameter          | Value                                  |
|-----------------------------|----------------------------------------|
| 1. Country                  | US (United States)                     |
| 2. Sex                      | F (Females)                            |
| 3. Year of start of process | 1990                                   |
| 4. Cause of Death           | COPD                                   |
| 5. Effective Dose NULL      | CC:1                                   |
| 6. Effective Dose Ecig      | CC:1 Ecig:0.05 Dual:0.525              |
| Note:                       | Death rates are per million population |

#### Results for Age Groups Combined and Years combined, Population unadjusted for deaths in Ecig scenario,

| Age Group:All |         | NULL       | Ecig       | %Drop    |        | NULL   | Ecig    | Drop    |         |        |
|---------------|---------|------------|------------|----------|--------|--------|---------|---------|---------|--------|
| Year          | Number  | Attrib     | Attrib     | Drop     | %Drop  | Attrib | Death   | Attrib  | Attrib  | Drop   |
|               | Deaths  | Deaths     | Deaths     | Deaths   | Deaths | Deaths | Rate    | Rates   | Rates   | Rates  |
| All Comb      | 2159941 | 862051.244 | 521812.292 | 340239.0 | 15.752 | 39.469 | 593.003 | 236.673 | 143.262 | 93.411 |

#### Results for Age Groups Combined, Population unadjusted for deaths in Ecig scenario,

| Age Group:All |        | NULL      | Ecig      | %Drop    |        | NULL   | Ecig    | Drop    |         |         |
|---------------|--------|-----------|-----------|----------|--------|--------|---------|---------|---------|---------|
| Year          | Number | Attrib    | Attrib    | Drop     | %Drop  | Attrib | Death   | Attrib  | Attrib  | Drop    |
|               | Deaths | Deaths    | Deaths    | Deaths   | Deaths | Deaths | Rate    | Rates   | Rates   | Rates   |
| 1990          | 24738  | 10694.712 | 10694.712 | 0.000    | 0.000  | 0.000  | 362.296 | 156.628 | 156.628 | 0.000   |
| 1991          | 26562  | 11602.933 | 11571.745 | 31.188   | 0.117  | 0.269  | 383.818 | 167.661 | 167.211 | 0.451   |
| 1992          | 26828  | 11831.375 | 11744.352 | 87.023   | 0.324  | 0.736  | 382.401 | 168.642 | 167.402 | 1.240   |
| 1993          | 29774  | 13246.371 | 13065.135 | 181.236  | 0.609  | 1.368  | 418.406 | 186.148 | 183.601 | 2.547   |
| 1994          | 29804  | 13355.662 | 13068.224 | 287.438  | 0.964  | 2.152  | 412.601 | 184.893 | 180.914 | 3.979   |
| 1995          | 29755  | 13397.439 | 12980.192 | 417.247  | 1.402  | 3.114  | 405.540 | 182.598 | 176.911 | 5.687   |
| 1996          | 30900  | 13960.356 | 13388.123 | 572.233  | 1.852  | 4.099  | 415.680 | 187.801 | 180.103 | 7.698   |
| 1997          | 31128  | 14109.552 | 13384.009 | 725.543  | 2.331  | 5.142  | 412.949 | 187.180 | 177.554 | 9.625   |
| 1998          | 32096  | 14599.657 | 13672.575 | 927.083  | 2.888  | 6.350  | 419.803 | 190.958 | 178.832 | 12.126  |
| 1999          | 34616  | 15728.102 | 14542.093 | 1186.009 | 3.426  | 7.541  | 446.673 | 202.950 | 187.646 | 15.304  |
| 2000          | 34299  | 15579.803 | 14194.558 | 1385.246 | 4.039  | 8.891  | 437.088 | 198.541 | 180.888 | 17.653  |
| 2001          | 34592  | 15696.614 | 14075.177 | 1621.437 | 4.687  | 10.330 | 435.935 | 197.812 | 177.378 | 20.434  |
| 2002          | 34291  | 15519.777 | 13671.051 | 1848.726 | 5.391  | 11.912 | 427.910 | 193.668 | 170.598 | 23.070  |
| 2003          | 35074  | 15888.389 | 13755.119 | 2133.270 | 6.082  | 13.427 | 433.587 | 196.413 | 170.042 | 26.372  |
| 2004          | 33512  | 15091.573 | 12823.685 | 2267.888 | 6.767  | 15.028 | 410.143 | 184.701 | 156.945 | 27.756  |
| 2005          | 35392  | 15803.656 | 13153.852 | 2649.804 | 7.487  | 16.767 | 428.364 | 191.278 | 159.207 | 32.072  |
| 2006          | 33981  | 15100.563 | 12317.993 | 2782.570 | 8.189  | 18.427 | 407.699 | 181.174 | 147.790 | 33.385  |
| 2007          | 34000  | 14974.384 | 11942.889 | 3031.495 | 8.916  | 20.245 | 403.863 | 177.871 | 141.862 | 36.009  |
| 2008          | 37425  | 16406.197 | 12813.919 | 3592.279 | 9.599  | 21.896 | 439.732 | 192.768 | 150.559 | 42.208  |
| 2009          | 36826  | 16083.194 | 12243.720 | 3839.474 | 10.426 | 23.873 | 427.825 | 186.846 | 142.241 | 44.605  |
| 2010          | 36788  | 15927.400 | 11845.622 | 4081.779 | 11.095 | 25.627 | 422.489 | 182.917 | 136.040 | 46.877  |
| 2011          | 37636  | 16221.836 | 11750.806 | 4471.030 | 11.880 | 27.562 | 428.164 | 184.547 | 133.682 | 50.864  |
| 2012          | 38265  | 16358.849 | 11555.191 | 4803.659 | 12.554 | 29.364 | 430.867 | 184.202 | 130.113 | 54.090  |
| 2013          | 40112  | 16994.822 | 11652.037 | 5342.785 | 13.320 | 31.438 | 446.821 | 189.311 | 129.796 | 59.515  |
| 2014          | 40084  | 16855.093 | 11210.045 | 5645.048 | 14.083 | 33.492 | 441.613 | 185.696 | 123.503 | 62.193  |
| 2015          | 42200  | 17572.483 | 11403.057 | 6169.426 | 14.619 | 35.108 | 519.788 | 216.445 | 140.454 | 75.990  |
| 2016          | 42606  | 17579.955 | 11033.473 | 6546.482 | 15.365 | 37.238 | 519.788 | 214.473 | 134.607 | 79.866  |
| 2017          | 44364  | 18080.688 | 10971.290 | 7109.398 | 16.025 | 39.320 | 536.117 | 218.496 | 132.583 | 85.914  |
| 2018          | 45359  | 18209.262 | 10717.673 | 7491.589 | 16.516 | 41.142 | 542.932 | 217.960 | 128.287 | 89.672  |
| 2019          | 46876  | 18648.302 | 10596.449 | 8051.853 | 17.177 | 43.177 | 555.657 | 221.054 | 125.609 | 95.445  |
| 2020          | 48331  | 19002.597 | 10453.481 | 8549.116 | 17.689 | 44.989 | 649.239 | 255.266 | 140.424 | 114.842 |
| 2021          | 48338  | 18885.717 | 9955.839  | 8929.879 | 18.474 | 47.284 | 644.660 | 251.867 | 132.775 | 119.092 |
| 2022          | 49708  | 19235.076 | 9745.340  | 9489.736 | 19.091 | 49.336 | 657.895 | 254.582 | 128.982 | 125.599 |
| 2023          | 51083  | 19521.158 | 9515.456  | 10005.70 | 19.587 | 51.256 | 670.849 | 256.363 | 124.962 | 131.401 |
| 2024          | 52397  | 19918.620 | 9306.861  | 10611.76 | 20.252 | 53.276 | 682.854 | 259.583 | 121.289 | 138.295 |
| 2025          | 53387  | 20150.545 | 9069.110  | 11081.43 | 20.757 | 54.993 | 803.004 | 303.086 | 136.409 | 166.677 |
| 2026          | 54232  | 20393.792 | 8771.613  | 11622.18 | 21.430 | 56.989 | 812.615 | 305.582 | 131.434 | 174.148 |
| 2027          | 55049  | 20615.351 | 8441.269  | 12174.08 | 22.115 | 59.053 | 821.568 | 307.668 | 125.980 | 181.689 |
| 2028          | 55809  | 20731.894 | 8082.909  | 12648.99 | 22.665 | 61.012 | 829.419 | 308.115 | 120.127 | 187.988 |
| 2029          | 56527  | 20781.967 | 7724.159  | 13057.81 | 23.100 | 62.832 | 836.392 | 307.495 | 114.288 | 193.206 |
| 2030          | 56756  | 20753.201 | 7369.452  | 13383.75 | 23.581 | 64.490 | 994.067 | 363.487 | 129.074 | 234.413 |
| 2031          | 58288  | 21048.417 | 7238.971  | 13809.45 | 23.692 | 65.608 | 1019.54 | 368.165 | 126.619 | 241.546 |
| 2032          | 58782  | 21169.329 | 6914.933  | 14254.40 | 24.249 | 67.335 | 1026.18 | 369.560 | 120.716 | 248.844 |
| 2033          | 59236  | 21109.293 | 6571.874  | 14537.42 | 24.542 | 68.867 | 1031.59 | 367.618 | 114.449 | 253.169 |
| 2034          | 59614  | 21109.429 | 6236.155  | 14873.27 | 24.949 | 70.458 | 1035.33 | 366.613 | 108.305 | 258.308 |
| 2035          | 58938  | 20794.840 | 5892.301  | 14902.54 | 25.285 | 71.665 | 1253.51 | 442.268 | 125.318 | 316.950 |
| 2036          | 56014  | 19354.577 | 5233.800  | 14120.78 | 25.209 | 72.958 | 1193.11 | 412.258 | 111.481 | 300.776 |
| 2037          | 55953  | 19064.169 | 4839.543  | 14224.63 | 25.423 | 74.614 | 1192.72 | 406.385 | 103.163 | 303.222 |
| 2038          | 55859  | 18854.812 | 4495.157  | 14359.66 | 25.707 | 76.159 | 1190.66 | 401.900 | 95.816  | 306.083 |
| 2039          | 55757  | 18437.457 | 4115.304  | 14322.15 | 25.687 | 77.680 | 1187.28 | 392.602 | 87.630  | 304.972 |

## Results for PHIM for Run 4 (Sensitivity\_Analysis\_2.RTF)

\*\*\*\*\*

### Main Results for E-Component for Run: 4, Simulation: 1, COD: Four Diseases Combined, Adjusted

| Variable Parameter          | Value                                  |
|-----------------------------|----------------------------------------|
| 1. Country                  | US (United States)                     |
| 2. Sex                      | F (Females)                            |
| 3. Year of start of process | 1990                                   |
| 4. Cause of Death           | Four Diseases Combined                 |
| 5. Effective Dose NULL      | CC:1                                   |
| 6. Effective Dose Ecig      | CC:1 Ecig:0.05 Dual:0.525              |
| Note:                       | Death rates are per million population |

#### Results for Age Groups Combined and Years combined, Population and Number deaths adjusted for Ecig scenario,

| Age Group:All |         | NULL        | Ecig        | %Drop   |        |        | NULL    | Ecig    | Drop    |         |
|---------------|---------|-------------|-------------|---------|--------|--------|---------|---------|---------|---------|
| Year          | Number  | Attrib      | Attrib      | Drop    | %Drop  | Attrib | Death   | Attrib  | Attrib  | Drop    |
|               | Deaths  | Deaths      | Deaths      | Deaths  | Deaths | Deaths | Rate    | Rates   | Rates   | Rates   |
| All Comb      | 9162908 | 2946250.006 | 1845723.958 | 1100526 | 12.011 | 37.353 | 2501.35 | 808.881 | 503.858 | 305.023 |

#### Results for Age Groups Combined, Population and Number deaths adjusted for Ecig scenario,

| Age Group:All |        | NULL      | Ecig      | %Drop    |        |        | NULL    | Ecig    | Drop    |         |
|---------------|--------|-----------|-----------|----------|--------|--------|---------|---------|---------|---------|
| Year          | Number | Attrib    | Attrib    | Drop     | %Drop  | Attrib | Death   | Attrib  | Attrib  | Drop    |
|               | Deaths | Deaths    | Deaths    | Deaths   | Deaths | Deaths | Rate    | Rates   | Rates   | Rates   |
| 1990          | 199848 | 57524.822 | 57524.822 | 0.000    | 0.000  | 0.000  | 2926.84 | 842.471 | 842.471 | 0.000   |
| 1991          | 199162 | 59078.486 | 58811.894 | 266.592  | 0.134  | 0.451  | 2877.87 | 853.678 | 849.826 | 3.852   |
| 1992          | 198533 | 60494.150 | 59751.652 | 742.498  | 0.374  | 1.227  | 2829.84 | 862.271 | 851.685 | 10.587  |
| 1993          | 202517 | 62694.848 | 61282.136 | 1412.711 | 0.698  | 2.253  | 2845.87 | 881.034 | 861.169 | 19.865  |
| 1994          | 200670 | 63202.598 | 60996.016 | 2206.582 | 1.100  | 3.491  | 2777.94 | 874.966 | 844.389 | 30.577  |
| 1995          | 201046 | 63766.862 | 60629.687 | 3137.175 | 1.560  | 4.920  | 2739.93 | 869.097 | 826.286 | 42.812  |
| 1996          | 201218 | 64591.163 | 60388.567 | 4202.595 | 2.089  | 6.506  | 2706.58 | 868.908 | 812.284 | 56.624  |
| 1997          | 198698 | 64686.912 | 59527.513 | 5159.399 | 2.597  | 7.976  | 2635.52 | 858.147 | 789.570 | 68.577  |
| 1998          | 197657 | 65295.961 | 59052.925 | 6243.037 | 3.159  | 9.561  | 2584.66 | 854.046 | 772.207 | 81.839  |
| 1999          | 211452 | 67327.521 | 59409.725 | 7917.796 | 3.744  | 11.760 | 2727.63 | 868.771 | 766.356 | 102.414 |
| 2000          | 208658 | 67596.897 | 58537.906 | 9058.990 | 4.342  | 13.401 | 2657.90 | 861.419 | 745.658 | 115.761 |
| 2001          | 203811 | 67008.811 | 56806.969 | 10201.84 | 5.006  | 15.225 | 2567.06 | 844.458 | 715.502 | 128.956 |
| 2002          | 201081 | 67067.744 | 55584.404 | 11483.34 | 5.711  | 17.122 | 2507.55 | 836.925 | 693.155 | 143.770 |
| 2003          | 196657 | 66756.217 | 54187.574 | 12568.64 | 6.391  | 18.828 | 2429.07 | 825.244 | 669.314 | 155.930 |
| 2004          | 188513 | 65058.725 | 51634.417 | 13424.31 | 7.121  | 20.634 | 2304.86 | 796.234 | 631.310 | 164.925 |
| 2005          | 186829 | 65214.724 | 50560.282 | 14654.44 | 7.844  | 22.471 | 2258.62 | 789.321 | 611.235 | 178.085 |
| 2006          | 180553 | 63771.146 | 48231.916 | 15539.23 | 8.606  | 24.367 | 2163.30 | 765.117 | 577.892 | 187.225 |
| 2007          | 176165 | 63110.718 | 46676.785 | 16433.93 | 9.329  | 26.040 | 2089.28 | 749.650 | 553.575 | 196.075 |
| 2008          | 178171 | 63718.624 | 45911.869 | 17806.76 | 9.994  | 27.946 | 2089.73 | 748.674 | 538.491 | 210.183 |
| 2009          | 173467 | 62794.698 | 44191.012 | 18603.69 | 10.725 | 29.626 | 2011.19 | 729.515 | 512.356 | 217.159 |
| 2010          | 171219 | 61917.074 | 42439.373 | 19477.70 | 11.376 | 31.458 | 1961.92 | 711.083 | 486.295 | 224.787 |
| 2011          | 171114 | 61680.114 | 41042.023 | 20638.09 | 12.061 | 33.460 | 1941.81 | 701.700 | 465.745 | 235.955 |
| 2012          | 172320 | 62023.127 | 40119.401 | 21903.73 | 12.711 | 35.315 | 1934.98 | 698.386 | 450.500 | 247.886 |
| 2013          | 173698 | 62037.765 | 38948.120 | 23089.65 | 13.293 | 37.219 | 1928.99 | 691.059 | 432.537 | 258.522 |
| 2014          | 175271 | 61921.017 | 37565.640 | 24355.38 | 13.896 | 39.333 | 1924.56 | 682.195 | 412.489 | 269.706 |
| 2015          | 178583 | 61856.204 | 36420.704 | 25435.50 | 14.243 | 41.120 | 2190.68 | 761.899 | 446.774 | 315.125 |
| 2016          | 178183 | 60464.119 | 34246.056 | 26218.06 | 14.714 | 43.361 | 2164.17 | 737.655 | 415.946 | 321.709 |
| 2017          | 180773 | 60243.839 | 32909.860 | 27333.98 | 15.121 | 45.372 | 2174.07 | 728.017 | 395.792 | 332.225 |
| 2018          | 178724 | 60713.327 | 32358.023 | 28355.30 | 15.865 | 46.704 | 2128.21 | 726.721 | 385.313 | 341.408 |
| 2019          | 180938 | 61148.172 | 31479.799 | 29668.37 | 16.397 | 48.519 | 2132.90 | 724.841 | 371.083 | 353.758 |
| 2020          | 182332 | 61149.317 | 30558.481 | 30590.84 | 16.778 | 50.026 | 2432.85 | 821.432 | 407.741 | 413.691 |
| 2021          | 180082 | 58727.786 | 27835.990 | 30891.80 | 17.154 | 52.602 | 2384.41 | 783.216 | 368.567 | 414.648 |
| 2022          | 181525 | 58848.802 | 26811.289 | 32037.51 | 17.649 | 54.440 | 2384.20 | 778.881 | 352.146 | 426.734 |
| 2023          | 182913 | 58816.149 | 25773.071 | 33043.08 | 18.065 | 56.180 | 2382.66 | 772.407 | 335.724 | 436.682 |
| 2024          | 184041 | 58955.232 | 24800.495 | 34154.74 | 18.558 | 57.933 | 2377.90 | 768.316 | 320.434 | 447.883 |
| 2025          | 183007 | 58297.744 | 23753.496 | 34544.25 | 18.876 | 59.255 | 2724.43 | 876.861 | 353.619 | 523.242 |
| 2026          | 183068 | 56469.971 | 21859.411 | 34610.56 | 18.906 | 61.290 | 2713.49 | 846.150 | 324.008 | 522.142 |
| 2027          | 182520 | 56209.427 | 20752.746 | 35456.68 | 19.426 | 63.080 | 2693.10 | 838.883 | 306.208 | 532.675 |
| 2028          | 181812 | 55733.105 | 19623.631 | 36109.47 | 19.861 | 64.790 | 2669.96 | 828.298 | 288.179 | 540.119 |
| 2029          | 181006 | 55145.838 | 18525.881 | 36619.96 | 20.231 | 66.406 | 2644.92 | 815.951 | 270.707 | 545.244 |
| 2030          | 176920 | 53615.097 | 17381.520 | 36233.58 | 20.480 | 67.581 | 3053.17 | 939.056 | 299.958 | 639.098 |
| 2031          | 178558 | 52046.561 | 16279.587 | 35766.97 | 20.031 | 68.721 | 3075.32 | 910.364 | 280.384 | 629.979 |
| 2032          | 177118 | 51582.636 | 15373.341 | 36209.29 | 20.444 | 70.197 | 3042.67 | 900.496 | 264.095 | 636.401 |
| 2033          | 175620 | 50839.758 | 14473.331 | 36366.43 | 20.707 | 71.531 | 3007.72 | 885.375 | 247.874 | 637.500 |
| 2034          | 173975 | 50215.451 | 13610.499 | 36604.95 | 21.040 | 72.896 | 2969.53 | 872.104 | 232.314 | 639.790 |
| 2035          | 166738 | 47773.075 | 12614.289 | 35158.79 | 21.086 | 73.595 | 3474.82 | 1016.05 | 262.882 | 753.164 |
| 2036          | 160367 | 43298.709 | 10830.189 | 32468.52 | 20.246 | 74.987 | 3344.69 | 922.274 | 225.880 | 696.394 |
| 2037          | 157797 | 42241.563 | 9969.561  | 32272.00 | 20.452 | 76.399 | 3291.51 | 900.450 | 207.956 | 692.494 |
| 2038          | 155236 | 41356.353 | 9231.936  | 32124.42 | 20.694 | 77.677 | 3235.87 | 881.531 | 192.438 | 689.092 |
| 2039          | 152744 | 40161.050 | 8438.145  | 31722.91 | 20.769 | 78.989 | 3178.72 | 855.178 | 175.604 | 679.574 |

## Results for PHIM for Run 4 (Sensitivity\_Analysis\_2.RTF)

\*\*\*\*\*

### Main Results for E-Component for Run: 4, Simulation: 1, COD: LUNG CANCER, Adjusted

| Variable Parameter          | Value                                  |
|-----------------------------|----------------------------------------|
| 1. Country                  | US (United States)                     |
| 2. Sex                      | F (Females)                            |
| 3. Year of start of process | 1990                                   |
| 4. Cause of Death           | LUNG CANCER                            |
| 5. Effective Dose NULL      | CC:1                                   |
| 6. Effective Dose Ecig      | CC:1 Ecig:0.05 Dual:0.525              |
| Note:                       | Death rates are per million population |

#### Results for Age Groups Combined and Years combined, Population and Number deaths adjusted for Ecig scenario,

| Age Group:All | NULL    | Ecig        | %Drop       |          |        |        | NULL    | Ecig    | Drop    |         |
|---------------|---------|-------------|-------------|----------|--------|--------|---------|---------|---------|---------|
| Year          | Number  | Attrib      | Attrib      | Drop     | %Drop  | Attrib | Death   | Attrib  | Attrib  | Drop    |
|               | Deaths  | Deaths      | Deaths      | Deaths   | Deaths | Deaths | Rate    | Rates   | Rates   | Rates   |
| All Comb      | 2347491 | 1580465.217 | 1094348.477 | 486116.7 | 20.708 | 30.758 | 640.834 | 433.910 | 298.743 | 135.168 |

#### Results for Age Groups Combined, Population and Number deaths adjusted for Ecig scenario,

| Age Group:All | NULL   | Ecig      | %Drop     |          |        |        | NULL    | Ecig    | Drop    |         |
|---------------|--------|-----------|-----------|----------|--------|--------|---------|---------|---------|---------|
| Year          | Number | Attrib    | Attrib    | Drop     | %Drop  | Attrib | Death   | Attrib  | Attrib  | Drop    |
|               | Deaths | Deaths    | Deaths    | Deaths   | Deaths | Deaths | Rate    | Rates   | Rates   | Rates   |
| 1990          | 42690  | 30614.201 | 30614.201 | 0.000    | 0.000  | 0.000  | 625.210 | 448.355 | 448.355 | 0.000   |
| 1991          | 43692  | 31412.010 | 31358.568 | 53.443   | 0.122  | 0.170  | 631.345 | 453.901 | 453.128 | 0.772   |
| 1992          | 45423  | 32782.407 | 32627.339 | 155.068  | 0.341  | 0.473  | 647.452 | 467.274 | 465.062 | 2.212   |
| 1993          | 46292  | 33491.183 | 33193.793 | 297.390  | 0.642  | 0.888  | 650.521 | 470.643 | 466.457 | 4.186   |
| 1994          | 47020  | 34074.347 | 33595.913 | 478.434  | 1.018  | 1.404  | 650.911 | 471.719 | 465.080 | 6.639   |
| 1995          | 47845  | 34694.454 | 33986.782 | 707.672  | 1.479  | 2.040  | 652.057 | 472.861 | 463.185 | 9.675   |
| 1996          | 48253  | 35027.269 | 34067.489 | 959.780  | 1.989  | 2.740  | 649.053 | 471.202 | 458.241 | 12.961  |
| 1997          | 49050  | 35590.763 | 34342.575 | 1248.188 | 2.545  | 3.507  | 650.591 | 472.153 | 455.518 | 16.635  |
| 1998          | 49707  | 36100.785 | 34520.225 | 1580.560 | 3.180  | 4.378  | 649.997 | 472.184 | 451.404 | 20.780  |
| 1999          | 48912  | 35451.030 | 33575.251 | 1875.778 | 3.835  | 5.291  | 630.935 | 457.448 | 433.104 | 24.343  |
| 2000          | 50370  | 36447.986 | 34140.568 | 2307.418 | 4.581  | 6.331  | 641.620 | 464.474 | 434.884 | 29.590  |
| 2001          | 50440  | 36411.326 | 33690.062 | 2721.264 | 5.395  | 7.474  | 635.304 | 458.863 | 424.337 | 34.526  |
| 2002          | 51510  | 37078.545 | 33834.422 | 3244.123 | 6.298  | 8.749  | 642.343 | 462.696 | 421.926 | 40.770  |
| 2003          | 51488  | 36999.876 | 33286.526 | 3713.350 | 7.212  | 10.036 | 635.964 | 457.395 | 411.148 | 46.246  |
| 2004          | 51495  | 36861.555 | 32633.758 | 4227.797 | 8.210  | 11.469 | 629.603 | 451.138 | 398.998 | 52.140  |
| 2005          | 51534  | 36689.529 | 31923.587 | 4765.942 | 9.248  | 12.990 | 623.005 | 444.069 | 385.932 | 58.137  |
| 2006          | 51486  | 36504.774 | 31172.121 | 5332.653 | 10.357 | 14.608 | 616.882 | 437.979 | 373.489 | 64.490  |
| 2007          | 51991  | 36663.202 | 30668.141 | 5995.061 | 11.531 | 16.352 | 616.603 | 435.498 | 363.717 | 71.781  |
| 2008          | 51147  | 35898.803 | 29423.191 | 6475.612 | 12.661 | 18.039 | 599.887 | 421.800 | 345.098 | 76.701  |
| 2009          | 51386  | 35934.525 | 28770.246 | 7164.280 | 13.942 | 19.937 | 595.780 | 417.468 | 333.566 | 83.902  |
| 2010          | 51068  | 35502.829 | 27771.724 | 7731.106 | 15.139 | 21.776 | 585.165 | 407.730 | 318.225 | 89.505  |
| 2011          | 50746  | 35136.342 | 26769.410 | 8366.932 | 16.488 | 23.813 | 575.862 | 399.726 | 303.779 | 95.947  |
| 2012          | 51510  | 35450.201 | 26300.302 | 9149.899 | 17.763 | 25.811 | 578.411 | 399.173 | 295.326 | 103.847 |
| 2013          | 51360  | 35123.224 | 25282.347 | 9840.877 | 19.161 | 28.018 | 570.378 | 391.249 | 280.772 | 110.477 |
| 2014          | 51571  | 35079.370 | 24506.398 | 10572.97 | 20.502 | 30.140 | 566.278 | 386.476 | 269.092 | 117.383 |
| 2015          | 50788  | 34324.171 | 23302.072 | 11022.10 | 21.702 | 32.112 | 623.015 | 422.780 | 285.847 | 136.932 |
| 2016          | 49217  | 33054.753 | 21667.505 | 11387.25 | 23.137 | 34.450 | 597.779 | 403.264 | 263.170 | 140.095 |
| 2017          | 48715  | 32471.234 | 20527.219 | 11944.02 | 24.518 | 36.783 | 585.871 | 392.399 | 246.872 | 145.527 |
| 2018          | 50904  | 33657.595 | 20433.058 | 13224.54 | 25.979 | 39.291 | 606.156 | 402.871 | 243.313 | 159.559 |
| 2019          | 51515  | 33863.424 | 19773.836 | 14089.59 | 27.350 | 41.607 | 607.257 | 401.412 | 233.094 | 168.318 |
| 2020          | 51964  | 33910.830 | 19090.532 | 14820.30 | 28.520 | 43.704 | 693.359 | 455.532 | 254.725 | 200.807 |
| 2021          | 48558  | 31531.880 | 16937.105 | 14594.78 | 30.056 | 46.286 | 642.942 | 420.521 | 224.259 | 196.262 |
| 2022          | 48895  | 31560.212 | 16194.798 | 15365.41 | 31.425 | 48.686 | 642.199 | 417.708 | 212.707 | 205.002 |
| 2023          | 49199  | 31508.781 | 15448.270 | 16060.51 | 32.644 | 50.972 | 640.876 | 413.791 | 201.232 | 212.559 |
| 2024          | 49424  | 31517.293 | 14735.407 | 16781.89 | 33.955 | 53.247 | 638.586 | 410.740 | 190.388 | 220.351 |
| 2025          | 49158  | 31175.389 | 13990.113 | 17185.28 | 34.960 | 55.124 | 731.811 | 468.912 | 208.271 | 260.640 |
| 2026          | 46005  | 29044.598 | 12409.755 | 16634.84 | 36.159 | 57.273 | 681.906 | 435.206 | 183.942 | 251.264 |
| 2027          | 45824  | 28825.765 | 11669.823 | 17155.94 | 37.439 | 59.516 | 676.135 | 430.203 | 172.189 | 258.014 |
| 2028          | 45594  | 28513.846 | 10932.218 | 17581.63 | 38.562 | 61.660 | 669.557 | 423.769 | 160.543 | 263.226 |
| 2029          | 45326  | 28148.109 | 10222.795 | 17925.31 | 39.547 | 63.682 | 662.326 | 416.486 | 149.379 | 267.107 |
| 2030          | 44212  | 27314.475 | 9489.595  | 17824.88 | 40.317 | 65.258 | 762.974 | 478.407 | 163.765 | 314.642 |
| 2031          | 41570  | 25423.102 | 8515.777  | 16907.32 | 40.672 | 66.504 | 715.963 | 444.684 | 146.668 | 298.016 |
| 2032          | 41179  | 25085.902 | 7955.281  | 17130.62 | 41.600 | 68.288 | 707.404 | 437.933 | 136.662 | 301.271 |
| 2033          | 40767  | 24645.067 | 7418.344  | 17226.72 | 42.257 | 69.899 | 698.187 | 429.194 | 127.049 | 302.145 |
| 2034          | 40319  | 24239.126 | 6910.232  | 17328.89 | 42.979 | 71.491 | 688.195 | 420.967 | 117.949 | 303.018 |
| 2035          | 38386  | 22944.147 | 6317.251  | 16626.90 | 43.315 | 72.467 | 799.962 | 487.980 | 131.652 | 356.328 |
| 2036          | 33844  | 19950.581 | 5208.164  | 14742.42 | 43.559 | 73.895 | 705.878 | 424.953 | 108.624 | 316.329 |
| 2037          | 33277  | 19415.334 | 4762.922  | 14652.41 | 44.032 | 75.468 | 694.122 | 413.871 | 99.350  | 314.520 |
| 2038          | 32709  | 18939.317 | 4387.672  | 14551.65 | 44.488 | 76.833 | 681.821 | 403.701 | 91.460  | 312.240 |
| 2039          | 32156  | 18379.752 | 3993.793  | 14385.96 | 44.738 | 78.271 | 669.190 | 391.373 | 83.114  | 308.259 |

## Results for PHIM for Run 4 (Sensitivity\_Analysis\_2.RTF)

\*\*\*\*\*

### Main Results for E-Component for Run: 4, Simulation: 1, COD: IHD, Adjusted

| Variable Parameter          | Value                                  |
|-----------------------------|----------------------------------------|
| 1. Country                  | US (United States)                     |
| 2. Sex                      | F (Females)                            |
| 3. Year of start of process | 1990                                   |
| 4. Cause of Death           | IHD                                    |
| 5. Effective Dose NULL      | CC:1                                   |
| 6. Effective Dose Ecig      | CC:1 Ecig:0.05 Dual:0.525              |
| Note:                       | Death rates are per million population |

### Results for Age Groups Combined and Years combined, Population and Number deaths adjusted for Ecig scenario,

| Age Group:All | NULL    | Ecig       | %Drop      |          |        |        | NULL    | Ecig    | Drop   |        |
|---------------|---------|------------|------------|----------|--------|--------|---------|---------|--------|--------|
| Year          | Number  | Attrib     | Attrib     | Drop     | %Drop  | Attrib | Death   | Attrib  | Attrib | Drop   |
|               | Deaths  | Deaths     | Deaths     | Deaths   | Deaths | Deaths | Rate    | Rates   | Rates  | Rates  |
| All Comb      | 3265997 | 398833.796 | 179504.343 | 219329.5 | 6.716  | 54.993 | 891.574 | 109.498 | 49.002 | 60.496 |

### Results for Age Groups Combined, Population and Number deaths adjusted for Ecig scenario,

| Age Group:All | NULL   | Ecig      | %Drop     |          |        |        | NULL    | Ecig    | Drop    |        |
|---------------|--------|-----------|-----------|----------|--------|--------|---------|---------|---------|--------|
| Year          | Number | Attrib    | Attrib    | Drop     | %Drop  | Attrib | Death   | Attrib  | Attrib  | Drop   |
|               | Deaths | Deaths    | Deaths    | Deaths   | Deaths | Deaths | Rate    | Rates   | Rates   | Rates  |
| 1990          | 98916  | 12922.892 | 12922.892 | 0.000    | 0.000  | 0.000  | 1448.66 | 189.260 | 189.260 | 0.000  |
| 1991          | 96403  | 12856.479 | 12717.693 | 138.786  | 0.144  | 1.080  | 1393.01 | 185.775 | 183.769 | 2.005  |
| 1992          | 93722  | 12662.244 | 12280.473 | 381.770  | 0.407  | 3.015  | 1335.88 | 180.485 | 175.043 | 5.442  |
| 1993          | 93681  | 12730.613 | 12016.040 | 714.573  | 0.763  | 5.613  | 1316.46 | 178.900 | 168.856 | 10.044 |
| 1994          | 90837  | 12495.323 | 11397.405 | 1097.917 | 1.209  | 8.787  | 1257.49 | 172.983 | 157.778 | 15.205 |
| 1995          | 89708  | 12365.590 | 10836.530 | 1529.060 | 1.704  | 12.365 | 1222.58 | 168.534 | 147.685 | 20.850 |
| 1996          | 88303  | 12290.551 | 10253.063 | 2037.489 | 2.307  | 16.578 | 1187.76 | 165.338 | 137.914 | 27.424 |
| 1997          | 84802  | 11719.531 | 9308.808  | 2410.723 | 2.843  | 20.570 | 1124.81 | 155.473 | 123.472 | 32.002 |
| 1998          | 82552  | 11416.794 | 8584.647  | 2832.147 | 3.431  | 24.807 | 1079.49 | 149.327 | 112.257 | 37.070 |
| 1999          | 93994  | 13028.038 | 9200.346  | 3827.692 | 4.072  | 29.380 | 1212.47 | 168.109 | 118.680 | 49.429 |
| 2000          | 90109  | 12426.299 | 8234.783  | 4191.516 | 4.652  | 33.731 | 1147.81 | 158.354 | 104.895 | 53.459 |
| 2001          | 86206  | 11939.281 | 7314.489  | 4624.792 | 5.365  | 38.736 | 1085.79 | 150.461 | 92.128  | 58.333 |
| 2002          | 83119  | 11528.794 | 6495.975  | 5032.819 | 6.055  | 43.654 | 1036.52 | 143.865 | 81.007  | 62.859 |
| 2003          | 79425  | 11048.407 | 5741.178  | 5307.229 | 6.682  | 48.036 | 981.045 | 136.581 | 70.914  | 65.667 |
| 2004          | 74000  | 10375.132 | 4923.425  | 5451.706 | 7.367  | 52.546 | 904.758 | 126.978 | 60.196  | 66.782 |
| 2005          | 71808  | 10051.029 | 4353.459  | 5697.570 | 7.934  | 56.686 | 868.099 | 121.652 | 52.630  | 69.022 |
| 2006          | 67725  | 9542.523  | 3722.026  | 5820.498 | 8.594  | 60.995 | 811.448 | 114.490 | 44.596  | 69.894 |
| 2007          | 63691  | 8936.533  | 3156.850  | 5779.683 | 9.075  | 64.675 | 755.358 | 106.151 | 37.439  | 68.712 |
| 2008          | 63383  | 8944.180  | 2853.505  | 6090.675 | 9.609  | 68.097 | 743.408 | 105.091 | 33.468  | 71.623 |
| 2009          | 59974  | 8390.033  | 2443.000  | 5947.033 | 9.916  | 70.882 | 695.346 | 97.471  | 28.324  | 69.146 |
| 2010          | 58254  | 8157.570  | 2156.058  | 6001.511 | 10.302 | 73.570 | 667.510 | 93.685  | 24.705  | 68.980 |
| 2011          | 57638  | 8035.356  | 1914.290  | 6121.066 | 10.620 | 76.177 | 654.077 | 91.414  | 21.723  | 69.690 |
| 2012          | 57708  | 7970.766  | 1708.884  | 6261.882 | 10.851 | 78.561 | 648.007 | 89.752  | 19.189  | 70.563 |
| 2013          | 57393  | 7743.216  | 1508.723  | 6234.493 | 10.863 | 80.516 | 637.378 | 86.254  | 16.755  | 69.499 |
| 2014          | 57897  | 7774.935  | 1369.717  | 6405.218 | 11.063 | 82.383 | 635.735 | 85.658  | 15.040  | 70.618 |
| 2015          | 58793  | 7722.535  | 1253.797  | 6468.738 | 11.003 | 83.764 | 721.217 | 95.120  | 15.380  | 79.740 |
| 2016          | 59092  | 7600.353  | 1111.215  | 6489.138 | 10.981 | 85.379 | 717.725 | 92.723  | 13.497  | 79.227 |
| 2017          | 59477  | 7470.266  | 997.339   | 6472.927 | 10.883 | 86.649 | 715.308 | 90.274  | 11.995  | 78.280 |
| 2018          | 56563  | 6907.050  | 846.084   | 6060.966 | 10.715 | 87.750 | 673.542 | 82.675  | 10.075  | 72.600 |
| 2019          | 56409  | 6732.046  | 764.199   | 5967.847 | 10.580 | 88.648 | 664.947 | 79.801  | 9.008   | 70.792 |
| 2020          | 55875  | 6429.836  | 686.764   | 5743.071 | 10.279 | 89.319 | 745.534 | 86.373  | 9.163   | 77.210 |
| 2021          | 56898  | 6562.016  | 634.203   | 5927.813 | 10.418 | 90.335 | 753.373 | 87.513  | 8.397   | 79.116 |
| 2022          | 56470  | 6352.366  | 573.874   | 5778.492 | 10.233 | 90.966 | 741.685 | 84.075  | 7.537   | 76.538 |
| 2023          | 56017  | 6134.123  | 521.758   | 5612.365 | 10.019 | 91.494 | 729.689 | 80.557  | 6.797   | 73.760 |
| 2024          | 55485  | 5922.193  | 478.704   | 5443.489 | 9.811  | 91.917 | 716.892 | 77.179  | 6.185   | 70.994 |
| 2025          | 54044  | 5504.188  | 427.636   | 5076.551 | 9.393  | 92.231 | 804.552 | 82.789  | 6.366   | 76.423 |
| 2026          | 56097  | 5641.075  | 418.866   | 5222.210 | 9.309  | 92.575 | 831.494 | 84.526  | 6.209   | 78.318 |
| 2027          | 55048  | 5426.216  | 388.426   | 5037.790 | 9.152  | 92.842 | 812.239 | 80.982  | 5.731   | 75.251 |
| 2028          | 53968  | 5197.830  | 361.134   | 4836.696 | 8.962  | 93.052 | 792.541 | 77.249  | 5.303   | 71.946 |
| 2029          | 52880  | 4973.547  | 337.072   | 4636.475 | 8.768  | 93.223 | 772.700 | 73.590  | 4.925   | 68.664 |
| 2030          | 50405  | 4450.618  | 292.824   | 4157.794 | 8.249  | 93.421 | 869.859 | 77.952  | 5.053   | 72.898 |
| 2031          | 53011  | 4555.052  | 295.131   | 4259.921 | 8.036  | 93.521 | 913.011 | 79.674  | 5.083   | 74.591 |
| 2032          | 51725  | 4349.999  | 277.064   | 4072.935 | 7.874  | 93.631 | 888.562 | 75.939  | 4.760   | 71.180 |
| 2033          | 50449  | 4147.948  | 261.141   | 3886.807 | 7.704  | 93.704 | 864.006 | 72.237  | 4.472   | 67.764 |
| 2034          | 49164  | 3966.133  | 246.293   | 3719.840 | 7.566  | 93.790 | 839.162 | 68.881  | 4.204   | 64.677 |
| 2035          | 45606  | 3289.064  | 198.810   | 3090.255 | 6.776  | 93.955 | 950.423 | 69.952  | 4.143   | 65.809 |
| 2036          | 47525  | 3313.192  | 197.684   | 3115.509 | 6.555  | 94.033 | 991.210 | 70.572  | 4.123   | 66.449 |
| 2037          | 46024  | 3117.951  | 184.487   | 2933.464 | 6.374  | 94.083 | 960.014 | 66.464  | 3.848   | 62.616 |
| 2038          | 44564  | 2949.775  | 173.364   | 2776.411 | 6.230  | 94.123 | 928.922 | 62.876  | 3.614   | 59.262 |
| 2039          | 43160  | 2766.312  | 162.215   | 2604.097 | 6.034  | 94.136 | 898.189 | 58.905  | 3.376   | 55.529 |

## Results for PHIM for Run 4 (Sensitivity\_Analysis\_2.RTF)

\*\*\*\*\*

### Main Results for E-Component for Run: 4, Simulation: 1, COD: STROKE, Adjusted

| Variable Parameter          | Value                                  |
|-----------------------------|----------------------------------------|
| 1. Country                  | US (United States)                     |
| 2. Sex                      | F (Females)                            |
| 3. Year of start of process | 1990                                   |
| 4. Cause of Death           | STROKE                                 |
| 5. Effective Dose NULL      | CC:1                                   |
| 6. Effective Dose Ecig      | CC:1 Ecig:0.05 Dual:0.525              |
| Note:                       | Death rates are per million population |

#### Results for Age Groups Combined and Years combined, Population and Number deaths adjusted for Ecig scenario,

| Age Group:All | NULL    | Ecig       | %Drop     |          |        |        | NULL    | Ecig   | Drop   |        |
|---------------|---------|------------|-----------|----------|--------|--------|---------|--------|--------|--------|
| Year          | Number  | Attrib     | Attrib    | Drop     | %Drop  | Attrib | Death   | Attrib | Attrib | Drop   |
|               | Deaths  | Deaths     | Deaths    | Deaths   | Deaths | Deaths | Rate    | Rates  | Rates  | Rates  |
| All Comb      | 1363572 | 104899.750 | 46106.393 | 58793.36 | 4.312  | 56.047 | 372.237 | 28.800 | 12.586 | 16.213 |

#### Results for Age Groups Combined, Population and Number deaths adjusted for Ecig scenario,

| Age Group:All | NULL   | Ecig     | %Drop    |          |        |        | NULL    | Ecig   | Drop   |        |
|---------------|--------|----------|----------|----------|--------|--------|---------|--------|--------|--------|
| Year          | Number | Attrib   | Attrib   | Drop     | %Drop  | Attrib | Death   | Attrib | Attrib | Drop   |
|               | Deaths | Deaths   | Deaths   | Deaths   | Deaths | Deaths | Rate    | Rates  | Rates  | Rates  |
| 1990          | 33504  | 3293.017 | 3293.017 | 0.000    | 0.000  | 0.000  | 490.678 | 48.227 | 48.227 | 0.000  |
| 1991          | 32505  | 3207.063 | 3163.888 | 43.175   | 0.133  | 1.346  | 469.694 | 46.342 | 45.718 | 0.624  |
| 1992          | 32560  | 3218.125 | 3099.410 | 118.715  | 0.365  | 3.689  | 464.105 | 45.871 | 44.178 | 1.692  |
| 1993          | 32769  | 3226.680 | 3006.840 | 219.840  | 0.671  | 6.813  | 460.484 | 45.344 | 42.254 | 3.090  |
| 1994          | 33007  | 3277.266 | 2933.681 | 343.584  | 1.041  | 10.484 | 456.926 | 45.370 | 40.612 | 4.758  |
| 1995          | 33734  | 3309.378 | 2824.682 | 484.696  | 1.437  | 14.646 | 459.736 | 45.104 | 38.496 | 6.609  |
| 1996          | 33756  | 3312.987 | 2677.272 | 635.715  | 1.883  | 19.189 | 454.054 | 44.568 | 36.012 | 8.556  |
| 1997          | 33709  | 3267.066 | 2488.067 | 778.999  | 2.311  | 23.844 | 447.109 | 43.341 | 33.002 | 10.340 |
| 1998          | 33288  | 3178.725 | 2269.500 | 909.225  | 2.731  | 28.603 | 435.285 | 41.577 | 29.677 | 11.899 |
| 1999          | 33910  | 3120.351 | 2083.301 | 1037.050 | 3.058  | 33.235 | 437.422 | 40.264 | 26.874 | 13.390 |
| 2000          | 33852  | 3142.808 | 1956.563 | 1186.245 | 3.504  | 37.745 | 431.212 | 40.050 | 24.923 | 15.128 |
| 2001          | 32538  | 2961.588 | 1712.559 | 1249.029 | 3.839  | 42.174 | 409.821 | 37.323 | 21.570 | 15.752 |
| 2002          | 32117  | 2940.627 | 1565.069 | 1375.559 | 4.283  | 46.778 | 400.511 | 36.695 | 19.517 | 17.179 |
| 2003          | 30614  | 2819.545 | 1382.515 | 1437.030 | 4.694  | 50.967 | 378.138 | 34.855 | 17.077 | 17.779 |
| 2004          | 29442  | 2730.466 | 1228.407 | 1502.059 | 5.102  | 55.011 | 359.968 | 33.417 | 15.019 | 18.398 |
| 2005          | 28014  | 2670.510 | 1098.922 | 1571.588 | 5.610  | 58.850 | 338.667 | 32.322 | 13.285 | 19.037 |
| 2006          | 27269  | 2623.285 | 986.413  | 1636.873 | 6.003  | 62.398 | 326.727 | 31.474 | 11.819 | 19.655 |
| 2007          | 26378  | 2536.599 | 871.557  | 1665.042 | 6.312  | 65.641 | 312.835 | 30.131 | 10.336 | 19.794 |
| 2008          | 26084  | 2469.443 | 775.376  | 1694.068 | 6.495  | 68.601 | 305.930 | 29.015 | 9.094  | 19.921 |
| 2009          | 25134  | 2386.945 | 684.600  | 1702.344 | 6.773  | 71.319 | 291.402 | 27.730 | 7.937  | 19.793 |
| 2010          | 24944  | 2329.274 | 612.237  | 1717.038 | 6.883  | 73.716 | 285.827 | 26.750 | 7.015  | 19.735 |
| 2011          | 24908  | 2286.581 | 548.275  | 1738.306 | 6.979  | 76.022 | 282.656 | 26.013 | 6.222  | 19.791 |
| 2012          | 24627  | 2243.311 | 490.535  | 1752.776 | 7.117  | 78.133 | 276.534 | 25.260 | 5.508  | 19.752 |
| 2013          | 24591  | 2176.503 | 433.373  | 1743.130 | 7.089  | 80.089 | 273.091 | 24.245 | 4.813  | 19.432 |
| 2014          | 25455  | 2211.619 | 403.994  | 1807.625 | 7.101  | 81.733 | 279.505 | 24.366 | 4.436  | 19.930 |
| 2015          | 26497  | 2237.016 | 377.770  | 1859.246 | 7.017  | 83.113 | 325.043 | 27.554 | 4.634  | 22.920 |
| 2016          | 26935  | 2229.057 | 345.777  | 1883.280 | 6.992  | 84.488 | 327.147 | 27.194 | 4.200  | 22.994 |
| 2017          | 27841  | 2221.649 | 318.945  | 1902.704 | 6.834  | 85.644 | 334.830 | 26.848 | 3.836  | 23.012 |
| 2018          | 25479  | 1939.420 | 260.076  | 1679.343 | 6.591  | 86.590 | 303.402 | 23.214 | 3.097  | 20.117 |
| 2019          | 25672  | 1904.400 | 237.244  | 1667.155 | 6.494  | 87.542 | 302.625 | 22.574 | 2.797  | 19.778 |
| 2020          | 25643  | 1806.054 | 212.709  | 1593.345 | 6.214  | 88.222 | 342.152 | 24.261 | 2.838  | 21.423 |
| 2021          | 25733  | 1748.172 | 191.891  | 1556.282 | 6.048  | 89.023 | 340.719 | 23.314 | 2.541  | 20.774 |
| 2022          | 25844  | 1701.148 | 174.943  | 1526.205 | 5.905  | 89.716 | 339.443 | 22.515 | 2.298  | 20.217 |
| 2023          | 25947  | 1652.087 | 160.155  | 1491.932 | 5.750  | 90.306 | 337.988 | 21.696 | 2.086  | 19.610 |
| 2024          | 26007  | 1597.127 | 146.733  | 1450.394 | 5.577  | 90.813 | 336.018 | 20.814 | 1.896  | 18.918 |
| 2025          | 25628  | 1467.622 | 128.876  | 1338.746 | 5.224  | 91.219 | 381.526 | 22.075 | 1.919  | 20.156 |
| 2026          | 25876  | 1390.505 | 116.902  | 1273.603 | 4.922  | 91.593 | 383.545 | 20.835 | 1.733  | 19.103 |
| 2027          | 25679  | 1342.095 | 108.055  | 1234.040 | 4.806  | 91.949 | 378.899 | 20.030 | 1.594  | 18.435 |
| 2028          | 25456  | 1289.536 | 100.279  | 1189.257 | 4.672  | 92.224 | 373.832 | 19.165 | 1.473  | 17.692 |
| 2029          | 25220  | 1242.216 | 93.193   | 1149.023 | 4.556  | 92.498 | 368.529 | 18.380 | 1.362  | 17.018 |
| 2030          | 24429  | 1096.803 | 79.546   | 1017.257 | 4.164  | 92.747 | 421.581 | 19.210 | 1.373  | 17.838 |
| 2031          | 24461  | 1019.991 | 72.059   | 947.932  | 3.875  | 92.935 | 421.286 | 17.841 | 1.241  | 16.600 |
| 2032          | 24131  | 977.406  | 67.192   | 910.214  | 3.772  | 93.125 | 414.534 | 17.063 | 1.154  | 15.909 |
| 2033          | 23791  | 937.450  | 62.988   | 874.462  | 3.676  | 93.281 | 407.458 | 16.326 | 1.079  | 15.247 |
| 2034          | 23427  | 900.763  | 59.106   | 841.657  | 3.593  | 93.438 | 399.875 | 15.644 | 1.009  | 14.635 |
| 2035          | 22291  | 745.023  | 47.658   | 697.365  | 3.128  | 93.603 | 464.544 | 15.845 | 0.993  | 14.852 |
| 2036          | 21466  | 680.360  | 42.497   | 637.862  | 2.972  | 93.754 | 447.702 | 14.492 | 0.886  | 13.605 |
| 2037          | 20967  | 644.109  | 39.677   | 604.432  | 2.883  | 93.840 | 437.355 | 13.730 | 0.828  | 12.903 |
| 2038          | 20468  | 612.448  | 37.234   | 575.214  | 2.810  | 93.920 | 426.652 | 13.055 | 0.776  | 12.278 |
| 2039          | 19977  | 577.529  | 34.834   | 542.695  | 2.717  | 93.968 | 415.731 | 12.298 | 0.725  | 11.573 |



## Results for PHIM for Run 4 (Sensitivity\_Analysis\_2.RTF)

\*\*\*\*\*

### Main Results for E-Component for Run: 4, Simulation: 1, COD: COPD, Adjusted

| Variable Parameter          | Value                                  |
|-----------------------------|----------------------------------------|
| 1. Country                  | US (United States)                     |
| 2. Sex                      | F (Females)                            |
| 3. Year of start of process | 1990                                   |
| 4. Cause of Death           | COPD                                   |
| 5. Effective Dose NULL      | CC:1                                   |
| 6. Effective Dose Ecig      | CC:1 Ecig:0.05 Dual:0.525              |
| Note:                       | Death rates are per million population |

#### Results for Age Groups Combined and Years combined, Population and Number deaths adjusted for Ecig scenario,

| Age Group:All | NULL    | Ecig       | %Drop      |          |        |        | NULL    | Ecig    | Drop    |        |
|---------------|---------|------------|------------|----------|--------|--------|---------|---------|---------|--------|
| Year          | Number  | Attrib     | Attrib     | Drop     | %Drop  | Attrib | Death   | Attrib  | Attrib  | Drop   |
|               | Deaths  | Deaths     | Deaths     | Deaths   | Deaths | Deaths | Rate    | Rates   | Rates   | Rates  |
| All Comb      | 2185848 | 862051.244 | 525764.745 | 336286.5 | 15.385 | 39.010 | 596.707 | 236.673 | 143.527 | 93.146 |

#### Results for Age Groups Combined, Population and Number deaths adjusted for Ecig scenario,

| Age Group:All | NULL   | Ecig      | %Drop     |          |        |        | NULL    | Ecig    | Drop    |         |
|---------------|--------|-----------|-----------|----------|--------|--------|---------|---------|---------|---------|
| Year          | Number | Attrib    | Attrib    | Drop     | %Drop  | Attrib | Death   | Attrib  | Attrib  | Drop    |
|               | Deaths | Deaths    | Deaths    | Deaths   | Deaths | Deaths | Rate    | Rates   | Rates   | Rates   |
| 1990          | 24738  | 10694.712 | 10694.712 | 0.000    | 0.000  | 0.000  | 362.296 | 156.628 | 156.628 | 0.000   |
| 1991          | 26562  | 11602.933 | 11571.745 | 31.188   | 0.117  | 0.269  | 383.818 | 167.661 | 167.211 | 0.451   |
| 1992          | 26828  | 11831.375 | 11744.429 | 86.945   | 0.324  | 0.735  | 382.402 | 168.642 | 167.402 | 1.240   |
| 1993          | 29775  | 13246.371 | 13065.463 | 180.908  | 0.608  | 1.366  | 418.410 | 186.148 | 183.603 | 2.545   |
| 1994          | 29806  | 13355.662 | 13069.016 | 286.646  | 0.962  | 2.146  | 412.612 | 184.893 | 180.919 | 3.975   |
| 1995          | 29758  | 13397.439 | 12981.693 | 415.747  | 1.397  | 3.103  | 405.560 | 182.598 | 176.920 | 5.678   |
| 1996          | 30906  | 13960.356 | 13390.744 | 569.612  | 1.843  | 4.080  | 415.716 | 187.801 | 180.118 | 7.682   |
| 1997          | 31137  | 14109.552 | 13388.063 | 721.489  | 2.317  | 5.113  | 413.005 | 187.180 | 177.579 | 9.601   |
| 1998          | 32110  | 14599.657 | 13678.553 | 921.104  | 2.869  | 6.309  | 419.886 | 190.958 | 178.868 | 12.090  |
| 1999          | 34637  | 15728.102 | 14550.827 | 1177.276 | 3.399  | 7.485  | 446.796 | 202.950 | 187.699 | 15.251  |
| 2000          | 34326  | 15579.803 | 14205.991 | 1373.812 | 4.002  | 8.818  | 437.252 | 198.541 | 180.957 | 17.584  |
| 2001          | 34628  | 15696.614 | 14089.859 | 1606.756 | 4.640  | 10.236 | 436.150 | 197.812 | 177.466 | 20.346  |
| 2002          | 34336  | 15519.777 | 13688.938 | 1830.839 | 5.332  | 11.797 | 428.177 | 193.668 | 170.705 | 22.963  |
| 2003          | 35130  | 15888.389 | 13777.356 | 2111.033 | 6.009  | 13.287 | 433.924 | 196.413 | 170.175 | 26.238  |
| 2004          | 33577  | 15091.573 | 12848.826 | 2242.746 | 6.679  | 14.861 | 410.535 | 184.701 | 157.097 | 27.605  |
| 2005          | 35473  | 15803.656 | 13184.314 | 2619.342 | 7.384  | 16.574 | 428.847 | 191.278 | 159.388 | 31.890  |
| 2006          | 34072  | 15100.563 | 12351.357 | 2749.207 | 8.069  | 18.206 | 408.238 | 181.174 | 147.988 | 33.186  |
| 2007          | 34105  | 14974.384 | 11980.237 | 2994.146 | 8.779  | 19.995 | 404.481 | 177.871 | 142.083 | 35.788  |
| 2008          | 37558  | 16406.197 | 12859.797 | 3546.400 | 9.443  | 21.616 | 440.504 | 192.768 | 150.830 | 41.938  |
| 2009          | 36973  | 16083.194 | 12293.166 | 3790.028 | 10.251 | 23.565 | 428.666 | 186.846 | 142.528 | 44.317  |
| 2010          | 36952  | 15927.400 | 11899.354 | 4028.046 | 10.901 | 25.290 | 423.422 | 182.917 | 136.350 | 46.567  |
| 2011          | 37822  | 16221.836 | 11810.048 | 4411.788 | 11.664 | 27.197 | 429.209 | 184.547 | 134.020 | 50.526  |
| 2012          | 38475  | 16358.849 | 11619.681 | 4739.168 | 12.318 | 28.970 | 432.031 | 184.202 | 130.477 | 53.725  |
| 2013          | 40354  | 16994.822 | 11723.677 | 5271.146 | 13.062 | 31.016 | 448.147 | 189.311 | 130.197 | 59.114  |
| 2014          | 40348  | 16855.093 | 11285.531 | 5569.562 | 13.804 | 33.044 | 443.042 | 185.696 | 123.921 | 61.775  |
| 2015          | 42505  | 17572.483 | 11487.065 | 6085.418 | 14.317 | 34.630 | 521.405 | 216.445 | 140.912 | 75.533  |
| 2016          | 42939  | 17579.955 | 11121.559 | 6458.397 | 15.041 | 36.737 | 521.524 | 214.473 | 135.080 | 79.393  |
| 2017          | 44739  | 18080.688 | 11066.356 | 7014.332 | 15.678 | 38.795 | 538.061 | 218.496 | 133.090 | 85.406  |
| 2018          | 45778  | 18209.262 | 10818.804 | 7390.458 | 16.144 | 40.586 | 545.110 | 217.960 | 128.828 | 89.131  |
| 2019          | 47342  | 18648.302 | 10704.519 | 7943.783 | 16.779 | 42.598 | 558.070 | 221.054 | 126.185 | 94.870  |
| 2020          | 48850  | 19002.597 | 10568.475 | 8434.122 | 17.265 | 44.384 | 651.804 | 255.266 | 141.015 | 114.251 |
| 2021          | 48893  | 18885.717 | 10072.792 | 8812.926 | 18.025 | 46.665 | 647.378 | 251.867 | 133.371 | 118.496 |
| 2022          | 50317  | 19235.076 | 9867.675  | 9367.402 | 18.617 | 48.700 | 660.871 | 254.582 | 129.605 | 124.977 |
| 2023          | 51750  | 19521.158 | 9642.888  | 9878.270 | 19.088 | 50.603 | 674.103 | 256.363 | 125.610 | 130.753 |
| 2024          | 53125  | 19918.620 | 9439.651  | 10478.97 | 19.725 | 52.609 | 686.400 | 259.583 | 121.965 | 137.619 |
| 2025          | 54178  | 20150.545 | 9206.870  | 10943.67 | 20.200 | 54.310 | 806.542 | 303.086 | 137.063 | 166.023 |
| 2026          | 55089  | 20393.792 | 8913.888  | 11479.90 | 20.839 | 56.291 | 816.548 | 305.582 | 132.125 | 173.457 |
| 2027          | 55969  | 20615.351 | 8586.442  | 12028.91 | 21.492 | 58.349 | 825.828 | 307.668 | 126.694 | 180.975 |
| 2028          | 56793  | 20731.894 | 8230.000  | 12501.89 | 22.013 | 60.303 | 834.027 | 308.115 | 120.860 | 187.255 |
| 2029          | 57579  | 20781.967 | 7872.821  | 12909.15 | 22.420 | 62.117 | 841.365 | 307.495 | 115.040 | 192.454 |
| 2030          | 57874  | 20753.201 | 7519.555  | 13233.65 | 22.866 | 63.767 | 998.756 | 363.487 | 129.767 | 233.720 |
| 2031          | 59517  | 21048.417 | 7396.620  | 13651.80 | 22.938 | 64.859 | 1025.06 | 368.165 | 127.392 | 240.772 |
| 2032          | 60084  | 21169.329 | 7073.804  | 14095.52 | 23.460 | 66.585 | 1032.17 | 369.560 | 121.519 | 248.041 |
| 2033          | 60612  | 21109.293 | 6730.858  | 14378.44 | 23.722 | 68.114 | 1038.06 | 367.618 | 115.275 | 252.344 |
| 2034          | 61065  | 21109.429 | 6394.867  | 14714.56 | 24.097 | 69.706 | 1042.30 | 366.613 | 109.152 | 257.460 |
| 2035          | 60455  | 20794.840 | 6050.571  | 14744.27 | 24.389 | 70.903 | 1259.89 | 442.268 | 126.094 | 316.174 |
| 2036          | 57531  | 19354.577 | 5381.844  | 13972.73 | 24.287 | 72.193 | 1199.90 | 412.258 | 112.247 | 300.011 |
| 2037          | 57530  | 19064.169 | 4982.475  | 14081.69 | 24.477 | 73.865 | 1200.02 | 406.385 | 103.930 | 302.455 |
| 2038          | 57495  | 18854.812 | 4633.666  | 14221.15 | 24.735 | 75.424 | 1198.47 | 401.900 | 96.588  | 305.311 |
| 2039          | 57452  | 18437.457 | 4247.302  | 14190.15 | 24.699 | 76.964 | 1195.61 | 392.602 | 88.389  | 304.212 |

## Results for PHIM for Run 5 (Sensitivity\_Analysis\_2.RTF)

---

### Control File Details for Run: 5

| Variable Parameter                                       | Value                  |
|----------------------------------------------------------|------------------------|
| 1. Name for Reference Scenario                           | NULL                   |
| 2. Name for Test Scenario                                | Ecig                   |
| 3. Name for Product 1                                    | CC                     |
| 4. Name for Product 2                                    | Ecig                   |
| 5. Name for Product 3                                    | -                      |
| 6. Name for Product 4                                    | Dual                   |
| 7. Country                                               | US (United States)     |
| 8. Sex                                                   | M (Males)              |
| 9. Year of start of process                              | 1990                   |
| 10. Number of months of follow-up                        | 600                    |
| 11. Follow-up interval length (in months)                | 12                     |
| 12. Lower age for risk estimation                        | 10                     |
| 13. Upper age for risk estimation                        | 79                     |
| 14. The effective dose for Product 1 (F1) - Ref          | 1                      |
| 15. The effective dose for Product 2 (F2) - Ref          | -                      |
| 16. The effective dose for Product 3 (F3) - Ref          | -                      |
| 17. The effective dose for Product 4 (F4) - Ref          | -                      |
| 18. The effective dose for Product 1 (F1) - Test         | 1                      |
| 19. The effective dose for Product 2 (F2) - Test         | 0.05                   |
| 20. The effective dose for Product 3 (F3) - Test         | -                      |
| 21. The effective dose for Product 4 (F4) - Test         | FROMF2                 |
| 22. Number in population to be simulated                 | 100000                 |
| 23. Number of MC simulations                             | 1                      |
| 24. The random number seed for the first simulation      | 15975263               |
| 25. Source for the population file (POP)                 | UN4                    |
| 26. Source for the socioeconomic prevalence file (SEP)   | -                      |
| 27. Source for the current smoking prevalence file (CSP) | ISS3                   |
| 28. Source for the former smoking prevalence file (FSP)  | ISS3                   |
| 29. Source for the quit-time distribution file (QTD)     | NHIS2006               |
| 30. Source for the death file (MORT)                     | APR-20                 |
| 31. Source for the relative risk file (RR)               | PNLEST                 |
| 32. Source for the half-life file (H)                    | PNLEST                 |
| 33. Assumption Set for TTP Factor Reference              | F1                     |
| 34. Assumption Set for TTP Factor Test                   | F1                     |
| 35. Assumption Set for TTP Reference                     | ISS3                   |
| 36. Assumption Set for TTP Test                          | S2C                    |
| 37. Assumption Set for TP for socioeconomic group        | -                      |
| 38. Source for Output Choice file (OUTC)                 | BASIC                  |
| 39. Output for DTP P1                                    | N                      |
| 40. Output for DTP P2                                    | N                      |
| 41. Output for Main P Component                          | Y                      |
| 42. Output for DTP E1                                    | N                      |
| 43. Output for DTP E2                                    | N                      |
| 44. Output for DTP E3                                    | N                      |
| 45. Output for Main E Component                          | Y                      |
| 46. Output file name                                     | Sensitivity_Analysis_2 |
| 47. Run number for P-Component                           | -                      |
| 48. Results file for E-Component                         | -                      |
| 49. Components required                                  | PE                     |
| 50. Results folder for P to be used in E-Component       | -                      |
| 51. Fixed age of starting product use                    | 16                     |
| 52. Output absolute risk file?                           | N                      |

## Results for PHIM for Run 5 (Sensitivity\_Analysis\_2.RTF)

\*\*\*\*\*

TTP values for Run: 5, Scenario: NULL

| Variable Parameter | Value               |
|--------------------|---------------------|
| 1. Country         | US (United States)  |
| 2. Sex             | M (Males)           |
| 3. Assumption Set  | ISS3                |
| Note:              | Period is in Months |

| Age   | Period  | Initiation  | Cessation    | Re-initiation |
|-------|---------|-------------|--------------|---------------|
|       |         | Never<br>CC | CC<br>Former | Former<br>CC  |
| 10-14 | 1-12    | 0.003842    | 0.008742     | 0.000000      |
| 15-19 | 1-12    | 0.004720    | 0.003614     | 0.000000      |
| 20-24 | 1-12    | 0.000376    | 0.000943     | 0.000000      |
| 25-29 | 1-12    | 0.000187    | 0.001143     | 0.000000      |
| 30-34 | 1-12    | 0.000093    | 0.000871     | 0.000000      |
| 35-39 | 1-12    | 0.000000    | 0.000867     | 0.000000      |
| 40-44 | 1-12    | 0.000000    | 0.001399     | 0.000000      |
| 45-49 | 1-12    | 0.000000    | 0.002033     | 0.000000      |
| 50-54 | 1-12    | 0.000000    | 0.003209     | 0.000000      |
| 55-59 | 1-12    | 0.000000    | 0.003574     | 0.000000      |
| 60-64 | 1-12    | 0.000000    | 0.003460     | 0.000000      |
| 65-69 | 1-12    | 0.000000    | 0.004136     | 0.000000      |
| 70-74 | 1-12    | 0.000000    | 0.005592     | 0.000000      |
| 75-79 | 1-12    | 0.000000    | 0.005592     | 0.000000      |
| 10-14 | 13-72   | 0.004906    | 0.008742     | 0.000000      |
| 15-19 | 13-72   | 0.006989    | 0.004426     | 0.000000      |
| 20-24 | 13-72   | 0.000687    | 0.001527     | 0.000000      |
| 25-29 | 13-72   | 0.000962    | 0.001515     | 0.000000      |
| 30-34 | 13-72   | 0.000364    | 0.001227     | 0.000000      |
| 35-39 | 13-72   | 0.000000    | 0.001630     | 0.000000      |
| 40-44 | 13-72   | 0.000000    | 0.001852     | 0.000000      |
| 45-49 | 13-72   | 0.000000    | 0.002667     | 0.000000      |
| 50-54 | 13-72   | 0.000000    | 0.003208     | 0.000000      |
| 55-59 | 13-72   | 0.000000    | 0.003978     | 0.000000      |
| 60-64 | 13-72   | 0.000000    | 0.005771     | 0.000000      |
| 65-69 | 13-72   | 0.000000    | 0.010432     | 0.000000      |
| 70-74 | 13-72   | 0.000000    | 0.007079     | 0.000000      |
| 75-79 | 13-72   | 0.000000    | 0.007079     | 0.000000      |
| 10-14 | 73-132  | 0.004312    | 0.008742     | 0.000000      |
| 15-19 | 73-132  | 0.005330    | 0.003289     | 0.000000      |
| 20-24 | 73-132  | 0.002456    | 0.003844     | 0.000000      |
| 25-29 | 73-132  | 0.000839    | 0.002006     | 0.000000      |
| 30-34 | 73-132  | 0.000414    | 0.001329     | 0.000000      |
| 35-39 | 73-132  | 0.000000    | 0.001278     | 0.000000      |
| 40-44 | 73-132  | 0.000000    | 0.001691     | 0.000000      |
| 45-49 | 73-132  | 0.000000    | 0.002904     | 0.000000      |
| 50-54 | 73-132  | 0.000000    | 0.003319     | 0.000000      |
| 55-59 | 73-132  | 0.000000    | 0.003976     | 0.000000      |
| 60-64 | 73-132  | 0.000000    | 0.005235     | 0.000000      |
| 65-69 | 73-132  | 0.000000    | 0.005901     | 0.000000      |
| 70-74 | 73-132  | 0.000000    | 0.005615     | 0.000000      |
| 75-79 | 73-132  | 0.000000    | 0.005615     | 0.000000      |
| 10-14 | 133-192 | 0.003468    | 0.008742     | 0.000000      |
| 15-19 | 133-192 | 0.004675    | 0.003732     | 0.000000      |
| 20-24 | 133-192 | 0.000062    | 0.002260     | 0.000000      |
| 25-29 | 133-192 | 0.001422    | 0.002822     | 0.000000      |
| 30-34 | 133-192 | 0.000696    | 0.002610     | 0.000000      |
| 35-39 | 133-192 | 0.000000    | 0.002058     | 0.000000      |
| 40-44 | 133-192 | 0.000000    | 0.002310     | 0.000000      |
| 45-49 | 133-192 | 0.000000    | 0.002256     | 0.000000      |
| 50-54 | 133-192 | 0.000000    | 0.002663     | 0.000000      |
| 55-59 | 133-192 | 0.000000    | 0.001746     | 0.000000      |
| 60-64 | 133-192 | 0.000000    | 0.005809     | 0.000000      |
| 65-69 | 133-192 | 0.000000    | 0.005896     | 0.000000      |
| 70-74 | 133-192 | 0.000000    | 0.007323     | 0.000000      |
| 75-79 | 133-192 | 0.000000    | 0.007323     | 0.000000      |
| 10-14 | 193-252 | 0.002314    | 0.008742     | 0.000000      |
| 15-19 | 193-252 | 0.003987    | 0.005036     | 0.000000      |
| 20-24 | 193-252 | 0.000320    | 0.002857     | 0.000000      |
| 25-29 | 193-252 | 0.000251    | 0.002314     | 0.000000      |
| 30-34 | 193-252 | 0.000125    | 0.004343     | 0.000000      |
| 35-39 | 193-252 | 0.000000    | 0.002092     | 0.000000      |
| 40-44 | 193-252 | 0.000000    | 0.002566     | 0.000000      |
| 45-49 | 193-252 | 0.000000    | 0.002311     | 0.000000      |
| 50-54 | 193-252 | 0.000000    | 0.003209     | 0.000000      |

### Results for PHIM for Run 5 (Sensitivity\_Analysis\_2.RTF)

|       |         |          |          |          |
|-------|---------|----------|----------|----------|
| 55-59 | 193-252 | 0.000000 | 0.004057 | 0.000000 |
| 60-64 | 193-252 | 0.000000 | 0.007166 | 0.000000 |
| 65-69 | 193-252 | 0.000000 | 0.004281 | 0.000000 |
| 70-74 | 193-252 | 0.000000 | 0.004580 | 0.000000 |
| 75-79 | 193-252 | 0.000000 | 0.004580 | 0.000000 |
| 10-14 | 253+    | 0.001325 | 0.008742 | 0.000000 |
| 15-19 | 253+    | 0.002984 | 0.010602 | 0.000000 |
| 20-24 | 253+    | 0.000452 | 0.004314 | 0.000000 |
| 25-29 | 253+    | 0.000225 | 0.003645 | 0.000000 |
| 30-34 | 253+    | 0.000112 | 0.004512 | 0.000000 |
| 35-39 | 253+    | 0.000000 | 0.002147 | 0.000000 |
| 40-44 | 253+    | 0.000000 | 0.002636 | 0.000000 |
| 45-49 | 253+    | 0.000000 | 0.001051 | 0.000000 |
| 50-54 | 253+    | 0.000000 | 0.002519 | 0.000000 |
| 55-59 | 253+    | 0.000000 | 0.003693 | 0.000000 |
| 60-64 | 253+    | 0.000000 | 0.005888 | 0.000000 |
| 65-69 | 253+    | 0.000000 | 0.004823 | 0.000000 |
| 70-74 | 253+    | 0.000000 | 0.004733 | 0.000000 |
| 75-79 | 253+    | 0.000000 | 0.004733 | 0.000000 |

## Results for PHIM for Run 5 (Sensitivity\_Analysis\_2.RTF)

\*\*\*\*\*

TTP values for Run: 5, Scenario: Ecig

Variable Parameter

Value

- 1. Country
  - 2. Sex
  - 3. Assumption Set
- Note:

US (United States)  
M (Males)  
S2C  
Period is in Months

| Age   | Period  | Initiation  |               | Cessation     |              |                | Re-initiation  |              |                |                |
|-------|---------|-------------|---------------|---------------|--------------|----------------|----------------|--------------|----------------|----------------|
|       |         | Never<br>CC | Never<br>Ecig | Never<br>Dual | CC<br>Former | Ecig<br>Former | Dual<br>Former | Former<br>CC | Former<br>Ecig | Former<br>Dual |
| 10-14 | 1-12    | 0.001921    | 0.001921      | 0.000000      | 0.008742     | 0.008742       | 0.000000       | 0.000000     | 0.000000       | 0.000000       |
| 15-19 | 1-12    | 0.002360    | 0.002360      | 0.000000      | 0.003614     | 0.003614       | 0.000000       | 0.000000     | 0.000000       | 0.000000       |
| 20-24 | 1-12    | 0.000188    | 0.000188      | 0.000000      | 0.000943     | 0.000943       | 0.000000       | 0.000000     | 0.000000       | 0.000000       |
| 25-29 | 1-12    | 0.000093    | 0.000093      | 0.000000      | 0.001143     | 0.001143       | 0.000000       | 0.000000     | 0.000000       | 0.000000       |
| 30-34 | 1-12    | 0.000047    | 0.000047      | 0.000000      | 0.000871     | 0.000871       | 0.000000       | 0.000000     | 0.000000       | 0.000000       |
| 35-39 | 1-12    | 0.000000    | 0.000000      | 0.000000      | 0.000867     | 0.000867       | 0.000000       | 0.000000     | 0.000000       | 0.000000       |
| 40-44 | 1-12    | 0.000000    | 0.000000      | 0.000000      | 0.001399     | 0.001399       | 0.000000       | 0.000000     | 0.000000       | 0.000000       |
| 45-49 | 1-12    | 0.000000    | 0.000000      | 0.000000      | 0.002033     | 0.002033       | 0.000000       | 0.000000     | 0.000000       | 0.000000       |
| 50-54 | 1-12    | 0.000000    | 0.000000      | 0.000000      | 0.003209     | 0.003209       | 0.000000       | 0.000000     | 0.000000       | 0.000000       |
| 55-59 | 1-12    | 0.000000    | 0.000000      | 0.000000      | 0.003574     | 0.003574       | 0.000000       | 0.000000     | 0.000000       | 0.000000       |
| 60-64 | 1-12    | 0.000000    | 0.000000      | 0.000000      | 0.003460     | 0.003460       | 0.000000       | 0.000000     | 0.000000       | 0.000000       |
| 65-69 | 1-12    | 0.000000    | 0.000000      | 0.000000      | 0.004136     | 0.004136       | 0.000000       | 0.000000     | 0.000000       | 0.000000       |
| 70-74 | 1-12    | 0.000000    | 0.000000      | 0.000000      | 0.005592     | 0.005592       | 0.000000       | 0.000000     | 0.000000       | 0.000000       |
| 75-79 | 1-12    | 0.000000    | 0.000000      | 0.000000      | 0.005592     | 0.005592       | 0.000000       | 0.000000     | 0.000000       | 0.000000       |
| 10-14 | 13-72   | 0.001962    | 0.002944      | 0.000000      | 0.008742     | 0.008742       | 0.000000       | 0.000000     | 0.000000       | 0.000000       |
| 15-19 | 13-72   | 0.002796    | 0.004193      | 0.000000      | 0.004426     | 0.004426       | 0.000000       | 0.000000     | 0.000000       | 0.000000       |
| 20-24 | 13-72   | 0.000275    | 0.000412      | 0.000000      | 0.001527     | 0.001527       | 0.000000       | 0.000000     | 0.000000       | 0.000000       |
| 25-29 | 13-72   | 0.000385    | 0.000578      | 0.000000      | 0.001515     | 0.001515       | 0.000000       | 0.000000     | 0.000000       | 0.000000       |
| 30-34 | 13-72   | 0.000146    | 0.000218      | 0.000000      | 0.001227     | 0.001227       | 0.000000       | 0.000000     | 0.000000       | 0.000000       |
| 35-39 | 13-72   | 0.000000    | 0.000000      | 0.000000      | 0.001630     | 0.001630       | 0.000000       | 0.000000     | 0.000000       | 0.000000       |
| 40-44 | 13-72   | 0.000000    | 0.000000      | 0.000000      | 0.001852     | 0.001852       | 0.000000       | 0.000000     | 0.000000       | 0.000000       |
| 45-49 | 13-72   | 0.000000    | 0.000000      | 0.000000      | 0.002667     | 0.002667       | 0.000000       | 0.000000     | 0.000000       | 0.000000       |
| 50-54 | 13-72   | 0.000000    | 0.000000      | 0.000000      | 0.003208     | 0.003208       | 0.000000       | 0.000000     | 0.000000       | 0.000000       |
| 55-59 | 13-72   | 0.000000    | 0.000000      | 0.000000      | 0.003978     | 0.003978       | 0.000000       | 0.000000     | 0.000000       | 0.000000       |
| 60-64 | 13-72   | 0.000000    | 0.000000      | 0.000000      | 0.005771     | 0.005771       | 0.000000       | 0.000000     | 0.000000       | 0.000000       |
| 65-69 | 13-72   | 0.000000    | 0.000000      | 0.000000      | 0.010432     | 0.010432       | 0.000000       | 0.000000     | 0.000000       | 0.000000       |
| 70-74 | 13-72   | 0.000000    | 0.000000      | 0.000000      | 0.007079     | 0.007079       | 0.000000       | 0.000000     | 0.000000       | 0.000000       |
| 75-79 | 13-72   | 0.000000    | 0.000000      | 0.000000      | 0.007079     | 0.007079       | 0.000000       | 0.000000     | 0.000000       | 0.000000       |
| 10-14 | 73-132  | 0.000862    | 0.003449      | 0.000000      | 0.008742     | 0.008742       | 0.000000       | 0.000000     | 0.000000       | 0.000000       |
| 15-19 | 73-132  | 0.001066    | 0.004264      | 0.000000      | 0.003289     | 0.003289       | 0.000000       | 0.000000     | 0.000000       | 0.000000       |
| 20-24 | 73-132  | 0.000491    | 0.001965      | 0.000000      | 0.003844     | 0.003844       | 0.000000       | 0.000000     | 0.000000       | 0.000000       |
| 25-29 | 73-132  | 0.000168    | 0.000671      | 0.000000      | 0.002006     | 0.002006       | 0.000000       | 0.000000     | 0.000000       | 0.000000       |
| 30-34 | 73-132  | 0.000083    | 0.000332      | 0.000000      | 0.001329     | 0.001329       | 0.000000       | 0.000000     | 0.000000       | 0.000000       |
| 35-39 | 73-132  | 0.000000    | 0.000000      | 0.000000      | 0.001278     | 0.001278       | 0.000000       | 0.000000     | 0.000000       | 0.000000       |
| 40-44 | 73-132  | 0.000000    | 0.000000      | 0.000000      | 0.001691     | 0.001691       | 0.000000       | 0.000000     | 0.000000       | 0.000000       |
| 45-49 | 73-132  | 0.000000    | 0.000000      | 0.000000      | 0.002904     | 0.002904       | 0.000000       | 0.000000     | 0.000000       | 0.000000       |
| 50-54 | 73-132  | 0.000000    | 0.000000      | 0.000000      | 0.003319     | 0.003319       | 0.000000       | 0.000000     | 0.000000       | 0.000000       |
| 55-59 | 73-132  | 0.000000    | 0.000000      | 0.000000      | 0.003976     | 0.003976       | 0.000000       | 0.000000     | 0.000000       | 0.000000       |
| 60-64 | 73-132  | 0.000000    | 0.000000      | 0.000000      | 0.005235     | 0.005235       | 0.000000       | 0.000000     | 0.000000       | 0.000000       |
| 65-69 | 73-132  | 0.000000    | 0.000000      | 0.000000      | 0.005901     | 0.005901       | 0.000000       | 0.000000     | 0.000000       | 0.000000       |
| 70-74 | 73-132  | 0.000000    | 0.000000      | 0.000000      | 0.005615     | 0.005615       | 0.000000       | 0.000000     | 0.000000       | 0.000000       |
| 75-79 | 73-132  | 0.000000    | 0.000000      | 0.000000      | 0.005615     | 0.005615       | 0.000000       | 0.000000     | 0.000000       | 0.000000       |
| 10-14 | 133-192 | 0.000173    | 0.003294      | 0.000000      | 0.008742     | 0.008742       | 0.000000       | 0.000000     | 0.000000       | 0.000000       |
| 15-19 | 133-192 | 0.000234    | 0.004442      | 0.000000      | 0.003732     | 0.003732       | 0.000000       | 0.000000     | 0.000000       | 0.000000       |
| 20-24 | 133-192 | 0.000003    | 0.000059      | 0.000000      | 0.002260     | 0.002260       | 0.000000       | 0.000000     | 0.000000       | 0.000000       |
| 25-29 | 133-192 | 0.000071    | 0.001351      | 0.000000      | 0.002822     | 0.002822       | 0.000000       | 0.000000     | 0.000000       | 0.000000       |
| 30-34 | 133-192 | 0.000035    | 0.000661      | 0.000000      | 0.002610     | 0.002610       | 0.000000       | 0.000000     | 0.000000       | 0.000000       |
| 35-39 | 133-192 | 0.000000    | 0.000000      | 0.000000      | 0.002058     | 0.002058       | 0.000000       | 0.000000     | 0.000000       | 0.000000       |
| 40-44 | 133-192 | 0.000000    | 0.000000      | 0.000000      | 0.002310     | 0.002310       | 0.000000       | 0.000000     | 0.000000       | 0.000000       |
| 45-49 | 133-192 | 0.000000    | 0.000000      | 0.000000      | 0.002256     | 0.002256       | 0.000000       | 0.000000     | 0.000000       | 0.000000       |
| 50-54 | 133-192 | 0.000000    | 0.000000      | 0.000000      | 0.002663     | 0.002663       | 0.000000       | 0.000000     | 0.000000       | 0.000000       |
| 55-59 | 133-192 | 0.000000    | 0.000000      | 0.000000      | 0.001747     | 0.001747       | 0.000000       | 0.000000     | 0.000000       | 0.000000       |
| 60-64 | 133-192 | 0.000000    | 0.000000      | 0.000000      | 0.005809     | 0.005809       | 0.000000       | 0.000000     | 0.000000       | 0.000000       |
| 65-69 | 133-192 | 0.000000    | 0.000000      | 0.000000      | 0.005896     | 0.005896       | 0.000000       | 0.000000     | 0.000000       | 0.000000       |
| 70-74 | 133-192 | 0.000000    | 0.000000      | 0.000000      | 0.007323     | 0.007323       | 0.000000       | 0.000000     | 0.000000       | 0.000000       |
| 75-79 | 133-192 | 0.000000    | 0.000000      | 0.000000      | 0.007323     | 0.007323       | 0.000000       | 0.000000     | 0.000000       | 0.000000       |
| 10-14 | 193-252 | 0.000116    | 0.002198      | 0.000000      | 0.008742     | 0.008742       | 0.000000       | 0.000000     | 0.000000       | 0.000000       |
| 15-19 | 193-252 | 0.000199    | 0.003788      | 0.000000      | 0.005036     | 0.005036       | 0.000000       | 0.000000     | 0.000000       | 0.000000       |
| 20-24 | 193-252 | 0.000016    | 0.000304      | 0.000000      | 0.002857     | 0.002857       | 0.000000       | 0.000000     | 0.000000       | 0.000000       |
| 25-29 | 193-252 | 0.000013    | 0.000239      | 0.000000      | 0.002314     | 0.002314       | 0.000000       | 0.000000     | 0.000000       | 0.000000       |
| 30-34 | 193-252 | 0.000006    | 0.000119      | 0.000000      | 0.004343     | 0.004343       | 0.000000       | 0.000000     | 0.000000       | 0.000000       |
| 35-39 | 193-252 | 0.000000    | 0.000000      | 0.000000      | 0.002092     | 0.002092       | 0.000000       | 0.000000     | 0.000000       | 0.000000       |
| 40-44 | 193-252 | 0.000000    | 0.000000      | 0.000000      | 0.002566     | 0.002566       | 0.000000       | 0.000000     | 0.000000       | 0.000000       |
| 45-49 | 193-252 | 0.000000    | 0.000000      | 0.000000      | 0.002311     | 0.002311       | 0.000000       | 0.000000     | 0.000000       | 0.000000       |
| 50-54 | 193-252 | 0.000000    | 0.000000      | 0.000000      | 0.003209     | 0.003209       | 0.000000       | 0.000000     | 0.000000       | 0.000000       |

### Results for PHIM for Run 5 (Sensitivity\_Analysis\_2.RTF)

|       |         |          |          |          |          |          |          |          |          |          |
|-------|---------|----------|----------|----------|----------|----------|----------|----------|----------|----------|
| 55-59 | 193-252 | 0.000000 | 0.000000 | 0.000000 | 0.004057 | 0.004057 | 0.000000 | 0.000000 | 0.000000 | 0.000000 |
| 60-64 | 193-252 | 0.000000 | 0.000000 | 0.000000 | 0.007166 | 0.007166 | 0.000000 | 0.000000 | 0.000000 | 0.000000 |
| 65-69 | 193-252 | 0.000000 | 0.000000 | 0.000000 | 0.004281 | 0.004281 | 0.000000 | 0.000000 | 0.000000 | 0.000000 |
| 70-74 | 193-252 | 0.000000 | 0.000000 | 0.000000 | 0.004580 | 0.004580 | 0.000000 | 0.000000 | 0.000000 | 0.000000 |
| 75-79 | 193-252 | 0.000000 | 0.000000 | 0.000000 | 0.004580 | 0.004580 | 0.000000 | 0.000000 | 0.000000 | 0.000000 |
| 10-14 | 253+    | 0.000066 | 0.001259 | 0.000000 | 0.008742 | 0.008742 | 0.000000 | 0.000000 | 0.000000 | 0.000000 |
| 15-19 | 253+    | 0.000149 | 0.002835 | 0.000000 | 0.010602 | 0.010602 | 0.000000 | 0.000000 | 0.000000 | 0.000000 |
| 20-24 | 253+    | 0.000023 | 0.000430 | 0.000000 | 0.004314 | 0.004314 | 0.000000 | 0.000000 | 0.000000 | 0.000000 |
| 25-29 | 253+    | 0.000011 | 0.000213 | 0.000000 | 0.003645 | 0.003645 | 0.000000 | 0.000000 | 0.000000 | 0.000000 |
| 30-34 | 253+    | 0.000006 | 0.000106 | 0.000000 | 0.004512 | 0.004512 | 0.000000 | 0.000000 | 0.000000 | 0.000000 |
| 35-39 | 253+    | 0.000000 | 0.000000 | 0.000000 | 0.002147 | 0.002147 | 0.000000 | 0.000000 | 0.000000 | 0.000000 |
| 40-44 | 253+    | 0.000000 | 0.000000 | 0.000000 | 0.002636 | 0.002636 | 0.000000 | 0.000000 | 0.000000 | 0.000000 |
| 45-49 | 253+    | 0.000000 | 0.000000 | 0.000000 | 0.001051 | 0.001051 | 0.000000 | 0.000000 | 0.000000 | 0.000000 |
| 50-54 | 253+    | 0.000000 | 0.000000 | 0.000000 | 0.002519 | 0.002519 | 0.000000 | 0.000000 | 0.000000 | 0.000000 |
| 55-59 | 253+    | 0.000000 | 0.000000 | 0.000000 | 0.003693 | 0.003693 | 0.000000 | 0.000000 | 0.000000 | 0.000000 |
| 60-64 | 253+    | 0.000000 | 0.000000 | 0.000000 | 0.005888 | 0.005888 | 0.000000 | 0.000000 | 0.000000 | 0.000000 |
| 65-69 | 253+    | 0.000000 | 0.000000 | 0.000000 | 0.004823 | 0.004823 | 0.000000 | 0.000000 | 0.000000 | 0.000000 |
| 70-74 | 253+    | 0.000000 | 0.000000 | 0.000000 | 0.004733 | 0.004733 | 0.000000 | 0.000000 | 0.000000 | 0.000000 |
| 75-79 | 253+    | 0.000000 | 0.000000 | 0.000000 | 0.004733 | 0.004733 | 0.000000 | 0.000000 | 0.000000 | 0.000000 |



### Results for PHIM for Run 5 (Sensitivity\_Analysis\_2.RTF)

|       |      |          |          |          |          |          |          |
|-------|------|----------|----------|----------|----------|----------|----------|
| 25-29 | 253+ | 0.009232 | 0.000000 | 0.000000 | 0.000000 | 0.000000 | 0.000000 |
| 30-34 | 253+ | 0.009517 | 0.000000 | 0.000000 | 0.000000 | 0.000000 | 0.000000 |
| 35-39 | 253+ | 0.008769 | 0.000000 | 0.000000 | 0.000000 | 0.000000 | 0.000000 |
| 40-44 | 253+ | 0.008295 | 0.000000 | 0.000000 | 0.000000 | 0.000000 | 0.000000 |
| 45-49 | 253+ | 0.007061 | 0.000000 | 0.000000 | 0.000000 | 0.000000 | 0.000000 |
| 50-54 | 253+ | 0.005807 | 0.000000 | 0.000000 | 0.000000 | 0.000000 | 0.000000 |
| 55-59 | 253+ | 0.005067 | 0.000000 | 0.000000 | 0.000000 | 0.000000 | 0.000000 |
| 60-64 | 253+ | 0.003551 | 0.000000 | 0.000000 | 0.000000 | 0.000000 | 0.000000 |
| 65-69 | 253+ | 0.000907 | 0.000000 | 0.000000 | 0.000000 | 0.000000 | 0.000000 |
| 70-74 | 253+ | 0.000000 | 0.000000 | 0.000000 | 0.000000 | 0.000000 | 0.000000 |
| 75-79 | 253+ | 0.000000 | 0.000000 | 0.000000 | 0.000000 | 0.000000 | 0.000000 |



## Results for PHIM for Run 5 (Sensitivity\_Analysis\_2.RTF)

\*\*\*\*\*

### Main Output for the Tobacco History for Run: 5, Simulation: 1, Scenario: NULL

| Variable Parameter          | Value              |
|-----------------------------|--------------------|
| 1. Country                  | US (United States) |
| 2. Sex                      | M (Males)          |
| 3. Year of start of process | 1990               |

Year of Follow-up: 2040, Age Group: All Ages  
 Period    Age Group    Smoking Group            N            %

|    |          |           |       |       |
|----|----------|-----------|-------|-------|
| 50 | All Ages | Never Any | 19445 | 50.68 |
| 50 | All Ages | CC        | 3024  | 7.88  |
| 50 | All Ages | Former    | 15896 | 41.43 |

Year of Follow-up: 2040, Age Group: 18-19  
 Period    Age Group    Smoking Group            N            %

|    |       |           |   |   |
|----|-------|-----------|---|---|
| 50 | 18-19 | Never Any | 0 | . |
| 50 | 18-19 | CC        | 0 | . |
| 50 | 18-19 | Former    | 0 | . |

Year of Follow-up: 2040, Age Group: 20-24  
 Period    Age Group    Smoking Group            N            %

|    |       |           |   |   |
|----|-------|-----------|---|---|
| 50 | 20-24 | Never Any | 0 | . |
| 50 | 20-24 | CC        | 0 | . |
| 50 | 20-24 | Former    | 0 | . |

Year of Follow-up: 2040, Age Group: 25-29  
 Period    Age Group    Smoking Group            N            %

|    |       |           |   |   |
|----|-------|-----------|---|---|
| 50 | 25-29 | Never Any | 0 | . |
| 50 | 25-29 | CC        | 0 | . |
| 50 | 25-29 | Former    | 0 | . |

Year of Follow-up: 2040, Age Group: 30-34  
 Period    Age Group    Smoking Group            N            %

|    |       |           |   |   |
|----|-------|-----------|---|---|
| 50 | 30-34 | Never Any | 0 | . |
| 50 | 30-34 | CC        | 0 | . |
| 50 | 30-34 | Former    | 0 | . |

Year of Follow-up: 2040, Age Group: 35-39  
 Period    Age Group    Smoking Group            N            %

|    |       |           |   |   |
|----|-------|-----------|---|---|
| 50 | 35-39 | Never Any | 0 | . |
| 50 | 35-39 | CC        | 0 | . |
| 50 | 35-39 | Former    | 0 | . |

Year of Follow-up: 2040, Age Group: 40-44  
 Period    Age Group    Smoking Group            N            %

|    |       |           |   |   |
|----|-------|-----------|---|---|
| 50 | 40-44 | Never Any | 0 | . |
| 50 | 40-44 | CC        | 0 | . |
| 50 | 40-44 | Former    | 0 | . |

Year of Follow-up: 2040, Age Group: 45-49  
 Period    Age Group    Smoking Group            N            %

|    |       |           |   |   |
|----|-------|-----------|---|---|
| 50 | 45-49 | Never Any | 0 | . |
| 50 | 45-49 | CC        | 0 | . |
| 50 | 45-49 | Former    | 0 | . |

Year of Follow-up: 2040, Age Group: 50-54  
 Period    Age Group    Smoking Group            N            %

|    |       |           |   |   |
|----|-------|-----------|---|---|
| 50 | 50-54 | Never Any | 0 | . |
| 50 | 50-54 | CC        | 0 | . |
| 50 | 50-54 | Former    | 0 | . |

Year of Follow-up: 2040, Age Group: 55-59  
 Period    Age Group    Smoking Group            N            %

|    |       |           |   |   |
|----|-------|-----------|---|---|
| 50 | 55-59 | Never Any | 0 | . |
| 50 | 55-59 | CC        | 0 | . |
| 50 | 55-59 | Former    | 0 | . |

Year of Follow-up: 2040, Age Group: 60-64  
 Period    Age Group    Smoking Group            N            %

### Results for PHIM for Run 5 (Sensitivity\_Analysis\_2.RTF)

|                                           |           |               |      |       |
|-------------------------------------------|-----------|---------------|------|-------|
| 50                                        | 60-64     | Never Any     | 4363 | 49.33 |
| 50                                        | 60-64     | CC            | 934  | 10.56 |
| 50                                        | 60-64     | Former        | 3548 | 40.11 |
| Year of Follow-up: 2040, Age Group: 65-69 |           |               |      |       |
| Period                                    | Age Group | Smoking Group | N    | %     |
| 50                                        | 65-69     | Never Any     | 4948 | 54.73 |
| 50                                        | 65-69     | CC            | 734  | 8.12  |
| 50                                        | 65-69     | Former        | 3358 | 37.15 |
| Year of Follow-up: 2040, Age Group: 70-74 |           |               |      |       |
| Period                                    | Age Group | Smoking Group | N    | %     |
| 50                                        | 70-74     | Never Any     | 5145 | 52.41 |
| 50                                        | 70-74     | CC            | 688  | 7.01  |
| 50                                        | 70-74     | Former        | 3983 | 40.58 |
| Year of Follow-up: 2040, Age Group: 75-79 |           |               |      |       |
| Period                                    | Age Group | Smoking Group | N    | %     |
| 50                                        | 75-79     | Never Any     | 4989 | 46.78 |
| 50                                        | 75-79     | CC            | 668  | 6.26  |
| 50                                        | 75-79     | Former        | 5007 | 46.95 |

## Results for PHIM for Run 5 (Sensitivity\_Analysis\_2.RTF)

\*\*\*\*\*

### Main Output for the Tobacco History for Run: 5, Simulation: 1, Scenario: Ecig

| Variable Parameter                           |           | Value              |       |       |               |             |               |                |              |
|----------------------------------------------|-----------|--------------------|-------|-------|---------------|-------------|---------------|----------------|--------------|
| 1. Country                                   |           | US (United States) |       |       |               |             |               |                |              |
| 2. Sex                                       |           | M (Males)          |       |       |               |             |               |                |              |
| 3. Year of start of process                  |           | 1990               |       |       |               |             |               |                |              |
| Year of Follow-up: 1990, Age Group: All Ages |           |                    |       |       |               |             |               |                |              |
| Period                                       | Age Group | Smoking Group      | N     | %     | Ever Quit (N) | Ever Quit % | Mean Yrs Quit | Short Term (n) | Short Term % |
| 0                                            | All Ages  | Never Any          | 34075 | 39.78 |               |             |               |                |              |
| 0                                            | All Ages  | CC                 | 27323 | 31.90 | 0             | 0.00        |               |                |              |
| 0                                            | All Ages  | Ecig               | 0     | 0.00  |               |             |               |                |              |
| 0                                            | All Ages  | Dual               | 0     | 0.00  |               |             |               |                |              |
| 0                                            | All Ages  | Former             | 24266 | 28.33 |               |             | 13.08         | 3623           | 14.93        |
| Year of Follow-up: 1990, Age Group: 18-19    |           |                    |       |       |               |             |               |                |              |
| Period                                       | Age Group | Smoking Group      | N     | %     | Ever Quit (N) | Ever Quit % | Mean Yrs Quit | Short Term (n) | Short Term % |
| 0                                            | 18-19     | Never Any          | 2783  | 78.42 |               |             |               |                |              |
| 0                                            | 18-19     | CC                 | 634   | 17.86 | 0             | 0.00        |               |                |              |
| 0                                            | 18-19     | Ecig               | 0     | 0.00  |               |             |               |                |              |
| 0                                            | 18-19     | Dual               | 0     | 0.00  |               |             |               |                |              |
| 0                                            | 18-19     | Former             | 132   | 3.72  |               |             | 0.11          | 132            | 100.00       |
| Year of Follow-up: 1990, Age Group: 20-24    |           |                    |       |       |               |             |               |                |              |
| Period                                       | Age Group | Smoking Group      | N     | %     | Ever Quit (N) | Ever Quit % | Mean Yrs Quit | Short Term (n) | Short Term % |
| 0                                            | 20-24     | Never Any          | 5722  | 58.29 |               |             |               |                |              |
| 0                                            | 20-24     | CC                 | 3199  | 32.59 | 0             | 0.00        |               |                |              |
| 0                                            | 20-24     | Ecig               | 0     | 0.00  |               |             |               |                |              |
| 0                                            | 20-24     | Dual               | 0     | 0.00  |               |             |               |                |              |
| 0                                            | 20-24     | Former             | 895   | 9.12  |               |             | 1.46          | 506            | 56.54        |
| Year of Follow-up: 1990, Age Group: 25-29    |           |                    |       |       |               |             |               |                |              |
| Period                                       | Age Group | Smoking Group      | N     | %     | Ever Quit (N) | Ever Quit % | Mean Yrs Quit | Short Term (n) | Short Term % |
| 0                                            | 25-29     | Never Any          | 5232  | 49.06 |               |             |               |                |              |
| 0                                            | 25-29     | CC                 | 3914  | 36.70 | 0             | 0.00        |               |                |              |
| 0                                            | 25-29     | Ecig               | 0     | 0.00  |               |             |               |                |              |
| 0                                            | 25-29     | Dual               | 0     | 0.00  |               |             |               |                |              |
| 0                                            | 25-29     | Former             | 1518  | 14.23 |               |             | 2.87          | 643            | 42.36        |
| Year of Follow-up: 1990, Age Group: 30-34    |           |                    |       |       |               |             |               |                |              |
| Period                                       | Age Group | Smoking Group      | N     | %     | Ever Quit (N) | Ever Quit % | Mean Yrs Quit | Short Term (n) | Short Term % |
| 0                                            | 30-34     | Never Any          | 4765  | 43.65 |               |             |               |                |              |
| 0                                            | 30-34     | CC                 | 4023  | 36.85 | 0             | 0.00        |               |                |              |
| 0                                            | 30-34     | Ecig               | 0     | 0.00  |               |             |               |                |              |
| 0                                            | 30-34     | Dual               | 0     | 0.00  |               |             |               |                |              |
| 0                                            | 30-34     | Former             | 2128  | 19.49 |               |             | 4.06          | 592            | 27.82        |
| Year of Follow-up: 1990, Age Group: 35-39    |           |                    |       |       |               |             |               |                |              |
| Period                                       | Age Group | Smoking Group      | N     | %     | Ever Quit (N) | Ever Quit % | Mean Yrs Quit | Short Term (n) | Short Term % |
| 0                                            | 35-39     | Never Any          | 3941  | 39.85 |               |             |               |                |              |
| 0                                            | 35-39     | CC                 | 3474  | 35.13 | 0             | 0.00        |               |                |              |
| 0                                            | 35-39     | Ecig               | 0     | 0.00  |               |             |               |                |              |
| 0                                            | 35-39     | Dual               | 0     | 0.00  |               |             |               |                |              |
| 0                                            | 35-39     | Former             | 2474  | 25.02 |               |             | 8.31          | 425            | 17.18        |
| Year of Follow-up: 1990, Age Group: 40-44    |           |                    |       |       |               |             |               |                |              |
| Period                                       | Age Group | Smoking Group      | N     | %     | Ever Quit (N) | Ever Quit % | Mean Yrs Quit | Short Term (n) | Short Term % |
| 0                                            | 40-44     | Never Any          | 2912  | 33.65 |               |             |               |                |              |
| 0                                            | 40-44     | CC                 | 3113  | 35.97 | 0             | 0.00        |               |                |              |
| 0                                            | 40-44     | Ecig               | 0     | 0.00  |               |             |               |                |              |
| 0                                            | 40-44     | Dual               | 0     | 0.00  |               |             |               |                |              |
| 0                                            | 40-44     | Former             | 2630  | 30.39 |               |             | 10.69         | 317            | 12.05        |
| Year of Follow-up: 1990, Age Group: 45-49    |           |                    |       |       |               |             |               |                |              |
| Period                                       | Age Group | Smoking Group      | N     | %     | Ever Quit (N) | Ever Quit % | Mean Yrs Quit | Short Term (n) | Short Term % |
| 0                                            | 45-49     | Never Any          | 1919  | 29.46 |               |             |               |                |              |
| 0                                            | 45-49     | CC                 | 2318  | 35.58 | 0             | 0.00        |               |                |              |
| 0                                            | 45-49     | Ecig               | 0     | 0.00  |               |             |               |                |              |
| 0                                            | 45-49     | Dual               | 0     | 0.00  |               |             |               |                |              |
| 0                                            | 45-49     | Former             | 2278  | 34.97 |               |             | 13.26         | 221            | 9.70         |
| Year of Follow-up: 1990, Age Group: 50-54    |           |                    |       |       |               |             |               |                |              |
| Period                                       | Age Group | Smoking Group      | N     | %     | Ever Quit (N) | Ever Quit % | Mean Yrs Quit | Short Term (n) | Short Term % |
| 0                                            | 50-54     | Never Any          | 1611  | 29.41 |               |             |               |                |              |
| 0                                            | 50-54     | CC                 | 1816  | 33.16 | 0             | 0.00        |               |                |              |

**Results for PHIM for Run 5 (Sensitivity\_Analysis\_2.RTF)**

|                                              |           |               |       |       |               |             |               |                |              |
|----------------------------------------------|-----------|---------------|-------|-------|---------------|-------------|---------------|----------------|--------------|
| 0                                            | 50-54     | Ecig          | 0     | 0.00  |               |             |               |                |              |
| 0                                            | 50-54     | Dual          | 0     | 0.00  |               |             |               |                |              |
| 0                                            | 50-54     | Former        | 2050  | 37.43 |               |             | 14.55         | 261            | 12.73        |
| Year of Follow-up: 1990, Age Group: 55-59    |           |               |       |       |               |             |               |                |              |
| Period                                       | Age Group | Smoking Group | N     | %     | Ever Quit (N) | Ever Quit % | Mean Yrs Quit | Short Term (n) | Short Term % |
| 0                                            | 55-59     | Never Any     | 1337  | 26.83 |               |             |               |                |              |
| 0                                            | 55-59     | CC            | 1520  | 30.50 | 0             | 0.00        |               |                |              |
| 0                                            | 55-59     | Ecig          | 0     | 0.00  |               |             |               |                |              |
| 0                                            | 55-59     | Dual          | 0     | 0.00  |               |             |               |                |              |
| 0                                            | 55-59     | Former        | 2126  | 42.67 |               |             | 14.80         | 216            | 10.16        |
| Year of Follow-up: 1990, Age Group: 60-64    |           |               |       |       |               |             |               |                |              |
| Period                                       | Age Group | Smoking Group | N     | %     | Ever Quit (N) | Ever Quit % | Mean Yrs Quit | Short Term (n) | Short Term % |
| 0                                            | 60-64     | Never Any     | 1169  | 23.83 |               |             |               |                |              |
| 0                                            | 60-64     | CC            | 1287  | 26.24 | 0             | 0.00        |               |                |              |
| 0                                            | 60-64     | Ecig          | 0     | 0.00  |               |             |               |                |              |
| 0                                            | 60-64     | Dual          | 0     | 0.00  |               |             |               |                |              |
| 0                                            | 60-64     | Former        | 2449  | 49.93 |               |             | 18.87         | 106            | 4.33         |
| Year of Follow-up: 1990, Age Group: 65-69    |           |               |       |       |               |             |               |                |              |
| Period                                       | Age Group | Smoking Group | N     | %     | Ever Quit (N) | Ever Quit % | Mean Yrs Quit | Short Term (n) | Short Term % |
| 0                                            | 65-69     | Never Any     | 1023  | 23.32 |               |             |               |                |              |
| 0                                            | 65-69     | CC            | 979   | 22.32 | 0             | 0.00        |               |                |              |
| 0                                            | 65-69     | Ecig          | 0     | 0.00  |               |             |               |                |              |
| 0                                            | 65-69     | Dual          | 0     | 0.00  |               |             |               |                |              |
| 0                                            | 65-69     | Former        | 2385  | 54.37 |               |             | 19.91         | 113            | 4.74         |
| Year of Follow-up: 1990, Age Group: 70-74    |           |               |       |       |               |             |               |                |              |
| Period                                       | Age Group | Smoking Group | N     | %     | Ever Quit (N) | Ever Quit % | Mean Yrs Quit | Short Term (n) | Short Term % |
| 0                                            | 70-74     | Never Any     | 961   | 27.46 |               |             |               |                |              |
| 0                                            | 70-74     | CC            | 675   | 19.29 | 0             | 0.00        |               |                |              |
| 0                                            | 70-74     | Ecig          | 0     | 0.00  |               |             |               |                |              |
| 0                                            | 70-74     | Dual          | 0     | 0.00  |               |             |               |                |              |
| 0                                            | 70-74     | Former        | 1863  | 53.24 |               |             | 20.69         | 23             | 1.23         |
| Year of Follow-up: 1990, Age Group: 75-79    |           |               |       |       |               |             |               |                |              |
| Period                                       | Age Group | Smoking Group | N     | %     | Ever Quit (N) | Ever Quit % | Mean Yrs Quit | Short Term (n) | Short Term % |
| 0                                            | 75-79     | Never Any     | 700   | 29.06 |               |             |               |                |              |
| 0                                            | 75-79     | CC            | 371   | 15.40 | 0             | 0.00        |               |                |              |
| 0                                            | 75-79     | Ecig          | 0     | 0.00  |               |             |               |                |              |
| 0                                            | 75-79     | Dual          | 0     | 0.00  |               |             |               |                |              |
| 0                                            | 75-79     | Former        | 1338  | 55.54 |               |             | 22.88         | 68             | 5.08         |
| Year of Follow-up: 1995, Age Group: All Ages |           |               |       |       |               |             |               |                |              |
| Period                                       | Age Group | Smoking Group | N     | %     | Ever Quit (N) | Ever Quit % | Mean Yrs Quit | Short Term (n) | Short Term % |
| 5                                            | All Ages  | Never Any     | 38368 | 41.57 |               |             |               |                |              |
| 5                                            | All Ages  | CC            | 16373 | 17.74 | 0             | 0.00        |               |                |              |
| 5                                            | All Ages  | Ecig          | 10499 | 11.38 |               |             |               |                |              |
| 5                                            | All Ages  | Dual          | 0     | 0.00  |               |             |               |                |              |
| 5                                            | All Ages  | Former        | 27050 | 29.31 |               |             | 15.12         | 1774           | 6.56         |
| Year of Follow-up: 1995, Age Group: 18-19    |           |               |       |       |               |             |               |                |              |
| Period                                       | Age Group | Smoking Group | N     | %     | Ever Quit (N) | Ever Quit % | Mean Yrs Quit | Short Term (n) | Short Term % |
| 5                                            | 18-19     | Never Any     | 2448  | 69.07 |               |             |               |                |              |
| 5                                            | 18-19     | CC            | 382   | 10.78 | 0             | 0.00        |               |                |              |
| 5                                            | 18-19     | Ecig          | 612   | 17.27 |               |             |               |                |              |
| 5                                            | 18-19     | Dual          | 0     | 0.00  |               |             |               |                |              |
| 5                                            | 18-19     | Former        | 102   | 2.88  |               |             | 0.99          | 74             | 72.55        |
| Year of Follow-up: 1995, Age Group: 20-24    |           |               |       |       |               |             |               |                |              |
| Period                                       | Age Group | Smoking Group | N     | %     | Ever Quit (N) | Ever Quit % | Mean Yrs Quit | Short Term (n) | Short Term % |
| 5                                            | 20-24     | Never Any     | 5787  | 64.02 |               |             |               |                |              |
| 5                                            | 20-24     | CC            | 1346  | 14.89 | 0             | 0.00        |               |                |              |
| 5                                            | 20-24     | Ecig          | 1343  | 14.86 |               |             |               |                |              |
| 5                                            | 20-24     | Dual          | 0     | 0.00  |               |             |               |                |              |
| 5                                            | 20-24     | Former        | 564   | 6.24  |               |             | 2.71          | 173            | 30.67        |
| Year of Follow-up: 1995, Age Group: 25-29    |           |               |       |       |               |             |               |                |              |
| Period                                       | Age Group | Smoking Group | N     | %     | Ever Quit (N) | Ever Quit % | Mean Yrs Quit | Short Term (n) | Short Term % |
| 5                                            | 25-29     | Never Any     | 5471  | 55.74 |               |             |               |                |              |
| 5                                            | 25-29     | CC            | 1807  | 18.41 | 0             | 0.00        |               |                |              |
| 5                                            | 25-29     | Ecig          | 1409  | 14.35 |               |             |               |                |              |
| 5                                            | 25-29     | Dual          | 0     | 0.00  |               |             |               |                |              |
| 5                                            | 25-29     | Former        | 1129  | 11.50 |               |             | 5.49          | 106            | 9.39         |
| Year of Follow-up: 1995, Age Group: 30-34    |           |               |       |       |               |             |               |                |              |
| Period                                       | Age Group | Smoking Group | N     | %     | Ever Quit (N) | Ever Quit % | Mean Yrs Quit | Short Term (n) | Short Term % |

**Results for PHIM for Run 5 (Sensitivity\_Analysis\_2.RTF)**

|                                              |           |               |      |       |               |             |               |                |              |
|----------------------------------------------|-----------|---------------|------|-------|---------------|-------------|---------------|----------------|--------------|
| 5                                            | 30-34     | Never Any     | 5065 | 47.50 |               |             |               |                |              |
| 5                                            | 30-34     | CC            | 2076 | 19.47 | 0             | 0.00        |               |                |              |
| 5                                            | 30-34     | Ecig          | 1726 | 16.19 |               |             |               |                |              |
| 5                                            | 30-34     | Dual          | 0    | 0.00  |               |             |               |                |              |
| 5                                            | 30-34     | Former        | 1797 | 16.85 |               |             | 6.95          | 110            | 6.12         |
| Year of Follow-up: 1995, Age Group: 35-39    |           |               |      |       |               |             |               |                |              |
| Period                                       | Age Group | Smoking Group | N    | %     | Ever Quit (N) | Ever Quit % | Mean Yrs Quit | Short Term (n) | Short Term % |
| 5                                            | 35-39     | Never Any     | 4724 | 43.28 |               |             |               |                |              |
| 5                                            | 35-39     | CC            | 2143 | 19.63 | 0             | 0.00        |               |                |              |
| 5                                            | 35-39     | Ecig          | 1614 | 14.79 |               |             |               |                |              |
| 5                                            | 35-39     | Dual          | 0    | 0.00  |               |             |               |                |              |
| 5                                            | 35-39     | Former        | 2435 | 22.31 |               |             | 8.16          | 127            | 5.22         |
| Year of Follow-up: 1995, Age Group: 40-44    |           |               |      |       |               |             |               |                |              |
| Period                                       | Age Group | Smoking Group | N    | %     | Ever Quit (N) | Ever Quit % | Mean Yrs Quit | Short Term (n) | Short Term % |
| 5                                            | 40-44     | Never Any     | 3941 | 39.85 |               |             |               |                |              |
| 5                                            | 40-44     | CC            | 1852 | 18.73 | 0             | 0.00        |               |                |              |
| 5                                            | 40-44     | Ecig          | 1310 | 13.25 |               |             |               |                |              |
| 5                                            | 40-44     | Dual          | 0    | 0.00  |               |             |               |                |              |
| 5                                            | 40-44     | Former        | 2786 | 28.17 |               |             | 11.99         | 156            | 5.60         |
| Year of Follow-up: 1995, Age Group: 45-49    |           |               |      |       |               |             |               |                |              |
| Period                                       | Age Group | Smoking Group | N    | %     | Ever Quit (N) | Ever Quit % | Mean Yrs Quit | Short Term (n) | Short Term % |
| 5                                            | 45-49     | Never Any     | 2912 | 33.65 |               |             |               |                |              |
| 5                                            | 45-49     | CC            | 1733 | 20.02 | 0             | 0.00        |               |                |              |
| 5                                            | 45-49     | Ecig          | 1023 | 11.82 |               |             |               |                |              |
| 5                                            | 45-49     | Dual          | 0    | 0.00  |               |             |               |                |              |
| 5                                            | 45-49     | Former        | 2987 | 34.51 |               |             | 14.02         | 162            | 5.42         |
| Year of Follow-up: 1995, Age Group: 50-54    |           |               |      |       |               |             |               |                |              |
| Period                                       | Age Group | Smoking Group | N    | %     | Ever Quit (N) | Ever Quit % | Mean Yrs Quit | Short Term (n) | Short Term % |
| 5                                            | 50-54     | Never Any     | 1919 | 29.46 |               |             |               |                |              |
| 5                                            | 50-54     | CC            | 1375 | 21.11 | 0             | 0.00        |               |                |              |
| 5                                            | 50-54     | Ecig          | 616  | 9.46  |               |             |               |                |              |
| 5                                            | 50-54     | Dual          | 0    | 0.00  |               |             |               |                |              |
| 5                                            | 50-54     | Former        | 2605 | 39.98 |               |             | 16.20         | 135            | 5.18         |
| Year of Follow-up: 1995, Age Group: 55-59    |           |               |      |       |               |             |               |                |              |
| Period                                       | Age Group | Smoking Group | N    | %     | Ever Quit (N) | Ever Quit % | Mean Yrs Quit | Short Term (n) | Short Term % |
| 5                                            | 55-59     | Never Any     | 1611 | 29.41 |               |             |               |                |              |
| 5                                            | 55-59     | CC            | 1051 | 19.19 | 0             | 0.00        |               |                |              |
| 5                                            | 55-59     | Ecig          | 413  | 7.54  |               |             |               |                |              |
| 5                                            | 55-59     | Dual          | 0    | 0.00  |               |             |               |                |              |
| 5                                            | 55-59     | Former        | 2402 | 43.86 |               |             | 16.98         | 132            | 5.50         |
| Year of Follow-up: 1995, Age Group: 60-64    |           |               |      |       |               |             |               |                |              |
| Period                                       | Age Group | Smoking Group | N    | %     | Ever Quit (N) | Ever Quit % | Mean Yrs Quit | Short Term (n) | Short Term % |
| 5                                            | 60-64     | Never Any     | 1337 | 26.83 |               |             |               |                |              |
| 5                                            | 60-64     | CC            | 869  | 17.44 | 0             | 0.00        |               |                |              |
| 5                                            | 60-64     | Ecig          | 283  | 5.68  |               |             |               |                |              |
| 5                                            | 60-64     | Dual          | 0    | 0.00  |               |             |               |                |              |
| 5                                            | 60-64     | Former        | 2494 | 50.05 |               |             | 17.16         | 149            | 5.97         |
| Year of Follow-up: 1995, Age Group: 65-69    |           |               |      |       |               |             |               |                |              |
| Period                                       | Age Group | Smoking Group | N    | %     | Ever Quit (N) | Ever Quit % | Mean Yrs Quit | Short Term (n) | Short Term % |
| 5                                            | 65-69     | Never Any     | 1169 | 23.83 |               |             |               |                |              |
| 5                                            | 65-69     | CC            | 708  | 14.43 | 0             | 0.00        |               |                |              |
| 5                                            | 65-69     | Ecig          | 134  | 2.73  |               |             |               |                |              |
| 5                                            | 65-69     | Dual          | 0    | 0.00  |               |             |               |                |              |
| 5                                            | 65-69     | Former        | 2894 | 59.00 |               |             | 20.46         | 217            | 7.50         |
| Year of Follow-up: 1995, Age Group: 70-74    |           |               |      |       |               |             |               |                |              |
| Period                                       | Age Group | Smoking Group | N    | %     | Ever Quit (N) | Ever Quit % | Mean Yrs Quit | Short Term (n) | Short Term % |
| 5                                            | 70-74     | Never Any     | 1023 | 23.32 |               |             |               |                |              |
| 5                                            | 70-74     | CC            | 595  | 13.56 | 0             | 0.00        |               |                |              |
| 5                                            | 70-74     | Ecig          | 16   | 0.36  |               |             |               |                |              |
| 5                                            | 70-74     | Dual          | 0    | 0.00  |               |             |               |                |              |
| 5                                            | 70-74     | Former        | 2753 | 62.75 |               |             | 21.84         | 139            | 5.05         |
| Year of Follow-up: 1995, Age Group: 75-79    |           |               |      |       |               |             |               |                |              |
| Period                                       | Age Group | Smoking Group | N    | %     | Ever Quit (N) | Ever Quit % | Mean Yrs Quit | Short Term (n) | Short Term % |
| 5                                            | 75-79     | Never Any     | 961  | 27.46 |               |             |               |                |              |
| 5                                            | 75-79     | CC            | 436  | 12.46 | 0             | 0.00        |               |                |              |
| 5                                            | 75-79     | Ecig          | 0    | 0.00  |               |             |               |                |              |
| 5                                            | 75-79     | Dual          | 0    | 0.00  |               |             |               |                |              |
| 5                                            | 75-79     | Former        | 2102 | 60.07 |               |             | 23.00         | 94             | 4.47         |
| Year of Follow-up: 2000, Age Group: All Ages |           |               |      |       |               |             |               |                |              |

**Results for PHIM for Run 5 (Sensitivity\_Analysis\_2.RTF)**

| Period                                    | Age Group | Smoking Group | N     | %     | Ever Quit (N) | Ever Quit % | Mean Yrs Quit | Short Term (n) | Short Term % |
|-------------------------------------------|-----------|---------------|-------|-------|---------------|-------------|---------------|----------------|--------------|
| 10                                        | All Ages  | Never Any     | 39177 | 41.64 |               |             |               |                |              |
| 10                                        | All Ages  | CC            | 9615  | 10.22 | 0             | 0.00        |               |                |              |
| 10                                        | All Ages  | Ecig          | 15930 | 16.93 |               |             |               |                |              |
| 10                                        | All Ages  | Dual          | 0     | 0.00  |               |             |               |                |              |
| 10                                        | All Ages  | Former        | 29370 | 31.21 |               |             | 16.86         | 1699           | 5.78         |
| Year of Follow-up: 2000, Age Group: 18-19 |           |               |       |       |               |             |               |                |              |
| Period                                    | Age Group | Smoking Group | N     | %     | Ever Quit (N) | Ever Quit % | Mean Yrs Quit | Short Term (n) | Short Term % |
| 10                                        | 18-19     | Never Any     | 0     | .     |               |             |               |                |              |
| 10                                        | 18-19     | CC            | 0     | .     | 0             | .           |               |                |              |
| 10                                        | 18-19     | Ecig          | 0     | .     |               |             |               |                |              |
| 10                                        | 18-19     | Dual          | 0     | .     |               |             |               |                |              |
| 10                                        | 18-19     | Former        | 0     | .     |               |             |               | 0              | .            |
| Year of Follow-up: 2000, Age Group: 20-24 |           |               |       |       |               |             |               |                |              |
| Period                                    | Age Group | Smoking Group | N     | %     | Ever Quit (N) | Ever Quit % | Mean Yrs Quit | Short Term (n) | Short Term % |
| 10                                        | 20-24     | Never Any     | 4927  | 55.70 |               |             |               |                |              |
| 10                                        | 20-24     | CC            | 718   | 8.12  | 0             | 0.00        |               |                |              |
| 10                                        | 20-24     | Ecig          | 2291  | 25.90 |               |             |               |                |              |
| 10                                        | 20-24     | Dual          | 0     | 0.00  |               |             |               |                |              |
| 10                                        | 20-24     | Former        | 909   | 10.28 |               |             | 3.40          | 254            | 27.94        |
| Year of Follow-up: 2000, Age Group: 25-29 |           |               |       |       |               |             |               |                |              |
| Period                                    | Age Group | Smoking Group | N     | %     | Ever Quit (N) | Ever Quit % | Mean Yrs Quit | Short Term (n) | Short Term % |
| 10                                        | 25-29     | Never Any     | 5341  | 59.08 |               |             |               |                |              |
| 10                                        | 25-29     | CC            | 770   | 8.52  | 0             | 0.00        |               |                |              |
| 10                                        | 25-29     | Ecig          | 1942  | 21.48 |               |             |               |                |              |
| 10                                        | 25-29     | Dual          | 0     | 0.00  |               |             |               |                |              |
| 10                                        | 25-29     | Former        | 987   | 10.92 |               |             | 5.22          | 170            | 17.22        |
| Year of Follow-up: 2000, Age Group: 30-34 |           |               |       |       |               |             |               |                |              |
| Period                                    | Age Group | Smoking Group | N     | %     | Ever Quit (N) | Ever Quit % | Mean Yrs Quit | Short Term (n) | Short Term % |
| 10                                        | 30-34     | Never Any     | 5276  | 53.75 |               |             |               |                |              |
| 10                                        | 30-34     | CC            | 981   | 9.99  | 0             | 0.00        |               |                |              |
| 10                                        | 30-34     | Ecig          | 2118  | 21.58 |               |             |               |                |              |
| 10                                        | 30-34     | Dual          | 0     | 0.00  |               |             |               |                |              |
| 10                                        | 30-34     | Former        | 1441  | 14.68 |               |             | 8.66          | 114            | 7.91         |
| Year of Follow-up: 2000, Age Group: 35-39 |           |               |       |       |               |             |               |                |              |
| Period                                    | Age Group | Smoking Group | N     | %     | Ever Quit (N) | Ever Quit % | Mean Yrs Quit | Short Term (n) | Short Term % |
| 10                                        | 35-39     | Never Any     | 4997  | 46.86 |               |             |               |                |              |
| 10                                        | 35-39     | CC            | 1168  | 10.95 | 0             | 0.00        |               |                |              |
| 10                                        | 35-39     | Ecig          | 2437  | 22.85 |               |             |               |                |              |
| 10                                        | 35-39     | Dual          | 0     | 0.00  |               |             |               |                |              |
| 10                                        | 35-39     | Former        | 2062  | 19.34 |               |             | 10.66         | 107            | 5.19         |
| Year of Follow-up: 2000, Age Group: 40-44 |           |               |       |       |               |             |               |                |              |
| Period                                    | Age Group | Smoking Group | N     | %     | Ever Quit (N) | Ever Quit % | Mean Yrs Quit | Short Term (n) | Short Term % |
| 10                                        | 40-44     | Never Any     | 4724  | 43.28 |               |             |               |                |              |
| 10                                        | 40-44     | CC            | 1178  | 10.79 | 0             | 0.00        |               |                |              |
| 10                                        | 40-44     | Ecig          | 2256  | 20.67 |               |             |               |                |              |
| 10                                        | 40-44     | Dual          | 0     | 0.00  |               |             |               |                |              |
| 10                                        | 40-44     | Former        | 2758  | 25.27 |               |             | 11.86         | 126            | 4.57         |
| Year of Follow-up: 2000, Age Group: 45-49 |           |               |       |       |               |             |               |                |              |
| Period                                    | Age Group | Smoking Group | N     | %     | Ever Quit (N) | Ever Quit % | Mean Yrs Quit | Short Term (n) | Short Term % |
| 10                                        | 45-49     | Never Any     | 3941  | 39.85 |               |             |               |                |              |
| 10                                        | 45-49     | CC            | 1039  | 10.51 | 0             | 0.00        |               |                |              |
| 10                                        | 45-49     | Ecig          | 1766  | 17.86 |               |             |               |                |              |
| 10                                        | 45-49     | Dual          | 0     | 0.00  |               |             |               |                |              |
| 10                                        | 45-49     | Former        | 3143  | 31.78 |               |             | 15.27         | 156            | 4.96         |
| Year of Follow-up: 2000, Age Group: 50-54 |           |               |       |       |               |             |               |                |              |
| Period                                    | Age Group | Smoking Group | N     | %     | Ever Quit (N) | Ever Quit % | Mean Yrs Quit | Short Term (n) | Short Term % |
| 10                                        | 50-54     | Never Any     | 2912  | 33.65 |               |             |               |                |              |
| 10                                        | 50-54     | CC            | 953   | 11.01 | 0             | 0.00        |               |                |              |
| 10                                        | 50-54     | Ecig          | 1365  | 15.77 |               |             |               |                |              |
| 10                                        | 50-54     | Dual          | 0     | 0.00  |               |             |               |                |              |
| 10                                        | 50-54     | Former        | 3425  | 39.57 |               |             | 16.84         | 178            | 5.20         |
| Year of Follow-up: 2000, Age Group: 55-59 |           |               |       |       |               |             |               |                |              |
| Period                                    | Age Group | Smoking Group | N     | %     | Ever Quit (N) | Ever Quit % | Mean Yrs Quit | Short Term (n) | Short Term % |
| 10                                        | 55-59     | Never Any     | 1919  | 29.46 |               |             |               |                |              |
| 10                                        | 55-59     | CC            | 787   | 12.08 | 0             | 0.00        |               |                |              |
| 10                                        | 55-59     | Ecig          | 807   | 12.39 |               |             |               |                |              |
| 10                                        | 55-59     | Dual          | 0     | 0.00  |               |             |               |                |              |

**Results for PHIM for Run 5 (Sensitivity\_Analysis\_2.RTF)**

| Year of Follow-up: 2000, Age Group: 60-64    | Period   | Age Group | Smoking Group | N     | %     | Ever Quit (N) | Ever Quit % | Mean Yrs Quit | Short Term (n) | Short Term % |
|----------------------------------------------|----------|-----------|---------------|-------|-------|---------------|-------------|---------------|----------------|--------------|
| 10                                           | 55-59    | Former    |               | 3002  | 46.08 |               |             | 18.66         | 158            | 5.26         |
| 10                                           | 60-64    | Never Any |               | 1611  | 29.41 |               |             |               |                |              |
| 10                                           | 60-64    | CC        |               | 626   | 11.43 | 0             | 0.00        |               |                |              |
| 10                                           | 60-64    | Ecig      |               | 529   | 9.66  |               |             |               |                |              |
| 10                                           | 60-64    | Dual      |               | 0     | 0.00  |               |             |               |                |              |
| 10                                           | 60-64    | Former    |               | 2711  | 49.50 |               |             | 19.69         | 143            | 5.27         |
| Year of Follow-up: 2000, Age Group: 65-69    | Period   | Age Group | Smoking Group | N     | %     | Ever Quit (N) | Ever Quit % | Mean Yrs Quit | Short Term (n) | Short Term % |
| 10                                           | 65-69    | Never Any |               | 1337  | 26.83 |               |             |               |                |              |
| 10                                           | 65-69    | CC        |               | 519   | 10.42 | 0             | 0.00        |               |                |              |
| 10                                           | 65-69    | Ecig      |               | 302   | 6.06  |               |             |               |                |              |
| 10                                           | 65-69    | Dual      |               | 0     | 0.00  |               |             |               |                |              |
| 10                                           | 65-69    | Former    |               | 2825  | 56.69 |               |             | 19.80         | 142            | 5.03         |
| Year of Follow-up: 2000, Age Group: 70-74    | Period   | Age Group | Smoking Group | N     | %     | Ever Quit (N) | Ever Quit % | Mean Yrs Quit | Short Term (n) | Short Term % |
| 10                                           | 70-74    | Never Any |               | 1169  | 23.83 |               |             |               |                |              |
| 10                                           | 70-74    | CC        |               | 474   | 9.66  | 0             | 0.00        |               |                |              |
| 10                                           | 70-74    | Ecig      |               | 108   | 2.20  |               |             |               |                |              |
| 10                                           | 70-74    | Dual      |               | 0     | 0.00  |               |             |               |                |              |
| 10                                           | 70-74    | Former    |               | 3154  | 64.30 |               |             | 23.56         | 77             | 2.44         |
| Year of Follow-up: 2000, Age Group: 75-79    | Period   | Age Group | Smoking Group | N     | %     | Ever Quit (N) | Ever Quit % | Mean Yrs Quit | Short Term (n) | Short Term % |
| 10                                           | 75-79    | Never Any |               | 1023  | 23.32 |               |             |               |                |              |
| 10                                           | 75-79    | CC        |               | 402   | 9.16  | 0             | 0.00        |               |                |              |
| 10                                           | 75-79    | Ecig      |               | 9     | 0.21  |               |             |               |                |              |
| 10                                           | 75-79    | Dual      |               | 0     | 0.00  |               |             |               |                |              |
| 10                                           | 75-79    | Former    |               | 2953  | 67.31 |               |             | 25.16         | 74             | 2.51         |
| Year of Follow-up: 2005, Age Group: All Ages | Period   | Age Group | Smoking Group | N     | %     | Ever Quit (N) | Ever Quit % | Mean Yrs Quit | Short Term (n) | Short Term % |
| 15                                           | All Ages | Never Any |               | 37449 | 41.75 |               |             |               |                |              |
| 15                                           | All Ages | CC        |               | 5334  | 5.95  | 0             | 0.00        |               |                |              |
| 15                                           | All Ages | Ecig      |               | 16605 | 18.51 |               |             |               |                |              |
| 15                                           | All Ages | Dual      |               | 0     | 0.00  |               |             |               |                |              |
| 15                                           | All Ages | Former    |               | 30317 | 33.80 |               |             | 18.50         | 1542           | 5.09         |
| Year of Follow-up: 2005, Age Group: 18-19    | Period   | Age Group | Smoking Group | N     | %     | Ever Quit (N) | Ever Quit % | Mean Yrs Quit | Short Term (n) | Short Term % |
| 15                                           | 18-19    | Never Any |               | 0     | .     |               |             |               |                |              |
| 15                                           | 18-19    | CC        |               | 0     | .     | 0             | .           |               |                |              |
| 15                                           | 18-19    | Ecig      |               | 0     | .     |               |             |               |                |              |
| 15                                           | 18-19    | Dual      |               | 0     | .     |               |             |               |                |              |
| 15                                           | 18-19    | Former    |               | 0     | .     |               |             | .             | 0              | .            |
| Year of Follow-up: 2005, Age Group: 20-24    | Period   | Age Group | Smoking Group | N     | %     | Ever Quit (N) | Ever Quit % | Mean Yrs Quit | Short Term (n) | Short Term % |
| 15                                           | 20-24    | Never Any |               | 0     | .     |               |             |               |                |              |
| 15                                           | 20-24    | CC        |               | 0     | .     | 0             | .           |               |                |              |
| 15                                           | 20-24    | Ecig      |               | 0     | .     |               |             |               |                |              |
| 15                                           | 20-24    | Dual      |               | 0     | .     |               |             |               |                |              |
| 15                                           | 20-24    | Former    |               | 0     | .     |               |             | .             | 0              | .            |
| Year of Follow-up: 2005, Age Group: 25-29    | Period   | Age Group | Smoking Group | N     | %     | Ever Quit (N) | Ever Quit % | Mean Yrs Quit | Short Term (n) | Short Term % |
| 15                                           | 25-29    | Never Any |               | 4634  | 52.39 |               |             |               |                |              |
| 15                                           | 25-29    | CC        |               | 386   | 4.36  | 0             | 0.00        |               |                |              |
| 15                                           | 25-29    | Ecig      |               | 2460  | 27.81 |               |             |               |                |              |
| 15                                           | 25-29    | Dual      |               | 0     | 0.00  |               |             |               |                |              |
| 15                                           | 25-29    | Former    |               | 1365  | 15.43 |               |             | 6.32          | 171            | 12.53        |
| Year of Follow-up: 2005, Age Group: 30-34    | Period   | Age Group | Smoking Group | N     | %     | Ever Quit (N) | Ever Quit % | Mean Yrs Quit | Short Term (n) | Short Term % |
| 15                                           | 30-34    | Never Any |               | 5042  | 55.77 |               |             |               |                |              |
| 15                                           | 30-34    | CC        |               | 384   | 4.25  | 0             | 0.00        |               |                |              |
| 15                                           | 30-34    | Ecig      |               | 2198  | 24.31 |               |             |               |                |              |
| 15                                           | 30-34    | Dual      |               | 0     | 0.00  |               |             |               |                |              |
| 15                                           | 30-34    | Former    |               | 1416  | 15.66 |               |             | 7.71          | 168            | 11.86        |
| Year of Follow-up: 2005, Age Group: 35-39    | Period   | Age Group | Smoking Group | N     | %     | Ever Quit (N) | Ever Quit % | Mean Yrs Quit | Short Term (n) | Short Term % |
| 15                                           | 35-39    | Never Any |               | 5163  | 52.60 |               |             |               |                |              |
| 15                                           | 35-39    | CC        |               | 533   | 5.43  | 0             | 0.00        |               |                |              |

**Results for PHIM for Run 5 (Sensitivity\_Analysis\_2.RTF)**

|                                              |           |               |       |       |               |             |               |                |              |
|----------------------------------------------|-----------|---------------|-------|-------|---------------|-------------|---------------|----------------|--------------|
| 15                                           | 35-39     | Ecig          | 2335  | 23.79 |               |             |               |                |              |
| 15                                           | 35-39     | Dual          | 0     | 0.00  |               |             |               |                |              |
| 15                                           | 35-39     | Former        | 1785  | 18.18 |               |             | 11.41         | 136            | 7.62         |
| Year of Follow-up: 2005, Age Group: 40-44    |           |               |       |       |               |             |               |                |              |
| Period                                       | Age Group | Smoking Group | N     | %     | Ever Quit (N) | Ever Quit % | Mean Yrs Quit | Short Term (n) | Short Term % |
| 15                                           | 40-44     | Never Any     | 4997  | 46.86 |               |             |               |                |              |
| 15                                           | 40-44     | CC            | 622   | 5.83  | 0             | 0.00        |               |                |              |
| 15                                           | 40-44     | Ecig          | 2566  | 24.06 |               |             |               |                |              |
| 15                                           | 40-44     | Dual          | 0     | 0.00  |               |             |               |                |              |
| 15                                           | 40-44     | Former        | 2479  | 23.25 |               |             | 13.33         | 195            | 7.87         |
| Year of Follow-up: 2005, Age Group: 45-49    |           |               |       |       |               |             |               |                |              |
| Period                                       | Age Group | Smoking Group | N     | %     | Ever Quit (N) | Ever Quit % | Mean Yrs Quit | Short Term (n) | Short Term % |
| 15                                           | 45-49     | Never Any     | 4724  | 43.28 |               |             |               |                |              |
| 15                                           | 45-49     | CC            | 657   | 6.02  | 0             | 0.00        |               |                |              |
| 15                                           | 45-49     | Ecig          | 2354  | 21.56 |               |             |               |                |              |
| 15                                           | 45-49     | Dual          | 0     | 0.00  |               |             |               |                |              |
| 15                                           | 45-49     | Former        | 3181  | 29.14 |               |             | 14.89         | 165            | 5.19         |
| Year of Follow-up: 2005, Age Group: 50-54    |           |               |       |       |               |             |               |                |              |
| Period                                       | Age Group | Smoking Group | N     | %     | Ever Quit (N) | Ever Quit % | Mean Yrs Quit | Short Term (n) | Short Term % |
| 15                                           | 50-54     | Never Any     | 3941  | 39.85 |               |             |               |                |              |
| 15                                           | 50-54     | CC            | 637   | 6.44  | 0             | 0.00        |               |                |              |
| 15                                           | 50-54     | Ecig          | 1775  | 17.95 |               |             |               |                |              |
| 15                                           | 50-54     | Dual          | 0     | 0.00  |               |             |               |                |              |
| 15                                           | 50-54     | Former        | 3536  | 35.76 |               |             | 18.25         | 150            | 4.24         |
| Year of Follow-up: 2005, Age Group: 55-59    |           |               |       |       |               |             |               |                |              |
| Period                                       | Age Group | Smoking Group | N     | %     | Ever Quit (N) | Ever Quit % | Mean Yrs Quit | Short Term (n) | Short Term % |
| 15                                           | 55-59     | Never Any     | 2912  | 33.65 |               |             |               |                |              |
| 15                                           | 55-59     | CC            | 596   | 6.89  | 0             | 0.00        |               |                |              |
| 15                                           | 55-59     | Ecig          | 1415  | 16.35 |               |             |               |                |              |
| 15                                           | 55-59     | Dual          | 0     | 0.00  |               |             |               |                |              |
| 15                                           | 55-59     | Former        | 3732  | 43.12 |               |             | 20.23         | 108            | 2.89         |
| Year of Follow-up: 2005, Age Group: 60-64    |           |               |       |       |               |             |               |                |              |
| Period                                       | Age Group | Smoking Group | N     | %     | Ever Quit (N) | Ever Quit % | Mean Yrs Quit | Short Term (n) | Short Term % |
| 15                                           | 60-64     | Never Any     | 1919  | 29.46 |               |             |               |                |              |
| 15                                           | 60-64     | CC            | 469   | 7.20  | 0             | 0.00        |               |                |              |
| 15                                           | 60-64     | Ecig          | 791   | 12.14 |               |             |               |                |              |
| 15                                           | 60-64     | Dual          | 0     | 0.00  |               |             |               |                |              |
| 15                                           | 60-64     | Former        | 3336  | 51.20 |               |             | 21.48         | 163            | 4.89         |
| Year of Follow-up: 2005, Age Group: 65-69    |           |               |       |       |               |             |               |                |              |
| Period                                       | Age Group | Smoking Group | N     | %     | Ever Quit (N) | Ever Quit % | Mean Yrs Quit | Short Term (n) | Short Term % |
| 15                                           | 65-69     | Never Any     | 1611  | 29.41 |               |             |               |                |              |
| 15                                           | 65-69     | CC            | 374   | 6.83  | 0             | 0.00        |               |                |              |
| 15                                           | 65-69     | Ecig          | 438   | 8.00  |               |             |               |                |              |
| 15                                           | 65-69     | Dual          | 0     | 0.00  |               |             |               |                |              |
| 15                                           | 65-69     | Former        | 3054  | 55.76 |               |             | 22.15         | 124            | 4.06         |
| Year of Follow-up: 2005, Age Group: 70-74    |           |               |       |       |               |             |               |                |              |
| Period                                       | Age Group | Smoking Group | N     | %     | Ever Quit (N) | Ever Quit % | Mean Yrs Quit | Short Term (n) | Short Term % |
| 15                                           | 70-74     | Never Any     | 1337  | 26.83 |               |             |               |                |              |
| 15                                           | 70-74     | CC            | 358   | 7.18  | 0             | 0.00        |               |                |              |
| 15                                           | 70-74     | Ecig          | 208   | 4.17  |               |             |               |                |              |
| 15                                           | 70-74     | Dual          | 0     | 0.00  |               |             |               |                |              |
| 15                                           | 70-74     | Former        | 3080  | 61.81 |               |             | 22.92         | 87             | 2.82         |
| Year of Follow-up: 2005, Age Group: 75-79    |           |               |       |       |               |             |               |                |              |
| Period                                       | Age Group | Smoking Group | N     | %     | Ever Quit (N) | Ever Quit % | Mean Yrs Quit | Short Term (n) | Short Term % |
| 15                                           | 75-79     | Never Any     | 1169  | 23.83 |               |             |               |                |              |
| 15                                           | 75-79     | CC            | 318   | 6.48  | 0             | 0.00        |               |                |              |
| 15                                           | 75-79     | Ecig          | 65    | 1.33  |               |             |               |                |              |
| 15                                           | 75-79     | Dual          | 0     | 0.00  |               |             |               |                |              |
| 15                                           | 75-79     | Former        | 3353  | 68.36 |               |             | 26.99         | 75             | 2.24         |
| Year of Follow-up: 2010, Age Group: All Ages |           |               |       |       |               |             |               |                |              |
| Period                                       | Age Group | Smoking Group | N     | %     | Ever Quit (N) | Ever Quit % | Mean Yrs Quit | Short Term (n) | Short Term % |
| 20                                           | All Ages  | Never Any     | 36103 | 42.57 |               |             |               |                |              |
| 20                                           | All Ages  | CC            | 2908  | 3.43  | 0             | 0.00        |               |                |              |
| 20                                           | All Ages  | Ecig          | 14925 | 17.60 |               |             |               |                |              |
| 20                                           | All Ages  | Dual          | 0     | 0.00  |               |             |               |                |              |
| 20                                           | All Ages  | Former        | 30864 | 36.40 |               |             | 19.86         | 1521           | 4.93         |
| Year of Follow-up: 2010, Age Group: 18-19    |           |               |       |       |               |             |               |                |              |
| Period                                       | Age Group | Smoking Group | N     | %     | Ever Quit (N) | Ever Quit % | Mean Yrs Quit | Short Term (n) | Short Term % |



**Results for PHIM for Run 5 (Sensitivity\_Analysis\_2.RTF)**

|                                           |           |               |      |       |               |             |               |                |              |
|-------------------------------------------|-----------|---------------|------|-------|---------------|-------------|---------------|----------------|--------------|
| 20                                        | 18-19     | Never Any     | 0    | .     |               |             |               |                |              |
| 20                                        | 18-19     | CC            | 0    | .     | 0             | .           |               |                |              |
| 20                                        | 18-19     | Ecig          | 0    | .     |               |             |               |                |              |
| 20                                        | 18-19     | Dual          | 0    | .     |               |             |               |                |              |
| 20                                        | 18-19     | Former        | 0    | .     |               |             | 0             | .              |              |
| Year of Follow-up: 2010, Age Group: 20-24 |           |               |      |       |               |             |               |                |              |
| Period                                    | Age Group | Smoking Group | N    | %     | Ever Quit (N) | Ever Quit % | Mean Yrs Quit | Short Term (n) | Short Term % |
| 20                                        | 20-24     | Never Any     | 0    | .     |               |             |               |                |              |
| 20                                        | 20-24     | CC            | 0    | .     | 0             | .           |               |                |              |
| 20                                        | 20-24     | Ecig          | 0    | .     |               |             |               |                |              |
| 20                                        | 20-24     | Dual          | 0    | .     |               |             |               |                |              |
| 20                                        | 20-24     | Former        | 0    | .     |               |             |               | 0              | .            |
| Year of Follow-up: 2010, Age Group: 25-29 |           |               |      |       |               |             |               |                |              |
| Period                                    | Age Group | Smoking Group | N    | %     | Ever Quit (N) | Ever Quit % | Mean Yrs Quit | Short Term (n) | Short Term % |
| 20                                        | 25-29     | Never Any     | 0    | .     |               |             |               |                |              |
| 20                                        | 25-29     | CC            | 0    | .     | 0             | .           |               |                |              |
| 20                                        | 25-29     | Ecig          | 0    | .     |               |             |               |                |              |
| 20                                        | 25-29     | Dual          | 0    | .     |               |             |               |                |              |
| 20                                        | 25-29     | Former        | 0    | .     |               |             |               | 0              | .            |
| Year of Follow-up: 2010, Age Group: 30-34 |           |               |      |       |               |             |               |                |              |
| Period                                    | Age Group | Smoking Group | N    | %     | Ever Quit (N) | Ever Quit % | Mean Yrs Quit | Short Term (n) | Short Term % |
| 20                                        | 30-34     | Never Any     | 4508 | 50.97 |               |             |               |                |              |
| 20                                        | 30-34     | CC            | 178  | 2.01  | 0             | 0.00        |               |                |              |
| 20                                        | 30-34     | Ecig          | 2268 | 25.64 |               |             |               |                |              |
| 20                                        | 30-34     | Dual          | 0    | 0.00  |               |             |               |                |              |
| 20                                        | 30-34     | Former        | 1891 | 21.38 |               |             | 8.70          | 231            | 12.22        |
| Year of Follow-up: 2010, Age Group: 35-39 |           |               |      |       |               |             |               |                |              |
| Period                                    | Age Group | Smoking Group | N    | %     | Ever Quit (N) | Ever Quit % | Mean Yrs Quit | Short Term (n) | Short Term % |
| 20                                        | 35-39     | Never Any     | 4991 | 55.21 |               |             |               |                |              |
| 20                                        | 35-39     | CC            | 195  | 2.16  | 0             | 0.00        |               |                |              |
| 20                                        | 35-39     | Ecig          | 1977 | 21.87 |               |             |               |                |              |
| 20                                        | 35-39     | Dual          | 0    | 0.00  |               |             |               |                |              |
| 20                                        | 35-39     | Former        | 1877 | 20.76 |               |             | 10.12         | 144            | 7.67         |
| Year of Follow-up: 2010, Age Group: 40-44 |           |               |      |       |               |             |               |                |              |
| Period                                    | Age Group | Smoking Group | N    | %     | Ever Quit (N) | Ever Quit % | Mean Yrs Quit | Short Term (n) | Short Term % |
| 20                                        | 40-44     | Never Any     | 5163 | 52.60 |               |             |               |                |              |
| 20                                        | 40-44     | CC            | 295  | 3.01  | 0             | 0.00        |               |                |              |
| 20                                        | 40-44     | Ecig          | 2209 | 22.50 |               |             |               |                |              |
| 20                                        | 40-44     | Dual          | 0    | 0.00  |               |             |               |                |              |
| 20                                        | 40-44     | Former        | 2149 | 21.89 |               |             | 13.96         | 149            | 6.93         |
| Year of Follow-up: 2010, Age Group: 45-49 |           |               |      |       |               |             |               |                |              |
| Period                                    | Age Group | Smoking Group | N    | %     | Ever Quit (N) | Ever Quit % | Mean Yrs Quit | Short Term (n) | Short Term % |
| 20                                        | 45-49     | Never Any     | 4997 | 46.86 |               |             |               |                |              |
| 20                                        | 45-49     | CC            | 342  | 3.21  | 0             | 0.00        |               |                |              |
| 20                                        | 45-49     | Ecig          | 2389 | 22.40 |               |             |               |                |              |
| 20                                        | 45-49     | Dual          | 0    | 0.00  |               |             |               |                |              |
| 20                                        | 45-49     | Former        | 2936 | 27.53 |               |             | 15.80         | 167            | 5.69         |
| Year of Follow-up: 2010, Age Group: 50-54 |           |               |      |       |               |             |               |                |              |
| Period                                    | Age Group | Smoking Group | N    | %     | Ever Quit (N) | Ever Quit % | Mean Yrs Quit | Short Term (n) | Short Term % |
| 20                                        | 50-54     | Never Any     | 4724 | 43.28 |               |             |               |                |              |
| 20                                        | 50-54     | CC            | 377  | 3.45  | 0             | 0.00        |               |                |              |
| 20                                        | 50-54     | Ecig          | 2207 | 20.22 |               |             |               |                |              |
| 20                                        | 50-54     | Dual          | 0    | 0.00  |               |             |               |                |              |
| 20                                        | 50-54     | Former        | 3608 | 33.05 |               |             | 17.78         | 168            | 4.66         |
| Year of Follow-up: 2010, Age Group: 55-59 |           |               |      |       |               |             |               |                |              |
| Period                                    | Age Group | Smoking Group | N    | %     | Ever Quit (N) | Ever Quit % | Mean Yrs Quit | Short Term (n) | Short Term % |
| 20                                        | 55-59     | Never Any     | 3941 | 39.85 |               |             |               |                |              |
| 20                                        | 55-59     | CC            | 372  | 3.76  | 0             | 0.00        |               |                |              |
| 20                                        | 55-59     | Ecig          | 1584 | 16.02 |               |             |               |                |              |
| 20                                        | 55-59     | Dual          | 0    | 0.00  |               |             |               |                |              |
| 20                                        | 55-59     | Former        | 3992 | 40.37 |               |             | 20.82         | 178            | 4.46         |
| Year of Follow-up: 2010, Age Group: 60-64 |           |               |      |       |               |             |               |                |              |
| Period                                    | Age Group | Smoking Group | N    | %     | Ever Quit (N) | Ever Quit % | Mean Yrs Quit | Short Term (n) | Short Term % |
| 20                                        | 60-64     | Never Any     | 2912 | 33.65 |               |             |               |                |              |
| 20                                        | 60-64     | CC            | 332  | 3.84  | 0             | 0.00        |               |                |              |
| 20                                        | 60-64     | Ecig          | 1194 | 13.80 |               |             |               |                |              |
| 20                                        | 60-64     | Dual          | 0    | 0.00  |               |             |               |                |              |
| 20                                        | 60-64     | Former        | 4217 | 48.72 |               |             | 22.51         | 248            | 5.88         |
| Year of Follow-up: 2010, Age Group: 65-69 |           |               |      |       |               |             |               |                |              |

**Results for PHIM for Run 5 (Sensitivity\_Analysis\_2.RTF)**

| Period                                       | Age Group | Smoking Group | N     | %     | Ever Quit (N) | Ever Quit % | Mean Yrs Quit | Short Term (n) | Short Term % |
|----------------------------------------------|-----------|---------------|-------|-------|---------------|-------------|---------------|----------------|--------------|
| 20                                           | 65-69     | Never Any     | 1919  | 29.46 |               |             |               |                |              |
| 20                                           | 65-69     | CC            | 283   | 4.34  | 0             | 0.00        |               |                |              |
| 20                                           | 65-69     | Ecig          | 600   | 9.21  |               |             |               |                |              |
| 20                                           | 65-69     | Dual          | 0     | 0.00  |               |             |               |                |              |
| 20                                           | 65-69     | Former        | 3713  | 56.99 |               |             | 24.02         | 119            | 3.20         |
| Year of Follow-up: 2010, Age Group: 70-74    |           |               |       |       |               |             |               |                |              |
| Period                                       | Age Group | Smoking Group | N     | %     | Ever Quit (N) | Ever Quit % | Mean Yrs Quit | Short Term (n) | Short Term % |
| 20                                           | 70-74     | Never Any     | 1611  | 29.41 |               |             |               |                |              |
| 20                                           | 70-74     | CC            | 270   | 4.93  | 0             | 0.00        |               |                |              |
| 20                                           | 70-74     | Ecig          | 347   | 6.34  |               |             |               |                |              |
| 20                                           | 70-74     | Dual          | 0     | 0.00  |               |             |               |                |              |
| 20                                           | 70-74     | Former        | 3249  | 59.32 |               |             | 25.66         | 64             | 1.97         |
| Year of Follow-up: 2010, Age Group: 75-79    |           |               |       |       |               |             |               |                |              |
| Period                                       | Age Group | Smoking Group | N     | %     | Ever Quit (N) | Ever Quit % | Mean Yrs Quit | Short Term (n) | Short Term % |
| 20                                           | 75-79     | Never Any     | 1337  | 26.83 |               |             |               |                |              |
| 20                                           | 75-79     | CC            | 264   | 5.30  | 0             | 0.00        |               |                |              |
| 20                                           | 75-79     | Ecig          | 150   | 3.01  |               |             |               |                |              |
| 20                                           | 75-79     | Dual          | 0     | 0.00  |               |             |               |                |              |
| 20                                           | 75-79     | Former        | 3232  | 64.86 |               |             | 26.71         | 53             | 1.64         |
| Year of Follow-up: 2015, Age Group: All Ages |           |               |       |       |               |             |               |                |              |
| Period                                       | Age Group | Smoking Group | N     | %     | Ever Quit (N) | Ever Quit % | Mean Yrs Quit | Short Term (n) | Short Term % |
| 25                                           | All Ages  | Never Any     | 34747 | 43.53 |               |             |               |                |              |
| 25                                           | All Ages  | CC            | 1573  | 1.97  | 0             | 0.00        |               |                |              |
| 25                                           | All Ages  | Ecig          | 12794 | 16.03 |               |             |               |                |              |
| 25                                           | All Ages  | Dual          | 0     | 0.00  |               |             |               |                |              |
| 25                                           | All Ages  | Former        | 30703 | 38.47 |               |             | 21.87         | 1097           | 3.57         |
| Year of Follow-up: 2015, Age Group: 18-19    |           |               |       |       |               |             |               |                |              |
| Period                                       | Age Group | Smoking Group | N     | %     | Ever Quit (N) | Ever Quit % | Mean Yrs Quit | Short Term (n) | Short Term % |
| 25                                           | 18-19     | Never Any     | 0     | .     |               |             |               |                |              |
| 25                                           | 18-19     | CC            | 0     | .     | 0             | .           |               |                |              |
| 25                                           | 18-19     | Ecig          | 0     | .     |               |             |               |                |              |
| 25                                           | 18-19     | Dual          | 0     | .     |               |             |               |                |              |
| 25                                           | 18-19     | Former        | 0     | .     |               |             | .             | 0              | .            |
| Year of Follow-up: 2015, Age Group: 20-24    |           |               |       |       |               |             |               |                |              |
| Period                                       | Age Group | Smoking Group | N     | %     | Ever Quit (N) | Ever Quit % | Mean Yrs Quit | Short Term (n) | Short Term % |
| 25                                           | 20-24     | Never Any     | 0     | .     |               |             |               |                |              |
| 25                                           | 20-24     | CC            | 0     | .     | 0             | .           |               |                |              |
| 25                                           | 20-24     | Ecig          | 0     | .     |               |             |               |                |              |
| 25                                           | 20-24     | Dual          | 0     | .     |               |             |               |                |              |
| 25                                           | 20-24     | Former        | 0     | .     |               |             | .             | 0              | .            |
| Year of Follow-up: 2015, Age Group: 25-29    |           |               |       |       |               |             |               |                |              |
| Period                                       | Age Group | Smoking Group | N     | %     | Ever Quit (N) | Ever Quit % | Mean Yrs Quit | Short Term (n) | Short Term % |
| 25                                           | 25-29     | Never Any     | 0     | .     |               |             |               |                |              |
| 25                                           | 25-29     | CC            | 0     | .     | 0             | .           |               |                |              |
| 25                                           | 25-29     | Ecig          | 0     | .     |               |             |               |                |              |
| 25                                           | 25-29     | Dual          | 0     | .     |               |             |               |                |              |
| 25                                           | 25-29     | Former        | 0     | .     |               |             | .             | 0              | .            |
| Year of Follow-up: 2015, Age Group: 30-34    |           |               |       |       |               |             |               |                |              |
| Period                                       | Age Group | Smoking Group | N     | %     | Ever Quit (N) | Ever Quit % | Mean Yrs Quit | Short Term (n) | Short Term % |
| 25                                           | 30-34     | Never Any     | 0     | .     |               |             |               |                |              |
| 25                                           | 30-34     | CC            | 0     | .     | 0             | .           |               |                |              |
| 25                                           | 30-34     | Ecig          | 0     | .     |               |             |               |                |              |
| 25                                           | 30-34     | Dual          | 0     | .     |               |             |               |                |              |
| 25                                           | 30-34     | Former        | 0     | .     |               |             | .             | 0              | .            |
| Year of Follow-up: 2015, Age Group: 35-39    |           |               |       |       |               |             |               |                |              |
| Period                                       | Age Group | Smoking Group | N     | %     | Ever Quit (N) | Ever Quit % | Mean Yrs Quit | Short Term (n) | Short Term % |
| 25                                           | 35-39     | Never Any     | 4489  | 50.75 |               |             |               |                |              |
| 25                                           | 35-39     | CC            | 83    | 0.94  | 0             | 0.00        |               |                |              |
| 25                                           | 35-39     | Ecig          | 1940  | 21.93 |               |             |               |                |              |
| 25                                           | 35-39     | Dual          | 0     | 0.00  |               |             |               |                |              |
| 25                                           | 35-39     | Former        | 2333  | 26.38 |               |             | 11.54         | 138            | 5.92         |
| Year of Follow-up: 2015, Age Group: 40-44    |           |               |       |       |               |             |               |                |              |
| Period                                       | Age Group | Smoking Group | N     | %     | Ever Quit (N) | Ever Quit % | Mean Yrs Quit | Short Term (n) | Short Term % |
| 25                                           | 40-44     | Never Any     | 4991  | 55.21 |               |             |               |                |              |
| 25                                           | 40-44     | CC            | 92    | 1.02  | 0             | 0.00        |               |                |              |
| 25                                           | 40-44     | Ecig          | 1798  | 19.89 |               |             |               |                |              |
| 25                                           | 40-44     | Dual          | 0     | 0.00  |               |             |               |                |              |

**Results for PHIM for Run 5 (Sensitivity\_Analysis\_2.RTF)**

|                                              |           |               |       |       |               |             |               |                |              |
|----------------------------------------------|-----------|---------------|-------|-------|---------------|-------------|---------------|----------------|--------------|
| 25                                           | 40-44     | Former        | 2159  | 23.88 |               |             | 13.41         | 109            | 5.05         |
| Year of Follow-up: 2015, Age Group: 45-49    |           |               |       |       |               |             |               |                |              |
| Period                                       | Age Group | Smoking Group | N     | %     | Ever Quit (N) | Ever Quit % | Mean Yrs Quit | Short Term (n) | Short Term % |
| 25                                           | 45-49     | Never Any     | 5163  | 52.60 |               |             |               |                |              |
| 25                                           | 45-49     | CC            | 166   | 1.69  | 0             | 0.00        |               |                |              |
| 25                                           | 45-49     | Ecig          | 2062  | 21.01 |               |             |               |                |              |
| 25                                           | 45-49     | Dual          | 0     | 0.00  |               |             |               |                |              |
| 25                                           | 45-49     | Former        | 2425  | 24.70 |               |             | 17.07         | 85             | 3.51         |
| Year of Follow-up: 2015, Age Group: 50-54    |           |               |       |       |               |             |               |                |              |
| Period                                       | Age Group | Smoking Group | N     | %     | Ever Quit (N) | Ever Quit % | Mean Yrs Quit | Short Term (n) | Short Term % |
| 25                                           | 50-54     | Never Any     | 4997  | 46.86 |               |             |               |                |              |
| 25                                           | 50-54     | CC            | 194   | 1.82  | 0             | 0.00        |               |                |              |
| 25                                           | 50-54     | Ecig          | 2248  | 21.08 |               |             |               |                |              |
| 25                                           | 50-54     | Dual          | 0     | 0.00  |               |             |               |                |              |
| 25                                           | 50-54     | Former        | 3225  | 30.24 |               |             | 19.11         | 136            | 4.22         |
| Year of Follow-up: 2015, Age Group: 55-59    |           |               |       |       |               |             |               |                |              |
| Period                                       | Age Group | Smoking Group | N     | %     | Ever Quit (N) | Ever Quit % | Mean Yrs Quit | Short Term (n) | Short Term % |
| 25                                           | 55-59     | Never Any     | 4724  | 43.28 |               |             |               |                |              |
| 25                                           | 55-59     | CC            | 202   | 1.85  | 0             | 0.00        |               |                |              |
| 25                                           | 55-59     | Ecig          | 1918  | 17.57 |               |             |               |                |              |
| 25                                           | 55-59     | Dual          | 0     | 0.00  |               |             |               |                |              |
| 25                                           | 55-59     | Former        | 4072  | 37.30 |               |             | 20.43         | 166            | 4.08         |
| Year of Follow-up: 2015, Age Group: 60-64    |           |               |       |       |               |             |               |                |              |
| Period                                       | Age Group | Smoking Group | N     | %     | Ever Quit (N) | Ever Quit % | Mean Yrs Quit | Short Term (n) | Short Term % |
| 25                                           | 60-64     | Never Any     | 3941  | 39.85 |               |             |               |                |              |
| 25                                           | 60-64     | CC            | 202   | 2.04  | 0             | 0.00        |               |                |              |
| 25                                           | 60-64     | Ecig          | 1235  | 12.49 |               |             |               |                |              |
| 25                                           | 60-64     | Dual          | 0     | 0.00  |               |             |               |                |              |
| 25                                           | 60-64     | Former        | 4511  | 45.62 |               |             | 23.08         | 212            | 4.70         |
| Year of Follow-up: 2015, Age Group: 65-69    |           |               |       |       |               |             |               |                |              |
| Period                                       | Age Group | Smoking Group | N     | %     | Ever Quit (N) | Ever Quit % | Mean Yrs Quit | Short Term (n) | Short Term % |
| 25                                           | 65-69     | Never Any     | 2912  | 33.65 |               |             |               |                |              |
| 25                                           | 65-69     | CC            | 219   | 2.53  | 0             | 0.00        |               |                |              |
| 25                                           | 65-69     | Ecig          | 862   | 9.96  |               |             |               |                |              |
| 25                                           | 65-69     | Dual          | 0     | 0.00  |               |             |               |                |              |
| 25                                           | 65-69     | Former        | 4662  | 53.86 |               |             | 25.11         | 132            | 2.83         |
| Year of Follow-up: 2015, Age Group: 70-74    |           |               |       |       |               |             |               |                |              |
| Period                                       | Age Group | Smoking Group | N     | %     | Ever Quit (N) | Ever Quit % | Mean Yrs Quit | Short Term (n) | Short Term % |
| 25                                           | 70-74     | Never Any     | 1919  | 29.46 |               |             |               |                |              |
| 25                                           | 70-74     | CC            | 216   | 3.32  | 0             | 0.00        |               |                |              |
| 25                                           | 70-74     | Ecig          | 464   | 7.12  |               |             |               |                |              |
| 25                                           | 70-74     | Dual          | 0     | 0.00  |               |             |               |                |              |
| 25                                           | 70-74     | Former        | 3916  | 60.11 |               |             | 27.63         | 72             | 1.84         |
| Year of Follow-up: 2015, Age Group: 75-79    |           |               |       |       |               |             |               |                |              |
| Period                                       | Age Group | Smoking Group | N     | %     | Ever Quit (N) | Ever Quit % | Mean Yrs Quit | Short Term (n) | Short Term % |
| 25                                           | 75-79     | Never Any     | 1611  | 29.41 |               |             |               |                |              |
| 25                                           | 75-79     | CC            | 199   | 3.63  | 0             | 0.00        |               |                |              |
| 25                                           | 75-79     | Ecig          | 267   | 4.87  |               |             |               |                |              |
| 25                                           | 75-79     | Dual          | 0     | 0.00  |               |             |               |                |              |
| 25                                           | 75-79     | Former        | 3400  | 62.08 |               |             | 29.39         | 47             | 1.38         |
| Year of Follow-up: 2020, Age Group: All Ages |           |               |       |       |               |             |               |                |              |
| Period                                       | Age Group | Smoking Group | N     | %     | Ever Quit (N) | Ever Quit % | Mean Yrs Quit | Short Term (n) | Short Term % |
| 30                                           | All Ages  | Never Any     | 33136 | 44.57 |               |             |               |                |              |
| 30                                           | All Ages  | CC            | 870   | 1.17  | 0             | 0.00        |               |                |              |
| 30                                           | All Ages  | Ecig          | 10574 | 14.22 |               |             |               |                |              |
| 30                                           | All Ages  | Dual          | 0     | 0.00  |               |             |               |                |              |
| 30                                           | All Ages  | Former        | 29760 | 40.03 |               |             | 23.96         | 932            | 3.13         |
| Year of Follow-up: 2020, Age Group: 18-19    |           |               |       |       |               |             |               |                |              |
| Period                                       | Age Group | Smoking Group | N     | %     | Ever Quit (N) | Ever Quit % | Mean Yrs Quit | Short Term (n) | Short Term % |
| 30                                           | 18-19     | Never Any     | 0     | .     |               |             |               |                |              |
| 30                                           | 18-19     | CC            | 0     | .     | 0             | .           |               |                |              |
| 30                                           | 18-19     | Ecig          | 0     | .     |               |             |               |                |              |
| 30                                           | 18-19     | Dual          | 0     | .     |               |             |               |                |              |
| 30                                           | 18-19     | Former        | 0     | .     |               |             | .             | 0              | .            |
| Year of Follow-up: 2020, Age Group: 20-24    |           |               |       |       |               |             |               |                |              |
| Period                                       | Age Group | Smoking Group | N     | %     | Ever Quit (N) | Ever Quit % | Mean Yrs Quit | Short Term (n) | Short Term % |
| 30                                           | 20-24     | Never Any     | 0     | .     |               |             |               |                |              |
| 30                                           | 20-24     | CC            | 0     | .     | 0             | .           |               |                |              |

**Results for PHIM for Run 5 (Sensitivity\_Analysis\_2.RTF)**

|                                           |           |               |      |       |               |             |               |                |              |
|-------------------------------------------|-----------|---------------|------|-------|---------------|-------------|---------------|----------------|--------------|
| 30                                        | 20-24     | Ecig          | 0    | .     |               |             |               |                |              |
| 30                                        | 20-24     | Dual          | 0    | .     |               |             |               |                |              |
| 30                                        | 20-24     | Former        | 0    | .     |               |             | 0             | .              |              |
| Year of Follow-up: 2020, Age Group: 25-29 |           |               |      |       |               |             |               |                |              |
| Period                                    | Age Group | Smoking Group | N    | %     | Ever Quit (N) | Ever Quit % | Mean Yrs Quit | Short Term (n) | Short Term % |
| 30                                        | 25-29     | Never Any     | 0    | .     |               |             |               |                |              |
| 30                                        | 25-29     | CC            | 0    | .     | 0             | .           |               |                |              |
| 30                                        | 25-29     | Ecig          | 0    | .     |               |             |               |                |              |
| 30                                        | 25-29     | Dual          | 0    | .     |               |             |               |                |              |
| 30                                        | 25-29     | Former        | 0    | .     |               |             |               | 0              | .            |
| Year of Follow-up: 2020, Age Group: 30-34 |           |               |      |       |               |             |               |                |              |
| Period                                    | Age Group | Smoking Group | N    | %     | Ever Quit (N) | Ever Quit % | Mean Yrs Quit | Short Term (n) | Short Term % |
| 30                                        | 30-34     | Never Any     | 0    | .     |               |             |               |                |              |
| 30                                        | 30-34     | CC            | 0    | .     | 0             | .           |               |                |              |
| 30                                        | 30-34     | Ecig          | 0    | .     |               |             |               |                |              |
| 30                                        | 30-34     | Dual          | 0    | .     |               |             |               |                |              |
| 30                                        | 30-34     | Former        | 0    | .     |               |             |               | 0              | .            |
| Year of Follow-up: 2020, Age Group: 35-39 |           |               |      |       |               |             |               |                |              |
| Period                                    | Age Group | Smoking Group | N    | %     | Ever Quit (N) | Ever Quit % | Mean Yrs Quit | Short Term (n) | Short Term % |
| 30                                        | 35-39     | Never Any     | 0    | .     |               |             |               |                |              |
| 30                                        | 35-39     | CC            | 0    | .     | 0             | .           |               |                |              |
| 30                                        | 35-39     | Ecig          | 0    | .     |               |             |               |                |              |
| 30                                        | 35-39     | Dual          | 0    | .     |               |             |               |                |              |
| 30                                        | 35-39     | Former        | 0    | .     |               |             |               | 0              | .            |
| Year of Follow-up: 2020, Age Group: 40-44 |           |               |      |       |               |             |               |                |              |
| Period                                    | Age Group | Smoking Group | N    | %     | Ever Quit (N) | Ever Quit % | Mean Yrs Quit | Short Term (n) | Short Term % |
| 30                                        | 40-44     | Never Any     | 4489 | 50.75 |               |             |               |                |              |
| 30                                        | 40-44     | CC            | 40   | 0.45  | 0             | 0.00        |               |                |              |
| 30                                        | 40-44     | Ecig          | 1710 | 19.33 |               |             |               |                |              |
| 30                                        | 40-44     | Dual          | 0    | 0.00  |               |             |               |                |              |
| 30                                        | 40-44     | Former        | 2606 | 29.46 |               |             | 15.02         | 108            | 4.14         |
| Year of Follow-up: 2020, Age Group: 45-49 |           |               |      |       |               |             |               |                |              |
| Period                                    | Age Group | Smoking Group | N    | %     | Ever Quit (N) | Ever Quit % | Mean Yrs Quit | Short Term (n) | Short Term % |
| 30                                        | 45-49     | Never Any     | 4991 | 55.21 |               |             |               |                |              |
| 30                                        | 45-49     | CC            | 55   | 0.61  | 0             | 0.00        |               |                |              |
| 30                                        | 45-49     | Ecig          | 1612 | 17.83 |               |             |               |                |              |
| 30                                        | 45-49     | Dual          | 0    | 0.00  |               |             |               |                |              |
| 30                                        | 45-49     | Former        | 2382 | 26.35 |               |             | 16.91         | 63             | 2.64         |
| Year of Follow-up: 2020, Age Group: 50-54 |           |               |      |       |               |             |               |                |              |
| Period                                    | Age Group | Smoking Group | N    | %     | Ever Quit (N) | Ever Quit % | Mean Yrs Quit | Short Term (n) | Short Term % |
| 30                                        | 50-54     | Never Any     | 5163 | 52.60 |               |             |               |                |              |
| 30                                        | 50-54     | CC            | 99   | 1.01  | 0             | 0.00        |               |                |              |
| 30                                        | 50-54     | Ecig          | 1936 | 19.72 |               |             |               |                |              |
| 30                                        | 50-54     | Dual          | 0    | 0.00  |               |             |               |                |              |
| 30                                        | 50-54     | Former        | 2618 | 26.67 |               |             | 20.56         | 99             | 3.78         |
| Year of Follow-up: 2020, Age Group: 55-59 |           |               |      |       |               |             |               |                |              |
| Period                                    | Age Group | Smoking Group | N    | %     | Ever Quit (N) | Ever Quit % | Mean Yrs Quit | Short Term (n) | Short Term % |
| 30                                        | 55-59     | Never Any     | 4997 | 46.86 |               |             |               |                |              |
| 30                                        | 55-59     | CC            | 114  | 1.07  | 0             | 0.00        |               |                |              |
| 30                                        | 55-59     | Ecig          | 1920 | 18.00 |               |             |               |                |              |
| 30                                        | 55-59     | Dual          | 0    | 0.00  |               |             |               |                |              |
| 30                                        | 55-59     | Former        | 3633 | 34.07 |               |             | 21.63         | 155            | 4.27         |
| Year of Follow-up: 2020, Age Group: 60-64 |           |               |      |       |               |             |               |                |              |
| Period                                    | Age Group | Smoking Group | N    | %     | Ever Quit (N) | Ever Quit % | Mean Yrs Quit | Short Term (n) | Short Term % |
| 30                                        | 60-64     | Never Any     | 4724 | 43.28 |               |             |               |                |              |
| 30                                        | 60-64     | CC            | 115  | 1.05  | 0             | 0.00        |               |                |              |
| 30                                        | 60-64     | Ecig          | 1482 | 13.58 |               |             |               |                |              |
| 30                                        | 60-64     | Dual          | 0    | 0.00  |               |             |               |                |              |
| 30                                        | 60-64     | Former        | 4595 | 42.09 |               |             | 22.76         | 223            | 4.85         |
| Year of Follow-up: 2020, Age Group: 65-69 |           |               |      |       |               |             |               |                |              |
| Period                                    | Age Group | Smoking Group | N    | %     | Ever Quit (N) | Ever Quit % | Mean Yrs Quit | Short Term (n) | Short Term % |
| 30                                        | 65-69     | Never Any     | 3941 | 39.85 |               |             |               |                |              |
| 30                                        | 65-69     | CC            | 133  | 1.34  | 0             | 0.00        |               |                |              |
| 30                                        | 65-69     | Ecig          | 912  | 9.22  |               |             |               |                |              |
| 30                                        | 65-69     | Dual          | 0    | 0.00  |               |             |               |                |              |
| 30                                        | 65-69     | Former        | 4903 | 49.58 |               |             | 26.01         | 133            | 2.71         |
| Year of Follow-up: 2020, Age Group: 70-74 |           |               |      |       |               |             |               |                |              |
| Period                                    | Age Group | Smoking Group | N    | %     | Ever Quit (N) | Ever Quit % | Mean Yrs Quit | Short Term (n) | Short Term % |

### Results for PHIM for Run 5 (Sensitivity\_Analysis\_2.RTF)

|                                              |           |               |       |       |               |             |               |                |              |
|----------------------------------------------|-----------|---------------|-------|-------|---------------|-------------|---------------|----------------|--------------|
| 30                                           | 70-74     | Never Any     | 2912  | 33.65 |               |             |               |                |              |
| 30                                           | 70-74     | CC            | 154   | 1.78  | 0             | 0.00        |               |                |              |
| 30                                           | 70-74     | Ecig          | 644   | 7.44  |               |             |               |                |              |
| 30                                           | 70-74     | Dual          | 0     | 0.00  |               |             |               |                |              |
| 30                                           | 70-74     | Former        | 4945  | 57.13 |               |             | 28.51         | 99             | 2.00         |
| Year of Follow-up: 2020, Age Group: 75-79    |           |               |       |       |               |             |               |                |              |
| Period                                       | Age Group | Smoking Group | N     | %     | Ever Quit (N) | Ever Quit % | Mean Yrs Quit | Short Term (n) | Short Term % |
| 30                                           | 75-79     | Never Any     | 1919  | 29.46 |               |             |               |                |              |
| 30                                           | 75-79     | CC            | 160   | 2.46  | 0             | 0.00        |               |                |              |
| 30                                           | 75-79     | Ecig          | 358   | 5.50  |               |             |               |                |              |
| 30                                           | 75-79     | Dual          | 0     | 0.00  |               |             |               |                |              |
| 30                                           | 75-79     | Former        | 4078  | 62.59 |               |             | 31.42         | 52             | 1.28         |
| Year of Follow-up: 2025, Age Group: All Ages |           |               |       |       |               |             |               |                |              |
| Period                                       | Age Group | Smoking Group | N     | %     | Ever Quit (N) | Ever Quit % | Mean Yrs Quit | Short Term (n) | Short Term % |
| 35                                           | All Ages  | Never Any     | 31217 | 46.03 |               |             |               |                |              |
| 35                                           | All Ages  | CC            | 477   | 0.70  | 0             | 0.00        |               |                |              |
| 35                                           | All Ages  | Ecig          | 8400  | 12.38 |               |             |               |                |              |
| 35                                           | All Ages  | Dual          | 0     | 0.00  |               |             |               |                |              |
| 35                                           | All Ages  | Former        | 27731 | 40.89 |               |             | 25.88         | 785            | 2.83         |
| Year of Follow-up: 2025, Age Group: 18-19    |           |               |       |       |               |             |               |                |              |
| Period                                       | Age Group | Smoking Group | N     | %     | Ever Quit (N) | Ever Quit % | Mean Yrs Quit | Short Term (n) | Short Term % |
| 35                                           | 18-19     | Never Any     | 0     | .     |               |             |               |                |              |
| 35                                           | 18-19     | CC            | 0     | .     | 0             | .           |               |                |              |
| 35                                           | 18-19     | Ecig          | 0     | .     |               |             |               |                |              |
| 35                                           | 18-19     | Dual          | 0     | .     |               |             |               |                |              |
| 35                                           | 18-19     | Former        | 0     | .     |               |             | .             | 0              | .            |
| Year of Follow-up: 2025, Age Group: 20-24    |           |               |       |       |               |             |               |                |              |
| Period                                       | Age Group | Smoking Group | N     | %     | Ever Quit (N) | Ever Quit % | Mean Yrs Quit | Short Term (n) | Short Term % |
| 35                                           | 20-24     | Never Any     | 0     | .     |               |             |               |                |              |
| 35                                           | 20-24     | CC            | 0     | .     | 0             | .           |               |                |              |
| 35                                           | 20-24     | Ecig          | 0     | .     |               |             |               |                |              |
| 35                                           | 20-24     | Dual          | 0     | .     |               |             |               |                |              |
| 35                                           | 20-24     | Former        | 0     | .     |               |             | .             | 0              | .            |
| Year of Follow-up: 2025, Age Group: 25-29    |           |               |       |       |               |             |               |                |              |
| Period                                       | Age Group | Smoking Group | N     | %     | Ever Quit (N) | Ever Quit % | Mean Yrs Quit | Short Term (n) | Short Term % |
| 35                                           | 25-29     | Never Any     | 0     | .     |               |             |               |                |              |
| 35                                           | 25-29     | CC            | 0     | .     | 0             | .           |               |                |              |
| 35                                           | 25-29     | Ecig          | 0     | .     |               |             |               |                |              |
| 35                                           | 25-29     | Dual          | 0     | .     |               |             |               |                |              |
| 35                                           | 25-29     | Former        | 0     | .     |               |             | .             | 0              | .            |
| Year of Follow-up: 2025, Age Group: 30-34    |           |               |       |       |               |             |               |                |              |
| Period                                       | Age Group | Smoking Group | N     | %     | Ever Quit (N) | Ever Quit % | Mean Yrs Quit | Short Term (n) | Short Term % |
| 35                                           | 30-34     | Never Any     | 0     | .     |               |             |               |                |              |
| 35                                           | 30-34     | CC            | 0     | .     | 0             | .           |               |                |              |
| 35                                           | 30-34     | Ecig          | 0     | .     |               |             |               |                |              |
| 35                                           | 30-34     | Dual          | 0     | .     |               |             |               |                |              |
| 35                                           | 30-34     | Former        | 0     | .     |               |             | .             | 0              | .            |
| Year of Follow-up: 2025, Age Group: 35-39    |           |               |       |       |               |             |               |                |              |
| Period                                       | Age Group | Smoking Group | N     | %     | Ever Quit (N) | Ever Quit % | Mean Yrs Quit | Short Term (n) | Short Term % |
| 35                                           | 35-39     | Never Any     | 0     | .     |               |             |               |                |              |
| 35                                           | 35-39     | CC            | 0     | .     | 0             | .           |               |                |              |
| 35                                           | 35-39     | Ecig          | 0     | .     |               |             |               |                |              |
| 35                                           | 35-39     | Dual          | 0     | .     |               |             |               |                |              |
| 35                                           | 35-39     | Former        | 0     | .     |               |             | .             | 0              | .            |
| Year of Follow-up: 2025, Age Group: 40-44    |           |               |       |       |               |             |               |                |              |
| Period                                       | Age Group | Smoking Group | N     | %     | Ever Quit (N) | Ever Quit % | Mean Yrs Quit | Short Term (n) | Short Term % |
| 35                                           | 40-44     | Never Any     | 0     | .     |               |             |               |                |              |
| 35                                           | 40-44     | CC            | 0     | .     | 0             | .           |               |                |              |
| 35                                           | 40-44     | Ecig          | 0     | .     |               |             |               |                |              |
| 35                                           | 40-44     | Dual          | 0     | .     |               |             |               |                |              |
| 35                                           | 40-44     | Former        | 0     | .     |               |             | .             | 0              | .            |
| Year of Follow-up: 2025, Age Group: 45-49    |           |               |       |       |               |             |               |                |              |
| Period                                       | Age Group | Smoking Group | N     | %     | Ever Quit (N) | Ever Quit % | Mean Yrs Quit | Short Term (n) | Short Term % |
| 35                                           | 45-49     | Never Any     | 4489  | 50.75 |               |             |               |                |              |
| 35                                           | 45-49     | CC            | 23    | 0.26  | 0             | 0.00        |               |                |              |
| 35                                           | 45-49     | Ecig          | 1526  | 17.25 |               |             |               |                |              |
| 35                                           | 45-49     | Dual          | 0     | 0.00  |               |             |               |                |              |
| 35                                           | 45-49     | Former        | 2807  | 31.74 |               |             | 18.76         | 58             | 2.07         |
| Year of Follow-up: 2025, Age Group: 50-54    |           |               |       |       |               |             |               |                |              |

**Results for PHIM for Run 5 (Sensitivity\_Analysis\_2.RTF)**

| Period                                       | Age Group | Smoking Group | N     | %     | Ever Quit (N) | Ever Quit % | Mean Yrs Quit | Short Term (n) | Short Term % |
|----------------------------------------------|-----------|---------------|-------|-------|---------------|-------------|---------------|----------------|--------------|
| 35                                           | 50-54     | Never Any     | 4991  | 55.21 |               |             |               |                |              |
| 35                                           | 50-54     | CC            | 34    | 0.38  | 0             | 0.00        |               |                |              |
| 35                                           | 50-54     | Ecig          | 1499  | 16.58 |               |             |               |                |              |
| 35                                           | 50-54     | Dual          | 0     | 0.00  |               |             |               |                |              |
| 35                                           | 50-54     | Former        | 2516  | 27.83 |               |             | 20.83         | 67             | 2.66         |
| Year of Follow-up: 2025, Age Group: 55-59    |           |               |       |       |               |             |               |                |              |
| Period                                       | Age Group | Smoking Group | N     | %     | Ever Quit (N) | Ever Quit % | Mean Yrs Quit | Short Term (n) | Short Term % |
| 35                                           | 55-59     | Never Any     | 5163  | 52.60 |               |             |               |                |              |
| 35                                           | 55-59     | CC            | 58    | 0.59  | 0             | 0.00        |               |                |              |
| 35                                           | 55-59     | Ecig          | 1602  | 16.32 |               |             |               |                |              |
| 35                                           | 55-59     | Dual          | 0     | 0.00  |               |             |               |                |              |
| 35                                           | 55-59     | Former        | 2993  | 30.49 |               |             | 22.60         | 161            | 5.38         |
| Year of Follow-up: 2025, Age Group: 60-64    |           |               |       |       |               |             |               |                |              |
| Period                                       | Age Group | Smoking Group | N     | %     | Ever Quit (N) | Ever Quit % | Mean Yrs Quit | Short Term (n) | Short Term % |
| 35                                           | 60-64     | Never Any     | 4997  | 46.86 |               |             |               |                |              |
| 35                                           | 60-64     | CC            | 65    | 0.61  | 0             | 0.00        |               |                |              |
| 35                                           | 60-64     | Ecig          | 1468  | 13.77 |               |             |               |                |              |
| 35                                           | 60-64     | Dual          | 0     | 0.00  |               |             |               |                |              |
| 35                                           | 60-64     | Former        | 4134  | 38.77 |               |             | 23.64         | 201            | 4.86         |
| Year of Follow-up: 2025, Age Group: 65-69    |           |               |       |       |               |             |               |                |              |
| Period                                       | Age Group | Smoking Group | N     | %     | Ever Quit (N) | Ever Quit % | Mean Yrs Quit | Short Term (n) | Short Term % |
| 35                                           | 65-69     | Never Any     | 4724  | 43.28 |               |             |               |                |              |
| 35                                           | 65-69     | CC            | 73    | 0.67  | 0             | 0.00        |               |                |              |
| 35                                           | 65-69     | Ecig          | 1101  | 10.09 |               |             |               |                |              |
| 35                                           | 65-69     | Dual          | 0     | 0.00  |               |             |               |                |              |
| 35                                           | 65-69     | Former        | 5018  | 45.97 |               |             | 25.60         | 153            | 3.05         |
| Year of Follow-up: 2025, Age Group: 70-74    |           |               |       |       |               |             |               |                |              |
| Period                                       | Age Group | Smoking Group | N     | %     | Ever Quit (N) | Ever Quit % | Mean Yrs Quit | Short Term (n) | Short Term % |
| 35                                           | 70-74     | Never Any     | 3941  | 39.85 |               |             |               |                |              |
| 35                                           | 70-74     | CC            | 104   | 1.05  | 0             | 0.00        |               |                |              |
| 35                                           | 70-74     | Ecig          | 727   | 7.35  |               |             |               |                |              |
| 35                                           | 70-74     | Dual          | 0     | 0.00  |               |             |               |                |              |
| 35                                           | 70-74     | Former        | 5117  | 51.74 |               |             | 29.81         | 70             | 1.37         |
| Year of Follow-up: 2025, Age Group: 75-79    |           |               |       |       |               |             |               |                |              |
| Period                                       | Age Group | Smoking Group | N     | %     | Ever Quit (N) | Ever Quit % | Mean Yrs Quit | Short Term (n) | Short Term % |
| 35                                           | 75-79     | Never Any     | 2912  | 33.65 |               |             |               |                |              |
| 35                                           | 75-79     | CC            | 120   | 1.39  | 0             | 0.00        |               |                |              |
| 35                                           | 75-79     | Ecig          | 477   | 5.51  |               |             |               |                |              |
| 35                                           | 75-79     | Dual          | 0     | 0.00  |               |             |               |                |              |
| 35                                           | 75-79     | Former        | 5146  | 59.46 |               |             | 32.28         | 75             | 1.46         |
| Year of Follow-up: 2030, Age Group: All Ages |           |               |       |       |               |             |               |                |              |
| Period                                       | Age Group | Smoking Group | N     | %     | Ever Quit (N) | Ever Quit % | Mean Yrs Quit | Short Term (n) | Short Term % |
| 40                                           | All Ages  | Never Any     | 28305 | 47.84 |               |             |               |                |              |
| 40                                           | All Ages  | CC            | 231   | 0.39  | 0             | 0.00        |               |                |              |
| 40                                           | All Ages  | Ecig          | 6290  | 10.63 |               |             |               |                |              |
| 40                                           | All Ages  | Dual          | 0     | 0.00  |               |             |               |                |              |
| 40                                           | All Ages  | Former        | 24344 | 41.14 |               |             | 27.44         | 684            | 2.81         |
| Year of Follow-up: 2030, Age Group: 18-19    |           |               |       |       |               |             |               |                |              |
| Period                                       | Age Group | Smoking Group | N     | %     | Ever Quit (N) | Ever Quit % | Mean Yrs Quit | Short Term (n) | Short Term % |
| 40                                           | 18-19     | Never Any     | 0     | .     |               |             |               |                |              |
| 40                                           | 18-19     | CC            | 0     | .     | 0             | .           |               |                |              |
| 40                                           | 18-19     | Ecig          | 0     | .     |               |             |               |                |              |
| 40                                           | 18-19     | Dual          | 0     | .     |               |             |               |                |              |
| 40                                           | 18-19     | Former        | 0     | .     |               |             | .             | 0              | .            |
| Year of Follow-up: 2030, Age Group: 20-24    |           |               |       |       |               |             |               |                |              |
| Period                                       | Age Group | Smoking Group | N     | %     | Ever Quit (N) | Ever Quit % | Mean Yrs Quit | Short Term (n) | Short Term % |
| 40                                           | 20-24     | Never Any     | 0     | .     |               |             |               |                |              |
| 40                                           | 20-24     | CC            | 0     | .     | 0             | .           |               |                |              |
| 40                                           | 20-24     | Ecig          | 0     | .     |               |             |               |                |              |
| 40                                           | 20-24     | Dual          | 0     | .     |               |             |               |                |              |
| 40                                           | 20-24     | Former        | 0     | .     |               |             | .             | 0              | .            |
| Year of Follow-up: 2030, Age Group: 25-29    |           |               |       |       |               |             |               |                |              |
| Period                                       | Age Group | Smoking Group | N     | %     | Ever Quit (N) | Ever Quit % | Mean Yrs Quit | Short Term (n) | Short Term % |
| 40                                           | 25-29     | Never Any     | 0     | .     |               |             |               |                |              |
| 40                                           | 25-29     | CC            | 0     | .     | 0             | .           |               |                |              |
| 40                                           | 25-29     | Ecig          | 0     | .     |               |             |               |                |              |
| 40                                           | 25-29     | Dual          | 0     | .     |               |             |               |                |              |

**Results for PHIM for Run 5 (Sensitivity\_Analysis\_2.RTF)**

| Year of Follow-up: 2030, Age Group: 30-34 | Period | Age Group | Smoking Group | N    | %     | Ever Quit (N) | Ever Quit % | Mean Yrs Quit | Short Term (n) | Short Term % |
|-------------------------------------------|--------|-----------|---------------|------|-------|---------------|-------------|---------------|----------------|--------------|
| 40                                        | 25-29  | Former    |               | 0    | .     |               |             |               | 0              | .            |
| 40                                        | 30-34  | Never Any |               | 0    | .     |               |             |               |                |              |
| 40                                        | 30-34  | CC        |               | 0    | .     | 0             | .           |               |                |              |
| 40                                        | 30-34  | Ecig      |               | 0    | .     |               |             |               |                |              |
| 40                                        | 30-34  | Dual      |               | 0    | .     |               |             |               |                |              |
| 40                                        | 30-34  | Former    |               | 0    | .     |               |             |               | 0              | .            |
| Year of Follow-up: 2030, Age Group: 35-39 | Period | Age Group | Smoking Group | N    | %     | Ever Quit (N) | Ever Quit % | Mean Yrs Quit | Short Term (n) | Short Term % |
| 40                                        | 35-39  | Never Any |               | 0    | .     |               |             |               |                |              |
| 40                                        | 35-39  | CC        |               | 0    | .     | 0             | .           |               |                |              |
| 40                                        | 35-39  | Ecig      |               | 0    | .     |               |             |               |                |              |
| 40                                        | 35-39  | Dual      |               | 0    | .     |               |             |               |                |              |
| 40                                        | 35-39  | Former    |               | 0    | .     |               |             |               | 0              | .            |
| Year of Follow-up: 2030, Age Group: 40-44 | Period | Age Group | Smoking Group | N    | %     | Ever Quit (N) | Ever Quit % | Mean Yrs Quit | Short Term (n) | Short Term % |
| 40                                        | 40-44  | Never Any |               | 0    | .     |               |             |               |                |              |
| 40                                        | 40-44  | CC        |               | 0    | .     | 0             | .           |               |                |              |
| 40                                        | 40-44  | Ecig      |               | 0    | .     |               |             |               |                |              |
| 40                                        | 40-44  | Dual      |               | 0    | .     |               |             |               |                |              |
| 40                                        | 40-44  | Former    |               | 0    | .     |               |             |               | 0              | .            |
| Year of Follow-up: 2030, Age Group: 45-49 | Period | Age Group | Smoking Group | N    | %     | Ever Quit (N) | Ever Quit % | Mean Yrs Quit | Short Term (n) | Short Term % |
| 40                                        | 45-49  | Never Any |               | 0    | .     |               |             |               |                |              |
| 40                                        | 45-49  | CC        |               | 0    | .     | 0             | .           |               |                |              |
| 40                                        | 45-49  | Ecig      |               | 0    | .     |               |             |               |                |              |
| 40                                        | 45-49  | Dual      |               | 0    | .     |               |             |               |                |              |
| 40                                        | 45-49  | Former    |               | 0    | .     |               |             |               | 0              | .            |
| Year of Follow-up: 2030, Age Group: 50-54 | Period | Age Group | Smoking Group | N    | %     | Ever Quit (N) | Ever Quit % | Mean Yrs Quit | Short Term (n) | Short Term % |
| 40                                        | 50-54  | Never Any |               | 4489 | 50.75 |               |             |               |                |              |
| 40                                        | 50-54  | CC        |               | 16   | 0.18  | 0             | 0.00        |               |                |              |
| 40                                        | 50-54  | Ecig      |               | 1387 | 15.68 |               |             |               |                |              |
| 40                                        | 50-54  | Dual      |               | 0    | 0.00  |               |             |               |                |              |
| 40                                        | 50-54  | Former    |               | 2953 | 33.39 |               |             | 22.67         | 75             | 2.54         |
| Year of Follow-up: 2030, Age Group: 55-59 | Period | Age Group | Smoking Group | N    | %     | Ever Quit (N) | Ever Quit % | Mean Yrs Quit | Short Term (n) | Short Term % |
| 40                                        | 55-59  | Never Any |               | 4991 | 55.21 |               |             |               |                |              |
| 40                                        | 55-59  | CC        |               | 21   | 0.23  | 0             | 0.00        |               |                |              |
| 40                                        | 55-59  | Ecig      |               | 1244 | 13.76 |               |             |               |                |              |
| 40                                        | 55-59  | Dual      |               | 0    | 0.00  |               |             |               |                |              |
| 40                                        | 55-59  | Former    |               | 2784 | 30.80 |               |             | 23.54         | 111            | 3.99         |
| Year of Follow-up: 2030, Age Group: 60-64 | Period | Age Group | Smoking Group | N    | %     | Ever Quit (N) | Ever Quit % | Mean Yrs Quit | Short Term (n) | Short Term % |
| 40                                        | 60-64  | Never Any |               | 5163 | 52.60 |               |             |               |                |              |
| 40                                        | 60-64  | CC        |               | 30   | 0.31  | 0             | 0.00        |               |                |              |
| 40                                        | 60-64  | Ecig      |               | 1204 | 12.27 |               |             |               |                |              |
| 40                                        | 60-64  | Dual      |               | 0    | 0.00  |               |             |               |                |              |
| 40                                        | 60-64  | Former    |               | 3419 | 34.83 |               |             | 24.40         | 180            | 5.26         |
| Year of Follow-up: 2030, Age Group: 65-69 | Period | Age Group | Smoking Group | N    | %     | Ever Quit (N) | Ever Quit % | Mean Yrs Quit | Short Term (n) | Short Term % |
| 40                                        | 65-69  | Never Any |               | 4997 | 46.86 |               |             |               |                |              |
| 40                                        | 65-69  | CC        |               | 33   | 0.31  | 0             | 0.00        |               |                |              |
| 40                                        | 65-69  | Ecig      |               | 1086 | 10.18 |               |             |               |                |              |
| 40                                        | 65-69  | Dual      |               | 0    | 0.00  |               |             |               |                |              |
| 40                                        | 65-69  | Former    |               | 4548 | 42.65 |               |             | 26.24         | 133            | 2.92         |
| Year of Follow-up: 2030, Age Group: 70-74 | Period | Age Group | Smoking Group | N    | %     | Ever Quit (N) | Ever Quit % | Mean Yrs Quit | Short Term (n) | Short Term % |
| 40                                        | 70-74  | Never Any |               | 4724 | 43.28 |               |             |               |                |              |
| 40                                        | 70-74  | CC        |               | 50   | 0.46  | 0             | 0.00        |               |                |              |
| 40                                        | 70-74  | Ecig      |               | 824  | 7.55  |               |             |               |                |              |
| 40                                        | 70-74  | Dual      |               | 0    | 0.00  |               |             |               |                |              |
| 40                                        | 70-74  | Former    |               | 5318 | 48.72 |               |             | 28.99         | 98             | 1.84         |
| Year of Follow-up: 2030, Age Group: 75-79 | Period | Age Group | Smoking Group | N    | %     | Ever Quit (N) | Ever Quit % | Mean Yrs Quit | Short Term (n) | Short Term % |
| 40                                        | 75-79  | Never Any |               | 3941 | 39.85 |               |             |               |                |              |
| 40                                        | 75-79  | CC        |               | 81   | 0.82  | 0             | 0.00        |               |                |              |

### Results for PHIM for Run 5 (Sensitivity\_Analysis\_2.RTF)

|                                              |           |               |       |       |               |             |               |                |              |
|----------------------------------------------|-----------|---------------|-------|-------|---------------|-------------|---------------|----------------|--------------|
| 40                                           | 75-79     | Ecig          | 545   | 5.51  |               |             |               |                |              |
| 40                                           | 75-79     | Dual          | 0     | 0.00  |               |             |               |                |              |
| 40                                           | 75-79     | Former        | 5322  | 53.82 |               |             | 33.54         | 87             | 1.63         |
| Year of Follow-up: 2035, Age Group: All Ages |           |               |       |       |               |             |               |                |              |
| Period                                       | Age Group | Smoking Group | N     | %     | Ever Quit (N) | Ever Quit % | Mean Yrs Quit | Short Term (n) | Short Term % |
| 45                                           | All Ages  | Never Any     | 24364 | 49.44 |               |             |               |                |              |
| 45                                           | All Ages  | CC            | 104   | 0.21  | 0             | 0.00        |               |                |              |
| 45                                           | All Ages  | Ecig          | 4415  | 8.96  |               |             |               |                |              |
| 45                                           | All Ages  | Dual          | 0     | 0.00  |               |             |               |                |              |
| 45                                           | All Ages  | Former        | 20398 | 41.39 |               |             | 28.79         | 550            | 2.70         |
| Year of Follow-up: 2035, Age Group: 18-19    |           |               |       |       |               |             |               |                |              |
| Period                                       | Age Group | Smoking Group | N     | %     | Ever Quit (N) | Ever Quit % | Mean Yrs Quit | Short Term (n) | Short Term % |
| 45                                           | 18-19     | Never Any     | 0     | .     |               |             |               |                |              |
| 45                                           | 18-19     | CC            | 0     | .     | 0             | .           |               |                |              |
| 45                                           | 18-19     | Ecig          | 0     | .     |               |             |               |                |              |
| 45                                           | 18-19     | Dual          | 0     | .     |               |             |               |                |              |
| 45                                           | 18-19     | Former        | 0     | .     |               |             | .             | 0              | .            |
| Year of Follow-up: 2035, Age Group: 20-24    |           |               |       |       |               |             |               |                |              |
| Period                                       | Age Group | Smoking Group | N     | %     | Ever Quit (N) | Ever Quit % | Mean Yrs Quit | Short Term (n) | Short Term % |
| 45                                           | 20-24     | Never Any     | 0     | .     |               |             |               |                |              |
| 45                                           | 20-24     | CC            | 0     | .     | 0             | .           |               |                |              |
| 45                                           | 20-24     | Ecig          | 0     | .     |               |             |               |                |              |
| 45                                           | 20-24     | Dual          | 0     | .     |               |             |               |                |              |
| 45                                           | 20-24     | Former        | 0     | .     |               |             | .             | 0              | .            |
| Year of Follow-up: 2035, Age Group: 25-29    |           |               |       |       |               |             |               |                |              |
| Period                                       | Age Group | Smoking Group | N     | %     | Ever Quit (N) | Ever Quit % | Mean Yrs Quit | Short Term (n) | Short Term % |
| 45                                           | 25-29     | Never Any     | 0     | .     |               |             |               |                |              |
| 45                                           | 25-29     | CC            | 0     | .     | 0             | .           |               |                |              |
| 45                                           | 25-29     | Ecig          | 0     | .     |               |             |               |                |              |
| 45                                           | 25-29     | Dual          | 0     | .     |               |             |               |                |              |
| 45                                           | 25-29     | Former        | 0     | .     |               |             | .             | 0              | .            |
| Year of Follow-up: 2035, Age Group: 30-34    |           |               |       |       |               |             |               |                |              |
| Period                                       | Age Group | Smoking Group | N     | %     | Ever Quit (N) | Ever Quit % | Mean Yrs Quit | Short Term (n) | Short Term % |
| 45                                           | 30-34     | Never Any     | 0     | .     |               |             |               |                |              |
| 45                                           | 30-34     | CC            | 0     | .     | 0             | .           |               |                |              |
| 45                                           | 30-34     | Ecig          | 0     | .     |               |             |               |                |              |
| 45                                           | 30-34     | Dual          | 0     | .     |               |             |               |                |              |
| 45                                           | 30-34     | Former        | 0     | .     |               |             | .             | 0              | .            |
| Year of Follow-up: 2035, Age Group: 35-39    |           |               |       |       |               |             |               |                |              |
| Period                                       | Age Group | Smoking Group | N     | %     | Ever Quit (N) | Ever Quit % | Mean Yrs Quit | Short Term (n) | Short Term % |
| 45                                           | 35-39     | Never Any     | 0     | .     |               |             |               |                |              |
| 45                                           | 35-39     | CC            | 0     | .     | 0             | .           |               |                |              |
| 45                                           | 35-39     | Ecig          | 0     | .     |               |             |               |                |              |
| 45                                           | 35-39     | Dual          | 0     | .     |               |             |               |                |              |
| 45                                           | 35-39     | Former        | 0     | .     |               |             | .             | 0              | .            |
| Year of Follow-up: 2035, Age Group: 40-44    |           |               |       |       |               |             |               |                |              |
| Period                                       | Age Group | Smoking Group | N     | %     | Ever Quit (N) | Ever Quit % | Mean Yrs Quit | Short Term (n) | Short Term % |
| 45                                           | 40-44     | Never Any     | 0     | .     |               |             |               |                |              |
| 45                                           | 40-44     | CC            | 0     | .     | 0             | .           |               |                |              |
| 45                                           | 40-44     | Ecig          | 0     | .     |               |             |               |                |              |
| 45                                           | 40-44     | Dual          | 0     | .     |               |             |               |                |              |
| 45                                           | 40-44     | Former        | 0     | .     |               |             | .             | 0              | .            |
| Year of Follow-up: 2035, Age Group: 45-49    |           |               |       |       |               |             |               |                |              |
| Period                                       | Age Group | Smoking Group | N     | %     | Ever Quit (N) | Ever Quit % | Mean Yrs Quit | Short Term (n) | Short Term % |
| 45                                           | 45-49     | Never Any     | 0     | .     |               |             |               |                |              |
| 45                                           | 45-49     | CC            | 0     | .     | 0             | .           |               |                |              |
| 45                                           | 45-49     | Ecig          | 0     | .     |               |             |               |                |              |
| 45                                           | 45-49     | Dual          | 0     | .     |               |             |               |                |              |
| 45                                           | 45-49     | Former        | 0     | .     |               |             | .             | 0              | .            |
| Year of Follow-up: 2035, Age Group: 50-54    |           |               |       |       |               |             |               |                |              |
| Period                                       | Age Group | Smoking Group | N     | %     | Ever Quit (N) | Ever Quit % | Mean Yrs Quit | Short Term (n) | Short Term % |
| 45                                           | 50-54     | Never Any     | 0     | .     |               |             |               |                |              |
| 45                                           | 50-54     | CC            | 0     | .     | 0             | .           |               |                |              |
| 45                                           | 50-54     | Ecig          | 0     | .     |               |             |               |                |              |
| 45                                           | 50-54     | Dual          | 0     | .     |               |             |               |                |              |
| 45                                           | 50-54     | Former        | 0     | .     |               |             | .             | 0              | .            |
| Year of Follow-up: 2035, Age Group: 55-59    |           |               |       |       |               |             |               |                |              |
| Period                                       | Age Group | Smoking Group | N     | %     | Ever Quit (N) | Ever Quit % | Mean Yrs Quit | Short Term (n) | Short Term % |



**Results for PHIM for Run 5 (Sensitivity\_Analysis\_2.RTF)**

|                                              |           |               |       |       |               |             |               |                |              |
|----------------------------------------------|-----------|---------------|-------|-------|---------------|-------------|---------------|----------------|--------------|
| 45                                           | 55-59     | Never Any     | 4489  | 50.75 |               |             |               |                |              |
| 45                                           | 55-59     | CC            | 11    | 0.12  | 0             | 0.00        |               |                |              |
| 45                                           | 55-59     | Ecig          | 1169  | 13.22 |               |             |               |                |              |
| 45                                           | 55-59     | Dual          | 0     | 0.00  |               |             |               |                |              |
| 45                                           | 55-59     | Former        | 3176  | 35.91 |               |             | 25.86         | 102            | 3.21         |
| Year of Follow-up: 2035, Age Group: 60-64    |           |               |       |       |               |             |               |                |              |
| Period                                       | Age Group | Smoking Group | N     | %     | Ever Quit (N) | Ever Quit % | Mean Yrs Quit | Short Term (n) | Short Term % |
| 45                                           | 60-64     | Never Any     | 4991  | 55.21 |               |             |               |                |              |
| 45                                           | 60-64     | CC            | 14    | 0.15  | 0             | 0.00        |               |                |              |
| 45                                           | 60-64     | Ecig          | 972   | 10.75 |               |             |               |                |              |
| 45                                           | 60-64     | Dual          | 0     | 0.00  |               |             |               |                |              |
| 45                                           | 60-64     | Former        | 3063  | 33.88 |               |             | 26.11         | 127            | 4.15         |
| Year of Follow-up: 2035, Age Group: 65-69    |           |               |       |       |               |             |               |                |              |
| Period                                       | Age Group | Smoking Group | N     | %     | Ever Quit (N) | Ever Quit % | Mean Yrs Quit | Short Term (n) | Short Term % |
| 45                                           | 65-69     | Never Any     | 5163  | 52.60 |               |             |               |                |              |
| 45                                           | 65-69     | CC            | 18    | 0.18  | 0             | 0.00        |               |                |              |
| 45                                           | 65-69     | Ecig          | 861   | 8.77  |               |             |               |                |              |
| 45                                           | 65-69     | Dual          | 0     | 0.00  |               |             |               |                |              |
| 45                                           | 65-69     | Former        | 3774  | 38.45 |               |             | 26.85         | 111            | 2.94         |
| Year of Follow-up: 2035, Age Group: 70-74    |           |               |       |       |               |             |               |                |              |
| Period                                       | Age Group | Smoking Group | N     | %     | Ever Quit (N) | Ever Quit % | Mean Yrs Quit | Short Term (n) | Short Term % |
| 45                                           | 70-74     | Never Any     | 4997  | 46.86 |               |             |               |                |              |
| 45                                           | 70-74     | CC            | 26    | 0.24  | 0             | 0.00        |               |                |              |
| 45                                           | 70-74     | Ecig          | 819   | 7.68  |               |             |               |                |              |
| 45                                           | 70-74     | Dual          | 0     | 0.00  |               |             |               |                |              |
| 45                                           | 70-74     | Former        | 4822  | 45.22 |               |             | 29.58         | 109            | 2.26         |
| Year of Follow-up: 2035, Age Group: 75-79    |           |               |       |       |               |             |               |                |              |
| Period                                       | Age Group | Smoking Group | N     | %     | Ever Quit (N) | Ever Quit % | Mean Yrs Quit | Short Term (n) | Short Term % |
| 45                                           | 75-79     | Never Any     | 4724  | 43.28 |               |             |               |                |              |
| 45                                           | 75-79     | CC            | 35    | 0.32  | 0             | 0.00        |               |                |              |
| 45                                           | 75-79     | Ecig          | 594   | 5.44  |               |             |               |                |              |
| 45                                           | 75-79     | Dual          | 0     | 0.00  |               |             |               |                |              |
| 45                                           | 75-79     | Former        | 5563  | 50.96 |               |             | 32.58         | 101            | 1.82         |
| Year of Follow-up: 2040, Age Group: All Ages |           |               |       |       |               |             |               |                |              |
| Period                                       | Age Group | Smoking Group | N     | %     | Ever Quit (N) | Ever Quit % | Mean Yrs Quit | Short Term (n) | Short Term % |
| 50                                           | All Ages  | Never Any     | 19640 | 51.19 |               |             |               |                |              |
| 50                                           | All Ages  | CC            | 46    | 0.12  | 0             | 0.00        |               |                |              |
| 50                                           | All Ages  | Ecig          | 2824  | 7.36  |               |             |               |                |              |
| 50                                           | All Ages  | Dual          | 0     | 0.00  |               |             |               |                |              |
| 50                                           | All Ages  | Former        | 15855 | 41.33 |               |             | 30.42         | 382            | 2.41         |
| Year of Follow-up: 2040, Age Group: 18-19    |           |               |       |       |               |             |               |                |              |
| Period                                       | Age Group | Smoking Group | N     | %     | Ever Quit (N) | Ever Quit % | Mean Yrs Quit | Short Term (n) | Short Term % |
| 50                                           | 18-19     | Never Any     | 0     | .     |               |             |               |                |              |
| 50                                           | 18-19     | CC            | 0     | .     | 0             | .           |               |                |              |
| 50                                           | 18-19     | Ecig          | 0     | .     |               |             |               |                |              |
| 50                                           | 18-19     | Dual          | 0     | .     |               |             |               |                |              |
| 50                                           | 18-19     | Former        | 0     | .     |               |             | .             | 0              | .            |
| Year of Follow-up: 2040, Age Group: 20-24    |           |               |       |       |               |             |               |                |              |
| Period                                       | Age Group | Smoking Group | N     | %     | Ever Quit (N) | Ever Quit % | Mean Yrs Quit | Short Term (n) | Short Term % |
| 50                                           | 20-24     | Never Any     | 0     | .     |               |             |               |                |              |
| 50                                           | 20-24     | CC            | 0     | .     | 0             | .           |               |                |              |
| 50                                           | 20-24     | Ecig          | 0     | .     |               |             |               |                |              |
| 50                                           | 20-24     | Dual          | 0     | .     |               |             |               |                |              |
| 50                                           | 20-24     | Former        | 0     | .     |               |             | .             | 0              | .            |
| Year of Follow-up: 2040, Age Group: 25-29    |           |               |       |       |               |             |               |                |              |
| Period                                       | Age Group | Smoking Group | N     | %     | Ever Quit (N) | Ever Quit % | Mean Yrs Quit | Short Term (n) | Short Term % |
| 50                                           | 25-29     | Never Any     | 0     | .     |               |             |               |                |              |
| 50                                           | 25-29     | CC            | 0     | .     | 0             | .           |               |                |              |
| 50                                           | 25-29     | Ecig          | 0     | .     |               |             |               |                |              |
| 50                                           | 25-29     | Dual          | 0     | .     |               |             |               |                |              |
| 50                                           | 25-29     | Former        | 0     | .     |               |             | .             | 0              | .            |
| Year of Follow-up: 2040, Age Group: 30-34    |           |               |       |       |               |             |               |                |              |
| Period                                       | Age Group | Smoking Group | N     | %     | Ever Quit (N) | Ever Quit % | Mean Yrs Quit | Short Term (n) | Short Term % |
| 50                                           | 30-34     | Never Any     | 0     | .     |               |             |               |                |              |
| 50                                           | 30-34     | CC            | 0     | .     | 0             | .           |               |                |              |
| 50                                           | 30-34     | Ecig          | 0     | .     |               |             |               |                |              |
| 50                                           | 30-34     | Dual          | 0     | .     |               |             |               |                |              |
| 50                                           | 30-34     | Former        | 0     | .     |               |             | .             | 0              | .            |
| Year of Follow-up: 2040, Age Group: 35-39    |           |               |       |       |               |             |               |                |              |

**Results for PHIM for Run 5 (Sensitivity\_Analysis\_2.RTF)**

| Period                                    | Age Group | Smoking Group | N    | %     | Ever Quit (N) | Ever Quit % | Mean Yrs Quit | Short Term (n) | Short Term % |
|-------------------------------------------|-----------|---------------|------|-------|---------------|-------------|---------------|----------------|--------------|
| 50                                        | 35-39     | Never Any     | 0    | .     |               |             |               |                |              |
| 50                                        | 35-39     | CC            | 0    | .     | 0             | .           |               |                |              |
| 50                                        | 35-39     | Ecig          | 0    | .     |               |             |               |                |              |
| 50                                        | 35-39     | Dual          | 0    | .     |               |             |               |                |              |
| 50                                        | 35-39     | Former        | 0    | .     |               |             | .             | 0              | .            |
| Year of Follow-up: 2040, Age Group: 40-44 |           |               |      |       |               |             |               |                |              |
| Period                                    | Age Group | Smoking Group | N    | %     | Ever Quit (N) | Ever Quit % | Mean Yrs Quit | Short Term (n) | Short Term % |
| 50                                        | 40-44     | Never Any     | 0    | .     |               |             |               |                |              |
| 50                                        | 40-44     | CC            | 0    | .     | 0             | .           |               |                |              |
| 50                                        | 40-44     | Ecig          | 0    | .     |               |             |               |                |              |
| 50                                        | 40-44     | Dual          | 0    | .     |               |             |               |                |              |
| 50                                        | 40-44     | Former        | 0    | .     |               |             | .             | 0              | .            |
| Year of Follow-up: 2040, Age Group: 45-49 |           |               |      |       |               |             |               |                |              |
| Period                                    | Age Group | Smoking Group | N    | %     | Ever Quit (N) | Ever Quit % | Mean Yrs Quit | Short Term (n) | Short Term % |
| 50                                        | 45-49     | Never Any     | 0    | .     |               |             |               |                |              |
| 50                                        | 45-49     | CC            | 0    | .     | 0             | .           |               |                |              |
| 50                                        | 45-49     | Ecig          | 0    | .     |               |             |               |                |              |
| 50                                        | 45-49     | Dual          | 0    | .     |               |             |               |                |              |
| 50                                        | 45-49     | Former        | 0    | .     |               |             | .             | 0              | .            |
| Year of Follow-up: 2040, Age Group: 50-54 |           |               |      |       |               |             |               |                |              |
| Period                                    | Age Group | Smoking Group | N    | %     | Ever Quit (N) | Ever Quit % | Mean Yrs Quit | Short Term (n) | Short Term % |
| 50                                        | 50-54     | Never Any     | 0    | .     |               |             |               |                |              |
| 50                                        | 50-54     | CC            | 0    | .     | 0             | .           |               |                |              |
| 50                                        | 50-54     | Ecig          | 0    | .     |               |             |               |                |              |
| 50                                        | 50-54     | Dual          | 0    | .     |               |             |               |                |              |
| 50                                        | 50-54     | Former        | 0    | .     |               |             | .             | 0              | .            |
| Year of Follow-up: 2040, Age Group: 55-59 |           |               |      |       |               |             |               |                |              |
| Period                                    | Age Group | Smoking Group | N    | %     | Ever Quit (N) | Ever Quit % | Mean Yrs Quit | Short Term (n) | Short Term % |
| 50                                        | 55-59     | Never Any     | 0    | .     |               |             |               |                |              |
| 50                                        | 55-59     | CC            | 0    | .     | 0             | .           |               |                |              |
| 50                                        | 55-59     | Ecig          | 0    | .     |               |             |               |                |              |
| 50                                        | 55-59     | Dual          | 0    | .     |               |             |               |                |              |
| 50                                        | 55-59     | Former        | 0    | .     |               |             | .             | 0              | .            |
| Year of Follow-up: 2040, Age Group: 60-64 |           |               |      |       |               |             |               |                |              |
| Period                                    | Age Group | Smoking Group | N    | %     | Ever Quit (N) | Ever Quit % | Mean Yrs Quit | Short Term (n) | Short Term % |
| 50                                        | 60-64     | Never Any     | 4489 | 50.75 |               |             |               |                |              |
| 50                                        | 60-64     | CC            | 7    | 0.08  | 0             | 0.00        |               |                |              |
| 50                                        | 60-64     | Ecig          | 865  | 9.78  |               |             |               |                |              |
| 50                                        | 60-64     | Dual          | 0    | 0.00  |               |             |               |                |              |
| 50                                        | 60-64     | Former        | 3484 | 39.39 |               |             | 28.30         | 131            | 3.76         |
| Year of Follow-up: 2040, Age Group: 65-69 |           |               |      |       |               |             |               |                |              |
| Period                                    | Age Group | Smoking Group | N    | %     | Ever Quit (N) | Ever Quit % | Mean Yrs Quit | Short Term (n) | Short Term % |
| 50                                        | 65-69     | Never Any     | 4991 | 55.21 |               |             |               |                |              |
| 50                                        | 65-69     | CC            | 6    | 0.07  | 0             | 0.00        |               |                |              |
| 50                                        | 65-69     | Ecig          | 713  | 7.89  |               |             |               |                |              |
| 50                                        | 65-69     | Dual          | 0    | 0.00  |               |             |               |                |              |
| 50                                        | 65-69     | Former        | 3330 | 36.84 |               |             | 28.78         | 102            | 3.06         |
| Year of Follow-up: 2040, Age Group: 70-74 |           |               |      |       |               |             |               |                |              |
| Period                                    | Age Group | Smoking Group | N    | %     | Ever Quit (N) | Ever Quit % | Mean Yrs Quit | Short Term (n) | Short Term % |
| 50                                        | 70-74     | Never Any     | 5163 | 52.60 |               |             |               |                |              |
| 50                                        | 70-74     | CC            | 13   | 0.13  | 0             | 0.00        |               |                |              |
| 50                                        | 70-74     | Ecig          | 628  | 6.40  |               |             |               |                |              |
| 50                                        | 70-74     | Dual          | 0    | 0.00  |               |             |               |                |              |
| 50                                        | 70-74     | Former        | 4012 | 40.87 |               |             | 30.10         | 72             | 1.79         |
| Year of Follow-up: 2040, Age Group: 75-79 |           |               |      |       |               |             |               |                |              |
| Period                                    | Age Group | Smoking Group | N    | %     | Ever Quit (N) | Ever Quit % | Mean Yrs Quit | Short Term (n) | Short Term % |
| 50                                        | 75-79     | Never Any     | 4997 | 46.86 |               |             |               |                |              |
| 50                                        | 75-79     | CC            | 20   | 0.19  | 0             | 0.00        |               |                |              |
| 50                                        | 75-79     | Ecig          | 618  | 5.80  |               |             |               |                |              |
| 50                                        | 75-79     | Dual          | 0    | 0.00  |               |             |               |                |              |
| 50                                        | 75-79     | Former        | 5029 | 47.16 |               |             | 33.24         | 77             | 1.53         |

## Results for PHIM for Run 5 (Sensitivity\_Analysis\_2.RTF)

\*\*\*\*\*

### Main Results for E-Component for Run: 5, Simulation: 1, COD: Four Diseases Combined

| Variable Parameter          | Value                                  |
|-----------------------------|----------------------------------------|
| 1. Country                  | US (United States)                     |
| 2. Sex                      | M (Males)                              |
| 3. Year of start of process | 1990                                   |
| 4. Cause of Death           | Four Diseases Combined                 |
| 5. Effective Dose NULL      | CC:1                                   |
| 6. Effective Dose Ecig      | CC:1 Ecig:0.05 Dual:0.525              |
| Note:                       | Death rates are per million population |

#### Results for Age Groups Combined and Years combined, Population unadjusted for deaths in Ecig scenario,

| Age Group:All |          | NULL        | Ecig        | %Drop   |        |        | NULL    | Ecig    | Drop    |         |
|---------------|----------|-------------|-------------|---------|--------|--------|---------|---------|---------|---------|
| Year          | Number   | Attrib      | Attrib      | Drop    | %Drop  | Attrib | Death   | Attrib  | Attrib  | Drop    |
|               | Deaths   | Deaths      | Deaths      | Deaths  | Deaths | Deaths | Rate    | Rates   | Rates   | Rates   |
| All Comb      | 13148871 | 4509390.583 | 3304895.519 | 1204495 | 9.160  | 26.711 | 3806.31 | 1305.37 | 956.696 | 348.675 |

#### Results for Age Groups Combined, Population unadjusted for deaths in Ecig scenario,

| Age Group:All |        | NULL       | Ecig       | %Drop    |        |        | NULL    | Ecig    | Drop    |         |
|---------------|--------|------------|------------|----------|--------|--------|---------|---------|---------|---------|
| Year          | Number | Attrib     | Attrib     | Drop     | %Drop  | Attrib | Death   | Attrib  | Attrib  | Drop    |
|               | Deaths | Deaths     | Deaths     | Deaths   | Deaths | Deaths | Rate    | Rates   | Rates   | Rates   |
| 1990          | 317161 | 125773.065 | 125773.065 | 0.000    | 0.000  | 0.000  | 5027.71 | 1993.78 | 1993.78 | 0.000   |
| 1991          | 313217 | 123999.442 | 123802.877 | 196.566  | 0.063  | 0.159  | 4883.81 | 1933.45 | 1930.38 | 3.065   |
| 1992          | 308577 | 122014.015 | 121488.007 | 526.008  | 0.170  | 0.431  | 4729.73 | 1870.18 | 1862.11 | 8.062   |
| 1993          | 311713 | 122810.618 | 121801.261 | 1009.357 | 0.324  | 0.822  | 4692.62 | 1848.83 | 1833.63 | 15.195  |
| 1994          | 305700 | 119925.592 | 118334.782 | 1590.810 | 0.520  | 1.326  | 4516.19 | 1771.69 | 1748.19 | 23.501  |
| 1995          | 303225 | 117896.496 | 115578.760 | 2317.736 | 0.764  | 1.966  | 4393.80 | 1708.35 | 1674.76 | 33.585  |
| 1996          | 299559 | 115698.645 | 112568.253 | 3130.392 | 1.045  | 2.706  | 4273.16 | 1650.42 | 1605.77 | 44.654  |
| 1997          | 294226 | 113359.847 | 109377.632 | 3982.214 | 1.353  | 3.513  | 4128.67 | 1590.70 | 1534.82 | 55.880  |
| 1998          | 289258 | 111444.212 | 106576.812 | 4867.400 | 1.683  | 4.368  | 3992.19 | 1538.10 | 1470.92 | 67.177  |
| 1999          | 311002 | 114877.722 | 108158.437 | 6719.285 | 2.161  | 5.849  | 4224.60 | 1560.48 | 1469.21 | 91.274  |
| 2000          | 303786 | 112379.704 | 104482.731 | 7896.973 | 2.600  | 7.027  | 4066.21 | 1504.22 | 1398.51 | 105.702 |
| 2001          | 296294 | 110024.943 | 100854.372 | 9170.571 | 3.095  | 8.335  | 3914.28 | 1453.52 | 1332.37 | 121.151 |
| 2002          | 291898 | 108289.173 | 97626.719  | 10662.45 | 3.653  | 9.846  | 3813.00 | 1414.56 | 1275.28 | 139.281 |
| 2003          | 285865 | 106539.023 | 94522.900  | 12016.12 | 4.203  | 11.279 | 3695.36 | 1377.22 | 1221.89 | 155.332 |
| 2004          | 274177 | 103037.251 | 89912.381  | 13124.87 | 4.787  | 12.738 | 3506.10 | 1317.61 | 1149.78 | 167.837 |
| 2005          | 272379 | 103044.562 | 88438.427  | 14606.14 | 5.362  | 14.175 | 3442.69 | 1302.41 | 1117.80 | 184.612 |
| 2006          | 264118 | 99672.555  | 83587.325  | 16085.23 | 6.090  | 16.138 | 3307.76 | 1248.28 | 1046.83 | 201.448 |
| 2007          | 258419 | 97839.152  | 80525.787  | 17313.36 | 6.700  | 17.696 | 3203.20 | 1212.75 | 998.146 | 214.605 |
| 2008          | 259461 | 98075.852  | 79281.569  | 18794.28 | 7.244  | 19.163 | 3180.09 | 1202.07 | 971.718 | 230.353 |
| 2009          | 253907 | 95617.338  | 75645.534  | 19971.80 | 7.866  | 20.887 | 3075.31 | 1158.11 | 916.216 | 241.898 |
| 2010          | 251878 | 94607.988  | 73420.498  | 21187.49 | 8.412  | 22.395 | 3013.72 | 1131.98 | 878.476 | 253.508 |
| 2011          | 251779 | 93633.119  | 70862.178  | 22770.94 | 9.044  | 24.319 | 2982.76 | 1109.25 | 839.487 | 269.762 |
| 2012          | 252643 | 92775.175  | 68521.826  | 24253.35 | 9.600  | 26.142 | 2960.61 | 1087.19 | 802.976 | 284.214 |
| 2013          | 256175 | 92345.780  | 66513.172  | 25832.61 | 10.084 | 27.974 | 2967.76 | 1069.82 | 770.548 | 299.268 |
| 2014          | 257393 | 91379.215  | 64203.423  | 27175.79 | 10.558 | 29.740 | 2947.05 | 1046.26 | 735.104 | 311.152 |
| 2015          | 259782 | 90750.242  | 62382.565  | 28367.68 | 10.920 | 31.259 | 3346.10 | 1168.90 | 803.514 | 365.388 |
| 2016          | 261453 | 88811.996  | 59036.260  | 29775.74 | 11.389 | 33.527 | 3336.15 | 1133.24 | 753.305 | 379.940 |
| 2017          | 263685 | 87325.126  | 56348.319  | 30976.81 | 11.748 | 35.473 | 3333.85 | 1104.08 | 712.429 | 391.650 |
| 2018          | 258714 | 87612.144  | 55518.413  | 32093.73 | 12.405 | 36.632 | 3240.73 | 1097.46 | 695.440 | 402.016 |
| 2019          | 261438 | 87797.760  | 54224.812  | 33572.95 | 12.842 | 38.239 | 3242.99 | 1089.08 | 672.628 | 416.454 |
| 2020          | 262288 | 87221.042  | 52824.378  | 34396.66 | 13.114 | 39.436 | 3715.29 | 1235.48 | 748.253 | 487.226 |
| 2021          | 255079 | 82001.292  | 47399.822  | 34601.47 | 13.565 | 42.196 | 3587.82 | 1153.39 | 666.702 | 486.687 |
| 2022          | 257097 | 81915.977  | 45866.353  | 36049.62 | 14.022 | 44.008 | 3588.53 | 1143.37 | 640.198 | 503.177 |
| 2023          | 259080 | 81810.810  | 44307.446  | 37503.36 | 14.476 | 45.842 | 3586.88 | 1132.64 | 613.423 | 519.222 |
| 2024          | 260719 | 81528.303  | 42784.564  | 38743.74 | 14.860 | 47.522 | 3579.65 | 1119.38 | 587.429 | 531.949 |
| 2025          | 257308 | 79599.213  | 40918.422  | 38680.79 | 15.033 | 48.594 | 4112.08 | 1272.09 | 653.924 | 618.164 |
| 2026          | 251528 | 75082.462  | 36630.326  | 38452.14 | 15.287 | 51.213 | 4003.24 | 1194.99 | 582.997 | 611.992 |
| 2027          | 250988 | 74444.425  | 34924.472  | 39519.95 | 15.746 | 53.087 | 3976.53 | 1179.46 | 553.326 | 626.135 |
| 2028          | 250285 | 73699.585  | 33145.261  | 40554.32 | 16.203 | 55.027 | 3945.35 | 1161.76 | 522.484 | 639.276 |
| 2029          | 249525 | 72819.703  | 31461.138  | 41358.57 | 16.575 | 56.796 | 3910.99 | 1141.36 | 493.113 | 648.243 |
| 2030          | 240528 | 69309.277  | 29443.015  | 39866.26 | 16.574 | 57.519 | 4504.36 | 1297.95 | 551.377 | 746.572 |
| 2031          | 235442 | 65433.368  | 26139.586  | 39293.78 | 16.689 | 60.052 | 4397.65 | 1222.18 | 488.242 | 733.939 |
| 2032          | 234017 | 64643.552  | 24684.399  | 39959.15 | 17.075 | 61.815 | 4356.12 | 1203.31 | 459.488 | 743.820 |
| 2033          | 232559 | 63793.514  | 23219.200  | 40574.31 | 17.447 | 63.603 | 4310.93 | 1182.54 | 430.413 | 752.124 |
| 2034          | 230963 | 63032.151  | 21837.388  | 41194.76 | 17.836 | 65.355 | 4260.75 | 1162.80 | 402.850 | 759.950 |
| 2035          | 215822 | 57653.301  | 19910.828  | 37742.47 | 17.488 | 65.465 | 4924.38 | 1315.47 | 454.304 | 861.167 |
| 2036          | 208183 | 52988.733  | 16655.858  | 36332.87 | 17.452 | 68.567 | 4748.94 | 1208.75 | 379.943 | 828.803 |
| 2037          | 205491 | 52026.921  | 15574.567  | 36452.35 | 17.739 | 70.064 | 4682.40 | 1185.50 | 354.887 | 830.616 |
| 2038          | 202834 | 50943.211  | 14399.822  | 36543.39 | 18.016 | 71.734 | 4612.18 | 1158.38 | 327.433 | 830.950 |
| 2039          | 200251 | 50085.991  | 13399.578  | 36686.41 | 18.320 | 73.247 | 4538.65 | 1135.19 | 303.699 | 831.492 |

## Results for PHIM for Run 5 (Sensitivity\_Analysis\_2.RTF)

\*\*\*\*\*

### Main Results for E-Component for Run: 5, Simulation: 1, COD: LUNG CANCER

| Variable Parameter          | Value                                  |
|-----------------------------|----------------------------------------|
| 1. Country                  | US (United States)                     |
| 2. Sex                      | M (Males)                              |
| 3. Year of start of process | 1990                                   |
| 4. Cause of Death           | LUNG CANCER                            |
| 5. Effective Dose NULL      | CC:1                                   |
| 6. Effective Dose Ecig      | CC:1 Ecig:0.05 Dual:0.525              |
| Note:                       | Death rates are per million population |

#### Results for Age Groups Combined and Years combined, Population unadjusted for deaths in Ecig scenario,

| Age Group:All |         | NULL        | Ecig        | %Drop    |        | NULL   | Ecig    | Drop    |         |         |
|---------------|---------|-------------|-------------|----------|--------|--------|---------|---------|---------|---------|
| Year          | Number  | Attrib      | Attrib      | Drop     | %Drop  | Attrib | Death   | Attrib  | Drop    |         |
|               | Deaths  | Deaths      | Deaths      | Deaths   | Deaths | Deaths | Rate    | Rates   | Rates   |         |
| All Comb      | 3065988 | 2244988.113 | 1853496.843 | 391491.3 | 12.769 | 17.438 | 887.537 | 649.875 | 536.547 | 113.328 |

#### Results for Age Groups Combined, Population unadjusted for deaths in Ecig scenario,

| Age Group:All |        | NULL      | Ecig      | %Drop    |        | NULL   | Ecig    | Drop    |         |         |
|---------------|--------|-----------|-----------|----------|--------|--------|---------|---------|---------|---------|
| Year          | Number | Attrib    | Attrib    | Drop     | %Drop  | Attrib | Death   | Attrib  | Drop    |         |
|               | Deaths | Deaths    | Deaths    | Deaths   | Deaths | Deaths | Rate    | Rates   | Rates   |         |
| 1990          | 78822  | 63385.736 | 63385.736 | 0.000    | 0.000  | 0.000  | 1249.50 | 1004.81 | 0.000   |         |
| 1991          | 78462  | 62918.402 | 62899.683 | 18.719   | 0.024  | 0.030  | 1223.41 | 981.049 | 980.757 | 0.292   |
| 1992          | 77987  | 62366.766 | 62319.071 | 47.695   | 0.061  | 0.076  | 1195.35 | 955.930 | 955.199 | 0.731   |
| 1993          | 78542  | 62652.888 | 62556.032 | 96.856   | 0.123  | 0.155  | 1182.39 | 943.195 | 941.737 | 1.458   |
| 1994          | 77437  | 61565.227 | 61407.744 | 157.483  | 0.203  | 0.256  | 1144.00 | 909.520 | 907.194 | 2.327   |
| 1995          | 76904  | 60851.961 | 60611.532 | 240.429  | 0.313  | 0.395  | 1114.36 | 881.759 | 878.275 | 3.484   |
| 1996          | 76232  | 60122.922 | 59773.937 | 348.985  | 0.458  | 0.580  | 1087.44 | 857.643 | 852.665 | 4.978   |
| 1997          | 75473  | 59237.155 | 58766.569 | 470.586  | 0.624  | 0.794  | 1059.06 | 831.234 | 824.631 | 6.603   |
| 1998          | 75381  | 58906.696 | 58279.174 | 627.522  | 0.832  | 1.065  | 1040.37 | 813.001 | 804.340 | 8.661   |
| 1999          | 73159  | 56930.073 | 56139.320 | 790.753  | 1.081  | 1.389  | 993.781 | 773.329 | 762.588 | 10.741  |
| 2000          | 73784  | 57137.121 | 56119.207 | 1017.914 | 1.380  | 1.782  | 987.608 | 764.787 | 751.162 | 13.625  |
| 2001          | 73294  | 56481.726 | 55207.979 | 1273.747 | 1.738  | 2.255  | 968.273 | 746.169 | 729.342 | 16.827  |
| 2002          | 72442  | 55588.365 | 54031.960 | 1556.405 | 2.148  | 2.800  | 946.293 | 726.138 | 705.807 | 20.331  |
| 2003          | 71942  | 54945.856 | 53081.742 | 1864.114 | 2.591  | 3.393  | 929.989 | 710.281 | 686.184 | 24.097  |
| 2004          | 71301  | 54203.126 | 51975.871 | 2227.255 | 3.124  | 4.109  | 911.778 | 693.135 | 664.653 | 28.482  |
| 2005          | 70964  | 53744.603 | 51137.985 | 2606.619 | 3.673  | 4.850  | 896.937 | 679.296 | 646.350 | 32.946  |
| 2006          | 69658  | 52535.572 | 49502.340 | 3033.232 | 4.354  | 5.774  | 872.383 | 657.945 | 619.957 | 37.988  |
| 2007          | 68565  | 51492.124 | 48037.747 | 3454.376 | 5.038  | 6.709  | 849.888 | 638.264 | 595.445 | 42.818  |
| 2008          | 68226  | 51030.736 | 47059.042 | 3971.694 | 5.821  | 7.783  | 836.215 | 625.460 | 576.781 | 48.679  |
| 2009          | 67509  | 50276.199 | 45774.737 | 4501.461 | 6.668  | 8.953  | 817.667 | 608.943 | 554.422 | 54.522  |
| 2010          | 67196  | 49840.933 | 44827.296 | 5013.637 | 7.461  | 10.059 | 804.000 | 596.347 | 536.358 | 59.988  |
| 2011          | 66506  | 49072.841 | 43435.796 | 5637.045 | 8.476  | 11.487 | 787.880 | 581.354 | 514.573 | 66.781  |
| 2012          | 66155  | 48539.512 | 42259.395 | 6280.117 | 9.493  | 12.938 | 775.240 | 568.812 | 495.218 | 73.594  |
| 2013          | 65333  | 47675.741 | 40778.325 | 6897.416 | 10.557 | 14.467 | 756.876 | 552.318 | 472.412 | 79.906  |
| 2014          | 65033  | 47194.534 | 39677.531 | 7517.003 | 11.559 | 15.928 | 744.602 | 540.359 | 454.292 | 86.067  |
| 2015          | 64145  | 46305.842 | 38225.822 | 8080.020 | 12.596 | 17.449 | 826.215 | 596.439 | 492.365 | 104.074 |
| 2016          | 61618  | 44208.867 | 35734.126 | 8474.740 | 13.754 | 19.170 | 786.248 | 564.107 | 455.969 | 108.138 |
| 2017          | 59897  | 42702.624 | 33796.667 | 8905.957 | 14.869 | 20.856 | 757.297 | 539.903 | 427.302 | 112.601 |
| 2018          | 62468  | 44321.202 | 34124.823 | 10196.38 | 16.323 | 23.006 | 782.490 | 555.181 | 427.458 | 127.723 |
| 2019          | 63045  | 44493.088 | 33406.859 | 11086.23 | 17.585 | 24.917 | 782.035 | 551.912 | 414.393 | 137.518 |
| 2020          | 63466  | 44529.551 | 32621.912 | 11907.64 | 18.762 | 26.741 | 898.991 | 630.757 | 462.087 | 168.671 |
| 2021          | 57113  | 39852.556 | 28330.293 | 11522.26 | 20.175 | 28.912 | 803.323 | 560.546 | 398.480 | 162.066 |
| 2022          | 57440  | 39853.685 | 27440.471 | 12413.21 | 21.611 | 31.147 | 801.745 | 556.274 | 383.011 | 173.262 |
| 2023          | 57738  | 39847.050 | 26508.803 | 13338.25 | 23.101 | 33.474 | 799.366 | 551.670 | 367.006 | 184.664 |
| 2024          | 57942  | 39726.010 | 25560.229 | 14165.78 | 24.448 | 35.659 | 795.539 | 545.435 | 350.940 | 194.495 |
| 2025          | 57521  | 39207.348 | 24444.076 | 14763.27 | 25.666 | 37.654 | 919.257 | 626.579 | 390.645 | 235.934 |
| 2026          | 51428  | 34803.960 | 20921.885 | 13882.07 | 26.993 | 39.886 | 818.510 | 553.929 | 332.986 | 220.943 |
| 2027          | 51172  | 34484.595 | 19886.428 | 14598.17 | 28.528 | 42.332 | 810.740 | 546.357 | 315.071 | 231.286 |
| 2028          | 50870  | 34100.638 | 18810.174 | 15290.46 | 30.058 | 44.839 | 801.884 | 537.544 | 296.513 | 241.030 |
| 2029          | 50540  | 33669.838 | 17786.034 | 15883.80 | 31.428 | 47.175 | 792.146 | 527.732 | 278.774 | 248.959 |
| 2030          | 49109  | 32557.688 | 16601.084 | 15956.60 | 32.492 | 49.010 | 919.662 | 609.705 | 310.887 | 298.818 |
| 2031          | 43585  | 28646.393 | 13942.332 | 14704.06 | 33.736 | 51.330 | 814.096 | 535.065 | 260.418 | 274.646 |
| 2032          | 43163  | 28227.160 | 13101.372 | 15125.79 | 35.044 | 53.586 | 803.454 | 525.435 | 243.876 | 281.559 |
| 2033          | 42725  | 27786.623 | 12250.098 | 15536.53 | 36.364 | 55.914 | 791.996 | 515.079 | 227.079 | 288.000 |
| 2034          | 42256  | 27348.299 | 11440.735 | 15907.56 | 37.646 | 58.167 | 779.523 | 504.514 | 211.056 | 293.458 |
| 2035          | 39748  | 25570.077 | 10378.566 | 15191.51 | 38.219 | 59.411 | 906.933 | 583.430 | 236.807 | 346.623 |
| 2036          | 34030  | 21717.319 | 8149.981  | 13567.34 | 39.869 | 62.472 | 776.269 | 495.402 | 185.912 | 309.490 |
| 2037          | 33454  | 21256.024 | 7576.499  | 13679.52 | 40.891 | 64.356 | 762.289 | 484.347 | 172.641 | 311.706 |
| 2038          | 32883  | 20747.175 | 6964.774  | 13782.40 | 41.913 | 66.430 | 747.720 | 471.764 | 158.370 | 313.394 |
| 2039          | 32325  | 20327.688 | 6447.049  | 13880.64 | 42.941 | 68.284 | 732.644 | 460.724 | 146.121 | 314.602 |

## Results for PHIM for Run 5 (Sensitivity\_Analysis\_2.RTF)

\*\*\*\*\*

### Main Results for E-Component for Run: 5, Simulation: 1, COD: IHD

| Variable Parameter          | Value                                  |
|-----------------------------|----------------------------------------|
| 1. Country                  | US (United States)                     |
| 2. Sex                      | M (Males)                              |
| 3. Year of start of process | 1990                                   |
| 4. Cause of Death           | IHD                                    |
| 5. Effective Dose NULL      | CC:1                                   |
| 6. Effective Dose Ecig      | CC:1 Ecig:0.05 Dual:0.525              |
| Note:                       | Death rates are per million population |

#### Results for Age Groups Combined and Years combined, Population unadjusted for deaths in Ecig scenario,

| Age Group:All |         | NULL        | Ecig       | %Drop    |        |        | NULL    | Ecig    | Drop    |         |
|---------------|---------|-------------|------------|----------|--------|--------|---------|---------|---------|---------|
| Year          | Number  | Attrib      | Attrib     | Drop     | %Drop  | Attrib | Death   | Attrib  | Drop    |         |
|               | Deaths  | Deaths      | Deaths     | Deaths   | Deaths | Deaths | Rate    | Rates   | Rates   |         |
| All Comb      | 6360041 | 1098877.421 | 624593.170 | 474284.3 | 7.457  | 43.161 | 1841.09 | 318.101 | 180.806 | 137.295 |

#### Results for Age Groups Combined, Population unadjusted for deaths in Ecig scenario,

| Age Group:All |        | NULL      | Ecig      | %Drop    |        |        | NULL    | Ecig    | Drop    |         |
|---------------|--------|-----------|-----------|----------|--------|--------|---------|---------|---------|---------|
| Year          | Number | Attrib    | Attrib    | Drop     | %Drop  | Attrib | Death   | Attrib  | Drop    |         |
|               | Deaths | Deaths    | Deaths    | Deaths   | Deaths | Deaths | Rate    | Rates   | Rates   |         |
| 1990          | 171484 | 38511.725 | 38511.725 | 0.000    | 0.000  | 0.000  | 2718.40 | 610.497 | 0.000   |         |
| 1991          | 168044 | 37309.838 | 37156.750 | 153.088  | 0.091  | 0.410  | 2620.21 | 581.750 | 579.363 | 2.387   |
| 1992          | 164548 | 36137.488 | 35721.540 | 415.948  | 0.253  | 1.151  | 2522.12 | 553.899 | 547.524 | 6.375   |
| 1993          | 164362 | 35599.588 | 34812.416 | 787.172  | 0.479  | 2.211  | 2474.35 | 535.926 | 524.076 | 11.850  |
| 1994          | 159866 | 34336.757 | 33107.167 | 1229.590 | 0.769  | 3.581  | 2361.75 | 507.267 | 489.101 | 18.165  |
| 1995          | 158083 | 33455.759 | 31685.121 | 1770.638 | 1.120  | 5.292  | 2290.66 | 484.782 | 459.125 | 25.657  |
| 1996          | 154875 | 32193.824 | 29837.509 | 2356.315 | 1.521  | 7.319  | 2209.26 | 459.239 | 425.627 | 33.612  |
| 1997          | 149970 | 30665.509 | 27718.127 | 2947.383 | 1.965  | 9.611  | 2104.43 | 430.308 | 388.950 | 41.359  |
| 1998          | 145407 | 29188.430 | 25661.754 | 3526.676 | 2.425  | 12.082 | 2006.83 | 402.844 | 354.171 | 48.673  |
| 1999          | 165952 | 33375.386 | 28331.783 | 5043.603 | 3.039  | 15.112 | 2254.27 | 453.366 | 384.855 | 68.512  |
| 2000          | 160260 | 32024.754 | 26226.916 | 5797.839 | 3.618  | 18.104 | 2145.10 | 428.655 | 351.050 | 77.605  |
| 2001          | 154444 | 30682.393 | 24067.540 | 6614.853 | 4.283  | 21.559 | 2040.33 | 405.339 | 317.952 | 87.388  |
| 2002          | 151887 | 30218.370 | 22619.774 | 7598.596 | 5.003  | 25.146 | 1984.06 | 394.736 | 295.477 | 99.259  |
| 2003          | 146733 | 29175.202 | 20783.122 | 8392.080 | 5.719  | 28.764 | 1896.81 | 377.146 | 268.662 | 108.484 |
| 2004          | 138381 | 27488.687 | 18577.846 | 8910.842 | 6.439  | 32.416 | 1769.58 | 351.518 | 237.568 | 113.949 |
| 2005          | 135881 | 27017.439 | 17329.635 | 9687.804 | 7.130  | 35.858 | 1717.44 | 341.482 | 219.035 | 122.447 |
| 2006          | 131922 | 26231.435 | 15756.394 | 10475.04 | 7.940  | 39.933 | 1652.16 | 328.517 | 197.330 | 131.187 |
| 2007          | 126502 | 25103.049 | 14177.534 | 10925.52 | 8.637  | 43.523 | 1568.04 | 311.161 | 175.736 | 135.426 |
| 2008          | 125859 | 24621.740 | 13116.229 | 11505.51 | 9.142  | 46.729 | 1542.60 | 301.777 | 160.760 | 141.018 |
| 2009          | 122428 | 23741.177 | 11892.101 | 11849.08 | 9.678  | 49.909 | 1482.84 | 287.552 | 144.037 | 143.516 |
| 2010          | 120537 | 23189.160 | 10930.097 | 12259.06 | 10.170 | 52.865 | 1442.22 | 277.458 | 130.779 | 146.680 |
| 2011          | 120221 | 22786.927 | 10010.314 | 12776.61 | 10.628 | 56.070 | 1424.23 | 269.951 | 118.590 | 151.361 |
| 2012          | 120927 | 22485.295 | 9258.424  | 13226.87 | 10.938 | 58.825 | 1417.09 | 263.495 | 108.495 | 155.000 |
| 2013          | 122648 | 22251.884 | 8581.769  | 13670.12 | 11.146 | 61.434 | 1420.86 | 257.786 | 99.419  | 158.367 |
| 2014          | 123229 | 21894.593 | 7919.711  | 13974.88 | 11.341 | 63.828 | 1410.92 | 250.685 | 90.678  | 160.007 |
| 2015          | 123774 | 21471.109 | 7322.092  | 14149.02 | 11.431 | 65.898 | 1594.26 | 276.557 | 94.312  | 182.245 |
| 2016          | 126218 | 21411.568 | 6780.938  | 14630.63 | 11.592 | 68.330 | 1610.55 | 273.213 | 86.525  | 186.687 |
| 2017          | 128265 | 21169.399 | 6290.141  | 14879.26 | 11.600 | 70.287 | 1621.69 | 267.651 | 79.528  | 188.123 |
| 2018          | 121429 | 19830.576 | 5403.162  | 14427.41 | 11.881 | 72.753 | 1521.05 | 248.404 | 67.682  | 180.722 |
| 2019          | 121832 | 19431.014 | 4948.383  | 14482.63 | 11.887 | 74.534 | 1511.26 | 241.031 | 61.382  | 179.649 |
| 2020          | 120811 | 18532.612 | 4482.610  | 14050.00 | 11.630 | 75.812 | 1711.27 | 262.513 | 63.496  | 199.017 |
| 2021          | 119407 | 18234.128 | 4037.702  | 14196.43 | 11.889 | 77.856 | 1679.51 | 256.472 | 56.792  | 199.680 |
| 2022          | 119438 | 17812.559 | 3660.930  | 14151.63 | 11.849 | 79.447 | 1667.10 | 248.626 | 51.099  | 197.527 |
| 2023          | 119445 | 17361.668 | 3313.087  | 14048.58 | 11.762 | 80.917 | 1653.68 | 240.367 | 45.869  | 194.498 |
| 2024          | 119305 | 16929.676 | 3026.902  | 13902.77 | 11.653 | 82.121 | 1638.05 | 232.443 | 41.559  | 190.884 |
| 2025          | 115685 | 15501.666 | 2658.876  | 12842.79 | 11.102 | 82.848 | 1848.78 | 247.735 | 42.492  | 205.243 |
| 2026          | 115073 | 15523.814 | 2435.732  | 13088.08 | 11.374 | 84.310 | 1831.46 | 247.072 | 38.766  | 208.306 |
| 2027          | 113989 | 15073.070 | 2220.330  | 12852.74 | 11.275 | 85.270 | 1805.98 | 238.810 | 35.178  | 203.632 |
| 2028          | 112855 | 14636.710 | 2007.901  | 12628.81 | 11.190 | 86.282 | 1778.98 | 230.725 | 31.651  | 199.074 |
| 2029          | 111718 | 14180.166 | 1829.430  | 12350.74 | 11.055 | 87.099 | 1751.04 | 222.256 | 28.674  | 193.582 |
| 2030          | 104851 | 12111.772 | 1535.341  | 10576.43 | 10.087 | 87.324 | 1963.54 | 226.816 | 28.752  | 198.064 |
| 2031          | 105289 | 12417.367 | 1449.616  | 10967.75 | 10.417 | 88.326 | 1966.62 | 231.935 | 27.076  | 204.858 |
| 2032          | 103879 | 12054.064 | 1326.003  | 10728.06 | 10.327 | 89.000 | 1933.67 | 224.381 | 24.683  | 199.698 |
| 2033          | 102485 | 11672.389 | 1202.731  | 10469.66 | 10.216 | 89.696 | 1899.76 | 216.370 | 22.295  | 194.075 |
| 2034          | 101070 | 11365.762 | 1122.452  | 10243.31 | 10.135 | 90.124 | 1864.51 | 209.673 | 20.707  | 188.966 |
| 2035          | 90820  | 8580.360  | 840.092   | 7740.268 | 8.523  | 90.209 | 2072.23 | 195.777 | 19.168  | 176.609 |
| 2036          | 92117  | 8948.841  | 807.545   | 8141.295 | 8.838  | 90.976 | 2101.31 | 204.135 | 18.421  | 185.714 |
| 2037          | 90327  | 8624.570  | 755.086   | 7869.483 | 8.712  | 91.245 | 2058.21 | 196.522 | 17.206  | 179.317 |
| 2038          | 88590  | 8315.017  | 695.183   | 7619.833 | 8.601  | 91.639 | 2014.42 | 189.073 | 15.808  | 173.265 |
| 2039          | 86921  | 8001.132  | 649.608   | 7351.523 | 8.458  | 91.881 | 1970.05 | 181.344 | 14.723  | 166.621 |

## Results for PHIM for Run 5 (Sensitivity\_Analysis\_2.RTF)

\*\*\*\*\*

### Main Results for E-Component for Run: 5, Simulation: 1, COD: STROKE

| Variable Parameter          | Value                                  |
|-----------------------------|----------------------------------------|
| 1. Country                  | US (United States)                     |
| 2. Sex                      | M (Males)                              |
| 3. Year of start of process | 1990                                   |
| 4. Cause of Death           | STROKE                                 |
| 5. Effective Dose NULL      | CC:1                                   |
| 6. Effective Dose Ecig      | CC:1 Ecig:0.05 Dual:0.525              |
| Note:                       | Death rates are per million population |

#### Results for Age Groups Combined and Years combined, Population unadjusted for deaths in Ecig scenario,

| Age Group:All |         | NULL       | Ecig      | %Drop    |        |        | NULL    | Ecig   | Drop   |        |
|---------------|---------|------------|-----------|----------|--------|--------|---------|--------|--------|--------|
| Year          | Number  | Attrib     | Attrib    | Drop     | %Drop  | Attrib | Death   | Attrib | Attrib | Drop   |
|               | Deaths  | Deaths     | Deaths    | Deaths   | Deaths | Deaths | Rate    | Rates  | Rates  | Rates  |
| All Comb      | 1489699 | 149918.462 | 84005.863 | 65912.60 | 4.425  | 43.966 | 431.236 | 43.398 | 24.318 | 19.080 |

#### Results for Age Groups Combined, Population unadjusted for deaths in Ecig scenario,

| Age Group:All |        | NULL     | Ecig     | %Drop    |        |        | NULL    | Ecig   | Drop   |        |
|---------------|--------|----------|----------|----------|--------|--------|---------|--------|--------|--------|
| Year          | Number | Attrib   | Attrib   | Drop     | %Drop  | Attrib | Death   | Attrib | Attrib | Drop   |
|               | Deaths | Deaths   | Deaths   | Deaths   | Deaths | Deaths | Rate    | Rates  | Rates  | Rates  |
| 1990          | 32862  | 4613.166 | 4613.166 | 0.000    | 0.000  | 0.000  | 520.936 | 73.129 | 73.129 | 0.000  |
| 1991          | 32619  | 4555.566 | 4538.125 | 17.441   | 0.053  | 0.383  | 508.609 | 71.032 | 70.760 | 0.272  |
| 1992          | 32100  | 4453.572 | 4407.428 | 46.144   | 0.144  | 1.036  | 492.014 | 68.262 | 67.555 | 0.707  |
| 1993          | 32896  | 4462.473 | 4371.543 | 90.930   | 0.276  | 2.038  | 495.226 | 67.179 | 65.810 | 1.369  |
| 1994          | 33323  | 4499.513 | 4350.603 | 148.910  | 0.447  | 3.309  | 492.290 | 66.473 | 64.273 | 2.200  |
| 1995          | 33569  | 4472.774 | 4250.976 | 221.798  | 0.661  | 4.959  | 486.422 | 64.812 | 61.598 | 3.214  |
| 1996          | 33870  | 4406.878 | 4101.675 | 305.203  | 0.901  | 6.926  | 483.150 | 62.863 | 58.510 | 4.354  |
| 1997          | 33516  | 4288.158 | 3894.435 | 393.723  | 1.175  | 9.182  | 470.307 | 60.173 | 54.648 | 5.525  |
| 1998          | 32795  | 4120.148 | 3640.969 | 479.179  | 1.461  | 11.630 | 452.620 | 56.864 | 50.251 | 6.613  |
| 1999          | 33375  | 3982.443 | 3415.610 | 566.832  | 1.698  | 14.233 | 453.361 | 54.097 | 46.397 | 7.700  |
| 2000          | 33459  | 4021.411 | 3331.757 | 689.655  | 2.061  | 17.150 | 447.853 | 53.827 | 44.596 | 9.231  |
| 2001          | 32275  | 3848.092 | 3064.981 | 783.111  | 2.426  | 20.351 | 426.379 | 50.836 | 40.491 | 10.346 |
| 2002          | 31586  | 3783.081 | 2888.749 | 894.332  | 2.831  | 23.640 | 412.601 | 49.418 | 37.735 | 11.682 |
| 2003          | 30985  | 3754.415 | 2731.854 | 1022.561 | 3.300  | 27.236 | 400.541 | 48.533 | 35.314 | 13.219 |
| 2004          | 29884  | 3666.274 | 2539.325 | 1126.949 | 3.771  | 30.738 | 382.149 | 46.883 | 32.472 | 14.411 |
| 2005          | 28708  | 3589.688 | 2361.168 | 1228.520 | 4.279  | 34.224 | 362.850 | 45.371 | 29.844 | 15.528 |
| 2006          | 28188  | 3596.985 | 2222.343 | 1374.642 | 4.877  | 38.217 | 353.021 | 45.048 | 27.832 | 17.216 |
| 2007          | 28026  | 3560.798 | 2074.976 | 1485.822 | 5.302  | 41.727 | 347.392 | 44.137 | 25.720 | 18.417 |
| 2008          | 27128  | 3417.001 | 1873.036 | 1543.966 | 5.691  | 45.185 | 332.495 | 41.881 | 22.957 | 18.924 |
| 2009          | 27068  | 3394.390 | 1748.087 | 1646.302 | 6.082  | 48.501 | 327.847 | 41.113 | 21.173 | 19.940 |
| 2010          | 26911  | 3340.137 | 1621.576 | 1718.561 | 6.386  | 51.452 | 321.990 | 39.965 | 19.402 | 20.563 |
| 2011          | 26959  | 3285.435 | 1497.789 | 1787.646 | 6.631  | 54.411 | 319.377 | 38.922 | 17.744 | 21.744 |
| 2012          | 27057  | 3259.209 | 1383.493 | 1875.717 | 6.932  | 57.551 | 317.068 | 38.193 | 16.213 | 21.981 |
| 2013          | 27904  | 3274.703 | 1298.262 | 1976.441 | 7.083  | 60.355 | 323.265 | 37.937 | 15.040 | 22.897 |
| 2014          | 28792  | 3298.083 | 1218.932 | 2079.151 | 7.221  | 63.041 | 329.657 | 37.762 | 13.956 | 23.805 |
| 2015          | 29560  | 3244.406 | 1130.566 | 2113.840 | 7.151  | 65.153 | 380.745 | 41.789 | 14.562 | 27.227 |
| 2016          | 30513  | 3314.836 | 1067.632 | 2247.204 | 7.365  | 67.792 | 389.347 | 42.297 | 13.623 | 28.674 |
| 2017          | 31416  | 3333.314 | 999.089  | 2334.224 | 7.430  | 70.027 | 397.202 | 42.144 | 12.632 | 29.512 |
| 2018          | 29348  | 2925.242 | 821.944  | 2103.298 | 7.167  | 71.902 | 367.626 | 36.642 | 10.296 | 26.347 |
| 2019          | 29598  | 2864.628 | 749.165  | 2115.463 | 7.147  | 73.848 | 367.149 | 35.534 | 9.293  | 26.241 |
| 2020          | 29592  | 2730.366 | 671.746  | 2058.620 | 6.957  | 75.397 | 419.174 | 38.675 | 9.515  | 29.160 |
| 2021          | 30097  | 2647.911 | 607.473  | 2040.438 | 6.780  | 77.058 | 423.328 | 37.244 | 8.544  | 28.700 |
| 2022          | 30304  | 2586.165 | 549.440  | 2036.725 | 6.721  | 78.755 | 422.974 | 36.097 | 7.669  | 28.428 |
| 2023          | 30505  | 2517.960 | 495.683  | 2022.277 | 6.629  | 80.314 | 422.337 | 34.860 | 6.863  | 27.998 |
| 2024          | 30661  | 2454.161 | 451.606  | 2002.555 | 6.531  | 81.598 | 420.968 | 33.695 | 6.201  | 27.495 |
| 2025          | 30254  | 2275.364 | 394.613  | 1880.752 | 6.217  | 82.657 | 483.488 | 36.363 | 6.306  | 30.057 |
| 2026          | 30685  | 2183.166 | 353.660  | 1829.506 | 5.962  | 83.801 | 488.380 | 34.747 | 5.629  | 29.118 |
| 2027          | 30561  | 2112.345 | 321.868  | 1790.477 | 5.859  | 84.763 | 484.196 | 33.467 | 5.100  | 28.367 |
| 2028          | 30412  | 2046.677 | 290.402  | 1756.274 | 5.775  | 85.811 | 479.392 | 32.263 | 4.578  | 27.685 |
| 2029          | 30254  | 1977.671 | 261.626  | 1716.046 | 5.672  | 86.771 | 474.195 | 30.997 | 4.101  | 26.897 |
| 2030          | 29330  | 1744.457 | 220.628  | 1523.829 | 5.195  | 87.353 | 549.260 | 32.668 | 4.132  | 28.537 |
| 2031          | 28976  | 1653.738 | 195.777  | 1457.960 | 5.032  | 88.162 | 541.223 | 30.889 | 3.657  | 27.232 |
| 2032          | 28724  | 1603.120 | 177.048  | 1426.073 | 4.965  | 88.956 | 534.690 | 29.841 | 3.296  | 26.546 |
| 2033          | 28464  | 1548.245 | 160.285  | 1387.960 | 4.876  | 89.647 | 527.627 | 28.700 | 2.971  | 25.729 |
| 2034          | 28178  | 1511.985 | 148.480  | 1363.505 | 4.839  | 90.180 | 519.826 | 27.893 | 2.739  | 25.154 |
| 2035          | 26737  | 1239.866 | 117.092  | 1122.773 | 4.199  | 90.556 | 610.065 | 28.290 | 2.672  | 25.618 |
| 2036          | 25591  | 1182.522 | 105.280  | 1077.241 | 4.209  | 91.097 | 583.762 | 26.975 | 2.402  | 24.573 |
| 2037          | 25143  | 1134.483 | 98.611   | 1035.872 | 4.120  | 91.308 | 572.916 | 25.851 | 2.247  | 23.604 |
| 2038          | 24693  | 1093.537 | 91.031   | 1002.506 | 4.060  | 91.676 | 561.491 | 24.866 | 2.070  | 22.796 |
| 2039          | 24247  | 1047.905 | 84.259   | 963.646  | 3.974  | 91.959 | 549.553 | 23.751 | 1.910  | 21.841 |

## Results for PHIM for Run 5 (Sensitivity\_Analysis\_2.RTF)

\*\*\*\*\*

### Main Results for E-Component for Run: 5, Simulation: 1, COD: COPD

| Variable Parameter          | Value                                  |
|-----------------------------|----------------------------------------|
| 1. Country                  | US (United States)                     |
| 2. Sex                      | M (Males)                              |
| 3. Year of start of process | 1990                                   |
| 4. Cause of Death           | COPD                                   |
| 5. Effective Dose NULL      | CC:1                                   |
| 6. Effective Dose Ecig      | CC:1 Ecig:0.05 Dual:0.525              |
| Note:                       | Death rates are per million population |

#### Results for Age Groups Combined and Years combined, Population unadjusted for deaths in Ecig scenario,

| Age Group:All | NULL    | Ecig        | %Drop      |          |        | NULL   | Ecig    | Drop    |         |        |
|---------------|---------|-------------|------------|----------|--------|--------|---------|---------|---------|--------|
| Year          | Number  | Attrib      | Attrib     | Drop     | %Drop  | Attrib | Death   | Attrib  | Attrib  | Drop   |
|               | Deaths  | Deaths      | Deaths     | Deaths   | Deaths | Deaths | Rate    | Rates   | Rates   | Rates  |
| All Comb      | 2233143 | 1015606.587 | 742799.643 | 272806.9 | 12.216 | 26.861 | 646.447 | 293.996 | 215.024 | 78.972 |

#### Results for Age Groups Combined, Population unadjusted for deaths in Ecig scenario,

| Age Group:All | NULL   | Ecig      | %Drop     |          |        | NULL   | Ecig    | Drop    |         |         |
|---------------|--------|-----------|-----------|----------|--------|--------|---------|---------|---------|---------|
| Year          | Number | Attrib    | Attrib    | Drop     | %Drop  | Attrib | Death   | Attrib  | Attrib  | Drop    |
|               | Deaths | Deaths    | Deaths    | Deaths   | Deaths | Deaths | Rate    | Rates   | Rates   | Rates   |
| 1990          | 33993  | 19262.437 | 19262.437 | 0.000    | 0.000  | 0.000  | 538.865 | 305.353 | 305.353 | 0.000   |
| 1991          | 34092  | 19215.636 | 19208.319 | 7.317    | 0.021  | 0.038  | 531.576 | 299.618 | 299.504 | 0.114   |
| 1992          | 33942  | 19056.189 | 19039.968 | 16.222   | 0.048  | 0.085  | 520.248 | 292.085 | 291.836 | 0.249   |
| 1993          | 35913  | 20095.670 | 20061.270 | 34.400   | 0.096  | 0.171  | 540.645 | 302.526 | 302.008 | 0.518   |
| 1994          | 35074  | 19524.095 | 19469.269 | 54.826   | 0.156  | 0.281  | 518.158 | 288.435 | 287.625 | 0.810   |
| 1995          | 34669  | 19116.002 | 19031.131 | 84.871   | 0.245  | 0.444  | 502.362 | 276.995 | 275.765 | 1.230   |
| 1996          | 34582  | 18975.021 | 18855.132 | 119.889  | 0.347  | 0.632  | 493.306 | 270.675 | 268.965 | 1.710   |
| 1997          | 35267  | 19169.025 | 18998.501 | 170.523  | 0.484  | 0.890  | 494.878 | 268.986 | 266.593 | 2.393   |
| 1998          | 35675  | 19228.937 | 18994.915 | 234.022  | 0.656  | 1.217  | 492.368 | 265.388 | 262.158 | 3.230   |
| 1999          | 38516  | 20589.820 | 20271.724 | 318.096  | 0.826  | 1.545  | 523.195 | 279.689 | 275.368 | 4.321   |
| 2000          | 36283  | 19196.417 | 18804.852 | 391.566  | 1.079  | 2.040  | 485.652 | 256.946 | 251.705 | 5.241   |
| 2001          | 36281  | 19012.731 | 18513.871 | 498.860  | 1.375  | 2.624  | 479.301 | 251.174 | 244.583 | 6.590   |
| 2002          | 35983  | 18699.357 | 18086.235 | 613.122  | 1.704  | 3.279  | 470.038 | 244.265 | 236.256 | 8.009   |
| 2003          | 36205  | 18663.550 | 17926.182 | 737.368  | 2.037  | 3.951  | 468.019 | 241.262 | 231.730 | 9.532   |
| 2004          | 34611  | 17679.164 | 16819.340 | 859.824  | 2.484  | 4.863  | 442.596 | 226.076 | 215.081 | 10.995  |
| 2005          | 36826  | 18692.832 | 17609.640 | 1083.192 | 2.941  | 5.795  | 465.456 | 236.265 | 222.574 | 13.691  |
| 2006          | 34350  | 17308.564 | 16106.249 | 1202.315 | 3.500  | 6.946  | 430.192 | 216.769 | 201.711 | 15.058  |
| 2007          | 35326  | 17683.181 | 16235.530 | 1447.651 | 4.098  | 8.187  | 437.879 | 219.189 | 201.245 | 17.944  |
| 2008          | 38248  | 19006.374 | 17233.262 | 1773.112 | 4.636  | 9.329  | 468.788 | 232.952 | 211.220 | 21.732  |
| 2009          | 36902  | 18205.573 | 16230.608 | 1974.964 | 5.352  | 10.848 | 446.956 | 220.505 | 196.585 | 23.921  |
| 2010          | 37234  | 18237.758 | 16041.530 | 2196.229 | 5.898  | 12.042 | 445.505 | 218.215 | 191.937 | 26.278  |
| 2011          | 38093  | 18487.916 | 15918.280 | 2569.637 | 6.746  | 13.899 | 451.279 | 219.022 | 188.580 | 30.442  |
| 2012          | 38504  | 18491.158 | 15620.514 | 2870.645 | 7.455  | 15.524 | 451.211 | 216.689 | 183.050 | 33.640  |
| 2013          | 40290  | 19143.452 | 15854.816 | 3288.636 | 8.162  | 17.179 | 466.755 | 221.775 | 183.676 | 38.098  |
| 2014          | 40339  | 18992.005 | 15387.248 | 3604.757 | 8.936  | 18.980 | 461.866 | 217.451 | 176.178 | 41.273  |
| 2015          | 42303  | 19728.885 | 15704.084 | 4024.801 | 9.514  | 20.401 | 544.880 | 254.116 | 202.275 | 51.841  |
| 2016          | 43104  | 19876.724 | 15453.563 | 4423.161 | 10.262 | 22.253 | 550.009 | 253.628 | 197.188 | 56.440  |
| 2017          | 44107  | 20119.790 | 15262.421 | 4857.369 | 11.013 | 24.142 | 557.659 | 254.381 | 192.968 | 61.413  |
| 2018          | 45469  | 20535.123 | 15168.484 | 5366.639 | 11.803 | 26.134 | 569.564 | 257.229 | 190.005 | 67.224  |
| 2019          | 46963  | 21009.029 | 15120.405 | 5888.624 | 12.539 | 28.029 | 582.552 | 260.605 | 187.560 | 73.045  |
| 2020          | 48419  | 21428.512 | 15048.110 | 6380.402 | 13.177 | 29.775 | 685.853 | 303.533 | 213.155 | 90.378  |
| 2021          | 48463  | 21266.697 | 14424.355 | 6842.343 | 14.119 | 32.174 | 681.652 | 299.127 | 202.886 | 96.241  |
| 2022          | 49915  | 21663.568 | 14215.512 | 7448.056 | 14.921 | 34.381 | 696.712 | 302.378 | 198.419 | 103.959 |
| 2023          | 51391  | 22084.131 | 13989.872 | 8094.259 | 15.750 | 36.652 | 711.491 | 305.748 | 193.685 | 112.062 |
| 2024          | 52811  | 22418.456 | 13745.827 | 8672.629 | 16.422 | 38.685 | 725.093 | 307.804 | 188.729 | 119.075 |
| 2025          | 53848  | 22614.834 | 13420.856 | 9193.978 | 17.074 | 40.655 | 860.553 | 361.411 | 214.481 | 146.930 |
| 2026          | 54342  | 22571.522 | 12919.049 | 9652.472 | 17.763 | 42.764 | 864.886 | 359.241 | 205.615 | 153.626 |
| 2027          | 55267  | 22774.416 | 12495.846 | 10278.57 | 18.598 | 45.132 | 875.619 | 360.827 | 197.978 | 162.849 |
| 2028          | 56149  | 22915.561 | 12036.784 | 10878.78 | 19.375 | 47.473 | 885.102 | 361.228 | 189.741 | 171.487 |
| 2029          | 57014  | 22992.027 | 11584.048 | 11407.98 | 20.009 | 49.617 | 893.616 | 360.371 | 181.565 | 178.806 |
| 2030          | 57238  | 22895.360 | 11085.962 | 11809.40 | 20.632 | 51.580 | 1071.90 | 428.760 | 207.606 | 221.154 |
| 2031          | 57592  | 22715.871 | 10551.861 | 12164.01 | 21.121 | 53.549 | 1075.71 | 424.293 | 197.990 | 227.202 |
| 2032          | 58251  | 22759.207 | 10079.977 | 12679.23 | 21.767 | 55.710 | 1084.31 | 423.652 | 187.634 | 236.018 |
| 2033          | 58885  | 22786.258 | 9606.087  | 13180.17 | 22.383 | 57.843 | 1091.54 | 422.387 | 178.067 | 244.320 |
| 2034          | 59460  | 22806.106 | 9125.722  | 13680.38 | 23.008 | 59.986 | 1096.89 | 420.721 | 168.349 | 252.372 |
| 2035          | 58516  | 22262.998 | 8575.077  | 13687.92 | 23.392 | 61.483 | 1335.15 | 507.973 | 195.657 | 312.316 |
| 2036          | 56446  | 21140.051 | 7593.052  | 13547.00 | 24.000 | 64.082 | 1287.60 | 482.234 | 173.208 | 309.026 |
| 2037          | 56568  | 21011.845 | 7144.371  | 13867.47 | 24.515 | 65.998 | 1288.98 | 478.783 | 162.794 | 315.989 |
| 2038          | 56668  | 20787.483 | 6648.835  | 14138.65 | 24.950 | 68.015 | 1288.55 | 472.681 | 151.186 | 321.495 |
| 2039          | 56758  | 20709.267 | 6218.661  | 14490.61 | 25.531 | 69.972 | 1286.40 | 469.372 | 140.945 | 328.427 |

## Results for PHIM for Run 5 (Sensitivity\_Analysis\_2.RTF)

\*\*\*\*\*

### Main Results for E-Component for Run: 5, Simulation: 1, COD: Four Diseases Combined, Adjusted

| Variable Parameter          | Value                                  |
|-----------------------------|----------------------------------------|
| 1. Country                  | US (United States)                     |
| 2. Sex                      | M (Males)                              |
| 3. Year of start of process | 1990                                   |
| 4. Cause of Death           | Four Diseases Combined                 |
| 5. Effective Dose NULL      | CC:1                                   |
| 6. Effective Dose Ecig      | CC:1 Ecig:0.05 Dual:0.525              |
| Note:                       | Death rates are per million population |

#### Results for Age Groups Combined and Years combined, Population and Number deaths adjusted for Ecig scenario,

| Age Group:All | NULL     | Ecig        |             |         |        |        | NULL    | Ecig    |         |         |
|---------------|----------|-------------|-------------|---------|--------|--------|---------|---------|---------|---------|
| Year          | Number   | Attrib      | Attrib      | Drop    | %Drop  | Attrib | Death   | Attrib  | Attrib  | Drop    |
|               | Deaths   | Deaths      | Deaths      | Deaths  | Deaths | Deaths | Rate    | Rates   | Rates   | Rates   |
| All Comb      | 13239547 | 4509390.583 | 3317930.426 | 1191460 | 8.999  | 26.422 | 3810.43 | 1305.37 | 954.924 | 350.447 |

#### Results for Age Groups Combined, Population and Number deaths adjusted for Ecig scenario,

| Age Group:All | NULL   | Ecig       |            |          |        |        | NULL    | Ecig    |         |         |
|---------------|--------|------------|------------|----------|--------|--------|---------|---------|---------|---------|
| Year          | Number | Attrib     | Attrib     | Drop     | %Drop  | Attrib | Death   | Attrib  | Attrib  | Drop    |
|               | Deaths | Deaths     | Deaths     | Deaths   | Deaths | Deaths | Rate    | Rates   | Rates   | Rates   |
| 1990          | 317161 | 125773.065 | 125773.065 | 0.000    | 0.000  | 0.000  | 5027.71 | 1993.78 | 1993.78 | 0.000   |
| 1991          | 313217 | 123999.442 | 123802.877 | 196.566  | 0.063  | 0.159  | 4883.81 | 1933.45 | 1930.38 | 3.065   |
| 1992          | 308578 | 122014.015 | 121488.401 | 525.615  | 0.170  | 0.431  | 4729.73 | 1870.18 | 1862.11 | 8.062   |
| 1993          | 311716 | 122810.618 | 121802.568 | 1008.050 | 0.323  | 0.821  | 4692.61 | 1848.83 | 1833.63 | 15.196  |
| 1994          | 305707 | 119925.592 | 118337.791 | 1587.801 | 0.519  | 1.324  | 4516.17 | 1771.69 | 1748.19 | 23.504  |
| 1995          | 303237 | 117896.496 | 115584.276 | 2312.220 | 0.763  | 1.961  | 4393.76 | 1708.35 | 1674.76 | 33.590  |
| 1996          | 299580 | 115698.645 | 112577.395 | 3121.250 | 1.042  | 2.698  | 4273.09 | 1650.42 | 1605.76 | 44.661  |
| 1997          | 294258 | 113359.847 | 109391.436 | 3968.411 | 1.349  | 3.501  | 4128.58 | 1590.70 | 1534.81 | 55.888  |
| 1998          | 289305 | 111444.212 | 106596.495 | 4847.717 | 1.676  | 4.350  | 3992.08 | 1538.10 | 1470.91 | 67.185  |
| 1999          | 311074 | 114877.722 | 108186.860 | 6690.861 | 2.151  | 5.824  | 4224.48 | 1560.48 | 1469.21 | 91.271  |
| 2000          | 303886 | 112379.704 | 104521.254 | 7858.450 | 2.586  | 6.993  | 4066.10 | 1504.22 | 1398.53 | 105.685 |
| 2001          | 296426 | 110024.943 | 100904.116 | 9120.827 | 3.077  | 8.290  | 3914.19 | 1453.52 | 1332.40 | 121.118 |
| 2002          | 292070 | 108289.173 | 97689.672  | 10599.50 | 3.629  | 9.788  | 3812.97 | 1414.56 | 1275.34 | 139.221 |
| 2003          | 286082 | 106539.023 | 94600.518  | 11938.51 | 4.173  | 11.206 | 3695.41 | 1377.22 | 1221.98 | 155.240 |
| 2004          | 274439 | 103037.251 | 90004.342  | 13032.91 | 4.749  | 12.649 | 3506.25 | 1317.61 | 1149.90 | 167.711 |
| 2005          | 272700 | 103044.562 | 88548.623  | 14495.94 | 5.316  | 14.068 | 3442.97 | 1302.41 | 1117.97 | 184.442 |
| 2006          | 264496 | 99672.555  | 83712.822  | 15959.73 | 6.034  | 16.012 | 3308.22 | 1248.28 | 1047.05 | 201.231 |
| 2007          | 258863 | 97839.152  | 80669.505  | 17169.65 | 6.633  | 17.549 | 3203.86 | 1212.75 | 998.418 | 214.334 |
| 2008          | 259988 | 98075.852  | 79447.420  | 18628.43 | 7.165  | 18.994 | 3181.00 | 1202.07 | 972.054 | 230.017 |
| 2009          | 254512 | 95617.338  | 75830.470  | 19786.87 | 7.774  | 20.694 | 3076.50 | 1158.11 | 916.627 | 241.487 |
| 2010          | 252570 | 94607.988  | 73626.869  | 20981.12 | 8.307  | 22.177 | 3015.20 | 1131.98 | 878.962 | 253.022 |
| 2011          | 252570 | 93633.119  | 71089.659  | 22543.46 | 8.926  | 24.076 | 2984.60 | 1109.25 | 840.060 | 269.189 |
| 2012          | 253545 | 92775.175  | 68770.828  | 24004.35 | 9.467  | 25.874 | 2962.85 | 1087.19 | 803.635 | 283.555 |
| 2013          | 257206 | 92345.780  | 66785.463  | 25560.32 | 9.938  | 27.679 | 2970.47 | 1069.82 | 771.305 | 298.511 |
| 2014          | 258555 | 91379.215  | 64498.395  | 26880.82 | 10.397 | 29.417 | 2950.26 | 1046.26 | 735.964 | 310.293 |
| 2015          | 261094 | 90750.242  | 62702.132  | 28048.11 | 10.743 | 30.907 | 3348.90 | 1168.90 | 804.245 | 364.656 |
| 2016          | 262914 | 88811.996  | 59371.006  | 29440.99 | 11.198 | 33.150 | 3339.47 | 1133.24 | 754.116 | 379.129 |
| 2017          | 265309 | 87325.126  | 56699.944  | 30625.18 | 11.543 | 35.070 | 3337.75 | 1104.08 | 713.320 | 390.759 |
| 2018          | 260453 | 87612.144  | 55897.795  | 31714.35 | 12.177 | 36.199 | 3245.03 | 1097.46 | 696.440 | 401.016 |
| 2019          | 263358 | 87797.760  | 54629.717  | 33168.04 | 12.594 | 37.778 | 3247.97 | 1089.08 | 673.744 | 415.338 |
| 2020          | 264399 | 87221.042  | 53255.011  | 33966.03 | 12.846 | 38.942 | 3719.13 | 1235.48 | 749.104 | 486.375 |
| 2021          | 257301 | 82001.292  | 47820.090  | 34181.20 | 13.285 | 41.684 | 3592.12 | 1153.39 | 667.605 | 485.784 |
| 2022          | 259510 | 81915.977  | 46305.288  | 35610.69 | 13.722 | 43.472 | 3593.50 | 1143.37 | 641.200 | 502.175 |
| 2023          | 261697 | 81810.810  | 44764.189  | 37046.62 | 14.156 | 45.283 | 3592.58 | 1132.64 | 614.525 | 518.120 |
| 2024          | 263549 | 81528.303  | 43259.242  | 38269.06 | 14.521 | 46.940 | 3586.18 | 1119.38 | 588.640 | 530.738 |
| 2025          | 260342 | 79599.213  | 41408.180  | 38191.03 | 14.670 | 47.979 | 4116.63 | 1272.09 | 654.761 | 617.326 |
| 2026          | 254686 | 75082.462  | 37099.892  | 37982.57 | 14.914 | 50.588 | 4008.23 | 1194.99 | 583.875 | 611.113 |
| 2027          | 254347 | 74444.425  | 35402.998  | 39041.43 | 15.350 | 52.444 | 3982.34 | 1179.46 | 554.308 | 625.152 |
| 2028          | 253851 | 73699.585  | 33630.087  | 40069.50 | 15.785 | 54.369 | 3952.07 | 1161.76 | 523.567 | 638.192 |
| 2029          | 253305 | 72819.703  | 31951.076  | 40868.63 | 16.134 | 56.123 | 3918.67 | 1141.36 | 494.289 | 647.068 |
| 2030          | 244469 | 69309.277  | 29934.561  | 39374.72 | 16.106 | 56.810 | 4509.54 | 1297.95 | 552.182 | 745.768 |
| 2031          | 239494 | 65433.368  | 26598.694  | 38834.67 | 16.215 | 59.350 | 4403.06 | 1222.18 | 489.013 | 733.168 |
| 2032          | 238267 | 64643.552  | 25142.988  | 39500.56 | 16.578 | 61.105 | 4362.42 | 1203.31 | 460.343 | 742.966 |
| 2033          | 237008 | 63793.514  | 23674.744  | 40118.77 | 16.927 | 62.888 | 4318.18 | 1182.54 | 431.343 | 751.194 |
| 2034          | 235613 | 63032.151  | 22289.429  | 40742.72 | 17.292 | 64.638 | 4269.00 | 1162.80 | 403.856 | 758.944 |
| 2035          | 220498 | 57653.301  | 20350.505  | 37302.80 | 16.918 | 64.702 | 4930.55 | 1315.47 | 455.058 | 860.413 |
| 2036          | 212867 | 52988.733  | 17038.858  | 35949.88 | 16.888 | 67.844 | 4754.79 | 1208.75 | 380.596 | 828.149 |
| 2037          | 210318 | 52026.921  | 15949.768  | 36077.15 | 17.154 | 69.343 | 4688.99 | 1185.50 | 355.596 | 829.906 |
| 2038          | 207801 | 50943.211  | 14762.325  | 36180.89 | 17.411 | 71.022 | 4619.54 | 1158.38 | 328.176 | 830.207 |
| 2039          | 205356 | 50085.991  | 13750.788  | 36335.20 | 17.694 | 72.546 | 4546.81 | 1135.19 | 304.457 | 830.734 |



## Results for PHIM for Run 5 (Sensitivity\_Analysis\_2.RTF)

\*\*\*\*\*

### Main Results for E-Component for Run: 5, Simulation: 1, COD: LUNG CANCER, Adjusted

| Variable Parameter          | Value                                  |
|-----------------------------|----------------------------------------|
| 1. Country                  | US (United States)                     |
| 2. Sex                      | M (Males)                              |
| 3. Year of start of process | 1990                                   |
| 4. Cause of Death           | LUNG CANCER                            |
| 5. Effective Dose NULL      | CC:1                                   |
| 6. Effective Dose Ecig      | CC:1 Ecig:0.05 Dual:0.525              |
| Note:                       | Death rates are per million population |

#### Results for Age Groups Combined and Years combined, Population and Number deaths adjusted for Ecig scenario,

| Age Group:All | NULL    | Ecig        | %Drop       |          |        |        | NULL    | Ecig    | Drop    |         |
|---------------|---------|-------------|-------------|----------|--------|--------|---------|---------|---------|---------|
| Year          | Number  | Attrib      | Attrib      | Drop     | %Drop  | Attrib | Death   | Attrib  | Attrib  | Drop    |
|               | Deaths  | Deaths      | Deaths      | Deaths   | Deaths | Deaths | Rate    | Rates   | Rates   | Rates   |
| All Comb      | 3084606 | 2244988.113 | 1860947.403 | 384040.7 | 12.450 | 17.107 | 887.771 | 649.875 | 535.594 | 114.282 |

#### Results for Age Groups Combined, Population and Number deaths adjusted for Ecig scenario,

| Age Group:All | NULL   | Ecig      | %Drop     |          |        |        | NULL    | Ecig    | Drop    |         |
|---------------|--------|-----------|-----------|----------|--------|--------|---------|---------|---------|---------|
| Year          | Number | Attrib    | Attrib    | Drop     | %Drop  | Attrib | Death   | Attrib  | Attrib  | Drop    |
|               | Deaths | Deaths    | Deaths    | Deaths   | Deaths | Deaths | Rate    | Rates   | Rates   | Rates   |
| 1990          | 78822  | 63385.736 | 63385.736 | 0.000    | 0.000  | 0.000  | 1249.50 | 1004.81 | 1004.81 | 0.000   |
| 1991          | 78462  | 62918.402 | 62899.683 | 18.719   | 0.024  | 0.030  | 1223.41 | 981.049 | 980.757 | 0.292   |
| 1992          | 77987  | 62366.766 | 62319.270 | 47.495   | 0.061  | 0.076  | 1195.35 | 955.930 | 955.199 | 0.731   |
| 1993          | 78543  | 62652.888 | 62556.686 | 96.201   | 0.122  | 0.154  | 1182.39 | 943.195 | 941.736 | 1.459   |
| 1994          | 77439  | 61565.227 | 61409.257 | 155.970  | 0.201  | 0.253  | 1144.00 | 909.520 | 907.192 | 2.328   |
| 1995          | 76907  | 60851.961 | 60614.323 | 237.638  | 0.309  | 0.391  | 1114.35 | 881.759 | 878.271 | 3.488   |
| 1996          | 76238  | 60122.922 | 59778.649 | 344.272  | 0.452  | 0.573  | 1087.43 | 857.643 | 852.659 | 4.984   |
| 1997          | 75482  | 59237.155 | 58773.790 | 463.365  | 0.614  | 0.782  | 1059.05 | 831.234 | 824.624 | 6.611   |
| 1998          | 75395  | 58906.696 | 58289.731 | 616.965  | 0.818  | 1.047  | 1040.36 | 813.001 | 804.333 | 8.668   |
| 1999          | 73178  | 56930.073 | 56153.807 | 776.266  | 1.061  | 1.364  | 993.776 | 773.329 | 762.586 | 10.743  |
| 2000          | 73810  | 57137.121 | 56139.493 | 997.628  | 1.352  | 1.746  | 987.610 | 764.787 | 751.166 | 13.621  |
| 2001          | 73329  | 56481.726 | 55234.800 | 1246.926 | 1.700  | 2.208  | 968.287 | 746.169 | 729.355 | 16.815  |
| 2002          | 72488  | 55588.365 | 54066.469 | 1521.897 | 2.100  | 2.738  | 946.330 | 726.138 | 705.836 | 20.302  |
| 2003          | 72000  | 54945.856 | 53124.961 | 1820.895 | 2.529  | 3.314  | 930.050 | 710.281 | 686.230 | 24.051  |
| 2004          | 71373  | 54203.126 | 52028.707 | 2174.418 | 3.047  | 4.012  | 911.870 | 693.135 | 664.722 | 28.413  |
| 2005          | 71052  | 53744.603 | 51201.536 | 2543.067 | 3.579  | 4.732  | 897.069 | 679.296 | 646.446 | 32.850  |
| 2006          | 69762  | 52535.572 | 49576.552 | 2959.019 | 4.242  | 5.632  | 872.563 | 657.945 | 620.085 | 37.860  |
| 2007          | 68688  | 51492.124 | 48123.485 | 3368.639 | 4.904  | 6.542  | 850.123 | 638.264 | 595.607 | 42.656  |
| 2008          | 68370  | 51030.736 | 47157.965 | 3872.770 | 5.664  | 7.589  | 836.519 | 625.460 | 576.986 | 48.474  |
| 2009          | 67675  | 50276.199 | 45887.138 | 4389.060 | 6.485  | 8.730  | 818.051 | 608.943 | 554.677 | 54.267  |
| 2010          | 67387  | 49840.933 | 44954.133 | 4886.799 | 7.252  | 9.805  | 804.471 | 596.347 | 536.665 | 59.682  |
| 2011          | 66722  | 49072.841 | 43576.200 | 5496.641 | 8.238  | 11.201 | 788.448 | 581.354 | 514.936 | 66.418  |
| 2012          | 66398  | 48539.512 | 42414.018 | 6125.494 | 9.225  | 12.620 | 775.909 | 568.812 | 495.637 | 73.175  |
| 2013          | 65604  | 47675.741 | 40946.549 | 6729.191 | 10.257 | 14.114 | 757.657 | 552.318 | 472.891 | 79.427  |
| 2014          | 65335  | 47194.534 | 39861.082 | 7333.452 | 11.224 | 15.539 | 745.510 | 540.359 | 454.838 | 85.521  |
| 2015          | 64477  | 46305.842 | 38422.995 | 7882.847 | 12.226 | 17.023 | 727.015 | 526.439 | 429.830 | 103.609 |
| 2016          | 61971  | 44208.867 | 35938.132 | 8270.734 | 13.346 | 18.708 | 787.142 | 564.107 | 456.477 | 107.630 |
| 2017          | 60274  | 42702.624 | 34008.690 | 8693.934 | 14.424 | 20.359 | 758.288 | 539.903 | 427.850 | 112.052 |
| 2018          | 62899  | 44321.202 | 34359.844 | 9961.358 | 15.837 | 22.475 | 783.671 | 555.181 | 428.095 | 127.085 |
| 2019          | 63520  | 44493.088 | 33658.262 | 10834.83 | 17.057 | 24.352 | 783.390 | 551.912 | 415.104 | 136.807 |
| 2020          | 63988  | 44529.551 | 32889.625 | 11639.93 | 18.191 | 26.140 | 900.080 | 630.757 | 462.637 | 168.120 |
| 2021          | 57623  | 39852.556 | 28583.185 | 11269.37 | 19.557 | 28.278 | 804.461 | 560.546 | 399.043 | 161.503 |
| 2022          | 57993  | 39853.685 | 27704.804 | 12148.88 | 20.949 | 30.484 | 803.043 | 556.274 | 383.635 | 172.639 |
| 2023          | 58336  | 39847.050 | 26783.813 | 13063.24 | 22.393 | 32.783 | 800.838 | 551.670 | 367.689 | 183.981 |
| 2024          | 58587  | 39726.010 | 25845.547 | 13880.46 | 23.692 | 34.940 | 797.203 | 545.435 | 351.687 | 193.748 |
| 2025          | 58212  | 39207.348 | 24738.025 | 14469.32 | 24.856 | 36.905 | 920.468 | 626.579 | 391.167 | 235.412 |
| 2026          | 52087  | 34803.960 | 21191.345 | 13612.62 | 26.135 | 39.112 | 819.736 | 553.929 | 333.508 | 220.421 |
| 2027          | 51871  | 34484.595 | 20160.096 | 14324.50 | 27.616 | 41.539 | 812.144 | 546.357 | 315.649 | 230.708 |
| 2028          | 51610  | 34100.638 | 19086.422 | 15014.22 | 29.092 | 44.029 | 803.480 | 537.544 | 297.146 | 240.398 |
| 2029          | 51321  | 33669.838 | 18064.105 | 15605.73 | 30.408 | 46.349 | 793.945 | 527.732 | 279.455 | 248.277 |
| 2030          | 49925  | 32557.688 | 16878.935 | 15678.75 | 31.405 | 48.157 | 920.924 | 609.705 | 311.354 | 298.352 |
| 2031          | 44344  | 28646.393 | 14187.711 | 14458.68 | 32.606 | 50.473 | 815.261 | 535.065 | 260.839 | 274.226 |
| 2032          | 43956  | 28227.160 | 13345.223 | 14881.94 | 33.857 | 52.722 | 804.787 | 525.435 | 244.338 | 281.097 |
| 2033          | 43553  | 27786.623 | 12490.831 | 15295.79 | 35.120 | 55.047 | 793.508 | 515.079 | 227.577 | 287.502 |
| 2034          | 43117  | 27348.299 | 11677.941 | 15670.36 | 36.344 | 57.299 | 781.220 | 504.514 | 211.589 | 292.925 |
| 2035          | 40616  | 25570.077 | 10607.864 | 14962.21 | 36.838 | 58.515 | 908.224 | 583.430 | 237.202 | 346.228 |
| 2036          | 34797  | 21717.319 | 8336.794  | 13380.53 | 38.453 | 61.612 | 777.257 | 495.402 | 186.219 | 309.183 |
| 2037          | 34241  | 21256.024 | 7758.392  | 13497.63 | 39.420 | 63.500 | 763.394 | 484.347 | 172.972 | 311.375 |
| 2038          | 33690  | 20747.175 | 7139.460  | 13607.71 | 40.391 | 65.588 | 748.947 | 471.764 | 158.715 | 313.049 |
| 2039          | 33151  | 20327.688 | 6615.341  | 13712.35 | 41.364 | 67.456 | 733.993 | 460.724 | 146.471 | 314.253 |

## Results for PHIM for Run 5 (Sensitivity\_Analysis\_2.RTF)

\*\*\*\*\*

### Main Results for E-Component for Run: 5, Simulation: 1, COD: IHD, Adjusted

| Variable Parameter          | Value                                  |
|-----------------------------|----------------------------------------|
| 1. Country                  | US (United States)                     |
| 2. Sex                      | M (Males)                              |
| 3. Year of start of process | 1990                                   |
| 4. Cause of Death           | IHD                                    |
| 5. Effective Dose NULL      | CC:1                                   |
| 6. Effective Dose Ecig      | CC:1 Ecig:0.05 Dual:0.525              |
| Note:                       | Death rates are per million population |

#### Results for Age Groups Combined and Years combined, Population and Number deaths adjusted for Ecig scenario,

| Age Group: | NULL    | Ecig        | %Drop      |          |        |        | NULL    | Ecig    | Drop    |         |
|------------|---------|-------------|------------|----------|--------|--------|---------|---------|---------|---------|
| Year       | Number  | Attrib      | Attrib     | Drop     | %Drop  | Attrib | Death   | Attrib  | Attrib  | Drop    |
|            | Deaths  | Deaths      | Deaths     | Deaths   | Deaths | Deaths | Rate    | Rates   | Rates   | Rates   |
| All Comb   | 6400423 | 1098877.421 | 625733.093 | 473144.3 | 7.392  | 43.057 | 1842.09 | 318.101 | 180.090 | 138.011 |

#### Results for Age Groups Combined, Population and Number deaths adjusted for Ecig scenario,

| Age Group: | NULL   | Ecig      | %Drop     |          |        |        | NULL    | Ecig    | Drop    |         |
|------------|--------|-----------|-----------|----------|--------|--------|---------|---------|---------|---------|
| Year       | Number | Attrib    | Attrib    | Drop     | %Drop  | Attrib | Death   | Attrib  | Attrib  | Drop    |
|            | Deaths | Deaths    | Deaths    | Deaths   | Deaths | Deaths | Rate    | Rates   | Rates   | Rates   |
| 1990       | 171484 | 38511.725 | 38511.725 | 0.000    | 0.000  | 0.000  | 2718.40 | 610.497 | 610.497 | 0.000   |
| 1991       | 168044 | 37309.838 | 37156.750 | 153.088  | 0.091  | 0.410  | 2620.21 | 581.750 | 579.363 | 2.387   |
| 1992       | 164548 | 36137.488 | 35721.668 | 415.820  | 0.253  | 1.151  | 2522.12 | 553.899 | 547.524 | 6.375   |
| 1993       | 164364 | 35599.588 | 34812.852 | 786.735  | 0.479  | 2.210  | 2474.35 | 535.926 | 524.077 | 11.850  |
| 1994       | 159870 | 34336.757 | 33108.161 | 1228.596 | 0.768  | 3.578  | 2361.73 | 507.267 | 489.103 | 18.164  |
| 1995       | 158090 | 33455.759 | 31686.935 | 1768.824 | 1.119  | 5.287  | 2290.64 | 484.782 | 459.128 | 25.654  |
| 1996       | 154886 | 32193.824 | 29840.404 | 2353.421 | 1.519  | 7.310  | 2209.23 | 459.239 | 425.632 | 33.607  |
| 1997       | 149987 | 30665.509 | 27722.337 | 2943.173 | 1.962  | 9.598  | 2104.38 | 430.308 | 388.957 | 41.351  |
| 1998       | 145431 | 29188.430 | 25667.439 | 3520.992 | 2.421  | 12.063 | 2006.78 | 402.844 | 354.182 | 48.662  |
| 1999       | 165991 | 33375.386 | 28340.627 | 5034.759 | 3.033  | 15.085 | 2254.21 | 453.366 | 384.874 | 68.492  |
| 2000       | 160314 | 32024.754 | 26238.345 | 5786.409 | 3.609  | 18.069 | 2145.05 | 428.655 | 351.078 | 77.577  |
| 2001       | 154514 | 30682.393 | 24081.485 | 6600.908 | 4.272  | 21.514 | 2040.30 | 405.339 | 317.987 | 87.352  |
| 2002       | 151978 | 30218.370 | 22636.705 | 7581.664 | 4.989  | 25.090 | 1984.07 | 394.736 | 295.522 | 99.214  |
| 2003       | 146847 | 29175.202 | 20802.760 | 8372.442 | 5.701  | 28.697 | 1896.86 | 377.146 | 268.715 | 108.430 |
| 2004       | 138516 | 27488.687 | 18599.572 | 8889.116 | 6.417  | 32.337 | 1769.69 | 351.518 | 237.629 | 113.889 |
| 2005       | 136044 | 27017.439 | 17354.151 | 9663.288 | 7.103  | 35.767 | 1717.62 | 341.482 | 219.105 | 122.377 |
| 2006       | 132114 | 26231.435 | 15782.924 | 10448.51 | 7.909  | 39.832 | 1652.43 | 328.517 | 197.407 | 131.110 |
| 2007       | 126723 | 25103.049 | 14205.710 | 10897.34 | 8.599  | 43.410 | 1568.41 | 311.161 | 175.819 | 135.342 |
| 2008       | 126118 | 24621.740 | 13146.501 | 11475.24 | 9.099  | 46.606 | 1543.08 | 301.777 | 160.850 | 140.928 |
| 2009       | 122723 | 23741.177 | 11923.773 | 11817.40 | 9.629  | 49.776 | 1483.46 | 287.552 | 144.133 | 143.420 |
| 2010       | 120871 | 23189.160 | 10963.212 | 12225.95 | 10.115 | 52.723 | 1442.97 | 277.458 | 130.879 | 146.579 |
| 2011       | 120601 | 22786.927 | 10044.635 | 12742.29 | 10.566 | 55.919 | 1425.14 | 269.951 | 118.697 | 151.255 |
| 2012       | 121362 | 22485.295 | 9294.099  | 13191.20 | 10.869 | 58.666 | 1418.20 | 263.495 | 108.608 | 154.887 |
| 2013       | 123144 | 22251.884 | 8618.630  | 13633.25 | 11.071 | 61.268 | 1422.19 | 257.786 | 99.536  | 158.249 |
| 2014       | 123787 | 21894.593 | 7957.560  | 13937.03 | 11.259 | 63.655 | 1412.48 | 250.685 | 90.800  | 159.884 |
| 2015       | 124400 | 21471.109 | 7360.911  | 14110.20 | 11.343 | 65.717 | 1595.61 | 276.557 | 94.414  | 182.143 |
| 2016       | 126924 | 21411.568 | 6820.533  | 14591.04 | 11.496 | 68.146 | 1612.16 | 273.213 | 86.633  | 186.580 |
| 2017       | 129055 | 21169.399 | 6330.434  | 14838.97 | 11.498 | 70.096 | 1623.59 | 267.651 | 79.641  | 188.011 |
| 2018       | 122239 | 19830.576 | 5440.509  | 14390.07 | 11.772 | 72.565 | 1523.00 | 248.404 | 67.784  | 180.620 |
| 2019       | 122719 | 19431.014 | 4985.509  | 14445.51 | 11.771 | 74.343 | 1513.48 | 241.031 | 61.486  | 179.545 |
| 2020       | 121776 | 18532.612 | 4519.450  | 14013.16 | 11.507 | 75.614 | 1712.95 | 262.513 | 63.572  | 198.941 |
| 2021       | 120434 | 18234.128 | 4073.261  | 14160.87 | 11.758 | 77.661 | 1681.35 | 256.472 | 56.866  | 199.606 |
| 2022       | 120544 | 17812.559 | 3695.508  | 14117.05 | 11.711 | 79.253 | 1669.20 | 248.626 | 51.173  | 197.453 |
| 2023       | 120633 | 17361.668 | 3346.598  | 14015.07 | 11.618 | 80.724 | 1656.06 | 240.367 | 45.942  | 194.425 |
| 2024       | 120578 | 16929.676 | 3059.649  | 13870.03 | 11.503 | 81.927 | 1640.74 | 232.443 | 41.633  | 190.810 |
| 2025       | 117034 | 15501.666 | 2690.336  | 12811.33 | 10.947 | 82.645 | 1850.59 | 247.735 | 42.541  | 205.194 |
| 2026       | 116494 | 15523.814 | 2465.957  | 13057.86 | 11.209 | 84.115 | 1833.37 | 247.072 | 38.809  | 208.263 |
| 2027       | 115486 | 15073.070 | 2249.615  | 12823.46 | 11.104 | 85.075 | 1808.18 | 238.810 | 35.222  | 203.588 |
| 2028       | 114430 | 14636.710 | 2035.928  | 12600.78 | 11.012 | 86.090 | 1781.50 | 230.725 | 31.696  | 199.029 |
| 2029       | 113373 | 14180.166 | 1856.233  | 12323.93 | 10.870 | 86.910 | 1753.90 | 222.256 | 28.716  | 193.540 |
| 2030       | 106546 | 12111.772 | 1560.162  | 10551.61 | 9.903  | 87.119 | 1965.38 | 226.816 | 28.779  | 198.037 |
| 2031       | 107071 | 12417.367 | 1473.794  | 10943.57 | 10.221 | 88.131 | 1968.49 | 231.935 | 27.095  | 204.839 |
| 2032       | 105731 | 12054.064 | 1349.136  | 10704.93 | 10.125 | 88.808 | 1935.83 | 224.381 | 24.701  | 199.679 |
| 2033       | 104406 | 11672.389 | 1224.674  | 10447.71 | 10.007 | 89.508 | 1902.24 | 216.370 | 22.313  | 194.057 |
| 2034       | 103059 | 11365.762 | 1143.726  | 10222.04 | 9.919  | 89.937 | 1867.29 | 209.673 | 20.723  | 188.950 |
| 2035       | 92763  | 8580.360  | 857.999   | 7722.361 | 8.325  | 90.000 | 2074.27 | 195.777 | 19.186  | 176.592 |
| 2036       | 94156  | 8948.841  | 825.138   | 8123.703 | 8.628  | 90.779 | 2103.15 | 204.135 | 18.431  | 185.704 |
| 2037       | 92411  | 8624.570  | 772.241   | 7852.329 | 8.497  | 91.046 | 2060.27 | 196.522 | 17.217  | 179.305 |
| 2038       | 90717  | 8315.017  | 711.544   | 7603.472 | 8.382  | 91.443 | 2016.71 | 189.073 | 15.818  | 173.255 |
| 2039       | 89091  | 8001.132  | 665.289   | 7335.843 | 8.234  | 91.685 | 1972.57 | 181.344 | 14.730  | 166.614 |

## Results for PHIM for Run 5 (Sensitivity\_Analysis\_2.RTF)

\*\*\*\*\*

### Main Results for E-Component for Run: 5, Simulation: 1, COD: STROKE, Adjusted

| Variable Parameter          | Value                                  |
|-----------------------------|----------------------------------------|
| 1. Country                  | US (United States)                     |
| 2. Sex                      | M (Males)                              |
| 3. Year of start of process | 1990                                   |
| 4. Cause of Death           | STROKE                                 |
| 5. Effective Dose NULL      | CC:1                                   |
| 6. Effective Dose Ecig      | CC:1 Ecig:0.05 Dual:0.525              |
| Note:                       | Death rates are per million population |

#### Results for Age Groups Combined and Years combined, Population and Number deaths adjusted for Ecig scenario,

| Age Group:All | NULL    | Ecig       | %Drop     |          | NULL   | Ecig   | Drop    |        |        |        |
|---------------|---------|------------|-----------|----------|--------|--------|---------|--------|--------|--------|
| Year          | Number  | Attrib     | Attrib    | Drop     | %Drop  | Attrib | Death   | Attrib | Attrib | Drop   |
|               | Deaths  | Deaths     | Deaths    | Deaths   | Deaths | Deaths | Rate    | Rates  | Rates  | Rates  |
| All Comb      | 1500499 | 149918.462 | 84175.846 | 65742.62 | 4.381  | 43.852 | 431.854 | 43.398 | 24.226 | 19.172 |

#### Results for Age Groups Combined, Population and Number deaths adjusted for Ecig scenario,

| Age Group:All | NULL   | Ecig     | %Drop    |          | NULL   | Ecig   | Drop    |        |        |        |
|---------------|--------|----------|----------|----------|--------|--------|---------|--------|--------|--------|
| Year          | Number | Attrib   | Attrib   | Drop     | %Drop  | Attrib | Death   | Attrib | Attrib | Drop   |
|               | Deaths | Deaths   | Deaths   | Deaths   | Deaths | Deaths | Rate    | Rates  | Rates  | Rates  |
| 1990          | 32862  | 4613.166 | 4613.166 | 0.000    | 0.000  | 0.000  | 520.936 | 73.129 | 73.129 | 0.000  |
| 1991          | 32619  | 4555.566 | 4538.125 | 17.441   | 0.053  | 0.383  | 508.609 | 71.032 | 70.760 | 0.272  |
| 1992          | 32100  | 4453.572 | 4407.445 | 46.127   | 0.144  | 1.036  | 492.014 | 68.262 | 67.555 | 0.707  |
| 1993          | 32896  | 4462.473 | 4371.603 | 90.870   | 0.276  | 2.036  | 495.224 | 67.179 | 65.811 | 1.369  |
| 1994          | 33324  | 4499.513 | 4350.746 | 148.767  | 0.446  | 3.306  | 492.287 | 66.473 | 64.273 | 2.200  |
| 1995          | 33570  | 4472.774 | 4251.245 | 221.529  | 0.660  | 4.953  | 486.416 | 64.812 | 61.598 | 3.213  |
| 1996          | 33872  | 4406.878 | 4102.117 | 304.761  | 0.900  | 6.916  | 483.139 | 62.863 | 58.511 | 4.352  |
| 1997          | 33519  | 4288.158 | 3895.091 | 393.067  | 1.173  | 9.166  | 470.291 | 60.173 | 54.650 | 5.523  |
| 1998          | 32800  | 4120.148 | 3641.868 | 478.280  | 1.458  | 11.608 | 452.600 | 56.864 | 50.254 | 6.611  |
| 1999          | 33382  | 3982.443 | 3416.767 | 565.675  | 1.695  | 14.204 | 453.334 | 54.097 | 46.401 | 7.696  |
| 2000          | 33469  | 4021.411 | 3333.338 | 688.073  | 2.056  | 17.110 | 447.823 | 53.827 | 44.601 | 9.226  |
| 2001          | 32288  | 3848.092 | 3066.895 | 781.198  | 2.419  | 20.301 | 426.348 | 50.836 | 40.497 | 10.339 |
| 2002          | 31603  | 3783.081 | 2891.084 | 891.997  | 2.823  | 23.579 | 412.573 | 49.418 | 37.743 | 11.675 |
| 2003          | 31006  | 3754.415 | 2734.610 | 1019.805 | 3.289  | 27.163 | 400.516 | 48.533 | 35.324 | 13.209 |
| 2004          | 29910  | 3666.274 | 2542.496 | 1123.778 | 3.757  | 30.652 | 382.133 | 46.883 | 32.483 | 14.400 |
| 2005          | 28739  | 3589.688 | 2364.726 | 1224.962 | 4.262  | 34.124 | 362.849 | 45.371 | 29.856 | 15.515 |
| 2006          | 28226  | 3596.985 | 2226.321 | 1370.664 | 4.856  | 38.106 | 353.038 | 45.048 | 27.846 | 17.202 |
| 2007          | 28071  | 3560.798 | 2079.320 | 1481.477 | 5.278  | 41.605 | 347.428 | 44.137 | 25.735 | 18.402 |
| 2008          | 27180  | 3417.001 | 1877.564 | 1539.438 | 5.664  | 45.052 | 332.552 | 41.881 | 22.972 | 18.908 |
| 2009          | 27129  | 3394.390 | 1752.936 | 1641.454 | 6.051  | 48.358 | 327.929 | 41.113 | 21.189 | 19.924 |
| 2010          | 26981  | 3340.137 | 1626.681 | 1713.456 | 6.351  | 51.299 | 322.103 | 39.965 | 19.419 | 20.545 |
| 2011          | 27040  | 3285.435 | 1503.131 | 1782.304 | 6.591  | 54.249 | 319.525 | 38.922 | 17.762 | 21.159 |
| 2012          | 27149  | 3259.209 | 1388.973 | 1870.236 | 6.889  | 57.383 | 317.259 | 38.193 | 16.231 | 21.962 |
| 2013          | 28012  | 3274.703 | 1303.995 | 1970.707 | 7.035  | 60.180 | 323.508 | 37.937 | 15.060 | 22.877 |
| 2014          | 28917  | 3298.083 | 1224.866 | 2073.217 | 7.170  | 62.861 | 329.954 | 37.762 | 13.976 | 23.785 |
| 2015          | 29704  | 3244.406 | 1136.690 | 2107.716 | 7.096  | 64.965 | 380.994 | 41.789 | 14.580 | 27.210 |
| 2016          | 30678  | 3314.836 | 1073.955 | 2240.882 | 7.305  | 67.602 | 389.659 | 42.297 | 13.641 | 28.656 |
| 2017          | 31603  | 3333.314 | 1005.557 | 2327.757 | 7.366  | 69.833 | 397.585 | 42.144 | 12.651 | 29.494 |
| 2018          | 29542  | 2925.242 | 827.786  | 2097.456 | 7.100  | 71.702 | 368.063 | 36.642 | 10.314 | 26.329 |
| 2019          | 29811  | 2864.628 | 754.921  | 2109.707 | 7.077  | 73.647 | 367.661 | 35.534 | 9.310  | 26.224 |
| 2020          | 29827  | 2730.366 | 677.405  | 2052.962 | 6.883  | 75.190 | 419.553 | 38.675 | 9.529  | 29.147 |
| 2021          | 30356  | 2647.911 | 612.971  | 2034.939 | 6.704  | 76.851 | 423.795 | 37.244 | 8.558  | 28.687 |
| 2022          | 30585  | 2586.165 | 554.756  | 2031.409 | 6.642  | 78.549 | 423.520 | 36.097 | 7.682  | 28.416 |
| 2023          | 30811  | 2517.960 | 500.803  | 2017.157 | 6.547  | 80.111 | 422.972 | 34.860 | 6.875  | 27.985 |
| 2024          | 30991  | 2454.161 | 456.581  | 1997.579 | 6.446  | 81.396 | 421.702 | 33.695 | 6.213  | 27.483 |
| 2025          | 30608  | 2275.364 | 399.359  | 1876.005 | 6.129  | 82.449 | 483.983 | 36.363 | 6.315  | 30.048 |
| 2026          | 31070  | 2183.166 | 358.158  | 1825.008 | 5.874  | 83.595 | 488.970 | 34.747 | 5.637  | 29.110 |
| 2027          | 30970  | 2112.345 | 326.208  | 1786.137 | 5.767  | 84.557 | 484.893 | 33.467 | 5.107  | 28.359 |
| 2028          | 30845  | 2046.677 | 294.532  | 1752.145 | 5.680  | 85.609 | 480.208 | 32.263 | 4.585  | 27.677 |
| 2029          | 30713  | 1977.671 | 265.524  | 1712.148 | 5.575  | 86.574 | 475.138 | 30.997 | 4.108  | 26.890 |
| 2030          | 29810  | 1744.457 | 224.223  | 1520.234 | 5.100  | 87.147 | 549.878 | 32.668 | 4.136  | 28.532 |
| 2031          | 29477  | 1653.738 | 199.102  | 1454.635 | 4.935  | 87.960 | 541.938 | 30.889 | 3.660  | 27.228 |
| 2032          | 29250  | 1603.120 | 180.183  | 1422.937 | 4.865  | 88.760 | 535.531 | 29.841 | 3.299  | 26.542 |
| 2033          | 29013  | 1548.245 | 163.242  | 1385.002 | 4.774  | 89.456 | 528.600 | 28.700 | 2.974  | 25.726 |
| 2034          | 28751  | 1511.985 | 151.330  | 1360.654 | 4.732  | 89.991 | 520.938 | 27.893 | 2.742  | 25.151 |
| 2035          | 27319  | 1239.866 | 119.567  | 1120.299 | 4.101  | 90.356 | 610.885 | 28.290 | 2.674  | 25.616 |
| 2036          | 26175  | 1182.522 | 107.578  | 1074.944 | 4.107  | 90.903 | 584.669 | 26.975 | 2.403  | 24.572 |
| 2037          | 25743  | 1134.483 | 100.852  | 1033.631 | 4.015  | 91.110 | 573.933 | 25.851 | 2.248  | 23.602 |
| 2038          | 25308  | 1093.537 | 93.168   | 1000.368 | 3.953  | 91.480 | 562.622 | 24.866 | 2.071  | 22.794 |
| 2039          | 24877  | 1047.905 | 86.285   | 961.620  | 3.866  | 91.766 | 550.800 | 23.751 | 1.910  | 21.840 |

## Results for PHIM for Run 5 (Sensitivity\_Analysis\_2.RTF)

\*\*\*\*\*

### Main Results for E-Component for Run: 5, Simulation: 1, COD: COPD, Adjusted

| Variable Parameter          | Value                                  |
|-----------------------------|----------------------------------------|
| 1. Country                  | US (United States)                     |
| 2. Sex                      | M (Males)                              |
| 3. Year of start of process | 1990                                   |
| 4. Cause of Death           | COPD                                   |
| 5. Effective Dose NULL      | CC:1                                   |
| 6. Effective Dose Ecig      | CC:1 Ecig:0.05 Dual:0.525              |
| Note:                       | Death rates are per million population |

#### Results for Age Groups Combined and Years combined, Population and Number deaths adjusted for Ecig scenario,

| Age Group:All | NULL    | Ecig        | %Drop      |          |        |        | NULL    | Ecig    | Drop    |        |
|---------------|---------|-------------|------------|----------|--------|--------|---------|---------|---------|--------|
| Year          | Number  | Attrib      | Attrib     | Drop     | %Drop  | Attrib | Death   | Attrib  | Attrib  | Drop   |
|               | Deaths  | Deaths      | Deaths     | Deaths   | Deaths | Deaths | Rate    | Rates   | Rates   | Rates  |
| All Comb      | 2254019 | 1015606.587 | 747074.084 | 268532.5 | 11.913 | 26.441 | 648.723 | 293.996 | 215.013 | 78.983 |

#### Results for Age Groups Combined, Population and Number deaths adjusted for Ecig scenario,

| Age Group:All | NULL   | Ecig      | %Drop     |          |        |        | NULL    | Ecig    | Drop    |         |
|---------------|--------|-----------|-----------|----------|--------|--------|---------|---------|---------|---------|
| Year          | Number | Attrib    | Attrib    | Drop     | %Drop  | Attrib | Death   | Attrib  | Attrib  | Drop    |
|               | Deaths | Deaths    | Deaths    | Deaths   | Deaths | Deaths | Rate    | Rates   | Rates   | Rates   |
| 1990          | 33993  | 19262.437 | 19262.437 | 0.000    | 0.000  | 0.000  | 538.865 | 305.353 | 305.353 | 0.000   |
| 1991          | 34092  | 19215.636 | 19208.319 | 7.317    | 0.021  | 0.038  | 531.576 | 299.618 | 299.504 | 0.114   |
| 1992          | 33942  | 19056.189 | 19040.017 | 16.172   | 0.048  | 0.085  | 520.247 | 292.085 | 291.836 | 0.249   |
| 1993          | 35913  | 20095.670 | 20061.427 | 34.242   | 0.095  | 0.170  | 540.643 | 302.526 | 302.007 | 0.519   |
| 1994          | 35075  | 19524.095 | 19469.627 | 54.467   | 0.155  | 0.279  | 518.154 | 288.435 | 287.623 | 0.812   |
| 1995          | 34670  | 19116.002 | 19031.774 | 84.228   | 0.243  | 0.441  | 502.353 | 276.995 | 275.761 | 1.235   |
| 1996          | 34584  | 18975.021 | 18856.225 | 118.796  | 0.344  | 0.626  | 493.292 | 270.675 | 268.958 | 1.718   |
| 1997          | 35270  | 19169.025 | 19000.218 | 168.806  | 0.479  | 0.881  | 494.856 | 268.986 | 266.582 | 2.404   |
| 1998          | 35680  | 19228.937 | 18997.458 | 231.480  | 0.649  | 1.204  | 492.339 | 265.388 | 262.144 | 3.245   |
| 1999          | 38523  | 20589.820 | 20275.659 | 314.161  | 0.816  | 1.526  | 523.159 | 279.689 | 275.350 | 4.339   |
| 2000          | 36293  | 19196.417 | 18810.077 | 386.340  | 1.065  | 2.013  | 485.612 | 256.946 | 251.685 | 5.261   |
| 2001          | 36295  | 19012.731 | 18520.936 | 491.795  | 1.355  | 2.587  | 479.257 | 251.174 | 244.562 | 6.612   |
| 2002          | 36001  | 18699.357 | 18095.413 | 603.944  | 1.678  | 3.230  | 469.992 | 244.265 | 236.235 | 8.030   |
| 2003          | 36229  | 18663.550 | 17938.187 | 725.363  | 2.002  | 3.887  | 467.980 | 241.262 | 231.713 | 9.550   |
| 2004          | 34640  | 17679.164 | 16833.566 | 845.597  | 2.441  | 4.783  | 442.563 | 226.076 | 215.067 | 11.010  |
| 2005          | 36865  | 18692.832 | 17628.210 | 1064.622 | 2.888  | 5.695  | 465.433 | 236.265 | 222.565 | 13.700  |
| 2006          | 34394  | 17308.564 | 16127.025 | 1181.538 | 3.435  | 6.826  | 430.188 | 216.769 | 201.711 | 15.058  |
| 2007          | 35381  | 17683.181 | 16260.989 | 1422.192 | 4.020  | 8.043  | 437.903 | 219.189 | 201.257 | 17.933  |
| 2008          | 38319  | 19006.374 | 17265.390 | 1740.984 | 4.543  | 9.160  | 468.846 | 232.952 | 211.245 | 21.707  |
| 2009          | 36984  | 18205.573 | 16266.623 | 1938.949 | 5.243  | 10.650 | 447.059 | 220.505 | 196.628 | 23.877  |
| 2010          | 37330  | 18237.758 | 16082.842 | 2154.916 | 5.773  | 11.816 | 445.651 | 218.215 | 191.998 | 26.217  |
| 2011          | 38207  | 18487.916 | 15965.693 | 2522.223 | 6.601  | 13.643 | 451.487 | 219.022 | 188.665 | 30.357  |
| 2012          | 38636  | 18491.158 | 15673.737 | 2817.421 | 7.292  | 15.237 | 451.484 | 216.689 | 183.158 | 33.531  |
| 2013          | 40447  | 19143.452 | 15916.288 | 3227.165 | 7.979  | 16.858 | 467.118 | 221.775 | 183.817 | 37.958  |
| 2014          | 40517  | 18992.005 | 15454.888 | 3537.117 | 8.730  | 18.624 | 462.318 | 217.451 | 176.349 | 41.102  |
| 2015          | 42513  | 19728.885 | 15781.537 | 3947.348 | 9.285  | 20.008 | 545.284 | 254.116 | 202.421 | 51.695  |
| 2016          | 43341  | 19876.724 | 15538.386 | 4338.338 | 10.010 | 21.826 | 550.511 | 253.628 | 197.365 | 56.263  |
| 2017          | 44376  | 20119.790 | 15355.264 | 4764.526 | 10.737 | 23.681 | 558.281 | 254.381 | 193.179 | 61.202  |
| 2018          | 45774  | 20535.123 | 15269.656 | 5265.468 | 11.503 | 25.641 | 570.300 | 257.229 | 190.247 | 66.982  |
| 2019          | 47308  | 21009.029 | 15231.025 | 5778.005 | 12.214 | 27.502 | 583.441 | 260.605 | 187.843 | 72.762  |
| 2020          | 48808  | 21428.512 | 15168.531 | 6259.981 | 12.826 | 29.213 | 686.551 | 303.533 | 213.366 | 90.167  |
| 2021          | 48888  | 21266.697 | 14550.674 | 6716.024 | 13.738 | 31.580 | 682.513 | 299.127 | 203.139 | 95.988  |
| 2022          | 50388  | 21663.568 | 14350.220 | 7313.348 | 14.514 | 33.759 | 697.741 | 302.378 | 198.711 | 103.667 |
| 2023          | 51916  | 22084.131 | 14132.975 | 7951.156 | 15.315 | 36.004 | 712.711 | 305.748 | 194.018 | 111.730 |
| 2024          | 53393  | 22418.456 | 13897.464 | 8520.992 | 15.959 | 38.009 | 726.531 | 307.804 | 189.107 | 118.697 |
| 2025          | 54488  | 22614.834 | 13580.460 | 9034.374 | 16.580 | 39.949 | 861.587 | 361.411 | 214.739 | 146.672 |
| 2026          | 55036  | 22571.522 | 13084.432 | 9487.090 | 17.238 | 42.031 | 866.146 | 359.241 | 205.922 | 153.319 |
| 2027          | 56021  | 22774.416 | 12667.079 | 10107.34 | 18.042 | 44.380 | 877.122 | 360.827 | 198.330 | 162.497 |
| 2028          | 56967  | 22915.561 | 12213.204 | 10702.36 | 18.787 | 46.703 | 886.879 | 361.228 | 190.140 | 171.088 |
| 2029          | 57898  | 22992.027 | 11765.215 | 11226.81 | 19.391 | 48.829 | 895.693 | 360.371 | 182.010 | 178.361 |
| 2030          | 58188  | 22895.360 | 11271.242 | 11624.12 | 19.977 | 50.771 | 1073.36 | 428.760 | 207.913 | 220.847 |
| 2031          | 58601  | 22715.871 | 10738.087 | 11977.78 | 20.440 | 52.729 | 1077.37 | 424.293 | 197.418 | 226.875 |
| 2032          | 59330  | 22759.207 | 10268.446 | 12490.76 | 21.053 | 54.882 | 1086.27 | 423.652 | 188.005 | 235.647 |
| 2033          | 60036  | 22786.258 | 9795.997  | 12990.26 | 21.637 | 57.009 | 1093.84 | 422.387 | 178.479 | 243.909 |
| 2034          | 60686  | 22806.106 | 9316.431  | 13489.68 | 22.229 | 59.149 | 1099.55 | 420.721 | 168.802 | 251.919 |
| 2035          | 59799  | 22262.998 | 8765.074  | 13497.92 | 22.572 | 60.629 | 1337.17 | 507.973 | 195.996 | 311.977 |
| 2036          | 57739  | 21140.051 | 7769.349  | 13370.70 | 23.157 | 63.248 | 1289.72 | 482.234 | 173.544 | 308.690 |
| 2037          | 57923  | 21011.845 | 7318.284  | 13693.56 | 23.641 | 65.171 | 1291.38 | 478.783 | 163.159 | 315.623 |
| 2038          | 58085  | 20787.483 | 6818.152  | 13969.33 | 24.050 | 67.201 | 1291.27 | 472.681 | 151.572 | 321.109 |
| 2039          | 58238  | 20709.267 | 6383.873  | 14325.39 | 24.598 | 69.174 | 1289.45 | 469.372 | 141.346 | 328.026 |

## Results for PHIM for Run 6 (Sensitivity\_Analysis\_2.RTF)

---

### Control File Details for Run: 6

| Variable Parameter                                       | Value                  |
|----------------------------------------------------------|------------------------|
| 1. Name for Reference Scenario                           | NULL                   |
| 2. Name for Test Scenario                                | Ecig                   |
| 3. Name for Product 1                                    | CC                     |
| 4. Name for Product 2                                    | Ecig                   |
| 5. Name for Product 3                                    | -                      |
| 6. Name for Product 4                                    | Dual                   |
| 7. Country                                               | US (United States)     |
| 8. Sex                                                   | F (Females)            |
| 9. Year of start of process                              | 1990                   |
| 10. Number of months of follow-up                        | 600                    |
| 11. Follow-up interval length (in months)                | 12                     |
| 12. Lower age for risk estimation                        | 10                     |
| 13. Upper age for risk estimation                        | 79                     |
| 14. The effective dose for Product 1 (F1) - Ref          | 1                      |
| 15. The effective dose for Product 2 (F2) - Ref          | -                      |
| 16. The effective dose for Product 3 (F3) - Ref          | -                      |
| 17. The effective dose for Product 4 (F4) - Ref          | -                      |
| 18. The effective dose for Product 1 (F1) - Test         | 1                      |
| 19. The effective dose for Product 2 (F2) - Test         | 0.05                   |
| 20. The effective dose for Product 3 (F3) - Test         | -                      |
| 21. The effective dose for Product 4 (F4) - Test         | FROMF2                 |
| 22. Number in population to be simulated                 | 100000                 |
| 23. Number of MC simulations                             | 1                      |
| 24. The random number seed for the first simulation      | 15975263               |
| 25. Source for the population file (POP)                 | UN4                    |
| 26. Source for the socioeconomic prevalence file (SEP)   | -                      |
| 27. Source for the current smoking prevalence file (CSP) | ISS3                   |
| 28. Source for the former smoking prevalence file (FSP)  | ISS3                   |
| 29. Source for the quit-time distribution file (QTD)     | NHIS2006               |
| 30. Source for the death file (MORT)                     | APR-20                 |
| 31. Source for the relative risk file (RR)               | PNLEST                 |
| 32. Source for the half-life file (H)                    | PNLEST                 |
| 33. Assumption Set for TTP Factor Reference              | F1                     |
| 34. Assumption Set for TTP Factor Test                   | F1                     |
| 35. Assumption Set for TTP Reference                     | ISS3                   |
| 36. Assumption Set for TTP Test                          | S2C                    |
| 37. Assumption Set for TP for socioeconomic group        | -                      |
| 38. Source for Output Choice file (OUTC)                 | BASIC                  |
| 39. Output for DTP P1                                    | N                      |
| 40. Output for DTP P2                                    | N                      |
| 41. Output for Main P Component                          | Y                      |
| 42. Output for DTP E1                                    | N                      |
| 43. Output for DTP E2                                    | N                      |
| 44. Output for DTP E3                                    | N                      |
| 45. Output for Main E Component                          | Y                      |
| 46. Output file name                                     | Sensitivity_Analysis_2 |
| 47. Run number for P-Component                           | -                      |
| 48. Results file for E-Component                         | -                      |
| 49. Components required                                  | PE                     |
| 50. Results folder for P to be used in E-Component       | -                      |
| 51. Fixed age of starting product use                    | 16                     |
| 52. Output absolute risk file?                           | N                      |

## Results for PHIM for Run 6 (Sensitivity\_Analysis\_2.RTF)

\*\*\*\*\*

TTP values for Run: 6, Scenario: NULL

| Variable Parameter | Value               |
|--------------------|---------------------|
| 1. Country         | US (United States)  |
| 2. Sex             | F (Females)         |
| 3. Assumption Set  | ISS3                |
| Note:              | Period is in Months |

| Age   | Period  | Initiation  | Cessation    | Re-initiation |
|-------|---------|-------------|--------------|---------------|
|       |         | Never<br>CC | CC<br>Former | Former<br>CC  |
| 10-14 | 1-12    | 0.003758    | 0.008742     | 0.000000      |
| 15-19 | 1-12    | 0.003469    | 0.002515     | 0.000000      |
| 20-24 | 1-12    | 0.000276    | 0.000761     | 0.000000      |
| 25-29 | 1-12    | 0.000137    | 0.001375     | 0.000000      |
| 30-34 | 1-12    | 0.000069    | 0.001149     | 0.000000      |
| 35-39 | 1-12    | 0.000000    | 0.000991     | 0.000000      |
| 40-44 | 1-12    | 0.000000    | 0.000833     | 0.000000      |
| 45-49 | 1-12    | 0.000000    | 0.001723     | 0.000000      |
| 50-54 | 1-12    | 0.000000    | 0.002336     | 0.000000      |
| 55-59 | 1-12    | 0.000000    | 0.002233     | 0.000000      |
| 60-64 | 1-12    | 0.000000    | 0.004634     | 0.000000      |
| 65-69 | 1-12    | 0.000000    | 0.003505     | 0.000000      |
| 70-74 | 1-12    | 0.000000    | 0.004329     | 0.000000      |
| 75-79 | 1-12    | 0.000000    | 0.004329     | 0.000000      |
| 10-14 | 13-72   | 0.004794    | 0.008742     | 0.000000      |
| 15-19 | 13-72   | 0.004527    | 0.004082     | 0.000000      |
| 20-24 | 13-72   | 0.000105    | 0.001261     | 0.000000      |
| 25-29 | 13-72   | 0.000053    | 0.000952     | 0.000000      |
| 30-34 | 13-72   | 0.000026    | 0.000733     | 0.000000      |
| 35-39 | 13-72   | 0.000000    | 0.000753     | 0.000000      |
| 40-44 | 13-72   | 0.000000    | 0.001535     | 0.000000      |
| 45-49 | 13-72   | 0.000000    | 0.002998     | 0.000000      |
| 50-54 | 13-72   | 0.000000    | 0.003159     | 0.000000      |
| 55-59 | 13-72   | 0.000000    | 0.002965     | 0.000000      |
| 60-64 | 13-72   | 0.000000    | 0.003633     | 0.000000      |
| 65-69 | 13-72   | 0.000000    | 0.004522     | 0.000000      |
| 70-74 | 13-72   | 0.000000    | 0.005208     | 0.000000      |
| 75-79 | 13-72   | 0.000000    | 0.005208     | 0.000000      |
| 10-14 | 73-132  | 0.003969    | 0.008742     | 0.000000      |
| 15-19 | 73-132  | 0.003056    | 0.003373     | 0.000000      |
| 20-24 | 73-132  | 0.001459    | 0.003881     | 0.000000      |
| 25-29 | 73-132  | 0.000714    | 0.001953     | 0.000000      |
| 30-34 | 73-132  | 0.000111    | 0.001338     | 0.000000      |
| 35-39 | 73-132  | 0.000000    | 0.001507     | 0.000000      |
| 40-44 | 73-132  | 0.000000    | 0.002080     | 0.000000      |
| 45-49 | 73-132  | 0.000000    | 0.003809     | 0.000000      |
| 50-54 | 73-132  | 0.000000    | 0.004871     | 0.000000      |
| 55-59 | 73-132  | 0.000000    | 0.004560     | 0.000000      |
| 60-64 | 73-132  | 0.000000    | 0.007192     | 0.000000      |
| 65-69 | 73-132  | 0.000000    | 0.007033     | 0.000000      |
| 70-74 | 73-132  | 0.000000    | 0.008206     | 0.000000      |
| 75-79 | 73-132  | 0.000000    | 0.008206     | 0.000000      |
| 10-14 | 133-192 | 0.002861    | 0.008742     | 0.000000      |
| 15-19 | 133-192 | 0.002594    | 0.003996     | 0.000000      |
| 20-24 | 133-192 | 0.001247    | 0.002805     | 0.000000      |
| 25-29 | 133-192 | 0.000289    | 0.001574     | 0.000000      |
| 30-34 | 133-192 | 0.000132    | 0.001293     | 0.000000      |
| 35-39 | 133-192 | 0.000000    | 0.001219     | 0.000000      |
| 40-44 | 133-192 | 0.000000    | 0.001657     | 0.000000      |
| 45-49 | 133-192 | 0.000000    | 0.001995     | 0.000000      |
| 50-54 | 133-192 | 0.000000    | 0.002154     | 0.000000      |
| 55-59 | 133-192 | 0.000000    | 0.002072     | 0.000000      |
| 60-64 | 133-192 | 0.000000    | 0.005049     | 0.000000      |
| 65-69 | 133-192 | 0.000000    | 0.003680     | 0.000000      |
| 70-74 | 133-192 | 0.000000    | 0.006144     | 0.000000      |
| 75-79 | 133-192 | 0.000000    | 0.006144     | 0.000000      |
| 10-14 | 193-252 | 0.001859    | 0.008742     | 0.000000      |
| 15-19 | 193-252 | 0.002232    | 0.005770     | 0.000000      |
| 20-24 | 193-252 | 0.001079    | 0.003262     | 0.000000      |
| 25-29 | 193-252 | 0.000531    | 0.002002     | 0.000000      |
| 30-34 | 193-252 | 0.000263    | 0.003240     | 0.000000      |
| 35-39 | 193-252 | 0.000000    | 0.001771     | 0.000000      |
| 40-44 | 193-252 | 0.000000    | 0.002173     | 0.000000      |
| 45-49 | 193-252 | 0.000000    | 0.002075     | 0.000000      |
| 50-54 | 193-252 | 0.000000    | 0.003431     | 0.000000      |

### Results for PHIM for Run 6 (Sensitivity\_Analysis\_2.RTF)

|       |         |          |          |          |
|-------|---------|----------|----------|----------|
| 55-59 | 193-252 | 0.000000 | 0.002906 | 0.000000 |
| 60-64 | 193-252 | 0.000000 | 0.007139 | 0.000000 |
| 65-69 | 193-252 | 0.000000 | 0.004963 | 0.000000 |
| 70-74 | 193-252 | 0.000000 | 0.006269 | 0.000000 |
| 75-79 | 193-252 | 0.000000 | 0.006269 | 0.000000 |
| 10-14 | 253+    | 0.000931 | 0.008742 | 0.000000 |
| 15-19 | 253+    | 0.001798 | 0.009440 | 0.000000 |
| 20-24 | 253+    | 0.000023 | 0.002831 | 0.000000 |
| 25-29 | 253+    | 0.000073 | 0.002655 | 0.000000 |
| 30-34 | 253+    | 0.000037 | 0.004614 | 0.000000 |
| 35-39 | 253+    | 0.000000 | 0.002607 | 0.000000 |
| 40-44 | 253+    | 0.000000 | 0.003115 | 0.000000 |
| 45-49 | 253+    | 0.000000 | 0.002132 | 0.000000 |
| 50-54 | 253+    | 0.000000 | 0.003497 | 0.000000 |
| 55-59 | 253+    | 0.000000 | 0.002942 | 0.000000 |
| 60-64 | 253+    | 0.000000 | 0.005376 | 0.000000 |
| 65-69 | 253+    | 0.000000 | 0.001789 | 0.000000 |
| 70-74 | 253+    | 0.000000 | 0.004077 | 0.000000 |
| 75-79 | 253+    | 0.000000 | 0.004077 | 0.000000 |

## Results for PHIM for Run 6 (Sensitivity\_Analysis\_2.RTF)

\*\*\*\*\*

TTP values for Run: 6, Scenario: Ecig

| Variable Parameter |         | Value               |               |               |              |                |                |               |                |                |  |
|--------------------|---------|---------------------|---------------|---------------|--------------|----------------|----------------|---------------|----------------|----------------|--|
| 1. Country         |         | US (United States)  |               |               |              |                |                |               |                |                |  |
| 2. Sex             |         | F (Females)         |               |               |              |                |                |               |                |                |  |
| 3. Assumption Set  |         | S2C                 |               |               |              |                |                |               |                |                |  |
| Note:              |         | Period is in Months |               |               |              |                |                |               |                |                |  |
| Age                | Period  | Initiation          |               |               | Cessation    |                |                | Re-initiation |                |                |  |
|                    |         | Never<br>CC         | Never<br>Ecig | Never<br>Dual | CC<br>Former | Ecig<br>Former | Dual<br>Former | Former<br>CC  | Former<br>Ecig | Former<br>Dual |  |
| 10-14              | 1-12    | 0.001879            | 0.001879      | 0.000000      | 0.008742     | 0.008742       | 0.000000       | 0.000000      | 0.000000       | 0.000000       |  |
| 15-19              | 1-12    | 0.001735            | 0.001735      | 0.000000      | 0.002515     | 0.002515       | 0.000000       | 0.000000      | 0.000000       | 0.000000       |  |
| 20-24              | 1-12    | 0.000138            | 0.000138      | 0.000000      | 0.000761     | 0.000761       | 0.000000       | 0.000000      | 0.000000       | 0.000000       |  |
| 25-29              | 1-12    | 0.000069            | 0.000069      | 0.000000      | 0.001376     | 0.001376       | 0.000000       | 0.000000      | 0.000000       | 0.000000       |  |
| 30-34              | 1-12    | 0.000034            | 0.000034      | 0.000000      | 0.001149     | 0.001149       | 0.000000       | 0.000000      | 0.000000       | 0.000000       |  |
| 35-39              | 1-12    | 0.000000            | 0.000000      | 0.000000      | 0.000991     | 0.000991       | 0.000000       | 0.000000      | 0.000000       | 0.000000       |  |
| 40-44              | 1-12    | 0.000000            | 0.000000      | 0.000000      | 0.000833     | 0.000833       | 0.000000       | 0.000000      | 0.000000       | 0.000000       |  |
| 45-49              | 1-12    | 0.000000            | 0.000000      | 0.000000      | 0.001723     | 0.001723       | 0.000000       | 0.000000      | 0.000000       | 0.000000       |  |
| 50-54              | 1-12    | 0.000000            | 0.000000      | 0.000000      | 0.002336     | 0.002336       | 0.000000       | 0.000000      | 0.000000       | 0.000000       |  |
| 55-59              | 1-12    | 0.000000            | 0.000000      | 0.000000      | 0.002233     | 0.002233       | 0.000000       | 0.000000      | 0.000000       | 0.000000       |  |
| 60-64              | 1-12    | 0.000000            | 0.000000      | 0.000000      | 0.004635     | 0.004635       | 0.000000       | 0.000000      | 0.000000       | 0.000000       |  |
| 65-69              | 1-12    | 0.000000            | 0.000000      | 0.000000      | 0.003505     | 0.003505       | 0.000000       | 0.000000      | 0.000000       | 0.000000       |  |
| 70-74              | 1-12    | 0.000000            | 0.000000      | 0.000000      | 0.004329     | 0.004329       | 0.000000       | 0.000000      | 0.000000       | 0.000000       |  |
| 75-79              | 1-12    | 0.000000            | 0.000000      | 0.000000      | 0.004329     | 0.004329       | 0.000000       | 0.000000      | 0.000000       | 0.000000       |  |
| 10-14              | 13-72   | 0.001918            | 0.002877      | 0.000000      | 0.008742     | 0.008742       | 0.000000       | 0.000000      | 0.000000       | 0.000000       |  |
| 15-19              | 13-72   | 0.001811            | 0.002716      | 0.000000      | 0.004083     | 0.004083       | 0.000000       | 0.000000      | 0.000000       | 0.000000       |  |
| 20-24              | 13-72   | 0.000042            | 0.000063      | 0.000000      | 0.001261     | 0.001261       | 0.000000       | 0.000000      | 0.000000       | 0.000000       |  |
| 25-29              | 13-72   | 0.000021            | 0.000032      | 0.000000      | 0.000952     | 0.000952       | 0.000000       | 0.000000      | 0.000000       | 0.000000       |  |
| 30-34              | 13-72   | 0.000011            | 0.000016      | 0.000000      | 0.000733     | 0.000733       | 0.000000       | 0.000000      | 0.000000       | 0.000000       |  |
| 35-39              | 13-72   | 0.000000            | 0.000000      | 0.000000      | 0.000754     | 0.000754       | 0.000000       | 0.000000      | 0.000000       | 0.000000       |  |
| 40-44              | 13-72   | 0.000000            | 0.000000      | 0.000000      | 0.001535     | 0.001535       | 0.000000       | 0.000000      | 0.000000       | 0.000000       |  |
| 45-49              | 13-72   | 0.000000            | 0.000000      | 0.000000      | 0.002998     | 0.002998       | 0.000000       | 0.000000      | 0.000000       | 0.000000       |  |
| 50-54              | 13-72   | 0.000000            | 0.000000      | 0.000000      | 0.003160     | 0.003160       | 0.000000       | 0.000000      | 0.000000       | 0.000000       |  |
| 55-59              | 13-72   | 0.000000            | 0.000000      | 0.000000      | 0.002965     | 0.002965       | 0.000000       | 0.000000      | 0.000000       | 0.000000       |  |
| 60-64              | 13-72   | 0.000000            | 0.000000      | 0.000000      | 0.003633     | 0.003633       | 0.000000       | 0.000000      | 0.000000       | 0.000000       |  |
| 65-69              | 13-72   | 0.000000            | 0.000000      | 0.000000      | 0.004522     | 0.004522       | 0.000000       | 0.000000      | 0.000000       | 0.000000       |  |
| 70-74              | 13-72   | 0.000000            | 0.000000      | 0.000000      | 0.005208     | 0.005208       | 0.000000       | 0.000000      | 0.000000       | 0.000000       |  |
| 75-79              | 13-72   | 0.000000            | 0.000000      | 0.000000      | 0.005208     | 0.005208       | 0.000000       | 0.000000      | 0.000000       | 0.000000       |  |
| 10-14              | 73-132  | 0.000794            | 0.003175      | 0.000000      | 0.008742     | 0.008742       | 0.000000       | 0.000000      | 0.000000       | 0.000000       |  |
| 15-19              | 73-132  | 0.000611            | 0.002445      | 0.000000      | 0.003373     | 0.003373       | 0.000000       | 0.000000      | 0.000000       | 0.000000       |  |
| 20-24              | 73-132  | 0.000292            | 0.001167      | 0.000000      | 0.003881     | 0.003881       | 0.000000       | 0.000000      | 0.000000       | 0.000000       |  |
| 25-29              | 73-132  | 0.000143            | 0.000571      | 0.000000      | 0.001954     | 0.001954       | 0.000000       | 0.000000      | 0.000000       | 0.000000       |  |
| 30-34              | 73-132  | 0.000022            | 0.000089      | 0.000000      | 0.001338     | 0.001338       | 0.000000       | 0.000000      | 0.000000       | 0.000000       |  |
| 35-39              | 73-132  | 0.000000            | 0.000000      | 0.000000      | 0.001507     | 0.001507       | 0.000000       | 0.000000      | 0.000000       | 0.000000       |  |
| 40-44              | 73-132  | 0.000000            | 0.000000      | 0.000000      | 0.002080     | 0.002080       | 0.000000       | 0.000000      | 0.000000       | 0.000000       |  |
| 45-49              | 73-132  | 0.000000            | 0.000000      | 0.000000      | 0.003809     | 0.003809       | 0.000000       | 0.000000      | 0.000000       | 0.000000       |  |
| 50-54              | 73-132  | 0.000000            | 0.000000      | 0.000000      | 0.004871     | 0.004871       | 0.000000       | 0.000000      | 0.000000       | 0.000000       |  |
| 55-59              | 73-132  | 0.000000            | 0.000000      | 0.000000      | 0.004560     | 0.004560       | 0.000000       | 0.000000      | 0.000000       | 0.000000       |  |
| 60-64              | 73-132  | 0.000000            | 0.000000      | 0.000000      | 0.007192     | 0.007192       | 0.000000       | 0.000000      | 0.000000       | 0.000000       |  |
| 65-69              | 73-132  | 0.000000            | 0.000000      | 0.000000      | 0.007033     | 0.007033       | 0.000000       | 0.000000      | 0.000000       | 0.000000       |  |
| 70-74              | 73-132  | 0.000000            | 0.000000      | 0.000000      | 0.008206     | 0.008206       | 0.000000       | 0.000000      | 0.000000       | 0.000000       |  |
| 75-79              | 73-132  | 0.000000            | 0.000000      | 0.000000      | 0.008206     | 0.008206       | 0.000000       | 0.000000      | 0.000000       | 0.000000       |  |
| 10-14              | 133-192 | 0.000143            | 0.002718      | 0.000000      | 0.008742     | 0.008742       | 0.000000       | 0.000000      | 0.000000       | 0.000000       |  |
| 15-19              | 133-192 | 0.000130            | 0.002465      | 0.000000      | 0.003996     | 0.003996       | 0.000000       | 0.000000      | 0.000000       | 0.000000       |  |
| 20-24              | 133-192 | 0.000062            | 0.001185      | 0.000000      | 0.002805     | 0.002805       | 0.000000       | 0.000000      | 0.000000       | 0.000000       |  |
| 25-29              | 133-192 | 0.000015            | 0.000275      | 0.000000      | 0.001574     | 0.001574       | 0.000000       | 0.000000      | 0.000000       | 0.000000       |  |
| 30-34              | 133-192 | 0.000007            | 0.000125      | 0.000000      | 0.001293     | 0.001293       | 0.000000       | 0.000000      | 0.000000       | 0.000000       |  |
| 35-39              | 133-192 | 0.000000            | 0.000000      | 0.000000      | 0.001219     | 0.001219       | 0.000000       | 0.000000      | 0.000000       | 0.000000       |  |
| 40-44              | 133-192 | 0.000000            | 0.000000      | 0.000000      | 0.001657     | 0.001657       | 0.000000       | 0.000000      | 0.000000       | 0.000000       |  |
| 45-49              | 133-192 | 0.000000            | 0.000000      | 0.000000      | 0.001995     | 0.001995       | 0.000000       | 0.000000      | 0.000000       | 0.000000       |  |
| 50-54              | 133-192 | 0.000000            | 0.000000      | 0.000000      | 0.002154     | 0.002154       | 0.000000       | 0.000000      | 0.000000       | 0.000000       |  |
| 55-59              | 133-192 | 0.000000            | 0.000000      | 0.000000      | 0.002072     | 0.002072       | 0.000000       | 0.000000      | 0.000000       | 0.000000       |  |
| 60-64              | 133-192 | 0.000000            | 0.000000      | 0.000000      | 0.005049     | 0.005049       | 0.000000       | 0.000000      | 0.000000       | 0.000000       |  |
| 65-69              | 133-192 | 0.000000            | 0.000000      | 0.000000      | 0.003681     | 0.003681       | 0.000000       | 0.000000      | 0.000000       | 0.000000       |  |
| 70-74              | 133-192 | 0.000000            | 0.000000      | 0.000000      | 0.006144     | 0.006144       | 0.000000       | 0.000000      | 0.000000       | 0.000000       |  |
| 75-79              | 133-192 | 0.000000            | 0.000000      | 0.000000      | 0.006144     | 0.006144       | 0.000000       | 0.000000      | 0.000000       | 0.000000       |  |
| 10-14              | 193-252 | 0.000093            | 0.001766      | 0.000000      | 0.008742     | 0.008742       | 0.000000       | 0.000000      | 0.000000       | 0.000000       |  |
| 15-19              | 193-252 | 0.000112            | 0.002120      | 0.000000      | 0.005770     | 0.005770       | 0.000000       | 0.000000      | 0.000000       | 0.000000       |  |
| 20-24              | 193-252 | 0.000054            | 0.001025      | 0.000000      | 0.003262     | 0.003262       | 0.000000       | 0.000000      | 0.000000       | 0.000000       |  |
| 25-29              | 193-252 | 0.000027            | 0.000504      | 0.000000      | 0.002002     | 0.002002       | 0.000000       | 0.000000      | 0.000000       | 0.000000       |  |
| 30-34              | 193-252 | 0.000013            | 0.000250      | 0.000000      | 0.003241     | 0.003241       | 0.000000       | 0.000000      | 0.000000       | 0.000000       |  |
| 35-39              | 193-252 | 0.000000            | 0.000000      | 0.000000      | 0.001771     | 0.001771       | 0.000000       | 0.000000      | 0.000000       | 0.000000       |  |
| 40-44              | 193-252 | 0.000000            | 0.000000      | 0.000000      | 0.002173     | 0.002173       | 0.000000       | 0.000000      | 0.000000       | 0.000000       |  |
| 45-49              | 193-252 | 0.000000            | 0.000000      | 0.000000      | 0.002075     | 0.002075       | 0.000000       | 0.000000      | 0.000000       | 0.000000       |  |
| 50-54              | 193-252 | 0.000000            | 0.000000      | 0.000000      | 0.003432     | 0.003432       | 0.000000       | 0.000000      | 0.000000       | 0.000000       |  |



### Results for PHIM for Run 6 (Sensitivity\_Analysis\_2.RTF)

|       |         |          |          |          |          |          |          |          |          |          |
|-------|---------|----------|----------|----------|----------|----------|----------|----------|----------|----------|
| 55-59 | 193-252 | 0.000000 | 0.000000 | 0.000000 | 0.002906 | 0.002906 | 0.000000 | 0.000000 | 0.000000 | 0.000000 |
| 60-64 | 193-252 | 0.000000 | 0.000000 | 0.000000 | 0.007139 | 0.007139 | 0.000000 | 0.000000 | 0.000000 | 0.000000 |
| 65-69 | 193-252 | 0.000000 | 0.000000 | 0.000000 | 0.004963 | 0.004963 | 0.000000 | 0.000000 | 0.000000 | 0.000000 |
| 70-74 | 193-252 | 0.000000 | 0.000000 | 0.000000 | 0.006269 | 0.006269 | 0.000000 | 0.000000 | 0.000000 | 0.000000 |
| 75-79 | 193-252 | 0.000000 | 0.000000 | 0.000000 | 0.006269 | 0.006269 | 0.000000 | 0.000000 | 0.000000 | 0.000000 |
| 10-14 | 253+    | 0.000047 | 0.000884 | 0.000000 | 0.008742 | 0.008742 | 0.000000 | 0.000000 | 0.000000 | 0.000000 |
| 15-19 | 253+    | 0.000090 | 0.001708 | 0.000000 | 0.009440 | 0.009440 | 0.000000 | 0.000000 | 0.000000 | 0.000000 |
| 20-24 | 253+    | 0.000001 | 0.000022 | 0.000000 | 0.002831 | 0.002831 | 0.000000 | 0.000000 | 0.000000 | 0.000000 |
| 25-29 | 253+    | 0.000004 | 0.000070 | 0.000000 | 0.002656 | 0.002656 | 0.000000 | 0.000000 | 0.000000 | 0.000000 |
| 30-34 | 253+    | 0.000002 | 0.000035 | 0.000000 | 0.004614 | 0.004614 | 0.000000 | 0.000000 | 0.000000 | 0.000000 |
| 35-39 | 253+    | 0.000000 | 0.000000 | 0.000000 | 0.002608 | 0.002608 | 0.000000 | 0.000000 | 0.000000 | 0.000000 |
| 40-44 | 253+    | 0.000000 | 0.000000 | 0.000000 | 0.003115 | 0.003115 | 0.000000 | 0.000000 | 0.000000 | 0.000000 |
| 45-49 | 253+    | 0.000000 | 0.000000 | 0.000000 | 0.002132 | 0.002132 | 0.000000 | 0.000000 | 0.000000 | 0.000000 |
| 50-54 | 253+    | 0.000000 | 0.000000 | 0.000000 | 0.003497 | 0.003497 | 0.000000 | 0.000000 | 0.000000 | 0.000000 |
| 55-59 | 253+    | 0.000000 | 0.000000 | 0.000000 | 0.002942 | 0.002942 | 0.000000 | 0.000000 | 0.000000 | 0.000000 |
| 60-64 | 253+    | 0.000000 | 0.000000 | 0.000000 | 0.005376 | 0.005376 | 0.000000 | 0.000000 | 0.000000 | 0.000000 |
| 65-69 | 253+    | 0.000000 | 0.000000 | 0.000000 | 0.001789 | 0.001789 | 0.000000 | 0.000000 | 0.000000 | 0.000000 |
| 70-74 | 253+    | 0.000000 | 0.000000 | 0.000000 | 0.004077 | 0.004077 | 0.000000 | 0.000000 | 0.000000 | 0.000000 |
| 75-79 | 253+    | 0.000000 | 0.000000 | 0.000000 | 0.004077 | 0.004077 | 0.000000 | 0.000000 | 0.000000 | 0.000000 |



**Results for PHIM for Run 6 (Sensitivity\_Analysis\_2.RTF)**

|       |      |          |          |          |          |          |          |
|-------|------|----------|----------|----------|----------|----------|----------|
| 25-29 | 253+ | 0.008145 | 0.000000 | 0.000000 | 0.000000 | 0.000000 | 0.000000 |
| 30-34 | 253+ | 0.007936 | 0.000000 | 0.000000 | 0.000000 | 0.000000 | 0.000000 |
| 35-39 | 253+ | 0.006975 | 0.000000 | 0.000000 | 0.000000 | 0.000000 | 0.000000 |
| 40-44 | 253+ | 0.006830 | 0.000000 | 0.000000 | 0.000000 | 0.000000 | 0.000000 |
| 45-49 | 253+ | 0.006338 | 0.000000 | 0.000000 | 0.000000 | 0.000000 | 0.000000 |
| 50-54 | 253+ | 0.005574 | 0.000000 | 0.000000 | 0.000000 | 0.000000 | 0.000000 |
| 55-59 | 253+ | 0.003011 | 0.000000 | 0.000000 | 0.000000 | 0.000000 | 0.000000 |
| 60-64 | 253+ | 0.002115 | 0.000000 | 0.000000 | 0.000000 | 0.000000 | 0.000000 |
| 65-69 | 253+ | 0.000281 | 0.000000 | 0.000000 | 0.000000 | 0.000000 | 0.000000 |
| 70-74 | 253+ | 0.000000 | 0.000000 | 0.000000 | 0.000000 | 0.000000 | 0.000000 |
| 75-79 | 253+ | 0.000000 | 0.000000 | 0.000000 | 0.000000 | 0.000000 | 0.000000 |

## Results for PHIM for Run 6 (Sensitivity\_Analysis\_2.RTF)

\*\*\*\*\*

### Main Output for the Tobacco History for Run: 6, Simulation: 1, Scenario: NULL

| Variable Parameter          | Value              |
|-----------------------------|--------------------|
| 1. Country                  | US (United States) |
| 2. Sex                      | F (Females)        |
| 3. Year of start of process | 1990               |

Year of Follow-up: 2040, Age Group: All Ages

| Period | Age Group | Smoking Group | N | % |
|--------|-----------|---------------|---|---|
|--------|-----------|---------------|---|---|

|    |          |           |       |       |
|----|----------|-----------|-------|-------|
| 50 | All Ages | Never Any | 20670 | 58.80 |
| 50 | All Ages | CC        | 2462  | 7.00  |
| 50 | All Ages | Former    | 12019 | 34.19 |

Year of Follow-up: 2040, Age Group: 18-19

| Period | Age Group | Smoking Group | N | % |
|--------|-----------|---------------|---|---|
|--------|-----------|---------------|---|---|

|    |       |           |   |   |
|----|-------|-----------|---|---|
| 50 | 18-19 | Never Any | 0 | . |
| 50 | 18-19 | CC        | 0 | . |
| 50 | 18-19 | Former    | 0 | . |

Year of Follow-up: 2040, Age Group: 20-24

| Period | Age Group | Smoking Group | N | % |
|--------|-----------|---------------|---|---|
|--------|-----------|---------------|---|---|

|    |       |           |   |   |
|----|-------|-----------|---|---|
| 50 | 20-24 | Never Any | 0 | . |
| 50 | 20-24 | CC        | 0 | . |
| 50 | 20-24 | Former    | 0 | . |

Year of Follow-up: 2040, Age Group: 25-29

| Period | Age Group | Smoking Group | N | % |
|--------|-----------|---------------|---|---|
|--------|-----------|---------------|---|---|

|    |       |           |   |   |
|----|-------|-----------|---|---|
| 50 | 25-29 | Never Any | 0 | . |
| 50 | 25-29 | CC        | 0 | . |
| 50 | 25-29 | Former    | 0 | . |

Year of Follow-up: 2040, Age Group: 30-34

| Period | Age Group | Smoking Group | N | % |
|--------|-----------|---------------|---|---|
|--------|-----------|---------------|---|---|

|    |       |           |   |   |
|----|-------|-----------|---|---|
| 50 | 30-34 | Never Any | 0 | . |
| 50 | 30-34 | CC        | 0 | . |
| 50 | 30-34 | Former    | 0 | . |

Year of Follow-up: 2040, Age Group: 35-39

| Period | Age Group | Smoking Group | N | % |
|--------|-----------|---------------|---|---|
|--------|-----------|---------------|---|---|

|    |       |           |   |   |
|----|-------|-----------|---|---|
| 50 | 35-39 | Never Any | 0 | . |
| 50 | 35-39 | CC        | 0 | . |
| 50 | 35-39 | Former    | 0 | . |

Year of Follow-up: 2040, Age Group: 40-44

| Period | Age Group | Smoking Group | N | % |
|--------|-----------|---------------|---|---|
|--------|-----------|---------------|---|---|

|    |       |           |   |   |
|----|-------|-----------|---|---|
| 50 | 40-44 | Never Any | 0 | . |
| 50 | 40-44 | CC        | 0 | . |
| 50 | 40-44 | Former    | 0 | . |

Year of Follow-up: 2040, Age Group: 45-49

| Period | Age Group | Smoking Group | N | % |
|--------|-----------|---------------|---|---|
|--------|-----------|---------------|---|---|

|    |       |           |   |   |
|----|-------|-----------|---|---|
| 50 | 45-49 | Never Any | 0 | . |
| 50 | 45-49 | CC        | 0 | . |
| 50 | 45-49 | Former    | 0 | . |

Year of Follow-up: 2040, Age Group: 50-54

| Period | Age Group | Smoking Group | N | % |
|--------|-----------|---------------|---|---|
|--------|-----------|---------------|---|---|

|    |       |           |   |   |
|----|-------|-----------|---|---|
| 50 | 50-54 | Never Any | 0 | . |
| 50 | 50-54 | CC        | 0 | . |
| 50 | 50-54 | Former    | 0 | . |

Year of Follow-up: 2040, Age Group: 55-59

| Period | Age Group | Smoking Group | N | % |
|--------|-----------|---------------|---|---|
|--------|-----------|---------------|---|---|

|    |       |           |   |   |
|----|-------|-----------|---|---|
| 50 | 55-59 | Never Any | 0 | . |
| 50 | 55-59 | CC        | 0 | . |
| 50 | 55-59 | Former    | 0 | . |

Year of Follow-up: 2040, Age Group: 60-64

| Period | Age Group | Smoking Group | N | % |
|--------|-----------|---------------|---|---|
|--------|-----------|---------------|---|---|

### Results for PHIM for Run 6 (Sensitivity\_Analysis\_2.RTF)

|                                           |           |               |      |       |
|-------------------------------------------|-----------|---------------|------|-------|
| 50                                        | 60-64     | Never Any     | 4803 | 60.57 |
| 50                                        | 60-64     | CC            | 621  | 7.83  |
| 50                                        | 60-64     | Former        | 2506 | 31.60 |
| Year of Follow-up: 2040, Age Group: 65-69 |           |               |      |       |
| Period                                    | Age Group | Smoking Group | N    | %     |
| 50                                        | 65-69     | Never Any     | 5407 | 64.75 |
| 50                                        | 65-69     | CC            | 538  | 6.44  |
| 50                                        | 65-69     | Former        | 2405 | 28.80 |
| Year of Follow-up: 2040, Age Group: 70-74 |           |               |      |       |
| Period                                    | Age Group | Smoking Group | N    | %     |
| 50                                        | 70-74     | Never Any     | 5181 | 58.92 |
| 50                                        | 70-74     | CC            | 605  | 6.88  |
| 50                                        | 70-74     | Former        | 3007 | 34.20 |
| Year of Follow-up: 2040, Age Group: 75-79 |           |               |      |       |
| Period                                    | Age Group | Smoking Group | N    | %     |
| 50                                        | 75-79     | Never Any     | 5279 | 52.38 |
| 50                                        | 75-79     | CC            | 698  | 6.93  |
| 50                                        | 75-79     | Former        | 4101 | 40.69 |

## Results for PHIM for Run 6 (Sensitivity\_Analysis\_2.RTF)

\*\*\*\*\*

### Main Output for the Tobacco History for Run: 6, Simulation: 1, Scenario: Ecig

| Variable Parameter                           |           |               | Value              |       |               |             |               |                |              |
|----------------------------------------------|-----------|---------------|--------------------|-------|---------------|-------------|---------------|----------------|--------------|
| 1. Country                                   |           |               | US (United States) |       |               |             |               |                |              |
| 2. Sex                                       |           |               | F (Females)        |       |               |             |               |                |              |
| 3. Year of start of process                  |           |               | 1990               |       |               |             |               |                |              |
| Year of Follow-up: 1990, Age Group: All Ages |           |               |                    |       |               |             |               |                |              |
| Period                                       | Age Group | Smoking Group | N                  | %     | Ever Quit (N) | Ever Quit % | Mean Yrs Quit | Short Term (n) | Short Term % |
| 0                                            | All Ages  | Never Any     | 47776              | 54.92 |               |             |               |                |              |
| 0                                            | All Ages  | CC            | 22737              | 26.14 | 0             | 0.00        |               |                |              |
| 0                                            | All Ages  | Ecig          | 0                  | 0.00  |               |             |               |                |              |
| 0                                            | All Ages  | Dual          | 0                  | 0.00  |               |             |               |                |              |
| 0                                            | All Ages  | Former        | 16484              | 18.95 |               |             | 11.90         | 2815           | 17.08        |
| Year of Follow-up: 1990, Age Group: 18-19    |           |               |                    |       |               |             |               |                |              |
| Period                                       | Age Group | Smoking Group | N                  | %     | Ever Quit (N) | Ever Quit % | Mean Yrs Quit | Short Term (n) | Short Term % |
| 0                                            | 18-19     | Never Any     | 2570               | 78.43 |               |             |               |                |              |
| 0                                            | 18-19     | CC            | 535                | 16.33 | 0             | 0.00        |               |                |              |
| 0                                            | 18-19     | Ecig          | 0                  | 0.00  |               |             |               |                |              |
| 0                                            | 18-19     | Dual          | 0                  | 0.00  |               |             |               |                |              |
| 0                                            | 18-19     | Former        | 172                | 5.25  |               |             | 0.20          | 172            | 100.00       |
| Year of Follow-up: 1990, Age Group: 20-24    |           |               |                    |       |               |             |               |                |              |
| Period                                       | Age Group | Smoking Group | N                  | %     | Ever Quit (N) | Ever Quit % | Mean Yrs Quit | Short Term (n) | Short Term % |
| 0                                            | 20-24     | Never Any     | 5354               | 60.89 |               |             |               |                |              |
| 0                                            | 20-24     | CC            | 2560               | 29.11 | 0             | 0.00        |               |                |              |
| 0                                            | 20-24     | Ecig          | 0                  | 0.00  |               |             |               |                |              |
| 0                                            | 20-24     | Dual          | 0                  | 0.00  |               |             |               |                |              |
| 0                                            | 20-24     | Former        | 879                | 10.00 |               |             | 1.58          | 420            | 47.78        |
| Year of Follow-up: 1990, Age Group: 25-29    |           |               |                    |       |               |             |               |                |              |
| Period                                       | Age Group | Smoking Group | N                  | %     | Ever Quit (N) | Ever Quit % | Mean Yrs Quit | Short Term (n) | Short Term % |
| 0                                            | 25-29     | Never Any     | 5318               | 52.77 |               |             |               |                |              |
| 0                                            | 25-29     | CC            | 3335               | 33.09 | 0             | 0.00        |               |                |              |
| 0                                            | 25-29     | Ecig          | 0                  | 0.00  |               |             |               |                |              |
| 0                                            | 25-29     | Dual          | 0                  | 0.00  |               |             |               |                |              |
| 0                                            | 25-29     | Former        | 1425               | 14.14 |               |             | 3.91          | 404            | 28.35        |
| Year of Follow-up: 1990, Age Group: 30-34    |           |               |                    |       |               |             |               |                |              |
| Period                                       | Age Group | Smoking Group | N                  | %     | Ever Quit (N) | Ever Quit % | Mean Yrs Quit | Short Term (n) | Short Term % |
| 0                                            | 30-34     | Never Any     | 5287               | 50.36 |               |             |               |                |              |
| 0                                            | 30-34     | CC            | 3326               | 31.68 | 0             | 0.00        |               |                |              |
| 0                                            | 30-34     | Ecig          | 0                  | 0.00  |               |             |               |                |              |
| 0                                            | 30-34     | Dual          | 0                  | 0.00  |               |             |               |                |              |
| 0                                            | 30-34     | Former        | 1886               | 17.96 |               |             | 4.36          | 566            | 30.01        |
| Year of Follow-up: 1990, Age Group: 35-39    |           |               |                    |       |               |             |               |                |              |
| Period                                       | Age Group | Smoking Group | N                  | %     | Ever Quit (N) | Ever Quit % | Mean Yrs Quit | Short Term (n) | Short Term % |
| 0                                            | 35-39     | Never Any     | 5018               | 52.27 |               |             |               |                |              |
| 0                                            | 35-39     | CC            | 2653               | 27.64 | 0             | 0.00        |               |                |              |
| 0                                            | 35-39     | Ecig          | 0                  | 0.00  |               |             |               |                |              |
| 0                                            | 35-39     | Dual          | 0                  | 0.00  |               |             |               |                |              |
| 0                                            | 35-39     | Former        | 1929               | 20.09 |               |             | 7.96          | 324            | 16.80        |
| Year of Follow-up: 1990, Age Group: 40-44    |           |               |                    |       |               |             |               |                |              |
| Period                                       | Age Group | Smoking Group | N                  | %     | Ever Quit (N) | Ever Quit % | Mean Yrs Quit | Short Term (n) | Short Term % |
| 0                                            | 40-44     | Never Any     | 4356               | 51.27 |               |             |               |                |              |
| 0                                            | 40-44     | CC            | 2397               | 28.21 | 0             | 0.00        |               |                |              |
| 0                                            | 40-44     | Ecig          | 0                  | 0.00  |               |             |               |                |              |
| 0                                            | 40-44     | Dual          | 0                  | 0.00  |               |             |               |                |              |
| 0                                            | 40-44     | Former        | 1744               | 20.52 |               |             | 7.33          | 339            | 19.44        |
| Year of Follow-up: 1990, Age Group: 45-49    |           |               |                    |       |               |             |               |                |              |
| Period                                       | Age Group | Smoking Group | N                  | %     | Ever Quit (N) | Ever Quit % | Mean Yrs Quit | Short Term (n) | Short Term % |
| 0                                            | 45-49     | Never Any     | 3116               | 47.67 |               |             |               |                |              |
| 0                                            | 45-49     | CC            | 1875               | 28.69 | 0             | 0.00        |               |                |              |
| 0                                            | 45-49     | Ecig          | 0                  | 0.00  |               |             |               |                |              |
| 0                                            | 45-49     | Dual          | 0                  | 0.00  |               |             |               |                |              |
| 0                                            | 45-49     | Former        | 1545               | 23.64 |               |             | 12.55         | 194            | 12.56        |
| Year of Follow-up: 1990, Age Group: 50-54    |           |               |                    |       |               |             |               |                |              |
| Period                                       | Age Group | Smoking Group | N                  | %     | Ever Quit (N) | Ever Quit % | Mean Yrs Quit | Short Term (n) | Short Term % |
| 0                                            | 50-54     | Never Any     | 2684               | 48.50 |               |             |               |                |              |
| 0                                            | 50-54     | CC            | 1572               | 28.41 | 0             | 0.00        |               |                |              |

**Results for PHIM for Run 6 (Sensitivity\_Analysis\_2.RTF)**

|                                              |           |               |       |       |               |             |               |                |              |
|----------------------------------------------|-----------|---------------|-------|-------|---------------|-------------|---------------|----------------|--------------|
| 0                                            | 50-54     | Ecig          | 0     | 0.00  |               |             |               |                |              |
| 0                                            | 50-54     | Dual          | 0     | 0.00  |               |             |               |                |              |
| 0                                            | 50-54     | Former        | 1278  | 23.09 |               |             | 13.28         | 126            | 9.86         |
| Year of Follow-up: 1990, Age Group: 55-59    |           |               |       |       |               |             |               |                |              |
| Period                                       | Age Group | Smoking Group | N     | %     | Ever Quit (N) | Ever Quit % | Mean Yrs Quit | Short Term (n) | Short Term % |
| 0                                            | 55-59     | Never Any     | 2732  | 51.90 |               |             |               |                |              |
| 0                                            | 55-59     | CC            | 1295  | 24.60 | 0             | 0.00        |               |                |              |
| 0                                            | 55-59     | Ecig          | 0     | 0.00  |               |             |               |                |              |
| 0                                            | 55-59     | Dual          | 0     | 0.00  |               |             |               |                |              |
| 0                                            | 55-59     | Former        | 1237  | 23.50 |               |             | 17.26         | 90             | 7.28         |
| Year of Follow-up: 1990, Age Group: 60-64    |           |               |       |       |               |             |               |                |              |
| Period                                       | Age Group | Smoking Group | N     | %     | Ever Quit (N) | Ever Quit % | Mean Yrs Quit | Short Term (n) | Short Term % |
| 0                                            | 60-64     | Never Any     | 3078  | 55.72 |               |             |               |                |              |
| 0                                            | 60-64     | CC            | 1249  | 22.61 | 0             | 0.00        |               |                |              |
| 0                                            | 60-64     | Ecig          | 0     | 0.00  |               |             |               |                |              |
| 0                                            | 60-64     | Dual          | 0     | 0.00  |               |             |               |                |              |
| 0                                            | 60-64     | Former        | 1197  | 21.67 |               |             | 18.28         | 61             | 5.10         |
| Year of Follow-up: 1990, Age Group: 65-69    |           |               |       |       |               |             |               |                |              |
| Period                                       | Age Group | Smoking Group | N     | %     | Ever Quit (N) | Ever Quit % | Mean Yrs Quit | Short Term (n) | Short Term % |
| 0                                            | 65-69     | Never Any     | 3042  | 57.36 |               |             |               |                |              |
| 0                                            | 65-69     | CC            | 976   | 18.40 | 0             | 0.00        |               |                |              |
| 0                                            | 65-69     | Ecig          | 0     | 0.00  |               |             |               |                |              |
| 0                                            | 65-69     | Dual          | 0     | 0.00  |               |             |               |                |              |
| 0                                            | 65-69     | Former        | 1285  | 24.23 |               |             | 20.65         | 68             | 5.29         |
| Year of Follow-up: 1990, Age Group: 70-74    |           |               |       |       |               |             |               |                |              |
| Period                                       | Age Group | Smoking Group | N     | %     | Ever Quit (N) | Ever Quit % | Mean Yrs Quit | Short Term (n) | Short Term % |
| 0                                            | 70-74     | Never Any     | 2738  | 61.05 |               |             |               |                |              |
| 0                                            | 70-74     | CC            | 610   | 13.60 | 0             | 0.00        |               |                |              |
| 0                                            | 70-74     | Ecig          | 0     | 0.00  |               |             |               |                |              |
| 0                                            | 70-74     | Dual          | 0     | 0.00  |               |             |               |                |              |
| 0                                            | 70-74     | Former        | 1137  | 25.35 |               |             | 24.48         | 27             | 2.37         |
| Year of Follow-up: 1990, Age Group: 75-79    |           |               |       |       |               |             |               |                |              |
| Period                                       | Age Group | Smoking Group | N     | %     | Ever Quit (N) | Ever Quit % | Mean Yrs Quit | Short Term (n) | Short Term % |
| 0                                            | 75-79     | Never Any     | 2483  | 68.84 |               |             |               |                |              |
| 0                                            | 75-79     | CC            | 354   | 9.81  | 0             | 0.00        |               |                |              |
| 0                                            | 75-79     | Ecig          | 0     | 0.00  |               |             |               |                |              |
| 0                                            | 75-79     | Dual          | 0     | 0.00  |               |             |               |                |              |
| 0                                            | 75-79     | Former        | 770   | 21.35 |               |             | 24.48         | 24             | 3.12         |
| Year of Follow-up: 1995, Age Group: All Ages |           |               |       |       |               |             |               |                |              |
| Period                                       | Age Group | Smoking Group | N     | %     | Ever Quit (N) | Ever Quit % | Mean Yrs Quit | Short Term (n) | Short Term % |
| 5                                            | All Ages  | Never Any     | 50887 | 55.53 |               |             |               |                |              |
| 5                                            | All Ages  | CC            | 15067 | 16.44 | 0             | 0.00        |               |                |              |
| 5                                            | All Ages  | Ecig          | 7277  | 7.94  |               |             |               |                |              |
| 5                                            | All Ages  | Dual          | 0     | 0.00  |               |             |               |                |              |
| 5                                            | All Ages  | Former        | 18408 | 20.09 |               |             | 14.18         | 1138           | 6.18         |
| Year of Follow-up: 1995, Age Group: 18-19    |           |               |       |       |               |             |               |                |              |
| Period                                       | Age Group | Smoking Group | N     | %     | Ever Quit (N) | Ever Quit % | Mean Yrs Quit | Short Term (n) | Short Term % |
| 5                                            | 18-19     | Never Any     | 2434  | 76.64 |               |             |               |                |              |
| 5                                            | 18-19     | CC            | 284   | 8.94  | 0             | 0.00        |               |                |              |
| 5                                            | 18-19     | Ecig          | 389   | 12.25 |               |             |               |                |              |
| 5                                            | 18-19     | Dual          | 0     | 0.00  |               |             |               |                |              |
| 5                                            | 18-19     | Former        | 69    | 2.17  |               |             | 1.04          | 46             | 66.67        |
| Year of Follow-up: 1995, Age Group: 20-24    |           |               |       |       |               |             |               |                |              |
| Period                                       | Age Group | Smoking Group | N     | %     | Ever Quit (N) | Ever Quit % | Mean Yrs Quit | Short Term (n) | Short Term % |
| 5                                            | 20-24     | Never Any     | 5794  | 69.39 |               |             |               |                |              |
| 5                                            | 20-24     | CC            | 1220  | 14.61 | 0             | 0.00        |               |                |              |
| 5                                            | 20-24     | Ecig          | 892   | 10.68 |               |             |               |                |              |
| 5                                            | 20-24     | Dual          | 0     | 0.00  |               |             |               |                |              |
| 5                                            | 20-24     | Former        | 444   | 5.32  |               |             | 3.21          | 104            | 23.42        |
| Year of Follow-up: 1995, Age Group: 25-29    |           |               |       |       |               |             |               |                |              |
| Period                                       | Age Group | Smoking Group | N     | %     | Ever Quit (N) | Ever Quit % | Mean Yrs Quit | Short Term (n) | Short Term % |
| 5                                            | 25-29     | Never Any     | 5313  | 60.42 |               |             |               |                |              |
| 5                                            | 25-29     | CC            | 1528  | 17.38 | 0             | 0.00        |               |                |              |
| 5                                            | 25-29     | Ecig          | 944   | 10.74 |               |             |               |                |              |
| 5                                            | 25-29     | Dual          | 0     | 0.00  |               |             |               |                |              |
| 5                                            | 25-29     | Former        | 1008  | 11.46 |               |             | 5.98          | 55             | 5.46         |
| Year of Follow-up: 1995, Age Group: 30-34    |           |               |       |       |               |             |               |                |              |
| Period                                       | Age Group | Smoking Group | N     | %     | Ever Quit (N) | Ever Quit % | Mean Yrs Quit | Short Term (n) | Short Term % |

**Results for PHIM for Run 6 (Sensitivity\_Analysis\_2.RTF)**

|                                              |           |               |      |       |               |             |               |                |              |
|----------------------------------------------|-----------|---------------|------|-------|---------------|-------------|---------------|----------------|--------------|
| 5                                            | 30-34     | Never Any     | 5304 | 52.63 |               |             |               |                |              |
| 5                                            | 30-34     | CC            | 1922 | 19.07 | 0             | 0.00        |               |                |              |
| 5                                            | 30-34     | Ecig          | 1237 | 12.27 |               |             |               |                |              |
| 5                                            | 30-34     | Dual          | 0    | 0.00  |               |             |               |                |              |
| 5                                            | 30-34     | Former        | 1615 | 16.03 |               |             | 8.12          | 71             | 4.40         |
| Year of Follow-up: 1995, Age Group: 35-39    |           |               |      |       |               |             |               |                |              |
| Period                                       | Age Group | Smoking Group | N    | %     | Ever Quit (N) | Ever Quit % | Mean Yrs Quit | Short Term (n) | Short Term % |
| 5                                            | 35-39     | Never Any     | 5278 | 50.27 |               |             |               |                |              |
| 5                                            | 35-39     | CC            | 2029 | 19.33 | 0             | 0.00        |               |                |              |
| 5                                            | 35-39     | Ecig          | 1165 | 11.10 |               |             |               |                |              |
| 5                                            | 35-39     | Dual          | 0    | 0.00  |               |             |               |                |              |
| 5                                            | 35-39     | Former        | 2027 | 19.31 |               |             | 8.86          | 54             | 2.66         |
| Year of Follow-up: 1995, Age Group: 40-44    |           |               |      |       |               |             |               |                |              |
| Period                                       | Age Group | Smoking Group | N    | %     | Ever Quit (N) | Ever Quit % | Mean Yrs Quit | Short Term (n) | Short Term % |
| 5                                            | 40-44     | Never Any     | 5018 | 52.27 |               |             |               |                |              |
| 5                                            | 40-44     | CC            | 1610 | 16.77 | 0             | 0.00        |               |                |              |
| 5                                            | 40-44     | Ecig          | 861  | 8.97  |               |             |               |                |              |
| 5                                            | 40-44     | Dual          | 0    | 0.00  |               |             |               |                |              |
| 5                                            | 40-44     | Former        | 2111 | 21.99 |               |             | 12.00         | 83             | 3.93         |
| Year of Follow-up: 1995, Age Group: 45-49    |           |               |      |       |               |             |               |                |              |
| Period                                       | Age Group | Smoking Group | N    | %     | Ever Quit (N) | Ever Quit % | Mean Yrs Quit | Short Term (n) | Short Term % |
| 5                                            | 45-49     | Never Any     | 4356 | 51.27 |               |             |               |                |              |
| 5                                            | 45-49     | CC            | 1404 | 16.52 | 0             | 0.00        |               |                |              |
| 5                                            | 45-49     | Ecig          | 713  | 8.39  |               |             |               |                |              |
| 5                                            | 45-49     | Dual          | 0    | 0.00  |               |             |               |                |              |
| 5                                            | 45-49     | Former        | 2024 | 23.82 |               |             | 10.84         | 136            | 6.72         |
| Year of Follow-up: 1995, Age Group: 50-54    |           |               |      |       |               |             |               |                |              |
| Period                                       | Age Group | Smoking Group | N    | %     | Ever Quit (N) | Ever Quit % | Mean Yrs Quit | Short Term (n) | Short Term % |
| 5                                            | 50-54     | Never Any     | 3116 | 47.67 |               |             |               |                |              |
| 5                                            | 50-54     | CC            | 1067 | 16.32 | 0             | 0.00        |               |                |              |
| 5                                            | 50-54     | Ecig          | 508  | 7.77  |               |             |               |                |              |
| 5                                            | 50-54     | Dual          | 0    | 0.00  |               |             |               |                |              |
| 5                                            | 50-54     | Former        | 1845 | 28.23 |               |             | 14.99         | 143            | 7.75         |
| Year of Follow-up: 1995, Age Group: 55-59    |           |               |      |       |               |             |               |                |              |
| Period                                       | Age Group | Smoking Group | N    | %     | Ever Quit (N) | Ever Quit % | Mean Yrs Quit | Short Term (n) | Short Term % |
| 5                                            | 55-59     | Never Any     | 2684 | 48.50 |               |             |               |                |              |
| 5                                            | 55-59     | CC            | 1039 | 18.77 | 0             | 0.00        |               |                |              |
| 5                                            | 55-59     | Ecig          | 296  | 5.35  |               |             |               |                |              |
| 5                                            | 55-59     | Dual          | 0    | 0.00  |               |             |               |                |              |
| 5                                            | 55-59     | Former        | 1515 | 27.38 |               |             | 15.70         | 106            | 7.00         |
| Year of Follow-up: 1995, Age Group: 60-64    |           |               |      |       |               |             |               |                |              |
| Period                                       | Age Group | Smoking Group | N    | %     | Ever Quit (N) | Ever Quit % | Mean Yrs Quit | Short Term (n) | Short Term % |
| 5                                            | 60-64     | Never Any     | 2732 | 51.90 |               |             |               |                |              |
| 5                                            | 60-64     | CC            | 900  | 17.10 | 0             | 0.00        |               |                |              |
| 5                                            | 60-64     | Ecig          | 174  | 3.31  |               |             |               |                |              |
| 5                                            | 60-64     | Dual          | 0    | 0.00  |               |             |               |                |              |
| 5                                            | 60-64     | Former        | 1458 | 27.70 |               |             | 19.17         | 88             | 6.04         |
| Year of Follow-up: 1995, Age Group: 65-69    |           |               |      |       |               |             |               |                |              |
| Period                                       | Age Group | Smoking Group | N    | %     | Ever Quit (N) | Ever Quit % | Mean Yrs Quit | Short Term (n) | Short Term % |
| 5                                            | 65-69     | Never Any     | 3078 | 55.72 |               |             |               |                |              |
| 5                                            | 65-69     | CC            | 866  | 15.68 | 0             | 0.00        |               |                |              |
| 5                                            | 65-69     | Ecig          | 88   | 1.59  |               |             |               |                |              |
| 5                                            | 65-69     | Dual          | 0    | 0.00  |               |             |               |                |              |
| 5                                            | 65-69     | Former        | 1492 | 27.01 |               |             | 19.11         | 102            | 6.84         |
| Year of Follow-up: 1995, Age Group: 70-74    |           |               |      |       |               |             |               |                |              |
| Period                                       | Age Group | Smoking Group | N    | %     | Ever Quit (N) | Ever Quit % | Mean Yrs Quit | Short Term (n) | Short Term % |
| 5                                            | 70-74     | Never Any     | 3042 | 57.36 |               |             |               |                |              |
| 5                                            | 70-74     | CC            | 743  | 14.01 | 0             | 0.00        |               |                |              |
| 5                                            | 70-74     | Ecig          | 10   | 0.19  |               |             |               |                |              |
| 5                                            | 70-74     | Dual          | 0    | 0.00  |               |             |               |                |              |
| 5                                            | 70-74     | Former        | 1508 | 28.44 |               |             | 22.14         | 87             | 5.77         |
| Year of Follow-up: 1995, Age Group: 75-79    |           |               |      |       |               |             |               |                |              |
| Period                                       | Age Group | Smoking Group | N    | %     | Ever Quit (N) | Ever Quit % | Mean Yrs Quit | Short Term (n) | Short Term % |
| 5                                            | 75-79     | Never Any     | 2738 | 61.05 |               |             |               |                |              |
| 5                                            | 75-79     | CC            | 455  | 10.14 | 0             | 0.00        |               |                |              |
| 5                                            | 75-79     | Ecig          | 0    | 0.00  |               |             |               |                |              |
| 5                                            | 75-79     | Dual          | 0    | 0.00  |               |             |               |                |              |
| 5                                            | 75-79     | Former        | 1292 | 28.81 |               |             | 26.18         | 63             | 4.88         |
| Year of Follow-up: 2000, Age Group: All Ages |           |               |      |       |               |             |               |                |              |



**Results for PHIM for Run 6 (Sensitivity\_Analysis\_2.RTF)**

| Period                                    | Age Group | Smoking Group | N     | %     | Ever Quit (N) | Ever Quit % | Mean Yrs Quit | Short Term (n) | Short Term % |
|-------------------------------------------|-----------|---------------|-------|-------|---------------|-------------|---------------|----------------|--------------|
| 10                                        | All Ages  | Never Any     | 50423 | 54.86 |               |             |               |                |              |
| 10                                        | All Ages  | CC            | 9107  | 9.91  | 0             | 0.00        |               |                |              |
| 10                                        | All Ages  | Ecig          | 11109 | 12.09 |               |             |               |                |              |
| 10                                        | All Ages  | Dual          | 0     | 0.00  |               |             |               |                |              |
| 10                                        | All Ages  | Former        | 21269 | 23.14 |               |             | 15.11         | 1666           | 7.83         |
| Year of Follow-up: 2000, Age Group: 18-19 |           |               |       |       |               |             |               |                |              |
| Period                                    | Age Group | Smoking Group | N     | %     | Ever Quit (N) | Ever Quit % | Mean Yrs Quit | Short Term (n) | Short Term % |
| 10                                        | 18-19     | Never Any     | 0     | .     |               |             |               |                |              |
| 10                                        | 18-19     | CC            | 0     | .     | 0             | .           |               |                |              |
| 10                                        | 18-19     | Ecig          | 0     | .     |               |             |               |                |              |
| 10                                        | 18-19     | Dual          | 0     | .     |               |             |               |                |              |
| 10                                        | 18-19     | Former        | 0     | .     |               |             |               | 0              | .            |
| Year of Follow-up: 2000, Age Group: 20-24 |           |               |       |       |               |             |               |                |              |
| Period                                    | Age Group | Smoking Group | N     | %     | Ever Quit (N) | Ever Quit % | Mean Yrs Quit | Short Term (n) | Short Term % |
| 10                                        | 20-24     | Never Any     | 5128  | 64.67 |               |             |               |                |              |
| 10                                        | 20-24     | CC            | 604   | 7.62  | 0             | 0.00        |               |                |              |
| 10                                        | 20-24     | Ecig          | 1529  | 19.28 |               |             |               |                |              |
| 10                                        | 20-24     | Dual          | 0     | 0.00  |               |             |               |                |              |
| 10                                        | 20-24     | Former        | 669   | 8.44  |               |             | 3.45          | 190            | 28.40        |
| Year of Follow-up: 2000, Age Group: 25-29 |           |               |       |       |               |             |               |                |              |
| Period                                    | Age Group | Smoking Group | N     | %     | Ever Quit (N) | Ever Quit % | Mean Yrs Quit | Short Term (n) | Short Term % |
| 10                                        | 25-29     | Never Any     | 5493  | 65.78 |               |             |               |                |              |
| 10                                        | 25-29     | CC            | 722   | 8.65  | 0             | 0.00        |               |                |              |
| 10                                        | 25-29     | Ecig          | 1367  | 16.37 |               |             |               |                |              |
| 10                                        | 25-29     | Dual          | 0     | 0.00  |               |             |               |                |              |
| 10                                        | 25-29     | Former        | 768   | 9.20  |               |             | 5.60          | 115            | 14.97        |
| Year of Follow-up: 2000, Age Group: 30-34 |           |               |       |       |               |             |               |                |              |
| Period                                    | Age Group | Smoking Group | N     | %     | Ever Quit (N) | Ever Quit % | Mean Yrs Quit | Short Term (n) | Short Term % |
| 10                                        | 30-34     | Never Any     | 5214  | 59.30 |               |             |               |                |              |
| 10                                        | 30-34     | CC            | 856   | 9.74  | 0             | 0.00        |               |                |              |
| 10                                        | 30-34     | Ecig          | 1469  | 16.71 |               |             |               |                |              |
| 10                                        | 30-34     | Dual          | 0     | 0.00  |               |             |               |                |              |
| 10                                        | 30-34     | Former        | 1254  | 14.26 |               |             | 9.20          | 94             | 7.50         |
| Year of Follow-up: 2000, Age Group: 35-39 |           |               |       |       |               |             |               |                |              |
| Period                                    | Age Group | Smoking Group | N     | %     | Ever Quit (N) | Ever Quit % | Mean Yrs Quit | Short Term (n) | Short Term % |
| 10                                        | 35-39     | Never Any     | 5284  | 52.43 |               |             |               |                |              |
| 10                                        | 35-39     | CC            | 1115  | 11.06 | 0             | 0.00        |               |                |              |
| 10                                        | 35-39     | Ecig          | 1829  | 18.15 |               |             |               |                |              |
| 10                                        | 35-39     | Dual          | 0     | 0.00  |               |             |               |                |              |
| 10                                        | 35-39     | Former        | 1850  | 18.36 |               |             | 11.67         | 116            | 6.27         |
| Year of Follow-up: 2000, Age Group: 40-44 |           |               |       |       |               |             |               |                |              |
| Period                                    | Age Group | Smoking Group | N     | %     | Ever Quit (N) | Ever Quit % | Mean Yrs Quit | Short Term (n) | Short Term % |
| 10                                        | 40-44     | Never Any     | 5278  | 50.27 |               |             |               |                |              |
| 10                                        | 40-44     | CC            | 1227  | 11.69 | 0             | 0.00        |               |                |              |
| 10                                        | 40-44     | Ecig          | 1671  | 15.92 |               |             |               |                |              |
| 10                                        | 40-44     | Dual          | 0     | 0.00  |               |             |               |                |              |
| 10                                        | 40-44     | Former        | 2323  | 22.13 |               |             | 12.30         | 144            | 6.20         |
| Year of Follow-up: 2000, Age Group: 45-49 |           |               |       |       |               |             |               |                |              |
| Period                                    | Age Group | Smoking Group | N     | %     | Ever Quit (N) | Ever Quit % | Mean Yrs Quit | Short Term (n) | Short Term % |
| 10                                        | 45-49     | Never Any     | 5018  | 52.27 |               |             |               |                |              |
| 10                                        | 45-49     | CC            | 949   | 9.89  | 0             | 0.00        |               |                |              |
| 10                                        | 45-49     | Ecig          | 1174  | 12.23 |               |             |               |                |              |
| 10                                        | 45-49     | Dual          | 0     | 0.00  |               |             |               |                |              |
| 10                                        | 45-49     | Former        | 2459  | 25.61 |               |             | 14.84         | 164            | 6.67         |
| Year of Follow-up: 2000, Age Group: 50-54 |           |               |       |       |               |             |               |                |              |
| Period                                    | Age Group | Smoking Group | N     | %     | Ever Quit (N) | Ever Quit % | Mean Yrs Quit | Short Term (n) | Short Term % |
| 10                                        | 50-54     | Never Any     | 4356  | 51.27 |               |             |               |                |              |
| 10                                        | 50-54     | CC            | 772   | 9.09  | 0             | 0.00        |               |                |              |
| 10                                        | 50-54     | Ecig          | 923   | 10.86 |               |             |               |                |              |
| 10                                        | 50-54     | Dual          | 0     | 0.00  |               |             |               |                |              |
| 10                                        | 50-54     | Former        | 2446  | 28.79 |               |             | 13.44         | 174            | 7.11         |
| Year of Follow-up: 2000, Age Group: 55-59 |           |               |       |       |               |             |               |                |              |
| Period                                    | Age Group | Smoking Group | N     | %     | Ever Quit (N) | Ever Quit % | Mean Yrs Quit | Short Term (n) | Short Term % |
| 10                                        | 55-59     | Never Any     | 3116  | 47.67 |               |             |               |                |              |
| 10                                        | 55-59     | CC            | 614   | 9.39  | 0             | 0.00        |               |                |              |
| 10                                        | 55-59     | Ecig          | 584   | 8.94  |               |             |               |                |              |
| 10                                        | 55-59     | Dual          | 0     | 0.00  |               |             |               |                |              |

**Results for PHIM for Run 6 (Sensitivity\_Analysis\_2.RTF)**

| Year of Follow-up: 2000, Age Group: 60-64    | Period   | Age Group | Smoking Group | N     | %     | Ever Quit (N) | Ever Quit % | Mean Yrs Quit | Short Term (n) | Short Term % |
|----------------------------------------------|----------|-----------|---------------|-------|-------|---------------|-------------|---------------|----------------|--------------|
| 10                                           | 55-59    | Former    |               | 2222  | 34.00 |               |             | 16.93         | 149            | 6.71         |
| 10                                           | 60-64    | Never Any |               | 2684  | 48.50 |               |             |               |                |              |
| 10                                           | 60-64    | CC        |               | 661   | 11.94 | 0             | 0.00        |               |                |              |
| 10                                           | 60-64    | Ecig      |               | 324   | 5.85  |               |             |               |                |              |
| 10                                           | 60-64    | Dual      |               | 0     | 0.00  |               |             |               |                |              |
| 10                                           | 60-64    | Former    |               | 1865  | 33.70 |               |             | 17.15         | 151            | 8.10         |
| Year of Follow-up: 2000, Age Group: 65-69    | Period   | Age Group | Smoking Group | N     | %     | Ever Quit (N) | Ever Quit % | Mean Yrs Quit | Short Term (n) | Short Term % |
| 10                                           | 65-69    | Never Any |               | 2732  | 51.90 |               |             |               |                |              |
| 10                                           | 65-69    | CC        |               | 581   | 11.04 | 0             | 0.00        |               |                |              |
| 10                                           | 65-69    | Ecig      |               | 167   | 3.17  |               |             |               |                |              |
| 10                                           | 65-69    | Dual      |               | 0     | 0.00  |               |             |               |                |              |
| 10                                           | 65-69    | Former    |               | 1784  | 33.89 |               |             | 20.11         | 125            | 7.01         |
| Year of Follow-up: 2000, Age Group: 70-74    | Period   | Age Group | Smoking Group | N     | %     | Ever Quit (N) | Ever Quit % | Mean Yrs Quit | Short Term (n) | Short Term % |
| 10                                           | 70-74    | Never Any |               | 3078  | 55.72 |               |             |               |                |              |
| 10                                           | 70-74    | CC        |               | 558   | 10.10 | 0             | 0.00        |               |                |              |
| 10                                           | 70-74    | Ecig      |               | 65    | 1.18  |               |             |               |                |              |
| 10                                           | 70-74    | Dual      |               | 0     | 0.00  |               |             |               |                |              |
| 10                                           | 70-74    | Former    |               | 1823  | 33.00 |               |             | 20.08         | 140            | 7.68         |
| Year of Follow-up: 2000, Age Group: 75-79    | Period   | Age Group | Smoking Group | N     | %     | Ever Quit (N) | Ever Quit % | Mean Yrs Quit | Short Term (n) | Short Term % |
| 10                                           | 75-79    | Never Any |               | 3042  | 57.36 |               |             |               |                |              |
| 10                                           | 75-79    | CC        |               | 448   | 8.45  | 0             | 0.00        |               |                |              |
| 10                                           | 75-79    | Ecig      |               | 7     | 0.13  |               |             |               |                |              |
| 10                                           | 75-79    | Dual      |               | 0     | 0.00  |               |             |               |                |              |
| 10                                           | 75-79    | Former    |               | 1806  | 34.06 |               |             | 23.01         | 104            | 5.76         |
| Year of Follow-up: 2005, Age Group: All Ages | Period   | Age Group | Smoking Group | N     | %     | Ever Quit (N) | Ever Quit % | Mean Yrs Quit | Short Term (n) | Short Term % |
| 15                                           | All Ages | Never Any |               | 47002 | 54.27 |               |             |               |                |              |
| 15                                           | All Ages | CC        |               | 5445  | 6.29  | 0             | 0.00        |               |                |              |
| 15                                           | All Ages | Ecig      |               | 12030 | 13.89 |               |             |               |                |              |
| 15                                           | All Ages | Dual      |               | 0     | 0.00  |               |             |               |                |              |
| 15                                           | All Ages | Former    |               | 22128 | 25.55 |               |             | 17.30         | 976            | 4.41         |
| Year of Follow-up: 2005, Age Group: 18-19    | Period   | Age Group | Smoking Group | N     | %     | Ever Quit (N) | Ever Quit % | Mean Yrs Quit | Short Term (n) | Short Term % |
| 15                                           | 18-19    | Never Any |               | 0     | .     |               |             |               |                |              |
| 15                                           | 18-19    | CC        |               | 0     | .     | 0             | .           |               |                |              |
| 15                                           | 18-19    | Ecig      |               | 0     | .     |               |             |               |                |              |
| 15                                           | 18-19    | Dual      |               | 0     | .     |               |             |               |                |              |
| 15                                           | 18-19    | Former    |               | 0     | .     |               |             | .             | 0              | .            |
| Year of Follow-up: 2005, Age Group: 20-24    | Period   | Age Group | Smoking Group | N     | %     | Ever Quit (N) | Ever Quit % | Mean Yrs Quit | Short Term (n) | Short Term % |
| 15                                           | 20-24    | Never Any |               | 0     | .     |               |             |               |                |              |
| 15                                           | 20-24    | CC        |               | 0     | .     | 0             | .           |               |                |              |
| 15                                           | 20-24    | Ecig      |               | 0     | .     |               |             |               |                |              |
| 15                                           | 20-24    | Dual      |               | 0     | .     |               |             |               |                |              |
| 15                                           | 20-24    | Former    |               | 0     | .     |               |             | .             | 0              | .            |
| Year of Follow-up: 2005, Age Group: 25-29    | Period   | Age Group | Smoking Group | N     | %     | Ever Quit (N) | Ever Quit % | Mean Yrs Quit | Short Term (n) | Short Term % |
| 15                                           | 25-29    | Never Any |               | 4860  | 61.29 |               |             |               |                |              |
| 15                                           | 25-29    | CC        |               | 357   | 4.50  | 0             | 0.00        |               |                |              |
| 15                                           | 25-29    | Ecig      |               | 1740  | 21.94 |               |             |               |                |              |
| 15                                           | 25-29    | Dual      |               | 0     | 0.00  |               |             |               |                |              |
| 15                                           | 25-29    | Former    |               | 973   | 12.27 |               |             | 6.53          | 105            | 10.79        |
| Year of Follow-up: 2005, Age Group: 30-34    | Period   | Age Group | Smoking Group | N     | %     | Ever Quit (N) | Ever Quit % | Mean Yrs Quit | Short Term (n) | Short Term % |
| 15                                           | 30-34    | Never Any |               | 5407  | 64.75 |               |             |               |                |              |
| 15                                           | 30-34    | CC        |               | 416   | 4.98  | 0             | 0.00        |               |                |              |
| 15                                           | 30-34    | Ecig      |               | 1554  | 18.61 |               |             |               |                |              |
| 15                                           | 30-34    | Dual      |               | 0     | 0.00  |               |             |               |                |              |
| 15                                           | 30-34    | Former    |               | 973   | 11.65 |               |             | 8.80          | 72             | 7.40         |
| Year of Follow-up: 2005, Age Group: 35-39    | Period   | Age Group | Smoking Group | N     | %     | Ever Quit (N) | Ever Quit % | Mean Yrs Quit | Short Term (n) | Short Term % |
| 15                                           | 35-39    | Never Any |               | 5189  | 59.01 |               |             |               |                |              |
| 15                                           | 35-39    | CC        |               | 503   | 5.72  | 0             | 0.00        |               |                |              |

**Results for PHIM for Run 6 (Sensitivity\_Analysis\_2.RTF)**

|                                              |           |               |       |       |               |             |               |                |              |
|----------------------------------------------|-----------|---------------|-------|-------|---------------|-------------|---------------|----------------|--------------|
| 15                                           | 35-39     | Ecig          | 1666  | 18.95 |               |             |               |                |              |
| 15                                           | 35-39     | Dual          | 0     | 0.00  |               |             |               |                |              |
| 15                                           | 35-39     | Former        | 1435  | 16.32 |               |             | 12.67         | 72             | 5.02         |
| Year of Follow-up: 2005, Age Group: 40-44    |           |               |       |       |               |             |               |                |              |
| Period                                       | Age Group | Smoking Group | N     | %     | Ever Quit (N) | Ever Quit % | Mean Yrs Quit | Short Term (n) | Short Term % |
| 15                                           | 40-44     | Never Any     | 5284  | 52.43 |               |             |               |                |              |
| 15                                           | 40-44     | CC            | 674   | 6.69  | 0             | 0.00        |               |                |              |
| 15                                           | 40-44     | Ecig          | 2016  | 20.00 |               |             |               |                |              |
| 15                                           | 40-44     | Dual          | 0     | 0.00  |               |             |               |                |              |
| 15                                           | 40-44     | Former        | 2104  | 20.88 |               |             | 14.90         | 112            | 5.32         |
| Year of Follow-up: 2005, Age Group: 45-49    |           |               |       |       |               |             |               |                |              |
| Period                                       | Age Group | Smoking Group | N     | %     | Ever Quit (N) | Ever Quit % | Mean Yrs Quit | Short Term (n) | Short Term % |
| 15                                           | 45-49     | Never Any     | 5278  | 50.27 |               |             |               |                |              |
| 15                                           | 45-49     | CC            | 757   | 7.21  | 0             | 0.00        |               |                |              |
| 15                                           | 45-49     | Ecig          | 1840  | 17.53 |               |             |               |                |              |
| 15                                           | 45-49     | Dual          | 0     | 0.00  |               |             |               |                |              |
| 15                                           | 45-49     | Former        | 2624  | 24.99 |               |             | 15.54         | 129            | 4.92         |
| Year of Follow-up: 2005, Age Group: 50-54    |           |               |       |       |               |             |               |                |              |
| Period                                       | Age Group | Smoking Group | N     | %     | Ever Quit (N) | Ever Quit % | Mean Yrs Quit | Short Term (n) | Short Term % |
| 15                                           | 50-54     | Never Any     | 5018  | 52.27 |               |             |               |                |              |
| 15                                           | 50-54     | CC            | 583   | 6.07  | 0             | 0.00        |               |                |              |
| 15                                           | 50-54     | Ecig          | 1253  | 13.05 |               |             |               |                |              |
| 15                                           | 50-54     | Dual          | 0     | 0.00  |               |             |               |                |              |
| 15                                           | 50-54     | Former        | 2746  | 28.60 |               |             | 18.00         | 98             | 3.57         |
| Year of Follow-up: 2005, Age Group: 55-59    |           |               |       |       |               |             |               |                |              |
| Period                                       | Age Group | Smoking Group | N     | %     | Ever Quit (N) | Ever Quit % | Mean Yrs Quit | Short Term (n) | Short Term % |
| 15                                           | 55-59     | Never Any     | 4356  | 51.27 |               |             |               |                |              |
| 15                                           | 55-59     | CC            | 510   | 6.00  | 0             | 0.00        |               |                |              |
| 15                                           | 55-59     | Ecig          | 955   | 11.24 |               |             |               |                |              |
| 15                                           | 55-59     | Dual          | 0     | 0.00  |               |             |               |                |              |
| 15                                           | 55-59     | Former        | 2676  | 31.49 |               |             | 17.05         | 80             | 2.99         |
| Year of Follow-up: 2005, Age Group: 60-64    |           |               |       |       |               |             |               |                |              |
| Period                                       | Age Group | Smoking Group | N     | %     | Ever Quit (N) | Ever Quit % | Mean Yrs Quit | Short Term (n) | Short Term % |
| 15                                           | 60-64     | Never Any     | 3116  | 47.67 |               |             |               |                |              |
| 15                                           | 60-64     | CC            | 423   | 6.47  | 0             | 0.00        |               |                |              |
| 15                                           | 60-64     | Ecig          | 550   | 8.41  |               |             |               |                |              |
| 15                                           | 60-64     | Dual          | 0     | 0.00  |               |             |               |                |              |
| 15                                           | 60-64     | Former        | 2447  | 37.44 |               |             | 20.10         | 98             | 4.00         |
| Year of Follow-up: 2005, Age Group: 65-69    |           |               |       |       |               |             |               |                |              |
| Period                                       | Age Group | Smoking Group | N     | %     | Ever Quit (N) | Ever Quit % | Mean Yrs Quit | Short Term (n) | Short Term % |
| 15                                           | 65-69     | Never Any     | 2684  | 48.50 |               |             |               |                |              |
| 15                                           | 65-69     | CC            | 457   | 8.26  | 0             | 0.00        |               |                |              |
| 15                                           | 65-69     | Ecig          | 276   | 4.99  |               |             |               |                |              |
| 15                                           | 65-69     | Dual          | 0     | 0.00  |               |             |               |                |              |
| 15                                           | 65-69     | Former        | 2117  | 38.25 |               |             | 19.81         | 70             | 3.31         |
| Year of Follow-up: 2005, Age Group: 70-74    |           |               |       |       |               |             |               |                |              |
| Period                                       | Age Group | Smoking Group | N     | %     | Ever Quit (N) | Ever Quit % | Mean Yrs Quit | Short Term (n) | Short Term % |
| 15                                           | 70-74     | Never Any     | 2732  | 51.90 |               |             |               |                |              |
| 15                                           | 70-74     | CC            | 387   | 7.35  | 0             | 0.00        |               |                |              |
| 15                                           | 70-74     | Ecig          | 131   | 2.49  |               |             |               |                |              |
| 15                                           | 70-74     | Dual          | 0     | 0.00  |               |             |               |                |              |
| 15                                           | 70-74     | Former        | 2014  | 38.26 |               |             | 22.50         | 77             | 3.82         |
| Year of Follow-up: 2005, Age Group: 75-79    |           |               |       |       |               |             |               |                |              |
| Period                                       | Age Group | Smoking Group | N     | %     | Ever Quit (N) | Ever Quit % | Mean Yrs Quit | Short Term (n) | Short Term % |
| 15                                           | 75-79     | Never Any     | 3078  | 55.72 |               |             |               |                |              |
| 15                                           | 75-79     | CC            | 378   | 6.84  | 0             | 0.00        |               |                |              |
| 15                                           | 75-79     | Ecig          | 49    | 0.89  |               |             |               |                |              |
| 15                                           | 75-79     | Dual          | 0     | 0.00  |               |             |               |                |              |
| 15                                           | 75-79     | Former        | 2019  | 36.55 |               |             | 22.87         | 63             | 3.12         |
| Year of Follow-up: 2010, Age Group: All Ages |           |               |       |       |               |             |               |                |              |
| Period                                       | Age Group | Smoking Group | N     | %     | Ever Quit (N) | Ever Quit % | Mean Yrs Quit | Short Term (n) | Short Term % |
| 20                                           | All Ages  | Never Any     | 43759 | 53.97 |               |             |               |                |              |
| 20                                           | All Ages  | CC            | 3157  | 3.89  | 0             | 0.00        |               |                |              |
| 20                                           | All Ages  | Ecig          | 11396 | 14.06 |               |             |               |                |              |
| 20                                           | All Ages  | Dual          | 0     | 0.00  |               |             |               |                |              |
| 20                                           | All Ages  | Former        | 22769 | 28.08 |               |             | 19.42         | 1115           | 4.90         |
| Year of Follow-up: 2010, Age Group: 18-19    |           |               |       |       |               |             |               |                |              |
| Period                                       | Age Group | Smoking Group | N     | %     | Ever Quit (N) | Ever Quit % | Mean Yrs Quit | Short Term (n) | Short Term % |

**Results for PHIM for Run 6 (Sensitivity\_Analysis\_2.RTF)**

|                                           |           |               |      |       |               |             |               |                |              |
|-------------------------------------------|-----------|---------------|------|-------|---------------|-------------|---------------|----------------|--------------|
| 20                                        | 18-19     | Never Any     | 0    | .     |               |             |               |                |              |
| 20                                        | 18-19     | CC            | 0    | .     | 0             | .           |               |                |              |
| 20                                        | 18-19     | Ecig          | 0    | .     |               |             |               |                |              |
| 20                                        | 18-19     | Dual          | 0    | .     |               |             |               |                |              |
| 20                                        | 18-19     | Former        | 0    | .     |               |             | 0             | .              |              |
| Year of Follow-up: 2010, Age Group: 20-24 |           |               |      |       |               |             |               |                |              |
| Period                                    | Age Group | Smoking Group | N    | %     | Ever Quit (N) | Ever Quit % | Mean Yrs Quit | Short Term (n) | Short Term % |
| 20                                        | 20-24     | Never Any     | 0    | .     |               |             |               |                |              |
| 20                                        | 20-24     | CC            | 0    | .     | 0             | .           |               |                |              |
| 20                                        | 20-24     | Ecig          | 0    | .     |               |             |               |                |              |
| 20                                        | 20-24     | Dual          | 0    | .     |               |             |               |                |              |
| 20                                        | 20-24     | Former        | 0    | .     |               |             |               | 0              | .            |
| Year of Follow-up: 2010, Age Group: 25-29 |           |               |      |       |               |             |               |                |              |
| Period                                    | Age Group | Smoking Group | N    | %     | Ever Quit (N) | Ever Quit % | Mean Yrs Quit | Short Term (n) | Short Term % |
| 20                                        | 25-29     | Never Any     | 0    | .     |               |             |               |                |              |
| 20                                        | 25-29     | CC            | 0    | .     | 0             | .           |               |                |              |
| 20                                        | 25-29     | Ecig          | 0    | .     |               |             |               |                |              |
| 20                                        | 25-29     | Dual          | 0    | .     |               |             |               |                |              |
| 20                                        | 25-29     | Former        | 0    | .     |               |             |               | 0              | .            |
| Year of Follow-up: 2010, Age Group: 30-34 |           |               |      |       |               |             |               |                |              |
| Period                                    | Age Group | Smoking Group | N    | %     | Ever Quit (N) | Ever Quit % | Mean Yrs Quit | Short Term (n) | Short Term % |
| 20                                        | 30-34     | Never Any     | 4743 | 59.81 |               |             |               |                |              |
| 20                                        | 30-34     | CC            | 185  | 2.33  | 0             | 0.00        |               |                |              |
| 20                                        | 30-34     | Ecig          | 1760 | 22.19 |               |             |               |                |              |
| 20                                        | 30-34     | Dual          | 0    | 0.00  |               |             |               |                |              |
| 20                                        | 30-34     | Former        | 1242 | 15.66 |               |             | 9.41          | 124            | 9.98         |
| Year of Follow-up: 2010, Age Group: 35-39 |           |               |      |       |               |             |               |                |              |
| Period                                    | Age Group | Smoking Group | N    | %     | Ever Quit (N) | Ever Quit % | Mean Yrs Quit | Short Term (n) | Short Term % |
| 20                                        | 35-39     | Never Any     | 5359 | 64.18 |               |             |               |                |              |
| 20                                        | 35-39     | CC            | 234  | 2.80  | 0             | 0.00        |               |                |              |
| 20                                        | 35-39     | Ecig          | 1521 | 18.22 |               |             |               |                |              |
| 20                                        | 35-39     | Dual          | 0    | 0.00  |               |             |               |                |              |
| 20                                        | 35-39     | Former        | 1236 | 14.80 |               |             | 11.27         | 101            | 8.17         |
| Year of Follow-up: 2010, Age Group: 40-44 |           |               |      |       |               |             |               |                |              |
| Period                                    | Age Group | Smoking Group | N    | %     | Ever Quit (N) | Ever Quit % | Mean Yrs Quit | Short Term (n) | Short Term % |
| 20                                        | 40-44     | Never Any     | 5189 | 59.01 |               |             |               |                |              |
| 20                                        | 40-44     | CC            | 274  | 3.12  | 0             | 0.00        |               |                |              |
| 20                                        | 40-44     | Ecig          | 1641 | 18.66 |               |             |               |                |              |
| 20                                        | 40-44     | Dual          | 0    | 0.00  |               |             |               |                |              |
| 20                                        | 40-44     | Former        | 1689 | 19.21 |               |             | 15.29         | 113            | 6.69         |
| Year of Follow-up: 2010, Age Group: 45-49 |           |               |      |       |               |             |               |                |              |
| Period                                    | Age Group | Smoking Group | N    | %     | Ever Quit (N) | Ever Quit % | Mean Yrs Quit | Short Term (n) | Short Term % |
| 20                                        | 45-49     | Never Any     | 5284 | 52.43 |               |             |               |                |              |
| 20                                        | 45-49     | CC            | 407  | 4.04  | 0             | 0.00        |               |                |              |
| 20                                        | 45-49     | Ecig          | 1997 | 19.82 |               |             |               |                |              |
| 20                                        | 45-49     | Dual          | 0    | 0.00  |               |             |               |                |              |
| 20                                        | 45-49     | Former        | 2390 | 23.72 |               |             | 17.73         | 124            | 5.19         |
| Year of Follow-up: 2010, Age Group: 50-54 |           |               |      |       |               |             |               |                |              |
| Period                                    | Age Group | Smoking Group | N    | %     | Ever Quit (N) | Ever Quit % | Mean Yrs Quit | Short Term (n) | Short Term % |
| 20                                        | 50-54     | Never Any     | 5278 | 50.27 |               |             |               |                |              |
| 20                                        | 50-54     | CC            | 458  | 4.36  | 0             | 0.00        |               |                |              |
| 20                                        | 50-54     | Ecig          | 1778 | 16.93 |               |             |               |                |              |
| 20                                        | 50-54     | Dual          | 0    | 0.00  |               |             |               |                |              |
| 20                                        | 50-54     | Former        | 2985 | 28.43 |               |             | 18.28         | 173            | 5.80         |
| Year of Follow-up: 2010, Age Group: 55-59 |           |               |      |       |               |             |               |                |              |
| Period                                    | Age Group | Smoking Group | N    | %     | Ever Quit (N) | Ever Quit % | Mean Yrs Quit | Short Term (n) | Short Term % |
| 20                                        | 55-59     | Never Any     | 5018 | 52.27 |               |             |               |                |              |
| 20                                        | 55-59     | CC            | 386  | 4.02  | 0             | 0.00        |               |                |              |
| 20                                        | 55-59     | Ecig          | 1164 | 12.13 |               |             |               |                |              |
| 20                                        | 55-59     | Dual          | 0    | 0.00  |               |             |               |                |              |
| 20                                        | 55-59     | Former        | 3032 | 31.58 |               |             | 21.03         | 103            | 3.40         |
| Year of Follow-up: 2010, Age Group: 60-64 |           |               |      |       |               |             |               |                |              |
| Period                                    | Age Group | Smoking Group | N    | %     | Ever Quit (N) | Ever Quit % | Mean Yrs Quit | Short Term (n) | Short Term % |
| 20                                        | 60-64     | Never Any     | 4356 | 51.27 |               |             |               |                |              |
| 20                                        | 60-64     | CC            | 334  | 3.93  | 0             | 0.00        |               |                |              |
| 20                                        | 60-64     | Ecig          | 823  | 9.69  |               |             |               |                |              |
| 20                                        | 60-64     | Dual          | 0    | 0.00  |               |             |               |                |              |
| 20                                        | 60-64     | Former        | 2984 | 35.12 |               |             | 19.94         | 148            | 4.96         |
| Year of Follow-up: 2010, Age Group: 65-69 |           |               |      |       |               |             |               |                |              |

**Results for PHIM for Run 6 (Sensitivity\_Analysis\_2.RTF)**

| Period                                       | Age Group | Smoking Group | N     | %     | Ever Quit (N) | Ever Quit % | Mean Yrs Quit | Short Term (n) | Short Term % |
|----------------------------------------------|-----------|---------------|-------|-------|---------------|-------------|---------------|----------------|--------------|
| 20                                           | 65-69     | Never Any     | 3116  | 47.67 |               |             |               |                |              |
| 20                                           | 65-69     | CC            | 276   | 4.22  | 0             | 0.00        |               |                |              |
| 20                                           | 65-69     | Ecig          | 407   | 6.23  |               |             |               |                |              |
| 20                                           | 65-69     | Dual          | 0     | 0.00  |               |             |               |                |              |
| 20                                           | 65-69     | Former        | 2737  | 41.88 |               |             | 22.66         | 98             | 3.58         |
| Year of Follow-up: 2010, Age Group: 70-74    |           |               |       |       |               |             |               |                |              |
| Period                                       | Age Group | Smoking Group | N     | %     | Ever Quit (N) | Ever Quit % | Mean Yrs Quit | Short Term (n) | Short Term % |
| 20                                           | 70-74     | Never Any     | 2684  | 48.50 |               |             |               |                |              |
| 20                                           | 70-74     | CC            | 327   | 5.91  | 0             | 0.00        |               |                |              |
| 20                                           | 70-74     | Ecig          | 218   | 3.94  |               |             |               |                |              |
| 20                                           | 70-74     | Dual          | 0     | 0.00  |               |             |               |                |              |
| 20                                           | 70-74     | Former        | 2305  | 41.65 |               |             | 22.95         | 70             | 3.04         |
| Year of Follow-up: 2010, Age Group: 75-79    |           |               |       |       |               |             |               |                |              |
| Period                                       | Age Group | Smoking Group | N     | %     | Ever Quit (N) | Ever Quit % | Mean Yrs Quit | Short Term (n) | Short Term % |
| 20                                           | 75-79     | Never Any     | 2732  | 51.90 |               |             |               |                |              |
| 20                                           | 75-79     | CC            | 276   | 5.24  | 0             | 0.00        |               |                |              |
| 20                                           | 75-79     | Ecig          | 87    | 1.65  |               |             |               |                |              |
| 20                                           | 75-79     | Dual          | 0     | 0.00  |               |             |               |                |              |
| 20                                           | 75-79     | Former        | 2169  | 41.20 |               |             | 25.69         | 61             | 2.81         |
| Year of Follow-up: 2015, Age Group: All Ages |           |               |       |       |               |             |               |                |              |
| Period                                       | Age Group | Smoking Group | N     | %     | Ever Quit (N) | Ever Quit % | Mean Yrs Quit | Short Term (n) | Short Term % |
| 25                                           | All Ages  | Never Any     | 41010 | 54.09 |               |             |               |                |              |
| 25                                           | All Ages  | CC            | 1927  | 2.54  | 0             | 0.00        |               |                |              |
| 25                                           | All Ages  | Ecig          | 9843  | 12.98 |               |             |               |                |              |
| 25                                           | All Ages  | Dual          | 0     | 0.00  |               |             |               |                |              |
| 25                                           | All Ages  | Former        | 23037 | 30.39 |               |             | 21.47         | 919            | 3.99         |
| Year of Follow-up: 2015, Age Group: 18-19    |           |               |       |       |               |             |               |                |              |
| Period                                       | Age Group | Smoking Group | N     | %     | Ever Quit (N) | Ever Quit % | Mean Yrs Quit | Short Term (n) | Short Term % |
| 25                                           | 18-19     | Never Any     | 0     | .     |               |             |               |                |              |
| 25                                           | 18-19     | CC            | 0     | .     | 0             | .           |               |                |              |
| 25                                           | 18-19     | Ecig          | 0     | .     |               |             |               |                |              |
| 25                                           | 18-19     | Dual          | 0     | .     |               |             |               |                |              |
| 25                                           | 18-19     | Former        | 0     | .     |               |             |               | 0              | .            |
| Year of Follow-up: 2015, Age Group: 20-24    |           |               |       |       |               |             |               |                |              |
| Period                                       | Age Group | Smoking Group | N     | %     | Ever Quit (N) | Ever Quit % | Mean Yrs Quit | Short Term (n) | Short Term % |
| 25                                           | 20-24     | Never Any     | 0     | .     |               |             |               |                |              |
| 25                                           | 20-24     | CC            | 0     | .     | 0             | .           |               |                |              |
| 25                                           | 20-24     | Ecig          | 0     | .     |               |             |               |                |              |
| 25                                           | 20-24     | Dual          | 0     | .     |               |             |               |                |              |
| 25                                           | 20-24     | Former        | 0     | .     |               |             |               | 0              | .            |
| Year of Follow-up: 2015, Age Group: 25-29    |           |               |       |       |               |             |               |                |              |
| Period                                       | Age Group | Smoking Group | N     | %     | Ever Quit (N) | Ever Quit % | Mean Yrs Quit | Short Term (n) | Short Term % |
| 25                                           | 25-29     | Never Any     | 0     | .     |               |             |               |                |              |
| 25                                           | 25-29     | CC            | 0     | .     | 0             | .           |               |                |              |
| 25                                           | 25-29     | Ecig          | 0     | .     |               |             |               |                |              |
| 25                                           | 25-29     | Dual          | 0     | .     |               |             |               |                |              |
| 25                                           | 25-29     | Former        | 0     | .     |               |             |               | 0              | .            |
| Year of Follow-up: 2015, Age Group: 30-34    |           |               |       |       |               |             |               |                |              |
| Period                                       | Age Group | Smoking Group | N     | %     | Ever Quit (N) | Ever Quit % | Mean Yrs Quit | Short Term (n) | Short Term % |
| 25                                           | 30-34     | Never Any     | 0     | .     |               |             |               |                |              |
| 25                                           | 30-34     | CC            | 0     | .     | 0             | .           |               |                |              |
| 25                                           | 30-34     | Ecig          | 0     | .     |               |             |               |                |              |
| 25                                           | 30-34     | Dual          | 0     | .     |               |             |               |                |              |
| 25                                           | 30-34     | Former        | 0     | .     |               |             |               | 0              | .            |
| Year of Follow-up: 2015, Age Group: 35-39    |           |               |       |       |               |             |               |                |              |
| Period                                       | Age Group | Smoking Group | N     | %     | Ever Quit (N) | Ever Quit % | Mean Yrs Quit | Short Term (n) | Short Term % |
| 25                                           | 35-39     | Never Any     | 4726  | 59.60 |               |             |               |                |              |
| 25                                           | 35-39     | CC            | 87    | 1.10  | 0             | 0.00        |               |                |              |
| 25                                           | 35-39     | Ecig          | 1488  | 18.76 |               |             |               |                |              |
| 25                                           | 35-39     | Dual          | 0     | 0.00  |               |             |               |                |              |
| 25                                           | 35-39     | Former        | 1629  | 20.54 |               |             | 11.50         | 133            | 8.16         |
| Year of Follow-up: 2015, Age Group: 40-44    |           |               |       |       |               |             |               |                |              |
| Period                                       | Age Group | Smoking Group | N     | %     | Ever Quit (N) | Ever Quit % | Mean Yrs Quit | Short Term (n) | Short Term % |
| 25                                           | 40-44     | Never Any     | 5359  | 64.18 |               |             |               |                |              |
| 25                                           | 40-44     | CC            | 148   | 1.77  | 0             | 0.00        |               |                |              |
| 25                                           | 40-44     | Ecig          | 1374  | 16.46 |               |             |               |                |              |
| 25                                           | 40-44     | Dual          | 0     | 0.00  |               |             |               |                |              |

**Results for PHIM for Run 6 (Sensitivity\_Analysis\_2.RTF)**

|                                              |           |               |       |       |               |             |               |                |              |
|----------------------------------------------|-----------|---------------|-------|-------|---------------|-------------|---------------|----------------|--------------|
| 25                                           | 40-44     | Former        | 1469  | 17.59 |               |             | 13.99         | 98             | 6.67         |
| Year of Follow-up: 2015, Age Group: 45-49    |           |               |       |       |               |             |               |                |              |
| Period                                       | Age Group | Smoking Group | N     | %     | Ever Quit (N) | Ever Quit % | Mean Yrs Quit | Short Term (n) | Short Term % |
| 25                                           | 45-49     | Never Any     | 5189  | 59.01 |               |             |               |                |              |
| 25                                           | 45-49     | CC            | 168   | 1.91  | 0             | 0.00        |               |                |              |
| 25                                           | 45-49     | Ecig          | 1502  | 17.08 |               |             |               |                |              |
| 25                                           | 45-49     | Dual          | 0     | 0.00  |               |             |               |                |              |
| 25                                           | 45-49     | Former        | 1934  | 21.99 |               |             | 17.98         | 92             | 4.76         |
| Year of Follow-up: 2015, Age Group: 50-54    |           |               |       |       |               |             |               |                |              |
| Period                                       | Age Group | Smoking Group | N     | %     | Ever Quit (N) | Ever Quit % | Mean Yrs Quit | Short Term (n) | Short Term % |
| 25                                           | 50-54     | Never Any     | 5284  | 52.43 |               |             |               |                |              |
| 25                                           | 50-54     | CC            | 234   | 2.32  | 0             | 0.00        |               |                |              |
| 25                                           | 50-54     | Ecig          | 1847  | 18.33 |               |             |               |                |              |
| 25                                           | 50-54     | Dual          | 0     | 0.00  |               |             |               |                |              |
| 25                                           | 50-54     | Former        | 2713  | 26.92 |               |             | 20.25         | 143            | 5.27         |
| Year of Follow-up: 2015, Age Group: 55-59    |           |               |       |       |               |             |               |                |              |
| Period                                       | Age Group | Smoking Group | N     | %     | Ever Quit (N) | Ever Quit % | Mean Yrs Quit | Short Term (n) | Short Term % |
| 25                                           | 55-59     | Never Any     | 5278  | 50.27 |               |             |               |                |              |
| 25                                           | 55-59     | CC            | 295   | 2.81  | 0             | 0.00        |               |                |              |
| 25                                           | 55-59     | Ecig          | 1545  | 14.72 |               |             |               |                |              |
| 25                                           | 55-59     | Dual          | 0     | 0.00  |               |             |               |                |              |
| 25                                           | 55-59     | Former        | 3381  | 32.20 |               |             | 20.79         | 150            | 4.44         |
| Year of Follow-up: 2015, Age Group: 60-64    |           |               |       |       |               |             |               |                |              |
| Period                                       | Age Group | Smoking Group | N     | %     | Ever Quit (N) | Ever Quit % | Mean Yrs Quit | Short Term (n) | Short Term % |
| 25                                           | 60-64     | Never Any     | 5018  | 52.27 |               |             |               |                |              |
| 25                                           | 60-64     | CC            | 261   | 2.72  | 0             | 0.00        |               |                |              |
| 25                                           | 60-64     | Ecig          | 960   | 10.00 |               |             |               |                |              |
| 25                                           | 60-64     | Dual          | 0     | 0.00  |               |             |               |                |              |
| 25                                           | 60-64     | Former        | 3361  | 35.01 |               |             | 23.66         | 150            | 4.46         |
| Year of Follow-up: 2015, Age Group: 65-69    |           |               |       |       |               |             |               |                |              |
| Period                                       | Age Group | Smoking Group | N     | %     | Ever Quit (N) | Ever Quit % | Mean Yrs Quit | Short Term (n) | Short Term % |
| 25                                           | 65-69     | Never Any     | 4356  | 51.27 |               |             |               |                |              |
| 25                                           | 65-69     | CC            | 242   | 2.85  | 0             | 0.00        |               |                |              |
| 25                                           | 65-69     | Ecig          | 642   | 7.56  |               |             |               |                |              |
| 25                                           | 65-69     | Dual          | 0     | 0.00  |               |             |               |                |              |
| 25                                           | 65-69     | Former        | 3257  | 38.33 |               |             | 23.07         | 67             | 2.06         |
| Year of Follow-up: 2015, Age Group: 70-74    |           |               |       |       |               |             |               |                |              |
| Period                                       | Age Group | Smoking Group | N     | %     | Ever Quit (N) | Ever Quit % | Mean Yrs Quit | Short Term (n) | Short Term % |
| 25                                           | 70-74     | Never Any     | 3116  | 47.67 |               |             |               |                |              |
| 25                                           | 70-74     | CC            | 227   | 3.47  | 0             | 0.00        |               |                |              |
| 25                                           | 70-74     | Ecig          | 318   | 4.87  |               |             |               |                |              |
| 25                                           | 70-74     | Dual          | 0     | 0.00  |               |             |               |                |              |
| 25                                           | 70-74     | Former        | 2875  | 43.99 |               |             | 26.44         | 48             | 1.67         |
| Year of Follow-up: 2015, Age Group: 75-79    |           |               |       |       |               |             |               |                |              |
| Period                                       | Age Group | Smoking Group | N     | %     | Ever Quit (N) | Ever Quit % | Mean Yrs Quit | Short Term (n) | Short Term % |
| 25                                           | 75-79     | Never Any     | 2684  | 48.50 |               |             |               |                |              |
| 25                                           | 75-79     | CC            | 265   | 4.79  | 0             | 0.00        |               |                |              |
| 25                                           | 75-79     | Ecig          | 167   | 3.02  |               |             |               |                |              |
| 25                                           | 75-79     | Dual          | 0     | 0.00  |               |             |               |                |              |
| 25                                           | 75-79     | Former        | 2418  | 43.69 |               |             | 26.76         | 38             | 1.57         |
| Year of Follow-up: 2020, Age Group: All Ages |           |               |       |       |               |             |               |                |              |
| Period                                       | Age Group | Smoking Group | N     | %     | Ever Quit (N) | Ever Quit % | Mean Yrs Quit | Short Term (n) | Short Term % |
| 30                                           | All Ages  | Never Any     | 38326 | 54.53 |               |             |               |                |              |
| 30                                           | All Ages  | CC            | 1142  | 1.62  | 0             | 0.00        |               |                |              |
| 30                                           | All Ages  | Ecig          | 8245  | 11.73 |               |             |               |                |              |
| 30                                           | All Ages  | Dual          | 0     | 0.00  |               |             |               |                |              |
| 30                                           | All Ages  | Former        | 22570 | 32.11 |               |             | 23.80         | 760            | 3.37         |
| Year of Follow-up: 2020, Age Group: 18-19    |           |               |       |       |               |             |               |                |              |
| Period                                       | Age Group | Smoking Group | N     | %     | Ever Quit (N) | Ever Quit % | Mean Yrs Quit | Short Term (n) | Short Term % |
| 30                                           | 18-19     | Never Any     | 0     | .     |               |             |               |                |              |
| 30                                           | 18-19     | CC            | 0     | .     | 0             | .           |               |                |              |
| 30                                           | 18-19     | Ecig          | 0     | .     |               |             |               |                |              |
| 30                                           | 18-19     | Dual          | 0     | .     |               |             |               |                |              |
| 30                                           | 18-19     | Former        | 0     | .     |               |             | .             | 0              | .            |
| Year of Follow-up: 2020, Age Group: 20-24    |           |               |       |       |               |             |               |                |              |
| Period                                       | Age Group | Smoking Group | N     | %     | Ever Quit (N) | Ever Quit % | Mean Yrs Quit | Short Term (n) | Short Term % |
| 30                                           | 20-24     | Never Any     | 0     | .     |               |             |               |                |              |
| 30                                           | 20-24     | CC            | 0     | .     | 0             | .           |               |                |              |

**Results for PHIM for Run 6 (Sensitivity\_Analysis\_2.RTF)**

| 30                                        | 20-24     | Ecig          | 0    | .     |               |             |               |                |              |
|-------------------------------------------|-----------|---------------|------|-------|---------------|-------------|---------------|----------------|--------------|
| 30                                        | 20-24     | Dual          | 0    | .     |               |             |               |                |              |
| 30                                        | 20-24     | Former        | 0    | .     |               |             | 0             | .              |              |
| Year of Follow-up: 2020, Age Group: 25-29 |           |               |      |       |               |             |               |                |              |
| Period                                    | Age Group | Smoking Group | N    | %     | Ever Quit (N) | Ever Quit % | Mean Yrs Quit | Short Term (n) | Short Term % |
| 30                                        | 25-29     | Never Any     | 0    | .     |               |             |               |                |              |
| 30                                        | 25-29     | CC            | 0    | .     | 0             | .           |               |                |              |
| 30                                        | 25-29     | Ecig          | 0    | .     |               |             |               |                |              |
| 30                                        | 25-29     | Dual          | 0    | .     |               |             |               |                |              |
| 30                                        | 25-29     | Former        | 0    | .     |               |             |               | 0              | .            |
| Year of Follow-up: 2020, Age Group: 30-34 |           |               |      |       |               |             |               |                |              |
| Period                                    | Age Group | Smoking Group | N    | %     | Ever Quit (N) | Ever Quit % | Mean Yrs Quit | Short Term (n) | Short Term % |
| 30                                        | 30-34     | Never Any     | 0    | .     |               |             |               |                |              |
| 30                                        | 30-34     | CC            | 0    | .     | 0             | .           |               |                |              |
| 30                                        | 30-34     | Ecig          | 0    | .     |               |             |               |                |              |
| 30                                        | 30-34     | Dual          | 0    | .     |               |             |               |                |              |
| 30                                        | 30-34     | Former        | 0    | .     |               |             |               | 0              | .            |
| Year of Follow-up: 2020, Age Group: 35-39 |           |               |      |       |               |             |               |                |              |
| Period                                    | Age Group | Smoking Group | N    | %     | Ever Quit (N) | Ever Quit % | Mean Yrs Quit | Short Term (n) | Short Term % |
| 30                                        | 35-39     | Never Any     | 0    | .     |               |             |               |                |              |
| 30                                        | 35-39     | CC            | 0    | .     | 0             | .           |               |                |              |
| 30                                        | 35-39     | Ecig          | 0    | .     |               |             |               |                |              |
| 30                                        | 35-39     | Dual          | 0    | .     |               |             |               |                |              |
| 30                                        | 35-39     | Former        | 0    | .     |               |             |               | 0              | .            |
| Year of Follow-up: 2020, Age Group: 40-44 |           |               |      |       |               |             |               |                |              |
| Period                                    | Age Group | Smoking Group | N    | %     | Ever Quit (N) | Ever Quit % | Mean Yrs Quit | Short Term (n) | Short Term % |
| 30                                        | 40-44     | Never Any     | 4726 | 59.60 |               |             |               |                |              |
| 30                                        | 40-44     | CC            | 49   | 0.62  | 0             | 0.00        |               |                |              |
| 30                                        | 40-44     | Ecig          | 1294 | 16.32 |               |             |               |                |              |
| 30                                        | 40-44     | Dual          | 0    | 0.00  |               |             |               |                |              |
| 30                                        | 40-44     | Former        | 1861 | 23.47 |               |             | 14.68         | 92             | 4.94         |
| Year of Follow-up: 2020, Age Group: 45-49 |           |               |      |       |               |             |               |                |              |
| Period                                    | Age Group | Smoking Group | N    | %     | Ever Quit (N) | Ever Quit % | Mean Yrs Quit | Short Term (n) | Short Term % |
| 30                                        | 45-49     | Never Any     | 5359 | 64.18 |               |             |               |                |              |
| 30                                        | 45-49     | CC            | 86   | 1.03  | 0             | 0.00        |               |                |              |
| 30                                        | 45-49     | Ecig          | 1218 | 14.59 |               |             |               |                |              |
| 30                                        | 45-49     | Dual          | 0    | 0.00  |               |             |               |                |              |
| 30                                        | 45-49     | Former        | 1687 | 20.20 |               |             | 16.82         | 82             | 4.86         |
| Year of Follow-up: 2020, Age Group: 50-54 |           |               |      |       |               |             |               |                |              |
| Period                                    | Age Group | Smoking Group | N    | %     | Ever Quit (N) | Ever Quit % | Mean Yrs Quit | Short Term (n) | Short Term % |
| 30                                        | 50-54     | Never Any     | 5189 | 59.01 |               |             |               |                |              |
| 30                                        | 50-54     | CC            | 92   | 1.05  | 0             | 0.00        |               |                |              |
| 30                                        | 50-54     | Ecig          | 1319 | 15.00 |               |             |               |                |              |
| 30                                        | 50-54     | Dual          | 0    | 0.00  |               |             |               |                |              |
| 30                                        | 50-54     | Former        | 2193 | 24.94 |               |             | 20.48         | 119            | 5.43         |
| Year of Follow-up: 2020, Age Group: 55-59 |           |               |      |       |               |             |               |                |              |
| Period                                    | Age Group | Smoking Group | N    | %     | Ever Quit (N) | Ever Quit % | Mean Yrs Quit | Short Term (n) | Short Term % |
| 30                                        | 55-59     | Never Any     | 5284 | 52.43 |               |             |               |                |              |
| 30                                        | 55-59     | CC            | 141  | 1.40  | 0             | 0.00        |               |                |              |
| 30                                        | 55-59     | Ecig          | 1582 | 15.70 |               |             |               |                |              |
| 30                                        | 55-59     | Dual          | 0    | 0.00  |               |             |               |                |              |
| 30                                        | 55-59     | Former        | 3071 | 30.47 |               |             | 22.56         | 123            | 4.01         |
| Year of Follow-up: 2020, Age Group: 60-64 |           |               |      |       |               |             |               |                |              |
| Period                                    | Age Group | Smoking Group | N    | %     | Ever Quit (N) | Ever Quit % | Mean Yrs Quit | Short Term (n) | Short Term % |
| 30                                        | 60-64     | Never Any     | 5278 | 50.27 |               |             |               |                |              |
| 30                                        | 60-64     | CC            | 213  | 2.03  | 0             | 0.00        |               |                |              |
| 30                                        | 60-64     | Ecig          | 1250 | 11.91 |               |             |               |                |              |
| 30                                        | 60-64     | Dual          | 0    | 0.00  |               |             |               |                |              |
| 30                                        | 60-64     | Former        | 3758 | 35.79 |               |             | 23.40         | 159            | 4.23         |
| Year of Follow-up: 2020, Age Group: 65-69 |           |               |      |       |               |             |               |                |              |
| Period                                    | Age Group | Smoking Group | N    | %     | Ever Quit (N) | Ever Quit % | Mean Yrs Quit | Short Term (n) | Short Term % |
| 30                                        | 65-69     | Never Any     | 5018 | 52.27 |               |             |               |                |              |
| 30                                        | 65-69     | CC            | 183  | 1.91  | 0             | 0.00        |               |                |              |
| 30                                        | 65-69     | Ecig          | 771  | 8.03  |               |             |               |                |              |
| 30                                        | 65-69     | Dual          | 0    | 0.00  |               |             |               |                |              |
| 30                                        | 65-69     | Former        | 3628 | 37.79 |               |             | 26.73         | 76             | 2.09         |
| Year of Follow-up: 2020, Age Group: 70-74 |           |               |      |       |               |             |               |                |              |
| Period                                    | Age Group | Smoking Group | N    | %     | Ever Quit (N) | Ever Quit % | Mean Yrs Quit | Short Term (n) | Short Term % |

**Results for PHIM for Run 6 (Sensitivity\_Analysis\_2.RTF)**

|                                              |           |               |       |       |               |             |               |                |              |
|----------------------------------------------|-----------|---------------|-------|-------|---------------|-------------|---------------|----------------|--------------|
| 30                                           | 70-74     | Never Any     | 4356  | 51.27 |               |             |               |                |              |
| 30                                           | 70-74     | CC            | 200   | 2.35  | 0             | 0.00        |               |                |              |
| 30                                           | 70-74     | Ecig          | 548   | 6.45  |               |             |               |                |              |
| 30                                           | 70-74     | Dual          | 0     | 0.00  |               |             |               |                |              |
| 30                                           | 70-74     | Former        | 3393  | 39.93 |               |             | 27.01         | 67             | 1.97         |
| Year of Follow-up: 2020, Age Group: 75-79    |           |               |       |       |               |             |               |                |              |
| Period                                       | Age Group | Smoking Group | N     | %     | Ever Quit (N) | Ever Quit % | Mean Yrs Quit | Short Term (n) | Short Term % |
| 30                                           | 75-79     | Never Any     | 3116  | 47.67 |               |             |               |                |              |
| 30                                           | 75-79     | CC            | 178   | 2.72  | 0             | 0.00        |               |                |              |
| 30                                           | 75-79     | Ecig          | 263   | 4.02  |               |             |               |                |              |
| 30                                           | 75-79     | Dual          | 0     | 0.00  |               |             |               |                |              |
| 30                                           | 75-79     | Former        | 2979  | 45.58 |               |             | 30.42         | 42             | 1.41         |
| Year of Follow-up: 2025, Age Group: All Ages |           |               |       |       |               |             |               |                |              |
| Period                                       | Age Group | Smoking Group | N     | %     | Ever Quit (N) | Ever Quit % | Mean Yrs Quit | Short Term (n) | Short Term % |
| 35                                           | All Ages  | Never Any     | 35210 | 55.23 |               |             |               |                |              |
| 35                                           | All Ages  | CC            | 709   | 1.11  | 0             | 0.00        |               |                |              |
| 35                                           | All Ages  | Ecig          | 6662  | 10.45 |               |             |               |                |              |
| 35                                           | All Ages  | Dual          | 0     | 0.00  |               |             |               |                |              |
| 35                                           | All Ages  | Former        | 21166 | 33.20 |               |             | 25.87         | 612            | 2.89         |
| Year of Follow-up: 2025, Age Group: 18-19    |           |               |       |       |               |             |               |                |              |
| Period                                       | Age Group | Smoking Group | N     | %     | Ever Quit (N) | Ever Quit % | Mean Yrs Quit | Short Term (n) | Short Term % |
| 35                                           | 18-19     | Never Any     | 0     | .     |               |             |               |                |              |
| 35                                           | 18-19     | CC            | 0     | .     | 0             | .           |               |                |              |
| 35                                           | 18-19     | Ecig          | 0     | .     |               |             |               |                |              |
| 35                                           | 18-19     | Dual          | 0     | .     |               |             |               |                |              |
| 35                                           | 18-19     | Former        | 0     | .     |               |             | .             | 0              | .            |
| Year of Follow-up: 2025, Age Group: 20-24    |           |               |       |       |               |             |               |                |              |
| Period                                       | Age Group | Smoking Group | N     | %     | Ever Quit (N) | Ever Quit % | Mean Yrs Quit | Short Term (n) | Short Term % |
| 35                                           | 20-24     | Never Any     | 0     | .     |               |             |               |                |              |
| 35                                           | 20-24     | CC            | 0     | .     | 0             | .           |               |                |              |
| 35                                           | 20-24     | Ecig          | 0     | .     |               |             |               |                |              |
| 35                                           | 20-24     | Dual          | 0     | .     |               |             |               |                |              |
| 35                                           | 20-24     | Former        | 0     | .     |               |             | .             | 0              | .            |
| Year of Follow-up: 2025, Age Group: 25-29    |           |               |       |       |               |             |               |                |              |
| Period                                       | Age Group | Smoking Group | N     | %     | Ever Quit (N) | Ever Quit % | Mean Yrs Quit | Short Term (n) | Short Term % |
| 35                                           | 25-29     | Never Any     | 0     | .     |               |             |               |                |              |
| 35                                           | 25-29     | CC            | 0     | .     | 0             | .           |               |                |              |
| 35                                           | 25-29     | Ecig          | 0     | .     |               |             |               |                |              |
| 35                                           | 25-29     | Dual          | 0     | .     |               |             |               |                |              |
| 35                                           | 25-29     | Former        | 0     | .     |               |             | .             | 0              | .            |
| Year of Follow-up: 2025, Age Group: 30-34    |           |               |       |       |               |             |               |                |              |
| Period                                       | Age Group | Smoking Group | N     | %     | Ever Quit (N) | Ever Quit % | Mean Yrs Quit | Short Term (n) | Short Term % |
| 35                                           | 30-34     | Never Any     | 0     | .     |               |             |               |                |              |
| 35                                           | 30-34     | CC            | 0     | .     | 0             | .           |               |                |              |
| 35                                           | 30-34     | Ecig          | 0     | .     |               |             |               |                |              |
| 35                                           | 30-34     | Dual          | 0     | .     |               |             |               |                |              |
| 35                                           | 30-34     | Former        | 0     | .     |               |             | .             | 0              | .            |
| Year of Follow-up: 2025, Age Group: 35-39    |           |               |       |       |               |             |               |                |              |
| Period                                       | Age Group | Smoking Group | N     | %     | Ever Quit (N) | Ever Quit % | Mean Yrs Quit | Short Term (n) | Short Term % |
| 35                                           | 35-39     | Never Any     | 0     | .     |               |             |               |                |              |
| 35                                           | 35-39     | CC            | 0     | .     | 0             | .           |               |                |              |
| 35                                           | 35-39     | Ecig          | 0     | .     |               |             |               |                |              |
| 35                                           | 35-39     | Dual          | 0     | .     |               |             |               |                |              |
| 35                                           | 35-39     | Former        | 0     | .     |               |             | .             | 0              | .            |
| Year of Follow-up: 2025, Age Group: 40-44    |           |               |       |       |               |             |               |                |              |
| Period                                       | Age Group | Smoking Group | N     | %     | Ever Quit (N) | Ever Quit % | Mean Yrs Quit | Short Term (n) | Short Term % |
| 35                                           | 40-44     | Never Any     | 0     | .     |               |             |               |                |              |
| 35                                           | 40-44     | CC            | 0     | .     | 0             | .           |               |                |              |
| 35                                           | 40-44     | Ecig          | 0     | .     |               |             |               |                |              |
| 35                                           | 40-44     | Dual          | 0     | .     |               |             |               |                |              |
| 35                                           | 40-44     | Former        | 0     | .     |               |             | .             | 0              | .            |
| Year of Follow-up: 2025, Age Group: 45-49    |           |               |       |       |               |             |               |                |              |
| Period                                       | Age Group | Smoking Group | N     | %     | Ever Quit (N) | Ever Quit % | Mean Yrs Quit | Short Term (n) | Short Term % |
| 35                                           | 45-49     | Never Any     | 4726  | 59.60 |               |             |               |                |              |
| 35                                           | 45-49     | CC            | 25    | 0.32  | 0             | 0.00        |               |                |              |
| 35                                           | 45-49     | Ecig          | 1139  | 14.36 |               |             |               |                |              |
| 35                                           | 45-49     | Dual          | 0     | 0.00  |               |             |               |                |              |
| 35                                           | 45-49     | Former        | 2040  | 25.73 |               |             | 18.15         | 62             | 3.04         |
| Year of Follow-up: 2025, Age Group: 50-54    |           |               |       |       |               |             |               |                |              |



**Results for PHIM for Run 6 (Sensitivity\_Analysis\_2.RTF)**

| Period                                       | Age Group | Smoking Group | N     | %     | Ever Quit (N) | Ever Quit % | Mean Yrs Quit | Short Term (n) | Short Term % |
|----------------------------------------------|-----------|---------------|-------|-------|---------------|-------------|---------------|----------------|--------------|
| 35                                           | 50-54     | Never Any     | 5359  | 64.18 |               |             |               |                |              |
| 35                                           | 50-54     | CC            | 52    | 0.62  | 0             | 0.00        |               |                |              |
| 35                                           | 50-54     | Ecig          | 1061  | 12.71 |               |             |               |                |              |
| 35                                           | 50-54     | Dual          | 0     | 0.00  |               |             |               |                |              |
| 35                                           | 50-54     | Former        | 1878  | 22.49 |               |             | 19.78         | 94             | 5.01         |
| Year of Follow-up: 2025, Age Group: 55-59    |           |               |       |       |               |             |               |                |              |
| Period                                       | Age Group | Smoking Group | N     | %     | Ever Quit (N) | Ever Quit % | Mean Yrs Quit | Short Term (n) | Short Term % |
| 35                                           | 55-59     | Never Any     | 5189  | 59.01 |               |             |               |                |              |
| 35                                           | 55-59     | CC            | 57    | 0.65  | 0             | 0.00        |               |                |              |
| 35                                           | 55-59     | Ecig          | 1114  | 12.67 |               |             |               |                |              |
| 35                                           | 55-59     | Dual          | 0     | 0.00  |               |             |               |                |              |
| 35                                           | 55-59     | Former        | 2433  | 27.67 |               |             | 23.17         | 90             | 3.70         |
| Year of Follow-up: 2025, Age Group: 60-64    |           |               |       |       |               |             |               |                |              |
| Period                                       | Age Group | Smoking Group | N     | %     | Ever Quit (N) | Ever Quit % | Mean Yrs Quit | Short Term (n) | Short Term % |
| 35                                           | 60-64     | Never Any     | 5284  | 52.43 |               |             |               |                |              |
| 35                                           | 60-64     | CC            | 99    | 0.98  | 0             | 0.00        |               |                |              |
| 35                                           | 60-64     | Ecig          | 1253  | 12.43 |               |             |               |                |              |
| 35                                           | 60-64     | Dual          | 0     | 0.00  |               |             |               |                |              |
| 35                                           | 60-64     | Former        | 3442  | 34.15 |               |             | 24.79         | 160            | 4.65         |
| Year of Follow-up: 2025, Age Group: 65-69    |           |               |       |       |               |             |               |                |              |
| Period                                       | Age Group | Smoking Group | N     | %     | Ever Quit (N) | Ever Quit % | Mean Yrs Quit | Short Term (n) | Short Term % |
| 35                                           | 65-69     | Never Any     | 5278  | 50.27 |               |             |               |                |              |
| 35                                           | 65-69     | CC            | 162   | 1.54  | 0             | 0.00        |               |                |              |
| 35                                           | 65-69     | Ecig          | 991   | 9.44  |               |             |               |                |              |
| 35                                           | 65-69     | Dual          | 0     | 0.00  |               |             |               |                |              |
| 35                                           | 65-69     | Former        | 4068  | 38.75 |               |             | 26.42         | 81             | 1.99         |
| Year of Follow-up: 2025, Age Group: 70-74    |           |               |       |       |               |             |               |                |              |
| Period                                       | Age Group | Smoking Group | N     | %     | Ever Quit (N) | Ever Quit % | Mean Yrs Quit | Short Term (n) | Short Term % |
| 35                                           | 70-74     | Never Any     | 5018  | 52.27 |               |             |               |                |              |
| 35                                           | 70-74     | CC            | 153   | 1.59  | 0             | 0.00        |               |                |              |
| 35                                           | 70-74     | Ecig          | 667   | 6.95  |               |             |               |                |              |
| 35                                           | 70-74     | Dual          | 0     | 0.00  |               |             |               |                |              |
| 35                                           | 70-74     | Former        | 3762  | 39.19 |               |             | 30.66         | 64             | 1.70         |
| Year of Follow-up: 2025, Age Group: 75-79    |           |               |       |       |               |             |               |                |              |
| Period                                       | Age Group | Smoking Group | N     | %     | Ever Quit (N) | Ever Quit % | Mean Yrs Quit | Short Term (n) | Short Term % |
| 35                                           | 75-79     | Never Any     | 4356  | 51.27 |               |             |               |                |              |
| 35                                           | 75-79     | CC            | 161   | 1.89  | 0             | 0.00        |               |                |              |
| 35                                           | 75-79     | Ecig          | 437   | 5.14  |               |             |               |                |              |
| 35                                           | 75-79     | Dual          | 0     | 0.00  |               |             |               |                |              |
| 35                                           | 75-79     | Former        | 3543  | 41.70 |               |             | 30.74         | 61             | 1.72         |
| Year of Follow-up: 2030, Age Group: All Ages |           |               |       |       |               |             |               |                |              |
| Period                                       | Age Group | Smoking Group | N     | %     | Ever Quit (N) | Ever Quit % | Mean Yrs Quit | Short Term (n) | Short Term % |
| 40                                           | All Ages  | Never Any     | 30854 | 55.84 |               |             |               |                |              |
| 40                                           | All Ages  | CC            | 400   | 0.72  | 0             | 0.00        |               |                |              |
| 40                                           | All Ages  | Ecig          | 5022  | 9.09  |               |             |               |                |              |
| 40                                           | All Ages  | Dual          | 0     | 0.00  |               |             |               |                |              |
| 40                                           | All Ages  | Former        | 18974 | 34.34 |               |             | 27.91         | 544            | 2.87         |
| Year of Follow-up: 2030, Age Group: 18-19    |           |               |       |       |               |             |               |                |              |
| Period                                       | Age Group | Smoking Group | N     | %     | Ever Quit (N) | Ever Quit % | Mean Yrs Quit | Short Term (n) | Short Term % |
| 40                                           | 18-19     | Never Any     | 0     | .     |               |             |               |                |              |
| 40                                           | 18-19     | CC            | 0     | .     | 0             | .           |               |                |              |
| 40                                           | 18-19     | Ecig          | 0     | .     |               |             |               |                |              |
| 40                                           | 18-19     | Dual          | 0     | .     |               |             |               |                |              |
| 40                                           | 18-19     | Former        | 0     | .     |               |             | .             | 0              | .            |
| Year of Follow-up: 2030, Age Group: 20-24    |           |               |       |       |               |             |               |                |              |
| Period                                       | Age Group | Smoking Group | N     | %     | Ever Quit (N) | Ever Quit % | Mean Yrs Quit | Short Term (n) | Short Term % |
| 40                                           | 20-24     | Never Any     | 0     | .     |               |             |               |                |              |
| 40                                           | 20-24     | CC            | 0     | .     | 0             | .           |               |                |              |
| 40                                           | 20-24     | Ecig          | 0     | .     |               |             |               |                |              |
| 40                                           | 20-24     | Dual          | 0     | .     |               |             |               |                |              |
| 40                                           | 20-24     | Former        | 0     | .     |               |             | .             | 0              | .            |
| Year of Follow-up: 2030, Age Group: 25-29    |           |               |       |       |               |             |               |                |              |
| Period                                       | Age Group | Smoking Group | N     | %     | Ever Quit (N) | Ever Quit % | Mean Yrs Quit | Short Term (n) | Short Term % |
| 40                                           | 25-29     | Never Any     | 0     | .     |               |             |               |                |              |
| 40                                           | 25-29     | CC            | 0     | .     | 0             | .           |               |                |              |
| 40                                           | 25-29     | Ecig          | 0     | .     |               |             |               |                |              |
| 40                                           | 25-29     | Dual          | 0     | .     |               |             |               |                |              |

**Results for PHIM for Run 6 (Sensitivity\_Analysis\_2.RTF)**

|                                           |           |               |      |       |               |             |               |                |              |
|-------------------------------------------|-----------|---------------|------|-------|---------------|-------------|---------------|----------------|--------------|
| 40                                        | 25-29     | Former        | 0    | .     | .             | .           | 0             | .              |              |
| Year of Follow-up: 2030, Age Group: 30-34 |           |               |      |       |               |             |               |                |              |
| Period                                    | Age Group | Smoking Group | N    | %     | Ever Quit (N) | Ever Quit % | Mean Yrs Quit | Short Term (n) | Short Term % |
| 40                                        | 30-34     | Never Any     | 0    | .     |               |             |               |                |              |
| 40                                        | 30-34     | CC            | 0    | .     | 0             | .           |               |                |              |
| 40                                        | 30-34     | Ecig          | 0    | .     |               |             |               |                |              |
| 40                                        | 30-34     | Dual          | 0    | .     |               |             |               |                |              |
| 40                                        | 30-34     | Former        | 0    | .     |               |             | 0             | .              |              |
| Year of Follow-up: 2030, Age Group: 35-39 |           |               |      |       |               |             |               |                |              |
| Period                                    | Age Group | Smoking Group | N    | %     | Ever Quit (N) | Ever Quit % | Mean Yrs Quit | Short Term (n) | Short Term % |
| 40                                        | 35-39     | Never Any     | 0    | .     |               |             |               |                |              |
| 40                                        | 35-39     | CC            | 0    | .     | 0             | .           |               |                |              |
| 40                                        | 35-39     | Ecig          | 0    | .     |               |             |               |                |              |
| 40                                        | 35-39     | Dual          | 0    | .     |               |             |               |                |              |
| 40                                        | 35-39     | Former        | 0    | .     |               |             | 0             | .              |              |
| Year of Follow-up: 2030, Age Group: 40-44 |           |               |      |       |               |             |               |                |              |
| Period                                    | Age Group | Smoking Group | N    | %     | Ever Quit (N) | Ever Quit % | Mean Yrs Quit | Short Term (n) | Short Term % |
| 40                                        | 40-44     | Never Any     | 0    | .     |               |             |               |                |              |
| 40                                        | 40-44     | CC            | 0    | .     | 0             | .           |               |                |              |
| 40                                        | 40-44     | Ecig          | 0    | .     |               |             |               |                |              |
| 40                                        | 40-44     | Dual          | 0    | .     |               |             |               |                |              |
| 40                                        | 40-44     | Former        | 0    | .     |               |             | 0             | .              |              |
| Year of Follow-up: 2030, Age Group: 45-49 |           |               |      |       |               |             |               |                |              |
| Period                                    | Age Group | Smoking Group | N    | %     | Ever Quit (N) | Ever Quit % | Mean Yrs Quit | Short Term (n) | Short Term % |
| 40                                        | 45-49     | Never Any     | 0    | .     |               |             |               |                |              |
| 40                                        | 45-49     | CC            | 0    | .     | 0             | .           |               |                |              |
| 40                                        | 45-49     | Ecig          | 0    | .     |               |             |               |                |              |
| 40                                        | 45-49     | Dual          | 0    | .     |               |             |               |                |              |
| 40                                        | 45-49     | Former        | 0    | .     |               |             | 0             | .              |              |
| Year of Follow-up: 2030, Age Group: 50-54 |           |               |      |       |               |             |               |                |              |
| Period                                    | Age Group | Smoking Group | N    | %     | Ever Quit (N) | Ever Quit % | Mean Yrs Quit | Short Term (n) | Short Term % |
| 40                                        | 50-54     | Never Any     | 4726 | 59.60 |               |             |               |                |              |
| 40                                        | 50-54     | CC            | 11   | 0.14  | 0             | 0.00        |               |                |              |
| 40                                        | 50-54     | Ecig          | 964  | 12.16 |               |             |               |                |              |
| 40                                        | 50-54     | Dual          | 0    | 0.00  |               |             |               |                |              |
| 40                                        | 50-54     | Former        | 2229 | 28.11 |               |             | 21.33         | 102            | 4.58         |
| Year of Follow-up: 2030, Age Group: 55-59 |           |               |      |       |               |             |               |                |              |
| Period                                    | Age Group | Smoking Group | N    | %     | Ever Quit (N) | Ever Quit % | Mean Yrs Quit | Short Term (n) | Short Term % |
| 40                                        | 55-59     | Never Any     | 5359 | 64.18 |               |             |               |                |              |
| 40                                        | 55-59     | CC            | 26   | 0.31  | 0             | 0.00        |               |                |              |
| 40                                        | 55-59     | Ecig          | 864  | 10.35 |               |             |               |                |              |
| 40                                        | 55-59     | Dual          | 0    | 0.00  |               |             |               |                |              |
| 40                                        | 55-59     | Former        | 2101 | 25.16 |               |             | 22.39         | 66             | 3.14         |
| Year of Follow-up: 2030, Age Group: 60-64 |           |               |      |       |               |             |               |                |              |
| Period                                    | Age Group | Smoking Group | N    | %     | Ever Quit (N) | Ever Quit % | Mean Yrs Quit | Short Term (n) | Short Term % |
| 40                                        | 60-64     | Never Any     | 5189 | 59.01 |               |             |               |                |              |
| 40                                        | 60-64     | CC            | 35   | 0.40  | 0             | 0.00        |               |                |              |
| 40                                        | 60-64     | Ecig          | 861  | 9.79  |               |             |               |                |              |
| 40                                        | 60-64     | Dual          | 0    | 0.00  |               |             |               |                |              |
| 40                                        | 60-64     | Former        | 2708 | 30.80 |               |             | 25.49         | 123            | 4.54         |
| Year of Follow-up: 2030, Age Group: 65-69 |           |               |      |       |               |             |               |                |              |
| Period                                    | Age Group | Smoking Group | N    | %     | Ever Quit (N) | Ever Quit % | Mean Yrs Quit | Short Term (n) | Short Term % |
| 40                                        | 65-69     | Never Any     | 5284 | 52.43 |               |             |               |                |              |
| 40                                        | 65-69     | CC            | 77   | 0.76  | 0             | 0.00        |               |                |              |
| 40                                        | 65-69     | Ecig          | 988  | 9.80  |               |             |               |                |              |
| 40                                        | 65-69     | Dual          | 0    | 0.00  |               |             |               |                |              |
| 40                                        | 65-69     | Former        | 3729 | 37.00 |               |             | 27.69         | 79             | 2.12         |
| Year of Follow-up: 2030, Age Group: 70-74 |           |               |      |       |               |             |               |                |              |
| Period                                    | Age Group | Smoking Group | N    | %     | Ever Quit (N) | Ever Quit % | Mean Yrs Quit | Short Term (n) | Short Term % |
| 40                                        | 70-74     | Never Any     | 5278 | 50.27 |               |             |               |                |              |
| 40                                        | 70-74     | CC            | 132  | 1.26  | 0             | 0.00        |               |                |              |
| 40                                        | 70-74     | Ecig          | 820  | 7.81  |               |             |               |                |              |
| 40                                        | 70-74     | Dual          | 0    | 0.00  |               |             |               |                |              |
| 40                                        | 70-74     | Former        | 4269 | 40.66 |               |             | 30.02         | 103            | 2.41         |
| Year of Follow-up: 2030, Age Group: 75-79 |           |               |      |       |               |             |               |                |              |
| Period                                    | Age Group | Smoking Group | N    | %     | Ever Quit (N) | Ever Quit % | Mean Yrs Quit | Short Term (n) | Short Term % |
| 40                                        | 75-79     | Never Any     | 5018 | 52.27 |               |             |               |                |              |
| 40                                        | 75-79     | CC            | 119  | 1.24  | 0             | 0.00        |               |                |              |

**Results for PHIM for Run 6 (Sensitivity\_Analysis\_2.RTF)**

|                                              |           |               |       |       |               |             |               |                |              |
|----------------------------------------------|-----------|---------------|-------|-------|---------------|-------------|---------------|----------------|--------------|
| 40                                           | 75-79     | Ecig          | 525   | 5.47  |               |             |               |                |              |
| 40                                           | 75-79     | Dual          | 0     | 0.00  |               |             |               |                |              |
| 40                                           | 75-79     | Former        | 3938  | 41.02 |               |             | 34.15         | 71             | 1.80         |
| Year of Follow-up: 2035, Age Group: All Ages |           |               |       |       |               |             |               |                |              |
| Period                                       | Age Group | Smoking Group | N     | %     | Ever Quit (N) | Ever Quit % | Mean Yrs Quit | Short Term (n) | Short Term % |
| 45                                           | All Ages  | Never Any     | 25836 | 56.60 |               |             |               |                |              |
| 45                                           | All Ages  | CC            | 203   | 0.44  | 0             | 0.00        |               |                |              |
| 45                                           | All Ages  | Ecig          | 3675  | 8.05  |               |             |               |                |              |
| 45                                           | All Ages  | Dual          | 0     | 0.00  |               |             |               |                |              |
| 45                                           | All Ages  | Former        | 15936 | 34.91 |               |             | 29.62         | 359            | 2.25         |
| Year of Follow-up: 2035, Age Group: 18-19    |           |               |       |       |               |             |               |                |              |
| Period                                       | Age Group | Smoking Group | N     | %     | Ever Quit (N) | Ever Quit % | Mean Yrs Quit | Short Term (n) | Short Term % |
| 45                                           | 18-19     | Never Any     | 0     | .     |               |             |               |                |              |
| 45                                           | 18-19     | CC            | 0     | .     | 0             | .           |               |                |              |
| 45                                           | 18-19     | Ecig          | 0     | .     |               |             |               |                |              |
| 45                                           | 18-19     | Dual          | 0     | .     |               |             |               |                |              |
| 45                                           | 18-19     | Former        | 0     | .     |               |             | .             | 0              | .            |
| Year of Follow-up: 2035, Age Group: 20-24    |           |               |       |       |               |             |               |                |              |
| Period                                       | Age Group | Smoking Group | N     | %     | Ever Quit (N) | Ever Quit % | Mean Yrs Quit | Short Term (n) | Short Term % |
| 45                                           | 20-24     | Never Any     | 0     | .     |               |             |               |                |              |
| 45                                           | 20-24     | CC            | 0     | .     | 0             | .           |               |                |              |
| 45                                           | 20-24     | Ecig          | 0     | .     |               |             |               |                |              |
| 45                                           | 20-24     | Dual          | 0     | .     |               |             |               |                |              |
| 45                                           | 20-24     | Former        | 0     | .     |               |             | .             | 0              | .            |
| Year of Follow-up: 2035, Age Group: 25-29    |           |               |       |       |               |             |               |                |              |
| Period                                       | Age Group | Smoking Group | N     | %     | Ever Quit (N) | Ever Quit % | Mean Yrs Quit | Short Term (n) | Short Term % |
| 45                                           | 25-29     | Never Any     | 0     | .     |               |             |               |                |              |
| 45                                           | 25-29     | CC            | 0     | .     | 0             | .           |               |                |              |
| 45                                           | 25-29     | Ecig          | 0     | .     |               |             |               |                |              |
| 45                                           | 25-29     | Dual          | 0     | .     |               |             |               |                |              |
| 45                                           | 25-29     | Former        | 0     | .     |               |             | .             | 0              | .            |
| Year of Follow-up: 2035, Age Group: 30-34    |           |               |       |       |               |             |               |                |              |
| Period                                       | Age Group | Smoking Group | N     | %     | Ever Quit (N) | Ever Quit % | Mean Yrs Quit | Short Term (n) | Short Term % |
| 45                                           | 30-34     | Never Any     | 0     | .     |               |             |               |                |              |
| 45                                           | 30-34     | CC            | 0     | .     | 0             | .           |               |                |              |
| 45                                           | 30-34     | Ecig          | 0     | .     |               |             |               |                |              |
| 45                                           | 30-34     | Dual          | 0     | .     |               |             |               |                |              |
| 45                                           | 30-34     | Former        | 0     | .     |               |             | .             | 0              | .            |
| Year of Follow-up: 2035, Age Group: 35-39    |           |               |       |       |               |             |               |                |              |
| Period                                       | Age Group | Smoking Group | N     | %     | Ever Quit (N) | Ever Quit % | Mean Yrs Quit | Short Term (n) | Short Term % |
| 45                                           | 35-39     | Never Any     | 0     | .     |               |             |               |                |              |
| 45                                           | 35-39     | CC            | 0     | .     | 0             | .           |               |                |              |
| 45                                           | 35-39     | Ecig          | 0     | .     |               |             |               |                |              |
| 45                                           | 35-39     | Dual          | 0     | .     |               |             |               |                |              |
| 45                                           | 35-39     | Former        | 0     | .     |               |             | .             | 0              | .            |
| Year of Follow-up: 2035, Age Group: 40-44    |           |               |       |       |               |             |               |                |              |
| Period                                       | Age Group | Smoking Group | N     | %     | Ever Quit (N) | Ever Quit % | Mean Yrs Quit | Short Term (n) | Short Term % |
| 45                                           | 40-44     | Never Any     | 0     | .     |               |             |               |                |              |
| 45                                           | 40-44     | CC            | 0     | .     | 0             | .           |               |                |              |
| 45                                           | 40-44     | Ecig          | 0     | .     |               |             |               |                |              |
| 45                                           | 40-44     | Dual          | 0     | .     |               |             |               |                |              |
| 45                                           | 40-44     | Former        | 0     | .     |               |             | .             | 0              | .            |
| Year of Follow-up: 2035, Age Group: 45-49    |           |               |       |       |               |             |               |                |              |
| Period                                       | Age Group | Smoking Group | N     | %     | Ever Quit (N) | Ever Quit % | Mean Yrs Quit | Short Term (n) | Short Term % |
| 45                                           | 45-49     | Never Any     | 0     | .     |               |             |               |                |              |
| 45                                           | 45-49     | CC            | 0     | .     | 0             | .           |               |                |              |
| 45                                           | 45-49     | Ecig          | 0     | .     |               |             |               |                |              |
| 45                                           | 45-49     | Dual          | 0     | .     |               |             |               |                |              |
| 45                                           | 45-49     | Former        | 0     | .     |               |             | .             | 0              | .            |
| Year of Follow-up: 2035, Age Group: 50-54    |           |               |       |       |               |             |               |                |              |
| Period                                       | Age Group | Smoking Group | N     | %     | Ever Quit (N) | Ever Quit % | Mean Yrs Quit | Short Term (n) | Short Term % |
| 45                                           | 50-54     | Never Any     | 0     | .     |               |             |               |                |              |
| 45                                           | 50-54     | CC            | 0     | .     | 0             | .           |               |                |              |
| 45                                           | 50-54     | Ecig          | 0     | .     |               |             |               |                |              |
| 45                                           | 50-54     | Dual          | 0     | .     |               |             |               |                |              |
| 45                                           | 50-54     | Former        | 0     | .     |               |             | .             | 0              | .            |
| Year of Follow-up: 2035, Age Group: 55-59    |           |               |       |       |               |             |               |                |              |
| Period                                       | Age Group | Smoking Group | N     | %     | Ever Quit (N) | Ever Quit % | Mean Yrs Quit | Short Term (n) | Short Term % |

**Results for PHIM for Run 6 (Sensitivity\_Analysis\_2.RTF)**

|                                              |           |               |       |       |               |             |               |                |              |
|----------------------------------------------|-----------|---------------|-------|-------|---------------|-------------|---------------|----------------|--------------|
| 45                                           | 55-59     | Never Any     | 4726  | 59.60 |               |             |               |                |              |
| 45                                           | 55-59     | CC            | 8     | 0.10  | 0             | 0.00        |               |                |              |
| 45                                           | 55-59     | Ecig          | 787   | 9.92  |               |             |               |                |              |
| 45                                           | 55-59     | Dual          | 0     | 0.00  |               |             |               |                |              |
| 45                                           | 55-59     | Former        | 2409  | 30.38 |               |             | 24.50         | 77             | 3.20         |
| Year of Follow-up: 2035, Age Group: 60-64    |           |               |       |       |               |             |               |                |              |
| Period                                       | Age Group | Smoking Group | N     | %     | Ever Quit (N) | Ever Quit % | Mean Yrs Quit | Short Term (n) | Short Term % |
| 45                                           | 60-64     | Never Any     | 5359  | 64.18 |               |             |               |                |              |
| 45                                           | 60-64     | CC            | 15    | 0.18  | 0             | 0.00        |               |                |              |
| 45                                           | 60-64     | Ecig          | 693   | 8.30  |               |             |               |                |              |
| 45                                           | 60-64     | Dual          | 0     | 0.00  |               |             |               |                |              |
| 45                                           | 60-64     | Former        | 2283  | 27.34 |               |             | 25.36         | 79             | 3.46         |
| Year of Follow-up: 2035, Age Group: 65-69    |           |               |       |       |               |             |               |                |              |
| Period                                       | Age Group | Smoking Group | N     | %     | Ever Quit (N) | Ever Quit % | Mean Yrs Quit | Short Term (n) | Short Term % |
| 45                                           | 65-69     | Never Any     | 5189  | 59.01 |               |             |               |                |              |
| 45                                           | 65-69     | CC            | 26    | 0.30  | 0             | 0.00        |               |                |              |
| 45                                           | 65-69     | Ecig          | 691   | 7.86  |               |             |               |                |              |
| 45                                           | 65-69     | Dual          | 0     | 0.00  |               |             |               |                |              |
| 45                                           | 65-69     | Former        | 2887  | 32.83 |               |             | 28.76         | 49             | 1.70         |
| Year of Follow-up: 2035, Age Group: 70-74    |           |               |       |       |               |             |               |                |              |
| Period                                       | Age Group | Smoking Group | N     | %     | Ever Quit (N) | Ever Quit % | Mean Yrs Quit | Short Term (n) | Short Term % |
| 45                                           | 70-74     | Never Any     | 5284  | 52.43 |               |             |               |                |              |
| 45                                           | 70-74     | CC            | 59    | 0.59  | 0             | 0.00        |               |                |              |
| 45                                           | 70-74     | Ecig          | 860   | 8.53  |               |             |               |                |              |
| 45                                           | 70-74     | Dual          | 0     | 0.00  |               |             |               |                |              |
| 45                                           | 70-74     | Former        | 3875  | 38.45 |               |             | 31.52         | 73             | 1.88         |
| Year of Follow-up: 2035, Age Group: 75-79    |           |               |       |       |               |             |               |                |              |
| Period                                       | Age Group | Smoking Group | N     | %     | Ever Quit (N) | Ever Quit % | Mean Yrs Quit | Short Term (n) | Short Term % |
| 45                                           | 75-79     | Never Any     | 5278  | 50.27 |               |             |               |                |              |
| 45                                           | 75-79     | CC            | 95    | 0.90  | 0             | 0.00        |               |                |              |
| 45                                           | 75-79     | Ecig          | 644   | 6.13  |               |             |               |                |              |
| 45                                           | 75-79     | Dual          | 0     | 0.00  |               |             |               |                |              |
| 45                                           | 75-79     | Former        | 4482  | 42.69 |               |             | 33.45         | 81             | 1.81         |
| Year of Follow-up: 2040, Age Group: All Ages |           |               |       |       |               |             |               |                |              |
| Period                                       | Age Group | Smoking Group | N     | %     | Ever Quit (N) | Ever Quit % | Mean Yrs Quit | Short Term (n) | Short Term % |
| 50                                           | All Ages  | Never Any     | 20558 | 58.48 |               |             |               |                |              |
| 50                                           | All Ages  | CC            | 83    | 0.24  | 0             | 0.00        |               |                |              |
| 50                                           | All Ages  | Ecig          | 2424  | 6.90  |               |             |               |                |              |
| 50                                           | All Ages  | Dual          | 0     | 0.00  |               |             |               |                |              |
| 50                                           | All Ages  | Former        | 12086 | 34.38 |               |             | 31.49         | 240            | 1.99         |
| Year of Follow-up: 2040, Age Group: 18-19    |           |               |       |       |               |             |               |                |              |
| Period                                       | Age Group | Smoking Group | N     | %     | Ever Quit (N) | Ever Quit % | Mean Yrs Quit | Short Term (n) | Short Term % |
| 50                                           | 18-19     | Never Any     | 0     | .     |               |             |               |                |              |
| 50                                           | 18-19     | CC            | 0     | .     | 0             | .           |               |                |              |
| 50                                           | 18-19     | Ecig          | 0     | .     |               |             |               |                |              |
| 50                                           | 18-19     | Dual          | 0     | .     |               |             |               |                |              |
| 50                                           | 18-19     | Former        | 0     | .     |               |             | .             | 0              | .            |
| Year of Follow-up: 2040, Age Group: 20-24    |           |               |       |       |               |             |               |                |              |
| Period                                       | Age Group | Smoking Group | N     | %     | Ever Quit (N) | Ever Quit % | Mean Yrs Quit | Short Term (n) | Short Term % |
| 50                                           | 20-24     | Never Any     | 0     | .     |               |             |               |                |              |
| 50                                           | 20-24     | CC            | 0     | .     | 0             | .           |               |                |              |
| 50                                           | 20-24     | Ecig          | 0     | .     |               |             |               |                |              |
| 50                                           | 20-24     | Dual          | 0     | .     |               |             |               |                |              |
| 50                                           | 20-24     | Former        | 0     | .     |               |             | .             | 0              | .            |
| Year of Follow-up: 2040, Age Group: 25-29    |           |               |       |       |               |             |               |                |              |
| Period                                       | Age Group | Smoking Group | N     | %     | Ever Quit (N) | Ever Quit % | Mean Yrs Quit | Short Term (n) | Short Term % |
| 50                                           | 25-29     | Never Any     | 0     | .     |               |             |               |                |              |
| 50                                           | 25-29     | CC            | 0     | .     | 0             | .           |               |                |              |
| 50                                           | 25-29     | Ecig          | 0     | .     |               |             |               |                |              |
| 50                                           | 25-29     | Dual          | 0     | .     |               |             |               |                |              |
| 50                                           | 25-29     | Former        | 0     | .     |               |             | .             | 0              | .            |
| Year of Follow-up: 2040, Age Group: 30-34    |           |               |       |       |               |             |               |                |              |
| Period                                       | Age Group | Smoking Group | N     | %     | Ever Quit (N) | Ever Quit % | Mean Yrs Quit | Short Term (n) | Short Term % |
| 50                                           | 30-34     | Never Any     | 0     | .     |               |             |               |                |              |
| 50                                           | 30-34     | CC            | 0     | .     | 0             | .           |               |                |              |
| 50                                           | 30-34     | Ecig          | 0     | .     |               |             |               |                |              |
| 50                                           | 30-34     | Dual          | 0     | .     |               |             |               |                |              |
| 50                                           | 30-34     | Former        | 0     | .     |               |             | .             | 0              | .            |
| Year of Follow-up: 2040, Age Group: 35-39    |           |               |       |       |               |             |               |                |              |

**Results for PHIM for Run 6 (Sensitivity\_Analysis\_2.RTF)**

| Period                                    | Age Group | Smoking Group | N    | %     | Ever Quit (N) | Ever Quit % | Mean Yrs Quit | Short Term (n) | Short Term % |
|-------------------------------------------|-----------|---------------|------|-------|---------------|-------------|---------------|----------------|--------------|
| 50                                        | 35-39     | Never Any     | 0    | .     |               |             |               |                |              |
| 50                                        | 35-39     | CC            | 0    | .     | 0             | .           |               |                |              |
| 50                                        | 35-39     | Ecig          | 0    | .     |               |             |               |                |              |
| 50                                        | 35-39     | Dual          | 0    | .     |               |             |               |                |              |
| 50                                        | 35-39     | Former        | 0    | .     |               |             | .             | 0              | .            |
| Year of Follow-up: 2040, Age Group: 40-44 |           |               |      |       |               |             |               |                |              |
| Period                                    | Age Group | Smoking Group | N    | %     | Ever Quit (N) | Ever Quit % | Mean Yrs Quit | Short Term (n) | Short Term % |
| 50                                        | 40-44     | Never Any     | 0    | .     |               |             |               |                |              |
| 50                                        | 40-44     | CC            | 0    | .     | 0             | .           |               |                |              |
| 50                                        | 40-44     | Ecig          | 0    | .     |               |             |               |                |              |
| 50                                        | 40-44     | Dual          | 0    | .     |               |             |               |                |              |
| 50                                        | 40-44     | Former        | 0    | .     |               |             | .             | 0              | .            |
| Year of Follow-up: 2040, Age Group: 45-49 |           |               |      |       |               |             |               |                |              |
| Period                                    | Age Group | Smoking Group | N    | %     | Ever Quit (N) | Ever Quit % | Mean Yrs Quit | Short Term (n) | Short Term % |
| 50                                        | 45-49     | Never Any     | 0    | .     |               |             |               |                |              |
| 50                                        | 45-49     | CC            | 0    | .     | 0             | .           |               |                |              |
| 50                                        | 45-49     | Ecig          | 0    | .     |               |             |               |                |              |
| 50                                        | 45-49     | Dual          | 0    | .     |               |             |               |                |              |
| 50                                        | 45-49     | Former        | 0    | .     |               |             | .             | 0              | .            |
| Year of Follow-up: 2040, Age Group: 50-54 |           |               |      |       |               |             |               |                |              |
| Period                                    | Age Group | Smoking Group | N    | %     | Ever Quit (N) | Ever Quit % | Mean Yrs Quit | Short Term (n) | Short Term % |
| 50                                        | 50-54     | Never Any     | 0    | .     |               |             |               |                |              |
| 50                                        | 50-54     | CC            | 0    | .     | 0             | .           |               |                |              |
| 50                                        | 50-54     | Ecig          | 0    | .     |               |             |               |                |              |
| 50                                        | 50-54     | Dual          | 0    | .     |               |             |               |                |              |
| 50                                        | 50-54     | Former        | 0    | .     |               |             | .             | 0              | .            |
| Year of Follow-up: 2040, Age Group: 55-59 |           |               |      |       |               |             |               |                |              |
| Period                                    | Age Group | Smoking Group | N    | %     | Ever Quit (N) | Ever Quit % | Mean Yrs Quit | Short Term (n) | Short Term % |
| 50                                        | 55-59     | Never Any     | 0    | .     |               |             |               |                |              |
| 50                                        | 55-59     | CC            | 0    | .     | 0             | .           |               |                |              |
| 50                                        | 55-59     | Ecig          | 0    | .     |               |             |               |                |              |
| 50                                        | 55-59     | Dual          | 0    | .     |               |             |               |                |              |
| 50                                        | 55-59     | Former        | 0    | .     |               |             | .             | 0              | .            |
| Year of Follow-up: 2040, Age Group: 60-64 |           |               |      |       |               |             |               |                |              |
| Period                                    | Age Group | Smoking Group | N    | %     | Ever Quit (N) | Ever Quit % | Mean Yrs Quit | Short Term (n) | Short Term % |
| 50                                        | 60-64     | Never Any     | 4726 | 59.60 |               |             |               |                |              |
| 50                                        | 60-64     | CC            | 6    | 0.08  | 0             | 0.00        |               |                |              |
| 50                                        | 60-64     | Ecig          | 611  | 7.70  |               |             |               |                |              |
| 50                                        | 60-64     | Dual          | 0    | 0.00  |               |             |               |                |              |
| 50                                        | 60-64     | Former        | 2587 | 32.62 |               |             | 27.60         | 77             | 2.98         |
| Year of Follow-up: 2040, Age Group: 65-69 |           |               |      |       |               |             |               |                |              |
| Period                                    | Age Group | Smoking Group | N    | %     | Ever Quit (N) | Ever Quit % | Mean Yrs Quit | Short Term (n) | Short Term % |
| 50                                        | 65-69     | Never Any     | 5359 | 64.18 |               |             |               |                |              |
| 50                                        | 65-69     | CC            | 7    | 0.08  | 0             | 0.00        |               |                |              |
| 50                                        | 65-69     | Ecig          | 565  | 6.77  |               |             |               |                |              |
| 50                                        | 65-69     | Dual          | 0    | 0.00  |               |             |               |                |              |
| 50                                        | 65-69     | Former        | 2419 | 28.97 |               |             | 28.79         | 38             | 1.57         |
| Year of Follow-up: 2040, Age Group: 70-74 |           |               |      |       |               |             |               |                |              |
| Period                                    | Age Group | Smoking Group | N    | %     | Ever Quit (N) | Ever Quit % | Mean Yrs Quit | Short Term (n) | Short Term % |
| 50                                        | 70-74     | Never Any     | 5189 | 59.01 |               |             |               |                |              |
| 50                                        | 70-74     | CC            | 22   | 0.25  | 0             | 0.00        |               |                |              |
| 50                                        | 70-74     | Ecig          | 583  | 6.63  |               |             |               |                |              |
| 50                                        | 70-74     | Dual          | 0    | 0.00  |               |             |               |                |              |
| 50                                        | 70-74     | Former        | 2999 | 34.11 |               |             | 32.56         | 51             | 1.70         |
| Year of Follow-up: 2040, Age Group: 75-79 |           |               |      |       |               |             |               |                |              |
| Period                                    | Age Group | Smoking Group | N    | %     | Ever Quit (N) | Ever Quit % | Mean Yrs Quit | Short Term (n) | Short Term % |
| 50                                        | 75-79     | Never Any     | 5284 | 52.43 |               |             |               |                |              |
| 50                                        | 75-79     | CC            | 48   | 0.48  | 0             | 0.00        |               |                |              |
| 50                                        | 75-79     | Ecig          | 665  | 6.60  |               |             |               |                |              |
| 50                                        | 75-79     | Dual          | 0    | 0.00  |               |             |               |                |              |
| 50                                        | 75-79     | Former        | 4081 | 40.49 |               |             | 34.78         | 74             | 1.81         |

## Results for PHIM for Run 6 (Sensitivity\_Analysis\_2.RTF)

\*\*\*\*\*

### Main Results for E-Component for Run: 6, Simulation: 1, COD: Four Diseases Combined

| Variable Parameter          | Value                                  |
|-----------------------------|----------------------------------------|
| 1. Country                  | US (United States)                     |
| 2. Sex                      | F (Females)                            |
| 3. Year of start of process | 1990                                   |
| 4. Cause of Death           | Four Diseases Combined                 |
| 5. Effective Dose NULL      | CC:1                                   |
| 6. Effective Dose Ecig      | CC:1 Ecig:0.05 Dual:0.525              |
| Note:                       | Death rates are per million population |

#### Results for Age Groups Combined and Years combined, Population unadjusted for deaths in Ecig scenario,

| Age Group:All |         | NULL        | Ecig        | %Drop    |        | NULL   | Ecig    | Drop    |         |         |
|---------------|---------|-------------|-------------|----------|--------|--------|---------|---------|---------|---------|
| Year          | Number  | Attrib      | Attrib      | Drop     | %Drop  | Attrib | Death   | Attrib  | Attrib  | Drop    |
|               | Deaths  | Deaths      | Deaths      | Deaths   | Deaths | Deaths | Rate    | Rates   | Rates   | Rates   |
| All Comb      | 9082078 | 2946250.006 | 2223282.841 | 722967.2 | 7.960  | 24.539 | 2493.45 | 808.881 | 610.394 | 198.488 |

#### Results for Age Groups Combined, Population unadjusted for deaths in Ecig scenario,

| Age Group:All |        | NULL      | Ecig      | %Drop    |        | NULL   | Ecig    | Drop    |         |         |
|---------------|--------|-----------|-----------|----------|--------|--------|---------|---------|---------|---------|
| Year          | Number | Attrib    | Attrib    | Drop     | %Drop  | Attrib | Death   | Attrib  | Attrib  | Drop    |
|               | Deaths | Deaths    | Deaths    | Deaths   | Deaths | Deaths | Rate    | Rates   | Rates   | Rates   |
| 1990          | 199848 | 57524.822 | 57524.822 | 0.000    | 0.000  | 0.000  | 2926.84 | 842.471 | 842.471 | 0.000   |
| 1991          | 199162 | 59078.486 | 59012.639 | 65.847   | 0.033  | 0.111  | 2877.87 | 853.678 | 852.727 | 0.951   |
| 1992          | 198532 | 60494.150 | 60315.602 | 178.548  | 0.090  | 0.295  | 2829.84 | 862.271 | 859.726 | 2.545   |
| 1993          | 202512 | 62694.848 | 62342.128 | 352.720  | 0.174  | 0.563  | 2845.85 | 881.034 | 876.077 | 4.957   |
| 1994          | 200658 | 63202.598 | 62633.854 | 568.743  | 0.283  | 0.900  | 2777.87 | 874.966 | 867.092 | 7.874   |
| 1995          | 201023 | 63766.862 | 62926.055 | 840.807  | 0.418  | 1.319  | 2739.80 | 869.097 | 857.638 | 11.460  |
| 1996          | 201180 | 64591.163 | 63420.267 | 1170.895 | 0.582  | 1.813  | 2706.36 | 868.908 | 853.157 | 15.751  |
| 1997          | 198639 | 64686.912 | 63175.450 | 1511.462 | 0.761  | 2.337  | 2635.18 | 858.147 | 838.096 | 20.051  |
| 1998          | 197573 | 65295.961 | 63366.527 | 1929.434 | 0.977  | 2.955  | 2584.18 | 854.046 | 828.810 | 25.236  |
| 1999          | 211329 | 67327.521 | 64724.914 | 2602.607 | 1.232  | 3.866  | 2726.91 | 868.771 | 835.187 | 33.583  |
| 2000          | 208496 | 67596.897 | 64459.800 | 3137.097 | 1.505  | 4.641  | 2656.96 | 861.419 | 821.442 | 39.978  |
| 2001          | 203606 | 67008.811 | 63302.148 | 3706.663 | 1.821  | 5.532  | 2565.88 | 844.458 | 797.746 | 46.712  |
| 2002          | 200828 | 67067.744 | 62664.610 | 4403.134 | 2.192  | 6.565  | 2506.09 | 836.925 | 781.979 | 54.946  |
| 2003          | 196352 | 66756.217 | 61712.266 | 5043.951 | 2.569  | 7.556  | 2427.31 | 825.244 | 762.891 | 62.354  |
| 2004          | 188160 | 65058.725 | 59411.946 | 5646.780 | 3.001  | 8.680  | 2302.83 | 796.234 | 727.125 | 69.109  |
| 2005          | 186416 | 65214.724 | 58810.386 | 6404.338 | 3.436  | 9.820  | 2256.27 | 789.321 | 711.806 | 77.514  |
| 2006          | 180088 | 63771.146 | 56684.656 | 7086.490 | 3.935  | 11.112 | 2160.67 | 765.117 | 680.094 | 85.023  |
| 2007          | 175644 | 63110.718 | 55343.202 | 7767.516 | 4.422  | 12.308 | 2086.36 | 749.650 | 657.385 | 92.265  |
| 2008          | 177570 | 63718.624 | 55047.464 | 8671.160 | 4.883  | 13.609 | 2086.39 | 748.674 | 646.790 | 101.883 |
| 2009          | 172806 | 62794.698 | 53489.450 | 9305.248 | 5.385  | 14.819 | 2007.57 | 729.515 | 621.412 | 108.103 |
| 2010          | 170489 | 61917.074 | 51889.765 | 10027.31 | 5.881  | 16.195 | 1957.97 | 711.083 | 595.925 | 115.158 |
| 2011          | 170305 | 61680.114 | 50687.112 | 10993.00 | 6.455  | 17.823 | 1937.46 | 701.700 | 576.639 | 125.061 |
| 2012          | 171421 | 62023.127 | 49995.488 | 12027.64 | 7.016  | 19.392 | 1930.22 | 698.386 | 562.954 | 135.432 |
| 2013          | 172699 | 62037.765 | 49070.879 | 12966.89 | 7.508  | 20.902 | 1923.75 | 691.059 | 546.616 | 144.442 |
| 2014          | 174169 | 61921.017 | 47874.990 | 14046.03 | 8.065  | 22.684 | 1918.85 | 682.195 | 527.447 | 154.748 |
| 2015          | 177354 | 61856.204 | 46912.541 | 14943.66 | 8.426  | 24.159 | 2184.51 | 761.899 | 577.834 | 184.065 |
| 2016          | 176853 | 60464.119 | 44674.680 | 15789.44 | 8.928  | 26.114 | 2157.59 | 737.655 | 545.026 | 192.629 |
| 2017          | 179309 | 60243.839 | 43417.153 | 16826.69 | 9.384  | 27.931 | 2166.86 | 728.017 | 524.675 | 203.342 |
| 2018          | 177157 | 60713.327 | 42942.919 | 17770.41 | 10.031 | 29.269 | 2120.51 | 726.721 | 514.014 | 212.707 |
| 2019          | 179227 | 61148.172 | 42219.932 | 18928.24 | 10.561 | 30.955 | 2124.53 | 724.841 | 500.469 | 224.372 |
| 2020          | 180467 | 61149.317 | 41387.383 | 19761.93 | 10.950 | 32.318 | 2424.25 | 821.432 | 555.966 | 265.466 |
| 2021          | 178116 | 58727.786 | 38342.546 | 20385.24 | 11.445 | 34.711 | 2375.42 | 783.216 | 511.350 | 271.865 |
| 2022          | 179408 | 58848.802 | 37342.522 | 21506.28 | 11.987 | 36.545 | 2374.52 | 778.881 | 494.239 | 284.642 |
| 2023          | 180640 | 58816.149 | 36348.914 | 22467.24 | 12.438 | 38.199 | 2372.26 | 772.407 | 477.354 | 295.052 |
| 2024          | 181610 | 58955.232 | 35379.355 | 23575.88 | 12.982 | 39.989 | 2366.77 | 768.316 | 461.071 | 307.245 |
| 2025          | 180418 | 58297.744 | 34224.449 | 24073.30 | 13.343 | 41.294 | 2713.69 | 876.861 | 514.773 | 362.088 |
| 2026          | 180313 | 56469.971 | 31902.503 | 24567.47 | 13.625 | 43.505 | 2701.83 | 846.150 | 478.029 | 368.121 |
| 2027          | 179619 | 56209.427 | 30684.343 | 25525.08 | 14.211 | 45.411 | 2680.68 | 838.883 | 457.941 | 380.943 |
| 2028          | 178762 | 55733.105 | 29390.292 | 26342.81 | 14.736 | 47.266 | 2656.74 | 828.298 | 436.795 | 391.503 |
| 2029          | 177808 | 55145.838 | 28022.118 | 27123.72 | 15.255 | 49.185 | 2630.89 | 815.951 | 414.622 | 401.329 |
| 2030          | 173587 | 53615.097 | 26596.685 | 27018.41 | 15.565 | 50.393 | 3040.33 | 939.056 | 465.835 | 473.221 |
| 2031          | 174985 | 52046.561 | 25060.054 | 26986.51 | 15.422 | 51.851 | 3060.73 | 910.364 | 438.334 | 472.030 |
| 2032          | 173400 | 51582.636 | 23895.520 | 27687.12 | 15.967 | 53.675 | 3027.10 | 900.496 | 417.152 | 483.343 |
| 2033          | 171756 | 50839.758 | 22631.642 | 28208.12 | 16.423 | 55.484 | 2991.14 | 885.375 | 394.130 | 491.244 |
| 2034          | 169973 | 50215.451 | 21440.065 | 28775.39 | 16.929 | 57.304 | 2951.96 | 872.104 | 372.355 | 499.749 |
| 2035          | 162644 | 47773.075 | 19855.009 | 27918.07 | 17.165 | 58.439 | 3459.14 | 1016.05 | 422.280 | 593.766 |
| 2036          | 156254 | 43298.709 | 17102.771 | 26195.94 | 16.765 | 60.501 | 3328.25 | 922.274 | 364.294 | 557.981 |
| 2037          | 153593 | 42241.563 | 15751.027 | 26490.54 | 17.247 | 62.712 | 3274.10 | 900.450 | 335.760 | 564.691 |
| 2038          | 150947 | 41356.353 | 14557.308 | 26799.04 | 17.754 | 64.800 | 3217.50 | 881.531 | 310.296 | 571.235 |
| 2039          | 148373 | 40161.050 | 13314.689 | 26846.36 | 18.094 | 66.847 | 3159.42 | 855.178 | 283.519 | 571.658 |

## Results for PHIM for Run 6 (Sensitivity\_Analysis\_2.RTF)

\*\*\*\*\*

### Main Results for E-Component for Run: 6, Simulation: 1, COD: LUNG CANCER

| Variable Parameter          | Value                                  |
|-----------------------------|----------------------------------------|
| 1. Country                  | US (United States)                     |
| 2. Sex                      | F (Females)                            |
| 3. Year of start of process | 1990                                   |
| 4. Cause of Death           | LUNG CANCER                            |
| 5. Effective Dose NULL      | CC:1                                   |
| 6. Effective Dose Ecig      | CC:1 Ecig:0.05 Dual:0.525              |
| Note:                       | Death rates are per million population |

#### Results for Age Groups Combined and Years combined, Population unadjusted for deaths in Ecig scenario,

| Age Group:All | NULL    | Ecig        | %Drop       |          |        | NULL   | Ecig    | Drop    |         |        |
|---------------|---------|-------------|-------------|----------|--------|--------|---------|---------|---------|--------|
| Year          | Number  | Attrib      | Attrib      | Drop     | %Drop  | Attrib | Death   | Attrib  | Attrib  | Drop   |
|               | Deaths  | Deaths      | Deaths      | Deaths   | Deaths | Deaths | Rate    | Rates   | Rates   | Rates  |
| All Comb      | 2327764 | 1580465.217 | 1278851.758 | 301613.5 | 12.957 | 19.084 | 639.078 | 433.910 | 351.104 | 82.807 |

#### Results for Age Groups Combined, Population unadjusted for deaths in Ecig scenario,

| Age Group:All | NULL   | Ecig      | %Drop     |          |        | NULL   | Ecig    | Drop    |         |         |
|---------------|--------|-----------|-----------|----------|--------|--------|---------|---------|---------|---------|
| Year          | Number | Attrib    | Attrib    | Drop     | %Drop  | Attrib | Death   | Attrib  | Attrib  | Drop    |
|               | Deaths | Deaths    | Deaths    | Deaths   | Deaths | Deaths | Rate    | Rates   | Rates   | Rates   |
| 1990          | 42690  | 30614.201 | 30614.201 | 0.000    | 0.000  | 0.000  | 625.210 | 448.355 | 448.355 | 0.000   |
| 1991          | 43692  | 31412.010 | 31401.028 | 10.982   | 0.025  | 0.035  | 631.345 | 453.901 | 453.742 | 0.159   |
| 1992          | 45423  | 32782.407 | 32752.859 | 29.548   | 0.065  | 0.090  | 647.450 | 467.274 | 466.853 | 0.421   |
| 1993          | 46291  | 33491.183 | 33430.912 | 60.272   | 0.130  | 0.180  | 650.515 | 470.643 | 469.796 | 0.847   |
| 1994          | 47017  | 34074.347 | 33975.351 | 98.997   | 0.211  | 0.291  | 650.895 | 471.719 | 470.349 | 1.370   |
| 1995          | 47840  | 34694.454 | 34540.462 | 153.992  | 0.322  | 0.444  | 652.025 | 472.861 | 470.762 | 2.099   |
| 1996          | 48244  | 35027.269 | 34811.691 | 215.577  | 0.447  | 0.615  | 648.999 | 471.202 | 468.302 | 2.900   |
| 1997          | 49035  | 35590.763 | 35290.258 | 300.504  | 0.613  | 0.844  | 650.506 | 472.153 | 468.166 | 3.987   |
| 1998          | 49686  | 36100.785 | 35686.906 | 413.879  | 0.833  | 1.146  | 649.874 | 472.184 | 466.771 | 5.413   |
| 1999          | 48883  | 35451.030 | 34928.305 | 522.724  | 1.069  | 1.474  | 630.769 | 457.448 | 450.703 | 6.745   |
| 2000          | 50331  | 36447.986 | 35763.459 | 684.527  | 1.360  | 1.878  | 641.392 | 464.474 | 455.751 | 8.723   |
| 2001          | 50389  | 36411.326 | 35563.260 | 848.066  | 1.683  | 2.329  | 635.012 | 458.863 | 448.175 | 10.687  |
| 2002          | 51445  | 37078.545 | 36008.220 | 1070.325 | 2.081  | 2.887  | 641.972 | 462.696 | 449.339 | 13.356  |
| 2003          | 51408  | 36999.876 | 35710.994 | 1288.881 | 2.507  | 3.483  | 635.509 | 457.395 | 441.461 | 15.933  |
| 2004          | 51399  | 36861.555 | 35320.493 | 1541.062 | 2.998  | 4.181  | 629.057 | 451.138 | 432.277 | 18.861  |
| 2005          | 51421  | 36689.529 | 34880.512 | 1809.017 | 3.518  | 4.931  | 622.370 | 444.069 | 422.173 | 21.895  |
| 2006          | 51355  | 36504.774 | 34391.531 | 2113.243 | 4.115  | 5.789  | 616.150 | 437.979 | 412.625 | 25.354  |
| 2007          | 51839  | 36663.202 | 34188.711 | 2474.491 | 4.773  | 6.749  | 615.761 | 435.498 | 406.105 | 29.393  |
| 2008          | 50976  | 35898.803 | 33143.085 | 2755.718 | 5.406  | 7.676  | 598.952 | 421.800 | 389.421 | 32.379  |
| 2009          | 51193  | 35934.525 | 32790.536 | 3143.989 | 6.141  | 8.749  | 594.733 | 417.468 | 380.943 | 36.525  |
| 2010          | 50853  | 35502.829 | 32008.984 | 3493.845 | 6.870  | 9.841  | 584.018 | 407.730 | 367.605 | 40.125  |
| 2011          | 50509  | 35136.342 | 31218.423 | 3917.919 | 7.757  | 11.151 | 574.613 | 399.726 | 355.154 | 44.572  |
| 2012          | 51245  | 35450.201 | 31031.760 | 4418.441 | 8.622  | 12.464 | 577.023 | 399.173 | 349.421 | 49.752  |
| 2013          | 51069  | 35123.224 | 30245.581 | 4877.643 | 9.551  | 13.887 | 568.874 | 391.249 | 336.915 | 54.334  |
| 2014          | 51251  | 35079.370 | 29704.954 | 5374.416 | 10.486 | 15.321 | 564.641 | 386.476 | 327.265 | 59.211  |
| 2015          | 50443  | 34324.171 | 28600.170 | 5724.001 | 11.347 | 16.676 | 621.319 | 422.780 | 352.276 | 70.504  |
| 2016          | 48854  | 33054.753 | 26993.195 | 6061.557 | 12.407 | 18.338 | 596.013 | 403.264 | 329.314 | 73.950  |
| 2017          | 48325  | 32471.234 | 25953.867 | 6517.367 | 13.487 | 20.071 | 583.983 | 392.399 | 313.639 | 78.759  |
| 2018          | 50465  | 33657.595 | 26220.169 | 7437.426 | 14.738 | 22.097 | 604.052 | 402.871 | 313.848 | 89.024  |
| 2019          | 51036  | 33863.424 | 25758.187 | 8105.237 | 15.881 | 23.935 | 604.975 | 401.412 | 305.334 | 96.078  |
| 2020          | 51444  | 33910.830 | 25234.681 | 8676.149 | 16.865 | 25.585 | 691.053 | 455.532 | 338.983 | 116.549 |
| 2021          | 48037  | 31531.880 | 22834.315 | 8697.565 | 18.106 | 27.583 | 640.639 | 420.521 | 304.527 | 115.994 |
| 2022          | 48335  | 31560.212 | 22204.291 | 9355.922 | 19.356 | 29.645 | 639.727 | 417.708 | 293.880 | 123.828 |
| 2023          | 48599  | 31508.781 | 21559.459 | 9949.323 | 20.472 | 31.576 | 638.227 | 413.791 | 283.131 | 130.660 |
| 2024          | 48784  | 31517.293 | 20912.740 | 10604.55 | 21.738 | 33.647 | 635.757 | 410.740 | 272.539 | 138.201 |
| 2025          | 48477  | 31175.389 | 20150.228 | 11025.16 | 22.743 | 35.365 | 729.141 | 468.912 | 303.081 | 165.830 |
| 2026          | 45324  | 29044.598 | 18187.251 | 10857.35 | 23.955 | 37.382 | 679.138 | 435.206 | 272.519 | 162.687 |
| 2027          | 45107  | 28825.765 | 17415.295 | 11410.47 | 25.296 | 39.584 | 673.191 | 430.203 | 259.910 | 170.293 |
| 2028          | 44842  | 28513.846 | 16608.945 | 11904.90 | 26.549 | 41.751 | 666.430 | 423.769 | 246.840 | 176.929 |
| 2029          | 44539  | 28148.109 | 15761.387 | 12386.72 | 27.811 | 44.006 | 659.013 | 416.486 | 233.209 | 183.277 |
| 2030          | 43393  | 27314.475 | 14862.231 | 12452.24 | 28.696 | 45.588 | 760.018 | 478.407 | 260.308 | 218.098 |
| 2031          | 40748  | 25423.102 | 13475.808 | 11947.29 | 29.320 | 46.994 | 712.731 | 444.684 | 235.710 | 208.974 |
| 2032          | 40325  | 25085.902 | 12761.590 | 12324.31 | 30.562 | 49.128 | 703.969 | 437.933 | 222.783 | 215.150 |
| 2033          | 39882  | 24645.067 | 12010.221 | 12634.85 | 31.681 | 51.267 | 694.543 | 429.194 | 209.158 | 220.036 |
| 2034          | 39404  | 24239.126 | 11301.064 | 12938.06 | 32.834 | 53.377 | 684.347 | 420.967 | 196.268 | 224.698 |
| 2035          | 37454  | 22944.147 | 10355.033 | 12589.11 | 33.612 | 54.869 | 796.588 | 487.980 | 220.233 | 267.747 |
| 2036          | 32988  | 19950.581 | 8592.259  | 11358.32 | 34.431 | 56.932 | 702.663 | 424.953 | 183.017 | 241.935 |
| 2037          | 32403  | 19415.334 | 7872.030  | 11543.30 | 35.624 | 59.455 | 690.731 | 413.871 | 167.806 | 246.065 |
| 2038          | 31820  | 18939.317 | 7236.193  | 11703.12 | 36.779 | 61.793 | 678.257 | 403.701 | 154.243 | 249.458 |
| 2039          | 31251  | 18379.752 | 6588.674  | 11791.08 | 37.730 | 64.153 | 665.457 | 391.373 | 140.297 | 251.076 |

## Results for PHIM for Run 6 (Sensitivity\_Analysis\_2.RTF)

\*\*\*\*\*

### Main Results for E-Component for Run: 6, Simulation: 1, COD: IHD

| Variable Parameter          | Value                                  |
|-----------------------------|----------------------------------------|
| 1. Country                  | US (United States)                     |
| 2. Sex                      | F (Females)                            |
| 3. Year of start of process | 1990                                   |
| 4. Cause of Death           | IHD                                    |
| 5. Effective Dose NULL      | CC:1                                   |
| 6. Effective Dose Ecig      | CC:1 Ecig:0.05 Dual:0.525              |
| Note:                       | Death rates are per million population |

#### Results for Age Groups Combined and Years combined, Population unadjusted for deaths in Ecig scenario,

| Age Group:All |         | NULL       | Ecig       | %Drop    |        |        | NULL    | Ecig    | Drop   |        |
|---------------|---------|------------|------------|----------|--------|--------|---------|---------|--------|--------|
| Year          | Number  | Attrib     | Attrib     | Drop     | %Drop  | Attrib | Death   | Attrib  | Attrib | Drop   |
|               | Deaths  | Deaths     | Deaths     | Deaths   | Deaths | Deaths | Rate    | Rates   | Rates  | Rates  |
| All Comb      | 3242167 | 398833.796 | 248465.843 | 150368.0 | 4.638  | 37.702 | 890.124 | 109.498 | 68.215 | 41.283 |

#### Results for Age Groups Combined, Population unadjusted for deaths in Ecig scenario,

| Age Group:All |        | NULL      | Ecig      | %Drop    |        |        | NULL    | Ecig    | Drop    |        |
|---------------|--------|-----------|-----------|----------|--------|--------|---------|---------|---------|--------|
| Year          | Number | Attrib    | Attrib    | Drop     | %Drop  | Attrib | Death   | Attrib  | Attrib  | Drop   |
|               | Deaths | Deaths    | Deaths    | Deaths   | Deaths | Deaths | Rate    | Rates   | Rates   | Rates  |
| 1990          | 98916  | 12922.892 | 12922.892 | 0.000    | 0.000  | 0.000  | 1448.66 | 189.260 | 189.260 | 0.000  |
| 1991          | 96403  | 12856.479 | 12818.187 | 38.292   | 0.040  | 0.298  | 1393.01 | 185.775 | 185.222 | 0.553  |
| 1992          | 93721  | 12662.244 | 12556.193 | 106.050  | 0.113  | 0.838  | 1335.88 | 180.485 | 178.973 | 1.512  |
| 1993          | 93679  | 12730.613 | 12525.451 | 205.162  | 0.219  | 1.612  | 1316.45 | 178.900 | 176.017 | 2.883  |
| 1994          | 90832  | 12495.323 | 12168.534 | 326.789  | 0.360  | 2.615  | 1257.46 | 172.983 | 168.459 | 4.524  |
| 1995          | 89698  | 12365.590 | 11893.185 | 472.405  | 0.527  | 3.820  | 1222.52 | 168.534 | 162.096 | 6.439  |
| 1996          | 88286  | 12290.551 | 11633.234 | 657.317  | 0.745  | 5.348  | 1187.66 | 165.338 | 156.495 | 8.843  |
| 1997          | 84777  | 11719.531 | 10906.681 | 812.851  | 0.959  | 6.936  | 1124.67 | 155.473 | 144.690 | 10.783 |
| 1998          | 82517  | 11416.794 | 10418.366 | 998.428  | 1.210  | 8.745  | 1079.29 | 149.327 | 136.268 | 13.059 |
| 1999          | 93939  | 13028.038 | 11606.466 | 1421.572 | 1.513  | 10.912 | 1212.16 | 168.109 | 149.766 | 18.343 |
| 2000          | 90039  | 12426.299 | 10788.894 | 1637.405 | 1.819  | 13.177 | 1147.41 | 158.354 | 137.488 | 20.866 |
| 2001          | 86119  | 11939.281 | 10033.819 | 1905.462 | 2.213  | 15.960 | 1085.29 | 150.461 | 126.448 | 24.013 |
| 2002          | 83014  | 11528.794 | 9342.196  | 2186.598 | 2.634  | 18.966 | 1035.91 | 143.865 | 116.579 | 27.286 |
| 2003          | 79302  | 11048.407 | 8629.753  | 2418.654 | 3.050  | 21.891 | 980.336 | 136.581 | 106.681 | 29.900 |
| 2004          | 73861  | 10375.132 | 7764.681  | 2610.450 | 3.534  | 25.161 | 903.963 | 126.978 | 95.030  | 31.949 |
| 2005          | 71649  | 10051.029 | 7208.743  | 2842.286 | 3.967  | 28.279 | 867.197 | 121.652 | 87.250  | 34.401 |
| 2006          | 67551  | 9542.523  | 6502.885  | 3039.639 | 4.500  | 31.854 | 810.467 | 114.490 | 78.021  | 36.469 |
| 2007          | 63503  | 8936.533  | 5792.569  | 3143.964 | 4.951  | 35.181 | 754.310 | 106.151 | 68.806  | 37.345 |
| 2008          | 63171  | 8944.180  | 5508.595  | 3435.585 | 5.439  | 38.411 | 742.239 | 105.091 | 64.724  | 40.367 |
| 2009          | 59747  | 8390.033  | 4928.932  | 3461.101 | 5.793  | 41.253 | 694.108 | 97.471  | 57.262  | 40.209 |
| 2010          | 58008  | 8157.570  | 4539.925  | 3617.644 | 6.236  | 44.347 | 666.189 | 93.685  | 52.138  | 41.547 |
| 2011          | 57368  | 8035.356  | 4211.483  | 3823.873 | 6.666  | 47.588 | 652.644 | 91.414  | 47.912  | 43.502 |
| 2012          | 57411  | 7970.766  | 3915.860  | 4054.906 | 7.063  | 50.872 | 646.453 | 89.752  | 44.093  | 45.659 |
| 2013          | 57067  | 7743.216  | 3596.407  | 4146.809 | 7.267  | 53.554 | 635.688 | 86.254  | 40.062  | 46.193 |
| 2014          | 57538  | 7774.935  | 3386.055  | 4388.880 | 7.628  | 56.449 | 633.906 | 85.658  | 37.305  | 48.353 |
| 2015          | 58395  | 7722.535  | 3204.643  | 4517.892 | 7.737  | 58.503 | 719.266 | 95.120  | 39.472  | 55.648 |
| 2016          | 58658  | 7600.353  | 2963.324  | 4637.029 | 7.905  | 61.011 | 715.621 | 92.723  | 36.152  | 56.571 |
| 2017          | 59004  | 7470.266  | 2739.086  | 4731.181 | 8.018  | 63.333 | 713.034 | 90.274  | 33.100  | 57.174 |
| 2018          | 56077  | 6907.050  | 2370.898  | 4536.152 | 8.089  | 65.674 | 671.224 | 82.675  | 28.379  | 54.296 |
| 2019          | 55886  | 6732.046  | 2184.286  | 4547.761 | 8.138  | 67.554 | 662.462 | 79.801  | 25.892  | 53.908 |
| 2020          | 55313  | 6429.836  | 1990.084  | 4439.751 | 8.027  | 69.049 | 743.037 | 86.373  | 26.733  | 59.640 |
| 2021          | 56292  | 6562.016  | 1880.826  | 4681.190 | 8.316  | 71.338 | 750.730 | 87.513  | 25.083  | 62.430 |
| 2022          | 55827  | 6352.366  | 1707.614  | 4644.752 | 8.320  | 73.118 | 738.885 | 84.075  | 22.601  | 61.475 |
| 2023          | 55338  | 6134.123  | 1556.526  | 4577.597 | 8.272  | 74.625 | 726.728 | 80.557  | 20.441  | 60.116 |
| 2024          | 54770  | 5922.193  | 1414.633  | 4507.559 | 8.230  | 76.113 | 713.771 | 77.179  | 18.436  | 58.743 |
| 2025          | 53295  | 5504.188  | 1272.493  | 4231.694 | 7.940  | 76.881 | 801.612 | 82.789  | 19.140  | 63.649 |
| 2026          | 55278  | 5641.075  | 1224.009  | 4417.067 | 7.991  | 78.302 | 828.283 | 84.526  | 18.341  | 66.186 |
| 2027          | 54199  | 5426.216  | 1114.425  | 4311.791 | 7.956  | 79.462 | 808.875 | 80.982  | 16.632  | 64.350 |
| 2028          | 53090  | 5197.830  | 1005.998  | 4191.832 | 7.896  | 80.646 | 789.020 | 77.249  | 14.951  | 62.298 |
| 2029          | 51974  | 4973.547  | 911.674   | 4061.873 | 7.815  | 81.670 | 769.023 | 73.590  | 13.489  | 60.100 |
| 2030          | 49479  | 4450.618  | 793.930   | 3656.688 | 7.390  | 82.161 | 866.605 | 77.952  | 13.905  | 64.046 |
| 2031          | 51987  | 4555.052  | 769.041   | 3786.011 | 7.283  | 83.117 | 909.317 | 79.674  | 13.452  | 66.222 |
| 2032          | 50677  | 4349.999  | 691.957   | 3658.042 | 7.218  | 84.093 | 884.689 | 75.939  | 12.080  | 63.860 |
| 2033          | 49380  | 4147.948  | 623.134   | 3524.814 | 7.138  | 84.977 | 859.955 | 72.237  | 10.852  | 61.385 |
| 2034          | 48076  | 3966.133  | 560.789   | 3405.344 | 7.083  | 85.861 | 834.943 | 68.881  | 9.739   | 59.141 |
| 2035          | 44518  | 3289.064  | 457.112   | 2831.953 | 6.361  | 86.102 | 946.825 | 69.952  | 9.722   | 60.230 |
| 2036          | 46347  | 3313.192  | 428.775   | 2884.417 | 6.223  | 87.059 | 987.211 | 70.572  | 9.133   | 61.439 |
| 2037          | 44841  | 3117.951  | 376.302   | 2741.650 | 6.114  | 87.931 | 955.859 | 66.464  | 8.022   | 58.443 |
| 2038          | 43378  | 2949.775  | 330.910   | 2618.865 | 6.037  | 88.782 | 924.621 | 62.876  | 7.053   | 55.822 |
| 2039          | 41973  | 2766.312  | 293.388   | 2472.924 | 5.892  | 89.394 | 893.753 | 58.905  | 6.247   | 52.658 |



## Results for PHIM for Run 6 (Sensitivity\_Analysis\_2.RTF)

\*\*\*\*\*

### Main Results for E-Component for Run: 6, Simulation: 1, COD: STROKE

| Variable Parameter          | Value                                  |
|-----------------------------|----------------------------------------|
| 1. Country                  | US (United States)                     |
| 2. Sex                      | F (Females)                            |
| 3. Year of start of process | 1990                                   |
| 4. Cause of Death           | STROKE                                 |
| 5. Effective Dose NULL      | CC:1                                   |
| 6. Effective Dose Ecig      | CC:1 Ecig:0.05 Dual:0.525              |
| Note:                       | Death rates are per million population |

#### Results for Age Groups Combined and Years combined, Population unadjusted for deaths in Ecig scenario,

| Age Group:All | NULL    | Ecig       | %Drop     |          |        | NULL   | Ecig    | Drop   |        |        |
|---------------|---------|------------|-----------|----------|--------|--------|---------|--------|--------|--------|
| Year          | Number  | Attrib     | Attrib    | Drop     | %Drop  | Attrib | Death   | Attrib | Attrib | Drop   |
|               | Deaths  | Deaths     | Deaths    | Deaths   | Deaths | Deaths | Rate    | Rates  | Rates  | Rates  |
| All Comb      | 1352207 | 104899.750 | 64304.734 | 40595.02 | 3.002  | 38.699 | 371.243 | 28.800 | 17.655 | 11.145 |

#### Results for Age Groups Combined, Population unadjusted for deaths in Ecig scenario,

| Age Group:All | NULL   | Ecig     | %Drop    |          |        | NULL   | Ecig    | Drop   |        |        |
|---------------|--------|----------|----------|----------|--------|--------|---------|--------|--------|--------|
| Year          | Number | Attrib   | Attrib   | Drop     | %Drop  | Attrib | Death   | Attrib | Attrib | Drop   |
|               | Deaths | Deaths   | Deaths   | Deaths   | Deaths | Deaths | Rate    | Rates  | Rates  | Rates  |
| 1990          | 33504  | 3293.017 | 3293.017 | 0.000    | 0.000  | 0.000  | 490.678 | 48.227 | 48.227 | 0.000  |
| 1991          | 32505  | 3207.063 | 3196.262 | 10.801   | 0.033  | 0.337  | 469.694 | 46.342 | 46.186 | 0.156  |
| 1992          | 32560  | 3218.125 | 3188.171 | 29.954   | 0.092  | 0.931  | 464.104 | 45.871 | 45.444 | 0.427  |
| 1993          | 32768  | 3226.680 | 3167.712 | 58.969   | 0.180  | 1.828  | 460.480 | 45.344 | 44.515 | 0.829  |
| 1994          | 33005  | 3277.266 | 3179.115 | 98.151   | 0.297  | 2.995  | 456.915 | 45.370 | 44.011 | 1.359  |
| 1995          | 33730  | 3309.378 | 3163.444 | 145.935  | 0.433  | 4.410  | 459.716 | 45.104 | 43.116 | 1.989  |
| 1996          | 33750  | 3312.987 | 3108.402 | 204.584  | 0.606  | 6.175  | 454.019 | 44.568 | 41.816 | 2.752  |
| 1997          | 33699  | 3267.066 | 2999.257 | 267.808  | 0.795  | 8.197  | 447.056 | 43.341 | 39.789 | 3.553  |
| 1998          | 33274  | 3178.725 | 2849.261 | 329.464  | 0.990  | 10.365 | 435.211 | 41.577 | 37.267 | 4.309  |
| 1999          | 33891  | 3120.351 | 2724.819 | 395.532  | 1.167  | 12.676 | 437.317 | 40.264 | 35.160 | 5.104  |
| 2000          | 33827  | 3142.808 | 2661.958 | 480.850  | 1.421  | 15.300 | 431.074 | 40.050 | 33.923 | 6.128  |
| 2001          | 32506  | 2961.588 | 2427.815 | 533.773  | 1.642  | 18.023 | 409.647 | 37.323 | 30.596 | 6.727  |
| 2002          | 32078  | 2940.627 | 2317.582 | 623.045  | 1.942  | 21.188 | 400.295 | 36.695 | 28.921 | 7.775  |
| 2003          | 30568  | 2819.545 | 2132.457 | 687.088  | 2.248  | 24.369 | 377.883 | 34.855 | 26.362 | 8.494  |
| 2004          | 29388  | 2730.466 | 1979.273 | 751.192  | 2.556  | 27.512 | 359.671 | 33.417 | 24.224 | 9.194  |
| 2005          | 27954  | 2670.510 | 1847.017 | 823.493  | 2.946  | 30.837 | 338.339 | 32.322 | 22.355 | 9.967  |
| 2006          | 27201  | 2623.285 | 1728.152 | 895.134  | 3.291  | 34.123 | 326.354 | 31.474 | 20.734 | 10.740 |
| 2007          | 26302  | 2536.599 | 1587.838 | 948.761  | 3.607  | 37.403 | 312.424 | 30.131 | 18.861 | 11.270 |
| 2008          | 25998  | 2469.443 | 1473.590 | 995.853  | 3.830  | 40.327 | 305.468 | 29.015 | 17.314 | 11.701 |
| 2009          | 25040  | 2386.945 | 1352.947 | 1033.998 | 4.129  | 43.319 | 290.901 | 27.730 | 15.718 | 12.012 |
| 2010          | 24840  | 2329.274 | 1253.411 | 1075.863 | 4.331  | 46.189 | 285.273 | 26.750 | 14.395 | 12.356 |
| 2011          | 24792  | 2286.581 | 1159.355 | 1127.226 | 4.547  | 49.297 | 282.045 | 26.013 | 13.189 | 12.824 |
| 2012          | 24500  | 2243.311 | 1070.310 | 1173.001 | 4.788  | 52.289 | 275.872 | 25.260 | 12.052 | 13.208 |
| 2013          | 24451  | 2176.503 | 974.837  | 1201.666 | 4.915  | 55.211 | 272.368 | 24.245 | 10.859 | 13.386 |
| 2014          | 25296  | 2211.619 | 933.405  | 1278.214 | 5.053  | 57.795 | 278.691 | 24.366 | 10.283 | 14.082 |
| 2015          | 26316  | 2237.016 | 897.357  | 1339.659 | 5.091  | 59.886 | 324.141 | 27.554 | 11.053 | 16.501 |
| 2016          | 26735  | 2229.057 | 840.910  | 1388.148 | 5.192  | 62.275 | 326.164 | 27.194 | 10.259 | 16.935 |
| 2017          | 27616  | 2221.649 | 790.488  | 1431.161 | 5.182  | 64.419 | 333.726 | 26.848 | 9.553  | 17.295 |
| 2018          | 25256  | 1939.420 | 652.071  | 1287.349 | 5.097  | 66.378 | 302.304 | 23.214 | 7.805  | 15.409 |
| 2019          | 25429  | 1904.400 | 602.454  | 1301.945 | 5.120  | 68.365 | 301.434 | 22.574 | 7.141  | 15.433 |
| 2020          | 25379  | 1806.054 | 543.014  | 1263.041 | 4.977  | 69.934 | 340.922 | 24.261 | 7.294  | 16.967 |
| 2021          | 25448  | 1748.172 | 493.346  | 1254.827 | 4.931  | 71.779 | 339.386 | 23.314 | 6.579  | 16.735 |
| 2022          | 25539  | 1701.148 | 448.844  | 1252.304 | 4.904  | 73.615 | 338.015 | 22.515 | 5.941  | 16.575 |
| 2023          | 25620  | 1652.087 | 409.686  | 1242.401 | 4.849  | 75.202 | 336.461 | 21.696 | 5.380  | 16.316 |
| 2024          | 25659  | 1597.127 | 370.923  | 1226.203 | 4.779  | 76.776 | 334.391 | 20.814 | 4.834  | 15.980 |
| 2025          | 25260  | 1467.622 | 327.923  | 1139.699 | 4.512  | 77.656 | 379.931 | 22.075 | 4.932  | 17.142 |
| 2026          | 25480  | 1390.505 | 294.767  | 1095.738 | 4.300  | 78.801 | 381.790 | 20.835 | 4.417  | 16.419 |
| 2027          | 25264  | 1342.095 | 268.773  | 1073.323 | 4.248  | 79.974 | 377.042 | 20.030 | 4.011  | 16.019 |
| 2028          | 25022  | 1289.536 | 243.208  | 1046.328 | 4.182  | 81.140 | 371.870 | 19.165 | 3.615  | 15.550 |
| 2029          | 24767  | 1242.216 | 221.829  | 1020.387 | 4.120  | 82.142 | 366.459 | 18.380 | 3.282  | 15.098 |
| 2030          | 23959  | 1096.803 | 188.360  | 908.443  | 3.792  | 82.826 | 419.641 | 19.210 | 3.299  | 15.911 |
| 2031          | 23963  | 1019.991 | 166.050  | 853.941  | 3.564  | 83.720 | 419.142 | 17.841 | 2.904  | 14.937 |
| 2032          | 23615  | 977.406  | 148.709  | 828.697  | 3.509  | 84.785 | 412.259 | 17.063 | 2.596  | 14.467 |
| 2033          | 23259  | 937.450  | 134.399  | 803.051  | 3.453  | 85.663 | 405.051 | 16.326 | 2.341  | 13.985 |
| 2034          | 22879  | 900.763  | 120.720  | 780.043  | 3.409  | 86.598 | 397.339 | 15.644 | 2.097  | 13.547 |
| 2035          | 21733  | 745.023  | 96.572   | 648.451  | 2.984  | 87.038 | 462.224 | 15.845 | 2.054  | 13.791 |
| 2036          | 20904  | 680.360  | 81.710   | 598.650  | 2.864  | 87.990 | 445.263 | 14.492 | 1.740  | 12.751 |
| 2037          | 20397  | 644.109  | 72.216   | 571.893  | 2.804  | 88.788 | 434.791 | 13.730 | 1.539  | 12.191 |
| 2038          | 19890  | 612.448  | 63.468   | 548.980  | 2.760  | 89.637 | 423.966 | 13.055 | 1.353  | 11.702 |
| 2039          | 19392  | 577.529  | 57.531   | 519.999  | 2.681  | 90.038 | 412.930 | 12.298 | 1.225  | 11.073 |

## Results for PHIM for Run 6 (Sensitivity\_Analysis\_2.RTF)

\*\*\*\*\*

### Main Results for E-Component for Run: 6, Simulation: 1, COD: COPD

| Variable Parameter          | Value                                  |
|-----------------------------|----------------------------------------|
| 1. Country                  | US (United States)                     |
| 2. Sex                      | F (Females)                            |
| 3. Year of start of process | 1990                                   |
| 4. Cause of Death           | COPD                                   |
| 5. Effective Dose NULL      | CC:1                                   |
| 6. Effective Dose Ecig      | CC:1 Ecig:0.05 Dual:0.525              |
| Note:                       | Death rates are per million population |

#### Results for Age Groups Combined and Years combined, Population unadjusted for deaths in Ecig scenario,

| Age Group:All | NULL    | Ecig       | %Drop      |          |        | NULL   | Ecig    | Drop    |         |        |
|---------------|---------|------------|------------|----------|--------|--------|---------|---------|---------|--------|
| Year          | Number  | Attrib     | Attrib     | Drop     | %Drop  | Attrib | Death   | Attrib  | Attrib  | Drop   |
|               | Deaths  | Deaths     | Deaths     | Deaths   | Deaths | Deaths | Rate    | Rates   | Rates   | Rates  |
| All Comb      | 2159941 | 862051.244 | 631660.506 | 230390.7 | 10.667 | 26.726 | 593.003 | 236.673 | 173.420 | 63.253 |

#### Results for Age Groups Combined, Population unadjusted for deaths in Ecig scenario,

| Age Group:All | NULL   | Ecig      | %Drop     |          |        | NULL   | Ecig    | Drop    |         |         |
|---------------|--------|-----------|-----------|----------|--------|--------|---------|---------|---------|---------|
| Year          | Number | Attrib    | Attrib    | Drop     | %Drop  | Attrib | Death   | Attrib  | Attrib  | Drop    |
|               | Deaths | Deaths    | Deaths    | Deaths   | Deaths | Deaths | Rate    | Rates   | Rates   | Rates   |
| 1990          | 24738  | 10694.712 | 10694.712 | 0.000    | 0.000  | 0.000  | 362.296 | 156.628 | 156.628 | 0.000   |
| 1991          | 26562  | 11602.933 | 11597.162 | 5.771    | 0.022  | 0.050  | 383.818 | 167.661 | 167.578 | 0.083   |
| 1992          | 26828  | 11831.375 | 11818.379 | 12.996   | 0.048  | 0.110  | 382.401 | 168.642 | 168.457 | 0.185   |
| 1993          | 29774  | 13246.371 | 13218.053 | 28.318   | 0.095  | 0.214  | 418.406 | 186.148 | 185.750 | 0.398   |
| 1994          | 29804  | 13355.662 | 13310.855 | 44.807   | 0.150  | 0.335  | 412.601 | 184.893 | 184.273 | 0.620   |
| 1995          | 29755  | 13397.439 | 13328.965 | 68.474   | 0.230  | 0.511  | 405.540 | 182.598 | 181.664 | 0.933   |
| 1996          | 30900  | 13960.356 | 13866.939 | 93.416   | 0.302  | 0.669  | 415.680 | 187.801 | 186.544 | 1.257   |
| 1997          | 31128  | 14109.552 | 13979.254 | 130.298  | 0.419  | 0.923  | 412.949 | 187.180 | 185.451 | 1.729   |
| 1998          | 32096  | 14599.657 | 14411.995 | 187.663  | 0.585  | 1.285  | 419.803 | 190.958 | 188.503 | 2.455   |
| 1999          | 34616  | 15728.102 | 15465.324 | 262.779  | 0.759  | 1.671  | 446.673 | 202.950 | 199.559 | 3.391   |
| 2000          | 34299  | 15579.803 | 15245.489 | 334.314  | 0.975  | 2.146  | 437.088 | 198.541 | 194.281 | 4.260   |
| 2001          | 34592  | 15696.614 | 15277.252 | 419.362  | 1.212  | 2.672  | 435.935 | 197.812 | 192.527 | 5.285   |
| 2002          | 34291  | 15519.777 | 14996.612 | 523.165  | 1.526  | 3.371  | 427.910 | 193.668 | 187.140 | 6.528   |
| 2003          | 35074  | 15888.389 | 15239.062 | 649.327  | 1.851  | 4.087  | 433.587 | 196.413 | 188.386 | 8.027   |
| 2004          | 33512  | 15091.573 | 14347.498 | 744.075  | 2.220  | 4.930  | 410.143 | 184.701 | 175.595 | 9.107   |
| 2005          | 35392  | 15803.656 | 14874.113 | 929.542  | 2.626  | 5.882  | 428.364 | 191.278 | 180.028 | 11.251  |
| 2006          | 33981  | 15100.563 | 14062.088 | 1038.475 | 3.056  | 6.877  | 407.699 | 181.174 | 168.715 | 12.459  |
| 2007          | 34000  | 14974.384 | 13774.084 | 1200.299 | 3.530  | 8.016  | 403.863 | 177.871 | 163.613 | 14.258  |
| 2008          | 37425  | 16406.197 | 14922.194 | 1484.004 | 3.965  | 9.045  | 439.732 | 192.768 | 175.331 | 17.437  |
| 2009          | 36826  | 16083.194 | 14417.035 | 1666.159 | 4.524  | 10.360 | 427.825 | 186.846 | 167.489 | 19.357  |
| 2010          | 36788  | 15927.400 | 14087.444 | 1839.956 | 5.002  | 11.552 | 422.489 | 182.917 | 161.786 | 21.131  |
| 2011          | 37636  | 16221.836 | 14097.852 | 2123.984 | 5.643  | 13.093 | 428.164 | 184.547 | 160.383 | 24.163  |
| 2012          | 38265  | 16358.849 | 13977.558 | 2381.291 | 6.223  | 14.557 | 430.867 | 184.202 | 157.389 | 26.814  |
| 2013          | 40112  | 16994.822 | 14254.054 | 2740.768 | 6.833  | 16.127 | 446.821 | 189.311 | 158.781 | 30.530  |
| 2014          | 40084  | 16855.093 | 13850.577 | 3004.516 | 7.496  | 17.826 | 441.613 | 185.696 | 152.594 | 33.101  |
| 2015          | 42200  | 17572.483 | 14210.371 | 3362.111 | 7.967  | 19.133 | 519.788 | 216.445 | 175.033 | 41.412  |
| 2016          | 42606  | 17579.955 | 13877.250 | 3702.705 | 8.691  | 21.062 | 519.788 | 214.473 | 169.301 | 45.173  |
| 2017          | 44364  | 18080.688 | 13933.711 | 4146.977 | 9.348  | 22.936 | 536.117 | 218.496 | 168.382 | 50.114  |
| 2018          | 45359  | 18209.262 | 13699.780 | 4509.482 | 9.942  | 24.765 | 542.932 | 217.960 | 163.982 | 53.977  |
| 2019          | 46876  | 18648.302 | 13675.005 | 4973.297 | 10.610 | 26.669 | 555.657 | 221.054 | 162.101 | 58.953  |
| 2020          | 48331  | 19002.597 | 13619.604 | 5382.993 | 11.138 | 28.328 | 649.239 | 255.266 | 182.955 | 72.311  |
| 2021          | 48338  | 18885.717 | 13134.060 | 5751.658 | 11.899 | 30.455 | 644.660 | 251.867 | 175.161 | 76.706  |
| 2022          | 49708  | 19235.076 | 12981.774 | 6253.302 | 12.580 | 32.510 | 657.895 | 254.582 | 171.817 | 82.764  |
| 2023          | 51083  | 19521.158 | 12823.243 | 6697.915 | 13.112 | 34.311 | 670.849 | 256.363 | 168.402 | 87.961  |
| 2024          | 52397  | 19918.620 | 12681.059 | 7237.561 | 13.813 | 36.336 | 682.854 | 259.583 | 165.262 | 94.321  |
| 2025          | 53387  | 20150.545 | 12473.805 | 7676.740 | 14.379 | 38.097 | 803.004 | 303.086 | 187.620 | 115.466 |
| 2026          | 54232  | 20393.792 | 12196.477 | 8197.315 | 15.115 | 40.195 | 812.615 | 305.582 | 182.753 | 122.829 |
| 2027          | 55049  | 20615.351 | 11885.850 | 8729.501 | 15.858 | 42.345 | 821.568 | 307.668 | 177.387 | 130.281 |
| 2028          | 55809  | 20731.894 | 11532.142 | 9199.751 | 16.484 | 44.375 | 829.419 | 308.115 | 171.389 | 136.726 |
| 2029          | 56527  | 20781.967 | 11127.228 | 9654.739 | 17.080 | 46.457 | 836.392 | 307.495 | 164.641 | 142.854 |
| 2030          | 56756  | 20753.201 | 10752.164 | 10001.04 | 17.621 | 48.190 | 994.067 | 363.487 | 188.322 | 175.166 |
| 2031          | 58288  | 21048.417 | 10649.156 | 10399.26 | 17.841 | 49.406 | 1019.54 | 368.165 | 186.268 | 181.897 |
| 2032          | 58782  | 21169.329 | 10293.264 | 10876.06 | 18.502 | 51.377 | 1026.18 | 369.560 | 179.693 | 189.867 |
| 2033          | 59236  | 21109.293 | 9863.888  | 11245.41 | 18.984 | 53.272 | 1031.59 | 367.618 | 171.780 | 195.839 |
| 2034          | 59614  | 21109.429 | 9457.491  | 11651.94 | 19.546 | 55.198 | 1035.33 | 366.613 | 164.251 | 202.362 |
| 2035          | 58938  | 20794.840 | 8946.292  | 11848.55 | 20.103 | 56.978 | 1253.51 | 442.268 | 190.271 | 251.997 |
| 2036          | 56014  | 19354.577 | 8000.027  | 11354.55 | 20.271 | 58.666 | 1193.11 | 412.258 | 170.403 | 241.855 |
| 2037          | 55953  | 19064.169 | 7430.479  | 11633.69 | 20.792 | 61.024 | 1192.72 | 406.385 | 158.393 | 247.992 |
| 2038          | 55859  | 18854.812 | 6926.737  | 11928.07 | 21.354 | 63.263 | 1190.66 | 401.900 | 147.647 | 254.253 |
| 2039          | 55757  | 18437.457 | 6375.097  | 12062.36 | 21.634 | 65.423 | 1187.28 | 392.602 | 135.749 | 256.852 |

## Results for PHIM for Run 6 (Sensitivity\_Analysis\_2.RTF)

\*\*\*\*\*

### Main Results for E-Component for Run: 6, Simulation: 1, COD: Four Diseases Combined, Adjusted

| Variable Parameter          | Value                                  |
|-----------------------------|----------------------------------------|
| 1. Country                  | US (United States)                     |
| 2. Sex                      | F (Females)                            |
| 3. Year of start of process | 1990                                   |
| 4. Cause of Death           | Four Diseases Combined                 |
| 5. Effective Dose NULL      | CC:1                                   |
| 6. Effective Dose Ecig      | CC:1 Ecig:0.05 Dual:0.525              |
| Note:                       | Death rates are per million population |

#### Results for Age Groups Combined and Years combined, Population and Number deaths adjusted for Ecig scenario,

| Age Group:All | NULL    | Ecig        | %Drop       |          |        |        | NULL    | Ecig    | Drop    |         |
|---------------|---------|-------------|-------------|----------|--------|--------|---------|---------|---------|---------|
| Year          | Number  | Attrib      | Attrib      | Drop     | %Drop  | Attrib | Death   | Attrib  | Attrib  | Drop    |
|               | Deaths  | Deaths      | Deaths      | Deaths   | Deaths | Deaths | Rate    | Rates   | Rates   | Rates   |
| All Comb      | 9118842 | 2946250.006 | 2229306.987 | 716943.0 | 7.862  | 24.334 | 2496.11 | 808.881 | 610.230 | 198.652 |

#### Results for Age Groups Combined, Population and Number deaths adjusted for Ecig scenario,

| Age Group:All | NULL   | Ecig      | %Drop     |          |        |        | NULL    | Ecig    | Drop    |         |
|---------------|--------|-----------|-----------|----------|--------|--------|---------|---------|---------|---------|
| Year          | Number | Attrib    | Attrib    | Drop     | %Drop  | Attrib | Death   | Attrib  | Attrib  | Drop    |
|               | Deaths | Deaths    | Deaths    | Deaths   | Deaths | Deaths | Rate    | Rates   | Rates   | Rates   |
| 1990          | 199848 | 57524.822 | 57524.822 | 0.000    | 0.000  | 0.000  | 2926.84 | 842.471 | 842.471 | 0.000   |
| 1991          | 199162 | 59078.486 | 59012.639 | 65.847   | 0.033  | 0.111  | 2877.87 | 853.678 | 852.727 | 0.951   |
| 1992          | 198532 | 60494.150 | 60315.664 | 178.486  | 0.090  | 0.295  | 2829.84 | 862.271 | 859.726 | 2.545   |
| 1993          | 202513 | 62694.848 | 62342.340 | 352.507  | 0.174  | 0.562  | 2845.85 | 881.034 | 876.077 | 4.957   |
| 1994          | 200660 | 63202.598 | 62634.379 | 568.218  | 0.283  | 0.899  | 2777.87 | 874.966 | 867.092 | 7.874   |
| 1995          | 201026 | 63766.862 | 62927.077 | 839.785  | 0.418  | 1.317  | 2739.79 | 869.097 | 857.637 | 11.460  |
| 1996          | 201185 | 64591.163 | 63422.028 | 1169.134 | 0.581  | 1.810  | 2706.35 | 868.908 | 853.156 | 15.752  |
| 1997          | 198646 | 64686.912 | 63178.181 | 1508.731 | 0.760  | 2.332  | 2635.15 | 858.147 | 838.095 | 20.052  |
| 1998          | 197583 | 65295.961 | 63370.603 | 1925.358 | 0.974  | 2.949  | 2584.14 | 854.046 | 828.809 | 25.237  |
| 1999          | 211345 | 67327.521 | 64730.979 | 2596.542 | 1.229  | 3.857  | 2726.87 | 868.771 | 835.189 | 33.582  |
| 2000          | 208519 | 67596.897 | 64468.443 | 3128.454 | 1.500  | 4.628  | 2656.92 | 861.419 | 821.448 | 39.972  |
| 2001          | 203638 | 67008.811 | 63313.865 | 3694.946 | 1.814  | 5.514  | 2565.85 | 844.458 | 797.759 | 46.699  |
| 2002          | 200870 | 67067.744 | 62679.912 | 4387.832 | 2.184  | 6.542  | 2506.07 | 836.925 | 781.999 | 54.926  |
| 2003          | 196407 | 66756.217 | 61731.940 | 5024.277 | 2.558  | 7.526  | 2427.32 | 825.244 | 762.922 | 62.322  |
| 2004          | 188229 | 65058.725 | 59436.252 | 5622.474 | 2.987  | 8.642  | 2302.89 | 796.234 | 727.173 | 69.062  |
| 2005          | 186503 | 65214.724 | 58840.303 | 6374.421 | 3.418  | 9.775  | 2256.38 | 789.321 | 711.871 | 77.450  |
| 2006          | 180193 | 63771.146 | 56720.209 | 7050.937 | 3.913  | 11.057 | 2160.85 | 765.117 | 680.180 | 84.937  |
| 2007          | 175769 | 63110.718 | 55385.129 | 7725.589 | 4.395  | 12.241 | 2086.61 | 749.650 | 657.493 | 92.157  |
| 2008          | 177723 | 63718.624 | 55097.121 | 8621.503 | 4.851  | 13.531 | 2086.74 | 748.674 | 646.926 | 101.748 |
| 2009          | 172983 | 62794.698 | 53546.553 | 9248.144 | 5.346  | 14.728 | 2008.01 | 729.515 | 621.576 | 107.939 |
| 2010          | 170693 | 61917.074 | 51954.234 | 9962.840 | 5.837  | 16.091 | 1958.52 | 711.083 | 596.117 | 114.965 |
| 2011          | 170541 | 61680.114 | 50759.642 | 10920.47 | 6.403  | 17.705 | 1938.13 | 701.700 | 576.863 | 124.837 |
| 2012          | 171695 | 62023.127 | 50077.460 | 11945.67 | 6.958  | 19.260 | 1931.03 | 698.386 | 563.215 | 135.171 |
| 2013          | 173014 | 62037.765 | 49162.399 | 12875.37 | 7.442  | 20.754 | 1924.72 | 691.059 | 546.915 | 144.144 |
| 2014          | 174530 | 61921.017 | 47976.183 | 13944.83 | 7.990  | 22.520 | 1920.00 | 682.195 | 527.786 | 154.409 |
| 2015          | 177770 | 61856.204 | 47024.607 | 14831.60 | 8.343  | 23.978 | 2185.65 | 761.899 | 578.158 | 183.741 |
| 2016          | 177319 | 60464.119 | 44794.355 | 15669.76 | 8.837  | 25.916 | 2158.91 | 737.655 | 545.384 | 192.271 |
| 2017          | 179836 | 60243.839 | 43547.152 | 16696.69 | 9.284  | 27.715 | 2168.41 | 728.017 | 525.078 | 202.938 |
| 2018          | 177734 | 60713.327 | 43085.410 | 17627.92 | 9.918  | 29.035 | 2122.26 | 726.721 | 514.467 | 212.254 |
| 2019          | 179876 | 61148.172 | 42375.685 | 18772.49 | 10.436 | 30.700 | 2126.57 | 724.841 | 500.984 | 223.858 |
| 2020          | 181193 | 61149.317 | 41556.781 | 19592.54 | 10.813 | 32.040 | 2426.14 | 821.432 | 556.437 | 264.996 |
| 2021          | 178909 | 58727.786 | 38516.408 | 20211.38 | 11.297 | 34.415 | 2377.63 | 783.216 | 511.868 | 271.347 |
| 2022          | 180283 | 58848.802 | 37527.948 | 21320.85 | 11.826 | 36.230 | 2377.06 | 778.881 | 494.814 | 284.067 |
| 2023          | 181600 | 58816.149 | 36546.041 | 22270.11 | 12.263 | 37.864 | 2375.17 | 772.407 | 477.988 | 294.419 |
| 2024          | 182660 | 58955.232 | 35588.042 | 23367.19 | 12.793 | 39.635 | 2370.05 | 768.316 | 461.763 | 306.553 |
| 2025          | 181560 | 58297.744 | 34444.612 | 23853.13 | 13.138 | 40.916 | 2716.52 | 876.861 | 515.365 | 361.496 |
| 2026          | 181554 | 56469.971 | 32126.661 | 24343.31 | 13.408 | 43.108 | 2705.15 | 846.150 | 478.686 | 367.464 |
| 2027          | 180954 | 56209.427 | 30917.926 | 25291.50 | 13.977 | 44.995 | 2684.46 | 838.883 | 458.667 | 380.216 |
| 2028          | 180195 | 55733.105 | 29632.009 | 26101.10 | 14.485 | 46.832 | 2661.01 | 828.298 | 437.587 | 390.711 |
| 2029          | 179341 | 55145.838 | 28270.649 | 26875.19 | 14.986 | 48.735 | 2635.68 | 815.951 | 415.479 | 400.472 |
| 2030          | 175213 | 53615.097 | 26851.879 | 26763.22 | 15.275 | 49.917 | 3044.31 | 939.056 | 466.549 | 472.507 |
| 2031          | 176745 | 52046.561 | 25318.697 | 26727.86 | 15.122 | 51.354 | 3065.39 | 910.364 | 439.115 | 471.248 |
| 2032          | 175266 | 51582.636 | 24159.932 | 27422.70 | 15.646 | 53.163 | 3032.41 | 900.496 | 418.010 | 482.486 |
| 2033          | 173730 | 50839.758 | 22899.777 | 27939.98 | 16.082 | 54.957 | 2997.13 | 885.375 | 395.059 | 490.316 |
| 2034          | 172052 | 50215.451 | 21711.106 | 28504.34 | 16.567 | 56.764 | 2958.64 | 872.104 | 373.347 | 498.757 |
| 2035          | 164801 | 47773.075 | 20125.446 | 27647.63 | 16.776 | 57.873 | 3464.71 | 1016.05 | 423.110 | 592.935 |
| 2036          | 158446 | 43298.709 | 17349.920 | 25948.79 | 16.377 | 59.930 | 3334.22 | 922.274 | 365.099 | 557.175 |
| 2037          | 155870 | 42241.563 | 15992.173 | 26249.39 | 16.841 | 62.141 | 3280.81 | 900.450 | 336.608 | 563.842 |
| 2038          | 153308 | 41356.353 | 14793.083 | 26563.27 | 17.327 | 64.230 | 3224.97 | 881.531 | 311.186 | 570.345 |
| 2039          | 150819 | 40161.050 | 13542.329 | 26618.72 | 17.649 | 66.280 | 3167.67 | 855.178 | 284.432 | 570.746 |

## Results for PHIM for Run 6 (Sensitivity\_Analysis\_2.RTF)

\*\*\*\*\*

### Main Results for E-Component for Run: 6, Simulation: 1, COD: LUNG CANCER, Adjusted

| Variable Parameter          | Value                                  |
|-----------------------------|----------------------------------------|
| 1. Country                  | US (United States)                     |
| 2. Sex                      | F (Females)                            |
| 3. Year of start of process | 1990                                   |
| 4. Cause of Death           | LUNG CANCER                            |
| 5. Effective Dose NULL      | CC:1                                   |
| 6. Effective Dose Ecig      | CC:1 Ecig:0.05 Dual:0.525              |
| Note:                       | Death rates are per million population |

#### Results for Age Groups Combined and Years combined, Population and Number deaths adjusted for Ecig scenario,

| Age Group:All | NULL    | Ecig        | %Drop       |          |        |        | NULL    | Ecig    | Drop    |        |
|---------------|---------|-------------|-------------|----------|--------|--------|---------|---------|---------|--------|
| Year          | Number  | Attrib      | Attrib      | Drop     | %Drop  | Attrib | Death   | Attrib  | Attrib  | Drop   |
|               | Deaths  | Deaths      | Deaths      | Deaths   | Deaths | Deaths | Rate    | Rates   | Rates   | Rates  |
| All Comb      | 2336748 | 1580465.217 | 1282238.178 | 298227.0 | 12.762 | 18.870 | 639.640 | 433.910 | 350.988 | 82.923 |

#### Results for Age Groups Combined, Population and Number deaths adjusted for Ecig scenario,

| Age Group:All | NULL   | Ecig      | %Drop     |          |        |        | NULL    | Ecig    | Drop    |         |
|---------------|--------|-----------|-----------|----------|--------|--------|---------|---------|---------|---------|
| Year          | Number | Attrib    | Attrib    | Drop     | %Drop  | Attrib | Death   | Attrib  | Attrib  | Drop    |
|               | Deaths | Deaths    | Deaths    | Deaths   | Deaths | Deaths | Rate    | Rates   | Rates   | Rates   |
| 1990          | 42690  | 30614.201 | 30614.201 | 0.000    | 0.000  | 0.000  | 625.210 | 448.355 | 448.355 | 0.000   |
| 1991          | 43692  | 31412.010 | 31401.028 | 10.982   | 0.025  | 0.035  | 631.345 | 453.901 | 453.742 | 0.159   |
| 1992          | 45423  | 32782.407 | 32752.893 | 29.514   | 0.065  | 0.090  | 647.450 | 467.274 | 466.853 | 0.421   |
| 1993          | 46291  | 33491.183 | 33431.027 | 60.156   | 0.130  | 0.180  | 650.515 | 470.643 | 469.796 | 0.847   |
| 1994          | 47017  | 34074.347 | 33975.641 | 98.707   | 0.210  | 0.290  | 650.895 | 471.719 | 470.349 | 1.371   |
| 1995          | 47841  | 34694.454 | 34541.034 | 153.420  | 0.321  | 0.442  | 652.025 | 472.861 | 470.762 | 2.099   |
| 1996          | 48245  | 35027.269 | 34812.682 | 214.586  | 0.445  | 0.613  | 648.999 | 471.202 | 468.302 | 2.900   |
| 1997          | 49037  | 35590.763 | 35291.817 | 298.946  | 0.610  | 0.840  | 650.505 | 472.153 | 468.166 | 3.987   |
| 1998          | 49689  | 36100.785 | 35689.266 | 411.519  | 0.828  | 1.140  | 649.873 | 472.184 | 466.771 | 5.413   |
| 1999          | 48888  | 35451.030 | 34931.655 | 519.374  | 1.062  | 1.465  | 630.770 | 457.448 | 450.704 | 6.743   |
| 2000          | 50338  | 36447.986 | 35768.375 | 679.611  | 1.350  | 1.865  | 641.397 | 464.474 | 455.756 | 8.718   |
| 2001          | 50398  | 36411.326 | 35569.989 | 841.337  | 1.669  | 2.311  | 635.023 | 458.863 | 448.184 | 10.679  |
| 2002          | 51458  | 37078.545 | 36017.209 | 1061.336 | 2.063  | 2.862  | 641.990 | 462.696 | 449.353 | 13.342  |
| 2003          | 51425  | 36999.876 | 35722.656 | 1277.220 | 2.484  | 3.452  | 635.539 | 457.395 | 441.483 | 15.911  |
| 2004          | 51420  | 36861.555 | 35335.248 | 1526.307 | 2.968  | 4.141  | 629.102 | 451.138 | 432.309 | 18.829  |
| 2005          | 51448  | 36689.529 | 34898.587 | 1790.942 | 3.481  | 4.881  | 622.431 | 444.069 | 422.216 | 21.853  |
| 2006          | 51388  | 36504.774 | 34413.432 | 2091.341 | 4.070  | 5.729  | 616.232 | 437.979 | 412.681 | 25.298  |
| 2007          | 51879  | 36663.202 | 34215.006 | 2448.196 | 4.719  | 6.678  | 615.868 | 435.498 | 406.177 | 29.321  |
| 2008          | 51023  | 35898.803 | 33173.406 | 2725.397 | 5.342  | 7.592  | 599.084 | 421.800 | 389.507 | 32.292  |
| 2009          | 51248  | 35934.525 | 32825.968 | 3108.558 | 6.066  | 8.651  | 594.897 | 417.468 | 381.049 | 36.419  |
| 2010          | 50917  | 35502.829 | 32049.235 | 3453.595 | 6.783  | 9.728  | 584.215 | 407.730 | 367.730 | 40.001  |
| 2011          | 50582  | 35136.342 | 31263.603 | 3872.739 | 7.656  | 11.022 | 574.845 | 399.726 | 355.298 | 44.428  |
| 2012          | 51330  | 35450.201 | 31083.153 | 4367.048 | 8.508  | 12.319 | 577.301 | 399.173 | 349.588 | 49.584  |
| 2013          | 51165  | 35123.224 | 30302.538 | 4820.686 | 9.422  | 13.725 | 569.196 | 391.249 | 337.105 | 54.144  |
| 2014          | 51360  | 35079.370 | 29768.262 | 5311.108 | 10.341 | 15.140 | 565.014 | 386.476 | 327.480 | 58.995  |
| 2015          | 50565  | 34324.171 | 28669.060 | 5655.110 | 11.184 | 16.476 | 621.681 | 422.780 | 352.480 | 70.299  |
| 2016          | 48986  | 33054.753 | 27065.961 | 5988.791 | 12.226 | 18.118 | 596.414 | 403.264 | 329.536 | 73.728  |
| 2017          | 48470  | 32471.234 | 26032.076 | 6439.158 | 13.285 | 19.830 | 584.441 | 392.399 | 313.887 | 78.512  |
| 2018          | 50633  | 33657.595 | 26307.559 | 7350.036 | 14.516 | 21.838 | 604.584 | 402.871 | 314.129 | 88.743  |
| 2019          | 51224  | 33863.424 | 25853.502 | 8009.922 | 15.637 | 23.654 | 605.588 | 401.412 | 305.651 | 95.761  |
| 2020          | 51653  | 33910.830 | 25338.125 | 8572.705 | 16.597 | 25.280 | 691.619 | 455.532 | 339.272 | 116.260 |
| 2021          | 48253  | 31531.880 | 22937.953 | 8593.927 | 17.810 | 27.255 | 641.264 | 420.521 | 304.837 | 115.684 |
| 2022          | 48572  | 31560.212 | 22314.579 | 9245.633 | 19.035 | 29.295 | 640.437 | 417.708 | 294.222 | 123.486 |
| 2023          | 48859  | 31508.781 | 21676.344 | 9832.438 | 20.124 | 31.205 | 639.029 | 413.791 | 283.506 | 130.285 |
| 2024          | 49067  | 31517.293 | 21036.005 | 10481.29 | 21.361 | 33.256 | 636.656 | 410.740 | 272.947 | 137.793 |
| 2025          | 48784  | 31175.389 | 20279.682 | 10895.71 | 22.335 | 34.950 | 729.912 | 468.912 | 303.427 | 165.484 |
| 2026          | 45637  | 29044.598 | 18314.855 | 10729.74 | 23.511 | 36.942 | 679.989 | 435.206 | 272.891 | 162.315 |
| 2027          | 45443  | 28825.765 | 17547.576 | 11278.19 | 24.818 | 39.125 | 674.153 | 430.203 | 260.318 | 169.884 |
| 2028          | 45202  | 28513.846 | 16745.153 | 11768.69 | 26.036 | 41.274 | 667.509 | 423.769 | 247.282 | 176.487 |
| 2029          | 44923  | 28148.109 | 15900.676 | 12247.43 | 27.263 | 43.511 | 660.214 | 416.486 | 233.684 | 182.802 |
| 2030          | 43799  | 27314.475 | 15004.350 | 12310.13 | 28.106 | 45.068 | 761.006 | 478.407 | 260.699 | 217.708 |
| 2031          | 41157  | 25423.102 | 13614.427 | 11808.67 | 28.692 | 46.449 | 713.810 | 444.684 | 236.122 | 208.562 |
| 2032          | 40758  | 25085.902 | 12902.224 | 12183.68 | 29.893 | 48.568 | 705.187 | 437.933 | 223.231 | 214.702 |
| 2033          | 40339  | 24645.067 | 12151.823 | 12493.24 | 30.971 | 50.693 | 695.908 | 429.194 | 209.639 | 219.555 |
| 2034          | 39884  | 24239.126 | 11443.126 | 12796.00 | 32.083 | 52.791 | 685.859 | 420.967 | 196.778 | 224.189 |
| 2035          | 37950  | 22944.147 | 10495.483 | 12448.66 | 32.803 | 54.256 | 797.841 | 487.980 | 220.653 | 267.327 |
| 2036          | 33448  | 19950.581 | 8715.625  | 11234.96 | 33.590 | 56.314 | 703.846 | 424.953 | 183.405 | 241.547 |
| 2037          | 32879  | 19415.334 | 7991.633  | 11423.70 | 34.744 | 58.839 | 692.052 | 413.871 | 168.210 | 245.660 |
| 2038          | 32312  | 18939.317 | 7352.339  | 11586.98 | 35.859 | 61.179 | 679.721 | 403.701 | 154.663 | 249.038 |
| 2039          | 31760  | 18379.752 | 6700.133  | 11679.62 | 36.774 | 63.546 | 667.066 | 391.373 | 140.724 | 250.649 |

## Results for PHIM for Run 6 (Sensitivity\_Analysis\_2.RTF)

\*\*\*\*\*

### Main Results for E-Component for Run: 6, Simulation: 1, COD: IHD, Adjusted

| Variable Parameter          | Value                                  |
|-----------------------------|----------------------------------------|
| 1. Country                  | US (United States)                     |
| 2. Sex                      | F (Females)                            |
| 3. Year of start of process | 1990                                   |
| 4. Cause of Death           | IHD                                    |
| 5. Effective Dose NULL      | CC:1                                   |
| 6. Effective Dose Ecig      | CC:1 Ecig:0.05 Dual:0.525              |
| Note:                       | Death rates are per million population |

#### Results for Age Groups Combined and Years combined, Population and Number deaths adjusted for Ecig scenario,

| Age Group:All | NULL    | Ecig       | %Drop      |          |        |        | NULL    | Ecig    | Drop   |        |
|---------------|---------|------------|------------|----------|--------|--------|---------|---------|--------|--------|
| Year          | Number  | Attrib     | Attrib     | Drop     | %Drop  | Attrib | Death   | Attrib  | Attrib | Drop   |
|               | Deaths  | Deaths     | Deaths     | Deaths   | Deaths | Deaths | Rate    | Rates   | Rates  | Rates  |
| All Comb      | 3252916 | 398833.796 | 248719.454 | 150114.3 | 4.615  | 37.638 | 890.423 | 109.498 | 68.082 | 41.416 |

#### Results for Age Groups Combined, Population and Number deaths adjusted for Ecig scenario,

| Age Group:All | NULL   | Ecig      | %Drop     |          |        |        | NULL    | Ecig    | Drop    |        |
|---------------|--------|-----------|-----------|----------|--------|--------|---------|---------|---------|--------|
| Year          | Number | Attrib    | Attrib    | Drop     | %Drop  | Attrib | Death   | Attrib  | Attrib  | Drop   |
|               | Deaths | Deaths    | Deaths    | Deaths   | Deaths | Deaths | Rate    | Rates   | Rates   | Rates  |
| 1990          | 98916  | 12922.892 | 12922.892 | 0.000    | 0.000  | 0.000  | 1448.66 | 189.260 | 189.260 | 0.000  |
| 1991          | 96403  | 12856.479 | 12818.187 | 38.292   | 0.040  | 0.298  | 1393.01 | 185.775 | 185.222 | 0.553  |
| 1992          | 93721  | 12662.244 | 12556.206 | 106.037  | 0.113  | 0.837  | 1335.88 | 180.485 | 178.973 | 1.512  |
| 1993          | 93679  | 12730.613 | 12525.495 | 205.118  | 0.219  | 1.611  | 1316.45 | 178.900 | 176.017 | 2.883  |
| 1994          | 90833  | 12495.323 | 12168.640 | 326.683  | 0.360  | 2.614  | 1257.46 | 172.983 | 168.459 | 4.524  |
| 1995          | 89699  | 12365.590 | 11893.388 | 472.202  | 0.526  | 3.819  | 1222.52 | 168.534 | 162.096 | 6.438  |
| 1996          | 88288  | 12290.551 | 11633.581 | 656.971  | 0.744  | 5.345  | 1187.65 | 165.338 | 156.495 | 8.842  |
| 1997          | 84780  | 11719.531 | 10907.196 | 812.335  | 0.958  | 6.931  | 1124.65 | 155.473 | 144.690 | 10.783 |
| 1998          | 82521  | 11416.794 | 10419.104 | 997.690  | 1.209  | 8.739  | 1079.27 | 149.327 | 136.269 | 13.058 |
| 1999          | 93946  | 13028.038 | 11607.682 | 1420.356 | 1.512  | 10.902 | 1212.13 | 168.109 | 149.768 | 18.342 |
| 2000          | 90048  | 12426.299 | 10790.503 | 1635.796 | 1.817  | 13.164 | 1147.38 | 158.354 | 137.491 | 20.863 |
| 2001          | 86132  | 11939.281 | 10035.865 | 1903.416 | 2.210  | 15.942 | 1085.26 | 150.461 | 126.453 | 24.009 |
| 2002          | 83031  | 11528.794 | 9344.693  | 2184.101 | 2.630  | 18.945 | 1035.90 | 143.865 | 116.585 | 27.280 |
| 2003          | 79323  | 11048.407 | 8632.723  | 2415.684 | 3.045  | 21.865 | 980.327 | 136.581 | 106.689 | 29.892 |
| 2004          | 73887  | 10375.132 | 7768.083  | 2607.049 | 3.528  | 25.128 | 903.973 | 126.978 | 95.039  | 31.940 |
| 2005          | 71681  | 10051.029 | 7212.659  | 2838.371 | 3.960  | 28.240 | 867.228 | 121.652 | 87.261  | 34.390 |
| 2006          | 67589  | 9542.523  | 6507.179  | 3035.345 | 4.491  | 31.809 | 810.522 | 114.490 | 78.033  | 36.457 |
| 2007          | 63547  | 8936.533  | 5797.156  | 3139.377 | 4.940  | 35.130 | 754.387 | 106.151 | 68.820  | 37.331 |
| 2008          | 63224  | 8944.180  | 5513.750  | 3430.430 | 5.426  | 38.354 | 742.351 | 105.091 | 64.740  | 40.351 |
| 2009          | 59807  | 8390.033  | 4934.336  | 3455.697 | 5.778  | 41.188 | 694.249 | 97.471  | 57.279  | 40.192 |
| 2010          | 58077  | 8157.570  | 4545.688  | 3611.882 | 6.219  | 44.276 | 666.364 | 93.685  | 52.157  | 41.528 |
| 2011          | 57447  | 8035.356  | 4217.604  | 3817.752 | 6.646  | 47.512 | 652.859 | 91.414  | 47.931  | 43.482 |
| 2012          | 57502  | 7970.766  | 3922.314  | 4048.452 | 7.041  | 50.791 | 646.713 | 89.752  | 44.114  | 45.638 |
| 2013          | 57170  | 7743.216  | 3603.122  | 4140.094 | 7.242  | 53.467 | 635.996 | 86.254  | 40.083  | 46.171 |
| 2014          | 57656  | 7774.935  | 3393.195  | 4381.740 | 7.600  | 56.357 | 634.273 | 85.658  | 37.329  | 48.329 |
| 2015          | 58531  | 7722.535  | 3212.280  | 4510.255 | 7.706  | 58.404 | 719.623 | 95.120  | 39.494  | 55.626 |
| 2016          | 58811  | 7600.353  | 2971.242  | 4629.111 | 7.871  | 60.907 | 716.043 | 92.723  | 36.176  | 56.548 |
| 2017          | 59176  | 7470.266  | 2747.233  | 4723.033 | 7.981  | 63.224 | 713.523 | 90.274  | 33.125  | 57.149 |
| 2018          | 56258  | 6907.050  | 2378.710  | 4528.340 | 8.049  | 65.561 | 671.753 | 82.675  | 28.403  | 54.272 |
| 2019          | 56086  | 6732.046  | 2192.247  | 4539.799 | 8.094  | 67.436 | 663.072 | 79.801  | 25.918  | 53.883 |
| 2020          | 55534  | 6429.836  | 1998.128  | 4431.708 | 7.980  | 68.924 | 743.586 | 86.373  | 26.755  | 59.619 |
| 2021          | 56539  | 6562.016  | 1889.161  | 4672.854 | 8.265  | 71.211 | 751.385 | 87.513  | 25.106  | 62.407 |
| 2022          | 56095  | 6352.366  | 1715.866  | 4636.500 | 8.265  | 72.989 | 739.624 | 84.075  | 22.624  | 61.451 |
| 2023          | 55628  | 6134.123  | 1564.708  | 4569.415 | 8.214  | 74.492 | 727.559 | 80.557  | 20.465  | 60.092 |
| 2024          | 55081  | 5922.193  | 1422.679  | 4499.514 | 8.169  | 75.977 | 714.695 | 77.179  | 18.460  | 58.720 |
| 2025          | 53628  | 5504.188  | 1280.456  | 4223.732 | 7.876  | 76.737 | 802.386 | 82.789  | 19.158  | 63.631 |
| 2026          | 55651  | 5641.075  | 1232.279  | 4408.796 | 7.922  | 78.155 | 829.199 | 84.526  | 18.361  | 66.165 |
| 2027          | 54594  | 5426.216  | 1122.544  | 4303.672 | 7.883  | 79.313 | 809.900 | 80.982  | 16.653  | 64.329 |
| 2028          | 53507  | 5197.830  | 1013.866  | 4183.964 | 7.819  | 80.494 | 790.160 | 77.249  | 14.972  | 62.277 |
| 2029          | 52413  | 4973.547  | 919.324   | 4054.222 | 7.735  | 81.516 | 770.279 | 73.590  | 13.511  | 60.079 |
| 2030          | 49934  | 4450.618  | 801.256   | 3649.362 | 7.308  | 81.997 | 867.604 | 77.952  | 13.922  | 64.030 |
| 2031          | 52499  | 4555.052  | 776.590   | 3778.463 | 7.197  | 82.951 | 910.514 | 79.674  | 13.469  | 66.205 |
| 2032          | 51210  | 4349.999  | 699.170   | 3650.829 | 7.129  | 83.927 | 886.026 | 75.939  | 12.097  | 63.842 |
| 2033          | 49933  | 4147.948  | 630.021   | 3517.927 | 7.045  | 84.811 | 861.434 | 72.237  | 10.869  | 61.368 |
| 2034          | 48648  | 3966.133  | 567.319   | 3398.814 | 6.987  | 85.696 | 836.562 | 68.881  | 9.756   | 59.125 |
| 2035          | 45097  | 3289.064  | 463.072   | 2825.993 | 6.266  | 85.921 | 948.107 | 69.952  | 9.735   | 60.217 |
| 2036          | 46984  | 3313.192  | 434.639   | 2878.553 | 6.127  | 86.882 | 988.689 | 70.572  | 9.146   | 61.426 |
| 2037          | 45490  | 3117.951  | 381.678   | 2736.273 | 6.015  | 87.759 | 957.484 | 66.464  | 8.034   | 58.431 |
| 2038          | 44039  | 2949.775  | 335.827   | 2613.948 | 5.936  | 88.615 | 926.393 | 62.876  | 7.064   | 55.811 |
| 2039          | 42645  | 2766.312  | 297.917   | 2468.396 | 5.788  | 89.231 | 895.670 | 58.905  | 6.257   | 52.648 |

## Results for PHIM for Run 6 (Sensitivity\_Analysis\_2.RTF)

\*\*\*\*\*

### Main Results for E-Component for Run: 6, Simulation: 1, COD: STROKE, Adjusted

| Variable Parameter          | Value                                  |
|-----------------------------|----------------------------------------|
| 1. Country                  | US (United States)                     |
| 2. Sex                      | F (Females)                            |
| 3. Year of start of process | 1990                                   |
| 4. Cause of Death           | STROKE                                 |
| 5. Effective Dose NULL      | CC:1                                   |
| 6. Effective Dose Ecig      | CC:1 Ecig:0.05 Dual:0.525              |
| Note:                       | Death rates are per million population |

#### Results for Age Groups Combined and Years combined, Population and Number deaths adjusted for Ecig scenario,

| Age Group:All | NULL    | Ecig       | %Drop     | NULL     | Ecig   | Drop   |
|---------------|---------|------------|-----------|----------|--------|--------|
| Year          | Number  | Attrib     | Attrib    | Death    | Attrib | Drop   |
|               | Deaths  | Deaths     | Deaths    | Rate     | Rates  | Rates  |
| All Comb      | 1357247 | 104899.750 | 64367.528 | 40532.22 | 2.986  | 38.639 |

#### Results for Age Groups Combined, Population and Number deaths adjusted for Ecig scenario,

| Age Group:All | NULL   | Ecig     | %Drop    | NULL     | Ecig   | Drop   |
|---------------|--------|----------|----------|----------|--------|--------|
| Year          | Number | Attrib   | Attrib   | Death    | Attrib | Drop   |
|               | Deaths | Deaths   | Deaths   | Rate     | Rates  | Rates  |
| 1990          | 33504  | 3293.017 | 3293.017 | 0.000    | 0.000  | 0.000  |
| 1991          | 32505  | 3207.063 | 3196.262 | 10.801   | 0.033  | 0.337  |
| 1992          | 32560  | 3218.125 | 3188.174 | 29.950   | 0.092  | 0.931  |
| 1993          | 32768  | 3226.680 | 3167.725 | 58.956   | 0.180  | 1.827  |
| 1994          | 33005  | 3277.266 | 3179.146 | 98.119   | 0.297  | 2.994  |
| 1995          | 33730  | 3309.378 | 3163.506 | 145.872  | 0.432  | 4.408  |
| 1996          | 33751  | 3312.987 | 3108.510 | 204.477  | 0.606  | 6.172  |
| 1997          | 33700  | 3267.066 | 2999.422 | 267.644  | 0.794  | 8.192  |
| 1998          | 33276  | 3178.725 | 2849.499 | 329.226  | 0.989  | 10.357 |
| 1999          | 33893  | 3120.351 | 2725.143 | 395.208  | 1.166  | 12.665 |
| 2000          | 33830  | 3142.808 | 2662.406 | 480.403  | 1.420  | 15.286 |
| 2001          | 32510  | 2961.588 | 2428.365 | 533.223  | 1.640  | 18.005 |
| 2002          | 32084  | 2940.627 | 2318.261 | 622.366  | 1.940  | 21.164 |
| 2003          | 30576  | 2819.545 | 2133.256 | 686.289  | 2.245  | 24.340 |
| 2004          | 29398  | 2730.466 | 1980.198 | 750.268  | 2.552  | 27.478 |
| 2005          | 27966  | 2670.510 | 1848.066 | 822.444  | 2.941  | 30.797 |
| 2006          | 27216  | 2623.285 | 1729.339 | 893.946  | 3.285  | 34.077 |
| 2007          | 26320  | 2536.599 | 1589.128 | 947.471  | 3.600  | 37.352 |
| 2008          | 26019  | 2469.443 | 1474.990 | 994.454  | 3.822  | 40.270 |
| 2009          | 25064  | 2386.945 | 1354.441 | 1032.504 | 4.119  | 43.256 |
| 2010          | 24868  | 2329.274 | 1255.000 | 1074.275 | 4.320  | 46.121 |
| 2011          | 24825  | 2286.581 | 1161.031 | 1125.549 | 4.534  | 49.224 |
| 2012          | 24537  | 2243.311 | 1072.053 | 1171.258 | 4.773  | 52.211 |
| 2013          | 24494  | 2176.503 | 976.631  | 1199.872 | 4.899  | 55.128 |
| 2014          | 25346  | 2211.619 | 935.336  | 1276.283 | 5.035  | 57.708 |
| 2015          | 26375  | 2237.016 | 899.449  | 1337.567 | 5.071  | 59.792 |
| 2016          | 26803  | 2229.057 | 843.093  | 1385.964 | 5.171  | 62.177 |
| 2017          | 27694  | 2221.649 | 792.778  | 1428.871 | 5.159  | 64.316 |
| 2018          | 25336  | 1939.420 | 654.170  | 1285.250 | 5.073  | 66.270 |
| 2019          | 25519  | 1904.400 | 604.585  | 1299.814 | 5.094  | 68.253 |
| 2020          | 25479  | 1806.054 | 545.149  | 1260.905 | 4.949  | 69.815 |
| 2021          | 25560  | 1748.172 | 495.475  | 1252.697 | 4.901  | 71.658 |
| 2022          | 25662  | 1701.148 | 450.948  | 1250.200 | 4.872  | 73.492 |
| 2023          | 25755  | 1652.087 | 411.767  | 1240.319 | 4.816  | 75.076 |
| 2024          | 25805  | 1597.127 | 372.953  | 1224.173 | 4.744  | 76.648 |
| 2025          | 25418  | 1467.622 | 329.916  | 1137.707 | 4.476  | 77.520 |
| 2026          | 25654  | 1390.505 | 296.703  | 1093.802 | 4.264  | 78.662 |
| 2027          | 25450  | 1342.095 | 270.669  | 1071.426 | 4.210  | 79.832 |
| 2028          | 25221  | 1289.536 | 245.043  | 1044.493 | 4.141  | 80.998 |
| 2029          | 24980  | 1242.216 | 223.618  | 1018.598 | 4.078  | 81.998 |
| 2030          | 24184  | 1096.803 | 190.050  | 906.753  | 3.749  | 82.672 |
| 2031          | 24204  | 1019.991 | 167.636  | 852.355  | 3.522  | 83.565 |
| 2032          | 23870  | 977.406  | 150.211  | 827.195  | 3.465  | 84.632 |
| 2033          | 23527  | 937.450  | 135.833  | 801.617  | 3.407  | 85.510 |
| 2034          | 23160  | 900.763  | 122.070  | 778.693  | 3.362  | 86.448 |
| 2035          | 22023  | 745.023  | 97.792   | 647.232  | 2.939  | 86.874 |
| 2036          | 21200  | 680.360  | 82.785   | 597.575  | 2.819  | 87.832 |
| 2037          | 20702  | 644.109  | 73.202   | 570.907  | 2.758  | 88.635 |
| 2038          | 20205  | 612.448  | 64.360   | 548.088  | 2.713  | 89.491 |
| 2039          | 19716  | 577.529  | 58.366   | 519.163  | 2.633  | 89.894 |

## Results for PHIM for Run 6 (Sensitivity\_Analysis\_2.RTF)

\*\*\*\*\*

### Main Results for E-Component for Run: 6, Simulation: 1, COD: COPD, Adjusted

| Variable Parameter          | Value                                  |
|-----------------------------|----------------------------------------|
| 1. Country                  | US (United States)                     |
| 2. Sex                      | F (Females)                            |
| 3. Year of start of process | 1990                                   |
| 4. Cause of Death           | COPD                                   |
| 5. Effective Dose NULL      | CC:1                                   |
| 6. Effective Dose Ecig      | CC:1 Ecig:0.05 Dual:0.525              |
| Note:                       | Death rates are per million population |

#### Results for Age Groups Combined and Years combined, Population and Number deaths adjusted for Ecig scenario,

| Age Group:All | NULL    | Ecig       | %Drop      |          |        | NULL   | Ecig    | Drop    |         |        |
|---------------|---------|------------|------------|----------|--------|--------|---------|---------|---------|--------|
| Year          | Number  | Attrib     | Attrib     | Drop     | %Drop  | Attrib | Death   | Attrib  | Attrib  | Drop   |
|               | Deaths  | Deaths     | Deaths     | Deaths   | Deaths | Deaths | Rate    | Rates   | Rates   | Rates  |
| All Comb      | 2171929 | 862051.244 | 633981.827 | 228069.4 | 10.501 | 26.457 | 594.524 | 236.673 | 173.540 | 63.132 |

#### Results for Age Groups Combined, Population and Number deaths adjusted for Ecig scenario,

| Age Group:All | NULL   | Ecig      | %Drop     |          |        | NULL   | Ecig    | Drop    |         |         |
|---------------|--------|-----------|-----------|----------|--------|--------|---------|---------|---------|---------|
| Year          | Number | Attrib    | Attrib    | Drop     | %Drop  | Attrib | Death   | Attrib  | Attrib  | Drop    |
|               | Deaths | Deaths    | Deaths    | Deaths   | Deaths | Deaths | Rate    | Rates   | Rates   | Rates   |
| 1990          | 24738  | 10694.712 | 10694.712 | 0.000    | 0.000  | 0.000  | 362.296 | 156.628 | 156.628 | 0.000   |
| 1991          | 26562  | 11602.933 | 11597.162 | 5.771    | 0.022  | 0.050  | 383.818 | 167.661 | 167.578 | 0.083   |
| 1992          | 26828  | 11831.375 | 11818.391 | 12.984   | 0.048  | 0.110  | 382.401 | 168.642 | 168.457 | 0.185   |
| 1993          | 29774  | 13246.371 | 13218.093 | 28.278   | 0.095  | 0.213  | 418.406 | 186.148 | 185.750 | 0.398   |
| 1994          | 29804  | 13355.662 | 13310.952 | 44.709   | 0.150  | 0.335  | 412.601 | 184.893 | 184.273 | 0.621   |
| 1995          | 29755  | 13397.439 | 13329.148 | 68.291   | 0.230  | 0.510  | 405.538 | 182.598 | 181.664 | 0.934   |
| 1996          | 30901  | 13960.356 | 13867.255 | 93.101   | 0.301  | 0.667  | 415.677 | 187.801 | 186.543 | 1.258   |
| 1997          | 31129  | 14109.552 | 13979.746 | 129.807  | 0.417  | 0.920  | 412.944 | 187.180 | 185.449 | 1.730   |
| 1998          | 32098  | 14599.657 | 14412.734 | 186.923  | 0.582  | 1.280  | 419.796 | 190.958 | 188.501 | 2.457   |
| 1999          | 34618  | 15728.102 | 15466.499 | 261.604  | 0.756  | 1.663  | 446.664 | 202.950 | 199.556 | 3.394   |
| 2000          | 34303  | 15579.803 | 15247.159 | 332.645  | 0.970  | 2.135  | 437.079 | 198.541 | 194.277 | 4.264   |
| 2001          | 34597  | 15696.614 | 15279.645 | 416.969  | 1.205  | 2.656  | 435.927 | 197.812 | 192.525 | 5.287   |
| 2002          | 34298  | 15519.777 | 14999.749 | 520.029  | 1.516  | 3.351  | 427.904 | 193.668 | 187.138 | 6.530   |
| 2003          | 35084  | 15888.389 | 15243.305 | 645.084  | 1.839  | 4.060  | 433.585 | 196.413 | 188.386 | 8.027   |
| 2004          | 33524  | 15091.573 | 14352.723 | 738.850  | 2.204  | 4.896  | 410.149 | 184.701 | 175.598 | 9.103   |
| 2005          | 35408  | 15803.656 | 14880.991 | 922.664  | 2.606  | 5.838  | 428.380 | 191.278 | 180.036 | 11.243  |
| 2006          | 34000  | 15100.563 | 14070.259 | 1030.305 | 3.030  | 6.823  | 407.729 | 181.174 | 168.728 | 12.446  |
| 2007          | 34024  | 14974.384 | 13783.838 | 1190.545 | 3.499  | 7.951  | 403.906 | 177.871 | 163.632 | 14.239  |
| 2008          | 37457  | 16406.197 | 14934.975 | 1471.222 | 3.928  | 8.967  | 439.801 | 192.768 | 175.360 | 17.408  |
| 2009          | 36863  | 16083.194 | 14431.809 | 1651.385 | 4.480  | 10.268 | 427.917 | 186.846 | 167.527 | 19.319  |
| 2010          | 36832  | 15927.400 | 14104.312 | 1823.089 | 4.950  | 11.446 | 422.604 | 182.917 | 161.831 | 21.086  |
| 2011          | 37688  | 16221.836 | 14117.404 | 2104.432 | 5.584  | 12.973 | 428.309 | 184.547 | 160.439 | 24.108  |
| 2012          | 38326  | 16358.849 | 13999.940 | 2358.909 | 6.155  | 14.420 | 431.050 | 184.202 | 157.456 | 26.747  |
| 2013          | 40185  | 16994.822 | 14280.108 | 2714.714 | 6.755  | 15.974 | 447.048 | 189.311 | 158.861 | 30.450  |
| 2014          | 40167  | 16855.093 | 13879.390 | 2975.703 | 7.408  | 17.655 | 441.881 | 185.696 | 152.687 | 33.008  |
| 2015          | 42300  | 17572.483 | 14243.818 | 3328.665 | 7.869  | 18.942 | 520.064 | 216.445 | 175.125 | 41.320  |
| 2016          | 42719  | 17579.955 | 13914.058 | 3665.897 | 8.581  | 20.853 | 520.117 | 214.473 | 169.408 | 45.066  |
| 2017          | 44496  | 18080.688 | 13975.064 | 4105.624 | 9.227  | 22.707 | 536.514 | 218.496 | 168.507 | 49.989  |
| 2018          | 45508  | 18209.262 | 13744.971 | 4464.291 | 9.810  | 24.517 | 543.395 | 217.960 | 164.123 | 53.836  |
| 2019          | 47047  | 18648.302 | 13725.351 | 4922.951 | 10.464 | 26.399 | 556.214 | 221.054 | 162.267 | 58.787  |
| 2020          | 48528  | 19002.597 | 13675.379 | 5327.218 | 10.978 | 28.034 | 649.774 | 255.266 | 183.110 | 72.156  |
| 2021          | 48557  | 18885.717 | 13193.819 | 5691.898 | 11.722 | 30.139 | 645.303 | 251.867 | 175.341 | 76.526  |
| 2022          | 49954  | 19235.076 | 13046.554 | 6188.522 | 12.389 | 32.173 | 658.650 | 254.582 | 172.021 | 82.560  |
| 2023          | 51359  | 19521.158 | 12893.222 | 6627.936 | 12.905 | 33.953 | 671.729 | 256.363 | 168.631 | 87.732  |
| 2024          | 52706  | 19918.620 | 12756.405 | 7162.214 | 13.589 | 35.957 | 683.870 | 259.583 | 165.517 | 94.066  |
| 2025          | 53730  | 20150.545 | 12554.558 | 7595.987 | 14.137 | 37.696 | 803.913 | 303.086 | 187.843 | 115.243 |
| 2026          | 54612  | 20393.792 | 12282.824 | 8110.969 | 14.852 | 39.772 | 813.717 | 305.582 | 183.014 | 122.568 |
| 2027          | 55467  | 20615.351 | 11977.137 | 8638.214 | 15.574 | 41.902 | 822.846 | 307.668 | 177.681 | 129.988 |
| 2028          | 56265  | 20731.894 | 11627.948 | 9103.946 | 16.180 | 43.913 | 830.891 | 308.115 | 171.714 | 136.400 |
| 2029          | 57025  | 20781.967 | 11227.031 | 9554.936 | 16.756 | 45.977 | 838.072 | 307.495 | 164.998 | 142.497 |
| 2030          | 57296  | 20753.201 | 10856.223 | 9896.978 | 17.273 | 47.689 | 995.510 | 363.487 | 188.626 | 174.862 |
| 2031          | 58885  | 21048.417 | 10760.045 | 10288.37 | 17.472 | 48.880 | 1021.28 | 368.165 | 186.617 | 181.548 |
| 2032          | 59428  | 21169.329 | 10408.328 | 10761.00 | 18.108 | 50.833 | 1028.20 | 369.560 | 180.082 | 189.478 |
| 2033          | 59931  | 21109.293 | 9982.099  | 11127.19 | 18.567 | 52.712 | 1033.91 | 367.618 | 172.208 | 195.411 |
| 2034          | 60360  | 21109.429 | 9578.591  | 11530.84 | 19.103 | 54.624 | 1037.96 | 366.613 | 164.715 | 201.898 |
| 2035          | 59731  | 20794.840 | 9069.100  | 11725.74 | 19.631 | 56.388 | 1255.76 | 442.268 | 190.665 | 251.603 |
| 2036          | 56814  | 19354.577 | 8116.871  | 11237.71 | 19.780 | 58.062 | 1195.56 | 412.258 | 170.806 | 241.452 |
| 2037          | 56799  | 19064.169 | 7545.660  | 11518.51 | 20.279 | 60.420 | 1195.52 | 406.385 | 158.823 | 247.562 |
| 2038          | 56752  | 18854.812 | 7040.557  | 11814.25 | 20.817 | 62.659 | 1193.82 | 401.900 | 148.105 | 253.795 |
| 2039          | 56698  | 18437.457 | 6485.913  | 11951.54 | 21.079 | 64.822 | 1190.83 | 392.602 | 136.225 | 256.377 |

## Results for PHIM for Run 7 (Sensitivity\_Analysis\_2.RTF)

---

### Control File Details for Run: 7

| Variable Parameter                                       | Value                  |
|----------------------------------------------------------|------------------------|
| 1. Name for Reference Scenario                           | NULL                   |
| 2. Name for Test Scenario                                | Ecig                   |
| 3. Name for Product 1                                    | CC                     |
| 4. Name for Product 2                                    | Ecig                   |
| 5. Name for Product 3                                    | -                      |
| 6. Name for Product 4                                    | Dual                   |
| 7. Country                                               | US (United States)     |
| 8. Sex                                                   | M (Males)              |
| 9. Year of start of process                              | 1990                   |
| 10. Number of months of follow-up                        | 600                    |
| 11. Follow-up interval length (in months)                | 12                     |
| 12. Lower age for risk estimation                        | 10                     |
| 13. Upper age for risk estimation                        | 79                     |
| 14. The effective dose for Product 1 (F1) - Ref          | 1                      |
| 15. The effective dose for Product 2 (F2) - Ref          | -                      |
| 16. The effective dose for Product 3 (F3) - Ref          | -                      |
| 17. The effective dose for Product 4 (F4) - Ref          | -                      |
| 18. The effective dose for Product 1 (F1) - Test         | 1                      |
| 19. The effective dose for Product 2 (F2) - Test         | 0.05                   |
| 20. The effective dose for Product 3 (F3) - Test         | -                      |
| 21. The effective dose for Product 4 (F4) - Test         | FROMF2                 |
| 22. Number in population to be simulated                 | 100000                 |
| 23. Number of MC simulations                             | 1                      |
| 24. The random number seed for the first simulation      | 15975263               |
| 25. Source for the population file (POP)                 | UN4                    |
| 26. Source for the socioeconomic prevalence file (SEP)   | -                      |
| 27. Source for the current smoking prevalence file (CSP) | ISS3                   |
| 28. Source for the former smoking prevalence file (FSP)  | ISS3                   |
| 29. Source for the quit-time distribution file (QTD)     | NHIS2006               |
| 30. Source for the death file (MORT)                     | APR-20                 |
| 31. Source for the relative risk file (RR)               | PNLEST                 |
| 32. Source for the half-life file (H)                    | PNLEST                 |
| 33. Assumption Set for TTP Factor Reference              | F1                     |
| 34. Assumption Set for TTP Factor Test                   | F1                     |
| 35. Assumption Set for TTP Reference                     | ISS3                   |
| 36. Assumption Set for TTP Test                          | S2D                    |
| 37. Assumption Set for TP for socioeconomic group        | -                      |
| 38. Source for Output Choice file (OUTC)                 | BASIC                  |
| 39. Output for DTP P1                                    | N                      |
| 40. Output for DTP P2                                    | N                      |
| 41. Output for Main P Component                          | Y                      |
| 42. Output for DTP E1                                    | N                      |
| 43. Output for DTP E2                                    | N                      |
| 44. Output for DTP E3                                    | N                      |
| 45. Output for Main E Component                          | Y                      |
| 46. Output file name                                     | Sensitivity_Analysis_2 |
| 47. Run number for P-Component                           | -                      |
| 48. Results file for E-Component                         | -                      |
| 49. Components required                                  | PE                     |
| 50. Results folder for P to be used in E-Component       | -                      |
| 51. Fixed age of starting product use                    | 16                     |
| 52. Output absolute risk file?                           | N                      |



## Results for PHIM for Run 7 (Sensitivity\_Analysis\_2.RTF)

\*\*\*\*\*

TTP values for Run: 7, Scenario: NULL

| Variable Parameter | Value               |
|--------------------|---------------------|
| 1. Country         | US (United States)  |
| 2. Sex             | M (Males)           |
| 3. Assumption Set  | ISS3                |
| Note:              | Period is in Months |

| Age   | Period  | Initiation  | Cessation    | Re-initiation |
|-------|---------|-------------|--------------|---------------|
|       |         | Never<br>CC | CC<br>Former | Former<br>CC  |
| 10-14 | 1-12    | 0.003842    | 0.008742     | 0.000000      |
| 15-19 | 1-12    | 0.004720    | 0.003614     | 0.000000      |
| 20-24 | 1-12    | 0.000376    | 0.000943     | 0.000000      |
| 25-29 | 1-12    | 0.000187    | 0.001143     | 0.000000      |
| 30-34 | 1-12    | 0.000093    | 0.000871     | 0.000000      |
| 35-39 | 1-12    | 0.000000    | 0.000867     | 0.000000      |
| 40-44 | 1-12    | 0.000000    | 0.001399     | 0.000000      |
| 45-49 | 1-12    | 0.000000    | 0.002033     | 0.000000      |
| 50-54 | 1-12    | 0.000000    | 0.003209     | 0.000000      |
| 55-59 | 1-12    | 0.000000    | 0.003574     | 0.000000      |
| 60-64 | 1-12    | 0.000000    | 0.003460     | 0.000000      |
| 65-69 | 1-12    | 0.000000    | 0.004136     | 0.000000      |
| 70-74 | 1-12    | 0.000000    | 0.005592     | 0.000000      |
| 75-79 | 1-12    | 0.000000    | 0.005592     | 0.000000      |
| 10-14 | 13-72   | 0.004906    | 0.008742     | 0.000000      |
| 15-19 | 13-72   | 0.006989    | 0.004426     | 0.000000      |
| 20-24 | 13-72   | 0.000687    | 0.001527     | 0.000000      |
| 25-29 | 13-72   | 0.000962    | 0.001515     | 0.000000      |
| 30-34 | 13-72   | 0.000364    | 0.001227     | 0.000000      |
| 35-39 | 13-72   | 0.000000    | 0.001630     | 0.000000      |
| 40-44 | 13-72   | 0.000000    | 0.001852     | 0.000000      |
| 45-49 | 13-72   | 0.000000    | 0.002667     | 0.000000      |
| 50-54 | 13-72   | 0.000000    | 0.003208     | 0.000000      |
| 55-59 | 13-72   | 0.000000    | 0.003978     | 0.000000      |
| 60-64 | 13-72   | 0.000000    | 0.005771     | 0.000000      |
| 65-69 | 13-72   | 0.000000    | 0.010432     | 0.000000      |
| 70-74 | 13-72   | 0.000000    | 0.007079     | 0.000000      |
| 75-79 | 13-72   | 0.000000    | 0.007079     | 0.000000      |
| 10-14 | 73-132  | 0.004312    | 0.008742     | 0.000000      |
| 15-19 | 73-132  | 0.005330    | 0.003289     | 0.000000      |
| 20-24 | 73-132  | 0.002456    | 0.003844     | 0.000000      |
| 25-29 | 73-132  | 0.000839    | 0.002006     | 0.000000      |
| 30-34 | 73-132  | 0.000414    | 0.001329     | 0.000000      |
| 35-39 | 73-132  | 0.000000    | 0.001278     | 0.000000      |
| 40-44 | 73-132  | 0.000000    | 0.001691     | 0.000000      |
| 45-49 | 73-132  | 0.000000    | 0.002904     | 0.000000      |
| 50-54 | 73-132  | 0.000000    | 0.003319     | 0.000000      |
| 55-59 | 73-132  | 0.000000    | 0.003976     | 0.000000      |
| 60-64 | 73-132  | 0.000000    | 0.005235     | 0.000000      |
| 65-69 | 73-132  | 0.000000    | 0.005901     | 0.000000      |
| 70-74 | 73-132  | 0.000000    | 0.005615     | 0.000000      |
| 75-79 | 73-132  | 0.000000    | 0.005615     | 0.000000      |
| 10-14 | 133-192 | 0.003468    | 0.008742     | 0.000000      |
| 15-19 | 133-192 | 0.004675    | 0.003732     | 0.000000      |
| 20-24 | 133-192 | 0.000062    | 0.002260     | 0.000000      |
| 25-29 | 133-192 | 0.001422    | 0.002822     | 0.000000      |
| 30-34 | 133-192 | 0.000696    | 0.002610     | 0.000000      |
| 35-39 | 133-192 | 0.000000    | 0.002058     | 0.000000      |
| 40-44 | 133-192 | 0.000000    | 0.002310     | 0.000000      |
| 45-49 | 133-192 | 0.000000    | 0.002256     | 0.000000      |
| 50-54 | 133-192 | 0.000000    | 0.002663     | 0.000000      |
| 55-59 | 133-192 | 0.000000    | 0.001746     | 0.000000      |
| 60-64 | 133-192 | 0.000000    | 0.005809     | 0.000000      |
| 65-69 | 133-192 | 0.000000    | 0.005896     | 0.000000      |
| 70-74 | 133-192 | 0.000000    | 0.007323     | 0.000000      |
| 75-79 | 133-192 | 0.000000    | 0.007323     | 0.000000      |
| 10-14 | 193-252 | 0.002314    | 0.008742     | 0.000000      |
| 15-19 | 193-252 | 0.003987    | 0.005036     | 0.000000      |
| 20-24 | 193-252 | 0.000320    | 0.002857     | 0.000000      |
| 25-29 | 193-252 | 0.000251    | 0.002314     | 0.000000      |
| 30-34 | 193-252 | 0.000125    | 0.004343     | 0.000000      |
| 35-39 | 193-252 | 0.000000    | 0.002092     | 0.000000      |
| 40-44 | 193-252 | 0.000000    | 0.002566     | 0.000000      |
| 45-49 | 193-252 | 0.000000    | 0.002311     | 0.000000      |
| 50-54 | 193-252 | 0.000000    | 0.003209     | 0.000000      |

### Results for PHIM for Run 7 (Sensitivity\_Analysis\_2.RTF)

|       |         |          |          |          |
|-------|---------|----------|----------|----------|
| 55-59 | 193-252 | 0.000000 | 0.004057 | 0.000000 |
| 60-64 | 193-252 | 0.000000 | 0.007166 | 0.000000 |
| 65-69 | 193-252 | 0.000000 | 0.004281 | 0.000000 |
| 70-74 | 193-252 | 0.000000 | 0.004580 | 0.000000 |
| 75-79 | 193-252 | 0.000000 | 0.004580 | 0.000000 |
| 10-14 | 253+    | 0.001325 | 0.008742 | 0.000000 |
| 15-19 | 253+    | 0.002984 | 0.010602 | 0.000000 |
| 20-24 | 253+    | 0.000452 | 0.004314 | 0.000000 |
| 25-29 | 253+    | 0.000225 | 0.003645 | 0.000000 |
| 30-34 | 253+    | 0.000112 | 0.004512 | 0.000000 |
| 35-39 | 253+    | 0.000000 | 0.002147 | 0.000000 |
| 40-44 | 253+    | 0.000000 | 0.002636 | 0.000000 |
| 45-49 | 253+    | 0.000000 | 0.001051 | 0.000000 |
| 50-54 | 253+    | 0.000000 | 0.002519 | 0.000000 |
| 55-59 | 253+    | 0.000000 | 0.003693 | 0.000000 |
| 60-64 | 253+    | 0.000000 | 0.005888 | 0.000000 |
| 65-69 | 253+    | 0.000000 | 0.004823 | 0.000000 |
| 70-74 | 253+    | 0.000000 | 0.004733 | 0.000000 |
| 75-79 | 253+    | 0.000000 | 0.004733 | 0.000000 |

## Results for PHIM for Run 7 (Sensitivity\_Analysis\_2.RTF)

\*\*\*\*\*

TTP values for Run: 7, Scenario: Ecig

| Variable Parameter | Value               |
|--------------------|---------------------|
| 1. Country         | US (United States)  |
| 2. Sex             | M (Males)           |
| 3. Assumption Set  | S2D                 |
| Note:              | Period is in Months |

| Age   | Period  | Initiation  |               |               | Cessation    |                |                | Re-initiation |                |                |
|-------|---------|-------------|---------------|---------------|--------------|----------------|----------------|---------------|----------------|----------------|
|       |         | Never<br>CC | Never<br>Ecig | Never<br>Dual | CC<br>Former | Ecig<br>Former | Dual<br>Former | Former<br>CC  | Former<br>Ecig | Former<br>Dual |
| 10-14 | 1-12    | 0.001921    | 0.001921      | 0.000000      | 0.008742     | 0.008742       | 0.000000       | 0.000000      | 0.000000       | 0.000000       |
| 15-19 | 1-12    | 0.002360    | 0.002360      | 0.000000      | 0.003614     | 0.003614       | 0.000000       | 0.000000      | 0.000000       | 0.000000       |
| 20-24 | 1-12    | 0.000188    | 0.000188      | 0.000000      | 0.000943     | 0.000943       | 0.000000       | 0.000000      | 0.000000       | 0.000000       |
| 25-29 | 1-12    | 0.000093    | 0.000093      | 0.000000      | 0.001143     | 0.001143       | 0.000000       | 0.000000      | 0.000000       | 0.000000       |
| 30-34 | 1-12    | 0.000047    | 0.000047      | 0.000000      | 0.000871     | 0.000871       | 0.000000       | 0.000000      | 0.000000       | 0.000000       |
| 35-39 | 1-12    | 0.000000    | 0.000000      | 0.000000      | 0.000867     | 0.000867       | 0.000000       | 0.000000      | 0.000000       | 0.000000       |
| 40-44 | 1-12    | 0.000000    | 0.000000      | 0.000000      | 0.001399     | 0.001399       | 0.000000       | 0.000000      | 0.000000       | 0.000000       |
| 45-49 | 1-12    | 0.000000    | 0.000000      | 0.000000      | 0.002033     | 0.002033       | 0.000000       | 0.000000      | 0.000000       | 0.000000       |
| 50-54 | 1-12    | 0.000000    | 0.000000      | 0.000000      | 0.003209     | 0.003209       | 0.000000       | 0.000000      | 0.000000       | 0.000000       |
| 55-59 | 1-12    | 0.000000    | 0.000000      | 0.000000      | 0.003574     | 0.003574       | 0.000000       | 0.000000      | 0.000000       | 0.000000       |
| 60-64 | 1-12    | 0.000000    | 0.000000      | 0.000000      | 0.003460     | 0.003460       | 0.000000       | 0.000000      | 0.000000       | 0.000000       |
| 65-69 | 1-12    | 0.000000    | 0.000000      | 0.000000      | 0.004136     | 0.004136       | 0.000000       | 0.000000      | 0.000000       | 0.000000       |
| 70-74 | 1-12    | 0.000000    | 0.000000      | 0.000000      | 0.005592     | 0.005592       | 0.000000       | 0.000000      | 0.000000       | 0.000000       |
| 75-79 | 1-12    | 0.000000    | 0.000000      | 0.000000      | 0.005592     | 0.005592       | 0.000000       | 0.000000      | 0.000000       | 0.000000       |
| 10-14 | 13-72   | 0.001962    | 0.002944      | 0.000000      | 0.008742     | 0.008742       | 0.000000       | 0.000000      | 0.000000       | 0.000000       |
| 15-19 | 13-72   | 0.002796    | 0.004193      | 0.000000      | 0.004426     | 0.004426       | 0.000000       | 0.000000      | 0.000000       | 0.000000       |
| 20-24 | 13-72   | 0.000275    | 0.000412      | 0.000000      | 0.001527     | 0.001527       | 0.000000       | 0.000000      | 0.000000       | 0.000000       |
| 25-29 | 13-72   | 0.000385    | 0.000578      | 0.000000      | 0.001515     | 0.001515       | 0.000000       | 0.000000      | 0.000000       | 0.000000       |
| 30-34 | 13-72   | 0.000146    | 0.000218      | 0.000000      | 0.001227     | 0.001227       | 0.000000       | 0.000000      | 0.000000       | 0.000000       |
| 35-39 | 13-72   | 0.000000    | 0.000000      | 0.000000      | 0.001630     | 0.001630       | 0.000000       | 0.000000      | 0.000000       | 0.000000       |
| 40-44 | 13-72   | 0.000000    | 0.000000      | 0.000000      | 0.001852     | 0.001852       | 0.000000       | 0.000000      | 0.000000       | 0.000000       |
| 45-49 | 13-72   | 0.000000    | 0.000000      | 0.000000      | 0.002667     | 0.002667       | 0.000000       | 0.000000      | 0.000000       | 0.000000       |
| 50-54 | 13-72   | 0.000000    | 0.000000      | 0.000000      | 0.003208     | 0.003208       | 0.000000       | 0.000000      | 0.000000       | 0.000000       |
| 55-59 | 13-72   | 0.000000    | 0.000000      | 0.000000      | 0.003978     | 0.003978       | 0.000000       | 0.000000      | 0.000000       | 0.000000       |
| 60-64 | 13-72   | 0.000000    | 0.000000      | 0.000000      | 0.005771     | 0.005771       | 0.000000       | 0.000000      | 0.000000       | 0.000000       |
| 65-69 | 13-72   | 0.000000    | 0.000000      | 0.000000      | 0.010432     | 0.010432       | 0.000000       | 0.000000      | 0.000000       | 0.000000       |
| 70-74 | 13-72   | 0.000000    | 0.000000      | 0.000000      | 0.007079     | 0.007079       | 0.000000       | 0.000000      | 0.000000       | 0.000000       |
| 75-79 | 13-72   | 0.000000    | 0.000000      | 0.000000      | 0.007079     | 0.007079       | 0.000000       | 0.000000      | 0.000000       | 0.000000       |
| 10-14 | 73-132  | 0.000862    | 0.003449      | 0.000000      | 0.008742     | 0.008742       | 0.000000       | 0.000000      | 0.000000       | 0.000000       |
| 15-19 | 73-132  | 0.001066    | 0.004264      | 0.000000      | 0.003289     | 0.003289       | 0.000000       | 0.000000      | 0.000000       | 0.000000       |
| 20-24 | 73-132  | 0.000491    | 0.001965      | 0.000000      | 0.003844     | 0.003844       | 0.000000       | 0.000000      | 0.000000       | 0.000000       |
| 25-29 | 73-132  | 0.000168    | 0.000671      | 0.000000      | 0.002006     | 0.002006       | 0.000000       | 0.000000      | 0.000000       | 0.000000       |
| 30-34 | 73-132  | 0.000083    | 0.000332      | 0.000000      | 0.001329     | 0.001329       | 0.000000       | 0.000000      | 0.000000       | 0.000000       |
| 35-39 | 73-132  | 0.000000    | 0.000000      | 0.000000      | 0.001278     | 0.001278       | 0.000000       | 0.000000      | 0.000000       | 0.000000       |
| 40-44 | 73-132  | 0.000000    | 0.000000      | 0.000000      | 0.001691     | 0.001691       | 0.000000       | 0.000000      | 0.000000       | 0.000000       |
| 45-49 | 73-132  | 0.000000    | 0.000000      | 0.000000      | 0.002904     | 0.002904       | 0.000000       | 0.000000      | 0.000000       | 0.000000       |
| 50-54 | 73-132  | 0.000000    | 0.000000      | 0.000000      | 0.003319     | 0.003319       | 0.000000       | 0.000000      | 0.000000       | 0.000000       |
| 55-59 | 73-132  | 0.000000    | 0.000000      | 0.000000      | 0.003976     | 0.003976       | 0.000000       | 0.000000      | 0.000000       | 0.000000       |
| 60-64 | 73-132  | 0.000000    | 0.000000      | 0.000000      | 0.005235     | 0.005235       | 0.000000       | 0.000000      | 0.000000       | 0.000000       |
| 65-69 | 73-132  | 0.000000    | 0.000000      | 0.000000      | 0.005901     | 0.005901       | 0.000000       | 0.000000      | 0.000000       | 0.000000       |
| 70-74 | 73-132  | 0.000000    | 0.000000      | 0.000000      | 0.005615     | 0.005615       | 0.000000       | 0.000000      | 0.000000       | 0.000000       |
| 75-79 | 73-132  | 0.000000    | 0.000000      | 0.000000      | 0.005615     | 0.005615       | 0.000000       | 0.000000      | 0.000000       | 0.000000       |
| 10-14 | 133-192 | 0.000173    | 0.003294      | 0.000000      | 0.008742     | 0.008742       | 0.000000       | 0.000000      | 0.000000       | 0.000000       |
| 15-19 | 133-192 | 0.000234    | 0.004442      | 0.000000      | 0.003732     | 0.003732       | 0.000000       | 0.000000      | 0.000000       | 0.000000       |
| 20-24 | 133-192 | 0.000003    | 0.000059      | 0.000000      | 0.002260     | 0.002260       | 0.000000       | 0.000000      | 0.000000       | 0.000000       |
| 25-29 | 133-192 | 0.000071    | 0.001351      | 0.000000      | 0.002822     | 0.002822       | 0.000000       | 0.000000      | 0.000000       | 0.000000       |
| 30-34 | 133-192 | 0.000035    | 0.000661      | 0.000000      | 0.002610     | 0.002610       | 0.000000       | 0.000000      | 0.000000       | 0.000000       |
| 35-39 | 133-192 | 0.000000    | 0.000000      | 0.000000      | 0.002058     | 0.002058       | 0.000000       | 0.000000      | 0.000000       | 0.000000       |
| 40-44 | 133-192 | 0.000000    | 0.000000      | 0.000000      | 0.002310     | 0.002310       | 0.000000       | 0.000000      | 0.000000       | 0.000000       |
| 45-49 | 133-192 | 0.000000    | 0.000000      | 0.000000      | 0.002256     | 0.002256       | 0.000000       | 0.000000      | 0.000000       | 0.000000       |
| 50-54 | 133-192 | 0.000000    | 0.000000      | 0.000000      | 0.002663     | 0.002663       | 0.000000       | 0.000000      | 0.000000       | 0.000000       |
| 55-59 | 133-192 | 0.000000    | 0.000000      | 0.000000      | 0.001747     | 0.001747       | 0.000000       | 0.000000      | 0.000000       | 0.000000       |
| 60-64 | 133-192 | 0.000000    | 0.000000      | 0.000000      | 0.005809     | 0.005809       | 0.000000       | 0.000000      | 0.000000       | 0.000000       |
| 65-69 | 133-192 | 0.000000    | 0.000000      | 0.000000      | 0.005896     | 0.005896       | 0.000000       | 0.000000      | 0.000000       | 0.000000       |
| 70-74 | 133-192 | 0.000000    | 0.000000      | 0.000000      | 0.007323     | 0.007323       | 0.000000       | 0.000000      | 0.000000       | 0.000000       |
| 75-79 | 133-192 | 0.000000    | 0.000000      | 0.000000      | 0.007323     | 0.007323       | 0.000000       | 0.000000      | 0.000000       | 0.000000       |
| 10-14 | 193-252 | 0.000116    | 0.002198      | 0.000000      | 0.008742     | 0.008742       | 0.000000       | 0.000000      | 0.000000       | 0.000000       |
| 15-19 | 193-252 | 0.000199    | 0.003788      | 0.000000      | 0.005036     | 0.005036       | 0.000000       | 0.000000      | 0.000000       | 0.000000       |
| 20-24 | 193-252 | 0.000016    | 0.000304      | 0.000000      | 0.002857     | 0.002857       | 0.000000       | 0.000000      | 0.000000       | 0.000000       |
| 25-29 | 193-252 | 0.000013    | 0.000239      | 0.000000      | 0.002314     | 0.002314       | 0.000000       | 0.000000      | 0.000000       | 0.000000       |
| 30-34 | 193-252 | 0.000006    | 0.000119      | 0.000000      | 0.004343     | 0.004343       | 0.000000       | 0.000000      | 0.000000       | 0.000000       |
| 35-39 | 193-252 | 0.000000    | 0.000000      | 0.000000      | 0.002092     | 0.002092       | 0.000000       | 0.000000      | 0.000000       | 0.000000       |
| 40-44 | 193-252 | 0.000000    | 0.000000      | 0.000000      | 0.002566     | 0.002566       | 0.000000       | 0.000000      | 0.000000       | 0.000000       |
| 45-49 | 193-252 | 0.000000    | 0.000000      | 0.000000      | 0.002311     | 0.002311       | 0.000000       | 0.000000      | 0.000000       | 0.000000       |
| 50-54 | 193-252 | 0.000000    | 0.000000      | 0.000000      | 0.003209     | 0.003209       | 0.000000       | 0.000000      | 0.000000       | 0.000000       |

### Results for PHIM for Run 7 (Sensitivity\_Analysis\_2.RTF)

|       |         |          |          |          |          |          |          |          |          |          |
|-------|---------|----------|----------|----------|----------|----------|----------|----------|----------|----------|
| 55-59 | 193-252 | 0.000000 | 0.000000 | 0.000000 | 0.004057 | 0.004057 | 0.000000 | 0.000000 | 0.000000 | 0.000000 |
| 60-64 | 193-252 | 0.000000 | 0.000000 | 0.000000 | 0.007166 | 0.007166 | 0.000000 | 0.000000 | 0.000000 | 0.000000 |
| 65-69 | 193-252 | 0.000000 | 0.000000 | 0.000000 | 0.004281 | 0.004281 | 0.000000 | 0.000000 | 0.000000 | 0.000000 |
| 70-74 | 193-252 | 0.000000 | 0.000000 | 0.000000 | 0.004580 | 0.004580 | 0.000000 | 0.000000 | 0.000000 | 0.000000 |
| 75-79 | 193-252 | 0.000000 | 0.000000 | 0.000000 | 0.004580 | 0.004580 | 0.000000 | 0.000000 | 0.000000 | 0.000000 |
| 10-14 | 253+    | 0.000066 | 0.001259 | 0.000000 | 0.008742 | 0.008742 | 0.000000 | 0.000000 | 0.000000 | 0.000000 |
| 15-19 | 253+    | 0.000149 | 0.002835 | 0.000000 | 0.010602 | 0.010602 | 0.000000 | 0.000000 | 0.000000 | 0.000000 |
| 20-24 | 253+    | 0.000023 | 0.000430 | 0.000000 | 0.004314 | 0.004314 | 0.000000 | 0.000000 | 0.000000 | 0.000000 |
| 25-29 | 253+    | 0.000011 | 0.000213 | 0.000000 | 0.003645 | 0.003645 | 0.000000 | 0.000000 | 0.000000 | 0.000000 |
| 30-34 | 253+    | 0.000006 | 0.000106 | 0.000000 | 0.004512 | 0.004512 | 0.000000 | 0.000000 | 0.000000 | 0.000000 |
| 35-39 | 253+    | 0.000000 | 0.000000 | 0.000000 | 0.002147 | 0.002147 | 0.000000 | 0.000000 | 0.000000 | 0.000000 |
| 40-44 | 253+    | 0.000000 | 0.000000 | 0.000000 | 0.002636 | 0.002636 | 0.000000 | 0.000000 | 0.000000 | 0.000000 |
| 45-49 | 253+    | 0.000000 | 0.000000 | 0.000000 | 0.001051 | 0.001051 | 0.000000 | 0.000000 | 0.000000 | 0.000000 |
| 50-54 | 253+    | 0.000000 | 0.000000 | 0.000000 | 0.002519 | 0.002519 | 0.000000 | 0.000000 | 0.000000 | 0.000000 |
| 55-59 | 253+    | 0.000000 | 0.000000 | 0.000000 | 0.003693 | 0.003693 | 0.000000 | 0.000000 | 0.000000 | 0.000000 |
| 60-64 | 253+    | 0.000000 | 0.000000 | 0.000000 | 0.005888 | 0.005888 | 0.000000 | 0.000000 | 0.000000 | 0.000000 |
| 65-69 | 253+    | 0.000000 | 0.000000 | 0.000000 | 0.004823 | 0.004823 | 0.000000 | 0.000000 | 0.000000 | 0.000000 |
| 70-74 | 253+    | 0.000000 | 0.000000 | 0.000000 | 0.004733 | 0.004733 | 0.000000 | 0.000000 | 0.000000 | 0.000000 |
| 75-79 | 253+    | 0.000000 | 0.000000 | 0.000000 | 0.004733 | 0.004733 | 0.000000 | 0.000000 | 0.000000 | 0.000000 |



### Results for PHIM for Run 7 (Sensitivity\_Analysis\_2.RTF)

|       |      |          |          |          |          |          |          |
|-------|------|----------|----------|----------|----------|----------|----------|
| 25-29 | 253+ | 0.011854 | 0.000000 | 0.000000 | 0.000000 | 0.000000 | 0.000000 |
| 30-34 | 253+ | 0.012125 | 0.000000 | 0.000000 | 0.000000 | 0.000000 | 0.000000 |
| 35-39 | 253+ | 0.011376 | 0.000000 | 0.000000 | 0.000000 | 0.000000 | 0.000000 |
| 40-44 | 253+ | 0.010904 | 0.000000 | 0.000000 | 0.000000 | 0.000000 | 0.000000 |
| 45-49 | 253+ | 0.009673 | 0.000000 | 0.000000 | 0.000000 | 0.000000 | 0.000000 |
| 50-54 | 253+ | 0.008423 | 0.000000 | 0.000000 | 0.000000 | 0.000000 | 0.000000 |
| 55-59 | 253+ | 0.007684 | 0.000000 | 0.000000 | 0.000000 | 0.000000 | 0.000000 |
| 60-64 | 253+ | 0.006173 | 0.000000 | 0.000000 | 0.000000 | 0.000000 | 0.000000 |
| 65-69 | 253+ | 0.003536 | 0.000000 | 0.000000 | 0.000000 | 0.000000 | 0.000000 |
| 70-74 | 253+ | 0.002068 | 0.000000 | 0.000000 | 0.000000 | 0.000000 | 0.000000 |
| 75-79 | 253+ | 0.002068 | 0.000000 | 0.000000 | 0.000000 | 0.000000 | 0.000000 |

## Results for PHIM for Run 7 (Sensitivity\_Analysis\_2.RTF)

\*\*\*\*\*

### Main Output for the Tobacco History for Run: 7, Simulation: 1, Scenario: NULL

| Variable Parameter          | Value              |
|-----------------------------|--------------------|
| 1. Country                  | US (United States) |
| 2. Sex                      | M (Males)          |
| 3. Year of start of process | 1990               |

Year of Follow-up: 2040, Age Group: All Ages  
 Period    Age Group    Smoking Group            N            %

|    |          |           |       |       |
|----|----------|-----------|-------|-------|
| 50 | All Ages | Never Any | 19445 | 50.68 |
| 50 | All Ages | CC        | 3024  | 7.88  |
| 50 | All Ages | Former    | 15896 | 41.43 |

Year of Follow-up: 2040, Age Group: 18-19  
 Period    Age Group    Smoking Group            N            %

|    |       |           |   |   |
|----|-------|-----------|---|---|
| 50 | 18-19 | Never Any | 0 | . |
| 50 | 18-19 | CC        | 0 | . |
| 50 | 18-19 | Former    | 0 | . |

Year of Follow-up: 2040, Age Group: 20-24  
 Period    Age Group    Smoking Group            N            %

|    |       |           |   |   |
|----|-------|-----------|---|---|
| 50 | 20-24 | Never Any | 0 | . |
| 50 | 20-24 | CC        | 0 | . |
| 50 | 20-24 | Former    | 0 | . |

Year of Follow-up: 2040, Age Group: 25-29  
 Period    Age Group    Smoking Group            N            %

|    |       |           |   |   |
|----|-------|-----------|---|---|
| 50 | 25-29 | Never Any | 0 | . |
| 50 | 25-29 | CC        | 0 | . |
| 50 | 25-29 | Former    | 0 | . |

Year of Follow-up: 2040, Age Group: 30-34  
 Period    Age Group    Smoking Group            N            %

|    |       |           |   |   |
|----|-------|-----------|---|---|
| 50 | 30-34 | Never Any | 0 | . |
| 50 | 30-34 | CC        | 0 | . |
| 50 | 30-34 | Former    | 0 | . |

Year of Follow-up: 2040, Age Group: 35-39  
 Period    Age Group    Smoking Group            N            %

|    |       |           |   |   |
|----|-------|-----------|---|---|
| 50 | 35-39 | Never Any | 0 | . |
| 50 | 35-39 | CC        | 0 | . |
| 50 | 35-39 | Former    | 0 | . |

Year of Follow-up: 2040, Age Group: 40-44  
 Period    Age Group    Smoking Group            N            %

|    |       |           |   |   |
|----|-------|-----------|---|---|
| 50 | 40-44 | Never Any | 0 | . |
| 50 | 40-44 | CC        | 0 | . |
| 50 | 40-44 | Former    | 0 | . |

Year of Follow-up: 2040, Age Group: 45-49  
 Period    Age Group    Smoking Group            N            %

|    |       |           |   |   |
|----|-------|-----------|---|---|
| 50 | 45-49 | Never Any | 0 | . |
| 50 | 45-49 | CC        | 0 | . |
| 50 | 45-49 | Former    | 0 | . |

Year of Follow-up: 2040, Age Group: 50-54  
 Period    Age Group    Smoking Group            N            %

|    |       |           |   |   |
|----|-------|-----------|---|---|
| 50 | 50-54 | Never Any | 0 | . |
| 50 | 50-54 | CC        | 0 | . |
| 50 | 50-54 | Former    | 0 | . |

Year of Follow-up: 2040, Age Group: 55-59  
 Period    Age Group    Smoking Group            N            %

|    |       |           |   |   |
|----|-------|-----------|---|---|
| 50 | 55-59 | Never Any | 0 | . |
| 50 | 55-59 | CC        | 0 | . |
| 50 | 55-59 | Former    | 0 | . |

Year of Follow-up: 2040, Age Group: 60-64  
 Period    Age Group    Smoking Group            N            %

### Results for PHIM for Run 7 (Sensitivity\_Analysis\_2.RTF)

|                                           |           |               |      |       |
|-------------------------------------------|-----------|---------------|------|-------|
| 50                                        | 60-64     | Never Any     | 4363 | 49.33 |
| 50                                        | 60-64     | CC            | 934  | 10.56 |
| 50                                        | 60-64     | Former        | 3548 | 40.11 |
| Year of Follow-up: 2040, Age Group: 65-69 |           |               |      |       |
| Period                                    | Age Group | Smoking Group | N    | %     |
| 50                                        | 65-69     | Never Any     | 4948 | 54.73 |
| 50                                        | 65-69     | CC            | 734  | 8.12  |
| 50                                        | 65-69     | Former        | 3358 | 37.15 |
| Year of Follow-up: 2040, Age Group: 70-74 |           |               |      |       |
| Period                                    | Age Group | Smoking Group | N    | %     |
| 50                                        | 70-74     | Never Any     | 5145 | 52.41 |
| 50                                        | 70-74     | CC            | 688  | 7.01  |
| 50                                        | 70-74     | Former        | 3983 | 40.58 |
| Year of Follow-up: 2040, Age Group: 75-79 |           |               |      |       |
| Period                                    | Age Group | Smoking Group | N    | %     |
| 50                                        | 75-79     | Never Any     | 4989 | 46.78 |
| 50                                        | 75-79     | CC            | 668  | 6.26  |
| 50                                        | 75-79     | Former        | 5007 | 46.95 |



## Results for PHIM for Run 7 (Sensitivity\_Analysis\_2.RTF)

\*\*\*\*\*

### Main Output for the Tobacco History for Run: 7, Simulation: 1, Scenario: Ecig

| Variable Parameter                           |           | Value              |       |       |               |             |               |                |              |
|----------------------------------------------|-----------|--------------------|-------|-------|---------------|-------------|---------------|----------------|--------------|
| 1. Country                                   |           | US (United States) |       |       |               |             |               |                |              |
| 2. Sex                                       |           | M (Males)          |       |       |               |             |               |                |              |
| 3. Year of start of process                  |           | 1990               |       |       |               |             |               |                |              |
| Year of Follow-up: 1990, Age Group: All Ages |           |                    |       |       |               |             |               |                |              |
| Period                                       | Age Group | Smoking Group      | N     | %     | Ever Quit (N) | Ever Quit % | Mean Yrs Quit | Short Term (n) | Short Term % |
| 0                                            | All Ages  | Never Any          | 34075 | 39.78 |               |             |               |                |              |
| 0                                            | All Ages  | CC                 | 27323 | 31.90 | 0             | 0.00        |               |                |              |
| 0                                            | All Ages  | Ecig               | 0     | 0.00  |               |             |               |                |              |
| 0                                            | All Ages  | Dual               | 0     | 0.00  |               |             |               |                |              |
| 0                                            | All Ages  | Former             | 24266 | 28.33 |               |             | 13.08         | 3623           | 14.93        |
| Year of Follow-up: 1990, Age Group: 18-19    |           |                    |       |       |               |             |               |                |              |
| Period                                       | Age Group | Smoking Group      | N     | %     | Ever Quit (N) | Ever Quit % | Mean Yrs Quit | Short Term (n) | Short Term % |
| 0                                            | 18-19     | Never Any          | 2783  | 78.42 |               |             |               |                |              |
| 0                                            | 18-19     | CC                 | 634   | 17.86 | 0             | 0.00        |               |                |              |
| 0                                            | 18-19     | Ecig               | 0     | 0.00  |               |             |               |                |              |
| 0                                            | 18-19     | Dual               | 0     | 0.00  |               |             |               |                |              |
| 0                                            | 18-19     | Former             | 132   | 3.72  |               |             | 0.11          | 132            | 100.00       |
| Year of Follow-up: 1990, Age Group: 20-24    |           |                    |       |       |               |             |               |                |              |
| Period                                       | Age Group | Smoking Group      | N     | %     | Ever Quit (N) | Ever Quit % | Mean Yrs Quit | Short Term (n) | Short Term % |
| 0                                            | 20-24     | Never Any          | 5722  | 58.29 |               |             |               |                |              |
| 0                                            | 20-24     | CC                 | 3199  | 32.59 | 0             | 0.00        |               |                |              |
| 0                                            | 20-24     | Ecig               | 0     | 0.00  |               |             |               |                |              |
| 0                                            | 20-24     | Dual               | 0     | 0.00  |               |             |               |                |              |
| 0                                            | 20-24     | Former             | 895   | 9.12  |               |             | 1.46          | 506            | 56.54        |
| Year of Follow-up: 1990, Age Group: 25-29    |           |                    |       |       |               |             |               |                |              |
| Period                                       | Age Group | Smoking Group      | N     | %     | Ever Quit (N) | Ever Quit % | Mean Yrs Quit | Short Term (n) | Short Term % |
| 0                                            | 25-29     | Never Any          | 5232  | 49.06 |               |             |               |                |              |
| 0                                            | 25-29     | CC                 | 3914  | 36.70 | 0             | 0.00        |               |                |              |
| 0                                            | 25-29     | Ecig               | 0     | 0.00  |               |             |               |                |              |
| 0                                            | 25-29     | Dual               | 0     | 0.00  |               |             |               |                |              |
| 0                                            | 25-29     | Former             | 1518  | 14.23 |               |             | 2.87          | 643            | 42.36        |
| Year of Follow-up: 1990, Age Group: 30-34    |           |                    |       |       |               |             |               |                |              |
| Period                                       | Age Group | Smoking Group      | N     | %     | Ever Quit (N) | Ever Quit % | Mean Yrs Quit | Short Term (n) | Short Term % |
| 0                                            | 30-34     | Never Any          | 4765  | 43.65 |               |             |               |                |              |
| 0                                            | 30-34     | CC                 | 4023  | 36.85 | 0             | 0.00        |               |                |              |
| 0                                            | 30-34     | Ecig               | 0     | 0.00  |               |             |               |                |              |
| 0                                            | 30-34     | Dual               | 0     | 0.00  |               |             |               |                |              |
| 0                                            | 30-34     | Former             | 2128  | 19.49 |               |             | 4.06          | 592            | 27.82        |
| Year of Follow-up: 1990, Age Group: 35-39    |           |                    |       |       |               |             |               |                |              |
| Period                                       | Age Group | Smoking Group      | N     | %     | Ever Quit (N) | Ever Quit % | Mean Yrs Quit | Short Term (n) | Short Term % |
| 0                                            | 35-39     | Never Any          | 3941  | 39.85 |               |             |               |                |              |
| 0                                            | 35-39     | CC                 | 3474  | 35.13 | 0             | 0.00        |               |                |              |
| 0                                            | 35-39     | Ecig               | 0     | 0.00  |               |             |               |                |              |
| 0                                            | 35-39     | Dual               | 0     | 0.00  |               |             |               |                |              |
| 0                                            | 35-39     | Former             | 2474  | 25.02 |               |             | 8.31          | 425            | 17.18        |
| Year of Follow-up: 1990, Age Group: 40-44    |           |                    |       |       |               |             |               |                |              |
| Period                                       | Age Group | Smoking Group      | N     | %     | Ever Quit (N) | Ever Quit % | Mean Yrs Quit | Short Term (n) | Short Term % |
| 0                                            | 40-44     | Never Any          | 2912  | 33.65 |               |             |               |                |              |
| 0                                            | 40-44     | CC                 | 3113  | 35.97 | 0             | 0.00        |               |                |              |
| 0                                            | 40-44     | Ecig               | 0     | 0.00  |               |             |               |                |              |
| 0                                            | 40-44     | Dual               | 0     | 0.00  |               |             |               |                |              |
| 0                                            | 40-44     | Former             | 2630  | 30.39 |               |             | 10.69         | 317            | 12.05        |
| Year of Follow-up: 1990, Age Group: 45-49    |           |                    |       |       |               |             |               |                |              |
| Period                                       | Age Group | Smoking Group      | N     | %     | Ever Quit (N) | Ever Quit % | Mean Yrs Quit | Short Term (n) | Short Term % |
| 0                                            | 45-49     | Never Any          | 1919  | 29.46 |               |             |               |                |              |
| 0                                            | 45-49     | CC                 | 2318  | 35.58 | 0             | 0.00        |               |                |              |
| 0                                            | 45-49     | Ecig               | 0     | 0.00  |               |             |               |                |              |
| 0                                            | 45-49     | Dual               | 0     | 0.00  |               |             |               |                |              |
| 0                                            | 45-49     | Former             | 2278  | 34.97 |               |             | 13.26         | 221            | 9.70         |
| Year of Follow-up: 1990, Age Group: 50-54    |           |                    |       |       |               |             |               |                |              |
| Period                                       | Age Group | Smoking Group      | N     | %     | Ever Quit (N) | Ever Quit % | Mean Yrs Quit | Short Term (n) | Short Term % |
| 0                                            | 50-54     | Never Any          | 1611  | 29.41 |               |             |               |                |              |
| 0                                            | 50-54     | CC                 | 1816  | 33.16 | 0             | 0.00        |               |                |              |

**Results for PHIM for Run 7 (Sensitivity\_Analysis\_2.RTF)**

|                                              |           |               |       |       |               |             |               |                |              |
|----------------------------------------------|-----------|---------------|-------|-------|---------------|-------------|---------------|----------------|--------------|
| 0                                            | 50-54     | Ecig          | 0     | 0.00  |               |             |               |                |              |
| 0                                            | 50-54     | Dual          | 0     | 0.00  |               |             |               |                |              |
| 0                                            | 50-54     | Former        | 2050  | 37.43 |               |             | 14.55         | 261            | 12.73        |
| Year of Follow-up: 1990, Age Group: 55-59    |           |               |       |       |               |             |               |                |              |
| Period                                       | Age Group | Smoking Group | N     | %     | Ever Quit (N) | Ever Quit % | Mean Yrs Quit | Short Term (n) | Short Term % |
| 0                                            | 55-59     | Never Any     | 1337  | 26.83 |               |             |               |                |              |
| 0                                            | 55-59     | CC            | 1520  | 30.50 | 0             | 0.00        |               |                |              |
| 0                                            | 55-59     | Ecig          | 0     | 0.00  |               |             |               |                |              |
| 0                                            | 55-59     | Dual          | 0     | 0.00  |               |             |               |                |              |
| 0                                            | 55-59     | Former        | 2126  | 42.67 |               |             | 14.80         | 216            | 10.16        |
| Year of Follow-up: 1990, Age Group: 60-64    |           |               |       |       |               |             |               |                |              |
| Period                                       | Age Group | Smoking Group | N     | %     | Ever Quit (N) | Ever Quit % | Mean Yrs Quit | Short Term (n) | Short Term % |
| 0                                            | 60-64     | Never Any     | 1169  | 23.83 |               |             |               |                |              |
| 0                                            | 60-64     | CC            | 1287  | 26.24 | 0             | 0.00        |               |                |              |
| 0                                            | 60-64     | Ecig          | 0     | 0.00  |               |             |               |                |              |
| 0                                            | 60-64     | Dual          | 0     | 0.00  |               |             |               |                |              |
| 0                                            | 60-64     | Former        | 2449  | 49.93 |               |             | 18.87         | 106            | 4.33         |
| Year of Follow-up: 1990, Age Group: 65-69    |           |               |       |       |               |             |               |                |              |
| Period                                       | Age Group | Smoking Group | N     | %     | Ever Quit (N) | Ever Quit % | Mean Yrs Quit | Short Term (n) | Short Term % |
| 0                                            | 65-69     | Never Any     | 1023  | 23.32 |               |             |               |                |              |
| 0                                            | 65-69     | CC            | 979   | 22.32 | 0             | 0.00        |               |                |              |
| 0                                            | 65-69     | Ecig          | 0     | 0.00  |               |             |               |                |              |
| 0                                            | 65-69     | Dual          | 0     | 0.00  |               |             |               |                |              |
| 0                                            | 65-69     | Former        | 2385  | 54.37 |               |             | 19.91         | 113            | 4.74         |
| Year of Follow-up: 1990, Age Group: 70-74    |           |               |       |       |               |             |               |                |              |
| Period                                       | Age Group | Smoking Group | N     | %     | Ever Quit (N) | Ever Quit % | Mean Yrs Quit | Short Term (n) | Short Term % |
| 0                                            | 70-74     | Never Any     | 961   | 27.46 |               |             |               |                |              |
| 0                                            | 70-74     | CC            | 675   | 19.29 | 0             | 0.00        |               |                |              |
| 0                                            | 70-74     | Ecig          | 0     | 0.00  |               |             |               |                |              |
| 0                                            | 70-74     | Dual          | 0     | 0.00  |               |             |               |                |              |
| 0                                            | 70-74     | Former        | 1863  | 53.24 |               |             | 20.69         | 23             | 1.23         |
| Year of Follow-up: 1990, Age Group: 75-79    |           |               |       |       |               |             |               |                |              |
| Period                                       | Age Group | Smoking Group | N     | %     | Ever Quit (N) | Ever Quit % | Mean Yrs Quit | Short Term (n) | Short Term % |
| 0                                            | 75-79     | Never Any     | 700   | 29.06 |               |             |               |                |              |
| 0                                            | 75-79     | CC            | 371   | 15.40 | 0             | 0.00        |               |                |              |
| 0                                            | 75-79     | Ecig          | 0     | 0.00  |               |             |               |                |              |
| 0                                            | 75-79     | Dual          | 0     | 0.00  |               |             |               |                |              |
| 0                                            | 75-79     | Former        | 1338  | 55.54 |               |             | 22.88         | 68             | 5.08         |
| Year of Follow-up: 1995, Age Group: All Ages |           |               |       |       |               |             |               |                |              |
| Period                                       | Age Group | Smoking Group | N     | %     | Ever Quit (N) | Ever Quit % | Mean Yrs Quit | Short Term (n) | Short Term % |
| 5                                            | All Ages  | Never Any     | 38368 | 41.57 |               |             |               |                |              |
| 5                                            | All Ages  | CC            | 13964 | 15.13 | 0             | 0.00        |               |                |              |
| 5                                            | All Ages  | Ecig          | 12974 | 14.06 |               |             |               |                |              |
| 5                                            | All Ages  | Dual          | 0     | 0.00  |               |             |               |                |              |
| 5                                            | All Ages  | Former        | 26984 | 29.24 |               |             | 15.16         | 1683           | 6.24         |
| Year of Follow-up: 1995, Age Group: 18-19    |           |               |       |       |               |             |               |                |              |
| Period                                       | Age Group | Smoking Group | N     | %     | Ever Quit (N) | Ever Quit % | Mean Yrs Quit | Short Term (n) | Short Term % |
| 5                                            | 18-19     | Never Any     | 2448  | 69.07 |               |             |               |                |              |
| 5                                            | 18-19     | CC            | 347   | 9.79  | 0             | 0.00        |               |                |              |
| 5                                            | 18-19     | Ecig          | 637   | 17.97 |               |             |               |                |              |
| 5                                            | 18-19     | Dual          | 0     | 0.00  |               |             |               |                |              |
| 5                                            | 18-19     | Former        | 112   | 3.16  |               |             | 0.93          | 82             | 73.21        |
| Year of Follow-up: 1995, Age Group: 20-24    |           |               |       |       |               |             |               |                |              |
| Period                                       | Age Group | Smoking Group | N     | %     | Ever Quit (N) | Ever Quit % | Mean Yrs Quit | Short Term (n) | Short Term % |
| 5                                            | 20-24     | Never Any     | 5787  | 64.02 |               |             |               |                |              |
| 5                                            | 20-24     | CC            | 1125  | 12.44 | 0             | 0.00        |               |                |              |
| 5                                            | 20-24     | Ecig          | 1623  | 17.95 |               |             |               |                |              |
| 5                                            | 20-24     | Dual          | 0     | 0.00  |               |             |               |                |              |
| 5                                            | 20-24     | Former        | 505   | 5.59  |               |             | 2.88          | 131            | 25.94        |
| Year of Follow-up: 1995, Age Group: 25-29    |           |               |       |       |               |             |               |                |              |
| Period                                       | Age Group | Smoking Group | N     | %     | Ever Quit (N) | Ever Quit % | Mean Yrs Quit | Short Term (n) | Short Term % |
| 5                                            | 25-29     | Never Any     | 5471  | 55.74 |               |             |               |                |              |
| 5                                            | 25-29     | CC            | 1551  | 15.80 | 0             | 0.00        |               |                |              |
| 5                                            | 25-29     | Ecig          | 1648  | 16.79 |               |             |               |                |              |
| 5                                            | 25-29     | Dual          | 0     | 0.00  |               |             |               |                |              |
| 5                                            | 25-29     | Former        | 1146  | 11.67 |               |             | 5.46          | 114            | 9.95         |
| Year of Follow-up: 1995, Age Group: 30-34    |           |               |       |       |               |             |               |                |              |
| Period                                       | Age Group | Smoking Group | N     | %     | Ever Quit (N) | Ever Quit % | Mean Yrs Quit | Short Term (n) | Short Term % |

**Results for PHIM for Run 7 (Sensitivity\_Analysis\_2.RTF)**

|                                              |           |               |      |       |               |             |               |                |              |
|----------------------------------------------|-----------|---------------|------|-------|---------------|-------------|---------------|----------------|--------------|
| 5                                            | 30-34     | Never Any     | 5065 | 47.50 |               |             |               |                |              |
| 5                                            | 30-34     | CC            | 1783 | 16.72 | 0             | 0.00        |               |                |              |
| 5                                            | 30-34     | Ecig          | 2024 | 18.98 |               |             |               |                |              |
| 5                                            | 30-34     | Dual          | 0    | 0.00  |               |             |               |                |              |
| 5                                            | 30-34     | Former        | 1792 | 16.80 |               |             | 6.96          | 109            | 6.08         |
| Year of Follow-up: 1995, Age Group: 35-39    |           |               |      |       |               |             |               |                |              |
| Period                                       | Age Group | Smoking Group | N    | %     | Ever Quit (N) | Ever Quit % | Mean Yrs Quit | Short Term (n) | Short Term % |
| 5                                            | 35-39     | Never Any     | 4724 | 43.28 |               |             |               |                |              |
| 5                                            | 35-39     | CC            | 1823 | 16.70 | 0             | 0.00        |               |                |              |
| 5                                            | 35-39     | Ecig          | 1960 | 17.96 |               |             |               |                |              |
| 5                                            | 35-39     | Dual          | 0    | 0.00  |               |             |               |                |              |
| 5                                            | 35-39     | Former        | 2409 | 22.07 |               |             | 8.23          | 118            | 4.90         |
| Year of Follow-up: 1995, Age Group: 40-44    |           |               |      |       |               |             |               |                |              |
| Period                                       | Age Group | Smoking Group | N    | %     | Ever Quit (N) | Ever Quit % | Mean Yrs Quit | Short Term (n) | Short Term % |
| 5                                            | 40-44     | Never Any     | 3941 | 39.85 |               |             |               |                |              |
| 5                                            | 40-44     | CC            | 1563 | 15.81 | 0             | 0.00        |               |                |              |
| 5                                            | 40-44     | Ecig          | 1596 | 16.14 |               |             |               |                |              |
| 5                                            | 40-44     | Dual          | 0    | 0.00  |               |             |               |                |              |
| 5                                            | 40-44     | Former        | 2789 | 28.20 |               |             | 12.01         | 135            | 4.84         |
| Year of Follow-up: 1995, Age Group: 45-49    |           |               |      |       |               |             |               |                |              |
| Period                                       | Age Group | Smoking Group | N    | %     | Ever Quit (N) | Ever Quit % | Mean Yrs Quit | Short Term (n) | Short Term % |
| 5                                            | 45-49     | Never Any     | 2912 | 33.65 |               |             |               |                |              |
| 5                                            | 45-49     | CC            | 1459 | 16.86 | 0             | 0.00        |               |                |              |
| 5                                            | 45-49     | Ecig          | 1281 | 14.80 |               |             |               |                |              |
| 5                                            | 45-49     | Dual          | 0    | 0.00  |               |             |               |                |              |
| 5                                            | 45-49     | Former        | 3003 | 34.70 |               |             | 13.97         | 159            | 5.29         |
| Year of Follow-up: 1995, Age Group: 50-54    |           |               |      |       |               |             |               |                |              |
| Period                                       | Age Group | Smoking Group | N    | %     | Ever Quit (N) | Ever Quit % | Mean Yrs Quit | Short Term (n) | Short Term % |
| 5                                            | 50-54     | Never Any     | 1919 | 29.46 |               |             |               |                |              |
| 5                                            | 50-54     | CC            | 1167 | 17.91 | 0             | 0.00        |               |                |              |
| 5                                            | 50-54     | Ecig          | 778  | 11.94 |               |             |               |                |              |
| 5                                            | 50-54     | Dual          | 0    | 0.00  |               |             |               |                |              |
| 5                                            | 50-54     | Former        | 2651 | 40.69 |               |             | 15.96         | 154            | 5.81         |
| Year of Follow-up: 1995, Age Group: 55-59    |           |               |      |       |               |             |               |                |              |
| Period                                       | Age Group | Smoking Group | N    | %     | Ever Quit (N) | Ever Quit % | Mean Yrs Quit | Short Term (n) | Short Term % |
| 5                                            | 55-59     | Never Any     | 1611 | 29.41 |               |             |               |                |              |
| 5                                            | 55-59     | CC            | 903  | 16.49 | 0             | 0.00        |               |                |              |
| 5                                            | 55-59     | Ecig          | 595  | 10.86 |               |             |               |                |              |
| 5                                            | 55-59     | Dual          | 0    | 0.00  |               |             |               |                |              |
| 5                                            | 55-59     | Former        | 2368 | 43.24 |               |             | 17.21         | 115            | 4.86         |
| Year of Follow-up: 1995, Age Group: 60-64    |           |               |      |       |               |             |               |                |              |
| Period                                       | Age Group | Smoking Group | N    | %     | Ever Quit (N) | Ever Quit % | Mean Yrs Quit | Short Term (n) | Short Term % |
| 5                                            | 60-64     | Never Any     | 1337 | 26.83 |               |             |               |                |              |
| 5                                            | 60-64     | CC            | 736  | 14.77 | 0             | 0.00        |               |                |              |
| 5                                            | 60-64     | Ecig          | 438  | 8.79  |               |             |               |                |              |
| 5                                            | 60-64     | Dual          | 0    | 0.00  |               |             |               |                |              |
| 5                                            | 60-64     | Former        | 2472 | 49.61 |               |             | 17.30         | 144            | 5.83         |
| Year of Follow-up: 1995, Age Group: 65-69    |           |               |      |       |               |             |               |                |              |
| Period                                       | Age Group | Smoking Group | N    | %     | Ever Quit (N) | Ever Quit % | Mean Yrs Quit | Short Term (n) | Short Term % |
| 5                                            | 65-69     | Never Any     | 1169 | 23.83 |               |             |               |                |              |
| 5                                            | 65-69     | CC            | 597  | 12.17 | 0             | 0.00        |               |                |              |
| 5                                            | 65-69     | Ecig          | 228  | 4.65  |               |             |               |                |              |
| 5                                            | 65-69     | Dual          | 0    | 0.00  |               |             |               |                |              |
| 5                                            | 65-69     | Former        | 2911 | 59.35 |               |             | 20.37         | 204            | 7.01         |
| Year of Follow-up: 1995, Age Group: 70-74    |           |               |      |       |               |             |               |                |              |
| Period                                       | Age Group | Smoking Group | N    | %     | Ever Quit (N) | Ever Quit % | Mean Yrs Quit | Short Term (n) | Short Term % |
| 5                                            | 70-74     | Never Any     | 1023 | 23.32 |               |             |               |                |              |
| 5                                            | 70-74     | CC            | 521  | 11.88 | 0             | 0.00        |               |                |              |
| 5                                            | 70-74     | Ecig          | 107  | 2.44  |               |             |               |                |              |
| 5                                            | 70-74     | Dual          | 0    | 0.00  |               |             |               |                |              |
| 5                                            | 70-74     | Former        | 2736 | 62.37 |               |             | 21.96         | 129            | 4.71         |
| Year of Follow-up: 1995, Age Group: 75-79    |           |               |      |       |               |             |               |                |              |
| Period                                       | Age Group | Smoking Group | N    | %     | Ever Quit (N) | Ever Quit % | Mean Yrs Quit | Short Term (n) | Short Term % |
| 5                                            | 75-79     | Never Any     | 961  | 27.46 |               |             |               |                |              |
| 5                                            | 75-79     | CC            | 389  | 11.12 | 0             | 0.00        |               |                |              |
| 5                                            | 75-79     | Ecig          | 59   | 1.69  |               |             |               |                |              |
| 5                                            | 75-79     | Dual          | 0    | 0.00  |               |             |               |                |              |
| 5                                            | 75-79     | Former        | 2090 | 59.73 |               |             | 23.12         | 89             | 4.26         |
| Year of Follow-up: 2000, Age Group: All Ages |           |               |      |       |               |             |               |                |              |

**Results for PHIM for Run 7 (Sensitivity\_Analysis\_2.RTF)**

| Period                                    | Age Group | Smoking Group | N     | %     | Ever Quit (N) | Ever Quit % | Mean Yrs Quit | Short Term (n) | Short Term % |
|-------------------------------------------|-----------|---------------|-------|-------|---------------|-------------|---------------|----------------|--------------|
| 10                                        | All Ages  | Never Any     | 39177 | 41.64 |               |             |               |                |              |
| 10                                        | All Ages  | CC            | 7102  | 7.55  | 0             | 0.00        |               |                |              |
| 10                                        | All Ages  | Ecig          | 18505 | 19.67 |               |             |               |                |              |
| 10                                        | All Ages  | Dual          | 0     | 0.00  |               |             |               |                |              |
| 10                                        | All Ages  | Former        | 29308 | 31.15 |               |             | 16.89         | 1690           | 5.77         |
| Year of Follow-up: 2000, Age Group: 18-19 |           |               |       |       |               |             |               |                |              |
| Period                                    | Age Group | Smoking Group | N     | %     | Ever Quit (N) | Ever Quit % | Mean Yrs Quit | Short Term (n) | Short Term % |
| 10                                        | 18-19     | Never Any     | 0     | .     |               |             |               |                |              |
| 10                                        | 18-19     | CC            | 0     | .     | 0             | .           |               |                |              |
| 10                                        | 18-19     | Ecig          | 0     | .     |               |             |               |                |              |
| 10                                        | 18-19     | Dual          | 0     | .     |               |             |               |                |              |
| 10                                        | 18-19     | Former        | 0     | .     |               |             |               | 0              | .            |
| Year of Follow-up: 2000, Age Group: 20-24 |           |               |       |       |               |             |               |                |              |
| Period                                    | Age Group | Smoking Group | N     | %     | Ever Quit (N) | Ever Quit % | Mean Yrs Quit | Short Term (n) | Short Term % |
| 10                                        | 20-24     | Never Any     | 4927  | 55.70 |               |             |               |                |              |
| 10                                        | 20-24     | CC            | 579   | 6.55  | 0             | 0.00        |               |                |              |
| 10                                        | 20-24     | Ecig          | 2431  | 27.48 |               |             |               |                |              |
| 10                                        | 20-24     | Dual          | 0     | 0.00  |               |             |               |                |              |
| 10                                        | 20-24     | Former        | 908   | 10.27 |               |             | 3.46          | 240            | 26.43        |
| Year of Follow-up: 2000, Age Group: 25-29 |           |               |       |       |               |             |               |                |              |
| Period                                    | Age Group | Smoking Group | N     | %     | Ever Quit (N) | Ever Quit % | Mean Yrs Quit | Short Term (n) | Short Term % |
| 10                                        | 25-29     | Never Any     | 5341  | 59.08 |               |             |               |                |              |
| 10                                        | 25-29     | CC            | 578   | 6.39  | 0             | 0.00        |               |                |              |
| 10                                        | 25-29     | Ecig          | 2182  | 24.14 |               |             |               |                |              |
| 10                                        | 25-29     | Dual          | 0     | 0.00  |               |             |               |                |              |
| 10                                        | 25-29     | Former        | 939   | 10.39 |               |             | 5.11          | 177            | 18.85        |
| Year of Follow-up: 2000, Age Group: 30-34 |           |               |       |       |               |             |               |                |              |
| Period                                    | Age Group | Smoking Group | N     | %     | Ever Quit (N) | Ever Quit % | Mean Yrs Quit | Short Term (n) | Short Term % |
| 10                                        | 30-34     | Never Any     | 5276  | 53.75 |               |             |               |                |              |
| 10                                        | 30-34     | CC            | 726   | 7.40  | 0             | 0.00        |               |                |              |
| 10                                        | 30-34     | Ecig          | 2385  | 24.30 |               |             |               |                |              |
| 10                                        | 30-34     | Dual          | 0     | 0.00  |               |             |               |                |              |
| 10                                        | 30-34     | Former        | 1429  | 14.56 |               |             | 8.79          | 103            | 7.21         |
| Year of Follow-up: 2000, Age Group: 35-39 |           |               |       |       |               |             |               |                |              |
| Period                                    | Age Group | Smoking Group | N     | %     | Ever Quit (N) | Ever Quit % | Mean Yrs Quit | Short Term (n) | Short Term % |
| 10                                        | 35-39     | Never Any     | 4997  | 46.86 |               |             |               |                |              |
| 10                                        | 35-39     | CC            | 887   | 8.32  | 0             | 0.00        |               |                |              |
| 10                                        | 35-39     | Ecig          | 2725  | 25.55 |               |             |               |                |              |
| 10                                        | 35-39     | Dual          | 0     | 0.00  |               |             |               |                |              |
| 10                                        | 35-39     | Former        | 2055  | 19.27 |               |             | 10.67         | 106            | 5.16         |
| Year of Follow-up: 2000, Age Group: 40-44 |           |               |       |       |               |             |               |                |              |
| Period                                    | Age Group | Smoking Group | N     | %     | Ever Quit (N) | Ever Quit % | Mean Yrs Quit | Short Term (n) | Short Term % |
| 10                                        | 40-44     | Never Any     | 4724  | 43.28 |               |             |               |                |              |
| 10                                        | 40-44     | CC            | 852   | 7.81  | 0             | 0.00        |               |                |              |
| 10                                        | 40-44     | Ecig          | 2612  | 23.93 |               |             |               |                |              |
| 10                                        | 40-44     | Dual          | 0     | 0.00  |               |             |               |                |              |
| 10                                        | 40-44     | Former        | 2728  | 24.99 |               |             | 11.92         | 129            | 4.73         |
| Year of Follow-up: 2000, Age Group: 45-49 |           |               |       |       |               |             |               |                |              |
| Period                                    | Age Group | Smoking Group | N     | %     | Ever Quit (N) | Ever Quit % | Mean Yrs Quit | Short Term (n) | Short Term % |
| 10                                        | 45-49     | Never Any     | 3941  | 39.85 |               |             |               |                |              |
| 10                                        | 45-49     | CC            | 754   | 7.62  | 0             | 0.00        |               |                |              |
| 10                                        | 45-49     | Ecig          | 2020  | 20.43 |               |             |               |                |              |
| 10                                        | 45-49     | Dual          | 0     | 0.00  |               |             |               |                |              |
| 10                                        | 45-49     | Former        | 3174  | 32.10 |               |             | 15.17         | 172            | 5.42         |
| Year of Follow-up: 2000, Age Group: 50-54 |           |               |       |       |               |             |               |                |              |
| Period                                    | Age Group | Smoking Group | N     | %     | Ever Quit (N) | Ever Quit % | Mean Yrs Quit | Short Term (n) | Short Term % |
| 10                                        | 50-54     | Never Any     | 2912  | 33.65 |               |             |               |                |              |
| 10                                        | 50-54     | CC            | 677   | 7.82  | 0             | 0.00        |               |                |              |
| 10                                        | 50-54     | Ecig          | 1607  | 18.57 |               |             |               |                |              |
| 10                                        | 50-54     | Dual          | 0     | 0.00  |               |             |               |                |              |
| 10                                        | 50-54     | Former        | 3459  | 39.97 |               |             | 16.74         | 183            | 5.29         |
| Year of Follow-up: 2000, Age Group: 55-59 |           |               |       |       |               |             |               |                |              |
| Period                                    | Age Group | Smoking Group | N     | %     | Ever Quit (N) | Ever Quit % | Mean Yrs Quit | Short Term (n) | Short Term % |
| 10                                        | 55-59     | Never Any     | 1919  | 29.46 |               |             |               |                |              |
| 10                                        | 55-59     | CC            | 560   | 8.60  | 0             | 0.00        |               |                |              |
| 10                                        | 55-59     | Ecig          | 1002  | 15.38 |               |             |               |                |              |
| 10                                        | 55-59     | Dual          | 0     | 0.00  |               |             |               |                |              |

**Results for PHIM for Run 7 (Sensitivity\_Analysis\_2.RTF)**

| Year of Follow-up: 2000, Age Group: 60-64    | Period   | Age Group | Smoking Group | N     | %     | Ever Quit (N) | Ever Quit % | Mean Yrs Quit | Short Term (n) | Short Term % |
|----------------------------------------------|----------|-----------|---------------|-------|-------|---------------|-------------|---------------|----------------|--------------|
| 10                                           | 55-59    | Former    |               | 3034  | 46.57 |               |             | 18.56         | 163            | 5.37         |
| 10                                           | 60-64    | Never Any |               | 1611  | 29.41 |               |             |               |                |              |
| 10                                           | 60-64    | CC        |               | 448   | 8.18  | 0             | 0.00        |               |                |              |
| 10                                           | 60-64    | Ecig      |               | 723   | 13.20 |               |             |               |                |              |
| 10                                           | 60-64    | Dual      |               | 0     | 0.00  |               |             |               |                |              |
| 10                                           | 60-64    | Former    |               | 2695  | 49.21 |               |             | 19.75         | 138            | 5.12         |
| Year of Follow-up: 2000, Age Group: 65-69    | Period   | Age Group | Smoking Group | N     | %     | Ever Quit (N) | Ever Quit % | Mean Yrs Quit | Short Term (n) | Short Term % |
| 10                                           | 65-69    | Never Any |               | 1337  | 26.83 |               |             |               |                |              |
| 10                                           | 65-69    | CC        |               | 376   | 7.55  | 0             | 0.00        |               |                |              |
| 10                                           | 65-69    | Ecig      |               | 478   | 9.59  |               |             |               |                |              |
| 10                                           | 65-69    | Dual      |               | 0     | 0.00  |               |             |               |                |              |
| 10                                           | 65-69    | Former    |               | 2792  | 56.03 |               |             | 19.97         | 131            | 4.69         |
| Year of Follow-up: 2000, Age Group: 70-74    | Period   | Age Group | Smoking Group | N     | %     | Ever Quit (N) | Ever Quit % | Mean Yrs Quit | Short Term (n) | Short Term % |
| 10                                           | 70-74    | Never Any |               | 1169  | 23.83 |               |             |               |                |              |
| 10                                           | 70-74    | CC        |               | 343   | 6.99  | 0             | 0.00        |               |                |              |
| 10                                           | 70-74    | Ecig      |               | 214   | 4.36  |               |             |               |                |              |
| 10                                           | 70-74    | Dual      |               | 0     | 0.00  |               |             |               |                |              |
| 10                                           | 70-74    | Former    |               | 3179  | 64.81 |               |             | 23.42         | 85             | 2.67         |
| Year of Follow-up: 2000, Age Group: 75-79    | Period   | Age Group | Smoking Group | N     | %     | Ever Quit (N) | Ever Quit % | Mean Yrs Quit | Short Term (n) | Short Term % |
| 10                                           | 75-79    | Never Any |               | 1023  | 23.32 |               |             |               |                |              |
| 10                                           | 75-79    | CC        |               | 322   | 7.34  | 0             | 0.00        |               |                |              |
| 10                                           | 75-79    | Ecig      |               | 126   | 2.87  |               |             |               |                |              |
| 10                                           | 75-79    | Dual      |               | 0     | 0.00  |               |             |               |                |              |
| 10                                           | 75-79    | Former    |               | 2916  | 66.47 |               |             | 25.43         | 63             | 2.16         |
| Year of Follow-up: 2005, Age Group: All Ages | Period   | Age Group | Smoking Group | N     | %     | Ever Quit (N) | Ever Quit % | Mean Yrs Quit | Short Term (n) | Short Term % |
| 15                                           | All Ages | Never Any |               | 37449 | 41.75 |               |             |               |                |              |
| 15                                           | All Ages | CC        |               | 3413  | 3.80  | 0             | 0.00        |               |                |              |
| 15                                           | All Ages | Ecig      |               | 18547 | 20.68 |               |             |               |                |              |
| 15                                           | All Ages | Dual      |               | 0     | 0.00  |               |             |               |                |              |
| 15                                           | All Ages | Former    |               | 30296 | 33.77 |               |             | 18.50         | 1578           | 5.21         |
| Year of Follow-up: 2005, Age Group: 18-19    | Period   | Age Group | Smoking Group | N     | %     | Ever Quit (N) | Ever Quit % | Mean Yrs Quit | Short Term (n) | Short Term % |
| 15                                           | 18-19    | Never Any |               | 0     | .     |               |             |               |                |              |
| 15                                           | 18-19    | CC        |               | 0     | .     | 0             | .           |               |                |              |
| 15                                           | 18-19    | Ecig      |               | 0     | .     |               |             |               |                |              |
| 15                                           | 18-19    | Dual      |               | 0     | .     |               |             |               |                |              |
| 15                                           | 18-19    | Former    |               | 0     | .     |               |             | .             | 0              | .            |
| Year of Follow-up: 2005, Age Group: 20-24    | Period   | Age Group | Smoking Group | N     | %     | Ever Quit (N) | Ever Quit % | Mean Yrs Quit | Short Term (n) | Short Term % |
| 15                                           | 20-24    | Never Any |               | 0     | .     |               |             |               |                |              |
| 15                                           | 20-24    | CC        |               | 0     | .     | 0             | .           |               |                |              |
| 15                                           | 20-24    | Ecig      |               | 0     | .     |               |             |               |                |              |
| 15                                           | 20-24    | Dual      |               | 0     | .     |               |             |               |                |              |
| 15                                           | 20-24    | Former    |               | 0     | .     |               |             | .             | 0              | .            |
| Year of Follow-up: 2005, Age Group: 25-29    | Period   | Age Group | Smoking Group | N     | %     | Ever Quit (N) | Ever Quit % | Mean Yrs Quit | Short Term (n) | Short Term % |
| 15                                           | 25-29    | Never Any |               | 4634  | 52.39 |               |             |               |                |              |
| 15                                           | 25-29    | CC        |               | 284   | 3.21  | 0             | 0.00        |               |                |              |
| 15                                           | 25-29    | Ecig      |               | 2582  | 29.19 |               |             |               |                |              |
| 15                                           | 25-29    | Dual      |               | 0     | 0.00  |               |             |               |                |              |
| 15                                           | 25-29    | Former    |               | 1345  | 15.21 |               |             | 6.41          | 166            | 12.34        |
| Year of Follow-up: 2005, Age Group: 30-34    | Period   | Age Group | Smoking Group | N     | %     | Ever Quit (N) | Ever Quit % | Mean Yrs Quit | Short Term (n) | Short Term % |
| 15                                           | 30-34    | Never Any |               | 5042  | 55.77 |               |             |               |                |              |
| 15                                           | 30-34    | CC        |               | 251   | 2.78  | 0             | 0.00        |               |                |              |
| 15                                           | 30-34    | Ecig      |               | 2371  | 26.23 |               |             |               |                |              |
| 15                                           | 30-34    | Dual      |               | 0     | 0.00  |               |             |               |                |              |
| 15                                           | 30-34    | Former    |               | 1376  | 15.22 |               |             | 7.52          | 164            | 11.92        |
| Year of Follow-up: 2005, Age Group: 35-39    | Period   | Age Group | Smoking Group | N     | %     | Ever Quit (N) | Ever Quit % | Mean Yrs Quit | Short Term (n) | Short Term % |
| 15                                           | 35-39    | Never Any |               | 5163  | 52.60 |               |             |               |                |              |
| 15                                           | 35-39    | CC        |               | 341   | 3.47  | 0             | 0.00        |               |                |              |

**Results for PHIM for Run 7 (Sensitivity\_Analysis\_2.RTF)**

|                                              |           |               |       |       |               |             |               |                |              |
|----------------------------------------------|-----------|---------------|-------|-------|---------------|-------------|---------------|----------------|--------------|
| 15                                           | 35-39     | Ecig          | 2530  | 25.77 |               |             |               |                |              |
| 15                                           | 35-39     | Dual          | 0     | 0.00  |               |             |               |                |              |
| 15                                           | 35-39     | Former        | 1782  | 18.15 |               |             | 11.45         | 142            | 7.97         |
| Year of Follow-up: 2005, Age Group: 40-44    |           |               |       |       |               |             |               |                |              |
| Period                                       | Age Group | Smoking Group | N     | %     | Ever Quit (N) | Ever Quit % | Mean Yrs Quit | Short Term (n) | Short Term % |
| 15                                           | 40-44     | Never Any     | 4997  | 46.86 |               |             |               |                |              |
| 15                                           | 40-44     | CC            | 405   | 3.80  | 0             | 0.00        |               |                |              |
| 15                                           | 40-44     | Ecig          | 2786  | 26.13 |               |             |               |                |              |
| 15                                           | 40-44     | Dual          | 0     | 0.00  |               |             |               |                |              |
| 15                                           | 40-44     | Former        | 2476  | 23.22 |               |             | 13.30         | 206            | 8.32         |
| Year of Follow-up: 2005, Age Group: 45-49    |           |               |       |       |               |             |               |                |              |
| Period                                       | Age Group | Smoking Group | N     | %     | Ever Quit (N) | Ever Quit % | Mean Yrs Quit | Short Term (n) | Short Term % |
| 15                                           | 45-49     | Never Any     | 4724  | 43.28 |               |             |               |                |              |
| 15                                           | 45-49     | CC            | 393   | 3.60  | 0             | 0.00        |               |                |              |
| 15                                           | 45-49     | Ecig          | 2640  | 24.18 |               |             |               |                |              |
| 15                                           | 45-49     | Dual          | 0     | 0.00  |               |             |               |                |              |
| 15                                           | 45-49     | Former        | 3159  | 28.94 |               |             | 14.88         | 163            | 5.16         |
| Year of Follow-up: 2005, Age Group: 50-54    |           |               |       |       |               |             |               |                |              |
| Period                                       | Age Group | Smoking Group | N     | %     | Ever Quit (N) | Ever Quit % | Mean Yrs Quit | Short Term (n) | Short Term % |
| 15                                           | 50-54     | Never Any     | 3941  | 39.85 |               |             |               |                |              |
| 15                                           | 50-54     | CC            | 410   | 4.15  | 0             | 0.00        |               |                |              |
| 15                                           | 50-54     | Ecig          | 1979  | 20.01 |               |             |               |                |              |
| 15                                           | 50-54     | Dual          | 0     | 0.00  |               |             |               |                |              |
| 15                                           | 50-54     | Former        | 3559  | 35.99 |               |             | 18.22         | 147            | 4.13         |
| Year of Follow-up: 2005, Age Group: 55-59    |           |               |       |       |               |             |               |                |              |
| Period                                       | Age Group | Smoking Group | N     | %     | Ever Quit (N) | Ever Quit % | Mean Yrs Quit | Short Term (n) | Short Term % |
| 15                                           | 55-59     | Never Any     | 2912  | 33.65 |               |             |               |                |              |
| 15                                           | 55-59     | CC            | 377   | 4.36  | 0             | 0.00        |               |                |              |
| 15                                           | 55-59     | Ecig          | 1600  | 18.49 |               |             |               |                |              |
| 15                                           | 55-59     | Dual          | 0     | 0.00  |               |             |               |                |              |
| 15                                           | 55-59     | Former        | 3766  | 43.51 |               |             | 20.14         | 121            | 3.21         |
| Year of Follow-up: 2005, Age Group: 60-64    |           |               |       |       |               |             |               |                |              |
| Period                                       | Age Group | Smoking Group | N     | %     | Ever Quit (N) | Ever Quit % | Mean Yrs Quit | Short Term (n) | Short Term % |
| 15                                           | 60-64     | Never Any     | 1919  | 29.46 |               |             |               |                |              |
| 15                                           | 60-64     | CC            | 286   | 4.39  | 0             | 0.00        |               |                |              |
| 15                                           | 60-64     | Ecig          | 950   | 14.58 |               |             |               |                |              |
| 15                                           | 60-64     | Dual          | 0     | 0.00  |               |             |               |                |              |
| 15                                           | 60-64     | Former        | 3360  | 51.57 |               |             | 21.45         | 156            | 4.64         |
| Year of Follow-up: 2005, Age Group: 65-69    |           |               |       |       |               |             |               |                |              |
| Period                                       | Age Group | Smoking Group | N     | %     | Ever Quit (N) | Ever Quit % | Mean Yrs Quit | Short Term (n) | Short Term % |
| 15                                           | 65-69     | Never Any     | 1611  | 29.41 |               |             |               |                |              |
| 15                                           | 65-69     | CC            | 232   | 4.24  | 0             | 0.00        |               |                |              |
| 15                                           | 65-69     | Ecig          | 604   | 11.03 |               |             |               |                |              |
| 15                                           | 65-69     | Dual          | 0     | 0.00  |               |             |               |                |              |
| 15                                           | 65-69     | Former        | 3030  | 55.32 |               |             | 22.24         | 127            | 4.19         |
| Year of Follow-up: 2005, Age Group: 70-74    |           |               |       |       |               |             |               |                |              |
| Period                                       | Age Group | Smoking Group | N     | %     | Ever Quit (N) | Ever Quit % | Mean Yrs Quit | Short Term (n) | Short Term % |
| 15                                           | 70-74     | Never Any     | 1337  | 26.83 |               |             |               |                |              |
| 15                                           | 70-74     | CC            | 224   | 4.50  | 0             | 0.00        |               |                |              |
| 15                                           | 70-74     | Ecig          | 338   | 6.78  |               |             |               |                |              |
| 15                                           | 70-74     | Dual          | 0     | 0.00  |               |             |               |                |              |
| 15                                           | 70-74     | Former        | 3084  | 61.89 |               |             | 22.80         | 117            | 3.79         |
| Year of Follow-up: 2005, Age Group: 75-79    |           |               |       |       |               |             |               |                |              |
| Period                                       | Age Group | Smoking Group | N     | %     | Ever Quit (N) | Ever Quit % | Mean Yrs Quit | Short Term (n) | Short Term % |
| 15                                           | 75-79     | Never Any     | 1169  | 23.83 |               |             |               |                |              |
| 15                                           | 75-79     | CC            | 210   | 4.28  | 0             | 0.00        |               |                |              |
| 15                                           | 75-79     | Ecig          | 167   | 3.40  |               |             |               |                |              |
| 15                                           | 75-79     | Dual          | 0     | 0.00  |               |             |               |                |              |
| 15                                           | 75-79     | Former        | 3359  | 68.48 |               |             | 27.01         | 69             | 2.05         |
| Year of Follow-up: 2010, Age Group: All Ages |           |               |       |       |               |             |               |                |              |
| Period                                       | Age Group | Smoking Group | N     | %     | Ever Quit (N) | Ever Quit % | Mean Yrs Quit | Short Term (n) | Short Term % |
| 20                                           | All Ages  | Never Any     | 36103 | 42.57 |               |             |               |                |              |
| 20                                           | All Ages  | CC            | 1599  | 1.89  | 0             | 0.00        |               |                |              |
| 20                                           | All Ages  | Ecig          | 16243 | 19.15 |               |             |               |                |              |
| 20                                           | All Ages  | Dual          | 0     | 0.00  |               |             |               |                |              |
| 20                                           | All Ages  | Former        | 30855 | 36.39 |               |             | 19.85         | 1517           | 4.92         |
| Year of Follow-up: 2010, Age Group: 18-19    |           |               |       |       |               |             |               |                |              |
| Period                                       | Age Group | Smoking Group | N     | %     | Ever Quit (N) | Ever Quit % | Mean Yrs Quit | Short Term (n) | Short Term % |

**Results for PHIM for Run 7 (Sensitivity\_Analysis\_2.RTF)**

|                                           |           |               |      |       |               |             |               |                |              |
|-------------------------------------------|-----------|---------------|------|-------|---------------|-------------|---------------|----------------|--------------|
| 20                                        | 18-19     | Never Any     | 0    | .     |               |             |               |                |              |
| 20                                        | 18-19     | CC            | 0    | .     | 0             | .           |               |                |              |
| 20                                        | 18-19     | Ecig          | 0    | .     |               |             |               |                |              |
| 20                                        | 18-19     | Dual          | 0    | .     |               |             |               |                |              |
| 20                                        | 18-19     | Former        | 0    | .     |               |             | 0             | .              |              |
| Year of Follow-up: 2010, Age Group: 20-24 |           |               |      |       |               |             |               |                |              |
| Period                                    | Age Group | Smoking Group | N    | %     | Ever Quit (N) | Ever Quit % | Mean Yrs Quit | Short Term (n) | Short Term % |
| 20                                        | 20-24     | Never Any     | 0    | .     |               |             |               |                |              |
| 20                                        | 20-24     | CC            | 0    | .     | 0             | .           |               |                |              |
| 20                                        | 20-24     | Ecig          | 0    | .     |               |             |               |                |              |
| 20                                        | 20-24     | Dual          | 0    | .     |               |             |               |                |              |
| 20                                        | 20-24     | Former        | 0    | .     |               |             |               | 0              | .            |
| Year of Follow-up: 2010, Age Group: 25-29 |           |               |      |       |               |             |               |                |              |
| Period                                    | Age Group | Smoking Group | N    | %     | Ever Quit (N) | Ever Quit % | Mean Yrs Quit | Short Term (n) | Short Term % |
| 20                                        | 25-29     | Never Any     | 0    | .     |               |             |               |                |              |
| 20                                        | 25-29     | CC            | 0    | .     | 0             | .           |               |                |              |
| 20                                        | 25-29     | Ecig          | 0    | .     |               |             |               |                |              |
| 20                                        | 25-29     | Dual          | 0    | .     |               |             |               |                |              |
| 20                                        | 25-29     | Former        | 0    | .     |               |             |               | 0              | .            |
| Year of Follow-up: 2010, Age Group: 30-34 |           |               |      |       |               |             |               |                |              |
| Period                                    | Age Group | Smoking Group | N    | %     | Ever Quit (N) | Ever Quit % | Mean Yrs Quit | Short Term (n) | Short Term % |
| 20                                        | 30-34     | Never Any     | 4508 | 50.97 |               |             |               |                |              |
| 20                                        | 30-34     | CC            | 124  | 1.40  | 0             | 0.00        |               |                |              |
| 20                                        | 30-34     | Ecig          | 2353 | 26.60 |               |             |               |                |              |
| 20                                        | 30-34     | Dual          | 0    | 0.00  |               |             |               |                |              |
| 20                                        | 30-34     | Former        | 1860 | 21.03 |               |             | 8.77          | 224            | 12.04        |
| Year of Follow-up: 2010, Age Group: 35-39 |           |               |      |       |               |             |               |                |              |
| Period                                    | Age Group | Smoking Group | N    | %     | Ever Quit (N) | Ever Quit % | Mean Yrs Quit | Short Term (n) | Short Term % |
| 20                                        | 35-39     | Never Any     | 4991 | 55.21 |               |             |               |                |              |
| 20                                        | 35-39     | CC            | 112  | 1.24  | 0             | 0.00        |               |                |              |
| 20                                        | 35-39     | Ecig          | 2091 | 23.13 |               |             |               |                |              |
| 20                                        | 35-39     | Dual          | 0    | 0.00  |               |             |               |                |              |
| 20                                        | 35-39     | Former        | 1846 | 20.42 |               |             | 9.89          | 146            | 7.91         |
| Year of Follow-up: 2010, Age Group: 40-44 |           |               |      |       |               |             |               |                |              |
| Period                                    | Age Group | Smoking Group | N    | %     | Ever Quit (N) | Ever Quit % | Mean Yrs Quit | Short Term (n) | Short Term % |
| 20                                        | 40-44     | Never Any     | 5163 | 52.60 |               |             |               |                |              |
| 20                                        | 40-44     | CC            | 157  | 1.60  | 0             | 0.00        |               |                |              |
| 20                                        | 40-44     | Ecig          | 2347 | 23.91 |               |             |               |                |              |
| 20                                        | 40-44     | Dual          | 0    | 0.00  |               |             |               |                |              |
| 20                                        | 40-44     | Former        | 2149 | 21.89 |               |             | 13.97         | 151            | 7.03         |
| Year of Follow-up: 2010, Age Group: 45-49 |           |               |      |       |               |             |               |                |              |
| Period                                    | Age Group | Smoking Group | N    | %     | Ever Quit (N) | Ever Quit % | Mean Yrs Quit | Short Term (n) | Short Term % |
| 20                                        | 45-49     | Never Any     | 4997 | 46.86 |               |             |               |                |              |
| 20                                        | 45-49     | CC            | 187  | 1.75  | 0             | 0.00        |               |                |              |
| 20                                        | 45-49     | Ecig          | 2535 | 23.77 |               |             |               |                |              |
| 20                                        | 45-49     | Dual          | 0    | 0.00  |               |             |               |                |              |
| 20                                        | 45-49     | Former        | 2945 | 27.62 |               |             | 15.73         | 170            | 5.77         |
| Year of Follow-up: 2010, Age Group: 50-54 |           |               |      |       |               |             |               |                |              |
| Period                                    | Age Group | Smoking Group | N    | %     | Ever Quit (N) | Ever Quit % | Mean Yrs Quit | Short Term (n) | Short Term % |
| 20                                        | 50-54     | Never Any     | 4724 | 43.28 |               |             |               |                |              |
| 20                                        | 50-54     | CC            | 192  | 1.76  | 0             | 0.00        |               |                |              |
| 20                                        | 50-54     | Ecig          | 2408 | 22.06 |               |             |               |                |              |
| 20                                        | 50-54     | Dual          | 0    | 0.00  |               |             |               |                |              |
| 20                                        | 50-54     | Former        | 3592 | 32.91 |               |             | 17.73         | 172            | 4.79         |
| Year of Follow-up: 2010, Age Group: 55-59 |           |               |      |       |               |             |               |                |              |
| Period                                    | Age Group | Smoking Group | N    | %     | Ever Quit (N) | Ever Quit % | Mean Yrs Quit | Short Term (n) | Short Term % |
| 20                                        | 55-59     | Never Any     | 3941 | 39.85 |               |             |               |                |              |
| 20                                        | 55-59     | CC            | 206  | 2.08  | 0             | 0.00        |               |                |              |
| 20                                        | 55-59     | Ecig          | 1701 | 17.20 |               |             |               |                |              |
| 20                                        | 55-59     | Dual          | 0    | 0.00  |               |             |               |                |              |
| 20                                        | 55-59     | Former        | 4041 | 40.86 |               |             | 20.68         | 197            | 4.88         |
| Year of Follow-up: 2010, Age Group: 60-64 |           |               |      |       |               |             |               |                |              |
| Period                                    | Age Group | Smoking Group | N    | %     | Ever Quit (N) | Ever Quit % | Mean Yrs Quit | Short Term (n) | Short Term % |
| 20                                        | 60-64     | Never Any     | 2912 | 33.65 |               |             |               |                |              |
| 20                                        | 60-64     | CC            | 175  | 2.02  | 0             | 0.00        |               |                |              |
| 20                                        | 60-64     | Ecig          | 1332 | 15.39 |               |             |               |                |              |
| 20                                        | 60-64     | Dual          | 0    | 0.00  |               |             |               |                |              |
| 20                                        | 60-64     | Former        | 4236 | 48.94 |               |             | 22.53         | 242            | 5.71         |
| Year of Follow-up: 2010, Age Group: 65-69 |           |               |      |       |               |             |               |                |              |

**Results for PHIM for Run 7 (Sensitivity\_Analysis\_2.RTF)**

| Period                                       | Age Group | Smoking Group | N     | %     | Ever Quit (N) | Ever Quit % | Mean Yrs Quit | Short Term (n) | Short Term % |
|----------------------------------------------|-----------|---------------|-------|-------|---------------|-------------|---------------|----------------|--------------|
| 20                                           | 65-69     | Never Any     | 1919  | 29.46 |               |             |               |                |              |
| 20                                           | 65-69     | CC            | 152   | 2.33  | 0             | 0.00        |               |                |              |
| 20                                           | 65-69     | Ecig          | 726   | 11.14 |               |             |               |                |              |
| 20                                           | 65-69     | Dual          | 0     | 0.00  |               |             |               |                |              |
| 20                                           | 65-69     | Former        | 3718  | 57.07 |               |             | 24.12         | 116            | 3.12         |
| Year of Follow-up: 2010, Age Group: 70-74    |           |               |       |       |               |             |               |                |              |
| Period                                       | Age Group | Smoking Group | N     | %     | Ever Quit (N) | Ever Quit % | Mean Yrs Quit | Short Term (n) | Short Term % |
| 20                                           | 70-74     | Never Any     | 1611  | 29.41 |               |             |               |                |              |
| 20                                           | 70-74     | CC            | 151   | 2.76  | 0             | 0.00        |               |                |              |
| 20                                           | 70-74     | Ecig          | 476   | 8.69  |               |             |               |                |              |
| 20                                           | 70-74     | Dual          | 0     | 0.00  |               |             |               |                |              |
| 20                                           | 70-74     | Former        | 3239  | 59.14 |               |             | 25.64         | 65             | 2.01         |
| Year of Follow-up: 2010, Age Group: 75-79    |           |               |       |       |               |             |               |                |              |
| Period                                       | Age Group | Smoking Group | N     | %     | Ever Quit (N) | Ever Quit % | Mean Yrs Quit | Short Term (n) | Short Term % |
| 20                                           | 75-79     | Never Any     | 1337  | 26.83 |               |             |               |                |              |
| 20                                           | 75-79     | CC            | 143   | 2.87  | 0             | 0.00        |               |                |              |
| 20                                           | 75-79     | Ecig          | 274   | 5.50  |               |             |               |                |              |
| 20                                           | 75-79     | Dual          | 0     | 0.00  |               |             |               |                |              |
| 20                                           | 75-79     | Former        | 3229  | 64.80 |               |             | 26.66         | 34             | 1.05         |
| Year of Follow-up: 2015, Age Group: All Ages |           |               |       |       |               |             |               |                |              |
| Period                                       | Age Group | Smoking Group | N     | %     | Ever Quit (N) | Ever Quit % | Mean Yrs Quit | Short Term (n) | Short Term % |
| 25                                           | All Ages  | Never Any     | 34747 | 43.53 |               |             |               |                |              |
| 25                                           | All Ages  | CC            | 767   | 0.96  | 0             | 0.00        |               |                |              |
| 25                                           | All Ages  | Ecig          | 13677 | 17.14 |               |             |               |                |              |
| 25                                           | All Ages  | Dual          | 0     | 0.00  |               |             |               |                |              |
| 25                                           | All Ages  | Former        | 30626 | 38.37 |               |             | 21.90         | 1086           | 3.55         |
| Year of Follow-up: 2015, Age Group: 18-19    |           |               |       |       |               |             |               |                |              |
| Period                                       | Age Group | Smoking Group | N     | %     | Ever Quit (N) | Ever Quit % | Mean Yrs Quit | Short Term (n) | Short Term % |
| 25                                           | 18-19     | Never Any     | 0     | .     |               |             |               |                |              |
| 25                                           | 18-19     | CC            | 0     | .     | 0             | .           |               |                |              |
| 25                                           | 18-19     | Ecig          | 0     | .     |               |             |               |                |              |
| 25                                           | 18-19     | Dual          | 0     | .     |               |             |               |                |              |
| 25                                           | 18-19     | Former        | 0     | .     |               |             | .             | 0              | .            |
| Year of Follow-up: 2015, Age Group: 20-24    |           |               |       |       |               |             |               |                |              |
| Period                                       | Age Group | Smoking Group | N     | %     | Ever Quit (N) | Ever Quit % | Mean Yrs Quit | Short Term (n) | Short Term % |
| 25                                           | 20-24     | Never Any     | 0     | .     |               |             |               |                |              |
| 25                                           | 20-24     | CC            | 0     | .     | 0             | .           |               |                |              |
| 25                                           | 20-24     | Ecig          | 0     | .     |               |             |               |                |              |
| 25                                           | 20-24     | Dual          | 0     | .     |               |             |               |                |              |
| 25                                           | 20-24     | Former        | 0     | .     |               |             | .             | 0              | .            |
| Year of Follow-up: 2015, Age Group: 25-29    |           |               |       |       |               |             |               |                |              |
| Period                                       | Age Group | Smoking Group | N     | %     | Ever Quit (N) | Ever Quit % | Mean Yrs Quit | Short Term (n) | Short Term % |
| 25                                           | 25-29     | Never Any     | 0     | .     |               |             |               |                |              |
| 25                                           | 25-29     | CC            | 0     | .     | 0             | .           |               |                |              |
| 25                                           | 25-29     | Ecig          | 0     | .     |               |             |               |                |              |
| 25                                           | 25-29     | Dual          | 0     | .     |               |             |               |                |              |
| 25                                           | 25-29     | Former        | 0     | .     |               |             | .             | 0              | .            |
| Year of Follow-up: 2015, Age Group: 30-34    |           |               |       |       |               |             |               |                |              |
| Period                                       | Age Group | Smoking Group | N     | %     | Ever Quit (N) | Ever Quit % | Mean Yrs Quit | Short Term (n) | Short Term % |
| 25                                           | 30-34     | Never Any     | 0     | .     |               |             |               |                |              |
| 25                                           | 30-34     | CC            | 0     | .     | 0             | .           |               |                |              |
| 25                                           | 30-34     | Ecig          | 0     | .     |               |             |               |                |              |
| 25                                           | 30-34     | Dual          | 0     | .     |               |             |               |                |              |
| 25                                           | 30-34     | Former        | 0     | .     |               |             | .             | 0              | .            |
| Year of Follow-up: 2015, Age Group: 35-39    |           |               |       |       |               |             |               |                |              |
| Period                                       | Age Group | Smoking Group | N     | %     | Ever Quit (N) | Ever Quit % | Mean Yrs Quit | Short Term (n) | Short Term % |
| 25                                           | 35-39     | Never Any     | 4489  | 50.75 |               |             |               |                |              |
| 25                                           | 35-39     | CC            | 54    | 0.61  | 0             | 0.00        |               |                |              |
| 25                                           | 35-39     | Ecig          | 1998  | 22.59 |               |             |               |                |              |
| 25                                           | 35-39     | Dual          | 0     | 0.00  |               |             |               |                |              |
| 25                                           | 35-39     | Former        | 2304  | 26.05 |               |             | 11.56         | 139            | 6.03         |
| Year of Follow-up: 2015, Age Group: 40-44    |           |               |       |       |               |             |               |                |              |
| Period                                       | Age Group | Smoking Group | N     | %     | Ever Quit (N) | Ever Quit % | Mean Yrs Quit | Short Term (n) | Short Term % |
| 25                                           | 40-44     | Never Any     | 4991  | 55.21 |               |             |               |                |              |
| 25                                           | 40-44     | CC            | 46    | 0.51  | 0             | 0.00        |               |                |              |
| 25                                           | 40-44     | Ecig          | 1876  | 20.75 |               |             |               |                |              |
| 25                                           | 40-44     | Dual          | 0     | 0.00  |               |             |               |                |              |



**Results for PHIM for Run 7 (Sensitivity\_Analysis\_2.RTF)**

|                                              |           |               |       |       |               |             |               |                |              |
|----------------------------------------------|-----------|---------------|-------|-------|---------------|-------------|---------------|----------------|--------------|
| 25                                           | 40-44     | Former        | 2127  | 23.53 |               |             | 13.18         | 112            | 5.27         |
| Year of Follow-up: 2015, Age Group: 45-49    |           |               |       |       |               |             |               |                |              |
| Period                                       | Age Group | Smoking Group | N     | %     | Ever Quit (N) | Ever Quit % | Mean Yrs Quit | Short Term (n) | Short Term % |
| 25                                           | 45-49     | Never Any     | 5163  | 52.60 |               |             |               |                |              |
| 25                                           | 45-49     | CC            | 76    | 0.77  | 0             | 0.00        |               |                |              |
| 25                                           | 45-49     | Ecig          | 2145  | 21.85 |               |             |               |                |              |
| 25                                           | 45-49     | Dual          | 0     | 0.00  |               |             |               |                |              |
| 25                                           | 45-49     | Former        | 2432  | 24.78 |               |             | 17.03         | 86             | 3.54         |
| Year of Follow-up: 2015, Age Group: 50-54    |           |               |       |       |               |             |               |                |              |
| Period                                       | Age Group | Smoking Group | N     | %     | Ever Quit (N) | Ever Quit % | Mean Yrs Quit | Short Term (n) | Short Term % |
| 25                                           | 50-54     | Never Any     | 4997  | 46.86 |               |             |               |                |              |
| 25                                           | 50-54     | CC            | 99    | 0.93  | 0             | 0.00        |               |                |              |
| 25                                           | 50-54     | Ecig          | 2339  | 21.93 |               |             |               |                |              |
| 25                                           | 50-54     | Dual          | 0     | 0.00  |               |             |               |                |              |
| 25                                           | 50-54     | Former        | 3229  | 30.28 |               |             | 19.07         | 127            | 3.93         |
| Year of Follow-up: 2015, Age Group: 55-59    |           |               |       |       |               |             |               |                |              |
| Period                                       | Age Group | Smoking Group | N     | %     | Ever Quit (N) | Ever Quit % | Mean Yrs Quit | Short Term (n) | Short Term % |
| 25                                           | 55-59     | Never Any     | 4724  | 43.28 |               |             |               |                |              |
| 25                                           | 55-59     | CC            | 79    | 0.72  | 0             | 0.00        |               |                |              |
| 25                                           | 55-59     | Ecig          | 2069  | 18.95 |               |             |               |                |              |
| 25                                           | 55-59     | Dual          | 0     | 0.00  |               |             |               |                |              |
| 25                                           | 55-59     | Former        | 4044  | 37.05 |               |             | 20.42         | 171            | 4.23         |
| Year of Follow-up: 2015, Age Group: 60-64    |           |               |       |       |               |             |               |                |              |
| Period                                       | Age Group | Smoking Group | N     | %     | Ever Quit (N) | Ever Quit % | Mean Yrs Quit | Short Term (n) | Short Term % |
| 25                                           | 60-64     | Never Any     | 3941  | 39.85 |               |             |               |                |              |
| 25                                           | 60-64     | CC            | 105   | 1.06  | 0             | 0.00        |               |                |              |
| 25                                           | 60-64     | Ecig          | 1336  | 13.51 |               |             |               |                |              |
| 25                                           | 60-64     | Dual          | 0     | 0.00  |               |             |               |                |              |
| 25                                           | 60-64     | Former        | 4507  | 45.58 |               |             | 23.22         | 203            | 4.50         |
| Year of Follow-up: 2015, Age Group: 65-69    |           |               |       |       |               |             |               |                |              |
| Period                                       | Age Group | Smoking Group | N     | %     | Ever Quit (N) | Ever Quit % | Mean Yrs Quit | Short Term (n) | Short Term % |
| 25                                           | 65-69     | Never Any     | 2912  | 33.65 |               |             |               |                |              |
| 25                                           | 65-69     | CC            | 94    | 1.09  | 0             | 0.00        |               |                |              |
| 25                                           | 65-69     | Ecig          | 961   | 11.10 |               |             |               |                |              |
| 25                                           | 65-69     | Dual          | 0     | 0.00  |               |             |               |                |              |
| 25                                           | 65-69     | Former        | 4688  | 54.17 |               |             | 25.10         | 135            | 2.88         |
| Year of Follow-up: 2015, Age Group: 70-74    |           |               |       |       |               |             |               |                |              |
| Period                                       | Age Group | Smoking Group | N     | %     | Ever Quit (N) | Ever Quit % | Mean Yrs Quit | Short Term (n) | Short Term % |
| 25                                           | 70-74     | Never Any     | 1919  | 29.46 |               |             |               |                |              |
| 25                                           | 70-74     | CC            | 112   | 1.72  | 0             | 0.00        |               |                |              |
| 25                                           | 70-74     | Ecig          | 570   | 8.75  |               |             |               |                |              |
| 25                                           | 70-74     | Dual          | 0     | 0.00  |               |             |               |                |              |
| 25                                           | 70-74     | Former        | 3914  | 60.08 |               |             | 27.77         | 70             | 1.79         |
| Year of Follow-up: 2015, Age Group: 75-79    |           |               |       |       |               |             |               |                |              |
| Period                                       | Age Group | Smoking Group | N     | %     | Ever Quit (N) | Ever Quit % | Mean Yrs Quit | Short Term (n) | Short Term % |
| 25                                           | 75-79     | Never Any     | 1611  | 29.41 |               |             |               |                |              |
| 25                                           | 75-79     | CC            | 102   | 1.86  | 0             | 0.00        |               |                |              |
| 25                                           | 75-79     | Ecig          | 383   | 6.99  |               |             |               |                |              |
| 25                                           | 75-79     | Dual          | 0     | 0.00  |               |             |               |                |              |
| 25                                           | 75-79     | Former        | 3381  | 61.73 |               |             | 29.44         | 43             | 1.27         |
| Year of Follow-up: 2020, Age Group: All Ages |           |               |       |       |               |             |               |                |              |
| Period                                       | Age Group | Smoking Group | N     | %     | Ever Quit (N) | Ever Quit % | Mean Yrs Quit | Short Term (n) | Short Term % |
| 30                                           | All Ages  | Never Any     | 33136 | 44.57 |               |             |               |                |              |
| 30                                           | All Ages  | CC            | 346   | 0.47  | 0             | 0.00        |               |                |              |
| 30                                           | All Ages  | Ecig          | 11147 | 14.99 |               |             |               |                |              |
| 30                                           | All Ages  | Dual          | 0     | 0.00  |               |             |               |                |              |
| 30                                           | All Ages  | Former        | 29711 | 39.97 |               |             | 23.99         | 920            | 3.10         |
| Year of Follow-up: 2020, Age Group: 18-19    |           |               |       |       |               |             |               |                |              |
| Period                                       | Age Group | Smoking Group | N     | %     | Ever Quit (N) | Ever Quit % | Mean Yrs Quit | Short Term (n) | Short Term % |
| 30                                           | 18-19     | Never Any     | 0     | .     |               |             |               |                |              |
| 30                                           | 18-19     | CC            | 0     | .     | 0             | .           |               |                |              |
| 30                                           | 18-19     | Ecig          | 0     | .     |               |             |               |                |              |
| 30                                           | 18-19     | Dual          | 0     | .     |               |             |               |                |              |
| 30                                           | 18-19     | Former        | 0     | .     |               |             | .             | 0              | .            |
| Year of Follow-up: 2020, Age Group: 20-24    |           |               |       |       |               |             |               |                |              |
| Period                                       | Age Group | Smoking Group | N     | %     | Ever Quit (N) | Ever Quit % | Mean Yrs Quit | Short Term (n) | Short Term % |
| 30                                           | 20-24     | Never Any     | 0     | .     |               |             |               |                |              |
| 30                                           | 20-24     | CC            | 0     | .     | 0             | .           |               |                |              |

**Results for PHIM for Run 7 (Sensitivity\_Analysis\_2.RTF)**

|                                           |           |               |      |       |               |             |               |                |              |
|-------------------------------------------|-----------|---------------|------|-------|---------------|-------------|---------------|----------------|--------------|
| 30                                        | 20-24     | Ecig          | 0    | .     |               |             |               |                |              |
| 30                                        | 20-24     | Dual          | 0    | .     |               |             |               |                |              |
| 30                                        | 20-24     | Former        | 0    | .     |               |             | 0             | .              |              |
| Year of Follow-up: 2020, Age Group: 25-29 |           |               |      |       |               |             |               |                |              |
| Period                                    | Age Group | Smoking Group | N    | %     | Ever Quit (N) | Ever Quit % | Mean Yrs Quit | Short Term (n) | Short Term % |
| 30                                        | 25-29     | Never Any     | 0    | .     |               |             |               |                |              |
| 30                                        | 25-29     | CC            | 0    | .     | 0             | .           |               |                |              |
| 30                                        | 25-29     | Ecig          | 0    | .     |               |             |               |                |              |
| 30                                        | 25-29     | Dual          | 0    | .     |               |             |               |                |              |
| 30                                        | 25-29     | Former        | 0    | .     |               |             |               | 0              | .            |
| Year of Follow-up: 2020, Age Group: 30-34 |           |               |      |       |               |             |               |                |              |
| Period                                    | Age Group | Smoking Group | N    | %     | Ever Quit (N) | Ever Quit % | Mean Yrs Quit | Short Term (n) | Short Term % |
| 30                                        | 30-34     | Never Any     | 0    | .     |               |             |               |                |              |
| 30                                        | 30-34     | CC            | 0    | .     | 0             | .           |               |                |              |
| 30                                        | 30-34     | Ecig          | 0    | .     |               |             |               |                |              |
| 30                                        | 30-34     | Dual          | 0    | .     |               |             |               |                |              |
| 30                                        | 30-34     | Former        | 0    | .     |               |             |               | 0              | .            |
| Year of Follow-up: 2020, Age Group: 35-39 |           |               |      |       |               |             |               |                |              |
| Period                                    | Age Group | Smoking Group | N    | %     | Ever Quit (N) | Ever Quit % | Mean Yrs Quit | Short Term (n) | Short Term % |
| 30                                        | 35-39     | Never Any     | 0    | .     |               |             |               |                |              |
| 30                                        | 35-39     | CC            | 0    | .     | 0             | .           |               |                |              |
| 30                                        | 35-39     | Ecig          | 0    | .     |               |             |               |                |              |
| 30                                        | 35-39     | Dual          | 0    | .     |               |             |               |                |              |
| 30                                        | 35-39     | Former        | 0    | .     |               |             |               | 0              | .            |
| Year of Follow-up: 2020, Age Group: 40-44 |           |               |      |       |               |             |               |                |              |
| Period                                    | Age Group | Smoking Group | N    | %     | Ever Quit (N) | Ever Quit % | Mean Yrs Quit | Short Term (n) | Short Term % |
| 30                                        | 40-44     | Never Any     | 4489 | 50.75 |               |             |               |                |              |
| 30                                        | 40-44     | CC            | 24   | 0.27  | 0             | 0.00        |               |                |              |
| 30                                        | 40-44     | Ecig          | 1753 | 19.82 |               |             |               |                |              |
| 30                                        | 40-44     | Dual          | 0    | 0.00  |               |             |               |                |              |
| 30                                        | 40-44     | Former        | 2579 | 29.16 |               |             | 15.01         | 112            | 4.34         |
| Year of Follow-up: 2020, Age Group: 45-49 |           |               |      |       |               |             |               |                |              |
| Period                                    | Age Group | Smoking Group | N    | %     | Ever Quit (N) | Ever Quit % | Mean Yrs Quit | Short Term (n) | Short Term % |
| 30                                        | 45-49     | Never Any     | 4991 | 55.21 |               |             |               |                |              |
| 30                                        | 45-49     | CC            | 19   | 0.21  | 0             | 0.00        |               |                |              |
| 30                                        | 45-49     | Ecig          | 1681 | 18.60 |               |             |               |                |              |
| 30                                        | 45-49     | Dual          | 0    | 0.00  |               |             |               |                |              |
| 30                                        | 45-49     | Former        | 2349 | 25.98 |               |             | 16.70         | 59             | 2.51         |
| Year of Follow-up: 2020, Age Group: 50-54 |           |               |      |       |               |             |               |                |              |
| Period                                    | Age Group | Smoking Group | N    | %     | Ever Quit (N) | Ever Quit % | Mean Yrs Quit | Short Term (n) | Short Term % |
| 30                                        | 50-54     | Never Any     | 5163 | 52.60 |               |             |               |                |              |
| 30                                        | 50-54     | CC            | 39   | 0.40  | 0             | 0.00        |               |                |              |
| 30                                        | 50-54     | Ecig          | 1987 | 20.24 |               |             |               |                |              |
| 30                                        | 50-54     | Dual          | 0    | 0.00  |               |             |               |                |              |
| 30                                        | 50-54     | Former        | 2627 | 26.76 |               |             | 20.51         | 97             | 3.69         |
| Year of Follow-up: 2020, Age Group: 55-59 |           |               |      |       |               |             |               |                |              |
| Period                                    | Age Group | Smoking Group | N    | %     | Ever Quit (N) | Ever Quit % | Mean Yrs Quit | Short Term (n) | Short Term % |
| 30                                        | 55-59     | Never Any     | 4997 | 46.86 |               |             |               |                |              |
| 30                                        | 55-59     | CC            | 47   | 0.44  | 0             | 0.00        |               |                |              |
| 30                                        | 55-59     | Ecig          | 1976 | 18.53 |               |             |               |                |              |
| 30                                        | 55-59     | Dual          | 0    | 0.00  |               |             |               |                |              |
| 30                                        | 55-59     | Former        | 3644 | 34.17 |               |             | 21.57         | 161            | 4.42         |
| Year of Follow-up: 2020, Age Group: 60-64 |           |               |      |       |               |             |               |                |              |
| Period                                    | Age Group | Smoking Group | N    | %     | Ever Quit (N) | Ever Quit % | Mean Yrs Quit | Short Term (n) | Short Term % |
| 30                                        | 60-64     | Never Any     | 4724 | 43.28 |               |             |               |                |              |
| 30                                        | 60-64     | CC            | 34   | 0.31  | 0             | 0.00        |               |                |              |
| 30                                        | 60-64     | Ecig          | 1594 | 14.60 |               |             |               |                |              |
| 30                                        | 60-64     | Dual          | 0    | 0.00  |               |             |               |                |              |
| 30                                        | 60-64     | Former        | 4564 | 41.81 |               |             | 22.75         | 208            | 4.56         |
| Year of Follow-up: 2020, Age Group: 65-69 |           |               |      |       |               |             |               |                |              |
| Period                                    | Age Group | Smoking Group | N    | %     | Ever Quit (N) | Ever Quit % | Mean Yrs Quit | Short Term (n) | Short Term % |
| 30                                        | 65-69     | Never Any     | 3941 | 39.85 |               |             |               |                |              |
| 30                                        | 65-69     | CC            | 52   | 0.53  | 0             | 0.00        |               |                |              |
| 30                                        | 65-69     | Ecig          | 980  | 9.91  |               |             |               |                |              |
| 30                                        | 65-69     | Dual          | 0    | 0.00  |               |             |               |                |              |
| 30                                        | 65-69     | Former        | 4916 | 49.71 |               |             | 26.06         | 135            | 2.75         |
| Year of Follow-up: 2020, Age Group: 70-74 |           |               |      |       |               |             |               |                |              |
| Period                                    | Age Group | Smoking Group | N    | %     | Ever Quit (N) | Ever Quit % | Mean Yrs Quit | Short Term (n) | Short Term % |

### Results for PHIM for Run 7 (Sensitivity\_Analysis\_2.RTF)

|                                              |           |               |       |       |               |             |               |                |              |
|----------------------------------------------|-----------|---------------|-------|-------|---------------|-------------|---------------|----------------|--------------|
| 30                                           | 70-74     | Never Any     | 2912  | 33.65 |               |             |               |                |              |
| 30                                           | 70-74     | CC            | 57    | 0.66  | 0             | 0.00        |               |                |              |
| 30                                           | 70-74     | Ecig          | 730   | 8.43  |               |             |               |                |              |
| 30                                           | 70-74     | Dual          | 0     | 0.00  |               |             |               |                |              |
| 30                                           | 70-74     | Former        | 4956  | 57.26 |               |             | 28.59         | 94             | 1.90         |
| Year of Follow-up: 2020, Age Group: 75-79    |           |               |       |       |               |             |               |                |              |
| Period                                       | Age Group | Smoking Group | N     | %     | Ever Quit (N) | Ever Quit % | Mean Yrs Quit | Short Term (n) | Short Term % |
| 30                                           | 75-79     | Never Any     | 1919  | 29.46 |               |             |               |                |              |
| 30                                           | 75-79     | CC            | 74    | 1.14  | 0             | 0.00        |               |                |              |
| 30                                           | 75-79     | Ecig          | 446   | 6.85  |               |             |               |                |              |
| 30                                           | 75-79     | Dual          | 0     | 0.00  |               |             |               |                |              |
| 30                                           | 75-79     | Former        | 4076  | 62.56 |               |             | 31.56         | 54             | 1.32         |
| Year of Follow-up: 2025, Age Group: All Ages |           |               |       |       |               |             |               |                |              |
| Period                                       | Age Group | Smoking Group | N     | %     | Ever Quit (N) | Ever Quit % | Mean Yrs Quit | Short Term (n) | Short Term % |
| 35                                           | All Ages  | Never Any     | 31217 | 46.03 |               |             |               |                |              |
| 35                                           | All Ages  | CC            | 166   | 0.24  | 0             | 0.00        |               |                |              |
| 35                                           | All Ages  | Ecig          | 8714  | 12.85 |               |             |               |                |              |
| 35                                           | All Ages  | Dual          | 0     | 0.00  |               |             |               |                |              |
| 35                                           | All Ages  | Former        | 27728 | 40.88 |               |             | 25.84         | 801            | 2.89         |
| Year of Follow-up: 2025, Age Group: 18-19    |           |               |       |       |               |             |               |                |              |
| Period                                       | Age Group | Smoking Group | N     | %     | Ever Quit (N) | Ever Quit % | Mean Yrs Quit | Short Term (n) | Short Term % |
| 35                                           | 18-19     | Never Any     | 0     | .     |               |             |               |                |              |
| 35                                           | 18-19     | CC            | 0     | .     | 0             | .           |               |                |              |
| 35                                           | 18-19     | Ecig          | 0     | .     |               |             |               |                |              |
| 35                                           | 18-19     | Dual          | 0     | .     |               |             |               |                |              |
| 35                                           | 18-19     | Former        | 0     | .     |               |             | .             | 0              | .            |
| Year of Follow-up: 2025, Age Group: 20-24    |           |               |       |       |               |             |               |                |              |
| Period                                       | Age Group | Smoking Group | N     | %     | Ever Quit (N) | Ever Quit % | Mean Yrs Quit | Short Term (n) | Short Term % |
| 35                                           | 20-24     | Never Any     | 0     | .     |               |             |               |                |              |
| 35                                           | 20-24     | CC            | 0     | .     | 0             | .           |               |                |              |
| 35                                           | 20-24     | Ecig          | 0     | .     |               |             |               |                |              |
| 35                                           | 20-24     | Dual          | 0     | .     |               |             |               |                |              |
| 35                                           | 20-24     | Former        | 0     | .     |               |             | .             | 0              | .            |
| Year of Follow-up: 2025, Age Group: 25-29    |           |               |       |       |               |             |               |                |              |
| Period                                       | Age Group | Smoking Group | N     | %     | Ever Quit (N) | Ever Quit % | Mean Yrs Quit | Short Term (n) | Short Term % |
| 35                                           | 25-29     | Never Any     | 0     | .     |               |             |               |                |              |
| 35                                           | 25-29     | CC            | 0     | .     | 0             | .           |               |                |              |
| 35                                           | 25-29     | Ecig          | 0     | .     |               |             |               |                |              |
| 35                                           | 25-29     | Dual          | 0     | .     |               |             |               |                |              |
| 35                                           | 25-29     | Former        | 0     | .     |               |             | .             | 0              | .            |
| Year of Follow-up: 2025, Age Group: 30-34    |           |               |       |       |               |             |               |                |              |
| Period                                       | Age Group | Smoking Group | N     | %     | Ever Quit (N) | Ever Quit % | Mean Yrs Quit | Short Term (n) | Short Term % |
| 35                                           | 30-34     | Never Any     | 0     | .     |               |             |               |                |              |
| 35                                           | 30-34     | CC            | 0     | .     | 0             | .           |               |                |              |
| 35                                           | 30-34     | Ecig          | 0     | .     |               |             |               |                |              |
| 35                                           | 30-34     | Dual          | 0     | .     |               |             |               |                |              |
| 35                                           | 30-34     | Former        | 0     | .     |               |             | .             | 0              | .            |
| Year of Follow-up: 2025, Age Group: 35-39    |           |               |       |       |               |             |               |                |              |
| Period                                       | Age Group | Smoking Group | N     | %     | Ever Quit (N) | Ever Quit % | Mean Yrs Quit | Short Term (n) | Short Term % |
| 35                                           | 35-39     | Never Any     | 0     | .     |               |             |               |                |              |
| 35                                           | 35-39     | CC            | 0     | .     | 0             | .           |               |                |              |
| 35                                           | 35-39     | Ecig          | 0     | .     |               |             |               |                |              |
| 35                                           | 35-39     | Dual          | 0     | .     |               |             |               |                |              |
| 35                                           | 35-39     | Former        | 0     | .     |               |             | .             | 0              | .            |
| Year of Follow-up: 2025, Age Group: 40-44    |           |               |       |       |               |             |               |                |              |
| Period                                       | Age Group | Smoking Group | N     | %     | Ever Quit (N) | Ever Quit % | Mean Yrs Quit | Short Term (n) | Short Term % |
| 35                                           | 40-44     | Never Any     | 0     | .     |               |             |               |                |              |
| 35                                           | 40-44     | CC            | 0     | .     | 0             | .           |               |                |              |
| 35                                           | 40-44     | Ecig          | 0     | .     |               |             |               |                |              |
| 35                                           | 40-44     | Dual          | 0     | .     |               |             |               |                |              |
| 35                                           | 40-44     | Former        | 0     | .     |               |             | .             | 0              | .            |
| Year of Follow-up: 2025, Age Group: 45-49    |           |               |       |       |               |             |               |                |              |
| Period                                       | Age Group | Smoking Group | N     | %     | Ever Quit (N) | Ever Quit % | Mean Yrs Quit | Short Term (n) | Short Term % |
| 35                                           | 45-49     | Never Any     | 4489  | 50.75 |               |             |               |                |              |
| 35                                           | 45-49     | CC            | 12    | 0.14  | 0             | 0.00        |               |                |              |
| 35                                           | 45-49     | Ecig          | 1560  | 17.64 |               |             |               |                |              |
| 35                                           | 45-49     | Dual          | 0     | 0.00  |               |             |               |                |              |
| 35                                           | 45-49     | Former        | 2784  | 31.48 |               |             | 18.71         | 61             | 2.19         |
| Year of Follow-up: 2025, Age Group: 50-54    |           |               |       |       |               |             |               |                |              |

**Results for PHIM for Run 7 (Sensitivity\_Analysis\_2.RTF)**

| Period                                       | Age Group | Smoking Group | N     | %     | Ever Quit (N) | Ever Quit % | Mean Yrs Quit | Short Term (n) | Short Term % |
|----------------------------------------------|-----------|---------------|-------|-------|---------------|-------------|---------------|----------------|--------------|
| 35                                           | 50-54     | Never Any     | 4991  | 55.21 |               |             |               |                |              |
| 35                                           | 50-54     | CC            | 9     | 0.10  | 0             | 0.00        |               |                |              |
| 35                                           | 50-54     | Ecig          | 1547  | 17.11 |               |             |               |                |              |
| 35                                           | 50-54     | Dual          | 0     | 0.00  |               |             |               |                |              |
| 35                                           | 50-54     | Former        | 2493  | 27.58 |               |             | 20.54         | 77             | 3.09         |
| Year of Follow-up: 2025, Age Group: 55-59    |           |               |       |       |               |             |               |                |              |
| Period                                       | Age Group | Smoking Group | N     | %     | Ever Quit (N) | Ever Quit % | Mean Yrs Quit | Short Term (n) | Short Term % |
| 35                                           | 55-59     | Never Any     | 5163  | 52.60 |               |             |               |                |              |
| 35                                           | 55-59     | CC            | 18    | 0.18  | 0             | 0.00        |               |                |              |
| 35                                           | 55-59     | Ecig          | 1637  | 16.68 |               |             |               |                |              |
| 35                                           | 55-59     | Dual          | 0     | 0.00  |               |             |               |                |              |
| 35                                           | 55-59     | Former        | 2998  | 30.54 |               |             | 22.60         | 162            | 5.40         |
| Year of Follow-up: 2025, Age Group: 60-64    |           |               |       |       |               |             |               |                |              |
| Period                                       | Age Group | Smoking Group | N     | %     | Ever Quit (N) | Ever Quit % | Mean Yrs Quit | Short Term (n) | Short Term % |
| 35                                           | 60-64     | Never Any     | 4997  | 46.86 |               |             |               |                |              |
| 35                                           | 60-64     | CC            | 24    | 0.23  | 0             | 0.00        |               |                |              |
| 35                                           | 60-64     | Ecig          | 1498  | 14.05 |               |             |               |                |              |
| 35                                           | 60-64     | Dual          | 0     | 0.00  |               |             |               |                |              |
| 35                                           | 60-64     | Former        | 4145  | 38.87 |               |             | 23.59         | 201            | 4.85         |
| Year of Follow-up: 2025, Age Group: 65-69    |           |               |       |       |               |             |               |                |              |
| Period                                       | Age Group | Smoking Group | N     | %     | Ever Quit (N) | Ever Quit % | Mean Yrs Quit | Short Term (n) | Short Term % |
| 35                                           | 65-69     | Never Any     | 4724  | 43.28 |               |             |               |                |              |
| 35                                           | 65-69     | CC            | 23    | 0.21  | 0             | 0.00        |               |                |              |
| 35                                           | 65-69     | Ecig          | 1147  | 10.51 |               |             |               |                |              |
| 35                                           | 65-69     | Dual          | 0     | 0.00  |               |             |               |                |              |
| 35                                           | 65-69     | Former        | 5022  | 46.01 |               |             | 25.42         | 160            | 3.19         |
| Year of Follow-up: 2025, Age Group: 70-74    |           |               |       |       |               |             |               |                |              |
| Period                                       | Age Group | Smoking Group | N     | %     | Ever Quit (N) | Ever Quit % | Mean Yrs Quit | Short Term (n) | Short Term % |
| 35                                           | 70-74     | Never Any     | 3941  | 39.85 |               |             |               |                |              |
| 35                                           | 70-74     | CC            | 39    | 0.39  | 0             | 0.00        |               |                |              |
| 35                                           | 70-74     | Ecig          | 763   | 7.72  |               |             |               |                |              |
| 35                                           | 70-74     | Dual          | 0     | 0.00  |               |             |               |                |              |
| 35                                           | 70-74     | Former        | 5146  | 52.04 |               |             | 29.77         | 75             | 1.46         |
| Year of Follow-up: 2025, Age Group: 75-79    |           |               |       |       |               |             |               |                |              |
| Period                                       | Age Group | Smoking Group | N     | %     | Ever Quit (N) | Ever Quit % | Mean Yrs Quit | Short Term (n) | Short Term % |
| 35                                           | 75-79     | Never Any     | 2912  | 33.65 |               |             |               |                |              |
| 35                                           | 75-79     | CC            | 41    | 0.47  | 0             | 0.00        |               |                |              |
| 35                                           | 75-79     | Ecig          | 562   | 6.49  |               |             |               |                |              |
| 35                                           | 75-79     | Dual          | 0     | 0.00  |               |             |               |                |              |
| 35                                           | 75-79     | Former        | 5140  | 59.39 |               |             | 32.47         | 65             | 1.26         |
| Year of Follow-up: 2030, Age Group: All Ages |           |               |       |       |               |             |               |                |              |
| Period                                       | Age Group | Smoking Group | N     | %     | Ever Quit (N) | Ever Quit % | Mean Yrs Quit | Short Term (n) | Short Term % |
| 40                                           | All Ages  | Never Any     | 28305 | 47.84 |               |             |               |                |              |
| 40                                           | All Ages  | CC            | 71    | 0.12  | 0             | 0.00        |               |                |              |
| 40                                           | All Ages  | Ecig          | 6477  | 10.95 |               |             |               |                |              |
| 40                                           | All Ages  | Dual          | 0     | 0.00  |               |             |               |                |              |
| 40                                           | All Ages  | Former        | 24317 | 41.10 |               |             | 27.39         | 695            | 2.86         |
| Year of Follow-up: 2030, Age Group: 18-19    |           |               |       |       |               |             |               |                |              |
| Period                                       | Age Group | Smoking Group | N     | %     | Ever Quit (N) | Ever Quit % | Mean Yrs Quit | Short Term (n) | Short Term % |
| 40                                           | 18-19     | Never Any     | 0     | .     |               |             |               |                |              |
| 40                                           | 18-19     | CC            | 0     | .     | 0             | .           |               |                |              |
| 40                                           | 18-19     | Ecig          | 0     | .     |               |             |               |                |              |
| 40                                           | 18-19     | Dual          | 0     | .     |               |             |               |                |              |
| 40                                           | 18-19     | Former        | 0     | .     |               |             | .             | 0              | .            |
| Year of Follow-up: 2030, Age Group: 20-24    |           |               |       |       |               |             |               |                |              |
| Period                                       | Age Group | Smoking Group | N     | %     | Ever Quit (N) | Ever Quit % | Mean Yrs Quit | Short Term (n) | Short Term % |
| 40                                           | 20-24     | Never Any     | 0     | .     |               |             |               |                |              |
| 40                                           | 20-24     | CC            | 0     | .     | 0             | .           |               |                |              |
| 40                                           | 20-24     | Ecig          | 0     | .     |               |             |               |                |              |
| 40                                           | 20-24     | Dual          | 0     | .     |               |             |               |                |              |
| 40                                           | 20-24     | Former        | 0     | .     |               |             | .             | 0              | .            |
| Year of Follow-up: 2030, Age Group: 25-29    |           |               |       |       |               |             |               |                |              |
| Period                                       | Age Group | Smoking Group | N     | %     | Ever Quit (N) | Ever Quit % | Mean Yrs Quit | Short Term (n) | Short Term % |
| 40                                           | 25-29     | Never Any     | 0     | .     |               |             |               |                |              |
| 40                                           | 25-29     | CC            | 0     | .     | 0             | .           |               |                |              |
| 40                                           | 25-29     | Ecig          | 0     | .     |               |             |               |                |              |
| 40                                           | 25-29     | Dual          | 0     | .     |               |             |               |                |              |

**Results for PHIM for Run 7 (Sensitivity\_Analysis\_2.RTF)**

| Year of Follow-up: 2030, Age Group: 30-34 | Period | Age Group | Smoking Group | N    | %     | Ever Quit (N) | Ever Quit % | Mean Yrs Quit | Short Term (n) | Short Term % |
|-------------------------------------------|--------|-----------|---------------|------|-------|---------------|-------------|---------------|----------------|--------------|
| 40                                        | 25-29  | Former    |               | 0    | .     |               |             |               | 0              | .            |
| 40                                        | 30-34  | Never Any |               | 0    | .     |               |             |               |                |              |
| 40                                        | 30-34  | CC        |               | 0    | .     | 0             | .           |               |                |              |
| 40                                        | 30-34  | Ecig      |               | 0    | .     |               |             |               |                |              |
| 40                                        | 30-34  | Dual      |               | 0    | .     |               |             |               |                |              |
| 40                                        | 30-34  | Former    |               | 0    | .     |               |             |               | 0              | .            |
| Year of Follow-up: 2030, Age Group: 35-39 | Period | Age Group | Smoking Group | N    | %     | Ever Quit (N) | Ever Quit % | Mean Yrs Quit | Short Term (n) | Short Term % |
| 40                                        | 35-39  | Never Any |               | 0    | .     |               |             |               |                |              |
| 40                                        | 35-39  | CC        |               | 0    | .     | 0             | .           |               |                |              |
| 40                                        | 35-39  | Ecig      |               | 0    | .     |               |             |               |                |              |
| 40                                        | 35-39  | Dual      |               | 0    | .     |               |             |               |                |              |
| 40                                        | 35-39  | Former    |               | 0    | .     |               |             |               | 0              | .            |
| Year of Follow-up: 2030, Age Group: 40-44 | Period | Age Group | Smoking Group | N    | %     | Ever Quit (N) | Ever Quit % | Mean Yrs Quit | Short Term (n) | Short Term % |
| 40                                        | 40-44  | Never Any |               | 0    | .     |               |             |               |                |              |
| 40                                        | 40-44  | CC        |               | 0    | .     | 0             | .           |               |                |              |
| 40                                        | 40-44  | Ecig      |               | 0    | .     |               |             |               |                |              |
| 40                                        | 40-44  | Dual      |               | 0    | .     |               |             |               |                |              |
| 40                                        | 40-44  | Former    |               | 0    | .     |               |             |               | 0              | .            |
| Year of Follow-up: 2030, Age Group: 45-49 | Period | Age Group | Smoking Group | N    | %     | Ever Quit (N) | Ever Quit % | Mean Yrs Quit | Short Term (n) | Short Term % |
| 40                                        | 45-49  | Never Any |               | 0    | .     |               |             |               |                |              |
| 40                                        | 45-49  | CC        |               | 0    | .     | 0             | .           |               |                |              |
| 40                                        | 45-49  | Ecig      |               | 0    | .     |               |             |               |                |              |
| 40                                        | 45-49  | Dual      |               | 0    | .     |               |             |               |                |              |
| 40                                        | 45-49  | Former    |               | 0    | .     |               |             |               | 0              | .            |
| Year of Follow-up: 2030, Age Group: 50-54 | Period | Age Group | Smoking Group | N    | %     | Ever Quit (N) | Ever Quit % | Mean Yrs Quit | Short Term (n) | Short Term % |
| 40                                        | 50-54  | Never Any |               | 4489 | 50.75 |               |             |               |                |              |
| 40                                        | 50-54  | CC        |               | 7    | 0.08  | 0             | 0.00        |               |                |              |
| 40                                        | 50-54  | Ecig      |               | 1412 | 15.96 |               |             |               |                |              |
| 40                                        | 50-54  | Dual      |               | 0    | 0.00  |               |             |               |                |              |
| 40                                        | 50-54  | Former    |               | 2937 | 33.21 |               |             | 22.56         | 82             | 2.79         |
| Year of Follow-up: 2030, Age Group: 55-59 | Period | Age Group | Smoking Group | N    | %     | Ever Quit (N) | Ever Quit % | Mean Yrs Quit | Short Term (n) | Short Term % |
| 40                                        | 55-59  | Never Any |               | 4991 | 55.21 |               |             |               |                |              |
| 40                                        | 55-59  | CC        |               | 5    | 0.06  | 0             | 0.00        |               |                |              |
| 40                                        | 55-59  | Ecig      |               | 1291 | 14.28 |               |             |               |                |              |
| 40                                        | 55-59  | Dual      |               | 0    | 0.00  |               |             |               |                |              |
| 40                                        | 55-59  | Former    |               | 2753 | 30.45 |               |             | 23.31         | 115            | 4.18         |
| Year of Follow-up: 2030, Age Group: 60-64 | Period | Age Group | Smoking Group | N    | %     | Ever Quit (N) | Ever Quit % | Mean Yrs Quit | Short Term (n) | Short Term % |
| 40                                        | 60-64  | Never Any |               | 5163 | 52.60 |               |             |               |                |              |
| 40                                        | 60-64  | CC        |               | 8    | 0.08  | 0             | 0.00        |               |                |              |
| 40                                        | 60-64  | Ecig      |               | 1221 | 12.44 |               |             |               |                |              |
| 40                                        | 60-64  | Dual      |               | 0    | 0.00  |               |             |               |                |              |
| 40                                        | 60-64  | Former    |               | 3424 | 34.88 |               |             | 24.40         | 181            | 5.29         |
| Year of Follow-up: 2030, Age Group: 65-69 | Period | Age Group | Smoking Group | N    | %     | Ever Quit (N) | Ever Quit % | Mean Yrs Quit | Short Term (n) | Short Term % |
| 40                                        | 65-69  | Never Any |               | 4997 | 46.86 |               |             |               |                |              |
| 40                                        | 65-69  | CC        |               | 13   | 0.12  | 0             | 0.00        |               |                |              |
| 40                                        | 65-69  | Ecig      |               | 1103 | 10.34 |               |             |               |                |              |
| 40                                        | 65-69  | Dual      |               | 0    | 0.00  |               |             |               |                |              |
| 40                                        | 65-69  | Former    |               | 4551 | 42.68 |               |             | 26.24         | 135            | 2.97         |
| Year of Follow-up: 2030, Age Group: 70-74 | Period | Age Group | Smoking Group | N    | %     | Ever Quit (N) | Ever Quit % | Mean Yrs Quit | Short Term (n) | Short Term % |
| 40                                        | 70-74  | Never Any |               | 4724 | 43.28 |               |             |               |                |              |
| 40                                        | 70-74  | CC        |               | 12   | 0.11  | 0             | 0.00        |               |                |              |
| 40                                        | 70-74  | Ecig      |               | 866  | 7.93  |               |             |               |                |              |
| 40                                        | 70-74  | Dual      |               | 0    | 0.00  |               |             |               |                |              |
| 40                                        | 70-74  | Former    |               | 5314 | 48.68 |               |             | 28.87         | 103            | 1.94         |
| Year of Follow-up: 2030, Age Group: 75-79 | Period | Age Group | Smoking Group | N    | %     | Ever Quit (N) | Ever Quit % | Mean Yrs Quit | Short Term (n) | Short Term % |
| 40                                        | 75-79  | Never Any |               | 3941 | 39.85 |               |             |               |                |              |
| 40                                        | 75-79  | CC        |               | 26   | 0.26  | 0             | 0.00        |               |                |              |

### Results for PHIM for Run 7 (Sensitivity\_Analysis\_2.RTF)

|                                              |           |               |       |       |               |             |               |                |              |
|----------------------------------------------|-----------|---------------|-------|-------|---------------|-------------|---------------|----------------|--------------|
| 40                                           | 75-79     | Ecig          | 584   | 5.91  |               |             |               |                |              |
| 40                                           | 75-79     | Dual          | 0     | 0.00  |               |             |               |                |              |
| 40                                           | 75-79     | Former        | 5338  | 53.98 |               |             | 33.59         | 79             | 1.48         |
| Year of Follow-up: 2035, Age Group: All Ages |           |               |       |       |               |             |               |                |              |
| Period                                       | Age Group | Smoking Group | N     | %     | Ever Quit (N) | Ever Quit % | Mean Yrs Quit | Short Term (n) | Short Term % |
| 45                                           | All Ages  | Never Any     | 24364 | 49.44 |               |             |               |                |              |
| 45                                           | All Ages  | CC            | 26    | 0.05  | 0             | 0.00        |               |                |              |
| 45                                           | All Ages  | Ecig          | 4544  | 9.22  |               |             |               |                |              |
| 45                                           | All Ages  | Dual          | 0     | 0.00  |               |             |               |                |              |
| 45                                           | All Ages  | Former        | 20347 | 41.29 |               |             | 28.73         | 546            | 2.68         |
| Year of Follow-up: 2035, Age Group: 18-19    |           |               |       |       |               |             |               |                |              |
| Period                                       | Age Group | Smoking Group | N     | %     | Ever Quit (N) | Ever Quit % | Mean Yrs Quit | Short Term (n) | Short Term % |
| 45                                           | 18-19     | Never Any     | 0     | .     |               |             |               |                |              |
| 45                                           | 18-19     | CC            | 0     | .     | 0             | .           |               |                |              |
| 45                                           | 18-19     | Ecig          | 0     | .     |               |             |               |                |              |
| 45                                           | 18-19     | Dual          | 0     | .     |               |             |               |                |              |
| 45                                           | 18-19     | Former        | 0     | .     |               |             | .             | 0              | .            |
| Year of Follow-up: 2035, Age Group: 20-24    |           |               |       |       |               |             |               |                |              |
| Period                                       | Age Group | Smoking Group | N     | %     | Ever Quit (N) | Ever Quit % | Mean Yrs Quit | Short Term (n) | Short Term % |
| 45                                           | 20-24     | Never Any     | 0     | .     |               |             |               |                |              |
| 45                                           | 20-24     | CC            | 0     | .     | 0             | .           |               |                |              |
| 45                                           | 20-24     | Ecig          | 0     | .     |               |             |               |                |              |
| 45                                           | 20-24     | Dual          | 0     | .     |               |             |               |                |              |
| 45                                           | 20-24     | Former        | 0     | .     |               |             | .             | 0              | .            |
| Year of Follow-up: 2035, Age Group: 25-29    |           |               |       |       |               |             |               |                |              |
| Period                                       | Age Group | Smoking Group | N     | %     | Ever Quit (N) | Ever Quit % | Mean Yrs Quit | Short Term (n) | Short Term % |
| 45                                           | 25-29     | Never Any     | 0     | .     |               |             |               |                |              |
| 45                                           | 25-29     | CC            | 0     | .     | 0             | .           |               |                |              |
| 45                                           | 25-29     | Ecig          | 0     | .     |               |             |               |                |              |
| 45                                           | 25-29     | Dual          | 0     | .     |               |             |               |                |              |
| 45                                           | 25-29     | Former        | 0     | .     |               |             | .             | 0              | .            |
| Year of Follow-up: 2035, Age Group: 30-34    |           |               |       |       |               |             |               |                |              |
| Period                                       | Age Group | Smoking Group | N     | %     | Ever Quit (N) | Ever Quit % | Mean Yrs Quit | Short Term (n) | Short Term % |
| 45                                           | 30-34     | Never Any     | 0     | .     |               |             |               |                |              |
| 45                                           | 30-34     | CC            | 0     | .     | 0             | .           |               |                |              |
| 45                                           | 30-34     | Ecig          | 0     | .     |               |             |               |                |              |
| 45                                           | 30-34     | Dual          | 0     | .     |               |             |               |                |              |
| 45                                           | 30-34     | Former        | 0     | .     |               |             | .             | 0              | .            |
| Year of Follow-up: 2035, Age Group: 35-39    |           |               |       |       |               |             |               |                |              |
| Period                                       | Age Group | Smoking Group | N     | %     | Ever Quit (N) | Ever Quit % | Mean Yrs Quit | Short Term (n) | Short Term % |
| 45                                           | 35-39     | Never Any     | 0     | .     |               |             |               |                |              |
| 45                                           | 35-39     | CC            | 0     | .     | 0             | .           |               |                |              |
| 45                                           | 35-39     | Ecig          | 0     | .     |               |             |               |                |              |
| 45                                           | 35-39     | Dual          | 0     | .     |               |             |               |                |              |
| 45                                           | 35-39     | Former        | 0     | .     |               |             | .             | 0              | .            |
| Year of Follow-up: 2035, Age Group: 40-44    |           |               |       |       |               |             |               |                |              |
| Period                                       | Age Group | Smoking Group | N     | %     | Ever Quit (N) | Ever Quit % | Mean Yrs Quit | Short Term (n) | Short Term % |
| 45                                           | 40-44     | Never Any     | 0     | .     |               |             |               |                |              |
| 45                                           | 40-44     | CC            | 0     | .     | 0             | .           |               |                |              |
| 45                                           | 40-44     | Ecig          | 0     | .     |               |             |               |                |              |
| 45                                           | 40-44     | Dual          | 0     | .     |               |             |               |                |              |
| 45                                           | 40-44     | Former        | 0     | .     |               |             | .             | 0              | .            |
| Year of Follow-up: 2035, Age Group: 45-49    |           |               |       |       |               |             |               |                |              |
| Period                                       | Age Group | Smoking Group | N     | %     | Ever Quit (N) | Ever Quit % | Mean Yrs Quit | Short Term (n) | Short Term % |
| 45                                           | 45-49     | Never Any     | 0     | .     |               |             |               |                |              |
| 45                                           | 45-49     | CC            | 0     | .     | 0             | .           |               |                |              |
| 45                                           | 45-49     | Ecig          | 0     | .     |               |             |               |                |              |
| 45                                           | 45-49     | Dual          | 0     | .     |               |             |               |                |              |
| 45                                           | 45-49     | Former        | 0     | .     |               |             | .             | 0              | .            |
| Year of Follow-up: 2035, Age Group: 50-54    |           |               |       |       |               |             |               |                |              |
| Period                                       | Age Group | Smoking Group | N     | %     | Ever Quit (N) | Ever Quit % | Mean Yrs Quit | Short Term (n) | Short Term % |
| 45                                           | 50-54     | Never Any     | 0     | .     |               |             |               |                |              |
| 45                                           | 50-54     | CC            | 0     | .     | 0             | .           |               |                |              |
| 45                                           | 50-54     | Ecig          | 0     | .     |               |             |               |                |              |
| 45                                           | 50-54     | Dual          | 0     | .     |               |             |               |                |              |
| 45                                           | 50-54     | Former        | 0     | .     |               |             | .             | 0              | .            |
| Year of Follow-up: 2035, Age Group: 55-59    |           |               |       |       |               |             |               |                |              |
| Period                                       | Age Group | Smoking Group | N     | %     | Ever Quit (N) | Ever Quit % | Mean Yrs Quit | Short Term (n) | Short Term % |

### Results for PHIM for Run 7 (Sensitivity\_Analysis\_2.RTF)

|                                              |           |               |       |       |               |             |               |                |              |
|----------------------------------------------|-----------|---------------|-------|-------|---------------|-------------|---------------|----------------|--------------|
| 45                                           | 55-59     | Never Any     | 4489  | 50.75 |               |             |               |                |              |
| 45                                           | 55-59     | CC            | 4     | 0.05  | 0             | 0.00        |               |                |              |
| 45                                           | 55-59     | Ecig          | 1185  | 13.40 |               |             |               |                |              |
| 45                                           | 55-59     | Dual          | 0     | 0.00  |               |             |               |                |              |
| 45                                           | 55-59     | Former        | 3167  | 35.81 |               |             | 25.69         | 105            | 3.32         |
| Year of Follow-up: 2035, Age Group: 60-64    |           |               |       |       |               |             |               |                |              |
| Period                                       | Age Group | Smoking Group | N     | %     | Ever Quit (N) | Ever Quit % | Mean Yrs Quit | Short Term (n) | Short Term % |
| 45                                           | 60-64     | Never Any     | 4991  | 55.21 |               |             |               |                |              |
| 45                                           | 60-64     | CC            | 2     | 0.02  | 0             | 0.00        |               |                |              |
| 45                                           | 60-64     | Ecig          | 1014  | 11.22 |               |             |               |                |              |
| 45                                           | 60-64     | Dual          | 0     | 0.00  |               |             |               |                |              |
| 45                                           | 60-64     | Former        | 3033  | 33.55 |               |             | 25.86         | 130            | 4.29         |
| Year of Follow-up: 2035, Age Group: 65-69    |           |               |       |       |               |             |               |                |              |
| Period                                       | Age Group | Smoking Group | N     | %     | Ever Quit (N) | Ever Quit % | Mean Yrs Quit | Short Term (n) | Short Term % |
| 45                                           | 65-69     | Never Any     | 5163  | 52.60 |               |             |               |                |              |
| 45                                           | 65-69     | CC            | 5     | 0.05  | 0             | 0.00        |               |                |              |
| 45                                           | 65-69     | Ecig          | 886   | 9.03  |               |             |               |                |              |
| 45                                           | 65-69     | Dual          | 0     | 0.00  |               |             |               |                |              |
| 45                                           | 65-69     | Former        | 3762  | 38.33 |               |             | 26.96         | 112            | 2.98         |
| Year of Follow-up: 2035, Age Group: 70-74    |           |               |       |       |               |             |               |                |              |
| Period                                       | Age Group | Smoking Group | N     | %     | Ever Quit (N) | Ever Quit % | Mean Yrs Quit | Short Term (n) | Short Term % |
| 45                                           | 70-74     | Never Any     | 4997  | 46.86 |               |             |               |                |              |
| 45                                           | 70-74     | CC            | 8     | 0.08  | 0             | 0.00        |               |                |              |
| 45                                           | 70-74     | Ecig          | 838   | 7.86  |               |             |               |                |              |
| 45                                           | 70-74     | Dual          | 0     | 0.00  |               |             |               |                |              |
| 45                                           | 70-74     | Former        | 4821  | 45.21 |               |             | 29.61         | 100            | 2.07         |
| Year of Follow-up: 2035, Age Group: 75-79    |           |               |       |       |               |             |               |                |              |
| Period                                       | Age Group | Smoking Group | N     | %     | Ever Quit (N) | Ever Quit % | Mean Yrs Quit | Short Term (n) | Short Term % |
| 45                                           | 75-79     | Never Any     | 4724  | 43.28 |               |             |               |                |              |
| 45                                           | 75-79     | CC            | 7     | 0.06  | 0             | 0.00        |               |                |              |
| 45                                           | 75-79     | Ecig          | 621   | 5.69  |               |             |               |                |              |
| 45                                           | 75-79     | Dual          | 0     | 0.00  |               |             |               |                |              |
| 45                                           | 75-79     | Former        | 5564  | 50.97 |               |             | 32.44         | 99             | 1.78         |
| Year of Follow-up: 2040, Age Group: All Ages |           |               |       |       |               |             |               |                |              |
| Period                                       | Age Group | Smoking Group | N     | %     | Ever Quit (N) | Ever Quit % | Mean Yrs Quit | Short Term (n) | Short Term % |
| 50                                           | All Ages  | Never Any     | 19640 | 51.19 |               |             |               |                |              |
| 50                                           | All Ages  | CC            | 10    | 0.03  | 0             | 0.00        |               |                |              |
| 50                                           | All Ages  | Ecig          | 2873  | 7.49  |               |             |               |                |              |
| 50                                           | All Ages  | Dual          | 0     | 0.00  |               |             |               |                |              |
| 50                                           | All Ages  | Former        | 15842 | 41.29 |               |             | 30.31         | 405            | 2.56         |
| Year of Follow-up: 2040, Age Group: 18-19    |           |               |       |       |               |             |               |                |              |
| Period                                       | Age Group | Smoking Group | N     | %     | Ever Quit (N) | Ever Quit % | Mean Yrs Quit | Short Term (n) | Short Term % |
| 50                                           | 18-19     | Never Any     | 0     | .     |               |             |               |                |              |
| 50                                           | 18-19     | CC            | 0     | .     | 0             | .           |               |                |              |
| 50                                           | 18-19     | Ecig          | 0     | .     |               |             |               |                |              |
| 50                                           | 18-19     | Dual          | 0     | .     |               |             |               |                |              |
| 50                                           | 18-19     | Former        | 0     | .     |               |             | .             | 0              | .            |
| Year of Follow-up: 2040, Age Group: 20-24    |           |               |       |       |               |             |               |                |              |
| Period                                       | Age Group | Smoking Group | N     | %     | Ever Quit (N) | Ever Quit % | Mean Yrs Quit | Short Term (n) | Short Term % |
| 50                                           | 20-24     | Never Any     | 0     | .     |               |             |               |                |              |
| 50                                           | 20-24     | CC            | 0     | .     | 0             | .           |               |                |              |
| 50                                           | 20-24     | Ecig          | 0     | .     |               |             |               |                |              |
| 50                                           | 20-24     | Dual          | 0     | .     |               |             |               |                |              |
| 50                                           | 20-24     | Former        | 0     | .     |               |             | .             | 0              | .            |
| Year of Follow-up: 2040, Age Group: 25-29    |           |               |       |       |               |             |               |                |              |
| Period                                       | Age Group | Smoking Group | N     | %     | Ever Quit (N) | Ever Quit % | Mean Yrs Quit | Short Term (n) | Short Term % |
| 50                                           | 25-29     | Never Any     | 0     | .     |               |             |               |                |              |
| 50                                           | 25-29     | CC            | 0     | .     | 0             | .           |               |                |              |
| 50                                           | 25-29     | Ecig          | 0     | .     |               |             |               |                |              |
| 50                                           | 25-29     | Dual          | 0     | .     |               |             |               |                |              |
| 50                                           | 25-29     | Former        | 0     | .     |               |             | .             | 0              | .            |
| Year of Follow-up: 2040, Age Group: 30-34    |           |               |       |       |               |             |               |                |              |
| Period                                       | Age Group | Smoking Group | N     | %     | Ever Quit (N) | Ever Quit % | Mean Yrs Quit | Short Term (n) | Short Term % |
| 50                                           | 30-34     | Never Any     | 0     | .     |               |             |               |                |              |
| 50                                           | 30-34     | CC            | 0     | .     | 0             | .           |               |                |              |
| 50                                           | 30-34     | Ecig          | 0     | .     |               |             |               |                |              |
| 50                                           | 30-34     | Dual          | 0     | .     |               |             |               |                |              |
| 50                                           | 30-34     | Former        | 0     | .     |               |             | .             | 0              | .            |
| Year of Follow-up: 2040, Age Group: 35-39    |           |               |       |       |               |             |               |                |              |

**Results for PHIM for Run 7 (Sensitivity\_Analysis\_2.RTF)**

| Period                                    | Age Group | Smoking Group | N    | %     | Ever Quit (N) | Ever Quit % | Mean Yrs Quit | Short Term (n) | Short Term % |
|-------------------------------------------|-----------|---------------|------|-------|---------------|-------------|---------------|----------------|--------------|
| 50                                        | 35-39     | Never Any     | 0    | .     |               |             |               |                |              |
| 50                                        | 35-39     | CC            | 0    | .     | 0             | .           |               |                |              |
| 50                                        | 35-39     | Ecig          | 0    | .     |               |             |               |                |              |
| 50                                        | 35-39     | Dual          | 0    | .     |               |             |               |                |              |
| 50                                        | 35-39     | Former        | 0    | .     |               |             | .             | 0              | .            |
| Year of Follow-up: 2040, Age Group: 40-44 |           |               |      |       |               |             |               |                |              |
| Period                                    | Age Group | Smoking Group | N    | %     | Ever Quit (N) | Ever Quit % | Mean Yrs Quit | Short Term (n) | Short Term % |
| 50                                        | 40-44     | Never Any     | 0    | .     |               |             |               |                |              |
| 50                                        | 40-44     | CC            | 0    | .     | 0             | .           |               |                |              |
| 50                                        | 40-44     | Ecig          | 0    | .     |               |             |               |                |              |
| 50                                        | 40-44     | Dual          | 0    | .     |               |             |               |                |              |
| 50                                        | 40-44     | Former        | 0    | .     |               |             | .             | 0              | .            |
| Year of Follow-up: 2040, Age Group: 45-49 |           |               |      |       |               |             |               |                |              |
| Period                                    | Age Group | Smoking Group | N    | %     | Ever Quit (N) | Ever Quit % | Mean Yrs Quit | Short Term (n) | Short Term % |
| 50                                        | 45-49     | Never Any     | 0    | .     |               |             |               |                |              |
| 50                                        | 45-49     | CC            | 0    | .     | 0             | .           |               |                |              |
| 50                                        | 45-49     | Ecig          | 0    | .     |               |             |               |                |              |
| 50                                        | 45-49     | Dual          | 0    | .     |               |             |               |                |              |
| 50                                        | 45-49     | Former        | 0    | .     |               |             | .             | 0              | .            |
| Year of Follow-up: 2040, Age Group: 50-54 |           |               |      |       |               |             |               |                |              |
| Period                                    | Age Group | Smoking Group | N    | %     | Ever Quit (N) | Ever Quit % | Mean Yrs Quit | Short Term (n) | Short Term % |
| 50                                        | 50-54     | Never Any     | 0    | .     |               |             |               |                |              |
| 50                                        | 50-54     | CC            | 0    | .     | 0             | .           |               |                |              |
| 50                                        | 50-54     | Ecig          | 0    | .     |               |             |               |                |              |
| 50                                        | 50-54     | Dual          | 0    | .     |               |             |               |                |              |
| 50                                        | 50-54     | Former        | 0    | .     |               |             | .             | 0              | .            |
| Year of Follow-up: 2040, Age Group: 55-59 |           |               |      |       |               |             |               |                |              |
| Period                                    | Age Group | Smoking Group | N    | %     | Ever Quit (N) | Ever Quit % | Mean Yrs Quit | Short Term (n) | Short Term % |
| 50                                        | 55-59     | Never Any     | 0    | .     |               |             |               |                |              |
| 50                                        | 55-59     | CC            | 0    | .     | 0             | .           |               |                |              |
| 50                                        | 55-59     | Ecig          | 0    | .     |               |             |               |                |              |
| 50                                        | 55-59     | Dual          | 0    | .     |               |             |               |                |              |
| 50                                        | 55-59     | Former        | 0    | .     |               |             | .             | 0              | .            |
| Year of Follow-up: 2040, Age Group: 60-64 |           |               |      |       |               |             |               |                |              |
| Period                                    | Age Group | Smoking Group | N    | %     | Ever Quit (N) | Ever Quit % | Mean Yrs Quit | Short Term (n) | Short Term % |
| 50                                        | 60-64     | Never Any     | 4489 | 50.75 |               |             |               |                |              |
| 50                                        | 60-64     | CC            | 1    | 0.01  | 0             | 0.00        |               |                |              |
| 50                                        | 60-64     | Ecig          | 870  | 9.84  |               |             |               |                |              |
| 50                                        | 60-64     | Dual          | 0    | 0.00  |               |             |               |                |              |
| 50                                        | 60-64     | Former        | 3485 | 39.40 |               |             | 28.07         | 137            | 3.93         |
| Year of Follow-up: 2040, Age Group: 65-69 |           |               |      |       |               |             |               |                |              |
| Period                                    | Age Group | Smoking Group | N    | %     | Ever Quit (N) | Ever Quit % | Mean Yrs Quit | Short Term (n) | Short Term % |
| 50                                        | 65-69     | Never Any     | 4991 | 55.21 |               |             |               |                |              |
| 50                                        | 65-69     | CC            | 0    | 0.00  | 0             | 0.00        |               |                |              |
| 50                                        | 65-69     | Ecig          | 719  | 7.95  |               |             |               |                |              |
| 50                                        | 65-69     | Dual          | 0    | 0.00  |               |             |               |                |              |
| 50                                        | 65-69     | Former        | 3330 | 36.84 |               |             | 28.30         | 114            | 3.42         |
| Year of Follow-up: 2040, Age Group: 70-74 |           |               |      |       |               |             |               |                |              |
| Period                                    | Age Group | Smoking Group | N    | %     | Ever Quit (N) | Ever Quit % | Mean Yrs Quit | Short Term (n) | Short Term % |
| 50                                        | 70-74     | Never Any     | 5163 | 52.60 |               |             |               |                |              |
| 50                                        | 70-74     | CC            | 4    | 0.04  | 0             | 0.00        |               |                |              |
| 50                                        | 70-74     | Ecig          | 654  | 6.66  |               |             |               |                |              |
| 50                                        | 70-74     | Dual          | 0    | 0.00  |               |             |               |                |              |
| 50                                        | 70-74     | Former        | 3995 | 40.70 |               |             | 30.23         | 76             | 1.90         |
| Year of Follow-up: 2040, Age Group: 75-79 |           |               |      |       |               |             |               |                |              |
| Period                                    | Age Group | Smoking Group | N    | %     | Ever Quit (N) | Ever Quit % | Mean Yrs Quit | Short Term (n) | Short Term % |
| 50                                        | 75-79     | Never Any     | 4997 | 46.86 |               |             |               |                |              |
| 50                                        | 75-79     | CC            | 5    | 0.05  | 0             | 0.00        |               |                |              |
| 50                                        | 75-79     | Ecig          | 630  | 5.91  |               |             |               |                |              |
| 50                                        | 75-79     | Dual          | 0    | 0.00  |               |             |               |                |              |
| 50                                        | 75-79     | Former        | 5032 | 47.19 |               |             | 33.24         | 78             | 1.55         |



## Results for PHIM for Run 7 (Sensitivity\_Analysis\_2.RTF)

\*\*\*\*\*

### Main Results for E-Component for Run: 7, Simulation: 1, COD: Four Diseases Combined

| Variable Parameter          | Value                                  |
|-----------------------------|----------------------------------------|
| 1. Country                  | US (United States)                     |
| 2. Sex                      | M (Males)                              |
| 3. Year of start of process | 1990                                   |
| 4. Cause of Death           | Four Diseases Combined                 |
| 5. Effective Dose NULL      | CC:1                                   |
| 6. Effective Dose Ecig      | CC:1 Ecig:0.05 Dual:0.525              |
| Note:                       | Death rates are per million population |

#### Results for Age Groups Combined and Years combined, Population unadjusted for deaths in Ecig scenario,

| Age Group:All | NULL     | Ecig        | %Drop       |         |        | NULL   | Ecig    | Drop    |         |         |
|---------------|----------|-------------|-------------|---------|--------|--------|---------|---------|---------|---------|
| Year          | Number   | Attrib      | Attrib      | Drop    | %Drop  | Attrib | Death   | Attrib  | Attrib  | Drop    |
|               | Deaths   | Deaths      | Deaths      | Deaths  | Deaths | Deaths | Rate    | Rates   | Rates   | Rates   |
| All Comb      | 13148871 | 4509390.583 | 3128172.592 | 1381218 | 10.504 | 30.630 | 3806.31 | 1305.37 | 905.538 | 399.833 |

#### Results for Age Groups Combined, Population unadjusted for deaths in Ecig scenario,

| Age Group:All | NULL   | Ecig       | %Drop      |          |        | NULL   | Ecig    | Drop    |         |         |
|---------------|--------|------------|------------|----------|--------|--------|---------|---------|---------|---------|
| Year          | Number | Attrib     | Attrib     | Drop     | %Drop  | Attrib | Death   | Attrib  | Attrib  | Drop    |
|               | Deaths | Deaths     | Deaths     | Deaths   | Deaths | Deaths | Rate    | Rates   | Rates   | Rates   |
| 1990          | 317161 | 125773.065 | 125773.065 | 0.000    | 0.000  | 0.000  | 5027.71 | 1993.78 | 1993.78 | 0.000   |
| 1991          | 313217 | 123999.442 | 123703.256 | 296.186  | 0.095  | 0.239  | 4883.81 | 1933.45 | 1928.83 | 4.618   |
| 1992          | 308577 | 122014.015 | 121206.970 | 807.045  | 0.262  | 0.661  | 4729.73 | 1870.18 | 1857.81 | 12.370  |
| 1993          | 311713 | 122810.618 | 121281.237 | 1529.381 | 0.491  | 1.245  | 4692.62 | 1848.83 | 1825.80 | 23.024  |
| 1994          | 305700 | 119925.592 | 117542.488 | 2383.104 | 0.780  | 1.987  | 4516.19 | 1771.69 | 1736.49 | 35.206  |
| 1995          | 303225 | 117896.496 | 114491.223 | 3405.273 | 1.123  | 2.888  | 4393.80 | 1708.35 | 1659.00 | 49.343  |
| 1996          | 299559 | 115698.645 | 111151.602 | 4547.043 | 1.518  | 3.930  | 4273.16 | 1650.42 | 1585.56 | 64.863  |
| 1997          | 294226 | 113359.847 | 107642.499 | 5717.347 | 1.943  | 5.044  | 4128.67 | 1590.70 | 1510.47 | 80.228  |
| 1998          | 289258 | 111444.212 | 104535.150 | 6909.062 | 2.389  | 6.200  | 3992.19 | 1538.10 | 1442.74 | 95.355  |
| 1999          | 311002 | 114877.722 | 105492.334 | 9385.388 | 3.018  | 8.170  | 4224.60 | 1560.48 | 1432.99 | 127.490 |
| 2000          | 303786 | 112379.704 | 101521.105 | 10858.60 | 3.574  | 9.662  | 4066.21 | 1504.22 | 1358.87 | 145.344 |
| 2001          | 296294 | 110024.943 | 97575.344  | 12449.60 | 4.202  | 11.315 | 3914.28 | 1453.52 | 1289.05 | 164.469 |
| 2002          | 291898 | 108289.173 | 94033.579  | 14255.59 | 4.884  | 13.164 | 3813.00 | 1414.56 | 1228.34 | 186.218 |
| 2003          | 285865 | 106539.023 | 90643.409  | 15895.61 | 5.561  | 14.920 | 3695.36 | 1377.22 | 1171.74 | 205.481 |
| 2004          | 274177 | 103037.251 | 85878.563  | 17158.69 | 6.258  | 16.653 | 3506.10 | 1317.61 | 1098.19 | 219.421 |
| 2005          | 272379 | 103044.562 | 84158.860  | 18885.70 | 6.934  | 18.328 | 3442.69 | 1302.41 | 1063.71 | 238.703 |
| 2006          | 264118 | 99672.555  | 79191.730  | 20480.83 | 7.754  | 20.548 | 3307.76 | 1248.28 | 991.781 | 256.498 |
| 2007          | 258419 | 97839.152  | 76008.506  | 21830.65 | 8.448  | 22.313 | 3203.20 | 1212.75 | 942.153 | 270.599 |
| 2008          | 259461 | 98075.852  | 74587.093  | 23488.76 | 9.053  | 23.950 | 3180.09 | 1202.07 | 914.180 | 287.891 |
| 2009          | 253907 | 95617.338  | 70879.293  | 24738.04 | 9.743  | 25.872 | 3075.31 | 1158.11 | 858.487 | 299.626 |
| 2010          | 251878 | 94607.988  | 68561.210  | 26046.78 | 10.341 | 27.531 | 3013.72 | 1131.98 | 820.335 | 311.650 |
| 2011          | 251779 | 93633.119  | 65941.145  | 27691.97 | 10.999 | 29.575 | 2982.76 | 1109.25 | 781.189 | 328.060 |
| 2012          | 252643 | 92775.175  | 63479.320  | 29295.86 | 11.596 | 31.577 | 2960.61 | 1087.19 | 743.885 | 343.305 |
| 2013          | 256175 | 92345.780  | 61391.584  | 30954.20 | 12.083 | 33.520 | 2967.76 | 1069.82 | 711.215 | 358.601 |
| 2014          | 257393 | 91379.215  | 59017.693  | 32361.52 | 12.573 | 35.415 | 2947.05 | 1046.26 | 675.730 | 370.527 |
| 2015          | 259782 | 90750.242  | 57174.055  | 33576.19 | 12.925 | 36.998 | 3346.10 | 1168.90 | 736.426 | 432.475 |
| 2016          | 261453 | 88811.996  | 53856.608  | 34955.39 | 13.370 | 39.359 | 3336.15 | 1133.24 | 687.213 | 446.032 |
| 2017          | 263685 | 87325.126  | 51183.855  | 36141.27 | 13.706 | 41.387 | 3333.85 | 1104.08 | 647.134 | 456.945 |
| 2018          | 258714 | 87612.144  | 50379.838  | 37232.31 | 14.391 | 42.497 | 3240.73 | 1097.46 | 631.073 | 466.383 |
| 2019          | 261438 | 87797.760  | 49044.205  | 38753.56 | 14.823 | 44.140 | 3242.99 | 1089.08 | 608.366 | 480.716 |
| 2020          | 262288 | 87221.042  | 47578.987  | 39642.05 | 15.114 | 45.450 | 3715.29 | 1235.48 | 673.952 | 561.526 |
| 2021          | 255079 | 82001.292  | 42486.226  | 39515.07 | 15.491 | 48.188 | 3587.82 | 1153.39 | 597.590 | 555.799 |
| 2022          | 257097 | 81915.977  | 40974.982  | 40940.99 | 15.924 | 49.979 | 3588.53 | 1143.37 | 571.925 | 571.450 |
| 2023          | 259080 | 81810.810  | 39424.264  | 42386.55 | 16.360 | 51.810 | 3586.88 | 1132.64 | 545.817 | 586.828 |
| 2024          | 260719 | 81528.303  | 37928.304  | 43600.00 | 16.723 | 53.478 | 3579.65 | 1119.38 | 520.753 | 598.625 |
| 2025          | 257308 | 79599.213  | 36166.244  | 43432.97 | 16.880 | 54.565 | 4112.08 | 1272.09 | 577.978 | 694.109 |
| 2026          | 251528 | 75082.462  | 32251.143  | 42831.32 | 17.028 | 57.046 | 4003.24 | 1194.99 | 513.299 | 681.690 |
| 2027          | 250988 | 74444.425  | 30663.717  | 43780.71 | 17.443 | 58.810 | 3976.53 | 1179.46 | 485.821 | 693.640 |
| 2028          | 250285 | 73699.585  | 29013.867  | 44685.72 | 17.854 | 60.632 | 3945.35 | 1161.76 | 457.359 | 704.401 |
| 2029          | 249525 | 72819.703  | 27424.688  | 45395.01 | 18.193 | 62.339 | 3910.99 | 1141.36 | 429.847 | 711.509 |
| 2030          | 240528 | 69309.277  | 25607.397  | 43701.88 | 18.169 | 63.053 | 4504.36 | 1297.95 | 479.548 | 818.402 |
| 2031          | 235442 | 65433.368  | 22668.226  | 42765.14 | 18.164 | 65.357 | 4397.65 | 1222.18 | 423.403 | 798.778 |
| 2032          | 234017 | 64643.552  | 21273.208  | 43370.34 | 18.533 | 67.092 | 4356.12 | 1203.31 | 395.991 | 807.318 |
| 2033          | 232559 | 63793.514  | 20006.061  | 43787.45 | 18.829 | 68.639 | 4310.93 | 1182.54 | 370.851 | 811.685 |
| 2034          | 230963 | 63032.151  | 18785.246  | 44246.91 | 19.158 | 70.197 | 4260.75 | 1162.80 | 346.545 | 816.255 |
| 2035          | 215822 | 57653.301  | 17114.555  | 40538.75 | 18.783 | 70.315 | 4924.38 | 1315.47 | 390.501 | 924.969 |
| 2036          | 208183 | 52988.733  | 14348.252  | 38640.48 | 18.561 | 72.922 | 4748.94 | 1208.75 | 327.303 | 881.442 |
| 2037          | 205491 | 52026.921  | 13366.287  | 38660.63 | 18.814 | 74.309 | 4682.40 | 1185.50 | 304.569 | 880.934 |
| 2038          | 202834 | 50943.211  | 12322.417  | 38620.79 | 19.041 | 75.811 | 4612.18 | 1158.38 | 280.196 | 878.187 |
| 2039          | 200251 | 50085.991  | 11441.707  | 38644.28 | 19.298 | 77.156 | 4538.65 | 1135.19 | 259.324 | 875.866 |

## Results for PHIM for Run 7 (Sensitivity\_Analysis\_2.RTF)

\*\*\*\*\*

### Main Results for E-Component for Run: 7, Simulation: 1, COD: LUNG CANCER

| Variable Parameter          | Value                                  |
|-----------------------------|----------------------------------------|
| 1. Country                  | US (United States)                     |
| 2. Sex                      | M (Males)                              |
| 3. Year of start of process | 1990                                   |
| 4. Cause of Death           | LUNG CANCER                            |
| 5. Effective Dose NULL      | CC:1                                   |
| 6. Effective Dose Ecig      | CC:1 Ecig:0.05 Dual:0.525              |
| Note:                       | Death rates are per million population |

#### Results for Age Groups Combined and Years combined, Population unadjusted for deaths in Ecig scenario,

| Age Group:All | NULL    | Ecig        | %Drop       |          |        | NULL   | Ecig    | Drop    |         |         |
|---------------|---------|-------------|-------------|----------|--------|--------|---------|---------|---------|---------|
| Year          | Number  | Attrib      | Attrib      | Drop     | %Drop  | Attrib | Death   | Attrib  | Attrib  | Drop    |
|               | Deaths  | Deaths      | Deaths      | Deaths   | Deaths | Deaths | Rate    | Rates   | Rates   | Rates   |
| All Comb      | 3065988 | 2244988.113 | 1782218.323 | 462769.8 | 15.094 | 20.613 | 887.537 | 649.875 | 515.914 | 133.962 |

#### Results for Age Groups Combined, Population unadjusted for deaths in Ecig scenario,

| Age Group:All | NULL   | Ecig      | %Drop     |          |        | NULL   | Ecig    | Drop    |         |         |
|---------------|--------|-----------|-----------|----------|--------|--------|---------|---------|---------|---------|
| Year          | Number | Attrib    | Attrib    | Drop     | %Drop  | Attrib | Death   | Attrib  | Attrib  | Drop    |
|               | Deaths | Deaths    | Deaths    | Deaths   | Deaths | Deaths | Rate    | Rates   | Rates   | Rates   |
| 1990          | 78822  | 63385.736 | 63385.736 | 0.000    | 0.000  | 0.000  | 1249.50 | 1004.81 | 1004.81 | 0.000   |
| 1991          | 78462  | 62918.402 | 62887.781 | 30.621   | 0.039  | 0.049  | 1223.41 | 981.049 | 980.572 | 0.477   |
| 1992          | 77987  | 62366.766 | 62283.168 | 83.598   | 0.107  | 0.134  | 1195.35 | 955.930 | 954.648 | 1.281   |
| 1993          | 78542  | 62652.888 | 62486.089 | 166.799  | 0.212  | 0.266  | 1182.39 | 943.195 | 940.684 | 2.511   |
| 1994          | 77437  | 61565.227 | 61297.760 | 267.467  | 0.345  | 0.434  | 1144.00 | 909.520 | 905.569 | 3.951   |
| 1995          | 76904  | 60851.961 | 60455.038 | 396.923  | 0.516  | 0.652  | 1114.36 | 881.759 | 876.007 | 5.751   |
| 1996          | 76232  | 60122.922 | 59558.491 | 564.430  | 0.740  | 0.939  | 1087.44 | 857.643 | 849.591 | 8.051   |
| 1997          | 75473  | 59237.155 | 58489.266 | 747.888  | 0.991  | 1.263  | 1059.06 | 831.234 | 820.740 | 10.495  |
| 1998          | 75381  | 58906.696 | 57928.178 | 978.518  | 1.298  | 1.661  | 1040.37 | 813.001 | 799.496 | 13.505  |
| 1999          | 73159  | 56930.073 | 55717.186 | 1212.887 | 1.658  | 2.130  | 993.781 | 773.329 | 756.854 | 16.476  |
| 2000          | 73784  | 57137.121 | 55612.498 | 1524.623 | 2.066  | 2.668  | 987.608 | 764.787 | 744.380 | 20.407  |
| 2001          | 73294  | 56481.726 | 54601.968 | 1879.758 | 2.565  | 3.328  | 968.273 | 746.169 | 721.336 | 24.833  |
| 2002          | 72442  | 55588.365 | 53329.898 | 2258.467 | 3.118  | 4.063  | 946.293 | 726.138 | 696.636 | 29.502  |
| 2003          | 71942  | 54945.856 | 52266.099 | 2679.758 | 3.725  | 4.877  | 929.989 | 710.281 | 675.640 | 34.641  |
| 2004          | 71301  | 54203.126 | 51050.833 | 3152.293 | 4.421  | 5.816  | 911.778 | 693.135 | 652.824 | 40.311  |
| 2005          | 70964  | 53744.603 | 50105.044 | 3639.559 | 5.129  | 6.772  | 896.937 | 679.296 | 633.294 | 46.002  |
| 2006          | 69658  | 52535.572 | 48372.271 | 4163.301 | 5.977  | 7.925  | 872.383 | 657.945 | 605.805 | 52.140  |
| 2007          | 68565  | 51492.124 | 46805.644 | 4686.480 | 6.835  | 9.101  | 849.888 | 638.264 | 580.173 | 58.091  |
| 2008          | 68226  | 51030.736 | 45702.810 | 5327.925 | 7.809  | 10.441 | 836.215 | 625.460 | 560.158 | 65.302  |
| 2009          | 67509  | 50276.199 | 44294.363 | 5981.836 | 8.861  | 11.898 | 817.667 | 608.943 | 536.492 | 72.452  |
| 2010          | 67196  | 49840.933 | 43228.205 | 6612.728 | 9.841  | 13.268 | 804.000 | 596.347 | 517.225 | 79.121  |
| 2011          | 66506  | 49072.841 | 41729.048 | 7343.793 | 11.042 | 14.965 | 787.880 | 581.354 | 494.354 | 87.000  |
| 2012          | 66155  | 48539.512 | 40412.608 | 8126.904 | 12.285 | 16.743 | 775.240 | 568.812 | 473.577 | 95.235  |
| 2013          | 65333  | 47675.741 | 38839.420 | 8836.321 | 13.525 | 18.534 | 756.876 | 552.318 | 449.950 | 102.368 |
| 2014          | 65033  | 47194.534 | 37620.397 | 9574.137 | 14.722 | 20.287 | 744.602 | 540.359 | 430.739 | 109.620 |
| 2015          | 64145  | 46305.842 | 36096.593 | 10209.25 | 15.916 | 22.047 | 726.215 | 526.439 | 414.939 | 131.499 |
| 2016          | 61618  | 44208.867 | 33588.347 | 10620.52 | 17.236 | 24.024 | 786.248 | 564.107 | 428.589 | 135.518 |
| 2017          | 59897  | 42702.624 | 31622.161 | 11080.46 | 18.499 | 25.948 | 757.297 | 539.903 | 399.809 | 140.094 |
| 2018          | 62468  | 44321.202 | 31761.503 | 12559.70 | 20.106 | 28.338 | 782.490 | 555.181 | 397.854 | 157.327 |
| 2019          | 63045  | 44493.088 | 30931.151 | 13561.94 | 21.512 | 30.481 | 782.035 | 551.912 | 383.684 | 168.228 |
| 2020          | 63466  | 44529.551 | 30032.281 | 14497.27 | 22.843 | 32.557 | 898.991 | 630.757 | 425.405 | 205.353 |
| 2021          | 57113  | 39852.556 | 25932.871 | 13919.68 | 24.372 | 34.928 | 803.323 | 560.546 | 364.759 | 195.787 |
| 2022          | 57440  | 39853.685 | 24968.775 | 14884.91 | 25.914 | 37.349 | 801.745 | 556.274 | 348.512 | 207.762 |
| 2023          | 57738  | 39847.050 | 23973.831 | 15873.22 | 27.492 | 39.835 | 799.366 | 551.670 | 331.910 | 219.760 |
| 2024          | 57942  | 39726.010 | 22983.580 | 16742.43 | 28.895 | 42.145 | 795.539 | 545.435 | 315.563 | 229.872 |
| 2025          | 57521  | 39207.348 | 21863.034 | 17344.31 | 30.153 | 44.237 | 919.257 | 626.579 | 349.397 | 277.182 |
| 2026          | 51428  | 34803.960 | 18616.065 | 16187.90 | 31.477 | 46.512 | 818.510 | 553.929 | 296.287 | 257.641 |
| 2027          | 51172  | 34484.595 | 17602.103 | 16882.49 | 32.992 | 48.957 | 810.740 | 546.357 | 278.879 | 267.478 |
| 2028          | 50870  | 34100.638 | 16556.294 | 17544.34 | 34.489 | 51.449 | 801.884 | 537.544 | 260.984 | 276.559 |
| 2029          | 50540  | 33669.838 | 15558.350 | 18111.49 | 35.836 | 53.791 | 792.146 | 527.732 | 243.857 | 283.875 |
| 2030          | 49109  | 32557.688 | 14457.944 | 18099.74 | 36.856 | 55.593 | 919.662 | 609.705 | 270.753 | 338.952 |
| 2031          | 43585  | 28646.393 | 12082.276 | 16564.12 | 38.004 | 57.823 | 814.096 | 535.065 | 225.676 | 309.389 |
| 2032          | 43163  | 28227.160 | 11255.848 | 16971.31 | 39.319 | 60.124 | 803.454 | 525.435 | 209.522 | 315.913 |
| 2033          | 42725  | 27786.623 | 10501.260 | 17285.36 | 40.457 | 62.207 | 791.996 | 515.079 | 194.661 | 320.418 |
| 2034          | 42256  | 27348.299 | 9781.784  | 17566.51 | 41.572 | 64.233 | 779.523 | 504.514 | 180.452 | 324.062 |
| 2035          | 39748  | 25570.077 | 8848.692  | 16721.39 | 42.068 | 65.394 | 906.933 | 583.430 | 201.900 | 381.530 |
| 2036          | 34030  | 21717.319 | 6958.289  | 14759.03 | 43.371 | 67.960 | 776.269 | 495.402 | 158.728 | 336.674 |
| 2037          | 33454  | 21256.024 | 6439.628  | 14816.40 | 44.289 | 69.704 | 762.289 | 484.347 | 146.736 | 337.611 |
| 2038          | 32883  | 20747.175 | 5898.322  | 14848.85 | 45.156 | 71.570 | 747.720 | 471.764 | 134.120 | 337.644 |
| 2039          | 32325  | 20327.688 | 5447.539  | 14880.15 | 46.033 | 73.201 | 732.644 | 460.724 | 123.468 | 337.256 |

## Results for PHIM for Run 7 (Sensitivity\_Analysis\_2.RTF)

\*\*\*\*\*

### Main Results for E-Component for Run: 7, Simulation: 1, COD: IHD

| Variable Parameter          | Value                                  |
|-----------------------------|----------------------------------------|
| 1. Country                  | US (United States)                     |
| 2. Sex                      | M (Males)                              |
| 3. Year of start of process | 1990                                   |
| 4. Cause of Death           | IHD                                    |
| 5. Effective Dose NULL      | CC:1                                   |
| 6. Effective Dose Ecig      | CC:1 Ecig:0.05 Dual:0.525              |
| Note:                       | Death rates are per million population |

#### Results for Age Groups Combined and Years combined, Population unadjusted for deaths in Ecig scenario,

| Age Group:All |         | NULL        | Ecig       | %Drop    |        | Death  |         | NULL    | Ecig    | Drop    |
|---------------|---------|-------------|------------|----------|--------|--------|---------|---------|---------|---------|
| Year          | Number  | Attrib      | Attrib     | Drop     | %Drop  | Attrib | Rate    | Attrib  | Attrib  | Rates   |
|               | Deaths  | Deaths      | Deaths     | Deaths   | Deaths | Deaths |         | Rates   | Rates   | Rates   |
| All Comb      | 6360041 | 1098877.421 | 564360.442 | 534517.0 | 8.404  | 48.642 | 1841.09 | 318.101 | 163.370 | 154.731 |

#### Results for Age Groups Combined, Population unadjusted for deaths in Ecig scenario,

| Age Group:All |        | NULL      | Ecig      | %Drop    |        | Death  |         | NULL    | Ecig    | Drop    |
|---------------|--------|-----------|-----------|----------|--------|--------|---------|---------|---------|---------|
| Year          | Number | Attrib    | Attrib    | Drop     | %Drop  | Attrib | Rate    | Attrib  | Attrib  | Rates   |
|               | Deaths | Deaths    | Deaths    | Deaths   | Deaths | Deaths |         | Rates   | Rates   | Rates   |
| 1990          | 171484 | 38511.725 | 38511.725 | 0.000    | 0.000  | 0.000  | 2718.40 | 610.497 | 610.497 | 0.000   |
| 1991          | 168044 | 37309.838 | 37084.129 | 225.708  | 0.134  | 0.605  | 2620.21 | 581.750 | 578.231 | 3.519   |
| 1992          | 164548 | 36137.488 | 35520.709 | 616.779  | 0.375  | 1.707  | 2522.12 | 553.899 | 544.445 | 9.454   |
| 1993          | 164362 | 35599.588 | 34447.386 | 1152.201 | 0.701  | 3.237  | 2474.35 | 535.926 | 518.581 | 17.346  |
| 1994          | 159866 | 34336.757 | 32556.778 | 1779.979 | 1.113  | 5.184  | 2361.75 | 507.267 | 480.970 | 26.296  |
| 1995          | 158083 | 33455.759 | 30936.483 | 2519.275 | 1.594  | 7.530  | 2290.66 | 484.782 | 448.277 | 36.505  |
| 1996          | 154875 | 32193.824 | 28878.741 | 3315.083 | 2.140  | 10.297 | 2209.26 | 459.239 | 411.950 | 47.289  |
| 1997          | 149970 | 30665.509 | 26566.015 | 4099.494 | 2.734  | 13.368 | 2104.43 | 430.308 | 372.783 | 57.525  |
| 1998          | 145407 | 29188.430 | 24338.565 | 4849.865 | 3.335  | 16.616 | 2006.83 | 402.844 | 335.909 | 66.935  |
| 1999          | 165952 | 33375.386 | 26535.945 | 6839.441 | 4.121  | 20.492 | 2254.27 | 453.366 | 360.460 | 92.906  |
| 2000          | 160260 | 32024.754 | 24269.981 | 7754.774 | 4.839  | 24.215 | 2145.10 | 428.655 | 324.857 | 103.799 |
| 2001          | 154444 | 30682.393 | 21956.815 | 8725.578 | 5.650  | 28.438 | 2040.33 | 405.339 | 290.067 | 115.272 |
| 2002          | 151887 | 30218.370 | 20346.995 | 9871.374 | 6.499  | 32.667 | 1984.06 | 394.736 | 265.788 | 128.947 |
| 2003          | 146733 | 29175.202 | 18410.387 | 10764.81 | 7.336  | 36.897 | 1896.81 | 377.146 | 237.990 | 139.156 |
| 2004          | 138381 | 27488.687 | 16194.796 | 11293.89 | 8.161  | 41.086 | 1769.58 | 351.518 | 207.095 | 144.423 |
| 2005          | 135881 | 27017.439 | 14884.367 | 12133.07 | 8.929  | 44.908 | 1717.44 | 341.482 | 188.128 | 153.354 |
| 2006          | 131922 | 26231.435 | 13302.153 | 12929.28 | 9.801  | 49.289 | 1652.16 | 328.517 | 166.593 | 161.924 |
| 2007          | 126502 | 25103.049 | 11759.779 | 13343.27 | 10.548 | 53.154 | 1568.04 | 311.161 | 145.767 | 165.395 |
| 2008          | 125859 | 24621.740 | 10725.237 | 13896.50 | 11.041 | 56.440 | 1542.60 | 301.777 | 131.454 | 170.323 |
| 2009          | 122428 | 23741.177 | 9574.172  | 14167.01 | 11.572 | 59.673 | 1482.84 | 287.552 | 115.962 | 171.590 |
| 2010          | 120537 | 23189.160 | 8678.555  | 14510.60 | 12.038 | 62.575 | 1442.22 | 277.458 | 103.839 | 173.619 |
| 2011          | 120221 | 22786.927 | 7840.158  | 14946.77 | 12.433 | 65.594 | 1424.23 | 269.951 | 92.880  | 177.071 |
| 2012          | 120927 | 22485.295 | 7152.318  | 15332.98 | 12.680 | 68.191 | 1417.09 | 263.495 | 83.815  | 179.680 |
| 2013          | 122648 | 22251.884 | 6542.693  | 15709.19 | 12.808 | 70.597 | 1420.86 | 257.786 | 75.796  | 181.989 |
| 2014          | 123229 | 21894.593 | 5965.735  | 15928.86 | 12.926 | 72.752 | 1410.92 | 250.685 | 68.305  | 182.379 |
| 2015          | 123774 | 21471.109 | 5466.663  | 16004.45 | 12.930 | 74.539 | 1594.26 | 276.557 | 70.413  | 206.144 |
| 2016          | 126218 | 21411.568 | 4996.712  | 16414.86 | 13.005 | 76.663 | 1610.55 | 273.213 | 63.758  | 209.454 |
| 2017          | 128265 | 21169.399 | 4579.259  | 16590.14 | 12.934 | 78.368 | 1621.69 | 267.651 | 57.897  | 209.754 |
| 2018          | 121429 | 19830.576 | 3909.978  | 15920.60 | 13.111 | 80.283 | 1521.05 | 248.404 | 48.978  | 199.426 |
| 2019          | 121832 | 19431.014 | 3559.679  | 15871.34 | 13.027 | 81.680 | 1511.26 | 241.031 | 44.156  | 196.875 |
| 2020          | 120811 | 18532.612 | 3185.370  | 15347.24 | 12.704 | 82.812 | 1711.27 | 262.513 | 45.121  | 217.392 |
| 2021          | 119407 | 18234.128 | 2865.645  | 15368.48 | 12.871 | 84.284 | 1679.51 | 256.472 | 40.307  | 216.165 |
| 2022          | 119438 | 17812.559 | 2599.863  | 15212.70 | 12.737 | 85.404 | 1667.10 | 248.626 | 36.289  | 212.337 |
| 2023          | 119445 | 17361.668 | 2341.608  | 15020.06 | 12.575 | 86.513 | 1653.68 | 240.367 | 32.419  | 207.948 |
| 2024          | 119305 | 16929.676 | 2134.165  | 14795.51 | 12.401 | 87.394 | 1638.05 | 232.443 | 29.302  | 203.141 |
| 2025          | 115685 | 15501.666 | 1866.690  | 13634.98 | 11.786 | 87.958 | 1848.78 | 247.735 | 29.832  | 217.903 |
| 2026          | 115073 | 15523.814 | 1720.961  | 13802.85 | 11.995 | 88.914 | 1831.46 | 247.072 | 27.390  | 219.682 |
| 2027          | 113989 | 15073.070 | 1572.616  | 13500.45 | 11.844 | 89.567 | 1805.98 | 238.810 | 24.916  | 213.895 |
| 2028          | 112855 | 14636.710 | 1437.837  | 13198.87 | 11.695 | 90.176 | 1778.98 | 230.725 | 22.665  | 208.060 |
| 2029          | 111718 | 14180.166 | 1318.185  | 12861.98 | 11.513 | 90.704 | 1751.04 | 222.256 | 20.661  | 201.595 |
| 2030          | 104851 | 12111.772 | 1099.744  | 11012.03 | 10.503 | 90.920 | 1963.54 | 226.816 | 20.595  | 206.221 |
| 2031          | 105289 | 12417.367 | 1066.734  | 11350.63 | 10.780 | 91.409 | 1966.62 | 231.935 | 19.925  | 212.010 |
| 2032          | 103879 | 12054.064 | 985.267   | 11068.80 | 10.655 | 91.826 | 1933.67 | 224.381 | 18.340  | 206.040 |
| 2033          | 102485 | 11672.389 | 907.500   | 10764.89 | 10.504 | 92.225 | 1899.76 | 216.370 | 16.822  | 199.548 |
| 2034          | 101070 | 11365.762 | 849.159   | 10516.60 | 10.405 | 92.529 | 1864.51 | 209.673 | 15.665  | 194.007 |
| 2035          | 90820  | 8580.360  | 630.707   | 7949.653 | 8.753  | 92.649 | 2072.23 | 195.777 | 14.391  | 181.387 |
| 2036          | 92117  | 8948.841  | 624.394   | 8324.447 | 9.037  | 93.023 | 2101.31 | 204.135 | 14.243  | 189.892 |
| 2037          | 90327  | 8624.570  | 591.701   | 8032.869 | 8.893  | 93.139 | 2058.21 | 196.522 | 13.483  | 183.040 |
| 2038          | 88590  | 8315.017  | 553.023   | 7761.994 | 8.762  | 93.349 | 2014.42 | 189.073 | 12.575  | 176.498 |
| 2039          | 86921  | 8001.132  | 516.364   | 7484.767 | 8.611  | 93.546 | 1970.05 | 181.344 | 11.703  | 169.641 |

## Results for PHIM for Run 7 (Sensitivity\_Analysis\_2.RTF)

\*\*\*\*\*

### Main Results for E-Component for Run: 7, Simulation: 1, COD: STROKE

| Variable Parameter          | Value                                  |
|-----------------------------|----------------------------------------|
| 1. Country                  | US (United States)                     |
| 2. Sex                      | M (Males)                              |
| 3. Year of start of process | 1990                                   |
| 4. Cause of Death           | STROKE                                 |
| 5. Effective Dose NULL      | CC:1                                   |
| 6. Effective Dose Ecig      | CC:1 Ecig:0.05 Dual:0.525              |
| Note:                       | Death rates are per million population |

#### Results for Age Groups Combined and Years combined, Population unadjusted for deaths in Ecig scenario,

| Age Group:All |         | NULL       | Ecig      | %Drop    |        | NULL   | Ecig    | Drop   |        |        |
|---------------|---------|------------|-----------|----------|--------|--------|---------|--------|--------|--------|
| Year          | Number  | Attrib     | Attrib    | Drop     | %Drop  | Attrib | Death   | Attrib | Drop   |        |
|               | Deaths  | Deaths     | Deaths    | Deaths   | Deaths | Deaths | Rate    | Rates  | Rates  |        |
| All Comb      | 1489699 | 149918.462 | 75995.949 | 73922.51 | 4.962  | 49.308 | 431.236 | 43.398 | 21.999 | 21.399 |

#### Results for Age Groups Combined, Population unadjusted for deaths in Ecig scenario,

| Age Group:All |        | NULL     | Ecig     | %Drop    |        | NULL   | Ecig    | Drop   |        |        |
|---------------|--------|----------|----------|----------|--------|--------|---------|--------|--------|--------|
| Year          | Number | Attrib   | Attrib   | Drop     | %Drop  | Attrib | Death   | Attrib | Drop   |        |
|               | Deaths | Deaths   | Deaths   | Deaths   | Deaths | Deaths | Rate    | Rates  | Rates  |        |
| 1990          | 32862  | 4613.166 | 4613.166 | 0.000    | 0.000  | 0.000  | 520.936 | 73.129 | 0.000  |        |
| 1991          | 32619  | 4555.566 | 4528.361 | 27.205   | 0.083  | 0.597  | 508.609 | 71.032 | 70.608 | 0.424  |
| 1992          | 32100  | 4453.572 | 4380.643 | 72.929   | 0.227  | 1.638  | 492.014 | 68.262 | 67.145 | 1.118  |
| 1993          | 32896  | 4462.473 | 4321.719 | 140.754  | 0.428  | 3.154  | 495.226 | 67.179 | 65.060 | 2.119  |
| 1994          | 33323  | 4499.513 | 4273.027 | 226.486  | 0.680  | 5.034  | 492.290 | 66.473 | 63.127 | 3.346  |
| 1995          | 33569  | 4472.774 | 4145.384 | 327.391  | 0.975  | 7.320  | 486.422 | 64.812 | 60.068 | 4.744  |
| 1996          | 33870  | 4406.878 | 3965.012 | 441.866  | 1.305  | 10.027 | 483.150 | 62.863 | 56.560 | 6.303  |
| 1997          | 33516  | 4288.158 | 3728.168 | 559.990  | 1.671  | 13.059 | 470.307 | 60.173 | 52.315 | 7.858  |
| 1998          | 32795  | 4120.148 | 3448.586 | 671.562  | 2.048  | 16.299 | 452.620 | 56.864 | 47.596 | 9.269  |
| 1999          | 33375  | 3982.443 | 3197.835 | 784.608  | 2.351  | 19.702 | 453.361 | 54.097 | 43.439 | 10.658 |
| 2000          | 33459  | 4021.411 | 3084.483 | 936.929  | 2.800  | 23.299 | 447.853 | 53.827 | 41.286 | 12.541 |
| 2001          | 32275  | 3848.092 | 2802.464 | 1045.628 | 3.240  | 27.173 | 426.379 | 50.836 | 37.023 | 13.814 |
| 2002          | 31586  | 3783.081 | 2610.936 | 1172.145 | 3.711  | 30.984 | 412.601 | 49.418 | 34.106 | 15.311 |
| 2003          | 30985  | 3754.415 | 2436.964 | 1317.451 | 4.252  | 35.091 | 400.541 | 48.533 | 31.502 | 17.031 |
| 2004          | 29884  | 3666.274 | 2234.259 | 1432.016 | 4.792  | 39.059 | 382.149 | 46.883 | 28.571 | 18.312 |
| 2005          | 28708  | 3589.688 | 2049.640 | 1540.048 | 5.365  | 42.902 | 362.850 | 45.371 | 25.906 | 19.465 |
| 2006          | 28188  | 3596.985 | 1904.416 | 1692.569 | 6.005  | 47.055 | 353.021 | 45.048 | 23.851 | 21.197 |
| 2007          | 28026  | 3560.798 | 1752.243 | 1808.555 | 6.453  | 50.791 | 347.392 | 44.137 | 21.720 | 22.418 |
| 2008          | 27128  | 3417.001 | 1561.552 | 1855.449 | 6.840  | 54.301 | 332.495 | 41.881 | 19.139 | 22.741 |
| 2009          | 27068  | 3394.390 | 1437.827 | 1956.563 | 7.228  | 57.641 | 327.847 | 41.113 | 17.415 | 23.698 |
| 2010          | 26911  | 3340.137 | 1318.774 | 2021.364 | 7.511  | 60.517 | 321.990 | 39.965 | 15.779 | 24.186 |
| 2011          | 26959  | 3285.435 | 1204.845 | 2080.590 | 7.718  | 63.328 | 319.377 | 38.922 | 14.274 | 24.648 |
| 2012          | 27057  | 3259.209 | 1100.641 | 2158.568 | 7.978  | 66.230 | 317.068 | 38.193 | 12.898 | 25.295 |
| 2013          | 27904  | 3274.703 | 1021.057 | 2253.646 | 8.076  | 68.820 | 323.265 | 37.937 | 11.829 | 26.108 |
| 2014          | 28792  | 3298.083 | 947.946  | 2350.136 | 8.162  | 71.258 | 329.657 | 37.762 | 10.854 | 26.908 |
| 2015          | 29560  | 3244.406 | 869.891  | 2374.515 | 8.033  | 73.188 | 380.745 | 41.789 | 11.205 | 30.585 |
| 2016          | 30513  | 3314.836 | 813.761  | 2501.075 | 8.197  | 75.451 | 389.347 | 42.297 | 10.384 | 31.914 |
| 2017          | 31416  | 3333.314 | 753.104  | 2580.210 | 8.213  | 77.407 | 397.202 | 42.144 | 9.522  | 32.622 |
| 2018          | 29348  | 2925.242 | 613.758  | 2311.484 | 7.876  | 79.019 | 367.626 | 36.642 | 7.688  | 28.954 |
| 2019          | 29598  | 2864.628 | 556.755  | 2307.873 | 7.797  | 80.564 | 367.149 | 35.534 | 6.906  | 28.628 |
| 2020          | 29592  | 2730.366 | 494.469  | 2235.897 | 7.556  | 81.890 | 419.174 | 38.675 | 7.004  | 31.671 |
| 2021          | 30097  | 2647.911 | 446.756  | 2201.155 | 7.314  | 83.128 | 423.328 | 37.244 | 6.284  | 30.960 |
| 2022          | 30304  | 2586.165 | 404.365  | 2181.799 | 7.200  | 84.364 | 422.974 | 36.097 | 5.644  | 30.453 |
| 2023          | 30505  | 2517.960 | 363.550  | 2154.410 | 7.062  | 85.562 | 422.337 | 34.860 | 5.033  | 29.827 |
| 2024          | 30661  | 2454.161 | 330.570  | 2123.590 | 6.926  | 86.530 | 420.968 | 33.695 | 4.539  | 29.157 |
| 2025          | 30254  | 2275.364 | 288.319  | 1987.045 | 6.568  | 87.329 | 483.488 | 36.363 | 4.608  | 31.755 |
| 2026          | 30685  | 2183.166 | 258.149  | 1925.018 | 6.273  | 88.175 | 488.380 | 34.747 | 4.109  | 30.638 |
| 2027          | 30561  | 2112.345 | 234.117  | 1878.228 | 6.146  | 88.917 | 484.196 | 33.467 | 3.709  | 29.758 |
| 2028          | 30412  | 2046.677 | 214.156  | 1832.521 | 6.026  | 89.536 | 479.392 | 32.263 | 3.376  | 28.887 |
| 2029          | 30254  | 1977.671 | 194.929  | 1782.743 | 5.893  | 90.144 | 474.195 | 30.997 | 3.055  | 27.942 |
| 2030          | 29330  | 1744.457 | 163.953  | 1580.504 | 5.389  | 90.602 | 549.260 | 32.668 | 3.070  | 29.598 |
| 2031          | 28976  | 1653.738 | 148.803  | 1504.935 | 5.194  | 91.002 | 541.223 | 30.889 | 2.779  | 28.110 |
| 2032          | 28724  | 1603.120 | 136.155  | 1466.966 | 5.107  | 91.507 | 534.690 | 29.841 | 2.534  | 27.307 |
| 2033          | 28464  | 1548.245 | 124.806  | 1423.438 | 5.001  | 91.939 | 527.627 | 28.700 | 2.314  | 26.386 |
| 2034          | 28178  | 1511.985 | 116.418  | 1395.567 | 4.953  | 92.300 | 519.826 | 27.893 | 2.148  | 25.745 |
| 2035          | 26737  | 1239.866 | 92.272   | 1147.594 | 4.292  | 92.558 | 610.065 | 28.290 | 2.105  | 26.185 |
| 2036          | 25591  | 1182.522 | 84.073   | 1098.449 | 4.292  | 92.890 | 583.762 | 26.975 | 1.918  | 25.057 |
| 2037          | 25143  | 1134.483 | 79.504   | 1054.979 | 4.196  | 92.992 | 572.916 | 25.851 | 1.812  | 24.039 |
| 2038          | 24693  | 1093.537 | 74.358   | 1019.179 | 4.127  | 93.200 | 561.491 | 24.866 | 1.691  | 23.175 |
| 2039          | 24247  | 1047.905 | 69.012   | 978.893  | 4.037  | 93.414 | 549.553 | 23.751 | 1.564  | 22.186 |

## Results for PHIM for Run 7 (Sensitivity\_Analysis\_2.RTF)

\*\*\*\*\*

### Main Results for E-Component for Run: 7, Simulation: 1, COD: COPD

| Variable Parameter          | Value                                  |
|-----------------------------|----------------------------------------|
| 1. Country                  | US (United States)                     |
| 2. Sex                      | M (Males)                              |
| 3. Year of start of process | 1990                                   |
| 4. Cause of Death           | COPD                                   |
| 5. Effective Dose NULL      | CC:1                                   |
| 6. Effective Dose Ecig      | CC:1 Ecig:0.05 Dual:0.525              |
| Note:                       | Death rates are per million population |

#### Results for Age Groups Combined and Years combined, Population unadjusted for deaths in Ecig scenario,

| Age Group:All |         | NULL        | Ecig       | %Drop    |        | NULL   | Ecig    | Drop    |         |        |
|---------------|---------|-------------|------------|----------|--------|--------|---------|---------|---------|--------|
| Year          | Number  | Attrib      | Attrib     | Drop     | %Drop  | Attrib | Death   | Attrib  | Attrib  | Drop   |
|               | Deaths  | Deaths      | Deaths     | Deaths   | Deaths | Deaths | Rate    | Rates   | Rates   | Rates  |
| All Comb      | 2233143 | 1015606.587 | 705597.879 | 310008.7 | 13.882 | 30.524 | 646.447 | 293.996 | 204.255 | 89.741 |

#### Results for Age Groups Combined, Population unadjusted for deaths in Ecig scenario,

| Age Group:All |        | NULL      | Ecig      | %Drop    |        | NULL   | Ecig    | Drop    |         |         |
|---------------|--------|-----------|-----------|----------|--------|--------|---------|---------|---------|---------|
| Year          | Number | Attrib    | Attrib    | Drop     | %Drop  | Attrib | Death   | Attrib  | Attrib  | Drop    |
|               | Deaths | Deaths    | Deaths    | Deaths   | Deaths | Deaths | Rate    | Rates   | Rates   | Rates   |
| 1990          | 33993  | 19262.437 | 19262.437 | 0.000    | 0.000  | 0.000  | 538.865 | 305.353 | 305.353 | 0.000   |
| 1991          | 34092  | 19215.636 | 19202.985 | 12.651   | 0.037  | 0.066  | 531.576 | 299.618 | 299.421 | 0.197   |
| 1992          | 33942  | 19056.189 | 19022.449 | 33.740   | 0.099  | 0.177  | 520.248 | 292.085 | 291.568 | 0.517   |
| 1993          | 35913  | 20095.670 | 20026.042 | 69.627   | 0.194  | 0.346  | 540.645 | 302.526 | 301.478 | 1.048   |
| 1994          | 35074  | 19524.095 | 19414.923 | 109.172  | 0.311  | 0.559  | 518.158 | 288.435 | 286.822 | 1.613   |
| 1995          | 34669  | 19116.002 | 18954.317 | 161.685  | 0.466  | 0.846  | 502.362 | 276.995 | 274.652 | 2.343   |
| 1996          | 34582  | 18975.021 | 18749.358 | 225.663  | 0.653  | 1.189  | 493.306 | 270.675 | 267.456 | 3.219   |
| 1997          | 35267  | 19169.025 | 18859.049 | 309.975  | 0.879  | 1.617  | 494.878 | 268.986 | 264.636 | 4.350   |
| 1998          | 35675  | 19228.937 | 18819.820 | 409.118  | 1.147  | 2.128  | 492.368 | 265.388 | 259.742 | 5.646   |
| 1999          | 38516  | 20589.820 | 20041.368 | 548.453  | 1.424  | 2.664  | 523.195 | 279.689 | 272.239 | 7.450   |
| 2000          | 36283  | 19196.417 | 18554.143 | 642.274  | 1.770  | 3.346  | 485.652 | 256.946 | 248.349 | 8.597   |
| 2001          | 36281  | 19012.731 | 18214.097 | 798.634  | 2.201  | 4.201  | 479.301 | 251.174 | 240.623 | 10.551  |
| 2002          | 35983  | 18699.357 | 17745.749 | 953.608  | 2.650  | 5.100  | 470.038 | 244.265 | 231.809 | 12.457  |
| 2003          | 36205  | 18663.550 | 17529.960 | 1133.590 | 3.131  | 6.074  | 468.019 | 241.262 | 226.608 | 14.654  |
| 2004          | 34611  | 17679.164 | 16398.675 | 1280.489 | 3.700  | 7.243  | 442.596 | 226.076 | 209.702 | 16.375  |
| 2005          | 36826  | 18692.832 | 17119.808 | 1573.023 | 4.272  | 8.415  | 465.456 | 236.265 | 216.383 | 19.882  |
| 2006          | 34350  | 17308.564 | 15612.890 | 1695.674 | 4.936  | 9.797  | 430.192 | 216.769 | 195.533 | 21.236  |
| 2007          | 35326  | 17683.181 | 15690.840 | 1992.342 | 5.640  | 11.267 | 437.879 | 219.189 | 194.494 | 24.696  |
| 2008          | 38248  | 19006.374 | 16597.494 | 2408.880 | 6.298  | 12.674 | 468.788 | 232.952 | 203.428 | 29.525  |
| 2009          | 36902  | 18205.573 | 15572.932 | 2632.641 | 7.134  | 14.461 | 446.956 | 220.505 | 188.619 | 31.886  |
| 2010          | 37234  | 18237.758 | 15335.676 | 2902.082 | 7.794  | 15.912 | 445.505 | 218.215 | 183.491 | 34.723  |
| 2011          | 38093  | 18487.916 | 15167.094 | 3320.822 | 8.718  | 17.962 | 451.279 | 219.022 | 179.681 | 39.341  |
| 2012          | 38504  | 18491.158 | 14813.753 | 3677.406 | 9.551  | 19.887 | 451.211 | 216.689 | 173.596 | 43.094  |
| 2013          | 40290  | 19143.452 | 14988.414 | 4155.038 | 10.313 | 21.705 | 466.755 | 221.775 | 173.639 | 48.136  |
| 2014          | 40339  | 18992.005 | 14483.614 | 4508.391 | 11.176 | 23.738 | 461.866 | 217.451 | 165.832 | 51.619  |
| 2015          | 42303  | 19728.885 | 14740.908 | 4987.977 | 11.791 | 25.283 | 544.880 | 254.116 | 189.869 | 64.247  |
| 2016          | 43104  | 19876.724 | 14457.788 | 5418.936 | 12.572 | 27.263 | 550.009 | 253.628 | 184.482 | 69.146  |
| 2017          | 44107  | 20119.790 | 14229.330 | 5890.460 | 13.355 | 29.277 | 557.659 | 254.381 | 179.906 | 74.475  |
| 2018          | 45469  | 20535.123 | 14094.599 | 6440.524 | 14.165 | 31.363 | 569.564 | 257.229 | 176.553 | 80.676  |
| 2019          | 46963  | 21009.029 | 13996.619 | 7012.410 | 14.932 | 33.378 | 582.552 | 260.605 | 173.620 | 86.985  |
| 2020          | 48419  | 21428.512 | 13866.867 | 7561.645 | 15.617 | 35.288 | 685.853 | 303.533 | 196.423 | 107.110 |
| 2021          | 48463  | 21266.697 | 13240.955 | 8025.742 | 16.561 | 37.739 | 681.652 | 299.127 | 186.241 | 112.886 |
| 2022          | 49915  | 21663.568 | 13001.979 | 8661.589 | 17.353 | 39.982 | 696.712 | 302.378 | 181.480 | 120.898 |
| 2023          | 51391  | 22084.131 | 12745.275 | 9338.856 | 18.172 | 42.288 | 711.491 | 305.748 | 176.454 | 129.294 |
| 2024          | 52811  | 22418.456 | 12479.988 | 9938.468 | 18.819 | 44.332 | 725.093 | 307.804 | 171.349 | 136.455 |
| 2025          | 53848  | 22614.834 | 12148.201 | 10466.63 | 19.437 | 46.282 | 860.553 | 361.411 | 194.142 | 167.269 |
| 2026          | 54342  | 22571.522 | 11655.968 | 10915.55 | 20.087 | 48.360 | 864.886 | 359.241 | 185.513 | 173.728 |
| 2027          | 55267  | 22774.416 | 11254.881 | 11519.53 | 20.844 | 50.581 | 875.619 | 360.827 | 178.317 | 182.510 |
| 2028          | 56149  | 22915.561 | 10805.580 | 12109.98 | 21.568 | 52.846 | 885.102 | 361.228 | 170.333 | 190.895 |
| 2029          | 57014  | 22992.027 | 10353.224 | 12638.80 | 22.168 | 54.970 | 893.616 | 360.371 | 162.274 | 198.097 |
| 2030          | 57238  | 22895.360 | 9885.756  | 13009.60 | 22.729 | 56.822 | 1071.90 | 428.760 | 185.130 | 243.630 |
| 2031          | 57592  | 22715.871 | 9370.414  | 13345.46 | 23.172 | 58.749 | 1075.71 | 424.293 | 175.023 | 249.270 |
| 2032          | 58251  | 22759.207 | 8895.938  | 13863.27 | 23.799 | 60.913 | 1084.31 | 423.652 | 165.594 | 258.058 |
| 2033          | 58885  | 22786.258 | 8472.495  | 14313.76 | 24.308 | 62.818 | 1091.54 | 422.387 | 157.054 | 265.333 |
| 2034          | 59460  | 22806.106 | 8037.885  | 14768.22 | 24.837 | 64.756 | 1096.89 | 420.721 | 148.281 | 272.440 |
| 2035          | 58516  | 22262.998 | 7542.884  | 14720.11 | 25.156 | 66.119 | 1335.15 | 507.973 | 172.105 | 335.868 |
| 2036          | 56446  | 21140.051 | 6681.496  | 14458.56 | 25.615 | 68.394 | 1287.60 | 482.234 | 152.414 | 329.819 |
| 2037          | 56568  | 21011.845 | 6255.454  | 14756.39 | 26.086 | 70.229 | 1288.98 | 478.783 | 142.539 | 336.244 |
| 2038          | 56668  | 20787.483 | 5796.715  | 14990.77 | 26.454 | 72.114 | 1288.55 | 472.681 | 131.810 | 340.871 |
| 2039          | 56758  | 20709.267 | 5408.792  | 15300.47 | 26.958 | 73.882 | 1286.40 | 469.372 | 122.589 | 346.783 |

## Results for PHIM for Run 7 (Sensitivity\_Analysis\_2.RTF)

\*\*\*\*\*

### Main Results for E-Component for Run: 7, Simulation: 1, COD: Four Diseases Combined, Adjusted

| Variable Parameter          | Value                                  |
|-----------------------------|----------------------------------------|
| 1. Country                  | US (United States)                     |
| 2. Sex                      | M (Males)                              |
| 3. Year of start of process | 1990                                   |
| 4. Cause of Death           | Four Diseases Combined                 |
| 5. Effective Dose NULL      | CC:1                                   |
| 6. Effective Dose Ecig      | CC:1 Ecig:0.05 Dual:0.525              |
| Note:                       | Death rates are per million population |

#### Results for Age Groups Combined and Years combined, Population and Number deaths adjusted for Ecig scenario,

| Age Group:All | NULL     | Ecig        | %Drop       |         |        |        | NULL    | Ecig    | Drop    |         |
|---------------|----------|-------------|-------------|---------|--------|--------|---------|---------|---------|---------|
| Year          | Number   | Attrib      | Attrib      | Drop    | %Drop  | Attrib | Death   | Attrib  | Attrib  | Drop    |
|               | Deaths   | Deaths      | Deaths      | Deaths  | Deaths | Deaths | Rate    | Rates   | Rates   | Rates   |
| All Comb      | 13266995 | 4509390.583 | 3143905.691 | 1365485 | 10.292 | 30.281 | 3813.12 | 1305.37 | 903.603 | 401.768 |

#### Results for Age Groups Combined, Population and Number deaths adjusted for Ecig scenario,

| Age Group:All | NULL   | Ecig       | %Drop      |          |        |        | NULL    | Ecig    | Drop    |         |
|---------------|--------|------------|------------|----------|--------|--------|---------|---------|---------|---------|
| Year          | Number | Attrib     | Attrib     | Drop     | %Drop  | Attrib | Death   | Attrib  | Attrib  | Drop    |
|               | Deaths | Deaths     | Deaths     | Deaths   | Deaths | Deaths | Rate    | Rates   | Rates   | Rates   |
| 1990          | 317161 | 125773.065 | 125773.065 | 0.000    | 0.000  | 0.000  | 5027.71 | 1993.78 | 1993.78 | 0.000   |
| 1991          | 313217 | 123999.442 | 123703.256 | 296.186  | 0.095  | 0.239  | 4883.81 | 1933.45 | 1928.83 | 4.618   |
| 1992          | 308579 | 122014.015 | 121207.646 | 806.370  | 0.261  | 0.661  | 4729.73 | 1870.18 | 1857.81 | 12.368  |
| 1993          | 311719 | 122810.618 | 121283.667 | 1526.951 | 0.490  | 1.243  | 4692.62 | 1848.83 | 1825.81 | 23.019  |
| 1994          | 305714 | 119925.592 | 117548.148 | 2377.444 | 0.778  | 1.982  | 4516.21 | 1771.69 | 1736.50 | 35.193  |
| 1995          | 303250 | 117896.496 | 114501.611 | 3394.886 | 1.119  | 2.880  | 4393.83 | 1708.35 | 1659.03 | 49.320  |
| 1996          | 299601 | 115698.645 | 111168.476 | 4530.169 | 1.512  | 3.915  | 4273.21 | 1650.42 | 1585.60 | 64.824  |
| 1997          | 294290 | 113359.847 | 107667.650 | 5692.197 | 1.934  | 5.021  | 4128.76 | 1590.70 | 1510.53 | 80.169  |
| 1998          | 289349 | 111444.212 | 104570.494 | 6873.718 | 2.376  | 6.168  | 3992.34 | 1538.10 | 1442.83 | 95.269  |
| 1999          | 311139 | 114877.722 | 105541.989 | 9335.732 | 3.001  | 8.127  | 4224.86 | 1560.48 | 1433.12 | 127.357 |
| 2000          | 303970 | 112379.704 | 101586.755 | 10792.95 | 3.551  | 9.604  | 4066.60 | 1504.22 | 1359.06 | 145.161 |
| 2001          | 296531 | 110024.943 | 97658.126  | 12366.82 | 4.171  | 11.240 | 3914.81 | 1453.52 | 1289.28 | 164.234 |
| 2002          | 292199 | 108289.173 | 94135.796  | 14153.38 | 4.844  | 13.070 | 3813.72 | 1414.56 | 1228.64 | 185.915 |
| 2003          | 286235 | 106539.023 | 90766.569  | 15772.45 | 5.510  | 14.804 | 3696.30 | 1377.22 | 1172.11 | 205.108 |
| 2004          | 274614 | 103037.251 | 86021.606  | 17015.64 | 6.196  | 16.514 | 3507.27 | 1317.61 | 1098.64 | 218.977 |
| 2005          | 272903 | 103044.562 | 84327.190  | 18717.37 | 6.859  | 18.164 | 3444.15 | 1302.41 | 1064.24 | 238.170 |
| 2006          | 264723 | 99672.555  | 79379.470  | 20293.08 | 7.666  | 20.360 | 3309.52 | 1248.28 | 992.388 | 255.891 |
| 2007          | 259116 | 97839.152  | 76219.387  | 21619.76 | 8.344  | 22.097 | 3205.30 | 1212.75 | 942.845 | 269.907 |
| 2008          | 260273 | 98075.852  | 74826.457  | 23249.39 | 8.933  | 23.706 | 3182.61 | 1202.07 | 914.976 | 287.094 |
| 2009          | 254822 | 95617.338  | 71141.078  | 24476.26 | 9.605  | 25.598 | 3078.24 | 1158.11 | 859.379 | 298.734 |
| 2010          | 252911 | 94607.988  | 68849.134  | 25758.85 | 10.185 | 27.227 | 3017.09 | 1131.98 | 821.332 | 310.652 |
| 2011          | 252944 | 93633.119  | 66253.741  | 27379.38 | 10.824 | 29.241 | 2986.66 | 1109.25 | 782.298 | 326.951 |
| 2012          | 253954 | 92775.175  | 63816.382  | 28958.79 | 11.403 | 31.214 | 2965.09 | 1087.19 | 745.102 | 342.088 |
| 2013          | 257658 | 92345.780  | 61755.204  | 30590.58 | 11.873 | 33.126 | 2972.94 | 1069.82 | 712.552 | 357.264 |
| 2014          | 259047 | 91379.215  | 59406.193  | 31973.02 | 12.343 | 34.989 | 2952.94 | 1046.26 | 677.187 | 369.070 |
| 2015          | 261630 | 90750.242  | 57589.818  | 33160.42 | 12.675 | 36.540 | 3351.75 | 1168.90 | 737.785 | 431.117 |
| 2016          | 263493 | 88811.996  | 54286.404  | 34525.59 | 13.103 | 38.875 | 3342.54 | 1133.24 | 688.649 | 444.595 |
| 2017          | 265934 | 87325.126  | 51630.060  | 35695.07 | 13.423 | 40.876 | 3341.07 | 1104.08 | 648.656 | 455.423 |
| 2018          | 261105 | 87612.144  | 50857.391  | 36754.75 | 14.077 | 41.952 | 3248.48 | 1097.46 | 632.731 | 464.725 |
| 2019          | 264057 | 87797.760  | 49548.654  | 38249.11 | 14.485 | 43.565 | 3251.67 | 1089.08 | 610.155 | 478.927 |
| 2020          | 265148 | 87221.042  | 48109.671  | 39111.37 | 14.751 | 44.842 | 3722.91 | 1235.48 | 675.500 | 559.979 |
| 2021          | 258067 | 82001.292  | 42998.174  | 39003.12 | 15.114 | 47.564 | 3595.96 | 1153.39 | 599.146 | 554.243 |
| 2022          | 260322 | 81915.977  | 41504.668  | 40411.31 | 15.524 | 49.333 | 3597.59 | 1143.37 | 573.584 | 569.791 |
| 2023          | 262555 | 81810.810  | 39969.649  | 41841.16 | 15.936 | 51.144 | 3596.92 | 1132.64 | 547.572 | 585.073 |
| 2024          | 264453 | 81528.303  | 38489.267  | 43039.04 | 16.275 | 52.790 | 3590.77 | 1119.38 | 522.611 | 596.767 |
| 2025          | 261290 | 79599.213  | 36739.822  | 42859.39 | 16.403 | 53.844 | 4121.09 | 1272.09 | 579.464 | 692.623 |
| 2026          | 255647 | 75082.462  | 32796.320  | 42286.14 | 16.541 | 56.320 | 4012.76 | 1194.99 | 514.788 | 680.201 |
| 2027          | 255343 | 74444.425  | 31213.569  | 43230.86 | 16.931 | 58.071 | 3987.09 | 1179.46 | 487.390 | 692.071 |
| 2028          | 254879 | 73699.585  | 29565.814  | 44133.77 | 17.316 | 59.883 | 3957.01 | 1161.76 | 459.012 | 702.748 |
| 2029          | 254363 | 72819.703  | 27976.700  | 44843.00 | 17.630 | 61.581 | 3923.81 | 1141.36 | 431.570 | 709.787 |
| 2030          | 245551 | 69309.277  | 26156.910  | 43152.37 | 17.574 | 62.261 | 4514.32 | 1297.95 | 480.882 | 817.068 |
| 2031          | 240577 | 65433.368  | 23178.832  | 42254.54 | 17.564 | 64.576 | 4407.82 | 1222.18 | 424.679 | 797.502 |
| 2032          | 239373 | 64643.552  | 21776.997  | 42866.56 | 17.908 | 66.312 | 4367.36 | 1203.31 | 397.322 | 805.987 |
| 2033          | 238136 | 63793.514  | 20503.399  | 43290.12 | 18.179 | 67.860 | 4323.30 | 1182.54 | 372.233 | 810.303 |
| 2034          | 236760 | 63032.151  | 19275.219  | 43756.93 | 18.482 | 69.420 | 4274.28 | 1162.80 | 347.980 | 814.820 |
| 2035          | 221640 | 57653.301  | 17589.271  | 40064.03 | 18.076 | 69.491 | 4935.37 | 1315.47 | 391.668 | 923.802 |
| 2036          | 213967 | 52988.733  | 14759.809  | 38228.92 | 17.867 | 72.145 | 4759.11 | 1208.75 | 328.291 | 880.455 |
| 2037          | 211421 | 52026.921  | 13765.458  | 38261.46 | 18.097 | 73.542 | 4693.39 | 1185.50 | 305.583 | 879.920 |
| 2038          | 208905 | 50943.211  | 12704.851  | 38238.36 | 18.304 | 75.061 | 4624.03 | 1158.38 | 281.217 | 877.166 |
| 2039          | 206461 | 50085.991  | 11809.873  | 38276.12 | 18.539 | 76.421 | 4551.37 | 1135.19 | 260.345 | 874.846 |

## Results for PHIM for Run 7 (Sensitivity\_Analysis\_2.RTF)

\*\*\*\*\*

### Main Results for E-Component for Run: 7, Simulation: 1, COD: LUNG CANCER, Adjusted

| Variable Parameter          | Value                                  |
|-----------------------------|----------------------------------------|
| 1. Country                  | US (United States)                     |
| 2. Sex                      | M (Males)                              |
| 3. Year of start of process | 1990                                   |
| 4. Cause of Death           | LUNG CANCER                            |
| 5. Effective Dose NULL      | CC:1                                   |
| 6. Effective Dose Ecig      | CC:1 Ecig:0.05 Dual:0.525              |
| Note:                       | Death rates are per million population |

#### Results for Age Groups Combined and Years combined, Population and Number deaths adjusted for Ecig scenario,

| Age Group:All | NULL    | Ecig        | %Drop       |          |        |        | NULL    | Ecig    | Drop    |         |
|---------------|---------|-------------|-------------|----------|--------|--------|---------|---------|---------|---------|
| Year          | Number  | Attrib      | Attrib      | Drop     | %Drop  | Attrib | Death   | Attrib  | Attrib  | Drop    |
|               | Deaths  | Deaths      | Deaths      | Deaths   | Deaths | Deaths | Rate    | Rates   | Rates   | Rates   |
| All Comb      | 3090455 | 2244988.113 | 1791382.763 | 453605.3 | 14.678 | 20.205 | 888.241 | 649.875 | 514.869 | 135.007 |

#### Results for Age Groups Combined, Population and Number deaths adjusted for Ecig scenario,

| Age Group:All | NULL   | Ecig      | %Drop     |          |        |        | NULL    | Ecig    | Drop    |         |
|---------------|--------|-----------|-----------|----------|--------|--------|---------|---------|---------|---------|
| Year          | Number | Attrib    | Attrib    | Drop     | %Drop  | Attrib | Death   | Attrib  | Attrib  | Drop    |
|               | Deaths | Deaths    | Deaths    | Deaths   | Deaths | Deaths | Rate    | Rates   | Rates   | Rates   |
| 1990          | 78822  | 63385.736 | 63385.736 | 0.000    | 0.000  | 0.000  | 1249.50 | 1004.81 | 1004.81 | 0.000   |
| 1991          | 78462  | 62918.402 | 62887.781 | 30.621   | 0.039  | 0.049  | 1223.41 | 981.049 | 980.572 | 0.477   |
| 1992          | 77987  | 62366.766 | 62283.515 | 83.251   | 0.107  | 0.133  | 1195.35 | 955.930 | 954.649 | 1.281   |
| 1993          | 78544  | 62652.888 | 62487.334 | 165.554  | 0.211  | 0.264  | 1182.40 | 943.195 | 940.686 | 2.509   |
| 1994          | 77441  | 61565.227 | 61300.692 | 264.535  | 0.342  | 0.430  | 1144.01 | 909.520 | 905.576 | 3.945   |
| 1995          | 76911  | 60851.961 | 60460.480 | 391.481  | 0.509  | 0.643  | 1114.37 | 881.759 | 876.019 | 5.740   |
| 1996          | 76243  | 60122.922 | 59567.486 | 555.436  | 0.729  | 0.924  | 1087.46 | 857.643 | 849.611 | 8.031   |
| 1997          | 75490  | 59237.155 | 58502.874 | 734.281  | 0.973  | 1.240  | 1059.10 | 831.234 | 820.771 | 10.463  |
| 1998          | 75406  | 58906.696 | 57947.746 | 958.950  | 1.272  | 1.628  | 1040.43 | 813.001 | 799.543 | 13.457  |
| 1999          | 73193  | 56930.073 | 55743.418 | 1186.655 | 1.621  | 2.084  | 993.871 | 773.329 | 756.924 | 16.405  |
| 2000          | 73831  | 57137.121 | 55648.418 | 1488.703 | 2.016  | 2.605  | 987.738 | 764.787 | 744.480 | 20.308  |
| 2001          | 73356  | 56481.726 | 54648.321 | 1833.406 | 2.499  | 3.246  | 968.448 | 746.169 | 721.468 | 24.701  |
| 2002          | 72521  | 55588.365 | 53388.059 | 2200.306 | 3.034  | 3.958  | 946.527 | 726.138 | 696.810 | 29.328  |
| 2003          | 72040  | 54945.856 | 52337.320 | 2608.537 | 3.621  | 4.747  | 930.285 | 710.281 | 675.858 | 34.423  |
| 2004          | 71420  | 54203.126 | 51136.211 | 3066.914 | 4.294  | 5.658  | 912.149 | 693.135 | 653.093 | 40.042  |
| 2005          | 71106  | 53744.603 | 50205.811 | 3538.792 | 4.977  | 6.584  | 897.392 | 679.296 | 633.618 | 45.678  |
| 2006          | 69824  | 52535.572 | 48487.653 | 4047.919 | 5.797  | 7.705  | 872.926 | 657.945 | 606.184 | 51.761  |
| 2007          | 68756  | 51492.124 | 46936.384 | 4555.740 | 6.626  | 8.847  | 850.527 | 638.264 | 580.610 | 57.654  |
| 2008          | 68447  | 51030.736 | 45850.676 | 5180.059 | 7.568  | 10.151 | 836.966 | 625.460 | 560.661 | 64.799  |
| 2009          | 67760  | 50276.199 | 44459.153 | 5817.045 | 8.585  | 11.570 | 818.538 | 608.943 | 537.064 | 71.880  |
| 2010          | 67480  | 49840.933 | 43411.196 | 6429.737 | 9.528  | 12.901 | 805.005 | 596.347 | 517.872 | 78.475  |
| 2011          | 66824  | 49207.841 | 41928.428 | 7144.413 | 10.691 | 14.559 | 789.026 | 581.354 | 495.074 | 86.280  |
| 2012          | 66508  | 48539.512 | 40628.733 | 7910.779 | 11.894 | 16.298 | 776.530 | 568.812 | 474.369 | 94.443  |
| 2013          | 65722  | 47675.741 | 39071.060 | 8604.681 | 13.093 | 18.048 | 758.320 | 552.318 | 450.815 | 101.503 |
| 2014          | 65463  | 47194.534 | 37869.705 | 9324.829 | 14.245 | 19.758 | 746.225 | 540.359 | 431.687 | 108.672 |
| 2015          | 64613  | 46305.842 | 36360.588 | 9945.254 | 15.392 | 21.477 | 827.756 | 596.439 | 465.816 | 130.622 |
| 2016          | 62111  | 44208.867 | 33857.969 | 10350.90 | 16.665 | 23.414 | 787.906 | 564.107 | 429.505 | 134.602 |
| 2017          | 60420  | 42702.624 | 31899.250 | 10803.37 | 17.880 | 25.299 | 759.087 | 539.903 | 400.767 | 139.136 |
| 2018          | 63060  | 44321.202 | 32064.379 | 12256.82 | 19.437 | 27.655 | 784.548 | 555.181 | 398.922 | 156.259 |
| 2019          | 63693  | 44493.088 | 31251.087 | 13242.00 | 20.791 | 29.762 | 784.326 | 551.912 | 384.834 | 167.078 |
| 2020          | 64172  | 44529.551 | 30368.699 | 14160.85 | 22.067 | 31.801 | 901.032 | 630.757 | 426.402 | 204.355 |
| 2021          | 57798  | 39852.556 | 26246.860 | 13605.70 | 23.540 | 34.140 | 805.372 | 560.546 | 365.729 | 194.817 |
| 2022          | 58178  | 39853.685 | 25293.015 | 14560.67 | 25.028 | 36.535 | 804.007 | 556.274 | 349.543 | 206.731 |
| 2023          | 58531  | 39847.050 | 24306.918 | 15540.13 | 26.550 | 38.999 | 801.856 | 551.670 | 332.997 | 218.673 |
| 2024          | 58791  | 39726.010 | 23324.895 | 16401.12 | 27.897 | 41.286 | 798.273 | 545.435 | 316.708 | 228.728 |
| 2025          | 58426  | 39207.348 | 22210.669 | 16996.68 | 29.091 | 43.351 | 921.495 | 626.579 | 350.309 | 276.270 |
| 2026          | 52287  | 34803.960 | 18931.773 | 15872.19 | 30.356 | 45.605 | 820.722 | 553.929 | 297.163 | 256.766 |
| 2027          | 52077  | 34484.595 | 17918.702 | 16565.89 | 31.810 | 48.039 | 813.170 | 546.357 | 279.795 | 266.562 |
| 2028          | 51822  | 34100.638 | 16872.102 | 17228.54 | 33.246 | 50.523 | 804.543 | 537.544 | 261.941 | 275.603 |
| 2029          | 51539  | 33669.838 | 15872.276 | 17797.56 | 34.532 | 52.859 | 795.043 | 527.732 | 244.847 | 282.886 |
| 2030          | 50147  | 32557.688 | 14768.509 | 17789.18 | 35.474 | 54.639 | 921.928 | 609.705 | 271.512 | 338.194 |
| 2031          | 44548  | 28646.393 | 12354.767 | 16291.63 | 36.571 | 56.871 | 816.205 | 535.065 | 226.362 | 308.702 |
| 2032          | 44163  | 28227.160 | 11522.663 | 16704.50 | 37.824 | 59.179 | 805.761 | 525.435 | 210.231 | 315.204 |
| 2033          | 43763  | 27786.623 | 10762.466 | 17024.16 | 38.901 | 61.267 | 794.510 | 515.079 | 195.389 | 319.689 |
| 2034          | 43330  | 27348.299 | 10036.980 | 17311.32 | 39.952 | 63.299 | 782.247 | 504.514 | 181.200 | 323.314 |
| 2035          | 40829  | 25570.077 | 9093.916  | 16476.16 | 40.354 | 64.435 | 909.149 | 583.430 | 202.498 | 380.932 |
| 2036          | 34978  | 21717.319 | 7156.965  | 14560.35 | 41.627 | 67.045 | 777.984 | 495.402 | 159.187 | 336.215 |
| 2037          | 34421  | 21256.024 | 6630.985  | 14625.04 | 42.488 | 68.804 | 764.131 | 484.347 | 147.203 | 337.144 |
| 2038          | 33870  | 20747.175 | 6080.384  | 14666.79 | 43.304 | 70.693 | 749.693 | 471.764 | 134.587 | 337.177 |
| 2039          | 33330  | 20327.688 | 5621.758  | 14705.93 | 44.122 | 72.344 | 734.746 | 460.724 | 123.930 | 336.794 |

## Results for PHIM for Run 7 (Sensitivity\_Analysis\_2.RTF)

\*\*\*\*\*

### Main Results for E-Component for Run: 7, Simulation: 1, COD: IHD, Adjusted

| Variable Parameter          | Value                                  |
|-----------------------------|----------------------------------------|
| 1. Country                  | US (United States)                     |
| 2. Sex                      | M (Males)                              |
| 3. Year of start of process | 1990                                   |
| 4. Cause of Death           | IHD                                    |
| 5. Effective Dose NULL      | CC:1                                   |
| 6. Effective Dose Ecig      | CC:1 Ecig:0.05 Dual:0.525              |
| Note:                       | Death rates are per million population |

#### Results for Age Groups Combined and Years combined, Population and Number deaths adjusted for Ecig scenario,

| Age Group: | NULL    | Ecig        | %Drop      |          |        |        | NULL    | Ecig    | Drop    |         |
|------------|---------|-------------|------------|----------|--------|--------|---------|---------|---------|---------|
| Year       | Number  | Attrib      | Attrib     | Drop     | %Drop  | Attrib | Death   | Attrib  | Attrib  | Drop    |
|            | Deaths  | Deaths      | Deaths     | Deaths   | Deaths | Deaths | Rate    | Rates   | Rates   | Rates   |
| All Comb   | 6412364 | 1098877.421 | 565532.768 | 533344.7 | 8.317  | 48.535 | 1843.00 | 318.101 | 162.542 | 155.559 |

#### Results for Age Groups Combined, Population and Number deaths adjusted for Ecig scenario,

| Age Group: | NULL   | Ecig      | %Drop     |          |        |        | NULL    | Ecig    | Drop    |         |
|------------|--------|-----------|-----------|----------|--------|--------|---------|---------|---------|---------|
| Year       | Number | Attrib    | Attrib    | Drop     | %Drop  | Attrib | Death   | Attrib  | Attrib  | Drop    |
|            | Deaths | Deaths    | Deaths    | Deaths   | Deaths | Deaths | Rate    | Rates   | Rates   | Rates   |
| 1990       | 171484 | 38511.725 | 38511.725 | 0.000    | 0.000  | 0.000  | 2718.40 | 610.497 | 610.497 | 0.000   |
| 1991       | 168044 | 37309.838 | 37084.129 | 225.708  | 0.134  | 0.605  | 2620.21 | 581.750 | 578.231 | 3.519   |
| 1992       | 164549 | 36137.488 | 35520.921 | 616.567  | 0.375  | 1.706  | 2522.12 | 553.899 | 544.446 | 9.453   |
| 1993       | 164365 | 35599.588 | 34448.135 | 1151.452 | 0.701  | 3.234  | 2474.36 | 535.926 | 518.583 | 17.343  |
| 1994       | 159873 | 34336.757 | 32558.478 | 1778.279 | 1.112  | 5.179  | 2361.75 | 507.267 | 480.976 | 26.291  |
| 1995       | 158096 | 33455.759 | 30939.551 | 2516.208 | 1.592  | 7.521  | 2290.67 | 484.782 | 448.287 | 36.495  |
| 1996       | 154897 | 32193.824 | 28883.523 | 3310.302 | 2.137  | 10.282 | 2209.29 | 459.239 | 411.966 | 47.273  |
| 1997       | 150002 | 30665.509 | 26572.804 | 4092.706 | 2.728  | 13.346 | 2104.47 | 430.308 | 372.805 | 57.503  |
| 1998       | 145453 | 29188.430 | 24347.541 | 4840.890 | 3.328  | 16.585 | 2006.91 | 402.844 | 335.939 | 66.905  |
| 1999       | 166025 | 33375.386 | 26549.489 | 6825.897 | 4.111  | 20.452 | 2254.41 | 453.366 | 360.508 | 92.858  |
| 2000       | 160357 | 32024.754 | 24286.968 | 7737.786 | 4.825  | 24.162 | 2145.31 | 428.655 | 324.918 | 103.738 |
| 2001       | 154568 | 30682.393 | 21976.930 | 8705.463 | 5.632  | 28.373 | 2040.61 | 405.339 | 290.140 | 115.199 |
| 2002       | 152044 | 30218.370 | 20370.713 | 9847.657 | 6.477  | 32.588 | 1984.45 | 394.736 | 265.874 | 128.861 |
| 2003       | 146923 | 29175.202 | 18437.063 | 10738.14 | 7.309  | 36.806 | 1897.30 | 377.146 | 238.087 | 139.059 |
| 2004       | 138602 | 27488.687 | 16223.409 | 11265.28 | 8.128  | 40.982 | 1770.17 | 351.518 | 207.199 | 144.319 |
| 2005       | 136143 | 27017.439 | 14915.785 | 12101.65 | 8.889  | 44.792 | 1718.18 | 341.482 | 188.243 | 153.239 |
| 2006       | 132224 | 26231.435 | 13335.144 | 12896.29 | 9.753  | 49.163 | 1653.04 | 328.517 | 166.714 | 161.804 |
| 2007       | 126843 | 25103.049 | 11793.724 | 13309.33 | 10.493 | 53.019 | 1569.06 | 311.161 | 145.890 | 165.271 |
| 2008       | 126252 | 24621.740 | 10760.885 | 13860.86 | 10.979 | 56.295 | 1543.81 | 301.777 | 131.584 | 170.193 |
| 2009       | 122868 | 23741.177 | 9610.525  | 14130.65 | 11.501 | 59.520 | 1484.24 | 287.552 | 116.094 | 171.458 |
| 2010       | 121029 | 23189.160 | 8715.711  | 14473.45 | 11.959 | 62.415 | 1443.80 | 277.458 | 103.974 | 173.485 |
| 2011       | 120773 | 22786.927 | 7877.812  | 14909.11 | 12.345 | 65.428 | 1426.04 | 269.951 | 93.018  | 176.933 |
| 2012       | 121550 | 22485.295 | 7190.627  | 15294.67 | 12.583 | 68.021 | 1419.19 | 263.495 | 83.956  | 179.539 |
| 2013       | 123352 | 22251.884 | 6581.473  | 15670.41 | 12.704 | 70.423 | 1423.28 | 257.786 | 75.939  | 181.846 |
| 2014       | 124013 | 21894.593 | 6004.767  | 15889.83 | 12.813 | 72.574 | 1413.66 | 250.685 | 68.450  | 182.235 |
| 2015       | 124646 | 21471.109 | 5506.085  | 15965.02 | 12.808 | 74.356 | 1596.84 | 276.557 | 70.539  | 206.018 |
| 2016       | 127193 | 21411.568 | 5036.026  | 16375.54 | 12.875 | 76.480 | 1613.51 | 273.213 | 63.884  | 209.328 |
| 2017       | 129348 | 21169.399 | 4618.425  | 16550.97 | 12.796 | 78.183 | 1625.07 | 267.651 | 58.024  | 209.628 |
| 2018       | 122532 | 19830.576 | 3945.762  | 15884.81 | 12.964 | 80.103 | 1524.45 | 248.404 | 49.090  | 199.313 |
| 2019       | 123030 | 19431.014 | 3594.802  | 15836.21 | 12.872 | 81.500 | 1515.02 | 241.031 | 44.267  | 196.763 |
| 2020       | 122107 | 18532.612 | 3219.629  | 15312.98 | 12.541 | 82.627 | 1714.49 | 262.513 | 45.206  | 217.307 |
| 2021       | 120775 | 18234.128 | 2898.390  | 15335.74 | 12.698 | 84.105 | 1682.91 | 256.472 | 40.387  | 216.085 |
| 2022       | 120903 | 17812.559 | 2631.471  | 15181.09 | 12.556 | 85.227 | 1670.84 | 248.626 | 36.366  | 212.260 |
| 2023       | 121010 | 17361.668 | 2371.796  | 14989.87 | 12.387 | 86.339 | 1657.80 | 240.367 | 32.493  | 207.874 |
| 2024       | 120972 | 16929.676 | 2163.351  | 14766.32 | 12.206 | 87.222 | 1642.57 | 232.443 | 29.374  | 203.069 |
| 2025       | 117443 | 15501.666 | 1894.603  | 13607.06 | 11.586 | 87.778 | 1852.33 | 247.735 | 29.882  | 217.853 |
| 2026       | 116910 | 15523.814 | 1747.580  | 13776.23 | 11.784 | 88.743 | 1835.09 | 247.072 | 27.431  | 219.641 |
| 2027       | 115914 | 15073.070 | 1598.124  | 13474.95 | 11.625 | 89.397 | 1809.96 | 238.810 | 24.954  | 213.856 |
| 2028       | 114868 | 14636.710 | 1462.343  | 13174.37 | 11.469 | 90.009 | 1783.34 | 230.725 | 22.703  | 208.022 |
| 2029       | 113820 | 14180.166 | 1341.641  | 12838.53 | 11.280 | 90.539 | 1755.80 | 222.256 | 20.696  | 201.560 |
| 2030       | 106998 | 12111.772 | 1121.413  | 10990.36 | 10.272 | 90.741 | 1967.11 | 226.816 | 20.617  | 206.200 |
| 2031       | 107529 | 12417.367 | 1088.178  | 11329.19 | 10.536 | 91.237 | 1970.13 | 231.935 | 19.937  | 211.997 |
| 2032       | 106194 | 12054.064 | 1005.819  | 11048.25 | 10.404 | 91.656 | 1937.52 | 224.381 | 18.351  | 206.029 |
| 2033       | 104875 | 11672.389 | 927.132   | 10745.26 | 10.246 | 92.057 | 1903.97 | 216.370 | 16.832  | 199.539 |
| 2034       | 103531 | 11365.762 | 868.208   | 10497.55 | 10.140 | 92.361 | 1869.07 | 209.673 | 15.674  | 193.999 |
| 2035       | 93224  | 8580.360  | 646.839   | 7933.521 | 8.510  | 92.461 | 2075.87 | 195.777 | 14.403  | 181.374 |
| 2036       | 94619  | 8948.841  | 640.510   | 8308.331 | 8.781  | 92.843 | 2104.53 | 204.135 | 14.246  | 189.889 |
| 2037       | 92871  | 8624.570  | 607.526   | 8017.044 | 8.632  | 92.956 | 2061.67 | 196.522 | 13.487  | 183.036 |
| 2038       | 91175  | 8315.017  | 568.272   | 7746.745 | 8.497  | 93.166 | 2018.12 | 189.073 | 12.578  | 176.494 |
| 2039       | 89545  | 8001.132  | 531.012   | 7470.119 | 8.342  | 93.363 | 1973.99 | 181.344 | 11.706  | 169.638 |



## Results for PHIM for Run 7 (Sensitivity\_Analysis\_2.RTF)

\*\*\*\*\*

### Main Results for E-Component for Run: 7, Simulation: 1, COD: STROKE, Adjusted

| Variable Parameter          | Value                                  |
|-----------------------------|----------------------------------------|
| 1. Country                  | US (United States)                     |
| 2. Sex                      | M (Males)                              |
| 3. Year of start of process | 1990                                   |
| 4. Cause of Death           | STROKE                                 |
| 5. Effective Dose NULL      | CC:1                                   |
| 6. Effective Dose Ecig      | CC:1 Ecig:0.05 Dual:0.525              |
| Note:                       | Death rates are per million population |

### Results for Age Groups Combined and Years combined, Population and Number deaths adjusted for Ecig scenario,

| Age Group:All | NULL    | Ecig       | %Drop     | NULL     | Ecig   | Drop   |
|---------------|---------|------------|-----------|----------|--------|--------|
| Year          | Number  | Attrib     | Attrib    | Death    | Attrib | Drop   |
|               | Deaths  | Deaths     | Deaths    | Rate     | Rates  | Rates  |
| All Comb      | 1503834 | 149918.462 | 76169.542 | 73748.92 | 4.904  | 49.193 |

### Results for Age Groups Combined, Population and Number deaths adjusted for Ecig scenario,

| Age Group:All | NULL   | Ecig     | %Drop    | NULL     | Ecig   | Drop   |
|---------------|--------|----------|----------|----------|--------|--------|
| Year          | Number | Attrib   | Attrib   | Death    | Attrib | Drop   |
|               | Deaths | Deaths   | Deaths   | Rate     | Rates  | Rates  |
| 1990          | 32862  | 4613.166 | 4613.166 | 0.000    | 0.000  | 0.000  |
| 1991          | 32619  | 4555.566 | 4528.361 | 27.205   | 0.083  | 0.597  |
| 1992          | 32100  | 4453.572 | 4380.670 | 72.902   | 0.227  | 1.637  |
| 1993          | 32897  | 4462.473 | 4321.816 | 140.657  | 0.428  | 3.152  |
| 1994          | 33324  | 4499.513 | 4273.259 | 226.255  | 0.679  | 5.028  |
| 1995          | 33572  | 4472.774 | 4145.811 | 326.963  | 0.974  | 7.310  |
| 1996          | 33874  | 4406.878 | 3965.697 | 441.181  | 1.302  | 10.011 |
| 1997          | 33523  | 4288.158 | 3729.161 | 558.997  | 1.668  | 13.036 |
| 1998          | 32805  | 4120.148 | 3449.915 | 670.233  | 2.043  | 16.267 |
| 1999          | 33388  | 3982.443 | 3199.517 | 782.926  | 2.345  | 19.659 |
| 2000          | 33478  | 4021.411 | 3086.713 | 934.699  | 2.792  | 23.243 |
| 2001          | 32299  | 3848.092 | 2805.100 | 1042.993 | 3.229  | 27.104 |
| 2002          | 31616  | 3783.081 | 2614.065 | 1169.016 | 3.697  | 30.901 |
| 2003          | 31022  | 3754.415 | 2440.554 | 1313.862 | 4.235  | 34.995 |
| 2004          | 29929  | 3666.274 | 2238.268 | 1428.006 | 4.771  | 38.950 |
| 2005          | 28761  | 3589.688 | 2054.023 | 1535.665 | 5.339  | 42.780 |
| 2006          | 28250  | 3596.985 | 1909.189 | 1687.796 | 5.975  | 46.923 |
| 2007          | 28098  | 3560.798 | 1757.324 | 1803.474 | 6.418  | 50.648 |
| 2008          | 27209  | 3417.001 | 1566.739 | 1850.262 | 6.800  | 54.149 |
| 2009          | 27162  | 3394.390 | 1443.255 | 1951.135 | 7.183  | 57.481 |
| 2010          | 27017  | 3340.137 | 1324.381 | 2015.757 | 7.461  | 60.350 |
| 2011          | 27079  | 3285.435 | 1210.606 | 2074.829 | 7.662  | 63.152 |
| 2012          | 27193  | 3259.209 | 1106.447 | 2152.763 | 7.917  | 66.052 |
| 2013          | 28061  | 3274.703 | 1027.017 | 2247.686 | 8.010  | 68.638 |
| 2014          | 28971  | 3298.083 | 953.999  | 2344.084 | 8.091  | 71.074 |
| 2015          | 29765  | 3244.406 | 876.043  | 2368.363 | 7.957  | 72.998 |
| 2016          | 30745  | 3314.836 | 819.995  | 2494.841 | 8.115  | 75.263 |
| 2017          | 31677  | 3333.314 | 759.354  | 2573.959 | 8.126  | 77.219 |
| 2018          | 29616  | 2925.242 | 619.335  | 2305.906 | 7.786  | 78.828 |
| 2019          | 29891  | 2864.628 | 562.189  | 2302.439 | 7.703  | 80.375 |
| 2020          | 29912  | 2730.366 | 499.739  | 2230.627 | 7.457  | 81.697 |
| 2021          | 30449  | 2647.911 | 451.860  | 2196.051 | 7.212  | 82.935 |
| 2022          | 30683  | 2586.165 | 409.273  | 2176.891 | 7.095  | 84.174 |
| 2023          | 30914  | 2517.960 | 368.223  | 2149.737 | 6.954  | 85.376 |
| 2024          | 31100  | 2454.161 | 335.067  | 2119.093 | 6.814  | 86.347 |
| 2025          | 30722  | 2275.364 | 292.601  | 1982.763 | 6.454  | 87.140 |
| 2026          | 31191  | 2183.166 | 262.177  | 1920.989 | 6.159  | 87.991 |
| 2027          | 31095  | 2112.345 | 237.946  | 1874.399 | 6.028  | 88.735 |
| 2028          | 30975  | 2046.677 | 217.835  | 1828.842 | 5.904  | 89.357 |
| 2029          | 30846  | 1977.671 | 198.419  | 1779.252 | 5.768  | 89.967 |
| 2030          | 29946  | 1744.457 | 167.171  | 1577.286 | 5.267  | 90.417 |
| 2031          | 29616  | 1653.738 | 151.836  | 1501.901 | 5.071  | 90.819 |
| 2032          | 29391  | 1603.120 | 139.032  | 1464.089 | 4.981  | 91.327 |
| 2033          | 29157  | 1548.245 | 127.535  | 1420.710 | 4.873  | 91.763 |
| 2034          | 28898  | 1511.985 | 119.056  | 1392.929 | 4.820  | 92.126 |
| 2035          | 27465  | 1239.866 | 94.589   | 1145.276 | 4.170  | 92.371 |
| 2036          | 26317  | 1182.522 | 86.238   | 1096.284 | 4.166  | 92.707 |
| 2037          | 25885  | 1134.483 | 81.624   | 1052.859 | 4.067  | 92.805 |
| 2038          | 25450  | 1093.537 | 76.398   | 1017.139 | 3.997  | 93.014 |
| 2039          | 25017  | 1047.905 | 70.954   | 976.950  | 3.905  | 93.229 |

## Results for PHIM for Run 7 (Sensitivity\_Analysis\_2.RTF)

\*\*\*\*\*

### Main Results for E-Component for Run: 7, Simulation: 1, COD: COPD, Adjusted

| Variable Parameter          | Value                                  |
|-----------------------------|----------------------------------------|
| 1. Country                  | US (United States)                     |
| 2. Sex                      | M (Males)                              |
| 3. Year of start of process | 1990                                   |
| 4. Cause of Death           | COPD                                   |
| 5. Effective Dose NULL      | CC:1                                   |
| 6. Effective Dose Ecig      | CC:1 Ecig:0.05 Dual:0.525              |
| Note:                       | Death rates are per million population |

#### Results for Age Groups Combined and Years combined, Population and Number deaths adjusted for Ecig scenario,

| Age Group:All | NULL    | Ecig        | %Drop      |          |        |        | NULL    | Ecig    | Drop    |        |
|---------------|---------|-------------|------------|----------|--------|--------|---------|---------|---------|--------|
| Year          | Number  | Attrib      | Attrib     | Drop     | %Drop  | Attrib | Death   | Attrib  | Attrib  | Drop   |
|               | Deaths  | Deaths      | Deaths     | Deaths   | Deaths | Deaths | Rate    | Rates   | Rates   | Rates  |
| All Comb      | 2260342 | 1015606.587 | 710820.619 | 304786.0 | 13.484 | 30.010 | 649.654 | 293.996 | 204.300 | 89.696 |

#### Results for Age Groups Combined, Population and Number deaths adjusted for Ecig scenario,

| Age Group:All | NULL   | Ecig      | %Drop     |          |        |        | NULL    | Ecig    | Drop    |         |
|---------------|--------|-----------|-----------|----------|--------|--------|---------|---------|---------|---------|
| Year          | Number | Attrib    | Attrib    | Drop     | %Drop  | Attrib | Death   | Attrib  | Attrib  | Drop    |
|               | Deaths | Deaths    | Deaths    | Deaths   | Deaths | Deaths | Rate    | Rates   | Rates   | Rates   |
| 1990          | 33993  | 19262.437 | 19262.437 | 0.000    | 0.000  | 0.000  | 538.865 | 305.353 | 305.353 | 0.000   |
| 1991          | 34092  | 19215.636 | 19202.985 | 12.651   | 0.037  | 0.066  | 531.576 | 299.618 | 299.421 | 0.197   |
| 1992          | 33942  | 19056.189 | 19022.539 | 33.650   | 0.099  | 0.177  | 520.248 | 292.085 | 291.568 | 0.517   |
| 1993          | 35914  | 20095.670 | 20026.382 | 69.288   | 0.193  | 0.345  | 540.644 | 302.526 | 301.478 | 1.048   |
| 1994          | 35075  | 19524.095 | 19415.719 | 108.376  | 0.309  | 0.555  | 518.158 | 288.435 | 286.822 | 1.613   |
| 1995          | 34672  | 19116.002 | 18955.769 | 160.233  | 0.462  | 0.838  | 502.361 | 276.995 | 274.652 | 2.343   |
| 1996          | 34586  | 18975.021 | 18751.771 | 223.250  | 0.645  | 1.177  | 493.306 | 270.675 | 267.457 | 3.219   |
| 1997          | 35274  | 19169.025 | 18862.811 | 306.214  | 0.868  | 1.597  | 494.879 | 268.986 | 264.637 | 4.348   |
| 1998          | 35685  | 19228.937 | 18825.293 | 403.644  | 1.131  | 2.099  | 492.373 | 265.388 | 259.745 | 5.643   |
| 1999          | 38532  | 20589.820 | 20049.566 | 540.254  | 1.402  | 2.624  | 523.210 | 279.689 | 272.247 | 7.442   |
| 2000          | 36303  | 19196.417 | 18564.657 | 631.761  | 1.740  | 3.291  | 485.676 | 256.946 | 248.363 | 8.583   |
| 2001          | 36308  | 19012.731 | 18227.775 | 784.956  | 2.162  | 4.129  | 479.339 | 251.174 | 240.644 | 10.530  |
| 2002          | 36018  | 18699.357 | 17762.958 | 936.399  | 2.600  | 5.008  | 470.094 | 244.265 | 231.839 | 12.427  |
| 2003          | 36249  | 18663.550 | 17551.633 | 1111.917 | 3.067  | 5.958  | 468.106 | 241.262 | 226.653 | 14.609  |
| 2004          | 34663  | 17679.164 | 16423.718 | 1255.446 | 3.622  | 7.101  | 442.708 | 226.076 | 209.758 | 16.319  |
| 2005          | 36894  | 18692.832 | 17151.571 | 1541.261 | 4.178  | 8.245  | 465.615 | 236.265 | 216.460 | 19.805  |
| 2006          | 34426  | 17308.564 | 15647.485 | 1661.079 | 4.825  | 9.597  | 430.384 | 216.769 | 195.622 | 21.147  |
| 2007          | 35418  | 17683.181 | 15731.956 | 1951.225 | 5.509  | 11.034 | 438.129 | 219.189 | 194.607 | 24.583  |
| 2008          | 38365  | 19006.374 | 16648.157 | 2358.218 | 6.147  | 12.408 | 469.121 | 232.952 | 203.573 | 29.379  |
| 2009          | 37033  | 18205.573 | 15628.144 | 2577.429 | 6.960  | 14.157 | 447.352 | 220.505 | 188.787 | 31.718  |
| 2010          | 37385  | 18237.758 | 15397.846 | 2839.912 | 7.596  | 15.572 | 445.979 | 218.215 | 183.688 | 34.527  |
| 2011          | 38268  | 18487.916 | 15236.895 | 3251.021 | 8.495  | 17.585 | 451.852 | 219.022 | 179.911 | 39.111  |
| 2012          | 38703  | 18491.158 | 14890.575 | 3600.583 | 9.303  | 19.472 | 451.885 | 216.689 | 173.858 | 42.831  |
| 2013          | 40523  | 19143.452 | 15075.654 | 4067.798 | 10.038 | 21.249 | 467.574 | 221.775 | 173.948 | 47.827  |
| 2014          | 40600  | 18992.005 | 14577.722 | 4414.283 | 10.873 | 23.243 | 462.806 | 217.451 | 166.175 | 51.276  |
| 2015          | 42607  | 19728.885 | 14847.102 | 4881.783 | 11.458 | 24.744 | 545.836 | 254.116 | 190.207 | 63.910  |
| 2016          | 43444  | 19876.724 | 14572.415 | 5304.310 | 12.209 | 26.686 | 551.112 | 253.628 | 184.858 | 68.770  |
| 2017          | 44489  | 20119.790 | 14353.031 | 5766.759 | 12.962 | 28.662 | 558.938 | 254.381 | 180.325 | 74.056  |
| 2018          | 45897  | 20535.123 | 14227.915 | 6307.208 | 13.742 | 30.714 | 571.020 | 257.229 | 177.013 | 80.216  |
| 2019          | 47443  | 21009.029 | 14140.575 | 6868.454 | 14.477 | 32.693 | 584.229 | 260.605 | 174.131 | 86.475  |
| 2020          | 48957  | 21428.512 | 14021.604 | 7406.908 | 15.130 | 34.566 | 687.392 | 303.533 | 196.875 | 106.658 |
| 2021          | 49045  | 21266.697 | 13401.065 | 7865.632 | 16.038 | 36.986 | 683.398 | 299.127 | 186.733 | 112.393 |
| 2022          | 50558  | 21663.568 | 13170.909 | 8492.659 | 16.798 | 39.202 | 698.701 | 302.378 | 182.019 | 120.359 |
| 2023          | 52100  | 22084.131 | 12922.711 | 9161.420 | 17.584 | 41.484 | 713.749 | 305.748 | 177.037 | 128.711 |
| 2024          | 53590  | 22418.456 | 12665.953 | 9752.502 | 18.198 | 43.502 | 727.650 | 307.804 | 171.980 | 135.824 |
| 2025          | 54699  | 22614.834 | 12341.949 | 10272.88 | 18.781 | 45.425 | 862.721 | 361.411 | 194.659 | 166.753 |
| 2026          | 55258  | 22571.522 | 11854.791 | 10716.73 | 19.394 | 47.479 | 867.362 | 359.241 | 186.079 | 173.162 |
| 2027          | 56256  | 22774.416 | 11458.797 | 11315.62 | 20.115 | 49.686 | 878.415 | 360.827 | 178.925 | 181.901 |
| 2028          | 57214  | 22915.561 | 11013.535 | 11902.03 | 20.803 | 51.939 | 888.247 | 361.228 | 170.986 | 190.242 |
| 2029          | 58157  | 22992.027 | 10564.363 | 12427.66 | 21.369 | 54.052 | 897.138 | 360.371 | 162.966 | 197.405 |
| 2030          | 58459  | 22895.360 | 10099.818 | 12795.54 | 21.888 | 55.887 | 1074.75 | 428.760 | 185.680 | 243.080 |
| 2031          | 58883  | 22715.871 | 9584.050  | 13131.82 | 22.301 | 57.809 | 1078.85 | 424.293 | 175.598 | 248.695 |
| 2032          | 59624  | 22759.207 | 9109.483  | 13649.72 | 22.893 | 59.975 | 1087.83 | 423.652 | 166.203 | 257.449 |
| 2033          | 60341  | 22786.258 | 8686.266  | 14099.99 | 23.367 | 61.879 | 1095.48 | 422.387 | 157.697 | 264.691 |
| 2034          | 61001  | 22806.106 | 8250.976  | 14555.13 | 23.860 | 63.821 | 1101.27 | 420.721 | 148.957 | 271.764 |
| 2035          | 60122  | 22262.998 | 7753.926  | 14509.07 | 24.133 | 65.171 | 1338.77 | 507.973 | 172.660 | 335.313 |
| 2036          | 58054  | 21140.051 | 6876.097  | 14263.95 | 24.570 | 67.474 | 1291.25 | 482.234 | 152.940 | 329.294 |
| 2037          | 58244  | 21011.845 | 6445.323  | 14566.52 | 25.010 | 69.325 | 1292.97 | 478.783 | 143.081 | 335.701 |
| 2038          | 58411  | 20787.483 | 5979.797  | 14807.69 | 25.351 | 71.234 | 1292.90 | 472.681 | 132.360 | 340.320 |
| 2039          | 58569  | 20709.267 | 5586.149  | 15123.12 | 25.821 | 73.026 | 1291.13 | 469.372 | 123.145 | 346.227 |

## Results for PHIM for Run 8 (Sensitivity\_Analysis\_2.RTF)

---

### Control File Details for Run: 8

| Variable Parameter                                       | Value                  |
|----------------------------------------------------------|------------------------|
| 1. Name for Reference Scenario                           | NULL                   |
| 2. Name for Test Scenario                                | Ecig                   |
| 3. Name for Product 1                                    | CC                     |
| 4. Name for Product 2                                    | Ecig                   |
| 5. Name for Product 3                                    | -                      |
| 6. Name for Product 4                                    | Dual                   |
| 7. Country                                               | US (United States)     |
| 8. Sex                                                   | F (Females)            |
| 9. Year of start of process                              | 1990                   |
| 10. Number of months of follow-up                        | 600                    |
| 11. Follow-up interval length (in months)                | 12                     |
| 12. Lower age for risk estimation                        | 10                     |
| 13. Upper age for risk estimation                        | 79                     |
| 14. The effective dose for Product 1 (F1) - Ref          | 1                      |
| 15. The effective dose for Product 2 (F2) - Ref          | -                      |
| 16. The effective dose for Product 3 (F3) - Ref          | -                      |
| 17. The effective dose for Product 4 (F4) - Ref          | -                      |
| 18. The effective dose for Product 1 (F1) - Test         | 1                      |
| 19. The effective dose for Product 2 (F2) - Test         | 0.05                   |
| 20. The effective dose for Product 3 (F3) - Test         | -                      |
| 21. The effective dose for Product 4 (F4) - Test         | FROMF2                 |
| 22. Number in population to be simulated                 | 100000                 |
| 23. Number of MC simulations                             | 1                      |
| 24. The random number seed for the first simulation      | 15975263               |
| 25. Source for the population file (POP)                 | UN4                    |
| 26. Source for the socioeconomic prevalence file (SEP)   | -                      |
| 27. Source for the current smoking prevalence file (CSP) | ISS3                   |
| 28. Source for the former smoking prevalence file (FSP)  | ISS3                   |
| 29. Source for the quit-time distribution file (QTD)     | NHIS2006               |
| 30. Source for the death file (MORT)                     | APR-20                 |
| 31. Source for the relative risk file (RR)               | PNLEST                 |
| 32. Source for the half-life file (H)                    | PNLEST                 |
| 33. Assumption Set for TTP Factor Reference              | F1                     |
| 34. Assumption Set for TTP Factor Test                   | F1                     |
| 35. Assumption Set for TTP Reference                     | ISS3                   |
| 36. Assumption Set for TTP Test                          | S2D                    |
| 37. Assumption Set for TP for socioeconomic group        | -                      |
| 38. Source for Output Choice file (OUTC)                 | BASIC                  |
| 39. Output for DTP P1                                    | N                      |
| 40. Output for DTP P2                                    | N                      |
| 41. Output for Main P Component                          | Y                      |
| 42. Output for DTP E1                                    | N                      |
| 43. Output for DTP E2                                    | N                      |
| 44. Output for DTP E3                                    | N                      |
| 45. Output for Main E Component                          | Y                      |
| 46. Output file name                                     | Sensitivity_Analysis_2 |
| 47. Run number for P-Component                           | -                      |
| 48. Results file for E-Component                         | -                      |
| 49. Components required                                  | PE                     |
| 50. Results folder for P to be used in E-Component       | -                      |
| 51. Fixed age of starting product use                    | 16                     |
| 52. Output absolute risk file?                           | N                      |

## Results for PHIM for Run 8 (Sensitivity\_Analysis\_2.RTF)

\*\*\*\*\*

TTP values for Run: 8, Scenario: NULL

| Variable Parameter | Value               |
|--------------------|---------------------|
| 1. Country         | US (United States)  |
| 2. Sex             | F (Females)         |
| 3. Assumption Set  | ISS3                |
| Note:              | Period is in Months |

| Age   | Period  | Initiation  | Cessation    | Re-initiation |
|-------|---------|-------------|--------------|---------------|
|       |         | Never<br>CC | CC<br>Former | Former<br>CC  |
| 10-14 | 1-12    | 0.003758    | 0.008742     | 0.000000      |
| 15-19 | 1-12    | 0.003469    | 0.002515     | 0.000000      |
| 20-24 | 1-12    | 0.000276    | 0.000761     | 0.000000      |
| 25-29 | 1-12    | 0.000137    | 0.001375     | 0.000000      |
| 30-34 | 1-12    | 0.000069    | 0.001149     | 0.000000      |
| 35-39 | 1-12    | 0.000000    | 0.000991     | 0.000000      |
| 40-44 | 1-12    | 0.000000    | 0.000833     | 0.000000      |
| 45-49 | 1-12    | 0.000000    | 0.001723     | 0.000000      |
| 50-54 | 1-12    | 0.000000    | 0.002336     | 0.000000      |
| 55-59 | 1-12    | 0.000000    | 0.002233     | 0.000000      |
| 60-64 | 1-12    | 0.000000    | 0.004634     | 0.000000      |
| 65-69 | 1-12    | 0.000000    | 0.003505     | 0.000000      |
| 70-74 | 1-12    | 0.000000    | 0.004329     | 0.000000      |
| 75-79 | 1-12    | 0.000000    | 0.004329     | 0.000000      |
| 10-14 | 13-72   | 0.004794    | 0.008742     | 0.000000      |
| 15-19 | 13-72   | 0.004527    | 0.004082     | 0.000000      |
| 20-24 | 13-72   | 0.000105    | 0.001261     | 0.000000      |
| 25-29 | 13-72   | 0.000053    | 0.000952     | 0.000000      |
| 30-34 | 13-72   | 0.000026    | 0.000733     | 0.000000      |
| 35-39 | 13-72   | 0.000000    | 0.000753     | 0.000000      |
| 40-44 | 13-72   | 0.000000    | 0.001535     | 0.000000      |
| 45-49 | 13-72   | 0.000000    | 0.002998     | 0.000000      |
| 50-54 | 13-72   | 0.000000    | 0.003159     | 0.000000      |
| 55-59 | 13-72   | 0.000000    | 0.002965     | 0.000000      |
| 60-64 | 13-72   | 0.000000    | 0.003633     | 0.000000      |
| 65-69 | 13-72   | 0.000000    | 0.004522     | 0.000000      |
| 70-74 | 13-72   | 0.000000    | 0.005208     | 0.000000      |
| 75-79 | 13-72   | 0.000000    | 0.005208     | 0.000000      |
| 10-14 | 73-132  | 0.003969    | 0.008742     | 0.000000      |
| 15-19 | 73-132  | 0.003056    | 0.003373     | 0.000000      |
| 20-24 | 73-132  | 0.001459    | 0.003881     | 0.000000      |
| 25-29 | 73-132  | 0.000714    | 0.001953     | 0.000000      |
| 30-34 | 73-132  | 0.000111    | 0.001338     | 0.000000      |
| 35-39 | 73-132  | 0.000000    | 0.001507     | 0.000000      |
| 40-44 | 73-132  | 0.000000    | 0.002080     | 0.000000      |
| 45-49 | 73-132  | 0.000000    | 0.003809     | 0.000000      |
| 50-54 | 73-132  | 0.000000    | 0.004871     | 0.000000      |
| 55-59 | 73-132  | 0.000000    | 0.004560     | 0.000000      |
| 60-64 | 73-132  | 0.000000    | 0.007192     | 0.000000      |
| 65-69 | 73-132  | 0.000000    | 0.007033     | 0.000000      |
| 70-74 | 73-132  | 0.000000    | 0.008206     | 0.000000      |
| 75-79 | 73-132  | 0.000000    | 0.008206     | 0.000000      |
| 10-14 | 133-192 | 0.002861    | 0.008742     | 0.000000      |
| 15-19 | 133-192 | 0.002594    | 0.003996     | 0.000000      |
| 20-24 | 133-192 | 0.001247    | 0.002805     | 0.000000      |
| 25-29 | 133-192 | 0.000289    | 0.001574     | 0.000000      |
| 30-34 | 133-192 | 0.000132    | 0.001293     | 0.000000      |
| 35-39 | 133-192 | 0.000000    | 0.001219     | 0.000000      |
| 40-44 | 133-192 | 0.000000    | 0.001657     | 0.000000      |
| 45-49 | 133-192 | 0.000000    | 0.001995     | 0.000000      |
| 50-54 | 133-192 | 0.000000    | 0.002154     | 0.000000      |
| 55-59 | 133-192 | 0.000000    | 0.002072     | 0.000000      |
| 60-64 | 133-192 | 0.000000    | 0.005049     | 0.000000      |
| 65-69 | 133-192 | 0.000000    | 0.003680     | 0.000000      |
| 70-74 | 133-192 | 0.000000    | 0.006144     | 0.000000      |
| 75-79 | 133-192 | 0.000000    | 0.006144     | 0.000000      |
| 10-14 | 193-252 | 0.001859    | 0.008742     | 0.000000      |
| 15-19 | 193-252 | 0.002232    | 0.005770     | 0.000000      |
| 20-24 | 193-252 | 0.001079    | 0.003262     | 0.000000      |
| 25-29 | 193-252 | 0.000531    | 0.002002     | 0.000000      |
| 30-34 | 193-252 | 0.000263    | 0.003240     | 0.000000      |
| 35-39 | 193-252 | 0.000000    | 0.001771     | 0.000000      |
| 40-44 | 193-252 | 0.000000    | 0.002173     | 0.000000      |
| 45-49 | 193-252 | 0.000000    | 0.002075     | 0.000000      |
| 50-54 | 193-252 | 0.000000    | 0.003431     | 0.000000      |

### Results for PHIM for Run 8 (Sensitivity\_Analysis\_2.RTF)

|       |         |          |          |          |
|-------|---------|----------|----------|----------|
| 55-59 | 193-252 | 0.000000 | 0.002906 | 0.000000 |
| 60-64 | 193-252 | 0.000000 | 0.007139 | 0.000000 |
| 65-69 | 193-252 | 0.000000 | 0.004963 | 0.000000 |
| 70-74 | 193-252 | 0.000000 | 0.006269 | 0.000000 |
| 75-79 | 193-252 | 0.000000 | 0.006269 | 0.000000 |
| 10-14 | 253+    | 0.000931 | 0.008742 | 0.000000 |
| 15-19 | 253+    | 0.001798 | 0.009440 | 0.000000 |
| 20-24 | 253+    | 0.000023 | 0.002831 | 0.000000 |
| 25-29 | 253+    | 0.000073 | 0.002655 | 0.000000 |
| 30-34 | 253+    | 0.000037 | 0.004614 | 0.000000 |
| 35-39 | 253+    | 0.000000 | 0.002607 | 0.000000 |
| 40-44 | 253+    | 0.000000 | 0.003115 | 0.000000 |
| 45-49 | 253+    | 0.000000 | 0.002132 | 0.000000 |
| 50-54 | 253+    | 0.000000 | 0.003497 | 0.000000 |
| 55-59 | 253+    | 0.000000 | 0.002942 | 0.000000 |
| 60-64 | 253+    | 0.000000 | 0.005376 | 0.000000 |
| 65-69 | 253+    | 0.000000 | 0.001789 | 0.000000 |
| 70-74 | 253+    | 0.000000 | 0.004077 | 0.000000 |
| 75-79 | 253+    | 0.000000 | 0.004077 | 0.000000 |

## Results for PHIM for Run 8 (Sensitivity\_Analysis\_2.RTF)

\*\*\*\*\*

TTP values for Run: 8, Scenario: Ecig

| Variable Parameter | Value               |
|--------------------|---------------------|
| 1. Country         | US (United States)  |
| 2. Sex             | F (Females)         |
| 3. Assumption Set  | S2D                 |
| Note:              | Period is in Months |

| Age   | Period  | Initiation  |               |               | Cessation    |                |                | Re-initiation |                |                |
|-------|---------|-------------|---------------|---------------|--------------|----------------|----------------|---------------|----------------|----------------|
|       |         | Never<br>CC | Never<br>Ecig | Never<br>Dual | CC<br>Former | Ecig<br>Former | Dual<br>Former | Former<br>CC  | Former<br>Ecig | Former<br>Dual |
| 10-14 | 1-12    | 0.001879    | 0.001879      | 0.000000      | 0.008742     | 0.008742       | 0.000000       | 0.000000      | 0.000000       | 0.000000       |
| 15-19 | 1-12    | 0.001735    | 0.001735      | 0.000000      | 0.002515     | 0.002515       | 0.000000       | 0.000000      | 0.000000       | 0.000000       |
| 20-24 | 1-12    | 0.000138    | 0.000138      | 0.000000      | 0.000761     | 0.000761       | 0.000000       | 0.000000      | 0.000000       | 0.000000       |
| 25-29 | 1-12    | 0.000069    | 0.000069      | 0.000000      | 0.001376     | 0.001376       | 0.000000       | 0.000000      | 0.000000       | 0.000000       |
| 30-34 | 1-12    | 0.000034    | 0.000034      | 0.000000      | 0.001149     | 0.001149       | 0.000000       | 0.000000      | 0.000000       | 0.000000       |
| 35-39 | 1-12    | 0.000000    | 0.000000      | 0.000000      | 0.000991     | 0.000991       | 0.000000       | 0.000000      | 0.000000       | 0.000000       |
| 40-44 | 1-12    | 0.000000    | 0.000000      | 0.000000      | 0.000833     | 0.000833       | 0.000000       | 0.000000      | 0.000000       | 0.000000       |
| 45-49 | 1-12    | 0.000000    | 0.000000      | 0.000000      | 0.001723     | 0.001723       | 0.000000       | 0.000000      | 0.000000       | 0.000000       |
| 50-54 | 1-12    | 0.000000    | 0.000000      | 0.000000      | 0.002336     | 0.002336       | 0.000000       | 0.000000      | 0.000000       | 0.000000       |
| 55-59 | 1-12    | 0.000000    | 0.000000      | 0.000000      | 0.002233     | 0.002233       | 0.000000       | 0.000000      | 0.000000       | 0.000000       |
| 60-64 | 1-12    | 0.000000    | 0.000000      | 0.000000      | 0.004635     | 0.004635       | 0.000000       | 0.000000      | 0.000000       | 0.000000       |
| 65-69 | 1-12    | 0.000000    | 0.000000      | 0.000000      | 0.003505     | 0.003505       | 0.000000       | 0.000000      | 0.000000       | 0.000000       |
| 70-74 | 1-12    | 0.000000    | 0.000000      | 0.000000      | 0.004329     | 0.004329       | 0.000000       | 0.000000      | 0.000000       | 0.000000       |
| 75-79 | 1-12    | 0.000000    | 0.000000      | 0.000000      | 0.004329     | 0.004329       | 0.000000       | 0.000000      | 0.000000       | 0.000000       |
| 10-14 | 13-72   | 0.001918    | 0.002877      | 0.000000      | 0.008742     | 0.008742       | 0.000000       | 0.000000      | 0.000000       | 0.000000       |
| 15-19 | 13-72   | 0.001811    | 0.002716      | 0.000000      | 0.004083     | 0.004083       | 0.000000       | 0.000000      | 0.000000       | 0.000000       |
| 20-24 | 13-72   | 0.000042    | 0.000063      | 0.000000      | 0.001261     | 0.001261       | 0.000000       | 0.000000      | 0.000000       | 0.000000       |
| 25-29 | 13-72   | 0.000021    | 0.000032      | 0.000000      | 0.000952     | 0.000952       | 0.000000       | 0.000000      | 0.000000       | 0.000000       |
| 30-34 | 13-72   | 0.000011    | 0.000016      | 0.000000      | 0.000733     | 0.000733       | 0.000000       | 0.000000      | 0.000000       | 0.000000       |
| 35-39 | 13-72   | 0.000000    | 0.000000      | 0.000000      | 0.000754     | 0.000754       | 0.000000       | 0.000000      | 0.000000       | 0.000000       |
| 40-44 | 13-72   | 0.000000    | 0.000000      | 0.000000      | 0.001535     | 0.001535       | 0.000000       | 0.000000      | 0.000000       | 0.000000       |
| 45-49 | 13-72   | 0.000000    | 0.000000      | 0.000000      | 0.002998     | 0.002998       | 0.000000       | 0.000000      | 0.000000       | 0.000000       |
| 50-54 | 13-72   | 0.000000    | 0.000000      | 0.000000      | 0.003160     | 0.003160       | 0.000000       | 0.000000      | 0.000000       | 0.000000       |
| 55-59 | 13-72   | 0.000000    | 0.000000      | 0.000000      | 0.002965     | 0.002965       | 0.000000       | 0.000000      | 0.000000       | 0.000000       |
| 60-64 | 13-72   | 0.000000    | 0.000000      | 0.000000      | 0.003633     | 0.003633       | 0.000000       | 0.000000      | 0.000000       | 0.000000       |
| 65-69 | 13-72   | 0.000000    | 0.000000      | 0.000000      | 0.004522     | 0.004522       | 0.000000       | 0.000000      | 0.000000       | 0.000000       |
| 70-74 | 13-72   | 0.000000    | 0.000000      | 0.000000      | 0.005208     | 0.005208       | 0.000000       | 0.000000      | 0.000000       | 0.000000       |
| 75-79 | 13-72   | 0.000000    | 0.000000      | 0.000000      | 0.005208     | 0.005208       | 0.000000       | 0.000000      | 0.000000       | 0.000000       |
| 10-14 | 73-132  | 0.000794    | 0.003175      | 0.000000      | 0.008742     | 0.008742       | 0.000000       | 0.000000      | 0.000000       | 0.000000       |
| 15-19 | 73-132  | 0.000611    | 0.002445      | 0.000000      | 0.003373     | 0.003373       | 0.000000       | 0.000000      | 0.000000       | 0.000000       |
| 20-24 | 73-132  | 0.000292    | 0.001167      | 0.000000      | 0.003881     | 0.003881       | 0.000000       | 0.000000      | 0.000000       | 0.000000       |
| 25-29 | 73-132  | 0.000143    | 0.000571      | 0.000000      | 0.001954     | 0.001954       | 0.000000       | 0.000000      | 0.000000       | 0.000000       |
| 30-34 | 73-132  | 0.000022    | 0.000089      | 0.000000      | 0.001338     | 0.001338       | 0.000000       | 0.000000      | 0.000000       | 0.000000       |
| 35-39 | 73-132  | 0.000000    | 0.000000      | 0.000000      | 0.001507     | 0.001507       | 0.000000       | 0.000000      | 0.000000       | 0.000000       |
| 40-44 | 73-132  | 0.000000    | 0.000000      | 0.000000      | 0.002080     | 0.002080       | 0.000000       | 0.000000      | 0.000000       | 0.000000       |
| 45-49 | 73-132  | 0.000000    | 0.000000      | 0.000000      | 0.003809     | 0.003809       | 0.000000       | 0.000000      | 0.000000       | 0.000000       |
| 50-54 | 73-132  | 0.000000    | 0.000000      | 0.000000      | 0.004871     | 0.004871       | 0.000000       | 0.000000      | 0.000000       | 0.000000       |
| 55-59 | 73-132  | 0.000000    | 0.000000      | 0.000000      | 0.004560     | 0.004560       | 0.000000       | 0.000000      | 0.000000       | 0.000000       |
| 60-64 | 73-132  | 0.000000    | 0.000000      | 0.000000      | 0.007192     | 0.007192       | 0.000000       | 0.000000      | 0.000000       | 0.000000       |
| 65-69 | 73-132  | 0.000000    | 0.000000      | 0.000000      | 0.007033     | 0.007033       | 0.000000       | 0.000000      | 0.000000       | 0.000000       |
| 70-74 | 73-132  | 0.000000    | 0.000000      | 0.000000      | 0.008206     | 0.008206       | 0.000000       | 0.000000      | 0.000000       | 0.000000       |
| 75-79 | 73-132  | 0.000000    | 0.000000      | 0.000000      | 0.008206     | 0.008206       | 0.000000       | 0.000000      | 0.000000       | 0.000000       |
| 10-14 | 133-192 | 0.000143    | 0.002718      | 0.000000      | 0.008742     | 0.008742       | 0.000000       | 0.000000      | 0.000000       | 0.000000       |
| 15-19 | 133-192 | 0.000130    | 0.002465      | 0.000000      | 0.003996     | 0.003996       | 0.000000       | 0.000000      | 0.000000       | 0.000000       |
| 20-24 | 133-192 | 0.000062    | 0.001185      | 0.000000      | 0.002805     | 0.002805       | 0.000000       | 0.000000      | 0.000000       | 0.000000       |
| 25-29 | 133-192 | 0.000015    | 0.000275      | 0.000000      | 0.001574     | 0.001574       | 0.000000       | 0.000000      | 0.000000       | 0.000000       |
| 30-34 | 133-192 | 0.000007    | 0.000125      | 0.000000      | 0.001293     | 0.001293       | 0.000000       | 0.000000      | 0.000000       | 0.000000       |
| 35-39 | 133-192 | 0.000000    | 0.000000      | 0.000000      | 0.001219     | 0.001219       | 0.000000       | 0.000000      | 0.000000       | 0.000000       |
| 40-44 | 133-192 | 0.000000    | 0.000000      | 0.000000      | 0.001657     | 0.001657       | 0.000000       | 0.000000      | 0.000000       | 0.000000       |
| 45-49 | 133-192 | 0.000000    | 0.000000      | 0.000000      | 0.001995     | 0.001995       | 0.000000       | 0.000000      | 0.000000       | 0.000000       |
| 50-54 | 133-192 | 0.000000    | 0.000000      | 0.000000      | 0.002154     | 0.002154       | 0.000000       | 0.000000      | 0.000000       | 0.000000       |
| 55-59 | 133-192 | 0.000000    | 0.000000      | 0.000000      | 0.002072     | 0.002072       | 0.000000       | 0.000000      | 0.000000       | 0.000000       |
| 60-64 | 133-192 | 0.000000    | 0.000000      | 0.000000      | 0.005049     | 0.005049       | 0.000000       | 0.000000      | 0.000000       | 0.000000       |
| 65-69 | 133-192 | 0.000000    | 0.000000      | 0.000000      | 0.003681     | 0.003681       | 0.000000       | 0.000000      | 0.000000       | 0.000000       |
| 70-74 | 133-192 | 0.000000    | 0.000000      | 0.000000      | 0.006144     | 0.006144       | 0.000000       | 0.000000      | 0.000000       | 0.000000       |
| 75-79 | 133-192 | 0.000000    | 0.000000      | 0.000000      | 0.006144     | 0.006144       | 0.000000       | 0.000000      | 0.000000       | 0.000000       |
| 10-14 | 193-252 | 0.000093    | 0.001766      | 0.000000      | 0.008742     | 0.008742       | 0.000000       | 0.000000      | 0.000000       | 0.000000       |
| 15-19 | 193-252 | 0.000112    | 0.002120      | 0.000000      | 0.005770     | 0.005770       | 0.000000       | 0.000000      | 0.000000       | 0.000000       |
| 20-24 | 193-252 | 0.000054    | 0.001025      | 0.000000      | 0.003262     | 0.003262       | 0.000000       | 0.000000      | 0.000000       | 0.000000       |
| 25-29 | 193-252 | 0.000027    | 0.000504      | 0.000000      | 0.002002     | 0.002002       | 0.000000       | 0.000000      | 0.000000       | 0.000000       |
| 30-34 | 193-252 | 0.000013    | 0.000250      | 0.000000      | 0.003241     | 0.003241       | 0.000000       | 0.000000      | 0.000000       | 0.000000       |
| 35-39 | 193-252 | 0.000000    | 0.000000      | 0.000000      | 0.001771     | 0.001771       | 0.000000       | 0.000000      | 0.000000       | 0.000000       |
| 40-44 | 193-252 | 0.000000    | 0.000000      | 0.000000      | 0.002173     | 0.002173       | 0.000000       | 0.000000      | 0.000000       | 0.000000       |
| 45-49 | 193-252 | 0.000000    | 0.000000      | 0.000000      | 0.002075     | 0.002075       | 0.000000       | 0.000000      | 0.000000       | 0.000000       |
| 50-54 | 193-252 | 0.000000    | 0.000000      | 0.000000      | 0.003432     | 0.003432       | 0.000000       | 0.000000      | 0.000000       | 0.000000       |

### Results for PHIM for Run 8 (Sensitivity\_Analysis\_2.RTF)

|       |         |          |          |          |          |          |          |          |          |          |
|-------|---------|----------|----------|----------|----------|----------|----------|----------|----------|----------|
| 55-59 | 193-252 | 0.000000 | 0.000000 | 0.000000 | 0.002906 | 0.002906 | 0.000000 | 0.000000 | 0.000000 | 0.000000 |
| 60-64 | 193-252 | 0.000000 | 0.000000 | 0.000000 | 0.007139 | 0.007139 | 0.000000 | 0.000000 | 0.000000 | 0.000000 |
| 65-69 | 193-252 | 0.000000 | 0.000000 | 0.000000 | 0.004963 | 0.004963 | 0.000000 | 0.000000 | 0.000000 | 0.000000 |
| 70-74 | 193-252 | 0.000000 | 0.000000 | 0.000000 | 0.006269 | 0.006269 | 0.000000 | 0.000000 | 0.000000 | 0.000000 |
| 75-79 | 193-252 | 0.000000 | 0.000000 | 0.000000 | 0.006269 | 0.006269 | 0.000000 | 0.000000 | 0.000000 | 0.000000 |
| 10-14 | 253+    | 0.000047 | 0.000884 | 0.000000 | 0.008742 | 0.008742 | 0.000000 | 0.000000 | 0.000000 | 0.000000 |
| 15-19 | 253+    | 0.000090 | 0.001708 | 0.000000 | 0.009440 | 0.009440 | 0.000000 | 0.000000 | 0.000000 | 0.000000 |
| 20-24 | 253+    | 0.000001 | 0.000022 | 0.000000 | 0.002831 | 0.002831 | 0.000000 | 0.000000 | 0.000000 | 0.000000 |
| 25-29 | 253+    | 0.000004 | 0.000070 | 0.000000 | 0.002656 | 0.002656 | 0.000000 | 0.000000 | 0.000000 | 0.000000 |
| 30-34 | 253+    | 0.000002 | 0.000035 | 0.000000 | 0.004614 | 0.004614 | 0.000000 | 0.000000 | 0.000000 | 0.000000 |
| 35-39 | 253+    | 0.000000 | 0.000000 | 0.000000 | 0.002608 | 0.002608 | 0.000000 | 0.000000 | 0.000000 | 0.000000 |
| 40-44 | 253+    | 0.000000 | 0.000000 | 0.000000 | 0.003115 | 0.003115 | 0.000000 | 0.000000 | 0.000000 | 0.000000 |
| 45-49 | 253+    | 0.000000 | 0.000000 | 0.000000 | 0.002132 | 0.002132 | 0.000000 | 0.000000 | 0.000000 | 0.000000 |
| 50-54 | 253+    | 0.000000 | 0.000000 | 0.000000 | 0.003497 | 0.003497 | 0.000000 | 0.000000 | 0.000000 | 0.000000 |
| 55-59 | 253+    | 0.000000 | 0.000000 | 0.000000 | 0.002942 | 0.002942 | 0.000000 | 0.000000 | 0.000000 | 0.000000 |
| 60-64 | 253+    | 0.000000 | 0.000000 | 0.000000 | 0.005376 | 0.005376 | 0.000000 | 0.000000 | 0.000000 | 0.000000 |
| 65-69 | 253+    | 0.000000 | 0.000000 | 0.000000 | 0.001789 | 0.001789 | 0.000000 | 0.000000 | 0.000000 | 0.000000 |
| 70-74 | 253+    | 0.000000 | 0.000000 | 0.000000 | 0.004077 | 0.004077 | 0.000000 | 0.000000 | 0.000000 | 0.000000 |
| 75-79 | 253+    | 0.000000 | 0.000000 | 0.000000 | 0.004077 | 0.004077 | 0.000000 | 0.000000 | 0.000000 | 0.000000 |





**Results for PHIM for Run 8 (Sensitivity\_Analysis\_2.RTF)**

|       |      |          |          |          |          |          |          |
|-------|------|----------|----------|----------|----------|----------|----------|
| 25-29 | 253+ | 0.010768 | 0.000000 | 0.000000 | 0.000000 | 0.000000 | 0.000000 |
| 30-34 | 253+ | 0.010548 | 0.000000 | 0.000000 | 0.000000 | 0.000000 | 0.000000 |
| 35-39 | 253+ | 0.009588 | 0.000000 | 0.000000 | 0.000000 | 0.000000 | 0.000000 |
| 40-44 | 253+ | 0.009443 | 0.000000 | 0.000000 | 0.000000 | 0.000000 | 0.000000 |
| 45-49 | 253+ | 0.008952 | 0.000000 | 0.000000 | 0.000000 | 0.000000 | 0.000000 |
| 50-54 | 253+ | 0.008190 | 0.000000 | 0.000000 | 0.000000 | 0.000000 | 0.000000 |
| 55-59 | 253+ | 0.005634 | 0.000000 | 0.000000 | 0.000000 | 0.000000 | 0.000000 |
| 60-64 | 253+ | 0.004741 | 0.000000 | 0.000000 | 0.000000 | 0.000000 | 0.000000 |
| 65-69 | 253+ | 0.002911 | 0.000000 | 0.000000 | 0.000000 | 0.000000 | 0.000000 |
| 70-74 | 253+ | 0.000771 | 0.000000 | 0.000000 | 0.000000 | 0.000000 | 0.000000 |
| 75-79 | 253+ | 0.000771 | 0.000000 | 0.000000 | 0.000000 | 0.000000 | 0.000000 |

## Results for PHIM for Run 8 (Sensitivity\_Analysis\_2.RTF)

\*\*\*\*\*

### Main Output for the Tobacco History for Run: 8, Simulation: 1, Scenario: NULL

| Variable Parameter          | Value              |
|-----------------------------|--------------------|
| 1. Country                  | US (United States) |
| 2. Sex                      | F (Females)        |
| 3. Year of start of process | 1990               |

Year of Follow-up: 2040, Age Group: All Ages  
 Period    Age Group    Smoking Group            N            %

|    |          |           |       |       |
|----|----------|-----------|-------|-------|
| 50 | All Ages | Never Any | 20670 | 58.80 |
| 50 | All Ages | CC        | 2462  | 7.00  |
| 50 | All Ages | Former    | 12019 | 34.19 |

Year of Follow-up: 2040, Age Group: 18-19  
 Period    Age Group    Smoking Group            N            %

|    |       |           |   |   |
|----|-------|-----------|---|---|
| 50 | 18-19 | Never Any | 0 | . |
| 50 | 18-19 | CC        | 0 | . |
| 50 | 18-19 | Former    | 0 | . |

Year of Follow-up: 2040, Age Group: 20-24  
 Period    Age Group    Smoking Group            N            %

|    |       |           |   |   |
|----|-------|-----------|---|---|
| 50 | 20-24 | Never Any | 0 | . |
| 50 | 20-24 | CC        | 0 | . |
| 50 | 20-24 | Former    | 0 | . |

Year of Follow-up: 2040, Age Group: 25-29  
 Period    Age Group    Smoking Group            N            %

|    |       |           |   |   |
|----|-------|-----------|---|---|
| 50 | 25-29 | Never Any | 0 | . |
| 50 | 25-29 | CC        | 0 | . |
| 50 | 25-29 | Former    | 0 | . |

Year of Follow-up: 2040, Age Group: 30-34  
 Period    Age Group    Smoking Group            N            %

|    |       |           |   |   |
|----|-------|-----------|---|---|
| 50 | 30-34 | Never Any | 0 | . |
| 50 | 30-34 | CC        | 0 | . |
| 50 | 30-34 | Former    | 0 | . |

Year of Follow-up: 2040, Age Group: 35-39  
 Period    Age Group    Smoking Group            N            %

|    |       |           |   |   |
|----|-------|-----------|---|---|
| 50 | 35-39 | Never Any | 0 | . |
| 50 | 35-39 | CC        | 0 | . |
| 50 | 35-39 | Former    | 0 | . |

Year of Follow-up: 2040, Age Group: 40-44  
 Period    Age Group    Smoking Group            N            %

|    |       |           |   |   |
|----|-------|-----------|---|---|
| 50 | 40-44 | Never Any | 0 | . |
| 50 | 40-44 | CC        | 0 | . |
| 50 | 40-44 | Former    | 0 | . |

Year of Follow-up: 2040, Age Group: 45-49  
 Period    Age Group    Smoking Group            N            %

|    |       |           |   |   |
|----|-------|-----------|---|---|
| 50 | 45-49 | Never Any | 0 | . |
| 50 | 45-49 | CC        | 0 | . |
| 50 | 45-49 | Former    | 0 | . |

Year of Follow-up: 2040, Age Group: 50-54  
 Period    Age Group    Smoking Group            N            %

|    |       |           |   |   |
|----|-------|-----------|---|---|
| 50 | 50-54 | Never Any | 0 | . |
| 50 | 50-54 | CC        | 0 | . |
| 50 | 50-54 | Former    | 0 | . |

Year of Follow-up: 2040, Age Group: 55-59  
 Period    Age Group    Smoking Group            N            %

|    |       |           |   |   |
|----|-------|-----------|---|---|
| 50 | 55-59 | Never Any | 0 | . |
| 50 | 55-59 | CC        | 0 | . |
| 50 | 55-59 | Former    | 0 | . |

Year of Follow-up: 2040, Age Group: 60-64  
 Period    Age Group    Smoking Group            N            %

### Results for PHIM for Run 8 (Sensitivity\_Analysis\_2.RTF)

|                                           |           |               |      |       |
|-------------------------------------------|-----------|---------------|------|-------|
| 50                                        | 60-64     | Never Any     | 4803 | 60.57 |
| 50                                        | 60-64     | CC            | 621  | 7.83  |
| 50                                        | 60-64     | Former        | 2506 | 31.60 |
| Year of Follow-up: 2040, Age Group: 65-69 |           |               |      |       |
| Period                                    | Age Group | Smoking Group | N    | %     |
| 50                                        | 65-69     | Never Any     | 5407 | 64.75 |
| 50                                        | 65-69     | CC            | 538  | 6.44  |
| 50                                        | 65-69     | Former        | 2405 | 28.80 |
| Year of Follow-up: 2040, Age Group: 70-74 |           |               |      |       |
| Period                                    | Age Group | Smoking Group | N    | %     |
| 50                                        | 70-74     | Never Any     | 5181 | 58.92 |
| 50                                        | 70-74     | CC            | 605  | 6.88  |
| 50                                        | 70-74     | Former        | 3007 | 34.20 |
| Year of Follow-up: 2040, Age Group: 75-79 |           |               |      |       |
| Period                                    | Age Group | Smoking Group | N    | %     |
| 50                                        | 75-79     | Never Any     | 5279 | 52.38 |
| 50                                        | 75-79     | CC            | 698  | 6.93  |
| 50                                        | 75-79     | Former        | 4101 | 40.69 |

## Results for PHIM for Run 8 (Sensitivity\_Analysis\_2.RTF)

\*\*\*\*\*

### Main Output for the Tobacco History for Run: 8, Simulation: 1, Scenario: Ecig

| Variable Parameter                           |           |               | Value              |       |               |             |               |                |              |
|----------------------------------------------|-----------|---------------|--------------------|-------|---------------|-------------|---------------|----------------|--------------|
| 1. Country                                   |           |               | US (United States) |       |               |             |               |                |              |
| 2. Sex                                       |           |               | F (Females)        |       |               |             |               |                |              |
| 3. Year of start of process                  |           |               | 1990               |       |               |             |               |                |              |
| Year of Follow-up: 1990, Age Group: All Ages |           |               |                    |       |               |             |               |                |              |
| Period                                       | Age Group | Smoking Group | N                  | %     | Ever Quit (N) | Ever Quit % | Mean Yrs Quit | Short Term (n) | Short Term % |
| 0                                            | All Ages  | Never Any     | 47776              | 54.92 |               |             |               |                |              |
| 0                                            | All Ages  | CC            | 22737              | 26.14 | 0             | 0.00        |               |                |              |
| 0                                            | All Ages  | Ecig          | 0                  | 0.00  |               |             |               |                |              |
| 0                                            | All Ages  | Dual          | 0                  | 0.00  |               |             |               |                |              |
| 0                                            | All Ages  | Former        | 16484              | 18.95 |               |             | 11.90         | 2815           | 17.08        |
| Year of Follow-up: 1990, Age Group: 18-19    |           |               |                    |       |               |             |               |                |              |
| Period                                       | Age Group | Smoking Group | N                  | %     | Ever Quit (N) | Ever Quit % | Mean Yrs Quit | Short Term (n) | Short Term % |
| 0                                            | 18-19     | Never Any     | 2570               | 78.43 |               |             |               |                |              |
| 0                                            | 18-19     | CC            | 535                | 16.33 | 0             | 0.00        |               |                |              |
| 0                                            | 18-19     | Ecig          | 0                  | 0.00  |               |             |               |                |              |
| 0                                            | 18-19     | Dual          | 0                  | 0.00  |               |             |               |                |              |
| 0                                            | 18-19     | Former        | 172                | 5.25  |               |             | 0.20          | 172            | 100.00       |
| Year of Follow-up: 1990, Age Group: 20-24    |           |               |                    |       |               |             |               |                |              |
| Period                                       | Age Group | Smoking Group | N                  | %     | Ever Quit (N) | Ever Quit % | Mean Yrs Quit | Short Term (n) | Short Term % |
| 0                                            | 20-24     | Never Any     | 5354               | 60.89 |               |             |               |                |              |
| 0                                            | 20-24     | CC            | 2560               | 29.11 | 0             | 0.00        |               |                |              |
| 0                                            | 20-24     | Ecig          | 0                  | 0.00  |               |             |               |                |              |
| 0                                            | 20-24     | Dual          | 0                  | 0.00  |               |             |               |                |              |
| 0                                            | 20-24     | Former        | 879                | 10.00 |               |             | 1.58          | 420            | 47.78        |
| Year of Follow-up: 1990, Age Group: 25-29    |           |               |                    |       |               |             |               |                |              |
| Period                                       | Age Group | Smoking Group | N                  | %     | Ever Quit (N) | Ever Quit % | Mean Yrs Quit | Short Term (n) | Short Term % |
| 0                                            | 25-29     | Never Any     | 5318               | 52.77 |               |             |               |                |              |
| 0                                            | 25-29     | CC            | 3335               | 33.09 | 0             | 0.00        |               |                |              |
| 0                                            | 25-29     | Ecig          | 0                  | 0.00  |               |             |               |                |              |
| 0                                            | 25-29     | Dual          | 0                  | 0.00  |               |             |               |                |              |
| 0                                            | 25-29     | Former        | 1425               | 14.14 |               |             | 3.91          | 404            | 28.35        |
| Year of Follow-up: 1990, Age Group: 30-34    |           |               |                    |       |               |             |               |                |              |
| Period                                       | Age Group | Smoking Group | N                  | %     | Ever Quit (N) | Ever Quit % | Mean Yrs Quit | Short Term (n) | Short Term % |
| 0                                            | 30-34     | Never Any     | 5287               | 50.36 |               |             |               |                |              |
| 0                                            | 30-34     | CC            | 3326               | 31.68 | 0             | 0.00        |               |                |              |
| 0                                            | 30-34     | Ecig          | 0                  | 0.00  |               |             |               |                |              |
| 0                                            | 30-34     | Dual          | 0                  | 0.00  |               |             |               |                |              |
| 0                                            | 30-34     | Former        | 1886               | 17.96 |               |             | 4.36          | 566            | 30.01        |
| Year of Follow-up: 1990, Age Group: 35-39    |           |               |                    |       |               |             |               |                |              |
| Period                                       | Age Group | Smoking Group | N                  | %     | Ever Quit (N) | Ever Quit % | Mean Yrs Quit | Short Term (n) | Short Term % |
| 0                                            | 35-39     | Never Any     | 5018               | 52.27 |               |             |               |                |              |
| 0                                            | 35-39     | CC            | 2653               | 27.64 | 0             | 0.00        |               |                |              |
| 0                                            | 35-39     | Ecig          | 0                  | 0.00  |               |             |               |                |              |
| 0                                            | 35-39     | Dual          | 0                  | 0.00  |               |             |               |                |              |
| 0                                            | 35-39     | Former        | 1929               | 20.09 |               |             | 7.96          | 324            | 16.80        |
| Year of Follow-up: 1990, Age Group: 40-44    |           |               |                    |       |               |             |               |                |              |
| Period                                       | Age Group | Smoking Group | N                  | %     | Ever Quit (N) | Ever Quit % | Mean Yrs Quit | Short Term (n) | Short Term % |
| 0                                            | 40-44     | Never Any     | 4356               | 51.27 |               |             |               |                |              |
| 0                                            | 40-44     | CC            | 2397               | 28.21 | 0             | 0.00        |               |                |              |
| 0                                            | 40-44     | Ecig          | 0                  | 0.00  |               |             |               |                |              |
| 0                                            | 40-44     | Dual          | 0                  | 0.00  |               |             |               |                |              |
| 0                                            | 40-44     | Former        | 1744               | 20.52 |               |             | 7.33          | 339            | 19.44        |
| Year of Follow-up: 1990, Age Group: 45-49    |           |               |                    |       |               |             |               |                |              |
| Period                                       | Age Group | Smoking Group | N                  | %     | Ever Quit (N) | Ever Quit % | Mean Yrs Quit | Short Term (n) | Short Term % |
| 0                                            | 45-49     | Never Any     | 3116               | 47.67 |               |             |               |                |              |
| 0                                            | 45-49     | CC            | 1875               | 28.69 | 0             | 0.00        |               |                |              |
| 0                                            | 45-49     | Ecig          | 0                  | 0.00  |               |             |               |                |              |
| 0                                            | 45-49     | Dual          | 0                  | 0.00  |               |             |               |                |              |
| 0                                            | 45-49     | Former        | 1545               | 23.64 |               |             | 12.55         | 194            | 12.56        |
| Year of Follow-up: 1990, Age Group: 50-54    |           |               |                    |       |               |             |               |                |              |
| Period                                       | Age Group | Smoking Group | N                  | %     | Ever Quit (N) | Ever Quit % | Mean Yrs Quit | Short Term (n) | Short Term % |
| 0                                            | 50-54     | Never Any     | 2684               | 48.50 |               |             |               |                |              |
| 0                                            | 50-54     | CC            | 1572               | 28.41 | 0             | 0.00        |               |                |              |

**Results for PHIM for Run 8 (Sensitivity\_Analysis\_2.RTF)**

|                                              |           |               |       |       |               |             |               |                |              |
|----------------------------------------------|-----------|---------------|-------|-------|---------------|-------------|---------------|----------------|--------------|
| 0                                            | 50-54     | Ecig          | 0     | 0.00  |               |             |               |                |              |
| 0                                            | 50-54     | Dual          | 0     | 0.00  |               |             |               |                |              |
| 0                                            | 50-54     | Former        | 1278  | 23.09 |               |             | 13.28         | 126            | 9.86         |
| Year of Follow-up: 1990, Age Group: 55-59    |           |               |       |       |               |             |               |                |              |
| Period                                       | Age Group | Smoking Group | N     | %     | Ever Quit (N) | Ever Quit % | Mean Yrs Quit | Short Term (n) | Short Term % |
| 0                                            | 55-59     | Never Any     | 2732  | 51.90 |               |             |               |                |              |
| 0                                            | 55-59     | CC            | 1295  | 24.60 | 0             | 0.00        |               |                |              |
| 0                                            | 55-59     | Ecig          | 0     | 0.00  |               |             |               |                |              |
| 0                                            | 55-59     | Dual          | 0     | 0.00  |               |             |               |                |              |
| 0                                            | 55-59     | Former        | 1237  | 23.50 |               |             | 17.26         | 90             | 7.28         |
| Year of Follow-up: 1990, Age Group: 60-64    |           |               |       |       |               |             |               |                |              |
| Period                                       | Age Group | Smoking Group | N     | %     | Ever Quit (N) | Ever Quit % | Mean Yrs Quit | Short Term (n) | Short Term % |
| 0                                            | 60-64     | Never Any     | 3078  | 55.72 |               |             |               |                |              |
| 0                                            | 60-64     | CC            | 1249  | 22.61 | 0             | 0.00        |               |                |              |
| 0                                            | 60-64     | Ecig          | 0     | 0.00  |               |             |               |                |              |
| 0                                            | 60-64     | Dual          | 0     | 0.00  |               |             |               |                |              |
| 0                                            | 60-64     | Former        | 1197  | 21.67 |               |             | 18.28         | 61             | 5.10         |
| Year of Follow-up: 1990, Age Group: 65-69    |           |               |       |       |               |             |               |                |              |
| Period                                       | Age Group | Smoking Group | N     | %     | Ever Quit (N) | Ever Quit % | Mean Yrs Quit | Short Term (n) | Short Term % |
| 0                                            | 65-69     | Never Any     | 3042  | 57.36 |               |             |               |                |              |
| 0                                            | 65-69     | CC            | 976   | 18.40 | 0             | 0.00        |               |                |              |
| 0                                            | 65-69     | Ecig          | 0     | 0.00  |               |             |               |                |              |
| 0                                            | 65-69     | Dual          | 0     | 0.00  |               |             |               |                |              |
| 0                                            | 65-69     | Former        | 1285  | 24.23 |               |             | 20.65         | 68             | 5.29         |
| Year of Follow-up: 1990, Age Group: 70-74    |           |               |       |       |               |             |               |                |              |
| Period                                       | Age Group | Smoking Group | N     | %     | Ever Quit (N) | Ever Quit % | Mean Yrs Quit | Short Term (n) | Short Term % |
| 0                                            | 70-74     | Never Any     | 2738  | 61.05 |               |             |               |                |              |
| 0                                            | 70-74     | CC            | 610   | 13.60 | 0             | 0.00        |               |                |              |
| 0                                            | 70-74     | Ecig          | 0     | 0.00  |               |             |               |                |              |
| 0                                            | 70-74     | Dual          | 0     | 0.00  |               |             |               |                |              |
| 0                                            | 70-74     | Former        | 1137  | 25.35 |               |             | 24.48         | 27             | 2.37         |
| Year of Follow-up: 1990, Age Group: 75-79    |           |               |       |       |               |             |               |                |              |
| Period                                       | Age Group | Smoking Group | N     | %     | Ever Quit (N) | Ever Quit % | Mean Yrs Quit | Short Term (n) | Short Term % |
| 0                                            | 75-79     | Never Any     | 2483  | 68.84 |               |             |               |                |              |
| 0                                            | 75-79     | CC            | 354   | 9.81  | 0             | 0.00        |               |                |              |
| 0                                            | 75-79     | Ecig          | 0     | 0.00  |               |             |               |                |              |
| 0                                            | 75-79     | Dual          | 0     | 0.00  |               |             |               |                |              |
| 0                                            | 75-79     | Former        | 770   | 21.35 |               |             | 24.48         | 24             | 3.12         |
| Year of Follow-up: 1995, Age Group: All Ages |           |               |       |       |               |             |               |                |              |
| Period                                       | Age Group | Smoking Group | N     | %     | Ever Quit (N) | Ever Quit % | Mean Yrs Quit | Short Term (n) | Short Term % |
| 5                                            | All Ages  | Never Any     | 50887 | 55.53 |               |             |               |                |              |
| 5                                            | All Ages  | CC            | 12984 | 14.17 | 0             | 0.00        |               |                |              |
| 5                                            | All Ages  | Ecig          | 9430  | 10.29 |               |             |               |                |              |
| 5                                            | All Ages  | Dual          | 0     | 0.00  |               |             |               |                |              |
| 5                                            | All Ages  | Former        | 18338 | 20.01 |               |             | 14.23         | 1077           | 5.87         |
| Year of Follow-up: 1995, Age Group: 18-19    |           |               |       |       |               |             |               |                |              |
| Period                                       | Age Group | Smoking Group | N     | %     | Ever Quit (N) | Ever Quit % | Mean Yrs Quit | Short Term (n) | Short Term % |
| 5                                            | 18-19     | Never Any     | 2434  | 76.64 |               |             |               |                |              |
| 5                                            | 18-19     | CC            | 260   | 8.19  | 0             | 0.00        |               |                |              |
| 5                                            | 18-19     | Ecig          | 406   | 12.78 |               |             |               |                |              |
| 5                                            | 18-19     | Dual          | 0     | 0.00  |               |             |               |                |              |
| 5                                            | 18-19     | Former        | 76    | 2.39  |               |             | 1.05          | 53             | 69.74        |
| Year of Follow-up: 1995, Age Group: 20-24    |           |               |       |       |               |             |               |                |              |
| Period                                       | Age Group | Smoking Group | N     | %     | Ever Quit (N) | Ever Quit % | Mean Yrs Quit | Short Term (n) | Short Term % |
| 5                                            | 20-24     | Never Any     | 5794  | 69.39 |               |             |               |                |              |
| 5                                            | 20-24     | CC            | 1028  | 12.31 | 0             | 0.00        |               |                |              |
| 5                                            | 20-24     | Ecig          | 1095  | 13.11 |               |             |               |                |              |
| 5                                            | 20-24     | Dual          | 0     | 0.00  |               |             |               |                |              |
| 5                                            | 20-24     | Former        | 433   | 5.19  |               |             | 3.25          | 92             | 21.25        |
| Year of Follow-up: 1995, Age Group: 25-29    |           |               |       |       |               |             |               |                |              |
| Period                                       | Age Group | Smoking Group | N     | %     | Ever Quit (N) | Ever Quit % | Mean Yrs Quit | Short Term (n) | Short Term % |
| 5                                            | 25-29     | Never Any     | 5313  | 60.42 |               |             |               |                |              |
| 5                                            | 25-29     | CC            | 1298  | 14.76 | 0             | 0.00        |               |                |              |
| 5                                            | 25-29     | Ecig          | 1150  | 13.08 |               |             |               |                |              |
| 5                                            | 25-29     | Dual          | 0     | 0.00  |               |             |               |                |              |
| 5                                            | 25-29     | Former        | 1032  | 11.74 |               |             | 5.88          | 67             | 6.49         |
| Year of Follow-up: 1995, Age Group: 30-34    |           |               |       |       |               |             |               |                |              |
| Period                                       | Age Group | Smoking Group | N     | %     | Ever Quit (N) | Ever Quit % | Mean Yrs Quit | Short Term (n) | Short Term % |

### Results for PHIM for Run 8 (Sensitivity\_Analysis\_2.RTF)

|                                              |           |               |      |       |               |             |               |                |              |
|----------------------------------------------|-----------|---------------|------|-------|---------------|-------------|---------------|----------------|--------------|
| 5                                            | 30-34     | Never Any     | 5304 | 52.63 |               |             |               |                |              |
| 5                                            | 30-34     | CC            | 1661 | 16.48 | 0             | 0.00        |               |                |              |
| 5                                            | 30-34     | Ecig          | 1538 | 15.26 |               |             |               |                |              |
| 5                                            | 30-34     | Dual          | 0    | 0.00  |               |             |               |                |              |
| 5                                            | 30-34     | Former        | 1575 | 15.63 |               |             | 8.30          | 36             | 2.29         |
| Year of Follow-up: 1995, Age Group: 35-39    |           |               |      |       |               |             |               |                |              |
| Period                                       | Age Group | Smoking Group | N    | %     | Ever Quit (N) | Ever Quit % | Mean Yrs Quit | Short Term (n) | Short Term % |
| 5                                            | 35-39     | Never Any     | 5278 | 50.27 |               |             |               |                |              |
| 5                                            | 35-39     | CC            | 1729 | 16.47 | 0             | 0.00        |               |                |              |
| 5                                            | 35-39     | Ecig          | 1440 | 13.72 |               |             |               |                |              |
| 5                                            | 35-39     | Dual          | 0    | 0.00  |               |             |               |                |              |
| 5                                            | 35-39     | Former        | 2052 | 19.54 |               |             | 8.78          | 63             | 3.07         |
| Year of Follow-up: 1995, Age Group: 40-44    |           |               |      |       |               |             |               |                |              |
| Period                                       | Age Group | Smoking Group | N    | %     | Ever Quit (N) | Ever Quit % | Mean Yrs Quit | Short Term (n) | Short Term % |
| 5                                            | 40-44     | Never Any     | 5018 | 52.27 |               |             |               |                |              |
| 5                                            | 40-44     | CC            | 1376 | 14.33 | 0             | 0.00        |               |                |              |
| 5                                            | 40-44     | Ecig          | 1113 | 11.59 |               |             |               |                |              |
| 5                                            | 40-44     | Dual          | 0    | 0.00  |               |             |               |                |              |
| 5                                            | 40-44     | Former        | 2093 | 21.80 |               |             | 12.10         | 64             | 3.06         |
| Year of Follow-up: 1995, Age Group: 45-49    |           |               |      |       |               |             |               |                |              |
| Period                                       | Age Group | Smoking Group | N    | %     | Ever Quit (N) | Ever Quit % | Mean Yrs Quit | Short Term (n) | Short Term % |
| 5                                            | 45-49     | Never Any     | 4356 | 51.27 |               |             |               |                |              |
| 5                                            | 45-49     | CC            | 1191 | 14.02 | 0             | 0.00        |               |                |              |
| 5                                            | 45-49     | Ecig          | 934  | 10.99 |               |             |               |                |              |
| 5                                            | 45-49     | Dual          | 0    | 0.00  |               |             |               |                |              |
| 5                                            | 45-49     | Former        | 2016 | 23.73 |               |             | 10.88         | 125            | 6.20         |
| Year of Follow-up: 1995, Age Group: 50-54    |           |               |      |       |               |             |               |                |              |
| Period                                       | Age Group | Smoking Group | N    | %     | Ever Quit (N) | Ever Quit % | Mean Yrs Quit | Short Term (n) | Short Term % |
| 5                                            | 50-54     | Never Any     | 3116 | 47.67 |               |             |               |                |              |
| 5                                            | 50-54     | CC            | 914  | 13.98 | 0             | 0.00        |               |                |              |
| 5                                            | 50-54     | Ecig          | 663  | 10.14 |               |             |               |                |              |
| 5                                            | 50-54     | Dual          | 0    | 0.00  |               |             |               |                |              |
| 5                                            | 50-54     | Former        | 1843 | 28.20 |               |             | 15.00         | 145            | 7.87         |
| Year of Follow-up: 1995, Age Group: 55-59    |           |               |      |       |               |             |               |                |              |
| Period                                       | Age Group | Smoking Group | N    | %     | Ever Quit (N) | Ever Quit % | Mean Yrs Quit | Short Term (n) | Short Term % |
| 5                                            | 55-59     | Never Any     | 2684 | 48.50 |               |             |               |                |              |
| 5                                            | 55-59     | CC            | 888  | 16.05 | 0             | 0.00        |               |                |              |
| 5                                            | 55-59     | Ecig          | 449  | 8.11  |               |             |               |                |              |
| 5                                            | 55-59     | Dual          | 0    | 0.00  |               |             |               |                |              |
| 5                                            | 55-59     | Former        | 1513 | 27.34 |               |             | 15.72         | 104            | 6.87         |
| Year of Follow-up: 1995, Age Group: 60-64    |           |               |      |       |               |             |               |                |              |
| Period                                       | Age Group | Smoking Group | N    | %     | Ever Quit (N) | Ever Quit % | Mean Yrs Quit | Short Term (n) | Short Term % |
| 5                                            | 60-64     | Never Any     | 2732 | 51.90 |               |             |               |                |              |
| 5                                            | 60-64     | CC            | 785  | 14.91 | 0             | 0.00        |               |                |              |
| 5                                            | 60-64     | Ecig          | 323  | 6.14  |               |             |               |                |              |
| 5                                            | 60-64     | Dual          | 0    | 0.00  |               |             |               |                |              |
| 5                                            | 60-64     | Former        | 1424 | 27.05 |               |             | 19.58         | 83             | 5.83         |
| Year of Follow-up: 1995, Age Group: 65-69    |           |               |      |       |               |             |               |                |              |
| Period                                       | Age Group | Smoking Group | N    | %     | Ever Quit (N) | Ever Quit % | Mean Yrs Quit | Short Term (n) | Short Term % |
| 5                                            | 65-69     | Never Any     | 3078 | 55.72 |               |             |               |                |              |
| 5                                            | 65-69     | CC            | 746  | 13.50 | 0             | 0.00        |               |                |              |
| 5                                            | 65-69     | Ecig          | 221  | 4.00  |               |             |               |                |              |
| 5                                            | 65-69     | Dual          | 0    | 0.00  |               |             |               |                |              |
| 5                                            | 65-69     | Former        | 1479 | 26.77 |               |             | 19.27         | 99             | 6.69         |
| Year of Follow-up: 1995, Age Group: 70-74    |           |               |      |       |               |             |               |                |              |
| Period                                       | Age Group | Smoking Group | N    | %     | Ever Quit (N) | Ever Quit % | Mean Yrs Quit | Short Term (n) | Short Term % |
| 5                                            | 70-74     | Never Any     | 3042 | 57.36 |               |             |               |                |              |
| 5                                            | 70-74     | CC            | 673  | 12.69 | 0             | 0.00        |               |                |              |
| 5                                            | 70-74     | Ecig          | 79   | 1.49  |               |             |               |                |              |
| 5                                            | 70-74     | Dual          | 0    | 0.00  |               |             |               |                |              |
| 5                                            | 70-74     | Former        | 1509 | 28.46 |               |             | 22.15         | 81             | 5.37         |
| Year of Follow-up: 1995, Age Group: 75-79    |           |               |      |       |               |             |               |                |              |
| Period                                       | Age Group | Smoking Group | N    | %     | Ever Quit (N) | Ever Quit % | Mean Yrs Quit | Short Term (n) | Short Term % |
| 5                                            | 75-79     | Never Any     | 2738 | 61.05 |               |             |               |                |              |
| 5                                            | 75-79     | CC            | 435  | 9.70  | 0             | 0.00        |               |                |              |
| 5                                            | 75-79     | Ecig          | 19   | 0.42  |               |             |               |                |              |
| 5                                            | 75-79     | Dual          | 0    | 0.00  |               |             |               |                |              |
| 5                                            | 75-79     | Former        | 1293 | 28.83 |               |             | 26.16         | 65             | 5.03         |
| Year of Follow-up: 2000, Age Group: All Ages |           |               |      |       |               |             |               |                |              |

### Results for PHIM for Run 8 (Sensitivity\_Analysis\_2.RTF)

| Period                                    | Age Group | Smoking Group | N     | %     | Ever Quit (N) | Ever Quit % | Mean Yrs Quit | Short Term (n) | Short Term % |
|-------------------------------------------|-----------|---------------|-------|-------|---------------|-------------|---------------|----------------|--------------|
| 10                                        | All Ages  | Never Any     | 50423 | 54.86 |               |             |               |                |              |
| 10                                        | All Ages  | CC            | 6784  | 7.38  | 0             | 0.00        |               |                |              |
| 10                                        | All Ages  | Ecig          | 13496 | 14.68 |               |             |               |                |              |
| 10                                        | All Ages  | Dual          | 0     | 0.00  |               |             |               |                |              |
| 10                                        | All Ages  | Former        | 21205 | 23.07 |               |             | 15.14         | 1662           | 7.84         |
| Year of Follow-up: 2000, Age Group: 18-19 |           |               |       |       |               |             |               |                |              |
| Period                                    | Age Group | Smoking Group | N     | %     | Ever Quit (N) | Ever Quit % | Mean Yrs Quit | Short Term (n) | Short Term % |
| 10                                        | 18-19     | Never Any     | 0     | .     |               |             |               |                |              |
| 10                                        | 18-19     | CC            | 0     | .     | 0             | .           |               |                |              |
| 10                                        | 18-19     | Ecig          | 0     | .     |               |             |               |                |              |
| 10                                        | 18-19     | Dual          | 0     | .     |               |             |               |                |              |
| 10                                        | 18-19     | Former        | 0     | .     |               |             |               | 0              | .            |
| Year of Follow-up: 2000, Age Group: 20-24 |           |               |       |       |               |             |               |                |              |
| Period                                    | Age Group | Smoking Group | N     | %     | Ever Quit (N) | Ever Quit % | Mean Yrs Quit | Short Term (n) | Short Term % |
| 10                                        | 20-24     | Never Any     | 5128  | 64.67 |               |             |               |                |              |
| 10                                        | 20-24     | CC            | 484   | 6.10  | 0             | 0.00        |               |                |              |
| 10                                        | 20-24     | Ecig          | 1652  | 20.83 |               |             |               |                |              |
| 10                                        | 20-24     | Dual          | 0     | 0.00  |               |             |               |                |              |
| 10                                        | 20-24     | Former        | 666   | 8.40  |               |             | 3.56          | 165            | 24.77        |
| Year of Follow-up: 2000, Age Group: 25-29 |           |               |       |       |               |             |               |                |              |
| Period                                    | Age Group | Smoking Group | N     | %     | Ever Quit (N) | Ever Quit % | Mean Yrs Quit | Short Term (n) | Short Term % |
| 10                                        | 25-29     | Never Any     | 5493  | 65.78 |               |             |               |                |              |
| 10                                        | 25-29     | CC            | 534   | 6.40  | 0             | 0.00        |               |                |              |
| 10                                        | 25-29     | Ecig          | 1558  | 18.66 |               |             |               |                |              |
| 10                                        | 25-29     | Dual          | 0     | 0.00  |               |             |               |                |              |
| 10                                        | 25-29     | Former        | 765   | 9.16  |               |             | 5.50          | 129            | 16.86        |
| Year of Follow-up: 2000, Age Group: 30-34 |           |               |       |       |               |             |               |                |              |
| Period                                    | Age Group | Smoking Group | N     | %     | Ever Quit (N) | Ever Quit % | Mean Yrs Quit | Short Term (n) | Short Term % |
| 10                                        | 30-34     | Never Any     | 5214  | 59.30 |               |             |               |                |              |
| 10                                        | 30-34     | CC            | 635   | 7.22  | 0             | 0.00        |               |                |              |
| 10                                        | 30-34     | Ecig          | 1695  | 19.28 |               |             |               |                |              |
| 10                                        | 30-34     | Dual          | 0     | 0.00  |               |             |               |                |              |
| 10                                        | 30-34     | Former        | 1249  | 14.20 |               |             | 9.31          | 97             | 7.77         |
| Year of Follow-up: 2000, Age Group: 35-39 |           |               |       |       |               |             |               |                |              |
| Period                                    | Age Group | Smoking Group | N     | %     | Ever Quit (N) | Ever Quit % | Mean Yrs Quit | Short Term (n) | Short Term % |
| 10                                        | 35-39     | Never Any     | 5284  | 52.43 |               |             |               |                |              |
| 10                                        | 35-39     | CC            | 810   | 8.04  | 0             | 0.00        |               |                |              |
| 10                                        | 35-39     | Ecig          | 2165  | 21.48 |               |             |               |                |              |
| 10                                        | 35-39     | Dual          | 0     | 0.00  |               |             |               |                |              |
| 10                                        | 35-39     | Former        | 1819  | 18.05 |               |             | 11.74         | 121            | 6.65         |
| Year of Follow-up: 2000, Age Group: 40-44 |           |               |       |       |               |             |               |                |              |
| Period                                    | Age Group | Smoking Group | N     | %     | Ever Quit (N) | Ever Quit % | Mean Yrs Quit | Short Term (n) | Short Term % |
| 10                                        | 40-44     | Never Any     | 5278  | 50.27 |               |             |               |                |              |
| 10                                        | 40-44     | CC            | 878   | 8.36  | 0             | 0.00        |               |                |              |
| 10                                        | 40-44     | Ecig          | 2007  | 19.12 |               |             |               |                |              |
| 10                                        | 40-44     | Dual          | 0     | 0.00  |               |             |               |                |              |
| 10                                        | 40-44     | Former        | 2336  | 22.25 |               |             | 12.32         | 123            | 5.27         |
| Year of Follow-up: 2000, Age Group: 45-49 |           |               |       |       |               |             |               |                |              |
| Period                                    | Age Group | Smoking Group | N     | %     | Ever Quit (N) | Ever Quit % | Mean Yrs Quit | Short Term (n) | Short Term % |
| 10                                        | 45-49     | Never Any     | 5018  | 52.27 |               |             |               |                |              |
| 10                                        | 45-49     | CC            | 690   | 7.19  | 0             | 0.00        |               |                |              |
| 10                                        | 45-49     | Ecig          | 1434  | 14.94 |               |             |               |                |              |
| 10                                        | 45-49     | Dual          | 0     | 0.00  |               |             |               |                |              |
| 10                                        | 45-49     | Former        | 2458  | 25.60 |               |             | 14.83         | 165            | 6.71         |
| Year of Follow-up: 2000, Age Group: 50-54 |           |               |       |       |               |             |               |                |              |
| Period                                    | Age Group | Smoking Group | N     | %     | Ever Quit (N) | Ever Quit % | Mean Yrs Quit | Short Term (n) | Short Term % |
| 10                                        | 50-54     | Never Any     | 4356  | 51.27 |               |             |               |                |              |
| 10                                        | 50-54     | CC            | 574   | 6.76  | 0             | 0.00        |               |                |              |
| 10                                        | 50-54     | Ecig          | 1123  | 13.22 |               |             |               |                |              |
| 10                                        | 50-54     | Dual          | 0     | 0.00  |               |             |               |                |              |
| 10                                        | 50-54     | Former        | 2444  | 28.76 |               |             | 13.43         | 186            | 7.61         |
| Year of Follow-up: 2000, Age Group: 55-59 |           |               |       |       |               |             |               |                |              |
| Period                                    | Age Group | Smoking Group | N     | %     | Ever Quit (N) | Ever Quit % | Mean Yrs Quit | Short Term (n) | Short Term % |
| 10                                        | 55-59     | Never Any     | 3116  | 47.67 |               |             |               |                |              |
| 10                                        | 55-59     | CC            | 439   | 6.72  | 0             | 0.00        |               |                |              |
| 10                                        | 55-59     | Ecig          | 764   | 11.69 |               |             |               |                |              |
| 10                                        | 55-59     | Dual          | 0     | 0.00  |               |             |               |                |              |

**Results for PHIM for Run 8 (Sensitivity\_Analysis\_2.RTF)**

|                                              |           |               |       |       |               |             |               |                |              |
|----------------------------------------------|-----------|---------------|-------|-------|---------------|-------------|---------------|----------------|--------------|
| 10                                           | 55-59     | Former        | 2217  | 33.92 |               |             | 16.96         | 144            | 6.50         |
| Year of Follow-up: 2000, Age Group: 60-64    |           |               |       |       |               |             |               |                |              |
| Period                                       | Age Group | Smoking Group | N     | %     | Ever Quit (N) | Ever Quit % | Mean Yrs Quit | Short Term (n) | Short Term % |
| 10                                           | 60-64     | Never Any     | 2684  | 48.50 |               |             |               |                |              |
| 10                                           | 60-64     | CC            | 487   | 8.80  | 0             | 0.00        |               |                |              |
| 10                                           | 60-64     | Ecig          | 494   | 8.93  |               |             |               |                |              |
| 10                                           | 60-64     | Dual          | 0     | 0.00  |               |             |               |                |              |
| 10                                           | 60-64     | Former        | 1869  | 33.77 |               |             | 17.11         | 155            | 8.29         |
| Year of Follow-up: 2000, Age Group: 65-69    |           |               |       |       |               |             |               |                |              |
| Period                                       | Age Group | Smoking Group | N     | %     | Ever Quit (N) | Ever Quit % | Mean Yrs Quit | Short Term (n) | Short Term % |
| 10                                           | 65-69     | Never Any     | 2732  | 51.90 |               |             |               |                |              |
| 10                                           | 65-69     | CC            | 441   | 8.38  | 0             | 0.00        |               |                |              |
| 10                                           | 65-69     | Ecig          | 325   | 6.17  |               |             |               |                |              |
| 10                                           | 65-69     | Dual          | 0     | 0.00  |               |             |               |                |              |
| 10                                           | 65-69     | Former        | 1766  | 33.55 |               |             | 20.20         | 128            | 7.25         |
| Year of Follow-up: 2000, Age Group: 70-74    |           |               |       |       |               |             |               |                |              |
| Period                                       | Age Group | Smoking Group | N     | %     | Ever Quit (N) | Ever Quit % | Mean Yrs Quit | Short Term (n) | Short Term % |
| 10                                           | 70-74     | Never Any     | 3078  | 55.72 |               |             |               |                |              |
| 10                                           | 70-74     | CC            | 424   | 7.68  | 0             | 0.00        |               |                |              |
| 10                                           | 70-74     | Ecig          | 203   | 3.67  |               |             |               |                |              |
| 10                                           | 70-74     | Dual          | 0     | 0.00  |               |             |               |                |              |
| 10                                           | 70-74     | Former        | 1819  | 32.93 |               |             | 20.10         | 142            | 7.81         |
| Year of Follow-up: 2000, Age Group: 75-79    |           |               |       |       |               |             |               |                |              |
| Period                                       | Age Group | Smoking Group | N     | %     | Ever Quit (N) | Ever Quit % | Mean Yrs Quit | Short Term (n) | Short Term % |
| 10                                           | 75-79     | Never Any     | 3042  | 57.36 |               |             |               |                |              |
| 10                                           | 75-79     | CC            | 388   | 7.32  | 0             | 0.00        |               |                |              |
| 10                                           | 75-79     | Ecig          | 76    | 1.43  |               |             |               |                |              |
| 10                                           | 75-79     | Dual          | 0     | 0.00  |               |             |               |                |              |
| 10                                           | 75-79     | Former        | 1797  | 33.89 |               |             | 23.13         | 107            | 5.95         |
| Year of Follow-up: 2005, Age Group: All Ages |           |               |       |       |               |             |               |                |              |
| Period                                       | Age Group | Smoking Group | N     | %     | Ever Quit (N) | Ever Quit % | Mean Yrs Quit | Short Term (n) | Short Term % |
| 15                                           | All Ages  | Never Any     | 47002 | 54.27 |               |             |               |                |              |
| 15                                           | All Ages  | CC            | 3463  | 4.00  | 0             | 0.00        |               |                |              |
| 15                                           | All Ages  | Ecig          | 14080 | 16.26 |               |             |               |                |              |
| 15                                           | All Ages  | Dual          | 0     | 0.00  |               |             |               |                |              |
| 15                                           | All Ages  | Former        | 22060 | 25.47 |               |             | 17.33         | 998            | 4.52         |
| Year of Follow-up: 2005, Age Group: 18-19    |           |               |       |       |               |             |               |                |              |
| Period                                       | Age Group | Smoking Group | N     | %     | Ever Quit (N) | Ever Quit % | Mean Yrs Quit | Short Term (n) | Short Term % |
| 15                                           | 18-19     | Never Any     | 0     | .     |               |             |               |                |              |
| 15                                           | 18-19     | CC            | 0     | .     | 0             | .           |               |                |              |
| 15                                           | 18-19     | Ecig          | 0     | .     |               |             |               |                |              |
| 15                                           | 18-19     | Dual          | 0     | .     |               |             |               |                |              |
| 15                                           | 18-19     | Former        | 0     | .     |               |             | .             | 0              | .            |
| Year of Follow-up: 2005, Age Group: 20-24    |           |               |       |       |               |             |               |                |              |
| Period                                       | Age Group | Smoking Group | N     | %     | Ever Quit (N) | Ever Quit % | Mean Yrs Quit | Short Term (n) | Short Term % |
| 15                                           | 20-24     | Never Any     | 0     | .     |               |             |               |                |              |
| 15                                           | 20-24     | CC            | 0     | .     | 0             | .           |               |                |              |
| 15                                           | 20-24     | Ecig          | 0     | .     |               |             |               |                |              |
| 15                                           | 20-24     | Dual          | 0     | .     |               |             |               |                |              |
| 15                                           | 20-24     | Former        | 0     | .     |               |             | .             | 0              | .            |
| Year of Follow-up: 2005, Age Group: 25-29    |           |               |       |       |               |             |               |                |              |
| Period                                       | Age Group | Smoking Group | N     | %     | Ever Quit (N) | Ever Quit % | Mean Yrs Quit | Short Term (n) | Short Term % |
| 15                                           | 25-29     | Never Any     | 4860  | 61.29 |               |             |               |                |              |
| 15                                           | 25-29     | CC            | 256   | 3.23  | 0             | 0.00        |               |                |              |
| 15                                           | 25-29     | Ecig          | 1848  | 23.30 |               |             |               |                |              |
| 15                                           | 25-29     | Dual          | 0     | 0.00  |               |             |               |                |              |
| 15                                           | 25-29     | Former        | 966   | 12.18 |               |             | 6.64          | 96             | 9.94         |
| Year of Follow-up: 2005, Age Group: 30-34    |           |               |       |       |               |             |               |                |              |
| Period                                       | Age Group | Smoking Group | N     | %     | Ever Quit (N) | Ever Quit % | Mean Yrs Quit | Short Term (n) | Short Term % |
| 15                                           | 30-34     | Never Any     | 5407  | 64.75 |               |             |               |                |              |
| 15                                           | 30-34     | CC            | 266   | 3.19  | 0             | 0.00        |               |                |              |
| 15                                           | 30-34     | Ecig          | 1706  | 20.43 |               |             |               |                |              |
| 15                                           | 30-34     | Dual          | 0     | 0.00  |               |             |               |                |              |
| 15                                           | 30-34     | Former        | 971   | 11.63 |               |             | 8.69          | 82             | 8.44         |
| Year of Follow-up: 2005, Age Group: 35-39    |           |               |       |       |               |             |               |                |              |
| Period                                       | Age Group | Smoking Group | N     | %     | Ever Quit (N) | Ever Quit % | Mean Yrs Quit | Short Term (n) | Short Term % |
| 15                                           | 35-39     | Never Any     | 5189  | 59.01 |               |             |               |                |              |
| 15                                           | 35-39     | CC            | 310   | 3.53  | 0             | 0.00        |               |                |              |



**Results for PHIM for Run 8 (Sensitivity\_Analysis\_2.RTF)**

|                                              |           |               |       |       |               |             |               |                |              |
|----------------------------------------------|-----------|---------------|-------|-------|---------------|-------------|---------------|----------------|--------------|
| 15                                           | 35-39     | Ecig          | 1855  | 21.10 |               |             |               |                |              |
| 15                                           | 35-39     | Dual          | 0     | 0.00  |               |             |               |                |              |
| 15                                           | 35-39     | Former        | 1439  | 16.37 |               |             | 12.70         | 72             | 5.00         |
| Year of Follow-up: 2005, Age Group: 40-44    |           |               |       |       |               |             |               |                |              |
| Period                                       | Age Group | Smoking Group | N     | %     | Ever Quit (N) | Ever Quit % | Mean Yrs Quit | Short Term (n) | Short Term % |
| 15                                           | 40-44     | Never Any     | 5284  | 52.43 |               |             |               |                |              |
| 15                                           | 40-44     | CC            | 405   | 4.02  | 0             | 0.00        |               |                |              |
| 15                                           | 40-44     | Ecig          | 2318  | 23.00 |               |             |               |                |              |
| 15                                           | 40-44     | Dual          | 0     | 0.00  |               |             |               |                |              |
| 15                                           | 40-44     | Former        | 2071  | 20.55 |               |             | 14.94         | 116            | 5.60         |
| Year of Follow-up: 2005, Age Group: 45-49    |           |               |       |       |               |             |               |                |              |
| Period                                       | Age Group | Smoking Group | N     | %     | Ever Quit (N) | Ever Quit % | Mean Yrs Quit | Short Term (n) | Short Term % |
| 15                                           | 45-49     | Never Any     | 5278  | 50.27 |               |             |               |                |              |
| 15                                           | 45-49     | CC            | 457   | 4.35  | 0             | 0.00        |               |                |              |
| 15                                           | 45-49     | Ecig          | 2102  | 20.02 |               |             |               |                |              |
| 15                                           | 45-49     | Dual          | 0     | 0.00  |               |             |               |                |              |
| 15                                           | 45-49     | Former        | 2662  | 25.35 |               |             | 15.44         | 142            | 5.33         |
| Year of Follow-up: 2005, Age Group: 50-54    |           |               |       |       |               |             |               |                |              |
| Period                                       | Age Group | Smoking Group | N     | %     | Ever Quit (N) | Ever Quit % | Mean Yrs Quit | Short Term (n) | Short Term % |
| 15                                           | 50-54     | Never Any     | 5018  | 52.27 |               |             |               |                |              |
| 15                                           | 50-54     | CC            | 372   | 3.88  | 0             | 0.00        |               |                |              |
| 15                                           | 50-54     | Ecig          | 1470  | 15.31 |               |             |               |                |              |
| 15                                           | 50-54     | Dual          | 0     | 0.00  |               |             |               |                |              |
| 15                                           | 50-54     | Former        | 2740  | 28.54 |               |             | 18.00         | 108            | 3.94         |
| Year of Follow-up: 2005, Age Group: 55-59    |           |               |       |       |               |             |               |                |              |
| Period                                       | Age Group | Smoking Group | N     | %     | Ever Quit (N) | Ever Quit % | Mean Yrs Quit | Short Term (n) | Short Term % |
| 15                                           | 55-59     | Never Any     | 4356  | 51.27 |               |             |               |                |              |
| 15                                           | 55-59     | CC            | 316   | 3.72  | 0             | 0.00        |               |                |              |
| 15                                           | 55-59     | Ecig          | 1162  | 13.68 |               |             |               |                |              |
| 15                                           | 55-59     | Dual          | 0     | 0.00  |               |             |               |                |              |
| 15                                           | 55-59     | Former        | 2663  | 31.34 |               |             | 17.11         | 68             | 2.55         |
| Year of Follow-up: 2005, Age Group: 60-64    |           |               |       |       |               |             |               |                |              |
| Period                                       | Age Group | Smoking Group | N     | %     | Ever Quit (N) | Ever Quit % | Mean Yrs Quit | Short Term (n) | Short Term % |
| 15                                           | 60-64     | Never Any     | 3116  | 47.67 |               |             |               |                |              |
| 15                                           | 60-64     | CC            | 256   | 3.92  | 0             | 0.00        |               |                |              |
| 15                                           | 60-64     | Ecig          | 731   | 11.18 |               |             |               |                |              |
| 15                                           | 60-64     | Dual          | 0     | 0.00  |               |             |               |                |              |
| 15                                           | 60-64     | Former        | 2433  | 37.22 |               |             | 20.19         | 90             | 3.70         |
| Year of Follow-up: 2005, Age Group: 65-69    |           |               |       |       |               |             |               |                |              |
| Period                                       | Age Group | Smoking Group | N     | %     | Ever Quit (N) | Ever Quit % | Mean Yrs Quit | Short Term (n) | Short Term % |
| 15                                           | 65-69     | Never Any     | 2684  | 48.50 |               |             |               |                |              |
| 15                                           | 65-69     | CC            | 295   | 5.33  | 0             | 0.00        |               |                |              |
| 15                                           | 65-69     | Ecig          | 432   | 7.81  |               |             |               |                |              |
| 15                                           | 65-69     | Dual          | 0     | 0.00  |               |             |               |                |              |
| 15                                           | 65-69     | Former        | 2123  | 38.36 |               |             | 19.76         | 76             | 3.58         |
| Year of Follow-up: 2005, Age Group: 70-74    |           |               |       |       |               |             |               |                |              |
| Period                                       | Age Group | Smoking Group | N     | %     | Ever Quit (N) | Ever Quit % | Mean Yrs Quit | Short Term (n) | Short Term % |
| 15                                           | 70-74     | Never Any     | 2732  | 51.90 |               |             |               |                |              |
| 15                                           | 70-74     | CC            | 262   | 4.98  | 0             | 0.00        |               |                |              |
| 15                                           | 70-74     | Ecig          | 294   | 5.59  |               |             |               |                |              |
| 15                                           | 70-74     | Dual          | 0     | 0.00  |               |             |               |                |              |
| 15                                           | 70-74     | Former        | 1976  | 37.54 |               |             | 22.75         | 87             | 4.40         |
| Year of Follow-up: 2005, Age Group: 75-79    |           |               |       |       |               |             |               |                |              |
| Period                                       | Age Group | Smoking Group | N     | %     | Ever Quit (N) | Ever Quit % | Mean Yrs Quit | Short Term (n) | Short Term % |
| 15                                           | 75-79     | Never Any     | 3078  | 55.72 |               |             |               |                |              |
| 15                                           | 75-79     | CC            | 268   | 4.85  | 0             | 0.00        |               |                |              |
| 15                                           | 75-79     | Ecig          | 162   | 2.93  |               |             |               |                |              |
| 15                                           | 75-79     | Dual          | 0     | 0.00  |               |             |               |                |              |
| 15                                           | 75-79     | Former        | 2016  | 36.50 |               |             | 22.88         | 61             | 3.03         |
| Year of Follow-up: 2010, Age Group: All Ages |           |               |       |       |               |             |               |                |              |
| Period                                       | Age Group | Smoking Group | N     | %     | Ever Quit (N) | Ever Quit % | Mean Yrs Quit | Short Term (n) | Short Term % |
| 20                                           | All Ages  | Never Any     | 43759 | 53.97 |               |             |               |                |              |
| 20                                           | All Ages  | CC            | 1725  | 2.13  | 0             | 0.00        |               |                |              |
| 20                                           | All Ages  | Ecig          | 12902 | 15.91 |               |             |               |                |              |
| 20                                           | All Ages  | Dual          | 0     | 0.00  |               |             |               |                |              |
| 20                                           | All Ages  | Former        | 22695 | 27.99 |               |             | 19.45         | 1101           | 4.85         |
| Year of Follow-up: 2010, Age Group: 18-19    |           |               |       |       |               |             |               |                |              |
| Period                                       | Age Group | Smoking Group | N     | %     | Ever Quit (N) | Ever Quit % | Mean Yrs Quit | Short Term (n) | Short Term % |

**Results for PHIM for Run 8 (Sensitivity\_Analysis\_2.RTF)**

|                                           |           |               |      |       |               |             |               |                |              |
|-------------------------------------------|-----------|---------------|------|-------|---------------|-------------|---------------|----------------|--------------|
| 20                                        | 18-19     | Never Any     | 0    | .     |               |             |               |                |              |
| 20                                        | 18-19     | CC            | 0    | .     | 0             | .           |               |                |              |
| 20                                        | 18-19     | Ecig          | 0    | .     |               |             |               |                |              |
| 20                                        | 18-19     | Dual          | 0    | .     |               |             |               |                |              |
| 20                                        | 18-19     | Former        | 0    | .     |               |             | 0             | .              |              |
| Year of Follow-up: 2010, Age Group: 20-24 |           |               |      |       |               |             |               |                |              |
| Period                                    | Age Group | Smoking Group | N    | %     | Ever Quit (N) | Ever Quit % | Mean Yrs Quit | Short Term (n) | Short Term % |
| 20                                        | 20-24     | Never Any     | 0    | .     |               |             |               |                |              |
| 20                                        | 20-24     | CC            | 0    | .     | 0             | .           |               |                |              |
| 20                                        | 20-24     | Ecig          | 0    | .     |               |             |               |                |              |
| 20                                        | 20-24     | Dual          | 0    | .     |               |             |               |                |              |
| 20                                        | 20-24     | Former        | 0    | .     |               |             |               | 0              | .            |
| Year of Follow-up: 2010, Age Group: 25-29 |           |               |      |       |               |             |               |                |              |
| Period                                    | Age Group | Smoking Group | N    | %     | Ever Quit (N) | Ever Quit % | Mean Yrs Quit | Short Term (n) | Short Term % |
| 20                                        | 25-29     | Never Any     | 0    | .     |               |             |               |                |              |
| 20                                        | 25-29     | CC            | 0    | .     | 0             | .           |               |                |              |
| 20                                        | 25-29     | Ecig          | 0    | .     |               |             |               |                |              |
| 20                                        | 25-29     | Dual          | 0    | .     |               |             |               |                |              |
| 20                                        | 25-29     | Former        | 0    | .     |               |             |               | 0              | .            |
| Year of Follow-up: 2010, Age Group: 30-34 |           |               |      |       |               |             |               |                |              |
| Period                                    | Age Group | Smoking Group | N    | %     | Ever Quit (N) | Ever Quit % | Mean Yrs Quit | Short Term (n) | Short Term % |
| 20                                        | 30-34     | Never Any     | 4743 | 59.81 |               |             |               |                |              |
| 20                                        | 30-34     | CC            | 114  | 1.44  | 0             | 0.00        |               |                |              |
| 20                                        | 30-34     | Ecig          | 1837 | 23.17 |               |             |               |                |              |
| 20                                        | 30-34     | Dual          | 0    | 0.00  |               |             |               |                |              |
| 20                                        | 30-34     | Former        | 1236 | 15.59 |               |             | 9.46          | 132            | 10.68        |
| Year of Follow-up: 2010, Age Group: 35-39 |           |               |      |       |               |             |               |                |              |
| Period                                    | Age Group | Smoking Group | N    | %     | Ever Quit (N) | Ever Quit % | Mean Yrs Quit | Short Term (n) | Short Term % |
| 20                                        | 35-39     | Never Any     | 5359 | 64.18 |               |             |               |                |              |
| 20                                        | 35-39     | CC            | 114  | 1.37  | 0             | 0.00        |               |                |              |
| 20                                        | 35-39     | Ecig          | 1648 | 19.74 |               |             |               |                |              |
| 20                                        | 35-39     | Dual          | 0    | 0.00  |               |             |               |                |              |
| 20                                        | 35-39     | Former        | 1229 | 14.72 |               |             | 11.22         | 94             | 7.65         |
| Year of Follow-up: 2010, Age Group: 40-44 |           |               |      |       |               |             |               |                |              |
| Period                                    | Age Group | Smoking Group | N    | %     | Ever Quit (N) | Ever Quit % | Mean Yrs Quit | Short Term (n) | Short Term % |
| 20                                        | 40-44     | Never Any     | 5189 | 59.01 |               |             |               |                |              |
| 20                                        | 40-44     | CC            | 145  | 1.65  | 0             | 0.00        |               |                |              |
| 20                                        | 40-44     | Ecig          | 1771 | 20.14 |               |             |               |                |              |
| 20                                        | 40-44     | Dual          | 0    | 0.00  |               |             |               |                |              |
| 20                                        | 40-44     | Former        | 1688 | 19.20 |               |             | 15.36         | 107            | 6.34         |
| Year of Follow-up: 2010, Age Group: 45-49 |           |               |      |       |               |             |               |                |              |
| Period                                    | Age Group | Smoking Group | N    | %     | Ever Quit (N) | Ever Quit % | Mean Yrs Quit | Short Term (n) | Short Term % |
| 20                                        | 45-49     | Never Any     | 5284 | 52.43 |               |             |               |                |              |
| 20                                        | 45-49     | CC            | 207  | 2.05  | 0             | 0.00        |               |                |              |
| 20                                        | 45-49     | Ecig          | 2218 | 22.01 |               |             |               |                |              |
| 20                                        | 45-49     | Dual          | 0    | 0.00  |               |             |               |                |              |
| 20                                        | 45-49     | Former        | 2369 | 23.51 |               |             | 17.67         | 123            | 5.19         |
| Year of Follow-up: 2010, Age Group: 50-54 |           |               |      |       |               |             |               |                |              |
| Period                                    | Age Group | Smoking Group | N    | %     | Ever Quit (N) | Ever Quit % | Mean Yrs Quit | Short Term (n) | Short Term % |
| 20                                        | 50-54     | Never Any     | 5278 | 50.27 |               |             |               |                |              |
| 20                                        | 50-54     | CC            | 236  | 2.25  | 0             | 0.00        |               |                |              |
| 20                                        | 50-54     | Ecig          | 1972 | 18.78 |               |             |               |                |              |
| 20                                        | 50-54     | Dual          | 0    | 0.00  |               |             |               |                |              |
| 20                                        | 50-54     | Former        | 3013 | 28.70 |               |             | 18.27         | 163            | 5.41         |
| Year of Follow-up: 2010, Age Group: 55-59 |           |               |      |       |               |             |               |                |              |
| Period                                    | Age Group | Smoking Group | N    | %     | Ever Quit (N) | Ever Quit % | Mean Yrs Quit | Short Term (n) | Short Term % |
| 20                                        | 55-59     | Never Any     | 5018 | 52.27 |               |             |               |                |              |
| 20                                        | 55-59     | CC            | 216  | 2.25  | 0             | 0.00        |               |                |              |
| 20                                        | 55-59     | Ecig          | 1352 | 14.08 |               |             |               |                |              |
| 20                                        | 55-59     | Dual          | 0    | 0.00  |               |             |               |                |              |
| 20                                        | 55-59     | Former        | 3014 | 31.40 |               |             | 21.11         | 91             | 3.02         |
| Year of Follow-up: 2010, Age Group: 60-64 |           |               |      |       |               |             |               |                |              |
| Period                                    | Age Group | Smoking Group | N    | %     | Ever Quit (N) | Ever Quit % | Mean Yrs Quit | Short Term (n) | Short Term % |
| 20                                        | 60-64     | Never Any     | 4356 | 51.27 |               |             |               |                |              |
| 20                                        | 60-64     | CC            | 179  | 2.11  | 0             | 0.00        |               |                |              |
| 20                                        | 60-64     | Ecig          | 993  | 11.69 |               |             |               |                |              |
| 20                                        | 60-64     | Dual          | 0    | 0.00  |               |             |               |                |              |
| 20                                        | 60-64     | Former        | 2969 | 34.94 |               |             | 19.99         | 154            | 5.19         |
| Year of Follow-up: 2010, Age Group: 65-69 |           |               |      |       |               |             |               |                |              |

**Results for PHIM for Run 8 (Sensitivity\_Analysis\_2.RTF)**

| Period                                       | Age Group | Smoking Group | N     | %     | Ever Quit (N) | Ever Quit % | Mean Yrs Quit | Short Term (n) | Short Term % |
|----------------------------------------------|-----------|---------------|-------|-------|---------------|-------------|---------------|----------------|--------------|
| 20                                           | 65-69     | Never Any     | 3116  | 47.67 |               |             |               |                |              |
| 20                                           | 65-69     | CC            | 144   | 2.20  | 0             | 0.00        |               |                |              |
| 20                                           | 65-69     | Ecig          | 548   | 8.38  |               |             |               |                |              |
| 20                                           | 65-69     | Dual          | 0     | 0.00  |               |             |               |                |              |
| 20                                           | 65-69     | Former        | 2728  | 41.74 |               |             | 22.70         | 98             | 3.59         |
| Year of Follow-up: 2010, Age Group: 70-74    |           |               |       |       |               |             |               |                |              |
| Period                                       | Age Group | Smoking Group | N     | %     | Ever Quit (N) | Ever Quit % | Mean Yrs Quit | Short Term (n) | Short Term % |
| 20                                           | 70-74     | Never Any     | 2684  | 48.50 |               |             |               |                |              |
| 20                                           | 70-74     | CC            | 185   | 3.34  | 0             | 0.00        |               |                |              |
| 20                                           | 70-74     | Ecig          | 357   | 6.45  |               |             |               |                |              |
| 20                                           | 70-74     | Dual          | 0     | 0.00  |               |             |               |                |              |
| 20                                           | 70-74     | Former        | 2308  | 41.71 |               |             | 22.93         | 73             | 3.16         |
| Year of Follow-up: 2010, Age Group: 75-79    |           |               |       |       |               |             |               |                |              |
| Period                                       | Age Group | Smoking Group | N     | %     | Ever Quit (N) | Ever Quit % | Mean Yrs Quit | Short Term (n) | Short Term % |
| 20                                           | 75-79     | Never Any     | 2732  | 51.90 |               |             |               |                |              |
| 20                                           | 75-79     | CC            | 185   | 3.51  | 0             | 0.00        |               |                |              |
| 20                                           | 75-79     | Ecig          | 206   | 3.91  |               |             |               |                |              |
| 20                                           | 75-79     | Dual          | 0     | 0.00  |               |             |               |                |              |
| 20                                           | 75-79     | Former        | 2141  | 40.67 |               |             | 25.77         | 66             | 3.08         |
| Year of Follow-up: 2015, Age Group: All Ages |           |               |       |       |               |             |               |                |              |
| Period                                       | Age Group | Smoking Group | N     | %     | Ever Quit (N) | Ever Quit % | Mean Yrs Quit | Short Term (n) | Short Term % |
| 25                                           | All Ages  | Never Any     | 41010 | 54.09 |               |             |               |                |              |
| 25                                           | All Ages  | CC            | 902   | 1.19  | 0             | 0.00        |               |                |              |
| 25                                           | All Ages  | Ecig          | 10915 | 14.40 |               |             |               |                |              |
| 25                                           | All Ages  | Dual          | 0     | 0.00  |               |             |               |                |              |
| 25                                           | All Ages  | Former        | 22990 | 30.32 |               |             | 21.49         | 914            | 3.98         |
| Year of Follow-up: 2015, Age Group: 18-19    |           |               |       |       |               |             |               |                |              |
| Period                                       | Age Group | Smoking Group | N     | %     | Ever Quit (N) | Ever Quit % | Mean Yrs Quit | Short Term (n) | Short Term % |
| 25                                           | 18-19     | Never Any     | 0     | .     |               |             |               |                |              |
| 25                                           | 18-19     | CC            | 0     | .     | 0             | .           |               |                |              |
| 25                                           | 18-19     | Ecig          | 0     | .     |               |             |               |                |              |
| 25                                           | 18-19     | Dual          | 0     | .     |               |             |               |                |              |
| 25                                           | 18-19     | Former        | 0     | .     |               |             | .             | 0              | .            |
| Year of Follow-up: 2015, Age Group: 20-24    |           |               |       |       |               |             |               |                |              |
| Period                                       | Age Group | Smoking Group | N     | %     | Ever Quit (N) | Ever Quit % | Mean Yrs Quit | Short Term (n) | Short Term % |
| 25                                           | 20-24     | Never Any     | 0     | .     |               |             |               |                |              |
| 25                                           | 20-24     | CC            | 0     | .     | 0             | .           |               |                |              |
| 25                                           | 20-24     | Ecig          | 0     | .     |               |             |               |                |              |
| 25                                           | 20-24     | Dual          | 0     | .     |               |             |               |                |              |
| 25                                           | 20-24     | Former        | 0     | .     |               |             | .             | 0              | .            |
| Year of Follow-up: 2015, Age Group: 25-29    |           |               |       |       |               |             |               |                |              |
| Period                                       | Age Group | Smoking Group | N     | %     | Ever Quit (N) | Ever Quit % | Mean Yrs Quit | Short Term (n) | Short Term % |
| 25                                           | 25-29     | Never Any     | 0     | .     |               |             |               |                |              |
| 25                                           | 25-29     | CC            | 0     | .     | 0             | .           |               |                |              |
| 25                                           | 25-29     | Ecig          | 0     | .     |               |             |               |                |              |
| 25                                           | 25-29     | Dual          | 0     | .     |               |             |               |                |              |
| 25                                           | 25-29     | Former        | 0     | .     |               |             | .             | 0              | .            |
| Year of Follow-up: 2015, Age Group: 30-34    |           |               |       |       |               |             |               |                |              |
| Period                                       | Age Group | Smoking Group | N     | %     | Ever Quit (N) | Ever Quit % | Mean Yrs Quit | Short Term (n) | Short Term % |
| 25                                           | 30-34     | Never Any     | 0     | .     |               |             |               |                |              |
| 25                                           | 30-34     | CC            | 0     | .     | 0             | .           |               |                |              |
| 25                                           | 30-34     | Ecig          | 0     | .     |               |             |               |                |              |
| 25                                           | 30-34     | Dual          | 0     | .     |               |             |               |                |              |
| 25                                           | 30-34     | Former        | 0     | .     |               |             | .             | 0              | .            |
| Year of Follow-up: 2015, Age Group: 35-39    |           |               |       |       |               |             |               |                |              |
| Period                                       | Age Group | Smoking Group | N     | %     | Ever Quit (N) | Ever Quit % | Mean Yrs Quit | Short Term (n) | Short Term % |
| 25                                           | 35-39     | Never Any     | 4726  | 59.60 |               |             |               |                |              |
| 25                                           | 35-39     | CC            | 43    | 0.54  | 0             | 0.00        |               |                |              |
| 25                                           | 35-39     | Ecig          | 1548  | 19.52 |               |             |               |                |              |
| 25                                           | 35-39     | Dual          | 0     | 0.00  |               |             |               |                |              |
| 25                                           | 35-39     | Former        | 1613  | 20.34 |               |             | 11.59         | 127            | 7.87         |
| Year of Follow-up: 2015, Age Group: 40-44    |           |               |       |       |               |             |               |                |              |
| Period                                       | Age Group | Smoking Group | N     | %     | Ever Quit (N) | Ever Quit % | Mean Yrs Quit | Short Term (n) | Short Term % |
| 25                                           | 40-44     | Never Any     | 5359  | 64.18 |               |             |               |                |              |
| 25                                           | 40-44     | CC            | 65    | 0.78  | 0             | 0.00        |               |                |              |
| 25                                           | 40-44     | Ecig          | 1453  | 17.40 |               |             |               |                |              |
| 25                                           | 40-44     | Dual          | 0     | 0.00  |               |             |               |                |              |

**Results for PHIM for Run 8 (Sensitivity\_Analysis\_2.RTF)**

|                                              |           |               |       |       |               |             |               |                |              |
|----------------------------------------------|-----------|---------------|-------|-------|---------------|-------------|---------------|----------------|--------------|
| 25                                           | 40-44     | Former        | 1473  | 17.64 |               |             | 13.86         | 102            | 6.92         |
| Year of Follow-up: 2015, Age Group: 45-49    |           |               |       |       |               |             |               |                |              |
| Period                                       | Age Group | Smoking Group | N     | %     | Ever Quit (N) | Ever Quit % | Mean Yrs Quit | Short Term (n) | Short Term % |
| 25                                           | 45-49     | Never Any     | 5189  | 59.01 |               |             |               |                |              |
| 25                                           | 45-49     | CC            | 86    | 0.98  | 0             | 0.00        |               |                |              |
| 25                                           | 45-49     | Ecig          | 1580  | 17.97 |               |             |               |                |              |
| 25                                           | 45-49     | Dual          | 0     | 0.00  |               |             |               |                |              |
| 25                                           | 45-49     | Former        | 1938  | 22.04 |               |             | 18.00         | 97             | 5.01         |
| Year of Follow-up: 2015, Age Group: 50-54    |           |               |       |       |               |             |               |                |              |
| Period                                       | Age Group | Smoking Group | N     | %     | Ever Quit (N) | Ever Quit % | Mean Yrs Quit | Short Term (n) | Short Term % |
| 25                                           | 50-54     | Never Any     | 5284  | 52.43 |               |             |               |                |              |
| 25                                           | 50-54     | CC            | 100   | 0.99  | 0             | 0.00        |               |                |              |
| 25                                           | 50-54     | Ecig          | 1997  | 19.82 |               |             |               |                |              |
| 25                                           | 50-54     | Dual          | 0     | 0.00  |               |             |               |                |              |
| 25                                           | 50-54     | Former        | 2697  | 26.76 |               |             | 20.13         | 155            | 5.75         |
| Year of Follow-up: 2015, Age Group: 55-59    |           |               |       |       |               |             |               |                |              |
| Period                                       | Age Group | Smoking Group | N     | %     | Ever Quit (N) | Ever Quit % | Mean Yrs Quit | Short Term (n) | Short Term % |
| 25                                           | 55-59     | Never Any     | 5278  | 50.27 |               |             |               |                |              |
| 25                                           | 55-59     | CC            | 126   | 1.20  | 0             | 0.00        |               |                |              |
| 25                                           | 55-59     | Ecig          | 1707  | 16.26 |               |             |               |                |              |
| 25                                           | 55-59     | Dual          | 0     | 0.00  |               |             |               |                |              |
| 25                                           | 55-59     | Former        | 3388  | 32.27 |               |             | 20.92         | 132            | 3.90         |
| Year of Follow-up: 2015, Age Group: 60-64    |           |               |       |       |               |             |               |                |              |
| Period                                       | Age Group | Smoking Group | N     | %     | Ever Quit (N) | Ever Quit % | Mean Yrs Quit | Short Term (n) | Short Term % |
| 25                                           | 60-64     | Never Any     | 5018  | 52.27 |               |             |               |                |              |
| 25                                           | 60-64     | CC            | 123   | 1.28  | 0             | 0.00        |               |                |              |
| 25                                           | 60-64     | Ecig          | 1115  | 11.61 |               |             |               |                |              |
| 25                                           | 60-64     | Dual          | 0     | 0.00  |               |             |               |                |              |
| 25                                           | 60-64     | Former        | 3344  | 34.83 |               |             | 23.72         | 151            | 4.52         |
| Year of Follow-up: 2015, Age Group: 65-69    |           |               |       |       |               |             |               |                |              |
| Period                                       | Age Group | Smoking Group | N     | %     | Ever Quit (N) | Ever Quit % | Mean Yrs Quit | Short Term (n) | Short Term % |
| 25                                           | 65-69     | Never Any     | 4356  | 51.27 |               |             |               |                |              |
| 25                                           | 65-69     | CC            | 109   | 1.28  | 0             | 0.00        |               |                |              |
| 25                                           | 65-69     | Ecig          | 788   | 9.27  |               |             |               |                |              |
| 25                                           | 65-69     | Dual          | 0     | 0.00  |               |             |               |                |              |
| 25                                           | 65-69     | Former        | 3244  | 38.18 |               |             | 23.09         | 69             | 2.13         |
| Year of Follow-up: 2015, Age Group: 70-74    |           |               |       |       |               |             |               |                |              |
| Period                                       | Age Group | Smoking Group | N     | %     | Ever Quit (N) | Ever Quit % | Mean Yrs Quit | Short Term (n) | Short Term % |
| 25                                           | 70-74     | Never Any     | 3116  | 47.67 |               |             |               |                |              |
| 25                                           | 70-74     | CC            | 105   | 1.61  | 0             | 0.00        |               |                |              |
| 25                                           | 70-74     | Ecig          | 445   | 6.81  |               |             |               |                |              |
| 25                                           | 70-74     | Dual          | 0     | 0.00  |               |             |               |                |              |
| 25                                           | 70-74     | Former        | 2870  | 43.91 |               |             | 26.45         | 44             | 1.53         |
| Year of Follow-up: 2015, Age Group: 75-79    |           |               |       |       |               |             |               |                |              |
| Period                                       | Age Group | Smoking Group | N     | %     | Ever Quit (N) | Ever Quit % | Mean Yrs Quit | Short Term (n) | Short Term % |
| 25                                           | 75-79     | Never Any     | 2684  | 48.50 |               |             |               |                |              |
| 25                                           | 75-79     | CC            | 145   | 2.62  | 0             | 0.00        |               |                |              |
| 25                                           | 75-79     | Ecig          | 282   | 5.10  |               |             |               |                |              |
| 25                                           | 75-79     | Dual          | 0     | 0.00  |               |             |               |                |              |
| 25                                           | 75-79     | Former        | 2423  | 43.78 |               |             | 26.72         | 37             | 1.53         |
| Year of Follow-up: 2020, Age Group: All Ages |           |               |       |       |               |             |               |                |              |
| Period                                       | Age Group | Smoking Group | N     | %     | Ever Quit (N) | Ever Quit % | Mean Yrs Quit | Short Term (n) | Short Term % |
| 30                                           | All Ages  | Never Any     | 38326 | 54.53 |               |             |               |                |              |
| 30                                           | All Ages  | CC            | 446   | 0.63  | 0             | 0.00        |               |                |              |
| 30                                           | All Ages  | Ecig          | 8980  | 12.78 |               |             |               |                |              |
| 30                                           | All Ages  | Dual          | 0     | 0.00  |               |             |               |                |              |
| 30                                           | All Ages  | Former        | 22531 | 32.06 |               |             | 23.80         | 764            | 3.39         |
| Year of Follow-up: 2020, Age Group: 18-19    |           |               |       |       |               |             |               |                |              |
| Period                                       | Age Group | Smoking Group | N     | %     | Ever Quit (N) | Ever Quit % | Mean Yrs Quit | Short Term (n) | Short Term % |
| 30                                           | 18-19     | Never Any     | 0     | .     |               |             |               |                |              |
| 30                                           | 18-19     | CC            | 0     | .     | 0             | .           |               |                |              |
| 30                                           | 18-19     | Ecig          | 0     | .     |               |             |               |                |              |
| 30                                           | 18-19     | Dual          | 0     | .     |               |             |               |                |              |
| 30                                           | 18-19     | Former        | 0     | .     |               |             | .             | 0              | .            |
| Year of Follow-up: 2020, Age Group: 20-24    |           |               |       |       |               |             |               |                |              |
| Period                                       | Age Group | Smoking Group | N     | %     | Ever Quit (N) | Ever Quit % | Mean Yrs Quit | Short Term (n) | Short Term % |
| 30                                           | 20-24     | Never Any     | 0     | .     |               |             |               |                |              |
| 30                                           | 20-24     | CC            | 0     | .     | 0             | .           |               |                |              |

### Results for PHIM for Run 8 (Sensitivity\_Analysis\_2.RTF)

|                                           |           |               |      |       |               |             |               |                |              |
|-------------------------------------------|-----------|---------------|------|-------|---------------|-------------|---------------|----------------|--------------|
| 30                                        | 20-24     | Ecig          | 0    | .     |               |             |               |                |              |
| 30                                        | 20-24     | Dual          | 0    | .     |               |             |               |                |              |
| 30                                        | 20-24     | Former        | 0    | .     |               |             | 0             | .              |              |
| Year of Follow-up: 2020, Age Group: 25-29 |           |               |      |       |               |             |               |                |              |
| Period                                    | Age Group | Smoking Group | N    | %     | Ever Quit (N) | Ever Quit % | Mean Yrs Quit | Short Term (n) | Short Term % |
| 30                                        | 25-29     | Never Any     | 0    | .     |               |             |               |                |              |
| 30                                        | 25-29     | CC            | 0    | .     | 0             | .           |               |                |              |
| 30                                        | 25-29     | Ecig          | 0    | .     |               |             |               |                |              |
| 30                                        | 25-29     | Dual          | 0    | .     |               |             |               |                |              |
| 30                                        | 25-29     | Former        | 0    | .     |               |             |               | 0              | .            |
| Year of Follow-up: 2020, Age Group: 30-34 |           |               |      |       |               |             |               |                |              |
| Period                                    | Age Group | Smoking Group | N    | %     | Ever Quit (N) | Ever Quit % | Mean Yrs Quit | Short Term (n) | Short Term % |
| 30                                        | 30-34     | Never Any     | 0    | .     |               |             |               |                |              |
| 30                                        | 30-34     | CC            | 0    | .     | 0             | .           |               |                |              |
| 30                                        | 30-34     | Ecig          | 0    | .     |               |             |               |                |              |
| 30                                        | 30-34     | Dual          | 0    | .     |               |             |               |                |              |
| 30                                        | 30-34     | Former        | 0    | .     |               |             |               | 0              | .            |
| Year of Follow-up: 2020, Age Group: 35-39 |           |               |      |       |               |             |               |                |              |
| Period                                    | Age Group | Smoking Group | N    | %     | Ever Quit (N) | Ever Quit % | Mean Yrs Quit | Short Term (n) | Short Term % |
| 30                                        | 35-39     | Never Any     | 0    | .     |               |             |               |                |              |
| 30                                        | 35-39     | CC            | 0    | .     | 0             | .           |               |                |              |
| 30                                        | 35-39     | Ecig          | 0    | .     |               |             |               |                |              |
| 30                                        | 35-39     | Dual          | 0    | .     |               |             |               |                |              |
| 30                                        | 35-39     | Former        | 0    | .     |               |             |               | 0              | .            |
| Year of Follow-up: 2020, Age Group: 40-44 |           |               |      |       |               |             |               |                |              |
| Period                                    | Age Group | Smoking Group | N    | %     | Ever Quit (N) | Ever Quit % | Mean Yrs Quit | Short Term (n) | Short Term % |
| 30                                        | 40-44     | Never Any     | 4726 | 59.60 |               |             |               |                |              |
| 30                                        | 40-44     | CC            | 20   | 0.25  | 0             | 0.00        |               |                |              |
| 30                                        | 40-44     | Ecig          | 1340 | 16.90 |               |             |               |                |              |
| 30                                        | 40-44     | Dual          | 0    | 0.00  |               |             |               |                |              |
| 30                                        | 40-44     | Former        | 1844 | 23.25 |               |             | 14.76         | 87             | 4.72         |
| Year of Follow-up: 2020, Age Group: 45-49 |           |               |      |       |               |             |               |                |              |
| Period                                    | Age Group | Smoking Group | N    | %     | Ever Quit (N) | Ever Quit % | Mean Yrs Quit | Short Term (n) | Short Term % |
| 30                                        | 45-49     | Never Any     | 5359 | 64.18 |               |             |               |                |              |
| 30                                        | 45-49     | CC            | 29   | 0.35  | 0             | 0.00        |               |                |              |
| 30                                        | 45-49     | Ecig          | 1278 | 15.31 |               |             |               |                |              |
| 30                                        | 45-49     | Dual          | 0    | 0.00  |               |             |               |                |              |
| 30                                        | 45-49     | Former        | 1684 | 20.17 |               |             | 16.77         | 75             | 4.45         |
| Year of Follow-up: 2020, Age Group: 50-54 |           |               |      |       |               |             |               |                |              |
| Period                                    | Age Group | Smoking Group | N    | %     | Ever Quit (N) | Ever Quit % | Mean Yrs Quit | Short Term (n) | Short Term % |
| 30                                        | 50-54     | Never Any     | 5189 | 59.01 |               |             |               |                |              |
| 30                                        | 50-54     | CC            | 41   | 0.47  | 0             | 0.00        |               |                |              |
| 30                                        | 50-54     | Ecig          | 1362 | 15.49 |               |             |               |                |              |
| 30                                        | 50-54     | Dual          | 0    | 0.00  |               |             |               |                |              |
| 30                                        | 50-54     | Former        | 2201 | 25.03 |               |             | 20.47         | 123            | 5.59         |
| Year of Follow-up: 2020, Age Group: 55-59 |           |               |      |       |               |             |               |                |              |
| Period                                    | Age Group | Smoking Group | N    | %     | Ever Quit (N) | Ever Quit % | Mean Yrs Quit | Short Term (n) | Short Term % |
| 30                                        | 55-59     | Never Any     | 5284 | 52.43 |               |             |               |                |              |
| 30                                        | 55-59     | CC            | 51   | 0.51  | 0             | 0.00        |               |                |              |
| 30                                        | 55-59     | Ecig          | 1671 | 16.58 |               |             |               |                |              |
| 30                                        | 55-59     | Dual          | 0    | 0.00  |               |             |               |                |              |
| 30                                        | 55-59     | Former        | 3072 | 30.48 |               |             | 22.33         | 133            | 4.33         |
| Year of Follow-up: 2020, Age Group: 60-64 |           |               |      |       |               |             |               |                |              |
| Period                                    | Age Group | Smoking Group | N    | %     | Ever Quit (N) | Ever Quit % | Mean Yrs Quit | Short Term (n) | Short Term % |
| 30                                        | 60-64     | Never Any     | 5278 | 50.27 |               |             |               |                |              |
| 30                                        | 60-64     | CC            | 75   | 0.71  | 0             | 0.00        |               |                |              |
| 30                                        | 60-64     | Ecig          | 1388 | 13.22 |               |             |               |                |              |
| 30                                        | 60-64     | Dual          | 0    | 0.00  |               |             |               |                |              |
| 30                                        | 60-64     | Former        | 3758 | 35.79 |               |             | 23.56         | 157            | 4.18         |
| Year of Follow-up: 2020, Age Group: 65-69 |           |               |      |       |               |             |               |                |              |
| Period                                    | Age Group | Smoking Group | N    | %     | Ever Quit (N) | Ever Quit % | Mean Yrs Quit | Short Term (n) | Short Term % |
| 30                                        | 65-69     | Never Any     | 5018 | 52.27 |               |             |               |                |              |
| 30                                        | 65-69     | CC            | 73   | 0.76  | 0             | 0.00        |               |                |              |
| 30                                        | 65-69     | Ecig          | 895  | 9.32  |               |             |               |                |              |
| 30                                        | 65-69     | Dual          | 0    | 0.00  |               |             |               |                |              |
| 30                                        | 65-69     | Former        | 3614 | 37.65 |               |             | 26.75         | 78             | 2.16         |
| Year of Follow-up: 2020, Age Group: 70-74 |           |               |      |       |               |             |               |                |              |
| Period                                    | Age Group | Smoking Group | N    | %     | Ever Quit (N) | Ever Quit % | Mean Yrs Quit | Short Term (n) | Short Term % |

**Results for PHIM for Run 8 (Sensitivity\_Analysis\_2.RTF)**

|                                              |           |               |       |       |               |             |               |                |              |
|----------------------------------------------|-----------|---------------|-------|-------|---------------|-------------|---------------|----------------|--------------|
| 30                                           | 70-74     | Never Any     | 4356  | 51.27 |               |             |               |                |              |
| 30                                           | 70-74     | CC            | 79    | 0.93  | 0             | 0.00        |               |                |              |
| 30                                           | 70-74     | Ecig          | 678   | 7.98  |               |             |               |                |              |
| 30                                           | 70-74     | Dual          | 0     | 0.00  |               |             |               |                |              |
| 30                                           | 70-74     | Former        | 3384  | 39.83 |               |             | 26.99         | 74             | 2.19         |
| Year of Follow-up: 2020, Age Group: 75-79    |           |               |       |       |               |             |               |                |              |
| Period                                       | Age Group | Smoking Group | N     | %     | Ever Quit (N) | Ever Quit % | Mean Yrs Quit | Short Term (n) | Short Term % |
| 30                                           | 75-79     | Never Any     | 3116  | 47.67 |               |             |               |                |              |
| 30                                           | 75-79     | CC            | 78    | 1.19  | 0             | 0.00        |               |                |              |
| 30                                           | 75-79     | Ecig          | 368   | 5.63  |               |             |               |                |              |
| 30                                           | 75-79     | Dual          | 0     | 0.00  |               |             |               |                |              |
| 30                                           | 75-79     | Former        | 2974  | 45.50 |               |             | 30.43         | 37             | 1.24         |
| Year of Follow-up: 2025, Age Group: All Ages |           |               |       |       |               |             |               |                |              |
| Period                                       | Age Group | Smoking Group | N     | %     | Ever Quit (N) | Ever Quit % | Mean Yrs Quit | Short Term (n) | Short Term % |
| 35                                           | All Ages  | Never Any     | 35210 | 55.23 |               |             |               |                |              |
| 35                                           | All Ages  | CC            | 239   | 0.37  | 0             | 0.00        |               |                |              |
| 35                                           | All Ages  | Ecig          | 7122  | 11.17 |               |             |               |                |              |
| 35                                           | All Ages  | Dual          | 0     | 0.00  |               |             |               |                |              |
| 35                                           | All Ages  | Former        | 21176 | 33.22 |               |             | 25.82         | 623            | 2.94         |
| Year of Follow-up: 2025, Age Group: 18-19    |           |               |       |       |               |             |               |                |              |
| Period                                       | Age Group | Smoking Group | N     | %     | Ever Quit (N) | Ever Quit % | Mean Yrs Quit | Short Term (n) | Short Term % |
| 35                                           | 18-19     | Never Any     | 0     | .     |               |             |               |                |              |
| 35                                           | 18-19     | CC            | 0     | .     | 0             | .           |               |                |              |
| 35                                           | 18-19     | Ecig          | 0     | .     |               |             |               |                |              |
| 35                                           | 18-19     | Dual          | 0     | .     |               |             |               |                |              |
| 35                                           | 18-19     | Former        | 0     | .     |               |             | .             | 0              | .            |
| Year of Follow-up: 2025, Age Group: 20-24    |           |               |       |       |               |             |               |                |              |
| Period                                       | Age Group | Smoking Group | N     | %     | Ever Quit (N) | Ever Quit % | Mean Yrs Quit | Short Term (n) | Short Term % |
| 35                                           | 20-24     | Never Any     | 0     | .     |               |             |               |                |              |
| 35                                           | 20-24     | CC            | 0     | .     | 0             | .           |               |                |              |
| 35                                           | 20-24     | Ecig          | 0     | .     |               |             |               |                |              |
| 35                                           | 20-24     | Dual          | 0     | .     |               |             |               |                |              |
| 35                                           | 20-24     | Former        | 0     | .     |               |             | .             | 0              | .            |
| Year of Follow-up: 2025, Age Group: 25-29    |           |               |       |       |               |             |               |                |              |
| Period                                       | Age Group | Smoking Group | N     | %     | Ever Quit (N) | Ever Quit % | Mean Yrs Quit | Short Term (n) | Short Term % |
| 35                                           | 25-29     | Never Any     | 0     | .     |               |             |               |                |              |
| 35                                           | 25-29     | CC            | 0     | .     | 0             | .           |               |                |              |
| 35                                           | 25-29     | Ecig          | 0     | .     |               |             |               |                |              |
| 35                                           | 25-29     | Dual          | 0     | .     |               |             |               |                |              |
| 35                                           | 25-29     | Former        | 0     | .     |               |             | .             | 0              | .            |
| Year of Follow-up: 2025, Age Group: 30-34    |           |               |       |       |               |             |               |                |              |
| Period                                       | Age Group | Smoking Group | N     | %     | Ever Quit (N) | Ever Quit % | Mean Yrs Quit | Short Term (n) | Short Term % |
| 35                                           | 30-34     | Never Any     | 0     | .     |               |             |               |                |              |
| 35                                           | 30-34     | CC            | 0     | .     | 0             | .           |               |                |              |
| 35                                           | 30-34     | Ecig          | 0     | .     |               |             |               |                |              |
| 35                                           | 30-34     | Dual          | 0     | .     |               |             |               |                |              |
| 35                                           | 30-34     | Former        | 0     | .     |               |             | .             | 0              | .            |
| Year of Follow-up: 2025, Age Group: 35-39    |           |               |       |       |               |             |               |                |              |
| Period                                       | Age Group | Smoking Group | N     | %     | Ever Quit (N) | Ever Quit % | Mean Yrs Quit | Short Term (n) | Short Term % |
| 35                                           | 35-39     | Never Any     | 0     | .     |               |             |               |                |              |
| 35                                           | 35-39     | CC            | 0     | .     | 0             | .           |               |                |              |
| 35                                           | 35-39     | Ecig          | 0     | .     |               |             |               |                |              |
| 35                                           | 35-39     | Dual          | 0     | .     |               |             |               |                |              |
| 35                                           | 35-39     | Former        | 0     | .     |               |             | .             | 0              | .            |
| Year of Follow-up: 2025, Age Group: 40-44    |           |               |       |       |               |             |               |                |              |
| Period                                       | Age Group | Smoking Group | N     | %     | Ever Quit (N) | Ever Quit % | Mean Yrs Quit | Short Term (n) | Short Term % |
| 35                                           | 40-44     | Never Any     | 0     | .     |               |             |               |                |              |
| 35                                           | 40-44     | CC            | 0     | .     | 0             | .           |               |                |              |
| 35                                           | 40-44     | Ecig          | 0     | .     |               |             |               |                |              |
| 35                                           | 40-44     | Dual          | 0     | .     |               |             |               |                |              |
| 35                                           | 40-44     | Former        | 0     | .     |               |             | .             | 0              | .            |
| Year of Follow-up: 2025, Age Group: 45-49    |           |               |       |       |               |             |               |                |              |
| Period                                       | Age Group | Smoking Group | N     | %     | Ever Quit (N) | Ever Quit % | Mean Yrs Quit | Short Term (n) | Short Term % |
| 35                                           | 45-49     | Never Any     | 4726  | 59.60 |               |             |               |                |              |
| 35                                           | 45-49     | CC            | 10    | 0.13  | 0             | 0.00        |               |                |              |
| 35                                           | 45-49     | Ecig          | 1148  | 14.48 |               |             |               |                |              |
| 35                                           | 45-49     | Dual          | 0     | 0.00  |               |             |               |                |              |
| 35                                           | 45-49     | Former        | 2046  | 25.80 |               |             | 18.03         | 69             | 3.37         |
| Year of Follow-up: 2025, Age Group: 50-54    |           |               |       |       |               |             |               |                |              |

**Results for PHIM for Run 8 (Sensitivity\_Analysis\_2.RTF)**

| Period                                       | Age Group | Smoking Group | N     | %     | Ever Quit (N) | Ever Quit % | Mean Yrs Quit | Short Term (n) | Short Term % |
|----------------------------------------------|-----------|---------------|-------|-------|---------------|-------------|---------------|----------------|--------------|
| 35                                           | 50-54     | Never Any     | 5359  | 64.18 |               |             |               |                |              |
| 35                                           | 50-54     | CC            | 12    | 0.14  | 0             | 0.00        |               |                |              |
| 35                                           | 50-54     | Ecig          | 1082  | 12.96 |               |             |               |                |              |
| 35                                           | 50-54     | Dual          | 0     | 0.00  |               |             |               |                |              |
| 35                                           | 50-54     | Former        | 1897  | 22.72 |               |             | 19.52         | 103            | 5.43         |
| Year of Follow-up: 2025, Age Group: 55-59    |           |               |       |       |               |             |               |                |              |
| Period                                       | Age Group | Smoking Group | N     | %     | Ever Quit (N) | Ever Quit % | Mean Yrs Quit | Short Term (n) | Short Term % |
| 35                                           | 55-59     | Never Any     | 5189  | 59.01 |               |             |               |                |              |
| 35                                           | 55-59     | CC            | 25    | 0.28  | 0             | 0.00        |               |                |              |
| 35                                           | 55-59     | Ecig          | 1139  | 12.95 |               |             |               |                |              |
| 35                                           | 55-59     | Dual          | 0     | 0.00  |               |             |               |                |              |
| 35                                           | 55-59     | Former        | 2440  | 27.75 |               |             | 23.16         | 95             | 3.89         |
| Year of Follow-up: 2025, Age Group: 60-64    |           |               |       |       |               |             |               |                |              |
| Period                                       | Age Group | Smoking Group | N     | %     | Ever Quit (N) | Ever Quit % | Mean Yrs Quit | Short Term (n) | Short Term % |
| 35                                           | 60-64     | Never Any     | 5284  | 52.43 |               |             |               |                |              |
| 35                                           | 60-64     | CC            | 29    | 0.29  | 0             | 0.00        |               |                |              |
| 35                                           | 60-64     | Ecig          | 1344  | 13.34 |               |             |               |                |              |
| 35                                           | 60-64     | Dual          | 0     | 0.00  |               |             |               |                |              |
| 35                                           | 60-64     | Former        | 3421  | 33.95 |               |             | 24.73         | 146            | 4.27         |
| Year of Follow-up: 2025, Age Group: 65-69    |           |               |       |       |               |             |               |                |              |
| Period                                       | Age Group | Smoking Group | N     | %     | Ever Quit (N) | Ever Quit % | Mean Yrs Quit | Short Term (n) | Short Term % |
| 35                                           | 65-69     | Never Any     | 5278  | 50.27 |               |             |               |                |              |
| 35                                           | 65-69     | CC            | 50    | 0.48  | 0             | 0.00        |               |                |              |
| 35                                           | 65-69     | Ecig          | 1097  | 10.45 |               |             |               |                |              |
| 35                                           | 65-69     | Dual          | 0     | 0.00  |               |             |               |                |              |
| 35                                           | 65-69     | Former        | 4074  | 38.80 |               |             | 26.54         | 84             | 2.06         |
| Year of Follow-up: 2025, Age Group: 70-74    |           |               |       |       |               |             |               |                |              |
| Period                                       | Age Group | Smoking Group | N     | %     | Ever Quit (N) | Ever Quit % | Mean Yrs Quit | Short Term (n) | Short Term % |
| 35                                           | 70-74     | Never Any     | 5018  | 52.27 |               |             |               |                |              |
| 35                                           | 70-74     | CC            | 54    | 0.56  | 0             | 0.00        |               |                |              |
| 35                                           | 70-74     | Ecig          | 771   | 8.03  |               |             |               |                |              |
| 35                                           | 70-74     | Dual          | 0     | 0.00  |               |             |               |                |              |
| 35                                           | 70-74     | Former        | 3757  | 39.14 |               |             | 30.61         | 68             | 1.81         |
| Year of Follow-up: 2025, Age Group: 75-79    |           |               |       |       |               |             |               |                |              |
| Period                                       | Age Group | Smoking Group | N     | %     | Ever Quit (N) | Ever Quit % | Mean Yrs Quit | Short Term (n) | Short Term % |
| 35                                           | 75-79     | Never Any     | 4356  | 51.27 |               |             |               |                |              |
| 35                                           | 75-79     | CC            | 59    | 0.69  | 0             | 0.00        |               |                |              |
| 35                                           | 75-79     | Ecig          | 541   | 6.37  |               |             |               |                |              |
| 35                                           | 75-79     | Dual          | 0     | 0.00  |               |             |               |                |              |
| 35                                           | 75-79     | Former        | 3541  | 41.67 |               |             | 30.66         | 58             | 1.64         |
| Year of Follow-up: 2030, Age Group: All Ages |           |               |       |       |               |             |               |                |              |
| Period                                       | Age Group | Smoking Group | N     | %     | Ever Quit (N) | Ever Quit % | Mean Yrs Quit | Short Term (n) | Short Term % |
| 40                                           | All Ages  | Never Any     | 30854 | 55.84 |               |             |               |                |              |
| 40                                           | All Ages  | CC            | 126   | 0.23  | 0             | 0.00        |               |                |              |
| 40                                           | All Ages  | Ecig          | 5315  | 9.62  |               |             |               |                |              |
| 40                                           | All Ages  | Dual          | 0     | 0.00  |               |             |               |                |              |
| 40                                           | All Ages  | Former        | 18955 | 34.31 |               |             | 27.91         | 516            | 2.72         |
| Year of Follow-up: 2030, Age Group: 18-19    |           |               |       |       |               |             |               |                |              |
| Period                                       | Age Group | Smoking Group | N     | %     | Ever Quit (N) | Ever Quit % | Mean Yrs Quit | Short Term (n) | Short Term % |
| 40                                           | 18-19     | Never Any     | 0     | .     |               |             |               |                |              |
| 40                                           | 18-19     | CC            | 0     | .     | 0             | .           |               |                |              |
| 40                                           | 18-19     | Ecig          | 0     | .     |               |             |               |                |              |
| 40                                           | 18-19     | Dual          | 0     | .     |               |             |               |                |              |
| 40                                           | 18-19     | Former        | 0     | .     |               |             | .             | 0              | .            |
| Year of Follow-up: 2030, Age Group: 20-24    |           |               |       |       |               |             |               |                |              |
| Period                                       | Age Group | Smoking Group | N     | %     | Ever Quit (N) | Ever Quit % | Mean Yrs Quit | Short Term (n) | Short Term % |
| 40                                           | 20-24     | Never Any     | 0     | .     |               |             |               |                |              |
| 40                                           | 20-24     | CC            | 0     | .     | 0             | .           |               |                |              |
| 40                                           | 20-24     | Ecig          | 0     | .     |               |             |               |                |              |
| 40                                           | 20-24     | Dual          | 0     | .     |               |             |               |                |              |
| 40                                           | 20-24     | Former        | 0     | .     |               |             | .             | 0              | .            |
| Year of Follow-up: 2030, Age Group: 25-29    |           |               |       |       |               |             |               |                |              |
| Period                                       | Age Group | Smoking Group | N     | %     | Ever Quit (N) | Ever Quit % | Mean Yrs Quit | Short Term (n) | Short Term % |
| 40                                           | 25-29     | Never Any     | 0     | .     |               |             |               |                |              |
| 40                                           | 25-29     | CC            | 0     | .     | 0             | .           |               |                |              |
| 40                                           | 25-29     | Ecig          | 0     | .     |               |             |               |                |              |
| 40                                           | 25-29     | Dual          | 0     | .     |               |             |               |                |              |

**Results for PHIM for Run 8 (Sensitivity\_Analysis\_2.RTF)**

| Year of Follow-up: 2030, Age Group: 30-34 | Period | Age Group | Smoking Group | N    | %     | Ever Quit (N) | Ever Quit % | Mean Yrs Quit | Short Term (n) | Short Term % |
|-------------------------------------------|--------|-----------|---------------|------|-------|---------------|-------------|---------------|----------------|--------------|
| Year of Follow-up: 2030, Age Group: 30-34 |        |           |               |      |       |               |             |               |                |              |
| 40                                        | 25-29  | Former    |               | 0    | .     |               |             |               | 0              | .            |
| 40                                        | 30-34  | Never Any |               | 0    | .     |               |             |               |                |              |
| 40                                        | 30-34  | CC        |               | 0    | .     | 0             | .           |               |                |              |
| 40                                        | 30-34  | Ecig      |               | 0    | .     |               |             |               |                |              |
| 40                                        | 30-34  | Dual      |               | 0    | .     |               |             |               |                |              |
| 40                                        | 30-34  | Former    |               | 0    | .     |               |             |               | 0              | .            |
| Year of Follow-up: 2030, Age Group: 35-39 |        |           |               |      |       |               |             |               |                |              |
| 40                                        | 35-39  | Never Any |               | 0    | .     |               |             |               |                |              |
| 40                                        | 35-39  | CC        |               | 0    | .     | 0             | .           |               |                |              |
| 40                                        | 35-39  | Ecig      |               | 0    | .     |               |             |               |                |              |
| 40                                        | 35-39  | Dual      |               | 0    | .     |               |             |               |                |              |
| 40                                        | 35-39  | Former    |               | 0    | .     |               |             |               | 0              | .            |
| Year of Follow-up: 2030, Age Group: 40-44 |        |           |               |      |       |               |             |               |                |              |
| 40                                        | 40-44  | Never Any |               | 0    | .     |               |             |               |                |              |
| 40                                        | 40-44  | CC        |               | 0    | .     | 0             | .           |               |                |              |
| 40                                        | 40-44  | Ecig      |               | 0    | .     |               |             |               |                |              |
| 40                                        | 40-44  | Dual      |               | 0    | .     |               |             |               |                |              |
| 40                                        | 40-44  | Former    |               | 0    | .     |               |             |               | 0              | .            |
| Year of Follow-up: 2030, Age Group: 45-49 |        |           |               |      |       |               |             |               |                |              |
| 40                                        | 45-49  | Never Any |               | 0    | .     |               |             |               |                |              |
| 40                                        | 45-49  | CC        |               | 0    | .     | 0             | .           |               |                |              |
| 40                                        | 45-49  | Ecig      |               | 0    | .     |               |             |               |                |              |
| 40                                        | 45-49  | Dual      |               | 0    | .     |               |             |               |                |              |
| 40                                        | 45-49  | Former    |               | 0    | .     |               |             |               | 0              | .            |
| Year of Follow-up: 2030, Age Group: 50-54 |        |           |               |      |       |               |             |               |                |              |
| 40                                        | 50-54  | Never Any |               | 4726 | 59.60 |               |             |               |                |              |
| 40                                        | 50-54  | CC        |               | 3    | 0.04  | 0             | 0.00        |               |                |              |
| 40                                        | 50-54  | Ecig      |               | 963  | 12.14 |               |             |               |                |              |
| 40                                        | 50-54  | Dual      |               | 0    | 0.00  |               |             |               |                |              |
| 40                                        | 50-54  | Former    |               | 2238 | 28.22 |               |             | 21.20         | 103            | 4.60         |
| Year of Follow-up: 2030, Age Group: 55-59 |        |           |               |      |       |               |             |               |                |              |
| 40                                        | 55-59  | Never Any |               | 5359 | 64.18 |               |             |               |                |              |
| 40                                        | 55-59  | CC        |               | 5    | 0.06  | 0             | 0.00        |               |                |              |
| 40                                        | 55-59  | Ecig      |               | 878  | 10.51 |               |             |               |                |              |
| 40                                        | 55-59  | Dual      |               | 0    | 0.00  |               |             |               |                |              |
| 40                                        | 55-59  | Former    |               | 2108 | 25.25 |               |             | 22.29         | 66             | 3.13         |
| Year of Follow-up: 2030, Age Group: 60-64 |        |           |               |      |       |               |             |               |                |              |
| 40                                        | 60-64  | Never Any |               | 5189 | 59.01 |               |             |               |                |              |
| 40                                        | 60-64  | CC        |               | 16   | 0.18  | 0             | 0.00        |               |                |              |
| 40                                        | 60-64  | Ecig      |               | 885  | 10.06 |               |             |               |                |              |
| 40                                        | 60-64  | Dual      |               | 0    | 0.00  |               |             |               |                |              |
| 40                                        | 60-64  | Former    |               | 2703 | 30.74 |               |             | 25.60         | 117            | 4.33         |
| Year of Follow-up: 2030, Age Group: 65-69 |        |           |               |      |       |               |             |               |                |              |
| 40                                        | 65-69  | Never Any |               | 5284 | 52.43 |               |             |               |                |              |
| 40                                        | 65-69  | CC        |               | 22   | 0.22  | 0             | 0.00        |               |                |              |
| 40                                        | 65-69  | Ecig      |               | 1059 | 10.51 |               |             |               |                |              |
| 40                                        | 65-69  | Dual      |               | 0    | 0.00  |               |             |               |                |              |
| 40                                        | 65-69  | Former    |               | 3713 | 36.84 |               |             | 27.59         | 73             | 1.97         |
| Year of Follow-up: 2030, Age Group: 70-74 |        |           |               |      |       |               |             |               |                |              |
| 40                                        | 70-74  | Never Any |               | 5278 | 50.27 |               |             |               |                |              |
| 40                                        | 70-74  | CC        |               | 39   | 0.37  | 0             | 0.00        |               |                |              |
| 40                                        | 70-74  | Ecig      |               | 926  | 8.82  |               |             |               |                |              |
| 40                                        | 70-74  | Dual      |               | 0    | 0.00  |               |             |               |                |              |
| 40                                        | 70-74  | Former    |               | 4256 | 40.54 |               |             | 30.26         | 85             | 2.00         |
| Year of Follow-up: 2030, Age Group: 75-79 |        |           |               |      |       |               |             |               |                |              |
| 40                                        | 75-79  | Never Any |               | 5018 | 52.27 |               |             |               |                |              |
| 40                                        | 75-79  | CC        |               | 41   | 0.43  | 0             | 0.00        |               |                |              |



**Results for PHIM for Run 8 (Sensitivity\_Analysis\_2.RTF)**

|                                              |           |               |       |       |               |             |               |                |              |
|----------------------------------------------|-----------|---------------|-------|-------|---------------|-------------|---------------|----------------|--------------|
| 40                                           | 75-79     | Ecig          | 604   | 6.29  |               |             |               |                |              |
| 40                                           | 75-79     | Dual          | 0     | 0.00  |               |             |               |                |              |
| 40                                           | 75-79     | Former        | 3937  | 41.01 |               |             | 34.07         | 72             | 1.83         |
| Year of Follow-up: 2035, Age Group: All Ages |           |               |       |       |               |             |               |                |              |
| Period                                       | Age Group | Smoking Group | N     | %     | Ever Quit (N) | Ever Quit % | Mean Yrs Quit | Short Term (n) | Short Term % |
| 45                                           | All Ages  | Never Any     | 25836 | 56.60 |               |             |               |                |              |
| 45                                           | All Ages  | CC            | 53    | 0.12  | 0             | 0.00        |               |                |              |
| 45                                           | All Ages  | Ecig          | 3836  | 8.40  |               |             |               |                |              |
| 45                                           | All Ages  | Dual          | 0     | 0.00  |               |             |               |                |              |
| 45                                           | All Ages  | Former        | 15925 | 34.88 |               |             | 29.62         | 362            | 2.27         |
| Year of Follow-up: 2035, Age Group: 18-19    |           |               |       |       |               |             |               |                |              |
| Period                                       | Age Group | Smoking Group | N     | %     | Ever Quit (N) | Ever Quit % | Mean Yrs Quit | Short Term (n) | Short Term % |
| 45                                           | 18-19     | Never Any     | 0     | .     |               |             |               |                |              |
| 45                                           | 18-19     | CC            | 0     | .     | 0             | .           |               |                |              |
| 45                                           | 18-19     | Ecig          | 0     | .     |               |             |               |                |              |
| 45                                           | 18-19     | Dual          | 0     | .     |               |             |               |                |              |
| 45                                           | 18-19     | Former        | 0     | .     |               |             | .             | 0              | .            |
| Year of Follow-up: 2035, Age Group: 20-24    |           |               |       |       |               |             |               |                |              |
| Period                                       | Age Group | Smoking Group | N     | %     | Ever Quit (N) | Ever Quit % | Mean Yrs Quit | Short Term (n) | Short Term % |
| 45                                           | 20-24     | Never Any     | 0     | .     |               |             |               |                |              |
| 45                                           | 20-24     | CC            | 0     | .     | 0             | .           |               |                |              |
| 45                                           | 20-24     | Ecig          | 0     | .     |               |             |               |                |              |
| 45                                           | 20-24     | Dual          | 0     | .     |               |             |               |                |              |
| 45                                           | 20-24     | Former        | 0     | .     |               |             | .             | 0              | .            |
| Year of Follow-up: 2035, Age Group: 25-29    |           |               |       |       |               |             |               |                |              |
| Period                                       | Age Group | Smoking Group | N     | %     | Ever Quit (N) | Ever Quit % | Mean Yrs Quit | Short Term (n) | Short Term % |
| 45                                           | 25-29     | Never Any     | 0     | .     |               |             |               |                |              |
| 45                                           | 25-29     | CC            | 0     | .     | 0             | .           |               |                |              |
| 45                                           | 25-29     | Ecig          | 0     | .     |               |             |               |                |              |
| 45                                           | 25-29     | Dual          | 0     | .     |               |             |               |                |              |
| 45                                           | 25-29     | Former        | 0     | .     |               |             | .             | 0              | .            |
| Year of Follow-up: 2035, Age Group: 30-34    |           |               |       |       |               |             |               |                |              |
| Period                                       | Age Group | Smoking Group | N     | %     | Ever Quit (N) | Ever Quit % | Mean Yrs Quit | Short Term (n) | Short Term % |
| 45                                           | 30-34     | Never Any     | 0     | .     |               |             |               |                |              |
| 45                                           | 30-34     | CC            | 0     | .     | 0             | .           |               |                |              |
| 45                                           | 30-34     | Ecig          | 0     | .     |               |             |               |                |              |
| 45                                           | 30-34     | Dual          | 0     | .     |               |             |               |                |              |
| 45                                           | 30-34     | Former        | 0     | .     |               |             | .             | 0              | .            |
| Year of Follow-up: 2035, Age Group: 35-39    |           |               |       |       |               |             |               |                |              |
| Period                                       | Age Group | Smoking Group | N     | %     | Ever Quit (N) | Ever Quit % | Mean Yrs Quit | Short Term (n) | Short Term % |
| 45                                           | 35-39     | Never Any     | 0     | .     |               |             |               |                |              |
| 45                                           | 35-39     | CC            | 0     | .     | 0             | .           |               |                |              |
| 45                                           | 35-39     | Ecig          | 0     | .     |               |             |               |                |              |
| 45                                           | 35-39     | Dual          | 0     | .     |               |             |               |                |              |
| 45                                           | 35-39     | Former        | 0     | .     |               |             | .             | 0              | .            |
| Year of Follow-up: 2035, Age Group: 40-44    |           |               |       |       |               |             |               |                |              |
| Period                                       | Age Group | Smoking Group | N     | %     | Ever Quit (N) | Ever Quit % | Mean Yrs Quit | Short Term (n) | Short Term % |
| 45                                           | 40-44     | Never Any     | 0     | .     |               |             |               |                |              |
| 45                                           | 40-44     | CC            | 0     | .     | 0             | .           |               |                |              |
| 45                                           | 40-44     | Ecig          | 0     | .     |               |             |               |                |              |
| 45                                           | 40-44     | Dual          | 0     | .     |               |             |               |                |              |
| 45                                           | 40-44     | Former        | 0     | .     |               |             | .             | 0              | .            |
| Year of Follow-up: 2035, Age Group: 45-49    |           |               |       |       |               |             |               |                |              |
| Period                                       | Age Group | Smoking Group | N     | %     | Ever Quit (N) | Ever Quit % | Mean Yrs Quit | Short Term (n) | Short Term % |
| 45                                           | 45-49     | Never Any     | 0     | .     |               |             |               |                |              |
| 45                                           | 45-49     | CC            | 0     | .     | 0             | .           |               |                |              |
| 45                                           | 45-49     | Ecig          | 0     | .     |               |             |               |                |              |
| 45                                           | 45-49     | Dual          | 0     | .     |               |             |               |                |              |
| 45                                           | 45-49     | Former        | 0     | .     |               |             | .             | 0              | .            |
| Year of Follow-up: 2035, Age Group: 50-54    |           |               |       |       |               |             |               |                |              |
| Period                                       | Age Group | Smoking Group | N     | %     | Ever Quit (N) | Ever Quit % | Mean Yrs Quit | Short Term (n) | Short Term % |
| 45                                           | 50-54     | Never Any     | 0     | .     |               |             |               |                |              |
| 45                                           | 50-54     | CC            | 0     | .     | 0             | .           |               |                |              |
| 45                                           | 50-54     | Ecig          | 0     | .     |               |             |               |                |              |
| 45                                           | 50-54     | Dual          | 0     | .     |               |             |               |                |              |
| 45                                           | 50-54     | Former        | 0     | .     |               |             | .             | 0              | .            |
| Year of Follow-up: 2035, Age Group: 55-59    |           |               |       |       |               |             |               |                |              |
| Period                                       | Age Group | Smoking Group | N     | %     | Ever Quit (N) | Ever Quit % | Mean Yrs Quit | Short Term (n) | Short Term % |

**Results for PHIM for Run 8 (Sensitivity\_Analysis\_2.RTF)**

|                                              |           |               |       |       |               |             |               |                |              |
|----------------------------------------------|-----------|---------------|-------|-------|---------------|-------------|---------------|----------------|--------------|
| 45                                           | 55-59     | Never Any     | 4726  | 59.60 |               |             |               |                |              |
| 45                                           | 55-59     | CC            | 2     | 0.03  | 0             | 0.00        |               |                |              |
| 45                                           | 55-59     | Ecig          | 791   | 9.97  |               |             |               |                |              |
| 45                                           | 55-59     | Dual          | 0     | 0.00  |               |             |               |                |              |
| 45                                           | 55-59     | Former        | 2411  | 30.40 |               |             | 24.46         | 68             | 2.82         |
| Year of Follow-up: 2035, Age Group: 60-64    |           |               |       |       |               |             |               |                |              |
| Period                                       | Age Group | Smoking Group | N     | %     | Ever Quit (N) | Ever Quit % | Mean Yrs Quit | Short Term (n) | Short Term % |
| 45                                           | 60-64     | Never Any     | 5359  | 64.18 |               |             |               |                |              |
| 45                                           | 60-64     | CC            | 1     | 0.01  | 0             | 0.00        |               |                |              |
| 45                                           | 60-64     | Ecig          | 702   | 8.41  |               |             |               |                |              |
| 45                                           | 60-64     | Dual          | 0     | 0.00  |               |             |               |                |              |
| 45                                           | 60-64     | Former        | 2288  | 27.40 |               |             | 25.29         | 81             | 3.54         |
| Year of Follow-up: 2035, Age Group: 65-69    |           |               |       |       |               |             |               |                |              |
| Period                                       | Age Group | Smoking Group | N     | %     | Ever Quit (N) | Ever Quit % | Mean Yrs Quit | Short Term (n) | Short Term % |
| 45                                           | 65-69     | Never Any     | 5189  | 59.01 |               |             |               |                |              |
| 45                                           | 65-69     | CC            | 11    | 0.13  | 0             | 0.00        |               |                |              |
| 45                                           | 65-69     | Ecig          | 696   | 7.92  |               |             |               |                |              |
| 45                                           | 65-69     | Dual          | 0     | 0.00  |               |             |               |                |              |
| 45                                           | 65-69     | Former        | 2897  | 32.95 |               |             | 28.72         | 55             | 1.90         |
| Year of Follow-up: 2035, Age Group: 70-74    |           |               |       |       |               |             |               |                |              |
| Period                                       | Age Group | Smoking Group | N     | %     | Ever Quit (N) | Ever Quit % | Mean Yrs Quit | Short Term (n) | Short Term % |
| 45                                           | 70-74     | Never Any     | 5284  | 52.43 |               |             |               |                |              |
| 45                                           | 70-74     | CC            | 16    | 0.16  | 0             | 0.00        |               |                |              |
| 45                                           | 70-74     | Ecig          | 918   | 9.11  |               |             |               |                |              |
| 45                                           | 70-74     | Dual          | 0     | 0.00  |               |             |               |                |              |
| 45                                           | 70-74     | Former        | 3860  | 38.30 |               |             | 31.41         | 76             | 1.97         |
| Year of Follow-up: 2035, Age Group: 75-79    |           |               |       |       |               |             |               |                |              |
| Period                                       | Age Group | Smoking Group | N     | %     | Ever Quit (N) | Ever Quit % | Mean Yrs Quit | Short Term (n) | Short Term % |
| 45                                           | 75-79     | Never Any     | 5278  | 50.27 |               |             |               |                |              |
| 45                                           | 75-79     | CC            | 23    | 0.22  | 0             | 0.00        |               |                |              |
| 45                                           | 75-79     | Ecig          | 729   | 6.94  |               |             |               |                |              |
| 45                                           | 75-79     | Dual          | 0     | 0.00  |               |             |               |                |              |
| 45                                           | 75-79     | Former        | 4469  | 42.57 |               |             | 33.67         | 82             | 1.83         |
| Year of Follow-up: 2040, Age Group: All Ages |           |               |       |       |               |             |               |                |              |
| Period                                       | Age Group | Smoking Group | N     | %     | Ever Quit (N) | Ever Quit % | Mean Yrs Quit | Short Term (n) | Short Term % |
| 50                                           | All Ages  | Never Any     | 20558 | 58.48 |               |             |               |                |              |
| 50                                           | All Ages  | CC            | 17    | 0.05  | 0             | 0.00        |               |                |              |
| 50                                           | All Ages  | Ecig          | 2481  | 7.06  |               |             |               |                |              |
| 50                                           | All Ages  | Dual          | 0     | 0.00  |               |             |               |                |              |
| 50                                           | All Ages  | Former        | 12095 | 34.41 |               |             | 31.41         | 230            | 1.90         |
| Year of Follow-up: 2040, Age Group: 18-19    |           |               |       |       |               |             |               |                |              |
| Period                                       | Age Group | Smoking Group | N     | %     | Ever Quit (N) | Ever Quit % | Mean Yrs Quit | Short Term (n) | Short Term % |
| 50                                           | 18-19     | Never Any     | 0     | .     |               |             |               |                |              |
| 50                                           | 18-19     | CC            | 0     | .     | 0             | .           |               |                |              |
| 50                                           | 18-19     | Ecig          | 0     | .     |               |             |               |                |              |
| 50                                           | 18-19     | Dual          | 0     | .     |               |             |               |                |              |
| 50                                           | 18-19     | Former        | 0     | .     |               |             | .             | 0              | .            |
| Year of Follow-up: 2040, Age Group: 20-24    |           |               |       |       |               |             |               |                |              |
| Period                                       | Age Group | Smoking Group | N     | %     | Ever Quit (N) | Ever Quit % | Mean Yrs Quit | Short Term (n) | Short Term % |
| 50                                           | 20-24     | Never Any     | 0     | .     |               |             |               |                |              |
| 50                                           | 20-24     | CC            | 0     | .     | 0             | .           |               |                |              |
| 50                                           | 20-24     | Ecig          | 0     | .     |               |             |               |                |              |
| 50                                           | 20-24     | Dual          | 0     | .     |               |             |               |                |              |
| 50                                           | 20-24     | Former        | 0     | .     |               |             | .             | 0              | .            |
| Year of Follow-up: 2040, Age Group: 25-29    |           |               |       |       |               |             |               |                |              |
| Period                                       | Age Group | Smoking Group | N     | %     | Ever Quit (N) | Ever Quit % | Mean Yrs Quit | Short Term (n) | Short Term % |
| 50                                           | 25-29     | Never Any     | 0     | .     |               |             |               |                |              |
| 50                                           | 25-29     | CC            | 0     | .     | 0             | .           |               |                |              |
| 50                                           | 25-29     | Ecig          | 0     | .     |               |             |               |                |              |
| 50                                           | 25-29     | Dual          | 0     | .     |               |             |               |                |              |
| 50                                           | 25-29     | Former        | 0     | .     |               |             | .             | 0              | .            |
| Year of Follow-up: 2040, Age Group: 30-34    |           |               |       |       |               |             |               |                |              |
| Period                                       | Age Group | Smoking Group | N     | %     | Ever Quit (N) | Ever Quit % | Mean Yrs Quit | Short Term (n) | Short Term % |
| 50                                           | 30-34     | Never Any     | 0     | .     |               |             |               |                |              |
| 50                                           | 30-34     | CC            | 0     | .     | 0             | .           |               |                |              |
| 50                                           | 30-34     | Ecig          | 0     | .     |               |             |               |                |              |
| 50                                           | 30-34     | Dual          | 0     | .     |               |             |               |                |              |
| 50                                           | 30-34     | Former        | 0     | .     |               |             | .             | 0              | .            |
| Year of Follow-up: 2040, Age Group: 35-39    |           |               |       |       |               |             |               |                |              |

**Results for PHIM for Run 8 (Sensitivity\_Analysis\_2.RTF)**

| Period                                    | Age Group | Smoking Group | N    | %     | Ever Quit (N) | Ever Quit % | Mean Yrs Quit | Short Term (n) | Short Term % |
|-------------------------------------------|-----------|---------------|------|-------|---------------|-------------|---------------|----------------|--------------|
| 50                                        | 35-39     | Never Any     | 0    | .     |               |             |               |                |              |
| 50                                        | 35-39     | CC            | 0    | .     | 0             | .           |               |                |              |
| 50                                        | 35-39     | Ecig          | 0    | .     |               |             |               |                |              |
| 50                                        | 35-39     | Dual          | 0    | .     |               |             |               |                |              |
| 50                                        | 35-39     | Former        | 0    | .     |               |             | .             | 0              | .            |
| Year of Follow-up: 2040, Age Group: 40-44 |           |               |      |       |               |             |               |                |              |
| Period                                    | Age Group | Smoking Group | N    | %     | Ever Quit (N) | Ever Quit % | Mean Yrs Quit | Short Term (n) | Short Term % |
| 50                                        | 40-44     | Never Any     | 0    | .     |               |             |               |                |              |
| 50                                        | 40-44     | CC            | 0    | .     | 0             | .           |               |                |              |
| 50                                        | 40-44     | Ecig          | 0    | .     |               |             |               |                |              |
| 50                                        | 40-44     | Dual          | 0    | .     |               |             |               |                |              |
| 50                                        | 40-44     | Former        | 0    | .     |               |             | .             | 0              | .            |
| Year of Follow-up: 2040, Age Group: 45-49 |           |               |      |       |               |             |               |                |              |
| Period                                    | Age Group | Smoking Group | N    | %     | Ever Quit (N) | Ever Quit % | Mean Yrs Quit | Short Term (n) | Short Term % |
| 50                                        | 45-49     | Never Any     | 0    | .     |               |             |               |                |              |
| 50                                        | 45-49     | CC            | 0    | .     | 0             | .           |               |                |              |
| 50                                        | 45-49     | Ecig          | 0    | .     |               |             |               |                |              |
| 50                                        | 45-49     | Dual          | 0    | .     |               |             |               |                |              |
| 50                                        | 45-49     | Former        | 0    | .     |               |             | .             | 0              | .            |
| Year of Follow-up: 2040, Age Group: 50-54 |           |               |      |       |               |             |               |                |              |
| Period                                    | Age Group | Smoking Group | N    | %     | Ever Quit (N) | Ever Quit % | Mean Yrs Quit | Short Term (n) | Short Term % |
| 50                                        | 50-54     | Never Any     | 0    | .     |               |             |               |                |              |
| 50                                        | 50-54     | CC            | 0    | .     | 0             | .           |               |                |              |
| 50                                        | 50-54     | Ecig          | 0    | .     |               |             |               |                |              |
| 50                                        | 50-54     | Dual          | 0    | .     |               |             |               |                |              |
| 50                                        | 50-54     | Former        | 0    | .     |               |             | .             | 0              | .            |
| Year of Follow-up: 2040, Age Group: 55-59 |           |               |      |       |               |             |               |                |              |
| Period                                    | Age Group | Smoking Group | N    | %     | Ever Quit (N) | Ever Quit % | Mean Yrs Quit | Short Term (n) | Short Term % |
| 50                                        | 55-59     | Never Any     | 0    | .     |               |             |               |                |              |
| 50                                        | 55-59     | CC            | 0    | .     | 0             | .           |               |                |              |
| 50                                        | 55-59     | Ecig          | 0    | .     |               |             |               |                |              |
| 50                                        | 55-59     | Dual          | 0    | .     |               |             |               |                |              |
| 50                                        | 55-59     | Former        | 0    | .     |               |             | .             | 0              | .            |
| Year of Follow-up: 2040, Age Group: 60-64 |           |               |      |       |               |             |               |                |              |
| Period                                    | Age Group | Smoking Group | N    | %     | Ever Quit (N) | Ever Quit % | Mean Yrs Quit | Short Term (n) | Short Term % |
| 50                                        | 60-64     | Never Any     | 4726 | 59.60 |               |             |               |                |              |
| 50                                        | 60-64     | CC            | 1    | 0.01  | 0             | 0.00        |               |                |              |
| 50                                        | 60-64     | Ecig          | 609  | 7.68  |               |             |               |                |              |
| 50                                        | 60-64     | Dual          | 0    | 0.00  |               |             |               |                |              |
| 50                                        | 60-64     | Former        | 2594 | 32.71 |               |             | 27.51         | 80             | 3.08         |
| Year of Follow-up: 2040, Age Group: 65-69 |           |               |      |       |               |             |               |                |              |
| Period                                    | Age Group | Smoking Group | N    | %     | Ever Quit (N) | Ever Quit % | Mean Yrs Quit | Short Term (n) | Short Term % |
| 50                                        | 65-69     | Never Any     | 5359 | 64.18 |               |             |               |                |              |
| 50                                        | 65-69     | CC            | 0    | 0.00  | 0             | 0.00        |               |                |              |
| 50                                        | 65-69     | Ecig          | 569  | 6.81  |               |             |               |                |              |
| 50                                        | 65-69     | Dual          | 0    | 0.00  |               |             |               |                |              |
| 50                                        | 65-69     | Former        | 2422 | 29.01 |               |             | 28.76         | 30             | 1.24         |
| Year of Follow-up: 2040, Age Group: 70-74 |           |               |      |       |               |             |               |                |              |
| Period                                    | Age Group | Smoking Group | N    | %     | Ever Quit (N) | Ever Quit % | Mean Yrs Quit | Short Term (n) | Short Term % |
| 50                                        | 70-74     | Never Any     | 5189 | 59.01 |               |             |               |                |              |
| 50                                        | 70-74     | CC            | 7    | 0.08  | 0             | 0.00        |               |                |              |
| 50                                        | 70-74     | Ecig          | 590  | 6.71  |               |             |               |                |              |
| 50                                        | 70-74     | Dual          | 0    | 0.00  |               |             |               |                |              |
| 50                                        | 70-74     | Former        | 3007 | 34.20 |               |             | 32.54         | 53             | 1.76         |
| Year of Follow-up: 2040, Age Group: 75-79 |           |               |      |       |               |             |               |                |              |
| Period                                    | Age Group | Smoking Group | N    | %     | Ever Quit (N) | Ever Quit % | Mean Yrs Quit | Short Term (n) | Short Term % |
| 50                                        | 75-79     | Never Any     | 5284 | 52.43 |               |             |               |                |              |
| 50                                        | 75-79     | CC            | 9    | 0.09  | 0             | 0.00        |               |                |              |
| 50                                        | 75-79     | Ecig          | 713  | 7.07  |               |             |               |                |              |
| 50                                        | 75-79     | Dual          | 0    | 0.00  |               |             |               |                |              |
| 50                                        | 75-79     | Former        | 4072 | 40.40 |               |             | 34.64         | 67             | 1.65         |

## Results for PHIM for Run 8 (Sensitivity\_Analysis\_2.RTF)

\*\*\*\*\*

### Main Results for E-Component for Run: 8, Simulation: 1, COD: Four Diseases Combined

| Variable Parameter          | Value                                  |
|-----------------------------|----------------------------------------|
| 1. Country                  | US (United States)                     |
| 2. Sex                      | F (Females)                            |
| 3. Year of start of process | 1990                                   |
| 4. Cause of Death           | Four Diseases Combined                 |
| 5. Effective Dose NULL      | CC:1                                   |
| 6. Effective Dose Ecig      | CC:1 Ecig:0.05 Dual:0.525              |
| Note:                       | Death rates are per million population |

#### Results for Age Groups Combined and Years combined, Population unadjusted for deaths in Ecig scenario,

| Age Group:All |         | NULL        | Ecig        | %Drop    |        | NULL   | Ecig    | Drop    |         |         |
|---------------|---------|-------------|-------------|----------|--------|--------|---------|---------|---------|---------|
| Year          | Number  | Attrib      | Attrib      | Drop     | %Drop  | Attrib | Death   | Attrib  | Attrib  | Drop    |
|               | Deaths  | Deaths      | Deaths      | Deaths   | Deaths | Deaths | Rate    | Rates   | Rates   | Rates   |
| All Comb      | 9082078 | 2946250.006 | 2070970.901 | 875279.1 | 9.637  | 29.708 | 2493.45 | 808.881 | 568.577 | 240.304 |

#### Results for Age Groups Combined, Population unadjusted for deaths in Ecig scenario,

| Age Group:All |        | NULL      | Ecig      | %Drop    |        | NULL   | Ecig    | Drop    |         |         |
|---------------|--------|-----------|-----------|----------|--------|--------|---------|---------|---------|---------|
| Year          | Number | Attrib    | Attrib    | Drop     | %Drop  | Attrib | Death   | Attrib  | Attrib  | Drop    |
|               | Deaths | Deaths    | Deaths    | Deaths   | Deaths | Deaths | Rate    | Rates   | Rates   | Rates   |
| 1990          | 199848 | 57524.822 | 57524.822 | 0.000    | 0.000  | 0.000  | 2926.84 | 842.471 | 842.471 | 0.000   |
| 1991          | 199162 | 59078.486 | 58968.887 | 109.598  | 0.055  | 0.186  | 2877.87 | 853.678 | 852.095 | 1.584   |
| 1992          | 198532 | 60494.150 | 60191.380 | 302.770  | 0.153  | 0.500  | 2829.84 | 862.271 | 857.956 | 4.316   |
| 1993          | 202512 | 62694.848 | 62103.693 | 591.155  | 0.292  | 0.943  | 2845.85 | 881.034 | 872.726 | 8.307   |
| 1994          | 200658 | 63202.598 | 62258.227 | 944.371  | 0.471  | 1.494  | 2777.87 | 874.966 | 861.892 | 13.074  |
| 1995          | 201023 | 63766.862 | 62393.276 | 1373.586 | 0.683  | 2.154  | 2739.80 | 869.097 | 850.376 | 18.721  |
| 1996          | 201180 | 64591.163 | 62693.678 | 1897.485 | 0.943  | 2.938  | 2706.36 | 868.908 | 843.382 | 25.526  |
| 1997          | 198639 | 64686.912 | 62262.226 | 2424.686 | 1.221  | 3.748  | 2635.18 | 858.147 | 825.981 | 32.166  |
| 1998          | 197573 | 65295.961 | 62243.421 | 3052.540 | 1.545  | 4.675  | 2584.18 | 854.046 | 814.120 | 39.926  |
| 1999          | 211329 | 67327.521 | 63298.533 | 4028.988 | 1.907  | 5.984  | 2726.91 | 868.771 | 816.782 | 51.989  |
| 2000          | 208496 | 67596.897 | 62825.842 | 4771.054 | 2.288  | 7.058  | 2656.96 | 861.419 | 800.620 | 60.800  |
| 2001          | 203606 | 67008.811 | 61451.365 | 5557.445 | 2.730  | 8.294  | 2565.88 | 844.458 | 774.422 | 70.036  |
| 2002          | 200828 | 67067.744 | 60596.912 | 6470.831 | 3.222  | 9.648  | 2506.09 | 836.925 | 756.177 | 80.748  |
| 2003          | 196352 | 66756.217 | 59451.652 | 7304.564 | 3.720  | 10.942 | 2427.31 | 825.244 | 734.945 | 90.299  |
| 2004          | 188160 | 65058.725 | 56998.059 | 8060.666 | 4.284  | 12.390 | 2302.83 | 796.234 | 697.582 | 98.652  |
| 2005          | 186416 | 65214.724 | 56197.312 | 9017.412 | 4.837  | 13.827 | 2256.27 | 789.321 | 680.179 | 109.141 |
| 2006          | 180088 | 63771.146 | 53950.559 | 9820.587 | 5.453  | 15.400 | 2160.67 | 765.117 | 647.291 | 117.826 |
| 2007          | 175644 | 63110.718 | 52505.989 | 10604.73 | 6.038  | 16.803 | 2086.36 | 749.650 | 623.684 | 125.967 |
| 2008          | 177570 | 63718.624 | 52010.618 | 11708.01 | 6.593  | 18.375 | 2086.39 | 748.674 | 611.108 | 137.565 |
| 2009          | 172806 | 62794.698 | 50305.277 | 12489.42 | 7.227  | 19.889 | 2007.57 | 729.515 | 584.420 | 145.095 |
| 2010          | 170489 | 61917.074 | 48579.905 | 13337.17 | 7.823  | 21.540 | 1957.97 | 711.083 | 557.913 | 153.170 |
| 2011          | 170305 | 61680.114 | 47235.425 | 14444.69 | 8.482  | 23.419 | 1937.46 | 701.700 | 537.371 | 164.329 |
| 2012          | 171421 | 62023.127 | 46371.584 | 15651.54 | 9.130  | 25.235 | 1930.22 | 698.386 | 522.148 | 176.238 |
| 2013          | 172699 | 62037.765 | 45289.517 | 16748.25 | 9.698  | 26.997 | 1923.75 | 691.059 | 504.495 | 186.564 |
| 2014          | 174169 | 61921.017 | 43934.858 | 17986.16 | 10.327 | 29.047 | 1918.85 | 682.195 | 484.038 | 198.157 |
| 2015          | 177354 | 61856.204 | 42802.061 | 19054.14 | 10.744 | 30.804 | 2184.51 | 761.899 | 527.204 | 234.695 |
| 2016          | 176853 | 60464.119 | 40560.580 | 19903.54 | 11.254 | 32.918 | 2157.59 | 737.655 | 494.834 | 242.821 |
| 2017          | 179309 | 60243.839 | 39162.044 | 21081.79 | 11.757 | 34.994 | 2166.86 | 728.017 | 473.254 | 254.763 |
| 2018          | 177157 | 60713.327 | 38627.554 | 22085.77 | 12.467 | 36.377 | 2120.51 | 726.721 | 462.360 | 264.360 |
| 2019          | 179227 | 61148.172 | 37748.509 | 23399.66 | 13.056 | 38.267 | 2124.53 | 724.841 | 447.465 | 277.376 |
| 2020          | 180467 | 61149.317 | 36782.254 | 24367.06 | 13.502 | 39.848 | 2424.25 | 821.432 | 494.104 | 327.328 |
| 2021          | 178116 | 58727.786 | 33807.260 | 24920.53 | 13.991 | 42.434 | 2375.42 | 783.216 | 450.866 | 332.349 |
| 2022          | 179408 | 58848.802 | 32731.141 | 26117.66 | 14.558 | 44.381 | 2374.52 | 778.881 | 433.206 | 345.675 |
| 2023          | 180640 | 58816.149 | 31678.357 | 27137.79 | 15.023 | 46.140 | 2372.26 | 772.407 | 416.018 | 356.389 |
| 2024          | 181610 | 58955.232 | 30658.854 | 28296.38 | 15.581 | 47.996 | 2366.77 | 768.316 | 399.552 | 368.764 |
| 2025          | 180418 | 58297.744 | 29485.368 | 28812.38 | 15.970 | 49.423 | 2713.69 | 876.861 | 443.492 | 433.369 |
| 2026          | 180313 | 56469.971 | 27249.597 | 29220.37 | 16.205 | 51.745 | 2701.83 | 846.150 | 408.310 | 437.840 |
| 2027          | 179619 | 56209.427 | 26068.341 | 30141.09 | 16.781 | 53.623 | 2680.68 | 838.883 | 389.050 | 449.833 |
| 2028          | 178762 | 55733.105 | 24794.824 | 30938.28 | 17.307 | 55.511 | 2656.74 | 828.298 | 368.497 | 459.801 |
| 2029          | 177808 | 55145.838 | 23500.824 | 31645.01 | 17.797 | 57.384 | 2630.89 | 815.951 | 347.724 | 468.227 |
| 2030          | 173587 | 53615.097 | 22180.244 | 31434.85 | 18.109 | 58.631 | 3040.33 | 939.056 | 388.482 | 550.574 |
| 2031          | 174985 | 52046.561 | 20767.883 | 31278.68 | 17.875 | 60.097 | 3060.73 | 910.364 | 363.258 | 547.106 |
| 2032          | 173400 | 51582.636 | 19654.124 | 31928.51 | 18.413 | 61.898 | 3027.10 | 900.496 | 343.109 | 557.387 |
| 2033          | 171756 | 50839.758 | 18526.856 | 32312.90 | 18.813 | 63.558 | 2991.14 | 885.375 | 322.645 | 562.729 |
| 2034          | 169973 | 50215.451 | 17456.939 | 32758.51 | 19.273 | 65.236 | 2951.96 | 872.104 | 303.179 | 568.925 |
| 2035          | 162644 | 47773.075 | 16140.430 | 31632.64 | 19.449 | 66.214 | 3459.14 | 1016.05 | 343.277 | 672.768 |
| 2036          | 156254 | 43298.709 | 13818.103 | 29480.61 | 18.867 | 68.087 | 3328.25 | 922.274 | 294.329 | 627.945 |
| 2037          | 153593 | 42241.563 | 12663.903 | 29577.66 | 19.257 | 70.020 | 3274.10 | 900.450 | 269.953 | 630.498 |
| 2038          | 150947 | 41356.353 | 11713.400 | 29642.95 | 19.638 | 71.677 | 3217.50 | 881.531 | 249.677 | 631.854 |
| 2039          | 148373 | 40161.050 | 10748.430 | 29412.62 | 19.823 | 73.237 | 3159.42 | 855.178 | 228.874 | 626.304 |

## Results for PHIM for Run 8 (Sensitivity\_Analysis\_2.RTF)

\*\*\*\*\*

### Main Results for E-Component for Run: 8, Simulation: 1, COD: LUNG CANCER

| Variable Parameter          | Value                                  |
|-----------------------------|----------------------------------------|
| 1. Country                  | US (United States)                     |
| 2. Sex                      | F (Females)                            |
| 3. Year of start of process | 1990                                   |
| 4. Cause of Death           | LUNG CANCER                            |
| 5. Effective Dose NULL      | CC:1                                   |
| 6. Effective Dose Ecig      | CC:1 Ecig:0.05 Dual:0.525              |
| Note:                       | Death rates are per million population |

#### Results for Age Groups Combined and Years combined, Population unadjusted for deaths in Ecig scenario,

| Age Group:All |         | NULL        | Ecig        | %Drop    |        |        | NULL    | Ecig    | Drop    |         |
|---------------|---------|-------------|-------------|----------|--------|--------|---------|---------|---------|---------|
| Year          | Number  | Attrib      | Attrib      | Drop     | %Drop  | Attrib | Death   | Attrib  | Attrib  | Drop    |
|               | Deaths  | Deaths      | Deaths      | Deaths   | Deaths | Deaths | Rate    | Rates   | Rates   | Rates   |
| All Comb      | 2327764 | 1580465.217 | 1205014.755 | 375450.5 | 16.129 | 23.756 | 639.078 | 433.910 | 330.832 | 103.078 |

#### Results for Age Groups Combined, Population unadjusted for deaths in Ecig scenario,

| Age Group:All |        | NULL      | Ecig      | %Drop    |        |        | NULL    | Ecig    | Drop    |         |
|---------------|--------|-----------|-----------|----------|--------|--------|---------|---------|---------|---------|
| Year          | Number | Attrib    | Attrib    | Drop     | %Drop  | Attrib | Death   | Attrib  | Attrib  | Drop    |
|               | Deaths | Deaths    | Deaths    | Deaths   | Deaths | Deaths | Rate    | Rates   | Rates   | Rates   |
| 1990          | 42690  | 30614.201 | 30614.201 | 0.000    | 0.000  | 0.000  | 625.210 | 448.355 | 448.355 | 0.000   |
| 1991          | 43692  | 31412.010 | 31392.092 | 19.919   | 0.046  | 0.063  | 631.345 | 453.901 | 453.613 | 0.288   |
| 1992          | 45423  | 32782.407 | 32726.013 | 56.394   | 0.124  | 0.172  | 647.450 | 467.274 | 466.470 | 0.804   |
| 1993          | 46291  | 33491.183 | 33379.615 | 111.569  | 0.241  | 0.333  | 650.515 | 470.643 | 469.075 | 1.568   |
| 1994          | 47017  | 34074.347 | 33892.092 | 182.255  | 0.388  | 0.535  | 650.895 | 471.719 | 469.196 | 2.523   |
| 1995          | 47840  | 34694.454 | 34418.534 | 275.920  | 0.577  | 0.795  | 652.025 | 472.861 | 469.100 | 3.761   |
| 1996          | 48244  | 35027.269 | 34643.200 | 384.069  | 0.796  | 1.096  | 648.999 | 471.202 | 466.035 | 5.167   |
| 1997          | 49035  | 35590.763 | 35065.619 | 525.144  | 1.071  | 1.476  | 650.506 | 472.153 | 465.186 | 6.967   |
| 1998          | 49686  | 36100.785 | 35397.570 | 703.215  | 1.415  | 1.948  | 649.874 | 472.184 | 462.987 | 9.198   |
| 1999          | 48883  | 35451.030 | 34582.562 | 868.468  | 1.777  | 2.450  | 630.769 | 457.448 | 446.241 | 11.206  |
| 2000          | 50331  | 36447.986 | 35336.509 | 1111.477 | 2.208  | 3.049  | 641.392 | 464.474 | 450.310 | 14.164  |
| 2001          | 50389  | 36411.326 | 35054.022 | 1357.304 | 2.694  | 3.728  | 635.012 | 458.863 | 441.758 | 17.105  |
| 2002          | 51445  | 37078.545 | 35403.662 | 1674.883 | 3.256  | 4.517  | 641.972 | 462.696 | 441.795 | 20.901  |
| 2003          | 51408  | 36999.876 | 35019.849 | 1980.027 | 3.852  | 5.351  | 635.509 | 457.395 | 432.917 | 24.477  |
| 2004          | 51399  | 36861.555 | 34531.877 | 2329.678 | 4.533  | 6.320  | 629.057 | 451.138 | 422.625 | 28.512  |
| 2005          | 51421  | 36689.529 | 33998.716 | 2690.813 | 5.233  | 7.334  | 622.370 | 444.069 | 411.501 | 32.568  |
| 2006          | 51355  | 36504.774 | 33414.645 | 3090.129 | 6.017  | 8.465  | 616.150 | 437.979 | 400.904 | 37.075  |
| 2007          | 51839  | 36663.202 | 33109.658 | 3553.544 | 6.855  | 9.692  | 615.761 | 435.498 | 393.288 | 42.210  |
| 2008          | 50976  | 35898.803 | 31987.814 | 3910.989 | 7.672  | 10.894 | 598.952 | 421.800 | 375.847 | 45.953  |
| 2009          | 51193  | 35934.525 | 31501.889 | 4432.637 | 8.659  | 12.335 | 594.733 | 417.468 | 365.972 | 51.496  |
| 2010          | 50853  | 35502.829 | 30621.472 | 4881.357 | 9.599  | 13.749 | 584.018 | 407.730 | 351.670 | 56.060  |
| 2011          | 50509  | 35136.342 | 29730.998 | 5405.343 | 10.702 | 15.384 | 574.613 | 399.726 | 338.233 | 61.494  |
| 2012          | 51245  | 35450.201 | 29407.750 | 6042.451 | 11.791 | 17.045 | 577.023 | 399.173 | 331.134 | 68.039  |
| 2013          | 51069  | 35123.224 | 28509.283 | 6613.941 | 12.951 | 18.831 | 568.874 | 391.249 | 317.574 | 73.675  |
| 2014          | 51251  | 35079.370 | 27842.470 | 7236.900 | 14.121 | 20.630 | 564.641 | 386.476 | 306.745 | 79.730  |
| 2015          | 50443  | 34324.171 | 26651.750 | 7672.421 | 15.210 | 22.353 | 621.319 | 422.780 | 328.276 | 94.503  |
| 2016          | 48854  | 33054.753 | 25018.670 | 8036.083 | 16.449 | 24.311 | 596.013 | 403.264 | 305.225 | 98.039  |
| 2017          | 48325  | 32471.234 | 23886.858 | 8584.377 | 17.764 | 26.437 | 583.983 | 392.399 | 288.661 | 103.738 |
| 2018          | 50465  | 33657.595 | 23989.421 | 9668.174 | 19.158 | 28.725 | 604.052 | 402.871 | 287.146 | 115.725 |
| 2019          | 51036  | 33863.424 | 23398.523 | 10464.90 | 20.505 | 30.903 | 604.975 | 401.412 | 277.363 | 124.049 |
| 2020          | 51444  | 33910.830 | 22754.656 | 11156.17 | 21.686 | 32.899 | 691.053 | 455.532 | 305.668 | 149.863 |
| 2021          | 48037  | 31531.880 | 20422.014 | 11109.87 | 23.128 | 35.234 | 640.639 | 420.521 | 272.356 | 148.165 |
| 2022          | 48335  | 31560.212 | 19703.632 | 11856.58 | 24.530 | 37.568 | 639.727 | 417.708 | 260.783 | 156.925 |
| 2023          | 48599  | 31508.781 | 18987.311 | 12521.47 | 25.765 | 39.740 | 638.227 | 413.791 | 249.352 | 164.439 |
| 2024          | 48784  | 31517.293 | 18277.014 | 13240.28 | 27.141 | 42.010 | 635.757 | 410.740 | 238.190 | 172.550 |
| 2025          | 48477  | 31175.389 | 17476.249 | 13699.14 | 28.259 | 43.942 | 729.141 | 468.912 | 262.862 | 206.050 |
| 2026          | 45324  | 29044.598 | 15620.244 | 13424.35 | 29.619 | 46.220 | 679.138 | 435.206 | 234.055 | 201.151 |
| 2027          | 45107  | 28825.765 | 14844.150 | 13981.61 | 30.996 | 48.504 | 673.191 | 430.203 | 221.538 | 208.665 |
| 2028          | 44842  | 28513.846 | 14031.838 | 14482.01 | 32.296 | 50.789 | 666.430 | 423.769 | 208.539 | 215.230 |
| 2029          | 44539  | 28148.109 | 13209.883 | 14938.23 | 33.539 | 53.070 | 659.013 | 416.486 | 195.457 | 221.029 |
| 2030          | 43393  | 27314.475 | 12364.327 | 14950.15 | 34.453 | 54.733 | 760.018 | 478.407 | 216.558 | 261.848 |
| 2031          | 40748  | 25423.102 | 11124.618 | 14298.48 | 35.090 | 56.242 | 712.731 | 444.684 | 194.584 | 250.100 |
| 2032          | 40325  | 25085.902 | 10436.281 | 14649.62 | 36.329 | 58.398 | 703.969 | 437.933 | 182.190 | 255.743 |
| 2033          | 39882  | 24645.067 | 9757.775  | 14887.29 | 37.328 | 60.407 | 694.543 | 429.194 | 169.932 | 259.262 |
| 2034          | 39404  | 24239.126 | 9117.418  | 15121.71 | 38.376 | 62.386 | 684.347 | 420.967 | 158.344 | 262.622 |
| 2035          | 37454  | 22944.147 | 8323.100  | 14621.05 | 39.037 | 63.725 | 796.588 | 487.980 | 177.017 | 310.963 |
| 2036          | 32988  | 19950.581 | 6851.366  | 13099.21 | 39.708 | 65.658 | 702.663 | 424.953 | 145.936 | 279.017 |
| 2037          | 32403  | 19415.334 | 6234.110  | 13181.22 | 40.679 | 67.891 | 690.731 | 413.871 | 132.891 | 280.980 |
| 2038          | 31820  | 18939.317 | 5726.526  | 13212.79 | 41.524 | 69.764 | 678.257 | 403.701 | 122.064 | 281.637 |
| 2039          | 31251  | 18379.752 | 5224.911  | 13154.84 | 42.094 | 71.572 | 665.457 | 391.373 | 111.258 | 280.115 |

## Results for PHIM for Run 8 (Sensitivity\_Analysis\_2.RTF)

\*\*\*\*\*

### Main Results for E-Component for Run: 8, Simulation: 1, COD: IHD

| Variable Parameter          | Value                                  |
|-----------------------------|----------------------------------------|
| 1. Country                  | US (United States)                     |
| 2. Sex                      | F (Females)                            |
| 3. Year of start of process | 1990                                   |
| 4. Cause of Death           | IHD                                    |
| 5. Effective Dose NULL      | CC:1                                   |
| 6. Effective Dose Ecig      | CC:1 Ecig:0.05 Dual:0.525              |
| Note:                       | Death rates are per million population |

#### Results for Age Groups Combined and Years combined, Population unadjusted for deaths in Ecig scenario,

| Age Group:All |         | NULL       | Ecig       | %Drop    |        | Death  |         | NULL    | Ecig   | Drop   |
|---------------|---------|------------|------------|----------|--------|--------|---------|---------|--------|--------|
| Year          | Number  | Attrib     | Attrib     | Drop     | %Drop  | Attrib | Rate    | Attrib  | Attrib | Rates  |
|               | Deaths  | Deaths     | Deaths     | Deaths   | Deaths | Deaths |         | Rates   | Rates  | Rates  |
| All Comb      | 3242167 | 398833.796 | 221814.487 | 177019.3 | 5.460  | 44.384 | 890.124 | 109.498 | 60.898 | 48.600 |

#### Results for Age Groups Combined, Population unadjusted for deaths in Ecig scenario,

| Age Group:All |        | NULL      | Ecig      | %Drop    |        | Death  |         | NULL    | Ecig    | Drop   |
|---------------|--------|-----------|-----------|----------|--------|--------|---------|---------|---------|--------|
| Year          | Number | Attrib    | Attrib    | Drop     | %Drop  | Attrib | Rate    | Attrib  | Attrib  | Rates  |
|               | Deaths | Deaths    | Deaths    | Deaths   | Deaths | Deaths |         | Rates   | Rates   | Rates  |
| 1990          | 98916  | 12922.892 | 12922.892 | 0.000    | 0.000  | 0.000  | 1448.66 | 189.260 | 189.260 | 0.000  |
| 1991          | 96403  | 12856.479 | 12795.282 | 61.197   | 0.063  | 0.476  | 1393.01 | 185.775 | 184.891 | 0.884  |
| 1992          | 93721  | 12662.244 | 12493.043 | 169.200  | 0.181  | 1.336  | 1335.88 | 180.485 | 178.073 | 2.412  |
| 1993          | 93679  | 12730.613 | 12405.543 | 325.070  | 0.347  | 2.553  | 1316.45 | 178.900 | 174.332 | 4.568  |
| 1994          | 90832  | 12495.323 | 11983.610 | 511.713  | 0.563  | 4.095  | 1257.46 | 172.983 | 165.899 | 7.084  |
| 1995          | 89698  | 12365.590 | 11636.150 | 729.440  | 0.813  | 5.899  | 1222.52 | 168.534 | 158.593 | 9.942  |
| 1996          | 88286  | 12290.551 | 11286.140 | 1004.412 | 1.138  | 8.172  | 1187.66 | 165.338 | 151.826 | 13.512 |
| 1997          | 84777  | 11719.531 | 10488.941 | 1230.591 | 1.452  | 10.500 | 1124.67 | 155.473 | 139.148 | 16.325 |
| 1998          | 82517  | 11416.794 | 9921.887  | 1494.907 | 1.812  | 13.094 | 1079.29 | 149.327 | 129.774 | 19.553 |
| 1999          | 93939  | 13028.038 | 10937.602 | 2090.436 | 2.225  | 16.046 | 1212.16 | 168.109 | 141.135 | 26.974 |
| 2000          | 90039  | 12426.299 | 10059.628 | 2366.671 | 2.628  | 19.046 | 1147.41 | 158.354 | 128.195 | 30.160 |
| 2001          | 86119  | 11939.281 | 9232.711  | 2706.570 | 3.143  | 22.669 | 1085.29 | 150.461 | 116.352 | 34.109 |
| 2002          | 83014  | 11528.794 | 8481.028  | 3047.766 | 3.671  | 26.436 | 1035.91 | 143.865 | 105.833 | 38.032 |
| 2003          | 79302  | 11048.407 | 7726.832  | 3321.575 | 4.189  | 30.064 | 980.336 | 136.581 | 95.520  | 41.061 |
| 2004          | 73861  | 10375.132 | 6842.285  | 3532.847 | 4.783  | 34.051 | 903.963 | 126.978 | 83.741  | 43.237 |
| 2005          | 71649  | 10051.029 | 6254.318  | 3796.712 | 5.299  | 37.774 | 867.197 | 121.652 | 75.699  | 45.953 |
| 2006          | 67551  | 9542.523  | 5545.181  | 3997.343 | 5.918  | 41.890 | 810.467 | 114.490 | 66.530  | 47.960 |
| 2007          | 63503  | 8936.533  | 4859.705  | 4076.828 | 6.420  | 45.620 | 754.310 | 106.151 | 57.725  | 48.426 |
| 2008          | 63171  | 8944.180  | 4546.532  | 4397.648 | 6.961  | 49.168 | 742.239 | 105.091 | 53.420  | 51.671 |
| 2009          | 59747  | 8390.033  | 3996.859  | 4393.175 | 7.353  | 52.362 | 694.108 | 97.471  | 46.433  | 51.038 |
| 2010          | 58008  | 8157.570  | 3616.846  | 4540.723 | 7.828  | 55.663 | 666.189 | 93.685  | 41.537  | 52.148 |
| 2011          | 57368  | 8035.356  | 3296.847  | 4738.509 | 8.260  | 58.971 | 652.644 | 91.414  | 37.506  | 53.907 |
| 2012          | 57411  | 7970.766  | 3010.974  | 4959.792 | 8.639  | 62.225 | 646.453 | 89.752  | 33.904  | 55.848 |
| 2013          | 57067  | 7743.216  | 2721.663  | 5021.553 | 8.799  | 64.851 | 635.688 | 86.254  | 30.317  | 55.937 |
| 2014          | 57538  | 7774.935  | 2518.372  | 5256.563 | 9.136  | 67.609 | 633.906 | 85.658  | 27.745  | 57.912 |
| 2015          | 58395  | 7722.535  | 2344.080  | 5378.455 | 9.210  | 69.646 | 719.266 | 95.120  | 28.873  | 66.248 |
| 2016          | 58658  | 7600.353  | 2135.192  | 5465.161 | 9.317  | 71.907 | 715.621 | 92.723  | 26.049  | 66.674 |
| 2017          | 59004  | 7470.266  | 1941.137  | 5529.129 | 9.371  | 74.015 | 713.034 | 90.274  | 23.458  | 66.817 |
| 2018          | 56077  | 6907.050  | 1660.859  | 5246.191 | 9.355  | 75.954 | 671.224 | 82.675  | 19.880  | 62.795 |
| 2019          | 55886  | 6732.046  | 1505.973  | 5226.074 | 9.351  | 77.630 | 662.462 | 79.801  | 17.852  | 61.949 |
| 2020          | 55313  | 6429.836  | 1352.376  | 5077.460 | 9.179  | 78.967 | 743.037 | 86.373  | 18.167  | 68.207 |
| 2021          | 56292  | 6562.016  | 1252.624  | 5309.392 | 9.432  | 80.911 | 750.730 | 87.513  | 16.705  | 70.808 |
| 2022          | 55827  | 6352.366  | 1126.398  | 5225.968 | 9.361  | 82.268 | 738.885 | 84.075  | 14.908  | 69.167 |
| 2023          | 55338  | 6134.123  | 1017.333  | 5116.791 | 9.246  | 83.415 | 726.728 | 80.557  | 13.360  | 67.197 |
| 2024          | 54770  | 5922.193  | 918.851   | 5003.342 | 9.135  | 84.485 | 713.771 | 77.179  | 11.975  | 65.205 |
| 2025          | 53295  | 5504.188  | 819.510   | 4684.678 | 8.790  | 85.111 | 801.612 | 82.789  | 12.326  | 70.463 |
| 2026          | 55278  | 5641.075  | 782.488   | 4858.587 | 8.789  | 86.129 | 828.283 | 84.526  | 11.725  | 72.801 |
| 2027          | 54199  | 5426.216  | 711.511   | 4714.704 | 8.699  | 86.888 | 808.875 | 80.982  | 10.619  | 70.363 |
| 2028          | 53090  | 5197.830  | 640.171   | 4557.659 | 8.585  | 87.684 | 789.020 | 77.249  | 9.514   | 67.735 |
| 2029          | 51974  | 4973.547  | 580.910   | 4392.637 | 8.452  | 88.320 | 769.023 | 73.590  | 8.595   | 64.994 |
| 2030          | 49479  | 4450.618  | 503.038   | 3947.580 | 7.978  | 88.697 | 866.605 | 77.952  | 8.811   | 69.141 |
| 2031          | 51987  | 4555.052  | 486.333   | 4068.719 | 7.826  | 89.323 | 909.317 | 79.674  | 8.507   | 71.167 |
| 2032          | 50677  | 4349.999  | 437.077   | 3912.922 | 7.721  | 89.952 | 884.689 | 75.939  | 7.630   | 68.309 |
| 2033          | 49380  | 4147.948  | 396.066   | 3751.882 | 7.598  | 90.452 | 859.955 | 72.237  | 6.897   | 65.339 |
| 2034          | 48076  | 3966.133  | 361.944   | 3604.189 | 7.497  | 90.874 | 834.943 | 68.881  | 6.286   | 62.595 |
| 2035          | 44518  | 3289.064  | 293.623   | 2995.442 | 6.729  | 91.073 | 946.825 | 69.952  | 6.245   | 63.708 |
| 2036          | 46347  | 3313.192  | 280.539   | 3032.653 | 6.543  | 91.533 | 987.211 | 70.572  | 5.976   | 64.596 |
| 2037          | 44841  | 3117.951  | 251.768   | 2866.184 | 6.392  | 91.925 | 955.859 | 66.464  | 5.367   | 61.098 |
| 2038          | 43378  | 2949.775  | 226.533   | 2723.242 | 6.278  | 92.320 | 924.621 | 62.876  | 4.829   | 58.047 |
| 2039          | 41973  | 2766.312  | 207.283   | 2559.029 | 6.097  | 92.507 | 893.753 | 58.905  | 4.414   | 54.491 |

## Results for PHIM for Run 8 (Sensitivity\_Analysis\_2.RTF)

\*\*\*\*\*

### Main Results for E-Component for Run: 8, Simulation: 1, COD: STROKE

| Variable Parameter          | Value                                  |
|-----------------------------|----------------------------------------|
| 1. Country                  | US (United States)                     |
| 2. Sex                      | F (Females)                            |
| 3. Year of start of process | 1990                                   |
| 4. Cause of Death           | STROKE                                 |
| 5. Effective Dose NULL      | CC:1                                   |
| 6. Effective Dose Ecig      | CC:1 Ecig:0.05 Dual:0.525              |
| Note:                       | Death rates are per million population |

#### Results for Age Groups Combined and Years combined, Population unadjusted for deaths in Ecig scenario,

| Age Group:All | NULL    | Ecig       | %Drop     |          |        | NULL   | Ecig    | Drop   |        |        |
|---------------|---------|------------|-----------|----------|--------|--------|---------|--------|--------|--------|
| Year          | Number  | Attrib     | Attrib    | Drop     | %Drop  | Attrib | Death   | Attrib | Attrib | Drop   |
|               | Deaths  | Deaths     | Deaths    | Deaths   | Deaths | Deaths | Rate    | Rates  | Rates  | Rates  |
| All Comb      | 1352207 | 104899.750 | 57246.371 | 47653.38 | 3.524  | 45.428 | 371.243 | 28.800 | 15.717 | 13.083 |

#### Results for Age Groups Combined, Population unadjusted for deaths in Ecig scenario,

| Age Group:All | NULL   | Ecig     | %Drop    |          |        | NULL   | Ecig    | Drop   |        |        |
|---------------|--------|----------|----------|----------|--------|--------|---------|--------|--------|--------|
| Year          | Number | Attrib   | Attrib   | Drop     | %Drop  | Attrib | Death   | Attrib | Attrib | Drop   |
|               | Deaths | Deaths   | Deaths   | Deaths   | Deaths | Deaths | Rate    | Rates  | Rates  | Rates  |
| 1990          | 33504  | 3293.017 | 3293.017 | 0.000    | 0.000  | 0.000  | 490.678 | 48.227 | 48.227 | 0.000  |
| 1991          | 32505  | 3207.063 | 3189.228 | 17.835   | 0.055  | 0.556  | 469.694 | 46.342 | 46.084 | 0.258  |
| 1992          | 32560  | 3218.125 | 3168.702 | 49.422   | 0.152  | 1.536  | 464.104 | 45.871 | 45.166 | 0.704  |
| 1993          | 32768  | 3226.680 | 3131.274 | 95.407   | 0.291  | 2.957  | 460.480 | 45.344 | 44.003 | 1.341  |
| 1994          | 33005  | 3277.266 | 3120.885 | 156.380  | 0.474  | 4.772  | 456.915 | 45.370 | 43.205 | 2.165  |
| 1995          | 33730  | 3309.378 | 3080.726 | 228.652  | 0.678  | 6.909  | 459.716 | 45.104 | 41.988 | 3.116  |
| 1996          | 33750  | 3312.987 | 2997.800 | 315.187  | 0.934  | 9.514  | 454.019 | 44.568 | 40.328 | 4.240  |
| 1997          | 33699  | 3267.066 | 2862.207 | 404.858  | 1.201  | 12.392 | 447.056 | 43.341 | 37.971 | 5.371  |
| 1998          | 33274  | 3178.725 | 2688.637 | 490.088  | 1.473  | 15.418 | 435.211 | 41.577 | 35.166 | 6.410  |
| 1999          | 33891  | 3120.351 | 2541.409 | 578.942  | 1.708  | 18.554 | 437.317 | 40.264 | 32.793 | 7.470  |
| 2000          | 33827  | 3142.808 | 2454.768 | 688.041  | 2.034  | 21.893 | 431.074 | 40.050 | 31.282 | 8.768  |
| 2001          | 32506  | 2961.588 | 2212.358 | 749.230  | 2.305  | 25.298 | 409.647 | 37.323 | 27.881 | 9.442  |
| 2002          | 32078  | 2940.627 | 2085.688 | 854.939  | 2.665  | 29.073 | 400.295 | 36.695 | 26.027 | 10.669 |
| 2003          | 30568  | 2819.545 | 1894.915 | 924.630  | 3.025  | 32.794 | 377.883 | 34.855 | 23.425 | 11.430 |
| 2004          | 29388  | 2730.466 | 1731.472 | 998.994  | 3.399  | 36.587 | 359.671 | 33.417 | 21.191 | 12.226 |
| 2005          | 27954  | 2670.510 | 1592.147 | 1078.363 | 3.858  | 40.380 | 338.339 | 32.322 | 19.270 | 13.052 |
| 2006          | 27201  | 2623.285 | 1467.557 | 1155.729 | 4.249  | 44.057 | 326.354 | 31.474 | 17.608 | 13.866 |
| 2007          | 26302  | 2536.599 | 1328.191 | 1208.408 | 4.594  | 47.639 | 312.424 | 30.131 | 15.777 | 14.354 |
| 2008          | 25998  | 2469.443 | 1214.416 | 1255.027 | 4.827  | 50.822 | 305.468 | 29.015 | 14.269 | 14.746 |
| 2009          | 25040  | 2386.945 | 1096.905 | 1290.040 | 5.152  | 54.046 | 290.901 | 27.730 | 12.743 | 14.987 |
| 2010          | 24840  | 2329.274 | 999.442  | 1329.833 | 5.354  | 57.092 | 285.273 | 26.750 | 11.478 | 15.272 |
| 2011          | 24792  | 2286.581 | 911.031  | 1375.550 | 5.548  | 60.158 | 282.045 | 26.013 | 10.364 | 15.649 |
| 2012          | 24500  | 2243.311 | 827.512  | 1415.799 | 5.779  | 63.112 | 275.872 | 25.260 | 9.318  | 15.942 |
| 2013          | 24451  | 2176.503 | 742.830  | 1433.673 | 5.863  | 65.870 | 272.368 | 24.245 | 8.275  | 15.970 |
| 2014          | 25296  | 2211.619 | 700.358  | 1511.261 | 5.974  | 68.333 | 278.691 | 24.366 | 7.716  | 16.650 |
| 2015          | 26316  | 2237.016 | 662.625  | 1574.390 | 5.983  | 70.379 | 324.141 | 27.554 | 8.162  | 19.392 |
| 2016          | 26735  | 2229.057 | 613.073  | 1615.984 | 6.044  | 72.496 | 326.164 | 27.194 | 7.479  | 19.715 |
| 2017          | 27616  | 2221.649 | 567.090  | 1654.559 | 5.991  | 74.474 | 333.726 | 26.848 | 6.853  | 19.995 |
| 2018          | 25256  | 1939.420 | 462.775  | 1476.645 | 5.847  | 76.138 | 302.304 | 23.214 | 5.539  | 17.675 |
| 2019          | 25429  | 1904.400 | 421.462  | 1482.937 | 5.832  | 77.869 | 301.434 | 22.574 | 4.996  | 17.579 |
| 2020          | 25379  | 1806.054 | 374.905  | 1431.149 | 5.639  | 79.242 | 340.922 | 24.261 | 5.036  | 19.225 |
| 2021          | 25448  | 1748.172 | 335.243  | 1412.930 | 5.552  | 80.823 | 339.386 | 23.314 | 4.471  | 18.843 |
| 2022          | 25539  | 1701.148 | 303.006  | 1398.142 | 5.475  | 82.188 | 338.015 | 22.515 | 4.010  | 18.505 |
| 2023          | 25620  | 1652.087 | 274.599  | 1377.488 | 5.377  | 83.379 | 336.461 | 21.696 | 3.606  | 18.090 |
| 2024          | 25659  | 1597.127 | 247.608  | 1349.519 | 5.259  | 84.497 | 334.391 | 20.814 | 3.227  | 17.587 |
| 2025          | 25260  | 1467.622 | 217.047  | 1250.575 | 4.951  | 85.211 | 379.931 | 22.075 | 3.265  | 18.810 |
| 2026          | 25480  | 1390.505 | 193.830  | 1196.675 | 4.697  | 86.060 | 381.790 | 20.835 | 2.904  | 17.931 |
| 2027          | 25264  | 1342.095 | 176.466  | 1165.630 | 4.614  | 86.851 | 377.042 | 20.030 | 2.634  | 17.396 |
| 2028          | 25022  | 1289.536 | 159.370  | 1130.166 | 4.517  | 87.641 | 371.870 | 19.165 | 2.369  | 16.796 |
| 2029          | 24767  | 1242.216 | 145.350  | 1096.866 | 4.429  | 88.299 | 366.459 | 18.380 | 2.151  | 16.229 |
| 2030          | 23959  | 1096.803 | 122.888  | 973.915  | 4.065  | 88.796 | 419.641 | 19.210 | 2.152  | 17.058 |
| 2031          | 23963  | 1019.991 | 107.991  | 912.000  | 3.806  | 89.413 | 419.142 | 17.841 | 1.889  | 15.952 |
| 2032          | 23615  | 977.406  | 96.805   | 880.601  | 3.729  | 90.096 | 412.259 | 17.063 | 1.690  | 15.373 |
| 2033          | 23259  | 937.450  | 88.186   | 849.264  | 3.651  | 90.593 | 405.051 | 16.326 | 1.536  | 14.790 |
| 2034          | 22879  | 900.763  | 80.779   | 819.984  | 3.584  | 91.032 | 397.339 | 15.644 | 1.403  | 14.241 |
| 2035          | 21733  | 745.023  | 64.880   | 680.144  | 3.130  | 91.292 | 462.224 | 15.845 | 1.380  | 14.465 |
| 2036          | 20904  | 680.360  | 56.265   | 624.095  | 2.986  | 91.730 | 445.263 | 14.492 | 1.198  | 13.293 |
| 2037          | 20397  | 644.109  | 51.385   | 592.725  | 2.906  | 92.022 | 434.791 | 13.730 | 1.095  | 12.635 |
| 2038          | 19890  | 612.448  | 46.425   | 566.023  | 2.846  | 92.420 | 423.966 | 13.055 | 0.990  | 12.065 |
| 2039          | 19392  | 577.529  | 42.843   | 534.686  | 2.757  | 92.582 | 412.930 | 12.298 | 0.912  | 11.385 |

## Results for PHIM for Run 8 (Sensitivity\_Analysis\_2.RTF)

\*\*\*\*\*

### Main Results for E-Component for Run: 8, Simulation: 1, COD: COPD

| Variable Parameter          | Value                                  |
|-----------------------------|----------------------------------------|
| 1. Country                  | US (United States)                     |
| 2. Sex                      | F (Females)                            |
| 3. Year of start of process | 1990                                   |
| 4. Cause of Death           | COPD                                   |
| 5. Effective Dose NULL      | CC:1                                   |
| 6. Effective Dose Ecig      | CC:1 Ecig:0.05 Dual:0.525              |
| Note:                       | Death rates are per million population |

#### Results for Age Groups Combined and Years combined, Population unadjusted for deaths in Ecig scenario,

| Age Group:All |         | NULL       | Ecig       | %Drop    |        |        | NULL    | Ecig    | Drop    |        |
|---------------|---------|------------|------------|----------|--------|--------|---------|---------|---------|--------|
| Year          | Number  | Attrib     | Attrib     | Drop     | %Drop  | Attrib | Death   | Attrib  | Attrib  | Drop   |
|               | Deaths  | Deaths     | Deaths     | Deaths   | Deaths | Deaths | Rate    | Rates   | Rates   | Rates  |
| All Comb      | 2159941 | 862051.244 | 586895.288 | 275156.0 | 12.739 | 31.919 | 593.003 | 236.673 | 161.130 | 75.543 |

#### Results for Age Groups Combined, Population unadjusted for deaths in Ecig scenario,

| Age Group:All |        | NULL      | Ecig      | %Drop    |        |        | NULL    | Ecig    | Drop    |         |
|---------------|--------|-----------|-----------|----------|--------|--------|---------|---------|---------|---------|
| Year          | Number | Attrib    | Attrib    | Drop     | %Drop  | Attrib | Death   | Attrib  | Attrib  | Drop    |
|               | Deaths | Deaths    | Deaths    | Deaths   | Deaths | Deaths | Rate    | Rates   | Rates   | Rates   |
| 1990          | 24738  | 10694.712 | 10694.712 | 0.000    | 0.000  | 0.000  | 362.296 | 156.628 | 156.628 | 0.000   |
| 1991          | 26562  | 11602.933 | 11592.286 | 10.647   | 0.040  | 0.092  | 383.818 | 167.661 | 167.507 | 0.154   |
| 1992          | 26828  | 11831.375 | 11803.622 | 27.753   | 0.103  | 0.235  | 382.401 | 168.642 | 168.246 | 0.396   |
| 1993          | 29774  | 13246.371 | 13187.262 | 59.109   | 0.199  | 0.446  | 418.406 | 186.148 | 185.317 | 0.831   |
| 1994          | 29804  | 13355.662 | 13261.640 | 94.022   | 0.315  | 0.704  | 412.601 | 184.893 | 183.592 | 1.302   |
| 1995          | 29755  | 13397.439 | 13257.866 | 139.573  | 0.469  | 1.042  | 405.540 | 182.598 | 180.695 | 1.902   |
| 1996          | 30900  | 13960.356 | 13766.539 | 193.817  | 0.627  | 1.388  | 415.680 | 187.801 | 185.193 | 2.607   |
| 1997          | 31128  | 14109.552 | 13845.460 | 264.092  | 0.848  | 1.872  | 412.949 | 187.180 | 183.676 | 3.503   |
| 1998          | 32096  | 14599.657 | 14235.326 | 364.331  | 1.135  | 2.495  | 419.803 | 190.958 | 186.193 | 4.765   |
| 1999          | 34616  | 15728.102 | 15236.961 | 491.142  | 1.419  | 3.123  | 446.673 | 202.950 | 196.612 | 6.338   |
| 2000          | 34299  | 15579.803 | 14974.938 | 604.866  | 1.764  | 3.882  | 437.088 | 198.541 | 190.833 | 7.708   |
| 2001          | 34592  | 15696.614 | 14952.274 | 744.341  | 2.152  | 4.742  | 435.935 | 197.812 | 188.431 | 9.380   |
| 2002          | 34291  | 15519.777 | 14626.534 | 893.243  | 2.605  | 5.756  | 427.910 | 193.668 | 182.522 | 11.147  |
| 2003          | 35074  | 15888.389 | 14810.056 | 1078.333 | 3.074  | 6.787  | 433.587 | 196.413 | 183.083 | 13.330  |
| 2004          | 33512  | 15091.573 | 13892.425 | 1199.148 | 3.578  | 7.946  | 410.143 | 184.701 | 170.025 | 14.676  |
| 2005          | 35392  | 15803.656 | 14352.132 | 1451.524 | 4.101  | 9.185  | 428.364 | 191.278 | 173.710 | 17.568  |
| 2006          | 33981  | 15100.563 | 13523.177 | 1577.387 | 4.642  | 10.446 | 407.699 | 181.174 | 162.249 | 18.925  |
| 2007          | 34000  | 14974.384 | 13208.435 | 1765.948 | 5.194  | 11.793 | 403.863 | 177.871 | 156.894 | 20.977  |
| 2008          | 37425  | 16406.197 | 14261.856 | 2144.342 | 5.730  | 13.070 | 439.732 | 192.768 | 167.572 | 25.195  |
| 2009          | 36826  | 16083.194 | 13709.625 | 2373.569 | 6.445  | 14.758 | 427.825 | 186.846 | 159.271 | 27.575  |
| 2010          | 36788  | 15927.400 | 13342.144 | 2585.256 | 7.027  | 16.231 | 422.489 | 182.917 | 153.227 | 29.690  |
| 2011          | 37636  | 16221.836 | 13296.549 | 2925.287 | 7.773  | 18.033 | 428.164 | 184.547 | 151.267 | 33.279  |
| 2012          | 38265  | 16358.849 | 13125.348 | 3233.501 | 8.450  | 19.766 | 430.867 | 184.202 | 147.793 | 36.410  |
| 2013          | 40112  | 16994.822 | 13315.742 | 3679.080 | 9.172  | 21.648 | 446.821 | 189.311 | 148.328 | 40.982  |
| 2014          | 40084  | 16855.093 | 12873.659 | 3981.435 | 9.933  | 23.622 | 441.613 | 185.696 | 141.831 | 43.864  |
| 2015          | 42200  | 17572.483 | 13143.606 | 4428.877 | 10.495 | 25.203 | 519.788 | 216.445 | 161.893 | 54.552  |
| 2016          | 42606  | 17579.955 | 12793.645 | 4786.311 | 11.234 | 27.226 | 519.788 | 214.473 | 156.081 | 58.392  |
| 2017          | 44364  | 18080.688 | 12766.959 | 5313.729 | 11.978 | 29.389 | 536.117 | 218.496 | 154.282 | 64.214  |
| 2018          | 45359  | 18209.262 | 12514.499 | 5694.763 | 12.555 | 31.274 | 542.932 | 217.960 | 149.795 | 68.165  |
| 2019          | 46876  | 18648.302 | 12422.551 | 6225.751 | 13.281 | 33.385 | 555.657 | 221.054 | 147.255 | 73.799  |
| 2020          | 48331  | 19002.597 | 12300.317 | 6702.280 | 13.868 | 35.270 | 649.239 | 255.266 | 165.233 | 90.033  |
| 2021          | 48338  | 18885.717 | 11797.379 | 7088.338 | 14.664 | 37.533 | 644.660 | 251.867 | 157.334 | 94.533  |
| 2022          | 49708  | 19235.076 | 11598.106 | 7636.971 | 15.364 | 39.703 | 657.895 | 254.582 | 153.504 | 101.077 |
| 2023          | 51083  | 19521.158 | 11399.115 | 8122.043 | 15.900 | 41.606 | 670.849 | 256.363 | 149.700 | 106.663 |
| 2024          | 52397  | 19918.620 | 11215.381 | 8703.239 | 16.610 | 43.694 | 682.854 | 259.583 | 146.161 | 113.422 |
| 2025          | 53387  | 20150.545 | 10972.562 | 9177.982 | 17.191 | 45.547 | 803.004 | 303.086 | 165.039 | 138.047 |
| 2026          | 54232  | 20393.792 | 10653.034 | 9740.758 | 17.961 | 47.763 | 812.615 | 305.582 | 159.626 | 145.956 |
| 2027          | 55049  | 20615.351 | 10336.214 | 10279.14 | 18.673 | 49.862 | 821.568 | 307.668 | 154.260 | 153.408 |
| 2028          | 55809  | 20731.894 | 9963.445  | 10768.45 | 19.295 | 51.941 | 829.419 | 308.115 | 148.075 | 160.039 |
| 2029          | 56527  | 20781.967 | 9564.681  | 11217.29 | 19.844 | 53.976 | 836.392 | 307.495 | 141.521 | 165.974 |
| 2030          | 56756  | 20753.201 | 9189.991  | 11563.21 | 20.374 | 55.718 | 994.067 | 363.487 | 160.961 | 202.527 |
| 2031          | 58288  | 21048.417 | 9048.941  | 11999.48 | 20.586 | 57.009 | 1019.54 | 368.165 | 158.278 | 209.887 |
| 2032          | 58782  | 21169.329 | 8683.960  | 12485.37 | 21.240 | 58.979 | 1026.18 | 369.560 | 151.599 | 217.961 |
| 2033          | 59236  | 21109.293 | 8284.829  | 12824.46 | 21.650 | 60.753 | 1031.59 | 367.618 | 144.280 | 223.338 |
| 2034          | 59614  | 21109.429 | 7896.797  | 13212.63 | 22.164 | 62.591 | 1035.33 | 366.613 | 137.146 | 229.467 |
| 2035          | 58938  | 20794.840 | 7458.827  | 13336.01 | 22.627 | 64.131 | 1253.51 | 442.268 | 158.636 | 283.633 |
| 2036          | 56014  | 19354.577 | 6629.933  | 12724.64 | 22.717 | 65.745 | 1193.11 | 412.258 | 141.219 | 271.038 |
| 2037          | 55953  | 19064.169 | 6126.641  | 12937.53 | 23.122 | 67.863 | 1192.72 | 406.385 | 130.600 | 275.785 |
| 2038          | 55859  | 18854.812 | 5713.917  | 13140.90 | 23.525 | 69.695 | 1190.66 | 401.900 | 121.795 | 280.105 |
| 2039          | 55757  | 18437.457 | 5273.393  | 13164.06 | 23.610 | 71.398 | 1187.28 | 392.602 | 112.290 | 280.312 |



## Results for PHIM for Run 8 (Sensitivity\_Analysis\_2.RTF)

\*\*\*\*\*

### Main Results for E-Component for Run: 8, Simulation: 1, COD: Four Diseases Combined, Adjusted

| Variable Parameter          | Value                                  |
|-----------------------------|----------------------------------------|
| 1. Country                  | US (United States)                     |
| 2. Sex                      | F (Females)                            |
| 3. Year of start of process | 1990                                   |
| 4. Cause of Death           | Four Diseases Combined                 |
| 5. Effective Dose NULL      | CC:1                                   |
| 6. Effective Dose Ecig      | CC:1 Ecig:0.05 Dual:0.525              |
| Note:                       | Death rates are per million population |

#### Results for Age Groups Combined and Years combined, Population and Number deaths adjusted for Ecig scenario,

| Age Group:All |         | NULL        | Ecig        | %Drop    |        |        | NULL    | Ecig    | Drop    |         |
|---------------|---------|-------------|-------------|----------|--------|--------|---------|---------|---------|---------|
| Year          | Number  | Attrib      | Attrib      | Drop     | %Drop  | Attrib | Death   | Attrib  | Attrib  | Drop    |
|               | Deaths  | Deaths      | Deaths      | Deaths   | Deaths | Deaths | Rate    | Rates   | Rates   | Rates   |
| All Comb      | 9133612 | 2946250.006 | 2078461.682 | 867788.3 | 9.501  | 29.454 | 2497.81 | 808.881 | 568.407 | 240.474 |

#### Results for Age Groups Combined, Population and Number deaths adjusted for Ecig scenario,

| Age Group:All |        | NULL      | Ecig      | %Drop    |        |        | NULL    | Ecig    | Drop    |         |
|---------------|--------|-----------|-----------|----------|--------|--------|---------|---------|---------|---------|
| Year          | Number | Attrib    | Attrib    | Drop     | %Drop  | Attrib | Death   | Attrib  | Attrib  | Drop    |
|               | Deaths | Deaths    | Deaths    | Deaths   | Deaths | Deaths | Rate    | Rates   | Rates   | Rates   |
| 1990          | 199848 | 57524.822 | 57524.822 | 0.000    | 0.000  | 0.000  | 2926.84 | 842.471 | 842.471 | 0.000   |
| 1991          | 199162 | 59078.486 | 58968.887 | 109.598  | 0.055  | 0.186  | 2877.87 | 853.678 | 852.095 | 1.584   |
| 1992          | 198532 | 60494.150 | 60191.507 | 302.643  | 0.152  | 0.500  | 2829.84 | 862.271 | 857.956 | 4.315   |
| 1993          | 202513 | 62694.848 | 62104.173 | 590.674  | 0.292  | 0.942  | 2845.85 | 881.034 | 872.728 | 8.306   |
| 1994          | 200662 | 63202.598 | 62259.410 | 943.188  | 0.470  | 1.492  | 2777.88 | 874.966 | 861.896 | 13.070  |
| 1995          | 201030 | 63766.862 | 62395.561 | 1371.301 | 0.682  | 2.150  | 2739.82 | 869.097 | 850.384 | 18.713  |
| 1996          | 201191 | 64591.163 | 62697.580 | 1893.583 | 0.941  | 2.932  | 2706.38 | 868.908 | 843.395 | 25.513  |
| 1997          | 198656 | 64686.912 | 62268.276 | 2418.636 | 1.217  | 3.739  | 2635.21 | 858.147 | 826.001 | 32.146  |
| 1998          | 197598 | 65295.961 | 62252.386 | 3043.575 | 1.540  | 4.661  | 2584.23 | 854.046 | 814.151 | 39.895  |
| 1999          | 211368 | 67327.521 | 63311.485 | 4016.036 | 1.900  | 5.965  | 2727.01 | 868.771 | 816.829 | 51.942  |
| 2000          | 208549 | 67596.897 | 62843.701 | 4753.195 | 2.279  | 7.032  | 2657.11 | 861.419 | 800.686 | 60.733  |
| 2001          | 203677 | 67008.811 | 61474.753 | 5534.057 | 2.717  | 8.259  | 2566.10 | 844.458 | 774.512 | 69.946  |
| 2002          | 200920 | 67067.744 | 60626.709 | 6441.035 | 3.206  | 9.604  | 2506.39 | 836.925 | 756.293 | 80.632  |
| 2003          | 196468 | 66756.217 | 59488.881 | 7267.336 | 3.699  | 10.886 | 2427.72 | 825.244 | 735.094 | 90.150  |
| 2004          | 188300 | 65058.725 | 57042.702 | 8016.023 | 4.257  | 12.321 | 2303.35 | 796.234 | 697.767 | 98.468  |
| 2005          | 186586 | 65214.724 | 56250.831 | 8963.893 | 4.804  | 13.745 | 2256.92 | 789.321 | 680.402 | 108.918 |
| 2006          | 180287 | 63771.146 | 54012.392 | 9758.753 | 5.413  | 15.303 | 2161.46 | 765.117 | 647.553 | 117.564 |
| 2007          | 175875 | 63110.718 | 52577.210 | 10533.51 | 5.989  | 16.691 | 2087.29 | 749.650 | 623.988 | 125.662 |
| 2008          | 177844 | 63718.624 | 52093.123 | 11625.50 | 6.537  | 18.245 | 2087.51 | 748.674 | 611.463 | 137.210 |
| 2009          | 173116 | 62794.698 | 50397.792 | 12396.91 | 7.161  | 19.742 | 2008.84 | 729.515 | 584.819 | 144.696 |
| 2010          | 170840 | 61917.074 | 48682.234 | 13234.84 | 7.747  | 21.375 | 1959.42 | 711.083 | 558.355 | 152.728 |
| 2011          | 170703 | 61680.114 | 47348.340 | 14331.77 | 8.396  | 23.236 | 1939.13 | 701.700 | 537.860 | 163.840 |
| 2012          | 171874 | 62023.127 | 46496.791 | 15526.34 | 9.034  | 25.033 | 1932.12 | 698.386 | 522.692 | 175.694 |
| 2013          | 173213 | 62037.765 | 45426.931 | 16610.83 | 9.590  | 26.775 | 1925.92 | 691.059 | 505.092 | 185.967 |
| 2014          | 174749 | 61921.017 | 44083.935 | 17837.08 | 10.207 | 28.806 | 1921.30 | 682.195 | 484.687 | 197.508 |
| 2015          | 178014 | 61856.204 | 42964.190 | 18892.01 | 10.613 | 30.542 | 2187.09 | 761.899 | 527.862 | 234.036 |
| 2016          | 177581 | 60464.119 | 40730.796 | 19733.32 | 11.112 | 32.636 | 2160.45 | 737.655 | 495.529 | 242.127 |
| 2017          | 180124 | 60243.839 | 39343.688 | 20900.15 | 11.603 | 34.693 | 2170.09 | 728.017 | 474.002 | 254.015 |
| 2018          | 178042 | 60713.327 | 38824.530 | 21888.80 | 12.294 | 36.053 | 2124.05 | 726.721 | 463.177 | 263.544 |
| 2019          | 180211 | 61148.172 | 37960.176 | 23188.00 | 12.867 | 37.921 | 2128.50 | 724.841 | 448.354 | 276.487 |
| 2020          | 181556 | 61149.317 | 37008.654 | 24140.66 | 13.297 | 39.478 | 2428.20 | 821.432 | 494.967 | 326.466 |
| 2021          | 179288 | 58727.786 | 34034.504 | 24693.28 | 13.773 | 42.047 | 2379.75 | 783.216 | 451.751 | 331.465 |
| 2022          | 180689 | 58848.802 | 32969.878 | 25878.92 | 14.322 | 43.975 | 2379.32 | 778.881 | 434.150 | 344.731 |
| 2023          | 182034 | 58816.149 | 31928.522 | 26887.63 | 14.771 | 45.715 | 2377.57 | 772.407 | 417.022 | 355.384 |
| 2024          | 183120 | 58955.232 | 30920.192 | 28035.04 | 15.310 | 47.553 | 2372.60 | 768.316 | 400.617 | 367.699 |
| 2025          | 182047 | 58297.744 | 29757.129 | 28540.61 | 15.678 | 48.957 | 2719.10 | 876.861 | 444.460 | 432.402 |
| 2026          | 182069 | 56469.971 | 27521.822 | 28948.15 | 15.900 | 51.263 | 2707.90 | 846.150 | 409.332 | 436.818 |
| 2027          | 181492 | 56209.427 | 26348.165 | 29861.26 | 16.453 | 53.125 | 2687.35 | 838.883 | 390.137 | 448.746 |
| 2028          | 180755 | 55733.105 | 25079.999 | 30653.11 | 16.958 | 55.000 | 2664.04 | 828.298 | 369.639 | 458.659 |
| 2029          | 179922 | 55145.838 | 23789.926 | 31355.91 | 17.427 | 56.860 | 2638.84 | 815.951 | 348.916 | 467.035 |
| 2030          | 175814 | 53615.097 | 22473.248 | 31141.85 | 17.713 | 58.084 | 3047.35 | 939.056 | 389.524 | 549.532 |
| 2031          | 177388 | 52046.561 | 21062.592 | 30983.97 | 17.467 | 59.531 | 3068.82 | 910.364 | 364.885 | 545.979 |
| 2032          | 175928 | 51582.636 | 19951.015 | 31631.62 | 17.980 | 61.322 | 3036.00 | 900.496 | 344.297 | 556.199 |
| 2033          | 174411 | 50839.758 | 18824.539 | 32015.22 | 18.356 | 62.973 | 3000.88 | 885.375 | 323.892 | 561.483 |
| 2034          | 172751 | 50215.451 | 17754.485 | 32460.97 | 18.791 | 64.643 | 2962.55 | 872.104 | 304.477 | 567.627 |
| 2035          | 165510 | 47773.075 | 16435.068 | 31338.01 | 18.934 | 65.598 | 3468.36 | 1016.05 | 344.408 | 671.638 |
| 2036          | 159153 | 43298.709 | 14084.694 | 29214.02 | 18.356 | 67.471 | 3338.03 | 922.274 | 295.409 | 626.866 |
| 2037          | 156585 | 42241.563 | 12920.944 | 29320.62 | 18.725 | 69.412 | 3284.75 | 900.450 | 271.049 | 629.402 |
| 2038          | 154028 | 41356.353 | 11963.457 | 29392.90 | 19.083 | 71.072 | 3229.04 | 881.531 | 250.802 | 630.729 |
| 2039          | 151543 | 40161.050 | 10989.054 | 29172.00 | 19.250 | 72.638 | 3171.85 | 855.178 | 230.005 | 625.172 |

## Results for PHIM for Run 8 (Sensitivity\_Analysis\_2.RTF)

\*\*\*\*\*

### Main Results for E-Component for Run: 8, Simulation: 1, COD: LUNG CANCER, Adjusted

| Variable Parameter          | Value                                  |
|-----------------------------|----------------------------------------|
| 1. Country                  | US (United States)                     |
| 2. Sex                      | F (Females)                            |
| 3. Year of start of process | 1990                                   |
| 4. Cause of Death           | LUNG CANCER                            |
| 5. Effective Dose NULL      | CC:1                                   |
| 6. Effective Dose Ecig      | CC:1 Ecig:0.05 Dual:0.525              |
| Note:                       | Death rates are per million population |

#### Results for Age Groups Combined and Years combined, Population and Number deaths adjusted for Ecig scenario,

| Age Group:All | NULL    | Ecig        | %Drop       |          |        |        | NULL    | Ecig    | Drop    |         |
|---------------|---------|-------------|-------------|----------|--------|--------|---------|---------|---------|---------|
| Year          | Number  | Attrib      | Attrib      | Drop     | %Drop  | Attrib | Death   | Attrib  | Attrib  | Drop    |
|               | Deaths  | Deaths      | Deaths      | Deaths   | Deaths | Deaths | Rate    | Rates   | Rates   | Rates   |
| All Comb      | 2340337 | 1580465.217 | 1209262.947 | 371202.3 | 15.861 | 23.487 | 640.023 | 433.910 | 330.703 | 103.207 |

#### Results for Age Groups Combined, Population and Number deaths adjusted for Ecig scenario,

| Age Group:All | NULL   | Ecig      | %Drop     |          |        |        | NULL    | Ecig    | Drop    |         |
|---------------|--------|-----------|-----------|----------|--------|--------|---------|---------|---------|---------|
| Year          | Number | Attrib    | Attrib    | Drop     | %Drop  | Attrib | Death   | Attrib  | Attrib  | Drop    |
|               | Deaths | Deaths    | Deaths    | Deaths   | Deaths | Deaths | Rate    | Rates   | Rates   | Rates   |
| 1990          | 42690  | 30614.201 | 30614.201 | 0.000    | 0.000  | 0.000  | 625.210 | 448.355 | 448.355 | 0.000   |
| 1991          | 43692  | 31412.010 | 31392.092 | 19.919   | 0.046  | 0.063  | 631.345 | 453.901 | 453.613 | 0.288   |
| 1992          | 45423  | 32782.407 | 32726.082 | 56.324   | 0.124  | 0.172  | 647.451 | 467.274 | 466.470 | 0.804   |
| 1993          | 46291  | 33491.183 | 33379.878 | 111.306  | 0.240  | 0.332  | 650.516 | 470.643 | 469.076 | 1.567   |
| 1994          | 47018  | 34074.347 | 33892.748 | 181.600  | 0.386  | 0.533  | 650.898 | 471.719 | 469.199 | 2.521   |
| 1995          | 47842  | 34694.454 | 34419.816 | 274.638  | 0.574  | 0.792  | 652.031 | 472.861 | 469.105 | 3.756   |
| 1996          | 48247  | 35027.269 | 34645.396 | 381.872  | 0.791  | 1.090  | 649.009 | 471.202 | 466.043 | 5.159   |
| 1997          | 49040  | 35590.763 | 35069.075 | 521.688  | 1.064  | 1.466  | 650.522 | 472.153 | 465.198 | 6.955   |
| 1998          | 49693  | 36100.785 | 35402.745 | 698.040  | 1.405  | 1.934  | 649.899 | 472.184 | 463.005 | 9.179   |
| 1999          | 48893  | 35451.030 | 34589.721 | 861.308  | 1.762  | 2.430  | 630.805 | 457.448 | 446.268 | 11.180  |
| 2000          | 50345  | 36447.986 | 35346.680 | 1101.306 | 2.188  | 3.022  | 641.446 | 464.474 | 450.349 | 14.125  |
| 2001          | 50408  | 36411.326 | 35067.499 | 1343.827 | 2.666  | 3.691  | 635.086 | 458.863 | 441.811 | 17.052  |
| 2002          | 51470  | 37078.545 | 35421.255 | 1657.290 | 3.220  | 4.470  | 642.072 | 462.696 | 441.865 | 20.830  |
| 2003          | 51440  | 36999.876 | 35042.017 | 1957.859 | 3.806  | 5.292  | 635.640 | 457.395 | 433.008 | 24.386  |
| 2004          | 51439  | 36861.555 | 34559.167 | 2302.388 | 4.476  | 6.246  | 629.225 | 451.138 | 422.740 | 28.398  |
| 2005          | 51470  | 36689.529 | 34031.325 | 2658.204 | 5.165  | 7.245  | 622.575 | 444.069 | 411.638 | 32.430  |
| 2006          | 51414  | 36504.774 | 33453.143 | 3051.631 | 5.935  | 8.360  | 616.399 | 437.979 | 401.069 | 36.910  |
| 2007          | 51909  | 36663.202 | 33154.792 | 3508.410 | 6.759  | 9.569  | 616.060 | 435.498 | 393.482 | 42.016  |
| 2008          | 51057  | 35898.803 | 32038.728 | 3860.075 | 7.560  | 10.753 | 599.296 | 421.800 | 376.067 | 45.733  |
| 2009          | 51287  | 35934.525 | 31559.990 | 4374.535 | 8.530  | 12.174 | 595.134 | 417.468 | 366.224 | 51.244  |
| 2010          | 50959  | 35502.829 | 30686.122 | 4816.707 | 9.452  | 13.567 | 584.473 | 407.730 | 351.951 | 55.779  |
| 2011          | 50629  | 35136.342 | 29802.187 | 5334.154 | 10.536 | 15.181 | 575.125 | 399.726 | 338.542 | 61.184  |
| 2012          | 51382  | 35450.201 | 29487.244 | 5962.957 | 11.605 | 16.821 | 577.611 | 399.173 | 331.480 | 67.693  |
| 2013          | 51222  | 35123.224 | 28595.824 | 6527.400 | 12.743 | 18.584 | 569.532 | 391.249 | 317.951 | 73.298  |
| 2014          | 51423  | 35079.370 | 27936.961 | 7142.409 | 13.889 | 20.361 | 565.379 | 386.476 | 307.157 | 79.319  |
| 2015          | 50632  | 34324.171 | 26752.698 | 7571.473 | 14.954 | 22.059 | 622.070 | 422.780 | 328.686 | 94.093  |
| 2016          | 49056  | 33054.753 | 25123.595 | 7931.157 | 16.167 | 23.994 | 596.817 | 403.264 | 305.652 | 97.612  |
| 2017          | 48546  | 32471.234 | 23997.594 | 8473.640 | 17.455 | 26.096 | 584.870 | 392.399 | 289.116 | 103.282 |
| 2018          | 50718  | 33657.595 | 24111.363 | 9546.232 | 18.822 | 28.363 | 605.061 | 402.871 | 287.649 | 115.223 |
| 2019          | 51316  | 33863.424 | 23529.196 | 10334.23 | 20.138 | 30.517 | 606.101 | 401.412 | 277.907 | 123.505 |
| 2020          | 51753  | 33910.830 | 22894.014 | 11016.82 | 21.287 | 32.488 | 692.157 | 455.532 | 306.193 | 149.339 |
| 2021          | 48352  | 31531.880 | 20558.605 | 10973.27 | 22.695 | 34.801 | 641.791 | 420.521 | 272.881 | 147.640 |
| 2022          | 48678  | 31560.212 | 19846.587 | 11713.63 | 24.063 | 37.115 | 640.998 | 417.708 | 261.341 | 156.367 |
| 2023          | 48972  | 31508.781 | 19136.409 | 12372.37 | 25.264 | 39.266 | 639.625 | 413.791 | 249.943 | 163.848 |
| 2024          | 49187  | 31517.293 | 18431.890 | 13085.40 | 26.604 | 41.518 | 637.287 | 410.740 | 238.813 | 171.927 |
| 2025          | 48910  | 31175.389 | 17636.339 | 13539.05 | 27.681 | 43.429 | 730.534 | 468.912 | 263.421 | 205.491 |
| 2026          | 45763  | 29044.598 | 15775.387 | 13269.21 | 28.996 | 45.686 | 680.627 | 435.206 | 234.627 | 200.579 |
| 2027          | 45574  | 28825.765 | 15002.492 | 13823.27 | 30.331 | 47.955 | 674.821 | 430.203 | 222.142 | 208.061 |
| 2028          | 45338  | 28513.846 | 14192.143 | 14321.70 | 31.589 | 50.227 | 668.207 | 423.769 | 209.170 | 214.600 |
| 2029          | 45065  | 28148.109 | 13371.232 | 14776.88 | 32.790 | 52.497 | 660.942 | 416.486 | 196.110 | 220.376 |
| 2030          | 43945  | 27314.475 | 12526.555 | 14787.92 | 33.651 | 54.139 | 761.687 | 478.407 | 217.120 | 261.286 |
| 2031          | 41304  | 25423.102 | 11281.477 | 14141.62 | 34.238 | 55.625 | 714.559 | 444.684 | 195.170 | 249.513 |
| 2032          | 40909  | 25085.902 | 10592.791 | 14493.11 | 35.428 | 57.774 | 705.968 | 437.933 | 182.801 | 255.132 |
| 2033          | 40493  | 24645.067 | 9913.313  | 14731.75 | 36.381 | 59.776 | 696.721 | 429.194 | 170.567 | 258.627 |
| 2034          | 40043  | 24239.126 | 9271.467  | 14967.66 | 37.379 | 61.750 | 686.702 | 420.967 | 158.999 | 261.968 |
| 2035          | 38110  | 22944.147 | 8473.939  | 14470.21 | 37.970 | 63.067 | 798.612 | 487.980 | 177.577 | 310.403 |
| 2036          | 33594  | 19950.581 | 6982.310  | 12968.27 | 38.603 | 65.002 | 704.587 | 424.953 | 146.445 | 278.508 |
| 2037          | 33027  | 19415.334 | 6359.277  | 13056.06 | 39.532 | 67.246 | 692.817 | 413.871 | 133.402 | 280.469 |
| 2038          | 32461  | 18939.317 | 5847.295  | 13092.02 | 40.332 | 69.126 | 680.507 | 403.701 | 122.583 | 281.118 |
| 2039          | 31909  | 18379.752 | 5340.291  | 13039.46 | 40.864 | 70.945 | 667.870 | 391.373 | 111.774 | 279.599 |

## Results for PHIM for Run 8 (Sensitivity\_Analysis\_2.RTF)

\*\*\*\*\*

### Main Results for E-Component for Run: 8, Simulation: 1, COD: IHD, Adjusted

| Variable Parameter          | Value                                  |
|-----------------------------|----------------------------------------|
| 1. Country                  | US (United States)                     |
| 2. Sex                      | F (Females)                            |
| 3. Year of start of process | 1990                                   |
| 4. Cause of Death           | IHD                                    |
| 5. Effective Dose NULL      | CC:1                                   |
| 6. Effective Dose Ecig      | CC:1 Ecig:0.05 Dual:0.525              |
| Note:                       | Death rates are per million population |

### Results for Age Groups Combined and Years combined, Population and Number deaths adjusted for Ecig scenario,

| Age Group:All | NULL    | Ecig       | %Drop      |          |        |        | NULL    | Ecig    | Drop   |        |
|---------------|---------|------------|------------|----------|--------|--------|---------|---------|--------|--------|
| Year          | Number  | Attrib     | Attrib     | Drop     | %Drop  | Attrib | Death   | Attrib  | Attrib | Drop   |
|               | Deaths  | Deaths     | Deaths     | Deaths   | Deaths | Deaths | Rate    | Rates   | Rates  | Rates  |
| All Comb      | 3257251 | 398833.796 | 222081.231 | 176752.6 | 5.426  | 44.317 | 890.776 | 109.498 | 60.734 | 48.765 |

### Results for Age Groups Combined, Population and Number deaths adjusted for Ecig scenario,

| Age Group:All | NULL   | Ecig      | %Drop     |          |        |        | NULL    | Ecig    | Drop    |        |
|---------------|--------|-----------|-----------|----------|--------|--------|---------|---------|---------|--------|
| Year          | Number | Attrib    | Attrib    | Drop     | %Drop  | Attrib | Death   | Attrib  | Attrib  | Drop   |
|               | Deaths | Deaths    | Deaths    | Deaths   | Deaths | Deaths | Rate    | Rates   | Rates   | Rates  |
| 1990          | 98916  | 12922.892 | 12922.892 | 0.000    | 0.000  | 0.000  | 1448.66 | 189.260 | 189.260 | 0.000  |
| 1991          | 96403  | 12856.479 | 12795.282 | 61.197   | 0.063  | 0.476  | 1393.01 | 185.775 | 184.891 | 0.884  |
| 1992          | 93721  | 12662.244 | 12493.069 | 169.174  | 0.181  | 1.336  | 1335.88 | 180.485 | 178.073 | 2.412  |
| 1993          | 93680  | 12730.613 | 12405.639 | 324.974  | 0.347  | 2.553  | 1316.45 | 178.900 | 174.332 | 4.568  |
| 1994          | 90834  | 12495.323 | 11983.839 | 511.484  | 0.563  | 4.093  | 1257.47 | 172.983 | 165.900 | 7.083  |
| 1995          | 89701  | 12365.590 | 11636.586 | 729.005  | 0.813  | 5.895  | 1222.53 | 168.534 | 158.594 | 9.940  |
| 1996          | 88291  | 12290.551 | 11286.863 | 1003.689 | 1.137  | 8.166  | 1187.67 | 165.338 | 151.829 | 13.509 |
| 1997          | 84784  | 11719.531 | 10490.006 | 1229.525 | 1.450  | 10.491 | 1124.68 | 155.473 | 139.152 | 16.321 |
| 1998          | 82527  | 11416.794 | 9923.389  | 1493.405 | 1.810  | 13.081 | 1079.31 | 149.327 | 129.780 | 19.547 |
| 1999          | 93956  | 13028.038 | 10939.967 | 2088.071 | 2.222  | 16.028 | 1212.19 | 168.109 | 141.145 | 26.964 |
| 2000          | 90061  | 12426.299 | 10062.640 | 2363.659 | 2.625  | 19.021 | 1147.46 | 158.354 | 128.207 | 30.147 |
| 2001          | 86148  | 11939.281 | 9236.388  | 2702.894 | 3.137  | 22.639 | 1085.37 | 150.461 | 116.368 | 34.093 |
| 2002          | 83051  | 11528.794 | 8485.359  | 3043.435 | 3.665  | 26.399 | 1036.03 | 143.865 | 105.851 | 38.014 |
| 2003          | 79348  | 11048.407 | 7731.808  | 3316.599 | 4.180  | 30.019 | 980.486 | 136.581 | 95.541  | 41.040 |
| 2004          | 73915  | 10375.132 | 6847.750  | 3527.381 | 4.772  | 33.998 | 904.155 | 126.978 | 83.764  | 43.214 |
| 2005          | 71714  | 10051.029 | 6260.369  | 3790.660 | 5.286  | 37.714 | 867.437 | 121.652 | 75.725  | 45.927 |
| 2006          | 67625  | 9542.523  | 5551.577  | 3990.946 | 5.902  | 41.823 | 810.750 | 114.490 | 66.558  | 47.932 |
| 2007          | 63585  | 8936.533  | 4866.300  | 4070.234 | 6.401  | 45.546 | 754.632 | 106.151 | 57.753  | 48.398 |
| 2008          | 63267  | 8944.180  | 4553.697  | 4390.483 | 6.940  | 49.088 | 742.622 | 105.091 | 53.451  | 51.640 |
| 2009          | 59853  | 8390.033  | 4004.131  | 4385.902 | 7.328  | 52.275 | 694.534 | 97.471  | 46.464  | 51.007 |
| 2010          | 58126  | 8157.570  | 3624.354  | 4533.216 | 7.799  | 55.571 | 666.667 | 93.685  | 41.569  | 52.116 |
| 2011          | 57501  | 8035.356  | 3304.585  | 4730.771 | 8.227  | 58.874 | 653.186 | 91.414  | 37.539  | 53.875 |
| 2012          | 57561  | 7970.766  | 3018.875  | 4951.891 | 8.603  | 62.126 | 647.066 | 89.752  | 33.937  | 55.815 |
| 2013          | 57235  | 7743.216  | 2729.663  | 5013.553 | 8.760  | 64.748 | 636.380 | 86.254  | 30.351  | 55.904 |
| 2014          | 57727  | 7774.935  | 2526.614  | 5248.321 | 9.092  | 67.503 | 634.687 | 85.658  | 27.779  | 57.879 |
| 2015          | 58609  | 7722.535  | 2352.631  | 5369.904 | 9.162  | 69.536 | 720.079 | 95.120  | 28.905  | 66.216 |
| 2016          | 58897  | 7600.353  | 2143.811  | 5456.543 | 9.265  | 71.793 | 716.533 | 92.723  | 26.081  | 66.642 |
| 2017          | 59269  | 7470.266  | 1949.748  | 5520.519 | 9.314  | 73.900 | 714.051 | 90.274  | 23.490  | 66.784 |
| 2018          | 56353  | 6907.050  | 1668.929  | 5238.121 | 9.295  | 75.837 | 672.290 | 82.675  | 19.910  | 62.765 |
| 2019          | 56188  | 6732.046  | 1513.980  | 5218.066 | 9.287  | 77.511 | 663.644 | 79.801  | 17.882  | 61.919 |
| 2020          | 55643  | 6429.836  | 1360.270  | 5069.566 | 9.111  | 78.844 | 744.183 | 86.373  | 18.193  | 68.181 |
| 2021          | 56656  | 6562.016  | 1260.508  | 5301.508 | 9.357  | 80.791 | 752.006 | 87.513  | 16.731  | 70.782 |
| 2022          | 56218  | 6352.366  | 1134.056  | 5218.310 | 9.282  | 82.148 | 740.276 | 84.075  | 14.933  | 69.142 |
| 2023          | 55756  | 6134.123  | 1024.790  | 5109.333 | 9.164  | 83.294 | 728.242 | 80.557  | 13.385  | 67.172 |
| 2024          | 55216  | 5922.193  | 926.080   | 4996.113 | 9.048  | 84.363 | 715.408 | 77.179  | 11.999  | 65.180 |
| 2025          | 53768  | 5504.188  | 826.552   | 4677.636 | 8.700  | 84.983 | 803.091 | 82.789  | 12.346  | 70.443 |
| 2026          | 55803  | 5641.075  | 789.669   | 4851.406 | 8.694  | 86.001 | 829.957 | 84.526  | 11.745  | 72.782 |
| 2027          | 54750  | 5426.216  | 718.491   | 4707.725 | 8.599  | 86.759 | 810.682 | 80.982  | 10.639  | 70.343 |
| 2028          | 53667  | 5197.830  | 646.856   | 4550.974 | 8.480  | 87.555 | 790.965 | 77.249  | 9.534   | 67.716 |
| 2029          | 52576  | 4973.547  | 587.346   | 4386.201 | 8.343  | 88.191 | 771.106 | 73.590  | 8.614   | 64.975 |
| 2030          | 50100  | 4450.618  | 509.150   | 3941.468 | 7.867  | 88.560 | 868.376 | 77.952  | 8.825   | 69.127 |
| 2031          | 52681  | 4555.052  | 492.551   | 4062.501 | 7.712  | 89.187 | 911.378 | 79.674  | 8.521   | 71.153 |
| 2032          | 51394  | 4349.999  | 442.945   | 3907.055 | 7.602  | 89.817 | 886.914 | 75.939  | 7.644   | 68.295 |
| 2033          | 50119  | 4147.948  | 401.671   | 3746.277 | 7.475  | 90.316 | 862.346 | 72.237  | 6.911   | 65.325 |
| 2034          | 48836  | 3966.133  | 367.306   | 3598.827 | 7.369  | 90.739 | 837.495 | 68.881  | 6.299   | 62.582 |
| 2035          | 45283  | 3289.064  | 298.531   | 2990.533 | 6.604  | 90.924 | 948.943 | 69.952  | 6.256   | 63.696 |
| 2036          | 47183  | 3313.192  | 285.407   | 3027.785 | 6.417  | 91.386 | 989.607 | 70.572  | 5.986   | 64.586 |
| 2037          | 45688  | 3117.951  | 256.300   | 2861.652 | 6.263  | 91.780 | 958.418 | 66.464  | 5.377   | 61.088 |
| 2038          | 44235  | 2949.775  | 230.752   | 2719.023 | 6.147  | 92.177 | 927.339 | 62.876  | 4.837   | 58.038 |
| 2039          | 42838  | 2766.312  | 211.257   | 2555.055 | 5.964  | 92.363 | 896.623 | 58.905  | 4.422   | 54.483 |

## Results for PHIM for Run 8 (Sensitivity\_Analysis\_2.RTF)

\*\*\*\*\*

### Main Results for E-Component for Run: 8, Simulation: 1, COD: STROKE, Adjusted

| Variable Parameter          | Value                                  |
|-----------------------------|----------------------------------------|
| 1. Country                  | US (United States)                     |
| 2. Sex                      | F (Females)                            |
| 3. Year of start of process | 1990                                   |
| 4. Cause of Death           | STROKE                                 |
| 5. Effective Dose NULL      | CC:1                                   |
| 6. Effective Dose Ecig      | CC:1 Ecig:0.05 Dual:0.525              |
| Note:                       | Death rates are per million population |

#### Results for Age Groups Combined and Years combined, Population and Number deaths adjusted for Ecig scenario,

| Age Group:All | NULL    | Ecig       | %Drop     | NULL     | Ecig   | Drop   |
|---------------|---------|------------|-----------|----------|--------|--------|
| Year          | Number  | Attrib     | Attrib    | Death    | Attrib | Drop   |
|               | Deaths  | Deaths     | Deaths    | Rate     | Rates  | Rates  |
| All Comb      | 1359351 | 104899.750 | 57309.905 | 47589.85 | 3.501  | 45.367 |

#### Results for Age Groups Combined, Population and Number deaths adjusted for Ecig scenario,

| Age Group:All | NULL   | Ecig     | %Drop    | NULL     | Ecig   | Drop   |
|---------------|--------|----------|----------|----------|--------|--------|
| Year          | Number | Attrib   | Attrib   | Death    | Attrib | Drop   |
|               | Deaths | Deaths   | Deaths   | Rate     | Rates  | Rates  |
| 1990          | 33504  | 3293.017 | 3293.017 | 0.000    | 0.000  | 0.000  |
| 1991          | 32505  | 3207.063 | 3189.228 | 17.835   | 0.055  | 0.556  |
| 1992          | 32560  | 3218.125 | 3168.709 | 49.416   | 0.152  | 1.536  |
| 1993          | 32768  | 3226.680 | 3131.298 | 95.383   | 0.291  | 2.956  |
| 1994          | 33006  | 3277.266 | 3120.944 | 156.321  | 0.474  | 4.770  |
| 1995          | 33731  | 3309.378 | 3080.841 | 228.537  | 0.678  | 6.906  |
| 1996          | 33752  | 3312.987 | 2997.992 | 314.995  | 0.933  | 9.508  |
| 1997          | 33702  | 3267.066 | 2862.498 | 404.568  | 1.200  | 12.383 |
| 1998          | 33278  | 3178.725 | 2689.045 | 489.680  | 1.471  | 15.405 |
| 1999          | 33897  | 3120.351 | 2541.952 | 578.399  | 1.706  | 18.536 |
| 2000          | 33835  | 3142.808 | 2455.489 | 687.319  | 2.031  | 21.870 |
| 2001          | 32516  | 2961.588 | 2213.216 | 748.372  | 2.302  | 25.269 |
| 2002          | 32092  | 2940.627 | 2086.714 | 853.914  | 2.661  | 29.038 |
| 2003          | 30585  | 2819.545 | 1896.077 | 923.468  | 3.019  | 32.752 |
| 2004          | 29408  | 2730.466 | 1732.769 | 997.697  | 3.393  | 36.539 |
| 2005          | 27978  | 2670.510 | 1593.564 | 1076.946 | 3.849  | 40.327 |
| 2006          | 27230  | 2623.285 | 1469.114 | 1154.172 | 4.239  | 43.997 |
| 2007          | 26335  | 2536.599 | 1329.833 | 1206.766 | 4.582  | 47.574 |
| 2008          | 26036  | 2469.443 | 1216.154 | 1253.289 | 4.814  | 50.752 |
| 2009          | 25083  | 2386.945 | 1098.708 | 1288.237 | 5.136  | 53.970 |
| 2010          | 24889  | 2329.274 | 1001.310 | 1327.964 | 5.336  | 57.012 |
| 2011          | 24848  | 2286.581 | 912.955  | 1373.626 | 5.528  | 60.073 |
| 2012          | 24563  | 2243.311 | 829.459  | 1413.852 | 5.756  | 63.025 |
| 2013          | 24521  | 2176.503 | 744.784  | 1431.720 | 5.839  | 65.781 |
| 2014          | 25378  | 2211.619 | 702.410  | 1509.209 | 5.947  | 68.240 |
| 2015          | 26412  | 2237.016 | 664.791  | 1572.225 | 5.953  | 70.282 |
| 2016          | 26843  | 2229.057 | 615.288  | 1613.769 | 6.012  | 72.397 |
| 2017          | 27739  | 2221.649 | 569.358  | 1652.291 | 5.957  | 74.372 |
| 2018          | 25380  | 1939.420 | 464.819  | 1474.601 | 5.810  | 76.033 |
| 2019          | 25567  | 1904.400 | 423.492  | 1480.907 | 5.792  | 77.762 |
| 2020          | 25531  | 1806.054 | 376.901  | 1429.154 | 5.598  | 79.131 |
| 2021          | 25615  | 1748.172 | 337.188  | 1410.985 | 5.508  | 80.712 |
| 2022          | 25721  | 1701.148 | 304.904  | 1396.244 | 5.428  | 82.077 |
| 2023          | 25818  | 1652.087 | 276.451  | 1375.636 | 5.328  | 83.267 |
| 2024          | 25872  | 1597.127 | 249.396  | 1347.731 | 5.209  | 84.385 |
| 2025          | 25489  | 1467.622 | 218.781  | 1248.841 | 4.900  | 85.093 |
| 2026          | 25729  | 1390.505 | 195.497  | 1195.008 | 4.645  | 85.941 |
| 2027          | 25529  | 1342.095 | 178.084  | 1164.011 | 4.560  | 86.731 |
| 2028          | 25302  | 1289.536 | 160.923  | 1128.612 | 4.461  | 87.521 |
| 2029          | 25063  | 1242.216 | 146.852  | 1095.364 | 4.370  | 88.178 |
| 2030          | 24270  | 1096.803 | 124.301  | 972.502  | 4.007  | 88.667 |
| 2031          | 24295  | 1019.991 | 109.300  | 910.690  | 3.749  | 89.284 |
| 2032          | 23963  | 977.406  | 98.033   | 879.374  | 3.670  | 89.970 |
| 2033          | 23622  | 937.450  | 89.363   | 848.087  | 3.590  | 90.467 |
| 2034          | 23257  | 900.763  | 81.906   | 818.857  | 3.521  | 90.907 |
| 2035          | 22121  | 745.023  | 65.910   | 679.114  | 3.070  | 91.153 |
| 2036          | 21298  | 680.360  | 57.188   | 623.171  | 2.926  | 91.594 |
| 2037          | 20800  | 644.109  | 52.257   | 591.852  | 2.845  | 91.887 |
| 2038          | 20303  | 612.448  | 47.235   | 565.213  | 2.784  | 92.287 |
| 2039          | 19814  | 577.529  | 43.608   | 533.921  | 2.695  | 92.449 |

## Results for PHIM for Run 8 (Sensitivity\_Analysis\_2.RTF)

\*\*\*\*\*

### Main Results for E-Component for Run: 8, Simulation: 1, COD: COPD, Adjusted

| Variable Parameter          | Value                                  |
|-----------------------------|----------------------------------------|
| 1. Country                  | US (United States)                     |
| 2. Sex                      | F (Females)                            |
| 3. Year of start of process | 1990                                   |
| 4. Cause of Death           | COPD                                   |
| 5. Effective Dose NULL      | CC:1                                   |
| 6. Effective Dose Ecig      | CC:1 Ecig:0.05 Dual:0.525              |
| Note:                       | Death rates are per million population |

#### Results for Age Groups Combined and Years combined, Population and Number deaths adjusted for Ecig scenario,

| Age Group:All | NULL    | Ecig       | %Drop      |          |        |        | NULL    | Ecig    | Drop    |        |
|---------------|---------|------------|------------|----------|--------|--------|---------|---------|---------|--------|
| Year          | Number  | Attrib     | Attrib     | Drop     | %Drop  | Attrib | Death   | Attrib  | Attrib  | Drop   |
|               | Deaths  | Deaths     | Deaths     | Deaths   | Deaths | Deaths | Rate    | Rates   | Rates   | Rates  |
| All Comb      | 2176673 | 862051.244 | 589807.599 | 272243.6 | 12.507 | 31.581 | 595.265 | 236.673 | 161.298 | 75.375 |

#### Results for Age Groups Combined, Population and Number deaths adjusted for Ecig scenario,

| Age Group:All | NULL   | Ecig      | %Drop     |          |        |        | NULL    | Ecig    | Drop    |         |
|---------------|--------|-----------|-----------|----------|--------|--------|---------|---------|---------|---------|
| Year          | Number | Attrib    | Attrib    | Drop     | %Drop  | Attrib | Death   | Attrib  | Attrib  | Drop    |
|               | Deaths | Deaths    | Deaths    | Deaths   | Deaths | Deaths | Rate    | Rates   | Rates   | Rates   |
| 1990          | 24738  | 10694.712 | 10694.712 | 0.000    | 0.000  | 0.000  | 362.296 | 156.628 | 156.628 | 0.000   |
| 1991          | 26562  | 11602.933 | 11592.286 | 10.647   | 0.040  | 0.092  | 383.818 | 167.661 | 167.507 | 0.154   |
| 1992          | 26828  | 11831.375 | 11803.646 | 27.729   | 0.103  | 0.234  | 382.401 | 168.642 | 168.247 | 0.396   |
| 1993          | 29774  | 13246.371 | 13187.359 | 59.012   | 0.198  | 0.445  | 418.407 | 186.148 | 185.317 | 0.830   |
| 1994          | 29805  | 13355.662 | 13261.878 | 93.783   | 0.315  | 0.702  | 412.603 | 184.893 | 183.593 | 1.301   |
| 1995          | 29756  | 13397.439 | 13258.320 | 139.120  | 0.468  | 1.038  | 405.542 | 182.598 | 180.697 | 1.901   |
| 1996          | 30902  | 13960.356 | 13767.329 | 193.027  | 0.625  | 1.383  | 415.684 | 187.801 | 185.195 | 2.605   |
| 1997          | 31131  | 14109.552 | 13846.697 | 262.855  | 0.844  | 1.863  | 412.955 | 187.180 | 183.679 | 3.500   |
| 1998          | 32100  | 14599.657 | 14237.207 | 362.450  | 1.129  | 2.483  | 419.813 | 190.958 | 186.197 | 4.760   |
| 1999          | 34622  | 15728.102 | 15239.845 | 488.257  | 1.410  | 3.104  | 446.689 | 202.950 | 196.621 | 6.329   |
| 2000          | 34308  | 15579.803 | 14978.893 | 600.910  | 1.752  | 3.857  | 437.113 | 198.541 | 190.845 | 7.696   |
| 2001          | 34604  | 15696.614 | 14957.651 | 738.964  | 2.135  | 4.708  | 435.974 | 197.812 | 188.449 | 9.362   |
| 2002          | 34307  | 15519.777 | 14633.380 | 886.397  | 2.584  | 5.711  | 427.963 | 193.668 | 182.545 | 11.123  |
| 2003          | 35095  | 15888.389 | 14818.979 | 1069.410 | 3.047  | 6.731  | 433.662 | 196.413 | 183.116 | 13.298  |
| 2004          | 33537  | 15091.573 | 13903.016 | 1188.557 | 3.544  | 7.876  | 410.240 | 184.701 | 170.067 | 14.635  |
| 2005          | 35425  | 15803.656 | 14365.573 | 1438.083 | 4.060  | 9.100  | 428.493 | 191.278 | 173.764 | 17.514  |
| 2006          | 34019  | 15100.563 | 13538.558 | 1562.005 | 4.592  | 10.344 | 407.856 | 181.174 | 162.313 | 18.861  |
| 2007          | 34045  | 14974.384 | 13226.285 | 1748.098 | 5.135  | 11.674 | 404.052 | 177.871 | 156.970 | 20.901  |
| 2008          | 37484  | 16406.197 | 14284.543 | 2121.654 | 5.660  | 12.932 | 439.982 | 192.768 | 167.670 | 25.097  |
| 2009          | 36893  | 16083.194 | 13734.963 | 2348.231 | 6.365  | 14.601 | 428.113 | 186.846 | 159.381 | 27.464  |
| 2010          | 36865  | 15927.400 | 13370.448 | 2556.953 | 6.936  | 16.054 | 422.821 | 182.917 | 153.351 | 29.566  |
| 2011          | 37726  | 16221.836 | 13328.613 | 2893.223 | 7.669  | 17.835 | 428.551 | 184.547 | 151.408 | 33.138  |
| 2012          | 38369  | 16358.849 | 13161.213 | 3197.636 | 8.334  | 19.547 | 431.319 | 184.202 | 147.951 | 36.251  |
| 2013          | 40234  | 16994.822 | 13356.660 | 3638.162 | 9.042  | 21.407 | 447.355 | 189.311 | 148.510 | 40.801  |
| 2014          | 40221  | 16855.093 | 12917.950 | 3937.144 | 9.789  | 23.359 | 442.211 | 185.696 | 142.028 | 43.667  |
| 2015          | 42361  | 17572.483 | 13194.071 | 4378.412 | 10.336 | 24.916 | 520.448 | 216.445 | 162.104 | 54.341  |
| 2016          | 42786  | 17579.955 | 12848.102 | 4731.854 | 11.059 | 26.916 | 520.527 | 214.473 | 156.309 | 58.164  |
| 2017          | 44570  | 18080.688 | 12826.989 | 5253.700 | 11.787 | 29.057 | 536.971 | 218.496 | 154.536 | 63.960  |
| 2018          | 45592  | 18209.262 | 12579.420 | 5629.842 | 12.348 | 30.917 | 543.908 | 217.960 | 150.072 | 67.887  |
| 2019          | 47140  | 18648.302 | 12493.508 | 6154.794 | 13.056 | 33.005 | 556.778 | 221.054 | 147.563 | 73.491  |
| 2020          | 48630  | 19002.597 | 12377.470 | 6625.127 | 13.624 | 34.864 | 650.395 | 255.266 | 165.541 | 89.726  |
| 2021          | 48665  | 18885.717 | 11878.204 | 7007.513 | 14.399 | 37.105 | 645.950 | 251.867 | 157.663 | 94.204  |
| 2022          | 50072  | 19235.076 | 11684.332 | 7550.745 | 15.080 | 39.255 | 659.351 | 254.582 | 153.860 | 100.722 |
| 2023          | 51488  | 19521.158 | 11490.872 | 8030.286 | 15.596 | 41.136 | 672.488 | 256.363 | 150.084 | 106.279 |
| 2024          | 52845  | 19918.620 | 11312.827 | 8605.793 | 16.285 | 43.205 | 684.689 | 259.583 | 146.574 | 113.009 |
| 2025          | 53880  | 20150.545 | 11075.458 | 9075.087 | 16.843 | 45.036 | 804.768 | 303.086 | 165.426 | 137.660 |
| 2026          | 54774  | 20393.792 | 10761.268 | 9632.524 | 17.586 | 47.233 | 814.651 | 305.582 | 160.052 | 145.530 |
| 2027          | 55639  | 20615.351 | 10449.097 | 10166.25 | 18.272 | 49.314 | 823.843 | 307.668 | 154.720 | 152.949 |
| 2028          | 56448  | 20731.894 | 10080.077 | 10651.82 | 18.870 | 51.379 | 831.952 | 308.115 | 148.564 | 159.550 |
| 2029          | 57218  | 20781.967 | 9684.496  | 11097.47 | 19.395 | 53.400 | 839.198 | 307.495 | 142.038 | 165.457 |
| 2030          | 57499  | 20753.201 | 9313.242  | 11439.96 | 19.896 | 55.124 | 996.624 | 363.487 | 161.424 | 202.063 |
| 2031          | 59109  | 21048.417 | 9179.264  | 11869.15 | 20.080 | 56.390 | 1022.59 | 368.165 | 158.802 | 209.363 |
| 2032          | 59662  | 21169.329 | 8817.246  | 12352.08 | 20.703 | 58.349 | 1029.59 | 369.560 | 152.160 | 217.400 |
| 2033          | 60176  | 21109.293 | 8420.192  | 12689.10 | 21.087 | 60.111 | 1035.38 | 367.618 | 144.876 | 222.742 |
| 2034          | 60616  | 21109.429 | 8033.806  | 13075.62 | 21.571 | 61.942 | 1039.52 | 366.613 | 137.774 | 228.839 |
| 2035          | 59996  | 20794.840 | 7596.688  | 13198.15 | 21.999 | 63.468 | 1257.25 | 442.268 | 159.194 | 283.075 |
| 2036          | 57078  | 19354.577 | 6759.789  | 12594.79 | 22.066 | 65.074 | 1197.14 | 412.258 | 141.778 | 270.480 |
| 2037          | 57070  | 19064.169 | 6253.110  | 12811.06 | 22.448 | 67.200 | 1197.18 | 406.385 | 131.174 | 275.211 |
| 2038          | 57029  | 18854.812 | 5838.174  | 13016.64 | 22.825 | 69.036 | 1195.56 | 401.900 | 122.391 | 279.508 |
| 2039          | 56981  | 18437.457 | 5393.898  | 13043.56 | 22.891 | 70.745 | 1192.63 | 392.602 | 112.896 | 279.705 |

## Results for PHIM for Run 9 (Sensitivity\_Analysis\_2.RTF)

---

### Control File Details for Run: 9

| Variable Parameter                                       | Value                  |
|----------------------------------------------------------|------------------------|
| 1. Name for Reference Scenario                           | NULL                   |
| 2. Name for Test Scenario                                | Ecig                   |
| 3. Name for Product 1                                    | CC                     |
| 4. Name for Product 2                                    | Ecig                   |
| 5. Name for Product 3                                    | -                      |
| 6. Name for Product 4                                    | Dual                   |
| 7. Country                                               | US (United States)     |
| 8. Sex                                                   | M (Males)              |
| 9. Year of start of process                              | 1990                   |
| 10. Number of months of follow-up                        | 600                    |
| 11. Follow-up interval length (in months)                | 12                     |
| 12. Lower age for risk estimation                        | 10                     |
| 13. Upper age for risk estimation                        | 79                     |
| 14. The effective dose for Product 1 (F1) - Ref          | 1                      |
| 15. The effective dose for Product 2 (F2) - Ref          | -                      |
| 16. The effective dose for Product 3 (F3) - Ref          | -                      |
| 17. The effective dose for Product 4 (F4) - Ref          | -                      |
| 18. The effective dose for Product 1 (F1) - Test         | 1                      |
| 19. The effective dose for Product 2 (F2) - Test         | 0.05                   |
| 20. The effective dose for Product 3 (F3) - Test         | -                      |
| 21. The effective dose for Product 4 (F4) - Test         | FROMF2                 |
| 22. Number in population to be simulated                 | 100000                 |
| 23. Number of MC simulations                             | 1                      |
| 24. The random number seed for the first simulation      | 15975263               |
| 25. Source for the population file (POP)                 | UN4                    |
| 26. Source for the socioeconomic prevalence file (SEP)   | -                      |
| 27. Source for the current smoking prevalence file (CSP) | ISS3                   |
| 28. Source for the former smoking prevalence file (FSP)  | ISS3                   |
| 29. Source for the quit-time distribution file (QTD)     | NHIS2006               |
| 30. Source for the death file (MORT)                     | APR-20                 |
| 31. Source for the relative risk file (RR)               | PNLEST                 |
| 32. Source for the half-life file (H)                    | PNLEST                 |
| 33. Assumption Set for TTP Factor Reference              | F1                     |
| 34. Assumption Set for TTP Factor Test                   | F1                     |
| 35. Assumption Set for TTP Reference                     | ISS3                   |
| 36. Assumption Set for TTP Test                          | S2E                    |
| 37. Assumption Set for TP for socioeconomic group        | -                      |
| 38. Source for Output Choice file (OUTC)                 | BASIC                  |
| 39. Output for DTP P1                                    | N                      |
| 40. Output for DTP P2                                    | N                      |
| 41. Output for Main P Component                          | Y                      |
| 42. Output for DTP E1                                    | N                      |
| 43. Output for DTP E2                                    | N                      |
| 44. Output for DTP E3                                    | N                      |
| 45. Output for Main E Component                          | Y                      |
| 46. Output file name                                     | Sensitivity_Analysis_2 |
| 47. Run number for P-Component                           | -                      |
| 48. Results file for E-Component                         | -                      |
| 49. Components required                                  | PE                     |
| 50. Results folder for P to be used in E-Component       | -                      |
| 51. Fixed age of starting product use                    | 16                     |
| 52. Output absolute risk file?                           | N                      |

## Results for PHIM for Run 9 (Sensitivity\_Analysis\_2.RTF)

\*\*\*\*\*

TTP values for Run: 9, Scenario: NULL

| Variable Parameter | Value               |
|--------------------|---------------------|
| 1. Country         | US (United States)  |
| 2. Sex             | M (Males)           |
| 3. Assumption Set  | ISS3                |
| Note:              | Period is in Months |

| Age   | Period  | Initiation  | Cessation    | Re-initiation |
|-------|---------|-------------|--------------|---------------|
|       |         | Never<br>CC | CC<br>Former | Former<br>CC  |
| 10-14 | 1-12    | 0.003842    | 0.008742     | 0.000000      |
| 15-19 | 1-12    | 0.004720    | 0.003614     | 0.000000      |
| 20-24 | 1-12    | 0.000376    | 0.000943     | 0.000000      |
| 25-29 | 1-12    | 0.000187    | 0.001143     | 0.000000      |
| 30-34 | 1-12    | 0.000093    | 0.000871     | 0.000000      |
| 35-39 | 1-12    | 0.000000    | 0.000867     | 0.000000      |
| 40-44 | 1-12    | 0.000000    | 0.001399     | 0.000000      |
| 45-49 | 1-12    | 0.000000    | 0.002033     | 0.000000      |
| 50-54 | 1-12    | 0.000000    | 0.003209     | 0.000000      |
| 55-59 | 1-12    | 0.000000    | 0.003574     | 0.000000      |
| 60-64 | 1-12    | 0.000000    | 0.003460     | 0.000000      |
| 65-69 | 1-12    | 0.000000    | 0.004136     | 0.000000      |
| 70-74 | 1-12    | 0.000000    | 0.005592     | 0.000000      |
| 75-79 | 1-12    | 0.000000    | 0.005592     | 0.000000      |
| 10-14 | 13-72   | 0.004906    | 0.008742     | 0.000000      |
| 15-19 | 13-72   | 0.006989    | 0.004426     | 0.000000      |
| 20-24 | 13-72   | 0.000687    | 0.001527     | 0.000000      |
| 25-29 | 13-72   | 0.000962    | 0.001515     | 0.000000      |
| 30-34 | 13-72   | 0.000364    | 0.001227     | 0.000000      |
| 35-39 | 13-72   | 0.000000    | 0.001630     | 0.000000      |
| 40-44 | 13-72   | 0.000000    | 0.001852     | 0.000000      |
| 45-49 | 13-72   | 0.000000    | 0.002667     | 0.000000      |
| 50-54 | 13-72   | 0.000000    | 0.003208     | 0.000000      |
| 55-59 | 13-72   | 0.000000    | 0.003978     | 0.000000      |
| 60-64 | 13-72   | 0.000000    | 0.005771     | 0.000000      |
| 65-69 | 13-72   | 0.000000    | 0.010432     | 0.000000      |
| 70-74 | 13-72   | 0.000000    | 0.007079     | 0.000000      |
| 75-79 | 13-72   | 0.000000    | 0.007079     | 0.000000      |
| 10-14 | 73-132  | 0.004312    | 0.008742     | 0.000000      |
| 15-19 | 73-132  | 0.005330    | 0.003289     | 0.000000      |
| 20-24 | 73-132  | 0.002456    | 0.003844     | 0.000000      |
| 25-29 | 73-132  | 0.000839    | 0.002006     | 0.000000      |
| 30-34 | 73-132  | 0.000414    | 0.001329     | 0.000000      |
| 35-39 | 73-132  | 0.000000    | 0.001278     | 0.000000      |
| 40-44 | 73-132  | 0.000000    | 0.001691     | 0.000000      |
| 45-49 | 73-132  | 0.000000    | 0.002904     | 0.000000      |
| 50-54 | 73-132  | 0.000000    | 0.003319     | 0.000000      |
| 55-59 | 73-132  | 0.000000    | 0.003976     | 0.000000      |
| 60-64 | 73-132  | 0.000000    | 0.005235     | 0.000000      |
| 65-69 | 73-132  | 0.000000    | 0.005901     | 0.000000      |
| 70-74 | 73-132  | 0.000000    | 0.005615     | 0.000000      |
| 75-79 | 73-132  | 0.000000    | 0.005615     | 0.000000      |
| 10-14 | 133-192 | 0.003468    | 0.008742     | 0.000000      |
| 15-19 | 133-192 | 0.004675    | 0.003732     | 0.000000      |
| 20-24 | 133-192 | 0.000062    | 0.002260     | 0.000000      |
| 25-29 | 133-192 | 0.001422    | 0.002822     | 0.000000      |
| 30-34 | 133-192 | 0.000696    | 0.002610     | 0.000000      |
| 35-39 | 133-192 | 0.000000    | 0.002058     | 0.000000      |
| 40-44 | 133-192 | 0.000000    | 0.002310     | 0.000000      |
| 45-49 | 133-192 | 0.000000    | 0.002256     | 0.000000      |
| 50-54 | 133-192 | 0.000000    | 0.002663     | 0.000000      |
| 55-59 | 133-192 | 0.000000    | 0.001746     | 0.000000      |
| 60-64 | 133-192 | 0.000000    | 0.005809     | 0.000000      |
| 65-69 | 133-192 | 0.000000    | 0.005896     | 0.000000      |
| 70-74 | 133-192 | 0.000000    | 0.007323     | 0.000000      |
| 75-79 | 133-192 | 0.000000    | 0.007323     | 0.000000      |
| 10-14 | 193-252 | 0.002314    | 0.008742     | 0.000000      |
| 15-19 | 193-252 | 0.003987    | 0.005036     | 0.000000      |
| 20-24 | 193-252 | 0.000320    | 0.002857     | 0.000000      |
| 25-29 | 193-252 | 0.000251    | 0.002314     | 0.000000      |
| 30-34 | 193-252 | 0.000125    | 0.004343     | 0.000000      |
| 35-39 | 193-252 | 0.000000    | 0.002092     | 0.000000      |
| 40-44 | 193-252 | 0.000000    | 0.002566     | 0.000000      |
| 45-49 | 193-252 | 0.000000    | 0.002311     | 0.000000      |
| 50-54 | 193-252 | 0.000000    | 0.003209     | 0.000000      |

### Results for PHIM for Run 9 (Sensitivity\_Analysis\_2.RTF)

|       |         |          |          |          |
|-------|---------|----------|----------|----------|
| 55-59 | 193-252 | 0.000000 | 0.004057 | 0.000000 |
| 60-64 | 193-252 | 0.000000 | 0.007166 | 0.000000 |
| 65-69 | 193-252 | 0.000000 | 0.004281 | 0.000000 |
| 70-74 | 193-252 | 0.000000 | 0.004580 | 0.000000 |
| 75-79 | 193-252 | 0.000000 | 0.004580 | 0.000000 |
| 10-14 | 253+    | 0.001325 | 0.008742 | 0.000000 |
| 15-19 | 253+    | 0.002984 | 0.010602 | 0.000000 |
| 20-24 | 253+    | 0.000452 | 0.004314 | 0.000000 |
| 25-29 | 253+    | 0.000225 | 0.003645 | 0.000000 |
| 30-34 | 253+    | 0.000112 | 0.004512 | 0.000000 |
| 35-39 | 253+    | 0.000000 | 0.002147 | 0.000000 |
| 40-44 | 253+    | 0.000000 | 0.002636 | 0.000000 |
| 45-49 | 253+    | 0.000000 | 0.001051 | 0.000000 |
| 50-54 | 253+    | 0.000000 | 0.002519 | 0.000000 |
| 55-59 | 253+    | 0.000000 | 0.003693 | 0.000000 |
| 60-64 | 253+    | 0.000000 | 0.005888 | 0.000000 |
| 65-69 | 253+    | 0.000000 | 0.004823 | 0.000000 |
| 70-74 | 253+    | 0.000000 | 0.004733 | 0.000000 |
| 75-79 | 253+    | 0.000000 | 0.004733 | 0.000000 |



## Results for PHIM for Run 9 (Sensitivity\_Analysis\_2.RTF)

\*\*\*\*\*

### TTP values for Run: 9, Scenario: Ecig

| Variable Parameter |  | Value               |  |  |  |  |  |  |  |  |  |
|--------------------|--|---------------------|--|--|--|--|--|--|--|--|--|
| 1. Country         |  | US (United States)  |  |  |  |  |  |  |  |  |  |
| 2. Sex             |  | M (Males)           |  |  |  |  |  |  |  |  |  |
| 3. Assumption Set  |  | S2E                 |  |  |  |  |  |  |  |  |  |
| Note:              |  | Period is in Months |  |  |  |  |  |  |  |  |  |

  

| Age   | Period  | Initiation  |               |               | Cessation    |                |                | Re-initiation |                |                |  |
|-------|---------|-------------|---------------|---------------|--------------|----------------|----------------|---------------|----------------|----------------|--|
|       |         | Never<br>CC | Never<br>Ecig | Never<br>Dual | CC<br>Former | Ecig<br>Former | Dual<br>Former | Former<br>CC  | Former<br>Ecig | Former<br>Dual |  |
| 10-14 | 1-12    | 0.001921    | 0.001921      | 0.000000      | 0.008742     | 0.008742       | 0.000000       | 0.000000      | 0.000000       | 0.000000       |  |
| 15-19 | 1-12    | 0.002360    | 0.002360      | 0.000000      | 0.003614     | 0.003614       | 0.000000       | 0.000000      | 0.000000       | 0.000000       |  |
| 20-24 | 1-12    | 0.000188    | 0.000188      | 0.000000      | 0.000943     | 0.000943       | 0.000000       | 0.000000      | 0.000000       | 0.000000       |  |
| 25-29 | 1-12    | 0.000093    | 0.000093      | 0.000000      | 0.001143     | 0.001143       | 0.000000       | 0.000000      | 0.000000       | 0.000000       |  |
| 30-34 | 1-12    | 0.000047    | 0.000047      | 0.000000      | 0.000871     | 0.000871       | 0.000000       | 0.000000      | 0.000000       | 0.000000       |  |
| 35-39 | 1-12    | 0.000000    | 0.000000      | 0.000000      | 0.000867     | 0.000867       | 0.000000       | 0.000000      | 0.000000       | 0.000000       |  |
| 40-44 | 1-12    | 0.000000    | 0.000000      | 0.000000      | 0.001399     | 0.001399       | 0.000000       | 0.000000      | 0.000000       | 0.000000       |  |
| 45-49 | 1-12    | 0.000000    | 0.000000      | 0.000000      | 0.002033     | 0.002033       | 0.000000       | 0.000000      | 0.000000       | 0.000000       |  |
| 50-54 | 1-12    | 0.000000    | 0.000000      | 0.000000      | 0.003209     | 0.003209       | 0.000000       | 0.000000      | 0.000000       | 0.000000       |  |
| 55-59 | 1-12    | 0.000000    | 0.000000      | 0.000000      | 0.003574     | 0.003574       | 0.000000       | 0.000000      | 0.000000       | 0.000000       |  |
| 60-64 | 1-12    | 0.000000    | 0.000000      | 0.000000      | 0.003460     | 0.003460       | 0.000000       | 0.000000      | 0.000000       | 0.000000       |  |
| 65-69 | 1-12    | 0.000000    | 0.000000      | 0.000000      | 0.004136     | 0.004136       | 0.000000       | 0.000000      | 0.000000       | 0.000000       |  |
| 70-74 | 1-12    | 0.000000    | 0.000000      | 0.000000      | 0.005592     | 0.005592       | 0.000000       | 0.000000      | 0.000000       | 0.000000       |  |
| 75-79 | 1-12    | 0.000000    | 0.000000      | 0.000000      | 0.005592     | 0.005592       | 0.000000       | 0.000000      | 0.000000       | 0.000000       |  |
| 10-14 | 13-72   | 0.001962    | 0.002944      | 0.000000      | 0.008742     | 0.008742       | 0.000000       | 0.000000      | 0.000000       | 0.000000       |  |
| 15-19 | 13-72   | 0.002796    | 0.004193      | 0.000000      | 0.004426     | 0.004426       | 0.000000       | 0.000000      | 0.000000       | 0.000000       |  |
| 20-24 | 13-72   | 0.000275    | 0.000412      | 0.000000      | 0.001527     | 0.001527       | 0.000000       | 0.000000      | 0.000000       | 0.000000       |  |
| 25-29 | 13-72   | 0.000385    | 0.000578      | 0.000000      | 0.001515     | 0.001515       | 0.000000       | 0.000000      | 0.000000       | 0.000000       |  |
| 30-34 | 13-72   | 0.000146    | 0.000218      | 0.000000      | 0.001227     | 0.001227       | 0.000000       | 0.000000      | 0.000000       | 0.000000       |  |
| 35-39 | 13-72   | 0.000000    | 0.000000      | 0.000000      | 0.001630     | 0.001630       | 0.000000       | 0.000000      | 0.000000       | 0.000000       |  |
| 40-44 | 13-72   | 0.000000    | 0.000000      | 0.000000      | 0.001852     | 0.001852       | 0.000000       | 0.000000      | 0.000000       | 0.000000       |  |
| 45-49 | 13-72   | 0.000000    | 0.000000      | 0.000000      | 0.002667     | 0.002667       | 0.000000       | 0.000000      | 0.000000       | 0.000000       |  |
| 50-54 | 13-72   | 0.000000    | 0.000000      | 0.000000      | 0.003208     | 0.003208       | 0.000000       | 0.000000      | 0.000000       | 0.000000       |  |
| 55-59 | 13-72   | 0.000000    | 0.000000      | 0.000000      | 0.003978     | 0.003978       | 0.000000       | 0.000000      | 0.000000       | 0.000000       |  |
| 60-64 | 13-72   | 0.000000    | 0.000000      | 0.000000      | 0.005771     | 0.005771       | 0.000000       | 0.000000      | 0.000000       | 0.000000       |  |
| 65-69 | 13-72   | 0.000000    | 0.000000      | 0.000000      | 0.010432     | 0.010432       | 0.000000       | 0.000000      | 0.000000       | 0.000000       |  |
| 70-74 | 13-72   | 0.000000    | 0.000000      | 0.000000      | 0.007079     | 0.007079       | 0.000000       | 0.000000      | 0.000000       | 0.000000       |  |
| 75-79 | 13-72   | 0.000000    | 0.000000      | 0.000000      | 0.007079     | 0.007079       | 0.000000       | 0.000000      | 0.000000       | 0.000000       |  |
| 10-14 | 73-132  | 0.000862    | 0.003449      | 0.000000      | 0.008742     | 0.008742       | 0.000000       | 0.000000      | 0.000000       | 0.000000       |  |
| 15-19 | 73-132  | 0.001066    | 0.004264      | 0.000000      | 0.003289     | 0.003289       | 0.000000       | 0.000000      | 0.000000       | 0.000000       |  |
| 20-24 | 73-132  | 0.000491    | 0.001965      | 0.000000      | 0.003844     | 0.003844       | 0.000000       | 0.000000      | 0.000000       | 0.000000       |  |
| 25-29 | 73-132  | 0.000168    | 0.000671      | 0.000000      | 0.002006     | 0.002006       | 0.000000       | 0.000000      | 0.000000       | 0.000000       |  |
| 30-34 | 73-132  | 0.000083    | 0.000332      | 0.000000      | 0.001329     | 0.001329       | 0.000000       | 0.000000      | 0.000000       | 0.000000       |  |
| 35-39 | 73-132  | 0.000000    | 0.000000      | 0.000000      | 0.001278     | 0.001278       | 0.000000       | 0.000000      | 0.000000       | 0.000000       |  |
| 40-44 | 73-132  | 0.000000    | 0.000000      | 0.000000      | 0.001691     | 0.001691       | 0.000000       | 0.000000      | 0.000000       | 0.000000       |  |
| 45-49 | 73-132  | 0.000000    | 0.000000      | 0.000000      | 0.002904     | 0.002904       | 0.000000       | 0.000000      | 0.000000       | 0.000000       |  |
| 50-54 | 73-132  | 0.000000    | 0.000000      | 0.000000      | 0.003319     | 0.003319       | 0.000000       | 0.000000      | 0.000000       | 0.000000       |  |
| 55-59 | 73-132  | 0.000000    | 0.000000      | 0.000000      | 0.003976     | 0.003976       | 0.000000       | 0.000000      | 0.000000       | 0.000000       |  |
| 60-64 | 73-132  | 0.000000    | 0.000000      | 0.000000      | 0.005235     | 0.005235       | 0.000000       | 0.000000      | 0.000000       | 0.000000       |  |
| 65-69 | 73-132  | 0.000000    | 0.000000      | 0.000000      | 0.005901     | 0.005901       | 0.000000       | 0.000000      | 0.000000       | 0.000000       |  |
| 70-74 | 73-132  | 0.000000    | 0.000000      | 0.000000      | 0.005615     | 0.005615       | 0.000000       | 0.000000      | 0.000000       | 0.000000       |  |
| 75-79 | 73-132  | 0.000000    | 0.000000      | 0.000000      | 0.005615     | 0.005615       | 0.000000       | 0.000000      | 0.000000       | 0.000000       |  |
| 10-14 | 133-192 | 0.000173    | 0.003294      | 0.000000      | 0.008742     | 0.008742       | 0.000000       | 0.000000      | 0.000000       | 0.000000       |  |
| 15-19 | 133-192 | 0.000234    | 0.004442      | 0.000000      | 0.003732     | 0.003732       | 0.000000       | 0.000000      | 0.000000       | 0.000000       |  |
| 20-24 | 133-192 | 0.000003    | 0.000059      | 0.000000      | 0.002260     | 0.002260       | 0.000000       | 0.000000      | 0.000000       | 0.000000       |  |
| 25-29 | 133-192 | 0.000071    | 0.001351      | 0.000000      | 0.002822     | 0.002822       | 0.000000       | 0.000000      | 0.000000       | 0.000000       |  |
| 30-34 | 133-192 | 0.000035    | 0.000661      | 0.000000      | 0.002610     | 0.002610       | 0.000000       | 0.000000      | 0.000000       | 0.000000       |  |
| 35-39 | 133-192 | 0.000000    | 0.000000      | 0.000000      | 0.002058     | 0.002058       | 0.000000       | 0.000000      | 0.000000       | 0.000000       |  |
| 40-44 | 133-192 | 0.000000    | 0.000000      | 0.000000      | 0.002310     | 0.002310       | 0.000000       | 0.000000      | 0.000000       | 0.000000       |  |
| 45-49 | 133-192 | 0.000000    | 0.000000      | 0.000000      | 0.002256     | 0.002256       | 0.000000       | 0.000000      | 0.000000       | 0.000000       |  |
| 50-54 | 133-192 | 0.000000    | 0.000000      | 0.000000      | 0.002663     | 0.002663       | 0.000000       | 0.000000      | 0.000000       | 0.000000       |  |
| 55-59 | 133-192 | 0.000000    | 0.000000      | 0.000000      | 0.001747     | 0.001747       | 0.000000       | 0.000000      | 0.000000       | 0.000000       |  |
| 60-64 | 133-192 | 0.000000    | 0.000000      | 0.000000      | 0.005809     | 0.005809       | 0.000000       | 0.000000      | 0.000000       | 0.000000       |  |
| 65-69 | 133-192 | 0.000000    | 0.000000      | 0.000000      | 0.005896     | 0.005896       | 0.000000       | 0.000000      | 0.000000       | 0.000000       |  |
| 70-74 | 133-192 | 0.000000    | 0.000000      | 0.000000      | 0.007323     | 0.007323       | 0.000000       | 0.000000      | 0.000000       | 0.000000       |  |
| 75-79 | 133-192 | 0.000000    | 0.000000      | 0.000000      | 0.007323     | 0.007323       | 0.000000       | 0.000000      | 0.000000       | 0.000000       |  |
| 10-14 | 193-252 | 0.000116    | 0.002198      | 0.000000      | 0.008742     | 0.008742       | 0.000000       | 0.000000      | 0.000000       | 0.000000       |  |
| 15-19 | 193-252 | 0.000199    | 0.003788      | 0.000000      | 0.005036     | 0.005036       | 0.000000       | 0.000000      | 0.000000       | 0.000000       |  |
| 20-24 | 193-252 | 0.000016    | 0.000304      | 0.000000      | 0.002857     | 0.002857       | 0.000000       | 0.000000      | 0.000000       | 0.000000       |  |
| 25-29 | 193-252 | 0.000013    | 0.000239      | 0.000000      | 0.002314     | 0.002314       | 0.000000       | 0.000000      | 0.000000       | 0.000000       |  |
| 30-34 | 193-252 | 0.000006    | 0.000119      | 0.000000      | 0.004343     | 0.004343       | 0.000000       | 0.000000      | 0.000000       | 0.000000       |  |
| 35-39 | 193-252 | 0.000000    | 0.000000      | 0.000000      | 0.002092     | 0.002092       | 0.000000       | 0.000000      | 0.000000       | 0.000000       |  |
| 40-44 | 193-252 | 0.000000    | 0.000000      | 0.000000      | 0.002566     | 0.002566       | 0.000000       | 0.000000      | 0.000000       | 0.000000       |  |
| 45-49 | 193-252 | 0.000000    | 0.000000      | 0.000000      | 0.002311     | 0.002311       | 0.000000       | 0.000000      | 0.000000       | 0.000000       |  |
| 50-54 | 193-252 | 0.000000    | 0.000000      | 0.000000      | 0.003209     | 0.003209       | 0.000000       | 0.000000      | 0.000000       | 0.000000       |  |

### Results for PHIM for Run 9 (Sensitivity\_Analysis\_2.RTF)

|       |         |          |          |          |          |          |          |          |          |          |
|-------|---------|----------|----------|----------|----------|----------|----------|----------|----------|----------|
| 55-59 | 193-252 | 0.000000 | 0.000000 | 0.000000 | 0.004057 | 0.004057 | 0.000000 | 0.000000 | 0.000000 | 0.000000 |
| 60-64 | 193-252 | 0.000000 | 0.000000 | 0.000000 | 0.007166 | 0.007166 | 0.000000 | 0.000000 | 0.000000 | 0.000000 |
| 65-69 | 193-252 | 0.000000 | 0.000000 | 0.000000 | 0.004281 | 0.004281 | 0.000000 | 0.000000 | 0.000000 | 0.000000 |
| 70-74 | 193-252 | 0.000000 | 0.000000 | 0.000000 | 0.004580 | 0.004580 | 0.000000 | 0.000000 | 0.000000 | 0.000000 |
| 75-79 | 193-252 | 0.000000 | 0.000000 | 0.000000 | 0.004580 | 0.004580 | 0.000000 | 0.000000 | 0.000000 | 0.000000 |
| 10-14 | 253+    | 0.000066 | 0.001259 | 0.000000 | 0.008742 | 0.008742 | 0.000000 | 0.000000 | 0.000000 | 0.000000 |
| 15-19 | 253+    | 0.000149 | 0.002835 | 0.000000 | 0.010602 | 0.010602 | 0.000000 | 0.000000 | 0.000000 | 0.000000 |
| 20-24 | 253+    | 0.000023 | 0.000430 | 0.000000 | 0.004314 | 0.004314 | 0.000000 | 0.000000 | 0.000000 | 0.000000 |
| 25-29 | 253+    | 0.000011 | 0.000213 | 0.000000 | 0.003645 | 0.003645 | 0.000000 | 0.000000 | 0.000000 | 0.000000 |
| 30-34 | 253+    | 0.000006 | 0.000106 | 0.000000 | 0.004512 | 0.004512 | 0.000000 | 0.000000 | 0.000000 | 0.000000 |
| 35-39 | 253+    | 0.000000 | 0.000000 | 0.000000 | 0.002147 | 0.002147 | 0.000000 | 0.000000 | 0.000000 | 0.000000 |
| 40-44 | 253+    | 0.000000 | 0.000000 | 0.000000 | 0.002636 | 0.002636 | 0.000000 | 0.000000 | 0.000000 | 0.000000 |
| 45-49 | 253+    | 0.000000 | 0.000000 | 0.000000 | 0.001051 | 0.001051 | 0.000000 | 0.000000 | 0.000000 | 0.000000 |
| 50-54 | 253+    | 0.000000 | 0.000000 | 0.000000 | 0.002519 | 0.002519 | 0.000000 | 0.000000 | 0.000000 | 0.000000 |
| 55-59 | 253+    | 0.000000 | 0.000000 | 0.000000 | 0.003693 | 0.003693 | 0.000000 | 0.000000 | 0.000000 | 0.000000 |
| 60-64 | 253+    | 0.000000 | 0.000000 | 0.000000 | 0.005888 | 0.005888 | 0.000000 | 0.000000 | 0.000000 | 0.000000 |
| 65-69 | 253+    | 0.000000 | 0.000000 | 0.000000 | 0.004823 | 0.004823 | 0.000000 | 0.000000 | 0.000000 | 0.000000 |
| 70-74 | 253+    | 0.000000 | 0.000000 | 0.000000 | 0.004733 | 0.004733 | 0.000000 | 0.000000 | 0.000000 | 0.000000 |
| 75-79 | 253+    | 0.000000 | 0.000000 | 0.000000 | 0.004733 | 0.004733 | 0.000000 | 0.000000 | 0.000000 | 0.000000 |



**Results for PHIM for Run 9 (Sensitivity\_Analysis\_2.RTF)**

|       |      |          |          |          |          |          |          |
|-------|------|----------|----------|----------|----------|----------|----------|
| 25-29 | 253+ | 0.005888 | 0.000000 | 0.000000 | 0.000000 | 0.000000 | 0.000000 |
| 30-34 | 253+ | 0.006188 | 0.000000 | 0.000000 | 0.000000 | 0.000000 | 0.000000 |
| 35-39 | 253+ | 0.005440 | 0.000000 | 0.000000 | 0.000000 | 0.000000 | 0.000000 |
| 40-44 | 253+ | 0.004964 | 0.000000 | 0.000000 | 0.000000 | 0.000000 | 0.000000 |
| 45-49 | 253+ | 0.003726 | 0.000000 | 0.000000 | 0.000000 | 0.000000 | 0.000000 |
| 50-54 | 253+ | 0.002468 | 0.000000 | 0.000000 | 0.000000 | 0.000000 | 0.000000 |
| 55-59 | 253+ | 0.001725 | 0.000000 | 0.000000 | 0.000000 | 0.000000 | 0.000000 |
| 60-64 | 253+ | 0.000205 | 0.000000 | 0.000000 | 0.000000 | 0.000000 | 0.000000 |
| 65-69 | 253+ | 0.000000 | 0.000000 | 0.000000 | 0.000000 | 0.000000 | 0.000000 |
| 70-74 | 253+ | 0.000000 | 0.000000 | 0.000000 | 0.000000 | 0.000000 | 0.000000 |
| 75-79 | 253+ | 0.000000 | 0.000000 | 0.000000 | 0.000000 | 0.000000 | 0.000000 |

## Results for PHIM for Run 9 (Sensitivity\_Analysis\_2.RTF)

\*\*\*\*\*

### Main Output for the Tobacco History for Run: 9, Simulation: 1, Scenario: NULL

| Variable Parameter          | Value              |
|-----------------------------|--------------------|
| 1. Country                  | US (United States) |
| 2. Sex                      | M (Males)          |
| 3. Year of start of process | 1990               |

Year of Follow-up: 2040, Age Group: All Ages  
 Period    Age Group    Smoking Group            N            %

|    |          |           |       |       |
|----|----------|-----------|-------|-------|
| 50 | All Ages | Never Any | 19445 | 50.68 |
| 50 | All Ages | CC        | 3024  | 7.88  |
| 50 | All Ages | Former    | 15896 | 41.43 |

Year of Follow-up: 2040, Age Group: 18-19  
 Period    Age Group    Smoking Group            N            %

|    |       |           |   |   |
|----|-------|-----------|---|---|
| 50 | 18-19 | Never Any | 0 | . |
| 50 | 18-19 | CC        | 0 | . |
| 50 | 18-19 | Former    | 0 | . |

Year of Follow-up: 2040, Age Group: 20-24  
 Period    Age Group    Smoking Group            N            %

|    |       |           |   |   |
|----|-------|-----------|---|---|
| 50 | 20-24 | Never Any | 0 | . |
| 50 | 20-24 | CC        | 0 | . |
| 50 | 20-24 | Former    | 0 | . |

Year of Follow-up: 2040, Age Group: 25-29  
 Period    Age Group    Smoking Group            N            %

|    |       |           |   |   |
|----|-------|-----------|---|---|
| 50 | 25-29 | Never Any | 0 | . |
| 50 | 25-29 | CC        | 0 | . |
| 50 | 25-29 | Former    | 0 | . |

Year of Follow-up: 2040, Age Group: 30-34  
 Period    Age Group    Smoking Group            N            %

|    |       |           |   |   |
|----|-------|-----------|---|---|
| 50 | 30-34 | Never Any | 0 | . |
| 50 | 30-34 | CC        | 0 | . |
| 50 | 30-34 | Former    | 0 | . |

Year of Follow-up: 2040, Age Group: 35-39  
 Period    Age Group    Smoking Group            N            %

|    |       |           |   |   |
|----|-------|-----------|---|---|
| 50 | 35-39 | Never Any | 0 | . |
| 50 | 35-39 | CC        | 0 | . |
| 50 | 35-39 | Former    | 0 | . |

Year of Follow-up: 2040, Age Group: 40-44  
 Period    Age Group    Smoking Group            N            %

|    |       |           |   |   |
|----|-------|-----------|---|---|
| 50 | 40-44 | Never Any | 0 | . |
| 50 | 40-44 | CC        | 0 | . |
| 50 | 40-44 | Former    | 0 | . |

Year of Follow-up: 2040, Age Group: 45-49  
 Period    Age Group    Smoking Group            N            %

|    |       |           |   |   |
|----|-------|-----------|---|---|
| 50 | 45-49 | Never Any | 0 | . |
| 50 | 45-49 | CC        | 0 | . |
| 50 | 45-49 | Former    | 0 | . |

Year of Follow-up: 2040, Age Group: 50-54  
 Period    Age Group    Smoking Group            N            %

|    |       |           |   |   |
|----|-------|-----------|---|---|
| 50 | 50-54 | Never Any | 0 | . |
| 50 | 50-54 | CC        | 0 | . |
| 50 | 50-54 | Former    | 0 | . |

Year of Follow-up: 2040, Age Group: 55-59  
 Period    Age Group    Smoking Group            N            %

|    |       |           |   |   |
|----|-------|-----------|---|---|
| 50 | 55-59 | Never Any | 0 | . |
| 50 | 55-59 | CC        | 0 | . |
| 50 | 55-59 | Former    | 0 | . |

Year of Follow-up: 2040, Age Group: 60-64  
 Period    Age Group    Smoking Group            N            %

### Results for PHIM for Run 9 (Sensitivity\_Analysis\_2.RTF)

|                                           |           |               |      |       |
|-------------------------------------------|-----------|---------------|------|-------|
| 50                                        | 60-64     | Never Any     | 4363 | 49.33 |
| 50                                        | 60-64     | CC            | 934  | 10.56 |
| 50                                        | 60-64     | Former        | 3548 | 40.11 |
| Year of Follow-up: 2040, Age Group: 65-69 |           |               |      |       |
| Period                                    | Age Group | Smoking Group | N    | %     |
| 50                                        | 65-69     | Never Any     | 4948 | 54.73 |
| 50                                        | 65-69     | CC            | 734  | 8.12  |
| 50                                        | 65-69     | Former        | 3358 | 37.15 |
| Year of Follow-up: 2040, Age Group: 70-74 |           |               |      |       |
| Period                                    | Age Group | Smoking Group | N    | %     |
| 50                                        | 70-74     | Never Any     | 5145 | 52.41 |
| 50                                        | 70-74     | CC            | 688  | 7.01  |
| 50                                        | 70-74     | Former        | 3983 | 40.58 |
| Year of Follow-up: 2040, Age Group: 75-79 |           |               |      |       |
| Period                                    | Age Group | Smoking Group | N    | %     |
| 50                                        | 75-79     | Never Any     | 4989 | 46.78 |
| 50                                        | 75-79     | CC            | 668  | 6.26  |
| 50                                        | 75-79     | Former        | 5007 | 46.95 |

## Results for PHIM for Run 9 (Sensitivity\_Analysis\_2.RTF)

\*\*\*\*\*

### Main Output for the Tobacco History for Run: 9, Simulation: 1, Scenario: Ecig

| Variable Parameter                           |           | Value              |       |       |               |             |               |                |              |
|----------------------------------------------|-----------|--------------------|-------|-------|---------------|-------------|---------------|----------------|--------------|
| 1. Country                                   |           | US (United States) |       |       |               |             |               |                |              |
| 2. Sex                                       |           | M (Males)          |       |       |               |             |               |                |              |
| 3. Year of start of process                  |           | 1990               |       |       |               |             |               |                |              |
| Year of Follow-up: 1990, Age Group: All Ages |           |                    |       |       |               |             |               |                |              |
| Period                                       | Age Group | Smoking Group      | N     | %     | Ever Quit (N) | Ever Quit % | Mean Yrs Quit | Short Term (n) | Short Term % |
| 0                                            | All Ages  | Never Any          | 34075 | 39.78 |               |             |               |                |              |
| 0                                            | All Ages  | CC                 | 27323 | 31.90 | 0             | 0.00        |               |                |              |
| 0                                            | All Ages  | Ecig               | 0     | 0.00  |               |             |               |                |              |
| 0                                            | All Ages  | Dual               | 0     | 0.00  |               |             |               |                |              |
| 0                                            | All Ages  | Former             | 24266 | 28.33 |               |             | 13.08         | 3623           | 14.93        |
| Year of Follow-up: 1990, Age Group: 18-19    |           |                    |       |       |               |             |               |                |              |
| Period                                       | Age Group | Smoking Group      | N     | %     | Ever Quit (N) | Ever Quit % | Mean Yrs Quit | Short Term (n) | Short Term % |
| 0                                            | 18-19     | Never Any          | 2783  | 78.42 |               |             |               |                |              |
| 0                                            | 18-19     | CC                 | 634   | 17.86 | 0             | 0.00        |               |                |              |
| 0                                            | 18-19     | Ecig               | 0     | 0.00  |               |             |               |                |              |
| 0                                            | 18-19     | Dual               | 0     | 0.00  |               |             |               |                |              |
| 0                                            | 18-19     | Former             | 132   | 3.72  |               |             | 0.11          | 132            | 100.00       |
| Year of Follow-up: 1990, Age Group: 20-24    |           |                    |       |       |               |             |               |                |              |
| Period                                       | Age Group | Smoking Group      | N     | %     | Ever Quit (N) | Ever Quit % | Mean Yrs Quit | Short Term (n) | Short Term % |
| 0                                            | 20-24     | Never Any          | 5722  | 58.29 |               |             |               |                |              |
| 0                                            | 20-24     | CC                 | 3199  | 32.59 | 0             | 0.00        |               |                |              |
| 0                                            | 20-24     | Ecig               | 0     | 0.00  |               |             |               |                |              |
| 0                                            | 20-24     | Dual               | 0     | 0.00  |               |             |               |                |              |
| 0                                            | 20-24     | Former             | 895   | 9.12  |               |             | 1.46          | 506            | 56.54        |
| Year of Follow-up: 1990, Age Group: 25-29    |           |                    |       |       |               |             |               |                |              |
| Period                                       | Age Group | Smoking Group      | N     | %     | Ever Quit (N) | Ever Quit % | Mean Yrs Quit | Short Term (n) | Short Term % |
| 0                                            | 25-29     | Never Any          | 5232  | 49.06 |               |             |               |                |              |
| 0                                            | 25-29     | CC                 | 3914  | 36.70 | 0             | 0.00        |               |                |              |
| 0                                            | 25-29     | Ecig               | 0     | 0.00  |               |             |               |                |              |
| 0                                            | 25-29     | Dual               | 0     | 0.00  |               |             |               |                |              |
| 0                                            | 25-29     | Former             | 1518  | 14.23 |               |             | 2.87          | 643            | 42.36        |
| Year of Follow-up: 1990, Age Group: 30-34    |           |                    |       |       |               |             |               |                |              |
| Period                                       | Age Group | Smoking Group      | N     | %     | Ever Quit (N) | Ever Quit % | Mean Yrs Quit | Short Term (n) | Short Term % |
| 0                                            | 30-34     | Never Any          | 4765  | 43.65 |               |             |               |                |              |
| 0                                            | 30-34     | CC                 | 4023  | 36.85 | 0             | 0.00        |               |                |              |
| 0                                            | 30-34     | Ecig               | 0     | 0.00  |               |             |               |                |              |
| 0                                            | 30-34     | Dual               | 0     | 0.00  |               |             |               |                |              |
| 0                                            | 30-34     | Former             | 2128  | 19.49 |               |             | 4.06          | 592            | 27.82        |
| Year of Follow-up: 1990, Age Group: 35-39    |           |                    |       |       |               |             |               |                |              |
| Period                                       | Age Group | Smoking Group      | N     | %     | Ever Quit (N) | Ever Quit % | Mean Yrs Quit | Short Term (n) | Short Term % |
| 0                                            | 35-39     | Never Any          | 3941  | 39.85 |               |             |               |                |              |
| 0                                            | 35-39     | CC                 | 3474  | 35.13 | 0             | 0.00        |               |                |              |
| 0                                            | 35-39     | Ecig               | 0     | 0.00  |               |             |               |                |              |
| 0                                            | 35-39     | Dual               | 0     | 0.00  |               |             |               |                |              |
| 0                                            | 35-39     | Former             | 2474  | 25.02 |               |             | 8.31          | 425            | 17.18        |
| Year of Follow-up: 1990, Age Group: 40-44    |           |                    |       |       |               |             |               |                |              |
| Period                                       | Age Group | Smoking Group      | N     | %     | Ever Quit (N) | Ever Quit % | Mean Yrs Quit | Short Term (n) | Short Term % |
| 0                                            | 40-44     | Never Any          | 2912  | 33.65 |               |             |               |                |              |
| 0                                            | 40-44     | CC                 | 3113  | 35.97 | 0             | 0.00        |               |                |              |
| 0                                            | 40-44     | Ecig               | 0     | 0.00  |               |             |               |                |              |
| 0                                            | 40-44     | Dual               | 0     | 0.00  |               |             |               |                |              |
| 0                                            | 40-44     | Former             | 2630  | 30.39 |               |             | 10.69         | 317            | 12.05        |
| Year of Follow-up: 1990, Age Group: 45-49    |           |                    |       |       |               |             |               |                |              |
| Period                                       | Age Group | Smoking Group      | N     | %     | Ever Quit (N) | Ever Quit % | Mean Yrs Quit | Short Term (n) | Short Term % |
| 0                                            | 45-49     | Never Any          | 1919  | 29.46 |               |             |               |                |              |
| 0                                            | 45-49     | CC                 | 2318  | 35.58 | 0             | 0.00        |               |                |              |
| 0                                            | 45-49     | Ecig               | 0     | 0.00  |               |             |               |                |              |
| 0                                            | 45-49     | Dual               | 0     | 0.00  |               |             |               |                |              |
| 0                                            | 45-49     | Former             | 2278  | 34.97 |               |             | 13.26         | 221            | 9.70         |
| Year of Follow-up: 1990, Age Group: 50-54    |           |                    |       |       |               |             |               |                |              |
| Period                                       | Age Group | Smoking Group      | N     | %     | Ever Quit (N) | Ever Quit % | Mean Yrs Quit | Short Term (n) | Short Term % |
| 0                                            | 50-54     | Never Any          | 1611  | 29.41 |               |             |               |                |              |
| 0                                            | 50-54     | CC                 | 1816  | 33.16 | 0             | 0.00        |               |                |              |

**Results for PHIM for Run 9 (Sensitivity\_Analysis\_2.RTF)**

|                                              |           |               |       |       |               |             |               |                |              |
|----------------------------------------------|-----------|---------------|-------|-------|---------------|-------------|---------------|----------------|--------------|
| 0                                            | 50-54     | Ecig          | 0     | 0.00  |               |             |               |                |              |
| 0                                            | 50-54     | Dual          | 0     | 0.00  |               |             |               |                |              |
| 0                                            | 50-54     | Former        | 2050  | 37.43 |               |             | 14.55         | 261            | 12.73        |
| Year of Follow-up: 1990, Age Group: 55-59    |           |               |       |       |               |             |               |                |              |
| Period                                       | Age Group | Smoking Group | N     | %     | Ever Quit (N) | Ever Quit % | Mean Yrs Quit | Short Term (n) | Short Term % |
| 0                                            | 55-59     | Never Any     | 1337  | 26.83 |               |             |               |                |              |
| 0                                            | 55-59     | CC            | 1520  | 30.50 | 0             | 0.00        |               |                |              |
| 0                                            | 55-59     | Ecig          | 0     | 0.00  |               |             |               |                |              |
| 0                                            | 55-59     | Dual          | 0     | 0.00  |               |             |               |                |              |
| 0                                            | 55-59     | Former        | 2126  | 42.67 |               |             | 14.80         | 216            | 10.16        |
| Year of Follow-up: 1990, Age Group: 60-64    |           |               |       |       |               |             |               |                |              |
| Period                                       | Age Group | Smoking Group | N     | %     | Ever Quit (N) | Ever Quit % | Mean Yrs Quit | Short Term (n) | Short Term % |
| 0                                            | 60-64     | Never Any     | 1169  | 23.83 |               |             |               |                |              |
| 0                                            | 60-64     | CC            | 1287  | 26.24 | 0             | 0.00        |               |                |              |
| 0                                            | 60-64     | Ecig          | 0     | 0.00  |               |             |               |                |              |
| 0                                            | 60-64     | Dual          | 0     | 0.00  |               |             |               |                |              |
| 0                                            | 60-64     | Former        | 2449  | 49.93 |               |             | 18.87         | 106            | 4.33         |
| Year of Follow-up: 1990, Age Group: 65-69    |           |               |       |       |               |             |               |                |              |
| Period                                       | Age Group | Smoking Group | N     | %     | Ever Quit (N) | Ever Quit % | Mean Yrs Quit | Short Term (n) | Short Term % |
| 0                                            | 65-69     | Never Any     | 1023  | 23.32 |               |             |               |                |              |
| 0                                            | 65-69     | CC            | 979   | 22.32 | 0             | 0.00        |               |                |              |
| 0                                            | 65-69     | Ecig          | 0     | 0.00  |               |             |               |                |              |
| 0                                            | 65-69     | Dual          | 0     | 0.00  |               |             |               |                |              |
| 0                                            | 65-69     | Former        | 2385  | 54.37 |               |             | 19.91         | 113            | 4.74         |
| Year of Follow-up: 1990, Age Group: 70-74    |           |               |       |       |               |             |               |                |              |
| Period                                       | Age Group | Smoking Group | N     | %     | Ever Quit (N) | Ever Quit % | Mean Yrs Quit | Short Term (n) | Short Term % |
| 0                                            | 70-74     | Never Any     | 961   | 27.46 |               |             |               |                |              |
| 0                                            | 70-74     | CC            | 675   | 19.29 | 0             | 0.00        |               |                |              |
| 0                                            | 70-74     | Ecig          | 0     | 0.00  |               |             |               |                |              |
| 0                                            | 70-74     | Dual          | 0     | 0.00  |               |             |               |                |              |
| 0                                            | 70-74     | Former        | 1863  | 53.24 |               |             | 20.69         | 23             | 1.23         |
| Year of Follow-up: 1990, Age Group: 75-79    |           |               |       |       |               |             |               |                |              |
| Period                                       | Age Group | Smoking Group | N     | %     | Ever Quit (N) | Ever Quit % | Mean Yrs Quit | Short Term (n) | Short Term % |
| 0                                            | 75-79     | Never Any     | 700   | 29.06 |               |             |               |                |              |
| 0                                            | 75-79     | CC            | 371   | 15.40 | 0             | 0.00        |               |                |              |
| 0                                            | 75-79     | Ecig          | 0     | 0.00  |               |             |               |                |              |
| 0                                            | 75-79     | Dual          | 0     | 0.00  |               |             |               |                |              |
| 0                                            | 75-79     | Former        | 1338  | 55.54 |               |             | 22.88         | 68             | 5.08         |
| Year of Follow-up: 1995, Age Group: All Ages |           |               |       |       |               |             |               |                |              |
| Period                                       | Age Group | Smoking Group | N     | %     | Ever Quit (N) | Ever Quit % | Mean Yrs Quit | Short Term (n) | Short Term % |
| 5                                            | All Ages  | Never Any     | 38368 | 41.57 |               |             |               |                |              |
| 5                                            | All Ages  | CC            | 19705 | 21.35 | 0             | 0.00        |               |                |              |
| 5                                            | All Ages  | Ecig          | 7193  | 7.79  |               |             |               |                |              |
| 5                                            | All Ages  | Dual          | 0     | 0.00  |               |             |               |                |              |
| 5                                            | All Ages  | Former        | 27024 | 29.28 |               |             | 15.14         | 1692           | 6.26         |
| Year of Follow-up: 1995, Age Group: 18-19    |           |               |       |       |               |             |               |                |              |
| Period                                       | Age Group | Smoking Group | N     | %     | Ever Quit (N) | Ever Quit % | Mean Yrs Quit | Short Term (n) | Short Term % |
| 5                                            | 18-19     | Never Any     | 2448  | 69.07 |               |             |               |                |              |
| 5                                            | 18-19     | CC            | 406   | 11.46 | 0             | 0.00        |               |                |              |
| 5                                            | 18-19     | Ecig          | 587   | 16.56 |               |             |               |                |              |
| 5                                            | 18-19     | Dual          | 0     | 0.00  |               |             |               |                |              |
| 5                                            | 18-19     | Former        | 103   | 2.91  |               |             | 1.04          | 73             | 70.87        |
| Year of Follow-up: 1995, Age Group: 20-24    |           |               |       |       |               |             |               |                |              |
| Period                                       | Age Group | Smoking Group | N     | %     | Ever Quit (N) | Ever Quit % | Mean Yrs Quit | Short Term (n) | Short Term % |
| 5                                            | 20-24     | Never Any     | 5787  | 64.02 |               |             |               |                |              |
| 5                                            | 20-24     | CC            | 1630  | 18.03 | 0             | 0.00        |               |                |              |
| 5                                            | 20-24     | Ecig          | 1088  | 12.04 |               |             |               |                |              |
| 5                                            | 20-24     | Dual          | 0     | 0.00  |               |             |               |                |              |
| 5                                            | 20-24     | Former        | 535   | 5.92  |               |             | 2.79          | 150            | 28.04        |
| Year of Follow-up: 1995, Age Group: 25-29    |           |               |       |       |               |             |               |                |              |
| Period                                       | Age Group | Smoking Group | N     | %     | Ever Quit (N) | Ever Quit % | Mean Yrs Quit | Short Term (n) | Short Term % |
| 5                                            | 25-29     | Never Any     | 5471  | 55.74 |               |             |               |                |              |
| 5                                            | 25-29     | CC            | 2187  | 22.28 | 0             | 0.00        |               |                |              |
| 5                                            | 25-29     | Ecig          | 998   | 10.17 |               |             |               |                |              |
| 5                                            | 25-29     | Dual          | 0     | 0.00  |               |             |               |                |              |
| 5                                            | 25-29     | Former        | 1160  | 11.82 |               |             | 5.44          | 99             | 8.53         |
| Year of Follow-up: 1995, Age Group: 30-34    |           |               |       |       |               |             |               |                |              |
| Period                                       | Age Group | Smoking Group | N     | %     | Ever Quit (N) | Ever Quit % | Mean Yrs Quit | Short Term (n) | Short Term % |



**Results for PHIM for Run 9 (Sensitivity\_Analysis\_2.RTF)**

|                                              |           |               |      |       |               |             |               |                |              |
|----------------------------------------------|-----------|---------------|------|-------|---------------|-------------|---------------|----------------|--------------|
| 5                                            | 30-34     | Never Any     | 5065 | 47.50 |               |             |               |                |              |
| 5                                            | 30-34     | CC            | 2530 | 23.72 | 0             | 0.00        |               |                |              |
| 5                                            | 30-34     | Ecig          | 1253 | 11.75 |               |             |               |                |              |
| 5                                            | 30-34     | Dual          | 0    | 0.00  |               |             |               |                |              |
| 5                                            | 30-34     | Former        | 1816 | 17.03 |               |             | 6.91          | 119            | 6.55         |
| Year of Follow-up: 1995, Age Group: 35-39    |           |               |      |       |               |             |               |                |              |
| Period                                       | Age Group | Smoking Group | N    | %     | Ever Quit (N) | Ever Quit % | Mean Yrs Quit | Short Term (n) | Short Term % |
| 5                                            | 35-39     | Never Any     | 4724 | 43.28 |               |             |               |                |              |
| 5                                            | 35-39     | CC            | 2646 | 24.24 | 0             | 0.00        |               |                |              |
| 5                                            | 35-39     | Ecig          | 1134 | 10.39 |               |             |               |                |              |
| 5                                            | 35-39     | Dual          | 0    | 0.00  |               |             |               |                |              |
| 5                                            | 35-39     | Former        | 2412 | 22.10 |               |             | 8.19          | 135            | 5.60         |
| Year of Follow-up: 1995, Age Group: 40-44    |           |               |      |       |               |             |               |                |              |
| Period                                       | Age Group | Smoking Group | N    | %     | Ever Quit (N) | Ever Quit % | Mean Yrs Quit | Short Term (n) | Short Term % |
| 5                                            | 40-44     | Never Any     | 3941 | 39.85 |               |             |               |                |              |
| 5                                            | 40-44     | CC            | 2294 | 23.20 | 0             | 0.00        |               |                |              |
| 5                                            | 40-44     | Ecig          | 876  | 8.86  |               |             |               |                |              |
| 5                                            | 40-44     | Dual          | 0    | 0.00  |               |             |               |                |              |
| 5                                            | 40-44     | Former        | 2778 | 28.09 |               |             | 12.05         | 129            | 4.64         |
| Year of Follow-up: 1995, Age Group: 45-49    |           |               |      |       |               |             |               |                |              |
| Period                                       | Age Group | Smoking Group | N    | %     | Ever Quit (N) | Ever Quit % | Mean Yrs Quit | Short Term (n) | Short Term % |
| 5                                            | 45-49     | Never Any     | 2912 | 33.65 |               |             |               |                |              |
| 5                                            | 45-49     | CC            | 2121 | 24.51 | 0             | 0.00        |               |                |              |
| 5                                            | 45-49     | Ecig          | 648  | 7.49  |               |             |               |                |              |
| 5                                            | 45-49     | Dual          | 0    | 0.00  |               |             |               |                |              |
| 5                                            | 45-49     | Former        | 2974 | 34.36 |               |             | 14.11         | 122            | 4.10         |
| Year of Follow-up: 1995, Age Group: 50-54    |           |               |      |       |               |             |               |                |              |
| Period                                       | Age Group | Smoking Group | N    | %     | Ever Quit (N) | Ever Quit % | Mean Yrs Quit | Short Term (n) | Short Term % |
| 5                                            | 50-54     | Never Any     | 1919 | 29.46 |               |             |               |                |              |
| 5                                            | 50-54     | CC            | 1652 | 25.36 | 0             | 0.00        |               |                |              |
| 5                                            | 50-54     | Ecig          | 341  | 5.23  |               |             |               |                |              |
| 5                                            | 50-54     | Dual          | 0    | 0.00  |               |             |               |                |              |
| 5                                            | 50-54     | Former        | 2603 | 39.95 |               |             | 16.21         | 141            | 5.42         |
| Year of Follow-up: 1995, Age Group: 55-59    |           |               |      |       |               |             |               |                |              |
| Period                                       | Age Group | Smoking Group | N    | %     | Ever Quit (N) | Ever Quit % | Mean Yrs Quit | Short Term (n) | Short Term % |
| 5                                            | 55-59     | Never Any     | 1611 | 29.41 |               |             |               |                |              |
| 5                                            | 55-59     | CC            | 1298 | 23.70 | 0             | 0.00        |               |                |              |
| 5                                            | 55-59     | Ecig          | 182  | 3.32  |               |             |               |                |              |
| 5                                            | 55-59     | Dual          | 0    | 0.00  |               |             |               |                |              |
| 5                                            | 55-59     | Former        | 2386 | 43.56 |               |             | 17.08         | 133            | 5.57         |
| Year of Follow-up: 1995, Age Group: 60-64    |           |               |      |       |               |             |               |                |              |
| Period                                       | Age Group | Smoking Group | N    | %     | Ever Quit (N) | Ever Quit % | Mean Yrs Quit | Short Term (n) | Short Term % |
| 5                                            | 60-64     | Never Any     | 1337 | 26.83 |               |             |               |                |              |
| 5                                            | 60-64     | CC            | 1069 | 21.45 | 0             | 0.00        |               |                |              |
| 5                                            | 60-64     | Ecig          | 73   | 1.46  |               |             |               |                |              |
| 5                                            | 60-64     | Dual          | 0    | 0.00  |               |             |               |                |              |
| 5                                            | 60-64     | Former        | 2504 | 50.25 |               |             | 17.11         | 149            | 5.95         |
| Year of Follow-up: 1995, Age Group: 65-69    |           |               |      |       |               |             |               |                |              |
| Period                                       | Age Group | Smoking Group | N    | %     | Ever Quit (N) | Ever Quit % | Mean Yrs Quit | Short Term (n) | Short Term % |
| 5                                            | 65-69     | Never Any     | 1169 | 23.83 |               |             |               |                |              |
| 5                                            | 65-69     | CC            | 821  | 16.74 | 0             | 0.00        |               |                |              |
| 5                                            | 65-69     | Ecig          | 13   | 0.27  |               |             |               |                |              |
| 5                                            | 65-69     | Dual          | 0    | 0.00  |               |             |               |                |              |
| 5                                            | 65-69     | Former        | 2902 | 59.16 |               |             | 20.41         | 215            | 7.41         |
| Year of Follow-up: 1995, Age Group: 70-74    |           |               |      |       |               |             |               |                |              |
| Period                                       | Age Group | Smoking Group | N    | %     | Ever Quit (N) | Ever Quit % | Mean Yrs Quit | Short Term (n) | Short Term % |
| 5                                            | 70-74     | Never Any     | 1023 | 23.32 |               |             |               |                |              |
| 5                                            | 70-74     | CC            | 615  | 14.02 | 0             | 0.00        |               |                |              |
| 5                                            | 70-74     | Ecig          | 0    | 0.00  |               |             |               |                |              |
| 5                                            | 70-74     | Dual          | 0    | 0.00  |               |             |               |                |              |
| 5                                            | 70-74     | Former        | 2749 | 62.66 |               |             | 21.87         | 133            | 4.84         |
| Year of Follow-up: 1995, Age Group: 75-79    |           |               |      |       |               |             |               |                |              |
| Period                                       | Age Group | Smoking Group | N    | %     | Ever Quit (N) | Ever Quit % | Mean Yrs Quit | Short Term (n) | Short Term % |
| 5                                            | 75-79     | Never Any     | 961  | 27.46 |               |             |               |                |              |
| 5                                            | 75-79     | CC            | 436  | 12.46 | 0             | 0.00        |               |                |              |
| 5                                            | 75-79     | Ecig          | 0    | 0.00  |               |             |               |                |              |
| 5                                            | 75-79     | Dual          | 0    | 0.00  |               |             |               |                |              |
| 5                                            | 75-79     | Former        | 2102 | 60.07 |               |             | 23.00         | 94             | 4.47         |
| Year of Follow-up: 2000, Age Group: All Ages |           |               |      |       |               |             |               |                |              |

**Results for PHIM for Run 9 (Sensitivity\_Analysis\_2.RTF)**

| Period                                    | Age Group | Smoking Group | N     | %     | Ever Quit (N) | Ever Quit % | Mean Yrs Quit | Short Term (n) | Short Term % |
|-------------------------------------------|-----------|---------------|-------|-------|---------------|-------------|---------------|----------------|--------------|
| 10                                        | All Ages  | Never Any     | 39177 | 41.64 |               |             |               |                |              |
| 10                                        | All Ages  | CC            | 13636 | 14.49 | 0             | 0.00        |               |                |              |
| 10                                        | All Ages  | Ecig          | 11833 | 12.58 |               |             |               |                |              |
| 10                                        | All Ages  | Dual          | 0     | 0.00  |               |             |               |                |              |
| 10                                        | All Ages  | Former        | 29446 | 31.29 |               |             | 16.82         | 1682           | 5.71         |
| Year of Follow-up: 2000, Age Group: 18-19 |           |               |       |       |               |             |               |                |              |
| Period                                    | Age Group | Smoking Group | N     | %     | Ever Quit (N) | Ever Quit % | Mean Yrs Quit | Short Term (n) | Short Term % |
| 10                                        | 18-19     | Never Any     | 0     | .     |               |             |               |                |              |
| 10                                        | 18-19     | CC            | 0     | .     | 0             | .           |               |                |              |
| 10                                        | 18-19     | Ecig          | 0     | .     |               |             |               |                |              |
| 10                                        | 18-19     | Dual          | 0     | .     |               |             |               |                |              |
| 10                                        | 18-19     | Former        | 0     | .     |               |             |               | 0              | .            |
| Year of Follow-up: 2000, Age Group: 20-24 |           |               |       |       |               |             |               |                |              |
| Period                                    | Age Group | Smoking Group | N     | %     | Ever Quit (N) | Ever Quit % | Mean Yrs Quit | Short Term (n) | Short Term % |
| 10                                        | 20-24     | Never Any     | 4927  | 55.70 |               |             |               |                |              |
| 10                                        | 20-24     | CC            | 869   | 9.82  | 0             | 0.00        |               |                |              |
| 10                                        | 20-24     | Ecig          | 2103  | 23.78 |               |             |               |                |              |
| 10                                        | 20-24     | Dual          | 0     | 0.00  |               |             |               |                |              |
| 10                                        | 20-24     | Former        | 946   | 10.70 |               |             | 3.34          | 272            | 28.75        |
| Year of Follow-up: 2000, Age Group: 25-29 |           |               |       |       |               |             |               |                |              |
| Period                                    | Age Group | Smoking Group | N     | %     | Ever Quit (N) | Ever Quit % | Mean Yrs Quit | Short Term (n) | Short Term % |
| 10                                        | 25-29     | Never Any     | 5341  | 59.08 |               |             |               |                |              |
| 10                                        | 25-29     | CC            | 1080  | 11.95 | 0             | 0.00        |               |                |              |
| 10                                        | 25-29     | Ecig          | 1648  | 18.23 |               |             |               |                |              |
| 10                                        | 25-29     | Dual          | 0     | 0.00  |               |             |               |                |              |
| 10                                        | 25-29     | Former        | 971   | 10.74 |               |             | 5.13          | 177            | 18.23        |
| Year of Follow-up: 2000, Age Group: 30-34 |           |               |       |       |               |             |               |                |              |
| Period                                    | Age Group | Smoking Group | N     | %     | Ever Quit (N) | Ever Quit % | Mean Yrs Quit | Short Term (n) | Short Term % |
| 10                                        | 30-34     | Never Any     | 5276  | 53.75 |               |             |               |                |              |
| 10                                        | 30-34     | CC            | 1448  | 14.75 | 0             | 0.00        |               |                |              |
| 10                                        | 30-34     | Ecig          | 1619  | 16.49 |               |             |               |                |              |
| 10                                        | 30-34     | Dual          | 0     | 0.00  |               |             |               |                |              |
| 10                                        | 30-34     | Former        | 1473  | 15.01 |               |             | 8.64          | 120            | 8.15         |
| Year of Follow-up: 2000, Age Group: 35-39 |           |               |       |       |               |             |               |                |              |
| Period                                    | Age Group | Smoking Group | N     | %     | Ever Quit (N) | Ever Quit % | Mean Yrs Quit | Short Term (n) | Short Term % |
| 10                                        | 35-39     | Never Any     | 4997  | 46.86 |               |             |               |                |              |
| 10                                        | 35-39     | CC            | 1698  | 15.92 | 0             | 0.00        |               |                |              |
| 10                                        | 35-39     | Ecig          | 1902  | 17.84 |               |             |               |                |              |
| 10                                        | 35-39     | Dual          | 0     | 0.00  |               |             |               |                |              |
| 10                                        | 35-39     | Former        | 2067  | 19.38 |               |             | 10.70         | 96             | 4.64         |
| Year of Follow-up: 2000, Age Group: 40-44 |           |               |       |       |               |             |               |                |              |
| Period                                    | Age Group | Smoking Group | N     | %     | Ever Quit (N) | Ever Quit % | Mean Yrs Quit | Short Term (n) | Short Term % |
| 10                                        | 40-44     | Never Any     | 4724  | 43.28 |               |             |               |                |              |
| 10                                        | 40-44     | CC            | 1740  | 15.94 | 0             | 0.00        |               |                |              |
| 10                                        | 40-44     | Ecig          | 1698  | 15.56 |               |             |               |                |              |
| 10                                        | 40-44     | Dual          | 0     | 0.00  |               |             |               |                |              |
| 10                                        | 40-44     | Former        | 2754  | 25.23 |               |             | 11.82         | 127            | 4.61         |
| Year of Follow-up: 2000, Age Group: 45-49 |           |               |       |       |               |             |               |                |              |
| Period                                    | Age Group | Smoking Group | N     | %     | Ever Quit (N) | Ever Quit % | Mean Yrs Quit | Short Term (n) | Short Term % |
| 10                                        | 45-49     | Never Any     | 3941  | 39.85 |               |             |               |                |              |
| 10                                        | 45-49     | CC            | 1550  | 15.67 | 0             | 0.00        |               |                |              |
| 10                                        | 45-49     | Ecig          | 1264  | 12.78 |               |             |               |                |              |
| 10                                        | 45-49     | Dual          | 0     | 0.00  |               |             |               |                |              |
| 10                                        | 45-49     | Former        | 3134  | 31.69 |               |             | 15.33         | 152            | 4.85         |
| Year of Follow-up: 2000, Age Group: 50-54 |           |               |       |       |               |             |               |                |              |
| Period                                    | Age Group | Smoking Group | N     | %     | Ever Quit (N) | Ever Quit % | Mean Yrs Quit | Short Term (n) | Short Term % |
| 10                                        | 50-54     | Never Any     | 2912  | 33.65 |               |             |               |                |              |
| 10                                        | 50-54     | CC            | 1432  | 16.55 | 0             | 0.00        |               |                |              |
| 10                                        | 50-54     | Ecig          | 876   | 10.12 |               |             |               |                |              |
| 10                                        | 50-54     | Dual          | 0     | 0.00  |               |             |               |                |              |
| 10                                        | 50-54     | Former        | 3435  | 39.69 |               |             | 16.81         | 182            | 5.30         |
| Year of Follow-up: 2000, Age Group: 55-59 |           |               |       |       |               |             |               |                |              |
| Period                                    | Age Group | Smoking Group | N     | %     | Ever Quit (N) | Ever Quit % | Mean Yrs Quit | Short Term (n) | Short Term % |
| 10                                        | 55-59     | Never Any     | 1919  | 29.46 |               |             |               |                |              |
| 10                                        | 55-59     | CC            | 1175  | 18.04 | 0             | 0.00        |               |                |              |
| 10                                        | 55-59     | Ecig          | 449   | 6.89  |               |             |               |                |              |
| 10                                        | 55-59     | Dual          | 0     | 0.00  |               |             |               |                |              |

**Results for PHIM for Run 9 (Sensitivity\_Analysis\_2.RTF)**

| Year of Follow-up: 2000, Age Group: 60-64    | Period   | Age Group | Smoking Group | N     | %     | Ever Quit (N) | Ever Quit % | Mean Yrs Quit | Short Term (n) | Short Term % |
|----------------------------------------------|----------|-----------|---------------|-------|-------|---------------|-------------|---------------|----------------|--------------|
| 10                                           | 55-59    | Former    |               | 2972  | 45.62 |               |             | 18.84         | 129            | 4.34         |
| 10                                           | 60-64    | Never Any |               | 1611  | 29.41 |               |             |               |                |              |
| 10                                           | 60-64    | CC        |               | 907   | 16.56 | 0             | 0.00        |               |                |              |
| 10                                           | 60-64    | Ecig      |               | 207   | 3.78  |               |             |               |                |              |
| 10                                           | 60-64    | Dual      |               | 0     | 0.00  |               |             |               |                |              |
| 10                                           | 60-64    | Former    |               | 2752  | 50.25 |               |             | 19.40         | 148            | 5.38         |
| Year of Follow-up: 2000, Age Group: 65-69    | Period   | Age Group | Smoking Group | N     | %     | Ever Quit (N) | Ever Quit % | Mean Yrs Quit | Short Term (n) | Short Term % |
| 10                                           | 65-69    | Never Any |               | 1337  | 26.83 |               |             |               |                |              |
| 10                                           | 65-69    | CC        |               | 759   | 15.23 | 0             | 0.00        |               |                |              |
| 10                                           | 65-69    | Ecig      |               | 61    | 1.22  |               |             |               |                |              |
| 10                                           | 65-69    | Dual      |               | 0     | 0.00  |               |             |               |                |              |
| 10                                           | 65-69    | Former    |               | 2826  | 56.71 |               |             | 19.82         | 127            | 4.49         |
| Year of Follow-up: 2000, Age Group: 70-74    | Period   | Age Group | Smoking Group | N     | %     | Ever Quit (N) | Ever Quit % | Mean Yrs Quit | Short Term (n) | Short Term % |
| 10                                           | 70-74    | Never Any |               | 1169  | 23.83 |               |             |               |                |              |
| 10                                           | 70-74    | CC        |               | 562   | 11.46 | 0             | 0.00        |               |                |              |
| 10                                           | 70-74    | Ecig      |               | 6     | 0.12  |               |             |               |                |              |
| 10                                           | 70-74    | Dual      |               | 0     | 0.00  |               |             |               |                |              |
| 10                                           | 70-74    | Former    |               | 3168  | 64.59 |               |             | 23.48         | 80             | 2.53         |
| Year of Follow-up: 2000, Age Group: 75-79    | Period   | Age Group | Smoking Group | N     | %     | Ever Quit (N) | Ever Quit % | Mean Yrs Quit | Short Term (n) | Short Term % |
| 10                                           | 75-79    | Never Any |               | 1023  | 23.32 |               |             |               |                |              |
| 10                                           | 75-79    | CC        |               | 416   | 9.48  | 0             | 0.00        |               |                |              |
| 10                                           | 75-79    | Ecig      |               | 0     | 0.00  |               |             |               |                |              |
| 10                                           | 75-79    | Dual      |               | 0     | 0.00  |               |             |               |                |              |
| 10                                           | 75-79    | Former    |               | 2948  | 67.20 |               |             | 25.20         | 72             | 2.44         |
| Year of Follow-up: 2005, Age Group: All Ages | Period   | Age Group | Smoking Group | N     | %     | Ever Quit (N) | Ever Quit % | Mean Yrs Quit | Short Term (n) | Short Term % |
| 15                                           | All Ages | Never Any |               | 37449 | 41.75 |               |             |               |                |              |
| 15                                           | All Ages | CC        |               | 8994  | 10.03 | 0             | 0.00        |               |                |              |
| 15                                           | All Ages | Ecig      |               | 12911 | 14.39 |               |             |               |                |              |
| 15                                           | All Ages | Dual      |               | 0     | 0.00  |               |             |               |                |              |
| 15                                           | All Ages | Former    |               | 30351 | 33.83 |               |             | 18.50         | 1515           | 4.99         |
| Year of Follow-up: 2005, Age Group: 18-19    | Period   | Age Group | Smoking Group | N     | %     | Ever Quit (N) | Ever Quit % | Mean Yrs Quit | Short Term (n) | Short Term % |
| 15                                           | 18-19    | Never Any |               | 0     | .     |               |             |               |                |              |
| 15                                           | 18-19    | CC        |               | 0     | .     | 0             | .           |               |                |              |
| 15                                           | 18-19    | Ecig      |               | 0     | .     |               |             |               |                |              |
| 15                                           | 18-19    | Dual      |               | 0     | .     |               |             |               |                |              |
| 15                                           | 18-19    | Former    |               | 0     | .     |               |             | .             | 0              | .            |
| Year of Follow-up: 2005, Age Group: 20-24    | Period   | Age Group | Smoking Group | N     | %     | Ever Quit (N) | Ever Quit % | Mean Yrs Quit | Short Term (n) | Short Term % |
| 15                                           | 20-24    | Never Any |               | 0     | .     |               |             |               |                |              |
| 15                                           | 20-24    | CC        |               | 0     | .     | 0             | .           |               |                |              |
| 15                                           | 20-24    | Ecig      |               | 0     | .     |               |             |               |                |              |
| 15                                           | 20-24    | Dual      |               | 0     | .     |               |             |               |                |              |
| 15                                           | 20-24    | Former    |               | 0     | .     |               |             | .             | 0              | .            |
| Year of Follow-up: 2005, Age Group: 25-29    | Period   | Age Group | Smoking Group | N     | %     | Ever Quit (N) | Ever Quit % | Mean Yrs Quit | Short Term (n) | Short Term % |
| 15                                           | 25-29    | Never Any |               | 4634  | 52.39 |               |             |               |                |              |
| 15                                           | 25-29    | CC        |               | 562   | 6.35  | 0             | 0.00        |               |                |              |
| 15                                           | 25-29    | Ecig      |               | 2231  | 25.22 |               |             |               |                |              |
| 15                                           | 25-29    | Dual      |               | 0     | 0.00  |               |             |               |                |              |
| 15                                           | 25-29    | Former    |               | 1418  | 16.03 |               |             | 6.29          | 172            | 12.13        |
| Year of Follow-up: 2005, Age Group: 30-34    | Period   | Age Group | Smoking Group | N     | %     | Ever Quit (N) | Ever Quit % | Mean Yrs Quit | Short Term (n) | Short Term % |
| 15                                           | 30-34    | Never Any |               | 5042  | 55.77 |               |             |               |                |              |
| 15                                           | 30-34    | CC        |               | 650   | 7.19  | 0             | 0.00        |               |                |              |
| 15                                           | 30-34    | Ecig      |               | 1942  | 21.48 |               |             |               |                |              |
| 15                                           | 30-34    | Dual      |               | 0     | 0.00  |               |             |               |                |              |
| 15                                           | 30-34    | Former    |               | 1406  | 15.55 |               |             | 7.59          | 168            | 11.95        |
| Year of Follow-up: 2005, Age Group: 35-39    | Period   | Age Group | Smoking Group | N     | %     | Ever Quit (N) | Ever Quit % | Mean Yrs Quit | Short Term (n) | Short Term % |
| 15                                           | 35-39    | Never Any |               | 5163  | 52.60 |               |             |               |                |              |
| 15                                           | 35-39    | CC        |               | 918   | 9.35  | 0             | 0.00        |               |                |              |

**Results for PHIM for Run 9 (Sensitivity\_Analysis\_2.RTF)**

|                                              |           |               |       |       |               |             |               |                |              |
|----------------------------------------------|-----------|---------------|-------|-------|---------------|-------------|---------------|----------------|--------------|
| 15                                           | 35-39     | Ecig          | 1927  | 19.63 |               |             |               |                |              |
| 15                                           | 35-39     | Dual          | 0     | 0.00  |               |             |               |                |              |
| 15                                           | 35-39     | Former        | 1808  | 18.42 |               |             | 11.49         | 121            | 6.69         |
| Year of Follow-up: 2005, Age Group: 40-44    |           |               |       |       |               |             |               |                |              |
| Period                                       | Age Group | Smoking Group | N     | %     | Ever Quit (N) | Ever Quit % | Mean Yrs Quit | Short Term (n) | Short Term % |
| 15                                           | 40-44     | Never Any     | 4997  | 46.86 |               |             |               |                |              |
| 15                                           | 40-44     | CC            | 1089  | 10.21 | 0             | 0.00        |               |                |              |
| 15                                           | 40-44     | Ecig          | 2095  | 19.65 |               |             |               |                |              |
| 15                                           | 40-44     | Dual          | 0     | 0.00  |               |             |               |                |              |
| 15                                           | 40-44     | Former        | 2483  | 23.28 |               |             | 13.37         | 192            | 7.73         |
| Year of Follow-up: 2005, Age Group: 45-49    |           |               |       |       |               |             |               |                |              |
| Period                                       | Age Group | Smoking Group | N     | %     | Ever Quit (N) | Ever Quit % | Mean Yrs Quit | Short Term (n) | Short Term % |
| 15                                           | 45-49     | Never Any     | 4724  | 43.28 |               |             |               |                |              |
| 15                                           | 45-49     | CC            | 1172  | 10.74 | 0             | 0.00        |               |                |              |
| 15                                           | 45-49     | Ecig          | 1847  | 16.92 |               |             |               |                |              |
| 15                                           | 45-49     | Dual          | 0     | 0.00  |               |             |               |                |              |
| 15                                           | 45-49     | Former        | 3173  | 29.07 |               |             | 14.85         | 179            | 5.64         |
| Year of Follow-up: 2005, Age Group: 50-54    |           |               |       |       |               |             |               |                |              |
| Period                                       | Age Group | Smoking Group | N     | %     | Ever Quit (N) | Ever Quit % | Mean Yrs Quit | Short Term (n) | Short Term % |
| 15                                           | 50-54     | Never Any     | 3941  | 39.85 |               |             |               |                |              |
| 15                                           | 50-54     | CC            | 1124  | 11.37 | 0             | 0.00        |               |                |              |
| 15                                           | 50-54     | Ecig          | 1325  | 13.40 |               |             |               |                |              |
| 15                                           | 50-54     | Dual          | 0     | 0.00  |               |             |               |                |              |
| 15                                           | 50-54     | Former        | 3499  | 35.38 |               |             | 18.43         | 144            | 4.12         |
| Year of Follow-up: 2005, Age Group: 55-59    |           |               |       |       |               |             |               |                |              |
| Period                                       | Age Group | Smoking Group | N     | %     | Ever Quit (N) | Ever Quit % | Mean Yrs Quit | Short Term (n) | Short Term % |
| 15                                           | 55-59     | Never Any     | 2912  | 33.65 |               |             |               |                |              |
| 15                                           | 55-59     | CC            | 1083  | 12.51 | 0             | 0.00        |               |                |              |
| 15                                           | 55-59     | Ecig          | 910   | 10.51 |               |             |               |                |              |
| 15                                           | 55-59     | Dual          | 0     | 0.00  |               |             |               |                |              |
| 15                                           | 55-59     | Former        | 3750  | 43.33 |               |             | 20.17         | 107            | 2.85         |
| Year of Follow-up: 2005, Age Group: 60-64    |           |               |       |       |               |             |               |                |              |
| Period                                       | Age Group | Smoking Group | N     | %     | Ever Quit (N) | Ever Quit % | Mean Yrs Quit | Short Term (n) | Short Term % |
| 15                                           | 60-64     | Never Any     | 1919  | 29.46 |               |             |               |                |              |
| 15                                           | 60-64     | CC            | 858   | 13.17 | 0             | 0.00        |               |                |              |
| 15                                           | 60-64     | Ecig          | 429   | 6.58  |               |             |               |                |              |
| 15                                           | 60-64     | Dual          | 0     | 0.00  |               |             |               |                |              |
| 15                                           | 60-64     | Former        | 3309  | 50.79 |               |             | 21.59         | 166            | 5.02         |
| Year of Follow-up: 2005, Age Group: 65-69    |           |               |       |       |               |             |               |                |              |
| Period                                       | Age Group | Smoking Group | N     | %     | Ever Quit (N) | Ever Quit % | Mean Yrs Quit | Short Term (n) | Short Term % |
| 15                                           | 65-69     | Never Any     | 1611  | 29.41 |               |             |               |                |              |
| 15                                           | 65-69     | CC            | 634   | 11.58 | 0             | 0.00        |               |                |              |
| 15                                           | 65-69     | Ecig          | 158   | 2.88  |               |             |               |                |              |
| 15                                           | 65-69     | Dual          | 0     | 0.00  |               |             |               |                |              |
| 15                                           | 65-69     | Former        | 3074  | 56.13 |               |             | 22.06         | 116            | 3.77         |
| Year of Follow-up: 2005, Age Group: 70-74    |           |               |       |       |               |             |               |                |              |
| Period                                       | Age Group | Smoking Group | N     | %     | Ever Quit (N) | Ever Quit % | Mean Yrs Quit | Short Term (n) | Short Term % |
| 15                                           | 70-74     | Never Any     | 1337  | 26.83 |               |             |               |                |              |
| 15                                           | 70-74     | CC            | 529   | 10.62 | 0             | 0.00        |               |                |              |
| 15                                           | 70-74     | Ecig          | 42    | 0.84  |               |             |               |                |              |
| 15                                           | 70-74     | Dual          | 0     | 0.00  |               |             |               |                |              |
| 15                                           | 70-74     | Former        | 3075  | 61.71 |               |             | 22.99         | 86             | 2.80         |
| Year of Follow-up: 2005, Age Group: 75-79    |           |               |       |       |               |             |               |                |              |
| Period                                       | Age Group | Smoking Group | N     | %     | Ever Quit (N) | Ever Quit % | Mean Yrs Quit | Short Term (n) | Short Term % |
| 15                                           | 75-79     | Never Any     | 1169  | 23.83 |               |             |               |                |              |
| 15                                           | 75-79     | CC            | 375   | 7.65  | 0             | 0.00        |               |                |              |
| 15                                           | 75-79     | Ecig          | 5     | 0.10  |               |             |               |                |              |
| 15                                           | 75-79     | Dual          | 0     | 0.00  |               |             |               |                |              |
| 15                                           | 75-79     | Former        | 3356  | 68.42 |               |             | 27.01         | 64             | 1.91         |
| Year of Follow-up: 2010, Age Group: All Ages |           |               |       |       |               |             |               |                |              |
| Period                                       | Age Group | Smoking Group | N     | %     | Ever Quit (N) | Ever Quit % | Mean Yrs Quit | Short Term (n) | Short Term % |
| 20                                           | All Ages  | Never Any     | 36103 | 42.57 |               |             |               |                |              |
| 20                                           | All Ages  | CC            | 5855  | 6.90  | 0             | 0.00        |               |                |              |
| 20                                           | All Ages  | Ecig          | 11929 | 14.07 |               |             |               |                |              |
| 20                                           | All Ages  | Dual          | 0     | 0.00  |               |             |               |                |              |
| 20                                           | All Ages  | Former        | 30913 | 36.45 |               |             | 19.85         | 1543           | 4.99         |
| Year of Follow-up: 2010, Age Group: 18-19    |           |               |       |       |               |             |               |                |              |
| Period                                       | Age Group | Smoking Group | N     | %     | Ever Quit (N) | Ever Quit % | Mean Yrs Quit | Short Term (n) | Short Term % |

**Results for PHIM for Run 9 (Sensitivity\_Analysis\_2.RTF)**

|                                           |           |               |      |       |               |             |               |                |              |
|-------------------------------------------|-----------|---------------|------|-------|---------------|-------------|---------------|----------------|--------------|
| 20                                        | 18-19     | Never Any     | 0    | .     |               |             |               |                |              |
| 20                                        | 18-19     | CC            | 0    | .     | 0             | .           |               |                |              |
| 20                                        | 18-19     | Ecig          | 0    | .     |               |             |               |                |              |
| 20                                        | 18-19     | Dual          | 0    | .     |               |             |               |                |              |
| 20                                        | 18-19     | Former        | 0    | .     |               |             | 0             | .              |              |
| Year of Follow-up: 2010, Age Group: 20-24 |           |               |      |       |               |             |               |                |              |
| Period                                    | Age Group | Smoking Group | N    | %     | Ever Quit (N) | Ever Quit % | Mean Yrs Quit | Short Term (n) | Short Term % |
| 20                                        | 20-24     | Never Any     | 0    | .     |               |             |               |                |              |
| 20                                        | 20-24     | CC            | 0    | .     | 0             | .           |               |                |              |
| 20                                        | 20-24     | Ecig          | 0    | .     |               |             |               |                |              |
| 20                                        | 20-24     | Dual          | 0    | .     |               |             |               |                |              |
| 20                                        | 20-24     | Former        | 0    | .     |               |             |               | 0              | .            |
| Year of Follow-up: 2010, Age Group: 25-29 |           |               |      |       |               |             |               |                |              |
| Period                                    | Age Group | Smoking Group | N    | %     | Ever Quit (N) | Ever Quit % | Mean Yrs Quit | Short Term (n) | Short Term % |
| 20                                        | 25-29     | Never Any     | 0    | .     |               |             |               |                |              |
| 20                                        | 25-29     | CC            | 0    | .     | 0             | .           |               |                |              |
| 20                                        | 25-29     | Ecig          | 0    | .     |               |             |               |                |              |
| 20                                        | 25-29     | Dual          | 0    | .     |               |             |               |                |              |
| 20                                        | 25-29     | Former        | 0    | .     |               |             |               | 0              | .            |
| Year of Follow-up: 2010, Age Group: 30-34 |           |               |      |       |               |             |               |                |              |
| Period                                    | Age Group | Smoking Group | N    | %     | Ever Quit (N) | Ever Quit % | Mean Yrs Quit | Short Term (n) | Short Term % |
| 20                                        | 30-34     | Never Any     | 4508 | 50.97 |               |             |               |                |              |
| 20                                        | 30-34     | CC            | 312  | 3.53  | 0             | 0.00        |               |                |              |
| 20                                        | 30-34     | Ecig          | 2111 | 23.87 |               |             |               |                |              |
| 20                                        | 30-34     | Dual          | 0    | 0.00  |               |             |               |                |              |
| 20                                        | 30-34     | Former        | 1914 | 21.64 |               |             | 8.86          | 212            | 11.08        |
| Year of Follow-up: 2010, Age Group: 35-39 |           |               |      |       |               |             |               |                |              |
| Period                                    | Age Group | Smoking Group | N    | %     | Ever Quit (N) | Ever Quit % | Mean Yrs Quit | Short Term (n) | Short Term % |
| 20                                        | 35-39     | Never Any     | 4991 | 55.21 |               |             |               |                |              |
| 20                                        | 35-39     | CC            | 387  | 4.28  | 0             | 0.00        |               |                |              |
| 20                                        | 35-39     | Ecig          | 1779 | 19.68 |               |             |               |                |              |
| 20                                        | 35-39     | Dual          | 0    | 0.00  |               |             |               |                |              |
| 20                                        | 35-39     | Former        | 1883 | 20.83 |               |             | 9.96          | 152            | 8.07         |
| Year of Follow-up: 2010, Age Group: 40-44 |           |               |      |       |               |             |               |                |              |
| Period                                    | Age Group | Smoking Group | N    | %     | Ever Quit (N) | Ever Quit % | Mean Yrs Quit | Short Term (n) | Short Term % |
| 20                                        | 40-44     | Never Any     | 5163 | 52.60 |               |             |               |                |              |
| 20                                        | 40-44     | CC            | 596  | 6.07  | 0             | 0.00        |               |                |              |
| 20                                        | 40-44     | Ecig          | 1868 | 19.03 |               |             |               |                |              |
| 20                                        | 40-44     | Dual          | 0    | 0.00  |               |             |               |                |              |
| 20                                        | 40-44     | Former        | 2189 | 22.30 |               |             | 13.96         | 155            | 7.08         |
| Year of Follow-up: 2010, Age Group: 45-49 |           |               |      |       |               |             |               |                |              |
| Period                                    | Age Group | Smoking Group | N    | %     | Ever Quit (N) | Ever Quit % | Mean Yrs Quit | Short Term (n) | Short Term % |
| 20                                        | 45-49     | Never Any     | 4997 | 46.86 |               |             |               |                |              |
| 20                                        | 45-49     | CC            | 722  | 6.77  | 0             | 0.00        |               |                |              |
| 20                                        | 45-49     | Ecig          | 2021 | 18.95 |               |             |               |                |              |
| 20                                        | 45-49     | Dual          | 0    | 0.00  |               |             |               |                |              |
| 20                                        | 45-49     | Former        | 2924 | 27.42 |               |             | 15.92         | 159            | 5.44         |
| Year of Follow-up: 2010, Age Group: 50-54 |           |               |      |       |               |             |               |                |              |
| Period                                    | Age Group | Smoking Group | N    | %     | Ever Quit (N) | Ever Quit % | Mean Yrs Quit | Short Term (n) | Short Term % |
| 20                                        | 50-54     | Never Any     | 4724 | 43.28 |               |             |               |                |              |
| 20                                        | 50-54     | CC            | 837  | 7.67  | 0             | 0.00        |               |                |              |
| 20                                        | 50-54     | Ecig          | 1752 | 16.05 |               |             |               |                |              |
| 20                                        | 50-54     | Dual          | 0    | 0.00  |               |             |               |                |              |
| 20                                        | 50-54     | Former        | 3603 | 33.01 |               |             | 17.72         | 173            | 4.80         |
| Year of Follow-up: 2010, Age Group: 55-59 |           |               |      |       |               |             |               |                |              |
| Period                                    | Age Group | Smoking Group | N    | %     | Ever Quit (N) | Ever Quit % | Mean Yrs Quit | Short Term (n) | Short Term % |
| 20                                        | 55-59     | Never Any     | 3941 | 39.85 |               |             |               |                |              |
| 20                                        | 55-59     | CC            | 785  | 7.94  | 0             | 0.00        |               |                |              |
| 20                                        | 55-59     | Ecig          | 1182 | 11.95 |               |             |               |                |              |
| 20                                        | 55-59     | Dual          | 0    | 0.00  |               |             |               |                |              |
| 20                                        | 55-59     | Former        | 3981 | 40.26 |               |             | 20.83         | 195            | 4.90         |
| Year of Follow-up: 2010, Age Group: 60-64 |           |               |      |       |               |             |               |                |              |
| Period                                    | Age Group | Smoking Group | N    | %     | Ever Quit (N) | Ever Quit % | Mean Yrs Quit | Short Term (n) | Short Term % |
| 20                                        | 60-64     | Never Any     | 2912 | 33.65 |               |             |               |                |              |
| 20                                        | 60-64     | CC            | 755  | 8.72  | 0             | 0.00        |               |                |              |
| 20                                        | 60-64     | Ecig          | 752  | 8.69  |               |             |               |                |              |
| 20                                        | 60-64     | Dual          | 0    | 0.00  |               |             |               |                |              |
| 20                                        | 60-64     | Former        | 4236 | 48.94 |               |             | 22.47         | 252            | 5.95         |
| Year of Follow-up: 2010, Age Group: 65-69 |           |               |      |       |               |             |               |                |              |

**Results for PHIM for Run 9 (Sensitivity\_Analysis\_2.RTF)**

| Period                                       | Age Group | Smoking Group | N     | %     | Ever Quit (N) | Ever Quit % | Mean Yrs Quit | Short Term (n) | Short Term % |
|----------------------------------------------|-----------|---------------|-------|-------|---------------|-------------|---------------|----------------|--------------|
| 20                                           | 65-69     | Never Any     | 1919  | 29.46 |               |             |               |                |              |
| 20                                           | 65-69     | CC            | 601   | 9.22  | 0             | 0.00        |               |                |              |
| 20                                           | 65-69     | Ecig          | 316   | 4.85  |               |             |               |                |              |
| 20                                           | 65-69     | Dual          | 0     | 0.00  |               |             |               |                |              |
| 20                                           | 65-69     | Former        | 3679  | 56.47 |               |             | 24.14         | 122            | 3.32         |
| Year of Follow-up: 2010, Age Group: 70-74    |           |               |       |       |               |             |               |                |              |
| Period                                       | Age Group | Smoking Group | N     | %     | Ever Quit (N) | Ever Quit % | Mean Yrs Quit | Short Term (n) | Short Term % |
| 20                                           | 70-74     | Never Any     | 1611  | 29.41 |               |             |               |                |              |
| 20                                           | 70-74     | CC            | 481   | 8.78  | 0             | 0.00        |               |                |              |
| 20                                           | 70-74     | Ecig          | 117   | 2.14  |               |             |               |                |              |
| 20                                           | 70-74     | Dual          | 0     | 0.00  |               |             |               |                |              |
| 20                                           | 70-74     | Former        | 3268  | 59.67 |               |             | 25.59         | 67             | 2.05         |
| Year of Follow-up: 2010, Age Group: 75-79    |           |               |       |       |               |             |               |                |              |
| Period                                       | Age Group | Smoking Group | N     | %     | Ever Quit (N) | Ever Quit % | Mean Yrs Quit | Short Term (n) | Short Term % |
| 20                                           | 75-79     | Never Any     | 1337  | 26.83 |               |             |               |                |              |
| 20                                           | 75-79     | CC            | 379   | 7.61  | 0             | 0.00        |               |                |              |
| 20                                           | 75-79     | Ecig          | 31    | 0.62  |               |             |               |                |              |
| 20                                           | 75-79     | Dual          | 0     | 0.00  |               |             |               |                |              |
| 20                                           | 75-79     | Former        | 3236  | 64.94 |               |             | 26.71         | 56             | 1.73         |
| Year of Follow-up: 2015, Age Group: All Ages |           |               |       |       |               |             |               |                |              |
| Period                                       | Age Group | Smoking Group | N     | %     | Ever Quit (N) | Ever Quit % | Mean Yrs Quit | Short Term (n) | Short Term % |
| 25                                           | All Ages  | Never Any     | 34747 | 43.53 |               |             |               |                |              |
| 25                                           | All Ages  | CC            | 3857  | 4.83  | 0             | 0.00        |               |                |              |
| 25                                           | All Ages  | Ecig          | 10482 | 13.13 |               |             |               |                |              |
| 25                                           | All Ages  | Dual          | 0     | 0.00  |               |             |               |                |              |
| 25                                           | All Ages  | Former        | 30731 | 38.50 |               |             | 21.87         | 1082           | 3.52         |
| Year of Follow-up: 2015, Age Group: 18-19    |           |               |       |       |               |             |               |                |              |
| Period                                       | Age Group | Smoking Group | N     | %     | Ever Quit (N) | Ever Quit % | Mean Yrs Quit | Short Term (n) | Short Term % |
| 25                                           | 18-19     | Never Any     | 0     | .     |               |             |               |                |              |
| 25                                           | 18-19     | CC            | 0     | .     | 0             | .           |               |                |              |
| 25                                           | 18-19     | Ecig          | 0     | .     |               |             |               |                |              |
| 25                                           | 18-19     | Dual          | 0     | .     |               |             |               |                |              |
| 25                                           | 18-19     | Former        | 0     | .     |               |             |               | 0              | .            |
| Year of Follow-up: 2015, Age Group: 20-24    |           |               |       |       |               |             |               |                |              |
| Period                                       | Age Group | Smoking Group | N     | %     | Ever Quit (N) | Ever Quit % | Mean Yrs Quit | Short Term (n) | Short Term % |
| 25                                           | 20-24     | Never Any     | 0     | .     |               |             |               |                |              |
| 25                                           | 20-24     | CC            | 0     | .     | 0             | .           |               |                |              |
| 25                                           | 20-24     | Ecig          | 0     | .     |               |             |               |                |              |
| 25                                           | 20-24     | Dual          | 0     | .     |               |             |               |                |              |
| 25                                           | 20-24     | Former        | 0     | .     |               |             |               | 0              | .            |
| Year of Follow-up: 2015, Age Group: 25-29    |           |               |       |       |               |             |               |                |              |
| Period                                       | Age Group | Smoking Group | N     | %     | Ever Quit (N) | Ever Quit % | Mean Yrs Quit | Short Term (n) | Short Term % |
| 25                                           | 25-29     | Never Any     | 0     | .     |               |             |               |                |              |
| 25                                           | 25-29     | CC            | 0     | .     | 0             | .           |               |                |              |
| 25                                           | 25-29     | Ecig          | 0     | .     |               |             |               |                |              |
| 25                                           | 25-29     | Dual          | 0     | .     |               |             |               |                |              |
| 25                                           | 25-29     | Former        | 0     | .     |               |             |               | 0              | .            |
| Year of Follow-up: 2015, Age Group: 30-34    |           |               |       |       |               |             |               |                |              |
| Period                                       | Age Group | Smoking Group | N     | %     | Ever Quit (N) | Ever Quit % | Mean Yrs Quit | Short Term (n) | Short Term % |
| 25                                           | 30-34     | Never Any     | 0     | .     |               |             |               |                |              |
| 25                                           | 30-34     | CC            | 0     | .     | 0             | .           |               |                |              |
| 25                                           | 30-34     | Ecig          | 0     | .     |               |             |               |                |              |
| 25                                           | 30-34     | Dual          | 0     | .     |               |             |               |                |              |
| 25                                           | 30-34     | Former        | 0     | .     |               |             |               | 0              | .            |
| Year of Follow-up: 2015, Age Group: 35-39    |           |               |       |       |               |             |               |                |              |
| Period                                       | Age Group | Smoking Group | N     | %     | Ever Quit (N) | Ever Quit % | Mean Yrs Quit | Short Term (n) | Short Term % |
| 25                                           | 35-39     | Never Any     | 4489  | 50.75 |               |             |               |                |              |
| 25                                           | 35-39     | CC            | 179   | 2.02  | 0             | 0.00        |               |                |              |
| 25                                           | 35-39     | Ecig          | 1819  | 20.57 |               |             |               |                |              |
| 25                                           | 35-39     | Dual          | 0     | 0.00  |               |             |               |                |              |
| 25                                           | 35-39     | Former        | 2358  | 26.66 |               |             | 11.68         | 144            | 6.11         |
| Year of Follow-up: 2015, Age Group: 40-44    |           |               |       |       |               |             |               |                |              |
| Period                                       | Age Group | Smoking Group | N     | %     | Ever Quit (N) | Ever Quit % | Mean Yrs Quit | Short Term (n) | Short Term % |
| 25                                           | 40-44     | Never Any     | 4991  | 55.21 |               |             |               |                |              |
| 25                                           | 40-44     | CC            | 233   | 2.58  | 0             | 0.00        |               |                |              |
| 25                                           | 40-44     | Ecig          | 1648  | 18.23 |               |             |               |                |              |
| 25                                           | 40-44     | Dual          | 0     | 0.00  |               |             |               |                |              |

**Results for PHIM for Run 9 (Sensitivity\_Analysis\_2.RTF)**

|                                              |           |               |       |       |               |             |               |                |              |
|----------------------------------------------|-----------|---------------|-------|-------|---------------|-------------|---------------|----------------|--------------|
| 25                                           | 40-44     | Former        | 2168  | 23.98 |               |             | 13.26         | 108            | 4.98         |
| Year of Follow-up: 2015, Age Group: 45-49    |           |               |       |       |               |             |               |                |              |
| Period                                       | Age Group | Smoking Group | N     | %     | Ever Quit (N) | Ever Quit % | Mean Yrs Quit | Short Term (n) | Short Term % |
| 25                                           | 45-49     | Never Any     | 5163  | 52.60 |               |             |               |                |              |
| 25                                           | 45-49     | CC            | 406   | 4.14  | 0             | 0.00        |               |                |              |
| 25                                           | 45-49     | Ecig          | 1772  | 18.05 |               |             |               |                |              |
| 25                                           | 45-49     | Dual          | 0     | 0.00  |               |             |               |                |              |
| 25                                           | 45-49     | Former        | 2475  | 25.21 |               |             | 17.03         | 88             | 3.56         |
| Year of Follow-up: 2015, Age Group: 50-54    |           |               |       |       |               |             |               |                |              |
| Period                                       | Age Group | Smoking Group | N     | %     | Ever Quit (N) | Ever Quit % | Mean Yrs Quit | Short Term (n) | Short Term % |
| 25                                           | 50-54     | Never Any     | 4997  | 46.86 |               |             |               |                |              |
| 25                                           | 50-54     | CC            | 524   | 4.91  | 0             | 0.00        |               |                |              |
| 25                                           | 50-54     | Ecig          | 1931  | 18.11 |               |             |               |                |              |
| 25                                           | 50-54     | Dual          | 0     | 0.00  |               |             |               |                |              |
| 25                                           | 50-54     | Former        | 3212  | 30.12 |               |             | 19.22         | 124            | 3.86         |
| Year of Follow-up: 2015, Age Group: 55-59    |           |               |       |       |               |             |               |                |              |
| Period                                       | Age Group | Smoking Group | N     | %     | Ever Quit (N) | Ever Quit % | Mean Yrs Quit | Short Term (n) | Short Term % |
| 25                                           | 55-59     | Never Any     | 4724  | 43.28 |               |             |               |                |              |
| 25                                           | 55-59     | CC            | 611   | 5.60  | 0             | 0.00        |               |                |              |
| 25                                           | 55-59     | Ecig          | 1529  | 14.01 |               |             |               |                |              |
| 25                                           | 55-59     | Dual          | 0     | 0.00  |               |             |               |                |              |
| 25                                           | 55-59     | Former        | 4052  | 37.12 |               |             | 20.44         | 163            | 4.02         |
| Year of Follow-up: 2015, Age Group: 60-64    |           |               |       |       |               |             |               |                |              |
| Period                                       | Age Group | Smoking Group | N     | %     | Ever Quit (N) | Ever Quit % | Mean Yrs Quit | Short Term (n) | Short Term % |
| 25                                           | 60-64     | Never Any     | 3941  | 39.85 |               |             |               |                |              |
| 25                                           | 60-64     | CC            | 578   | 5.84  | 0             | 0.00        |               |                |              |
| 25                                           | 60-64     | Ecig          | 924   | 9.34  |               |             |               |                |              |
| 25                                           | 60-64     | Dual          | 0     | 0.00  |               |             |               |                |              |
| 25                                           | 60-64     | Former        | 4446  | 44.96 |               |             | 23.34         | 184            | 4.14         |
| Year of Follow-up: 2015, Age Group: 65-69    |           |               |       |       |               |             |               |                |              |
| Period                                       | Age Group | Smoking Group | N     | %     | Ever Quit (N) | Ever Quit % | Mean Yrs Quit | Short Term (n) | Short Term % |
| 25                                           | 65-69     | Never Any     | 2912  | 33.65 |               |             |               |                |              |
| 25                                           | 65-69     | CC            | 514   | 5.94  | 0             | 0.00        |               |                |              |
| 25                                           | 65-69     | Ecig          | 532   | 6.15  |               |             |               |                |              |
| 25                                           | 65-69     | Dual          | 0     | 0.00  |               |             |               |                |              |
| 25                                           | 65-69     | Former        | 4697  | 54.27 |               |             | 25.00         | 148            | 3.15         |
| Year of Follow-up: 2015, Age Group: 70-74    |           |               |       |       |               |             |               |                |              |
| Period                                       | Age Group | Smoking Group | N     | %     | Ever Quit (N) | Ever Quit % | Mean Yrs Quit | Short Term (n) | Short Term % |
| 25                                           | 70-74     | Never Any     | 1919  | 29.46 |               |             |               |                |              |
| 25                                           | 70-74     | CC            | 446   | 6.85  | 0             | 0.00        |               |                |              |
| 25                                           | 70-74     | Ecig          | 235   | 3.61  |               |             |               |                |              |
| 25                                           | 70-74     | Dual          | 0     | 0.00  |               |             |               |                |              |
| 25                                           | 70-74     | Former        | 3915  | 60.09 |               |             | 27.51         | 78             | 1.99         |
| Year of Follow-up: 2015, Age Group: 75-79    |           |               |       |       |               |             |               |                |              |
| Period                                       | Age Group | Smoking Group | N     | %     | Ever Quit (N) | Ever Quit % | Mean Yrs Quit | Short Term (n) | Short Term % |
| 25                                           | 75-79     | Never Any     | 1611  | 29.41 |               |             |               |                |              |
| 25                                           | 75-79     | CC            | 366   | 6.68  | 0             | 0.00        |               |                |              |
| 25                                           | 75-79     | Ecig          | 92    | 1.68  |               |             |               |                |              |
| 25                                           | 75-79     | Dual          | 0     | 0.00  |               |             |               |                |              |
| 25                                           | 75-79     | Former        | 3408  | 62.22 |               |             | 29.42         | 45             | 1.32         |
| Year of Follow-up: 2020, Age Group: All Ages |           |               |       |       |               |             |               |                |              |
| Period                                       | Age Group | Smoking Group | N     | %     | Ever Quit (N) | Ever Quit % | Mean Yrs Quit | Short Term (n) | Short Term % |
| 30                                           | All Ages  | Never Any     | 33136 | 44.57 |               |             |               |                |              |
| 30                                           | All Ages  | CC            | 2497  | 3.36  | 0             | 0.00        |               |                |              |
| 30                                           | All Ages  | Ecig          | 8874  | 11.94 |               |             |               |                |              |
| 30                                           | All Ages  | Dual          | 0     | 0.00  |               |             |               |                |              |
| 30                                           | All Ages  | Former        | 29833 | 40.13 |               |             | 23.93         | 925            | 3.10         |
| Year of Follow-up: 2020, Age Group: 18-19    |           |               |       |       |               |             |               |                |              |
| Period                                       | Age Group | Smoking Group | N     | %     | Ever Quit (N) | Ever Quit % | Mean Yrs Quit | Short Term (n) | Short Term % |
| 30                                           | 18-19     | Never Any     | 0     | .     |               |             |               |                |              |
| 30                                           | 18-19     | CC            | 0     | .     | 0             | .           |               |                |              |
| 30                                           | 18-19     | Ecig          | 0     | .     |               |             |               |                |              |
| 30                                           | 18-19     | Dual          | 0     | .     |               |             |               |                |              |
| 30                                           | 18-19     | Former        | 0     | .     |               |             | .             | 0              | .            |
| Year of Follow-up: 2020, Age Group: 20-24    |           |               |       |       |               |             |               |                |              |
| Period                                       | Age Group | Smoking Group | N     | %     | Ever Quit (N) | Ever Quit % | Mean Yrs Quit | Short Term (n) | Short Term % |
| 30                                           | 20-24     | Never Any     | 0     | .     |               |             |               |                |              |
| 30                                           | 20-24     | CC            | 0     | .     | 0             | .           |               |                |              |

**Results for PHIM for Run 9 (Sensitivity\_Analysis\_2.RTF)**

|                                           |           |               |      |       |               |             |               |                |              |
|-------------------------------------------|-----------|---------------|------|-------|---------------|-------------|---------------|----------------|--------------|
| 30                                        | 20-24     | Ecig          | 0    | .     |               |             |               |                |              |
| 30                                        | 20-24     | Dual          | 0    | .     |               |             |               |                |              |
| 30                                        | 20-24     | Former        | 0    | .     |               |             | 0             | .              |              |
| Year of Follow-up: 2020, Age Group: 25-29 |           |               |      |       |               |             |               |                |              |
| Period                                    | Age Group | Smoking Group | N    | %     | Ever Quit (N) | Ever Quit % | Mean Yrs Quit | Short Term (n) | Short Term % |
| 30                                        | 25-29     | Never Any     | 0    | .     |               |             |               |                |              |
| 30                                        | 25-29     | CC            | 0    | .     | 0             | .           |               |                |              |
| 30                                        | 25-29     | Ecig          | 0    | .     |               |             |               |                |              |
| 30                                        | 25-29     | Dual          | 0    | .     |               |             |               |                |              |
| 30                                        | 25-29     | Former        | 0    | .     |               |             | 0             | .              |              |
| Year of Follow-up: 2020, Age Group: 30-34 |           |               |      |       |               |             |               |                |              |
| Period                                    | Age Group | Smoking Group | N    | %     | Ever Quit (N) | Ever Quit % | Mean Yrs Quit | Short Term (n) | Short Term % |
| 30                                        | 30-34     | Never Any     | 0    | .     |               |             |               |                |              |
| 30                                        | 30-34     | CC            | 0    | .     | 0             | .           |               |                |              |
| 30                                        | 30-34     | Ecig          | 0    | .     |               |             |               |                |              |
| 30                                        | 30-34     | Dual          | 0    | .     |               |             |               |                |              |
| 30                                        | 30-34     | Former        | 0    | .     |               |             | 0             | .              |              |
| Year of Follow-up: 2020, Age Group: 35-39 |           |               |      |       |               |             |               |                |              |
| Period                                    | Age Group | Smoking Group | N    | %     | Ever Quit (N) | Ever Quit % | Mean Yrs Quit | Short Term (n) | Short Term % |
| 30                                        | 35-39     | Never Any     | 0    | .     |               |             |               |                |              |
| 30                                        | 35-39     | CC            | 0    | .     | 0             | .           |               |                |              |
| 30                                        | 35-39     | Ecig          | 0    | .     |               |             |               |                |              |
| 30                                        | 35-39     | Dual          | 0    | .     |               |             |               |                |              |
| 30                                        | 35-39     | Former        | 0    | .     |               |             | 0             | .              |              |
| Year of Follow-up: 2020, Age Group: 40-44 |           |               |      |       |               |             |               |                |              |
| Period                                    | Age Group | Smoking Group | N    | %     | Ever Quit (N) | Ever Quit % | Mean Yrs Quit | Short Term (n) | Short Term % |
| 30                                        | 40-44     | Never Any     | 4489 | 50.75 |               |             |               |                |              |
| 30                                        | 40-44     | CC            | 110  | 1.24  | 0             | 0.00        |               |                |              |
| 30                                        | 40-44     | Ecig          | 1611 | 18.21 |               |             |               |                |              |
| 30                                        | 40-44     | Dual          | 0    | 0.00  |               |             |               |                |              |
| 30                                        | 40-44     | Former        | 2635 | 29.79 |               |             | 15.14         | 111            | 4.21         |
| Year of Follow-up: 2020, Age Group: 45-49 |           |               |      |       |               |             |               |                |              |
| Period                                    | Age Group | Smoking Group | N    | %     | Ever Quit (N) | Ever Quit % | Mean Yrs Quit | Short Term (n) | Short Term % |
| 30                                        | 45-49     | Never Any     | 4991 | 55.21 |               |             |               |                |              |
| 30                                        | 45-49     | CC            | 150  | 1.66  | 0             | 0.00        |               |                |              |
| 30                                        | 45-49     | Ecig          | 1502 | 16.62 |               |             |               |                |              |
| 30                                        | 45-49     | Dual          | 0    | 0.00  |               |             |               |                |              |
| 30                                        | 45-49     | Former        | 2397 | 26.52 |               |             | 16.75         | 66             | 2.75         |
| Year of Follow-up: 2020, Age Group: 50-54 |           |               |      |       |               |             |               |                |              |
| Period                                    | Age Group | Smoking Group | N    | %     | Ever Quit (N) | Ever Quit % | Mean Yrs Quit | Short Term (n) | Short Term % |
| 30                                        | 50-54     | Never Any     | 5163 | 52.60 |               |             |               |                |              |
| 30                                        | 50-54     | CC            | 309  | 3.15  | 0             | 0.00        |               |                |              |
| 30                                        | 50-54     | Ecig          | 1680 | 17.11 |               |             |               |                |              |
| 30                                        | 50-54     | Dual          | 0    | 0.00  |               |             |               |                |              |
| 30                                        | 50-54     | Former        | 2664 | 27.14 |               |             | 20.58         | 96             | 3.60         |
| Year of Follow-up: 2020, Age Group: 55-59 |           |               |      |       |               |             |               |                |              |
| Period                                    | Age Group | Smoking Group | N    | %     | Ever Quit (N) | Ever Quit % | Mean Yrs Quit | Short Term (n) | Short Term % |
| 30                                        | 55-59     | Never Any     | 4997 | 46.86 |               |             |               |                |              |
| 30                                        | 55-59     | CC            | 365  | 3.42  | 0             | 0.00        |               |                |              |
| 30                                        | 55-59     | Ecig          | 1681 | 15.76 |               |             |               |                |              |
| 30                                        | 55-59     | Dual          | 0    | 0.00  |               |             |               |                |              |
| 30                                        | 55-59     | Former        | 3621 | 33.96 |               |             | 21.71         | 155            | 4.28         |
| Year of Follow-up: 2020, Age Group: 60-64 |           |               |      |       |               |             |               |                |              |
| Period                                    | Age Group | Smoking Group | N    | %     | Ever Quit (N) | Ever Quit % | Mean Yrs Quit | Short Term (n) | Short Term % |
| 30                                        | 60-64     | Never Any     | 4724 | 43.28 |               |             |               |                |              |
| 30                                        | 60-64     | CC            | 437  | 4.00  | 0             | 0.00        |               |                |              |
| 30                                        | 60-64     | Ecig          | 1162 | 10.64 |               |             |               |                |              |
| 30                                        | 60-64     | Dual          | 0    | 0.00  |               |             |               |                |              |
| 30                                        | 60-64     | Former        | 4593 | 42.08 |               |             | 22.68         | 221            | 4.81         |
| Year of Follow-up: 2020, Age Group: 65-69 |           |               |      |       |               |             |               |                |              |
| Period                                    | Age Group | Smoking Group | N    | %     | Ever Quit (N) | Ever Quit % | Mean Yrs Quit | Short Term (n) | Short Term % |
| 30                                        | 65-69     | Never Any     | 3941 | 39.85 |               |             |               |                |              |
| 30                                        | 65-69     | CC            | 413  | 4.18  | 0             | 0.00        |               |                |              |
| 30                                        | 65-69     | Ecig          | 666  | 6.73  |               |             |               |                |              |
| 30                                        | 65-69     | Dual          | 0    | 0.00  |               |             |               |                |              |
| 30                                        | 65-69     | Former        | 4869 | 49.24 |               |             | 26.08         | 137            | 2.81         |
| Year of Follow-up: 2020, Age Group: 70-74 |           |               |      |       |               |             |               |                |              |
| Period                                    | Age Group | Smoking Group | N    | %     | Ever Quit (N) | Ever Quit % | Mean Yrs Quit | Short Term (n) | Short Term % |



**Results for PHIM for Run 9 (Sensitivity\_Analysis\_2.RTF)**

|                                              |           |               |       |       |               |             |               |                |              |
|----------------------------------------------|-----------|---------------|-------|-------|---------------|-------------|---------------|----------------|--------------|
| 30                                           | 70-74     | Never Any     | 2912  | 33.65 |               |             |               |                |              |
| 30                                           | 70-74     | CC            | 377   | 4.36  | 0             | 0.00        |               |                |              |
| 30                                           | 70-74     | Ecig          | 395   | 4.56  |               |             |               |                |              |
| 30                                           | 70-74     | Dual          | 0     | 0.00  |               |             |               |                |              |
| 30                                           | 70-74     | Former        | 4971  | 57.44 |               |             | 28.47         | 89             | 1.79         |
| Year of Follow-up: 2020, Age Group: 75-79    |           |               |       |       |               |             |               |                |              |
| Period                                       | Age Group | Smoking Group | N     | %     | Ever Quit (N) | Ever Quit % | Mean Yrs Quit | Short Term (n) | Short Term % |
| 30                                           | 75-79     | Never Any     | 1919  | 29.46 |               |             |               |                |              |
| 30                                           | 75-79     | CC            | 336   | 5.16  | 0             | 0.00        |               |                |              |
| 30                                           | 75-79     | Ecig          | 177   | 2.72  |               |             |               |                |              |
| 30                                           | 75-79     | Dual          | 0     | 0.00  |               |             |               |                |              |
| 30                                           | 75-79     | Former        | 4083  | 62.67 |               |             | 31.27         | 50             | 1.22         |
| Year of Follow-up: 2025, Age Group: All Ages |           |               |       |       |               |             |               |                |              |
| Period                                       | Age Group | Smoking Group | N     | %     | Ever Quit (N) | Ever Quit % | Mean Yrs Quit | Short Term (n) | Short Term % |
| 35                                           | All Ages  | Never Any     | 31217 | 46.03 |               |             |               |                |              |
| 35                                           | All Ages  | CC            | 1580  | 2.33  | 0             | 0.00        |               |                |              |
| 35                                           | All Ages  | Ecig          | 7222  | 10.65 |               |             |               |                |              |
| 35                                           | All Ages  | Dual          | 0     | 0.00  |               |             |               |                |              |
| 35                                           | All Ages  | Former        | 27806 | 41.00 |               |             | 25.86         | 791            | 2.84         |
| Year of Follow-up: 2025, Age Group: 18-19    |           |               |       |       |               |             |               |                |              |
| Period                                       | Age Group | Smoking Group | N     | %     | Ever Quit (N) | Ever Quit % | Mean Yrs Quit | Short Term (n) | Short Term % |
| 35                                           | 18-19     | Never Any     | 0     | .     |               |             |               |                |              |
| 35                                           | 18-19     | CC            | 0     | .     | 0             | .           |               |                |              |
| 35                                           | 18-19     | Ecig          | 0     | .     |               |             |               |                |              |
| 35                                           | 18-19     | Dual          | 0     | .     |               |             |               |                |              |
| 35                                           | 18-19     | Former        | 0     | .     |               |             | .             | 0              | .            |
| Year of Follow-up: 2025, Age Group: 20-24    |           |               |       |       |               |             |               |                |              |
| Period                                       | Age Group | Smoking Group | N     | %     | Ever Quit (N) | Ever Quit % | Mean Yrs Quit | Short Term (n) | Short Term % |
| 35                                           | 20-24     | Never Any     | 0     | .     |               |             |               |                |              |
| 35                                           | 20-24     | CC            | 0     | .     | 0             | .           |               |                |              |
| 35                                           | 20-24     | Ecig          | 0     | .     |               |             |               |                |              |
| 35                                           | 20-24     | Dual          | 0     | .     |               |             |               |                |              |
| 35                                           | 20-24     | Former        | 0     | .     |               |             | .             | 0              | .            |
| Year of Follow-up: 2025, Age Group: 25-29    |           |               |       |       |               |             |               |                |              |
| Period                                       | Age Group | Smoking Group | N     | %     | Ever Quit (N) | Ever Quit % | Mean Yrs Quit | Short Term (n) | Short Term % |
| 35                                           | 25-29     | Never Any     | 0     | .     |               |             |               |                |              |
| 35                                           | 25-29     | CC            | 0     | .     | 0             | .           |               |                |              |
| 35                                           | 25-29     | Ecig          | 0     | .     |               |             |               |                |              |
| 35                                           | 25-29     | Dual          | 0     | .     |               |             |               |                |              |
| 35                                           | 25-29     | Former        | 0     | .     |               |             | .             | 0              | .            |
| Year of Follow-up: 2025, Age Group: 30-34    |           |               |       |       |               |             |               |                |              |
| Period                                       | Age Group | Smoking Group | N     | %     | Ever Quit (N) | Ever Quit % | Mean Yrs Quit | Short Term (n) | Short Term % |
| 35                                           | 30-34     | Never Any     | 0     | .     |               |             |               |                |              |
| 35                                           | 30-34     | CC            | 0     | .     | 0             | .           |               |                |              |
| 35                                           | 30-34     | Ecig          | 0     | .     |               |             |               |                |              |
| 35                                           | 30-34     | Dual          | 0     | .     |               |             |               |                |              |
| 35                                           | 30-34     | Former        | 0     | .     |               |             | .             | 0              | .            |
| Year of Follow-up: 2025, Age Group: 35-39    |           |               |       |       |               |             |               |                |              |
| Period                                       | Age Group | Smoking Group | N     | %     | Ever Quit (N) | Ever Quit % | Mean Yrs Quit | Short Term (n) | Short Term % |
| 35                                           | 35-39     | Never Any     | 0     | .     |               |             |               |                |              |
| 35                                           | 35-39     | CC            | 0     | .     | 0             | .           |               |                |              |
| 35                                           | 35-39     | Ecig          | 0     | .     |               |             |               |                |              |
| 35                                           | 35-39     | Dual          | 0     | .     |               |             |               |                |              |
| 35                                           | 35-39     | Former        | 0     | .     |               |             | .             | 0              | .            |
| Year of Follow-up: 2025, Age Group: 40-44    |           |               |       |       |               |             |               |                |              |
| Period                                       | Age Group | Smoking Group | N     | %     | Ever Quit (N) | Ever Quit % | Mean Yrs Quit | Short Term (n) | Short Term % |
| 35                                           | 40-44     | Never Any     | 0     | .     |               |             |               |                |              |
| 35                                           | 40-44     | CC            | 0     | .     | 0             | .           |               |                |              |
| 35                                           | 40-44     | Ecig          | 0     | .     |               |             |               |                |              |
| 35                                           | 40-44     | Dual          | 0     | .     |               |             |               |                |              |
| 35                                           | 40-44     | Former        | 0     | .     |               |             | .             | 0              | .            |
| Year of Follow-up: 2025, Age Group: 45-49    |           |               |       |       |               |             |               |                |              |
| Period                                       | Age Group | Smoking Group | N     | %     | Ever Quit (N) | Ever Quit % | Mean Yrs Quit | Short Term (n) | Short Term % |
| 35                                           | 45-49     | Never Any     | 4489  | 50.75 |               |             |               |                |              |
| 35                                           | 45-49     | CC            | 74    | 0.84  | 0             | 0.00        |               |                |              |
| 35                                           | 45-49     | Ecig          | 1449  | 16.38 |               |             |               |                |              |
| 35                                           | 45-49     | Dual          | 0     | 0.00  |               |             |               |                |              |
| 35                                           | 45-49     | Former        | 2833  | 32.03 |               |             | 18.90         | 61             | 2.15         |
| Year of Follow-up: 2025, Age Group: 50-54    |           |               |       |       |               |             |               |                |              |

**Results for PHIM for Run 9 (Sensitivity\_Analysis\_2.RTF)**

| Period                                       | Age Group | Smoking Group | N     | %     | Ever Quit (N) | Ever Quit % | Mean Yrs Quit | Short Term (n) | Short Term % |
|----------------------------------------------|-----------|---------------|-------|-------|---------------|-------------|---------------|----------------|--------------|
| 35                                           | 50-54     | Never Any     | 4991  | 55.21 |               |             |               |                |              |
| 35                                           | 50-54     | CC            | 112   | 1.24  | 0             | 0.00        |               |                |              |
| 35                                           | 50-54     | Ecig          | 1408  | 15.58 |               |             |               |                |              |
| 35                                           | 50-54     | Dual          | 0     | 0.00  |               |             |               |                |              |
| 35                                           | 50-54     | Former        | 2529  | 27.98 |               |             | 20.70         | 65             | 2.57         |
| Year of Follow-up: 2025, Age Group: 55-59    |           |               |       |       |               |             |               |                |              |
| Period                                       | Age Group | Smoking Group | N     | %     | Ever Quit (N) | Ever Quit % | Mean Yrs Quit | Short Term (n) | Short Term % |
| 35                                           | 55-59     | Never Any     | 5163  | 52.60 |               |             |               |                |              |
| 35                                           | 55-59     | CC            | 224   | 2.28  | 0             | 0.00        |               |                |              |
| 35                                           | 55-59     | Ecig          | 1399  | 14.25 |               |             |               |                |              |
| 35                                           | 55-59     | Dual          | 0     | 0.00  |               |             |               |                |              |
| 35                                           | 55-59     | Former        | 3030  | 30.87 |               |             | 22.73         | 160            | 5.28         |
| Year of Follow-up: 2025, Age Group: 60-64    |           |               |       |       |               |             |               |                |              |
| Period                                       | Age Group | Smoking Group | N     | %     | Ever Quit (N) | Ever Quit % | Mean Yrs Quit | Short Term (n) | Short Term % |
| 35                                           | 60-64     | Never Any     | 4997  | 46.86 |               |             |               |                |              |
| 35                                           | 60-64     | CC            | 265   | 2.48  | 0             | 0.00        |               |                |              |
| 35                                           | 60-64     | Ecig          | 1297  | 12.16 |               |             |               |                |              |
| 35                                           | 60-64     | Dual          | 0     | 0.00  |               |             |               |                |              |
| 35                                           | 60-64     | Former        | 4105  | 38.49 |               |             | 23.80         | 188            | 4.58         |
| Year of Follow-up: 2025, Age Group: 65-69    |           |               |       |       |               |             |               |                |              |
| Period                                       | Age Group | Smoking Group | N     | %     | Ever Quit (N) | Ever Quit % | Mean Yrs Quit | Short Term (n) | Short Term % |
| 35                                           | 65-69     | Never Any     | 4724  | 43.28 |               |             |               |                |              |
| 35                                           | 65-69     | CC            | 300   | 2.75  | 0             | 0.00        |               |                |              |
| 35                                           | 65-69     | Ecig          | 864   | 7.91  |               |             |               |                |              |
| 35                                           | 65-69     | Dual          | 0     | 0.00  |               |             |               |                |              |
| 35                                           | 65-69     | Former        | 5028  | 46.06 |               |             | 25.47         | 156            | 3.10         |
| Year of Follow-up: 2025, Age Group: 70-74    |           |               |       |       |               |             |               |                |              |
| Period                                       | Age Group | Smoking Group | N     | %     | Ever Quit (N) | Ever Quit % | Mean Yrs Quit | Short Term (n) | Short Term % |
| 35                                           | 70-74     | Never Any     | 3941  | 39.85 |               |             |               |                |              |
| 35                                           | 70-74     | CC            | 312   | 3.16  | 0             | 0.00        |               |                |              |
| 35                                           | 70-74     | Ecig          | 515   | 5.21  |               |             |               |                |              |
| 35                                           | 70-74     | Dual          | 0     | 0.00  |               |             |               |                |              |
| 35                                           | 70-74     | Former        | 5121  | 51.78 |               |             | 29.65         | 88             | 1.72         |
| Year of Follow-up: 2025, Age Group: 75-79    |           |               |       |       |               |             |               |                |              |
| Period                                       | Age Group | Smoking Group | N     | %     | Ever Quit (N) | Ever Quit % | Mean Yrs Quit | Short Term (n) | Short Term % |
| 35                                           | 75-79     | Never Any     | 2912  | 33.65 |               |             |               |                |              |
| 35                                           | 75-79     | CC            | 293   | 3.39  | 0             | 0.00        |               |                |              |
| 35                                           | 75-79     | Ecig          | 290   | 3.35  |               |             |               |                |              |
| 35                                           | 75-79     | Dual          | 0     | 0.00  |               |             |               |                |              |
| 35                                           | 75-79     | Former        | 5160  | 59.62 |               |             | 32.32         | 73             | 1.41         |
| Year of Follow-up: 2030, Age Group: All Ages |           |               |       |       |               |             |               |                |              |
| Period                                       | Age Group | Smoking Group | N     | %     | Ever Quit (N) | Ever Quit % | Mean Yrs Quit | Short Term (n) | Short Term % |
| 40                                           | All Ages  | Never Any     | 28305 | 47.84 |               |             |               |                |              |
| 40                                           | All Ages  | CC            | 933   | 1.58  | 0             | 0.00        |               |                |              |
| 40                                           | All Ages  | Ecig          | 5540  | 9.36  |               |             |               |                |              |
| 40                                           | All Ages  | Dual          | 0     | 0.00  |               |             |               |                |              |
| 40                                           | All Ages  | Former        | 24392 | 41.22 |               |             | 27.43         | 678            | 2.78         |
| Year of Follow-up: 2030, Age Group: 18-19    |           |               |       |       |               |             |               |                |              |
| Period                                       | Age Group | Smoking Group | N     | %     | Ever Quit (N) | Ever Quit % | Mean Yrs Quit | Short Term (n) | Short Term % |
| 40                                           | 18-19     | Never Any     | 0     | .     |               |             |               |                |              |
| 40                                           | 18-19     | CC            | 0     | .     | 0             | .           |               |                |              |
| 40                                           | 18-19     | Ecig          | 0     | .     |               |             |               |                |              |
| 40                                           | 18-19     | Dual          | 0     | .     |               |             |               |                |              |
| 40                                           | 18-19     | Former        | 0     | .     |               |             | .             | 0              | .            |
| Year of Follow-up: 2030, Age Group: 20-24    |           |               |       |       |               |             |               |                |              |
| Period                                       | Age Group | Smoking Group | N     | %     | Ever Quit (N) | Ever Quit % | Mean Yrs Quit | Short Term (n) | Short Term % |
| 40                                           | 20-24     | Never Any     | 0     | .     |               |             |               |                |              |
| 40                                           | 20-24     | CC            | 0     | .     | 0             | .           |               |                |              |
| 40                                           | 20-24     | Ecig          | 0     | .     |               |             |               |                |              |
| 40                                           | 20-24     | Dual          | 0     | .     |               |             |               |                |              |
| 40                                           | 20-24     | Former        | 0     | .     |               |             | .             | 0              | .            |
| Year of Follow-up: 2030, Age Group: 25-29    |           |               |       |       |               |             |               |                |              |
| Period                                       | Age Group | Smoking Group | N     | %     | Ever Quit (N) | Ever Quit % | Mean Yrs Quit | Short Term (n) | Short Term % |
| 40                                           | 25-29     | Never Any     | 0     | .     |               |             |               |                |              |
| 40                                           | 25-29     | CC            | 0     | .     | 0             | .           |               |                |              |
| 40                                           | 25-29     | Ecig          | 0     | .     |               |             |               |                |              |
| 40                                           | 25-29     | Dual          | 0     | .     |               |             |               |                |              |

**Results for PHIM for Run 9 (Sensitivity\_Analysis\_2.RTF)**

| Year of Follow-up: 2030, Age Group: 30-34 | Period | Age Group | Smoking Group | N    | %     | Ever Quit (N) | Ever Quit % | Mean Yrs Quit | Short Term (n) | Short Term % |
|-------------------------------------------|--------|-----------|---------------|------|-------|---------------|-------------|---------------|----------------|--------------|
| 40                                        | 25-29  | Former    |               | 0    | .     |               |             |               | 0              | .            |
| 40                                        | 30-34  | Never Any |               | 0    | .     |               |             |               |                |              |
| 40                                        | 30-34  | CC        |               | 0    | .     | 0             | .           |               |                |              |
| 40                                        | 30-34  | Ecig      |               | 0    | .     |               |             |               |                |              |
| 40                                        | 30-34  | Dual      |               | 0    | .     |               |             |               |                |              |
| 40                                        | 30-34  | Former    |               | 0    | .     |               |             |               | 0              | .            |
| Year of Follow-up: 2030, Age Group: 35-39 | Period | Age Group | Smoking Group | N    | %     | Ever Quit (N) | Ever Quit % | Mean Yrs Quit | Short Term (n) | Short Term % |
| 40                                        | 35-39  | Never Any |               | 0    | .     |               |             |               |                |              |
| 40                                        | 35-39  | CC        |               | 0    | .     | 0             | .           |               |                |              |
| 40                                        | 35-39  | Ecig      |               | 0    | .     |               |             |               |                |              |
| 40                                        | 35-39  | Dual      |               | 0    | .     |               |             |               |                |              |
| 40                                        | 35-39  | Former    |               | 0    | .     |               |             |               | 0              | .            |
| Year of Follow-up: 2030, Age Group: 40-44 | Period | Age Group | Smoking Group | N    | %     | Ever Quit (N) | Ever Quit % | Mean Yrs Quit | Short Term (n) | Short Term % |
| 40                                        | 40-44  | Never Any |               | 0    | .     |               |             |               |                |              |
| 40                                        | 40-44  | CC        |               | 0    | .     | 0             | .           |               |                |              |
| 40                                        | 40-44  | Ecig      |               | 0    | .     |               |             |               |                |              |
| 40                                        | 40-44  | Dual      |               | 0    | .     |               |             |               |                |              |
| 40                                        | 40-44  | Former    |               | 0    | .     |               |             |               | 0              | .            |
| Year of Follow-up: 2030, Age Group: 45-49 | Period | Age Group | Smoking Group | N    | %     | Ever Quit (N) | Ever Quit % | Mean Yrs Quit | Short Term (n) | Short Term % |
| 40                                        | 45-49  | Never Any |               | 0    | .     |               |             |               |                |              |
| 40                                        | 45-49  | CC        |               | 0    | .     | 0             | .           |               |                |              |
| 40                                        | 45-49  | Ecig      |               | 0    | .     |               |             |               |                |              |
| 40                                        | 45-49  | Dual      |               | 0    | .     |               |             |               |                |              |
| 40                                        | 45-49  | Former    |               | 0    | .     |               |             |               | 0              | .            |
| Year of Follow-up: 2030, Age Group: 50-54 | Period | Age Group | Smoking Group | N    | %     | Ever Quit (N) | Ever Quit % | Mean Yrs Quit | Short Term (n) | Short Term % |
| 40                                        | 50-54  | Never Any |               | 4489 | 50.75 |               |             |               |                |              |
| 40                                        | 50-54  | CC        |               | 55   | 0.62  | 0             | 0.00        |               |                |              |
| 40                                        | 50-54  | Ecig      |               | 1320 | 14.92 |               |             |               |                |              |
| 40                                        | 50-54  | Dual      |               | 0    | 0.00  |               |             |               |                |              |
| 40                                        | 50-54  | Former    |               | 2981 | 33.70 |               |             | 22.80         | 73             | 2.45         |
| Year of Follow-up: 2030, Age Group: 55-59 | Period | Age Group | Smoking Group | N    | %     | Ever Quit (N) | Ever Quit % | Mean Yrs Quit | Short Term (n) | Short Term % |
| 40                                        | 55-59  | Never Any |               | 4991 | 55.21 |               |             |               |                |              |
| 40                                        | 55-59  | CC        |               | 81   | 0.90  | 0             | 0.00        |               |                |              |
| 40                                        | 55-59  | Ecig      |               | 1186 | 13.12 |               |             |               |                |              |
| 40                                        | 55-59  | Dual      |               | 0    | 0.00  |               |             |               |                |              |
| 40                                        | 55-59  | Former    |               | 2782 | 30.77 |               |             | 23.56         | 99             | 3.56         |
| Year of Follow-up: 2030, Age Group: 60-64 | Period | Age Group | Smoking Group | N    | %     | Ever Quit (N) | Ever Quit % | Mean Yrs Quit | Short Term (n) | Short Term % |
| 40                                        | 60-64  | Never Any |               | 5163 | 52.60 |               |             |               |                |              |
| 40                                        | 60-64  | CC        |               | 151  | 1.54  | 0             | 0.00        |               |                |              |
| 40                                        | 60-64  | Ecig      |               | 1050 | 10.70 |               |             |               |                |              |
| 40                                        | 60-64  | Dual      |               | 0    | 0.00  |               |             |               |                |              |
| 40                                        | 60-64  | Former    |               | 3452 | 35.17 |               |             | 24.57         | 186            | 5.39         |
| Year of Follow-up: 2030, Age Group: 65-69 | Period | Age Group | Smoking Group | N    | %     | Ever Quit (N) | Ever Quit % | Mean Yrs Quit | Short Term (n) | Short Term % |
| 40                                        | 65-69  | Never Any |               | 4997 | 46.86 |               |             |               |                |              |
| 40                                        | 65-69  | CC        |               | 190  | 1.78  | 0             | 0.00        |               |                |              |
| 40                                        | 65-69  | Ecig      |               | 941  | 8.82  |               |             |               |                |              |
| 40                                        | 65-69  | Dual      |               | 0    | 0.00  |               |             |               |                |              |
| 40                                        | 65-69  | Former    |               | 4536 | 42.54 |               |             | 26.27         | 138            | 3.04         |
| Year of Follow-up: 2030, Age Group: 70-74 | Period | Age Group | Smoking Group | N    | %     | Ever Quit (N) | Ever Quit % | Mean Yrs Quit | Short Term (n) | Short Term % |
| 40                                        | 70-74  | Never Any |               | 4724 | 43.28 |               |             |               |                |              |
| 40                                        | 70-74  | CC        |               | 221  | 2.02  | 0             | 0.00        |               |                |              |
| 40                                        | 70-74  | Ecig      |               | 656  | 6.01  |               |             |               |                |              |
| 40                                        | 70-74  | Dual      |               | 0    | 0.00  |               |             |               |                |              |
| 40                                        | 70-74  | Former    |               | 5315 | 48.69 |               |             | 28.94         | 98             | 1.84         |
| Year of Follow-up: 2030, Age Group: 75-79 | Period | Age Group | Smoking Group | N    | %     | Ever Quit (N) | Ever Quit % | Mean Yrs Quit | Short Term (n) | Short Term % |
| 40                                        | 75-79  | Never Any |               | 3941 | 39.85 |               |             |               |                |              |
| 40                                        | 75-79  | CC        |               | 235  | 2.38  | 0             | 0.00        |               |                |              |

**Results for PHIM for Run 9 (Sensitivity\_Analysis\_2.RTF)**

|                                              |           |               |       |       |               |             |               |                |              |
|----------------------------------------------|-----------|---------------|-------|-------|---------------|-------------|---------------|----------------|--------------|
| 40                                           | 75-79     | Ecig          | 387   | 3.91  |               |             |               |                |              |
| 40                                           | 75-79     | Dual          | 0     | 0.00  |               |             |               |                |              |
| 40                                           | 75-79     | Former        | 5326  | 53.86 |               |             | 33.40         | 84             | 1.58         |
| Year of Follow-up: 2035, Age Group: All Ages |           |               |       |       |               |             |               |                |              |
| Period                                       | Age Group | Smoking Group | N     | %     | Ever Quit (N) | Ever Quit % | Mean Yrs Quit | Short Term (n) | Short Term % |
| 45                                           | All Ages  | Never Any     | 24364 | 49.44 |               |             |               |                |              |
| 45                                           | All Ages  | CC            | 529   | 1.07  | 0             | 0.00        |               |                |              |
| 45                                           | All Ages  | Ecig          | 3988  | 8.09  |               |             |               |                |              |
| 45                                           | All Ages  | Dual          | 0     | 0.00  |               |             |               |                |              |
| 45                                           | All Ages  | Former        | 20400 | 41.40 |               |             | 28.89         | 543            | 2.66         |
| Year of Follow-up: 2035, Age Group: 18-19    |           |               |       |       |               |             |               |                |              |
| Period                                       | Age Group | Smoking Group | N     | %     | Ever Quit (N) | Ever Quit % | Mean Yrs Quit | Short Term (n) | Short Term % |
| 45                                           | 18-19     | Never Any     | 0     | .     |               |             |               |                |              |
| 45                                           | 18-19     | CC            | 0     | .     | 0             | .           |               |                |              |
| 45                                           | 18-19     | Ecig          | 0     | .     |               |             |               |                |              |
| 45                                           | 18-19     | Dual          | 0     | .     |               |             |               |                |              |
| 45                                           | 18-19     | Former        | 0     | .     |               |             | .             | 0              | .            |
| Year of Follow-up: 2035, Age Group: 20-24    |           |               |       |       |               |             |               |                |              |
| Period                                       | Age Group | Smoking Group | N     | %     | Ever Quit (N) | Ever Quit % | Mean Yrs Quit | Short Term (n) | Short Term % |
| 45                                           | 20-24     | Never Any     | 0     | .     |               |             |               |                |              |
| 45                                           | 20-24     | CC            | 0     | .     | 0             | .           |               |                |              |
| 45                                           | 20-24     | Ecig          | 0     | .     |               |             |               |                |              |
| 45                                           | 20-24     | Dual          | 0     | .     |               |             |               |                |              |
| 45                                           | 20-24     | Former        | 0     | .     |               |             | .             | 0              | .            |
| Year of Follow-up: 2035, Age Group: 25-29    |           |               |       |       |               |             |               |                |              |
| Period                                       | Age Group | Smoking Group | N     | %     | Ever Quit (N) | Ever Quit % | Mean Yrs Quit | Short Term (n) | Short Term % |
| 45                                           | 25-29     | Never Any     | 0     | .     |               |             |               |                |              |
| 45                                           | 25-29     | CC            | 0     | .     | 0             | .           |               |                |              |
| 45                                           | 25-29     | Ecig          | 0     | .     |               |             |               |                |              |
| 45                                           | 25-29     | Dual          | 0     | .     |               |             |               |                |              |
| 45                                           | 25-29     | Former        | 0     | .     |               |             | .             | 0              | .            |
| Year of Follow-up: 2035, Age Group: 30-34    |           |               |       |       |               |             |               |                |              |
| Period                                       | Age Group | Smoking Group | N     | %     | Ever Quit (N) | Ever Quit % | Mean Yrs Quit | Short Term (n) | Short Term % |
| 45                                           | 30-34     | Never Any     | 0     | .     |               |             |               |                |              |
| 45                                           | 30-34     | CC            | 0     | .     | 0             | .           |               |                |              |
| 45                                           | 30-34     | Ecig          | 0     | .     |               |             |               |                |              |
| 45                                           | 30-34     | Dual          | 0     | .     |               |             |               |                |              |
| 45                                           | 30-34     | Former        | 0     | .     |               |             | .             | 0              | .            |
| Year of Follow-up: 2035, Age Group: 35-39    |           |               |       |       |               |             |               |                |              |
| Period                                       | Age Group | Smoking Group | N     | %     | Ever Quit (N) | Ever Quit % | Mean Yrs Quit | Short Term (n) | Short Term % |
| 45                                           | 35-39     | Never Any     | 0     | .     |               |             |               |                |              |
| 45                                           | 35-39     | CC            | 0     | .     | 0             | .           |               |                |              |
| 45                                           | 35-39     | Ecig          | 0     | .     |               |             |               |                |              |
| 45                                           | 35-39     | Dual          | 0     | .     |               |             |               |                |              |
| 45                                           | 35-39     | Former        | 0     | .     |               |             | .             | 0              | .            |
| Year of Follow-up: 2035, Age Group: 40-44    |           |               |       |       |               |             |               |                |              |
| Period                                       | Age Group | Smoking Group | N     | %     | Ever Quit (N) | Ever Quit % | Mean Yrs Quit | Short Term (n) | Short Term % |
| 45                                           | 40-44     | Never Any     | 0     | .     |               |             |               |                |              |
| 45                                           | 40-44     | CC            | 0     | .     | 0             | .           |               |                |              |
| 45                                           | 40-44     | Ecig          | 0     | .     |               |             |               |                |              |
| 45                                           | 40-44     | Dual          | 0     | .     |               |             |               |                |              |
| 45                                           | 40-44     | Former        | 0     | .     |               |             | .             | 0              | .            |
| Year of Follow-up: 2035, Age Group: 45-49    |           |               |       |       |               |             |               |                |              |
| Period                                       | Age Group | Smoking Group | N     | %     | Ever Quit (N) | Ever Quit % | Mean Yrs Quit | Short Term (n) | Short Term % |
| 45                                           | 45-49     | Never Any     | 0     | .     |               |             |               |                |              |
| 45                                           | 45-49     | CC            | 0     | .     | 0             | .           |               |                |              |
| 45                                           | 45-49     | Ecig          | 0     | .     |               |             |               |                |              |
| 45                                           | 45-49     | Dual          | 0     | .     |               |             |               |                |              |
| 45                                           | 45-49     | Former        | 0     | .     |               |             | .             | 0              | .            |
| Year of Follow-up: 2035, Age Group: 50-54    |           |               |       |       |               |             |               |                |              |
| Period                                       | Age Group | Smoking Group | N     | %     | Ever Quit (N) | Ever Quit % | Mean Yrs Quit | Short Term (n) | Short Term % |
| 45                                           | 50-54     | Never Any     | 0     | .     |               |             |               |                |              |
| 45                                           | 50-54     | CC            | 0     | .     | 0             | .           |               |                |              |
| 45                                           | 50-54     | Ecig          | 0     | .     |               |             |               |                |              |
| 45                                           | 50-54     | Dual          | 0     | .     |               |             |               |                |              |
| 45                                           | 50-54     | Former        | 0     | .     |               |             | .             | 0              | .            |
| Year of Follow-up: 2035, Age Group: 55-59    |           |               |       |       |               |             |               |                |              |
| Period                                       | Age Group | Smoking Group | N     | %     | Ever Quit (N) | Ever Quit % | Mean Yrs Quit | Short Term (n) | Short Term % |

**Results for PHIM for Run 9 (Sensitivity\_Analysis\_2.RTF)**

|                                              |           |               |       |       |               |             |               |                |              |
|----------------------------------------------|-----------|---------------|-------|-------|---------------|-------------|---------------|----------------|--------------|
| 45                                           | 55-59     | Never Any     | 4489  | 50.75 |               |             |               |                |              |
| 45                                           | 55-59     | CC            | 43    | 0.49  | 0             | 0.00        |               |                |              |
| 45                                           | 55-59     | Ecig          | 1119  | 12.65 |               |             |               |                |              |
| 45                                           | 55-59     | Dual          | 0     | 0.00  |               |             |               |                |              |
| 45                                           | 55-59     | Former        | 3194  | 36.11 |               |             | 26.06         | 96             | 3.01         |
| Year of Follow-up: 2035, Age Group: 60-64    |           |               |       |       |               |             |               |                |              |
| Period                                       | Age Group | Smoking Group | N     | %     | Ever Quit (N) | Ever Quit % | Mean Yrs Quit | Short Term (n) | Short Term % |
| 45                                           | 60-64     | Never Any     | 4991  | 55.21 |               |             |               |                |              |
| 45                                           | 60-64     | CC            | 62    | 0.69  | 0             | 0.00        |               |                |              |
| 45                                           | 60-64     | Ecig          | 933   | 10.32 |               |             |               |                |              |
| 45                                           | 60-64     | Dual          | 0     | 0.00  |               |             |               |                |              |
| 45                                           | 60-64     | Former        | 3054  | 33.78 |               |             | 26.18         | 130            | 4.26         |
| Year of Follow-up: 2035, Age Group: 65-69    |           |               |       |       |               |             |               |                |              |
| Period                                       | Age Group | Smoking Group | N     | %     | Ever Quit (N) | Ever Quit % | Mean Yrs Quit | Short Term (n) | Short Term % |
| 45                                           | 65-69     | Never Any     | 5163  | 52.60 |               |             |               |                |              |
| 45                                           | 65-69     | CC            | 114   | 1.16  | 0             | 0.00        |               |                |              |
| 45                                           | 65-69     | Ecig          | 756   | 7.70  |               |             |               |                |              |
| 45                                           | 65-69     | Dual          | 0     | 0.00  |               |             |               |                |              |
| 45                                           | 65-69     | Former        | 3783  | 38.54 |               |             | 27.18         | 112            | 2.96         |
| Year of Follow-up: 2035, Age Group: 70-74    |           |               |       |       |               |             |               |                |              |
| Period                                       | Age Group | Smoking Group | N     | %     | Ever Quit (N) | Ever Quit % | Mean Yrs Quit | Short Term (n) | Short Term % |
| 45                                           | 70-74     | Never Any     | 4997  | 46.86 |               |             |               |                |              |
| 45                                           | 70-74     | CC            | 148   | 1.39  | 0             | 0.00        |               |                |              |
| 45                                           | 70-74     | Ecig          | 707   | 6.63  |               |             |               |                |              |
| 45                                           | 70-74     | Dual          | 0     | 0.00  |               |             |               |                |              |
| 45                                           | 70-74     | Former        | 4812  | 45.12 |               |             | 29.60         | 103            | 2.14         |
| Year of Follow-up: 2035, Age Group: 75-79    |           |               |       |       |               |             |               |                |              |
| Period                                       | Age Group | Smoking Group | N     | %     | Ever Quit (N) | Ever Quit % | Mean Yrs Quit | Short Term (n) | Short Term % |
| 45                                           | 75-79     | Never Any     | 4724  | 43.28 |               |             |               |                |              |
| 45                                           | 75-79     | CC            | 162   | 1.48  | 0             | 0.00        |               |                |              |
| 45                                           | 75-79     | Ecig          | 473   | 4.33  |               |             |               |                |              |
| 45                                           | 75-79     | Dual          | 0     | 0.00  |               |             |               |                |              |
| 45                                           | 75-79     | Former        | 5557  | 50.91 |               |             | 32.55         | 102            | 1.84         |
| Year of Follow-up: 2040, Age Group: All Ages |           |               |       |       |               |             |               |                |              |
| Period                                       | Age Group | Smoking Group | N     | %     | Ever Quit (N) | Ever Quit % | Mean Yrs Quit | Short Term (n) | Short Term % |
| 50                                           | All Ages  | Never Any     | 19640 | 51.19 |               |             |               |                |              |
| 50                                           | All Ages  | CC            | 274   | 0.71  | 0             | 0.00        |               |                |              |
| 50                                           | All Ages  | Ecig          | 2585  | 6.74  |               |             |               |                |              |
| 50                                           | All Ages  | Dual          | 0     | 0.00  |               |             |               |                |              |
| 50                                           | All Ages  | Former        | 15866 | 41.36 |               |             | 30.56         | 391            | 2.46         |
| Year of Follow-up: 2040, Age Group: 18-19    |           |               |       |       |               |             |               |                |              |
| Period                                       | Age Group | Smoking Group | N     | %     | Ever Quit (N) | Ever Quit % | Mean Yrs Quit | Short Term (n) | Short Term % |
| 50                                           | 18-19     | Never Any     | 0     | .     |               |             |               |                |              |
| 50                                           | 18-19     | CC            | 0     | .     | 0             | .           |               |                |              |
| 50                                           | 18-19     | Ecig          | 0     | .     |               |             |               |                |              |
| 50                                           | 18-19     | Dual          | 0     | .     |               |             |               |                |              |
| 50                                           | 18-19     | Former        | 0     | .     |               |             | .             | 0              | .            |
| Year of Follow-up: 2040, Age Group: 20-24    |           |               |       |       |               |             |               |                |              |
| Period                                       | Age Group | Smoking Group | N     | %     | Ever Quit (N) | Ever Quit % | Mean Yrs Quit | Short Term (n) | Short Term % |
| 50                                           | 20-24     | Never Any     | 0     | .     |               |             |               |                |              |
| 50                                           | 20-24     | CC            | 0     | .     | 0             | .           |               |                |              |
| 50                                           | 20-24     | Ecig          | 0     | .     |               |             |               |                |              |
| 50                                           | 20-24     | Dual          | 0     | .     |               |             |               |                |              |
| 50                                           | 20-24     | Former        | 0     | .     |               |             | .             | 0              | .            |
| Year of Follow-up: 2040, Age Group: 25-29    |           |               |       |       |               |             |               |                |              |
| Period                                       | Age Group | Smoking Group | N     | %     | Ever Quit (N) | Ever Quit % | Mean Yrs Quit | Short Term (n) | Short Term % |
| 50                                           | 25-29     | Never Any     | 0     | .     |               |             |               |                |              |
| 50                                           | 25-29     | CC            | 0     | .     | 0             | .           |               |                |              |
| 50                                           | 25-29     | Ecig          | 0     | .     |               |             |               |                |              |
| 50                                           | 25-29     | Dual          | 0     | .     |               |             |               |                |              |
| 50                                           | 25-29     | Former        | 0     | .     |               |             | .             | 0              | .            |
| Year of Follow-up: 2040, Age Group: 30-34    |           |               |       |       |               |             |               |                |              |
| Period                                       | Age Group | Smoking Group | N     | %     | Ever Quit (N) | Ever Quit % | Mean Yrs Quit | Short Term (n) | Short Term % |
| 50                                           | 30-34     | Never Any     | 0     | .     |               |             |               |                |              |
| 50                                           | 30-34     | CC            | 0     | .     | 0             | .           |               |                |              |
| 50                                           | 30-34     | Ecig          | 0     | .     |               |             |               |                |              |
| 50                                           | 30-34     | Dual          | 0     | .     |               |             |               |                |              |
| 50                                           | 30-34     | Former        | 0     | .     |               |             | .             | 0              | .            |
| Year of Follow-up: 2040, Age Group: 35-39    |           |               |       |       |               |             |               |                |              |

**Results for PHIM for Run 9 (Sensitivity\_Analysis\_2.RTF)**

| Period                                    | Age Group | Smoking Group | N    | %     | Ever Quit (N) | Ever Quit % | Mean Yrs Quit | Short Term (n) | Short Term % |
|-------------------------------------------|-----------|---------------|------|-------|---------------|-------------|---------------|----------------|--------------|
| 50                                        | 35-39     | Never Any     | 0    | .     |               |             |               |                |              |
| 50                                        | 35-39     | CC            | 0    | .     | 0             | .           |               |                |              |
| 50                                        | 35-39     | Ecig          | 0    | .     |               |             |               |                |              |
| 50                                        | 35-39     | Dual          | 0    | .     |               |             |               |                |              |
| 50                                        | 35-39     | Former        | 0    | .     |               |             | .             | 0              | .            |
| Year of Follow-up: 2040, Age Group: 40-44 |           |               |      |       |               |             |               |                |              |
| Period                                    | Age Group | Smoking Group | N    | %     | Ever Quit (N) | Ever Quit % | Mean Yrs Quit | Short Term (n) | Short Term % |
| 50                                        | 40-44     | Never Any     | 0    | .     |               |             |               |                |              |
| 50                                        | 40-44     | CC            | 0    | .     | 0             | .           |               |                |              |
| 50                                        | 40-44     | Ecig          | 0    | .     |               |             |               |                |              |
| 50                                        | 40-44     | Dual          | 0    | .     |               |             |               |                |              |
| 50                                        | 40-44     | Former        | 0    | .     |               |             | .             | 0              | .            |
| Year of Follow-up: 2040, Age Group: 45-49 |           |               |      |       |               |             |               |                |              |
| Period                                    | Age Group | Smoking Group | N    | %     | Ever Quit (N) | Ever Quit % | Mean Yrs Quit | Short Term (n) | Short Term % |
| 50                                        | 45-49     | Never Any     | 0    | .     |               |             |               |                |              |
| 50                                        | 45-49     | CC            | 0    | .     | 0             | .           |               |                |              |
| 50                                        | 45-49     | Ecig          | 0    | .     |               |             |               |                |              |
| 50                                        | 45-49     | Dual          | 0    | .     |               |             |               |                |              |
| 50                                        | 45-49     | Former        | 0    | .     |               |             | .             | 0              | .            |
| Year of Follow-up: 2040, Age Group: 50-54 |           |               |      |       |               |             |               |                |              |
| Period                                    | Age Group | Smoking Group | N    | %     | Ever Quit (N) | Ever Quit % | Mean Yrs Quit | Short Term (n) | Short Term % |
| 50                                        | 50-54     | Never Any     | 0    | .     |               |             |               |                |              |
| 50                                        | 50-54     | CC            | 0    | .     | 0             | .           |               |                |              |
| 50                                        | 50-54     | Ecig          | 0    | .     |               |             |               |                |              |
| 50                                        | 50-54     | Dual          | 0    | .     |               |             |               |                |              |
| 50                                        | 50-54     | Former        | 0    | .     |               |             | .             | 0              | .            |
| Year of Follow-up: 2040, Age Group: 55-59 |           |               |      |       |               |             |               |                |              |
| Period                                    | Age Group | Smoking Group | N    | %     | Ever Quit (N) | Ever Quit % | Mean Yrs Quit | Short Term (n) | Short Term % |
| 50                                        | 55-59     | Never Any     | 0    | .     |               |             |               |                |              |
| 50                                        | 55-59     | CC            | 0    | .     | 0             | .           |               |                |              |
| 50                                        | 55-59     | Ecig          | 0    | .     |               |             |               |                |              |
| 50                                        | 55-59     | Dual          | 0    | .     |               |             |               |                |              |
| 50                                        | 55-59     | Former        | 0    | .     |               |             | .             | 0              | .            |
| Year of Follow-up: 2040, Age Group: 60-64 |           |               |      |       |               |             |               |                |              |
| Period                                    | Age Group | Smoking Group | N    | %     | Ever Quit (N) | Ever Quit % | Mean Yrs Quit | Short Term (n) | Short Term % |
| 50                                        | 60-64     | Never Any     | 4489 | 50.75 |               |             |               |                |              |
| 50                                        | 60-64     | CC            | 30   | 0.34  | 0             | 0.00        |               |                |              |
| 50                                        | 60-64     | Ecig          | 824  | 9.32  |               |             |               |                |              |
| 50                                        | 60-64     | Dual          | 0    | 0.00  |               |             |               |                |              |
| 50                                        | 60-64     | Former        | 3502 | 39.59 |               |             | 28.50         | 138            | 3.94         |
| Year of Follow-up: 2040, Age Group: 65-69 |           |               |      |       |               |             |               |                |              |
| Period                                    | Age Group | Smoking Group | N    | %     | Ever Quit (N) | Ever Quit % | Mean Yrs Quit | Short Term (n) | Short Term % |
| 50                                        | 65-69     | Never Any     | 4991 | 55.21 |               |             |               |                |              |
| 50                                        | 65-69     | CC            | 44   | 0.49  | 0             | 0.00        |               |                |              |
| 50                                        | 65-69     | Ecig          | 666  | 7.37  |               |             |               |                |              |
| 50                                        | 65-69     | Dual          | 0    | 0.00  |               |             |               |                |              |
| 50                                        | 65-69     | Former        | 3339 | 36.94 |               |             | 28.70         | 104            | 3.11         |
| Year of Follow-up: 2040, Age Group: 70-74 |           |               |      |       |               |             |               |                |              |
| Period                                    | Age Group | Smoking Group | N    | %     | Ever Quit (N) | Ever Quit % | Mean Yrs Quit | Short Term (n) | Short Term % |
| 50                                        | 70-74     | Never Any     | 5163 | 52.60 |               |             |               |                |              |
| 50                                        | 70-74     | CC            | 86   | 0.88  | 0             | 0.00        |               |                |              |
| 50                                        | 70-74     | Ecig          | 563  | 5.74  |               |             |               |                |              |
| 50                                        | 70-74     | Dual          | 0    | 0.00  |               |             |               |                |              |
| 50                                        | 70-74     | Former        | 4004 | 40.79 |               |             | 30.53         | 70             | 1.75         |
| Year of Follow-up: 2040, Age Group: 75-79 |           |               |      |       |               |             |               |                |              |
| Period                                    | Age Group | Smoking Group | N    | %     | Ever Quit (N) | Ever Quit % | Mean Yrs Quit | Short Term (n) | Short Term % |
| 50                                        | 75-79     | Never Any     | 4997 | 46.86 |               |             |               |                |              |
| 50                                        | 75-79     | CC            | 114  | 1.07  | 0             | 0.00        |               |                |              |
| 50                                        | 75-79     | Ecig          | 532  | 4.99  |               |             |               |                |              |
| 50                                        | 75-79     | Dual          | 0    | 0.00  |               |             |               |                |              |
| 50                                        | 75-79     | Former        | 5021 | 47.08 |               |             | 33.25         | 79             | 1.57         |

## Results for PHIM for Run 9 (Sensitivity\_Analysis\_2.RTF)

\*\*\*\*\*

### Main Results for E-Component for Run: 9, Simulation: 1, COD: Four Diseases Combined

| Variable Parameter          | Value                                  |
|-----------------------------|----------------------------------------|
| 1. Country                  | US (United States)                     |
| 2. Sex                      | M (Males)                              |
| 3. Year of start of process | 1990                                   |
| 4. Cause of Death           | Four Diseases Combined                 |
| 5. Effective Dose NULL      | CC:1                                   |
| 6. Effective Dose Ecig      | CC:1 Ecig:0.05 Dual:0.525              |
| Note:                       | Death rates are per million population |

#### Results for Age Groups Combined and Years combined, Population unadjusted for deaths in Ecig scenario,

| Age Group:All | NULL     | Ecig        | %Drop       |          |        | NULL   | Ecig    | Drop    |         |         |
|---------------|----------|-------------|-------------|----------|--------|--------|---------|---------|---------|---------|
| Year          | Number   | Attrib      | Attrib      | Drop     | %Drop  | Attrib | Death   | Attrib  | Attrib  | Drop    |
|               | Deaths   | Deaths      | Deaths      | Deaths   | Deaths | Deaths | Rate    | Rates   | Rates   | Rates   |
| All Comb      | 13148871 | 4509390.583 | 3644756.203 | 864634.4 | 6.576  | 19.174 | 3806.31 | 1305.37 | 1055.08 | 250.293 |

#### Results for Age Groups Combined, Population unadjusted for deaths in Ecig scenario,

| Age Group:All | NULL   | Ecig       | %Drop      |          |        | NULL   | Ecig    | Drop    |         |         |
|---------------|--------|------------|------------|----------|--------|--------|---------|---------|---------|---------|
| Year          | Number | Attrib     | Attrib     | Drop     | %Drop  | Attrib | Death   | Attrib  | Attrib  | Drop    |
|               | Deaths | Deaths     | Deaths     | Deaths   | Deaths | Deaths | Rate    | Rates   | Rates   | Rates   |
| 1990          | 317161 | 125773.065 | 125773.065 | 0.000    | 0.000  | 0.000  | 5027.71 | 1993.78 | 1993.78 | 0.000   |
| 1991          | 313217 | 123999.442 | 123893.979 | 105.463  | 0.034  | 0.085  | 4883.81 | 1933.45 | 1931.81 | 1.644   |
| 1992          | 308577 | 122014.015 | 121755.499 | 258.516  | 0.084  | 0.212  | 4729.73 | 1870.18 | 1866.21 | 3.962   |
| 1993          | 311713 | 122810.618 | 122325.541 | 485.077  | 0.156  | 0.395  | 4692.62 | 1848.83 | 1841.52 | 7.302   |
| 1994          | 305700 | 119925.592 | 119166.532 | 759.060  | 0.248  | 0.633  | 4516.19 | 1771.69 | 1760.48 | 11.214  |
| 1995          | 303225 | 117896.496 | 116776.738 | 1119.758 | 0.369  | 0.950  | 4393.80 | 1708.35 | 1692.12 | 16.226  |
| 1996          | 299559 | 115698.645 | 114162.184 | 1536.461 | 0.513  | 1.328  | 4273.16 | 1650.42 | 1628.50 | 21.917  |
| 1997          | 294226 | 113359.847 | 111390.678 | 1969.169 | 0.669  | 1.737  | 4128.67 | 1590.70 | 1563.07 | 27.632  |
| 1998          | 289258 | 111444.212 | 108991.095 | 2453.117 | 0.848  | 2.201  | 3992.19 | 1538.10 | 1504.24 | 33.857  |
| 1999          | 311002 | 114877.722 | 111425.724 | 3451.997 | 1.110  | 3.005  | 4224.60 | 1560.48 | 1513.59 | 46.891  |
| 2000          | 303786 | 112379.704 | 108275.566 | 4104.138 | 1.351  | 3.652  | 4066.21 | 1504.22 | 1449.28 | 54.934  |
| 2001          | 296294 | 110024.943 | 105160.191 | 4864.752 | 1.642  | 4.421  | 3914.28 | 1453.52 | 1389.25 | 64.267  |
| 2002          | 291898 | 108289.173 | 102523.255 | 5765.919 | 1.975  | 5.325  | 3813.00 | 1414.56 | 1339.24 | 75.319  |
| 2003          | 285865 | 106539.023 | 99941.477  | 6597.546 | 2.308  | 6.193  | 3695.36 | 1377.22 | 1291.94 | 85.286  |
| 2004          | 274177 | 103037.251 | 95708.030  | 7329.221 | 2.673  | 7.113  | 3506.10 | 1317.61 | 1223.89 | 93.724  |
| 2005          | 272379 | 103044.562 | 94765.066  | 8279.496 | 3.040  | 8.035  | 3442.69 | 1302.41 | 1197.77 | 104.647 |
| 2006          | 264118 | 99672.555  | 90337.987  | 9334.568 | 3.534  | 9.365  | 3307.76 | 1248.28 | 1131.37 | 116.904 |
| 2007          | 258419 | 97839.152  | 87624.434  | 10214.72 | 3.953  | 10.440 | 3203.20 | 1212.75 | 1086.14 | 126.615 |
| 2008          | 259461 | 98075.852  | 86851.962  | 11223.89 | 4.326  | 11.444 | 3180.09 | 1202.07 | 1064.50 | 137.566 |
| 2009          | 253907 | 95617.338  | 83511.756  | 12105.58 | 4.768  | 12.660 | 3075.31 | 1158.11 | 1011.49 | 146.622 |
| 2010          | 251878 | 94607.988  | 81575.868  | 13032.12 | 5.174  | 13.775 | 3013.72 | 1131.98 | 976.055 | 155.929 |
| 2011          | 251779 | 93633.119  | 79326.291  | 14306.83 | 5.682  | 15.280 | 2982.76 | 1109.25 | 939.759 | 169.490 |
| 2012          | 252643 | 92775.175  | 77336.677  | 15438.50 | 6.111  | 16.641 | 2960.61 | 1087.19 | 906.273 | 180.917 |
| 2013          | 256175 | 92345.780  | 75703.919  | 16641.86 | 6.496  | 18.021 | 2967.76 | 1069.82 | 877.022 | 192.794 |
| 2014          | 257393 | 91379.215  | 73648.189  | 17731.03 | 6.889  | 19.404 | 2947.05 | 1046.26 | 843.243 | 203.013 |
| 2015          | 259782 | 90750.242  | 72100.574  | 18649.67 | 7.179  | 20.551 | 3346.10 | 1168.90 | 928.686 | 240.216 |
| 2016          | 261453 | 88811.996  | 68973.879  | 19838.12 | 7.588  | 22.337 | 3336.15 | 1133.24 | 880.110 | 253.135 |
| 2017          | 263685 | 87325.126  | 66424.620  | 20900.51 | 7.926  | 23.934 | 3333.85 | 1104.08 | 839.827 | 264.252 |
| 2018          | 258714 | 87612.144  | 65681.230  | 21930.91 | 8.477  | 25.032 | 3240.73 | 1097.46 | 822.743 | 274.713 |
| 2019          | 261438 | 87797.760  | 64605.178  | 23192.58 | 8.871  | 26.416 | 3242.99 | 1089.08 | 801.391 | 287.691 |
| 2020          | 262288 | 87221.042  | 63334.919  | 23886.12 | 9.107  | 27.386 | 3715.29 | 1235.48 | 897.134 | 338.345 |
| 2021          | 255079 | 82001.292  | 57474.025  | 24527.27 | 9.616  | 29.911 | 3587.82 | 1153.39 | 808.401 | 344.988 |
| 2022          | 257097 | 81915.977  | 56067.141  | 25848.84 | 10.054 | 31.555 | 3588.53 | 1143.37 | 782.580 | 360.795 |
| 2023          | 259080 | 81810.810  | 54607.999  | 27202.81 | 10.500 | 33.251 | 3586.88 | 1132.64 | 756.031 | 376.614 |
| 2024          | 260719 | 81528.303  | 53127.657  | 28400.65 | 10.893 | 34.835 | 3579.65 | 1119.38 | 729.439 | 389.939 |
| 2025          | 257308 | 79599.213  | 51197.279  | 28401.93 | 11.038 | 35.681 | 4112.08 | 1272.09 | 818.192 | 453.896 |
| 2026          | 251528 | 75082.462  | 46326.136  | 28756.33 | 11.433 | 38.300 | 4003.24 | 1194.99 | 737.312 | 457.677 |
| 2027          | 250988 | 74444.425  | 44551.041  | 29893.38 | 11.910 | 40.155 | 3976.53 | 1179.46 | 705.845 | 473.616 |
| 2028          | 250285 | 73699.585  | 42755.952  | 30943.63 | 12.363 | 41.986 | 3945.35 | 1161.76 | 673.981 | 487.778 |
| 2029          | 249525 | 72819.703  | 40955.346  | 31864.36 | 12.770 | 43.758 | 3910.99 | 1141.36 | 641.923 | 499.433 |
| 2030          | 240528 | 69309.277  | 38678.130  | 30631.15 | 12.735 | 44.195 | 4504.36 | 1297.95 | 724.322 | 573.627 |
| 2031          | 235442 | 65433.368  | 34732.442  | 30700.93 | 13.040 | 46.919 | 4397.65 | 1222.18 | 648.741 | 573.440 |
| 2032          | 234017 | 64643.552  | 32967.130  | 31676.42 | 13.536 | 49.002 | 4356.12 | 1203.31 | 613.667 | 589.641 |
| 2033          | 232559 | 63793.514  | 31263.272  | 32530.24 | 13.988 | 50.993 | 4310.93 | 1182.54 | 579.525 | 603.011 |
| 2034          | 230963 | 63032.151  | 29643.503  | 33388.65 | 14.456 | 52.971 | 4260.75 | 1162.80 | 546.855 | 615.945 |
| 2035          | 215822 | 57653.301  | 27348.312  | 30304.99 | 14.042 | 52.564 | 4924.38 | 1315.47 | 624.004 | 691.466 |
| 2036          | 208183 | 52988.733  | 23107.910  | 29880.82 | 14.353 | 56.391 | 4748.94 | 1208.75 | 527.123 | 681.623 |
| 2037          | 205491 | 52026.921  | 21684.002  | 30342.92 | 14.766 | 58.322 | 4682.40 | 1185.50 | 494.099 | 691.404 |
| 2038          | 202834 | 50943.211  | 20252.958  | 30690.25 | 15.131 | 60.244 | 4612.18 | 1158.38 | 460.526 | 697.857 |
| 2039          | 200251 | 50085.991  | 18943.867  | 31142.12 | 15.552 | 62.177 | 4538.65 | 1135.19 | 429.360 | 705.831 |

## Results for PHIM for Run 9 (Sensitivity\_Analysis\_2.RTF)

\*\*\*\*\*

### Main Results for E-Component for Run: 9, Simulation: 1, COD: LUNG CANCER

| Variable Parameter          | Value                                  |
|-----------------------------|----------------------------------------|
| 1. Country                  | US (United States)                     |
| 2. Sex                      | M (Males)                              |
| 3. Year of start of process | 1990                                   |
| 4. Cause of Death           | LUNG CANCER                            |
| 5. Effective Dose NULL      | CC:1                                   |
| 6. Effective Dose Ecig      | CC:1 Ecig:0.05 Dual:0.525              |
| Note:                       | Death rates are per million population |

#### Results for Age Groups Combined and Years combined, Population unadjusted for deaths in Ecig scenario,

| Age Group:All |         | NULL        | Ecig        | %Drop    |        |        | NULL    | Ecig    | Drop    |        |
|---------------|---------|-------------|-------------|----------|--------|--------|---------|---------|---------|--------|
| Year          | Number  | Attrib      | Attrib      | Drop     | %Drop  | Attrib | Death   | Attrib  | Attrib  | Drop   |
|               | Deaths  | Deaths      | Deaths      | Deaths   | Deaths | Deaths | Rate    | Rates   | Rates   | Rates  |
| All Comb      | 3065988 | 2244988.113 | 1984193.179 | 260794.9 | 8.506  | 11.617 | 887.537 | 649.875 | 574.381 | 75.494 |

#### Results for Age Groups Combined, Population unadjusted for deaths in Ecig scenario,

| Age Group:All |        | NULL      | Ecig      | %Drop    |        |        | NULL    | Ecig    | Drop    |         |
|---------------|--------|-----------|-----------|----------|--------|--------|---------|---------|---------|---------|
| Year          | Number | Attrib    | Attrib    | Drop     | %Drop  | Attrib | Death   | Attrib  | Attrib  | Drop    |
|               | Deaths | Deaths    | Deaths    | Deaths   | Deaths | Deaths | Rate    | Rates   | Rates   | Rates   |
| 1990          | 78822  | 63385.736 | 63385.736 | 0.000    | 0.000  | 0.000  | 1249.50 | 1004.81 | 1004.81 | 0.000   |
| 1991          | 78462  | 62918.402 | 62908.710 | 9.693    | 0.012  | 0.015  | 1223.41 | 981.049 | 980.898 | 0.151   |
| 1992          | 77987  | 62366.766 | 62347.549 | 19.217   | 0.025  | 0.031  | 1195.35 | 955.930 | 955.635 | 0.295   |
| 1993          | 78542  | 62652.888 | 62614.825 | 38.063   | 0.048  | 0.061  | 1182.39 | 943.195 | 942.622 | 0.573   |
| 1994          | 77437  | 61565.227 | 61505.257 | 59.970   | 0.077  | 0.097  | 1144.00 | 909.520 | 908.634 | 0.886   |
| 1995          | 76904  | 60851.961 | 60757.678 | 94.283   | 0.123  | 0.155  | 1114.36 | 881.759 | 880.393 | 1.366   |
| 1996          | 76232  | 60122.922 | 59982.844 | 140.078  | 0.184  | 0.233  | 1087.44 | 857.643 | 855.645 | 1.998   |
| 1997          | 75473  | 59237.155 | 59045.916 | 191.239  | 0.253  | 0.323  | 1059.06 | 831.234 | 828.551 | 2.684   |
| 1998          | 75381  | 58906.696 | 58641.478 | 265.218  | 0.352  | 0.450  | 1040.37 | 813.001 | 809.340 | 3.660   |
| 1999          | 73159  | 56930.073 | 56592.688 | 337.385  | 0.461  | 0.593  | 993.781 | 773.329 | 768.746 | 4.583   |
| 2000          | 73784  | 57137.121 | 56693.551 | 443.570  | 0.601  | 0.776  | 987.608 | 764.787 | 758.850 | 5.937   |
| 2001          | 73294  | 56481.726 | 55911.745 | 569.981  | 0.778  | 1.009  | 968.273 | 746.169 | 738.639 | 7.530   |
| 2002          | 72442  | 55588.365 | 54876.573 | 711.792  | 0.983  | 1.280  | 946.293 | 726.138 | 716.840 | 9.298   |
| 2003          | 71942  | 54945.856 | 54078.796 | 867.061  | 1.205  | 1.578  | 929.989 | 710.281 | 699.073 | 11.208  |
| 2004          | 71301  | 54203.126 | 53144.947 | 1058.178 | 1.484  | 1.952  | 911.778 | 693.135 | 679.603 | 13.532  |
| 2005          | 70964  | 53744.603 | 52491.052 | 1253.551 | 1.766  | 2.332  | 896.937 | 679.296 | 663.452 | 15.844  |
| 2006          | 69658  | 52535.572 | 51044.107 | 1491.465 | 2.141  | 2.839  | 872.383 | 657.945 | 639.266 | 18.679  |
| 2007          | 68565  | 51492.124 | 49762.028 | 1730.096 | 2.523  | 3.360  | 849.888 | 638.264 | 616.816 | 21.445  |
| 2008          | 68226  | 51030.736 | 49007.920 | 2022.816 | 2.965  | 3.964  | 836.215 | 625.460 | 600.668 | 24.793  |
| 2009          | 67509  | 50276.199 | 47939.416 | 2336.783 | 3.461  | 4.648  | 817.667 | 608.943 | 580.640 | 28.303  |
| 2010          | 67196  | 49840.933 | 47195.727 | 2645.206 | 3.937  | 5.307  | 804.000 | 596.347 | 564.697 | 31.650  |
| 2011          | 66506  | 49072.841 | 46015.333 | 3057.508 | 4.597  | 6.231  | 787.880 | 581.354 | 545.132 | 36.222  |
| 2012          | 66155  | 48539.512 | 45078.128 | 3461.384 | 5.232  | 7.131  | 775.240 | 568.812 | 528.250 | 40.562  |
| 2013          | 65333  | 47675.741 | 43806.961 | 3868.780 | 5.922  | 8.115  | 756.876 | 552.318 | 507.499 | 44.819  |
| 2014          | 65033  | 47194.534 | 42925.807 | 4268.727 | 6.564  | 9.045  | 744.602 | 540.359 | 491.484 | 48.875  |
| 2015          | 64145  | 46305.842 | 41671.235 | 4634.607 | 7.225  | 10.009 | 726.215 | 526.439 | 476.743 | 59.696  |
| 2016          | 61618  | 44208.867 | 39289.969 | 4918.897 | 7.983  | 11.126 | 786.248 | 564.107 | 501.342 | 62.765  |
| 2017          | 59897  | 42702.624 | 37470.119 | 5232.505 | 8.736  | 12.253 | 757.297 | 539.903 | 473.746 | 66.156  |
| 2018          | 62468  | 44321.202 | 38209.368 | 6111.834 | 9.784  | 13.790 | 782.490 | 555.181 | 478.622 | 76.559  |
| 2019          | 63045  | 44493.088 | 37749.823 | 6743.265 | 10.696 | 15.156 | 782.035 | 551.912 | 468.265 | 83.646  |
| 2020          | 63466  | 44529.551 | 37184.732 | 7344.819 | 11.573 | 16.494 | 898.991 | 630.757 | 526.719 | 104.039 |
| 2021          | 57113  | 39852.556 | 32635.866 | 7216.690 | 12.636 | 18.108 | 803.323 | 560.546 | 459.040 | 101.506 |
| 2022          | 57440  | 39853.685 | 31955.597 | 7898.088 | 13.750 | 19.818 | 801.745 | 556.274 | 446.033 | 110.241 |
| 2023          | 57738  | 39847.050 | 31218.556 | 8628.494 | 14.944 | 21.654 | 799.366 | 551.670 | 432.211 | 119.459 |
| 2024          | 57942  | 39726.010 | 30427.349 | 9298.661 | 16.048 | 23.407 | 795.539 | 545.435 | 417.765 | 127.670 |
| 2025          | 57521  | 39207.348 | 29430.506 | 9776.842 | 16.997 | 24.936 | 919.257 | 626.579 | 470.334 | 156.245 |
| 2026          | 51428  | 34803.960 | 25472.975 | 9330.986 | 18.144 | 26.810 | 818.510 | 553.929 | 405.420 | 148.509 |
| 2027          | 51172  | 34484.595 | 24506.010 | 9978.585 | 19.500 | 28.936 | 810.740 | 546.357 | 388.261 | 158.096 |
| 2028          | 50870  | 34100.638 | 23524.123 | 10576.52 | 20.791 | 31.016 | 801.884 | 537.544 | 370.821 | 166.722 |
| 2029          | 50540  | 33669.838 | 22531.894 | 11137.94 | 22.038 | 33.080 | 792.146 | 527.732 | 353.159 | 174.573 |
| 2030          | 49109  | 32557.688 | 21296.271 | 11261.42 | 22.931 | 34.589 | 919.662 | 609.705 | 398.814 | 210.892 |
| 2031          | 43585  | 28646.393 | 18119.235 | 10527.16 | 24.153 | 36.749 | 814.096 | 535.065 | 338.436 | 196.629 |
| 2032          | 43163  | 28227.160 | 17187.092 | 11040.07 | 25.578 | 39.112 | 803.454 | 525.435 | 319.929 | 205.506 |
| 2033          | 42725  | 27786.623 | 16270.418 | 11516.20 | 26.954 | 41.445 | 791.996 | 515.079 | 301.604 | 213.475 |
| 2034          | 42256  | 27348.299 | 15381.670 | 11966.63 | 28.320 | 43.756 | 779.523 | 504.514 | 283.757 | 220.757 |
| 2035          | 39748  | 25570.077 | 14168.081 | 11402.00 | 28.686 | 44.591 | 906.933 | 583.430 | 323.272 | 260.158 |
| 2036          | 34030  | 21717.319 | 11259.592 | 10457.73 | 30.731 | 48.154 | 776.269 | 495.402 | 256.847 | 238.555 |
| 2037          | 33454  | 21256.024 | 10529.616 | 10726.41 | 32.063 | 50.463 | 762.289 | 484.347 | 239.931 | 244.416 |
| 2038          | 32883  | 20747.175 | 9804.180  | 10942.99 | 33.278 | 52.745 | 747.720 | 471.764 | 222.934 | 248.830 |
| 2039          | 32325  | 20327.688 | 9144.134  | 11183.55 | 34.597 | 55.016 | 732.644 | 460.724 | 207.250 | 253.473 |



## Results for PHIM for Run 9 (Sensitivity\_Analysis\_2.RTF)

\*\*\*\*\*

### Main Results for E-Component for Run: 9, Simulation: 1, COD: IHD

| Variable Parameter          | Value                                  |
|-----------------------------|----------------------------------------|
| 1. Country                  | US (United States)                     |
| 2. Sex                      | M (Males)                              |
| 3. Year of start of process | 1990                                   |
| 4. Cause of Death           | IHD                                    |
| 5. Effective Dose NULL      | CC:1                                   |
| 6. Effective Dose Ecig      | CC:1 Ecig:0.05 Dual:0.525              |
| Note:                       | Death rates are per million population |

#### Results for Age Groups Combined and Years combined, Population unadjusted for deaths in Ecig scenario,

| Age Group:All |         | NULL        | Ecig       | %Drop    |        |        | NULL    | Ecig    | Drop    |         |
|---------------|---------|-------------|------------|----------|--------|--------|---------|---------|---------|---------|
| Year          | Number  | Attrib      | Attrib     | Drop     | %Drop  | Attrib | Death   | Attrib  | Attrib  | Drop    |
|               | Deaths  | Deaths      | Deaths     | Deaths   | Deaths | Deaths | Rate    | Rates   | Rates   | Rates   |
| All Comb      | 6360041 | 1098877.421 | 742089.650 | 356787.8 | 5.610  | 32.468 | 1841.09 | 318.101 | 214.819 | 103.282 |

#### Results for Age Groups Combined, Population unadjusted for deaths in Ecig scenario,

| Age Group:All |        | NULL      | Ecig      | %Drop    |        |        | NULL    | Ecig    | Drop    |         |
|---------------|--------|-----------|-----------|----------|--------|--------|---------|---------|---------|---------|
| Year          | Number | Attrib    | Attrib    | Drop     | %Drop  | Attrib | Death   | Attrib  | Attrib  | Drop    |
|               | Deaths | Deaths    | Deaths    | Deaths   | Deaths | Deaths | Rate    | Rates   | Rates   | Rates   |
| 1990          | 171484 | 38511.725 | 38511.725 | 0.000    | 0.000  | 0.000  | 2718.40 | 610.497 | 610.497 | 0.000   |
| 1991          | 168044 | 37309.838 | 37227.384 | 82.453   | 0.049  | 0.221  | 2620.21 | 581.750 | 580.465 | 1.286   |
| 1992          | 164548 | 36137.488 | 35925.621 | 211.867  | 0.129  | 0.586  | 2522.12 | 553.899 | 550.652 | 3.247   |
| 1993          | 164362 | 35599.588 | 35206.808 | 392.779  | 0.239  | 1.103  | 2474.35 | 535.926 | 530.013 | 5.913   |
| 1994          | 159866 | 34336.757 | 33723.996 | 612.761  | 0.383  | 1.785  | 2361.75 | 507.267 | 498.214 | 9.052   |
| 1995          | 158083 | 33455.759 | 32564.989 | 890.770  | 0.563  | 2.663  | 2290.66 | 484.782 | 471.874 | 12.907  |
| 1996          | 154875 | 32193.824 | 30986.358 | 1207.466 | 0.780  | 3.751  | 2209.26 | 459.239 | 442.015 | 17.224  |
| 1997          | 149970 | 30665.509 | 29140.539 | 1524.971 | 1.017  | 4.973  | 2104.43 | 430.308 | 408.909 | 21.399  |
| 1998          | 145407 | 29188.430 | 27330.389 | 1858.041 | 1.278  | 6.366  | 2006.83 | 402.844 | 377.200 | 25.644  |
| 1999          | 165952 | 33375.386 | 30666.355 | 2709.030 | 1.632  | 8.117  | 2254.27 | 453.366 | 416.567 | 36.799  |
| 2000          | 160260 | 32024.754 | 28871.141 | 3153.613 | 1.968  | 9.847  | 2145.10 | 428.655 | 386.444 | 42.212  |
| 2001          | 154444 | 30682.393 | 26999.931 | 3682.462 | 2.384  | 12.002 | 2040.33 | 405.339 | 356.691 | 48.648  |
| 2002          | 151887 | 30218.370 | 25900.266 | 4318.104 | 2.843  | 14.290 | 1984.06 | 394.736 | 338.329 | 56.406  |
| 2003          | 146733 | 29175.202 | 24318.637 | 4856.565 | 3.310  | 16.646 | 1896.81 | 377.146 | 314.365 | 62.780  |
| 2004          | 138381 | 27488.687 | 22228.093 | 5260.595 | 3.802  | 19.137 | 1769.58 | 351.518 | 284.247 | 67.271  |
| 2005          | 135881 | 27017.439 | 21184.304 | 5833.135 | 4.293  | 21.590 | 1717.44 | 341.482 | 267.755 | 73.727  |
| 2006          | 131922 | 26231.435 | 19768.464 | 6462.971 | 4.899  | 24.638 | 1652.16 | 328.517 | 247.576 | 80.941  |
| 2007          | 126502 | 25103.049 | 18228.113 | 6874.936 | 5.435  | 27.387 | 1568.04 | 311.161 | 225.944 | 85.217  |
| 2008          | 125859 | 24621.740 | 17253.959 | 7367.781 | 5.854  | 29.924 | 1542.60 | 301.777 | 211.474 | 90.304  |
| 2009          | 122428 | 23741.177 | 16028.325 | 7712.852 | 6.300  | 32.487 | 1482.84 | 287.552 | 194.134 | 93.418  |
| 2010          | 120537 | 23189.160 | 15057.205 | 8131.954 | 6.746  | 35.068 | 1442.22 | 277.458 | 180.159 | 97.299  |
| 2011          | 120221 | 22786.927 | 14128.559 | 8658.369 | 7.202  | 37.997 | 1424.23 | 269.951 | 167.378 | 102.574 |
| 2012          | 120927 | 22485.295 | 13382.974 | 9102.320 | 7.527  | 40.481 | 1417.09 | 263.495 | 156.829 | 106.666 |
| 2013          | 122648 | 22251.884 | 12718.445 | 9533.439 | 7.773  | 42.843 | 1420.86 | 257.786 | 147.342 | 110.444 |
| 2014          | 123229 | 21894.593 | 12002.031 | 9892.562 | 8.028  | 45.183 | 1410.92 | 250.685 | 137.419 | 113.266 |
| 2015          | 123774 | 21471.109 | 11321.133 | 10149.98 | 8.200  | 47.273 | 1594.26 | 276.557 | 145.821 | 130.736 |
| 2016          | 126218 | 21411.568 | 10765.959 | 10645.61 | 8.434  | 49.719 | 1610.55 | 273.213 | 137.374 | 135.838 |
| 2017          | 128265 | 21169.399 | 10187.049 | 10982.35 | 8.562  | 51.878 | 1621.69 | 267.651 | 128.798 | 138.853 |
| 2018          | 121429 | 19830.576 | 8917.419  | 10913.16 | 8.987  | 55.032 | 1521.05 | 248.404 | 111.702 | 136.701 |
| 2019          | 121832 | 19431.014 | 8315.314  | 11115.70 | 9.124  | 57.206 | 1511.26 | 241.031 | 103.147 | 137.884 |
| 2020          | 120811 | 18532.612 | 7679.574  | 10853.04 | 8.984  | 58.562 | 1711.27 | 262.513 | 108.781 | 153.732 |
| 2021          | 119407 | 18234.128 | 7023.197  | 11210.93 | 9.389  | 61.483 | 1679.51 | 256.472 | 98.785  | 157.687 |
| 2022          | 119438 | 17812.559 | 6474.241  | 11338.32 | 9.493  | 63.654 | 1667.10 | 248.626 | 90.367  | 158.259 |
| 2023          | 119445 | 17361.668 | 5960.022  | 11401.65 | 9.545  | 65.671 | 1653.68 | 240.367 | 82.515  | 157.852 |
| 2024          | 119305 | 16929.676 | 5503.785  | 11425.89 | 9.577  | 67.490 | 1638.05 | 232.443 | 75.567  | 156.877 |
| 2025          | 115685 | 15501.666 | 4911.825  | 10589.84 | 9.154  | 68.314 | 1848.78 | 247.735 | 78.497  | 169.238 |
| 2026          | 115073 | 15523.814 | 4534.598  | 10989.22 | 9.550  | 70.789 | 1831.46 | 247.072 | 72.171  | 174.901 |
| 2027          | 113989 | 15073.070 | 4155.901  | 10917.17 | 9.577  | 72.428 | 1805.98 | 238.810 | 65.844  | 172.966 |
| 2028          | 112855 | 14636.710 | 3787.855  | 10848.85 | 9.613  | 74.121 | 1778.98 | 230.725 | 59.710  | 171.015 |
| 2029          | 111718 | 14180.166 | 3454.845  | 10725.32 | 9.600  | 75.636 | 1751.04 | 222.256 | 54.150  | 168.106 |
| 2030          | 104851 | 12111.772 | 2984.700  | 9127.072 | 8.705  | 75.357 | 1963.54 | 226.816 | 55.894  | 170.922 |
| 2031          | 105289 | 12417.367 | 2789.879  | 9627.488 | 9.144  | 77.532 | 1966.62 | 231.935 | 52.110  | 179.825 |
| 2032          | 103879 | 12054.064 | 2526.193  | 9527.871 | 9.172  | 79.043 | 1933.67 | 224.381 | 47.024  | 177.357 |
| 2033          | 102485 | 11672.389 | 2280.707  | 9391.682 | 9.164  | 80.461 | 1899.76 | 216.370 | 42.277  | 174.093 |
| 2034          | 101070 | 11365.762 | 2090.920  | 9274.842 | 9.177  | 81.603 | 1864.51 | 209.673 | 38.573  | 171.100 |
| 2035          | 90820  | 8580.360  | 1651.145  | 6929.215 | 7.630  | 80.757 | 2072.23 | 195.777 | 37.674  | 158.103 |
| 2036          | 92117  | 8948.841  | 1544.251  | 7404.589 | 8.038  | 82.744 | 2101.31 | 204.135 | 35.226  | 168.909 |
| 2037          | 90327  | 8624.570  | 1418.660  | 7205.909 | 7.978  | 83.551 | 2058.21 | 196.522 | 32.326  | 164.196 |
| 2038          | 88590  | 8315.017  | 1286.553  | 7028.464 | 7.934  | 84.527 | 2014.42 | 189.073 | 29.255  | 159.818 |
| 2039          | 86921  | 8001.132  | 1169.313  | 6831.819 | 7.860  | 85.386 | 1970.05 | 181.344 | 26.502  | 154.842 |

## Results for PHIM for Run 9 (Sensitivity\_Analysis\_2.RTF)

\*\*\*\*\*

### Main Results for E-Component for Run: 9, Simulation: 1, COD: STROKE

| Variable Parameter          | Value                                  |
|-----------------------------|----------------------------------------|
| 1. Country                  | US (United States)                     |
| 2. Sex                      | M (Males)                              |
| 3. Year of start of process | 1990                                   |
| 4. Cause of Death           | STROKE                                 |
| 5. Effective Dose NULL      | CC:1                                   |
| 6. Effective Dose Ecig      | CC:1 Ecig:0.05 Dual:0.525              |
| Note:                       | Death rates are per million population |

---

#### Results for Age Groups Combined and Years combined, Population unadjusted for deaths in Ecig scenario,

| Age Group:All | NULL    | Ecig       | %Drop      |          |        |        | NULL    | Ecig   | Drop   |        |
|---------------|---------|------------|------------|----------|--------|--------|---------|--------|--------|--------|
| Year          | Number  | Attrib     | Attrib     | Drop     | %Drop  | Attrib | Death   | Attrib | Attrib | Drop   |
|               | Deaths  | Deaths     | Deaths     | Deaths   | Deaths | Deaths | Rate    | Rates  | Rates  | Rates  |
| All Comb      | 1489699 | 149918.462 | 100045.894 | 49872.57 | 3.348  | 33.266 | 431.236 | 43.398 | 28.961 | 14.437 |

---

#### Results for Age Groups Combined, Population unadjusted for deaths in Ecig scenario,

| Age Group:All | NULL   | Ecig     | %Drop    |          |        |        | NULL    | Ecig   | Drop   |        |
|---------------|--------|----------|----------|----------|--------|--------|---------|--------|--------|--------|
| Year          | Number | Attrib   | Attrib   | Drop     | %Drop  | Attrib | Death   | Attrib | Attrib | Drop   |
|               | Deaths | Deaths   | Deaths   | Deaths   | Deaths | Deaths | Rate    | Rates  | Rates  | Rates  |
| 1990          | 32862  | 4613.166 | 4613.166 | 0.000    | 0.000  | 0.000  | 520.936 | 73.129 | 73.129 | 0.000  |
| 1991          | 32619  | 4555.566 | 4546.538 | 9.028    | 0.028  | 0.198  | 508.609 | 71.032 | 70.891 | 0.141  |
| 1992          | 32100  | 4453.572 | 4432.512 | 21.060   | 0.066  | 0.473  | 492.014 | 68.262 | 67.940 | 0.323  |
| 1993          | 32896  | 4462.473 | 4421.066 | 41.407   | 0.126  | 0.928  | 495.226 | 67.179 | 66.556 | 0.623  |
| 1994          | 33323  | 4499.513 | 4431.727 | 67.786   | 0.203  | 1.507  | 492.290 | 66.473 | 65.471 | 1.001  |
| 1995          | 33569  | 4472.774 | 4368.515 | 104.259  | 0.311  | 2.331  | 486.422 | 64.812 | 63.301 | 1.511  |
| 1996          | 33870  | 4406.878 | 4258.858 | 148.020  | 0.437  | 3.359  | 483.150 | 62.863 | 60.752 | 2.111  |
| 1997          | 33516  | 4288.158 | 4093.815 | 194.343  | 0.580  | 4.532  | 470.307 | 60.173 | 57.446 | 2.727  |
| 1998          | 32795  | 4120.148 | 3877.027 | 243.121  | 0.741  | 5.901  | 452.620 | 56.864 | 53.509 | 3.355  |
| 1999          | 33375  | 3982.443 | 3690.632 | 291.810  | 0.874  | 7.327  | 453.361 | 54.097 | 50.133 | 3.964  |
| 2000          | 33459  | 4021.411 | 3661.054 | 360.357  | 1.077  | 8.961  | 447.853 | 53.827 | 49.004 | 4.823  |
| 2001          | 32275  | 3848.092 | 3429.385 | 418.708  | 1.297  | 10.881 | 426.379 | 50.836 | 45.305 | 5.531  |
| 2002          | 31586  | 3783.081 | 3293.708 | 489.374  | 1.549  | 12.936 | 412.601 | 49.418 | 43.025 | 6.393  |
| 2003          | 30985  | 3754.415 | 3178.374 | 576.042  | 1.859  | 15.343 | 400.541 | 48.533 | 41.087 | 7.446  |
| 2004          | 29884  | 3666.274 | 3017.265 | 649.009  | 2.172  | 17.702 | 382.149 | 46.883 | 38.584 | 8.299  |
| 2005          | 28708  | 3589.688 | 2861.729 | 727.960  | 2.536  | 20.279 | 362.850 | 45.371 | 36.170 | 9.201  |
| 2006          | 28188  | 3596.985 | 2753.438 | 843.546  | 2.993  | 23.451 | 353.021 | 45.048 | 34.484 | 10.564 |
| 2007          | 28026  | 3560.798 | 2627.189 | 933.609  | 3.331  | 26.219 | 347.392 | 44.137 | 32.565 | 11.572 |
| 2008          | 27128  | 3417.001 | 2421.921 | 995.080  | 3.668  | 29.121 | 332.495 | 41.881 | 29.684 | 12.196 |
| 2009          | 27068  | 3394.390 | 2310.724 | 1083.666 | 4.003  | 31.925 | 327.847 | 41.113 | 27.987 | 13.125 |
| 2010          | 26911  | 3340.137 | 2190.305 | 1149.833 | 4.273  | 34.425 | 321.990 | 39.965 | 26.207 | 13.758 |
| 2011          | 26959  | 3285.435 | 2066.716 | 1218.719 | 4.521  | 37.095 | 319.377 | 38.922 | 24.484 | 14.438 |
| 2012          | 27057  | 3259.209 | 1952.551 | 1306.659 | 4.829  | 40.091 | 317.068 | 38.193 | 22.881 | 15.312 |
| 2013          | 27904  | 3274.703 | 1878.996 | 1395.707 | 5.002  | 42.621 | 323.265 | 37.937 | 21.768 | 16.169 |
| 2014          | 28792  | 3298.083 | 1803.369 | 1494.714 | 5.191  | 45.321 | 329.657 | 37.762 | 20.648 | 17.114 |
| 2015          | 29560  | 3244.406 | 1709.273 | 1535.133 | 5.193  | 47.316 | 380.745 | 41.789 | 22.016 | 19.773 |
| 2016          | 30513  | 3314.836 | 1651.820 | 1663.016 | 5.450  | 50.169 | 389.347 | 42.297 | 21.077 | 21.220 |
| 2017          | 31416  | 3333.314 | 1574.860 | 1758.453 | 5.597  | 52.754 | 397.202 | 42.144 | 19.911 | 22.233 |
| 2018          | 29348  | 2925.242 | 1322.818 | 1602.424 | 5.460  | 54.779 | 367.626 | 36.642 | 16.570 | 20.072 |
| 2019          | 29598  | 2864.628 | 1226.874 | 1637.754 | 5.533  | 57.172 | 367.149 | 35.534 | 15.219 | 20.315 |
| 2020          | 29592  | 2730.366 | 1125.255 | 1605.111 | 5.424  | 58.787 | 419.174 | 38.675 | 15.939 | 22.736 |
| 2021          | 30097  | 2647.911 | 1033.147 | 1614.763 | 5.365  | 60.983 | 423.328 | 37.244 | 14.532 | 22.712 |
| 2022          | 30304  | 2586.165 | 950.088  | 1636.076 | 5.399  | 63.263 | 422.974 | 36.097 | 13.261 | 22.836 |
| 2023          | 30505  | 2517.960 | 874.366  | 1643.594 | 5.388  | 65.275 | 422.337 | 34.860 | 12.105 | 22.755 |
| 2024          | 30661  | 2454.161 | 805.272  | 1648.888 | 5.378  | 67.187 | 420.968 | 33.695 | 11.056 | 22.639 |
| 2025          | 30254  | 2275.364 | 714.034  | 1561.330 | 5.161  | 68.619 | 483.488 | 36.363 | 11.411 | 24.952 |
| 2026          | 30685  | 2183.166 | 648.789  | 1534.377 | 5.000  | 70.282 | 488.380 | 34.747 | 10.326 | 24.421 |
| 2027          | 30561  | 2112.345 | 592.007  | 1520.337 | 4.975  | 71.974 | 484.196 | 33.467 | 9.379  | 24.087 |
| 2028          | 30412  | 2046.677 | 537.067  | 1509.610 | 4.964  | 73.759 | 479.392 | 32.263 | 8.466  | 23.797 |
| 2029          | 30254  | 1977.671 | 485.655  | 1492.017 | 4.932  | 75.443 | 474.195 | 30.997 | 7.612  | 23.385 |
| 2030          | 29330  | 1744.457 | 420.443  | 1324.014 | 4.514  | 75.898 | 549.260 | 32.668 | 7.874  | 24.795 |
| 2031          | 28976  | 1653.738 | 372.832  | 1280.906 | 4.421  | 77.455 | 541.223 | 30.889 | 6.964  | 23.925 |
| 2032          | 28724  | 1603.120 | 333.310  | 1269.811 | 4.421  | 79.209 | 534.690 | 29.841 | 6.204  | 23.637 |
| 2033          | 28464  | 1548.245 | 299.516  | 1248.729 | 4.387  | 80.654 | 527.627 | 28.700 | 5.552  | 23.148 |
| 2034          | 28178  | 1511.985 | 274.322  | 1237.663 | 4.392  | 81.857 | 519.826 | 27.893 | 5.061  | 22.832 |
| 2035          | 26737  | 1239.866 | 222.922  | 1016.944 | 3.803  | 82.020 | 610.065 | 28.290 | 5.086  | 23.204 |
| 2036          | 25591  | 1182.522 | 196.270  | 986.252  | 3.854  | 83.402 | 583.762 | 26.975 | 4.477  | 22.498 |
| 2037          | 25143  | 1134.483 | 181.632  | 952.851  | 3.790  | 83.990 | 572.916 | 25.851 | 4.139  | 21.712 |
| 2038          | 24693  | 1093.537 | 164.480  | 929.056  | 3.762  | 84.959 | 561.491 | 24.866 | 3.740  | 21.126 |
| 2039          | 24247  | 1047.905 | 148.262  | 899.643  | 3.710  | 85.852 | 549.553 | 23.751 | 3.360  | 20.390 |

## Results for PHIM for Run 9 (Sensitivity\_Analysis\_2.RTF)

\*\*\*\*\*

### Main Results for E-Component for Run: 9, Simulation: 1, COD: COPD

| Variable Parameter          | Value                                  |
|-----------------------------|----------------------------------------|
| 1. Country                  | US (United States)                     |
| 2. Sex                      | M (Males)                              |
| 3. Year of start of process | 1990                                   |
| 4. Cause of Death           | COPD                                   |
| 5. Effective Dose NULL      | CC:1                                   |
| 6. Effective Dose Ecig      | CC:1 Ecig:0.05 Dual:0.525              |
| Note:                       | Death rates are per million population |

---

#### Results for Age Groups Combined and Years combined, Population unadjusted for deaths in Ecig scenario,

| Age Group:All | NULL    | Ecig        | %Drop      |          |        | NULL   | Ecig    | Drop    |         |        |
|---------------|---------|-------------|------------|----------|--------|--------|---------|---------|---------|--------|
| Year          | Number  | Attrib      | Attrib     | Drop     | %Drop  | Attrib | Death   | Attrib  | Attrib  | Drop   |
|               | Deaths  | Deaths      | Deaths     | Deaths   | Deaths | Deaths | Rate    | Rates   | Rates   | Rates  |
| All Comb      | 2233143 | 1015606.587 | 818427.480 | 197179.1 | 8.830  | 19.415 | 646.447 | 293.996 | 236.917 | 57.079 |

---

#### Results for Age Groups Combined, Population unadjusted for deaths in Ecig scenario,

| Age Group:All | NULL   | Ecig      | %Drop     |          |        | NULL   | Ecig    | Drop    |         |         |
|---------------|--------|-----------|-----------|----------|--------|--------|---------|---------|---------|---------|
| Year          | Number | Attrib    | Attrib    | Drop     | %Drop  | Attrib | Death   | Attrib  | Attrib  | Drop    |
|               | Deaths | Deaths    | Deaths    | Deaths   | Deaths | Deaths | Rate    | Rates   | Rates   | Rates   |
| 1990          | 33993  | 19262.437 | 19262.437 | 0.000    | 0.000  | 0.000  | 538.865 | 305.353 | 305.353 | 0.000   |
| 1991          | 34092  | 19215.636 | 19211.347 | 4.289    | 0.013  | 0.022  | 531.576 | 299.618 | 299.551 | 0.067   |
| 1992          | 33942  | 19056.189 | 19049.818 | 6.372    | 0.019  | 0.033  | 520.248 | 292.085 | 291.987 | 0.098   |
| 1993          | 35913  | 20095.670 | 20082.842 | 12.827   | 0.036  | 0.064  | 540.645 | 302.526 | 302.333 | 0.193   |
| 1994          | 35074  | 19524.095 | 19505.552 | 18.543   | 0.053  | 0.095  | 518.158 | 288.435 | 288.161 | 0.274   |
| 1995          | 34669  | 19116.002 | 19085.556 | 30.446   | 0.088  | 0.159  | 502.362 | 276.995 | 276.554 | 0.441   |
| 1996          | 34582  | 18975.021 | 18934.124 | 40.898   | 0.118  | 0.216  | 493.306 | 270.675 | 270.092 | 0.583   |
| 1997          | 35267  | 19169.025 | 19110.409 | 58.616   | 0.166  | 0.306  | 494.878 | 268.986 | 268.163 | 0.823   |
| 1998          | 35675  | 19228.937 | 19142.200 | 86.738   | 0.243  | 0.451  | 492.368 | 265.388 | 264.191 | 1.197   |
| 1999          | 38516  | 20589.820 | 20476.049 | 113.772  | 0.295  | 0.553  | 523.195 | 279.689 | 278.143 | 1.545   |
| 2000          | 36283  | 19196.417 | 19049.820 | 146.597  | 0.404  | 0.764  | 485.652 | 256.946 | 254.984 | 1.962   |
| 2001          | 36281  | 19012.731 | 18819.130 | 193.601  | 0.534  | 1.018  | 479.301 | 251.174 | 248.616 | 2.558   |
| 2002          | 35983  | 18699.357 | 18452.708 | 246.649  | 0.685  | 1.319  | 470.038 | 244.265 | 241.043 | 3.222   |
| 2003          | 36205  | 18663.550 | 18365.670 | 297.880  | 0.823  | 1.596  | 468.019 | 241.262 | 237.412 | 3.851   |
| 2004          | 34611  | 17679.164 | 17317.725 | 361.439  | 1.044  | 2.044  | 442.596 | 226.076 | 221.454 | 4.622   |
| 2005          | 36826  | 18692.832 | 18227.982 | 464.850  | 1.262  | 2.487  | 465.456 | 236.265 | 230.389 | 5.875   |
| 2006          | 34350  | 17308.564 | 16771.978 | 536.586  | 1.562  | 3.100  | 430.192 | 216.769 | 210.049 | 6.720   |
| 2007          | 35326  | 17683.181 | 17007.105 | 676.076  | 1.914  | 3.823  | 437.879 | 219.189 | 210.809 | 8.380   |
| 2008          | 38248  | 19006.374 | 18168.161 | 838.213  | 2.192  | 4.410  | 468.788 | 232.952 | 222.679 | 10.274  |
| 2009          | 36902  | 18205.573 | 17233.291 | 972.282  | 2.635  | 5.341  | 446.956 | 220.505 | 208.729 | 11.776  |
| 2010          | 37234  | 18237.758 | 17132.631 | 1105.127 | 2.968  | 6.060  | 445.505 | 218.215 | 204.992 | 13.223  |
| 2011          | 38093  | 18487.916 | 17115.684 | 1372.233 | 3.602  | 7.422  | 451.279 | 219.022 | 202.765 | 16.257  |
| 2012          | 38504  | 18491.158 | 16923.025 | 1568.134 | 4.073  | 8.480  | 451.211 | 216.689 | 198.313 | 18.376  |
| 2013          | 40290  | 19143.452 | 17299.517 | 1843.935 | 4.577  | 9.632  | 466.755 | 221.775 | 200.413 | 21.362  |
| 2014          | 40339  | 18992.005 | 16916.981 | 2075.024 | 5.144  | 10.926 | 461.866 | 217.451 | 193.693 | 23.758  |
| 2015          | 42303  | 19728.885 | 17398.932 | 2329.952 | 5.508  | 11.810 | 544.880 | 254.116 | 224.106 | 30.011  |
| 2016          | 43104  | 19876.724 | 17266.130 | 2610.594 | 6.057  | 13.134 | 550.009 | 253.628 | 220.317 | 33.311  |
| 2017          | 44107  | 20119.790 | 17192.592 | 2927.198 | 6.637  | 14.549 | 557.659 | 254.381 | 217.371 | 37.009  |
| 2018          | 45469  | 20535.123 | 17231.626 | 3303.497 | 7.265  | 16.087 | 569.564 | 257.229 | 215.849 | 41.381  |
| 2019          | 46963  | 21009.029 | 17313.167 | 3695.862 | 7.870  | 17.592 | 582.552 | 260.605 | 214.760 | 45.845  |
| 2020          | 48419  | 21428.512 | 17345.358 | 4083.154 | 8.433  | 19.055 | 685.853 | 303.533 | 245.696 | 57.838  |
| 2021          | 48463  | 21266.697 | 16781.815 | 4484.882 | 9.254  | 21.089 | 681.652 | 299.127 | 236.045 | 63.082  |
| 2022          | 49915  | 21663.568 | 16687.215 | 4976.353 | 9.970  | 22.971 | 696.712 | 302.378 | 232.918 | 69.459  |
| 2023          | 51391  | 22084.131 | 16555.055 | 5529.076 | 10.759 | 25.036 | 711.491 | 305.748 | 229.200 | 76.548  |
| 2024          | 52811  | 22418.456 | 16391.250 | 6027.205 | 11.413 | 26.885 | 725.093 | 307.804 | 225.051 | 82.753  |
| 2025          | 53848  | 22614.834 | 16140.915 | 6473.919 | 12.023 | 28.627 | 860.553 | 361.411 | 257.950 | 103.461 |
| 2026          | 54342  | 22571.522 | 15669.774 | 6901.748 | 12.701 | 30.577 | 864.886 | 359.241 | 249.395 | 109.846 |
| 2027          | 55267  | 22774.416 | 15297.123 | 7477.293 | 13.529 | 32.832 | 875.619 | 360.827 | 242.360 | 118.467 |
| 2028          | 56149  | 22915.561 | 14906.908 | 8008.652 | 14.263 | 34.949 | 885.102 | 361.228 | 234.984 | 126.244 |
| 2029          | 57014  | 22992.027 | 14482.952 | 8509.076 | 14.925 | 37.009 | 893.616 | 360.371 | 227.002 | 133.369 |
| 2030          | 57238  | 22895.360 | 13976.716 | 8918.644 | 15.582 | 38.954 | 1071.90 | 428.760 | 261.741 | 167.019 |
| 2031          | 57592  | 22715.871 | 13450.496 | 9265.375 | 16.088 | 40.788 | 1075.71 | 424.293 | 251.232 | 173.061 |
| 2032          | 58251  | 22759.207 | 12920.534 | 9838.673 | 16.890 | 43.229 | 1084.31 | 423.652 | 240.510 | 183.142 |
| 2033          | 58885  | 22786.258 | 12412.631 | 10373.63 | 17.617 | 45.526 | 1091.54 | 422.387 | 230.092 | 192.295 |
| 2034          | 59460  | 22806.106 | 11896.592 | 10909.51 | 18.348 | 47.836 | 1096.89 | 420.721 | 219.465 | 201.256 |
| 2035          | 58516  | 22262.998 | 11306.164 | 10956.83 | 18.725 | 49.215 | 1335.15 | 507.973 | 257.972 | 250.001 |
| 2036          | 56446  | 21140.051 | 10107.797 | 11032.25 | 19.545 | 52.187 | 1287.60 | 482.234 | 230.573 | 251.661 |
| 2037          | 56568  | 21011.845 | 9554.094  | 11457.75 | 20.255 | 54.530 | 1288.98 | 478.783 | 217.703 | 261.080 |
| 2038          | 56668  | 20787.483 | 8997.745  | 11789.74 | 20.805 | 56.716 | 1288.55 | 472.681 | 204.597 | 268.084 |
| 2039          | 56758  | 20709.267 | 8482.158  | 12227.11 | 21.543 | 59.042 | 1286.40 | 469.372 | 192.247 | 277.125 |

## Results for PHIM for Run 9 (Sensitivity\_Analysis\_2.RTF)

\*\*\*\*\*

### Main Results for E-Component for Run: 9, Simulation: 1, COD: Four Diseases Combined, Adjusted

| Variable Parameter          | Value                                  |
|-----------------------------|----------------------------------------|
| 1. Country                  | US (United States)                     |
| 2. Sex                      | M (Males)                              |
| 3. Year of start of process | 1990                                   |
| 4. Cause of Death           | Four Diseases Combined                 |
| 5. Effective Dose NULL      | CC:1                                   |
| 6. Effective Dose Ecig      | CC:1 Ecig:0.05 Dual:0.525              |
| Note:                       | Death rates are per million population |

#### Results for Age Groups Combined and Years combined, Population and Number deaths adjusted for Ecig scenario,

| Age Group: | All      | NULL        | Ecig        | %Drop    |        |        | NULL    | Ecig    | Drop    |         |
|------------|----------|-------------|-------------|----------|--------|--------|---------|---------|---------|---------|
| Year       | Number   | Attrib      | Attrib      | Drop     | %Drop  | Attrib | Death   | Attrib  | Drop    |         |
|            | Deaths   | Deaths      | Deaths      | Deaths   | Deaths | Deaths | Rate    | Rates   | Rates   |         |
| All Comb   | 13197783 | 4509390.583 | 3653009.662 | 856380.9 | 6.489  | 18.991 | 3806.93 | 1305.37 | 1053.72 | 251.653 |

#### Results for Age Groups Combined, Population and Number deaths adjusted for Ecig scenario,

| Age Group: | All    | NULL       | Ecig       | %Drop    |        |        | NULL    | Ecig    | Drop    |         |
|------------|--------|------------|------------|----------|--------|--------|---------|---------|---------|---------|
| Year       | Number | Attrib     | Attrib     | Drop     | %Drop  | Attrib | Death   | Attrib  | Drop    |         |
|            | Deaths | Deaths     | Deaths     | Deaths   | Deaths | Deaths | Rate    | Rates   | Rates   |         |
| 1990       | 317161 | 125773.065 | 125773.065 | 0.000    | 0.000  | 0.000  | 5027.71 | 1993.78 | 1993.78 | 0.000   |
| 1991       | 313217 | 123999.442 | 123893.979 | 105.463  | 0.034  | 0.085  | 4883.81 | 1933.45 | 1931.81 | 1.644   |
| 1992       | 308578 | 122014.015 | 121755.705 | 258.311  | 0.084  | 0.212  | 4729.73 | 1870.18 | 1866.21 | 3.962   |
| 1993       | 311714 | 122810.618 | 122326.083 | 484.535  | 0.155  | 0.395  | 4692.61 | 1848.83 | 1841.52 | 7.305   |
| 1994       | 305703 | 119925.592 | 119167.665 | 757.927  | 0.248  | 0.632  | 4516.17 | 1771.69 | 1760.47 | 11.220  |
| 1995       | 303229 | 117896.496 | 116778.678 | 1117.818 | 0.369  | 0.948  | 4393.75 | 1708.35 | 1692.11 | 16.239  |
| 1996       | 299566 | 115698.645 | 114165.376 | 1533.270 | 0.512  | 1.325  | 4273.08 | 1650.42 | 1628.48 | 21.939  |
| 1997       | 294237 | 113359.847 | 111395.434 | 1964.413 | 0.668  | 1.733  | 4128.56 | 1590.70 | 1563.04 | 27.666  |
| 1998       | 289273 | 111444.212 | 108997.807 | 2446.405 | 0.846  | 2.195  | 3992.03 | 1538.10 | 1504.19 | 33.904  |
| 1999       | 311026 | 114877.722 | 111435.741 | 3441.981 | 1.107  | 2.996  | 4224.38 | 1560.48 | 1513.53 | 46.950  |
| 2000       | 303819 | 112379.704 | 108289.417 | 4090.287 | 1.346  | 3.640  | 4065.93 | 1504.22 | 1449.21 | 55.007  |
| 2001       | 296338 | 110024.943 | 105178.389 | 4846.554 | 1.635  | 4.405  | 3913.95 | 1453.52 | 1389.16 | 64.355  |
| 2002       | 291957 | 108289.173 | 102546.867 | 5742.307 | 1.967  | 5.303  | 3812.61 | 1414.56 | 1339.14 | 75.418  |
| 2003       | 285941 | 106539.023 | 99971.265  | 6567.758 | 2.297  | 6.165  | 3694.92 | 1377.22 | 1291.83 | 85.397  |
| 2004       | 274270 | 103037.251 | 95743.995  | 7293.256 | 2.659  | 7.078  | 3505.63 | 1317.61 | 1223.77 | 93.844  |
| 2005       | 272495 | 103044.562 | 94808.965  | 8235.598 | 3.022  | 7.992  | 3442.18 | 1302.41 | 1197.63 | 104.779 |
| 2006       | 264258 | 99672.555  | 90389.498  | 9283.057 | 3.513  | 9.314  | 3307.25 | 1248.28 | 1131.25 | 117.033 |
| 2007       | 258587 | 97839.152  | 87684.843  | 10154.31 | 3.927  | 10.379 | 3202.70 | 1212.75 | 1086.01 | 126.744 |
| 2008       | 259665 | 98075.852  | 86923.235  | 11152.62 | 4.295  | 11.371 | 3179.59 | 1202.07 | 1064.38 | 137.695 |
| 2009       | 254146 | 95617.338  | 83593.408  | 12023.93 | 4.731  | 12.575 | 3074.87 | 1158.11 | 1011.38 | 146.732 |
| 2010       | 252157 | 94607.988  | 81668.911  | 12939.08 | 5.131  | 13.677 | 3013.33 | 1131.98 | 975.960 | 156.024 |
| 2011       | 252104 | 93633.119  | 79431.460  | 14201.66 | 5.633  | 15.167 | 2982.45 | 1109.25 | 939.692 | 169.557 |
| 2012       | 253023 | 92775.175  | 77454.963  | 15320.21 | 6.055  | 16.513 | 2960.41 | 1087.19 | 906.237 | 180.952 |
| 2013       | 256618 | 92345.780  | 75836.806  | 16508.97 | 6.433  | 17.877 | 2967.69 | 1069.82 | 877.026 | 192.790 |
| 2014       | 257902 | 91379.215  | 73795.632  | 17583.58 | 6.818  | 19.242 | 2947.15 | 1046.26 | 843.293 | 202.963 |
| 2015       | 260368 | 90750.242  | 72264.325  | 18485.92 | 7.100  | 20.370 | 3345.64 | 1168.90 | 928.572 | 240.330 |
| 2016       | 262117 | 88811.996  | 69149.907  | 19662.09 | 7.501  | 22.139 | 3335.85 | 1133.24 | 880.039 | 253.206 |
| 2017       | 264433 | 87325.126  | 66613.565  | 20711.56 | 7.832  | 23.718 | 3333.71 | 1104.08 | 839.796 | 264.283 |
| 2018       | 259527 | 87612.144  | 65888.223  | 21723.92 | 8.371  | 24.796 | 3240.74 | 1097.46 | 822.752 | 274.704 |
| 2019       | 262348 | 87797.760  | 64830.564  | 22967.20 | 8.754  | 26.159 | 3243.23 | 1089.08 | 801.456 | 287.626 |
| 2020       | 263302 | 87221.042  | 63579.586  | 23641.46 | 8.979  | 27.105 | 3714.40 | 1235.48 | 896.914 | 338.565 |
| 2021       | 256164 | 82001.292  | 57718.488  | 24282.80 | 9.479  | 29.613 | 3587.17 | 1153.39 | 808.254 | 345.135 |
| 2022       | 258293 | 81915.977  | 56328.247  | 25587.73 | 9.906  | 31.237 | 3588.13 | 1143.37 | 782.493 | 360.882 |
| 2023       | 260396 | 81810.810  | 54886.250  | 26924.56 | 10.340 | 32.911 | 3586.77 | 1132.64 | 756.018 | 376.627 |
| 2024       | 262165 | 81528.303  | 53423.621  | 28104.68 | 10.720 | 34.472 | 3579.91 | 1119.38 | 729.510 | 389.868 |
| 2025       | 258879 | 79599.213  | 51509.446  | 28089.77 | 10.851 | 35.289 | 4110.74 | 1272.09 | 817.918 | 454.169 |
| 2026       | 253188 | 75082.462  | 46631.621  | 28450.84 | 11.237 | 37.893 | 4002.15 | 1194.99 | 737.107 | 457.882 |
| 2027       | 252782 | 74444.425  | 44869.816  | 29574.61 | 11.700 | 39.727 | 3975.86 | 1179.46 | 705.730 | 473.731 |
| 2028       | 252219 | 73699.585  | 43087.433  | 30612.15 | 12.137 | 41.536 | 3945.16 | 1161.76 | 673.964 | 487.796 |
| 2029       | 251606 | 72819.703  | 41298.425  | 31521.28 | 12.528 | 43.287 | 3911.33 | 1141.36 | 642.003 | 499.354 |
| 2030       | 242715 | 69309.277  | 39029.725  | 30279.55 | 12.475 | 43.688 | 4502.96 | 1297.95 | 724.098 | 573.851 |
| 2031       | 237726 | 65433.368  | 35067.386  | 30365.98 | 12.774 | 46.407 | 4396.50 | 1222.18 | 648.534 | 573.647 |
| 2032       | 236444 | 64643.552  | 33307.801  | 31335.75 | 13.253 | 48.475 | 4355.44 | 1203.31 | 613.549 | 589.760 |
| 2033       | 235135 | 63793.514  | 31609.225  | 32184.29 | 13.688 | 50.451 | 4310.80 | 1182.54 | 579.502 | 603.035 |
| 2034       | 233692 | 63032.151  | 29994.613  | 33037.54 | 14.137 | 52.414 | 4261.23 | 1162.80 | 546.934 | 615.866 |
| 2035       | 218570 | 57653.301  | 27695.809  | 29957.49 | 13.706 | 51.961 | 4923.81 | 1315.47 | 623.914 | 691.556 |
| 2036       | 210991 | 52988.733  | 23418.991  | 29569.74 | 14.015 | 55.804 | 4748.70 | 1208.75 | 527.084 | 681.662 |
| 2037       | 208421 | 52026.921  | 21993.886  | 30033.03 | 14.410 | 57.726 | 4682.61 | 1185.50 | 494.138 | 691.365 |
| 2038       | 205887 | 50943.211  | 20559.342  | 30383.87 | 14.758 | 59.643 | 4612.91 | 1158.38 | 460.632 | 697.751 |
| 2039       | 203428 | 50085.991  | 19246.180  | 30839.81 | 15.160 | 61.574 | 4539.92 | 1135.19 | 429.518 | 705.673 |

## Results for PHIM for Run 9 (Sensitivity\_Analysis\_2.RTF)

\*\*\*\*\*

### Main Results for E-Component for Run: 9, Simulation: 1, COD: LUNG CANCER, Adjusted

| Variable Parameter          | Value                                  |
|-----------------------------|----------------------------------------|
| 1. Country                  | US (United States)                     |
| 2. Sex                      | M (Males)                              |
| 3. Year of start of process | 1990                                   |
| 4. Cause of Death           | LUNG CANCER                            |
| 5. Effective Dose NULL      | CC:1                                   |
| 6. Effective Dose Ecig      | CC:1 Ecig:0.05 Dual:0.525              |
| Note:                       | Death rates are per million population |

### Results for Age Groups Combined and Years combined, Population and Number deaths adjusted for Ecig scenario,

| Age Group:All |         | NULL        | Ecig        | %Drop    |        |        | NULL    | Ecig    | Drop    |        |
|---------------|---------|-------------|-------------|----------|--------|--------|---------|---------|---------|--------|
| Year          | Number  | Attrib      | Attrib      | Drop     | %Drop  | Attrib | Death   | Attrib  | Attrib  | Drop   |
|               | Deaths  | Deaths      | Deaths      | Deaths   | Deaths | Deaths | Rate    | Rates   | Rates   | Rates  |
| All Comb      | 3075801 | 2244988.113 | 1988679.945 | 256308.2 | 8.333  | 11.417 | 887.221 | 649.875 | 573.639 | 76.237 |

### Results for Age Groups Combined, Population and Number deaths adjusted for Ecig scenario,

| Age Group:All |        | NULL      | Ecig      | %Drop    |        |        | NULL    | Ecig    | Drop    |         |
|---------------|--------|-----------|-----------|----------|--------|--------|---------|---------|---------|---------|
| Year          | Number | Attrib    | Attrib    | Drop     | %Drop  | Attrib | Death   | Attrib  | Attrib  | Drop    |
|               | Deaths | Deaths    | Deaths    | Deaths   | Deaths | Deaths | Rate    | Rates   | Rates   | Rates   |
| 1990          | 78822  | 63385.736 | 63385.736 | 0.000    | 0.000  | 0.000  | 1249.50 | 1004.81 | 1004.81 | 0.000   |
| 1991          | 78462  | 62918.402 | 62908.710 | 9.693    | 0.012  | 0.015  | 1223.41 | 981.049 | 980.898 | 0.151   |
| 1992          | 77987  | 62366.766 | 62347.653 | 19.113   | 0.025  | 0.031  | 1195.35 | 955.930 | 955.635 | 0.295   |
| 1993          | 78542  | 62652.888 | 62615.087 | 37.801   | 0.048  | 0.060  | 1182.39 | 943.195 | 942.620 | 0.574   |
| 1994          | 77438  | 61565.227 | 61505.796 | 59.431   | 0.077  | 0.097  | 1143.99 | 909.520 | 908.630 | 0.890   |
| 1995          | 76905  | 60851.961 | 60758.592 | 93.369   | 0.121  | 0.153  | 1114.35 | 881.759 | 880.384 | 1.375   |
| 1996          | 76234  | 60122.922 | 59984.368 | 138.553  | 0.182  | 0.230  | 1087.42 | 857.643 | 855.631 | 2.012   |
| 1997          | 75476  | 59237.155 | 59048.208 | 188.947  | 0.250  | 0.319  | 1059.03 | 831.234 | 828.530 | 2.705   |
| 1998          | 75385  | 58906.696 | 58644.793 | 261.903  | 0.347  | 0.445  | 1040.33 | 813.001 | 809.310 | 3.690   |
| 1999          | 73165  | 56930.073 | 56597.346 | 332.727  | 0.455  | 0.584  | 993.733 | 773.329 | 768.711 | 4.619   |
| 2000          | 73793  | 57137.121 | 56700.167 | 436.953  | 0.592  | 0.765  | 987.546 | 764.787 | 758.804 | 5.984   |
| 2001          | 73306  | 56481.726 | 55920.657 | 561.069  | 0.765  | 0.993  | 968.198 | 746.169 | 738.583 | 7.587   |
| 2002          | 72457  | 55588.365 | 54888.346 | 700.019  | 0.966  | 1.259  | 946.207 | 726.138 | 716.776 | 9.362   |
| 2003          | 71962  | 54945.856 | 54093.908 | 851.948  | 1.184  | 1.551  | 929.891 | 710.281 | 699.000 | 11.281  |
| 2004          | 71326  | 54203.126 | 53163.781 | 1039.345 | 1.457  | 1.917  | 911.668 | 693.135 | 679.522 | 13.613  |
| 2005          | 70995  | 53744.603 | 52514.166 | 1230.437 | 1.733  | 2.289  | 896.818 | 679.296 | 663.363 | 15.932  |
| 2006          | 69696  | 52535.572 | 51071.811 | 1463.760 | 2.100  | 2.786  | 872.261 | 657.945 | 639.176 | 18.769  |
| 2007          | 68610  | 51492.124 | 49794.824 | 1697.300 | 2.474  | 3.296  | 849.764 | 638.264 | 616.727 | 21.537  |
| 2008          | 68281  | 51030.736 | 49046.935 | 1983.801 | 2.905  | 3.887  | 836.099 | 625.460 | 600.580 | 24.880  |
| 2009          | 67574  | 50276.199 | 47984.989 | 2291.209 | 3.391  | 4.557  | 817.564 | 608.943 | 580.562 | 28.381  |
| 2010          | 67272  | 49840.933 | 47248.428 | 2592.505 | 3.854  | 5.202  | 803.914 | 596.347 | 564.628 | 31.718  |
| 2011          | 66594  | 49072.841 | 46075.234 | 2997.607 | 4.501  | 6.108  | 787.818 | 581.354 | 545.080 | 36.274  |
| 2012          | 66256  | 48539.512 | 45146.040 | 3393.472 | 5.122  | 6.991  | 775.207 | 568.812 | 528.217 | 40.595  |
| 2013          | 65448  | 47675.741 | 43883.106 | 3792.635 | 5.795  | 7.955  | 756.885 | 552.318 | 507.493 | 44.826  |
| 2014          | 65164  | 47194.534 | 43010.849 | 4183.684 | 6.420  | 8.865  | 744.653 | 540.359 | 491.503 | 48.856  |
| 2015          | 64292  | 46305.842 | 41765.361 | 4540.481 | 7.062  | 9.805  | 726.133 | 526.439 | 476.670 | 59.768  |
| 2016          | 61777  | 44208.867 | 39389.754 | 4819.112 | 7.801  | 10.901 | 786.208 | 564.107 | 501.295 | 62.812  |
| 2017          | 60069  | 42702.624 | 37576.004 | 5126.620 | 8.535  | 12.005 | 757.290 | 539.903 | 473.720 | 66.183  |
| 2018          | 62668  | 44321.202 | 38330.077 | 5991.125 | 9.560  | 13.518 | 782.547 | 555.181 | 478.631 | 76.550  |
| 2019          | 63270  | 44493.088 | 37882.124 | 6610.964 | 10.449 | 14.858 | 782.159 | 551.912 | 468.311 | 83.601  |
| 2020          | 63717  | 44529.551 | 37329.058 | 7200.494 | 11.301 | 16.170 | 898.849 | 630.757 | 526.599 | 104.158 |
| 2021          | 57361  | 39852.556 | 32775.241 | 7077.315 | 12.338 | 17.759 | 803.247 | 560.546 | 458.964 | 101.582 |
| 2022          | 57713  | 39853.685 | 32105.207 | 7748.478 | 13.426 | 19.442 | 801.736 | 556.274 | 445.995 | 110.279 |
| 2023          | 58038  | 39847.050 | 31378.584 | 8468.466 | 14.591 | 21.252 | 799.435 | 551.670 | 432.217 | 119.453 |
| 2024          | 58271  | 39726.010 | 30597.979 | 9128.031 | 15.665 | 22.977 | 795.704 | 545.435 | 417.822 | 127.614 |
| 2025          | 57879  | 39207.348 | 29611.074 | 9596.274 | 16.580 | 24.476 | 919.065 | 626.579 | 470.194 | 156.385 |
| 2026          | 51773  | 34803.960 | 25641.660 | 9162.300 | 17.697 | 26.325 | 818.370 | 553.929 | 405.318 | 148.611 |
| 2027          | 51543  | 34484.595 | 24682.149 | 9802.445 | 19.018 | 28.426 | 810.695 | 546.357 | 388.210 | 158.146 |
| 2028          | 51270  | 34100.638 | 23707.386 | 10393.25 | 20.272 | 30.478 | 801.949 | 537.544 | 370.826 | 166.718 |
| 2029          | 50969  | 33669.838 | 22721.627 | 10948.21 | 21.480 | 32.516 | 792.329 | 527.732 | 353.218 | 174.514 |
| 2030          | 49562  | 32557.688 | 21490.716 | 11066.97 | 22.330 | 33.992 | 919.490 | 609.705 | 398.706 | 210.999 |
| 2031          | 44011  | 28646.393 | 18294.361 | 10352.03 | 23.522 | 36.137 | 813.930 | 535.065 | 338.335 | 196.730 |
| 2032          | 43613  | 28227.160 | 17365.161 | 10862.00 | 24.905 | 38.481 | 803.384 | 525.435 | 319.876 | 205.559 |
| 2033          | 43202  | 27786.623 | 16450.973 | 11335.65 | 26.239 | 40.795 | 792.036 | 515.079 | 301.601 | 213.478 |
| 2034          | 42759  | 27348.299 | 15564.358 | 11783.94 | 27.559 | 43.088 | 779.682 | 504.514 | 283.807 | 220.707 |
| 2035          | 40258  | 25570.077 | 14348.546 | 11221.53 | 27.874 | 43.885 | 906.900 | 583.430 | 323.235 | 260.195 |
| 2036          | 34489  | 21171.319 | 11410.994 | 10306.33 | 29.883 | 47.457 | 776.231 | 495.402 | 256.824 | 238.578 |
| 2037          | 33931  | 21256.024 | 10679.886 | 10576.14 | 31.170 | 49.756 | 762.328 | 484.347 | 239.945 | 244.401 |
| 2038          | 33378  | 20747.175 | 9952.286  | 10794.89 | 32.341 | 52.031 | 747.844 | 471.764 | 222.981 | 248.783 |
| 2039          | 32838  | 20327.688 | 9289.848  | 11037.84 | 33.613 | 54.300 | 732.855 | 460.724 | 207.322 | 253.402 |

## Results for PHIM for Run 9 (Sensitivity\_Analysis\_2.RTF)

\*\*\*\*\*

### Main Results for E-Component for Run: 9, Simulation: 1, COD: IHD, Adjusted

| Variable Parameter          | Value                                  |
|-----------------------------|----------------------------------------|
| 1. Country                  | US (United States)                     |
| 2. Sex                      | M (Males)                              |
| 3. Year of start of process | 1990                                   |
| 4. Cause of Death           | IHD                                    |
| 5. Effective Dose NULL      | CC:1                                   |
| 6. Effective Dose Ecig      | CC:1 Ecig:0.05 Dual:0.525              |
| Note:                       | Death rates are per million population |

### Results for Age Groups Combined and Years combined, Population and Number deaths adjusted for Ecig scenario,

| Age Group: | NULL    | Ecig        | %Drop      |          | NULL   | Ecig   | Drop    |         |         |         |
|------------|---------|-------------|------------|----------|--------|--------|---------|---------|---------|---------|
| Year       | Number  | Attrib      | Attrib     | Drop     | %Drop  | Attrib | Death   | Attrib  | Drop    |         |
|            | Deaths  | Deaths      | Deaths     | Deaths   | Deaths | Deaths | Rate    | Rates   | Rates   |         |
| All Comb   | 6382212 | 1098877.421 | 743068.337 | 355809.1 | 5.575  | 32.379 | 1840.96 | 318.101 | 214.340 | 103.762 |

### Results for Age Groups Combined, Population and Number deaths adjusted for Ecig scenario,

| Age Group: | NULL   | Ecig      | %Drop     |          | NULL   | Ecig   | Drop    |         |         |         |
|------------|--------|-----------|-----------|----------|--------|--------|---------|---------|---------|---------|
| Year       | Number | Attrib    | Attrib    | Drop     | %Drop  | Attrib | Death   | Attrib  | Drop    |         |
|            | Deaths | Deaths    | Deaths    | Deaths   | Deaths | Deaths | Rate    | Rates   | Rates   |         |
| 1990       | 171484 | 38511.725 | 38511.725 | 0.000    | 0.000  | 0.000  | 2718.40 | 610.497 | 0.000   |         |
| 1991       | 168044 | 37309.838 | 37227.384 | 82.453   | 0.049  | 0.221  | 2620.21 | 581.750 | 580.465 | 1.286   |
| 1992       | 164548 | 36137.488 | 35925.685 | 211.803  | 0.129  | 0.586  | 2522.12 | 553.899 | 550.652 | 3.247   |
| 1993       | 164363 | 35599.588 | 35206.994 | 392.594  | 0.239  | 1.103  | 2474.35 | 535.926 | 530.013 | 5.913   |
| 1994       | 159867 | 34336.757 | 33724.396 | 612.361  | 0.383  | 1.783  | 2361.73 | 507.267 | 498.213 | 9.053   |
| 1995       | 158085 | 33455.759 | 32565.697 | 890.062  | 0.563  | 2.660  | 2290.64 | 484.782 | 471.873 | 12.909  |
| 1996       | 154879 | 32193.824 | 30987.501 | 1206.324 | 0.779  | 3.747  | 2209.23 | 459.239 | 442.013 | 17.226  |
| 1997       | 149976 | 30665.509 | 29142.236 | 1523.273 | 1.016  | 4.967  | 2104.37 | 430.308 | 408.907 | 21.401  |
| 1998       | 145415 | 29188.430 | 27332.712 | 1855.719 | 1.276  | 6.358  | 2006.76 | 402.844 | 377.197 | 25.647  |
| 1999       | 165966 | 33375.386 | 30670.109 | 2705.277 | 1.630  | 8.106  | 2254.16 | 453.366 | 416.564 | 36.802  |
| 2000       | 160279 | 32024.754 | 28876.184 | 3148.571 | 1.964  | 9.832  | 2144.97 | 428.655 | 386.442 | 42.213  |
| 2001       | 154469 | 30682.393 | 27006.297 | 3676.096 | 2.380  | 11.981 | 2040.17 | 405.339 | 356.691 | 48.648  |
| 2002       | 151920 | 30218.370 | 25908.286 | 4310.084 | 2.837  | 14.263 | 1983.89 | 394.736 | 338.331 | 56.405  |
| 2003       | 146775 | 29175.202 | 24328.313 | 4846.888 | 3.302  | 16.613 | 1896.62 | 377.146 | 314.370 | 62.776  |
| 2004       | 138431 | 27488.687 | 22239.208 | 5249.479 | 3.792  | 19.097 | 1769.38 | 351.518 | 284.254 | 67.264  |
| 2005       | 135943 | 27017.439 | 21197.312 | 5820.127 | 4.281  | 21.542 | 1717.24 | 341.482 | 267.766 | 73.716  |
| 2006       | 131997 | 26231.435 | 19783.221 | 6448.215 | 4.885  | 24.582 | 1651.97 | 328.517 | 247.592 | 80.926  |
| 2007       | 126590 | 25103.049 | 18244.501 | 6858.548 | 5.418  | 27.322 | 1567.86 | 311.161 | 225.965 | 85.197  |
| 2008       | 125964 | 24621.740 | 17272.192 | 7349.548 | 5.835  | 29.850 | 1542.43 | 301.777 | 211.498 | 90.279  |
| 2009       | 122550 | 23741.177 | 16048.163 | 7693.015 | 6.277  | 32.404 | 1482.71 | 287.552 | 194.164 | 93.388  |
| 2010       | 120678 | 23189.160 | 15078.754 | 8110.405 | 6.721  | 34.975 | 1442.13 | 277.458 | 180.194 | 97.264  |
| 2011       | 120384 | 22786.927 | 14151.723 | 8635.204 | 7.173  | 37.895 | 1424.18 | 269.951 | 167.418 | 102.533 |
| 2012       | 121118 | 22485.295 | 13407.939 | 9077.356 | 7.495  | 40.370 | 1417.10 | 263.495 | 156.875 | 106.619 |
| 2013       | 122869 | 22251.884 | 12745.207 | 9506.677 | 7.737  | 42.723 | 1420.94 | 257.786 | 147.394 | 110.392 |
| 2014       | 123482 | 21894.593 | 12030.425 | 9864.169 | 7.988  | 45.053 | 1411.08 | 250.685 | 137.477 | 113.208 |
| 2015       | 124063 | 21471.109 | 11351.093 | 10120.02 | 8.157  | 47.133 | 1594.17 | 276.557 | 145.858 | 130.699 |
| 2016       | 126549 | 21411.568 | 10797.710 | 10613.86 | 8.387  | 49.571 | 1610.54 | 273.213 | 137.417 | 135.795 |
| 2017       | 128640 | 21169.399 | 10220.348 | 10949.05 | 8.511  | 51.721 | 1621.76 | 267.651 | 128.848 | 138.804 |
| 2018       | 121819 | 19830.576 | 8949.272  | 10881.30 | 8.932  | 54.871 | 1521.17 | 248.404 | 111.750 | 136.653 |
| 2019       | 122265 | 19431.014 | 8347.901  | 11083.11 | 9.065  | 57.038 | 1511.48 | 241.031 | 103.199 | 137.831 |
| 2020       | 121287 | 18532.612 | 7712.912  | 10819.70 | 8.921  | 58.382 | 1711.00 | 262.513 | 108.806 | 153.707 |
| 2021       | 119923 | 18234.128 | 7056.321  | 11177.81 | 9.321  | 61.302 | 1679.33 | 256.472 | 98.812  | 157.660 |
| 2022       | 120001 | 17812.559 | 6507.394  | 11305.16 | 9.421  | 63.467 | 1667.02 | 248.626 | 90.399  | 158.227 |
| 2023       | 120059 | 17361.668 | 5993.206  | 11368.46 | 9.469  | 65.480 | 1653.72 | 240.367 | 82.552  | 157.815 |
| 2024       | 119972 | 16929.676 | 5537.008  | 11392.67 | 9.496  | 67.294 | 1638.24 | 232.443 | 75.609  | 156.834 |
| 2025       | 116399 | 15501.666 | 4944.366  | 10557.30 | 9.070  | 68.104 | 1848.30 | 247.735 | 78.512  | 169.223 |
| 2026       | 115840 | 15523.814 | 4566.775  | 10957.04 | 9.459  | 70.582 | 1831.08 | 247.072 | 72.187  | 174.885 |
| 2027       | 114809 | 15073.070 | 4187.675  | 10885.40 | 9.481  | 72.218 | 1805.76 | 238.810 | 65.865  | 172.945 |
| 2028       | 113730 | 14636.710 | 3818.939  | 10817.77 | 9.512  | 73.908 | 1778.93 | 230.725 | 59.735  | 170.990 |
| 2029       | 112649 | 14180.166 | 3485.114  | 10695.05 | 9.494  | 75.423 | 1751.19 | 222.256 | 54.178  | 168.078 |
| 2030       | 105809 | 12111.772 | 3013.348  | 9098.424 | 8.599  | 75.121 | 1963.01 | 226.816 | 55.905  | 170.911 |
| 2031       | 106317 | 12417.367 | 2818.210  | 9599.156 | 9.029  | 77.304 | 1966.23 | 231.935 | 52.120  | 179.815 |
| 2032       | 104961 | 12054.064 | 2553.373  | 9500.691 | 9.052  | 78.817 | 1933.44 | 224.381 | 47.035  | 177.346 |
| 2033       | 103622 | 11672.389 | 2306.718  | 9365.671 | 9.038  | 80.238 | 1899.73 | 216.370 | 42.290  | 174.081 |
| 2034       | 102261 | 11365.762 | 2116.188  | 9249.574 | 9.045  | 81.381 | 1864.68 | 209.673 | 38.587  | 171.085 |
| 2035       | 91979  | 8580.360  | 1672.872  | 6907.488 | 7.510  | 80.503 | 2072.04 | 195.777 | 37.685  | 158.092 |
| 2036       | 93359  | 8948.841  | 1565.623  | 7383.218 | 7.908  | 82.505 | 2101.21 | 204.135 | 35.237  | 168.898 |
| 2037       | 91612  | 8624.570  | 1439.406  | 7185.163 | 7.843  | 83.310 | 2058.26 | 196.522 | 32.339  | 164.183 |
| 2038       | 89918  | 8315.017  | 1306.318  | 7008.699 | 7.795  | 84.290 | 2014.62 | 189.073 | 29.268  | 159.805 |
| 2039       | 88292  | 8001.132  | 1188.081  | 6813.051 | 7.716  | 85.151 | 1970.43 | 181.344 | 26.514  | 154.830 |

## Results for PHIM for Run 9 (Sensitivity\_Analysis\_2.RTF)

\*\*\*\*\*

### Main Results for E-Component for Run: 9, Simulation: 1, COD: STROKE, Adjusted

| Variable Parameter          | Value                                  |
|-----------------------------|----------------------------------------|
| 1. Country                  | US (United States)                     |
| 2. Sex                      | M (Males)                              |
| 3. Year of start of process | 1990                                   |
| 4. Cause of Death           | STROKE                                 |
| 5. Effective Dose NULL      | CC:1                                   |
| 6. Effective Dose Ecig      | CC:1 Ecig:0.05 Dual:0.525              |
| Note:                       | Death rates are per million population |

#### Results for Age Groups Combined and Years combined, Population and Number deaths adjusted for Ecig scenario,

| Age Group: | NULL    | Ecig       | %Drop      |          |        |        | NULL    | Ecig   | Drop   |        |
|------------|---------|------------|------------|----------|--------|--------|---------|--------|--------|--------|
| Year       | Number  | Attrib     | Attrib     | Drop     | %Drop  | Attrib | Death   | Attrib | Attrib | Drop   |
|            | Deaths  | Deaths     | Deaths     | Deaths   | Deaths | Deaths | Rate    | Rates  | Rates  | Rates  |
| All Comb   | 1495460 | 149918.462 | 100194.611 | 49723.85 | 3.325  | 33.167 | 431.369 | 43.398 | 28.901 | 14.497 |

#### Results for Age Groups Combined, Population and Number deaths adjusted for Ecig scenario,

| Age Group: | NULL   | Ecig     | %Drop    |          |        |        | NULL    | Ecig   | Drop   |        |
|------------|--------|----------|----------|----------|--------|--------|---------|--------|--------|--------|
| Year       | Number | Attrib   | Attrib   | Drop     | %Drop  | Attrib | Death   | Attrib | Attrib | Drop   |
|            | Deaths | Deaths   | Deaths   | Deaths   | Deaths | Deaths | Rate    | Rates  | Rates  | Rates  |
| 1990       | 32862  | 4613.166 | 4613.166 | 0.000    | 0.000  | 0.000  | 520.936 | 73.129 | 73.129 | 0.000  |
| 1991       | 32619  | 4555.566 | 4546.538 | 9.028    | 0.028  | 0.198  | 508.609 | 71.032 | 70.891 | 0.141  |
| 1992       | 32100  | 4453.572 | 4432.520 | 21.052   | 0.066  | 0.473  | 492.014 | 68.262 | 67.940 | 0.323  |
| 1993       | 32896  | 4462.473 | 4421.091 | 41.382   | 0.126  | 0.927  | 495.225 | 67.179 | 66.556 | 0.623  |
| 1994       | 33323  | 4499.513 | 4431.787 | 67.726   | 0.203  | 1.505  | 492.288 | 66.473 | 65.471 | 1.001  |
| 1995       | 33569  | 4472.774 | 4368.624 | 104.150  | 0.310  | 2.329  | 486.417 | 64.812 | 63.301 | 1.511  |
| 1996       | 33871  | 4406.878 | 4259.042 | 147.836  | 0.436  | 3.355  | 483.141 | 62.863 | 60.752 | 2.111  |
| 1997       | 33517  | 4288.158 | 4094.095 | 194.063  | 0.579  | 4.526  | 470.293 | 60.173 | 57.446 | 2.727  |
| 1998       | 32797  | 4120.148 | 3877.420 | 242.728  | 0.740  | 5.891  | 452.600 | 56.864 | 53.509 | 3.355  |
| 1999       | 33377  | 3982.443 | 3691.146 | 291.297  | 0.873  | 7.315  | 453.333 | 54.097 | 50.133 | 3.963  |
| 2000       | 33462  | 4021.411 | 3661.785 | 359.626  | 1.075  | 8.943  | 447.817 | 53.827 | 49.005 | 4.822  |
| 2001       | 32279  | 3848.092 | 3430.296 | 417.796  | 1.294  | 10.857 | 426.335 | 50.836 | 45.306 | 5.530  |
| 2002       | 31592  | 3783.081 | 3294.859 | 488.223  | 1.545  | 12.905 | 412.549 | 49.418 | 43.027 | 6.391  |
| 2003       | 30992  | 3754.415 | 3179.790 | 574.625  | 1.854  | 15.305 | 400.481 | 48.533 | 41.089 | 7.444  |
| 2004       | 29893  | 3666.274 | 3018.958 | 647.316  | 2.165  | 17.656 | 382.084 | 46.883 | 38.587 | 8.296  |
| 2005       | 28719  | 3589.688 | 2863.699 | 725.989  | 2.528  | 20.224 | 362.784 | 45.371 | 36.174 | 9.197  |
| 2006       | 28202  | 3596.985 | 2755.745 | 841.239  | 2.983  | 23.387 | 352.954 | 45.048 | 34.489 | 10.559 |
| 2007       | 28043  | 3560.798 | 2629.811 | 930.986  | 3.320  | 26.145 | 347.322 | 44.137 | 32.571 | 11.566 |
| 2008       | 27148  | 3417.001 | 2424.752 | 992.250  | 3.655  | 29.039 | 332.426 | 41.881 | 29.691 | 12.190 |
| 2009       | 27092  | 3394.390 | 2313.880 | 1080.510 | 3.988  | 31.832 | 327.778 | 41.113 | 27.995 | 13.117 |
| 2010       | 26939  | 3340.137 | 2193.750 | 1146.387 | 4.255  | 34.322 | 321.926 | 39.965 | 26.216 | 13.749 |
| 2011       | 26992  | 3285.435 | 2070.443 | 1214.992 | 4.501  | 36.981 | 319.318 | 38.922 | 24.494 | 14.428 |
| 2012       | 27095  | 3259.209 | 1956.516 | 1302.694 | 4.808  | 39.970 | 317.021 | 38.193 | 22.892 | 15.302 |
| 2013       | 27950  | 3274.703 | 1883.304 | 1391.399 | 4.978  | 42.489 | 323.229 | 37.937 | 21.780 | 16.157 |
| 2014       | 28846  | 3298.083 | 1807.981 | 1490.102 | 5.166  | 45.181 | 329.634 | 37.762 | 20.661 | 17.101 |
| 2015       | 29623  | 3244.406 | 1714.171 | 1530.235 | 5.166  | 47.165 | 380.648 | 41.789 | 22.027 | 19.763 |
| 2016       | 30587  | 3314.836 | 1657.077 | 1657.760 | 5.420  | 50.010 | 389.265 | 42.297 | 21.089 | 21.209 |
| 2017       | 31501  | 3333.314 | 1580.409 | 1752.905 | 5.565  | 52.587 | 397.136 | 42.144 | 19.924 | 22.220 |
| 2018       | 29437  | 2925.242 | 1327.945 | 1597.297 | 5.426  | 54.604 | 367.582 | 36.642 | 16.582 | 20.060 |
| 2019       | 29698  | 2864.628 | 1232.083 | 1632.545 | 5.497  | 56.990 | 367.130 | 35.534 | 15.231 | 20.303 |
| 2020       | 29703  | 2730.366 | 1130.550 | 1599.817 | 5.386  | 58.593 | 419.019 | 38.675 | 15.949 | 22.727 |
| 2021       | 30221  | 2647.911 | 1038.392 | 1609.518 | 5.326  | 60.784 | 423.190 | 37.244 | 14.541 | 22.703 |
| 2022       | 30440  | 2586.165 | 955.310  | 1630.854 | 5.358  | 63.061 | 422.864 | 36.097 | 13.271 | 22.827 |
| 2023       | 30656  | 2517.960 | 879.573  | 1638.387 | 5.344  | 65.068 | 422.261 | 34.860 | 12.115 | 22.745 |
| 2024       | 30826  | 2454.161 | 810.452  | 1643.709 | 5.332  | 66.976 | 420.936 | 33.695 | 11.067 | 22.629 |
| 2025       | 30434  | 2275.364 | 719.064  | 1556.300 | 5.114  | 68.398 | 483.255 | 36.363 | 11.418 | 24.945 |
| 2026       | 30883  | 2183.166 | 653.668  | 1529.498 | 4.953  | 70.059 | 488.163 | 34.747 | 10.333 | 24.414 |
| 2027       | 30774  | 2112.345 | 596.789  | 1515.555 | 4.925  | 71.748 | 484.033 | 33.467 | 9.387  | 24.080 |
| 2028       | 30642  | 2046.677 | 541.704  | 1504.972 | 4.912  | 73.532 | 479.292 | 32.263 | 8.473  | 23.789 |
| 2029       | 30502  | 1977.671 | 490.115  | 1487.556 | 4.877  | 75.218 | 474.166 | 30.997 | 7.619  | 23.378 |
| 2030       | 29592  | 1744.457 | 424.650  | 1319.807 | 4.460  | 75.657 | 548.996 | 32.668 | 7.878  | 24.790 |
| 2031       | 29253  | 1653.738 | 376.779  | 1276.959 | 4.365  | 77.217 | 541.005 | 30.889 | 6.968  | 23.921 |
| 2032       | 29019  | 1603.120 | 337.033  | 1266.088 | 4.363  | 78.976 | 534.541 | 29.841 | 6.208  | 23.633 |
| 2033       | 28776  | 1548.245 | 303.048  | 1245.197 | 4.327  | 80.426 | 527.556 | 28.700 | 5.556  | 23.144 |
| 2034       | 28509  | 1511.985 | 277.741  | 1234.244 | 4.329  | 81.631 | 519.843 | 27.893 | 5.064  | 22.828 |
| 2035       | 27075  | 1239.866 | 225.927  | 1013.939 | 3.745  | 81.778 | 609.929 | 28.290 | 5.090  | 23.200 |
| 2036       | 25935  | 1182.522 | 199.052  | 983.470  | 3.792  | 83.167 | 583.713 | 26.975 | 4.480  | 22.495 |
| 2037       | 25501  | 1134.483 | 184.346  | 950.137  | 3.726  | 83.751 | 572.939 | 25.851 | 4.142  | 21.709 |
| 2038       | 25066  | 1093.537 | 167.056  | 926.481  | 3.696  | 84.723 | 561.594 | 24.866 | 3.743  | 21.123 |
| 2039       | 24633  | 1047.905 | 150.680  | 897.225  | 3.642  | 85.621 | 549.739 | 23.751 | 3.363  | 20.388 |

## Results for PHIM for Run 9 (Sensitivity\_Analysis\_2.RTF)

\*\*\*\*\*

### Main Results for E-Component for Run: 9, Simulation: 1, COD: COPD, Adjusted

| Variable Parameter          | Value                                  |
|-----------------------------|----------------------------------------|
| 1. Country                  | US (United States)                     |
| 2. Sex                      | M (Males)                              |
| 3. Year of start of process | 1990                                   |
| 4. Cause of Death           | COPD                                   |
| 5. Effective Dose NULL      | CC:1                                   |
| 6. Effective Dose Ecig      | CC:1 Ecig:0.05 Dual:0.525              |
| Note:                       | Death rates are per million population |

-----

#### Results for Age Groups Combined and Years combined, Population and Number deaths adjusted for Ecig scenario,

| Age Group:All |         | NULL        | Ecig       | %Drop    |        | NULL   | Ecig    | Drop    |         |        |
|---------------|---------|-------------|------------|----------|--------|--------|---------|---------|---------|--------|
| Year          | Number  | Attrib      | Attrib     | Drop     | %Drop  | Attrib | Death   | Attrib  | Drop    |        |
|               | Deaths  | Deaths      | Deaths     | Deaths   | Deaths | Deaths | Rate    | Rates   | Rates   |        |
| All Comb      | 2244310 | 1015606.587 | 821066.769 | 194539.8 | 8.668  | 19.155 | 647.376 | 293.996 | 236.838 | 57.158 |

-----

#### Results for Age Groups Combined, Population and Number deaths adjusted for Ecig scenario,

| Age Group:All |        | NULL      | Ecig      | %Drop    |        | NULL   | Ecig    | Drop    |         |         |
|---------------|--------|-----------|-----------|----------|--------|--------|---------|---------|---------|---------|
| Year          | Number | Attrib    | Attrib    | Drop     | %Drop  | Attrib | Death   | Attrib  | Drop    |         |
|               | Deaths | Deaths    | Deaths    | Deaths   | Deaths | Deaths | Rate    | Rates   | Rates   |         |
| 1990          | 33993  | 19262.437 | 19262.437 | 0.000    | 0.000  | 0.000  | 538.865 | 305.353 | 0.000   |         |
| 1991          | 34092  | 19215.636 | 19211.347 | 4.289    | 0.013  | 0.022  | 531.576 | 299.618 | 299.551 | 0.067   |
| 1992          | 33942  | 19056.189 | 19049.847 | 6.342    | 0.019  | 0.033  | 520.248 | 292.085 | 291.987 | 0.098   |
| 1993          | 35913  | 20095.670 | 20082.911 | 12.758   | 0.036  | 0.063  | 540.643 | 302.526 | 302.332 | 0.194   |
| 1994          | 35074  | 19524.095 | 19505.686 | 18.408   | 0.052  | 0.094  | 518.155 | 288.435 | 288.159 | 0.276   |
| 1995          | 34669  | 19116.002 | 19085.765 | 30.237   | 0.087  | 0.158  | 502.355 | 276.995 | 276.550 | 0.445   |
| 1996          | 34583  | 18975.021 | 18934.465 | 40.557   | 0.117  | 0.214  | 493.294 | 270.675 | 270.086 | 0.590   |
| 1997          | 35268  | 19169.025 | 19110.895 | 58.129   | 0.165  | 0.303  | 494.858 | 268.986 | 268.153 | 0.833   |
| 1998          | 35676  | 19228.937 | 19142.882 | 86.055   | 0.241  | 0.448  | 492.340 | 265.388 | 264.176 | 1.212   |
| 1999          | 38518  | 20589.820 | 20477.141 | 112.679  | 0.293  | 0.547  | 523.155 | 279.689 | 278.122 | 1.566   |
| 2000          | 36286  | 19196.417 | 19051.281 | 145.137  | 0.400  | 0.756  | 485.602 | 256.946 | 254.958 | 1.988   |
| 2001          | 36285  | 19012.731 | 18821.139 | 191.593  | 0.528  | 1.008  | 479.238 | 251.174 | 248.584 | 2.590   |
| 2002          | 35988  | 18699.357 | 18455.376 | 243.981  | 0.678  | 1.305  | 469.962 | 244.265 | 241.005 | 3.260   |
| 2003          | 36212  | 18663.550 | 18369.253 | 294.296  | 0.813  | 1.577  | 467.930 | 241.262 | 237.367 | 3.895   |
| 2004          | 34620  | 17679.164 | 17322.048 | 357.116  | 1.032  | 2.020  | 442.496 | 226.076 | 221.405 | 4.672   |
| 2005          | 36838  | 18692.832 | 18233.787 | 459.045  | 1.246  | 2.456  | 465.336 | 236.265 | 230.331 | 5.934   |
| 2006          | 34364  | 17308.564 | 16778.720 | 529.843  | 1.542  | 3.061  | 430.071 | 216.769 | 209.990 | 6.779   |
| 2007          | 35344  | 17683.181 | 17015.707 | 667.474  | 1.889  | 3.775  | 437.747 | 219.189 | 210.746 | 8.444   |
| 2008          | 38272  | 19006.374 | 18179.356 | 827.018  | 2.161  | 4.351  | 468.638 | 232.952 | 222.606 | 10.346  |
| 2009          | 36930  | 18205.573 | 17246.376 | 959.197  | 2.597  | 5.269  | 446.814 | 220.505 | 208.661 | 11.844  |
| 2010          | 37268  | 18237.758 | 17147.979 | 1089.779 | 2.924  | 5.975  | 445.358 | 218.215 | 204.922 | 13.293  |
| 2011          | 38135  | 18487.916 | 17134.061 | 1353.856 | 3.550  | 7.323  | 451.140 | 219.022 | 202.700 | 16.322  |
| 2012          | 38554  | 18491.158 | 16944.468 | 1546.690 | 4.012  | 8.364  | 451.084 | 216.689 | 198.253 | 18.436  |
| 2013          | 40351  | 19143.452 | 17325.190 | 1818.263 | 4.506  | 9.498  | 466.642 | 221.775 | 200.360 | 21.415  |
| 2014          | 40410  | 18992.005 | 16946.377 | 2045.628 | 5.062  | 10.771 | 461.785 | 217.451 | 193.653 | 23.798  |
| 2015          | 42389  | 19728.885 | 17433.700 | 2295.185 | 5.415  | 11.634 | 544.687 | 254.116 | 224.017 | 30.099  |
| 2016          | 43204  | 19876.724 | 17305.366 | 2571.358 | 5.952  | 12.937 | 549.836 | 253.628 | 220.237 | 33.390  |
| 2017          | 44223  | 20119.790 | 17236.804 | 2882.986 | 6.519  | 14.329 | 557.516 | 254.381 | 217.304 | 37.077  |
| 2018          | 45602  | 20535.123 | 17280.929 | 3254.195 | 7.136  | 15.847 | 569.440 | 257.229 | 215.789 | 41.441  |
| 2019          | 47117  | 21009.029 | 17368.456 | 3640.573 | 7.727  | 17.329 | 582.470 | 260.605 | 214.714 | 45.891  |
| 2020          | 48595  | 21428.512 | 17407.066 | 4021.445 | 8.275  | 18.767 | 685.532 | 303.533 | 245.561 | 57.972  |
| 2021          | 48660  | 21266.697 | 16848.533 | 4418.164 | 9.080  | 20.775 | 681.400 | 299.127 | 235.936 | 63.190  |
| 2022          | 50139  | 21663.568 | 16760.335 | 4903.233 | 9.779  | 22.634 | 696.508 | 302.378 | 232.829 | 69.549  |
| 2023          | 51643  | 22084.131 | 16634.886 | 5449.244 | 10.552 | 24.675 | 711.349 | 305.748 | 229.133 | 76.615  |
| 2024          | 53096  | 22418.456 | 16478.182 | 5940.273 | 11.188 | 26.497 | 725.036 | 307.804 | 225.013 | 82.791  |
| 2025          | 54167  | 22614.834 | 16234.942 | 6379.892 | 11.778 | 28.211 | 860.120 | 361.411 | 257.795 | 103.617 |
| 2026          | 54693  | 22571.522 | 15769.519 | 6802.003 | 12.437 | 30.135 | 864.535 | 359.241 | 249.269 | 109.972 |
| 2027          | 55656  | 22774.416 | 15403.203 | 7371.213 | 13.244 | 32.366 | 875.372 | 360.827 | 242.268 | 118.559 |
| 2028          | 56578  | 22915.561 | 15019.403 | 7896.158 | 13.956 | 34.458 | 884.984 | 361.228 | 234.930 | 126.298 |
| 2029          | 57486  | 22992.027 | 14601.569 | 8390.458 | 14.596 | 36.493 | 893.646 | 360.371 | 226.988 | 133.383 |
| 2030          | 57753  | 22895.360 | 14101.011 | 8794.349 | 15.228 | 38.411 | 1071.46 | 428.760 | 261.609 | 167.151 |
| 2031          | 58145  | 22715.871 | 13578.035 | 9137.836 | 15.716 | 40.227 | 1075.33 | 424.293 | 251.111 | 173.181 |
| 2032          | 58851  | 22759.207 | 13052.234 | 9706.973 | 16.494 | 42.651 | 1084.07 | 423.652 | 240.430 | 183.222 |
| 2033          | 59535  | 22786.258 | 12548.485 | 10237.77 | 17.196 | 44.930 | 1091.48 | 422.387 | 230.055 | 192.332 |
| 2034          | 60163  | 22806.106 | 12036.326 | 10769.78 | 17.901 | 47.223 | 1097.03 | 420.721 | 219.475 | 201.246 |
| 2035          | 59259  | 22262.998 | 11448.464 | 10814.53 | 18.250 | 48.576 | 1334.94 | 507.973 | 257.904 | 250.069 |
| 2036          | 57207  | 21140.051 | 10243.323 | 10896.73 | 19.048 | 51.545 | 1287.55 | 482.234 | 230.543 | 251.690 |
| 2037          | 57377  | 21011.845 | 9690.248  | 11321.60 | 19.732 | 53.882 | 1289.08 | 478.783 | 217.711 | 261.072 |
| 2038          | 57525  | 20787.483 | 9133.683  | 11653.80 | 20.259 | 56.062 | 1288.85 | 472.681 | 204.640 | 268.040 |
| 2039          | 57664  | 20709.267 | 8617.571  | 12091.70 | 20.969 | 58.388 | 1286.90 | 469.372 | 192.319 | 277.053 |



## Results for PHIM for Run 10 (Sensitivity\_Analysis\_2.RTF)

---

### Control File Details for Run: 10

| Variable Parameter                                       | Value                  |
|----------------------------------------------------------|------------------------|
| 1. Name for Reference Scenario                           | NULL                   |
| 2. Name for Test Scenario                                | Ecig                   |
| 3. Name for Product 1                                    | CC                     |
| 4. Name for Product 2                                    | Ecig                   |
| 5. Name for Product 3                                    | -                      |
| 6. Name for Product 4                                    | Dual                   |
| 7. Country                                               | US (United States)     |
| 8. Sex                                                   | F (Females)            |
| 9. Year of start of process                              | 1990                   |
| 10. Number of months of follow-up                        | 600                    |
| 11. Follow-up interval length (in months)                | 12                     |
| 12. Lower age for risk estimation                        | 10                     |
| 13. Upper age for risk estimation                        | 79                     |
| 14. The effective dose for Product 1 (F1) - Ref          | 1                      |
| 15. The effective dose for Product 2 (F2) - Ref          | -                      |
| 16. The effective dose for Product 3 (F3) - Ref          | -                      |
| 17. The effective dose for Product 4 (F4) - Ref          | -                      |
| 18. The effective dose for Product 1 (F1) - Test         | 1                      |
| 19. The effective dose for Product 2 (F2) - Test         | 0.05                   |
| 20. The effective dose for Product 3 (F3) - Test         | -                      |
| 21. The effective dose for Product 4 (F4) - Test         | FROMF2                 |
| 22. Number in population to be simulated                 | 100000                 |
| 23. Number of MC simulations                             | 1                      |
| 24. The random number seed for the first simulation      | 15975263               |
| 25. Source for the population file (POP)                 | UN4                    |
| 26. Source for the socioeconomic prevalence file (SEP)   | -                      |
| 27. Source for the current smoking prevalence file (CSP) | ISS3                   |
| 28. Source for the former smoking prevalence file (FSP)  | ISS3                   |
| 29. Source for the quit-time distribution file (QTD)     | NHIS2006               |
| 30. Source for the death file (MORT)                     | APR-20                 |
| 31. Source for the relative risk file (RR)               | PNLEST                 |
| 32. Source for the half-life file (H)                    | PNLEST                 |
| 33. Assumption Set for TTP Factor Reference              | F1                     |
| 34. Assumption Set for TTP Factor Test                   | F1                     |
| 35. Assumption Set for TTP Reference                     | ISS3                   |
| 36. Assumption Set for TTP Test                          | S2E                    |
| 37. Assumption Set for TP for socioeconomic group        | -                      |
| 38. Source for Output Choice file (OUTC)                 | BASIC                  |
| 39. Output for DTP P1                                    | N                      |
| 40. Output for DTP P2                                    | N                      |
| 41. Output for Main P Component                          | Y                      |
| 42. Output for DTP E1                                    | N                      |
| 43. Output for DTP E2                                    | N                      |
| 44. Output for DTP E3                                    | N                      |
| 45. Output for Main E Component                          | Y                      |
| 46. Output file name                                     | Sensitivity_Analysis_2 |
| 47. Run number for P-Component                           | -                      |
| 48. Results file for E-Component                         | -                      |
| 49. Components required                                  | PE                     |
| 50. Results folder for P to be used in E-Component       | -                      |
| 51. Fixed age of starting product use                    | 16                     |
| 52. Output absolute risk file?                           | N                      |

## Results for PHIM for Run 10 (Sensitivity\_Analysis\_2.RTF)

\*\*\*\*\*

TTP values for Run: 10, Scenario: NULL

| Variable Parameter | Value               |
|--------------------|---------------------|
| 1. Country         | US (United States)  |
| 2. Sex             | F (Females)         |
| 3. Assumption Set  | ISS3                |
| Note:              | Period is in Months |

| Age   | Period  | Initiation  | Cessation    | Re-initiation |
|-------|---------|-------------|--------------|---------------|
|       |         | Never<br>CC | CC<br>Former | Former<br>CC  |
| 10-14 | 1-12    | 0.003758    | 0.008742     | 0.000000      |
| 15-19 | 1-12    | 0.003469    | 0.002515     | 0.000000      |
| 20-24 | 1-12    | 0.000276    | 0.000761     | 0.000000      |
| 25-29 | 1-12    | 0.000137    | 0.001375     | 0.000000      |
| 30-34 | 1-12    | 0.000069    | 0.001149     | 0.000000      |
| 35-39 | 1-12    | 0.000000    | 0.000991     | 0.000000      |
| 40-44 | 1-12    | 0.000000    | 0.000833     | 0.000000      |
| 45-49 | 1-12    | 0.000000    | 0.001723     | 0.000000      |
| 50-54 | 1-12    | 0.000000    | 0.002336     | 0.000000      |
| 55-59 | 1-12    | 0.000000    | 0.002233     | 0.000000      |
| 60-64 | 1-12    | 0.000000    | 0.004634     | 0.000000      |
| 65-69 | 1-12    | 0.000000    | 0.003505     | 0.000000      |
| 70-74 | 1-12    | 0.000000    | 0.004329     | 0.000000      |
| 75-79 | 1-12    | 0.000000    | 0.004329     | 0.000000      |
| 10-14 | 13-72   | 0.004794    | 0.008742     | 0.000000      |
| 15-19 | 13-72   | 0.004527    | 0.004082     | 0.000000      |
| 20-24 | 13-72   | 0.000105    | 0.001261     | 0.000000      |
| 25-29 | 13-72   | 0.000053    | 0.000952     | 0.000000      |
| 30-34 | 13-72   | 0.000026    | 0.000733     | 0.000000      |
| 35-39 | 13-72   | 0.000000    | 0.000753     | 0.000000      |
| 40-44 | 13-72   | 0.000000    | 0.001535     | 0.000000      |
| 45-49 | 13-72   | 0.000000    | 0.002998     | 0.000000      |
| 50-54 | 13-72   | 0.000000    | 0.003159     | 0.000000      |
| 55-59 | 13-72   | 0.000000    | 0.002965     | 0.000000      |
| 60-64 | 13-72   | 0.000000    | 0.003633     | 0.000000      |
| 65-69 | 13-72   | 0.000000    | 0.004522     | 0.000000      |
| 70-74 | 13-72   | 0.000000    | 0.005208     | 0.000000      |
| 75-79 | 13-72   | 0.000000    | 0.005208     | 0.000000      |
| 10-14 | 73-132  | 0.003969    | 0.008742     | 0.000000      |
| 15-19 | 73-132  | 0.003056    | 0.003373     | 0.000000      |
| 20-24 | 73-132  | 0.001459    | 0.003881     | 0.000000      |
| 25-29 | 73-132  | 0.000714    | 0.001953     | 0.000000      |
| 30-34 | 73-132  | 0.000111    | 0.001338     | 0.000000      |
| 35-39 | 73-132  | 0.000000    | 0.001507     | 0.000000      |
| 40-44 | 73-132  | 0.000000    | 0.002080     | 0.000000      |
| 45-49 | 73-132  | 0.000000    | 0.003809     | 0.000000      |
| 50-54 | 73-132  | 0.000000    | 0.004871     | 0.000000      |
| 55-59 | 73-132  | 0.000000    | 0.004560     | 0.000000      |
| 60-64 | 73-132  | 0.000000    | 0.007192     | 0.000000      |
| 65-69 | 73-132  | 0.000000    | 0.007033     | 0.000000      |
| 70-74 | 73-132  | 0.000000    | 0.008206     | 0.000000      |
| 75-79 | 73-132  | 0.000000    | 0.008206     | 0.000000      |
| 10-14 | 133-192 | 0.002861    | 0.008742     | 0.000000      |
| 15-19 | 133-192 | 0.002594    | 0.003996     | 0.000000      |
| 20-24 | 133-192 | 0.001247    | 0.002805     | 0.000000      |
| 25-29 | 133-192 | 0.000289    | 0.001574     | 0.000000      |
| 30-34 | 133-192 | 0.000132    | 0.001293     | 0.000000      |
| 35-39 | 133-192 | 0.000000    | 0.001219     | 0.000000      |
| 40-44 | 133-192 | 0.000000    | 0.001657     | 0.000000      |
| 45-49 | 133-192 | 0.000000    | 0.001995     | 0.000000      |
| 50-54 | 133-192 | 0.000000    | 0.002154     | 0.000000      |
| 55-59 | 133-192 | 0.000000    | 0.002072     | 0.000000      |
| 60-64 | 133-192 | 0.000000    | 0.005049     | 0.000000      |
| 65-69 | 133-192 | 0.000000    | 0.003680     | 0.000000      |
| 70-74 | 133-192 | 0.000000    | 0.006144     | 0.000000      |
| 75-79 | 133-192 | 0.000000    | 0.006144     | 0.000000      |
| 10-14 | 193-252 | 0.001859    | 0.008742     | 0.000000      |
| 15-19 | 193-252 | 0.002232    | 0.005770     | 0.000000      |
| 20-24 | 193-252 | 0.001079    | 0.003262     | 0.000000      |
| 25-29 | 193-252 | 0.000531    | 0.002002     | 0.000000      |
| 30-34 | 193-252 | 0.000263    | 0.003240     | 0.000000      |
| 35-39 | 193-252 | 0.000000    | 0.001771     | 0.000000      |
| 40-44 | 193-252 | 0.000000    | 0.002173     | 0.000000      |
| 45-49 | 193-252 | 0.000000    | 0.002075     | 0.000000      |
| 50-54 | 193-252 | 0.000000    | 0.003431     | 0.000000      |

### Results for PHIM for Run 10 (Sensitivity\_Analysis\_2.RTF)

|       |         |          |          |          |
|-------|---------|----------|----------|----------|
| 55-59 | 193-252 | 0.000000 | 0.002906 | 0.000000 |
| 60-64 | 193-252 | 0.000000 | 0.007139 | 0.000000 |
| 65-69 | 193-252 | 0.000000 | 0.004963 | 0.000000 |
| 70-74 | 193-252 | 0.000000 | 0.006269 | 0.000000 |
| 75-79 | 193-252 | 0.000000 | 0.006269 | 0.000000 |
| 10-14 | 253+    | 0.000931 | 0.008742 | 0.000000 |
| 15-19 | 253+    | 0.001798 | 0.009440 | 0.000000 |
| 20-24 | 253+    | 0.000023 | 0.002831 | 0.000000 |
| 25-29 | 253+    | 0.000073 | 0.002655 | 0.000000 |
| 30-34 | 253+    | 0.000037 | 0.004614 | 0.000000 |
| 35-39 | 253+    | 0.000000 | 0.002607 | 0.000000 |
| 40-44 | 253+    | 0.000000 | 0.003115 | 0.000000 |
| 45-49 | 253+    | 0.000000 | 0.002132 | 0.000000 |
| 50-54 | 253+    | 0.000000 | 0.003497 | 0.000000 |
| 55-59 | 253+    | 0.000000 | 0.002942 | 0.000000 |
| 60-64 | 253+    | 0.000000 | 0.005376 | 0.000000 |
| 65-69 | 253+    | 0.000000 | 0.001789 | 0.000000 |
| 70-74 | 253+    | 0.000000 | 0.004077 | 0.000000 |
| 75-79 | 253+    | 0.000000 | 0.004077 | 0.000000 |

## Results for PHIM for Run 10 (Sensitivity\_Analysis\_2.RTF)

\*\*\*\*\*

TTP values for Run: 10, Scenario: Ecig

Variable Parameter

Value

- 1. Country
  - 2. Sex
  - 3. Assumption Set
- Note:

US (United States)  
 F (Females)  
 S2E  
 Period is in Months

| Age   | Period  | Initiation  |               |               | Cessation    |                |                | Re-initiation |                |                |
|-------|---------|-------------|---------------|---------------|--------------|----------------|----------------|---------------|----------------|----------------|
|       |         | Never<br>CC | Never<br>Ecig | Never<br>Dual | CC<br>Former | Ecig<br>Former | Dual<br>Former | Former<br>CC  | Former<br>Ecig | Former<br>Dual |
| 10-14 | 1-12    | 0.001879    | 0.001879      | 0.000000      | 0.008742     | 0.008742       | 0.000000       | 0.000000      | 0.000000       | 0.000000       |
| 15-19 | 1-12    | 0.001735    | 0.001735      | 0.000000      | 0.002515     | 0.002515       | 0.000000       | 0.000000      | 0.000000       | 0.000000       |
| 20-24 | 1-12    | 0.000138    | 0.000138      | 0.000000      | 0.000761     | 0.000761       | 0.000000       | 0.000000      | 0.000000       | 0.000000       |
| 25-29 | 1-12    | 0.000069    | 0.000069      | 0.000000      | 0.001376     | 0.001376       | 0.000000       | 0.000000      | 0.000000       | 0.000000       |
| 30-34 | 1-12    | 0.000034    | 0.000034      | 0.000000      | 0.001149     | 0.001149       | 0.000000       | 0.000000      | 0.000000       | 0.000000       |
| 35-39 | 1-12    | 0.000000    | 0.000000      | 0.000000      | 0.000991     | 0.000991       | 0.000000       | 0.000000      | 0.000000       | 0.000000       |
| 40-44 | 1-12    | 0.000000    | 0.000000      | 0.000000      | 0.000833     | 0.000833       | 0.000000       | 0.000000      | 0.000000       | 0.000000       |
| 45-49 | 1-12    | 0.000000    | 0.000000      | 0.000000      | 0.001723     | 0.001723       | 0.000000       | 0.000000      | 0.000000       | 0.000000       |
| 50-54 | 1-12    | 0.000000    | 0.000000      | 0.000000      | 0.002336     | 0.002336       | 0.000000       | 0.000000      | 0.000000       | 0.000000       |
| 55-59 | 1-12    | 0.000000    | 0.000000      | 0.000000      | 0.002233     | 0.002233       | 0.000000       | 0.000000      | 0.000000       | 0.000000       |
| 60-64 | 1-12    | 0.000000    | 0.000000      | 0.000000      | 0.004635     | 0.004635       | 0.000000       | 0.000000      | 0.000000       | 0.000000       |
| 65-69 | 1-12    | 0.000000    | 0.000000      | 0.000000      | 0.003505     | 0.003505       | 0.000000       | 0.000000      | 0.000000       | 0.000000       |
| 70-74 | 1-12    | 0.000000    | 0.000000      | 0.000000      | 0.004329     | 0.004329       | 0.000000       | 0.000000      | 0.000000       | 0.000000       |
| 75-79 | 1-12    | 0.000000    | 0.000000      | 0.000000      | 0.004329     | 0.004329       | 0.000000       | 0.000000      | 0.000000       | 0.000000       |
| 10-14 | 13-72   | 0.001918    | 0.002877      | 0.000000      | 0.008742     | 0.008742       | 0.000000       | 0.000000      | 0.000000       | 0.000000       |
| 15-19 | 13-72   | 0.001811    | 0.002716      | 0.000000      | 0.004083     | 0.004083       | 0.000000       | 0.000000      | 0.000000       | 0.000000       |
| 20-24 | 13-72   | 0.000042    | 0.000063      | 0.000000      | 0.001261     | 0.001261       | 0.000000       | 0.000000      | 0.000000       | 0.000000       |
| 25-29 | 13-72   | 0.000021    | 0.000032      | 0.000000      | 0.000952     | 0.000952       | 0.000000       | 0.000000      | 0.000000       | 0.000000       |
| 30-34 | 13-72   | 0.000011    | 0.000016      | 0.000000      | 0.000733     | 0.000733       | 0.000000       | 0.000000      | 0.000000       | 0.000000       |
| 35-39 | 13-72   | 0.000000    | 0.000000      | 0.000000      | 0.000754     | 0.000754       | 0.000000       | 0.000000      | 0.000000       | 0.000000       |
| 40-44 | 13-72   | 0.000000    | 0.000000      | 0.000000      | 0.001535     | 0.001535       | 0.000000       | 0.000000      | 0.000000       | 0.000000       |
| 45-49 | 13-72   | 0.000000    | 0.000000      | 0.000000      | 0.002998     | 0.002998       | 0.000000       | 0.000000      | 0.000000       | 0.000000       |
| 50-54 | 13-72   | 0.000000    | 0.000000      | 0.000000      | 0.003160     | 0.003160       | 0.000000       | 0.000000      | 0.000000       | 0.000000       |
| 55-59 | 13-72   | 0.000000    | 0.000000      | 0.000000      | 0.002965     | 0.002965       | 0.000000       | 0.000000      | 0.000000       | 0.000000       |
| 60-64 | 13-72   | 0.000000    | 0.000000      | 0.000000      | 0.003633     | 0.003633       | 0.000000       | 0.000000      | 0.000000       | 0.000000       |
| 65-69 | 13-72   | 0.000000    | 0.000000      | 0.000000      | 0.004522     | 0.004522       | 0.000000       | 0.000000      | 0.000000       | 0.000000       |
| 70-74 | 13-72   | 0.000000    | 0.000000      | 0.000000      | 0.005208     | 0.005208       | 0.000000       | 0.000000      | 0.000000       | 0.000000       |
| 75-79 | 13-72   | 0.000000    | 0.000000      | 0.000000      | 0.005208     | 0.005208       | 0.000000       | 0.000000      | 0.000000       | 0.000000       |
| 10-14 | 73-132  | 0.000794    | 0.003175      | 0.000000      | 0.008742     | 0.008742       | 0.000000       | 0.000000      | 0.000000       | 0.000000       |
| 15-19 | 73-132  | 0.000611    | 0.002445      | 0.000000      | 0.003373     | 0.003373       | 0.000000       | 0.000000      | 0.000000       | 0.000000       |
| 20-24 | 73-132  | 0.000292    | 0.001167      | 0.000000      | 0.003881     | 0.003881       | 0.000000       | 0.000000      | 0.000000       | 0.000000       |
| 25-29 | 73-132  | 0.000143    | 0.000571      | 0.000000      | 0.001954     | 0.001954       | 0.000000       | 0.000000      | 0.000000       | 0.000000       |
| 30-34 | 73-132  | 0.000022    | 0.000089      | 0.000000      | 0.001338     | 0.001338       | 0.000000       | 0.000000      | 0.000000       | 0.000000       |
| 35-39 | 73-132  | 0.000000    | 0.000000      | 0.000000      | 0.001507     | 0.001507       | 0.000000       | 0.000000      | 0.000000       | 0.000000       |
| 40-44 | 73-132  | 0.000000    | 0.000000      | 0.000000      | 0.002080     | 0.002080       | 0.000000       | 0.000000      | 0.000000       | 0.000000       |
| 45-49 | 73-132  | 0.000000    | 0.000000      | 0.000000      | 0.003809     | 0.003809       | 0.000000       | 0.000000      | 0.000000       | 0.000000       |
| 50-54 | 73-132  | 0.000000    | 0.000000      | 0.000000      | 0.004871     | 0.004871       | 0.000000       | 0.000000      | 0.000000       | 0.000000       |
| 55-59 | 73-132  | 0.000000    | 0.000000      | 0.000000      | 0.004560     | 0.004560       | 0.000000       | 0.000000      | 0.000000       | 0.000000       |
| 60-64 | 73-132  | 0.000000    | 0.000000      | 0.000000      | 0.007192     | 0.007192       | 0.000000       | 0.000000      | 0.000000       | 0.000000       |
| 65-69 | 73-132  | 0.000000    | 0.000000      | 0.000000      | 0.007033     | 0.007033       | 0.000000       | 0.000000      | 0.000000       | 0.000000       |
| 70-74 | 73-132  | 0.000000    | 0.000000      | 0.000000      | 0.008206     | 0.008206       | 0.000000       | 0.000000      | 0.000000       | 0.000000       |
| 75-79 | 73-132  | 0.000000    | 0.000000      | 0.000000      | 0.008206     | 0.008206       | 0.000000       | 0.000000      | 0.000000       | 0.000000       |
| 10-14 | 133-192 | 0.000143    | 0.002718      | 0.000000      | 0.008742     | 0.008742       | 0.000000       | 0.000000      | 0.000000       | 0.000000       |
| 15-19 | 133-192 | 0.000130    | 0.002465      | 0.000000      | 0.003996     | 0.003996       | 0.000000       | 0.000000      | 0.000000       | 0.000000       |
| 20-24 | 133-192 | 0.000062    | 0.001185      | 0.000000      | 0.002805     | 0.002805       | 0.000000       | 0.000000      | 0.000000       | 0.000000       |
| 25-29 | 133-192 | 0.000015    | 0.000275      | 0.000000      | 0.001574     | 0.001574       | 0.000000       | 0.000000      | 0.000000       | 0.000000       |
| 30-34 | 133-192 | 0.000007    | 0.000125      | 0.000000      | 0.001293     | 0.001293       | 0.000000       | 0.000000      | 0.000000       | 0.000000       |
| 35-39 | 133-192 | 0.000000    | 0.000000      | 0.000000      | 0.001219     | 0.001219       | 0.000000       | 0.000000      | 0.000000       | 0.000000       |
| 40-44 | 133-192 | 0.000000    | 0.000000      | 0.000000      | 0.001657     | 0.001657       | 0.000000       | 0.000000      | 0.000000       | 0.000000       |
| 45-49 | 133-192 | 0.000000    | 0.000000      | 0.000000      | 0.001995     | 0.001995       | 0.000000       | 0.000000      | 0.000000       | 0.000000       |
| 50-54 | 133-192 | 0.000000    | 0.000000      | 0.000000      | 0.002154     | 0.002154       | 0.000000       | 0.000000      | 0.000000       | 0.000000       |
| 55-59 | 133-192 | 0.000000    | 0.000000      | 0.000000      | 0.002072     | 0.002072       | 0.000000       | 0.000000      | 0.000000       | 0.000000       |
| 60-64 | 133-192 | 0.000000    | 0.000000      | 0.000000      | 0.005049     | 0.005049       | 0.000000       | 0.000000      | 0.000000       | 0.000000       |
| 65-69 | 133-192 | 0.000000    | 0.000000      | 0.000000      | 0.003681     | 0.003681       | 0.000000       | 0.000000      | 0.000000       | 0.000000       |
| 70-74 | 133-192 | 0.000000    | 0.000000      | 0.000000      | 0.006144     | 0.006144       | 0.000000       | 0.000000      | 0.000000       | 0.000000       |
| 75-79 | 133-192 | 0.000000    | 0.000000      | 0.000000      | 0.006144     | 0.006144       | 0.000000       | 0.000000      | 0.000000       | 0.000000       |
| 10-14 | 193-252 | 0.000093    | 0.001766      | 0.000000      | 0.008742     | 0.008742       | 0.000000       | 0.000000      | 0.000000       | 0.000000       |
| 15-19 | 193-252 | 0.000112    | 0.002120      | 0.000000      | 0.005770     | 0.005770       | 0.000000       | 0.000000      | 0.000000       | 0.000000       |
| 20-24 | 193-252 | 0.000054    | 0.001025      | 0.000000      | 0.003262     | 0.003262       | 0.000000       | 0.000000      | 0.000000       | 0.000000       |
| 25-29 | 193-252 | 0.000027    | 0.000504      | 0.000000      | 0.002002     | 0.002002       | 0.000000       | 0.000000      | 0.000000       | 0.000000       |
| 30-34 | 193-252 | 0.000013    | 0.000250      | 0.000000      | 0.003241     | 0.003241       | 0.000000       | 0.000000      | 0.000000       | 0.000000       |
| 35-39 | 193-252 | 0.000000    | 0.000000      | 0.000000      | 0.001771     | 0.001771       | 0.000000       | 0.000000      | 0.000000       | 0.000000       |
| 40-44 | 193-252 | 0.000000    | 0.000000      | 0.000000      | 0.002173     | 0.002173       | 0.000000       | 0.000000      | 0.000000       | 0.000000       |
| 45-49 | 193-252 | 0.000000    | 0.000000      | 0.000000      | 0.002075     | 0.002075       | 0.000000       | 0.000000      | 0.000000       | 0.000000       |
| 50-54 | 193-252 | 0.000000    | 0.000000      | 0.000000      | 0.003432     | 0.003432       | 0.000000       | 0.000000      | 0.000000       | 0.000000       |

### Results for PHIM for Run 10 (Sensitivity\_Analysis\_2.RTF)

|       |         |          |          |          |          |          |          |          |          |          |
|-------|---------|----------|----------|----------|----------|----------|----------|----------|----------|----------|
| 55-59 | 193-252 | 0.000000 | 0.000000 | 0.000000 | 0.002906 | 0.002906 | 0.000000 | 0.000000 | 0.000000 | 0.000000 |
| 60-64 | 193-252 | 0.000000 | 0.000000 | 0.000000 | 0.007139 | 0.007139 | 0.000000 | 0.000000 | 0.000000 | 0.000000 |
| 65-69 | 193-252 | 0.000000 | 0.000000 | 0.000000 | 0.004963 | 0.004963 | 0.000000 | 0.000000 | 0.000000 | 0.000000 |
| 70-74 | 193-252 | 0.000000 | 0.000000 | 0.000000 | 0.006269 | 0.006269 | 0.000000 | 0.000000 | 0.000000 | 0.000000 |
| 75-79 | 193-252 | 0.000000 | 0.000000 | 0.000000 | 0.006269 | 0.006269 | 0.000000 | 0.000000 | 0.000000 | 0.000000 |
| 10-14 | 253+    | 0.000047 | 0.000884 | 0.000000 | 0.008742 | 0.008742 | 0.000000 | 0.000000 | 0.000000 | 0.000000 |
| 15-19 | 253+    | 0.000090 | 0.001708 | 0.000000 | 0.009440 | 0.009440 | 0.000000 | 0.000000 | 0.000000 | 0.000000 |
| 20-24 | 253+    | 0.000001 | 0.000022 | 0.000000 | 0.002831 | 0.002831 | 0.000000 | 0.000000 | 0.000000 | 0.000000 |
| 25-29 | 253+    | 0.000004 | 0.000070 | 0.000000 | 0.002656 | 0.002656 | 0.000000 | 0.000000 | 0.000000 | 0.000000 |
| 30-34 | 253+    | 0.000002 | 0.000035 | 0.000000 | 0.004614 | 0.004614 | 0.000000 | 0.000000 | 0.000000 | 0.000000 |
| 35-39 | 253+    | 0.000000 | 0.000000 | 0.000000 | 0.002608 | 0.002608 | 0.000000 | 0.000000 | 0.000000 | 0.000000 |
| 40-44 | 253+    | 0.000000 | 0.000000 | 0.000000 | 0.003115 | 0.003115 | 0.000000 | 0.000000 | 0.000000 | 0.000000 |
| 45-49 | 253+    | 0.000000 | 0.000000 | 0.000000 | 0.002132 | 0.002132 | 0.000000 | 0.000000 | 0.000000 | 0.000000 |
| 50-54 | 253+    | 0.000000 | 0.000000 | 0.000000 | 0.003497 | 0.003497 | 0.000000 | 0.000000 | 0.000000 | 0.000000 |
| 55-59 | 253+    | 0.000000 | 0.000000 | 0.000000 | 0.002942 | 0.002942 | 0.000000 | 0.000000 | 0.000000 | 0.000000 |
| 60-64 | 253+    | 0.000000 | 0.000000 | 0.000000 | 0.005376 | 0.005376 | 0.000000 | 0.000000 | 0.000000 | 0.000000 |
| 65-69 | 253+    | 0.000000 | 0.000000 | 0.000000 | 0.001789 | 0.001789 | 0.000000 | 0.000000 | 0.000000 | 0.000000 |
| 70-74 | 253+    | 0.000000 | 0.000000 | 0.000000 | 0.004077 | 0.004077 | 0.000000 | 0.000000 | 0.000000 | 0.000000 |
| 75-79 | 253+    | 0.000000 | 0.000000 | 0.000000 | 0.004077 | 0.004077 | 0.000000 | 0.000000 | 0.000000 | 0.000000 |



**Results for PHIM for Run 10 (Sensitivity\_Analysis\_2.RTF)**

|       |      |          |          |          |          |          |          |
|-------|------|----------|----------|----------|----------|----------|----------|
| 25-29 | 253+ | 0.004801 | 0.000000 | 0.000000 | 0.000000 | 0.000000 | 0.000000 |
| 30-34 | 253+ | 0.004602 | 0.000000 | 0.000000 | 0.000000 | 0.000000 | 0.000000 |
| 35-39 | 253+ | 0.003640 | 0.000000 | 0.000000 | 0.000000 | 0.000000 | 0.000000 |
| 40-44 | 253+ | 0.003495 | 0.000000 | 0.000000 | 0.000000 | 0.000000 | 0.000000 |
| 45-49 | 253+ | 0.003001 | 0.000000 | 0.000000 | 0.000000 | 0.000000 | 0.000000 |
| 50-54 | 253+ | 0.002234 | 0.000000 | 0.000000 | 0.000000 | 0.000000 | 0.000000 |
| 55-59 | 253+ | 0.000000 | 0.000000 | 0.000000 | 0.000000 | 0.000000 | 0.000000 |
| 60-64 | 253+ | 0.000000 | 0.000000 | 0.000000 | 0.000000 | 0.000000 | 0.000000 |
| 65-69 | 253+ | 0.000000 | 0.000000 | 0.000000 | 0.000000 | 0.000000 | 0.000000 |
| 70-74 | 253+ | 0.000000 | 0.000000 | 0.000000 | 0.000000 | 0.000000 | 0.000000 |
| 75-79 | 253+ | 0.000000 | 0.000000 | 0.000000 | 0.000000 | 0.000000 | 0.000000 |

## Results for PHIM for Run 10 (Sensitivity\_Analysis\_2.RTF)

\*\*\*\*\*

**Main Output for the Tobacco History for Run: 10, Simulation: 1, Scenario: NULL**

| Variable Parameter          | Value              |
|-----------------------------|--------------------|
| 1. Country                  | US (United States) |
| 2. Sex                      | F (Females)        |
| 3. Year of start of process | 1990               |

Year of Follow-up: 2040, Age Group: All Ages

| Period | Age Group | Smoking Group | N | % |
|--------|-----------|---------------|---|---|
|--------|-----------|---------------|---|---|

|    |          |           |       |       |
|----|----------|-----------|-------|-------|
| 50 | All Ages | Never Any | 20670 | 58.80 |
| 50 | All Ages | CC        | 2462  | 7.00  |
| 50 | All Ages | Former    | 12019 | 34.19 |

Year of Follow-up: 2040, Age Group: 18-19

| Period | Age Group | Smoking Group | N | % |
|--------|-----------|---------------|---|---|
|--------|-----------|---------------|---|---|

|    |       |           |   |   |
|----|-------|-----------|---|---|
| 50 | 18-19 | Never Any | 0 | . |
| 50 | 18-19 | CC        | 0 | . |
| 50 | 18-19 | Former    | 0 | . |

Year of Follow-up: 2040, Age Group: 20-24

| Period | Age Group | Smoking Group | N | % |
|--------|-----------|---------------|---|---|
|--------|-----------|---------------|---|---|

|    |       |           |   |   |
|----|-------|-----------|---|---|
| 50 | 20-24 | Never Any | 0 | . |
| 50 | 20-24 | CC        | 0 | . |
| 50 | 20-24 | Former    | 0 | . |

Year of Follow-up: 2040, Age Group: 25-29

| Period | Age Group | Smoking Group | N | % |
|--------|-----------|---------------|---|---|
|--------|-----------|---------------|---|---|

|    |       |           |   |   |
|----|-------|-----------|---|---|
| 50 | 25-29 | Never Any | 0 | . |
| 50 | 25-29 | CC        | 0 | . |
| 50 | 25-29 | Former    | 0 | . |

Year of Follow-up: 2040, Age Group: 30-34

| Period | Age Group | Smoking Group | N | % |
|--------|-----------|---------------|---|---|
|--------|-----------|---------------|---|---|

|    |       |           |   |   |
|----|-------|-----------|---|---|
| 50 | 30-34 | Never Any | 0 | . |
| 50 | 30-34 | CC        | 0 | . |
| 50 | 30-34 | Former    | 0 | . |

Year of Follow-up: 2040, Age Group: 35-39

| Period | Age Group | Smoking Group | N | % |
|--------|-----------|---------------|---|---|
|--------|-----------|---------------|---|---|

|    |       |           |   |   |
|----|-------|-----------|---|---|
| 50 | 35-39 | Never Any | 0 | . |
| 50 | 35-39 | CC        | 0 | . |
| 50 | 35-39 | Former    | 0 | . |

Year of Follow-up: 2040, Age Group: 40-44

| Period | Age Group | Smoking Group | N | % |
|--------|-----------|---------------|---|---|
|--------|-----------|---------------|---|---|

|    |       |           |   |   |
|----|-------|-----------|---|---|
| 50 | 40-44 | Never Any | 0 | . |
| 50 | 40-44 | CC        | 0 | . |
| 50 | 40-44 | Former    | 0 | . |

Year of Follow-up: 2040, Age Group: 45-49

| Period | Age Group | Smoking Group | N | % |
|--------|-----------|---------------|---|---|
|--------|-----------|---------------|---|---|

|    |       |           |   |   |
|----|-------|-----------|---|---|
| 50 | 45-49 | Never Any | 0 | . |
| 50 | 45-49 | CC        | 0 | . |
| 50 | 45-49 | Former    | 0 | . |

Year of Follow-up: 2040, Age Group: 50-54

| Period | Age Group | Smoking Group | N | % |
|--------|-----------|---------------|---|---|
|--------|-----------|---------------|---|---|

|    |       |           |   |   |
|----|-------|-----------|---|---|
| 50 | 50-54 | Never Any | 0 | . |
| 50 | 50-54 | CC        | 0 | . |
| 50 | 50-54 | Former    | 0 | . |

Year of Follow-up: 2040, Age Group: 55-59

| Period | Age Group | Smoking Group | N | % |
|--------|-----------|---------------|---|---|
|--------|-----------|---------------|---|---|

|    |       |           |   |   |
|----|-------|-----------|---|---|
| 50 | 55-59 | Never Any | 0 | . |
| 50 | 55-59 | CC        | 0 | . |
| 50 | 55-59 | Former    | 0 | . |

Year of Follow-up: 2040, Age Group: 60-64

| Period | Age Group | Smoking Group | N | % |
|--------|-----------|---------------|---|---|
|--------|-----------|---------------|---|---|



**Results for PHIM for Run 10 (Sensitivity\_Analysis\_2.RTF)**

|                                           |           |               |      |       |
|-------------------------------------------|-----------|---------------|------|-------|
| 50                                        | 60-64     | Never Any     | 4803 | 60.57 |
| 50                                        | 60-64     | CC            | 621  | 7.83  |
| 50                                        | 60-64     | Former        | 2506 | 31.60 |
| Year of Follow-up: 2040, Age Group: 65-69 |           |               |      |       |
| Period                                    | Age Group | Smoking Group | N    | %     |
| 50                                        | 65-69     | Never Any     | 5407 | 64.75 |
| 50                                        | 65-69     | CC            | 538  | 6.44  |
| 50                                        | 65-69     | Former        | 2405 | 28.80 |
| Year of Follow-up: 2040, Age Group: 70-74 |           |               |      |       |
| Period                                    | Age Group | Smoking Group | N    | %     |
| 50                                        | 70-74     | Never Any     | 5181 | 58.92 |
| 50                                        | 70-74     | CC            | 605  | 6.88  |
| 50                                        | 70-74     | Former        | 3007 | 34.20 |
| Year of Follow-up: 2040, Age Group: 75-79 |           |               |      |       |
| Period                                    | Age Group | Smoking Group | N    | %     |
| 50                                        | 75-79     | Never Any     | 5279 | 52.38 |
| 50                                        | 75-79     | CC            | 698  | 6.93  |
| 50                                        | 75-79     | Former        | 4101 | 40.69 |

## Results for PHIM for Run 10 (Sensitivity\_Analysis\_2.RTF)

\*\*\*\*\*

### Main Output for the Tobacco History for Run: 10, Simulation: 1, Scenario: Ecig

| Variable Parameter                           |           | Value              |       |       |               |             |               |                |              |
|----------------------------------------------|-----------|--------------------|-------|-------|---------------|-------------|---------------|----------------|--------------|
| 1. Country                                   |           | US (United States) |       |       |               |             |               |                |              |
| 2. Sex                                       |           | F (Females)        |       |       |               |             |               |                |              |
| 3. Year of start of process                  |           | 1990               |       |       |               |             |               |                |              |
| Year of Follow-up: 1990, Age Group: All Ages |           |                    |       |       |               |             |               |                |              |
| Period                                       | Age Group | Smoking Group      | N     | %     | Ever Quit (N) | Ever Quit % | Mean Yrs Quit | Short Term (n) | Short Term % |
| 0                                            | All Ages  | Never Any          | 47776 | 54.92 |               |             |               |                |              |
| 0                                            | All Ages  | CC                 | 22737 | 26.14 | 0             | 0.00        |               |                |              |
| 0                                            | All Ages  | Ecig               | 0     | 0.00  |               |             |               |                |              |
| 0                                            | All Ages  | Dual               | 0     | 0.00  |               |             |               |                |              |
| 0                                            | All Ages  | Former             | 16484 | 18.95 |               |             | 11.90         | 2815           | 17.08        |
| Year of Follow-up: 1990, Age Group: 18-19    |           |                    |       |       |               |             |               |                |              |
| Period                                       | Age Group | Smoking Group      | N     | %     | Ever Quit (N) | Ever Quit % | Mean Yrs Quit | Short Term (n) | Short Term % |
| 0                                            | 18-19     | Never Any          | 2570  | 78.43 |               |             |               |                |              |
| 0                                            | 18-19     | CC                 | 535   | 16.33 | 0             | 0.00        |               |                |              |
| 0                                            | 18-19     | Ecig               | 0     | 0.00  |               |             |               |                |              |
| 0                                            | 18-19     | Dual               | 0     | 0.00  |               |             |               |                |              |
| 0                                            | 18-19     | Former             | 172   | 5.25  |               |             | 0.20          | 172            | 100.00       |
| Year of Follow-up: 1990, Age Group: 20-24    |           |                    |       |       |               |             |               |                |              |
| Period                                       | Age Group | Smoking Group      | N     | %     | Ever Quit (N) | Ever Quit % | Mean Yrs Quit | Short Term (n) | Short Term % |
| 0                                            | 20-24     | Never Any          | 5354  | 60.89 |               |             |               |                |              |
| 0                                            | 20-24     | CC                 | 2560  | 29.11 | 0             | 0.00        |               |                |              |
| 0                                            | 20-24     | Ecig               | 0     | 0.00  |               |             |               |                |              |
| 0                                            | 20-24     | Dual               | 0     | 0.00  |               |             |               |                |              |
| 0                                            | 20-24     | Former             | 879   | 10.00 |               |             | 1.58          | 420            | 47.78        |
| Year of Follow-up: 1990, Age Group: 25-29    |           |                    |       |       |               |             |               |                |              |
| Period                                       | Age Group | Smoking Group      | N     | %     | Ever Quit (N) | Ever Quit % | Mean Yrs Quit | Short Term (n) | Short Term % |
| 0                                            | 25-29     | Never Any          | 5318  | 52.77 |               |             |               |                |              |
| 0                                            | 25-29     | CC                 | 3335  | 33.09 | 0             | 0.00        |               |                |              |
| 0                                            | 25-29     | Ecig               | 0     | 0.00  |               |             |               |                |              |
| 0                                            | 25-29     | Dual               | 0     | 0.00  |               |             |               |                |              |
| 0                                            | 25-29     | Former             | 1425  | 14.14 |               |             | 3.91          | 404            | 28.35        |
| Year of Follow-up: 1990, Age Group: 30-34    |           |                    |       |       |               |             |               |                |              |
| Period                                       | Age Group | Smoking Group      | N     | %     | Ever Quit (N) | Ever Quit % | Mean Yrs Quit | Short Term (n) | Short Term % |
| 0                                            | 30-34     | Never Any          | 5287  | 50.36 |               |             |               |                |              |
| 0                                            | 30-34     | CC                 | 3326  | 31.68 | 0             | 0.00        |               |                |              |
| 0                                            | 30-34     | Ecig               | 0     | 0.00  |               |             |               |                |              |
| 0                                            | 30-34     | Dual               | 0     | 0.00  |               |             |               |                |              |
| 0                                            | 30-34     | Former             | 1886  | 17.96 |               |             | 4.36          | 566            | 30.01        |
| Year of Follow-up: 1990, Age Group: 35-39    |           |                    |       |       |               |             |               |                |              |
| Period                                       | Age Group | Smoking Group      | N     | %     | Ever Quit (N) | Ever Quit % | Mean Yrs Quit | Short Term (n) | Short Term % |
| 0                                            | 35-39     | Never Any          | 5018  | 52.27 |               |             |               |                |              |
| 0                                            | 35-39     | CC                 | 2653  | 27.64 | 0             | 0.00        |               |                |              |
| 0                                            | 35-39     | Ecig               | 0     | 0.00  |               |             |               |                |              |
| 0                                            | 35-39     | Dual               | 0     | 0.00  |               |             |               |                |              |
| 0                                            | 35-39     | Former             | 1929  | 20.09 |               |             | 7.96          | 324            | 16.80        |
| Year of Follow-up: 1990, Age Group: 40-44    |           |                    |       |       |               |             |               |                |              |
| Period                                       | Age Group | Smoking Group      | N     | %     | Ever Quit (N) | Ever Quit % | Mean Yrs Quit | Short Term (n) | Short Term % |
| 0                                            | 40-44     | Never Any          | 4356  | 51.27 |               |             |               |                |              |
| 0                                            | 40-44     | CC                 | 2397  | 28.21 | 0             | 0.00        |               |                |              |
| 0                                            | 40-44     | Ecig               | 0     | 0.00  |               |             |               |                |              |
| 0                                            | 40-44     | Dual               | 0     | 0.00  |               |             |               |                |              |
| 0                                            | 40-44     | Former             | 1744  | 20.52 |               |             | 7.33          | 339            | 19.44        |
| Year of Follow-up: 1990, Age Group: 45-49    |           |                    |       |       |               |             |               |                |              |
| Period                                       | Age Group | Smoking Group      | N     | %     | Ever Quit (N) | Ever Quit % | Mean Yrs Quit | Short Term (n) | Short Term % |
| 0                                            | 45-49     | Never Any          | 3116  | 47.67 |               |             |               |                |              |
| 0                                            | 45-49     | CC                 | 1875  | 28.69 | 0             | 0.00        |               |                |              |
| 0                                            | 45-49     | Ecig               | 0     | 0.00  |               |             |               |                |              |
| 0                                            | 45-49     | Dual               | 0     | 0.00  |               |             |               |                |              |
| 0                                            | 45-49     | Former             | 1545  | 23.64 |               |             | 12.55         | 194            | 12.56        |
| Year of Follow-up: 1990, Age Group: 50-54    |           |                    |       |       |               |             |               |                |              |
| Period                                       | Age Group | Smoking Group      | N     | %     | Ever Quit (N) | Ever Quit % | Mean Yrs Quit | Short Term (n) | Short Term % |
| 0                                            | 50-54     | Never Any          | 2684  | 48.50 |               |             |               |                |              |
| 0                                            | 50-54     | CC                 | 1572  | 28.41 | 0             | 0.00        |               |                |              |

**Results for PHIM for Run 10 (Sensitivity\_Analysis\_2.RTF)**

|                                              |           |               |       |       |               |             |               |                |              |
|----------------------------------------------|-----------|---------------|-------|-------|---------------|-------------|---------------|----------------|--------------|
| 0                                            | 50-54     | Ecig          | 0     | 0.00  |               |             |               |                |              |
| 0                                            | 50-54     | Dual          | 0     | 0.00  |               |             |               |                |              |
| 0                                            | 50-54     | Former        | 1278  | 23.09 |               |             | 13.28         | 126            | 9.86         |
| Year of Follow-up: 1990, Age Group: 55-59    |           |               |       |       |               |             |               |                |              |
| Period                                       | Age Group | Smoking Group | N     | %     | Ever Quit (N) | Ever Quit % | Mean Yrs Quit | Short Term (n) | Short Term % |
| 0                                            | 55-59     | Never Any     | 2732  | 51.90 |               |             |               |                |              |
| 0                                            | 55-59     | CC            | 1295  | 24.60 | 0             | 0.00        |               |                |              |
| 0                                            | 55-59     | Ecig          | 0     | 0.00  |               |             |               |                |              |
| 0                                            | 55-59     | Dual          | 0     | 0.00  |               |             |               |                |              |
| 0                                            | 55-59     | Former        | 1237  | 23.50 |               |             | 17.26         | 90             | 7.28         |
| Year of Follow-up: 1990, Age Group: 60-64    |           |               |       |       |               |             |               |                |              |
| Period                                       | Age Group | Smoking Group | N     | %     | Ever Quit (N) | Ever Quit % | Mean Yrs Quit | Short Term (n) | Short Term % |
| 0                                            | 60-64     | Never Any     | 3078  | 55.72 |               |             |               |                |              |
| 0                                            | 60-64     | CC            | 1249  | 22.61 | 0             | 0.00        |               |                |              |
| 0                                            | 60-64     | Ecig          | 0     | 0.00  |               |             |               |                |              |
| 0                                            | 60-64     | Dual          | 0     | 0.00  |               |             |               |                |              |
| 0                                            | 60-64     | Former        | 1197  | 21.67 |               |             | 18.28         | 61             | 5.10         |
| Year of Follow-up: 1990, Age Group: 65-69    |           |               |       |       |               |             |               |                |              |
| Period                                       | Age Group | Smoking Group | N     | %     | Ever Quit (N) | Ever Quit % | Mean Yrs Quit | Short Term (n) | Short Term % |
| 0                                            | 65-69     | Never Any     | 3042  | 57.36 |               |             |               |                |              |
| 0                                            | 65-69     | CC            | 976   | 18.40 | 0             | 0.00        |               |                |              |
| 0                                            | 65-69     | Ecig          | 0     | 0.00  |               |             |               |                |              |
| 0                                            | 65-69     | Dual          | 0     | 0.00  |               |             |               |                |              |
| 0                                            | 65-69     | Former        | 1285  | 24.23 |               |             | 20.65         | 68             | 5.29         |
| Year of Follow-up: 1990, Age Group: 70-74    |           |               |       |       |               |             |               |                |              |
| Period                                       | Age Group | Smoking Group | N     | %     | Ever Quit (N) | Ever Quit % | Mean Yrs Quit | Short Term (n) | Short Term % |
| 0                                            | 70-74     | Never Any     | 2738  | 61.05 |               |             |               |                |              |
| 0                                            | 70-74     | CC            | 610   | 13.60 | 0             | 0.00        |               |                |              |
| 0                                            | 70-74     | Ecig          | 0     | 0.00  |               |             |               |                |              |
| 0                                            | 70-74     | Dual          | 0     | 0.00  |               |             |               |                |              |
| 0                                            | 70-74     | Former        | 1137  | 25.35 |               |             | 24.48         | 27             | 2.37         |
| Year of Follow-up: 1990, Age Group: 75-79    |           |               |       |       |               |             |               |                |              |
| Period                                       | Age Group | Smoking Group | N     | %     | Ever Quit (N) | Ever Quit % | Mean Yrs Quit | Short Term (n) | Short Term % |
| 0                                            | 75-79     | Never Any     | 2483  | 68.84 |               |             |               |                |              |
| 0                                            | 75-79     | CC            | 354   | 9.81  | 0             | 0.00        |               |                |              |
| 0                                            | 75-79     | Ecig          | 0     | 0.00  |               |             |               |                |              |
| 0                                            | 75-79     | Dual          | 0     | 0.00  |               |             |               |                |              |
| 0                                            | 75-79     | Former        | 770   | 21.35 |               |             | 24.48         | 24             | 3.12         |
| Year of Follow-up: 1995, Age Group: All Ages |           |               |       |       |               |             |               |                |              |
| Period                                       | Age Group | Smoking Group | N     | %     | Ever Quit (N) | Ever Quit % | Mean Yrs Quit | Short Term (n) | Short Term % |
| 5                                            | All Ages  | Never Any     | 50887 | 55.53 |               |             |               |                |              |
| 5                                            | All Ages  | CC            | 17875 | 19.51 | 0             | 0.00        |               |                |              |
| 5                                            | All Ages  | Ecig          | 4461  | 4.87  |               |             |               |                |              |
| 5                                            | All Ages  | Dual          | 0     | 0.00  |               |             |               |                |              |
| 5                                            | All Ages  | Former        | 18416 | 20.10 |               |             | 14.18         | 1130           | 6.14         |
| Year of Follow-up: 1995, Age Group: 18-19    |           |               |       |       |               |             |               |                |              |
| Period                                       | Age Group | Smoking Group | N     | %     | Ever Quit (N) | Ever Quit % | Mean Yrs Quit | Short Term (n) | Short Term % |
| 5                                            | 18-19     | Never Any     | 2434  | 76.64 |               |             |               |                |              |
| 5                                            | 18-19     | CC            | 298   | 9.38  | 0             | 0.00        |               |                |              |
| 5                                            | 18-19     | Ecig          | 372   | 11.71 |               |             |               |                |              |
| 5                                            | 18-19     | Dual          | 0     | 0.00  |               |             |               |                |              |
| 5                                            | 18-19     | Former        | 72    | 2.27  |               |             | 0.93          | 51             | 70.83        |
| Year of Follow-up: 1995, Age Group: 20-24    |           |               |       |       |               |             |               |                |              |
| Period                                       | Age Group | Smoking Group | N     | %     | Ever Quit (N) | Ever Quit % | Mean Yrs Quit | Short Term (n) | Short Term % |
| 5                                            | 20-24     | Never Any     | 5794  | 69.39 |               |             |               |                |              |
| 5                                            | 20-24     | CC            | 1420  | 17.01 | 0             | 0.00        |               |                |              |
| 5                                            | 20-24     | Ecig          | 679   | 8.13  |               |             |               |                |              |
| 5                                            | 20-24     | Dual          | 0     | 0.00  |               |             |               |                |              |
| 5                                            | 20-24     | Former        | 457   | 5.47  |               |             | 3.19          | 106            | 23.19        |
| Year of Follow-up: 1995, Age Group: 25-29    |           |               |       |       |               |             |               |                |              |
| Period                                       | Age Group | Smoking Group | N     | %     | Ever Quit (N) | Ever Quit % | Mean Yrs Quit | Short Term (n) | Short Term % |
| 5                                            | 25-29     | Never Any     | 5313  | 60.42 |               |             |               |                |              |
| 5                                            | 25-29     | CC            | 1854  | 21.08 | 0             | 0.00        |               |                |              |
| 5                                            | 25-29     | Ecig          | 603   | 6.86  |               |             |               |                |              |
| 5                                            | 25-29     | Dual          | 0     | 0.00  |               |             |               |                |              |
| 5                                            | 25-29     | Former        | 1023  | 11.63 |               |             | 5.93          | 56             | 5.47         |
| Year of Follow-up: 1995, Age Group: 30-34    |           |               |       |       |               |             |               |                |              |
| Period                                       | Age Group | Smoking Group | N     | %     | Ever Quit (N) | Ever Quit % | Mean Yrs Quit | Short Term (n) | Short Term % |

**Results for PHIM for Run 10 (Sensitivity\_Analysis\_2.RTF)**

|                                              |           |               |      |       |               |             |               |                |              |
|----------------------------------------------|-----------|---------------|------|-------|---------------|-------------|---------------|----------------|--------------|
| 5                                            | 30-34     | Never Any     | 5304 | 52.63 |               |             |               |                |              |
| 5                                            | 30-34     | CC            | 2344 | 23.26 | 0             | 0.00        |               |                |              |
| 5                                            | 30-34     | Ecig          | 826  | 8.20  |               |             |               |                |              |
| 5                                            | 30-34     | Dual          | 0    | 0.00  |               |             |               |                |              |
| 5                                            | 30-34     | Former        | 1604 | 15.92 |               |             | 8.17          | 55             | 3.43         |
| Year of Follow-up: 1995, Age Group: 35-39    |           |               |      |       |               |             |               |                |              |
| Period                                       | Age Group | Smoking Group | N    | %     | Ever Quit (N) | Ever Quit % | Mean Yrs Quit | Short Term (n) | Short Term % |
| 5                                            | 35-39     | Never Any     | 5278 | 50.27 |               |             |               |                |              |
| 5                                            | 35-39     | CC            | 2445 | 23.29 | 0             | 0.00        |               |                |              |
| 5                                            | 35-39     | Ecig          | 741  | 7.06  |               |             |               |                |              |
| 5                                            | 35-39     | Dual          | 0    | 0.00  |               |             |               |                |              |
| 5                                            | 35-39     | Former        | 2035 | 19.38 |               |             | 8.84          | 56             | 2.75         |
| Year of Follow-up: 1995, Age Group: 40-44    |           |               |      |       |               |             |               |                |              |
| Period                                       | Age Group | Smoking Group | N    | %     | Ever Quit (N) | Ever Quit % | Mean Yrs Quit | Short Term (n) | Short Term % |
| 5                                            | 40-44     | Never Any     | 5018 | 52.27 |               |             |               |                |              |
| 5                                            | 40-44     | CC            | 2004 | 20.88 | 0             | 0.00        |               |                |              |
| 5                                            | 40-44     | Ecig          | 471  | 4.91  |               |             |               |                |              |
| 5                                            | 40-44     | Dual          | 0    | 0.00  |               |             |               |                |              |
| 5                                            | 40-44     | Former        | 2107 | 21.95 |               |             | 12.03         | 76             | 3.61         |
| Year of Follow-up: 1995, Age Group: 45-49    |           |               |      |       |               |             |               |                |              |
| Period                                       | Age Group | Smoking Group | N    | %     | Ever Quit (N) | Ever Quit % | Mean Yrs Quit | Short Term (n) | Short Term % |
| 5                                            | 45-49     | Never Any     | 4356 | 51.27 |               |             |               |                |              |
| 5                                            | 45-49     | CC            | 1733 | 20.40 | 0             | 0.00        |               |                |              |
| 5                                            | 45-49     | Ecig          | 407  | 4.79  |               |             |               |                |              |
| 5                                            | 45-49     | Dual          | 0    | 0.00  |               |             |               |                |              |
| 5                                            | 45-49     | Former        | 2001 | 23.55 |               |             | 10.95         | 125            | 6.25         |
| Year of Follow-up: 1995, Age Group: 50-54    |           |               |      |       |               |             |               |                |              |
| Period                                       | Age Group | Smoking Group | N    | %     | Ever Quit (N) | Ever Quit % | Mean Yrs Quit | Short Term (n) | Short Term % |
| 5                                            | 50-54     | Never Any     | 3116 | 47.67 |               |             |               |                |              |
| 5                                            | 50-54     | CC            | 1314 | 20.10 | 0             | 0.00        |               |                |              |
| 5                                            | 50-54     | Ecig          | 248  | 3.79  |               |             |               |                |              |
| 5                                            | 50-54     | Dual          | 0    | 0.00  |               |             |               |                |              |
| 5                                            | 50-54     | Former        | 1858 | 28.43 |               |             | 14.90         | 148            | 7.97         |
| Year of Follow-up: 1995, Age Group: 55-59    |           |               |      |       |               |             |               |                |              |
| Period                                       | Age Group | Smoking Group | N    | %     | Ever Quit (N) | Ever Quit % | Mean Yrs Quit | Short Term (n) | Short Term % |
| 5                                            | 55-59     | Never Any     | 2684 | 48.50 |               |             |               |                |              |
| 5                                            | 55-59     | CC            | 1246 | 22.52 | 0             | 0.00        |               |                |              |
| 5                                            | 55-59     | Ecig          | 114  | 2.06  |               |             |               |                |              |
| 5                                            | 55-59     | Dual          | 0    | 0.00  |               |             |               |                |              |
| 5                                            | 55-59     | Former        | 1490 | 26.92 |               |             | 15.95         | 91             | 6.11         |
| Year of Follow-up: 1995, Age Group: 60-64    |           |               |      |       |               |             |               |                |              |
| Period                                       | Age Group | Smoking Group | N    | %     | Ever Quit (N) | Ever Quit % | Mean Yrs Quit | Short Term (n) | Short Term % |
| 5                                            | 60-64     | Never Any     | 2732 | 51.90 |               |             |               |                |              |
| 5                                            | 60-64     | CC            | 1062 | 20.17 | 0             | 0.00        |               |                |              |
| 5                                            | 60-64     | Ecig          | 0    | 0.00  |               |             |               |                |              |
| 5                                            | 60-64     | Dual          | 0    | 0.00  |               |             |               |                |              |
| 5                                            | 60-64     | Former        | 1470 | 27.93 |               |             | 19.04         | 102            | 6.94         |
| Year of Follow-up: 1995, Age Group: 65-69    |           |               |      |       |               |             |               |                |              |
| Period                                       | Age Group | Smoking Group | N    | %     | Ever Quit (N) | Ever Quit % | Mean Yrs Quit | Short Term (n) | Short Term % |
| 5                                            | 65-69     | Never Any     | 3078 | 55.72 |               |             |               |                |              |
| 5                                            | 65-69     | CC            | 949  | 17.18 | 0             | 0.00        |               |                |              |
| 5                                            | 65-69     | Ecig          | 0    | 0.00  |               |             |               |                |              |
| 5                                            | 65-69     | Dual          | 0    | 0.00  |               |             |               |                |              |
| 5                                            | 65-69     | Former        | 1497 | 27.10 |               |             | 19.05         | 112            | 7.48         |
| Year of Follow-up: 1995, Age Group: 70-74    |           |               |      |       |               |             |               |                |              |
| Period                                       | Age Group | Smoking Group | N    | %     | Ever Quit (N) | Ever Quit % | Mean Yrs Quit | Short Term (n) | Short Term % |
| 5                                            | 70-74     | Never Any     | 3042 | 57.36 |               |             |               |                |              |
| 5                                            | 70-74     | CC            | 751  | 14.16 | 0             | 0.00        |               |                |              |
| 5                                            | 70-74     | Ecig          | 0    | 0.00  |               |             |               |                |              |
| 5                                            | 70-74     | Dual          | 0    | 0.00  |               |             |               |                |              |
| 5                                            | 70-74     | Former        | 1510 | 28.47 |               |             | 22.10         | 89             | 5.89         |
| Year of Follow-up: 1995, Age Group: 75-79    |           |               |      |       |               |             |               |                |              |
| Period                                       | Age Group | Smoking Group | N    | %     | Ever Quit (N) | Ever Quit % | Mean Yrs Quit | Short Term (n) | Short Term % |
| 5                                            | 75-79     | Never Any     | 2738 | 61.05 |               |             |               |                |              |
| 5                                            | 75-79     | CC            | 455  | 10.14 | 0             | 0.00        |               |                |              |
| 5                                            | 75-79     | Ecig          | 0    | 0.00  |               |             |               |                |              |
| 5                                            | 75-79     | Dual          | 0    | 0.00  |               |             |               |                |              |
| 5                                            | 75-79     | Former        | 1292 | 28.81 |               |             | 26.18         | 63             | 4.88         |
| Year of Follow-up: 2000, Age Group: All Ages |           |               |      |       |               |             |               |                |              |

**Results for PHIM for Run 10 (Sensitivity\_Analysis\_2.RTF)**

| Period                                    | Age Group | Smoking Group | N     | %     | Ever Quit (N) | Ever Quit % | Mean Yrs Quit | Short Term (n) | Short Term % |
|-------------------------------------------|-----------|---------------|-------|-------|---------------|-------------|---------------|----------------|--------------|
| 10                                        | All Ages  | Never Any     | 50423 | 54.86 |               |             |               |                |              |
| 10                                        | All Ages  | CC            | 12688 | 13.81 | 0             | 0.00        |               |                |              |
| 10                                        | All Ages  | Ecig          | 7515  | 8.18  |               |             |               |                |              |
| 10                                        | All Ages  | Dual          | 0     | 0.00  |               |             |               |                |              |
| 10                                        | All Ages  | Former        | 21282 | 23.16 |               |             | 15.11         | 1659           | 7.80         |
| Year of Follow-up: 2000, Age Group: 18-19 |           |               |       |       |               |             |               |                |              |
| Period                                    | Age Group | Smoking Group | N     | %     | Ever Quit (N) | Ever Quit % | Mean Yrs Quit | Short Term (n) | Short Term % |
| 10                                        | 18-19     | Never Any     | 0     | .     |               |             |               |                |              |
| 10                                        | 18-19     | CC            | 0     | .     | 0             | .           |               |                |              |
| 10                                        | 18-19     | Ecig          | 0     | .     |               |             |               |                |              |
| 10                                        | 18-19     | Dual          | 0     | .     |               |             |               |                |              |
| 10                                        | 18-19     | Former        | 0     | .     |               |             |               | 0              | .            |
| Year of Follow-up: 2000, Age Group: 20-24 |           |               |       |       |               |             |               |                |              |
| Period                                    | Age Group | Smoking Group | N     | %     | Ever Quit (N) | Ever Quit % | Mean Yrs Quit | Short Term (n) | Short Term % |
| 10                                        | 20-24     | Never Any     | 5128  | 64.67 |               |             |               |                |              |
| 10                                        | 20-24     | CC            | 730   | 9.21  | 0             | 0.00        |               |                |              |
| 10                                        | 20-24     | Ecig          | 1396  | 17.60 |               |             |               |                |              |
| 10                                        | 20-24     | Dual          | 0     | 0.00  |               |             |               |                |              |
| 10                                        | 20-24     | Former        | 676   | 8.52  |               |             | 3.47          | 186            | 27.51        |
| Year of Follow-up: 2000, Age Group: 25-29 |           |               |       |       |               |             |               |                |              |
| Period                                    | Age Group | Smoking Group | N     | %     | Ever Quit (N) | Ever Quit % | Mean Yrs Quit | Short Term (n) | Short Term % |
| 10                                        | 25-29     | Never Any     | 5493  | 65.78 |               |             |               |                |              |
| 10                                        | 25-29     | CC            | 1006  | 12.05 | 0             | 0.00        |               |                |              |
| 10                                        | 25-29     | Ecig          | 1085  | 12.99 |               |             |               |                |              |
| 10                                        | 25-29     | Dual          | 0     | 0.00  |               |             |               |                |              |
| 10                                        | 25-29     | Former        | 766   | 9.17  |               |             | 5.65          | 121            | 15.80        |
| Year of Follow-up: 2000, Age Group: 30-34 |           |               |       |       |               |             |               |                |              |
| Period                                    | Age Group | Smoking Group | N     | %     | Ever Quit (N) | Ever Quit % | Mean Yrs Quit | Short Term (n) | Short Term % |
| 10                                        | 30-34     | Never Any     | 5214  | 59.30 |               |             |               |                |              |
| 10                                        | 30-34     | CC            | 1276  | 14.51 | 0             | 0.00        |               |                |              |
| 10                                        | 30-34     | Ecig          | 1039  | 11.82 |               |             |               |                |              |
| 10                                        | 30-34     | Dual          | 0     | 0.00  |               |             |               |                |              |
| 10                                        | 30-34     | Former        | 1264  | 14.38 |               |             | 9.21          | 99             | 7.83         |
| Year of Follow-up: 2000, Age Group: 35-39 |           |               |       |       |               |             |               |                |              |
| Period                                    | Age Group | Smoking Group | N     | %     | Ever Quit (N) | Ever Quit % | Mean Yrs Quit | Short Term (n) | Short Term % |
| 10                                        | 35-39     | Never Any     | 5284  | 52.43 |               |             |               |                |              |
| 10                                        | 35-39     | CC            | 1674  | 16.61 | 0             | 0.00        |               |                |              |
| 10                                        | 35-39     | Ecig          | 1266  | 12.56 |               |             |               |                |              |
| 10                                        | 35-39     | Dual          | 0     | 0.00  |               |             |               |                |              |
| 10                                        | 35-39     | Former        | 1854  | 18.40 |               |             | 11.63         | 114            | 6.15         |
| Year of Follow-up: 2000, Age Group: 40-44 |           |               |       |       |               |             |               |                |              |
| Period                                    | Age Group | Smoking Group | N     | %     | Ever Quit (N) | Ever Quit % | Mean Yrs Quit | Short Term (n) | Short Term % |
| 10                                        | 40-44     | Never Any     | 5278  | 50.27 |               |             |               |                |              |
| 10                                        | 40-44     | CC            | 1815  | 17.29 | 0             | 0.00        |               |                |              |
| 10                                        | 40-44     | Ecig          | 1123  | 10.70 |               |             |               |                |              |
| 10                                        | 40-44     | Dual          | 0     | 0.00  |               |             |               |                |              |
| 10                                        | 40-44     | Former        | 2283  | 21.74 |               |             | 12.51         | 121            | 5.30         |
| Year of Follow-up: 2000, Age Group: 45-49 |           |               |       |       |               |             |               |                |              |
| Period                                    | Age Group | Smoking Group | N     | %     | Ever Quit (N) | Ever Quit % | Mean Yrs Quit | Short Term (n) | Short Term % |
| 10                                        | 45-49     | Never Any     | 5018  | 52.27 |               |             |               |                |              |
| 10                                        | 45-49     | CC            | 1410  | 14.69 | 0             | 0.00        |               |                |              |
| 10                                        | 45-49     | Ecig          | 700   | 7.29  |               |             |               |                |              |
| 10                                        | 45-49     | Dual          | 0     | 0.00  |               |             |               |                |              |
| 10                                        | 45-49     | Former        | 2472  | 25.75 |               |             | 14.77         | 172            | 6.96         |
| Year of Follow-up: 2000, Age Group: 50-54 |           |               |       |       |               |             |               |                |              |
| Period                                    | Age Group | Smoking Group | N     | %     | Ever Quit (N) | Ever Quit % | Mean Yrs Quit | Short Term (n) | Short Term % |
| 10                                        | 50-54     | Never Any     | 4356  | 51.27 |               |             |               |                |              |
| 10                                        | 50-54     | CC            | 1125  | 13.24 | 0             | 0.00        |               |                |              |
| 10                                        | 50-54     | Ecig          | 552   | 6.50  |               |             |               |                |              |
| 10                                        | 50-54     | Dual          | 0     | 0.00  |               |             |               |                |              |
| 10                                        | 50-54     | Former        | 2464  | 29.00 |               |             | 13.31         | 192            | 7.79         |
| Year of Follow-up: 2000, Age Group: 55-59 |           |               |       |       |               |             |               |                |              |
| Period                                    | Age Group | Smoking Group | N     | %     | Ever Quit (N) | Ever Quit % | Mean Yrs Quit | Short Term (n) | Short Term % |
| 10                                        | 55-59     | Never Any     | 3116  | 47.67 |               |             |               |                |              |
| 10                                        | 55-59     | CC            | 926   | 14.17 | 0             | 0.00        |               |                |              |
| 10                                        | 55-59     | Ecig          | 269   | 4.12  |               |             |               |                |              |
| 10                                        | 55-59     | Dual          | 0     | 0.00  |               |             |               |                |              |

**Results for PHIM for Run 10 (Sensitivity\_Analysis\_2.RTF)**

| Year of Follow-up: 2000, Age Group: 60-64    | Period   | Age Group | Smoking Group | N     | %     | Ever Quit (N) | Ever Quit % | Mean Yrs Quit | Short Term (n) | Short Term % |
|----------------------------------------------|----------|-----------|---------------|-------|-------|---------------|-------------|---------------|----------------|--------------|
| 10                                           | 55-59    | Former    |               | 2225  | 34.04 |               |             | 16.93         | 146            | 6.56         |
| 10                                           | 60-64    | Never Any |               | 2684  | 48.50 |               |             |               |                |              |
| 10                                           | 60-64    | CC        |               | 911   | 16.46 | 0             | 0.00        |               |                |              |
| 10                                           | 60-64    | Ecig      |               | 85    | 1.54  |               |             |               |                |              |
| 10                                           | 60-64    | Dual      |               | 0     | 0.00  |               |             |               |                |              |
| 10                                           | 60-64    | Former    |               | 1854  | 33.50 |               |             | 17.21         | 148            | 7.98         |
| Year of Follow-up: 2000, Age Group: 65-69    | Period   | Age Group | Smoking Group | N     | %     | Ever Quit (N) | Ever Quit % | Mean Yrs Quit | Short Term (n) | Short Term % |
| 10                                           | 65-69    | Never Any |               | 2732  | 51.90 |               |             |               |                |              |
| 10                                           | 65-69    | CC        |               | 735   | 13.96 | 0             | 0.00        |               |                |              |
| 10                                           | 65-69    | Ecig      |               | 0     | 0.00  |               |             |               |                |              |
| 10                                           | 65-69    | Dual      |               | 0     | 0.00  |               |             |               |                |              |
| 10                                           | 65-69    | Former    |               | 1797  | 34.14 |               |             | 20.03         | 112            | 6.23         |
| Year of Follow-up: 2000, Age Group: 70-74    | Period   | Age Group | Smoking Group | N     | %     | Ever Quit (N) | Ever Quit % | Mean Yrs Quit | Short Term (n) | Short Term % |
| 10                                           | 70-74    | Never Any |               | 3078  | 55.72 |               |             |               |                |              |
| 10                                           | 70-74    | CC        |               | 626   | 11.33 | 0             | 0.00        |               |                |              |
| 10                                           | 70-74    | Ecig      |               | 0     | 0.00  |               |             |               |                |              |
| 10                                           | 70-74    | Dual      |               | 0     | 0.00  |               |             |               |                |              |
| 10                                           | 70-74    | Former    |               | 1820  | 32.95 |               |             | 20.11         | 143            | 7.86         |
| Year of Follow-up: 2000, Age Group: 75-79    | Period   | Age Group | Smoking Group | N     | %     | Ever Quit (N) | Ever Quit % | Mean Yrs Quit | Short Term (n) | Short Term % |
| 10                                           | 75-79    | Never Any |               | 3042  | 57.36 |               |             |               |                |              |
| 10                                           | 75-79    | CC        |               | 454   | 8.56  | 0             | 0.00        |               |                |              |
| 10                                           | 75-79    | Ecig      |               | 0     | 0.00  |               |             |               |                |              |
| 10                                           | 75-79    | Dual      |               | 0     | 0.00  |               |             |               |                |              |
| 10                                           | 75-79    | Former    |               | 1807  | 34.08 |               |             | 23.00         | 105            | 5.81         |
| Year of Follow-up: 2005, Age Group: All Ages | Period   | Age Group | Smoking Group | N     | %     | Ever Quit (N) | Ever Quit % | Mean Yrs Quit | Short Term (n) | Short Term % |
| 15                                           | All Ages | Never Any |               | 47002 | 54.27 |               |             |               |                |              |
| 15                                           | All Ages | CC        |               | 8985  | 10.37 | 0             | 0.00        |               |                |              |
| 15                                           | All Ages | Ecig      |               | 8528  | 9.85  |               |             |               |                |              |
| 15                                           | All Ages | Dual      |               | 0     | 0.00  |               |             |               |                |              |
| 15                                           | All Ages | Former    |               | 22090 | 25.51 |               |             | 17.34         | 965            | 4.37         |
| Year of Follow-up: 2005, Age Group: 18-19    | Period   | Age Group | Smoking Group | N     | %     | Ever Quit (N) | Ever Quit % | Mean Yrs Quit | Short Term (n) | Short Term % |
| 15                                           | 18-19    | Never Any |               | 0     | .     |               |             |               |                |              |
| 15                                           | 18-19    | CC        |               | 0     | .     | 0             | .           |               |                |              |
| 15                                           | 18-19    | Ecig      |               | 0     | .     |               |             |               |                |              |
| 15                                           | 18-19    | Dual      |               | 0     | .     |               |             |               |                |              |
| 15                                           | 18-19    | Former    |               | 0     | .     |               |             | .             | 0              | .            |
| Year of Follow-up: 2005, Age Group: 20-24    | Period   | Age Group | Smoking Group | N     | %     | Ever Quit (N) | Ever Quit % | Mean Yrs Quit | Short Term (n) | Short Term % |
| 15                                           | 20-24    | Never Any |               | 0     | .     |               |             |               |                |              |
| 15                                           | 20-24    | CC        |               | 0     | .     | 0             | .           |               |                |              |
| 15                                           | 20-24    | Ecig      |               | 0     | .     |               |             |               |                |              |
| 15                                           | 20-24    | Dual      |               | 0     | .     |               |             |               |                |              |
| 15                                           | 20-24    | Former    |               | 0     | .     |               |             | .             | 0              | .            |
| Year of Follow-up: 2005, Age Group: 25-29    | Period   | Age Group | Smoking Group | N     | %     | Ever Quit (N) | Ever Quit % | Mean Yrs Quit | Short Term (n) | Short Term % |
| 15                                           | 25-29    | Never Any |               | 4860  | 61.29 |               |             |               |                |              |
| 15                                           | 25-29    | CC        |               | 524   | 6.61  | 0             | 0.00        |               |                |              |
| 15                                           | 25-29    | Ecig      |               | 1579  | 19.91 |               |             |               |                |              |
| 15                                           | 25-29    | Dual      |               | 0     | 0.00  |               |             |               |                |              |
| 15                                           | 25-29    | Former    |               | 967   | 12.19 |               |             | 6.62          | 99             | 10.24        |
| Year of Follow-up: 2005, Age Group: 30-34    | Period   | Age Group | Smoking Group | N     | %     | Ever Quit (N) | Ever Quit % | Mean Yrs Quit | Short Term (n) | Short Term % |
| 15                                           | 30-34    | Never Any |               | 5407  | 64.75 |               |             |               |                |              |
| 15                                           | 30-34    | CC        |               | 689   | 8.25  | 0             | 0.00        |               |                |              |
| 15                                           | 30-34    | Ecig      |               | 1301  | 15.58 |               |             |               |                |              |
| 15                                           | 30-34    | Dual      |               | 0     | 0.00  |               |             |               |                |              |
| 15                                           | 30-34    | Former    |               | 953   | 11.41 |               |             | 8.95          | 75             | 7.87         |
| Year of Follow-up: 2005, Age Group: 35-39    | Period   | Age Group | Smoking Group | N     | %     | Ever Quit (N) | Ever Quit % | Mean Yrs Quit | Short Term (n) | Short Term % |
| 15                                           | 35-39    | Never Any |               | 5189  | 59.01 |               |             |               |                |              |
| 15                                           | 35-39    | CC        |               | 899   | 10.22 | 0             | 0.00        |               |                |              |

**Results for PHIM for Run 10 (Sensitivity\_Analysis\_2.RTF)**

|                                              |           |               |       |       |               |             |               |                |              |
|----------------------------------------------|-----------|---------------|-------|-------|---------------|-------------|---------------|----------------|--------------|
| 15                                           | 35-39     | Ecig          | 1279  | 14.55 |               |             |               |                |              |
| 15                                           | 35-39     | Dual          | 0     | 0.00  |               |             |               |                |              |
| 15                                           | 35-39     | Former        | 1426  | 16.22 |               |             | 12.82         | 67             | 4.70         |
| Year of Follow-up: 2005, Age Group: 40-44    |           |               |       |       |               |             |               |                |              |
| Period                                       | Age Group | Smoking Group | N     | %     | Ever Quit (N) | Ever Quit % | Mean Yrs Quit | Short Term (n) | Short Term % |
| 15                                           | 40-44     | Never Any     | 5284  | 52.43 |               |             |               |                |              |
| 15                                           | 40-44     | CC            | 1243  | 12.33 | 0             | 0.00        |               |                |              |
| 15                                           | 40-44     | Ecig          | 1442  | 14.31 |               |             |               |                |              |
| 15                                           | 40-44     | Dual          | 0     | 0.00  |               |             |               |                |              |
| 15                                           | 40-44     | Former        | 2109  | 20.93 |               |             | 14.87         | 107            | 5.07         |
| Year of Follow-up: 2005, Age Group: 45-49    |           |               |       |       |               |             |               |                |              |
| Period                                       | Age Group | Smoking Group | N     | %     | Ever Quit (N) | Ever Quit % | Mean Yrs Quit | Short Term (n) | Short Term % |
| 15                                           | 45-49     | Never Any     | 5278  | 50.27 |               |             |               |                |              |
| 15                                           | 45-49     | CC            | 1314  | 12.52 | 0             | 0.00        |               |                |              |
| 15                                           | 45-49     | Ecig          | 1319  | 12.56 |               |             |               |                |              |
| 15                                           | 45-49     | Dual          | 0     | 0.00  |               |             |               |                |              |
| 15                                           | 45-49     | Former        | 2588  | 24.65 |               |             | 15.68         | 131            | 5.06         |
| Year of Follow-up: 2005, Age Group: 50-54    |           |               |       |       |               |             |               |                |              |
| Period                                       | Age Group | Smoking Group | N     | %     | Ever Quit (N) | Ever Quit % | Mean Yrs Quit | Short Term (n) | Short Term % |
| 15                                           | 50-54     | Never Any     | 5018  | 52.27 |               |             |               |                |              |
| 15                                           | 50-54     | CC            | 1043  | 10.86 | 0             | 0.00        |               |                |              |
| 15                                           | 50-54     | Ecig          | 781   | 8.14  |               |             |               |                |              |
| 15                                           | 50-54     | Dual          | 0     | 0.00  |               |             |               |                |              |
| 15                                           | 50-54     | Former        | 2758  | 28.73 |               |             | 17.96         | 99             | 3.59         |
| Year of Follow-up: 2005, Age Group: 55-59    |           |               |       |       |               |             |               |                |              |
| Period                                       | Age Group | Smoking Group | N     | %     | Ever Quit (N) | Ever Quit % | Mean Yrs Quit | Short Term (n) | Short Term % |
| 15                                           | 55-59     | Never Any     | 4356  | 51.27 |               |             |               |                |              |
| 15                                           | 55-59     | CC            | 899   | 10.58 | 0             | 0.00        |               |                |              |
| 15                                           | 55-59     | Ecig          | 545   | 6.41  |               |             |               |                |              |
| 15                                           | 55-59     | Dual          | 0     | 0.00  |               |             |               |                |              |
| 15                                           | 55-59     | Former        | 2697  | 31.74 |               |             | 16.94         | 74             | 2.74         |
| Year of Follow-up: 2005, Age Group: 60-64    |           |               |       |       |               |             |               |                |              |
| Period                                       | Age Group | Smoking Group | N     | %     | Ever Quit (N) | Ever Quit % | Mean Yrs Quit | Short Term (n) | Short Term % |
| 15                                           | 60-64     | Never Any     | 3116  | 47.67 |               |             |               |                |              |
| 15                                           | 60-64     | CC            | 753   | 11.52 | 0             | 0.00        |               |                |              |
| 15                                           | 60-64     | Ecig          | 222   | 3.40  |               |             |               |                |              |
| 15                                           | 60-64     | Dual          | 0     | 0.00  |               |             |               |                |              |
| 15                                           | 60-64     | Former        | 2445  | 37.41 |               |             | 20.13         | 102            | 4.17         |
| Year of Follow-up: 2005, Age Group: 65-69    |           |               |       |       |               |             |               |                |              |
| Period                                       | Age Group | Smoking Group | N     | %     | Ever Quit (N) | Ever Quit % | Mean Yrs Quit | Short Term (n) | Short Term % |
| 15                                           | 65-69     | Never Any     | 2684  | 48.50 |               |             |               |                |              |
| 15                                           | 65-69     | CC            | 686   | 12.40 | 0             | 0.00        |               |                |              |
| 15                                           | 65-69     | Ecig          | 60    | 1.08  |               |             |               |                |              |
| 15                                           | 65-69     | Dual          | 0     | 0.00  |               |             |               |                |              |
| 15                                           | 65-69     | Former        | 2104  | 38.02 |               |             | 19.87         | 67             | 3.18         |
| Year of Follow-up: 2005, Age Group: 70-74    |           |               |       |       |               |             |               |                |              |
| Period                                       | Age Group | Smoking Group | N     | %     | Ever Quit (N) | Ever Quit % | Mean Yrs Quit | Short Term (n) | Short Term % |
| 15                                           | 70-74     | Never Any     | 2732  | 51.90 |               |             |               |                |              |
| 15                                           | 70-74     | CC            | 509   | 9.67  | 0             | 0.00        |               |                |              |
| 15                                           | 70-74     | Ecig          | 0     | 0.00  |               |             |               |                |              |
| 15                                           | 70-74     | Dual          | 0     | 0.00  |               |             |               |                |              |
| 15                                           | 70-74     | Former        | 2023  | 38.43 |               |             | 22.48         | 79             | 3.91         |
| Year of Follow-up: 2005, Age Group: 75-79    |           |               |       |       |               |             |               |                |              |
| Period                                       | Age Group | Smoking Group | N     | %     | Ever Quit (N) | Ever Quit % | Mean Yrs Quit | Short Term (n) | Short Term % |
| 15                                           | 75-79     | Never Any     | 3078  | 55.72 |               |             |               |                |              |
| 15                                           | 75-79     | CC            | 426   | 7.71  | 0             | 0.00        |               |                |              |
| 15                                           | 75-79     | Ecig          | 0     | 0.00  |               |             |               |                |              |
| 15                                           | 75-79     | Dual          | 0     | 0.00  |               |             |               |                |              |
| 15                                           | 75-79     | Former        | 2020  | 36.57 |               |             | 22.85         | 65             | 3.22         |
| Year of Follow-up: 2010, Age Group: All Ages |           |               |       |       |               |             |               |                |              |
| Period                                       | Age Group | Smoking Group | N     | %     | Ever Quit (N) | Ever Quit % | Mean Yrs Quit | Short Term (n) | Short Term % |
| 20                                           | All Ages  | Never Any     | 43759 | 53.97 |               |             |               |                |              |
| 20                                           | All Ages  | CC            | 6171  | 7.61  | 0             | 0.00        |               |                |              |
| 20                                           | All Ages  | Ecig          | 8408  | 10.37 |               |             |               |                |              |
| 20                                           | All Ages  | Dual          | 0     | 0.00  |               |             |               |                |              |
| 20                                           | All Ages  | Former        | 22743 | 28.05 |               |             | 19.45         | 1114           | 4.90         |
| Year of Follow-up: 2010, Age Group: 18-19    |           |               |       |       |               |             |               |                |              |
| Period                                       | Age Group | Smoking Group | N     | %     | Ever Quit (N) | Ever Quit % | Mean Yrs Quit | Short Term (n) | Short Term % |

**Results for PHIM for Run 10 (Sensitivity\_Analysis\_2.RTF)**

|                                           |           |               |      |       |               |             |               |                |              |
|-------------------------------------------|-----------|---------------|------|-------|---------------|-------------|---------------|----------------|--------------|
| 20                                        | 18-19     | Never Any     | 0    | .     |               |             |               |                |              |
| 20                                        | 18-19     | CC            | 0    | .     | 0             | .           |               |                |              |
| 20                                        | 18-19     | Ecig          | 0    | .     |               |             |               |                |              |
| 20                                        | 18-19     | Dual          | 0    | .     |               |             |               |                |              |
| 20                                        | 18-19     | Former        | 0    | .     |               |             | 0             | .              |              |
| Year of Follow-up: 2010, Age Group: 20-24 |           |               |      |       |               |             |               |                |              |
| Period                                    | Age Group | Smoking Group | N    | %     | Ever Quit (N) | Ever Quit % | Mean Yrs Quit | Short Term (n) | Short Term % |
| 20                                        | 20-24     | Never Any     | 0    | .     |               |             |               |                |              |
| 20                                        | 20-24     | CC            | 0    | .     | 0             | .           |               |                |              |
| 20                                        | 20-24     | Ecig          | 0    | .     |               |             |               |                |              |
| 20                                        | 20-24     | Dual          | 0    | .     |               |             |               |                |              |
| 20                                        | 20-24     | Former        | 0    | .     |               |             |               | 0              | .            |
| Year of Follow-up: 2010, Age Group: 25-29 |           |               |      |       |               |             |               |                |              |
| Period                                    | Age Group | Smoking Group | N    | %     | Ever Quit (N) | Ever Quit % | Mean Yrs Quit | Short Term (n) | Short Term % |
| 20                                        | 25-29     | Never Any     | 0    | .     |               |             |               |                |              |
| 20                                        | 25-29     | CC            | 0    | .     | 0             | .           |               |                |              |
| 20                                        | 25-29     | Ecig          | 0    | .     |               |             |               |                |              |
| 20                                        | 25-29     | Dual          | 0    | .     |               |             |               |                |              |
| 20                                        | 25-29     | Former        | 0    | .     |               |             |               | 0              | .            |
| Year of Follow-up: 2010, Age Group: 30-34 |           |               |      |       |               |             |               |                |              |
| Period                                    | Age Group | Smoking Group | N    | %     | Ever Quit (N) | Ever Quit % | Mean Yrs Quit | Short Term (n) | Short Term % |
| 20                                        | 30-34     | Never Any     | 4743 | 59.81 |               |             |               |                |              |
| 20                                        | 30-34     | CC            | 333  | 4.20  | 0             | 0.00        |               |                |              |
| 20                                        | 30-34     | Ecig          | 1604 | 20.23 |               |             |               |                |              |
| 20                                        | 30-34     | Dual          | 0    | 0.00  |               |             |               |                |              |
| 20                                        | 30-34     | Former        | 1250 | 15.76 |               |             | 9.38          | 132            | 10.56        |
| Year of Follow-up: 2010, Age Group: 35-39 |           |               |      |       |               |             |               |                |              |
| Period                                    | Age Group | Smoking Group | N    | %     | Ever Quit (N) | Ever Quit % | Mean Yrs Quit | Short Term (n) | Short Term % |
| 20                                        | 35-39     | Never Any     | 5359 | 64.18 |               |             |               |                |              |
| 20                                        | 35-39     | CC            | 464  | 5.56  | 0             | 0.00        |               |                |              |
| 20                                        | 35-39     | Ecig          | 1305 | 15.63 |               |             |               |                |              |
| 20                                        | 35-39     | Dual          | 0    | 0.00  |               |             |               |                |              |
| 20                                        | 35-39     | Former        | 1222 | 14.63 |               |             | 11.31         | 101            | 8.27         |
| Year of Follow-up: 2010, Age Group: 40-44 |           |               |      |       |               |             |               |                |              |
| Period                                    | Age Group | Smoking Group | N    | %     | Ever Quit (N) | Ever Quit % | Mean Yrs Quit | Short Term (n) | Short Term % |
| 20                                        | 40-44     | Never Any     | 5189 | 59.01 |               |             |               |                |              |
| 20                                        | 40-44     | CC            | 604  | 6.87  | 0             | 0.00        |               |                |              |
| 20                                        | 40-44     | Ecig          | 1327 | 15.09 |               |             |               |                |              |
| 20                                        | 40-44     | Dual          | 0    | 0.00  |               |             |               |                |              |
| 20                                        | 40-44     | Former        | 1673 | 19.03 |               |             | 15.44         | 120            | 7.17         |
| Year of Follow-up: 2010, Age Group: 45-49 |           |               |      |       |               |             |               |                |              |
| Period                                    | Age Group | Smoking Group | N    | %     | Ever Quit (N) | Ever Quit % | Mean Yrs Quit | Short Term (n) | Short Term % |
| 20                                        | 45-49     | Never Any     | 5284 | 52.43 |               |             |               |                |              |
| 20                                        | 45-49     | CC            | 896  | 8.89  | 0             | 0.00        |               |                |              |
| 20                                        | 45-49     | Ecig          | 1502 | 14.90 |               |             |               |                |              |
| 20                                        | 45-49     | Dual          | 0    | 0.00  |               |             |               |                |              |
| 20                                        | 45-49     | Former        | 2396 | 23.77 |               |             | 17.72         | 119            | 4.97         |
| Year of Follow-up: 2010, Age Group: 50-54 |           |               |      |       |               |             |               |                |              |
| Period                                    | Age Group | Smoking Group | N    | %     | Ever Quit (N) | Ever Quit % | Mean Yrs Quit | Short Term (n) | Short Term % |
| 20                                        | 50-54     | Never Any     | 5278 | 50.27 |               |             |               |                |              |
| 20                                        | 50-54     | CC            | 965  | 9.19  | 0             | 0.00        |               |                |              |
| 20                                        | 50-54     | Ecig          | 1313 | 12.51 |               |             |               |                |              |
| 20                                        | 50-54     | Dual          | 0    | 0.00  |               |             |               |                |              |
| 20                                        | 50-54     | Former        | 2943 | 28.03 |               |             | 18.41         | 160            | 5.44         |
| Year of Follow-up: 2010, Age Group: 55-59 |           |               |      |       |               |             |               |                |              |
| Period                                    | Age Group | Smoking Group | N    | %     | Ever Quit (N) | Ever Quit % | Mean Yrs Quit | Short Term (n) | Short Term % |
| 20                                        | 55-59     | Never Any     | 5018 | 52.27 |               |             |               |                |              |
| 20                                        | 55-59     | CC            | 814  | 8.48  | 0             | 0.00        |               |                |              |
| 20                                        | 55-59     | Ecig          | 727  | 7.57  |               |             |               |                |              |
| 20                                        | 55-59     | Dual          | 0    | 0.00  |               |             |               |                |              |
| 20                                        | 55-59     | Former        | 3041 | 31.68 |               |             | 21.01         | 104            | 3.42         |
| Year of Follow-up: 2010, Age Group: 60-64 |           |               |      |       |               |             |               |                |              |
| Period                                    | Age Group | Smoking Group | N    | %     | Ever Quit (N) | Ever Quit % | Mean Yrs Quit | Short Term (n) | Short Term % |
| 20                                        | 60-64     | Never Any     | 4356 | 51.27 |               |             |               |                |              |
| 20                                        | 60-64     | CC            | 700  | 8.24  | 0             | 0.00        |               |                |              |
| 20                                        | 60-64     | Ecig          | 436  | 5.13  |               |             |               |                |              |
| 20                                        | 60-64     | Dual          | 0    | 0.00  |               |             |               |                |              |
| 20                                        | 60-64     | Former        | 3005 | 35.37 |               |             | 19.87         | 151            | 5.02         |
| Year of Follow-up: 2010, Age Group: 65-69 |           |               |      |       |               |             |               |                |              |



**Results for PHIM for Run 10 (Sensitivity\_Analysis\_2.RTF)**

| Period                                       | Age Group | Smoking Group | N     | %     | Ever Quit (N) | Ever Quit % | Mean Yrs Quit | Short Term (n) | Short Term % |
|----------------------------------------------|-----------|---------------|-------|-------|---------------|-------------|---------------|----------------|--------------|
| 20                                           | 65-69     | Never Any     | 3116  | 47.67 |               |             |               |                |              |
| 20                                           | 65-69     | CC            | 535   | 8.19  | 0             | 0.00        |               |                |              |
| 20                                           | 65-69     | Ecig          | 147   | 2.25  |               |             |               |                |              |
| 20                                           | 65-69     | Dual          | 0     | 0.00  |               |             |               |                |              |
| 20                                           | 65-69     | Former        | 2738  | 41.89 |               |             | 22.67         | 100            | 3.65         |
| Year of Follow-up: 2010, Age Group: 70-74    |           |               |       |       |               |             |               |                |              |
| Period                                       | Age Group | Smoking Group | N     | %     | Ever Quit (N) | Ever Quit % | Mean Yrs Quit | Short Term (n) | Short Term % |
| 20                                           | 70-74     | Never Any     | 2684  | 48.50 |               |             |               |                |              |
| 20                                           | 70-74     | CC            | 500   | 9.04  | 0             | 0.00        |               |                |              |
| 20                                           | 70-74     | Ecig          | 47    | 0.85  |               |             |               |                |              |
| 20                                           | 70-74     | Dual          | 0     | 0.00  |               |             |               |                |              |
| 20                                           | 70-74     | Former        | 2303  | 41.62 |               |             | 22.89         | 74             | 3.21         |
| Year of Follow-up: 2010, Age Group: 75-79    |           |               |       |       |               |             |               |                |              |
| Period                                       | Age Group | Smoking Group | N     | %     | Ever Quit (N) | Ever Quit % | Mean Yrs Quit | Short Term (n) | Short Term % |
| 20                                           | 75-79     | Never Any     | 2732  | 51.90 |               |             |               |                |              |
| 20                                           | 75-79     | CC            | 360   | 6.84  | 0             | 0.00        |               |                |              |
| 20                                           | 75-79     | Ecig          | 0     | 0.00  |               |             |               |                |              |
| 20                                           | 75-79     | Dual          | 0     | 0.00  |               |             |               |                |              |
| 20                                           | 75-79     | Former        | 2172  | 41.26 |               |             | 25.75         | 53             | 2.44         |
| Year of Follow-up: 2015, Age Group: All Ages |           |               |       |       |               |             |               |                |              |
| Period                                       | Age Group | Smoking Group | N     | %     | Ever Quit (N) | Ever Quit % | Mean Yrs Quit | Short Term (n) | Short Term % |
| 25                                           | All Ages  | Never Any     | 41010 | 54.09 |               |             |               |                |              |
| 25                                           | All Ages  | CC            | 4326  | 5.71  | 0             | 0.00        |               |                |              |
| 25                                           | All Ages  | Ecig          | 7438  | 9.81  |               |             |               |                |              |
| 25                                           | All Ages  | Dual          | 0     | 0.00  |               |             |               |                |              |
| 25                                           | All Ages  | Former        | 23043 | 30.39 |               |             | 21.46         | 914            | 3.97         |
| Year of Follow-up: 2015, Age Group: 18-19    |           |               |       |       |               |             |               |                |              |
| Period                                       | Age Group | Smoking Group | N     | %     | Ever Quit (N) | Ever Quit % | Mean Yrs Quit | Short Term (n) | Short Term % |
| 25                                           | 18-19     | Never Any     | 0     | .     |               |             |               |                |              |
| 25                                           | 18-19     | CC            | 0     | .     | 0             | .           |               |                |              |
| 25                                           | 18-19     | Ecig          | 0     | .     |               |             |               |                |              |
| 25                                           | 18-19     | Dual          | 0     | .     |               |             |               |                |              |
| 25                                           | 18-19     | Former        | 0     | .     |               |             |               | 0              | .            |
| Year of Follow-up: 2015, Age Group: 20-24    |           |               |       |       |               |             |               |                |              |
| Period                                       | Age Group | Smoking Group | N     | %     | Ever Quit (N) | Ever Quit % | Mean Yrs Quit | Short Term (n) | Short Term % |
| 25                                           | 20-24     | Never Any     | 0     | .     |               |             |               |                |              |
| 25                                           | 20-24     | CC            | 0     | .     | 0             | .           |               |                |              |
| 25                                           | 20-24     | Ecig          | 0     | .     |               |             |               |                |              |
| 25                                           | 20-24     | Dual          | 0     | .     |               |             |               |                |              |
| 25                                           | 20-24     | Former        | 0     | .     |               |             |               | 0              | .            |
| Year of Follow-up: 2015, Age Group: 25-29    |           |               |       |       |               |             |               |                |              |
| Period                                       | Age Group | Smoking Group | N     | %     | Ever Quit (N) | Ever Quit % | Mean Yrs Quit | Short Term (n) | Short Term % |
| 25                                           | 25-29     | Never Any     | 0     | .     |               |             |               |                |              |
| 25                                           | 25-29     | CC            | 0     | .     | 0             | .           |               |                |              |
| 25                                           | 25-29     | Ecig          | 0     | .     |               |             |               |                |              |
| 25                                           | 25-29     | Dual          | 0     | .     |               |             |               |                |              |
| 25                                           | 25-29     | Former        | 0     | .     |               |             |               | 0              | .            |
| Year of Follow-up: 2015, Age Group: 30-34    |           |               |       |       |               |             |               |                |              |
| Period                                       | Age Group | Smoking Group | N     | %     | Ever Quit (N) | Ever Quit % | Mean Yrs Quit | Short Term (n) | Short Term % |
| 25                                           | 30-34     | Never Any     | 0     | .     |               |             |               |                |              |
| 25                                           | 30-34     | CC            | 0     | .     | 0             | .           |               |                |              |
| 25                                           | 30-34     | Ecig          | 0     | .     |               |             |               |                |              |
| 25                                           | 30-34     | Dual          | 0     | .     |               |             |               |                |              |
| 25                                           | 30-34     | Former        | 0     | .     |               |             |               | 0              | .            |
| Year of Follow-up: 2015, Age Group: 35-39    |           |               |       |       |               |             |               |                |              |
| Period                                       | Age Group | Smoking Group | N     | %     | Ever Quit (N) | Ever Quit % | Mean Yrs Quit | Short Term (n) | Short Term % |
| 25                                           | 35-39     | Never Any     | 4726  | 59.60 |               |             |               |                |              |
| 25                                           | 35-39     | CC            | 193   | 2.43  | 0             | 0.00        |               |                |              |
| 25                                           | 35-39     | Ecig          | 1367  | 17.24 |               |             |               |                |              |
| 25                                           | 35-39     | Dual          | 0     | 0.00  |               |             |               |                |              |
| 25                                           | 35-39     | Former        | 1644  | 20.73 |               |             | 11.45         | 135            | 8.21         |
| Year of Follow-up: 2015, Age Group: 40-44    |           |               |       |       |               |             |               |                |              |
| Period                                       | Age Group | Smoking Group | N     | %     | Ever Quit (N) | Ever Quit % | Mean Yrs Quit | Short Term (n) | Short Term % |
| 25                                           | 40-44     | Never Any     | 5359  | 64.18 |               |             |               |                |              |
| 25                                           | 40-44     | CC            | 340   | 4.07  | 0             | 0.00        |               |                |              |
| 25                                           | 40-44     | Ecig          | 1199  | 14.36 |               |             |               |                |              |
| 25                                           | 40-44     | Dual          | 0     | 0.00  |               |             |               |                |              |

**Results for PHIM for Run 10 (Sensitivity\_Analysis\_2.RTF)**

| Year of Follow-up: 2015, Age Group: 45-49    | Period   | Age Group | Smoking Group | N     | %     | Ever Quit (N) | Ever Quit % | Mean Yrs Quit | Short Term (n) | Short Term % |
|----------------------------------------------|----------|-----------|---------------|-------|-------|---------------|-------------|---------------|----------------|--------------|
| 25                                           | 40-44    | Former    |               | 1452  | 17.39 |               |             | 14.02         | 99             | 6.82         |
| 25                                           | 45-49    | Never Any |               | 5189  | 59.01 |               |             |               |                |              |
| 25                                           | 45-49    | CC        |               | 432   | 4.91  | 0             | 0.00        |               |                |              |
| 25                                           | 45-49    | Ecig      |               | 1257  | 14.30 |               |             |               |                |              |
| 25                                           | 45-49    | Dual      |               | 0     | 0.00  |               |             |               |                |              |
| 25                                           | 45-49    | Former    |               | 1915  | 21.78 |               |             | 18.11         | 92             | 4.80         |
| Year of Follow-up: 2015, Age Group: 50-54    | Period   | Age Group | Smoking Group | N     | %     | Ever Quit (N) | Ever Quit % | Mean Yrs Quit | Short Term (n) | Short Term % |
| 25                                           | 50-54    | Never Any |               | 5284  | 52.43 |               |             |               |                |              |
| 25                                           | 50-54    | CC        |               | 642   | 6.37  | 0             | 0.00        |               |                |              |
| 25                                           | 50-54    | Ecig      |               | 1407  | 13.96 |               |             |               |                |              |
| 25                                           | 50-54    | Dual      |               | 0     | 0.00  |               |             |               |                |              |
| 25                                           | 50-54    | Former    |               | 2745  | 27.24 |               |             | 20.07         | 164            | 5.97         |
| Year of Follow-up: 2015, Age Group: 55-59    | Period   | Age Group | Smoking Group | N     | %     | Ever Quit (N) | Ever Quit % | Mean Yrs Quit | Short Term (n) | Short Term % |
| 25                                           | 55-59    | Never Any |               | 5278  | 50.27 |               |             |               |                |              |
| 25                                           | 55-59    | CC        |               | 713   | 6.79  | 0             | 0.00        |               |                |              |
| 25                                           | 55-59    | Ecig      |               | 1151  | 10.96 |               |             |               |                |              |
| 25                                           | 55-59    | Dual      |               | 0     | 0.00  |               |             |               |                |              |
| 25                                           | 55-59    | Former    |               | 3357  | 31.97 |               |             | 20.79         | 137            | 4.08         |
| Year of Follow-up: 2015, Age Group: 60-64    | Period   | Age Group | Smoking Group | N     | %     | Ever Quit (N) | Ever Quit % | Mean Yrs Quit | Short Term (n) | Short Term % |
| 25                                           | 60-64    | Never Any |               | 5018  | 52.27 |               |             |               |                |              |
| 25                                           | 60-64    | CC        |               | 633   | 6.59  | 0             | 0.00        |               |                |              |
| 25                                           | 60-64    | Ecig      |               | 579   | 6.03  |               |             |               |                |              |
| 25                                           | 60-64    | Dual      |               | 0     | 0.00  |               |             |               |                |              |
| 25                                           | 60-64    | Former    |               | 3370  | 35.10 |               |             | 23.66         | 144            | 4.27         |
| Year of Follow-up: 2015, Age Group: 65-69    | Period   | Age Group | Smoking Group | N     | %     | Ever Quit (N) | Ever Quit % | Mean Yrs Quit | Short Term (n) | Short Term % |
| 25                                           | 65-69    | Never Any |               | 4356  | 51.27 |               |             |               |                |              |
| 25                                           | 65-69    | CC        |               | 542   | 6.38  | 0             | 0.00        |               |                |              |
| 25                                           | 65-69    | Ecig      |               | 328   | 3.86  |               |             |               |                |              |
| 25                                           | 65-69    | Dual      |               | 0     | 0.00  |               |             |               |                |              |
| 25                                           | 65-69    | Former    |               | 3271  | 38.50 |               |             | 23.05         | 67             | 2.05         |
| Year of Follow-up: 2015, Age Group: 70-74    | Period   | Age Group | Smoking Group | N     | %     | Ever Quit (N) | Ever Quit % | Mean Yrs Quit | Short Term (n) | Short Term % |
| 25                                           | 70-74    | Never Any |               | 3116  | 47.67 |               |             |               |                |              |
| 25                                           | 70-74    | CC        |               | 431   | 6.59  | 0             | 0.00        |               |                |              |
| 25                                           | 70-74    | Ecig      |               | 116   | 1.77  |               |             |               |                |              |
| 25                                           | 70-74    | Dual      |               | 0     | 0.00  |               |             |               |                |              |
| 25                                           | 70-74    | Former    |               | 2873  | 43.96 |               |             | 26.48         | 46             | 1.60         |
| Year of Follow-up: 2015, Age Group: 75-79    | Period   | Age Group | Smoking Group | N     | %     | Ever Quit (N) | Ever Quit % | Mean Yrs Quit | Short Term (n) | Short Term % |
| 25                                           | 75-79    | Never Any |               | 2684  | 48.50 |               |             |               |                |              |
| 25                                           | 75-79    | CC        |               | 400   | 7.23  | 0             | 0.00        |               |                |              |
| 25                                           | 75-79    | Ecig      |               | 34    | 0.61  |               |             |               |                |              |
| 25                                           | 75-79    | Dual      |               | 0     | 0.00  |               |             |               |                |              |
| 25                                           | 75-79    | Former    |               | 2416  | 43.66 |               |             | 26.71         | 30             | 1.24         |
| Year of Follow-up: 2020, Age Group: All Ages | Period   | Age Group | Smoking Group | N     | %     | Ever Quit (N) | Ever Quit % | Mean Yrs Quit | Short Term (n) | Short Term % |
| 30                                           | All Ages | Never Any |               | 38326 | 54.53 |               |             |               |                |              |
| 30                                           | All Ages | CC        |               | 3034  | 4.32  | 0             | 0.00        |               |                |              |
| 30                                           | All Ages | Ecig      |               | 6312  | 8.98  |               |             |               |                |              |
| 30                                           | All Ages | Dual      |               | 0     | 0.00  |               |             |               |                |              |
| 30                                           | All Ages | Former    |               | 22611 | 32.17 |               |             | 23.75         | 773            | 3.42         |
| Year of Follow-up: 2020, Age Group: 18-19    | Period   | Age Group | Smoking Group | N     | %     | Ever Quit (N) | Ever Quit % | Mean Yrs Quit | Short Term (n) | Short Term % |
| 30                                           | 18-19    | Never Any |               | 0     | .     |               |             |               |                |              |
| 30                                           | 18-19    | CC        |               | 0     | .     | 0             | .           |               |                |              |
| 30                                           | 18-19    | Ecig      |               | 0     | .     |               |             |               |                |              |
| 30                                           | 18-19    | Dual      |               | 0     | .     |               |             |               |                |              |
| 30                                           | 18-19    | Former    |               | 0     | .     |               |             | .             | 0              | .            |
| Year of Follow-up: 2020, Age Group: 20-24    | Period   | Age Group | Smoking Group | N     | %     | Ever Quit (N) | Ever Quit % | Mean Yrs Quit | Short Term (n) | Short Term % |
| 30                                           | 20-24    | Never Any |               | 0     | .     |               |             |               |                |              |
| 30                                           | 20-24    | CC        |               | 0     | .     | 0             | .           |               |                |              |

**Results for PHIM for Run 10 (Sensitivity\_Analysis\_2.RTF)**

|                                           |           |               |      |       |               |             |               |                |              |
|-------------------------------------------|-----------|---------------|------|-------|---------------|-------------|---------------|----------------|--------------|
| 30                                        | 20-24     | Ecig          | 0    | .     |               |             |               |                |              |
| 30                                        | 20-24     | Dual          | 0    | .     |               |             |               |                |              |
| 30                                        | 20-24     | Former        | 0    | .     |               |             | 0             | .              |              |
| Year of Follow-up: 2020, Age Group: 25-29 |           |               |      |       |               |             |               |                |              |
| Period                                    | Age Group | Smoking Group | N    | %     | Ever Quit (N) | Ever Quit % | Mean Yrs Quit | Short Term (n) | Short Term % |
| 30                                        | 25-29     | Never Any     | 0    | .     |               |             |               |                |              |
| 30                                        | 25-29     | CC            | 0    | .     | 0             | .           |               |                |              |
| 30                                        | 25-29     | Ecig          | 0    | .     |               |             |               |                |              |
| 30                                        | 25-29     | Dual          | 0    | .     |               |             |               |                |              |
| 30                                        | 25-29     | Former        | 0    | .     |               |             | 0             | .              |              |
| Year of Follow-up: 2020, Age Group: 30-34 |           |               |      |       |               |             |               |                |              |
| Period                                    | Age Group | Smoking Group | N    | %     | Ever Quit (N) | Ever Quit % | Mean Yrs Quit | Short Term (n) | Short Term % |
| 30                                        | 30-34     | Never Any     | 0    | .     |               |             |               |                |              |
| 30                                        | 30-34     | CC            | 0    | .     | 0             | .           |               |                |              |
| 30                                        | 30-34     | Ecig          | 0    | .     |               |             |               |                |              |
| 30                                        | 30-34     | Dual          | 0    | .     |               |             |               |                |              |
| 30                                        | 30-34     | Former        | 0    | .     |               |             | 0             | .              |              |
| Year of Follow-up: 2020, Age Group: 35-39 |           |               |      |       |               |             |               |                |              |
| Period                                    | Age Group | Smoking Group | N    | %     | Ever Quit (N) | Ever Quit % | Mean Yrs Quit | Short Term (n) | Short Term % |
| 30                                        | 35-39     | Never Any     | 0    | .     |               |             |               |                |              |
| 30                                        | 35-39     | CC            | 0    | .     | 0             | .           |               |                |              |
| 30                                        | 35-39     | Ecig          | 0    | .     |               |             |               |                |              |
| 30                                        | 35-39     | Dual          | 0    | .     |               |             |               |                |              |
| 30                                        | 35-39     | Former        | 0    | .     |               |             | 0             | .              |              |
| Year of Follow-up: 2020, Age Group: 40-44 |           |               |      |       |               |             |               |                |              |
| Period                                    | Age Group | Smoking Group | N    | %     | Ever Quit (N) | Ever Quit % | Mean Yrs Quit | Short Term (n) | Short Term % |
| 30                                        | 40-44     | Never Any     | 4726 | 59.60 |               |             |               |                |              |
| 30                                        | 40-44     | CC            | 136  | 1.72  | 0             | 0.00        |               |                |              |
| 30                                        | 40-44     | Ecig          | 1181 | 14.89 |               |             |               |                |              |
| 30                                        | 40-44     | Dual          | 0    | 0.00  |               |             |               |                |              |
| 30                                        | 40-44     | Former        | 1887 | 23.80 |               |             | 14.59         | 88             | 4.66         |
| Year of Follow-up: 2020, Age Group: 45-49 |           |               |      |       |               |             |               |                |              |
| Period                                    | Age Group | Smoking Group | N    | %     | Ever Quit (N) | Ever Quit % | Mean Yrs Quit | Short Term (n) | Short Term % |
| 30                                        | 45-49     | Never Any     | 5359 | 64.18 |               |             |               |                |              |
| 30                                        | 45-49     | CC            | 238  | 2.85  | 0             | 0.00        |               |                |              |
| 30                                        | 45-49     | Ecig          | 1083 | 12.97 |               |             |               |                |              |
| 30                                        | 45-49     | Dual          | 0    | 0.00  |               |             |               |                |              |
| 30                                        | 45-49     | Former        | 1670 | 20.00 |               |             | 16.82         | 78             | 4.67         |
| Year of Follow-up: 2020, Age Group: 50-54 |           |               |      |       |               |             |               |                |              |
| Period                                    | Age Group | Smoking Group | N    | %     | Ever Quit (N) | Ever Quit % | Mean Yrs Quit | Short Term (n) | Short Term % |
| 30                                        | 50-54     | Never Any     | 5189 | 59.01 |               |             |               |                |              |
| 30                                        | 50-54     | CC            | 311  | 3.54  | 0             | 0.00        |               |                |              |
| 30                                        | 50-54     | Ecig          | 1113 | 12.66 |               |             |               |                |              |
| 30                                        | 50-54     | Dual          | 0    | 0.00  |               |             |               |                |              |
| 30                                        | 50-54     | Former        | 2180 | 24.79 |               |             | 20.53         | 119            | 5.46         |
| Year of Follow-up: 2020, Age Group: 55-59 |           |               |      |       |               |             |               |                |              |
| Period                                    | Age Group | Smoking Group | N    | %     | Ever Quit (N) | Ever Quit % | Mean Yrs Quit | Short Term (n) | Short Term % |
| 30                                        | 55-59     | Never Any     | 5284 | 52.43 |               |             |               |                |              |
| 30                                        | 55-59     | CC            | 477  | 4.73  | 0             | 0.00        |               |                |              |
| 30                                        | 55-59     | Ecig          | 1195 | 11.86 |               |             |               |                |              |
| 30                                        | 55-59     | Dual          | 0    | 0.00  |               |             |               |                |              |
| 30                                        | 55-59     | Former        | 3122 | 30.98 |               |             | 22.30         | 135            | 4.32         |
| Year of Follow-up: 2020, Age Group: 60-64 |           |               |      |       |               |             |               |                |              |
| Period                                    | Age Group | Smoking Group | N    | %     | Ever Quit (N) | Ever Quit % | Mean Yrs Quit | Short Term (n) | Short Term % |
| 30                                        | 60-64     | Never Any     | 5278 | 50.27 |               |             |               |                |              |
| 30                                        | 60-64     | CC            | 584  | 5.56  | 0             | 0.00        |               |                |              |
| 30                                        | 60-64     | Ecig          | 919  | 8.75  |               |             |               |                |              |
| 30                                        | 60-64     | Dual          | 0    | 0.00  |               |             |               |                |              |
| 30                                        | 60-64     | Former        | 3718 | 35.41 |               |             | 23.47         | 154            | 4.14         |
| Year of Follow-up: 2020, Age Group: 65-69 |           |               |      |       |               |             |               |                |              |
| Period                                    | Age Group | Smoking Group | N    | %     | Ever Quit (N) | Ever Quit % | Mean Yrs Quit | Short Term (n) | Short Term % |
| 30                                        | 65-69     | Never Any     | 5018 | 52.27 |               |             |               |                |              |
| 30                                        | 65-69     | CC            | 498  | 5.19  | 0             | 0.00        |               |                |              |
| 30                                        | 65-69     | Ecig          | 454  | 4.73  |               |             |               |                |              |
| 30                                        | 65-69     | Dual          | 0    | 0.00  |               |             |               |                |              |
| 30                                        | 65-69     | Former        | 3630 | 37.81 |               |             | 26.78         | 77             | 2.12         |
| Year of Follow-up: 2020, Age Group: 70-74 |           |               |      |       |               |             |               |                |              |
| Period                                    | Age Group | Smoking Group | N    | %     | Ever Quit (N) | Ever Quit % | Mean Yrs Quit | Short Term (n) | Short Term % |

**Results for PHIM for Run 10 (Sensitivity\_Analysis\_2.RTF)**

|                                              |           |               |       |       |               |             |               |                |              |
|----------------------------------------------|-----------|---------------|-------|-------|---------------|-------------|---------------|----------------|--------------|
| 30                                           | 70-74     | Never Any     | 4356  | 51.27 |               |             |               |                |              |
| 30                                           | 70-74     | CC            | 444   | 5.23  | 0             | 0.00        |               |                |              |
| 30                                           | 70-74     | Ecig          | 278   | 3.27  |               |             |               |                |              |
| 30                                           | 70-74     | Dual          | 0     | 0.00  |               |             |               |                |              |
| 30                                           | 70-74     | Former        | 3419  | 40.24 |               |             | 26.91         | 70             | 2.05         |
| Year of Follow-up: 2020, Age Group: 75-79    |           |               |       |       |               |             |               |                |              |
| Period                                       | Age Group | Smoking Group | N     | %     | Ever Quit (N) | Ever Quit % | Mean Yrs Quit | Short Term (n) | Short Term % |
| 30                                           | 75-79     | Never Any     | 3116  | 47.67 |               |             |               |                |              |
| 30                                           | 75-79     | CC            | 346   | 5.29  | 0             | 0.00        |               |                |              |
| 30                                           | 75-79     | Ecig          | 89    | 1.36  |               |             |               |                |              |
| 30                                           | 75-79     | Dual          | 0     | 0.00  |               |             |               |                |              |
| 30                                           | 75-79     | Former        | 2985  | 45.67 |               |             | 30.37         | 52             | 1.74         |
| Year of Follow-up: 2025, Age Group: All Ages |           |               |       |       |               |             |               |                |              |
| Period                                       | Age Group | Smoking Group | N     | %     | Ever Quit (N) | Ever Quit % | Mean Yrs Quit | Short Term (n) | Short Term % |
| 35                                           | All Ages  | Never Any     | 35210 | 55.23 |               |             |               |                |              |
| 35                                           | All Ages  | CC            | 2119  | 3.32  | 0             | 0.00        |               |                |              |
| 35                                           | All Ages  | Ecig          | 5196  | 8.15  |               |             |               |                |              |
| 35                                           | All Ages  | Dual          | 0     | 0.00  |               |             |               |                |              |
| 35                                           | All Ages  | Former        | 21222 | 33.29 |               |             | 25.81         | 642            | 3.03         |
| Year of Follow-up: 2025, Age Group: 18-19    |           |               |       |       |               |             |               |                |              |
| Period                                       | Age Group | Smoking Group | N     | %     | Ever Quit (N) | Ever Quit % | Mean Yrs Quit | Short Term (n) | Short Term % |
| 35                                           | 18-19     | Never Any     | 0     | .     |               |             |               |                |              |
| 35                                           | 18-19     | CC            | 0     | .     | 0             | .           |               |                |              |
| 35                                           | 18-19     | Ecig          | 0     | .     |               |             |               |                |              |
| 35                                           | 18-19     | Dual          | 0     | .     |               |             |               |                |              |
| 35                                           | 18-19     | Former        | 0     | .     |               |             | .             | 0              | .            |
| Year of Follow-up: 2025, Age Group: 20-24    |           |               |       |       |               |             |               |                |              |
| Period                                       | Age Group | Smoking Group | N     | %     | Ever Quit (N) | Ever Quit % | Mean Yrs Quit | Short Term (n) | Short Term % |
| 35                                           | 20-24     | Never Any     | 0     | .     |               |             |               |                |              |
| 35                                           | 20-24     | CC            | 0     | .     | 0             | .           |               |                |              |
| 35                                           | 20-24     | Ecig          | 0     | .     |               |             |               |                |              |
| 35                                           | 20-24     | Dual          | 0     | .     |               |             |               |                |              |
| 35                                           | 20-24     | Former        | 0     | .     |               |             | .             | 0              | .            |
| Year of Follow-up: 2025, Age Group: 25-29    |           |               |       |       |               |             |               |                |              |
| Period                                       | Age Group | Smoking Group | N     | %     | Ever Quit (N) | Ever Quit % | Mean Yrs Quit | Short Term (n) | Short Term % |
| 35                                           | 25-29     | Never Any     | 0     | .     |               |             |               |                |              |
| 35                                           | 25-29     | CC            | 0     | .     | 0             | .           |               |                |              |
| 35                                           | 25-29     | Ecig          | 0     | .     |               |             |               |                |              |
| 35                                           | 25-29     | Dual          | 0     | .     |               |             |               |                |              |
| 35                                           | 25-29     | Former        | 0     | .     |               |             | .             | 0              | .            |
| Year of Follow-up: 2025, Age Group: 30-34    |           |               |       |       |               |             |               |                |              |
| Period                                       | Age Group | Smoking Group | N     | %     | Ever Quit (N) | Ever Quit % | Mean Yrs Quit | Short Term (n) | Short Term % |
| 35                                           | 30-34     | Never Any     | 0     | .     |               |             |               |                |              |
| 35                                           | 30-34     | CC            | 0     | .     | 0             | .           |               |                |              |
| 35                                           | 30-34     | Ecig          | 0     | .     |               |             |               |                |              |
| 35                                           | 30-34     | Dual          | 0     | .     |               |             |               |                |              |
| 35                                           | 30-34     | Former        | 0     | .     |               |             | .             | 0              | .            |
| Year of Follow-up: 2025, Age Group: 35-39    |           |               |       |       |               |             |               |                |              |
| Period                                       | Age Group | Smoking Group | N     | %     | Ever Quit (N) | Ever Quit % | Mean Yrs Quit | Short Term (n) | Short Term % |
| 35                                           | 35-39     | Never Any     | 0     | .     |               |             |               |                |              |
| 35                                           | 35-39     | CC            | 0     | .     | 0             | .           |               |                |              |
| 35                                           | 35-39     | Ecig          | 0     | .     |               |             |               |                |              |
| 35                                           | 35-39     | Dual          | 0     | .     |               |             |               |                |              |
| 35                                           | 35-39     | Former        | 0     | .     |               |             | .             | 0              | .            |
| Year of Follow-up: 2025, Age Group: 40-44    |           |               |       |       |               |             |               |                |              |
| Period                                       | Age Group | Smoking Group | N     | %     | Ever Quit (N) | Ever Quit % | Mean Yrs Quit | Short Term (n) | Short Term % |
| 35                                           | 40-44     | Never Any     | 0     | .     |               |             |               |                |              |
| 35                                           | 40-44     | CC            | 0     | .     | 0             | .           |               |                |              |
| 35                                           | 40-44     | Ecig          | 0     | .     |               |             |               |                |              |
| 35                                           | 40-44     | Dual          | 0     | .     |               |             |               |                |              |
| 35                                           | 40-44     | Former        | 0     | .     |               |             | .             | 0              | .            |
| Year of Follow-up: 2025, Age Group: 45-49    |           |               |       |       |               |             |               |                |              |
| Period                                       | Age Group | Smoking Group | N     | %     | Ever Quit (N) | Ever Quit % | Mean Yrs Quit | Short Term (n) | Short Term % |
| 35                                           | 45-49     | Never Any     | 4726  | 59.60 |               |             |               |                |              |
| 35                                           | 45-49     | CC            | 86    | 1.08  | 0             | 0.00        |               |                |              |
| 35                                           | 45-49     | Ecig          | 1048  | 13.22 |               |             |               |                |              |
| 35                                           | 45-49     | Dual          | 0     | 0.00  |               |             |               |                |              |
| 35                                           | 45-49     | Former        | 2070  | 26.10 |               |             | 18.05         | 64             | 3.09         |
| Year of Follow-up: 2025, Age Group: 50-54    |           |               |       |       |               |             |               |                |              |

**Results for PHIM for Run 10 (Sensitivity\_Analysis\_2.RTF)**

| Period                                       | Age Group | Smoking Group | N     | %     | Ever Quit (N) | Ever Quit % | Mean Yrs Quit | Short Term (n) | Short Term % |
|----------------------------------------------|-----------|---------------|-------|-------|---------------|-------------|---------------|----------------|--------------|
| 35                                           | 50-54     | Never Any     | 5359  | 64.18 |               |             |               |                |              |
| 35                                           | 50-54     | CC            | 164   | 1.96  | 0             | 0.00        |               |                |              |
| 35                                           | 50-54     | Ecig          | 935   | 11.20 |               |             |               |                |              |
| 35                                           | 50-54     | Dual          | 0     | 0.00  |               |             |               |                |              |
| 35                                           | 50-54     | Former        | 1892  | 22.66 |               |             | 19.46         | 113            | 5.97         |
| Year of Follow-up: 2025, Age Group: 55-59    |           |               |       |       |               |             |               |                |              |
| Period                                       | Age Group | Smoking Group | N     | %     | Ever Quit (N) | Ever Quit % | Mean Yrs Quit | Short Term (n) | Short Term % |
| 35                                           | 55-59     | Never Any     | 5189  | 59.01 |               |             |               |                |              |
| 35                                           | 55-59     | CC            | 234   | 2.66  | 0             | 0.00        |               |                |              |
| 35                                           | 55-59     | Ecig          | 944   | 10.74 |               |             |               |                |              |
| 35                                           | 55-59     | Dual          | 0     | 0.00  |               |             |               |                |              |
| 35                                           | 55-59     | Former        | 2426  | 27.59 |               |             | 23.14         | 96             | 3.96         |
| Year of Follow-up: 2025, Age Group: 60-64    |           |               |       |       |               |             |               |                |              |
| Period                                       | Age Group | Smoking Group | N     | %     | Ever Quit (N) | Ever Quit % | Mean Yrs Quit | Short Term (n) | Short Term % |
| 35                                           | 60-64     | Never Any     | 5284  | 52.43 |               |             |               |                |              |
| 35                                           | 60-64     | CC            | 382   | 3.79  | 0             | 0.00        |               |                |              |
| 35                                           | 60-64     | Ecig          | 947   | 9.40  |               |             |               |                |              |
| 35                                           | 60-64     | Dual          | 0     | 0.00  |               |             |               |                |              |
| 35                                           | 60-64     | Former        | 3465  | 34.38 |               |             | 24.78         | 154            | 4.44         |
| Year of Follow-up: 2025, Age Group: 65-69    |           |               |       |       |               |             |               |                |              |
| Period                                       | Age Group | Smoking Group | N     | %     | Ever Quit (N) | Ever Quit % | Mean Yrs Quit | Short Term (n) | Short Term % |
| 35                                           | 65-69     | Never Any     | 5278  | 50.27 |               |             |               |                |              |
| 35                                           | 65-69     | CC            | 477   | 4.54  | 0             | 0.00        |               |                |              |
| 35                                           | 65-69     | Ecig          | 710   | 6.76  |               |             |               |                |              |
| 35                                           | 65-69     | Dual          | 0     | 0.00  |               |             |               |                |              |
| 35                                           | 65-69     | Former        | 4034  | 38.42 |               |             | 26.43         | 91             | 2.26         |
| Year of Follow-up: 2025, Age Group: 70-74    |           |               |       |       |               |             |               |                |              |
| Period                                       | Age Group | Smoking Group | N     | %     | Ever Quit (N) | Ever Quit % | Mean Yrs Quit | Short Term (n) | Short Term % |
| 35                                           | 70-74     | Never Any     | 5018  | 52.27 |               |             |               |                |              |
| 35                                           | 70-74     | CC            | 427   | 4.45  | 0             | 0.00        |               |                |              |
| 35                                           | 70-74     | Ecig          | 389   | 4.05  |               |             |               |                |              |
| 35                                           | 70-74     | Dual          | 0     | 0.00  |               |             |               |                |              |
| 35                                           | 70-74     | Former        | 3766  | 39.23 |               |             | 30.69         | 66             | 1.75         |
| Year of Follow-up: 2025, Age Group: 75-79    |           |               |       |       |               |             |               |                |              |
| Period                                       | Age Group | Smoking Group | N     | %     | Ever Quit (N) | Ever Quit % | Mean Yrs Quit | Short Term (n) | Short Term % |
| 35                                           | 75-79     | Never Any     | 4356  | 51.27 |               |             |               |                |              |
| 35                                           | 75-79     | CC            | 349   | 4.11  | 0             | 0.00        |               |                |              |
| 35                                           | 75-79     | Ecig          | 223   | 2.62  |               |             |               |                |              |
| 35                                           | 75-79     | Dual          | 0     | 0.00  |               |             |               |                |              |
| 35                                           | 75-79     | Former        | 3569  | 42.00 |               |             | 30.65         | 58             | 1.63         |
| Year of Follow-up: 2030, Age Group: All Ages |           |               |       |       |               |             |               |                |              |
| Period                                       | Age Group | Smoking Group | N     | %     | Ever Quit (N) | Ever Quit % | Mean Yrs Quit | Short Term (n) | Short Term % |
| 40                                           | All Ages  | Never Any     | 30854 | 55.84 |               |             |               |                |              |
| 40                                           | All Ages  | CC            | 1400  | 2.53  | 0             | 0.00        |               |                |              |
| 40                                           | All Ages  | Ecig          | 4030  | 7.29  |               |             |               |                |              |
| 40                                           | All Ages  | Dual          | 0     | 0.00  |               |             |               |                |              |
| 40                                           | All Ages  | Former        | 18966 | 34.33 |               |             | 27.91         | 506            | 2.67         |
| Year of Follow-up: 2030, Age Group: 18-19    |           |               |       |       |               |             |               |                |              |
| Period                                       | Age Group | Smoking Group | N     | %     | Ever Quit (N) | Ever Quit % | Mean Yrs Quit | Short Term (n) | Short Term % |
| 40                                           | 18-19     | Never Any     | 0     | .     |               |             |               |                |              |
| 40                                           | 18-19     | CC            | 0     | .     | 0             | .           |               |                |              |
| 40                                           | 18-19     | Ecig          | 0     | .     |               |             |               |                |              |
| 40                                           | 18-19     | Dual          | 0     | .     |               |             |               |                |              |
| 40                                           | 18-19     | Former        | 0     | .     |               |             | .             | 0              | .            |
| Year of Follow-up: 2030, Age Group: 20-24    |           |               |       |       |               |             |               |                |              |
| Period                                       | Age Group | Smoking Group | N     | %     | Ever Quit (N) | Ever Quit % | Mean Yrs Quit | Short Term (n) | Short Term % |
| 40                                           | 20-24     | Never Any     | 0     | .     |               |             |               |                |              |
| 40                                           | 20-24     | CC            | 0     | .     | 0             | .           |               |                |              |
| 40                                           | 20-24     | Ecig          | 0     | .     |               |             |               |                |              |
| 40                                           | 20-24     | Dual          | 0     | .     |               |             |               |                |              |
| 40                                           | 20-24     | Former        | 0     | .     |               |             | .             | 0              | .            |
| Year of Follow-up: 2030, Age Group: 25-29    |           |               |       |       |               |             |               |                |              |
| Period                                       | Age Group | Smoking Group | N     | %     | Ever Quit (N) | Ever Quit % | Mean Yrs Quit | Short Term (n) | Short Term % |
| 40                                           | 25-29     | Never Any     | 0     | .     |               |             |               |                |              |
| 40                                           | 25-29     | CC            | 0     | .     | 0             | .           |               |                |              |
| 40                                           | 25-29     | Ecig          | 0     | .     |               |             |               |                |              |
| 40                                           | 25-29     | Dual          | 0     | .     |               |             |               |                |              |

**Results for PHIM for Run 10 (Sensitivity\_Analysis\_2.RTF)**

| Year of Follow-up: 2030, Age Group: 30-34 | Period | Age Group | Smoking Group | N    | %     | Ever Quit (N) | Ever Quit % | Mean Yrs Quit | Short Term (n) | Short Term % |
|-------------------------------------------|--------|-----------|---------------|------|-------|---------------|-------------|---------------|----------------|--------------|
| 40                                        | 25-29  | Former    |               | 0    | .     |               |             |               | 0              | .            |
| 40                                        | 30-34  | Never Any |               | 0    | .     |               |             |               |                |              |
| 40                                        | 30-34  | CC        |               | 0    | .     | 0             | .           |               |                |              |
| 40                                        | 30-34  | Ecig      |               | 0    | .     |               |             |               |                |              |
| 40                                        | 30-34  | Dual      |               | 0    | .     |               |             |               |                |              |
| 40                                        | 30-34  | Former    |               | 0    | .     |               |             |               | 0              | .            |
| Year of Follow-up: 2030, Age Group: 35-39 | Period | Age Group | Smoking Group | N    | %     | Ever Quit (N) | Ever Quit % | Mean Yrs Quit | Short Term (n) | Short Term % |
| 40                                        | 35-39  | Never Any |               | 0    | .     |               |             |               |                |              |
| 40                                        | 35-39  | CC        |               | 0    | .     | 0             | .           |               |                |              |
| 40                                        | 35-39  | Ecig      |               | 0    | .     |               |             |               |                |              |
| 40                                        | 35-39  | Dual      |               | 0    | .     |               |             |               |                |              |
| 40                                        | 35-39  | Former    |               | 0    | .     |               |             |               | 0              | .            |
| Year of Follow-up: 2030, Age Group: 40-44 | Period | Age Group | Smoking Group | N    | %     | Ever Quit (N) | Ever Quit % | Mean Yrs Quit | Short Term (n) | Short Term % |
| 40                                        | 40-44  | Never Any |               | 0    | .     |               |             |               |                |              |
| 40                                        | 40-44  | CC        |               | 0    | .     | 0             | .           |               |                |              |
| 40                                        | 40-44  | Ecig      |               | 0    | .     |               |             |               |                |              |
| 40                                        | 40-44  | Dual      |               | 0    | .     |               |             |               |                |              |
| 40                                        | 40-44  | Former    |               | 0    | .     |               |             |               | 0              | .            |
| Year of Follow-up: 2030, Age Group: 45-49 | Period | Age Group | Smoking Group | N    | %     | Ever Quit (N) | Ever Quit % | Mean Yrs Quit | Short Term (n) | Short Term % |
| 40                                        | 45-49  | Never Any |               | 0    | .     |               |             |               |                |              |
| 40                                        | 45-49  | CC        |               | 0    | .     | 0             | .           |               |                |              |
| 40                                        | 45-49  | Ecig      |               | 0    | .     |               |             |               |                |              |
| 40                                        | 45-49  | Dual      |               | 0    | .     |               |             |               |                |              |
| 40                                        | 45-49  | Former    |               | 0    | .     |               |             |               | 0              | .            |
| Year of Follow-up: 2030, Age Group: 50-54 | Period | Age Group | Smoking Group | N    | %     | Ever Quit (N) | Ever Quit % | Mean Yrs Quit | Short Term (n) | Short Term % |
| 40                                        | 50-54  | Never Any |               | 4726 | 59.60 |               |             |               |                |              |
| 40                                        | 50-54  | CC        |               | 58   | 0.73  | 0             | 0.00        |               |                |              |
| 40                                        | 50-54  | Ecig      |               | 884  | 11.15 |               |             |               |                |              |
| 40                                        | 50-54  | Dual      |               | 0    | 0.00  |               |             |               |                |              |
| 40                                        | 50-54  | Former    |               | 2262 | 28.52 |               |             | 21.23         | 104            | 4.60         |
| Year of Follow-up: 2030, Age Group: 55-59 | Period | Age Group | Smoking Group | N    | %     | Ever Quit (N) | Ever Quit % | Mean Yrs Quit | Short Term (n) | Short Term % |
| 40                                        | 55-59  | Never Any |               | 5359 | 64.18 |               |             |               |                |              |
| 40                                        | 55-59  | CC        |               | 118  | 1.41  | 0             | 0.00        |               |                |              |
| 40                                        | 55-59  | Ecig      |               | 767  | 9.19  |               |             |               |                |              |
| 40                                        | 55-59  | Dual      |               | 0    | 0.00  |               |             |               |                |              |
| 40                                        | 55-59  | Former    |               | 2106 | 25.22 |               |             | 22.22         | 56             | 2.66         |
| Year of Follow-up: 2030, Age Group: 60-64 | Period | Age Group | Smoking Group | N    | %     | Ever Quit (N) | Ever Quit % | Mean Yrs Quit | Short Term (n) | Short Term % |
| 40                                        | 60-64  | Never Any |               | 5189 | 59.01 |               |             |               |                |              |
| 40                                        | 60-64  | CC        |               | 179  | 2.04  | 0             | 0.00        |               |                |              |
| 40                                        | 60-64  | Ecig      |               | 731  | 8.31  |               |             |               |                |              |
| 40                                        | 60-64  | Dual      |               | 0    | 0.00  |               |             |               |                |              |
| 40                                        | 60-64  | Former    |               | 2694 | 30.64 |               |             | 25.53         | 115            | 4.27         |
| Year of Follow-up: 2030, Age Group: 65-69 | Period | Age Group | Smoking Group | N    | %     | Ever Quit (N) | Ever Quit % | Mean Yrs Quit | Short Term (n) | Short Term % |
| 40                                        | 65-69  | Never Any |               | 5284 | 52.43 |               |             |               |                |              |
| 40                                        | 65-69  | CC        |               | 315  | 3.13  | 0             | 0.00        |               |                |              |
| 40                                        | 65-69  | Ecig      |               | 744  | 7.38  |               |             |               |                |              |
| 40                                        | 65-69  | Dual      |               | 0    | 0.00  |               |             |               |                |              |
| 40                                        | 65-69  | Former    |               | 3735 | 37.06 |               |             | 27.80         | 71             | 1.90         |
| Year of Follow-up: 2030, Age Group: 70-74 | Period | Age Group | Smoking Group | N    | %     | Ever Quit (N) | Ever Quit % | Mean Yrs Quit | Short Term (n) | Short Term % |
| 40                                        | 70-74  | Never Any |               | 5278 | 50.27 |               |             |               |                |              |
| 40                                        | 70-74  | CC        |               | 406  | 3.87  | 0             | 0.00        |               |                |              |
| 40                                        | 70-74  | Ecig      |               | 601  | 5.72  |               |             |               |                |              |
| 40                                        | 70-74  | Dual      |               | 0    | 0.00  |               |             |               |                |              |
| 40                                        | 70-74  | Former    |               | 4214 | 40.14 |               |             | 30.16         | 88             | 2.09         |
| Year of Follow-up: 2030, Age Group: 75-79 | Period | Age Group | Smoking Group | N    | %     | Ever Quit (N) | Ever Quit % | Mean Yrs Quit | Short Term (n) | Short Term % |
| 40                                        | 75-79  | Never Any |               | 5018 | 52.27 |               |             |               |                |              |
| 40                                        | 75-79  | CC        |               | 324  | 3.38  | 0             | 0.00        |               |                |              |

**Results for PHIM for Run 10 (Sensitivity\_Analysis\_2.RTF)**

|                                              |           |               |       |       |               |             |               |                |              |
|----------------------------------------------|-----------|---------------|-------|-------|---------------|-------------|---------------|----------------|--------------|
| 40                                           | 75-79     | Ecig          | 303   | 3.16  |               |             |               |                |              |
| 40                                           | 75-79     | Dual          | 0     | 0.00  |               |             |               |                |              |
| 40                                           | 75-79     | Former        | 3955  | 41.20 |               |             | 34.08         | 72             | 1.82         |
| Year of Follow-up: 2035, Age Group: All Ages |           |               |       |       |               |             |               |                |              |
| Period                                       | Age Group | Smoking Group | N     | %     | Ever Quit (N) | Ever Quit % | Mean Yrs Quit | Short Term (n) | Short Term % |
| 45                                           | All Ages  | Never Any     | 25836 | 56.60 |               |             |               |                |              |
| 45                                           | All Ages  | CC            | 845   | 1.85  | 0             | 0.00        |               |                |              |
| 45                                           | All Ages  | Ecig          | 3001  | 6.57  |               |             |               |                |              |
| 45                                           | All Ages  | Dual          | 0     | 0.00  |               |             |               |                |              |
| 45                                           | All Ages  | Former        | 15968 | 34.98 |               |             | 29.52         | 385            | 2.41         |
| Year of Follow-up: 2035, Age Group: 18-19    |           |               |       |       |               |             |               |                |              |
| Period                                       | Age Group | Smoking Group | N     | %     | Ever Quit (N) | Ever Quit % | Mean Yrs Quit | Short Term (n) | Short Term % |
| 45                                           | 18-19     | Never Any     | 0     | .     |               |             |               |                |              |
| 45                                           | 18-19     | CC            | 0     | .     | 0             | .           |               |                |              |
| 45                                           | 18-19     | Ecig          | 0     | .     |               |             |               |                |              |
| 45                                           | 18-19     | Dual          | 0     | .     |               |             |               |                |              |
| 45                                           | 18-19     | Former        | 0     | .     |               |             |               | 0              | .            |
| Year of Follow-up: 2035, Age Group: 20-24    |           |               |       |       |               |             |               |                |              |
| Period                                       | Age Group | Smoking Group | N     | %     | Ever Quit (N) | Ever Quit % | Mean Yrs Quit | Short Term (n) | Short Term % |
| 45                                           | 20-24     | Never Any     | 0     | .     |               |             |               |                |              |
| 45                                           | 20-24     | CC            | 0     | .     | 0             | .           |               |                |              |
| 45                                           | 20-24     | Ecig          | 0     | .     |               |             |               |                |              |
| 45                                           | 20-24     | Dual          | 0     | .     |               |             |               |                |              |
| 45                                           | 20-24     | Former        | 0     | .     |               |             |               | 0              | .            |
| Year of Follow-up: 2035, Age Group: 25-29    |           |               |       |       |               |             |               |                |              |
| Period                                       | Age Group | Smoking Group | N     | %     | Ever Quit (N) | Ever Quit % | Mean Yrs Quit | Short Term (n) | Short Term % |
| 45                                           | 25-29     | Never Any     | 0     | .     |               |             |               |                |              |
| 45                                           | 25-29     | CC            | 0     | .     | 0             | .           |               |                |              |
| 45                                           | 25-29     | Ecig          | 0     | .     |               |             |               |                |              |
| 45                                           | 25-29     | Dual          | 0     | .     |               |             |               |                |              |
| 45                                           | 25-29     | Former        | 0     | .     |               |             |               | 0              | .            |
| Year of Follow-up: 2035, Age Group: 30-34    |           |               |       |       |               |             |               |                |              |
| Period                                       | Age Group | Smoking Group | N     | %     | Ever Quit (N) | Ever Quit % | Mean Yrs Quit | Short Term (n) | Short Term % |
| 45                                           | 30-34     | Never Any     | 0     | .     |               |             |               |                |              |
| 45                                           | 30-34     | CC            | 0     | .     | 0             | .           |               |                |              |
| 45                                           | 30-34     | Ecig          | 0     | .     |               |             |               |                |              |
| 45                                           | 30-34     | Dual          | 0     | .     |               |             |               |                |              |
| 45                                           | 30-34     | Former        | 0     | .     |               |             |               | 0              | .            |
| Year of Follow-up: 2035, Age Group: 35-39    |           |               |       |       |               |             |               |                |              |
| Period                                       | Age Group | Smoking Group | N     | %     | Ever Quit (N) | Ever Quit % | Mean Yrs Quit | Short Term (n) | Short Term % |
| 45                                           | 35-39     | Never Any     | 0     | .     |               |             |               |                |              |
| 45                                           | 35-39     | CC            | 0     | .     | 0             | .           |               |                |              |
| 45                                           | 35-39     | Ecig          | 0     | .     |               |             |               |                |              |
| 45                                           | 35-39     | Dual          | 0     | .     |               |             |               |                |              |
| 45                                           | 35-39     | Former        | 0     | .     |               |             |               | 0              | .            |
| Year of Follow-up: 2035, Age Group: 40-44    |           |               |       |       |               |             |               |                |              |
| Period                                       | Age Group | Smoking Group | N     | %     | Ever Quit (N) | Ever Quit % | Mean Yrs Quit | Short Term (n) | Short Term % |
| 45                                           | 40-44     | Never Any     | 0     | .     |               |             |               |                |              |
| 45                                           | 40-44     | CC            | 0     | .     | 0             | .           |               |                |              |
| 45                                           | 40-44     | Ecig          | 0     | .     |               |             |               |                |              |
| 45                                           | 40-44     | Dual          | 0     | .     |               |             |               |                |              |
| 45                                           | 40-44     | Former        | 0     | .     |               |             |               | 0              | .            |
| Year of Follow-up: 2035, Age Group: 45-49    |           |               |       |       |               |             |               |                |              |
| Period                                       | Age Group | Smoking Group | N     | %     | Ever Quit (N) | Ever Quit % | Mean Yrs Quit | Short Term (n) | Short Term % |
| 45                                           | 45-49     | Never Any     | 0     | .     |               |             |               |                |              |
| 45                                           | 45-49     | CC            | 0     | .     | 0             | .           |               |                |              |
| 45                                           | 45-49     | Ecig          | 0     | .     |               |             |               |                |              |
| 45                                           | 45-49     | Dual          | 0     | .     |               |             |               |                |              |
| 45                                           | 45-49     | Former        | 0     | .     |               |             |               | 0              | .            |
| Year of Follow-up: 2035, Age Group: 50-54    |           |               |       |       |               |             |               |                |              |
| Period                                       | Age Group | Smoking Group | N     | %     | Ever Quit (N) | Ever Quit % | Mean Yrs Quit | Short Term (n) | Short Term % |
| 45                                           | 50-54     | Never Any     | 0     | .     |               |             |               |                |              |
| 45                                           | 50-54     | CC            | 0     | .     | 0             | .           |               |                |              |
| 45                                           | 50-54     | Ecig          | 0     | .     |               |             |               |                |              |
| 45                                           | 50-54     | Dual          | 0     | .     |               |             |               |                |              |
| 45                                           | 50-54     | Former        | 0     | .     |               |             |               | 0              | .            |
| Year of Follow-up: 2035, Age Group: 55-59    |           |               |       |       |               |             |               |                |              |
| Period                                       | Age Group | Smoking Group | N     | %     | Ever Quit (N) | Ever Quit % | Mean Yrs Quit | Short Term (n) | Short Term % |

**Results for PHIM for Run 10 (Sensitivity\_Analysis\_2.RTF)**

|                                              |           |               |       |       |               |             |               |                |              |
|----------------------------------------------|-----------|---------------|-------|-------|---------------|-------------|---------------|----------------|--------------|
| 45                                           | 55-59     | Never Any     | 4726  | 59.60 |               |             |               |                |              |
| 45                                           | 55-59     | CC            | 49    | 0.62  | 0             | 0.00        |               |                |              |
| 45                                           | 55-59     | Ecig          | 717   | 9.04  |               |             |               |                |              |
| 45                                           | 55-59     | Dual          | 0     | 0.00  |               |             |               |                |              |
| 45                                           | 55-59     | Former        | 2438  | 30.74 |               |             | 24.48         | 74             | 3.04         |
| Year of Follow-up: 2035, Age Group: 60-64    |           |               |       |       |               |             |               |                |              |
| Period                                       | Age Group | Smoking Group | N     | %     | Ever Quit (N) | Ever Quit % | Mean Yrs Quit | Short Term (n) | Short Term % |
| 45                                           | 60-64     | Never Any     | 5359  | 64.18 |               |             |               |                |              |
| 45                                           | 60-64     | CC            | 85    | 1.02  | 0             | 0.00        |               |                |              |
| 45                                           | 60-64     | Ecig          | 625   | 7.49  |               |             |               |                |              |
| 45                                           | 60-64     | Dual          | 0     | 0.00  |               |             |               |                |              |
| 45                                           | 60-64     | Former        | 2281  | 27.32 |               |             | 25.27         | 73             | 3.20         |
| Year of Follow-up: 2035, Age Group: 65-69    |           |               |       |       |               |             |               |                |              |
| Period                                       | Age Group | Smoking Group | N     | %     | Ever Quit (N) | Ever Quit % | Mean Yrs Quit | Short Term (n) | Short Term % |
| 45                                           | 65-69     | Never Any     | 5189  | 59.01 |               |             |               |                |              |
| 45                                           | 65-69     | CC            | 130   | 1.48  | 0             | 0.00        |               |                |              |
| 45                                           | 65-69     | Ecig          | 576   | 6.55  |               |             |               |                |              |
| 45                                           | 65-69     | Dual          | 0     | 0.00  |               |             |               |                |              |
| 45                                           | 65-69     | Former        | 2898  | 32.96 |               |             | 28.55         | 59             | 2.04         |
| Year of Follow-up: 2035, Age Group: 70-74    |           |               |       |       |               |             |               |                |              |
| Period                                       | Age Group | Smoking Group | N     | %     | Ever Quit (N) | Ever Quit % | Mean Yrs Quit | Short Term (n) | Short Term % |
| 45                                           | 70-74     | Never Any     | 5284  | 52.43 |               |             |               |                |              |
| 45                                           | 70-74     | CC            | 278   | 2.76  | 0             | 0.00        |               |                |              |
| 45                                           | 70-74     | Ecig          | 626   | 6.21  |               |             |               |                |              |
| 45                                           | 70-74     | Dual          | 0     | 0.00  |               |             |               |                |              |
| 45                                           | 70-74     | Former        | 3890  | 38.60 |               |             | 31.56         | 77             | 1.98         |
| Year of Follow-up: 2035, Age Group: 75-79    |           |               |       |       |               |             |               |                |              |
| Period                                       | Age Group | Smoking Group | N     | %     | Ever Quit (N) | Ever Quit % | Mean Yrs Quit | Short Term (n) | Short Term % |
| 45                                           | 75-79     | Never Any     | 5278  | 50.27 |               |             |               |                |              |
| 45                                           | 75-79     | CC            | 303   | 2.89  | 0             | 0.00        |               |                |              |
| 45                                           | 75-79     | Ecig          | 457   | 4.35  |               |             |               |                |              |
| 45                                           | 75-79     | Dual          | 0     | 0.00  |               |             |               |                |              |
| 45                                           | 75-79     | Former        | 4461  | 42.49 |               |             | 33.32         | 102            | 2.29         |
| Year of Follow-up: 2040, Age Group: All Ages |           |               |       |       |               |             |               |                |              |
| Period                                       | Age Group | Smoking Group | N     | %     | Ever Quit (N) | Ever Quit % | Mean Yrs Quit | Short Term (n) | Short Term % |
| 50                                           | All Ages  | Never Any     | 20558 | 58.48 |               |             |               |                |              |
| 50                                           | All Ages  | CC            | 443   | 1.26  | 0             | 0.00        |               |                |              |
| 50                                           | All Ages  | Ecig          | 2024  | 5.76  |               |             |               |                |              |
| 50                                           | All Ages  | Dual          | 0     | 0.00  |               |             |               |                |              |
| 50                                           | All Ages  | Former        | 12126 | 34.50 |               |             | 31.47         | 237            | 1.95         |
| Year of Follow-up: 2040, Age Group: 18-19    |           |               |       |       |               |             |               |                |              |
| Period                                       | Age Group | Smoking Group | N     | %     | Ever Quit (N) | Ever Quit % | Mean Yrs Quit | Short Term (n) | Short Term % |
| 50                                           | 18-19     | Never Any     | 0     | .     |               |             |               |                |              |
| 50                                           | 18-19     | CC            | 0     | .     | 0             | .           |               |                |              |
| 50                                           | 18-19     | Ecig          | 0     | .     |               |             |               |                |              |
| 50                                           | 18-19     | Dual          | 0     | .     |               |             |               |                |              |
| 50                                           | 18-19     | Former        | 0     | .     |               |             | .             | 0              | .            |
| Year of Follow-up: 2040, Age Group: 20-24    |           |               |       |       |               |             |               |                |              |
| Period                                       | Age Group | Smoking Group | N     | %     | Ever Quit (N) | Ever Quit % | Mean Yrs Quit | Short Term (n) | Short Term % |
| 50                                           | 20-24     | Never Any     | 0     | .     |               |             |               |                |              |
| 50                                           | 20-24     | CC            | 0     | .     | 0             | .           |               |                |              |
| 50                                           | 20-24     | Ecig          | 0     | .     |               |             |               |                |              |
| 50                                           | 20-24     | Dual          | 0     | .     |               |             |               |                |              |
| 50                                           | 20-24     | Former        | 0     | .     |               |             | .             | 0              | .            |
| Year of Follow-up: 2040, Age Group: 25-29    |           |               |       |       |               |             |               |                |              |
| Period                                       | Age Group | Smoking Group | N     | %     | Ever Quit (N) | Ever Quit % | Mean Yrs Quit | Short Term (n) | Short Term % |
| 50                                           | 25-29     | Never Any     | 0     | .     |               |             |               |                |              |
| 50                                           | 25-29     | CC            | 0     | .     | 0             | .           |               |                |              |
| 50                                           | 25-29     | Ecig          | 0     | .     |               |             |               |                |              |
| 50                                           | 25-29     | Dual          | 0     | .     |               |             |               |                |              |
| 50                                           | 25-29     | Former        | 0     | .     |               |             | .             | 0              | .            |
| Year of Follow-up: 2040, Age Group: 30-34    |           |               |       |       |               |             |               |                |              |
| Period                                       | Age Group | Smoking Group | N     | %     | Ever Quit (N) | Ever Quit % | Mean Yrs Quit | Short Term (n) | Short Term % |
| 50                                           | 30-34     | Never Any     | 0     | .     |               |             |               |                |              |
| 50                                           | 30-34     | CC            | 0     | .     | 0             | .           |               |                |              |
| 50                                           | 30-34     | Ecig          | 0     | .     |               |             |               |                |              |
| 50                                           | 30-34     | Dual          | 0     | .     |               |             |               |                |              |
| 50                                           | 30-34     | Former        | 0     | .     |               |             | .             | 0              | .            |
| Year of Follow-up: 2040, Age Group: 35-39    |           |               |       |       |               |             |               |                |              |



**Results for PHIM for Run 10 (Sensitivity\_Analysis\_2.RTF)**

| Period                                    | Age Group | Smoking Group | N    | %     | Ever Quit (N) | Ever Quit % | Mean Yrs Quit | Short Term (n) | Short Term % |
|-------------------------------------------|-----------|---------------|------|-------|---------------|-------------|---------------|----------------|--------------|
| 50                                        | 35-39     | Never Any     | 0    | .     |               |             |               |                |              |
| 50                                        | 35-39     | CC            | 0    | .     | 0             | .           |               |                |              |
| 50                                        | 35-39     | Ecig          | 0    | .     |               |             |               |                |              |
| 50                                        | 35-39     | Dual          | 0    | .     |               |             |               |                |              |
| 50                                        | 35-39     | Former        | 0    | .     |               |             | .             | 0              | .            |
| Year of Follow-up: 2040, Age Group: 40-44 |           |               |      |       |               |             |               |                |              |
| Period                                    | Age Group | Smoking Group | N    | %     | Ever Quit (N) | Ever Quit % | Mean Yrs Quit | Short Term (n) | Short Term % |
| 50                                        | 40-44     | Never Any     | 0    | .     |               |             |               |                |              |
| 50                                        | 40-44     | CC            | 0    | .     | 0             | .           |               |                |              |
| 50                                        | 40-44     | Ecig          | 0    | .     |               |             |               |                |              |
| 50                                        | 40-44     | Dual          | 0    | .     |               |             |               |                |              |
| 50                                        | 40-44     | Former        | 0    | .     |               |             | .             | 0              | .            |
| Year of Follow-up: 2040, Age Group: 45-49 |           |               |      |       |               |             |               |                |              |
| Period                                    | Age Group | Smoking Group | N    | %     | Ever Quit (N) | Ever Quit % | Mean Yrs Quit | Short Term (n) | Short Term % |
| 50                                        | 45-49     | Never Any     | 0    | .     |               |             |               |                |              |
| 50                                        | 45-49     | CC            | 0    | .     | 0             | .           |               |                |              |
| 50                                        | 45-49     | Ecig          | 0    | .     |               |             |               |                |              |
| 50                                        | 45-49     | Dual          | 0    | .     |               |             |               |                |              |
| 50                                        | 45-49     | Former        | 0    | .     |               |             | .             | 0              | .            |
| Year of Follow-up: 2040, Age Group: 50-54 |           |               |      |       |               |             |               |                |              |
| Period                                    | Age Group | Smoking Group | N    | %     | Ever Quit (N) | Ever Quit % | Mean Yrs Quit | Short Term (n) | Short Term % |
| 50                                        | 50-54     | Never Any     | 0    | .     |               |             |               |                |              |
| 50                                        | 50-54     | CC            | 0    | .     | 0             | .           |               |                |              |
| 50                                        | 50-54     | Ecig          | 0    | .     |               |             |               |                |              |
| 50                                        | 50-54     | Dual          | 0    | .     |               |             |               |                |              |
| 50                                        | 50-54     | Former        | 0    | .     |               |             | .             | 0              | .            |
| Year of Follow-up: 2040, Age Group: 55-59 |           |               |      |       |               |             |               |                |              |
| Period                                    | Age Group | Smoking Group | N    | %     | Ever Quit (N) | Ever Quit % | Mean Yrs Quit | Short Term (n) | Short Term % |
| 50                                        | 55-59     | Never Any     | 0    | .     |               |             |               |                |              |
| 50                                        | 55-59     | CC            | 0    | .     | 0             | .           |               |                |              |
| 50                                        | 55-59     | Ecig          | 0    | .     |               |             |               |                |              |
| 50                                        | 55-59     | Dual          | 0    | .     |               |             |               |                |              |
| 50                                        | 55-59     | Former        | 0    | .     |               |             | .             | 0              | .            |
| Year of Follow-up: 2040, Age Group: 60-64 |           |               |      |       |               |             |               |                |              |
| Period                                    | Age Group | Smoking Group | N    | %     | Ever Quit (N) | Ever Quit % | Mean Yrs Quit | Short Term (n) | Short Term % |
| 50                                        | 60-64     | Never Any     | 4726 | 59.60 |               |             |               |                |              |
| 50                                        | 60-64     | CC            | 40   | 0.50  | 0             | 0.00        |               |                |              |
| 50                                        | 60-64     | Ecig          | 551  | 6.95  |               |             |               |                |              |
| 50                                        | 60-64     | Dual          | 0    | 0.00  |               |             |               |                |              |
| 50                                        | 60-64     | Former        | 2613 | 32.95 |               |             | 27.63         | 73             | 2.79         |
| Year of Follow-up: 2040, Age Group: 65-69 |           |               |      |       |               |             |               |                |              |
| Period                                    | Age Group | Smoking Group | N    | %     | Ever Quit (N) | Ever Quit % | Mean Yrs Quit | Short Term (n) | Short Term % |
| 50                                        | 65-69     | Never Any     | 5359 | 64.18 |               |             |               |                |              |
| 50                                        | 65-69     | CC            | 65   | 0.78  | 0             | 0.00        |               |                |              |
| 50                                        | 65-69     | Ecig          | 502  | 6.01  |               |             |               |                |              |
| 50                                        | 65-69     | Dual          | 0    | 0.00  |               |             |               |                |              |
| 50                                        | 65-69     | Former        | 2424 | 29.03 |               |             | 28.63         | 43             | 1.77         |
| Year of Follow-up: 2040, Age Group: 70-74 |           |               |      |       |               |             |               |                |              |
| Period                                    | Age Group | Smoking Group | N    | %     | Ever Quit (N) | Ever Quit % | Mean Yrs Quit | Short Term (n) | Short Term % |
| 50                                        | 70-74     | Never Any     | 5189 | 59.01 |               |             |               |                |              |
| 50                                        | 70-74     | CC            | 116  | 1.32  | 0             | 0.00        |               |                |              |
| 50                                        | 70-74     | Ecig          | 486  | 5.53  |               |             |               |                |              |
| 50                                        | 70-74     | Dual          | 0    | 0.00  |               |             |               |                |              |
| 50                                        | 70-74     | Former        | 3002 | 34.14 |               |             | 32.44         | 48             | 1.60         |
| Year of Follow-up: 2040, Age Group: 75-79 |           |               |      |       |               |             |               |                |              |
| Period                                    | Age Group | Smoking Group | N    | %     | Ever Quit (N) | Ever Quit % | Mean Yrs Quit | Short Term (n) | Short Term % |
| 50                                        | 75-79     | Never Any     | 5284 | 52.43 |               |             |               |                |              |
| 50                                        | 75-79     | CC            | 222  | 2.20  | 0             | 0.00        |               |                |              |
| 50                                        | 75-79     | Ecig          | 485  | 4.81  |               |             |               |                |              |
| 50                                        | 75-79     | Dual          | 0    | 0.00  |               |             |               |                |              |
| 50                                        | 75-79     | Former        | 4087 | 40.55 |               |             | 34.90         | 73             | 1.79         |

## Results for PHIM for Run 10 (Sensitivity\_Analysis\_2.RTF)

\*\*\*\*\*

### Main Results for E-Component for Run: 10, Simulation: 1, COD: Four Diseases Combined

| Variable Parameter          | Value                                  |
|-----------------------------|----------------------------------------|
| 1. Country                  | US (United States)                     |
| 2. Sex                      | F (Females)                            |
| 3. Year of start of process | 1990                                   |
| 4. Cause of Death           | Four Diseases Combined                 |
| 5. Effective Dose NULL      | CC:1                                   |
| 6. Effective Dose Ecig      | CC:1 Ecig:0.05 Dual:0.525              |
| Note:                       | Death rates are per million population |

#### Results for Age Groups Combined and Years combined, Population unadjusted for deaths in Ecig scenario,

| Age Group:All |         | NULL        | Ecig        | %Drop    |        |        | NULL    | Ecig    | Drop    |         |
|---------------|---------|-------------|-------------|----------|--------|--------|---------|---------|---------|---------|
| Year          | Number  | Attrib      | Attrib      | Drop     | %Drop  | Attrib | Death   | Attrib  | Attrib  | Drop    |
|               | Deaths  | Deaths      | Deaths      | Deaths   | Deaths | Deaths | Rate    | Rates   | Rates   | Rates   |
| All Comb      | 9082078 | 2946250.006 | 2499285.526 | 446964.5 | 4.921  | 15.171 | 2493.45 | 808.881 | 686.169 | 122.712 |

#### Results for Age Groups Combined, Population unadjusted for deaths in Ecig scenario,

| Age Group:All |        | NULL      | Ecig      | %Drop    |        |        | NULL    | Ecig    | Drop    |         |
|---------------|--------|-----------|-----------|----------|--------|--------|---------|---------|---------|---------|
| Year          | Number | Attrib    | Attrib    | Drop     | %Drop  | Attrib | Death   | Attrib  | Attrib  | Drop    |
|               | Deaths | Deaths    | Deaths    | Deaths   | Deaths | Deaths | Rate    | Rates   | Rates   | Rates   |
| 1990          | 199848 | 57524.822 | 57524.822 | 0.000    | 0.000  | 0.000  | 2926.84 | 842.471 | 842.471 | 0.000   |
| 1991          | 199162 | 59078.486 | 59047.703 | 30.783   | 0.015  | 0.052  | 2877.87 | 853.678 | 853.234 | 0.445   |
| 1992          | 198532 | 60494.150 | 60420.939 | 73.210   | 0.037  | 0.121  | 2829.84 | 862.271 | 861.228 | 1.044   |
| 1993          | 202512 | 62694.848 | 62554.055 | 140.793  | 0.070  | 0.225  | 2845.85 | 881.034 | 879.055 | 1.979   |
| 1994          | 200658 | 63202.598 | 62976.349 | 226.248  | 0.113  | 0.358  | 2777.87 | 874.966 | 871.834 | 3.132   |
| 1995          | 201023 | 63766.862 | 63436.632 | 330.230  | 0.164  | 0.518  | 2739.80 | 869.097 | 864.596 | 4.501   |
| 1996          | 201180 | 64591.163 | 64124.694 | 466.468  | 0.232  | 0.722  | 2706.36 | 868.908 | 862.633 | 6.275   |
| 1997          | 198639 | 64686.912 | 64072.977 | 613.935  | 0.309  | 0.949  | 2635.18 | 858.147 | 850.002 | 8.145   |
| 1998          | 197573 | 65295.961 | 64489.919 | 806.043  | 0.408  | 1.234  | 2584.18 | 854.046 | 843.503 | 10.543  |
| 1999          | 211329 | 67327.521 | 66215.714 | 1111.807 | 0.526  | 1.651  | 2726.91 | 868.771 | 854.424 | 14.346  |
| 2000          | 208496 | 67596.897 | 66236.509 | 1360.388 | 0.652  | 2.013  | 2656.96 | 861.419 | 844.083 | 17.336  |
| 2001          | 203606 | 67008.811 | 65365.635 | 1643.176 | 0.807  | 2.452  | 2565.88 | 844.458 | 823.751 | 20.708  |
| 2002          | 200828 | 67067.744 | 65057.796 | 2009.947 | 1.001  | 2.997  | 2506.09 | 836.925 | 811.843 | 25.082  |
| 2003          | 196352 | 66756.217 | 64437.030 | 2319.186 | 1.181  | 3.474  | 2427.31 | 825.244 | 796.574 | 28.670  |
| 2004          | 188160 | 65058.725 | 62402.927 | 2655.799 | 1.411  | 4.082  | 2302.83 | 796.234 | 763.731 | 32.504  |
| 2005          | 186416 | 65214.724 | 62200.670 | 3014.054 | 1.617  | 4.622  | 2256.27 | 789.321 | 752.840 | 36.480  |
| 2006          | 180088 | 63771.146 | 60371.591 | 3399.555 | 1.888  | 5.331  | 2160.67 | 765.117 | 724.330 | 40.787  |
| 2007          | 175644 | 63110.718 | 59328.745 | 3781.973 | 2.153  | 5.993  | 2086.36 | 749.650 | 704.727 | 44.924  |
| 2008          | 177570 | 63718.624 | 59458.695 | 4259.929 | 2.399  | 6.686  | 2086.39 | 748.674 | 698.621 | 50.053  |
| 2009          | 172806 | 62794.698 | 58131.421 | 4663.277 | 2.699  | 7.426  | 2007.57 | 729.515 | 675.340 | 54.175  |
| 2010          | 170489 | 61917.074 | 56854.806 | 5062.268 | 2.969  | 8.176  | 1957.97 | 711.083 | 652.945 | 58.137  |
| 2011          | 170305 | 61680.114 | 56010.850 | 5669.264 | 3.329  | 9.191  | 1937.46 | 701.700 | 637.204 | 64.496  |
| 2012          | 171421 | 62023.127 | 55739.251 | 6283.876 | 3.666  | 10.132 | 1930.22 | 698.386 | 627.629 | 70.757  |
| 2013          | 172699 | 62037.765 | 55157.937 | 6879.829 | 3.984  | 11.090 | 1923.75 | 691.059 | 614.422 | 76.637  |
| 2014          | 174169 | 61921.017 | 54298.445 | 7622.572 | 4.377  | 12.310 | 1918.85 | 682.195 | 598.216 | 83.979  |
| 2015          | 177354 | 61856.204 | 53687.244 | 8168.960 | 4.606  | 13.206 | 2184.51 | 761.899 | 661.279 | 100.619 |
| 2016          | 176853 | 60464.119 | 51634.854 | 8829.264 | 4.992  | 14.602 | 2157.59 | 737.655 | 629.939 | 107.716 |
| 2017          | 179309 | 60243.839 | 50678.238 | 9565.600 | 5.335  | 15.878 | 2166.86 | 728.017 | 612.421 | 115.595 |
| 2018          | 177157 | 60713.327 | 50535.798 | 10177.53 | 5.745  | 16.763 | 2120.51 | 726.721 | 604.899 | 121.822 |
| 2019          | 179227 | 61148.172 | 50116.930 | 11031.24 | 6.155  | 18.040 | 2124.53 | 724.841 | 594.078 | 130.763 |
| 2020          | 180467 | 61149.317 | 49662.555 | 11486.76 | 6.365  | 18.785 | 2424.25 | 821.432 | 667.128 | 154.304 |
| 2021          | 178116 | 58727.786 | 46529.493 | 12198.29 | 6.849  | 20.771 | 2375.42 | 783.216 | 620.535 | 162.681 |
| 2022          | 179408 | 58848.802 | 45841.716 | 13007.09 | 7.250  | 22.103 | 2374.52 | 778.881 | 606.728 | 172.152 |
| 2023          | 180640 | 58816.149 | 45111.487 | 13704.66 | 7.587  | 23.301 | 2372.26 | 772.407 | 592.429 | 179.977 |
| 2024          | 181610 | 58955.232 | 44403.516 | 14551.72 | 8.013  | 24.683 | 2366.77 | 768.316 | 578.675 | 189.641 |
| 2025          | 180418 | 58297.744 | 43405.439 | 14892.31 | 8.254  | 25.545 | 2713.69 | 876.861 | 652.865 | 223.996 |
| 2026          | 180313 | 56469.971 | 41028.495 | 15441.48 | 8.564  | 27.345 | 2701.83 | 846.150 | 614.774 | 231.376 |
| 2027          | 179619 | 56209.427 | 39962.448 | 16246.98 | 9.045  | 28.904 | 2680.68 | 838.883 | 596.409 | 242.474 |
| 2028          | 178762 | 55733.105 | 38736.887 | 16996.22 | 9.508  | 30.496 | 2656.74 | 828.298 | 575.703 | 252.596 |
| 2029          | 177808 | 55145.838 | 37465.069 | 17680.77 | 9.944  | 32.062 | 2630.89 | 815.951 | 554.342 | 261.609 |
| 2030          | 173587 | 53615.097 | 35966.621 | 17648.48 | 10.167 | 32.917 | 3040.33 | 939.056 | 629.947 | 309.109 |
| 2031          | 174985 | 52046.561 | 34317.276 | 17729.28 | 10.132 | 34.064 | 3060.73 | 910.364 | 600.255 | 310.109 |
| 2032          | 173400 | 51582.636 | 33083.281 | 18499.35 | 10.669 | 35.864 | 3027.10 | 900.496 | 577.546 | 322.950 |
| 2033          | 171756 | 50839.758 | 31748.399 | 19091.36 | 11.115 | 37.552 | 2991.14 | 885.375 | 552.898 | 332.476 |
| 2034          | 169973 | 50215.451 | 30477.191 | 19738.26 | 11.613 | 39.307 | 2951.96 | 872.104 | 529.305 | 342.799 |
| 2035          | 162644 | 47773.075 | 28466.254 | 19306.82 | 11.871 | 40.414 | 3459.14 | 1016.05 | 605.425 | 410.621 |
| 2036          | 156254 | 43298.709 | 24897.772 | 18400.94 | 11.776 | 42.498 | 3328.25 | 922.274 | 530.329 | 391.945 |
| 2037          | 153593 | 42241.563 | 23355.037 | 18886.53 | 12.296 | 44.711 | 3274.10 | 900.450 | 497.852 | 402.598 |
| 2038          | 150947 | 41356.353 | 21883.184 | 19473.17 | 12.901 | 47.086 | 3217.50 | 881.531 | 466.451 | 415.080 |
| 2039          | 148373 | 40161.050 | 20374.228 | 19786.82 | 13.336 | 49.269 | 3159.42 | 855.178 | 433.843 | 421.335 |

## Results for PHIM for Run 10 (Sensitivity\_Analysis\_2.RTF)

\*\*\*\*\*

### Main Results for E-Component for Run: 10, Simulation: 1, COD: LUNG CANCER

| Variable Parameter          | Value                                  |
|-----------------------------|----------------------------------------|
| 1. Country                  | US (United States)                     |
| 2. Sex                      | F (Females)                            |
| 3. Year of start of process | 1990                                   |
| 4. Cause of Death           | LUNG CANCER                            |
| 5. Effective Dose NULL      | CC:1                                   |
| 6. Effective Dose Ecig      | CC:1 Ecig:0.05 Dual:0.525              |
| Note:                       | Death rates are per million population |

#### Results for Age Groups Combined and Years combined, Population unadjusted for deaths in Ecig scenario,

| Age Group:All | NULL    | Ecig        | %Drop       |          |        | NULL   | Ecig    | Drop    |         |        |
|---------------|---------|-------------|-------------|----------|--------|--------|---------|---------|---------|--------|
| Year          | Number  | Attrib      | Attrib      | Drop     | %Drop  | Attrib | Death   | Attrib  | Attrib  | Drop   |
|               | Deaths  | Deaths      | Deaths      | Deaths   | Deaths | Deaths | Rate    | Rates   | Rates   | Rates  |
| All Comb      | 2327764 | 1580465.217 | 1405362.168 | 175103.0 | 7.522  | 11.079 | 639.078 | 433.910 | 385.837 | 48.074 |

#### Results for Age Groups Combined, Population unadjusted for deaths in Ecig scenario,

| Age Group:All | NULL   | Ecig      | %Drop     |          |        | NULL   | Ecig    | Drop    |         |         |
|---------------|--------|-----------|-----------|----------|--------|--------|---------|---------|---------|---------|
| Year          | Number | Attrib    | Attrib    | Drop     | %Drop  | Attrib | Death   | Attrib  | Attrib  | Drop    |
|               | Deaths | Deaths    | Deaths    | Deaths   | Deaths | Deaths | Rate    | Rates   | Rates   | Rates   |
| 1990          | 42690  | 30614.201 | 30614.201 | 0.000    | 0.000  | 0.000  | 625.210 | 448.355 | 448.355 | 0.000   |
| 1991          | 43692  | 31412.010 | 31406.571 | 5.440    | 0.012  | 0.017  | 631.345 | 453.901 | 453.822 | 0.079   |
| 1992          | 45423  | 32782.407 | 32771.168 | 11.239   | 0.025  | 0.034  | 647.450 | 467.274 | 467.114 | 0.160   |
| 1993          | 46291  | 33491.183 | 33469.166 | 22.018   | 0.048  | 0.066  | 650.515 | 470.643 | 470.333 | 0.309   |
| 1994          | 47017  | 34074.347 | 34040.043 | 34.304   | 0.073  | 0.101  | 650.895 | 471.719 | 471.244 | 0.475   |
| 1995          | 47840  | 34694.454 | 34642.098 | 52.356   | 0.109  | 0.151  | 652.025 | 472.861 | 472.147 | 0.714   |
| 1996          | 48244  | 35027.269 | 34955.066 | 72.202   | 0.150  | 0.206  | 648.999 | 471.202 | 470.231 | 0.971   |
| 1997          | 49035  | 35590.763 | 35485.295 | 105.468  | 0.215  | 0.296  | 650.506 | 472.153 | 470.754 | 1.399   |
| 1998          | 49686  | 36100.785 | 35946.624 | 154.161  | 0.310  | 0.427  | 649.874 | 472.184 | 470.168 | 2.016   |
| 1999          | 48883  | 35451.030 | 35251.396 | 199.634  | 0.408  | 0.563  | 630.769 | 457.448 | 454.872 | 2.576   |
| 2000          | 50331  | 36447.986 | 36181.089 | 266.897  | 0.530  | 0.732  | 641.392 | 464.474 | 461.073 | 3.401   |
| 2001          | 50389  | 36411.326 | 36072.035 | 339.291  | 0.673  | 0.932  | 635.012 | 458.863 | 454.587 | 4.276   |
| 2002          | 51445  | 37078.545 | 36636.162 | 442.383  | 0.860  | 1.193  | 641.972 | 462.696 | 457.175 | 5.520   |
| 2003          | 51408  | 36999.876 | 36464.984 | 534.892  | 1.040  | 1.446  | 635.509 | 457.395 | 450.782 | 6.612   |
| 2004          | 51399  | 36861.555 | 36206.388 | 655.167  | 1.275  | 1.777  | 629.057 | 451.138 | 443.119 | 8.018   |
| 2005          | 51421  | 36689.529 | 35921.046 | 768.482  | 1.494  | 2.095  | 622.370 | 444.069 | 434.767 | 9.301   |
| 2006          | 51355  | 36504.774 | 35592.770 | 912.004  | 1.776  | 2.498  | 616.150 | 437.979 | 427.037 | 10.942  |
| 2007          | 51839  | 36663.202 | 35575.219 | 1087.983 | 2.099  | 2.968  | 615.761 | 435.498 | 422.574 | 12.923  |
| 2008          | 50976  | 35898.803 | 34678.746 | 1220.057 | 2.393  | 3.399  | 598.952 | 421.800 | 407.464 | 14.335  |
| 2009          | 51193  | 35934.525 | 34507.982 | 1426.543 | 2.787  | 3.970  | 594.733 | 417.468 | 400.895 | 16.573  |
| 2010          | 50853  | 35502.829 | 33912.893 | 1589.937 | 3.127  | 4.478  | 584.018 | 407.730 | 389.470 | 18.260  |
| 2011          | 50509  | 35136.342 | 33309.022 | 1827.320 | 3.618  | 5.201  | 574.613 | 399.726 | 378.938 | 20.788  |
| 2012          | 51245  | 35450.201 | 33369.656 | 2080.545 | 4.060  | 5.869  | 577.023 | 399.173 | 375.745 | 23.427  |
| 2013          | 51069  | 35123.224 | 32785.797 | 2337.427 | 4.577  | 6.655  | 568.874 | 391.249 | 365.212 | 26.037  |
| 2014          | 51251  | 35079.370 | 32450.333 | 2629.036 | 5.130  | 7.495  | 564.641 | 386.476 | 357.511 | 28.965  |
| 2015          | 50443  | 34324.171 | 31499.419 | 2824.752 | 5.600  | 8.230  | 621.319 | 422.780 | 387.986 | 34.793  |
| 2016          | 48854  | 33054.753 | 29993.758 | 3060.995 | 6.266  | 9.260  | 596.013 | 403.264 | 365.920 | 37.344  |
| 2017          | 48325  | 32471.234 | 29126.158 | 3345.077 | 6.922  | 10.302 | 583.983 | 392.399 | 351.975 | 40.424  |
| 2018          | 50465  | 33657.595 | 29765.852 | 3891.743 | 7.712  | 11.563 | 604.052 | 402.871 | 356.288 | 46.583  |
| 2019          | 51036  | 33863.424 | 29535.846 | 4327.578 | 8.479  | 12.780 | 604.975 | 401.412 | 350.113 | 51.298  |
| 2020          | 51444  | 33910.830 | 29278.888 | 4631.942 | 9.004  | 13.659 | 691.053 | 455.532 | 393.310 | 62.222  |
| 2021          | 48037  | 31531.880 | 26769.067 | 4762.813 | 9.915  | 15.105 | 640.639 | 420.521 | 357.002 | 63.519  |
| 2022          | 48335  | 31560.212 | 26368.691 | 5191.521 | 10.741 | 16.450 | 639.727 | 417.708 | 348.997 | 68.711  |
| 2023          | 48599  | 31508.781 | 25934.706 | 5574.075 | 11.470 | 17.691 | 638.227 | 413.791 | 340.589 | 73.202  |
| 2024          | 48784  | 31517.293 | 25485.431 | 6031.863 | 12.365 | 19.138 | 635.757 | 410.740 | 332.131 | 78.608  |
| 2025          | 48477  | 31175.389 | 24865.835 | 6309.554 | 13.016 | 20.239 | 729.141 | 468.912 | 374.009 | 94.903  |
| 2026          | 45324  | 29044.598 | 22747.272 | 6297.326 | 13.894 | 21.682 | 679.138 | 435.206 | 340.847 | 94.360  |
| 2027          | 45107  | 28825.765 | 22108.556 | 6717.209 | 14.892 | 23.303 | 673.191 | 430.203 | 329.953 | 100.249 |
| 2028          | 44842  | 28513.846 | 21389.986 | 7123.859 | 15.887 | 24.984 | 666.430 | 423.769 | 317.895 | 105.874 |
| 2029          | 44539  | 28148.109 | 20639.635 | 7508.474 | 16.858 | 26.675 | 659.013 | 416.486 | 305.389 | 111.097 |
| 2030          | 43393  | 27314.475 | 19730.443 | 7584.032 | 17.478 | 27.766 | 760.018 | 478.407 | 345.574 | 132.833 |
| 2031          | 40748  | 25423.102 | 18114.038 | 7309.064 | 17.937 | 28.750 | 712.731 | 444.684 | 316.839 | 127.845 |
| 2032          | 40325  | 25085.902 | 17392.753 | 7693.149 | 19.078 | 30.667 | 703.969 | 437.933 | 303.631 | 134.302 |
| 2033          | 39882  | 24645.067 | 16635.795 | 8009.272 | 20.082 | 32.498 | 694.543 | 429.194 | 289.712 | 139.481 |
| 2034          | 39404  | 24239.126 | 15900.744 | 8338.382 | 21.161 | 34.401 | 684.347 | 420.967 | 276.152 | 144.815 |
| 2035          | 37454  | 22944.147 | 14748.398 | 8195.748 | 21.882 | 35.720 | 796.588 | 487.980 | 313.671 | 174.309 |
| 2036          | 32988  | 19950.581 | 12428.852 | 7521.728 | 22.801 | 37.702 | 702.663 | 424.953 | 264.738 | 160.215 |
| 2037          | 32403  | 19415.334 | 11639.081 | 7776.252 | 23.998 | 40.052 | 690.731 | 413.871 | 248.107 | 165.764 |
| 2038          | 31820  | 18939.317 | 10885.521 | 8053.796 | 25.311 | 42.524 | 678.257 | 403.701 | 232.030 | 171.671 |
| 2039          | 31251  | 18379.752 | 10131.693 | 8248.059 | 26.393 | 44.876 | 665.457 | 391.373 | 215.741 | 175.632 |

## Results for PHIM for Run 10 (Sensitivity\_Analysis\_2.RTF)

\*\*\*\*\*

### Main Results for E-Component for Run: 10, Simulation: 1, COD: IHD

| Variable Parameter          | Value                                  |
|-----------------------------|----------------------------------------|
| 1. Country                  | US (United States)                     |
| 2. Sex                      | F (Females)                            |
| 3. Year of start of process | 1990                                   |
| 4. Cause of Death           | IHD                                    |
| 5. Effective Dose NULL      | CC:1                                   |
| 6. Effective Dose Ecig      | CC:1 Ecig:0.05 Dual:0.525              |
| Note:                       | Death rates are per million population |

#### Results for Age Groups Combined and Years combined, Population unadjusted for deaths in Ecig scenario,

| Age Group:All |         | NULL       | Ecig       | %Drop    |        |        | NULL    | Ecig    | Drop   |        |
|---------------|---------|------------|------------|----------|--------|--------|---------|---------|--------|--------|
| Year          | Number  | Attrib     | Attrib     | Drop     | %Drop  | Attrib | Death   | Attrib  | Attrib | Drop   |
|               | Deaths  | Deaths     | Deaths     | Deaths   | Deaths | Deaths | Rate    | Rates   | Rates  | Rates  |
| All Comb      | 3242167 | 398833.796 | 299177.320 | 99656.48 | 3.074  | 24.987 | 890.124 | 109.498 | 82.138 | 27.360 |

#### Results for Age Groups Combined, Population unadjusted for deaths in Ecig scenario,

| Age Group:All |        | NULL      | Ecig      | %Drop    |        |        | NULL    | Ecig    | Drop    |        |
|---------------|--------|-----------|-----------|----------|--------|--------|---------|---------|---------|--------|
| Year          | Number | Attrib    | Attrib    | Drop     | %Drop  | Attrib | Death   | Attrib  | Attrib  | Drop   |
|               | Deaths | Deaths    | Deaths    | Deaths   | Deaths | Deaths | Rate    | Rates   | Rates   | Rates  |
| 1990          | 98916  | 12922.892 | 12922.892 | 0.000    | 0.000  | 0.000  | 1448.66 | 189.260 | 189.260 | 0.000  |
| 1991          | 96403  | 12856.479 | 12839.302 | 17.177   | 0.018  | 0.134  | 1393.01 | 185.775 | 185.527 | 0.248  |
| 1992          | 93721  | 12662.244 | 12617.553 | 44.690   | 0.048  | 0.353  | 1335.88 | 180.485 | 179.848 | 0.637  |
| 1993          | 93679  | 12730.613 | 12645.886 | 84.727   | 0.090  | 0.666  | 1316.45 | 178.900 | 177.709 | 1.191  |
| 1994          | 90832  | 12495.323 | 12357.865 | 137.458  | 0.151  | 1.100  | 1257.46 | 172.983 | 171.080 | 1.903  |
| 1995          | 89698  | 12365.590 | 12168.500 | 197.090  | 0.220  | 1.594  | 1222.52 | 168.534 | 165.848 | 2.686  |
| 1996          | 88286  | 12290.551 | 12009.561 | 280.991  | 0.318  | 2.286  | 1187.66 | 165.338 | 161.558 | 3.780  |
| 1997          | 84777  | 11719.531 | 11366.503 | 353.028  | 0.416  | 3.012  | 1124.67 | 155.473 | 150.790 | 4.683  |
| 1998          | 82517  | 11416.794 | 10975.238 | 441.556  | 0.535  | 3.868  | 1079.29 | 149.327 | 143.552 | 5.775  |
| 1999          | 93939  | 13028.038 | 12386.293 | 641.745  | 0.683  | 4.926  | 1212.16 | 168.109 | 159.828 | 8.281  |
| 2000          | 90039  | 12426.299 | 11676.057 | 750.242  | 0.833  | 6.038  | 1147.41 | 158.354 | 148.794 | 9.561  |
| 2001          | 86119  | 11939.281 | 11041.692 | 897.590  | 1.042  | 7.518  | 1085.29 | 150.461 | 139.150 | 11.312 |
| 2002          | 83014  | 11528.794 | 10470.878 | 1057.916 | 1.274  | 9.176  | 1035.91 | 143.865 | 130.664 | 13.202 |
| 2003          | 79302  | 11048.407 | 9859.749  | 1188.658 | 1.499  | 10.759 | 980.336 | 136.581 | 121.887 | 14.694 |
| 2004          | 73861  | 10375.132 | 9058.679  | 1316.453 | 1.782  | 12.689 | 903.963 | 126.978 | 110.866 | 16.112 |
| 2005          | 71649  | 10051.029 | 8607.464  | 1443.565 | 2.015  | 14.362 | 867.197 | 121.652 | 104.180 | 17.472 |
| 2006          | 67551  | 9542.523  | 7953.870  | 1588.653 | 2.352  | 16.648 | 810.467 | 114.490 | 95.429  | 19.060 |
| 2007          | 63503  | 8936.533  | 7262.987  | 1673.546 | 2.635  | 18.727 | 754.310 | 106.151 | 86.272  | 19.879 |
| 2008          | 63171  | 8944.180  | 7079.324  | 1864.856 | 2.952  | 20.850 | 742.239 | 105.091 | 83.180  | 21.911 |
| 2009          | 59747  | 8390.033  | 6472.200  | 1917.833 | 3.210  | 22.858 | 694.108 | 97.471  | 75.191  | 22.280 |
| 2010          | 58008  | 8157.570  | 6117.859  | 2039.711 | 3.516  | 25.004 | 666.189 | 93.685  | 70.260  | 23.425 |
| 2011          | 57368  | 8035.356  | 5829.055  | 2206.301 | 3.846  | 27.457 | 652.644 | 91.414  | 66.314  | 25.100 |
| 2012          | 57411  | 7970.766  | 5577.465  | 2393.300 | 4.169  | 30.026 | 646.453 | 89.752  | 62.803  | 26.949 |
| 2013          | 57067  | 7743.216  | 5250.845  | 2492.371 | 4.367  | 32.188 | 635.688 | 86.254  | 58.491  | 27.763 |
| 2014          | 57538  | 7774.935  | 5073.518  | 2701.417 | 4.695  | 34.745 | 633.906 | 85.658  | 55.896  | 29.762 |
| 2015          | 58395  | 7722.535  | 4914.470  | 2808.065 | 4.809  | 36.362 | 719.266 | 95.120  | 60.533  | 34.588 |
| 2016          | 58658  | 7600.353  | 4657.541  | 2942.812 | 5.017  | 38.719 | 715.621 | 92.723  | 56.821  | 35.902 |
| 2017          | 59004  | 7470.266  | 4408.139  | 3062.127 | 5.190  | 40.991 | 713.034 | 90.274  | 53.270  | 37.004 |
| 2018          | 56077  | 6907.050  | 3922.478  | 2984.572 | 5.322  | 43.211 | 671.224 | 82.675  | 46.951  | 35.724 |
| 2019          | 55886  | 6732.046  | 3685.853  | 3046.193 | 5.451  | 45.249 | 662.462 | 79.801  | 43.692  | 36.109 |
| 2020          | 55313  | 6429.836  | 3436.816  | 2993.020 | 5.411  | 46.549 | 743.037 | 86.373  | 46.168  | 40.206 |
| 2021          | 56292  | 6562.016  | 3330.127  | 3231.889 | 5.741  | 49.251 | 750.730 | 87.513  | 44.412  | 43.102 |
| 2022          | 55827  | 6352.366  | 3101.093  | 3251.273 | 5.824  | 51.182 | 738.885 | 84.075  | 41.044  | 43.032 |
| 2023          | 55338  | 6134.123  | 2878.571  | 3255.552 | 5.883  | 53.073 | 726.728 | 80.557  | 37.803  | 42.754 |
| 2024          | 54770  | 5922.193  | 2676.898  | 3245.295 | 5.925  | 54.799 | 713.771 | 77.179  | 34.886  | 42.293 |
| 2025          | 53295  | 5504.188  | 2446.140  | 3058.048 | 5.738  | 55.559 | 801.612 | 82.789  | 36.793  | 45.996 |
| 2026          | 55278  | 5641.075  | 2400.679  | 3240.397 | 5.862  | 57.443 | 828.283 | 84.526  | 35.972  | 48.554 |
| 2027          | 54199  | 5426.216  | 2212.476  | 3213.740 | 5.930  | 59.226 | 808.875 | 80.982  | 33.020  | 47.963 |
| 2028          | 53090  | 5197.830  | 2031.872  | 3165.958 | 5.963  | 60.909 | 789.020 | 77.249  | 30.197  | 47.052 |
| 2029          | 51974  | 4973.547  | 1872.304  | 3101.242 | 5.967  | 62.355 | 769.023 | 73.590  | 27.703  | 45.887 |
| 2030          | 49479  | 4450.618  | 1650.368  | 2800.250 | 5.660  | 62.918 | 866.605 | 77.952  | 28.906  | 49.046 |
| 2031          | 51987  | 4555.052  | 1620.397  | 2934.655 | 5.645  | 64.426 | 909.317 | 79.674  | 28.343  | 51.331 |
| 2032          | 50677  | 4349.999  | 1479.093  | 2870.906 | 5.665  | 65.998 | 884.689 | 75.939  | 25.821  | 50.118 |
| 2033          | 49380  | 4147.948  | 1345.291  | 2802.657 | 5.676  | 67.567 | 859.955 | 72.237  | 23.428  | 48.808 |
| 2034          | 48076  | 3966.133  | 1238.774  | 2727.359 | 5.673  | 68.766 | 834.943 | 68.881  | 21.514  | 47.367 |
| 2035          | 44518  | 3289.064  | 1014.111  | 2274.953 | 5.110  | 69.167 | 946.825 | 69.952  | 21.568  | 48.384 |
| 2036          | 46347  | 3313.192  | 959.382   | 2353.810 | 5.079  | 71.044 | 987.211 | 70.572  | 20.435  | 50.137 |
| 2037          | 44841  | 3117.951  | 847.480   | 2270.471 | 5.063  | 72.819 | 955.859 | 66.464  | 18.065  | 48.399 |
| 2038          | 43378  | 2949.775  | 752.858   | 2196.917 | 5.065  | 74.477 | 924.621 | 62.876  | 16.048  | 46.828 |
| 2039          | 41973  | 2766.312  | 672.871   | 2093.441 | 4.988  | 75.676 | 893.753 | 58.905  | 14.328  | 44.577 |

## Results for PHIM for Run 10 (Sensitivity\_Analysis\_2.RTF)

\*\*\*\*\*

### Main Results for E-Component for Run: 10, Simulation: 1, COD: STROKE

| Variable Parameter          | Value                                  |
|-----------------------------|----------------------------------------|
| 1. Country                  | US (United States)                     |
| 2. Sex                      | F (Females)                            |
| 3. Year of start of process | 1990                                   |
| 4. Cause of Death           | STROKE                                 |
| 5. Effective Dose NULL      | CC:1                                   |
| 6. Effective Dose Ecig      | CC:1 Ecig:0.05 Dual:0.525              |
| Note:                       | Death rates are per million population |

#### Results for Age Groups Combined and Years combined, Population unadjusted for deaths in Ecig scenario,

| Age Group:All | NULL    | Ecig       | %Drop     |          |        | NULL   | Ecig    | Drop   |        |       |
|---------------|---------|------------|-----------|----------|--------|--------|---------|--------|--------|-------|
| Year          | Number  | Attrib     | Attrib    | Drop     | %Drop  | Attrib | Death   | Attrib | Attrib | Drop  |
|               | Deaths  | Deaths     | Deaths    | Deaths   | Deaths | Deaths | Rate    | Rates  | Rates  | Rates |
| All Comb      | 1352207 | 104899.750 | 77682.997 | 27216.75 | 2.013  | 25.945 | 371.243 | 28.800 | 21.328 | 7.472 |

#### Results for Age Groups Combined, Population unadjusted for deaths in Ecig scenario,

| Age Group:All | NULL   | Ecig     | %Drop    |         |        | NULL   | Ecig    | Drop   |        |        |
|---------------|--------|----------|----------|---------|--------|--------|---------|--------|--------|--------|
| Year          | Number | Attrib   | Attrib   | Drop    | %Drop  | Attrib | Death   | Attrib | Attrib | Drop   |
|               | Deaths | Deaths   | Deaths   | Deaths  | Deaths | Deaths | Rate    | Rates  | Rates  | Rates  |
| 1990          | 33504  | 3293.017 | 3293.017 | 0.000   | 0.000  | 0.000  | 490.678 | 48.227 | 48.227 | 0.000  |
| 1991          | 32505  | 3207.063 | 3202.424 | 4.639   | 0.014  | 0.145  | 469.694 | 46.342 | 46.275 | 0.067  |
| 1992          | 32560  | 3218.125 | 3206.500 | 11.625  | 0.036  | 0.361  | 464.104 | 45.871 | 45.705 | 0.166  |
| 1993          | 32768  | 3226.680 | 3203.783 | 22.897  | 0.070  | 0.710  | 460.480 | 45.344 | 45.022 | 0.322  |
| 1994          | 33005  | 3277.266 | 3237.603 | 39.663  | 0.120  | 1.210  | 456.915 | 45.370 | 44.821 | 0.549  |
| 1995          | 33730  | 3309.378 | 3249.852 | 59.526  | 0.176  | 1.799  | 459.716 | 45.104 | 44.293 | 0.811  |
| 1996          | 33750  | 3312.987 | 3225.688 | 87.298  | 0.259  | 2.635  | 454.019 | 44.568 | 43.393 | 1.174  |
| 1997          | 33699  | 3267.066 | 3148.559 | 118.507 | 0.352  | 3.627  | 447.056 | 43.341 | 41.769 | 1.572  |
| 1998          | 33274  | 3178.725 | 3029.648 | 149.077 | 0.448  | 4.690  | 435.211 | 41.577 | 39.627 | 1.950  |
| 1999          | 33891  | 3120.351 | 2937.236 | 183.115 | 0.540  | 5.868  | 437.317 | 40.264 | 37.901 | 2.363  |
| 2000          | 33827  | 3142.808 | 2916.161 | 226.647 | 0.670  | 7.212  | 431.074 | 40.050 | 37.162 | 2.888  |
| 2001          | 32506  | 2961.588 | 2703.820 | 257.768 | 0.793  | 8.704  | 409.647 | 37.323 | 34.074 | 3.248  |
| 2002          | 32078  | 2940.627 | 2629.143 | 311.484 | 0.971  | 10.592 | 400.295 | 36.695 | 32.809 | 3.887  |
| 2003          | 30568  | 2819.545 | 2468.966 | 350.579 | 1.147  | 12.434 | 377.883 | 34.855 | 30.521 | 4.334  |
| 2004          | 29388  | 2730.466 | 2337.664 | 392.802 | 1.337  | 14.386 | 359.671 | 33.417 | 28.610 | 4.807  |
| 2005          | 27954  | 2670.510 | 2233.533 | 436.977 | 1.563  | 16.363 | 338.339 | 32.322 | 27.033 | 5.289  |
| 2006          | 27201  | 2623.285 | 2135.555 | 487.730 | 1.793  | 18.592 | 326.354 | 31.474 | 25.622 | 5.852  |
| 2007          | 26302  | 2536.599 | 2009.821 | 526.778 | 2.003  | 20.767 | 312.424 | 30.131 | 23.873 | 6.257  |
| 2008          | 25998  | 2469.443 | 1907.445 | 561.999 | 2.162  | 22.758 | 305.468 | 29.015 | 22.412 | 6.603  |
| 2009          | 25040  | 2386.945 | 1790.104 | 596.841 | 2.384  | 25.004 | 290.901 | 27.730 | 20.796 | 6.934  |
| 2010          | 24840  | 2329.274 | 1696.551 | 632.723 | 2.547  | 27.164 | 285.273 | 26.750 | 19.484 | 7.266  |
| 2011          | 24792  | 2286.581 | 1608.792 | 677.789 | 2.734  | 29.642 | 282.045 | 26.013 | 18.302 | 7.711  |
| 2012          | 24500  | 2243.311 | 1522.006 | 721.305 | 2.944  | 32.154 | 275.872 | 25.260 | 17.138 | 8.122  |
| 2013          | 24451  | 2176.503 | 1421.345 | 755.158 | 3.088  | 34.696 | 272.368 | 24.245 | 15.833 | 8.412  |
| 2014          | 25296  | 2211.619 | 1391.821 | 819.798 | 3.241  | 37.068 | 278.691 | 24.366 | 15.334 | 9.032  |
| 2015          | 26316  | 2237.016 | 1371.890 | 865.126 | 3.287  | 38.673 | 324.141 | 27.554 | 16.898 | 10.656 |
| 2016          | 26735  | 2229.057 | 1312.336 | 916.721 | 3.429  | 41.126 | 326.164 | 27.194 | 16.010 | 11.184 |
| 2017          | 27616  | 2221.649 | 1262.583 | 959.066 | 3.473  | 43.169 | 333.726 | 26.848 | 15.258 | 11.590 |
| 2018          | 25256  | 1939.420 | 1067.857 | 871.563 | 3.451  | 44.939 | 302.304 | 23.214 | 12.782 | 10.432 |
| 2019          | 25429  | 1904.400 | 1006.328 | 898.072 | 3.532  | 47.158 | 301.434 | 22.574 | 11.929 | 10.646 |
| 2020          | 25379  | 1806.054 | 930.246  | 875.809 | 3.451  | 48.493 | 340.922 | 24.261 | 12.496 | 11.765 |
| 2021          | 25448  | 1748.172 | 863.676  | 884.496 | 3.476  | 50.595 | 339.386 | 23.314 | 11.518 | 11.796 |
| 2022          | 25539  | 1701.148 | 806.139  | 895.009 | 3.504  | 52.612 | 338.015 | 22.515 | 10.669 | 11.846 |
| 2023          | 25620  | 1652.087 | 748.958  | 903.129 | 3.525  | 54.666 | 336.461 | 21.696 | 9.836  | 11.860 |
| 2024          | 25659  | 1597.127 | 694.046  | 903.081 | 3.520  | 56.544 | 334.391 | 20.814 | 9.045  | 11.769 |
| 2025          | 25260  | 1467.622 | 626.982  | 840.641 | 3.328  | 57.279 | 379.931 | 22.075 | 9.430  | 12.644 |
| 2026          | 25480  | 1390.505 | 574.997  | 815.508 | 3.201  | 58.648 | 381.790 | 20.835 | 8.616  | 12.220 |
| 2027          | 25264  | 1342.095 | 529.530  | 812.565 | 3.216  | 60.545 | 377.042 | 20.030 | 7.903  | 12.127 |
| 2028          | 25022  | 1289.536 | 487.403  | 802.133 | 3.206  | 62.203 | 371.870 | 19.165 | 7.244  | 11.921 |
| 2029          | 24767  | 1242.216 | 450.285  | 791.931 | 3.198  | 63.751 | 366.459 | 18.380 | 6.663  | 11.718 |
| 2030          | 23959  | 1096.803 | 390.425  | 706.378 | 2.948  | 64.403 | 419.641 | 19.210 | 6.838  | 12.372 |
| 2031          | 23963  | 1019.991 | 349.046  | 670.945 | 2.800  | 65.779 | 419.142 | 17.841 | 6.105  | 11.736 |
| 2032          | 23615  | 977.406  | 318.603  | 658.804 | 2.790  | 67.403 | 412.259 | 17.063 | 5.562  | 11.501 |
| 2033          | 23259  | 937.450  | 288.832  | 648.618 | 2.789  | 69.190 | 405.051 | 16.326 | 5.030  | 11.296 |
| 2034          | 22879  | 900.763  | 264.952  | 635.811 | 2.779  | 70.586 | 397.339 | 15.644 | 4.601  | 11.042 |
| 2035          | 21733  | 745.023  | 215.007  | 530.017 | 2.439  | 71.141 | 462.224 | 15.845 | 4.573  | 11.272 |
| 2036          | 20904  | 680.360  | 183.037  | 497.322 | 2.379  | 73.097 | 445.263 | 14.492 | 3.899  | 10.593 |
| 2037          | 20397  | 644.109  | 161.422  | 482.687 | 2.366  | 74.939 | 434.791 | 13.730 | 3.441  | 10.289 |
| 2038          | 19890  | 612.448  | 143.161  | 469.288 | 2.359  | 76.625 | 423.966 | 13.055 | 3.052  | 10.003 |
| 2039          | 19392  | 577.529  | 128.220  | 449.309 | 2.317  | 77.798 | 412.930 | 12.298 | 2.730  | 9.567  |

## Results for PHIM for Run 10 (Sensitivity\_Analysis\_2.RTF)

\*\*\*\*\*

### Main Results for E-Component for Run: 10, Simulation: 1, COD: COPD

| Variable Parameter          | Value                                  |
|-----------------------------|----------------------------------------|
| 1. Country                  | US (United States)                     |
| 2. Sex                      | F (Females)                            |
| 3. Year of start of process | 1990                                   |
| 4. Cause of Death           | COPD                                   |
| 5. Effective Dose NULL      | CC:1                                   |
| 6. Effective Dose Ecig      | CC:1 Ecig:0.05 Dual:0.525              |
| Note:                       | Death rates are per million population |

#### Results for Age Groups Combined and Years combined, Population unadjusted for deaths in Ecig scenario,

| Age Group:All | NULL    | Ecig       | %Drop      |          |        | NULL   | Ecig    | Drop    |         |        |
|---------------|---------|------------|------------|----------|--------|--------|---------|---------|---------|--------|
| Year          | Number  | Attrib     | Attrib     | Drop     | %Drop  | Attrib | Death   | Attrib  | Attrib  | Drop   |
|               | Deaths  | Deaths     | Deaths     | Deaths   | Deaths | Deaths | Rate    | Rates   | Rates   | Rates  |
| All Comb      | 2159941 | 862051.244 | 717063.042 | 144988.2 | 6.713  | 16.819 | 593.003 | 236.673 | 196.867 | 39.806 |

#### Results for Age Groups Combined, Population unadjusted for deaths in Ecig scenario,

| Age Group:All | NULL   | Ecig      | %Drop     |          |        | NULL   | Ecig    | Drop    |         |         |
|---------------|--------|-----------|-----------|----------|--------|--------|---------|---------|---------|---------|
| Year          | Number | Attrib    | Attrib    | Drop     | %Drop  | Attrib | Death   | Attrib  | Attrib  | Drop    |
|               | Deaths | Deaths    | Deaths    | Deaths   | Deaths | Deaths | Rate    | Rates   | Rates   | Rates   |
| 1990          | 24738  | 10694.712 | 10694.712 | 0.000    | 0.000  | 0.000  | 362.296 | 156.628 | 156.628 | 0.000   |
| 1991          | 26562  | 11602.933 | 11599.406 | 3.527    | 0.013  | 0.030  | 383.818 | 167.661 | 167.610 | 0.051   |
| 1992          | 26828  | 11831.375 | 11825.719 | 5.656    | 0.021  | 0.048  | 382.401 | 168.642 | 168.561 | 0.081   |
| 1993          | 29774  | 13246.371 | 13235.220 | 11.151   | 0.037  | 0.084  | 418.406 | 186.148 | 185.991 | 0.157   |
| 1994          | 29804  | 13355.662 | 13340.838 | 14.824   | 0.050  | 0.111  | 412.601 | 184.893 | 184.688 | 0.205   |
| 1995          | 29755  | 13397.439 | 13376.181 | 21.259   | 0.071  | 0.159  | 405.540 | 182.598 | 182.308 | 0.290   |
| 1996          | 30900  | 13960.356 | 13934.379 | 25.977   | 0.084  | 0.186  | 415.680 | 187.801 | 187.451 | 0.349   |
| 1997          | 31128  | 14109.552 | 14072.620 | 36.932   | 0.119  | 0.262  | 412.949 | 187.180 | 186.690 | 0.490   |
| 1998          | 32096  | 14599.657 | 14538.409 | 61.249   | 0.191  | 0.420  | 419.803 | 190.958 | 190.157 | 0.801   |
| 1999          | 34616  | 15728.102 | 15640.790 | 87.313   | 0.252  | 0.555  | 446.673 | 202.950 | 201.823 | 1.127   |
| 2000          | 34299  | 15579.803 | 15463.201 | 116.602  | 0.340  | 0.748  | 437.088 | 198.541 | 197.055 | 1.486   |
| 2001          | 34592  | 15696.614 | 15548.088 | 148.527  | 0.429  | 0.946  | 435.935 | 197.812 | 195.940 | 1.872   |
| 2002          | 34291  | 15519.777 | 15321.613 | 198.165  | 0.578  | 1.277  | 427.910 | 193.668 | 191.195 | 2.473   |
| 2003          | 35074  | 15888.389 | 15643.332 | 245.058  | 0.699  | 1.542  | 433.587 | 196.413 | 193.384 | 3.029   |
| 2004          | 33512  | 15091.573 | 14800.195 | 291.377  | 0.869  | 1.931  | 410.143 | 184.701 | 181.135 | 3.566   |
| 2005          | 35392  | 15803.656 | 15438.627 | 365.029  | 1.031  | 2.310  | 428.364 | 191.278 | 186.860 | 4.418   |
| 2006          | 33981  | 15100.563 | 14689.396 | 411.168  | 1.210  | 2.723  | 407.699 | 181.174 | 176.241 | 4.933   |
| 2007          | 34000  | 14974.384 | 14480.718 | 493.665  | 1.452  | 3.297  | 403.863 | 177.871 | 172.007 | 5.864   |
| 2008          | 37425  | 16406.197 | 15793.181 | 613.017  | 1.638  | 3.736  | 439.732 | 192.768 | 185.565 | 7.203   |
| 2009          | 36826  | 16083.194 | 15361.135 | 722.059  | 1.961  | 4.490  | 427.825 | 186.846 | 178.457 | 8.388   |
| 2010          | 36788  | 15927.400 | 15127.503 | 799.897  | 2.174  | 5.022  | 422.489 | 182.917 | 173.731 | 9.186   |
| 2011          | 37636  | 16221.836 | 15263.982 | 957.854  | 2.545  | 5.905  | 428.164 | 184.547 | 173.650 | 10.897  |
| 2012          | 38265  | 16358.849 | 15270.124 | 1088.726 | 2.845  | 6.655  | 430.867 | 184.202 | 171.943 | 12.259  |
| 2013          | 40112  | 16994.822 | 15699.950 | 1294.872 | 3.228  | 7.619  | 446.821 | 189.311 | 174.887 | 14.424  |
| 2014          | 40084  | 16855.093 | 15382.773 | 1472.320 | 3.673  | 8.735  | 441.613 | 185.696 | 169.475 | 16.221  |
| 2015          | 42200  | 17572.483 | 15901.465 | 1671.018 | 3.960  | 9.509  | 519.788 | 216.445 | 195.862 | 20.582  |
| 2016          | 42606  | 17579.955 | 15671.219 | 1908.736 | 4.480  | 10.857 | 519.788 | 214.473 | 191.187 | 23.286  |
| 2017          | 44364  | 18080.688 | 15881.358 | 2199.330 | 4.957  | 12.164 | 536.117 | 218.496 | 191.918 | 26.578  |
| 2018          | 45359  | 18209.262 | 15779.610 | 2429.652 | 5.357  | 13.343 | 542.932 | 217.960 | 188.877 | 29.082  |
| 2019          | 46876  | 18648.302 | 15888.904 | 2759.398 | 5.887  | 14.797 | 555.657 | 221.054 | 188.345 | 32.709  |
| 2020          | 48331  | 19002.597 | 16016.606 | 2985.992 | 6.178  | 15.714 | 649.239 | 255.266 | 215.155 | 40.111  |
| 2021          | 48338  | 18885.717 | 15566.622 | 3319.095 | 6.866  | 17.575 | 644.660 | 251.867 | 207.602 | 44.265  |
| 2022          | 49708  | 19235.076 | 15565.793 | 3669.283 | 7.382  | 19.076 | 657.895 | 254.582 | 206.018 | 48.564  |
| 2023          | 51083  | 19521.158 | 15549.253 | 3971.905 | 7.775  | 20.347 | 670.849 | 256.363 | 204.202 | 52.161  |
| 2024          | 52397  | 19918.620 | 15547.142 | 4371.478 | 8.343  | 21.947 | 682.854 | 259.583 | 202.613 | 56.970  |
| 2025          | 53387  | 20150.545 | 15466.482 | 4684.063 | 8.774  | 23.245 | 803.004 | 303.086 | 232.633 | 70.453  |
| 2026          | 54232  | 20393.792 | 15305.547 | 5088.245 | 9.382  | 24.950 | 812.615 | 305.582 | 229.339 | 76.243  |
| 2027          | 55049  | 20615.351 | 15111.886 | 5503.465 | 9.997  | 26.696 | 821.568 | 307.668 | 225.533 | 82.135  |
| 2028          | 55809  | 20731.894 | 14827.625 | 5904.268 | 10.580 | 28.479 | 829.419 | 308.115 | 220.366 | 87.748  |
| 2029          | 56527  | 20781.967 | 14502.844 | 6279.123 | 11.108 | 30.214 | 836.392 | 307.495 | 214.587 | 92.907  |
| 2030          | 56756  | 20753.201 | 14195.385 | 6557.815 | 11.554 | 31.599 | 994.067 | 363.487 | 248.629 | 114.859 |
| 2031          | 58288  | 21048.417 | 14233.796 | 6814.621 | 11.691 | 32.376 | 1019.54 | 368.165 | 248.968 | 119.197 |
| 2032          | 58782  | 21169.329 | 13892.833 | 7276.496 | 12.379 | 34.373 | 1026.18 | 369.560 | 242.532 | 127.028 |
| 2033          | 59236  | 21109.293 | 13478.482 | 7630.811 | 12.882 | 36.149 | 1031.59 | 367.618 | 234.728 | 132.891 |
| 2034          | 59614  | 21109.429 | 13072.721 | 8036.708 | 13.481 | 38.072 | 1035.33 | 366.613 | 227.037 | 139.575 |
| 2035          | 58938  | 20794.840 | 12488.737 | 8306.103 | 14.093 | 39.943 | 1253.51 | 442.268 | 265.613 | 176.656 |
| 2036          | 56014  | 19354.577 | 11326.499 | 8028.077 | 14.332 | 41.479 | 1193.11 | 412.258 | 241.258 | 171.000 |
| 2037          | 55953  | 19064.169 | 10707.054 | 8357.115 | 14.936 | 43.837 | 1192.72 | 406.385 | 228.239 | 178.146 |
| 2038          | 55859  | 18854.812 | 10101.644 | 8753.168 | 15.670 | 46.424 | 1190.66 | 401.900 | 215.321 | 186.578 |
| 2039          | 55757  | 18437.457 | 9441.445  | 8996.012 | 16.134 | 48.792 | 1187.28 | 392.602 | 201.043 | 191.558 |

## Results for PHIM for Run 10 (Sensitivity\_Analysis\_2.RTF)

\*\*\*\*\*

### Main Results for E-Component for Run: 10, Simulation: 1, COD: Four Diseases Combined, Adjusted

| Variable Parameter          | Value                                  |
|-----------------------------|----------------------------------------|
| 1. Country                  | US (United States)                     |
| 2. Sex                      | F (Females)                            |
| 3. Year of start of process | 1990                                   |
| 4. Cause of Death           | Four Diseases Combined                 |
| 5. Effective Dose NULL      | CC:1                                   |
| 6. Effective Dose Ecig      | CC:1 Ecig:0.05 Dual:0.525              |
| Note:                       | Death rates are per million population |

#### Results for Age Groups Combined and Years combined, Population and Number deaths adjusted for Ecig scenario,

| Age Group:All | NULL    | Ecig        | %Drop       |          |        | NULL   | Ecig    | Drop    |         |         |
|---------------|---------|-------------|-------------|----------|--------|--------|---------|---------|---------|---------|
| Year          | Number  | Attrib      | Attrib      | Drop     | %Drop  | Attrib | Death   | Attrib  | Attrib  | Drop    |
|               | Deaths  | Deaths      | Deaths      | Deaths   | Deaths | Deaths | Rate    | Rates   | Rates   | Rates   |
| All Comb      | 9098907 | 2946250.006 | 2502743.679 | 443506.3 | 4.874  | 15.053 | 2494.17 | 808.881 | 686.046 | 122.835 |

#### Results for Age Groups Combined, Population and Number deaths adjusted for Ecig scenario,

| Age Group:All | NULL   | Ecig      | %Drop     |          |        | NULL   | Ecig    | Drop    |         |         |
|---------------|--------|-----------|-----------|----------|--------|--------|---------|---------|---------|---------|
| Year          | Number | Attrib    | Attrib    | Drop     | %Drop  | Attrib | Death   | Attrib  | Attrib  | Drop    |
|               | Deaths | Deaths    | Deaths    | Deaths   | Deaths | Deaths | Rate    | Rates   | Rates   | Rates   |
| 1990          | 199848 | 57524.822 | 57524.822 | 0.000    | 0.000  | 0.000  | 2926.84 | 842.471 | 842.471 | 0.000   |
| 1991          | 199162 | 59078.486 | 59047.703 | 30.783   | 0.015  | 0.052  | 2877.87 | 853.678 | 853.234 | 0.445   |
| 1992          | 198532 | 60494.150 | 60420.972 | 73.178   | 0.037  | 0.121  | 2829.84 | 862.271 | 861.228 | 1.043   |
| 1993          | 202512 | 62694.848 | 62554.136 | 140.711  | 0.069  | 0.224  | 2845.85 | 881.034 | 879.055 | 1.979   |
| 1994          | 200659 | 63202.598 | 62976.528 | 226.070  | 0.113  | 0.358  | 2777.87 | 874.966 | 871.833 | 3.133   |
| 1995          | 201024 | 63766.862 | 63436.945 | 329.917  | 0.164  | 0.517  | 2739.80 | 869.097 | 864.595 | 4.502   |
| 1996          | 201182 | 64591.163 | 64125.191 | 465.971  | 0.232  | 0.721  | 2706.35 | 868.908 | 862.630 | 6.278   |
| 1997          | 198641 | 64686.912 | 64073.696 | 613.216  | 0.309  | 0.948  | 2635.16 | 858.147 | 849.997 | 8.150   |
| 1998          | 197576 | 65295.961 | 64490.960 | 805.002  | 0.407  | 1.233  | 2584.14 | 854.046 | 843.495 | 10.552  |
| 1999          | 211333 | 67327.521 | 66217.327 | 1110.194 | 0.525  | 1.649  | 2726.86 | 868.771 | 854.413 | 14.358  |
| 2000          | 208502 | 67596.897 | 66238.877 | 1358.019 | 0.651  | 2.009  | 2656.90 | 861.419 | 844.069 | 17.350  |
| 2001          | 203614 | 67008.811 | 65368.984 | 1639.827 | 0.805  | 2.447  | 2565.81 | 844.458 | 823.734 | 20.724  |
| 2002          | 200840 | 67067.744 | 65062.286 | 2005.458 | 0.999  | 2.990  | 2506.00 | 836.925 | 811.824 | 25.101  |
| 2003          | 196368 | 66756.217 | 64443.031 | 2313.186 | 1.178  | 3.465  | 2427.22 | 825.244 | 796.553 | 28.691  |
| 2004          | 188180 | 65058.725 | 62410.577 | 2648.148 | 1.407  | 4.070  | 2302.74 | 796.234 | 763.710 | 32.524  |
| 2005          | 186442 | 65214.724 | 62210.451 | 3004.273 | 1.611  | 4.607  | 2256.17 | 789.321 | 752.820 | 36.501  |
| 2006          | 180120 | 63771.146 | 60383.476 | 3387.670 | 1.881  | 5.312  | 2160.58 | 765.117 | 724.311 | 40.806  |
| 2007          | 175683 | 63110.718 | 59342.954 | 3767.764 | 2.145  | 5.970  | 2086.26 | 749.650 | 704.708 | 44.942  |
| 2008          | 177618 | 63718.624 | 59475.760 | 4242.865 | 2.389  | 6.659  | 2086.30 | 748.674 | 698.603 | 50.071  |
| 2009          | 172862 | 62794.698 | 58151.396 | 4643.302 | 2.686  | 7.394  | 2007.49 | 729.515 | 675.325 | 54.190  |
| 2010          | 170555 | 61917.074 | 56877.897 | 5039.177 | 2.955  | 8.139  | 1957.90 | 711.083 | 652.936 | 58.147  |
| 2011          | 170382 | 61680.114 | 56037.416 | 5642.698 | 3.312  | 9.148  | 1937.41 | 701.700 | 637.200 | 64.500  |
| 2012          | 171511 | 62023.127 | 55769.886 | 6253.241 | 3.646  | 10.082 | 1930.18 | 698.386 | 627.631 | 70.755  |
| 2013          | 172804 | 62037.765 | 55192.744 | 6845.021 | 3.961  | 11.034 | 1923.73 | 691.059 | 614.430 | 76.628  |
| 2014          | 174291 | 61921.017 | 54338.025 | 7582.992 | 4.351  | 12.246 | 1918.87 | 682.195 | 598.236 | 83.958  |
| 2015          | 177498 | 61856.204 | 53732.281 | 8123.923 | 4.577  | 13.134 | 2184.40 | 761.899 | 661.263 | 100.635 |
| 2016          | 177017 | 60464.119 | 51684.524 | 8779.595 | 4.960  | 14.520 | 2157.51 | 737.655 | 629.938 | 107.717 |
| 2017          | 179498 | 60243.839 | 50733.693 | 9510.145 | 5.298  | 15.786 | 2166.83 | 728.017 | 612.436 | 115.581 |
| 2018          | 177368 | 60713.327 | 50597.972 | 10115.35 | 5.703  | 16.661 | 2120.53 | 726.721 | 604.927 | 121.794 |
| 2019          | 179470 | 61148.172 | 50186.877 | 10961.29 | 6.108  | 17.926 | 2124.64 | 724.841 | 594.133 | 130.708 |
| 2020          | 180745 | 61149.317 | 49741.145 | 11408.17 | 6.312  | 18.656 | 2424.14 | 821.432 | 667.124 | 154.309 |
| 2021          | 178428 | 58727.786 | 46613.200 | 12114.59 | 6.790  | 20.628 | 2375.45 | 783.216 | 620.571 | 162.645 |
| 2022          | 179761 | 58848.802 | 45934.048 | 12914.75 | 7.184  | 21.946 | 2374.67 | 778.881 | 606.797 | 172.083 |
| 2023          | 181036 | 58816.149 | 45212.716 | 13603.43 | 7.514  | 23.129 | 2372.56 | 772.407 | 592.534 | 179.873 |
| 2024          | 182051 | 58955.232 | 44513.778 | 14441.45 | 7.933  | 24.496 | 2367.22 | 768.316 | 578.814 | 189.502 |
| 2025          | 180907 | 58297.744 | 43525.114 | 14772.63 | 8.166  | 25.340 | 2713.76 | 876.861 | 652.914 | 223.948 |
| 2026          | 180853 | 56469.971 | 41153.507 | 15316.46 | 8.469  | 27.123 | 2702.07 | 846.150 | 614.862 | 231.287 |
| 2027          | 180212 | 56209.427 | 40096.701 | 16112.73 | 8.941  | 28.666 | 2681.14 | 838.883 | 596.546 | 242.337 |
| 2028          | 179411 | 55733.105 | 38880.097 | 16853.01 | 9.393  | 30.239 | 2657.44 | 828.298 | 575.892 | 252.406 |
| 2029          | 178516 | 55145.838 | 37616.941 | 17528.90 | 9.819  | 31.786 | 2631.85 | 815.951 | 554.585 | 261.366 |
| 2030          | 174349 | 53615.097 | 36126.809 | 17488.29 | 10.031 | 32.618 | 3040.78 | 939.056 | 630.078 | 308.978 |
| 2031          | 175817 | 52046.561 | 34482.122 | 17564.44 | 9.990  | 33.748 | 3061.34 | 910.364 | 600.406 | 309.957 |
| 2032          | 174296 | 51582.636 | 33256.226 | 18326.41 | 10.515 | 35.528 | 3028.04 | 900.496 | 577.760 | 322.736 |
| 2033          | 172720 | 50839.758 | 31928.838 | 18910.92 | 10.949 | 37.197 | 2992.44 | 885.375 | 553.179 | 332.195 |
| 2034          | 171004 | 50215.451 | 30664.621 | 19550.83 | 11.433 | 38.934 | 2953.63 | 872.104 | 529.648 | 342.456 |
| 2035          | 163725 | 47773.075 | 28657.366 | 19115.71 | 11.676 | 40.014 | 3460.23 | 1016.05 | 605.657 | 410.389 |
| 2036          | 157366 | 43298.709 | 25076.894 | 18221.81 | 11.579 | 42.084 | 3329.51 | 922.274 | 530.572 | 391.702 |
| 2037          | 154766 | 42241.563 | 23535.663 | 18705.90 | 12.087 | 44.283 | 3275.79 | 900.450 | 498.157 | 402.294 |
| 2038          | 152181 | 41356.353 | 22064.984 | 19291.37 | 12.677 | 46.647 | 3219.64 | 881.531 | 466.820 | 414.711 |
| 2039          | 149672 | 40161.050 | 20555.520 | 19605.53 | 13.099 | 48.817 | 3162.04 | 855.178 | 434.266 | 420.912 |

## Results for PHIM for Run 10 (Sensitivity\_Analysis\_2.RTF)

\*\*\*\*\*

### Main Results for E-Component for Run: 10, Simulation: 1, COD: LUNG CANCER, Adjusted

| Variable Parameter          | Value                                  |
|-----------------------------|----------------------------------------|
| 1. Country                  | US (United States)                     |
| 2. Sex                      | F (Females)                            |
| 3. Year of start of process | 1990                                   |
| 4. Cause of Death           | LUNG CANCER                            |
| 5. Effective Dose NULL      | CC:1                                   |
| 6. Effective Dose Ecig      | CC:1 Ecig:0.05 Dual:0.525              |
| Note:                       | Death rates are per million population |

#### Results for Age Groups Combined and Years combined, Population and Number deaths adjusted for Ecig scenario,

| Age Group: | All     | NULL        | Ecig        |          |        |        |         |         |         |        |
|------------|---------|-------------|-------------|----------|--------|--------|---------|---------|---------|--------|
| Year       | Number  | Attrib      | Attrib      | Drop     | %Drop  | Attrib | Death   | Attrib  | Ecig    | Drop   |
|            | Deaths  | Deaths      | Deaths      | Deaths   | Deaths | Deaths | Rate    | Rates   | Rates   | Rates  |
| All Comb   | 2331875 | 1580465.217 | 1407249.015 | 173216.2 | 7.428  | 10.960 | 639.208 | 433.910 | 385.752 | 48.159 |

#### Results for Age Groups Combined, Population and Number deaths adjusted for Ecig scenario,

| Age Group: | All    | NULL      | Ecig      |          |        |        |         |         |         |         |
|------------|--------|-----------|-----------|----------|--------|--------|---------|---------|---------|---------|
| Year       | Number | Attrib    | Attrib    | Drop     | %Drop  | Attrib | Death   | Attrib  | Ecig    | Drop    |
|            | Deaths | Deaths    | Deaths    | Deaths   | Deaths | Deaths | Rate    | Rates   | Rates   | Rates   |
| 1990       | 42690  | 30614.201 | 30614.201 | 0.000    | 0.000  | 0.000  | 625.210 | 448.355 | 448.355 | 0.000   |
| 1991       | 43692  | 31412.010 | 31406.571 | 5.440    | 0.012  | 0.017  | 631.345 | 453.901 | 453.822 | 0.079   |
| 1992       | 45423  | 32782.407 | 32771.185 | 11.222   | 0.025  | 0.034  | 647.450 | 467.274 | 467.114 | 0.160   |
| 1993       | 46291  | 33491.183 | 33469.209 | 21.974   | 0.047  | 0.066  | 650.515 | 470.643 | 470.333 | 0.310   |
| 1994       | 47017  | 34074.347 | 34040.140 | 34.208   | 0.073  | 0.100  | 650.895 | 471.719 | 471.244 | 0.475   |
| 1995       | 47840  | 34694.454 | 34642.269 | 52.185   | 0.109  | 0.150  | 652.024 | 472.861 | 472.146 | 0.714   |
| 1996       | 48244  | 35027.269 | 34955.338 | 71.930   | 0.149  | 0.205  | 648.997 | 471.202 | 470.229 | 0.973   |
| 1997       | 49036  | 35590.763 | 35485.694 | 105.068  | 0.214  | 0.295  | 650.502 | 472.153 | 470.750 | 1.402   |
| 1998       | 49687  | 36100.785 | 35947.209 | 153.576  | 0.309  | 0.425  | 649.867 | 472.184 | 470.163 | 2.021   |
| 1999       | 48884  | 35451.030 | 35252.260 | 198.770  | 0.407  | 0.561  | 630.760 | 457.448 | 454.866 | 2.582   |
| 2000       | 50333  | 36447.986 | 36182.396 | 265.590  | 0.528  | 0.729  | 641.381 | 464.474 | 461.065 | 3.409   |
| 2001       | 50392  | 36411.326 | 36073.905 | 337.421  | 0.670  | 0.927  | 634.999 | 458.863 | 454.578 | 4.285   |
| 2002       | 51449  | 37078.545 | 36638.714 | 439.831  | 0.855  | 1.186  | 641.956 | 462.696 | 457.165 | 5.531   |
| 2003       | 51413  | 36999.876 | 36468.425 | 531.451  | 1.034  | 1.436  | 635.492 | 457.395 | 450.771 | 6.624   |
| 2004       | 51405  | 36861.555 | 36210.870 | 650.685  | 1.266  | 1.765  | 629.040 | 451.138 | 443.108 | 8.030   |
| 2005       | 51429  | 36689.529 | 35926.746 | 762.783  | 1.483  | 2.079  | 622.354 | 444.069 | 434.756 | 9.312   |
| 2006       | 51365  | 36504.774 | 35599.828 | 904.946  | 1.762  | 2.479  | 616.135 | 437.979 | 427.027 | 10.952  |
| 2007       | 51852  | 36663.202 | 35583.808 | 1079.394 | 2.082  | 2.944  | 615.746 | 435.498 | 422.564 | 12.934  |
| 2008       | 50991  | 35898.803 | 34688.803 | 1210.000 | 2.373  | 3.371  | 598.939 | 421.800 | 407.455 | 14.345  |
| 2009       | 51211  | 35934.525 | 34519.954 | 1414.572 | 2.762  | 3.937  | 594.723 | 417.468 | 400.888 | 16.580  |
| 2010       | 50874  | 35502.829 | 33926.833 | 1575.996 | 3.098  | 4.439  | 584.013 | 407.730 | 389.467 | 18.263  |
| 2011       | 50533  | 35136.342 | 33325.036 | 1811.305 | 3.584  | 5.155  | 574.615 | 399.726 | 378.938 | 20.788  |
| 2012       | 51274  | 35450.201 | 33388.241 | 2061.959 | 4.021  | 5.816  | 577.032 | 399.173 | 375.749 | 23.423  |
| 2013       | 51102  | 35123.224 | 32806.809 | 2316.415 | 4.533  | 6.595  | 568.891 | 391.249 | 365.220 | 26.029  |
| 2014       | 51289  | 35079.370 | 32474.308 | 2605.062 | 5.079  | 7.426  | 564.671 | 386.476 | 357.527 | 28.949  |
| 2015       | 50486  | 34324.171 | 31526.225 | 2797.946 | 5.542  | 8.152  | 621.317 | 422.780 | 387.982 | 34.798  |
| 2016       | 48902  | 33054.753 | 30022.944 | 3031.808 | 6.200  | 9.172  | 596.024 | 403.264 | 365.924 | 37.340  |
| 2017       | 48379  | 32471.234 | 29158.436 | 3312.799 | 6.848  | 10.202 | 584.011 | 392.399 | 351.988 | 40.410  |
| 2018       | 50529  | 33657.595 | 29803.055 | 3854.540 | 7.628  | 11.452 | 604.096 | 402.871 | 356.312 | 46.560  |
| 2019       | 51109  | 33863.424 | 29577.680 | 4285.744 | 8.386  | 12.656 | 605.046 | 401.412 | 350.153 | 51.259  |
| 2020       | 51526  | 33910.830 | 29325.836 | 4584.994 | 8.898  | 13.521 | 691.066 | 455.532 | 393.315 | 62.216  |
| 2021       | 48124  | 31531.880 | 26817.753 | 4714.127 | 9.796  | 14.950 | 640.690 | 420.521 | 357.030 | 63.491  |
| 2022       | 48433  | 31560.212 | 26422.342 | 5137.871 | 10.608 | 16.280 | 639.812 | 417.708 | 349.044 | 68.664  |
| 2023       | 48709  | 31508.781 | 25993.464 | 5515.317 | 11.323 | 17.504 | 638.351 | 413.791 | 340.656 | 73.135  |
| 2024       | 48906  | 31517.293 | 25549.312 | 5967.982 | 12.203 | 18.936 | 635.922 | 410.740 | 332.218 | 78.521  |
| 2025       | 48611  | 31175.389 | 24934.977 | 6240.412 | 12.837 | 20.017 | 729.212 | 468.912 | 374.046 | 94.866  |
| 2026       | 45463  | 29044.598 | 22817.064 | 6227.534 | 13.698 | 21.441 | 679.245 | 435.206 | 340.903 | 94.303  |
| 2027       | 45259  | 28825.765 | 22183.293 | 6642.472 | 14.677 | 23.044 | 673.352 | 430.203 | 330.036 | 100.167 |
| 2028       | 45007  | 28513.846 | 21469.494 | 7044.351 | 15.652 | 24.705 | 666.651 | 423.769 | 318.006 | 105.763 |
| 2029       | 44719  | 28148.109 | 20723.686 | 7424.423 | 16.602 | 26.376 | 659.297 | 416.486 | 305.528 | 110.958 |
| 2030       | 43586  | 27314.475 | 19818.699 | 7495.776 | 17.198 | 27.443 | 760.178 | 478.407 | 345.653 | 132.754 |
| 2031       | 40943  | 25423.102 | 18201.322 | 7221.780 | 17.639 | 28.406 | 712.905 | 444.684 | 316.923 | 127.761 |
| 2032       | 40535  | 25085.902 | 17483.895 | 7602.007 | 18.754 | 30.304 | 704.215 | 437.933 | 303.747 | 134.186 |
| 2033       | 40107  | 24645.067 | 16730.493 | 7914.574 | 19.734 | 32.114 | 694.869 | 429.194 | 289.862 | 139.332 |
| 2034       | 39645  | 24239.126 | 15998.630 | 8240.496 | 20.786 | 33.997 | 684.755 | 420.967 | 276.333 | 144.634 |
| 2035       | 37705  | 22944.147 | 14847.575 | 8096.572 | 21.474 | 35.288 | 796.869 | 487.980 | 313.795 | 174.185 |
| 2036       | 33223  | 19950.581 | 12518.164 | 7432.417 | 22.371 | 37.254 | 702.923 | 424.953 | 264.857 | 160.096 |
| 2037       | 32650  | 19415.334 | 11728.900 | 7686.434 | 23.542 | 39.590 | 691.071 | 413.871 | 248.254 | 165.616 |
| 2038       | 32079  | 18939.317 | 10975.639 | 7963.678 | 24.825 | 42.048 | 678.684 | 403.701 | 232.207 | 171.494 |
| 2039       | 31523  | 18379.752 | 10221.388 | 8158.363 | 25.880 | 44.388 | 665.976 | 391.373 | 215.942 | 175.431 |



## Results for PHIM for Run 10 (Sensitivity\_Analysis\_2.RTF)

\*\*\*\*\*

### Main Results for E-Component for Run: 10, Simulation: 1, COD: IHD, Adjusted

| Variable Parameter          | Value                                  |
|-----------------------------|----------------------------------------|
| 1. Country                  | US (United States)                     |
| 2. Sex                      | F (Females)                            |
| 3. Year of start of process | 1990                                   |
| 4. Cause of Death           | IHD                                    |
| 5. Effective Dose NULL      | CC:1                                   |
| 6. Effective Dose Ecig      | CC:1 Ecig:0.05 Dual:0.525              |
| Note:                       | Death rates are per million population |

### Results for Age Groups Combined and Years combined, Population and Number deaths adjusted for Ecig scenario,

| Age Group:All | NULL    | Ecig       | %Drop      |          |        |        | NULL    | Ecig    | Drop   |        |
|---------------|---------|------------|------------|----------|--------|--------|---------|---------|--------|--------|
| Year          | Number  | Attrib     | Attrib     | Drop     | %Drop  | Attrib | Death   | Attrib  | Attrib | Drop   |
|               | Deaths  | Deaths     | Deaths     | Deaths   | Deaths | Deaths | Rate    | Rates   | Rates  | Rates  |
| All Comb      | 3247122 | 398833.796 | 299378.290 | 99455.51 | 3.063  | 24.937 | 890.093 | 109.498 | 82.065 | 27.433 |

### Results for Age Groups Combined, Population and Number deaths adjusted for Ecig scenario,

| Age Group:All | NULL   | Ecig      | %Drop     |          |        |        | NULL    | Ecig    | Drop    |        |
|---------------|--------|-----------|-----------|----------|--------|--------|---------|---------|---------|--------|
| Year          | Number | Attrib    | Attrib    | Drop     | %Drop  | Attrib | Death   | Attrib  | Attrib  | Drop   |
|               | Deaths | Deaths    | Deaths    | Deaths   | Deaths | Deaths | Rate    | Rates   | Rates   | Rates  |
| 1990          | 98916  | 12922.892 | 12922.892 | 0.000    | 0.000  | 0.000  | 1448.66 | 189.260 | 189.260 | 0.000  |
| 1991          | 96403  | 12856.479 | 12839.302 | 17.177   | 0.018  | 0.134  | 1393.01 | 185.775 | 185.527 | 0.248  |
| 1992          | 93721  | 12662.244 | 12617.559 | 44.684   | 0.048  | 0.353  | 1335.88 | 180.485 | 179.848 | 0.637  |
| 1993          | 93679  | 12730.613 | 12645.901 | 84.712   | 0.090  | 0.665  | 1316.45 | 178.900 | 177.709 | 1.191  |
| 1994          | 90832  | 12495.323 | 12357.897 | 137.426  | 0.151  | 1.100  | 1257.46 | 172.983 | 171.080 | 1.903  |
| 1995          | 89699  | 12365.590 | 12168.559 | 197.032  | 0.220  | 1.593  | 1222.52 | 168.534 | 165.848 | 2.687  |
| 1996          | 88287  | 12290.551 | 12009.658 | 280.894  | 0.318  | 2.285  | 1187.66 | 165.338 | 161.557 | 3.781  |
| 1997          | 84778  | 11719.531 | 11366.646 | 352.885  | 0.416  | 3.011  | 1124.66 | 155.473 | 150.789 | 4.684  |
| 1998          | 82518  | 11416.794 | 10975.446 | 441.348  | 0.535  | 3.866  | 1079.27 | 149.327 | 143.551 | 5.776  |
| 1999          | 93941  | 13028.038 | 12386.655 | 641.383  | 0.683  | 4.923  | 1212.13 | 168.109 | 159.827 | 8.282  |
| 2000          | 90041  | 12426.299 | 11676.562 | 749.737  | 0.833  | 6.033  | 1147.38 | 158.354 | 148.792 | 9.562  |
| 2001          | 86122  | 11939.281 | 11042.369 | 896.912  | 1.041  | 7.512  | 1085.25 | 150.461 | 139.148 | 11.313 |
| 2002          | 83019  | 11528.794 | 10471.743 | 1057.051 | 1.273  | 9.169  | 1035.87 | 143.865 | 130.663 | 13.203 |
| 2003          | 79308  | 11048.407 | 9860.833  | 1187.574 | 1.497  | 10.749 | 980.294 | 136.581 | 121.886 | 14.695 |
| 2004          | 73869  | 10375.132 | 9059.987  | 1315.145 | 1.780  | 12.676 | 903.921 | 126.978 | 110.866 | 16.112 |
| 2005          | 71659  | 10051.029 | 8609.054  | 1441.976 | 2.012  | 14.347 | 867.157 | 121.652 | 104.180 | 17.472 |
| 2006          | 67563  | 9542.523  | 7955.695  | 1586.828 | 2.349  | 16.629 | 810.430 | 114.490 | 95.430  | 19.060 |
| 2007          | 63517  | 8936.533  | 7265.017  | 1671.516 | 2.632  | 18.704 | 754.274 | 106.151 | 86.273  | 19.878 |
| 2008          | 63188  | 8944.180  | 7081.698  | 1862.483 | 2.948  | 20.823 | 742.207 | 105.091 | 83.182  | 21.910 |
| 2009          | 59766  | 8390.033  | 6474.758  | 1915.276 | 3.205  | 22.828 | 694.079 | 97.471  | 75.193  | 22.278 |
| 2010          | 58030  | 8157.570  | 6120.707  | 2036.863 | 3.510  | 24.969 | 666.166 | 93.685  | 70.263  | 23.422 |
| 2011          | 57394  | 8035.356  | 5832.210  | 2203.146 | 3.839  | 27.418 | 652.626 | 91.414  | 66.318  | 25.096 |
| 2012          | 57441  | 7970.766  | 5580.953  | 2389.813 | 4.160  | 29.982 | 646.442 | 89.752  | 62.808  | 26.944 |
| 2013          | 57102  | 7743.216  | 5254.602  | 2488.614 | 4.358  | 32.139 | 635.681 | 86.254  | 58.497  | 27.758 |
| 2014          | 57578  | 7774.935  | 5077.702  | 2697.233 | 4.684  | 34.691 | 633.912 | 85.658  | 55.903  | 29.755 |
| 2015          | 58443  | 7722.535  | 4919.141  | 2803.394 | 4.797  | 36.301 | 719.231 | 95.120  | 60.538  | 34.582 |
| 2016          | 58713  | 7600.353  | 4662.596  | 2937.757 | 5.004  | 38.653 | 715.600 | 92.723  | 56.828  | 35.895 |
| 2017          | 59067  | 7470.266  | 4413.551  | 3056.715 | 5.175  | 40.918 | 713.027 | 90.274  | 53.279  | 36.996 |
| 2018          | 56144  | 6907.050  | 3927.896  | 2979.154 | 5.306  | 43.132 | 671.233 | 82.675  | 46.960  | 35.715 |
| 2019          | 55962  | 6732.046  | 3691.552  | 3040.495 | 5.433  | 45.164 | 662.498 | 79.801  | 43.702  | 36.099 |
| 2020          | 55399  | 6429.836  | 3442.788  | 2987.048 | 5.392  | 46.456 | 743.005 | 86.373  | 46.174  | 40.199 |
| 2021          | 56391  | 6562.016  | 3336.626  | 3225.389 | 5.720  | 49.152 | 750.745 | 87.513  | 44.421  | 43.092 |
| 2022          | 55937  | 6352.366  | 3107.803  | 3244.562 | 5.800  | 51.076 | 738.934 | 84.075  | 41.055  | 43.021 |
| 2023          | 55459  | 6134.123  | 2885.444  | 3248.679 | 5.858  | 52.961 | 726.817 | 80.557  | 37.815  | 42.742 |
| 2024          | 54903  | 5922.193  | 2683.907  | 3238.286 | 5.898  | 54.681 | 713.900 | 77.179  | 34.899  | 42.280 |
| 2025          | 53439  | 5504.188  | 2453.265  | 3050.922 | 5.709  | 55.429 | 801.632 | 82.789  | 36.801  | 45.988 |
| 2026          | 55443  | 5641.075  | 2408.331  | 3232.744 | 5.831  | 57.307 | 828.356 | 84.526  | 35.982  | 48.544 |
| 2027          | 54377  | 5426.216  | 2220.155  | 3206.061 | 5.896  | 59.085 | 809.005 | 80.982  | 33.031  | 47.951 |
| 2028          | 53282  | 5197.830  | 2039.551  | 3158.279 | 5.927  | 60.761 | 789.212 | 77.249  | 30.210  | 47.040 |
| 2029          | 52179  | 4973.547  | 1879.964  | 3093.583 | 5.929  | 62.201 | 769.280 | 73.590  | 27.716  | 45.874 |
| 2030          | 49695  | 4450.618  | 1657.860  | 2792.758 | 5.620  | 62.750 | 866.712 | 77.952  | 28.914  | 49.037 |
| 2031          | 52233  | 4555.052  | 1628.341  | 2926.711 | 5.603  | 64.252 | 909.489 | 79.674  | 28.353  | 51.321 |
| 2032          | 50938  | 4349.999  | 1486.911  | 2863.088 | 5.621  | 65.818 | 884.939 | 75.939  | 25.832  | 50.107 |
| 2033          | 49655  | 4147.948  | 1352.932  | 2795.016 | 5.629  | 67.383 | 860.288 | 72.237  | 23.440  | 48.796 |
| 2034          | 48364  | 3966.133  | 1246.274  | 2719.859 | 5.624  | 68.577 | 835.359 | 68.881  | 21.526  | 47.355 |
| 2035          | 44812  | 3289.064  | 1020.990  | 2268.074 | 5.061  | 68.958 | 947.078 | 69.952  | 21.578  | 48.374 |
| 2036          | 46675  | 3313.192  | 966.351   | 2346.841 | 5.028  | 70.833 | 987.540 | 70.572  | 20.446  | 50.126 |
| 2037          | 45180  | 3117.951  | 854.017   | 2263.934 | 5.011  | 72.610 | 956.283 | 66.464  | 18.076  | 48.388 |
| 2038          | 43728  | 2949.775  | 759.006   | 2190.769 | 5.010  | 74.269 | 925.142 | 62.876  | 16.058  | 46.818 |
| 2039          | 42334  | 2766.312  | 678.632   | 2087.680 | 4.931  | 75.468 | 894.375 | 58.905  | 14.337  | 44.568 |

## Results for PHIM for Run 10 (Sensitivity\_Analysis\_2.RTF)

\*\*\*\*\*

### Main Results for E-Component for Run: 10, Simulation: 1, COD: STROKE, Adjusted

| Variable Parameter          | Value                                  |
|-----------------------------|----------------------------------------|
| 1. Country                  | US (United States)                     |
| 2. Sex                      | F (Females)                            |
| 3. Year of start of process | 1990                                   |
| 4. Cause of Death           | STROKE                                 |
| 5. Effective Dose NULL      | CC:1                                   |
| 6. Effective Dose Ecig      | CC:1 Ecig:0.05 Dual:0.525              |
| Note:                       | Death rates are per million population |

#### Results for Age Groups Combined and Years combined, Population and Number deaths adjusted for Ecig scenario,

| Age Group:All | NULL    | Ecig       | %Drop     |          |        |        | NULL    | Ecig   | Drop   |       |
|---------------|---------|------------|-----------|----------|--------|--------|---------|--------|--------|-------|
| Year          | Number  | Attrib     | Attrib    | Drop     | %Drop  | Attrib | Death   | Attrib | Attrib | Drop  |
|               | Deaths  | Deaths     | Deaths    | Deaths   | Deaths | Deaths | Rate    | Rates  | Rates  | Rates |
| All Comb      | 1354474 | 104899.750 | 77734.361 | 27165.39 | 2.006  | 25.897 | 371.285 | 28.800 | 21.308 | 7.491 |

#### Results for Age Groups Combined, Population and Number deaths adjusted for Ecig scenario,

| Age Group:All | NULL   | Ecig     | %Drop    |         |        |        | NULL    | Ecig   | Drop   |        |
|---------------|--------|----------|----------|---------|--------|--------|---------|--------|--------|--------|
| Year          | Number | Attrib   | Attrib   | Drop    | %Drop  | Attrib | Death   | Attrib | Attrib | Drop   |
|               | Deaths | Deaths   | Deaths   | Deaths  | Deaths | Deaths | Rate    | Rates  | Rates  | Rates  |
| 1990          | 33504  | 3293.017 | 3293.017 | 0.000   | 0.000  | 0.000  | 490.678 | 48.227 | 48.227 | 0.000  |
| 1991          | 32505  | 3207.063 | 3202.424 | 4.639   | 0.014  | 0.145  | 469.694 | 46.342 | 46.275 | 0.067  |
| 1992          | 32560  | 3218.125 | 3206.501 | 11.624  | 0.036  | 0.361  | 464.104 | 45.871 | 45.705 | 0.166  |
| 1993          | 32768  | 3226.680 | 3203.787 | 22.893  | 0.070  | 0.709  | 460.480 | 45.344 | 45.022 | 0.322  |
| 1994          | 33005  | 3277.266 | 3237.613 | 39.653  | 0.120  | 1.210  | 456.916 | 45.370 | 44.821 | 0.549  |
| 1995          | 33730  | 3309.378 | 3249.872 | 59.506  | 0.176  | 1.798  | 459.716 | 45.104 | 44.293 | 0.811  |
| 1996          | 33750  | 3312.987 | 3225.722 | 87.265  | 0.259  | 2.634  | 454.018 | 44.568 | 43.393 | 1.174  |
| 1997          | 33699  | 3267.066 | 3148.611 | 118.454 | 0.352  | 3.626  | 447.053 | 43.341 | 41.769 | 1.572  |
| 1998          | 33274  | 3178.725 | 3029.728 | 148.997 | 0.448  | 4.687  | 435.205 | 41.577 | 39.627 | 1.950  |
| 1999          | 33892  | 3120.351 | 2937.349 | 183.002 | 0.540  | 5.865  | 437.309 | 40.264 | 37.901 | 2.363  |
| 2000          | 33828  | 3142.808 | 2916.325 | 226.483 | 0.670  | 7.206  | 431.062 | 40.050 | 37.162 | 2.888  |
| 2001          | 32507  | 2961.588 | 2704.031 | 257.557 | 0.792  | 8.697  | 409.634 | 37.323 | 34.074 | 3.248  |
| 2002          | 32080  | 2940.627 | 2629.415 | 311.212 | 0.970  | 10.583 | 400.279 | 36.695 | 32.809 | 3.887  |
| 2003          | 30570  | 2819.545 | 2469.304 | 350.240 | 1.146  | 12.422 | 377.867 | 34.855 | 30.522 | 4.333  |
| 2004          | 29391  | 2730.466 | 2338.073 | 392.393 | 1.335  | 14.371 | 359.654 | 33.417 | 28.611 | 4.807  |
| 2005          | 27958  | 2670.510 | 2234.024 | 436.486 | 1.561  | 16.345 | 338.322 | 32.322 | 27.034 | 5.288  |
| 2006          | 27206  | 2623.285 | 2136.132 | 487.154 | 1.791  | 18.570 | 326.338 | 31.474 | 25.623 | 5.851  |
| 2007          | 26308  | 2536.599 | 2010.474 | 526.126 | 2.000  | 20.741 | 312.407 | 30.131 | 23.875 | 6.256  |
| 2008          | 26005  | 2469.443 | 1908.176 | 561.267 | 2.158  | 22.728 | 305.452 | 29.015 | 22.413 | 6.602  |
| 2009          | 25048  | 2386.945 | 1790.913 | 596.032 | 2.380  | 24.971 | 290.886 | 27.730 | 20.798 | 6.932  |
| 2010          | 24849  | 2329.274 | 1697.439 | 631.836 | 2.543  | 27.126 | 285.258 | 26.750 | 19.486 | 7.264  |
| 2011          | 24803  | 2286.581 | 1609.766 | 676.815 | 2.729  | 29.599 | 282.030 | 26.013 | 18.305 | 7.709  |
| 2012          | 24512  | 2243.311 | 1523.062 | 720.249 | 2.938  | 32.107 | 275.860 | 25.260 | 17.140 | 8.119  |
| 2013          | 24465  | 2176.503 | 1422.478 | 754.025 | 3.082  | 34.644 | 272.356 | 24.245 | 15.836 | 8.409  |
| 2014          | 25313  | 2211.619 | 1393.087 | 818.532 | 3.234  | 37.011 | 278.682 | 24.366 | 15.337 | 9.029  |
| 2015          | 26336  | 2237.016 | 1373.319 | 863.697 | 3.280  | 38.609 | 324.108 | 27.554 | 16.901 | 10.653 |
| 2016          | 26758  | 2229.057 | 1313.878 | 915.180 | 3.420  | 41.057 | 326.135 | 27.194 | 16.014 | 11.181 |
| 2017          | 27643  | 2221.649 | 1264.255 | 957.394 | 3.463  | 43.094 | 333.700 | 26.848 | 15.262 | 11.586 |
| 2018          | 25284  | 1939.420 | 1069.444 | 869.976 | 3.441  | 44.858 | 302.287 | 23.214 | 12.786 | 10.428 |
| 2019          | 25462  | 1904.400 | 1007.987 | 896.413 | 3.521  | 47.071 | 301.429 | 22.574 | 11.933 | 10.641 |
| 2020          | 25417  | 1806.054 | 931.967  | 874.087 | 3.439  | 48.398 | 340.884 | 24.261 | 12.499 | 11.762 |
| 2021          | 25491  | 1748.172 | 865.442  | 882.730 | 3.463  | 50.494 | 339.365 | 23.314 | 11.522 | 11.792 |
| 2022          | 25587  | 1701.148 | 807.956  | 893.192 | 3.491  | 52.505 | 338.010 | 22.515 | 10.673 | 11.842 |
| 2023          | 25674  | 1652.087 | 750.811  | 901.276 | 3.510  | 54.554 | 336.474 | 21.696 | 9.840  | 11.856 |
| 2024          | 25719  | 1597.127 | 695.922  | 901.204 | 3.504  | 56.427 | 334.424 | 20.814 | 9.049  | 11.765 |
| 2025          | 25326  | 1467.622 | 628.873  | 838.749 | 3.312  | 57.150 | 379.909 | 22.075 | 9.434  | 12.641 |
| 2026          | 25554  | 1390.505 | 576.878  | 813.627 | 3.184  | 58.513 | 381.789 | 20.835 | 8.619  | 12.216 |
| 2027          | 25345  | 1342.095 | 531.406  | 810.690 | 3.199  | 60.405 | 377.071 | 20.030 | 7.906  | 12.124 |
| 2028          | 25110  | 1289.536 | 489.274  | 800.262 | 3.187  | 62.058 | 371.933 | 19.165 | 7.247  | 11.918 |
| 2029          | 24863  | 1242.216 | 452.147  | 790.069 | 3.178  | 63.602 | 366.558 | 18.380 | 6.666  | 11.714 |
| 2030          | 24062  | 1096.803 | 392.225  | 704.578 | 2.928  | 64.239 | 419.667 | 19.210 | 6.841  | 12.370 |
| 2031          | 24075  | 1019.991 | 350.779  | 669.211 | 2.780  | 65.610 | 419.195 | 17.841 | 6.108  | 11.733 |
| 2032          | 23736  | 977.406  | 320.303  | 657.103 | 2.768  | 67.229 | 412.359 | 17.063 | 5.565  | 11.498 |
| 2033          | 23388  | 937.450  | 290.483  | 646.966 | 2.766  | 69.013 | 405.202 | 16.326 | 5.033  | 11.293 |
| 2034          | 23016  | 900.763  | 266.564  | 634.199 | 2.755  | 70.407 | 397.542 | 15.644 | 4.604  | 11.040 |
| 2035          | 21876  | 745.023  | 216.475  | 528.548 | 2.416  | 70.944 | 462.346 | 15.845 | 4.575  | 11.270 |
| 2036          | 21053  | 680.360  | 184.371  | 495.988 | 2.356  | 72.901 | 445.425 | 14.492 | 3.901  | 10.591 |
| 2037          | 20553  | 644.109  | 162.664  | 481.445 | 2.343  | 74.746 | 435.015 | 13.730 | 3.443  | 10.287 |
| 2038          | 20053  | 612.448  | 144.318  | 468.130 | 2.334  | 76.436 | 424.257 | 13.055 | 3.053  | 10.001 |
| 2039          | 19563  | 577.529  | 129.296  | 448.233 | 2.291  | 77.612 | 413.291 | 12.298 | 2.732  | 9.566  |

## Results for PHIM for Run 10 (Sensitivity\_Analysis\_2.RTF)

\*\*\*\*\*

### Main Results for E-Component for Run: 10, Simulation: 1, COD: COPD, Adjusted

| Variable Parameter          | Value                                  |
|-----------------------------|----------------------------------------|
| 1. Country                  | US (United States)                     |
| 2. Sex                      | F (Females)                            |
| 3. Year of start of process | 1990                                   |
| 4. Cause of Death           | COPD                                   |
| 5. Effective Dose NULL      | CC:1                                   |
| 6. Effective Dose Ecig      | CC:1 Ecig:0.05 Dual:0.525              |
| Note:                       | Death rates are per million population |

### Results for Age Groups Combined and Years combined, Population and Number deaths adjusted for Ecig scenario,

| Age Group:All | NULL    | Ecig       | %Drop      |          |        | NULL   | Ecig    | Drop    |         |        |
|---------------|---------|------------|------------|----------|--------|--------|---------|---------|---------|--------|
| Year          | Number  | Attrib     | Attrib     | Drop     | %Drop  | Attrib | Death   | Attrib  | Attrib  | Drop   |
|               | Deaths  | Deaths     | Deaths     | Deaths   | Deaths | Deaths | Rate    | Rates   | Rates   | Rates  |
| All Comb      | 2165437 | 862051.244 | 718382.013 | 143669.2 | 6.635  | 16.666 | 593.584 | 236.673 | 196.921 | 39.752 |

### Results for Age Groups Combined, Population and Number deaths adjusted for Ecig scenario,

| Age Group:All | NULL   | Ecig      | %Drop     |          |        | NULL   | Ecig    | Drop    |         |         |
|---------------|--------|-----------|-----------|----------|--------|--------|---------|---------|---------|---------|
| Year          | Number | Attrib    | Attrib    | Drop     | %Drop  | Attrib | Death   | Attrib  | Attrib  | Drop    |
|               | Deaths | Deaths    | Deaths    | Deaths   | Deaths | Deaths | Rate    | Rates   | Rates   | Rates   |
| 1990          | 24738  | 10694.712 | 10694.712 | 0.000    | 0.000  | 0.000  | 362.296 | 156.628 | 156.628 | 0.000   |
| 1991          | 26562  | 11602.933 | 11599.406 | 3.527    | 0.013  | 0.030  | 383.818 | 167.661 | 167.610 | 0.051   |
| 1992          | 26828  | 11831.375 | 11825.727 | 5.648    | 0.021  | 0.048  | 382.401 | 168.642 | 168.561 | 0.081   |
| 1993          | 29774  | 13246.371 | 13235.239 | 11.132   | 0.037  | 0.084  | 418.406 | 186.148 | 185.991 | 0.157   |
| 1994          | 29804  | 13355.662 | 13340.879 | 14.783   | 0.050  | 0.111  | 412.601 | 184.893 | 184.688 | 0.205   |
| 1995          | 29755  | 13397.439 | 13376.245 | 21.195   | 0.071  | 0.158  | 405.539 | 182.598 | 182.308 | 0.290   |
| 1996          | 30900  | 13960.356 | 13934.473 | 25.882   | 0.084  | 0.185  | 415.678 | 187.801 | 187.450 | 0.350   |
| 1997          | 31128  | 14109.552 | 14072.744 | 36.808   | 0.118  | 0.261  | 412.945 | 187.180 | 186.688 | 0.492   |
| 1998          | 32096  | 14599.657 | 14538.576 | 61.081   | 0.190  | 0.418  | 419.797 | 190.958 | 190.154 | 0.804   |
| 1999          | 34617  | 15728.102 | 15641.064 | 87.039   | 0.251  | 0.553  | 446.663 | 202.950 | 201.819 | 1.131   |
| 2000          | 34300  | 15579.803 | 15463.594 | 116.209  | 0.339  | 0.746  | 437.076 | 198.541 | 197.050 | 1.491   |
| 2001          | 34593  | 15696.614 | 15548.679 | 147.936  | 0.428  | 0.942  | 435.920 | 197.812 | 195.934 | 1.878   |
| 2002          | 34293  | 15519.777 | 15322.414 | 197.364  | 0.576  | 1.272  | 427.892 | 193.668 | 191.188 | 2.481   |
| 2003          | 35077  | 15888.389 | 15644.469 | 243.921  | 0.695  | 1.535  | 433.566 | 196.413 | 193.375 | 3.038   |
| 2004          | 33515  | 15091.573 | 14801.647 | 289.926  | 0.865  | 1.921  | 410.122 | 184.701 | 181.126 | 3.575   |
| 2005          | 35397  | 15803.656 | 15440.627 | 363.028  | 1.026  | 2.297  | 428.340 | 191.278 | 186.850 | 4.428   |
| 2006          | 33987  | 15100.563 | 14691.822 | 408.742  | 1.203  | 2.707  | 407.675 | 181.174 | 176.231 | 4.943   |
| 2007          | 34007  | 14974.384 | 14483.654 | 490.729  | 1.443  | 3.277  | 403.837 | 177.871 | 171.996 | 5.875   |
| 2008          | 37434  | 16406.197 | 15797.083 | 609.115  | 1.627  | 3.713  | 439.703 | 192.768 | 185.553 | 7.215   |
| 2009          | 36837  | 16083.194 | 15365.772 | 717.422  | 1.948  | 4.461  | 427.798 | 186.846 | 178.446 | 8.400   |
| 2010          | 36801  | 15927.400 | 15132.918 | 794.482  | 2.159  | 4.988  | 422.463 | 182.917 | 173.720 | 9.197   |
| 2011          | 37652  | 16221.836 | 15270.404 | 951.432  | 2.527  | 5.865  | 428.139 | 184.547 | 173.639 | 10.907  |
| 2012          | 38284  | 16358.849 | 15277.630 | 1081.220 | 2.824  | 6.609  | 430.846 | 184.202 | 171.934 | 12.269  |
| 2013          | 40135  | 16994.822 | 15708.855 | 1285.967 | 3.204  | 7.567  | 446.801 | 189.311 | 174.878 | 14.433  |
| 2014          | 40111  | 16855.093 | 15392.929 | 1462.164 | 3.645  | 8.675  | 441.601 | 185.696 | 169.469 | 16.227  |
| 2015          | 42233  | 17572.483 | 15913.596 | 1658.886 | 3.928  | 9.440  | 519.741 | 216.445 | 195.843 | 20.602  |
| 2016          | 42644  | 17579.955 | 15685.105 | 1894.850 | 4.443  | 10.778 | 519.754 | 214.473 | 191.172 | 23.301  |
| 2017          | 44409  | 18080.688 | 15897.452 | 2183.237 | 4.916  | 12.075 | 536.092 | 218.496 | 191.907 | 26.589  |
| 2018          | 45411  | 18209.262 | 15797.577 | 2411.685 | 5.311  | 13.244 | 542.913 | 217.960 | 188.869 | 29.091  |
| 2019          | 46937  | 18648.302 | 15909.659 | 2738.643 | 5.835  | 14.686 | 555.662 | 221.054 | 188.345 | 32.709  |
| 2020          | 48403  | 19002.597 | 16040.554 | 2962.043 | 6.120  | 15.588 | 649.181 | 255.266 | 215.134 | 40.132  |
| 2021          | 48422  | 18885.717 | 15593.379 | 3292.338 | 6.799  | 17.433 | 644.647 | 251.867 | 207.598 | 44.269  |
| 2022          | 49804  | 19235.076 | 15595.947 | 3639.129 | 7.307  | 18.919 | 657.918 | 254.582 | 206.025 | 48.556  |
| 2023          | 51194  | 19521.158 | 15582.997 | 3938.161 | 7.693  | 20.174 | 670.916 | 256.363 | 204.222 | 52.140  |
| 2024          | 52524  | 19918.620 | 15584.638 | 4333.982 | 8.251  | 21.758 | 682.969 | 259.583 | 202.647 | 56.936  |
| 2025          | 53531  | 20150.545 | 15507.998 | 4642.547 | 8.673  | 23.039 | 803.006 | 303.086 | 232.633 | 70.453  |
| 2026          | 54394  | 20393.792 | 15351.235 | 5042.558 | 9.270  | 24.726 | 812.681 | 305.582 | 229.358 | 76.224  |
| 2027          | 55231  | 20615.351 | 15161.848 | 5453.503 | 9.874  | 26.454 | 821.709 | 307.668 | 225.573 | 82.095  |
| 2028          | 56012  | 20731.894 | 14881.778 | 5850.116 | 10.444 | 28.218 | 829.646 | 308.115 | 220.429 | 87.686  |
| 2029          | 56754  | 20781.967 | 14561.144 | 6220.823 | 10.961 | 29.934 | 836.715 | 307.495 | 214.674 | 92.821  |
| 2030          | 57006  | 20753.201 | 14258.025 | 6495.176 | 11.394 | 31.297 | 994.219 | 363.487 | 248.670 | 114.817 |
| 2031          | 58566  | 21048.417 | 14301.680 | 6746.737 | 11.520 | 32.053 | 1019.75 | 368.165 | 249.022 | 119.142 |
| 2032          | 59087  | 21169.329 | 13965.117 | 7204.212 | 12.192 | 34.031 | 1026.53 | 369.560 | 242.616 | 126.944 |
| 2033          | 59570  | 21109.293 | 13554.930 | 7554.364 | 12.681 | 35.787 | 1032.08 | 367.618 | 234.844 | 132.774 |
| 2034          | 59979  | 21109.429 | 13153.153 | 7956.276 | 13.265 | 37.691 | 1035.97 | 366.613 | 227.185 | 139.428 |
| 2035          | 59331  | 20794.840 | 12572.326 | 8222.514 | 13.859 | 39.541 | 1253.93 | 442.268 | 265.709 | 176.559 |
| 2036          | 56415  | 19354.577 | 11408.008 | 7946.568 | 14.086 | 41.058 | 1193.62 | 412.258 | 241.368 | 170.889 |
| 2037          | 56384  | 19064.169 | 10790.081 | 8274.088 | 14.675 | 43.401 | 1193.42 | 406.385 | 228.383 | 178.002 |
| 2038          | 56321  | 18854.812 | 10186.021 | 8668.791 | 15.392 | 45.977 | 1191.56 | 401.900 | 215.501 | 186.398 |
| 2039          | 56252  | 18437.457 | 9526.203  | 8911.254 | 15.842 | 48.332 | 1188.40 | 392.602 | 201.255 | 191.347 |

## Results for PHIM for Run 2 (ELL Summary Sensitivity\_Analysis\_2.RTF)

\*\*\*\*\*

### Estimated Loss of Life from the E Component for Run: 2, Simulation: 1

Country: US (United States)  
 Follow-up Period: 1990 to 2039

**Table 1: Estimated Loss of Life, at the end of follow-up, all age groups combined, Population unadjusted for deaths in Ecig scenario**

| Disease      | Sex    | Year | Years of life lost<br>NULL | Years of life lost<br>Ecig | Years of life<br>Saved |
|--------------|--------|------|----------------------------|----------------------------|------------------------|
| All Diseases | Males  | 2039 | 42093547.949               | 20546170.996               | 21547377.0             |
|              | Female | 2039 | 23817891.273               | 12209985.169               | 11607906.1             |
| Lung cancer  | Males  | 2039 | 18222549.860               | 12233087.179               | 5989462.68             |
|              | Female | 2039 | 12512468.845               | 7712396.126                | 4800072.72             |
| IHD          | Males  | 2039 | 15635992.616               | 4284317.625                | 11351675.0             |
|              | Female | 2039 | 4798769.065                | 1326739.475                | 3472029.59             |
| Stroke       | Males  | 2039 | 2389546.238                | 846745.565                 | 1542800.67             |
|              | Female | 2039 | 1665361.569                | 607922.659                 | 1057438.91             |
| COPD         | Males  | 2039 | 5845459.234                | 3182020.626                | 2663438.61             |
|              | Female | 2039 | 4841291.793                | 2562926.910                | 2278364.88             |

## Results for PHIM for Run 2 (ELL Summary Sensitivity\_Analysis\_2.RTF)

\*\*\*\*\*

**Table 2: Estimated Loss of Life, at the end of follow-up, all age groups combined, Population and Number deaths adjusted for Ecig scenario**

| Disease      | Sex    | Year | Years of life lost<br>NULL | Years of life lost<br>Ecig | Years of life<br>Saved |
|--------------|--------|------|----------------------------|----------------------------|------------------------|
| All Diseases | Males  | 2039 | 42093547.949               | 20673061.709               | 21420486.2             |
|              | Female | 2039 | 23817891.273               | 12258006.145               | 11559885.1             |
| Lung cancer  | Males  | 2039 | 18222549.860               | 12314679.074               | 5907870.79             |
|              | Female | 2039 | 12512468.845               | 7742961.029                | 4769507.82             |
| IHD          | Males  | 2039 | 15635992.616               | 4295932.010                | 11340060.6             |
|              | Female | 2039 | 4798769.065                | 1328723.281                | 3470045.78             |
| Stroke       | Males  | 2039 | 2389546.238                | 849153.944                 | 1540392.29             |
|              | Female | 2039 | 1665361.569                | 608658.582                 | 1056702.99             |
| COPD         | Males  | 2039 | 5845459.234                | 3213296.681                | 2632162.55             |
|              | Female | 2039 | 4841291.793                | 2577663.254                | 2263628.54             |

## Results for PHIM for Run 2 (ELL Summary Sensitivity\_Analysis\_2.RTF)

\*\*\*\*\*

**Table 3: Estimated Loss of Life, All age groups combined, Population unadjusted for deaths in Ecig scenario, cumulative over years**

| Disease      | Sex          | Year         | Years of life lost<br>NULL | Years of life lost<br>Ecig | Years of life<br>Saved |
|--------------|--------------|--------------|----------------------------|----------------------------|------------------------|
| All Diseases | Males        | 1990         | 1304839.645                | 1304839.645                | 0.000                  |
|              |              | 1991         | 2579865.358                | 2545584.709                | 34280.649              |
|              |              | 1992         | 3830683.831                | 3712373.883                | 118309.948             |
|              |              | 1993         | 5076567.803                | 4819330.770                | 257237.033             |
|              |              | 1994         | 6292145.526                | 5843396.508                | 448749.018             |
|              |              | 1995         | 7485537.010                | 6793871.961                | 691665.048             |
|              |              | 1996         | 8655955.028                | 7678084.262                | 977870.766             |
|              |              | 1997         | 9791729.713                | 8494210.145                | 1297519.57             |
|              |              | 1998         | 10899134.186               | 9255911.652                | 1643222.53             |
|              |              | 1999         | 12070409.674               | 9997971.689                | 2072437.99             |
|              |              | 2000         | 13231384.595               | 10702844.520               | 2528540.08             |
|              |              | 2001         | 14371761.018               | 11364114.560               | 3007646.46             |
|              |              | 2002         | 15508906.386               | 11992391.062               | 3516515.32             |
|              |              | 2003         | 16638100.422               | 12591369.025               | 4046731.40             |
|              |              | 2004         | 17736465.088               | 13154444.733               | 4582020.36             |
|              |              | 2005         | 18834658.606               | 13697558.398               | 5137100.21             |
|              |              | 2006         | 19909100.501               | 14203677.853               | 5705422.65             |
|              |              | 2007         | 20958321.463               | 14681143.031               | 6277178.43             |
|              |              | 2008         | 22000068.148               | 15141239.016               | 6858829.13             |
|              |              | 2009         | 23018816.903               | 15576022.379               | 7442794.52             |
|              |              | 2010         | 24018480.537               | 15986214.321               | 8032266.22             |
|              |              | 2011         | 25003034.574               | 16374536.569               | 8628498.00             |
|              |              | 2012         | 25969871.429               | 16739556.536               | 9230314.89             |
|              |              | 2013         | 26920275.180               | 17083378.611               | 9836896.57             |
|              |              | 2014         | 27849005.227               | 17404293.278               | 10444711.9             |
|              |              | 2015         | 28749620.400               | 17706125.510               | 11043494.9             |
|              |              | 2016         | 29622417.562               | 17980916.117               | 11641501.4             |
|              |              | 2017         | 30462559.724               | 18231404.446               | 12231155.3             |
|              |              | 2018         | 31293299.299               | 18471647.548               | 12821651.8             |
|              |              | 2019         | 32109993.427               | 18697399.979               | 13412593.4             |
|              |              | 2020         | 32883323.977               | 18906697.715               | 13976626.3             |
|              |              | 2021         | 33610102.554               | 19087626.990               | 14522475.6             |
|              |              | 2022         | 34322010.448               | 19256377.398               | 15065633.1             |
|              |              | 2023         | 35018383.550               | 19413307.275               | 15605076.3             |
|              |              | 2024         | 35700177.955               | 19559165.216               | 16141012.7             |
|              |              | 2025         | 36315500.346               | 19690035.602               | 16625464.7             |
|              |              | 2026         | 36896159.343               | 19801243.037               | 17094916.3             |
|              |              | 2027         | 37462570.116               | 19904073.656               | 17558496.5             |
|              |              | 2028         | 38015337.780               | 19998850.833               | 18016486.9             |
|              |              | 2029         | 38554814.764               | 20086535.858               | 18468278.9             |
|              |              | 2030         | 39003805.400               | 20160636.978               | 18843168.4             |
|              |              | 2031         | 39436509.703               | 20223916.631               | 19212593.1             |
| 2032         | 39858470.458 | 20282344.502 | 19576126.0                 |                            |                        |
| 2033         | 40270147.082 | 20336046.312 | 19934100.8                 |                            |                        |
| 2034         | 40672665.743 | 20386054.049 | 20286611.7                 |                            |                        |
| 2035         | 40962732.664 | 20423283.616 | 20539449.0                 |                            |                        |
| 2036         | 41255021.653 | 20457241.676 | 20797780.0                 |                            |                        |
| 2037         | 41540573.023 | 20488917.126 | 21051655.9                 |                            |                        |
| 2038         | 41820158.066 | 20518372.532 | 21301785.5                 |                            |                        |
| 2039         | 42093547.949 | 20546170.996 | 21547377.0                 |                            |                        |
|              | Female       | 1990         | 588979.406                 | 588979.406                 | 0.000                  |
| 1991         |              | 1182571.252  | 1169324.468                | 13246.785                  |                        |
| 1992         |              | 1777346.679  | 1731704.655                | 45642.024                  |                        |
| 1993         |              | 2380261.899  | 2280278.517                | 99983.382                  |                        |
| 1994         |              | 2983130.039  | 2806550.906                | 176579.133                 |                        |
| 1995         |              | 3588982.584  | 3314395.499                | 274587.085                 |                        |
| 1996         |              | 4195430.235  | 3800031.709                | 395398.526                 |                        |
| 1997         |              | 4793866.694  | 4262902.696                | 530963.999                 |                        |
| 1998         |              | 5389747.381  | 4707703.488                | 682043.893                 |                        |
| 1999         |              | 6006722.467  | 5142557.735                | 864164.732                 |                        |
| 2000         |              | 6625758.871  | 5565211.352                | 1060547.52                 |                        |
| 2001         |              | 7245135.411  | 5972192.020                | 1272943.39                 |                        |
| 2002         |              | 7867492.021  | 6366323.871                | 1501168.15                 |                        |
| 2003         |              | 8485051.793  | 6744957.339                | 1740094.45                 |                        |
| 2004         |              | 9092994.774  | 7105268.740                | 1987726.03                 |                        |
| 2005         |              | 9706032.803  | 7455936.505                | 2250096.30                 |                        |
| 2006         |              | 10311907.548 | 7789332.837                | 2522574.71                 |                        |
| 2007         |              | 10909437.502 | 8108110.241                | 2801327.26                 |                        |
| 2008         |              | 11506462.491 | 8412916.089                | 3093546.40                 |                        |
| 2009         |              | 12098393.287 | 8705927.101                | 3392466.19                 |                        |
| 2010         |              | 12681188.981 | 8983142.594                | 3698046.39                 |                        |

**Results for PHIM for Run 2 (ELL Summary Sensitivity\_Analysis\_2.RTF)**

|             |       |      |              |              |            |
|-------------|-------|------|--------------|--------------|------------|
|             |       | 2011 | 13260062.991 | 9246695.679  | 4013367.31 |
|             |       | 2012 | 13839417.441 | 9498757.472  | 4340659.97 |
|             |       | 2013 | 14409614.758 | 9736978.953  | 4672635.81 |
|             |       | 2014 | 14976658.746 | 9961788.352  | 5014870.39 |
|             |       | 2015 | 15529977.821 | 10172871.778 | 5357106.04 |
|             |       | 2016 | 16066640.764 | 10366854.662 | 5699786.10 |
|             |       | 2017 | 16590035.078 | 10546978.320 | 6043056.76 |
|             |       | 2018 | 17098716.137 | 10715796.180 | 6382919.96 |
|             |       | 2019 | 17599868.850 | 10874077.703 | 6725791.15 |
|             |       | 2020 | 18081346.241 | 11021260.456 | 7060085.79 |
|             |       | 2021 | 18537594.460 | 11153418.843 | 7384175.62 |
|             |       | 2022 | 18985300.234 | 11276544.700 | 7708755.53 |
|             |       | 2023 | 19423958.747 | 11391010.535 | 8032948.21 |
|             |       | 2024 | 19853347.772 | 11496974.999 | 8356372.77 |
|             |       | 2025 | 20252822.245 | 11592980.105 | 8659842.14 |
|             |       | 2026 | 20619307.063 | 11676058.840 | 8943248.22 |
|             |       | 2027 | 20976063.406 | 11752533.606 | 9223529.80 |
|             |       | 2028 | 21323641.947 | 11823009.203 | 9500632.74 |
|             |       | 2029 | 21662117.106 | 11887596.458 | 9774520.65 |
|             |       | 2030 | 21960971.694 | 11943542.580 | 10017429.1 |
|             |       | 2031 | 22224951.983 | 11989179.741 | 10235772.2 |
|             |       | 2032 | 22480397.853 | 12030773.096 | 10449624.8 |
|             |       | 2033 | 22728639.455 | 12068890.915 | 10659748.5 |
|             |       | 2034 | 22970448.888 | 12103682.900 | 10866766.0 |
|             |       | 2035 | 23164154.188 | 12131121.677 | 11033032.5 |
|             |       | 2036 | 23334538.616 | 12153233.449 | 11181305.2 |
|             |       | 2037 | 23499760.723 | 12173568.789 | 11326191.9 |
|             |       | 2038 | 23660308.401 | 12192406.596 | 11467901.8 |
|             |       | 2039 | 23817891.273 | 12209985.169 | 11607906.1 |
| Lung cancer | Males | 1990 | 595621.791   | 595621.791   | 0.000      |
|             |       | 1991 | 1177744.113  | 1175089.423  | 2654.690   |
|             |       | 1992 | 1750034.892  | 1740710.842  | 9324.049   |
|             |       | 1993 | 2319752.308  | 2298814.985  | 20937.322  |
|             |       | 1994 | 2872597.339  | 2834943.125  | 37654.214  |
|             |       | 1995 | 3411494.825  | 3351560.869  | 59933.956  |
|             |       | 1996 | 3945569.726  | 3856635.785  | 88933.941  |
|             |       | 1997 | 4463316.362  | 4339337.912  | 123978.450 |
|             |       | 1998 | 4975301.180  | 4809163.211  | 166137.969 |
|             |       | 1999 | 5473691.125  | 5258528.434  | 215162.691 |
|             |       | 2000 | 5977500.570  | 5703656.211  | 273844.359 |
|             |       | 2001 | 6474795.516  | 6133499.686  | 341295.830 |
|             |       | 2002 | 6968769.705  | 6550348.580  | 418421.125 |
|             |       | 2003 | 7460282.140  | 6954159.560  | 506122.580 |
|             |       | 2004 | 7947048.275  | 7343432.619  | 603615.657 |
|             |       | 2005 | 8430571.669  | 7719012.737  | 711558.932 |
|             |       | 2006 | 8903945.390  | 8075070.589  | 828874.801 |
|             |       | 2007 | 9364177.982  | 8410247.413  | 953930.569 |
|             |       | 2008 | 9822525.458  | 8731906.570  | 1090618.89 |
|             |       | 2009 | 10275228.886 | 9037860.177  | 1237368.71 |
|             |       | 2010 | 10720275.500 | 9327577.042  | 1392698.46 |
|             |       | 2011 | 11155356.373 | 9599516.207  | 1555840.17 |
|             |       | 2012 | 11582611.617 | 9854517.412  | 1728094.21 |
|             |       | 2013 | 11998803.791 | 10091824.846 | 1906978.94 |
|             |       | 2014 | 12402087.090 | 10311341.279 | 2090745.81 |
|             |       | 2015 | 12793451.706 | 10515261.437 | 2278190.27 |
|             |       | 2016 | 13160101.653 | 10696605.855 | 2463495.80 |
|             |       | 2017 | 13503583.414 | 10858049.576 | 2645533.84 |
|             |       | 2018 | 13859755.737 | 11015091.785 | 2844663.95 |
|             |       | 2019 | 14211625.176 | 11161556.362 | 3050068.81 |
|             |       | 2020 | 14553935.288 | 11297153.881 | 3256781.41 |
|             |       | 2021 | 14851747.495 | 11408383.282 | 3443364.21 |
|             |       | 2022 | 15144531.004 | 11511267.103 | 3633263.90 |
|             |       | 2023 | 15431932.496 | 11606140.207 | 3825792.29 |
|             |       | 2024 | 15713920.740 | 11693526.843 | 4020393.90 |
|             |       | 2025 | 15979112.816 | 11772231.485 | 4206881.33 |
|             |       | 2026 | 16206550.153 | 11834756.840 | 4371793.31 |
|             |       | 2027 | 16428826.050 | 11892080.187 | 4536745.86 |
|             |       | 2028 | 16645902.186 | 11944532.091 | 4701370.10 |
|             |       | 2029 | 16858126.517 | 11992710.324 | 4865416.19 |
|             |       | 2030 | 17045220.687 | 12033992.433 | 5011228.25 |
|             |       | 2031 | 17208482.610 | 12066820.476 | 5141662.13 |
|             |       | 2032 | 17367586.074 | 12097040.493 | 5270545.58 |
|             |       | 2033 | 17522716.280 | 12124788.970 | 5397927.31 |
|             |       | 2034 | 17674226.555 | 12150551.050 | 5523675.51 |
|             |       | 2035 | 17792201.734 | 12170299.751 | 5621901.98 |
|             |       | 2036 | 17903508.236 | 12187552.980 | 5715955.26 |
|             |       | 2037 | 18012162.345 | 12203708.393 | 5808453.95 |
|             |       | 2038 | 18118464.470 | 12218786.854 | 5899677.62 |

**Results for PHIM for Run 2 (ELL Summary Sensitivity\_Analysis\_2.RTF)**

|     |        |      |              |              |            |
|-----|--------|------|--------------|--------------|------------|
|     | Female | 2039 | 18222549.860 | 12233087.179 | 5989462.68 |
|     |        | 1990 | 307897.357   | 307897.357   | 0.000      |
|     |        | 1991 | 616547.418   | 614544.943   | 2002.475   |
|     |        | 1992 | 931086.773   | 923956.663   | 7130.110   |
|     |        | 1993 | 1246155.671  | 1230201.230  | 15954.441  |
|     |        | 1994 | 1561212.934  | 1532299.590  | 28913.345  |
|     |        | 1995 | 1879967.742  | 1833296.200  | 46671.542  |
|     |        | 1996 | 2197488.109  | 2128159.222  | 69328.887  |
|     |        | 1997 | 2515698.453  | 2418360.768  | 97337.685  |
|     |        | 1998 | 2836249.556  | 2705125.825  | 131123.731 |
|     |        | 1999 | 3150201.390  | 2980237.742  | 169963.648 |
|     |        | 2000 | 3472722.342  | 3256737.983  | 215984.360 |
|     |        | 2001 | 3796994.889  | 3527817.214  | 269177.675 |
|     |        | 2002 | 4126619.935  | 3796122.661  | 330497.275 |
|     |        | 2003 | 4454982.533  | 4056258.936  | 398723.598 |
|     |        | 2004 | 4784343.030  | 4309403.449  | 474939.582 |
|     |        | 2005 | 5113443.121  | 4554327.711  | 559115.410 |
|     |        | 2006 | 5442543.963  | 4790460.452  | 652083.511 |
|     |        | 2007 | 5772441.497  | 5018808.054  | 753633.442 |
|     |        | 2008 | 6091911.943  | 5231730.508  | 860181.435 |
|     |        | 2009 | 6413671.330  | 5437108.083  | 976563.247 |
|     |        | 2010 | 6730763.530  | 5631698.564  | 1099064.97 |
|     |        | 2011 | 7043614.101  | 5815161.219  | 1228452.88 |
|     |        | 2012 | 7356270.780  | 5990113.275  | 1366157.50 |
|     |        | 2013 | 7662551.964  | 6153393.834  | 1509158.13 |
|     |        | 2014 | 7964551.465  | 6306723.336  | 1657828.13 |
|     |        | 2015 | 8254895.403  | 6448021.965  | 1806873.44 |
|     |        | 2016 | 8530661.848  | 6575090.616  | 1955571.23 |
|     |        | 2017 | 8795826.122  | 6691136.003  | 2104690.12 |
|     |        | 2018 | 9067233.707  | 6802392.850  | 2264840.86 |
|     |        | 2019 | 9335343.270  | 6905967.514  | 2429375.76 |
|     |        | 2020 | 9596110.883  | 7001818.062  | 2594292.82 |
|     |        | 2021 | 9833186.859  | 7085049.744  | 2748137.11 |
|     |        | 2022 | 10066452.037 | 7162024.621  | 2904427.42 |
|     |        | 2023 | 10295503.609 | 7233098.639  | 3062404.97 |
|     |        | 2024 | 10520125.318 | 7298453.834  | 3221671.48 |
|     |        | 2025 | 10731915.863 | 7357374.562  | 3374541.30 |
|     |        | 2026 | 10917495.549 | 7406463.730  | 3511031.82 |
|     |        | 2027 | 11098620.885 | 7451406.430  | 3647214.46 |
|     |        | 2028 | 11275441.234 | 7492653.263  | 3782787.97 |
|     |        | 2029 | 11447962.710 | 7530337.052  | 3917625.66 |
|     |        | 2030 | 11601867.623 | 7562780.166  | 4039087.46 |
|     |        | 2031 | 11731666.516 | 7588370.463  | 4143296.05 |
|     |        | 2032 | 11857585.969 | 7611711.213  | 4245874.76 |
|     |        | 2033 | 11980128.625 | 7633148.148  | 4346980.48 |
|     |        | 2034 | 12099562.464 | 7652802.032  | 4446760.43 |
|     |        | 2035 | 12195919.946 | 7668159.114  | 4527760.83 |
|     |        | 2036 | 12278201.969 | 7680391.828  | 4597810.14 |
|     |        | 2037 | 12358146.336 | 7691752.978  | 4666393.36 |
|     |        | 2038 | 12435978.633 | 7702375.252  | 4733603.38 |
|     |        | 2039 | 12512468.845 | 7712396.126  | 4800072.72 |
| IHD | Males  | 1990 | 517209.093   | 517209.093   | 0.000      |
|     |        | 1991 | 1019219.395  | 991293.953   | 27925.442  |
|     |        | 1992 | 1509598.614  | 1413244.375  | 96354.239  |
|     |        | 1993 | 1992735.299  | 1784140.783  | 208594.516 |
|     |        | 1994 | 2462877.575  | 2101217.531  | 361660.044 |
|     |        | 1995 | 2928249.390  | 2374022.979  | 554226.410 |
|     |        | 1996 | 3377377.730  | 2600004.168  | 777373.562 |
|     |        | 1997 | 3809062.472  | 2786842.082  | 1022220.39 |
|     |        | 1998 | 4222213.867  | 2940838.000  | 1281375.87 |
|     |        | 1999 | 4708317.743  | 3095982.391  | 1612335.35 |
|     |        | 2000 | 5182084.396  | 3227301.561  | 1954782.84 |
|     |        | 2001 | 5644097.705  | 3336699.046  | 2307398.66 |
|     |        | 2002 | 6107232.129  | 3431681.921  | 2675550.21 |
|     |        | 2003 | 6561785.704  | 3513179.553  | 3048606.15 |
|     |        | 2004 | 6996156.348  | 3581975.291  | 3414181.06 |
|     |        | 2005 | 7426261.361  | 3642827.086  | 3783434.28 |
|     |        | 2006 | 7849012.694  | 3695621.190  | 4153391.50 |
|     |        | 2007 | 8255300.530  | 3741530.706  | 4513769.82 |
|     |        | 2008 | 8650662.040  | 3782694.043  | 4867968.00 |
|     |        | 2009 | 9030818.513  | 3819539.369  | 5211279.14 |
|     |        | 2010 | 9403026.327  | 3853359.673  | 5549666.65 |
|     |        | 2011 | 9767535.506  | 3884486.988  | 5883048.52 |
|     |        | 2012 | 10123044.281 | 3913459.344  | 6209584.94 |
|     |        | 2013 | 10470104.786 | 3940660.332  | 6529444.45 |
|     |        | 2014 | 10807756.112 | 3966270.753  | 6841485.36 |
|     |        | 2015 | 11130681.425 | 3990133.208  | 7140548.22 |
|     |        | 2016 | 11448966.506 | 4013055.452  | 7435911.05 |



**Results for PHIM for Run 2 (ELL Summary Sensitivity\_Analysis\_2.RTF)**

|        |        |      |              |             |            |
|--------|--------|------|--------------|-------------|------------|
|        |        | 2017 | 11758164.882 | 4034852.613 | 7723312.27 |
|        |        | 2018 | 12054448.241 | 4055471.524 | 7998976.72 |
|        |        | 2019 | 12341606.261 | 4075217.148 | 8266389.11 |
|        |        | 2020 | 12600728.939 | 4092763.664 | 8507965.27 |
|        |        | 2021 | 12861767.105 | 4110295.175 | 8751471.93 |
|        |        | 2022 | 13114168.616 | 4127044.873 | 8987123.74 |
|        |        | 2023 | 13357894.797 | 4143035.384 | 9214859.41 |
|        |        | 2024 | 13593848.521 | 4158433.755 | 9435414.77 |
|        |        | 2025 | 13789177.359 | 4170977.827 | 9618199.53 |
|        |        | 2026 | 13993401.656 | 4184113.590 | 9809288.07 |
|        |        | 2027 | 14190519.224 | 4196755.650 | 9993763.57 |
|        |        | 2028 | 14381193.356 | 4208809.028 | 10172384.3 |
|        |        | 2029 | 14565171.927 | 4220439.675 | 10344732.3 |
|        |        | 2030 | 14697381.605 | 4228612.005 | 10468769.6 |
|        |        | 2031 | 14842203.512 | 4237597.811 | 10604605.7 |
|        |        | 2032 | 14982485.826 | 4246242.361 | 10736243.5 |
|        |        | 2033 | 15118410.647 | 4254433.766 | 10863976.9 |
|        |        | 2034 | 15250284.398 | 4262458.278 | 10987826.1 |
|        |        | 2035 | 15322911.166 | 4266630.619 | 11056280.5 |
|        |        | 2036 | 15405115.031 | 4271333.179 | 11133781.9 |
|        |        | 2037 | 15484709.137 | 4275866.722 | 11208842.4 |
|        |        | 2038 | 15561812.193 | 4280169.507 | 11281642.7 |
|        |        | 2039 | 15635992.616 | 4284317.625 | 11351675.0 |
|        | Female | 1990 | 147299.110   | 147299.110  | 0.000      |
|        |        | 1991 | 295122.462   | 287009.016  | 8113.446   |
|        |        | 1992 | 439962.920   | 412166.429  | 27796.491  |
|        |        | 1993 | 584735.615   | 524312.742  | 60422.873  |
|        |        | 1994 | 727640.783   | 622147.773  | 105493.010 |
|        |        | 1995 | 868486.937   | 706843.283  | 161643.655 |
|        |        | 1996 | 1010321.847  | 780079.265  | 230242.582 |
|        |        | 1997 | 1144230.930  | 840704.561  | 303526.369 |
|        |        | 1998 | 1274513.622  | 891888.064  | 382625.558 |
|        |        | 1999 | 1426725.938  | 943982.319  | 482743.619 |
|        |        | 2000 | 1573462.680  | 988074.904  | 585387.775 |
|        |        | 2001 | 1719132.015  | 1025308.212 | 693823.803 |
|        |        | 2002 | 1863006.732  | 1057111.307 | 805895.424 |
|        |        | 2003 | 2002943.227  | 1084180.783 | 918762.445 |
|        |        | 2004 | 2137798.705  | 1107044.150 | 1030754.55 |
|        |        | 2005 | 2271071.245  | 1127151.819 | 1143919.43 |
|        |        | 2006 | 2400707.731  | 1144161.447 | 1256546.28 |
|        |        | 2007 | 2523634.512  | 1158644.150 | 1364990.36 |
|        |        | 2008 | 2648752.232  | 1171974.428 | 1476777.80 |
|        |        | 2009 | 2765973.961  | 1183585.103 | 1582388.86 |
|        |        | 2010 | 2881329.235  | 1194277.673 | 1687051.56 |
|        |        | 2011 | 2994972.694  | 1204080.560 | 1790892.13 |
|        |        | 2012 | 3108958.829  | 1213363.560 | 1895595.27 |
|        |        | 2013 | 3218140.416  | 1221911.481 | 1996228.94 |
|        |        | 2014 | 3328387.914  | 1230238.011 | 2098149.90 |
|        |        | 2015 | 3435342.796  | 1238083.143 | 2197259.65 |
|        |        | 2016 | 3539189.408  | 1245463.694 | 2293725.71 |
|        |        | 2017 | 3640041.363  | 1252462.662 | 2387578.70 |
|        |        | 2018 | 3732645.362  | 1258792.085 | 2473853.28 |
|        |        | 2019 | 3821421.978  | 1264789.434 | 2556632.54 |
|        |        | 2020 | 3902115.950  | 1270134.562 | 2631981.39 |
|        |        | 2021 | 3984301.053  | 1275528.863 | 2708772.19 |
|        |        | 2022 | 4062629.299  | 1280640.421 | 2781988.88 |
|        |        | 2023 | 4137348.729  | 1285497.693 | 2851851.04 |
|        |        | 2024 | 4208611.493  | 1290117.432 | 2918494.06 |
|        |        | 2025 | 4269419.492  | 1293979.339 | 2975440.15 |
|        |        | 2026 | 4330969.998  | 1297888.041 | 3033081.96 |
|        |        | 2027 | 4389134.306  | 1301581.473 | 3087552.83 |
|        |        | 2028 | 4444222.970  | 1305077.979 | 3139144.99 |
|        |        | 2029 | 4496447.877  | 1308393.825 | 3188054.05 |
|        |        | 2030 | 4536975.698  | 1310878.791 | 3226096.91 |
|        |        | 2031 | 4578338.586  | 1313430.405 | 3264908.18 |
|        |        | 2032 | 4617397.784  | 1315860.147 | 3301537.64 |
|        |        | 2033 | 4654407.697  | 1318167.550 | 3336240.15 |
|        |        | 2034 | 4689913.454  | 1320375.976 | 3369537.48 |
|        |        | 2035 | 4712518.190  | 1321684.713 | 3390833.48 |
|        |        | 2036 | 4735845.827  | 1323038.790 | 3412807.04 |
|        |        | 2037 | 4757958.806  | 1324329.528 | 3433629.28 |
|        |        | 2038 | 4778813.806  | 1325558.618 | 3453255.19 |
|        |        | 2039 | 4798769.065  | 1326739.475 | 3472029.59 |
|        | Males  | 1990 | 75005.854    | 75005.854   | 0.000      |
|        |        | 1991 | 149463.017   | 146629.661  | 2833.356   |
|        |        | 1992 | 222966.278   | 213320.362  | 9645.917   |
|        |        | 1993 | 296801.879   | 275800.619  | 21001.260  |
|        |        | 1994 | 372453.706   | 335102.880  | 37350.826  |
| Stroke |        |      |              |             |            |

**Results for PHIM for Run 2 (ELL Summary Sensitivity\_Analysis\_2.RTF)**

|        |      |             |            |            |
|--------|------|-------------|------------|------------|
|        | 1995 | 448401.338  | 389941.100 | 58460.238  |
|        | 1996 | 523536.301  | 439678.063 | 83858.238  |
|        | 1997 | 596763.211  | 483895.953 | 112867.258 |
|        | 1998 | 667546.681  | 522790.433 | 144756.249 |
|        | 1999 | 734925.407  | 556432.612 | 178492.795 |
|        | 2000 | 803749.361  | 587610.061 | 216139.300 |
|        | 2001 | 870081.588  | 614707.265 | 255374.323 |
|        | 2002 | 935347.140  | 638842.025 | 296505.115 |
|        | 2003 | 1001627.349 | 660820.685 | 340806.664 |
|        | 2004 | 1066587.976 | 680300.278 | 386287.697 |
|        | 2005 | 1130548.052 | 697577.105 | 432970.947 |
|        | 2006 | 1195132.454 | 713283.671 | 481848.783 |
|        | 2007 | 1258974.043 | 727315.902 | 531658.141 |
|        | 2008 | 1320124.867 | 739416.295 | 580708.572 |
|        | 2009 | 1380776.123 | 750313.048 | 630463.075 |
|        | 2010 | 1440048.533 | 760038.282 | 680010.251 |
|        | 2011 | 1497484.847 | 768686.259 | 728798.588 |
|        | 2012 | 1554496.526 | 776502.261 | 777994.266 |
|        | 2013 | 1610819.598 | 783639.575 | 827180.022 |
|        | 2014 | 1667484.890 | 790236.942 | 877247.947 |
|        | 2015 | 1720948.287 | 796115.892 | 924832.395 |
|        | 2016 | 1775699.228 | 801714.200 | 973985.028 |
|        | 2017 | 1830250.175 | 806950.027 | 1023300.15 |
|        | 2018 | 1875958.950 | 811117.491 | 1064841.46 |
|        | 2019 | 1920359.232 | 814953.278 | 1105405.95 |
|        | 2020 | 1960605.297 | 818304.230 | 1142301.07 |
|        | 2021 | 1998912.887 | 821337.132 | 1177575.75 |
|        | 2022 | 2036003.696 | 824145.402 | 1211858.29 |
|        | 2023 | 2071857.536 | 826754.101 | 1245103.44 |
|        | 2024 | 2106636.468 | 829200.818 | 1277435.65 |
|        | 2025 | 2136450.873 | 831248.436 | 1305202.44 |
|        | 2026 | 2164796.470 | 833141.283 | 1331655.19 |
|        | 2027 | 2192079.608 | 834926.340 | 1357153.27 |
|        | 2028 | 2218404.367 | 836605.004 | 1381799.36 |
|        | 2029 | 2243769.140 | 838199.760 | 1405569.38 |
|        | 2030 | 2263570.213 | 839424.558 | 1424145.65 |
|        | 2031 | 2282521.590 | 840578.733 | 1441942.86 |
|        | 2032 | 2300804.945 | 841675.006 | 1459129.94 |
|        | 2033 | 2318464.018 | 842712.538 | 1475751.48 |
|        | 2034 | 2335611.973 | 843716.119 | 1491895.85 |
|        | 2035 | 2347097.290 | 844374.244 | 1502723.05 |
|        | 2036 | 2358248.747 | 845006.175 | 1513242.57 |
|        | 2037 | 2369033.655 | 845613.800 | 1523419.86 |
|        | 2038 | 2379490.114 | 846191.654 | 1533298.46 |
|        | 2039 | 2389546.238 | 846745.565 | 1542800.67 |
| Female | 1990 | 56348.092   | 56348.092  | 0.000      |
|        | 1991 | 110871.862  | 108594.044 | 2277.818   |
|        | 1992 | 165654.454  | 157843.566 | 7810.888   |
|        | 1993 | 220008.519  | 203129.855 | 16878.664  |
|        | 1994 | 275706.807  | 245795.573 | 29911.234  |
|        | 1995 | 331417.547  | 284883.772 | 46533.775  |
|        | 1996 | 387580.161  | 320789.813 | 66790.348  |
|        | 1997 | 442778.242  | 352867.499 | 89910.743  |
|        | 1998 | 496117.305  | 381031.547 | 115085.758 |
|        | 1999 | 548268.214  | 406047.081 | 142221.133 |
|        | 2000 | 601693.202  | 429303.717 | 172389.485 |
|        | 2001 | 652221.103  | 449206.721 | 203014.381 |
|        | 2002 | 703022.600  | 467256.880 | 235765.720 |
|        | 2003 | 752023.351  | 482991.773 | 269031.578 |
|        | 2004 | 799826.733  | 496797.631 | 303029.101 |
|        | 2005 | 847563.928  | 509256.040 | 338307.889 |
|        | 2006 | 894205.027  | 520242.096 | 373962.930 |
|        | 2007 | 939571.282  | 529882.368 | 409688.914 |
|        | 2008 | 983437.578  | 538340.036 | 445097.542 |
|        | 2009 | 1025803.786 | 545773.910 | 480029.876 |
|        | 2010 | 1066964.934 | 552347.829 | 514617.105 |
|        | 2011 | 1106954.044 | 558183.231 | 548770.814 |
|        | 2012 | 1146108.461 | 563438.000 | 582670.461 |
|        | 2013 | 1183544.689 | 568081.864 | 615462.825 |
|        | 2014 | 1221220.945 | 572406.548 | 648814.398 |
|        | 2015 | 1258289.311 | 576413.103 | 681876.208 |
|        | 2016 | 1294830.207 | 580105.983 | 714724.224 |
|        | 2017 | 1330332.626 | 583488.767 | 746843.858 |
|        | 2018 | 1360571.987 | 586227.802 | 774344.185 |
|        | 2019 | 1389848.723 | 588744.279 | 801104.443 |
|        | 2020 | 1416046.192 | 590914.331 | 825131.861 |
|        | 2021 | 1440588.850 | 592859.895 | 847728.955 |
|        | 2022 | 1464157.934 | 594658.017 | 869499.917 |

**Results for PHIM for Run 2 (ELL Summary Sensitivity\_Analysis\_2.RTF)**

|      |             |             |             |             |            |
|------|-------------|-------------|-------------|-------------|------------|
|      |             | 2023        | 1486810.237 | 596330.094  | 890480.143 |
|      |             | 2024        | 1508591.729 | 597888.486  | 910703.243 |
|      |             | 2025        | 1526875.621 | 599162.560  | 927713.061 |
|      |             | 2026        | 1543659.810 | 600304.632  | 943355.178 |
|      |             | 2027        | 1559623.774 | 601371.177  | 958252.597 |
|      |             | 2028        | 1574852.850 | 602371.915  | 972480.936 |
|      |             | 2029        | 1589437.452 | 603316.168  | 986121.284 |
|      |             | 2030        | 1600568.199 | 604014.906  | 996553.293 |
|      |             | 2031        | 1610776.297 | 604650.821  | 1006125.48 |
|      |             | 2032        | 1620483.563 | 605253.491  | 1015230.07 |
|      |             | 2033        | 1629745.442 | 605825.105  | 1023920.34 |
|      |             | 2034        | 1638721.425 | 606372.316  | 1032349.11 |
|      |             | 2035        | 1644649.404 | 606717.294  | 1037932.11 |
|      |             | 2036        | 1650181.590 | 607037.675  | 1043143.91 |
|      |             | 2037        | 1655476.066 | 607344.513  | 1048131.55 |
|      |             | 2038        | 1660507.914 | 607638.246  | 1052869.67 |
|      |             | 2039        | 1665361.569 | 607922.659  | 1057438.91 |
| COPD | Males       | 1990        | 117002.906  | 117002.906  | 0.000      |
|      |             | 1991        | 233438.833  | 232571.672  | 867.160    |
|      |             | 1992        | 348084.047  | 345098.304  | 2985.743   |
|      |             | 1993        | 467278.318  | 460574.384  | 6703.934   |
|      |             | 1994        | 584216.907  | 572132.972  | 12083.935  |
|      |             | 1995        | 697391.457  | 678347.013  | 19044.444  |
|      |             | 1996        | 809471.271  | 781766.246  | 27705.025  |
|      |             | 1997        | 922587.668  | 884134.198  | 38453.470  |
|      |             | 1998        | 1034072.457 | 983120.008  | 50952.449  |
|      |             | 1999        | 1153475.399 | 1087028.253 | 66447.147  |
|      |             | 2000        | 1268050.268 | 1184276.688 | 83773.580  |
|      |             | 2001        | 1382786.209 | 1279208.563 | 103577.646 |
|      |             | 2002        | 1497557.412 | 1371518.536 | 126038.876 |
|      |             | 2003        | 1614405.229 | 1463209.227 | 151196.003 |
|      |             | 2004        | 1726672.489 | 1548736.544 | 177935.945 |
|      |             | 2005        | 1847277.524 | 1638141.470 | 209136.055 |
|      |             | 2006        | 1961009.963 | 1719702.403 | 241307.561 |
|      |             | 2007        | 2079868.908 | 1802049.010 | 277819.898 |
|      |             | 2008        | 2206755.783 | 1887222.109 | 319533.674 |
|      |             | 2009        | 2331993.380 | 1968309.784 | 363683.597 |
|      |             | 2010        | 2455130.176 | 2045239.324 | 409890.853 |
|      |             | 2011        | 2582657.849 | 2121847.116 | 460810.733 |
|      |             | 2012        | 2709719.005 | 2195077.520 | 514641.485 |
|      |             | 2013        | 2840547.005 | 2267253.858 | 573293.147 |
|      |             | 2014        | 2971677.135 | 2336444.304 | 635232.832 |
|      |             | 2015        | 3104538.983 | 2404614.972 | 699924.011 |
|      |             | 2016        | 3237650.175 | 2469540.610 | 768109.565 |
|      |             | 2017        | 3370561.253 | 2531552.230 | 839009.023 |
|      |             | 2018        | 3503136.371 | 2589966.749 | 913169.623 |
|      |             | 2019        | 3636402.758 | 2645673.192 | 990729.567 |
|      |             | 2020        | 3768054.453 | 2698475.939 | 1069578.51 |
|      |             | 2021        | 3897675.067 | 2747611.400 | 1150063.67 |
|      |             | 2022        | 4027307.132 | 2793920.019 | 1233387.11 |
|      |             | 2023        | 4156698.720 | 2837377.583 | 1319321.14 |
|      |             | 2024        | 4285772.226 | 2878003.800 | 1407768.43 |
|      |             | 2025        | 4410759.298 | 2915577.853 | 1495181.44 |
|      |             | 2026        | 4531411.064 | 2949231.324 | 1582179.74 |
|      |             | 2027        | 4651145.233 | 2980311.479 | 1670833.75 |
|      |             | 2028        | 4769837.872 | 3008904.711 | 1760933.16 |
|      |             | 2029        | 4887747.179 | 3035186.098 | 1852561.08 |
| 2030 | 4997632.895 | 3058607.982 | 1939024.91  |             |            |
| 2031 | 5103301.991 | 3078919.611 | 2024382.38  |             |            |
| 2032 | 5207593.613 | 3097386.642 | 2110206.97  |             |            |
| 2033 | 5310556.138 | 3114111.037 | 2196445.10  |             |            |
| 2034 | 5412542.816 | 3129328.602 | 2283214.21  |             |            |
| 2035 | 5500522.473 | 3141979.001 | 2358543.47  |             |            |
| 2036 | 5588149.640 | 3153349.343 | 2434800.30  |             |            |
| 2037 | 5674667.886 | 3163728.211 | 2510939.67  |             |            |
| 2038 | 5760391.289 | 3173224.517 | 2587166.77  |             |            |
| 2039 | 5845459.234 | 3182020.626 | 2663438.61  |             |            |
|      | Female      | 1990        | 77434.846   | 77434.846   | 0.000      |
|      |             | 1991        | 160029.510  | 159176.465  | 853.045    |
|      |             | 1992        | 240642.531  | 237737.996  | 2904.535   |
|      |             | 1993        | 329362.093  | 322634.690  | 6727.404   |
|      |             | 1994        | 418569.515  | 406307.970  | 12261.545  |
|      |             | 1995        | 509110.357  | 489372.244  | 19738.113  |
|      |             | 1996        | 600040.117  | 571003.409  | 29036.709  |
|      |             | 1997        | 691159.071  | 650969.868  | 40189.203  |
|      |             | 1998        | 782866.899  | 729658.052  | 53208.847  |
|      |             | 1999        | 881526.925  | 812290.593  | 69236.333  |
|      |             | 2000        | 977880.647  | 891094.749  | 86785.898  |

**Results for PHIM for Run 2 (ELL Summary Sensitivity\_Analysis\_2.RTF)**

|      |             |             |            |
|------|-------------|-------------|------------|
| 2001 | 1076787.404 | 969859.872  | 106927.531 |
| 2002 | 1174842.754 | 1045833.023 | 129009.730 |
| 2003 | 1275102.681 | 1121525.847 | 153576.834 |
| 2004 | 1371026.306 | 1192023.510 | 179002.796 |
| 2005 | 1473954.509 | 1265200.936 | 208753.573 |
| 2006 | 1574450.828 | 1334468.842 | 239981.986 |
| 2007 | 1673790.211 | 1400775.669 | 273014.543 |
| 2008 | 1782360.738 | 1470871.117 | 311489.621 |
| 2009 | 1892944.209 | 1539460.005 | 353484.204 |
| 2010 | 2002131.282 | 1604818.528 | 397312.754 |
| 2011 | 2114522.152 | 1669270.670 | 445251.482 |
| 2012 | 2228079.372 | 1731842.636 | 496236.735 |
| 2013 | 2345377.689 | 1793591.774 | 551785.915 |
| 2014 | 2462498.422 | 1852420.457 | 610077.965 |
| 2015 | 2581450.312 | 1910353.566 | 671096.746 |
| 2016 | 2701959.301 | 1966194.370 | 735764.931 |
| 2017 | 2823834.967 | 2019890.888 | 803944.079 |
| 2018 | 2938265.081 | 2068383.443 | 869881.638 |
| 2019 | 3053254.880 | 2114576.476 | 938678.404 |
| 2020 | 3167073.216 | 2158393.501 | 1008679.71 |
| 2021 | 3279517.699 | 2199980.342 | 1079537.36 |
| 2022 | 3392060.964 | 2239221.641 | 1152839.32 |
| 2023 | 3504296.171 | 2276084.110 | 1228212.06 |
| 2024 | 3616019.231 | 2310515.247 | 1305503.98 |
| 2025 | 3724611.269 | 2342463.644 | 1382147.63 |
| 2026 | 3827181.707 | 2371402.438 | 1455779.27 |
| 2027 | 3928684.441 | 2398174.525 | 1530509.92 |
| 2028 | 4029124.892 | 2422906.047 | 1606218.85 |
| 2029 | 4128269.068 | 2445549.413 | 1682719.65 |
| 2030 | 4221560.174 | 2465868.716 | 1755691.46 |
| 2031 | 4304170.584 | 2482728.052 | 1821442.53 |
| 2032 | 4384930.537 | 2497948.246 | 1886982.29 |
| 2033 | 4464357.691 | 2511750.112 | 1952607.58 |
| 2034 | 4542251.545 | 2524132.576 | 2018118.97 |
| 2035 | 4611066.648 | 2534560.555 | 2076506.09 |
| 2036 | 4670309.230 | 2542765.155 | 2127544.08 |
| 2037 | 4728179.514 | 2550141.770 | 2178037.74 |
| 2038 | 4785008.048 | 2556834.479 | 2228173.57 |
| 2039 | 4841291.793 | 2562926.910 | 2278364.88 |

---

## Results for PHIM for Run 2 (ELL Summary Sensitivity\_Analysis\_2.RTF)

\*\*\*\*\*

**Table 4: Estimated Loss of Life, All age groups combined, Population and Number deaths adjusted for Ecig scenario, cumulative over years**

| Disease      | Sex          | Year         | Years of life lost<br>NULL | Years of life lost<br>Ecig | Years of life<br>Saved |
|--------------|--------------|--------------|----------------------------|----------------------------|------------------------|
| All Diseases | Males        | 1990         | 1304839.645                | 1304839.645                | 0.000                  |
|              |              | 1991         | 2579865.358                | 2545584.709                | 34280.649              |
|              |              | 1992         | 3830683.831                | 3712422.947                | 118260.884             |
|              |              | 1993         | 5076567.803                | 4819539.235                | 257028.567             |
|              |              | 1994         | 6292145.526                | 5843928.073                | 448217.453             |
|              |              | 1995         | 7485537.010                | 6794929.588                | 690607.421             |
|              |              | 1996         | 8655955.028                | 7679898.413                | 976056.614             |
|              |              | 1997         | 9791729.713                | 8497020.865                | 1294708.85             |
|              |              | 1998         | 10899134.186               | 9259969.348                | 1639164.84             |
|              |              | 1999         | 12070409.674               | 10003585.738               | 2066823.94             |
|              |              | 2000         | 13231384.595               | 10710324.355               | 2521060.24             |
|              |              | 2001         | 14371761.018               | 11373739.505               | 2998021.51             |
|              |              | 2002         | 15508906.386               | 12004450.217               | 3504456.17             |
|              |              | 2003         | 16638100.422               | 12606145.146               | 4031955.28             |
|              |              | 2004         | 17736465.088               | 13172171.267               | 4564293.82             |
|              |              | 2005         | 18834658.606               | 13718522.321               | 5116136.29             |
|              |              | 2006         | 19909100.501               | 14228033.647               | 5681066.85             |
|              |              | 2007         | 20958321.463               | 14709072.539               | 6249248.92             |
|              |              | 2008         | 22000068.148               | 15172980.580               | 6827087.57             |
|              |              | 2009         | 23018816.903               | 15611723.198               | 7407093.71             |
|              |              | 2010         | 24018480.537               | 16026003.444               | 7992477.09             |
|              |              | 2011         | 25003034.574               | 16418530.858               | 8584503.72             |
|              |              | 2012         | 25969871.429               | 16787818.374               | 9182053.05             |
|              |              | 2013         | 26920275.180               | 17135971.351               | 9784303.83             |
|              |              | 2014         | 27849005.227               | 17461234.767               | 10387770.5             |
|              |              | 2015         | 28749620.400               | 17767468.694               | 10982151.7             |
|              |              | 2016         | 29622417.562               | 18046537.935               | 11575879.6             |
|              |              | 2017         | 30462559.724               | 18301187.940               | 12161371.8             |
|              |              | 2018         | 31293299.299               | 18545651.986               | 12747647.3             |
|              |              | 2019         | 32109993.427               | 18775597.757               | 13334395.7             |
|              |              | 2020         | 32883323.977               | 18989047.947               | 13894276.0             |
|              |              | 2021         | 33610102.554               | 19173746.861               | 14436355.7             |
|              |              | 2022         | 34322010.448               | 19346180.885               | 14975829.6             |
|              |              | 2023         | 35018383.550               | 19506693.731               | 15511689.8             |
|              |              | 2024         | 35700177.955               | 19656025.610               | 16044152.3             |
|              |              | 2025         | 36315500.346               | 19790238.662               | 16525261.7             |
|              |              | 2026         | 36896159.343               | 19904367.551               | 16991791.8             |
|              |              | 2027         | 37462570.116               | 20009996.090               | 17452574.0             |
|              |              | 2028         | 38015337.780               | 20107443.454               | 17907894.3             |
|              |              | 2029         | 38554814.764               | 20197673.890               | 18357140.9             |
|              |              | 2030         | 39003805.400               | 20274123.342               | 18729682.1             |
|              |              | 2031         | 39436509.703               | 20339408.629               | 19097101.1             |
| 2032         | 39858470.458 | 20399728.308 | 19458742.1                 |                            |                        |
| 2033         | 40270147.082 | 20455206.214 | 19814940.9                 |                            |                        |
| 2034         | 40672665.743 | 20506895.942 | 20165769.8                 |                            |                        |
| 2035         | 40962732.664 | 20545528.092 | 20417204.6                 |                            |                        |
| 2036         | 41255021.653 | 20580743.942 | 20674277.7                 |                            |                        |
| 2037         | 41540573.023 | 20613609.970 | 20926963.1                 |                            |                        |
| 2038         | 41820158.066 | 20644190.639 | 21175967.4                 |                            |                        |
| 2039         | 42093547.949 | 20673061.709 | 21420486.2                 |                            |                        |
|              | Female       | 1990         | 588979.406                 | 588979.406                 | 0.000                  |
|              |              | 1991         | 1182571.252                | 1169324.468                | 13246.785              |
|              |              | 1992         | 1777346.679                | 1731715.148                | 45631.531              |
|              |              | 1993         | 2380261.899                | 2280324.714                | 99937.185              |
|              |              | 1994         | 2983130.039                | 2806673.085                | 176456.954             |
|              |              | 1995         | 3588982.584                | 3314647.453                | 274335.131             |
|              |              | 1996         | 4195430.235                | 3800478.452                | 394951.783             |
|              |              | 1997         | 4793866.694                | 4263617.758                | 530248.936             |
|              |              | 1998         | 5389747.381                | 4708770.136                | 680977.245             |
|              |              | 1999         | 6006722.467                | 5144068.548                | 862653.919             |
|              |              | 2000         | 6625758.871                | 5567269.838                | 1058489.03             |
|              |              | 2001         | 7245135.411                | 5974895.832                | 1270239.58             |
|              |              | 2002         | 7867492.021                | 6369773.930                | 1497718.09             |
|              |              | 2003         | 8485051.793                | 6749256.927                | 1735794.87             |
|              |              | 2004         | 9092994.774                | 7110503.147                | 1982491.63             |
|              |              | 2005         | 9706032.803                | 7462203.042                | 2243829.76             |
|              |              | 2006         | 10311907.548               | 7796707.680                | 2515199.87             |
|              |              | 2007         | 10909437.502               | 8116676.108                | 2792761.39             |
|              |              | 2008         | 11506462.491               | 8422756.016                | 3083706.47             |
|              |              | 2009         | 12098393.287               | 8717115.233                | 3381278.05             |
|              |              | 2010         | 12681188.981               | 8995732.242                | 3685456.74             |

**Results for PHIM for Run 2 (ELL Summary Sensitivity\_Analysis\_2.RTF)**

|             |       |      |              |              |            |
|-------------|-------|------|--------------|--------------|------------|
|             |       | 2011 | 13260062.991 | 9260738.653  | 3999324.34 |
|             |       | 2012 | 13839417.441 | 9514313.393  | 4325104.05 |
|             |       | 2013 | 14409614.758 | 9754086.645  | 4655528.11 |
|             |       | 2014 | 14976658.746 | 9980476.299  | 4996182.45 |
|             |       | 2015 | 15529977.821 | 10193170.239 | 5336807.58 |
|             |       | 2016 | 16066640.764 | 10388744.763 | 5677896.00 |
|             |       | 2017 | 16590035.078 | 10570464.837 | 6019570.24 |
|             |       | 2018 | 17098716.137 | 10740885.832 | 6357830.30 |
|             |       | 2019 | 17599868.850 | 10900773.542 | 6699095.31 |
|             |       | 2020 | 18081346.241 | 11049561.879 | 7031784.36 |
|             |       | 2021 | 18537594.460 | 11183274.487 | 7354319.97 |
|             |       | 2022 | 18985300.234 | 11307934.535 | 7677365.70 |
|             |       | 2023 | 19423958.747 | 11423906.791 | 8000051.96 |
|             |       | 2024 | 19853347.772 | 11531341.742 | 8322006.03 |
|             |       | 2025 | 20252822.245 | 11628778.736 | 8624043.51 |
|             |       | 2026 | 20619307.063 | 11713184.381 | 8906122.68 |
|             |       | 2027 | 20976063.406 | 11790939.629 | 9185123.78 |
|             |       | 2028 | 21323641.947 | 11862648.650 | 9460993.30 |
|             |       | 2029 | 21662117.106 | 11928414.368 | 9733702.74 |
|             |       | 2030 | 21960971.694 | 11985472.796 | 9975498.90 |
|             |       | 2031 | 22224951.983 | 12032053.153 | 10192898.8 |
|             |       | 2032 | 22480397.853 | 12074531.037 | 10405866.8 |
|             |       | 2033 | 22728639.455 | 12113481.972 | 10615157.5 |
|             |       | 2034 | 22970448.888 | 12149049.988 | 10821398.9 |
|             |       | 2035 | 23164154.188 | 12177173.706 | 10986980.5 |
|             |       | 2036 | 23334538.616 | 12199832.488 | 11134706.1 |
|             |       | 2037 | 23499760.723 | 12220674.595 | 11279086.1 |
|             |       | 2038 | 23660308.401 | 12239985.731 | 11420322.7 |
|             |       | 2039 | 23817891.273 | 12258006.145 | 11559885.1 |
| Lung cancer | Males | 1990 | 595621.791   | 595621.791   | 0.000      |
|             |       | 1991 | 1177744.113  | 1175089.423  | 2654.690   |
|             |       | 1992 | 1750034.892  | 1740735.726  | 9299.166   |
|             |       | 1993 | 2319752.308  | 2298923.027  | 20829.280  |
|             |       | 1994 | 2872597.339  | 2835225.170  | 37372.169  |
|             |       | 1995 | 3411494.825  | 3352135.091  | 59359.734  |
|             |       | 1996 | 3945569.726  | 3857647.357  | 87922.369  |
|             |       | 1997 | 4463316.362  | 4340943.981  | 122372.382 |
|             |       | 1998 | 4975301.180  | 4811542.399  | 163758.781 |
|             |       | 1999 | 5473691.125  | 5261852.119  | 211839.006 |
|             |       | 2000 | 5977500.570  | 5708159.023  | 269341.547 |
|             |       | 2001 | 6474795.516  | 6139398.693  | 335396.823 |
|             |       | 2002 | 6968769.705  | 6557867.148  | 410902.557 |
|             |       | 2003 | 7460282.140  | 6963513.977  | 496768.163 |
|             |       | 2004 | 7947048.275  | 7354835.421  | 592212.855 |
|             |       | 2005 | 8430571.669  | 7732665.505  | 697906.163 |
|             |       | 2006 | 8903945.390  | 8091130.153  | 812815.237 |
|             |       | 2007 | 9364177.982  | 8428843.608  | 935334.373 |
|             |       | 2008 | 9822525.458  | 8753194.339  | 1069331.12 |
|             |       | 2009 | 10275228.886 | 9061967.028  | 1213261.86 |
|             |       | 2010 | 10720275.500 | 9354608.414  | 1365667.09 |
|             |       | 2011 | 11155356.373 | 9629536.641  | 1525819.73 |
|             |       | 2012 | 11582611.617 | 9887564.925  | 1695046.69 |
|             |       | 2013 | 11998803.791 | 10127908.558 | 1870895.23 |
|             |       | 2014 | 12402087.090 | 10350453.857 | 2051633.23 |
|             |       | 2015 | 12793451.706 | 10557394.866 | 2236056.84 |
|             |       | 2016 | 13160101.653 | 10741615.470 | 2418486.18 |
|             |       | 2017 | 13503583.414 | 10905795.690 | 2597787.72 |
|             |       | 2018 | 13859755.737 | 11065655.721 | 2794100.02 |
|             |       | 2019 | 14211625.176 | 11214900.471 | 2996724.71 |
|             |       | 2020 | 14553935.288 | 11353232.624 | 3200702.66 |
|             |       | 2021 | 14851747.495 | 11466834.732 | 3384912.76 |
|             |       | 2022 | 15144531.004 | 11572019.139 | 3572511.87 |
|             |       | 2023 | 15431932.496 | 11669111.679 | 3762820.82 |
|             |       | 2024 | 15713920.740 | 11758632.343 | 3955288.40 |
|             |       | 2025 | 15979112.816 | 11839378.615 | 4139734.20 |
|             |       | 2026 | 16206550.153 | 11903581.490 | 4302968.66 |
|             |       | 2027 | 16428826.050 | 11962498.329 | 4466327.72 |
|             |       | 2028 | 16645902.186 | 12016459.713 | 4629442.47 |
|             |       | 2029 | 16858126.517 | 12066067.406 | 4792059.11 |
|             |       | 2030 | 17045220.687 | 12108670.116 | 4936550.57 |
|             |       | 2031 | 17208482.610 | 12142547.582 | 5065935.03 |
|             |       | 2032 | 17367586.074 | 12173754.335 | 5193831.74 |
|             |       | 2033 | 17522716.280 | 12202427.775 | 5320288.51 |
|             |       | 2034 | 17674226.555 | 12229063.875 | 5445162.68 |
|             |       | 2035 | 17792201.734 | 12249553.557 | 5542648.18 |
|             |       | 2036 | 17903508.236 | 12267435.777 | 5636072.46 |
|             |       | 2037 | 18012162.345 | 12284189.011 | 5727973.33 |
|             |       | 2038 | 18118464.470 | 12299834.853 | 5818629.62 |

**Results for PHIM for Run 2 (ELL Summary Sensitivity\_Analysis\_2.RTF)**

|     |        |      |              |              |            |
|-----|--------|------|--------------|--------------|------------|
|     | Female | 2039 | 18222549.860 | 12314679.074 | 5907870.79 |
|     |        | 1990 | 307897.357   | 307897.357   | 0.000      |
|     |        | 1991 | 616547.418   | 614544.943   | 2002.475   |
|     |        | 1992 | 931086.773   | 923962.592   | 7124.181   |
|     |        | 1993 | 1246155.671  | 1230227.464  | 15928.207  |
|     |        | 1994 | 1561212.934  | 1532370.091  | 28842.843  |
|     |        | 1995 | 1879967.742  | 1833444.307  | 46523.435  |
|     |        | 1996 | 2197488.109  | 2128425.946  | 69062.163  |
|     |        | 1997 | 2515698.453  | 2418795.042  | 96903.411  |
|     |        | 1998 | 2836249.556  | 2705784.741  | 130464.815 |
|     |        | 1999 | 3150201.390  | 2981173.314  | 169028.076 |
|     |        | 2000 | 3472722.342  | 3258026.609  | 214695.734 |
|     |        | 2001 | 3796994.889  | 3529527.904  | 267466.985 |
|     |        | 2002 | 4126619.935  | 3798333.707  | 328286.228 |
|     |        | 2003 | 4454982.533  | 4059045.398  | 395937.136 |
|     |        | 2004 | 4784343.030  | 4312838.042  | 471504.988 |
|     |        | 2005 | 5113443.121  | 4558474.667  | 554968.454 |
|     |        | 2006 | 5442543.963  | 4795385.059  | 647158.903 |
|     |        | 2007 | 5772441.497  | 5024579.300  | 747862.197 |
|     |        | 2008 | 6091911.943  | 5238384.618  | 853527.324 |
|     |        | 2009 | 6413671.330  | 5444701.705  | 968969.625 |
|     |        | 2010 | 6730763.530  | 5640272.198  | 1090491.33 |
|     |        | 2011 | 7043614.101  | 5824743.875  | 1218870.23 |
|     |        | 2012 | 7356270.780  | 6000744.966  | 1355525.81 |
|     |        | 2013 | 7662551.964  | 6165088.238  | 1497463.73 |
|     |        | 2014 | 7964551.465  | 6319498.112  | 1645053.35 |
|     |        | 2015 | 8254895.403  | 6461876.820  | 1793018.58 |
|     |        | 2016 | 8530661.848  | 6589991.503  | 1940670.34 |
|     |        | 2017 | 8795826.122  | 6707069.358  | 2088756.76 |
|     |        | 2018 | 9067233.707  | 6819379.252  | 2247854.45 |
|     |        | 2019 | 9335343.270  | 6924000.987  | 2411342.28 |
|     |        | 2020 | 9596110.883  | 7020890.530  | 2575220.35 |
|     |        | 2021 | 9833186.859  | 7105096.833  | 2728090.03 |
|     |        | 2022 | 10066452.037 | 7183025.999  | 2883426.04 |
|     |        | 2023 | 10295503.609 | 7255029.769  | 3040473.84 |
|     |        | 2024 | 10520125.318 | 7321285.600  | 3198839.72 |
|     |        | 2025 | 10731915.863 | 7381076.880  | 3350838.98 |
|     |        | 2026 | 10917495.549 | 7430942.544  | 3486553.00 |
|     |        | 2027 | 11098620.885 | 7476629.062  | 3621991.82 |
|     |        | 2028 | 11275441.234 | 7518587.988  | 3756853.25 |
|     |        | 2029 | 11447962.710 | 7556948.449  | 3891014.26 |
|     |        | 2030 | 11601867.623 | 7590026.365  | 4011841.26 |
|     |        | 2031 | 11731666.516 | 7616134.275  | 4115532.24 |
|     |        | 2032 | 11857585.969 | 7639959.441  | 4217626.53 |
|     |        | 2033 | 11980128.625 | 7661852.456  | 4318276.17 |
|     |        | 2034 | 12099562.464 | 7681931.948  | 4417630.52 |
|     |        | 2035 | 12195919.946 | 7697663.272  | 4498256.67 |
|     |        | 2036 | 12278201.969 | 7710187.064  | 4568014.91 |
|     |        | 2037 | 12358146.336 | 7721820.051  | 4636326.29 |
|     |        | 2038 | 12435978.633 | 7732698.423  | 4703280.21 |
|     |        | 2039 | 12512468.845 | 7742961.029  | 4769507.82 |
| IHD | Males  | 1990 | 517209.093   | 517209.093   | 0.000      |
|     |        | 1991 | 1019219.395  | 991293.953   | 27925.442  |
|     |        | 1992 | 1509598.614  | 1413261.009  | 96337.605  |
|     |        | 1993 | 1992735.299  | 1784208.065  | 208527.234 |
|     |        | 1994 | 2462877.575  | 2101380.715  | 361496.860 |
|     |        | 1995 | 2928249.390  | 2374332.758  | 553916.632 |
|     |        | 1996 | 3377377.730  | 2600504.733  | 776872.996 |
|     |        | 1997 | 3809062.472  | 2787569.686  | 1021492.79 |
|     |        | 1998 | 4222213.867  | 2941818.058  | 1280395.81 |
|     |        | 1999 | 4708317.743  | 3097288.587  | 1611029.16 |
|     |        | 2000 | 5182084.396  | 3228958.756  | 1953125.64 |
|     |        | 2001 | 5644097.705  | 3338713.518  | 2305384.19 |
|     |        | 2002 | 6107232.129  | 3434063.934  | 2673168.19 |
|     |        | 2003 | 6561785.704  | 3515926.942  | 3045858.76 |
|     |        | 2004 | 6996156.348  | 3585073.093  | 3411083.26 |
|     |        | 2005 | 7426261.361  | 3646271.048  | 3779990.31 |
|     |        | 2006 | 7849012.694  | 3699392.896  | 4149619.80 |
|     |        | 2007 | 8255300.530  | 3745612.056  | 4509688.47 |
|     |        | 2008 | 8650662.040  | 3787075.902  | 4863586.14 |
|     |        | 2009 | 9030818.513  | 3824209.928  | 5206608.58 |
|     |        | 2010 | 9403026.327  | 3858311.417  | 5544714.91 |
|     |        | 2011 | 9767535.506  | 3889712.489  | 5877823.02 |
|     |        | 2012 | 10123044.281 | 3918955.813  | 6204088.47 |
|     |        | 2013 | 10470104.786 | 3946426.168  | 6523678.62 |
|     |        | 2014 | 10807756.112 | 3972304.593  | 6835451.52 |
|     |        | 2015 | 11130681.425 | 3996436.073  | 7134245.35 |
|     |        | 2016 | 11448966.506 | 4019630.057  | 7429336.45 |

**Results for PHIM for Run 2 (ELL Summary Sensitivity\_Analysis\_2.RTF)**

|        |        |      |              |             |            |
|--------|--------|------|--------------|-------------|------------|
|        |        | 2017 | 11758164.882 | 4041699.794 | 7716465.09 |
|        |        | 2018 | 12054448.241 | 4062576.232 | 7991872.01 |
|        |        | 2019 | 12341606.261 | 4082579.141 | 8259027.12 |
|        |        | 2020 | 12600728.939 | 4100381.179 | 8500347.76 |
|        |        | 2021 | 12861767.105 | 4118168.056 | 8743599.05 |
|        |        | 2022 | 13114168.616 | 4135170.641 | 8978997.98 |
|        |        | 2023 | 13357894.797 | 4151412.322 | 9206482.48 |
|        |        | 2024 | 13593848.521 | 4167061.176 | 9426787.35 |
|        |        | 2025 | 13789177.359 | 4179843.802 | 9609333.56 |
|        |        | 2026 | 13993401.656 | 4193226.714 | 9800174.94 |
|        |        | 2027 | 14190519.224 | 4206113.749 | 9984405.48 |
|        |        | 2028 | 14381193.356 | 4218408.300 | 10162785.1 |
|        |        | 2029 | 14565171.927 | 4230276.814 | 10334895.1 |
|        |        | 2030 | 14697381.605 | 4238651.366 | 10458730.2 |
|        |        | 2031 | 14842203.512 | 4247856.718 | 10594346.8 |
|        |        | 2032 | 14982485.826 | 4256716.868 | 10725769.0 |
|        |        | 2033 | 15118410.647 | 4265117.822 | 10853292.8 |
|        |        | 2034 | 15250284.398 | 4273351.375 | 10976933.0 |
|        |        | 2035 | 15322911.166 | 4277658.539 | 11045252.6 |
|        |        | 2036 | 15405115.031 | 4282512.334 | 11122602.7 |
|        |        | 2037 | 15484709.137 | 4287194.708 | 11197514.4 |
|        |        | 2038 | 15561812.193 | 4291642.212 | 11270170.0 |
|        |        | 2039 | 15635992.616 | 4295932.010 | 11340060.6 |
|        | Female | 1990 | 147299.110   | 147299.110  | 0.000      |
|        |        | 1991 | 295122.462   | 287009.016  | 8113.446   |
|        |        | 1992 | 439962.920   | 412168.688  | 27794.232  |
|        |        | 1993 | 584735.615   | 524322.140  | 60413.475  |
|        |        | 1994 | 727640.783   | 622171.262  | 105469.521 |
|        |        | 1995 | 868486.937   | 706888.999  | 161597.938 |
|        |        | 1996 | 1010321.847  | 780155.658  | 230166.189 |
|        |        | 1997 | 1144230.930  | 840818.622  | 303412.308 |
|        |        | 1998 | 1274513.622  | 892046.183  | 382467.439 |
|        |        | 1999 | 1426725.938  | 944199.066  | 482526.872 |
|        |        | 2000 | 1573462.680  | 988355.102  | 585107.578 |
|        |        | 2001 | 1719132.015  | 1025654.256 | 693477.759 |
|        |        | 2002 | 1863006.732  | 1057524.247 | 805482.485 |
|        |        | 2003 | 2002943.227  | 1084660.041 | 918283.186 |
|        |        | 2004 | 2137798.705  | 1107587.096 | 1030211.61 |
|        |        | 2005 | 2271071.245  | 1127757.135 | 1143314.11 |
|        |        | 2006 | 2400707.731  | 1144824.050 | 1255883.68 |
|        |        | 2007 | 2523634.512  | 1159359.499 | 1364275.01 |
|        |        | 2008 | 2648752.232  | 1172741.287 | 1476010.95 |
|        |        | 2009 | 2765973.961  | 1184399.988 | 1581573.97 |
|        |        | 2010 | 2881329.235  | 1195139.296 | 1686189.94 |
|        |        | 2011 | 2994972.694  | 1204987.193 | 1789985.50 |
|        |        | 2012 | 3108958.829  | 1214314.309 | 1894644.52 |
|        |        | 2013 | 3218140.416  | 1222905.106 | 1995235.31 |
|        |        | 2014 | 3328387.914  | 1231275.108 | 2097112.81 |
|        |        | 2015 | 3435342.796  | 1239164.613 | 2196178.18 |
|        |        | 2016 | 3539189.408  | 1246589.257 | 2292600.15 |
|        |        | 2017 | 3640041.363  | 1253632.291 | 2386409.07 |
|        |        | 2018 | 3732645.362  | 1260003.267 | 2472642.10 |
|        |        | 2019 | 3821421.978  | 1266042.080 | 2555379.90 |
|        |        | 2020 | 3902115.950  | 1271428.468 | 2630687.48 |
|        |        | 2021 | 3984301.053  | 1276866.393 | 2707434.66 |
|        |        | 2022 | 4062629.299  | 1282021.345 | 2780607.95 |
|        |        | 2023 | 4137348.729  | 1286921.843 | 2850426.89 |
|        |        | 2024 | 4208611.493  | 1291584.453 | 2917027.04 |
|        |        | 2025 | 4269419.492  | 1295487.835 | 2973931.66 |
|        |        | 2026 | 4330969.998  | 1299439.746 | 3031530.25 |
|        |        | 2027 | 4389134.306  | 1303175.324 | 3085958.98 |
|        |        | 2028 | 4444222.970  | 1306713.045 | 3137509.92 |
|        |        | 2029 | 4496447.877  | 1310069.067 | 3186378.81 |
|        |        | 2030 | 4536975.698  | 1312590.195 | 3224385.50 |
|        |        | 2031 | 4578338.586  | 1315179.319 | 3263159.27 |
|        |        | 2032 | 4617397.784  | 1317645.378 | 3299752.41 |
|        |        | 2033 | 4654407.697  | 1319988.018 | 3334419.68 |
|        |        | 2034 | 4689913.454  | 1322230.628 | 3367682.83 |
|        |        | 2035 | 4712518.190  | 1323565.538 | 3388952.65 |
|        |        | 2036 | 4735845.827  | 1324946.796 | 3410899.03 |
|        |        | 2037 | 4757958.806  | 1326263.685 | 3431695.12 |
|        |        | 2038 | 4778813.806  | 1327518.000 | 3451295.81 |
|        |        | 2039 | 4798769.065  | 1328723.281 | 3470045.78 |
| Stroke | Males  | 1990 | 75005.854    | 75005.854   | 0.000      |
|        |        | 1991 | 149463.017   | 146629.661  | 2833.356   |
|        |        | 1992 | 222966.278   | 213322.726  | 9643.553   |
|        |        | 1993 | 296801.879   | 275810.524  | 20991.354  |
|        |        | 1994 | 372453.706   | 335128.341  | 37325.365  |



**Results for PHIM for Run 2 (ELL Summary Sensitivity\_Analysis\_2.RTF)**

|        |      |             |            |            |
|--------|------|-------------|------------|------------|
|        | 1995 | 448401.338  | 389991.583 | 58409.755  |
|        | 1996 | 523536.301  | 439763.761 | 83772.540  |
|        | 1997 | 596763.211  | 484026.089 | 112737.122 |
|        | 1998 | 667546.681  | 522972.688 | 144573.993 |
|        | 1999 | 734925.407  | 556672.559 | 178252.848 |
|        | 2000 | 803749.361  | 587917.919 | 215831.442 |
|        | 2001 | 870081.588  | 615086.960 | 254994.628 |
|        | 2002 | 935347.140  | 639298.778 | 296048.362 |
|        | 2003 | 1001627.349 | 661358.499 | 340268.850 |
|        | 2004 | 1066587.976 | 680921.391 | 385666.584 |
|        | 2005 | 1130548.052 | 698282.580 | 432265.472 |
|        | 2006 | 1195132.454 | 714075.264 | 481057.189 |
|        | 2007 | 1258974.043 | 728192.942 | 530781.101 |
|        | 2008 | 1320124.867 | 740374.542 | 579750.325 |
|        | 2009 | 1380776.123 | 751351.429 | 629424.694 |
|        | 2010 | 1440048.533 | 761154.638 | 678893.895 |
|        | 2011 | 1497484.847 | 769878.317 | 727606.530 |
|        | 2012 | 1554496.526 | 777767.180 | 776729.346 |
|        | 2013 | 1610819.598 | 784976.234 | 825843.364 |
|        | 2014 | 1667484.890 | 791643.554 | 875841.335 |
|        | 2015 | 1720948.287 | 797590.855 | 923357.431 |
|        | 2016 | 1775699.228 | 803257.401 | 972441.827 |
|        | 2017 | 1830250.175 | 808560.532 | 1021689.64 |
|        | 2018 | 1875958.950 | 812785.720 | 1063173.23 |
|        | 2019 | 1920359.232 | 816676.976 | 1103682.26 |
|        | 2020 | 1960605.297 | 820081.210 | 1140524.09 |
|        | 2021 | 1998912.887 | 823164.016 | 1175748.87 |
|        | 2022 | 2036003.696 | 826020.076 | 1209983.62 |
|        | 2023 | 2071857.536 | 828674.724 | 1243182.81 |
|        | 2024 | 2106636.468 | 831165.895 | 1275470.57 |
|        | 2025 | 2136450.873 | 833255.420 | 1303195.45 |
|        | 2026 | 2164796.470 | 835187.911 | 1329608.56 |
|        | 2027 | 2192079.608 | 837011.380 | 1355068.23 |
|        | 2028 | 2218404.367 | 838727.173 | 1379677.19 |
|        | 2029 | 2243769.140 | 840357.940 | 1403411.20 |
|        | 2030 | 2263570.213 | 841614.568 | 1421955.64 |
|        | 2031 | 2282521.590 | 842799.151 | 1439722.44 |
|        | 2032 | 2300804.945 | 843924.846 | 1456880.10 |
|        | 2033 | 2318464.018 | 844990.861 | 1473473.16 |
|        | 2034 | 2335611.973 | 846022.519 | 1489589.45 |
|        | 2035 | 2347097.290 | 846702.076 | 1500395.21 |
|        | 2036 | 2358248.747 | 847354.838 | 1510893.91 |
|        | 2037 | 2369033.655 | 847982.906 | 1521050.75 |
|        | 2038 | 2379490.114 | 848580.659 | 1530909.45 |
|        | 2039 | 2389546.238 | 849153.944 | 1540392.29 |
| Female | 1990 | 56348.092   | 56348.092  | 0.000      |
|        | 1991 | 110871.862  | 108594.044 | 2277.818   |
|        | 1992 | 165654.454  | 157844.244 | 7810.211   |
|        | 1993 | 220008.519  | 203132.684 | 16875.835  |
|        | 1994 | 275706.807  | 245802.756 | 29904.050  |
|        | 1995 | 331417.547  | 284898.026 | 46519.521  |
|        | 1996 | 387580.161  | 320814.130 | 66766.031  |
|        | 1997 | 442778.242  | 352904.683 | 89873.558  |
|        | 1998 | 496117.305  | 381084.121 | 115033.184 |
|        | 1999 | 548268.214  | 406117.264 | 142150.950 |
|        | 2000 | 601693.202  | 429394.535 | 172298.667 |
|        | 2001 | 652221.103  | 449319.264 | 202901.839 |
|        | 2002 | 703022.600  | 467392.817 | 235629.783 |
|        | 2003 | 752023.351  | 483151.800 | 268871.551 |
|        | 2004 | 799826.733  | 496982.129 | 302844.604 |
|        | 2005 | 847563.928  | 509465.447 | 338098.482 |
|        | 2006 | 894205.027  | 520476.720 | 373728.306 |
|        | 2007 | 939571.282  | 530141.779 | 409429.503 |
|        | 2008 | 983437.578  | 538623.690 | 444813.888 |
|        | 2009 | 1025803.786 | 546081.206 | 479722.580 |
|        | 2010 | 1066964.934 | 552678.195 | 514286.739 |
|        | 2011 | 1106954.044 | 558536.141 | 548417.903 |
|        | 2012 | 1146108.461 | 563812.795 | 582295.665 |
|        | 2013 | 1183544.689 | 568477.725 | 615066.965 |
|        | 2014 | 1221220.945 | 572823.564 | 648397.382 |
|        | 2015 | 1258289.311 | 576851.628 | 681437.683 |
|        | 2016 | 1294830.207 | 580565.711 | 714264.496 |
|        | 2017 | 1330332.626 | 583969.507 | 746363.118 |
|        | 2018 | 1360571.987 | 586726.843 | 773845.144 |
|        | 2019 | 1389848.723 | 589261.082 | 800587.641 |
|        | 2020 | 1416046.192 | 591448.313 | 824597.880 |
|        | 2021 | 1440588.850 | 593410.215 | 847178.635 |
|        | 2022 | 1464157.934 | 595224.125 | 868933.810 |

**Results for PHIM for Run 2 (ELL Summary Sensitivity\_Analysis\_2.RTF)**

|      |             |             |             |             |            |
|------|-------------|-------------|-------------|-------------|------------|
|      |             | 2023        | 1486810.237 | 596911.512  | 889898.725 |
|      |             | 2024        | 1508591.729 | 598484.686  | 910107.043 |
|      |             | 2025        | 1526875.621 | 599772.729  | 927102.892 |
|      |             | 2026        | 1543659.810 | 600927.737  | 942732.072 |
|      |             | 2027        | 1559623.774 | 602006.690  | 957617.085 |
|      |             | 2028        | 1574852.850 | 603019.384  | 971833.467 |
|      |             | 2029        | 1589437.452 | 603975.158  | 985462.294 |
|      |             | 2030        | 1600568.199 | 604684.148  | 995884.051 |
|      |             | 2031        | 1610776.297 | 605329.526  | 1005446.77 |
|      |             | 2032        | 1620483.563 | 605941.307  | 1014542.26 |
|      |             | 2033        | 1629745.442 | 606521.732  | 1023223.71 |
|      |             | 2034        | 1638721.425 | 607077.482  | 1031643.94 |
|      |             | 2035        | 1644649.404 | 607429.200  | 1037220.20 |
|      |             | 2036        | 1650181.590 | 607755.877  | 1042425.71 |
|      |             | 2037        | 1655476.066 | 608068.797  | 1047407.27 |
|      |             | 2038        | 1660507.914 | 608368.424  | 1052139.49 |
|      |             | 2039        | 1665361.569 | 608658.582  | 1056702.99 |
| COPD | Males       | 1990        | 117002.906  | 117002.906  | 0.000      |
|      |             | 1991        | 233438.833  | 232571.672  | 867.160    |
|      |             | 1992        | 348084.047  | 345103.487  | 2980.561   |
|      |             | 1993        | 467278.318  | 460597.618  | 6680.699   |
|      |             | 1994        | 584216.907  | 572193.848  | 12023.059  |
|      |             | 1995        | 697391.457  | 678470.157  | 18921.300  |
|      |             | 1996        | 809471.271  | 781982.561  | 27488.709  |
|      |             | 1997        | 922587.668  | 884481.110  | 38106.558  |
|      |             | 1998        | 1034072.457 | 983636.203  | 50436.254  |
|      |             | 1999        | 1153475.399 | 1087772.473 | 65702.926  |
|      |             | 2000        | 1268050.268 | 1185288.657 | 82761.611  |
|      |             | 2001        | 1382786.209 | 1280540.334 | 102245.876 |
|      |             | 2002        | 1497557.412 | 1373220.357 | 124337.055 |
|      |             | 2003        | 1614405.229 | 1465345.727 | 149059.502 |
|      |             | 2004        | 1726672.489 | 1551341.362 | 175331.128 |
|      |             | 2005        | 1847277.524 | 1641303.187 | 205974.337 |
|      |             | 2006        | 1961009.963 | 1723435.333 | 237574.630 |
|      |             | 2007        | 2079868.908 | 1806423.933 | 273444.976 |
|      |             | 2008        | 2206755.783 | 1892335.797 | 314419.986 |
|      |             | 2009        | 2331993.380 | 1974194.813 | 357798.568 |
|      |             | 2010        | 2455130.176 | 2051928.974 | 403201.203 |
|      |             | 2011        | 2582657.849 | 2129403.411 | 453254.437 |
|      |             | 2012        | 2709719.005 | 2203530.456 | 506188.549 |
|      |             | 2013        | 2840547.005 | 2276660.392 | 563886.613 |
|      |             | 2014        | 2971677.135 | 2346832.763 | 624844.372 |
|      |             | 2015        | 3104538.983 | 2416046.900 | 688492.083 |
|      |             | 2016        | 3237650.175 | 2482035.007 | 755615.168 |
|      |             | 2017        | 3370561.253 | 2545131.924 | 825429.329 |
|      |             | 2018        | 3503136.371 | 2604634.314 | 898502.058 |
|      |             | 2019        | 3636402.758 | 2661441.169 | 974961.589 |
|      |             | 2020        | 3768054.453 | 2715352.934 | 1052701.52 |
|      |             | 2021        | 3897675.067 | 2765580.057 | 1132095.01 |
|      |             | 2022        | 4027307.132 | 2812971.030 | 1214336.10 |
|      |             | 2023        | 4156698.720 | 2857495.006 | 1299203.71 |
|      |             | 2024        | 4285772.226 | 2899166.196 | 1386606.03 |
|      |             | 2025        | 4410759.298 | 2937760.825 | 1472998.47 |
|      |             | 2026        | 4531411.064 | 2972371.437 | 1559039.63 |
|      |             | 2027        | 4651145.233 | 3004372.633 | 1646772.60 |
|      |             | 2028        | 4769837.872 | 3033848.269 | 1735989.60 |
|      |             | 2029        | 4887747.179 | 3060971.731 | 1826775.45 |
| 2030 | 4997632.895 | 3085187.291 | 1912445.60  |             |            |
| 2031 | 5103301.991 | 3106205.178 | 1997096.81  |             |            |
| 2032 | 5207593.613 | 3125332.259 | 2082261.35  |             |            |
| 2033 | 5310556.138 | 3142669.757 | 2167886.38  |             |            |
| 2034 | 5412542.816 | 3158458.173 | 2254084.64  |             |            |
| 2035 | 5500522.473 | 3171613.920 | 2328908.55  |             |            |
| 2036 | 5588149.640 | 3183440.995 | 2404708.65  |             |            |
| 2037 | 5674667.886 | 3194243.346 | 2480424.54  |             |            |
| 2038 | 5760391.289 | 3204132.915 | 2556258.37  |             |            |
| 2039 | 5845459.234 | 3213296.681 | 2632162.55  |             |            |
|      | Female      | 1990        | 77434.846   | 77434.846   | 0.000      |
|      |             | 1991        | 160029.510  | 159176.465  | 853.045    |
|      |             | 1992        | 240642.531  | 237739.624  | 2902.907   |
|      |             | 1993        | 329362.093  | 322642.425  | 6719.668   |
|      |             | 1994        | 418569.515  | 406328.975  | 12240.540  |
|      |             | 1995        | 509110.357  | 489416.121  | 19694.236  |
|      |             | 1996        | 600040.117  | 571082.718  | 28957.399  |
|      |             | 1997        | 691159.071  | 651099.411  | 40059.659  |
|      |             | 1998        | 782866.899  | 729855.091  | 53011.807  |
|      |             | 1999        | 881526.925  | 812578.904  | 68948.022  |
|      |             | 2000        | 977880.647  | 891493.593  | 86387.055  |

**Results for PHIM for Run 2 (ELL Summary Sensitivity\_Analysis\_2.RTF)**

|      |             |             |            |
|------|-------------|-------------|------------|
| 2001 | 1076787.404 | 970394.408  | 106392.996 |
| 2002 | 1174842.754 | 1046523.158 | 128319.595 |
| 2003 | 1275102.681 | 1122399.689 | 152702.992 |
| 2004 | 1371026.306 | 1193095.879 | 177930.426 |
| 2005 | 1473954.509 | 1266505.794 | 207448.715 |
| 2006 | 1574450.828 | 1336021.850 | 238428.978 |
| 2007 | 1673790.211 | 1402595.530 | 271194.682 |
| 2008 | 1782360.738 | 1473006.420 | 309354.317 |
| 2009 | 1892944.209 | 1541932.334 | 351011.875 |
| 2010 | 2002131.282 | 1607642.553 | 394488.729 |
| 2011 | 2114522.152 | 1672471.444 | 442050.709 |
| 2012 | 2228079.372 | 1735441.322 | 492638.049 |
| 2013 | 2345377.689 | 1797615.577 | 547762.112 |
| 2014 | 2462498.422 | 1856879.516 | 605618.906 |
| 2015 | 2581450.312 | 1915277.178 | 666173.134 |
| 2016 | 2701959.301 | 1971598.292 | 730361.009 |
| 2017 | 2823834.967 | 2025793.681 | 798041.287 |
| 2018 | 2938265.081 | 2074776.470 | 863488.610 |
| 2019 | 3053254.880 | 2121469.393 | 931785.487 |
| 2020 | 3167073.216 | 2165794.568 | 1001278.65 |
| 2021 | 3279517.699 | 2207901.046 | 1071616.65 |
| 2022 | 3392060.964 | 2247663.066 | 1144397.90 |
| 2023 | 3504296.171 | 2285043.666 | 1219252.50 |
| 2024 | 3616019.231 | 2319987.002 | 1296032.23 |
| 2025 | 3724611.269 | 2352441.293 | 1372169.98 |
| 2026 | 3827181.707 | 2381874.354 | 1445307.35 |
| 2027 | 3928684.441 | 2409128.554 | 1519555.89 |
| 2028 | 4029124.892 | 2434328.233 | 1594796.66 |
| 2029 | 4128269.068 | 2457421.694 | 1670847.37 |
| 2030 | 4221560.174 | 2478172.088 | 1743388.09 |
| 2031 | 4304170.584 | 2495410.032 | 1808760.55 |
| 2032 | 4384930.537 | 2510984.912 | 1873945.63 |
| 2033 | 4464357.691 | 2525119.766 | 1939237.92 |
| 2034 | 4542251.545 | 2537809.930 | 2004441.61 |
| 2035 | 4611066.648 | 2548515.697 | 2062550.95 |
| 2036 | 4670309.230 | 2556942.750 | 2113366.48 |
| 2037 | 4728179.514 | 2564522.062 | 2163657.45 |
| 2038 | 4785008.048 | 2571400.885 | 2213607.16 |
| 2039 | 4841291.793 | 2577663.254 | 2263628.54 |

---

## Results for PHIM for Run 2 (ELL Summary Sensitivity\_Analysis\_2.RTF)

\*\*\*\*\*

**Table 5: Estimated Loss of Life, at the end of follow-up, Population unadjusted for deaths in Ecig scenario**

| Disease      | Sex    | Age Group   | Years of life lost<br>NULL | Years of life lost<br>Ecig | Years of life<br>Saved |
|--------------|--------|-------------|----------------------------|----------------------------|------------------------|
| All Diseases | Males  | 30-34       | 443911.034                 | 159880.750                 | 284030.284             |
|              |        | 35-39       | 1146798.555                | 431720.712                 | 715077.843             |
|              |        | 40-44       | 2609591.408                | 988245.752                 | 1621345.66             |
|              |        | 45-49       | 4775841.753                | 1826264.445                | 2949577.31             |
|              |        | 50-54       | 7446969.205                | 3089308.008                | 4357661.20             |
|              |        | 55-59       | 8240205.925                | 3995132.004                | 4245073.92             |
|              |        | 60-64       | 8772829.118                | 4725777.781                | 4047051.34             |
|              |        | 65-69       | 6161494.678                | 3748214.954                | 2413279.72             |
|              |        | 70-74       | 2495906.274                | 1581626.591                | 914279.682             |
|              | 75-79  | 0.000       | 0.000                      | 0.000                      |                        |
|              | Female | 30-34       | 229140.561                 | 100134.215                 | 129006.346             |
|              |        | 35-39       | 570217.942                 | 256485.539                 | 313732.403             |
|              |        | 40-44       | 1267538.938                | 568060.294                 | 699478.644             |
|              |        | 45-49       | 2340070.698                | 1056408.667                | 1283662.03             |
|              |        | 50-54       | 3743803.613                | 1748136.317                | 1995667.30             |
|              |        | 55-59       | 4591478.168                | 2328156.490                | 2263321.68             |
|              |        | 60-64       | 5207367.788                | 2779214.680                | 2428153.11             |
|              |        | 65-69       | 4092181.394                | 2341884.370                | 1750297.02             |
| 70-74        |        | 1776092.171 | 1031504.598                | 744587.572                 |                        |
| Lung cancer  | Males  | 30-34       | 66065.017                  | 42958.600                  | 23106.417              |
|              |        | 35-39       | 232509.414                 | 158424.396                 | 74085.019              |
|              |        | 40-44       | 688628.041                 | 464808.675                 | 223819.366             |
|              |        | 45-49       | 1528300.367                | 1002931.801                | 525368.566             |
|              |        | 50-54       | 2730187.229                | 1774627.587                | 955559.642             |
|              |        | 55-59       | 3909101.673                | 2547385.415                | 1361716.26             |
|              |        | 60-64       | 4287716.660                | 2903548.183                | 1384168.48             |
|              |        | 65-69       | 3467897.115                | 2408644.948                | 1059252.17             |
|              |        | 70-74       | 1312144.343                | 929757.574                 | 382386.769             |
|              | 75-79  | 0.000       | 0.000                      | 0.000                      |                        |
|              | Female | 30-34       | 51913.113                  | 32913.877                  | 18999.236              |
|              |        | 35-39       | 189792.904                 | 124786.934                 | 65005.970              |
|              |        | 40-44       | 527596.573                 | 333794.312                 | 193802.261             |
|              |        | 45-49       | 1122524.269                | 686648.419                 | 435875.850             |
|              |        | 50-54       | 1882214.322                | 1135602.743                | 746611.579             |
|              |        | 55-59       | 2595581.943                | 1561236.326                | 1034345.62             |
|              |        | 60-64       | 2846273.090                | 1759931.738                | 1086341.35             |
|              |        | 65-69       | 2358758.394                | 1481064.850                | 877693.544             |
| 70-74        |        | 937814.238  | 596416.927                 | 341397.311                 |                        |
| IHD          | Males  | 30-34       | 263834.566                 | 65400.209                  | 198434.357             |
|              |        | 35-39       | 692140.150                 | 171137.742                 | 521002.409             |
|              |        | 40-44       | 1519708.432                | 343499.073                 | 1176209.36             |
|              |        | 45-49       | 2568546.697                | 524247.466                 | 2044299.23             |
|              |        | 50-54       | 3632929.903                | 845844.854                 | 2787085.05             |
|              |        | 55-59       | 2807892.356                | 764559.103                 | 2043333.25             |
|              |        | 60-64       | 2599825.934                | 896286.899                 | 1703539.03             |
|              |        | 65-69       | 1113578.307                | 459403.964                 | 654174.343             |
|              |        | 70-74       | 437536.271                 | 213938.315                 | 223597.956             |
|              | 75-79  | 0.000       | 0.000                      | 0.000                      |                        |
|              | Female | 30-34       | 79649.097                  | 19948.946                  | 59700.151              |
|              |        | 35-39       | 193965.908                 | 42914.386                  | 151051.522             |
|              |        | 40-44       | 403380.974                 | 80073.268                  | 323307.706             |
|              |        | 45-49       | 671385.408                 | 124865.188                 | 546520.220             |
|              |        | 50-54       | 1011875.989                | 227181.959                 | 784694.030             |
|              |        | 55-59       | 849875.715                 | 232218.131                 | 617657.584             |
|              |        | 60-64       | 925490.876                 | 316141.203                 | 609349.674             |
|              |        | 65-69       | 455463.881                 | 185760.818                 | 269703.063             |
| 70-74        |        | 207681.216  | 97635.576                  | 110045.641                 |                        |
| Stroke       | Males  | 30-34       | 73463.650                  | 31479.533                  | 41984.117              |
|              |        | 35-39       | 151934.057                 | 65433.207                  | 86500.850              |
|              |        | 40-44       | 262845.974                 | 107318.626                 | 155527.349             |
|              |        | 45-49       | 383421.246                 | 145288.289                 | 238132.957             |
|              |        | 50-54       | 479872.634                 | 163443.184                 | 316429.450             |
|              |        | 55-59       | 437124.903                 | 137090.224                 | 300034.679             |
|              |        | 60-64       | 419457.235                 | 134647.197                 | 284810.037             |
|              |        | 65-69       | 128180.574                 | 42867.963                  | 85312.611              |
|              |        | 70-74       | 53245.965                  | 19177.342                  | 34068.623              |
|              | 75-79  | 0.000       | 0.000                      | 0.000                      |                        |
|              | Female | 30-34       | 62919.090                  | 29147.046                  | 33772.044              |

**Results for PHIM for Run 2 (ELL Summary Sensitivity\_Analysis\_2.RTF)**

|      |        |       |             |            |            |
|------|--------|-------|-------------|------------|------------|
|      |        | 35-39 | 120806.205  | 53547.548  | 67258.658  |
|      |        | 40-44 | 203391.885  | 83044.582  | 120347.303 |
|      |        | 45-49 | 278172.097  | 105048.262 | 173123.836 |
|      |        | 50-54 | 325979.181  | 114638.653 | 211340.528 |
|      |        | 55-59 | 275161.340  | 90280.144  | 184881.195 |
|      |        | 60-64 | 268920.493  | 88695.081  | 180225.412 |
|      |        | 65-69 | 87956.054   | 29448.048  | 58508.005  |
|      |        | 70-74 | 42055.224   | 14073.294  | 27981.929  |
|      |        | 75-79 | 0.000       | 0.000      | 0.000      |
| COPD | Males  | 30-34 | 40547.801   | 20042.408  | 20505.393  |
|      |        | 35-39 | 70214.933   | 36725.368  | 33489.566  |
|      |        | 40-44 | 138408.960  | 72619.378  | 65789.582  |
|      |        | 45-49 | 295573.443  | 153796.889 | 141776.554 |
|      |        | 50-54 | 603979.438  | 305392.383 | 298587.056 |
|      |        | 55-59 | 1086086.992 | 546097.261 | 539989.731 |
|      |        | 60-64 | 1465829.290 | 791295.502 | 674533.788 |
|      |        | 65-69 | 1451838.682 | 837298.079 | 614540.603 |
|      |        | 70-74 | 692979.695  | 418753.360 | 274226.335 |
|      |        | 75-79 | 0.000       | 0.000      | 0.000      |
|      | Female | 30-34 | 34659.261   | 18124.346  | 16534.915  |
|      |        | 35-39 | 65652.924   | 35236.671  | 30416.253  |
|      |        | 40-44 | 133169.505  | 71148.131  | 62021.374  |
|      |        | 45-49 | 267988.924  | 139846.798 | 128142.126 |
|      |        | 50-54 | 523734.121  | 270712.962 | 253021.159 |
|      |        | 55-59 | 870859.170  | 444421.887 | 426437.282 |
|      |        | 60-64 | 1166683.329 | 614446.658 | 552236.670 |
|      |        | 65-69 | 1190003.066 | 645610.654 | 544392.412 |
|      |        | 70-74 | 588541.493  | 323378.802 | 265162.692 |
|      |        | 75-79 | 0.000       | 0.000      | 0.000      |

---

## Results for PHIM for Run 2 (ELL Summary Sensitivity\_Analysis\_2.RTF)

\*\*\*\*\*

**Table 6: Estimated Loss of Life, at the end of follow-up, Population and Number deaths adjusted for Ecig scenario**

| Disease      | Sex    | Age Group   | Years of life lost<br>NULL | Years of life lost<br>Ecig | Years of life<br>Saved |
|--------------|--------|-------------|----------------------------|----------------------------|------------------------|
| All Diseases | Males  | 30-34       | 443911.034                 | 159895.230                 | 284015.804             |
|              |        | 35-39       | 1146798.555                | 431838.685                 | 714959.870             |
|              |        | 40-44       | 2609591.408                | 989078.595                 | 1620512.81             |
|              |        | 45-49       | 4775841.753                | 1830235.131                | 2945606.62             |
|              |        | 50-54       | 7446969.205                | 3101683.948                | 4345285.26             |
|              |        | 55-59       | 8240205.925                | 4015918.912                | 4224287.01             |
|              |        | 60-64       | 8772829.118                | 4762423.001                | 4010406.12             |
|              |        | 65-69       | 6161494.678                | 3781246.583                | 2380248.10             |
|              |        | 70-74       | 2495906.274                | 1600741.624                | 895164.650             |
|              | 75-79  | 0.000       | 0.000                      | 0.000                      |                        |
|              | Female | 30-34       | 229140.561                 | 100138.265                 | 129002.296             |
|              |        | 35-39       | 570217.942                 | 256517.648                 | 313700.294             |
|              |        | 40-44       | 1267538.938                | 568273.476                 | 699265.462             |
|              |        | 45-49       | 2340070.698                | 1057380.997                | 1282689.70             |
|              |        | 50-54       | 3743803.613                | 1751290.011                | 1992513.60             |
|              |        | 55-59       | 4591478.168                | 2334495.934                | 2256982.23             |
|              |        | 60-64       | 5207367.788                | 2792094.966                | 2415272.82             |
|              |        | 65-69       | 4092181.394                | 2356439.462                | 1735741.93             |
| 70-74        |        | 1776092.171 | 1041375.386                | 734716.785                 |                        |
| Lung cancer  | Males  | 30-34       | 66065.017                  | 42962.759                  | 23102.259              |
|              |        | 35-39       | 232509.414                 | 158472.809                 | 74036.605              |
|              |        | 40-44       | 688628.041                 | 465247.511                 | 223380.530             |
|              |        | 45-49       | 1528300.367                | 1005312.178                | 522988.189             |
|              |        | 50-54       | 2730187.229                | 1782378.535                | 947808.695             |
|              |        | 55-59       | 3909101.673                | 2561536.478                | 1347565.20             |
|              |        | 60-64       | 4287716.660                | 2927550.847                | 1360165.81             |
|              |        | 65-69       | 3467897.115                | 2430075.708                | 1037821.41             |
|              |        | 70-74       | 1312144.343                | 941142.250                 | 371002.093             |
|              | 75-79  | 0.000       | 0.000                      | 0.000                      |                        |
|              | Female | 30-34       | 51913.113                  | 32915.415                  | 18997.698              |
|              |        | 35-39       | 189792.904                 | 124803.957                 | 64988.947              |
|              |        | 40-44       | 527596.573                 | 333929.361                 | 193667.213             |
|              |        | 45-49       | 1122524.269                | 687308.195                 | 435216.074             |
|              |        | 50-54       | 1882214.322                | 1137743.849                | 744470.473             |
|              |        | 55-59       | 2595581.943                | 1565620.112                | 1029961.83             |
|              |        | 60-64       | 2846273.090                | 1768371.169                | 1077901.92             |
|              |        | 65-69       | 2358758.394                | 1490191.425                | 868566.969             |
| 70-74        |        | 937814.238  | 602077.547                 | 335736.691                 |                        |
| IHD          | Males  | 30-34       | 263834.566                 | 65406.087                  | 198428.479             |
|              |        | 35-39       | 692140.150                 | 171179.041                 | 520961.109             |
|              |        | 40-44       | 1519708.432                | 343735.631                 | 1175972.80             |
|              |        | 45-49       | 2568546.697                | 525134.810                 | 2043411.89             |
|              |        | 50-54       | 3632929.903                | 848211.078                 | 2784718.83             |
|              |        | 55-59       | 2807892.356                | 766733.305                 | 2041159.05             |
|              |        | 60-64       | 2599825.934                | 899645.763                 | 1700180.17             |
|              |        | 65-69       | 1113578.307                | 460992.029                 | 652586.278             |
|              |        | 70-74       | 437536.271                 | 214894.265                 | 222642.006             |
|              | 75-79  | 0.000       | 0.000                      | 0.000                      |                        |
|              | Female | 30-34       | 79649.097                  | 19949.730                  | 59699.367              |
|              |        | 35-39       | 193965.908                 | 42919.311                  | 151046.596             |
|              |        | 40-44       | 403380.974                 | 80098.389                  | 323282.585             |
|              |        | 45-49       | 671385.408                 | 124954.359                 | 546431.049             |
|              |        | 50-54       | 1011875.989                | 227443.169                 | 784432.820             |
|              |        | 55-59       | 849875.715                 | 232520.397                 | 617355.318             |
|              |        | 60-64       | 925490.876                 | 316754.519                 | 608736.357             |
|              |        | 65-69       | 455463.881                 | 186146.921                 | 269316.961             |
| 70-74        |        | 207681.216  | 97936.486                  | 109744.730                 |                        |
| Stroke       | Males  | 30-34       | 73463.650                  | 31481.869                  | 41981.781              |
|              |        | 35-39       | 151934.057                 | 65448.531                  | 86485.526              |
|              |        | 40-44       | 262845.974                 | 107394.668                 | 155451.307             |
|              |        | 45-49       | 383421.246                 | 145545.831                 | 237875.415             |
|              |        | 50-54       | 479872.634                 | 163973.204                 | 315899.430             |
|              |        | 55-59       | 437124.903                 | 137613.372                 | 299511.531             |
|              |        | 60-64       | 419457.235                 | 135353.414                 | 284103.820             |
|              |        | 65-69       | 128180.574                 | 43063.025                  | 85117.549              |
|              |        | 70-74       | 53245.965                  | 19280.031                  | 33965.934              |
|              | 75-79  | 0.000       | 0.000                      | 0.000                      |                        |
|              | Female | 30-34       | 62919.090                  | 29147.948                  | 33771.142              |

**Results for PHIM for Run 2 (ELL Summary Sensitivity\_Analysis\_2.RTF)**

|      |       |        |             |             |            |            |
|------|-------|--------|-------------|-------------|------------|------------|
|      |       | 35-39  | 120806.205  | 53552.590   | 67253.616  |            |
|      |       | 40-44  | 203391.885  | 83066.837   | 120325.049 |            |
|      |       | 45-49  | 278172.097  | 105114.741  | 173057.356 |            |
|      |       | 50-54  | 325979.181  | 114775.441  | 211203.740 |            |
|      |       | 55-59  | 275161.340  | 90427.358   | 184733.982 |            |
|      |       | 60-64  | 268920.493  | 88921.161   | 179999.332 |            |
|      |       | 65-69  | 87956.054   | 29526.545   | 58429.508  |            |
|      |       | 70-74  | 42055.224   | 14125.960   | 27929.263  |            |
|      |       | 75-79  | 0.000       | 0.000       | 0.000      |            |
| COPD | Males | 30-34  | 40547.801   | 20044.515   | 20503.286  |            |
|      |       | 35-39  | 70214.933   | 36738.305   | 33476.629  |            |
|      |       | 40-44  | 138408.960  | 72700.785   | 65708.175  |            |
|      |       | 45-49  | 295573.443  | 154242.311  | 141331.132 |            |
|      |       | 50-54  | 603979.438  | 307121.132  | 296858.307 |            |
|      |       | 55-59  | 1086086.992 | 550035.758  | 536051.235 |            |
|      |       | 60-64  | 1465829.290 | 799872.977  | 665956.313 |            |
|      |       | 65-69  | 1451838.682 | 847115.820  | 604722.862 |            |
|      |       | 70-74  | 692979.695  | 425425.077  | 267554.617 |            |
|      |       | 75-79  | 0.000       | 0.000       | 0.000      |            |
|      |       | Female | 30-34       | 34659.261   | 18125.172  | 16534.089  |
|      |       |        | 35-39       | 65652.924   | 35241.790  | 30411.135  |
|      |       |        | 40-44       | 133169.505  | 71178.890  | 61990.616  |
|      |       |        | 45-49       | 267988.924  | 140003.702 | 127985.222 |
|      |       |        | 50-54       | 523734.121  | 271327.552 | 252406.569 |
|      |       |        | 55-59       | 870859.170  | 445928.068 | 424931.102 |
|      |       |        | 60-64       | 1166683.329 | 618048.118 | 548635.211 |
|      |       |        | 65-69       | 1190003.066 | 650574.571 | 539428.495 |
|      |       |        | 70-74       | 588541.493  | 327235.393 | 261306.101 |
|      |       | 75-79  | 0.000       | 0.000       | 0.000      |            |

---

## Results for PHIM for Run 4 (ELL Summary Sensitivity\_Analysis\_2.RTF)

\*\*\*\*\*

### Estimated Loss of Life from the E Component for Run: 4, Simulation: 1

Country: US (United States)  
 Follow-up Period: 1990 to 2039

**Table 1: Estimated Loss of Life, at the end of follow-up, all age groups combined, Population unadjusted for deaths in Ecig scenario**

| Disease      | Sex    | Year | Years of life lost<br>NULL | Years of life lost<br>Ecig | Years of life<br>Saved |
|--------------|--------|------|----------------------------|----------------------------|------------------------|
| All Diseases | Males  | 2039 | 42093547.949               | 23303274.220               | 18790273.7             |
|              | Female | 2039 | 23817891.273               | 13905884.713               | 9912006.56             |
| Lung cancer  | Males  | 2039 | 18222549.860               | 13164462.422               | 5058087.44             |
|              | Female | 2039 | 12512468.845               | 8508738.279                | 4003730.57             |
| IHD          | Males  | 2039 | 15635992.616               | 5621970.941                | 10014021.7             |
|              | Female | 2039 | 4798769.065                | 1773611.161                | 3025157.90             |
| Stroke       | Males  | 2039 | 2389546.238                | 1030497.534                | 1359048.70             |
|              | Female | 2039 | 1665361.569                | 758594.548                 | 906767.021             |
| COPD         | Males  | 2039 | 5845459.234                | 3486343.322                | 2359115.91             |
|              | Female | 2039 | 4841291.793                | 2864940.725                | 1976351.07             |



## Results for PHIM for Run 4 (ELL Summary Sensitivity\_Analysis\_2.RTF)

\*\*\*\*\*

**Table 2: Estimated Loss of Life, at the end of follow-up, all age groups combined, Population and Number deaths adjusted for Ecig scenario**

| Disease      | Sex    | Year | Years of life lost<br>NULL | Years of life lost<br>Ecig | Years of life<br>Saved |
|--------------|--------|------|----------------------------|----------------------------|------------------------|
| All Diseases | Males  | 2039 | 42093547.949               | 23411081.106               | 18682466.8             |
|              | Female | 2039 | 23817891.273               | 13946690.314               | 9871200.96             |
| Lung cancer  | Males  | 2039 | 18222549.860               | 13232023.068               | 4990526.79             |
|              | Female | 2039 | 12512468.845               | 8534353.880                | 3978114.97             |
| IHD          | Males  | 2039 | 15635992.616               | 5632991.698                | 10003000.9             |
|              | Female | 2039 | 4798769.065                | 1775465.098                | 3023303.97             |
| Stroke       | Males  | 2039 | 2389546.238                | 1032701.794                | 1356844.44             |
|              | Female | 2039 | 1665361.569                | 759275.144                 | 906086.426             |
| COPD         | Males  | 2039 | 5845459.234                | 3513364.546                | 2332094.69             |
|              | Female | 2039 | 4841291.793                | 2877596.193                | 1963695.60             |

## Results for PHIM for Run 4 (ELL Summary Sensitivity\_Analysis\_2.RTF)

\*\*\*\*\*

**Table 3: Estimated Loss of Life, All age groups combined, Population unadjusted for deaths in Ecig scenario, cumulative over years**

| Disease      | Sex          | Year         | Years of life lost<br>NULL | Years of life lost<br>Ecig | Years of life<br>Saved |
|--------------|--------------|--------------|----------------------------|----------------------------|------------------------|
| All Diseases | Males        | 1990         | 1304839.645                | 1304839.645                | 0.000                  |
|              |              | 1991         | 2579865.358                | 2567841.030                | 12024.328              |
|              |              | 1992         | 3830683.831                | 3786065.883                | 44617.949              |
|              |              | 1993         | 5076567.803                | 4972703.171                | 103864.632             |
|              |              | 1994         | 6292145.526                | 6098416.082                | 193729.445             |
|              |              | 1995         | 7485537.010                | 7167705.178                | 317831.832             |
|              |              | 1996         | 8655955.028                | 8178974.129                | 476980.898             |
|              |              | 1997         | 9791729.713                | 9123218.808                | 668510.905             |
|              |              | 1998         | 10899134.186               | 10009300.941               | 889833.245             |
|              |              | 1999         | 12070409.674               | 10889211.507               | 1181198.17             |
|              |              | 2000         | 13231384.595               | 11725819.389               | 1505565.21             |
|              |              | 2001         | 14371761.018               | 12510215.439               | 1861545.58             |
|              |              | 2002         | 15508906.386               | 13255026.034               | 2253880.35             |
|              |              | 2003         | 16638100.422               | 13962488.337               | 2675612.09             |
|              |              | 2004         | 17736465.088               | 14624916.820               | 3111548.27             |
|              |              | 2005         | 18834658.606               | 15261987.807               | 3572670.80             |
|              |              | 2006         | 19909100.501               | 15855100.955               | 4053999.55             |
|              |              | 2007         | 20958321.463               | 16413019.001               | 4545302.46             |
|              |              | 2008         | 22000068.148               | 16949273.033               | 5050795.12             |
|              |              | 2009         | 23018816.903               | 17455742.034               | 5563074.87             |
|              |              | 2010         | 24018480.537               | 17933432.234               | 6085048.30             |
|              |              | 2011         | 25003034.574               | 18385613.714               | 6617420.86             |
|              |              | 2012         | 25969871.429               | 18811078.894               | 7158792.53             |
|              |              | 2013         | 26920275.180               | 19211937.794               | 7708337.39             |
|              |              | 2014         | 27849005.227               | 19586956.860               | 8262048.37             |
|              |              | 2015         | 28749620.400               | 19939905.317               | 8809715.08             |
|              |              | 2016         | 29622417.562               | 20262010.929               | 9360406.63             |
|              |              | 2017         | 30462559.724               | 20556034.351               | 9906525.37             |
|              |              | 2018         | 31293299.299               | 20838379.937               | 10454919.4             |
|              |              | 2019         | 32109993.427               | 21104579.002               | 11005414.4             |
|              |              | 2020         | 32883323.977               | 21352047.319               | 11531276.7             |
|              |              | 2021         | 33610102.554               | 21565804.744               | 12044297.8             |
|              |              | 2022         | 34322010.448               | 21765633.073               | 12556377.4             |
|              |              | 2023         | 35018383.550               | 21951696.431               | 13066687.1             |
|              |              | 2024         | 35700177.955               | 22125247.834               | 13574930.1             |
|              |              | 2025         | 36315500.346               | 22281587.180               | 14033913.2             |
|              |              | 2026         | 36896159.343               | 22414040.475               | 14482118.9             |
|              |              | 2027         | 37462570.116               | 22536648.548               | 14925921.6             |
|              |              | 2028         | 38015337.780               | 22649726.105               | 15365611.7             |
|              |              | 2029         | 38554814.764               | 22754627.580               | 15800187.2             |
|              |              | 2030         | 39003805.400               | 22843923.068               | 16159882.3             |
|              |              | 2031         | 39436509.703               | 22919709.196               | 16516800.5             |
| 2032         | 39858470.458 | 22989515.521 | 16868954.9                 |                            |                        |
| 2033         | 40270147.082 | 23053500.689 | 17216646.4                 |                            |                        |
| 2034         | 40672665.743 | 23113009.724 | 17559656.0                 |                            |                        |
| 2035         | 40962732.664 | 23157910.273 | 17804822.4                 |                            |                        |
| 2036         | 41255021.653 | 23198446.811 | 18056574.8                 |                            |                        |
| 2037         | 41540573.023 | 23236000.412 | 18304572.6                 |                            |                        |
| 2038         | 41820158.066 | 23270704.698 | 18549453.4                 |                            |                        |
| 2039         | 42093547.949 | 23303274.220 | 18790273.7                 |                            |                        |
|              | Female       | 1990         | 588979.406                 | 588979.406                 | 0.000                  |
|              |              | 1991         | 1182571.252                | 1178210.284                | 4360.969               |
|              |              | 1992         | 1777346.679                | 1760947.650                | 16399.029              |
|              |              | 1993         | 2380261.899                | 2341353.109                | 38908.790              |
|              |              | 1994         | 2983130.039                | 2909336.110                | 73793.929              |
|              |              | 1995         | 3588982.584                | 3466481.325                | 122501.259             |
|              |              | 1996         | 4195430.235                | 4008031.101                | 187399.134             |
|              |              | 1997         | 4793866.694                | 4528597.179                | 265269.515             |
|              |              | 1998         | 5389747.381                | 5032414.122                | 357333.259             |
|              |              | 1999         | 6006722.467                | 5532135.563                | 474586.904             |
|              |              | 2000         | 6625758.871                | 6019156.628                | 606602.242             |
|              |              | 2001         | 7245135.411                | 6489711.597                | 755423.814             |
|              |              | 2002         | 7867492.021                | 6946270.133                | 921221.887             |
|              |              | 2003         | 8485051.793                | 7384873.035                | 1100178.76             |
|              |              | 2004         | 9092994.774                | 7802778.193                | 1290216.58             |
|              |              | 2005         | 9706032.803                | 8210226.053                | 1495806.75             |
|              |              | 2006         | 10311907.548               | 8598449.636                | 1713457.91             |
|              |              | 2007         | 10909437.502               | 8969963.016                | 1939474.49             |
|              |              | 2008         | 11506462.491               | 9326037.657                | 2180424.83             |
|              |              | 2009         | 12098393.287               | 9669190.747                | 2429202.54             |
|              |              | 2010         | 12681188.981               | 9994756.362                | 2686432.62             |

**Results for PHIM for Run 4 (ELL Summary Sensitivity\_Analysis\_2.RTF)**

|             |       |      |              |              |            |
|-------------|-------|------|--------------|--------------|------------|
|             |       | 2011 | 13260062.991 | 10305307.169 | 2954755.82 |
|             |       | 2012 | 13839417.441 | 10603261.310 | 3236156.13 |
|             |       | 2013 | 14409614.758 | 10885898.429 | 3523716.33 |
|             |       | 2014 | 14976658.746 | 11153845.870 | 3822812.88 |
|             |       | 2015 | 15529977.821 | 11406075.481 | 4123902.34 |
|             |       | 2016 | 16066640.764 | 11638854.426 | 4427786.34 |
|             |       | 2017 | 16590035.078 | 11855734.393 | 4734300.68 |
|             |       | 2018 | 17098716.137 | 12060033.360 | 5038682.78 |
|             |       | 2019 | 17599868.850 | 12252514.207 | 5347354.64 |
|             |       | 2020 | 18081346.241 | 12432229.595 | 5649116.65 |
|             |       | 2021 | 18537594.460 | 12593548.186 | 5944046.27 |
|             |       | 2022 | 18985300.234 | 12744405.423 | 6240894.81 |
|             |       | 2023 | 19423958.747 | 12885233.735 | 6538725.01 |
|             |       | 2024 | 19853347.772 | 13016133.071 | 6837214.70 |
|             |       | 2025 | 20252822.245 | 13135307.217 | 7117515.03 |
|             |       | 2026 | 20619307.063 | 13238159.965 | 7381147.10 |
|             |       | 2027 | 20976063.406 | 13333096.925 | 7642966.48 |
|             |       | 2028 | 21323641.947 | 13420899.529 | 7902742.42 |
|             |       | 2029 | 21662117.106 | 13501516.656 | 8160600.45 |
|             |       | 2030 | 21960971.694 | 13571948.417 | 8389023.28 |
|             |       | 2031 | 22224951.983 | 13629149.215 | 8595802.77 |
|             |       | 2032 | 22480397.853 | 13681322.629 | 8799075.22 |
|             |       | 2033 | 22728639.455 | 13729161.248 | 8999478.21 |
|             |       | 2034 | 22970448.888 | 13772648.415 | 9197800.47 |
|             |       | 2035 | 23164154.188 | 13807534.857 | 9356619.33 |
|             |       | 2036 | 23334538.616 | 13835378.033 | 9499160.58 |
|             |       | 2037 | 23499760.723 | 13860871.839 | 9638888.88 |
|             |       | 2038 | 23660308.401 | 13884318.723 | 9775989.68 |
|             |       | 2039 | 23817891.273 | 13905884.713 | 9912006.56 |
| Lung cancer | Males | 1990 | 595621.791   | 595621.791   | 0.000      |
|             |       | 1991 | 1177744.113  | 1176812.874  | 931.239    |
|             |       | 1992 | 1750034.892  | 1746533.954  | 3500.938   |
|             |       | 1993 | 2319752.308  | 2311335.142  | 8417.165   |
|             |       | 1994 | 2872597.339  | 2856473.366  | 16123.973  |
|             |       | 1995 | 3411494.825  | 3384357.383  | 27137.443  |
|             |       | 1996 | 3945569.726  | 3903112.328  | 42457.398  |
|             |       | 1997 | 4463316.362  | 4401327.407  | 61988.956  |
|             |       | 1998 | 4975301.180  | 4888745.746  | 86555.435  |
|             |       | 1999 | 5473691.125  | 5357358.704  | 116332.421 |
|             |       | 2000 | 5977500.570  | 5824340.816  | 153159.754 |
|             |       | 2001 | 6474795.516  | 6277902.438  | 196893.078 |
|             |       | 2002 | 6968769.705  | 6720467.102  | 248302.603 |
|             |       | 2003 | 7460282.140  | 7151994.455  | 308287.685 |
|             |       | 2004 | 7947048.275  | 7570543.414  | 376504.861 |
|             |       | 2005 | 8430571.669  | 7977057.142  | 453514.526 |
|             |       | 2006 | 8903945.390  | 8365042.983  | 538902.407 |
|             |       | 2007 | 9364177.982  | 8732574.752  | 631603.230 |
|             |       | 2008 | 9822525.458  | 9087838.419  | 734687.039 |
|             |       | 2009 | 10275228.886 | 9428240.986  | 846987.900 |
|             |       | 2010 | 10720275.500 | 9752712.568  | 967562.933 |
|             |       | 2011 | 11155356.373 | 10059423.240 | 1095933.13 |
|             |       | 2012 | 11582611.617 | 10349156.421 | 1233455.20 |
|             |       | 2013 | 11998803.791 | 10620641.638 | 1378162.15 |
|             |       | 2014 | 12402087.090 | 10873601.795 | 1528485.29 |
|             |       | 2015 | 12793451.706 | 11109986.948 | 1683464.76 |
|             |       | 2016 | 13160101.653 | 11321634.864 | 1838466.79 |
|             |       | 2017 | 13503583.414 | 11511145.628 | 1992437.79 |
|             |       | 2018 | 13859755.737 | 11696745.355 | 2163010.38 |
|             |       | 2019 | 14211625.176 | 11871025.881 | 2340599.29 |
|             |       | 2020 | 14553935.288 | 12033169.613 | 2520765.67 |
|             |       | 2021 | 14851747.495 | 12166591.947 | 2685155.55 |
|             |       | 2022 | 15144531.004 | 12290547.262 | 2853983.74 |
|             |       | 2023 | 15431932.496 | 12405240.447 | 3026692.05 |
|             |       | 2024 | 15713920.740 | 12511413.080 | 3202507.66 |
|             |       | 2025 | 15979112.816 | 12607300.440 | 3371812.38 |
|             |       | 2026 | 16206550.153 | 12683495.216 | 3523054.94 |
|             |       | 2027 | 16428826.050 | 12753418.985 | 3675407.07 |
|             |       | 2028 | 16645902.186 | 12817386.409 | 3828515.78 |
|             |       | 2029 | 16858126.517 | 12876243.509 | 3981883.01 |
|             |       | 2030 | 17045220.687 | 12926768.030 | 4118452.66 |
|             |       | 2031 | 17208482.610 | 12966718.869 | 4241763.74 |
|             |       | 2032 | 17367586.074 | 13003301.317 | 4364284.76 |
|             |       | 2033 | 17522716.280 | 13036684.160 | 4486032.12 |
|             |       | 2034 | 17674226.555 | 13067541.266 | 4606685.29 |
|             |       | 2035 | 17792201.734 | 13091241.269 | 4700960.46 |
|             |       | 2036 | 17903508.236 | 13111646.044 | 4791862.19 |
|             |       | 2037 | 18012162.345 | 13130549.588 | 4881612.76 |
|             |       | 2038 | 18118464.470 | 13148022.414 | 4970442.06 |

**Results for PHIM for Run 4 (ELL Summary Sensitivity\_Analysis\_2.RTF)**

|     |        |      |              |              |            |
|-----|--------|------|--------------|--------------|------------|
|     |        | 2039 | 18222549.860 | 13164462.422 | 5058087.44 |
|     | Female | 1990 | 307897.357   | 307897.357   | 0.000      |
|     |        | 1991 | 616547.418   | 615911.140   | 636.278    |
|     |        | 1992 | 931086.773   | 928598.062   | 2488.711   |
|     |        | 1993 | 1246155.671  | 1240124.227  | 6031.444   |
|     |        | 1994 | 1561212.934  | 1549499.975  | 11712.960  |
|     |        | 1995 | 1879967.742  | 1859847.722  | 20120.020  |
|     |        | 1996 | 2197488.109  | 2165916.446  | 31571.664  |
|     |        | 1997 | 2515698.453  | 2469121.789  | 46576.664  |
|     |        | 1998 | 2836249.556  | 2770728.060  | 65521.496  |
|     |        | 1999 | 3150201.390  | 3061965.933  | 88235.457  |
|     |        | 2000 | 3472722.342  | 3356617.273  | 116105.070 |
|     |        | 2001 | 3796994.889  | 3647603.749  | 149391.141 |
|     |        | 2002 | 4126619.935  | 3937669.657  | 188950.278 |
|     |        | 2003 | 4454982.533  | 4220761.496  | 234221.038 |
|     |        | 2004 | 4784343.030  | 4498294.379  | 286048.651 |
|     |        | 2005 | 5113443.121  | 4768856.858  | 344586.262 |
|     |        | 2006 | 5442543.963  | 5031881.176  | 410662.787 |
|     |        | 2007 | 5772441.497  | 5288139.357  | 484302.140 |
|     |        | 2008 | 6091911.943  | 5528814.641  | 563097.302 |
|     |        | 2009 | 6413671.330  | 5763072.058  | 650599.272 |
|     |        | 2010 | 6730763.530  | 5986597.579  | 744165.951 |
|     |        | 2011 | 7043614.101  | 6199032.751  | 844581.350 |
|     |        | 2012 | 7356270.780  | 6403161.486  | 953109.294 |
|     |        | 2013 | 7662551.964  | 6595225.183  | 1067326.78 |
|     |        | 2014 | 7964551.465  | 6776981.884  | 1187569.58 |
|     |        | 2015 | 8254895.403  | 6945430.598  | 1309464.80 |
|     |        | 2016 | 8530661.848  | 7098036.154  | 1432625.69 |
|     |        | 2017 | 8795826.122  | 7238275.753  | 1557550.37 |
|     |        | 2018 | 9067233.707  | 7373936.673  | 1693297.03 |
|     |        | 2019 | 9335343.270  | 7501142.672  | 1834200.60 |
|     |        | 2020 | 9596110.883  | 7619525.970  | 1976584.91 |
|     |        | 2021 | 9833186.859  | 7722510.281  | 2110676.58 |
|     |        | 2022 | 10066452.037 | 7818232.989  | 2248219.05 |
|     |        | 2023 | 10295503.609 | 7907064.415  | 2388439.19 |
|     |        | 2024 | 10520125.318 | 7989104.672  | 2531020.65 |
|     |        | 2025 | 10731915.863 | 8063384.261  | 2668531.60 |
|     |        | 2026 | 10917495.549 | 8125165.754  | 2792329.79 |
|     |        | 2027 | 11098620.885 | 8181826.533  | 2916794.35 |
|     |        | 2028 | 11275441.234 | 8233922.739  | 3041518.50 |
|     |        | 2029 | 11447962.710 | 8281482.414  | 3166480.30 |
|     |        | 2030 | 11601867.623 | 8322673.259  | 3279194.36 |
|     |        | 2031 | 11731666.516 | 8354967.590  | 3376698.93 |
|     |        | 2032 | 11857585.969 | 8384345.021  | 3473240.95 |
|     |        | 2033 | 11980128.625 | 8411226.733  | 3568901.89 |
|     |        | 2034 | 12099562.464 | 8435638.158  | 3663924.31 |
|     |        | 2035 | 12195919.946 | 8454931.719  | 3740988.23 |
|     |        | 2036 | 12278201.969 | 8470064.499  | 3808137.47 |
|     |        | 2037 | 12358146.336 | 8483983.971  | 3874162.36 |
|     |        | 2038 | 12435978.633 | 8496843.922  | 3939134.71 |
|     |        | 2039 | 12512468.845 | 8508738.279  | 4003730.57 |
| IHD | Males  | 1990 | 517209.093   | 517209.093   | 0.000      |
|     |        | 1991 | 1019219.395  | 1009438.169  | 9781.225   |
|     |        | 1992 | 1509598.614  | 1473327.008  | 36271.606  |
|     |        | 1993 | 1992735.299  | 1908751.270  | 83984.029  |
|     |        | 1994 | 2462877.575  | 2307235.841  | 155641.733 |
|     |        | 1995 | 2928249.390  | 2674268.308  | 253981.082 |
|     |        | 1996 | 3377377.730  | 2998878.631  | 378499.099 |
|     |        | 1997 | 3809062.472  | 3282588.707  | 526473.765 |
|     |        | 1998 | 4222213.867  | 3527308.375  | 694905.492 |
|     |        | 1999 | 4708317.743  | 3784743.003  | 923574.740 |
|     |        | 2000 | 5182084.396  | 4009278.075  | 1172806.32 |
|     |        | 2001 | 5644097.705  | 4201768.656  | 1442329.05 |
|     |        | 2002 | 6107232.129  | 4371535.606  | 1735696.52 |
|     |        | 2003 | 6561785.704  | 4517824.262  | 2043961.44 |
|     |        | 2004 | 6996156.348  | 4641485.825  | 2354670.52 |
|     |        | 2005 | 7426261.361  | 4750192.138  | 2676069.22 |
|     |        | 2006 | 7849012.694  | 4843716.682  | 3005296.01 |
|     |        | 2007 | 8255300.530  | 4923601.542  | 3331698.99 |
|     |        | 2008 | 8650662.040  | 4993418.775  | 3657243.27 |
|     |        | 2009 | 9030818.513  | 5054153.351  | 3976665.16 |
|     |        | 2010 | 9403026.327  | 5108019.401  | 4295006.93 |
|     |        | 2011 | 9767535.506  | 5155751.767  | 4611783.74 |
|     |        | 2012 | 10123044.281 | 5198421.890  | 4924622.39 |
|     |        | 2013 | 10470104.786 | 5236640.437  | 5233464.35 |
|     |        | 2014 | 10807756.112 | 5271347.829  | 5536408.28 |
|     |        | 2015 | 11130681.425 | 5302637.201  | 5828044.22 |
|     |        | 2016 | 11448966.506 | 5331595.727  | 6117370.78 |

**Results for PHIM for Run 4 (ELL Summary Sensitivity\_Analysis\_2.RTF)**

|        |        |      |              |             |            |
|--------|--------|------|--------------|-------------|------------|
|        |        | 2017 | 11758164.882 | 5358245.203 | 6399919.68 |
|        |        | 2018 | 12054448.241 | 5382391.131 | 6672057.11 |
|        |        | 2019 | 12341606.261 | 5404951.127 | 6936655.13 |
|        |        | 2020 | 12600728.939 | 5424688.673 | 7176040.27 |
|        |        | 2021 | 12861767.105 | 5443872.182 | 7417894.92 |
|        |        | 2022 | 13114168.616 | 5461899.900 | 7652268.72 |
|        |        | 2023 | 13357894.797 | 5478771.441 | 7879123.36 |
|        |        | 2024 | 13593848.521 | 5494845.452 | 8099003.07 |
|        |        | 2025 | 13789177.359 | 5507869.809 | 8281307.55 |
|        |        | 2026 | 13993401.656 | 5521327.733 | 8472073.92 |
|        |        | 2027 | 14190519.224 | 5534189.321 | 8656329.90 |
|        |        | 2028 | 14381193.356 | 5546385.631 | 8834807.72 |
|        |        | 2029 | 14565171.927 | 5558133.150 | 9007038.78 |
|        |        | 2030 | 14697381.605 | 5566370.181 | 9131011.42 |
|        |        | 2031 | 14842203.512 | 5575376.834 | 9266826.68 |
|        |        | 2032 | 14982485.826 | 5584015.659 | 9398470.17 |
|        |        | 2033 | 15118410.647 | 5592189.732 | 9526220.91 |
|        |        | 2034 | 15250284.398 | 5600222.128 | 9650062.27 |
|        |        | 2035 | 15322911.166 | 5604374.232 | 9718536.93 |
|        |        | 2036 | 15405115.031 | 5609048.418 | 9796066.61 |
|        |        | 2037 | 15484709.137 | 5613550.480 | 9871158.66 |
|        |        | 2038 | 15561812.193 | 5617830.802 | 9943981.39 |
|        |        | 2039 | 15635992.616 | 5621970.941 | 10014021.7 |
|        | Female | 1990 | 147299.110   | 147299.110  | 0.000      |
|        |        | 1991 | 295122.462   | 292418.822  | 2703.641   |
|        |        | 1992 | 439962.920   | 429911.656  | 10051.264  |
|        |        | 1993 | 584735.615   | 561126.733  | 23608.882  |
|        |        | 1994 | 727640.783   | 683432.803  | 44207.980  |
|        |        | 1995 | 868486.937   | 796167.553  | 72319.384  |
|        |        | 1996 | 1010321.847  | 900678.583  | 109643.265 |
|        |        | 1997 | 1144230.930  | 991684.367  | 152546.563 |
|        |        | 1998 | 1274513.622  | 1072354.247 | 202159.375 |
|        |        | 1999 | 1426725.938  | 1157894.388 | 268831.550 |
|        |        | 2000 | 1573462.680  | 1232634.587 | 340828.092 |
|        |        | 2001 | 1719132.015  | 1298231.538 | 420900.477 |
|        |        | 2002 | 1863006.732  | 1355576.847 | 507429.885 |
|        |        | 2003 | 2002943.227  | 1404976.540 | 597966.687 |
|        |        | 2004 | 2137798.705  | 1447192.979 | 690605.726 |
|        |        | 2005 | 2271071.245  | 1484374.216 | 786697.029 |
|        |        | 2006 | 2400707.731  | 1515990.246 | 884717.485 |
|        |        | 2007 | 2523634.512  | 1542627.932 | 981006.580 |
|        |        | 2008 | 2648752.232  | 1566687.372 | 1082064.86 |
|        |        | 2009 | 2765973.961  | 1587098.650 | 1178875.31 |
|        |        | 2010 | 2881329.235  | 1605299.934 | 1276029.30 |
|        |        | 2011 | 2994972.694  | 1621424.968 | 1373547.73 |
|        |        | 2012 | 3108958.829  | 1636038.861 | 1472919.97 |
|        |        | 2013 | 3218140.416  | 1648956.401 | 1569184.02 |
|        |        | 2014 | 3328387.914  | 1661007.300 | 1667380.61 |
|        |        | 2015 | 3435342.796  | 1672018.277 | 1763324.52 |
|        |        | 2016 | 3539189.408  | 1682011.055 | 1857178.35 |
|        |        | 2017 | 3640041.363  | 1691170.307 | 1948871.06 |
|        |        | 2018 | 3732645.362  | 1699181.686 | 2033463.68 |
|        |        | 2019 | 3821421.978  | 1706536.720 | 2114885.26 |
|        |        | 2020 | 3902115.950  | 1712980.723 | 2189135.23 |
|        |        | 2021 | 3984301.053  | 1719310.531 | 2264990.52 |
|        |        | 2022 | 4062629.299  | 1725151.899 | 2337477.40 |
|        |        | 2023 | 4137348.729  | 1730567.011 | 2406781.72 |
|        |        | 2024 | 4208611.493  | 1735605.190 | 2473006.30 |
|        |        | 2025 | 4269419.492  | 1739801.629 | 2529617.86 |
|        |        | 2026 | 4330969.998  | 1743984.252 | 2586985.75 |
|        |        | 2027 | 4389134.306  | 1747882.630 | 2641251.68 |
|        |        | 2028 | 4444222.970  | 1751539.142 | 2692683.83 |
|        |        | 2029 | 4496447.877  | 1754964.760 | 2741483.12 |
|        |        | 2030 | 4536975.698  | 1757545.095 | 2779430.60 |
|        |        | 2031 | 4578338.586  | 1760173.283 | 2818165.30 |
|        |        | 2032 | 4617397.784  | 1762651.076 | 2854746.71 |
|        |        | 2033 | 4654407.697  | 1764990.411 | 2889417.29 |
|        |        | 2034 | 4689913.454  | 1767205.772 | 2922707.68 |
|        |        | 2035 | 4712518.190  | 1768537.210 | 2943980.98 |
|        |        | 2036 | 4735845.827  | 1769906.622 | 2965939.20 |
|        |        | 2037 | 4757958.806  | 1771205.249 | 2986753.56 |
|        |        | 2038 | 4778813.806  | 1772437.936 | 3006375.87 |
|        |        | 2039 | 4798769.065  | 1773611.161 | 3025157.90 |
| Stroke | Males  | 1990 | 75005.854    | 75005.854   | 0.000      |
|        |        | 1991 | 149463.017   | 148450.303  | 1012.715   |
|        |        | 1992 | 222966.278   | 219223.809  | 3742.469   |
|        |        | 1993 | 296801.879   | 288007.669  | 8794.209   |
|        |        | 1994 | 372453.706   | 355652.566  | 16801.140  |

**Results for PHIM for Run 4 (ELL Summary Sensitivity\_Analysis\_2.RTF)**

|        |      |             |             |            |
|--------|------|-------------|-------------|------------|
|        | 1995 | 448401.338  | 420357.214  | 28044.124  |
|        | 1996 | 523536.301  | 480886.077  | 42650.224  |
|        | 1997 | 596763.211  | 536275.556  | 60487.655  |
|        | 1998 | 667546.681  | 586289.078  | 81257.603  |
|        | 1999 | 734925.407  | 630556.856  | 104368.551 |
|        | 2000 | 803749.361  | 672477.212  | 131272.149 |
|        | 2001 | 870081.588  | 709598.212  | 160483.376 |
|        | 2002 | 935347.140  | 743127.773  | 192219.367 |
|        | 2003 | 1001627.349 | 774116.711  | 227510.638 |
|        | 2004 | 1066587.976 | 801889.419  | 264698.556 |
|        | 2005 | 1130548.052 | 826738.319  | 303809.733 |
|        | 2006 | 1195132.454 | 849459.825  | 345672.629 |
|        | 2007 | 1258974.043 | 869833.958  | 389140.086 |
|        | 2008 | 1320124.867 | 887449.872  | 432674.995 |
|        | 2009 | 1380776.123 | 903321.858  | 477454.266 |
|        | 2010 | 1440048.533 | 917460.384  | 522588.149 |
|        | 2011 | 1497484.847 | 929950.548  | 567534.298 |
|        | 2012 | 1554496.526 | 941163.385  | 613333.142 |
|        | 2013 | 1610819.598 | 951274.653  | 659544.945 |
|        | 2014 | 1667484.890 | 960539.120  | 706945.769 |
|        | 2015 | 1720948.287 | 968682.128  | 752266.159 |
|        | 2016 | 1775699.228 | 976310.556  | 799388.672 |
|        | 2017 | 1830250.175 | 983323.572  | 846926.603 |
|        | 2018 | 1875958.950 | 988803.269  | 887155.681 |
|        | 2019 | 1920359.232 | 993764.126  | 926595.106 |
|        | 2020 | 1960605.297 | 998024.810  | 962580.488 |
|        | 2021 | 1998912.887 | 1001811.887 | 997101.000 |
|        | 2022 | 2036003.696 | 1005254.564 | 1030749.13 |
|        | 2023 | 2071857.536 | 1008385.610 | 1063471.93 |
|        | 2024 | 2106636.468 | 1011279.549 | 1095356.92 |
|        | 2025 | 2136450.873 | 1013667.699 | 1122783.17 |
|        | 2026 | 2164796.470 | 1015837.842 | 1148958.63 |
|        | 2027 | 2192079.608 | 1017851.973 | 1174227.64 |
|        | 2028 | 2218404.367 | 1019718.786 | 1198685.58 |
|        | 2029 | 2243769.140 | 1021474.240 | 1222294.90 |
|        | 2030 | 2263570.213 | 1022807.868 | 1240762.34 |
|        | 2031 | 2282521.590 | 1024050.518 | 1258471.07 |
|        | 2032 | 2300804.945 | 1025219.736 | 1275585.21 |
|        | 2033 | 2318464.018 | 1026315.067 | 1292148.95 |
|        | 2034 | 2335611.973 | 1027369.659 | 1308242.31 |
|        | 2035 | 2347097.290 | 1028055.210 | 1319042.08 |
|        | 2036 | 2358248.747 | 1028709.810 | 1329538.94 |
|        | 2037 | 2369033.655 | 1029335.559 | 1339698.10 |
|        | 2038 | 2379490.114 | 1029929.116 | 1349561.00 |
|        | 2039 | 2389546.238 | 1030497.534 | 1359048.70 |
| Female | 1990 | 56348.092   | 56348.092   | 0.000      |
|        | 1991 | 110871.862  | 110114.012  | 757.850    |
|        | 1992 | 165654.454  | 162785.607  | 2868.848   |
|        | 1993 | 220008.519  | 213247.867  | 6760.652   |
|        | 1994 | 275706.807  | 262771.099  | 12935.708  |
|        | 1995 | 331417.547  | 309886.082  | 21531.465  |
|        | 1996 | 387580.161  | 354738.078  | 32842.083  |
|        | 1997 | 442778.242  | 396144.817  | 46633.425  |
|        | 1998 | 496117.305  | 433563.245  | 62554.060  |
|        | 1999 | 548268.214  | 467640.004  | 80628.210  |
|        | 2000 | 601693.202  | 500068.606  | 101624.595 |
|        | 2001 | 652221.103  | 528391.631  | 123829.472 |
|        | 2002 | 703022.600  | 554530.898  | 148491.702 |
|        | 2003 | 752023.351  | 577624.089  | 174399.262 |
|        | 2004 | 799826.733  | 598186.863  | 201639.870 |
|        | 2005 | 847563.928  | 616923.004  | 230640.925 |
|        | 2006 | 894205.027  | 633558.717  | 260646.309 |
|        | 2007 | 939571.282  | 648237.258  | 291334.024 |
|        | 2008 | 983437.578  | 661147.280  | 322290.298 |
|        | 2009 | 1025803.786 | 672503.134  | 353300.652 |
|        | 2010 | 1066964.934 | 682525.860  | 384439.074 |
|        | 2011 | 1106954.044 | 691366.875  | 415587.170 |
|        | 2012 | 1146108.461 | 699257.673  | 446850.788 |
|        | 2013 | 1183544.689 | 706153.212  | 477391.477 |
|        | 2014 | 1221220.945 | 712499.234  | 508721.711 |
|        | 2015 | 1258289.311 | 718303.777  | 539985.534 |
|        | 2016 | 1294830.207 | 723570.270  | 571259.938 |
|        | 2017 | 1330332.626 | 728307.925  | 602024.701 |
|        | 2018 | 1360571.987 | 732081.973  | 628490.014 |
|        | 2019 | 1389848.723 | 735479.593  | 654369.129 |
|        | 2020 | 1416046.192 | 738370.376  | 677675.816 |
|        | 2021 | 1440588.850 | 740913.403  | 699675.447 |
|        | 2022 | 1464157.934 | 743214.320  | 720943.615 |

**Results for PHIM for Run 4 (ELL Summary Sensitivity\_Analysis\_2.RTF)**

|      |             |             |             |             |            |
|------|-------------|-------------|-------------|-------------|------------|
|      |             | 2023        | 1486810.237 | 745310.886  | 741499.351 |
|      |             | 2024        | 1508591.729 | 747221.503  | 761370.226 |
|      |             | 2025        | 1526875.621 | 748769.459  | 778106.162 |
|      |             | 2026        | 1543659.810 | 750131.423  | 793528.387 |
|      |             | 2027        | 1559623.774 | 751380.211  | 808243.564 |
|      |             | 2028        | 1574852.850 | 752534.810  | 822318.041 |
|      |             | 2029        | 1589437.452 | 753602.322  | 835835.130 |
|      |             | 2030        | 1600568.199 | 754391.747  | 846176.453 |
|      |             | 2031        | 1610776.297 | 755100.002  | 855676.294 |
|      |             | 2032        | 1620483.563 | 755760.847  | 864722.716 |
|      |             | 2033        | 1629745.442 | 756379.943  | 873365.499 |
|      |             | 2034        | 1638721.425 | 756962.689  | 881758.736 |
|      |             | 2035        | 1644649.404 | 757332.854  | 887316.550 |
|      |             | 2036        | 1650181.590 | 757672.773  | 892508.817 |
|      |             | 2037        | 1655476.066 | 757995.485  | 897480.581 |
|      |             | 2038        | 1660507.914 | 758302.163  | 902205.750 |
|      |             | 2039        | 1665361.569 | 758594.548  | 906767.021 |
| COPD | Males       | 1990        | 117002.906  | 117002.906  | 0.000      |
|      |             | 1991        | 233438.833  | 233139.684  | 299.149    |
|      |             | 1992        | 348084.047  | 346981.112  | 1102.935   |
|      |             | 1993        | 467278.318  | 464609.090  | 2669.228   |
|      |             | 1994        | 584216.907  | 579054.309  | 5162.598   |
|      |             | 1995        | 697391.457  | 688722.273  | 8669.183   |
|      |             | 1996        | 809471.271  | 796097.094  | 13374.177  |
|      |             | 1997        | 922587.668  | 903027.138  | 19560.530  |
|      |             | 1998        | 1034072.457 | 1006957.742 | 27114.715  |
|      |             | 1999        | 1153475.399 | 1116552.944 | 36922.455  |
|      |             | 2000        | 1268050.268 | 1219723.286 | 48326.982  |
|      |             | 2001        | 1382786.209 | 1320946.133 | 61840.077  |
|      |             | 2002        | 1497557.412 | 1419895.553 | 77661.859  |
|      |             | 2003        | 1614405.229 | 1518552.910 | 95852.319  |
|      |             | 2004        | 1726672.489 | 1610998.162 | 115674.327 |
|      |             | 2005        | 1847277.524 | 1708000.208 | 139277.317 |
|      |             | 2006        | 1961009.963 | 1796881.465 | 164128.498 |
|      |             | 2007        | 2079868.908 | 1887008.750 | 192860.158 |
|      |             | 2008        | 2206755.783 | 1980565.966 | 226189.817 |
|      |             | 2009        | 2331993.380 | 2070025.840 | 261967.541 |
|      |             | 2010        | 2455130.176 | 2155239.881 | 299890.295 |
|      |             | 2011        | 2582657.849 | 2240488.157 | 342169.691 |
|      |             | 2012        | 2709719.005 | 2322337.198 | 387381.806 |
|      |             | 2013        | 2840547.005 | 2403381.066 | 437165.940 |
|      |             | 2014        | 2971677.135 | 2481468.115 | 490209.020 |
|      |             | 2015        | 3104538.983 | 2558599.041 | 545939.942 |
|      |             | 2016        | 3237650.175 | 2632469.781 | 605180.394 |
|      |             | 2017        | 3370561.253 | 2703319.948 | 667241.305 |
|      |             | 2018        | 3503136.371 | 2770440.182 | 732696.189 |
|      |             | 2019        | 3636402.758 | 2834837.868 | 801564.890 |
|      |             | 2020        | 3768054.453 | 2896164.223 | 871890.229 |
|      |             | 2021        | 3897675.067 | 2953528.728 | 944146.339 |
|      |             | 2022        | 4027307.132 | 3007931.347 | 1019375.78 |
|      |             | 2023        | 4156698.720 | 3059298.934 | 1097399.79 |
|      |             | 2024        | 4285772.226 | 3107709.752 | 1178062.47 |
|      |             | 2025        | 4410759.298 | 3152749.232 | 1258010.07 |
|      |             | 2026        | 4531411.064 | 3193379.683 | 1338031.38 |
|      |             | 2027        | 4651145.233 | 3231188.269 | 1419956.96 |
|      |             | 2028        | 4769837.872 | 3266235.278 | 1503602.59 |
|      |             | 2029        | 4887747.179 | 3298776.681 | 1588970.50 |
| 2030 | 4997632.895 | 3327976.990 | 1669655.91  |             |            |
| 2031 | 5103301.991 | 3353562.975 | 1749739.02  |             |            |
| 2032 | 5207593.613 | 3376978.808 | 1830614.80  |             |            |
| 2033 | 5310556.138 | 3398311.729 | 1912244.41  |             |            |
| 2034 | 5412542.816 | 3417876.670 | 1994666.15  |             |            |
| 2035 | 5500522.473 | 3434239.562 | 2066282.91  |             |            |
| 2036 | 5588149.640 | 3449042.539 | 2139107.10  |             |            |
| 2037 | 5674667.886 | 3462564.785 | 2212103.10  |             |            |
| 2038 | 5760391.289 | 3474922.365 | 2285468.92  |             |            |
| 2039 | 5845459.234 | 3486343.322 | 2359115.91  |             |            |
|      | Female      | 1990        | 77434.846   | 77434.846   | 0.000      |
|      |             | 1991        | 160029.510  | 159766.311  | 263.199    |
|      |             | 1992        | 240642.531  | 239652.325  | 990.207    |
|      |             | 1993        | 329362.093  | 326854.282  | 2507.811   |
|      |             | 1994        | 418569.515  | 413632.233  | 4937.282   |
|      |             | 1995        | 509110.357  | 500579.968  | 8530.390   |
|      |             | 1996        | 600040.117  | 586697.995  | 13342.123  |
|      |             | 1997        | 691159.071  | 671646.207  | 19512.864  |
|      |             | 1998        | 782866.899  | 755768.571  | 27098.328  |
|      |             | 1999        | 881526.925  | 844635.238  | 36891.687  |
|      |             | 2000        | 977880.647  | 929836.162  | 48044.485  |

**Results for PHIM for Run 4 (ELL Summary Sensitivity\_Analysis\_2.RTF)**

|      |             |             |            |
|------|-------------|-------------|------------|
| 2001 | 1076787.404 | 1015484.680 | 61302.724  |
| 2002 | 1174842.754 | 1098492.731 | 76350.022  |
| 2003 | 1275102.681 | 1181510.910 | 93591.771  |
| 2004 | 1371026.306 | 1259103.973 | 111922.333 |
| 2005 | 1473954.509 | 1340071.975 | 133882.533 |
| 2006 | 1574450.828 | 1417019.498 | 157431.330 |
| 2007 | 1673790.211 | 1490958.470 | 182831.742 |
| 2008 | 1782360.738 | 1569388.364 | 212972.373 |
| 2009 | 1892944.209 | 1646516.904 | 246427.306 |
| 2010 | 2002131.282 | 1720332.989 | 281798.293 |
| 2011 | 2114522.152 | 1793482.576 | 321039.577 |
| 2012 | 2228079.372 | 1864803.289 | 363276.082 |
| 2013 | 2345377.689 | 1935563.633 | 409814.056 |
| 2014 | 2462498.422 | 2003357.452 | 459140.970 |
| 2015 | 2581450.312 | 2070322.828 | 511127.484 |
| 2016 | 2701959.301 | 2135236.948 | 566722.353 |
| 2017 | 2823834.967 | 2197980.408 | 625854.559 |
| 2018 | 2938265.081 | 2254833.028 | 683432.052 |
| 2019 | 3053254.880 | 2309355.221 | 743899.658 |
| 2020 | 3167073.216 | 2361352.526 | 805720.690 |
| 2021 | 3279517.699 | 2410813.971 | 868703.728 |
| 2022 | 3392060.964 | 2457806.215 | 934254.748 |
| 2023 | 3504296.171 | 2502291.423 | 1002004.75 |
| 2024 | 3616019.231 | 2544201.705 | 1071817.53 |
| 2025 | 3724611.269 | 2583351.868 | 1141259.40 |
| 2026 | 3827181.707 | 2618878.537 | 1208303.17 |
| 2027 | 3928684.441 | 2652007.552 | 1276676.89 |
| 2028 | 4029124.892 | 2682902.839 | 1346222.05 |
| 2029 | 4128269.068 | 2711467.159 | 1416801.91 |
| 2030 | 4221560.174 | 2737338.316 | 1484221.86 |
| 2031 | 4304170.584 | 2758908.341 | 1545262.24 |
| 2032 | 4384930.537 | 2778565.685 | 1606364.85 |
| 2033 | 4464357.691 | 2796564.161 | 1667793.53 |
| 2034 | 4542251.545 | 2812841.796 | 1729409.75 |
| 2035 | 4611066.648 | 2826733.075 | 1784333.57 |
| 2036 | 4670309.230 | 2837734.139 | 1832575.09 |
| 2037 | 4728179.514 | 2847687.133 | 1880492.38 |
| 2038 | 4785008.048 | 2856734.702 | 1928273.35 |
| 2039 | 4841291.793 | 2864940.725 | 1976351.07 |

---



## Results for PHIM for Run 4 (ELL Summary Sensitivity\_Analysis\_2.RTF)

\*\*\*\*\*

**Table 4: Estimated Loss of Life, All age groups combined, Population and Number deaths adjusted for Ecig scenario, cumulative over years**

| Disease      | Sex          | Year         | Years of life lost<br>NULL | Years of life lost<br>Ecig | Years of life<br>Saved |
|--------------|--------------|--------------|----------------------------|----------------------------|------------------------|
| All Diseases | Males        | 1990         | 1304839.645                | 1304839.645                | 0.000                  |
|              |              | 1991         | 2579865.358                | 2567841.030                | 12024.328              |
|              |              | 1992         | 3830683.831                | 3786083.321                | 44600.511              |
|              |              | 1993         | 5076567.803                | 4972782.153                | 103785.650             |
|              |              | 1994         | 6292145.526                | 6098631.055                | 193514.471             |
|              |              | 1995         | 7485537.010                | 7168160.751                | 317376.258             |
|              |              | 1996         | 8655955.028                | 8179803.323                | 476151.704             |
|              |              | 1997         | 9791729.713                | 9124574.768                | 667154.944             |
|              |              | 1998         | 10899134.186               | 10011354.294               | 887779.892             |
|              |              | 1999         | 12070409.674               | 10892191.559               | 1178218.12             |
|              |              | 2000         | 13231384.595               | 11729966.907               | 1501417.69             |
|              |              | 2001         | 14371761.018               | 12515759.887               | 1856001.13             |
|              |              | 2002         | 15508906.386               | 13262214.741               | 2246691.64             |
|              |              | 2003         | 16638100.422               | 13971569.271               | 2666531.15             |
|              |              | 2004         | 17736465.088               | 14636106.671               | 3100358.42             |
|              |              | 2005         | 18834658.606               | 15275546.909               | 3559111.70             |
|              |              | 2006         | 19909100.501               | 15871201.340               | 4037899.16             |
|              |              | 2007         | 20958321.463               | 16431848.688               | 4526472.78             |
|              |              | 2008         | 22000068.148               | 16971066.056               | 5029002.09             |
|              |              | 2009         | 23018816.903               | 17480666.453               | 5538150.45             |
|              |              | 2010         | 24018480.537               | 17961640.329               | 6056840.21             |
|              |              | 2011         | 25003034.574               | 18417250.278               | 6585784.30             |
|              |              | 2012         | 25969871.429               | 18846244.141               | 7123627.29             |
|              |              | 2013         | 26920275.180               | 19250730.581               | 7669544.60             |
|              |              | 2014         | 27849005.227               | 19629440.736               | 8219564.49             |
|              |              | 2015         | 28749620.400               | 19986171.694               | 8763448.71             |
|              |              | 2016         | 29622417.562               | 20312000.091               | 9310417.47             |
|              |              | 2017         | 30462559.724               | 20609685.147               | 9852874.58             |
|              |              | 2018         | 31293299.299               | 20895782.509               | 10397516.8             |
|              |              | 2019         | 32109993.427               | 21165751.128               | 10944242.3             |
|              |              | 2020         | 32883323.977               | 21416991.201               | 11466332.8             |
|              |              | 2021         | 33610102.554               | 21634196.013               | 11975906.5             |
|              |              | 2022         | 34322010.448               | 21837426.129               | 12484584.3             |
|              |              | 2023         | 35018383.550               | 22026826.393               | 12991557.2             |
|              |              | 2024         | 35700177.955               | 22203648.514               | 13496529.4             |
|              |              | 2025         | 36315500.346               | 22363164.239               | 13952336.1             |
|              |              | 2026         | 36896159.343               | 22498402.870               | 14397756.5             |
|              |              | 2027         | 37462570.116               | 22623698.850               | 14838871.3             |
|              |              | 2028         | 38015337.780               | 22739359.692               | 15275978.1             |
|              |              | 2029         | 38554814.764               | 22846746.340               | 15708068.4             |
|              |              | 2030         | 39003805.400               | 22938353.127               | 16065452.3             |
| 2031         | 39436509.703 | 23016118.329 | 16420391.4                 |                            |                        |
| 2032         | 39858470.458 | 23087799.344 | 16770671.1                 |                            |                        |
| 2033         | 40270147.082 | 23153549.327 | 17116597.8                 |                            |                        |
| 2034         | 40672665.743 | 23214738.677 | 17457927.1                 |                            |                        |
| 2035         | 40962732.664 | 23261054.237 | 17701678.4                 |                            |                        |
| 2036         | 41255021.653 | 23302857.056 | 17952164.6                 |                            |                        |
| 2037         | 41540573.023 | 23341607.103 | 18198965.9                 |                            |                        |
| 2038         | 41820158.066 | 23377439.438 | 18442718.6                 |                            |                        |
| 2039         | 42093547.949 | 23411081.106 | 18682466.8                 |                            |                        |
|              | Female       | 1990         | 588979.406                 | 588979.406                 | 0.000                  |
|              |              | 1991         | 1182571.252                | 1178210.284                | 4360.969               |
|              |              | 1992         | 1777346.679                | 1760950.890                | 16395.789              |
|              |              | 1993         | 2380261.899                | 2341368.708                | 38893.191              |
|              |              | 1994         | 2983130.039                | 2909380.753                | 73749.286              |
|              |              | 1995         | 3588982.584                | 3466580.090                | 122402.494             |
|              |              | 1996         | 4195430.235                | 4008217.811                | 187212.423             |
|              |              | 1997         | 4793866.694                | 4528913.774                | 264952.921             |
|              |              | 1998         | 5389747.381                | 5032911.520                | 356835.861             |
|              |              | 1999         | 6006722.467                | 5532876.005                | 473846.462             |
|              |              | 2000         | 6625758.871                | 6020212.357                | 605546.514             |
|              |              | 2001         | 7245135.411                | 6491155.373                | 753980.038             |
|              |              | 2002         | 7867492.021                | 6948179.772                | 919312.249             |
|              |              | 2003         | 8485051.793                | 7387330.609                | 1097721.18             |
|              |              | 2004         | 9092994.774                | 7805857.647                | 1287137.13             |
|              |              | 2005         | 9706032.803                | 8214012.319                | 1492020.48             |
|              |              | 2006         | 10311907.548               | 8603014.926                | 1708892.62             |
|              |              | 2007         | 10909437.502               | 8975384.442                | 1934053.06             |
|              |              | 2008         | 11506462.491               | 9332393.916                | 2174068.57             |
|              |              | 2009         | 12098393.287               | 9676557.417                | 2421835.87             |
|              |              | 2010         | 12681188.981               | 10003194.513               | 2677994.47             |

**Results for PHIM for Run 4 (ELL Summary Sensitivity\_Analysis\_2.RTF)**

|             |       |      |              |              |            |
|-------------|-------|------|--------------|--------------|------------|
|             |       | 2011 | 13260062.991 | 10314877.865 | 2945185.13 |
|             |       | 2012 | 13839417.441 | 10614031.588 | 3225385.85 |
|             |       | 2013 | 14409614.758 | 10897920.297 | 3511694.46 |
|             |       | 2014 | 14976658.746 | 11167165.776 | 3809492.97 |
|             |       | 2015 | 15529977.821 | 11420738.396 | 4109239.43 |
|             |       | 2016 | 16066640.764 | 11654866.997 | 4411773.77 |
|             |       | 2017 | 16590035.078 | 11873119.612 | 4716915.47 |
|             |       | 2018 | 17098716.137 | 12078817.837 | 5019898.30 |
|             |       | 2019 | 17599868.850 | 12272720.562 | 5327148.29 |
|             |       | 2020 | 18081346.241 | 12453875.682 | 5627470.56 |
|             |       | 2021 | 18537594.460 | 12616600.563 | 5920993.90 |
|             |       | 2022 | 18985300.234 | 12768863.348 | 6216436.89 |
|             |       | 2023 | 19423958.747 | 12911089.611 | 6512869.14 |
|             |       | 2024 | 19853347.772 | 13043371.787 | 6809975.98 |
|             |       | 2025 | 20252822.245 | 13163907.772 | 7088914.47 |
|             |       | 2026 | 20619307.063 | 13268026.456 | 7351280.61 |
|             |       | 2027 | 20976063.406 | 13364197.363 | 7611866.04 |
|             |       | 2028 | 21323641.947 | 13453202.547 | 7870439.40 |
|             |       | 2029 | 21662117.106 | 13534981.036 | 8127136.07 |
|             |       | 2030 | 21960971.694 | 13606520.962 | 8354450.73 |
|             |       | 2031 | 22224951.983 | 13664664.199 | 8560287.78 |
|             |       | 2032 | 22480397.853 | 13717728.759 | 8762669.09 |
|             |       | 2033 | 22728639.455 | 13766414.108 | 8962225.35 |
|             |       | 2034 | 22970448.888 | 13810695.360 | 9159753.53 |
|             |       | 2035 | 23164154.188 | 13846292.579 | 9317861.61 |
|             |       | 2036 | 23334538.616 | 13874703.725 | 9459834.89 |
|             |       | 2037 | 23499760.723 | 13900725.612 | 9599035.11 |
|             |       | 2038 | 23660308.401 | 13924665.813 | 9735642.59 |
|             |       | 2039 | 23817891.273 | 13946690.314 | 9871200.96 |
| Lung cancer | Males | 1990 | 595621.791   | 595621.791   | 0.000      |
|             |       | 1991 | 1177744.113  | 1176812.874  | 931.239    |
|             |       | 1992 | 1750034.892  | 1746542.528  | 3492.364   |
|             |       | 1993 | 2319752.308  | 2311374.234  | 8378.073   |
|             |       | 1994 | 2872597.339  | 2856580.997  | 16016.342  |
|             |       | 1995 | 3411494.825  | 3384588.382  | 26906.444  |
|             |       | 1996 | 3945569.726  | 3903540.897  | 42028.829  |
|             |       | 1997 | 4463316.362  | 4402041.782  | 61274.581  |
|             |       | 1998 | 4975301.180  | 4889853.168  | 85448.012  |
|             |       | 1999 | 5473691.125  | 5358971.047  | 114720.077 |
|             |       | 2000 | 5977500.570  | 5826616.793  | 150883.777 |
|             |       | 2001 | 6474795.516  | 6281000.131  | 193795.385 |
|             |       | 2002 | 6968769.705  | 6724558.102  | 244211.603 |
|             |       | 2003 | 7460282.140  | 7157255.646  | 303026.494 |
|             |       | 2004 | 7947048.275  | 7577155.338  | 369892.938 |
|             |       | 2005 | 8430571.669  | 7985199.221  | 445372.448 |
|             |       | 2006 | 8903945.390  | 8374470.357  | 529075.033 |
|             |       | 2007 | 9364177.982  | 8744226.094  | 619951.888 |
|             |       | 2008 | 9822525.458  | 9101476.176  | 721049.282 |
|             |       | 2009 | 10275228.886 | 9444009.217  | 831219.669 |
|             |       | 2010 | 10720275.500 | 9770739.523  | 949535.978 |
|             |       | 2011 | 11155356.373 | 10079807.966 | 1075548.41 |
|             |       | 2012 | 11582611.617 | 10371976.736 | 1210634.88 |
|             |       | 2013 | 11998803.791 | 10645951.876 | 1352851.92 |
|             |       | 2014 | 12402087.090 | 10901440.012 | 1500647.08 |
|             |       | 2015 | 12793451.706 | 11140390.245 | 1653061.46 |
|             |       | 2016 | 13160101.653 | 11354520.404 | 1805581.25 |
|             |       | 2017 | 13503583.414 | 11546428.484 | 1957154.93 |
|             |       | 2018 | 13859755.737 | 11734534.761 | 2125220.98 |
|             |       | 2019 | 14211625.176 | 11911324.831 | 2300300.35 |
|             |       | 2020 | 14553935.288 | 12075969.735 | 2477965.55 |
|             |       | 2021 | 14851747.495 | 12211582.805 | 2640164.69 |
|             |       | 2022 | 15144531.004 | 12337687.927 | 2806843.08 |
|             |       | 2023 | 15431932.496 | 12454477.441 | 2977455.06 |
|             |       | 2024 | 15713920.740 | 12562690.966 | 3151229.77 |
|             |       | 2025 | 15979112.816 | 12660550.201 | 3318562.61 |
|             |       | 2026 | 16206550.153 | 12738373.421 | 3468176.73 |
|             |       | 2027 | 16428826.050 | 12809855.932 | 3618970.12 |
|             |       | 2028 | 16645902.186 | 12875309.511 | 3770592.68 |
|             |       | 2029 | 16858126.517 | 12935585.686 | 3922540.83 |
|             |       | 2030 | 17045220.687 | 12987428.262 | 4057792.42 |
|             |       | 2031 | 17208482.610 | 13028429.041 | 4180053.57 |
|             |       | 2032 | 17367586.074 | 13066000.164 | 4301585.91 |
|             |       | 2033 | 17522716.280 | 13100309.247 | 4422407.03 |
|             |       | 2034 | 17674226.555 | 13132043.302 | 4542183.25 |
|             |       | 2035 | 17792201.734 | 13156487.995 | 4635713.74 |
|             |       | 2036 | 17903508.236 | 13177520.841 | 4725987.39 |
|             |       | 2037 | 18012162.345 | 13197017.706 | 4815144.64 |
|             |       | 2038 | 18118464.470 | 13215050.031 | 4903414.44 |

**Results for PHIM for Run 4 (ELL Summary Sensitivity\_Analysis\_2.RTF)**

|     |        |      |              |              |            |
|-----|--------|------|--------------|--------------|------------|
|     |        | 2039 | 18222549.860 | 13232023.068 | 4990526.79 |
|     | Female | 1990 | 307897.357   | 307897.357   | 0.000      |
|     |        | 1991 | 616547.418   | 615911.140   | 636.278    |
|     |        | 1992 | 931086.773   | 928599.855   | 2486.918   |
|     |        | 1993 | 1246155.671  | 1240132.848  | 6022.823   |
|     |        | 1994 | 1561212.934  | 1549524.878  | 11688.056  |
|     |        | 1995 | 1879967.742  | 1859903.580  | 20064.162  |
|     |        | 1996 | 2197488.109  | 2166023.181  | 31464.928  |
|     |        | 1997 | 2515698.453  | 2469305.402  | 46393.051  |
|     |        | 1998 | 2836249.556  | 2771021.168  | 65228.388  |
|     |        | 1999 | 3150201.390  | 3062401.502  | 87799.887  |
|     |        | 2000 | 3472722.342  | 3357244.415  | 115477.927 |
|     |        | 2001 | 3796994.889  | 3648470.708  | 148524.181 |
|     |        | 2002 | 4126619.935  | 3938832.646  | 187787.289 |
|     |        | 2003 | 4454982.533  | 4222277.817  | 232704.717 |
|     |        | 2004 | 4784343.030  | 4500222.709  | 284120.322 |
|     |        | 2005 | 5113443.121  | 4771253.077  | 342190.044 |
|     |        | 2006 | 5442543.963  | 5034803.756  | 407740.207 |
|     |        | 2007 | 5772441.497  | 5291650.889  | 480790.607 |
|     |        | 2008 | 6091911.943  | 5532955.638  | 558956.305 |
|     |        | 2009 | 6413671.330  | 5767900.479  | 645770.851 |
|     |        | 2010 | 6730763.530  | 5992159.916  | 738603.614 |
|     |        | 2011 | 7043614.101  | 6205368.482  | 838245.619 |
|     |        | 2012 | 7356270.780  | 6410318.491  | 945952.289 |
|     |        | 2013 | 7662551.964  | 6603232.045  | 1059319.92 |
|     |        | 2014 | 7964551.465  | 6785870.874  | 1178680.59 |
|     |        | 2015 | 8254895.403  | 6955217.316  | 1299678.09 |
|     |        | 2016 | 8530661.848  | 7108709.675  | 1421952.17 |
|     |        | 2017 | 8795826.122  | 7249839.434  | 1545986.69 |
|     |        | 2018 | 9067233.707  | 7386425.856  | 1680807.85 |
|     |        | 2019 | 9335343.270  | 7514567.515  | 1820775.75 |
|     |        | 2020 | 9596110.883  | 7633893.001  | 1962217.88 |
|     |        | 2021 | 9833186.859  | 7737770.896  | 2095415.96 |
|     |        | 2022 | 10066452.037 | 7834380.841  | 2232071.20 |
|     |        | 2023 | 10295503.609 | 7924088.991  | 2371414.62 |
|     |        | 2024 | 10520125.318 | 8006990.500  | 2513134.82 |
|     |        | 2025 | 10731915.863 | 8082112.181  | 2649803.68 |
|     |        | 2026 | 10917495.549 | 8144647.759  | 2772847.79 |
|     |        | 2027 | 11098620.885 | 8202037.760  | 2896583.12 |
|     |        | 2028 | 11275441.234 | 8254839.509  | 3020601.72 |
|     |        | 2029 | 11447962.710 | 8303075.577  | 3144887.13 |
|     |        | 2030 | 11601867.623 | 8344906.603  | 3256961.02 |
|     |        | 2031 | 11731666.516 | 8377723.824  | 3353942.69 |
|     |        | 2032 | 11857585.969 | 8407593.191  | 3449992.78 |
|     |        | 2033 | 11980128.625 | 8434940.307  | 3545188.32 |
|     |        | 2034 | 12099562.464 | 8459786.722  | 3639775.74 |
|     |        | 2035 | 12195919.946 | 8479466.135  | 3716453.81 |
|     |        | 2036 | 12278201.969 | 8494897.589  | 3783304.38 |
|     |        | 2037 | 12358146.336 | 8509095.420  | 3849050.92 |
|     |        | 2038 | 12435978.633 | 8522216.098  | 3913762.54 |
|     |        | 2039 | 12512468.845 | 8534353.880  | 3978114.97 |
| IHD | Males  | 1990 | 517209.093   | 517209.093   | 0.000      |
|     |        | 1991 | 1019219.395  | 1009438.169  | 9781.225   |
|     |        | 1992 | 1509598.614  | 1473333.251  | 36265.363  |
|     |        | 1993 | 1992735.299  | 1908778.964  | 83956.335  |
|     |        | 1994 | 2462877.575  | 2307309.338  | 155568.237 |
|     |        | 1995 | 2928249.390  | 2674420.581  | 253828.809 |
|     |        | 1996 | 3377377.730  | 2999145.967  | 378231.763 |
|     |        | 1997 | 3809062.472  | 3283008.268  | 526054.204 |
|     |        | 1998 | 4222213.867  | 3527913.355  | 694300.512 |
|     |        | 1999 | 4708317.743  | 3785609.003  | 922708.741 |
|     |        | 2000 | 5182084.396  | 4010448.011  | 1171636.39 |
|     |        | 2001 | 5644097.705  | 4203270.576  | 1440827.13 |
|     |        | 2002 | 6107232.129  | 4373399.515  | 1733832.61 |
|     |        | 2003 | 6561785.704  | 4520065.421  | 2041720.28 |
|     |        | 2004 | 6996156.348  | 4644104.414  | 2352051.93 |
|     |        | 2005 | 7426261.361  | 4753196.598  | 2673064.76 |
|     |        | 2006 | 7849012.694  | 4847099.501  | 3001913.19 |
|     |        | 2007 | 8255300.530  | 4927349.917  | 3327950.61 |
|     |        | 2008 | 8650662.040  | 4997526.046  | 3653135.99 |
|     |        | 2009 | 9030818.513  | 5058606.607  | 3972211.91 |
|     |        | 2010 | 9403026.327  | 5112807.998  | 4290218.33 |
|     |        | 2011 | 9767535.506  | 5160862.888  | 4606672.62 |
|     |        | 2012 | 10123044.281 | 5203845.314  | 4919198.97 |
|     |        | 2013 | 10470104.786 | 5242364.649  | 5227740.14 |
|     |        | 2014 | 10807756.112 | 5277364.397  | 5530391.72 |
|     |        | 2015 | 11130681.425 | 5308939.690  | 5821741.74 |
|     |        | 2016 | 11448966.506 | 5338179.237  | 6110787.27 |

**Results for PHIM for Run 4 (ELL Summary Sensitivity\_Analysis\_2.RTF)**

|        |        |      |              |             |            |
|--------|--------|------|--------------|-------------|------------|
|        |        | 2017 | 11758164.882 | 5365103.173 | 6393061.71 |
|        |        | 2018 | 12054448.241 | 5389500.722 | 6664947.52 |
|        |        | 2019 | 12341606.261 | 5412306.515 | 6929299.75 |
|        |        | 2020 | 12600728.939 | 5432283.177 | 7168445.76 |
|        |        | 2021 | 12861767.105 | 5451700.150 | 7410066.96 |
|        |        | 2022 | 13114168.616 | 5469955.258 | 7644213.36 |
|        |        | 2023 | 13357894.797 | 5487047.769 | 7870847.03 |
|        |        | 2024 | 13593848.521 | 5503339.768 | 8090508.75 |
|        |        | 2025 | 13789177.359 | 5516569.823 | 8272607.54 |
|        |        | 2026 | 13993401.656 | 5530238.658 | 8463163.00 |
|        |        | 2027 | 14190519.224 | 5543308.226 | 8647211.00 |
|        |        | 2028 | 14381193.356 | 5555708.491 | 8825484.86 |
|        |        | 2029 | 14565171.927 | 5567657.215 | 8997514.71 |
|        |        | 2030 | 14697381.605 | 5576064.611 | 9121316.99 |
|        |        | 2031 | 14842203.512 | 5585255.870 | 9256947.64 |
|        |        | 2032 | 14982485.826 | 5594076.132 | 9388409.69 |
|        |        | 2033 | 15118410.647 | 5602426.420 | 9515984.23 |
|        |        | 2034 | 15250284.398 | 5610635.559 | 9639648.84 |
|        |        | 2035 | 15322911.166 | 5614900.502 | 9708010.66 |
|        |        | 2036 | 15405115.031 | 5619701.574 | 9785413.46 |
|        |        | 2037 | 15484709.137 | 5624328.836 | 9860380.30 |
|        |        | 2038 | 15561812.193 | 5628731.354 | 9933080.84 |
|        |        | 2039 | 15635992.616 | 5632991.698 | 10003000.9 |
|        | Female | 1990 | 147299.110   | 147299.110  | 0.000      |
|        |        | 1991 | 295122.462   | 292418.822  | 2703.641   |
|        |        | 1992 | 439962.920   | 429912.393  | 10050.527  |
|        |        | 1993 | 584735.615   | 561130.152  | 23605.463  |
|        |        | 1994 | 727640.783   | 683442.258  | 44198.525  |
|        |        | 1995 | 868486.937   | 796187.676  | 72299.261  |
|        |        | 1996 | 1010321.847  | 900715.245  | 109606.603 |
|        |        | 1997 | 1144230.930  | 991743.456  | 152487.474 |
|        |        | 1998 | 1274513.622  | 1072441.974 | 202071.647 |
|        |        | 1999 | 1426725.938  | 1158023.628 | 268702.310 |
|        |        | 2000 | 1573462.680  | 1232812.409 | 340650.271 |
|        |        | 2001 | 1719132.015  | 1298463.628 | 420668.387 |
|        |        | 2002 | 1863006.732  | 1355867.652 | 507139.080 |
|        |        | 2003 | 2002943.227  | 1405328.800 | 597614.427 |
|        |        | 2004 | 2137798.705  | 1447607.649 | 690191.056 |
|        |        | 2005 | 2271071.245  | 1484853.032 | 786218.213 |
|        |        | 2006 | 2400707.731  | 1516531.308 | 884176.423 |
|        |        | 2007 | 2523634.512  | 1543228.539 | 980405.974 |
|        |        | 2008 | 2648752.232  | 1567347.808 | 1081404.42 |
|        |        | 2009 | 2765973.961  | 1587815.760 | 1178158.20 |
|        |        | 2010 | 2881329.235  | 1606072.666 | 1275256.57 |
|        |        | 2011 | 2994972.694  | 1622251.442 | 1372721.25 |
|        |        | 2012 | 3108958.829  | 1636917.553 | 1472041.28 |
|        |        | 2013 | 3218140.416  | 1649884.998 | 1568255.42 |
|        |        | 2014 | 3328387.914  | 1661985.587 | 1666402.33 |
|        |        | 2015 | 3435342.796  | 1673046.257 | 1762296.54 |
|        |        | 2016 | 3539189.408  | 1683087.346 | 1856102.06 |
|        |        | 2017 | 3640041.363  | 1692293.720 | 1947747.64 |
|        |        | 2018 | 3732645.362  | 1700348.488 | 2032296.87 |
|        |        | 2019 | 3821421.978  | 1707745.670 | 2113676.31 |
|        |        | 2020 | 3902115.950  | 1714230.664 | 2187885.29 |
|        |        | 2021 | 3984301.053  | 1720602.662 | 2263698.39 |
|        |        | 2022 | 4062629.299  | 1726484.928 | 2336144.37 |
|        |        | 2023 | 4137348.729  | 1731939.774 | 2405408.96 |
|        |        | 2024 | 4208611.493  | 1737016.601 | 2471594.89 |
|        |        | 2025 | 4269419.492  | 1741249.975 | 2528169.52 |
|        |        | 2026 | 4330969.998  | 1745470.593 | 2585499.40 |
|        |        | 2027 | 4389134.306  | 1749405.625 | 2639728.68 |
|        |        | 2028 | 4444222.970  | 1753097.766 | 2691125.20 |
|        |        | 2029 | 4496447.877  | 1756557.852 | 2739890.02 |
|        |        | 2030 | 4536975.698  | 1759169.172 | 2777806.53 |
|        |        | 2031 | 4578338.586  | 1761829.369 | 2816509.22 |
|        |        | 2032 | 4617397.784  | 1764337.926 | 2853059.86 |
|        |        | 2033 | 4654407.697  | 1766706.987 | 2887700.71 |
|        |        | 2034 | 4689913.454  | 1768951.044 | 2920962.41 |
|        |        | 2035 | 4712518.190  | 1770304.576 | 2942213.61 |
|        |        | 2036 | 4735845.827  | 1771696.882 | 2964148.94 |
|        |        | 2037 | 4757958.806  | 1773017.513 | 2984941.29 |
|        |        | 2038 | 4778813.806  | 1774271.417 | 3004542.39 |
|        |        | 2039 | 4798769.065  | 1775465.098 | 3023303.97 |
| Stroke | Males  | 1990 | 75005.854    | 75005.854   | 0.000      |
|        |        | 1991 | 149463.017   | 148450.303  | 1012.715   |
|        |        | 1992 | 222966.278   | 219224.682  | 3741.596   |
|        |        | 1993 | 296801.879   | 288011.636  | 8790.243   |
|        |        | 1994 | 372453.706   | 355663.583  | 16790.122  |

**Results for PHIM for Run 4 (ELL Summary Sensitivity\_Analysis\_2.RTF)**

|        |      |             |             |            |
|--------|------|-------------|-------------|------------|
|        | 1995 | 448401.338  | 420380.728  | 28020.610  |
|        | 1996 | 523536.301  | 480928.828  | 42607.474  |
|        | 1997 | 596763.211  | 536344.702  | 60418.509  |
|        | 1998 | 667546.681  | 586391.646  | 81155.035  |
|        | 1999 | 734925.407  | 630698.955  | 104226.452 |
|        | 2000 | 803749.361  | 672669.168  | 131080.193 |
|        | 2001 | 870081.588  | 709845.984  | 160235.605 |
|        | 2002 | 935347.140  | 743438.461  | 191908.679 |
|        | 2003 | 1001627.349 | 774496.655  | 227130.694 |
|        | 2004 | 1066587.976 | 802343.405  | 264244.570 |
|        | 2005 | 1130548.052 | 827269.708  | 303278.343 |
|        | 2006 | 1195132.454 | 850072.477  | 345059.977 |
|        | 2007 | 1258974.043 | 870529.299  | 388444.744 |
|        | 2008 | 1320124.867 | 888225.443  | 431899.423 |
|        | 2009 | 1380776.123 | 904178.074  | 476598.049 |
|        | 2010 | 1440048.533 | 918396.229  | 521652.304 |
|        | 2011 | 1497484.847 | 930964.435  | 566520.412 |
|        | 2012 | 1554496.526 | 942252.893  | 612243.634 |
|        | 2013 | 1610819.598 | 952438.717  | 658380.880 |
|        | 2014 | 1667484.890 | 961776.189  | 705708.701 |
|        | 2015 | 1720948.287 | 969990.507  | 750957.780 |
|        | 2016 | 1775699.228 | 977689.766  | 798009.462 |
|        | 2017 | 1830250.175 | 984772.258  | 845477.916 |
|        | 2018 | 1875958.950 | 990311.044  | 885647.906 |
|        | 2019 | 1920359.232 | 995328.248  | 925030.983 |
|        | 2020 | 1960605.297 | 999642.555  | 960962.742 |
|        | 2021 | 1998912.887 | 1003479.373 | 995433.515 |
|        | 2022 | 2036003.696 | 1006969.182 | 1029034.51 |
|        | 2023 | 2071857.536 | 1010144.864 | 1061712.67 |
|        | 2024 | 2106636.468 | 1013081.630 | 1093554.84 |
|        | 2025 | 2136450.873 | 1015509.733 | 1120941.14 |
|        | 2026 | 2164796.470 | 1017717.220 | 1147079.25 |
|        | 2027 | 2192079.608 | 1019767.127 | 1172312.48 |
|        | 2028 | 2218404.367 | 1021668.179 | 1196736.19 |
|        | 2029 | 2243769.140 | 1023456.625 | 1220312.52 |
|        | 2030 | 2263570.213 | 1024819.112 | 1238751.10 |
|        | 2031 | 2282521.590 | 1026089.132 | 1256432.46 |
|        | 2032 | 2300804.945 | 1027284.705 | 1273520.24 |
|        | 2033 | 2318464.018 | 1028405.330 | 1290058.69 |
|        | 2034 | 2335611.973 | 1029484.802 | 1306127.17 |
|        | 2035 | 2347097.290 | 1030189.146 | 1316908.14 |
|        | 2036 | 2358248.747 | 1030861.969 | 1327386.78 |
|        | 2037 | 2369033.655 | 1031505.558 | 1337528.10 |
|        | 2038 | 2379490.114 | 1032116.472 | 1347373.64 |
|        | 2039 | 2389546.238 | 1032701.794 | 1356844.44 |
| Female | 1990 | 56348.092   | 56348.092   | 0.000      |
|        | 1991 | 110871.862  | 110114.012  | 757.850    |
|        | 1992 | 165654.454  | 162785.837  | 2868.618   |
|        | 1993 | 220008.519  | 213248.934  | 6759.586   |
|        | 1994 | 275706.807  | 262774.080  | 12932.727  |
|        | 1995 | 331417.547  | 309892.533  | 21525.014  |
|        | 1996 | 387580.161  | 354749.989  | 32830.172  |
|        | 1997 | 442778.242  | 396164.374  | 46613.868  |
|        | 1998 | 496117.305  | 433592.694  | 62524.611  |
|        | 1999 | 548268.214  | 467681.599  | 80586.616  |
|        | 2000 | 601693.202  | 500125.441  | 101567.760 |
|        | 2001 | 652221.103  | 528465.449  | 123755.654 |
|        | 2002 | 703022.600  | 554623.921  | 148398.679 |
|        | 2003 | 752023.351  | 577737.765  | 174285.586 |
|        | 2004 | 799826.733  | 598322.373  | 201504.360 |
|        | 2005 | 847563.928  | 617081.535  | 230482.393 |
|        | 2006 | 894205.027  | 633741.196  | 260463.830 |
|        | 2007 | 939571.282  | 648443.890  | 291127.393 |
|        | 2008 | 983437.578  | 661378.024  | 322059.554 |
|        | 2009 | 1025803.786 | 672757.842  | 353045.944 |
|        | 2010 | 1066964.934 | 682804.255  | 384160.679 |
|        | 2011 | 1106954.044 | 691668.618  | 415285.427 |
|        | 2012 | 1146108.461 | 699582.274  | 446526.187 |
|        | 2013 | 1183544.689 | 706499.869  | 477044.820 |
|        | 2014 | 1221220.945 | 712868.133  | 508352.812 |
|        | 2015 | 1258289.311 | 718695.282  | 539594.030 |
|        | 2016 | 1294830.207 | 723983.978  | 570846.229 |
|        | 2017 | 1330332.626 | 728743.464  | 601589.162 |
|        | 2018 | 1360571.987 | 732536.461  | 628035.526 |
|        | 2019 | 1389848.723 | 735952.342  | 653896.381 |
|        | 2020 | 1416046.192 | 738860.662  | 677185.531 |
|        | 2021 | 1440588.850 | 741420.206  | 699168.644 |
|        | 2022 | 1464157.934 | 743736.884  | 720421.050 |

**Results for PHIM for Run 4 (ELL Summary Sensitivity\_Analysis\_2.RTF)**

|      |             |             |             |             |            |
|------|-------------|-------------|-------------|-------------|------------|
|      |             | 2023        | 1486810.237 | 745848.564  | 740961.674 |
|      |             | 2024        | 1508591.729 | 747773.626  | 760818.103 |
|      |             | 2025        | 1526875.621 | 749335.101  | 777540.520 |
|      |             | 2026        | 1543659.810 | 750709.441  | 792950.369 |
|      |             | 2027        | 1559623.774 | 751969.963  | 807653.812 |
|      |             | 2028        | 1574852.850 | 753135.788  | 821717.062 |
|      |             | 2029        | 1589437.452 | 754213.997  | 835223.455 |
|      |             | 2030        | 1600568.199 | 755012.888  | 845555.311 |
|      |             | 2031        | 1610776.297 | 755729.808  | 855046.489 |
|      |             | 2032        | 1620483.563 | 756398.899  | 864084.664 |
|      |             | 2033        | 1629745.442 | 757025.897  | 872719.545 |
|      |             | 2034        | 1638721.425 | 757616.235  | 881105.191 |
|      |             | 2035        | 1644649.404 | 757992.394  | 886657.010 |
|      |             | 2036        | 1650181.590 | 758337.872  | 891843.717 |
|      |             | 2037        | 1655476.066 | 758665.935  | 896810.131 |
|      |             | 2038        | 1660507.914 | 758977.774  | 901530.140 |
|      |             | 2039        | 1665361.569 | 759275.144  | 906086.426 |
| COPD | Males       | 1990        | 117002.906  | 117002.906  | 0.000      |
|      |             | 1991        | 233438.833  | 233139.684  | 299.149    |
|      |             | 1992        | 348084.047  | 346982.860  | 1101.187   |
|      |             | 1993        | 467278.318  | 464617.319  | 2660.999   |
|      |             | 1994        | 584216.907  | 579077.137  | 5139.770   |
|      |             | 1995        | 697391.457  | 688771.061  | 8620.395   |
|      |             | 1996        | 809471.271  | 796187.631  | 13283.639  |
|      |             | 1997        | 922587.668  | 903180.017  | 19407.651  |
|      |             | 1998        | 1034072.457 | 1007196.125 | 26876.332  |
|      |             | 1999        | 1153475.399 | 1116912.554 | 36562.846  |
|      |             | 2000        | 1268050.268 | 1220232.935 | 47817.333  |
|      |             | 2001        | 1382786.209 | 1321643.196 | 61143.014  |
|      |             | 2002        | 1497557.412 | 1420818.664 | 76738.748  |
|      |             | 2003        | 1614405.229 | 1519751.548 | 94653.681  |
|      |             | 2004        | 1726672.489 | 1612503.515 | 114168.975 |
|      |             | 2005        | 1847277.524 | 1709881.381 | 137396.143 |
|      |             | 2006        | 1961009.963 | 1799159.004 | 161850.959 |
|      |             | 2007        | 2079868.908 | 1889743.377 | 190125.531 |
|      |             | 2008        | 2206755.783 | 1983838.391 | 222917.392 |
|      |             | 2009        | 2331993.380 | 2073872.553 | 258120.827 |
|      |             | 2010        | 2455130.176 | 2159696.580 | 295433.597 |
|      |             | 2011        | 2582657.849 | 2245614.989 | 337042.859 |
|      |             | 2012        | 2709719.005 | 2328169.198 | 381549.807 |
|      |             | 2013        | 2840547.005 | 2409975.339 | 430571.666 |
|      |             | 2014        | 2971677.135 | 2488860.139 | 482816.996 |
|      |             | 2015        | 3104538.983 | 2566851.252 | 537687.731 |
|      |             | 2016        | 3237650.175 | 2641610.683 | 596039.492 |
|      |             | 2017        | 3370561.253 | 2713381.232 | 657180.021 |
|      |             | 2018        | 3503136.371 | 2781435.983 | 721700.388 |
|      |             | 2019        | 3636402.758 | 2846791.533 | 789611.225 |
|      |             | 2020        | 3768054.453 | 2909095.734 | 858958.718 |
|      |             | 2021        | 3897675.067 | 2967433.685 | 930241.382 |
|      |             | 2022        | 4027307.132 | 3022813.763 | 1004493.37 |
|      |             | 2023        | 4156698.720 | 3075156.320 | 1081542.40 |
|      |             | 2024        | 4285772.226 | 3124536.151 | 1161236.08 |
|      |             | 2025        | 4410759.298 | 3170534.482 | 1240224.82 |
|      |             | 2026        | 4531411.064 | 3212073.571 | 1319337.49 |
|      |             | 2027        | 4651145.233 | 3250767.565 | 1400377.67 |
|      |             | 2028        | 4769837.872 | 3286673.510 | 1483164.36 |
|      |             | 2029        | 4887747.179 | 3320046.814 | 1567700.36 |
| 2030 | 4997632.895 | 3350041.142 | 1647591.75  |             |            |
| 2031 | 5103301.991 | 3376344.286 | 1726957.71  |             |            |
| 2032 | 5207593.613 | 3400438.343 | 1807155.27  |             |            |
| 2033 | 5310556.138 | 3422408.330 | 1888147.81  |             |            |
| 2034 | 5412542.816 | 3442575.013 | 1969967.80  |             |            |
| 2035 | 5500522.473 | 3459476.594 | 2041045.88  |             |            |
| 2036 | 5588149.640 | 3474772.672 | 2113376.97  |             |            |
| 2037 | 5674667.886 | 3488755.003 | 2185912.88  |             |            |
| 2038 | 5760391.289 | 3501541.581 | 2258849.71  |             |            |
| 2039 | 5845459.234 | 3513364.546 | 2332094.69  |             |            |
|      | Female      | 1990        | 77434.846   | 77434.846   | 0.000      |
|      |             | 1991        | 160029.510  | 159766.311  | 263.199    |
|      |             | 1992        | 240642.531  | 239652.805  | 989.726    |
|      |             | 1993        | 329362.093  | 326856.775  | 2505.318   |
|      |             | 1994        | 418569.515  | 413639.537  | 4929.978   |
|      |             | 1995        | 509110.357  | 500596.300  | 8514.057   |
|      |             | 1996        | 600040.117  | 586729.397  | 13310.720  |
|      |             | 1997        | 691159.071  | 671700.542  | 19458.528  |
|      |             | 1998        | 782866.899  | 755855.684  | 27011.215  |
|      |             | 1999        | 881526.925  | 844769.277  | 36757.648  |
|      |             | 2000        | 977880.647  | 930030.091  | 47850.556  |

**Results for PHIM for Run 4 (ELL Summary Sensitivity\_Analysis\_2.RTF)**

|      |             |             |            |
|------|-------------|-------------|------------|
| 2001 | 1076787.404 | 1015755.588 | 61031.816  |
| 2002 | 1174842.754 | 1098855.552 | 75987.202  |
| 2003 | 1275102.681 | 1181986.227 | 93116.454  |
| 2004 | 1371026.306 | 1259704.917 | 111321.389 |
| 2005 | 1473954.509 | 1340824.676 | 133129.833 |
| 2006 | 1574450.828 | 1417938.666 | 156512.162 |
| 2007 | 1673790.211 | 1492061.124 | 181729.087 |
| 2008 | 1782360.738 | 1570712.446 | 211648.291 |
| 2009 | 1892944.209 | 1648083.335 | 244860.874 |
| 2010 | 2002131.282 | 1722157.677 | 279973.605 |
| 2011 | 2114522.152 | 1795589.322 | 318932.830 |
| 2012 | 2228079.372 | 1867213.270 | 360866.101 |
| 2013 | 2345377.689 | 1938303.385 | 407074.304 |
| 2014 | 2462498.422 | 2006441.181 | 456057.241 |
| 2015 | 2581450.312 | 2073779.541 | 507670.771 |
| 2016 | 2701959.301 | 2139085.998 | 562873.303 |
| 2017 | 2823834.967 | 2202242.994 | 621591.973 |
| 2018 | 2938265.081 | 2259507.031 | 678758.050 |
| 2019 | 3053254.880 | 2314455.036 | 738799.844 |
| 2020 | 3167073.216 | 2366891.355 | 800181.861 |
| 2021 | 3279517.699 | 2416806.799 | 862710.900 |
| 2022 | 3392060.964 | 2464260.694 | 927800.269 |
| 2023 | 3504296.171 | 2509212.282 | 995083.889 |
| 2024 | 3616019.231 | 2551591.059 | 1064428.17 |
| 2025 | 3724611.269 | 2591210.514 | 1133400.75 |
| 2026 | 3827181.707 | 2627198.662 | 1199983.04 |
| 2027 | 3928684.441 | 2660784.016 | 1267900.43 |
| 2028 | 4029124.892 | 2692129.483 | 1336995.41 |
| 2029 | 4128269.068 | 2721133.610 | 1407135.46 |
| 2030 | 4221560.174 | 2747432.299 | 1474127.87 |
| 2031 | 4304170.584 | 2769381.198 | 1534789.39 |
| 2032 | 4384930.537 | 2789398.743 | 1595531.79 |
| 2033 | 4464357.691 | 2807740.917 | 1656616.77 |
| 2034 | 4542251.545 | 2824341.359 | 1717910.19 |
| 2035 | 4611066.648 | 2838529.475 | 1772537.17 |
| 2036 | 4670309.230 | 2849771.381 | 1820537.85 |
| 2037 | 4728179.514 | 2859946.745 | 1868232.77 |
| 2038 | 4785008.048 | 2869200.524 | 1915807.52 |
| 2039 | 4841291.793 | 2877596.193 | 1963695.60 |

---

## Results for PHIM for Run 4 (ELL Summary Sensitivity\_Analysis\_2.RTF)

\*\*\*\*\*

**Table 5: Estimated Loss of Life, at the end of follow-up, Population unadjusted for deaths in Ecig scenario**

| Disease      | Sex    | Age Group   | Years of life lost<br>NULL | Years of life lost<br>Ecig | Years of life<br>Saved |
|--------------|--------|-------------|----------------------------|----------------------------|------------------------|
| All Diseases | Males  | 30-34       | 443911.034                 | 216466.608                 | 227444.426             |
|              |        | 35-39       | 1146798.555                | 551606.932                 | 595191.623             |
|              |        | 40-44       | 2609591.408                | 1225127.119                | 1384464.29             |
|              |        | 45-49       | 4775841.753                | 2216401.359                | 2559440.39             |
|              |        | 50-54       | 7446969.205                | 3623969.687                | 3822999.52             |
|              |        | 55-59       | 8240205.925                | 4489564.224                | 3750641.70             |
|              |        | 60-64       | 8772829.118                | 5214937.801                | 3557891.32             |
|              |        | 65-69       | 6161494.678                | 4060623.309                | 2100871.37             |
|              |        | 70-74       | 2495906.274                | 1704577.181                | 791329.093             |
|              | 75-79  | 0.000       | 0.000                      | 0.000                      |                        |
|              | Female | 30-34       | 229140.561                 | 130513.727                 | 98626.833              |
|              |        | 35-39       | 570217.942                 | 319634.266                 | 250583.676             |
|              |        | 40-44       | 1267538.938                | 688592.137                 | 578946.801             |
|              |        | 45-49       | 2340070.698                | 1253165.832                | 1086904.87             |
|              |        | 50-54       | 3743803.613                | 2032336.657                | 1711466.96             |
|              |        | 55-59       | 4591478.168                | 2634500.035                | 1956978.13             |
|              |        | 60-64       | 5207367.788                | 3113940.169                | 2093427.62             |
|              |        | 65-69       | 4092181.394                | 2592423.306                | 1499758.09             |
| 70-74        |        | 1776092.171 | 1140778.583                | 635313.588                 |                        |
| Lung cancer  | Males  | 30-34       | 66065.017                  | 49459.470                  | 16605.547              |
|              |        | 35-39       | 232509.414                 | 176280.806                 | 56228.608              |
|              |        | 40-44       | 688628.041                 | 510611.952                 | 178016.089             |
|              |        | 45-49       | 1528300.367                | 1095939.310                | 432361.057             |
|              |        | 50-54       | 2730187.229                | 1926885.787                | 803301.442             |
|              |        | 55-59       | 3909101.673                | 2746088.480                | 1163013.19             |
|              |        | 60-64       | 4287716.660                | 3107469.485                | 1180247.18             |
|              |        | 65-69       | 3467897.115                | 2564897.245                | 902999.870             |
|              |        | 70-74       | 1312144.343                | 986829.887                 | 325314.456             |
|              | 75-79  | 0.000       | 0.000                      | 0.000                      |                        |
|              | Female | 30-34       | 51913.113                  | 38604.470                  | 13308.643              |
|              |        | 35-39       | 189792.904                 | 142096.961                 | 47695.943              |
|              |        | 40-44       | 527596.573                 | 377331.689                 | 150264.884             |
|              |        | 45-49       | 1122524.269                | 770624.357                 | 351899.912             |
|              |        | 50-54       | 1882214.322                | 1263723.546                | 618490.776             |
|              |        | 55-59       | 2595581.943                | 1722031.402                | 873550.541             |
|              |        | 60-64       | 2846273.090                | 1927988.918                | 918284.172             |
|              |        | 65-69       | 2358758.394                | 1616413.711                | 742344.683             |
| 70-74        |        | 937814.238  | 649923.225                 | 287891.013                 |                        |
| IHD          | Males  | 30-34       | 263834.566                 | 102641.533                 | 161193.033             |
|              |        | 35-39       | 692140.150                 | 252614.095                 | 439526.055             |
|              |        | 40-44       | 1519708.432                | 501561.172                 | 1018147.26             |
|              |        | 45-49       | 2568546.697                | 771391.157                 | 1797155.54             |
|              |        | 50-54       | 3632929.903                | 1157882.651                | 2475047.25             |
|              |        | 55-59       | 2807892.356                | 974379.543                 | 1833512.81             |
|              |        | 60-64       | 2599825.934                | 1080504.256                | 1519321.68             |
|              |        | 65-69       | 1113578.307                | 537324.889                 | 576253.418             |
|              |        | 70-74       | 437536.271                 | 243671.645                 | 193864.626             |
|              | 75-79  | 0.000       | 0.000                      | 0.000                      |                        |
|              | Female | 30-34       | 79649.097                  | 32660.810                  | 46988.287              |
|              |        | 35-39       | 193965.908                 | 68874.792                  | 125091.116             |
|              |        | 40-44       | 403380.974                 | 125247.745                 | 278133.229             |
|              |        | 45-49       | 671385.408                 | 191886.062                 | 479499.346             |
|              |        | 50-54       | 1011875.989                | 320406.138                 | 691469.851             |
|              |        | 55-59       | 849875.715                 | 302672.005                 | 547203.710             |
|              |        | 60-64       | 925490.876                 | 392097.379                 | 533393.497             |
|              |        | 65-69       | 455463.881                 | 224321.357                 | 231142.524             |
| 70-74        |        | 207681.216  | 115444.873                 | 92236.344                  |                        |
| Stroke       | Males  | 30-34       | 73463.650                  | 40008.365                  | 33455.284              |
|              |        | 35-39       | 151934.057                 | 79986.083                  | 71947.973              |
|              |        | 40-44       | 262845.974                 | 130202.773                 | 132643.201             |
|              |        | 45-49       | 383421.246                 | 176278.526                 | 207142.720             |
|              |        | 50-54       | 479872.634                 | 198805.531                 | 281067.103             |
|              |        | 55-59       | 437124.903                 | 166780.835                 | 270344.068             |
|              |        | 60-64       | 419457.235                 | 162925.825                 | 256531.410             |
|              |        | 65-69       | 128180.574                 | 52062.466                  | 76118.108              |
|              |        | 70-74       | 53245.965                  | 23447.129                  | 29798.836              |
|              | 75-79  | 0.000       | 0.000                      | 0.000                      |                        |
|              | Female | 30-34       | 62919.090                  | 37159.911                  | 25759.179              |



**Results for PHIM for Run 4 (ELL Summary Sensitivity\_Analysis\_2.RTF)**

|      |        |       |             |            |            |
|------|--------|-------|-------------|------------|------------|
|      |        | 35-39 | 120806.205  | 67079.634  | 53726.571  |
|      |        | 40-44 | 203391.885  | 103622.910 | 99768.976  |
|      |        | 45-49 | 278172.097  | 130452.595 | 147719.502 |
|      |        | 50-54 | 325979.181  | 141954.974 | 184024.207 |
|      |        | 55-59 | 275161.340  | 112059.746 | 163101.594 |
|      |        | 60-64 | 268920.493  | 110562.586 | 158357.907 |
|      |        | 65-69 | 87956.054   | 37370.292  | 50585.762  |
|      |        | 70-74 | 42055.224   | 18331.900  | 23723.324  |
|      |        | 75-79 | 0.000       | 0.000      | 0.000      |
| COPD | Males  | 30-34 | 40547.801   | 24357.239  | 16190.562  |
|      |        | 35-39 | 70214.933   | 42725.947  | 27488.986  |
|      |        | 40-44 | 138408.960  | 82751.222  | 55657.738  |
|      |        | 45-49 | 295573.443  | 172792.366 | 122781.077 |
|      |        | 50-54 | 603979.438  | 340395.718 | 263583.720 |
|      |        | 55-59 | 1086086.992 | 602315.366 | 483771.626 |
|      |        | 60-64 | 1465829.290 | 864038.236 | 601791.054 |
|      |        | 65-69 | 1451838.682 | 906338.708 | 545499.974 |
|      |        | 70-74 | 692979.695  | 450628.520 | 242351.174 |
|      |        | 75-79 | 0.000       | 0.000      | 0.000      |
|      | Female | 30-34 | 34659.261   | 22088.536  | 12570.725  |
|      |        | 35-39 | 65652.924   | 41582.879  | 24070.046  |
|      |        | 40-44 | 133169.505  | 82389.794  | 50779.712  |
|      |        | 45-49 | 267988.924  | 160202.818 | 107786.107 |
|      |        | 50-54 | 523734.121  | 306252.000 | 217482.121 |
|      |        | 55-59 | 870859.170  | 497736.881 | 373122.288 |
|      |        | 60-64 | 1166683.329 | 683291.286 | 483392.043 |
|      |        | 65-69 | 1190003.066 | 714317.946 | 475685.119 |
|      |        | 70-74 | 588541.493  | 357078.586 | 231462.908 |
|      |        | 75-79 | 0.000       | 0.000      | 0.000      |

---

## Results for PHIM for Run 4 (ELL Summary Sensitivity\_Analysis\_2.RTF)

\*\*\*\*\*

**Table 6: Estimated Loss of Life, at the end of follow-up, Population and Number deaths adjusted for Ecig scenario**

| Disease      | Sex    | Age Group | Years of life lost<br>NULL | Years of life lost<br>Ecig | Years of life<br>Saved |
|--------------|--------|-----------|----------------------------|----------------------------|------------------------|
| All Diseases | Males  | 30-34     | 443911.034                 | 216481.168                 | 227429.865             |
|              |        | 35-39     | 1146798.555                | 551720.685                 | 595077.870             |
|              |        | 40-44     | 2609591.408                | 1225887.132                | 1383704.28             |
|              |        | 45-49     | 4775841.753                | 2219895.529                | 2555946.22             |
|              |        | 50-54     | 7446969.205                | 3634752.104                | 3812217.10             |
|              |        | 55-59     | 8240205.925                | 4507584.996                | 3732620.93             |
|              |        | 60-64     | 8772829.118                | 5246275.723                | 3526553.39             |
|              |        | 65-69     | 6161494.678                | 4088296.523                | 2073198.16             |
|              | Female | 70-74     | 2495906.274                | 1720187.244                | 775719.029             |
|              |        | 75-79     | 0.000                      | 0.000                      | 0.000                  |
|              |        | 30-34     | 229140.561                 | 130517.618                 | 98622.943              |
|              |        | 35-39     | 570217.942                 | 319664.311                 | 250553.630             |
|              |        | 40-44     | 1267538.938                | 688788.576                 | 578750.362             |
|              |        | 45-49     | 2340070.698                | 1254047.791                | 1086022.91             |
|              |        | 50-54     | 3743803.613                | 2035153.523                | 1708650.09             |
|              |        | 55-59     | 4591478.168                | 2640060.525                | 1951417.64             |
|              |        | 60-64     | 5207367.788                | 3124961.678                | 2082406.11             |
| Lung cancer  | Males  | 65-69     | 4092181.394                | 2604629.061                | 1487552.33             |
|              |        | 70-74     | 1776092.171                | 1148867.230                | 627224.940             |
|              |        | 75-79     | 0.000                      | 0.000                      | 0.000                  |
|              |        | 30-34     | 66065.017                  | 49463.198                  | 16601.819              |
|              |        | 35-39     | 232509.414                 | 176323.023                 | 56186.392              |
|              |        | 40-44     | 688628.041                 | 510982.054                 | 177645.987             |
|              |        | 45-49     | 1528300.367                | 1097922.966                | 430377.401             |
|              |        | 50-54     | 2730187.229                | 1933343.097                | 796844.132             |
|              | Female | 55-59     | 3909101.673                | 2757995.196                | 1151106.48             |
|              |        | 60-64     | 4287716.660                | 3127478.756                | 1160237.90             |
|              |        | 65-69     | 3467897.115                | 2582535.577                | 885361.538             |
|              |        | 70-74     | 1312144.343                | 995979.201                 | 316165.142             |
|              |        | 75-79     | 0.000                      | 0.000                      | 0.000                  |
|              |        | 30-34     | 51913.113                  | 38605.815                  | 13307.298              |
|              |        | 35-39     | 189792.904                 | 142111.755                 | 47681.149              |
|              |        | 40-44     | 527596.573                 | 377450.635                 | 150145.938             |
|              |        | 45-49     | 1122524.269                | 771206.145                 | 351318.124             |
| IHD          | Males  | 50-54     | 1882214.322                | 1265591.661                | 616622.661             |
|              |        | 55-59     | 2595581.943                | 1725815.201                | 869766.742             |
|              |        | 60-64     | 2846273.090                | 1935096.711                | 911176.379             |
|              |        | 65-69     | 2358758.394                | 1623970.032                | 734788.361             |
|              |        | 70-74     | 937814.238                 | 654505.924                 | 283308.313             |
|              |        | 75-79     | 0.000                      | 0.000                      | 0.000                  |
|              |        | 30-34     | 263834.566                 | 102647.949                 | 161186.617             |
|              |        | 35-39     | 692140.150                 | 252658.153                 | 439481.998             |
|              | Female | 40-44     | 1519708.432                | 501803.973                 | 1017904.46             |
|              |        | 45-49     | 2568546.697                | 772267.222                 | 1796279.47             |
|              |        | 50-54     | 3632929.903                | 1160186.340                | 2472743.56             |
|              |        | 55-59     | 2807892.356                | 976504.541                 | 1831387.82             |
|              |        | 60-64     | 2599825.934                | 1083679.877                | 1516146.06             |
|              |        | 65-69     | 1113578.307                | 538759.806                 | 574818.502             |
|              |        | 70-74     | 437536.271                 | 244483.837                 | 193052.433             |
|              |        | 75-79     | 0.000                      | 0.000                      | 0.000                  |
|              |        | 30-34     | 79649.097                  | 32661.695                  | 46987.402              |
| Stroke       | Males  | 35-39     | 193965.908                 | 68880.267                  | 125085.641             |
|              |        | 40-44     | 403380.974                 | 125274.416                 | 278106.558             |
|              |        | 45-49     | 671385.408                 | 191976.457                 | 479408.951             |
|              |        | 50-54     | 1011875.989                | 320668.287                 | 691207.702             |
|              |        | 55-59     | 849875.715                 | 302967.354                 | 546908.361             |
|              |        | 60-64     | 925490.876                 | 392670.751                 | 532820.125             |
|              |        | 65-69     | 455463.881                 | 224666.427                 | 230797.454             |
|              |        | 70-74     | 207681.216                 | 115699.443                 | 91981.773              |
|              | Female | 75-79     | 0.000                      | 0.000                      | 0.000                  |
|              |        | 30-34     | 73463.650                  | 40010.735                  | 33452.914              |
|              |        | 35-39     | 151934.057                 | 80001.296                  | 71932.760              |
|              |        | 40-44     | 262845.974                 | 130275.162                 | 132570.813             |
|              |        | 45-49     | 383421.246                 | 176515.871                 | 206905.375             |
|              |        | 50-54     | 479872.634                 | 199291.411                 | 280581.223             |
|              |        | 55-59     | 437124.903                 | 167263.889                 | 269861.015             |
|              |        | 60-64     | 419457.235                 | 163569.553                 | 255887.682             |
|              |        | 65-69     | 128180.574                 | 52237.712                  | 75942.862              |
| Stroke       | Female | 70-74     | 53245.965                  | 23536.164                  | 29709.801              |
|              |        | 75-79     | 0.000                      | 0.000                      | 0.000                  |
| Stroke       | Female | 30-34     | 62919.090                  | 37160.804                  | 25758.286              |

**Results for PHIM for Run 4 (ELL Summary Sensitivity\_Analysis\_2.RTF)**

|      |        |       |             |            |            |
|------|--------|-------|-------------|------------|------------|
|      |        | 35-39 | 120806.205  | 67084.634  | 53721.572  |
|      |        | 40-44 | 203391.885  | 103645.038 | 99746.847  |
|      |        | 45-49 | 278172.097  | 130517.396 | 147654.701 |
|      |        | 50-54 | 325979.181  | 142084.921 | 183894.260 |
|      |        | 55-59 | 275161.340  | 112196.288 | 162965.052 |
|      |        | 60-64 | 268920.493  | 110767.488 | 158153.005 |
|      |        | 65-69 | 87956.054   | 37440.601  | 50515.453  |
|      |        | 70-74 | 42055.224   | 18377.974  | 23677.250  |
|      |        | 75-79 | 0.000       | 0.000      | 0.000      |
| COPD | Males  | 30-34 | 40547.801   | 24359.286  | 16188.515  |
|      |        | 35-39 | 70214.933   | 42738.213  | 27476.720  |
|      |        | 40-44 | 138408.960  | 82825.944  | 55583.016  |
|      |        | 45-49 | 295573.443  | 173189.471 | 122383.972 |
|      |        | 50-54 | 603979.438  | 341931.256 | 262048.182 |
|      |        | 55-59 | 1086086.992 | 605821.370 | 480265.622 |
|      |        | 60-64 | 1465829.290 | 871547.537 | 594281.753 |
|      |        | 65-69 | 1451838.682 | 914763.428 | 537075.254 |
|      |        | 70-74 | 692979.695  | 456188.042 | 236791.653 |
|      |        | 75-79 | 0.000       | 0.000      | 0.000      |
|      | Female | 30-34 | 34659.261   | 22089.304  | 12569.957  |
|      |        | 35-39 | 65652.924   | 41587.656  | 24065.268  |
|      |        | 40-44 | 133169.505  | 82418.486  | 50751.019  |
|      |        | 45-49 | 267988.924  | 160347.793 | 107641.131 |
|      |        | 50-54 | 523734.121  | 306808.654 | 216925.467 |
|      |        | 55-59 | 870859.170  | 499081.681 | 371777.489 |
|      |        | 60-64 | 1166683.329 | 686426.728 | 480256.601 |
|      |        | 65-69 | 1190003.066 | 718552.001 | 471451.065 |
|      |        | 70-74 | 588541.493  | 360283.889 | 228257.604 |
|      |        | 75-79 | 0.000       | 0.000      | 0.000      |

---

## Results for PHIM for Run 6 (ELL Summary Sensitivity\_Analysis\_2.RTF)

\*\*\*\*\*

### Estimated Loss of Life from the E Component for Run: 6, Simulation: 1

Country: US (United States)  
 Follow-up Period: 1990 to 2039

**Table 1: Estimated Loss of Life, at the end of follow-up, all age groups combined, Population unadjusted for deaths in Ecig scenario**

| Disease      | Sex    | Year | Years of life lost<br>NULL | Years of life lost<br>Ecig | Years of life<br>Saved |
|--------------|--------|------|----------------------------|----------------------------|------------------------|
| All Diseases | Males  | 2039 | 42093547.949               | 28025651.202               | 14067896.7             |
|              | Female | 2039 | 23817891.273               | 16997382.038               | 6820509.23             |
| Lung cancer  | Males  | 2039 | 18222549.860               | 14691269.492               | 3531280.37             |
|              | Female | 2039 | 12512468.845               | 9922680.064                | 2589788.78             |
| IHD          | Males  | 2039 | 15635992.616               | 7986364.186                | 7649628.43             |
|              | Female | 2039 | 4798769.065                | 2634814.150                | 2163954.92             |
| Stroke       | Males  | 2039 | 2389546.238                | 1339711.369                | 1049834.87             |
|              | Female | 2039 | 1665361.569                | 1018444.765                | 646916.804             |
| COPD         | Males  | 2039 | 5845459.234                | 4008306.155                | 1837153.08             |
|              | Female | 2039 | 4841291.793                | 3421443.059                | 1419848.73             |

## Results for PHIM for Run 6 (ELL Summary Sensitivity\_Analysis\_2.RTF)

\*\*\*\*\*

**Table 2: Estimated Loss of Life, at the end of follow-up, all age groups combined, Population and Number deaths adjusted for Ecig scenario**

| Disease      | Sex    | Year | Years of life lost<br>NULL | Years of life lost<br>Ecig | Years of life<br>Saved |
|--------------|--------|------|----------------------------|----------------------------|------------------------|
| All Diseases | Males  | 2039 | 42093547.949               | 28106830.829               | 13986717.1             |
|              | Female | 2039 | 23817891.273               | 17026288.384               | 6791602.89             |
| Lung cancer  | Males  | 2039 | 18222549.860               | 14738560.799               | 3483989.06             |
|              | Female | 2039 | 12512468.845               | 9940233.967                | 2572234.88             |
| IHD          | Males  | 2039 | 15635992.616               | 7998608.161                | 7637384.46             |
|              | Female | 2039 | 4798769.065                | 2636865.479                | 2161903.59             |
| Stroke       | Males  | 2039 | 2389546.238                | 1341867.302                | 1047678.94             |
|              | Female | 2039 | 1665361.569                | 1019126.825                | 646234.744             |
| COPD         | Males  | 2039 | 5845459.234                | 4027794.568                | 1817664.67             |
|              | Female | 2039 | 4841291.793                | 3430062.113                | 1411229.68             |

## Results for PHIM for Run 6 (ELL Summary Sensitivity\_Analysis\_2.RTF)

\*\*\*\*\*

**Table 3: Estimated Loss of Life, All age groups combined, Population unadjusted for deaths in Ecig scenario, cumulative over years**

| Disease      | Sex          | Year         | Years of life lost<br>NULL | Years of life lost<br>Ecig | Years of life<br>Saved |
|--------------|--------------|--------------|----------------------------|----------------------------|------------------------|
| All Diseases | Males        | 1990         | 1304839.645                | 1304839.645                | 0.000                  |
|              |              | 1991         | 2579865.358                | 2575282.179                | 4583.179               |
|              |              | 1992         | 3830683.831                | 3813377.671                | 17306.160              |
|              |              | 1993         | 5076567.803                | 5035254.139                | 41313.664              |
|              |              | 1994         | 6292145.526                | 6213219.916                | 78925.611              |
|              |              | 1995         | 7485537.010                | 7352676.490                | 132860.520             |
|              |              | 1996         | 8655955.028                | 8451574.958                | 204380.070             |
|              |              | 1997         | 9791729.713                | 9498563.684                | 293166.029             |
|              |              | 1998         | 10899134.186               | 10499943.641               | 399190.545             |
|              |              | 1999         | 12070409.674               | 11526612.499               | 543797.176             |
|              |              | 2000         | 13231384.595               | 12520926.098               | 710458.498             |
|              |              | 2001         | 14371761.018               | 13471386.994               | 900374.024             |
|              |              | 2002         | 15508906.386               | 14391447.370               | 1117459.02             |
|              |              | 2003         | 16638100.422               | 15278667.556               | 1359432.87             |
|              |              | 2004         | 17736465.088               | 16119089.858               | 1617375.23             |
|              |              | 2005         | 18834658.606               | 16936749.006               | 1897909.60             |
|              |              | 2006         | 19909100.501               | 17708384.125               | 2200716.38             |
|              |              | 2007         | 20958321.463               | 18440256.263               | 2518065.20             |
|              |              | 2008         | 22000068.148               | 19146906.557               | 2853161.59             |
|              |              | 2009         | 23018816.903               | 19818364.917               | 3200451.99             |
|              |              | 2010         | 24018480.537               | 20456424.361               | 3562056.18             |
|              |              | 2011         | 25003034.574               | 21064399.062               | 3938635.51             |
|              |              | 2012         | 25969871.429               | 21641221.269               | 4328650.16             |
|              |              | 2013         | 26920275.180               | 22188404.003               | 4731871.18             |
|              |              | 2014         | 27849005.227               | 22703618.147               | 5145387.08             |
|              |              | 2015         | 28749620.400               | 23190109.288               | 5559511.11             |
|              |              | 2016         | 29622417.562               | 23638768.317               | 5983649.25             |
|              |              | 2017         | 30462559.724               | 24052264.929               | 6410294.79             |
|              |              | 2018         | 31293299.299               | 24448907.315               | 6844391.98             |
|              |              | 2019         | 32109993.427               | 24824575.783               | 7285417.64             |
|              |              | 2020         | 32883323.977               | 25174963.338               | 7708360.64             |
|              |              | 2021         | 33610102.554               | 25480327.402               | 8129775.15             |
|              |              | 2022         | 34322010.448               | 25767423.496               | 8554586.95             |
|              |              | 2023         | 35018383.550               | 26036151.581               | 8982231.97             |
|              |              | 2024         | 35700177.955               | 26287882.423               | 9412295.53             |
|              |              | 2025         | 36315500.346               | 26515380.630               | 9800119.72             |
|              |              | 2026         | 36896159.343               | 26708970.520               | 10187188.8             |
|              |              | 2027         | 37462570.116               | 26889349.964               | 10573220.2             |
|              |              | 2028         | 38015337.780               | 27056180.498               | 10959157.3             |
| 2029         | 38554814.764 | 27210990.616 | 11343824.1                 |                            |                        |
| 2030         | 39003805.400 | 27343520.407 | 11660285.0                 |                            |                        |
| 2031         | 39436509.703 | 27455997.985 | 11980511.7                 |                            |                        |
| 2032         | 39858470.458 | 27559779.992 | 12298690.5                 |                            |                        |
| 2033         | 40270147.082 | 27654883.690 | 12615263.4                 |                            |                        |
| 2034         | 40672665.743 | 27743156.739 | 12929509.0                 |                            |                        |
| 2035         | 40962732.664 | 27810541.222 | 13152191.4                 |                            |                        |
| 2036         | 41255021.653 | 27870949.916 | 13384071.7                 |                            |                        |
| 2037         | 41540573.023 | 27926500.234 | 13614072.8                 |                            |                        |
| 2038         | 41820158.066 | 27977706.219 | 13842451.8                 |                            |                        |
| 2039         | 42093547.949 | 28025651.202 | 14067896.7                 |                            |                        |
|              | Female       | 1990         | 588979.406                 | 588979.406                 | 0.000                  |
| 1991         |              | 1182571.252  | 1181134.661                | 1436.592                   |                        |
| 1992         |              | 1777346.679  | 1771798.657                | 5548.022                   |                        |
| 1993         |              | 2380261.899  | 2366811.874                | 13450.025                  |                        |
| 1994         |              | 2983130.039  | 2957036.389                | 26093.650                  |                        |
| 1995         |              | 3588982.584  | 3544419.693                | 44562.891                  |                        |
| 1996         |              | 4195430.235  | 4125154.080                | 70276.155                  |                        |
| 1997         |              | 4793866.694  | 4691583.066                | 102283.628                 |                        |
| 1998         |              | 5389747.381  | 5248288.015                | 141459.366                 |                        |
| 1999         |              | 6006722.467  | 5813534.991                | 193187.476                 |                        |
| 2000         |              | 6625758.871  | 6372227.580                | 253531.291                 |                        |
| 2001         |              | 7245135.411  | 6920658.960                | 324476.451                 |                        |
| 2002         |              | 7867492.021  | 7461036.847                | 406455.174                 |                        |
| 2003         |              | 8485051.793  | 7987172.590                | 497879.203                 |                        |
| 2004         |              | 9092994.774  | 8494924.339                | 598070.435                 |                        |
| 2005         |              | 9706032.803  | 8996635.113                | 709397.691                 |                        |
| 2006         |              | 10311907.548 | 9481169.460                | 830738.088                 |                        |
| 2007         |              | 10909437.502 | 9949575.996                | 959861.506                 |                        |
| 2008         |              | 11506462.491 | 10405174.976               | 1101287.51                 |                        |
| 2009         |              | 12098393.287 | 10848180.047               | 1250213.24                 |                        |
| 2010         |              | 12681188.981 | 11273686.993               | 1407501.99                 |                        |

**Results for PHIM for Run 6 (ELL Summary Sensitivity\_Analysis\_2.RTF)**

|             |       |      |              |              |            |
|-------------|-------|------|--------------|--------------|------------|
|             |       | 2011 | 13260062.991 | 11684966.879 | 1575096.11 |
|             |       | 2012 | 13839417.441 | 12084779.694 | 1754637.75 |
|             |       | 2013 | 14409614.758 | 12468402.513 | 1941212.25 |
|             |       | 2014 | 14976658.746 | 12837511.116 | 2139147.63 |
|             |       | 2015 | 15529977.821 | 13189222.820 | 2340755.00 |
|             |       | 2016 | 16066640.764 | 13518789.517 | 2547851.25 |
|             |       | 2017 | 16590035.078 | 13829820.393 | 2760214.69 |
|             |       | 2018 | 17098716.137 | 14125559.440 | 2973156.70 |
|             |       | 2019 | 17599868.850 | 14407738.258 | 3192130.59 |
|             |       | 2020 | 18081346.241 | 14673722.364 | 3407623.88 |
|             |       | 2021 | 18537594.460 | 14915421.965 | 3622172.50 |
|             |       | 2022 | 18985300.234 | 15144175.724 | 3841124.51 |
|             |       | 2023 | 19423958.747 | 15359984.118 | 4063974.63 |
|             |       | 2024 | 19853347.772 | 15562920.367 | 4290427.40 |
|             |       | 2025 | 20252822.245 | 15749096.569 | 4503725.68 |
|             |       | 2026 | 20619307.063 | 15911202.394 | 4708104.67 |
|             |       | 2027 | 20976063.406 | 16062204.846 | 4913858.56 |
|             |       | 2028 | 21323641.947 | 16202637.481 | 5121004.47 |
|             |       | 2029 | 21662117.106 | 16332804.950 | 5329312.16 |
|             |       | 2030 | 21960971.694 | 16447111.605 | 5513860.09 |
|             |       | 2031 | 22224951.983 | 16540506.066 | 5684445.92 |
|             |       | 2032 | 22480397.853 | 16625948.812 | 5854449.04 |
|             |       | 2033 | 22728639.455 | 16704403.616 | 6024235.84 |
|             |       | 2034 | 22970448.888 | 16776285.009 | 6194163.88 |
|             |       | 2035 | 23164154.188 | 16834375.709 | 6329778.48 |
|             |       | 2036 | 23334538.616 | 16880597.341 | 6453941.27 |
|             |       | 2037 | 23499760.723 | 16922785.944 | 6576974.78 |
|             |       | 2038 | 23660308.401 | 16961513.244 | 6698795.16 |
|             |       | 2039 | 23817891.273 | 16997382.038 | 6820509.23 |
| Lung cancer | Males | 1990 | 595621.791   | 595621.791   | 0.000      |
|             |       | 1991 | 1177744.113  | 1177435.588  | 308.525    |
|             |       | 1992 | 1750034.892  | 1748848.521  | 1186.371   |
|             |       | 1993 | 2319752.308  | 2316794.914  | 2957.394   |
|             |       | 1994 | 2872597.339  | 2866739.254  | 5858.085   |
|             |       | 1995 | 3411494.825  | 3401303.797  | 10191.028  |
|             |       | 1996 | 3945569.726  | 3929066.507  | 16503.218  |
|             |       | 1997 | 4463316.362  | 4438513.297  | 24803.065  |
|             |       | 1998 | 4975301.180  | 4939751.052  | 35550.129  |
|             |       | 1999 | 5473691.125  | 5424732.711  | 48958.414  |
|             |       | 2000 | 5977500.570  | 5911491.970  | 66008.601  |
|             |       | 2001 | 6474795.516  | 6387955.527  | 86839.989  |
|             |       | 2002 | 6968769.705  | 6856873.697  | 111896.008 |
|             |       | 2003 | 7460282.140  | 7318394.521  | 141887.619 |
|             |       | 2004 | 7947048.275  | 7770391.866  | 176656.409 |
|             |       | 2005 | 8430571.669  | 8213967.946  | 216603.723 |
|             |       | 2006 | 8903945.390  | 8642052.772  | 261892.618 |
|             |       | 2007 | 9364177.982  | 9052210.017  | 311967.965 |
|             |       | 2008 | 9822525.458  | 9453596.019  | 368929.439 |
|             |       | 2009 | 10275228.886 | 9843103.158  | 432125.729 |
|             |       | 2010 | 10720275.500 | 10219069.876 | 501205.624 |
|             |       | 2011 | 11155356.373 | 10579323.338 | 576033.035 |
|             |       | 2012 | 11582611.617 | 10924715.758 | 657895.859 |
|             |       | 2013 | 11998803.791 | 11253007.320 | 745796.471 |
|             |       | 2014 | 12402087.090 | 11563233.098 | 838853.992 |
|             |       | 2015 | 12793451.706 | 11857035.642 | 936416.063 |
|             |       | 2016 | 13160101.653 | 12124245.899 | 1035855.75 |
|             |       | 2017 | 13503583.414 | 12367142.086 | 1136441.33 |
|             |       | 2018 | 13859755.737 | 12609192.216 | 1250563.52 |
|             |       | 2019 | 14211625.176 | 12839971.661 | 1371653.52 |
|             |       | 2020 | 14553935.288 | 13057551.102 | 1496384.19 |
|             |       | 2021 | 14851747.495 | 13239126.267 | 1612621.23 |
|             |       | 2022 | 15144531.004 | 13410468.564 | 1734062.44 |
|             |       | 2023 | 15431932.496 | 13571310.799 | 1860621.70 |
|             |       | 2024 | 15713920.740 | 13722081.954 | 1991838.79 |
|             |       | 2025 | 15979112.816 | 13859630.810 | 2119482.01 |
|             |       | 2026 | 16206550.153 | 13970180.468 | 2236369.68 |
|             |       | 2027 | 16428826.050 | 14073036.256 | 2355789.79 |
|             |       | 2028 | 16645902.186 | 14168057.852 | 2477844.33 |
|             |       | 2029 | 16858126.517 | 14255966.263 | 2602160.25 |
|             |       | 2030 | 17045220.687 | 14331920.177 | 2713300.51 |
|             |       | 2031 | 17208482.610 | 14392236.484 | 2816246.13 |
|             |       | 2032 | 17367586.074 | 14447807.297 | 2919778.78 |
|             |       | 2033 | 17522716.280 | 14498632.842 | 3024083.44 |
|             |       | 2034 | 17674226.555 | 14545476.811 | 3128749.74 |
|             |       | 2035 | 17792201.734 | 14581671.922 | 3210529.81 |
|             |       | 2036 | 17903508.236 | 14612556.894 | 3290951.34 |
|             |       | 2037 | 18012162.345 | 14640908.771 | 3371253.57 |
|             |       | 2038 | 18118464.470 | 14666945.815 | 3451518.65 |

**Results for PHIM for Run 6 (ELL Summary Sensitivity\_Analysis\_2.RTF)**

|     |        |      |              |              |            |
|-----|--------|------|--------------|--------------|------------|
|     | Female | 2039 | 18222549.860 | 14691269.492 | 3531280.37 |
|     |        | 1990 | 307897.357   | 307897.357   | 0.000      |
|     |        | 1991 | 616547.418   | 616369.139   | 178.279    |
|     |        | 1992 | 931086.773   | 930359.064   | 727.709    |
|     |        | 1993 | 1246155.671  | 1244325.016  | 1830.655   |
|     |        | 1994 | 1561212.934  | 1557539.663  | 3673.271   |
|     |        | 1995 | 1879967.742  | 1873403.407  | 6564.335   |
|     |        | 1996 | 2197488.109  | 2186812.673  | 10675.436  |
|     |        | 1997 | 2515698.453  | 2499400.736  | 16297.716  |
|     |        | 1998 | 2836249.556  | 2812590.219  | 23659.337  |
|     |        | 1999 | 3150201.390  | 3117408.844  | 32792.545  |
|     |        | 2000 | 3472722.342  | 3428384.662  | 44337.680  |
|     |        | 2001 | 3796994.889  | 3738357.912  | 58636.977  |
|     |        | 2002 | 4126619.935  | 4050512.425  | 76107.511  |
|     |        | 2003 | 4454982.533  | 4358425.316  | 96557.218  |
|     |        | 2004 | 4784343.030  | 4663808.703  | 120534.328 |
|     |        | 2005 | 5113443.121  | 4965225.647  | 148217.473 |
|     |        | 2006 | 5442543.963  | 5262285.434  | 180258.529 |
|     |        | 2007 | 5772441.497  | 5555720.828  | 216720.669 |
|     |        | 2008 | 6091911.943  | 5835373.028  | 256538.914 |
|     |        | 2009 | 6413671.330  | 6111957.362  | 301713.968 |
|     |        | 2010 | 6730763.530  | 6379859.410  | 350904.120 |
|     |        | 2011 | 7043614.101  | 6638900.842  | 404713.259 |
|     |        | 2012 | 7356270.780  | 6892216.871  | 464053.909 |
|     |        | 2013 | 7662551.964  | 7134858.037  | 527693.926 |
|     |        | 2014 | 7964551.465  | 7368599.370  | 595952.095 |
|     |        | 2015 | 8254895.403  | 7588768.192  | 666127.211 |
|     |        | 2016 | 8530661.848  | 7792185.030  | 738476.818 |
|     |        | 2017 | 8795826.122  | 7982578.304  | 813247.819 |
|     |        | 2018 | 9067233.707  | 8170733.379  | 896500.328 |
|     |        | 2019 | 9335343.270  | 8350608.623  | 984734.647 |
|     |        | 2020 | 9596110.883  | 8520845.164  | 1075265.72 |
|     |        | 2021 | 9833186.859  | 8671252.192  | 1161934.67 |
|     |        | 2022 | 10066452.037 | 8813738.095  | 1252713.94 |
|     |        | 2023 | 10295503.609 | 8948198.731  | 1347304.88 |
|     |        | 2024 | 10520125.318 | 9074620.091  | 1445505.23 |
|     |        | 2025 | 10731915.863 | 9190585.683  | 1541330.18 |
|     |        | 2026 | 10917495.549 | 9288256.821  | 1629238.73 |
|     |        | 2027 | 11098620.885 | 9379123.248  | 1719497.64 |
|     |        | 2028 | 11275441.234 | 9463527.020  | 1811914.21 |
|     |        | 2029 | 11447962.710 | 9541608.067  | 1906354.64 |
|     |        | 2030 | 11601867.623 | 9609806.375  | 1992061.25 |
|     |        | 2031 | 11731666.516 | 9663659.055  | 2068007.46 |
|     |        | 2032 | 11857585.969 | 9712887.821  | 2144698.15 |
|     |        | 2033 | 11980128.625 | 9758009.308  | 2222119.32 |
|     |        | 2034 | 12099562.464 | 9799318.095  | 2300244.37 |
|     |        | 2035 | 12195919.946 | 9832216.850  | 2363703.10 |
|     |        | 2036 | 12278201.969 | 9857816.525  | 2420385.44 |
|     |        | 2037 | 12358146.336 | 9881213.660  | 2476932.68 |
|     |        | 2038 | 12435978.633 | 9902723.171  | 2533255.46 |
|     |        | 2039 | 12512468.845 | 9922680.064  | 2589788.78 |
| IHD | Males  | 1990 | 517209.093   | 517209.093   | 0.000      |
|     |        | 1991 | 1019219.395  | 1015406.135  | 3813.260   |
|     |        | 1992 | 1509598.614  | 1495228.853  | 14369.761  |
|     |        | 1993 | 1992735.299  | 1958677.506  | 34057.793  |
|     |        | 1994 | 2462877.575  | 2398374.677  | 64502.898  |
|     |        | 1995 | 2928249.390  | 2820450.859  | 107798.531 |
|     |        | 1996 | 3377377.730  | 3212997.770  | 164379.960 |
|     |        | 1997 | 3809062.472  | 3575345.162  | 233717.310 |
|     |        | 1998 | 4222213.867  | 3906835.432  | 315378.435 |
|     |        | 1999 | 4708317.743  | 4278039.584  | 430278.159 |
|     |        | 2000 | 5182084.396  | 4621884.156  | 560200.240 |
|     |        | 2001 | 5644097.705  | 4937651.154  | 706446.551 |
|     |        | 2002 | 6107232.129  | 5235022.057  | 872210.072 |
|     |        | 2003 | 6561785.704  | 5508204.923  | 1053580.78 |
|     |        | 2004 | 6996156.348  | 5753029.307  | 1243127.04 |
|     |        | 2005 | 7426261.361  | 5980451.910  | 1445809.45 |
|     |        | 2006 | 7849012.694  | 6187457.726  | 1661554.97 |
|     |        | 2007 | 8255300.530  | 6372853.974  | 1882446.56 |
|     |        | 2008 | 8650662.040  | 6540651.965  | 2110010.07 |
|     |        | 2009 | 9030818.513  | 6691012.740  | 2339805.77 |
|     |        | 2010 | 9403026.327  | 6827862.781  | 2575163.55 |
|     |        | 2011 | 9767535.506  | 6951777.192  | 2815758.31 |
|     |        | 2012 | 10123044.281 | 7064350.330  | 3058693.95 |
|     |        | 2013 | 10470104.786 | 7166155.827  | 3303948.96 |
|     |        | 2014 | 10807756.112 | 7258099.427  | 3549656.68 |
|     |        | 2015 | 11130681.425 | 7340343.252  | 3790338.17 |
|     |        | 2016 | 11448966.506 | 7415301.563  | 4033664.94 |



**Results for PHIM for Run 6 (ELL Summary Sensitivity\_Analysis\_2.RTF)**

|        |        |      |              |             |            |
|--------|--------|------|--------------|-------------|------------|
|        |        | 2017 | 11758164.882 | 7483502.441 | 4274662.44 |
|        |        | 2018 | 12054448.241 | 7542556.718 | 4511891.52 |
|        |        | 2019 | 12341606.261 | 7595645.837 | 4745960.42 |
|        |        | 2020 | 12600728.939 | 7641426.671 | 4959302.27 |
|        |        | 2021 | 12861767.105 | 7683519.583 | 5178247.52 |
|        |        | 2022 | 13114168.616 | 7721449.571 | 5392719.05 |
|        |        | 2023 | 13357894.797 | 7755509.049 | 5602385.75 |
|        |        | 2024 | 13593848.521 | 7786477.819 | 5807370.70 |
|        |        | 2025 | 13789177.359 | 7811510.531 | 5977666.83 |
|        |        | 2026 | 13993401.656 | 7835476.857 | 6157924.80 |
|        |        | 2027 | 14190519.224 | 7857447.066 | 6333072.16 |
|        |        | 2028 | 14381193.356 | 7877334.522 | 6503858.83 |
|        |        | 2029 | 14565171.927 | 7895689.620 | 6669482.31 |
|        |        | 2030 | 14697381.605 | 7908874.948 | 6788506.66 |
|        |        | 2031 | 14842203.512 | 7922483.682 | 6919719.83 |
|        |        | 2032 | 14982485.826 | 7934982.559 | 7047503.27 |
|        |        | 2033 | 15118410.647 | 7946351.852 | 7172058.80 |
|        |        | 2034 | 15250284.398 | 7957315.200 | 7292969.20 |
|        |        | 2035 | 15322911.166 | 7963198.696 | 7359712.47 |
|        |        | 2036 | 15405115.031 | 7969548.703 | 7435566.33 |
|        |        | 2037 | 15484709.137 | 7975465.703 | 7509243.43 |
|        |        | 2038 | 15561812.193 | 7981007.206 | 7580804.99 |
|        |        | 2039 | 15635992.616 | 7986364.186 | 7649628.43 |
|        | Female | 1990 | 147299.110   | 147299.110  | 0.000      |
|        |        | 1991 | 295122.462   | 294180.358  | 942.104    |
|        |        | 1992 | 439962.920   | 436379.369  | 3583.551   |
|        |        | 1993 | 584735.615   | 576178.445  | 8557.170   |
|        |        | 1994 | 727640.783   | 711345.768  | 16295.015  |
|        |        | 1995 | 868486.937   | 841200.061  | 27286.877  |
|        |        | 1996 | 1010321.847  | 967812.515  | 42509.332  |
|        |        | 1997 | 1144230.930  | 1083598.127 | 60632.802  |
|        |        | 1998 | 1274513.622  | 1192158.217 | 82355.405  |
|        |        | 1999 | 1426725.938  | 1314172.829 | 112553.109 |
|        |        | 2000 | 1573462.680  | 1426995.072 | 146467.608 |
|        |        | 2001 | 1719132.015  | 1533099.887 | 186032.128 |
|        |        | 2002 | 1863006.732  | 1632400.236 | 230606.496 |
|        |        | 2003 | 2002943.227  | 1723747.012 | 279196.215 |
|        |        | 2004 | 2137798.705  | 1806848.810 | 330949.896 |
|        |        | 2005 | 2271071.245  | 1884664.078 | 386407.168 |
|        |        | 2006 | 2400707.731  | 1955586.355 | 445121.376 |
|        |        | 2007 | 2523634.512  | 2018851.131 | 504783.381 |
|        |        | 2008 | 2648752.232  | 2079134.276 | 569617.956 |
|        |        | 2009 | 2765973.961  | 2132399.822 | 633574.140 |
|        |        | 2010 | 2881329.235  | 2181663.405 | 699665.829 |
|        |        | 2011 | 2994972.694  | 2227013.759 | 767958.934 |
|        |        | 2012 | 3108958.829  | 2269272.533 | 839686.296 |
|        |        | 2013 | 3218140.416  | 2307311.456 | 910828.960 |
|        |        | 2014 | 3328387.914  | 2343147.911 | 985240.003 |
|        |        | 2015 | 3435342.796  | 2376319.488 | 1059023.31 |
|        |        | 2016 | 3539189.408  | 2406633.989 | 1132555.42 |
|        |        | 2017 | 3640041.363  | 2434230.883 | 1205810.48 |
|        |        | 2018 | 3732645.362  | 2457853.613 | 1274791.75 |
|        |        | 2019 | 3821421.978  | 2479142.057 | 1342279.92 |
|        |        | 2020 | 3902115.950  | 2497666.949 | 1404449.00 |
|        |        | 2021 | 3984301.053  | 2515319.010 | 1468982.04 |
|        |        | 2022 | 4062629.299  | 2531064.217 | 1531565.08 |
|        |        | 2023 | 4137348.729  | 2545140.360 | 1592208.37 |
|        |        | 2024 | 4208611.493  | 2557695.129 | 1650916.36 |
|        |        | 2025 | 4269419.492  | 2568160.179 | 1701259.31 |
|        |        | 2026 | 4330969.998  | 2578056.974 | 1752913.02 |
|        |        | 2027 | 4389134.306  | 2586853.823 | 1802280.48 |
|        |        | 2028 | 4444222.970  | 2594649.418 | 1849573.55 |
|        |        | 2029 | 4496447.877  | 2601615.092 | 1894832.78 |
|        |        | 2030 | 4536975.698  | 2606937.353 | 1930038.34 |
|        |        | 2031 | 4578338.586  | 2612060.277 | 1966278.31 |
|        |        | 2032 | 4617397.784  | 2616630.379 | 2000767.41 |
|        |        | 2033 | 4654407.697  | 2620761.525 | 2033646.17 |
|        |        | 2034 | 4689913.454  | 2624526.527 | 2065386.93 |
|        |        | 2035 | 4712518.190  | 2626878.944 | 2085639.25 |
|        |        | 2036 | 4735845.827  | 2629154.259 | 2106691.57 |
|        |        | 2037 | 4757958.806  | 2631211.829 | 2126746.98 |
|        |        | 2038 | 4778813.806  | 2633082.229 | 2145731.58 |
|        |        | 2039 | 4798769.065  | 2634814.150 | 2163954.92 |
| Stroke | Males  | 1990 | 75005.854    | 75005.854   | 0.000      |
|        |        | 1991 | 149463.017   | 149092.478  | 370.540    |
|        |        | 1992 | 222966.278   | 221557.028  | 1409.250   |
|        |        | 1993 | 296801.879   | 293355.642  | 3446.237   |
|        |        | 1994 | 372453.706   | 365619.159  | 6834.547   |

**Results for PHIM for Run 6 (ELL Summary Sensitivity\_Analysis\_2.RTF)**

|        |      |             |             |            |
|--------|------|-------------|-------------|------------|
|        | 1995 | 448401.338  | 436581.046  | 11820.292  |
|        | 1996 | 523536.301  | 504963.030  | 18573.271  |
|        | 1997 | 596763.211  | 569627.786  | 27135.425  |
|        | 1998 | 667546.681  | 630059.101  | 37487.580  |
|        | 1999 | 734925.407  | 685546.114  | 49379.293  |
|        | 2000 | 803749.361  | 740050.351  | 63699.010  |
|        | 2001 | 870081.588  | 790199.789  | 79881.799  |
|        | 2002 | 935347.140  | 837300.586  | 98046.554  |
|        | 2003 | 1001627.349 | 882544.212  | 119083.137 |
|        | 2004 | 1066587.976 | 924646.938  | 141941.037 |
|        | 2005 | 1130548.052 | 963808.080  | 166739.972 |
|        | 2006 | 1195132.454 | 1000914.587 | 194217.867 |
|        | 2007 | 1258974.043 | 1035349.825 | 223624.218 |
|        | 2008 | 1320124.867 | 1066111.439 | 254013.428 |
|        | 2009 | 1380776.123 | 1094653.330 | 286122.794 |
|        | 2010 | 1440048.533 | 1120785.435 | 319263.098 |
|        | 2011 | 1497484.847 | 1144467.359 | 353017.488 |
|        | 2012 | 1554496.526 | 1166215.891 | 388280.635 |
|        | 2013 | 1610819.598 | 1186221.540 | 424598.057 |
|        | 2014 | 1667484.890 | 1204805.003 | 462679.887 |
|        | 2015 | 1720948.287 | 1221325.942 | 499622.345 |
|        | 2016 | 1775699.228 | 1236892.890 | 538806.338 |
|        | 2017 | 1830250.175 | 1251307.194 | 578942.981 |
|        | 2018 | 1875958.950 | 1262597.422 | 613361.528 |
|        | 2019 | 1920359.232 | 1272751.858 | 647607.373 |
|        | 2020 | 1960605.297 | 1281457.214 | 679148.083 |
|        | 2021 | 1998912.887 | 1289115.016 | 709797.871 |
|        | 2022 | 2036003.696 | 1295998.429 | 740005.267 |
|        | 2023 | 2071857.536 | 1302160.931 | 769696.606 |
|        | 2024 | 2106636.468 | 1307728.719 | 798907.749 |
|        | 2025 | 2136450.873 | 1312277.079 | 824173.795 |
|        | 2026 | 2164796.470 | 1316281.260 | 848515.210 |
|        | 2027 | 2192079.608 | 1319917.642 | 872161.966 |
|        | 2028 | 2218404.367 | 1323179.854 | 895224.513 |
|        | 2029 | 2243769.140 | 1326132.152 | 917636.989 |
|        | 2030 | 2263570.213 | 1328357.130 | 935213.083 |
|        | 2031 | 2282521.590 | 1330365.752 | 952155.838 |
|        | 2032 | 2300804.945 | 1332176.347 | 968628.598 |
|        | 2033 | 2318464.018 | 1333820.337 | 984643.681 |
|        | 2034 | 2335611.973 | 1335361.100 | 1000250.87 |
|        | 2035 | 2347097.290 | 1336354.984 | 1010742.31 |
|        | 2036 | 2358248.747 | 1337279.283 | 1020969.46 |
|        | 2037 | 2369033.655 | 1338138.969 | 1030894.69 |
|        | 2038 | 2379490.114 | 1338944.052 | 1040546.06 |
|        | 2039 | 2389546.238 | 1339711.369 | 1049834.87 |
| Female | 1990 | 56348.092   | 56348.092   | 0.000      |
|        | 1991 | 110871.862  | 110619.293  | 252.569    |
|        | 1992 | 165654.454  | 164667.821  | 986.634    |
|        | 1993 | 220008.519  | 217614.815  | 2393.705   |
|        | 1994 | 275706.807  | 270972.010  | 4734.797   |
|        | 1995 | 331417.547  | 323265.906  | 8151.641   |
|        | 1996 | 387580.161  | 374683.367  | 12896.794  |
|        | 1997 | 442778.242  | 423831.860  | 18946.382  |
|        | 1998 | 496117.305  | 469923.520  | 26193.785  |
|        | 1999 | 548268.214  | 513552.152  | 34716.062  |
|        | 2000 | 601693.202  | 556694.835  | 44998.366  |
|        | 2001 | 652221.103  | 595891.167  | 56329.936  |
|        | 2002 | 703022.600  | 633602.792  | 69419.808  |
|        | 2003 | 752023.351  | 668330.954  | 83692.397  |
|        | 2004 | 799826.733  | 700588.544  | 99238.189  |
|        | 2005 | 847563.928  | 731232.256  | 116331.672 |
|        | 2006 | 894205.027  | 759613.038  | 134591.989 |
|        | 2007 | 939571.282  | 785688.734  | 153882.548 |
|        | 2008 | 983437.578  | 809510.368  | 173927.210 |
|        | 2009 | 1025803.786 | 831239.171  | 194564.615 |
|        | 2010 | 1066964.934 | 851093.070  | 215871.864 |
|        | 2011 | 1106954.044 | 869197.223  | 237756.821 |
|        | 2012 | 1146108.461 | 885837.535  | 260270.925 |
|        | 2013 | 1183544.689 | 900777.842  | 282766.847 |
|        | 2014 | 1221220.945 | 914863.992  | 306356.953 |
|        | 2015 | 1258289.311 | 928030.385  | 330258.926 |
|        | 2016 | 1294830.207 | 940168.205  | 354662.003 |
|        | 2017 | 1330332.626 | 951242.656  | 379089.969 |
|        | 2018 | 1360571.987 | 960118.346  | 400453.641 |
|        | 2019 | 1389848.723 | 968160.877  | 421687.845 |
|        | 2020 | 1416046.192 | 975038.413  | 441007.780 |
|        | 2021 | 1440588.850 | 981065.399  | 459523.451 |
|        | 2022 | 1464157.934 | 986458.732  | 477699.202 |

**Results for PHIM for Run 6 (ELL Summary Sensitivity\_Analysis\_2.RTF)**

|      |             |             |             |             |            |
|------|-------------|-------------|-------------|-------------|------------|
|      |             | 2023        | 1486810.237 | 991302.505  | 495507.732 |
|      |             | 2024        | 1508591.729 | 995645.158  | 512946.572 |
|      |             | 2025        | 1526875.621 | 999167.355  | 527708.266 |
|      |             | 2026        | 1543659.810 | 1002190.382 | 541469.428 |
|      |             | 2027        | 1559623.774 | 1004882.065 | 554741.709 |
|      |             | 2028        | 1574852.850 | 1007280.908 | 567571.942 |
|      |             | 2029        | 1589437.452 | 1009443.731 | 579993.722 |
|      |             | 2030        | 1600568.199 | 1011043.456 | 589524.744 |
|      |             | 2031        | 1610776.297 | 1012424.134 | 598352.162 |
|      |             | 2032        | 1620483.563 | 1013657.826 | 606825.737 |
|      |             | 2033        | 1629745.442 | 1014775.364 | 614970.078 |
|      |             | 2034        | 1638721.425 | 1015798.521 | 622922.905 |
|      |             | 2035        | 1644649.404 | 1016448.153 | 628201.252 |
|      |             | 2036        | 1650181.590 | 1017015.390 | 633166.200 |
|      |             | 2037        | 1655476.066 | 1017532.102 | 637943.965 |
|      |             | 2038        | 1660507.914 | 1018003.356 | 642504.558 |
|      |             | 2039        | 1665361.569 | 1018444.765 | 646916.804 |
| COPD | Males       | 1990        | 117002.906  | 117002.906  | 0.000      |
|      |             | 1991        | 233438.833  | 233347.979  | 90.854     |
|      |             | 1992        | 348084.047  | 347743.269  | 340.778    |
|      |             | 1993        | 467278.318  | 466426.077  | 852.241    |
|      |             | 1994        | 584216.907  | 582486.826  | 1730.081   |
|      |             | 1995        | 697391.457  | 694340.788  | 3050.668   |
|      |             | 1996        | 809471.271  | 804547.651  | 4923.620   |
|      |             | 1997        | 922587.668  | 915077.439  | 7510.229   |
|      |             | 1998        | 1034072.457 | 1023298.056 | 10774.401  |
|      |             | 1999        | 1153475.399 | 1138294.090 | 15181.310  |
|      |             | 2000        | 1268050.268 | 1247499.621 | 20550.646  |
|      |             | 2001        | 1382786.209 | 1355580.525 | 27205.685  |
|      |             | 2002        | 1497557.412 | 1462251.030 | 35306.382  |
|      |             | 2003        | 1614405.229 | 1569523.900 | 44881.329  |
|      |             | 2004        | 1726672.489 | 1671021.747 | 55650.742  |
|      |             | 2005        | 1847277.524 | 1778521.070 | 68756.454  |
|      |             | 2006        | 1961009.963 | 1877959.039 | 83050.924  |
|      |             | 2007        | 2079868.908 | 1979842.447 | 100026.461 |
|      |             | 2008        | 2206755.783 | 2086547.134 | 120208.649 |
|      |             | 2009        | 2331993.380 | 2189595.690 | 142397.691 |
|      |             | 2010        | 2455130.176 | 2288706.269 | 166423.908 |
|      |             | 2011        | 2582657.849 | 2388831.174 | 193826.675 |
|      |             | 2012        | 2709719.005 | 2485939.290 | 223779.715 |
|      |             | 2013        | 2840547.005 | 2583019.315 | 257527.691 |
|      |             | 2014        | 2971677.135 | 2677480.619 | 294196.517 |
|      |             | 2015        | 3104538.983 | 2771404.452 | 333134.531 |
|      |             | 2016        | 3237650.175 | 2862327.964 | 375322.211 |
|      |             | 2017        | 3370561.253 | 2950313.208 | 420248.044 |
|      |             | 2018        | 3503136.371 | 3034560.958 | 468575.413 |
|      |             | 2019        | 3636402.758 | 3116206.426 | 520196.332 |
|      |             | 2020        | 3768054.453 | 3194528.351 | 573526.101 |
|      |             | 2021        | 3897675.067 | 3268566.537 | 629108.530 |
|      |             | 2022        | 4027307.132 | 3339506.932 | 687800.200 |
|      |             | 2023        | 4156698.720 | 3407170.802 | 749527.918 |
|      |             | 2024        | 4285772.226 | 3471593.931 | 814178.295 |
|      |             | 2025        | 4410759.298 | 3531962.211 | 878797.087 |
|      |             | 2026        | 4531411.064 | 3587031.935 | 944379.129 |
|      |             | 2027        | 4651145.233 | 3638949.000 | 1012196.23 |
|      |             | 2028        | 4769837.872 | 3687608.271 | 1082229.60 |
|      |             | 2029        | 4887747.179 | 3733202.582 | 1154544.60 |
| 2030 | 4997632.895 | 3774368.152 | 1223264.74  |             |            |
| 2031 | 5103301.991 | 3810912.067 | 1292389.92  |             |            |
| 2032 | 5207593.613 | 3844813.790 | 1362779.82  |             |            |
| 2033 | 5310556.138 | 3876078.658 | 1434477.48  |             |            |
| 2034 | 5412542.816 | 3905003.629 | 1507539.19  |             |            |
| 2035 | 5500522.473 | 3929315.620 | 1571206.85  |             |            |
| 2036 | 5588149.640 | 3951565.036 | 1636584.60  |             |            |
| 2037 | 5674667.886 | 3971986.791 | 1702681.10  |             |            |
| 2038 | 5760391.289 | 3990809.146 | 1769582.14  |             |            |
| 2039 | 5845459.234 | 4008306.155 | 1837153.08  |             |            |
|      | Female      | 1990        | 77434.846   | 77434.846   | 0.000      |
|      |             | 1991        | 160029.510  | 159965.871  | 63.639     |
|      |             | 1992        | 240642.531  | 240392.403  | 250.128    |
|      |             | 1993        | 329362.093  | 328693.598  | 668.496    |
|      |             | 1994        | 418569.515  | 417178.948  | 1390.567   |
|      |             | 1995        | 509110.357  | 506550.320  | 2560.038   |
|      |             | 1996        | 600040.117  | 595845.524  | 4194.593   |
|      |             | 1997        | 691159.071  | 684752.343  | 6406.728   |
|      |             | 1998        | 782866.899  | 773616.060  | 9250.839   |
|      |             | 1999        | 881526.925  | 868401.165  | 13125.760  |
|      |             | 2000        | 977880.647  | 960153.011  | 17727.636  |

**Results for PHIM for Run 6 (ELL Summary Sensitivity\_Analysis\_2.RTF)**

|      |             |             |            |
|------|-------------|-------------|------------|
| 2001 | 1076787.404 | 1053309.994 | 23477.410  |
| 2002 | 1174842.754 | 1144521.394 | 30321.359  |
| 2003 | 1275102.681 | 1236669.308 | 38433.373  |
| 2004 | 1371026.306 | 1323678.282 | 47348.023  |
| 2005 | 1473954.509 | 1415513.131 | 58441.378  |
| 2006 | 1574450.828 | 1503684.633 | 70766.195  |
| 2007 | 1673790.211 | 1589315.304 | 84474.907  |
| 2008 | 1782360.738 | 1681157.304 | 101203.434 |
| 2009 | 1892944.209 | 1772583.693 | 120360.516 |
| 2010 | 2002131.282 | 1861071.108 | 141060.174 |
| 2011 | 2114522.152 | 1949855.055 | 164667.098 |
| 2012 | 2228079.372 | 2037452.755 | 190626.617 |
| 2013 | 2345377.689 | 2125455.177 | 219922.512 |
| 2014 | 2462498.422 | 2210899.843 | 251598.579 |
| 2015 | 2581450.312 | 2296104.755 | 285345.557 |
| 2016 | 2701959.301 | 2379802.293 | 322157.008 |
| 2017 | 2823834.967 | 2461768.550 | 362066.417 |
| 2018 | 2938265.081 | 2536854.101 | 401410.980 |
| 2019 | 3053254.880 | 2609826.700 | 443428.180 |
| 2020 | 3167073.216 | 2680171.838 | 486901.377 |
| 2021 | 3279517.699 | 2747785.364 | 531732.335 |
| 2022 | 3392060.964 | 2812914.680 | 579146.284 |
| 2023 | 3504296.171 | 2875342.521 | 628953.650 |
| 2024 | 3616019.231 | 2934959.990 | 681059.241 |
| 2025 | 3724611.269 | 2991183.353 | 733427.917 |
| 2026 | 3827181.707 | 3042698.217 | 784483.490 |
| 2027 | 3928684.441 | 3091345.710 | 837338.731 |
| 2028 | 4029124.892 | 3137180.135 | 891944.758 |
| 2029 | 4128269.068 | 3180138.060 | 948131.008 |
| 2030 | 4221560.174 | 3219324.420 | 1002235.75 |
| 2031 | 4304170.584 | 3252362.600 | 1051807.98 |
| 2032 | 4384930.537 | 3282772.786 | 1102157.75 |
| 2033 | 4464357.691 | 3310857.419 | 1153500.27 |
| 2034 | 4542251.545 | 3336641.866 | 1205609.68 |
| 2035 | 4611066.648 | 3358831.763 | 1252234.89 |
| 2036 | 4670309.230 | 3376611.167 | 1293698.06 |
| 2037 | 4728179.514 | 3392828.354 | 1335351.16 |
| 2038 | 4785008.048 | 3407704.488 | 1377303.56 |
| 2039 | 4841291.793 | 3421443.059 | 1419848.73 |

---

## Results for PHIM for Run 6 (ELL Summary Sensitivity\_Analysis\_2.RTF)

\*\*\*\*\*

**Table 4: Estimated Loss of Life, All age groups combined, Population and Number deaths adjusted for Ecig scenario, cumulative over years**

| Disease      | Sex          | Year         | Years of life lost<br>NULL | Years of life lost<br>Ecig | Years of life<br>Saved |
|--------------|--------------|--------------|----------------------------|----------------------------|------------------------|
| All Diseases | Males        | 1990         | 1304839.645                | 1304839.645                | 0.000                  |
|              |              | 1991         | 2579865.358                | 2575282.179                | 4583.179               |
|              |              | 1992         | 3830683.831                | 3813382.974                | 17300.857              |
|              |              | 1993         | 5076567.803                | 5035278.457                | 41289.346              |
|              |              | 1994         | 6292145.526                | 6213288.168                | 78857.358              |
|              |              | 1995         | 7485537.010                | 7352826.587                | 132710.423             |
|              |              | 1996         | 8655955.028                | 8451859.359                | 204095.668             |
|              |              | 1997         | 9791729.713                | 9499047.813                | 292681.900             |
|              |              | 1998         | 10899134.186               | 10500705.188               | 398428.998             |
|              |              | 1999         | 12070409.674               | 11527766.446               | 542643.229             |
|              |              | 2000         | 13231384.595               | 12522600.949               | 708783.647             |
|              |              | 2001         | 14371761.018               | 13473715.173               | 898045.845             |
|              |              | 2002         | 15508906.386               | 14394582.885               | 1114323.50             |
|              |              | 2003         | 16638100.422               | 15282772.869               | 1355327.55             |
|              |              | 2004         | 17736465.088               | 16124318.854               | 1612146.23             |
|              |              | 2005         | 18834658.606               | 16943286.873               | 1891371.73             |
|              |              | 2006         | 19909100.501               | 17716379.418               | 2192721.08             |
|              |              | 2007         | 20958321.463               | 18449865.574               | 2508455.89             |
|              |              | 2008         | 22000068.148               | 19158313.920               | 2841754.23             |
|              |              | 2009         | 23018816.903               | 19831725.600               | 3187091.30             |
|              |              | 2010         | 24018480.537               | 20471886.536               | 3546594.00             |
|              |              | 2011         | 25003034.574               | 21082112.927               | 3920921.65             |
|              |              | 2012         | 25969871.429               | 21661313.814               | 4308557.62             |
|              |              | 2013         | 26920275.180               | 22211002.799               | 4709272.38             |
|              |              | 2014         | 27849005.227               | 22728824.776               | 5120180.45             |
|              |              | 2015         | 28749620.400               | 23218046.032               | 5531574.37             |
|              |              | 2016         | 29622417.562               | 23669460.242               | 5952957.32             |
|              |              | 2017         | 30462559.724               | 24085734.340               | 6376825.38             |
|              |              | 2018         | 31293299.299               | 24485256.932               | 6808042.37             |
|              |              | 2019         | 32109993.427               | 24863875.610               | 7246117.82             |
|              |              | 2020         | 32883323.977               | 25217270.824               | 7666053.15             |
|              |              | 2021         | 33610102.554               | 25525434.335               | 8084668.22             |
|              |              | 2022         | 34322010.448               | 25815346.163               | 8506664.29             |
|              |              | 2023         | 35018383.550               | 26086888.991               | 8931494.56             |
|              |              | 2024         | 35700177.955               | 26341428.942               | 9358749.01             |
|              |              | 2025         | 36315500.346               | 26571695.547               | 9743804.80             |
|              |              | 2026         | 36896159.343               | 26767744.717               | 10128414.6             |
|              |              | 2027         | 37462570.116               | 26950546.758               | 10512023.4             |
|              |              | 2028         | 38015337.780               | 27119739.593               | 10895598.2             |
|              |              | 2029         | 38554814.764               | 27276848.417               | 11277966.3             |
|              |              | 2030         | 39003805.400               | 27411537.449               | 11592268.0             |
|              |              | 2031         | 39436509.703               | 27525895.536               | 11910614.2             |
| 2032         | 39858470.458 | 27631483.145 | 12226987.3                 |                            |                        |
| 2033         | 40270147.082 | 27728307.500 | 12541839.6                 |                            |                        |
| 2034         | 40672665.743 | 27818233.599 | 12854432.1                 |                            |                        |
| 2035         | 40962732.664 | 27887016.261 | 13075716.4                 |                            |                        |
| 2036         | 41255021.653 | 27948691.640 | 13306330.0                 |                            |                        |
| 2037         | 41540573.023 | 28005443.913 | 13535129.1                 |                            |                        |
| 2038         | 41820158.066 | 28057792.597 | 13762365.5                 |                            |                        |
| 2039         | 42093547.949 | 28106830.829 | 13986717.1                 |                            |                        |
|              | Female       | 1990         | 588979.406                 | 588979.406                 | 0.000                  |
| 1991         |              | 1182571.252  | 1181134.661                | 1436.592                   |                        |
| 1992         |              | 1777346.679  | 1771799.355                | 5547.324                   |                        |
| 1993         |              | 2380261.899  | 2366815.344                | 13446.555                  |                        |
| 1994         |              | 2983130.039  | 2957046.832                | 26083.207                  |                        |
| 1995         |              | 3588982.584  | 3544444.030                | 44538.554                  |                        |
| 1996         |              | 4195430.235  | 4125202.448                | 70227.787                  |                        |
| 1997         |              | 4793866.694  | 4691668.817                | 102197.878                 |                        |
| 1998         |              | 5389747.381  | 5248428.424                | 141318.957                 |                        |
| 1999         |              | 6006722.467  | 5813753.756                | 192968.711                 |                        |
| 2000         |              | 6625758.871  | 6372553.810                | 253205.061                 |                        |
| 2001         |              | 7245135.411  | 6921124.841                | 324010.570                 |                        |
| 2002         |              | 7867492.021  | 7461679.408                | 405812.613                 |                        |
| 2003         |              | 8485051.793  | 7988032.851                | 497018.942                 |                        |
| 2004         |              | 9092994.774  | 8496043.730                | 596951.044                 |                        |
| 2005         |              | 9706032.803  | 8998063.557                | 707969.246                 |                        |
| 2006         |              | 10311907.548 | 9482953.561                | 828953.988                 |                        |
| 2007         |              | 10909437.502 | 9951765.825                | 957671.677                 |                        |
| 2008         |              | 11506462.491 | 10407824.127               | 1098638.36                 |                        |
| 2009         |              | 12098393.287 | 10851344.803               | 1247048.48                 |                        |
| 2010         |              | 12681188.981 | 11277418.914               | 1403770.07                 |                        |

**Results for PHIM for Run 6 (ELL Summary Sensitivity\_Analysis\_2.RTF)**

|             |       |      |              |              |            |
|-------------|-------|------|--------------|--------------|------------|
|             |       | 2011 | 13260062.991 | 11689321.263 | 1570741.73 |
|             |       | 2012 | 13839417.441 | 12089815.924 | 1749601.52 |
|             |       | 2013 | 14409614.758 | 12474174.142 | 1935440.62 |
|             |       | 2014 | 14976658.746 | 12844074.313 | 2132584.43 |
|             |       | 2015 | 15529977.821 | 13196632.226 | 2333345.60 |
|             |       | 2016 | 16066640.764 | 13527081.392 | 2539559.37 |
|             |       | 2017 | 16590035.078 | 13839036.297 | 2750998.78 |
|             |       | 2018 | 17098716.137 | 14135742.210 | 2962973.93 |
|             |       | 2019 | 17599868.850 | 14418930.682 | 3180938.17 |
|             |       | 2020 | 18081346.241 | 14685963.699 | 3395382.54 |
|             |       | 2021 | 18537594.460 | 14928711.338 | 3608883.12 |
|             |       | 2022 | 18985300.234 | 15158541.416 | 3826758.82 |
|             |       | 2023 | 19423958.747 | 15375448.494 | 4048510.25 |
|             |       | 2024 | 19853347.772 | 15579498.857 | 4273848.91 |
|             |       | 2025 | 20252822.245 | 15766797.897 | 4486024.35 |
|             |       | 2026 | 20619307.063 | 15929958.750 | 4689348.31 |
|             |       | 2027 | 20976063.406 | 16082012.827 | 4894050.58 |
|             |       | 2028 | 21323641.947 | 16223489.230 | 5100152.72 |
|             |       | 2029 | 21662117.106 | 16354686.472 | 5307430.63 |
|             |       | 2030 | 21960971.694 | 16469991.909 | 5490979.78 |
|             |       | 2031 | 22224951.983 | 16564249.562 | 5660702.42 |
|             |       | 2032 | 22480397.853 | 16650522.472 | 5829875.38 |
|             |       | 2033 | 22728639.455 | 16729777.204 | 5998862.25 |
|             |       | 2034 | 22970448.888 | 16802423.950 | 6168024.94 |
|             |       | 2035 | 23164154.188 | 16861209.567 | 6302944.62 |
|             |       | 2036 | 23334538.616 | 16907996.706 | 6426541.91 |
|             |       | 2037 | 23499760.723 | 16950716.923 | 6549043.80 |
|             |       | 2038 | 23660308.401 | 16989945.127 | 6670363.27 |
|             |       | 2039 | 23817891.273 | 17026288.384 | 6791602.89 |
| Lung cancer | Males | 1990 | 595621.791   | 595621.791   | 0.000      |
|             |       | 1991 | 1177744.113  | 1177435.588  | 308.525    |
|             |       | 1992 | 1750034.892  | 1748850.997  | 1183.894   |
|             |       | 1993 | 2319752.308  | 2316806.256  | 2946.052   |
|             |       | 1994 | 2872597.339  | 2866771.133  | 5826.206   |
|             |       | 1995 | 3411494.825  | 3401374.225  | 10120.600  |
|             |       | 1996 | 3945569.726  | 3929201.798  | 16367.928  |
|             |       | 1997 | 4463316.362  | 4438746.769  | 24569.593  |
|             |       | 1998 | 4975301.180  | 4940125.363  | 35175.818  |
|             |       | 1999 | 5473691.125  | 5425295.504  | 48395.621  |
|             |       | 2000 | 5977500.570  | 5912313.571  | 65186.999  |
|             |       | 2001 | 6474795.516  | 6389110.654  | 85684.862  |
|             |       | 2002 | 6968769.705  | 6858449.100  | 110320.605 |
|             |       | 2003 | 7460282.140  | 7320485.480  | 139796.660 |
|             |       | 2004 | 7947048.275  | 7773100.563  | 173947.712 |
|             |       | 2005 | 8430571.669  | 8217401.505  | 213170.164 |
|             |       | 2006 | 8903945.390  | 8646312.692  | 257632.698 |
|             |       | 2007 | 9364177.982  | 9057394.392  | 306783.590 |
|             |       | 2008 | 9822525.458  | 9459822.722  | 362702.737 |
|             |       | 2009 | 10275228.886 | 9850485.583  | 424743.303 |
|             |       | 2010 | 10720275.500 | 10227716.551 | 492558.950 |
|             |       | 2011 | 11155356.373 | 10589332.056 | 566024.318 |
|             |       | 2012 | 11582611.617 | 10936176.811 | 646434.805 |
|             |       | 2013 | 11998803.791 | 11266001.287 | 732802.504 |
|             |       | 2014 | 12402087.090 | 11577828.306 | 824258.784 |
|             |       | 2015 | 12793451.706 | 11873306.081 | 920145.625 |
|             |       | 2016 | 13160101.653 | 12142186.348 | 1017915.30 |
|             |       | 2017 | 13503583.414 | 12386742.594 | 1116840.82 |
|             |       | 2018 | 13859755.737 | 12630583.029 | 1229172.71 |
|             |       | 2019 | 14211625.176 | 12863207.748 | 1348417.43 |
|             |       | 2020 | 14553935.288 | 13082678.083 | 1471257.20 |
|             |       | 2021 | 14851747.495 | 13265945.316 | 1585802.18 |
|             |       | 2022 | 15144531.004 | 13438995.785 | 1705535.22 |
|             |       | 2023 | 15431932.496 | 13601550.102 | 1830382.39 |
|             |       | 2024 | 15713920.740 | 13754031.388 | 1959889.35 |
|             |       | 2025 | 15979112.816 | 13893270.511 | 2085842.30 |
|             |       | 2026 | 16206550.153 | 14005240.521 | 2201309.63 |
|             |       | 2027 | 16428826.050 | 14109493.122 | 2319332.93 |
|             |       | 2028 | 16645902.186 | 14205875.017 | 2440027.17 |
|             |       | 2029 | 16858126.517 | 14295104.713 | 2563021.80 |
|             |       | 2030 | 17045220.687 | 14372303.319 | 2672917.37 |
|             |       | 2031 | 17208482.610 | 14433631.549 | 2774851.06 |
|             |       | 2032 | 17367586.074 | 14490172.692 | 2877413.38 |
|             |       | 2033 | 17522716.280 | 14541920.901 | 2980795.38 |
|             |       | 2034 | 17674226.555 | 14589646.060 | 3084580.50 |
|             |       | 2035 | 17792201.734 | 14626591.425 | 3165610.31 |
|             |       | 2036 | 17903508.236 | 14658117.540 | 3245390.70 |
|             |       | 2037 | 18012162.345 | 14687076.371 | 3325085.97 |
|             |       | 2038 | 18118464.470 | 14713688.331 | 3404776.14 |

**Results for PHIM for Run 6 (ELL Summary Sensitivity\_Analysis\_2.RTF)**

|     |        |      |              |              |            |
|-----|--------|------|--------------|--------------|------------|
|     | Female | 2039 | 18222549.860 | 14738560.799 | 3483989.06 |
|     |        | 1990 | 307897.357   | 307897.357   | 0.000      |
|     |        | 1991 | 616547.418   | 616369.139   | 178.279    |
|     |        | 1992 | 931086.773   | 930359.439   | 727.334    |
|     |        | 1993 | 1246155.671  | 1244326.889  | 1828.782   |
|     |        | 1994 | 1561212.934  | 1557545.320  | 3667.615   |
|     |        | 1995 | 1879967.742  | 1873416.726  | 6551.016   |
|     |        | 1996 | 2197488.109  | 2186839.289  | 10648.820  |
|     |        | 1997 | 2515698.453  | 2499448.455  | 16249.997  |
|     |        | 1998 | 2836249.556  | 2812669.427  | 23580.130  |
|     |        | 1999 | 3150201.390  | 3117531.228  | 32670.161  |
|     |        | 2000 | 3472722.342  | 3428568.204  | 44154.138  |
|     |        | 2001 | 3796994.889  | 3738622.081  | 58372.808  |
|     |        | 2002 | 4126619.935  | 4050880.845  | 75739.090  |
|     |        | 2003 | 4454982.533  | 4358923.979  | 96058.555  |
|     |        | 2004 | 4784343.030  | 4664466.225  | 119876.805 |
|     |        | 2005 | 5113443.121  | 4966072.189  | 147370.931 |
|     |        | 2006 | 5442543.963  | 5263353.757  | 179190.205 |
|     |        | 2007 | 5772441.497  | 5557047.244  | 215394.253 |
|     |        | 2008 | 6091911.943  | 5836985.645  | 254926.298 |
|     |        | 2009 | 6413671.330  | 6113895.814  | 299775.516 |
|     |        | 2010 | 6730763.530  | 6382159.451  | 348604.079 |
|     |        | 2011 | 7043614.101  | 6641597.766  | 402016.335 |
|     |        | 2012 | 7356270.780  | 6895351.114  | 460919.665 |
|     |        | 2013 | 7662551.964  | 7138462.484  | 524089.479 |
|     |        | 2014 | 7964551.465  | 7372711.219  | 591840.246 |
|     |        | 2015 | 8254895.403  | 7593414.544  | 661480.859 |
|     |        | 2016 | 8530661.848  | 7797381.128  | 733280.720 |
|     |        | 2017 | 8795826.122  | 7988345.142  | 807480.981 |
|     |        | 2018 | 9067233.707  | 8177117.486  | 890116.221 |
|     |        | 2019 | 9335343.270  | 8357637.964  | 977705.306 |
|     |        | 2020 | 9596110.883  | 8528545.409  | 1067565.47 |
|     |        | 2021 | 9833186.859  | 8679605.034  | 1153581.82 |
|     |        | 2022 | 10066452.037 | 8822761.254  | 1243690.78 |
|     |        | 2023 | 10295503.609 | 8957905.838  | 1337597.77 |
|     |        | 2024 | 10520125.318 | 9085020.245  | 1435105.07 |
|     |        | 2025 | 10731915.863 | 9201683.023  | 1530232.84 |
|     |        | 2026 | 10917495.549 | 9299987.200  | 1617508.35 |
|     |        | 2027 | 11098620.885 | 9391483.173  | 1707137.71 |
|     |        | 2028 | 11275441.234 | 9476510.377  | 1798930.86 |
|     |        | 2029 | 11447962.710 | 9555204.561  | 1892758.15 |
|     |        | 2030 | 11601867.623 | 9623994.933  | 1977872.69 |
|     |        | 2031 | 11731666.516 | 9678340.031  | 2053326.49 |
|     |        | 2032 | 11857585.969 | 9728041.343  | 2129544.63 |
|     |        | 2033 | 11980128.625 | 9773616.658  | 2206511.97 |
|     |        | 2034 | 12099562.464 | 9815358.688  | 2284203.78 |
|     |        | 2035 | 12195919.946 | 9848647.089  | 2347272.86 |
|     |        | 2036 | 12278201.969 | 9874553.400  | 2403648.57 |
|     |        | 2037 | 12358146.336 | 9898238.760  | 2459907.58 |
|     |        | 2038 | 12435978.633 | 9920019.810  | 2515958.82 |
|     |        | 2039 | 12512468.845 | 9940233.967  | 2572234.88 |
| IHD | Males  | 1990 | 517209.093   | 517209.093   | 0.000      |
|     |        | 1991 | 1019219.395  | 1015406.135  | 3813.260   |
|     |        | 1992 | 1509598.614  | 1495230.927  | 14367.687  |
|     |        | 1993 | 1992735.299  | 1958686.968  | 34048.331  |
|     |        | 1994 | 2462877.575  | 2398400.986  | 64476.589  |
|     |        | 1995 | 2928249.390  | 2820508.228  | 107741.161 |
|     |        | 1996 | 3377377.730  | 3213103.994  | 164273.736 |
|     |        | 1997 | 3809062.472  | 3575521.502  | 233540.969 |
|     |        | 1998 | 4222213.867  | 3907104.191  | 315109.676 |
|     |        | 1999 | 4708317.743  | 4278450.236  | 429867.507 |
|     |        | 2000 | 5182084.396  | 4622474.790  | 559609.606 |
|     |        | 2001 | 5644097.705  | 4938457.087  | 705640.618 |
|     |        | 2002 | 6107232.129  | 5236084.602  | 871147.527 |
|     |        | 2003 | 6561785.704  | 5509559.389  | 1052226.31 |
|     |        | 2004 | 6996156.348  | 5754702.165  | 1241454.18 |
|     |        | 2005 | 7426261.361  | 5982478.019  | 1443783.34 |
|     |        | 2006 | 7849012.694  | 6189860.898  | 1659151.80 |
|     |        | 2007 | 8255300.530  | 6375650.201  | 1879650.33 |
|     |        | 2008 | 8650662.040  | 6543857.727  | 2106804.31 |
|     |        | 2009 | 9030818.513  | 6694636.437  | 2336182.08 |
|     |        | 2010 | 9403026.327  | 6831914.269  | 2571112.06 |
|     |        | 2011 | 9767535.506  | 6956261.950  | 2811273.56 |
|     |        | 2012 | 10123044.281 | 7069273.283  | 3053771.00 |
|     |        | 2013 | 10470104.786 | 7171516.937  | 3298587.85 |
|     |        | 2014 | 10807756.112 | 7263896.474  | 3543859.64 |
|     |        | 2015 | 11130681.425 | 7346572.766  | 3784108.66 |
|     |        | 2016 | 11448966.506 | 7421959.978  | 4027006.53 |

**Results for PHIM for Run 6 (ELL Summary Sensitivity\_Analysis\_2.RTF)**

|        |        |      |              |             |            |
|--------|--------|------|--------------|-------------|------------|
|        |        | 2017 | 11758164.882 | 7490585.996 | 4267578.89 |
|        |        | 2018 | 12054448.241 | 7550026.008 | 4504422.23 |
|        |        | 2019 | 12341606.261 | 7603487.187 | 4738119.07 |
|        |        | 2020 | 12600728.939 | 7649625.562 | 4951103.38 |
|        |        | 2021 | 12861767.105 | 7692059.952 | 5169707.15 |
|        |        | 2022 | 13114168.616 | 7730315.703 | 5383852.91 |
|        |        | 2023 | 13357894.797 | 7764684.689 | 5593210.11 |
|        |        | 2024 | 13593848.521 | 7795949.742 | 5797898.78 |
|        |        | 2025 | 13789177.359 | 7821254.959 | 5967922.40 |
|        |        | 2026 | 13993401.656 | 7845485.676 | 6147915.98 |
|        |        | 2027 | 14190519.224 | 7867710.494 | 6322808.73 |
|        |        | 2028 | 14381193.356 | 7887838.877 | 6493354.48 |
|        |        | 2029 | 14565171.927 | 7906422.541 | 6658749.39 |
|        |        | 2030 | 14697381.605 | 7919799.971 | 6777581.63 |
|        |        | 2031 | 14842203.512 | 7933608.217 | 6908595.29 |
|        |        | 2032 | 14982485.826 | 7946295.945 | 7036189.88 |
|        |        | 2033 | 15118410.647 | 7957843.010 | 7160567.64 |
|        |        | 2034 | 15250284.398 | 7968981.504 | 7281302.89 |
|        |        | 2035 | 15322911.166 | 7974977.351 | 7347933.82 |
|        |        | 2036 | 15405115.031 | 7981449.543 | 7423665.49 |
|        |        | 2037 | 15484709.137 | 7987484.097 | 7497225.04 |
|        |        | 2038 | 15561812.193 | 7993139.358 | 7568672.84 |
|        |        | 2039 | 15635992.616 | 7998608.161 | 7637384.46 |
|        | Female | 1990 | 147299.110   | 147299.110  | 0.000      |
|        |        | 1991 | 295122.462   | 294180.358  | 942.104    |
|        |        | 1992 | 439962.920   | 436379.544  | 3583.376   |
|        |        | 1993 | 584735.615   | 576179.286  | 8556.329   |
|        |        | 1994 | 727640.783   | 711348.237  | 16292.546  |
|        |        | 1995 | 868486.937   | 841205.624  | 27281.313  |
|        |        | 1996 | 1010321.847  | 967823.344  | 42498.504  |
|        |        | 1997 | 1144230.930  | 1083616.644 | 60614.285  |
|        |        | 1998 | 1274513.622  | 1192187.323 | 82326.299  |
|        |        | 1999 | 1426725.938  | 1314218.770 | 112507.168 |
|        |        | 2000 | 1573462.680  | 1427062.515 | 146400.165 |
|        |        | 2001 | 1719132.015  | 1533193.755 | 185938.260 |
|        |        | 2002 | 1863006.732  | 1632525.646 | 230481.085 |
|        |        | 2003 | 2002943.227  | 1723908.625 | 279034.602 |
|        |        | 2004 | 2137798.705  | 1807050.914 | 330747.791 |
|        |        | 2005 | 2271071.245  | 1884911.970 | 386159.275 |
|        |        | 2006 | 2400707.731  | 1955883.589 | 444824.142 |
|        |        | 2007 | 2523634.512  | 2019200.126 | 504434.386 |
|        |        | 2008 | 2648752.232  | 2079540.217 | 569212.015 |
|        |        | 2009 | 2765973.961  | 2132863.861 | 633110.100 |
|        |        | 2010 | 2881329.235  | 2182188.654 | 699140.580 |
|        |        | 2011 | 2994972.694  | 2227602.837 | 767369.856 |
|        |        | 2012 | 3108958.829  | 2269928.019 | 839030.810 |
|        |        | 2013 | 3218140.416  | 2308034.172 | 910106.244 |
|        |        | 2014 | 3328387.914  | 2343940.911 | 984447.003 |
|        |        | 2015 | 3435342.796  | 2377186.015 | 1058156.78 |
|        |        | 2016 | 3539189.408  | 2407575.263 | 1131614.15 |
|        |        | 2017 | 3640041.363  | 2435247.234 | 1204794.13 |
|        |        | 2018 | 3732645.362  | 2458940.012 | 1273705.35 |
|        |        | 2019 | 3821421.978  | 2480297.273 | 1341124.71 |
|        |        | 2020 | 3902115.950  | 2498889.138 | 1403226.81 |
|        |        | 2021 | 3984301.053  | 2516610.192 | 1467690.86 |
|        |        | 2022 | 4062629.299  | 2532421.671 | 1530207.63 |
|        |        | 2023 | 4137348.729  | 2546561.382 | 1590787.35 |
|        |        | 2024 | 4208611.493  | 2559176.601 | 1649434.89 |
|        |        | 2025 | 4269419.492  | 2569698.728 | 1699720.76 |
|        |        | 2026 | 4330969.998  | 2579652.680 | 1751317.32 |
|        |        | 2027 | 4389134.306  | 2588503.148 | 1800631.16 |
|        |        | 2028 | 4444222.970  | 2596348.652 | 1847874.32 |
|        |        | 2029 | 4496447.877  | 2603361.079 | 1893086.80 |
|        |        | 2030 | 4536975.698  | 2608724.823 | 1928250.87 |
|        |        | 2031 | 4578338.586  | 2613889.097 | 1964449.49 |
|        |        | 2032 | 4617397.784  | 2618497.305 | 1998900.48 |
|        |        | 2033 | 4654407.697  | 2622663.966 | 2031743.73 |
|        |        | 2034 | 4689913.454  | 2626462.057 | 2063451.40 |
|        |        | 2035 | 4712518.190  | 2628840.030 | 2083678.16 |
|        |        | 2036 | 4735845.827  | 2631140.560 | 2104705.27 |
|        |        | 2037 | 4757958.806  | 2633221.428 | 2124737.38 |
|        |        | 2038 | 4778813.806  | 2635113.327 | 2143700.48 |
|        |        | 2039 | 4798769.065  | 2636865.479 | 2161903.59 |
| Stroke | Males  | 1990 | 75005.854    | 75005.854   | 0.000      |
|        |        | 1991 | 149463.017   | 149092.478  | 370.540    |
|        |        | 1992 | 222966.278   | 221557.327  | 1408.951   |
|        |        | 1993 | 296801.879   | 293357.042  | 3444.837   |
|        |        | 1994 | 372453.706   | 365623.225  | 6830.481   |



**Results for PHIM for Run 6 (ELL Summary Sensitivity\_Analysis\_2.RTF)**

|        |      |             |             |            |
|--------|------|-------------|-------------|------------|
|        | 1995 | 448401.338  | 436590.121  | 11811.217  |
|        | 1996 | 523536.301  | 504980.300  | 18556.001  |
|        | 1997 | 596763.211  | 569657.013  | 27106.198  |
|        | 1998 | 667546.681  | 630104.436  | 37442.245  |
|        | 1999 | 734925.407  | 685611.638  | 49313.769  |
|        | 2000 | 803749.361  | 740143.085  | 63606.276  |
|        | 2001 | 870081.588  | 790324.998  | 79756.591  |
|        | 2002 | 935347.140  | 837464.829  | 97882.310  |
|        | 2003 | 1001627.349 | 882754.334  | 118873.015 |
|        | 2004 | 1066587.976 | 924909.370  | 141678.606 |
|        | 2005 | 1130548.052 | 964128.684  | 166419.368 |
|        | 2006 | 1195132.454 | 1001299.953 | 193832.500 |
|        | 2007 | 1258974.043 | 1035805.000 | 223169.043 |
|        | 2008 | 1320124.867 | 1066637.885 | 253486.982 |
|        | 2009 | 1380776.123 | 1095255.093 | 285521.030 |
|        | 2010 | 1440048.533 | 1121465.051 | 318583.481 |
|        | 2011 | 1497484.847 | 1145226.665 | 352258.181 |
|        | 2012 | 1554496.526 | 1167055.648 | 387440.879 |
|        | 2013 | 1610819.598 | 1187143.623 | 423675.975 |
|        | 2014 | 1667484.890 | 1205810.360 | 461674.529 |
|        | 2015 | 1720948.287 | 1222414.746 | 498533.540 |
|        | 2016 | 1775699.228 | 1238066.518 | 537632.710 |
|        | 2017 | 1830250.175 | 1252566.186 | 577683.988 |
|        | 2018 | 1875958.950 | 1263929.810 | 612029.140 |
|        | 2019 | 1920359.232 | 1274154.955 | 646204.277 |
|        | 2020 | 1960605.297 | 1282928.124 | 677677.174 |
|        | 2021 | 1998912.887 | 1290649.154 | 708263.734 |
|        | 2022 | 2036003.696 | 1297592.778 | 738410.917 |
|        | 2023 | 2071857.536 | 1303812.271 | 768045.265 |
|        | 2024 | 2106636.468 | 1309434.370 | 797202.098 |
|        | 2025 | 2136450.873 | 1314032.790 | 822418.084 |
|        | 2026 | 2164796.470 | 1318082.812 | 846713.658 |
|        | 2027 | 2192079.608 | 1321762.929 | 870316.679 |
|        | 2028 | 2218404.367 | 1325066.091 | 893338.276 |
|        | 2029 | 2243769.140 | 1328056.673 | 915712.467 |
|        | 2030 | 2263570.213 | 1330314.557 | 933255.655 |
|        | 2031 | 2282521.590 | 1332353.773 | 950167.817 |
|        | 2032 | 2300804.945 | 1334192.774 | 966612.170 |
|        | 2033 | 2318464.018 | 1335863.414 | 982600.604 |
|        | 2034 | 2335611.973 | 1337429.830 | 998182.143 |
|        | 2035 | 2347097.290 | 1338442.636 | 1008654.65 |
|        | 2036 | 2358248.747 | 1339384.938 | 1018863.81 |
|        | 2037 | 2369033.655 | 1340261.918 | 1028771.74 |
|        | 2038 | 2379490.114 | 1341083.731 | 1038406.38 |
|        | 2039 | 2389546.238 | 1341867.302 | 1047678.94 |
| Female | 1990 | 56348.092   | 56348.092   | 0.000      |
|        | 1991 | 110871.862  | 110619.293  | 252.569    |
|        | 1992 | 165654.454  | 164667.887  | 986.568    |
|        | 1993 | 220008.519  | 217615.132  | 2393.387   |
|        | 1994 | 275706.807  | 270972.935  | 4733.872   |
|        | 1995 | 331417.547  | 323268.002  | 8149.545   |
|        | 1996 | 387580.161  | 374687.446  | 12892.715  |
|        | 1997 | 442778.242  | 423838.904  | 18939.338  |
|        | 1998 | 496117.305  | 469934.688  | 26182.617  |
|        | 1999 | 548268.214  | 513568.737  | 34699.478  |
|        | 2000 | 601693.202  | 556718.734  | 44974.467  |
|        | 2001 | 652221.103  | 595923.811  | 56297.292  |
|        | 2002 | 703022.600  | 633646.112  | 69376.488  |
|        | 2003 | 752023.351  | 668386.663  | 83636.688  |
|        | 2004 | 799826.733  | 700658.326  | 99168.407  |
|        | 2005 | 847563.928  | 731318.067  | 116245.861 |
|        | 2006 | 894205.027  | 759716.666  | 134488.361 |
|        | 2007 | 939571.282  | 785811.543  | 153759.739 |
|        | 2008 | 983437.578  | 809653.530  | 173784.048 |
|        | 2009 | 1025803.786 | 831403.807  | 194399.979 |
|        | 2010 | 1066964.934 | 851280.018  | 215684.916 |
|        | 2011 | 1106954.044 | 869407.325  | 237546.719 |
|        | 2012 | 1146108.461 | 886071.536  | 260036.925 |
|        | 2013 | 1183544.689 | 901036.028  | 282508.661 |
|        | 2014 | 1221220.945 | 915147.579  | 306073.366 |
|        | 2015 | 1258289.311 | 928340.942  | 329948.369 |
|        | 2016 | 1294830.207 | 940506.195  | 354324.012 |
|        | 2017 | 1330332.626 | 951608.452  | 378724.174 |
|        | 2018 | 1360571.987 | 960508.771  | 400063.216 |
|        | 2019 | 1389848.723 | 968575.561  | 421273.161 |
|        | 2020 | 1416046.192 | 975476.685  | 440569.507 |
|        | 2021 | 1440588.850 | 981526.133  | 459062.717 |
|        | 2022 | 1464157.934 | 986941.039  | 477216.895 |

**Results for PHIM for Run 6 (ELL Summary Sensitivity\_Analysis\_2.RTF)**

|      |             |             |             |             |            |
|------|-------------|-------------|-------------|-------------|------------|
| COPD | Males       | 2023        | 1486810.237 | 991805.538  | 495004.700 |
|      |             | 2024        | 1508591.729 | 996167.926  | 512423.803 |
|      |             | 2025        | 1526875.621 | 999708.608  | 527167.013 |
|      |             | 2026        | 1543659.810 | 1002748.441 | 540911.369 |
|      |             | 2027        | 1559623.774 | 1005455.861 | 554167.913 |
|      |             | 2028        | 1574852.850 | 1007869.377 | 566983.473 |
|      |             | 2029        | 1589437.452 | 1010046.004 | 579391.449 |
|      |             | 2030        | 1600568.199 | 1011657.818 | 588910.382 |
|      |             | 2031        | 1610776.297 | 1013049.338 | 597726.958 |
|      |             | 2032        | 1620483.563 | 1014293.038 | 606190.526 |
|      |             | 2033        | 1629745.442 | 1015419.931 | 614325.511 |
|      |             | 2034        | 1638721.425 | 1016451.854 | 622269.572 |
|      |             | 2035        | 1644649.404 | 1017108.291 | 627541.114 |
|      |             | 2036        | 1650181.590 | 1017681.596 | 632499.994 |
|      |             | 2037        | 1655476.066 | 1018203.957 | 637272.109 |
|      |             | 2038        | 1660507.914 | 1018680.437 | 641827.476 |
|      |             | 2039        | 1665361.569 | 1019126.825 | 646234.744 |
|      |             | 1990        | 117002.906  | 117002.906  | 0.000      |
|      |             | 1991        | 233438.833  | 233347.979  | 90.854     |
|      |             | 1992        | 348084.047  | 347743.722  | 340.325    |
|      |             | 1993        | 467278.318  | 466428.191  | 850.127    |
|      |             | 1994        | 584216.907  | 582492.824  | 1724.083   |
|      |             | 1995        | 697391.457  | 694354.013  | 3037.444   |
|      |             | 1996        | 809471.271  | 804573.268  | 4898.003   |
|      |             | 1997        | 922587.668  | 915122.528  | 7465.140   |
|      |             | 1998        | 1034072.457 | 1023371.198 | 10701.259  |
|      |             | 1999        | 1153475.399 | 1138409.068 | 15066.331  |
|      |             | 2000        | 1268050.268 | 1247669.502 | 20380.766  |
|      |             | 2001        | 1382786.209 | 1355822.435 | 26963.774  |
|      |             | 2002        | 1497557.412 | 1462584.353 | 34973.059  |
|      |             | 2003        | 1614405.229 | 1569973.665 | 44431.564  |
|      |             | 2004        | 1726672.489 | 1671606.756 | 55065.734  |
|      |             | 2005        | 1847277.524 | 1779278.665 | 67998.860  |
|      |             | 2006        | 1961009.963 | 1878905.875 | 82104.089  |
|      |             | 2007        | 2079868.908 | 1981015.981 | 98852.928  |
|      |             | 2008        | 2206755.783 | 2087995.587 | 118760.196 |
|      |             | 2009        | 2331993.380 | 2191348.486 | 140644.894 |
|      |             | 2010        | 2455130.176 | 2290790.665 | 164339.511 |
|      |             | 2011        | 2582657.849 | 2391292.255 | 191365.593 |
| 2012 | 2709719.005 | 2488808.072 | 220910.932  |             |            |
| 2013 | 2840547.005 | 2586340.953 | 254206.053  |             |            |
| 2014 | 2971677.135 | 2681289.636 | 290387.499  |             |            |
| 2015 | 3104538.983 | 2775752.439 | 328786.544  |             |            |
| 2016 | 3237650.175 | 2867247.398 | 370402.777  |             |            |
| 2017 | 3370561.253 | 2955839.564 | 414721.689  |             |            |
| 2018 | 3503136.371 | 3040718.085 | 462418.286  |             |            |
| 2019 | 3636402.758 | 3123025.721 | 513377.037  |             |            |
| 2020 | 3768054.453 | 3202039.055 | 566015.398  |             |            |
| 2021 | 3897675.067 | 3276779.912 | 620895.154  |             |            |
| 2022 | 4027307.132 | 3348441.897 | 678865.235  |             |            |
| 2023 | 4156698.720 | 3416841.930 | 739856.790  |             |            |
| 2024 | 4285772.226 | 3482013.442 | 803758.784  |             |            |
| 2025 | 4410759.298 | 3543137.287 | 867622.011  |             |            |
| 2026 | 4531411.064 | 3598935.709 | 932475.356  |             |            |
| 2027 | 4651145.233 | 3651580.213 | 999565.020  |             |            |
| 2028 | 4769837.872 | 3700959.608 | 1068878.26  |             |            |
| 2029 | 4887747.179 | 3747264.490 | 1140482.69  |             |            |
| 2030 | 4997632.895 | 3789119.601 | 1208513.29  |             |            |
| 2031 | 5103301.991 | 3826301.996 | 1276999.99  |             |            |
| 2032 | 5207593.613 | 3860821.734 | 1346771.88  |             |            |
| 2033 | 5310556.138 | 3892680.176 | 1417875.96  |             |            |
| 2034 | 5412542.816 | 3922176.205 | 1490366.61  |             |            |
| 2035 | 5500522.473 | 3947004.850 | 1553517.62  |             |            |
| 2036 | 5588149.640 | 3969739.620 | 1618410.02  |             |            |
| 2037 | 5674667.886 | 3990621.527 | 1684046.36  |             |            |
| 2038 | 5760391.289 | 4009881.177 | 1750510.11  |             |            |
| 2039 | 5845459.234 | 4027794.568 | 1817664.67  |             |            |
| 1990 | 77434.846   | 77434.846   | 0.000       |             |            |
| 1991 | 160029.510  | 159965.871  | 63.639      |             |            |
| 1992 | 240642.531  | 240392.485  | 250.047     |             |            |
| 1993 | 329362.093  | 328694.037  | 668.056     |             |            |
| 1994 | 418569.515  | 417180.340  | 1389.175    |             |            |
| 1995 | 509110.357  | 506553.677  | 2556.680    |             |            |
| 1996 | 600040.117  | 595852.370  | 4187.748    |             |            |
| 1997 | 691159.071  | 684764.813  | 6394.257    |             |            |
| 1998 | 782866.899  | 773636.987  | 9229.912    |             |            |
| 1999 | 881526.925  | 868435.021  | 13091.904   |             |            |
| 2000 | 977880.647  | 960204.356  | 17676.291   |             |            |

**Results for PHIM for Run 6 (ELL Summary Sensitivity\_Analysis\_2.RTF)**

|      |             |             |            |
|------|-------------|-------------|------------|
| 2001 | 1076787.404 | 1053385.194 | 23402.209  |
| 2002 | 1174842.754 | 1144626.804 | 30215.949  |
| 2003 | 1275102.681 | 1236813.584 | 38289.097  |
| 2004 | 1371026.306 | 1323868.265 | 47158.040  |
| 2005 | 1473954.509 | 1415761.330 | 58193.179  |
| 2006 | 1574450.828 | 1503999.549 | 70451.279  |
| 2007 | 1673790.211 | 1589706.912 | 84083.299  |
| 2008 | 1782360.738 | 1681644.735 | 100716.003 |
| 2009 | 1892944.209 | 1773181.321 | 119762.889 |
| 2010 | 2002131.282 | 1861790.792 | 140340.491 |
| 2011 | 2114522.152 | 1950713.334 | 163808.818 |
| 2012 | 2228079.372 | 2038465.255 | 189614.117 |
| 2013 | 2345377.689 | 2126641.457 | 218736.232 |
| 2014 | 2462498.422 | 2212274.605 | 250223.817 |
| 2015 | 2581450.312 | 2297690.725 | 283759.587 |
| 2016 | 2701959.301 | 2381618.806 | 320340.495 |
| 2017 | 2823834.967 | 2463835.470 | 359999.497 |
| 2018 | 2938265.081 | 2539175.942 | 399089.139 |
| 2019 | 3053254.880 | 2612419.885 | 440834.995 |
| 2020 | 3167073.216 | 2683052.467 | 484020.749 |
| 2021 | 3279517.699 | 2750969.979 | 528547.721 |
| 2022 | 3392060.964 | 2816417.452 | 575643.512 |
| 2023 | 3504296.171 | 2879175.736 | 625120.435 |
| 2024 | 3616019.231 | 2939134.084 | 676885.147 |
| 2025 | 3724611.269 | 2995707.538 | 728903.731 |
| 2026 | 3827181.707 | 3047570.430 | 779611.277 |
| 2027 | 3928684.441 | 3096570.645 | 832113.796 |
| 2028 | 4029124.892 | 3142760.824 | 886364.068 |
| 2029 | 4128269.068 | 3186074.828 | 942194.240 |
| 2030 | 4221560.174 | 3225614.335 | 995945.838 |
| 2031 | 4304170.584 | 3258971.096 | 1045199.49 |
| 2032 | 4384930.537 | 3289690.786 | 1095239.75 |
| 2033 | 4464357.691 | 3318076.648 | 1146281.04 |
| 2034 | 4542251.545 | 3344151.351 | 1198100.19 |
| 2035 | 4611066.648 | 3366614.157 | 1244452.49 |
| 2036 | 4670309.230 | 3384621.149 | 1285688.08 |
| 2037 | 4728179.514 | 3401052.778 | 1327126.74 |
| 2038 | 4785008.048 | 3416131.552 | 1368876.50 |
| 2039 | 4841291.793 | 3430062.113 | 1411229.68 |

---

## Results for PHIM for Run 6 (ELL Summary Sensitivity\_Analysis\_2.RTF)

\*\*\*\*\*

**Table 5: Estimated Loss of Life, at the end of follow-up, Population unadjusted for deaths in Ecig scenario**

| Disease      | Sex    | Age Group   | Years of life lost<br>NULL | Years of life lost<br>Ecig | Years of life<br>Saved |
|--------------|--------|-------------|----------------------------|----------------------------|------------------------|
| All Diseases | Males  | 30-34       | 443911.034                 | 275136.873                 | 168774.161             |
|              |        | 35-39       | 1146798.555                | 705603.389                 | 441195.166             |
|              |        | 40-44       | 2609591.408                | 1570440.068                | 1039151.34             |
|              |        | 45-49       | 4775841.753                | 2836209.574                | 1939632.18             |
|              |        | 50-54       | 7446969.205                | 4544187.022                | 2902782.18             |
|              |        | 55-59       | 8240205.925                | 5370077.590                | 2870128.33             |
|              |        | 60-64       | 8772829.118                | 6123516.674                | 2649312.44             |
|              |        | 65-69       | 6161494.678                | 4651936.340                | 1509558.34             |
|              |        | 70-74       | 2495906.274                | 1948543.671                | 547362.602             |
|              | 75-79  | 0.000       | 0.000                      | 0.000                      |                        |
|              | Female | 30-34       | 229140.561                 | 161466.421                 | 67674.140              |
|              |        | 35-39       | 570217.942                 | 397131.249                 | 173086.693             |
|              |        | 40-44       | 1267538.938                | 866561.503                 | 400977.435             |
|              |        | 45-49       | 2340070.698                | 1582912.527                | 757158.171             |
|              |        | 50-54       | 3743803.613                | 2539807.627                | 1203995.99             |
|              |        | 55-59       | 4591478.168                | 3203916.460                | 1387561.71             |
|              |        | 60-64       | 5207367.788                | 3766657.014                | 1440710.77             |
|              |        | 65-69       | 4092181.394                | 3102450.065                | 989731.329             |
| 70-74        |        | 1776092.171 | 1376479.172                | 399612.999                 |                        |
| Lung cancer  | Males  | 30-34       | 66065.017                  | 55060.041                  | 11004.976              |
|              |        | 35-39       | 232509.414                 | 194541.202                 | 37968.212              |
|              |        | 40-44       | 688628.041                 | 565251.751                 | 123376.291             |
|              |        | 45-49       | 1528300.367                | 1223463.816                | 304836.551             |
|              |        | 50-54       | 2730187.229                | 2159157.440                | 571029.789             |
|              |        | 55-59       | 3909101.673                | 3074737.078                | 834364.595             |
|              |        | 60-64       | 4287716.660                | 3465292.677                | 822423.982             |
|              |        | 65-69       | 3467897.115                | 2855105.615                | 612791.500             |
|              |        | 70-74       | 1312144.343                | 1098659.871                | 213484.472             |
|              | 75-79  | 0.000       | 0.000                      | 0.000                      |                        |
|              | Female | 30-34       | 51913.113                  | 43701.012                  | 8212.101               |
|              |        | 35-39       | 189792.904                 | 160008.404                 | 29784.501              |
|              |        | 40-44       | 527596.573                 | 431375.232                 | 96221.341              |
|              |        | 45-49       | 1122524.269                | 893744.359                 | 228779.909             |
|              |        | 50-54       | 1882214.322                | 1474055.740                | 408158.582             |
|              |        | 55-59       | 2595581.943                | 2010822.780                | 584759.163             |
|              |        | 60-64       | 2846273.090                | 2250092.185                | 596180.905             |
|              |        | 65-69       | 2358758.394                | 1892971.725                | 465786.669             |
| 70-74        |        | 937814.238  | 765908.627                 | 171905.610                 |                        |
| IHD          | Males  | 30-34       | 263834.566                 | 143557.108                 | 120277.458             |
|              |        | 35-39       | 692140.150                 | 364728.879                 | 327411.271             |
|              |        | 40-44       | 1519708.432                | 748408.654                 | 771299.778             |
|              |        | 45-49       | 2568546.697                | 1189761.634                | 1378785.06             |
|              |        | 50-54       | 3632929.903                | 1729813.102                | 1903116.80             |
|              |        | 55-59       | 2807892.356                | 1374438.791                | 1433453.56             |
|              |        | 60-64       | 2599825.934                | 1443995.927                | 1155830.01             |
|              |        | 65-69       | 1113578.307                | 689277.319                 | 424300.989             |
|              |        | 70-74       | 437536.271                 | 302382.772                 | 135153.499             |
|              | 75-79  | 0.000       | 0.000                      | 0.000                      |                        |
|              | Female | 30-34       | 79649.097                  | 46956.020                  | 32693.077              |
|              |        | 35-39       | 193965.908                 | 105655.169                 | 88310.739              |
|              |        | 40-44       | 403380.974                 | 205507.759                 | 197873.216             |
|              |        | 45-49       | 671385.408                 | 326480.719                 | 344904.689             |
|              |        | 50-54       | 1011875.989                | 509248.324                 | 502627.666             |
|              |        | 55-59       | 849875.715                 | 444655.742                 | 405219.974             |
|              |        | 60-64       | 925490.876                 | 545482.517                 | 380008.359             |
|              |        | 65-69       | 455463.881                 | 300249.716                 | 155214.165             |
| 70-74        |        | 207681.216  | 150578.185                 | 57103.032                  |                        |
| Stroke       | Males  | 30-34       | 73463.650                  | 48112.590                  | 25351.060              |
|              |        | 35-39       | 151934.057                 | 97035.032                  | 54899.024              |
|              |        | 40-44       | 262845.974                 | 161365.895                 | 101480.079             |
|              |        | 45-49       | 383421.246                 | 223759.362                 | 159661.884             |
|              |        | 50-54       | 479872.634                 | 260806.088                 | 219066.546             |
|              |        | 55-59       | 437124.903                 | 224066.231                 | 213058.673             |
|              |        | 60-64       | 419457.235                 | 220988.601                 | 198468.634             |
|              |        | 65-69       | 128180.574                 | 71075.111                  | 57105.463              |
|              |        | 70-74       | 53245.965                  | 32502.460                  | 20743.506              |
|              | 75-79  | 0.000       | 0.000                      | 0.000                      |                        |
|              | Female | 30-34       | 62919.090                  | 44900.567                  | 18018.523              |

**Results for PHIM for Run 6 (ELL Summary Sensitivity\_Analysis\_2.RTF)**

|      |        |       |             |             |            |
|------|--------|-------|-------------|-------------|------------|
|      |        | 35-39 | 120806.205  | 82823.340   | 37982.865  |
|      |        | 40-44 | 203391.885  | 132813.524  | 70578.361  |
|      |        | 45-49 | 278172.097  | 172637.779  | 105534.318 |
|      |        | 50-54 | 325979.181  | 192232.712  | 133746.469 |
|      |        | 55-59 | 275161.340  | 155171.481  | 119989.859 |
|      |        | 60-64 | 268920.493  | 156199.856  | 112720.637 |
|      |        | 65-69 | 87956.054   | 54045.281   | 33910.772  |
|      |        | 70-74 | 42055.224   | 27620.224   | 14434.999  |
|      |        | 75-79 | 0.000       | 0.000       | 0.000      |
| COPD | Males  | 30-34 | 40547.801   | 28407.134   | 12140.667  |
|      |        | 35-39 | 70214.933   | 49298.276   | 20916.658  |
|      |        | 40-44 | 138408.960  | 95413.768   | 42995.192  |
|      |        | 45-49 | 295573.443  | 199224.762  | 96348.681  |
|      |        | 50-54 | 603979.438  | 394410.392  | 209569.046 |
|      |        | 55-59 | 1086086.992 | 696835.490  | 389251.502 |
|      |        | 60-64 | 1465829.290 | 993239.468  | 472589.822 |
|      |        | 65-69 | 1451838.682 | 1036478.296 | 415360.386 |
|      |        | 70-74 | 692979.695  | 514998.569  | 177981.126 |
|      |        | 75-79 | 0.000       | 0.000       | 0.000      |
|      | Female | 30-34 | 34659.261   | 25908.822   | 8750.439   |
|      |        | 35-39 | 65652.924   | 48644.336   | 17008.588  |
|      |        | 40-44 | 133169.505  | 96864.988   | 36304.517  |
|      |        | 45-49 | 267988.924  | 190049.669  | 77939.255  |
|      |        | 50-54 | 523734.121  | 364270.851  | 159463.269 |
|      |        | 55-59 | 870859.170  | 593266.457  | 277592.712 |
|      |        | 60-64 | 1166683.329 | 814882.456  | 351800.872 |
|      |        | 65-69 | 1190003.066 | 855183.343  | 334819.722 |
|      |        | 70-74 | 588541.493  | 432372.136  | 156169.358 |
|      |        | 75-79 | 0.000       | 0.000       | 0.000      |

---

## Results for PHIM for Run 6 (ELL Summary Sensitivity\_Analysis\_2.RTF)

\*\*\*\*\*

**Table 6: Estimated Loss of Life, at the end of follow-up, Population and Number deaths adjusted for Ecig scenario**

| Disease      | Sex    | Age Group   | Years of life lost<br>NULL | Years of life lost<br>Ecig | Years of life<br>Saved |
|--------------|--------|-------------|----------------------------|----------------------------|------------------------|
| All Diseases | Males  | 30-34       | 443911.034                 | 275152.687                 | 168758.347             |
|              |        | 35-39       | 1146798.555                | 705718.804                 | 441079.751             |
|              |        | 40-44       | 2609591.408                | 1571167.075                | 1038424.33             |
|              |        | 45-49       | 4775841.753                | 2839387.938                | 1936453.82             |
|              |        | 50-54       | 7446969.205                | 4553584.218                | 2893384.99             |
|              |        | 55-59       | 8240205.925                | 5384765.104                | 2855440.82             |
|              |        | 60-64       | 8772829.118                | 6147504.781                | 2625324.34             |
|              |        | 65-69       | 6161494.678                | 4671254.820                | 1490239.86             |
|              |        | 70-74       | 2495906.274                | 1958295.403                | 537610.871             |
|              | 75-79  | 0.000       | 0.000                      | 0.000                      |                        |
|              | Female | 30-34       | 229140.561                 | 161470.146                 | 67670.415              |
|              |        | 35-39       | 570217.942                 | 397158.432                 | 173059.510             |
|              |        | 40-44       | 1267538.938                | 866732.663                 | 400806.275             |
|              |        | 45-49       | 2340070.698                | 1583666.464                | 756404.234             |
|              |        | 50-54       | 3743803.613                | 2542191.257                | 1201612.36             |
|              |        | 55-59       | 4591478.168                | 3208411.823                | 1383066.35             |
|              |        | 60-64       | 5207367.788                | 3774853.032                | 1432514.76             |
|              |        | 65-69       | 4092181.394                | 3110568.033                | 981613.361             |
| 70-74        |        | 1776092.171 | 1381236.535                | 394855.636                 |                        |
| 75-79        | 0.000  | 0.000       | 0.000                      |                            |                        |
| Lung cancer  | Males  | 30-34       | 66065.017                  | 55063.315                  | 11001.702              |
|              |        | 35-39       | 232509.414                 | 194575.636                 | 37933.778              |
|              |        | 40-44       | 688628.041                 | 565541.950                 | 123086.092             |
|              |        | 45-49       | 1528300.367                | 1224991.932                | 303308.435             |
|              |        | 50-54       | 2730187.229                | 2164049.285                | 566137.945             |
|              |        | 55-59       | 3909101.673                | 3083676.403                | 825425.270             |
|              |        | 60-64       | 4287716.660                | 3479573.638                | 808143.022             |
|              |        | 65-69       | 3467897.115                | 2866936.399                | 600960.715             |
|              |        | 70-74       | 1312144.343                | 1104152.240                | 207992.104             |
|              | 75-79  | 0.000       | 0.000                      | 0.000                      |                        |
|              | Female | 30-34       | 51913.113                  | 43702.116                  | 8210.996               |
|              |        | 35-39       | 189792.904                 | 160019.961                 | 29772.943              |
|              |        | 40-44       | 527596.573                 | 431466.854                 | 96129.719              |
|              |        | 45-49       | 1122524.269                | 894195.610                 | 228328.659             |
|              |        | 50-54       | 1882214.322                | 1475516.956                | 406697.366             |
|              |        | 55-59       | 2595581.943                | 2013749.159                | 581832.784             |
|              |        | 60-64       | 2846273.090                | 2255166.053                | 591107.037             |
|              |        | 65-69       | 2358758.394                | 1897883.933                | 460874.461             |
| 70-74        |        | 937814.238  | 768533.325                 | 169280.913                 |                        |
| 75-79        | 0.000  | 0.000       | 0.000                      |                            |                        |
| IHD          | Males  | 30-34       | 263834.566                 | 143565.252                 | 120269.314             |
|              |        | 35-39       | 692140.150                 | 364784.131                 | 327356.019             |
|              |        | 40-44       | 1519708.432                | 748713.084                 | 770995.348             |
|              |        | 45-49       | 2568546.697                | 1190861.045                | 1377685.65             |
|              |        | 50-54       | 3632929.903                | 1732618.199                | 1900311.70             |
|              |        | 55-59       | 2807892.356                | 1376920.528                | 1430971.83             |
|              |        | 60-64       | 2599825.934                | 1447430.685                | 1152395.25             |
|              |        | 65-69       | 1113578.307                | 690671.901                 | 422906.406             |
|              |        | 70-74       | 437536.271                 | 303043.337                 | 134492.934             |
|              | 75-79  | 0.000       | 0.000                      | 0.000                      |                        |
|              | Female | 30-34       | 79649.097                  | 46957.103                  | 32691.993              |
|              |        | 35-39       | 193965.908                 | 105662.071                 | 88303.837              |
|              |        | 40-44       | 403380.974                 | 205543.063                 | 197837.911             |
|              |        | 45-49       | 671385.408                 | 326604.530                 | 344780.878             |
|              |        | 50-54       | 1011875.989                | 509598.547                 | 502277.442             |
|              |        | 55-59       | 849875.715                 | 445029.186                 | 404846.530             |
|              |        | 60-64       | 925490.876                 | 546119.348                 | 379371.528             |
|              |        | 65-69       | 455463.881                 | 300577.538                 | 154886.343             |
| 70-74        |        | 207681.216  | 150774.093                 | 56907.124                  |                        |
| 75-79        | 0.000  | 0.000       | 0.000                      |                            |                        |
| Stroke       | Males  | 30-34       | 73463.650                  | 48115.046                  | 25348.603              |
|              |        | 35-39       | 151934.057                 | 97049.986                  | 54884.071              |
|              |        | 40-44       | 262845.974                 | 161435.390                 | 101410.585             |
|              |        | 45-49       | 383421.246                 | 223986.179                 | 159435.067             |
|              |        | 50-54       | 479872.634                 | 261278.360                 | 218594.273             |
|              |        | 55-59       | 437124.903                 | 224547.766                 | 212577.137             |
|              |        | 60-64       | 419457.235                 | 221625.586                 | 197831.648             |
|              |        | 65-69       | 128180.574                 | 71245.526                  | 56935.048              |
|              |        | 70-74       | 53245.965                  | 32583.462                  | 20662.503              |
|              | 75-79  | 0.000       | 0.000                      | 0.000                      |                        |
|              | Female | 30-34       | 62919.090                  | 44901.429                  | 18017.662              |

**Results for PHIM for Run 6 (ELL Summary Sensitivity\_Analysis\_2.RTF)**

|      |        |       |             |             |            |
|------|--------|-------|-------------|-------------|------------|
|      |        | 35-39 | 120806.205  | 82828.072   | 37978.133  |
|      |        | 40-44 | 203391.885  | 132834.542  | 70557.344  |
|      |        | 45-49 | 278172.097  | 172701.447  | 105470.650 |
|      |        | 50-54 | 325979.181  | 192365.439  | 133613.742 |
|      |        | 55-59 | 275161.340  | 155314.106  | 119847.233 |
|      |        | 60-64 | 268920.493  | 156406.667  | 112513.826 |
|      |        | 65-69 | 87956.054   | 54113.132   | 33842.922  |
|      |        | 70-74 | 42055.224   | 27661.990   | 14393.233  |
|      |        | 75-79 | 0.000       | 0.000       | 0.000      |
| COPD | Males  | 30-34 | 40547.801   | 28409.073   | 12138.728  |
|      |        | 35-39 | 70214.933   | 49309.051   | 20905.883  |
|      |        | 40-44 | 138408.960  | 95476.651   | 42932.309  |
|      |        | 45-49 | 295573.443  | 199548.782  | 96024.661  |
|      |        | 50-54 | 603979.438  | 395638.374  | 208341.064 |
|      |        | 55-59 | 1086086.992 | 699620.407  | 386466.585 |
|      |        | 60-64 | 1465829.290 | 998874.872  | 466954.418 |
|      |        | 65-69 | 1451838.682 | 1042400.994 | 409437.688 |
|      |        | 70-74 | 692979.695  | 518516.364  | 174463.330 |
|      |        | 75-79 | 0.000       | 0.000       | 0.000      |
|      | Female | 30-34 | 34659.261   | 25909.497   | 8749.764   |
|      |        | 35-39 | 65652.924   | 48648.328   | 17004.596  |
|      |        | 40-44 | 133169.505  | 96888.203   | 36281.302  |
|      |        | 45-49 | 267988.924  | 190164.878  | 77824.047  |
|      |        | 50-54 | 523734.121  | 364710.314  | 159023.806 |
|      |        | 55-59 | 870859.170  | 594319.372  | 276539.798 |
|      |        | 60-64 | 1166683.329 | 817160.964  | 349522.365 |
|      |        | 65-69 | 1190003.066 | 857993.431  | 332009.635 |
|      |        | 70-74 | 588541.493  | 434267.127  | 154274.367 |
|      |        | 75-79 | 0.000       | 0.000       | 0.000      |

---

## Results for PHIM for Run 8 (ELL Summary Sensitivity\_Analysis\_2.RTF)

\*\*\*\*\*

### Estimated Loss of Life from the E Component for Run: 8, Simulation: 1

Country: US (United States)  
 Follow-up Period: 1990 to 2039

**Table 1: Estimated Loss of Life, at the end of follow-up, all age groups combined, Population unadjusted for deaths in Ecig scenario**

| Disease      | Sex    | Year | Years of life lost<br>NULL | Years of life lost<br>Ecig | Years of life<br>Saved |
|--------------|--------|------|----------------------------|----------------------------|------------------------|
| All Diseases | Males  | 2039 | 42093547.949               | 26300486.682               | 15793061.3             |
|              | Female | 2039 | 23817891.273               | 15818775.413               | 7999115.86             |
| Lung cancer  | Males  | 2039 | 18222549.860               | 14147466.487               | 4075083.37             |
|              | Female | 2039 | 12512468.845               | 9391557.112                | 3120911.73             |
| IHD          | Males  | 2039 | 15635992.616               | 7114000.188                | 8521992.43             |
|              | Female | 2039 | 4798769.065                | 2304086.242                | 2494682.82             |
| Stroke       | Males  | 2039 | 2389546.238                | 1226049.992                | 1163496.25             |
|              | Female | 2039 | 1665361.569                | 920306.284                 | 745055.286             |
| COPD         | Males  | 2039 | 5845459.234                | 3812970.015                | 2032489.22             |
|              | Female | 2039 | 4841291.793                | 3202825.775                | 1638466.02             |



## Results for PHIM for Run 8 (ELL Summary Sensitivity\_Analysis\_2.RTF)

\*\*\*\*\*

**Table 2: Estimated Loss of Life, at the end of follow-up, all age groups combined, Population and Number deaths adjusted for Ecig scenario**

| Disease      | Sex    | Year | Years of life lost<br>NULL | Years of life lost<br>Ecig | Years of life<br>Saved |
|--------------|--------|------|----------------------------|----------------------------|------------------------|
| All Diseases | Males  | 2039 | 42093547.949               | 26391959.848               | 15701588.1             |
|              | Female | 2039 | 23817891.273               | 15852101.603               | 7965789.67             |
| Lung cancer  | Males  | 2039 | 18222549.860               | 14202411.503               | 4020138.36             |
|              | Female | 2039 | 12512468.845               | 9412098.175                | 3100370.67             |
| IHD          | Males  | 2039 | 15635992.616               | 7125934.212                | 8510058.40             |
|              | Female | 2039 | 4798769.065                | 2306064.012                | 2492705.05             |
| Stroke       | Males  | 2039 | 2389546.238                | 1228242.847                | 1161303.39             |
|              | Female | 2039 | 1665361.569                | 920987.246                 | 744374.324             |
| COPD         | Males  | 2039 | 5845459.234                | 3835371.287                | 2010087.95             |
|              | Female | 2039 | 4841291.793                | 3212952.171                | 1628339.62             |

## Results for PHIM for Run 8 (ELL Summary Sensitivity\_Analysis\_2.RTF)

\*\*\*\*\*

**Table 3: Estimated Loss of Life, All age groups combined, Population unadjusted for deaths in Ecig scenario, cumulative over years**

| Disease      | Sex          | Year         | Years of life lost<br>NULL | Years of life lost<br>Ecig | Years of life<br>Saved |
|--------------|--------------|--------------|----------------------------|----------------------------|------------------------|
| All Diseases | Males        | 1990         | 1304839.645                | 1304839.645                | 0.000                  |
|              |              | 1991         | 2579865.358                | 2573361.406                | 6503.951               |
|              |              | 1992         | 3830683.831                | 3806243.506                | 24440.325              |
|              |              | 1993         | 5076567.803                | 5018844.273                | 57723.530              |
|              |              | 1994         | 6292145.526                | 6182807.960                | 109337.566             |
|              |              | 1995         | 7485537.010                | 7303182.541                | 182354.469             |
|              |              | 1996         | 8655955.028                | 8377841.257                | 278113.771             |
|              |              | 1997         | 9791729.713                | 9395929.496                | 395800.217             |
|              |              | 1998         | 10899134.186               | 10364407.322               | 534726.864             |
|              |              | 1999         | 12070409.674               | 11348052.063               | 722357.612             |
|              |              | 2000         | 13231384.595               | 12294932.643               | 936451.952             |
|              |              | 2001         | 14371761.018               | 13194249.040               | 1177511.98             |
|              |              | 2002         | 15508906.386               | 14059074.166               | 1449832.22             |
|              |              | 2003         | 16638100.422               | 14888281.002               | 1749819.42             |
|              |              | 2004         | 17736465.088               | 15669512.977               | 2066952.11             |
|              |              | 2005         | 18834658.606               | 16425896.812               | 2408761.79             |
|              |              | 2006         | 19909100.501               | 17135331.196               | 2773769.31             |
|              |              | 2007         | 20958321.463               | 17805044.285               | 3153277.18             |
|              |              | 2008         | 22000068.148               | 18449551.096               | 3550517.05             |
|              |              | 2009         | 23018816.903               | 19059659.499               | 3959157.40             |
|              |              | 2010         | 24018480.537               | 19637178.542               | 4381301.99             |
|              |              | 2011         | 25003034.574               | 20185640.687               | 4817393.89             |
|              |              | 2012         | 25969871.429               | 20704070.501               | 5265800.93             |
|              |              | 2013         | 26920275.180               | 21193940.742               | 5726334.44             |
|              |              | 2014         | 27849005.227               | 21653772.058               | 6195233.17             |
|              |              | 2015         | 28749620.400               | 22087004.296               | 6662616.10             |
|              |              | 2016         | 29622417.562               | 22484530.057               | 7137887.50             |
|              |              | 2017         | 30462559.724               | 22849121.977               | 7613437.75             |
|              |              | 2018         | 31293299.299               | 23199070.998               | 8094228.30             |
|              |              | 2019         | 32109993.427               | 23529775.266               | 8580218.16             |
|              |              | 2020         | 32883323.977               | 23837309.078               | 9046014.90             |
|              |              | 2021         | 33610102.554               | 24104187.073               | 9505915.48             |
|              |              | 2022         | 34322010.448               | 24354411.704               | 9967598.74             |
|              |              | 2023         | 35018383.550               | 24588091.483               | 10430292.1             |
|              |              | 2024         | 35700177.955               | 24806476.717               | 10893701.2             |
|              |              | 2025         | 36315500.346               | 25003407.326               | 11312093.0             |
|              |              | 2026         | 36896159.343               | 25170479.328               | 11725680.0             |
|              |              | 2027         | 37462570.116               | 25325673.474               | 12136896.6             |
|              |              | 2028         | 38015337.780               | 25469126.298               | 12546211.5             |
|              |              | 2029         | 38554814.764               | 25602122.599               | 12952692.2             |
|              |              | 2030         | 39003805.400               | 25715695.126               | 13288110.3             |
|              |              | 2031         | 39436509.703               | 25812131.470               | 13624378.2             |
| 2032         | 39858470.458 | 25901190.700 | 13957279.8                 |                            |                        |
| 2033         | 40270147.082 | 25982893.766 | 14287253.3                 |                            |                        |
| 2034         | 40672665.743 | 26058459.640 | 14614206.1                 |                            |                        |
| 2035         | 40962732.664 | 26115918.256 | 14846814.4                 |                            |                        |
| 2036         | 41255021.653 | 26167557.362 | 15087464.3                 |                            |                        |
| 2037         | 41540573.023 | 26215281.879 | 15325291.1                 |                            |                        |
| 2038         | 41820158.066 | 26259412.888 | 15560745.2                 |                            |                        |
| 2039         | 42093547.949 | 26300486.682 | 15793061.3                 |                            |                        |
|              | Female       | 1990         | 588979.406                 | 588979.406                 | 0.000                  |
|              |              | 1991         | 1182571.252                | 1180438.918                | 2132.335               |
|              |              | 1992         | 1777346.679                | 1769241.149                | 8105.530               |
|              |              | 1993         | 2380261.899                | 2360737.613                | 19524.286              |
|              |              | 1994         | 2983130.039                | 2945463.227                | 37666.812              |
|              |              | 1995         | 3588982.584                | 3525214.502                | 63768.081              |
|              |              | 1996         | 4195430.235                | 4095769.125                | 99661.110              |
|              |              | 1997         | 4793866.694                | 4649931.177                | 143935.518             |
|              |              | 1998         | 5389747.381                | 5192192.213                | 197555.168             |
|              |              | 1999         | 6006722.467                | 5738937.772                | 267784.695             |
|              |              | 2000         | 6625758.871                | 6276863.139                | 348895.732             |
|              |              | 2001         | 7245135.411                | 6802080.759                | 443054.652             |
|              |              | 2002         | 7867492.021                | 7316797.383                | 550694.638             |
|              |              | 2003         | 8485051.793                | 7815566.642                | 669485.151             |
|              |              | 2004         | 9092994.774                | 8294342.622                | 798652.152             |
|              |              | 2005         | 9706032.803                | 8764803.544                | 941229.259             |
|              |              | 2006         | 10311907.548               | 9216667.310                | 1095240.24             |
|              |              | 2007         | 10909437.502               | 9651435.361                | 1258002.14             |
|              |              | 2008         | 11506462.491               | 10071932.070               | 1434530.42             |
|              |              | 2009         | 12098393.287               | 10479031.454               | 1619361.83             |
|              |              | 2010         | 12681188.981               | 10867775.075               | 1813413.91             |

**Results for PHIM for Run 8 (ELL Summary Sensitivity\_Analysis\_2.RTF)**

|             |       |      |              |              |            |
|-------------|-------|------|--------------|--------------|------------|
|             |       | 2011 | 13260062.991 | 11241385.623 | 2018677.37 |
|             |       | 2012 | 13839417.441 | 11602539.969 | 2236877.47 |
|             |       | 2013 | 14409614.758 | 11947446.573 | 2462168.19 |
|             |       | 2014 | 14976658.746 | 12277124.419 | 2699534.33 |
|             |       | 2015 | 15529977.821 | 12589387.019 | 2940590.80 |
|             |       | 2016 | 16066640.764 | 12879905.204 | 3186735.56 |
|             |       | 2017 | 16590035.078 | 13152493.616 | 3437541.46 |
|             |       | 2018 | 17098716.137 | 13410681.367 | 3688034.77 |
|             |       | 2019 | 17599868.850 | 13655466.505 | 3944402.35 |
|             |       | 2020 | 18081346.241 | 13885090.781 | 4196255.46 |
|             |       | 2021 | 18537594.460 | 14092176.920 | 4445417.54 |
|             |       | 2022 | 18985300.234 | 14286962.763 | 4698337.47 |
|             |       | 2023 | 19423958.747 | 14469667.195 | 4954291.55 |
|             |       | 2024 | 19853347.772 | 14640405.846 | 5212941.93 |
|             |       | 2025 | 20252822.245 | 14796478.500 | 5456343.74 |
|             |       | 2026 | 20619307.063 | 14931514.622 | 5687792.44 |
|             |       | 2027 | 20976063.406 | 15056539.234 | 5919524.17 |
|             |       | 2028 | 21323641.947 | 15172312.538 | 6151329.41 |
|             |       | 2029 | 21662117.106 | 15279164.983 | 6382952.12 |
|             |       | 2030 | 21960971.694 | 15372904.430 | 6588067.26 |
|             |       | 2031 | 22224951.983 | 15449107.857 | 6775844.13 |
|             |       | 2032 | 22480397.853 | 15518665.641 | 6961732.21 |
|             |       | 2033 | 22728639.455 | 15582250.837 | 7146388.62 |
|             |       | 2034 | 22970448.888 | 15640302.269 | 7330146.62 |
|             |       | 2035 | 23164154.188 | 15687248.655 | 7476905.53 |
|             |       | 2036 | 23334538.616 | 15724638.182 | 7609900.43 |
|             |       | 2037 | 23499760.723 | 15758844.276 | 7740916.45 |
|             |       | 2038 | 23660308.401 | 15790038.162 | 7870270.24 |
|             |       | 2039 | 23817891.273 | 15818775.413 | 7999115.86 |
| Lung cancer | Males | 1990 | 595621.791   | 595621.791   | 0.000      |
|             |       | 1991 | 1177744.113  | 1177279.340  | 464.773    |
|             |       | 1992 | 1750034.892  | 1748255.632  | 1779.260   |
|             |       | 1993 | 2319752.308  | 2315371.480  | 4380.828   |
|             |       | 1994 | 2872597.339  | 2864020.871  | 8576.468   |
|             |       | 1995 | 3411494.825  | 3396770.068  | 14724.757  |
|             |       | 1996 | 3945569.726  | 3922052.046  | 23517.680  |
|             |       | 1997 | 4463316.362  | 4428373.866  | 34942.497  |
|             |       | 1998 | 4975301.180  | 4925727.967  | 49573.214  |
|             |       | 1999 | 5473691.125  | 5406023.390  | 67667.735  |
|             |       | 2000 | 5977500.570  | 5887055.821  | 90444.749  |
|             |       | 2001 | 6474795.516  | 6356822.225  | 117973.291 |
|             |       | 2002 | 6968769.705  | 6817934.271  | 150835.434 |
|             |       | 2003 | 7460282.140  | 7270497.244  | 189784.896 |
|             |       | 2004 | 7947048.275  | 7712320.533  | 234727.742 |
|             |       | 2005 | 8430571.669  | 8144537.034  | 286034.635 |
|             |       | 2006 | 8903945.390  | 8560184.112  | 343761.278 |
|             |       | 2007 | 9364177.982  | 8956918.286  | 407259.696 |
|             |       | 2008 | 9822525.458  | 9343593.527  | 478931.932 |
|             |       | 2009 | 10275228.886 | 9717161.882  | 558067.004 |
|             |       | 2010 | 10720275.500 | 10076227.898 | 644047.602 |
|             |       | 2011 | 11155356.373 | 10418664.461 | 736691.913 |
|             |       | 2012 | 11582611.617 | 10745288.523 | 837323.093 |
|             |       | 2013 | 11998803.791 | 11054132.088 | 944671.703 |
|             |       | 2014 | 12402087.090 | 11344511.996 | 1057575.09 |
|             |       | 2015 | 12793451.706 | 11618133.490 | 1175318.22 |
|             |       | 2016 | 13160101.653 | 11865568.750 | 1294532.90 |
|             |       | 2017 | 13503583.414 | 12089193.705 | 1414389.71 |
|             |       | 2018 | 13859755.737 | 12310593.023 | 1549162.71 |
|             |       | 2019 | 14211625.176 | 12520467.849 | 1691157.33 |
|             |       | 2020 | 14553935.288 | 12717215.076 | 1836720.21 |
|             |       | 2021 | 14851747.495 | 12880477.991 | 1971269.50 |
|             |       | 2022 | 15144531.004 | 13033463.485 | 2111067.52 |
|             |       | 2023 | 15431932.496 | 13176251.859 | 2255680.64 |
|             |       | 2024 | 15713920.740 | 13309427.175 | 2404493.57 |
|             |       | 2025 | 15979112.816 | 13430266.276 | 2548846.54 |
|             |       | 2026 | 16206550.153 | 13526957.632 | 2679592.52 |
|             |       | 2027 | 16428826.050 | 13616364.515 | 2812461.54 |
|             |       | 2028 | 16645902.186 | 13698629.757 | 2947272.43 |
|             |       | 2029 | 16858126.517 | 13774544.008 | 3083582.51 |
|             |       | 2030 | 17045220.687 | 13839801.488 | 3205419.20 |
|             |       | 2031 | 17208482.610 | 13891563.737 | 3316918.87 |
|             |       | 2032 | 17367586.074 | 13939181.938 | 3428404.14 |
|             |       | 2033 | 17522716.280 | 13982714.405 | 3540001.87 |
|             |       | 2034 | 17674226.555 | 14022789.742 | 3651436.81 |
|             |       | 2035 | 17792201.734 | 14053548.150 | 3738653.58 |
|             |       | 2036 | 17903508.236 | 14079899.239 | 3823609.00 |
|             |       | 2037 | 18012162.345 | 14104203.286 | 3907959.06 |
|             |       | 2038 | 18118464.470 | 14126618.009 | 3991846.46 |

**Results for PHIM for Run 8 (ELL Summary Sensitivity\_Analysis\_2.RTF)**

|     |        |      |              |              |            |
|-----|--------|------|--------------|--------------|------------|
|     | Female | 2039 | 18222549.860 | 14147466.487 | 4075083.37 |
|     |        | 1990 | 307897.357   | 307897.357   | 0.000      |
|     |        | 1991 | 616547.418   | 616259.828   | 287.590    |
|     |        | 1992 | 931086.773   | 929945.806   | 1140.967   |
|     |        | 1993 | 1246155.671  | 1243331.482  | 2824.189   |
|     |        | 1994 | 1561212.934  | 1555606.125  | 5606.810   |
|     |        | 1995 | 1879967.742  | 1870097.376  | 9870.366   |
|     |        | 1996 | 2197488.109  | 2181641.906  | 15846.203  |
|     |        | 1997 | 2515698.453  | 2491804.333  | 23894.119  |
|     |        | 1998 | 2836249.556  | 2801950.603  | 34298.953  |
|     |        | 1999 | 3150201.390  | 3103095.115  | 47106.274  |
|     |        | 2000 | 3472722.342  | 3409579.024  | 63143.318  |
|     |        | 2001 | 3796994.889  | 3714232.943  | 82761.946  |
|     |        | 2002 | 4126619.935  | 4020082.736  | 106537.199 |
|     |        | 2003 | 4454982.533  | 4320850.189  | 134132.345 |
|     |        | 2004 | 4784343.030  | 4618007.391  | 166335.639 |
|     |        | 2005 | 5113443.121  | 4910116.119  | 203327.002 |
|     |        | 2006 | 5442543.963  | 5196717.118  | 245826.844 |
|     |        | 2007 | 5772441.497  | 5478465.471  | 293976.026 |
|     |        | 2008 | 6091911.943  | 5745722.578  | 346189.365 |
|     |        | 2009 | 6413671.330  | 6008545.858  | 405125.472 |
|     |        | 2010 | 6730763.530  | 6261717.687  | 469045.843 |
|     |        | 2011 | 7043614.101  | 6505037.449  | 538576.652 |
|     |        | 2012 | 7356270.780  | 6741483.343  | 614787.437 |
|     |        | 2013 | 7662551.964  | 6966539.201  | 696012.763 |
|     |        | 2014 | 7964551.465  | 7181849.652  | 782701.812 |
|     |        | 2015 | 8254895.403  | 7383301.252  | 871594.151 |
|     |        | 2016 | 8530661.848  | 7567946.167  | 962715.680 |
|     |        | 2017 | 8795826.122  | 7739510.267  | 1056315.85 |
|     |        | 2018 | 9067233.707  | 7907663.255  | 1159570.45 |
|     |        | 2019 | 9335343.270  | 8067074.444  | 1268268.83 |
|     |        | 2020 | 9596110.883  | 8216813.172  | 1379297.71 |
|     |        | 2021 | 9833186.859  | 8348098.801  | 1485088.06 |
|     |        | 2022 | 10066452.037 | 8471381.202  | 1595070.83 |
|     |        | 2023 | 10295503.609 | 8586777.021  | 1708726.59 |
|     |        | 2024 | 10520125.318 | 8694329.303  | 1825796.01 |
|     |        | 2025 | 10731915.863 | 8792353.027  | 1939562.84 |
|     |        | 2026 | 10917495.549 | 8874304.848  | 2043190.70 |
|     |        | 2027 | 11098620.885 | 8949887.968  | 2148732.92 |
|     |        | 2028 | 11275441.234 | 9019624.351  | 2255816.88 |
|     |        | 2029 | 11447962.710 | 9083705.160  | 2364257.55 |
|     |        | 2030 | 11601867.623 | 9139496.290  | 2462371.33 |
|     |        | 2031 | 11731666.516 | 9183325.790  | 2548340.73 |
|     |        | 2032 | 11857585.969 | 9223244.190  | 2634341.78 |
|     |        | 2033 | 11980128.625 | 9259622.847  | 2720505.78 |
|     |        | 2034 | 12099562.464 | 9292752.437  | 2806810.03 |
|     |        | 2035 | 12195919.946 | 9319128.134  | 2876791.81 |
|     |        | 2036 | 12278201.969 | 9339696.455  | 2938505.51 |
|     |        | 2037 | 12358146.336 | 9358535.468  | 2999610.87 |
|     |        | 2038 | 12435978.633 | 9375716.161  | 3060262.47 |
|     |        | 2039 | 12512468.845 | 9391557.112  | 3120911.73 |
| IHD | Males  | 1990 | 517209.093   | 517209.093   | 0.000      |
|     |        | 1991 | 1019219.395  | 1013854.137  | 5365.258   |
|     |        | 1992 | 1509598.614  | 1489477.027  | 20121.587  |
|     |        | 1993 | 1992735.299  | 1945552.429  | 47182.870  |
|     |        | 1994 | 2462877.575  | 2374227.500  | 88650.075  |
|     |        | 1995 | 2928249.390  | 2781351.257  | 146898.133 |
|     |        | 1996 | 3377377.730  | 3155131.836  | 222245.893 |
|     |        | 1997 | 3809062.472  | 3495380.415  | 313682.057 |
|     |        | 1998 | 4222213.867  | 3802126.629  | 420087.238 |
|     |        | 1999 | 4708317.743  | 4139950.155  | 568367.588 |
|     |        | 2000 | 5182084.396  | 4447767.905  | 734316.491 |
|     |        | 2001 | 5644097.705  | 4725270.600  | 918827.105 |
|     |        | 2002 | 6107232.129  | 4981958.643  | 1125273.49 |
|     |        | 2003 | 6561785.704  | 5213474.613  | 1348311.09 |
|     |        | 2004 | 6996156.348  | 5417041.527  | 1579114.82 |
|     |        | 2005 | 7426261.361  | 5602916.852  | 1823344.51 |
|     |        | 2006 | 7849012.694  | 5768755.771  | 2080256.92 |
|     |        | 2007 | 8255300.530  | 5914483.239  | 2340817.29 |
|     |        | 2008 | 8650662.040  | 6044233.066  | 2606428.97 |
|     |        | 2009 | 9030818.513  | 6158739.994  | 2872078.52 |
|     |        | 2010 | 9403026.327  | 6261498.262  | 3141528.06 |
|     |        | 2011 | 9767535.506  | 6353445.775  | 3414089.73 |
|     |        | 2012 | 10123044.281 | 6436121.753  | 3686922.53 |
|     |        | 2013 | 10470104.786 | 6509970.388  | 3960134.40 |
|     |        | 2014 | 10807756.112 | 6576280.566  | 4231475.55 |
|     |        | 2015 | 11130681.425 | 6635300.336  | 4495381.09 |
|     |        | 2016 | 11448966.506 | 6688781.298  | 4760185.21 |

**Results for PHIM for Run 8 (ELL Summary Sensitivity\_Analysis\_2.RTF)**

|        |        |      |              |             |            |
|--------|--------|------|--------------|-------------|------------|
|        |        | 2017 | 11758164.882 | 6737159.388 | 5021005.49 |
|        |        | 2018 | 12054448.241 | 6779371.086 | 5275077.16 |
|        |        | 2019 | 12341606.261 | 6817436.628 | 5524169.63 |
|        |        | 2020 | 12600728.939 | 6849934.811 | 5750794.13 |
|        |        | 2021 | 12861767.105 | 6880246.375 | 5981520.73 |
|        |        | 2022 | 13114168.616 | 6907892.745 | 6206275.87 |
|        |        | 2023 | 13357894.797 | 6932935.837 | 6424958.96 |
|        |        | 2024 | 13593848.521 | 6955872.202 | 6637976.32 |
|        |        | 2025 | 13789177.359 | 6974324.575 | 6814852.78 |
|        |        | 2026 | 13993401.656 | 6992403.129 | 7000998.53 |
|        |        | 2027 | 14190519.224 | 7009233.570 | 7181285.65 |
|        |        | 2028 | 14381193.356 | 7024771.103 | 7356422.25 |
|        |        | 2029 | 14565171.927 | 7039223.054 | 7525948.87 |
|        |        | 2030 | 14697381.605 | 7049541.718 | 7647839.89 |
|        |        | 2031 | 14842203.512 | 7060536.456 | 7781667.06 |
|        |        | 2032 | 14982485.826 | 7070852.282 | 7911633.54 |
|        |        | 2033 | 15118410.647 | 7080414.717 | 8037995.93 |
|        |        | 2034 | 15250284.398 | 7089466.392 | 8160818.01 |
|        |        | 2035 | 15322911.166 | 7094308.903 | 8228602.26 |
|        |        | 2036 | 15405115.031 | 7099635.867 | 8305479.16 |
|        |        | 2037 | 15484709.137 | 7104695.907 | 8380013.23 |
|        |        | 2038 | 15561812.193 | 7109489.557 | 8452322.64 |
|        |        | 2039 | 15635992.616 | 7114000.188 | 8521992.43 |
|        | Female | 1990 | 147299.110   | 147299.110  | 0.000      |
|        |        | 1991 | 295122.462   | 293760.360  | 1362.103   |
|        |        | 1992 | 439962.920   | 434848.854  | 5114.066   |
|        |        | 1993 | 584735.615   | 572566.987  | 12168.629  |
|        |        | 1994 | 727640.783   | 704550.820  | 23089.962  |
|        |        | 1995 | 868486.937   | 830079.953  | 38406.985  |
|        |        | 1996 | 1010321.847  | 950944.419  | 59377.429  |
|        |        | 1997 | 1144230.930  | 1060063.964 | 84166.965  |
|        |        | 1998 | 1274513.622  | 1160942.151 | 113571.470 |
|        |        | 1999 | 1426725.938  | 1272567.571 | 154158.367 |
|        |        | 2000 | 1573462.680  | 1374190.638 | 199272.041 |
|        |        | 2001 | 1719132.015  | 1467939.320 | 251192.695 |
|        |        | 2002 | 1863006.732  | 1553995.846 | 309010.886 |
|        |        | 2003 | 2002943.227  | 1631658.000 | 371285.228 |
|        |        | 2004 | 2137798.705  | 1700874.721 | 436923.984 |
|        |        | 2005 | 2271071.245  | 1764357.634 | 506713.611 |
|        |        | 2006 | 2400707.731  | 1820924.330 | 579783.401 |
|        |        | 2007 | 2523634.512  | 1870350.718 | 653283.795 |
|        |        | 2008 | 2648752.232  | 1916590.386 | 732161.846 |
|        |        | 2009 | 2765973.961  | 1956696.788 | 809277.173 |
|        |        | 2010 | 2881329.235  | 1993061.117 | 888268.118 |
|        |        | 2011 | 2994972.694  | 2025888.756 | 969083.938 |
|        |        | 2012 | 3108958.829  | 2055997.017 | 1052961.81 |
|        |        | 2013 | 3218140.416  | 2082741.283 | 1135399.13 |
|        |        | 2014 | 3328387.914  | 2107630.233 | 1220757.68 |
|        |        | 2015 | 3435342.796  | 2130383.530 | 1304959.27 |
|        |        | 2016 | 3539189.408  | 2150933.043 | 1388256.37 |
|        |        | 2017 | 3640041.363  | 2169510.255 | 1470531.11 |
|        |        | 2018 | 3732645.362  | 2185322.636 | 1547322.73 |
|        |        | 2019 | 3821421.978  | 2199450.104 | 1621971.87 |
|        |        | 2020 | 3902115.950  | 2211657.930 | 1690458.02 |
|        |        | 2021 | 3984301.053  | 2223215.772 | 1761085.28 |
|        |        | 2022 | 4062629.299  | 2233502.621 | 1829126.68 |
|        |        | 2023 | 4137348.729  | 2242687.360 | 1894661.37 |
|        |        | 2024 | 4208611.493  | 2250899.721 | 1957711.77 |
|        |        | 2025 | 4269419.492  | 2257742.709 | 2011676.78 |
|        |        | 2026 | 4330969.998  | 2264295.436 | 2066674.56 |
|        |        | 2027 | 4389134.306  | 2270177.655 | 2118956.65 |
|        |        | 2028 | 4444222.970  | 2275436.985 | 2168785.98 |
|        |        | 2029 | 4496447.877  | 2280223.012 | 2216224.86 |
|        |        | 2030 | 4536975.698  | 2283884.308 | 2253091.39 |
|        |        | 2031 | 4578338.586  | 2287461.879 | 2290876.71 |
|        |        | 2032 | 4617397.784  | 2290710.613 | 2326687.17 |
|        |        | 2033 | 4654407.697  | 2293653.557 | 2360754.14 |
|        |        | 2034 | 4689913.454  | 2296381.041 | 2393532.41 |
|        |        | 2035 | 4712518.190  | 2298068.072 | 2414450.12 |
|        |        | 2036 | 4735845.827  | 2299749.131 | 2436096.70 |
|        |        | 2037 | 4757958.806  | 2301302.525 | 2456656.28 |
|        |        | 2038 | 4778813.806  | 2302730.163 | 2476083.64 |
|        |        | 2039 | 4798769.065  | 2304086.242 | 2494682.82 |
|        | Males  | 1990 | 75005.854    | 75005.854   | 0.000      |
|        |        | 1991 | 149463.017   | 148929.896  | 533.122    |
|        |        | 1992 | 222966.278   | 220954.819  | 2011.459   |
|        |        | 1993 | 296801.879   | 291955.947  | 4845.931   |
|        |        | 1994 | 372453.706   | 362966.356  | 9487.349   |
| Stroke |        |      |              |             |            |

**Results for PHIM for Run 8 (ELL Summary Sensitivity\_Analysis\_2.RTF)**

|        |      |             |             |            |
|--------|------|-------------|-------------|------------|
|        | 1995 | 448401.338  | 432206.455  | 16194.883  |
|        | 1996 | 523536.301  | 498382.684  | 25153.617  |
|        | 1997 | 596763.211  | 560388.140  | 36375.071  |
|        | 1998 | 667546.681  | 617782.869  | 49763.813  |
|        | 1999 | 734925.407  | 669909.502  | 65015.905  |
|        | 2000 | 803749.361  | 720555.346  | 83194.015  |
|        | 2001 | 870081.588  | 766624.736  | 103456.852 |
|        | 2002 | 935347.140  | 809386.235  | 125960.905 |
|        | 2003 | 1001627.349 | 849970.412  | 151656.937 |
|        | 2004 | 1066587.976 | 887248.449  | 179339.526 |
|        | 2005 | 1130548.052 | 921483.679  | 209064.372 |
|        | 2006 | 1195132.454 | 953506.080  | 241626.374 |
|        | 2007 | 1258974.043 | 982850.198  | 276123.845 |
|        | 2008 | 1320124.867 | 1008737.692 | 311387.175 |
|        | 2009 | 1380776.123 | 1032470.189 | 348305.934 |
|        | 2010 | 1440048.533 | 1053950.701 | 386097.832 |
|        | 2011 | 1497484.847 | 1073209.934 | 424274.913 |
|        | 2012 | 1554496.526 | 1090725.306 | 463771.220 |
|        | 2013 | 1610819.598 | 1106665.085 | 504154.513 |
|        | 2014 | 1667484.890 | 1121362.039 | 546122.851 |
|        | 2015 | 1720948.287 | 1134303.142 | 586645.145 |
|        | 2016 | 1775699.228 | 1146416.234 | 629282.994 |
|        | 2017 | 1830250.175 | 1157536.301 | 672713.873 |
|        | 2018 | 1875958.950 | 1166194.438 | 709764.512 |
|        | 2019 | 1920359.232 | 1173973.161 | 746386.071 |
|        | 2020 | 1960605.297 | 1180581.558 | 780023.739 |
|        | 2021 | 1998912.887 | 1186411.053 | 812501.835 |
|        | 2022 | 2036003.696 | 1191655.622 | 844348.073 |
|        | 2023 | 2071857.536 | 1196359.441 | 875498.096 |
|        | 2024 | 2106636.468 | 1200630.636 | 906005.832 |
|        | 2025 | 2136450.873 | 1204101.216 | 932349.657 |
|        | 2026 | 2164796.470 | 1207180.983 | 957615.487 |
|        | 2027 | 2192079.608 | 1209993.665 | 982085.943 |
|        | 2028 | 2218404.367 | 1212551.177 | 1005853.19 |
|        | 2029 | 2243769.140 | 1214891.921 | 1028877.22 |
|        | 2030 | 2263570.213 | 1216642.849 | 1046927.36 |
|        | 2031 | 2282521.590 | 1218254.608 | 1064266.98 |
|        | 2032 | 2300804.945 | 1219735.386 | 1081069.56 |
|        | 2033 | 2318464.018 | 1221099.613 | 1097364.40 |
|        | 2034 | 2335611.973 | 1222377.832 | 1113234.14 |
|        | 2035 | 2347097.290 | 1223202.869 | 1123894.42 |
|        | 2036 | 2358248.747 | 1223977.737 | 1134271.01 |
|        | 2037 | 2369033.655 | 1224709.621 | 1144324.03 |
|        | 2038 | 2379490.114 | 1225401.177 | 1154088.94 |
|        | 2039 | 2389546.238 | 1226049.992 | 1163496.25 |
| Female | 1990 | 56348.092   | 56348.092   | 0.000      |
|        | 1991 | 110871.862  | 110500.281  | 371.581    |
|        | 1992 | 165654.454  | 164228.863  | 1425.592   |
|        | 1993 | 220008.519  | 216583.930  | 3424.589   |
|        | 1994 | 275706.807  | 268988.409  | 6718.398   |
|        | 1995 | 331417.547  | 319958.011  | 11459.536  |
|        | 1996 | 387580.161  | 369629.729  | 17950.432  |
|        | 1997 | 442778.242  | 416643.268  | 26134.974  |
|        | 1998 | 496117.305  | 460291.560  | 35825.744  |
|        | 1999 | 548268.214  | 501137.984  | 47130.230  |
|        | 2000 | 601693.202  | 541072.552  | 60620.650  |
|        | 2001 | 652221.103  | 576921.913  | 75299.189  |
|        | 2002 | 703022.600  | 610964.829  | 92057.771  |
|        | 2003 | 752023.351  | 641917.012  | 110106.339 |
|        | 2004 | 799826.733  | 670246.286  | 129580.446 |
|        | 2005 | 847563.928  | 696753.926  | 150810.002 |
|        | 2006 | 894205.027  | 720935.214  | 173269.813 |
|        | 2007 | 939571.282  | 742811.750  | 196759.532 |
|        | 2008 | 983437.578  | 762521.733  | 220915.845 |
|        | 2009 | 1025803.786 | 780231.908  | 245571.878 |
|        | 2010 | 1066964.934 | 796167.662  | 270797.272 |
|        | 2011 | 1106954.044 | 810471.948  | 296482.097 |
|        | 2012 | 1146108.461 | 823438.674  | 322669.786 |
|        | 2013 | 1183544.689 | 834928.705  | 348615.985 |
|        | 2014 | 1221220.945 | 845620.776  | 375600.170 |
|        | 2015 | 1258289.311 | 855487.731  | 402801.580 |
|        | 2016 | 1294830.207 | 864470.922  | 430359.285 |
|        | 2017 | 1330332.626 | 872568.567  | 457764.059 |
|        | 2018 | 1360571.987 | 878997.362  | 481574.625 |
|        | 2019 | 1389848.723 | 884756.459  | 505092.263 |
|        | 2020 | 1416046.192 | 889633.995  | 526412.198 |
|        | 2021 | 1440588.850 | 893869.663  | 546719.186 |
|        | 2022 | 1464157.934 | 897641.954  | 566515.980 |

**Results for PHIM for Run 8 (ELL Summary Sensitivity\_Analysis\_2.RTF)**

|      |             |             |             |             |            |
|------|-------------|-------------|-------------|-------------|------------|
|      |             | 2023        | 1486810.237 | 901018.442  | 585791.796 |
|      |             | 2024        | 1508591.729 | 904040.125  | 604551.605 |
|      |             | 2025        | 1526875.621 | 906483.066  | 620392.555 |
|      |             | 2026        | 1543659.810 | 908590.325  | 635069.484 |
|      |             | 2027        | 1559623.774 | 910480.596  | 649143.178 |
|      |             | 2028        | 1574852.850 | 912171.256  | 662681.594 |
|      |             | 2029        | 1589437.452 | 913703.879  | 675733.573 |
|      |             | 2030        | 1600568.199 | 914840.118  | 685728.081 |
|      |             | 2031        | 1610776.297 | 915831.773  | 694944.524 |
|      |             | 2032        | 1620483.563 | 916730.317  | 703753.246 |
|      |             | 2033        | 1629745.442 | 917543.233  | 712202.209 |
|      |             | 2034        | 1638721.425 | 918292.508  | 720428.918 |
|      |             | 2035        | 1644649.404 | 918769.110  | 725880.294 |
|      |             | 2036        | 1650181.590 | 919195.638  | 730985.952 |
|      |             | 2037        | 1655476.066 | 919591.564  | 735884.502 |
|      |             | 2038        | 1660507.914 | 919957.525  | 740550.388 |
|      |             | 2039        | 1665361.569 | 920306.284  | 745055.286 |
| COPD | Males       | 1990        | 117002.906  | 117002.906  | 0.000      |
|      |             | 1991        | 233438.833  | 233298.034  | 140.799    |
|      |             | 1992        | 348084.047  | 347556.028  | 528.019    |
|      |             | 1993        | 467278.318  | 465964.417  | 1313.901   |
|      |             | 1994        | 584216.907  | 581593.233  | 2623.674   |
|      |             | 1995        | 697391.457  | 692854.761  | 4536.696   |
|      |             | 1996        | 809471.271  | 802274.691  | 7196.580   |
|      |             | 1997        | 922587.668  | 911787.075  | 10800.593  |
|      |             | 1998        | 1034072.457 | 1018769.857 | 15302.599  |
|      |             | 1999        | 1153475.399 | 1132169.016 | 21306.383  |
|      |             | 2000        | 1268050.268 | 1239553.571 | 28496.697  |
|      |             | 2001        | 1382786.209 | 1345531.480 | 37254.730  |
|      |             | 2002        | 1497557.412 | 1449795.017 | 47762.395  |
|      |             | 2003        | 1614405.229 | 1554338.732 | 60066.497  |
|      |             | 2004        | 1726672.489 | 1652902.468 | 73770.021  |
|      |             | 2005        | 1847277.524 | 1756959.246 | 90318.278  |
|      |             | 2006        | 1961009.963 | 1852885.233 | 108124.731 |
|      |             | 2007        | 2079868.908 | 1950792.561 | 129076.347 |
|      |             | 2008        | 2206755.783 | 2052986.811 | 153768.972 |
|      |             | 2009        | 2331993.380 | 2151287.433 | 180705.948 |
|      |             | 2010        | 2455130.176 | 2245501.680 | 209628.496 |
|      |             | 2011        | 2582657.849 | 2340320.518 | 242337.331 |
|      |             | 2012        | 2709719.005 | 2431934.919 | 277784.086 |
|      |             | 2013        | 2840547.005 | 2523173.181 | 317373.825 |
|      |             | 2014        | 2971677.135 | 2611617.458 | 360059.677 |
|      |             | 2015        | 3104538.983 | 2699267.328 | 405271.655 |
|      |             | 2016        | 3237650.175 | 2783763.775 | 453886.400 |
|      |             | 2017        | 3370561.253 | 2865232.583 | 505328.670 |
|      |             | 2018        | 3503136.371 | 2942912.451 | 560223.920 |
|      |             | 2019        | 3636402.758 | 3017897.628 | 618505.130 |
|      |             | 2020        | 3768054.453 | 3089577.633 | 678476.820 |
|      |             | 2021        | 3897675.067 | 3157051.654 | 740623.412 |
|      |             | 2022        | 4027307.132 | 3221399.851 | 805907.281 |
|      |             | 2023        | 4156698.720 | 3282544.345 | 874154.375 |
|      |             | 2024        | 4285772.226 | 3340546.704 | 945225.521 |
|      |             | 2025        | 4410759.298 | 3394715.259 | 1016044.04 |
|      |             | 2026        | 4531411.064 | 3443937.584 | 1087473.48 |
|      |             | 2027        | 4651145.233 | 3490081.725 | 1161063.51 |
|      |             | 2028        | 4769837.872 | 3533174.260 | 1236663.61 |
|      |             | 2029        | 4887747.179 | 3573463.616 | 1314283.56 |
| 2030 | 4997632.895 | 3609709.071 | 1387923.82  |             |            |
| 2031 | 5103301.991 | 3641776.669 | 1461525.32  |             |            |
| 2032 | 5207593.613 | 3671421.094 | 1536172.52  |             |            |
| 2033 | 5310556.138 | 3698665.031 | 1611891.11  |             |            |
| 2034 | 5412542.816 | 3723825.675 | 1688717.14  |             |            |
| 2035 | 5500522.473 | 3744858.334 | 1755664.14  |             |            |
| 2036 | 5588149.640 | 3764044.520 | 1824105.12  |             |            |
| 2037 | 5674667.886 | 3781673.066 | 1892994.82  |             |            |
| 2038 | 5760391.289 | 3797904.145 | 1962487.14  |             |            |
| 2039 | 5845459.234 | 3812970.015 | 2032489.22  |             |            |
|      | Female      | 1990        | 77434.846   | 77434.846   | 0.000      |
|      |             | 1991        | 160029.510  | 159918.449  | 111.061    |
|      |             | 1992        | 240642.531  | 240217.626  | 424.905    |
|      |             | 1993        | 329362.093  | 328255.214  | 1106.879   |
|      |             | 1994        | 418569.515  | 416317.873  | 2251.642   |
|      |             | 1995        | 509110.357  | 505079.163  | 4031.195   |
|      |             | 1996        | 600040.117  | 593553.071  | 6487.046   |
|      |             | 1997        | 691159.071  | 681419.611  | 9739.459   |
|      |             | 1998        | 782866.899  | 769007.899  | 13858.999  |
|      |             | 1999        | 881526.925  | 862137.102  | 19389.823  |
|      |             | 2000        | 977880.647  | 952020.924  | 25859.723  |

**Results for PHIM for Run 8 (ELL Summary Sensitivity\_Analysis\_2.RTF)**

|      |             |             |            |
|------|-------------|-------------|------------|
| 2001 | 1076787.404 | 1042986.582 | 33800.821  |
| 2002 | 1174842.754 | 1131753.972 | 43088.781  |
| 2003 | 1275102.681 | 1221141.441 | 53961.240  |
| 2004 | 1371026.306 | 1305214.223 | 65812.082  |
| 2005 | 1473954.509 | 1393575.865 | 80378.644  |
| 2006 | 1574450.828 | 1478090.648 | 96360.180  |
| 2007 | 1673790.211 | 1559807.422 | 113982.790 |
| 2008 | 1782360.738 | 1647097.372 | 135263.365 |
| 2009 | 1892944.209 | 1733556.899 | 159387.310 |
| 2010 | 2002131.282 | 1816828.610 | 185302.673 |
| 2011 | 2114522.152 | 1899987.470 | 214534.682 |
| 2012 | 2228079.372 | 1981620.935 | 246458.436 |
| 2013 | 2345377.689 | 2063237.385 | 282140.304 |
| 2014 | 2462498.422 | 2142023.758 | 320474.664 |
| 2015 | 2581450.312 | 2220214.506 | 361235.805 |
| 2016 | 2701959.301 | 2296555.071 | 405404.230 |
| 2017 | 2823834.967 | 2370904.527 | 452930.441 |
| 2018 | 2938265.081 | 2438698.113 | 499566.967 |
| 2019 | 3053254.880 | 2504185.498 | 549069.382 |
| 2020 | 3167073.216 | 2566985.683 | 600087.533 |
| 2021 | 3279517.699 | 2626992.684 | 652525.015 |
| 2022 | 3392060.964 | 2684436.986 | 707623.978 |
| 2023 | 3504296.171 | 2739184.372 | 765111.799 |
| 2024 | 3616019.231 | 2791136.698 | 824882.533 |
| 2025 | 3724611.269 | 2839899.698 | 884711.571 |
| 2026 | 3827181.707 | 2884324.012 | 942857.695 |
| 2027 | 3928684.441 | 2925993.016 | 1002691.43 |
| 2028 | 4029124.892 | 2965079.946 | 1064044.95 |
| 2029 | 4128269.068 | 3001532.932 | 1126736.14 |
| 2030 | 4221560.174 | 3034683.714 | 1186876.46 |
| 2031 | 4304170.584 | 3062488.415 | 1241682.17 |
| 2032 | 4384930.537 | 3087980.522 | 1296950.02 |
| 2033 | 4464357.691 | 3111431.200 | 1352926.49 |
| 2034 | 4542251.545 | 3132876.284 | 1409375.26 |
| 2035 | 4611066.648 | 3151283.339 | 1459783.31 |
| 2036 | 4670309.230 | 3165996.959 | 1504312.27 |
| 2037 | 4728179.514 | 3179414.720 | 1548764.79 |
| 2038 | 4785008.048 | 3191634.313 | 1593373.74 |
| 2039 | 4841291.793 | 3202825.775 | 1638466.02 |

---



## Results for PHIM for Run 8 (ELL Summary Sensitivity\_Analysis\_2.RTF)

\*\*\*\*\*

**Table 4: Estimated Loss of Life, All age groups combined, Population and Number deaths adjusted for Ecig scenario, cumulative over years**

| Disease      | Sex          | Year         | Years of life lost<br>NULL | Years of life lost<br>Ecig | Years of life<br>Saved |
|--------------|--------------|--------------|----------------------------|----------------------------|------------------------|
| All Diseases | Males        | 1990         | 1304839.645                | 1304839.645                | 0.000                  |
|              |              | 1991         | 2579865.358                | 2573361.406                | 6503.951               |
|              |              | 1992         | 3830683.831                | 3806251.804                | 24432.027              |
|              |              | 1993         | 5076567.803                | 5018882.422                | 57685.381              |
|              |              | 1994         | 6292145.526                | 6182914.397                | 109231.129             |
|              |              | 1995         | 7485537.010                | 7303414.119                | 182122.890             |
|              |              | 1996         | 8655955.028                | 8378273.934                | 277681.094             |
|              |              | 1997         | 9791729.713                | 9396655.538                | 395074.174             |
|              |              | 1998         | 10899134.186               | 10365534.052               | 533600.133             |
|              |              | 1999         | 12070409.674               | 11349733.336               | 720676.338             |
|              |              | 2000         | 13231384.595               | 12297336.410               | 934048.185             |
|              |              | 2001         | 14371761.018               | 13197544.547               | 1174216.47             |
|              |              | 2002         | 15508906.386               | 14063452.357               | 1445454.03             |
|              |              | 2003         | 16638100.422               | 14893939.035               | 1744161.39             |
|              |              | 2004         | 17736465.088               | 15676631.765               | 2059833.32             |
|              |              | 2005         | 18834658.606               | 16434695.566               | 2399963.04             |
|              |              | 2006         | 19909100.501               | 17145973.838               | 2763126.66             |
|              |              | 2007         | 20958321.463               | 17817703.754               | 3140617.71             |
|              |              | 2008         | 22000068.148               | 18464435.186               | 3535632.96             |
|              |              | 2009         | 23018816.903               | 19076933.719               | 3941883.18             |
|              |              | 2010         | 24018480.537               | 19656998.765               | 4361481.77             |
|              |              | 2011         | 25003034.574               | 20208162.747               | 4794871.83             |
|              |              | 2012         | 25969871.429               | 20729418.301               | 5240453.13             |
|              |              | 2013         | 26920275.180               | 21222234.971               | 5698040.21             |
|              |              | 2014         | 27849005.227               | 21685105.027               | 6163900.20             |
|              |              | 2015         | 28749620.400               | 22121492.490               | 6628127.91             |
|              |              | 2016         | 29622417.562               | 22522168.483               | 7100249.08             |
|              |              | 2017         | 30462559.724               | 22889900.742               | 7572658.98             |
|              |              | 2018         | 31293299.299               | 23243091.799               | 8050207.50             |
|              |              | 2019         | 32109993.427               | 23577091.260               | 8532902.17             |
|              |              | 2020         | 32883323.977               | 23887957.604               | 8995366.37             |
|              |              | 2021         | 33610102.554               | 24157916.462               | 9452186.09             |
|              |              | 2022         | 34322010.448               | 24411214.421               | 9910796.03             |
|              |              | 2023         | 35018383.550               | 24647942.098               | 10370441.5             |
|              |              | 2024         | 35700177.955               | 24869346.878               | 10830831.1             |
|              |              | 2025         | 36315500.346               | 25069237.069               | 11246263.3             |
|              |              | 2026         | 36896159.343               | 25238920.382               | 11657239.0             |
|              |              | 2027         | 37462570.116               | 25396662.911               | 12065907.2             |
|              |              | 2028         | 38015337.780               | 25542587.919               | 12472749.9             |
|              |              | 2029         | 38554814.764               | 25677979.204               | 12876835.6             |
|              |              | 2030         | 39003805.400               | 25793792.315               | 13210013.1             |
|              |              | 2031         | 39436509.703               | 25892168.055               | 13544341.6             |
| 2032         | 39858470.458 | 25983082.177 | 13875388.3                 |                            |                        |
| 2033         | 40270147.082 | 26066544.420 | 14203602.7                 |                            |                        |
| 2034         | 40672665.743 | 26143788.778 | 14528877.0                 |                            |                        |
| 2035         | 40962732.664 | 26202665.160 | 14760067.5                 |                            |                        |
| 2036         | 41255021.653 | 26255579.721 | 14999441.9                 |                            |                        |
| 2037         | 41540573.023 | 26304515.143 | 15236057.9                 |                            |                        |
| 2038         | 41820158.066 | 26349794.900 | 15470363.2                 |                            |                        |
| 2039         | 42093547.949 | 26391959.848 | 15701588.1                 |                            |                        |
|              | Female       | 1990         | 588979.406                 | 588979.406                 | 0.000                  |
|              |              | 1991         | 1182571.252                | 1180438.918                | 2132.335               |
|              |              | 1992         | 1777346.679                | 1769242.457                | 8104.222               |
|              |              | 1993         | 2380261.899                | 2360743.969                | 19517.930              |
|              |              | 1994         | 2983130.039                | 2945481.878                | 37648.161              |
|              |              | 1995         | 3588982.584                | 3525256.992                | 63725.591              |
|              |              | 1996         | 4195430.235                | 4095851.794                | 99578.441              |
|              |              | 1997         | 4793866.694                | 4650075.209                | 143791.485             |
|              |              | 1998         | 5389747.381                | 5192424.387                | 197322.994             |
|              |              | 1999         | 6006722.467                | 5739293.298                | 267429.169             |
|              |              | 2000         | 6625758.871                | 6277384.574                | 348374.297             |
|              |              | 2001         | 7245135.411                | 6802813.439                | 442321.972             |
|              |              | 2002         | 7867492.021                | 7317792.076                | 549699.945             |
|              |              | 2003         | 8485051.793                | 7816878.579                | 668173.214             |
|              |              | 2004         | 9092994.774                | 8296025.058                | 796969.716             |
|              |              | 2005         | 9706032.803                | 8766919.732                | 939113.071             |
|              |              | 2006         | 10311907.548               | 9219274.740                | 1092632.81             |
|              |              | 2007         | 10909437.502               | 9654595.153                | 1254842.35             |
|              |              | 2008         | 11506462.491               | 10075709.580               | 1430752.91             |
|              |              | 2009         | 12098393.287               | 10483492.122               | 1614901.16             |
|              |              | 2010         | 12681188.981               | 10872976.488               | 1808212.49             |

**Results for PHIM for Run 8 (ELL Summary Sensitivity\_Analysis\_2.RTF)**

|             |       |      |              |              |            |
|-------------|-------|------|--------------|--------------|------------|
|             |       | 2011 | 13260062.991 | 11247388.693 | 2012674.30 |
|             |       | 2012 | 13839417.441 | 11609410.152 | 2230007.29 |
|             |       | 2013 | 14409614.758 | 11955240.892 | 2454373.87 |
|             |       | 2014 | 14976658.746 | 12285899.130 | 2690759.62 |
|             |       | 2015 | 15529977.821 | 12599196.314 | 2930781.51 |
|             |       | 2016 | 16066640.764 | 12890777.929 | 3175862.84 |
|             |       | 2017 | 16590035.078 | 13164467.717 | 3425567.36 |
|             |       | 2018 | 17098716.137 | 13423797.171 | 3674918.97 |
|             |       | 2019 | 17599868.850 | 13669761.126 | 3930107.72 |
|             |       | 2020 | 18081346.241 | 13900597.125 | 4180749.12 |
|             |       | 2021 | 18537594.460 | 14108881.240 | 4428713.22 |
|             |       | 2022 | 18985300.234 | 14304883.743 | 4680416.49 |
|             |       | 2023 | 19423958.747 | 14488817.349 | 4935141.40 |
|             |       | 2024 | 19853347.772 | 14660789.562 | 5192558.21 |
|             |       | 2025 | 20252822.245 | 14818093.598 | 5434728.65 |
|             |       | 2026 | 20619307.063 | 14954280.582 | 5665026.48 |
|             |       | 2027 | 20976063.406 | 15080440.163 | 5895623.24 |
|             |       | 2028 | 21323641.947 | 15197331.333 | 6126310.61 |
|             |       | 2029 | 21662117.106 | 15305278.030 | 6356839.08 |
|             |       | 2030 | 21960971.694 | 15400072.141 | 6560899.55 |
|             |       | 2031 | 22224951.983 | 15477179.303 | 6747772.68 |
|             |       | 2032 | 22480397.853 | 15547599.208 | 6932798.65 |
|             |       | 2033 | 22728639.455 | 15612008.451 | 7116631.00 |
|             |       | 2034 | 22970448.888 | 15670842.380 | 7299606.51 |
|             |       | 2035 | 23164154.188 | 15718496.897 | 7445657.29 |
|             |       | 2036 | 23334538.616 | 15756458.589 | 7578080.03 |
|             |       | 2037 | 23499760.723 | 15791201.216 | 7708559.51 |
|             |       | 2038 | 23660308.401 | 15822895.512 | 7837412.89 |
|             |       | 2039 | 23817891.273 | 15852101.603 | 7965789.67 |
| Lung cancer | Males | 1990 | 595621.791   | 595621.791   | 0.000      |
|             |       | 1991 | 1177744.113  | 1177279.340  | 464.773    |
|             |       | 1992 | 1750034.892  | 1748259.584  | 1775.308   |
|             |       | 1993 | 2319752.308  | 2315389.683  | 4362.625   |
|             |       | 1994 | 2872597.339  | 2864071.970  | 8525.369   |
|             |       | 1995 | 3411494.825  | 3396882.079  | 14612.746  |
|             |       | 1996 | 3945569.726  | 3922264.489  | 23305.236  |
|             |       | 1997 | 4463316.362  | 4428735.661  | 34580.701  |
|             |       | 1998 | 4975301.180  | 4926300.562  | 49000.619  |
|             |       | 1999 | 5473691.125  | 5406873.863  | 66817.262  |
|             |       | 2000 | 5977500.570  | 5888281.849  | 89218.721  |
|             |       | 2001 | 6474795.516  | 6358525.549  | 116269.967 |
|             |       | 2002 | 6968769.705  | 6820229.897  | 148539.808 |
|             |       | 2003 | 7460282.140  | 7273508.823  | 186773.317 |
|             |       | 2004 | 7947048.275  | 7716178.532  | 230869.744 |
|             |       | 2005 | 8430571.669  | 8149376.477  | 281195.191 |
|             |       | 2006 | 8903945.390  | 8566129.199  | 337816.191 |
|             |       | 2007 | 9364177.982  | 8964086.013  | 400091.969 |
|             |       | 2008 | 9822525.458  | 9352123.138  | 470402.321 |
|             |       | 2009 | 10275228.886 | 9727183.680  | 548045.206 |
|             |       | 2010 | 10720275.500 | 10087864.441 | 632411.059 |
|             |       | 2011 | 11155356.373 | 10432021.594 | 723334.779 |
|             |       | 2012 | 11582611.617 | 10760459.534 | 822152.082 |
|             |       | 2013 | 11998803.791 | 11071194.978 | 927608.813 |
|             |       | 2014 | 12402087.090 | 11363530.797 | 1038556.29 |
|             |       | 2015 | 12793451.706 | 11639175.416 | 1154276.29 |
|             |       | 2016 | 13160101.653 | 11888605.194 | 1271496.46 |
|             |       | 2017 | 13503583.414 | 12114190.525 | 1389392.89 |
|             |       | 2018 | 13859755.737 | 12337678.643 | 1522077.09 |
|             |       | 2019 | 14211625.176 | 12549682.434 | 1661942.74 |
|             |       | 2020 | 14553935.288 | 12748587.804 | 1805347.48 |
|             |       | 2021 | 14851747.495 | 12913767.036 | 1937980.46 |
|             |       | 2022 | 15144531.004 | 13068663.665 | 2075867.34 |
|             |       | 2023 | 15431932.496 | 13213346.422 | 2218586.07 |
|             |       | 2024 | 15713920.740 | 13348394.739 | 2365526.00 |
|             |       | 2025 | 15979112.816 | 13471068.515 | 2508044.30 |
|             |       | 2026 | 16206550.153 | 13569290.363 | 2637259.79 |
|             |       | 2027 | 16428826.050 | 13660184.285 | 2768641.77 |
|             |       | 2028 | 16645902.186 | 13743885.350 | 2902016.84 |
|             |       | 2029 | 16858126.517 | 13821184.594 | 3036941.92 |
|             |       | 2030 | 17045220.687 | 13887737.967 | 3157482.72 |
|             |       | 2031 | 17208482.610 | 13940545.751 | 3267936.86 |
|             |       | 2032 | 17367586.074 | 13989160.117 | 3378425.96 |
|             |       | 2033 | 17522716.280 | 14033633.708 | 3489082.57 |
|             |       | 2034 | 17674226.555 | 14074602.690 | 3599623.87 |
|             |       | 2035 | 17792201.734 | 14106118.802 | 3686082.93 |
|             |       | 2036 | 17903508.236 | 14133112.787 | 3770395.45 |
|             |       | 2037 | 18012162.345 | 14158025.692 | 3854136.65 |
|             |       | 2038 | 18118464.470 | 14181016.468 | 3937448.00 |

**Results for PHIM for Run 8 (ELL Summary Sensitivity\_Analysis\_2.RTF)**

|     |        |      |              |              |            |
|-----|--------|------|--------------|--------------|------------|
|     |        | 2039 | 18222549.860 | 14202411.503 | 4020138.36 |
|     | Female | 1990 | 307897.357   | 307897.357   | 0.000      |
|     |        | 1991 | 616547.418   | 616259.828   | 287.590    |
|     |        | 1992 | 931086.773   | 929946.522   | 1140.252   |
|     |        | 1993 | 1246155.671  | 1243334.956  | 2820.715   |
|     |        | 1994 | 1561212.934  | 1555616.372  | 5596.562   |
|     |        | 1995 | 1879967.742  | 1870120.955  | 9846.787   |
|     |        | 1996 | 2197488.109  | 2181688.078  | 15800.031  |
|     |        | 1997 | 2515698.453  | 2491885.681  | 23812.772  |
|     |        | 1998 | 2836249.556  | 2802083.470  | 34166.086  |
|     |        | 1999 | 3150201.390  | 3103297.179  | 46904.210  |
|     |        | 2000 | 3472722.342  | 3409877.322  | 62845.020  |
|     |        | 2001 | 3796994.889  | 3714655.657  | 82339.232  |
|     |        | 2002 | 4126619.935  | 4020663.615  | 105956.320 |
|     |        | 2003 | 4454982.533  | 4321625.371  | 133357.162 |
|     |        | 2004 | 4784343.030  | 4619015.564  | 165327.466 |
|     |        | 2005 | 5113443.121  | 4911396.790  | 202046.331 |
|     |        | 2006 | 5442543.963  | 5198312.811  | 244231.151 |
|     |        | 2007 | 5772441.497  | 5480422.619  | 292018.877 |
|     |        | 2008 | 6091911.943  | 5748075.749  | 343836.194 |
|     |        | 2009 | 6413671.330  | 6011343.056  | 402328.274 |
|     |        | 2010 | 6730763.530  | 6265000.746  | 465762.784 |
|     |        | 2011 | 7043614.101  | 6508846.218  | 534767.883 |
|     |        | 2012 | 7356270.780  | 6745863.856  | 610406.924 |
|     |        | 2013 | 7662551.964  | 6971526.327  | 691025.636 |
|     |        | 2014 | 7964551.465  | 7187481.983  | 777069.482 |
|     |        | 2015 | 8254895.403  | 7389604.612  | 865290.791 |
|     |        | 2016 | 8530661.848  | 7574929.361  | 955732.486 |
|     |        | 2017 | 8795826.122  | 7747190.782  | 1048635.34 |
|     |        | 2018 | 9067233.707  | 7916087.021  | 1151146.69 |
|     |        | 2019 | 9335343.270  | 8076264.962  | 1259078.31 |
|     |        | 2020 | 9596110.883  | 8226790.878  | 1369320.00 |
|     |        | 2021 | 9833186.859  | 8358834.260  | 1474352.60 |
|     |        | 2022 | 10066452.037 | 8482884.428  | 1583567.61 |
|     |        | 2023 | 10295503.609 | 8599053.705  | 1696449.90 |
|     |        | 2024 | 10520125.318 | 8707379.660  | 1812745.66 |
|     |        | 2025 | 10731915.863 | 8806172.391  | 1925743.47 |
|     |        | 2026 | 10917495.549 | 8888818.160  | 2028677.39 |
|     |        | 2027 | 11098620.885 | 8965082.150  | 2133538.74 |
|     |        | 2028 | 11275441.234 | 9035485.950  | 2239955.28 |
|     |        | 2029 | 11447962.710 | 9100216.524  | 2347746.19 |
|     |        | 2030 | 11601867.623 | 9156629.815  | 2445237.81 |
|     |        | 2031 | 11731666.516 | 9200972.124  | 2530694.39 |
|     |        | 2032 | 11857585.969 | 9241377.789  | 2616208.18 |
|     |        | 2033 | 11980128.625 | 9278219.956  | 2701908.67 |
|     |        | 2034 | 12099562.464 | 9311787.906  | 2787774.56 |
|     |        | 2035 | 12195919.946 | 9338556.286  | 2857363.66 |
|     |        | 2036 | 12278201.969 | 9359431.410  | 2918770.56 |
|     |        | 2037 | 12358146.336 | 9378557.970  | 2979588.37 |
|     |        | 2038 | 12435978.633 | 9396006.427  | 3039972.21 |
|     |        | 2039 | 12512468.845 | 9412098.175  | 3100370.67 |
| IHD | Males  | 1990 | 517209.093   | 517209.093   | 0.000      |
|     |        | 1991 | 1019219.395  | 1013854.137  | 5365.258   |
|     |        | 1992 | 1509598.614  | 1489480.171  | 20118.443  |
|     |        | 1993 | 1992735.299  | 1945566.721  | 47168.578  |
|     |        | 1994 | 2462877.575  | 2374266.723  | 88610.852  |
|     |        | 1995 | 2928249.390  | 2781435.466  | 146813.924 |
|     |        | 1996 | 3377377.730  | 3155285.077  | 222092.653 |
|     |        | 1997 | 3809062.472  | 3495630.201  | 313432.271 |
|     |        | 1998 | 4222213.867  | 3802500.728  | 419713.139 |
|     |        | 1999 | 4708317.743  | 4140510.022  | 567807.722 |
|     |        | 2000 | 5182084.396  | 4448557.163  | 733527.234 |
|     |        | 2001 | 5644097.705  | 4726327.036  | 917770.669 |
|     |        | 2002 | 6107232.129  | 4983324.995  | 1123907.13 |
|     |        | 2003 | 6561785.704  | 5215183.854  | 1346601.85 |
|     |        | 2004 | 6996156.348  | 5419114.149  | 1577042.20 |
|     |        | 2005 | 7426261.361  | 5605382.822  | 1820878.54 |
|     |        | 2006 | 7849012.694  | 5771629.613  | 2077383.08 |
|     |        | 2007 | 8255300.530  | 5917770.453  | 2337530.08 |
|     |        | 2008 | 8650662.040  | 6047941.498  | 2602720.54 |
|     |        | 2009 | 9030818.513  | 6162868.673  | 2867949.84 |
|     |        | 2010 | 9403026.327  | 6266047.490  | 3136978.84 |
|     |        | 2011 | 9767535.506  | 6358412.897  | 3409122.61 |
|     |        | 2012 | 10123044.281 | 6441503.824  | 3681540.46 |
|     |        | 2013 | 10470104.786 | 6515758.694  | 3954346.09 |
|     |        | 2014 | 10807756.112 | 6582467.303  | 4225288.81 |
|     |        | 2015 | 11130681.425 | 6641878.452  | 4488802.97 |
|     |        | 2016 | 11448966.506 | 6695741.720  | 4753224.79 |

**Results for PHIM for Run 8 (ELL Summary Sensitivity\_Analysis\_2.RTF)**

|        |        |      |              |             |            |
|--------|--------|------|--------------|-------------|------------|
|        |        | 2017 | 11758164.882 | 6744491.862 | 5013673.02 |
|        |        | 2018 | 12054448.241 | 6787039.208 | 5267409.03 |
|        |        | 2019 | 12341606.261 | 6825426.653 | 5516179.61 |
|        |        | 2020 | 12600728.939 | 6858231.117 | 5742497.82 |
|        |        | 2021 | 12861767.105 | 6888836.543 | 5972930.56 |
|        |        | 2022 | 13114168.616 | 6916763.710 | 6197404.91 |
|        |        | 2023 | 13357894.797 | 6942073.026 | 6415821.77 |
|        |        | 2024 | 13593848.521 | 6965264.786 | 6628583.74 |
|        |        | 2025 | 13789177.359 | 6983953.089 | 6805224.27 |
|        |        | 2026 | 13993401.656 | 7002262.808 | 6991138.85 |
|        |        | 2027 | 14190519.224 | 7019317.066 | 7171202.16 |
|        |        | 2028 | 14381193.356 | 7035069.452 | 7346123.90 |
|        |        | 2029 | 14565171.927 | 7049727.325 | 7515444.60 |
|        |        | 2030 | 14697381.605 | 7060219.174 | 7637162.43 |
|        |        | 2031 | 14842203.512 | 7071398.455 | 7770805.06 |
|        |        | 2032 | 14982485.826 | 7081892.264 | 7900593.56 |
|        |        | 2033 | 15118410.647 | 7091624.554 | 8026786.09 |
|        |        | 2034 | 15250284.398 | 7100841.276 | 8149443.12 |
|        |        | 2035 | 15322911.166 | 7105790.286 | 8217120.88 |
|        |        | 2036 | 15405115.031 | 7111234.629 | 8293880.40 |
|        |        | 2037 | 15484709.137 | 7116409.568 | 8368299.57 |
|        |        | 2038 | 15561812.193 | 7121315.332 | 8440496.86 |
|        |        | 2039 | 15635992.616 | 7125934.212 | 8510058.40 |
|        | Female | 1990 | 147299.110   | 147299.110  | 0.000      |
|        |        | 1991 | 295122.462   | 293760.360  | 1362.103   |
|        |        | 1992 | 439962.920   | 434849.164  | 5113.756   |
|        |        | 1993 | 584735.615   | 572568.442  | 12167.174  |
|        |        | 1994 | 727640.783   | 704554.980  | 23085.803  |
|        |        | 1995 | 868486.937   | 830089.146  | 38397.791  |
|        |        | 1996 | 1010321.847  | 950961.891  | 59359.956  |
|        |        | 1997 | 1144230.930  | 1060093.279 | 84137.651  |
|        |        | 1998 | 1274513.622  | 1160987.434 | 113526.188 |
|        |        | 1999 | 1426725.938  | 1272637.485 | 154088.453 |
|        |        | 2000 | 1573462.680  | 1374291.175 | 199171.505 |
|        |        | 2001 | 1719132.015  | 1468076.340 | 251055.675 |
|        |        | 2002 | 1863006.732  | 1554175.025 | 308831.707 |
|        |        | 2003 | 2002943.227  | 1631884.140 | 371059.088 |
|        |        | 2004 | 2137798.705  | 1701151.625 | 436647.080 |
|        |        | 2005 | 2271071.245  | 1764690.078 | 506381.167 |
|        |        | 2006 | 2400707.731  | 1821314.634 | 579393.097 |
|        |        | 2007 | 2523634.512  | 1870799.815 | 652834.697 |
|        |        | 2008 | 2648752.232  | 1917102.355 | 731649.877 |
|        |        | 2009 | 2765973.961  | 1957271.137 | 808702.824 |
|        |        | 2010 | 2881329.235  | 1993699.277 | 887629.958 |
|        |        | 2011 | 2994972.694  | 2026591.535 | 968381.159 |
|        |        | 2012 | 3108958.829  | 2056765.297 | 1052193.53 |
|        |        | 2013 | 3218140.416  | 2083574.426 | 1134565.99 |
|        |        | 2014 | 3328387.914  | 2108529.753 | 1219858.16 |
|        |        | 2015 | 3435342.796  | 2131350.971 | 1303991.82 |
|        |        | 2016 | 3539189.408  | 2151968.142 | 1387221.27 |
|        |        | 2017 | 3640041.363  | 2170612.228 | 1469429.13 |
|        |        | 2018 | 3732645.362  | 2186486.145 | 1546159.22 |
|        |        | 2019 | 3821421.978  | 2200673.068 | 1620748.91 |
|        |        | 2020 | 3902115.950  | 2212937.966 | 1689177.98 |
|        |        | 2021 | 3984301.053  | 2224553.560 | 1759747.49 |
|        |        | 2022 | 4062629.299  | 2234895.252 | 1827734.05 |
|        |        | 2023 | 4137348.729  | 2244132.287 | 1893216.44 |
|        |        | 2024 | 4208611.493  | 2252394.255 | 1956217.24 |
|        |        | 2025 | 4269419.492  | 2259283.914 | 2010135.58 |
|        |        | 2026 | 4330969.998  | 2265883.540 | 2065086.46 |
|        |        | 2027 | 4389134.306  | 2271809.867 | 2117324.44 |
|        |        | 2028 | 4444222.970  | 2277110.477 | 2167112.49 |
|        |        | 2029 | 4496447.877  | 2281935.638 | 2214512.24 |
|        |        | 2030 | 4536975.698  | 2285631.799 | 2251343.90 |
|        |        | 2031 | 4578338.586  | 2289244.323 | 2289094.26 |
|        |        | 2032 | 4617397.784  | 2292525.572 | 2324872.21 |
|        |        | 2033 | 4654407.697  | 2295498.763 | 2358908.93 |
|        |        | 2034 | 4689913.454  | 2298254.774 | 2391658.68 |
|        |        | 2035 | 4712518.190  | 2299963.899 | 2412554.29 |
|        |        | 2036 | 4735845.827  | 2301667.323 | 2434178.50 |
|        |        | 2037 | 4757958.806  | 2303241.814 | 2454716.99 |
|        |        | 2038 | 4778813.806  | 2304689.100 | 2474124.71 |
|        |        | 2039 | 4798769.065  | 2306064.012 | 2492705.05 |
| Stroke | Males  | 1990 | 75005.854    | 75005.854   | 0.000      |
|        |        | 1991 | 149463.017   | 148929.896  | 533.122    |
|        |        | 1992 | 222966.278   | 220955.266  | 2011.012   |
|        |        | 1993 | 296801.879   | 291958.028  | 4843.850   |
|        |        | 1994 | 372453.706   | 362972.317  | 9481.389   |

**Results for PHIM for Run 8 (ELL Summary Sensitivity\_Analysis\_2.RTF)**

|        |      |             |             |            |
|--------|------|-------------|-------------|------------|
|        | 1995 | 448401.338  | 432219.567  | 16181.771  |
|        | 1996 | 523536.301  | 498407.259  | 25129.042  |
|        | 1997 | 596763.211  | 560429.110  | 36334.101  |
|        | 1998 | 667546.681  | 617845.499  | 49701.182  |
|        | 1999 | 734925.407  | 669998.788  | 64926.619  |
|        | 2000 | 803749.361  | 720679.790  | 83069.571  |
|        | 2001 | 870081.588  | 766790.315  | 103291.273 |
|        | 2002 | 935347.140  | 809600.261  | 125746.879 |
|        | 2003 | 1001627.349 | 850240.113  | 151387.236 |
|        | 2004 | 1066587.976 | 887580.201  | 179007.775 |
|        | 2005 | 1130548.052 | 921883.084  | 208664.968 |
|        | 2006 | 1195132.454 | 953979.216  | 241153.238 |
|        | 2007 | 1258974.043 | 983401.154  | 275572.890 |
|        | 2008 | 1320124.867 | 1009366.651 | 310758.216 |
|        | 2009 | 1380776.123 | 1033180.010 | 347596.114 |
|        | 2010 | 1440048.533 | 1054742.612 | 385305.921 |
|        | 2011 | 1497484.847 | 1074084.545 | 423400.302 |
|        | 2012 | 1554496.526 | 1091682.025 | 462814.501 |
|        | 2013 | 1610819.598 | 1107704.370 | 503115.228 |
|        | 2014 | 1667484.890 | 1122483.544 | 545001.346 |
|        | 2015 | 1720948.287 | 1135506.018 | 585442.268 |
|        | 2016 | 1775699.228 | 1147700.563 | 627998.665 |
|        | 2017 | 1830250.175 | 1158901.079 | 671349.096 |
|        | 2018 | 1875958.950 | 1167627.752 | 708331.198 |
|        | 2019 | 1920359.232 | 1175471.953 | 744887.279 |
|        | 2020 | 1960605.297 | 1182142.532 | 778462.765 |
|        | 2021 | 1998912.887 | 1188029.958 | 810882.930 |
|        | 2022 | 2036003.696 | 1193329.338 | 842674.357 |
|        | 2023 | 2071857.536 | 1198084.713 | 873772.823 |
|        | 2024 | 2106636.468 | 1202404.962 | 904231.506 |
|        | 2025 | 2136450.873 | 1205920.781 | 930530.093 |
|        | 2026 | 2164796.470 | 1209042.025 | 955754.445 |
|        | 2027 | 2192079.608 | 1211894.137 | 980185.471 |
|        | 2028 | 2218404.367 | 1214488.893 | 1003915.47 |
|        | 2029 | 2243769.140 | 1216864.753 | 1026904.39 |
|        | 2030 | 2263570.213 | 1218645.796 | 1044924.42 |
|        | 2031 | 2282521.590 | 1220286.027 | 1062235.56 |
|        | 2032 | 2300804.945 | 1221793.658 | 1079011.29 |
|        | 2033 | 2318464.018 | 1223183.307 | 1095280.71 |
|        | 2034 | 2335611.973 | 1224485.983 | 1111125.99 |
|        | 2035 | 2347097.290 | 1225329.174 | 1121768.12 |
|        | 2036 | 2358248.747 | 1226121.417 | 1132127.33 |
|        | 2037 | 2369033.655 | 1226870.211 | 1142163.44 |
|        | 2038 | 2379490.114 | 1227578.212 | 1151911.90 |
|        | 2039 | 2389546.238 | 1228242.847 | 1161303.39 |
| Female | 1990 | 56348.092   | 56348.092   | 0.000      |
|        | 1991 | 110871.862  | 110500.281  | 371.581    |
|        | 1992 | 165654.454  | 164228.968  | 1425.486   |
|        | 1993 | 220008.519  | 216584.424  | 3424.096   |
|        | 1994 | 275706.807  | 268989.827  | 6716.980   |
|        | 1995 | 331417.547  | 319961.185  | 11456.362  |
|        | 1996 | 387580.161  | 369635.811  | 17944.350  |
|        | 1997 | 442778.242  | 416653.629  | 26124.613  |
|        | 1998 | 496117.305  | 460307.757  | 35809.547  |
|        | 1999 | 548268.214  | 501161.707  | 47106.507  |
|        | 2000 | 601693.202  | 541106.219  | 60586.983  |
|        | 2001 | 652221.103  | 576967.214  | 75253.888  |
|        | 2002 | 703022.600  | 611023.981  | 91998.619  |
|        | 2003 | 752023.351  | 641991.842  | 110031.509 |
|        | 2004 | 799826.733  | 670338.486  | 129488.247 |
|        | 2005 | 847563.928  | 696865.366  | 150698.562 |
|        | 2006 | 894205.027  | 721067.576  | 173137.451 |
|        | 2007 | 939571.282  | 742966.107  | 196605.175 |
|        | 2008 | 983437.578  | 762698.964  | 220738.614 |
|        | 2009 | 1025803.786 | 780432.715  | 245371.071 |
|        | 2010 | 1066964.934 | 796392.457  | 270572.477 |
|        | 2011 | 1106954.044 | 810721.102  | 296232.943 |
|        | 2012 | 1146108.461 | 823712.442  | 322396.019 |
|        | 2013 | 1183544.689 | 835226.907  | 348317.782 |
|        | 2014 | 1221220.945 | 845944.189  | 375276.757 |
|        | 2015 | 1258289.311 | 855837.385  | 402451.926 |
|        | 2016 | 1294830.207 | 864846.785  | 429983.423 |
|        | 2017 | 1330332.626 | 872970.534  | 457362.092 |
|        | 2018 | 1360571.987 | 879422.142  | 481149.845 |
|        | 2019 | 1389848.723 | 885203.329  | 504645.394 |
|        | 2020 | 1416046.192 | 890102.048  | 525944.144 |
|        | 2021 | 1440588.850 | 894357.578  | 546231.271 |
|        | 2022 | 1464157.934 | 898148.712  | 566009.222 |

**Results for PHIM for Run 8 (ELL Summary Sensitivity\_Analysis\_2.RTF)**

|      |             |             |             |             |            |
|------|-------------|-------------|-------------|-------------|------------|
|      |             | 2023        | 1486810.237 | 901543.189  | 585267.048 |
|      |             | 2024        | 1508591.729 | 904581.927  | 604009.802 |
|      |             | 2025        | 1526875.621 | 907040.758  | 619834.863 |
|      |             | 2026        | 1543659.810 | 909162.452  | 634497.358 |
|      |             | 2027        | 1559623.774 | 911066.253  | 648557.522 |
|      |             | 2028        | 1574852.850 | 912769.551  | 662083.299 |
|      |             | 2029        | 1589437.452 | 914314.111  | 675123.342 |
|      |             | 2030        | 1600568.199 | 915460.829  | 685107.370 |
|      |             | 2031        | 1610776.297 | 916461.912  | 694314.385 |
|      |             | 2032        | 1620483.563 | 917369.218  | 703114.345 |
|      |             | 2033        | 1629745.442 | 918190.286  | 711555.156 |
|      |             | 2034        | 1638721.425 | 918947.237  | 719774.188 |
|      |             | 2035        | 1644649.404 | 919429.846  | 725219.558 |
|      |             | 2036        | 1650181.590 | 919861.844  | 730319.745 |
|      |             | 2037        | 1655476.066 | 920262.962  | 735213.104 |
|      |             | 2038        | 1660507.914 | 920633.794  | 739874.120 |
|      |             | 2039        | 1665361.569 | 920987.246  | 744374.324 |
| COPD | Males       | 1990        | 117002.906  | 117002.906  | 0.000      |
|      |             | 1991        | 233438.833  | 233298.034  | 140.799    |
|      |             | 1992        | 348084.047  | 347556.783  | 527.265    |
|      |             | 1993        | 467278.318  | 465967.991  | 1310.327   |
|      |             | 1994        | 584216.907  | 581603.388  | 2613.518   |
|      |             | 1995        | 697391.457  | 692877.007  | 4514.449   |
|      |             | 1996        | 809471.271  | 802317.109  | 7154.162   |
|      |             | 1997        | 922587.668  | 911860.566  | 10727.102  |
|      |             | 1998        | 1034072.457 | 1018887.263 | 15185.193  |
|      |             | 1999        | 1153475.399 | 1132350.664 | 21124.736  |
|      |             | 2000        | 1268050.268 | 1239817.608 | 28232.660  |
|      |             | 2001        | 1382786.209 | 1345901.647 | 36884.563  |
|      |             | 2002        | 1497557.412 | 1450297.204 | 47260.208  |
|      |             | 2003        | 1614405.229 | 1555006.245 | 59398.985  |
|      |             | 2004        | 1726672.489 | 1653758.883 | 72913.606  |
|      |             | 2005        | 1847277.524 | 1758053.183 | 89224.341  |
|      |             | 2006        | 1961009.963 | 1854235.811 | 106774.152 |
|      |             | 2007        | 2079868.908 | 1952446.134 | 127422.774 |
|      |             | 2008        | 2206755.783 | 2055003.900 | 151751.883 |
|      |             | 2009        | 2331993.380 | 2153701.356 | 178292.024 |
|      |             | 2010        | 2455130.176 | 2248344.222 | 206785.955 |
|      |             | 2011        | 2582657.849 | 2343643.711 | 239014.137 |
|      |             | 2012        | 2709719.005 | 2435772.918 | 273946.087 |
|      |             | 2013        | 2840547.005 | 2527576.929 | 312970.076 |
|      |             | 2014        | 2971677.135 | 2616623.383 | 355053.752 |
|      |             | 2015        | 3104538.983 | 2704932.603 | 399606.380 |
|      |             | 2016        | 3237650.175 | 2790121.006 | 447529.169 |
|      |             | 2017        | 3370561.253 | 2872317.276 | 498243.977 |
|      |             | 2018        | 3503136.371 | 2950746.196 | 552390.175 |
|      |             | 2019        | 3636402.758 | 3026510.220 | 609892.538 |
|      |             | 2020        | 3768054.453 | 3098996.150 | 669058.302 |
|      |             | 2021        | 3897675.067 | 3167282.925 | 730392.142 |
|      |             | 2022        | 4027307.132 | 3232457.708 | 794849.424 |
|      |             | 2023        | 4156698.720 | 3294437.936 | 862260.784 |
|      |             | 2024        | 4285772.226 | 3353282.390 | 932489.836 |
|      |             | 2025        | 4410759.298 | 3408294.685 | 1002464.61 |
|      |             | 2026        | 4531411.064 | 3458325.186 | 1073085.88 |
|      |             | 2027        | 4651145.233 | 3505267.423 | 1145877.81 |
|      |             | 2028        | 4769837.872 | 3549144.224 | 1220693.65 |
|      |             | 2029        | 4887747.179 | 3590202.532 | 1297544.65 |
| 2030 | 4997632.895 | 3627189.378 | 1370443.52  |             |            |
| 2031 | 5103301.991 | 3659937.821 | 1443364.17  |             |            |
| 2032 | 5207593.613 | 3690236.139 | 1517357.47  |             |            |
| 2033 | 5310556.138 | 3718102.851 | 1592453.29  |             |            |
| 2034 | 5412542.816 | 3743858.828 | 1668683.99  |             |            |
| 2035 | 5500522.473 | 3765426.897 | 1735095.58  |             |            |
| 2036 | 5588149.640 | 3785110.888 | 1803038.75  |             |            |
| 2037 | 5674667.886 | 3803209.671 | 1871458.21  |             |            |
| 2038 | 5760391.289 | 3819884.887 | 1940506.40  |             |            |
| 2039 | 5845459.234 | 3835371.287 | 2010087.95  |             |            |
|      | Female      | 1990        | 77434.846   | 77434.846   | 0.000      |
|      |             | 1991        | 160029.510  | 159918.449  | 111.061    |
|      |             | 1992        | 240642.531  | 240217.803  | 424.728    |
|      |             | 1993        | 329362.093  | 328256.147  | 1105.946   |
|      |             | 1994        | 418569.515  | 416320.700  | 2248.816   |
|      |             | 1995        | 509110.357  | 505085.706  | 4024.651   |
|      |             | 1996        | 600040.117  | 593566.013  | 6474.105   |
|      |             | 1997        | 691159.071  | 681442.620  | 9716.450   |
|      |             | 1998        | 782866.899  | 769045.725  | 13821.173  |
|      |             | 1999        | 881526.925  | 862196.927  | 19329.998  |
|      |             | 2000        | 977880.647  | 952109.858  | 25770.789  |

**Results for PHIM for Run 8 (ELL Summary Sensitivity\_Analysis\_2.RTF)**

|      |             |             |            |
|------|-------------|-------------|------------|
| 2001 | 1076787.404 | 1043114.228 | 33673.176  |
| 2002 | 1174842.754 | 1131929.455 | 42913.298  |
| 2003 | 1275102.681 | 1221377.226 | 53725.455  |
| 2004 | 1371026.306 | 1305519.383 | 65506.922  |
| 2005 | 1473954.509 | 1393967.498 | 79987.011  |
| 2006 | 1574450.828 | 1478579.718 | 95871.110  |
| 2007 | 1673790.211 | 1560406.612 | 113383.600 |
| 2008 | 1782360.738 | 1647832.512 | 134528.226 |
| 2009 | 1892944.209 | 1734445.214 | 158498.995 |
| 2010 | 2002131.282 | 1817884.009 | 184247.274 |
| 2011 | 2114522.152 | 1901229.839 | 213292.314 |
| 2012 | 2228079.372 | 1983068.557 | 245010.815 |
| 2013 | 2345377.689 | 2064913.232 | 280464.457 |
| 2014 | 2462498.422 | 2143943.206 | 318555.216 |
| 2015 | 2581450.312 | 2222403.347 | 359046.965 |
| 2016 | 2701959.301 | 2299033.640 | 402925.661 |
| 2017 | 2823834.967 | 2373694.173 | 450140.794 |
| 2018 | 2938265.081 | 2441801.863 | 496463.217 |
| 2019 | 3053254.880 | 2507619.768 | 545635.112 |
| 2020 | 3167073.216 | 2570766.233 | 596306.983 |
| 2021 | 3279517.699 | 2631135.842 | 648381.857 |
| 2022 | 3392060.964 | 2688955.351 | 703105.613 |
| 2023 | 3504296.171 | 2744088.168 | 760208.003 |
| 2024 | 3616019.231 | 2796433.719 | 819585.512 |
| 2025 | 3724611.269 | 2845596.536 | 879014.734 |
| 2026 | 3827181.707 | 2890416.430 | 936765.277 |
| 2027 | 3928684.441 | 2932481.894 | 996202.547 |
| 2028 | 4029124.892 | 2971965.356 | 1057159.54 |
| 2029 | 4128269.068 | 3008811.758 | 1119457.31 |
| 2030 | 4221560.174 | 3042349.698 | 1179210.48 |
| 2031 | 4304170.584 | 3070500.944 | 1233669.64 |
| 2032 | 4384930.537 | 3096326.629 | 1288603.91 |
| 2033 | 4464357.691 | 3120099.446 | 1344258.25 |
| 2034 | 4542251.545 | 3141852.464 | 1400399.08 |
| 2035 | 4611066.648 | 3160546.866 | 1450519.78 |
| 2036 | 4670309.230 | 3175498.011 | 1494811.22 |
| 2037 | 4728179.514 | 3189138.470 | 1539041.04 |
| 2038 | 4785008.048 | 3201566.192 | 1583441.86 |
| 2039 | 4841291.793 | 3212952.171 | 1628339.62 |

---

## Results for PHIM for Run 8 (ELL Summary Sensitivity\_Analysis\_2.RTF)

\*\*\*\*\*

**Table 5: Estimated Loss of Life, at the end of follow-up, Population unadjusted for deaths in Ecig scenario**

| Disease      | Sex    | Age Group   | Years of life lost<br>NULL | Years of life lost<br>Ecig | Years of life<br>Saved |
|--------------|--------|-------------|----------------------------|----------------------------|------------------------|
| All Diseases | Males  | 30-34       | 443911.034                 | 257358.945                 | 186552.089             |
|              |        | 35-39       | 1146798.555                | 658435.358                 | 488363.197             |
|              |        | 40-44       | 2609591.408                | 1457692.367                | 1151899.04             |
|              |        | 45-49       | 4775841.753                | 2618143.723                | 2157698.03             |
|              |        | 50-54       | 7446969.205                | 4208548.003                | 3238421.20             |
|              |        | 55-59       | 8240205.925                | 5043222.920                | 3196983.00             |
|              |        | 60-64       | 8772829.118                | 5778555.029                | 2994274.09             |
|              |        | 65-69       | 6161494.678                | 4425094.203                | 1736400.48             |
|              |        | 70-74       | 2495906.274                | 1853436.135                | 642470.139             |
|              | 75-79  | 0.000       | 0.000                      | 0.000                      |                        |
|              | Female | 30-34       | 229140.561                 | 151618.484                 | 77522.077              |
|              |        | 35-39       | 570217.942                 | 370859.669                 | 199358.272             |
|              |        | 40-44       | 1267538.938                | 802310.926                 | 465228.012             |
|              |        | 45-49       | 2340070.698                | 1461046.328                | 879024.370             |
|              |        | 50-54       | 3743803.613                | 2349109.848                | 1394693.77             |
|              |        | 55-59       | 4591478.168                | 2986777.026                | 1604701.14             |
|              |        | 60-64       | 5207367.788                | 3513549.631                | 1693818.16             |
|              |        | 65-69       | 4092181.394                | 2901695.871                | 1190485.52             |
| 70-74        |        | 1776092.171 | 1281807.631                | 494284.540                 |                        |
| Lung cancer  | Males  | 30-34       | 66065.017                  | 53478.876                  | 12586.141              |
|              |        | 35-39       | 232509.414                 | 189271.019                 | 43238.396              |
|              |        | 40-44       | 688628.041                 | 548745.611                 | 139882.431             |
|              |        | 45-49       | 1528300.367                | 1182189.204                | 346111.163             |
|              |        | 50-54       | 2730187.229                | 2079959.699                | 650227.530             |
|              |        | 55-59       | 3909101.673                | 2958240.992                | 950860.681             |
|              |        | 60-64       | 4287716.660                | 3333828.772                | 953887.887             |
|              |        | 65-69       | 3467897.115                | 2745972.500                | 721924.615             |
|              |        | 70-74       | 1312144.343                | 1055779.815                | 256364.529             |
|              | 75-79  | 0.000       | 0.000                      | 0.000                      |                        |
|              | Female | 30-34       | 51913.113                  | 42188.327                  | 9724.786               |
|              |        | 35-39       | 189792.904                 | 154312.533                 | 35480.371              |
|              |        | 40-44       | 527596.573                 | 412988.902                 | 114607.671             |
|              |        | 45-49       | 1122524.269                | 849978.751                 | 272545.517             |
|              |        | 50-54       | 1882214.322                | 1397234.934                | 484979.388             |
|              |        | 55-59       | 2595581.943                | 1902779.438                | 692802.506             |
|              |        | 60-64       | 2846273.090                | 2127059.788                | 719213.302             |
|              |        | 65-69       | 2358758.394                | 1785241.535                | 573516.859             |
| 70-74        |        | 937814.238  | 719772.905                 | 218041.333                 |                        |
| IHD          | Males  | 30-34       | 263834.566                 | 131042.581                 | 132791.985             |
|              |        | 35-39       | 692140.150                 | 330141.517                 | 361998.634             |
|              |        | 40-44       | 1519708.432                | 666373.272                 | 853335.160             |
|              |        | 45-49       | 2568546.697                | 1038376.911                | 1530169.79             |
|              |        | 50-54       | 3632929.903                | 1515402.122                | 2117527.78             |
|              |        | 55-59       | 2807892.356                | 1220730.703                | 1587161.65             |
|              |        | 60-64       | 2599825.934                | 1302686.634                | 1297139.30             |
|              |        | 65-69       | 1113578.307                | 629846.614                 | 483731.694             |
|              |        | 70-74       | 437536.271                 | 279399.834                 | 158136.436             |
|              | 75-79  | 0.000       | 0.000                      | 0.000                      |                        |
|              | Female | 30-34       | 79649.097                  | 42283.857                  | 37365.240              |
|              |        | 35-39       | 193965.908                 | 92719.668                  | 101246.240             |
|              |        | 40-44       | 403380.974                 | 175194.907                 | 228186.068             |
|              |        | 45-49       | 671385.408                 | 274954.632                 | 396430.776             |
|              |        | 50-54       | 1011875.989                | 436388.349                 | 575487.640             |
|              |        | 55-59       | 849875.715                 | 389323.449                 | 460552.266             |
|              |        | 60-64       | 925490.876                 | 485594.122                 | 439896.755             |
|              |        | 65-69       | 455463.881                 | 270694.478                 | 184769.403             |
| 70-74        |        | 207681.216  | 136932.781                 | 70748.435                  |                        |
| Stroke       | Males  | 30-34       | 73463.650                  | 45636.040                  | 27827.610              |
|              |        | 35-39       | 151934.057                 | 91733.512                  | 60200.545              |
|              |        | 40-44       | 262845.974                 | 151184.832                 | 111661.143             |
|              |        | 45-49       | 383421.246                 | 207201.641                 | 176219.605             |
|              |        | 50-54       | 479872.634                 | 237804.891                 | 242067.743             |
|              |        | 55-59       | 437124.903                 | 202051.625                 | 235073.278             |
|              |        | 60-64       | 419457.235                 | 198090.530                 | 221366.704             |
|              |        | 65-69       | 128180.574                 | 63478.558                  | 64702.016              |
|              |        | 70-74       | 53245.965                  | 28868.363                  | 24377.602              |
|              | 75-79  | 0.000       | 0.000                      | 0.000                      |                        |
|              | Female | 30-34       | 62919.090                  | 42433.404                  | 20485.687              |



**Results for PHIM for Run 8 (ELL Summary Sensitivity\_Analysis\_2.RTF)**

|      |        |       |             |            |            |
|------|--------|-------|-------------|------------|------------|
|      |        | 35-39 | 120806.205  | 77528.003  | 43278.202  |
|      |        | 40-44 | 203391.885  | 122343.546 | 81048.339  |
|      |        | 45-49 | 278172.097  | 156975.445 | 121196.652 |
|      |        | 50-54 | 325979.181  | 173114.935 | 152864.246 |
|      |        | 55-59 | 275161.340  | 138417.955 | 136743.384 |
|      |        | 60-64 | 268920.493  | 138179.562 | 130740.931 |
|      |        | 65-69 | 87956.054   | 47406.176  | 40549.878  |
|      |        | 70-74 | 42055.224   | 23907.257  | 18147.967  |
|      |        | 75-79 | 0.000       | 0.000      | 0.000      |
| COPD | Males  | 30-34 | 40547.801   | 27201.448  | 13346.353  |
|      |        | 35-39 | 70214.933   | 47289.311  | 22925.622  |
|      |        | 40-44 | 138408.960  | 91388.652  | 47020.308  |
|      |        | 45-49 | 295573.443  | 190375.967 | 105197.476 |
|      |        | 50-54 | 603979.438  | 375381.291 | 228598.147 |
|      |        | 55-59 | 1086086.992 | 662199.600 | 423887.392 |
|      |        | 60-64 | 1465829.290 | 943949.091 | 521880.198 |
|      |        | 65-69 | 1451838.682 | 985796.531 | 466042.151 |
|      |        | 70-74 | 692979.695  | 489388.123 | 203591.572 |
|      |        | 75-79 | 0.000       | 0.000      | 0.000      |
|      | Female | 30-34 | 34659.261   | 24712.897  | 9946.364   |
|      |        | 35-39 | 65652.924   | 46299.466  | 19353.459  |
|      |        | 40-44 | 133169.505  | 91783.571  | 41385.934  |
|      |        | 45-49 | 267988.924  | 179137.499 | 88851.425  |
|      |        | 50-54 | 523734.121  | 342371.630 | 181362.491 |
|      |        | 55-59 | 870859.170  | 556256.184 | 314602.986 |
|      |        | 60-64 | 1166683.329 | 762716.159 | 403967.169 |
|      |        | 65-69 | 1190003.066 | 798353.682 | 391649.384 |
|      |        | 70-74 | 588541.493  | 401194.688 | 187346.805 |
|      |        | 75-79 | 0.000       | 0.000      | 0.000      |

---

## Results for PHIM for Run 8 (ELL Summary Sensitivity\_Analysis\_2.RTF)

\*\*\*\*\*

**Table 6: Estimated Loss of Life, at the end of follow-up, Population and Number deaths adjusted for Ecig scenario**

| Disease      | Sex    | Age Group   | Years of life lost<br>NULL | Years of life lost<br>Ecig | Years of life<br>Saved |
|--------------|--------|-------------|----------------------------|----------------------------|------------------------|
| All Diseases | Males  | 30-34       | 443911.034                 | 257374.754                 | 186536.280             |
|              |        | 35-39       | 1146798.555                | 658552.857                 | 488245.698             |
|              |        | 40-44       | 2609591.408                | 1458442.991                | 1151148.42             |
|              |        | 45-49       | 4775841.753                | 2621470.195                | 2154371.56             |
|              |        | 50-54       | 7446969.205                | 4218556.431                | 3228412.77             |
|              |        | 55-59       | 8240205.925                | 5059226.865                | 3180979.06             |
|              |        | 60-64       | 8772829.118                | 5805322.849                | 2967506.27             |
|              |        | 65-69       | 6161494.678                | 4447597.526                | 1713897.15             |
|              |        | 70-74       | 2495906.274                | 1865415.381                | 630490.892             |
|              | 75-79  | 0.000       | 0.000                      | 0.000                      |                        |
|              | Female | 30-34       | 229140.561                 | 151622.344                 | 77518.217              |
|              |        | 35-39       | 570217.942                 | 370888.143                 | 199329.799             |
|              |        | 40-44       | 1267538.938                | 802492.700                 | 465046.238             |
|              |        | 45-49       | 2340070.698                | 1461851.206                | 878219.492             |
|              |        | 50-54       | 3743803.613                | 2351654.026                | 1392149.59             |
|              |        | 55-59       | 4591478.168                | 2991656.208                | 1599821.96             |
|              |        | 60-64       | 5207367.788                | 3522767.388                | 1684600.40             |
|              |        | 65-69       | 4092181.394                | 2911348.571                | 1180832.82             |
| 70-74        |        | 1776092.171 | 1287821.019                | 488271.152                 |                        |
| 75-79        | 0.000  | 0.000       | 0.000                      |                            |                        |
| Lung cancer  | Males  | 30-34       | 66065.017                  | 53482.359                  | 12582.658              |
|              |        | 35-39       | 232509.414                 | 189308.369                 | 43201.045              |
|              |        | 40-44       | 688628.041                 | 549065.294                 | 139562.748             |
|              |        | 45-49       | 1528300.367                | 1183891.471                | 344408.896             |
|              |        | 50-54       | 2730187.229                | 2085464.348                | 644722.882             |
|              |        | 55-59       | 3909101.673                | 2968315.334                | 940786.340             |
|              |        | 60-64       | 4287716.660                | 3350243.959                | 937472.701             |
|              |        | 65-69       | 3467897.115                | 2759992.961                | 707904.154             |
|              |        | 70-74       | 1312144.343                | 1062647.407                | 249496.936             |
|              | 75-79  | 0.000       | 0.000                      | 0.000                      |                        |
|              | Female | 30-34       | 51913.113                  | 42189.534                  | 9723.579               |
|              |        | 35-39       | 189792.904                 | 154325.322                 | 35467.583              |
|              |        | 40-44       | 527596.573                 | 413091.164                 | 114505.409             |
|              |        | 45-49       | 1122524.269                | 850479.979                 | 272044.290             |
|              |        | 50-54       | 1882214.322                | 1398846.817                | 483367.505             |
|              |        | 55-59       | 2595581.943                | 1906017.192                | 689564.751             |
|              |        | 60-64       | 2846273.090                | 2132871.595                | 713401.494             |
|              |        | 65-69       | 2358758.394                | 1791143.665                | 567614.728             |
| 70-74        |        | 937814.238  | 723132.906                 | 214681.331                 |                        |
| 75-79        | 0.000  | 0.000       | 0.000                      |                            |                        |
| IHD          | Males  | 30-34       | 263834.566                 | 131050.407                 | 132784.159             |
|              |        | 35-39       | 692140.150                 | 330194.933                 | 361945.217             |
|              |        | 40-44       | 1519708.432                | 666664.702                 | 853043.730             |
|              |        | 45-49       | 2568546.697                | 1039412.130                | 1529134.57             |
|              |        | 50-54       | 3632929.903                | 1518064.723                | 2114865.18             |
|              |        | 55-59       | 2807892.356                | 1223098.804                | 1584793.55             |
|              |        | 60-64       | 2599825.934                | 1306047.219                | 1293778.71             |
|              |        | 65-69       | 1113578.307                | 631272.228                 | 482306.079             |
|              |        | 70-74       | 437536.271                 | 280129.064                 | 157407.206             |
|              | 75-79  | 0.000       | 0.000                      | 0.000                      |                        |
|              | Female | 30-34       | 79649.097                  | 42284.897                  | 37364.200              |
|              |        | 35-39       | 193965.908                 | 92726.135                  | 101239.772             |
|              |        | 40-44       | 403380.974                 | 175227.186                 | 228153.788             |
|              |        | 45-49       | 671385.408                 | 275066.356                 | 396319.052             |
|              |        | 50-54       | 1011875.989                | 436704.685                 | 575171.304             |
|              |        | 55-59       | 849875.715                 | 389664.791                 | 460210.925             |
|              |        | 60-64       | 925490.876                 | 486204.773                 | 439286.104             |
|              |        | 65-69       | 455463.881                 | 271030.886                 | 184432.995             |
| 70-74        |        | 207681.216  | 137154.302                 | 70526.915                  |                        |
| 75-79        | 0.000  | 0.000       | 0.000                      |                            |                        |
| Stroke       | Males  | 30-34       | 73463.650                  | 45638.521                  | 27825.128              |
|              |        | 35-39       | 151934.057                 | 91748.828                  | 60185.229              |
|              |        | 40-44       | 262845.974                 | 151256.608                 | 111589.366             |
|              |        | 45-49       | 383421.246                 | 207436.443                 | 175984.803             |
|              |        | 50-54       | 479872.634                 | 238290.216                 | 241582.417             |
|              |        | 55-59       | 437124.903                 | 202537.140                 | 234587.764             |
|              |        | 60-64       | 419457.235                 | 198730.759                 | 220726.476             |
|              |        | 65-69       | 128180.574                 | 63651.340                  | 64529.234              |
|              |        | 70-74       | 53245.965                  | 28952.991                  | 24292.974              |
|              | 75-79  | 0.000       | 0.000                      | 0.000                      |                        |
|              | Female | 30-34       | 62919.090                  | 42434.295                  | 20484.796              |

**Results for PHIM for Run 8 (ELL Summary Sensitivity\_Analysis\_2.RTF)**

|      |        |       |             |            |            |
|------|--------|-------|-------------|------------|------------|
|      |        | 35-39 | 120806.205  | 77532.898  | 43273.307  |
|      |        | 40-44 | 203391.885  | 122365.269 | 81026.617  |
|      |        | 45-49 | 278172.097  | 157040.218 | 121131.879 |
|      |        | 50-54 | 325979.181  | 173246.914 | 152732.267 |
|      |        | 55-59 | 275161.340  | 138557.485 | 136603.855 |
|      |        | 60-64 | 268920.493  | 138384.194 | 130536.299 |
|      |        | 65-69 | 87956.054   | 47474.923  | 40481.131  |
|      |        | 70-74 | 42055.224   | 23951.050  | 18104.174  |
|      |        | 75-79 | 0.000       | 0.000      | 0.000      |
| COPD | Males  | 30-34 | 40547.801   | 27203.466  | 13344.335  |
|      |        | 35-39 | 70214.933   | 47300.726  | 22914.207  |
|      |        | 40-44 | 138408.960  | 91456.387  | 46952.573  |
|      |        | 45-49 | 295573.443  | 190730.150 | 104843.293 |
|      |        | 50-54 | 603979.438  | 376737.144 | 227242.294 |
|      |        | 55-59 | 1086086.992 | 665275.587 | 420811.405 |
|      |        | 60-64 | 1465829.290 | 950300.912 | 515528.378 |
|      |        | 65-69 | 1451838.682 | 992680.997 | 459157.685 |
|      |        | 70-74 | 692979.695  | 493685.918 | 199293.776 |
|      |        | 75-79 | 0.000       | 0.000      | 0.000      |
|      | Female | 30-34 | 34659.261   | 24713.618  | 9945.643   |
|      |        | 35-39 | 65652.924   | 46303.787  | 19349.137  |
|      |        | 40-44 | 133169.505  | 91809.081  | 41360.424  |
|      |        | 45-49 | 267988.924  | 179264.653 | 88724.271  |
|      |        | 50-54 | 523734.121  | 342855.609 | 180878.511 |
|      |        | 55-59 | 870859.170  | 557416.741 | 313442.429 |
|      |        | 60-64 | 1166683.329 | 765306.825 | 401376.503 |
|      |        | 65-69 | 1190003.066 | 801699.096 | 388303.970 |
|      |        | 70-74 | 588541.493  | 403582.761 | 184958.733 |
|      |        | 75-79 | 0.000       | 0.000      | 0.000      |

---

## Results for PHIM for Run 10 (ELL Summary Sensitivity\_Analysis\_2.RTF)

\*\*\*\*\*

### Estimated Loss of Life from the E Component for Run: 10, Simulation: 1

Country: US (United States)  
 Follow-up Period: 1990 to 2039

**Table 1: Estimated Loss of Life, at the end of follow-up, all age groups combined, Population unadjusted for deaths in Ecig scenario**

| Disease      | Sex    | Year | Years of life lost<br>NULL | Years of life lost<br>Ecig | Years of life<br>Saved |
|--------------|--------|------|----------------------------|----------------------------|------------------------|
| All Diseases | Males  | 2039 | 42093547.949               | 31289692.958               | 10803855.0             |
|              | Female | 2039 | 23817891.273               | 19197499.919               | 4620391.35             |
| Lung cancer  | Males  | 2039 | 18222549.860               | 15675084.127               | 2547465.73             |
|              | Female | 2039 | 12512468.845               | 10855001.559               | 1657467.29             |
| IHD          | Males  | 2039 | 15635992.616               | 9649603.625                | 5986388.99             |
|              | Female | 2039 | 4798769.065                | 3283057.508                | 1515711.56             |
| Stroke       | Males  | 2039 | 2389546.238                | 1562302.302                | 827243.936             |
|              | Female | 2039 | 1665361.569                | 1207459.002                | 457902.567             |
| COPD         | Males  | 2039 | 5845459.234                | 4402702.903                | 1442756.33             |
|              | Female | 2039 | 4841291.793                | 3851981.850                | 989309.943             |

## Results for PHIM for Run 10 (ELL Summary Sensitivity\_Analysis\_2.RTF)

\*\*\*\*\*

**Table 2: Estimated Loss of Life, at the end of follow-up, all age groups combined, Population and Number deaths adjusted for Ecig scenario**

| Disease      | Sex    | Year | Years of life lost<br>NULL | Years of life lost<br>Ecig | Years of life<br>Saved |
|--------------|--------|------|----------------------------|----------------------------|------------------------|
| All Diseases | Males  | 2039 | 42093547.949               | 31348638.657               | 10744909.3             |
|              | Female | 2039 | 23817891.273               | 19216455.772               | 4601435.50             |
| Lung cancer  | Males  | 2039 | 18222549.860               | 15707051.895               | 2515497.97             |
|              | Female | 2039 | 12512468.845               | 10866057.719               | 1646411.13             |
| IHD          | Males  | 2039 | 15635992.616               | 9661119.870                | 5974872.75             |
|              | Female | 2039 | 4798769.065                | 3284893.799                | 1513875.27             |
| Stroke       | Males  | 2039 | 2389546.238                | 1564229.778                | 825316.460             |
|              | Female | 2039 | 1665361.569                | 1208038.049                | 457323.520             |
| COPD         | Males  | 2039 | 5845459.234                | 4416237.114                | 1429222.12             |
|              | Female | 2039 | 4841291.793                | 3857466.205                | 983825.588             |

## Results for PHIM for Run 10 (ELL Summary Sensitivity\_Analysis\_2.RTF)

\*\*\*\*\*

**Table 3: Estimated Loss of Life, All age groups combined, Population unadjusted for deaths in Ecig scenario, cumulative over years**

| Disease      | Sex          | Year         | Years of life lost<br>NULL | Years of life lost<br>Ecig | Years of life<br>Saved |
|--------------|--------------|--------------|----------------------------|----------------------------|------------------------|
| All Diseases | Males        | 1990         | 1304839.645                | 1304839.645                | 0.000                  |
|              |              | 1991         | 2579865.358                | 2577322.071                | 2543.286               |
|              |              | 1992         | 3830683.831                | 3821208.715                | 9475.116               |
|              |              | 1993         | 5076567.803                | 5054148.146                | 22419.657              |
|              |              | 1994         | 6292145.526                | 6249358.813                | 42786.713              |
|              |              | 1995         | 7485537.010                | 7413282.509                | 72254.501              |
|              |              | 1996         | 8655955.028                | 8543813.653                | 112141.375             |
|              |              | 1997         | 9791729.713                | 9629348.624                | 162381.089             |
|              |              | 1998         | 10899134.186               | 10675771.021               | 223363.164             |
|              |              | 1999         | 12070409.674               | 11762370.263               | 308039.411             |
|              |              | 2000         | 13231384.595               | 12824384.444               | 407000.151             |
|              |              | 2001         | 14371761.018               | 13849536.063               | 522224.956             |
|              |              | 2002         | 15508906.386               | 14852684.064               | 656222.321             |
|              |              | 2003         | 16638100.422               | 15829971.076               | 808129.346             |
|              |              | 2004         | 17736465.088               | 16763736.925               | 972728.163             |
|              |              | 2005         | 18834658.606               | 17680050.325               | 1154608.28             |
|              |              | 2006         | 19909100.501               | 18554555.612               | 1354544.89             |
|              |              | 2007         | 20958321.463               | 19390970.118               | 1567351.34             |
|              |              | 2008         | 22000068.148               | 20204712.498               | 1795355.65             |
|              |              | 2009         | 23018816.903               | 20984168.228               | 2034648.67             |
|              |              | 2010         | 24018480.537               | 21730667.759               | 2287812.78             |
|              |              | 2011         | 25003034.574               | 22447832.329               | 2555202.25             |
|              |              | 2012         | 25969871.429               | 23133979.638               | 2835891.79             |
|              |              | 2013         | 26920275.180               | 23791011.818               | 3129263.36             |
|              |              | 2014         | 27849005.227               | 24415220.045               | 3433785.18             |
|              |              | 2015         | 28749620.400               | 25008781.936               | 3740838.46             |
|              |              | 2016         | 29622417.562               | 25562889.226               | 4059528.34             |
|              |              | 2017         | 30462559.724               | 26078353.407               | 4384206.32             |
|              |              | 2018         | 31293299.299               | 26573661.909               | 4719637.39             |
|              |              | 2019         | 32109993.427               | 27046136.528               | 5063856.90             |
|              |              | 2020         | 32883323.977               | 27489791.338               | 5393532.64             |
|              |              | 2021         | 33610102.554               | 27881254.928               | 5728847.63             |
|              |              | 2022         | 34322010.448               | 28251315.731               | 6070694.72             |
|              |              | 2023         | 35018383.550               | 28600188.649               | 6418194.90             |
|              |              | 2024         | 35700177.955               | 28929334.440               | 6770843.52             |
|              |              | 2025         | 36315500.346               | 29228541.096               | 7086959.25             |
|              |              | 2026         | 36896159.343               | 29486652.080               | 7409507.26             |
|              |              | 2027         | 37462570.116               | 29728262.842               | 7734307.27             |
|              |              | 2028         | 38015337.780               | 29952960.446               | 8062377.33             |
|              |              | 2029         | 38554814.764               | 30162339.778               | 8392474.99             |
|              |              | 2030         | 39003805.400               | 30343197.223               | 8660608.18             |
|              |              | 2031         | 39436509.703               | 30498248.217               | 8938261.49             |
| 2032         | 39858470.458 | 30641722.141 | 9216748.32                 |                            |                        |
| 2033         | 40270147.082 | 30773285.423 | 9496861.66                 |                            |                        |
| 2034         | 40672665.743 | 30895206.080 | 9777459.66                 |                            |                        |
| 2035         | 40962732.664 | 30989711.360 | 9973021.30                 |                            |                        |
| 2036         | 41255021.653 | 31074477.373 | 10180544.3                 |                            |                        |
| 2037         | 41540573.023 | 31152416.557 | 10388156.5                 |                            |                        |
| 2038         | 41820158.066 | 31223660.025 | 10596498.0                 |                            |                        |
| 2039         | 42093547.949 | 31289692.958 | 10803855.0                 |                            |                        |
|              | Female       | 1990         | 588979.406                 | 588979.406                 | 0.000                  |
| 1991         |              | 1182571.252  | 1181926.435                | 644.817                    |                        |
| 1992         |              | 1777346.679  | 1774847.743                | 2498.936                   |                        |
| 1993         |              | 2380261.899  | 2374217.089                | 6044.811                   |                        |
| 1994         |              | 2983130.039  | 2971235.261                | 11894.778                  |                        |
| 1995         |              | 3588982.584  | 3568485.999                | 20496.585                  |                        |
| 1996         |              | 4195430.235  | 4162648.580                | 32781.655                  |                        |
| 1997         |              | 4793866.694  | 4745515.619                | 48351.076                  |                        |
| 1998         |              | 5389747.381  | 5321970.482                | 67776.899                  |                        |
| 1999         |              | 6006722.467  | 5912755.340                | 93967.127                  |                        |
| 2000         |              | 6625758.871  | 6500914.465                | 124844.406                 |                        |
| 2001         |              | 7245135.411  | 7083027.545                | 162107.866                 |                        |
| 2002         |              | 7867492.021  | 7661636.820                | 205855.201                 |                        |
| 2003         |              | 8485051.793  | 8229640.927                | 255410.866                 |                        |
| 2004         |              | 9092994.774  | 8782220.010                | 310774.764                 |                        |
| 2005         |              | 9706032.803  | 9333067.557                | 372965.246                 |                        |
| 2006         |              | 10311907.548 | 9869600.540                | 442307.008                 |                        |
| 2007         |              | 10909437.502 | 10392312.130               | 517125.373                 |                        |
| 2008         |              | 11506462.491 | 10906108.097               | 600354.394                 |                        |
| 2009         |              | 12098393.287 | 11409046.189               | 689347.098                 |                        |
| 2010         |              | 12681188.981 | 11896797.352               | 784391.629                 |                        |

**Results for PHIM for Run 10 (ELL Summary Sensitivity\_Analysis\_2.RTF)**

|             |       |      |              |              |            |
|-------------|-------|------|--------------|--------------|------------|
|             |       | 2011 | 13260062.991 | 12372612.346 | 887450.645 |
|             |       | 2012 | 13839417.441 | 12839892.871 | 999524.570 |
|             |       | 2013 | 14409614.758 | 13292449.386 | 1117165.37 |
|             |       | 2014 | 14976658.746 | 13732723.651 | 1243935.09 |
|             |       | 2015 | 15529977.821 | 14156619.805 | 1373358.02 |
|             |       | 2016 | 16066640.764 | 14558481.717 | 1508159.05 |
|             |       | 2017 | 16590035.078 | 14941798.502 | 1648236.58 |
|             |       | 2018 | 17098716.137 | 15308875.952 | 1789840.18 |
|             |       | 2019 | 17599868.850 | 15662724.610 | 1937144.24 |
|             |       | 2020 | 18081346.241 | 15999206.368 | 2082139.87 |
|             |       | 2021 | 18537594.460 | 16309165.845 | 2228428.62 |
|             |       | 2022 | 18985300.234 | 16605837.180 | 2379463.05 |
|             |       | 2023 | 19423958.747 | 16888843.319 | 2535115.43 |
|             |       | 2024 | 19853347.772 | 17158329.830 | 2695017.94 |
|             |       | 2025 | 20252822.245 | 17407433.010 | 2845389.23 |
|             |       | 2026 | 20619307.063 | 17627401.385 | 2991905.68 |
|             |       | 2027 | 20976063.406 | 17834725.769 | 3141337.64 |
|             |       | 2028 | 21323641.947 | 18030036.253 | 3293605.69 |
|             |       | 2029 | 21662117.106 | 18213855.541 | 3448261.57 |
|             |       | 2030 | 21960971.694 | 18375944.386 | 3585027.31 |
|             |       | 2031 | 22224951.983 | 18510377.601 | 3714574.38 |
|             |       | 2032 | 22480397.853 | 18635083.042 | 3845314.81 |
|             |       | 2033 | 22728639.455 | 18751084.048 | 3977555.41 |
|             |       | 2034 | 22970448.888 | 18859477.506 | 4110971.38 |
|             |       | 2035 | 23164154.188 | 18946750.815 | 4217403.37 |
|             |       | 2036 | 23334538.616 | 19016808.082 | 4317730.53 |
|             |       | 2037 | 23499760.723 | 19081270.929 | 4418489.79 |
|             |       | 2038 | 23660308.401 | 19141001.415 | 4519306.99 |
|             |       | 2039 | 23817891.273 | 19197499.919 | 4620391.35 |
| Lung cancer | Males | 1990 | 595621.791   | 595621.791   | 0.000      |
|             |       | 1991 | 1177744.113  | 1177589.565  | 154.547    |
|             |       | 1992 | 1750034.892  | 1749473.075  | 561.817    |
|             |       | 1993 | 2319752.308  | 2318368.310  | 1383.997   |
|             |       | 1994 | 2872597.339  | 2869850.298  | 2747.041   |
|             |       | 1995 | 3411494.825  | 3406669.952  | 4824.874   |
|             |       | 1996 | 3945569.726  | 3937583.154  | 7986.572   |
|             |       | 1997 | 4463316.362  | 4451094.818  | 12221.545  |
|             |       | 1998 | 4975301.180  | 4957479.376  | 17821.805  |
|             |       | 1999 | 5473691.125  | 5448750.673  | 24940.452  |
|             |       | 2000 | 5977500.570  | 5943322.809  | 34177.761  |
|             |       | 2001 | 6474795.516  | 6429077.946  | 45717.570  |
|             |       | 2002 | 6968769.705  | 6908980.078  | 59789.627  |
|             |       | 2003 | 7460282.140  | 7383354.831  | 76927.309  |
|             |       | 2004 | 7947048.275  | 7849987.046  | 97061.229  |
|             |       | 2005 | 8430571.669  | 8310112.542  | 120459.127 |
|             |       | 2006 | 8903945.390  | 8756624.371  | 147321.019 |
|             |       | 2007 | 9364177.982  | 9186858.966  | 177319.016 |
|             |       | 2008 | 9822525.458  | 9610620.304  | 211905.155 |
|             |       | 2009 | 10275228.886 | 10024552.595 | 250676.292 |
|             |       | 2010 | 10720275.500 | 10426720.667 | 293554.834 |
|             |       | 2011 | 11155356.373 | 10814994.550 | 340361.823 |
|             |       | 2012 | 11582611.617 | 11190271.827 | 392339.789 |
|             |       | 2013 | 11998803.791 | 11550089.714 | 448714.077 |
|             |       | 2014 | 12402087.090 | 11893097.239 | 508989.851 |
|             |       | 2015 | 12793451.706 | 12220762.620 | 572689.085 |
|             |       | 2016 | 13160101.653 | 12521778.477 | 638323.176 |
|             |       | 2017 | 13503583.414 | 12798044.236 | 705539.178 |
|             |       | 2018 | 13859755.737 | 13076639.558 | 783116.179 |
|             |       | 2019 | 14211625.176 | 13345249.542 | 866375.634 |
|             |       | 2020 | 14553935.288 | 13601265.377 | 952669.911 |
|             |       | 2021 | 14851747.495 | 13817385.106 | 1034362.39 |
|             |       | 2022 | 15144531.004 | 14023528.049 | 1121002.96 |
|             |       | 2023 | 15431932.496 | 14219500.335 | 1212432.16 |
|             |       | 2024 | 15713920.740 | 14405454.505 | 1308466.24 |
|             |       | 2025 | 15979112.816 | 14577128.456 | 1401984.36 |
|             |       | 2026 | 16206550.153 | 14716910.678 | 1489639.47 |
|             |       | 2027 | 16428826.050 | 14848238.930 | 1580587.12 |
|             |       | 2028 | 16645902.186 | 14970962.879 | 1674939.31 |
|             |       | 2029 | 16858126.517 | 15085691.121 | 1772435.40 |
|             |       | 2030 | 17045220.687 | 15186098.934 | 1859121.75 |
|             |       | 2031 | 17208482.610 | 15266661.713 | 1941820.90 |
|             |       | 2032 | 17367586.074 | 15341440.021 | 2026146.05 |
|             |       | 2033 | 17522716.280 | 15410223.401 | 2112492.88 |
|             |       | 2034 | 17674226.555 | 15473892.887 | 2200333.67 |
|             |       | 2035 | 17792201.734 | 15523988.037 | 2268213.70 |
|             |       | 2036 | 17903508.236 | 15566715.388 | 2336792.85 |
|             |       | 2037 | 18012162.345 | 15606004.959 | 2406157.39 |
|             |       | 2038 | 18118464.470 | 15641857.861 | 2476606.61 |

**Results for PHIM for Run 10 (ELL Summary Sensitivity\_Analysis\_2.RTF)**

|     |        |      |              |              |            |
|-----|--------|------|--------------|--------------|------------|
|     |        | 2039 | 18222549.860 | 15675084.127 | 2547465.73 |
|     | Female | 1990 | 307897.357   | 307897.357   | 0.000      |
|     |        | 1991 | 616547.418   | 616476.786   | 70.632     |
|     |        | 1992 | 931086.773   | 930800.634   | 286.139    |
|     |        | 1993 | 1246155.671  | 1245435.912  | 719.759    |
|     |        | 1994 | 1561212.934  | 1559735.161  | 1477.773   |
|     |        | 1995 | 1879967.742  | 1877275.231  | 2692.511   |
|     |        | 1996 | 2197488.109  | 2193011.860  | 4476.249   |
|     |        | 1997 | 2515698.453  | 2508691.048  | 7007.405   |
|     |        | 1998 | 2836249.556  | 2825848.697  | 10400.860  |
|     |        | 1999 | 3150201.390  | 3135475.615  | 14725.775  |
|     |        | 2000 | 3472722.342  | 3452491.430  | 20230.912  |
|     |        | 2001 | 3796994.889  | 3769745.922  | 27248.967  |
|     |        | 2002 | 4126619.935  | 4090685.652  | 35934.283  |
|     |        | 2003 | 4454982.533  | 4408772.943  | 46209.590  |
|     |        | 2004 | 4784343.030  | 4725885.191  | 58457.840  |
|     |        | 2005 | 5113443.121  | 5040741.782  | 72701.339  |
|     |        | 2006 | 5442543.963  | 5353000.275  | 89543.687  |
|     |        | 2007 | 5772441.497  | 5663560.732  | 108880.764 |
|     |        | 2008 | 6091911.943  | 5961707.127  | 130204.816 |
|     |        | 2009 | 6413671.330  | 6258877.072  | 154794.258 |
|     |        | 2010 | 6730763.530  | 6549048.694  | 181714.836 |
|     |        | 2011 | 7043614.101  | 6831997.604  | 211616.497 |
|     |        | 2012 | 7356270.780  | 7111257.908  | 245012.872 |
|     |        | 2013 | 7662551.964  | 7381453.803  | 281098.160 |
|     |        | 2014 | 7964551.465  | 7644287.854  | 320263.611 |
|     |        | 2015 | 8254895.403  | 7894285.331  | 360610.072 |
|     |        | 2016 | 8530661.848  | 8127862.665  | 402799.183 |
|     |        | 2017 | 8795826.122  | 8348996.430  | 446829.692 |
|     |        | 2018 | 9067233.707  | 8570428.627  | 496805.079 |
|     |        | 2019 | 9335343.270  | 8784865.751  | 550477.519 |
|     |        | 2020 | 9596110.883  | 8990260.497  | 605850.386 |
|     |        | 2021 | 9833186.859  | 9173826.343  | 659360.515 |
|     |        | 2022 | 10066452.037 | 9350184.678  | 716267.359 |
|     |        | 2023 | 10295503.609 | 9519061.152  | 776442.458 |
|     |        | 2024 | 10520125.318 | 9680293.095  | 839832.223 |
|     |        | 2025 | 10731915.863 | 9829991.885  | 901923.978 |
|     |        | 2026 | 10917495.549 | 9957670.027  | 959825.521 |
|     |        | 2027 | 11098620.885 | 10078366.646 | 1020254.24 |
|     |        | 2028 | 11275441.234 | 10192310.248 | 1083130.99 |
|     |        | 2029 | 11447962.710 | 10299681.935 | 1148280.77 |
|     |        | 2030 | 11601867.623 | 10394373.041 | 1207494.58 |
|     |        | 2031 | 11731666.516 | 10470153.686 | 1261512.83 |
|     |        | 2032 | 11857585.969 | 10540618.239 | 1316967.73 |
|     |        | 2033 | 11980128.625 | 10606252.605 | 1373876.02 |
|     |        | 2034 | 12099562.464 | 10667598.852 | 1431963.61 |
|     |        | 2035 | 12195919.946 | 10716658.022 | 1479261.92 |
|     |        | 2036 | 12278201.969 | 10755064.012 | 1523137.96 |
|     |        | 2037 | 12358146.336 | 10790560.011 | 1567586.33 |
|     |        | 2038 | 12435978.633 | 10823592.818 | 1612385.82 |
|     |        | 2039 | 12512468.845 | 10855001.559 | 1657467.29 |
| IHD | Males  | 1990 | 517209.093   | 517209.093   | 0.000      |
|     |        | 1991 | 1019219.395  | 1017076.785  | 2142.609   |
|     |        | 1992 | 1509598.614  | 1501584.773  | 8013.841   |
|     |        | 1993 | 1992735.299  | 1973891.573  | 18843.726  |
|     |        | 1994 | 2462877.575  | 2427236.200  | 35641.375  |
|     |        | 1995 | 2928249.390  | 2868557.285  | 59692.104  |
|     |        | 1996 | 3377377.730  | 3285649.833  | 91727.897  |
|     |        | 1997 | 3809062.472  | 3677515.025  | 131547.447 |
|     |        | 1998 | 4222213.867  | 4042984.316  | 179229.551 |
|     |        | 1999 | 4708317.743  | 4460846.444  | 247471.299 |
|     |        | 2000 | 5182084.396  | 4856369.735  | 325714.661 |
|     |        | 2001 | 5644097.705  | 5228344.134  | 415753.571 |
|     |        | 2002 | 6107232.129  | 5587504.341  | 519727.788 |
|     |        | 2003 | 6561785.704  | 5926261.974  | 635523.730 |
|     |        | 2004 | 6996156.348  | 6237384.806  | 758771.542 |
|     |        | 2005 | 7426261.361  | 6533295.712  | 892965.649 |
|     |        | 2006 | 7849012.694  | 6810357.769  | 1038654.93 |
|     |        | 2007 | 8255300.530  | 7064762.577  | 1190537.95 |
|     |        | 2008 | 8650662.040  | 7300956.232  | 1349705.81 |
|     |        | 2009 | 9030818.513  | 7517967.531  | 1512850.98 |
|     |        | 2010 | 9403026.327  | 7719829.870  | 1683196.46 |
|     |        | 2011 | 9767535.506  | 7906991.766  | 1860543.74 |
|     |        | 2012 | 10123044.281 | 8080690.428  | 2042353.85 |
|     |        | 2013 | 10470104.786 | 8241738.946  | 2228365.84 |
|     |        | 2014 | 10807756.112 | 8390383.263  | 2417372.85 |
|     |        | 2015 | 11130681.425 | 8526035.399  | 2604646.03 |
|     |        | 2016 | 11448966.506 | 8652356.890  | 2796609.62 |



**Results for PHIM for Run 10 (ELL Summary Sensitivity\_Analysis\_2.RTF)**

|        |        |      |              |             |            |
|--------|--------|------|--------------|-------------|------------|
|        |        | 2017 | 11758164.882 | 8768750.451 | 2989414.43 |
|        |        | 2018 | 12054448.241 | 8870509.985 | 3183938.26 |
|        |        | 2019 | 12341606.261 | 8963139.390 | 3378466.87 |
|        |        | 2020 | 12600728.939 | 9044609.753 | 3556119.19 |
|        |        | 2021 | 12861767.105 | 9119572.626 | 3742194.48 |
|        |        | 2022 | 13114168.616 | 9187287.501 | 3926881.11 |
|        |        | 2023 | 13357894.797 | 9248194.175 | 4109700.62 |
|        |        | 2024 | 13593848.521 | 9303517.500 | 4290331.02 |
|        |        | 2025 | 13789177.359 | 9349019.296 | 4440158.06 |
|        |        | 2026 | 13993401.656 | 9392049.897 | 4601351.76 |
|        |        | 2027 | 14190519.224 | 9431122.832 | 4759396.39 |
|        |        | 2028 | 14381193.356 | 9466065.376 | 4915127.98 |
|        |        | 2029 | 14565171.927 | 9497613.760 | 5067558.17 |
|        |        | 2030 | 14697381.605 | 9521233.292 | 5176148.31 |
|        |        | 2031 | 14842203.512 | 9544814.354 | 5297389.16 |
|        |        | 2032 | 14982485.826 | 9566079.456 | 5416406.37 |
|        |        | 2033 | 15118410.647 | 9584969.570 | 5533441.08 |
|        |        | 2034 | 15250284.398 | 9602388.020 | 5647896.38 |
|        |        | 2035 | 15322911.166 | 9612550.275 | 5710360.89 |
|        |        | 2036 | 15405115.031 | 9623105.303 | 5782009.73 |
|        |        | 2037 | 15484709.137 | 9632733.505 | 5851975.63 |
|        |        | 2038 | 15561812.193 | 9641505.355 | 5920306.84 |
|        |        | 2039 | 15635992.616 | 9649603.625 | 5986388.99 |
|        | Female | 1990 | 147299.110   | 147299.110  | 0.000      |
|        |        | 1991 | 295122.462   | 294685.256  | 437.206    |
|        |        | 1992 | 439962.920   | 438286.298  | 1676.622   |
|        |        | 1993 | 584735.615   | 580738.719  | 3996.897   |
|        |        | 1994 | 727640.783   | 719947.536  | 7693.247   |
|        |        | 1995 | 868486.937   | 855531.063  | 12955.874  |
|        |        | 1996 | 1010321.847  | 989904.472  | 20417.376  |
|        |        | 1997 | 1144230.930  | 1114811.339 | 29419.591  |
|        |        | 1998 | 1274513.622  | 1234094.093 | 40419.529  |
|        |        | 1999 | 1426725.938  | 1370745.964 | 55979.974  |
|        |        | 2000 | 1573462.680  | 1499793.364 | 73669.316  |
|        |        | 2001 | 1719132.015  | 1624231.075 | 94900.940  |
|        |        | 2002 | 1863006.732  | 1743792.395 | 119214.337 |
|        |        | 2003 | 2002943.227  | 1856710.504 | 146232.724 |
|        |        | 2004 | 2137798.705  | 1962146.331 | 175652.375 |
|        |        | 2005 | 2271071.245  | 2063495.020 | 207576.225 |
|        |        | 2006 | 2400707.731  | 2158419.632 | 242288.099 |
|        |        | 2007 | 2523634.512  | 2245404.385 | 278230.128 |
|        |        | 2008 | 2648752.232  | 2330663.154 | 318089.078 |
|        |        | 2009 | 2765973.961  | 2407810.667 | 358163.294 |
|        |        | 2010 | 2881329.235  | 2481086.134 | 400243.101 |
|        |        | 2011 | 2994972.694  | 2550343.186 | 444629.508 |
|        |        | 2012 | 3108958.829  | 2616715.111 | 492243.718 |
|        |        | 2013 | 3218140.416  | 2677974.797 | 540165.619 |
|        |        | 2014 | 3328387.914  | 2737104.131 | 591283.783 |
|        |        | 2015 | 3435342.796  | 2792964.115 | 642378.681 |
|        |        | 2016 | 3539189.408  | 2845142.097 | 694047.311 |
|        |        | 2017 | 3640041.363  | 2893539.799 | 746501.564 |
|        |        | 2018 | 3732645.362  | 2935860.096 | 796785.266 |
|        |        | 2019 | 3821421.978  | 2974638.874 | 846783.104 |
|        |        | 2020 | 3902115.950  | 3008993.382 | 893122.568 |
|        |        | 2021 | 3984301.053  | 3042314.897 | 941986.156 |
|        |        | 2022 | 4062629.299  | 3072580.501 | 990048.798 |
|        |        | 2023 | 4137348.729  | 3099949.395 | 1037399.33 |
|        |        | 2024 | 4208611.493  | 3124828.441 | 1083783.05 |
|        |        | 2025 | 4269419.492  | 3145740.180 | 1123679.31 |
|        |        | 2026 | 4330969.998  | 3165675.049 | 1165294.95 |
|        |        | 2027 | 4389134.306  | 3183470.071 | 1205664.23 |
|        |        | 2028 | 4444222.970  | 3199440.367 | 1244782.60 |
|        |        | 2029 | 4496447.877  | 3213963.466 | 1282484.41 |
|        |        | 2030 | 4536975.698  | 3225033.416 | 1311942.28 |
|        |        | 2031 | 4578338.586  | 3235578.545 | 1342760.04 |
|        |        | 2032 | 4617397.784  | 3245021.629 | 1372376.16 |
|        |        | 2033 | 4654407.697  | 3253593.980 | 1400813.72 |
|        |        | 2034 | 4689913.454  | 3261727.179 | 1428186.27 |
|        |        | 2035 | 4712518.190  | 3266703.247 | 1445814.94 |
|        |        | 2036 | 4735845.827  | 3271396.401 | 1464449.43 |
|        |        | 2037 | 4757958.806  | 3275574.003 | 1482384.80 |
|        |        | 2038 | 4778813.806  | 3279382.734 | 1499431.07 |
|        |        | 2039 | 4798769.065  | 3283057.508 | 1515711.56 |
| Stroke | Males  | 1990 | 75005.854    | 75005.854   | 0.000      |
|        |        | 1991 | 149463.017   | 149262.128  | 200.889    |
|        |        | 1992 | 222966.278   | 222220.542  | 745.736    |
|        |        | 1993 | 296801.879   | 294980.947  | 1820.931   |
|        |        | 1994 | 372453.706   | 368812.195  | 3641.511   |

**Results for PHIM for Run 10 (ELL Summary Sensitivity\_Analysis\_2.RTF)**

|        |      |             |             |            |
|--------|------|-------------|-------------|------------|
|        | 1995 | 448401.338  | 442024.003  | 6377.335   |
|        | 1996 | 523536.301  | 513357.378  | 10178.924  |
|        | 1997 | 596763.211  | 581667.464  | 15095.747  |
|        | 1998 | 667546.681  | 646378.939  | 21167.742  |
|        | 1999 | 734925.407  | 706675.675  | 28249.732  |
|        | 2000 | 803749.361  | 766843.825  | 36905.536  |
|        | 2001 | 870081.588  | 823157.695  | 46923.894  |
|        | 2002 | 935347.140  | 877016.370  | 58330.770  |
|        | 2003 | 1001627.349 | 929760.274  | 71867.075  |
|        | 2004 | 1066587.976 | 979775.989  | 86811.987  |
|        | 2005 | 1130548.052 | 1027191.534 | 103356.517 |
|        | 2006 | 1195132.454 | 1073071.587 | 122060.866 |
|        | 2007 | 1258974.043 | 1116505.798 | 142468.245 |
|        | 2008 | 1320124.867 | 1156096.148 | 164028.719 |
|        | 2009 | 1380776.123 | 1193581.519 | 187194.605 |
|        | 2010 | 1440048.533 | 1228570.324 | 211478.209 |
|        | 2011 | 1497484.847 | 1260903.023 | 236581.824 |
|        | 2012 | 1554496.526 | 1291181.522 | 263315.004 |
|        | 2013 | 1610819.598 | 1319654.622 | 291164.976 |
|        | 2014 | 1667484.890 | 1346618.077 | 320866.812 |
|        | 2015 | 1720948.287 | 1371149.439 | 349798.848 |
|        | 2016 | 1775699.228 | 1394706.075 | 380993.153 |
|        | 2017 | 1830250.175 | 1416836.540 | 413413.634 |
|        | 2018 | 1875958.950 | 1434493.750 | 441465.200 |
|        | 2019 | 1920359.232 | 1450616.707 | 469742.525 |
|        | 2020 | 1960605.297 | 1464771.982 | 495833.315 |
|        | 2021 | 1998912.887 | 1477357.419 | 521555.468 |
|        | 2022 | 2036003.696 | 1488750.260 | 547253.436 |
|        | 2023 | 2071857.536 | 1499044.031 | 572813.506 |
|        | 2024 | 2106636.468 | 1508387.875 | 598248.593 |
|        | 2025 | 2136450.873 | 1516166.419 | 620284.455 |
|        | 2026 | 2164796.470 | 1523032.961 | 641763.509 |
|        | 2027 | 2192079.608 | 1529249.559 | 662830.049 |
|        | 2028 | 2218404.367 | 1534794.697 | 683609.670 |
|        | 2029 | 2243769.140 | 1539773.168 | 703995.972 |
|        | 2030 | 2263570.213 | 1543635.676 | 719934.536 |
|        | 2031 | 2282521.590 | 1547071.541 | 735450.049 |
|        | 2032 | 2300804.945 | 1550128.967 | 750675.978 |
|        | 2033 | 2318464.018 | 1552837.181 | 765626.837 |
|        | 2034 | 2335611.973 | 1555314.473 | 780297.500 |
|        | 2035 | 2347097.290 | 1556983.967 | 790113.323 |
|        | 2036 | 2358248.747 | 1558497.212 | 799751.535 |
|        | 2037 | 2369033.655 | 1559879.955 | 809153.700 |
|        | 2038 | 2379490.114 | 1561143.094 | 818347.020 |
|        | 2039 | 2389546.238 | 1562302.302 | 827243.936 |
| Female | 1990 | 56348.092   | 56348.092   | 0.000      |
|        | 1991 | 110871.862  | 110758.339  | 113.523    |
|        | 1992 | 165654.454  | 165207.658  | 446.796    |
|        | 1993 | 220008.519  | 218919.394  | 1089.125   |
|        | 1994 | 275706.807  | 273498.865  | 2207.942   |
|        | 1995 | 331417.547  | 327556.174  | 3861.373   |
|        | 1996 | 387580.161  | 381349.937  | 6230.224   |
|        | 1997 | 442778.242  | 433456.489  | 9321.753   |
|        | 1998 | 496117.305  | 483013.145  | 13104.160  |
|        | 1999 | 548268.214  | 530629.208  | 17639.006  |
|        | 2000 | 601693.202  | 578494.014  | 23199.187  |
|        | 2001 | 652221.103  | 622747.266  | 29473.836  |
|        | 2002 | 703022.600  | 666152.310  | 36870.290  |
|        | 2003 | 752023.351  | 706937.603  | 45085.748  |
|        | 2004 | 799826.733  | 745590.420  | 54236.313  |
|        | 2005 | 847563.928  | 783110.189  | 64453.739  |
|        | 2006 | 894205.027  | 818581.215  | 75623.811  |
|        | 2007 | 939571.282  | 851894.597  | 87676.685  |
|        | 2008 | 983437.578  | 883025.539  | 100412.039 |
|        | 2009 | 1025803.786 | 912036.856  | 113766.930 |
|        | 2010 | 1066964.934 | 939132.661  | 127832.274 |
|        | 2011 | 1106954.044 | 964413.576  | 142540.468 |
|        | 2012 | 1146108.461 | 988186.819  | 157921.641 |
|        | 2013 | 1183544.689 | 1010008.205 | 173536.484 |
|        | 2014 | 1221220.945 | 1031032.751 | 190188.194 |
|        | 2015 | 1258289.311 | 1051142.181 | 207147.130 |
|        | 2016 | 1294830.207 | 1070090.944 | 224739.263 |
|        | 2017 | 1330332.626 | 1087734.408 | 242598.218 |
|        | 2018 | 1360571.987 | 1102167.587 | 258404.400 |
|        | 2019 | 1389848.723 | 1115478.620 | 274370.103 |
|        | 2020 | 1416046.192 | 1127134.918 | 288911.275 |
|        | 2021 | 1440588.850 | 1137555.520 | 303033.329 |
|        | 2022 | 1464157.934 | 1147068.634 | 317089.301 |

**Results for PHIM for Run 10 (ELL Summary Sensitivity\_Analysis\_2.RTF)**

|      |             |             |             |             |            |
|------|-------------|-------------|-------------|-------------|------------|
|      |             | 2023        | 1486810.237 | 1155728.787 | 331081.450 |
|      |             | 2024        | 1508591.729 | 1163624.216 | 344967.513 |
|      |             | 2025        | 1526875.621 | 1170166.104 | 356709.517 |
|      |             | 2026        | 1543659.810 | 1175839.303 | 367820.506 |
|      |             | 2027        | 1559623.774 | 1180923.788 | 378699.986 |
|      |             | 2028        | 1574852.850 | 1185508.931 | 389343.920 |
|      |             | 2029        | 1589437.452 | 1189688.964 | 399748.488 |
|      |             | 2030        | 1600568.199 | 1192836.106 | 407732.094 |
|      |             | 2031        | 1610776.297 | 1195538.778 | 415237.519 |
|      |             | 2032        | 1620483.563 | 1197967.257 | 422516.306 |
|      |             | 2033        | 1629745.442 | 1200161.716 | 429583.726 |
|      |             | 2034        | 1638721.425 | 1202223.321 | 436498.105 |
|      |             | 2035        | 1644649.404 | 1203533.039 | 441116.365 |
|      |             | 2036        | 1650181.590 | 1204650.334 | 445531.255 |
|      |             | 2037        | 1655476.066 | 1205651.357 | 449824.709 |
|      |             | 2038        | 1660507.914 | 1206569.123 | 453938.790 |
|      |             | 2039        | 1665361.569 | 1207459.002 | 457902.567 |
| COPD | Males       | 1990        | 117002.906  | 117002.906  | 0.000      |
|      |             | 1991        | 233438.833  | 233393.593  | 45.240     |
|      |             | 1992        | 348084.047  | 347930.325  | 153.722    |
|      |             | 1993        | 467278.318  | 466907.315  | 371.003    |
|      |             | 1994        | 584216.907  | 583460.121  | 756.786    |
|      |             | 1995        | 697391.457  | 696031.268  | 1360.188   |
|      |             | 1996        | 809471.271  | 807223.288  | 2247.983   |
|      |             | 1997        | 922587.668  | 919071.317  | 3516.350   |
|      |             | 1998        | 1034072.457 | 1028928.391 | 5144.066   |
|      |             | 1999        | 1153475.399 | 1146097.471 | 7377.928   |
|      |             | 2000        | 1268050.268 | 1257848.075 | 10202.193  |
|      |             | 2001        | 1382786.209 | 1368956.289 | 13829.921  |
|      |             | 2002        | 1497557.412 | 1479183.275 | 18374.137  |
|      |             | 2003        | 1614405.229 | 1590593.997 | 23811.233  |
|      |             | 2004        | 1726672.489 | 1696589.084 | 30083.405  |
|      |             | 2005        | 1847277.524 | 1809450.536 | 37826.988  |
|      |             | 2006        | 1961009.963 | 1914501.885 | 46508.079  |
|      |             | 2007        | 2079868.908 | 2022842.777 | 57026.131  |
|      |             | 2008        | 2206755.783 | 2137039.815 | 69715.968  |
|      |             | 2009        | 2331993.380 | 2248066.584 | 83926.796  |
|      |             | 2010        | 2455130.176 | 2355546.899 | 99583.278  |
|      |             | 2011        | 2582657.849 | 2464942.990 | 117714.858 |
|      |             | 2012        | 2709719.005 | 2571835.861 | 137883.144 |
|      |             | 2013        | 2840547.005 | 2679528.536 | 161018.470 |
|      |             | 2014        | 2971677.135 | 2785121.465 | 186555.670 |
|      |             | 2015        | 3104538.983 | 2890834.478 | 213704.505 |
|      |             | 2016        | 3237650.175 | 2994047.785 | 243602.390 |
|      |             | 2017        | 3370561.253 | 3094722.180 | 275839.073 |
|      |             | 2018        | 3503136.371 | 3192018.616 | 311117.755 |
|      |             | 2019        | 3636402.758 | 3287130.889 | 349271.869 |
|      |             | 2020        | 3768054.453 | 3379144.225 | 388910.227 |
|      |             | 2021        | 3897675.067 | 3466939.778 | 430735.289 |
|      |             | 2022        | 4027307.132 | 3551749.922 | 475557.211 |
|      |             | 2023        | 4156698.720 | 3633450.108 | 523248.612 |
|      |             | 2024        | 4285772.226 | 3711974.559 | 573797.667 |
|      |             | 2025        | 4410759.298 | 3786226.926 | 624532.372 |
|      |             | 2026        | 4531411.064 | 3854658.544 | 676752.521 |
|      |             | 2027        | 4651145.233 | 3919651.522 | 731493.712 |
|      |             | 2028        | 4769837.872 | 3981137.495 | 788700.377 |
|      |             | 2029        | 4887747.179 | 4039261.729 | 848485.450 |
| 2030 | 4997632.895 | 4092229.321 | 905403.574  |             |            |
| 2031 | 5103301.991 | 4139700.609 | 963601.382  |             |            |
| 2032 | 5207593.613 | 4184073.697 | 1023519.92  |             |            |
| 2033 | 5310556.138 | 4225255.272 | 1085300.87  |             |            |
| 2034 | 5412542.816 | 4263610.700 | 1148932.12  |             |            |
| 2035 | 5500522.473 | 4296189.081 | 1204333.39  |             |            |
| 2036 | 5588149.640 | 4326159.470 | 1261990.17  |             |            |
| 2037 | 5674667.886 | 4353798.139 | 1320869.75  |             |            |
| 2038 | 5760391.289 | 4379153.716 | 1381237.57  |             |            |
| 2039 | 5845459.234 | 4402702.903 | 1442756.33  |             |            |
|      | Female      | 1990        | 77434.846   | 77434.846   | 0.000      |
|      |             | 1991        | 160029.510  | 160006.055  | 23.455     |
|      |             | 1992        | 240642.531  | 240553.152  | 89.379     |
|      |             | 1993        | 329362.093  | 329123.063  | 239.030    |
|      |             | 1994        | 418569.515  | 418053.698  | 515.817    |
|      |             | 1995        | 509110.357  | 508123.531  | 986.826    |
|      |             | 1996        | 600040.117  | 598382.311  | 1657.806   |
|      |             | 1997        | 691159.071  | 688556.744  | 2602.327   |
|      |             | 1998        | 782866.899  | 779014.548  | 3852.351   |
|      |             | 1999        | 881526.925  | 875904.553  | 5622.372   |
|      |             | 2000        | 977880.647  | 970135.657  | 7744.990   |

**Results for PHIM for Run 10 (ELL Summary Sensitivity\_Analysis\_2.RTF)**

|      |             |             |            |
|------|-------------|-------------|------------|
| 2001 | 1076787.404 | 1066303.282 | 10484.122  |
| 2002 | 1174842.754 | 1161006.463 | 13836.290  |
| 2003 | 1275102.681 | 1257219.877 | 17882.804  |
| 2004 | 1371026.306 | 1348598.068 | 22428.237  |
| 2005 | 1473954.509 | 1445720.566 | 28233.943  |
| 2006 | 1574450.828 | 1539599.418 | 34851.410  |
| 2007 | 1673790.211 | 1631452.415 | 42337.796  |
| 2008 | 1782360.738 | 1730712.276 | 51648.461  |
| 2009 | 1892944.209 | 1830321.594 | 62622.615  |
| 2010 | 2002131.282 | 1927529.863 | 74601.419  |
| 2011 | 2114522.152 | 2025857.981 | 88664.172  |
| 2012 | 2228079.372 | 2123733.033 | 104346.339 |
| 2013 | 2345377.689 | 2223012.580 | 122365.109 |
| 2014 | 2462498.422 | 2320298.916 | 142199.506 |
| 2015 | 2581450.312 | 2418228.179 | 163222.133 |
| 2016 | 2701959.301 | 2515386.011 | 186573.290 |
| 2017 | 2823834.967 | 2611527.865 | 212307.102 |
| 2018 | 2938265.081 | 2700419.642 | 237845.439 |
| 2019 | 3053254.880 | 2787741.366 | 265513.514 |
| 2020 | 3167073.216 | 2872817.571 | 294255.645 |
| 2021 | 3279517.699 | 2955469.084 | 324048.615 |
| 2022 | 3392060.964 | 3036003.368 | 356057.595 |
| 2023 | 3504296.171 | 3114103.986 | 390192.186 |
| 2024 | 3616019.231 | 3189584.078 | 426435.153 |
| 2025 | 3724611.269 | 3261534.842 | 463076.427 |
| 2026 | 3827181.707 | 3328217.005 | 498964.702 |
| 2027 | 3928684.441 | 3391965.264 | 536719.177 |
| 2028 | 4029124.892 | 3452776.708 | 576348.185 |
| 2029 | 4128269.068 | 3510521.175 | 617747.892 |
| 2030 | 4221560.174 | 3563701.822 | 657858.351 |
| 2031 | 4304170.584 | 3609106.592 | 695063.993 |
| 2032 | 4384930.537 | 3651475.917 | 733454.620 |
| 2033 | 4464357.691 | 3691075.747 | 773281.944 |
| 2034 | 4542251.545 | 3727928.154 | 814323.390 |
| 2035 | 4611066.648 | 3759856.507 | 851210.141 |
| 2036 | 4670309.230 | 3785697.335 | 884611.896 |
| 2037 | 4728179.514 | 3809485.559 | 918693.956 |
| 2038 | 4785008.048 | 3831456.739 | 953551.310 |
| 2039 | 4841291.793 | 3851981.850 | 989309.943 |

---

## Results for PHIM for Run 10 (ELL Summary Sensitivity\_Analysis\_2.RTF)

\*\*\*\*\*

**Table 4: Estimated Loss of Life, All age groups combined, Population and Number deaths adjusted for Ecig scenario, cumulative over years**

| Disease      | Sex          | Year         | Years of life lost<br>NULL | Years of life lost<br>Ecig | Years of life<br>Saved |
|--------------|--------------|--------------|----------------------------|----------------------------|------------------------|
| All Diseases | Males        | 1990         | 1304839.645                | 1304839.645                | 0.000                  |
|              |              | 1991         | 2579865.358                | 2577322.071                | 2543.286               |
|              |              | 1992         | 3830683.831                | 3821211.203                | 9472.628               |
|              |              | 1993         | 5076567.803                | 5054158.647                | 22409.156              |
|              |              | 1994         | 6292145.526                | 6249387.185                | 42758.342              |
|              |              | 1995         | 7485537.010                | 7413344.218                | 72192.791              |
|              |              | 1996         | 8655955.028                | 8543931.071                | 112023.957             |
|              |              | 1997         | 9791729.713                | 9629551.292                | 162178.420             |
|              |              | 1998         | 10899134.186               | 10676094.712               | 223039.474             |
|              |              | 1999         | 12070409.674               | 11762871.439               | 307538.236             |
|              |              | 2000         | 13231384.595               | 12825129.488               | 406255.107             |
|              |              | 2001         | 14371761.018               | 13850595.352               | 521165.666             |
|              |              | 2002         | 15508906.386               | 14854144.611               | 654761.775             |
|              |              | 2003         | 16638100.422               | 15831927.742               | 806172.681             |
|              |              | 2004         | 17736465.088               | 16766282.610               | 970182.479             |
|              |              | 2005         | 18834658.606               | 17683298.754               | 1151359.85             |
|              |              | 2006         | 19909100.501               | 18558608.864               | 1350491.64             |
|              |              | 2007         | 20958321.463               | 19395934.318               | 1562387.15             |
|              |              | 2008         | 22000068.148               | 20210712.181               | 1789355.97             |
|              |              | 2009         | 23018816.903               | 20991318.085               | 2027498.82             |
|              |              | 2010         | 24018480.537               | 21739079.720               | 2279400.82             |
|              |              | 2011         | 25003034.574               | 22457622.983               | 2545411.59             |
|              |              | 2012         | 25969871.429               | 23145257.702               | 2824613.73             |
|              |              | 2013         | 26920275.180               | 23803892.854               | 3116382.33             |
|              |              | 2014         | 27849005.227               | 24429801.356               | 3419203.87             |
|              |              | 2015         | 28749620.400               | 25025175.459               | 3724444.94             |
|              |              | 2016         | 29622417.562               | 25581153.935               | 4041263.63             |
|              |              | 2017         | 30462559.724               | 26098543.343               | 4364016.38             |
|              |              | 2018         | 31293299.299               | 26595872.808               | 4697426.49             |
|              |              | 2019         | 32109993.427               | 27070455.373               | 5039538.05             |
|              |              | 2020         | 32883323.977               | 27516297.923               | 5367026.05             |
|              |              | 2021         | 33610102.554               | 27909832.179               | 5700270.38             |
|              |              | 2022         | 34322010.448               | 28282008.787               | 6040001.66             |
|              |              | 2023         | 35018383.550               | 28633036.466               | 6385347.08             |
|              |              | 2024         | 35700177.955               | 28964371.434               | 6735806.52             |
|              |              | 2025         | 36315500.346               | 29265762.200               | 7049738.15             |
|              |              | 2026         | 36896159.343               | 29525857.668               | 7370301.67             |
|              |              | 2027         | 37462570.116               | 29769451.884               | 7693118.23             |
|              |              | 2028         | 38015337.780               | 29996115.232               | 8019222.55             |
|              |              | 2029         | 38554814.764               | 30207437.186               | 8347377.58             |
|              |              | 2030         | 39003805.400               | 30390133.608               | 8613671.79             |
|              |              | 2031         | 39436509.703               | 30546834.305               | 8889675.40             |
| 2032         | 39858470.458 | 30691912.800 | 9166557.66                 |                            |                        |
| 2033         | 40270147.082 | 30825022.079 | 9445125.00                 |                            |                        |
| 2034         | 40672665.743 | 30948446.407 | 9724219.34                 |                            |                        |
| 2035         | 40962732.664 | 31044222.555 | 9918510.11                 |                            |                        |
| 2036         | 41255021.653 | 31130168.925 | 10124852.7                 |                            |                        |
| 2037         | 41540573.023 | 31209241.879 | 10331331.1                 |                            |                        |
| 2038         | 41820158.066 | 31281566.392 | 10538591.7                 |                            |                        |
| 2039         | 42093547.949 | 31348638.657 | 10744909.3                 |                            |                        |
|              | Female       | 1990         | 588979.406                 | 588979.406                 | 0.000                  |
| 1991         |              | 1182571.252  | 1181926.435                | 644.817                    |                        |
| 1992         |              | 1777346.679  | 1774847.962                | 2498.717                   |                        |
| 1993         |              | 2380261.899  | 2374218.117                | 6043.782                   |                        |
| 1994         |              | 2983130.039  | 2971238.288                | 11891.751                  |                        |
| 1995         |              | 3588982.584  | 3568493.224                | 20489.360                  |                        |
| 1996         |              | 4195430.235  | 4162663.258                | 32766.976                  |                        |
| 1997         |              | 4793866.694  | 4745542.167                | 48324.528                  |                        |
| 1998         |              | 5389747.381  | 5322014.975                | 67732.406                  |                        |
| 1999         |              | 6006722.467  | 5912826.856                | 93895.611                  |                        |
| 2000         |              | 6625758.871  | 6501024.712                | 124734.159                 |                        |
| 2001         |              | 7245135.411  | 7083189.977                | 161945.434                 |                        |
| 2002         |              | 7867492.021  | 7661867.609                | 205624.411                 |                        |
| 2003         |              | 8485051.793  | 8229958.194                | 255093.599                 |                        |
| 2004         |              | 9092994.774  | 8782643.974                | 310350.800                 |                        |
| 2005         |              | 9706032.803  | 9333623.695                | 372409.108                 |                        |
| 2006         |              | 10311907.548 | 9870313.429                | 441594.119                 |                        |
| 2007         |              | 10909437.502 | 10393208.607               | 516228.896                 |                        |
| 2008         |              | 11506462.491 | 10907217.320               | 599245.171                 |                        |
| 2009         |              | 12098393.287 | 11410400.941               | 687992.346                 |                        |
| 2010         |              | 12681188.981 | 11898430.011               | 782758.970                 |                        |

**Results for PHIM for Run 10 (ELL Summary Sensitivity\_Analysis\_2.RTF)**

|             |       |      |              |              |            |
|-------------|-------|------|--------------|--------------|------------|
|             |       | 2011 | 13260062.991 | 12374558.374 | 885504.618 |
|             |       | 2012 | 13839417.441 | 12842191.607 | 997225.834 |
|             |       | 2013 | 14409614.758 | 13295138.280 | 1114476.48 |
|             |       | 2014 | 14976658.746 | 13735844.901 | 1240813.85 |
|             |       | 2015 | 15529977.821 | 14160214.742 | 1369763.08 |
|             |       | 2016 | 16066640.764 | 14562583.918 | 1504056.85 |
|             |       | 2017 | 16590035.078 | 14946443.322 | 1643591.76 |
|             |       | 2018 | 17098716.137 | 15314099.577 | 1784616.56 |
|             |       | 2019 | 17599868.850 | 15668565.353 | 1931303.50 |
|             |       | 2020 | 18081346.241 | 16005701.303 | 2075644.94 |
|             |       | 2021 | 18537594.460 | 16316324.088 | 2221270.37 |
|             |       | 2022 | 18985300.234 | 16613692.129 | 2371608.10 |
|             |       | 2023 | 19423958.747 | 16897425.920 | 2526532.83 |
|             |       | 2024 | 19853347.772 | 17167667.562 | 2685680.21 |
|             |       | 2025 | 20252822.245 | 17417545.971 | 2835276.27 |
|             |       | 2026 | 20619307.063 | 17638251.179 | 2981055.88 |
|             |       | 2027 | 20976063.406 | 17846325.544 | 3129737.86 |
|             |       | 2028 | 21323641.947 | 18042398.476 | 3281243.47 |
|             |       | 2029 | 21662117.106 | 18226988.010 | 3435129.10 |
|             |       | 2030 | 21960971.694 | 18389833.498 | 3571138.20 |
|             |       | 2031 | 22224951.983 | 18524936.177 | 3700015.81 |
|             |       | 2032 | 22480397.853 | 18650302.827 | 3830095.03 |
|             |       | 2033 | 22728639.455 | 18766956.782 | 3961682.67 |
|             |       | 2034 | 22970448.888 | 18875994.150 | 4094454.74 |
|             |       | 2035 | 23164154.188 | 18963850.886 | 4200303.30 |
|             |       | 2036 | 23334538.616 | 19034397.794 | 4300140.82 |
|             |       | 2037 | 23499760.723 | 19099331.389 | 4400429.33 |
|             |       | 2038 | 23660308.401 | 19159515.281 | 4500793.12 |
|             |       | 2039 | 23817891.273 | 19216455.772 | 4601435.50 |
| Lung cancer | Males | 1990 | 595621.791   | 595621.791   | 0.000      |
|             |       | 1991 | 1177744.113  | 1177589.565  | 154.547    |
|             |       | 1992 | 1750034.892  | 1749474.207  | 560.684    |
|             |       | 1993 | 2319752.308  | 2318372.958  | 1379.350   |
|             |       | 1994 | 2872597.339  | 2869862.664  | 2734.675   |
|             |       | 1995 | 3411494.825  | 3406696.743  | 4798.082   |
|             |       | 1996 | 3945569.726  | 3937634.673  | 7935.053   |
|             |       | 1997 | 4463316.362  | 4451184.796  | 12131.566  |
|             |       | 1998 | 4975301.180  | 4957625.818  | 17675.362  |
|             |       | 1999 | 5473691.125  | 5448974.581  | 24716.544  |
|             |       | 2000 | 5977500.570  | 5943656.517  | 33844.053  |
|             |       | 2001 | 6474795.516  | 6429556.763  | 45238.753  |
|             |       | 2002 | 6968769.705  | 6909647.274  | 59122.431  |
|             |       | 2003 | 7460282.140  | 7384259.810  | 76022.330  |
|             |       | 2004 | 7947048.275  | 7851183.626  | 95864.649  |
|             |       | 2005 | 8430571.669  | 8311659.324  | 118912.345 |
|             |       | 2006 | 8903945.390  | 8758579.575  | 145365.815 |
|             |       | 2007 | 9364177.982  | 9189280.590  | 174897.392 |
|             |       | 2008 | 9822525.458  | 9613581.122  | 208944.336 |
|             |       | 2009 | 10275228.886 | 10028124.534 | 247104.352 |
|             |       | 2010 | 10720275.500 | 10430975.138 | 289300.363 |
|             |       | 2011 | 11155356.373 | 10819999.440 | 335356.933 |
|             |       | 2012 | 11582611.617 | 11196094.967 | 386516.650 |
|             |       | 2013 | 11998803.791 | 11556797.012 | 442006.779 |
|             |       | 2014 | 12402087.090 | 11900745.883 | 501341.207 |
|             |       | 2015 | 12793451.706 | 12229418.020 | 564033.686 |
|             |       | 2016 | 13160101.653 | 12531458.897 | 628642.756 |
|             |       | 2017 | 13503583.414 | 12808764.669 | 694818.745 |
|             |       | 2018 | 13859755.737 | 13088510.469 | 771245.268 |
|             |       | 2019 | 14211625.176 | 13358334.348 | 853290.828 |
|             |       | 2020 | 14553935.288 | 13615622.615 | 938312.673 |
|             |       | 2021 | 14851747.495 | 13832896.705 | 1018850.79 |
|             |       | 2022 | 15144531.004 | 14040231.103 | 1104299.90 |
|             |       | 2023 | 15431932.496 | 14237427.430 | 1194505.07 |
|             |       | 2024 | 15713920.740 | 14424633.191 | 1289287.55 |
|             |       | 2025 | 15979112.816 | 14597568.934 | 1381543.88 |
|             |       | 2026 | 16206550.153 | 14738432.241 | 1468117.91 |
|             |       | 2027 | 16428826.050 | 14870845.103 | 1557980.95 |
|             |       | 2028 | 16645902.186 | 14994649.281 | 1651252.90 |
|             |       | 2029 | 16858126.517 | 15110449.494 | 1747677.02 |
|             |       | 2030 | 17045220.687 | 15211881.369 | 1833339.32 |
|             |       | 2031 | 17208482.610 | 15293302.059 | 1915180.55 |
|             |       | 2032 | 17367586.074 | 15368917.962 | 1998668.11 |
|             |       | 2033 | 17522716.280 | 15438511.142 | 2084205.14 |
|             |       | 2034 | 17674226.555 | 15502967.611 | 2171258.94 |
|             |       | 2035 | 17792201.734 | 15553735.793 | 2238465.94 |
|             |       | 2036 | 17903508.236 | 15597054.790 | 2306453.45 |
|             |       | 2037 | 18012162.345 | 15636912.420 | 2375249.92 |
|             |       | 2038 | 18118464.470 | 15673305.984 | 2445158.49 |

**Results for PHIM for Run 10 (ELL Summary Sensitivity\_Analysis\_2.RTF)**

|     |        |      |              |              |            |
|-----|--------|------|--------------|--------------|------------|
|     |        | 2039 | 18222549.860 | 15707051.895 | 2515497.97 |
|     | Female | 1990 | 307897.357   | 307897.357   | 0.000      |
|     |        | 1991 | 616547.418   | 616476.786   | 70.632     |
|     |        | 1992 | 931086.773   | 930800.748   | 286.026    |
|     |        | 1993 | 1246155.671  | 1245436.448  | 719.223    |
|     |        | 1994 | 1561212.934  | 1559736.739  | 1476.196   |
|     |        | 1995 | 1879967.742  | 1877279.035  | 2688.707   |
|     |        | 1996 | 2197488.109  | 2193019.619  | 4468.490   |
|     |        | 1997 | 2515698.453  | 2508705.258  | 6993.195   |
|     |        | 1998 | 2836249.556  | 2825872.845  | 10376.711  |
|     |        | 1999 | 3150201.390  | 3135514.044  | 14687.345  |
|     |        | 2000 | 3472722.342  | 3452550.960  | 20171.382  |
|     |        | 2001 | 3796994.889  | 3769834.322  | 27160.567  |
|     |        | 2002 | 4126619.935  | 4090812.449  | 35807.486  |
|     |        | 2003 | 4454982.533  | 4408948.933  | 46033.600  |
|     |        | 2004 | 4784343.030  | 4726123.178  | 58219.853  |
|     |        | 2005 | 5113443.121  | 5041056.227  | 72386.894  |
|     |        | 2006 | 5442543.963  | 5353406.974  | 89136.989  |
|     |        | 2007 | 5772441.497  | 5664077.587  | 108363.909 |
|     |        | 2008 | 6091911.943  | 5962348.852  | 129563.091 |
|     |        | 2009 | 6413671.330  | 6259665.331  | 154005.999 |
|     |        | 2010 | 6730763.530  | 6550004.032  | 180759.498 |
|     |        | 2011 | 7043614.101  | 6833141.459  | 210472.642 |
|     |        | 2012 | 7356270.780  | 7112615.053  | 243655.727 |
|     |        | 2013 | 7662551.964  | 7383046.619  | 279505.345 |
|     |        | 2014 | 7964551.465  | 7646141.976  | 318409.489 |
|     |        | 2015 | 8254895.403  | 7896421.268  | 358474.135 |
|     |        | 2016 | 8530661.848  | 8130296.226  | 400365.622 |
|     |        | 2017 | 8795826.122  | 8351746.043  | 444080.079 |
|     |        | 2018 | 9067233.707  | 8573530.195  | 493703.511 |
|     |        | 2019 | 9335343.270  | 8788344.233  | 546999.037 |
|     |        | 2020 | 9596110.883  | 8994140.195  | 601970.688 |
|     |        | 2021 | 9833186.859  | 9178100.757  | 655086.101 |
|     |        | 2022 | 10066452.037 | 9354875.081  | 711576.956 |
|     |        | 2023 | 10295503.609 | 9524187.504  | 771316.105 |
|     |        | 2024 | 10520125.318 | 9685873.066  | 834252.252 |
|     |        | 2025 | 10731915.863 | 9836038.576  | 895877.287 |
|     |        | 2026 | 10917495.549 | 9964144.303  | 953351.245 |
|     |        | 2027 | 11098620.885 | 10085277.323 | 1013343.56 |
|     |        | 2028 | 11275441.234 | 10199665.295 | 1075775.94 |
|     |        | 2029 | 11447962.710 | 10307486.457 | 1140476.25 |
|     |        | 2030 | 11601867.623 | 10402619.046 | 1199248.58 |
|     |        | 2031 | 11731666.516 | 10478775.067 | 1252891.45 |
|     |        | 2032 | 11857585.969 | 10549610.929 | 1307975.04 |
|     |        | 2033 | 11980128.625 | 10615612.187 | 1364516.44 |
|     |        | 2034 | 12099562.464 | 10677320.249 | 1422242.22 |
|     |        | 2035 | 12195919.946 | 10726705.616 | 1469214.33 |
|     |        | 2036 | 12278201.969 | 10765376.392 | 1512825.58 |
|     |        | 2037 | 12358146.336 | 10801127.849 | 1557018.49 |
|     |        | 2038 | 12435978.633 | 10834407.440 | 1601571.19 |
|     |        | 2039 | 12512468.845 | 10866057.719 | 1646411.13 |
| IHD | Males  | 1990 | 517209.093   | 517209.093   | 0.000      |
|     |        | 1991 | 1019219.395  | 1017076.785  | 2142.609   |
|     |        | 1992 | 1509598.614  | 1501585.776  | 8012.839   |
|     |        | 1993 | 1992735.299  | 1973895.948  | 18839.351  |
|     |        | 1994 | 2462877.575  | 2427248.155  | 35629.420  |
|     |        | 1995 | 2928249.390  | 2868583.390  | 59666.000  |
|     |        | 1996 | 3377377.730  | 3285698.753  | 91678.976  |
|     |        | 1997 | 3809062.472  | 3677597.994  | 131464.478 |
|     |        | 1998 | 4222213.867  | 4043113.641  | 179100.227 |
|     |        | 1999 | 4708317.743  | 4461049.845  | 247267.898 |
|     |        | 2000 | 5182084.396  | 4856671.246  | 325413.150 |
|     |        | 2001 | 5644097.705  | 5228767.869  | 415329.835 |
|     |        | 2002 | 6107232.129  | 5588080.318  | 519151.811 |
|     |        | 2003 | 6561785.704  | 5927018.817  | 634766.887 |
|     |        | 2004 | 6996156.348  | 6238346.891  | 757809.457 |
|     |        | 2005 | 7426261.361  | 6534494.458  | 891766.903 |
|     |        | 2006 | 7849012.694  | 6811820.820  | 1037191.87 |
|     |        | 2007 | 8255300.530  | 7066512.162  | 1188788.37 |
|     |        | 2008 | 8650662.040  | 7303015.322  | 1347646.72 |
|     |        | 2009 | 9030818.513  | 7520354.813  | 1510463.70 |
|     |        | 2010 | 9403026.327  | 7722565.635  | 1680460.69 |
|     |        | 2011 | 9767535.506  | 7910092.450  | 1857443.06 |
|     |        | 2012 | 10123044.281 | 8084172.653  | 2038871.63 |
|     |        | 2013 | 10470104.786 | 8245617.882  | 2224486.90 |
|     |        | 2014 | 10807756.112 | 8394670.237  | 2413085.88 |
|     |        | 2015 | 11130681.425 | 8530738.804  | 2599942.62 |
|     |        | 2016 | 11448966.506 | 8657487.148  | 2791479.36 |

**Results for PHIM for Run 10 (ELL Summary Sensitivity\_Analysis\_2.RTF)**

|        |        |      |              |             |            |
|--------|--------|------|--------------|-------------|------------|
|        |        | 2017 | 11758164.882 | 8774314.466 | 2983850.42 |
|        |        | 2018 | 12054448.241 | 8876479.956 | 3177968.29 |
|        |        | 2019 | 12341606.261 | 8969510.700 | 3372095.56 |
|        |        | 2020 | 12600728.939 | 9051376.327 | 3549352.61 |
|        |        | 2021 | 12861767.105 | 9126723.930 | 3735043.17 |
|        |        | 2022 | 13114168.616 | 9194811.239 | 3919357.38 |
|        |        | 2023 | 13357894.797 | 9256077.474 | 4101817.32 |
|        |        | 2024 | 13593848.521 | 9311749.517 | 4282099.00 |
|        |        | 2025 | 13789177.359 | 9357573.807 | 4431603.55 |
|        |        | 2026 | 13993401.656 | 9400921.729 | 4592479.93 |
|        |        | 2027 | 14190519.224 | 9440300.760 | 4750218.46 |
|        |        | 2028 | 14381193.356 | 9475533.450 | 4905659.91 |
|        |        | 2029 | 14565171.927 | 9507356.635 | 5057815.29 |
|        |        | 2030 | 14697381.605 | 9531209.626 | 5166171.98 |
|        |        | 2031 | 14842203.512 | 9555031.238 | 5287172.27 |
|        |        | 2032 | 14982485.826 | 9576522.496 | 5405963.33 |
|        |        | 2033 | 15118410.647 | 9595622.204 | 5522788.44 |
|        |        | 2034 | 15250284.398 | 9613242.093 | 5637042.31 |
|        |        | 2035 | 15322911.166 | 9623537.476 | 5699373.69 |
|        |        | 2036 | 15405115.031 | 9634234.754 | 5770880.28 |
|        |        | 2037 | 15484709.137 | 9643998.398 | 5840710.74 |
|        |        | 2038 | 15561812.193 | 9652898.810 | 5908913.38 |
|        |        | 2039 | 15635992.616 | 9661119.870 | 5974872.75 |
|        | Female | 1990 | 147299.110   | 147299.110  | 0.000      |
|        |        | 1991 | 295122.462   | 294685.256  | 437.206    |
|        |        | 1992 | 439962.920   | 438286.357  | 1676.563   |
|        |        | 1993 | 584735.615   | 580738.991  | 3996.624   |
|        |        | 1994 | 727640.783   | 719948.323  | 7692.460   |
|        |        | 1995 | 868486.937   | 855532.875  | 12954.062  |
|        |        | 1996 | 1010321.847  | 989908.102  | 20413.745  |
|        |        | 1997 | 1144230.930  | 1114817.711 | 29413.219  |
|        |        | 1998 | 1274513.622  | 1234104.391 | 40409.230  |
|        |        | 1999 | 1426725.938  | 1370762.858 | 55963.080  |
|        |        | 2000 | 1573462.680  | 1499819.160 | 73643.520  |
|        |        | 2001 | 1719132.015  | 1624268.442 | 94863.573  |
|        |        | 2002 | 1863006.732  | 1743844.374 | 119162.358 |
|        |        | 2003 | 2002943.227  | 1856780.079 | 146163.149 |
|        |        | 2004 | 2137798.705  | 1962236.740 | 175561.965 |
|        |        | 2005 | 2271071.245  | 2063610.285 | 207460.960 |
|        |        | 2006 | 2400707.731  | 2158563.179 | 242144.552 |
|        |        | 2007 | 2523634.512  | 2245579.088 | 278055.424 |
|        |        | 2008 | 2648752.232  | 2330873.865 | 317878.368 |
|        |        | 2009 | 2765973.961  | 2408059.433 | 357914.529 |
|        |        | 2010 | 2881329.235  | 2481376.915 | 399952.320 |
|        |        | 2011 | 2994972.694  | 2550679.666 | 444293.028 |
|        |        | 2012 | 3108958.829  | 2617101.416 | 491857.413 |
|        |        | 2013 | 3218140.416  | 2678413.481 | 539726.935 |
|        |        | 2014 | 3328387.914  | 2737599.873 | 590788.041 |
|        |        | 2015 | 3435342.796  | 2793521.518 | 641821.278 |
|        |        | 2016 | 3539189.408  | 2845764.280 | 693425.129 |
|        |        | 2017 | 3640041.363  | 2894228.943 | 745812.420 |
|        |        | 2018 | 3732645.362  | 2936613.958 | 796031.405 |
|        |        | 2019 | 3821421.978  | 2975457.904 | 845964.074 |
|        |        | 2020 | 3902115.950  | 3009877.391 | 892238.559 |
|        |        | 2021 | 3984301.053  | 3043267.870 | 941033.182 |
|        |        | 2022 | 4062629.299  | 3073601.747 | 989027.552 |
|        |        | 2023 | 4137348.729  | 3101037.705 | 1036311.02 |
|        |        | 2024 | 4208611.493  | 3125982.389 | 1082629.10 |
|        |        | 2025 | 4269419.492  | 3146956.885 | 1122462.61 |
|        |        | 2026 | 4330969.998  | 3166955.985 | 1164014.01 |
|        |        | 2027 | 4389134.306  | 3184812.153 | 1204322.15 |
|        |        | 2028 | 4444222.970  | 3200840.870 | 1243382.10 |
|        |        | 2029 | 4496447.877  | 3215419.744 | 1281028.13 |
|        |        | 2030 | 4536975.698  | 3226539.083 | 1310436.61 |
|        |        | 2031 | 4578338.586  | 3237134.033 | 1341204.55 |
|        |        | 2032 | 4617397.784  | 3246624.040 | 1370773.74 |
|        |        | 2033 | 4654407.697  | 3255240.769 | 1399166.93 |
|        |        | 2034 | 4689913.454  | 3263417.138 | 1426496.32 |
|        |        | 2035 | 4712518.190  | 3268425.187 | 1444093.00 |
|        |        | 2036 | 4735845.827  | 3273149.879 | 1462695.95 |
|        |        | 2037 | 4757958.806  | 3277356.603 | 1480602.20 |
|        |        | 2038 | 4778813.806  | 3281192.531 | 1497621.27 |
|        |        | 2039 | 4798769.065  | 3284893.799 | 1513875.27 |
| Stroke | Males  | 1990 | 75005.854    | 75005.854   | 0.000      |
|        |        | 1991 | 149463.017   | 149262.128  | 200.889    |
|        |        | 1992 | 222966.278   | 222220.689  | 745.589    |
|        |        | 1993 | 296801.879   | 294981.613  | 1820.265   |
|        |        | 1994 | 372453.706   | 368814.113  | 3639.593   |



Results for PHIM for Run 10 (ELL Summary Sensitivity\_Analysis\_2.RTF)

|        |      |             |             |            |
|--------|------|-------------|-------------|------------|
|        | 1995 | 448401.338  | 442028.288  | 6373.049   |
|        | 1996 | 523536.301  | 513365.626  | 10170.675  |
|        | 1997 | 596763.211  | 581681.664  | 15081.547  |
|        | 1998 | 667546.681  | 646401.377  | 21145.304  |
|        | 1999 | 734925.407  | 706708.688  | 28216.719  |
|        | 2000 | 803749.361  | 766891.617  | 36857.744  |
|        | 2001 | 870081.588  | 823223.727  | 46857.861  |
|        | 2002 | 935347.140  | 877105.057  | 58242.083  |
|        | 2003 | 1001627.349 | 929876.646  | 71750.703  |
|        | 2004 | 1066587.976 | 979924.972  | 86663.003  |
|        | 2005 | 1130548.052 | 1027377.973 | 103170.079 |
|        | 2006 | 1195132.454 | 1073301.273 | 121831.181 |
|        | 2007 | 1258974.043 | 1116783.743 | 142190.300 |
|        | 2008 | 1320124.867 | 1156424.957 | 163699.909 |
|        | 2009 | 1380776.123 | 1193965.989 | 186810.135 |
|        | 2010 | 1440048.533 | 1229014.159 | 211034.374 |
|        | 2011 | 1497484.847 | 1261409.269 | 236075.578 |
|        | 2012 | 1554496.526 | 1291752.950 | 262743.576 |
|        | 2013 | 1610819.598 | 1320295.104 | 290524.494 |
|        | 2014 | 1667484.890 | 1347330.752 | 320154.138 |
|        | 2015 | 1720948.287 | 1371936.566 | 349011.721 |
|        | 2016 | 1775699.228 | 1395571.439 | 380127.789 |
|        | 2017 | 1830250.175 | 1417782.824 | 412467.351 |
|        | 2018 | 1875958.950 | 1435511.214 | 440447.736 |
|        | 2019 | 1920359.232 | 1451704.686 | 468654.545 |
|        | 2020 | 1960605.297 | 1465929.477 | 494675.820 |
|        | 2021 | 1998912.887 | 1478581.024 | 520331.863 |
|        | 2022 | 2036003.696 | 1490037.992 | 545965.703 |
|        | 2023 | 2071857.536 | 1500393.877 | 571463.660 |
|        | 2024 | 2106636.468 | 1509797.897 | 596838.572 |
|        | 2025 | 2136450.873 | 1517632.473 | 618818.400 |
|        | 2026 | 2164796.470 | 1524551.229 | 640245.241 |
|        | 2027 | 2192079.608 | 1530818.042 | 661261.566 |
|        | 2028 | 2218404.367 | 1536410.575 | 681993.791 |
|        | 2029 | 2243769.140 | 1541433.682 | 702335.459 |
|        | 2030 | 2263570.213 | 1545334.908 | 718235.305 |
|        | 2031 | 2282521.590 | 1548806.767 | 733714.823 |
|        | 2032 | 2300804.945 | 1551897.559 | 748907.386 |
|        | 2033 | 2318464.018 | 1554636.578 | 763827.440 |
|        | 2034 | 2335611.973 | 1557143.277 | 778468.696 |
|        | 2035 | 2347097.290 | 1558834.702 | 788262.589 |
|        | 2036 | 2358248.747 | 1560368.549 | 797880.198 |
|        | 2037 | 2369033.655 | 1561770.950 | 807262.705 |
|        | 2038 | 2379490.114 | 1563052.800 | 816437.313 |
|        | 2039 | 2389546.238 | 1564229.778 | 825316.460 |
| Female | 1990 | 56348.092   | 56348.092   | 0.000      |
|        | 1991 | 110871.862  | 110758.339  | 113.523    |
|        | 1992 | 165654.454  | 165207.684  | 446.770    |
|        | 1993 | 220008.519  | 218919.515  | 1089.004   |
|        | 1994 | 275706.807  | 273499.213  | 2207.594   |
|        | 1995 | 331417.547  | 327556.973  | 3860.574   |
|        | 1996 | 387580.161  | 381351.521  | 6228.640   |
|        | 1997 | 442778.242  | 433459.283  | 9318.959   |
|        | 1998 | 496117.305  | 483017.679  | 13099.626  |
|        | 1999 | 548268.214  | 530636.106  | 17632.109  |
|        | 2000 | 601693.202  | 578504.240  | 23188.961  |
|        | 2001 | 652221.103  | 622761.632  | 29459.471  |
|        | 2002 | 703022.600  | 666171.964  | 36850.636  |
|        | 2003 | 752023.351  | 706963.676  | 45059.675  |
|        | 2004 | 799826.733  | 745624.087  | 54202.646  |
|        | 2005 | 847563.928  | 783152.948  | 64410.980  |
|        | 2006 | 894205.027  | 818634.426  | 75570.601  |
|        | 2007 | 939571.282  | 851959.524  | 87611.758  |
|        | 2008 | 983437.578  | 883103.368  | 100334.210 |
|        | 2009 | 1025803.786 | 912128.780  | 113675.006 |
|        | 2010 | 1066964.934 | 939239.718  | 127725.216 |
|        | 2011 | 1106954.044 | 964536.850  | 142417.194 |
|        | 2012 | 1146108.461 | 988327.528  | 157780.933 |
|        | 2013 | 1183544.689 | 1010167.134 | 173377.555 |
|        | 2014 | 1221220.945 | 1031211.462 | 190009.483 |
|        | 2015 | 1258289.311 | 1051342.599 | 206946.712 |
|        | 2016 | 1294830.207 | 1070314.155 | 224516.052 |
|        | 2017 | 1330332.626 | 1087981.317 | 242351.309 |
|        | 2018 | 1360571.987 | 1102436.109 | 258135.878 |
|        | 2019 | 1389848.723 | 1115769.003 | 274079.720 |
|        | 2020 | 1416046.192 | 1127447.115 | 288599.077 |
|        | 2021 | 1440588.850 | 1137889.030 | 302699.820 |
|        | 2022 | 1464157.934 | 1147423.297 | 316734.638 |

**Results for PHIM for Run 10 (ELL Summary Sensitivity\_Analysis\_2.RTF)**

|      |             |             |             |             |            |
|------|-------------|-------------|-------------|-------------|------------|
|      |             | 2023        | 1486810.237 | 1156104.315 | 330705.922 |
|      |             | 2024        | 1508591.729 | 1164020.196 | 344571.533 |
|      |             | 2025        | 1526875.621 | 1170581.572 | 356294.049 |
|      |             | 2026        | 1543659.810 | 1176272.868 | 367386.941 |
|      |             | 2027        | 1559623.774 | 1181374.604 | 378249.171 |
|      |             | 2028        | 1574852.850 | 1185976.269 | 388876.581 |
|      |             | 2029        | 1589437.452 | 1190172.103 | 399265.350 |
|      |             | 2030        | 1600568.199 | 1193333.165 | 407235.034 |
|      |             | 2031        | 1610776.297 | 1196048.488 | 414727.809 |
|      |             | 2032        | 1620483.563 | 1198488.919 | 421994.644 |
|      |             | 2033        | 1629745.442 | 1200694.645 | 429050.797 |
|      |             | 2034        | 1638721.425 | 1202767.155 | 435954.271 |
|      |             | 2035        | 1644649.404 | 1204085.143 | 440564.261 |
|      |             | 2036        | 1650181.590 | 1205209.811 | 444971.778 |
|      |             | 2037        | 1655476.066 | 1206217.683 | 449258.383 |
|      |             | 2038        | 1660507.914 | 1207141.876 | 453366.038 |
|      |             | 2039        | 1665361.569 | 1208038.049 | 457323.520 |
| COPD | Males       | 1990        | 117002.906  | 117002.906  | 0.000      |
|      |             | 1991        | 233438.833  | 233393.593  | 45.240     |
|      |             | 1992        | 348084.047  | 347930.531  | 153.516    |
|      |             | 1993        | 467278.318  | 466908.128  | 370.189    |
|      |             | 1994        | 584216.907  | 583462.253  | 754.654    |
|      |             | 1995        | 697391.457  | 696035.797  | 1355.660   |
|      |             | 1996        | 809471.271  | 807232.018  | 2239.252   |
|      |             | 1997        | 922587.668  | 919086.839  | 3500.829   |
|      |             | 1998        | 1034072.457 | 1028953.876 | 5118.581   |
|      |             | 1999        | 1153475.399 | 1146138.325 | 7337.074   |
|      |             | 2000        | 1268050.268 | 1257910.107 | 10140.160  |
|      |             | 2001        | 1382786.209 | 1369046.992 | 13739.218  |
|      |             | 2002        | 1497557.412 | 1479311.962 | 18245.449  |
|      |             | 2003        | 1614405.229 | 1590772.469 | 23632.760  |
|      |             | 2004        | 1726672.489 | 1696827.120 | 29845.369  |
|      |             | 2005        | 1847277.524 | 1809766.999 | 37510.526  |
|      |             | 2006        | 1961009.963 | 1914907.196 | 46102.767  |
|      |             | 2007        | 2079868.908 | 2023357.822 | 56511.086  |
|      |             | 2008        | 2206755.783 | 2137690.780 | 69065.003  |
|      |             | 2009        | 2331993.380 | 2248872.749 | 83120.631  |
|      |             | 2010        | 2455130.176 | 2356524.788 | 98605.388  |
|      |             | 2011        | 2582657.849 | 2466121.824 | 116536.025 |
|      |             | 2012        | 2709719.005 | 2573237.132 | 136481.873 |
|      |             | 2013        | 2840547.005 | 2681182.857 | 159364.149 |
|      |             | 2014        | 2971677.135 | 2787054.484 | 184622.651 |
|      |             | 2015        | 3104538.983 | 2893082.070 | 211456.913 |
|      |             | 2016        | 3237650.175 | 2996636.451 | 241013.724 |
|      |             | 2017        | 3370561.253 | 3097681.384 | 272879.869 |
|      |             | 2018        | 3503136.371 | 3195371.169 | 307765.202 |
|      |             | 2019        | 3636402.758 | 3290905.639 | 345497.119 |
|      |             | 2020        | 3768054.453 | 3383369.503 | 384684.950 |
|      |             | 2021        | 3897675.067 | 3471630.519 | 426044.548 |
|      |             | 2022        | 4027307.132 | 3556928.454 | 470378.679 |
|      |             | 2023        | 4156698.720 | 3639137.684 | 517561.036 |
|      |             | 2024        | 4285772.226 | 3718190.828 | 567581.397 |
|      |             | 2025        | 4410759.298 | 3792986.986 | 617772.312 |
|      |             | 2026        | 4531411.064 | 3861952.468 | 669458.596 |
|      |             | 2027        | 4651145.233 | 3927487.979 | 723657.254 |
|      |             | 2028        | 4769837.872 | 3989521.925 | 780315.947 |
|      |             | 2029        | 4887747.179 | 4048197.375 | 839549.804 |
| 2030 | 4997632.895 | 4101707.705 | 895925.190  |             |            |
| 2031 | 5103301.991 | 4149694.241 | 953607.750  |             |            |
| 2032 | 5207593.613 | 4194574.783 | 1013018.83  |             |            |
| 2033 | 5310556.138 | 4236252.154 | 1074303.98  |             |            |
| 2034 | 5412542.816 | 4275093.426 | 1137449.39  |             |            |
| 2035 | 5500522.473 | 4308114.584 | 1192407.89  |             |            |
| 2036 | 5588149.640 | 4338510.832 | 1249638.81  |             |            |
| 2037 | 5674667.886 | 4366560.111 | 1308107.78  |             |            |
| 2038 | 5760391.289 | 4392308.798 | 1368082.49  |             |            |
| 2039 | 5845459.234 | 4416237.114 | 1429222.12  |             |            |
|      | Female      | 1990        | 77434.846   | 77434.846   | 0.000      |
|      |             | 1991        | 160029.510  | 160006.055  | 23.455     |
|      |             | 1992        | 240642.531  | 240553.173  | 89.358     |
|      |             | 1993        | 329362.093  | 329123.163  | 238.931    |
|      |             | 1994        | 418569.515  | 418054.013  | 515.502    |
|      |             | 1995        | 509110.357  | 508124.341  | 986.016    |
|      |             | 1996        | 600040.117  | 598384.016  | 1656.101   |
|      |             | 1997        | 691159.071  | 688559.916  | 2599.155   |
|      |             | 1998        | 782866.899  | 779020.059  | 3846.839   |
|      |             | 1999        | 881526.925  | 875913.849  | 5613.077   |
|      |             | 2000        | 977880.647  | 970150.352  | 7730.296   |

## Results for PHIM for Run 10 (ELL Summary Sensitivity\_Analysis\_2.RTF)

|      |             |             |            |
|------|-------------|-------------|------------|
| 2001 | 1076787.404 | 1066325.581 | 10461.823  |
| 2002 | 1174842.754 | 1161038.824 | 13803.930  |
| 2003 | 1275102.681 | 1257265.505 | 17837.176  |
| 2004 | 1371026.306 | 1348659.969 | 22366.336  |
| 2005 | 1473954.509 | 1445804.235 | 28150.274  |
| 2006 | 1574450.828 | 1539708.851 | 34741.977  |
| 2007 | 1673790.211 | 1631592.407 | 42197.804  |
| 2008 | 1782360.738 | 1730891.235 | 51469.502  |
| 2009 | 1892944.209 | 1830547.397 | 62396.812  |
| 2010 | 2002131.282 | 1927809.346 | 74321.936  |
| 2011 | 2114522.152 | 2026200.399 | 88321.754  |
| 2012 | 2228079.372 | 2124147.611 | 103931.761 |
| 2013 | 2345377.689 | 2223511.045 | 121866.644 |
| 2014 | 2462498.422 | 2320891.590 | 141606.832 |
| 2015 | 2581450.312 | 2418929.357 | 162520.955 |
| 2016 | 2701959.301 | 2516209.258 | 185750.043 |
| 2017 | 2823834.967 | 2612487.019 | 211347.948 |
| 2018 | 2938265.081 | 2701519.315 | 236745.766 |
| 2019 | 3053254.880 | 2788994.214 | 264260.666 |
| 2020 | 3167073.216 | 2874236.601 | 292836.615 |
| 2021 | 3279517.699 | 2957066.431 | 322451.268 |
| 2022 | 3392060.964 | 3037792.005 | 354268.959 |
| 2023 | 3504296.171 | 3116096.396 | 388199.775 |
| 2024 | 3616019.231 | 3191791.911 | 424227.320 |
| 2025 | 3724611.269 | 3263968.939 | 460642.330 |
| 2026 | 3827181.707 | 3330878.022 | 496303.685 |
| 2027 | 3928684.441 | 3394861.464 | 533822.977 |
| 2028 | 4029124.892 | 3455916.041 | 573208.851 |
| 2029 | 4128269.068 | 3513909.707 | 614359.361 |
| 2030 | 4221560.174 | 3567342.203 | 654217.970 |
| 2031 | 4304170.584 | 3612978.589 | 691191.996 |
| 2032 | 4384930.537 | 3655578.939 | 729351.598 |
| 2033 | 4464357.691 | 3695409.181 | 768948.511 |
| 2034 | 4542251.545 | 3732489.608 | 809761.937 |
| 2035 | 4611066.648 | 3764634.940 | 846431.708 |
| 2036 | 4670309.230 | 3790661.712 | 879647.519 |
| 2037 | 4728179.514 | 3814629.255 | 913550.259 |
| 2038 | 4785008.048 | 3836773.434 | 948234.614 |
| 2039 | 4841291.793 | 3857466.205 | 983825.588 |

---

## Results for PHIM for Run 10 (ELL Summary Sensitivity\_Analysis\_2.RTF)

\*\*\*\*\*

**Table 5: Estimated Loss of Life, at the end of follow-up, Population unadjusted for deaths in Ecig scenario**

| Disease      | Sex    | Age Group   | Years of life lost<br>NULL | Years of life lost<br>Ecig | Years of life<br>Saved |
|--------------|--------|-------------|----------------------------|----------------------------|------------------------|
| All Diseases | Males  | 30-34       | 443911.034                 | 303653.242                 | 140257.792             |
|              |        | 35-39       | 1146798.555                | 785731.581                 | 361066.974             |
|              |        | 40-44       | 2609591.408                | 1766535.281                | 843056.127             |
|              |        | 45-49       | 4775841.753                | 3220910.908                | 1554930.84             |
|              |        | 50-54       | 7446969.205                | 5152722.220                | 2294246.98             |
|              |        | 55-59       | 8240205.925                | 5996520.228                | 2243685.70             |
|              |        | 60-64       | 8772829.118                | 6812931.966                | 1959897.15             |
|              |        | 65-69       | 6161494.678                | 5113970.514                | 1047524.16             |
|              |        | 70-74       | 2495906.274                | 2136717.017                | 359189.257             |
|              | 75-79  | 0.000       | 0.000                      | 0.000                      |                        |
|              | Female | 30-34       | 229140.561                 | 176235.872                 | 52904.689              |
|              |        | 35-39       | 570217.942                 | 439341.161                 | 130876.780             |
|              |        | 40-44       | 1267538.938                | 973440.344                 | 294098.594             |
|              |        | 45-49       | 2340070.698                | 1797603.956                | 542466.743             |
|              |        | 50-54       | 3743803.613                | 2893049.848                | 850753.765             |
|              |        | 55-59       | 4591478.168                | 3620086.599                | 971391.569             |
|              |        | 60-64       | 5207367.788                | 4260974.696                | 946393.092             |
|              |        | 65-69       | 4092181.394                | 3489193.235                | 602988.159             |
| 70-74        |        | 1776092.171 | 1547574.208                | 228517.963                 |                        |
| 75-79        | 0.000  | 0.000       | 0.000                      |                            |                        |
| Lung cancer  | Males  | 30-34       | 66065.017                  | 57222.791                  | 8842.226               |
|              |        | 35-39       | 232509.414                 | 202524.280                 | 29985.134              |
|              |        | 40-44       | 688628.041                 | 591813.163                 | 96814.879              |
|              |        | 45-49       | 1528300.367                | 1291928.138                | 236372.229             |
|              |        | 50-54       | 2730187.229                | 2294192.253                | 435994.976             |
|              |        | 55-59       | 3909101.673                | 3282838.685                | 626262.989             |
|              |        | 60-64       | 4287716.660                | 3709508.155                | 578208.504             |
|              |        | 65-69       | 3467897.115                | 3065226.788                | 402670.326             |
|              |        | 70-74       | 1312144.343                | 1179829.874                | 132314.469             |
|              | 75-79  | 0.000       | 0.000                      | 0.000                      |                        |
|              | Female | 30-34       | 51913.113                  | 45673.428                  | 6239.685               |
|              |        | 35-39       | 189792.904                 | 168130.855                 | 21662.050              |
|              |        | 40-44       | 527596.573                 | 459239.713                 | 68356.860              |
|              |        | 45-49       | 1122524.269                | 963946.160                 | 158578.109             |
|              |        | 50-54       | 1882214.322                | 1604431.296                | 277783.026             |
|              |        | 55-59       | 2595581.943                | 2203413.252                | 392168.691             |
|              |        | 60-64       | 2846273.090                | 2474344.244                | 371928.846             |
|              |        | 65-69       | 2358758.394                | 2090200.319                | 268558.075             |
| 70-74        |        | 937814.238  | 845622.294                 | 92191.943                  |                        |
| 75-79        | 0.000  | 0.000       | 0.000                      |                            |                        |
| IHD          | Males  | 30-34       | 263834.566                 | 164264.863                 | 99569.703              |
|              |        | 35-39       | 692140.150                 | 424659.965                 | 267480.186             |
|              |        | 40-44       | 1519708.432                | 893188.585                 | 626519.848             |
|              |        | 45-49       | 2568546.697                | 1460562.862                | 1107983.83             |
|              |        | 50-54       | 3632929.903                | 2124914.604                | 1508015.30             |
|              |        | 55-59       | 2807892.356                | 1680113.285                | 1127779.07             |
|              |        | 60-64       | 2599825.934                | 1738089.559                | 861736.374             |
|              |        | 65-69       | 1113578.307                | 815595.542                 | 297982.765             |
|              |        | 70-74       | 437536.271                 | 348214.360                 | 89321.910              |
|              | 75-79  | 0.000       | 0.000                      | 0.000                      |                        |
|              | Female | 30-34       | 79649.097                  | 54372.763                  | 25276.334              |
|              |        | 35-39       | 193965.908                 | 127468.009                 | 66497.898              |
|              |        | 40-44       | 403380.974                 | 258236.899                 | 145144.076             |
|              |        | 45-49       | 671385.408                 | 423357.627                 | 248027.781             |
|              |        | 50-54       | 1011875.989                | 653996.636                 | 357879.353             |
|              |        | 55-59       | 849875.715                 | 560850.863                 | 289024.853             |
|              |        | 60-64       | 925490.876                 | 671145.438                 | 254345.438             |
|              |        | 65-69       | 455463.881                 | 359094.470                 | 96369.412              |
| 70-74        |        | 207681.216  | 174534.803                 | 33146.413                  |                        |
| 75-79        | 0.000  | 0.000       | 0.000                      |                            |                        |
| Stroke       | Males  | 30-34       | 73463.650                  | 51991.758                  | 21471.892              |
|              |        | 35-39       | 151934.057                 | 106051.616                 | 45882.441              |
|              |        | 40-44       | 262845.974                 | 179309.546                 | 83536.428              |
|              |        | 45-49       | 383421.246                 | 253593.023                 | 129828.223             |
|              |        | 50-54       | 479872.634                 | 304062.749                 | 175809.885             |
|              |        | 55-59       | 437124.903                 | 268947.944                 | 168176.959             |
|              |        | 60-64       | 419457.235                 | 270678.054                 | 148779.180             |
|              |        | 65-69       | 128180.574                 | 87997.572                  | 40183.002              |
|              |        | 70-74       | 53245.965                  | 39670.039                  | 13575.927              |
|              | 75-79  | 0.000       | 0.000                      | 0.000                      |                        |
|              | Female | 30-34       | 62919.090                  | 48619.057                  | 14300.034              |

**Results for PHIM for Run 10 (ELL Summary Sensitivity\_Analysis\_2.RTF)**

|      |        |       |             |             |            |
|------|--------|-------|-------------|-------------|------------|
|      |        | 35-39 | 120806.205  | 91518.174   | 29288.032  |
|      |        | 40-44 | 203391.885  | 150804.046  | 52587.839  |
|      |        | 45-49 | 278172.097  | 201258.340  | 76913.757  |
|      |        | 50-54 | 325979.181  | 229786.637  | 96192.544  |
|      |        | 55-59 | 275161.340  | 190020.561  | 85140.779  |
|      |        | 60-64 | 268920.493  | 194283.249  | 74637.244  |
|      |        | 65-69 | 87956.054   | 67298.971   | 20657.083  |
|      |        | 70-74 | 42055.224   | 33869.968   | 8185.256   |
|      |        | 75-79 | 0.000       | 0.000       | 0.000      |
| COPD | Males  | 30-34 | 40547.801   | 30173.831   | 10373.970  |
|      |        | 35-39 | 70214.933   | 52495.720   | 17719.213  |
|      |        | 40-44 | 138408.960  | 102223.988  | 36184.973  |
|      |        | 45-49 | 295573.443  | 214826.884  | 80746.559  |
|      |        | 50-54 | 603979.438  | 429552.614  | 174426.825 |
|      |        | 55-59 | 1086086.992 | 764620.314  | 321466.678 |
|      |        | 60-64 | 1465829.290 | 1094656.197 | 371173.093 |
|      |        | 65-69 | 1451838.682 | 1145150.611 | 306688.071 |
|      |        | 70-74 | 692979.695  | 569002.744  | 123976.951 |
|      |        | 75-79 | 0.000       | 0.000       | 0.000      |
|      | Female | 30-34 | 34659.261   | 27570.624   | 7088.637   |
|      |        | 35-39 | 65652.924   | 52224.123   | 13428.801  |
|      |        | 40-44 | 133169.505  | 105159.686  | 28009.819  |
|      |        | 45-49 | 267988.924  | 209041.828  | 58947.096  |
|      |        | 50-54 | 523734.121  | 404835.279  | 118898.841 |
|      |        | 55-59 | 870859.170  | 665801.924  | 205057.246 |
|      |        | 60-64 | 1166683.329 | 921201.765  | 245481.563 |
|      |        | 65-69 | 1190003.066 | 972599.476  | 217403.590 |
|      |        | 70-74 | 588541.493  | 493547.143  | 94994.350  |
|      |        | 75-79 | 0.000       | 0.000       | 0.000      |

---

## Results for PHIM for Run 10 (ELL Summary Sensitivity\_Analysis\_2.RTF)

\*\*\*\*\*

**Table 6: Estimated Loss of Life, at the end of follow-up, Population and Number deaths adjusted for Ecig scenario**

| Disease      | Sex    | Age Group   | Years of life lost<br>NULL | Years of life lost<br>Ecig | Years of life<br>Saved |
|--------------|--------|-------------|----------------------------|----------------------------|------------------------|
| All Diseases | Males  | 30-34       | 443911.034                 | 303667.993                 | 140243.041             |
|              |        | 35-39       | 1146798.555                | 785838.383                 | 360960.172             |
|              |        | 40-44       | 2609591.408                | 1767197.678                | 842393.730             |
|              |        | 45-49       | 4775841.753                | 3223720.637                | 1552121.12             |
|              |        | 50-54       | 7446969.205                | 5160718.253                | 2286250.95             |
|              |        | 55-59       | 8240205.925                | 6008191.539                | 2232014.39             |
|              |        | 60-64       | 8772829.118                | 6830420.640                | 1942408.48             |
|              |        | 65-69       | 6161494.678                | 5126435.010                | 1035059.67             |
|              |        | 70-74       | 2495906.274                | 2142448.524                | 353457.750             |
|              | 75-79  | 0.000       | 0.000                      | 0.000                      |                        |
|              | Female | 30-34       | 229140.561                 | 176239.031                 | 52901.529              |
|              |        | 35-39       | 570217.942                 | 439363.700                 | 130854.241             |
|              |        | 40-44       | 1267538.938                | 973577.974                 | 293960.964             |
|              |        | 45-49       | 2340070.698                | 1798196.985                | 541873.713             |
|              |        | 50-54       | 3743803.613                | 2894910.293                | 848893.320             |
|              |        | 55-59       | 4591478.168                | 3623463.032                | 968015.136             |
|              |        | 60-64       | 5207367.788                | 4266474.904                | 940892.883             |
|              |        | 65-69       | 4092181.394                | 3494029.267                | 598152.127             |
| 70-74        |        | 1776092.171 | 1550200.584                | 225891.587                 |                        |
| 75-79        | 0.000  | 0.000       | 0.000                      |                            |                        |
| Lung cancer  | Males  | 30-34       | 66065.017                  | 57225.554                  | 8839.464               |
|              |        | 35-39       | 232509.414                 | 202552.746                 | 29956.669              |
|              |        | 40-44       | 688628.041                 | 592048.805                 | 96579.236              |
|              |        | 45-49       | 1528300.367                | 1293138.658                | 235161.709             |
|              |        | 50-54       | 2730187.229                | 2297954.117                | 432233.112             |
|              |        | 55-59       | 3909101.673                | 3289465.154                | 619636.519             |
|              |        | 60-64       | 4287716.660                | 3719244.918                | 568471.742             |
|              |        | 65-69       | 3467897.115                | 3072514.918                | 395382.197             |
|              |        | 70-74       | 1312144.343                | 1182907.026                | 129237.318             |
|              | 75-79  | 0.000       | 0.000                      | 0.000                      |                        |
|              | Female | 30-34       | 51913.113                  | 45674.294                  | 6238.819               |
|              |        | 35-39       | 189792.904                 | 168139.625                 | 21653.280              |
|              |        | 40-44       | 527596.573                 | 459307.552                 | 68289.021              |
|              |        | 45-49       | 1122524.269                | 964276.147                 | 158248.122             |
|              |        | 50-54       | 1882214.322                | 1605498.951                | 276715.371             |
|              |        | 55-59       | 2595581.943                | 2205516.776                | 390065.167             |
|              |        | 60-64       | 2846273.090                | 2477596.953                | 368676.136             |
|              |        | 65-69       | 2358758.394                | 2093030.045                | 265728.349             |
| 70-74        |        | 937814.238  | 847017.375                 | 90796.862                  |                        |
| 75-79        | 0.000  | 0.000       | 0.000                      |                            |                        |
| IHD          | Males  | 30-34       | 263834.566                 | 164272.912                 | 99561.653              |
|              |        | 35-39       | 692140.150                 | 424715.454                 | 267424.697             |
|              |        | 40-44       | 1519708.432                | 893499.540                 | 626208.892             |
|              |        | 45-49       | 2568546.697                | 1461693.410                | 1106853.29             |
|              |        | 50-54       | 3632929.903                | 2127742.674                | 1505187.23             |
|              |        | 55-59       | 2807892.356                | 1682552.997                | 1125339.36             |
|              |        | 60-64       | 2599825.934                | 1741207.956                | 858617.978             |
|              |        | 65-69       | 1113578.307                | 816736.283                 | 296842.025             |
|              |        | 70-74       | 437536.271                 | 348698.644                 | 88837.627              |
|              | 75-79  | 0.000       | 0.000                      | 0.000                      |                        |
|              | Female | 30-34       | 79649.097                  | 54373.780                  | 25275.317              |
|              |        | 35-39       | 193965.908                 | 127474.643                 | 66491.264              |
|              |        | 40-44       | 403380.974                 | 258271.432                 | 145109.543             |
|              |        | 45-49       | 671385.408                 | 423481.131                 | 247904.277             |
|              |        | 50-54       | 1011875.989                | 654347.844                 | 357528.145             |
|              |        | 55-59       | 849875.715                 | 561222.506                 | 288653.210             |
|              |        | 60-64       | 925490.876                 | 671700.648                 | 253790.228             |
|              |        | 65-69       | 455463.881                 | 359348.816                 | 96115.065              |
| 70-74        |        | 207681.216  | 174672.999                 | 33008.218                  |                        |
| 75-79        | 0.000  | 0.000       | 0.000                      |                            |                        |
| Stroke       | Males  | 30-34       | 73463.650                  | 51994.002                  | 21469.647              |
|              |        | 35-39       | 151934.057                 | 106065.234                 | 45868.823              |
|              |        | 40-44       | 262845.974                 | 179372.527                 | 83473.447              |
|              |        | 45-49       | 383421.246                 | 253796.520                 | 129624.726             |
|              |        | 50-54       | 479872.634                 | 304488.906                 | 175383.728             |
|              |        | 55-59       | 437124.903                 | 269387.503                 | 167737.400             |
|              |        | 60-64       | 419457.235                 | 271245.250                 | 148211.985             |
|              |        | 65-69       | 128180.574                 | 88143.653                  | 40036.921              |
|              |        | 70-74       | 53245.965                  | 39736.183                  | 13509.782              |
|              | 75-79  | 0.000       | 0.000                      | 0.000                      |                        |
|              | Female | 30-34       | 62919.090                  | 48619.788                  | 14299.302              |

**Results for PHIM for Run 10 (ELL Summary Sensitivity\_Analysis\_2.RTF)**

|      |        |       |             |             |            |
|------|--------|-------|-------------|-------------|------------|
|      |        | 35-39 | 120806.205  | 91522.174   | 29284.032  |
|      |        | 40-44 | 203391.885  | 150821.620  | 52570.266  |
|      |        | 45-49 | 278172.097  | 201312.080  | 76860.017  |
|      |        | 50-54 | 325979.181  | 229902.756  | 96076.425  |
|      |        | 55-59 | 275161.340  | 190148.887  | 85012.453  |
|      |        | 60-64 | 268920.493  | 194456.266  | 74464.227  |
|      |        | 65-69 | 87956.054   | 67352.533   | 20603.521  |
|      |        | 70-74 | 42055.224   | 33901.947   | 8153.277   |
|      |        | 75-79 | 0.000       | 0.000       | 0.000      |
| COPD | Males  | 30-34 | 40547.801   | 30175.524   | 10372.277  |
|      |        | 35-39 | 70214.933   | 52504.950   | 17709.984  |
|      |        | 40-44 | 138408.960  | 102276.806  | 36132.154  |
|      |        | 45-49 | 295573.443  | 215092.049  | 80481.394  |
|      |        | 50-54 | 603979.438  | 430532.556  | 173446.883 |
|      |        | 55-59 | 1086086.992 | 766785.885  | 319301.107 |
|      |        | 60-64 | 1465829.290 | 1098722.517 | 367106.773 |
|      |        | 65-69 | 1451838.682 | 1149040.157 | 302798.525 |
|      |        | 70-74 | 692979.695  | 571106.671  | 121873.023 |
|      |        | 75-79 | 0.000       | 0.000       | 0.000      |
|      | Female | 30-34 | 34659.261   | 27571.170   | 7088.091   |
|      |        | 35-39 | 65652.924   | 52227.259   | 13425.666  |
|      |        | 40-44 | 133169.505  | 105177.371  | 27992.134  |
|      |        | 45-49 | 267988.924  | 209127.627  | 58861.297  |
|      |        | 50-54 | 523734.121  | 405160.742  | 118573.379 |
|      |        | 55-59 | 870859.170  | 666574.864  | 204284.306 |
|      |        | 60-64 | 1166683.329 | 922721.037  | 243962.292 |
|      |        | 65-69 | 1190003.066 | 974297.873  | 215705.193 |
|      |        | 70-74 | 588541.493  | 494608.263  | 93933.230  |
|      |        | 75-79 | 0.000       | 0.000       | 0.000      |

---

## Results for PHIM for Run 1 (Sensitivity\_Analysis\_3.RTF)

System Date and Time: 20210220T095720  
User: JohnS  
SAS Version: 9.4  
Project: Population Health Impact Model 7.3

The System is running in Test Mode

Maximum Upper Age for P Component = 79  
Upper Age for ELL Calculations = 75  
Report in E-component: Social Classes A and B combined  
Description: Sensitivity Analysis 3 for VeneBio, Change Quitting rate  
Assumption Files:  
Options Control File: C:\VeneBio\OG\_Test\US\_Control\_V\_S3.CSV  
TTP Test File: C:\VeneBio\OG\_Test\TTP\_Test\_MAS3.csv  
TTP Reference File: C:\VeneBio\OG\_Test\TTP\_Reference\_V.csv  
TTP Factor Test File: C:\VeneBio\OG\_Test\TTP\_FACTOR\_Test.csv  
TTP Factor Reference File: C:\VeneBio\OG\_Test\TTP\_FACTOR\_Test.csv  
TP Socioeconomic Groups: Not Used  
Output Choices:C:\VeneBio\OG\_Test\OUTC\_PA.csv

Main Results will be sent to the folder C:\VeneBio\Main\_Results\  
Plots will be sent to the folder C:\VeneBio\Plot\_Results\Plots\_20210220T095720  
Saved P, E and/or A Component results will be sent to the folder C:\VeneBio\SAVED\Saved\_20210220T095720\

### Table of Contents

|                                                                                                               |      |
|---------------------------------------------------------------------------------------------------------------|------|
| <a href="#">Control File Details for Run: 1</a>                                                               | 1123 |
| <a href="#">TTP values for Run: 1, Scenario: NULL</a>                                                         | 1124 |
| <a href="#">TTP values for Run: 1, Scenario: Ecig</a>                                                         | 1126 |
| <a href="#">Main Output for the Tobacco History for Run: 1, Simulation: 1, Scenario: NULL</a>                 | 1130 |
| <a href="#">Main Output for the Tobacco History for Run: 1, Simulation: 1, Scenario: Ecig</a>                 | 1132 |
| <a href="#">Main Results for E-Component for Run: 1, Simulation: 1, COD: Four Diseases Combined</a>           | 1148 |
| <a href="#">Main Results for E-Component for Run: 1, Simulation: 1, COD: LUNG CANCER</a>                      | 1149 |
| <a href="#">Main Results for E-Component for Run: 1, Simulation: 1, COD: IHD</a>                              | 1150 |
| <a href="#">Main Results for E-Component for Run: 1, Simulation: 1, COD: STROKE</a>                           | 1151 |
| <a href="#">Main Results for E-Component for Run: 1, Simulation: 1, COD: COPD</a>                             | 1152 |
| <a href="#">Main Results for E-Component for Run: 1, Simulation: 1, COD: Four Diseases Combined, Adjusted</a> | 1153 |
| <a href="#">Main Results for E-Component for Run: 1, Simulation: 1, COD: LUNG CANCER, Adjusted</a>            | 1154 |
| <a href="#">Main Results for E-Component for Run: 1, Simulation: 1, COD: IHD, Adjusted</a>                    | 1155 |
| <a href="#">Main Results for E-Component for Run: 1, Simulation: 1, COD: STROKE, Adjusted</a>                 | 1156 |
| <a href="#">Main Results for E-Component for Run: 1, Simulation: 1, COD: COPD, Adjusted</a>                   | 1157 |
| <a href="#">Control File Details for Run: 2</a>                                                               | 1158 |
| <a href="#">TTP values for Run: 2, Scenario: NULL</a>                                                         | 1159 |
| <a href="#">TTP values for Run: 2, Scenario: Ecig</a>                                                         | 1161 |
| <a href="#">Main Output for the Tobacco History for Run: 2, Simulation: 1, Scenario: NULL</a>                 | 1165 |
| <a href="#">Main Output for the Tobacco History for Run: 2, Simulation: 1, Scenario: Ecig</a>                 | 1167 |
| <a href="#">Main Results for E-Component for Run: 2, Simulation: 1, COD: Four Diseases Combined</a>           | 1183 |
| <a href="#">Main Results for E-Component for Run: 2, Simulation: 1, COD: LUNG CANCER</a>                      | 1184 |
| <a href="#">Main Results for E-Component for Run: 2, Simulation: 1, COD: IHD</a>                              | 1185 |
| <a href="#">Main Results for E-Component for Run: 2, Simulation: 1, COD: STROKE</a>                           | 1186 |
| <a href="#">Main Results for E-Component for Run: 2, Simulation: 1, COD: COPD</a>                             | 1187 |
| <a href="#">Main Results for E-Component for Run: 2, Simulation: 1, COD: Four Diseases Combined, Adjusted</a> | 1188 |
| <a href="#">Main Results for E-Component for Run: 2, Simulation: 1, COD: LUNG CANCER, Adjusted</a>            | 1189 |
| <a href="#">Main Results for E-Component for Run: 2, Simulation: 1, COD: IHD, Adjusted</a>                    | 1190 |
| <a href="#">Main Results for E-Component for Run: 2, Simulation: 1, COD: STROKE, Adjusted</a>                 | 1191 |
| <a href="#">Main Results for E-Component for Run: 2, Simulation: 1, COD: COPD, Adjusted</a>                   | 1192 |
| <a href="#">Control File Details for Run: 3</a>                                                               | 1193 |
| <a href="#">TTP values for Run: 3, Scenario: NULL</a>                                                         | 1194 |
| <a href="#">TTP values for Run: 3, Scenario: Ecig</a>                                                         | 1196 |
| <a href="#">Main Output for the Tobacco History for Run: 3, Simulation: 1, Scenario: NULL</a>                 | 1200 |
| <a href="#">Main Output for the Tobacco History for Run: 3, Simulation: 1, Scenario: Ecig</a>                 | 1202 |
| <a href="#">Main Results for E-Component for Run: 3, Simulation: 1, COD: Four Diseases Combined</a>           | 1218 |
| <a href="#">Main Results for E-Component for Run: 3, Simulation: 1, COD: LUNG CANCER</a>                      | 1219 |
| <a href="#">Main Results for E-Component for Run: 3, Simulation: 1, COD: IHD</a>                              | 1220 |
| <a href="#">Main Results for E-Component for Run: 3, Simulation: 1, COD: STROKE</a>                           | 1221 |
| <a href="#">Main Results for E-Component for Run: 3, Simulation: 1, COD: COPD</a>                             | 1222 |
| <a href="#">Main Results for E-Component for Run: 3, Simulation: 1, COD: Four Diseases Combined, Adjusted</a> | 1223 |
| <a href="#">Main Results for E-Component for Run: 3, Simulation: 1, COD: LUNG CANCER, Adjusted</a>            | 1224 |
| <a href="#">Main Results for E-Component for Run: 3, Simulation: 1, COD: IHD, Adjusted</a>                    | 1225 |
| <a href="#">Main Results for E-Component for Run: 3, Simulation: 1, COD: STROKE, Adjusted</a>                 | 1226 |
| <a href="#">Main Results for E-Component for Run: 3, Simulation: 1, COD: COPD, Adjusted</a>                   | 1227 |
| <a href="#">Control File Details for Run: 4</a>                                                               | 1228 |
| <a href="#">TTP values for Run: 4, Scenario: NULL</a>                                                         | 1229 |



## Results for PHIM for Run 1 (Sensitivity\_Analysis\_3.RTF)

|                                                                                                               |      |
|---------------------------------------------------------------------------------------------------------------|------|
| <a href="#">TTP values for Run: 4, Scenario: Ecig</a>                                                         | 1231 |
| <a href="#">Main Output for the Tobacco History for Run: 4, Simulation: 1, Scenario: NULL</a>                 | 1235 |
| <a href="#">Main Output for the Tobacco History for Run: 4, Simulation: 1, Scenario: Ecig</a>                 | 1237 |
| <a href="#">Main Results for E-Component for Run: 4, Simulation: 1, COD: Four Diseases Combined</a>           | 1253 |
| <a href="#">Main Results for E-Component for Run: 4, Simulation: 1, COD: LUNG CANCER</a>                      | 1254 |
| <a href="#">Main Results for E-Component for Run: 4, Simulation: 1, COD: IHD</a>                              | 1255 |
| <a href="#">Main Results for E-Component for Run: 4, Simulation: 1, COD: STROKE</a>                           | 1256 |
| <a href="#">Main Results for E-Component for Run: 4, Simulation: 1, COD: COPD</a>                             | 1257 |
| <a href="#">Main Results for E-Component for Run: 4, Simulation: 1, COD: Four Diseases Combined, Adjusted</a> | 1258 |
| <a href="#">Main Results for E-Component for Run: 4, Simulation: 1, COD: LUNG CANCER, Adjusted</a>            | 1259 |
| <a href="#">Main Results for E-Component for Run: 4, Simulation: 1, COD: IHD, Adjusted</a>                    | 1260 |
| <a href="#">Main Results for E-Component for Run: 4, Simulation: 1, COD: STROKE, Adjusted</a>                 | 1261 |
| <a href="#">Main Results for E-Component for Run: 4, Simulation: 1, COD: COPD, Adjusted</a>                   | 1262 |
| <a href="#">Control File Details for Run: 5</a>                                                               | 1263 |
| <a href="#">TTP values for Run: 5, Scenario: NULL</a>                                                         | 1264 |
| <a href="#">TTP values for Run: 5, Scenario: Ecig</a>                                                         | 1266 |
| <a href="#">Main Output for the Tobacco History for Run: 5, Simulation: 1, Scenario: NULL</a>                 | 1270 |
| <a href="#">Main Output for the Tobacco History for Run: 5, Simulation: 1, Scenario: Ecig</a>                 | 1272 |
| <a href="#">Main Results for E-Component for Run: 5, Simulation: 1, COD: Four Diseases Combined</a>           | 1288 |
| <a href="#">Main Results for E-Component for Run: 5, Simulation: 1, COD: LUNG CANCER</a>                      | 1289 |
| <a href="#">Main Results for E-Component for Run: 5, Simulation: 1, COD: IHD</a>                              | 1290 |
| <a href="#">Main Results for E-Component for Run: 5, Simulation: 1, COD: STROKE</a>                           | 1291 |
| <a href="#">Main Results for E-Component for Run: 5, Simulation: 1, COD: COPD</a>                             | 1292 |
| <a href="#">Main Results for E-Component for Run: 5, Simulation: 1, COD: Four Diseases Combined, Adjusted</a> | 1293 |
| <a href="#">Main Results for E-Component for Run: 5, Simulation: 1, COD: LUNG CANCER, Adjusted</a>            | 1294 |
| <a href="#">Main Results for E-Component for Run: 5, Simulation: 1, COD: IHD, Adjusted</a>                    | 1295 |
| <a href="#">Main Results for E-Component for Run: 5, Simulation: 1, COD: STROKE, Adjusted</a>                 | 1296 |
| <a href="#">Main Results for E-Component for Run: 5, Simulation: 1, COD: COPD, Adjusted</a>                   | 1297 |
| <a href="#">Control File Details for Run: 6</a>                                                               | 1298 |
| <a href="#">TTP values for Run: 6, Scenario: NULL</a>                                                         | 1299 |
| <a href="#">TTP values for Run: 6, Scenario: Ecig</a>                                                         | 1301 |
| <a href="#">Main Output for the Tobacco History for Run: 6, Simulation: 1, Scenario: NULL</a>                 | 1305 |
| <a href="#">Main Output for the Tobacco History for Run: 6, Simulation: 1, Scenario: Ecig</a>                 | 1307 |
| <a href="#">Main Results for E-Component for Run: 6, Simulation: 1, COD: Four Diseases Combined</a>           | 1323 |
| <a href="#">Main Results for E-Component for Run: 6, Simulation: 1, COD: LUNG CANCER</a>                      | 1324 |
| <a href="#">Main Results for E-Component for Run: 6, Simulation: 1, COD: IHD</a>                              | 1325 |
| <a href="#">Main Results for E-Component for Run: 6, Simulation: 1, COD: STROKE</a>                           | 1326 |
| <a href="#">Main Results for E-Component for Run: 6, Simulation: 1, COD: COPD</a>                             | 1327 |
| <a href="#">Main Results for E-Component for Run: 6, Simulation: 1, COD: Four Diseases Combined, Adjusted</a> | 1328 |
| <a href="#">Main Results for E-Component for Run: 6, Simulation: 1, COD: LUNG CANCER, Adjusted</a>            | 1329 |
| <a href="#">Main Results for E-Component for Run: 6, Simulation: 1, COD: IHD, Adjusted</a>                    | 1330 |
| <a href="#">Main Results for E-Component for Run: 6, Simulation: 1, COD: STROKE, Adjusted</a>                 | 1331 |
| <a href="#">Main Results for E-Component for Run: 6, Simulation: 1, COD: COPD, Adjusted</a>                   | 1332 |
| <a href="#">Control File Details for Run: 7</a>                                                               | 1333 |
| <a href="#">TTP values for Run: 7, Scenario: NULL</a>                                                         | 1334 |
| <a href="#">TTP values for Run: 7, Scenario: Ecig</a>                                                         | 1336 |
| <a href="#">Main Output for the Tobacco History for Run: 7, Simulation: 1, Scenario: NULL</a>                 | 1340 |
| <a href="#">Main Output for the Tobacco History for Run: 7, Simulation: 1, Scenario: Ecig</a>                 | 1342 |
| <a href="#">Main Results for E-Component for Run: 7, Simulation: 1, COD: Four Diseases Combined</a>           | 1358 |
| <a href="#">Main Results for E-Component for Run: 7, Simulation: 1, COD: LUNG CANCER</a>                      | 1359 |
| <a href="#">Main Results for E-Component for Run: 7, Simulation: 1, COD: IHD</a>                              | 1360 |
| <a href="#">Main Results for E-Component for Run: 7, Simulation: 1, COD: STROKE</a>                           | 1361 |
| <a href="#">Main Results for E-Component for Run: 7, Simulation: 1, COD: COPD</a>                             | 1362 |
| <a href="#">Main Results for E-Component for Run: 7, Simulation: 1, COD: Four Diseases Combined, Adjusted</a> | 1363 |
| <a href="#">Main Results for E-Component for Run: 7, Simulation: 1, COD: LUNG CANCER, Adjusted</a>            | 1364 |
| <a href="#">Main Results for E-Component for Run: 7, Simulation: 1, COD: IHD, Adjusted</a>                    | 1365 |
| <a href="#">Main Results for E-Component for Run: 7, Simulation: 1, COD: STROKE, Adjusted</a>                 | 1366 |
| <a href="#">Main Results for E-Component for Run: 7, Simulation: 1, COD: COPD, Adjusted</a>                   | 1367 |
| <a href="#">Control File Details for Run: 8</a>                                                               | 1368 |
| <a href="#">TTP values for Run: 8, Scenario: NULL</a>                                                         | 1369 |
| <a href="#">TTP values for Run: 8, Scenario: Ecig</a>                                                         | 1371 |
| <a href="#">Main Output for the Tobacco History for Run: 8, Simulation: 1, Scenario: NULL</a>                 | 1375 |
| <a href="#">Main Output for the Tobacco History for Run: 8, Simulation: 1, Scenario: Ecig</a>                 | 1377 |
| <a href="#">Main Results for E-Component for Run: 8, Simulation: 1, COD: Four Diseases Combined</a>           | 1393 |
| <a href="#">Main Results for E-Component for Run: 8, Simulation: 1, COD: LUNG CANCER</a>                      | 1394 |
| <a href="#">Main Results for E-Component for Run: 8, Simulation: 1, COD: IHD</a>                              | 1395 |
| <a href="#">Main Results for E-Component for Run: 8, Simulation: 1, COD: STROKE</a>                           | 1396 |
| <a href="#">Main Results for E-Component for Run: 8, Simulation: 1, COD: COPD</a>                             | 1397 |
| <a href="#">Main Results for E-Component for Run: 8, Simulation: 1, COD: Four Diseases Combined, Adjusted</a> | 1398 |
| <a href="#">Main Results for E-Component for Run: 8, Simulation: 1, COD: LUNG CANCER, Adjusted</a>            | 1399 |
| <a href="#">Main Results for E-Component for Run: 8, Simulation: 1, COD: IHD, Adjusted</a>                    | 1400 |
| <a href="#">Main Results for E-Component for Run: 8, Simulation: 1, COD: STROKE, Adjusted</a>                 | 1401 |
| <a href="#">Main Results for E-Component for Run: 8, Simulation: 1, COD: COPD, Adjusted</a>                   | 1402 |

## Results for PHIM for Run 1 (Sensitivity\_Analysis\_3.RTF)

|                                                                                                                                                            |      |
|------------------------------------------------------------------------------------------------------------------------------------------------------------|------|
| <a href="#">Estimated Loss of Life from the E Component for Run: 2, Simulation: 1</a>                                                                      | 1403 |
| <a href="#">Table 1: Estimated Loss of Life, at the end of follow-up, all age groups combined, Population unadjusted for deaths in Ecig scenario</a>       | 1403 |
| <a href="#">Table 2: Estimated Loss of Life, at the end of follow-up, all age groups combined, Population and Number deaths adjusted for Ecig scenario</a> | 1404 |
| <a href="#">Table 3: Estimated Loss of Life, All age groups combined, Population unadjusted for deaths in Ecig scenario, cumulative over years</a>         | 1405 |
| <a href="#">Table 4: Estimated Loss of Life, All age groups combined, Population and Number deaths adjusted for Ecig scenario, cumulative over years</a>   | 1412 |
| <a href="#">Table 5: Estimated Loss of Life, at the end of follow-up, Population unadjusted for deaths in Ecig scenario</a>                                | 1419 |
| <a href="#">Table 6: Estimated Loss of Life, at the end of follow-up, Population and Number deaths adjusted for Ecig scenario</a>                          | 1421 |
| <a href="#">Estimated Loss of Life from the E Component for Run: 4, Simulation: 1</a>                                                                      | 1423 |
| <a href="#">Table 1: Estimated Loss of Life, at the end of follow-up, all age groups combined, Population unadjusted for deaths in Ecig scenario</a>       | 1423 |
| <a href="#">Table 2: Estimated Loss of Life, at the end of follow-up, all age groups combined, Population and Number deaths adjusted for Ecig scenario</a> | 1424 |
| <a href="#">Table 3: Estimated Loss of Life, All age groups combined, Population unadjusted for deaths in Ecig scenario, cumulative over years</a>         | 1425 |
| <a href="#">Table 4: Estimated Loss of Life, All age groups combined, Population and Number deaths adjusted for Ecig scenario, cumulative over years</a>   | 1432 |
| <a href="#">Table 5: Estimated Loss of Life, at the end of follow-up, Population unadjusted for deaths in Ecig scenario</a>                                | 1439 |
| <a href="#">Table 6: Estimated Loss of Life, at the end of follow-up, Population and Number deaths adjusted for Ecig scenario</a>                          | 1441 |
| <a href="#">Estimated Loss of Life from the E Component for Run: 6, Simulation: 1</a>                                                                      | 1443 |
| <a href="#">Table 1: Estimated Loss of Life, at the end of follow-up, all age groups combined, Population unadjusted for deaths in Ecig scenario</a>       | 1443 |
| <a href="#">Table 2: Estimated Loss of Life, at the end of follow-up, all age groups combined, Population and Number deaths adjusted for Ecig scenario</a> | 1444 |
| <a href="#">Table 3: Estimated Loss of Life, All age groups combined, Population unadjusted for deaths in Ecig scenario, cumulative over years</a>         | 1445 |
| <a href="#">Table 4: Estimated Loss of Life, All age groups combined, Population and Number deaths adjusted for Ecig scenario, cumulative over years</a>   | 1452 |
| <a href="#">Table 5: Estimated Loss of Life, at the end of follow-up, Population unadjusted for deaths in Ecig scenario</a>                                | 1459 |
| <a href="#">Table 6: Estimated Loss of Life, at the end of follow-up, Population and Number deaths adjusted for Ecig scenario</a>                          | 1461 |
| <a href="#">Estimated Loss of Life from the E Component for Run: 8, Simulation: 1</a>                                                                      | 1463 |
| <a href="#">Table 1: Estimated Loss of Life, at the end of follow-up, all age groups combined, Population unadjusted for deaths in Ecig scenario</a>       | 1463 |
| <a href="#">Table 2: Estimated Loss of Life, at the end of follow-up, all age groups combined, Population and Number deaths adjusted for Ecig scenario</a> | 1464 |
| <a href="#">Table 3: Estimated Loss of Life, All age groups combined, Population unadjusted for deaths in Ecig scenario, cumulative over years</a>         | 1465 |
| <a href="#">Table 4: Estimated Loss of Life, All age groups combined, Population and Number deaths adjusted for Ecig scenario, cumulative over years</a>   | 1472 |
| <a href="#">Table 5: Estimated Loss of Life, at the end of follow-up, Population unadjusted for deaths in Ecig scenario</a>                                | 1479 |
| <a href="#">Table 6: Estimated Loss of Life, at the end of follow-up, Population and Number deaths adjusted for Ecig scenario</a>                          | 1481 |

## Results for PHIM for Run 1 (Sensitivity\_Analysis\_3.RTF)

---

### Control File Details for Run: 1

| Variable Parameter                                       | Value                  |
|----------------------------------------------------------|------------------------|
| 1. Name for Reference Scenario                           | NULL                   |
| 2. Name for Test Scenario                                | Ecig                   |
| 3. Name for Product 1                                    | CC                     |
| 4. Name for Product 2                                    | Ecig                   |
| 5. Name for Product 3                                    | -                      |
| 6. Name for Product 4                                    | Dual                   |
| 7. Country                                               | US (United States)     |
| 8. Sex                                                   | M (Males)              |
| 9. Year of start of process                              | 1990                   |
| 10. Number of months of follow-up                        | 600                    |
| 11. Follow-up interval length (in months)                | 12                     |
| 12. Lower age for risk estimation                        | 10                     |
| 13. Upper age for risk estimation                        | 79                     |
| 14. The effective dose for Product 1 (F1) - Ref          | 1                      |
| 15. The effective dose for Product 2 (F2) - Ref          | -                      |
| 16. The effective dose for Product 3 (F3) - Ref          | -                      |
| 17. The effective dose for Product 4 (F4) - Ref          | -                      |
| 18. The effective dose for Product 1 (F1) - Test         | 1                      |
| 19. The effective dose for Product 2 (F2) - Test         | 0.05                   |
| 20. The effective dose for Product 3 (F3) - Test         | -                      |
| 21. The effective dose for Product 4 (F4) - Test         | FROMF2                 |
| 22. Number in population to be simulated                 | 100000                 |
| 23. Number of MC simulations                             | 1                      |
| 24. The random number seed for the first simulation      | 15975263               |
| 25. Source for the population file (POP)                 | UN4                    |
| 26. Source for the socioeconomic prevalence file (SEP)   | -                      |
| 27. Source for the current smoking prevalence file (CSP) | ISS3                   |
| 28. Source for the former smoking prevalence file (FSP)  | ISS3                   |
| 29. Source for the quit-time distribution file (QTD)     | NHIS2006               |
| 30. Source for the death file (MORT)                     | APR-20                 |
| 31. Source for the relative risk file (RR)               | PNLEST                 |
| 32. Source for the half-life file (H)                    | PNLEST                 |
| 33. Assumption Set for TTP Factor Reference              | F1                     |
| 34. Assumption Set for TTP Factor Test                   | F1                     |
| 35. Assumption Set for TTP Reference                     | ISS3                   |
| 36. Assumption Set for TTP Test                          | S3A                    |
| 37. Assumption Set for TP for socioeconomic group        | -                      |
| 38. Source for Output Choice file (OUTC)                 | BASIC                  |
| 39. Output for DTP P1                                    | N                      |
| 40. Output for DTP P2                                    | N                      |
| 41. Output for Main P Component                          | Y                      |
| 42. Output for DTP E1                                    | N                      |
| 43. Output for DTP E2                                    | N                      |
| 44. Output for DTP E3                                    | N                      |
| 45. Output for Main E Component                          | Y                      |
| 46. Output file name                                     | Sensitivity_Analysis_3 |
| 47. Run number for P-Component                           | -                      |
| 48. Results file for E-Component                         | -                      |
| 49. Components required                                  | PE                     |
| 50. Results folder for P to be used in E-Component       | -                      |
| 51. Fixed age of starting product use                    | 16                     |
| 52. Output absolute risk file?                           | N                      |

## Results for PHIM for Run 1 (Sensitivity\_Analysis\_3.RTF)

\*\*\*\*\*

TTP values for Run: 1, Scenario: NULL

| Variable Parameter | Value               |
|--------------------|---------------------|
| 1. Country         | US (United States)  |
| 2. Sex             | M (Males)           |
| 3. Assumption Set  | ISS3                |
| Note:              | Period is in Months |

| Age   | Period  | Initiation  | Cessation    | Re-initiation |
|-------|---------|-------------|--------------|---------------|
|       |         | Never<br>CC | CC<br>Former | Former<br>CC  |
| 10-14 | 1-12    | 0.003842    | 0.008742     | 0.000000      |
| 15-19 | 1-12    | 0.004720    | 0.003614     | 0.000000      |
| 20-24 | 1-12    | 0.000376    | 0.000943     | 0.000000      |
| 25-29 | 1-12    | 0.000187    | 0.001143     | 0.000000      |
| 30-34 | 1-12    | 0.000093    | 0.000871     | 0.000000      |
| 35-39 | 1-12    | 0.000000    | 0.000867     | 0.000000      |
| 40-44 | 1-12    | 0.000000    | 0.001399     | 0.000000      |
| 45-49 | 1-12    | 0.000000    | 0.002033     | 0.000000      |
| 50-54 | 1-12    | 0.000000    | 0.003209     | 0.000000      |
| 55-59 | 1-12    | 0.000000    | 0.003574     | 0.000000      |
| 60-64 | 1-12    | 0.000000    | 0.003460     | 0.000000      |
| 65-69 | 1-12    | 0.000000    | 0.004136     | 0.000000      |
| 70-74 | 1-12    | 0.000000    | 0.005592     | 0.000000      |
| 75-79 | 1-12    | 0.000000    | 0.005592     | 0.000000      |
| 10-14 | 13-72   | 0.004906    | 0.008742     | 0.000000      |
| 15-19 | 13-72   | 0.006989    | 0.004426     | 0.000000      |
| 20-24 | 13-72   | 0.000687    | 0.001527     | 0.000000      |
| 25-29 | 13-72   | 0.000962    | 0.001515     | 0.000000      |
| 30-34 | 13-72   | 0.000364    | 0.001227     | 0.000000      |
| 35-39 | 13-72   | 0.000000    | 0.001630     | 0.000000      |
| 40-44 | 13-72   | 0.000000    | 0.001852     | 0.000000      |
| 45-49 | 13-72   | 0.000000    | 0.002667     | 0.000000      |
| 50-54 | 13-72   | 0.000000    | 0.003208     | 0.000000      |
| 55-59 | 13-72   | 0.000000    | 0.003978     | 0.000000      |
| 60-64 | 13-72   | 0.000000    | 0.005771     | 0.000000      |
| 65-69 | 13-72   | 0.000000    | 0.010432     | 0.000000      |
| 70-74 | 13-72   | 0.000000    | 0.007079     | 0.000000      |
| 75-79 | 13-72   | 0.000000    | 0.007079     | 0.000000      |
| 10-14 | 73-132  | 0.004312    | 0.008742     | 0.000000      |
| 15-19 | 73-132  | 0.005330    | 0.003289     | 0.000000      |
| 20-24 | 73-132  | 0.002456    | 0.003844     | 0.000000      |
| 25-29 | 73-132  | 0.000839    | 0.002006     | 0.000000      |
| 30-34 | 73-132  | 0.000414    | 0.001329     | 0.000000      |
| 35-39 | 73-132  | 0.000000    | 0.001278     | 0.000000      |
| 40-44 | 73-132  | 0.000000    | 0.001691     | 0.000000      |
| 45-49 | 73-132  | 0.000000    | 0.002904     | 0.000000      |
| 50-54 | 73-132  | 0.000000    | 0.003319     | 0.000000      |
| 55-59 | 73-132  | 0.000000    | 0.003976     | 0.000000      |
| 60-64 | 73-132  | 0.000000    | 0.005235     | 0.000000      |
| 65-69 | 73-132  | 0.000000    | 0.005901     | 0.000000      |
| 70-74 | 73-132  | 0.000000    | 0.005615     | 0.000000      |
| 75-79 | 73-132  | 0.000000    | 0.005615     | 0.000000      |
| 10-14 | 133-192 | 0.003468    | 0.008742     | 0.000000      |
| 15-19 | 133-192 | 0.004675    | 0.003732     | 0.000000      |
| 20-24 | 133-192 | 0.000062    | 0.002260     | 0.000000      |
| 25-29 | 133-192 | 0.001422    | 0.002822     | 0.000000      |
| 30-34 | 133-192 | 0.000696    | 0.002610     | 0.000000      |
| 35-39 | 133-192 | 0.000000    | 0.002058     | 0.000000      |
| 40-44 | 133-192 | 0.000000    | 0.002310     | 0.000000      |
| 45-49 | 133-192 | 0.000000    | 0.002256     | 0.000000      |
| 50-54 | 133-192 | 0.000000    | 0.002663     | 0.000000      |
| 55-59 | 133-192 | 0.000000    | 0.001746     | 0.000000      |
| 60-64 | 133-192 | 0.000000    | 0.005809     | 0.000000      |
| 65-69 | 133-192 | 0.000000    | 0.005896     | 0.000000      |
| 70-74 | 133-192 | 0.000000    | 0.007323     | 0.000000      |
| 75-79 | 133-192 | 0.000000    | 0.007323     | 0.000000      |
| 10-14 | 193-252 | 0.002314    | 0.008742     | 0.000000      |
| 15-19 | 193-252 | 0.003987    | 0.005036     | 0.000000      |
| 20-24 | 193-252 | 0.000320    | 0.002857     | 0.000000      |
| 25-29 | 193-252 | 0.000251    | 0.002314     | 0.000000      |
| 30-34 | 193-252 | 0.000125    | 0.004343     | 0.000000      |
| 35-39 | 193-252 | 0.000000    | 0.002092     | 0.000000      |
| 40-44 | 193-252 | 0.000000    | 0.002566     | 0.000000      |
| 45-49 | 193-252 | 0.000000    | 0.002311     | 0.000000      |
| 50-54 | 193-252 | 0.000000    | 0.003209     | 0.000000      |

### Results for PHIM for Run 1 (Sensitivity\_Analysis\_3.RTF)

|       |         |          |          |          |
|-------|---------|----------|----------|----------|
| 55-59 | 193-252 | 0.000000 | 0.004057 | 0.000000 |
| 60-64 | 193-252 | 0.000000 | 0.007166 | 0.000000 |
| 65-69 | 193-252 | 0.000000 | 0.004281 | 0.000000 |
| 70-74 | 193-252 | 0.000000 | 0.004580 | 0.000000 |
| 75-79 | 193-252 | 0.000000 | 0.004580 | 0.000000 |
| 10-14 | 253+    | 0.001325 | 0.008742 | 0.000000 |
| 15-19 | 253+    | 0.002984 | 0.010602 | 0.000000 |
| 20-24 | 253+    | 0.000452 | 0.004314 | 0.000000 |
| 25-29 | 253+    | 0.000225 | 0.003645 | 0.000000 |
| 30-34 | 253+    | 0.000112 | 0.004512 | 0.000000 |
| 35-39 | 253+    | 0.000000 | 0.002147 | 0.000000 |
| 40-44 | 253+    | 0.000000 | 0.002636 | 0.000000 |
| 45-49 | 253+    | 0.000000 | 0.001051 | 0.000000 |
| 50-54 | 253+    | 0.000000 | 0.002519 | 0.000000 |
| 55-59 | 253+    | 0.000000 | 0.003693 | 0.000000 |
| 60-64 | 253+    | 0.000000 | 0.005888 | 0.000000 |
| 65-69 | 253+    | 0.000000 | 0.004823 | 0.000000 |
| 70-74 | 253+    | 0.000000 | 0.004733 | 0.000000 |
| 75-79 | 253+    | 0.000000 | 0.004733 | 0.000000 |

## Results for PHIM for Run 1 (Sensitivity\_Analysis\_3.RTF)

\*\*\*\*\*

**TTP values for Run: 1, Scenario: Ecig**

| Variable Parameter |         | Value               |            |            |           |             |             |               |             |             |  |
|--------------------|---------|---------------------|------------|------------|-----------|-------------|-------------|---------------|-------------|-------------|--|
| 1. Country         |         | US (United States)  |            |            |           |             |             |               |             |             |  |
| 2. Sex             |         | M (Males)           |            |            |           |             |             |               |             |             |  |
| 3. Assumption Set  |         | S3A                 |            |            |           |             |             |               |             |             |  |
| Note:              |         | Period is in Months |            |            |           |             |             |               |             |             |  |
| Age                | Period  | Initiation          |            |            | Cessation |             |             | Re-initiation |             |             |  |
|                    |         | Never CC            | Never Ecig | Never Dual | CC Former | Ecig Former | Dual Former | Former CC     | Former Ecig | Former Dual |  |
| 10-14              | 1-12    | 0.001921            | 0.001921   | 0.000000   | 0.008742  | 0.004371    | 0.000000    | 0.000000      | 0.000000    | 0.000000    |  |
| 15-19              | 1-12    | 0.002360            | 0.002360   | 0.000000   | 0.003614  | 0.001807    | 0.000000    | 0.000000      | 0.000000    | 0.000000    |  |
| 20-24              | 1-12    | 0.000188            | 0.000188   | 0.000000   | 0.000943  | 0.000472    | 0.000000    | 0.000000      | 0.000000    | 0.000000    |  |
| 25-29              | 1-12    | 0.000093            | 0.000093   | 0.000000   | 0.001143  | 0.000571    | 0.000000    | 0.000000      | 0.000000    | 0.000000    |  |
| 30-34              | 1-12    | 0.000047            | 0.000047   | 0.000000   | 0.000871  | 0.000435    | 0.000000    | 0.000000      | 0.000000    | 0.000000    |  |
| 35-39              | 1-12    | 0.000000            | 0.000000   | 0.000000   | 0.000867  | 0.000433    | 0.000000    | 0.000000      | 0.000000    | 0.000000    |  |
| 40-44              | 1-12    | 0.000000            | 0.000000   | 0.000000   | 0.001399  | 0.000699    | 0.000000    | 0.000000      | 0.000000    | 0.000000    |  |
| 45-49              | 1-12    | 0.000000            | 0.000000   | 0.000000   | 0.002033  | 0.001016    | 0.000000    | 0.000000      | 0.000000    | 0.000000    |  |
| 50-54              | 1-12    | 0.000000            | 0.000000   | 0.000000   | 0.003209  | 0.001604    | 0.000000    | 0.000000      | 0.000000    | 0.000000    |  |
| 55-59              | 1-12    | 0.000000            | 0.000000   | 0.000000   | 0.003574  | 0.001787    | 0.000000    | 0.000000      | 0.000000    | 0.000000    |  |
| 60-64              | 1-12    | 0.000000            | 0.000000   | 0.000000   | 0.003460  | 0.001730    | 0.000000    | 0.000000      | 0.000000    | 0.000000    |  |
| 65-69              | 1-12    | 0.000000            | 0.000000   | 0.000000   | 0.004136  | 0.002068    | 0.000000    | 0.000000      | 0.000000    | 0.000000    |  |
| 70-74              | 1-12    | 0.000000            | 0.000000   | 0.000000   | 0.005592  | 0.002796    | 0.000000    | 0.000000      | 0.000000    | 0.000000    |  |
| 75-79              | 1-12    | 0.000000            | 0.000000   | 0.000000   | 0.005592  | 0.002796    | 0.000000    | 0.000000      | 0.000000    | 0.000000    |  |
| 10-14              | 13-72   | 0.001962            | 0.002944   | 0.000000   | 0.008742  | 0.004371    | 0.000000    | 0.000000      | 0.000000    | 0.000000    |  |
| 15-19              | 13-72   | 0.002796            | 0.004193   | 0.000000   | 0.004426  | 0.002213    | 0.000000    | 0.000000      | 0.000000    | 0.000000    |  |
| 20-24              | 13-72   | 0.000275            | 0.000412   | 0.000000   | 0.001527  | 0.000764    | 0.000000    | 0.000000      | 0.000000    | 0.000000    |  |
| 25-29              | 13-72   | 0.000385            | 0.000578   | 0.000000   | 0.001515  | 0.000758    | 0.000000    | 0.000000      | 0.000000    | 0.000000    |  |
| 30-34              | 13-72   | 0.000146            | 0.000218   | 0.000000   | 0.001227  | 0.000613    | 0.000000    | 0.000000      | 0.000000    | 0.000000    |  |
| 35-39              | 13-72   | 0.000000            | 0.000000   | 0.000000   | 0.001630  | 0.000815    | 0.000000    | 0.000000      | 0.000000    | 0.000000    |  |
| 40-44              | 13-72   | 0.000000            | 0.000000   | 0.000000   | 0.001852  | 0.000926    | 0.000000    | 0.000000      | 0.000000    | 0.000000    |  |
| 45-49              | 13-72   | 0.000000            | 0.000000   | 0.000000   | 0.002667  | 0.001333    | 0.000000    | 0.000000      | 0.000000    | 0.000000    |  |
| 50-54              | 13-72   | 0.000000            | 0.000000   | 0.000000   | 0.003208  | 0.001604    | 0.000000    | 0.000000      | 0.000000    | 0.000000    |  |
| 55-59              | 13-72   | 0.000000            | 0.000000   | 0.000000   | 0.003978  | 0.001989    | 0.000000    | 0.000000      | 0.000000    | 0.000000    |  |
| 60-64              | 13-72   | 0.000000            | 0.000000   | 0.000000   | 0.005771  | 0.002886    | 0.000000    | 0.000000      | 0.000000    | 0.000000    |  |
| 65-69              | 13-72   | 0.000000            | 0.000000   | 0.000000   | 0.010432  | 0.005216    | 0.000000    | 0.000000      | 0.000000    | 0.000000    |  |
| 70-74              | 13-72   | 0.000000            | 0.000000   | 0.000000   | 0.007079  | 0.003540    | 0.000000    | 0.000000      | 0.000000    | 0.000000    |  |
| 75-79              | 13-72   | 0.000000            | 0.000000   | 0.000000   | 0.007079  | 0.003540    | 0.000000    | 0.000000      | 0.000000    | 0.000000    |  |
| 10-14              | 73-132  | 0.000862            | 0.003449   | 0.000000   | 0.008742  | 0.004371    | 0.000000    | 0.000000      | 0.000000    | 0.000000    |  |
| 15-19              | 73-132  | 0.001066            | 0.004264   | 0.000000   | 0.003289  | 0.001645    | 0.000000    | 0.000000      | 0.000000    | 0.000000    |  |
| 20-24              | 73-132  | 0.000491            | 0.001965   | 0.000000   | 0.003844  | 0.001922    | 0.000000    | 0.000000      | 0.000000    | 0.000000    |  |
| 25-29              | 73-132  | 0.000168            | 0.000671   | 0.000000   | 0.002006  | 0.001003    | 0.000000    | 0.000000      | 0.000000    | 0.000000    |  |
| 30-34              | 73-132  | 0.000083            | 0.000332   | 0.000000   | 0.001329  | 0.000664    | 0.000000    | 0.000000      | 0.000000    | 0.000000    |  |
| 35-39              | 73-132  | 0.000000            | 0.000000   | 0.000000   | 0.001278  | 0.000639    | 0.000000    | 0.000000      | 0.000000    | 0.000000    |  |
| 40-44              | 73-132  | 0.000000            | 0.000000   | 0.000000   | 0.001691  | 0.000846    | 0.000000    | 0.000000      | 0.000000    | 0.000000    |  |
| 45-49              | 73-132  | 0.000000            | 0.000000   | 0.000000   | 0.002904  | 0.001452    | 0.000000    | 0.000000      | 0.000000    | 0.000000    |  |
| 50-54              | 73-132  | 0.000000            | 0.000000   | 0.000000   | 0.003319  | 0.001660    | 0.000000    | 0.000000      | 0.000000    | 0.000000    |  |
| 55-59              | 73-132  | 0.000000            | 0.000000   | 0.000000   | 0.003976  | 0.001988    | 0.000000    | 0.000000      | 0.000000    | 0.000000    |  |
| 60-64              | 73-132  | 0.000000            | 0.000000   | 0.000000   | 0.005235  | 0.002617    | 0.000000    | 0.000000      | 0.000000    | 0.000000    |  |
| 65-69              | 73-132  | 0.000000            | 0.000000   | 0.000000   | 0.005901  | 0.002951    | 0.000000    | 0.000000      | 0.000000    | 0.000000    |  |
| 70-74              | 73-132  | 0.000000            | 0.000000   | 0.000000   | 0.005615  | 0.002808    | 0.000000    | 0.000000      | 0.000000    | 0.000000    |  |
| 75-79              | 73-132  | 0.000000            | 0.000000   | 0.000000   | 0.005615  | 0.002808    | 0.000000    | 0.000000      | 0.000000    | 0.000000    |  |
| 10-14              | 133-192 | 0.000173            | 0.003294   | 0.000000   | 0.008742  | 0.004371    | 0.000000    | 0.000000      | 0.000000    | 0.000000    |  |
| 15-19              | 133-192 | 0.000234            | 0.004442   | 0.000000   | 0.003732  | 0.001866    | 0.000000    | 0.000000      | 0.000000    | 0.000000    |  |
| 20-24              | 133-192 | 0.000003            | 0.000059   | 0.000000   | 0.002260  | 0.001130    | 0.000000    | 0.000000      | 0.000000    | 0.000000    |  |
| 25-29              | 133-192 | 0.000071            | 0.001351   | 0.000000   | 0.002822  | 0.001411    | 0.000000    | 0.000000      | 0.000000    | 0.000000    |  |
| 30-34              | 133-192 | 0.000035            | 0.000661   | 0.000000   | 0.002610  | 0.001305    | 0.000000    | 0.000000      | 0.000000    | 0.000000    |  |
| 35-39              | 133-192 | 0.000000            | 0.000000   | 0.000000   | 0.002058  | 0.001029    | 0.000000    | 0.000000      | 0.000000    | 0.000000    |  |
| 40-44              | 133-192 | 0.000000            | 0.000000   | 0.000000   | 0.002310  | 0.001155    | 0.000000    | 0.000000      | 0.000000    | 0.000000    |  |
| 45-49              | 133-192 | 0.000000            | 0.000000   | 0.000000   | 0.002256  | 0.001128    | 0.000000    | 0.000000      | 0.000000    | 0.000000    |  |
| 50-54              | 133-192 | 0.000000            | 0.000000   | 0.000000   | 0.002663  | 0.001332    | 0.000000    | 0.000000      | 0.000000    | 0.000000    |  |
| 55-59              | 133-192 | 0.000000            | 0.000000   | 0.000000   | 0.001747  | 0.000873    | 0.000000    | 0.000000      | 0.000000    | 0.000000    |  |
| 60-64              | 133-192 | 0.000000            | 0.000000   | 0.000000   | 0.005809  | 0.002905    | 0.000000    | 0.000000      | 0.000000    | 0.000000    |  |
| 65-69              | 133-192 | 0.000000            | 0.000000   | 0.000000   | 0.005896  | 0.002948    | 0.000000    | 0.000000      | 0.000000    | 0.000000    |  |
| 70-74              | 133-192 | 0.000000            | 0.000000   | 0.000000   | 0.007323  | 0.003661    | 0.000000    | 0.000000      | 0.000000    | 0.000000    |  |
| 75-79              | 133-192 | 0.000000            | 0.000000   | 0.000000   | 0.007323  | 0.003661    | 0.000000    | 0.000000      | 0.000000    | 0.000000    |  |
| 10-14              | 193-252 | 0.000116            | 0.002198   | 0.000000   | 0.008742  | 0.004371    | 0.000000    | 0.000000      | 0.000000    | 0.000000    |  |
| 15-19              | 193-252 | 0.000199            | 0.003788   | 0.000000   | 0.005036  | 0.002518    | 0.000000    | 0.000000      | 0.000000    | 0.000000    |  |
| 20-24              | 193-252 | 0.000016            | 0.000304   | 0.000000   | 0.002857  | 0.001429    | 0.000000    | 0.000000      | 0.000000    | 0.000000    |  |
| 25-29              | 193-252 | 0.000013            | 0.000239   | 0.000000   | 0.002314  | 0.001157    | 0.000000    | 0.000000      | 0.000000    | 0.000000    |  |
| 30-34              | 193-252 | 0.000006            | 0.000119   | 0.000000   | 0.004343  | 0.002171    | 0.000000    | 0.000000      | 0.000000    | 0.000000    |  |
| 35-39              | 193-252 | 0.000000            | 0.000000   | 0.000000   | 0.002092  | 0.001046    | 0.000000    | 0.000000      | 0.000000    | 0.000000    |  |
| 40-44              | 193-252 | 0.000000            | 0.000000   | 0.000000   | 0.002566  | 0.001283    | 0.000000    | 0.000000      | 0.000000    | 0.000000    |  |
| 45-49              | 193-252 | 0.000000            | 0.000000   | 0.000000   | 0.002311  | 0.001156    | 0.000000    | 0.000000      | 0.000000    | 0.000000    |  |
| 50-54              | 193-252 | 0.000000            | 0.000000   | 0.000000   | 0.003209  | 0.001604    | 0.000000    | 0.000000      | 0.000000    | 0.000000    |  |

### Results for PHIM for Run 1 (Sensitivity\_Analysis\_3.RTF)

|       |         |          |          |          |          |          |          |          |          |          |
|-------|---------|----------|----------|----------|----------|----------|----------|----------|----------|----------|
| 55-59 | 193-252 | 0.000000 | 0.000000 | 0.000000 | 0.004057 | 0.002029 | 0.000000 | 0.000000 | 0.000000 | 0.000000 |
| 60-64 | 193-252 | 0.000000 | 0.000000 | 0.000000 | 0.007166 | 0.003583 | 0.000000 | 0.000000 | 0.000000 | 0.000000 |
| 65-69 | 193-252 | 0.000000 | 0.000000 | 0.000000 | 0.004281 | 0.002141 | 0.000000 | 0.000000 | 0.000000 | 0.000000 |
| 70-74 | 193-252 | 0.000000 | 0.000000 | 0.000000 | 0.004580 | 0.002290 | 0.000000 | 0.000000 | 0.000000 | 0.000000 |
| 75-79 | 193-252 | 0.000000 | 0.000000 | 0.000000 | 0.004580 | 0.002290 | 0.000000 | 0.000000 | 0.000000 | 0.000000 |
| 10-14 | 253+    | 0.000066 | 0.001259 | 0.000000 | 0.008742 | 0.004371 | 0.000000 | 0.000000 | 0.000000 | 0.000000 |
| 15-19 | 253+    | 0.000149 | 0.002835 | 0.000000 | 0.010602 | 0.005301 | 0.000000 | 0.000000 | 0.000000 | 0.000000 |
| 20-24 | 253+    | 0.000023 | 0.000430 | 0.000000 | 0.004314 | 0.002157 | 0.000000 | 0.000000 | 0.000000 | 0.000000 |
| 25-29 | 253+    | 0.000011 | 0.000213 | 0.000000 | 0.003645 | 0.001823 | 0.000000 | 0.000000 | 0.000000 | 0.000000 |
| 30-34 | 253+    | 0.000006 | 0.000106 | 0.000000 | 0.004512 | 0.002256 | 0.000000 | 0.000000 | 0.000000 | 0.000000 |
| 35-39 | 253+    | 0.000000 | 0.000000 | 0.000000 | 0.002147 | 0.001073 | 0.000000 | 0.000000 | 0.000000 | 0.000000 |
| 40-44 | 253+    | 0.000000 | 0.000000 | 0.000000 | 0.002636 | 0.001318 | 0.000000 | 0.000000 | 0.000000 | 0.000000 |
| 45-49 | 253+    | 0.000000 | 0.000000 | 0.000000 | 0.001051 | 0.000525 | 0.000000 | 0.000000 | 0.000000 | 0.000000 |
| 50-54 | 253+    | 0.000000 | 0.000000 | 0.000000 | 0.002519 | 0.001259 | 0.000000 | 0.000000 | 0.000000 | 0.000000 |
| 55-59 | 253+    | 0.000000 | 0.000000 | 0.000000 | 0.003693 | 0.001847 | 0.000000 | 0.000000 | 0.000000 | 0.000000 |
| 60-64 | 253+    | 0.000000 | 0.000000 | 0.000000 | 0.005888 | 0.002944 | 0.000000 | 0.000000 | 0.000000 | 0.000000 |
| 65-69 | 253+    | 0.000000 | 0.000000 | 0.000000 | 0.004823 | 0.002412 | 0.000000 | 0.000000 | 0.000000 | 0.000000 |
| 70-74 | 253+    | 0.000000 | 0.000000 | 0.000000 | 0.004733 | 0.002366 | 0.000000 | 0.000000 | 0.000000 | 0.000000 |
| 75-79 | 253+    | 0.000000 | 0.000000 | 0.000000 | 0.004733 | 0.002366 | 0.000000 | 0.000000 | 0.000000 | 0.000000 |





**Results for PHIM for Run 1 (Sensitivity\_Analysis\_3.RTF)**

|       |      |          |          |          |          |          |          |
|-------|------|----------|----------|----------|----------|----------|----------|
| 25-29 | 253+ | 0.015212 | 0.000000 | 0.000000 | 0.000000 | 0.000000 | 0.000000 |
| 30-34 | 253+ | 0.015460 | 0.000000 | 0.000000 | 0.000000 | 0.000000 | 0.000000 |
| 35-39 | 253+ | 0.014711 | 0.000000 | 0.000000 | 0.000000 | 0.000000 | 0.000000 |
| 40-44 | 253+ | 0.014241 | 0.000000 | 0.000000 | 0.000000 | 0.000000 | 0.000000 |
| 45-49 | 253+ | 0.013014 | 0.000000 | 0.000000 | 0.000000 | 0.000000 | 0.000000 |
| 50-54 | 253+ | 0.011768 | 0.000000 | 0.000000 | 0.000000 | 0.000000 | 0.000000 |
| 55-59 | 253+ | 0.011032 | 0.000000 | 0.000000 | 0.000000 | 0.000000 | 0.000000 |
| 60-64 | 253+ | 0.009525 | 0.000000 | 0.000000 | 0.000000 | 0.000000 | 0.000000 |
| 65-69 | 253+ | 0.006897 | 0.000000 | 0.000000 | 0.000000 | 0.000000 | 0.000000 |
| 70-74 | 253+ | 0.005435 | 0.000000 | 0.000000 | 0.000000 | 0.000000 | 0.000000 |
| 75-79 | 253+ | 0.005435 | 0.000000 | 0.000000 | 0.000000 | 0.000000 | 0.000000 |

## Results for PHIM for Run 1 (Sensitivity\_Analysis\_3.RTF)

\*\*\*\*\*

### Main Output for the Tobacco History for Run: 1, Simulation: 1, Scenario: NULL

| Variable Parameter          | Value              |
|-----------------------------|--------------------|
| 1. Country                  | US (United States) |
| 2. Sex                      | M (Males)          |
| 3. Year of start of process | 1990               |

Year of Follow-up: 2040, Age Group: All Ages  
 Period    Age Group    Smoking Group            N            %

|    |          |           |       |       |
|----|----------|-----------|-------|-------|
| 50 | All Ages | Never Any | 19445 | 50.68 |
| 50 | All Ages | CC        | 3024  | 7.88  |
| 50 | All Ages | Former    | 15896 | 41.43 |

Year of Follow-up: 2040, Age Group: 18-19  
 Period    Age Group    Smoking Group            N            %

|    |       |           |   |   |
|----|-------|-----------|---|---|
| 50 | 18-19 | Never Any | 0 | . |
| 50 | 18-19 | CC        | 0 | . |
| 50 | 18-19 | Former    | 0 | . |

Year of Follow-up: 2040, Age Group: 20-24  
 Period    Age Group    Smoking Group            N            %

|    |       |           |   |   |
|----|-------|-----------|---|---|
| 50 | 20-24 | Never Any | 0 | . |
| 50 | 20-24 | CC        | 0 | . |
| 50 | 20-24 | Former    | 0 | . |

Year of Follow-up: 2040, Age Group: 25-29  
 Period    Age Group    Smoking Group            N            %

|    |       |           |   |   |
|----|-------|-----------|---|---|
| 50 | 25-29 | Never Any | 0 | . |
| 50 | 25-29 | CC        | 0 | . |
| 50 | 25-29 | Former    | 0 | . |

Year of Follow-up: 2040, Age Group: 30-34  
 Period    Age Group    Smoking Group            N            %

|    |       |           |   |   |
|----|-------|-----------|---|---|
| 50 | 30-34 | Never Any | 0 | . |
| 50 | 30-34 | CC        | 0 | . |
| 50 | 30-34 | Former    | 0 | . |

Year of Follow-up: 2040, Age Group: 35-39  
 Period    Age Group    Smoking Group            N            %

|    |       |           |   |   |
|----|-------|-----------|---|---|
| 50 | 35-39 | Never Any | 0 | . |
| 50 | 35-39 | CC        | 0 | . |
| 50 | 35-39 | Former    | 0 | . |

Year of Follow-up: 2040, Age Group: 40-44  
 Period    Age Group    Smoking Group            N            %

|    |       |           |   |   |
|----|-------|-----------|---|---|
| 50 | 40-44 | Never Any | 0 | . |
| 50 | 40-44 | CC        | 0 | . |
| 50 | 40-44 | Former    | 0 | . |

Year of Follow-up: 2040, Age Group: 45-49  
 Period    Age Group    Smoking Group            N            %

|    |       |           |   |   |
|----|-------|-----------|---|---|
| 50 | 45-49 | Never Any | 0 | . |
| 50 | 45-49 | CC        | 0 | . |
| 50 | 45-49 | Former    | 0 | . |

Year of Follow-up: 2040, Age Group: 50-54  
 Period    Age Group    Smoking Group            N            %

|    |       |           |   |   |
|----|-------|-----------|---|---|
| 50 | 50-54 | Never Any | 0 | . |
| 50 | 50-54 | CC        | 0 | . |
| 50 | 50-54 | Former    | 0 | . |

Year of Follow-up: 2040, Age Group: 55-59  
 Period    Age Group    Smoking Group            N            %

|    |       |           |   |   |
|----|-------|-----------|---|---|
| 50 | 55-59 | Never Any | 0 | . |
| 50 | 55-59 | CC        | 0 | . |
| 50 | 55-59 | Former    | 0 | . |

Year of Follow-up: 2040, Age Group: 60-64  
 Period    Age Group    Smoking Group            N            %

### Results for PHIM for Run 1 (Sensitivity\_Analysis\_3.RTF)

|                                           |           |               |      |       |
|-------------------------------------------|-----------|---------------|------|-------|
| 50                                        | 60-64     | Never Any     | 4363 | 49.33 |
| 50                                        | 60-64     | CC            | 934  | 10.56 |
| 50                                        | 60-64     | Former        | 3548 | 40.11 |
| Year of Follow-up: 2040, Age Group: 65-69 |           |               |      |       |
| Period                                    | Age Group | Smoking Group | N    | %     |
| 50                                        | 65-69     | Never Any     | 4948 | 54.73 |
| 50                                        | 65-69     | CC            | 734  | 8.12  |
| 50                                        | 65-69     | Former        | 3358 | 37.15 |
| Year of Follow-up: 2040, Age Group: 70-74 |           |               |      |       |
| Period                                    | Age Group | Smoking Group | N    | %     |
| 50                                        | 70-74     | Never Any     | 5145 | 52.41 |
| 50                                        | 70-74     | CC            | 688  | 7.01  |
| 50                                        | 70-74     | Former        | 3983 | 40.58 |
| Year of Follow-up: 2040, Age Group: 75-79 |           |               |      |       |
| Period                                    | Age Group | Smoking Group | N    | %     |
| 50                                        | 75-79     | Never Any     | 4989 | 46.78 |
| 50                                        | 75-79     | CC            | 668  | 6.26  |
| 50                                        | 75-79     | Former        | 5007 | 46.95 |

## Results for PHIM for Run 1 (Sensitivity\_Analysis\_3.RTF)

\*\*\*\*\*

### Main Output for the Tobacco History for Run: 1, Simulation: 1, Scenario: Ecig

| Variable Parameter                           |           | Value              |       |       |               |             |               |                |              |
|----------------------------------------------|-----------|--------------------|-------|-------|---------------|-------------|---------------|----------------|--------------|
| 1. Country                                   |           | US (United States) |       |       |               |             |               |                |              |
| 2. Sex                                       |           | M (Males)          |       |       |               |             |               |                |              |
| 3. Year of start of process                  |           | 1990               |       |       |               |             |               |                |              |
| Year of Follow-up: 1990, Age Group: All Ages |           |                    |       |       |               |             |               |                |              |
| Period                                       | Age Group | Smoking Group      | N     | %     | Ever Quit (N) | Ever Quit % | Mean Yrs Quit | Short Term (n) | Short Term % |
| 0                                            | All Ages  | Never Any          | 34075 | 39.78 |               |             |               |                |              |
| 0                                            | All Ages  | CC                 | 27323 | 31.90 | 0             | 0.00        |               |                |              |
| 0                                            | All Ages  | Ecig               | 0     | 0.00  |               |             |               |                |              |
| 0                                            | All Ages  | Dual               | 0     | 0.00  |               |             |               |                |              |
| 0                                            | All Ages  | Former             | 24266 | 28.33 |               |             | 13.08         | 3623           | 14.93        |
| Year of Follow-up: 1990, Age Group: 18-19    |           |                    |       |       |               |             |               |                |              |
| Period                                       | Age Group | Smoking Group      | N     | %     | Ever Quit (N) | Ever Quit % | Mean Yrs Quit | Short Term (n) | Short Term % |
| 0                                            | 18-19     | Never Any          | 2783  | 78.42 |               |             |               |                |              |
| 0                                            | 18-19     | CC                 | 634   | 17.86 | 0             | 0.00        |               |                |              |
| 0                                            | 18-19     | Ecig               | 0     | 0.00  |               |             |               |                |              |
| 0                                            | 18-19     | Dual               | 0     | 0.00  |               |             |               |                |              |
| 0                                            | 18-19     | Former             | 132   | 3.72  |               |             | 0.11          | 132            | 100.00       |
| Year of Follow-up: 1990, Age Group: 20-24    |           |                    |       |       |               |             |               |                |              |
| Period                                       | Age Group | Smoking Group      | N     | %     | Ever Quit (N) | Ever Quit % | Mean Yrs Quit | Short Term (n) | Short Term % |
| 0                                            | 20-24     | Never Any          | 5722  | 58.29 |               |             |               |                |              |
| 0                                            | 20-24     | CC                 | 3199  | 32.59 | 0             | 0.00        |               |                |              |
| 0                                            | 20-24     | Ecig               | 0     | 0.00  |               |             |               |                |              |
| 0                                            | 20-24     | Dual               | 0     | 0.00  |               |             |               |                |              |
| 0                                            | 20-24     | Former             | 895   | 9.12  |               |             | 1.46          | 506            | 56.54        |
| Year of Follow-up: 1990, Age Group: 25-29    |           |                    |       |       |               |             |               |                |              |
| Period                                       | Age Group | Smoking Group      | N     | %     | Ever Quit (N) | Ever Quit % | Mean Yrs Quit | Short Term (n) | Short Term % |
| 0                                            | 25-29     | Never Any          | 5232  | 49.06 |               |             |               |                |              |
| 0                                            | 25-29     | CC                 | 3914  | 36.70 | 0             | 0.00        |               |                |              |
| 0                                            | 25-29     | Ecig               | 0     | 0.00  |               |             |               |                |              |
| 0                                            | 25-29     | Dual               | 0     | 0.00  |               |             |               |                |              |
| 0                                            | 25-29     | Former             | 1518  | 14.23 |               |             | 2.87          | 643            | 42.36        |
| Year of Follow-up: 1990, Age Group: 30-34    |           |                    |       |       |               |             |               |                |              |
| Period                                       | Age Group | Smoking Group      | N     | %     | Ever Quit (N) | Ever Quit % | Mean Yrs Quit | Short Term (n) | Short Term % |
| 0                                            | 30-34     | Never Any          | 4765  | 43.65 |               |             |               |                |              |
| 0                                            | 30-34     | CC                 | 4023  | 36.85 | 0             | 0.00        |               |                |              |
| 0                                            | 30-34     | Ecig               | 0     | 0.00  |               |             |               |                |              |
| 0                                            | 30-34     | Dual               | 0     | 0.00  |               |             |               |                |              |
| 0                                            | 30-34     | Former             | 2128  | 19.49 |               |             | 4.06          | 592            | 27.82        |
| Year of Follow-up: 1990, Age Group: 35-39    |           |                    |       |       |               |             |               |                |              |
| Period                                       | Age Group | Smoking Group      | N     | %     | Ever Quit (N) | Ever Quit % | Mean Yrs Quit | Short Term (n) | Short Term % |
| 0                                            | 35-39     | Never Any          | 3941  | 39.85 |               |             |               |                |              |
| 0                                            | 35-39     | CC                 | 3474  | 35.13 | 0             | 0.00        |               |                |              |
| 0                                            | 35-39     | Ecig               | 0     | 0.00  |               |             |               |                |              |
| 0                                            | 35-39     | Dual               | 0     | 0.00  |               |             |               |                |              |
| 0                                            | 35-39     | Former             | 2474  | 25.02 |               |             | 8.31          | 425            | 17.18        |
| Year of Follow-up: 1990, Age Group: 40-44    |           |                    |       |       |               |             |               |                |              |
| Period                                       | Age Group | Smoking Group      | N     | %     | Ever Quit (N) | Ever Quit % | Mean Yrs Quit | Short Term (n) | Short Term % |
| 0                                            | 40-44     | Never Any          | 2912  | 33.65 |               |             |               |                |              |
| 0                                            | 40-44     | CC                 | 3113  | 35.97 | 0             | 0.00        |               |                |              |
| 0                                            | 40-44     | Ecig               | 0     | 0.00  |               |             |               |                |              |
| 0                                            | 40-44     | Dual               | 0     | 0.00  |               |             |               |                |              |
| 0                                            | 40-44     | Former             | 2630  | 30.39 |               |             | 10.69         | 317            | 12.05        |
| Year of Follow-up: 1990, Age Group: 45-49    |           |                    |       |       |               |             |               |                |              |
| Period                                       | Age Group | Smoking Group      | N     | %     | Ever Quit (N) | Ever Quit % | Mean Yrs Quit | Short Term (n) | Short Term % |
| 0                                            | 45-49     | Never Any          | 1919  | 29.46 |               |             |               |                |              |
| 0                                            | 45-49     | CC                 | 2318  | 35.58 | 0             | 0.00        |               |                |              |
| 0                                            | 45-49     | Ecig               | 0     | 0.00  |               |             |               |                |              |
| 0                                            | 45-49     | Dual               | 0     | 0.00  |               |             |               |                |              |
| 0                                            | 45-49     | Former             | 2278  | 34.97 |               |             | 13.26         | 221            | 9.70         |
| Year of Follow-up: 1990, Age Group: 50-54    |           |                    |       |       |               |             |               |                |              |
| Period                                       | Age Group | Smoking Group      | N     | %     | Ever Quit (N) | Ever Quit % | Mean Yrs Quit | Short Term (n) | Short Term % |
| 0                                            | 50-54     | Never Any          | 1611  | 29.41 |               |             |               |                |              |
| 0                                            | 50-54     | CC                 | 1816  | 33.16 | 0             | 0.00        |               |                |              |

**Results for PHIM for Run 1 (Sensitivity\_Analysis\_3.RTF)**

|                                              |           |               |       |       |               |             |               |                |              |
|----------------------------------------------|-----------|---------------|-------|-------|---------------|-------------|---------------|----------------|--------------|
| 0                                            | 50-54     | Ecig          | 0     | 0.00  |               |             |               |                |              |
| 0                                            | 50-54     | Dual          | 0     | 0.00  |               |             |               |                |              |
| 0                                            | 50-54     | Former        | 2050  | 37.43 |               |             | 14.55         | 261            | 12.73        |
| Year of Follow-up: 1990, Age Group: 55-59    |           |               |       |       |               |             |               |                |              |
| Period                                       | Age Group | Smoking Group | N     | %     | Ever Quit (N) | Ever Quit % | Mean Yrs Quit | Short Term (n) | Short Term % |
| 0                                            | 55-59     | Never Any     | 1337  | 26.83 |               |             |               |                |              |
| 0                                            | 55-59     | CC            | 1520  | 30.50 | 0             | 0.00        |               |                |              |
| 0                                            | 55-59     | Ecig          | 0     | 0.00  |               |             |               |                |              |
| 0                                            | 55-59     | Dual          | 0     | 0.00  |               |             |               |                |              |
| 0                                            | 55-59     | Former        | 2126  | 42.67 |               |             | 14.80         | 216            | 10.16        |
| Year of Follow-up: 1990, Age Group: 60-64    |           |               |       |       |               |             |               |                |              |
| Period                                       | Age Group | Smoking Group | N     | %     | Ever Quit (N) | Ever Quit % | Mean Yrs Quit | Short Term (n) | Short Term % |
| 0                                            | 60-64     | Never Any     | 1169  | 23.83 |               |             |               |                |              |
| 0                                            | 60-64     | CC            | 1287  | 26.24 | 0             | 0.00        |               |                |              |
| 0                                            | 60-64     | Ecig          | 0     | 0.00  |               |             |               |                |              |
| 0                                            | 60-64     | Dual          | 0     | 0.00  |               |             |               |                |              |
| 0                                            | 60-64     | Former        | 2449  | 49.93 |               |             | 18.87         | 106            | 4.33         |
| Year of Follow-up: 1990, Age Group: 65-69    |           |               |       |       |               |             |               |                |              |
| Period                                       | Age Group | Smoking Group | N     | %     | Ever Quit (N) | Ever Quit % | Mean Yrs Quit | Short Term (n) | Short Term % |
| 0                                            | 65-69     | Never Any     | 1023  | 23.32 |               |             |               |                |              |
| 0                                            | 65-69     | CC            | 979   | 22.32 | 0             | 0.00        |               |                |              |
| 0                                            | 65-69     | Ecig          | 0     | 0.00  |               |             |               |                |              |
| 0                                            | 65-69     | Dual          | 0     | 0.00  |               |             |               |                |              |
| 0                                            | 65-69     | Former        | 2385  | 54.37 |               |             | 19.91         | 113            | 4.74         |
| Year of Follow-up: 1990, Age Group: 70-74    |           |               |       |       |               |             |               |                |              |
| Period                                       | Age Group | Smoking Group | N     | %     | Ever Quit (N) | Ever Quit % | Mean Yrs Quit | Short Term (n) | Short Term % |
| 0                                            | 70-74     | Never Any     | 961   | 27.46 |               |             |               |                |              |
| 0                                            | 70-74     | CC            | 675   | 19.29 | 0             | 0.00        |               |                |              |
| 0                                            | 70-74     | Ecig          | 0     | 0.00  |               |             |               |                |              |
| 0                                            | 70-74     | Dual          | 0     | 0.00  |               |             |               |                |              |
| 0                                            | 70-74     | Former        | 1863  | 53.24 |               |             | 20.69         | 23             | 1.23         |
| Year of Follow-up: 1990, Age Group: 75-79    |           |               |       |       |               |             |               |                |              |
| Period                                       | Age Group | Smoking Group | N     | %     | Ever Quit (N) | Ever Quit % | Mean Yrs Quit | Short Term (n) | Short Term % |
| 0                                            | 75-79     | Never Any     | 700   | 29.06 |               |             |               |                |              |
| 0                                            | 75-79     | CC            | 371   | 15.40 | 0             | 0.00        |               |                |              |
| 0                                            | 75-79     | Ecig          | 0     | 0.00  |               |             |               |                |              |
| 0                                            | 75-79     | Dual          | 0     | 0.00  |               |             |               |                |              |
| 0                                            | 75-79     | Former        | 1338  | 55.54 |               |             | 22.88         | 68             | 5.08         |
| Year of Follow-up: 1995, Age Group: All Ages |           |               |       |       |               |             |               |                |              |
| Period                                       | Age Group | Smoking Group | N     | %     | Ever Quit (N) | Ever Quit % | Mean Yrs Quit | Short Term (n) | Short Term % |
| 5                                            | All Ages  | Never Any     | 38368 | 41.57 |               |             |               |                |              |
| 5                                            | All Ages  | CC            | 11508 | 12.47 | 0             | 0.00        |               |                |              |
| 5                                            | All Ages  | Ecig          | 16028 | 17.37 |               |             |               |                |              |
| 5                                            | All Ages  | Dual          | 0     | 0.00  |               |             |               |                |              |
| 5                                            | All Ages  | Former        | 26386 | 28.59 |               |             | 15.47         | 1373           | 5.20         |
| Year of Follow-up: 1995, Age Group: 18-19    |           |               |       |       |               |             |               |                |              |
| Period                                       | Age Group | Smoking Group | N     | %     | Ever Quit (N) | Ever Quit % | Mean Yrs Quit | Short Term (n) | Short Term % |
| 5                                            | 18-19     | Never Any     | 2448  | 69.07 |               |             |               |                |              |
| 5                                            | 18-19     | CC            | 320   | 9.03  | 0             | 0.00        |               |                |              |
| 5                                            | 18-19     | Ecig          | 691   | 19.50 |               |             |               |                |              |
| 5                                            | 18-19     | Dual          | 0     | 0.00  |               |             |               |                |              |
| 5                                            | 18-19     | Former        | 85    | 2.40  |               |             | 1.13          | 57             | 67.06        |
| Year of Follow-up: 1995, Age Group: 20-24    |           |               |       |       |               |             |               |                |              |
| Period                                       | Age Group | Smoking Group | N     | %     | Ever Quit (N) | Ever Quit % | Mean Yrs Quit | Short Term (n) | Short Term % |
| 5                                            | 20-24     | Never Any     | 5787  | 64.02 |               |             |               |                |              |
| 5                                            | 20-24     | CC            | 946   | 10.46 | 0             | 0.00        |               |                |              |
| 5                                            | 20-24     | Ecig          | 1886  | 20.86 |               |             |               |                |              |
| 5                                            | 20-24     | Dual          | 0     | 0.00  |               |             |               |                |              |
| 5                                            | 20-24     | Former        | 421   | 4.66  |               |             | 3.02          | 107            | 25.42        |
| Year of Follow-up: 1995, Age Group: 25-29    |           |               |       |       |               |             |               |                |              |
| Period                                       | Age Group | Smoking Group | N     | %     | Ever Quit (N) | Ever Quit % | Mean Yrs Quit | Short Term (n) | Short Term % |
| 5                                            | 25-29     | Never Any     | 5471  | 55.74 |               |             |               |                |              |
| 5                                            | 25-29     | CC            | 1255  | 12.79 | 0             | 0.00        |               |                |              |
| 5                                            | 25-29     | Ecig          | 1974  | 20.11 |               |             |               |                |              |
| 5                                            | 25-29     | Dual          | 0     | 0.00  |               |             |               |                |              |
| 5                                            | 25-29     | Former        | 1116  | 11.37 |               |             | 5.56          | 90             | 8.06         |
| Year of Follow-up: 1995, Age Group: 30-34    |           |               |       |       |               |             |               |                |              |
| Period                                       | Age Group | Smoking Group | N     | %     | Ever Quit (N) | Ever Quit % | Mean Yrs Quit | Short Term (n) | Short Term % |

**Results for PHIM for Run 1 (Sensitivity\_Analysis\_3.RTF)**

|                                              |           |               |      |       |               |             |               |                |              |
|----------------------------------------------|-----------|---------------|------|-------|---------------|-------------|---------------|----------------|--------------|
| 5                                            | 30-34     | Never Any     | 5065 | 47.50 |               |             |               |                |              |
| 5                                            | 30-34     | CC            | 1480 | 13.88 | 0             | 0.00        |               |                |              |
| 5                                            | 30-34     | Ecig          | 2366 | 22.19 |               |             |               |                |              |
| 5                                            | 30-34     | Dual          | 0    | 0.00  |               |             |               |                |              |
| 5                                            | 30-34     | Former        | 1753 | 16.44 |               |             | 7.10          | 72             | 4.11         |
| Year of Follow-up: 1995, Age Group: 35-39    |           |               |      |       |               |             |               |                |              |
| Period                                       | Age Group | Smoking Group | N    | %     | Ever Quit (N) | Ever Quit % | Mean Yrs Quit | Short Term (n) | Short Term % |
| 5                                            | 35-39     | Never Any     | 4724 | 43.28 |               |             |               |                |              |
| 5                                            | 35-39     | CC            | 1496 | 13.70 | 0             | 0.00        |               |                |              |
| 5                                            | 35-39     | Ecig          | 2312 | 21.18 |               |             |               |                |              |
| 5                                            | 35-39     | Dual          | 0    | 0.00  |               |             |               |                |              |
| 5                                            | 35-39     | Former        | 2384 | 21.84 |               |             | 8.31          | 94             | 3.94         |
| Year of Follow-up: 1995, Age Group: 40-44    |           |               |      |       |               |             |               |                |              |
| Period                                       | Age Group | Smoking Group | N    | %     | Ever Quit (N) | Ever Quit % | Mean Yrs Quit | Short Term (n) | Short Term % |
| 5                                            | 40-44     | Never Any     | 3941 | 39.85 |               |             |               |                |              |
| 5                                            | 40-44     | CC            | 1280 | 12.94 | 0             | 0.00        |               |                |              |
| 5                                            | 40-44     | Ecig          | 1941 | 19.63 |               |             |               |                |              |
| 5                                            | 40-44     | Dual          | 0    | 0.00  |               |             |               |                |              |
| 5                                            | 40-44     | Former        | 2727 | 27.58 |               |             | 12.25         | 99             | 3.63         |
| Year of Follow-up: 1995, Age Group: 45-49    |           |               |      |       |               |             |               |                |              |
| Period                                       | Age Group | Smoking Group | N    | %     | Ever Quit (N) | Ever Quit % | Mean Yrs Quit | Short Term (n) | Short Term % |
| 5                                            | 45-49     | Never Any     | 2912 | 33.65 |               |             |               |                |              |
| 5                                            | 45-49     | CC            | 1236 | 14.28 | 0             | 0.00        |               |                |              |
| 5                                            | 45-49     | Ecig          | 1609 | 18.59 |               |             |               |                |              |
| 5                                            | 45-49     | Dual          | 0    | 0.00  |               |             |               |                |              |
| 5                                            | 45-49     | Former        | 2898 | 33.48 |               |             | 14.41         | 121            | 4.18         |
| Year of Follow-up: 1995, Age Group: 50-54    |           |               |      |       |               |             |               |                |              |
| Period                                       | Age Group | Smoking Group | N    | %     | Ever Quit (N) | Ever Quit % | Mean Yrs Quit | Short Term (n) | Short Term % |
| 5                                            | 50-54     | Never Any     | 1919 | 29.46 |               |             |               |                |              |
| 5                                            | 50-54     | CC            | 940  | 14.43 | 0             | 0.00        |               |                |              |
| 5                                            | 50-54     | Ecig          | 1073 | 16.47 |               |             |               |                |              |
| 5                                            | 50-54     | Dual          | 0    | 0.00  |               |             |               |                |              |
| 5                                            | 50-54     | Former        | 2583 | 39.65 |               |             | 16.31         | 137            | 5.30         |
| Year of Follow-up: 1995, Age Group: 55-59    |           |               |      |       |               |             |               |                |              |
| Period                                       | Age Group | Smoking Group | N    | %     | Ever Quit (N) | Ever Quit % | Mean Yrs Quit | Short Term (n) | Short Term % |
| 5                                            | 55-59     | Never Any     | 1611 | 29.41 |               |             |               |                |              |
| 5                                            | 55-59     | CC            | 740  | 13.51 | 0             | 0.00        |               |                |              |
| 5                                            | 55-59     | Ecig          | 794  | 14.50 |               |             |               |                |              |
| 5                                            | 55-59     | Dual          | 0    | 0.00  |               |             |               |                |              |
| 5                                            | 55-59     | Former        | 2332 | 42.58 |               |             | 17.43         | 104            | 4.46         |
| Year of Follow-up: 1995, Age Group: 60-64    |           |               |      |       |               |             |               |                |              |
| Period                                       | Age Group | Smoking Group | N    | %     | Ever Quit (N) | Ever Quit % | Mean Yrs Quit | Short Term (n) | Short Term % |
| 5                                            | 60-64     | Never Any     | 1337 | 26.83 |               |             |               |                |              |
| 5                                            | 60-64     | CC            | 597  | 11.98 | 0             | 0.00        |               |                |              |
| 5                                            | 60-64     | Ecig          | 613  | 12.30 |               |             |               |                |              |
| 5                                            | 60-64     | Dual          | 0    | 0.00  |               |             |               |                |              |
| 5                                            | 60-64     | Former        | 2436 | 48.89 |               |             | 17.55         | 114            | 4.68         |
| Year of Follow-up: 1995, Age Group: 65-69    |           |               |      |       |               |             |               |                |              |
| Period                                       | Age Group | Smoking Group | N    | %     | Ever Quit (N) | Ever Quit % | Mean Yrs Quit | Short Term (n) | Short Term % |
| 5                                            | 65-69     | Never Any     | 1169 | 23.83 |               |             |               |                |              |
| 5                                            | 65-69     | CC            | 477  | 9.72  | 0             | 0.00        |               |                |              |
| 5                                            | 65-69     | Ecig          | 403  | 8.22  |               |             |               |                |              |
| 5                                            | 65-69     | Dual          | 0    | 0.00  |               |             |               |                |              |
| 5                                            | 65-69     | Former        | 2856 | 58.23 |               |             | 20.73         | 170            | 5.95         |
| Year of Follow-up: 1995, Age Group: 70-74    |           |               |      |       |               |             |               |                |              |
| Period                                       | Age Group | Smoking Group | N    | %     | Ever Quit (N) | Ever Quit % | Mean Yrs Quit | Short Term (n) | Short Term % |
| 5                                            | 70-74     | Never Any     | 1023 | 23.32 |               |             |               |                |              |
| 5                                            | 70-74     | CC            | 438  | 9.98  | 0             | 0.00        |               |                |              |
| 5                                            | 70-74     | Ecig          | 220  | 5.01  |               |             |               |                |              |
| 5                                            | 70-74     | Dual          | 0    | 0.00  |               |             |               |                |              |
| 5                                            | 70-74     | Former        | 2706 | 61.68 |               |             | 22.18         | 120            | 4.43         |
| Year of Follow-up: 1995, Age Group: 75-79    |           |               |      |       |               |             |               |                |              |
| Period                                       | Age Group | Smoking Group | N    | %     | Ever Quit (N) | Ever Quit % | Mean Yrs Quit | Short Term (n) | Short Term % |
| 5                                            | 75-79     | Never Any     | 961  | 27.46 |               |             |               |                |              |
| 5                                            | 75-79     | CC            | 303  | 8.66  | 0             | 0.00        |               |                |              |
| 5                                            | 75-79     | Ecig          | 146  | 4.17  |               |             |               |                |              |
| 5                                            | 75-79     | Dual          | 0    | 0.00  |               |             |               |                |              |
| 5                                            | 75-79     | Former        | 2089 | 59.70 |               |             | 23.13         | 88             | 4.21         |
| Year of Follow-up: 2000, Age Group: All Ages |           |               |      |       |               |             |               |                |              |

**Results for PHIM for Run 1 (Sensitivity\_Analysis\_3.RTF)**

| Period                                    | Age Group | Smoking Group | N     | %     | Ever Quit (N) | Ever Quit % | Mean Yrs Quit | Short Term (n) | Short Term % |
|-------------------------------------------|-----------|---------------|-------|-------|---------------|-------------|---------------|----------------|--------------|
| 10                                        | All Ages  | Never Any     | 39177 | 41.64 |               |             |               |                |              |
| 10                                        | All Ages  | CC            | 4843  | 5.15  | 0             | 0.00        |               |                |              |
| 10                                        | All Ages  | Ecig          | 22692 | 24.12 |               |             |               |                |              |
| 10                                        | All Ages  | Dual          | 0     | 0.00  |               |             |               |                |              |
| 10                                        | All Ages  | Former        | 27380 | 29.10 |               |             | 17.83         | 1120           | 4.09         |
| Year of Follow-up: 2000, Age Group: 18-19 |           |               |       |       |               |             |               |                |              |
| Period                                    | Age Group | Smoking Group | N     | %     | Ever Quit (N) | Ever Quit % | Mean Yrs Quit | Short Term (n) | Short Term % |
| 10                                        | 18-19     | Never Any     | 0     | .     |               |             |               |                |              |
| 10                                        | 18-19     | CC            | 0     | .     | 0             | .           |               |                |              |
| 10                                        | 18-19     | Ecig          | 0     | .     |               |             |               |                |              |
| 10                                        | 18-19     | Dual          | 0     | .     |               |             |               |                |              |
| 10                                        | 18-19     | Former        | 0     | .     |               |             |               | 0              | .            |
| Year of Follow-up: 2000, Age Group: 20-24 |           |               |       |       |               |             |               |                |              |
| Period                                    | Age Group | Smoking Group | N     | %     | Ever Quit (N) | Ever Quit % | Mean Yrs Quit | Short Term (n) | Short Term % |
| 10                                        | 20-24     | Never Any     | 4927  | 55.70 |               |             |               |                |              |
| 10                                        | 20-24     | CC            | 462   | 5.22  | 0             | 0.00        |               |                |              |
| 10                                        | 20-24     | Ecig          | 2847  | 32.19 |               |             |               |                |              |
| 10                                        | 20-24     | Dual          | 0     | 0.00  |               |             |               |                |              |
| 10                                        | 20-24     | Former        | 609   | 6.89  |               |             | 3.51          | 167            | 27.42        |
| Year of Follow-up: 2000, Age Group: 25-29 |           |               |       |       |               |             |               |                |              |
| Period                                    | Age Group | Smoking Group | N     | %     | Ever Quit (N) | Ever Quit % | Mean Yrs Quit | Short Term (n) | Short Term % |
| 10                                        | 25-29     | Never Any     | 5341  | 59.08 |               |             |               |                |              |
| 10                                        | 25-29     | CC            | 404   | 4.47  | 0             | 0.00        |               |                |              |
| 10                                        | 25-29     | Ecig          | 2583  | 28.57 |               |             |               |                |              |
| 10                                        | 25-29     | Dual          | 0     | 0.00  |               |             |               |                |              |
| 10                                        | 25-29     | Former        | 712   | 7.88  |               |             | 5.51          | 125            | 17.56        |
| Year of Follow-up: 2000, Age Group: 30-34 |           |               |       |       |               |             |               |                |              |
| Period                                    | Age Group | Smoking Group | N     | %     | Ever Quit (N) | Ever Quit % | Mean Yrs Quit | Short Term (n) | Short Term % |
| 10                                        | 30-34     | Never Any     | 5276  | 53.75 |               |             |               |                |              |
| 10                                        | 30-34     | CC            | 481   | 4.90  | 0             | 0.00        |               |                |              |
| 10                                        | 30-34     | Ecig          | 2743  | 27.94 |               |             |               |                |              |
| 10                                        | 30-34     | Dual          | 0     | 0.00  |               |             |               |                |              |
| 10                                        | 30-34     | Former        | 1316  | 13.41 |               |             | 9.25          | 80             | 6.08         |
| Year of Follow-up: 2000, Age Group: 35-39 |           |               |       |       |               |             |               |                |              |
| Period                                    | Age Group | Smoking Group | N     | %     | Ever Quit (N) | Ever Quit % | Mean Yrs Quit | Short Term (n) | Short Term % |
| 10                                        | 35-39     | Never Any     | 4997  | 46.86 |               |             |               |                |              |
| 10                                        | 35-39     | CC            | 609   | 5.71  | 0             | 0.00        |               |                |              |
| 10                                        | 35-39     | Ecig          | 3134  | 29.39 |               |             |               |                |              |
| 10                                        | 35-39     | Dual          | 0     | 0.00  |               |             |               |                |              |
| 10                                        | 35-39     | Former        | 1924  | 18.04 |               |             | 11.21         | 55             | 2.86         |
| Year of Follow-up: 2000, Age Group: 40-44 |           |               |       |       |               |             |               |                |              |
| Period                                    | Age Group | Smoking Group | N     | %     | Ever Quit (N) | Ever Quit % | Mean Yrs Quit | Short Term (n) | Short Term % |
| 10                                        | 40-44     | Never Any     | 4724  | 43.28 |               |             |               |                |              |
| 10                                        | 40-44     | CC            | 567   | 5.19  | 0             | 0.00        |               |                |              |
| 10                                        | 40-44     | Ecig          | 3025  | 27.71 |               |             |               |                |              |
| 10                                        | 40-44     | Dual          | 0     | 0.00  |               |             |               |                |              |
| 10                                        | 40-44     | Former        | 2600  | 23.82 |               |             | 12.39         | 63             | 2.42         |
| Year of Follow-up: 2000, Age Group: 45-49 |           |               |       |       |               |             |               |                |              |
| Period                                    | Age Group | Smoking Group | N     | %     | Ever Quit (N) | Ever Quit % | Mean Yrs Quit | Short Term (n) | Short Term % |
| 10                                        | 45-49     | Never Any     | 3941  | 39.85 |               |             |               |                |              |
| 10                                        | 45-49     | CC            | 484   | 4.89  | 0             | 0.00        |               |                |              |
| 10                                        | 45-49     | Ecig          | 2480  | 25.08 |               |             |               |                |              |
| 10                                        | 45-49     | Dual          | 0     | 0.00  |               |             |               |                |              |
| 10                                        | 45-49     | Former        | 2984  | 30.17 |               |             | 15.93         | 108            | 3.62         |
| Year of Follow-up: 2000, Age Group: 50-54 |           |               |       |       |               |             |               |                |              |
| Period                                    | Age Group | Smoking Group | N     | %     | Ever Quit (N) | Ever Quit % | Mean Yrs Quit | Short Term (n) | Short Term % |
| 10                                        | 50-54     | Never Any     | 2912  | 33.65 |               |             |               |                |              |
| 10                                        | 50-54     | CC            | 473   | 5.47  | 0             | 0.00        |               |                |              |
| 10                                        | 50-54     | Ecig          | 2077  | 24.00 |               |             |               |                |              |
| 10                                        | 50-54     | Dual          | 0     | 0.00  |               |             |               |                |              |
| 10                                        | 50-54     | Former        | 3193  | 36.89 |               |             | 17.81         | 114            | 3.57         |
| Year of Follow-up: 2000, Age Group: 55-59 |           |               |       |       |               |             |               |                |              |
| Period                                    | Age Group | Smoking Group | N     | %     | Ever Quit (N) | Ever Quit % | Mean Yrs Quit | Short Term (n) | Short Term % |
| 10                                        | 55-59     | Never Any     | 1919  | 29.46 |               |             |               |                |              |
| 10                                        | 55-59     | CC            | 363   | 5.57  | 0             | 0.00        |               |                |              |
| 10                                        | 55-59     | Ecig          | 1374  | 21.09 |               |             |               |                |              |
| 10                                        | 55-59     | Dual          | 0     | 0.00  |               |             |               |                |              |

**Results for PHIM for Run 1 (Sensitivity\_Analysis\_3.RTF)**

| Year of Follow-up: 2000, Age Group: 60-64    | Period   | Age Group | Smoking Group | N     | %     | Ever Quit (N) | Ever Quit % | Mean Yrs Quit | Short Term (n) | Short Term % |
|----------------------------------------------|----------|-----------|---------------|-------|-------|---------------|-------------|---------------|----------------|--------------|
| 10                                           | 55-59    | Former    |               | 2859  | 43.88 |               |             | 19.46         | 96             | 3.36         |
| 10                                           | 60-64    | Never Any |               | 1611  | 29.41 |               |             |               |                |              |
| 10                                           | 60-64    | CC        |               | 306   | 5.59  | 0             | 0.00        |               |                |              |
| 10                                           | 60-64    | Ecig      |               | 980   | 17.89 |               |             |               |                |              |
| 10                                           | 60-64    | Dual      |               | 0     | 0.00  |               |             |               |                |              |
| 10                                           | 60-64    | Former    |               | 2580  | 47.11 |               |             | 20.46         | 101            | 3.91         |
| Year of Follow-up: 2000, Age Group: 65-69    | Period   | Age Group | Smoking Group | N     | %     | Ever Quit (N) | Ever Quit % | Mean Yrs Quit | Short Term (n) | Short Term % |
| 10                                           | 65-69    | Never Any |               | 1337  | 26.83 |               |             |               |                |              |
| 10                                           | 65-69    | CC        |               | 244   | 4.90  | 0             | 0.00        |               |                |              |
| 10                                           | 65-69    | Ecig      |               | 723   | 14.51 |               |             |               |                |              |
| 10                                           | 65-69    | Dual      |               | 0     | 0.00  |               |             |               |                |              |
| 10                                           | 65-69    | Former    |               | 2679  | 53.76 |               |             | 20.69         | 94             | 3.51         |
| Year of Follow-up: 2000, Age Group: 70-74    | Period   | Age Group | Smoking Group | N     | %     | Ever Quit (N) | Ever Quit % | Mean Yrs Quit | Short Term (n) | Short Term % |
| 10                                           | 70-74    | Never Any |               | 1169  | 23.83 |               |             |               |                |              |
| 10                                           | 70-74    | CC        |               | 236   | 4.81  | 0             | 0.00        |               |                |              |
| 10                                           | 70-74    | Ecig      |               | 435   | 8.87  |               |             |               |                |              |
| 10                                           | 70-74    | Dual      |               | 0     | 0.00  |               |             |               |                |              |
| 10                                           | 70-74    | Former    |               | 3065  | 62.49 |               |             | 24.14         | 66             | 2.15         |
| Year of Follow-up: 2000, Age Group: 75-79    | Period   | Age Group | Smoking Group | N     | %     | Ever Quit (N) | Ever Quit % | Mean Yrs Quit | Short Term (n) | Short Term % |
| 10                                           | 75-79    | Never Any |               | 1023  | 23.32 |               |             |               |                |              |
| 10                                           | 75-79    | CC        |               | 214   | 4.88  | 0             | 0.00        |               |                |              |
| 10                                           | 75-79    | Ecig      |               | 291   | 6.63  |               |             |               |                |              |
| 10                                           | 75-79    | Dual      |               | 0     | 0.00  |               |             |               |                |              |
| 10                                           | 75-79    | Former    |               | 2859  | 65.17 |               |             | 25.86         | 51             | 1.78         |
| Year of Follow-up: 2005, Age Group: All Ages | Period   | Age Group | Smoking Group | N     | %     | Ever Quit (N) | Ever Quit % | Mean Yrs Quit | Short Term (n) | Short Term % |
| 15                                           | All Ages | Never Any |               | 37449 | 41.75 |               |             |               |                |              |
| 15                                           | All Ages | CC        |               | 1911  | 2.13  | 0             | 0.00        |               |                |              |
| 15                                           | All Ages | Ecig      |               | 23351 | 26.03 |               |             |               |                |              |
| 15                                           | All Ages | Dual      |               | 0     | 0.00  |               |             |               |                |              |
| 15                                           | All Ages | Former    |               | 26994 | 30.09 |               |             | 20.07         | 986            | 3.65         |
| Year of Follow-up: 2005, Age Group: 18-19    | Period   | Age Group | Smoking Group | N     | %     | Ever Quit (N) | Ever Quit % | Mean Yrs Quit | Short Term (n) | Short Term % |
| 15                                           | 18-19    | Never Any |               | 0     | .     |               |             |               |                |              |
| 15                                           | 18-19    | CC        |               | 0     | .     | 0             | .           |               |                |              |
| 15                                           | 18-19    | Ecig      |               | 0     | .     |               |             |               |                |              |
| 15                                           | 18-19    | Dual      |               | 0     | .     |               |             |               |                |              |
| 15                                           | 18-19    | Former    |               | 0     | .     |               |             | .             | 0              | .            |
| Year of Follow-up: 2005, Age Group: 20-24    | Period   | Age Group | Smoking Group | N     | %     | Ever Quit (N) | Ever Quit % | Mean Yrs Quit | Short Term (n) | Short Term % |
| 15                                           | 20-24    | Never Any |               | 0     | .     |               |             |               |                |              |
| 15                                           | 20-24    | CC        |               | 0     | .     | 0             | .           |               |                |              |
| 15                                           | 20-24    | Ecig      |               | 0     | .     |               |             |               |                |              |
| 15                                           | 20-24    | Dual      |               | 0     | .     |               |             |               |                |              |
| 15                                           | 20-24    | Former    |               | 0     | .     |               |             | .             | 0              | .            |
| Year of Follow-up: 2005, Age Group: 25-29    | Period   | Age Group | Smoking Group | N     | %     | Ever Quit (N) | Ever Quit % | Mean Yrs Quit | Short Term (n) | Short Term % |
| 15                                           | 25-29    | Never Any |               | 4634  | 52.39 |               |             |               |                |              |
| 15                                           | 25-29    | CC        |               | 179   | 2.02  | 0             | 0.00        |               |                |              |
| 15                                           | 25-29    | Ecig      |               | 3125  | 35.33 |               |             |               |                |              |
| 15                                           | 25-29    | Dual      |               | 0     | 0.00  |               |             |               |                |              |
| 15                                           | 25-29    | Former    |               | 907   | 10.25 |               |             | 6.45          | 108            | 11.91        |
| Year of Follow-up: 2005, Age Group: 30-34    | Period   | Age Group | Smoking Group | N     | %     | Ever Quit (N) | Ever Quit % | Mean Yrs Quit | Short Term (n) | Short Term % |
| 15                                           | 30-34    | Never Any |               | 5042  | 55.77 |               |             |               |                |              |
| 15                                           | 30-34    | CC        |               | 153   | 1.69  | 0             | 0.00        |               |                |              |
| 15                                           | 30-34    | Ecig      |               | 2863  | 31.67 |               |             |               |                |              |
| 15                                           | 30-34    | Dual      |               | 0     | 0.00  |               |             |               |                |              |
| 15                                           | 30-34    | Former    |               | 982   | 10.86 |               |             | 8.13          | 107            | 10.90        |
| Year of Follow-up: 2005, Age Group: 35-39    | Period   | Age Group | Smoking Group | N     | %     | Ever Quit (N) | Ever Quit % | Mean Yrs Quit | Short Term (n) | Short Term % |
| 15                                           | 35-39    | Never Any |               | 5163  | 52.60 |               |             |               |                |              |
| 15                                           | 35-39    | CC        |               | 188   | 1.92  | 0             | 0.00        |               |                |              |



**Results for PHIM for Run 1 (Sensitivity\_Analysis\_3.RTF)**

|                                              |           |               |       |       |               |             |               |                |              |
|----------------------------------------------|-----------|---------------|-------|-------|---------------|-------------|---------------|----------------|--------------|
| 15                                           | 35-39     | Ecig          | 2945  | 30.00 |               |             |               |                |              |
| 15                                           | 35-39     | Dual          | 0     | 0.00  |               |             |               |                |              |
| 15                                           | 35-39     | Former        | 1520  | 15.48 |               |             | 12.59         | 88             | 5.79         |
| Year of Follow-up: 2005, Age Group: 40-44    |           |               |       |       |               |             |               |                |              |
| Period                                       | Age Group | Smoking Group | N     | %     | Ever Quit (N) | Ever Quit % | Mean Yrs Quit | Short Term (n) | Short Term % |
| 15                                           | 40-44     | Never Any     | 4997  | 46.86 |               |             |               |                |              |
| 15                                           | 40-44     | CC            | 231   | 2.17  | 0             | 0.00        |               |                |              |
| 15                                           | 40-44     | Ecig          | 3270  | 30.66 |               |             |               |                |              |
| 15                                           | 40-44     | Dual          | 0     | 0.00  |               |             |               |                |              |
| 15                                           | 40-44     | Former        | 2166  | 20.31 |               |             | 14.61         | 107            | 4.94         |
| Year of Follow-up: 2005, Age Group: 45-49    |           |               |       |       |               |             |               |                |              |
| Period                                       | Age Group | Smoking Group | N     | %     | Ever Quit (N) | Ever Quit % | Mean Yrs Quit | Short Term (n) | Short Term % |
| 15                                           | 45-49     | Never Any     | 4724  | 43.28 |               |             |               |                |              |
| 15                                           | 45-49     | CC            | 216   | 1.98  | 0             | 0.00        |               |                |              |
| 15                                           | 45-49     | Ecig          | 3136  | 28.73 |               |             |               |                |              |
| 15                                           | 45-49     | Dual          | 0     | 0.00  |               |             |               |                |              |
| 15                                           | 45-49     | Former        | 2840  | 26.02 |               |             | 16.09         | 94             | 3.31         |
| Year of Follow-up: 2005, Age Group: 50-54    |           |               |       |       |               |             |               |                |              |
| Period                                       | Age Group | Smoking Group | N     | %     | Ever Quit (N) | Ever Quit % | Mean Yrs Quit | Short Term (n) | Short Term % |
| 15                                           | 50-54     | Never Any     | 3941  | 39.85 |               |             |               |                |              |
| 15                                           | 50-54     | CC            | 213   | 2.15  | 0             | 0.00        |               |                |              |
| 15                                           | 50-54     | Ecig          | 2520  | 25.48 |               |             |               |                |              |
| 15                                           | 50-54     | Dual          | 0     | 0.00  |               |             |               |                |              |
| 15                                           | 50-54     | Former        | 3215  | 32.51 |               |             | 19.57         | 99             | 3.08         |
| Year of Follow-up: 2005, Age Group: 55-59    |           |               |       |       |               |             |               |                |              |
| Period                                       | Age Group | Smoking Group | N     | %     | Ever Quit (N) | Ever Quit % | Mean Yrs Quit | Short Term (n) | Short Term % |
| 15                                           | 55-59     | Never Any     | 2912  | 33.65 |               |             |               |                |              |
| 15                                           | 55-59     | CC            | 215   | 2.48  | 0             | 0.00        |               |                |              |
| 15                                           | 55-59     | Ecig          | 2128  | 24.59 |               |             |               |                |              |
| 15                                           | 55-59     | Dual          | 0     | 0.00  |               |             |               |                |              |
| 15                                           | 55-59     | Former        | 3400  | 39.28 |               |             | 21.56         | 66             | 1.94         |
| Year of Follow-up: 2005, Age Group: 60-64    |           |               |       |       |               |             |               |                |              |
| Period                                       | Age Group | Smoking Group | N     | %     | Ever Quit (N) | Ever Quit % | Mean Yrs Quit | Short Term (n) | Short Term % |
| 15                                           | 60-64     | Never Any     | 1919  | 29.46 |               |             |               |                |              |
| 15                                           | 60-64     | CC            | 143   | 2.19  | 0             | 0.00        |               |                |              |
| 15                                           | 60-64     | Ecig          | 1388  | 21.30 |               |             |               |                |              |
| 15                                           | 60-64     | Dual          | 0     | 0.00  |               |             |               |                |              |
| 15                                           | 60-64     | Former        | 3065  | 47.05 |               |             | 22.94         | 98             | 3.20         |
| Year of Follow-up: 2005, Age Group: 65-69    |           |               |       |       |               |             |               |                |              |
| Period                                       | Age Group | Smoking Group | N     | %     | Ever Quit (N) | Ever Quit % | Mean Yrs Quit | Short Term (n) | Short Term % |
| 15                                           | 65-69     | Never Any     | 1611  | 29.41 |               |             |               |                |              |
| 15                                           | 65-69     | CC            | 124   | 2.26  | 0             | 0.00        |               |                |              |
| 15                                           | 65-69     | Ecig          | 921   | 16.82 |               |             |               |                |              |
| 15                                           | 65-69     | Dual          | 0     | 0.00  |               |             |               |                |              |
| 15                                           | 65-69     | Former        | 2821  | 51.51 |               |             | 23.46         | 86             | 3.05         |
| Year of Follow-up: 2005, Age Group: 70-74    |           |               |       |       |               |             |               |                |              |
| Period                                       | Age Group | Smoking Group | N     | %     | Ever Quit (N) | Ever Quit % | Mean Yrs Quit | Short Term (n) | Short Term % |
| 15                                           | 70-74     | Never Any     | 1337  | 26.83 |               |             |               |                |              |
| 15                                           | 70-74     | CC            | 129   | 2.59  | 0             | 0.00        |               |                |              |
| 15                                           | 70-74     | Ecig          | 648   | 13.00 |               |             |               |                |              |
| 15                                           | 70-74     | Dual          | 0     | 0.00  |               |             |               |                |              |
| 15                                           | 70-74     | Former        | 2869  | 57.58 |               |             | 24.12         | 74             | 2.58         |
| Year of Follow-up: 2005, Age Group: 75-79    |           |               |       |       |               |             |               |                |              |
| Period                                       | Age Group | Smoking Group | N     | %     | Ever Quit (N) | Ever Quit % | Mean Yrs Quit | Short Term (n) | Short Term % |
| 15                                           | 75-79     | Never Any     | 1169  | 23.83 |               |             |               |                |              |
| 15                                           | 75-79     | CC            | 120   | 2.45  | 0             | 0.00        |               |                |              |
| 15                                           | 75-79     | Ecig          | 407   | 8.30  |               |             |               |                |              |
| 15                                           | 75-79     | Dual          | 0     | 0.00  |               |             |               |                |              |
| 15                                           | 75-79     | Former        | 3209  | 65.42 |               |             | 27.92         | 59             | 1.84         |
| Year of Follow-up: 2010, Age Group: All Ages |           |               |       |       |               |             |               |                |              |
| Period                                       | Age Group | Smoking Group | N     | %     | Ever Quit (N) | Ever Quit % | Mean Yrs Quit | Short Term (n) | Short Term % |
| 20                                           | All Ages  | Never Any     | 36103 | 42.57 |               |             |               |                |              |
| 20                                           | All Ages  | CC            | 738   | 0.87  | 0             | 0.00        |               |                |              |
| 20                                           | All Ages  | Ecig          | 21649 | 25.53 |               |             |               |                |              |
| 20                                           | All Ages  | Dual          | 0     | 0.00  |               |             |               |                |              |
| 20                                           | All Ages  | Former        | 26310 | 31.03 |               |             | 21.90         | 1014           | 3.85         |
| Year of Follow-up: 2010, Age Group: 18-19    |           |               |       |       |               |             |               |                |              |
| Period                                       | Age Group | Smoking Group | N     | %     | Ever Quit (N) | Ever Quit % | Mean Yrs Quit | Short Term (n) | Short Term % |

**Results for PHIM for Run 1 (Sensitivity\_Analysis\_3.RTF)**

|                                           |           |               |      |       |               |             |               |                |              |
|-------------------------------------------|-----------|---------------|------|-------|---------------|-------------|---------------|----------------|--------------|
| 20                                        | 18-19     | Never Any     | 0    | .     |               |             |               |                |              |
| 20                                        | 18-19     | CC            | 0    | .     | 0             | .           |               |                |              |
| 20                                        | 18-19     | Ecig          | 0    | .     |               |             |               |                |              |
| 20                                        | 18-19     | Dual          | 0    | .     |               |             |               |                |              |
| 20                                        | 18-19     | Former        | 0    | .     |               |             | 0             | .              |              |
| Year of Follow-up: 2010, Age Group: 20-24 |           |               |      |       |               |             |               |                |              |
| Period                                    | Age Group | Smoking Group | N    | %     | Ever Quit (N) | Ever Quit % | Mean Yrs Quit | Short Term (n) | Short Term % |
| 20                                        | 20-24     | Never Any     | 0    | .     |               |             |               |                |              |
| 20                                        | 20-24     | CC            | 0    | .     | 0             | .           |               |                |              |
| 20                                        | 20-24     | Ecig          | 0    | .     |               |             |               |                |              |
| 20                                        | 20-24     | Dual          | 0    | .     |               |             |               |                |              |
| 20                                        | 20-24     | Former        | 0    | .     |               |             |               | 0              | .            |
| Year of Follow-up: 2010, Age Group: 25-29 |           |               |      |       |               |             |               |                |              |
| Period                                    | Age Group | Smoking Group | N    | %     | Ever Quit (N) | Ever Quit % | Mean Yrs Quit | Short Term (n) | Short Term % |
| 20                                        | 25-29     | Never Any     | 0    | .     |               |             |               |                |              |
| 20                                        | 25-29     | CC            | 0    | .     | 0             | .           |               |                |              |
| 20                                        | 25-29     | Ecig          | 0    | .     |               |             |               |                |              |
| 20                                        | 25-29     | Dual          | 0    | .     |               |             |               |                |              |
| 20                                        | 25-29     | Former        | 0    | .     |               |             |               | 0              | .            |
| Year of Follow-up: 2010, Age Group: 30-34 |           |               |      |       |               |             |               |                |              |
| Period                                    | Age Group | Smoking Group | N    | %     | Ever Quit (N) | Ever Quit % | Mean Yrs Quit | Short Term (n) | Short Term % |
| 20                                        | 30-34     | Never Any     | 4508 | 50.97 |               |             |               |                |              |
| 20                                        | 30-34     | CC            | 71   | 0.80  | 0             | 0.00        |               |                |              |
| 20                                        | 30-34     | Ecig          | 3041 | 34.38 |               |             |               |                |              |
| 20                                        | 30-34     | Dual          | 0    | 0.00  |               |             |               |                |              |
| 20                                        | 30-34     | Former        | 1225 | 13.85 |               |             | 8.94          | 151            | 12.33        |
| Year of Follow-up: 2010, Age Group: 35-39 |           |               |      |       |               |             |               |                |              |
| Period                                    | Age Group | Smoking Group | N    | %     | Ever Quit (N) | Ever Quit % | Mean Yrs Quit | Short Term (n) | Short Term % |
| 20                                        | 35-39     | Never Any     | 4991 | 55.21 |               |             |               |                |              |
| 20                                        | 35-39     | CC            | 59   | 0.65  | 0             | 0.00        |               |                |              |
| 20                                        | 35-39     | Ecig          | 2699 | 29.86 |               |             |               |                |              |
| 20                                        | 35-39     | Dual          | 0    | 0.00  |               |             |               |                |              |
| 20                                        | 35-39     | Former        | 1291 | 14.28 |               |             | 10.49         | 106            | 8.21         |
| Year of Follow-up: 2010, Age Group: 40-44 |           |               |      |       |               |             |               |                |              |
| Period                                    | Age Group | Smoking Group | N    | %     | Ever Quit (N) | Ever Quit % | Mean Yrs Quit | Short Term (n) | Short Term % |
| 20                                        | 40-44     | Never Any     | 5163 | 52.60 |               |             |               |                |              |
| 20                                        | 40-44     | CC            | 68   | 0.69  | 0             | 0.00        |               |                |              |
| 20                                        | 40-44     | Ecig          | 2836 | 28.89 |               |             |               |                |              |
| 20                                        | 40-44     | Dual          | 0    | 0.00  |               |             |               |                |              |
| 20                                        | 40-44     | Former        | 1749 | 17.82 |               |             | 15.56         | 86             | 4.92         |
| Year of Follow-up: 2010, Age Group: 45-49 |           |               |      |       |               |             |               |                |              |
| Period                                    | Age Group | Smoking Group | N    | %     | Ever Quit (N) | Ever Quit % | Mean Yrs Quit | Short Term (n) | Short Term % |
| 20                                        | 45-49     | Never Any     | 4997 | 46.86 |               |             |               |                |              |
| 20                                        | 45-49     | CC            | 89   | 0.83  | 0             | 0.00        |               |                |              |
| 20                                        | 45-49     | Ecig          | 3139 | 29.44 |               |             |               |                |              |
| 20                                        | 45-49     | Dual          | 0    | 0.00  |               |             |               |                |              |
| 20                                        | 45-49     | Former        | 2439 | 22.87 |               |             | 17.64         | 102            | 4.18         |
| Year of Follow-up: 2010, Age Group: 50-54 |           |               |      |       |               |             |               |                |              |
| Period                                    | Age Group | Smoking Group | N    | %     | Ever Quit (N) | Ever Quit % | Mean Yrs Quit | Short Term (n) | Short Term % |
| 20                                        | 50-54     | Never Any     | 4724 | 43.28 |               |             |               |                |              |
| 20                                        | 50-54     | CC            | 87   | 0.80  | 0             | 0.00        |               |                |              |
| 20                                        | 50-54     | Ecig          | 2997 | 27.46 |               |             |               |                |              |
| 20                                        | 50-54     | Dual          | 0    | 0.00  |               |             |               |                |              |
| 20                                        | 50-54     | Former        | 3108 | 28.47 |               |             | 19.44         | 114            | 3.67         |
| Year of Follow-up: 2010, Age Group: 55-59 |           |               |      |       |               |             |               |                |              |
| Period                                    | Age Group | Smoking Group | N    | %     | Ever Quit (N) | Ever Quit % | Mean Yrs Quit | Short Term (n) | Short Term % |
| 20                                        | 55-59     | Never Any     | 3941 | 39.85 |               |             |               |                |              |
| 20                                        | 55-59     | CC            | 85   | 0.86  | 0             | 0.00        |               |                |              |
| 20                                        | 55-59     | Ecig          | 2362 | 23.89 |               |             |               |                |              |
| 20                                        | 55-59     | Dual          | 0    | 0.00  |               |             |               |                |              |
| 20                                        | 55-59     | Former        | 3501 | 35.40 |               |             | 22.73         | 113            | 3.23         |
| Year of Follow-up: 2010, Age Group: 60-64 |           |               |      |       |               |             |               |                |              |
| Period                                    | Age Group | Smoking Group | N    | %     | Ever Quit (N) | Ever Quit % | Mean Yrs Quit | Short Term (n) | Short Term % |
| 20                                        | 60-64     | Never Any     | 2912 | 33.65 |               |             |               |                |              |
| 20                                        | 60-64     | CC            | 87   | 1.01  | 0             | 0.00        |               |                |              |
| 20                                        | 60-64     | Ecig          | 1919 | 22.17 |               |             |               |                |              |
| 20                                        | 60-64     | Dual          | 0    | 0.00  |               |             |               |                |              |
| 20                                        | 60-64     | Former        | 3737 | 43.18 |               |             | 24.31         | 172            | 4.60         |
| Year of Follow-up: 2010, Age Group: 65-69 |           |               |      |       |               |             |               |                |              |

**Results for PHIM for Run 1 (Sensitivity\_Analysis\_3.RTF)**

| Period                                       | Age Group | Smoking Group | N     | %     | Ever Quit (N) | Ever Quit % | Mean Yrs Quit | Short Term (n) | Short Term % |
|----------------------------------------------|-----------|---------------|-------|-------|---------------|-------------|---------------|----------------|--------------|
| 20                                           | 65-69     | Never Any     | 1919  | 29.46 |               |             |               |                |              |
| 20                                           | 65-69     | CC            | 60    | 0.92  | 0             | 0.00        |               |                |              |
| 20                                           | 65-69     | Ecig          | 1226  | 18.82 |               |             |               |                |              |
| 20                                           | 65-69     | Dual          | 0     | 0.00  |               |             |               |                |              |
| 20                                           | 65-69     | Former        | 3310  | 50.81 |               |             | 26.03         | 90             | 2.72         |
| Year of Follow-up: 2010, Age Group: 70-74    |           |               |       |       |               |             |               |                |              |
| Period                                       | Age Group | Smoking Group | N     | %     | Ever Quit (N) | Ever Quit % | Mean Yrs Quit | Short Term (n) | Short Term % |
| 20                                           | 70-74     | Never Any     | 1611  | 29.41 |               |             |               |                |              |
| 20                                           | 70-74     | CC            | 69    | 1.26  | 0             | 0.00        |               |                |              |
| 20                                           | 70-74     | Ecig          | 831   | 15.17 |               |             |               |                |              |
| 20                                           | 70-74     | Dual          | 0     | 0.00  |               |             |               |                |              |
| 20                                           | 70-74     | Former        | 2966  | 54.15 |               |             | 27.17         | 51             | 1.72         |
| Year of Follow-up: 2010, Age Group: 75-79    |           |               |       |       |               |             |               |                |              |
| Period                                       | Age Group | Smoking Group | N     | %     | Ever Quit (N) | Ever Quit % | Mean Yrs Quit | Short Term (n) | Short Term % |
| 20                                           | 75-79     | Never Any     | 1337  | 26.83 |               |             |               |                |              |
| 20                                           | 75-79     | CC            | 63    | 1.26  | 0             | 0.00        |               |                |              |
| 20                                           | 75-79     | Ecig          | 599   | 12.02 |               |             |               |                |              |
| 20                                           | 75-79     | Dual          | 0     | 0.00  |               |             |               |                |              |
| 20                                           | 75-79     | Former        | 2984  | 59.88 |               |             | 28.10         | 29             | 0.97         |
| Year of Follow-up: 2015, Age Group: All Ages |           |               |       |       |               |             |               |                |              |
| Period                                       | Age Group | Smoking Group | N     | %     | Ever Quit (N) | Ever Quit % | Mean Yrs Quit | Short Term (n) | Short Term % |
| 25                                           | All Ages  | Never Any     | 34747 | 43.53 |               |             |               |                |              |
| 25                                           | All Ages  | CC            | 289   | 0.36  | 0             | 0.00        |               |                |              |
| 25                                           | All Ages  | Ecig          | 19405 | 24.31 |               |             |               |                |              |
| 25                                           | All Ages  | Dual          | 0     | 0.00  |               |             |               |                |              |
| 25                                           | All Ages  | Former        | 25376 | 31.79 |               |             | 24.17         | 760            | 2.99         |
| Year of Follow-up: 2015, Age Group: 18-19    |           |               |       |       |               |             |               |                |              |
| Period                                       | Age Group | Smoking Group | N     | %     | Ever Quit (N) | Ever Quit % | Mean Yrs Quit | Short Term (n) | Short Term % |
| 25                                           | 18-19     | Never Any     | 0     | .     |               |             |               |                |              |
| 25                                           | 18-19     | CC            | 0     | .     | 0             | .           |               |                |              |
| 25                                           | 18-19     | Ecig          | 0     | .     |               |             |               |                |              |
| 25                                           | 18-19     | Dual          | 0     | .     |               |             |               |                |              |
| 25                                           | 18-19     | Former        | 0     | .     |               |             | .             | 0              | .            |
| Year of Follow-up: 2015, Age Group: 20-24    |           |               |       |       |               |             |               |                |              |
| Period                                       | Age Group | Smoking Group | N     | %     | Ever Quit (N) | Ever Quit % | Mean Yrs Quit | Short Term (n) | Short Term % |
| 25                                           | 20-24     | Never Any     | 0     | .     |               |             |               |                |              |
| 25                                           | 20-24     | CC            | 0     | .     | 0             | .           |               |                |              |
| 25                                           | 20-24     | Ecig          | 0     | .     |               |             |               |                |              |
| 25                                           | 20-24     | Dual          | 0     | .     |               |             |               |                |              |
| 25                                           | 20-24     | Former        | 0     | .     |               |             | .             | 0              | .            |
| Year of Follow-up: 2015, Age Group: 25-29    |           |               |       |       |               |             |               |                |              |
| Period                                       | Age Group | Smoking Group | N     | %     | Ever Quit (N) | Ever Quit % | Mean Yrs Quit | Short Term (n) | Short Term % |
| 25                                           | 25-29     | Never Any     | 0     | .     |               |             |               |                |              |
| 25                                           | 25-29     | CC            | 0     | .     | 0             | .           |               |                |              |
| 25                                           | 25-29     | Ecig          | 0     | .     |               |             |               |                |              |
| 25                                           | 25-29     | Dual          | 0     | .     |               |             |               |                |              |
| 25                                           | 25-29     | Former        | 0     | .     |               |             | .             | 0              | .            |
| Year of Follow-up: 2015, Age Group: 30-34    |           |               |       |       |               |             |               |                |              |
| Period                                       | Age Group | Smoking Group | N     | %     | Ever Quit (N) | Ever Quit % | Mean Yrs Quit | Short Term (n) | Short Term % |
| 25                                           | 30-34     | Never Any     | 0     | .     |               |             |               |                |              |
| 25                                           | 30-34     | CC            | 0     | .     | 0             | .           |               |                |              |
| 25                                           | 30-34     | Ecig          | 0     | .     |               |             |               |                |              |
| 25                                           | 30-34     | Dual          | 0     | .     |               |             |               |                |              |
| 25                                           | 30-34     | Former        | 0     | .     |               |             | .             | 0              | .            |
| Year of Follow-up: 2015, Age Group: 35-39    |           |               |       |       |               |             |               |                |              |
| Period                                       | Age Group | Smoking Group | N     | %     | Ever Quit (N) | Ever Quit % | Mean Yrs Quit | Short Term (n) | Short Term % |
| 25                                           | 35-39     | Never Any     | 4489  | 50.75 |               |             |               |                |              |
| 25                                           | 35-39     | CC            | 28    | 0.32  | 0             | 0.00        |               |                |              |
| 25                                           | 35-39     | Ecig          | 2796  | 31.61 |               |             |               |                |              |
| 25                                           | 35-39     | Dual          | 0     | 0.00  |               |             |               |                |              |
| 25                                           | 35-39     | Former        | 1532  | 17.32 |               |             | 11.61         | 95             | 6.20         |
| Year of Follow-up: 2015, Age Group: 40-44    |           |               |       |       |               |             |               |                |              |
| Period                                       | Age Group | Smoking Group | N     | %     | Ever Quit (N) | Ever Quit % | Mean Yrs Quit | Short Term (n) | Short Term % |
| 25                                           | 40-44     | Never Any     | 4991  | 55.21 |               |             |               |                |              |
| 25                                           | 40-44     | CC            | 20    | 0.22  | 0             | 0.00        |               |                |              |
| 25                                           | 40-44     | Ecig          | 2536  | 28.05 |               |             |               |                |              |
| 25                                           | 40-44     | Dual          | 0     | 0.00  |               |             |               |                |              |

**Results for PHIM for Run 1 (Sensitivity\_Analysis\_3.RTF)**

|                                              |           |               |       |       |               |             |               |                |              |
|----------------------------------------------|-----------|---------------|-------|-------|---------------|-------------|---------------|----------------|--------------|
| 25                                           | 40-44     | Former        | 1493  | 16.52 |               |             | 13.67         | 78             | 5.22         |
| Year of Follow-up: 2015, Age Group: 45-49    |           |               |       |       |               |             |               |                |              |
| Period                                       | Age Group | Smoking Group | N     | %     | Ever Quit (N) | Ever Quit % | Mean Yrs Quit | Short Term (n) | Short Term % |
| 25                                           | 45-49     | Never Any     | 5163  | 52.60 |               |             |               |                |              |
| 25                                           | 45-49     | CC            | 29    | 0.30  | 0             | 0.00        |               |                |              |
| 25                                           | 45-49     | Ecig          | 2719  | 27.70 |               |             |               |                |              |
| 25                                           | 45-49     | Dual          | 0     | 0.00  |               |             |               |                |              |
| 25                                           | 45-49     | Former        | 1905  | 19.41 |               |             | 19.07         | 43             | 2.26         |
| Year of Follow-up: 2015, Age Group: 50-54    |           |               |       |       |               |             |               |                |              |
| Period                                       | Age Group | Smoking Group | N     | %     | Ever Quit (N) | Ever Quit % | Mean Yrs Quit | Short Term (n) | Short Term % |
| 25                                           | 50-54     | Never Any     | 4997  | 46.86 |               |             |               |                |              |
| 25                                           | 50-54     | CC            | 37    | 0.35  | 0             | 0.00        |               |                |              |
| 25                                           | 50-54     | Ecig          | 3019  | 28.31 |               |             |               |                |              |
| 25                                           | 50-54     | Dual          | 0     | 0.00  |               |             |               |                |              |
| 25                                           | 50-54     | Former        | 2611  | 24.48 |               |             | 21.27         | 83             | 3.18         |
| Year of Follow-up: 2015, Age Group: 55-59    |           |               |       |       |               |             |               |                |              |
| Period                                       | Age Group | Smoking Group | N     | %     | Ever Quit (N) | Ever Quit % | Mean Yrs Quit | Short Term (n) | Short Term % |
| 25                                           | 55-59     | Never Any     | 4724  | 43.28 |               |             |               |                |              |
| 25                                           | 55-59     | CC            | 33    | 0.30  | 0             | 0.00        |               |                |              |
| 25                                           | 55-59     | Ecig          | 2775  | 25.42 |               |             |               |                |              |
| 25                                           | 55-59     | Dual          | 0     | 0.00  |               |             |               |                |              |
| 25                                           | 55-59     | Former        | 3384  | 31.00 |               |             | 22.61         | 105            | 3.10         |
| Year of Follow-up: 2015, Age Group: 60-64    |           |               |       |       |               |             |               |                |              |
| Period                                       | Age Group | Smoking Group | N     | %     | Ever Quit (N) | Ever Quit % | Mean Yrs Quit | Short Term (n) | Short Term % |
| 25                                           | 60-64     | Never Any     | 3941  | 39.85 |               |             |               |                |              |
| 25                                           | 60-64     | CC            | 28    | 0.28  | 0             | 0.00        |               |                |              |
| 25                                           | 60-64     | Ecig          | 2101  | 21.25 |               |             |               |                |              |
| 25                                           | 60-64     | Dual          | 0     | 0.00  |               |             |               |                |              |
| 25                                           | 60-64     | Former        | 3819  | 38.62 |               |             | 25.59         | 133            | 3.48         |
| Year of Follow-up: 2015, Age Group: 65-69    |           |               |       |       |               |             |               |                |              |
| Period                                       | Age Group | Smoking Group | N     | %     | Ever Quit (N) | Ever Quit % | Mean Yrs Quit | Short Term (n) | Short Term % |
| 25                                           | 65-69     | Never Any     | 2912  | 33.65 |               |             |               |                |              |
| 25                                           | 65-69     | CC            | 43    | 0.50  | 0             | 0.00        |               |                |              |
| 25                                           | 65-69     | Ecig          | 1644  | 18.99 |               |             |               |                |              |
| 25                                           | 65-69     | Dual          | 0     | 0.00  |               |             |               |                |              |
| 25                                           | 65-69     | Former        | 4056  | 46.86 |               |             | 27.17         | 108            | 2.66         |
| Year of Follow-up: 2015, Age Group: 70-74    |           |               |       |       |               |             |               |                |              |
| Period                                       | Age Group | Smoking Group | N     | %     | Ever Quit (N) | Ever Quit % | Mean Yrs Quit | Short Term (n) | Short Term % |
| 25                                           | 70-74     | Never Any     | 1919  | 29.46 |               |             |               |                |              |
| 25                                           | 70-74     | CC            | 35    | 0.54  | 0             | 0.00        |               |                |              |
| 25                                           | 70-74     | Ecig          | 1068  | 16.39 |               |             |               |                |              |
| 25                                           | 70-74     | Dual          | 0     | 0.00  |               |             |               |                |              |
| 25                                           | 70-74     | Former        | 3493  | 53.61 |               |             | 29.51         | 64             | 1.83         |
| Year of Follow-up: 2015, Age Group: 75-79    |           |               |       |       |               |             |               |                |              |
| Period                                       | Age Group | Smoking Group | N     | %     | Ever Quit (N) | Ever Quit % | Mean Yrs Quit | Short Term (n) | Short Term % |
| 25                                           | 75-79     | Never Any     | 1611  | 29.41 |               |             |               |                |              |
| 25                                           | 75-79     | CC            | 36    | 0.66  | 0             | 0.00        |               |                |              |
| 25                                           | 75-79     | Ecig          | 747   | 13.64 |               |             |               |                |              |
| 25                                           | 75-79     | Dual          | 0     | 0.00  |               |             |               |                |              |
| 25                                           | 75-79     | Former        | 3083  | 56.29 |               |             | 31.03         | 51             | 1.65         |
| Year of Follow-up: 2020, Age Group: All Ages |           |               |       |       |               |             |               |                |              |
| Period                                       | Age Group | Smoking Group | N     | %     | Ever Quit (N) | Ever Quit % | Mean Yrs Quit | Short Term (n) | Short Term % |
| 30                                           | All Ages  | Never Any     | 33136 | 44.57 |               |             |               |                |              |
| 30                                           | All Ages  | CC            | 100   | 0.13  | 0             | 0.00        |               |                |              |
| 30                                           | All Ages  | Ecig          | 17009 | 22.88 |               |             |               |                |              |
| 30                                           | All Ages  | Dual          | 0     | 0.00  |               |             |               |                |              |
| 30                                           | All Ages  | Former        | 24095 | 32.41 |               |             | 26.26         | 685            | 2.84         |
| Year of Follow-up: 2020, Age Group: 18-19    |           |               |       |       |               |             |               |                |              |
| Period                                       | Age Group | Smoking Group | N     | %     | Ever Quit (N) | Ever Quit % | Mean Yrs Quit | Short Term (n) | Short Term % |
| 30                                           | 18-19     | Never Any     | 0     | .     |               |             |               |                |              |
| 30                                           | 18-19     | CC            | 0     | .     | 0             | .           |               |                |              |
| 30                                           | 18-19     | Ecig          | 0     | .     |               |             |               |                |              |
| 30                                           | 18-19     | Dual          | 0     | .     |               |             |               |                |              |
| 30                                           | 18-19     | Former        | 0     | .     |               |             | .             | 0              | .            |
| Year of Follow-up: 2020, Age Group: 20-24    |           |               |       |       |               |             |               |                |              |
| Period                                       | Age Group | Smoking Group | N     | %     | Ever Quit (N) | Ever Quit % | Mean Yrs Quit | Short Term (n) | Short Term % |
| 30                                           | 20-24     | Never Any     | 0     | .     |               |             |               |                |              |
| 30                                           | 20-24     | CC            | 0     | .     | 0             | .           |               |                |              |

**Results for PHIM for Run 1 (Sensitivity\_Analysis\_3.RTF)**

|                                           |           |               |      |       |               |             |               |                |              |
|-------------------------------------------|-----------|---------------|------|-------|---------------|-------------|---------------|----------------|--------------|
| 30                                        | 20-24     | Ecig          | 0    | .     |               |             |               |                |              |
| 30                                        | 20-24     | Dual          | 0    | .     |               |             |               |                |              |
| 30                                        | 20-24     | Former        | 0    | .     |               |             | 0             | .              |              |
| Year of Follow-up: 2020, Age Group: 25-29 |           |               |      |       |               |             |               |                |              |
| Period                                    | Age Group | Smoking Group | N    | %     | Ever Quit (N) | Ever Quit % | Mean Yrs Quit | Short Term (n) | Short Term % |
| 30                                        | 25-29     | Never Any     | 0    | .     |               |             |               |                |              |
| 30                                        | 25-29     | CC            | 0    | .     | 0             | .           |               |                |              |
| 30                                        | 25-29     | Ecig          | 0    | .     |               |             |               |                |              |
| 30                                        | 25-29     | Dual          | 0    | .     |               |             |               |                |              |
| 30                                        | 25-29     | Former        | 0    | .     |               |             |               | 0              | .            |
| Year of Follow-up: 2020, Age Group: 30-34 |           |               |      |       |               |             |               |                |              |
| Period                                    | Age Group | Smoking Group | N    | %     | Ever Quit (N) | Ever Quit % | Mean Yrs Quit | Short Term (n) | Short Term % |
| 30                                        | 30-34     | Never Any     | 0    | .     |               |             |               |                |              |
| 30                                        | 30-34     | CC            | 0    | .     | 0             | .           |               |                |              |
| 30                                        | 30-34     | Ecig          | 0    | .     |               |             |               |                |              |
| 30                                        | 30-34     | Dual          | 0    | .     |               |             |               |                |              |
| 30                                        | 30-34     | Former        | 0    | .     |               |             |               | 0              | .            |
| Year of Follow-up: 2020, Age Group: 35-39 |           |               |      |       |               |             |               |                |              |
| Period                                    | Age Group | Smoking Group | N    | %     | Ever Quit (N) | Ever Quit % | Mean Yrs Quit | Short Term (n) | Short Term % |
| 30                                        | 35-39     | Never Any     | 0    | .     |               |             |               |                |              |
| 30                                        | 35-39     | CC            | 0    | .     | 0             | .           |               |                |              |
| 30                                        | 35-39     | Ecig          | 0    | .     |               |             |               |                |              |
| 30                                        | 35-39     | Dual          | 0    | .     |               |             |               |                |              |
| 30                                        | 35-39     | Former        | 0    | .     |               |             |               | 0              | .            |
| Year of Follow-up: 2020, Age Group: 40-44 |           |               |      |       |               |             |               |                |              |
| Period                                    | Age Group | Smoking Group | N    | %     | Ever Quit (N) | Ever Quit % | Mean Yrs Quit | Short Term (n) | Short Term % |
| 30                                        | 40-44     | Never Any     | 4489 | 50.75 |               |             |               |                |              |
| 30                                        | 40-44     | CC            | 12   | 0.14  | 0             | 0.00        |               |                |              |
| 30                                        | 40-44     | Ecig          | 2609 | 29.50 |               |             |               |                |              |
| 30                                        | 40-44     | Dual          | 0    | 0.00  |               |             |               |                |              |
| 30                                        | 40-44     | Former        | 1735 | 19.62 |               |             | 14.91         | 77             | 4.44         |
| Year of Follow-up: 2020, Age Group: 45-49 |           |               |      |       |               |             |               |                |              |
| Period                                    | Age Group | Smoking Group | N    | %     | Ever Quit (N) | Ever Quit % | Mean Yrs Quit | Short Term (n) | Short Term % |
| 30                                        | 45-49     | Never Any     | 4991 | 55.21 |               |             |               |                |              |
| 30                                        | 45-49     | CC            | 5    | 0.06  | 0             | 0.00        |               |                |              |
| 30                                        | 45-49     | Ecig          | 2398 | 26.53 |               |             |               |                |              |
| 30                                        | 45-49     | Dual          | 0    | 0.00  |               |             |               |                |              |
| 30                                        | 45-49     | Former        | 1646 | 18.21 |               |             | 17.15         | 51             | 3.10         |
| Year of Follow-up: 2020, Age Group: 50-54 |           |               |      |       |               |             |               |                |              |
| Period                                    | Age Group | Smoking Group | N    | %     | Ever Quit (N) | Ever Quit % | Mean Yrs Quit | Short Term (n) | Short Term % |
| 30                                        | 50-54     | Never Any     | 5163 | 52.60 |               |             |               |                |              |
| 30                                        | 50-54     | CC            | 9    | 0.09  | 0             | 0.00        |               |                |              |
| 30                                        | 50-54     | Ecig          | 2612 | 26.61 |               |             |               |                |              |
| 30                                        | 50-54     | Dual          | 0    | 0.00  |               |             |               |                |              |
| 30                                        | 50-54     | Former        | 2032 | 20.70 |               |             | 22.67         | 62             | 3.05         |
| Year of Follow-up: 2020, Age Group: 55-59 |           |               |      |       |               |             |               |                |              |
| Period                                    | Age Group | Smoking Group | N    | %     | Ever Quit (N) | Ever Quit % | Mean Yrs Quit | Short Term (n) | Short Term % |
| 30                                        | 55-59     | Never Any     | 4997 | 46.86 |               |             |               |                |              |
| 30                                        | 55-59     | CC            | 18   | 0.17  | 0             | 0.00        |               |                |              |
| 30                                        | 55-59     | Ecig          | 2760 | 25.88 |               |             |               |                |              |
| 30                                        | 55-59     | Dual          | 0    | 0.00  |               |             |               |                |              |
| 30                                        | 55-59     | Former        | 2889 | 27.09 |               |             | 23.94         | 104            | 3.60         |
| Year of Follow-up: 2020, Age Group: 60-64 |           |               |      |       |               |             |               |                |              |
| Period                                    | Age Group | Smoking Group | N    | %     | Ever Quit (N) | Ever Quit % | Mean Yrs Quit | Short Term (n) | Short Term % |
| 30                                        | 60-64     | Never Any     | 4724 | 43.28 |               |             |               |                |              |
| 30                                        | 60-64     | CC            | 10   | 0.09  | 0             | 0.00        |               |                |              |
| 30                                        | 60-64     | Ecig          | 2427 | 22.23 |               |             |               |                |              |
| 30                                        | 60-64     | Dual          | 0    | 0.00  |               |             |               |                |              |
| 30                                        | 60-64     | Former        | 3755 | 34.40 |               |             | 25.07         | 151            | 4.02         |
| Year of Follow-up: 2020, Age Group: 65-69 |           |               |      |       |               |             |               |                |              |
| Period                                    | Age Group | Smoking Group | N    | %     | Ever Quit (N) | Ever Quit % | Mean Yrs Quit | Short Term (n) | Short Term % |
| 30                                        | 65-69     | Never Any     | 3941 | 39.85 |               |             |               |                |              |
| 30                                        | 65-69     | CC            | 13   | 0.13  | 0             | 0.00        |               |                |              |
| 30                                        | 65-69     | Ecig          | 1787 | 18.07 |               |             |               |                |              |
| 30                                        | 65-69     | Dual          | 0    | 0.00  |               |             |               |                |              |
| 30                                        | 65-69     | Former        | 4148 | 41.95 |               |             | 28.33         | 129            | 3.11         |
| Year of Follow-up: 2020, Age Group: 70-74 |           |               |      |       |               |             |               |                |              |
| Period                                    | Age Group | Smoking Group | N    | %     | Ever Quit (N) | Ever Quit % | Mean Yrs Quit | Short Term (n) | Short Term % |

**Results for PHIM for Run 1 (Sensitivity\_Analysis\_3.RTF)**

|                                              |           |               |       |       |               |             |               |                |              |
|----------------------------------------------|-----------|---------------|-------|-------|---------------|-------------|---------------|----------------|--------------|
| 30                                           | 70-74     | Never Any     | 2912  | 33.65 |               |             |               |                |              |
| 30                                           | 70-74     | CC            | 18    | 0.21  | 0             | 0.00        |               |                |              |
| 30                                           | 70-74     | Ecig          | 1450  | 16.75 |               |             |               |                |              |
| 30                                           | 70-74     | Dual          | 0     | 0.00  |               |             |               |                |              |
| 30                                           | 70-74     | Former        | 4275  | 49.39 |               |             | 30.63         | 70             | 1.64         |
| Year of Follow-up: 2020, Age Group: 75-79    |           |               |       |       |               |             |               |                |              |
| Period                                       | Age Group | Smoking Group | N     | %     | Ever Quit (N) | Ever Quit % | Mean Yrs Quit | Short Term (n) | Short Term % |
| 30                                           | 75-79     | Never Any     | 1919  | 29.46 |               |             |               |                |              |
| 30                                           | 75-79     | CC            | 15    | 0.23  | 0             | 0.00        |               |                |              |
| 30                                           | 75-79     | Ecig          | 966   | 14.83 |               |             |               |                |              |
| 30                                           | 75-79     | Dual          | 0     | 0.00  |               |             |               |                |              |
| 30                                           | 75-79     | Former        | 3615  | 55.49 |               |             | 33.43         | 41             | 1.13         |
| Year of Follow-up: 2025, Age Group: All Ages |           |               |       |       |               |             |               |                |              |
| Period                                       | Age Group | Smoking Group | N     | %     | Ever Quit (N) | Ever Quit % | Mean Yrs Quit | Short Term (n) | Short Term % |
| 35                                           | All Ages  | Never Any     | 31217 | 46.03 |               |             |               |                |              |
| 35                                           | All Ages  | CC            | 38    | 0.06  | 0             | 0.00        |               |                |              |
| 35                                           | All Ages  | Ecig          | 14446 | 21.30 |               |             |               |                |              |
| 35                                           | All Ages  | Dual          | 0     | 0.00  |               |             |               |                |              |
| 35                                           | All Ages  | Former        | 22124 | 32.62 |               |             | 27.92         | 616            | 2.78         |
| Year of Follow-up: 2025, Age Group: 18-19    |           |               |       |       |               |             |               |                |              |
| Period                                       | Age Group | Smoking Group | N     | %     | Ever Quit (N) | Ever Quit % | Mean Yrs Quit | Short Term (n) | Short Term % |
| 35                                           | 18-19     | Never Any     | 0     | .     |               |             |               |                |              |
| 35                                           | 18-19     | CC            | 0     | .     | 0             | .           |               |                |              |
| 35                                           | 18-19     | Ecig          | 0     | .     |               |             |               |                |              |
| 35                                           | 18-19     | Dual          | 0     | .     |               |             |               |                |              |
| 35                                           | 18-19     | Former        | 0     | .     |               |             | .             | 0              | .            |
| Year of Follow-up: 2025, Age Group: 20-24    |           |               |       |       |               |             |               |                |              |
| Period                                       | Age Group | Smoking Group | N     | %     | Ever Quit (N) | Ever Quit % | Mean Yrs Quit | Short Term (n) | Short Term % |
| 35                                           | 20-24     | Never Any     | 0     | .     |               |             |               |                |              |
| 35                                           | 20-24     | CC            | 0     | .     | 0             | .           |               |                |              |
| 35                                           | 20-24     | Ecig          | 0     | .     |               |             |               |                |              |
| 35                                           | 20-24     | Dual          | 0     | .     |               |             |               |                |              |
| 35                                           | 20-24     | Former        | 0     | .     |               |             | .             | 0              | .            |
| Year of Follow-up: 2025, Age Group: 25-29    |           |               |       |       |               |             |               |                |              |
| Period                                       | Age Group | Smoking Group | N     | %     | Ever Quit (N) | Ever Quit % | Mean Yrs Quit | Short Term (n) | Short Term % |
| 35                                           | 25-29     | Never Any     | 0     | .     |               |             |               |                |              |
| 35                                           | 25-29     | CC            | 0     | .     | 0             | .           |               |                |              |
| 35                                           | 25-29     | Ecig          | 0     | .     |               |             |               |                |              |
| 35                                           | 25-29     | Dual          | 0     | .     |               |             |               |                |              |
| 35                                           | 25-29     | Former        | 0     | .     |               |             | .             | 0              | .            |
| Year of Follow-up: 2025, Age Group: 30-34    |           |               |       |       |               |             |               |                |              |
| Period                                       | Age Group | Smoking Group | N     | %     | Ever Quit (N) | Ever Quit % | Mean Yrs Quit | Short Term (n) | Short Term % |
| 35                                           | 30-34     | Never Any     | 0     | .     |               |             |               |                |              |
| 35                                           | 30-34     | CC            | 0     | .     | 0             | .           |               |                |              |
| 35                                           | 30-34     | Ecig          | 0     | .     |               |             |               |                |              |
| 35                                           | 30-34     | Dual          | 0     | .     |               |             |               |                |              |
| 35                                           | 30-34     | Former        | 0     | .     |               |             | .             | 0              | .            |
| Year of Follow-up: 2025, Age Group: 35-39    |           |               |       |       |               |             |               |                |              |
| Period                                       | Age Group | Smoking Group | N     | %     | Ever Quit (N) | Ever Quit % | Mean Yrs Quit | Short Term (n) | Short Term % |
| 35                                           | 35-39     | Never Any     | 0     | .     |               |             |               |                |              |
| 35                                           | 35-39     | CC            | 0     | .     | 0             | .           |               |                |              |
| 35                                           | 35-39     | Ecig          | 0     | .     |               |             |               |                |              |
| 35                                           | 35-39     | Dual          | 0     | .     |               |             |               |                |              |
| 35                                           | 35-39     | Former        | 0     | .     |               |             | .             | 0              | .            |
| Year of Follow-up: 2025, Age Group: 40-44    |           |               |       |       |               |             |               |                |              |
| Period                                       | Age Group | Smoking Group | N     | %     | Ever Quit (N) | Ever Quit % | Mean Yrs Quit | Short Term (n) | Short Term % |
| 35                                           | 40-44     | Never Any     | 0     | .     |               |             |               |                |              |
| 35                                           | 40-44     | CC            | 0     | .     | 0             | .           |               |                |              |
| 35                                           | 40-44     | Ecig          | 0     | .     |               |             |               |                |              |
| 35                                           | 40-44     | Dual          | 0     | .     |               |             |               |                |              |
| 35                                           | 40-44     | Former        | 0     | .     |               |             | .             | 0              | .            |
| Year of Follow-up: 2025, Age Group: 45-49    |           |               |       |       |               |             |               |                |              |
| Period                                       | Age Group | Smoking Group | N     | %     | Ever Quit (N) | Ever Quit % | Mean Yrs Quit | Short Term (n) | Short Term % |
| 35                                           | 45-49     | Never Any     | 4489  | 50.75 |               |             |               |                |              |
| 35                                           | 45-49     | CC            | 7     | 0.08  | 0             | 0.00        |               |                |              |
| 35                                           | 45-49     | Ecig          | 2456  | 27.77 |               |             |               |                |              |
| 35                                           | 45-49     | Dual          | 0     | 0.00  |               |             |               |                |              |
| 35                                           | 45-49     | Former        | 1893  | 21.40 |               |             | 18.45         | 43             | 2.27         |
| Year of Follow-up: 2025, Age Group: 50-54    |           |               |       |       |               |             |               |                |              |

**Results for PHIM for Run 1 (Sensitivity\_Analysis\_3.RTF)**

| Period                                       | Age Group | Smoking Group | N     | %     | Ever Quit (N) | Ever Quit % | Mean Yrs Quit | Short Term (n) | Short Term % |
|----------------------------------------------|-----------|---------------|-------|-------|---------------|-------------|---------------|----------------|--------------|
| 35                                           | 50-54     | Never Any     | 4991  | 55.21 |               |             |               |                |              |
| 35                                           | 50-54     | CC            | 3     | 0.03  | 0             | 0.00        |               |                |              |
| 35                                           | 50-54     | Ecig          | 2291  | 25.34 |               |             |               |                |              |
| 35                                           | 50-54     | Dual          | 0     | 0.00  |               |             |               |                |              |
| 35                                           | 50-54     | Former        | 1755  | 19.41 |               |             | 20.87         | 60             | 3.42         |
| Year of Follow-up: 2025, Age Group: 55-59    |           |               |       |       |               |             |               |                |              |
| Period                                       | Age Group | Smoking Group | N     | %     | Ever Quit (N) | Ever Quit % | Mean Yrs Quit | Short Term (n) | Short Term % |
| 35                                           | 55-59     | Never Any     | 5163  | 52.60 |               |             |               |                |              |
| 35                                           | 55-59     | CC            | 0     | 0.00  | 0             | 0.00        |               |                |              |
| 35                                           | 55-59     | Ecig          | 2362  | 24.06 |               |             |               |                |              |
| 35                                           | 55-59     | Dual          | 0     | 0.00  |               |             |               |                |              |
| 35                                           | 55-59     | Former        | 2291  | 23.34 |               |             | 24.77         | 105            | 4.58         |
| Year of Follow-up: 2025, Age Group: 60-64    |           |               |       |       |               |             |               |                |              |
| Period                                       | Age Group | Smoking Group | N     | %     | Ever Quit (N) | Ever Quit % | Mean Yrs Quit | Short Term (n) | Short Term % |
| 35                                           | 60-64     | Never Any     | 4997  | 46.86 |               |             |               |                |              |
| 35                                           | 60-64     | CC            | 9     | 0.08  | 0             | 0.00        |               |                |              |
| 35                                           | 60-64     | Ecig          | 2425  | 22.74 |               |             |               |                |              |
| 35                                           | 60-64     | Dual          | 0     | 0.00  |               |             |               |                |              |
| 35                                           | 60-64     | Former        | 3233  | 30.32 |               |             | 26.08         | 131            | 4.05         |
| Year of Follow-up: 2025, Age Group: 65-69    |           |               |       |       |               |             |               |                |              |
| Period                                       | Age Group | Smoking Group | N     | %     | Ever Quit (N) | Ever Quit % | Mean Yrs Quit | Short Term (n) | Short Term % |
| 35                                           | 65-69     | Never Any     | 4724  | 43.28 |               |             |               |                |              |
| 35                                           | 65-69     | CC            | 5     | 0.05  | 0             | 0.00        |               |                |              |
| 35                                           | 65-69     | Ecig          | 2063  | 18.90 |               |             |               |                |              |
| 35                                           | 65-69     | Dual          | 0     | 0.00  |               |             |               |                |              |
| 35                                           | 65-69     | Former        | 4124  | 37.78 |               |             | 27.58         | 132            | 3.20         |
| Year of Follow-up: 2025, Age Group: 70-74    |           |               |       |       |               |             |               |                |              |
| Period                                       | Age Group | Smoking Group | N     | %     | Ever Quit (N) | Ever Quit % | Mean Yrs Quit | Short Term (n) | Short Term % |
| 35                                           | 70-74     | Never Any     | 3941  | 39.85 |               |             |               |                |              |
| 35                                           | 70-74     | CC            | 5     | 0.05  | 0             | 0.00        |               |                |              |
| 35                                           | 70-74     | Ecig          | 1561  | 15.79 |               |             |               |                |              |
| 35                                           | 70-74     | Dual          | 0     | 0.00  |               |             |               |                |              |
| 35                                           | 70-74     | Former        | 4382  | 44.31 |               |             | 31.66         | 78             | 1.78         |
| Year of Follow-up: 2025, Age Group: 75-79    |           |               |       |       |               |             |               |                |              |
| Period                                       | Age Group | Smoking Group | N     | %     | Ever Quit (N) | Ever Quit % | Mean Yrs Quit | Short Term (n) | Short Term % |
| 35                                           | 75-79     | Never Any     | 2912  | 33.65 |               |             |               |                |              |
| 35                                           | 75-79     | CC            | 9     | 0.10  | 0             | 0.00        |               |                |              |
| 35                                           | 75-79     | Ecig          | 1288  | 14.88 |               |             |               |                |              |
| 35                                           | 75-79     | Dual          | 0     | 0.00  |               |             |               |                |              |
| 35                                           | 75-79     | Former        | 4446  | 51.37 |               |             | 34.34         | 67             | 1.51         |
| Year of Follow-up: 2030, Age Group: All Ages |           |               |       |       |               |             |               |                |              |
| Period                                       | Age Group | Smoking Group | N     | %     | Ever Quit (N) | Ever Quit % | Mean Yrs Quit | Short Term (n) | Short Term % |
| 40                                           | All Ages  | Never Any     | 28305 | 47.84 |               |             |               |                |              |
| 40                                           | All Ages  | CC            | 15    | 0.03  | 0             | 0.00        |               |                |              |
| 40                                           | All Ages  | Ecig          | 11686 | 19.75 |               |             |               |                |              |
| 40                                           | All Ages  | Dual          | 0     | 0.00  |               |             |               |                |              |
| 40                                           | All Ages  | Former        | 19164 | 32.39 |               |             | 29.03         | 597            | 3.12         |
| Year of Follow-up: 2030, Age Group: 18-19    |           |               |       |       |               |             |               |                |              |
| Period                                       | Age Group | Smoking Group | N     | %     | Ever Quit (N) | Ever Quit % | Mean Yrs Quit | Short Term (n) | Short Term % |
| 40                                           | 18-19     | Never Any     | 0     | .     |               |             |               |                |              |
| 40                                           | 18-19     | CC            | 0     | .     | 0             | .           |               |                |              |
| 40                                           | 18-19     | Ecig          | 0     | .     |               |             |               |                |              |
| 40                                           | 18-19     | Dual          | 0     | .     |               |             |               |                |              |
| 40                                           | 18-19     | Former        | 0     | .     |               |             | .             | 0              | .            |
| Year of Follow-up: 2030, Age Group: 20-24    |           |               |       |       |               |             |               |                |              |
| Period                                       | Age Group | Smoking Group | N     | %     | Ever Quit (N) | Ever Quit % | Mean Yrs Quit | Short Term (n) | Short Term % |
| 40                                           | 20-24     | Never Any     | 0     | .     |               |             |               |                |              |
| 40                                           | 20-24     | CC            | 0     | .     | 0             | .           |               |                |              |
| 40                                           | 20-24     | Ecig          | 0     | .     |               |             |               |                |              |
| 40                                           | 20-24     | Dual          | 0     | .     |               |             |               |                |              |
| 40                                           | 20-24     | Former        | 0     | .     |               |             | .             | 0              | .            |
| Year of Follow-up: 2030, Age Group: 25-29    |           |               |       |       |               |             |               |                |              |
| Period                                       | Age Group | Smoking Group | N     | %     | Ever Quit (N) | Ever Quit % | Mean Yrs Quit | Short Term (n) | Short Term % |
| 40                                           | 25-29     | Never Any     | 0     | .     |               |             |               |                |              |
| 40                                           | 25-29     | CC            | 0     | .     | 0             | .           |               |                |              |
| 40                                           | 25-29     | Ecig          | 0     | .     |               |             |               |                |              |
| 40                                           | 25-29     | Dual          | 0     | .     |               |             |               |                |              |

### Results for PHIM for Run 1 (Sensitivity\_Analysis\_3.RTF)

| Year of Follow-up: 2030, Age Group: 30-34 | Period | Age Group | Smoking Group | N    | %     | Ever Quit (N) | Ever Quit % | Mean Yrs Quit | Short Term (n) | Short Term % |
|-------------------------------------------|--------|-----------|---------------|------|-------|---------------|-------------|---------------|----------------|--------------|
| Year of Follow-up: 2030, Age Group: 30-34 |        |           |               |      |       |               |             |               |                |              |
| 40                                        | 25-29  | Former    |               | 0    | .     |               |             |               | 0              | .            |
| 40                                        | 30-34  | Never Any |               | 0    | .     |               |             |               |                |              |
| 40                                        | 30-34  | CC        |               | 0    | .     | 0             | .           |               |                |              |
| 40                                        | 30-34  | Ecig      |               | 0    | .     |               |             |               |                |              |
| 40                                        | 30-34  | Dual      |               | 0    | .     |               |             |               |                |              |
| 40                                        | 30-34  | Former    |               | 0    | .     |               |             |               | 0              | .            |
| Year of Follow-up: 2030, Age Group: 35-39 |        |           |               |      |       |               |             |               |                |              |
| 40                                        | 35-39  | Never Any |               | 0    | .     |               |             |               |                |              |
| 40                                        | 35-39  | CC        |               | 0    | .     | 0             | .           |               |                |              |
| 40                                        | 35-39  | Ecig      |               | 0    | .     |               |             |               |                |              |
| 40                                        | 35-39  | Dual      |               | 0    | .     |               |             |               |                |              |
| 40                                        | 35-39  | Former    |               | 0    | .     |               |             |               | 0              | .            |
| Year of Follow-up: 2030, Age Group: 40-44 |        |           |               |      |       |               |             |               |                |              |
| 40                                        | 40-44  | Never Any |               | 0    | .     |               |             |               |                |              |
| 40                                        | 40-44  | CC        |               | 0    | .     | 0             | .           |               |                |              |
| 40                                        | 40-44  | Ecig      |               | 0    | .     |               |             |               |                |              |
| 40                                        | 40-44  | Dual      |               | 0    | .     |               |             |               |                |              |
| 40                                        | 40-44  | Former    |               | 0    | .     |               |             |               | 0              | .            |
| Year of Follow-up: 2030, Age Group: 45-49 |        |           |               |      |       |               |             |               |                |              |
| 40                                        | 45-49  | Never Any |               | 0    | .     |               |             |               |                |              |
| 40                                        | 45-49  | CC        |               | 0    | .     | 0             | .           |               |                |              |
| 40                                        | 45-49  | Ecig      |               | 0    | .     |               |             |               |                |              |
| 40                                        | 45-49  | Dual      |               | 0    | .     |               |             |               |                |              |
| 40                                        | 45-49  | Former    |               | 0    | .     |               |             |               | 0              | .            |
| Year of Follow-up: 2030, Age Group: 50-54 |        |           |               |      |       |               |             |               |                |              |
| 40                                        | 50-54  | Never Any |               | 4489 | 50.75 |               |             |               |                |              |
| 40                                        | 50-54  | CC        |               | 3    | 0.03  | 0             | 0.00        |               |                |              |
| 40                                        | 50-54  | Ecig      |               | 2332 | 26.37 |               |             |               |                |              |
| 40                                        | 50-54  | Dual      |               | 0    | 0.00  |               |             |               |                |              |
| 40                                        | 50-54  | Former    |               | 2021 | 22.85 |               |             | 22.07         | 66             | 3.27         |
| Year of Follow-up: 2030, Age Group: 55-59 |        |           |               |      |       |               |             |               |                |              |
| 40                                        | 55-59  | Never Any |               | 4991 | 55.21 |               |             |               |                |              |
| 40                                        | 55-59  | CC        |               | 2    | 0.02  | 0             | 0.00        |               |                |              |
| 40                                        | 55-59  | Ecig      |               | 2090 | 23.12 |               |             |               |                |              |
| 40                                        | 55-59  | Dual      |               | 0    | 0.00  |               |             |               |                |              |
| 40                                        | 55-59  | Former    |               | 1957 | 21.65 |               |             | 23.41         | 74             | 3.78         |
| Year of Follow-up: 2030, Age Group: 60-64 |        |           |               |      |       |               |             |               |                |              |
| 40                                        | 60-64  | Never Any |               | 5163 | 52.60 |               |             |               |                |              |
| 40                                        | 60-64  | CC        |               | 0    | 0.00  | 0             | 0.00        |               |                |              |
| 40                                        | 60-64  | Ecig      |               | 2033 | 20.71 |               |             |               |                |              |
| 40                                        | 60-64  | Dual      |               | 0    | 0.00  |               |             |               |                |              |
| 40                                        | 60-64  | Former    |               | 2620 | 26.69 |               |             | 26.26         | 152            | 5.80         |
| Year of Follow-up: 2030, Age Group: 65-69 |        |           |               |      |       |               |             |               |                |              |
| 40                                        | 65-69  | Never Any |               | 4997 | 46.86 |               |             |               |                |              |
| 40                                        | 65-69  | CC        |               | 4    | 0.04  | 0             | 0.00        |               |                |              |
| 40                                        | 65-69  | Ecig      |               | 2047 | 19.20 |               |             |               |                |              |
| 40                                        | 65-69  | Dual      |               | 0    | 0.00  |               |             |               |                |              |
| 40                                        | 65-69  | Former    |               | 3616 | 33.91 |               |             | 28.01         | 140            | 3.87         |
| Year of Follow-up: 2030, Age Group: 70-74 |        |           |               |      |       |               |             |               |                |              |
| 40                                        | 70-74  | Never Any |               | 4724 | 43.28 |               |             |               |                |              |
| 40                                        | 70-74  | CC        |               | 3    | 0.03  | 0             | 0.00        |               |                |              |
| 40                                        | 70-74  | Ecig      |               | 1808 | 16.56 |               |             |               |                |              |
| 40                                        | 70-74  | Dual      |               | 0    | 0.00  |               |             |               |                |              |
| 40                                        | 70-74  | Former    |               | 4381 | 40.13 |               |             | 30.79         | 93             | 2.12         |
| Year of Follow-up: 2030, Age Group: 75-79 |        |           |               |      |       |               |             |               |                |              |
| 40                                        | 75-79  | Never Any |               | 3941 | 39.85 |               |             |               |                |              |
| 40                                        | 75-79  | CC        |               | 3    | 0.03  | 0             | 0.00        |               |                |              |



**Results for PHIM for Run 1 (Sensitivity\_Analysis\_3.RTF)**

|                                              |           |               |       |       |               |             |               |                |              |
|----------------------------------------------|-----------|---------------|-------|-------|---------------|-------------|---------------|----------------|--------------|
| 40                                           | 75-79     | Ecig          | 1376  | 13.91 |               |             |               |                |              |
| 40                                           | 75-79     | Dual          | 0     | 0.00  |               |             |               |                |              |
| 40                                           | 75-79     | Former        | 4569  | 46.20 |               |             | 35.24         | 72             | 1.58         |
| Year of Follow-up: 2035, Age Group: All Ages |           |               |       |       |               |             |               |                |              |
| Period                                       | Age Group | Smoking Group | N     | %     | Ever Quit (N) | Ever Quit % | Mean Yrs Quit | Short Term (n) | Short Term % |
| 45                                           | All Ages  | Never Any     | 24364 | 49.44 |               |             |               |                |              |
| 45                                           | All Ages  | CC            | 6     | 0.01  | 0             | 0.00        |               |                |              |
| 45                                           | All Ages  | Ecig          | 9057  | 18.38 |               |             |               |                |              |
| 45                                           | All Ages  | Dual          | 0     | 0.00  |               |             |               |                |              |
| 45                                           | All Ages  | Former        | 15854 | 32.17 |               |             | 29.70         | 518            | 3.27         |
| Year of Follow-up: 2035, Age Group: 18-19    |           |               |       |       |               |             |               |                |              |
| Period                                       | Age Group | Smoking Group | N     | %     | Ever Quit (N) | Ever Quit % | Mean Yrs Quit | Short Term (n) | Short Term % |
| 45                                           | 18-19     | Never Any     | 0     | .     |               |             |               |                |              |
| 45                                           | 18-19     | CC            | 0     | .     | 0             | .           |               |                |              |
| 45                                           | 18-19     | Ecig          | 0     | .     |               |             |               |                |              |
| 45                                           | 18-19     | Dual          | 0     | .     |               |             |               |                |              |
| 45                                           | 18-19     | Former        | 0     | .     |               |             | .             | 0              | .            |
| Year of Follow-up: 2035, Age Group: 20-24    |           |               |       |       |               |             |               |                |              |
| Period                                       | Age Group | Smoking Group | N     | %     | Ever Quit (N) | Ever Quit % | Mean Yrs Quit | Short Term (n) | Short Term % |
| 45                                           | 20-24     | Never Any     | 0     | .     |               |             |               |                |              |
| 45                                           | 20-24     | CC            | 0     | .     | 0             | .           |               |                |              |
| 45                                           | 20-24     | Ecig          | 0     | .     |               |             |               |                |              |
| 45                                           | 20-24     | Dual          | 0     | .     |               |             |               |                |              |
| 45                                           | 20-24     | Former        | 0     | .     |               |             | .             | 0              | .            |
| Year of Follow-up: 2035, Age Group: 25-29    |           |               |       |       |               |             |               |                |              |
| Period                                       | Age Group | Smoking Group | N     | %     | Ever Quit (N) | Ever Quit % | Mean Yrs Quit | Short Term (n) | Short Term % |
| 45                                           | 25-29     | Never Any     | 0     | .     |               |             |               |                |              |
| 45                                           | 25-29     | CC            | 0     | .     | 0             | .           |               |                |              |
| 45                                           | 25-29     | Ecig          | 0     | .     |               |             |               |                |              |
| 45                                           | 25-29     | Dual          | 0     | .     |               |             |               |                |              |
| 45                                           | 25-29     | Former        | 0     | .     |               |             | .             | 0              | .            |
| Year of Follow-up: 2035, Age Group: 30-34    |           |               |       |       |               |             |               |                |              |
| Period                                       | Age Group | Smoking Group | N     | %     | Ever Quit (N) | Ever Quit % | Mean Yrs Quit | Short Term (n) | Short Term % |
| 45                                           | 30-34     | Never Any     | 0     | .     |               |             |               |                |              |
| 45                                           | 30-34     | CC            | 0     | .     | 0             | .           |               |                |              |
| 45                                           | 30-34     | Ecig          | 0     | .     |               |             |               |                |              |
| 45                                           | 30-34     | Dual          | 0     | .     |               |             |               |                |              |
| 45                                           | 30-34     | Former        | 0     | .     |               |             | .             | 0              | .            |
| Year of Follow-up: 2035, Age Group: 35-39    |           |               |       |       |               |             |               |                |              |
| Period                                       | Age Group | Smoking Group | N     | %     | Ever Quit (N) | Ever Quit % | Mean Yrs Quit | Short Term (n) | Short Term % |
| 45                                           | 35-39     | Never Any     | 0     | .     |               |             |               |                |              |
| 45                                           | 35-39     | CC            | 0     | .     | 0             | .           |               |                |              |
| 45                                           | 35-39     | Ecig          | 0     | .     |               |             |               |                |              |
| 45                                           | 35-39     | Dual          | 0     | .     |               |             |               |                |              |
| 45                                           | 35-39     | Former        | 0     | .     |               |             | .             | 0              | .            |
| Year of Follow-up: 2035, Age Group: 40-44    |           |               |       |       |               |             |               |                |              |
| Period                                       | Age Group | Smoking Group | N     | %     | Ever Quit (N) | Ever Quit % | Mean Yrs Quit | Short Term (n) | Short Term % |
| 45                                           | 40-44     | Never Any     | 0     | .     |               |             |               |                |              |
| 45                                           | 40-44     | CC            | 0     | .     | 0             | .           |               |                |              |
| 45                                           | 40-44     | Ecig          | 0     | .     |               |             |               |                |              |
| 45                                           | 40-44     | Dual          | 0     | .     |               |             |               |                |              |
| 45                                           | 40-44     | Former        | 0     | .     |               |             | .             | 0              | .            |
| Year of Follow-up: 2035, Age Group: 45-49    |           |               |       |       |               |             |               |                |              |
| Period                                       | Age Group | Smoking Group | N     | %     | Ever Quit (N) | Ever Quit % | Mean Yrs Quit | Short Term (n) | Short Term % |
| 45                                           | 45-49     | Never Any     | 0     | .     |               |             |               |                |              |
| 45                                           | 45-49     | CC            | 0     | .     | 0             | .           |               |                |              |
| 45                                           | 45-49     | Ecig          | 0     | .     |               |             |               |                |              |
| 45                                           | 45-49     | Dual          | 0     | .     |               |             |               |                |              |
| 45                                           | 45-49     | Former        | 0     | .     |               |             | .             | 0              | .            |
| Year of Follow-up: 2035, Age Group: 50-54    |           |               |       |       |               |             |               |                |              |
| Period                                       | Age Group | Smoking Group | N     | %     | Ever Quit (N) | Ever Quit % | Mean Yrs Quit | Short Term (n) | Short Term % |
| 45                                           | 50-54     | Never Any     | 0     | .     |               |             |               |                |              |
| 45                                           | 50-54     | CC            | 0     | .     | 0             | .           |               |                |              |
| 45                                           | 50-54     | Ecig          | 0     | .     |               |             |               |                |              |
| 45                                           | 50-54     | Dual          | 0     | .     |               |             |               |                |              |
| 45                                           | 50-54     | Former        | 0     | .     |               |             | .             | 0              | .            |
| Year of Follow-up: 2035, Age Group: 55-59    |           |               |       |       |               |             |               |                |              |
| Period                                       | Age Group | Smoking Group | N     | %     | Ever Quit (N) | Ever Quit % | Mean Yrs Quit | Short Term (n) | Short Term % |

### Results for PHIM for Run 1 (Sensitivity\_Analysis\_3.RTF)

|                                              |           |               |       |       |               |             |               |                |              |
|----------------------------------------------|-----------|---------------|-------|-------|---------------|-------------|---------------|----------------|--------------|
| 45                                           | 55-59     | Never Any     | 4489  | 50.75 |               |             |               |                |              |
| 45                                           | 55-59     | CC            | 2     | 0.02  | 0             | 0.00        |               |                |              |
| 45                                           | 55-59     | Ecig          | 2140  | 24.19 |               |             |               |                |              |
| 45                                           | 55-59     | Dual          | 0     | 0.00  |               |             |               |                |              |
| 45                                           | 55-59     | Former        | 2214  | 25.03 |               |             | 24.88         | 84             | 3.79         |
| Year of Follow-up: 2035, Age Group: 60-64    |           |               |       |       |               |             |               |                |              |
| Period                                       | Age Group | Smoking Group | N     | %     | Ever Quit (N) | Ever Quit % | Mean Yrs Quit | Short Term (n) | Short Term % |
| 45                                           | 60-64     | Never Any     | 4991  | 55.21 |               |             |               |                |              |
| 45                                           | 60-64     | CC            | 0     | 0.00  | 0             | 0.00        |               |                |              |
| 45                                           | 60-64     | Ecig          | 1832  | 20.27 |               |             |               |                |              |
| 45                                           | 60-64     | Dual          | 0     | 0.00  |               |             |               |                |              |
| 45                                           | 60-64     | Former        | 2217  | 24.52 |               |             | 25.29         | 113            | 5.10         |
| Year of Follow-up: 2035, Age Group: 65-69    |           |               |       |       |               |             |               |                |              |
| Period                                       | Age Group | Smoking Group | N     | %     | Ever Quit (N) | Ever Quit % | Mean Yrs Quit | Short Term (n) | Short Term % |
| 45                                           | 65-69     | Never Any     | 5163  | 52.60 |               |             |               |                |              |
| 45                                           | 65-69     | CC            | 0     | 0.00  | 0             | 0.00        |               |                |              |
| 45                                           | 65-69     | Ecig          | 1738  | 17.71 |               |             |               |                |              |
| 45                                           | 65-69     | Dual          | 0     | 0.00  |               |             |               |                |              |
| 45                                           | 65-69     | Former        | 2915  | 29.70 |               |             | 28.32         | 110            | 3.77         |
| Year of Follow-up: 2035, Age Group: 70-74    |           |               |       |       |               |             |               |                |              |
| Period                                       | Age Group | Smoking Group | N     | %     | Ever Quit (N) | Ever Quit % | Mean Yrs Quit | Short Term (n) | Short Term % |
| 45                                           | 70-74     | Never Any     | 4997  | 46.86 |               |             |               |                |              |
| 45                                           | 70-74     | CC            | 1     | 0.01  | 0             | 0.00        |               |                |              |
| 45                                           | 70-74     | Ecig          | 1783  | 16.72 |               |             |               |                |              |
| 45                                           | 70-74     | Dual          | 0     | 0.00  |               |             |               |                |              |
| 45                                           | 70-74     | Former        | 3883  | 36.41 |               |             | 30.87         | 113            | 2.91         |
| Year of Follow-up: 2035, Age Group: 75-79    |           |               |       |       |               |             |               |                |              |
| Period                                       | Age Group | Smoking Group | N     | %     | Ever Quit (N) | Ever Quit % | Mean Yrs Quit | Short Term (n) | Short Term % |
| 45                                           | 75-79     | Never Any     | 4724  | 43.28 |               |             |               |                |              |
| 45                                           | 75-79     | CC            | 3     | 0.03  | 0             | 0.00        |               |                |              |
| 45                                           | 75-79     | Ecig          | 1564  | 14.33 |               |             |               |                |              |
| 45                                           | 75-79     | Dual          | 0     | 0.00  |               |             |               |                |              |
| 45                                           | 75-79     | Former        | 4625  | 42.37 |               |             | 34.01         | 98             | 2.12         |
| Year of Follow-up: 2040, Age Group: All Ages |           |               |       |       |               |             |               |                |              |
| Period                                       | Age Group | Smoking Group | N     | %     | Ever Quit (N) | Ever Quit % | Mean Yrs Quit | Short Term (n) | Short Term % |
| 50                                           | All Ages  | Never Any     | 19640 | 51.19 |               |             |               |                |              |
| 50                                           | All Ages  | CC            | 1     | 0.00  | 0             | 0.00        |               |                |              |
| 50                                           | All Ages  | Ecig          | 6428  | 16.75 |               |             |               |                |              |
| 50                                           | All Ages  | Dual          | 0     | 0.00  |               |             |               |                |              |
| 50                                           | All Ages  | Former        | 12296 | 32.05 |               |             | 30.24         | 426            | 3.46         |
| Year of Follow-up: 2040, Age Group: 18-19    |           |               |       |       |               |             |               |                |              |
| Period                                       | Age Group | Smoking Group | N     | %     | Ever Quit (N) | Ever Quit % | Mean Yrs Quit | Short Term (n) | Short Term % |
| 50                                           | 18-19     | Never Any     | 0     | .     |               |             |               |                |              |
| 50                                           | 18-19     | CC            | 0     | .     | 0             | .           |               |                |              |
| 50                                           | 18-19     | Ecig          | 0     | .     |               |             |               |                |              |
| 50                                           | 18-19     | Dual          | 0     | .     |               |             |               |                |              |
| 50                                           | 18-19     | Former        | 0     | .     |               |             | .             | 0              | .            |
| Year of Follow-up: 2040, Age Group: 20-24    |           |               |       |       |               |             |               |                |              |
| Period                                       | Age Group | Smoking Group | N     | %     | Ever Quit (N) | Ever Quit % | Mean Yrs Quit | Short Term (n) | Short Term % |
| 50                                           | 20-24     | Never Any     | 0     | .     |               |             |               |                |              |
| 50                                           | 20-24     | CC            | 0     | .     | 0             | .           |               |                |              |
| 50                                           | 20-24     | Ecig          | 0     | .     |               |             |               |                |              |
| 50                                           | 20-24     | Dual          | 0     | .     |               |             |               |                |              |
| 50                                           | 20-24     | Former        | 0     | .     |               |             | .             | 0              | .            |
| Year of Follow-up: 2040, Age Group: 25-29    |           |               |       |       |               |             |               |                |              |
| Period                                       | Age Group | Smoking Group | N     | %     | Ever Quit (N) | Ever Quit % | Mean Yrs Quit | Short Term (n) | Short Term % |
| 50                                           | 25-29     | Never Any     | 0     | .     |               |             |               |                |              |
| 50                                           | 25-29     | CC            | 0     | .     | 0             | .           |               |                |              |
| 50                                           | 25-29     | Ecig          | 0     | .     |               |             |               |                |              |
| 50                                           | 25-29     | Dual          | 0     | .     |               |             |               |                |              |
| 50                                           | 25-29     | Former        | 0     | .     |               |             | .             | 0              | .            |
| Year of Follow-up: 2040, Age Group: 30-34    |           |               |       |       |               |             |               |                |              |
| Period                                       | Age Group | Smoking Group | N     | %     | Ever Quit (N) | Ever Quit % | Mean Yrs Quit | Short Term (n) | Short Term % |
| 50                                           | 30-34     | Never Any     | 0     | .     |               |             |               |                |              |
| 50                                           | 30-34     | CC            | 0     | .     | 0             | .           |               |                |              |
| 50                                           | 30-34     | Ecig          | 0     | .     |               |             |               |                |              |
| 50                                           | 30-34     | Dual          | 0     | .     |               |             |               |                |              |
| 50                                           | 30-34     | Former        | 0     | .     |               |             | .             | 0              | .            |
| Year of Follow-up: 2040, Age Group: 35-39    |           |               |       |       |               |             |               |                |              |

**Results for PHIM for Run 1 (Sensitivity\_Analysis\_3.RTF)**

| Period                                    | Age Group | Smoking Group | N    | %     | Ever Quit (N) | Ever Quit % | Mean Yrs Quit | Short Term (n) | Short Term % |
|-------------------------------------------|-----------|---------------|------|-------|---------------|-------------|---------------|----------------|--------------|
| 50                                        | 35-39     | Never Any     | 0    | .     |               |             |               |                |              |
| 50                                        | 35-39     | CC            | 0    | .     | 0             | .           |               |                |              |
| 50                                        | 35-39     | Ecig          | 0    | .     |               |             |               |                |              |
| 50                                        | 35-39     | Dual          | 0    | .     |               |             |               |                |              |
| 50                                        | 35-39     | Former        | 0    | .     |               |             | .             | 0              | .            |
| Year of Follow-up: 2040, Age Group: 40-44 |           |               |      |       |               |             |               |                |              |
| Period                                    | Age Group | Smoking Group | N    | %     | Ever Quit (N) | Ever Quit % | Mean Yrs Quit | Short Term (n) | Short Term % |
| 50                                        | 40-44     | Never Any     | 0    | .     |               |             |               |                |              |
| 50                                        | 40-44     | CC            | 0    | .     | 0             | .           |               |                |              |
| 50                                        | 40-44     | Ecig          | 0    | .     |               |             |               |                |              |
| 50                                        | 40-44     | Dual          | 0    | .     |               |             |               |                |              |
| 50                                        | 40-44     | Former        | 0    | .     |               |             | .             | 0              | .            |
| Year of Follow-up: 2040, Age Group: 45-49 |           |               |      |       |               |             |               |                |              |
| Period                                    | Age Group | Smoking Group | N    | %     | Ever Quit (N) | Ever Quit % | Mean Yrs Quit | Short Term (n) | Short Term % |
| 50                                        | 45-49     | Never Any     | 0    | .     |               |             |               |                |              |
| 50                                        | 45-49     | CC            | 0    | .     | 0             | .           |               |                |              |
| 50                                        | 45-49     | Ecig          | 0    | .     |               |             |               |                |              |
| 50                                        | 45-49     | Dual          | 0    | .     |               |             |               |                |              |
| 50                                        | 45-49     | Former        | 0    | .     |               |             | .             | 0              | .            |
| Year of Follow-up: 2040, Age Group: 50-54 |           |               |      |       |               |             |               |                |              |
| Period                                    | Age Group | Smoking Group | N    | %     | Ever Quit (N) | Ever Quit % | Mean Yrs Quit | Short Term (n) | Short Term % |
| 50                                        | 50-54     | Never Any     | 0    | .     |               |             |               |                |              |
| 50                                        | 50-54     | CC            | 0    | .     | 0             | .           |               |                |              |
| 50                                        | 50-54     | Ecig          | 0    | .     |               |             |               |                |              |
| 50                                        | 50-54     | Dual          | 0    | .     |               |             |               |                |              |
| 50                                        | 50-54     | Former        | 0    | .     |               |             | .             | 0              | .            |
| Year of Follow-up: 2040, Age Group: 55-59 |           |               |      |       |               |             |               |                |              |
| Period                                    | Age Group | Smoking Group | N    | %     | Ever Quit (N) | Ever Quit % | Mean Yrs Quit | Short Term (n) | Short Term % |
| 50                                        | 55-59     | Never Any     | 0    | .     |               |             |               |                |              |
| 50                                        | 55-59     | CC            | 0    | .     | 0             | .           |               |                |              |
| 50                                        | 55-59     | Ecig          | 0    | .     |               |             |               |                |              |
| 50                                        | 55-59     | Dual          | 0    | .     |               |             |               |                |              |
| 50                                        | 55-59     | Former        | 0    | .     |               |             | .             | 0              | .            |
| Year of Follow-up: 2040, Age Group: 60-64 |           |               |      |       |               |             |               |                |              |
| Period                                    | Age Group | Smoking Group | N    | %     | Ever Quit (N) | Ever Quit % | Mean Yrs Quit | Short Term (n) | Short Term % |
| 50                                        | 60-64     | Never Any     | 4489 | 50.75 |               |             |               |                |              |
| 50                                        | 60-64     | CC            | 0    | 0.00  | 0             | 0.00        |               |                |              |
| 50                                        | 60-64     | Ecig          | 1845 | 20.86 |               |             |               |                |              |
| 50                                        | 60-64     | Dual          | 0    | 0.00  |               |             |               |                |              |
| 50                                        | 60-64     | Former        | 2511 | 28.39 |               |             | 26.56         | 135            | 5.38         |
| Year of Follow-up: 2040, Age Group: 65-69 |           |               |      |       |               |             |               |                |              |
| Period                                    | Age Group | Smoking Group | N    | %     | Ever Quit (N) | Ever Quit % | Mean Yrs Quit | Short Term (n) | Short Term % |
| 50                                        | 65-69     | Never Any     | 4991 | 55.21 |               |             |               |                |              |
| 50                                        | 65-69     | CC            | 0    | 0.00  | 0             | 0.00        |               |                |              |
| 50                                        | 65-69     | Ecig          | 1537 | 17.00 |               |             |               |                |              |
| 50                                        | 65-69     | Dual          | 0    | 0.00  |               |             |               |                |              |
| 50                                        | 65-69     | Former        | 2512 | 27.79 |               |             | 26.99         | 109            | 4.34         |
| Year of Follow-up: 2040, Age Group: 70-74 |           |               |      |       |               |             |               |                |              |
| Period                                    | Age Group | Smoking Group | N    | %     | Ever Quit (N) | Ever Quit % | Mean Yrs Quit | Short Term (n) | Short Term % |
| 50                                        | 70-74     | Never Any     | 5163 | 52.60 |               |             |               |                |              |
| 50                                        | 70-74     | CC            | 0    | 0.00  | 0             | 0.00        |               |                |              |
| 50                                        | 70-74     | Ecig          | 1508 | 15.36 |               |             |               |                |              |
| 50                                        | 70-74     | Dual          | 0    | 0.00  |               |             |               |                |              |
| 50                                        | 70-74     | Former        | 3145 | 32.04 |               |             | 31.03         | 85             | 2.70         |
| Year of Follow-up: 2040, Age Group: 75-79 |           |               |      |       |               |             |               |                |              |
| Period                                    | Age Group | Smoking Group | N    | %     | Ever Quit (N) | Ever Quit % | Mean Yrs Quit | Short Term (n) | Short Term % |
| 50                                        | 75-79     | Never Any     | 4997 | 46.86 |               |             |               |                |              |
| 50                                        | 75-79     | CC            | 1    | 0.01  | 0             | 0.00        |               |                |              |
| 50                                        | 75-79     | Ecig          | 1538 | 14.42 |               |             |               |                |              |
| 50                                        | 75-79     | Dual          | 0    | 0.00  |               |             |               |                |              |
| 50                                        | 75-79     | Former        | 4128 | 38.71 |               |             | 33.86         | 97             | 2.35         |

## Results for PHIM for Run 1 (Sensitivity\_Analysis\_3.RTF)

\*\*\*\*\*

### Main Results for E-Component for Run: 1, Simulation: 1, COD: Four Diseases Combined

| Variable Parameter          | Value                                  |
|-----------------------------|----------------------------------------|
| 1. Country                  | US (United States)                     |
| 2. Sex                      | M (Males)                              |
| 3. Year of start of process | 1990                                   |
| 4. Cause of Death           | Four Diseases Combined                 |
| 5. Effective Dose NULL      | CC:1                                   |
| 6. Effective Dose Ecig      | CC:1 Ecig:0.05 Dual:0.525              |
| Note:                       | Death rates are per million population |

#### Results for Age Groups Combined and Years combined, Population unadjusted for deaths in Ecig scenario,

| Age Group:All |          | NULL        | Ecig        | %Drop   |        |        | NULL    | Ecig    | Drop    |         |
|---------------|----------|-------------|-------------|---------|--------|--------|---------|---------|---------|---------|
| Year          | Number   | Attrib      | Attrib      | Drop    | %Drop  | Attrib | Death   | Attrib  | Drop    |         |
|               | Deaths   | Deaths      | Deaths      | Deaths  | Deaths | Deaths | Rate    | Rates   | Rates   |         |
| All Comb      | 13148871 | 4509390.583 | 3024461.187 | 1484929 | 11.293 | 32.930 | 3806.31 | 1305.37 | 875.516 | 429.855 |

#### Results for Age Groups Combined, Population unadjusted for deaths in Ecig scenario,

| Age Group:All |        | NULL       | Ecig       | %Drop    |        |        | NULL    | Ecig    | Drop    |         |
|---------------|--------|------------|------------|----------|--------|--------|---------|---------|---------|---------|
| Year          | Number | Attrib     | Attrib     | Drop     | %Drop  | Attrib | Death   | Attrib  | Drop    |         |
|               | Deaths | Deaths     | Deaths     | Deaths   | Deaths | Deaths | Rate    | Rates   | Rates   |         |
| 1990          | 317161 | 125773.065 | 125773.065 | 0.000    | 0.000  | 0.000  | 5027.71 | 1993.78 | 0.000   |         |
| 1991          | 313217 | 123999.442 | 123575.252 | 424.190  | 0.135  | 0.342  | 4883.81 | 1933.45 | 1926.84 | 6.614   |
| 1992          | 308577 | 122014.015 | 120877.705 | 1136.310 | 0.368  | 0.931  | 4729.73 | 1870.18 | 1852.76 | 17.417  |
| 1993          | 311713 | 122810.618 | 120677.298 | 2133.320 | 0.684  | 1.737  | 4692.62 | 1848.83 | 1816.71 | 32.116  |
| 1994          | 305700 | 119925.592 | 116647.074 | 3278.518 | 1.072  | 2.734  | 4516.19 | 1771.69 | 1723.26 | 48.434  |
| 1995          | 303225 | 117896.496 | 113279.722 | 4616.774 | 1.523  | 3.916  | 4393.80 | 1708.35 | 1641.45 | 66.898  |
| 1996          | 299559 | 115698.645 | 109609.173 | 6089.472 | 2.033  | 5.263  | 4273.16 | 1650.42 | 1563.56 | 86.865  |
| 1997          | 294226 | 113359.847 | 105789.553 | 7570.293 | 2.573  | 6.678  | 4128.67 | 1590.70 | 1484.47 | 106.229 |
| 1998          | 289258 | 111444.212 | 102390.754 | 9053.458 | 3.130  | 8.124  | 3992.19 | 1538.10 | 1413.15 | 124.951 |
| 1999          | 311002 | 114877.722 | 102774.132 | 12103.59 | 3.892  | 10.536 | 4224.60 | 1560.48 | 1396.07 | 164.413 |
| 2000          | 303786 | 112379.704 | 98577.429  | 13802.27 | 4.543  | 12.282 | 4066.21 | 1504.22 | 1319.47 | 184.745 |
| 2001          | 296294 | 110024.943 | 94408.652  | 15616.29 | 5.271  | 14.193 | 3914.28 | 1453.52 | 1247.21 | 206.304 |
| 2002          | 291898 | 108289.173 | 90638.128  | 17651.05 | 6.047  | 16.300 | 3813.00 | 1414.56 | 1183.99 | 230.572 |
| 2003          | 285865 | 106539.023 | 87092.745  | 19446.28 | 6.803  | 18.253 | 3695.36 | 1377.22 | 1125.84 | 251.381 |
| 2004          | 274177 | 103037.251 | 82282.582  | 20754.67 | 7.570  | 20.143 | 3506.10 | 1317.61 | 1052.21 | 265.405 |
| 2005          | 272379 | 103044.562 | 80403.478  | 22641.08 | 8.312  | 21.972 | 3442.69 | 1302.41 | 1016.25 | 286.168 |
| 2006          | 264118 | 99672.555  | 75427.988  | 24244.57 | 9.179  | 24.324 | 3307.76 | 1248.28 | 944.645 | 303.634 |
| 2007          | 258419 | 97839.152  | 72253.642  | 25585.51 | 9.901  | 26.151 | 3203.20 | 1212.75 | 895.610 | 317.142 |
| 2008          | 259461 | 98075.852  | 70790.485  | 27285.37 | 10.516 | 27.821 | 3180.09 | 1202.07 | 867.646 | 334.424 |
| 2009          | 253907 | 95617.338  | 67156.762  | 28460.58 | 11.209 | 29.765 | 3075.31 | 1158.11 | 813.400 | 344.713 |
| 2010          | 251878 | 94607.988  | 64829.145  | 29778.84 | 11.823 | 31.476 | 3013.72 | 1131.98 | 775.681 | 356.304 |
| 2011          | 251779 | 93633.119  | 62236.327  | 31396.79 | 12.470 | 33.532 | 2982.76 | 1109.25 | 737.299 | 371.950 |
| 2012          | 252643 | 92775.175  | 59800.659  | 32974.52 | 13.052 | 35.542 | 2960.61 | 1087.19 | 700.776 | 386.413 |
| 2013          | 256175 | 92345.780  | 57753.102  | 34592.68 | 13.504 | 37.460 | 2967.76 | 1069.82 | 669.063 | 400.752 |
| 2014          | 257393 | 91379.215  | 55447.612  | 35931.60 | 13.960 | 39.321 | 2947.05 | 1046.26 | 634.854 | 411.403 |
| 2015          | 259782 | 90750.242  | 53617.911  | 37132.33 | 14.294 | 40.917 | 3346.10 | 1168.90 | 690.621 | 478.280 |
| 2016          | 261453 | 88811.996  | 50444.386  | 38367.61 | 14.675 | 43.201 | 3336.15 | 1133.24 | 643.672 | 489.572 |
| 2017          | 263685 | 87325.126  | 47877.264  | 39447.86 | 14.960 | 45.174 | 3333.85 | 1104.08 | 605.327 | 498.752 |
| 2018          | 258714 | 87612.144  | 47208.393  | 40403.75 | 15.617 | 46.117 | 3240.73 | 1097.46 | 591.347 | 506.110 |
| 2019          | 261438 | 87797.760  | 45965.363  | 41832.40 | 16.001 | 47.646 | 3242.99 | 1089.08 | 570.174 | 518.907 |
| 2020          | 262288 | 87221.042  | 44582.031  | 42639.01 | 16.257 | 48.886 | 3715.29 | 1235.48 | 631.501 | 603.978 |
| 2021          | 255079 | 82001.292  | 39849.003  | 42152.29 | 16.525 | 51.404 | 3587.82 | 1153.39 | 560.496 | 592.893 |
| 2022          | 257097 | 81915.977  | 38457.075  | 43458.90 | 16.904 | 53.053 | 3588.53 | 1143.37 | 536.780 | 606.595 |
| 2023          | 259080 | 81810.810  | 37107.993  | 44702.82 | 17.254 | 54.642 | 3586.88 | 1132.64 | 513.748 | 618.896 |
| 2024          | 260719 | 81528.303  | 35779.453  | 45748.85 | 17.547 | 56.114 | 3579.65 | 1119.38 | 491.250 | 628.129 |
| 2025          | 257308 | 79599.213  | 34150.522  | 45448.69 | 17.663 | 57.097 | 4112.08 | 1272.09 | 545.765 | 726.323 |
| 2026          | 251528 | 75082.462  | 30521.932  | 44560.53 | 17.716 | 59.349 | 4003.24 | 1194.99 | 485.777 | 709.211 |
| 2027          | 250988 | 74444.425  | 29125.630  | 45318.79 | 18.056 | 60.876 | 3976.53 | 1179.46 | 461.452 | 718.009 |
| 2028          | 250285 | 73699.585  | 27645.243  | 46054.34 | 18.401 | 62.489 | 3945.35 | 1161.76 | 435.784 | 725.975 |
| 2029          | 249525 | 72819.703  | 26235.035  | 46584.67 | 18.669 | 63.973 | 3910.99 | 1141.36 | 411.201 | 730.156 |
| 2030          | 240528 | 69309.277  | 24522.334  | 44786.94 | 18.620 | 64.619 | 4504.36 | 1297.95 | 459.228 | 838.722 |
| 2031          | 235442 | 65433.368  | 21917.830  | 43515.54 | 18.482 | 66.504 | 4397.65 | 1222.18 | 409.387 | 812.794 |
| 2032          | 234017 | 64643.552  | 20758.522  | 43885.03 | 18.753 | 67.888 | 4356.12 | 1203.31 | 386.410 | 816.899 |
| 2033          | 232559 | 63793.514  | 19672.408  | 44121.11 | 18.972 | 69.162 | 4310.93 | 1182.54 | 364.666 | 817.870 |
| 2034          | 230963 | 63032.151  | 18662.352  | 44369.80 | 19.211 | 70.392 | 4260.75 | 1162.80 | 344.278 | 818.522 |
| 2035          | 215822 | 57653.301  | 17028.330  | 40624.97 | 18.823 | 70.464 | 4924.38 | 1315.47 | 388.534 | 926.937 |
| 2036          | 208183 | 52988.733  | 14485.312  | 38503.42 | 18.495 | 72.663 | 4748.94 | 1208.75 | 330.430 | 878.316 |
| 2037          | 205491 | 52026.921  | 13601.504  | 38425.42 | 18.699 | 73.857 | 4682.40 | 1185.50 | 309.928 | 875.574 |
| 2038          | 202834 | 50943.211  | 12733.848  | 38209.36 | 18.838 | 75.004 | 4612.18 | 1158.38 | 289.551 | 868.832 |
| 2039          | 200251 | 50085.991  | 12019.047  | 38066.94 | 19.010 | 76.003 | 4538.65 | 1135.19 | 272.410 | 862.781 |

## Results for PHIM for Run 1 (Sensitivity\_Analysis\_3.RTF)

\*\*\*\*\*

### Main Results for E-Component for Run: 1, Simulation: 1, COD: LUNG CANCER

| Variable Parameter          | Value                                  |
|-----------------------------|----------------------------------------|
| 1. Country                  | US (United States)                     |
| 2. Sex                      | M (Males)                              |
| 3. Year of start of process | 1990                                   |
| 4. Cause of Death           | LUNG CANCER                            |
| 5. Effective Dose NULL      | CC:1                                   |
| 6. Effective Dose Ecig      | CC:1 Ecig:0.05 Dual:0.525              |
| Note:                       | Death rates are per million population |

#### Results for Age Groups Combined and Years combined, Population unadjusted for deaths in Ecig scenario,

| Age Group:All |         | NULL        | Ecig        | %Drop    |        |        | NULL    | Ecig    | Drop    |         |
|---------------|---------|-------------|-------------|----------|--------|--------|---------|---------|---------|---------|
| Year          | Number  | Attrib      | Attrib      | Drop     | %Drop  | Attrib | Death   | Attrib  | Drop    |         |
|               | Deaths  | Deaths      | Deaths      | Deaths   | Deaths | Deaths | Rate    | Rates   | Rates   |         |
| All Comb      | 3065988 | 2244988.113 | 1741534.300 | 503453.8 | 16.421 | 22.426 | 887.537 | 649.875 | 504.136 | 145.739 |

#### Results for Age Groups Combined, Population unadjusted for deaths in Ecig scenario,

| Age Group:All |        | NULL      | Ecig      | %Drop    |        |        | NULL    | Ecig    | Drop    |         |
|---------------|--------|-----------|-----------|----------|--------|--------|---------|---------|---------|---------|
| Year          | Number | Attrib    | Attrib    | Drop     | %Drop  | Attrib | Death   | Attrib  | Drop    |         |
|               | Deaths | Deaths    | Deaths    | Deaths   | Deaths | Deaths | Rate    | Rates   | Rates   |         |
| 1990          | 78822  | 63385.736 | 63385.736 | 0.000    | 0.000  | 0.000  | 1249.50 | 1004.81 | 0.000   |         |
| 1991          | 78462  | 62918.402 | 62870.284 | 48.118   | 0.061  | 0.076  | 1223.41 | 981.049 | 980.299 | 0.750   |
| 1992          | 77987  | 62366.766 | 62237.631 | 129.135  | 0.166  | 0.207  | 1195.35 | 955.930 | 953.950 | 1.979   |
| 1993          | 78542  | 62652.888 | 62398.789 | 254.098  | 0.324  | 0.406  | 1182.39 | 943.195 | 939.369 | 3.825   |
| 1994          | 77437  | 61565.227 | 61164.512 | 400.715  | 0.517  | 0.651  | 1144.00 | 909.520 | 903.601 | 5.920   |
| 1995          | 76904  | 60851.961 | 60269.278 | 582.683  | 0.758  | 0.958  | 1114.36 | 881.759 | 873.316 | 8.443   |
| 1996          | 76232  | 60122.922 | 59311.142 | 811.779  | 1.065  | 1.350  | 1087.44 | 857.643 | 846.063 | 11.580  |
| 1997          | 75473  | 59237.155 | 58179.263 | 1057.892 | 1.402  | 1.786  | 1059.06 | 831.234 | 816.390 | 14.845  |
| 1998          | 75381  | 58906.696 | 57543.649 | 1363.047 | 1.808  | 2.314  | 1040.37 | 813.001 | 794.188 | 18.812  |
| 1999          | 73159  | 56930.073 | 55267.768 | 1662.305 | 2.272  | 2.920  | 993.781 | 773.329 | 750.749 | 22.580  |
| 2000          | 73784  | 57137.121 | 55085.121 | 2052.000 | 2.781  | 3.591  | 987.608 | 764.787 | 737.321 | 27.466  |
| 2001          | 73294  | 56481.726 | 53990.468 | 2491.258 | 3.399  | 4.411  | 968.273 | 746.169 | 713.258 | 32.912  |
| 2002          | 72442  | 55588.365 | 52635.891 | 2952.475 | 4.076  | 5.311  | 946.293 | 726.138 | 687.571 | 38.568  |
| 2003          | 71942  | 54945.856 | 51483.259 | 3462.598 | 4.813  | 6.302  | 929.989 | 710.281 | 665.520 | 44.761  |
| 2004          | 71301  | 54203.126 | 50179.329 | 4023.797 | 5.643  | 7.424  | 911.778 | 693.135 | 641.680 | 51.455  |
| 2005          | 70964  | 53744.603 | 49141.346 | 4603.257 | 6.487  | 8.565  | 896.937 | 679.296 | 621.114 | 58.182  |
| 2006          | 69658  | 52535.572 | 47324.910 | 5210.661 | 7.480  | 9.918  | 872.383 | 657.945 | 592.688 | 65.257  |
| 2007          | 68565  | 51492.124 | 45682.690 | 5809.434 | 8.473  | 11.282 | 849.888 | 638.264 | 566.253 | 72.010  |
| 2008          | 68226  | 51030.736 | 44495.220 | 6535.515 | 9.579  | 12.807 | 836.215 | 625.460 | 545.357 | 80.103  |
| 2009          | 67509  | 50276.199 | 43016.963 | 7259.236 | 10.753 | 14.439 | 817.667 | 608.943 | 521.020 | 87.924  |
| 2010          | 67196  | 49840.933 | 41857.839 | 7983.093 | 11.880 | 16.017 | 804.000 | 596.347 | 500.829 | 95.518  |
| 2011          | 66506  | 49072.841 | 40293.387 | 8779.454 | 13.201 | 17.891 | 787.880 | 581.354 | 477.346 | 104.008 |
| 2012          | 66155  | 48539.512 | 38908.273 | 9631.239 | 14.559 | 19.842 | 775.240 | 568.812 | 455.948 | 112.864 |
| 2013          | 65333  | 47675.741 | 37287.972 | 10387.77 | 15.900 | 21.788 | 756.876 | 552.318 | 431.977 | 120.341 |
| 2014          | 65033  | 47194.534 | 36022.608 | 11171.93 | 17.179 | 23.672 | 744.602 | 540.359 | 412.445 | 127.914 |
| 2015          | 64145  | 46305.842 | 34455.957 | 11849.89 | 18.474 | 25.590 | 726.215 | 526.439 | 443.807 | 152.632 |
| 2016          | 61618  | 44208.867 | 31972.289 | 12236.58 | 19.859 | 27.679 | 786.248 | 564.107 | 407.968 | 156.139 |
| 2017          | 59897  | 42702.624 | 30016.469 | 12686.15 | 21.180 | 29.708 | 757.297 | 539.903 | 379.508 | 160.395 |
| 2018          | 62468  | 44321.202 | 30090.973 | 14230.23 | 22.780 | 32.107 | 782.490 | 555.181 | 376.929 | 178.252 |
| 2019          | 63045  | 44493.088 | 29242.980 | 15250.11 | 24.189 | 34.275 | 782.035 | 551.912 | 362.743 | 189.169 |
| 2020          | 63466  | 44529.551 | 28333.403 | 16196.15 | 25.519 | 36.372 | 898.991 | 630.757 | 401.340 | 229.417 |
| 2021          | 57113  | 39852.556 | 24442.286 | 15410.27 | 26.982 | 38.668 | 803.323 | 560.546 | 343.793 | 216.753 |
| 2022          | 57440  | 39853.685 | 23502.107 | 16351.58 | 28.467 | 41.029 | 801.745 | 556.274 | 328.040 | 228.234 |
| 2023          | 57738  | 39847.050 | 22574.991 | 17272.06 | 29.914 | 43.346 | 799.366 | 551.670 | 312.544 | 239.126 |
| 2024          | 57942  | 39726.010 | 21644.265 | 18081.74 | 31.207 | 45.516 | 795.539 | 545.435 | 297.174 | 248.261 |
| 2025          | 57521  | 39207.348 | 20589.295 | 18618.05 | 32.367 | 47.486 | 919.257 | 626.579 | 329.041 | 297.538 |
| 2026          | 51428  | 34803.960 | 17525.949 | 17278.01 | 33.597 | 49.644 | 818.510 | 553.929 | 278.937 | 274.991 |
| 2027          | 51172  | 34484.595 | 16602.701 | 17881.89 | 34.945 | 51.855 | 810.740 | 546.357 | 263.045 | 283.312 |
| 2028          | 50870  | 34100.638 | 15646.509 | 18454.13 | 36.277 | 54.117 | 801.884 | 537.544 | 246.643 | 290.901 |
| 2029          | 50540  | 33669.838 | 14743.408 | 18926.43 | 37.449 | 56.212 | 792.146 | 527.732 | 231.084 | 296.648 |
| 2030          | 49109  | 32557.688 | 13730.741 | 18826.95 | 38.337 | 57.826 | 919.662 | 609.705 | 257.135 | 352.571 |
| 2031          | 43585  | 28646.393 | 11566.635 | 17079.76 | 39.187 | 59.623 | 814.096 | 535.065 | 216.045 | 319.020 |
| 2032          | 43163  | 28227.160 | 10868.172 | 17358.99 | 40.218 | 61.497 | 803.454 | 525.435 | 202.306 | 323.129 |
| 2033          | 42725  | 27786.623 | 10220.090 | 17566.53 | 41.115 | 63.219 | 791.996 | 515.079 | 189.449 | 325.630 |
| 2034          | 42256  | 27348.299 | 9621.496  | 17726.80 | 41.951 | 64.819 | 779.523 | 504.514 | 177.495 | 327.019 |
| 2035          | 39748  | 25570.077 | 8757.380  | 16812.70 | 42.298 | 65.751 | 906.933 | 583.430 | 199.816 | 383.614 |
| 2036          | 34030  | 21717.319 | 6993.482  | 14723.84 | 43.267 | 67.798 | 776.269 | 495.402 | 159.531 | 335.871 |
| 2037          | 33454  | 21256.024 | 6533.345  | 14722.68 | 44.009 | 69.264 | 762.289 | 484.347 | 148.871 | 335.476 |
| 2038          | 32883  | 20747.175 | 6091.476  | 14655.70 | 44.569 | 70.639 | 747.720 | 471.764 | 138.512 | 333.252 |
| 2039          | 32325  | 20327.688 | 5734.572  | 14593.12 | 45.145 | 71.789 | 732.644 | 460.724 | 129.973 | 330.751 |

## Results for PHIM for Run 1 (Sensitivity\_Analysis\_3.RTF)

\*\*\*\*\*

### Main Results for E-Component for Run: 1, Simulation: 1, COD: IHD

| Variable Parameter          | Value                                  |
|-----------------------------|----------------------------------------|
| 1. Country                  | US (United States)                     |
| 2. Sex                      | M (Males)                              |
| 3. Year of start of process | 1990                                   |
| 4. Cause of Death           | IHD                                    |
| 5. Effective Dose NULL      | CC:1                                   |
| 6. Effective Dose Ecig      | CC:1 Ecig:0.05 Dual:0.525              |
| Note:                       | Death rates are per million population |

#### Results for Age Groups Combined and Years combined, Population unadjusted for deaths in Ecig scenario,

| Age Group:All |         | NULL        | Ecig       | %Drop    |        |        | NULL    | Ecig    | Drop    |         |
|---------------|---------|-------------|------------|----------|--------|--------|---------|---------|---------|---------|
| Year          | Number  | Attrib      | Attrib     | Drop     | %Drop  | Attrib | Death   | Attrib  | Attrib  | Drop    |
|               | Deaths  | Deaths      | Deaths     | Deaths   | Deaths | Deaths | Rate    | Rates   | Rates   | Rates   |
| All Comb      | 6360041 | 1098877.421 | 526679.024 | 572198.4 | 8.997  | 52.071 | 1841.09 | 318.101 | 152.462 | 165.639 |

#### Results for Age Groups Combined, Population unadjusted for deaths in Ecig scenario,

| Age Group:All |        | NULL      | Ecig      | %Drop    |        |        | NULL    | Ecig    | Drop    |         |
|---------------|--------|-----------|-----------|----------|--------|--------|---------|---------|---------|---------|
| Year          | Number | Attrib    | Attrib    | Drop     | %Drop  | Attrib | Death   | Attrib  | Attrib  | Drop    |
|               | Deaths | Deaths    | Deaths    | Deaths   | Deaths | Deaths | Rate    | Rates   | Rates   | Rates   |
| 1990          | 171484 | 38511.725 | 38511.725 | 0.000    | 0.000  | 0.000  | 2718.40 | 610.497 | 610.497 | 0.000   |
| 1991          | 168044 | 37309.838 | 36996.011 | 313.827  | 0.187  | 0.841  | 2620.21 | 581.750 | 576.857 | 4.893   |
| 1992          | 164548 | 36137.488 | 35293.273 | 844.215  | 0.513  | 2.336  | 2522.12 | 553.899 | 540.959 | 12.940  |
| 1993          | 164362 | 35599.588 | 34037.346 | 1562.242 | 0.950  | 4.388  | 2474.35 | 535.926 | 512.408 | 23.518  |
| 1994          | 159866 | 34336.757 | 31953.567 | 2383.190 | 1.491  | 6.941  | 2361.75 | 507.267 | 472.059 | 35.208  |
| 1995          | 158083 | 33455.759 | 30125.464 | 3330.295 | 2.107  | 9.954  | 2290.66 | 484.782 | 436.525 | 48.257  |
| 1996          | 154875 | 32193.824 | 27859.569 | 4334.256 | 2.799  | 13.463 | 2209.26 | 459.239 | 397.412 | 61.827  |
| 1997          | 149970 | 30665.509 | 25359.700 | 5305.809 | 3.538  | 17.302 | 2104.43 | 430.308 | 355.855 | 74.453  |
| 1998          | 145407 | 29188.430 | 22974.164 | 6214.267 | 4.274  | 21.290 | 2006.83 | 402.844 | 317.078 | 85.766  |
| 1999          | 165952 | 33375.386 | 24734.348 | 8641.037 | 5.207  | 25.890 | 2254.27 | 453.366 | 335.988 | 117.379 |
| 2000          | 160260 | 32024.754 | 22355.032 | 9669.723 | 6.034  | 30.195 | 2145.10 | 428.655 | 299.225 | 129.430 |
| 2001          | 154444 | 30682.393 | 19946.339 | 10736.05 | 6.951  | 34.991 | 2040.33 | 405.339 | 263.507 | 141.832 |
| 2002          | 151887 | 30218.370 | 18232.375 | 11985.99 | 7.891  | 39.665 | 1984.06 | 394.736 | 238.165 | 156.570 |
| 2003          | 146733 | 29175.202 | 16270.673 | 12904.53 | 8.795  | 44.231 | 1896.81 | 377.146 | 210.330 | 166.816 |
| 2004          | 138381 | 27488.687 | 14113.491 | 13375.20 | 9.665  | 48.657 | 1769.58 | 351.518 | 180.480 | 171.038 |
| 2005          | 135881 | 27017.439 | 12790.009 | 14227.43 | 10.471 | 52.660 | 1717.44 | 341.482 | 161.657 | 179.825 |
| 2006          | 131922 | 26231.435 | 11280.697 | 14950.74 | 11.333 | 56.996 | 1652.16 | 328.517 | 141.277 | 187.240 |
| 2007          | 126502 | 25103.049 | 9854.831  | 15248.22 | 12.054 | 60.742 | 1568.04 | 311.161 | 122.154 | 189.007 |
| 2008          | 125859 | 24621.740 | 8906.987  | 15714.75 | 12.486 | 63.825 | 1542.60 | 301.777 | 109.169 | 192.609 |
| 2009          | 122428 | 23741.177 | 7886.404  | 15854.77 | 12.950 | 66.782 | 1482.84 | 287.552 | 95.520  | 192.032 |
| 2010          | 120537 | 23189.160 | 7098.374  | 16090.79 | 13.349 | 69.389 | 1442.22 | 277.458 | 84.932  | 192.526 |
| 2011          | 120221 | 22786.927 | 6366.101  | 16420.83 | 13.659 | 72.062 | 1424.23 | 269.951 | 75.418  | 194.534 |
| 2012          | 120927 | 22485.295 | 5775.489  | 16709.81 | 13.818 | 74.314 | 1417.09 | 263.495 | 67.680  | 195.814 |
| 2013          | 122648 | 22251.884 | 5280.859  | 16971.03 | 13.837 | 76.268 | 1420.86 | 257.786 | 61.178  | 196.607 |
| 2014          | 123229 | 21894.593 | 4811.849  | 17082.74 | 13.863 | 78.023 | 1410.92 | 250.685 | 55.094  | 195.591 |
| 2015          | 123774 | 21471.109 | 4403.787  | 17067.32 | 13.789 | 79.490 | 1594.26 | 276.557 | 56.723  | 219.834 |
| 2016          | 126218 | 21411.568 | 4048.440  | 17363.13 | 13.756 | 81.092 | 1610.55 | 273.213 | 51.658  | 221.554 |
| 2017          | 128265 | 21169.399 | 3727.756  | 17441.64 | 13.598 | 82.391 | 1621.69 | 267.651 | 47.131  | 220.520 |
| 2018          | 121429 | 19830.576 | 3232.642  | 16597.93 | 13.669 | 83.699 | 1521.05 | 248.404 | 40.493  | 207.911 |
| 2019          | 121832 | 19431.014 | 2986.576  | 16444.44 | 13.498 | 84.630 | 1511.26 | 241.031 | 37.047  | 203.984 |
| 2020          | 120811 | 18532.612 | 2700.095  | 15832.52 | 13.105 | 85.431 | 1711.27 | 262.513 | 38.247  | 224.266 |
| 2021          | 119407 | 18234.128 | 2482.193  | 15751.93 | 13.192 | 86.387 | 1679.51 | 256.472 | 34.913  | 221.559 |
| 2022          | 119438 | 17812.559 | 2295.739  | 15516.82 | 12.992 | 87.112 | 1667.10 | 248.626 | 32.044  | 216.582 |
| 2023          | 119445 | 17361.668 | 2125.869  | 15235.80 | 12.755 | 87.755 | 1653.68 | 240.367 | 29.432  | 210.935 |
| 2024          | 119305 | 16929.676 | 1994.437  | 14935.24 | 12.519 | 88.219 | 1638.05 | 232.443 | 27.383  | 205.060 |
| 2025          | 115685 | 15501.666 | 1762.414  | 13739.25 | 11.876 | 88.631 | 1848.78 | 247.735 | 28.165  | 219.569 |
| 2026          | 115073 | 15523.814 | 1702.363  | 13821.45 | 12.011 | 89.034 | 1831.46 | 247.072 | 27.094  | 219.978 |
| 2027          | 113989 | 15073.070 | 1611.691  | 13461.38 | 11.809 | 89.307 | 1805.98 | 238.810 | 25.535  | 213.275 |
| 2028          | 112855 | 14636.710 | 1519.526  | 13117.18 | 11.623 | 89.618 | 1778.98 | 230.725 | 23.953  | 206.772 |
| 2029          | 111718 | 14180.166 | 1445.953  | 12734.21 | 11.399 | 89.803 | 1751.04 | 222.256 | 22.663  | 199.593 |
| 2030          | 104851 | 12111.772 | 1203.764  | 10908.01 | 10.403 | 90.061 | 1963.54 | 226.816 | 22.543  | 204.273 |
| 2031          | 105289 | 12417.367 | 1227.921  | 11189.45 | 10.627 | 90.111 | 1966.62 | 231.935 | 22.935  | 208.999 |
| 2032          | 103879 | 12054.064 | 1180.081  | 10873.98 | 10.468 | 90.210 | 1933.67 | 224.381 | 21.967  | 202.414 |
| 2033          | 102485 | 11672.389 | 1126.140  | 10546.25 | 10.290 | 90.352 | 1899.76 | 216.370 | 20.875  | 195.495 |
| 2034          | 101070 | 11365.762 | 1097.651  | 10268.11 | 10.159 | 90.342 | 1864.51 | 209.673 | 20.249  | 189.423 |
| 2035          | 90820  | 8580.360  | 800.962   | 7779.398 | 8.566  | 90.665 | 2072.23 | 195.777 | 18.275  | 177.502 |
| 2036          | 92117  | 8948.841  | 834.968   | 8113.873 | 8.808  | 90.670 | 2101.31 | 204.135 | 19.047  | 185.089 |
| 2037          | 90327  | 8624.570  | 812.269   | 7812.300 | 8.649  | 90.582 | 2058.21 | 196.522 | 18.509  | 178.014 |
| 2038          | 88590  | 8315.017  | 782.123   | 7532.893 | 8.503  | 90.594 | 2014.42 | 189.073 | 17.784  | 171.288 |
| 2039          | 86921  | 8001.132  | 758.987   | 7242.145 | 8.332  | 90.514 | 1970.05 | 181.344 | 17.202  | 164.142 |

## Results for PHIM for Run 1 (Sensitivity\_Analysis\_3.RTF)

\*\*\*\*\*

### Main Results for E-Component for Run: 1, Simulation: 1, COD: STROKE

| Variable Parameter          | Value                                  |
|-----------------------------|----------------------------------------|
| 1. Country                  | US (United States)                     |
| 2. Sex                      | M (Males)                              |
| 3. Year of start of process | 1990                                   |
| 4. Cause of Death           | STROKE                                 |
| 5. Effective Dose NULL      | CC:1                                   |
| 6. Effective Dose Ecig      | CC:1 Ecig:0.05 Dual:0.525              |
| Note:                       | Death rates are per million population |

#### Results for Age Groups Combined and Years combined, Population unadjusted for deaths in Ecig scenario,

| Age Group:All |         | NULL       | Ecig      | %Drop    |        | NULL   | Ecig    | Drop   |        |        |
|---------------|---------|------------|-----------|----------|--------|--------|---------|--------|--------|--------|
| Year          | Number  | Attrib     | Attrib    | Drop     | %Drop  | Attrib | Death   | Attrib | Drop   |        |
|               | Deaths  | Deaths     | Deaths    | Deaths   | Deaths | Deaths | Rate    | Rates  | Rates  |        |
| All Comb      | 1489699 | 149918.462 | 71064.689 | 78853.77 | 5.293  | 52.598 | 431.236 | 43.398 | 20.572 | 22.826 |

#### Results for Age Groups Combined, Population unadjusted for deaths in Ecig scenario,

| Age Group:All |        | NULL     | Ecig     | %Drop    |        | NULL   | Ecig    | Drop   |        |        |
|---------------|--------|----------|----------|----------|--------|--------|---------|--------|--------|--------|
| Year          | Number | Attrib   | Attrib   | Drop     | %Drop  | Attrib | Death   | Attrib | Drop   |        |
|               | Deaths | Deaths   | Deaths   | Deaths   | Deaths | Deaths | Rate    | Rates  | Rates  |        |
| 1990          | 32862  | 4613.166 | 4613.166 | 0.000    | 0.000  | 0.000  | 520.936 | 73.129 | 0.000  |        |
| 1991          | 32619  | 4555.566 | 4515.509 | 40.057   | 0.123  | 0.879  | 508.609 | 71.032 | 70.408 | 0.625  |
| 1992          | 32100  | 4453.572 | 4348.549 | 105.023  | 0.327  | 2.358  | 492.014 | 68.262 | 66.653 | 1.610  |
| 1993          | 32896  | 4462.473 | 4264.139 | 198.334  | 0.603  | 4.444  | 495.226 | 67.179 | 64.194 | 2.986  |
| 1994          | 33323  | 4499.513 | 4186.609 | 312.905  | 0.939  | 6.954  | 492.290 | 66.473 | 61.850 | 4.623  |
| 1995          | 33569  | 4472.774 | 4029.364 | 443.410  | 1.321  | 9.914  | 486.422 | 64.812 | 58.386 | 6.425  |
| 1996          | 33870  | 4406.878 | 3819.301 | 587.577  | 1.735  | 13.333 | 483.150 | 62.863 | 54.482 | 8.382  |
| 1997          | 33516  | 4288.158 | 3554.465 | 733.693  | 2.189  | 17.110 | 470.307 | 60.173 | 49.877 | 10.295 |
| 1998          | 32795  | 4120.148 | 3253.150 | 866.998  | 2.644  | 21.043 | 452.620 | 56.864 | 44.898 | 11.966 |
| 1999          | 33375  | 3982.443 | 2982.973 | 999.469  | 2.995  | 25.097 | 453.361 | 54.097 | 40.520 | 13.577 |
| 2000          | 33459  | 4021.411 | 2847.261 | 1174.150 | 3.509  | 29.197 | 447.853 | 53.827 | 38.111 | 15.716 |
| 2001          | 32275  | 3848.092 | 2556.796 | 1291.296 | 4.001  | 33.557 | 426.379 | 50.836 | 33.777 | 17.059 |
| 2002          | 31586  | 3783.081 | 2354.995 | 1428.086 | 4.521  | 37.749 | 412.601 | 49.418 | 30.763 | 18.655 |
| 2003          | 30985  | 3754.415 | 2174.744 | 1579.671 | 5.098  | 42.075 | 400.541 | 48.533 | 28.113 | 20.420 |
| 2004          | 29884  | 3666.274 | 1972.497 | 1693.777 | 5.668  | 46.199 | 382.149 | 46.883 | 25.224 | 21.660 |
| 2005          | 28708  | 3589.688 | 1787.572 | 1802.117 | 6.277  | 50.203 | 362.850 | 45.371 | 22.594 | 22.778 |
| 2006          | 28188  | 3596.985 | 1645.878 | 1951.106 | 6.922  | 54.243 | 353.021 | 45.048 | 20.613 | 24.435 |
| 2007          | 28026  | 3560.798 | 1499.900 | 2060.898 | 7.354  | 57.877 | 347.392 | 44.137 | 18.592 | 25.546 |
| 2008          | 27128  | 3417.001 | 1325.546 | 2091.455 | 7.710  | 61.207 | 332.495 | 41.881 | 16.247 | 25.634 |
| 2009          | 27068  | 3394.390 | 1212.816 | 2181.573 | 8.060  | 64.270 | 327.847 | 41.113 | 14.690 | 26.423 |
| 2010          | 26911  | 3340.137 | 1104.304 | 2235.833 | 8.308  | 66.938 | 321.990 | 39.965 | 13.213 | 26.752 |
| 2011          | 26959  | 3285.435 | 1002.229 | 2283.205 | 8.469  | 69.495 | 319.377 | 38.922 | 11.873 | 27.049 |
| 2012          | 27057  | 3259.209 | 912.016  | 2347.194 | 8.675  | 72.017 | 317.068 | 38.193 | 10.687 | 27.506 |
| 2013          | 27904  | 3274.703 | 845.153  | 2429.550 | 8.707  | 74.191 | 323.265 | 37.937 | 9.791  | 28.146 |
| 2014          | 28792  | 3298.083 | 783.817  | 2514.266 | 8.733  | 76.234 | 329.657 | 37.762 | 8.974  | 28.787 |
| 2015          | 29560  | 3244.406 | 718.568  | 2525.838 | 8.545  | 77.852 | 380.745 | 41.789 | 9.255  | 32.534 |
| 2016          | 30513  | 3314.836 | 679.238  | 2635.598 | 8.638  | 79.509 | 389.347 | 42.297 | 8.667  | 33.630 |
| 2017          | 31416  | 3333.314 | 633.607  | 2699.707 | 8.593  | 80.992 | 397.202 | 42.144 | 8.011  | 34.133 |
| 2018          | 29348  | 2925.242 | 522.064  | 2403.178 | 8.188  | 82.153 | 367.626 | 36.642 | 6.540  | 30.103 |
| 2019          | 29598  | 2864.628 | 480.293  | 2384.335 | 8.056  | 83.234 | 367.149 | 35.534 | 5.958  | 29.576 |
| 2020          | 29592  | 2730.366 | 432.197  | 2298.169 | 7.766  | 84.171 | 419.174 | 38.675 | 6.122  | 32.553 |
| 2021          | 30097  | 2647.911 | 395.063  | 2252.848 | 7.485  | 85.080 | 423.328 | 37.244 | 5.557  | 31.687 |
| 2022          | 30304  | 2586.165 | 363.595  | 2222.569 | 7.334  | 85.941 | 422.974 | 36.097 | 5.075  | 31.022 |
| 2023          | 30505  | 2517.960 | 335.173  | 2182.787 | 7.155  | 86.689 | 422.337 | 34.860 | 4.640  | 30.220 |
| 2024          | 30661  | 2454.161 | 312.326  | 2141.835 | 6.986  | 87.274 | 420.968 | 33.695 | 4.288  | 29.407 |
| 2025          | 30254  | 2275.364 | 277.741  | 1997.624 | 6.603  | 87.794 | 483.488 | 36.363 | 4.439  | 31.924 |
| 2026          | 30685  | 2183.166 | 256.587  | 1926.579 | 6.278  | 88.247 | 488.380 | 34.747 | 4.084  | 30.663 |
| 2027          | 30561  | 2112.345 | 240.468  | 1871.877 | 6.125  | 88.616 | 484.196 | 33.467 | 3.810  | 29.657 |
| 2028          | 30412  | 2046.677 | 225.785  | 1820.891 | 5.987  | 88.968 | 479.392 | 32.263 | 3.559  | 28.704 |
| 2029          | 30254  | 1977.671 | 212.844  | 1764.828 | 5.833  | 89.238 | 474.195 | 30.997 | 3.336  | 27.661 |
| 2030          | 29330  | 1744.457 | 183.837  | 1560.620 | 5.321  | 89.462 | 549.260 | 32.668 | 3.443  | 29.226 |
| 2031          | 28976  | 1653.738 | 171.657  | 1482.081 | 5.115  | 89.620 | 541.223 | 30.889 | 3.206  | 27.683 |
| 2032          | 28724  | 1603.120 | 163.141  | 1439.979 | 5.013  | 89.824 | 534.690 | 29.841 | 3.037  | 26.805 |
| 2033          | 28464  | 1548.245 | 155.476  | 1392.769 | 4.893  | 89.958 | 527.627 | 28.700 | 2.882  | 25.818 |
| 2034          | 28178  | 1511.985 | 150.717  | 1361.268 | 4.831  | 90.032 | 519.826 | 27.893 | 2.780  | 25.112 |
| 2035          | 26737  | 1239.866 | 122.130  | 1117.736 | 4.180  | 90.150 | 610.065 | 28.290 | 2.787  | 25.503 |
| 2036          | 25591  | 1182.522 | 115.649  | 1066.873 | 4.169  | 90.220 | 583.762 | 26.975 | 2.638  | 24.337 |
| 2037          | 25143  | 1134.483 | 112.064  | 1022.420 | 4.066  | 90.122 | 572.916 | 25.851 | 2.554  | 23.297 |
| 2038          | 24693  | 1093.537 | 107.804  | 985.733  | 3.992  | 90.142 | 561.491 | 24.866 | 2.451  | 22.414 |
| 2039          | 24247  | 1047.905 | 103.919  | 943.986  | 3.893  | 90.083 | 549.553 | 23.751 | 2.355  | 21.395 |

## Results for PHIM for Run 1 (Sensitivity\_Analysis\_3.RTF)

\*\*\*\*\*

### Main Results for E-Component for Run: 1, Simulation: 1, COD: COPD

| Variable Parameter          | Value                                  |
|-----------------------------|----------------------------------------|
| 1. Country                  | US (United States)                     |
| 2. Sex                      | M (Males)                              |
| 3. Year of start of process | 1990                                   |
| 4. Cause of Death           | COPD                                   |
| 5. Effective Dose NULL      | CC:1                                   |
| 6. Effective Dose Ecig      | CC:1 Ecig:0.05 Dual:0.525              |
| Note:                       | Death rates are per million population |

#### Results for Age Groups Combined and Years combined, Population unadjusted for deaths in Ecig scenario,

| Age Group:All | NULL    | Ecig        | %Drop      |          |        |        | NULL    | Ecig    | Drop    |        |
|---------------|---------|-------------|------------|----------|--------|--------|---------|---------|---------|--------|
| Year          | Number  | Attrib      | Attrib     | Drop     | %Drop  | Attrib | Death   | Attrib  | Attrib  | Drop   |
|               | Deaths  | Deaths      | Deaths     | Deaths   | Deaths | Deaths | Rate    | Rates   | Rates   | Rates  |
| All Comb      | 2233143 | 1015606.587 | 685183.174 | 330423.4 | 14.796 | 32.535 | 646.447 | 293.996 | 198.346 | 95.650 |

#### Results for Age Groups Combined, Population unadjusted for deaths in Ecig scenario,

| Age Group:All | NULL   | Ecig      | %Drop     |          |        |        | NULL    | Ecig    | Drop    |         |
|---------------|--------|-----------|-----------|----------|--------|--------|---------|---------|---------|---------|
| Year          | Number | Attrib    | Attrib    | Drop     | %Drop  | Attrib | Death   | Attrib  | Attrib  | Drop    |
|               | Deaths | Deaths    | Deaths    | Deaths   | Deaths | Deaths | Rate    | Rates   | Rates   | Rates   |
| 1990          | 33993  | 19262.437 | 19262.437 | 0.000    | 0.000  | 0.000  | 538.865 | 305.353 | 305.353 | 0.000   |
| 1991          | 34092  | 19215.636 | 19193.448 | 22.188   | 0.065  | 0.115  | 531.576 | 299.618 | 299.272 | 0.346   |
| 1992          | 33942  | 19056.189 | 18998.252 | 57.937   | 0.171  | 0.304  | 520.248 | 292.085 | 291.197 | 0.888   |
| 1993          | 35913  | 20095.670 | 19977.024 | 118.645  | 0.330  | 0.590  | 540.645 | 302.526 | 300.740 | 1.786   |
| 1994          | 35074  | 19524.095 | 19342.385 | 181.709  | 0.518  | 0.931  | 518.158 | 288.435 | 285.751 | 2.684   |
| 1995          | 34669  | 19116.002 | 18855.617 | 260.385  | 0.751  | 1.362  | 502.362 | 276.995 | 273.222 | 3.773   |
| 1996          | 34582  | 18975.021 | 18619.162 | 355.860  | 1.029  | 1.875  | 493.306 | 270.675 | 265.599 | 5.076   |
| 1997          | 35267  | 19169.025 | 18696.125 | 472.900  | 1.341  | 2.467  | 494.878 | 268.986 | 262.350 | 6.636   |
| 1998          | 35675  | 19228.937 | 18619.792 | 609.145  | 1.707  | 3.168  | 492.368 | 265.388 | 256.981 | 8.407   |
| 1999          | 38516  | 20589.820 | 19789.043 | 800.778  | 2.079  | 3.889  | 523.195 | 279.689 | 268.811 | 10.878  |
| 2000          | 36283  | 19196.417 | 18290.016 | 906.401  | 2.498  | 4.722  | 485.652 | 256.946 | 244.814 | 12.132  |
| 2001          | 36281  | 19012.731 | 17915.048 | 1097.683 | 3.026  | 5.773  | 479.301 | 251.174 | 236.672 | 14.501  |
| 2002          | 35983  | 18699.357 | 17414.867 | 1284.490 | 3.570  | 6.869  | 470.038 | 244.265 | 227.486 | 16.779  |
| 2003          | 36205  | 18663.550 | 17164.070 | 1499.480 | 4.142  | 8.034  | 468.019 | 241.262 | 221.879 | 19.384  |
| 2004          | 34611  | 17679.164 | 16017.264 | 1661.900 | 4.802  | 9.400  | 442.596 | 226.076 | 204.824 | 21.252  |
| 2005          | 36826  | 18692.832 | 16684.551 | 2008.281 | 5.453  | 10.744 | 465.456 | 236.265 | 210.881 | 25.383  |
| 2006          | 34350  | 17308.564 | 15176.502 | 2132.061 | 6.207  | 12.318 | 430.192 | 216.769 | 190.067 | 26.702  |
| 2007          | 35326  | 17683.181 | 15216.222 | 2466.960 | 6.983  | 13.951 | 437.879 | 219.189 | 188.611 | 30.579  |
| 2008          | 38248  | 19006.374 | 16062.732 | 2943.642 | 7.696  | 15.488 | 468.878 | 232.952 | 196.874 | 36.079  |
| 2009          | 36902  | 18205.573 | 15040.579 | 3164.993 | 8.577  | 17.385 | 446.956 | 220.505 | 182.171 | 38.334  |
| 2010          | 37234  | 18237.758 | 14768.628 | 3469.130 | 9.317  | 19.022 | 445.505 | 218.215 | 176.707 | 41.508  |
| 2011          | 38093  | 18487.916 | 14574.610 | 3913.306 | 10.273 | 21.167 | 451.279 | 219.022 | 172.662 | 46.360  |
| 2012          | 38504  | 18491.158 | 14204.881 | 4286.277 | 11.132 | 23.180 | 451.211 | 216.689 | 166.460 | 50.229  |
| 2013          | 40290  | 19143.452 | 14339.118 | 4804.334 | 11.924 | 25.096 | 466.755 | 221.775 | 166.117 | 55.658  |
| 2014          | 40339  | 18992.005 | 13829.338 | 5162.667 | 12.798 | 27.183 | 461.866 | 217.451 | 158.341 | 59.111  |
| 2015          | 42303  | 19728.885 | 14039.599 | 5689.286 | 13.449 | 28.837 | 544.880 | 254.116 | 180.836 | 73.280  |
| 2016          | 43104  | 19876.724 | 13744.419 | 6132.305 | 14.227 | 30.852 | 550.009 | 253.628 | 175.379 | 78.248  |
| 2017          | 44107  | 20119.790 | 13499.431 | 6620.359 | 15.010 | 32.905 | 557.659 | 254.381 | 170.678 | 83.703  |
| 2018          | 45469  | 20535.123 | 13362.715 | 7172.408 | 15.774 | 34.928 | 569.564 | 257.229 | 167.385 | 89.844  |
| 2019          | 46963  | 21009.029 | 13255.514 | 7753.515 | 16.510 | 36.906 | 582.552 | 260.605 | 164.427 | 96.178  |
| 2020          | 48419  | 21428.512 | 13116.335 | 8312.177 | 17.167 | 38.790 | 685.853 | 303.533 | 185.792 | 117.741 |
| 2021          | 48463  | 21266.697 | 12529.461 | 8737.236 | 18.029 | 41.084 | 681.652 | 299.127 | 176.233 | 122.894 |
| 2022          | 49915  | 21663.568 | 12295.634 | 9367.934 | 18.768 | 43.243 | 696.712 | 302.378 | 171.621 | 130.757 |
| 2023          | 51391  | 22084.131 | 12071.961 | 10012.17 | 19.482 | 45.336 | 711.491 | 305.748 | 167.132 | 138.615 |
| 2024          | 52811  | 22418.456 | 11828.424 | 10590.03 | 20.053 | 47.238 | 725.093 | 307.804 | 162.403 | 145.400 |
| 2025          | 53848  | 22614.834 | 11521.072 | 11093.76 | 20.602 | 49.055 | 860.553 | 361.411 | 184.120 | 177.291 |
| 2026          | 54342  | 22571.522 | 11037.033 | 11534.49 | 21.226 | 51.102 | 864.886 | 359.241 | 175.662 | 183.579 |
| 2027          | 55267  | 22774.416 | 10670.770 | 12103.65 | 21.900 | 53.146 | 875.619 | 360.827 | 169.062 | 191.764 |
| 2028          | 56149  | 22915.561 | 10253.424 | 12662.14 | 22.551 | 55.256 | 885.102 | 361.228 | 161.629 | 199.599 |
| 2029          | 57014  | 22992.027 | 9832.831  | 13159.20 | 23.081 | 57.234 | 893.616 | 360.371 | 154.117 | 206.254 |
| 2030          | 57238  | 22895.360 | 9403.991  | 13491.37 | 23.571 | 58.926 | 1071.90 | 428.760 | 176.108 | 252.652 |
| 2031          | 57592  | 22715.871 | 8951.618  | 13764.25 | 23.900 | 60.593 | 1075.71 | 424.293 | 167.201 | 257.092 |
| 2032          | 58251  | 22759.207 | 8547.127  | 14212.08 | 24.398 | 62.445 | 1084.31 | 423.652 | 159.101 | 264.551 |
| 2033          | 58885  | 22786.258 | 8170.702  | 14615.56 | 24.821 | 64.142 | 1091.54 | 422.387 | 151.460 | 270.928 |
| 2034          | 59460  | 22806.106 | 7792.488  | 15013.62 | 25.250 | 65.832 | 1096.89 | 420.721 | 143.754 | 276.967 |
| 2035          | 58516  | 22262.998 | 7347.858  | 14915.14 | 25.489 | 66.995 | 1335.15 | 507.973 | 167.655 | 340.317 |
| 2036          | 56446  | 21140.051 | 6541.213  | 14598.84 | 25.864 | 69.058 | 1287.60 | 482.234 | 149.214 | 333.020 |
| 2037          | 56568  | 21011.845 | 6143.827  | 14868.02 | 26.283 | 70.760 | 1288.98 | 478.783 | 139.995 | 338.788 |
| 2038          | 56668  | 20787.483 | 5752.445  | 15035.04 | 26.532 | 72.327 | 1288.55 | 472.681 | 130.803 | 341.877 |
| 2039          | 56758  | 20709.267 | 5421.569  | 15287.70 | 26.935 | 73.821 | 1286.40 | 469.372 | 122.879 | 346.493 |



## Results for PHIM for Run 1 (Sensitivity\_Analysis\_3.RTF)

\*\*\*\*\*

### Main Results for E-Component for Run: 1, Simulation: 1, COD: Four Diseases Combined, Adjusted

| Variable Parameter          | Value                                  |
|-----------------------------|----------------------------------------|
| 1. Country                  | US (United States)                     |
| 2. Sex                      | M (Males)                              |
| 3. Year of start of process | 1990                                   |
| 4. Cause of Death           | Four Diseases Combined                 |
| 5. Effective Dose NULL      | CC:1                                   |
| 6. Effective Dose Ecig      | CC:1 Ecig:0.05 Dual:0.525              |
| Note:                       | Death rates are per million population |

#### Results for Age Groups Combined and Years combined, Population and Number deaths adjusted for Ecig scenario,

| Age Group:All | NULL     | Ecig        | %Drop       |         |        |        | NULL    | Ecig    | Drop    |         |
|---------------|----------|-------------|-------------|---------|--------|--------|---------|---------|---------|---------|
| Year          | Number   | Attrib      | Attrib      | Drop    | %Drop  | Attrib | Death   | Attrib  | Drop    |         |
|               | Deaths   | Deaths      | Deaths      | Deaths  | Deaths | Deaths | Rate    | Rates   | Rates   |         |
| All Comb      | 13288580 | 4509390.583 | 3042822.914 | 1466568 | 11.036 | 32.523 | 3815.31 | 1305.37 | 873.630 | 431.741 |

#### Results for Age Groups Combined, Population and Number deaths adjusted for Ecig scenario,

| Age Group:All | NULL   | Ecig       | %Drop      |          |        |        | NULL    | Ecig    | Drop    |
|---------------|--------|------------|------------|----------|--------|--------|---------|---------|---------|
| Year          | Number | Attrib     | Attrib     | Drop     | %Drop  | Attrib | Death   | Attrib  | Drop    |
|               | Deaths | Deaths     | Deaths     | Deaths   | Deaths | Deaths | Rate    | Rates   | Rates   |
| 1990          | 317161 | 125773.065 | 125773.065 | 0.000    | 0.000  | 0.000  | 5027.71 | 1993.78 | 0.000   |
| 1991          | 313217 | 123999.442 | 123575.252 | 424.190  | 0.135  | 0.342  | 4883.81 | 1933.45 | 6.614   |
| 1992          | 308580 | 122014.015 | 120878.823 | 1135.192 | 0.368  | 0.930  | 4729.74 | 1870.18 | 17.412  |
| 1993          | 311723 | 122810.618 | 120681.283 | 2129.335 | 0.683  | 1.734  | 4692.65 | 1848.83 | 32.100  |
| 1994          | 305723 | 119925.592 | 116656.235 | 3269.357 | 1.069  | 2.726  | 4516.28 | 1771.69 | 48.398  |
| 1995          | 303268 | 117896.496 | 113296.330 | 4600.166 | 1.517  | 3.902  | 4393.95 | 1708.35 | 66.832  |
| 1996          | 299629 | 115698.645 | 109635.674 | 6062.971 | 2.023  | 5.240  | 4273.40 | 1650.42 | 86.761  |
| 1997          | 294330 | 113359.847 | 105828.467 | 7531.379 | 2.559  | 6.644  | 4129.04 | 1590.70 | 106.076 |
| 1998          | 289404 | 111444.212 | 102444.567 | 8999.645 | 3.110  | 8.075  | 3992.71 | 1538.10 | 124.739 |
| 1999          | 311217 | 114877.722 | 102848.057 | 12029.66 | 3.865  | 10.472 | 4225.39 | 1560.48 | 164.116 |
| 2000          | 304070 | 112379.704 | 98673.142  | 13706.56 | 4.508  | 12.197 | 4067.25 | 1504.22 | 184.360 |
| 2001          | 296652 | 110024.943 | 94527.012  | 15497.93 | 5.224  | 14.086 | 3915.59 | 1453.52 | 205.830 |
| 2002          | 292343 | 108289.173 | 90781.340  | 17507.83 | 5.989  | 16.168 | 3814.64 | 1414.56 | 229.996 |
| 2003          | 286402 | 106539.023 | 87262.191  | 19276.83 | 6.731  | 18.094 | 3697.34 | 1377.22 | 250.699 |
| 2004          | 274800 | 103037.251 | 82476.040  | 20561.21 | 7.482  | 19.955 | 3508.42 | 1317.61 | 264.627 |
| 2005          | 273115 | 103044.562 | 80627.594  | 22416.97 | 8.208  | 21.755 | 3445.44 | 1302.41 | 285.268 |
| 2006          | 264954 | 99672.555  | 75674.042  | 23998.51 | 9.058  | 24.077 | 3310.91 | 1248.28 | 302.644 |
| 2007          | 259368 | 97839.152  | 72526.340  | 25312.81 | 9.759  | 25.872 | 3206.79 | 1212.75 | 316.044 |
| 2008          | 260553 | 98075.852  | 71096.236  | 26979.62 | 10.355 | 27.509 | 3184.25 | 1202.07 | 333.193 |
| 2009          | 255122 | 95617.338  | 67486.736  | 28130.60 | 11.026 | 29.420 | 3079.97 | 1158.11 | 343.378 |
| 2010          | 253234 | 94607.988  | 65187.927  | 29420.06 | 11.618 | 31.097 | 3018.93 | 1131.98 | 354.846 |
| 2011          | 253294 | 93633.119  | 62621.365  | 31011.75 | 12.243 | 33.120 | 2988.64 | 1109.25 | 370.372 |
| 2012          | 254332 | 92775.175  | 60211.448  | 32563.73 | 12.804 | 35.100 | 2967.22 | 1087.19 | 384.719 |
| 2013          | 258069 | 92345.780  | 58192.066  | 34153.71 | 13.234 | 36.985 | 2975.24 | 1069.82 | 398.928 |
| 2014          | 259487 | 91379.215  | 55912.258  | 35466.96 | 13.668 | 38.813 | 2955.38 | 1046.26 | 409.454 |
| 2015          | 262105 | 90750.242  | 54110.436  | 36639.81 | 13.979 | 40.374 | 3354.33 | 1168.90 | 476.414 |
| 2016          | 263998 | 88811.996  | 50949.745  | 37862.25 | 14.342 | 42.632 | 3345.27 | 1133.24 | 487.633 |
| 2017          | 266474 | 87325.126  | 48398.216  | 38926.91 | 14.608 | 44.577 | 3344.00 | 1104.08 | 496.728 |
| 2018          | 261662 | 87612.144  | 47763.621  | 39848.52 | 15.229 | 45.483 | 3251.49 | 1097.46 | 503.932 |
| 2019          | 264649 | 87797.760  | 46548.486  | 41249.27 | 15.586 | 46.982 | 3254.86 | 1089.08 | 516.592 |
| 2020          | 265775 | 87221.042  | 45191.986  | 42029.06 | 15.814 | 48.187 | 3726.15 | 1235.48 | 601.890 |
| 2021          | 258699 | 82001.292  | 40433.704  | 41567.59 | 16.068 | 50.691 | 3599.21 | 1153.39 | 590.846 |
| 2022          | 260984 | 81915.977  | 39058.803  | 42857.17 | 16.421 | 52.318 | 3601.00 | 1143.37 | 604.450 |
| 2023          | 263247 | 81810.810  | 37725.833  | 44084.98 | 16.747 | 53.886 | 3600.50 | 1132.64 | 616.658 |
| 2024          | 265172 | 81528.303  | 36412.359  | 45115.94 | 17.014 | 55.338 | 3594.50 | 1119.38 | 625.796 |
| 2025          | 262032 | 79599.213  | 34794.928  | 44804.28 | 17.099 | 56.287 | 4124.68 | 1272.09 | 724.377 |
| 2026          | 256389 | 75082.462  | 31132.492  | 43949.97 | 17.142 | 58.536 | 4016.34 | 1194.99 | 707.297 |
| 2027          | 256101 | 74444.425  | 29740.309  | 44704.12 | 17.456 | 60.050 | 3990.78 | 1179.46 | 716.022 |
| 2028          | 255652 | 73699.585  | 28260.416  | 45439.17 | 17.774 | 61.655 | 3960.81 | 1161.76 | 723.921 |
| 2029          | 255149 | 72819.703  | 26848.959  | 45970.74 | 18.017 | 63.130 | 3927.71 | 1141.36 | 728.049 |
| 2030          | 246345 | 69309.277  | 25132.345  | 44176.93 | 17.933 | 63.739 | 4517.91 | 1297.95 | 837.027 |
| 2031          | 241362 | 65433.368  | 22487.142  | 42946.23 | 17.793 | 65.634 | 4411.35 | 1222.18 | 811.186 |
| 2032          | 240164 | 64643.552  | 21321.985  | 43321.57 | 18.038 | 67.016 | 4370.97 | 1203.31 | 815.250 |
| 2033          | 238931 | 63793.514  | 20230.264  | 43563.25 | 18.233 | 68.288 | 4326.96 | 1182.54 | 816.173 |
| 2034          | 237556 | 63032.151  | 19214.339  | 43817.81 | 18.445 | 69.517 | 4278.00 | 1162.80 | 816.781 |
| 2035          | 222422 | 57653.301  | 17563.728  | 40089.57 | 18.024 | 69.536 | 4938.67 | 1315.47 | 925.484 |
| 2036          | 214709 | 52988.733  | 14952.968  | 38035.76 | 17.715 | 71.781 | 4762.03 | 1208.75 | 877.104 |
| 2037          | 212154 | 52026.921  | 14055.757  | 37971.16 | 17.898 | 72.984 | 4696.32 | 1185.50 | 874.359 |
| 2038          | 209629 | 50943.211  | 13173.639  | 37769.57 | 18.017 | 74.141 | 4626.98 | 1158.38 | 867.612 |
| 2039          | 207174 | 50085.991  | 12446.960  | 37639.03 | 18.168 | 75.149 | 4554.32 | 1135.19 | 861.569 |

## Results for PHIM for Run 1 (Sensitivity\_Analysis\_3.RTF)

\*\*\*\*\*

### Main Results for E-Component for Run: 1, Simulation: 1, COD: LUNG CANCER, Adjusted

| Variable Parameter          | Value                                  |
|-----------------------------|----------------------------------------|
| 1. Country                  | US (United States)                     |
| 2. Sex                      | M (Males)                              |
| 3. Year of start of process | 1990                                   |
| 4. Cause of Death           | LUNG CANCER                            |
| 5. Effective Dose NULL      | CC:1                                   |
| 6. Effective Dose Ecig      | CC:1 Ecig:0.05 Dual:0.525              |
| Note:                       | Death rates are per million population |

#### Results for Age Groups Combined and Years combined, Population and Number deaths adjusted for Ecig scenario,

| Age Group:All | NULL    | Ecig        | %Drop       |          |        |        | NULL    | Ecig    | Drop    |         |
|---------------|---------|-------------|-------------|----------|--------|--------|---------|---------|---------|---------|
| Year          | Number  | Attrib      | Attrib      | Drop     | %Drop  | Attrib | Death   | Attrib  | Attrib  | Drop    |
|               | Deaths  | Deaths      | Deaths      | Deaths   | Deaths | Deaths | Rate    | Rates   | Rates   | Rates   |
| All Comb      | 3095137 | 2244988.113 | 1752308.317 | 492679.8 | 15.918 | 21.946 | 888.650 | 649.875 | 503.108 | 146.767 |

#### Results for Age Groups Combined, Population and Number deaths adjusted for Ecig scenario,

| Age Group:All | NULL   | Ecig      | %Drop     |          |        |        | NULL    | Ecig    | Drop    |         |
|---------------|--------|-----------|-----------|----------|--------|--------|---------|---------|---------|---------|
| Year          | Number | Attrib    | Attrib    | Drop     | %Drop  | Attrib | Death   | Attrib  | Attrib  | Drop    |
|               | Deaths | Deaths    | Deaths    | Deaths   | Deaths | Deaths | Rate    | Rates   | Rates   | Rates   |
| 1990          | 78822  | 63385.736 | 63385.736 | 0.000    | 0.000  | 0.000  | 1249.50 | 1004.81 | 1004.81 | 0.000   |
| 1991          | 78462  | 62918.402 | 62870.284 | 48.118   | 0.061  | 0.076  | 1223.41 | 981.049 | 980.299 | 0.750   |
| 1992          | 77988  | 62366.766 | 62238.212 | 128.554  | 0.165  | 0.206  | 1195.35 | 955.930 | 953.953 | 1.977   |
| 1993          | 78545  | 62652.888 | 62400.863 | 252.025  | 0.321  | 0.402  | 1182.40 | 943.195 | 939.378 | 3.817   |
| 1994          | 77443  | 61565.227 | 61169.347 | 395.880  | 0.511  | 0.643  | 1144.02 | 909.520 | 903.620 | 5.900   |
| 1995          | 76915  | 60851.961 | 60278.164 | 573.798  | 0.746  | 0.943  | 1114.40 | 881.759 | 873.351 | 8.408   |
| 1996          | 76250  | 60122.922 | 59325.561 | 797.360  | 1.046  | 1.326  | 1087.51 | 857.643 | 846.120 | 11.523  |
| 1997          | 75501  | 59237.155 | 58200.775 | 1036.380 | 1.373  | 1.750  | 1059.17 | 831.234 | 816.475 | 14.759  |
| 1998          | 75421  | 58906.696 | 57574.066 | 1332.630 | 1.767  | 2.262  | 1040.53 | 813.001 | 794.310 | 18.691  |
| 1999          | 73212  | 56930.073 | 55307.773 | 1622.299 | 2.216  | 2.850  | 993.995 | 773.329 | 750.912 | 22.417  |
| 2000          | 73856  | 57137.121 | 55138.860 | 1998.261 | 2.706  | 3.497  | 987.898 | 764.787 | 737.540 | 27.247  |
| 2001          | 73386  | 56481.726 | 54058.514 | 2423.212 | 3.302  | 4.290  | 968.644 | 746.169 | 713.533 | 32.636  |
| 2002          | 72557  | 55588.365 | 52719.587 | 2868.779 | 3.954  | 5.161  | 946.758 | 726.138 | 687.912 | 38.226  |
| 2003          | 72082  | 54945.856 | 51583.950 | 3361.907 | 4.664  | 6.119  | 930.555 | 710.281 | 665.930 | 44.351  |
| 2004          | 71469  | 54203.126 | 50297.977 | 3905.149 | 5.464  | 7.205  | 912.456 | 693.135 | 642.163 | 50.972  |
| 2005          | 71162  | 53744.603 | 49279.176 | 4465.427 | 6.275  | 8.309  | 897.738 | 679.296 | 621.675 | 57.621  |
| 2006          | 69886  | 52535.572 | 47480.308 | 5055.263 | 7.234  | 9.623  | 873.305 | 657.945 | 593.321 | 64.623  |
| 2007          | 68825  | 51492.124 | 45856.294 | 5635.830 | 8.189  | 10.945 | 850.942 | 638.264 | 566.962 | 71.301  |
| 2008          | 68522  | 51030.736 | 44688.736 | 6342.000 | 9.255  | 12.428 | 837.415 | 625.460 | 546.147 | 79.313  |
| 2009          | 67842  | 50276.199 | 43229.649 | 7046.549 | 10.387 | 14.016 | 819.019 | 608.943 | 521.891 | 87.052  |
| 2010          | 67569  | 49840.933 | 42090.970 | 7749.963 | 11.470 | 15.549 | 805.520 | 596.347 | 501.788 | 94.559  |
| 2011          | 66918  | 49072.841 | 40544.312 | 8528.529 | 12.745 | 17.379 | 789.576 | 581.354 | 478.387 | 102.967 |
| 2012          | 66609  | 48539.512 | 39177.141 | 9362.371 | 14.056 | 19.288 | 777.113 | 568.812 | 457.069 | 111.743 |
| 2013          | 65829  | 47675.741 | 37572.918 | 10102.82 | 15.347 | 21.191 | 758.931 | 552.318 | 433.173 | 119.145 |
| 2014          | 65577  | 47194.534 | 36326.224 | 10868.31 | 16.573 | 23.029 | 746.875 | 540.359 | 413.731 | 126.628 |
| 2015          | 64732  | 46305.842 | 34773.944 | 11531.90 | 17.815 | 24.904 | 828.422 | 596.439 | 445.025 | 151.414 |
| 2016          | 62233  | 44208.867 | 32294.179 | 11914.69 | 19.145 | 26.951 | 788.584 | 564.107 | 409.217 | 154.890 |
| 2017          | 60546  | 42702.624 | 30344.621 | 12358.00 | 20.411 | 28.940 | 759.790 | 539.903 | 380.796 | 159.107 |
| 2018          | 63198  | 44321.202 | 30446.697 | 13874.51 | 21.954 | 31.304 | 785.310 | 555.181 | 378.339 | 176.841 |
| 2019          | 63838  | 44493.088 | 29615.797 | 14877.29 | 23.305 | 33.437 | 785.130 | 551.912 | 364.239 | 187.673 |
| 2020          | 64326  | 44529.551 | 28722.425 | 15807.13 | 24.574 | 35.498 | 901.845 | 630.757 | 402.687 | 228.071 |
| 2021          | 57943  | 39852.556 | 24802.720 | 15049.84 | 25.974 | 37.764 | 806.140 | 560.546 | 345.074 | 215.472 |
| 2022          | 58329  | 39853.685 | 23871.684 | 15982.00 | 27.400 | 40.102 | 804.808 | 556.274 | 329.376 | 226.898 |
| 2023          | 58688  | 39847.050 | 22952.733 | 16894.32 | 28.787 | 42.398 | 802.689 | 551.670 | 313.931 | 237.739 |
| 2024          | 58954  | 39726.010 | 22029.057 | 17696.95 | 30.018 | 44.548 | 799.136 | 545.435 | 298.611 | 246.824 |
| 2025          | 58593  | 39207.348 | 20978.973 | 18228.38 | 31.110 | 46.492 | 922.316 | 626.579 | 330.232 | 296.346 |
| 2026          | 52441  | 34803.960 | 17878.128 | 16925.83 | 32.276 | 48.632 | 821.496 | 553.929 | 280.061 | 273.867 |
| 2027          | 52235  | 34484.595 | 16954.696 | 17529.90 | 33.560 | 50.834 | 813.964 | 546.357 | 264.202 | 282.154 |
| 2028          | 51982  | 34100.638 | 15996.212 | 18104.43 | 34.828 | 53.091 | 805.354 | 537.544 | 247.829 | 289.714 |
| 2029          | 51701  | 33669.838 | 15089.925 | 18579.91 | 35.937 | 55.183 | 795.870 | 527.732 | 232.291 | 295.441 |
| 2030          | 50310  | 32557.688 | 14072.851 | 18484.84 | 36.742 | 56.776 | 922.675 | 609.705 | 258.093 | 351.612 |
| 2031          | 44696  | 28646.393 | 11867.871 | 16778.52 | 37.539 | 58.571 | 816.902 | 535.065 | 216.908 | 318.157 |
| 2032          | 44312  | 28227.160 | 11163.910 | 17063.25 | 38.507 | 60.450 | 806.468 | 525.435 | 203.182 | 322.253 |
| 2033          | 43912  | 27786.623 | 10510.525 | 17276.10 | 39.343 | 62.174 | 795.225 | 515.079 | 190.342 | 324.737 |
| 2034          | 43478  | 27348.299 | 9906.632  | 17441.67 | 40.116 | 63.776 | 782.967 | 504.514 | 178.402 | 326.112 |
| 2035          | 40974  | 25570.077 | 9032.458  | 16537.62 | 40.362 | 64.676 | 909.781 | 583.430 | 200.557 | 382.873 |
| 2036          | 35100  | 21717.319 | 7218.235  | 14499.08 | 41.308 | 66.763 | 778.474 | 495.402 | 160.093 | 335.309 |
| 2037          | 34541  | 21256.024 | 6750.437  | 14505.59 | 41.995 | 68.242 | 764.621 | 484.347 | 149.430 | 334.917 |
| 2038          | 33988  | 20747.175 | 6300.712  | 14446.46 | 42.505 | 69.631 | 750.182 | 471.764 | 139.071 | 332.693 |
| 2039          | 33445  | 20327.688 | 5937.500  | 14390.19 | 43.026 | 70.791 | 735.232 | 460.724 | 130.524 | 330.200 |

## Results for PHIM for Run 1 (Sensitivity\_Analysis\_3.RTF)

\*\*\*\*\*

### Main Results for E-Component for Run: 1, Simulation: 1, COD: IHD, Adjusted

| Variable Parameter          | Value                                  |
|-----------------------------|----------------------------------------|
| 1. Country                  | US (United States)                     |
| 2. Sex                      | M (Males)                              |
| 3. Year of start of process | 1990                                   |
| 4. Cause of Death           | IHD                                    |
| 5. Effective Dose NULL      | CC:1                                   |
| 6. Effective Dose Ecig      | CC:1 Ecig:0.05 Dual:0.525              |
| Note:                       | Death rates are per million population |

#### Results for Age Groups Combined and Years combined, Population and Number deaths adjusted for Ecig scenario,

| Age Group:All | NULL    | Ecig        | %Drop      |          |        |        | NULL    | Ecig    | Drop    |         |
|---------------|---------|-------------|------------|----------|--------|--------|---------|---------|---------|---------|
| Year          | Number  | Attrib      | Attrib     | Drop     | %Drop  | Attrib | Death   | Attrib  | Drop    |         |
|               | Deaths  | Deaths      | Deaths     | Deaths   | Deaths | Deaths | Rate    | Rates   | Rates   |         |
| All Comb      | 6421809 | 1098877.421 | 527999.485 | 570877.9 | 8.890  | 51.951 | 1843.78 | 318.101 | 151.595 | 166.506 |

#### Results for Age Groups Combined, Population and Number deaths adjusted for Ecig scenario,

| Age Group:All | NULL   | Ecig      | %Drop     |          |        |        | NULL    | Ecig    | Drop    |         |
|---------------|--------|-----------|-----------|----------|--------|--------|---------|---------|---------|---------|
| Year          | Number | Attrib    | Attrib    | Drop     | %Drop  | Attrib | Death   | Attrib  | Drop    |         |
|               | Deaths | Deaths    | Deaths    | Deaths   | Deaths | Deaths | Rate    | Rates   | Rates   |         |
| 1990          | 171484 | 38511.725 | 38511.725 | 0.000    | 0.000  | 0.000  | 2718.40 | 610.497 | 0.000   |         |
| 1991          | 168044 | 37309.838 | 36996.011 | 313.827  | 0.187  | 0.841  | 2620.21 | 581.750 | 576.857 | 4.893   |
| 1992          | 164549 | 36137.488 | 35293.604 | 843.884  | 0.513  | 2.335  | 2522.12 | 553.899 | 540.961 | 12.938  |
| 1993          | 164367 | 35599.588 | 34038.498 | 1561.090 | 0.950  | 4.385  | 2474.37 | 535.926 | 512.413 | 23.514  |
| 1994          | 159878 | 34336.757 | 31956.133 | 2380.624 | 1.489  | 6.933  | 2361.79 | 507.267 | 472.070 | 35.197  |
| 1995          | 158105 | 33455.759 | 30130.001 | 3325.757 | 2.104  | 9.941  | 2290.74 | 484.782 | 436.544 | 48.238  |
| 1996          | 154911 | 32193.824 | 27866.503 | 4327.321 | 2.793  | 13.441 | 2209.39 | 459.239 | 397.441 | 61.798  |
| 1997          | 150023 | 30665.509 | 25369.325 | 5296.184 | 3.530  | 17.271 | 2104.61 | 430.308 | 355.896 | 74.412  |
| 1998          | 145480 | 29188.430 | 22986.624 | 6201.807 | 4.263  | 21.247 | 2007.09 | 402.844 | 317.131 | 85.713  |
| 1999          | 166067 | 33375.386 | 24752.656 | 8622.730 | 5.192  | 25.836 | 2254.68 | 453.366 | 336.066 | 117.300 |
| 2000          | 160409 | 32024.754 | 22377.403 | 9647.351 | 6.014  | 30.125 | 2145.64 | 428.655 | 299.321 | 129.334 |
| 2001          | 154630 | 30682.393 | 19972.121 | 10710.27 | 6.926  | 34.907 | 2041.00 | 405.339 | 263.618 | 141.722 |
| 2002          | 152117 | 30218.370 | 18261.991 | 11956.38 | 7.860  | 39.567 | 1984.90 | 394.736 | 238.292 | 156.444 |
| 2003          | 147007 | 29175.202 | 16303.140 | 12872.06 | 8.756  | 44.120 | 1897.81 | 377.146 | 210.467 | 166.678 |
| 2004          | 138693 | 27488.687 | 14147.419 | 13341.27 | 9.619  | 48.534 | 1770.72 | 351.518 | 180.622 | 170.895 |
| 2005          | 136245 | 27017.439 | 12826.320 | 14191.12 | 10.416 | 52.526 | 1718.78 | 341.482 | 161.809 | 179.674 |
| 2006          | 132336 | 26231.435 | 11317.947 | 14913.49 | 11.269 | 56.853 | 1653.69 | 328.517 | 141.431 | 187.086 |
| 2007          | 126962 | 25103.049 | 9892.300  | 15210.75 | 11.981 | 60.593 | 1569.74 | 311.161 | 122.307 | 188.854 |
| 2008          | 126383 | 24621.740 | 8945.627  | 15676.11 | 12.404 | 63.668 | 1544.55 | 301.777 | 109.326 | 192.452 |
| 2009          | 123008 | 23741.177 | 7925.125  | 15816.05 | 12.858 | 66.619 | 1485.01 | 287.552 | 95.676  | 191.876 |
| 2010          | 121177 | 23189.160 | 7137.343  | 16051.82 | 13.247 | 69.221 | 1444.62 | 277.458 | 85.088  | 192.370 |
| 2011          | 120933 | 22786.927 | 6404.883  | 16382.04 | 13.546 | 71.892 | 1426.91 | 269.951 | 75.572  | 194.379 |
| 2012          | 121724 | 22485.295 | 5814.373  | 16670.92 | 13.696 | 74.141 | 1420.12 | 263.495 | 67.835  | 195.660 |
| 2013          | 123541 | 22251.884 | 5319.912  | 16931.97 | 13.706 | 76.092 | 1424.29 | 257.786 | 61.333  | 196.453 |
| 2014          | 124216 | 21894.593 | 4850.767  | 17043.83 | 13.721 | 77.845 | 1414.73 | 250.685 | 55.247  | 195.438 |
| 2015          | 124863 | 21471.109 | 4442.711  | 17028.40 | 13.638 | 79.308 | 1597.96 | 276.557 | 56.856  | 219.701 |
| 2016          | 127427 | 21411.568 | 4087.182  | 17324.39 | 13.595 | 80.911 | 1614.70 | 273.213 | 51.791  | 221.422 |
| 2017          | 129601 | 21169.399 | 3766.232  | 17403.17 | 13.428 | 82.209 | 1626.37 | 267.651 | 47.263  | 220.389 |
| 2018          | 122781 | 19830.576 | 3267.931  | 16562.65 | 13.490 | 83.521 | 1525.71 | 248.404 | 40.608  | 207.796 |
| 2019          | 123293 | 19431.014 | 3021.372  | 16409.64 | 13.309 | 84.451 | 1516.35 | 241.031 | 37.159  | 203.872 |
| 2020          | 122383 | 18532.612 | 2734.257  | 15798.36 | 12.909 | 85.246 | 1715.81 | 262.513 | 38.334  | 224.179 |
| 2021          | 121057 | 18234.128 | 2514.960  | 15719.17 | 12.985 | 86.207 | 1684.23 | 256.472 | 34.990  | 221.482 |
| 2022          | 121195 | 17812.559 | 2327.610  | 15484.95 | 12.777 | 86.933 | 1672.22 | 248.626 | 32.116  | 216.510 |
| 2023          | 121313 | 17361.668 | 2156.880  | 15204.79 | 12.534 | 87.577 | 1659.23 | 240.367 | 29.500  | 210.867 |
| 2024          | 121284 | 16929.676 | 2024.935  | 14904.74 | 12.289 | 88.039 | 1644.05 | 232.443 | 27.449  | 204.995 |
| 2025          | 117763 | 15501.666 | 1792.014  | 13709.65 | 11.642 | 88.440 | 1853.72 | 247.735 | 28.208  | 219.526 |
| 2026          | 117232 | 15523.814 | 1731.520  | 13792.29 | 11.765 | 88.846 | 1836.44 | 247.072 | 27.124  | 219.948 |
| 2027          | 116240 | 15073.070 | 1640.389  | 13432.68 | 11.556 | 89.117 | 1811.35 | 238.810 | 25.562  | 213.248 |
| 2028          | 115197 | 14636.710 | 1547.722  | 13088.99 | 11.362 | 89.426 | 1784.75 | 230.725 | 23.979  | 206.746 |
| 2029          | 114152 | 14180.166 | 1473.729  | 12706.44 | 11.131 | 89.607 | 1757.24 | 222.256 | 22.686  | 199.570 |
| 2030          | 107330 | 12111.772 | 1229.836  | 10881.94 | 10.139 | 89.846 | 1968.41 | 226.816 | 22.555  | 204.261 |
| 2031          | 107860 | 12417.367 | 1254.706  | 11162.66 | 10.349 | 89.896 | 1971.35 | 231.935 | 22.932  | 209.003 |
| 2032          | 106525 | 12054.064 | 1206.605  | 10847.46 | 10.183 | 89.990 | 1938.75 | 224.381 | 21.960  | 202.420 |
| 2033          | 105204 | 11672.389 | 1152.375  | 10520.01 | 10.000 | 90.127 | 1905.22 | 216.370 | 20.869  | 195.501 |
| 2034          | 103859 | 11365.762 | 1124.044  | 10241.72 | 9.861  | 90.110 | 1870.32 | 209.673 | 20.242  | 189.430 |
| 2035          | 93540  | 8580.360  | 823.353   | 7757.007 | 8.293  | 90.404 | 2076.96 | 195.777 | 18.282  | 177.496 |
| 2036          | 94931  | 8948.841  | 858.378   | 8090.463 | 8.523  | 90.408 | 2105.47 | 204.135 | 19.038  | 185.097 |
| 2037          | 93177  | 8624.570  | 835.665   | 7788.904 | 8.359  | 90.311 | 2062.60 | 196.522 | 18.499  | 178.024 |
| 2038          | 91475  | 8315.017  | 805.311   | 7509.706 | 8.210  | 90.315 | 2019.05 | 189.073 | 17.775  | 171.298 |
| 2039          | 89838  | 8001.132  | 782.018   | 7219.113 | 8.036  | 90.226 | 1974.91 | 181.344 | 17.191  | 164.153 |

## Results for PHIM for Run 1 (Sensitivity\_Analysis\_3.RTF)

\*\*\*\*\*

### Main Results for E-Component for Run: 1, Simulation: 1, COD: STROKE, Adjusted

| Variable Parameter          | Value                                  |
|-----------------------------|----------------------------------------|
| 1. Country                  | US (United States)                     |
| 2. Sex                      | M (Males)                              |
| 3. Year of start of process | 1990                                   |
| 4. Cause of Death           | STROKE                                 |
| 5. Effective Dose NULL      | CC:1                                   |
| 6. Effective Dose Ecig      | CC:1 Ecig:0.05 Dual:0.525              |
| Note:                       | Death rates are per million population |

#### Results for Age Groups Combined and Years combined, Population and Number deaths adjusted for Ecig scenario,

| Age Group:All | NULL    | Ecig       | %Drop     |          |        |        | NULL    | Ecig   | Drop   |        |
|---------------|---------|------------|-----------|----------|--------|--------|---------|--------|--------|--------|
| Year          | Number  | Attrib     | Attrib    | Drop     | %Drop  | Attrib | Death   | Attrib | Attrib | Drop   |
|               | Deaths  | Deaths     | Deaths    | Deaths   | Deaths | Deaths | Rate    | Rates  | Rates  | Rates  |
| All Comb      | 1506444 | 149918.462 | 71259.986 | 78658.48 | 5.221  | 52.468 | 432.518 | 43.398 | 20.460 | 22.939 |

#### Results for Age Groups Combined, Population and Number deaths adjusted for Ecig scenario,

| Age Group:All | NULL   | Ecig     | %Drop    |          |        |        | NULL    | Ecig   | Drop   |        |
|---------------|--------|----------|----------|----------|--------|--------|---------|--------|--------|--------|
| Year          | Number | Attrib   | Attrib   | Drop     | %Drop  | Attrib | Death   | Attrib | Attrib | Drop   |
|               | Deaths | Deaths   | Deaths   | Deaths   | Deaths | Deaths | Rate    | Rates  | Rates  | Rates  |
| 1990          | 32862  | 4613.166 | 4613.166 | 0.000    | 0.000  | 0.000  | 520.936 | 73.129 | 73.129 | 0.000  |
| 1991          | 32619  | 4555.566 | 4515.509 | 40.057   | 0.123  | 0.879  | 508.609 | 71.032 | 70.408 | 0.625  |
| 1992          | 32100  | 4453.572 | 4348.590 | 104.982  | 0.327  | 2.357  | 492.015 | 68.262 | 66.653 | 1.610  |
| 1993          | 32897  | 4462.473 | 4264.283 | 198.191  | 0.602  | 4.441  | 495.229 | 67.179 | 64.194 | 2.985  |
| 1994          | 33325  | 4499.513 | 4186.942 | 312.572  | 0.938  | 6.947  | 492.297 | 66.473 | 61.851 | 4.621  |
| 1995          | 33574  | 4472.774 | 4029.965 | 442.809  | 1.319  | 9.900  | 486.436 | 64.812 | 58.389 | 6.423  |
| 1996          | 33877  | 4406.878 | 3820.245 | 586.633  | 1.732  | 13.312 | 483.172 | 62.863 | 54.486 | 8.378  |
| 1997          | 33527  | 4288.158 | 3555.804 | 732.354  | 2.184  | 17.079 | 470.341 | 60.173 | 49.883 | 10.290 |
| 1998          | 32811  | 4120.148 | 3254.900 | 865.248  | 2.637  | 21.000 | 452.668 | 56.864 | 44.906 | 11.959 |
| 1999          | 33397  | 3982.443 | 2985.151 | 997.292  | 2.986  | 25.042 | 453.430 | 54.097 | 40.529 | 13.568 |
| 2000          | 33489  | 4021.411 | 2850.074 | 1171.337 | 3.498  | 29.128 | 447.949 | 53.827 | 38.123 | 15.704 |
| 2001          | 32312  | 3848.092 | 2560.045 | 1288.047 | 3.986  | 33.472 | 426.497 | 50.836 | 33.791 | 17.046 |
| 2002          | 31632  | 3783.081 | 2358.763 | 1424.318 | 4.503  | 37.650 | 412.752 | 49.418 | 30.778 | 18.639 |
| 2003          | 31041  | 3754.415 | 2178.970 | 1575.445 | 5.075  | 41.962 | 400.723 | 48.533 | 28.130 | 20.403 |
| 2004          | 29949  | 3666.274 | 1977.112 | 1689.162 | 5.640  | 46.073 | 382.367 | 46.883 | 25.242 | 21.641 |
| 2005          | 28783  | 3589.688 | 1792.499 | 1797.189 | 6.244  | 50.065 | 363.105 | 45.371 | 22.613 | 22.758 |
| 2006          | 28274  | 3596.985 | 1651.144 | 1945.841 | 6.882  | 54.096 | 353.319 | 45.048 | 20.633 | 24.415 |
| 2007          | 28125  | 3560.798 | 1505.404 | 2055.394 | 7.308  | 57.723 | 347.739 | 44.137 | 18.613 | 25.525 |
| 2008          | 27238  | 3417.001 | 1331.075 | 2085.926 | 7.658  | 61.046 | 332.884 | 41.881 | 16.267 | 25.613 |
| 2009          | 27193  | 3394.390 | 1218.520 | 2175.870 | 8.001  | 64.102 | 328.292 | 41.113 | 14.711 | 26.402 |
| 2010          | 27051  | 3340.137 | 1110.113 | 2230.024 | 8.244  | 66.764 | 322.494 | 39.965 | 13.234 | 26.731 |
| 2011          | 27117  | 3285.435 | 1008.108 | 2277.327 | 8.398  | 69.316 | 319.954 | 38.922 | 11.895 | 27.027 |
| 2012          | 27233  | 3259.209 | 917.874  | 2341.336 | 8.597  | 71.838 | 317.718 | 38.193 | 10.709 | 27.485 |
| 2013          | 28105  | 3274.703 | 851.126  | 2423.576 | 8.623  | 74.009 | 324.021 | 37.937 | 9.813  | 28.125 |
| 2014          | 29020  | 3298.083 | 789.832  | 2508.251 | 8.643  | 76.052 | 330.519 | 37.762 | 8.996  | 28.766 |
| 2015          | 29819  | 3244.406 | 724.641  | 2519.765 | 8.450  | 77.665 | 381.612 | 41.789 | 9.274  | 32.516 |
| 2016          | 30804  | 3314.836 | 685.423  | 2629.413 | 8.536  | 79.323 | 390.330 | 42.297 | 8.685  | 33.612 |
| 2017          | 31741  | 3333.314 | 639.823  | 2693.491 | 8.486  | 80.805 | 398.322 | 42.144 | 8.029  | 34.115 |
| 2018          | 29680  | 2925.242 | 527.657  | 2397.585 | 8.078  | 81.962 | 368.816 | 36.642 | 6.557  | 30.086 |
| 2019          | 29959  | 2864.628 | 485.787  | 2378.841 | 7.940  | 83.042 | 368.463 | 35.534 | 5.975  | 29.559 |
| 2020          | 29984  | 2730.366 | 437.574  | 2292.792 | 7.647  | 83.974 | 420.376 | 38.675 | 6.135  | 32.541 |
| 2021          | 30525  | 2647.911 | 400.292  | 2247.619 | 7.363  | 84.883 | 424.692 | 37.244 | 5.569  | 31.675 |
| 2022          | 30764  | 2586.165 | 368.672  | 2217.493 | 7.208  | 85.744 | 424.469 | 36.097 | 5.087  | 31.011 |
| 2023          | 30998  | 2517.960 | 340.105  | 2177.855 | 7.026  | 86.493 | 423.971 | 34.860 | 4.652  | 30.209 |
| 2024          | 31187  | 2454.161 | 317.157  | 2137.003 | 6.852  | 87.077 | 422.751 | 33.695 | 4.299  | 29.396 |
| 2025          | 30812  | 2275.364 | 282.425  | 1992.940 | 6.468  | 87.588 | 485.011 | 36.363 | 4.446  | 31.917 |
| 2026          | 31286  | 2183.166 | 261.118  | 1922.048 | 6.144  | 88.039 | 490.089 | 34.747 | 4.090  | 30.656 |
| 2027          | 31192  | 2112.345 | 244.897  | 1867.447 | 5.987  | 88.406 | 486.053 | 33.467 | 3.816  | 29.651 |
| 2028          | 31072  | 2046.677 | 230.128  | 1816.548 | 5.846  | 88.756 | 481.405 | 32.263 | 3.565  | 28.697 |
| 2029          | 30946  | 1977.671 | 217.088  | 1760.584 | 5.689  | 89.023 | 476.371 | 30.997 | 3.342  | 27.656 |
| 2030          | 30046  | 1744.457 | 187.870  | 1556.587 | 5.181  | 89.230 | 551.039 | 32.668 | 3.445  | 29.223 |
| 2031          | 29718  | 1653.738 | 175.542  | 1478.196 | 4.974  | 89.385 | 543.144 | 30.889 | 3.208  | 27.681 |
| 2032          | 29493  | 1603.120 | 166.950  | 1436.170 | 4.870  | 89.586 | 536.769 | 29.841 | 3.038  | 26.803 |
| 2033          | 29259  | 1548.245 | 159.233  | 1389.012 | 4.747  | 89.715 | 529.867 | 28.700 | 2.884  | 25.816 |
| 2034          | 28999  | 1511.985 | 154.479  | 1357.506 | 4.681  | 89.783 | 522.230 | 27.893 | 2.782  | 25.111 |
| 2035          | 27565  | 1239.866 | 125.520  | 1114.346 | 4.043  | 89.876 | 612.064 | 28.290 | 2.787  | 25.503 |
| 2036          | 26413  | 1182.522 | 118.931  | 1063.591 | 4.027  | 89.943 | 585.808 | 26.975 | 2.638  | 24.337 |
| 2037          | 25979  | 1134.483 | 115.330  | 1019.153 | 3.923  | 89.834 | 575.081 | 25.851 | 2.553  | 23.298 |
| 2038          | 25542  | 1093.537 | 111.033  | 982.504  | 3.847  | 89.846 | 563.778 | 24.866 | 2.451  | 22.415 |
| 2039          | 25108  | 1047.905 | 107.099  | 940.806  | 3.747  | 89.780 | 551.958 | 23.751 | 2.354  | 21.396 |

## Results for PHIM for Run 1 (Sensitivity\_Analysis\_3.RTF)

\*\*\*\*\*

### Main Results for E-Component for Run: 1, Simulation: 1, COD: COPD, Adjusted

| Variable Parameter          | Value                                  |
|-----------------------------|----------------------------------------|
| 1. Country                  | US (United States)                     |
| 2. Sex                      | M (Males)                              |
| 3. Year of start of process | 1990                                   |
| 4. Cause of Death           | COPD                                   |
| 5. Effective Dose NULL      | CC:1                                   |
| 6. Effective Dose Ecig      | CC:1 Ecig:0.05 Dual:0.525              |
| Note:                       | Death rates are per million population |

#### Results for Age Groups Combined and Years combined, Population and Number deaths adjusted for Ecig scenario,

| Age Group:All | NULL    | Ecig        | %Drop      |          |        |        | NULL    | Ecig    | Drop    |        |
|---------------|---------|-------------|------------|----------|--------|--------|---------|---------|---------|--------|
| Year          | Number  | Attrib      | Attrib     | Drop     | %Drop  | Attrib | Death   | Attrib  | Attrib  | Drop   |
|               | Deaths  | Deaths      | Deaths     | Deaths   | Deaths | Deaths | Rate    | Rates   | Rates   | Rates  |
| All Comb      | 2265190 | 1015606.587 | 691255.126 | 324351.5 | 14.319 | 31.937 | 650.362 | 293.996 | 198.467 | 95.529 |

#### Results for Age Groups Combined, Population and Number deaths adjusted for Ecig scenario,

| Age Group:All | NULL   | Ecig      | %Drop     |          |        |        | NULL    | Ecig    | Drop    |         |
|---------------|--------|-----------|-----------|----------|--------|--------|---------|---------|---------|---------|
| Year          | Number | Attrib    | Attrib    | Drop     | %Drop  | Attrib | Death   | Attrib  | Attrib  | Drop    |
|               | Deaths | Deaths    | Deaths    | Deaths   | Deaths | Deaths | Rate    | Rates   | Rates   | Rates   |
| 1990          | 33993  | 19262.437 | 19262.437 | 0.000    | 0.000  | 0.000  | 538.865 | 305.353 | 305.353 | 0.000   |
| 1991          | 34092  | 19215.636 | 19193.448 | 22.188   | 0.065  | 0.115  | 531.576 | 299.618 | 299.272 | 0.346   |
| 1992          | 33942  | 19056.189 | 18998.417 | 57.772   | 0.170  | 0.303  | 520.249 | 292.085 | 291.197 | 0.887   |
| 1993          | 35914  | 20095.670 | 19977.640 | 118.029  | 0.329  | 0.587  | 540.648 | 302.526 | 300.742 | 1.784   |
| 1994          | 35077  | 19524.095 | 19343.813 | 180.281  | 0.514  | 0.923  | 518.166 | 288.435 | 285.755 | 2.680   |
| 1995          | 34674  | 19116.002 | 18858.200 | 257.802  | 0.744  | 1.349  | 502.376 | 276.995 | 273.230 | 3.765   |
| 1996          | 34590  | 18975.021 | 18623.365 | 351.656  | 1.017  | 1.853  | 493.330 | 270.675 | 265.612 | 5.063   |
| 1997          | 35279  | 19169.025 | 18702.564 | 466.461  | 1.322  | 2.433  | 494.916 | 268.986 | 262.371 | 6.615   |
| 1998          | 35692  | 19228.937 | 18628.977 | 599.961  | 1.681  | 3.120  | 492.425 | 265.388 | 257.011 | 8.377   |
| 1999          | 38542  | 20589.820 | 19802.477 | 787.343  | 2.043  | 3.824  | 523.284 | 279.689 | 268.858 | 10.831  |
| 2000          | 36316  | 19196.417 | 18306.805 | 889.613  | 2.450  | 4.634  | 485.766 | 256.946 | 244.873 | 12.074  |
| 2001          | 36324  | 19012.731 | 17936.332 | 1076.400 | 2.963  | 5.661  | 479.448 | 251.174 | 236.747 | 14.427  |
| 2002          | 36037  | 18699.357 | 17441.000 | 1258.357 | 3.492  | 6.729  | 470.224 | 244.265 | 227.579 | 16.686  |
| 2003          | 36272  | 18663.550 | 17196.132 | 1467.418 | 4.046  | 7.862  | 468.259 | 241.262 | 221.996 | 19.267  |
| 2004          | 34689  | 17679.164 | 16053.533 | 1625.631 | 4.686  | 9.195  | 442.877 | 226.076 | 204.958 | 21.118  |
| 2005          | 36925  | 18692.832 | 16729.599 | 1963.233 | 5.317  | 10.503 | 465.818 | 236.265 | 211.050 | 25.215  |
| 2006          | 34458  | 17308.564 | 15224.642 | 2083.922 | 6.048  | 12.040 | 430.596 | 216.769 | 190.250 | 26.519  |
| 2007          | 35456  | 17683.181 | 15272.342 | 2410.839 | 6.800  | 13.634 | 438.369 | 219.189 | 188.826 | 30.364  |
| 2008          | 38409  | 19006.374 | 16130.799 | 2875.575 | 7.487  | 15.130 | 469.407 | 232.952 | 197.137 | 35.816  |
| 2009          | 37080  | 18205.573 | 15113.441 | 3092.131 | 8.339  | 16.985 | 447.649 | 220.505 | 182.457 | 38.048  |
| 2010          | 37437  | 18237.758 | 14849.501 | 3388.257 | 9.051  | 18.578 | 446.303 | 218.215 | 177.028 | 41.186  |
| 2011          | 38325  | 18487.916 | 14664.062 | 3823.854 | 9.977  | 20.683 | 452.207 | 219.022 | 173.023 | 45.999  |
| 2012          | 38766  | 18491.158 | 14302.060 | 4189.098 | 10.806 | 22.655 | 452.267 | 216.689 | 166.858 | 49.831  |
| 2013          | 40594  | 19143.452 | 14448.110 | 4695.342 | 11.567 | 24.527 | 468.000 | 221.775 | 166.570 | 55.205  |
| 2014          | 40674  | 18992.005 | 13945.435 | 5046.570 | 12.407 | 26.572 | 463.254 | 217.451 | 158.829 | 58.622  |
| 2015          | 42690  | 19728.885 | 14169.141 | 5559.744 | 13.023 | 28.181 | 546.338 | 254.116 | 181.332 | 72.784  |
| 2016          | 43535  | 19876.724 | 13882.961 | 5993.763 | 13.768 | 30.155 | 551.651 | 253.628 | 175.919 | 77.709  |
| 2017          | 44587  | 20119.790 | 13647.541 | 6472.249 | 14.516 | 32.169 | 559.521 | 254.381 | 171.264 | 83.117  |
| 2018          | 46004  | 20535.123 | 13521.336 | 7013.787 | 15.246 | 34.155 | 571.653 | 257.229 | 168.020 | 89.209  |
| 2019          | 47559  | 21009.029 | 13425.529 | 7583.500 | 15.946 | 36.096 | 584.913 | 260.605 | 165.118 | 95.487  |
| 2020          | 49081  | 21428.512 | 13297.730 | 8130.781 | 16.566 | 37.944 | 688.119 | 303.533 | 186.433 | 117.100 |
| 2021          | 49174  | 21266.697 | 12715.733 | 8550.964 | 17.389 | 40.208 | 684.151 | 299.127 | 176.911 | 122.216 |
| 2022          | 50697  | 21663.568 | 12490.837 | 9172.731 | 18.093 | 42.342 | 699.506 | 302.378 | 172.346 | 130.032 |
| 2023          | 52248  | 22084.131 | 12276.115 | 9808.016 | 18.772 | 44.412 | 714.608 | 305.748 | 167.904 | 137.844 |
| 2024          | 53747  | 22418.456 | 12041.210 | 10377.25 | 19.308 | 46.289 | 728.560 | 307.804 | 163.223 | 144.581 |
| 2025          | 54865  | 22614.834 | 11741.517 | 10873.32 | 19.818 | 48.080 | 863.634 | 361.411 | 184.825 | 176.587 |
| 2026          | 55431  | 22571.522 | 11261.725 | 11309.80 | 20.404 | 50.106 | 868.322 | 359.241 | 176.415 | 182.826 |
| 2027          | 56435  | 22774.416 | 10900.327 | 11874.09 | 21.040 | 52.138 | 879.422 | 360.827 | 169.858 | 190.968 |
| 2028          | 57400  | 22915.561 | 10486.354 | 12429.21 | 21.654 | 54.239 | 889.298 | 361.228 | 162.465 | 198.763 |
| 2029          | 58350  | 22992.027 | 10068.218 | 12923.81 | 22.149 | 56.210 | 898.233 | 360.371 | 154.988 | 205.383 |
| 2030          | 58659  | 22895.360 | 9641.788  | 13253.57 | 22.594 | 57.888 | 1075.79 | 428.760 | 176.828 | 251.931 |
| 2031          | 59089  | 22715.871 | 9189.024  | 13526.85 | 22.892 | 59.548 | 1079.95 | 424.293 | 167.947 | 256.346 |
| 2032          | 59834  | 22759.207 | 8784.520  | 13974.69 | 23.356 | 61.402 | 1088.98 | 423.652 | 159.878 | 263.774 |
| 2033          | 60556  | 22786.258 | 8408.131  | 14378.13 | 23.743 | 63.100 | 1096.65 | 422.387 | 152.269 | 270.119 |
| 2034          | 61220  | 22806.106 | 8029.184  | 14776.92 | 24.137 | 64.794 | 1102.48 | 420.721 | 144.592 | 276.128 |
| 2035          | 60343  | 22262.998 | 7582.398  | 14680.60 | 24.329 | 65.942 | 1339.86 | 507.973 | 168.360 | 339.613 |
| 2036          | 58266  | 21140.051 | 6757.424  | 14382.63 | 24.684 | 68.035 | 1292.28 | 482.234 | 149.873 | 332.361 |
| 2037          | 58457  | 21011.845 | 6354.325  | 14657.52 | 25.074 | 69.758 | 1294.02 | 478.783 | 140.662 | 338.121 |
| 2038          | 58625  | 20787.483 | 5956.583  | 14830.90 | 25.298 | 71.345 | 1293.97 | 472.681 | 131.475 | 341.206 |
| 2039          | 58782  | 20709.267 | 5620.343  | 15088.92 | 25.669 | 72.861 | 1292.22 | 469.372 | 123.552 | 345.820 |

## Results for PHIM for Run 2 (Sensitivity\_Analysis\_3.RTF)

---

### Control File Details for Run: 2

| Variable Parameter                                       | Value                  |
|----------------------------------------------------------|------------------------|
| 1. Name for Reference Scenario                           | NULL                   |
| 2. Name for Test Scenario                                | Ecig                   |
| 3. Name for Product 1                                    | CC                     |
| 4. Name for Product 2                                    | Ecig                   |
| 5. Name for Product 3                                    | -                      |
| 6. Name for Product 4                                    | Dual                   |
| 7. Country                                               | US (United States)     |
| 8. Sex                                                   | F (Females)            |
| 9. Year of start of process                              | 1990                   |
| 10. Number of months of follow-up                        | 600                    |
| 11. Follow-up interval length (in months)                | 12                     |
| 12. Lower age for risk estimation                        | 10                     |
| 13. Upper age for risk estimation                        | 79                     |
| 14. The effective dose for Product 1 (F1) - Ref          | 1                      |
| 15. The effective dose for Product 2 (F2) - Ref          | -                      |
| 16. The effective dose for Product 3 (F3) - Ref          | -                      |
| 17. The effective dose for Product 4 (F4) - Ref          | -                      |
| 18. The effective dose for Product 1 (F1) - Test         | 1                      |
| 19. The effective dose for Product 2 (F2) - Test         | 0.05                   |
| 20. The effective dose for Product 3 (F3) - Test         | -                      |
| 21. The effective dose for Product 4 (F4) - Test         | FROMF2                 |
| 22. Number in population to be simulated                 | 100000                 |
| 23. Number of MC simulations                             | 1                      |
| 24. The random number seed for the first simulation      | 15975263               |
| 25. Source for the population file (POP)                 | UN4                    |
| 26. Source for the socioeconomic prevalence file (SEP)   | -                      |
| 27. Source for the current smoking prevalence file (CSP) | ISS3                   |
| 28. Source for the former smoking prevalence file (FSP)  | ISS3                   |
| 29. Source for the quit-time distribution file (QTD)     | NHIS2006               |
| 30. Source for the death file (MORT)                     | APR-20                 |
| 31. Source for the relative risk file (RR)               | PNLEST                 |
| 32. Source for the half-life file (H)                    | PNLEST                 |
| 33. Assumption Set for TTP Factor Reference              | F1                     |
| 34. Assumption Set for TTP Factor Test                   | F1                     |
| 35. Assumption Set for TTP Reference                     | ISS3                   |
| 36. Assumption Set for TTP Test                          | S3A                    |
| 37. Assumption Set for TP for socioeconomic group        | -                      |
| 38. Source for Output Choice file (OUTC)                 | BASIC                  |
| 39. Output for DTP P1                                    | N                      |
| 40. Output for DTP P2                                    | N                      |
| 41. Output for Main P Component                          | Y                      |
| 42. Output for DTP E1                                    | N                      |
| 43. Output for DTP E2                                    | N                      |
| 44. Output for DTP E3                                    | N                      |
| 45. Output for Main E Component                          | Y                      |
| 46. Output file name                                     | Sensitivity_Analysis_3 |
| 47. Run number for P-Component                           | -                      |
| 48. Results file for E-Component                         | -                      |
| 49. Components required                                  | PE                     |
| 50. Results folder for P to be used in E-Component       | -                      |
| 51. Fixed age of starting product use                    | 16                     |
| 52. Output absolute risk file?                           | N                      |

## Results for PHIM for Run 2 (Sensitivity\_Analysis\_3.RTF)

\*\*\*\*\*

TTP values for Run: 2, Scenario: NULL

| Variable Parameter | Value               |
|--------------------|---------------------|
| 1. Country         | US (United States)  |
| 2. Sex             | F (Females)         |
| 3. Assumption Set  | ISS3                |
| Note:              | Period is in Months |

| Age   | Period  | Initiation  | Cessation    | Re-initiation |
|-------|---------|-------------|--------------|---------------|
|       |         | Never<br>CC | CC<br>Former | Former<br>CC  |
| 10-14 | 1-12    | 0.003758    | 0.008742     | 0.000000      |
| 15-19 | 1-12    | 0.003469    | 0.002515     | 0.000000      |
| 20-24 | 1-12    | 0.000276    | 0.000761     | 0.000000      |
| 25-29 | 1-12    | 0.000137    | 0.001375     | 0.000000      |
| 30-34 | 1-12    | 0.000069    | 0.001149     | 0.000000      |
| 35-39 | 1-12    | 0.000000    | 0.000991     | 0.000000      |
| 40-44 | 1-12    | 0.000000    | 0.000833     | 0.000000      |
| 45-49 | 1-12    | 0.000000    | 0.001723     | 0.000000      |
| 50-54 | 1-12    | 0.000000    | 0.002336     | 0.000000      |
| 55-59 | 1-12    | 0.000000    | 0.002233     | 0.000000      |
| 60-64 | 1-12    | 0.000000    | 0.004634     | 0.000000      |
| 65-69 | 1-12    | 0.000000    | 0.003505     | 0.000000      |
| 70-74 | 1-12    | 0.000000    | 0.004329     | 0.000000      |
| 75-79 | 1-12    | 0.000000    | 0.004329     | 0.000000      |
| 10-14 | 13-72   | 0.004794    | 0.008742     | 0.000000      |
| 15-19 | 13-72   | 0.004527    | 0.004082     | 0.000000      |
| 20-24 | 13-72   | 0.000105    | 0.001261     | 0.000000      |
| 25-29 | 13-72   | 0.000053    | 0.000952     | 0.000000      |
| 30-34 | 13-72   | 0.000026    | 0.000733     | 0.000000      |
| 35-39 | 13-72   | 0.000000    | 0.000753     | 0.000000      |
| 40-44 | 13-72   | 0.000000    | 0.001535     | 0.000000      |
| 45-49 | 13-72   | 0.000000    | 0.002998     | 0.000000      |
| 50-54 | 13-72   | 0.000000    | 0.003159     | 0.000000      |
| 55-59 | 13-72   | 0.000000    | 0.002965     | 0.000000      |
| 60-64 | 13-72   | 0.000000    | 0.003633     | 0.000000      |
| 65-69 | 13-72   | 0.000000    | 0.004522     | 0.000000      |
| 70-74 | 13-72   | 0.000000    | 0.005208     | 0.000000      |
| 75-79 | 13-72   | 0.000000    | 0.005208     | 0.000000      |
| 10-14 | 73-132  | 0.003969    | 0.008742     | 0.000000      |
| 15-19 | 73-132  | 0.003056    | 0.003373     | 0.000000      |
| 20-24 | 73-132  | 0.001459    | 0.003881     | 0.000000      |
| 25-29 | 73-132  | 0.000714    | 0.001953     | 0.000000      |
| 30-34 | 73-132  | 0.000111    | 0.001338     | 0.000000      |
| 35-39 | 73-132  | 0.000000    | 0.001507     | 0.000000      |
| 40-44 | 73-132  | 0.000000    | 0.002080     | 0.000000      |
| 45-49 | 73-132  | 0.000000    | 0.003809     | 0.000000      |
| 50-54 | 73-132  | 0.000000    | 0.004871     | 0.000000      |
| 55-59 | 73-132  | 0.000000    | 0.004560     | 0.000000      |
| 60-64 | 73-132  | 0.000000    | 0.007192     | 0.000000      |
| 65-69 | 73-132  | 0.000000    | 0.007033     | 0.000000      |
| 70-74 | 73-132  | 0.000000    | 0.008206     | 0.000000      |
| 75-79 | 73-132  | 0.000000    | 0.008206     | 0.000000      |
| 10-14 | 133-192 | 0.002861    | 0.008742     | 0.000000      |
| 15-19 | 133-192 | 0.002594    | 0.003996     | 0.000000      |
| 20-24 | 133-192 | 0.001247    | 0.002805     | 0.000000      |
| 25-29 | 133-192 | 0.000289    | 0.001574     | 0.000000      |
| 30-34 | 133-192 | 0.000132    | 0.001293     | 0.000000      |
| 35-39 | 133-192 | 0.000000    | 0.001219     | 0.000000      |
| 40-44 | 133-192 | 0.000000    | 0.001657     | 0.000000      |
| 45-49 | 133-192 | 0.000000    | 0.001995     | 0.000000      |
| 50-54 | 133-192 | 0.000000    | 0.002154     | 0.000000      |
| 55-59 | 133-192 | 0.000000    | 0.002072     | 0.000000      |
| 60-64 | 133-192 | 0.000000    | 0.005049     | 0.000000      |
| 65-69 | 133-192 | 0.000000    | 0.003680     | 0.000000      |
| 70-74 | 133-192 | 0.000000    | 0.006144     | 0.000000      |
| 75-79 | 133-192 | 0.000000    | 0.006144     | 0.000000      |
| 10-14 | 193-252 | 0.001859    | 0.008742     | 0.000000      |
| 15-19 | 193-252 | 0.002232    | 0.005770     | 0.000000      |
| 20-24 | 193-252 | 0.001079    | 0.003262     | 0.000000      |
| 25-29 | 193-252 | 0.000531    | 0.002002     | 0.000000      |
| 30-34 | 193-252 | 0.000263    | 0.003240     | 0.000000      |
| 35-39 | 193-252 | 0.000000    | 0.001771     | 0.000000      |
| 40-44 | 193-252 | 0.000000    | 0.002173     | 0.000000      |
| 45-49 | 193-252 | 0.000000    | 0.002075     | 0.000000      |
| 50-54 | 193-252 | 0.000000    | 0.003431     | 0.000000      |

### Results for PHIM for Run 2 (Sensitivity\_Analysis\_3.RTF)

|       |         |          |          |          |
|-------|---------|----------|----------|----------|
| 55-59 | 193-252 | 0.000000 | 0.002906 | 0.000000 |
| 60-64 | 193-252 | 0.000000 | 0.007139 | 0.000000 |
| 65-69 | 193-252 | 0.000000 | 0.004963 | 0.000000 |
| 70-74 | 193-252 | 0.000000 | 0.006269 | 0.000000 |
| 75-79 | 193-252 | 0.000000 | 0.006269 | 0.000000 |
| 10-14 | 253+    | 0.000931 | 0.008742 | 0.000000 |
| 15-19 | 253+    | 0.001798 | 0.009440 | 0.000000 |
| 20-24 | 253+    | 0.000023 | 0.002831 | 0.000000 |
| 25-29 | 253+    | 0.000073 | 0.002655 | 0.000000 |
| 30-34 | 253+    | 0.000037 | 0.004614 | 0.000000 |
| 35-39 | 253+    | 0.000000 | 0.002607 | 0.000000 |
| 40-44 | 253+    | 0.000000 | 0.003115 | 0.000000 |
| 45-49 | 253+    | 0.000000 | 0.002132 | 0.000000 |
| 50-54 | 253+    | 0.000000 | 0.003497 | 0.000000 |
| 55-59 | 253+    | 0.000000 | 0.002942 | 0.000000 |
| 60-64 | 253+    | 0.000000 | 0.005376 | 0.000000 |
| 65-69 | 253+    | 0.000000 | 0.001789 | 0.000000 |
| 70-74 | 253+    | 0.000000 | 0.004077 | 0.000000 |
| 75-79 | 253+    | 0.000000 | 0.004077 | 0.000000 |



## Results for PHIM for Run 2 (Sensitivity\_Analysis\_3.RTF)

\*\*\*\*\*

TTP values for Run: 2, Scenario: Ecig

**Variable Parameter**

1. Country
  2. Sex
  3. Assumption Set
- Note:

**Value**

US (United States)  
 F (Females)  
 S3A  
 Period is in Months

| Age   | Period  | Initiation  |               |               | Cessation    |                |                | Re-initiation |                |                |
|-------|---------|-------------|---------------|---------------|--------------|----------------|----------------|---------------|----------------|----------------|
|       |         | Never<br>CC | Never<br>Ecig | Never<br>Dual | CC<br>Former | Ecig<br>Former | Dual<br>Former | Former<br>CC  | Former<br>Ecig | Former<br>Dual |
| 10-14 | 1-12    | 0.001879    | 0.001879      | 0.000000      | 0.008742     | 0.004371       | 0.000000       | 0.000000      | 0.000000       | 0.000000       |
| 15-19 | 1-12    | 0.001735    | 0.001735      | 0.000000      | 0.002515     | 0.001258       | 0.000000       | 0.000000      | 0.000000       | 0.000000       |
| 20-24 | 1-12    | 0.000138    | 0.000138      | 0.000000      | 0.000761     | 0.000381       | 0.000000       | 0.000000      | 0.000000       | 0.000000       |
| 25-29 | 1-12    | 0.000069    | 0.000069      | 0.000000      | 0.001376     | 0.000688       | 0.000000       | 0.000000      | 0.000000       | 0.000000       |
| 30-34 | 1-12    | 0.000034    | 0.000034      | 0.000000      | 0.001149     | 0.000575       | 0.000000       | 0.000000      | 0.000000       | 0.000000       |
| 35-39 | 1-12    | 0.000000    | 0.000000      | 0.000000      | 0.000991     | 0.000496       | 0.000000       | 0.000000      | 0.000000       | 0.000000       |
| 40-44 | 1-12    | 0.000000    | 0.000000      | 0.000000      | 0.000833     | 0.000417       | 0.000000       | 0.000000      | 0.000000       | 0.000000       |
| 45-49 | 1-12    | 0.000000    | 0.000000      | 0.000000      | 0.001723     | 0.000862       | 0.000000       | 0.000000      | 0.000000       | 0.000000       |
| 50-54 | 1-12    | 0.000000    | 0.000000      | 0.000000      | 0.002336     | 0.001168       | 0.000000       | 0.000000      | 0.000000       | 0.000000       |
| 55-59 | 1-12    | 0.000000    | 0.000000      | 0.000000      | 0.002233     | 0.001116       | 0.000000       | 0.000000      | 0.000000       | 0.000000       |
| 60-64 | 1-12    | 0.000000    | 0.000000      | 0.000000      | 0.004635     | 0.002317       | 0.000000       | 0.000000      | 0.000000       | 0.000000       |
| 65-69 | 1-12    | 0.000000    | 0.000000      | 0.000000      | 0.003505     | 0.001752       | 0.000000       | 0.000000      | 0.000000       | 0.000000       |
| 70-74 | 1-12    | 0.000000    | 0.000000      | 0.000000      | 0.004329     | 0.002164       | 0.000000       | 0.000000      | 0.000000       | 0.000000       |
| 75-79 | 1-12    | 0.000000    | 0.000000      | 0.000000      | 0.004329     | 0.002164       | 0.000000       | 0.000000      | 0.000000       | 0.000000       |
| 10-14 | 13-72   | 0.001918    | 0.002877      | 0.000000      | 0.008742     | 0.004371       | 0.000000       | 0.000000      | 0.000000       | 0.000000       |
| 15-19 | 13-72   | 0.001811    | 0.002716      | 0.000000      | 0.004083     | 0.002041       | 0.000000       | 0.000000      | 0.000000       | 0.000000       |
| 20-24 | 13-72   | 0.000042    | 0.000063      | 0.000000      | 0.001261     | 0.000631       | 0.000000       | 0.000000      | 0.000000       | 0.000000       |
| 25-29 | 13-72   | 0.000021    | 0.000032      | 0.000000      | 0.000952     | 0.000476       | 0.000000       | 0.000000      | 0.000000       | 0.000000       |
| 30-34 | 13-72   | 0.000011    | 0.000016      | 0.000000      | 0.000733     | 0.000367       | 0.000000       | 0.000000      | 0.000000       | 0.000000       |
| 35-39 | 13-72   | 0.000000    | 0.000000      | 0.000000      | 0.000754     | 0.000377       | 0.000000       | 0.000000      | 0.000000       | 0.000000       |
| 40-44 | 13-72   | 0.000000    | 0.000000      | 0.000000      | 0.001535     | 0.000767       | 0.000000       | 0.000000      | 0.000000       | 0.000000       |
| 45-49 | 13-72   | 0.000000    | 0.000000      | 0.000000      | 0.002998     | 0.001499       | 0.000000       | 0.000000      | 0.000000       | 0.000000       |
| 50-54 | 13-72   | 0.000000    | 0.000000      | 0.000000      | 0.003160     | 0.001580       | 0.000000       | 0.000000      | 0.000000       | 0.000000       |
| 55-59 | 13-72   | 0.000000    | 0.000000      | 0.000000      | 0.002965     | 0.001482       | 0.000000       | 0.000000      | 0.000000       | 0.000000       |
| 60-64 | 13-72   | 0.000000    | 0.000000      | 0.000000      | 0.003633     | 0.001816       | 0.000000       | 0.000000      | 0.000000       | 0.000000       |
| 65-69 | 13-72   | 0.000000    | 0.000000      | 0.000000      | 0.004522     | 0.002261       | 0.000000       | 0.000000      | 0.000000       | 0.000000       |
| 70-74 | 13-72   | 0.000000    | 0.000000      | 0.000000      | 0.005208     | 0.002604       | 0.000000       | 0.000000      | 0.000000       | 0.000000       |
| 75-79 | 13-72   | 0.000000    | 0.000000      | 0.000000      | 0.005208     | 0.002604       | 0.000000       | 0.000000      | 0.000000       | 0.000000       |
| 10-14 | 73-132  | 0.000794    | 0.003175      | 0.000000      | 0.008742     | 0.004371       | 0.000000       | 0.000000      | 0.000000       | 0.000000       |
| 15-19 | 73-132  | 0.000611    | 0.002445      | 0.000000      | 0.003373     | 0.001686       | 0.000000       | 0.000000      | 0.000000       | 0.000000       |
| 20-24 | 73-132  | 0.000292    | 0.001167      | 0.000000      | 0.003881     | 0.001940       | 0.000000       | 0.000000      | 0.000000       | 0.000000       |
| 25-29 | 73-132  | 0.000143    | 0.000571      | 0.000000      | 0.001954     | 0.000977       | 0.000000       | 0.000000      | 0.000000       | 0.000000       |
| 30-34 | 73-132  | 0.000022    | 0.000089      | 0.000000      | 0.001338     | 0.000669       | 0.000000       | 0.000000      | 0.000000       | 0.000000       |
| 35-39 | 73-132  | 0.000000    | 0.000000      | 0.000000      | 0.001507     | 0.000753       | 0.000000       | 0.000000      | 0.000000       | 0.000000       |
| 40-44 | 73-132  | 0.000000    | 0.000000      | 0.000000      | 0.002080     | 0.001040       | 0.000000       | 0.000000      | 0.000000       | 0.000000       |
| 45-49 | 73-132  | 0.000000    | 0.000000      | 0.000000      | 0.003809     | 0.001904       | 0.000000       | 0.000000      | 0.000000       | 0.000000       |
| 50-54 | 73-132  | 0.000000    | 0.000000      | 0.000000      | 0.004871     | 0.002436       | 0.000000       | 0.000000      | 0.000000       | 0.000000       |
| 55-59 | 73-132  | 0.000000    | 0.000000      | 0.000000      | 0.004560     | 0.002280       | 0.000000       | 0.000000      | 0.000000       | 0.000000       |
| 60-64 | 73-132  | 0.000000    | 0.000000      | 0.000000      | 0.007192     | 0.003596       | 0.000000       | 0.000000      | 0.000000       | 0.000000       |
| 65-69 | 73-132  | 0.000000    | 0.000000      | 0.000000      | 0.007033     | 0.003517       | 0.000000       | 0.000000      | 0.000000       | 0.000000       |
| 70-74 | 73-132  | 0.000000    | 0.000000      | 0.000000      | 0.008206     | 0.004103       | 0.000000       | 0.000000      | 0.000000       | 0.000000       |
| 75-79 | 73-132  | 0.000000    | 0.000000      | 0.000000      | 0.008206     | 0.004103       | 0.000000       | 0.000000      | 0.000000       | 0.000000       |
| 10-14 | 133-192 | 0.000143    | 0.002718      | 0.000000      | 0.008742     | 0.004371       | 0.000000       | 0.000000      | 0.000000       | 0.000000       |
| 15-19 | 133-192 | 0.000130    | 0.002465      | 0.000000      | 0.003996     | 0.001998       | 0.000000       | 0.000000      | 0.000000       | 0.000000       |
| 20-24 | 133-192 | 0.000062    | 0.001185      | 0.000000      | 0.002805     | 0.001403       | 0.000000       | 0.000000      | 0.000000       | 0.000000       |
| 25-29 | 133-192 | 0.000015    | 0.000275      | 0.000000      | 0.001574     | 0.000787       | 0.000000       | 0.000000      | 0.000000       | 0.000000       |
| 30-34 | 133-192 | 0.000007    | 0.000125      | 0.000000      | 0.001293     | 0.000646       | 0.000000       | 0.000000      | 0.000000       | 0.000000       |
| 35-39 | 133-192 | 0.000000    | 0.000000      | 0.000000      | 0.001219     | 0.000610       | 0.000000       | 0.000000      | 0.000000       | 0.000000       |
| 40-44 | 133-192 | 0.000000    | 0.000000      | 0.000000      | 0.001657     | 0.000828       | 0.000000       | 0.000000      | 0.000000       | 0.000000       |
| 45-49 | 133-192 | 0.000000    | 0.000000      | 0.000000      | 0.001995     | 0.000997       | 0.000000       | 0.000000      | 0.000000       | 0.000000       |
| 50-54 | 133-192 | 0.000000    | 0.000000      | 0.000000      | 0.002154     | 0.001077       | 0.000000       | 0.000000      | 0.000000       | 0.000000       |
| 55-59 | 133-192 | 0.000000    | 0.000000      | 0.000000      | 0.002072     | 0.001036       | 0.000000       | 0.000000      | 0.000000       | 0.000000       |
| 60-64 | 133-192 | 0.000000    | 0.000000      | 0.000000      | 0.005049     | 0.002524       | 0.000000       | 0.000000      | 0.000000       | 0.000000       |
| 65-69 | 133-192 | 0.000000    | 0.000000      | 0.000000      | 0.003681     | 0.001840       | 0.000000       | 0.000000      | 0.000000       | 0.000000       |
| 70-74 | 133-192 | 0.000000    | 0.000000      | 0.000000      | 0.006144     | 0.003072       | 0.000000       | 0.000000      | 0.000000       | 0.000000       |
| 75-79 | 133-192 | 0.000000    | 0.000000      | 0.000000      | 0.006144     | 0.003072       | 0.000000       | 0.000000      | 0.000000       | 0.000000       |
| 10-14 | 193-252 | 0.000093    | 0.001766      | 0.000000      | 0.008742     | 0.004371       | 0.000000       | 0.000000      | 0.000000       | 0.000000       |
| 15-19 | 193-252 | 0.000112    | 0.002120      | 0.000000      | 0.005770     | 0.002885       | 0.000000       | 0.000000      | 0.000000       | 0.000000       |
| 20-24 | 193-252 | 0.000054    | 0.001025      | 0.000000      | 0.003262     | 0.001631       | 0.000000       | 0.000000      | 0.000000       | 0.000000       |
| 25-29 | 193-252 | 0.000027    | 0.000504      | 0.000000      | 0.002002     | 0.001001       | 0.000000       | 0.000000      | 0.000000       | 0.000000       |
| 30-34 | 193-252 | 0.000013    | 0.000250      | 0.000000      | 0.003241     | 0.001620       | 0.000000       | 0.000000      | 0.000000       | 0.000000       |
| 35-39 | 193-252 | 0.000000    | 0.000000      | 0.000000      | 0.001771     | 0.000885       | 0.000000       | 0.000000      | 0.000000       | 0.000000       |
| 40-44 | 193-252 | 0.000000    | 0.000000      | 0.000000      | 0.002173     | 0.001087       | 0.000000       | 0.000000      | 0.000000       | 0.000000       |
| 45-49 | 193-252 | 0.000000    | 0.000000      | 0.000000      | 0.002075     | 0.001037       | 0.000000       | 0.000000      | 0.000000       | 0.000000       |
| 50-54 | 193-252 | 0.000000    | 0.000000      | 0.000000      | 0.003432     | 0.001716       | 0.000000       | 0.000000      | 0.000000       | 0.000000       |

### Results for PHIM for Run 2 (Sensitivity\_Analysis\_3.RTF)

|       |         |          |          |          |          |          |          |          |          |          |
|-------|---------|----------|----------|----------|----------|----------|----------|----------|----------|----------|
| 55-59 | 193-252 | 0.000000 | 0.000000 | 0.000000 | 0.002906 | 0.001453 | 0.000000 | 0.000000 | 0.000000 | 0.000000 |
| 60-64 | 193-252 | 0.000000 | 0.000000 | 0.000000 | 0.007139 | 0.003569 | 0.000000 | 0.000000 | 0.000000 | 0.000000 |
| 65-69 | 193-252 | 0.000000 | 0.000000 | 0.000000 | 0.004963 | 0.002481 | 0.000000 | 0.000000 | 0.000000 | 0.000000 |
| 70-74 | 193-252 | 0.000000 | 0.000000 | 0.000000 | 0.006269 | 0.003134 | 0.000000 | 0.000000 | 0.000000 | 0.000000 |
| 75-79 | 193-252 | 0.000000 | 0.000000 | 0.000000 | 0.006269 | 0.003134 | 0.000000 | 0.000000 | 0.000000 | 0.000000 |
| 10-14 | 253+    | 0.000047 | 0.000884 | 0.000000 | 0.008742 | 0.004371 | 0.000000 | 0.000000 | 0.000000 | 0.000000 |
| 15-19 | 253+    | 0.000090 | 0.001708 | 0.000000 | 0.009440 | 0.004720 | 0.000000 | 0.000000 | 0.000000 | 0.000000 |
| 20-24 | 253+    | 0.000001 | 0.000022 | 0.000000 | 0.002831 | 0.001415 | 0.000000 | 0.000000 | 0.000000 | 0.000000 |
| 25-29 | 253+    | 0.000004 | 0.000070 | 0.000000 | 0.002656 | 0.001328 | 0.000000 | 0.000000 | 0.000000 | 0.000000 |
| 30-34 | 253+    | 0.000002 | 0.000035 | 0.000000 | 0.004614 | 0.002307 | 0.000000 | 0.000000 | 0.000000 | 0.000000 |
| 35-39 | 253+    | 0.000000 | 0.000000 | 0.000000 | 0.002608 | 0.001304 | 0.000000 | 0.000000 | 0.000000 | 0.000000 |
| 40-44 | 253+    | 0.000000 | 0.000000 | 0.000000 | 0.003115 | 0.001558 | 0.000000 | 0.000000 | 0.000000 | 0.000000 |
| 45-49 | 253+    | 0.000000 | 0.000000 | 0.000000 | 0.002132 | 0.001066 | 0.000000 | 0.000000 | 0.000000 | 0.000000 |
| 50-54 | 253+    | 0.000000 | 0.000000 | 0.000000 | 0.003497 | 0.001749 | 0.000000 | 0.000000 | 0.000000 | 0.000000 |
| 55-59 | 253+    | 0.000000 | 0.000000 | 0.000000 | 0.002942 | 0.001471 | 0.000000 | 0.000000 | 0.000000 | 0.000000 |
| 60-64 | 253+    | 0.000000 | 0.000000 | 0.000000 | 0.005376 | 0.002688 | 0.000000 | 0.000000 | 0.000000 | 0.000000 |
| 65-69 | 253+    | 0.000000 | 0.000000 | 0.000000 | 0.001789 | 0.000894 | 0.000000 | 0.000000 | 0.000000 | 0.000000 |
| 70-74 | 253+    | 0.000000 | 0.000000 | 0.000000 | 0.004077 | 0.002039 | 0.000000 | 0.000000 | 0.000000 | 0.000000 |
| 75-79 | 253+    | 0.000000 | 0.000000 | 0.000000 | 0.004077 | 0.002039 | 0.000000 | 0.000000 | 0.000000 | 0.000000 |



### Results for PHIM for Run 2 (Sensitivity\_Analysis\_3.RTF)

|       |      |          |          |          |          |          |          |
|-------|------|----------|----------|----------|----------|----------|----------|
| 25-29 | 253+ | 0.014127 | 0.000000 | 0.000000 | 0.000000 | 0.000000 | 0.000000 |
| 30-34 | 253+ | 0.013889 | 0.000000 | 0.000000 | 0.000000 | 0.000000 | 0.000000 |
| 35-39 | 253+ | 0.012929 | 0.000000 | 0.000000 | 0.000000 | 0.000000 | 0.000000 |
| 40-44 | 253+ | 0.012785 | 0.000000 | 0.000000 | 0.000000 | 0.000000 | 0.000000 |
| 45-49 | 253+ | 0.012295 | 0.000000 | 0.000000 | 0.000000 | 0.000000 | 0.000000 |
| 50-54 | 253+ | 0.011536 | 0.000000 | 0.000000 | 0.000000 | 0.000000 | 0.000000 |
| 55-59 | 253+ | 0.008988 | 0.000000 | 0.000000 | 0.000000 | 0.000000 | 0.000000 |
| 60-64 | 253+ | 0.008098 | 0.000000 | 0.000000 | 0.000000 | 0.000000 | 0.000000 |
| 65-69 | 253+ | 0.006274 | 0.000000 | 0.000000 | 0.000000 | 0.000000 | 0.000000 |
| 70-74 | 253+ | 0.004141 | 0.000000 | 0.000000 | 0.000000 | 0.000000 | 0.000000 |
| 75-79 | 253+ | 0.004141 | 0.000000 | 0.000000 | 0.000000 | 0.000000 | 0.000000 |

## Results for PHIM for Run 2 (Sensitivity\_Analysis\_3.RTF)

\*\*\*\*\*

### Main Output for the Tobacco History for Run: 2, Simulation: 1, Scenario: NULL

| Variable Parameter          | Value              |
|-----------------------------|--------------------|
| 1. Country                  | US (United States) |
| 2. Sex                      | F (Females)        |
| 3. Year of start of process | 1990               |

Year of Follow-up: 2040, Age Group: All Ages  
 Period    Age Group    Smoking Group            N            %

|    |          |           |       |       |
|----|----------|-----------|-------|-------|
| 50 | All Ages | Never Any | 20670 | 58.80 |
| 50 | All Ages | CC        | 2462  | 7.00  |
| 50 | All Ages | Former    | 12019 | 34.19 |

Year of Follow-up: 2040, Age Group: 18-19  
 Period    Age Group    Smoking Group            N            %

|    |       |           |   |   |
|----|-------|-----------|---|---|
| 50 | 18-19 | Never Any | 0 | . |
| 50 | 18-19 | CC        | 0 | . |
| 50 | 18-19 | Former    | 0 | . |

Year of Follow-up: 2040, Age Group: 20-24  
 Period    Age Group    Smoking Group            N            %

|    |       |           |   |   |
|----|-------|-----------|---|---|
| 50 | 20-24 | Never Any | 0 | . |
| 50 | 20-24 | CC        | 0 | . |
| 50 | 20-24 | Former    | 0 | . |

Year of Follow-up: 2040, Age Group: 25-29  
 Period    Age Group    Smoking Group            N            %

|    |       |           |   |   |
|----|-------|-----------|---|---|
| 50 | 25-29 | Never Any | 0 | . |
| 50 | 25-29 | CC        | 0 | . |
| 50 | 25-29 | Former    | 0 | . |

Year of Follow-up: 2040, Age Group: 30-34  
 Period    Age Group    Smoking Group            N            %

|    |       |           |   |   |
|----|-------|-----------|---|---|
| 50 | 30-34 | Never Any | 0 | . |
| 50 | 30-34 | CC        | 0 | . |
| 50 | 30-34 | Former    | 0 | . |

Year of Follow-up: 2040, Age Group: 35-39  
 Period    Age Group    Smoking Group            N            %

|    |       |           |   |   |
|----|-------|-----------|---|---|
| 50 | 35-39 | Never Any | 0 | . |
| 50 | 35-39 | CC        | 0 | . |
| 50 | 35-39 | Former    | 0 | . |

Year of Follow-up: 2040, Age Group: 40-44  
 Period    Age Group    Smoking Group            N            %

|    |       |           |   |   |
|----|-------|-----------|---|---|
| 50 | 40-44 | Never Any | 0 | . |
| 50 | 40-44 | CC        | 0 | . |
| 50 | 40-44 | Former    | 0 | . |

Year of Follow-up: 2040, Age Group: 45-49  
 Period    Age Group    Smoking Group            N            %

|    |       |           |   |   |
|----|-------|-----------|---|---|
| 50 | 45-49 | Never Any | 0 | . |
| 50 | 45-49 | CC        | 0 | . |
| 50 | 45-49 | Former    | 0 | . |

Year of Follow-up: 2040, Age Group: 50-54  
 Period    Age Group    Smoking Group            N            %

|    |       |           |   |   |
|----|-------|-----------|---|---|
| 50 | 50-54 | Never Any | 0 | . |
| 50 | 50-54 | CC        | 0 | . |
| 50 | 50-54 | Former    | 0 | . |

Year of Follow-up: 2040, Age Group: 55-59  
 Period    Age Group    Smoking Group            N            %

|    |       |           |   |   |
|----|-------|-----------|---|---|
| 50 | 55-59 | Never Any | 0 | . |
| 50 | 55-59 | CC        | 0 | . |
| 50 | 55-59 | Former    | 0 | . |

Year of Follow-up: 2040, Age Group: 60-64  
 Period    Age Group    Smoking Group            N            %

### Results for PHIM for Run 2 (Sensitivity\_Analysis\_3.RTF)

|                                           |           |               |      |       |
|-------------------------------------------|-----------|---------------|------|-------|
| 50                                        | 60-64     | Never Any     | 4803 | 60.57 |
| 50                                        | 60-64     | CC            | 621  | 7.83  |
| 50                                        | 60-64     | Former        | 2506 | 31.60 |
| Year of Follow-up: 2040, Age Group: 65-69 |           |               |      |       |
| Period                                    | Age Group | Smoking Group | N    | %     |
| 50                                        | 65-69     | Never Any     | 5407 | 64.75 |
| 50                                        | 65-69     | CC            | 538  | 6.44  |
| 50                                        | 65-69     | Former        | 2405 | 28.80 |
| Year of Follow-up: 2040, Age Group: 70-74 |           |               |      |       |
| Period                                    | Age Group | Smoking Group | N    | %     |
| 50                                        | 70-74     | Never Any     | 5181 | 58.92 |
| 50                                        | 70-74     | CC            | 605  | 6.88  |
| 50                                        | 70-74     | Former        | 3007 | 34.20 |
| Year of Follow-up: 2040, Age Group: 75-79 |           |               |      |       |
| Period                                    | Age Group | Smoking Group | N    | %     |
| 50                                        | 75-79     | Never Any     | 5279 | 52.38 |
| 50                                        | 75-79     | CC            | 698  | 6.93  |
| 50                                        | 75-79     | Former        | 4101 | 40.69 |

## Results for PHIM for Run 2 (Sensitivity\_Analysis\_3.RTF)

\*\*\*\*\*

### Main Output for the Tobacco History for Run: 2, Simulation: 1, Scenario: Ecig

| Variable Parameter                           |           | Value              |       |       |               |             |               |                |              |
|----------------------------------------------|-----------|--------------------|-------|-------|---------------|-------------|---------------|----------------|--------------|
| 1. Country                                   |           | US (United States) |       |       |               |             |               |                |              |
| 2. Sex                                       |           | F (Females)        |       |       |               |             |               |                |              |
| 3. Year of start of process                  |           | 1990               |       |       |               |             |               |                |              |
| Year of Follow-up: 1990, Age Group: All Ages |           |                    |       |       |               |             |               |                |              |
| Period                                       | Age Group | Smoking Group      | N     | %     | Ever Quit (N) | Ever Quit % | Mean Yrs Quit | Short Term (n) | Short Term % |
| 0                                            | All Ages  | Never Any          | 47776 | 54.92 |               |             |               |                |              |
| 0                                            | All Ages  | CC                 | 22737 | 26.14 | 0             | 0.00        |               |                |              |
| 0                                            | All Ages  | Ecig               | 0     | 0.00  |               |             |               |                |              |
| 0                                            | All Ages  | Dual               | 0     | 0.00  |               |             |               |                |              |
| 0                                            | All Ages  | Former             | 16484 | 18.95 |               |             | 11.90         | 2815           | 17.08        |
| Year of Follow-up: 1990, Age Group: 18-19    |           |                    |       |       |               |             |               |                |              |
| Period                                       | Age Group | Smoking Group      | N     | %     | Ever Quit (N) | Ever Quit % | Mean Yrs Quit | Short Term (n) | Short Term % |
| 0                                            | 18-19     | Never Any          | 2570  | 78.43 |               |             |               |                |              |
| 0                                            | 18-19     | CC                 | 535   | 16.33 | 0             | 0.00        |               |                |              |
| 0                                            | 18-19     | Ecig               | 0     | 0.00  |               |             |               |                |              |
| 0                                            | 18-19     | Dual               | 0     | 0.00  |               |             |               |                |              |
| 0                                            | 18-19     | Former             | 172   | 5.25  |               |             | 0.20          | 172            | 100.00       |
| Year of Follow-up: 1990, Age Group: 20-24    |           |                    |       |       |               |             |               |                |              |
| Period                                       | Age Group | Smoking Group      | N     | %     | Ever Quit (N) | Ever Quit % | Mean Yrs Quit | Short Term (n) | Short Term % |
| 0                                            | 20-24     | Never Any          | 5354  | 60.89 |               |             |               |                |              |
| 0                                            | 20-24     | CC                 | 2560  | 29.11 | 0             | 0.00        |               |                |              |
| 0                                            | 20-24     | Ecig               | 0     | 0.00  |               |             |               |                |              |
| 0                                            | 20-24     | Dual               | 0     | 0.00  |               |             |               |                |              |
| 0                                            | 20-24     | Former             | 879   | 10.00 |               |             | 1.58          | 420            | 47.78        |
| Year of Follow-up: 1990, Age Group: 25-29    |           |                    |       |       |               |             |               |                |              |
| Period                                       | Age Group | Smoking Group      | N     | %     | Ever Quit (N) | Ever Quit % | Mean Yrs Quit | Short Term (n) | Short Term % |
| 0                                            | 25-29     | Never Any          | 5318  | 52.77 |               |             |               |                |              |
| 0                                            | 25-29     | CC                 | 3335  | 33.09 | 0             | 0.00        |               |                |              |
| 0                                            | 25-29     | Ecig               | 0     | 0.00  |               |             |               |                |              |
| 0                                            | 25-29     | Dual               | 0     | 0.00  |               |             |               |                |              |
| 0                                            | 25-29     | Former             | 1425  | 14.14 |               |             | 3.91          | 404            | 28.35        |
| Year of Follow-up: 1990, Age Group: 30-34    |           |                    |       |       |               |             |               |                |              |
| Period                                       | Age Group | Smoking Group      | N     | %     | Ever Quit (N) | Ever Quit % | Mean Yrs Quit | Short Term (n) | Short Term % |
| 0                                            | 30-34     | Never Any          | 5287  | 50.36 |               |             |               |                |              |
| 0                                            | 30-34     | CC                 | 3326  | 31.68 | 0             | 0.00        |               |                |              |
| 0                                            | 30-34     | Ecig               | 0     | 0.00  |               |             |               |                |              |
| 0                                            | 30-34     | Dual               | 0     | 0.00  |               |             |               |                |              |
| 0                                            | 30-34     | Former             | 1886  | 17.96 |               |             | 4.36          | 566            | 30.01        |
| Year of Follow-up: 1990, Age Group: 35-39    |           |                    |       |       |               |             |               |                |              |
| Period                                       | Age Group | Smoking Group      | N     | %     | Ever Quit (N) | Ever Quit % | Mean Yrs Quit | Short Term (n) | Short Term % |
| 0                                            | 35-39     | Never Any          | 5018  | 52.27 |               |             |               |                |              |
| 0                                            | 35-39     | CC                 | 2653  | 27.64 | 0             | 0.00        |               |                |              |
| 0                                            | 35-39     | Ecig               | 0     | 0.00  |               |             |               |                |              |
| 0                                            | 35-39     | Dual               | 0     | 0.00  |               |             |               |                |              |
| 0                                            | 35-39     | Former             | 1929  | 20.09 |               |             | 7.96          | 324            | 16.80        |
| Year of Follow-up: 1990, Age Group: 40-44    |           |                    |       |       |               |             |               |                |              |
| Period                                       | Age Group | Smoking Group      | N     | %     | Ever Quit (N) | Ever Quit % | Mean Yrs Quit | Short Term (n) | Short Term % |
| 0                                            | 40-44     | Never Any          | 4356  | 51.27 |               |             |               |                |              |
| 0                                            | 40-44     | CC                 | 2397  | 28.21 | 0             | 0.00        |               |                |              |
| 0                                            | 40-44     | Ecig               | 0     | 0.00  |               |             |               |                |              |
| 0                                            | 40-44     | Dual               | 0     | 0.00  |               |             |               |                |              |
| 0                                            | 40-44     | Former             | 1744  | 20.52 |               |             | 7.33          | 339            | 19.44        |
| Year of Follow-up: 1990, Age Group: 45-49    |           |                    |       |       |               |             |               |                |              |
| Period                                       | Age Group | Smoking Group      | N     | %     | Ever Quit (N) | Ever Quit % | Mean Yrs Quit | Short Term (n) | Short Term % |
| 0                                            | 45-49     | Never Any          | 3116  | 47.67 |               |             |               |                |              |
| 0                                            | 45-49     | CC                 | 1875  | 28.69 | 0             | 0.00        |               |                |              |
| 0                                            | 45-49     | Ecig               | 0     | 0.00  |               |             |               |                |              |
| 0                                            | 45-49     | Dual               | 0     | 0.00  |               |             |               |                |              |
| 0                                            | 45-49     | Former             | 1545  | 23.64 |               |             | 12.55         | 194            | 12.56        |
| Year of Follow-up: 1990, Age Group: 50-54    |           |                    |       |       |               |             |               |                |              |
| Period                                       | Age Group | Smoking Group      | N     | %     | Ever Quit (N) | Ever Quit % | Mean Yrs Quit | Short Term (n) | Short Term % |
| 0                                            | 50-54     | Never Any          | 2684  | 48.50 |               |             |               |                |              |
| 0                                            | 50-54     | CC                 | 1572  | 28.41 | 0             | 0.00        |               |                |              |

**Results for PHIM for Run 2 (Sensitivity\_Analysis\_3.RTF)**

|                                              |           |               |       |       |               |             |               |                |              |
|----------------------------------------------|-----------|---------------|-------|-------|---------------|-------------|---------------|----------------|--------------|
| 0                                            | 50-54     | Ecig          | 0     | 0.00  |               |             |               |                |              |
| 0                                            | 50-54     | Dual          | 0     | 0.00  |               |             |               |                |              |
| 0                                            | 50-54     | Former        | 1278  | 23.09 |               |             | 13.28         | 126            | 9.86         |
| Year of Follow-up: 1990, Age Group: 55-59    |           |               |       |       |               |             |               |                |              |
| Period                                       | Age Group | Smoking Group | N     | %     | Ever Quit (N) | Ever Quit % | Mean Yrs Quit | Short Term (n) | Short Term % |
| 0                                            | 55-59     | Never Any     | 2732  | 51.90 |               |             |               |                |              |
| 0                                            | 55-59     | CC            | 1295  | 24.60 | 0             | 0.00        |               |                |              |
| 0                                            | 55-59     | Ecig          | 0     | 0.00  |               |             |               |                |              |
| 0                                            | 55-59     | Dual          | 0     | 0.00  |               |             |               |                |              |
| 0                                            | 55-59     | Former        | 1237  | 23.50 |               |             | 17.26         | 90             | 7.28         |
| Year of Follow-up: 1990, Age Group: 60-64    |           |               |       |       |               |             |               |                |              |
| Period                                       | Age Group | Smoking Group | N     | %     | Ever Quit (N) | Ever Quit % | Mean Yrs Quit | Short Term (n) | Short Term % |
| 0                                            | 60-64     | Never Any     | 3078  | 55.72 |               |             |               |                |              |
| 0                                            | 60-64     | CC            | 1249  | 22.61 | 0             | 0.00        |               |                |              |
| 0                                            | 60-64     | Ecig          | 0     | 0.00  |               |             |               |                |              |
| 0                                            | 60-64     | Dual          | 0     | 0.00  |               |             |               |                |              |
| 0                                            | 60-64     | Former        | 1197  | 21.67 |               |             | 18.28         | 61             | 5.10         |
| Year of Follow-up: 1990, Age Group: 65-69    |           |               |       |       |               |             |               |                |              |
| Period                                       | Age Group | Smoking Group | N     | %     | Ever Quit (N) | Ever Quit % | Mean Yrs Quit | Short Term (n) | Short Term % |
| 0                                            | 65-69     | Never Any     | 3042  | 57.36 |               |             |               |                |              |
| 0                                            | 65-69     | CC            | 976   | 18.40 | 0             | 0.00        |               |                |              |
| 0                                            | 65-69     | Ecig          | 0     | 0.00  |               |             |               |                |              |
| 0                                            | 65-69     | Dual          | 0     | 0.00  |               |             |               |                |              |
| 0                                            | 65-69     | Former        | 1285  | 24.23 |               |             | 20.65         | 68             | 5.29         |
| Year of Follow-up: 1990, Age Group: 70-74    |           |               |       |       |               |             |               |                |              |
| Period                                       | Age Group | Smoking Group | N     | %     | Ever Quit (N) | Ever Quit % | Mean Yrs Quit | Short Term (n) | Short Term % |
| 0                                            | 70-74     | Never Any     | 2738  | 61.05 |               |             |               |                |              |
| 0                                            | 70-74     | CC            | 610   | 13.60 | 0             | 0.00        |               |                |              |
| 0                                            | 70-74     | Ecig          | 0     | 0.00  |               |             |               |                |              |
| 0                                            | 70-74     | Dual          | 0     | 0.00  |               |             |               |                |              |
| 0                                            | 70-74     | Former        | 1137  | 25.35 |               |             | 24.48         | 27             | 2.37         |
| Year of Follow-up: 1990, Age Group: 75-79    |           |               |       |       |               |             |               |                |              |
| Period                                       | Age Group | Smoking Group | N     | %     | Ever Quit (N) | Ever Quit % | Mean Yrs Quit | Short Term (n) | Short Term % |
| 0                                            | 75-79     | Never Any     | 2483  | 68.84 |               |             |               |                |              |
| 0                                            | 75-79     | CC            | 354   | 9.81  | 0             | 0.00        |               |                |              |
| 0                                            | 75-79     | Ecig          | 0     | 0.00  |               |             |               |                |              |
| 0                                            | 75-79     | Dual          | 0     | 0.00  |               |             |               |                |              |
| 0                                            | 75-79     | Former        | 770   | 21.35 |               |             | 24.48         | 24             | 3.12         |
| Year of Follow-up: 1995, Age Group: All Ages |           |               |       |       |               |             |               |                |              |
| Period                                       | Age Group | Smoking Group | N     | %     | Ever Quit (N) | Ever Quit % | Mean Yrs Quit | Short Term (n) | Short Term % |
| 5                                            | All Ages  | Never Any     | 50887 | 55.53 |               |             |               |                |              |
| 5                                            | All Ages  | CC            | 10659 | 11.63 | 0             | 0.00        |               |                |              |
| 5                                            | All Ages  | Ecig          | 12043 | 13.14 |               |             |               |                |              |
| 5                                            | All Ages  | Dual          | 0     | 0.00  |               |             |               |                |              |
| 5                                            | All Ages  | Former        | 18050 | 19.70 |               |             | 14.44         | 892            | 4.94         |
| Year of Follow-up: 1995, Age Group: 18-19    |           |               |       |       |               |             |               |                |              |
| Period                                       | Age Group | Smoking Group | N     | %     | Ever Quit (N) | Ever Quit % | Mean Yrs Quit | Short Term (n) | Short Term % |
| 5                                            | 18-19     | Never Any     | 2434  | 76.64 |               |             |               |                |              |
| 5                                            | 18-19     | CC            | 233   | 7.34  | 0             | 0.00        |               |                |              |
| 5                                            | 18-19     | Ecig          | 452   | 14.23 |               |             |               |                |              |
| 5                                            | 18-19     | Dual          | 0     | 0.00  |               |             |               |                |              |
| 5                                            | 18-19     | Former        | 57    | 1.79  |               |             | 1.26          | 32             | 56.14        |
| Year of Follow-up: 1995, Age Group: 20-24    |           |               |       |       |               |             |               |                |              |
| Period                                       | Age Group | Smoking Group | N     | %     | Ever Quit (N) | Ever Quit % | Mean Yrs Quit | Short Term (n) | Short Term % |
| 5                                            | 20-24     | Never Any     | 5794  | 69.39 |               |             |               |                |              |
| 5                                            | 20-24     | CC            | 862   | 10.32 | 0             | 0.00        |               |                |              |
| 5                                            | 20-24     | Ecig          | 1307  | 15.65 |               |             |               |                |              |
| 5                                            | 20-24     | Dual          | 0     | 0.00  |               |             |               |                |              |
| 5                                            | 20-24     | Former        | 387   | 4.63  |               |             | 3.52          | 73             | 18.86        |
| Year of Follow-up: 1995, Age Group: 25-29    |           |               |       |       |               |             |               |                |              |
| Period                                       | Age Group | Smoking Group | N     | %     | Ever Quit (N) | Ever Quit % | Mean Yrs Quit | Short Term (n) | Short Term % |
| 5                                            | 25-29     | Never Any     | 5313  | 60.42 |               |             |               |                |              |
| 5                                            | 25-29     | CC            | 1062  | 12.08 | 0             | 0.00        |               |                |              |
| 5                                            | 25-29     | Ecig          | 1414  | 16.08 |               |             |               |                |              |
| 5                                            | 25-29     | Dual          | 0     | 0.00  |               |             |               |                |              |
| 5                                            | 25-29     | Former        | 1004  | 11.42 |               |             | 6.03          | 41             | 4.08         |
| Year of Follow-up: 1995, Age Group: 30-34    |           |               |       |       |               |             |               |                |              |
| Period                                       | Age Group | Smoking Group | N     | %     | Ever Quit (N) | Ever Quit % | Mean Yrs Quit | Short Term (n) | Short Term % |



**Results for PHIM for Run 2 (Sensitivity\_Analysis\_3.RTF)**

|                                              |           |               |      |       |               |             |               |                |              |
|----------------------------------------------|-----------|---------------|------|-------|---------------|-------------|---------------|----------------|--------------|
| 5                                            | 30-34     | Never Any     | 5304 | 52.63 |               |             |               |                |              |
| 5                                            | 30-34     | CC            | 1373 | 13.62 | 0             | 0.00        |               |                |              |
| 5                                            | 30-34     | Ecig          | 1823 | 18.09 |               |             |               |                |              |
| 5                                            | 30-34     | Dual          | 0    | 0.00  |               |             |               |                |              |
| 5                                            | 30-34     | Former        | 1578 | 15.66 |               |             | 8.25          | 55             | 3.49         |
| Year of Follow-up: 1995, Age Group: 35-39    |           |               |      |       |               |             |               |                |              |
| Period                                       | Age Group | Smoking Group | N    | %     | Ever Quit (N) | Ever Quit % | Mean Yrs Quit | Short Term (n) | Short Term % |
| 5                                            | 35-39     | Never Any     | 5278 | 50.27 |               |             |               |                |              |
| 5                                            | 35-39     | CC            | 1410 | 13.43 | 0             | 0.00        |               |                |              |
| 5                                            | 35-39     | Ecig          | 1772 | 16.88 |               |             |               |                |              |
| 5                                            | 35-39     | Dual          | 0    | 0.00  |               |             |               |                |              |
| 5                                            | 35-39     | Former        | 2039 | 19.42 |               |             | 8.85          | 43             | 2.11         |
| Year of Follow-up: 1995, Age Group: 40-44    |           |               |      |       |               |             |               |                |              |
| Period                                       | Age Group | Smoking Group | N    | %     | Ever Quit (N) | Ever Quit % | Mean Yrs Quit | Short Term (n) | Short Term % |
| 5                                            | 40-44     | Never Any     | 5018 | 52.27 |               |             |               |                |              |
| 5                                            | 40-44     | CC            | 1135 | 11.82 | 0             | 0.00        |               |                |              |
| 5                                            | 40-44     | Ecig          | 1376 | 14.33 |               |             |               |                |              |
| 5                                            | 40-44     | Dual          | 0    | 0.00  |               |             |               |                |              |
| 5                                            | 40-44     | Former        | 2071 | 21.57 |               |             | 12.19         | 67             | 3.24         |
| Year of Follow-up: 1995, Age Group: 45-49    |           |               |      |       |               |             |               |                |              |
| Period                                       | Age Group | Smoking Group | N    | %     | Ever Quit (N) | Ever Quit % | Mean Yrs Quit | Short Term (n) | Short Term % |
| 5                                            | 45-49     | Never Any     | 4356 | 51.27 |               |             |               |                |              |
| 5                                            | 45-49     | CC            | 974  | 11.46 | 0             | 0.00        |               |                |              |
| 5                                            | 45-49     | Ecig          | 1199 | 14.11 |               |             |               |                |              |
| 5                                            | 45-49     | Dual          | 0    | 0.00  |               |             |               |                |              |
| 5                                            | 45-49     | Former        | 1968 | 23.16 |               |             | 11.12         | 109            | 5.54         |
| Year of Follow-up: 1995, Age Group: 50-54    |           |               |      |       |               |             |               |                |              |
| Period                                       | Age Group | Smoking Group | N    | %     | Ever Quit (N) | Ever Quit % | Mean Yrs Quit | Short Term (n) | Short Term % |
| 5                                            | 50-54     | Never Any     | 3116 | 47.67 |               |             |               |                |              |
| 5                                            | 50-54     | CC            | 739  | 11.31 | 0             | 0.00        |               |                |              |
| 5                                            | 50-54     | Ecig          | 866  | 13.25 |               |             |               |                |              |
| 5                                            | 50-54     | Dual          | 0    | 0.00  |               |             |               |                |              |
| 5                                            | 50-54     | Former        | 1815 | 27.77 |               |             | 15.23         | 108            | 5.95         |
| Year of Follow-up: 1995, Age Group: 55-59    |           |               |      |       |               |             |               |                |              |
| Period                                       | Age Group | Smoking Group | N    | %     | Ever Quit (N) | Ever Quit % | Mean Yrs Quit | Short Term (n) | Short Term % |
| 5                                            | 55-59     | Never Any     | 2684 | 48.50 |               |             |               |                |              |
| 5                                            | 55-59     | CC            | 722  | 13.05 | 0             | 0.00        |               |                |              |
| 5                                            | 55-59     | Ecig          | 652  | 11.78 |               |             |               |                |              |
| 5                                            | 55-59     | Dual          | 0    | 0.00  |               |             |               |                |              |
| 5                                            | 55-59     | Former        | 1476 | 26.67 |               |             | 16.10         | 73             | 4.95         |
| Year of Follow-up: 1995, Age Group: 60-64    |           |               |      |       |               |             |               |                |              |
| Period                                       | Age Group | Smoking Group | N    | %     | Ever Quit (N) | Ever Quit % | Mean Yrs Quit | Short Term (n) | Short Term % |
| 5                                            | 60-64     | Never Any     | 2732 | 51.90 |               |             |               |                |              |
| 5                                            | 60-64     | CC            | 633  | 12.03 | 0             | 0.00        |               |                |              |
| 5                                            | 60-64     | Ecig          | 468  | 8.89  |               |             |               |                |              |
| 5                                            | 60-64     | Dual          | 0    | 0.00  |               |             |               |                |              |
| 5                                            | 60-64     | Former        | 1431 | 27.18 |               |             | 19.52         | 73             | 5.10         |
| Year of Follow-up: 1995, Age Group: 65-69    |           |               |      |       |               |             |               |                |              |
| Period                                       | Age Group | Smoking Group | N    | %     | Ever Quit (N) | Ever Quit % | Mean Yrs Quit | Short Term (n) | Short Term % |
| 5                                            | 65-69     | Never Any     | 3078 | 55.72 |               |             |               |                |              |
| 5                                            | 65-69     | CC            | 602  | 10.90 | 0             | 0.00        |               |                |              |
| 5                                            | 65-69     | Ecig          | 397  | 7.19  |               |             |               |                |              |
| 5                                            | 65-69     | Dual          | 0    | 0.00  |               |             |               |                |              |
| 5                                            | 65-69     | Former        | 1447 | 26.19 |               |             | 19.63         | 91             | 6.29         |
| Year of Follow-up: 1995, Age Group: 70-74    |           |               |      |       |               |             |               |                |              |
| Period                                       | Age Group | Smoking Group | N    | %     | Ever Quit (N) | Ever Quit % | Mean Yrs Quit | Short Term (n) | Short Term % |
| 5                                            | 70-74     | Never Any     | 3042 | 57.36 |               |             |               |                |              |
| 5                                            | 70-74     | CC            | 577  | 10.88 | 0             | 0.00        |               |                |              |
| 5                                            | 70-74     | Ecig          | 207  | 3.90  |               |             |               |                |              |
| 5                                            | 70-74     | Dual          | 0    | 0.00  |               |             |               |                |              |
| 5                                            | 70-74     | Former        | 1477 | 27.85 |               |             | 22.59         | 64             | 4.33         |
| Year of Follow-up: 1995, Age Group: 75-79    |           |               |      |       |               |             |               |                |              |
| Period                                       | Age Group | Smoking Group | N    | %     | Ever Quit (N) | Ever Quit % | Mean Yrs Quit | Short Term (n) | Short Term % |
| 5                                            | 75-79     | Never Any     | 2738 | 61.05 |               |             |               |                |              |
| 5                                            | 75-79     | CC            | 337  | 7.51  | 0             | 0.00        |               |                |              |
| 5                                            | 75-79     | Ecig          | 110  | 2.45  |               |             |               |                |              |
| 5                                            | 75-79     | Dual          | 0    | 0.00  |               |             |               |                |              |
| 5                                            | 75-79     | Former        | 1300 | 28.99 |               |             | 26.04         | 63             | 4.85         |
| Year of Follow-up: 2000, Age Group: All Ages |           |               |      |       |               |             |               |                |              |

**Results for PHIM for Run 2 (Sensitivity\_Analysis\_3.RTF)**

| Period                                    | Age Group | Smoking Group | N     | %     | Ever Quit (N) | Ever Quit % | Mean Yrs Quit | Short Term (n) | Short Term % |
|-------------------------------------------|-----------|---------------|-------|-------|---------------|-------------|---------------|----------------|--------------|
| 10                                        | All Ages  | Never Any     | 50423 | 54.86 |               |             |               |                |              |
| 10                                        | All Ages  | CC            | 4595  | 5.00  | 0             | 0.00        |               |                |              |
| 10                                        | All Ages  | Ecig          | 17179 | 18.69 |               |             |               |                |              |
| 10                                        | All Ages  | Dual          | 0     | 0.00  |               |             |               |                |              |
| 10                                        | All Ages  | Former        | 19711 | 21.45 |               |             | 16.07         | 1177           | 5.97         |
| Year of Follow-up: 2000, Age Group: 18-19 |           |               |       |       |               |             |               |                |              |
| Period                                    | Age Group | Smoking Group | N     | %     | Ever Quit (N) | Ever Quit % | Mean Yrs Quit | Short Term (n) | Short Term % |
| 10                                        | 18-19     | Never Any     | 0     | .     |               |             |               |                |              |
| 10                                        | 18-19     | CC            | 0     | .     | 0             | .           |               |                |              |
| 10                                        | 18-19     | Ecig          | 0     | .     |               |             |               |                |              |
| 10                                        | 18-19     | Dual          | 0     | .     |               |             |               |                |              |
| 10                                        | 18-19     | Former        | 0     | .     |               |             |               | 0              | .            |
| Year of Follow-up: 2000, Age Group: 20-24 |           |               |       |       |               |             |               |                |              |
| Period                                    | Age Group | Smoking Group | N     | %     | Ever Quit (N) | Ever Quit % | Mean Yrs Quit | Short Term (n) | Short Term % |
| 10                                        | 20-24     | Never Any     | 5128  | 64.67 |               |             |               |                |              |
| 10                                        | 20-24     | CC            | 370   | 4.67  | 0             | 0.00        |               |                |              |
| 10                                        | 20-24     | Ecig          | 1988  | 25.07 |               |             |               |                |              |
| 10                                        | 20-24     | Dual          | 0     | 0.00  |               |             |               |                |              |
| 10                                        | 20-24     | Former        | 444   | 5.60  |               |             | 3.64          | 108            | 24.32        |
| Year of Follow-up: 2000, Age Group: 25-29 |           |               |       |       |               |             |               |                |              |
| Period                                    | Age Group | Smoking Group | N     | %     | Ever Quit (N) | Ever Quit % | Mean Yrs Quit | Short Term (n) | Short Term % |
| 10                                        | 25-29     | Never Any     | 5493  | 65.78 |               |             |               |                |              |
| 10                                        | 25-29     | CC            | 400   | 4.79  | 0             | 0.00        |               |                |              |
| 10                                        | 25-29     | Ecig          | 1865  | 22.34 |               |             |               |                |              |
| 10                                        | 25-29     | Dual          | 0     | 0.00  |               |             |               |                |              |
| 10                                        | 25-29     | Former        | 592   | 7.09  |               |             | 6.22          | 85             | 14.36        |
| Year of Follow-up: 2000, Age Group: 30-34 |           |               |       |       |               |             |               |                |              |
| Period                                    | Age Group | Smoking Group | N     | %     | Ever Quit (N) | Ever Quit % | Mean Yrs Quit | Short Term (n) | Short Term % |
| 10                                        | 30-34     | Never Any     | 5214  | 59.30 |               |             |               |                |              |
| 10                                        | 30-34     | CC            | 417   | 4.74  | 0             | 0.00        |               |                |              |
| 10                                        | 30-34     | Ecig          | 1998  | 22.72 |               |             |               |                |              |
| 10                                        | 30-34     | Dual          | 0     | 0.00  |               |             |               |                |              |
| 10                                        | 30-34     | Former        | 1164  | 13.24 |               |             | 9.79          | 59             | 5.07         |
| Year of Follow-up: 2000, Age Group: 35-39 |           |               |       |       |               |             |               |                |              |
| Period                                    | Age Group | Smoking Group | N     | %     | Ever Quit (N) | Ever Quit % | Mean Yrs Quit | Short Term (n) | Short Term % |
| 10                                        | 35-39     | Never Any     | 5284  | 52.43 |               |             |               |                |              |
| 10                                        | 35-39     | CC            | 561   | 5.57  | 0             | 0.00        |               |                |              |
| 10                                        | 35-39     | Ecig          | 2514  | 24.95 |               |             |               |                |              |
| 10                                        | 35-39     | Dual          | 0     | 0.00  |               |             |               |                |              |
| 10                                        | 35-39     | Former        | 1719  | 17.06 |               |             | 12.32         | 60             | 3.49         |
| Year of Follow-up: 2000, Age Group: 40-44 |           |               |       |       |               |             |               |                |              |
| Period                                    | Age Group | Smoking Group | N     | %     | Ever Quit (N) | Ever Quit % | Mean Yrs Quit | Short Term (n) | Short Term % |
| 10                                        | 40-44     | Never Any     | 5278  | 50.27 |               |             |               |                |              |
| 10                                        | 40-44     | CC            | 584   | 5.56  | 0             | 0.00        |               |                |              |
| 10                                        | 40-44     | Ecig          | 2403  | 22.89 |               |             |               |                |              |
| 10                                        | 40-44     | Dual          | 0     | 0.00  |               |             |               |                |              |
| 10                                        | 40-44     | Former        | 2234  | 21.28 |               |             | 12.79         | 93             | 4.16         |
| Year of Follow-up: 2000, Age Group: 45-49 |           |               |       |       |               |             |               |                |              |
| Period                                    | Age Group | Smoking Group | N     | %     | Ever Quit (N) | Ever Quit % | Mean Yrs Quit | Short Term (n) | Short Term % |
| 10                                        | 45-49     | Never Any     | 5018  | 52.27 |               |             |               |                |              |
| 10                                        | 45-49     | CC            | 446   | 4.65  | 0             | 0.00        |               |                |              |
| 10                                        | 45-49     | Ecig          | 1816  | 18.92 |               |             |               |                |              |
| 10                                        | 45-49     | Dual          | 0     | 0.00  |               |             |               |                |              |
| 10                                        | 45-49     | Former        | 2320  | 24.17 |               |             | 15.53         | 120            | 5.17         |
| Year of Follow-up: 2000, Age Group: 50-54 |           |               |       |       |               |             |               |                |              |
| Period                                    | Age Group | Smoking Group | N     | %     | Ever Quit (N) | Ever Quit % | Mean Yrs Quit | Short Term (n) | Short Term % |
| 10                                        | 50-54     | Never Any     | 4356  | 51.27 |               |             |               |                |              |
| 10                                        | 50-54     | CC            | 378   | 4.45  | 0             | 0.00        |               |                |              |
| 10                                        | 50-54     | Ecig          | 1482  | 17.44 |               |             |               |                |              |
| 10                                        | 50-54     | Dual          | 0     | 0.00  |               |             |               |                |              |
| 10                                        | 50-54     | Former        | 2281  | 26.84 |               |             | 14.18         | 116            | 5.09         |
| Year of Follow-up: 2000, Age Group: 55-59 |           |               |       |       |               |             |               |                |              |
| Period                                    | Age Group | Smoking Group | N     | %     | Ever Quit (N) | Ever Quit % | Mean Yrs Quit | Short Term (n) | Short Term % |
| 10                                        | 55-59     | Never Any     | 3116  | 47.67 |               |             |               |                |              |
| 10                                        | 55-59     | CC            | 283   | 4.33  | 0             | 0.00        |               |                |              |
| 10                                        | 55-59     | Ecig          | 1057  | 16.17 |               |             |               |                |              |
| 10                                        | 55-59     | Dual          | 0     | 0.00  |               |             |               |                |              |

**Results for PHIM for Run 2 (Sensitivity\_Analysis\_3.RTF)**

| Year of Follow-up: 2000, Age Group: 60-64    | Period   | Age Group | Smoking Group | N     | %     | Ever Quit (N) | Ever Quit % | Mean Yrs Quit | Short Term (n) | Short Term % |
|----------------------------------------------|----------|-----------|---------------|-------|-------|---------------|-------------|---------------|----------------|--------------|
| 10                                           | 55-59    | Former    |               | 2080  | 31.82 |               |             | 17.89         | 112            | 5.38         |
| 10                                           | 60-64    | Never Any |               | 2684  | 48.50 |               |             |               |                |              |
| 10                                           | 60-64    | CC        |               | 334   | 6.04  | 0             | 0.00        |               |                |              |
| 10                                           | 60-64    | Ecig      |               | 795   | 14.37 |               |             |               |                |              |
| 10                                           | 60-64    | Dual      |               | 0     | 0.00  |               |             |               |                |              |
| 10                                           | 60-64    | Former    |               | 1721  | 31.10 |               |             | 18.36         | 103            | 5.98         |
| Year of Follow-up: 2000, Age Group: 65-69    | Period   | Age Group | Smoking Group | N     | %     | Ever Quit (N) | Ever Quit % | Mean Yrs Quit | Short Term (n) | Short Term % |
| 10                                           | 65-69    | Never Any |               | 2732  | 51.90 |               |             |               |                |              |
| 10                                           | 65-69    | CC        |               | 280   | 5.32  | 0             | 0.00        |               |                |              |
| 10                                           | 65-69    | Ecig      |               | 535   | 10.16 |               |             |               |                |              |
| 10                                           | 65-69    | Dual      |               | 0     | 0.00  |               |             |               |                |              |
| 10                                           | 65-69    | Former    |               | 1717  | 32.62 |               |             | 20.75         | 114            | 6.64         |
| Year of Follow-up: 2000, Age Group: 70-74    | Period   | Age Group | Smoking Group | N     | %     | Ever Quit (N) | Ever Quit % | Mean Yrs Quit | Short Term (n) | Short Term % |
| 10                                           | 70-74    | Never Any |               | 3078  | 55.72 |               |             |               |                |              |
| 10                                           | 70-74    | CC        |               | 274   | 4.96  | 0             | 0.00        |               |                |              |
| 10                                           | 70-74    | Ecig      |               | 459   | 8.31  |               |             |               |                |              |
| 10                                           | 70-74    | Dual      |               | 0     | 0.00  |               |             |               |                |              |
| 10                                           | 70-74    | Former    |               | 1713  | 31.01 |               |             | 21.11         | 118            | 6.89         |
| Year of Follow-up: 2000, Age Group: 75-79    | Period   | Age Group | Smoking Group | N     | %     | Ever Quit (N) | Ever Quit % | Mean Yrs Quit | Short Term (n) | Short Term % |
| 10                                           | 75-79    | Never Any |               | 3042  | 57.36 |               |             |               |                |              |
| 10                                           | 75-79    | CC        |               | 268   | 5.05  | 0             | 0.00        |               |                |              |
| 10                                           | 75-79    | Ecig      |               | 267   | 5.03  |               |             |               |                |              |
| 10                                           | 75-79    | Dual      |               | 0     | 0.00  |               |             |               |                |              |
| 10                                           | 75-79    | Former    |               | 1726  | 32.55 |               |             | 23.91         | 89             | 5.16         |
| Year of Follow-up: 2005, Age Group: All Ages | Period   | Age Group | Smoking Group | N     | %     | Ever Quit (N) | Ever Quit % | Mean Yrs Quit | Short Term (n) | Short Term % |
| 15                                           | All Ages | Never Any |               | 47002 | 54.27 |               |             |               |                |              |
| 15                                           | All Ages | CC        |               | 1890  | 2.18  | 0             | 0.00        |               |                |              |
| 15                                           | All Ages | Ecig      |               | 18014 | 20.80 |               |             |               |                |              |
| 15                                           | All Ages | Dual      |               | 0     | 0.00  |               |             |               |                |              |
| 15                                           | All Ages | Former    |               | 19699 | 22.75 |               |             | 18.74         | 594            | 3.02         |
| Year of Follow-up: 2005, Age Group: 18-19    | Period   | Age Group | Smoking Group | N     | %     | Ever Quit (N) | Ever Quit % | Mean Yrs Quit | Short Term (n) | Short Term % |
| 15                                           | 18-19    | Never Any |               | 0     | .     |               |             |               |                |              |
| 15                                           | 18-19    | CC        |               | 0     | .     | 0             | .           |               |                |              |
| 15                                           | 18-19    | Ecig      |               | 0     | .     |               |             |               |                |              |
| 15                                           | 18-19    | Dual      |               | 0     | .     |               |             |               |                |              |
| 15                                           | 18-19    | Former    |               | 0     | .     |               |             | .             | 0              | .            |
| Year of Follow-up: 2005, Age Group: 20-24    | Period   | Age Group | Smoking Group | N     | %     | Ever Quit (N) | Ever Quit % | Mean Yrs Quit | Short Term (n) | Short Term % |
| 15                                           | 20-24    | Never Any |               | 0     | .     |               |             |               |                |              |
| 15                                           | 20-24    | CC        |               | 0     | .     | 0             | .           |               |                |              |
| 15                                           | 20-24    | Ecig      |               | 0     | .     |               |             |               |                |              |
| 15                                           | 20-24    | Dual      |               | 0     | .     |               |             |               |                |              |
| 15                                           | 20-24    | Former    |               | 0     | .     |               |             | .             | 0              | .            |
| Year of Follow-up: 2005, Age Group: 25-29    | Period   | Age Group | Smoking Group | N     | %     | Ever Quit (N) | Ever Quit % | Mean Yrs Quit | Short Term (n) | Short Term % |
| 15                                           | 25-29    | Never Any |               | 4860  | 61.29 |               |             |               |                |              |
| 15                                           | 25-29    | CC        |               | 166   | 2.09  | 0             | 0.00        |               |                |              |
| 15                                           | 25-29    | Ecig      |               | 2286  | 28.83 |               |             |               |                |              |
| 15                                           | 25-29    | Dual      |               | 0     | 0.00  |               |             |               |                |              |
| 15                                           | 25-29    | Former    |               | 618   | 7.79  |               |             | 6.87          | 59             | 9.55         |
| Year of Follow-up: 2005, Age Group: 30-34    | Period   | Age Group | Smoking Group | N     | %     | Ever Quit (N) | Ever Quit % | Mean Yrs Quit | Short Term (n) | Short Term % |
| 15                                           | 30-34    | Never Any |               | 5407  | 64.75 |               |             |               |                |              |
| 15                                           | 30-34    | CC        |               | 149   | 1.78  | 0             | 0.00        |               |                |              |
| 15                                           | 30-34    | Ecig      |               | 2075  | 24.85 |               |             |               |                |              |
| 15                                           | 30-34    | Dual      |               | 0     | 0.00  |               |             |               |                |              |
| 15                                           | 30-34    | Former    |               | 719   | 8.61  |               |             | 9.63          | 41             | 5.70         |
| Year of Follow-up: 2005, Age Group: 35-39    | Period   | Age Group | Smoking Group | N     | %     | Ever Quit (N) | Ever Quit % | Mean Yrs Quit | Short Term (n) | Short Term % |
| 15                                           | 35-39    | Never Any |               | 5189  | 59.01 |               |             |               |                |              |
| 15                                           | 35-39    | CC        |               | 167   | 1.90  | 0             | 0.00        |               |                |              |

**Results for PHIM for Run 2 (Sensitivity\_Analysis\_3.RTF)**

|                                              |           |               |       |       |               |             |               |                |              |
|----------------------------------------------|-----------|---------------|-------|-------|---------------|-------------|---------------|----------------|--------------|
| 15                                           | 35-39     | Ecig          | 2178  | 24.77 |               |             |               |                |              |
| 15                                           | 35-39     | Dual          | 0     | 0.00  |               |             |               |                |              |
| 15                                           | 35-39     | Former        | 1259  | 14.32 |               |             | 13.84         | 33             | 2.62         |
| Year of Follow-up: 2005, Age Group: 40-44    |           |               |       |       |               |             |               |                |              |
| Period                                       | Age Group | Smoking Group | N     | %     | Ever Quit (N) | Ever Quit % | Mean Yrs Quit | Short Term (n) | Short Term % |
| 15                                           | 40-44     | Never Any     | 5284  | 52.43 |               |             |               |                |              |
| 15                                           | 40-44     | CC            | 238   | 2.36  | 0             | 0.00        |               |                |              |
| 15                                           | 40-44     | Ecig          | 2697  | 26.76 |               |             |               |                |              |
| 15                                           | 40-44     | Dual          | 0     | 0.00  |               |             |               |                |              |
| 15                                           | 40-44     | Former        | 1859  | 18.45 |               |             | 16.17         | 62             | 3.34         |
| Year of Follow-up: 2005, Age Group: 45-49    |           |               |       |       |               |             |               |                |              |
| Period                                       | Age Group | Smoking Group | N     | %     | Ever Quit (N) | Ever Quit % | Mean Yrs Quit | Short Term (n) | Short Term % |
| 15                                           | 45-49     | Never Any     | 5278  | 50.27 |               |             |               |                |              |
| 15                                           | 45-49     | CC            | 237   | 2.26  | 0             | 0.00        |               |                |              |
| 15                                           | 45-49     | Ecig          | 2562  | 24.40 |               |             |               |                |              |
| 15                                           | 45-49     | Dual          | 0     | 0.00  |               |             |               |                |              |
| 15                                           | 45-49     | Former        | 2422  | 23.07 |               |             | 16.55         | 84             | 3.47         |
| Year of Follow-up: 2005, Age Group: 50-54    |           |               |       |       |               |             |               |                |              |
| Period                                       | Age Group | Smoking Group | N     | %     | Ever Quit (N) | Ever Quit % | Mean Yrs Quit | Short Term (n) | Short Term % |
| 15                                           | 50-54     | Never Any     | 5018  | 52.27 |               |             |               |                |              |
| 15                                           | 50-54     | CC            | 191   | 1.99  | 0             | 0.00        |               |                |              |
| 15                                           | 50-54     | Ecig          | 1870  | 19.48 |               |             |               |                |              |
| 15                                           | 50-54     | Dual          | 0     | 0.00  |               |             |               |                |              |
| 15                                           | 50-54     | Former        | 2521  | 26.26 |               |             | 19.08         | 61             | 2.42         |
| Year of Follow-up: 2005, Age Group: 55-59    |           |               |       |       |               |             |               |                |              |
| Period                                       | Age Group | Smoking Group | N     | %     | Ever Quit (N) | Ever Quit % | Mean Yrs Quit | Short Term (n) | Short Term % |
| 15                                           | 55-59     | Never Any     | 4356  | 51.27 |               |             |               |                |              |
| 15                                           | 55-59     | CC            | 166   | 1.95  | 0             | 0.00        |               |                |              |
| 15                                           | 55-59     | Ecig          | 1537  | 18.09 |               |             |               |                |              |
| 15                                           | 55-59     | Dual          | 0     | 0.00  |               |             |               |                |              |
| 15                                           | 55-59     | Former        | 2438  | 28.69 |               |             | 18.10         | 50             | 2.05         |
| Year of Follow-up: 2005, Age Group: 60-64    |           |               |       |       |               |             |               |                |              |
| Period                                       | Age Group | Smoking Group | N     | %     | Ever Quit (N) | Ever Quit % | Mean Yrs Quit | Short Term (n) | Short Term % |
| 15                                           | 60-64     | Never Any     | 3116  | 47.67 |               |             |               |                |              |
| 15                                           | 60-64     | CC            | 131   | 2.00  | 0             | 0.00        |               |                |              |
| 15                                           | 60-64     | Ecig          | 1071  | 16.39 |               |             |               |                |              |
| 15                                           | 60-64     | Dual          | 0     | 0.00  |               |             |               |                |              |
| 15                                           | 60-64     | Former        | 2218  | 33.94 |               |             | 21.60         | 57             | 2.57         |
| Year of Follow-up: 2005, Age Group: 65-69    |           |               |       |       |               |             |               |                |              |
| Period                                       | Age Group | Smoking Group | N     | %     | Ever Quit (N) | Ever Quit % | Mean Yrs Quit | Short Term (n) | Short Term % |
| 15                                           | 65-69     | Never Any     | 2684  | 48.50 |               |             |               |                |              |
| 15                                           | 65-69     | CC            | 160   | 2.89  | 0             | 0.00        |               |                |              |
| 15                                           | 65-69     | Ecig          | 782   | 14.13 |               |             |               |                |              |
| 15                                           | 65-69     | Dual          | 0     | 0.00  |               |             |               |                |              |
| 15                                           | 65-69     | Former        | 1908  | 34.48 |               |             | 21.31         | 53             | 2.78         |
| Year of Follow-up: 2005, Age Group: 70-74    |           |               |       |       |               |             |               |                |              |
| Period                                       | Age Group | Smoking Group | N     | %     | Ever Quit (N) | Ever Quit % | Mean Yrs Quit | Short Term (n) | Short Term % |
| 15                                           | 70-74     | Never Any     | 2732  | 51.90 |               |             |               |                |              |
| 15                                           | 70-74     | CC            | 139   | 2.64  | 0             | 0.00        |               |                |              |
| 15                                           | 70-74     | Ecig          | 528   | 10.03 |               |             |               |                |              |
| 15                                           | 70-74     | Dual          | 0     | 0.00  |               |             |               |                |              |
| 15                                           | 70-74     | Former        | 1865  | 35.43 |               |             | 23.88         | 56             | 3.00         |
| Year of Follow-up: 2005, Age Group: 75-79    |           |               |       |       |               |             |               |                |              |
| Period                                       | Age Group | Smoking Group | N     | %     | Ever Quit (N) | Ever Quit % | Mean Yrs Quit | Short Term (n) | Short Term % |
| 15                                           | 75-79     | Never Any     | 3078  | 55.72 |               |             |               |                |              |
| 15                                           | 75-79     | CC            | 146   | 2.64  | 0             | 0.00        |               |                |              |
| 15                                           | 75-79     | Ecig          | 428   | 7.75  |               |             |               |                |              |
| 15                                           | 75-79     | Dual          | 0     | 0.00  |               |             |               |                |              |
| 15                                           | 75-79     | Former        | 1872  | 33.89 |               |             | 24.10         | 38             | 2.03         |
| Year of Follow-up: 2010, Age Group: All Ages |           |               |       |       |               |             |               |                |              |
| Period                                       | Age Group | Smoking Group | N     | %     | Ever Quit (N) | Ever Quit % | Mean Yrs Quit | Short Term (n) | Short Term % |
| 20                                           | All Ages  | Never Any     | 43759 | 53.97 |               |             |               |                |              |
| 20                                           | All Ages  | CC            | 765   | 0.94  | 0             | 0.00        |               |                |              |
| 20                                           | All Ages  | Ecig          | 16977 | 20.94 |               |             |               |                |              |
| 20                                           | All Ages  | Dual          | 0     | 0.00  |               |             |               |                |              |
| 20                                           | All Ages  | Former        | 19580 | 24.15 |               |             | 21.27         | 746            | 3.81         |
| Year of Follow-up: 2010, Age Group: 18-19    |           |               |       |       |               |             |               |                |              |
| Period                                       | Age Group | Smoking Group | N     | %     | Ever Quit (N) | Ever Quit % | Mean Yrs Quit | Short Term (n) | Short Term % |

**Results for PHIM for Run 2 (Sensitivity\_Analysis\_3.RTF)**

|                                           |           |               |      |       |               |             |               |                |              |
|-------------------------------------------|-----------|---------------|------|-------|---------------|-------------|---------------|----------------|--------------|
| 20                                        | 18-19     | Never Any     | 0    | .     |               |             |               |                |              |
| 20                                        | 18-19     | CC            | 0    | .     | 0             | .           |               |                |              |
| 20                                        | 18-19     | Ecig          | 0    | .     |               |             |               |                |              |
| 20                                        | 18-19     | Dual          | 0    | .     |               |             |               |                |              |
| 20                                        | 18-19     | Former        | 0    | .     |               |             | 0             | .              |              |
| Year of Follow-up: 2010, Age Group: 20-24 |           |               |      |       |               |             |               |                |              |
| Period                                    | Age Group | Smoking Group | N    | %     | Ever Quit (N) | Ever Quit % | Mean Yrs Quit | Short Term (n) | Short Term % |
| 20                                        | 20-24     | Never Any     | 0    | .     |               |             |               |                |              |
| 20                                        | 20-24     | CC            | 0    | .     | 0             | .           |               |                |              |
| 20                                        | 20-24     | Ecig          | 0    | .     |               |             |               |                |              |
| 20                                        | 20-24     | Dual          | 0    | .     |               |             |               |                |              |
| 20                                        | 20-24     | Former        | 0    | .     |               |             |               | 0              | .            |
| Year of Follow-up: 2010, Age Group: 25-29 |           |               |      |       |               |             |               |                |              |
| Period                                    | Age Group | Smoking Group | N    | %     | Ever Quit (N) | Ever Quit % | Mean Yrs Quit | Short Term (n) | Short Term % |
| 20                                        | 25-29     | Never Any     | 0    | .     |               |             |               |                |              |
| 20                                        | 25-29     | CC            | 0    | .     | 0             | .           |               |                |              |
| 20                                        | 25-29     | Ecig          | 0    | .     |               |             |               |                |              |
| 20                                        | 25-29     | Dual          | 0    | .     |               |             |               |                |              |
| 20                                        | 25-29     | Former        | 0    | .     |               |             |               | 0              | .            |
| Year of Follow-up: 2010, Age Group: 30-34 |           |               |      |       |               |             |               |                |              |
| Period                                    | Age Group | Smoking Group | N    | %     | Ever Quit (N) | Ever Quit % | Mean Yrs Quit | Short Term (n) | Short Term % |
| 20                                        | 30-34     | Never Any     | 4743 | 59.81 |               |             |               |                |              |
| 20                                        | 30-34     | CC            | 65   | 0.82  | 0             | 0.00        |               |                |              |
| 20                                        | 30-34     | Ecig          | 2332 | 29.41 |               |             |               |                |              |
| 20                                        | 30-34     | Dual          | 0    | 0.00  |               |             |               |                |              |
| 20                                        | 30-34     | Former        | 790  | 9.96  |               |             | 9.66          | 77             | 9.75         |
| Year of Follow-up: 2010, Age Group: 35-39 |           |               |      |       |               |             |               |                |              |
| Period                                    | Age Group | Smoking Group | N    | %     | Ever Quit (N) | Ever Quit % | Mean Yrs Quit | Short Term (n) | Short Term % |
| 20                                        | 35-39     | Never Any     | 5359 | 64.18 |               |             |               |                |              |
| 20                                        | 35-39     | CC            | 58   | 0.69  | 0             | 0.00        |               |                |              |
| 20                                        | 35-39     | Ecig          | 2074 | 24.84 |               |             |               |                |              |
| 20                                        | 35-39     | Dual          | 0    | 0.00  |               |             |               |                |              |
| 20                                        | 35-39     | Former        | 859  | 10.29 |               |             | 12.54         | 61             | 7.10         |
| Year of Follow-up: 2010, Age Group: 40-44 |           |               |      |       |               |             |               |                |              |
| Period                                    | Age Group | Smoking Group | N    | %     | Ever Quit (N) | Ever Quit % | Mean Yrs Quit | Short Term (n) | Short Term % |
| 20                                        | 40-44     | Never Any     | 5189 | 59.01 |               |             |               |                |              |
| 20                                        | 40-44     | CC            | 64   | 0.73  | 0             | 0.00        |               |                |              |
| 20                                        | 40-44     | Ecig          | 2125 | 24.17 |               |             |               |                |              |
| 20                                        | 40-44     | Dual          | 0    | 0.00  |               |             |               |                |              |
| 20                                        | 40-44     | Former        | 1415 | 16.09 |               |             | 16.97         | 71             | 5.02         |
| Year of Follow-up: 2010, Age Group: 45-49 |           |               |      |       |               |             |               |                |              |
| Period                                    | Age Group | Smoking Group | N    | %     | Ever Quit (N) | Ever Quit % | Mean Yrs Quit | Short Term (n) | Short Term % |
| 20                                        | 45-49     | Never Any     | 5284 | 52.43 |               |             |               |                |              |
| 20                                        | 45-49     | CC            | 105  | 1.04  | 0             | 0.00        |               |                |              |
| 20                                        | 45-49     | Ecig          | 2660 | 26.39 |               |             |               |                |              |
| 20                                        | 45-49     | Dual          | 0    | 0.00  |               |             |               |                |              |
| 20                                        | 45-49     | Former        | 2029 | 20.13 |               |             | 19.55         | 69             | 3.40         |
| Year of Follow-up: 2010, Age Group: 50-54 |           |               |      |       |               |             |               |                |              |
| Period                                    | Age Group | Smoking Group | N    | %     | Ever Quit (N) | Ever Quit % | Mean Yrs Quit | Short Term (n) | Short Term % |
| 20                                        | 50-54     | Never Any     | 5278 | 50.27 |               |             |               |                |              |
| 20                                        | 50-54     | CC            | 101  | 0.96  | 0             | 0.00        |               |                |              |
| 20                                        | 50-54     | Ecig          | 2484 | 23.66 |               |             |               |                |              |
| 20                                        | 50-54     | Dual          | 0    | 0.00  |               |             |               |                |              |
| 20                                        | 50-54     | Former        | 2636 | 25.11 |               |             | 19.95         | 105            | 3.98         |
| Year of Follow-up: 2010, Age Group: 55-59 |           |               |      |       |               |             |               |                |              |
| Period                                    | Age Group | Smoking Group | N    | %     | Ever Quit (N) | Ever Quit % | Mean Yrs Quit | Short Term (n) | Short Term % |
| 20                                        | 55-59     | Never Any     | 5018 | 52.27 |               |             |               |                |              |
| 20                                        | 55-59     | CC            | 91   | 0.95  | 0             | 0.00        |               |                |              |
| 20                                        | 55-59     | Ecig          | 1791 | 18.66 |               |             |               |                |              |
| 20                                        | 55-59     | Dual          | 0    | 0.00  |               |             |               |                |              |
| 20                                        | 55-59     | Former        | 2700 | 28.13 |               |             | 22.63         | 63             | 2.33         |
| Year of Follow-up: 2010, Age Group: 60-64 |           |               |      |       |               |             |               |                |              |
| Period                                    | Age Group | Smoking Group | N    | %     | Ever Quit (N) | Ever Quit % | Mean Yrs Quit | Short Term (n) | Short Term % |
| 20                                        | 60-64     | Never Any     | 4356 | 51.27 |               |             |               |                |              |
| 20                                        | 60-64     | CC            | 71   | 0.84  | 0             | 0.00        |               |                |              |
| 20                                        | 60-64     | Ecig          | 1420 | 16.71 |               |             |               |                |              |
| 20                                        | 60-64     | Dual          | 0    | 0.00  |               |             |               |                |              |
| 20                                        | 60-64     | Former        | 2650 | 31.19 |               |             | 21.37         | 110            | 4.15         |
| Year of Follow-up: 2010, Age Group: 65-69 |           |               |      |       |               |             |               |                |              |

**Results for PHIM for Run 2 (Sensitivity\_Analysis\_3.RTF)**

| Period                                       | Age Group | Smoking Group | N     | %     | Ever Quit (N) | Ever Quit % | Mean Yrs Quit | Short Term (n) | Short Term % |
|----------------------------------------------|-----------|---------------|-------|-------|---------------|-------------|---------------|----------------|--------------|
| 20                                           | 65-69     | Never Any     | 3116  | 47.67 |               |             |               |                |              |
| 20                                           | 65-69     | CC            | 47    | 0.72  | 0             | 0.00        |               |                |              |
| 20                                           | 65-69     | Ecig          | 936   | 14.32 |               |             |               |                |              |
| 20                                           | 65-69     | Dual          | 0     | 0.00  |               |             |               |                |              |
| 20                                           | 65-69     | Former        | 2437  | 37.29 |               |             | 24.39         | 75             | 3.08         |
| Year of Follow-up: 2010, Age Group: 70-74    |           |               |       |       |               |             |               |                |              |
| Period                                       | Age Group | Smoking Group | N     | %     | Ever Quit (N) | Ever Quit % | Mean Yrs Quit | Short Term (n) | Short Term % |
| 20                                           | 70-74     | Never Any     | 2684  | 48.50 |               |             |               |                |              |
| 20                                           | 70-74     | CC            | 88    | 1.59  | 0             | 0.00        |               |                |              |
| 20                                           | 70-74     | Ecig          | 710   | 12.83 |               |             |               |                |              |
| 20                                           | 70-74     | Dual          | 0     | 0.00  |               |             |               |                |              |
| 20                                           | 70-74     | Former        | 2052  | 37.08 |               |             | 24.60         | 52             | 2.53         |
| Year of Follow-up: 2010, Age Group: 75-79    |           |               |       |       |               |             |               |                |              |
| Period                                       | Age Group | Smoking Group | N     | %     | Ever Quit (N) | Ever Quit % | Mean Yrs Quit | Short Term (n) | Short Term % |
| 20                                           | 75-79     | Never Any     | 2732  | 51.90 |               |             |               |                |              |
| 20                                           | 75-79     | CC            | 75    | 1.42  | 0             | 0.00        |               |                |              |
| 20                                           | 75-79     | Ecig          | 445   | 8.45  |               |             |               |                |              |
| 20                                           | 75-79     | Dual          | 0     | 0.00  |               |             |               |                |              |
| 20                                           | 75-79     | Former        | 2012  | 38.22 |               |             | 26.91         | 63             | 3.13         |
| Year of Follow-up: 2015, Age Group: All Ages |           |               |       |       |               |             |               |                |              |
| Period                                       | Age Group | Smoking Group | N     | %     | Ever Quit (N) | Ever Quit % | Mean Yrs Quit | Short Term (n) | Short Term % |
| 25                                           | All Ages  | Never Any     | 41010 | 54.09 |               |             |               |                |              |
| 25                                           | All Ages  | CC            | 340   | 0.45  | 0             | 0.00        |               |                |              |
| 25                                           | All Ages  | Ecig          | 15263 | 20.13 |               |             |               |                |              |
| 25                                           | All Ages  | Dual          | 0     | 0.00  |               |             |               |                |              |
| 25                                           | All Ages  | Former        | 19204 | 25.33 |               |             | 23.62         | 617            | 3.21         |
| Year of Follow-up: 2015, Age Group: 18-19    |           |               |       |       |               |             |               |                |              |
| Period                                       | Age Group | Smoking Group | N     | %     | Ever Quit (N) | Ever Quit % | Mean Yrs Quit | Short Term (n) | Short Term % |
| 25                                           | 18-19     | Never Any     | 0     | .     |               |             |               |                |              |
| 25                                           | 18-19     | CC            | 0     | .     | 0             | .           |               |                |              |
| 25                                           | 18-19     | Ecig          | 0     | .     |               |             |               |                |              |
| 25                                           | 18-19     | Dual          | 0     | .     |               |             |               |                |              |
| 25                                           | 18-19     | Former        | 0     | .     |               |             | .             | 0              | .            |
| Year of Follow-up: 2015, Age Group: 20-24    |           |               |       |       |               |             |               |                |              |
| Period                                       | Age Group | Smoking Group | N     | %     | Ever Quit (N) | Ever Quit % | Mean Yrs Quit | Short Term (n) | Short Term % |
| 25                                           | 20-24     | Never Any     | 0     | .     |               |             |               |                |              |
| 25                                           | 20-24     | CC            | 0     | .     | 0             | .           |               |                |              |
| 25                                           | 20-24     | Ecig          | 0     | .     |               |             |               |                |              |
| 25                                           | 20-24     | Dual          | 0     | .     |               |             |               |                |              |
| 25                                           | 20-24     | Former        | 0     | .     |               |             | .             | 0              | .            |
| Year of Follow-up: 2015, Age Group: 25-29    |           |               |       |       |               |             |               |                |              |
| Period                                       | Age Group | Smoking Group | N     | %     | Ever Quit (N) | Ever Quit % | Mean Yrs Quit | Short Term (n) | Short Term % |
| 25                                           | 25-29     | Never Any     | 0     | .     |               |             |               |                |              |
| 25                                           | 25-29     | CC            | 0     | .     | 0             | .           |               |                |              |
| 25                                           | 25-29     | Ecig          | 0     | .     |               |             |               |                |              |
| 25                                           | 25-29     | Dual          | 0     | .     |               |             |               |                |              |
| 25                                           | 25-29     | Former        | 0     | .     |               |             | .             | 0              | .            |
| Year of Follow-up: 2015, Age Group: 30-34    |           |               |       |       |               |             |               |                |              |
| Period                                       | Age Group | Smoking Group | N     | %     | Ever Quit (N) | Ever Quit % | Mean Yrs Quit | Short Term (n) | Short Term % |
| 25                                           | 30-34     | Never Any     | 0     | .     |               |             |               |                |              |
| 25                                           | 30-34     | CC            | 0     | .     | 0             | .           |               |                |              |
| 25                                           | 30-34     | Ecig          | 0     | .     |               |             |               |                |              |
| 25                                           | 30-34     | Dual          | 0     | .     |               |             |               |                |              |
| 25                                           | 30-34     | Former        | 0     | .     |               |             | .             | 0              | .            |
| Year of Follow-up: 2015, Age Group: 35-39    |           |               |       |       |               |             |               |                |              |
| Period                                       | Age Group | Smoking Group | N     | %     | Ever Quit (N) | Ever Quit % | Mean Yrs Quit | Short Term (n) | Short Term % |
| 25                                           | 35-39     | Never Any     | 4726  | 59.60 |               |             |               |                |              |
| 25                                           | 35-39     | CC            | 20    | 0.25  | 0             | 0.00        |               |                |              |
| 25                                           | 35-39     | Ecig          | 2156  | 27.19 |               |             |               |                |              |
| 25                                           | 35-39     | Dual          | 0     | 0.00  |               |             |               |                |              |
| 25                                           | 35-39     | Former        | 1028  | 12.96 |               |             | 11.78         | 70             | 6.81         |
| Year of Follow-up: 2015, Age Group: 40-44    |           |               |       |       |               |             |               |                |              |
| Period                                       | Age Group | Smoking Group | N     | %     | Ever Quit (N) | Ever Quit % | Mean Yrs Quit | Short Term (n) | Short Term % |
| 25                                           | 40-44     | Never Any     | 5359  | 64.18 |               |             |               |                |              |
| 25                                           | 40-44     | CC            | 33    | 0.40  | 0             | 0.00        |               |                |              |
| 25                                           | 40-44     | Ecig          | 1931  | 23.13 |               |             |               |                |              |
| 25                                           | 40-44     | Dual          | 0     | 0.00  |               |             |               |                |              |

**Results for PHIM for Run 2 (Sensitivity\_Analysis\_3.RTF)**

|                                              |           |               |       |       |               |             |               |                |              |
|----------------------------------------------|-----------|---------------|-------|-------|---------------|-------------|---------------|----------------|--------------|
| 25                                           | 40-44     | Former        | 1027  | 12.30 |               |             | 14.99         | 74             | 7.21         |
| Year of Follow-up: 2015, Age Group: 45-49    |           |               |       |       |               |             |               |                |              |
| Period                                       | Age Group | Smoking Group | N     | %     | Ever Quit (N) | Ever Quit % | Mean Yrs Quit | Short Term (n) | Short Term % |
| 25                                           | 45-49     | Never Any     | 5189  | 59.01 |               |             |               |                |              |
| 25                                           | 45-49     | CC            | 32    | 0.36  | 0             | 0.00        |               |                |              |
| 25                                           | 45-49     | Ecig          | 2008  | 22.84 |               |             |               |                |              |
| 25                                           | 45-49     | Dual          | 0     | 0.00  |               |             |               |                |              |
| 25                                           | 45-49     | Former        | 1564  | 17.79 |               |             | 20.06         | 56             | 3.58         |
| Year of Follow-up: 2015, Age Group: 50-54    |           |               |       |       |               |             |               |                |              |
| Period                                       | Age Group | Smoking Group | N     | %     | Ever Quit (N) | Ever Quit % | Mean Yrs Quit | Short Term (n) | Short Term % |
| 25                                           | 50-54     | Never Any     | 5284  | 52.43 |               |             |               |                |              |
| 25                                           | 50-54     | CC            | 45    | 0.45  | 0             | 0.00        |               |                |              |
| 25                                           | 50-54     | Ecig          | 2502  | 24.83 |               |             |               |                |              |
| 25                                           | 50-54     | Dual          | 0     | 0.00  |               |             |               |                |              |
| 25                                           | 50-54     | Former        | 2247  | 22.30 |               |             | 22.35         | 99             | 4.41         |
| Year of Follow-up: 2015, Age Group: 55-59    |           |               |       |       |               |             |               |                |              |
| Period                                       | Age Group | Smoking Group | N     | %     | Ever Quit (N) | Ever Quit % | Mean Yrs Quit | Short Term (n) | Short Term % |
| 25                                           | 55-59     | Never Any     | 5278  | 50.27 |               |             |               |                |              |
| 25                                           | 55-59     | CC            | 37    | 0.35  | 0             | 0.00        |               |                |              |
| 25                                           | 55-59     | Ecig          | 2307  | 21.97 |               |             |               |                |              |
| 25                                           | 55-59     | Dual          | 0     | 0.00  |               |             |               |                |              |
| 25                                           | 55-59     | Former        | 2877  | 27.40 |               |             | 23.02         | 93             | 3.23         |
| Year of Follow-up: 2015, Age Group: 60-64    |           |               |       |       |               |             |               |                |              |
| Period                                       | Age Group | Smoking Group | N     | %     | Ever Quit (N) | Ever Quit % | Mean Yrs Quit | Short Term (n) | Short Term % |
| 25                                           | 60-64     | Never Any     | 5018  | 52.27 |               |             |               |                |              |
| 25                                           | 60-64     | CC            | 42    | 0.44  | 0             | 0.00        |               |                |              |
| 25                                           | 60-64     | Ecig          | 1615  | 16.82 |               |             |               |                |              |
| 25                                           | 60-64     | Dual          | 0     | 0.00  |               |             |               |                |              |
| 25                                           | 60-64     | Former        | 2925  | 30.47 |               |             | 25.64         | 104            | 3.56         |
| Year of Follow-up: 2015, Age Group: 65-69    |           |               |       |       |               |             |               |                |              |
| Period                                       | Age Group | Smoking Group | N     | %     | Ever Quit (N) | Ever Quit % | Mean Yrs Quit | Short Term (n) | Short Term % |
| 25                                           | 65-69     | Never Any     | 4356  | 51.27 |               |             |               |                |              |
| 25                                           | 65-69     | CC            | 41    | 0.48  | 0             | 0.00        |               |                |              |
| 25                                           | 65-69     | Ecig          | 1262  | 14.85 |               |             |               |                |              |
| 25                                           | 65-69     | Dual          | 0     | 0.00  |               |             |               |                |              |
| 25                                           | 65-69     | Former        | 2838  | 33.40 |               |             | 24.80         | 47             | 1.66         |
| Year of Follow-up: 2015, Age Group: 70-74    |           |               |       |       |               |             |               |                |              |
| Period                                       | Age Group | Smoking Group | N     | %     | Ever Quit (N) | Ever Quit % | Mean Yrs Quit | Short Term (n) | Short Term % |
| 25                                           | 70-74     | Never Any     | 3116  | 47.67 |               |             |               |                |              |
| 25                                           | 70-74     | CC            | 31    | 0.47  | 0             | 0.00        |               |                |              |
| 25                                           | 70-74     | Ecig          | 850   | 13.00 |               |             |               |                |              |
| 25                                           | 70-74     | Dual          | 0     | 0.00  |               |             |               |                |              |
| 25                                           | 70-74     | Former        | 2539  | 38.85 |               |             | 28.30         | 35             | 1.38         |
| Year of Follow-up: 2015, Age Group: 75-79    |           |               |       |       |               |             |               |                |              |
| Period                                       | Age Group | Smoking Group | N     | %     | Ever Quit (N) | Ever Quit % | Mean Yrs Quit | Short Term (n) | Short Term % |
| 25                                           | 75-79     | Never Any     | 2684  | 48.50 |               |             |               |                |              |
| 25                                           | 75-79     | CC            | 59    | 1.07  | 0             | 0.00        |               |                |              |
| 25                                           | 75-79     | Ecig          | 632   | 11.42 |               |             |               |                |              |
| 25                                           | 75-79     | Dual          | 0     | 0.00  |               |             |               |                |              |
| 25                                           | 75-79     | Former        | 2159  | 39.01 |               |             | 28.25         | 39             | 1.81         |
| Year of Follow-up: 2020, Age Group: All Ages |           |               |       |       |               |             |               |                |              |
| Period                                       | Age Group | Smoking Group | N     | %     | Ever Quit (N) | Ever Quit % | Mean Yrs Quit | Short Term (n) | Short Term % |
| 30                                           | All Ages  | Never Any     | 38326 | 54.53 |               |             |               |                |              |
| 30                                           | All Ages  | CC            | 115   | 0.16  | 0             | 0.00        |               |                |              |
| 30                                           | All Ages  | Ecig          | 13397 | 19.06 |               |             |               |                |              |
| 30                                           | All Ages  | Dual          | 0     | 0.00  |               |             |               |                |              |
| 30                                           | All Ages  | Former        | 18445 | 26.24 |               |             | 26.06         | 563            | 3.05         |
| Year of Follow-up: 2020, Age Group: 18-19    |           |               |       |       |               |             |               |                |              |
| Period                                       | Age Group | Smoking Group | N     | %     | Ever Quit (N) | Ever Quit % | Mean Yrs Quit | Short Term (n) | Short Term % |
| 30                                           | 18-19     | Never Any     | 0     | .     |               |             |               |                |              |
| 30                                           | 18-19     | CC            | 0     | .     | 0             | .           |               |                |              |
| 30                                           | 18-19     | Ecig          | 0     | .     |               |             |               |                |              |
| 30                                           | 18-19     | Dual          | 0     | .     |               |             |               |                |              |
| 30                                           | 18-19     | Former        | 0     | .     |               |             | .             | 0              | .            |
| Year of Follow-up: 2020, Age Group: 20-24    |           |               |       |       |               |             |               |                |              |
| Period                                       | Age Group | Smoking Group | N     | %     | Ever Quit (N) | Ever Quit % | Mean Yrs Quit | Short Term (n) | Short Term % |
| 30                                           | 20-24     | Never Any     | 0     | .     |               |             |               |                |              |
| 30                                           | 20-24     | CC            | 0     | .     | 0             | .           |               |                |              |

**Results for PHIM for Run 2 (Sensitivity\_Analysis\_3.RTF)**

|                                           |           |               |      |       |               |             |               |                |              |
|-------------------------------------------|-----------|---------------|------|-------|---------------|-------------|---------------|----------------|--------------|
| 30                                        | 20-24     | Ecig          | 0    | .     |               |             |               |                |              |
| 30                                        | 20-24     | Dual          | 0    | .     |               |             |               |                |              |
| 30                                        | 20-24     | Former        | 0    | .     |               |             | 0             | .              |              |
| Year of Follow-up: 2020, Age Group: 25-29 |           |               |      |       |               |             |               |                |              |
| Period                                    | Age Group | Smoking Group | N    | %     | Ever Quit (N) | Ever Quit % | Mean Yrs Quit | Short Term (n) | Short Term % |
| 30                                        | 25-29     | Never Any     | 0    | .     |               |             |               |                |              |
| 30                                        | 25-29     | CC            | 0    | .     | 0             | .           |               |                |              |
| 30                                        | 25-29     | Ecig          | 0    | .     |               |             |               |                |              |
| 30                                        | 25-29     | Dual          | 0    | .     |               |             |               |                |              |
| 30                                        | 25-29     | Former        | 0    | .     |               |             |               | 0              | .            |
| Year of Follow-up: 2020, Age Group: 30-34 |           |               |      |       |               |             |               |                |              |
| Period                                    | Age Group | Smoking Group | N    | %     | Ever Quit (N) | Ever Quit % | Mean Yrs Quit | Short Term (n) | Short Term % |
| 30                                        | 30-34     | Never Any     | 0    | .     |               |             |               |                |              |
| 30                                        | 30-34     | CC            | 0    | .     | 0             | .           |               |                |              |
| 30                                        | 30-34     | Ecig          | 0    | .     |               |             |               |                |              |
| 30                                        | 30-34     | Dual          | 0    | .     |               |             |               |                |              |
| 30                                        | 30-34     | Former        | 0    | .     |               |             |               | 0              | .            |
| Year of Follow-up: 2020, Age Group: 35-39 |           |               |      |       |               |             |               |                |              |
| Period                                    | Age Group | Smoking Group | N    | %     | Ever Quit (N) | Ever Quit % | Mean Yrs Quit | Short Term (n) | Short Term % |
| 30                                        | 35-39     | Never Any     | 0    | .     |               |             |               |                |              |
| 30                                        | 35-39     | CC            | 0    | .     | 0             | .           |               |                |              |
| 30                                        | 35-39     | Ecig          | 0    | .     |               |             |               |                |              |
| 30                                        | 35-39     | Dual          | 0    | .     |               |             |               |                |              |
| 30                                        | 35-39     | Former        | 0    | .     |               |             |               | 0              | .            |
| Year of Follow-up: 2020, Age Group: 40-44 |           |               |      |       |               |             |               |                |              |
| Period                                    | Age Group | Smoking Group | N    | %     | Ever Quit (N) | Ever Quit % | Mean Yrs Quit | Short Term (n) | Short Term % |
| 30                                        | 40-44     | Never Any     | 4726 | 59.60 |               |             |               |                |              |
| 30                                        | 40-44     | CC            | 6    | 0.08  | 0             | 0.00        |               |                |              |
| 30                                        | 40-44     | Ecig          | 1983 | 25.01 |               |             |               |                |              |
| 30                                        | 40-44     | Dual          | 0    | 0.00  |               |             |               |                |              |
| 30                                        | 40-44     | Former        | 1215 | 15.32 |               |             | 14.52         | 69             | 5.68         |
| Year of Follow-up: 2020, Age Group: 45-49 |           |               |      |       |               |             |               |                |              |
| Period                                    | Age Group | Smoking Group | N    | %     | Ever Quit (N) | Ever Quit % | Mean Yrs Quit | Short Term (n) | Short Term % |
| 30                                        | 45-49     | Never Any     | 5359 | 64.18 |               |             |               |                |              |
| 30                                        | 45-49     | CC            | 13   | 0.16  | 0             | 0.00        |               |                |              |
| 30                                        | 45-49     | Ecig          | 1825 | 21.86 |               |             |               |                |              |
| 30                                        | 45-49     | Dual          | 0    | 0.00  |               |             |               |                |              |
| 30                                        | 45-49     | Former        | 1153 | 13.81 |               |             | 18.04         | 50             | 4.34         |
| Year of Follow-up: 2020, Age Group: 50-54 |           |               |      |       |               |             |               |                |              |
| Period                                    | Age Group | Smoking Group | N    | %     | Ever Quit (N) | Ever Quit % | Mean Yrs Quit | Short Term (n) | Short Term % |
| 30                                        | 50-54     | Never Any     | 5189 | 59.01 |               |             |               |                |              |
| 30                                        | 50-54     | CC            | 9    | 0.10  | 0             | 0.00        |               |                |              |
| 30                                        | 50-54     | Ecig          | 1873 | 21.30 |               |             |               |                |              |
| 30                                        | 50-54     | Dual          | 0    | 0.00  |               |             |               |                |              |
| 30                                        | 50-54     | Former        | 1722 | 19.58 |               |             | 22.91         | 82             | 4.76         |
| Year of Follow-up: 2020, Age Group: 55-59 |           |               |      |       |               |             |               |                |              |
| Period                                    | Age Group | Smoking Group | N    | %     | Ever Quit (N) | Ever Quit % | Mean Yrs Quit | Short Term (n) | Short Term % |
| 30                                        | 55-59     | Never Any     | 5284 | 52.43 |               |             |               |                |              |
| 30                                        | 55-59     | CC            | 14   | 0.14  | 0             | 0.00        |               |                |              |
| 30                                        | 55-59     | Ecig          | 2289 | 22.71 |               |             |               |                |              |
| 30                                        | 55-59     | Dual          | 0    | 0.00  |               |             |               |                |              |
| 30                                        | 55-59     | Former        | 2491 | 24.72 |               |             | 24.87         | 93             | 3.73         |
| Year of Follow-up: 2020, Age Group: 60-64 |           |               |      |       |               |             |               |                |              |
| Period                                    | Age Group | Smoking Group | N    | %     | Ever Quit (N) | Ever Quit % | Mean Yrs Quit | Short Term (n) | Short Term % |
| 30                                        | 60-64     | Never Any     | 5278 | 50.27 |               |             |               |                |              |
| 30                                        | 60-64     | CC            | 15   | 0.14  | 0             | 0.00        |               |                |              |
| 30                                        | 60-64     | Ecig          | 2052 | 19.54 |               |             |               |                |              |
| 30                                        | 60-64     | Dual          | 0    | 0.00  |               |             |               |                |              |
| 30                                        | 60-64     | Former        | 3154 | 30.04 |               |             | 25.73         | 115            | 3.65         |
| Year of Follow-up: 2020, Age Group: 65-69 |           |               |      |       |               |             |               |                |              |
| Period                                    | Age Group | Smoking Group | N    | %     | Ever Quit (N) | Ever Quit % | Mean Yrs Quit | Short Term (n) | Short Term % |
| 30                                        | 65-69     | Never Any     | 5018 | 52.27 |               |             |               |                |              |
| 30                                        | 65-69     | CC            | 18   | 0.19  | 0             | 0.00        |               |                |              |
| 30                                        | 65-69     | Ecig          | 1449 | 15.09 |               |             |               |                |              |
| 30                                        | 65-69     | Dual          | 0    | 0.00  |               |             |               |                |              |
| 30                                        | 65-69     | Former        | 3115 | 32.45 |               |             | 28.92         | 56             | 1.80         |
| Year of Follow-up: 2020, Age Group: 70-74 |           |               |      |       |               |             |               |                |              |
| Period                                    | Age Group | Smoking Group | N    | %     | Ever Quit (N) | Ever Quit % | Mean Yrs Quit | Short Term (n) | Short Term % |



**Results for PHIM for Run 2 (Sensitivity\_Analysis\_3.RTF)**

|                                              |           |               |       |       |               |             |               |                |              |
|----------------------------------------------|-----------|---------------|-------|-------|---------------|-------------|---------------|----------------|--------------|
| 30                                           | 70-74     | Never Any     | 4356  | 51.27 |               |             |               |                |              |
| 30                                           | 70-74     | CC            | 22    | 0.26  | 0             | 0.00        |               |                |              |
| 30                                           | 70-74     | Ecig          | 1181  | 13.90 |               |             |               |                |              |
| 30                                           | 70-74     | Dual          | 0     | 0.00  |               |             |               |                |              |
| 30                                           | 70-74     | Former        | 2938  | 34.58 |               |             | 28.84         | 51             | 1.74         |
| Year of Follow-up: 2020, Age Group: 75-79    |           |               |       |       |               |             |               |                |              |
| Period                                       | Age Group | Smoking Group | N     | %     | Ever Quit (N) | Ever Quit % | Mean Yrs Quit | Short Term (n) | Short Term % |
| 30                                           | 75-79     | Never Any     | 3116  | 47.67 |               |             |               |                |              |
| 30                                           | 75-79     | CC            | 18    | 0.28  | 0             | 0.00        |               |                |              |
| 30                                           | 75-79     | Ecig          | 745   | 11.40 |               |             |               |                |              |
| 30                                           | 75-79     | Dual          | 0     | 0.00  |               |             |               |                |              |
| 30                                           | 75-79     | Former        | 2657  | 40.65 |               |             | 31.91         | 47             | 1.77         |
| Year of Follow-up: 2025, Age Group: All Ages |           |               |       |       |               |             |               |                |              |
| Period                                       | Age Group | Smoking Group | N     | %     | Ever Quit (N) | Ever Quit % | Mean Yrs Quit | Short Term (n) | Short Term % |
| 35                                           | All Ages  | Never Any     | 35210 | 55.23 |               |             |               |                |              |
| 35                                           | All Ages  | CC            | 47    | 0.07  | 0             | 0.00        |               |                |              |
| 35                                           | All Ages  | Ecig          | 11528 | 18.08 |               |             |               |                |              |
| 35                                           | All Ages  | Dual          | 0     | 0.00  |               |             |               |                |              |
| 35                                           | All Ages  | Former        | 16962 | 26.61 |               |             | 28.13         | 463            | 2.73         |
| Year of Follow-up: 2025, Age Group: 18-19    |           |               |       |       |               |             |               |                |              |
| Period                                       | Age Group | Smoking Group | N     | %     | Ever Quit (N) | Ever Quit % | Mean Yrs Quit | Short Term (n) | Short Term % |
| 35                                           | 18-19     | Never Any     | 0     | .     |               |             |               |                |              |
| 35                                           | 18-19     | CC            | 0     | .     | 0             | .           |               |                |              |
| 35                                           | 18-19     | Ecig          | 0     | .     |               |             |               |                |              |
| 35                                           | 18-19     | Dual          | 0     | .     |               |             |               |                |              |
| 35                                           | 18-19     | Former        | 0     | .     |               |             | .             | 0              | .            |
| Year of Follow-up: 2025, Age Group: 20-24    |           |               |       |       |               |             |               |                |              |
| Period                                       | Age Group | Smoking Group | N     | %     | Ever Quit (N) | Ever Quit % | Mean Yrs Quit | Short Term (n) | Short Term % |
| 35                                           | 20-24     | Never Any     | 0     | .     |               |             |               |                |              |
| 35                                           | 20-24     | CC            | 0     | .     | 0             | .           |               |                |              |
| 35                                           | 20-24     | Ecig          | 0     | .     |               |             |               |                |              |
| 35                                           | 20-24     | Dual          | 0     | .     |               |             |               |                |              |
| 35                                           | 20-24     | Former        | 0     | .     |               |             | .             | 0              | .            |
| Year of Follow-up: 2025, Age Group: 25-29    |           |               |       |       |               |             |               |                |              |
| Period                                       | Age Group | Smoking Group | N     | %     | Ever Quit (N) | Ever Quit % | Mean Yrs Quit | Short Term (n) | Short Term % |
| 35                                           | 25-29     | Never Any     | 0     | .     |               |             |               |                |              |
| 35                                           | 25-29     | CC            | 0     | .     | 0             | .           |               |                |              |
| 35                                           | 25-29     | Ecig          | 0     | .     |               |             |               |                |              |
| 35                                           | 25-29     | Dual          | 0     | .     |               |             |               |                |              |
| 35                                           | 25-29     | Former        | 0     | .     |               |             | .             | 0              | .            |
| Year of Follow-up: 2025, Age Group: 30-34    |           |               |       |       |               |             |               |                |              |
| Period                                       | Age Group | Smoking Group | N     | %     | Ever Quit (N) | Ever Quit % | Mean Yrs Quit | Short Term (n) | Short Term % |
| 35                                           | 30-34     | Never Any     | 0     | .     |               |             |               |                |              |
| 35                                           | 30-34     | CC            | 0     | .     | 0             | .           |               |                |              |
| 35                                           | 30-34     | Ecig          | 0     | .     |               |             |               |                |              |
| 35                                           | 30-34     | Dual          | 0     | .     |               |             |               |                |              |
| 35                                           | 30-34     | Former        | 0     | .     |               |             | .             | 0              | .            |
| Year of Follow-up: 2025, Age Group: 35-39    |           |               |       |       |               |             |               |                |              |
| Period                                       | Age Group | Smoking Group | N     | %     | Ever Quit (N) | Ever Quit % | Mean Yrs Quit | Short Term (n) | Short Term % |
| 35                                           | 35-39     | Never Any     | 0     | .     |               |             |               |                |              |
| 35                                           | 35-39     | CC            | 0     | .     | 0             | .           |               |                |              |
| 35                                           | 35-39     | Ecig          | 0     | .     |               |             |               |                |              |
| 35                                           | 35-39     | Dual          | 0     | .     |               |             |               |                |              |
| 35                                           | 35-39     | Former        | 0     | .     |               |             | .             | 0              | .            |
| Year of Follow-up: 2025, Age Group: 40-44    |           |               |       |       |               |             |               |                |              |
| Period                                       | Age Group | Smoking Group | N     | %     | Ever Quit (N) | Ever Quit % | Mean Yrs Quit | Short Term (n) | Short Term % |
| 35                                           | 40-44     | Never Any     | 0     | .     |               |             |               |                |              |
| 35                                           | 40-44     | CC            | 0     | .     | 0             | .           |               |                |              |
| 35                                           | 40-44     | Ecig          | 0     | .     |               |             |               |                |              |
| 35                                           | 40-44     | Dual          | 0     | .     |               |             |               |                |              |
| 35                                           | 40-44     | Former        | 0     | .     |               |             | .             | 0              | .            |
| Year of Follow-up: 2025, Age Group: 45-49    |           |               |       |       |               |             |               |                |              |
| Period                                       | Age Group | Smoking Group | N     | %     | Ever Quit (N) | Ever Quit % | Mean Yrs Quit | Short Term (n) | Short Term % |
| 35                                           | 45-49     | Never Any     | 4726  | 59.60 |               |             |               |                |              |
| 35                                           | 45-49     | CC            | 1     | 0.01  | 0             | 0.00        |               |                |              |
| 35                                           | 45-49     | Ecig          | 1829  | 23.06 |               |             |               |                |              |
| 35                                           | 45-49     | Dual          | 0     | 0.00  |               |             |               |                |              |
| 35                                           | 45-49     | Former        | 1374  | 17.33 |               |             | 17.52         | 52             | 3.78         |
| Year of Follow-up: 2025, Age Group: 50-54    |           |               |       |       |               |             |               |                |              |

**Results for PHIM for Run 2 (Sensitivity\_Analysis\_3.RTF)**

| Period                                       | Age Group | Smoking Group | N     | %     | Ever Quit (N) | Ever Quit % | Mean Yrs Quit | Short Term (n) | Short Term % |
|----------------------------------------------|-----------|---------------|-------|-------|---------------|-------------|---------------|----------------|--------------|
| 35                                           | 50-54     | Never Any     | 5359  | 64.18 |               |             |               |                |              |
| 35                                           | 50-54     | CC            | 3     | 0.04  | 0             | 0.00        |               |                |              |
| 35                                           | 50-54     | Ecig          | 1679  | 20.11 |               |             |               |                |              |
| 35                                           | 50-54     | Dual          | 0     | 0.00  |               |             |               |                |              |
| 35                                           | 50-54     | Former        | 1309  | 15.68 |               |             | 20.50         | 73             | 5.58         |
| Year of Follow-up: 2025, Age Group: 55-59    |           |               |       |       |               |             |               |                |              |
| Period                                       | Age Group | Smoking Group | N     | %     | Ever Quit (N) | Ever Quit % | Mean Yrs Quit | Short Term (n) | Short Term % |
| 35                                           | 55-59     | Never Any     | 5189  | 59.01 |               |             |               |                |              |
| 35                                           | 55-59     | CC            | 4     | 0.05  | 0             | 0.00        |               |                |              |
| 35                                           | 55-59     | Ecig          | 1713  | 19.48 |               |             |               |                |              |
| 35                                           | 55-59     | Dual          | 0     | 0.00  |               |             |               |                |              |
| 35                                           | 55-59     | Former        | 1887  | 21.46 |               |             | 25.64         | 69             | 3.66         |
| Year of Follow-up: 2025, Age Group: 60-64    |           |               |       |       |               |             |               |                |              |
| Period                                       | Age Group | Smoking Group | N     | %     | Ever Quit (N) | Ever Quit % | Mean Yrs Quit | Short Term (n) | Short Term % |
| 35                                           | 60-64     | Never Any     | 5284  | 52.43 |               |             |               |                |              |
| 35                                           | 60-64     | CC            | 7     | 0.07  | 0             | 0.00        |               |                |              |
| 35                                           | 60-64     | Ecig          | 2053  | 20.37 |               |             |               |                |              |
| 35                                           | 60-64     | Dual          | 0     | 0.00  |               |             |               |                |              |
| 35                                           | 60-64     | Former        | 2734  | 27.13 |               |             | 27.37         | 111            | 4.06         |
| Year of Follow-up: 2025, Age Group: 65-69    |           |               |       |       |               |             |               |                |              |
| Period                                       | Age Group | Smoking Group | N     | %     | Ever Quit (N) | Ever Quit % | Mean Yrs Quit | Short Term (n) | Short Term % |
| 35                                           | 65-69     | Never Any     | 5278  | 50.27 |               |             |               |                |              |
| 35                                           | 65-69     | CC            | 7     | 0.07  | 0             | 0.00        |               |                |              |
| 35                                           | 65-69     | Ecig          | 1841  | 17.54 |               |             |               |                |              |
| 35                                           | 65-69     | Dual          | 0     | 0.00  |               |             |               |                |              |
| 35                                           | 65-69     | Former        | 3373  | 32.13 |               |             | 28.88         | 74             | 2.19         |
| Year of Follow-up: 2025, Age Group: 70-74    |           |               |       |       |               |             |               |                |              |
| Period                                       | Age Group | Smoking Group | N     | %     | Ever Quit (N) | Ever Quit % | Mean Yrs Quit | Short Term (n) | Short Term % |
| 35                                           | 70-74     | Never Any     | 5018  | 52.27 |               |             |               |                |              |
| 35                                           | 70-74     | CC            | 11    | 0.11  | 0             | 0.00        |               |                |              |
| 35                                           | 70-74     | Ecig          | 1346  | 14.02 |               |             |               |                |              |
| 35                                           | 70-74     | Dual          | 0     | 0.00  |               |             |               |                |              |
| 35                                           | 70-74     | Former        | 3225  | 33.59 |               |             | 32.82         | 48             | 1.49         |
| Year of Follow-up: 2025, Age Group: 75-79    |           |               |       |       |               |             |               |                |              |
| Period                                       | Age Group | Smoking Group | N     | %     | Ever Quit (N) | Ever Quit % | Mean Yrs Quit | Short Term (n) | Short Term % |
| 35                                           | 75-79     | Never Any     | 4356  | 51.27 |               |             |               |                |              |
| 35                                           | 75-79     | CC            | 14    | 0.16  | 0             | 0.00        |               |                |              |
| 35                                           | 75-79     | Ecig          | 1067  | 12.56 |               |             |               |                |              |
| 35                                           | 75-79     | Dual          | 0     | 0.00  |               |             |               |                |              |
| 35                                           | 75-79     | Former        | 3060  | 36.01 |               |             | 32.58         | 36             | 1.18         |
| Year of Follow-up: 2030, Age Group: All Ages |           |               |       |       |               |             |               |                |              |
| Period                                       | Age Group | Smoking Group | N     | %     | Ever Quit (N) | Ever Quit % | Mean Yrs Quit | Short Term (n) | Short Term % |
| 40                                           | All Ages  | Never Any     | 30854 | 55.84 |               |             |               |                |              |
| 40                                           | All Ages  | CC            | 14    | 0.03  | 0             | 0.00        |               |                |              |
| 40                                           | All Ages  | Ecig          | 9450  | 17.10 |               |             |               |                |              |
| 40                                           | All Ages  | Dual          | 0     | 0.00  |               |             |               |                |              |
| 40                                           | All Ages  | Former        | 14932 | 27.03 |               |             | 30.07         | 408            | 2.73         |
| Year of Follow-up: 2030, Age Group: 18-19    |           |               |       |       |               |             |               |                |              |
| Period                                       | Age Group | Smoking Group | N     | %     | Ever Quit (N) | Ever Quit % | Mean Yrs Quit | Short Term (n) | Short Term % |
| 40                                           | 18-19     | Never Any     | 0     | .     |               |             |               |                |              |
| 40                                           | 18-19     | CC            | 0     | .     | 0             | .           |               |                |              |
| 40                                           | 18-19     | Ecig          | 0     | .     |               |             |               |                |              |
| 40                                           | 18-19     | Dual          | 0     | .     |               |             |               |                |              |
| 40                                           | 18-19     | Former        | 0     | .     |               |             | .             | 0              | .            |
| Year of Follow-up: 2030, Age Group: 20-24    |           |               |       |       |               |             |               |                |              |
| Period                                       | Age Group | Smoking Group | N     | %     | Ever Quit (N) | Ever Quit % | Mean Yrs Quit | Short Term (n) | Short Term % |
| 40                                           | 20-24     | Never Any     | 0     | .     |               |             |               |                |              |
| 40                                           | 20-24     | CC            | 0     | .     | 0             | .           |               |                |              |
| 40                                           | 20-24     | Ecig          | 0     | .     |               |             |               |                |              |
| 40                                           | 20-24     | Dual          | 0     | .     |               |             |               |                |              |
| 40                                           | 20-24     | Former        | 0     | .     |               |             | .             | 0              | .            |
| Year of Follow-up: 2030, Age Group: 25-29    |           |               |       |       |               |             |               |                |              |
| Period                                       | Age Group | Smoking Group | N     | %     | Ever Quit (N) | Ever Quit % | Mean Yrs Quit | Short Term (n) | Short Term % |
| 40                                           | 25-29     | Never Any     | 0     | .     |               |             |               |                |              |
| 40                                           | 25-29     | CC            | 0     | .     | 0             | .           |               |                |              |
| 40                                           | 25-29     | Ecig          | 0     | .     |               |             |               |                |              |
| 40                                           | 25-29     | Dual          | 0     | .     |               |             |               |                |              |

**Results for PHIM for Run 2 (Sensitivity\_Analysis\_3.RTF)**

| Year of Follow-up: 2030, Age Group: 30-34 | Period | Age Group | Smoking Group | N    | %     | Ever Quit (N) | Ever Quit % | Mean Yrs Quit | Short Term (n) | Short Term % |
|-------------------------------------------|--------|-----------|---------------|------|-------|---------------|-------------|---------------|----------------|--------------|
| Year of Follow-up: 2030, Age Group: 30-34 |        |           |               |      |       |               |             |               |                |              |
| 40                                        | 25-29  | Former    |               | 0    | .     |               |             |               | 0              | .            |
| 40                                        | 30-34  | Never Any |               | 0    | .     |               |             |               |                |              |
| 40                                        | 30-34  | CC        |               | 0    | .     | 0             | .           |               |                |              |
| 40                                        | 30-34  | Ecig      |               | 0    | .     |               |             |               |                |              |
| 40                                        | 30-34  | Dual      |               | 0    | .     |               |             |               |                |              |
| 40                                        | 30-34  | Former    |               | 0    | .     |               |             |               | 0              | .            |
| Year of Follow-up: 2030, Age Group: 35-39 |        |           |               |      |       |               |             |               |                |              |
| 40                                        | 35-39  | Never Any |               | 0    | .     |               |             |               |                |              |
| 40                                        | 35-39  | CC        |               | 0    | .     | 0             | .           |               |                |              |
| 40                                        | 35-39  | Ecig      |               | 0    | .     |               |             |               |                |              |
| 40                                        | 35-39  | Dual      |               | 0    | .     |               |             |               |                |              |
| 40                                        | 35-39  | Former    |               | 0    | .     |               |             |               | 0              | .            |
| Year of Follow-up: 2030, Age Group: 40-44 |        |           |               |      |       |               |             |               |                |              |
| 40                                        | 40-44  | Never Any |               | 0    | .     |               |             |               |                |              |
| 40                                        | 40-44  | CC        |               | 0    | .     | 0             | .           |               |                |              |
| 40                                        | 40-44  | Ecig      |               | 0    | .     |               |             |               |                |              |
| 40                                        | 40-44  | Dual      |               | 0    | .     |               |             |               |                |              |
| 40                                        | 40-44  | Former    |               | 0    | .     |               |             |               | 0              | .            |
| Year of Follow-up: 2030, Age Group: 45-49 |        |           |               |      |       |               |             |               |                |              |
| 40                                        | 45-49  | Never Any |               | 0    | .     |               |             |               |                |              |
| 40                                        | 45-49  | CC        |               | 0    | .     | 0             | .           |               |                |              |
| 40                                        | 45-49  | Ecig      |               | 0    | .     |               |             |               |                |              |
| 40                                        | 45-49  | Dual      |               | 0    | .     |               |             |               |                |              |
| 40                                        | 45-49  | Former    |               | 0    | .     |               |             |               | 0              | .            |
| Year of Follow-up: 2030, Age Group: 50-54 |        |           |               |      |       |               |             |               |                |              |
| 40                                        | 50-54  | Never Any |               | 4726 | 59.60 |               |             |               |                |              |
| 40                                        | 50-54  | CC        |               | 0    | 0.00  | 0             | 0.00        |               |                |              |
| 40                                        | 50-54  | Ecig      |               | 1679 | 21.17 |               |             |               |                |              |
| 40                                        | 50-54  | Dual      |               | 0    | 0.00  |               |             |               |                |              |
| 40                                        | 50-54  | Former    |               | 1525 | 19.23 |               |             | 20.45         | 82             | 5.38         |
| Year of Follow-up: 2030, Age Group: 55-59 |        |           |               |      |       |               |             |               |                |              |
| 40                                        | 55-59  | Never Any |               | 5359 | 64.18 |               |             |               |                |              |
| 40                                        | 55-59  | CC        |               | 0    | 0.00  | 0             | 0.00        |               |                |              |
| 40                                        | 55-59  | Ecig      |               | 1531 | 18.34 |               |             |               |                |              |
| 40                                        | 55-59  | Dual      |               | 0    | 0.00  |               |             |               |                |              |
| 40                                        | 55-59  | Former    |               | 1460 | 17.49 |               |             | 23.07         | 53             | 3.63         |
| Year of Follow-up: 2030, Age Group: 60-64 |        |           |               |      |       |               |             |               |                |              |
| 40                                        | 60-64  | Never Any |               | 5189 | 59.01 |               |             |               |                |              |
| 40                                        | 60-64  | CC        |               | 3    | 0.03  | 0             | 0.00        |               |                |              |
| 40                                        | 60-64  | Ecig      |               | 1513 | 17.21 |               |             |               |                |              |
| 40                                        | 60-64  | Dual      |               | 0    | 0.00  |               |             |               |                |              |
| 40                                        | 60-64  | Former    |               | 2088 | 23.75 |               |             | 27.87         | 83             | 3.98         |
| Year of Follow-up: 2030, Age Group: 65-69 |        |           |               |      |       |               |             |               |                |              |
| 40                                        | 65-69  | Never Any |               | 5284 | 52.43 |               |             |               |                |              |
| 40                                        | 65-69  | CC        |               | 3    | 0.03  | 0             | 0.00        |               |                |              |
| 40                                        | 65-69  | Ecig      |               | 1827 | 18.13 |               |             |               |                |              |
| 40                                        | 65-69  | Dual      |               | 0    | 0.00  |               |             |               |                |              |
| 40                                        | 65-69  | Former    |               | 2964 | 29.41 |               |             | 30.05         | 62             | 2.09         |
| Year of Follow-up: 2030, Age Group: 70-74 |        |           |               |      |       |               |             |               |                |              |
| 40                                        | 70-74  | Never Any |               | 5278 | 50.27 |               |             |               |                |              |
| 40                                        | 70-74  | CC        |               | 4    | 0.04  | 0             | 0.00        |               |                |              |
| 40                                        | 70-74  | Ecig      |               | 1701 | 16.20 |               |             |               |                |              |
| 40                                        | 70-74  | Dual      |               | 0    | 0.00  |               |             |               |                |              |
| 40                                        | 70-74  | Former    |               | 3516 | 33.49 |               |             | 32.58         | 64             | 1.82         |
| Year of Follow-up: 2030, Age Group: 75-79 |        |           |               |      |       |               |             |               |                |              |
| 40                                        | 75-79  | Never Any |               | 5018 | 52.27 |               |             |               |                |              |
| 40                                        | 75-79  | CC        |               | 4    | 0.04  | 0             | 0.00        |               |                |              |

**Results for PHIM for Run 2 (Sensitivity\_Analysis\_3.RTF)**

|                                              |           |               |       |       |               |             |               |                |              |
|----------------------------------------------|-----------|---------------|-------|-------|---------------|-------------|---------------|----------------|--------------|
| 40                                           | 75-79     | Ecig          | 1199  | 12.49 |               |             |               |                |              |
| 40                                           | 75-79     | Dual          | 0     | 0.00  |               |             |               |                |              |
| 40                                           | 75-79     | Former        | 3379  | 35.20 |               |             | 36.19         | 64             | 1.89         |
| Year of Follow-up: 2035, Age Group: All Ages |           |               |       |       |               |             |               |                |              |
| Period                                       | Age Group | Smoking Group | N     | %     | Ever Quit (N) | Ever Quit % | Mean Yrs Quit | Short Term (n) | Short Term % |
| 45                                           | All Ages  | Never Any     | 25836 | 56.60 |               |             |               |                |              |
| 45                                           | All Ages  | CC            | 5     | 0.01  | 0             | 0.00        |               |                |              |
| 45                                           | All Ages  | Ecig          | 7417  | 16.25 |               |             |               |                |              |
| 45                                           | All Ages  | Dual          | 0     | 0.00  |               |             |               |                |              |
| 45                                           | All Ages  | Former        | 12392 | 27.15 |               |             | 31.16         | 327            | 2.64         |
| Year of Follow-up: 2035, Age Group: 18-19    |           |               |       |       |               |             |               |                |              |
| Period                                       | Age Group | Smoking Group | N     | %     | Ever Quit (N) | Ever Quit % | Mean Yrs Quit | Short Term (n) | Short Term % |
| 45                                           | 18-19     | Never Any     | 0     | .     |               |             |               |                |              |
| 45                                           | 18-19     | CC            | 0     | .     | 0             | .           |               |                |              |
| 45                                           | 18-19     | Ecig          | 0     | .     |               |             |               |                |              |
| 45                                           | 18-19     | Dual          | 0     | .     |               |             |               |                |              |
| 45                                           | 18-19     | Former        | 0     | .     |               |             | .             | 0              | .            |
| Year of Follow-up: 2035, Age Group: 20-24    |           |               |       |       |               |             |               |                |              |
| Period                                       | Age Group | Smoking Group | N     | %     | Ever Quit (N) | Ever Quit % | Mean Yrs Quit | Short Term (n) | Short Term % |
| 45                                           | 20-24     | Never Any     | 0     | .     |               |             |               |                |              |
| 45                                           | 20-24     | CC            | 0     | .     | 0             | .           |               |                |              |
| 45                                           | 20-24     | Ecig          | 0     | .     |               |             |               |                |              |
| 45                                           | 20-24     | Dual          | 0     | .     |               |             |               |                |              |
| 45                                           | 20-24     | Former        | 0     | .     |               |             | .             | 0              | .            |
| Year of Follow-up: 2035, Age Group: 25-29    |           |               |       |       |               |             |               |                |              |
| Period                                       | Age Group | Smoking Group | N     | %     | Ever Quit (N) | Ever Quit % | Mean Yrs Quit | Short Term (n) | Short Term % |
| 45                                           | 25-29     | Never Any     | 0     | .     |               |             |               |                |              |
| 45                                           | 25-29     | CC            | 0     | .     | 0             | .           |               |                |              |
| 45                                           | 25-29     | Ecig          | 0     | .     |               |             |               |                |              |
| 45                                           | 25-29     | Dual          | 0     | .     |               |             |               |                |              |
| 45                                           | 25-29     | Former        | 0     | .     |               |             | .             | 0              | .            |
| Year of Follow-up: 2035, Age Group: 30-34    |           |               |       |       |               |             |               |                |              |
| Period                                       | Age Group | Smoking Group | N     | %     | Ever Quit (N) | Ever Quit % | Mean Yrs Quit | Short Term (n) | Short Term % |
| 45                                           | 30-34     | Never Any     | 0     | .     |               |             |               |                |              |
| 45                                           | 30-34     | CC            | 0     | .     | 0             | .           |               |                |              |
| 45                                           | 30-34     | Ecig          | 0     | .     |               |             |               |                |              |
| 45                                           | 30-34     | Dual          | 0     | .     |               |             |               |                |              |
| 45                                           | 30-34     | Former        | 0     | .     |               |             | .             | 0              | .            |
| Year of Follow-up: 2035, Age Group: 35-39    |           |               |       |       |               |             |               |                |              |
| Period                                       | Age Group | Smoking Group | N     | %     | Ever Quit (N) | Ever Quit % | Mean Yrs Quit | Short Term (n) | Short Term % |
| 45                                           | 35-39     | Never Any     | 0     | .     |               |             |               |                |              |
| 45                                           | 35-39     | CC            | 0     | .     | 0             | .           |               |                |              |
| 45                                           | 35-39     | Ecig          | 0     | .     |               |             |               |                |              |
| 45                                           | 35-39     | Dual          | 0     | .     |               |             |               |                |              |
| 45                                           | 35-39     | Former        | 0     | .     |               |             | .             | 0              | .            |
| Year of Follow-up: 2035, Age Group: 40-44    |           |               |       |       |               |             |               |                |              |
| Period                                       | Age Group | Smoking Group | N     | %     | Ever Quit (N) | Ever Quit % | Mean Yrs Quit | Short Term (n) | Short Term % |
| 45                                           | 40-44     | Never Any     | 0     | .     |               |             |               |                |              |
| 45                                           | 40-44     | CC            | 0     | .     | 0             | .           |               |                |              |
| 45                                           | 40-44     | Ecig          | 0     | .     |               |             |               |                |              |
| 45                                           | 40-44     | Dual          | 0     | .     |               |             |               |                |              |
| 45                                           | 40-44     | Former        | 0     | .     |               |             | .             | 0              | .            |
| Year of Follow-up: 2035, Age Group: 45-49    |           |               |       |       |               |             |               |                |              |
| Period                                       | Age Group | Smoking Group | N     | %     | Ever Quit (N) | Ever Quit % | Mean Yrs Quit | Short Term (n) | Short Term % |
| 45                                           | 45-49     | Never Any     | 0     | .     |               |             |               |                |              |
| 45                                           | 45-49     | CC            | 0     | .     | 0             | .           |               |                |              |
| 45                                           | 45-49     | Ecig          | 0     | .     |               |             |               |                |              |
| 45                                           | 45-49     | Dual          | 0     | .     |               |             |               |                |              |
| 45                                           | 45-49     | Former        | 0     | .     |               |             | .             | 0              | .            |
| Year of Follow-up: 2035, Age Group: 50-54    |           |               |       |       |               |             |               |                |              |
| Period                                       | Age Group | Smoking Group | N     | %     | Ever Quit (N) | Ever Quit % | Mean Yrs Quit | Short Term (n) | Short Term % |
| 45                                           | 50-54     | Never Any     | 0     | .     |               |             |               |                |              |
| 45                                           | 50-54     | CC            | 0     | .     | 0             | .           |               |                |              |
| 45                                           | 50-54     | Ecig          | 0     | .     |               |             |               |                |              |
| 45                                           | 50-54     | Dual          | 0     | .     |               |             |               |                |              |
| 45                                           | 50-54     | Former        | 0     | .     |               |             | .             | 0              | .            |
| Year of Follow-up: 2035, Age Group: 55-59    |           |               |       |       |               |             |               |                |              |
| Period                                       | Age Group | Smoking Group | N     | %     | Ever Quit (N) | Ever Quit % | Mean Yrs Quit | Short Term (n) | Short Term % |

### Results for PHIM for Run 2 (Sensitivity\_Analysis\_3.RTF)

|                                              |           |               |       |       |               |             |               |                |              |
|----------------------------------------------|-----------|---------------|-------|-------|---------------|-------------|---------------|----------------|--------------|
| 45                                           | 55-59     | Never Any     | 4726  | 59.60 |               |             |               |                |              |
| 45                                           | 55-59     | CC            | 0     | 0.00  | 0             | 0.00        |               |                |              |
| 45                                           | 55-59     | Ecig          | 1521  | 19.18 |               |             |               |                |              |
| 45                                           | 55-59     | Dual          | 0     | 0.00  |               |             |               |                |              |
| 45                                           | 55-59     | Former        | 1683  | 21.22 |               |             | 23.25         | 59             | 3.51         |
| Year of Follow-up: 2035, Age Group: 60-64    |           |               |       |       |               |             |               |                |              |
| Period                                       | Age Group | Smoking Group | N     | %     | Ever Quit (N) | Ever Quit % | Mean Yrs Quit | Short Term (n) | Short Term % |
| 45                                           | 60-64     | Never Any     | 5359  | 64.18 |               |             |               |                |              |
| 45                                           | 60-64     | CC            | 0     | 0.00  | 0             | 0.00        |               |                |              |
| 45                                           | 60-64     | Ecig          | 1365  | 16.35 |               |             |               |                |              |
| 45                                           | 60-64     | Dual          | 0     | 0.00  |               |             |               |                |              |
| 45                                           | 60-64     | Former        | 1626  | 19.47 |               |             | 25.39         | 76             | 4.67         |
| Year of Follow-up: 2035, Age Group: 65-69    |           |               |       |       |               |             |               |                |              |
| Period                                       | Age Group | Smoking Group | N     | %     | Ever Quit (N) | Ever Quit % | Mean Yrs Quit | Short Term (n) | Short Term % |
| 45                                           | 65-69     | Never Any     | 5189  | 59.01 |               |             |               |                |              |
| 45                                           | 65-69     | CC            | 3     | 0.03  | 0             | 0.00        |               |                |              |
| 45                                           | 65-69     | Ecig          | 1347  | 15.32 |               |             |               |                |              |
| 45                                           | 65-69     | Dual          | 0     | 0.00  |               |             |               |                |              |
| 45                                           | 65-69     | Former        | 2254  | 25.63 |               |             | 30.63         | 50             | 2.22         |
| Year of Follow-up: 2035, Age Group: 70-74    |           |               |       |       |               |             |               |                |              |
| Period                                       | Age Group | Smoking Group | N     | %     | Ever Quit (N) | Ever Quit % | Mean Yrs Quit | Short Term (n) | Short Term % |
| 45                                           | 70-74     | Never Any     | 5284  | 52.43 |               |             |               |                |              |
| 45                                           | 70-74     | CC            | 1     | 0.01  | 0             | 0.00        |               |                |              |
| 45                                           | 70-74     | Ecig          | 1682  | 16.69 |               |             |               |                |              |
| 45                                           | 70-74     | Dual          | 0     | 0.00  |               |             |               |                |              |
| 45                                           | 70-74     | Former        | 3111  | 30.87 |               |             | 33.48         | 74             | 2.38         |
| Year of Follow-up: 2035, Age Group: 75-79    |           |               |       |       |               |             |               |                |              |
| Period                                       | Age Group | Smoking Group | N     | %     | Ever Quit (N) | Ever Quit % | Mean Yrs Quit | Short Term (n) | Short Term % |
| 45                                           | 75-79     | Never Any     | 5278  | 50.27 |               |             |               |                |              |
| 45                                           | 75-79     | CC            | 1     | 0.01  | 0             | 0.00        |               |                |              |
| 45                                           | 75-79     | Ecig          | 1502  | 14.31 |               |             |               |                |              |
| 45                                           | 75-79     | Dual          | 0     | 0.00  |               |             |               |                |              |
| 45                                           | 75-79     | Former        | 3718  | 35.41 |               |             | 35.65         | 68             | 1.83         |
| Year of Follow-up: 2040, Age Group: All Ages |           |               |       |       |               |             |               |                |              |
| Period                                       | Age Group | Smoking Group | N     | %     | Ever Quit (N) | Ever Quit % | Mean Yrs Quit | Short Term (n) | Short Term % |
| 50                                           | All Ages  | Never Any     | 20558 | 58.48 |               |             |               |                |              |
| 50                                           | All Ages  | CC            | 4     | 0.01  | 0             | 0.00        |               |                |              |
| 50                                           | All Ages  | Ecig          | 5319  | 15.13 |               |             |               |                |              |
| 50                                           | All Ages  | Dual          | 0     | 0.00  |               |             |               |                |              |
| 50                                           | All Ages  | Former        | 9270  | 26.37 |               |             | 32.16         | 243            | 2.62         |
| Year of Follow-up: 2040, Age Group: 18-19    |           |               |       |       |               |             |               |                |              |
| Period                                       | Age Group | Smoking Group | N     | %     | Ever Quit (N) | Ever Quit % | Mean Yrs Quit | Short Term (n) | Short Term % |
| 50                                           | 18-19     | Never Any     | 0     | .     |               |             |               |                |              |
| 50                                           | 18-19     | CC            | 0     | .     | 0             | .           |               |                |              |
| 50                                           | 18-19     | Ecig          | 0     | .     |               |             |               |                |              |
| 50                                           | 18-19     | Dual          | 0     | .     |               |             |               |                |              |
| 50                                           | 18-19     | Former        | 0     | .     |               |             | .             | 0              | .            |
| Year of Follow-up: 2040, Age Group: 20-24    |           |               |       |       |               |             |               |                |              |
| Period                                       | Age Group | Smoking Group | N     | %     | Ever Quit (N) | Ever Quit % | Mean Yrs Quit | Short Term (n) | Short Term % |
| 50                                           | 20-24     | Never Any     | 0     | .     |               |             |               |                |              |
| 50                                           | 20-24     | CC            | 0     | .     | 0             | .           |               |                |              |
| 50                                           | 20-24     | Ecig          | 0     | .     |               |             |               |                |              |
| 50                                           | 20-24     | Dual          | 0     | .     |               |             |               |                |              |
| 50                                           | 20-24     | Former        | 0     | .     |               |             | .             | 0              | .            |
| Year of Follow-up: 2040, Age Group: 25-29    |           |               |       |       |               |             |               |                |              |
| Period                                       | Age Group | Smoking Group | N     | %     | Ever Quit (N) | Ever Quit % | Mean Yrs Quit | Short Term (n) | Short Term % |
| 50                                           | 25-29     | Never Any     | 0     | .     |               |             |               |                |              |
| 50                                           | 25-29     | CC            | 0     | .     | 0             | .           |               |                |              |
| 50                                           | 25-29     | Ecig          | 0     | .     |               |             |               |                |              |
| 50                                           | 25-29     | Dual          | 0     | .     |               |             |               |                |              |
| 50                                           | 25-29     | Former        | 0     | .     |               |             | .             | 0              | .            |
| Year of Follow-up: 2040, Age Group: 30-34    |           |               |       |       |               |             |               |                |              |
| Period                                       | Age Group | Smoking Group | N     | %     | Ever Quit (N) | Ever Quit % | Mean Yrs Quit | Short Term (n) | Short Term % |
| 50                                           | 30-34     | Never Any     | 0     | .     |               |             |               |                |              |
| 50                                           | 30-34     | CC            | 0     | .     | 0             | .           |               |                |              |
| 50                                           | 30-34     | Ecig          | 0     | .     |               |             |               |                |              |
| 50                                           | 30-34     | Dual          | 0     | .     |               |             |               |                |              |
| 50                                           | 30-34     | Former        | 0     | .     |               |             | .             | 0              | .            |
| Year of Follow-up: 2040, Age Group: 35-39    |           |               |       |       |               |             |               |                |              |

**Results for PHIM for Run 2 (Sensitivity\_Analysis\_3.RTF)**

| Period                                    | Age Group | Smoking Group | N    | %     | Ever Quit (N) | Ever Quit % | Mean Yrs Quit | Short Term (n) | Short Term % |
|-------------------------------------------|-----------|---------------|------|-------|---------------|-------------|---------------|----------------|--------------|
| 50                                        | 35-39     | Never Any     | 0    | .     |               |             |               |                |              |
| 50                                        | 35-39     | CC            | 0    | .     | 0             | .           |               |                |              |
| 50                                        | 35-39     | Ecig          | 0    | .     |               |             |               |                |              |
| 50                                        | 35-39     | Dual          | 0    | .     |               |             |               |                |              |
| 50                                        | 35-39     | Former        | 0    | .     |               |             | .             | 0              | .            |
| Year of Follow-up: 2040, Age Group: 40-44 |           |               |      |       |               |             |               |                |              |
| Period                                    | Age Group | Smoking Group | N    | %     | Ever Quit (N) | Ever Quit % | Mean Yrs Quit | Short Term (n) | Short Term % |
| 50                                        | 40-44     | Never Any     | 0    | .     |               |             |               |                |              |
| 50                                        | 40-44     | CC            | 0    | .     | 0             | .           |               |                |              |
| 50                                        | 40-44     | Ecig          | 0    | .     |               |             |               |                |              |
| 50                                        | 40-44     | Dual          | 0    | .     |               |             |               |                |              |
| 50                                        | 40-44     | Former        | 0    | .     |               |             | .             | 0              | .            |
| Year of Follow-up: 2040, Age Group: 45-49 |           |               |      |       |               |             |               |                |              |
| Period                                    | Age Group | Smoking Group | N    | %     | Ever Quit (N) | Ever Quit % | Mean Yrs Quit | Short Term (n) | Short Term % |
| 50                                        | 45-49     | Never Any     | 0    | .     |               |             |               |                |              |
| 50                                        | 45-49     | CC            | 0    | .     | 0             | .           |               |                |              |
| 50                                        | 45-49     | Ecig          | 0    | .     |               |             |               |                |              |
| 50                                        | 45-49     | Dual          | 0    | .     |               |             |               |                |              |
| 50                                        | 45-49     | Former        | 0    | .     |               |             | .             | 0              | .            |
| Year of Follow-up: 2040, Age Group: 50-54 |           |               |      |       |               |             |               |                |              |
| Period                                    | Age Group | Smoking Group | N    | %     | Ever Quit (N) | Ever Quit % | Mean Yrs Quit | Short Term (n) | Short Term % |
| 50                                        | 50-54     | Never Any     | 0    | .     |               |             |               |                |              |
| 50                                        | 50-54     | CC            | 0    | .     | 0             | .           |               |                |              |
| 50                                        | 50-54     | Ecig          | 0    | .     |               |             |               |                |              |
| 50                                        | 50-54     | Dual          | 0    | .     |               |             |               |                |              |
| 50                                        | 50-54     | Former        | 0    | .     |               |             | .             | 0              | .            |
| Year of Follow-up: 2040, Age Group: 55-59 |           |               |      |       |               |             |               |                |              |
| Period                                    | Age Group | Smoking Group | N    | %     | Ever Quit (N) | Ever Quit % | Mean Yrs Quit | Short Term (n) | Short Term % |
| 50                                        | 55-59     | Never Any     | 0    | .     |               |             |               |                |              |
| 50                                        | 55-59     | CC            | 0    | .     | 0             | .           |               |                |              |
| 50                                        | 55-59     | Ecig          | 0    | .     |               |             |               |                |              |
| 50                                        | 55-59     | Dual          | 0    | .     |               |             |               |                |              |
| 50                                        | 55-59     | Former        | 0    | .     |               |             | .             | 0              | .            |
| Year of Follow-up: 2040, Age Group: 60-64 |           |               |      |       |               |             |               |                |              |
| Period                                    | Age Group | Smoking Group | N    | %     | Ever Quit (N) | Ever Quit % | Mean Yrs Quit | Short Term (n) | Short Term % |
| 50                                        | 60-64     | Never Any     | 4726 | 59.60 |               |             |               |                |              |
| 50                                        | 60-64     | CC            | 0    | 0.00  | 0             | 0.00        |               |                |              |
| 50                                        | 60-64     | Ecig          | 1358 | 17.12 |               |             |               |                |              |
| 50                                        | 60-64     | Dual          | 0    | 0.00  |               |             |               |                |              |
| 50                                        | 60-64     | Former        | 1846 | 23.28 |               |             | 25.90         | 85             | 4.60         |
| Year of Follow-up: 2040, Age Group: 65-69 |           |               |      |       |               |             |               |                |              |
| Period                                    | Age Group | Smoking Group | N    | %     | Ever Quit (N) | Ever Quit % | Mean Yrs Quit | Short Term (n) | Short Term % |
| 50                                        | 65-69     | Never Any     | 5359 | 64.18 |               |             |               |                |              |
| 50                                        | 65-69     | CC            | 0    | 0.00  | 0             | 0.00        |               |                |              |
| 50                                        | 65-69     | Ecig          | 1224 | 14.66 |               |             |               |                |              |
| 50                                        | 65-69     | Dual          | 0    | 0.00  |               |             |               |                |              |
| 50                                        | 65-69     | Former        | 1767 | 21.16 |               |             | 28.17         | 38             | 2.15         |
| Year of Follow-up: 2040, Age Group: 70-74 |           |               |      |       |               |             |               |                |              |
| Period                                    | Age Group | Smoking Group | N    | %     | Ever Quit (N) | Ever Quit % | Mean Yrs Quit | Short Term (n) | Short Term % |
| 50                                        | 70-74     | Never Any     | 5189 | 59.01 |               |             |               |                |              |
| 50                                        | 70-74     | CC            | 3    | 0.03  | 0             | 0.00        |               |                |              |
| 50                                        | 70-74     | Ecig          | 1249 | 14.20 |               |             |               |                |              |
| 50                                        | 70-74     | Dual          | 0    | 0.00  |               |             |               |                |              |
| 50                                        | 70-74     | Former        | 2352 | 26.75 |               |             | 34.20         | 51             | 2.17         |
| Year of Follow-up: 2040, Age Group: 75-79 |           |               |      |       |               |             |               |                |              |
| Period                                    | Age Group | Smoking Group | N    | %     | Ever Quit (N) | Ever Quit % | Mean Yrs Quit | Short Term (n) | Short Term % |
| 50                                        | 75-79     | Never Any     | 5284 | 52.43 |               |             |               |                |              |
| 50                                        | 75-79     | CC            | 1    | 0.01  | 0             | 0.00        |               |                |              |
| 50                                        | 75-79     | Ecig          | 1488 | 14.76 |               |             |               |                |              |
| 50                                        | 75-79     | Dual          | 0    | 0.00  |               |             |               |                |              |
| 50                                        | 75-79     | Former        | 3305 | 32.79 |               |             | 36.34         | 69             | 2.09         |

## Results for PHIM for Run 2 (Sensitivity\_Analysis\_3.RTF)

\*\*\*\*\*

### Main Results for E-Component for Run: 2, Simulation: 1, COD: Four Diseases Combined

| Variable Parameter          | Value                                  |
|-----------------------------|----------------------------------------|
| 1. Country                  | US (United States)                     |
| 2. Sex                      | F (Females)                            |
| 3. Year of start of process | 1990                                   |
| 4. Cause of Death           | Four Diseases Combined                 |
| 5. Effective Dose NULL      | CC:1                                   |
| 6. Effective Dose Ecig      | CC:1 Ecig:0.05 Dual:0.525              |
| Note:                       | Death rates are per million population |

#### Results for Age Groups Combined and Years combined, Population unadjusted for deaths in Ecig scenario,

| Age Group:All |         | NULL        | Ecig        | %Drop    |        |        | NULL    | Ecig    | Drop    |         |
|---------------|---------|-------------|-------------|----------|--------|--------|---------|---------|---------|---------|
| Year          | Number  | Attrib      | Attrib      | Drop     | %Drop  | Attrib | Death   | Attrib  | Attrib  | Drop    |
|               | Deaths  | Deaths      | Deaths      | Deaths   | Deaths | Deaths | Rate    | Rates   | Rates   | Rates   |
| All Comb      | 9082078 | 2946250.006 | 1971417.685 | 974832.3 | 10.734 | 33.087 | 2493.45 | 808.881 | 541.245 | 267.636 |

#### Results for Age Groups Combined, Population unadjusted for deaths in Ecig scenario,

| Age Group:All |        | NULL      | Ecig      | %Drop    |        |        | NULL    | Ecig    | Drop    |         |
|---------------|--------|-----------|-----------|----------|--------|--------|---------|---------|---------|---------|
| Year          | Number | Attrib    | Attrib    | Drop     | %Drop  | Attrib | Death   | Attrib  | Attrib  | Drop    |
|               | Deaths | Deaths    | Deaths    | Deaths   | Deaths | Deaths | Rate    | Rates   | Rates   | Rates   |
| 1990          | 199848 | 57524.822 | 57524.822 | 0.000    | 0.000  | 0.000  | 2926.84 | 842.471 | 842.471 | 0.000   |
| 1991          | 199162 | 59078.486 | 58910.022 | 168.464  | 0.085  | 0.285  | 2877.87 | 853.678 | 851.244 | 2.434   |
| 1992          | 198532 | 60494.150 | 60022.661 | 471.488  | 0.237  | 0.779  | 2829.84 | 862.271 | 855.551 | 6.720   |
| 1993          | 202512 | 62694.848 | 61777.456 | 917.392  | 0.453  | 1.463  | 2845.85 | 881.034 | 868.142 | 12.892  |
| 1994          | 200658 | 63202.598 | 61753.666 | 1448.932 | 0.722  | 2.293  | 2777.87 | 874.966 | 854.907 | 20.059  |
| 1995          | 201023 | 63766.862 | 61674.456 | 2092.406 | 1.041  | 3.281  | 2739.80 | 869.097 | 840.579 | 28.518  |
| 1996          | 201180 | 64591.163 | 61724.652 | 2866.510 | 1.425  | 4.438  | 2706.36 | 868.908 | 830.347 | 38.562  |
| 1997          | 198639 | 64686.912 | 61098.849 | 3588.063 | 1.806  | 5.547  | 2635.18 | 858.147 | 810.547 | 47.600  |
| 1998          | 197573 | 65295.961 | 60872.586 | 4423.375 | 2.239  | 6.774  | 2584.18 | 854.046 | 796.190 | 57.856  |
| 1999          | 211329 | 67327.521 | 61617.632 | 5709.889 | 2.702  | 8.481  | 2726.91 | 868.771 | 795.092 | 73.678  |
| 2000          | 208496 | 67596.897 | 60951.284 | 6645.612 | 3.187  | 9.831  | 2656.96 | 861.419 | 776.731 | 84.688  |
| 2001          | 203606 | 67008.811 | 59373.859 | 7634.951 | 3.750  | 11.394 | 2565.88 | 844.458 | 748.241 | 96.217  |
| 2002          | 200828 | 67067.744 | 58330.943 | 8736.800 | 4.350  | 13.027 | 2506.09 | 836.925 | 727.900 | 109.025 |
| 2003          | 196352 | 66756.217 | 57025.628 | 9730.589 | 4.956  | 14.576 | 2427.31 | 825.244 | 704.954 | 120.290 |
| 2004          | 188160 | 65058.725 | 54488.777 | 10569.95 | 5.618  | 16.247 | 2302.83 | 796.234 | 666.872 | 129.362 |
| 2005          | 186416 | 65214.724 | 53514.264 | 11700.46 | 6.277  | 17.941 | 2256.27 | 789.321 | 647.705 | 141.616 |
| 2006          | 180088 | 63771.146 | 51215.077 | 12556.07 | 6.972  | 19.689 | 2160.67 | 765.117 | 614.471 | 150.646 |
| 2007          | 175644 | 63110.718 | 49677.354 | 13433.36 | 7.648  | 21.285 | 2086.36 | 749.650 | 590.084 | 159.566 |
| 2008          | 177570 | 63718.624 | 49015.670 | 14702.95 | 8.280  | 23.075 | 2086.39 | 748.674 | 575.919 | 172.755 |
| 2009          | 172806 | 62794.698 | 47279.866 | 15514.83 | 8.978  | 24.707 | 2007.57 | 729.515 | 549.272 | 180.243 |
| 2010          | 170489 | 61917.074 | 45552.496 | 16364.58 | 9.599  | 26.430 | 1957.97 | 711.083 | 523.145 | 187.938 |
| 2011          | 170305 | 61680.114 | 44170.009 | 17510.11 | 10.282 | 28.389 | 1937.46 | 701.700 | 502.497 | 199.203 |
| 2012          | 171421 | 62023.127 | 43243.829 | 18779.30 | 10.955 | 30.278 | 1930.22 | 698.386 | 486.930 | 211.457 |
| 2013          | 172699 | 62037.765 | 42120.294 | 19917.47 | 11.533 | 32.105 | 1923.75 | 691.059 | 469.192 | 221.867 |
| 2014          | 174169 | 61921.017 | 40756.493 | 21164.52 | 12.152 | 34.180 | 1918.85 | 682.195 | 449.022 | 233.173 |
| 2015          | 177354 | 61856.204 | 39633.405 | 22222.80 | 12.530 | 35.927 | 2184.51 | 761.899 | 488.175 | 273.724 |
| 2016          | 176853 | 60464.119 | 37395.593 | 23068.53 | 13.044 | 38.152 | 2157.59 | 737.655 | 456.222 | 281.433 |
| 2017          | 179309 | 60243.839 | 36034.423 | 24209.42 | 13.502 | 40.186 | 2166.86 | 728.017 | 435.458 | 292.559 |
| 2018          | 177157 | 60713.327 | 35483.677 | 25229.65 | 14.241 | 41.555 | 2120.51 | 726.721 | 424.729 | 301.991 |
| 2019          | 179227 | 61148.172 | 34605.269 | 26542.90 | 14.810 | 43.408 | 2124.53 | 724.841 | 410.206 | 314.636 |
| 2020          | 180467 | 61149.317 | 33699.273 | 27450.04 | 15.211 | 44.890 | 2424.25 | 821.432 | 452.690 | 368.743 |
| 2021          | 178116 | 58727.786 | 30909.967 | 27817.82 | 15.618 | 47.367 | 2375.42 | 783.216 | 412.227 | 370.989 |
| 2022          | 179408 | 58848.802 | 29936.338 | 28912.46 | 16.115 | 49.130 | 2374.52 | 778.881 | 396.216 | 382.665 |
| 2023          | 180640 | 58816.149 | 28948.921 | 29867.23 | 16.534 | 50.781 | 2372.26 | 772.407 | 380.174 | 392.233 |
| 2024          | 181610 | 58955.232 | 27975.624 | 30979.61 | 17.058 | 52.548 | 2366.77 | 768.316 | 364.584 | 403.732 |
| 2025          | 180418 | 58297.744 | 26859.902 | 31437.84 | 17.425 | 53.926 | 2713.69 | 876.861 | 404.002 | 472.859 |
| 2026          | 180313 | 56469.971 | 24859.966 | 31610.01 | 17.531 | 55.977 | 2701.83 | 846.150 | 372.503 | 473.646 |
| 2027          | 179619 | 56209.427 | 23778.487 | 32430.94 | 18.055 | 57.697 | 2680.68 | 838.883 | 354.876 | 484.007 |
| 2028          | 178762 | 55733.105 | 22639.123 | 33093.98 | 18.513 | 59.379 | 2656.74 | 828.298 | 336.460 | 491.838 |
| 2029          | 177808 | 55145.838 | 21484.477 | 33661.36 | 18.931 | 61.041 | 2630.89 | 815.951 | 317.889 | 498.061 |
| 2030          | 173587 | 53615.097 | 20255.861 | 33359.24 | 19.218 | 62.220 | 3040.33 | 939.056 | 354.777 | 584.279 |
| 2031          | 174985 | 52046.561 | 19061.219 | 32985.34 | 18.850 | 63.377 | 3060.73 | 910.364 | 333.406 | 576.958 |
| 2032          | 173400 | 51582.636 | 18137.473 | 33445.16 | 19.288 | 64.838 | 3027.10 | 900.496 | 316.632 | 583.864 |
| 2033          | 171756 | 50839.758 | 17198.996 | 33640.76 | 19.586 | 66.170 | 2991.14 | 885.375 | 299.521 | 585.854 |
| 2034          | 169973 | 50215.451 | 16286.850 | 33928.60 | 19.961 | 67.566 | 2951.96 | 872.104 | 282.858 | 589.246 |
| 2035          | 162644 | 47773.075 | 15135.928 | 32637.15 | 20.067 | 68.317 | 3459.14 | 1016.05 | 321.913 | 694.132 |
| 2036          | 156254 | 43298.709 | 13102.678 | 30196.03 | 19.325 | 69.739 | 3328.25 | 922.274 | 279.091 | 643.184 |
| 2037          | 153593 | 42241.563 | 12180.009 | 30061.55 | 19.572 | 71.166 | 3274.10 | 900.450 | 259.638 | 640.813 |
| 2038          | 150947 | 41356.353 | 11473.175 | 29883.18 | 19.797 | 72.258 | 3217.50 | 881.531 | 244.556 | 636.975 |
| 2039          | 148373 | 40161.050 | 10648.407 | 29512.64 | 19.891 | 73.486 | 3159.42 | 855.178 | 226.744 | 628.433 |

## Results for PHIM for Run 2 (Sensitivity\_Analysis\_3.RTF)

\*\*\*\*\*

### Main Results for E-Component for Run: 2, Simulation: 1, COD: LUNG CANCER

| Variable Parameter          | Value                                  |
|-----------------------------|----------------------------------------|
| 1. Country                  | US (United States)                     |
| 2. Sex                      | F (Females)                            |
| 3. Year of start of process | 1990                                   |
| 4. Cause of Death           | LUNG CANCER                            |
| 5. Effective Dose NULL      | CC:1                                   |
| 6. Effective Dose Ecig      | CC:1 Ecig:0.05 Dual:0.525              |
| Note:                       | Death rates are per million population |

#### Results for Age Groups Combined and Years combined, Population unadjusted for deaths in Ecig scenario,

| Age Group:All | NULL    | Ecig        | %Drop       |          |        | NULL   | Ecig    | Drop    |         |         |
|---------------|---------|-------------|-------------|----------|--------|--------|---------|---------|---------|---------|
| Year          | Number  | Attrib      | Attrib      | Drop     | %Drop  | Attrib | Death   | Attrib  | Attrib  | Drop    |
|               | Deaths  | Deaths      | Deaths      | Deaths   | Deaths | Deaths | Rate    | Rates   | Rates   | Rates   |
| All Comb      | 2327764 | 1580465.217 | 1157281.054 | 423184.2 | 18.180 | 26.776 | 639.078 | 433.910 | 317.727 | 116.184 |

#### Results for Age Groups Combined, Population unadjusted for deaths in Ecig scenario,

| Age Group:All | NULL   | Ecig      | %Drop     |          |        | NULL   | Ecig    | Drop    |         |         |
|---------------|--------|-----------|-----------|----------|--------|--------|---------|---------|---------|---------|
| Year          | Number | Attrib    | Attrib    | Drop     | %Drop  | Attrib | Death   | Attrib  | Attrib  | Drop    |
|               | Deaths | Deaths    | Deaths    | Deaths   | Deaths | Deaths | Rate    | Rates   | Rates   | Rates   |
| 1990          | 42690  | 30614.201 | 30614.201 | 0.000    | 0.000  | 0.000  | 625.210 | 448.355 | 448.355 | 0.000   |
| 1991          | 43692  | 31412.010 | 31379.684 | 32.326   | 0.074  | 0.103  | 631.345 | 453.901 | 453.433 | 0.467   |
| 1992          | 45423  | 32782.407 | 32688.475 | 93.931   | 0.207  | 0.287  | 647.450 | 467.274 | 465.935 | 1.339   |
| 1993          | 46291  | 33491.183 | 33305.500 | 185.683  | 0.401  | 0.554  | 650.515 | 470.643 | 468.033 | 2.609   |
| 1994          | 47017  | 34074.347 | 33773.363 | 300.985  | 0.640  | 0.883  | 650.895 | 471.719 | 467.553 | 4.167   |
| 1995          | 47840  | 34694.454 | 34240.625 | 453.829  | 0.949  | 1.308  | 652.025 | 472.861 | 466.676 | 6.185   |
| 1996          | 48244  | 35027.269 | 34399.166 | 628.103  | 1.302  | 1.793  | 648.999 | 471.202 | 462.752 | 8.450   |
| 1997          | 49035  | 35590.763 | 34755.233 | 835.529  | 1.704  | 2.348  | 650.506 | 472.153 | 461.069 | 11.084  |
| 1998          | 49686  | 36100.785 | 35020.102 | 1080.683 | 2.175  | 2.994  | 649.874 | 472.184 | 458.049 | 14.135  |
| 1999          | 48883  | 35451.030 | 34149.518 | 1301.511 | 2.663  | 3.671  | 630.769 | 457.448 | 440.653 | 16.794  |
| 2000          | 50331  | 36447.986 | 34819.825 | 1628.161 | 3.235  | 4.467  | 641.392 | 464.474 | 443.726 | 20.748  |
| 2001          | 50389  | 36411.326 | 34452.124 | 1959.202 | 3.888  | 5.381  | 635.012 | 458.863 | 434.172 | 24.690  |
| 2002          | 51445  | 37078.545 | 34708.388 | 2370.157 | 4.607  | 6.392  | 641.972 | 462.696 | 433.119 | 29.577  |
| 2003          | 51408  | 36999.876 | 34237.721 | 2762.155 | 5.373  | 7.465  | 635.509 | 457.395 | 423.249 | 34.146  |
| 2004          | 51399  | 36861.555 | 33664.617 | 3196.938 | 6.220  | 8.673  | 629.057 | 451.138 | 412.011 | 39.126  |
| 2005          | 51421  | 36689.529 | 33033.598 | 3655.931 | 7.110  | 9.965  | 622.370 | 444.069 | 399.819 | 44.249  |
| 2006          | 51355  | 36504.774 | 32366.904 | 4137.870 | 8.057  | 11.335 | 616.150 | 437.979 | 388.333 | 49.646  |
| 2007          | 51839  | 36663.202 | 31951.726 | 4711.476 | 9.089  | 12.851 | 615.761 | 435.498 | 379.533 | 55.964  |
| 2008          | 50976  | 35898.803 | 30757.946 | 5140.857 | 10.085 | 14.320 | 598.952 | 421.800 | 361.396 | 60.403  |
| 2009          | 51193  | 35934.525 | 30180.532 | 5753.993 | 11.240 | 16.012 | 594.733 | 417.468 | 350.621 | 66.847  |
| 2010          | 50853  | 35502.829 | 29249.118 | 6253.711 | 12.298 | 17.615 | 584.018 | 407.730 | 335.910 | 71.820  |
| 2011          | 50509  | 35136.342 | 28300.194 | 6836.148 | 13.535 | 19.456 | 574.613 | 399.726 | 321.955 | 77.771  |
| 2012          | 51245  | 35450.201 | 27890.202 | 7559.999 | 14.753 | 21.326 | 577.023 | 399.173 | 314.046 | 85.126  |
| 2013          | 51069  | 35123.224 | 26930.533 | 8192.691 | 16.042 | 23.326 | 568.874 | 391.249 | 299.988 | 91.261  |
| 2014          | 51251  | 35079.370 | 26211.365 | 8868.005 | 17.303 | 25.280 | 564.641 | 386.476 | 288.775 | 97.700  |
| 2015          | 50443  | 34324.171 | 25019.046 | 9305.125 | 18.447 | 27.110 | 621.319 | 422.780 | 308.166 | 114.614 |
| 2016          | 48854  | 33054.753 | 23370.583 | 9684.169 | 19.823 | 29.297 | 596.013 | 403.264 | 285.118 | 118.146 |
| 2017          | 48325  | 32471.234 | 22237.660 | 10233.57 | 21.177 | 31.516 | 583.983 | 392.399 | 268.731 | 123.668 |
| 2018          | 50465  | 33657.595 | 22240.649 | 11416.95 | 22.623 | 33.921 | 604.052 | 402.871 | 266.214 | 136.657 |
| 2019          | 51036  | 33863.424 | 21613.805 | 12249.62 | 24.002 | 36.174 | 604.975 | 401.412 | 256.207 | 145.205 |
| 2020          | 51444  | 33910.830 | 20970.174 | 12940.66 | 25.155 | 38.161 | 691.053 | 455.532 | 281.697 | 173.835 |
| 2021          | 48037  | 31531.880 | 18755.288 | 12776.59 | 26.597 | 40.520 | 640.639 | 420.521 | 250.128 | 170.393 |
| 2022          | 48335  | 31560.212 | 18067.015 | 13493.20 | 27.916 | 42.754 | 639.727 | 417.708 | 239.122 | 178.586 |
| 2023          | 48599  | 31508.781 | 17367.464 | 14141.32 | 29.098 | 44.881 | 638.227 | 413.791 | 228.079 | 185.712 |
| 2024          | 48784  | 31517.293 | 16669.111 | 14848.18 | 30.437 | 47.111 | 635.757 | 410.740 | 217.235 | 193.504 |
| 2025          | 48477  | 31175.389 | 15897.467 | 15277.92 | 31.516 | 49.006 | 729.141 | 468.912 | 239.115 | 229.796 |
| 2026          | 45324  | 29044.598 | 14210.279 | 14834.32 | 32.729 | 51.074 | 679.138 | 435.206 | 212.928 | 222.278 |
| 2027          | 45107  | 28825.765 | 13490.430 | 15335.34 | 33.998 | 53.200 | 673.191 | 430.203 | 201.334 | 228.868 |
| 2028          | 44842  | 28513.846 | 12753.608 | 15760.24 | 35.146 | 55.272 | 666.430 | 423.769 | 189.542 | 234.227 |
| 2029          | 44539  | 28148.109 | 12012.276 | 16135.83 | 36.228 | 57.325 | 659.013 | 416.486 | 177.736 | 238.750 |
| 2030          | 43393  | 27314.475 | 11230.337 | 16084.14 | 37.066 | 58.885 | 760.018 | 478.407 | 196.697 | 281.710 |
| 2031          | 40748  | 25423.102 | 10146.544 | 15276.56 | 37.491 | 60.089 | 712.731 | 444.684 | 177.477 | 267.207 |
| 2032          | 40325  | 25085.902 | 9570.694  | 15515.21 | 38.475 | 61.848 | 703.969 | 437.933 | 167.079 | 270.854 |
| 2033          | 39882  | 24645.067 | 9008.058  | 15637.01 | 39.208 | 63.449 | 694.543 | 429.194 | 156.875 | 272.319 |
| 2034          | 39404  | 24239.126 | 8465.984  | 15773.14 | 40.029 | 65.073 | 684.347 | 420.967 | 147.031 | 273.936 |
| 2035          | 37454  | 22944.147 | 7777.917  | 15166.23 | 40.492 | 66.101 | 796.588 | 487.980 | 165.422 | 322.558 |
| 2036          | 32988  | 19950.581 | 6482.084  | 13468.50 | 40.828 | 67.509 | 702.663 | 424.953 | 138.070 | 286.883 |
| 2037          | 32403  | 19415.334 | 5997.031  | 13418.30 | 41.410 | 69.112 | 690.731 | 413.871 | 127.837 | 286.034 |
| 2038          | 31820  | 18939.317 | 5631.384  | 13307.93 | 41.823 | 70.266 | 678.257 | 403.701 | 120.036 | 283.665 |
| 2039          | 31251  | 18379.752 | 5215.507  | 13164.24 | 42.124 | 71.624 | 665.457 | 391.373 | 111.057 | 280.316 |



## Results for PHIM for Run 2 (Sensitivity\_Analysis\_3.RTF)

\*\*\*\*\*

### Main Results for E-Component for Run: 2, Simulation: 1, COD: IHD

| Variable Parameter          | Value                                  |
|-----------------------------|----------------------------------------|
| 1. Country                  | US (United States)                     |
| 2. Sex                      | F (Females)                            |
| 3. Year of start of process | 1990                                   |
| 4. Cause of Death           | IHD                                    |
| 5. Effective Dose NULL      | CC:1                                   |
| 6. Effective Dose Ecig      | CC:1 Ecig:0.05 Dual:0.525              |
| Note:                       | Death rates are per million population |

#### Results for Age Groups Combined and Years combined, Population unadjusted for deaths in Ecig scenario,

| Age Group:All |         | NULL       | Ecig       | %Drop    |        | NULL   | Ecig    | Drop    |        |        |
|---------------|---------|------------|------------|----------|--------|--------|---------|---------|--------|--------|
| Year          | Number  | Attrib     | Attrib     | Drop     | %Drop  | Attrib | Death   | Attrib  | Drop   |        |
|               | Deaths  | Deaths     | Deaths     | Deaths   | Deaths | Deaths | Rate    | Rates   | Rates  |        |
| All Comb      | 3242167 | 398833.796 | 203015.169 | 195818.6 | 6.040  | 49.098 | 890.124 | 109.498 | 55.737 | 53.761 |

#### Results for Age Groups Combined, Population unadjusted for deaths in Ecig scenario,

| Age Group:All |        | NULL      | Ecig      | %Drop    |        | NULL   | Ecig    | Drop    |         |        |
|---------------|--------|-----------|-----------|----------|--------|--------|---------|---------|---------|--------|
| Year          | Number | Attrib    | Attrib    | Drop     | %Drop  | Attrib | Death   | Attrib  | Drop    |        |
|               | Deaths | Deaths    | Deaths    | Deaths   | Deaths | Deaths | Rate    | Rates   | Rates   |        |
| 1990          | 98916  | 12922.892 | 12922.892 | 0.000    | 0.000  | 0.000  | 1448.66 | 189.260 | 0.000   |        |
| 1991          | 96403  | 12856.479 | 12766.075 | 90.404   | 0.094  | 0.703  | 1393.01 | 185.775 | 184.469 | 1.306  |
| 1992          | 93721  | 12662.244 | 12411.742 | 250.502  | 0.267  | 1.978  | 1335.88 | 180.485 | 176.914 | 3.571  |
| 1993          | 93679  | 12730.613 | 12252.609 | 478.004  | 0.510  | 3.755  | 1316.45 | 178.900 | 172.183 | 6.717  |
| 1994          | 90832  | 12495.323 | 11751.150 | 744.172  | 0.819  | 5.956  | 1257.46 | 172.983 | 162.681 | 10.302 |
| 1995          | 89698  | 12365.590 | 11314.296 | 1051.294 | 1.172  | 8.502  | 1222.52 | 168.534 | 154.206 | 14.328 |
| 1996          | 88286  | 12290.551 | 10857.476 | 1433.076 | 1.623  | 11.660 | 1187.66 | 165.338 | 146.059 | 19.278 |
| 1997          | 84777  | 11719.531 | 9994.457  | 1725.074 | 2.035  | 14.720 | 1124.67 | 155.473 | 132.588 | 22.885 |
| 1998          | 82517  | 11416.794 | 9352.725  | 2064.069 | 2.501  | 18.079 | 1079.29 | 149.327 | 122.330 | 26.997 |
| 1999          | 93939  | 13028.038 | 10188.593 | 2839.445 | 3.023  | 21.795 | 1212.16 | 168.109 | 131.470 | 36.639 |
| 2000          | 90039  | 12426.299 | 9258.408  | 3167.891 | 3.518  | 25.493 | 1147.41 | 158.354 | 117.984 | 40.370 |
| 2001          | 86119  | 11939.281 | 8371.460  | 3567.821 | 4.143  | 29.883 | 1085.29 | 150.461 | 105.499 | 44.962 |
| 2002          | 83014  | 11528.794 | 7572.189  | 3956.605 | 4.766  | 34.319 | 1035.91 | 143.865 | 94.492  | 49.374 |
| 2003          | 79302  | 11048.407 | 6798.589  | 4249.818 | 5.359  | 38.465 | 980.336 | 136.581 | 84.045  | 52.536 |
| 2004          | 73861  | 10375.132 | 5928.244  | 4446.888 | 6.021  | 42.861 | 903.963 | 126.978 | 72.554  | 54.424 |
| 2005          | 71649  | 10051.029 | 5335.838  | 4715.192 | 6.581  | 46.913 | 867.197 | 121.652 | 64.582  | 57.070 |
| 2006          | 67551  | 9542.523  | 4656.472  | 4886.051 | 7.233  | 51.203 | 810.467 | 114.490 | 55.868  | 58.622 |
| 2007          | 63503  | 8936.533  | 4018.081  | 4918.452 | 7.745  | 55.038 | 754.310 | 106.151 | 47.728  | 58.423 |
| 2008          | 63171  | 8944.180  | 3698.175  | 5246.005 | 8.304  | 58.653 | 742.239 | 105.091 | 43.452  | 61.639 |
| 2009          | 59747  | 8390.033  | 3212.121  | 5177.913 | 8.666  | 61.715 | 694.108 | 97.471  | 37.317  | 60.154 |
| 2010          | 58008  | 8157.570  | 2877.639  | 5279.930 | 9.102  | 64.724 | 666.189 | 93.685  | 33.048  | 60.637 |
| 2011          | 57368  | 8035.356  | 2592.273  | 5443.083 | 9.488  | 67.739 | 652.644 | 91.414  | 29.991  | 61.923 |
| 2012          | 57411  | 7970.766  | 2343.311  | 5627.455 | 9.802  | 70.601 | 646.453 | 89.752  | 26.386  | 63.366 |
| 2013          | 57067  | 7743.216  | 2104.062  | 5639.154 | 9.882  | 72.827 | 635.688 | 86.254  | 23.438  | 62.816 |
| 2014          | 57538  | 7774.935  | 1933.518  | 5841.417 | 10.152 | 75.131 | 633.906 | 85.658  | 21.302  | 64.356 |
| 2015          | 58395  | 7722.535  | 1794.156  | 5928.379 | 10.152 | 76.767 | 719.266 | 95.120  | 22.099  | 73.021 |
| 2016          | 58658  | 7600.353  | 1620.375  | 5979.979 | 10.195 | 78.680 | 715.621 | 92.723  | 19.768  | 72.955 |
| 2017          | 59004  | 7470.266  | 1472.119  | 5998.147 | 10.166 | 80.294 | 713.034 | 90.274  | 17.790  | 72.485 |
| 2018          | 56077  | 6907.050  | 1259.845  | 5647.206 | 10.070 | 81.760 | 671.224 | 82.675  | 15.080  | 67.595 |
| 2019          | 55886  | 6732.046  | 1145.889  | 5586.157 | 9.996  | 82.979 | 662.462 | 79.801  | 13.583  | 66.217 |
| 2020          | 55313  | 6429.836  | 1033.391  | 5396.445 | 9.756  | 83.928 | 743.037 | 86.373  | 13.882  | 72.492 |
| 2021          | 56292  | 6562.016  | 969.806   | 5592.210 | 9.934  | 85.221 | 750.730 | 87.513  | 12.934  | 74.580 |
| 2022          | 55827  | 6352.366  | 885.634   | 5466.731 | 9.792  | 86.058 | 738.885 | 84.075  | 11.722  | 72.354 |
| 2023          | 55338  | 6134.123  | 815.142   | 5318.982 | 9.612  | 86.711 | 726.728 | 80.557  | 10.705  | 69.852 |
| 2024          | 54770  | 5922.193  | 749.127   | 5173.065 | 9.445  | 87.351 | 713.771 | 77.179  | 9.763   | 67.416 |
| 2025          | 53295  | 5504.188  | 670.463   | 4833.725 | 9.070  | 87.819 | 801.612 | 82.789  | 10.084  | 72.704 |
| 2026          | 55278  | 5641.075  | 658.550   | 4982.526 | 9.014  | 88.326 | 828.283 | 84.526  | 9.868   | 74.658 |
| 2027          | 54199  | 5426.216  | 613.341   | 4812.875 | 8.880  | 88.697 | 808.875 | 80.982  | 9.154   | 71.829 |
| 2028          | 53090  | 5197.830  | 570.678   | 4627.152 | 8.716  | 89.021 | 789.020 | 77.249  | 8.481   | 68.768 |
| 2029          | 51974  | 4973.547  | 534.102   | 4439.444 | 8.542  | 89.261 | 769.023 | 73.590  | 7.903   | 65.687 |
| 2030          | 49479  | 4450.618  | 463.309   | 3987.309 | 8.059  | 89.590 | 866.605 | 77.952  | 8.115   | 69.837 |
| 2031          | 51987  | 4555.052  | 469.243   | 4085.809 | 7.859  | 89.698 | 909.317 | 79.674  | 8.208   | 71.466 |
| 2032          | 50677  | 4349.999  | 441.544   | 3908.456 | 7.712  | 89.850 | 884.689 | 75.939  | 7.708   | 68.231 |
| 2033          | 49380  | 4147.948  | 420.899   | 3727.049 | 7.548  | 89.853 | 859.955 | 72.237  | 7.330   | 64.907 |
| 2034          | 48076  | 3966.133  | 400.626   | 3565.507 | 7.416  | 89.899 | 834.943 | 68.881  | 6.958   | 61.923 |
| 2035          | 44518  | 3289.064  | 321.319   | 2967.745 | 6.666  | 90.231 | 946.825 | 69.952  | 6.834   | 63.118 |
| 2036          | 46347  | 3313.192  | 322.227   | 2990.966 | 6.453  | 90.274 | 987.211 | 70.572  | 6.864   | 63.708 |
| 2037          | 44841  | 3117.951  | 303.179   | 2814.772 | 6.277  | 90.276 | 955.859 | 66.464  | 6.463   | 60.002 |
| 2038          | 43378  | 2949.775  | 290.421   | 2659.354 | 6.131  | 90.154 | 924.621 | 62.876  | 6.190   | 56.685 |
| 2039          | 41973  | 2766.312  | 277.391   | 2488.921 | 5.930  | 89.973 | 893.753 | 58.905  | 5.907   | 52.998 |

## Results for PHIM for Run 2 (Sensitivity\_Analysis\_3.RTF)

\*\*\*\*\*

### Main Results for E-Component for Run: 2, Simulation: 1, COD: STROKE

| Variable Parameter          | Value                                  |
|-----------------------------|----------------------------------------|
| 1. Country                  | US (United States)                     |
| 2. Sex                      | F (Females)                            |
| 3. Year of start of process | 1990                                   |
| 4. Cause of Death           | STROKE                                 |
| 5. Effective Dose NULL      | CC:1                                   |
| 6. Effective Dose Ecig      | CC:1 Ecig:0.05 Dual:0.525              |
| Note:                       | Death rates are per million population |

#### Results for Age Groups Combined and Years combined, Population unadjusted for deaths in Ecig scenario,

| Age Group:All | NULL    | Ecig       | %Drop     |          |        | NULL   | Ecig    | Drop   |        |        |
|---------------|---------|------------|-----------|----------|--------|--------|---------|--------|--------|--------|
| Year          | Number  | Attrib     | Attrib    | Drop     | %Drop  | Attrib | Death   | Attrib | Attrib | Drop   |
|               | Deaths  | Deaths     | Deaths    | Deaths   | Deaths | Deaths | Rate    | Rates  | Rates  | Rates  |
| All Comb      | 1352207 | 104899.750 | 52301.561 | 52598.19 | 3.890  | 50.141 | 371.243 | 28.800 | 14.359 | 14.441 |

#### Results for Age Groups Combined, Population unadjusted for deaths in Ecig scenario,

| Age Group:All | NULL   | Ecig     | %Drop    |          |        | NULL   | Ecig    | Drop   |        |        |
|---------------|--------|----------|----------|----------|--------|--------|---------|--------|--------|--------|
| Year          | Number | Attrib   | Attrib   | Drop     | %Drop  | Attrib | Death   | Attrib | Attrib | Drop   |
|               | Deaths | Deaths   | Deaths   | Deaths   | Deaths | Deaths | Rate    | Rates  | Rates  | Rates  |
| 1990          | 33504  | 3293.017 | 3293.017 | 0.000    | 0.000  | 0.000  | 490.678 | 48.227 | 48.227 | 0.000  |
| 1991          | 32505  | 3207.063 | 3179.556 | 27.507   | 0.085  | 0.858  | 469.694 | 46.342 | 45.944 | 0.397  |
| 1992          | 32560  | 3218.125 | 3141.257 | 76.868   | 0.236  | 2.389  | 464.104 | 45.871 | 44.775 | 1.096  |
| 1993          | 32768  | 3226.680 | 3081.176 | 145.504  | 0.444  | 4.509  | 460.480 | 45.344 | 43.299 | 2.045  |
| 1994          | 33005  | 3277.266 | 3045.336 | 231.930  | 0.703  | 7.077  | 456.915 | 45.370 | 42.159 | 3.211  |
| 1995          | 33730  | 3309.378 | 2977.197 | 332.181  | 0.985  | 10.038 | 459.716 | 45.104 | 40.577 | 4.527  |
| 1996          | 33750  | 3312.987 | 2864.019 | 448.968  | 1.330  | 13.552 | 454.019 | 44.568 | 38.528 | 6.040  |
| 1997          | 33699  | 3267.066 | 2705.221 | 561.845  | 1.667  | 17.197 | 447.056 | 43.341 | 35.888 | 7.454  |
| 1998          | 33274  | 3178.725 | 2509.355 | 669.370  | 2.012  | 21.058 | 435.211 | 41.577 | 32.821 | 8.755  |
| 1999          | 33891  | 3120.351 | 2341.687 | 778.664  | 2.298  | 24.954 | 437.317 | 40.264 | 30.216 | 10.048 |
| 2000          | 33827  | 3142.808 | 2232.739 | 910.069  | 2.690  | 28.957 | 431.074 | 40.050 | 28.453 | 11.597 |
| 2001          | 32506  | 2961.588 | 1985.121 | 976.467  | 3.004  | 32.971 | 409.647 | 37.323 | 25.017 | 12.306 |
| 2002          | 32078  | 2940.627 | 1843.518 | 1097.109 | 3.420  | 37.309 | 400.295 | 36.695 | 23.005 | 13.691 |
| 2003          | 30568  | 2819.545 | 1652.108 | 1167.436 | 3.819  | 41.405 | 377.883 | 34.855 | 20.423 | 14.432 |
| 2004          | 29388  | 2730.466 | 1488.144 | 1242.322 | 4.227  | 45.499 | 359.671 | 33.417 | 18.213 | 15.204 |
| 2005          | 27954  | 2670.510 | 1352.452 | 1318.058 | 4.715  | 49.356 | 338.339 | 32.322 | 16.369 | 15.953 |
| 2006          | 27201  | 2623.285 | 1232.324 | 1390.961 | 5.114  | 53.024 | 326.354 | 31.474 | 14.785 | 16.689 |
| 2007          | 26302  | 2536.599 | 1101.710 | 1434.890 | 5.455  | 56.567 | 312.424 | 30.131 | 13.086 | 17.044 |
| 2008          | 25998  | 2469.443 | 994.244  | 1475.200 | 5.674  | 59.738 | 305.468 | 29.015 | 11.682 | 17.333 |
| 2009          | 25040  | 2386.945 | 888.687  | 1498.258 | 5.983  | 62.769 | 290.901 | 27.730 | 10.324 | 17.406 |
| 2010          | 24840  | 2329.274 | 802.440  | 1526.835 | 6.147  | 65.550 | 285.273 | 26.750 | 9.216  | 17.535 |
| 2011          | 24792  | 2286.581 | 724.439  | 1562.142 | 6.301  | 68.318 | 282.045 | 26.013 | 8.242  | 17.772 |
| 2012          | 24500  | 2243.311 | 653.484  | 1589.826 | 6.489  | 70.870 | 275.872 | 25.260 | 7.358  | 17.902 |
| 2013          | 24451  | 2176.503 | 583.967  | 1592.536 | 6.513  | 73.169 | 272.368 | 24.245 | 6.505  | 17.740 |
| 2014          | 25296  | 2211.619 | 548.070  | 1663.549 | 6.576  | 75.219 | 278.691 | 24.366 | 6.038  | 18.328 |
| 2015          | 26316  | 2237.016 | 517.896  | 1719.119 | 6.533  | 76.849 | 324.141 | 27.554 | 6.379  | 21.175 |
| 2016          | 26735  | 2229.057 | 479.204  | 1749.853 | 6.545  | 78.502 | 326.164 | 27.194 | 5.846  | 21.348 |
| 2017          | 27616  | 2221.649 | 445.343  | 1776.306 | 6.432  | 79.954 | 333.726 | 26.848 | 5.382  | 21.466 |
| 2018          | 25256  | 1939.420 | 364.790  | 1574.630 | 6.235  | 81.191 | 302.304 | 23.214 | 4.366  | 18.848 |
| 2019          | 25429  | 1904.400 | 333.986  | 1570.414 | 6.176  | 82.462 | 301.434 | 22.574 | 3.959  | 18.615 |
| 2020          | 25379  | 1806.054 | 299.063  | 1506.991 | 5.938  | 83.441 | 340.922 | 24.261 | 4.017  | 20.244 |
| 2021          | 25448  | 1748.172 | 271.814  | 1476.359 | 5.801  | 84.452 | 339.386 | 23.314 | 3.625  | 19.689 |
| 2022          | 25539  | 1701.148 | 249.807  | 1451.341 | 5.683  | 85.315 | 338.015 | 22.515 | 3.306  | 19.209 |
| 2023          | 25620  | 1652.087 | 231.117  | 1420.970 | 5.546  | 86.011 | 336.461 | 21.696 | 3.035  | 18.661 |
| 2024          | 25659  | 1597.127 | 212.408  | 1384.719 | 5.397  | 86.701 | 334.391 | 20.814 | 2.768  | 18.046 |
| 2025          | 25260  | 1467.622 | 187.706  | 1279.916 | 5.067  | 87.210 | 379.931 | 22.075 | 2.823  | 19.251 |
| 2026          | 25480  | 1390.505 | 171.578  | 1218.927 | 4.784  | 87.661 | 381.790 | 20.835 | 2.571  | 18.264 |
| 2027          | 25264  | 1342.095 | 159.727  | 1182.369 | 4.680  | 88.099 | 377.042 | 20.030 | 2.384  | 17.646 |
| 2028          | 25022  | 1289.536 | 149.180  | 1140.355 | 4.557  | 88.431 | 371.870 | 19.165 | 2.217  | 16.948 |
| 2029          | 24767  | 1242.216 | 140.039  | 1102.177 | 4.450  | 88.727 | 366.459 | 18.380 | 2.072  | 16.308 |
| 2030          | 23959  | 1096.803 | 120.166  | 976.637  | 4.076  | 89.044 | 419.641 | 19.210 | 2.105  | 17.106 |
| 2031          | 23963  | 1019.991 | 110.277  | 909.713  | 3.796  | 89.188 | 419.142 | 17.841 | 1.929  | 15.912 |
| 2032          | 23615  | 977.406  | 103.886  | 873.520  | 3.699  | 89.371 | 412.259 | 17.063 | 1.814  | 15.249 |
| 2033          | 23259  | 937.450  | 99.423   | 838.027  | 3.603  | 89.394 | 405.051 | 16.326 | 1.731  | 14.594 |
| 2034          | 22879  | 900.763  | 94.828   | 805.935  | 3.523  | 89.473 | 397.339 | 15.644 | 1.647  | 13.997 |
| 2035          | 21733  | 745.023  | 77.017   | 668.006  | 3.074  | 89.662 | 462.224 | 15.845 | 1.638  | 14.207 |
| 2036          | 20904  | 680.360  | 69.779   | 610.581  | 2.921  | 89.744 | 445.263 | 14.492 | 1.486  | 13.006 |
| 2037          | 20397  | 644.109  | 66.250   | 577.859  | 2.833  | 89.714 | 434.791 | 13.730 | 1.412  | 12.318 |
| 2038          | 19890  | 612.448  | 63.747   | 548.701  | 2.759  | 89.591 | 423.966 | 13.055 | 1.359  | 11.696 |
| 2039          | 19392  | 577.529  | 61.262   | 516.267  | 2.662  | 89.392 | 412.930 | 12.298 | 1.304  | 10.993 |

## Results for PHIM for Run 2 (Sensitivity\_Analysis\_3.RTF)

\*\*\*\*\*

### Main Results for E-Component for Run: 2, Simulation: 1, COD: COPD

| Variable Parameter          | Value                                  |
|-----------------------------|----------------------------------------|
| 1. Country                  | US (United States)                     |
| 2. Sex                      | F (Females)                            |
| 3. Year of start of process | 1990                                   |
| 4. Cause of Death           | COPD                                   |
| 5. Effective Dose NULL      | CC:1                                   |
| 6. Effective Dose Ecig      | CC:1 Ecig:0.05 Dual:0.525              |
| Note:                       | Death rates are per million population |

#### Results for Age Groups Combined and Years combined, Population unadjusted for deaths in Ecig scenario,

| Age Group:All |         | NULL       | Ecig       | %Drop    |        | NULL   | Ecig    | Drop    |         |        |
|---------------|---------|------------|------------|----------|--------|--------|---------|---------|---------|--------|
| Year          | Number  | Attrib     | Attrib     | Drop     | %Drop  | Attrib | Death   | Attrib  | Attrib  | Drop   |
|               | Deaths  | Deaths     | Deaths     | Deaths   | Deaths | Deaths | Rate    | Rates   | Rates   | Rates  |
| All Comb      | 2159941 | 862051.244 | 558819.900 | 303231.3 | 14.039 | 35.176 | 593.003 | 236.673 | 153.422 | 83.251 |

#### Results for Age Groups Combined, Population unadjusted for deaths in Ecig scenario,

| Age Group:All |        | NULL      | Ecig      | %Drop    |        | NULL   | Ecig    | Drop    |         |         |
|---------------|--------|-----------|-----------|----------|--------|--------|---------|---------|---------|---------|
| Year          | Number | Attrib    | Attrib    | Drop     | %Drop  | Attrib | Death   | Attrib  | Attrib  | Drop    |
|               | Deaths | Deaths    | Deaths    | Deaths   | Deaths | Deaths | Rate    | Rates   | Rates   | Rates   |
| 1990          | 24738  | 10694.712 | 10694.712 | 0.000    | 0.000  | 0.000  | 362.296 | 156.628 | 156.628 | 0.000   |
| 1991          | 26562  | 11602.933 | 11584.706 | 18.227   | 0.069  | 0.157  | 383.818 | 167.661 | 167.398 | 0.263   |
| 1992          | 26828  | 11831.375 | 11781.187 | 50.188   | 0.187  | 0.424  | 382.401 | 168.642 | 167.927 | 0.715   |
| 1993          | 29774  | 13246.371 | 13138.171 | 108.200  | 0.363  | 0.817  | 418.406 | 186.148 | 184.627 | 1.521   |
| 1994          | 29804  | 13355.662 | 13183.817 | 171.845  | 0.577  | 1.287  | 412.601 | 184.893 | 182.514 | 2.379   |
| 1995          | 29755  | 13397.439 | 13142.338 | 255.101  | 0.857  | 1.904  | 405.540 | 182.598 | 179.121 | 3.477   |
| 1996          | 30900  | 13960.356 | 13603.992 | 356.364  | 1.153  | 2.553  | 415.680 | 187.801 | 183.007 | 4.794   |
| 1997          | 31128  | 14109.552 | 13643.938 | 465.615  | 1.496  | 3.300  | 412.949 | 187.180 | 181.003 | 6.177   |
| 1998          | 32096  | 14599.657 | 13990.404 | 609.254  | 1.898  | 4.173  | 419.803 | 190.958 | 182.989 | 7.969   |
| 1999          | 34616  | 15728.102 | 14937.833 | 790.269  | 2.283  | 5.025  | 446.673 | 202.950 | 192.753 | 10.197  |
| 2000          | 34299  | 15579.803 | 14640.313 | 939.490  | 2.739  | 6.030  | 437.088 | 198.541 | 186.568 | 11.972  |
| 2001          | 34592  | 15696.614 | 14565.153 | 1131.461 | 3.271  | 7.208  | 435.935 | 197.812 | 183.553 | 14.259  |
| 2002          | 34291  | 15519.777 | 14206.848 | 1312.929 | 3.829  | 8.460  | 427.910 | 193.668 | 177.284 | 16.384  |
| 2003          | 35074  | 15888.389 | 14337.210 | 1551.179 | 4.423  | 9.763  | 433.587 | 196.413 | 177.237 | 19.176  |
| 2004          | 33512  | 15091.573 | 13407.773 | 1683.800 | 5.024  | 11.157 | 410.143 | 184.701 | 164.094 | 20.608  |
| 2005          | 35392  | 15803.656 | 13792.376 | 2011.280 | 5.683  | 12.727 | 428.364 | 191.278 | 166.935 | 24.343  |
| 2006          | 33981  | 15100.563 | 12959.376 | 2141.187 | 6.301  | 14.180 | 407.699 | 181.174 | 155.485 | 25.690  |
| 2007          | 34000  | 14974.384 | 12605.837 | 2368.547 | 6.966  | 15.817 | 403.863 | 177.871 | 149.736 | 28.134  |
| 2008          | 37425  | 16406.197 | 13565.305 | 2840.892 | 7.591  | 17.316 | 439.732 | 192.768 | 159.388 | 33.380  |
| 2009          | 36826  | 16083.194 | 12998.526 | 3084.668 | 8.376  | 19.179 | 427.825 | 186.846 | 151.010 | 35.836  |
| 2010          | 36788  | 15927.400 | 12623.298 | 3304.102 | 8.981  | 20.745 | 422.489 | 182.917 | 144.971 | 37.946  |
| 2011          | 37636  | 16221.836 | 12553.103 | 3668.733 | 9.748  | 22.616 | 428.164 | 184.547 | 142.810 | 41.737  |
| 2012          | 38265  | 16358.849 | 12356.832 | 4002.017 | 10.459 | 24.464 | 430.867 | 184.202 | 139.139 | 45.063  |
| 2013          | 40112  | 16994.822 | 12501.732 | 4493.090 | 11.201 | 26.438 | 446.821 | 189.311 | 139.261 | 50.050  |
| 2014          | 40084  | 16855.093 | 12063.539 | 4791.554 | 11.954 | 28.428 | 441.613 | 185.696 | 132.906 | 52.789  |
| 2015          | 42200  | 17572.483 | 12302.307 | 5270.176 | 12.489 | 29.991 | 519.788 | 216.445 | 151.531 | 64.914  |
| 2016          | 42606  | 17579.955 | 11925.431 | 5654.524 | 13.272 | 32.165 | 519.788 | 214.473 | 145.489 | 68.985  |
| 2017          | 44364  | 18080.688 | 11879.301 | 6201.387 | 13.978 | 34.298 | 536.117 | 218.496 | 143.555 | 74.941  |
| 2018          | 45359  | 18209.262 | 11618.393 | 6590.869 | 14.530 | 36.195 | 542.932 | 217.960 | 139.069 | 78.891  |
| 2019          | 46876  | 18648.302 | 11511.589 | 7136.713 | 15.225 | 38.270 | 555.657 | 221.054 | 136.457 | 84.598  |
| 2020          | 48331  | 19002.597 | 11396.646 | 7605.951 | 15.737 | 40.026 | 649.239 | 255.266 | 153.094 | 102.172 |
| 2021          | 48338  | 18885.717 | 10913.060 | 7972.658 | 16.493 | 42.215 | 644.660 | 251.867 | 145.541 | 106.326 |
| 2022          | 49708  | 19235.076 | 10733.881 | 8501.195 | 17.102 | 44.196 | 657.895 | 254.582 | 142.066 | 112.516 |
| 2023          | 51083  | 19521.158 | 10535.199 | 8985.959 | 17.591 | 46.032 | 670.849 | 256.363 | 138.354 | 118.009 |
| 2024          | 52397  | 19918.620 | 10344.979 | 9573.641 | 18.271 | 48.064 | 682.854 | 259.583 | 134.818 | 124.766 |
| 2025          | 53387  | 20150.545 | 10104.267 | 10046.28 | 18.818 | 49.856 | 803.004 | 303.086 | 151.979 | 151.107 |
| 2026          | 54232  | 20393.792 | 9819.559  | 10574.23 | 19.498 | 51.850 | 812.615 | 305.582 | 147.137 | 158.445 |
| 2027          | 55049  | 20615.351 | 9514.990  | 11100.36 | 20.164 | 53.845 | 821.568 | 307.668 | 142.004 | 165.664 |
| 2028          | 55809  | 20731.894 | 9165.656  | 11566.24 | 20.725 | 55.790 | 829.419 | 308.115 | 136.219 | 171.896 |
| 2029          | 56527  | 20781.967 | 8798.059  | 11983.91 | 21.200 | 57.665 | 836.392 | 307.495 | 130.178 | 177.317 |
| 2030          | 56756  | 20753.201 | 8442.048  | 12311.15 | 21.691 | 59.322 | 994.067 | 363.487 | 147.860 | 215.627 |
| 2031          | 58288  | 21048.417 | 8335.154  | 12713.26 | 21.811 | 60.400 | 1019.54 | 368.165 | 145.793 | 222.372 |
| 2032          | 58782  | 21169.329 | 8021.349  | 13147.98 | 22.367 | 62.109 | 1026.18 | 369.560 | 140.031 | 229.529 |
| 2033          | 59236  | 21109.293 | 7670.616  | 13438.68 | 22.687 | 63.662 | 1031.59 | 367.618 | 133.584 | 234.035 |
| 2034          | 59614  | 21109.429 | 7325.413  | 13784.02 | 23.122 | 65.298 | 1035.33 | 366.613 | 127.222 | 239.390 |
| 2035          | 58938  | 20794.840 | 6959.674  | 13835.17 | 23.474 | 66.532 | 1253.51 | 442.268 | 148.020 | 294.249 |
| 2036          | 56014  | 19354.577 | 6228.588  | 13125.99 | 23.433 | 67.819 | 1193.11 | 412.258 | 132.671 | 279.587 |
| 2037          | 55953  | 19064.169 | 5813.549  | 13250.62 | 23.682 | 69.505 | 1192.72 | 406.385 | 123.926 | 282.459 |
| 2038          | 55859  | 18854.812 | 5487.624  | 13367.19 | 23.930 | 70.895 | 1190.66 | 401.900 | 116.971 | 284.928 |
| 2039          | 55757  | 18437.457 | 5094.248  | 13343.21 | 23.931 | 72.370 | 1187.28 | 392.602 | 108.475 | 284.126 |

## Results for PHIM for Run 2 (Sensitivity\_Analysis\_3.RTF)

\*\*\*\*\*

### Main Results for E-Component for Run: 2, Simulation: 1, COD: Four Diseases Combined, Adjusted

| Variable Parameter          | Value                                  |
|-----------------------------|----------------------------------------|
| 1. Country                  | US (United States)                     |
| 2. Sex                      | F (Females)                            |
| 3. Year of start of process | 1990                                   |
| 4. Cause of Death           | Four Diseases Combined                 |
| 5. Effective Dose NULL      | CC:1                                   |
| 6. Effective Dose Ecig      | CC:1 Ecig:0.05 Dual:0.525              |
| Note:                       | Death rates are per million population |

#### Results for Age Groups Combined and Years combined, Population and Number deaths adjusted for Ecig scenario,

| Age Group:All |         | NULL        | Ecig        | %Drop    |        | NULL   | Ecig    | Drop    |         |         |
|---------------|---------|-------------|-------------|----------|--------|--------|---------|---------|---------|---------|
| Year          | Number  | Attrib      | Attrib      | Drop     | %Drop  | Attrib | Death   | Attrib  | Attrib  | Drop    |
|               | Deaths  | Deaths      | Deaths      | Deaths   | Deaths | Deaths | Rate    | Rates   | Rates   | Rates   |
| All Comb      | 9147078 | 2946250.006 | 1980448.556 | 965801.5 | 10.559 | 32.781 | 2499.47 | 808.881 | 541.163 | 267.718 |

#### Results for Age Groups Combined, Population and Number deaths adjusted for Ecig scenario,

| Age Group:All |        | NULL      | Ecig      | %Drop    |        | NULL   | Ecig    | Drop    |         |         |
|---------------|--------|-----------|-----------|----------|--------|--------|---------|---------|---------|---------|
| Year          | Number | Attrib    | Attrib    | Drop     | %Drop  | Attrib | Death   | Attrib  | Attrib  | Drop    |
|               | Deaths | Deaths    | Deaths    | Deaths   | Deaths | Deaths | Rate    | Rates   | Rates   | Rates   |
| 1990          | 199848 | 57524.822 | 57524.822 | 0.000    | 0.000  | 0.000  | 2926.84 | 842.471 | 842.471 | 0.000   |
| 1991          | 199162 | 59078.486 | 58910.022 | 168.464  | 0.085  | 0.285  | 2877.87 | 853.678 | 851.244 | 2.434   |
| 1992          | 198533 | 60494.150 | 60022.886 | 471.264  | 0.237  | 0.779  | 2829.84 | 862.271 | 855.552 | 6.719   |
| 1993          | 202515 | 62694.848 | 61778.334 | 916.514  | 0.453  | 1.462  | 2845.86 | 881.034 | 868.146 | 12.888  |
| 1994          | 200665 | 63202.598 | 61755.820 | 1446.778 | 0.721  | 2.289  | 2777.91 | 874.966 | 854.918 | 20.048  |
| 1995          | 201036 | 63766.862 | 61678.591 | 2088.271 | 1.039  | 3.275  | 2739.86 | 869.097 | 840.600 | 28.497  |
| 1996          | 201202 | 64591.163 | 61731.686 | 2859.477 | 1.421  | 4.427  | 2706.47 | 868.908 | 830.382 | 38.526  |
| 1997          | 198673 | 64686.912 | 61109.749 | 3577.163 | 1.801  | 5.530  | 2635.34 | 858.147 | 810.602 | 47.545  |
| 1998          | 197623 | 65295.961 | 60888.496 | 4407.465 | 2.230  | 6.750  | 2584.42 | 854.046 | 796.271 | 57.775  |
| 1999          | 211403 | 67327.521 | 61640.077 | 5687.444 | 2.690  | 8.447  | 2727.28 | 868.771 | 795.208 | 73.563  |
| 2000          | 208596 | 67596.897 | 60981.438 | 6615.459 | 3.171  | 9.787  | 2657.45 | 861.419 | 776.886 | 84.533  |
| 2001          | 203734 | 67008.811 | 59412.317 | 7596.494 | 3.729  | 11.337 | 2566.51 | 844.458 | 748.439 | 96.019  |
| 2002          | 200989 | 67067.744 | 58378.923 | 8688.820 | 4.323  | 12.955 | 2506.89 | 836.925 | 728.147 | 108.778 |
| 2003          | 196549 | 66756.217 | 57084.239 | 9671.978 | 4.921  | 14.489 | 2428.30 | 825.244 | 705.257 | 119.987 |
| 2004          | 188392 | 65058.725 | 54557.414 | 10501.31 | 5.574  | 16.141 | 2304.01 | 796.234 | 667.229 | 129.006 |
| 2005          | 186692 | 65214.724 | 53594.865 | 11619.86 | 6.224  | 17.818 | 2257.66 | 789.321 | 648.122 | 141.199 |
| 2006          | 180404 | 63771.146 | 51306.406 | 12464.74 | 6.909  | 19.546 | 2162.27 | 765.117 | 614.944 | 150.174 |
| 2007          | 176003 | 63110.718 | 49780.723 | 13329.99 | 7.574  | 21.122 | 2088.17 | 749.650 | 590.617 | 159.033 |
| 2008          | 177990 | 63718.624 | 49133.609 | 14585.02 | 8.194  | 22.890 | 2088.50 | 748.674 | 576.526 | 172.147 |
| 2009          | 173273 | 62794.698 | 47410.061 | 15384.64 | 8.879  | 24.500 | 2009.90 | 729.515 | 549.939 | 179.576 |
| 2010          | 171011 | 61917.074 | 44694.578 | 16222.50 | 9.486  | 26.200 | 1960.56 | 711.083 | 523.867 | 187.216 |
| 2011          | 170890 | 61680.114 | 44324.564 | 17355.55 | 10.156 | 28.138 | 1940.35 | 701.700 | 503.278 | 198.422 |
| 2012          | 172077 | 62023.127 | 43412.783 | 18610.34 | 10.815 | 30.005 | 1933.43 | 698.386 | 487.778 | 210.609 |
| 2013          | 173435 | 62037.765 | 42303.311 | 19734.45 | 11.379 | 31.810 | 1927.33 | 691.059 | 470.105 | 220.954 |
| 2014          | 174989 | 61921.017 | 40952.393 | 20968.62 | 11.983 | 33.864 | 1922.80 | 682.195 | 449.992 | 232.203 |
| 2015          | 178276 | 61856.204 | 39843.814 | 22012.39 | 12.347 | 35.586 | 2188.76 | 761.899 | 489.176 | 272.722 |
| 2016          | 177859 | 60464.119 | 37613.086 | 22851.03 | 12.848 | 37.793 | 2162.18 | 737.655 | 457.250 | 280.405 |
| 2017          | 180425 | 60243.839 | 36263.881 | 23979.96 | 13.291 | 39.805 | 2171.95 | 728.017 | 436.534 | 291.474 |
| 2018          | 178360 | 60713.327 | 35730.144 | 24983.18 | 14.007 | 41.149 | 2126.00 | 726.721 | 425.893 | 300.827 |
| 2019          | 180551 | 61148.172 | 34867.133 | 26281.04 | 14.556 | 42.979 | 2130.58 | 724.841 | 411.447 | 313.394 |
| 2020          | 181920 | 61149.317 | 33976.701 | 27172.62 | 14.937 | 44.436 | 2430.41 | 821.432 | 453.922 | 367.511 |
| 2021          | 179661 | 58727.786 | 31184.552 | 27543.23 | 15.331 | 46.900 | 2381.97 | 783.216 | 413.449 | 369.766 |
| 2022          | 181082 | 58848.802 | 30222.418 | 28626.38 | 15.809 | 48.644 | 2381.65 | 778.881 | 397.496 | 381.385 |
| 2023          | 182447 | 58816.149 | 29245.839 | 29570.31 | 16.208 | 50.276 | 2380.00 | 772.407 | 381.509 | 390.898 |
| 2024          | 183553 | 58955.232 | 28282.874 | 30672.36 | 16.710 | 52.027 | 2375.13 | 768.316 | 365.974 | 402.342 |
| 2025          | 182497 | 58297.744 | 27176.376 | 31121.37 | 17.053 | 53.383 | 2721.65 | 876.861 | 405.292 | 471.569 |
| 2026          | 182537 | 56469.971 | 25174.779 | 31295.19 | 17.145 | 55.419 | 2710.58 | 846.150 | 373.833 | 472.316 |
| 2027          | 181973 | 56209.427 | 24099.315 | 32110.11 | 17.646 | 57.126 | 2690.10 | 838.883 | 356.260 | 482.623 |
| 2028          | 181248 | 55733.105 | 22963.507 | 32769.60 | 18.080 | 58.797 | 2666.87 | 828.298 | 337.883 | 490.415 |
| 2029          | 180427 | 55145.838 | 21811.072 | 33334.77 | 18.475 | 60.448 | 2641.75 | 815.951 | 319.350 | 496.601 |
| 2030          | 176328 | 53615.097 | 20584.622 | 33030.47 | 18.732 | 61.607 | 3050.14 | 939.056 | 356.074 | 582.981 |
| 2031          | 177931 | 52046.561 | 19392.736 | 32653.82 | 18.352 | 62.740 | 3071.94 | 910.364 | 334.812 | 575.552 |
| 2032          | 176479 | 51582.636 | 18470.999 | 33111.64 | 18.762 | 64.191 | 3039.20 | 900.496 | 318.095 | 582.400 |
| 2033          | 174968 | 50839.758 | 17532.653 | 33307.11 | 19.036 | 65.514 | 3004.15 | 885.375 | 301.031 | 584.344 |
| 2034          | 173312 | 50215.451 | 16619.476 | 33595.98 | 19.385 | 66.904 | 2965.88 | 872.104 | 284.407 | 587.696 |
| 2035          | 166071 | 47773.075 | 15466.034 | 32307.04 | 19.454 | 67.626 | 3471.45 | 1016.05 | 323.293 | 692.753 |
| 2036          | 159706 | 43298.709 | 13402.929 | 29895.78 | 18.719 | 69.045 | 3341.22 | 922.274 | 280.404 | 641.870 |
| 2037          | 157134 | 42241.563 | 12471.366 | 29770.20 | 18.946 | 70.476 | 3287.98 | 900.450 | 260.959 | 639.491 |
| 2038          | 154571 | 41356.353 | 11759.552 | 29596.80 | 19.148 | 71.565 | 3232.28 | 881.531 | 245.907 | 635.624 |
| 2039          | 152079 | 40161.050 | 10924.592 | 29236.46 | 19.225 | 72.798 | 3175.08 | 855.178 | 228.082 | 627.096 |

## Results for PHIM for Run 2 (Sensitivity\_Analysis\_3.RTF)

\*\*\*\*\*

### Main Results for E-Component for Run: 2, Simulation: 1, COD: LUNG CANCER, Adjusted

| Variable Parameter          | Value                                  |
|-----------------------------|----------------------------------------|
| 1. Country                  | US (United States)                     |
| 2. Sex                      | F (Females)                            |
| 3. Year of start of process | 1990                                   |
| 4. Cause of Death           | LUNG CANCER                            |
| 5. Effective Dose NULL      | CC:1                                   |
| 6. Effective Dose Ecig      | CC:1 Ecig:0.05 Dual:0.525              |
| Note:                       | Death rates are per million population |

#### Results for Age Groups Combined and Years combined, Population and Number deaths adjusted for Ecig scenario,

| Age Group: | NULL    | Ecig        | %Drop       |          |        |        | NULL    | Ecig    | Drop    |         |
|------------|---------|-------------|-------------|----------|--------|--------|---------|---------|---------|---------|
| Year       | Number  | Attrib      | Attrib      | Drop     | %Drop  | Attrib | Death   | Attrib  | Drop    |         |
|            | Deaths  | Deaths      | Deaths      | Deaths   | Deaths | Deaths | Rate    | Rates   | Rates   |         |
| All Comb   | 2343623 | 1580465.217 | 1162429.558 | 418035.7 | 17.837 | 26.450 | 640.402 | 433.910 | 317.637 | 116.273 |

#### Results for Age Groups Combined, Population and Number deaths adjusted for Ecig scenario,

| Age Group: | NULL   | Ecig      | %Drop     |          |        |        | NULL    | Ecig    | Drop    |
|------------|--------|-----------|-----------|----------|--------|--------|---------|---------|---------|
| Year       | Number | Attrib    | Attrib    | Drop     | %Drop  | Attrib | Death   | Attrib  | Drop    |
|            | Deaths | Deaths    | Deaths    | Deaths   | Deaths | Deaths | Rate    | Rates   | Rates   |
| 1990       | 42690  | 30614.201 | 30614.201 | 0.000    | 0.000  | 0.000  | 625.210 | 448.355 | 0.000   |
| 1991       | 43692  | 31412.010 | 31379.684 | 32.326   | 0.074  | 0.103  | 631.345 | 453.901 | 0.467   |
| 1992       | 45423  | 32782.407 | 32688.599 | 93.808   | 0.207  | 0.286  | 647.451 | 467.274 | 1.338   |
| 1993       | 46292  | 33491.183 | 33305.977 | 185.206  | 0.400  | 0.553  | 650.518 | 470.643 | 2.607   |
| 1994       | 47019  | 34074.347 | 33774.552 | 299.796  | 0.638  | 0.880  | 650.904 | 471.719 | 4.161   |
| 1995       | 47843  | 34694.454 | 34242.942 | 451.512  | 0.944  | 1.301  | 652.042 | 472.861 | 6.174   |
| 1996       | 48250  | 35027.269 | 34403.127 | 624.141  | 1.294  | 1.782  | 649.027 | 471.202 | 8.429   |
| 1997       | 49044  | 35590.763 | 34761.479 | 829.284  | 1.691  | 2.330  | 650.551 | 472.153 | 11.053  |
| 1998       | 49699  | 36100.785 | 35029.312 | 1071.472 | 2.156  | 2.968  | 649.940 | 472.184 | 14.088  |
| 1999       | 48901  | 35451.030 | 34162.007 | 1289.023 | 2.636  | 3.636  | 630.860 | 457.448 | 16.730  |
| 2000       | 50356  | 36447.986 | 34837.115 | 1610.871 | 3.199  | 4.420  | 641.520 | 464.474 | 20.659  |
| 2001       | 50422  | 36411.326 | 34474.476 | 1936.850 | 3.841  | 5.319  | 635.179 | 458.863 | 24.575  |
| 2002       | 51487  | 37078.545 | 34736.994 | 2341.551 | 4.548  | 6.315  | 642.189 | 462.696 | 29.429  |
| 2003       | 51461  | 36999.876 | 34272.949 | 2726.927 | 5.299  | 7.370  | 635.780 | 457.395 | 33.963  |
| 2004       | 51463  | 36861.555 | 33707.018 | 3154.537 | 6.130  | 8.558  | 629.389 | 451.138 | 38.906  |
| 2005       | 51498  | 36689.529 | 33083.273 | 3606.256 | 7.003  | 9.829  | 622.762 | 444.069 | 43.993  |
| 2006       | 51446  | 36504.774 | 32424.467 | 4080.307 | 7.931  | 11.177 | 616.611 | 437.979 | 49.349  |
| 2007       | 51945  | 36663.202 | 32018.004 | 4645.198 | 8.942  | 12.670 | 616.300 | 435.498 | 55.624  |
| 2008       | 51097  | 35898.803 | 30831.592 | 5067.211 | 9.917  | 14.115 | 599.560 | 421.800 | 60.026  |
| 2009       | 51331  | 35934.525 | 30263.268 | 5671.257 | 11.048 | 15.782 | 595.424 | 417.468 | 66.426  |
| 2010       | 51008  | 35502.829 | 29339.875 | 6162.954 | 12.082 | 17.359 | 584.786 | 407.730 | 71.362  |
| 2011       | 50682  | 35136.342 | 28398.676 | 6737.666 | 13.294 | 19.176 | 575.461 | 399.726 | 77.277  |
| 2012       | 51441  | 35450.201 | 27998.595 | 7451.606 | 14.486 | 21.020 | 577.977 | 399.173 | 84.586  |
| 2013       | 51285  | 35123.224 | 27046.872 | 8076.352 | 15.748 | 22.994 | 569.921 | 391.249 | 90.685  |
| 2014       | 51491  | 35079.370 | 26336.711 | 8742.659 | 16.979 | 24.923 | 565.794 | 386.476 | 97.083  |
| 2015       | 50704  | 34324.171 | 25151.134 | 9173.037 | 18.091 | 26.725 | 622.508 | 422.780 | 113.990 |
| 2016       | 49131  | 33054.753 | 23505.849 | 9548.903 | 19.436 | 28.888 | 597.264 | 403.264 | 117.511 |
| 2017       | 48624  | 32471.234 | 22378.601 | 10092.63 | 20.756 | 31.082 | 585.337 | 392.399 | 123.006 |
| 2018       | 50804  | 33657.595 | 22393.964 | 11263.63 | 22.171 | 33.465 | 605.575 | 402.871 | 135.941 |
| 2019       | 51409  | 33863.424 | 21776.062 | 12087.36 | 23.512 | 35.694 | 606.646 | 401.412 | 144.445 |
| 2020       | 51852  | 33910.830 | 21141.323 | 12769.51 | 24.627 | 37.656 | 692.728 | 455.532 | 173.088 |
| 2021       | 48449  | 31531.880 | 18920.566 | 12611.31 | 26.030 | 39.995 | 642.339 | 420.521 | 169.669 |
| 2022       | 48780  | 31560.212 | 18238.275 | 13321.94 | 27.310 | 42.211 | 641.571 | 417.708 | 177.832 |
| 2023       | 49078  | 31508.781 | 17544.140 | 13964.64 | 28.454 | 44.320 | 640.222 | 413.791 | 184.930 |
| 2024       | 49298  | 31517.293 | 16850.666 | 14666.63 | 29.751 | 46.535 | 637.907 | 410.740 | 192.696 |
| 2025       | 49026  | 31175.389 | 16083.179 | 15092.21 | 30.784 | 48.411 | 731.145 | 468.912 | 229.057 |
| 2026       | 45876  | 29044.598 | 14388.799 | 14655.80 | 31.946 | 50.460 | 681.238 | 435.206 | 213.667 |
| 2027       | 45691  | 28825.765 | 13670.937 | 15154.83 | 33.168 | 52.574 | 675.449 | 430.203 | 202.097 |
| 2028       | 45457  | 28513.846 | 12934.750 | 15579.10 | 34.272 | 54.637 | 668.851 | 423.769 | 190.321 |
| 2029       | 45186  | 28148.109 | 12193.195 | 15954.91 | 35.309 | 56.682 | 661.602 | 416.486 | 178.528 |
| 2030       | 44069  | 27314.475 | 11410.954 | 15903.52 | 36.088 | 58.224 | 762.303 | 478.407 | 197.388 |
| 2031       | 41427  | 25423.102 | 10321.510 | 15101.59 | 36.453 | 59.401 | 715.232 | 444.684 | 178.199 |
| 2032       | 41034  | 25085.902 | 9745.017  | 15340.88 | 37.386 | 61.153 | 706.655 | 437.933 | 167.822 |
| 2033       | 40619  | 24645.067 | 9180.991  | 15464.08 | 38.071 | 62.747 | 697.420 | 429.194 | 157.635 |
| 2034       | 40169  | 24239.126 | 8636.897  | 15602.23 | 38.841 | 64.368 | 687.412 | 420.967 | 147.802 |
| 2035       | 38236  | 22944.147 | 7945.837  | 14998.31 | 39.226 | 65.369 | 799.257 | 487.980 | 166.095 |
| 2036       | 33708  | 19950.581 | 6628.728  | 13321.85 | 39.522 | 66.774 | 705.205 | 424.953 | 138.680 |
| 2037       | 33140  | 19415.334 | 6138.400  | 13276.93 | 40.063 | 68.384 | 693.439 | 413.871 | 128.444 |
| 2038       | 32572  | 18939.317 | 5769.681  | 13169.64 | 40.432 | 69.536 | 681.130 | 403.701 | 120.651 |
| 2039       | 32019  | 18379.752 | 5348.338  | 13031.41 | 40.699 | 70.901 | 668.490 | 391.373 | 111.662 |

## Results for PHIM for Run 2 (Sensitivity\_Analysis\_3.RTF)

\*\*\*\*\*

### Main Results for E-Component for Run: 2, Simulation: 1, COD: IHD, Adjusted

| Variable Parameter          | Value                                  |
|-----------------------------|----------------------------------------|
| 1. Country                  | US (United States)                     |
| 2. Sex                      | F (Females)                            |
| 3. Year of start of process | 1990                                   |
| 4. Cause of Death           | IHD                                    |
| 5. Effective Dose NULL      | CC:1                                   |
| 6. Effective Dose Ecig      | CC:1 Ecig:0.05 Dual:0.525              |
| Note:                       | Death rates are per million population |

#### Results for Age Groups Combined and Years combined, Population and Number deaths adjusted for Ecig scenario,

| Age Group:All | NULL    | Ecig       | %Drop      |          |        |        | NULL    | Ecig    | Drop   |        |
|---------------|---------|------------|------------|----------|--------|--------|---------|---------|--------|--------|
| Year          | Number  | Attrib     | Attrib     | Drop     | %Drop  | Attrib | Death   | Attrib  | Attrib | Drop   |
|               | Deaths  | Deaths     | Deaths     | Deaths   | Deaths | Deaths | Rate    | Rates   | Rates  | Rates  |
| All Comb      | 3261261 | 398833.796 | 203319.020 | 195514.8 | 5.995  | 49.022 | 891.149 | 109.498 | 55.558 | 53.941 |

#### Results for Age Groups Combined, Population and Number deaths adjusted for Ecig scenario,

| Age Group:All | NULL   | Ecig      | %Drop     |          |        |        | NULL    | Ecig    | Drop    |        |
|---------------|--------|-----------|-----------|----------|--------|--------|---------|---------|---------|--------|
| Year          | Number | Attrib    | Attrib    | Drop     | %Drop  | Attrib | Death   | Attrib  | Attrib  | Drop   |
|               | Deaths | Deaths    | Deaths    | Deaths   | Deaths | Deaths | Rate    | Rates   | Rates   | Rates  |
| 1990          | 98916  | 12922.892 | 12922.892 | 0.000    | 0.000  | 0.000  | 1448.66 | 189.260 | 189.260 | 0.000  |
| 1991          | 96403  | 12856.479 | 12766.075 | 90.404   | 0.094  | 0.703  | 1393.01 | 185.775 | 184.469 | 1.306  |
| 1992          | 93721  | 12662.244 | 12411.788 | 250.455  | 0.267  | 1.978  | 1335.88 | 180.485 | 176.915 | 3.570  |
| 1993          | 93680  | 12730.613 | 12252.783 | 477.830  | 0.510  | 3.753  | 1316.45 | 178.900 | 172.183 | 6.716  |
| 1994          | 90835  | 12495.323 | 11751.560 | 743.763  | 0.819  | 5.952  | 1257.48 | 172.983 | 162.683 | 10.300 |
| 1995          | 89704  | 12365.590 | 11315.056 | 1050.534 | 1.171  | 8.496  | 1222.55 | 168.534 | 154.210 | 14.325 |
| 1996          | 88296  | 12290.551 | 10858.712 | 1431.839 | 1.622  | 11.650 | 1187.71 | 165.338 | 146.066 | 19.272 |
| 1997          | 84792  | 11719.531 | 9996.252  | 1723.279 | 2.032  | 14.704 | 1124.73 | 155.473 | 132.597 | 22.876 |
| 1998          | 82538  | 11416.794 | 9355.193  | 2061.601 | 2.498  | 18.058 | 1079.39 | 149.327 | 122.343 | 26.984 |
| 1999          | 93972  | 13028.038 | 10192.351 | 2835.687 | 3.018  | 21.766 | 1212.31 | 168.109 | 131.490 | 36.620 |
| 2000          | 90082  | 12426.299 | 9263.049  | 3163.250 | 3.512  | 25.456 | 1147.62 | 158.354 | 118.009 | 40.346 |
| 2001          | 86173  | 11939.281 | 8376.948  | 3562.334 | 4.134  | 29.837 | 1085.55 | 150.461 | 105.528 | 44.934 |
| 2002          | 83080  | 11528.794 | 7578.469  | 3950.325 | 4.755  | 34.265 | 1036.24 | 143.865 | 94.525  | 49.341 |
| 2003          | 79381  | 11048.407 | 6805.615  | 4242.792 | 5.345  | 38.402 | 980.728 | 136.581 | 84.081  | 52.500 |
| 2004          | 73952  | 10375.132 | 5935.721  | 4439.411 | 6.003  | 42.789 | 904.417 | 126.978 | 72.593  | 54.385 |
| 2005          | 71754  | 10051.029 | 5343.875  | 4707.155 | 6.560  | 46.833 | 867.725 | 121.652 | 64.623  | 57.028 |
| 2006          | 67669  | 9542.523  | 4664.734  | 4877.790 | 7.208  | 51.116 | 811.058 | 114.490 | 55.910  | 58.580 |
| 2007          | 63632  | 8936.533  | 4026.361  | 4910.172 | 7.717  | 54.945 | 754.954 | 106.151 | 47.770  | 58.381 |
| 2008          | 63319  | 8944.180  | 3706.920  | 5237.261 | 8.271  | 58.555 | 742.973 | 105.091 | 43.496  | 61.595 |
| 2009          | 59907  | 8390.033  | 3220.800  | 5169.234 | 8.629  | 61.612 | 694.900 | 97.471  | 37.360  | 60.111 |
| 2010          | 58184  | 8157.570  | 2886.402  | 5271.167 | 9.060  | 64.617 | 667.050 | 93.685  | 33.091  | 60.594 |
| 2011          | 57563  | 8035.356  | 2601.084  | 5434.272 | 9.441  | 67.630 | 653.592 | 91.414  | 29.534  | 61.880 |
| 2012          | 57628  | 7970.766  | 2352.096  | 5618.670 | 9.750  | 70.491 | 647.496 | 89.752  | 26.428  | 63.324 |
| 2013          | 57307  | 7743.216  | 2112.781  | 5630.435 | 9.825  | 72.714 | 636.839 | 86.254  | 23.479  | 62.775 |
| 2014          | 57805  | 7774.935  | 1942.305  | 5832.631 | 10.090 | 75.018 | 635.171 | 85.658  | 21.342  | 64.315 |
| 2015          | 58694  | 7722.535  | 1803.127  | 5919.408 | 10.085 | 76.651 | 720.607 | 95.120  | 22.138  | 72.983 |
| 2016          | 58987  | 7600.353  | 1629.188  | 5971.165 | 10.123 | 78.564 | 717.087 | 92.723  | 19.806  | 72.918 |
| 2017          | 59365  | 7470.266  | 1480.799  | 5989.467 | 10.089 | 80.177 | 714.638 | 90.274  | 17.826  | 72.449 |
| 2018          | 56451  | 6907.050  | 1267.848  | 5639.202 | 9.990  | 81.644 | 672.878 | 82.675  | 15.112  | 67.563 |
| 2019          | 56291  | 6732.046  | 1153.740  | 5578.307 | 9.910  | 82.862 | 664.259 | 79.801  | 13.615  | 66.186 |
| 2020          | 55751  | 6429.836  | 1041.088  | 5388.748 | 9.666  | 83.808 | 744.826 | 86.373  | 13.909  | 72.465 |
| 2021          | 56770  | 6562.016  | 977.449   | 5584.567 | 9.837  | 85.104 | 752.659 | 87.513  | 12.959  | 74.554 |
| 2022          | 56336  | 6352.366  | 893.069   | 5459.297 | 9.691  | 85.941 | 740.950 | 84.075  | 11.746  | 72.329 |
| 2023          | 55879  | 6134.123  | 822.403   | 5311.721 | 9.506  | 86.593 | 728.934 | 80.557  | 10.728  | 69.829 |
| 2024          | 55342  | 5922.193  | 756.178   | 5166.014 | 9.335  | 87.231 | 716.118 | 77.179  | 9.785   | 67.394 |
| 2025          | 53897  | 5504.188  | 677.334   | 4826.854 | 8.956  | 87.694 | 803.792 | 82.789  | 10.101  | 72.688 |
| 2026          | 55941  | 5641.075  | 665.651   | 4975.425 | 8.894  | 88.200 | 830.694 | 84.526  | 9.885   | 74.642 |
| 2027          | 54889  | 5426.216  | 620.313   | 4805.903 | 8.756  | 88.568 | 811.428 | 80.982  | 9.170   | 71.812 |
| 2028          | 53807  | 5197.830  | 577.466   | 4620.364 | 8.587  | 88.890 | 791.719 | 77.249  | 8.497   | 68.753 |
| 2029          | 52717  | 4973.547  | 540.741   | 4432.806 | 8.409  | 89.128 | 771.868 | 73.590  | 7.917   | 65.672 |
| 2030          | 50242  | 4450.618  | 469.715   | 3980.903 | 7.923  | 89.446 | 869.088 | 77.952  | 8.125   | 69.826 |
| 2031          | 52834  | 4555.052  | 476.005   | 4079.048 | 7.721  | 89.550 | 912.162 | 79.674  | 8.218   | 71.456 |
| 2032          | 51547  | 4349.999  | 448.166   | 3901.834 | 7.570  | 89.697 | 887.704 | 75.939  | 7.718   | 68.221 |
| 2033          | 50271  | 4147.948  | 427.470   | 3720.478 | 7.401  | 89.694 | 863.139 | 72.237  | 7.340   | 64.897 |
| 2034          | 48986  | 3966.133  | 407.096   | 3559.037 | 7.265  | 89.736 | 838.289 | 68.881  | 6.967   | 61.914 |
| 2035          | 45431  | 3289.064  | 327.343   | 2961.722 | 6.519  | 90.048 | 949.652 | 69.952  | 6.843   | 63.110 |
| 2036          | 47339  | 3313.192  | 328.417   | 2984.775 | 6.305  | 90.088 | 990.375 | 70.572  | 6.871   | 63.701 |
| 2037          | 45840  | 3117.951  | 309.154   | 2808.797 | 6.127  | 90.085 | 959.179 | 66.464  | 6.469   | 59.995 |
| 2038          | 44382  | 2949.775  | 296.307   | 2653.468 | 5.979  | 89.955 | 928.089 | 62.876  | 6.196   | 56.680 |
| 2039          | 42981  | 2766.312  | 283.136   | 2483.176 | 5.777  | 89.765 | 897.359 | 58.905  | 5.911   | 52.994 |

## Results for PHIM for Run 2 (Sensitivity\_Analysis\_3.RTF)

\*\*\*\*\*

### Main Results for E-Component for Run: 2, Simulation: 1, COD: STROKE, Adjusted

| Variable Parameter          | Value                                  |
|-----------------------------|----------------------------------------|
| 1. Country                  | US (United States)                     |
| 2. Sex                      | F (Females)                            |
| 3. Year of start of process | 1990                                   |
| 4. Cause of Death           | STROKE                                 |
| 5. Effective Dose NULL      | CC:1                                   |
| 6. Effective Dose Ecig      | CC:1 Ecig:0.05 Dual:0.525              |
| Note:                       | Death rates are per million population |

#### Results for Age Groups Combined and Years combined, Population and Number deaths adjusted for Ecig scenario,

| Age Group:All | NULL    | Ecig       | %Drop     |          |        |        | NULL    | Ecig   | Drop   |        |
|---------------|---------|------------|-----------|----------|--------|--------|---------|--------|--------|--------|
| Year          | Number  | Attrib     | Attrib    | Drop     | %Drop  | Attrib | Death   | Attrib | Attrib | Drop   |
|               | Deaths  | Deaths     | Deaths    | Deaths   | Deaths | Deaths | Rate    | Rates  | Rates  | Rates  |
| All Comb      | 1361295 | 104899.750 | 52372.300 | 52527.45 | 3.859  | 50.074 | 371.978 | 28.800 | 14.311 | 14.489 |

#### Results for Age Groups Combined, Population and Number deaths adjusted for Ecig scenario,

| Age Group:All | NULL   | Ecig     | %Drop    |          |        |        | NULL    | Ecig   | Drop   |        |
|---------------|--------|----------|----------|----------|--------|--------|---------|--------|--------|--------|
| Year          | Number | Attrib   | Attrib   | Drop     | %Drop  | Attrib | Death   | Attrib | Attrib | Drop   |
|               | Deaths | Deaths   | Deaths   | Deaths   | Deaths | Deaths | Rate    | Rates  | Rates  | Rates  |
| 1990          | 33504  | 3293.017 | 3293.017 | 0.000    | 0.000  | 0.000  | 490.678 | 48.227 | 48.227 | 0.000  |
| 1991          | 32505  | 3207.063 | 3179.556 | 27.507   | 0.085  | 0.858  | 469.694 | 46.342 | 45.944 | 0.397  |
| 1992          | 32560  | 3218.125 | 3141.268 | 76.857   | 0.236  | 2.388  | 464.104 | 45.871 | 44.775 | 1.096  |
| 1993          | 32768  | 3226.680 | 3081.216 | 145.464  | 0.444  | 4.508  | 460.482 | 45.344 | 43.299 | 2.045  |
| 1994          | 33006  | 3277.266 | 3045.432 | 231.833  | 0.702  | 7.074  | 456.920 | 45.370 | 42.159 | 3.210  |
| 1995          | 33732  | 3309.378 | 2977.379 | 331.999  | 0.984  | 10.032 | 459.725 | 45.104 | 40.578 | 4.527  |
| 1996          | 33754  | 3312.987 | 2864.314 | 448.672  | 1.329  | 13.543 | 454.035 | 44.568 | 38.529 | 6.038  |
| 1997          | 33705  | 3267.066 | 2705.658 | 561.408  | 1.666  | 17.184 | 447.080 | 43.341 | 35.890 | 7.452  |
| 1998          | 33282  | 3178.725 | 2509.949 | 668.776  | 2.009  | 21.039 | 435.246 | 41.577 | 32.824 | 8.753  |
| 1999          | 33902  | 3120.351 | 2342.456 | 777.895  | 2.295  | 24.930 | 437.368 | 40.264 | 30.220 | 10.044 |
| 2000          | 33842  | 3142.808 | 2233.728 | 909.081  | 2.686  | 28.926 | 431.142 | 40.050 | 28.457 | 11.593 |
| 2001          | 32525  | 2961.588 | 1986.265 | 975.324  | 2.999  | 32.932 | 409.735 | 37.323 | 25.022 | 12.301 |
| 2002          | 32103  | 2940.627 | 1844.844 | 1095.783 | 3.413  | 37.264 | 400.408 | 36.695 | 23.010 | 13.685 |
| 2003          | 30597  | 2819.545 | 1653.572 | 1165.973 | 3.811  | 41.353 | 378.020 | 34.855 | 20.429 | 14.426 |
| 2004          | 29423  | 2730.466 | 1489.732 | 1240.734 | 4.217  | 45.440 | 359.836 | 33.417 | 18.219 | 15.198 |
| 2005          | 27994  | 2670.510 | 1354.144 | 1316.366 | 4.702  | 49.293 | 338.527 | 32.322 | 16.376 | 15.947 |
| 2006          | 27247  | 2623.285 | 1234.142 | 1389.144 | 5.098  | 52.954 | 326.575 | 31.474 | 14.792 | 16.682 |
| 2007          | 26354  | 2536.599 | 1103.581 | 1433.018 | 5.438  | 56.494 | 312.673 | 30.131 | 13.093 | 17.037 |
| 2008          | 26057  | 2469.443 | 996.180  | 1473.264 | 5.654  | 59.660 | 305.754 | 29.015 | 11.689 | 17.326 |
| 2009          | 25106  | 2386.945 | 890.655  | 1496.290 | 5.960  | 62.686 | 291.216 | 27.730 | 10.331 | 17.399 |
| 2010          | 24914  | 2329.274 | 804.444  | 1524.830 | 6.120  | 65.464 | 285.628 | 26.750 | 9.223  | 17.528 |
| 2011          | 24875  | 2286.581 | 726.460  | 1560.121 | 6.272  | 68.229 | 282.442 | 26.013 | 8.249  | 17.765 |
| 2012          | 24592  | 2243.311 | 655.492  | 1587.819 | 6.457  | 70.780 | 276.309 | 25.260 | 7.365  | 17.895 |
| 2013          | 24553  | 2176.503 | 585.951  | 1590.552 | 6.478  | 73.078 | 272.852 | 24.245 | 6.512  | 17.733 |
| 2014          | 25413  | 2211.619 | 550.124  | 1661.495 | 6.538  | 75.126 | 279.245 | 24.366 | 6.045  | 18.321 |
| 2015          | 26451  | 2237.016 | 520.045  | 1716.971 | 6.491  | 76.753 | 324.749 | 27.554 | 6.385  | 21.169 |
| 2016          | 26885  | 2229.057 | 481.379  | 1747.678 | 6.500  | 78.404 | 326.837 | 27.194 | 5.852  | 21.342 |
| 2017          | 27786  | 2221.649 | 447.567  | 1774.082 | 6.385  | 79.854 | 334.491 | 26.848 | 5.388  | 21.460 |
| 2018          | 25426  | 1939.420 | 366.785  | 1572.635 | 6.185  | 81.088 | 303.076 | 23.214 | 4.372  | 18.842 |
| 2019          | 25616  | 1904.400 | 335.962  | 1568.438 | 6.123  | 82.359 | 302.284 | 22.574 | 3.964  | 18.610 |
| 2020          | 25584  | 1806.054 | 301.011  | 1505.044 | 5.883  | 83.333 | 341.792 | 24.261 | 4.021  | 20.240 |
| 2021          | 25671  | 1748.172 | 273.733  | 1474.439 | 5.744  | 84.342 | 340.345 | 23.314 | 3.629  | 19.685 |
| 2022          | 25779  | 1701.148 | 251.697  | 1449.450 | 5.623  | 85.204 | 339.054 | 22.515 | 3.310  | 19.205 |
| 2023          | 25879  | 1652.087 | 232.981  | 1419.106 | 5.484  | 85.898 | 337.583 | 21.696 | 3.039  | 18.657 |
| 2024          | 25935  | 1597.127 | 214.224  | 1382.902 | 5.332  | 86.587 | 335.599 | 20.814 | 2.772  | 18.042 |
| 2025          | 25554  | 1467.622 | 189.480  | 1278.143 | 5.002  | 87.089 | 381.099 | 22.075 | 2.826  | 19.249 |
| 2026          | 25798  | 1390.505 | 173.314  | 1217.191 | 4.718  | 87.536 | 383.090 | 20.835 | 2.574  | 18.262 |
| 2027          | 25599  | 1342.095 | 161.434  | 1180.661 | 4.612  | 87.971 | 378.433 | 20.030 | 2.386  | 17.643 |
| 2028          | 25374  | 1289.536 | 150.855  | 1138.681 | 4.488  | 88.302 | 373.356 | 19.165 | 2.220  | 16.945 |
| 2029          | 25137  | 1242.216 | 141.688  | 1100.528 | 4.378  | 88.594 | 368.042 | 18.380 | 2.075  | 16.306 |
| 2030          | 24344  | 1096.803 | 121.755  | 975.049  | 4.005  | 88.899 | 421.105 | 19.210 | 2.106  | 17.104 |
| 2031          | 24372  | 1019.991 | 111.809  | 908.182  | 3.726  | 89.038 | 420.773 | 17.841 | 1.930  | 15.911 |
| 2032          | 24041  | 977.406  | 105.388  | 872.018  | 3.627  | 89.218 | 414.011 | 17.063 | 1.815  | 15.248 |
| 2033          | 23700  | 937.450  | 100.922  | 836.528  | 3.530  | 89.234 | 406.925 | 16.326 | 1.733  | 14.593 |
| 2034          | 23335  | 900.763  | 96.308   | 804.455  | 3.447  | 89.308 | 399.333 | 15.644 | 1.648  | 13.996 |
| 2035          | 22199  | 745.023  | 78.401   | 666.622  | 3.003  | 89.477 | 464.031 | 15.845 | 1.639  | 14.206 |
| 2036          | 21374  | 680.360  | 71.062   | 609.298  | 2.851  | 89.555 | 447.178 | 14.492 | 1.487  | 13.005 |
| 2037          | 20876  | 644.109  | 67.497   | 576.613  | 2.762  | 89.521 | 436.826 | 13.730 | 1.412  | 12.318 |
| 2038          | 20378  | 612.448  | 64.977   | 547.471  | 2.687  | 89.391 | 426.120 | 13.055 | 1.359  | 11.696 |
| 2039          | 19887  | 577.529  | 62.468   | 515.062  | 2.590  | 89.184 | 415.196 | 12.298 | 1.304  | 10.994 |

## Results for PHIM for Run 2 (Sensitivity\_Analysis\_3.RTF)

\*\*\*\*\*

### Main Results for E-Component for Run: 2, Simulation: 1, COD: COPD, Adjusted

| Variable Parameter          | Value                                  |
|-----------------------------|----------------------------------------|
| 1. Country                  | US (United States)                     |
| 2. Sex                      | F (Females)                            |
| 3. Year of start of process | 1990                                   |
| 4. Cause of Death           | COPD                                   |
| 5. Effective Dose NULL      | CC:1                                   |
| 6. Effective Dose Ecig      | CC:1 Ecig:0.05 Dual:0.525              |
| Note:                       | Death rates are per million population |

#### Results for Age Groups Combined and Years combined, Population and Number deaths adjusted for Ecig scenario,

| Age Group:All | NULL    | Ecig       | %Drop      |          |        |        | NULL    | Ecig    | Drop    |        |
|---------------|---------|------------|------------|----------|--------|--------|---------|---------|---------|--------|
| Year          | Number  | Attrib     | Attrib     | Drop     | %Drop  | Attrib | Death   | Attrib  | Attrib  | Drop   |
|               | Deaths  | Deaths     | Deaths     | Deaths   | Deaths | Deaths | Rate    | Rates   | Rates   | Rates  |
| All Comb      | 2180900 | 862051.244 | 562327.679 | 299723.6 | 13.743 | 34.769 | 595.937 | 236.673 | 153.658 | 83.015 |

#### Results for Age Groups Combined, Population and Number deaths adjusted for Ecig scenario,

| Age Group:All | NULL   | Ecig      | %Drop     |          |        |        | NULL    | Ecig    | Drop    |         |
|---------------|--------|-----------|-----------|----------|--------|--------|---------|---------|---------|---------|
| Year          | Number | Attrib    | Attrib    | Drop     | %Drop  | Attrib | Death   | Attrib  | Attrib  | Drop    |
|               | Deaths | Deaths    | Deaths    | Deaths   | Deaths | Deaths | Rate    | Rates   | Rates   | Rates   |
| 1990          | 24738  | 10694.712 | 10694.712 | 0.000    | 0.000  | 0.000  | 362.296 | 156.628 | 156.628 | 0.000   |
| 1991          | 26562  | 11602.933 | 11584.706 | 18.227   | 0.069  | 0.157  | 383.818 | 167.661 | 167.398 | 0.263   |
| 1992          | 26828  | 11831.375 | 11781.232 | 50.143   | 0.187  | 0.424  | 382.401 | 168.642 | 167.927 | 0.715   |
| 1993          | 29774  | 13246.371 | 13138.357 | 108.014  | 0.363  | 0.815  | 418.408 | 186.148 | 184.628 | 1.520   |
| 1994          | 29805  | 13355.662 | 13184.276 | 171.386  | 0.575  | 1.283  | 412.606 | 184.893 | 182.517 | 2.377   |
| 1995          | 29757  | 13397.439 | 13143.213 | 254.226  | 0.854  | 1.898  | 405.549 | 182.598 | 179.125 | 3.473   |
| 1996          | 30903  | 13960.356 | 13605.532 | 354.823  | 1.148  | 2.542  | 415.697 | 187.801 | 183.014 | 4.786   |
| 1997          | 31133  | 14109.552 | 13646.360 | 463.192  | 1.488  | 3.283  | 412.976 | 187.180 | 181.015 | 6.165   |
| 1998          | 32104  | 14599.657 | 13994.043 | 605.615  | 1.886  | 4.148  | 419.844 | 190.958 | 183.008 | 7.950   |
| 1999          | 34628  | 15728.102 | 14943.263 | 784.839  | 2.266  | 4.990  | 446.735 | 202.950 | 192.780 | 10.170  |
| 2000          | 34316  | 15579.803 | 14647.546 | 932.257  | 2.717  | 5.984  | 437.173 | 198.541 | 186.606 | 11.935  |
| 2001          | 34614  | 15696.614 | 14574.629 | 1121.986 | 3.241  | 7.148  | 436.049 | 197.812 | 183.602 | 14.210  |
| 2002          | 34319  | 15519.777 | 14218.616 | 1301.162 | 3.791  | 8.384  | 428.056 | 193.668 | 177.346 | 16.323  |
| 2003          | 35110  | 15888.389 | 14352.104 | 1536.285 | 4.376  | 9.669  | 433.775 | 196.413 | 177.316 | 19.098  |
| 2004          | 33555  | 15091.573 | 13424.943 | 1666.630 | 4.967  | 11.043 | 410.368 | 184.701 | 164.185 | 20.516  |
| 2005          | 35446  | 15803.656 | 13813.573 | 1990.082 | 5.614  | 12.593 | 428.647 | 191.278 | 167.047 | 24.231  |
| 2006          | 34043  | 15100.563 | 12983.063 | 2117.500 | 6.220  | 14.023 | 408.024 | 181.174 | 155.611 | 25.563  |
| 2007          | 34072  | 14974.384 | 12632.777 | 2341.607 | 6.873  | 15.637 | 404.242 | 177.871 | 149.880 | 27.991  |
| 2008          | 37517  | 16406.197 | 13598.918 | 2807.280 | 7.483  | 17.111 | 440.216 | 192.768 | 159.568 | 33.200  |
| 2009          | 36929  | 16083.194 | 13035.338 | 3047.856 | 8.253  | 18.951 | 428.362 | 186.846 | 151.205 | 35.641  |
| 2010          | 36905  | 15927.400 | 12663.857 | 3263.544 | 8.843  | 20.490 | 423.094 | 182.917 | 145.185 | 37.732  |
| 2011          | 37770  | 16221.836 | 12598.344 | 3623.492 | 9.594  | 22.337 | 428.851 | 184.547 | 143.046 | 41.500  |
| 2012          | 38417  | 16358.849 | 12406.600 | 3952.250 | 10.288 | 24.160 | 431.644 | 184.202 | 139.398 | 44.804  |
| 2013          | 40289  | 16994.822 | 12557.707 | 4437.115 | 11.013 | 26.109 | 447.719 | 189.311 | 139.550 | 49.761  |
| 2014          | 40279  | 16855.093 | 12123.253 | 4731.840 | 11.748 | 28.074 | 442.595 | 185.696 | 133.212 | 52.483  |
| 2015          | 42427  | 17572.483 | 12369.509 | 5202.974 | 12.263 | 29.609 | 520.892 | 216.445 | 151.865 | 64.580  |
| 2016          | 42856  | 17579.955 | 11996.670 | 5583.286 | 13.028 | 31.759 | 520.991 | 214.473 | 145.840 | 68.634  |
| 2017          | 44649  | 18080.688 | 11956.913 | 6123.775 | 13.715 | 33.869 | 537.480 | 218.496 | 143.937 | 74.559  |
| 2018          | 45678  | 18209.262 | 11701.546 | 6507.716 | 14.247 | 35.738 | 544.473 | 217.960 | 139.479 | 78.480  |
| 2019          | 47235  | 18648.302 | 11601.370 | 7046.932 | 14.919 | 37.789 | 557.389 | 221.054 | 136.901 | 84.153  |
| 2020          | 48733  | 19002.597 | 11493.279 | 7509.318 | 15.409 | 39.517 | 651.066 | 255.266 | 153.548 | 101.718 |
| 2021          | 48772  | 18885.717 | 11012.804 | 7872.913 | 16.142 | 41.687 | 646.631 | 251.867 | 146.009 | 105.858 |
| 2022          | 50187  | 19235.076 | 10839.377 | 8395.700 | 16.729 | 43.648 | 660.079 | 254.582 | 142.563 | 112.018 |
| 2023          | 51611  | 19521.158 | 10646.315 | 8874.843 | 17.196 | 45.463 | 673.261 | 256.363 | 138.880 | 117.483 |
| 2024          | 52977  | 19918.620 | 10461.806 | 9456.814 | 17.851 | 47.477 | 685.508 | 259.583 | 135.373 | 124.210 |
| 2025          | 54020  | 20150.545 | 10226.384 | 9924.161 | 18.371 | 49.250 | 805.619 | 303.086 | 152.510 | 150.576 |
| 2026          | 54922  | 20393.792 | 9947.015  | 10446.78 | 19.021 | 51.225 | 815.561 | 305.582 | 147.708 | 157.874 |
| 2027          | 55793  | 20615.351 | 9646.632  | 10968.72 | 19.659 | 53.207 | 824.794 | 307.668 | 142.606 | 165.062 |
| 2028          | 56609  | 20731.894 | 9300.436  | 11431.46 | 20.194 | 55.139 | 832.945 | 308.115 | 136.846 | 171.269 |
| 2029          | 57387  | 20781.967 | 8935.448  | 11846.52 | 20.643 | 57.004 | 840.234 | 307.495 | 130.830 | 176.665 |
| 2030          | 57674  | 20753.201 | 8582.199  | 12171.00 | 21.103 | 58.646 | 997.647 | 363.487 | 148.456 | 215.032 |
| 2031          | 59299  | 21048.417 | 8483.413  | 12565.00 | 21.189 | 59.696 | 1023.78 | 368.165 | 146.464 | 221.700 |
| 2032          | 59858  | 21169.329 | 8172.428  | 12996.90 | 21.713 | 61.395 | 1030.83 | 369.560 | 140.740 | 228.820 |
| 2033          | 60377  | 21109.293 | 7823.270  | 13286.02 | 22.005 | 62.939 | 1036.66 | 367.618 | 134.323 | 233.295 |
| 2034          | 60822  | 21109.429 | 7479.175  | 13630.25 | 22.410 | 64.570 | 1040.84 | 366.613 | 127.990 | 238.622 |
| 2035          | 60206  | 20794.840 | 7114.453  | 13680.39 | 22.723 | 65.787 | 1258.51 | 442.268 | 148.716 | 293.552 |
| 2036          | 57285  | 19354.577 | 6374.722  | 12979.85 | 22.658 | 67.063 | 1198.46 | 412.258 | 133.366 | 278.892 |
| 2037          | 57278  | 19064.169 | 5956.316  | 13107.85 | 22.884 | 68.756 | 1198.53 | 406.385 | 124.634 | 281.751 |
| 2038          | 57239  | 18854.812 | 5628.587  | 13226.23 | 23.107 | 70.148 | 1196.94 | 401.900 | 117.701 | 284.199 |
| 2039          | 57191  | 18437.457 | 5230.650  | 13206.81 | 23.092 | 71.630 | 1194.03 | 392.602 | 109.205 | 283.397 |



## Results for PHIM for Run 3 (Sensitivity\_Analysis\_3.RTF)

---

### Control File Details for Run: 3

| Variable Parameter                                       | Value                  |
|----------------------------------------------------------|------------------------|
| 1. Name for Reference Scenario                           | NULL                   |
| 2. Name for Test Scenario                                | Ecig                   |
| 3. Name for Product 1                                    | CC                     |
| 4. Name for Product 2                                    | Ecig                   |
| 5. Name for Product 3                                    | -                      |
| 6. Name for Product 4                                    | Dual                   |
| 7. Country                                               | US (United States)     |
| 8. Sex                                                   | M (Males)              |
| 9. Year of start of process                              | 1990                   |
| 10. Number of months of follow-up                        | 600                    |
| 11. Follow-up interval length (in months)                | 12                     |
| 12. Lower age for risk estimation                        | 10                     |
| 13. Upper age for risk estimation                        | 79                     |
| 14. The effective dose for Product 1 (F1) - Ref          | 1                      |
| 15. The effective dose for Product 2 (F2) - Ref          | -                      |
| 16. The effective dose for Product 3 (F3) - Ref          | -                      |
| 17. The effective dose for Product 4 (F4) - Ref          | -                      |
| 18. The effective dose for Product 1 (F1) - Test         | 1                      |
| 19. The effective dose for Product 2 (F2) - Test         | 0.05                   |
| 20. The effective dose for Product 3 (F3) - Test         | -                      |
| 21. The effective dose for Product 4 (F4) - Test         | FROMF2                 |
| 22. Number in population to be simulated                 | 100000                 |
| 23. Number of MC simulations                             | 1                      |
| 24. The random number seed for the first simulation      | 15975263               |
| 25. Source for the population file (POP)                 | UN4                    |
| 26. Source for the socioeconomic prevalence file (SEP)   | -                      |
| 27. Source for the current smoking prevalence file (CSP) | ISS3                   |
| 28. Source for the former smoking prevalence file (FSP)  | ISS3                   |
| 29. Source for the quit-time distribution file (QTD)     | NHIS2006               |
| 30. Source for the death file (MORT)                     | APR-20                 |
| 31. Source for the relative risk file (RR)               | PNLEST                 |
| 32. Source for the half-life file (H)                    | PNLEST                 |
| 33. Assumption Set for TTP Factor Reference              | F1                     |
| 34. Assumption Set for TTP Factor Test                   | F1                     |
| 35. Assumption Set for TTP Reference                     | ISS3                   |
| 36. Assumption Set for TTP Test                          | S3B                    |
| 37. Assumption Set for TP for socioeconomic group        | -                      |
| 38. Source for Output Choice file (OUTC)                 | BASIC                  |
| 39. Output for DTP P1                                    | N                      |
| 40. Output for DTP P2                                    | N                      |
| 41. Output for Main P Component                          | Y                      |
| 42. Output for DTP E1                                    | N                      |
| 43. Output for DTP E2                                    | N                      |
| 44. Output for DTP E3                                    | N                      |
| 45. Output for Main E Component                          | Y                      |
| 46. Output file name                                     | Sensitivity_Analysis_3 |
| 47. Run number for P-Component                           | -                      |
| 48. Results file for E-Component                         | -                      |
| 49. Components required                                  | PE                     |
| 50. Results folder for P to be used in E-Component       | -                      |
| 51. Fixed age of starting product use                    | 16                     |
| 52. Output absolute risk file?                           | N                      |

## Results for PHIM for Run 3 (Sensitivity\_Analysis\_3.RTF)

\*\*\*\*\*

TTP values for Run: 3, Scenario: NULL

| Variable Parameter | Value               |
|--------------------|---------------------|
| 1. Country         | US (United States)  |
| 2. Sex             | M (Males)           |
| 3. Assumption Set  | ISS3                |
| Note:              | Period is in Months |

| Age   | Period  | Initiation  | Cessation    | Re-initiation |
|-------|---------|-------------|--------------|---------------|
|       |         | Never<br>CC | CC<br>Former | Former<br>CC  |
| 10-14 | 1-12    | 0.003842    | 0.008742     | 0.000000      |
| 15-19 | 1-12    | 0.004720    | 0.003614     | 0.000000      |
| 20-24 | 1-12    | 0.000376    | 0.000943     | 0.000000      |
| 25-29 | 1-12    | 0.000187    | 0.001143     | 0.000000      |
| 30-34 | 1-12    | 0.000093    | 0.000871     | 0.000000      |
| 35-39 | 1-12    | 0.000000    | 0.000867     | 0.000000      |
| 40-44 | 1-12    | 0.000000    | 0.001399     | 0.000000      |
| 45-49 | 1-12    | 0.000000    | 0.002033     | 0.000000      |
| 50-54 | 1-12    | 0.000000    | 0.003209     | 0.000000      |
| 55-59 | 1-12    | 0.000000    | 0.003574     | 0.000000      |
| 60-64 | 1-12    | 0.000000    | 0.003460     | 0.000000      |
| 65-69 | 1-12    | 0.000000    | 0.004136     | 0.000000      |
| 70-74 | 1-12    | 0.000000    | 0.005592     | 0.000000      |
| 75-79 | 1-12    | 0.000000    | 0.005592     | 0.000000      |
| 10-14 | 13-72   | 0.004906    | 0.008742     | 0.000000      |
| 15-19 | 13-72   | 0.006989    | 0.004426     | 0.000000      |
| 20-24 | 13-72   | 0.000687    | 0.001527     | 0.000000      |
| 25-29 | 13-72   | 0.000962    | 0.001515     | 0.000000      |
| 30-34 | 13-72   | 0.000364    | 0.001227     | 0.000000      |
| 35-39 | 13-72   | 0.000000    | 0.001630     | 0.000000      |
| 40-44 | 13-72   | 0.000000    | 0.001852     | 0.000000      |
| 45-49 | 13-72   | 0.000000    | 0.002667     | 0.000000      |
| 50-54 | 13-72   | 0.000000    | 0.003208     | 0.000000      |
| 55-59 | 13-72   | 0.000000    | 0.003978     | 0.000000      |
| 60-64 | 13-72   | 0.000000    | 0.005771     | 0.000000      |
| 65-69 | 13-72   | 0.000000    | 0.010432     | 0.000000      |
| 70-74 | 13-72   | 0.000000    | 0.007079     | 0.000000      |
| 75-79 | 13-72   | 0.000000    | 0.007079     | 0.000000      |
| 10-14 | 73-132  | 0.004312    | 0.008742     | 0.000000      |
| 15-19 | 73-132  | 0.005330    | 0.003289     | 0.000000      |
| 20-24 | 73-132  | 0.002456    | 0.003844     | 0.000000      |
| 25-29 | 73-132  | 0.000839    | 0.002006     | 0.000000      |
| 30-34 | 73-132  | 0.000414    | 0.001329     | 0.000000      |
| 35-39 | 73-132  | 0.000000    | 0.001278     | 0.000000      |
| 40-44 | 73-132  | 0.000000    | 0.001691     | 0.000000      |
| 45-49 | 73-132  | 0.000000    | 0.002904     | 0.000000      |
| 50-54 | 73-132  | 0.000000    | 0.003319     | 0.000000      |
| 55-59 | 73-132  | 0.000000    | 0.003976     | 0.000000      |
| 60-64 | 73-132  | 0.000000    | 0.005235     | 0.000000      |
| 65-69 | 73-132  | 0.000000    | 0.005901     | 0.000000      |
| 70-74 | 73-132  | 0.000000    | 0.005615     | 0.000000      |
| 75-79 | 73-132  | 0.000000    | 0.005615     | 0.000000      |
| 10-14 | 133-192 | 0.003468    | 0.008742     | 0.000000      |
| 15-19 | 133-192 | 0.004675    | 0.003732     | 0.000000      |
| 20-24 | 133-192 | 0.000062    | 0.002260     | 0.000000      |
| 25-29 | 133-192 | 0.001422    | 0.002822     | 0.000000      |
| 30-34 | 133-192 | 0.000696    | 0.002610     | 0.000000      |
| 35-39 | 133-192 | 0.000000    | 0.002058     | 0.000000      |
| 40-44 | 133-192 | 0.000000    | 0.002310     | 0.000000      |
| 45-49 | 133-192 | 0.000000    | 0.002256     | 0.000000      |
| 50-54 | 133-192 | 0.000000    | 0.002663     | 0.000000      |
| 55-59 | 133-192 | 0.000000    | 0.001746     | 0.000000      |
| 60-64 | 133-192 | 0.000000    | 0.005809     | 0.000000      |
| 65-69 | 133-192 | 0.000000    | 0.005896     | 0.000000      |
| 70-74 | 133-192 | 0.000000    | 0.007323     | 0.000000      |
| 75-79 | 133-192 | 0.000000    | 0.007323     | 0.000000      |
| 10-14 | 193-252 | 0.002314    | 0.008742     | 0.000000      |
| 15-19 | 193-252 | 0.003987    | 0.005036     | 0.000000      |
| 20-24 | 193-252 | 0.000320    | 0.002857     | 0.000000      |
| 25-29 | 193-252 | 0.000251    | 0.002314     | 0.000000      |
| 30-34 | 193-252 | 0.000125    | 0.004343     | 0.000000      |
| 35-39 | 193-252 | 0.000000    | 0.002092     | 0.000000      |
| 40-44 | 193-252 | 0.000000    | 0.002566     | 0.000000      |
| 45-49 | 193-252 | 0.000000    | 0.002311     | 0.000000      |
| 50-54 | 193-252 | 0.000000    | 0.003209     | 0.000000      |

### Results for PHIM for Run 3 (Sensitivity\_Analysis\_3.RTF)

|       |         |          |          |          |
|-------|---------|----------|----------|----------|
| 55-59 | 193-252 | 0.000000 | 0.004057 | 0.000000 |
| 60-64 | 193-252 | 0.000000 | 0.007166 | 0.000000 |
| 65-69 | 193-252 | 0.000000 | 0.004281 | 0.000000 |
| 70-74 | 193-252 | 0.000000 | 0.004580 | 0.000000 |
| 75-79 | 193-252 | 0.000000 | 0.004580 | 0.000000 |
| 10-14 | 253+    | 0.001325 | 0.008742 | 0.000000 |
| 15-19 | 253+    | 0.002984 | 0.010602 | 0.000000 |
| 20-24 | 253+    | 0.000452 | 0.004314 | 0.000000 |
| 25-29 | 253+    | 0.000225 | 0.003645 | 0.000000 |
| 30-34 | 253+    | 0.000112 | 0.004512 | 0.000000 |
| 35-39 | 253+    | 0.000000 | 0.002147 | 0.000000 |
| 40-44 | 253+    | 0.000000 | 0.002636 | 0.000000 |
| 45-49 | 253+    | 0.000000 | 0.001051 | 0.000000 |
| 50-54 | 253+    | 0.000000 | 0.002519 | 0.000000 |
| 55-59 | 253+    | 0.000000 | 0.003693 | 0.000000 |
| 60-64 | 253+    | 0.000000 | 0.005888 | 0.000000 |
| 65-69 | 253+    | 0.000000 | 0.004823 | 0.000000 |
| 70-74 | 253+    | 0.000000 | 0.004733 | 0.000000 |
| 75-79 | 253+    | 0.000000 | 0.004733 | 0.000000 |



### Results for PHIM for Run 3 (Sensitivity\_Analysis\_3.RTF)

|       |         |          |          |          |          |          |          |          |          |          |
|-------|---------|----------|----------|----------|----------|----------|----------|----------|----------|----------|
| 55-59 | 193-252 | 0.000000 | 0.000000 | 0.000000 | 0.004057 | 0.003043 | 0.000000 | 0.000000 | 0.000000 | 0.000000 |
| 60-64 | 193-252 | 0.000000 | 0.000000 | 0.000000 | 0.007166 | 0.005374 | 0.000000 | 0.000000 | 0.000000 | 0.000000 |
| 65-69 | 193-252 | 0.000000 | 0.000000 | 0.000000 | 0.004281 | 0.003211 | 0.000000 | 0.000000 | 0.000000 | 0.000000 |
| 70-74 | 193-252 | 0.000000 | 0.000000 | 0.000000 | 0.004580 | 0.003435 | 0.000000 | 0.000000 | 0.000000 | 0.000000 |
| 75-79 | 193-252 | 0.000000 | 0.000000 | 0.000000 | 0.004580 | 0.003435 | 0.000000 | 0.000000 | 0.000000 | 0.000000 |
| 10-14 | 253+    | 0.000066 | 0.001259 | 0.000000 | 0.008742 | 0.006556 | 0.000000 | 0.000000 | 0.000000 | 0.000000 |
| 15-19 | 253+    | 0.000149 | 0.002835 | 0.000000 | 0.010602 | 0.007951 | 0.000000 | 0.000000 | 0.000000 | 0.000000 |
| 20-24 | 253+    | 0.000023 | 0.000430 | 0.000000 | 0.004314 | 0.003235 | 0.000000 | 0.000000 | 0.000000 | 0.000000 |
| 25-29 | 253+    | 0.000011 | 0.000213 | 0.000000 | 0.003645 | 0.002734 | 0.000000 | 0.000000 | 0.000000 | 0.000000 |
| 30-34 | 253+    | 0.000006 | 0.000106 | 0.000000 | 0.004512 | 0.003384 | 0.000000 | 0.000000 | 0.000000 | 0.000000 |
| 35-39 | 253+    | 0.000000 | 0.000000 | 0.000000 | 0.002147 | 0.001610 | 0.000000 | 0.000000 | 0.000000 | 0.000000 |
| 40-44 | 253+    | 0.000000 | 0.000000 | 0.000000 | 0.002636 | 0.001977 | 0.000000 | 0.000000 | 0.000000 | 0.000000 |
| 45-49 | 253+    | 0.000000 | 0.000000 | 0.000000 | 0.001051 | 0.000788 | 0.000000 | 0.000000 | 0.000000 | 0.000000 |
| 50-54 | 253+    | 0.000000 | 0.000000 | 0.000000 | 0.002519 | 0.001889 | 0.000000 | 0.000000 | 0.000000 | 0.000000 |
| 55-59 | 253+    | 0.000000 | 0.000000 | 0.000000 | 0.003693 | 0.002770 | 0.000000 | 0.000000 | 0.000000 | 0.000000 |
| 60-64 | 253+    | 0.000000 | 0.000000 | 0.000000 | 0.005888 | 0.004416 | 0.000000 | 0.000000 | 0.000000 | 0.000000 |
| 65-69 | 253+    | 0.000000 | 0.000000 | 0.000000 | 0.004823 | 0.003617 | 0.000000 | 0.000000 | 0.000000 | 0.000000 |
| 70-74 | 253+    | 0.000000 | 0.000000 | 0.000000 | 0.004733 | 0.003549 | 0.000000 | 0.000000 | 0.000000 | 0.000000 |
| 75-79 | 253+    | 0.000000 | 0.000000 | 0.000000 | 0.004733 | 0.003549 | 0.000000 | 0.000000 | 0.000000 | 0.000000 |



### Results for PHIM for Run 3 (Sensitivity\_Analysis\_3.RTF)

|       |      |          |          |          |          |          |          |
|-------|------|----------|----------|----------|----------|----------|----------|
| 25-29 | 253+ | 0.015212 | 0.000000 | 0.000000 | 0.000000 | 0.000000 | 0.000000 |
| 30-34 | 253+ | 0.015460 | 0.000000 | 0.000000 | 0.000000 | 0.000000 | 0.000000 |
| 35-39 | 253+ | 0.014711 | 0.000000 | 0.000000 | 0.000000 | 0.000000 | 0.000000 |
| 40-44 | 253+ | 0.014241 | 0.000000 | 0.000000 | 0.000000 | 0.000000 | 0.000000 |
| 45-49 | 253+ | 0.013014 | 0.000000 | 0.000000 | 0.000000 | 0.000000 | 0.000000 |
| 50-54 | 253+ | 0.011768 | 0.000000 | 0.000000 | 0.000000 | 0.000000 | 0.000000 |
| 55-59 | 253+ | 0.011032 | 0.000000 | 0.000000 | 0.000000 | 0.000000 | 0.000000 |
| 60-64 | 253+ | 0.009525 | 0.000000 | 0.000000 | 0.000000 | 0.000000 | 0.000000 |
| 65-69 | 253+ | 0.006897 | 0.000000 | 0.000000 | 0.000000 | 0.000000 | 0.000000 |
| 70-74 | 253+ | 0.005435 | 0.000000 | 0.000000 | 0.000000 | 0.000000 | 0.000000 |
| 75-79 | 253+ | 0.005435 | 0.000000 | 0.000000 | 0.000000 | 0.000000 | 0.000000 |

## Results for PHIM for Run 3 (Sensitivity\_Analysis\_3.RTF)

\*\*\*\*\*

### Main Output for the Tobacco History for Run: 3, Simulation: 1, Scenario: NULL

| Variable Parameter          | Value              |
|-----------------------------|--------------------|
| 1. Country                  | US (United States) |
| 2. Sex                      | M (Males)          |
| 3. Year of start of process | 1990               |

Year of Follow-up: 2040, Age Group: All Ages  
 Period    Age Group    Smoking Group            N            %

|    |          |           |       |       |
|----|----------|-----------|-------|-------|
| 50 | All Ages | Never Any | 19445 | 50.68 |
| 50 | All Ages | CC        | 3024  | 7.88  |
| 50 | All Ages | Former    | 15896 | 41.43 |

Year of Follow-up: 2040, Age Group: 18-19  
 Period    Age Group    Smoking Group            N            %

|    |       |           |   |   |
|----|-------|-----------|---|---|
| 50 | 18-19 | Never Any | 0 | . |
| 50 | 18-19 | CC        | 0 | . |
| 50 | 18-19 | Former    | 0 | . |

Year of Follow-up: 2040, Age Group: 20-24  
 Period    Age Group    Smoking Group            N            %

|    |       |           |   |   |
|----|-------|-----------|---|---|
| 50 | 20-24 | Never Any | 0 | . |
| 50 | 20-24 | CC        | 0 | . |
| 50 | 20-24 | Former    | 0 | . |

Year of Follow-up: 2040, Age Group: 25-29  
 Period    Age Group    Smoking Group            N            %

|    |       |           |   |   |
|----|-------|-----------|---|---|
| 50 | 25-29 | Never Any | 0 | . |
| 50 | 25-29 | CC        | 0 | . |
| 50 | 25-29 | Former    | 0 | . |

Year of Follow-up: 2040, Age Group: 30-34  
 Period    Age Group    Smoking Group            N            %

|    |       |           |   |   |
|----|-------|-----------|---|---|
| 50 | 30-34 | Never Any | 0 | . |
| 50 | 30-34 | CC        | 0 | . |
| 50 | 30-34 | Former    | 0 | . |

Year of Follow-up: 2040, Age Group: 35-39  
 Period    Age Group    Smoking Group            N            %

|    |       |           |   |   |
|----|-------|-----------|---|---|
| 50 | 35-39 | Never Any | 0 | . |
| 50 | 35-39 | CC        | 0 | . |
| 50 | 35-39 | Former    | 0 | . |

Year of Follow-up: 2040, Age Group: 40-44  
 Period    Age Group    Smoking Group            N            %

|    |       |           |   |   |
|----|-------|-----------|---|---|
| 50 | 40-44 | Never Any | 0 | . |
| 50 | 40-44 | CC        | 0 | . |
| 50 | 40-44 | Former    | 0 | . |

Year of Follow-up: 2040, Age Group: 45-49  
 Period    Age Group    Smoking Group            N            %

|    |       |           |   |   |
|----|-------|-----------|---|---|
| 50 | 45-49 | Never Any | 0 | . |
| 50 | 45-49 | CC        | 0 | . |
| 50 | 45-49 | Former    | 0 | . |

Year of Follow-up: 2040, Age Group: 50-54  
 Period    Age Group    Smoking Group            N            %

|    |       |           |   |   |
|----|-------|-----------|---|---|
| 50 | 50-54 | Never Any | 0 | . |
| 50 | 50-54 | CC        | 0 | . |
| 50 | 50-54 | Former    | 0 | . |

Year of Follow-up: 2040, Age Group: 55-59  
 Period    Age Group    Smoking Group            N            %

|    |       |           |   |   |
|----|-------|-----------|---|---|
| 50 | 55-59 | Never Any | 0 | . |
| 50 | 55-59 | CC        | 0 | . |
| 50 | 55-59 | Former    | 0 | . |

Year of Follow-up: 2040, Age Group: 60-64  
 Period    Age Group    Smoking Group            N            %



### Results for PHIM for Run 3 (Sensitivity\_Analysis\_3.RTF)

|                                           |           |               |      |       |
|-------------------------------------------|-----------|---------------|------|-------|
| 50                                        | 60-64     | Never Any     | 4363 | 49.33 |
| 50                                        | 60-64     | CC            | 934  | 10.56 |
| 50                                        | 60-64     | Former        | 3548 | 40.11 |
| Year of Follow-up: 2040, Age Group: 65-69 |           |               |      |       |
| Period                                    | Age Group | Smoking Group | N    | %     |
| 50                                        | 65-69     | Never Any     | 4948 | 54.73 |
| 50                                        | 65-69     | CC            | 734  | 8.12  |
| 50                                        | 65-69     | Former        | 3358 | 37.15 |
| Year of Follow-up: 2040, Age Group: 70-74 |           |               |      |       |
| Period                                    | Age Group | Smoking Group | N    | %     |
| 50                                        | 70-74     | Never Any     | 5145 | 52.41 |
| 50                                        | 70-74     | CC            | 688  | 7.01  |
| 50                                        | 70-74     | Former        | 3983 | 40.58 |
| Year of Follow-up: 2040, Age Group: 75-79 |           |               |      |       |
| Period                                    | Age Group | Smoking Group | N    | %     |
| 50                                        | 75-79     | Never Any     | 4989 | 46.78 |
| 50                                        | 75-79     | CC            | 668  | 6.26  |
| 50                                        | 75-79     | Former        | 5007 | 46.95 |

## Results for PHIM for Run 3 (Sensitivity\_Analysis\_3.RTF)

\*\*\*\*\*

### Main Output for the Tobacco History for Run: 3, Simulation: 1, Scenario: Ecig

| Variable Parameter                           |           | Value              |       |       |               |             |               |                |              |
|----------------------------------------------|-----------|--------------------|-------|-------|---------------|-------------|---------------|----------------|--------------|
| 1. Country                                   |           | US (United States) |       |       |               |             |               |                |              |
| 2. Sex                                       |           | M (Males)          |       |       |               |             |               |                |              |
| 3. Year of start of process                  |           | 1990               |       |       |               |             |               |                |              |
| Year of Follow-up: 1990, Age Group: All Ages |           |                    |       |       |               |             |               |                |              |
| Period                                       | Age Group | Smoking Group      | N     | %     | Ever Quit (N) | Ever Quit % | Mean Yrs Quit | Short Term (n) | Short Term % |
| 0                                            | All Ages  | Never Any          | 34075 | 39.78 |               |             |               |                |              |
| 0                                            | All Ages  | CC                 | 27323 | 31.90 | 0             | 0.00        |               |                |              |
| 0                                            | All Ages  | Ecig               | 0     | 0.00  |               |             |               |                |              |
| 0                                            | All Ages  | Dual               | 0     | 0.00  |               |             |               |                |              |
| 0                                            | All Ages  | Former             | 24266 | 28.33 |               |             | 13.08         | 3623           | 14.93        |
| Year of Follow-up: 1990, Age Group: 18-19    |           |                    |       |       |               |             |               |                |              |
| Period                                       | Age Group | Smoking Group      | N     | %     | Ever Quit (N) | Ever Quit % | Mean Yrs Quit | Short Term (n) | Short Term % |
| 0                                            | 18-19     | Never Any          | 2783  | 78.42 |               |             |               |                |              |
| 0                                            | 18-19     | CC                 | 634   | 17.86 | 0             | 0.00        |               |                |              |
| 0                                            | 18-19     | Ecig               | 0     | 0.00  |               |             |               |                |              |
| 0                                            | 18-19     | Dual               | 0     | 0.00  |               |             |               |                |              |
| 0                                            | 18-19     | Former             | 132   | 3.72  |               |             | 0.11          | 132            | 100.00       |
| Year of Follow-up: 1990, Age Group: 20-24    |           |                    |       |       |               |             |               |                |              |
| Period                                       | Age Group | Smoking Group      | N     | %     | Ever Quit (N) | Ever Quit % | Mean Yrs Quit | Short Term (n) | Short Term % |
| 0                                            | 20-24     | Never Any          | 5722  | 58.29 |               |             |               |                |              |
| 0                                            | 20-24     | CC                 | 3199  | 32.59 | 0             | 0.00        |               |                |              |
| 0                                            | 20-24     | Ecig               | 0     | 0.00  |               |             |               |                |              |
| 0                                            | 20-24     | Dual               | 0     | 0.00  |               |             |               |                |              |
| 0                                            | 20-24     | Former             | 895   | 9.12  |               |             | 1.46          | 506            | 56.54        |
| Year of Follow-up: 1990, Age Group: 25-29    |           |                    |       |       |               |             |               |                |              |
| Period                                       | Age Group | Smoking Group      | N     | %     | Ever Quit (N) | Ever Quit % | Mean Yrs Quit | Short Term (n) | Short Term % |
| 0                                            | 25-29     | Never Any          | 5232  | 49.06 |               |             |               |                |              |
| 0                                            | 25-29     | CC                 | 3914  | 36.70 | 0             | 0.00        |               |                |              |
| 0                                            | 25-29     | Ecig               | 0     | 0.00  |               |             |               |                |              |
| 0                                            | 25-29     | Dual               | 0     | 0.00  |               |             |               |                |              |
| 0                                            | 25-29     | Former             | 1518  | 14.23 |               |             | 2.87          | 643            | 42.36        |
| Year of Follow-up: 1990, Age Group: 30-34    |           |                    |       |       |               |             |               |                |              |
| Period                                       | Age Group | Smoking Group      | N     | %     | Ever Quit (N) | Ever Quit % | Mean Yrs Quit | Short Term (n) | Short Term % |
| 0                                            | 30-34     | Never Any          | 4765  | 43.65 |               |             |               |                |              |
| 0                                            | 30-34     | CC                 | 4023  | 36.85 | 0             | 0.00        |               |                |              |
| 0                                            | 30-34     | Ecig               | 0     | 0.00  |               |             |               |                |              |
| 0                                            | 30-34     | Dual               | 0     | 0.00  |               |             |               |                |              |
| 0                                            | 30-34     | Former             | 2128  | 19.49 |               |             | 4.06          | 592            | 27.82        |
| Year of Follow-up: 1990, Age Group: 35-39    |           |                    |       |       |               |             |               |                |              |
| Period                                       | Age Group | Smoking Group      | N     | %     | Ever Quit (N) | Ever Quit % | Mean Yrs Quit | Short Term (n) | Short Term % |
| 0                                            | 35-39     | Never Any          | 3941  | 39.85 |               |             |               |                |              |
| 0                                            | 35-39     | CC                 | 3474  | 35.13 | 0             | 0.00        |               |                |              |
| 0                                            | 35-39     | Ecig               | 0     | 0.00  |               |             |               |                |              |
| 0                                            | 35-39     | Dual               | 0     | 0.00  |               |             |               |                |              |
| 0                                            | 35-39     | Former             | 2474  | 25.02 |               |             | 8.31          | 425            | 17.18        |
| Year of Follow-up: 1990, Age Group: 40-44    |           |                    |       |       |               |             |               |                |              |
| Period                                       | Age Group | Smoking Group      | N     | %     | Ever Quit (N) | Ever Quit % | Mean Yrs Quit | Short Term (n) | Short Term % |
| 0                                            | 40-44     | Never Any          | 2912  | 33.65 |               |             |               |                |              |
| 0                                            | 40-44     | CC                 | 3113  | 35.97 | 0             | 0.00        |               |                |              |
| 0                                            | 40-44     | Ecig               | 0     | 0.00  |               |             |               |                |              |
| 0                                            | 40-44     | Dual               | 0     | 0.00  |               |             |               |                |              |
| 0                                            | 40-44     | Former             | 2630  | 30.39 |               |             | 10.69         | 317            | 12.05        |
| Year of Follow-up: 1990, Age Group: 45-49    |           |                    |       |       |               |             |               |                |              |
| Period                                       | Age Group | Smoking Group      | N     | %     | Ever Quit (N) | Ever Quit % | Mean Yrs Quit | Short Term (n) | Short Term % |
| 0                                            | 45-49     | Never Any          | 1919  | 29.46 |               |             |               |                |              |
| 0                                            | 45-49     | CC                 | 2318  | 35.58 | 0             | 0.00        |               |                |              |
| 0                                            | 45-49     | Ecig               | 0     | 0.00  |               |             |               |                |              |
| 0                                            | 45-49     | Dual               | 0     | 0.00  |               |             |               |                |              |
| 0                                            | 45-49     | Former             | 2278  | 34.97 |               |             | 13.26         | 221            | 9.70         |
| Year of Follow-up: 1990, Age Group: 50-54    |           |                    |       |       |               |             |               |                |              |
| Period                                       | Age Group | Smoking Group      | N     | %     | Ever Quit (N) | Ever Quit % | Mean Yrs Quit | Short Term (n) | Short Term % |
| 0                                            | 50-54     | Never Any          | 1611  | 29.41 |               |             |               |                |              |
| 0                                            | 50-54     | CC                 | 1816  | 33.16 | 0             | 0.00        |               |                |              |

### Results for PHIM for Run 3 (Sensitivity\_Analysis\_3.RTF)

|                                              |           |               |       |       |               |             |               |                |              |
|----------------------------------------------|-----------|---------------|-------|-------|---------------|-------------|---------------|----------------|--------------|
| 0                                            | 50-54     | Ecig          | 0     | 0.00  |               |             |               |                |              |
| 0                                            | 50-54     | Dual          | 0     | 0.00  |               |             |               |                |              |
| 0                                            | 50-54     | Former        | 2050  | 37.43 |               |             | 14.55         | 261            | 12.73        |
| Year of Follow-up: 1990, Age Group: 55-59    |           |               |       |       |               |             |               |                |              |
| Period                                       | Age Group | Smoking Group | N     | %     | Ever Quit (N) | Ever Quit % | Mean Yrs Quit | Short Term (n) | Short Term % |
| 0                                            | 55-59     | Never Any     | 1337  | 26.83 |               |             |               |                |              |
| 0                                            | 55-59     | CC            | 1520  | 30.50 | 0             | 0.00        |               |                |              |
| 0                                            | 55-59     | Ecig          | 0     | 0.00  |               |             |               |                |              |
| 0                                            | 55-59     | Dual          | 0     | 0.00  |               |             |               |                |              |
| 0                                            | 55-59     | Former        | 2126  | 42.67 |               |             | 14.80         | 216            | 10.16        |
| Year of Follow-up: 1990, Age Group: 60-64    |           |               |       |       |               |             |               |                |              |
| Period                                       | Age Group | Smoking Group | N     | %     | Ever Quit (N) | Ever Quit % | Mean Yrs Quit | Short Term (n) | Short Term % |
| 0                                            | 60-64     | Never Any     | 1169  | 23.83 |               |             |               |                |              |
| 0                                            | 60-64     | CC            | 1287  | 26.24 | 0             | 0.00        |               |                |              |
| 0                                            | 60-64     | Ecig          | 0     | 0.00  |               |             |               |                |              |
| 0                                            | 60-64     | Dual          | 0     | 0.00  |               |             |               |                |              |
| 0                                            | 60-64     | Former        | 2449  | 49.93 |               |             | 18.87         | 106            | 4.33         |
| Year of Follow-up: 1990, Age Group: 65-69    |           |               |       |       |               |             |               |                |              |
| Period                                       | Age Group | Smoking Group | N     | %     | Ever Quit (N) | Ever Quit % | Mean Yrs Quit | Short Term (n) | Short Term % |
| 0                                            | 65-69     | Never Any     | 1023  | 23.32 |               |             |               |                |              |
| 0                                            | 65-69     | CC            | 979   | 22.32 | 0             | 0.00        |               |                |              |
| 0                                            | 65-69     | Ecig          | 0     | 0.00  |               |             |               |                |              |
| 0                                            | 65-69     | Dual          | 0     | 0.00  |               |             |               |                |              |
| 0                                            | 65-69     | Former        | 2385  | 54.37 |               |             | 19.91         | 113            | 4.74         |
| Year of Follow-up: 1990, Age Group: 70-74    |           |               |       |       |               |             |               |                |              |
| Period                                       | Age Group | Smoking Group | N     | %     | Ever Quit (N) | Ever Quit % | Mean Yrs Quit | Short Term (n) | Short Term % |
| 0                                            | 70-74     | Never Any     | 961   | 27.46 |               |             |               |                |              |
| 0                                            | 70-74     | CC            | 675   | 19.29 | 0             | 0.00        |               |                |              |
| 0                                            | 70-74     | Ecig          | 0     | 0.00  |               |             |               |                |              |
| 0                                            | 70-74     | Dual          | 0     | 0.00  |               |             |               |                |              |
| 0                                            | 70-74     | Former        | 1863  | 53.24 |               |             | 20.69         | 23             | 1.23         |
| Year of Follow-up: 1990, Age Group: 75-79    |           |               |       |       |               |             |               |                |              |
| Period                                       | Age Group | Smoking Group | N     | %     | Ever Quit (N) | Ever Quit % | Mean Yrs Quit | Short Term (n) | Short Term % |
| 0                                            | 75-79     | Never Any     | 700   | 29.06 |               |             |               |                |              |
| 0                                            | 75-79     | CC            | 371   | 15.40 | 0             | 0.00        |               |                |              |
| 0                                            | 75-79     | Ecig          | 0     | 0.00  |               |             |               |                |              |
| 0                                            | 75-79     | Dual          | 0     | 0.00  |               |             |               |                |              |
| 0                                            | 75-79     | Former        | 1338  | 55.54 |               |             | 22.88         | 68             | 5.08         |
| Year of Follow-up: 1995, Age Group: All Ages |           |               |       |       |               |             |               |                |              |
| Period                                       | Age Group | Smoking Group | N     | %     | Ever Quit (N) | Ever Quit % | Mean Yrs Quit | Short Term (n) | Short Term % |
| 5                                            | All Ages  | Never Any     | 38368 | 41.57 |               |             |               |                |              |
| 5                                            | All Ages  | CC            | 11508 | 12.47 | 0             | 0.00        |               |                |              |
| 5                                            | All Ages  | Ecig          | 15766 | 17.08 |               |             |               |                |              |
| 5                                            | All Ages  | Dual          | 0     | 0.00  |               |             |               |                |              |
| 5                                            | All Ages  | Former        | 26648 | 28.87 |               |             | 15.32         | 1551           | 5.82         |
| Year of Follow-up: 1995, Age Group: 18-19    |           |               |       |       |               |             |               |                |              |
| Period                                       | Age Group | Smoking Group | N     | %     | Ever Quit (N) | Ever Quit % | Mean Yrs Quit | Short Term (n) | Short Term % |
| 5                                            | 18-19     | Never Any     | 2448  | 69.07 |               |             |               |                |              |
| 5                                            | 18-19     | CC            | 320   | 9.03  | 0             | 0.00        |               |                |              |
| 5                                            | 18-19     | Ecig          | 677   | 19.10 |               |             |               |                |              |
| 5                                            | 18-19     | Dual          | 0     | 0.00  |               |             |               |                |              |
| 5                                            | 18-19     | Former        | 99    | 2.79  |               |             | 1.12          | 67             | 67.68        |
| Year of Follow-up: 1995, Age Group: 20-24    |           |               |       |       |               |             |               |                |              |
| Period                                       | Age Group | Smoking Group | N     | %     | Ever Quit (N) | Ever Quit % | Mean Yrs Quit | Short Term (n) | Short Term % |
| 5                                            | 20-24     | Never Any     | 5787  | 64.02 |               |             |               |                |              |
| 5                                            | 20-24     | CC            | 946   | 10.46 | 0             | 0.00        |               |                |              |
| 5                                            | 20-24     | Ecig          | 1856  | 20.53 |               |             |               |                |              |
| 5                                            | 20-24     | Dual          | 0     | 0.00  |               |             |               |                |              |
| 5                                            | 20-24     | Former        | 451   | 4.99  |               |             | 2.91          | 125            | 27.72        |
| Year of Follow-up: 1995, Age Group: 25-29    |           |               |       |       |               |             |               |                |              |
| Period                                       | Age Group | Smoking Group | N     | %     | Ever Quit (N) | Ever Quit % | Mean Yrs Quit | Short Term (n) | Short Term % |
| 5                                            | 25-29     | Never Any     | 5471  | 55.74 |               |             |               |                |              |
| 5                                            | 25-29     | CC            | 1255  | 12.79 | 0             | 0.00        |               |                |              |
| 5                                            | 25-29     | Ecig          | 1958  | 19.95 |               |             |               |                |              |
| 5                                            | 25-29     | Dual          | 0     | 0.00  |               |             |               |                |              |
| 5                                            | 25-29     | Former        | 1132  | 11.53 |               |             | 5.49          | 103            | 9.10         |
| Year of Follow-up: 1995, Age Group: 30-34    |           |               |       |       |               |             |               |                |              |
| Period                                       | Age Group | Smoking Group | N     | %     | Ever Quit (N) | Ever Quit % | Mean Yrs Quit | Short Term (n) | Short Term % |

**Results for PHIM for Run 3 (Sensitivity\_Analysis\_3.RTF)**

|                                              |           |               |      |       |               |             |               |                |              |
|----------------------------------------------|-----------|---------------|------|-------|---------------|-------------|---------------|----------------|--------------|
| 5                                            | 30-34     | Never Any     | 5065 | 47.50 |               |             |               |                |              |
| 5                                            | 30-34     | CC            | 1480 | 13.88 | 0             | 0.00        |               |                |              |
| 5                                            | 30-34     | Ecig          | 2345 | 21.99 |               |             |               |                |              |
| 5                                            | 30-34     | Dual          | 0    | 0.00  |               |             |               |                |              |
| 5                                            | 30-34     | Former        | 1774 | 16.64 |               |             | 7.03          | 89             | 5.02         |
| Year of Follow-up: 1995, Age Group: 35-39    |           |               |      |       |               |             |               |                |              |
| Period                                       | Age Group | Smoking Group | N    | %     | Ever Quit (N) | Ever Quit % | Mean Yrs Quit | Short Term (n) | Short Term % |
| 5                                            | 35-39     | Never Any     | 4724 | 43.28 |               |             |               |                |              |
| 5                                            | 35-39     | CC            | 1496 | 13.70 | 0             | 0.00        |               |                |              |
| 5                                            | 35-39     | Ecig          | 2291 | 20.99 |               |             |               |                |              |
| 5                                            | 35-39     | Dual          | 0    | 0.00  |               |             |               |                |              |
| 5                                            | 35-39     | Former        | 2405 | 22.03 |               |             | 8.25          | 107            | 4.45         |
| Year of Follow-up: 1995, Age Group: 40-44    |           |               |      |       |               |             |               |                |              |
| Period                                       | Age Group | Smoking Group | N    | %     | Ever Quit (N) | Ever Quit % | Mean Yrs Quit | Short Term (n) | Short Term % |
| 5                                            | 40-44     | Never Any     | 3941 | 39.85 |               |             |               |                |              |
| 5                                            | 40-44     | CC            | 1280 | 12.94 | 0             | 0.00        |               |                |              |
| 5                                            | 40-44     | Ecig          | 1920 | 19.42 |               |             |               |                |              |
| 5                                            | 40-44     | Dual          | 0    | 0.00  |               |             |               |                |              |
| 5                                            | 40-44     | Former        | 2748 | 27.79 |               |             | 12.16         | 115            | 4.18         |
| Year of Follow-up: 1995, Age Group: 45-49    |           |               |      |       |               |             |               |                |              |
| Period                                       | Age Group | Smoking Group | N    | %     | Ever Quit (N) | Ever Quit % | Mean Yrs Quit | Short Term (n) | Short Term % |
| 5                                            | 45-49     | Never Any     | 2912 | 33.65 |               |             |               |                |              |
| 5                                            | 45-49     | CC            | 1236 | 14.28 | 0             | 0.00        |               |                |              |
| 5                                            | 45-49     | Ecig          | 1583 | 18.29 |               |             |               |                |              |
| 5                                            | 45-49     | Dual          | 0    | 0.00  |               |             |               |                |              |
| 5                                            | 45-49     | Former        | 2924 | 33.78 |               |             | 14.29         | 139            | 4.75         |
| Year of Follow-up: 1995, Age Group: 50-54    |           |               |      |       |               |             |               |                |              |
| Period                                       | Age Group | Smoking Group | N    | %     | Ever Quit (N) | Ever Quit % | Mean Yrs Quit | Short Term (n) | Short Term % |
| 5                                            | 50-54     | Never Any     | 1919 | 29.46 |               |             |               |                |              |
| 5                                            | 50-54     | CC            | 940  | 14.43 | 0             | 0.00        |               |                |              |
| 5                                            | 50-54     | Ecig          | 1045 | 16.04 |               |             |               |                |              |
| 5                                            | 50-54     | Dual          | 0    | 0.00  |               |             |               |                |              |
| 5                                            | 50-54     | Former        | 2611 | 40.08 |               |             | 16.15         | 156            | 5.97         |
| Year of Follow-up: 1995, Age Group: 55-59    |           |               |      |       |               |             |               |                |              |
| Period                                       | Age Group | Smoking Group | N    | %     | Ever Quit (N) | Ever Quit % | Mean Yrs Quit | Short Term (n) | Short Term % |
| 5                                            | 55-59     | Never Any     | 1611 | 29.41 |               |             |               |                |              |
| 5                                            | 55-59     | CC            | 740  | 13.51 | 0             | 0.00        |               |                |              |
| 5                                            | 55-59     | Ecig          | 772  | 14.10 |               |             |               |                |              |
| 5                                            | 55-59     | Dual          | 0    | 0.00  |               |             |               |                |              |
| 5                                            | 55-59     | Former        | 2354 | 42.98 |               |             | 17.27         | 118            | 5.01         |
| Year of Follow-up: 1995, Age Group: 60-64    |           |               |      |       |               |             |               |                |              |
| Period                                       | Age Group | Smoking Group | N    | %     | Ever Quit (N) | Ever Quit % | Mean Yrs Quit | Short Term (n) | Short Term % |
| 5                                            | 60-64     | Never Any     | 1337 | 26.83 |               |             |               |                |              |
| 5                                            | 60-64     | CC            | 597  | 11.98 | 0             | 0.00        |               |                |              |
| 5                                            | 60-64     | Ecig          | 595  | 11.94 |               |             |               |                |              |
| 5                                            | 60-64     | Dual          | 0    | 0.00  |               |             |               |                |              |
| 5                                            | 60-64     | Former        | 2454 | 49.25 |               |             | 17.43         | 126            | 5.13         |
| Year of Follow-up: 1995, Age Group: 65-69    |           |               |      |       |               |             |               |                |              |
| Period                                       | Age Group | Smoking Group | N    | %     | Ever Quit (N) | Ever Quit % | Mean Yrs Quit | Short Term (n) | Short Term % |
| 5                                            | 65-69     | Never Any     | 1169 | 23.83 |               |             |               |                |              |
| 5                                            | 65-69     | CC            | 477  | 9.72  | 0             | 0.00        |               |                |              |
| 5                                            | 65-69     | Ecig          | 382  | 7.79  |               |             |               |                |              |
| 5                                            | 65-69     | Dual          | 0    | 0.00  |               |             |               |                |              |
| 5                                            | 65-69     | Former        | 2877 | 58.65 |               |             | 20.59         | 182            | 6.33         |
| Year of Follow-up: 1995, Age Group: 70-74    |           |               |      |       |               |             |               |                |              |
| Period                                       | Age Group | Smoking Group | N    | %     | Ever Quit (N) | Ever Quit % | Mean Yrs Quit | Short Term (n) | Short Term % |
| 5                                            | 70-74     | Never Any     | 1023 | 23.32 |               |             |               |                |              |
| 5                                            | 70-74     | CC            | 438  | 9.98  | 0             | 0.00        |               |                |              |
| 5                                            | 70-74     | Ecig          | 203  | 4.63  |               |             |               |                |              |
| 5                                            | 70-74     | Dual          | 0    | 0.00  |               |             |               |                |              |
| 5                                            | 70-74     | Former        | 2723 | 62.07 |               |             | 22.05         | 131            | 4.81         |
| Year of Follow-up: 1995, Age Group: 75-79    |           |               |      |       |               |             |               |                |              |
| Period                                       | Age Group | Smoking Group | N    | %     | Ever Quit (N) | Ever Quit % | Mean Yrs Quit | Short Term (n) | Short Term % |
| 5                                            | 75-79     | Never Any     | 961  | 27.46 |               |             |               |                |              |
| 5                                            | 75-79     | CC            | 303  | 8.66  | 0             | 0.00        |               |                |              |
| 5                                            | 75-79     | Ecig          | 139  | 3.97  |               |             |               |                |              |
| 5                                            | 75-79     | Dual          | 0    | 0.00  |               |             |               |                |              |
| 5                                            | 75-79     | Former        | 2096 | 59.90 |               |             | 23.06         | 93             | 4.44         |
| Year of Follow-up: 2000, Age Group: All Ages |           |               |      |       |               |             |               |                |              |

**Results for PHIM for Run 3 (Sensitivity\_Analysis\_3.RTF)**

| Period                                    | Age Group | Smoking Group | N     | %     | Ever Quit (N) | Ever Quit % | Mean Yrs Quit | Short Term (n) | Short Term % |
|-------------------------------------------|-----------|---------------|-------|-------|---------------|-------------|---------------|----------------|--------------|
| 10                                        | All Ages  | Never Any     | 39177 | 41.64 |               |             |               |                |              |
| 10                                        | All Ages  | CC            | 4843  | 5.15  | 0             | 0.00        |               |                |              |
| 10                                        | All Ages  | Ecig          | 21673 | 23.03 |               |             |               |                |              |
| 10                                        | All Ages  | Dual          | 0     | 0.00  |               |             |               |                |              |
| 10                                        | All Ages  | Former        | 28399 | 30.18 |               |             | 17.30         | 1447           | 5.10         |
| Year of Follow-up: 2000, Age Group: 18-19 |           |               |       |       |               |             |               |                |              |
| Period                                    | Age Group | Smoking Group | N     | %     | Ever Quit (N) | Ever Quit % | Mean Yrs Quit | Short Term (n) | Short Term % |
| 10                                        | 18-19     | Never Any     | 0     | .     |               |             |               |                |              |
| 10                                        | 18-19     | CC            | 0     | .     | 0             | .           |               |                |              |
| 10                                        | 18-19     | Ecig          | 0     | .     |               |             |               |                |              |
| 10                                        | 18-19     | Dual          | 0     | .     |               |             |               |                |              |
| 10                                        | 18-19     | Former        | 0     | .     |               |             |               | 0              | .            |
| Year of Follow-up: 2000, Age Group: 20-24 |           |               |       |       |               |             |               |                |              |
| Period                                    | Age Group | Smoking Group | N     | %     | Ever Quit (N) | Ever Quit % | Mean Yrs Quit | Short Term (n) | Short Term % |
| 10                                        | 20-24     | Never Any     | 4927  | 55.70 |               |             |               |                |              |
| 10                                        | 20-24     | CC            | 462   | 5.22  | 0             | 0.00        |               |                |              |
| 10                                        | 20-24     | Ecig          | 2684  | 30.34 |               |             |               |                |              |
| 10                                        | 20-24     | Dual          | 0     | 0.00  |               |             |               |                |              |
| 10                                        | 20-24     | Former        | 772   | 8.73  |               |             | 3.42          | 222            | 28.76        |
| Year of Follow-up: 2000, Age Group: 25-29 |           |               |       |       |               |             |               |                |              |
| Period                                    | Age Group | Smoking Group | N     | %     | Ever Quit (N) | Ever Quit % | Mean Yrs Quit | Short Term (n) | Short Term % |
| 10                                        | 25-29     | Never Any     | 5341  | 59.08 |               |             |               |                |              |
| 10                                        | 25-29     | CC            | 404   | 4.47  | 0             | 0.00        |               |                |              |
| 10                                        | 25-29     | Ecig          | 2460  | 27.21 |               |             |               |                |              |
| 10                                        | 25-29     | Dual          | 0     | 0.00  |               |             |               |                |              |
| 10                                        | 25-29     | Former        | 835   | 9.24  |               |             | 5.12          | 165            | 19.76        |
| Year of Follow-up: 2000, Age Group: 30-34 |           |               |       |       |               |             |               |                |              |
| Period                                    | Age Group | Smoking Group | N     | %     | Ever Quit (N) | Ever Quit % | Mean Yrs Quit | Short Term (n) | Short Term % |
| 10                                        | 30-34     | Never Any     | 5276  | 53.75 |               |             |               |                |              |
| 10                                        | 30-34     | CC            | 481   | 4.90  | 0             | 0.00        |               |                |              |
| 10                                        | 30-34     | Ecig          | 2672  | 27.22 |               |             |               |                |              |
| 10                                        | 30-34     | Dual          | 0     | 0.00  |               |             |               |                |              |
| 10                                        | 30-34     | Former        | 1387  | 14.13 |               |             | 8.92          | 97             | 6.99         |
| Year of Follow-up: 2000, Age Group: 35-39 |           |               |       |       |               |             |               |                |              |
| Period                                    | Age Group | Smoking Group | N     | %     | Ever Quit (N) | Ever Quit % | Mean Yrs Quit | Short Term (n) | Short Term % |
| 10                                        | 35-39     | Never Any     | 4997  | 46.86 |               |             |               |                |              |
| 10                                        | 35-39     | CC            | 609   | 5.71  | 0             | 0.00        |               |                |              |
| 10                                        | 35-39     | Ecig          | 3056  | 28.66 |               |             |               |                |              |
| 10                                        | 35-39     | Dual          | 0     | 0.00  |               |             |               |                |              |
| 10                                        | 35-39     | Former        | 2002  | 18.77 |               |             | 10.89         | 85             | 4.25         |
| Year of Follow-up: 2000, Age Group: 40-44 |           |               |       |       |               |             |               |                |              |
| Period                                    | Age Group | Smoking Group | N     | %     | Ever Quit (N) | Ever Quit % | Mean Yrs Quit | Short Term (n) | Short Term % |
| 10                                        | 40-44     | Never Any     | 4724  | 43.28 |               |             |               |                |              |
| 10                                        | 40-44     | CC            | 567   | 5.19  | 0             | 0.00        |               |                |              |
| 10                                        | 40-44     | Ecig          | 2936  | 26.90 |               |             |               |                |              |
| 10                                        | 40-44     | Dual          | 0     | 0.00  |               |             |               |                |              |
| 10                                        | 40-44     | Former        | 2689  | 24.63 |               |             | 12.08         | 92             | 3.42         |
| Year of Follow-up: 2000, Age Group: 45-49 |           |               |       |       |               |             |               |                |              |
| Period                                    | Age Group | Smoking Group | N     | %     | Ever Quit (N) | Ever Quit % | Mean Yrs Quit | Short Term (n) | Short Term % |
| 10                                        | 45-49     | Never Any     | 3941  | 39.85 |               |             |               |                |              |
| 10                                        | 45-49     | CC            | 484   | 4.89  | 0             | 0.00        |               |                |              |
| 10                                        | 45-49     | Ecig          | 2400  | 24.27 |               |             |               |                |              |
| 10                                        | 45-49     | Dual          | 0     | 0.00  |               |             |               |                |              |
| 10                                        | 45-49     | Former        | 3064  | 30.98 |               |             | 15.59         | 139            | 4.54         |
| Year of Follow-up: 2000, Age Group: 50-54 |           |               |       |       |               |             |               |                |              |
| Period                                    | Age Group | Smoking Group | N     | %     | Ever Quit (N) | Ever Quit % | Mean Yrs Quit | Short Term (n) | Short Term % |
| 10                                        | 50-54     | Never Any     | 2912  | 33.65 |               |             |               |                |              |
| 10                                        | 50-54     | CC            | 473   | 5.47  | 0             | 0.00        |               |                |              |
| 10                                        | 50-54     | Ecig          | 1969  | 22.75 |               |             |               |                |              |
| 10                                        | 50-54     | Dual          | 0     | 0.00  |               |             |               |                |              |
| 10                                        | 50-54     | Former        | 3301  | 38.14 |               |             | 17.32         | 148            | 4.48         |
| Year of Follow-up: 2000, Age Group: 55-59 |           |               |       |       |               |             |               |                |              |
| Period                                    | Age Group | Smoking Group | N     | %     | Ever Quit (N) | Ever Quit % | Mean Yrs Quit | Short Term (n) | Short Term % |
| 10                                        | 55-59     | Never Any     | 1919  | 29.46 |               |             |               |                |              |
| 10                                        | 55-59     | CC            | 363   | 5.57  | 0             | 0.00        |               |                |              |
| 10                                        | 55-59     | Ecig          | 1289  | 19.79 |               |             |               |                |              |
| 10                                        | 55-59     | Dual          | 0     | 0.00  |               |             |               |                |              |

**Results for PHIM for Run 3 (Sensitivity\_Analysis\_3.RTF)**

| Year of Follow-up: 2000, Age Group: 60-64    | Period   | Age Group | Smoking Group | N     | %     | Ever Quit (N) | Ever Quit % | Mean Yrs Quit | Short Term (n) | Short Term % |
|----------------------------------------------|----------|-----------|---------------|-------|-------|---------------|-------------|---------------|----------------|--------------|
| 10                                           | 55-59    | Former    |               | 2944  | 45.19 |               |             | 18.99         | 123            | 4.18         |
| 10                                           | 60-64    | Never Any |               | 1611  | 29.41 |               |             |               |                |              |
| 10                                           | 60-64    | CC        |               | 306   | 5.59  | 0             | 0.00        |               |                |              |
| 10                                           | 60-64    | Ecig      |               | 917   | 16.74 |               |             |               |                |              |
| 10                                           | 60-64    | Dual      |               | 0     | 0.00  |               |             |               |                |              |
| 10                                           | 60-64    | Former    |               | 2643  | 48.26 |               |             | 20.05         | 122            | 4.62         |
| Year of Follow-up: 2000, Age Group: 65-69    | Period   | Age Group | Smoking Group | N     | %     | Ever Quit (N) | Ever Quit % | Mean Yrs Quit | Short Term (n) | Short Term % |
| 10                                           | 65-69    | Never Any |               | 1337  | 26.83 |               |             |               |                |              |
| 10                                           | 65-69    | CC        |               | 244   | 4.90  | 0             | 0.00        |               |                |              |
| 10                                           | 65-69    | Ecig      |               | 667   | 13.39 |               |             |               |                |              |
| 10                                           | 65-69    | Dual      |               | 0     | 0.00  |               |             |               |                |              |
| 10                                           | 65-69    | Former    |               | 2735  | 54.89 |               |             | 20.34         | 107            | 3.91         |
| Year of Follow-up: 2000, Age Group: 70-74    | Period   | Age Group | Smoking Group | N     | %     | Ever Quit (N) | Ever Quit % | Mean Yrs Quit | Short Term (n) | Short Term % |
| 10                                           | 70-74    | Never Any |               | 1169  | 23.83 |               |             |               |                |              |
| 10                                           | 70-74    | CC        |               | 236   | 4.81  | 0             | 0.00        |               |                |              |
| 10                                           | 70-74    | Ecig      |               | 371   | 7.56  |               |             |               |                |              |
| 10                                           | 70-74    | Dual      |               | 0     | 0.00  |               |             |               |                |              |
| 10                                           | 70-74    | Former    |               | 3129  | 63.79 |               |             | 23.71         | 86             | 2.75         |
| Year of Follow-up: 2000, Age Group: 75-79    | Period   | Age Group | Smoking Group | N     | %     | Ever Quit (N) | Ever Quit % | Mean Yrs Quit | Short Term (n) | Short Term % |
| 10                                           | 75-79    | Never Any |               | 1023  | 23.32 |               |             |               |                |              |
| 10                                           | 75-79    | CC        |               | 214   | 4.88  | 0             | 0.00        |               |                |              |
| 10                                           | 75-79    | Ecig      |               | 252   | 5.74  |               |             |               |                |              |
| 10                                           | 75-79    | Dual      |               | 0     | 0.00  |               |             |               |                |              |
| 10                                           | 75-79    | Former    |               | 2898  | 66.06 |               |             | 25.56         | 61             | 2.10         |
| Year of Follow-up: 2005, Age Group: All Ages | Period   | Age Group | Smoking Group | N     | %     | Ever Quit (N) | Ever Quit % | Mean Yrs Quit | Short Term (n) | Short Term % |
| 15                                           | All Ages | Never Any |               | 37449 | 41.75 |               |             |               |                |              |
| 15                                           | All Ages | CC        |               | 1911  | 2.13  | 0             | 0.00        |               |                |              |
| 15                                           | All Ages | Ecig      |               | 21622 | 24.10 |               |             |               |                |              |
| 15                                           | All Ages | Dual      |               | 0     | 0.00  |               |             |               |                |              |
| 15                                           | All Ages | Former    |               | 28723 | 32.02 |               |             | 19.19         | 1292           | 4.50         |
| Year of Follow-up: 2005, Age Group: 18-19    | Period   | Age Group | Smoking Group | N     | %     | Ever Quit (N) | Ever Quit % | Mean Yrs Quit | Short Term (n) | Short Term % |
| 15                                           | 18-19    | Never Any |               | 0     | .     |               |             |               |                |              |
| 15                                           | 18-19    | CC        |               | 0     | .     | 0             | .           |               |                |              |
| 15                                           | 18-19    | Ecig      |               | 0     | .     |               |             |               |                |              |
| 15                                           | 18-19    | Dual      |               | 0     | .     |               |             |               |                |              |
| 15                                           | 18-19    | Former    |               | 0     | .     |               |             | .             | 0              | .            |
| Year of Follow-up: 2005, Age Group: 20-24    | Period   | Age Group | Smoking Group | N     | %     | Ever Quit (N) | Ever Quit % | Mean Yrs Quit | Short Term (n) | Short Term % |
| 15                                           | 20-24    | Never Any |               | 0     | .     |               |             |               |                |              |
| 15                                           | 20-24    | CC        |               | 0     | .     | 0             | .           |               |                |              |
| 15                                           | 20-24    | Ecig      |               | 0     | .     |               |             |               |                |              |
| 15                                           | 20-24    | Dual      |               | 0     | .     |               |             |               |                |              |
| 15                                           | 20-24    | Former    |               | 0     | .     |               |             | .             | 0              | .            |
| Year of Follow-up: 2005, Age Group: 25-29    | Period   | Age Group | Smoking Group | N     | %     | Ever Quit (N) | Ever Quit % | Mean Yrs Quit | Short Term (n) | Short Term % |
| 15                                           | 25-29    | Never Any |               | 4634  | 52.39 |               |             |               |                |              |
| 15                                           | 25-29    | CC        |               | 179   | 2.02  | 0             | 0.00        |               |                |              |
| 15                                           | 25-29    | Ecig      |               | 2874  | 32.49 |               |             |               |                |              |
| 15                                           | 25-29    | Dual      |               | 0     | 0.00  |               |             |               |                |              |
| 15                                           | 25-29    | Former    |               | 1158  | 13.09 |               |             | 6.34          | 144            | 12.44        |
| Year of Follow-up: 2005, Age Group: 30-34    | Period   | Age Group | Smoking Group | N     | %     | Ever Quit (N) | Ever Quit % | Mean Yrs Quit | Short Term (n) | Short Term % |
| 15                                           | 30-34    | Never Any |               | 5042  | 55.77 |               |             |               |                |              |
| 15                                           | 30-34    | CC        |               | 153   | 1.69  | 0             | 0.00        |               |                |              |
| 15                                           | 30-34    | Ecig      |               | 2661  | 29.44 |               |             |               |                |              |
| 15                                           | 30-34    | Dual      |               | 0     | 0.00  |               |             |               |                |              |
| 15                                           | 30-34    | Former    |               | 1184  | 13.10 |               |             | 7.68          | 145            | 12.25        |
| Year of Follow-up: 2005, Age Group: 35-39    | Period   | Age Group | Smoking Group | N     | %     | Ever Quit (N) | Ever Quit % | Mean Yrs Quit | Short Term (n) | Short Term % |
| 15                                           | 35-39    | Never Any |               | 5163  | 52.60 |               |             |               |                |              |
| 15                                           | 35-39    | CC        |               | 188   | 1.92  | 0             | 0.00        |               |                |              |

**Results for PHIM for Run 3 (Sensitivity\_Analysis\_3.RTF)**

|                                              |           |               |       |       |               |             |               |                |              |
|----------------------------------------------|-----------|---------------|-------|-------|---------------|-------------|---------------|----------------|--------------|
| 15                                           | 35-39     | Ecig          | 2794  | 28.46 |               |             |               |                |              |
| 15                                           | 35-39     | Dual          | 0     | 0.00  |               |             |               |                |              |
| 15                                           | 35-39     | Former        | 1671  | 17.02 |               |             | 11.89         | 116            | 6.94         |
| Year of Follow-up: 2005, Age Group: 40-44    |           |               |       |       |               |             |               |                |              |
| Period                                       | Age Group | Smoking Group | N     | %     | Ever Quit (N) | Ever Quit % | Mean Yrs Quit | Short Term (n) | Short Term % |
| 15                                           | 40-44     | Never Any     | 4997  | 46.86 |               |             |               |                |              |
| 15                                           | 40-44     | CC            | 231   | 2.17  | 0             | 0.00        |               |                |              |
| 15                                           | 40-44     | Ecig          | 3106  | 29.13 |               |             |               |                |              |
| 15                                           | 40-44     | Dual          | 0     | 0.00  |               |             |               |                |              |
| 15                                           | 40-44     | Former        | 2330  | 21.85 |               |             | 13.90         | 156            | 6.70         |
| Year of Follow-up: 2005, Age Group: 45-49    |           |               |       |       |               |             |               |                |              |
| Period                                       | Age Group | Smoking Group | N     | %     | Ever Quit (N) | Ever Quit % | Mean Yrs Quit | Short Term (n) | Short Term % |
| 15                                           | 45-49     | Never Any     | 4724  | 43.28 |               |             |               |                |              |
| 15                                           | 45-49     | CC            | 216   | 1.98  | 0             | 0.00        |               |                |              |
| 15                                           | 45-49     | Ecig          | 2961  | 27.13 |               |             |               |                |              |
| 15                                           | 45-49     | Dual          | 0     | 0.00  |               |             |               |                |              |
| 15                                           | 45-49     | Former        | 3015  | 27.62 |               |             | 15.44         | 131            | 4.34         |
| Year of Follow-up: 2005, Age Group: 50-54    |           |               |       |       |               |             |               |                |              |
| Period                                       | Age Group | Smoking Group | N     | %     | Ever Quit (N) | Ever Quit % | Mean Yrs Quit | Short Term (n) | Short Term % |
| 15                                           | 50-54     | Never Any     | 3941  | 39.85 |               |             |               |                |              |
| 15                                           | 50-54     | CC            | 213   | 2.15  | 0             | 0.00        |               |                |              |
| 15                                           | 50-54     | Ecig          | 2336  | 23.62 |               |             |               |                |              |
| 15                                           | 50-54     | Dual          | 0     | 0.00  |               |             |               |                |              |
| 15                                           | 50-54     | Former        | 3399  | 34.37 |               |             | 18.77         | 131            | 3.85         |
| Year of Follow-up: 2005, Age Group: 55-59    |           |               |       |       |               |             |               |                |              |
| Period                                       | Age Group | Smoking Group | N     | %     | Ever Quit (N) | Ever Quit % | Mean Yrs Quit | Short Term (n) | Short Term % |
| 15                                           | 55-59     | Never Any     | 2912  | 33.65 |               |             |               |                |              |
| 15                                           | 55-59     | CC            | 215   | 2.48  | 0             | 0.00        |               |                |              |
| 15                                           | 55-59     | Ecig          | 1965  | 22.70 |               |             |               |                |              |
| 15                                           | 55-59     | Dual          | 0     | 0.00  |               |             |               |                |              |
| 15                                           | 55-59     | Former        | 3563  | 41.17 |               |             | 20.85         | 82             | 2.30         |
| Year of Follow-up: 2005, Age Group: 60-64    |           |               |       |       |               |             |               |                |              |
| Period                                       | Age Group | Smoking Group | N     | %     | Ever Quit (N) | Ever Quit % | Mean Yrs Quit | Short Term (n) | Short Term % |
| 15                                           | 60-64     | Never Any     | 1919  | 29.46 |               |             |               |                |              |
| 15                                           | 60-64     | CC            | 143   | 2.19  | 0             | 0.00        |               |                |              |
| 15                                           | 60-64     | Ecig          | 1248  | 19.16 |               |             |               |                |              |
| 15                                           | 60-64     | Dual          | 0     | 0.00  |               |             |               |                |              |
| 15                                           | 60-64     | Former        | 3205  | 49.19 |               |             | 22.19         | 127            | 3.96         |
| Year of Follow-up: 2005, Age Group: 65-69    |           |               |       |       |               |             |               |                |              |
| Period                                       | Age Group | Smoking Group | N     | %     | Ever Quit (N) | Ever Quit % | Mean Yrs Quit | Short Term (n) | Short Term % |
| 15                                           | 65-69     | Never Any     | 1611  | 29.41 |               |             |               |                |              |
| 15                                           | 65-69     | CC            | 124   | 2.26  | 0             | 0.00        |               |                |              |
| 15                                           | 65-69     | Ecig          | 810   | 14.79 |               |             |               |                |              |
| 15                                           | 65-69     | Dual          | 0     | 0.00  |               |             |               |                |              |
| 15                                           | 65-69     | Former        | 2932  | 53.53 |               |             | 22.78         | 101            | 3.44         |
| Year of Follow-up: 2005, Age Group: 70-74    |           |               |       |       |               |             |               |                |              |
| Period                                       | Age Group | Smoking Group | N     | %     | Ever Quit (N) | Ever Quit % | Mean Yrs Quit | Short Term (n) | Short Term % |
| 15                                           | 70-74     | Never Any     | 1337  | 26.83 |               |             |               |                |              |
| 15                                           | 70-74     | CC            | 129   | 2.59  | 0             | 0.00        |               |                |              |
| 15                                           | 70-74     | Ecig          | 543   | 10.90 |               |             |               |                |              |
| 15                                           | 70-74     | Dual          | 0     | 0.00  |               |             |               |                |              |
| 15                                           | 70-74     | Former        | 2974  | 59.68 |               |             | 23.46         | 97             | 3.26         |
| Year of Follow-up: 2005, Age Group: 75-79    |           |               |       |       |               |             |               |                |              |
| Period                                       | Age Group | Smoking Group | N     | %     | Ever Quit (N) | Ever Quit % | Mean Yrs Quit | Short Term (n) | Short Term % |
| 15                                           | 75-79     | Never Any     | 1169  | 23.83 |               |             |               |                |              |
| 15                                           | 75-79     | CC            | 120   | 2.45  | 0             | 0.00        |               |                |              |
| 15                                           | 75-79     | Ecig          | 324   | 6.61  |               |             |               |                |              |
| 15                                           | 75-79     | Dual          | 0     | 0.00  |               |             |               |                |              |
| 15                                           | 75-79     | Former        | 3292  | 67.12 |               |             | 27.39         | 62             | 1.88         |
| Year of Follow-up: 2010, Age Group: All Ages |           |               |       |       |               |             |               |                |              |
| Period                                       | Age Group | Smoking Group | N     | %     | Ever Quit (N) | Ever Quit % | Mean Yrs Quit | Short Term (n) | Short Term % |
| 20                                           | All Ages  | Never Any     | 36103 | 42.57 |               |             |               |                |              |
| 20                                           | All Ages  | CC            | 738   | 0.87  | 0             | 0.00        |               |                |              |
| 20                                           | All Ages  | Ecig          | 19251 | 22.70 |               |             |               |                |              |
| 20                                           | All Ages  | Dual          | 0     | 0.00  |               |             |               |                |              |
| 20                                           | All Ages  | Former        | 28708 | 33.85 |               |             | 20.72         | 1281           | 4.46         |
| Year of Follow-up: 2010, Age Group: 18-19    |           |               |       |       |               |             |               |                |              |
| Period                                       | Age Group | Smoking Group | N     | %     | Ever Quit (N) | Ever Quit % | Mean Yrs Quit | Short Term (n) | Short Term % |

**Results for PHIM for Run 3 (Sensitivity\_Analysis\_3.RTF)**

|                                           |           |               |      |       |               |             |               |                |              |
|-------------------------------------------|-----------|---------------|------|-------|---------------|-------------|---------------|----------------|--------------|
| 20                                        | 18-19     | Never Any     | 0    | .     |               |             |               |                |              |
| 20                                        | 18-19     | CC            | 0    | .     | 0             | .           |               |                |              |
| 20                                        | 18-19     | Ecig          | 0    | .     |               |             |               |                |              |
| 20                                        | 18-19     | Dual          | 0    | .     |               |             |               |                |              |
| 20                                        | 18-19     | Former        | 0    | .     |               |             | 0             | .              |              |
| Year of Follow-up: 2010, Age Group: 20-24 |           |               |      |       |               |             |               |                |              |
| Period                                    | Age Group | Smoking Group | N    | %     | Ever Quit (N) | Ever Quit % | Mean Yrs Quit | Short Term (n) | Short Term % |
| 20                                        | 20-24     | Never Any     | 0    | .     |               |             |               |                |              |
| 20                                        | 20-24     | CC            | 0    | .     | 0             | .           |               |                |              |
| 20                                        | 20-24     | Ecig          | 0    | .     |               |             |               |                |              |
| 20                                        | 20-24     | Dual          | 0    | .     |               |             |               |                |              |
| 20                                        | 20-24     | Former        | 0    | .     |               |             |               | 0              | .            |
| Year of Follow-up: 2010, Age Group: 25-29 |           |               |      |       |               |             |               |                |              |
| Period                                    | Age Group | Smoking Group | N    | %     | Ever Quit (N) | Ever Quit % | Mean Yrs Quit | Short Term (n) | Short Term % |
| 20                                        | 25-29     | Never Any     | 0    | .     |               |             |               |                |              |
| 20                                        | 25-29     | CC            | 0    | .     | 0             | .           |               |                |              |
| 20                                        | 25-29     | Ecig          | 0    | .     |               |             |               |                |              |
| 20                                        | 25-29     | Dual          | 0    | .     |               |             |               |                |              |
| 20                                        | 25-29     | Former        | 0    | .     |               |             |               | 0              | .            |
| Year of Follow-up: 2010, Age Group: 30-34 |           |               |      |       |               |             |               |                |              |
| Period                                    | Age Group | Smoking Group | N    | %     | Ever Quit (N) | Ever Quit % | Mean Yrs Quit | Short Term (n) | Short Term % |
| 20                                        | 30-34     | Never Any     | 4508 | 50.97 |               |             |               |                |              |
| 20                                        | 30-34     | CC            | 71   | 0.80  | 0             | 0.00        |               |                |              |
| 20                                        | 30-34     | Ecig          | 2682 | 30.32 |               |             |               |                |              |
| 20                                        | 30-34     | Dual          | 0    | 0.00  |               |             |               |                |              |
| 20                                        | 30-34     | Former        | 1584 | 17.91 |               |             | 8.78          | 190            | 11.99        |
| Year of Follow-up: 2010, Age Group: 35-39 |           |               |      |       |               |             |               |                |              |
| Period                                    | Age Group | Smoking Group | N    | %     | Ever Quit (N) | Ever Quit % | Mean Yrs Quit | Short Term (n) | Short Term % |
| 20                                        | 35-39     | Never Any     | 4991 | 55.21 |               |             |               |                |              |
| 20                                        | 35-39     | CC            | 59   | 0.65  | 0             | 0.00        |               |                |              |
| 20                                        | 35-39     | Ecig          | 2409 | 26.65 |               |             |               |                |              |
| 20                                        | 35-39     | Dual          | 0    | 0.00  |               |             |               |                |              |
| 20                                        | 35-39     | Former        | 1581 | 17.49 |               |             | 10.04         | 126            | 7.97         |
| Year of Follow-up: 2010, Age Group: 40-44 |           |               |      |       |               |             |               |                |              |
| Period                                    | Age Group | Smoking Group | N    | %     | Ever Quit (N) | Ever Quit % | Mean Yrs Quit | Short Term (n) | Short Term % |
| 20                                        | 40-44     | Never Any     | 5163 | 52.60 |               |             |               |                |              |
| 20                                        | 40-44     | CC            | 68   | 0.69  | 0             | 0.00        |               |                |              |
| 20                                        | 40-44     | Ecig          | 2619 | 26.68 |               |             |               |                |              |
| 20                                        | 40-44     | Dual          | 0    | 0.00  |               |             |               |                |              |
| 20                                        | 40-44     | Former        | 1966 | 20.03 |               |             | 14.65         | 116            | 5.90         |
| Year of Follow-up: 2010, Age Group: 45-49 |           |               |      |       |               |             |               |                |              |
| Period                                    | Age Group | Smoking Group | N    | %     | Ever Quit (N) | Ever Quit % | Mean Yrs Quit | Short Term (n) | Short Term % |
| 20                                        | 45-49     | Never Any     | 4997 | 46.86 |               |             |               |                |              |
| 20                                        | 45-49     | CC            | 89   | 0.83  | 0             | 0.00        |               |                |              |
| 20                                        | 45-49     | Ecig          | 2876 | 26.97 |               |             |               |                |              |
| 20                                        | 45-49     | Dual          | 0    | 0.00  |               |             |               |                |              |
| 20                                        | 45-49     | Former        | 2702 | 25.34 |               |             | 16.59         | 133            | 4.92         |
| Year of Follow-up: 2010, Age Group: 50-54 |           |               |      |       |               |             |               |                |              |
| Period                                    | Age Group | Smoking Group | N    | %     | Ever Quit (N) | Ever Quit % | Mean Yrs Quit | Short Term (n) | Short Term % |
| 20                                        | 50-54     | Never Any     | 4724 | 43.28 |               |             |               |                |              |
| 20                                        | 50-54     | CC            | 87   | 0.80  | 0             | 0.00        |               |                |              |
| 20                                        | 50-54     | Ecig          | 2736 | 25.06 |               |             |               |                |              |
| 20                                        | 50-54     | Dual          | 0    | 0.00  |               |             |               |                |              |
| 20                                        | 50-54     | Former        | 3369 | 30.86 |               |             | 18.50         | 149            | 4.42         |
| Year of Follow-up: 2010, Age Group: 55-59 |           |               |      |       |               |             |               |                |              |
| Period                                    | Age Group | Smoking Group | N    | %     | Ever Quit (N) | Ever Quit % | Mean Yrs Quit | Short Term (n) | Short Term % |
| 20                                        | 55-59     | Never Any     | 3941 | 39.85 |               |             |               |                |              |
| 20                                        | 55-59     | CC            | 85   | 0.86  | 0             | 0.00        |               |                |              |
| 20                                        | 55-59     | Ecig          | 2079 | 21.02 |               |             |               |                |              |
| 20                                        | 55-59     | Dual          | 0    | 0.00  |               |             |               |                |              |
| 20                                        | 55-59     | Former        | 3784 | 38.26 |               |             | 21.55         | 156            | 4.12         |
| Year of Follow-up: 2010, Age Group: 60-64 |           |               |      |       |               |             |               |                |              |
| Period                                    | Age Group | Smoking Group | N    | %     | Ever Quit (N) | Ever Quit % | Mean Yrs Quit | Short Term (n) | Short Term % |
| 20                                        | 60-64     | Never Any     | 2912 | 33.65 |               |             |               |                |              |
| 20                                        | 60-64     | CC            | 87   | 1.01  | 0             | 0.00        |               |                |              |
| 20                                        | 60-64     | Ecig          | 1675 | 19.35 |               |             |               |                |              |
| 20                                        | 60-64     | Dual          | 0    | 0.00  |               |             |               |                |              |
| 20                                        | 60-64     | Former        | 3981 | 46.00 |               |             | 23.30         | 210            | 5.28         |
| Year of Follow-up: 2010, Age Group: 65-69 |           |               |      |       |               |             |               |                |              |



**Results for PHIM for Run 3 (Sensitivity\_Analysis\_3.RTF)**

| Period                                       | Age Group | Smoking Group | N     | %     | Ever Quit (N) | Ever Quit % | Mean Yrs Quit | Short Term (n) | Short Term % |
|----------------------------------------------|-----------|---------------|-------|-------|---------------|-------------|---------------|----------------|--------------|
| 20                                           | 65-69     | Never Any     | 1919  | 29.46 |               |             |               |                |              |
| 20                                           | 65-69     | CC            | 60    | 0.92  | 0             | 0.00        |               |                |              |
| 20                                           | 65-69     | Ecig          | 1009  | 15.49 |               |             |               |                |              |
| 20                                           | 65-69     | Dual          | 0     | 0.00  |               |             |               |                |              |
| 20                                           | 65-69     | Former        | 3527  | 54.14 |               |             | 24.90         | 111            | 3.15         |
| Year of Follow-up: 2010, Age Group: 70-74    |           |               |       |       |               |             |               |                |              |
| Period                                       | Age Group | Smoking Group | N     | %     | Ever Quit (N) | Ever Quit % | Mean Yrs Quit | Short Term (n) | Short Term % |
| 20                                           | 70-74     | Never Any     | 1611  | 29.41 |               |             |               |                |              |
| 20                                           | 70-74     | CC            | 69    | 1.26  | 0             | 0.00        |               |                |              |
| 20                                           | 70-74     | Ecig          | 693   | 12.65 |               |             |               |                |              |
| 20                                           | 70-74     | Dual          | 0     | 0.00  |               |             |               |                |              |
| 20                                           | 70-74     | Former        | 3104  | 56.67 |               |             | 26.37         | 56             | 1.80         |
| Year of Follow-up: 2010, Age Group: 75-79    |           |               |       |       |               |             |               |                |              |
| Period                                       | Age Group | Smoking Group | N     | %     | Ever Quit (N) | Ever Quit % | Mean Yrs Quit | Short Term (n) | Short Term % |
| 20                                           | 75-79     | Never Any     | 1337  | 26.83 |               |             |               |                |              |
| 20                                           | 75-79     | CC            | 63    | 1.26  | 0             | 0.00        |               |                |              |
| 20                                           | 75-79     | Ecig          | 473   | 9.49  |               |             |               |                |              |
| 20                                           | 75-79     | Dual          | 0     | 0.00  |               |             |               |                |              |
| 20                                           | 75-79     | Former        | 3110  | 62.41 |               |             | 27.33         | 34             | 1.09         |
| Year of Follow-up: 2015, Age Group: All Ages |           |               |       |       |               |             |               |                |              |
| Period                                       | Age Group | Smoking Group | N     | %     | Ever Quit (N) | Ever Quit % | Mean Yrs Quit | Short Term (n) | Short Term % |
| 25                                           | All Ages  | Never Any     | 34747 | 43.53 |               |             |               |                |              |
| 25                                           | All Ages  | CC            | 289   | 0.36  | 0             | 0.00        |               |                |              |
| 25                                           | All Ages  | Ecig          | 16551 | 20.74 |               |             |               |                |              |
| 25                                           | All Ages  | Dual          | 0     | 0.00  |               |             |               |                |              |
| 25                                           | All Ages  | Former        | 28230 | 35.37 |               |             | 22.79         | 981            | 3.48         |
| Year of Follow-up: 2015, Age Group: 18-19    |           |               |       |       |               |             |               |                |              |
| Period                                       | Age Group | Smoking Group | N     | %     | Ever Quit (N) | Ever Quit % | Mean Yrs Quit | Short Term (n) | Short Term % |
| 25                                           | 18-19     | Never Any     | 0     | .     |               |             |               |                |              |
| 25                                           | 18-19     | CC            | 0     | .     | 0             | .           |               |                |              |
| 25                                           | 18-19     | Ecig          | 0     | .     |               |             |               |                |              |
| 25                                           | 18-19     | Dual          | 0     | .     |               |             |               |                |              |
| 25                                           | 18-19     | Former        | 0     | .     |               |             |               | 0              | .            |
| Year of Follow-up: 2015, Age Group: 20-24    |           |               |       |       |               |             |               |                |              |
| Period                                       | Age Group | Smoking Group | N     | %     | Ever Quit (N) | Ever Quit % | Mean Yrs Quit | Short Term (n) | Short Term % |
| 25                                           | 20-24     | Never Any     | 0     | .     |               |             |               |                |              |
| 25                                           | 20-24     | CC            | 0     | .     | 0             | .           |               |                |              |
| 25                                           | 20-24     | Ecig          | 0     | .     |               |             |               |                |              |
| 25                                           | 20-24     | Dual          | 0     | .     |               |             |               |                |              |
| 25                                           | 20-24     | Former        | 0     | .     |               |             |               | 0              | .            |
| Year of Follow-up: 2015, Age Group: 25-29    |           |               |       |       |               |             |               |                |              |
| Period                                       | Age Group | Smoking Group | N     | %     | Ever Quit (N) | Ever Quit % | Mean Yrs Quit | Short Term (n) | Short Term % |
| 25                                           | 25-29     | Never Any     | 0     | .     |               |             |               |                |              |
| 25                                           | 25-29     | CC            | 0     | .     | 0             | .           |               |                |              |
| 25                                           | 25-29     | Ecig          | 0     | .     |               |             |               |                |              |
| 25                                           | 25-29     | Dual          | 0     | .     |               |             |               |                |              |
| 25                                           | 25-29     | Former        | 0     | .     |               |             |               | 0              | .            |
| Year of Follow-up: 2015, Age Group: 30-34    |           |               |       |       |               |             |               |                |              |
| Period                                       | Age Group | Smoking Group | N     | %     | Ever Quit (N) | Ever Quit % | Mean Yrs Quit | Short Term (n) | Short Term % |
| 25                                           | 30-34     | Never Any     | 0     | .     |               |             |               |                |              |
| 25                                           | 30-34     | CC            | 0     | .     | 0             | .           |               |                |              |
| 25                                           | 30-34     | Ecig          | 0     | .     |               |             |               |                |              |
| 25                                           | 30-34     | Dual          | 0     | .     |               |             |               |                |              |
| 25                                           | 30-34     | Former        | 0     | .     |               |             |               | 0              | .            |
| Year of Follow-up: 2015, Age Group: 35-39    |           |               |       |       |               |             |               |                |              |
| Period                                       | Age Group | Smoking Group | N     | %     | Ever Quit (N) | Ever Quit % | Mean Yrs Quit | Short Term (n) | Short Term % |
| 25                                           | 35-39     | Never Any     | 4489  | 50.75 |               |             |               |                |              |
| 25                                           | 35-39     | CC            | 28    | 0.32  | 0             | 0.00        |               |                |              |
| 25                                           | 35-39     | Ecig          | 2347  | 26.53 |               |             |               |                |              |
| 25                                           | 35-39     | Dual          | 0     | 0.00  |               |             |               |                |              |
| 25                                           | 35-39     | Former        | 1981  | 22.40 |               |             | 11.48         | 125            | 6.31         |
| Year of Follow-up: 2015, Age Group: 40-44    |           |               |       |       |               |             |               |                |              |
| Period                                       | Age Group | Smoking Group | N     | %     | Ever Quit (N) | Ever Quit % | Mean Yrs Quit | Short Term (n) | Short Term % |
| 25                                           | 40-44     | Never Any     | 4991  | 55.21 |               |             |               |                |              |
| 25                                           | 40-44     | CC            | 20    | 0.22  | 0             | 0.00        |               |                |              |
| 25                                           | 40-44     | Ecig          | 2191  | 24.24 |               |             |               |                |              |
| 25                                           | 40-44     | Dual          | 0     | 0.00  |               |             |               |                |              |

**Results for PHIM for Run 3 (Sensitivity\_Analysis\_3.RTF)**

|                                              |           |               |       |       |               |             |               |                |              |
|----------------------------------------------|-----------|---------------|-------|-------|---------------|-------------|---------------|----------------|--------------|
| 25                                           | 40-44     | Former        | 1838  | 20.33 |               |             | 13.22         | 103            | 5.60         |
| Year of Follow-up: 2015, Age Group: 45-49    |           |               |       |       |               |             |               |                |              |
| Period                                       | Age Group | Smoking Group | N     | %     | Ever Quit (N) | Ever Quit % | Mean Yrs Quit | Short Term (n) | Short Term % |
| 25                                           | 45-49     | Never Any     | 5163  | 52.60 |               |             |               |                |              |
| 25                                           | 45-49     | CC            | 29    | 0.30  | 0             | 0.00        |               |                |              |
| 25                                           | 45-49     | Ecig          | 2433  | 24.79 |               |             |               |                |              |
| 25                                           | 45-49     | Dual          | 0     | 0.00  |               |             |               |                |              |
| 25                                           | 45-49     | Former        | 2191  | 22.32 |               |             | 17.87         | 72             | 3.29         |
| Year of Follow-up: 2015, Age Group: 50-54    |           |               |       |       |               |             |               |                |              |
| Period                                       | Age Group | Smoking Group | N     | %     | Ever Quit (N) | Ever Quit % | Mean Yrs Quit | Short Term (n) | Short Term % |
| 25                                           | 50-54     | Never Any     | 4997  | 46.86 |               |             |               |                |              |
| 25                                           | 50-54     | CC            | 37    | 0.35  | 0             | 0.00        |               |                |              |
| 25                                           | 50-54     | Ecig          | 2686  | 25.19 |               |             |               |                |              |
| 25                                           | 50-54     | Dual          | 0     | 0.00  |               |             |               |                |              |
| 25                                           | 50-54     | Former        | 2944  | 27.61 |               |             | 19.96         | 117            | 3.97         |
| Year of Follow-up: 2015, Age Group: 55-59    |           |               |       |       |               |             |               |                |              |
| Period                                       | Age Group | Smoking Group | N     | %     | Ever Quit (N) | Ever Quit % | Mean Yrs Quit | Short Term (n) | Short Term % |
| 25                                           | 55-59     | Never Any     | 4724  | 43.28 |               |             |               |                |              |
| 25                                           | 55-59     | CC            | 33    | 0.30  | 0             | 0.00        |               |                |              |
| 25                                           | 55-59     | Ecig          | 2432  | 22.28 |               |             |               |                |              |
| 25                                           | 55-59     | Dual          | 0     | 0.00  |               |             |               |                |              |
| 25                                           | 55-59     | Former        | 3727  | 34.14 |               |             | 21.45         | 134            | 3.60         |
| Year of Follow-up: 2015, Age Group: 60-64    |           |               |       |       |               |             |               |                |              |
| Period                                       | Age Group | Smoking Group | N     | %     | Ever Quit (N) | Ever Quit % | Mean Yrs Quit | Short Term (n) | Short Term % |
| 25                                           | 60-64     | Never Any     | 3941  | 39.85 |               |             |               |                |              |
| 25                                           | 60-64     | CC            | 28    | 0.28  | 0             | 0.00        |               |                |              |
| 25                                           | 60-64     | Ecig          | 1730  | 17.49 |               |             |               |                |              |
| 25                                           | 60-64     | Dual          | 0     | 0.00  |               |             |               |                |              |
| 25                                           | 60-64     | Former        | 4190  | 42.37 |               |             | 24.17         | 174            | 4.15         |
| Year of Follow-up: 2015, Age Group: 65-69    |           |               |       |       |               |             |               |                |              |
| Period                                       | Age Group | Smoking Group | N     | %     | Ever Quit (N) | Ever Quit % | Mean Yrs Quit | Short Term (n) | Short Term % |
| 25                                           | 65-69     | Never Any     | 2912  | 33.65 |               |             |               |                |              |
| 25                                           | 65-69     | CC            | 43    | 0.50  | 0             | 0.00        |               |                |              |
| 25                                           | 65-69     | Ecig          | 1326  | 15.32 |               |             |               |                |              |
| 25                                           | 65-69     | Dual          | 0     | 0.00  |               |             |               |                |              |
| 25                                           | 65-69     | Former        | 4374  | 50.54 |               |             | 25.95         | 130            | 2.97         |
| Year of Follow-up: 2015, Age Group: 70-74    |           |               |       |       |               |             |               |                |              |
| Period                                       | Age Group | Smoking Group | N     | %     | Ever Quit (N) | Ever Quit % | Mean Yrs Quit | Short Term (n) | Short Term % |
| 25                                           | 70-74     | Never Any     | 1919  | 29.46 |               |             |               |                |              |
| 25                                           | 70-74     | CC            | 35    | 0.54  | 0             | 0.00        |               |                |              |
| 25                                           | 70-74     | Ecig          | 821   | 12.60 |               |             |               |                |              |
| 25                                           | 70-74     | Dual          | 0     | 0.00  |               |             |               |                |              |
| 25                                           | 70-74     | Former        | 3740  | 57.41 |               |             | 28.32         | 74             | 1.98         |
| Year of Follow-up: 2015, Age Group: 75-79    |           |               |       |       |               |             |               |                |              |
| Period                                       | Age Group | Smoking Group | N     | %     | Ever Quit (N) | Ever Quit % | Mean Yrs Quit | Short Term (n) | Short Term % |
| 25                                           | 75-79     | Never Any     | 1611  | 29.41 |               |             |               |                |              |
| 25                                           | 75-79     | CC            | 36    | 0.66  | 0             | 0.00        |               |                |              |
| 25                                           | 75-79     | Ecig          | 585   | 10.68 |               |             |               |                |              |
| 25                                           | 75-79     | Dual          | 0     | 0.00  |               |             |               |                |              |
| 25                                           | 75-79     | Former        | 3245  | 59.25 |               |             | 30.10         | 52             | 1.60         |
| Year of Follow-up: 2020, Age Group: All Ages |           |               |       |       |               |             |               |                |              |
| Period                                       | Age Group | Smoking Group | N     | %     | Ever Quit (N) | Ever Quit % | Mean Yrs Quit | Short Term (n) | Short Term % |
| 30                                           | All Ages  | Never Any     | 33136 | 44.57 |               |             |               |                |              |
| 30                                           | All Ages  | CC            | 100   | 0.13  | 0             | 0.00        |               |                |              |
| 30                                           | All Ages  | Ecig          | 13910 | 18.71 |               |             |               |                |              |
| 30                                           | All Ages  | Dual          | 0     | 0.00  |               |             |               |                |              |
| 30                                           | All Ages  | Former        | 27194 | 36.58 |               |             | 24.82         | 842            | 3.10         |
| Year of Follow-up: 2020, Age Group: 18-19    |           |               |       |       |               |             |               |                |              |
| Period                                       | Age Group | Smoking Group | N     | %     | Ever Quit (N) | Ever Quit % | Mean Yrs Quit | Short Term (n) | Short Term % |
| 30                                           | 18-19     | Never Any     | 0     | .     |               |             |               |                |              |
| 30                                           | 18-19     | CC            | 0     | .     | 0             | .           |               |                |              |
| 30                                           | 18-19     | Ecig          | 0     | .     |               |             |               |                |              |
| 30                                           | 18-19     | Dual          | 0     | .     |               |             |               |                |              |
| 30                                           | 18-19     | Former        | 0     | .     |               |             | .             | 0              | .            |
| Year of Follow-up: 2020, Age Group: 20-24    |           |               |       |       |               |             |               |                |              |
| Period                                       | Age Group | Smoking Group | N     | %     | Ever Quit (N) | Ever Quit % | Mean Yrs Quit | Short Term (n) | Short Term % |
| 30                                           | 20-24     | Never Any     | 0     | .     |               |             |               |                |              |
| 30                                           | 20-24     | CC            | 0     | .     | 0             | .           |               |                |              |

**Results for PHIM for Run 3 (Sensitivity\_Analysis\_3.RTF)**

| 30                                        | 20-24     | Ecig          | 0    | .     |               |             |               |                |              |
|-------------------------------------------|-----------|---------------|------|-------|---------------|-------------|---------------|----------------|--------------|
| 30                                        | 20-24     | Dual          | 0    | .     |               |             |               |                |              |
| 30                                        | 20-24     | Former        | 0    | .     |               |             | 0             | .              |              |
| Year of Follow-up: 2020, Age Group: 25-29 |           |               |      |       |               |             |               |                |              |
| Period                                    | Age Group | Smoking Group | N    | %     | Ever Quit (N) | Ever Quit % | Mean Yrs Quit | Short Term (n) | Short Term % |
| 30                                        | 25-29     | Never Any     | 0    | .     |               |             |               |                |              |
| 30                                        | 25-29     | CC            | 0    | .     | 0             | .           |               |                |              |
| 30                                        | 25-29     | Ecig          | 0    | .     |               |             |               |                |              |
| 30                                        | 25-29     | Dual          | 0    | .     |               |             |               |                |              |
| 30                                        | 25-29     | Former        | 0    | .     |               |             |               | 0              | .            |
| Year of Follow-up: 2020, Age Group: 30-34 |           |               |      |       |               |             |               |                |              |
| Period                                    | Age Group | Smoking Group | N    | %     | Ever Quit (N) | Ever Quit % | Mean Yrs Quit | Short Term (n) | Short Term % |
| 30                                        | 30-34     | Never Any     | 0    | .     |               |             |               |                |              |
| 30                                        | 30-34     | CC            | 0    | .     | 0             | .           |               |                |              |
| 30                                        | 30-34     | Ecig          | 0    | .     |               |             |               |                |              |
| 30                                        | 30-34     | Dual          | 0    | .     |               |             |               |                |              |
| 30                                        | 30-34     | Former        | 0    | .     |               |             |               | 0              | .            |
| Year of Follow-up: 2020, Age Group: 35-39 |           |               |      |       |               |             |               |                |              |
| Period                                    | Age Group | Smoking Group | N    | %     | Ever Quit (N) | Ever Quit % | Mean Yrs Quit | Short Term (n) | Short Term % |
| 30                                        | 35-39     | Never Any     | 0    | .     |               |             |               |                |              |
| 30                                        | 35-39     | CC            | 0    | .     | 0             | .           |               |                |              |
| 30                                        | 35-39     | Ecig          | 0    | .     |               |             |               |                |              |
| 30                                        | 35-39     | Dual          | 0    | .     |               |             |               |                |              |
| 30                                        | 35-39     | Former        | 0    | .     |               |             |               | 0              | .            |
| Year of Follow-up: 2020, Age Group: 40-44 |           |               |      |       |               |             |               |                |              |
| Period                                    | Age Group | Smoking Group | N    | %     | Ever Quit (N) | Ever Quit % | Mean Yrs Quit | Short Term (n) | Short Term % |
| 30                                        | 40-44     | Never Any     | 4489 | 50.75 |               |             |               |                |              |
| 30                                        | 40-44     | CC            | 12   | 0.14  | 0             | 0.00        |               |                |              |
| 30                                        | 40-44     | Ecig          | 2127 | 24.05 |               |             |               |                |              |
| 30                                        | 40-44     | Dual          | 0    | 0.00  |               |             |               |                |              |
| 30                                        | 40-44     | Former        | 2217 | 25.07 |               |             | 14.94         | 94             | 4.24         |
| Year of Follow-up: 2020, Age Group: 45-49 |           |               |      |       |               |             |               |                |              |
| Period                                    | Age Group | Smoking Group | N    | %     | Ever Quit (N) | Ever Quit % | Mean Yrs Quit | Short Term (n) | Short Term % |
| 30                                        | 45-49     | Never Any     | 4991 | 55.21 |               |             |               |                |              |
| 30                                        | 45-49     | CC            | 5    | 0.06  | 0             | 0.00        |               |                |              |
| 30                                        | 45-49     | Ecig          | 2007 | 22.20 |               |             |               |                |              |
| 30                                        | 45-49     | Dual          | 0    | 0.00  |               |             |               |                |              |
| 30                                        | 45-49     | Former        | 2037 | 22.53 |               |             | 16.68         | 55             | 2.70         |
| Year of Follow-up: 2020, Age Group: 50-54 |           |               |      |       |               |             |               |                |              |
| Period                                    | Age Group | Smoking Group | N    | %     | Ever Quit (N) | Ever Quit % | Mean Yrs Quit | Short Term (n) | Short Term % |
| 30                                        | 50-54     | Never Any     | 5163 | 52.60 |               |             |               |                |              |
| 30                                        | 50-54     | CC            | 9    | 0.09  | 0             | 0.00        |               |                |              |
| 30                                        | 50-54     | Ecig          | 2290 | 23.33 |               |             |               |                |              |
| 30                                        | 50-54     | Dual          | 0    | 0.00  |               |             |               |                |              |
| 30                                        | 50-54     | Former        | 2354 | 23.98 |               |             | 21.41         | 79             | 3.36         |
| Year of Follow-up: 2020, Age Group: 55-59 |           |               |      |       |               |             |               |                |              |
| Period                                    | Age Group | Smoking Group | N    | %     | Ever Quit (N) | Ever Quit % | Mean Yrs Quit | Short Term (n) | Short Term % |
| 30                                        | 55-59     | Never Any     | 4997 | 46.86 |               |             |               |                |              |
| 30                                        | 55-59     | CC            | 18   | 0.17  | 0             | 0.00        |               |                |              |
| 30                                        | 55-59     | Ecig          | 2359 | 22.12 |               |             |               |                |              |
| 30                                        | 55-59     | Dual          | 0    | 0.00  |               |             |               |                |              |
| 30                                        | 55-59     | Former        | 3290 | 30.85 |               |             | 22.56         | 125            | 3.80         |
| Year of Follow-up: 2020, Age Group: 60-64 |           |               |      |       |               |             |               |                |              |
| Period                                    | Age Group | Smoking Group | N    | %     | Ever Quit (N) | Ever Quit % | Mean Yrs Quit | Short Term (n) | Short Term % |
| 30                                        | 60-64     | Never Any     | 4724 | 43.28 |               |             |               |                |              |
| 30                                        | 60-64     | CC            | 10   | 0.09  | 0             | 0.00        |               |                |              |
| 30                                        | 60-64     | Ecig          | 1986 | 18.19 |               |             |               |                |              |
| 30                                        | 60-64     | Dual          | 0    | 0.00  |               |             |               |                |              |
| 30                                        | 60-64     | Former        | 4196 | 38.44 |               |             | 23.70         | 206            | 4.91         |
| Year of Follow-up: 2020, Age Group: 65-69 |           |               |      |       |               |             |               |                |              |
| Period                                    | Age Group | Smoking Group | N    | %     | Ever Quit (N) | Ever Quit % | Mean Yrs Quit | Short Term (n) | Short Term % |
| 30                                        | 65-69     | Never Any     | 3941 | 39.85 |               |             |               |                |              |
| 30                                        | 65-69     | CC            | 13   | 0.13  | 0             | 0.00        |               |                |              |
| 30                                        | 65-69     | Ecig          | 1351 | 13.66 |               |             |               |                |              |
| 30                                        | 65-69     | Dual          | 0    | 0.00  |               |             |               |                |              |
| 30                                        | 65-69     | Former        | 4584 | 46.35 |               |             | 26.84         | 144            | 3.14         |
| Year of Follow-up: 2020, Age Group: 70-74 |           |               |      |       |               |             |               |                |              |
| Period                                    | Age Group | Smoking Group | N    | %     | Ever Quit (N) | Ever Quit % | Mean Yrs Quit | Short Term (n) | Short Term % |

**Results for PHIM for Run 3 (Sensitivity\_Analysis\_3.RTF)**

|                                              |           |               |       |       |               |             |               |                |              |
|----------------------------------------------|-----------|---------------|-------|-------|---------------|-------------|---------------|----------------|--------------|
| 30                                           | 70-74     | Never Any     | 2912  | 33.65 |               |             |               |                |              |
| 30                                           | 70-74     | CC            | 18    | 0.21  | 0             | 0.00        |               |                |              |
| 30                                           | 70-74     | Ecig          | 1091  | 12.61 |               |             |               |                |              |
| 30                                           | 70-74     | Dual          | 0     | 0.00  |               |             |               |                |              |
| 30                                           | 70-74     | Former        | 4634  | 53.54 |               |             | 29.33         | 92             | 1.99         |
| Year of Follow-up: 2020, Age Group: 75-79    |           |               |       |       |               |             |               |                |              |
| Period                                       | Age Group | Smoking Group | N     | %     | Ever Quit (N) | Ever Quit % | Mean Yrs Quit | Short Term (n) | Short Term % |
| 30                                           | 75-79     | Never Any     | 1919  | 29.46 |               |             |               |                |              |
| 30                                           | 75-79     | CC            | 15    | 0.23  | 0             | 0.00        |               |                |              |
| 30                                           | 75-79     | Ecig          | 699   | 10.73 |               |             |               |                |              |
| 30                                           | 75-79     | Dual          | 0     | 0.00  |               |             |               |                |              |
| 30                                           | 75-79     | Former        | 3882  | 59.59 |               |             | 32.19         | 47             | 1.21         |
| Year of Follow-up: 2025, Age Group: All Ages |           |               |       |       |               |             |               |                |              |
| Period                                       | Age Group | Smoking Group | N     | %     | Ever Quit (N) | Ever Quit % | Mean Yrs Quit | Short Term (n) | Short Term % |
| 35                                           | All Ages  | Never Any     | 31217 | 46.03 |               |             |               |                |              |
| 35                                           | All Ages  | CC            | 38    | 0.06  | 0             | 0.00        |               |                |              |
| 35                                           | All Ages  | Ecig          | 11322 | 16.69 |               |             |               |                |              |
| 35                                           | All Ages  | Dual          | 0     | 0.00  |               |             |               |                |              |
| 35                                           | All Ages  | Former        | 25248 | 37.23 |               |             | 26.56         | 736            | 2.92         |
| Year of Follow-up: 2025, Age Group: 18-19    |           |               |       |       |               |             |               |                |              |
| Period                                       | Age Group | Smoking Group | N     | %     | Ever Quit (N) | Ever Quit % | Mean Yrs Quit | Short Term (n) | Short Term % |
| 35                                           | 18-19     | Never Any     | 0     | .     |               |             |               |                |              |
| 35                                           | 18-19     | CC            | 0     | .     | 0             | .           |               |                |              |
| 35                                           | 18-19     | Ecig          | 0     | .     |               |             |               |                |              |
| 35                                           | 18-19     | Dual          | 0     | .     |               |             |               |                |              |
| 35                                           | 18-19     | Former        | 0     | .     |               |             | .             | 0              | .            |
| Year of Follow-up: 2025, Age Group: 20-24    |           |               |       |       |               |             |               |                |              |
| Period                                       | Age Group | Smoking Group | N     | %     | Ever Quit (N) | Ever Quit % | Mean Yrs Quit | Short Term (n) | Short Term % |
| 35                                           | 20-24     | Never Any     | 0     | .     |               |             |               |                |              |
| 35                                           | 20-24     | CC            | 0     | .     | 0             | .           |               |                |              |
| 35                                           | 20-24     | Ecig          | 0     | .     |               |             |               |                |              |
| 35                                           | 20-24     | Dual          | 0     | .     |               |             |               |                |              |
| 35                                           | 20-24     | Former        | 0     | .     |               |             | .             | 0              | .            |
| Year of Follow-up: 2025, Age Group: 25-29    |           |               |       |       |               |             |               |                |              |
| Period                                       | Age Group | Smoking Group | N     | %     | Ever Quit (N) | Ever Quit % | Mean Yrs Quit | Short Term (n) | Short Term % |
| 35                                           | 25-29     | Never Any     | 0     | .     |               |             |               |                |              |
| 35                                           | 25-29     | CC            | 0     | .     | 0             | .           |               |                |              |
| 35                                           | 25-29     | Ecig          | 0     | .     |               |             |               |                |              |
| 35                                           | 25-29     | Dual          | 0     | .     |               |             |               |                |              |
| 35                                           | 25-29     | Former        | 0     | .     |               |             | .             | 0              | .            |
| Year of Follow-up: 2025, Age Group: 30-34    |           |               |       |       |               |             |               |                |              |
| Period                                       | Age Group | Smoking Group | N     | %     | Ever Quit (N) | Ever Quit % | Mean Yrs Quit | Short Term (n) | Short Term % |
| 35                                           | 30-34     | Never Any     | 0     | .     |               |             |               |                |              |
| 35                                           | 30-34     | CC            | 0     | .     | 0             | .           |               |                |              |
| 35                                           | 30-34     | Ecig          | 0     | .     |               |             |               |                |              |
| 35                                           | 30-34     | Dual          | 0     | .     |               |             |               |                |              |
| 35                                           | 30-34     | Former        | 0     | .     |               |             | .             | 0              | .            |
| Year of Follow-up: 2025, Age Group: 35-39    |           |               |       |       |               |             |               |                |              |
| Period                                       | Age Group | Smoking Group | N     | %     | Ever Quit (N) | Ever Quit % | Mean Yrs Quit | Short Term (n) | Short Term % |
| 35                                           | 35-39     | Never Any     | 0     | .     |               |             |               |                |              |
| 35                                           | 35-39     | CC            | 0     | .     | 0             | .           |               |                |              |
| 35                                           | 35-39     | Ecig          | 0     | .     |               |             |               |                |              |
| 35                                           | 35-39     | Dual          | 0     | .     |               |             |               |                |              |
| 35                                           | 35-39     | Former        | 0     | .     |               |             | .             | 0              | .            |
| Year of Follow-up: 2025, Age Group: 40-44    |           |               |       |       |               |             |               |                |              |
| Period                                       | Age Group | Smoking Group | N     | %     | Ever Quit (N) | Ever Quit % | Mean Yrs Quit | Short Term (n) | Short Term % |
| 35                                           | 40-44     | Never Any     | 0     | .     |               |             |               |                |              |
| 35                                           | 40-44     | CC            | 0     | .     | 0             | .           |               |                |              |
| 35                                           | 40-44     | Ecig          | 0     | .     |               |             |               |                |              |
| 35                                           | 40-44     | Dual          | 0     | .     |               |             |               |                |              |
| 35                                           | 40-44     | Former        | 0     | .     |               |             | .             | 0              | .            |
| Year of Follow-up: 2025, Age Group: 45-49    |           |               |       |       |               |             |               |                |              |
| Period                                       | Age Group | Smoking Group | N     | %     | Ever Quit (N) | Ever Quit % | Mean Yrs Quit | Short Term (n) | Short Term % |
| 35                                           | 45-49     | Never Any     | 4489  | 50.75 |               |             |               |                |              |
| 35                                           | 45-49     | CC            | 7     | 0.08  | 0             | 0.00        |               |                |              |
| 35                                           | 45-49     | Ecig          | 1938  | 21.91 |               |             |               |                |              |
| 35                                           | 45-49     | Dual          | 0     | 0.00  |               |             |               |                |              |
| 35                                           | 45-49     | Former        | 2411  | 27.26 |               |             | 18.53         | 54             | 2.24         |
| Year of Follow-up: 2025, Age Group: 50-54    |           |               |       |       |               |             |               |                |              |

**Results for PHIM for Run 3 (Sensitivity\_Analysis\_3.RTF)**

| Period                                       | Age Group | Smoking Group | N     | %     | Ever Quit (N) | Ever Quit % | Mean Yrs Quit | Short Term (n) | Short Term % |
|----------------------------------------------|-----------|---------------|-------|-------|---------------|-------------|---------------|----------------|--------------|
| 35                                           | 50-54     | Never Any     | 4991  | 55.21 |               |             |               |                |              |
| 35                                           | 50-54     | CC            | 3     | 0.03  | 0             | 0.00        |               |                |              |
| 35                                           | 50-54     | Ecig          | 1889  | 20.90 |               |             |               |                |              |
| 35                                           | 50-54     | Dual          | 0     | 0.00  |               |             |               |                |              |
| 35                                           | 50-54     | Former        | 2157  | 23.86 |               |             | 20.55         | 70             | 3.25         |
| Year of Follow-up: 2025, Age Group: 55-59    |           |               |       |       |               |             |               |                |              |
| Period                                       | Age Group | Smoking Group | N     | %     | Ever Quit (N) | Ever Quit % | Mean Yrs Quit | Short Term (n) | Short Term % |
| 35                                           | 55-59     | Never Any     | 5163  | 52.60 |               |             |               |                |              |
| 35                                           | 55-59     | CC            | 0     | 0.00  | 0             | 0.00        |               |                |              |
| 35                                           | 55-59     | Ecig          | 1977  | 20.14 |               |             |               |                |              |
| 35                                           | 55-59     | Dual          | 0     | 0.00  |               |             |               |                |              |
| 35                                           | 55-59     | Former        | 2676  | 27.26 |               |             | 23.47         | 128            | 4.78         |
| Year of Follow-up: 2025, Age Group: 60-64    |           |               |       |       |               |             |               |                |              |
| Period                                       | Age Group | Smoking Group | N     | %     | Ever Quit (N) | Ever Quit % | Mean Yrs Quit | Short Term (n) | Short Term % |
| 35                                           | 60-64     | Never Any     | 4997  | 46.86 |               |             |               |                |              |
| 35                                           | 60-64     | CC            | 9     | 0.08  | 0             | 0.00        |               |                |              |
| 35                                           | 60-64     | Ecig          | 1943  | 18.22 |               |             |               |                |              |
| 35                                           | 60-64     | Dual          | 0     | 0.00  |               |             |               |                |              |
| 35                                           | 60-64     | Former        | 3715  | 34.84 |               |             | 24.63         | 175            | 4.71         |
| Year of Follow-up: 2025, Age Group: 65-69    |           |               |       |       |               |             |               |                |              |
| Period                                       | Age Group | Smoking Group | N     | %     | Ever Quit (N) | Ever Quit % | Mean Yrs Quit | Short Term (n) | Short Term % |
| 35                                           | 65-69     | Never Any     | 4724  | 43.28 |               |             |               |                |              |
| 35                                           | 65-69     | CC            | 5     | 0.05  | 0             | 0.00        |               |                |              |
| 35                                           | 65-69     | Ecig          | 1570  | 14.38 |               |             |               |                |              |
| 35                                           | 65-69     | Dual          | 0     | 0.00  |               |             |               |                |              |
| 35                                           | 65-69     | Former        | 4617  | 42.30 |               |             | 26.28         | 145            | 3.14         |
| Year of Follow-up: 2025, Age Group: 70-74    |           |               |       |       |               |             |               |                |              |
| Period                                       | Age Group | Smoking Group | N     | %     | Ever Quit (N) | Ever Quit % | Mean Yrs Quit | Short Term (n) | Short Term % |
| 35                                           | 70-74     | Never Any     | 3941  | 39.85 |               |             |               |                |              |
| 35                                           | 70-74     | CC            | 5     | 0.05  | 0             | 0.00        |               |                |              |
| 35                                           | 70-74     | Ecig          | 1110  | 11.22 |               |             |               |                |              |
| 35                                           | 70-74     | Dual          | 0     | 0.00  |               |             |               |                |              |
| 35                                           | 70-74     | Former        | 4833  | 48.87 |               |             | 30.31         | 84             | 1.74         |
| Year of Follow-up: 2025, Age Group: 75-79    |           |               |       |       |               |             |               |                |              |
| Period                                       | Age Group | Smoking Group | N     | %     | Ever Quit (N) | Ever Quit % | Mean Yrs Quit | Short Term (n) | Short Term % |
| 35                                           | 75-79     | Never Any     | 2912  | 33.65 |               |             |               |                |              |
| 35                                           | 75-79     | CC            | 9     | 0.10  | 0             | 0.00        |               |                |              |
| 35                                           | 75-79     | Ecig          | 895   | 10.34 |               |             |               |                |              |
| 35                                           | 75-79     | Dual          | 0     | 0.00  |               |             |               |                |              |
| 35                                           | 75-79     | Former        | 4839  | 55.91 |               |             | 32.96         | 80             | 1.65         |
| Year of Follow-up: 2030, Age Group: All Ages |           |               |       |       |               |             |               |                |              |
| Period                                       | Age Group | Smoking Group | N     | %     | Ever Quit (N) | Ever Quit % | Mean Yrs Quit | Short Term (n) | Short Term % |
| 40                                           | All Ages  | Never Any     | 28305 | 47.84 |               |             |               |                |              |
| 40                                           | All Ages  | CC            | 15    | 0.03  | 0             | 0.00        |               |                |              |
| 40                                           | All Ages  | Ecig          | 8728  | 14.75 |               |             |               |                |              |
| 40                                           | All Ages  | Dual          | 0     | 0.00  |               |             |               |                |              |
| 40                                           | All Ages  | Former        | 22122 | 37.39 |               |             | 27.87         | 696            | 3.15         |
| Year of Follow-up: 2030, Age Group: 18-19    |           |               |       |       |               |             |               |                |              |
| Period                                       | Age Group | Smoking Group | N     | %     | Ever Quit (N) | Ever Quit % | Mean Yrs Quit | Short Term (n) | Short Term % |
| 40                                           | 18-19     | Never Any     | 0     | .     |               |             |               |                |              |
| 40                                           | 18-19     | CC            | 0     | .     | 0             | .           |               |                |              |
| 40                                           | 18-19     | Ecig          | 0     | .     |               |             |               |                |              |
| 40                                           | 18-19     | Dual          | 0     | .     |               |             |               |                |              |
| 40                                           | 18-19     | Former        | 0     | .     |               |             | .             | 0              | .            |
| Year of Follow-up: 2030, Age Group: 20-24    |           |               |       |       |               |             |               |                |              |
| Period                                       | Age Group | Smoking Group | N     | %     | Ever Quit (N) | Ever Quit % | Mean Yrs Quit | Short Term (n) | Short Term % |
| 40                                           | 20-24     | Never Any     | 0     | .     |               |             |               |                |              |
| 40                                           | 20-24     | CC            | 0     | .     | 0             | .           |               |                |              |
| 40                                           | 20-24     | Ecig          | 0     | .     |               |             |               |                |              |
| 40                                           | 20-24     | Dual          | 0     | .     |               |             |               |                |              |
| 40                                           | 20-24     | Former        | 0     | .     |               |             | .             | 0              | .            |
| Year of Follow-up: 2030, Age Group: 25-29    |           |               |       |       |               |             |               |                |              |
| Period                                       | Age Group | Smoking Group | N     | %     | Ever Quit (N) | Ever Quit % | Mean Yrs Quit | Short Term (n) | Short Term % |
| 40                                           | 25-29     | Never Any     | 0     | .     |               |             |               |                |              |
| 40                                           | 25-29     | CC            | 0     | .     | 0             | .           |               |                |              |
| 40                                           | 25-29     | Ecig          | 0     | .     |               |             |               |                |              |
| 40                                           | 25-29     | Dual          | 0     | .     |               |             |               |                |              |

**Results for PHIM for Run 3 (Sensitivity\_Analysis\_3.RTF)**

| Year of Follow-up: 2030, Age Group: 30-34 | Period | Age Group | Smoking Group | N    | %     | Ever Quit (N) | Ever Quit % | Mean Yrs Quit | Short Term (n) | Short Term % |
|-------------------------------------------|--------|-----------|---------------|------|-------|---------------|-------------|---------------|----------------|--------------|
| 40                                        | 25-29  | Former    |               | 0    | .     |               |             |               | 0              | .            |
| 40                                        | 30-34  | Never Any |               | 0    | .     |               |             |               |                |              |
| 40                                        | 30-34  | CC        |               | 0    | .     | 0             | .           |               |                |              |
| 40                                        | 30-34  | Ecig      |               | 0    | .     |               |             |               |                |              |
| 40                                        | 30-34  | Dual      |               | 0    | .     |               |             |               |                |              |
| 40                                        | 30-34  | Former    |               | 0    | .     |               |             |               | 0              | .            |
| Year of Follow-up: 2030, Age Group: 35-39 | Period | Age Group | Smoking Group | N    | %     | Ever Quit (N) | Ever Quit % | Mean Yrs Quit | Short Term (n) | Short Term % |
| 40                                        | 35-39  | Never Any |               | 0    | .     |               |             |               |                |              |
| 40                                        | 35-39  | CC        |               | 0    | .     | 0             | .           |               |                |              |
| 40                                        | 35-39  | Ecig      |               | 0    | .     |               |             |               |                |              |
| 40                                        | 35-39  | Dual      |               | 0    | .     |               |             |               |                |              |
| 40                                        | 35-39  | Former    |               | 0    | .     |               |             |               | 0              | .            |
| Year of Follow-up: 2030, Age Group: 40-44 | Period | Age Group | Smoking Group | N    | %     | Ever Quit (N) | Ever Quit % | Mean Yrs Quit | Short Term (n) | Short Term % |
| 40                                        | 40-44  | Never Any |               | 0    | .     |               |             |               |                |              |
| 40                                        | 40-44  | CC        |               | 0    | .     | 0             | .           |               |                |              |
| 40                                        | 40-44  | Ecig      |               | 0    | .     |               |             |               |                |              |
| 40                                        | 40-44  | Dual      |               | 0    | .     |               |             |               |                |              |
| 40                                        | 40-44  | Former    |               | 0    | .     |               |             |               | 0              | .            |
| Year of Follow-up: 2030, Age Group: 45-49 | Period | Age Group | Smoking Group | N    | %     | Ever Quit (N) | Ever Quit % | Mean Yrs Quit | Short Term (n) | Short Term % |
| 40                                        | 45-49  | Never Any |               | 0    | .     |               |             |               |                |              |
| 40                                        | 45-49  | CC        |               | 0    | .     | 0             | .           |               |                |              |
| 40                                        | 45-49  | Ecig      |               | 0    | .     |               |             |               |                |              |
| 40                                        | 45-49  | Dual      |               | 0    | .     |               |             |               |                |              |
| 40                                        | 45-49  | Former    |               | 0    | .     |               |             |               | 0              | .            |
| Year of Follow-up: 2030, Age Group: 50-54 | Period | Age Group | Smoking Group | N    | %     | Ever Quit (N) | Ever Quit % | Mean Yrs Quit | Short Term (n) | Short Term % |
| 40                                        | 50-54  | Never Any |               | 4489 | 50.75 |               |             |               |                |              |
| 40                                        | 50-54  | CC        |               | 3    | 0.03  | 0             | 0.00        |               |                |              |
| 40                                        | 50-54  | Ecig      |               | 1799 | 20.34 |               |             |               |                |              |
| 40                                        | 50-54  | Dual      |               | 0    | 0.00  |               |             |               |                |              |
| 40                                        | 50-54  | Former    |               | 2554 | 28.88 |               |             | 22.30         | 73             | 2.86         |
| Year of Follow-up: 2030, Age Group: 55-59 | Period | Age Group | Smoking Group | N    | %     | Ever Quit (N) | Ever Quit % | Mean Yrs Quit | Short Term (n) | Short Term % |
| 40                                        | 55-59  | Never Any |               | 4991 | 55.21 |               |             |               |                |              |
| 40                                        | 55-59  | CC        |               | 2    | 0.02  | 0             | 0.00        |               |                |              |
| 40                                        | 55-59  | Ecig      |               | 1654 | 18.30 |               |             |               |                |              |
| 40                                        | 55-59  | Dual      |               | 0    | 0.00  |               |             |               |                |              |
| 40                                        | 55-59  | Former    |               | 2393 | 26.47 |               |             | 23.24         | 94             | 3.93         |
| Year of Follow-up: 2030, Age Group: 60-64 | Period | Age Group | Smoking Group | N    | %     | Ever Quit (N) | Ever Quit % | Mean Yrs Quit | Short Term (n) | Short Term % |
| 40                                        | 60-64  | Never Any |               | 5163 | 52.60 |               |             |               |                |              |
| 40                                        | 60-64  | CC        |               | 0    | 0.00  | 0             | 0.00        |               |                |              |
| 40                                        | 60-64  | Ecig      |               | 1569 | 15.98 |               |             |               |                |              |
| 40                                        | 60-64  | Dual      |               | 0    | 0.00  |               |             |               |                |              |
| 40                                        | 60-64  | Former    |               | 3084 | 31.42 |               |             | 24.94         | 192            | 6.23         |
| Year of Follow-up: 2030, Age Group: 65-69 | Period | Age Group | Smoking Group | N    | %     | Ever Quit (N) | Ever Quit % | Mean Yrs Quit | Short Term (n) | Short Term % |
| 40                                        | 65-69  | Never Any |               | 4997 | 46.86 |               |             |               |                |              |
| 40                                        | 65-69  | CC        |               | 4    | 0.04  | 0             | 0.00        |               |                |              |
| 40                                        | 65-69  | Ecig      |               | 1522 | 14.27 |               |             |               |                |              |
| 40                                        | 65-69  | Dual      |               | 0    | 0.00  |               |             |               |                |              |
| 40                                        | 65-69  | Former    |               | 4141 | 38.83 |               |             | 26.80         | 151            | 3.65         |
| Year of Follow-up: 2030, Age Group: 70-74 | Period | Age Group | Smoking Group | N    | %     | Ever Quit (N) | Ever Quit % | Mean Yrs Quit | Short Term (n) | Short Term % |
| 40                                        | 70-74  | Never Any |               | 4724 | 43.28 |               |             |               |                |              |
| 40                                        | 70-74  | CC        |               | 3    | 0.03  | 0             | 0.00        |               |                |              |
| 40                                        | 70-74  | Ecig      |               | 1274 | 11.67 |               |             |               |                |              |
| 40                                        | 70-74  | Dual      |               | 0    | 0.00  |               |             |               |                |              |
| 40                                        | 70-74  | Former    |               | 4915 | 45.03 |               |             | 29.52         | 106            | 2.16         |
| Year of Follow-up: 2030, Age Group: 75-79 | Period | Age Group | Smoking Group | N    | %     | Ever Quit (N) | Ever Quit % | Mean Yrs Quit | Short Term (n) | Short Term % |
| 40                                        | 75-79  | Never Any |               | 3941 | 39.85 |               |             |               |                |              |
| 40                                        | 75-79  | CC        |               | 3    | 0.03  | 0             | 0.00        |               |                |              |

**Results for PHIM for Run 3 (Sensitivity\_Analysis\_3.RTF)**

|                                              |           |               |       |       |               |             |               |                |              |
|----------------------------------------------|-----------|---------------|-------|-------|---------------|-------------|---------------|----------------|--------------|
| 40                                           | 75-79     | Ecig          | 910   | 9.20  |               |             |               |                |              |
| 40                                           | 75-79     | Dual          | 0     | 0.00  |               |             |               |                |              |
| 40                                           | 75-79     | Former        | 5035  | 50.92 |               |             | 33.98         | 80             | 1.59         |
| Year of Follow-up: 2035, Age Group: All Ages |           |               |       |       |               |             |               |                |              |
| Period                                       | Age Group | Smoking Group | N     | %     | Ever Quit (N) | Ever Quit % | Mean Yrs Quit | Short Term (n) | Short Term % |
| 45                                           | All Ages  | Never Any     | 24364 | 49.44 |               |             |               |                |              |
| 45                                           | All Ages  | CC            | 6     | 0.01  | 0             | 0.00        |               |                |              |
| 45                                           | All Ages  | Ecig          | 6468  | 13.12 |               |             |               |                |              |
| 45                                           | All Ages  | Dual          | 0     | 0.00  |               |             |               |                |              |
| 45                                           | All Ages  | Former        | 18443 | 37.42 |               |             | 28.94         | 542            | 2.94         |
| Year of Follow-up: 2035, Age Group: 18-19    |           |               |       |       |               |             |               |                |              |
| Period                                       | Age Group | Smoking Group | N     | %     | Ever Quit (N) | Ever Quit % | Mean Yrs Quit | Short Term (n) | Short Term % |
| 45                                           | 18-19     | Never Any     | 0     | .     |               |             |               |                |              |
| 45                                           | 18-19     | CC            | 0     | .     | 0             | .           |               |                |              |
| 45                                           | 18-19     | Ecig          | 0     | .     |               |             |               |                |              |
| 45                                           | 18-19     | Dual          | 0     | .     |               |             |               |                |              |
| 45                                           | 18-19     | Former        | 0     | .     |               |             |               | 0              | .            |
| Year of Follow-up: 2035, Age Group: 20-24    |           |               |       |       |               |             |               |                |              |
| Period                                       | Age Group | Smoking Group | N     | %     | Ever Quit (N) | Ever Quit % | Mean Yrs Quit | Short Term (n) | Short Term % |
| 45                                           | 20-24     | Never Any     | 0     | .     |               |             |               |                |              |
| 45                                           | 20-24     | CC            | 0     | .     | 0             | .           |               |                |              |
| 45                                           | 20-24     | Ecig          | 0     | .     |               |             |               |                |              |
| 45                                           | 20-24     | Dual          | 0     | .     |               |             |               |                |              |
| 45                                           | 20-24     | Former        | 0     | .     |               |             |               | 0              | .            |
| Year of Follow-up: 2035, Age Group: 25-29    |           |               |       |       |               |             |               |                |              |
| Period                                       | Age Group | Smoking Group | N     | %     | Ever Quit (N) | Ever Quit % | Mean Yrs Quit | Short Term (n) | Short Term % |
| 45                                           | 25-29     | Never Any     | 0     | .     |               |             |               |                |              |
| 45                                           | 25-29     | CC            | 0     | .     | 0             | .           |               |                |              |
| 45                                           | 25-29     | Ecig          | 0     | .     |               |             |               |                |              |
| 45                                           | 25-29     | Dual          | 0     | .     |               |             |               |                |              |
| 45                                           | 25-29     | Former        | 0     | .     |               |             |               | 0              | .            |
| Year of Follow-up: 2035, Age Group: 30-34    |           |               |       |       |               |             |               |                |              |
| Period                                       | Age Group | Smoking Group | N     | %     | Ever Quit (N) | Ever Quit % | Mean Yrs Quit | Short Term (n) | Short Term % |
| 45                                           | 30-34     | Never Any     | 0     | .     |               |             |               |                |              |
| 45                                           | 30-34     | CC            | 0     | .     | 0             | .           |               |                |              |
| 45                                           | 30-34     | Ecig          | 0     | .     |               |             |               |                |              |
| 45                                           | 30-34     | Dual          | 0     | .     |               |             |               |                |              |
| 45                                           | 30-34     | Former        | 0     | .     |               |             |               | 0              | .            |
| Year of Follow-up: 2035, Age Group: 35-39    |           |               |       |       |               |             |               |                |              |
| Period                                       | Age Group | Smoking Group | N     | %     | Ever Quit (N) | Ever Quit % | Mean Yrs Quit | Short Term (n) | Short Term % |
| 45                                           | 35-39     | Never Any     | 0     | .     |               |             |               |                |              |
| 45                                           | 35-39     | CC            | 0     | .     | 0             | .           |               |                |              |
| 45                                           | 35-39     | Ecig          | 0     | .     |               |             |               |                |              |
| 45                                           | 35-39     | Dual          | 0     | .     |               |             |               |                |              |
| 45                                           | 35-39     | Former        | 0     | .     |               |             |               | 0              | .            |
| Year of Follow-up: 2035, Age Group: 40-44    |           |               |       |       |               |             |               |                |              |
| Period                                       | Age Group | Smoking Group | N     | %     | Ever Quit (N) | Ever Quit % | Mean Yrs Quit | Short Term (n) | Short Term % |
| 45                                           | 40-44     | Never Any     | 0     | .     |               |             |               |                |              |
| 45                                           | 40-44     | CC            | 0     | .     | 0             | .           |               |                |              |
| 45                                           | 40-44     | Ecig          | 0     | .     |               |             |               |                |              |
| 45                                           | 40-44     | Dual          | 0     | .     |               |             |               |                |              |
| 45                                           | 40-44     | Former        | 0     | .     |               |             |               | 0              | .            |
| Year of Follow-up: 2035, Age Group: 45-49    |           |               |       |       |               |             |               |                |              |
| Period                                       | Age Group | Smoking Group | N     | %     | Ever Quit (N) | Ever Quit % | Mean Yrs Quit | Short Term (n) | Short Term % |
| 45                                           | 45-49     | Never Any     | 0     | .     |               |             |               |                |              |
| 45                                           | 45-49     | CC            | 0     | .     | 0             | .           |               |                |              |
| 45                                           | 45-49     | Ecig          | 0     | .     |               |             |               |                |              |
| 45                                           | 45-49     | Dual          | 0     | .     |               |             |               |                |              |
| 45                                           | 45-49     | Former        | 0     | .     |               |             |               | 0              | .            |
| Year of Follow-up: 2035, Age Group: 50-54    |           |               |       |       |               |             |               |                |              |
| Period                                       | Age Group | Smoking Group | N     | %     | Ever Quit (N) | Ever Quit % | Mean Yrs Quit | Short Term (n) | Short Term % |
| 45                                           | 50-54     | Never Any     | 0     | .     |               |             |               |                |              |
| 45                                           | 50-54     | CC            | 0     | .     | 0             | .           |               |                |              |
| 45                                           | 50-54     | Ecig          | 0     | .     |               |             |               |                |              |
| 45                                           | 50-54     | Dual          | 0     | .     |               |             |               |                |              |
| 45                                           | 50-54     | Former        | 0     | .     |               |             |               | 0              | .            |
| Year of Follow-up: 2035, Age Group: 55-59    |           |               |       |       |               |             |               |                |              |
| Period                                       | Age Group | Smoking Group | N     | %     | Ever Quit (N) | Ever Quit % | Mean Yrs Quit | Short Term (n) | Short Term % |

### Results for PHIM for Run 3 (Sensitivity\_Analysis\_3.RTF)

|                                              |           |               |       |       |               |             |               |                |              |
|----------------------------------------------|-----------|---------------|-------|-------|---------------|-------------|---------------|----------------|--------------|
| 45                                           | 55-59     | Never Any     | 4489  | 50.75 |               |             |               |                |              |
| 45                                           | 55-59     | CC            | 2     | 0.02  | 0             | 0.00        |               |                |              |
| 45                                           | 55-59     | Ecig          | 1577  | 17.83 |               |             |               |                |              |
| 45                                           | 55-59     | Dual          | 0     | 0.00  |               |             |               |                |              |
| 45                                           | 55-59     | Former        | 2777  | 31.40 |               |             | 25.25         | 108            | 3.89         |
| Year of Follow-up: 2035, Age Group: 60-64    |           |               |       |       |               |             |               |                |              |
| Period                                       | Age Group | Smoking Group | N     | %     | Ever Quit (N) | Ever Quit % | Mean Yrs Quit | Short Term (n) | Short Term % |
| 45                                           | 60-64     | Never Any     | 4991  | 55.21 |               |             |               |                |              |
| 45                                           | 60-64     | CC            | 0     | 0.00  | 0             | 0.00        |               |                |              |
| 45                                           | 60-64     | Ecig          | 1376  | 15.22 |               |             |               |                |              |
| 45                                           | 60-64     | Dual          | 0     | 0.00  |               |             |               |                |              |
| 45                                           | 60-64     | Former        | 2673  | 29.57 |               |             | 25.48         | 117            | 4.38         |
| Year of Follow-up: 2035, Age Group: 65-69    |           |               |       |       |               |             |               |                |              |
| Period                                       | Age Group | Smoking Group | N     | %     | Ever Quit (N) | Ever Quit % | Mean Yrs Quit | Short Term (n) | Short Term % |
| 45                                           | 65-69     | Never Any     | 5163  | 52.60 |               |             |               |                |              |
| 45                                           | 65-69     | CC            | 0     | 0.00  | 0             | 0.00        |               |                |              |
| 45                                           | 65-69     | Ecig          | 1239  | 12.62 |               |             |               |                |              |
| 45                                           | 65-69     | Dual          | 0     | 0.00  |               |             |               |                |              |
| 45                                           | 65-69     | Former        | 3414  | 34.78 |               |             | 27.26         | 116            | 3.40         |
| Year of Follow-up: 2035, Age Group: 70-74    |           |               |       |       |               |             |               |                |              |
| Period                                       | Age Group | Smoking Group | N     | %     | Ever Quit (N) | Ever Quit % | Mean Yrs Quit | Short Term (n) | Short Term % |
| 45                                           | 70-74     | Never Any     | 4997  | 46.86 |               |             |               |                |              |
| 45                                           | 70-74     | CC            | 1     | 0.01  | 0             | 0.00        |               |                |              |
| 45                                           | 70-74     | Ecig          | 1256  | 11.78 |               |             |               |                |              |
| 45                                           | 70-74     | Dual          | 0     | 0.00  |               |             |               |                |              |
| 45                                           | 70-74     | Former        | 4410  | 41.35 |               |             | 29.99         | 100            | 2.27         |
| Year of Follow-up: 2035, Age Group: 75-79    |           |               |       |       |               |             |               |                |              |
| Period                                       | Age Group | Smoking Group | N     | %     | Ever Quit (N) | Ever Quit % | Mean Yrs Quit | Short Term (n) | Short Term % |
| 45                                           | 75-79     | Never Any     | 4724  | 43.28 |               |             |               |                |              |
| 45                                           | 75-79     | CC            | 3     | 0.03  | 0             | 0.00        |               |                |              |
| 45                                           | 75-79     | Ecig          | 1020  | 9.34  |               |             |               |                |              |
| 45                                           | 75-79     | Dual          | 0     | 0.00  |               |             |               |                |              |
| 45                                           | 75-79     | Former        | 5169  | 47.35 |               |             | 32.92         | 101            | 1.95         |
| Year of Follow-up: 2040, Age Group: All Ages |           |               |       |       |               |             |               |                |              |
| Period                                       | Age Group | Smoking Group | N     | %     | Ever Quit (N) | Ever Quit % | Mean Yrs Quit | Short Term (n) | Short Term % |
| 50                                           | All Ages  | Never Any     | 19640 | 51.19 |               |             |               |                |              |
| 50                                           | All Ages  | CC            | 1     | 0.00  | 0             | 0.00        |               |                |              |
| 50                                           | All Ages  | Ecig          | 4298  | 11.20 |               |             |               |                |              |
| 50                                           | All Ages  | Dual          | 0     | 0.00  |               |             |               |                |              |
| 50                                           | All Ages  | Former        | 14426 | 37.60 |               |             | 29.97         | 430            | 2.98         |
| Year of Follow-up: 2040, Age Group: 18-19    |           |               |       |       |               |             |               |                |              |
| Period                                       | Age Group | Smoking Group | N     | %     | Ever Quit (N) | Ever Quit % | Mean Yrs Quit | Short Term (n) | Short Term % |
| 50                                           | 18-19     | Never Any     | 0     | .     |               |             |               |                |              |
| 50                                           | 18-19     | CC            | 0     | .     | 0             | .           |               |                |              |
| 50                                           | 18-19     | Ecig          | 0     | .     |               |             |               |                |              |
| 50                                           | 18-19     | Dual          | 0     | .     |               |             |               |                |              |
| 50                                           | 18-19     | Former        | 0     | .     |               |             | .             | 0              | .            |
| Year of Follow-up: 2040, Age Group: 20-24    |           |               |       |       |               |             |               |                |              |
| Period                                       | Age Group | Smoking Group | N     | %     | Ever Quit (N) | Ever Quit % | Mean Yrs Quit | Short Term (n) | Short Term % |
| 50                                           | 20-24     | Never Any     | 0     | .     |               |             |               |                |              |
| 50                                           | 20-24     | CC            | 0     | .     | 0             | .           |               |                |              |
| 50                                           | 20-24     | Ecig          | 0     | .     |               |             |               |                |              |
| 50                                           | 20-24     | Dual          | 0     | .     |               |             |               |                |              |
| 50                                           | 20-24     | Former        | 0     | .     |               |             | .             | 0              | .            |
| Year of Follow-up: 2040, Age Group: 25-29    |           |               |       |       |               |             |               |                |              |
| Period                                       | Age Group | Smoking Group | N     | %     | Ever Quit (N) | Ever Quit % | Mean Yrs Quit | Short Term (n) | Short Term % |
| 50                                           | 25-29     | Never Any     | 0     | .     |               |             |               |                |              |
| 50                                           | 25-29     | CC            | 0     | .     | 0             | .           |               |                |              |
| 50                                           | 25-29     | Ecig          | 0     | .     |               |             |               |                |              |
| 50                                           | 25-29     | Dual          | 0     | .     |               |             |               |                |              |
| 50                                           | 25-29     | Former        | 0     | .     |               |             | .             | 0              | .            |
| Year of Follow-up: 2040, Age Group: 30-34    |           |               |       |       |               |             |               |                |              |
| Period                                       | Age Group | Smoking Group | N     | %     | Ever Quit (N) | Ever Quit % | Mean Yrs Quit | Short Term (n) | Short Term % |
| 50                                           | 30-34     | Never Any     | 0     | .     |               |             |               |                |              |
| 50                                           | 30-34     | CC            | 0     | .     | 0             | .           |               |                |              |
| 50                                           | 30-34     | Ecig          | 0     | .     |               |             |               |                |              |
| 50                                           | 30-34     | Dual          | 0     | .     |               |             |               |                |              |
| 50                                           | 30-34     | Former        | 0     | .     |               |             | .             | 0              | .            |
| Year of Follow-up: 2040, Age Group: 35-39    |           |               |       |       |               |             |               |                |              |



### Results for PHIM for Run 3 (Sensitivity\_Analysis\_3.RTF)

| Period                                    | Age Group | Smoking Group | N    | %     | Ever Quit (N) | Ever Quit % | Mean Yrs Quit | Short Term (n) | Short Term % |
|-------------------------------------------|-----------|---------------|------|-------|---------------|-------------|---------------|----------------|--------------|
| 50                                        | 35-39     | Never Any     | 0    | .     |               |             |               |                |              |
| 50                                        | 35-39     | CC            | 0    | .     | 0             | .           |               |                |              |
| 50                                        | 35-39     | Ecig          | 0    | .     |               |             |               |                |              |
| 50                                        | 35-39     | Dual          | 0    | .     |               |             |               |                |              |
| 50                                        | 35-39     | Former        | 0    | .     |               |             | .             | 0              | .            |
| Year of Follow-up: 2040, Age Group: 40-44 |           |               |      |       |               |             |               |                |              |
| Period                                    | Age Group | Smoking Group | N    | %     | Ever Quit (N) | Ever Quit % | Mean Yrs Quit | Short Term (n) | Short Term % |
| 50                                        | 40-44     | Never Any     | 0    | .     |               |             |               |                |              |
| 50                                        | 40-44     | CC            | 0    | .     | 0             | .           |               |                |              |
| 50                                        | 40-44     | Ecig          | 0    | .     |               |             |               |                |              |
| 50                                        | 40-44     | Dual          | 0    | .     |               |             |               |                |              |
| 50                                        | 40-44     | Former        | 0    | .     |               |             | .             | 0              | .            |
| Year of Follow-up: 2040, Age Group: 45-49 |           |               |      |       |               |             |               |                |              |
| Period                                    | Age Group | Smoking Group | N    | %     | Ever Quit (N) | Ever Quit % | Mean Yrs Quit | Short Term (n) | Short Term % |
| 50                                        | 45-49     | Never Any     | 0    | .     |               |             |               |                |              |
| 50                                        | 45-49     | CC            | 0    | .     | 0             | .           |               |                |              |
| 50                                        | 45-49     | Ecig          | 0    | .     |               |             |               |                |              |
| 50                                        | 45-49     | Dual          | 0    | .     |               |             |               |                |              |
| 50                                        | 45-49     | Former        | 0    | .     |               |             | .             | 0              | .            |
| Year of Follow-up: 2040, Age Group: 50-54 |           |               |      |       |               |             |               |                |              |
| Period                                    | Age Group | Smoking Group | N    | %     | Ever Quit (N) | Ever Quit % | Mean Yrs Quit | Short Term (n) | Short Term % |
| 50                                        | 50-54     | Never Any     | 0    | .     |               |             |               |                |              |
| 50                                        | 50-54     | CC            | 0    | .     | 0             | .           |               |                |              |
| 50                                        | 50-54     | Ecig          | 0    | .     |               |             |               |                |              |
| 50                                        | 50-54     | Dual          | 0    | .     |               |             |               |                |              |
| 50                                        | 50-54     | Former        | 0    | .     |               |             | .             | 0              | .            |
| Year of Follow-up: 2040, Age Group: 55-59 |           |               |      |       |               |             |               |                |              |
| Period                                    | Age Group | Smoking Group | N    | %     | Ever Quit (N) | Ever Quit % | Mean Yrs Quit | Short Term (n) | Short Term % |
| 50                                        | 55-59     | Never Any     | 0    | .     |               |             |               |                |              |
| 50                                        | 55-59     | CC            | 0    | .     | 0             | .           |               |                |              |
| 50                                        | 55-59     | Ecig          | 0    | .     |               |             |               |                |              |
| 50                                        | 55-59     | Dual          | 0    | .     |               |             |               |                |              |
| 50                                        | 55-59     | Former        | 0    | .     |               |             | .             | 0              | .            |
| Year of Follow-up: 2040, Age Group: 60-64 |           |               |      |       |               |             |               |                |              |
| Period                                    | Age Group | Smoking Group | N    | %     | Ever Quit (N) | Ever Quit % | Mean Yrs Quit | Short Term (n) | Short Term % |
| 50                                        | 60-64     | Never Any     | 4489 | 50.75 |               |             |               |                |              |
| 50                                        | 60-64     | CC            | 0    | 0.00  | 0             | 0.00        |               |                |              |
| 50                                        | 60-64     | Ecig          | 1263 | 14.28 |               |             |               |                |              |
| 50                                        | 60-64     | Dual          | 0    | 0.00  |               |             |               |                |              |
| 50                                        | 60-64     | Former        | 3093 | 34.97 |               |             | 27.37         | 126            | 4.07         |
| Year of Follow-up: 2040, Age Group: 65-69 |           |               |      |       |               |             |               |                |              |
| Period                                    | Age Group | Smoking Group | N    | %     | Ever Quit (N) | Ever Quit % | Mean Yrs Quit | Short Term (n) | Short Term % |
| 50                                        | 65-69     | Never Any     | 4991 | 55.21 |               |             |               |                |              |
| 50                                        | 65-69     | CC            | 0    | 0.00  | 0             | 0.00        |               |                |              |
| 50                                        | 65-69     | Ecig          | 1054 | 11.66 |               |             |               |                |              |
| 50                                        | 65-69     | Dual          | 0    | 0.00  |               |             |               |                |              |
| 50                                        | 65-69     | Former        | 2995 | 33.13 |               |             | 27.43         | 126            | 4.21         |
| Year of Follow-up: 2040, Age Group: 70-74 |           |               |      |       |               |             |               |                |              |
| Period                                    | Age Group | Smoking Group | N    | %     | Ever Quit (N) | Ever Quit % | Mean Yrs Quit | Short Term (n) | Short Term % |
| 50                                        | 70-74     | Never Any     | 5163 | 52.60 |               |             |               |                |              |
| 50                                        | 70-74     | CC            | 0    | 0.00  | 0             | 0.00        |               |                |              |
| 50                                        | 70-74     | Ecig          | 980  | 9.98  |               |             |               |                |              |
| 50                                        | 70-74     | Dual          | 0    | 0.00  |               |             |               |                |              |
| 50                                        | 70-74     | Former        | 3673 | 37.42 |               |             | 30.14         | 84             | 2.29         |
| Year of Follow-up: 2040, Age Group: 75-79 |           |               |      |       |               |             |               |                |              |
| Period                                    | Age Group | Smoking Group | N    | %     | Ever Quit (N) | Ever Quit % | Mean Yrs Quit | Short Term (n) | Short Term % |
| 50                                        | 75-79     | Never Any     | 4997 | 46.86 |               |             |               |                |              |
| 50                                        | 75-79     | CC            | 1    | 0.01  | 0             | 0.00        |               |                |              |
| 50                                        | 75-79     | Ecig          | 1001 | 9.39  |               |             |               |                |              |
| 50                                        | 75-79     | Dual          | 0    | 0.00  |               |             |               |                |              |
| 50                                        | 75-79     | Former        | 4665 | 43.75 |               |             | 33.19         | 94             | 2.02         |

## Results for PHIM for Run 3 (Sensitivity\_Analysis\_3.RTF)

\*\*\*\*\*

### Main Results for E-Component for Run: 3, Simulation: 1, COD: Four Diseases Combined

| Variable Parameter          | Value                                  |
|-----------------------------|----------------------------------------|
| 1. Country                  | US (United States)                     |
| 2. Sex                      | M (Males)                              |
| 3. Year of start of process | 1990                                   |
| 4. Cause of Death           | Four Diseases Combined                 |
| 5. Effective Dose NULL      | CC:1                                   |
| 6. Effective Dose Ecig      | CC:1 Ecig:0.05 Dual:0.525              |
| Note:                       | Death rates are per million population |

#### Results for Age Groups Combined and Years combined, Population unadjusted for deaths in Ecig scenario,

| Age Group:All | NULL     | Ecig        | %Drop       |         |        |        | NULL    | Ecig    | Drop    |         |
|---------------|----------|-------------|-------------|---------|--------|--------|---------|---------|---------|---------|
| Year          | Number   | Attrib      | Attrib      | Drop    | %Drop  | Attrib | Death   | Attrib  | Attrib  | Drop    |
|               | Deaths   | Deaths      | Deaths      | Deaths  | Deaths | Deaths | Rate    | Rates   | Rates   | Rates   |
| All Comb      | 13148871 | 4509390.583 | 3002954.890 | 1506436 | 11.457 | 33.407 | 3806.31 | 1305.37 | 869.290 | 436.081 |

#### Results for Age Groups Combined, Population unadjusted for deaths in Ecig scenario,

| Age Group:All | NULL   | Ecig       | %Drop      |          |        |        | NULL    | Ecig    | Drop    |         |
|---------------|--------|------------|------------|----------|--------|--------|---------|---------|---------|---------|
| Year          | Number | Attrib     | Attrib     | Drop     | %Drop  | Attrib | Death   | Attrib  | Attrib  | Drop    |
|               | Deaths | Deaths     | Deaths     | Deaths   | Deaths | Deaths | Rate    | Rates   | Rates   | Rates   |
| 1990          | 317161 | 125773.065 | 125773.065 | 0.000    | 0.000  | 0.000  | 5027.71 | 1993.78 | 1993.78 | 0.000   |
| 1991          | 313217 | 123999.442 | 123575.252 | 424.190  | 0.135  | 0.342  | 4883.81 | 1933.45 | 1926.84 | 6.614   |
| 1992          | 308577 | 122014.015 | 120877.521 | 1136.494 | 0.368  | 0.931  | 4729.73 | 1870.18 | 1852.76 | 17.420  |
| 1993          | 311713 | 122810.618 | 120676.279 | 2134.339 | 0.685  | 1.738  | 4692.62 | 1848.83 | 1816.70 | 32.131  |
| 1994          | 305700 | 119925.592 | 116644.610 | 3280.982 | 1.073  | 2.736  | 4516.19 | 1771.69 | 1723.22 | 48.471  |
| 1995          | 303225 | 117896.496 | 113274.763 | 4621.733 | 1.524  | 3.920  | 4393.80 | 1708.35 | 1641.38 | 66.970  |
| 1996          | 299559 | 115698.645 | 109600.772 | 6097.873 | 2.036  | 5.270  | 4273.16 | 1650.42 | 1563.44 | 86.985  |
| 1997          | 294226 | 113359.847 | 105776.737 | 7583.110 | 2.577  | 6.689  | 4128.67 | 1590.70 | 1484.29 | 106.409 |
| 1998          | 289258 | 111444.212 | 102372.538 | 9071.674 | 3.136  | 8.140  | 3992.19 | 1538.10 | 1412.89 | 125.203 |
| 1999          | 311002 | 114877.722 | 102745.506 | 12132.22 | 3.901  | 10.561 | 4224.60 | 1560.48 | 1395.68 | 164.802 |
| 2000          | 303786 | 112379.704 | 98539.778  | 13839.93 | 4.556  | 12.315 | 4066.21 | 1504.22 | 1318.97 | 185.249 |
| 2001          | 296294 | 110024.943 | 94360.435  | 15664.51 | 5.287  | 14.237 | 3914.28 | 1453.52 | 1246.58 | 206.941 |
| 2002          | 291898 | 108289.173 | 90577.236  | 17711.94 | 6.068  | 16.356 | 3813.00 | 1414.56 | 1183.19 | 231.367 |
| 2003          | 285865 | 106539.023 | 87018.811  | 19520.21 | 6.828  | 18.322 | 3695.36 | 1377.22 | 1124.89 | 252.336 |
| 2004          | 274177 | 103037.251 | 82196.151  | 20841.10 | 7.601  | 20.227 | 3506.10 | 1317.61 | 1051.10 | 266.510 |
| 2005          | 272379 | 103044.562 | 80299.555  | 22745.01 | 8.350  | 22.073 | 3442.69 | 1302.41 | 1014.93 | 287.482 |
| 2006          | 264118 | 99672.555  | 75307.767  | 24364.79 | 9.225  | 24.445 | 3307.76 | 1248.28 | 943.139 | 305.140 |
| 2007          | 258419 | 97839.152  | 72116.672  | 25722.48 | 9.954  | 26.291 | 3203.20 | 1212.75 | 893.912 | 318.839 |
| 2008          | 259461 | 98075.852  | 70632.115  | 27443.74 | 10.577 | 27.982 | 3180.09 | 1202.07 | 865.705 | 336.365 |
| 2009          | 253907 | 95617.338  | 66977.757  | 28639.58 | 11.280 | 29.952 | 3075.31 | 1158.11 | 811.232 | 346.882 |
| 2010          | 251878 | 94607.988  | 64625.862  | 29982.13 | 11.903 | 31.691 | 3013.72 | 1131.98 | 773.248 | 358.736 |
| 2011          | 251779 | 93633.119  | 62006.951  | 31626.17 | 12.561 | 33.777 | 2982.76 | 1109.25 | 734.581 | 374.668 |
| 2012          | 252643 | 92775.175  | 59541.126  | 33234.05 | 13.155 | 35.822 | 2960.61 | 1087.19 | 697.735 | 389.454 |
| 2013          | 256175 | 92345.780  | 57463.291  | 34882.49 | 13.617 | 37.774 | 2967.76 | 1069.82 | 665.706 | 404.110 |
| 2014          | 257393 | 91379.215  | 55125.245  | 36253.97 | 14.085 | 39.674 | 2947.05 | 1046.26 | 631.163 | 415.094 |
| 2015          | 259782 | 90750.242  | 53262.421  | 37487.82 | 14.430 | 41.309 | 3346.10 | 1168.90 | 686.042 | 482.859 |
| 2016          | 261453 | 88811.996  | 50055.534  | 38756.46 | 14.823 | 43.639 | 3336.15 | 1133.24 | 638.711 | 494.534 |
| 2017          | 263685 | 87325.126  | 47451.762  | 39873.36 | 15.122 | 45.661 | 3333.85 | 1104.08 | 599.948 | 504.131 |
| 2018          | 258714 | 87612.144  | 46740.213  | 40871.93 | 15.798 | 46.651 | 3240.73 | 1097.46 | 585.482 | 511.974 |
| 2019          | 261438 | 87797.760  | 45450.722  | 42347.04 | 16.198 | 48.232 | 3242.99 | 1089.08 | 563.791 | 525.291 |
| 2020          | 262288 | 87221.042  | 44030.719  | 43190.32 | 16.467 | 49.518 | 3715.29 | 1235.48 | 623.692 | 611.787 |
| 2021          | 255079 | 82001.292  | 39273.260  | 42728.03 | 16.751 | 52.107 | 3587.82 | 1153.39 | 552.398 | 600.991 |
| 2022          | 257097 | 81915.977  | 37834.368  | 44081.61 | 17.146 | 53.813 | 3588.53 | 1143.37 | 528.088 | 615.287 |
| 2023          | 259080 | 81810.810  | 36437.065  | 45373.74 | 17.513 | 55.462 | 3586.88 | 1132.64 | 504.460 | 628.185 |
| 2024          | 260719 | 81528.303  | 35051.869  | 46476.43 | 17.826 | 57.007 | 3579.65 | 1119.38 | 481.260 | 638.118 |
| 2025          | 257308 | 79599.213  | 33403.642  | 46195.57 | 17.953 | 58.035 | 4112.08 | 1272.09 | 533.829 | 738.259 |
| 2026          | 251528 | 75082.462  | 29753.663  | 45328.80 | 18.021 | 60.372 | 4003.24 | 1194.99 | 473.550 | 721.439 |
| 2027          | 250988 | 74444.425  | 28302.436  | 46141.99 | 18.384 | 61.982 | 3976.53 | 1179.46 | 448.410 | 731.051 |
| 2028          | 250285 | 73699.585  | 26779.492  | 46920.09 | 18.747 | 63.664 | 3945.35 | 1161.76 | 422.137 | 739.622 |
| 2029          | 249525 | 72819.703  | 25316.889  | 47502.81 | 19.037 | 65.233 | 3910.99 | 1141.36 | 396.810 | 744.546 |
| 2030          | 240528 | 69309.277  | 23622.937  | 45686.34 | 18.994 | 65.917 | 4504.36 | 1297.95 | 442.385 | 855.565 |
| 2031          | 235442 | 65433.368  | 21013.049  | 44420.32 | 18.867 | 67.886 | 4397.65 | 1222.18 | 392.487 | 829.694 |
| 2032          | 234017 | 64643.552  | 19813.078  | 44830.47 | 19.157 | 69.350 | 4356.12 | 1203.31 | 368.811 | 834.498 |
| 2033          | 232559 | 63793.514  | 18687.035  | 45106.48 | 19.396 | 70.707 | 4310.93 | 1182.54 | 346.400 | 836.136 |
| 2034          | 230963 | 63032.151  | 17622.464  | 45409.69 | 19.661 | 72.042 | 4260.75 | 1162.80 | 325.094 | 837.706 |
| 2035          | 215822 | 57653.301  | 16068.252  | 41585.05 | 19.268 | 72.130 | 4924.38 | 1315.47 | 366.628 | 948.843 |
| 2036          | 208183 | 52988.733  | 13553.926  | 39434.81 | 18.942 | 74.421 | 4748.94 | 1208.75 | 309.184 | 899.562 |
| 2037          | 205491 | 52026.921  | 12634.899  | 39392.02 | 19.170 | 75.715 | 4682.40 | 1185.50 | 287.903 | 897.600 |
| 2038          | 202834 | 50943.211  | 11729.791  | 39213.42 | 19.333 | 76.975 | 4612.18 | 1158.38 | 266.720 | 891.663 |
| 2039          | 200251 | 50085.991  | 10959.610  | 39126.38 | 19.539 | 78.118 | 4538.65 | 1135.19 | 248.398 | 886.793 |

## Results for PHIM for Run 3 (Sensitivity\_Analysis\_3.RTF)

\*\*\*\*\*

### Main Results for E-Component for Run: 3, Simulation: 1, COD: LUNG CANCER

| Variable Parameter          | Value                                  |
|-----------------------------|----------------------------------------|
| 1. Country                  | US (United States)                     |
| 2. Sex                      | M (Males)                              |
| 3. Year of start of process | 1990                                   |
| 4. Cause of Death           | LUNG CANCER                            |
| 5. Effective Dose NULL      | CC:1                                   |
| 6. Effective Dose Ecig      | CC:1 Ecig:0.05 Dual:0.525              |
| Note:                       | Death rates are per million population |

#### Results for Age Groups Combined and Years combined, Population unadjusted for deaths in Ecig scenario,

| Age Group:All |         | NULL        | Ecig        | %Drop    |        |        | NULL    | Ecig    | Drop    |         |
|---------------|---------|-------------|-------------|----------|--------|--------|---------|---------|---------|---------|
| Year          | Number  | Attrib      | Attrib      | Drop     | %Drop  | Attrib | Death   | Attrib  | Attrib  | Drop    |
|               | Deaths  | Deaths      | Deaths      | Deaths   | Deaths | Deaths | Rate    | Rates   | Rates   | Rates   |
| All Comb      | 3065988 | 2244988.113 | 1731520.944 | 513467.2 | 16.747 | 22.872 | 887.537 | 649.875 | 501.238 | 148.638 |

#### Results for Age Groups Combined, Population unadjusted for deaths in Ecig scenario,

| Age Group:All |        | NULL      | Ecig      | %Drop    |        |        | NULL    | Ecig    | Drop    |         |
|---------------|--------|-----------|-----------|----------|--------|--------|---------|---------|---------|---------|
| Year          | Number | Attrib    | Attrib    | Drop     | %Drop  | Attrib | Death   | Attrib  | Attrib  | Drop    |
|               | Deaths | Deaths    | Deaths    | Deaths   | Deaths | Deaths | Rate    | Rates   | Rates   | Rates   |
| 1990          | 78822  | 63385.736 | 63385.736 | 0.000    | 0.000  | 0.000  | 1249.50 | 1004.81 | 1004.81 | 0.000   |
| 1991          | 78462  | 62918.402 | 62870.284 | 48.118   | 0.061  | 0.076  | 1223.41 | 981.049 | 980.299 | 0.750   |
| 1992          | 77987  | 62366.766 | 62237.604 | 129.162  | 0.166  | 0.207  | 1195.35 | 955.930 | 953.950 | 1.980   |
| 1993          | 78542  | 62652.888 | 62398.634 | 254.253  | 0.324  | 0.406  | 1182.39 | 943.195 | 939.367 | 3.828   |
| 1994          | 77437  | 61565.227 | 61164.135 | 401.092  | 0.518  | 0.651  | 1144.00 | 909.520 | 903.595 | 5.925   |
| 1995          | 76904  | 60851.961 | 60268.494 | 583.467  | 0.759  | 0.959  | 1114.36 | 881.759 | 873.304 | 8.455   |
| 1996          | 76232  | 60122.922 | 59309.741 | 813.181  | 1.067  | 1.353  | 1087.44 | 857.643 | 846.043 | 11.600  |
| 1997          | 75473  | 59237.155 | 58177.087 | 1060.068 | 1.405  | 1.790  | 1059.06 | 831.234 | 816.359 | 14.875  |
| 1998          | 75381  | 58906.696 | 57540.370 | 1366.326 | 1.813  | 2.319  | 1040.37 | 813.001 | 794.143 | 18.857  |
| 1999          | 73159  | 56930.073 | 55263.139 | 1666.934 | 2.279  | 2.928  | 993.781 | 773.329 | 750.686 | 22.643  |
| 2000          | 73784  | 57137.121 | 55078.573 | 2058.548 | 2.790  | 3.603  | 987.608 | 764.787 | 737.233 | 27.554  |
| 2001          | 73294  | 56481.726 | 53981.611 | 2500.115 | 3.411  | 4.426  | 968.273 | 746.169 | 713.141 | 33.029  |
| 2002          | 72442  | 55588.365 | 52624.353 | 2964.013 | 4.092  | 5.332  | 946.293 | 726.138 | 687.420 | 38.718  |
| 2003          | 71942  | 54945.856 | 51468.381 | 3477.475 | 4.834  | 6.329  | 929.989 | 710.281 | 665.328 | 44.953  |
| 2004          | 71301  | 54203.126 | 50160.440 | 4042.686 | 5.670  | 7.458  | 911.778 | 693.135 | 641.438 | 51.697  |
| 2005          | 70964  | 53744.603 | 49117.716 | 4626.887 | 6.520  | 8.609  | 896.937 | 679.296 | 620.815 | 58.481  |
| 2006          | 69658  | 52535.572 | 47295.976 | 5239.595 | 7.522  | 9.973  | 872.383 | 657.945 | 592.325 | 65.620  |
| 2007          | 68565  | 51492.124 | 45647.722 | 5844.402 | 8.524  | 11.350 | 849.888 | 638.264 | 565.820 | 72.443  |
| 2008          | 68226  | 51030.736 | 44452.731 | 6578.005 | 9.641  | 12.890 | 836.215 | 625.460 | 544.837 | 80.624  |
| 2009          | 67509  | 50276.199 | 42965.656 | 7310.543 | 10.829 | 14.541 | 817.667 | 608.943 | 520.398 | 88.545  |
| 2010          | 67196  | 49840.933 | 41796.475 | 8044.457 | 11.972 | 16.140 | 804.000 | 596.347 | 500.095 | 96.252  |
| 2011          | 66506  | 49072.841 | 40220.905 | 8851.936 | 13.310 | 18.038 | 787.880 | 581.354 | 476.487 | 104.867 |
| 2012          | 66155  | 48539.512 | 38822.122 | 9717.390 | 14.689 | 20.020 | 775.240 | 568.812 | 454.939 | 113.874 |
| 2013          | 65333  | 47675.741 | 37188.469 | 10487.27 | 16.052 | 21.997 | 756.876 | 552.318 | 430.824 | 121.494 |
| 2014          | 65033  | 47194.534 | 35906.839 | 11287.69 | 17.357 | 23.917 | 744.602 | 540.359 | 411.119 | 129.240 |
| 2015          | 64145  | 46305.842 | 34323.564 | 11982.28 | 18.680 | 25.876 | 826.215 | 596.439 | 442.102 | 154.337 |
| 2016          | 61618  | 44208.867 | 31826.237 | 12382.63 | 20.096 | 28.009 | 786.248 | 564.107 | 406.104 | 158.003 |
| 2017          | 59897  | 42702.624 | 29852.900 | 12849.72 | 21.453 | 30.091 | 757.297 | 539.903 | 377.440 | 162.463 |
| 2018          | 62468  | 44321.202 | 29895.101 | 14426.10 | 23.094 | 32.549 | 782.490 | 555.181 | 374.475 | 180.706 |
| 2019          | 63045  | 44493.088 | 29019.386 | 15473.70 | 24.544 | 34.778 | 782.035 | 551.912 | 359.969 | 191.943 |
| 2020          | 63466  | 44529.551 | 28081.218 | 16448.33 | 25.917 | 36.938 | 898.991 | 630.757 | 397.768 | 232.989 |
| 2021          | 57113  | 39852.556 | 24186.393 | 15666.16 | 27.430 | 39.310 | 803.323 | 560.546 | 340.194 | 220.352 |
| 2022          | 57440  | 39853.685 | 23217.089 | 16636.60 | 28.963 | 41.744 | 801.745 | 556.274 | 324.062 | 232.212 |
| 2023          | 57738  | 39847.050 | 22259.091 | 17587.96 | 30.462 | 44.139 | 799.366 | 551.670 | 308.170 | 243.500 |
| 2024          | 57942  | 39726.010 | 21294.315 | 18431.70 | 31.811 | 46.397 | 795.539 | 545.435 | 292.370 | 253.066 |
| 2025          | 57521  | 39207.348 | 20213.294 | 18994.05 | 33.021 | 48.445 | 919.257 | 626.579 | 323.032 | 303.547 |
| 2026          | 51428  | 34803.960 | 17155.963 | 17648.00 | 34.316 | 50.707 | 818.510 | 553.929 | 273.049 | 280.880 |
| 2027          | 51172  | 34484.595 | 16198.419 | 18286.18 | 35.735 | 53.027 | 810.740 | 546.357 | 256.640 | 289.717 |
| 2028          | 50870  | 34100.638 | 15214.136 | 18886.50 | 37.127 | 55.385 | 801.884 | 537.544 | 239.827 | 297.716 |
| 2029          | 50540  | 33669.838 | 14279.161 | 19390.68 | 38.367 | 57.591 | 792.146 | 527.732 | 223.808 | 303.924 |
| 2030          | 49109  | 32557.688 | 13255.292 | 19302.40 | 39.305 | 59.287 | 919.662 | 609.705 | 248.231 | 361.474 |
| 2031          | 43585  | 28646.393 | 11112.929 | 17533.46 | 40.228 | 61.207 | 814.096 | 535.065 | 207.570 | 327.495 |
| 2032          | 43163  | 28227.160 | 10390.216 | 17836.94 | 41.325 | 63.191 | 803.454 | 525.435 | 193.409 | 332.026 |
| 2033          | 42725  | 27786.623 | 9716.956  | 18069.67 | 42.293 | 65.030 | 791.996 | 515.079 | 180.123 | 334.956 |
| 2034          | 42256  | 27348.299 | 9090.082  | 18258.22 | 43.209 | 66.762 | 779.523 | 504.514 | 167.691 | 336.823 |
| 2035          | 39748  | 25570.077 | 8244.667  | 17325.41 | 43.588 | 67.757 | 906.933 | 583.430 | 188.118 | 395.312 |
| 2036          | 34030  | 21717.319 | 6524.214  | 15193.11 | 44.646 | 69.958 | 776.269 | 495.402 | 148.826 | 346.576 |
| 2037          | 33454  | 21256.024 | 6045.223  | 15210.80 | 45.468 | 71.560 | 762.289 | 484.347 | 137.748 | 346.598 |
| 2038          | 32883  | 20747.175 | 5583.522  | 15163.65 | 46.114 | 73.088 | 747.720 | 471.764 | 126.962 | 344.802 |
| 2039          | 32325  | 20327.688 | 5198.380  | 15129.31 | 46.804 | 74.427 | 732.644 | 460.724 | 117.820 | 342.903 |

## Results for PHIM for Run 3 (Sensitivity\_Analysis\_3.RTF)

\*\*\*\*\*

### Main Results for E-Component for Run: 3, Simulation: 1, COD: IHD

| Variable Parameter          | Value                                  |
|-----------------------------|----------------------------------------|
| 1. Country                  | US (United States)                     |
| 2. Sex                      | M (Males)                              |
| 3. Year of start of process | 1990                                   |
| 4. Cause of Death           | IHD                                    |
| 5. Effective Dose NULL      | CC:1                                   |
| 6. Effective Dose Ecig      | CC:1 Ecig:0.05 Dual:0.525              |
| Note:                       | Death rates are per million population |

#### Results for Age Groups Combined and Years combined, Population unadjusted for deaths in Ecig scenario,

| Age Group:All |         | NULL        | Ecig       | %Drop    |        |        | NULL    | Ecig    | Drop    |         |
|---------------|---------|-------------|------------|----------|--------|--------|---------|---------|---------|---------|
| Year          | Number  | Attrib      | Attrib     | Drop     | %Drop  | Attrib | Death   | Attrib  | Drop    |         |
|               | Deaths  | Deaths      | Deaths     | Deaths   | Deaths | Deaths | Rate    | Rates   | Rates   |         |
| All Comb      | 6360041 | 1098877.421 | 520754.837 | 578122.6 | 9.090  | 52.610 | 1841.09 | 318.101 | 150.747 | 167.354 |

#### Results for Age Groups Combined, Population unadjusted for deaths in Ecig scenario,

| Age Group:All |        | NULL      | Ecig      | %Drop    |        |        | NULL    | Ecig    | Drop    |         |
|---------------|--------|-----------|-----------|----------|--------|--------|---------|---------|---------|---------|
| Year          | Number | Attrib    | Attrib    | Drop     | %Drop  | Attrib | Death   | Attrib  | Drop    |         |
|               | Deaths | Deaths    | Deaths    | Deaths   | Deaths | Deaths | Rate    | Rates   | Rates   |         |
| 1990          | 171484 | 38511.725 | 38511.725 | 0.000    | 0.000  | 0.000  | 2718.40 | 610.497 | 0.000   |         |
| 1991          | 168044 | 37309.838 | 36996.011 | 313.827  | 0.187  | 0.841  | 2620.21 | 581.750 | 576.857 | 4.893   |
| 1992          | 164548 | 36137.488 | 35293.152 | 844.336  | 0.513  | 2.336  | 2522.12 | 553.899 | 540.958 | 12.942  |
| 1993          | 164362 | 35599.588 | 34036.668 | 1562.920 | 0.951  | 4.390  | 2474.35 | 535.926 | 512.398 | 23.529  |
| 1994          | 159866 | 34336.757 | 31951.921 | 2384.836 | 1.492  | 6.945  | 2361.75 | 507.267 | 472.035 | 35.232  |
| 1995          | 158083 | 33455.759 | 30122.201 | 3333.558 | 2.109  | 9.964  | 2290.66 | 484.782 | 436.478 | 48.304  |
| 1996          | 154875 | 32193.824 | 27854.145 | 4339.679 | 2.802  | 13.480 | 2209.26 | 459.239 | 397.334 | 61.905  |
| 1997          | 149970 | 30665.509 | 25351.469 | 5314.041 | 3.543  | 17.329 | 2104.43 | 430.308 | 355.740 | 74.568  |
| 1998          | 145407 | 29188.430 | 22962.678 | 6225.753 | 4.282  | 21.330 | 2006.83 | 402.844 | 316.919 | 85.925  |
| 1999          | 165952 | 33375.386 | 24715.348 | 8660.037 | 5.218  | 25.947 | 2254.27 | 453.366 | 335.729 | 117.637 |
| 2000          | 160260 | 32024.754 | 22330.485 | 9694.269 | 6.049  | 30.271 | 2145.10 | 428.655 | 298.896 | 129.759 |
| 2001          | 154444 | 30682.393 | 19915.308 | 10767.09 | 6.972  | 35.092 | 2040.33 | 405.339 | 263.097 | 142.242 |
| 2002          | 151887 | 30218.370 | 18193.394 | 12024.98 | 7.917  | 39.794 | 1984.06 | 394.736 | 237.656 | 157.079 |
| 2003          | 146733 | 29175.202 | 16224.414 | 12950.79 | 8.826  | 44.390 | 1896.81 | 377.146 | 209.732 | 167.414 |
| 2004          | 138381 | 27488.687 | 14060.864 | 13427.82 | 9.704  | 48.849 | 1769.58 | 351.518 | 179.807 | 171.711 |
| 2005          | 135881 | 27017.439 | 12728.080 | 14289.36 | 10.516 | 52.889 | 1717.44 | 341.482 | 160.874 | 180.608 |
| 2006          | 131922 | 26231.435 | 11210.210 | 15021.23 | 11.386 | 57.264 | 1652.16 | 328.517 | 140.394 | 188.123 |
| 2007          | 126502 | 25103.049 | 9777.209  | 15325.84 | 12.115 | 61.052 | 1568.04 | 311.161 | 121.192 | 189.969 |
| 2008          | 125859 | 24621.740 | 8820.338  | 15801.40 | 12.555 | 64.177 | 1542.60 | 301.777 | 108.107 | 193.671 |
| 2009          | 122428 | 23741.177 | 7791.729  | 15949.45 | 13.028 | 67.181 | 1482.84 | 287.552 | 94.373  | 193.179 |
| 2010          | 120537 | 23189.160 | 6994.080  | 16195.08 | 13.436 | 69.839 | 1442.22 | 277.458 | 83.684  | 193.774 |
| 2011          | 120221 | 22786.927 | 6252.299  | 16534.63 | 13.754 | 72.562 | 1424.23 | 269.951 | 74.069  | 195.882 |
| 2012          | 120927 | 22485.295 | 5651.336  | 16833.96 | 13.921 | 74.867 | 1417.09 | 263.495 | 66.225  | 197.269 |
| 2013          | 122648 | 22251.884 | 5147.211  | 17104.67 | 13.946 | 76.868 | 1420.86 | 257.786 | 59.630  | 198.156 |
| 2014          | 123229 | 21894.593 | 4668.826  | 17225.77 | 13.979 | 78.676 | 1410.92 | 250.685 | 53.456  | 197.228 |
| 2015          | 123774 | 21471.109 | 4252.983  | 17218.13 | 13.911 | 80.192 | 1594.26 | 276.557 | 54.780  | 221.777 |
| 2016          | 126218 | 21411.568 | 3886.559  | 17525.01 | 13.885 | 81.848 | 1610.55 | 273.213 | 49.593  | 223.620 |
| 2017          | 128265 | 21169.399 | 3557.036  | 17612.36 | 13.731 | 83.197 | 1621.69 | 267.651 | 44.973  | 222.679 |
| 2018          | 121429 | 19830.576 | 3059.193  | 16771.38 | 13.812 | 84.573 | 1521.05 | 248.404 | 38.320  | 210.083 |
| 2019          | 121832 | 19431.014 | 2805.355  | 16625.66 | 13.646 | 85.562 | 1511.26 | 241.031 | 34.799  | 206.232 |
| 2020          | 120811 | 18532.612 | 2521.370  | 16011.24 | 13.253 | 86.395 | 1711.27 | 262.513 | 35.715  | 226.798 |
| 2021          | 119407 | 18234.128 | 2292.416  | 15941.71 | 13.351 | 87.428 | 1679.51 | 256.472 | 32.244  | 224.228 |
| 2022          | 119438 | 17812.559 | 2099.433  | 15713.13 | 13.156 | 88.214 | 1667.10 | 248.626 | 29.304  | 219.322 |
| 2023          | 119445 | 17361.668 | 1924.646  | 15437.02 | 12.924 | 88.914 | 1653.68 | 240.367 | 26.646  | 213.721 |
| 2024          | 119305 | 16929.676 | 1784.879  | 15144.80 | 12.694 | 89.457 | 1638.05 | 232.443 | 24.506  | 207.937 |
| 2025          | 115685 | 15501.666 | 1570.118  | 13931.55 | 12.043 | 89.871 | 1848.78 | 247.735 | 25.092  | 222.642 |
| 2026          | 115073 | 15523.814 | 1494.975  | 14028.84 | 12.191 | 90.370 | 1831.46 | 247.072 | 23.794  | 223.279 |
| 2027          | 113989 | 15073.070 | 1400.270  | 13672.80 | 11.995 | 90.710 | 1805.98 | 238.810 | 22.185  | 216.625 |
| 2028          | 112855 | 14636.710 | 1305.191  | 13331.52 | 11.813 | 91.083 | 1778.98 | 230.725 | 20.574  | 210.151 |
| 2029          | 111718 | 14180.166 | 1225.007  | 12955.16 | 11.596 | 91.361 | 1751.04 | 222.256 | 19.200  | 203.056 |
| 2030          | 104851 | 12111.772 | 1021.752  | 11090.02 | 10.577 | 91.564 | 1963.54 | 226.816 | 19.134  | 207.682 |
| 2031          | 105289 | 12417.367 | 1029.965  | 11387.40 | 10.815 | 91.705 | 1966.62 | 231.935 | 19.238  | 212.697 |
| 2032          | 103879 | 12054.064 | 979.038   | 11075.03 | 10.661 | 91.878 | 1933.67 | 224.381 | 18.224  | 206.156 |
| 2033          | 102485 | 11672.389 | 924.808   | 10747.58 | 10.487 | 92.077 | 1899.76 | 216.370 | 17.143  | 199.227 |
| 2034          | 101070 | 11365.762 | 886.043   | 10479.72 | 10.369 | 92.204 | 1864.51 | 209.673 | 16.345  | 193.327 |
| 2035          | 90820  | 8580.360  | 652.862   | 7927.498 | 8.729  | 92.391 | 2072.23 | 195.777 | 14.896  | 180.881 |
| 2036          | 92117  | 8948.841  | 671.363   | 8277.478 | 8.986  | 92.498 | 2101.31 | 204.135 | 15.315  | 188.821 |
| 2037          | 90327  | 8624.570  | 646.873   | 7977.697 | 8.832  | 92.500 | 2058.21 | 196.522 | 14.740  | 181.782 |
| 2038          | 88590  | 8315.017  | 615.848   | 7699.169 | 8.691  | 92.594 | 2014.42 | 189.073 | 14.004  | 175.069 |
| 2039          | 86921  | 8001.132  | 585.753   | 7415.378 | 8.531  | 92.679 | 1970.05 | 181.344 | 13.276  | 168.068 |

## Results for PHIM for Run 3 (Sensitivity\_Analysis\_3.RTF)

\*\*\*\*\*

### Main Results for E-Component for Run: 3, Simulation: 1, COD: STROKE

| Variable Parameter          | Value                                  |
|-----------------------------|----------------------------------------|
| 1. Country                  | US (United States)                     |
| 2. Sex                      | M (Males)                              |
| 3. Year of start of process | 1990                                   |
| 4. Cause of Death           | STROKE                                 |
| 5. Effective Dose NULL      | CC:1                                   |
| 6. Effective Dose Ecig      | CC:1 Ecig:0.05 Dual:0.525              |
| Note:                       | Death rates are per million population |

#### Results for Age Groups Combined and Years combined, Population unadjusted for deaths in Ecig scenario,

| Age Group:All |         | NULL       | Ecig      | %Drop    |        | NULL   | Ecig    | Drop   |        |        |
|---------------|---------|------------|-----------|----------|--------|--------|---------|--------|--------|--------|
| Year          | Number  | Attrib     | Attrib    | Drop     | %Drop  | Attrib | Death   | Attrib | Drop   |        |
|               | Deaths  | Deaths     | Deaths    | Deaths   | Deaths | Deaths | Rate    | Rates  | Rates  |        |
| All Comb      | 1489699 | 149918.462 | 70251.296 | 79667.17 | 5.348  | 53.140 | 431.236 | 43.398 | 20.336 | 23.062 |

#### Results for Age Groups Combined, Population unadjusted for deaths in Ecig scenario,

| Age Group:All |        | NULL     | Ecig     | %Drop    |        | NULL   | Ecig    | Drop   |        |        |
|---------------|--------|----------|----------|----------|--------|--------|---------|--------|--------|--------|
| Year          | Number | Attrib   | Attrib   | Drop     | %Drop  | Attrib | Death   | Attrib | Drop   |        |
|               | Deaths | Deaths   | Deaths   | Deaths   | Deaths | Deaths | Rate    | Rates  | Rates  |        |
| 1990          | 32862  | 4613.166 | 4613.166 | 0.000    | 0.000  | 0.000  | 520.936 | 73.129 | 0.000  |        |
| 1991          | 32619  | 4555.566 | 4515.509 | 40.057   | 0.123  | 0.879  | 508.609 | 71.032 | 70.408 | 0.625  |
| 1992          | 32100  | 4453.572 | 4348.527 | 105.045  | 0.327  | 2.359  | 492.014 | 68.262 | 66.652 | 1.610  |
| 1993          | 32896  | 4462.473 | 4264.035 | 198.438  | 0.603  | 4.447  | 495.226 | 67.179 | 64.192 | 2.987  |
| 1994          | 33323  | 4499.513 | 4186.362 | 313.151  | 0.940  | 6.960  | 492.290 | 66.473 | 61.846 | 4.626  |
| 1995          | 33569  | 4472.774 | 4028.853 | 443.921  | 1.322  | 9.925  | 486.422 | 64.812 | 58.379 | 6.433  |
| 1996          | 33870  | 4406.878 | 3818.455 | 588.423  | 1.737  | 13.352 | 483.150 | 62.863 | 54.470 | 8.394  |
| 1997          | 33516  | 4288.158 | 3553.200 | 734.958  | 2.193  | 17.139 | 470.307 | 60.173 | 49.860 | 10.313 |
| 1998          | 32795  | 4120.148 | 3251.409 | 868.739  | 2.649  | 21.085 | 452.620 | 56.864 | 44.874 | 11.990 |
| 1999          | 33375  | 3982.443 | 2980.608 | 1001.835 | 3.002  | 25.156 | 453.361 | 54.097 | 40.488 | 13.609 |
| 2000          | 33459  | 4021.411 | 2844.127 | 1177.285 | 3.519  | 29.275 | 447.853 | 53.827 | 38.069 | 15.758 |
| 2001          | 32275  | 3848.092 | 2552.966 | 1295.126 | 4.013  | 33.656 | 426.379 | 50.836 | 33.727 | 17.110 |
| 2002          | 31586  | 3783.081 | 2350.258 | 1432.823 | 4.536  | 37.874 | 412.601 | 49.418 | 30.701 | 18.717 |
| 2003          | 30985  | 3754.415 | 2169.120 | 1585.295 | 5.116  | 42.225 | 400.541 | 48.533 | 28.040 | 20.493 |
| 2004          | 29884  | 3666.274 | 1966.027 | 1700.247 | 5.689  | 46.375 | 382.149 | 46.883 | 25.141 | 21.742 |
| 2005          | 28708  | 3589.688 | 1780.080 | 1809.608 | 6.303  | 50.411 | 362.850 | 45.371 | 22.499 | 22.872 |
| 2006          | 28188  | 3596.985 | 1637.202 | 1959.783 | 6.953  | 54.484 | 353.021 | 45.048 | 20.504 | 24.544 |
| 2007          | 28026  | 3560.798 | 1490.129 | 2070.668 | 7.388  | 58.152 | 347.392 | 44.137 | 18.471 | 25.667 |
| 2008          | 27128  | 3417.001 | 1314.838 | 2102.163 | 7.749  | 61.521 | 332.495 | 41.881 | 16.115 | 25.765 |
| 2009          | 27068  | 3394.390 | 1200.685 | 2193.704 | 8.104  | 64.627 | 327.847 | 41.113 | 14.543 | 26.570 |
| 2010          | 26911  | 3340.137 | 1090.853 | 2249.285 | 8.358  | 67.341 | 321.990 | 39.965 | 13.052 | 26.913 |
| 2011          | 26959  | 3285.435 | 987.485  | 2297.950 | 8.524  | 69.944 | 319.377 | 38.922 | 11.698 | 27.223 |
| 2012          | 27057  | 3259.209 | 895.546  | 2363.663 | 8.736  | 72.523 | 317.068 | 38.193 | 10.494 | 27.699 |
| 2013          | 27904  | 3274.703 | 826.969  | 2447.734 | 8.772  | 74.747 | 323.265 | 37.937 | 9.580  | 28.357 |
| 2014          | 28792  | 3298.083 | 763.698  | 2534.385 | 8.802  | 76.844 | 329.657 | 37.762 | 8.744  | 29.018 |
| 2015          | 29560  | 3244.406 | 697.072  | 2547.334 | 8.618  | 78.515 | 380.745 | 41.789 | 8.979  | 32.811 |
| 2016          | 30513  | 3314.836 | 655.555  | 2659.282 | 8.715  | 80.224 | 389.347 | 42.297 | 8.365  | 33.933 |
| 2017          | 31416  | 3333.314 | 608.247  | 2725.067 | 8.674  | 81.752 | 397.202 | 42.144 | 7.690  | 34.454 |
| 2018          | 29348  | 2925.242 | 498.180  | 2427.061 | 8.270  | 82.970 | 367.626 | 36.642 | 6.240  | 30.402 |
| 2019          | 29598  | 2864.628 | 455.237  | 2409.391 | 8.140  | 84.108 | 367.149 | 35.534 | 5.647  | 29.887 |
| 2020          | 29592  | 2730.366 | 406.978  | 2323.389 | 7.851  | 85.094 | 419.174 | 38.675 | 5.765  | 32.911 |
| 2021          | 30097  | 2647.911 | 368.980  | 2278.931 | 7.572  | 86.065 | 423.328 | 37.244 | 5.190  | 32.054 |
| 2022          | 30304  | 2586.165 | 336.393  | 2249.771 | 7.424  | 86.993 | 422.974 | 36.097 | 4.695  | 31.402 |
| 2023          | 30505  | 2517.960 | 307.357  | 2210.604 | 7.247  | 87.793 | 422.337 | 34.860 | 4.255  | 30.605 |
| 2024          | 30661  | 2454.161 | 283.538  | 2170.623 | 7.080  | 88.447 | 420.968 | 33.695 | 3.893  | 29.803 |
| 2025          | 30254  | 2275.364 | 250.123  | 2025.241 | 6.694  | 89.007 | 483.488 | 36.363 | 3.997  | 32.366 |
| 2026          | 30685  | 2183.166 | 228.530  | 1954.636 | 6.370  | 89.532 | 488.380 | 34.747 | 3.637  | 31.109 |
| 2027          | 30561  | 2112.345 | 211.963  | 1900.382 | 6.218  | 89.966 | 484.196 | 33.467 | 3.358  | 30.109 |
| 2028          | 30412  | 2046.677 | 196.889  | 1849.787 | 6.083  | 90.380 | 479.392 | 32.263 | 3.104  | 29.159 |
| 2029          | 30254  | 1977.671 | 183.286  | 1794.386 | 5.931  | 90.732 | 474.195 | 30.997 | 2.873  | 28.125 |
| 2030          | 29330  | 1744.457 | 157.103  | 1587.354 | 5.412  | 90.994 | 549.260 | 32.668 | 2.942  | 29.726 |
| 2031          | 28976  | 1653.738 | 145.183  | 1508.555 | 5.206  | 91.221 | 541.223 | 30.889 | 2.712  | 28.177 |
| 2032          | 28724  | 1603.120 | 136.250  | 1466.870 | 5.107  | 91.501 | 534.690 | 29.841 | 2.536  | 27.305 |
| 2033          | 28464  | 1548.245 | 128.353  | 1419.892 | 4.988  | 91.710 | 527.627 | 28.700 | 2.379  | 26.320 |
| 2034          | 28178  | 1511.985 | 122.573  | 1389.412 | 4.931  | 91.893 | 519.826 | 27.893 | 2.261  | 25.632 |
| 2035          | 26737  | 1239.866 | 98.859   | 1141.007 | 4.267  | 92.027 | 610.065 | 28.290 | 2.256  | 26.034 |
| 2036          | 25591  | 1182.522 | 92.418   | 1090.104 | 4.260  | 92.185 | 583.762 | 26.975 | 2.108  | 24.867 |
| 2037          | 25143  | 1134.483 | 88.599   | 1045.884 | 4.160  | 92.190 | 572.916 | 25.851 | 2.019  | 23.832 |
| 2038          | 24693  | 1093.537 | 84.087   | 1009.450 | 4.088  | 92.311 | 561.491 | 24.866 | 1.912  | 22.954 |
| 2039          | 24247  | 1047.905 | 79.436   | 968.469  | 3.994  | 92.420 | 549.553 | 23.751 | 1.800  | 21.950 |

## Results for PHIM for Run 3 (Sensitivity\_Analysis\_3.RTF)

\*\*\*\*\*

### Main Results for E-Component for Run: 3, Simulation: 1, COD: COPD

| Variable Parameter          | Value                                  |
|-----------------------------|----------------------------------------|
| 1. Country                  | US (United States)                     |
| 2. Sex                      | M (Males)                              |
| 3. Year of start of process | 1990                                   |
| 4. Cause of Death           | COPD                                   |
| 5. Effective Dose NULL      | CC:1                                   |
| 6. Effective Dose Ecig      | CC:1 Ecig:0.05 Dual:0.525              |
| Note:                       | Death rates are per million population |

#### Results for Age Groups Combined and Years combined, Population unadjusted for deaths in Ecig scenario,

| Age Group:All |         | NULL        | Ecig       | %Drop    |        | NULL   | Ecig    | Drop    |         |        |
|---------------|---------|-------------|------------|----------|--------|--------|---------|---------|---------|--------|
| Year          | Number  | Attrib      | Attrib     | Drop     | %Drop  | Attrib | Death   | Attrib  | Attrib  | Drop   |
|               | Deaths  | Deaths      | Deaths     | Deaths   | Deaths | Deaths | Rate    | Rates   | Rates   | Rates  |
| All Comb      | 2233143 | 1015606.587 | 680427.813 | 335178.8 | 15.009 | 33.003 | 646.447 | 293.996 | 196.969 | 97.027 |

#### Results for Age Groups Combined, Population unadjusted for deaths in Ecig scenario,

| Age Group:All |        | NULL      | Ecig      | %Drop    |        | NULL   | Ecig    | Drop    |         |         |
|---------------|--------|-----------|-----------|----------|--------|--------|---------|---------|---------|---------|
| Year          | Number | Attrib    | Attrib    | Drop     | %Drop  | Attrib | Death   | Attrib  | Attrib  | Drop    |
|               | Deaths | Deaths    | Deaths    | Deaths   | Deaths | Deaths | Rate    | Rates   | Rates   | Rates   |
| 1990          | 33993  | 19262.437 | 19262.437 | 0.000    | 0.000  | 0.000  | 538.865 | 305.353 | 305.353 | 0.000   |
| 1991          | 34092  | 19215.636 | 19193.448 | 22.188   | 0.065  | 0.115  | 531.576 | 299.618 | 299.272 | 0.346   |
| 1992          | 33942  | 19056.189 | 18998.238 | 57.951   | 0.171  | 0.304  | 520.248 | 292.085 | 291.196 | 0.888   |
| 1993          | 35913  | 20095.670 | 19976.941 | 118.728  | 0.331  | 0.591  | 540.645 | 302.526 | 300.739 | 1.787   |
| 1994          | 35074  | 19524.095 | 19342.191 | 181.903  | 0.519  | 0.932  | 518.158 | 288.435 | 285.748 | 2.687   |
| 1995          | 34669  | 19116.002 | 18855.216 | 260.786  | 0.752  | 1.364  | 502.362 | 276.995 | 273.216 | 3.779   |
| 1996          | 34582  | 18975.021 | 18618.431 | 356.590  | 1.031  | 1.879  | 493.306 | 270.675 | 265.589 | 5.087   |
| 1997          | 35267  | 19169.025 | 18694.981 | 474.044  | 1.344  | 2.473  | 494.878 | 268.986 | 262.334 | 6.652   |
| 1998          | 35675  | 19228.937 | 18618.081 | 610.856  | 1.712  | 3.177  | 492.368 | 265.388 | 256.957 | 8.431   |
| 1999          | 38516  | 20589.820 | 19786.411 | 803.409  | 2.086  | 3.902  | 523.195 | 279.689 | 268.776 | 10.913  |
| 2000          | 36283  | 19196.417 | 18286.593 | 909.825  | 2.508  | 4.740  | 485.652 | 256.946 | 244.768 | 12.178  |
| 2001          | 36281  | 19012.731 | 17910.550 | 1102.181 | 3.038  | 5.797  | 479.301 | 251.174 | 236.613 | 14.561  |
| 2002          | 35983  | 18699.357 | 17409.230 | 1290.127 | 3.585  | 6.899  | 470.038 | 244.265 | 227.413 | 16.853  |
| 2003          | 36205  | 18663.550 | 17156.896 | 1506.654 | 4.161  | 8.073  | 468.019 | 241.262 | 221.786 | 19.476  |
| 2004          | 34611  | 17679.164 | 16008.820 | 1670.343 | 4.826  | 9.448  | 442.596 | 226.076 | 204.716 | 21.360  |
| 2005          | 36826  | 18692.832 | 16673.679 | 2019.153 | 5.483  | 10.802 | 465.456 | 236.265 | 210.744 | 25.521  |
| 2006          | 34350  | 17308.564 | 15164.379 | 2144.184 | 6.242  | 12.388 | 430.192 | 216.769 | 189.916 | 26.853  |
| 2007          | 35326  | 17683.181 | 15201.611 | 2481.570 | 7.025  | 14.034 | 437.879 | 219.189 | 188.429 | 30.760  |
| 2008          | 38248  | 19006.374 | 16044.209 | 2962.166 | 7.745  | 15.585 | 468.788 | 232.952 | 196.646 | 36.306  |
| 2009          | 36902  | 18205.573 | 15019.687 | 3185.885 | 8.633  | 17.500 | 446.956 | 220.505 | 181.918 | 38.587  |
| 2010          | 37234  | 18237.758 | 14744.453 | 3493.305 | 9.382  | 19.154 | 445.505 | 218.215 | 176.417 | 41.797  |
| 2011          | 38093  | 18487.916 | 14546.262 | 3941.655 | 10.347 | 21.320 | 451.279 | 219.022 | 172.326 | 46.696  |
| 2012          | 38504  | 18491.158 | 14172.123 | 4319.036 | 11.217 | 23.357 | 451.211 | 216.689 | 166.077 | 50.613  |
| 2013          | 40290  | 19143.452 | 14300.642 | 4842.810 | 12.020 | 25.297 | 466.755 | 221.775 | 165.671 | 56.103  |
| 2014          | 40339  | 18992.005 | 13785.881 | 5206.124 | 12.906 | 27.412 | 461.866 | 217.451 | 157.843 | 59.608  |
| 2015          | 42303  | 19728.885 | 13988.802 | 5740.083 | 13.569 | 29.095 | 544.880 | 254.116 | 180.182 | 73.935  |
| 2016          | 43104  | 19876.724 | 13687.184 | 6189.541 | 14.360 | 31.140 | 550.009 | 253.628 | 174.649 | 78.979  |
| 2017          | 44107  | 20119.790 | 13433.579 | 6686.211 | 15.159 | 33.232 | 557.659 | 254.381 | 169.845 | 84.536  |
| 2018          | 45469  | 20535.123 | 13287.738 | 7247.385 | 15.939 | 35.293 | 569.564 | 257.229 | 166.446 | 90.783  |
| 2019          | 46963  | 21009.029 | 13170.744 | 7838.285 | 16.690 | 37.309 | 582.552 | 260.605 | 163.376 | 97.230  |
| 2020          | 48419  | 21428.512 | 13021.153 | 8407.359 | 17.364 | 39.234 | 685.853 | 303.533 | 184.444 | 119.090 |
| 2021          | 48463  | 21266.697 | 12425.472 | 8841.225 | 18.243 | 41.573 | 681.652 | 299.127 | 174.770 | 124.356 |
| 2022          | 49915  | 21663.568 | 12181.453 | 9482.115 | 18.996 | 43.770 | 696.712 | 302.378 | 170.027 | 132.350 |
| 2023          | 51391  | 22084.131 | 11945.971 | 10138.16 | 19.728 | 45.907 | 711.491 | 305.748 | 165.388 | 140.360 |
| 2024          | 52811  | 22418.456 | 11689.138 | 10729.32 | 20.316 | 47.859 | 725.093 | 307.804 | 160.491 | 147.313 |
| 2025          | 53848  | 22614.834 | 11370.106 | 11244.73 | 20.882 | 49.723 | 860.553 | 361.411 | 181.707 | 179.704 |
| 2026          | 54342  | 22571.522 | 10874.194 | 11697.33 | 21.525 | 51.823 | 864.886 | 359.241 | 173.070 | 186.171 |
| 2027          | 55267  | 22774.416 | 10491.784 | 12282.63 | 22.224 | 53.932 | 875.619 | 360.827 | 166.227 | 194.600 |
| 2028          | 56149  | 22915.561 | 10063.276 | 12852.29 | 22.890 | 56.085 | 885.102 | 361.228 | 158.632 | 202.596 |
| 2029          | 57014  | 22992.027 | 9629.435  | 13362.59 | 23.438 | 58.118 | 893.616 | 360.371 | 150.929 | 209.442 |
| 2030          | 57238  | 22895.360 | 9188.791  | 13706.57 | 23.946 | 59.866 | 1071.90 | 428.760 | 172.078 | 256.682 |
| 2031          | 57592  | 22715.871 | 8724.972  | 13990.90 | 24.293 | 61.591 | 1075.71 | 424.293 | 162.967 | 261.326 |
| 2032          | 58251  | 22759.207 | 8307.574  | 14451.63 | 24.809 | 63.498 | 1084.31 | 423.652 | 154.641 | 269.010 |
| 2033          | 58885  | 22786.258 | 7916.919  | 14869.34 | 25.252 | 65.256 | 1091.54 | 422.387 | 146.755 | 275.632 |
| 2034          | 59460  | 22806.106 | 7523.767  | 15282.34 | 25.702 | 67.010 | 1096.89 | 420.721 | 138.796 | 281.924 |
| 2035          | 58516  | 22262.998 | 7071.863  | 15191.13 | 25.961 | 68.235 | 1335.15 | 507.973 | 161.358 | 346.615 |
| 2036          | 56446  | 21140.051 | 6265.931  | 14874.12 | 26.351 | 70.360 | 1287.60 | 482.234 | 142.934 | 339.299 |
| 2037          | 56568  | 21011.845 | 5854.203  | 15157.64 | 26.795 | 72.139 | 1288.98 | 478.783 | 133.396 | 345.387 |
| 2038          | 56668  | 20787.483 | 5446.334  | 15341.15 | 27.072 | 73.800 | 1288.55 | 472.681 | 123.843 | 348.838 |
| 2039          | 56758  | 20709.267 | 5096.040  | 15613.23 | 27.509 | 75.392 | 1286.40 | 469.372 | 115.501 | 353.871 |

## Results for PHIM for Run 3 (Sensitivity\_Analysis\_3.RTF)

\*\*\*\*\*

### Main Results for E-Component for Run: 3, Simulation: 1, COD: Four Diseases Combined, Adjusted

| Variable Parameter          | Value                                  |
|-----------------------------|----------------------------------------|
| 1. Country                  | US (United States)                     |
| 2. Sex                      | M (Males)                              |
| 3. Year of start of process | 1990                                   |
| 4. Cause of Death           | Four Diseases Combined                 |
| 5. Effective Dose NULL      | CC:1                                   |
| 6. Effective Dose Ecig      | CC:1 Ecig:0.05 Dual:0.525              |
| Note:                       | Death rates are per million population |

#### Results for Age Groups Combined and Years combined, Population and Number deaths adjusted for Ecig scenario,

| Age Group:All | NULL     | Ecig        |             |         |        |        | NULL    | Ecig    |         |         |
|---------------|----------|-------------|-------------|---------|--------|--------|---------|---------|---------|---------|
| Year          | Number   | Attrib      | Attrib      | Drop    | %Drop  | Attrib | Death   | Attrib  | Attrib  | Drop    |
|               | Deaths   | Deaths      | Deaths      | Deaths  | Deaths | Deaths | Rate    | Rates   | Rates   | Rates   |
| All Comb      | 13290159 | 4509390.583 | 3021060.715 | 1488330 | 11.199 | 33.005 | 3815.45 | 1305.37 | 867.312 | 438.058 |

#### Results for Age Groups Combined, Population and Number deaths adjusted for Ecig scenario,

| Age Group:All | NULL   | Ecig       |            |          |        |        | NULL    | Ecig    |         |         |
|---------------|--------|------------|------------|----------|--------|--------|---------|---------|---------|---------|
| Year          | Number | Attrib     | Attrib     | Drop     | %Drop  | Attrib | Death   | Attrib  | Attrib  | Drop    |
|               | Deaths | Deaths     | Deaths     | Deaths   | Deaths | Deaths | Rate    | Rates   | Rates   | Rates   |
| 1990          | 317161 | 125773.065 | 125773.065 | 0.000    | 0.000  | 0.000  | 5027.71 | 1993.78 | 1993.78 | 0.000   |
| 1991          | 313217 | 123999.442 | 123575.252 | 424.190  | 0.135  | 0.342  | 4883.81 | 1933.45 | 1926.84 | 6.614   |
| 1992          | 308580 | 122014.015 | 120878.639 | 1135.376 | 0.368  | 0.931  | 4729.74 | 1870.18 | 1852.76 | 17.415  |
| 1993          | 311723 | 122810.618 | 120680.264 | 2130.354 | 0.683  | 1.735  | 4692.65 | 1848.83 | 1816.71 | 32.115  |
| 1994          | 305723 | 119925.592 | 116653.775 | 3271.817 | 1.070  | 2.728  | 4516.28 | 1771.69 | 1723.26 | 48.434  |
| 1995          | 303268 | 117896.496 | 113291.382 | 4605.114 | 1.518  | 3.906  | 4393.95 | 1708.35 | 1641.44 | 66.904  |
| 1996          | 299629 | 115698.645 | 109627.300 | 6071.345 | 2.026  | 5.248  | 4273.40 | 1650.42 | 1563.54 | 86.881  |
| 1997          | 294330 | 113359.847 | 105815.701 | 7544.145 | 2.563  | 6.655  | 4129.04 | 1590.70 | 1484.45 | 106.256 |
| 1998          | 289404 | 111444.212 | 102426.434 | 9017.778 | 3.116  | 8.092  | 3992.71 | 1538.10 | 1413.11 | 124.990 |
| 1999          | 311218 | 114877.722 | 102819.561 | 12058.16 | 3.875  | 10.497 | 4225.39 | 1560.48 | 1395.98 | 164.504 |
| 2000          | 304071 | 112379.704 | 98635.680  | 13744.02 | 4.520  | 12.230 | 4067.26 | 1504.22 | 1319.35 | 184.862 |
| 2001          | 296653 | 110024.943 | 94479.054  | 15545.89 | 5.240  | 14.129 | 3915.60 | 1453.52 | 1247.05 | 206.465 |
| 2002          | 292344 | 108289.173 | 90720.782  | 17568.39 | 6.009  | 16.224 | 3814.65 | 1414.56 | 1183.77 | 230.788 |
| 2003          | 286404 | 106539.023 | 87188.676  | 19350.35 | 6.756  | 18.163 | 3697.36 | 1377.22 | 1125.57 | 251.652 |
| 2004          | 274803 | 103037.251 | 82390.109  | 20647.14 | 7.513  | 20.039 | 3508.44 | 1317.61 | 1051.88 | 265.729 |
| 2005          | 273118 | 103044.562 | 80524.263  | 22520.30 | 8.246  | 21.855 | 3445.46 | 1302.41 | 1015.84 | 286.577 |
| 2006          | 264958 | 99672.555  | 75554.468  | 24118.09 | 9.103  | 24.197 | 3310.93 | 1248.28 | 944.134 | 304.145 |
| 2007          | 259372 | 97839.152  | 72390.086  | 25449.07 | 9.812  | 26.011 | 3206.82 | 1212.75 | 895.016 | 317.736 |
| 2008          | 260558 | 98075.852  | 70938.657  | 27137.19 | 10.415 | 27.670 | 3184.28 | 1202.07 | 866.943 | 335.128 |
| 2009          | 255128 | 95617.338  | 67308.539  | 28308.80 | 11.096 | 29.606 | 3080.01 | 1158.11 | 812.574 | 345.539 |
| 2010          | 253241 | 94607.988  | 64985.476  | 29622.51 | 11.697 | 31.311 | 3018.97 | 1131.98 | 774.713 | 357.271 |
| 2011          | 253302 | 93633.119  | 62392.796  | 31240.32 | 12.333 | 33.365 | 2988.69 | 1109.25 | 736.168 | 373.081 |
| 2012          | 254341 | 92775.175  | 59952.644  | 32822.53 | 12.905 | 35.379 | 2967.27 | 1087.19 | 699.437 | 387.753 |
| 2013          | 258080 | 92345.780  | 57902.900  | 34442.88 | 13.346 | 37.298 | 2975.30 | 1069.82 | 667.539 | 402.277 |
| 2014          | 259500 | 91379.215  | 55590.393  | 35788.82 | 13.791 | 39.165 | 2955.45 | 1046.26 | 633.120 | 413.137 |
| 2015          | 262120 | 90750.242  | 53755.238  | 36995.00 | 14.114 | 40.766 | 3354.41 | 1168.90 | 687.917 | 480.984 |
| 2016          | 264016 | 88811.996  | 50560.877  | 38251.12 | 14.488 | 43.070 | 3345.36 | 1133.24 | 640.659 | 492.586 |
| 2017          | 266495 | 87325.126  | 47972.340  | 39352.79 | 14.767 | 45.065 | 3344.10 | 1104.08 | 601.980 | 502.099 |
| 2018          | 261685 | 87612.144  | 47294.799  | 40317.34 | 15.407 | 46.018 | 3251.61 | 1097.46 | 587.669 | 509.788 |
| 2019          | 264675 | 87797.760  | 46032.746  | 41765.01 | 15.780 | 47.570 | 3254.99 | 1089.08 | 566.115 | 522.967 |
| 2020          | 265804 | 87221.042  | 44638.995  | 42582.05 | 16.020 | 48.821 | 3726.29 | 1235.48 | 625.791 | 609.688 |
| 2021          | 258731 | 82001.292  | 39855.589  | 42145.70 | 16.289 | 51.396 | 3599.36 | 1153.39 | 554.455 | 598.934 |
| 2022          | 261020 | 81915.977  | 38432.920  | 43483.06 | 16.659 | 53.083 | 3601.17 | 1143.37 | 530.241 | 613.134 |
| 2023          | 263287 | 81810.810  | 37050.845  | 44759.96 | 17.000 | 54.712 | 3600.69 | 1132.64 | 506.705 | 625.940 |
| 2024          | 265217 | 81528.303  | 35679.618  | 45848.68 | 17.287 | 56.237 | 3594.71 | 1119.38 | 483.596 | 635.782 |
| 2025          | 262082 | 79599.213  | 34041.744  | 45557.47 | 17.383 | 57.234 | 4124.90 | 1272.09 | 535.783 | 736.305 |
| 2026          | 256442 | 75082.462  | 30356.904  | 44725.56 | 17.441 | 59.569 | 4016.58 | 1194.99 | 475.472 | 719.517 |
| 2027          | 256159 | 74444.425  | 28908.277  | 45536.15 | 17.777 | 61.168 | 3991.04 | 1179.46 | 450.401 | 729.060 |
| 2028          | 255714 | 73699.585  | 27384.403  | 46315.18 | 18.112 | 62.843 | 3961.09 | 1161.76 | 424.193 | 737.567 |
| 2029          | 255217 | 72819.703  | 25918.909  | 46900.79 | 18.377 | 64.407 | 3928.02 | 1141.36 | 398.915 | 742.442 |
| 2030          | 246418 | 69309.277  | 24219.627  | 45089.65 | 18.298 | 65.056 | 4518.22 | 1297.95 | 444.082 | 853.867 |
| 2031          | 241439 | 65433.368  | 21568.120  | 43865.25 | 18.168 | 67.038 | 4411.67 | 1222.18 | 394.101 | 828.080 |
| 2032          | 240246 | 64643.552  | 20360.465  | 44283.09 | 18.432 | 68.503 | 4371.32 | 1203.31 | 370.462 | 832.847 |
| 2033          | 239019 | 63793.514  | 19226.862  | 44566.65 | 18.646 | 69.861 | 4327.34 | 1182.54 | 348.095 | 834.442 |
| 2034          | 237650 | 63032.151  | 18154.141  | 44878.01 | 18.884 | 71.199 | 4278.40 | 1162.80 | 326.829 | 835.971 |
| 2035          | 222518 | 57653.301  | 16582.733  | 41070.57 | 18.457 | 71.237 | 4939.08 | 1315.47 | 368.075 | 947.396 |
| 2036          | 214806 | 52988.733  | 14000.265  | 38988.47 | 18.151 | 73.579 | 4762.40 | 1208.75 | 310.396 | 898.350 |
| 2037          | 212256 | 52026.921  | 13065.721  | 38961.20 | 18.356 | 74.887 | 4696.72 | 1185.50 | 289.114 | 896.389 |
| 2038          | 209735 | 50943.211  | 12143.717  | 38799.49 | 18.499 | 76.162 | 4627.39 | 1158.38 | 267.927 | 890.456 |
| 2039          | 207285 | 50085.991  | 11358.962  | 38727.03 | 18.683 | 77.321 | 4554.75 | 1135.19 | 249.595 | 885.596 |

## Results for PHIM for Run 3 (Sensitivity\_Analysis\_3.RTF)

\*\*\*\*\*

### Main Results for E-Component for Run: 3, Simulation: 1, COD: LUNG CANCER, Adjusted

| Variable Parameter          | Value                                  |
|-----------------------------|----------------------------------------|
| 1. Country                  | US (United States)                     |
| 2. Sex                      | M (Males)                              |
| 3. Year of start of process | 1990                                   |
| 4. Cause of Death           | LUNG CANCER                            |
| 5. Effective Dose NULL      | CC:1                                   |
| 6. Effective Dose Ecig      | CC:1 Ecig:0.05 Dual:0.525              |
| Note:                       | Death rates are per million population |

#### Results for Age Groups Combined and Years combined, Population and Number deaths adjusted for Ecig scenario,

| Age Group:All | NULL    | Ecig        | %Drop       |          |        |        | NULL    | Ecig    | Drop    |         |
|---------------|---------|-------------|-------------|----------|--------|--------|---------|---------|---------|---------|
| Year          | Number  | Attrib      | Attrib      | Drop     | %Drop  | Attrib | Death   | Attrib  | Attrib  | Drop    |
|               | Deaths  | Deaths      | Deaths      | Deaths   | Deaths | Deaths | Rate    | Rates   | Rates   | Rates   |
| All Comb      | 3095450 | 2244988.113 | 1742176.815 | 502811.3 | 16.244 | 22.397 | 888.669 | 649.875 | 500.159 | 149.716 |

#### Results for Age Groups Combined, Population and Number deaths adjusted for Ecig scenario,

| Age Group:All | NULL   | Ecig      | %Drop     |          |        |        | NULL    | Ecig    | Drop    |         |
|---------------|--------|-----------|-----------|----------|--------|--------|---------|---------|---------|---------|
| Year          | Number | Attrib    | Attrib    | Drop     | %Drop  | Attrib | Death   | Attrib  | Attrib  | Drop    |
|               | Deaths | Deaths    | Deaths    | Deaths   | Deaths | Deaths | Rate    | Rates   | Rates   | Rates   |
| 1990          | 78822  | 63385.736 | 63385.736 | 0.000    | 0.000  | 0.000  | 1249.50 | 1004.81 | 1004.81 | 0.000   |
| 1991          | 78462  | 62918.402 | 62870.284 | 48.118   | 0.061  | 0.076  | 1223.41 | 981.049 | 980.299 | 0.750   |
| 1992          | 77988  | 62366.766 | 62238.185 | 128.581  | 0.165  | 0.206  | 1195.35 | 955.930 | 953.952 | 1.977   |
| 1993          | 78545  | 62652.888 | 62400.708 | 252.180  | 0.321  | 0.403  | 1182.40 | 943.195 | 939.375 | 3.819   |
| 1994          | 77443  | 61565.227 | 61168.972 | 396.255  | 0.512  | 0.644  | 1144.02 | 909.520 | 903.615 | 5.906   |
| 1995          | 76915  | 60851.961 | 60277.386 | 574.575  | 0.747  | 0.944  | 1114.40 | 881.759 | 873.340 | 8.419   |
| 1996          | 76250  | 60122.922 | 59324.175 | 798.746  | 1.048  | 1.329  | 1087.51 | 857.643 | 846.101 | 11.542  |
| 1997          | 75501  | 59237.155 | 58198.630 | 1038.525 | 1.376  | 1.753  | 1059.17 | 831.234 | 816.445 | 14.789  |
| 1998          | 75421  | 58906.696 | 57570.840 | 1335.856 | 1.771  | 2.268  | 1040.53 | 813.001 | 794.265 | 18.735  |
| 1999          | 73212  | 56930.073 | 55303.223 | 1626.850 | 2.222  | 2.858  | 993.996 | 773.329 | 750.850 | 22.479  |
| 2000          | 73856  | 57137.121 | 55132.435 | 2004.686 | 2.714  | 3.509  | 987.899 | 764.787 | 737.453 | 27.334  |
| 2001          | 73386  | 56481.726 | 54049.831 | 2431.896 | 3.314  | 4.306  | 968.645 | 746.169 | 713.418 | 32.752  |
| 2002          | 72557  | 55588.365 | 52708.282 | 2880.083 | 3.969  | 5.181  | 946.761 | 726.138 | 687.763 | 38.375  |
| 2003          | 72083  | 54945.856 | 51569.376 | 3376.481 | 4.684  | 6.145  | 930.558 | 710.281 | 665.739 | 44.542  |
| 2004          | 71470  | 54203.126 | 50279.469 | 3923.657 | 5.490  | 7.239  | 912.460 | 693.135 | 641.924 | 51.211  |
| 2005          | 71163  | 53744.603 | 49256.013 | 4488.590 | 6.307  | 8.352  | 897.743 | 679.296 | 621.379 | 57.917  |
| 2006          | 69887  | 52535.572 | 47451.923 | 5083.648 | 7.274  | 9.677  | 873.311 | 657.945 | 592.963 | 64.982  |
| 2007          | 68826  | 51492.124 | 45821.959 | 5670.164 | 8.238  | 11.012 | 850.949 | 638.264 | 566.533 | 71.731  |
| 2008          | 68523  | 51030.736 | 44646.966 | 6383.769 | 9.316  | 12.510 | 837.423 | 625.460 | 545.631 | 79.829  |
| 2009          | 67843  | 50276.199 | 43179.140 | 7097.059 | 10.461 | 14.116 | 819.028 | 608.943 | 521.275 | 87.668  |
| 2010          | 67571  | 49840.933 | 42030.484 | 7810.448 | 11.559 | 15.671 | 805.531 | 596.347 | 501.059 | 95.287  |
| 2011          | 66920  | 49207.841 | 40472.763 | 8600.078 | 12.851 | 17.525 | 789.589 | 581.354 | 477.535 | 103.819 |
| 2012          | 66612  | 48539.512 | 39091.959 | 9447.553 | 14.183 | 19.464 | 777.128 | 568.812 | 456.066 | 112.746 |
| 2013          | 65832  | 47675.741 | 37474.404 | 10201.34 | 15.496 | 21.397 | 758.948 | 552.318 | 432.027 | 120.291 |
| 2014          | 65580  | 47194.534 | 36211.452 | 10983.08 | 16.748 | 23.272 | 746.893 | 540.359 | 412.413 | 127.946 |
| 2015          | 64736  | 46305.842 | 34642.498 | 11663.34 | 18.017 | 25.188 | 828.442 | 596.439 | 443.328 | 153.111 |
| 2016          | 62237  | 44208.867 | 32148.973 | 12059.89 | 19.377 | 27.279 | 788.606 | 564.107 | 407.361 | 156.746 |
| 2017          | 60550  | 42702.624 | 30181.767 | 12520.86 | 20.678 | 29.321 | 759.815 | 539.903 | 378.735 | 161.168 |
| 2018          | 63203  | 44321.202 | 30251.389 | 14069.81 | 22.261 | 31.745 | 785.339 | 555.181 | 375.893 | 179.288 |
| 2019          | 63844  | 44493.088 | 29392.545 | 15100.54 | 23.652 | 33.939 | 785.163 | 551.912 | 361.472 | 190.440 |
| 2020          | 64333  | 44529.551 | 28470.270 | 16059.28 | 24.963 | 36.064 | 901.880 | 630.757 | 399.123 | 231.635 |
| 2021          | 57950  | 39852.556 | 24546.493 | 15306.06 | 26.413 | 38.407 | 806.176 | 560.546 | 341.481 | 219.065 |
| 2022          | 58337  | 39853.685 | 23585.882 | 16267.80 | 27.886 | 40.819 | 804.849 | 556.274 | 325.403 | 230.870 |
| 2023          | 58697  | 39847.050 | 22635.524 | 17211.53 | 29.323 | 43.194 | 802.734 | 551.670 | 309.562 | 242.108 |
| 2024          | 58964  | 39726.010 | 21677.145 | 18048.86 | 30.610 | 45.433 | 799.186 | 545.435 | 293.809 | 251.627 |
| 2025          | 58604  | 39207.348 | 20600.266 | 18607.08 | 31.751 | 47.458 | 922.367 | 626.579 | 324.227 | 302.351 |
| 2026          | 52452  | 34803.960 | 17504.987 | 17298.97 | 32.980 | 49.704 | 821.548 | 553.929 | 274.176 | 279.753 |
| 2027          | 52247  | 34484.595 | 16546.334 | 17938.26 | 34.334 | 52.018 | 814.020 | 546.357 | 257.798 | 288.559 |
| 2028          | 51995  | 34100.638 | 15558.868 | 18541.77 | 35.661 | 54.374 | 805.415 | 537.544 | 241.012 | 296.532 |
| 2029          | 51715  | 33669.838 | 14619.686 | 19050.15 | 36.837 | 56.579 | 795.936 | 527.732 | 225.010 | 302.722 |
| 2030          | 50325  | 32557.688 | 13590.362 | 18967.33 | 37.690 | 58.258 | 922.740 | 609.705 | 249.188 | 360.517 |
| 2031          | 44710  | 28646.393 | 11406.956 | 17239.44 | 38.558 | 60.180 | 816.967 | 535.065 | 208.433 | 326.632 |
| 2032          | 44327  | 28227.160 | 10677.659 | 17549.50 | 39.591 | 62.172 | 806.537 | 525.435 | 194.282 | 331.153 |
| 2033          | 43928  | 27786.623 | 9997.922  | 17788.70 | 40.495 | 64.019 | 795.299 | 515.079 | 181.008 | 334.070 |
| 2034          | 43495  | 27348.299 | 9364.480  | 17983.82 | 41.347 | 65.758 | 783.045 | 504.514 | 168.589 | 335.925 |
| 2035          | 40992  | 25570.077 | 8508.254  | 17061.82 | 41.623 | 66.726 | 909.858 | 583.430 | 188.851 | 394.579 |
| 2036          | 35116  | 21717.319 | 6737.958  | 14979.36 | 42.657 | 68.974 | 778.537 | 495.402 | 149.385 | 346.017 |
| 2037          | 34558  | 21256.024 | 6250.175  | 15005.85 | 43.422 | 70.596 | 764.687 | 484.347 | 138.302 | 346.045 |
| 2038          | 34005  | 20747.175 | 5779.338  | 14967.84 | 44.017 | 72.144 | 750.251 | 471.764 | 127.510 | 344.254 |
| 2039          | 33463  | 20327.688 | 5386.489  | 14941.20 | 44.649 | 73.502 | 735.303 | 460.724 | 118.359 | 342.364 |



## Results for PHIM for Run 3 (Sensitivity\_Analysis\_3.RTF)

\*\*\*\*\*

### Main Results for E-Component for Run: 3, Simulation: 1, COD: IHD, Adjusted

| Variable Parameter          | Value                                  |
|-----------------------------|----------------------------------------|
| 1. Country                  | US (United States)                     |
| 2. Sex                      | M (Males)                              |
| 3. Year of start of process | 1990                                   |
| 4. Cause of Death           | IHD                                    |
| 5. Effective Dose NULL      | CC:1                                   |
| 6. Effective Dose Ecig      | CC:1 Ecig:0.05 Dual:0.525              |
| Note:                       | Death rates are per million population |

#### Results for Age Groups Combined and Years combined, Population and Number deaths adjusted for Ecig scenario,

| Age Group:All | NULL    | Ecig        | %Drop      |          |        |        | NULL    | Ecig    | Drop    |         |
|---------------|---------|-------------|------------|----------|--------|--------|---------|---------|---------|---------|
| Year          | Number  | Attrib      | Attrib     | Drop     | %Drop  | Attrib | Death   | Attrib  | Drop    |         |
|               | Deaths  | Deaths      | Deaths     | Deaths   | Deaths | Deaths | Rate    | Rates   | Rates   |         |
| All Comb      | 6422482 | 1098877.421 | 521996.623 | 576880.8 | 8.982  | 52.497 | 1843.82 | 318.101 | 149.859 | 168.242 |

#### Results for Age Groups Combined, Population and Number deaths adjusted for Ecig scenario,

| Age Group:All | NULL   | Ecig      | %Drop     |          |        |        | NULL    | Ecig    | Drop    |         |
|---------------|--------|-----------|-----------|----------|--------|--------|---------|---------|---------|---------|
| Year          | Number | Attrib    | Attrib    | Drop     | %Drop  | Attrib | Death   | Attrib  | Drop    |         |
|               | Deaths | Deaths    | Deaths    | Deaths   | Deaths | Deaths | Rate    | Rates   | Rates   |         |
| 1990          | 171484 | 38511.725 | 38511.725 | 0.000    | 0.000  | 0.000  | 2718.40 | 610.497 | 0.000   |         |
| 1991          | 168044 | 37309.838 | 36996.011 | 313.827  | 0.187  | 0.841  | 2620.21 | 581.750 | 576.857 | 4.893   |
| 1992          | 164549 | 36137.488 | 35293.483 | 844.005  | 0.513  | 2.336  | 2522.12 | 553.899 | 540.959 | 12.940  |
| 1993          | 164367 | 35599.588 | 34037.820 | 1561.768 | 0.950  | 4.387  | 2474.37 | 535.926 | 512.403 | 23.524  |
| 1994          | 159878 | 34336.757 | 31954.488 | 2382.270 | 1.490  | 6.938  | 2361.79 | 507.267 | 472.046 | 35.221  |
| 1995          | 158105 | 33455.759 | 30126.741 | 3329.018 | 2.106  | 9.951  | 2290.74 | 484.782 | 436.497 | 48.285  |
| 1996          | 154911 | 32193.824 | 27861.085 | 4332.739 | 2.797  | 13.458 | 2209.39 | 459.239 | 397.364 | 61.875  |
| 1997          | 150023 | 30665.509 | 25361.103 | 5304.407 | 3.536  | 17.298 | 2104.61 | 430.308 | 355.781 | 74.527  |
| 1998          | 145480 | 29188.430 | 22975.151 | 6213.279 | 4.271  | 21.287 | 2007.09 | 402.844 | 316.972 | 85.872  |
| 1999          | 166067 | 33375.386 | 24733.675 | 8641.710 | 5.204  | 25.892 | 2254.68 | 453.366 | 335.808 | 117.558 |
| 2000          | 160410 | 32024.754 | 22352.881 | 9671.873 | 6.029  | 30.201 | 2145.64 | 428.655 | 298.993 | 129.662 |
| 2001          | 154630 | 30682.393 | 19941.114 | 10741.28 | 6.946  | 35.008 | 2041.00 | 405.339 | 263.208 | 142.131 |
| 2002          | 152118 | 30218.370 | 18223.030 | 11995.34 | 7.886  | 39.696 | 1984.91 | 394.736 | 237.783 | 156.953 |
| 2003          | 147008 | 29175.202 | 16256.891 | 12918.31 | 8.787  | 44.278 | 1897.81 | 377.146 | 209.870 | 167.276 |
| 2004          | 138695 | 27488.687 | 14094.785 | 13393.90 | 9.657  | 48.725 | 1770.73 | 351.518 | 179.950 | 171.568 |
| 2005          | 136246 | 27017.439 | 12764.356 | 14253.08 | 10.461 | 52.755 | 1718.79 | 341.482 | 161.026 | 180.456 |
| 2006          | 132337 | 26231.435 | 11247.388 | 14984.05 | 11.323 | 57.122 | 1653.70 | 328.517 | 140.548 | 187.969 |
| 2007          | 126964 | 25103.049 | 9814.561  | 15288.49 | 12.042 | 60.903 | 1569.75 | 311.161 | 121.345 | 189.816 |
| 2008          | 126385 | 24621.740 | 8858.804  | 15762.94 | 12.472 | 64.020 | 1544.56 | 301.777 | 108.264 | 193.514 |
| 2009          | 123010 | 23741.177 | 7830.207  | 15910.97 | 12.935 | 67.018 | 1485.03 | 287.552 | 94.529  | 193.023 |
| 2010          | 121181 | 23189.160 | 7032.725  | 16156.43 | 13.333 | 69.672 | 1444.63 | 277.458 | 83.839  | 193.619 |
| 2011          | 120937 | 22786.927 | 6290.661  | 16496.27 | 13.640 | 72.394 | 1426.93 | 269.951 | 74.223  | 195.728 |
| 2012          | 121728 | 22485.295 | 5689.681  | 16795.61 | 13.798 | 74.696 | 1420.14 | 263.495 | 66.379  | 197.116 |
| 2013          | 123546 | 22251.884 | 5185.603  | 17066.28 | 13.814 | 76.696 | 1424.31 | 257.786 | 59.783  | 198.003 |
| 2014          | 124222 | 21894.593 | 4706.947  | 17187.65 | 13.836 | 78.502 | 1414.77 | 250.685 | 53.607  | 197.077 |
| 2015          | 124870 | 21471.109 | 4290.951  | 17180.16 | 13.758 | 80.015 | 1597.99 | 276.557 | 54.912  | 221.645 |
| 2016          | 127436 | 21411.568 | 3924.164  | 17487.40 | 13.723 | 81.673 | 1614.74 | 273.213 | 49.723  | 223.489 |
| 2017          | 129610 | 21169.399 | 3594.196  | 17575.20 | 13.560 | 83.022 | 1626.41 | 267.651 | 45.102  | 222.550 |
| 2018          | 122791 | 19830.576 | 3093.075  | 16737.50 | 13.631 | 84.402 | 1525.76 | 248.404 | 38.433  | 209.970 |
| 2019          | 123304 | 19431.014 | 2838.568  | 16592.45 | 13.456 | 85.392 | 1516.41 | 241.031 | 34.909  | 206.122 |
| 2020          | 122396 | 18532.612 | 2553.766  | 15978.85 | 13.055 | 86.220 | 1715.87 | 262.513 | 35.801  | 226.712 |
| 2021          | 121071 | 18234.128 | 2323.223  | 15910.90 | 13.142 | 87.259 | 1684.29 | 256.472 | 32.320  | 224.152 |
| 2022          | 121211 | 17812.559 | 2129.131  | 15683.43 | 12.939 | 88.047 | 1672.29 | 248.626 | 29.375  | 219.251 |
| 2023          | 121330 | 17361.668 | 1953.290  | 15408.38 | 12.700 | 88.749 | 1659.31 | 240.367 | 26.713  | 213.654 |
| 2024          | 121304 | 16929.676 | 1812.787  | 15116.89 | 12.462 | 89.292 | 1644.13 | 232.443 | 24.570  | 207.873 |
| 2025          | 117784 | 15501.666 | 1596.975  | 13904.69 | 11.805 | 89.698 | 1853.81 | 247.735 | 25.135  | 222.600 |
| 2026          | 117255 | 15523.814 | 1521.109  | 14002.70 | 11.942 | 90.201 | 1836.53 | 247.072 | 23.825  | 223.247 |
| 2027          | 116265 | 15073.070 | 1425.743  | 13647.33 | 11.738 | 90.541 | 1811.44 | 238.810 | 22.214  | 216.597 |
| 2028          | 115224 | 14636.710 | 1329.961  | 13306.75 | 11.549 | 90.914 | 1784.86 | 230.725 | 20.602  | 210.124 |
| 2029          | 114181 | 14180.166 | 1249.150  | 12931.02 | 11.325 | 91.191 | 1757.35 | 222.256 | 19.226  | 203.031 |
| 2030          | 107360 | 12111.772 | 1044.298  | 11067.47 | 10.309 | 91.378 | 1968.52 | 226.816 | 19.148  | 207.668 |
| 2031          | 107893 | 12417.367 | 1052.884  | 11364.48 | 10.533 | 91.521 | 1971.46 | 231.935 | 19.239  | 212.696 |
| 2032          | 106560 | 12054.064 | 1001.494  | 11052.57 | 10.372 | 91.692 | 1938.87 | 224.381 | 18.222  | 206.158 |
| 2033          | 105241 | 11672.389 | 946.807   | 10725.58 | 10.191 | 91.888 | 1905.34 | 216.370 | 17.142  | 199.229 |
| 2034          | 103897 | 11365.762 | 907.878   | 10457.88 | 10.066 | 92.012 | 1870.46 | 209.673 | 16.345  | 193.328 |
| 2035          | 93579  | 8580.360  | 671.454   | 7908.906 | 8.452  | 92.175 | 2077.10 | 195.777 | 14.904  | 180.874 |
| 2036          | 94972  | 8948.841  | 690.537   | 8258.304 | 8.696  | 92.284 | 2105.59 | 204.135 | 15.310  | 188.826 |
| 2037          | 93220  | 8624.570  | 665.870   | 7958.700 | 8.538  | 92.279 | 2062.73 | 196.522 | 14.734  | 181.788 |
| 2038          | 91519  | 8315.017  | 634.456   | 7680.561 | 8.392  | 92.370 | 2019.18 | 189.073 | 13.998  | 175.075 |
| 2039          | 89884  | 8001.132  | 603.942   | 7397.190 | 8.230  | 92.452 | 1975.05 | 181.344 | 13.271  | 168.074 |

## Results for PHIM for Run 3 (Sensitivity\_Analysis\_3.RTF)

\*\*\*\*\*

### Main Results for E-Component for Run: 3, Simulation: 1, COD: STROKE, Adjusted

| Variable Parameter          | Value                                  |
|-----------------------------|----------------------------------------|
| 1. Country                  | US (United States)                     |
| 2. Sex                      | M (Males)                              |
| 3. Year of start of process | 1990                                   |
| 4. Cause of Death           | STROKE                                 |
| 5. Effective Dose NULL      | CC:1                                   |
| 6. Effective Dose Ecig      | CC:1 Ecig:0.05 Dual:0.525              |
| Note:                       | Death rates are per million population |

#### Results for Age Groups Combined and Years combined, Population and Number deaths adjusted for Ecig scenario,

| Age Group:All | NULL    | Ecig       | %Drop     |          |        |        | NULL    | Ecig   | Drop   |        |
|---------------|---------|------------|-----------|----------|--------|--------|---------|--------|--------|--------|
| Year          | Number  | Attrib     | Attrib    | Drop     | %Drop  | Attrib | Death   | Attrib | Attrib | Drop   |
|               | Deaths  | Deaths     | Deaths    | Deaths   | Deaths | Deaths | Rate    | Rates  | Rates  | Rates  |
| All Comb      | 1506641 | 149918.462 | 70434.822 | 79483.64 | 5.276  | 53.018 | 432.540 | 43.398 | 20.221 | 23.177 |

#### Results for Age Groups Combined, Population and Number deaths adjusted for Ecig scenario,

| Age Group:All | NULL   | Ecig     | %Drop    |          |        |        | NULL    | Ecig   | Drop   |        |
|---------------|--------|----------|----------|----------|--------|--------|---------|--------|--------|--------|
| Year          | Number | Attrib   | Attrib   | Drop     | %Drop  | Attrib | Death   | Attrib | Attrib | Drop   |
|               | Deaths | Deaths   | Deaths   | Deaths   | Deaths | Deaths | Rate    | Rates  | Rates  | Rates  |
| 1990          | 32862  | 4613.166 | 4613.166 | 0.000    | 0.000  | 0.000  | 520.936 | 73.129 | 73.129 | 0.000  |
| 1991          | 32619  | 4555.566 | 4515.509 | 40.057   | 0.123  | 0.879  | 508.609 | 71.032 | 70.408 | 0.625  |
| 1992          | 32100  | 4453.572 | 4348.568 | 105.004  | 0.327  | 2.358  | 492.015 | 68.262 | 66.652 | 1.610  |
| 1993          | 32897  | 4462.473 | 4264.179 | 198.294  | 0.603  | 4.444  | 495.229 | 67.179 | 64.193 | 2.987  |
| 1994          | 33325  | 4499.513 | 4186.695 | 312.818  | 0.939  | 6.952  | 492.297 | 66.473 | 61.848 | 4.625  |
| 1995          | 33574  | 4472.774 | 4029.455 | 443.319  | 1.320  | 9.912  | 486.436 | 64.812 | 58.381 | 6.430  |
| 1996          | 33877  | 4406.878 | 3819.400 | 587.478  | 1.734  | 13.331 | 483.172 | 62.863 | 54.474 | 8.390  |
| 1997          | 33527  | 4288.158 | 3554.540 | 733.618  | 2.188  | 17.108 | 470.341 | 60.173 | 49.865 | 10.308 |
| 1998          | 32811  | 4120.148 | 3253.160 | 866.988  | 2.642  | 21.043 | 452.668 | 56.864 | 44.882 | 11.983 |
| 1999          | 33397  | 3982.443 | 2982.787 | 999.655  | 2.993  | 25.102 | 453.430 | 54.097 | 40.497 | 13.600 |
| 2000          | 33489  | 4021.411 | 2846.942 | 1174.470 | 3.507  | 29.205 | 447.949 | 53.827 | 38.081 | 15.746 |
| 2001          | 32312  | 3848.092 | 2556.217 | 1291.875 | 3.998  | 33.572 | 426.498 | 50.836 | 33.740 | 17.096 |
| 2002          | 31632  | 3783.081 | 2354.027 | 1429.054 | 4.518  | 37.775 | 412.753 | 49.418 | 30.716 | 18.701 |
| 2003          | 31041  | 3754.415 | 2173.347 | 1581.069 | 5.094  | 42.112 | 400.724 | 48.533 | 28.057 | 20.476 |
| 2004          | 29950  | 3666.274 | 1970.640 | 1695.635 | 5.662  | 46.250 | 382.369 | 46.883 | 25.159 | 21.724 |
| 2005          | 28783  | 3589.688 | 1785.002 | 1804.687 | 6.270  | 50.274 | 363.107 | 45.371 | 22.518 | 22.853 |
| 2006          | 28275  | 3596.985 | 1642.456 | 1954.528 | 6.913  | 54.338 | 353.322 | 45.048 | 20.524 | 24.524 |
| 2007          | 28126  | 3560.798 | 1495.617 | 2065.181 | 7.343  | 57.998 | 347.742 | 44.137 | 18.491 | 25.646 |
| 2008          | 27239  | 3417.001 | 1320.342 | 2096.659 | 7.697  | 61.360 | 332.887 | 41.881 | 16.136 | 25.745 |
| 2009          | 27194  | 3394.390 | 1206.354 | 2188.036 | 8.046  | 64.460 | 328.295 | 41.113 | 14.564 | 26.549 |
| 2010          | 27052  | 3340.137 | 1096.616 | 2243.522 | 8.293  | 67.169 | 322.498 | 39.965 | 13.073 | 26.892 |
| 2011          | 27118  | 3285.435 | 993.304  | 2292.131 | 8.453  | 69.766 | 319.958 | 38.922 | 11.720 | 27.202 |
| 2012          | 27234  | 3259.209 | 901.327  | 2357.882 | 8.658  | 72.345 | 317.723 | 38.193 | 10.515 | 27.678 |
| 2013          | 28106  | 3274.703 | 832.846  | 2441.857 | 8.688  | 74.567 | 324.027 | 37.937 | 9.602  | 28.336 |
| 2014          | 29022  | 3298.083 | 769.594  | 2528.489 | 8.712  | 76.665 | 330.527 | 37.762 | 8.765  | 28.997 |
| 2015          | 29821  | 3244.406 | 702.998  | 2541.408 | 8.522  | 78.332 | 381.621 | 41.789 | 8.996  | 32.793 |
| 2016          | 30806  | 3314.836 | 661.564  | 2653.272 | 8.613  | 80.042 | 390.340 | 42.297 | 8.383  | 33.915 |
| 2017          | 31744  | 3333.314 | 614.258  | 2719.055 | 8.566  | 81.572 | 398.334 | 42.144 | 7.708  | 34.436 |
| 2018          | 29683  | 2925.242 | 503.560  | 2421.682 | 8.159  | 82.786 | 368.829 | 36.642 | 6.257  | 30.385 |
| 2019          | 29962  | 2864.628 | 460.491  | 2404.137 | 8.024  | 83.925 | 368.478 | 35.534 | 5.663  | 29.871 |
| 2020          | 29988  | 2730.366 | 412.084  | 2318.282 | 7.731  | 84.907 | 420.393 | 38.675 | 5.777  | 32.898 |
| 2021          | 30529  | 2647.911 | 373.908  | 2274.002 | 7.449  | 85.879 | 424.712 | 37.244 | 5.202  | 32.043 |
| 2022          | 30768  | 2586.165 | 341.135  | 2245.030 | 7.297  | 86.809 | 424.490 | 36.097 | 4.706  | 31.391 |
| 2023          | 31003  | 2517.960 | 311.926  | 2206.034 | 7.116  | 87.612 | 423.996 | 34.860 | 4.266  | 30.594 |
| 2024          | 31192  | 2454.161 | 287.973  | 2166.187 | 6.945  | 88.266 | 422.777 | 33.695 | 3.903  | 29.792 |
| 2025          | 30818  | 2275.364 | 254.384  | 2020.981 | 6.558  | 88.820 | 485.039 | 36.363 | 4.004  | 32.359 |
| 2026          | 31292  | 2183.166 | 232.609  | 1950.557 | 6.233  | 89.345 | 490.122 | 34.747 | 3.643  | 31.103 |
| 2027          | 31199  | 2112.345 | 215.911  | 1896.434 | 6.079  | 89.779 | 486.089 | 33.467 | 3.364  | 30.103 |
| 2028          | 31080  | 2046.677 | 200.722  | 1845.954 | 5.939  | 90.193 | 481.444 | 32.263 | 3.109  | 29.153 |
| 2029          | 30954  | 1977.671 | 186.991  | 1790.681 | 5.785  | 90.545 | 476.413 | 30.997 | 2.878  | 28.120 |
| 2030          | 30055  | 1744.457 | 160.589  | 1583.868 | 5.270  | 90.794 | 551.082 | 32.668 | 2.944  | 29.724 |
| 2031          | 29727  | 1653.738 | 148.509  | 1505.228 | 5.063  | 91.020 | 543.191 | 30.889 | 2.714  | 28.175 |
| 2032          | 29503  | 1603.120 | 139.471  | 1463.650 | 4.961  | 91.300 | 536.819 | 29.841 | 2.538  | 27.304 |
| 2033          | 29270  | 1548.245 | 131.494  | 1416.751 | 4.840  | 91.507 | 529.921 | 28.700 | 2.381  | 26.319 |
| 2034          | 29011  | 1511.985 | 125.678  | 1386.307 | 4.779  | 91.688 | 522.288 | 27.893 | 2.263  | 25.630 |
| 2035          | 27578  | 1239.866 | 101.639  | 1138.226 | 4.127  | 91.802 | 612.122 | 28.290 | 2.256  | 26.034 |
| 2036          | 26425  | 1182.522 | 95.076   | 1087.446 | 4.115  | 91.960 | 585.868 | 26.975 | 2.108  | 24.867 |
| 2037          | 25992  | 1134.483 | 91.217   | 1043.266 | 4.014  | 91.960 | 575.143 | 25.851 | 2.018  | 23.832 |
| 2038          | 25556  | 1093.537 | 86.638   | 1006.898 | 3.940  | 92.077 | 563.842 | 24.866 | 1.912  | 22.954 |
| 2039          | 25122  | 1047.905 | 81.906   | 965.999  | 3.845  | 92.184 | 552.024 | 23.751 | 1.800  | 21.951 |

## Results for PHIM for Run 3 (Sensitivity\_Analysis\_3.RTF)

\*\*\*\*\*

### Main Results for E-Component for Run: 3, Simulation: 1, COD: COPD, Adjusted

| Variable Parameter          | Value                                  |
|-----------------------------|----------------------------------------|
| 1. Country                  | US (United States)                     |
| 2. Sex                      | M (Males)                              |
| 3. Year of start of process | 1990                                   |
| 4. Cause of Death           | COPD                                   |
| 5. Effective Dose NULL      | CC:1                                   |
| 6. Effective Dose Ecig      | CC:1 Ecig:0.05 Dual:0.525              |
| Note:                       | Death rates are per million population |

### Results for Age Groups Combined and Years combined, Population and Number deaths adjusted for Ecig scenario,

| Age Group:All | NULL    | Ecig        | %Drop      |          |        |        | NULL    | Ecig    | Drop    |        |
|---------------|---------|-------------|------------|----------|--------|--------|---------|---------|---------|--------|
| Year          | Number  | Attrib      | Attrib     | Drop     | %Drop  | Attrib | Death   | Attrib  | Attrib  | Drop   |
|               | Deaths  | Deaths      | Deaths     | Deaths   | Deaths | Deaths | Rate    | Rates   | Rates   | Rates  |
| All Comb      | 2265586 | 1015606.587 | 686452.456 | 329154.1 | 14.528 | 32.410 | 650.424 | 293.996 | 197.073 | 96.923 |

### Results for Age Groups Combined, Population and Number deaths adjusted for Ecig scenario,

| Age Group:All | NULL   | Ecig      | %Drop     |          |        |        | NULL    | Ecig    | Drop    |         |
|---------------|--------|-----------|-----------|----------|--------|--------|---------|---------|---------|---------|
| Year          | Number | Attrib    | Attrib    | Drop     | %Drop  | Attrib | Death   | Attrib  | Attrib  | Drop    |
|               | Deaths | Deaths    | Deaths    | Deaths   | Deaths | Deaths | Rate    | Rates   | Rates   | Rates   |
| 1990          | 33993  | 19262.437 | 19262.437 | 0.000    | 0.000  | 0.000  | 538.865 | 305.353 | 305.353 | 0.000   |
| 1991          | 34092  | 19215.636 | 19193.448 | 22.188   | 0.065  | 0.115  | 531.576 | 299.618 | 299.272 | 0.346   |
| 1992          | 33942  | 19056.189 | 18998.403 | 57.786   | 0.170  | 0.303  | 520.249 | 292.085 | 291.197 | 0.888   |
| 1993          | 35914  | 20095.670 | 19977.557 | 118.112  | 0.329  | 0.588  | 540.648 | 302.526 | 300.741 | 1.785   |
| 1994          | 35077  | 19524.095 | 19343.620 | 180.475  | 0.515  | 0.924  | 518.166 | 288.435 | 285.752 | 2.683   |
| 1995          | 34674  | 19116.002 | 18857.801 | 258.201  | 0.745  | 1.351  | 502.376 | 276.995 | 273.225 | 3.771   |
| 1996          | 34590  | 18975.021 | 18622.639 | 352.382  | 1.019  | 1.857  | 493.330 | 270.675 | 265.602 | 5.073   |
| 1997          | 35279  | 19169.025 | 18701.429 | 467.595  | 1.325  | 2.439  | 494.916 | 268.986 | 262.355 | 6.631   |
| 1998          | 35693  | 19228.937 | 18627.283 | 601.655  | 1.686  | 3.129  | 492.425 | 265.388 | 256.988 | 8.400   |
| 1999          | 38542  | 20589.820 | 19799.875 | 789.946  | 2.050  | 3.837  | 523.284 | 279.689 | 268.822 | 10.867  |
| 2000          | 36316  | 19196.417 | 18303.423 | 892.995  | 2.459  | 4.652  | 485.766 | 256.946 | 244.827 | 12.119  |
| 2001          | 36324  | 19012.731 | 17931.893 | 1080.839 | 2.976  | 5.685  | 479.449 | 251.174 | 236.688 | 14.486  |
| 2002          | 36037  | 18699.357 | 17435.443 | 1263.914 | 3.507  | 6.759  | 470.225 | 244.265 | 227.506 | 16.759  |
| 2003          | 36272  | 18663.550 | 17189.062 | 1474.487 | 4.065  | 7.900  | 468.261 | 241.262 | 221.904 | 19.359  |
| 2004          | 34689  | 17679.164 | 16045.215 | 1633.949 | 4.710  | 9.242  | 442.879 | 226.076 | 204.851 | 21.225  |
| 2005          | 36925  | 18692.832 | 16718.891 | 1973.940 | 5.346  | 10.560 | 465.821 | 236.265 | 210.914 | 25.351  |
| 2006          | 34459  | 17308.564 | 15212.701 | 2095.863 | 6.082  | 12.109 | 430.599 | 216.769 | 190.099 | 26.670  |
| 2007          | 35456  | 17683.181 | 15257.950 | 2425.232 | 6.840  | 13.715 | 438.373 | 219.189 | 188.646 | 30.543  |
| 2008          | 38410  | 19006.374 | 16112.545 | 2893.829 | 7.534  | 15.226 | 469.412 | 232.952 | 196.912 | 36.041  |
| 2009          | 37081  | 18205.573 | 15092.838 | 3112.735 | 8.394  | 17.098 | 447.655 | 220.505 | 182.206 | 38.299  |
| 2010          | 37438  | 18237.758 | 14825.651 | 3412.108 | 9.114  | 18.709 | 446.310 | 218.215 | 176.741 | 41.473  |
| 2011          | 38327  | 18487.916 | 14636.068 | 3851.848 | 10.050 | 20.834 | 452.215 | 219.022 | 172.690 | 46.332  |
| 2012          | 38767  | 18491.158 | 14269.677 | 4221.481 | 10.889 | 22.830 | 452.277 | 216.689 | 166.477 | 50.212  |
| 2013          | 40596  | 19143.452 | 14410.048 | 4733.405 | 11.660 | 24.726 | 468.011 | 221.775 | 166.128 | 55.647  |
| 2014          | 40677  | 18992.005 | 13902.399 | 5089.606 | 12.512 | 26.799 | 463.267 | 217.451 | 158.335 | 59.116  |
| 2015          | 42693  | 19728.885 | 14118.791 | 5610.094 | 13.140 | 28.436 | 546.354 | 254.116 | 180.681 | 73.435  |
| 2016          | 43538  | 19876.724 | 13826.176 | 6050.548 | 13.897 | 30.440 | 551.668 | 253.628 | 175.192 | 78.436  |
| 2017          | 44590  | 20119.790 | 13582.120 | 6537.670 | 14.662 | 32.494 | 559.542 | 254.381 | 170.435 | 83.946  |
| 2018          | 46008  | 20535.123 | 13446.775 | 7088.348 | 15.407 | 34.518 | 571.677 | 257.229 | 167.085 | 90.144  |
| 2019          | 47564  | 21009.029 | 13341.143 | 7667.886 | 16.121 | 36.498 | 584.941 | 260.605 | 164.070 | 96.535  |
| 2020          | 49087  | 21428.512 | 13202.874 | 8225.637 | 16.757 | 38.386 | 688.151 | 303.533 | 185.090 | 118.443 |
| 2021          | 49181  | 21266.697 | 12611.964 | 8654.733 | 17.598 | 40.696 | 684.187 | 299.127 | 175.453 | 123.674 |
| 2022          | 50705  | 21663.568 | 12376.773 | 9286.795 | 18.316 | 42.868 | 699.547 | 302.378 | 170.757 | 131.621 |
| 2023          | 52256  | 22084.131 | 12150.105 | 9934.026 | 19.010 | 44.983 | 714.654 | 305.748 | 166.164 | 139.584 |
| 2024          | 53757  | 22418.456 | 11901.713 | 10516.74 | 19.564 | 46.911 | 728.612 | 307.804 | 161.314 | 146.490 |
| 2025          | 54876  | 22614.834 | 11590.120 | 11024.71 | 20.090 | 48.750 | 863.690 | 361.411 | 182.417 | 178.994 |
| 2026          | 55443  | 22571.522 | 11098.198 | 11473.32 | 20.694 | 50.831 | 868.386 | 359.241 | 173.828 | 185.413 |
| 2027          | 56449  | 22774.416 | 10720.290 | 12054.13 | 21.354 | 52.928 | 879.492 | 360.827 | 167.026 | 193.801 |
| 2028          | 57415  | 22915.561 | 10294.852 | 12620.71 | 21.982 | 55.075 | 889.377 | 361.228 | 159.470 | 201.758 |
| 2029          | 58367  | 22992.027 | 9863.083  | 13128.94 | 22.494 | 57.102 | 898.320 | 360.371 | 151.802 | 208.569 |
| 2030          | 58677  | 22895.360 | 9424.378  | 13470.98 | 22.958 | 58.837 | 1075.88 | 428.760 | 172.802 | 255.958 |
| 2031          | 59109  | 22715.871 | 8959.771  | 13756.10 | 23.273 | 60.557 | 1080.06 | 424.293 | 163.717 | 260.576 |
| 2032          | 59856  | 22759.207 | 8541.841  | 14217.37 | 23.753 | 62.469 | 1089.09 | 423.652 | 155.420 | 268.231 |
| 2033          | 60580  | 22786.258 | 8150.639  | 14635.62 | 24.159 | 64.230 | 1096.78 | 422.387 | 147.564 | 274.823 |
| 2034          | 61246  | 22806.106 | 7756.106  | 15050.00 | 24.573 | 65.991 | 1102.61 | 420.721 | 139.633 | 281.088 |
| 2035          | 60370  | 22262.998 | 7301.385  | 14961.61 | 24.783 | 67.204 | 1340.00 | 507.973 | 162.063 | 345.910 |
| 2036          | 58294  | 21140.051 | 6476.695  | 14663.36 | 25.154 | 69.363 | 1292.41 | 482.234 | 143.593 | 338.641 |
| 2037          | 58486  | 21011.845 | 6058.459  | 14953.39 | 25.567 | 71.166 | 1294.16 | 478.783 | 134.059 | 344.724 |
| 2038          | 58656  | 20787.483 | 5643.285  | 15144.20 | 25.819 | 72.852 | 1294.12 | 472.681 | 124.508 | 348.173 |
| 2039          | 58815  | 20709.267 | 5286.626  | 15422.64 | 26.222 | 74.472 | 1292.37 | 469.372 | 116.165 | 353.207 |

## Results for PHIM for Run 4 (Sensitivity\_Analysis\_3.RTF)

---

### Control File Details for Run: 4

| Variable Parameter                                       | Value                  |
|----------------------------------------------------------|------------------------|
| 1. Name for Reference Scenario                           | NULL                   |
| 2. Name for Test Scenario                                | Ecig                   |
| 3. Name for Product 1                                    | CC                     |
| 4. Name for Product 2                                    | Ecig                   |
| 5. Name for Product 3                                    | -                      |
| 6. Name for Product 4                                    | Dual                   |
| 7. Country                                               | US (United States)     |
| 8. Sex                                                   | F (Females)            |
| 9. Year of start of process                              | 1990                   |
| 10. Number of months of follow-up                        | 600                    |
| 11. Follow-up interval length (in months)                | 12                     |
| 12. Lower age for risk estimation                        | 10                     |
| 13. Upper age for risk estimation                        | 79                     |
| 14. The effective dose for Product 1 (F1) - Ref          | 1                      |
| 15. The effective dose for Product 2 (F2) - Ref          | -                      |
| 16. The effective dose for Product 3 (F3) - Ref          | -                      |
| 17. The effective dose for Product 4 (F4) - Ref          | -                      |
| 18. The effective dose for Product 1 (F1) - Test         | 1                      |
| 19. The effective dose for Product 2 (F2) - Test         | 0.05                   |
| 20. The effective dose for Product 3 (F3) - Test         | -                      |
| 21. The effective dose for Product 4 (F4) - Test         | FROMF2                 |
| 22. Number in population to be simulated                 | 100000                 |
| 23. Number of MC simulations                             | 1                      |
| 24. The random number seed for the first simulation      | 15975263               |
| 25. Source for the population file (POP)                 | UN4                    |
| 26. Source for the socioeconomic prevalence file (SEP)   | -                      |
| 27. Source for the current smoking prevalence file (CSP) | ISS3                   |
| 28. Source for the former smoking prevalence file (FSP)  | ISS3                   |
| 29. Source for the quit-time distribution file (QTD)     | NHIS2006               |
| 30. Source for the death file (MORT)                     | APR-20                 |
| 31. Source for the relative risk file (RR)               | PNLEST                 |
| 32. Source for the half-life file (H)                    | PNLEST                 |
| 33. Assumption Set for TTP Factor Reference              | F1                     |
| 34. Assumption Set for TTP Factor Test                   | F1                     |
| 35. Assumption Set for TTP Reference                     | ISS3                   |
| 36. Assumption Set for TTP Test                          | S3B                    |
| 37. Assumption Set for TP for socioeconomic group        | -                      |
| 38. Source for Output Choice file (OUTC)                 | BASIC                  |
| 39. Output for DTP P1                                    | N                      |
| 40. Output for DTP P2                                    | N                      |
| 41. Output for Main P Component                          | Y                      |
| 42. Output for DTP E1                                    | N                      |
| 43. Output for DTP E2                                    | N                      |
| 44. Output for DTP E3                                    | N                      |
| 45. Output for Main E Component                          | Y                      |
| 46. Output file name                                     | Sensitivity_Analysis_3 |
| 47. Run number for P-Component                           | -                      |
| 48. Results file for E-Component                         | -                      |
| 49. Components required                                  | PE                     |
| 50. Results folder for P to be used in E-Component       | -                      |
| 51. Fixed age of starting product use                    | 16                     |
| 52. Output absolute risk file?                           | N                      |

## Results for PHIM for Run 4 (Sensitivity\_Analysis\_3.RTF)

\*\*\*\*\*

TTP values for Run: 4, Scenario: NULL

| Variable Parameter | Value               |
|--------------------|---------------------|
| 1. Country         | US (United States)  |
| 2. Sex             | F (Females)         |
| 3. Assumption Set  | ISS3                |
| Note:              | Period is in Months |

| Age   | Period  | Initiation  | Cessation    | Re-initiation |
|-------|---------|-------------|--------------|---------------|
|       |         | Never<br>CC | CC<br>Former | Former<br>CC  |
| 10-14 | 1-12    | 0.003758    | 0.008742     | 0.000000      |
| 15-19 | 1-12    | 0.003469    | 0.002515     | 0.000000      |
| 20-24 | 1-12    | 0.000276    | 0.000761     | 0.000000      |
| 25-29 | 1-12    | 0.000137    | 0.001375     | 0.000000      |
| 30-34 | 1-12    | 0.000069    | 0.001149     | 0.000000      |
| 35-39 | 1-12    | 0.000000    | 0.000991     | 0.000000      |
| 40-44 | 1-12    | 0.000000    | 0.000833     | 0.000000      |
| 45-49 | 1-12    | 0.000000    | 0.001723     | 0.000000      |
| 50-54 | 1-12    | 0.000000    | 0.002336     | 0.000000      |
| 55-59 | 1-12    | 0.000000    | 0.002233     | 0.000000      |
| 60-64 | 1-12    | 0.000000    | 0.004634     | 0.000000      |
| 65-69 | 1-12    | 0.000000    | 0.003505     | 0.000000      |
| 70-74 | 1-12    | 0.000000    | 0.004329     | 0.000000      |
| 75-79 | 1-12    | 0.000000    | 0.004329     | 0.000000      |
| 10-14 | 13-72   | 0.004794    | 0.008742     | 0.000000      |
| 15-19 | 13-72   | 0.004527    | 0.004082     | 0.000000      |
| 20-24 | 13-72   | 0.000105    | 0.001261     | 0.000000      |
| 25-29 | 13-72   | 0.000053    | 0.000952     | 0.000000      |
| 30-34 | 13-72   | 0.000026    | 0.000733     | 0.000000      |
| 35-39 | 13-72   | 0.000000    | 0.000753     | 0.000000      |
| 40-44 | 13-72   | 0.000000    | 0.001535     | 0.000000      |
| 45-49 | 13-72   | 0.000000    | 0.002998     | 0.000000      |
| 50-54 | 13-72   | 0.000000    | 0.003159     | 0.000000      |
| 55-59 | 13-72   | 0.000000    | 0.002965     | 0.000000      |
| 60-64 | 13-72   | 0.000000    | 0.003633     | 0.000000      |
| 65-69 | 13-72   | 0.000000    | 0.004522     | 0.000000      |
| 70-74 | 13-72   | 0.000000    | 0.005208     | 0.000000      |
| 75-79 | 13-72   | 0.000000    | 0.005208     | 0.000000      |
| 10-14 | 73-132  | 0.003969    | 0.008742     | 0.000000      |
| 15-19 | 73-132  | 0.003056    | 0.003373     | 0.000000      |
| 20-24 | 73-132  | 0.001459    | 0.003881     | 0.000000      |
| 25-29 | 73-132  | 0.000714    | 0.001953     | 0.000000      |
| 30-34 | 73-132  | 0.000111    | 0.001338     | 0.000000      |
| 35-39 | 73-132  | 0.000000    | 0.001507     | 0.000000      |
| 40-44 | 73-132  | 0.000000    | 0.002080     | 0.000000      |
| 45-49 | 73-132  | 0.000000    | 0.003809     | 0.000000      |
| 50-54 | 73-132  | 0.000000    | 0.004871     | 0.000000      |
| 55-59 | 73-132  | 0.000000    | 0.004560     | 0.000000      |
| 60-64 | 73-132  | 0.000000    | 0.007192     | 0.000000      |
| 65-69 | 73-132  | 0.000000    | 0.007033     | 0.000000      |
| 70-74 | 73-132  | 0.000000    | 0.008206     | 0.000000      |
| 75-79 | 73-132  | 0.000000    | 0.008206     | 0.000000      |
| 10-14 | 133-192 | 0.002861    | 0.008742     | 0.000000      |
| 15-19 | 133-192 | 0.002594    | 0.003996     | 0.000000      |
| 20-24 | 133-192 | 0.001247    | 0.002805     | 0.000000      |
| 25-29 | 133-192 | 0.000289    | 0.001574     | 0.000000      |
| 30-34 | 133-192 | 0.000132    | 0.001293     | 0.000000      |
| 35-39 | 133-192 | 0.000000    | 0.001219     | 0.000000      |
| 40-44 | 133-192 | 0.000000    | 0.001657     | 0.000000      |
| 45-49 | 133-192 | 0.000000    | 0.001995     | 0.000000      |
| 50-54 | 133-192 | 0.000000    | 0.002154     | 0.000000      |
| 55-59 | 133-192 | 0.000000    | 0.002072     | 0.000000      |
| 60-64 | 133-192 | 0.000000    | 0.005049     | 0.000000      |
| 65-69 | 133-192 | 0.000000    | 0.003680     | 0.000000      |
| 70-74 | 133-192 | 0.000000    | 0.006144     | 0.000000      |
| 75-79 | 133-192 | 0.000000    | 0.006144     | 0.000000      |
| 10-14 | 193-252 | 0.001859    | 0.008742     | 0.000000      |
| 15-19 | 193-252 | 0.002232    | 0.005770     | 0.000000      |
| 20-24 | 193-252 | 0.001079    | 0.003262     | 0.000000      |
| 25-29 | 193-252 | 0.000531    | 0.002002     | 0.000000      |
| 30-34 | 193-252 | 0.000263    | 0.003240     | 0.000000      |
| 35-39 | 193-252 | 0.000000    | 0.001771     | 0.000000      |
| 40-44 | 193-252 | 0.000000    | 0.002173     | 0.000000      |
| 45-49 | 193-252 | 0.000000    | 0.002075     | 0.000000      |
| 50-54 | 193-252 | 0.000000    | 0.003431     | 0.000000      |

### Results for PHIM for Run 4 (Sensitivity\_Analysis\_3.RTF)

|       |         |          |          |          |
|-------|---------|----------|----------|----------|
| 55-59 | 193-252 | 0.000000 | 0.002906 | 0.000000 |
| 60-64 | 193-252 | 0.000000 | 0.007139 | 0.000000 |
| 65-69 | 193-252 | 0.000000 | 0.004963 | 0.000000 |
| 70-74 | 193-252 | 0.000000 | 0.006269 | 0.000000 |
| 75-79 | 193-252 | 0.000000 | 0.006269 | 0.000000 |
| 10-14 | 253+    | 0.000931 | 0.008742 | 0.000000 |
| 15-19 | 253+    | 0.001798 | 0.009440 | 0.000000 |
| 20-24 | 253+    | 0.000023 | 0.002831 | 0.000000 |
| 25-29 | 253+    | 0.000073 | 0.002655 | 0.000000 |
| 30-34 | 253+    | 0.000037 | 0.004614 | 0.000000 |
| 35-39 | 253+    | 0.000000 | 0.002607 | 0.000000 |
| 40-44 | 253+    | 0.000000 | 0.003115 | 0.000000 |
| 45-49 | 253+    | 0.000000 | 0.002132 | 0.000000 |
| 50-54 | 253+    | 0.000000 | 0.003497 | 0.000000 |
| 55-59 | 253+    | 0.000000 | 0.002942 | 0.000000 |
| 60-64 | 253+    | 0.000000 | 0.005376 | 0.000000 |
| 65-69 | 253+    | 0.000000 | 0.001789 | 0.000000 |
| 70-74 | 253+    | 0.000000 | 0.004077 | 0.000000 |
| 75-79 | 253+    | 0.000000 | 0.004077 | 0.000000 |

## Results for PHIM for Run 4 (Sensitivity\_Analysis\_3.RTF)

\*\*\*\*\*

TTP values for Run: 4, Scenario: Ecig

| Variable Parameter |         | Value               |               |               |              |                |                |               |                |                |  |
|--------------------|---------|---------------------|---------------|---------------|--------------|----------------|----------------|---------------|----------------|----------------|--|
| 1. Country         |         | US (United States)  |               |               |              |                |                |               |                |                |  |
| 2. Sex             |         | F (Females)         |               |               |              |                |                |               |                |                |  |
| 3. Assumption Set  |         | S3B                 |               |               |              |                |                |               |                |                |  |
| Note:              |         | Period is in Months |               |               |              |                |                |               |                |                |  |
| Age                | Period  | Initiation          |               |               | Cessation    |                |                | Re-initiation |                |                |  |
|                    |         | Never<br>CC         | Never<br>Ecig | Never<br>Dual | CC<br>Former | Ecig<br>Former | Dual<br>Former | Former<br>CC  | Former<br>Ecig | Former<br>Dual |  |
| 10-14              | 1-12    | 0.001879            | 0.001879      | 0.000000      | 0.008742     | 0.006556       | 0.000000       | 0.000000      | 0.000000       | 0.000000       |  |
| 15-19              | 1-12    | 0.001735            | 0.001735      | 0.000000      | 0.002515     | 0.001886       | 0.000000       | 0.000000      | 0.000000       | 0.000000       |  |
| 20-24              | 1-12    | 0.000138            | 0.000138      | 0.000000      | 0.000761     | 0.000571       | 0.000000       | 0.000000      | 0.000000       | 0.000000       |  |
| 25-29              | 1-12    | 0.000069            | 0.000069      | 0.000000      | 0.001376     | 0.001032       | 0.000000       | 0.000000      | 0.000000       | 0.000000       |  |
| 30-34              | 1-12    | 0.000034            | 0.000034      | 0.000000      | 0.001149     | 0.000862       | 0.000000       | 0.000000      | 0.000000       | 0.000000       |  |
| 35-39              | 1-12    | 0.000000            | 0.000000      | 0.000000      | 0.000991     | 0.000743       | 0.000000       | 0.000000      | 0.000000       | 0.000000       |  |
| 40-44              | 1-12    | 0.000000            | 0.000000      | 0.000000      | 0.000833     | 0.000625       | 0.000000       | 0.000000      | 0.000000       | 0.000000       |  |
| 45-49              | 1-12    | 0.000000            | 0.000000      | 0.000000      | 0.001723     | 0.001292       | 0.000000       | 0.000000      | 0.000000       | 0.000000       |  |
| 50-54              | 1-12    | 0.000000            | 0.000000      | 0.000000      | 0.002336     | 0.001752       | 0.000000       | 0.000000      | 0.000000       | 0.000000       |  |
| 55-59              | 1-12    | 0.000000            | 0.000000      | 0.000000      | 0.002233     | 0.001675       | 0.000000       | 0.000000      | 0.000000       | 0.000000       |  |
| 60-64              | 1-12    | 0.000000            | 0.000000      | 0.000000      | 0.004635     | 0.003476       | 0.000000       | 0.000000      | 0.000000       | 0.000000       |  |
| 65-69              | 1-12    | 0.000000            | 0.000000      | 0.000000      | 0.003505     | 0.002629       | 0.000000       | 0.000000      | 0.000000       | 0.000000       |  |
| 70-74              | 1-12    | 0.000000            | 0.000000      | 0.000000      | 0.004329     | 0.003246       | 0.000000       | 0.000000      | 0.000000       | 0.000000       |  |
| 75-79              | 1-12    | 0.000000            | 0.000000      | 0.000000      | 0.004329     | 0.003246       | 0.000000       | 0.000000      | 0.000000       | 0.000000       |  |
| 10-14              | 13-72   | 0.001918            | 0.002877      | 0.000000      | 0.008742     | 0.006556       | 0.000000       | 0.000000      | 0.000000       | 0.000000       |  |
| 15-19              | 13-72   | 0.001811            | 0.002716      | 0.000000      | 0.004083     | 0.003062       | 0.000000       | 0.000000      | 0.000000       | 0.000000       |  |
| 20-24              | 13-72   | 0.000042            | 0.000063      | 0.000000      | 0.001261     | 0.000946       | 0.000000       | 0.000000      | 0.000000       | 0.000000       |  |
| 25-29              | 13-72   | 0.000021            | 0.000032      | 0.000000      | 0.000952     | 0.000714       | 0.000000       | 0.000000      | 0.000000       | 0.000000       |  |
| 30-34              | 13-72   | 0.000011            | 0.000016      | 0.000000      | 0.000733     | 0.000550       | 0.000000       | 0.000000      | 0.000000       | 0.000000       |  |
| 35-39              | 13-72   | 0.000000            | 0.000000      | 0.000000      | 0.000754     | 0.000565       | 0.000000       | 0.000000      | 0.000000       | 0.000000       |  |
| 40-44              | 13-72   | 0.000000            | 0.000000      | 0.000000      | 0.001535     | 0.001151       | 0.000000       | 0.000000      | 0.000000       | 0.000000       |  |
| 45-49              | 13-72   | 0.000000            | 0.000000      | 0.000000      | 0.002998     | 0.002248       | 0.000000       | 0.000000      | 0.000000       | 0.000000       |  |
| 50-54              | 13-72   | 0.000000            | 0.000000      | 0.000000      | 0.003160     | 0.002370       | 0.000000       | 0.000000      | 0.000000       | 0.000000       |  |
| 55-59              | 13-72   | 0.000000            | 0.000000      | 0.000000      | 0.002965     | 0.002224       | 0.000000       | 0.000000      | 0.000000       | 0.000000       |  |
| 60-64              | 13-72   | 0.000000            | 0.000000      | 0.000000      | 0.003633     | 0.002725       | 0.000000       | 0.000000      | 0.000000       | 0.000000       |  |
| 65-69              | 13-72   | 0.000000            | 0.000000      | 0.000000      | 0.004522     | 0.003391       | 0.000000       | 0.000000      | 0.000000       | 0.000000       |  |
| 70-74              | 13-72   | 0.000000            | 0.000000      | 0.000000      | 0.005208     | 0.003906       | 0.000000       | 0.000000      | 0.000000       | 0.000000       |  |
| 75-79              | 13-72   | 0.000000            | 0.000000      | 0.000000      | 0.005208     | 0.003906       | 0.000000       | 0.000000      | 0.000000       | 0.000000       |  |
| 10-14              | 73-132  | 0.000794            | 0.003175      | 0.000000      | 0.008742     | 0.006556       | 0.000000       | 0.000000      | 0.000000       | 0.000000       |  |
| 15-19              | 73-132  | 0.000611            | 0.002445      | 0.000000      | 0.003373     | 0.002530       | 0.000000       | 0.000000      | 0.000000       | 0.000000       |  |
| 20-24              | 73-132  | 0.000292            | 0.001167      | 0.000000      | 0.003881     | 0.002910       | 0.000000       | 0.000000      | 0.000000       | 0.000000       |  |
| 25-29              | 73-132  | 0.000143            | 0.000571      | 0.000000      | 0.001954     | 0.001465       | 0.000000       | 0.000000      | 0.000000       | 0.000000       |  |
| 30-34              | 73-132  | 0.000022            | 0.000089      | 0.000000      | 0.001338     | 0.001004       | 0.000000       | 0.000000      | 0.000000       | 0.000000       |  |
| 35-39              | 73-132  | 0.000000            | 0.000000      | 0.000000      | 0.001507     | 0.001130       | 0.000000       | 0.000000      | 0.000000       | 0.000000       |  |
| 40-44              | 73-132  | 0.000000            | 0.000000      | 0.000000      | 0.002080     | 0.001560       | 0.000000       | 0.000000      | 0.000000       | 0.000000       |  |
| 45-49              | 73-132  | 0.000000            | 0.000000      | 0.000000      | 0.003809     | 0.002856       | 0.000000       | 0.000000      | 0.000000       | 0.000000       |  |
| 50-54              | 73-132  | 0.000000            | 0.000000      | 0.000000      | 0.004871     | 0.003653       | 0.000000       | 0.000000      | 0.000000       | 0.000000       |  |
| 55-59              | 73-132  | 0.000000            | 0.000000      | 0.000000      | 0.004560     | 0.003420       | 0.000000       | 0.000000      | 0.000000       | 0.000000       |  |
| 60-64              | 73-132  | 0.000000            | 0.000000      | 0.000000      | 0.007192     | 0.005394       | 0.000000       | 0.000000      | 0.000000       | 0.000000       |  |
| 65-69              | 73-132  | 0.000000            | 0.000000      | 0.000000      | 0.007033     | 0.005275       | 0.000000       | 0.000000      | 0.000000       | 0.000000       |  |
| 70-74              | 73-132  | 0.000000            | 0.000000      | 0.000000      | 0.008206     | 0.006155       | 0.000000       | 0.000000      | 0.000000       | 0.000000       |  |
| 75-79              | 73-132  | 0.000000            | 0.000000      | 0.000000      | 0.008206     | 0.006155       | 0.000000       | 0.000000      | 0.000000       | 0.000000       |  |
| 10-14              | 133-192 | 0.000143            | 0.002718      | 0.000000      | 0.008742     | 0.006556       | 0.000000       | 0.000000      | 0.000000       | 0.000000       |  |
| 15-19              | 133-192 | 0.000130            | 0.002465      | 0.000000      | 0.003996     | 0.002997       | 0.000000       | 0.000000      | 0.000000       | 0.000000       |  |
| 20-24              | 133-192 | 0.000062            | 0.001185      | 0.000000      | 0.002805     | 0.002104       | 0.000000       | 0.000000      | 0.000000       | 0.000000       |  |
| 25-29              | 133-192 | 0.000015            | 0.000275      | 0.000000      | 0.001574     | 0.001181       | 0.000000       | 0.000000      | 0.000000       | 0.000000       |  |
| 30-34              | 133-192 | 0.000007            | 0.000125      | 0.000000      | 0.001293     | 0.000970       | 0.000000       | 0.000000      | 0.000000       | 0.000000       |  |
| 35-39              | 133-192 | 0.000000            | 0.000000      | 0.000000      | 0.001219     | 0.000914       | 0.000000       | 0.000000      | 0.000000       | 0.000000       |  |
| 40-44              | 133-192 | 0.000000            | 0.000000      | 0.000000      | 0.001657     | 0.001243       | 0.000000       | 0.000000      | 0.000000       | 0.000000       |  |
| 45-49              | 133-192 | 0.000000            | 0.000000      | 0.000000      | 0.001995     | 0.001496       | 0.000000       | 0.000000      | 0.000000       | 0.000000       |  |
| 50-54              | 133-192 | 0.000000            | 0.000000      | 0.000000      | 0.002154     | 0.001615       | 0.000000       | 0.000000      | 0.000000       | 0.000000       |  |
| 55-59              | 133-192 | 0.000000            | 0.000000      | 0.000000      | 0.002072     | 0.001554       | 0.000000       | 0.000000      | 0.000000       | 0.000000       |  |
| 60-64              | 133-192 | 0.000000            | 0.000000      | 0.000000      | 0.005049     | 0.003786       | 0.000000       | 0.000000      | 0.000000       | 0.000000       |  |
| 65-69              | 133-192 | 0.000000            | 0.000000      | 0.000000      | 0.003681     | 0.002760       | 0.000000       | 0.000000      | 0.000000       | 0.000000       |  |
| 70-74              | 133-192 | 0.000000            | 0.000000      | 0.000000      | 0.006144     | 0.004608       | 0.000000       | 0.000000      | 0.000000       | 0.000000       |  |
| 75-79              | 133-192 | 0.000000            | 0.000000      | 0.000000      | 0.006144     | 0.004608       | 0.000000       | 0.000000      | 0.000000       | 0.000000       |  |
| 10-14              | 193-252 | 0.000093            | 0.001766      | 0.000000      | 0.008742     | 0.006556       | 0.000000       | 0.000000      | 0.000000       | 0.000000       |  |
| 15-19              | 193-252 | 0.000112            | 0.002120      | 0.000000      | 0.005770     | 0.004327       | 0.000000       | 0.000000      | 0.000000       | 0.000000       |  |
| 20-24              | 193-252 | 0.000054            | 0.001025      | 0.000000      | 0.003262     | 0.002447       | 0.000000       | 0.000000      | 0.000000       | 0.000000       |  |
| 25-29              | 193-252 | 0.000027            | 0.000504      | 0.000000      | 0.002002     | 0.001501       | 0.000000       | 0.000000      | 0.000000       | 0.000000       |  |
| 30-34              | 193-252 | 0.000013            | 0.000250      | 0.000000      | 0.003241     | 0.002430       | 0.000000       | 0.000000      | 0.000000       | 0.000000       |  |
| 35-39              | 193-252 | 0.000000            | 0.000000      | 0.000000      | 0.001771     | 0.001328       | 0.000000       | 0.000000      | 0.000000       | 0.000000       |  |
| 40-44              | 193-252 | 0.000000            | 0.000000      | 0.000000      | 0.002173     | 0.001630       | 0.000000       | 0.000000      | 0.000000       | 0.000000       |  |
| 45-49              | 193-252 | 0.000000            | 0.000000      | 0.000000      | 0.002075     | 0.001556       | 0.000000       | 0.000000      | 0.000000       | 0.000000       |  |
| 50-54              | 193-252 | 0.000000            | 0.000000      | 0.000000      | 0.003432     | 0.002574       | 0.000000       | 0.000000      | 0.000000       | 0.000000       |  |

### Results for PHIM for Run 4 (Sensitivity\_Analysis\_3.RTF)

|       |         |          |          |          |          |          |          |          |          |          |
|-------|---------|----------|----------|----------|----------|----------|----------|----------|----------|----------|
| 55-59 | 193-252 | 0.000000 | 0.000000 | 0.000000 | 0.002906 | 0.002180 | 0.000000 | 0.000000 | 0.000000 | 0.000000 |
| 60-64 | 193-252 | 0.000000 | 0.000000 | 0.000000 | 0.007139 | 0.005354 | 0.000000 | 0.000000 | 0.000000 | 0.000000 |
| 65-69 | 193-252 | 0.000000 | 0.000000 | 0.000000 | 0.004963 | 0.003722 | 0.000000 | 0.000000 | 0.000000 | 0.000000 |
| 70-74 | 193-252 | 0.000000 | 0.000000 | 0.000000 | 0.006269 | 0.004701 | 0.000000 | 0.000000 | 0.000000 | 0.000000 |
| 75-79 | 193-252 | 0.000000 | 0.000000 | 0.000000 | 0.006269 | 0.004701 | 0.000000 | 0.000000 | 0.000000 | 0.000000 |
| 10-14 | 253+    | 0.000047 | 0.000884 | 0.000000 | 0.008742 | 0.006556 | 0.000000 | 0.000000 | 0.000000 | 0.000000 |
| 15-19 | 253+    | 0.000090 | 0.001708 | 0.000000 | 0.009440 | 0.007080 | 0.000000 | 0.000000 | 0.000000 | 0.000000 |
| 20-24 | 253+    | 0.000001 | 0.000022 | 0.000000 | 0.002831 | 0.002123 | 0.000000 | 0.000000 | 0.000000 | 0.000000 |
| 25-29 | 253+    | 0.000004 | 0.000070 | 0.000000 | 0.002656 | 0.001992 | 0.000000 | 0.000000 | 0.000000 | 0.000000 |
| 30-34 | 253+    | 0.000002 | 0.000035 | 0.000000 | 0.004614 | 0.003460 | 0.000000 | 0.000000 | 0.000000 | 0.000000 |
| 35-39 | 253+    | 0.000000 | 0.000000 | 0.000000 | 0.002608 | 0.001956 | 0.000000 | 0.000000 | 0.000000 | 0.000000 |
| 40-44 | 253+    | 0.000000 | 0.000000 | 0.000000 | 0.003115 | 0.002336 | 0.000000 | 0.000000 | 0.000000 | 0.000000 |
| 45-49 | 253+    | 0.000000 | 0.000000 | 0.000000 | 0.002132 | 0.001599 | 0.000000 | 0.000000 | 0.000000 | 0.000000 |
| 50-54 | 253+    | 0.000000 | 0.000000 | 0.000000 | 0.003497 | 0.002623 | 0.000000 | 0.000000 | 0.000000 | 0.000000 |
| 55-59 | 253+    | 0.000000 | 0.000000 | 0.000000 | 0.002942 | 0.002206 | 0.000000 | 0.000000 | 0.000000 | 0.000000 |
| 60-64 | 253+    | 0.000000 | 0.000000 | 0.000000 | 0.005376 | 0.004032 | 0.000000 | 0.000000 | 0.000000 | 0.000000 |
| 65-69 | 253+    | 0.000000 | 0.000000 | 0.000000 | 0.001789 | 0.001342 | 0.000000 | 0.000000 | 0.000000 | 0.000000 |
| 70-74 | 253+    | 0.000000 | 0.000000 | 0.000000 | 0.004077 | 0.003058 | 0.000000 | 0.000000 | 0.000000 | 0.000000 |
| 75-79 | 253+    | 0.000000 | 0.000000 | 0.000000 | 0.004077 | 0.003058 | 0.000000 | 0.000000 | 0.000000 | 0.000000 |





### Results for PHIM for Run 4 (Sensitivity\_Analysis\_3.RTF)

|       |      |          |          |          |          |          |          |
|-------|------|----------|----------|----------|----------|----------|----------|
| 25-29 | 253+ | 0.014127 | 0.000000 | 0.000000 | 0.000000 | 0.000000 | 0.000000 |
| 30-34 | 253+ | 0.013889 | 0.000000 | 0.000000 | 0.000000 | 0.000000 | 0.000000 |
| 35-39 | 253+ | 0.012929 | 0.000000 | 0.000000 | 0.000000 | 0.000000 | 0.000000 |
| 40-44 | 253+ | 0.012785 | 0.000000 | 0.000000 | 0.000000 | 0.000000 | 0.000000 |
| 45-49 | 253+ | 0.012295 | 0.000000 | 0.000000 | 0.000000 | 0.000000 | 0.000000 |
| 50-54 | 253+ | 0.011536 | 0.000000 | 0.000000 | 0.000000 | 0.000000 | 0.000000 |
| 55-59 | 253+ | 0.008988 | 0.000000 | 0.000000 | 0.000000 | 0.000000 | 0.000000 |
| 60-64 | 253+ | 0.008098 | 0.000000 | 0.000000 | 0.000000 | 0.000000 | 0.000000 |
| 65-69 | 253+ | 0.006274 | 0.000000 | 0.000000 | 0.000000 | 0.000000 | 0.000000 |
| 70-74 | 253+ | 0.004141 | 0.000000 | 0.000000 | 0.000000 | 0.000000 | 0.000000 |
| 75-79 | 253+ | 0.004141 | 0.000000 | 0.000000 | 0.000000 | 0.000000 | 0.000000 |

## Results for PHIM for Run 4 (Sensitivity\_Analysis\_3.RTF)

\*\*\*\*\*

### Main Output for the Tobacco History for Run: 4, Simulation: 1, Scenario: NULL

| Variable Parameter          | Value              |
|-----------------------------|--------------------|
| 1. Country                  | US (United States) |
| 2. Sex                      | F (Females)        |
| 3. Year of start of process | 1990               |

Year of Follow-up: 2040, Age Group: All Ages  
 Period    Age Group    Smoking Group            N            %

|    |          |           |       |       |
|----|----------|-----------|-------|-------|
| 50 | All Ages | Never Any | 20670 | 58.80 |
| 50 | All Ages | CC        | 2462  | 7.00  |
| 50 | All Ages | Former    | 12019 | 34.19 |

Year of Follow-up: 2040, Age Group: 18-19  
 Period    Age Group    Smoking Group            N            %

|    |       |           |   |   |
|----|-------|-----------|---|---|
| 50 | 18-19 | Never Any | 0 | . |
| 50 | 18-19 | CC        | 0 | . |
| 50 | 18-19 | Former    | 0 | . |

Year of Follow-up: 2040, Age Group: 20-24  
 Period    Age Group    Smoking Group            N            %

|    |       |           |   |   |
|----|-------|-----------|---|---|
| 50 | 20-24 | Never Any | 0 | . |
| 50 | 20-24 | CC        | 0 | . |
| 50 | 20-24 | Former    | 0 | . |

Year of Follow-up: 2040, Age Group: 25-29  
 Period    Age Group    Smoking Group            N            %

|    |       |           |   |   |
|----|-------|-----------|---|---|
| 50 | 25-29 | Never Any | 0 | . |
| 50 | 25-29 | CC        | 0 | . |
| 50 | 25-29 | Former    | 0 | . |

Year of Follow-up: 2040, Age Group: 30-34  
 Period    Age Group    Smoking Group            N            %

|    |       |           |   |   |
|----|-------|-----------|---|---|
| 50 | 30-34 | Never Any | 0 | . |
| 50 | 30-34 | CC        | 0 | . |
| 50 | 30-34 | Former    | 0 | . |

Year of Follow-up: 2040, Age Group: 35-39  
 Period    Age Group    Smoking Group            N            %

|    |       |           |   |   |
|----|-------|-----------|---|---|
| 50 | 35-39 | Never Any | 0 | . |
| 50 | 35-39 | CC        | 0 | . |
| 50 | 35-39 | Former    | 0 | . |

Year of Follow-up: 2040, Age Group: 40-44  
 Period    Age Group    Smoking Group            N            %

|    |       |           |   |   |
|----|-------|-----------|---|---|
| 50 | 40-44 | Never Any | 0 | . |
| 50 | 40-44 | CC        | 0 | . |
| 50 | 40-44 | Former    | 0 | . |

Year of Follow-up: 2040, Age Group: 45-49  
 Period    Age Group    Smoking Group            N            %

|    |       |           |   |   |
|----|-------|-----------|---|---|
| 50 | 45-49 | Never Any | 0 | . |
| 50 | 45-49 | CC        | 0 | . |
| 50 | 45-49 | Former    | 0 | . |

Year of Follow-up: 2040, Age Group: 50-54  
 Period    Age Group    Smoking Group            N            %

|    |       |           |   |   |
|----|-------|-----------|---|---|
| 50 | 50-54 | Never Any | 0 | . |
| 50 | 50-54 | CC        | 0 | . |
| 50 | 50-54 | Former    | 0 | . |

Year of Follow-up: 2040, Age Group: 55-59  
 Period    Age Group    Smoking Group            N            %

|    |       |           |   |   |
|----|-------|-----------|---|---|
| 50 | 55-59 | Never Any | 0 | . |
| 50 | 55-59 | CC        | 0 | . |
| 50 | 55-59 | Former    | 0 | . |

Year of Follow-up: 2040, Age Group: 60-64  
 Period    Age Group    Smoking Group            N            %

### Results for PHIM for Run 4 (Sensitivity\_Analysis\_3.RTF)

|                                           |           |               |      |       |
|-------------------------------------------|-----------|---------------|------|-------|
| 50                                        | 60-64     | Never Any     | 4803 | 60.57 |
| 50                                        | 60-64     | CC            | 621  | 7.83  |
| 50                                        | 60-64     | Former        | 2506 | 31.60 |
| Year of Follow-up: 2040, Age Group: 65-69 |           |               |      |       |
| Period                                    | Age Group | Smoking Group | N    | %     |
| 50                                        | 65-69     | Never Any     | 5407 | 64.75 |
| 50                                        | 65-69     | CC            | 538  | 6.44  |
| 50                                        | 65-69     | Former        | 2405 | 28.80 |
| Year of Follow-up: 2040, Age Group: 70-74 |           |               |      |       |
| Period                                    | Age Group | Smoking Group | N    | %     |
| 50                                        | 70-74     | Never Any     | 5181 | 58.92 |
| 50                                        | 70-74     | CC            | 605  | 6.88  |
| 50                                        | 70-74     | Former        | 3007 | 34.20 |
| Year of Follow-up: 2040, Age Group: 75-79 |           |               |      |       |
| Period                                    | Age Group | Smoking Group | N    | %     |
| 50                                        | 75-79     | Never Any     | 5279 | 52.38 |
| 50                                        | 75-79     | CC            | 698  | 6.93  |
| 50                                        | 75-79     | Former        | 4101 | 40.69 |

## Results for PHIM for Run 4 (Sensitivity\_Analysis\_3.RTF)

\*\*\*\*\*

### Main Output for the Tobacco History for Run: 4, Simulation: 1, Scenario: Ecig

| Variable Parameter                           |           | Value              |       |       |               |             |               |                |              |
|----------------------------------------------|-----------|--------------------|-------|-------|---------------|-------------|---------------|----------------|--------------|
| 1. Country                                   |           | US (United States) |       |       |               |             |               |                |              |
| 2. Sex                                       |           | F (Females)        |       |       |               |             |               |                |              |
| 3. Year of start of process                  |           | 1990               |       |       |               |             |               |                |              |
| Year of Follow-up: 1990, Age Group: All Ages |           |                    |       |       |               |             |               |                |              |
| Period                                       | Age Group | Smoking Group      | N     | %     | Ever Quit (N) | Ever Quit % | Mean Yrs Quit | Short Term (n) | Short Term % |
| 0                                            | All Ages  | Never Any          | 47776 | 54.92 |               |             |               |                |              |
| 0                                            | All Ages  | CC                 | 22737 | 26.14 | 0             | 0.00        |               |                |              |
| 0                                            | All Ages  | Ecig               | 0     | 0.00  |               |             |               |                |              |
| 0                                            | All Ages  | Dual               | 0     | 0.00  |               |             |               |                |              |
| 0                                            | All Ages  | Former             | 16484 | 18.95 |               |             | 11.90         | 2815           | 17.08        |
| Year of Follow-up: 1990, Age Group: 18-19    |           |                    |       |       |               |             |               |                |              |
| Period                                       | Age Group | Smoking Group      | N     | %     | Ever Quit (N) | Ever Quit % | Mean Yrs Quit | Short Term (n) | Short Term % |
| 0                                            | 18-19     | Never Any          | 2570  | 78.43 |               |             |               |                |              |
| 0                                            | 18-19     | CC                 | 535   | 16.33 | 0             | 0.00        |               |                |              |
| 0                                            | 18-19     | Ecig               | 0     | 0.00  |               |             |               |                |              |
| 0                                            | 18-19     | Dual               | 0     | 0.00  |               |             |               |                |              |
| 0                                            | 18-19     | Former             | 172   | 5.25  |               |             | 0.20          | 172            | 100.00       |
| Year of Follow-up: 1990, Age Group: 20-24    |           |                    |       |       |               |             |               |                |              |
| Period                                       | Age Group | Smoking Group      | N     | %     | Ever Quit (N) | Ever Quit % | Mean Yrs Quit | Short Term (n) | Short Term % |
| 0                                            | 20-24     | Never Any          | 5354  | 60.89 |               |             |               |                |              |
| 0                                            | 20-24     | CC                 | 2560  | 29.11 | 0             | 0.00        |               |                |              |
| 0                                            | 20-24     | Ecig               | 0     | 0.00  |               |             |               |                |              |
| 0                                            | 20-24     | Dual               | 0     | 0.00  |               |             |               |                |              |
| 0                                            | 20-24     | Former             | 879   | 10.00 |               |             | 1.58          | 420            | 47.78        |
| Year of Follow-up: 1990, Age Group: 25-29    |           |                    |       |       |               |             |               |                |              |
| Period                                       | Age Group | Smoking Group      | N     | %     | Ever Quit (N) | Ever Quit % | Mean Yrs Quit | Short Term (n) | Short Term % |
| 0                                            | 25-29     | Never Any          | 5318  | 52.77 |               |             |               |                |              |
| 0                                            | 25-29     | CC                 | 3335  | 33.09 | 0             | 0.00        |               |                |              |
| 0                                            | 25-29     | Ecig               | 0     | 0.00  |               |             |               |                |              |
| 0                                            | 25-29     | Dual               | 0     | 0.00  |               |             |               |                |              |
| 0                                            | 25-29     | Former             | 1425  | 14.14 |               |             | 3.91          | 404            | 28.35        |
| Year of Follow-up: 1990, Age Group: 30-34    |           |                    |       |       |               |             |               |                |              |
| Period                                       | Age Group | Smoking Group      | N     | %     | Ever Quit (N) | Ever Quit % | Mean Yrs Quit | Short Term (n) | Short Term % |
| 0                                            | 30-34     | Never Any          | 5287  | 50.36 |               |             |               |                |              |
| 0                                            | 30-34     | CC                 | 3326  | 31.68 | 0             | 0.00        |               |                |              |
| 0                                            | 30-34     | Ecig               | 0     | 0.00  |               |             |               |                |              |
| 0                                            | 30-34     | Dual               | 0     | 0.00  |               |             |               |                |              |
| 0                                            | 30-34     | Former             | 1886  | 17.96 |               |             | 4.36          | 566            | 30.01        |
| Year of Follow-up: 1990, Age Group: 35-39    |           |                    |       |       |               |             |               |                |              |
| Period                                       | Age Group | Smoking Group      | N     | %     | Ever Quit (N) | Ever Quit % | Mean Yrs Quit | Short Term (n) | Short Term % |
| 0                                            | 35-39     | Never Any          | 5018  | 52.27 |               |             |               |                |              |
| 0                                            | 35-39     | CC                 | 2653  | 27.64 | 0             | 0.00        |               |                |              |
| 0                                            | 35-39     | Ecig               | 0     | 0.00  |               |             |               |                |              |
| 0                                            | 35-39     | Dual               | 0     | 0.00  |               |             |               |                |              |
| 0                                            | 35-39     | Former             | 1929  | 20.09 |               |             | 7.96          | 324            | 16.80        |
| Year of Follow-up: 1990, Age Group: 40-44    |           |                    |       |       |               |             |               |                |              |
| Period                                       | Age Group | Smoking Group      | N     | %     | Ever Quit (N) | Ever Quit % | Mean Yrs Quit | Short Term (n) | Short Term % |
| 0                                            | 40-44     | Never Any          | 4356  | 51.27 |               |             |               |                |              |
| 0                                            | 40-44     | CC                 | 2397  | 28.21 | 0             | 0.00        |               |                |              |
| 0                                            | 40-44     | Ecig               | 0     | 0.00  |               |             |               |                |              |
| 0                                            | 40-44     | Dual               | 0     | 0.00  |               |             |               |                |              |
| 0                                            | 40-44     | Former             | 1744  | 20.52 |               |             | 7.33          | 339            | 19.44        |
| Year of Follow-up: 1990, Age Group: 45-49    |           |                    |       |       |               |             |               |                |              |
| Period                                       | Age Group | Smoking Group      | N     | %     | Ever Quit (N) | Ever Quit % | Mean Yrs Quit | Short Term (n) | Short Term % |
| 0                                            | 45-49     | Never Any          | 3116  | 47.67 |               |             |               |                |              |
| 0                                            | 45-49     | CC                 | 1875  | 28.69 | 0             | 0.00        |               |                |              |
| 0                                            | 45-49     | Ecig               | 0     | 0.00  |               |             |               |                |              |
| 0                                            | 45-49     | Dual               | 0     | 0.00  |               |             |               |                |              |
| 0                                            | 45-49     | Former             | 1545  | 23.64 |               |             | 12.55         | 194            | 12.56        |
| Year of Follow-up: 1990, Age Group: 50-54    |           |                    |       |       |               |             |               |                |              |
| Period                                       | Age Group | Smoking Group      | N     | %     | Ever Quit (N) | Ever Quit % | Mean Yrs Quit | Short Term (n) | Short Term % |
| 0                                            | 50-54     | Never Any          | 2684  | 48.50 |               |             |               |                |              |
| 0                                            | 50-54     | CC                 | 1572  | 28.41 | 0             | 0.00        |               |                |              |

**Results for PHIM for Run 4 (Sensitivity\_Analysis\_3.RTF)**

|                                              |           |               |       |       |               |             |               |                |              |
|----------------------------------------------|-----------|---------------|-------|-------|---------------|-------------|---------------|----------------|--------------|
| 0                                            | 50-54     | Ecig          | 0     | 0.00  |               |             |               |                |              |
| 0                                            | 50-54     | Dual          | 0     | 0.00  |               |             |               |                |              |
| 0                                            | 50-54     | Former        | 1278  | 23.09 |               |             | 13.28         | 126            | 9.86         |
| Year of Follow-up: 1990, Age Group: 55-59    |           |               |       |       |               |             |               |                |              |
| Period                                       | Age Group | Smoking Group | N     | %     | Ever Quit (N) | Ever Quit % | Mean Yrs Quit | Short Term (n) | Short Term % |
| 0                                            | 55-59     | Never Any     | 2732  | 51.90 |               |             |               |                |              |
| 0                                            | 55-59     | CC            | 1295  | 24.60 | 0             | 0.00        |               |                |              |
| 0                                            | 55-59     | Ecig          | 0     | 0.00  |               |             |               |                |              |
| 0                                            | 55-59     | Dual          | 0     | 0.00  |               |             |               |                |              |
| 0                                            | 55-59     | Former        | 1237  | 23.50 |               |             | 17.26         | 90             | 7.28         |
| Year of Follow-up: 1990, Age Group: 60-64    |           |               |       |       |               |             |               |                |              |
| Period                                       | Age Group | Smoking Group | N     | %     | Ever Quit (N) | Ever Quit % | Mean Yrs Quit | Short Term (n) | Short Term % |
| 0                                            | 60-64     | Never Any     | 3078  | 55.72 |               |             |               |                |              |
| 0                                            | 60-64     | CC            | 1249  | 22.61 | 0             | 0.00        |               |                |              |
| 0                                            | 60-64     | Ecig          | 0     | 0.00  |               |             |               |                |              |
| 0                                            | 60-64     | Dual          | 0     | 0.00  |               |             |               |                |              |
| 0                                            | 60-64     | Former        | 1197  | 21.67 |               |             | 18.28         | 61             | 5.10         |
| Year of Follow-up: 1990, Age Group: 65-69    |           |               |       |       |               |             |               |                |              |
| Period                                       | Age Group | Smoking Group | N     | %     | Ever Quit (N) | Ever Quit % | Mean Yrs Quit | Short Term (n) | Short Term % |
| 0                                            | 65-69     | Never Any     | 3042  | 57.36 |               |             |               |                |              |
| 0                                            | 65-69     | CC            | 976   | 18.40 | 0             | 0.00        |               |                |              |
| 0                                            | 65-69     | Ecig          | 0     | 0.00  |               |             |               |                |              |
| 0                                            | 65-69     | Dual          | 0     | 0.00  |               |             |               |                |              |
| 0                                            | 65-69     | Former        | 1285  | 24.23 |               |             | 20.65         | 68             | 5.29         |
| Year of Follow-up: 1990, Age Group: 70-74    |           |               |       |       |               |             |               |                |              |
| Period                                       | Age Group | Smoking Group | N     | %     | Ever Quit (N) | Ever Quit % | Mean Yrs Quit | Short Term (n) | Short Term % |
| 0                                            | 70-74     | Never Any     | 2738  | 61.05 |               |             |               |                |              |
| 0                                            | 70-74     | CC            | 610   | 13.60 | 0             | 0.00        |               |                |              |
| 0                                            | 70-74     | Ecig          | 0     | 0.00  |               |             |               |                |              |
| 0                                            | 70-74     | Dual          | 0     | 0.00  |               |             |               |                |              |
| 0                                            | 70-74     | Former        | 1137  | 25.35 |               |             | 24.48         | 27             | 2.37         |
| Year of Follow-up: 1990, Age Group: 75-79    |           |               |       |       |               |             |               |                |              |
| Period                                       | Age Group | Smoking Group | N     | %     | Ever Quit (N) | Ever Quit % | Mean Yrs Quit | Short Term (n) | Short Term % |
| 0                                            | 75-79     | Never Any     | 2483  | 68.84 |               |             |               |                |              |
| 0                                            | 75-79     | CC            | 354   | 9.81  | 0             | 0.00        |               |                |              |
| 0                                            | 75-79     | Ecig          | 0     | 0.00  |               |             |               |                |              |
| 0                                            | 75-79     | Dual          | 0     | 0.00  |               |             |               |                |              |
| 0                                            | 75-79     | Former        | 770   | 21.35 |               |             | 24.48         | 24             | 3.12         |
| Year of Follow-up: 1995, Age Group: All Ages |           |               |       |       |               |             |               |                |              |
| Period                                       | Age Group | Smoking Group | N     | %     | Ever Quit (N) | Ever Quit % | Mean Yrs Quit | Short Term (n) | Short Term % |
| 5                                            | All Ages  | Never Any     | 50887 | 55.53 |               |             |               |                |              |
| 5                                            | All Ages  | CC            | 10659 | 11.63 | 0             | 0.00        |               |                |              |
| 5                                            | All Ages  | Ecig          | 11882 | 12.97 |               |             |               |                |              |
| 5                                            | All Ages  | Dual          | 0     | 0.00  |               |             |               |                |              |
| 5                                            | All Ages  | Former        | 18211 | 19.87 |               |             | 14.32         | 1004           | 5.51         |
| Year of Follow-up: 1995, Age Group: 18-19    |           |               |       |       |               |             |               |                |              |
| Period                                       | Age Group | Smoking Group | N     | %     | Ever Quit (N) | Ever Quit % | Mean Yrs Quit | Short Term (n) | Short Term % |
| 5                                            | 18-19     | Never Any     | 2434  | 76.64 |               |             |               |                |              |
| 5                                            | 18-19     | CC            | 233   | 7.34  | 0             | 0.00        |               |                |              |
| 5                                            | 18-19     | Ecig          | 439   | 13.82 |               |             |               |                |              |
| 5                                            | 18-19     | Dual          | 0     | 0.00  |               |             |               |                |              |
| 5                                            | 18-19     | Former        | 70    | 2.20  |               |             | 1.20          | 42             | 60.00        |
| Year of Follow-up: 1995, Age Group: 20-24    |           |               |       |       |               |             |               |                |              |
| Period                                       | Age Group | Smoking Group | N     | %     | Ever Quit (N) | Ever Quit % | Mean Yrs Quit | Short Term (n) | Short Term % |
| 5                                            | 20-24     | Never Any     | 5794  | 69.39 |               |             |               |                |              |
| 5                                            | 20-24     | CC            | 862   | 10.32 | 0             | 0.00        |               |                |              |
| 5                                            | 20-24     | Ecig          | 1286  | 15.40 |               |             |               |                |              |
| 5                                            | 20-24     | Dual          | 0     | 0.00  |               |             |               |                |              |
| 5                                            | 20-24     | Former        | 408   | 4.89  |               |             | 3.39          | 86             | 21.08        |
| Year of Follow-up: 1995, Age Group: 25-29    |           |               |       |       |               |             |               |                |              |
| Period                                       | Age Group | Smoking Group | N     | %     | Ever Quit (N) | Ever Quit % | Mean Yrs Quit | Short Term (n) | Short Term % |
| 5                                            | 25-29     | Never Any     | 5313  | 60.42 |               |             |               |                |              |
| 5                                            | 25-29     | CC            | 1062  | 12.08 | 0             | 0.00        |               |                |              |
| 5                                            | 25-29     | Ecig          | 1404  | 15.97 |               |             |               |                |              |
| 5                                            | 25-29     | Dual          | 0     | 0.00  |               |             |               |                |              |
| 5                                            | 25-29     | Former        | 1014  | 11.53 |               |             | 5.99          | 47             | 4.64         |
| Year of Follow-up: 1995, Age Group: 30-34    |           |               |       |       |               |             |               |                |              |
| Period                                       | Age Group | Smoking Group | N     | %     | Ever Quit (N) | Ever Quit % | Mean Yrs Quit | Short Term (n) | Short Term % |

**Results for PHIM for Run 4 (Sensitivity\_Analysis\_3.RTF)**

|                                              |           |               |      |       |               |             |               |                |              |
|----------------------------------------------|-----------|---------------|------|-------|---------------|-------------|---------------|----------------|--------------|
| 5                                            | 30-34     | Never Any     | 5304 | 52.63 |               |             |               |                |              |
| 5                                            | 30-34     | CC            | 1373 | 13.62 | 0             | 0.00        |               |                |              |
| 5                                            | 30-34     | Ecig          | 1812 | 17.98 |               |             |               |                |              |
| 5                                            | 30-34     | Dual          | 0    | 0.00  |               |             |               |                |              |
| 5                                            | 30-34     | Former        | 1589 | 15.77 |               |             | 8.20          | 63             | 3.96         |
| Year of Follow-up: 1995, Age Group: 35-39    |           |               |      |       |               |             |               |                |              |
| Period                                       | Age Group | Smoking Group | N    | %     | Ever Quit (N) | Ever Quit % | Mean Yrs Quit | Short Term (n) | Short Term % |
| 5                                            | 35-39     | Never Any     | 5278 | 50.27 |               |             |               |                |              |
| 5                                            | 35-39     | CC            | 1410 | 13.43 | 0             | 0.00        |               |                |              |
| 5                                            | 35-39     | Ecig          | 1757 | 16.73 |               |             |               |                |              |
| 5                                            | 35-39     | Dual          | 0    | 0.00  |               |             |               |                |              |
| 5                                            | 35-39     | Former        | 2054 | 19.56 |               |             | 8.79          | 55             | 2.68         |
| Year of Follow-up: 1995, Age Group: 40-44    |           |               |      |       |               |             |               |                |              |
| Period                                       | Age Group | Smoking Group | N    | %     | Ever Quit (N) | Ever Quit % | Mean Yrs Quit | Short Term (n) | Short Term % |
| 5                                            | 40-44     | Never Any     | 5018 | 52.27 |               |             |               |                |              |
| 5                                            | 40-44     | CC            | 1135 | 11.82 | 0             | 0.00        |               |                |              |
| 5                                            | 40-44     | Ecig          | 1370 | 14.27 |               |             |               |                |              |
| 5                                            | 40-44     | Dual          | 0    | 0.00  |               |             |               |                |              |
| 5                                            | 40-44     | Former        | 2077 | 21.64 |               |             | 12.16         | 71             | 3.42         |
| Year of Follow-up: 1995, Age Group: 45-49    |           |               |      |       |               |             |               |                |              |
| Period                                       | Age Group | Smoking Group | N    | %     | Ever Quit (N) | Ever Quit % | Mean Yrs Quit | Short Term (n) | Short Term % |
| 5                                            | 45-49     | Never Any     | 4356 | 51.27 |               |             |               |                |              |
| 5                                            | 45-49     | CC            | 974  | 11.46 | 0             | 0.00        |               |                |              |
| 5                                            | 45-49     | Ecig          | 1178 | 13.86 |               |             |               |                |              |
| 5                                            | 45-49     | Dual          | 0    | 0.00  |               |             |               |                |              |
| 5                                            | 45-49     | Former        | 1989 | 23.41 |               |             | 11.01         | 122            | 6.13         |
| Year of Follow-up: 1995, Age Group: 50-54    |           |               |      |       |               |             |               |                |              |
| Period                                       | Age Group | Smoking Group | N    | %     | Ever Quit (N) | Ever Quit % | Mean Yrs Quit | Short Term (n) | Short Term % |
| 5                                            | 50-54     | Never Any     | 3116 | 47.67 |               |             |               |                |              |
| 5                                            | 50-54     | CC            | 739  | 11.31 | 0             | 0.00        |               |                |              |
| 5                                            | 50-54     | Ecig          | 848  | 12.97 |               |             |               |                |              |
| 5                                            | 50-54     | Dual          | 0    | 0.00  |               |             |               |                |              |
| 5                                            | 50-54     | Former        | 1833 | 28.04 |               |             | 15.09         | 121            | 6.60         |
| Year of Follow-up: 1995, Age Group: 55-59    |           |               |      |       |               |             |               |                |              |
| Period                                       | Age Group | Smoking Group | N    | %     | Ever Quit (N) | Ever Quit % | Mean Yrs Quit | Short Term (n) | Short Term % |
| 5                                            | 55-59     | Never Any     | 2684 | 48.50 |               |             |               |                |              |
| 5                                            | 55-59     | CC            | 722  | 13.05 | 0             | 0.00        |               |                |              |
| 5                                            | 55-59     | Ecig          | 638  | 11.53 |               |             |               |                |              |
| 5                                            | 55-59     | Dual          | 0    | 0.00  |               |             |               |                |              |
| 5                                            | 55-59     | Former        | 1490 | 26.92 |               |             | 15.95         | 84             | 5.64         |
| Year of Follow-up: 1995, Age Group: 60-64    |           |               |      |       |               |             |               |                |              |
| Period                                       | Age Group | Smoking Group | N    | %     | Ever Quit (N) | Ever Quit % | Mean Yrs Quit | Short Term (n) | Short Term % |
| 5                                            | 60-64     | Never Any     | 2732 | 51.90 |               |             |               |                |              |
| 5                                            | 60-64     | CC            | 633  | 12.03 | 0             | 0.00        |               |                |              |
| 5                                            | 60-64     | Ecig          | 456  | 8.66  |               |             |               |                |              |
| 5                                            | 60-64     | Dual          | 0    | 0.00  |               |             |               |                |              |
| 5                                            | 60-64     | Former        | 1443 | 27.41 |               |             | 19.37         | 80             | 5.54         |
| Year of Follow-up: 1995, Age Group: 65-69    |           |               |      |       |               |             |               |                |              |
| Period                                       | Age Group | Smoking Group | N    | %     | Ever Quit (N) | Ever Quit % | Mean Yrs Quit | Short Term (n) | Short Term % |
| 5                                            | 65-69     | Never Any     | 3078 | 55.72 |               |             |               |                |              |
| 5                                            | 65-69     | CC            | 602  | 10.90 | 0             | 0.00        |               |                |              |
| 5                                            | 65-69     | Ecig          | 388  | 7.02  |               |             |               |                |              |
| 5                                            | 65-69     | Dual          | 0    | 0.00  |               |             |               |                |              |
| 5                                            | 65-69     | Former        | 1456 | 26.36 |               |             | 19.52         | 98             | 6.73         |
| Year of Follow-up: 1995, Age Group: 70-74    |           |               |      |       |               |             |               |                |              |
| Period                                       | Age Group | Smoking Group | N    | %     | Ever Quit (N) | Ever Quit % | Mean Yrs Quit | Short Term (n) | Short Term % |
| 5                                            | 70-74     | Never Any     | 3042 | 57.36 |               |             |               |                |              |
| 5                                            | 70-74     | CC            | 577  | 10.88 | 0             | 0.00        |               |                |              |
| 5                                            | 70-74     | Ecig          | 198  | 3.73  |               |             |               |                |              |
| 5                                            | 70-74     | Dual          | 0    | 0.00  |               |             |               |                |              |
| 5                                            | 70-74     | Former        | 1486 | 28.02 |               |             | 22.46         | 70             | 4.71         |
| Year of Follow-up: 1995, Age Group: 75-79    |           |               |      |       |               |             |               |                |              |
| Period                                       | Age Group | Smoking Group | N    | %     | Ever Quit (N) | Ever Quit % | Mean Yrs Quit | Short Term (n) | Short Term % |
| 5                                            | 75-79     | Never Any     | 2738 | 61.05 |               |             |               |                |              |
| 5                                            | 75-79     | CC            | 337  | 7.51  | 0             | 0.00        |               |                |              |
| 5                                            | 75-79     | Ecig          | 108  | 2.41  |               |             |               |                |              |
| 5                                            | 75-79     | Dual          | 0    | 0.00  |               |             |               |                |              |
| 5                                            | 75-79     | Former        | 1302 | 29.03 |               |             | 26.00         | 65             | 4.99         |
| Year of Follow-up: 2000, Age Group: All Ages |           |               |      |       |               |             |               |                |              |

**Results for PHIM for Run 4 (Sensitivity\_Analysis\_3.RTF)**

| Period                                    | Age Group | Smoking Group | N     | %     | Ever Quit (N) | Ever Quit % | Mean Yrs Quit | Short Term (n) | Short Term % |
|-------------------------------------------|-----------|---------------|-------|-------|---------------|-------------|---------------|----------------|--------------|
| 10                                        | All Ages  | Never Any     | 50423 | 54.86 |               |             |               |                |              |
| 10                                        | All Ages  | CC            | 4595  | 5.00  | 0             | 0.00        |               |                |              |
| 10                                        | All Ages  | Ecig          | 16397 | 17.84 |               |             |               |                |              |
| 10                                        | All Ages  | Dual          | 0     | 0.00  |               |             |               |                |              |
| 10                                        | All Ages  | Former        | 20493 | 22.30 |               |             | 15.56         | 1454           | 7.10         |
| Year of Follow-up: 2000, Age Group: 18-19 |           |               |       |       |               |             |               |                |              |
| Period                                    | Age Group | Smoking Group | N     | %     | Ever Quit (N) | Ever Quit % | Mean Yrs Quit | Short Term (n) | Short Term % |
| 10                                        | 18-19     | Never Any     | 0     | .     |               |             |               |                |              |
| 10                                        | 18-19     | CC            | 0     | .     | 0             | .           |               |                |              |
| 10                                        | 18-19     | Ecig          | 0     | .     |               |             |               |                |              |
| 10                                        | 18-19     | Dual          | 0     | .     |               |             |               |                |              |
| 10                                        | 18-19     | Former        | 0     | .     |               |             |               | 0              | .            |
| Year of Follow-up: 2000, Age Group: 20-24 |           |               |       |       |               |             |               |                |              |
| Period                                    | Age Group | Smoking Group | N     | %     | Ever Quit (N) | Ever Quit % | Mean Yrs Quit | Short Term (n) | Short Term % |
| 10                                        | 20-24     | Never Any     | 5128  | 64.67 |               |             |               |                |              |
| 10                                        | 20-24     | CC            | 370   | 4.67  | 0             | 0.00        |               |                |              |
| 10                                        | 20-24     | Ecig          | 1883  | 23.75 |               |             |               |                |              |
| 10                                        | 20-24     | Dual          | 0     | 0.00  |               |             |               |                |              |
| 10                                        | 20-24     | Former        | 549   | 6.92  |               |             | 3.58          | 137            | 24.95        |
| Year of Follow-up: 2000, Age Group: 25-29 |           |               |       |       |               |             |               |                |              |
| Period                                    | Age Group | Smoking Group | N     | %     | Ever Quit (N) | Ever Quit % | Mean Yrs Quit | Short Term (n) | Short Term % |
| 10                                        | 25-29     | Never Any     | 5493  | 65.78 |               |             |               |                |              |
| 10                                        | 25-29     | CC            | 400   | 4.79  | 0             | 0.00        |               |                |              |
| 10                                        | 25-29     | Ecig          | 1783  | 21.35 |               |             |               |                |              |
| 10                                        | 25-29     | Dual          | 0     | 0.00  |               |             |               |                |              |
| 10                                        | 25-29     | Former        | 674   | 8.07  |               |             | 5.86          | 99             | 14.69        |
| Year of Follow-up: 2000, Age Group: 30-34 |           |               |       |       |               |             |               |                |              |
| Period                                    | Age Group | Smoking Group | N     | %     | Ever Quit (N) | Ever Quit % | Mean Yrs Quit | Short Term (n) | Short Term % |
| 10                                        | 30-34     | Never Any     | 5214  | 59.30 |               |             |               |                |              |
| 10                                        | 30-34     | CC            | 417   | 4.74  | 0             | 0.00        |               |                |              |
| 10                                        | 30-34     | Ecig          | 1948  | 22.15 |               |             |               |                |              |
| 10                                        | 30-34     | Dual          | 0     | 0.00  |               |             |               |                |              |
| 10                                        | 30-34     | Former        | 1214  | 13.81 |               |             | 9.50          | 76             | 6.26         |
| Year of Follow-up: 2000, Age Group: 35-39 |           |               |       |       |               |             |               |                |              |
| Period                                    | Age Group | Smoking Group | N     | %     | Ever Quit (N) | Ever Quit % | Mean Yrs Quit | Short Term (n) | Short Term % |
| 10                                        | 35-39     | Never Any     | 5284  | 52.43 |               |             |               |                |              |
| 10                                        | 35-39     | CC            | 561   | 5.57  | 0             | 0.00        |               |                |              |
| 10                                        | 35-39     | Ecig          | 2467  | 24.48 |               |             |               |                |              |
| 10                                        | 35-39     | Dual          | 0     | 0.00  |               |             |               |                |              |
| 10                                        | 35-39     | Former        | 1766  | 17.52 |               |             | 12.05         | 82             | 4.64         |
| Year of Follow-up: 2000, Age Group: 40-44 |           |               |       |       |               |             |               |                |              |
| Period                                    | Age Group | Smoking Group | N     | %     | Ever Quit (N) | Ever Quit % | Mean Yrs Quit | Short Term (n) | Short Term % |
| 10                                        | 40-44     | Never Any     | 5278  | 50.27 |               |             |               |                |              |
| 10                                        | 40-44     | CC            | 584   | 5.56  | 0             | 0.00        |               |                |              |
| 10                                        | 40-44     | Ecig          | 2333  | 22.22 |               |             |               |                |              |
| 10                                        | 40-44     | Dual          | 0     | 0.00  |               |             |               |                |              |
| 10                                        | 40-44     | Former        | 2304  | 21.94 |               |             | 12.47         | 127            | 5.51         |
| Year of Follow-up: 2000, Age Group: 45-49 |           |               |       |       |               |             |               |                |              |
| Period                                    | Age Group | Smoking Group | N     | %     | Ever Quit (N) | Ever Quit % | Mean Yrs Quit | Short Term (n) | Short Term % |
| 10                                        | 45-49     | Never Any     | 5018  | 52.27 |               |             |               |                |              |
| 10                                        | 45-49     | CC            | 446   | 4.65  | 0             | 0.00        |               |                |              |
| 10                                        | 45-49     | Ecig          | 1750  | 18.23 |               |             |               |                |              |
| 10                                        | 45-49     | Dual          | 0     | 0.00  |               |             |               |                |              |
| 10                                        | 45-49     | Former        | 2386  | 24.85 |               |             | 15.16         | 150            | 6.29         |
| Year of Follow-up: 2000, Age Group: 50-54 |           |               |       |       |               |             |               |                |              |
| Period                                    | Age Group | Smoking Group | N     | %     | Ever Quit (N) | Ever Quit % | Mean Yrs Quit | Short Term (n) | Short Term % |
| 10                                        | 50-54     | Never Any     | 4356  | 51.27 |               |             |               |                |              |
| 10                                        | 50-54     | CC            | 378   | 4.45  | 0             | 0.00        |               |                |              |
| 10                                        | 50-54     | Ecig          | 1395  | 16.42 |               |             |               |                |              |
| 10                                        | 50-54     | Dual          | 0     | 0.00  |               |             |               |                |              |
| 10                                        | 50-54     | Former        | 2368  | 27.87 |               |             | 13.76         | 149            | 6.29         |
| Year of Follow-up: 2000, Age Group: 55-59 |           |               |       |       |               |             |               |                |              |
| Period                                    | Age Group | Smoking Group | N     | %     | Ever Quit (N) | Ever Quit % | Mean Yrs Quit | Short Term (n) | Short Term % |
| 10                                        | 55-59     | Never Any     | 3116  | 47.67 |               |             |               |                |              |
| 10                                        | 55-59     | CC            | 283   | 4.33  | 0             | 0.00        |               |                |              |
| 10                                        | 55-59     | Ecig          | 987   | 15.10 |               |             |               |                |              |
| 10                                        | 55-59     | Dual          | 0     | 0.00  |               |             |               |                |              |



**Results for PHIM for Run 4 (Sensitivity\_Analysis\_3.RTF)**

| Year of Follow-up: 2000, Age Group: 60-64    | Period   | Age Group | Smoking Group | N     | %     | Ever Quit (N) | Ever Quit % | Mean Yrs Quit | Short Term (n) | Short Term % |
|----------------------------------------------|----------|-----------|---------------|-------|-------|---------------|-------------|---------------|----------------|--------------|
| 10                                           | 55-59    | Former    |               | 2150  | 32.89 |               |             | 17.40         | 134            | 6.23         |
| 10                                           | 60-64    | Never Any |               | 2684  | 48.50 |               |             |               |                |              |
| 10                                           | 60-64    | CC        |               | 334   | 6.04  | 0             | 0.00        |               |                |              |
| 10                                           | 60-64    | Ecig      |               | 719   | 12.99 |               |             |               |                |              |
| 10                                           | 60-64    | Dual      |               | 0     | 0.00  |               |             |               |                |              |
| 10                                           | 60-64    | Former    |               | 1797  | 32.47 |               |             | 17.68         | 134            | 7.46         |
| Year of Follow-up: 2000, Age Group: 65-69    | Period   | Age Group | Smoking Group | N     | %     | Ever Quit (N) | Ever Quit % | Mean Yrs Quit | Short Term (n) | Short Term % |
| 10                                           | 65-69    | Never Any |               | 2732  | 51.90 |               |             |               |                |              |
| 10                                           | 65-69    | CC        |               | 280   | 5.32  | 0             | 0.00        |               |                |              |
| 10                                           | 65-69    | Ecig      |               | 484   | 9.19  |               |             |               |                |              |
| 10                                           | 65-69    | Dual      |               | 0     | 0.00  |               |             |               |                |              |
| 10                                           | 65-69    | Former    |               | 1768  | 33.59 |               |             | 20.24         | 133            | 7.52         |
| Year of Follow-up: 2000, Age Group: 70-74    | Period   | Age Group | Smoking Group | N     | %     | Ever Quit (N) | Ever Quit % | Mean Yrs Quit | Short Term (n) | Short Term % |
| 10                                           | 70-74    | Never Any |               | 3078  | 55.72 |               |             |               |                |              |
| 10                                           | 70-74    | CC        |               | 274   | 4.96  | 0             | 0.00        |               |                |              |
| 10                                           | 70-74    | Ecig      |               | 416   | 7.53  |               |             |               |                |              |
| 10                                           | 70-74    | Dual      |               | 0     | 0.00  |               |             |               |                |              |
| 10                                           | 70-74    | Former    |               | 1756  | 31.79 |               |             | 20.65         | 137            | 7.80         |
| Year of Follow-up: 2000, Age Group: 75-79    | Period   | Age Group | Smoking Group | N     | %     | Ever Quit (N) | Ever Quit % | Mean Yrs Quit | Short Term (n) | Short Term % |
| 10                                           | 75-79    | Never Any |               | 3042  | 57.36 |               |             |               |                |              |
| 10                                           | 75-79    | CC        |               | 268   | 5.05  | 0             | 0.00        |               |                |              |
| 10                                           | 75-79    | Ecig      |               | 232   | 4.37  |               |             |               |                |              |
| 10                                           | 75-79    | Dual      |               | 0     | 0.00  |               |             |               |                |              |
| 10                                           | 75-79    | Former    |               | 1761  | 33.21 |               |             | 23.50         | 96             | 5.45         |
| Year of Follow-up: 2005, Age Group: All Ages | Period   | Age Group | Smoking Group | N     | %     | Ever Quit (N) | Ever Quit % | Mean Yrs Quit | Short Term (n) | Short Term % |
| 15                                           | All Ages | Never Any |               | 47002 | 54.27 |               |             |               |                |              |
| 15                                           | All Ages | CC        |               | 1890  | 2.18  | 0             | 0.00        |               |                |              |
| 15                                           | All Ages | Ecig      |               | 16763 | 19.36 |               |             |               |                |              |
| 15                                           | All Ages | Dual      |               | 0     | 0.00  |               |             |               |                |              |
| 15                                           | All Ages | Former    |               | 20950 | 24.19 |               |             | 17.95         | 784            | 3.74         |
| Year of Follow-up: 2005, Age Group: 18-19    | Period   | Age Group | Smoking Group | N     | %     | Ever Quit (N) | Ever Quit % | Mean Yrs Quit | Short Term (n) | Short Term % |
| 15                                           | 18-19    | Never Any |               | 0     | .     |               |             |               |                |              |
| 15                                           | 18-19    | CC        |               | 0     | .     | 0             | .           |               |                |              |
| 15                                           | 18-19    | Ecig      |               | 0     | .     |               |             |               |                |              |
| 15                                           | 18-19    | Dual      |               | 0     | .     |               |             |               |                |              |
| 15                                           | 18-19    | Former    |               | 0     | .     |               |             | .             | 0              | .            |
| Year of Follow-up: 2005, Age Group: 20-24    | Period   | Age Group | Smoking Group | N     | %     | Ever Quit (N) | Ever Quit % | Mean Yrs Quit | Short Term (n) | Short Term % |
| 15                                           | 20-24    | Never Any |               | 0     | .     |               |             |               |                |              |
| 15                                           | 20-24    | CC        |               | 0     | .     | 0             | .           |               |                |              |
| 15                                           | 20-24    | Ecig      |               | 0     | .     |               |             |               |                |              |
| 15                                           | 20-24    | Dual      |               | 0     | .     |               |             |               |                |              |
| 15                                           | 20-24    | Former    |               | 0     | .     |               |             | .             | 0              | .            |
| Year of Follow-up: 2005, Age Group: 25-29    | Period   | Age Group | Smoking Group | N     | %     | Ever Quit (N) | Ever Quit % | Mean Yrs Quit | Short Term (n) | Short Term % |
| 15                                           | 25-29    | Never Any |               | 4860  | 61.29 |               |             |               |                |              |
| 15                                           | 25-29    | CC        |               | 166   | 2.09  | 0             | 0.00        |               |                |              |
| 15                                           | 25-29    | Ecig      |               | 2105  | 26.54 |               |             |               |                |              |
| 15                                           | 25-29    | Dual      |               | 0     | 0.00  |               |             |               |                |              |
| 15                                           | 25-29    | Former    |               | 799   | 10.08 |               |             | 6.66          | 78             | 9.76         |
| Year of Follow-up: 2005, Age Group: 30-34    | Period   | Age Group | Smoking Group | N     | %     | Ever Quit (N) | Ever Quit % | Mean Yrs Quit | Short Term (n) | Short Term % |
| 15                                           | 30-34    | Never Any |               | 5407  | 64.75 |               |             |               |                |              |
| 15                                           | 30-34    | CC        |               | 149   | 1.78  | 0             | 0.00        |               |                |              |
| 15                                           | 30-34    | Ecig      |               | 1952  | 23.38 |               |             |               |                |              |
| 15                                           | 30-34    | Dual      |               | 0     | 0.00  |               |             |               |                |              |
| 15                                           | 30-34    | Former    |               | 842   | 10.08 |               |             | 9.10          | 65             | 7.72         |
| Year of Follow-up: 2005, Age Group: 35-39    | Period   | Age Group | Smoking Group | N     | %     | Ever Quit (N) | Ever Quit % | Mean Yrs Quit | Short Term (n) | Short Term % |
| 15                                           | 35-39    | Never Any |               | 5189  | 59.01 |               |             |               |                |              |
| 15                                           | 35-39    | CC        |               | 167   | 1.90  | 0             | 0.00        |               |                |              |

**Results for PHIM for Run 4 (Sensitivity\_Analysis\_3.RTF)**

|                                              |           |               |       |       |               |             |               |                |              |
|----------------------------------------------|-----------|---------------|-------|-------|---------------|-------------|---------------|----------------|--------------|
| 15                                           | 35-39     | Ecig          | 2082  | 23.68 |               |             |               |                |              |
| 15                                           | 35-39     | Dual          | 0     | 0.00  |               |             |               |                |              |
| 15                                           | 35-39     | Former        | 1355  | 15.41 |               |             | 13.23         | 46             | 3.39         |
| Year of Follow-up: 2005, Age Group: 40-44    |           |               |       |       |               |             |               |                |              |
| Period                                       | Age Group | Smoking Group | N     | %     | Ever Quit (N) | Ever Quit % | Mean Yrs Quit | Short Term (n) | Short Term % |
| 15                                           | 40-44     | Never Any     | 5284  | 52.43 |               |             |               |                |              |
| 15                                           | 40-44     | CC            | 238   | 2.36  | 0             | 0.00        |               |                |              |
| 15                                           | 40-44     | Ecig          | 2606  | 25.86 |               |             |               |                |              |
| 15                                           | 40-44     | Dual          | 0     | 0.00  |               |             |               |                |              |
| 15                                           | 40-44     | Former        | 1950  | 19.35 |               |             | 15.63         | 82             | 4.21         |
| Year of Follow-up: 2005, Age Group: 45-49    |           |               |       |       |               |             |               |                |              |
| Period                                       | Age Group | Smoking Group | N     | %     | Ever Quit (N) | Ever Quit % | Mean Yrs Quit | Short Term (n) | Short Term % |
| 15                                           | 45-49     | Never Any     | 5278  | 50.27 |               |             |               |                |              |
| 15                                           | 45-49     | CC            | 237   | 2.26  | 0             | 0.00        |               |                |              |
| 15                                           | 45-49     | Ecig          | 2420  | 23.05 |               |             |               |                |              |
| 15                                           | 45-49     | Dual          | 0     | 0.00  |               |             |               |                |              |
| 15                                           | 45-49     | Former        | 2564  | 24.42 |               |             | 15.90         | 111            | 4.33         |
| Year of Follow-up: 2005, Age Group: 50-54    |           |               |       |       |               |             |               |                |              |
| Period                                       | Age Group | Smoking Group | N     | %     | Ever Quit (N) | Ever Quit % | Mean Yrs Quit | Short Term (n) | Short Term % |
| 15                                           | 50-54     | Never Any     | 5018  | 52.27 |               |             |               |                |              |
| 15                                           | 50-54     | CC            | 191   | 1.99  | 0             | 0.00        |               |                |              |
| 15                                           | 50-54     | Ecig          | 1750  | 18.23 |               |             |               |                |              |
| 15                                           | 50-54     | Dual          | 0     | 0.00  |               |             |               |                |              |
| 15                                           | 50-54     | Former        | 2641  | 27.51 |               |             | 18.44         | 80             | 3.03         |
| Year of Follow-up: 2005, Age Group: 55-59    |           |               |       |       |               |             |               |                |              |
| Period                                       | Age Group | Smoking Group | N     | %     | Ever Quit (N) | Ever Quit % | Mean Yrs Quit | Short Term (n) | Short Term % |
| 15                                           | 55-59     | Never Any     | 4356  | 51.27 |               |             |               |                |              |
| 15                                           | 55-59     | CC            | 166   | 1.95  | 0             | 0.00        |               |                |              |
| 15                                           | 55-59     | Ecig          | 1410  | 16.59 |               |             |               |                |              |
| 15                                           | 55-59     | Dual          | 0     | 0.00  |               |             |               |                |              |
| 15                                           | 55-59     | Former        | 2565  | 30.19 |               |             | 17.49         | 69             | 2.69         |
| Year of Follow-up: 2005, Age Group: 60-64    |           |               |       |       |               |             |               |                |              |
| Period                                       | Age Group | Smoking Group | N     | %     | Ever Quit (N) | Ever Quit % | Mean Yrs Quit | Short Term (n) | Short Term % |
| 15                                           | 60-64     | Never Any     | 3116  | 47.67 |               |             |               |                |              |
| 15                                           | 60-64     | CC            | 131   | 2.00  | 0             | 0.00        |               |                |              |
| 15                                           | 60-64     | Ecig          | 959   | 14.67 |               |             |               |                |              |
| 15                                           | 60-64     | Dual          | 0     | 0.00  |               |             |               |                |              |
| 15                                           | 60-64     | Former        | 2330  | 35.65 |               |             | 20.82         | 79             | 3.39         |
| Year of Follow-up: 2005, Age Group: 65-69    |           |               |       |       |               |             |               |                |              |
| Period                                       | Age Group | Smoking Group | N     | %     | Ever Quit (N) | Ever Quit % | Mean Yrs Quit | Short Term (n) | Short Term % |
| 15                                           | 65-69     | Never Any     | 2684  | 48.50 |               |             |               |                |              |
| 15                                           | 65-69     | CC            | 160   | 2.89  | 0             | 0.00        |               |                |              |
| 15                                           | 65-69     | Ecig          | 673   | 12.16 |               |             |               |                |              |
| 15                                           | 65-69     | Dual          | 0     | 0.00  |               |             |               |                |              |
| 15                                           | 65-69     | Former        | 2017  | 36.45 |               |             | 20.48         | 63             | 3.12         |
| Year of Follow-up: 2005, Age Group: 70-74    |           |               |       |       |               |             |               |                |              |
| Period                                       | Age Group | Smoking Group | N     | %     | Ever Quit (N) | Ever Quit % | Mean Yrs Quit | Short Term (n) | Short Term % |
| 15                                           | 70-74     | Never Any     | 2732  | 51.90 |               |             |               |                |              |
| 15                                           | 70-74     | CC            | 139   | 2.64  | 0             | 0.00        |               |                |              |
| 15                                           | 70-74     | Ecig          | 451   | 8.57  |               |             |               |                |              |
| 15                                           | 70-74     | Dual          | 0     | 0.00  |               |             |               |                |              |
| 15                                           | 70-74     | Former        | 1942  | 36.89 |               |             | 23.18         | 62             | 3.19         |
| Year of Follow-up: 2005, Age Group: 75-79    |           |               |       |       |               |             |               |                |              |
| Period                                       | Age Group | Smoking Group | N     | %     | Ever Quit (N) | Ever Quit % | Mean Yrs Quit | Short Term (n) | Short Term % |
| 15                                           | 75-79     | Never Any     | 3078  | 55.72 |               |             |               |                |              |
| 15                                           | 75-79     | CC            | 146   | 2.64  | 0             | 0.00        |               |                |              |
| 15                                           | 75-79     | Ecig          | 355   | 6.43  |               |             |               |                |              |
| 15                                           | 75-79     | Dual          | 0     | 0.00  |               |             |               |                |              |
| 15                                           | 75-79     | Former        | 1945  | 35.21 |               |             | 23.39         | 49             | 2.52         |
| Year of Follow-up: 2010, Age Group: All Ages |           |               |       |       |               |             |               |                |              |
| Period                                       | Age Group | Smoking Group | N     | %     | Ever Quit (N) | Ever Quit % | Mean Yrs Quit | Short Term (n) | Short Term % |
| 20                                           | All Ages  | Never Any     | 43759 | 53.97 |               |             |               |                |              |
| 20                                           | All Ages  | CC            | 765   | 0.94  | 0             | 0.00        |               |                |              |
| 20                                           | All Ages  | Ecig          | 15280 | 18.85 |               |             |               |                |              |
| 20                                           | All Ages  | Dual          | 0     | 0.00  |               |             |               |                |              |
| 20                                           | All Ages  | Former        | 21277 | 26.24 |               |             | 20.20         | 953            | 4.48         |
| Year of Follow-up: 2010, Age Group: 18-19    |           |               |       |       |               |             |               |                |              |
| Period                                       | Age Group | Smoking Group | N     | %     | Ever Quit (N) | Ever Quit % | Mean Yrs Quit | Short Term (n) | Short Term % |

**Results for PHIM for Run 4 (Sensitivity\_Analysis\_3.RTF)**

|                                           |           |               |      |       |               |             |               |                |              |
|-------------------------------------------|-----------|---------------|------|-------|---------------|-------------|---------------|----------------|--------------|
| 20                                        | 18-19     | Never Any     | 0    | .     |               |             |               |                |              |
| 20                                        | 18-19     | CC            | 0    | .     | 0             | .           |               |                |              |
| 20                                        | 18-19     | Ecig          | 0    | .     |               |             |               |                |              |
| 20                                        | 18-19     | Dual          | 0    | .     |               |             |               |                |              |
| 20                                        | 18-19     | Former        | 0    | .     |               |             | 0             | .              |              |
| Year of Follow-up: 2010, Age Group: 20-24 |           |               |      |       |               |             |               |                |              |
| Period                                    | Age Group | Smoking Group | N    | %     | Ever Quit (N) | Ever Quit % | Mean Yrs Quit | Short Term (n) | Short Term % |
| 20                                        | 20-24     | Never Any     | 0    | .     |               |             |               |                |              |
| 20                                        | 20-24     | CC            | 0    | .     | 0             | .           |               |                |              |
| 20                                        | 20-24     | Ecig          | 0    | .     |               |             |               |                |              |
| 20                                        | 20-24     | Dual          | 0    | .     |               |             |               |                |              |
| 20                                        | 20-24     | Former        | 0    | .     |               |             |               | 0              | .            |
| Year of Follow-up: 2010, Age Group: 25-29 |           |               |      |       |               |             |               |                |              |
| Period                                    | Age Group | Smoking Group | N    | %     | Ever Quit (N) | Ever Quit % | Mean Yrs Quit | Short Term (n) | Short Term % |
| 20                                        | 25-29     | Never Any     | 0    | .     |               |             |               |                |              |
| 20                                        | 25-29     | CC            | 0    | .     | 0             | .           |               |                |              |
| 20                                        | 25-29     | Ecig          | 0    | .     |               |             |               |                |              |
| 20                                        | 25-29     | Dual          | 0    | .     |               |             |               |                |              |
| 20                                        | 25-29     | Former        | 0    | .     |               |             |               | 0              | .            |
| Year of Follow-up: 2010, Age Group: 30-34 |           |               |      |       |               |             |               |                |              |
| Period                                    | Age Group | Smoking Group | N    | %     | Ever Quit (N) | Ever Quit % | Mean Yrs Quit | Short Term (n) | Short Term % |
| 20                                        | 30-34     | Never Any     | 4743 | 59.81 |               |             |               |                |              |
| 20                                        | 30-34     | CC            | 65   | 0.82  | 0             | 0.00        |               |                |              |
| 20                                        | 30-34     | Ecig          | 2088 | 26.33 |               |             |               |                |              |
| 20                                        | 30-34     | Dual          | 0    | 0.00  |               |             |               |                |              |
| 20                                        | 30-34     | Former        | 1034 | 13.04 |               |             | 9.39          | 113            | 10.93        |
| Year of Follow-up: 2010, Age Group: 35-39 |           |               |      |       |               |             |               |                |              |
| Period                                    | Age Group | Smoking Group | N    | %     | Ever Quit (N) | Ever Quit % | Mean Yrs Quit | Short Term (n) | Short Term % |
| 20                                        | 35-39     | Never Any     | 5359 | 64.18 |               |             |               |                |              |
| 20                                        | 35-39     | CC            | 58   | 0.69  | 0             | 0.00        |               |                |              |
| 20                                        | 35-39     | Ecig          | 1891 | 22.65 |               |             |               |                |              |
| 20                                        | 35-39     | Dual          | 0    | 0.00  |               |             |               |                |              |
| 20                                        | 35-39     | Former        | 1042 | 12.48 |               |             | 11.75         | 82             | 7.87         |
| Year of Follow-up: 2010, Age Group: 40-44 |           |               |      |       |               |             |               |                |              |
| Period                                    | Age Group | Smoking Group | N    | %     | Ever Quit (N) | Ever Quit % | Mean Yrs Quit | Short Term (n) | Short Term % |
| 20                                        | 40-44     | Never Any     | 5189 | 59.01 |               |             |               |                |              |
| 20                                        | 40-44     | CC            | 64   | 0.73  | 0             | 0.00        |               |                |              |
| 20                                        | 40-44     | Ecig          | 1982 | 22.54 |               |             |               |                |              |
| 20                                        | 40-44     | Dual          | 0    | 0.00  |               |             |               |                |              |
| 20                                        | 40-44     | Former        | 1558 | 17.72 |               |             | 16.09         | 90             | 5.78         |
| Year of Follow-up: 2010, Age Group: 45-49 |           |               |      |       |               |             |               |                |              |
| Period                                    | Age Group | Smoking Group | N    | %     | Ever Quit (N) | Ever Quit % | Mean Yrs Quit | Short Term (n) | Short Term % |
| 20                                        | 45-49     | Never Any     | 5284 | 52.43 |               |             |               |                |              |
| 20                                        | 45-49     | CC            | 105  | 1.04  | 0             | 0.00        |               |                |              |
| 20                                        | 45-49     | Ecig          | 2491 | 24.72 |               |             |               |                |              |
| 20                                        | 45-49     | Dual          | 0    | 0.00  |               |             |               |                |              |
| 20                                        | 45-49     | Former        | 2198 | 21.81 |               |             | 18.51         | 105            | 4.78         |
| Year of Follow-up: 2010, Age Group: 50-54 |           |               |      |       |               |             |               |                |              |
| Period                                    | Age Group | Smoking Group | N    | %     | Ever Quit (N) | Ever Quit % | Mean Yrs Quit | Short Term (n) | Short Term % |
| 20                                        | 50-54     | Never Any     | 5278 | 50.27 |               |             |               |                |              |
| 20                                        | 50-54     | CC            | 101  | 0.96  | 0             | 0.00        |               |                |              |
| 20                                        | 50-54     | Ecig          | 2273 | 21.65 |               |             |               |                |              |
| 20                                        | 50-54     | Dual          | 0    | 0.00  |               |             |               |                |              |
| 20                                        | 50-54     | Former        | 2847 | 27.12 |               |             | 19.00         | 133            | 4.67         |
| Year of Follow-up: 2010, Age Group: 55-59 |           |               |      |       |               |             |               |                |              |
| Period                                    | Age Group | Smoking Group | N    | %     | Ever Quit (N) | Ever Quit % | Mean Yrs Quit | Short Term (n) | Short Term % |
| 20                                        | 55-59     | Never Any     | 5018 | 52.27 |               |             |               |                |              |
| 20                                        | 55-59     | CC            | 91   | 0.95  | 0             | 0.00        |               |                |              |
| 20                                        | 55-59     | Ecig          | 1610 | 16.77 |               |             |               |                |              |
| 20                                        | 55-59     | Dual          | 0    | 0.00  |               |             |               |                |              |
| 20                                        | 55-59     | Former        | 2881 | 30.01 |               |             | 21.66         | 80             | 2.78         |
| Year of Follow-up: 2010, Age Group: 60-64 |           |               |      |       |               |             |               |                |              |
| Period                                    | Age Group | Smoking Group | N    | %     | Ever Quit (N) | Ever Quit % | Mean Yrs Quit | Short Term (n) | Short Term % |
| 20                                        | 60-64     | Never Any     | 4356 | 51.27 |               |             |               |                |              |
| 20                                        | 60-64     | CC            | 71   | 0.84  | 0             | 0.00        |               |                |              |
| 20                                        | 60-64     | Ecig          | 1241 | 14.61 |               |             |               |                |              |
| 20                                        | 60-64     | Dual          | 0    | 0.00  |               |             |               |                |              |
| 20                                        | 60-64     | Former        | 2829 | 33.29 |               |             | 20.55         | 131            | 4.63         |
| Year of Follow-up: 2010, Age Group: 65-69 |           |               |      |       |               |             |               |                |              |

**Results for PHIM for Run 4 (Sensitivity\_Analysis\_3.RTF)**

| Period                                       | Age Group | Smoking Group | N     | %     | Ever Quit (N) | Ever Quit % | Mean Yrs Quit | Short Term (n) | Short Term % |
|----------------------------------------------|-----------|---------------|-------|-------|---------------|-------------|---------------|----------------|--------------|
| 20                                           | 65-69     | Never Any     | 3116  | 47.67 |               |             |               |                |              |
| 20                                           | 65-69     | CC            | 47    | 0.72  | 0             | 0.00        |               |                |              |
| 20                                           | 65-69     | Ecig          | 780   | 11.93 |               |             |               |                |              |
| 20                                           | 65-69     | Dual          | 0     | 0.00  |               |             |               |                |              |
| 20                                           | 65-69     | Former        | 2593  | 39.67 |               |             | 23.41         | 90             | 3.47         |
| Year of Follow-up: 2010, Age Group: 70-74    |           |               |       |       |               |             |               |                |              |
| Period                                       | Age Group | Smoking Group | N     | %     | Ever Quit (N) | Ever Quit % | Mean Yrs Quit | Short Term (n) | Short Term % |
| 20                                           | 70-74     | Never Any     | 2684  | 48.50 |               |             |               |                |              |
| 20                                           | 70-74     | CC            | 88    | 1.59  | 0             | 0.00        |               |                |              |
| 20                                           | 70-74     | Ecig          | 578   | 10.44 |               |             |               |                |              |
| 20                                           | 70-74     | Dual          | 0     | 0.00  |               |             |               |                |              |
| 20                                           | 70-74     | Former        | 2184  | 39.47 |               |             | 23.69         | 57             | 2.61         |
| Year of Follow-up: 2010, Age Group: 75-79    |           |               |       |       |               |             |               |                |              |
| Period                                       | Age Group | Smoking Group | N     | %     | Ever Quit (N) | Ever Quit % | Mean Yrs Quit | Short Term (n) | Short Term % |
| 20                                           | 75-79     | Never Any     | 2732  | 51.90 |               |             |               |                |              |
| 20                                           | 75-79     | CC            | 75    | 1.42  | 0             | 0.00        |               |                |              |
| 20                                           | 75-79     | Ecig          | 346   | 6.57  |               |             |               |                |              |
| 20                                           | 75-79     | Dual          | 0     | 0.00  |               |             |               |                |              |
| 20                                           | 75-79     | Former        | 2111  | 40.10 |               |             | 26.07         | 72             | 3.41         |
| Year of Follow-up: 2015, Age Group: All Ages |           |               |       |       |               |             |               |                |              |
| Period                                       | Age Group | Smoking Group | N     | %     | Ever Quit (N) | Ever Quit % | Mean Yrs Quit | Short Term (n) | Short Term % |
| 25                                           | All Ages  | Never Any     | 41010 | 54.09 |               |             |               |                |              |
| 25                                           | All Ages  | CC            | 340   | 0.45  | 0             | 0.00        |               |                |              |
| 25                                           | All Ages  | Ecig          | 13186 | 17.39 |               |             |               |                |              |
| 25                                           | All Ages  | Dual          | 0     | 0.00  |               |             |               |                |              |
| 25                                           | All Ages  | Former        | 21281 | 28.07 |               |             | 22.32         | 786            | 3.69         |
| Year of Follow-up: 2015, Age Group: 18-19    |           |               |       |       |               |             |               |                |              |
| Period                                       | Age Group | Smoking Group | N     | %     | Ever Quit (N) | Ever Quit % | Mean Yrs Quit | Short Term (n) | Short Term % |
| 25                                           | 18-19     | Never Any     | 0     | .     |               |             |               |                |              |
| 25                                           | 18-19     | CC            | 0     | .     | 0             | .           |               |                |              |
| 25                                           | 18-19     | Ecig          | 0     | .     |               |             |               |                |              |
| 25                                           | 18-19     | Dual          | 0     | .     |               |             |               |                |              |
| 25                                           | 18-19     | Former        | 0     | .     |               |             | .             | 0              | .            |
| Year of Follow-up: 2015, Age Group: 20-24    |           |               |       |       |               |             |               |                |              |
| Period                                       | Age Group | Smoking Group | N     | %     | Ever Quit (N) | Ever Quit % | Mean Yrs Quit | Short Term (n) | Short Term % |
| 25                                           | 20-24     | Never Any     | 0     | .     |               |             |               |                |              |
| 25                                           | 20-24     | CC            | 0     | .     | 0             | .           |               |                |              |
| 25                                           | 20-24     | Ecig          | 0     | .     |               |             |               |                |              |
| 25                                           | 20-24     | Dual          | 0     | .     |               |             |               |                |              |
| 25                                           | 20-24     | Former        | 0     | .     |               |             | .             | 0              | .            |
| Year of Follow-up: 2015, Age Group: 25-29    |           |               |       |       |               |             |               |                |              |
| Period                                       | Age Group | Smoking Group | N     | %     | Ever Quit (N) | Ever Quit % | Mean Yrs Quit | Short Term (n) | Short Term % |
| 25                                           | 25-29     | Never Any     | 0     | .     |               |             |               |                |              |
| 25                                           | 25-29     | CC            | 0     | .     | 0             | .           |               |                |              |
| 25                                           | 25-29     | Ecig          | 0     | .     |               |             |               |                |              |
| 25                                           | 25-29     | Dual          | 0     | .     |               |             |               |                |              |
| 25                                           | 25-29     | Former        | 0     | .     |               |             | .             | 0              | .            |
| Year of Follow-up: 2015, Age Group: 30-34    |           |               |       |       |               |             |               |                |              |
| Period                                       | Age Group | Smoking Group | N     | %     | Ever Quit (N) | Ever Quit % | Mean Yrs Quit | Short Term (n) | Short Term % |
| 25                                           | 30-34     | Never Any     | 0     | .     |               |             |               |                |              |
| 25                                           | 30-34     | CC            | 0     | .     | 0             | .           |               |                |              |
| 25                                           | 30-34     | Ecig          | 0     | .     |               |             |               |                |              |
| 25                                           | 30-34     | Dual          | 0     | .     |               |             |               |                |              |
| 25                                           | 30-34     | Former        | 0     | .     |               |             | .             | 0              | .            |
| Year of Follow-up: 2015, Age Group: 35-39    |           |               |       |       |               |             |               |                |              |
| Period                                       | Age Group | Smoking Group | N     | %     | Ever Quit (N) | Ever Quit % | Mean Yrs Quit | Short Term (n) | Short Term % |
| 25                                           | 35-39     | Never Any     | 4726  | 59.60 |               |             |               |                |              |
| 25                                           | 35-39     | CC            | 20    | 0.25  | 0             | 0.00        |               |                |              |
| 25                                           | 35-39     | Ecig          | 1836  | 23.15 |               |             |               |                |              |
| 25                                           | 35-39     | Dual          | 0     | 0.00  |               |             |               |                |              |
| 25                                           | 35-39     | Former        | 1348  | 17.00 |               |             | 11.54         | 102            | 7.57         |
| Year of Follow-up: 2015, Age Group: 40-44    |           |               |       |       |               |             |               |                |              |
| Period                                       | Age Group | Smoking Group | N     | %     | Ever Quit (N) | Ever Quit % | Mean Yrs Quit | Short Term (n) | Short Term % |
| 25                                           | 40-44     | Never Any     | 5359  | 64.18 |               |             |               |                |              |
| 25                                           | 40-44     | CC            | 33    | 0.40  | 0             | 0.00        |               |                |              |
| 25                                           | 40-44     | Ecig          | 1708  | 20.46 |               |             |               |                |              |
| 25                                           | 40-44     | Dual          | 0     | 0.00  |               |             |               |                |              |

**Results for PHIM for Run 4 (Sensitivity\_Analysis\_3.RTF)**

|                                              |           |               |       |       |               |             |               |                |              |
|----------------------------------------------|-----------|---------------|-------|-------|---------------|-------------|---------------|----------------|--------------|
| 25                                           | 40-44     | Former        | 1250  | 14.97 |               |             | 14.31         | 83             | 6.64         |
| Year of Follow-up: 2015, Age Group: 45-49    |           |               |       |       |               |             |               |                |              |
| Period                                       | Age Group | Smoking Group | N     | %     | Ever Quit (N) | Ever Quit % | Mean Yrs Quit | Short Term (n) | Short Term % |
| 25                                           | 45-49     | Never Any     | 5189  | 59.01 |               |             |               |                |              |
| 25                                           | 45-49     | CC            | 32    | 0.36  | 0             | 0.00        |               |                |              |
| 25                                           | 45-49     | Ecig          | 1809  | 20.57 |               |             |               |                |              |
| 25                                           | 45-49     | Dual          | 0     | 0.00  |               |             |               |                |              |
| 25                                           | 45-49     | Former        | 1763  | 20.05 |               |             | 18.87         | 74             | 4.20         |
| Year of Follow-up: 2015, Age Group: 50-54    |           |               |       |       |               |             |               |                |              |
| Period                                       | Age Group | Smoking Group | N     | %     | Ever Quit (N) | Ever Quit % | Mean Yrs Quit | Short Term (n) | Short Term % |
| 25                                           | 50-54     | Never Any     | 5284  | 52.43 |               |             |               |                |              |
| 25                                           | 50-54     | CC            | 45    | 0.45  | 0             | 0.00        |               |                |              |
| 25                                           | 50-54     | Ecig          | 2272  | 22.54 |               |             |               |                |              |
| 25                                           | 50-54     | Dual          | 0     | 0.00  |               |             |               |                |              |
| 25                                           | 50-54     | Former        | 2477  | 24.58 |               |             | 21.07         | 128            | 5.17         |
| Year of Follow-up: 2015, Age Group: 55-59    |           |               |       |       |               |             |               |                |              |
| Period                                       | Age Group | Smoking Group | N     | %     | Ever Quit (N) | Ever Quit % | Mean Yrs Quit | Short Term (n) | Short Term % |
| 25                                           | 55-59     | Never Any     | 5278  | 50.27 |               |             |               |                |              |
| 25                                           | 55-59     | CC            | 37    | 0.35  | 0             | 0.00        |               |                |              |
| 25                                           | 55-59     | Ecig          | 2001  | 19.06 |               |             |               |                |              |
| 25                                           | 55-59     | Dual          | 0     | 0.00  |               |             |               |                |              |
| 25                                           | 55-59     | Former        | 3183  | 30.32 |               |             | 21.68         | 116            | 3.64         |
| Year of Follow-up: 2015, Age Group: 60-64    |           |               |       |       |               |             |               |                |              |
| Period                                       | Age Group | Smoking Group | N     | %     | Ever Quit (N) | Ever Quit % | Mean Yrs Quit | Short Term (n) | Short Term % |
| 25                                           | 60-64     | Never Any     | 5018  | 52.27 |               |             |               |                |              |
| 25                                           | 60-64     | CC            | 42    | 0.44  | 0             | 0.00        |               |                |              |
| 25                                           | 60-64     | Ecig          | 1377  | 14.34 |               |             |               |                |              |
| 25                                           | 60-64     | Dual          | 0     | 0.00  |               |             |               |                |              |
| 25                                           | 60-64     | Former        | 3163  | 32.95 |               |             | 24.45         | 132            | 4.17         |
| Year of Follow-up: 2015, Age Group: 65-69    |           |               |       |       |               |             |               |                |              |
| Period                                       | Age Group | Smoking Group | N     | %     | Ever Quit (N) | Ever Quit % | Mean Yrs Quit | Short Term (n) | Short Term % |
| 25                                           | 65-69     | Never Any     | 4356  | 51.27 |               |             |               |                |              |
| 25                                           | 65-69     | CC            | 41    | 0.48  | 0             | 0.00        |               |                |              |
| 25                                           | 65-69     | Ecig          | 1028  | 12.10 |               |             |               |                |              |
| 25                                           | 65-69     | Dual          | 0     | 0.00  |               |             |               |                |              |
| 25                                           | 65-69     | Former        | 3072  | 36.15 |               |             | 23.73         | 65             | 2.12         |
| Year of Follow-up: 2015, Age Group: 70-74    |           |               |       |       |               |             |               |                |              |
| Period                                       | Age Group | Smoking Group | N     | %     | Ever Quit (N) | Ever Quit % | Mean Yrs Quit | Short Term (n) | Short Term % |
| 25                                           | 70-74     | Never Any     | 3116  | 47.67 |               |             |               |                |              |
| 25                                           | 70-74     | CC            | 31    | 0.47  | 0             | 0.00        |               |                |              |
| 25                                           | 70-74     | Ecig          | 669   | 10.24 |               |             |               |                |              |
| 25                                           | 70-74     | Dual          | 0     | 0.00  |               |             |               |                |              |
| 25                                           | 70-74     | Former        | 2720  | 41.62 |               |             | 27.20         | 40             | 1.47         |
| Year of Follow-up: 2015, Age Group: 75-79    |           |               |       |       |               |             |               |                |              |
| Period                                       | Age Group | Smoking Group | N     | %     | Ever Quit (N) | Ever Quit % | Mean Yrs Quit | Short Term (n) | Short Term % |
| 25                                           | 75-79     | Never Any     | 2684  | 48.50 |               |             |               |                |              |
| 25                                           | 75-79     | CC            | 59    | 1.07  | 0             | 0.00        |               |                |              |
| 25                                           | 75-79     | Ecig          | 486   | 8.78  |               |             |               |                |              |
| 25                                           | 75-79     | Dual          | 0     | 0.00  |               |             |               |                |              |
| 25                                           | 75-79     | Former        | 2305  | 41.65 |               |             | 27.30         | 46             | 2.00         |
| Year of Follow-up: 2020, Age Group: All Ages |           |               |       |       |               |             |               |                |              |
| Period                                       | Age Group | Smoking Group | N     | %     | Ever Quit (N) | Ever Quit % | Mean Yrs Quit | Short Term (n) | Short Term % |
| 30                                           | All Ages  | Never Any     | 38326 | 54.53 |               |             |               |                |              |
| 30                                           | All Ages  | CC            | 115   | 0.16  | 0             | 0.00        |               |                |              |
| 30                                           | All Ages  | Ecig          | 11107 | 15.80 |               |             |               |                |              |
| 30                                           | All Ages  | Dual          | 0     | 0.00  |               |             |               |                |              |
| 30                                           | All Ages  | Former        | 20735 | 29.50 |               |             | 24.62         | 685            | 3.30         |
| Year of Follow-up: 2020, Age Group: 18-19    |           |               |       |       |               |             |               |                |              |
| Period                                       | Age Group | Smoking Group | N     | %     | Ever Quit (N) | Ever Quit % | Mean Yrs Quit | Short Term (n) | Short Term % |
| 30                                           | 18-19     | Never Any     | 0     | .     |               |             |               |                |              |
| 30                                           | 18-19     | CC            | 0     | .     | 0             | .           |               |                |              |
| 30                                           | 18-19     | Ecig          | 0     | .     |               |             |               |                |              |
| 30                                           | 18-19     | Dual          | 0     | .     |               |             |               |                |              |
| 30                                           | 18-19     | Former        | 0     | .     |               |             | .             | 0              | .            |
| Year of Follow-up: 2020, Age Group: 20-24    |           |               |       |       |               |             |               |                |              |
| Period                                       | Age Group | Smoking Group | N     | %     | Ever Quit (N) | Ever Quit % | Mean Yrs Quit | Short Term (n) | Short Term % |
| 30                                           | 20-24     | Never Any     | 0     | .     |               |             |               |                |              |
| 30                                           | 20-24     | CC            | 0     | .     | 0             | .           |               |                |              |

**Results for PHIM for Run 4 (Sensitivity\_Analysis\_3.RTF)**

| 30                                        | 20-24     | Ecig          | 0    | .     |               |             |               |                |              |
|-------------------------------------------|-----------|---------------|------|-------|---------------|-------------|---------------|----------------|--------------|
| 30                                        | 20-24     | Dual          | 0    | .     |               |             |               |                |              |
| 30                                        | 20-24     | Former        | 0    | .     |               |             | 0             | .              |              |
| Year of Follow-up: 2020, Age Group: 25-29 |           |               |      |       |               |             |               |                |              |
| Period                                    | Age Group | Smoking Group | N    | %     | Ever Quit (N) | Ever Quit % | Mean Yrs Quit | Short Term (n) | Short Term % |
| 30                                        | 25-29     | Never Any     | 0    | .     |               |             |               |                |              |
| 30                                        | 25-29     | CC            | 0    | .     | 0             | .           |               |                |              |
| 30                                        | 25-29     | Ecig          | 0    | .     |               |             |               |                |              |
| 30                                        | 25-29     | Dual          | 0    | .     |               |             |               |                |              |
| 30                                        | 25-29     | Former        | 0    | .     |               |             | 0             | .              |              |
| Year of Follow-up: 2020, Age Group: 30-34 |           |               |      |       |               |             |               |                |              |
| Period                                    | Age Group | Smoking Group | N    | %     | Ever Quit (N) | Ever Quit % | Mean Yrs Quit | Short Term (n) | Short Term % |
| 30                                        | 30-34     | Never Any     | 0    | .     |               |             |               |                |              |
| 30                                        | 30-34     | CC            | 0    | .     | 0             | .           |               |                |              |
| 30                                        | 30-34     | Ecig          | 0    | .     |               |             |               |                |              |
| 30                                        | 30-34     | Dual          | 0    | .     |               |             |               |                |              |
| 30                                        | 30-34     | Former        | 0    | .     |               |             | 0             | .              |              |
| Year of Follow-up: 2020, Age Group: 35-39 |           |               |      |       |               |             |               |                |              |
| Period                                    | Age Group | Smoking Group | N    | %     | Ever Quit (N) | Ever Quit % | Mean Yrs Quit | Short Term (n) | Short Term % |
| 30                                        | 35-39     | Never Any     | 0    | .     |               |             |               |                |              |
| 30                                        | 35-39     | CC            | 0    | .     | 0             | .           |               |                |              |
| 30                                        | 35-39     | Ecig          | 0    | .     |               |             |               |                |              |
| 30                                        | 35-39     | Dual          | 0    | .     |               |             |               |                |              |
| 30                                        | 35-39     | Former        | 0    | .     |               |             | 0             | .              |              |
| Year of Follow-up: 2020, Age Group: 40-44 |           |               |      |       |               |             |               |                |              |
| Period                                    | Age Group | Smoking Group | N    | %     | Ever Quit (N) | Ever Quit % | Mean Yrs Quit | Short Term (n) | Short Term % |
| 30                                        | 40-44     | Never Any     | 4726 | 59.60 |               |             |               |                |              |
| 30                                        | 40-44     | CC            | 6    | 0.08  | 0             | 0.00        |               |                |              |
| 30                                        | 40-44     | Ecig          | 1624 | 20.48 |               |             |               |                |              |
| 30                                        | 40-44     | Dual          | 0    | 0.00  |               |             |               |                |              |
| 30                                        | 40-44     | Former        | 1574 | 19.85 |               |             | 14.46         | 81             | 5.15         |
| Year of Follow-up: 2020, Age Group: 45-49 |           |               |      |       |               |             |               |                |              |
| Period                                    | Age Group | Smoking Group | N    | %     | Ever Quit (N) | Ever Quit % | Mean Yrs Quit | Short Term (n) | Short Term % |
| 30                                        | 45-49     | Never Any     | 5359 | 64.18 |               |             |               |                |              |
| 30                                        | 45-49     | CC            | 13   | 0.16  | 0             | 0.00        |               |                |              |
| 30                                        | 45-49     | Ecig          | 1549 | 18.55 |               |             |               |                |              |
| 30                                        | 45-49     | Dual          | 0    | 0.00  |               |             |               |                |              |
| 30                                        | 45-49     | Former        | 1429 | 17.11 |               |             | 17.16         | 65             | 4.55         |
| Year of Follow-up: 2020, Age Group: 50-54 |           |               |      |       |               |             |               |                |              |
| Period                                    | Age Group | Smoking Group | N    | %     | Ever Quit (N) | Ever Quit % | Mean Yrs Quit | Short Term (n) | Short Term % |
| 30                                        | 50-54     | Never Any     | 5189 | 59.01 |               |             |               |                |              |
| 30                                        | 50-54     | CC            | 9    | 0.10  | 0             | 0.00        |               |                |              |
| 30                                        | 50-54     | Ecig          | 1619 | 18.41 |               |             |               |                |              |
| 30                                        | 50-54     | Dual          | 0    | 0.00  |               |             |               |                |              |
| 30                                        | 50-54     | Former        | 1976 | 22.47 |               |             | 21.50         | 99             | 5.01         |
| Year of Follow-up: 2020, Age Group: 55-59 |           |               |      |       |               |             |               |                |              |
| Period                                    | Age Group | Smoking Group | N    | %     | Ever Quit (N) | Ever Quit % | Mean Yrs Quit | Short Term (n) | Short Term % |
| 30                                        | 55-59     | Never Any     | 5284 | 52.43 |               |             |               |                |              |
| 30                                        | 55-59     | CC            | 14   | 0.14  | 0             | 0.00        |               |                |              |
| 30                                        | 55-59     | Ecig          | 1973 | 19.58 |               |             |               |                |              |
| 30                                        | 55-59     | Dual          | 0    | 0.00  |               |             |               |                |              |
| 30                                        | 55-59     | Former        | 2807 | 27.85 |               |             | 23.25         | 123            | 4.38         |
| Year of Follow-up: 2020, Age Group: 60-64 |           |               |      |       |               |             |               |                |              |
| Period                                    | Age Group | Smoking Group | N    | %     | Ever Quit (N) | Ever Quit % | Mean Yrs Quit | Short Term (n) | Short Term % |
| 30                                        | 60-64     | Never Any     | 5278 | 50.27 |               |             |               |                |              |
| 30                                        | 60-64     | CC            | 15   | 0.14  | 0             | 0.00        |               |                |              |
| 30                                        | 60-64     | Ecig          | 1689 | 16.09 |               |             |               |                |              |
| 30                                        | 60-64     | Dual          | 0    | 0.00  |               |             |               |                |              |
| 30                                        | 60-64     | Former        | 3517 | 33.50 |               |             | 24.34         | 136            | 3.87         |
| Year of Follow-up: 2020, Age Group: 65-69 |           |               |      |       |               |             |               |                |              |
| Period                                    | Age Group | Smoking Group | N    | %     | Ever Quit (N) | Ever Quit % | Mean Yrs Quit | Short Term (n) | Short Term % |
| 30                                        | 65-69     | Never Any     | 5018 | 52.27 |               |             |               |                |              |
| 30                                        | 65-69     | CC            | 18   | 0.19  | 0             | 0.00        |               |                |              |
| 30                                        | 65-69     | Ecig          | 1162 | 12.10 |               |             |               |                |              |
| 30                                        | 65-69     | Dual          | 0    | 0.00  |               |             |               |                |              |
| 30                                        | 65-69     | Former        | 3402 | 35.44 |               |             | 27.55         | 71             | 2.09         |
| Year of Follow-up: 2020, Age Group: 70-74 |           |               |      |       |               |             |               |                |              |
| Period                                    | Age Group | Smoking Group | N    | %     | Ever Quit (N) | Ever Quit % | Mean Yrs Quit | Short Term (n) | Short Term % |

**Results for PHIM for Run 4 (Sensitivity\_Analysis\_3.RTF)**

|                                              |           |               |       |       |               |             |               |                |              |
|----------------------------------------------|-----------|---------------|-------|-------|---------------|-------------|---------------|----------------|--------------|
| 30                                           | 70-74     | Never Any     | 4356  | 51.27 |               |             |               |                |              |
| 30                                           | 70-74     | CC            | 22    | 0.26  | 0             | 0.00        |               |                |              |
| 30                                           | 70-74     | Ecig          | 928   | 10.92 |               |             |               |                |              |
| 30                                           | 70-74     | Dual          | 0     | 0.00  |               |             |               |                |              |
| 30                                           | 70-74     | Former        | 3191  | 37.55 |               |             | 27.71         | 60             | 1.88         |
| Year of Follow-up: 2020, Age Group: 75-79    |           |               |       |       |               |             |               |                |              |
| Period                                       | Age Group | Smoking Group | N     | %     | Ever Quit (N) | Ever Quit % | Mean Yrs Quit | Short Term (n) | Short Term % |
| 30                                           | 75-79     | Never Any     | 3116  | 47.67 |               |             |               |                |              |
| 30                                           | 75-79     | CC            | 18    | 0.28  | 0             | 0.00        |               |                |              |
| 30                                           | 75-79     | Ecig          | 563   | 8.61  |               |             |               |                |              |
| 30                                           | 75-79     | Dual          | 0     | 0.00  |               |             |               |                |              |
| 30                                           | 75-79     | Former        | 2839  | 43.44 |               |             | 30.93         | 50             | 1.76         |
| Year of Follow-up: 2025, Age Group: All Ages |           |               |       |       |               |             |               |                |              |
| Period                                       | Age Group | Smoking Group | N     | %     | Ever Quit (N) | Ever Quit % | Mean Yrs Quit | Short Term (n) | Short Term % |
| 35                                           | All Ages  | Never Any     | 35210 | 55.23 |               |             |               |                |              |
| 35                                           | All Ages  | CC            | 47    | 0.07  | 0             | 0.00        |               |                |              |
| 35                                           | All Ages  | Ecig          | 9127  | 14.32 |               |             |               |                |              |
| 35                                           | All Ages  | Dual          | 0     | 0.00  |               |             |               |                |              |
| 35                                           | All Ages  | Former        | 19363 | 30.37 |               |             | 26.61         | 585            | 3.02         |
| Year of Follow-up: 2025, Age Group: 18-19    |           |               |       |       |               |             |               |                |              |
| Period                                       | Age Group | Smoking Group | N     | %     | Ever Quit (N) | Ever Quit % | Mean Yrs Quit | Short Term (n) | Short Term % |
| 35                                           | 18-19     | Never Any     | 0     | .     |               |             |               |                |              |
| 35                                           | 18-19     | CC            | 0     | .     | 0             | .           |               |                |              |
| 35                                           | 18-19     | Ecig          | 0     | .     |               |             |               |                |              |
| 35                                           | 18-19     | Dual          | 0     | .     |               |             |               |                |              |
| 35                                           | 18-19     | Former        | 0     | .     |               |             | .             | 0              | .            |
| Year of Follow-up: 2025, Age Group: 20-24    |           |               |       |       |               |             |               |                |              |
| Period                                       | Age Group | Smoking Group | N     | %     | Ever Quit (N) | Ever Quit % | Mean Yrs Quit | Short Term (n) | Short Term % |
| 35                                           | 20-24     | Never Any     | 0     | .     |               |             |               |                |              |
| 35                                           | 20-24     | CC            | 0     | .     | 0             | .           |               |                |              |
| 35                                           | 20-24     | Ecig          | 0     | .     |               |             |               |                |              |
| 35                                           | 20-24     | Dual          | 0     | .     |               |             |               |                |              |
| 35                                           | 20-24     | Former        | 0     | .     |               |             | .             | 0              | .            |
| Year of Follow-up: 2025, Age Group: 25-29    |           |               |       |       |               |             |               |                |              |
| Period                                       | Age Group | Smoking Group | N     | %     | Ever Quit (N) | Ever Quit % | Mean Yrs Quit | Short Term (n) | Short Term % |
| 35                                           | 25-29     | Never Any     | 0     | .     |               |             |               |                |              |
| 35                                           | 25-29     | CC            | 0     | .     | 0             | .           |               |                |              |
| 35                                           | 25-29     | Ecig          | 0     | .     |               |             |               |                |              |
| 35                                           | 25-29     | Dual          | 0     | .     |               |             |               |                |              |
| 35                                           | 25-29     | Former        | 0     | .     |               |             | .             | 0              | .            |
| Year of Follow-up: 2025, Age Group: 30-34    |           |               |       |       |               |             |               |                |              |
| Period                                       | Age Group | Smoking Group | N     | %     | Ever Quit (N) | Ever Quit % | Mean Yrs Quit | Short Term (n) | Short Term % |
| 35                                           | 30-34     | Never Any     | 0     | .     |               |             |               |                |              |
| 35                                           | 30-34     | CC            | 0     | .     | 0             | .           |               |                |              |
| 35                                           | 30-34     | Ecig          | 0     | .     |               |             |               |                |              |
| 35                                           | 30-34     | Dual          | 0     | .     |               |             |               |                |              |
| 35                                           | 30-34     | Former        | 0     | .     |               |             | .             | 0              | .            |
| Year of Follow-up: 2025, Age Group: 35-39    |           |               |       |       |               |             |               |                |              |
| Period                                       | Age Group | Smoking Group | N     | %     | Ever Quit (N) | Ever Quit % | Mean Yrs Quit | Short Term (n) | Short Term % |
| 35                                           | 35-39     | Never Any     | 0     | .     |               |             |               |                |              |
| 35                                           | 35-39     | CC            | 0     | .     | 0             | .           |               |                |              |
| 35                                           | 35-39     | Ecig          | 0     | .     |               |             |               |                |              |
| 35                                           | 35-39     | Dual          | 0     | .     |               |             |               |                |              |
| 35                                           | 35-39     | Former        | 0     | .     |               |             | .             | 0              | .            |
| Year of Follow-up: 2025, Age Group: 40-44    |           |               |       |       |               |             |               |                |              |
| Period                                       | Age Group | Smoking Group | N     | %     | Ever Quit (N) | Ever Quit % | Mean Yrs Quit | Short Term (n) | Short Term % |
| 35                                           | 40-44     | Never Any     | 0     | .     |               |             |               |                |              |
| 35                                           | 40-44     | CC            | 0     | .     | 0             | .           |               |                |              |
| 35                                           | 40-44     | Ecig          | 0     | .     |               |             |               |                |              |
| 35                                           | 40-44     | Dual          | 0     | .     |               |             |               |                |              |
| 35                                           | 40-44     | Former        | 0     | .     |               |             | .             | 0              | .            |
| Year of Follow-up: 2025, Age Group: 45-49    |           |               |       |       |               |             |               |                |              |
| Period                                       | Age Group | Smoking Group | N     | %     | Ever Quit (N) | Ever Quit % | Mean Yrs Quit | Short Term (n) | Short Term % |
| 35                                           | 45-49     | Never Any     | 4726  | 59.60 |               |             |               |                |              |
| 35                                           | 45-49     | CC            | 1     | 0.01  | 0             | 0.00        |               |                |              |
| 35                                           | 45-49     | Ecig          | 1424  | 17.96 |               |             |               |                |              |
| 35                                           | 45-49     | Dual          | 0     | 0.00  |               |             |               |                |              |
| 35                                           | 45-49     | Former        | 1779  | 22.43 |               |             | 17.49         | 64             | 3.60         |
| Year of Follow-up: 2025, Age Group: 50-54    |           |               |       |       |               |             |               |                |              |

**Results for PHIM for Run 4 (Sensitivity\_Analysis\_3.RTF)**

| Period                                       | Age Group | Smoking Group | N     | %     | Ever Quit (N) | Ever Quit % | Mean Yrs Quit | Short Term (n) | Short Term % |
|----------------------------------------------|-----------|---------------|-------|-------|---------------|-------------|---------------|----------------|--------------|
| 35                                           | 50-54     | Never Any     | 5359  | 64.18 |               |             |               |                |              |
| 35                                           | 50-54     | CC            | 3     | 0.04  | 0             | 0.00        |               |                |              |
| 35                                           | 50-54     | Ecig          | 1361  | 16.30 |               |             |               |                |              |
| 35                                           | 50-54     | Dual          | 0     | 0.00  |               |             |               |                |              |
| 35                                           | 50-54     | Former        | 1627  | 19.49 |               |             | 19.67         | 98             | 6.02         |
| Year of Follow-up: 2025, Age Group: 55-59    |           |               |       |       |               |             |               |                |              |
| Period                                       | Age Group | Smoking Group | N     | %     | Ever Quit (N) | Ever Quit % | Mean Yrs Quit | Short Term (n) | Short Term % |
| 35                                           | 55-59     | Never Any     | 5189  | 59.01 |               |             |               |                |              |
| 35                                           | 55-59     | CC            | 4     | 0.05  | 0             | 0.00        |               |                |              |
| 35                                           | 55-59     | Ecig          | 1396  | 15.88 |               |             |               |                |              |
| 35                                           | 55-59     | Dual          | 0     | 0.00  |               |             |               |                |              |
| 35                                           | 55-59     | Former        | 2204  | 25.07 |               |             | 23.96         | 95             | 4.31         |
| Year of Follow-up: 2025, Age Group: 60-64    |           |               |       |       |               |             |               |                |              |
| Period                                       | Age Group | Smoking Group | N     | %     | Ever Quit (N) | Ever Quit % | Mean Yrs Quit | Short Term (n) | Short Term % |
| 35                                           | 60-64     | Never Any     | 5284  | 52.43 |               |             |               |                |              |
| 35                                           | 60-64     | CC            | 7     | 0.07  | 0             | 0.00        |               |                |              |
| 35                                           | 60-64     | Ecig          | 1698  | 16.85 |               |             |               |                |              |
| 35                                           | 60-64     | Dual          | 0     | 0.00  |               |             |               |                |              |
| 35                                           | 60-64     | Former        | 3089  | 30.65 |               |             | 25.84         | 124            | 4.01         |
| Year of Follow-up: 2025, Age Group: 65-69    |           |               |       |       |               |             |               |                |              |
| Period                                       | Age Group | Smoking Group | N     | %     | Ever Quit (N) | Ever Quit % | Mean Yrs Quit | Short Term (n) | Short Term % |
| 35                                           | 65-69     | Never Any     | 5278  | 50.27 |               |             |               |                |              |
| 35                                           | 65-69     | CC            | 7     | 0.07  | 0             | 0.00        |               |                |              |
| 35                                           | 65-69     | Ecig          | 1420  | 13.53 |               |             |               |                |              |
| 35                                           | 65-69     | Dual          | 0     | 0.00  |               |             |               |                |              |
| 35                                           | 65-69     | Former        | 3794  | 36.14 |               |             | 27.37         | 83             | 2.19         |
| Year of Follow-up: 2025, Age Group: 70-74    |           |               |       |       |               |             |               |                |              |
| Period                                       | Age Group | Smoking Group | N     | %     | Ever Quit (N) | Ever Quit % | Mean Yrs Quit | Short Term (n) | Short Term % |
| 35                                           | 70-74     | Never Any     | 5018  | 52.27 |               |             |               |                |              |
| 35                                           | 70-74     | CC            | 11    | 0.11  | 0             | 0.00        |               |                |              |
| 35                                           | 70-74     | Ecig          | 1037  | 10.80 |               |             |               |                |              |
| 35                                           | 70-74     | Dual          | 0     | 0.00  |               |             |               |                |              |
| 35                                           | 70-74     | Former        | 3534  | 36.81 |               |             | 31.39         | 70             | 1.98         |
| Year of Follow-up: 2025, Age Group: 75-79    |           |               |       |       |               |             |               |                |              |
| Period                                       | Age Group | Smoking Group | N     | %     | Ever Quit (N) | Ever Quit % | Mean Yrs Quit | Short Term (n) | Short Term % |
| 35                                           | 75-79     | Never Any     | 4356  | 51.27 |               |             |               |                |              |
| 35                                           | 75-79     | CC            | 14    | 0.16  | 0             | 0.00        |               |                |              |
| 35                                           | 75-79     | Ecig          | 791   | 9.31  |               |             |               |                |              |
| 35                                           | 75-79     | Dual          | 0     | 0.00  |               |             |               |                |              |
| 35                                           | 75-79     | Former        | 3336  | 39.26 |               |             | 31.39         | 51             | 1.53         |
| Year of Follow-up: 2030, Age Group: All Ages |           |               |       |       |               |             |               |                |              |
| Period                                       | Age Group | Smoking Group | N     | %     | Ever Quit (N) | Ever Quit % | Mean Yrs Quit | Short Term (n) | Short Term % |
| 40                                           | All Ages  | Never Any     | 30854 | 55.84 |               |             |               |                |              |
| 40                                           | All Ages  | CC            | 14    | 0.03  | 0             | 0.00        |               |                |              |
| 40                                           | All Ages  | Ecig          | 7108  | 12.87 |               |             |               |                |              |
| 40                                           | All Ages  | Dual          | 0     | 0.00  |               |             |               |                |              |
| 40                                           | All Ages  | Former        | 17274 | 31.27 |               |             | 28.54         | 508            | 2.94         |
| Year of Follow-up: 2030, Age Group: 18-19    |           |               |       |       |               |             |               |                |              |
| Period                                       | Age Group | Smoking Group | N     | %     | Ever Quit (N) | Ever Quit % | Mean Yrs Quit | Short Term (n) | Short Term % |
| 40                                           | 18-19     | Never Any     | 0     | .     |               |             |               |                |              |
| 40                                           | 18-19     | CC            | 0     | .     | 0             | .           |               |                |              |
| 40                                           | 18-19     | Ecig          | 0     | .     |               |             |               |                |              |
| 40                                           | 18-19     | Dual          | 0     | .     |               |             |               |                |              |
| 40                                           | 18-19     | Former        | 0     | .     |               |             | .             | 0              | .            |
| Year of Follow-up: 2030, Age Group: 20-24    |           |               |       |       |               |             |               |                |              |
| Period                                       | Age Group | Smoking Group | N     | %     | Ever Quit (N) | Ever Quit % | Mean Yrs Quit | Short Term (n) | Short Term % |
| 40                                           | 20-24     | Never Any     | 0     | .     |               |             |               |                |              |
| 40                                           | 20-24     | CC            | 0     | .     | 0             | .           |               |                |              |
| 40                                           | 20-24     | Ecig          | 0     | .     |               |             |               |                |              |
| 40                                           | 20-24     | Dual          | 0     | .     |               |             |               |                |              |
| 40                                           | 20-24     | Former        | 0     | .     |               |             | .             | 0              | .            |
| Year of Follow-up: 2030, Age Group: 25-29    |           |               |       |       |               |             |               |                |              |
| Period                                       | Age Group | Smoking Group | N     | %     | Ever Quit (N) | Ever Quit % | Mean Yrs Quit | Short Term (n) | Short Term % |
| 40                                           | 25-29     | Never Any     | 0     | .     |               |             |               |                |              |
| 40                                           | 25-29     | CC            | 0     | .     | 0             | .           |               |                |              |
| 40                                           | 25-29     | Ecig          | 0     | .     |               |             |               |                |              |
| 40                                           | 25-29     | Dual          | 0     | .     |               |             |               |                |              |



**Results for PHIM for Run 4 (Sensitivity\_Analysis\_3.RTF)**

| Year of Follow-up: 2030, Age Group: 30-34 | Period | Age Group | Smoking Group | N    | %     | Ever Quit (N) | Ever Quit % | Mean Yrs Quit | Short Term (n) | Short Term % |
|-------------------------------------------|--------|-----------|---------------|------|-------|---------------|-------------|---------------|----------------|--------------|
| Year of Follow-up: 2030, Age Group: 30-34 |        |           |               |      |       |               |             |               |                |              |
| 40                                        | 25-29  | Former    |               | 0    | .     |               |             |               | 0              | .            |
| 40                                        | 30-34  | Never Any |               | 0    | .     |               |             |               |                |              |
| 40                                        | 30-34  | CC        |               | 0    | .     | 0             | .           |               |                |              |
| 40                                        | 30-34  | Ecig      |               | 0    | .     |               |             |               |                |              |
| 40                                        | 30-34  | Dual      |               | 0    | .     |               |             |               |                |              |
| 40                                        | 30-34  | Former    |               | 0    | .     |               |             |               | 0              | .            |
| Year of Follow-up: 2030, Age Group: 35-39 |        |           |               |      |       |               |             |               |                |              |
| 40                                        | 35-39  | Never Any |               | 0    | .     |               |             |               |                |              |
| 40                                        | 35-39  | CC        |               | 0    | .     | 0             | .           |               |                |              |
| 40                                        | 35-39  | Ecig      |               | 0    | .     |               |             |               |                |              |
| 40                                        | 35-39  | Dual      |               | 0    | .     |               |             |               |                |              |
| 40                                        | 35-39  | Former    |               | 0    | .     |               |             |               | 0              | .            |
| Year of Follow-up: 2030, Age Group: 40-44 |        |           |               |      |       |               |             |               |                |              |
| 40                                        | 40-44  | Never Any |               | 0    | .     |               |             |               |                |              |
| 40                                        | 40-44  | CC        |               | 0    | .     | 0             | .           |               |                |              |
| 40                                        | 40-44  | Ecig      |               | 0    | .     |               |             |               |                |              |
| 40                                        | 40-44  | Dual      |               | 0    | .     |               |             |               |                |              |
| 40                                        | 40-44  | Former    |               | 0    | .     |               |             |               | 0              | .            |
| Year of Follow-up: 2030, Age Group: 45-49 |        |           |               |      |       |               |             |               |                |              |
| 40                                        | 45-49  | Never Any |               | 0    | .     |               |             |               |                |              |
| 40                                        | 45-49  | CC        |               | 0    | .     | 0             | .           |               |                |              |
| 40                                        | 45-49  | Ecig      |               | 0    | .     |               |             |               |                |              |
| 40                                        | 45-49  | Dual      |               | 0    | .     |               |             |               |                |              |
| 40                                        | 45-49  | Former    |               | 0    | .     |               |             |               | 0              | .            |
| Year of Follow-up: 2030, Age Group: 50-54 |        |           |               |      |       |               |             |               |                |              |
| 40                                        | 50-54  | Never Any |               | 4726 | 59.60 |               |             |               |                |              |
| 40                                        | 50-54  | CC        |               | 0    | 0.00  | 0             | 0.00        |               |                |              |
| 40                                        | 50-54  | Ecig      |               | 1247 | 15.73 |               |             |               |                |              |
| 40                                        | 50-54  | Dual      |               | 0    | 0.00  |               |             |               |                |              |
| 40                                        | 50-54  | Former    |               | 1957 | 24.68 |               |             | 20.59         | 95             | 4.85         |
| Year of Follow-up: 2030, Age Group: 55-59 |        |           |               |      |       |               |             |               |                |              |
| 40                                        | 55-59  | Never Any |               | 5359 | 64.18 |               |             |               |                |              |
| 40                                        | 55-59  | CC        |               | 0    | 0.00  | 0             | 0.00        |               |                |              |
| 40                                        | 55-59  | Ecig      |               | 1178 | 14.11 |               |             |               |                |              |
| 40                                        | 55-59  | Dual      |               | 0    | 0.00  |               |             |               |                |              |
| 40                                        | 55-59  | Former    |               | 1813 | 21.71 |               |             | 22.34         | 73             | 4.03         |
| Year of Follow-up: 2030, Age Group: 60-64 |        |           |               |      |       |               |             |               |                |              |
| 40                                        | 60-64  | Never Any |               | 5189 | 59.01 |               |             |               |                |              |
| 40                                        | 60-64  | CC        |               | 3    | 0.03  | 0             | 0.00        |               |                |              |
| 40                                        | 60-64  | Ecig      |               | 1157 | 13.16 |               |             |               |                |              |
| 40                                        | 60-64  | Dual      |               | 0    | 0.00  |               |             |               |                |              |
| 40                                        | 60-64  | Former    |               | 2444 | 27.79 |               |             | 26.28         | 113            | 4.62         |
| Year of Follow-up: 2030, Age Group: 65-69 |        |           |               |      |       |               |             |               |                |              |
| 40                                        | 65-69  | Never Any |               | 5284 | 52.43 |               |             |               |                |              |
| 40                                        | 65-69  | CC        |               | 3    | 0.03  | 0             | 0.00        |               |                |              |
| 40                                        | 65-69  | Ecig      |               | 1411 | 14.00 |               |             |               |                |              |
| 40                                        | 65-69  | Dual      |               | 0    | 0.00  |               |             |               |                |              |
| 40                                        | 65-69  | Former    |               | 3380 | 33.54 |               |             | 28.39         | 79             | 2.34         |
| Year of Follow-up: 2030, Age Group: 70-74 |        |           |               |      |       |               |             |               |                |              |
| 40                                        | 70-74  | Never Any |               | 5278 | 50.27 |               |             |               |                |              |
| 40                                        | 70-74  | CC        |               | 4    | 0.04  | 0             | 0.00        |               |                |              |
| 40                                        | 70-74  | Ecig      |               | 1251 | 11.92 |               |             |               |                |              |
| 40                                        | 70-74  | Dual      |               | 0    | 0.00  |               |             |               |                |              |
| 40                                        | 70-74  | Former    |               | 3966 | 37.78 |               |             | 31.04         | 72             | 1.82         |
| Year of Follow-up: 2030, Age Group: 75-79 |        |           |               |      |       |               |             |               |                |              |
| 40                                        | 75-79  | Never Any |               | 5018 | 52.27 |               |             |               |                |              |
| 40                                        | 75-79  | CC        |               | 4    | 0.04  | 0             | 0.00        |               |                |              |

**Results for PHIM for Run 4 (Sensitivity\_Analysis\_3.RTF)**

|                                              |           |               |       |       |               |             |               |                |              |
|----------------------------------------------|-----------|---------------|-------|-------|---------------|-------------|---------------|----------------|--------------|
| 40                                           | 75-79     | Ecig          | 864   | 9.00  |               |             |               |                |              |
| 40                                           | 75-79     | Dual          | 0     | 0.00  |               |             |               |                |              |
| 40                                           | 75-79     | Former        | 3714  | 38.69 |               |             | 34.71         | 76             | 2.05         |
| Year of Follow-up: 2035, Age Group: All Ages |           |               |       |       |               |             |               |                |              |
| Period                                       | Age Group | Smoking Group | N     | %     | Ever Quit (N) | Ever Quit % | Mean Yrs Quit | Short Term (n) | Short Term % |
| 45                                           | All Ages  | Never Any     | 25836 | 56.60 |               |             |               |                |              |
| 45                                           | All Ages  | CC            | 5     | 0.01  | 0             | 0.00        |               |                |              |
| 45                                           | All Ages  | Ecig          | 5365  | 11.75 |               |             |               |                |              |
| 45                                           | All Ages  | Dual          | 0     | 0.00  |               |             |               |                |              |
| 45                                           | All Ages  | Former        | 14444 | 31.64 |               |             | 30.03         | 350            | 2.42         |
| Year of Follow-up: 2035, Age Group: 18-19    |           |               |       |       |               |             |               |                |              |
| Period                                       | Age Group | Smoking Group | N     | %     | Ever Quit (N) | Ever Quit % | Mean Yrs Quit | Short Term (n) | Short Term % |
| 45                                           | 18-19     | Never Any     | 0     | .     |               |             |               |                |              |
| 45                                           | 18-19     | CC            | 0     | .     | 0             | .           |               |                |              |
| 45                                           | 18-19     | Ecig          | 0     | .     |               |             |               |                |              |
| 45                                           | 18-19     | Dual          | 0     | .     |               |             |               |                |              |
| 45                                           | 18-19     | Former        | 0     | .     |               |             | .             | 0              | .            |
| Year of Follow-up: 2035, Age Group: 20-24    |           |               |       |       |               |             |               |                |              |
| Period                                       | Age Group | Smoking Group | N     | %     | Ever Quit (N) | Ever Quit % | Mean Yrs Quit | Short Term (n) | Short Term % |
| 45                                           | 20-24     | Never Any     | 0     | .     |               |             |               |                |              |
| 45                                           | 20-24     | CC            | 0     | .     | 0             | .           |               |                |              |
| 45                                           | 20-24     | Ecig          | 0     | .     |               |             |               |                |              |
| 45                                           | 20-24     | Dual          | 0     | .     |               |             |               |                |              |
| 45                                           | 20-24     | Former        | 0     | .     |               |             | .             | 0              | .            |
| Year of Follow-up: 2035, Age Group: 25-29    |           |               |       |       |               |             |               |                |              |
| Period                                       | Age Group | Smoking Group | N     | %     | Ever Quit (N) | Ever Quit % | Mean Yrs Quit | Short Term (n) | Short Term % |
| 45                                           | 25-29     | Never Any     | 0     | .     |               |             |               |                |              |
| 45                                           | 25-29     | CC            | 0     | .     | 0             | .           |               |                |              |
| 45                                           | 25-29     | Ecig          | 0     | .     |               |             |               |                |              |
| 45                                           | 25-29     | Dual          | 0     | .     |               |             |               |                |              |
| 45                                           | 25-29     | Former        | 0     | .     |               |             | .             | 0              | .            |
| Year of Follow-up: 2035, Age Group: 30-34    |           |               |       |       |               |             |               |                |              |
| Period                                       | Age Group | Smoking Group | N     | %     | Ever Quit (N) | Ever Quit % | Mean Yrs Quit | Short Term (n) | Short Term % |
| 45                                           | 30-34     | Never Any     | 0     | .     |               |             |               |                |              |
| 45                                           | 30-34     | CC            | 0     | .     | 0             | .           |               |                |              |
| 45                                           | 30-34     | Ecig          | 0     | .     |               |             |               |                |              |
| 45                                           | 30-34     | Dual          | 0     | .     |               |             |               |                |              |
| 45                                           | 30-34     | Former        | 0     | .     |               |             | .             | 0              | .            |
| Year of Follow-up: 2035, Age Group: 35-39    |           |               |       |       |               |             |               |                |              |
| Period                                       | Age Group | Smoking Group | N     | %     | Ever Quit (N) | Ever Quit % | Mean Yrs Quit | Short Term (n) | Short Term % |
| 45                                           | 35-39     | Never Any     | 0     | .     |               |             |               |                |              |
| 45                                           | 35-39     | CC            | 0     | .     | 0             | .           |               |                |              |
| 45                                           | 35-39     | Ecig          | 0     | .     |               |             |               |                |              |
| 45                                           | 35-39     | Dual          | 0     | .     |               |             |               |                |              |
| 45                                           | 35-39     | Former        | 0     | .     |               |             | .             | 0              | .            |
| Year of Follow-up: 2035, Age Group: 40-44    |           |               |       |       |               |             |               |                |              |
| Period                                       | Age Group | Smoking Group | N     | %     | Ever Quit (N) | Ever Quit % | Mean Yrs Quit | Short Term (n) | Short Term % |
| 45                                           | 40-44     | Never Any     | 0     | .     |               |             |               |                |              |
| 45                                           | 40-44     | CC            | 0     | .     | 0             | .           |               |                |              |
| 45                                           | 40-44     | Ecig          | 0     | .     |               |             |               |                |              |
| 45                                           | 40-44     | Dual          | 0     | .     |               |             |               |                |              |
| 45                                           | 40-44     | Former        | 0     | .     |               |             | .             | 0              | .            |
| Year of Follow-up: 2035, Age Group: 45-49    |           |               |       |       |               |             |               |                |              |
| Period                                       | Age Group | Smoking Group | N     | %     | Ever Quit (N) | Ever Quit % | Mean Yrs Quit | Short Term (n) | Short Term % |
| 45                                           | 45-49     | Never Any     | 0     | .     |               |             |               |                |              |
| 45                                           | 45-49     | CC            | 0     | .     | 0             | .           |               |                |              |
| 45                                           | 45-49     | Ecig          | 0     | .     |               |             |               |                |              |
| 45                                           | 45-49     | Dual          | 0     | .     |               |             |               |                |              |
| 45                                           | 45-49     | Former        | 0     | .     |               |             | .             | 0              | .            |
| Year of Follow-up: 2035, Age Group: 50-54    |           |               |       |       |               |             |               |                |              |
| Period                                       | Age Group | Smoking Group | N     | %     | Ever Quit (N) | Ever Quit % | Mean Yrs Quit | Short Term (n) | Short Term % |
| 45                                           | 50-54     | Never Any     | 0     | .     |               |             |               |                |              |
| 45                                           | 50-54     | CC            | 0     | .     | 0             | .           |               |                |              |
| 45                                           | 50-54     | Ecig          | 0     | .     |               |             |               |                |              |
| 45                                           | 50-54     | Dual          | 0     | .     |               |             |               |                |              |
| 45                                           | 50-54     | Former        | 0     | .     |               |             | .             | 0              | .            |
| Year of Follow-up: 2035, Age Group: 55-59    |           |               |       |       |               |             |               |                |              |
| Period                                       | Age Group | Smoking Group | N     | %     | Ever Quit (N) | Ever Quit % | Mean Yrs Quit | Short Term (n) | Short Term % |

**Results for PHIM for Run 4 (Sensitivity\_Analysis\_3.RTF)**

|                                              |           |               |       |       |               |             |               |                |              |
|----------------------------------------------|-----------|---------------|-------|-------|---------------|-------------|---------------|----------------|--------------|
| 45                                           | 55-59     | Never Any     | 4726  | 59.60 |               |             |               |                |              |
| 45                                           | 55-59     | CC            | 0     | 0.00  | 0             | 0.00        |               |                |              |
| 45                                           | 55-59     | Ecig          | 1084  | 13.67 |               |             |               |                |              |
| 45                                           | 55-59     | Dual          | 0     | 0.00  |               |             |               |                |              |
| 45                                           | 55-59     | Former        | 2120  | 26.73 |               |             | 23.78         | 59             | 2.78         |
| Year of Follow-up: 2035, Age Group: 60-64    |           |               |       |       |               |             |               |                |              |
| Period                                       | Age Group | Smoking Group | N     | %     | Ever Quit (N) | Ever Quit % | Mean Yrs Quit | Short Term (n) | Short Term % |
| 45                                           | 60-64     | Never Any     | 5359  | 64.18 |               |             |               |                |              |
| 45                                           | 60-64     | CC            | 0     | 0.00  | 0             | 0.00        |               |                |              |
| 45                                           | 60-64     | Ecig          | 991   | 11.87 |               |             |               |                |              |
| 45                                           | 60-64     | Dual          | 0     | 0.00  |               |             |               |                |              |
| 45                                           | 60-64     | Former        | 2000  | 23.95 |               |             | 24.96         | 85             | 4.25         |
| Year of Follow-up: 2035, Age Group: 65-69    |           |               |       |       |               |             |               |                |              |
| Period                                       | Age Group | Smoking Group | N     | %     | Ever Quit (N) | Ever Quit % | Mean Yrs Quit | Short Term (n) | Short Term % |
| 45                                           | 65-69     | Never Any     | 5189  | 59.01 |               |             |               |                |              |
| 45                                           | 65-69     | CC            | 3     | 0.03  | 0             | 0.00        |               |                |              |
| 45                                           | 65-69     | Ecig          | 977   | 11.11 |               |             |               |                |              |
| 45                                           | 65-69     | Dual          | 0     | 0.00  |               |             |               |                |              |
| 45                                           | 65-69     | Former        | 2624  | 29.84 |               |             | 29.30         | 55             | 2.10         |
| Year of Follow-up: 2035, Age Group: 70-74    |           |               |       |       |               |             |               |                |              |
| Period                                       | Age Group | Smoking Group | N     | %     | Ever Quit (N) | Ever Quit % | Mean Yrs Quit | Short Term (n) | Short Term % |
| 45                                           | 70-74     | Never Any     | 5284  | 52.43 |               |             |               |                |              |
| 45                                           | 70-74     | CC            | 1     | 0.01  | 0             | 0.00        |               |                |              |
| 45                                           | 70-74     | Ecig          | 1259  | 12.49 |               |             |               |                |              |
| 45                                           | 70-74     | Dual          | 0     | 0.00  |               |             |               |                |              |
| 45                                           | 70-74     | Former        | 3534  | 35.07 |               |             | 32.00         | 82             | 2.32         |
| Year of Follow-up: 2035, Age Group: 75-79    |           |               |       |       |               |             |               |                |              |
| Period                                       | Age Group | Smoking Group | N     | %     | Ever Quit (N) | Ever Quit % | Mean Yrs Quit | Short Term (n) | Short Term % |
| 45                                           | 75-79     | Never Any     | 5278  | 50.27 |               |             |               |                |              |
| 45                                           | 75-79     | CC            | 1     | 0.01  | 0             | 0.00        |               |                |              |
| 45                                           | 75-79     | Ecig          | 1054  | 10.04 |               |             |               |                |              |
| 45                                           | 75-79     | Dual          | 0     | 0.00  |               |             |               |                |              |
| 45                                           | 75-79     | Former        | 4166  | 39.68 |               |             | 34.41         | 69             | 1.66         |
| Year of Follow-up: 2040, Age Group: All Ages |           |               |       |       |               |             |               |                |              |
| Period                                       | Age Group | Smoking Group | N     | %     | Ever Quit (N) | Ever Quit % | Mean Yrs Quit | Short Term (n) | Short Term % |
| 50                                           | All Ages  | Never Any     | 20558 | 58.48 |               |             |               |                |              |
| 50                                           | All Ages  | CC            | 4     | 0.01  | 0             | 0.00        |               |                |              |
| 50                                           | All Ages  | Ecig          | 3646  | 10.37 |               |             |               |                |              |
| 50                                           | All Ages  | Dual          | 0     | 0.00  |               |             |               |                |              |
| 50                                           | All Ages  | Former        | 10943 | 31.13 |               |             | 31.35         | 271            | 2.48         |
| Year of Follow-up: 2040, Age Group: 18-19    |           |               |       |       |               |             |               |                |              |
| Period                                       | Age Group | Smoking Group | N     | %     | Ever Quit (N) | Ever Quit % | Mean Yrs Quit | Short Term (n) | Short Term % |
| 50                                           | 18-19     | Never Any     | 0     | .     |               |             |               |                |              |
| 50                                           | 18-19     | CC            | 0     | .     | 0             | .           |               |                |              |
| 50                                           | 18-19     | Ecig          | 0     | .     |               |             |               |                |              |
| 50                                           | 18-19     | Dual          | 0     | .     |               |             |               |                |              |
| 50                                           | 18-19     | Former        | 0     | .     |               |             | .             | 0              | .            |
| Year of Follow-up: 2040, Age Group: 20-24    |           |               |       |       |               |             |               |                |              |
| Period                                       | Age Group | Smoking Group | N     | %     | Ever Quit (N) | Ever Quit % | Mean Yrs Quit | Short Term (n) | Short Term % |
| 50                                           | 20-24     | Never Any     | 0     | .     |               |             |               |                |              |
| 50                                           | 20-24     | CC            | 0     | .     | 0             | .           |               |                |              |
| 50                                           | 20-24     | Ecig          | 0     | .     |               |             |               |                |              |
| 50                                           | 20-24     | Dual          | 0     | .     |               |             |               |                |              |
| 50                                           | 20-24     | Former        | 0     | .     |               |             | .             | 0              | .            |
| Year of Follow-up: 2040, Age Group: 25-29    |           |               |       |       |               |             |               |                |              |
| Period                                       | Age Group | Smoking Group | N     | %     | Ever Quit (N) | Ever Quit % | Mean Yrs Quit | Short Term (n) | Short Term % |
| 50                                           | 25-29     | Never Any     | 0     | .     |               |             |               |                |              |
| 50                                           | 25-29     | CC            | 0     | .     | 0             | .           |               |                |              |
| 50                                           | 25-29     | Ecig          | 0     | .     |               |             |               |                |              |
| 50                                           | 25-29     | Dual          | 0     | .     |               |             |               |                |              |
| 50                                           | 25-29     | Former        | 0     | .     |               |             | .             | 0              | .            |
| Year of Follow-up: 2040, Age Group: 30-34    |           |               |       |       |               |             |               |                |              |
| Period                                       | Age Group | Smoking Group | N     | %     | Ever Quit (N) | Ever Quit % | Mean Yrs Quit | Short Term (n) | Short Term % |
| 50                                           | 30-34     | Never Any     | 0     | .     |               |             |               |                |              |
| 50                                           | 30-34     | CC            | 0     | .     | 0             | .           |               |                |              |
| 50                                           | 30-34     | Ecig          | 0     | .     |               |             |               |                |              |
| 50                                           | 30-34     | Dual          | 0     | .     |               |             |               |                |              |
| 50                                           | 30-34     | Former        | 0     | .     |               |             | .             | 0              | .            |
| Year of Follow-up: 2040, Age Group: 35-39    |           |               |       |       |               |             |               |                |              |

**Results for PHIM for Run 4 (Sensitivity\_Analysis\_3.RTF)**

| Period                                    | Age Group | Smoking Group | N    | %     | Ever Quit (N) | Ever Quit % | Mean Yrs Quit | Short Term (n) | Short Term % |
|-------------------------------------------|-----------|---------------|------|-------|---------------|-------------|---------------|----------------|--------------|
| 50                                        | 35-39     | Never Any     | 0    | .     |               |             |               |                |              |
| 50                                        | 35-39     | CC            | 0    | .     | 0             | .           |               |                |              |
| 50                                        | 35-39     | Ecig          | 0    | .     |               |             |               |                |              |
| 50                                        | 35-39     | Dual          | 0    | .     |               |             |               |                |              |
| 50                                        | 35-39     | Former        | 0    | .     |               |             | .             | 0              | .            |
| Year of Follow-up: 2040, Age Group: 40-44 |           |               |      |       |               |             |               |                |              |
| Period                                    | Age Group | Smoking Group | N    | %     | Ever Quit (N) | Ever Quit % | Mean Yrs Quit | Short Term (n) | Short Term % |
| 50                                        | 40-44     | Never Any     | 0    | .     |               |             |               |                |              |
| 50                                        | 40-44     | CC            | 0    | .     | 0             | .           |               |                |              |
| 50                                        | 40-44     | Ecig          | 0    | .     |               |             |               |                |              |
| 50                                        | 40-44     | Dual          | 0    | .     |               |             |               |                |              |
| 50                                        | 40-44     | Former        | 0    | .     |               |             | .             | 0              | .            |
| Year of Follow-up: 2040, Age Group: 45-49 |           |               |      |       |               |             |               |                |              |
| Period                                    | Age Group | Smoking Group | N    | %     | Ever Quit (N) | Ever Quit % | Mean Yrs Quit | Short Term (n) | Short Term % |
| 50                                        | 45-49     | Never Any     | 0    | .     |               |             |               |                |              |
| 50                                        | 45-49     | CC            | 0    | .     | 0             | .           |               |                |              |
| 50                                        | 45-49     | Ecig          | 0    | .     |               |             |               |                |              |
| 50                                        | 45-49     | Dual          | 0    | .     |               |             |               |                |              |
| 50                                        | 45-49     | Former        | 0    | .     |               |             | .             | 0              | .            |
| Year of Follow-up: 2040, Age Group: 50-54 |           |               |      |       |               |             |               |                |              |
| Period                                    | Age Group | Smoking Group | N    | %     | Ever Quit (N) | Ever Quit % | Mean Yrs Quit | Short Term (n) | Short Term % |
| 50                                        | 50-54     | Never Any     | 0    | .     |               |             |               |                |              |
| 50                                        | 50-54     | CC            | 0    | .     | 0             | .           |               |                |              |
| 50                                        | 50-54     | Ecig          | 0    | .     |               |             |               |                |              |
| 50                                        | 50-54     | Dual          | 0    | .     |               |             |               |                |              |
| 50                                        | 50-54     | Former        | 0    | .     |               |             | .             | 0              | .            |
| Year of Follow-up: 2040, Age Group: 55-59 |           |               |      |       |               |             |               |                |              |
| Period                                    | Age Group | Smoking Group | N    | %     | Ever Quit (N) | Ever Quit % | Mean Yrs Quit | Short Term (n) | Short Term % |
| 50                                        | 55-59     | Never Any     | 0    | .     |               |             |               |                |              |
| 50                                        | 55-59     | CC            | 0    | .     | 0             | .           |               |                |              |
| 50                                        | 55-59     | Ecig          | 0    | .     |               |             |               |                |              |
| 50                                        | 55-59     | Dual          | 0    | .     |               |             |               |                |              |
| 50                                        | 55-59     | Former        | 0    | .     |               |             | .             | 0              | .            |
| Year of Follow-up: 2040, Age Group: 60-64 |           |               |      |       |               |             |               |                |              |
| Period                                    | Age Group | Smoking Group | N    | %     | Ever Quit (N) | Ever Quit % | Mean Yrs Quit | Short Term (n) | Short Term % |
| 50                                        | 60-64     | Never Any     | 4726 | 59.60 |               |             |               |                |              |
| 50                                        | 60-64     | CC            | 0    | 0.00  | 0             | 0.00        |               |                |              |
| 50                                        | 60-64     | Ecig          | 907  | 11.44 |               |             |               |                |              |
| 50                                        | 60-64     | Dual          | 0    | 0.00  |               |             |               |                |              |
| 50                                        | 60-64     | Former        | 2297 | 28.97 |               |             | 26.69         | 92             | 4.01         |
| Year of Follow-up: 2040, Age Group: 65-69 |           |               |      |       |               |             |               |                |              |
| Period                                    | Age Group | Smoking Group | N    | %     | Ever Quit (N) | Ever Quit % | Mean Yrs Quit | Short Term (n) | Short Term % |
| 50                                        | 65-69     | Never Any     | 5359 | 64.18 |               |             |               |                |              |
| 50                                        | 65-69     | CC            | 0    | 0.00  | 0             | 0.00        |               |                |              |
| 50                                        | 65-69     | Ecig          | 835  | 10.00 |               |             |               |                |              |
| 50                                        | 65-69     | Dual          | 0    | 0.00  |               |             |               |                |              |
| 50                                        | 65-69     | Former        | 2156 | 25.82 |               |             | 27.97         | 42             | 1.95         |
| Year of Follow-up: 2040, Age Group: 70-74 |           |               |      |       |               |             |               |                |              |
| Period                                    | Age Group | Smoking Group | N    | %     | Ever Quit (N) | Ever Quit % | Mean Yrs Quit | Short Term (n) | Short Term % |
| 50                                        | 70-74     | Never Any     | 5189 | 59.01 |               |             |               |                |              |
| 50                                        | 70-74     | CC            | 3    | 0.03  | 0             | 0.00        |               |                |              |
| 50                                        | 70-74     | Ecig          | 860  | 9.78  |               |             |               |                |              |
| 50                                        | 70-74     | Dual          | 0    | 0.00  |               |             |               |                |              |
| 50                                        | 70-74     | Former        | 2741 | 31.17 |               |             | 32.90         | 57             | 2.08         |
| Year of Follow-up: 2040, Age Group: 75-79 |           |               |      |       |               |             |               |                |              |
| Period                                    | Age Group | Smoking Group | N    | %     | Ever Quit (N) | Ever Quit % | Mean Yrs Quit | Short Term (n) | Short Term % |
| 50                                        | 75-79     | Never Any     | 5284 | 52.43 |               |             |               |                |              |
| 50                                        | 75-79     | CC            | 1    | 0.01  | 0             | 0.00        |               |                |              |
| 50                                        | 75-79     | Ecig          | 1044 | 10.36 |               |             |               |                |              |
| 50                                        | 75-79     | Dual          | 0    | 0.00  |               |             |               |                |              |
| 50                                        | 75-79     | Former        | 3749 | 37.20 |               |             | 35.00         | 80             | 2.13         |

## Results for PHIM for Run 4 (Sensitivity\_Analysis\_3.RTF)

\*\*\*\*\*

### Main Results for E-Component for Run: 4, Simulation: 1, COD: Four Diseases Combined

| Variable Parameter          | Value                                  |
|-----------------------------|----------------------------------------|
| 1. Country                  | US (United States)                     |
| 2. Sex                      | F (Females)                            |
| 3. Year of start of process | 1990                                   |
| 4. Cause of Death           | Four Diseases Combined                 |
| 5. Effective Dose NULL      | CC:1                                   |
| 6. Effective Dose Ecig      | CC:1 Ecig:0.05 Dual:0.525              |
| Note:                       | Death rates are per million population |

#### Results for Age Groups Combined and Years combined, Population unadjusted for deaths in Ecig scenario,

| Age Group:All |         | NULL        | Ecig        | %Drop    |        |        | NULL    | Ecig    | Drop    |         |
|---------------|---------|-------------|-------------|----------|--------|--------|---------|---------|---------|---------|
| Year          | Number  | Attrib      | Attrib      | Drop     | %Drop  | Attrib | Death   | Attrib  | Attrib  | Drop    |
|               | Deaths  | Deaths      | Deaths      | Deaths   | Deaths | Deaths | Rate    | Rates   | Rates   | Rates   |
| All Comb      | 9082078 | 2946250.006 | 1957454.186 | 988795.8 | 10.887 | 33.561 | 2493.45 | 808.881 | 537.411 | 271.470 |

#### Results for Age Groups Combined, Population unadjusted for deaths in Ecig scenario,

| Age Group:All |        | NULL      | Ecig      | %Drop    |        |        | NULL    | Ecig    | Drop    |         |
|---------------|--------|-----------|-----------|----------|--------|--------|---------|---------|---------|---------|
| Year          | Number | Attrib    | Attrib    | Drop     | %Drop  | Attrib | Death   | Attrib  | Attrib  | Drop    |
|               | Deaths | Deaths    | Deaths    | Deaths   | Deaths | Deaths | Rate    | Rates   | Rates   | Rates   |
| 1990          | 199848 | 57524.822 | 57524.822 | 0.000    | 0.000  | 0.000  | 2926.84 | 842.471 | 842.471 | 0.000   |
| 1991          | 199162 | 59078.486 | 58910.022 | 168.464  | 0.085  | 0.285  | 2877.87 | 853.678 | 851.244 | 2.434   |
| 1992          | 198532 | 60494.150 | 60022.578 | 471.572  | 0.238  | 0.780  | 2829.84 | 862.271 | 855.550 | 6.722   |
| 1993          | 202512 | 62694.848 | 61777.164 | 917.683  | 0.453  | 1.464  | 2845.85 | 881.034 | 868.138 | 12.896  |
| 1994          | 200658 | 63202.598 | 61752.826 | 1449.772 | 0.723  | 2.294  | 2777.87 | 874.966 | 854.895 | 20.070  |
| 1995          | 201023 | 63766.862 | 61672.765 | 2094.097 | 1.042  | 3.284  | 2739.80 | 869.097 | 840.556 | 28.541  |
| 1996          | 201180 | 64591.163 | 61721.811 | 2869.351 | 1.426  | 4.442  | 2706.36 | 868.908 | 830.308 | 38.600  |
| 1997          | 198639 | 64686.912 | 61094.116 | 3592.796 | 1.809  | 5.554  | 2635.18 | 858.147 | 810.484 | 47.663  |
| 1998          | 197573 | 65295.961 | 60865.284 | 4430.677 | 2.243  | 6.786  | 2584.18 | 854.046 | 796.095 | 57.952  |
| 1999          | 211329 | 67327.521 | 61605.573 | 5721.948 | 2.708  | 8.499  | 2726.91 | 868.771 | 794.937 | 73.834  |
| 2000          | 208496 | 67596.897 | 60934.113 | 6662.783 | 3.196  | 9.857  | 2656.96 | 861.419 | 776.512 | 84.907  |
| 2001          | 203606 | 67008.811 | 59350.798 | 7658.012 | 3.761  | 11.428 | 2565.88 | 844.458 | 747.950 | 96.508  |
| 2002          | 200828 | 67067.744 | 58301.127 | 8766.617 | 4.365  | 13.071 | 2506.09 | 836.925 | 727.528 | 109.397 |
| 2003          | 196352 | 66756.217 | 56988.532 | 9767.684 | 4.975  | 14.632 | 2427.31 | 825.244 | 704.495 | 120.749 |
| 2004          | 188160 | 65058.725 | 54445.318 | 10613.41 | 5.641  | 16.314 | 2302.83 | 796.234 | 666.340 | 129.894 |
| 2005          | 186416 | 65214.724 | 53461.523 | 11753.20 | 6.305  | 18.022 | 2256.27 | 789.321 | 647.067 | 142.254 |
| 2006          | 180088 | 63771.146 | 51153.699 | 12617.45 | 7.006  | 19.786 | 2160.67 | 765.117 | 613.735 | 151.382 |
| 2007          | 175644 | 63110.718 | 49606.486 | 13504.23 | 7.688  | 21.398 | 2086.36 | 749.650 | 589.242 | 160.408 |
| 2008          | 177570 | 63718.624 | 48932.501 | 14786.12 | 8.327  | 23.205 | 2086.39 | 748.674 | 574.941 | 173.732 |
| 2009          | 172806 | 62794.698 | 47185.451 | 15609.25 | 9.033  | 24.858 | 2007.57 | 729.515 | 548.175 | 181.340 |
| 2010          | 170489 | 61917.074 | 45444.395 | 16472.68 | 9.662  | 26.604 | 1957.97 | 711.083 | 521.903 | 189.179 |
| 2011          | 170305 | 61680.114 | 44046.449 | 17633.67 | 10.354 | 28.589 | 1937.46 | 701.700 | 501.092 | 200.608 |
| 2012          | 171421 | 62023.127 | 43103.406 | 18919.72 | 11.037 | 30.504 | 1930.22 | 698.386 | 485.348 | 213.038 |
| 2013          | 172699 | 62037.765 | 41961.719 | 20076.05 | 11.625 | 32.361 | 1923.75 | 691.059 | 467.425 | 223.634 |
| 2014          | 174169 | 61921.017 | 40576.750 | 21344.27 | 12.255 | 34.470 | 1918.85 | 682.195 | 447.041 | 235.154 |
| 2015          | 177354 | 61856.204 | 39433.902 | 22422.30 | 12.643 | 36.249 | 2184.51 | 761.899 | 485.717 | 276.181 |
| 2016          | 176853 | 60464.119 | 37178.914 | 23285.20 | 13.166 | 38.511 | 2157.59 | 737.655 | 453.578 | 284.077 |
| 2017          | 179309 | 60243.839 | 35796.422 | 24447.42 | 13.634 | 40.581 | 2166.86 | 728.017 | 432.582 | 295.435 |
| 2018          | 177157 | 60713.327 | 35218.960 | 25494.37 | 14.391 | 41.991 | 2120.51 | 726.721 | 421.561 | 305.160 |
| 2019          | 179227 | 61148.172 | 34309.255 | 26838.92 | 14.975 | 43.892 | 2124.53 | 724.841 | 406.697 | 318.144 |
| 2020          | 180467 | 61149.317 | 33377.886 | 27771.43 | 15.389 | 45.416 | 2424.25 | 821.432 | 448.373 | 373.060 |
| 2021          | 178116 | 58727.786 | 30571.278 | 28156.51 | 15.808 | 47.944 | 2375.42 | 783.216 | 407.710 | 375.506 |
| 2022          | 179408 | 58848.802 | 29564.460 | 29284.34 | 16.323 | 49.762 | 2374.52 | 778.881 | 391.294 | 387.587 |
| 2023          | 180640 | 58816.149 | 28543.562 | 30272.59 | 16.759 | 51.470 | 2372.26 | 772.407 | 374.850 | 397.557 |
| 2024          | 181610 | 58955.232 | 27532.662 | 31422.57 | 17.302 | 53.299 | 2366.77 | 768.316 | 358.811 | 409.505 |
| 2025          | 180418 | 58297.744 | 26397.285 | 31900.46 | 17.681 | 54.720 | 2713.69 | 876.861 | 397.044 | 479.817 |
| 2026          | 180313 | 56469.971 | 24372.147 | 32097.82 | 17.801 | 56.841 | 2701.83 | 846.150 | 365.194 | 480.956 |
| 2027          | 179619 | 56209.427 | 23255.055 | 32954.37 | 18.347 | 58.628 | 2680.68 | 838.883 | 347.064 | 491.819 |
| 2028          | 178762 | 55733.105 | 22076.868 | 33656.24 | 18.827 | 60.388 | 2656.74 | 828.298 | 328.104 | 500.195 |
| 2029          | 177808 | 55145.838 | 20888.981 | 34256.86 | 19.266 | 62.120 | 2630.89 | 815.951 | 309.078 | 506.872 |
| 2030          | 173587 | 53615.097 | 19650.737 | 33964.36 | 19.566 | 63.349 | 3040.33 | 939.056 | 344.178 | 594.878 |
| 2031          | 174985 | 52046.561 | 18436.349 | 33610.21 | 19.207 | 64.577 | 3060.73 | 910.364 | 322.476 | 587.887 |
| 2032          | 173400 | 51582.636 | 17472.475 | 34110.16 | 19.671 | 66.127 | 3027.10 | 900.496 | 305.023 | 595.473 |
| 2033          | 171756 | 50839.758 | 16493.383 | 34346.38 | 19.997 | 67.558 | 2991.14 | 885.375 | 287.232 | 598.142 |
| 2034          | 169973 | 50215.451 | 15546.229 | 34669.22 | 20.397 | 69.041 | 2951.96 | 872.104 | 269.995 | 602.109 |
| 2035          | 162644 | 47773.075 | 14415.496 | 33357.58 | 20.510 | 69.825 | 3459.14 | 1016.05 | 306.591 | 709.454 |
| 2036          | 156254 | 43298.709 | 12407.956 | 30890.75 | 19.770 | 71.343 | 3328.25 | 922.274 | 264.293 | 657.981 |
| 2037          | 153593 | 42241.563 | 11470.971 | 30770.59 | 20.034 | 72.844 | 3274.10 | 900.450 | 244.523 | 655.927 |
| 2038          | 150947 | 41356.353 | 10726.012 | 30630.34 | 20.292 | 74.064 | 3217.50 | 881.531 | 228.630 | 652.901 |
| 2039          | 148373 | 40161.050 | 9877.712  | 30283.34 | 20.410 | 75.405 | 3159.42 | 855.178 | 210.333 | 644.844 |

## Results for PHIM for Run 4 (Sensitivity\_Analysis\_3.RTF)

\*\*\*\*\*

### Main Results for E-Component for Run: 4, Simulation: 1, COD: LUNG CANCER

| Variable Parameter          | Value                                  |
|-----------------------------|----------------------------------------|
| 1. Country                  | US (United States)                     |
| 2. Sex                      | F (Females)                            |
| 3. Year of start of process | 1990                                   |
| 4. Cause of Death           | LUNG CANCER                            |
| 5. Effective Dose NULL      | CC:1                                   |
| 6. Effective Dose Ecig      | CC:1 Ecig:0.05 Dual:0.525              |
| Note:                       | Death rates are per million population |

#### Results for Age Groups Combined and Years combined, Population unadjusted for deaths in Ecig scenario,

| Age Group:All | NULL    | Ecig        | %Drop       |          |        | NULL   | Ecig    | Drop    |         |         |
|---------------|---------|-------------|-------------|----------|--------|--------|---------|---------|---------|---------|
| Year          | Number  | Attrib      | Attrib      | Drop     | %Drop  | Attrib | Death   | Attrib  | Attrib  | Drop    |
|               | Deaths  | Deaths      | Deaths      | Deaths   | Deaths | Deaths | Rate    | Rates   | Rates   | Rates   |
| All Comb      | 2327764 | 1580465.217 | 1149683.300 | 430781.9 | 18.506 | 27.257 | 639.078 | 433.910 | 315.641 | 118.269 |

#### Results for Age Groups Combined, Population unadjusted for deaths in Ecig scenario,

| Age Group:All | NULL   | Ecig      | %Drop     |          |        | NULL   | Ecig    | Drop    |         |         |
|---------------|--------|-----------|-----------|----------|--------|--------|---------|---------|---------|---------|
| Year          | Number | Attrib    | Attrib    | Drop     | %Drop  | Attrib | Death   | Attrib  | Attrib  | Drop    |
|               | Deaths | Deaths    | Deaths    | Deaths   | Deaths | Deaths | Rate    | Rates   | Rates   | Rates   |
| 1990          | 42690  | 30614.201 | 30614.201 | 0.000    | 0.000  | 0.000  | 625.210 | 448.355 | 448.355 | 0.000   |
| 1991          | 43692  | 31412.010 | 31379.684 | 32.326   | 0.074  | 0.103  | 631.345 | 453.901 | 453.433 | 0.467   |
| 1992          | 45423  | 32782.407 | 32688.458 | 93.949   | 0.207  | 0.287  | 647.450 | 467.274 | 465.935 | 1.339   |
| 1993          | 46291  | 33491.183 | 33305.441 | 185.742  | 0.401  | 0.555  | 650.515 | 470.643 | 468.032 | 2.610   |
| 1994          | 47017  | 34074.347 | 33773.180 | 301.167  | 0.641  | 0.884  | 650.895 | 471.719 | 467.550 | 4.169   |
| 1995          | 47840  | 34694.454 | 34240.243 | 454.211  | 0.949  | 1.309  | 652.025 | 472.861 | 466.670 | 6.191   |
| 1996          | 48244  | 35027.269 | 34398.513 | 628.756  | 1.303  | 1.795  | 648.999 | 471.202 | 462.744 | 8.458   |
| 1997          | 49035  | 35590.763 | 34754.069 | 836.694  | 1.706  | 2.351  | 650.506 | 472.153 | 461.053 | 11.100  |
| 1998          | 49686  | 36100.785 | 35018.241 | 1082.543 | 2.179  | 2.999  | 649.874 | 472.184 | 458.025 | 14.159  |
| 1999          | 48883  | 35451.030 | 34146.590 | 1304.440 | 2.668  | 3.680  | 630.769 | 457.448 | 440.616 | 16.832  |
| 2000          | 50331  | 36447.986 | 34815.332 | 1632.654 | 3.244  | 4.479  | 641.392 | 464.474 | 443.668 | 20.806  |
| 2001          | 50389  | 36411.326 | 34445.837 | 1965.490 | 3.901  | 5.398  | 635.012 | 458.863 | 434.093 | 24.769  |
| 2002          | 51445  | 37078.545 | 34699.723 | 2378.822 | 4.624  | 6.416  | 641.972 | 462.696 | 433.011 | 29.685  |
| 2003          | 51408  | 36999.876 | 34226.370 | 2773.506 | 5.395  | 7.496  | 635.509 | 457.395 | 423.108 | 34.286  |
| 2004          | 51399  | 36861.555 | 33650.409 | 3211.146 | 6.247  | 8.711  | 629.057 | 451.138 | 411.837 | 39.300  |
| 2005          | 51421  | 36689.529 | 33015.744 | 3673.785 | 7.145  | 10.013 | 622.370 | 444.069 | 399.603 | 44.465  |
| 2006          | 51355  | 36504.774 | 32344.798 | 4159.976 | 8.100  | 11.396 | 616.150 | 437.979 | 388.068 | 49.911  |
| 2007          | 51839  | 36663.202 | 31924.574 | 4738.628 | 9.141  | 12.925 | 615.761 | 435.498 | 379.211 | 56.287  |
| 2008          | 50976  | 35898.803 | 30726.097 | 5172.706 | 10.147 | 14.409 | 598.952 | 421.800 | 361.022 | 60.778  |
| 2009          | 51193  | 35934.525 | 30142.109 | 5792.416 | 11.315 | 16.119 | 594.733 | 417.468 | 350.175 | 67.293  |
| 2010          | 50853  | 35502.829 | 29203.555 | 6299.274 | 12.387 | 17.743 | 584.018 | 407.730 | 335.386 | 72.344  |
| 2011          | 50509  | 35136.342 | 28246.848 | 6889.494 | 13.640 | 19.608 | 574.613 | 399.726 | 321.349 | 78.378  |
| 2012          | 51245  | 35450.201 | 27827.124 | 7623.077 | 14.876 | 21.504 | 577.023 | 399.173 | 313.336 | 85.837  |
| 2013          | 51069  | 35123.224 | 26857.626 | 8265.598 | 16.185 | 23.533 | 568.874 | 391.249 | 299.176 | 92.073  |
| 2014          | 51251  | 35079.370 | 26126.644 | 8952.726 | 17.468 | 25.521 | 564.641 | 386.476 | 287.842 | 98.634  |
| 2015          | 50443  | 34324.171 | 24924.435 | 9399.735 | 18.634 | 27.385 | 621.319 | 422.780 | 307.001 | 115.779 |
| 2016          | 48854  | 33054.753 | 23266.672 | 9788.080 | 20.035 | 29.612 | 596.013 | 403.264 | 283.851 | 119.413 |
| 2017          | 48325  | 32471.234 | 22122.317 | 10348.92 | 21.415 | 31.871 | 583.983 | 392.399 | 267.337 | 125.061 |
| 2018          | 50465  | 33657.595 | 22103.988 | 11553.61 | 22.894 | 34.327 | 604.052 | 402.871 | 264.578 | 138.293 |
| 2019          | 51036  | 33863.424 | 21457.614 | 12405.81 | 24.308 | 36.635 | 604.975 | 401.412 | 254.355 | 147.057 |
| 2020          | 51444  | 33910.830 | 20796.252 | 13114.58 | 25.493 | 38.674 | 691.053 | 455.532 | 279.361 | 176.171 |
| 2021          | 48037  | 31531.880 | 18574.838 | 12957.04 | 26.973 | 41.092 | 640.639 | 420.521 | 247.721 | 172.800 |
| 2022          | 48335  | 31560.212 | 17864.829 | 13695.38 | 28.334 | 43.394 | 639.727 | 417.708 | 236.446 | 181.262 |
| 2023          | 48599  | 31508.781 | 17143.315 | 14365.47 | 29.559 | 45.592 | 638.227 | 413.791 | 225.136 | 188.655 |
| 2024          | 48784  | 31517.293 | 16420.487 | 15096.81 | 30.946 | 47.900 | 635.757 | 410.740 | 213.995 | 196.745 |
| 2025          | 48477  | 31175.389 | 15632.571 | 15542.82 | 32.063 | 49.856 | 729.141 | 468.912 | 235.131 | 233.781 |
| 2026          | 45324  | 29044.598 | 13937.680 | 15106.92 | 33.331 | 52.013 | 679.138 | 435.206 | 208.843 | 226.363 |
| 2027          | 45107  | 28825.765 | 13195.113 | 15630.65 | 34.652 | 54.225 | 673.191 | 430.203 | 196.927 | 233.276 |
| 2028          | 44842  | 28513.846 | 12432.886 | 16080.96 | 35.862 | 56.397 | 666.430 | 423.769 | 184.776 | 238.993 |
| 2029          | 44539  | 28148.109 | 11669.658 | 16478.45 | 36.998 | 58.542 | 659.013 | 416.486 | 172.667 | 243.819 |
| 2030          | 43393  | 27314.475 | 10878.342 | 16436.13 | 37.877 | 60.174 | 760.018 | 478.407 | 190.532 | 287.875 |
| 2031          | 40748  | 25423.102 | 9793.989  | 15629.11 | 38.356 | 61.476 | 712.731 | 444.684 | 171.310 | 273.374 |
| 2032          | 40325  | 25085.902 | 9193.885  | 15892.02 | 39.410 | 63.350 | 703.969 | 437.933 | 160.501 | 277.432 |
| 2033          | 39882  | 24645.067 | 8606.333  | 16038.73 | 40.216 | 65.079 | 694.543 | 429.194 | 149.879 | 279.315 |
| 2034          | 39404  | 24239.126 | 8042.798  | 16196.33 | 41.103 | 66.819 | 684.347 | 420.967 | 139.681 | 281.286 |
| 2035          | 37454  | 22944.147 | 7363.738  | 15580.41 | 41.598 | 67.906 | 796.588 | 487.980 | 156.613 | 331.367 |
| 2036          | 32988  | 19950.581 | 6094.349  | 13856.23 | 42.003 | 69.453 | 702.663 | 424.953 | 129.811 | 295.141 |
| 2037          | 32403  | 19415.334 | 5600.273  | 13815.06 | 42.635 | 71.155 | 690.731 | 413.871 | 119.379 | 294.491 |
| 2038          | 31820  | 18939.317 | 5212.650  | 13726.67 | 43.139 | 72.477 | 678.257 | 403.701 | 111.110 | 292.591 |
| 2039          | 31251  | 18379.752 | 4782.875  | 13596.88 | 43.508 | 73.977 | 665.457 | 391.373 | 101.845 | 289.528 |

## Results for PHIM for Run 4 (Sensitivity\_Analysis\_3.RTF)

\*\*\*\*\*

### Main Results for E-Component for Run: 4, Simulation: 1, COD: IHD

| Variable Parameter          | Value                                  |
|-----------------------------|----------------------------------------|
| 1. Country                  | US (United States)                     |
| 2. Sex                      | F (Females)                            |
| 3. Year of start of process | 1990                                   |
| 4. Cause of Death           | IHD                                    |
| 5. Effective Dose NULL      | CC:1                                   |
| 6. Effective Dose Ecig      | CC:1 Ecig:0.05 Dual:0.525              |
| Note:                       | Death rates are per million population |

#### Results for Age Groups Combined and Years combined, Population unadjusted for deaths in Ecig scenario,

| Age Group:All |         | NULL       | Ecig       | %Drop    |        | NULL   | Ecig    | Drop    |        |        |
|---------------|---------|------------|------------|----------|--------|--------|---------|---------|--------|--------|
| Year          | Number  | Attrib     | Attrib     | Drop     | %Drop  | Attrib | Death   | Attrib  | Attrib | Drop   |
|               | Deaths  | Deaths     | Deaths     | Deaths   | Deaths | Deaths | Rate    | Rates   | Rates  | Rates  |
| All Comb      | 3242167 | 398833.796 | 201089.110 | 197744.7 | 6.099  | 49.581 | 890.124 | 109.498 | 55.208 | 54.290 |

#### Results for Age Groups Combined, Population unadjusted for deaths in Ecig scenario,

| Age Group:All |        | NULL      | Ecig      | %Drop    |        | NULL   | Ecig    | Drop    |         |        |
|---------------|--------|-----------|-----------|----------|--------|--------|---------|---------|---------|--------|
| Year          | Number | Attrib    | Attrib    | Drop     | %Drop  | Attrib | Death   | Attrib  | Attrib  | Drop   |
|               | Deaths | Deaths    | Deaths    | Deaths   | Deaths | Deaths | Rate    | Rates   | Rates   | Rates  |
| 1990          | 98916  | 12922.892 | 12922.892 | 0.000    | 0.000  | 0.000  | 1448.66 | 189.260 | 189.260 | 0.000  |
| 1991          | 96403  | 12856.479 | 12766.075 | 90.404   | 0.094  | 0.703  | 1393.01 | 185.775 | 184.469 | 1.306  |
| 1992          | 93721  | 12662.244 | 12411.697 | 250.547  | 0.267  | 1.979  | 1335.88 | 180.485 | 176.914 | 3.571  |
| 1993          | 93679  | 12730.613 | 12252.454 | 478.159  | 0.510  | 3.756  | 1316.45 | 178.900 | 172.180 | 6.719  |
| 1994          | 90832  | 12495.323 | 11750.726 | 744.597  | 0.820  | 5.959  | 1257.46 | 172.983 | 162.675 | 10.308 |
| 1995          | 89698  | 12365.590 | 11313.470 | 1052.120 | 1.173  | 8.508  | 1222.52 | 168.534 | 154.195 | 14.340 |
| 1996          | 88286  | 12290.551 | 10856.106 | 1434.445 | 1.625  | 11.671 | 1187.66 | 165.338 | 146.041 | 19.297 |
| 1997          | 84777  | 11719.531 | 9992.295  | 1727.236 | 2.037  | 14.738 | 1124.67 | 155.473 | 132.559 | 22.914 |
| 1998          | 82517  | 11416.794 | 9349.475  | 2067.320 | 2.505  | 18.108 | 1079.29 | 149.327 | 122.288 | 27.040 |
| 1999          | 93939  | 13028.038 | 10182.944 | 2845.094 | 3.029  | 21.838 | 1212.16 | 168.109 | 131.397 | 36.712 |
| 2000          | 90039  | 12426.299 | 9250.724  | 3175.575 | 3.527  | 25.555 | 1147.41 | 158.354 | 117.886 | 40.468 |
| 2001          | 86119  | 11939.281 | 8361.304  | 3577.977 | 4.155  | 29.968 | 1085.29 | 150.461 | 105.371 | 45.090 |
| 2002          | 83014  | 11528.794 | 7559.518  | 3969.276 | 4.781  | 34.429 | 1035.91 | 143.865 | 94.334  | 49.532 |
| 2003          | 79302  | 11048.407 | 6783.559  | 4264.848 | 5.378  | 38.601 | 980.336 | 136.581 | 83.859  | 52.722 |
| 2004          | 73861  | 10375.132 | 5911.240  | 4463.891 | 6.044  | 43.025 | 903.963 | 126.978 | 72.346  | 54.632 |
| 2005          | 71649  | 10051.029 | 5316.101  | 4734.928 | 6.609  | 47.109 | 867.197 | 121.652 | 64.343  | 57.309 |
| 2006          | 67551  | 9542.523  | 4634.547  | 4907.976 | 7.266  | 51.433 | 810.467 | 114.490 | 55.605  | 58.885 |
| 2007          | 63503  | 8936.533  | 3994.353  | 4942.180 | 7.783  | 55.303 | 754.310 | 106.151 | 47.446  | 58.705 |
| 2008          | 63171  | 8944.180  | 3671.043  | 5273.137 | 8.347  | 58.956 | 742.239 | 105.091 | 43.134  | 61.958 |
| 2009          | 59747  | 8390.033  | 3183.386  | 5206.647 | 8.714  | 62.058 | 694.108 | 97.471  | 36.983  | 60.488 |
| 2010          | 58008  | 8157.570  | 2846.228  | 5311.342 | 9.156  | 65.109 | 666.189 | 93.685  | 32.687  | 60.998 |
| 2011          | 57368  | 8035.356  | 2557.800  | 5477.556 | 9.548  | 68.168 | 652.644 | 91.414  | 29.099  | 62.315 |
| 2012          | 57411  | 7970.766  | 2305.842  | 5664.923 | 9.867  | 71.071 | 646.453 | 89.752  | 25.964  | 63.788 |
| 2013          | 57067  | 7743.216  | 2064.042  | 5679.174 | 9.952  | 73.344 | 635.688 | 86.254  | 22.992  | 63.262 |
| 2014          | 57538  | 7774.935  | 1889.616  | 5885.319 | 10.229 | 75.696 | 633.906 | 85.658  | 20.818  | 64.840 |
| 2015          | 58395  | 7722.535  | 1747.478  | 5975.057 | 10.232 | 77.372 | 719.266 | 95.120  | 21.524  | 73.596 |
| 2016          | 58658  | 7600.353  | 1571.137  | 6029.216 | 10.279 | 79.328 | 715.621 | 92.723  | 19.168  | 73.556 |
| 2017          | 59004  | 7470.266  | 1419.971  | 6050.295 | 10.254 | 80.992 | 713.034 | 90.274  | 17.160  | 73.115 |
| 2018          | 56077  | 6907.050  | 1207.478  | 5699.572 | 10.164 | 82.518 | 671.224 | 82.675  | 14.453  | 68.222 |
| 2019          | 55886  | 6732.046  | 1091.013  | 5641.033 | 10.094 | 83.794 | 662.462 | 79.801  | 12.933  | 66.868 |
| 2020          | 55313  | 6429.836  | 978.452   | 5451.384 | 9.855  | 84.783 | 743.037 | 86.373  | 13.144  | 73.230 |
| 2021          | 56292  | 6562.016  | 909.925   | 5652.090 | 10.041 | 86.133 | 750.730 | 87.513  | 12.135  | 75.378 |
| 2022          | 55827  | 6352.366  | 824.324   | 5528.042 | 9.902  | 87.023 | 738.885 | 84.075  | 10.910  | 73.165 |
| 2023          | 55338  | 6134.123  | 751.599   | 5382.524 | 9.727  | 87.747 | 726.728 | 80.557  | 9.870   | 70.686 |
| 2024          | 54770  | 5922.193  | 684.017   | 5238.176 | 9.564  | 88.450 | 713.771 | 77.179  | 8.914   | 68.265 |
| 2025          | 53295  | 5504.188  | 609.085   | 4895.102 | 9.185  | 88.934 | 801.612 | 82.789  | 9.161   | 73.628 |
| 2026          | 55278  | 5641.075  | 591.329   | 5049.746 | 9.135  | 89.517 | 828.283 | 84.526  | 8.861   | 75.666 |
| 2027          | 54199  | 5426.216  | 544.636   | 4881.580 | 9.007  | 89.963 | 808.875 | 80.982  | 8.128   | 72.854 |
| 2028          | 53090  | 5197.830  | 500.432   | 4697.398 | 8.848  | 90.372 | 789.020 | 77.249  | 7.437   | 69.812 |
| 2029          | 51974  | 4973.547  | 462.680   | 4510.867 | 8.679  | 90.697 | 769.023 | 73.590  | 6.846   | 66.744 |
| 2030          | 49479  | 4450.618  | 399.911   | 4050.707 | 8.187  | 91.014 | 866.605 | 77.952  | 7.004   | 70.947 |
| 2031          | 51987  | 4555.052  | 400.104   | 4154.949 | 7.992  | 91.216 | 909.317 | 79.674  | 6.998   | 72.676 |
| 2032          | 50677  | 4349.999  | 372.125   | 3977.874 | 7.849  | 91.445 | 884.689 | 75.939  | 6.496   | 69.443 |
| 2033          | 49380  | 4147.948  | 349.807   | 3798.141 | 7.692  | 91.567 | 859.955 | 72.237  | 6.092   | 66.145 |
| 2034          | 48076  | 3966.133  | 329.078   | 3637.055 | 7.565  | 91.703 | 834.943 | 68.881  | 5.715   | 63.166 |
| 2035          | 44518  | 3289.064  | 265.337   | 3023.727 | 6.792  | 91.933 | 946.825 | 69.952  | 5.643   | 64.309 |
| 2036          | 46347  | 3313.192  | 262.041   | 3051.152 | 6.583  | 92.091 | 987.211 | 70.572  | 5.582   | 64.990 |
| 2037          | 44841  | 3117.951  | 243.297   | 2874.654 | 6.411  | 92.197 | 955.859 | 66.464  | 5.186   | 61.278 |
| 2038          | 43378  | 2949.775  | 229.892   | 2719.883 | 6.270  | 92.206 | 924.621 | 62.876  | 4.900   | 57.976 |
| 2039          | 41973  | 2766.312  | 216.523   | 2549.789 | 6.075  | 92.173 | 893.753 | 58.905  | 4.611   | 54.294 |

## Results for PHIM for Run 4 (Sensitivity\_Analysis\_3.RTF)

\*\*\*\*\*

### Main Results for E-Component for Run: 4, Simulation: 1, COD: STROKE

| Variable Parameter          | Value                                  |
|-----------------------------|----------------------------------------|
| 1. Country                  | US (United States)                     |
| 2. Sex                      | F (Females)                            |
| 3. Year of start of process | 1990                                   |
| 4. Cause of Death           | STROKE                                 |
| 5. Effective Dose NULL      | CC:1                                   |
| 6. Effective Dose Ecig      | CC:1 Ecig:0.05 Dual:0.525              |
| Note:                       | Death rates are per million population |

#### Results for Age Groups Combined and Years combined, Population unadjusted for deaths in Ecig scenario,

| Age Group:All | NULL    | Ecig       | %Drop     |          |        |        | NULL    | Ecig   | Drop   |        |
|---------------|---------|------------|-----------|----------|--------|--------|---------|--------|--------|--------|
| Year          | Number  | Attrib     | Attrib    | Drop     | %Drop  | Attrib | Death   | Attrib | Attrib | Drop   |
|               | Deaths  | Deaths     | Deaths    | Deaths   | Deaths | Deaths | Rate    | Rates  | Rates  | Rates  |
| All Comb      | 1352207 | 104899.750 | 51804.137 | 53095.61 | 3.927  | 50.616 | 371.243 | 28.800 | 14.223 | 14.577 |

#### Results for Age Groups Combined, Population unadjusted for deaths in Ecig scenario,

| Age Group:All | NULL   | Ecig     | %Drop    |          |        |        | NULL    | Ecig   | Drop   |        |
|---------------|--------|----------|----------|----------|--------|--------|---------|--------|--------|--------|
| Year          | Number | Attrib   | Attrib   | Drop     | %Drop  | Attrib | Death   | Attrib | Attrib | Drop   |
|               | Deaths | Deaths   | Deaths   | Deaths   | Deaths | Deaths | Rate    | Rates  | Rates  | Rates  |
| 1990          | 33504  | 3293.017 | 3293.017 | 0.000    | 0.000  | 0.000  | 490.678 | 48.227 | 48.227 | 0.000  |
| 1991          | 32505  | 3207.063 | 3179.556 | 27.507   | 0.085  | 0.858  | 469.694 | 46.342 | 45.944 | 0.397  |
| 1992          | 32560  | 3218.125 | 3141.244 | 76.881   | 0.236  | 2.389  | 464.104 | 45.871 | 44.775 | 1.096  |
| 1993          | 32768  | 3226.680 | 3081.131 | 145.549  | 0.444  | 4.511  | 460.480 | 45.344 | 43.298 | 2.045  |
| 1994          | 33005  | 3277.266 | 3045.209 | 232.057  | 0.703  | 7.081  | 456.915 | 45.370 | 42.157 | 3.213  |
| 1995          | 33730  | 3309.378 | 2976.932 | 332.446  | 0.986  | 10.046 | 459.716 | 45.104 | 40.573 | 4.531  |
| 1996          | 33750  | 3312.987 | 2863.592 | 449.395  | 1.332  | 13.565 | 454.019 | 44.568 | 38.522 | 6.045  |
| 1997          | 33699  | 3267.066 | 2704.521 | 562.544  | 1.669  | 17.219 | 447.056 | 43.341 | 35.879 | 7.463  |
| 1998          | 33274  | 3178.725 | 2508.274 | 670.451  | 2.015  | 21.092 | 435.211 | 41.577 | 32.807 | 8.769  |
| 1999          | 33891  | 3120.351 | 2340.152 | 780.200  | 2.302  | 25.004 | 437.317 | 40.264 | 30.196 | 10.067 |
| 2000          | 33827  | 3142.808 | 2230.574 | 912.234  | 2.697  | 29.026 | 431.074 | 40.050 | 28.425 | 11.625 |
| 2001          | 32506  | 2961.588 | 1982.375 | 979.213  | 3.012  | 33.064 | 409.647 | 37.323 | 24.982 | 12.340 |
| 2002          | 32078  | 2940.627 | 1840.097 | 1100.531 | 3.431  | 37.425 | 400.295 | 36.695 | 22.962 | 13.733 |
| 2003          | 30568  | 2819.545 | 1648.112 | 1171.433 | 3.832  | 41.547 | 377.883 | 34.855 | 20.374 | 14.481 |
| 2004          | 29388  | 2730.466 | 1483.568 | 1246.898 | 4.243  | 45.666 | 359.671 | 33.417 | 18.157 | 15.260 |
| 2005          | 27954  | 2670.510 | 1347.201 | 1323.309 | 4.734  | 49.553 | 338.339 | 32.322 | 16.306 | 16.017 |
| 2006          | 27201  | 2623.285 | 1226.380 | 1396.906 | 5.135  | 53.250 | 326.354 | 31.474 | 14.714 | 16.760 |
| 2007          | 26302  | 2536.599 | 1095.121 | 1441.478 | 5.480  | 56.827 | 312.424 | 30.131 | 13.008 | 17.122 |
| 2008          | 25998  | 2469.443 | 986.966  | 1482.477 | 5.702  | 60.033 | 305.468 | 29.015 | 11.597 | 17.419 |
| 2009          | 25040  | 2386.945 | 880.772  | 1506.173 | 6.015  | 63.100 | 290.901 | 27.730 | 10.232 | 17.498 |
| 2010          | 24840  | 2329.274 | 793.791  | 1535.484 | 6.181  | 65.921 | 285.273 | 26.750 | 9.116  | 17.634 |
| 2011          | 24792  | 2286.581 | 715.008  | 1571.573 | 6.339  | 68.730 | 282.045 | 26.013 | 8.134  | 17.879 |
| 2012          | 24500  | 2243.311 | 643.499  | 1599.812 | 6.530  | 71.315 | 275.872 | 25.260 | 7.246  | 18.014 |
| 2013          | 24451  | 2176.503 | 573.266  | 1603.237 | 6.557  | 73.661 | 272.368 | 24.245 | 6.386  | 17.859 |
| 2014          | 25296  | 2211.619 | 536.177  | 1675.442 | 6.623  | 75.756 | 278.691 | 24.366 | 5.907  | 18.459 |
| 2015          | 26316  | 2237.016 | 504.859  | 1732.157 | 6.582  | 77.432 | 324.141 | 27.554 | 6.218  | 21.335 |
| 2016          | 26735  | 2229.057 | 465.297  | 1763.761 | 6.597  | 79.126 | 326.164 | 27.194 | 5.677  | 21.518 |
| 2017          | 27616  | 2221.649 | 430.250  | 1791.399 | 6.487  | 80.634 | 333.726 | 26.848 | 5.199  | 21.648 |
| 2018          | 25256  | 1939.420 | 350.507  | 1588.913 | 6.291  | 81.927 | 302.304 | 23.214 | 4.195  | 19.019 |
| 2019          | 25429  | 1904.400 | 318.819  | 1585.581 | 6.235  | 83.259 | 301.434 | 22.574 | 3.779  | 18.795 |
| 2020          | 25379  | 1806.054 | 283.872  | 1522.182 | 5.998  | 84.282 | 340.922 | 24.261 | 3.813  | 20.448 |
| 2021          | 25448  | 1748.172 | 256.008  | 1492.165 | 5.864  | 85.356 | 339.386 | 23.314 | 3.414  | 19.900 |
| 2022          | 25539  | 1701.148 | 233.594  | 1467.554 | 5.746  | 86.268 | 338.015 | 22.515 | 3.092  | 19.423 |
| 2023          | 25620  | 1652.087 | 214.244  | 1437.843 | 5.612  | 87.032 | 336.461 | 21.696 | 2.814  | 18.883 |
| 2024          | 25659  | 1597.127 | 195.091  | 1402.035 | 5.464  | 87.785 | 334.391 | 20.814 | 2.542  | 18.272 |
| 2025          | 25260  | 1467.622 | 171.282  | 1296.340 | 5.132  | 88.329 | 379.931 | 22.075 | 2.576  | 19.498 |
| 2026          | 25480  | 1390.505 | 154.958  | 1235.548 | 4.849  | 88.856 | 381.790 | 20.835 | 2.322  | 18.514 |
| 2027          | 25264  | 1342.095 | 142.554  | 1199.541 | 4.748  | 89.378 | 377.042 | 20.030 | 2.128  | 17.902 |
| 2028          | 25022  | 1289.536 | 131.460  | 1158.076 | 4.628  | 89.806 | 371.870 | 19.165 | 1.954  | 17.211 |
| 2029          | 24767  | 1242.216 | 121.879  | 1120.337 | 4.524  | 90.189 | 366.459 | 18.380 | 1.803  | 16.577 |
| 2030          | 23959  | 1096.803 | 103.584  | 993.219  | 4.145  | 90.556 | 419.641 | 19.210 | 1.814  | 17.396 |
| 2031          | 23963  | 1019.991 | 93.835   | 926.156  | 3.865  | 90.800 | 419.142 | 17.841 | 1.641  | 16.200 |
| 2032          | 23615  | 977.406  | 87.383   | 890.023  | 3.769  | 91.060 | 412.259 | 17.063 | 1.525  | 15.537 |
| 2033          | 23259  | 937.450  | 82.418   | 855.032  | 3.676  | 91.208 | 405.051 | 16.326 | 1.435  | 14.890 |
| 2034          | 22879  | 900.763  | 77.648   | 823.115  | 3.598  | 91.380 | 397.339 | 15.644 | 1.349  | 14.295 |
| 2035          | 21733  | 745.023  | 62.840   | 682.183  | 3.139  | 91.565 | 462.224 | 15.845 | 1.336  | 14.509 |
| 2036          | 20904  | 680.360  | 56.007   | 624.352  | 2.987  | 91.768 | 445.263 | 14.492 | 1.193  | 13.299 |
| 2037          | 20397  | 644.109  | 52.428   | 591.682  | 2.901  | 91.860 | 434.791 | 13.730 | 1.118  | 12.613 |
| 2038          | 19890  | 612.448  | 49.730   | 562.718  | 2.829  | 91.880 | 423.966 | 13.055 | 1.060  | 11.995 |
| 2039          | 19392  | 577.529  | 47.057   | 530.473  | 2.736  | 91.852 | 412.930 | 12.298 | 1.002  | 11.296 |



## Results for PHIM for Run 4 (Sensitivity\_Analysis\_3.RTF)

\*\*\*\*\*

### Main Results for E-Component for Run: 4, Simulation: 1, COD: COPD

| Variable Parameter          | Value                                  |
|-----------------------------|----------------------------------------|
| 1. Country                  | US (United States)                     |
| 2. Sex                      | F (Females)                            |
| 3. Year of start of process | 1990                                   |
| 4. Cause of Death           | COPD                                   |
| 5. Effective Dose NULL      | CC:1                                   |
| 6. Effective Dose Ecig      | CC:1 Ecig:0.05 Dual:0.525              |
| Note:                       | Death rates are per million population |

#### Results for Age Groups Combined and Years combined, Population unadjusted for deaths in Ecig scenario,

| Age Group:All | NULL    | Ecig       | %Drop      |          |        | NULL   | Ecig    | Drop    |         |        |
|---------------|---------|------------|------------|----------|--------|--------|---------|---------|---------|--------|
| Year          | Number  | Attrib     | Attrib     | Drop     | %Drop  | Attrib | Death   | Attrib  | Attrib  | Drop   |
|               | Deaths  | Deaths     | Deaths     | Deaths   | Deaths | Deaths | Rate    | Rates   | Rates   | Rates  |
| All Comb      | 2159941 | 862051.244 | 554877.640 | 307173.6 | 14.221 | 35.633 | 593.003 | 236.673 | 152.339 | 84.333 |

#### Results for Age Groups Combined, Population unadjusted for deaths in Ecig scenario,

| Age Group:All | NULL   | Ecig      | %Drop     |          |        | NULL   | Ecig    | Drop    |         |         |
|---------------|--------|-----------|-----------|----------|--------|--------|---------|---------|---------|---------|
| Year          | Number | Attrib    | Attrib    | Drop     | %Drop  | Attrib | Death   | Attrib  | Attrib  | Drop    |
|               | Deaths | Deaths    | Deaths    | Deaths   | Deaths | Deaths | Rate    | Rates   | Rates   | Rates   |
| 1990          | 24738  | 10694.712 | 10694.712 | 0.000    | 0.000  | 0.000  | 362.296 | 156.628 | 156.628 | 0.000   |
| 1991          | 26562  | 11602.933 | 11584.706 | 18.227   | 0.069  | 0.157  | 383.818 | 167.661 | 167.398 | 0.263   |
| 1992          | 26828  | 11831.375 | 11781.179 | 50.196   | 0.187  | 0.424  | 382.401 | 168.642 | 167.927 | 0.715   |
| 1993          | 29774  | 13246.371 | 13138.138 | 108.233  | 0.364  | 0.817  | 418.406 | 186.148 | 184.627 | 1.521   |
| 1994          | 29804  | 13355.662 | 13183.711 | 171.951  | 0.577  | 1.287  | 412.601 | 184.893 | 182.513 | 2.380   |
| 1995          | 29755  | 13397.439 | 13142.120 | 255.319  | 0.858  | 1.906  | 405.540 | 182.598 | 179.118 | 3.480   |
| 1996          | 30900  | 13960.356 | 13603.600 | 356.755  | 1.155  | 2.555  | 415.680 | 187.801 | 183.001 | 4.799   |
| 1997          | 31128  | 14109.552 | 13643.231 | 466.321  | 1.498  | 3.305  | 412.949 | 187.180 | 180.993 | 6.186   |
| 1998          | 32096  | 14599.657 | 13989.294 | 610.363  | 1.902  | 4.181  | 419.803 | 190.958 | 182.975 | 7.983   |
| 1999          | 34616  | 15728.102 | 14935.887 | 792.215  | 2.289  | 5.037  | 446.673 | 202.950 | 192.727 | 10.222  |
| 2000          | 34299  | 15579.803 | 14637.483 | 942.320  | 2.747  | 6.048  | 437.088 | 198.541 | 186.532 | 12.008  |
| 2001          | 34592  | 15696.614 | 14561.282 | 1135.332 | 3.282  | 7.233  | 435.935 | 197.812 | 183.504 | 14.308  |
| 2002          | 34291  | 15519.777 | 14201.789 | 1317.988 | 3.844  | 8.492  | 427.910 | 193.668 | 177.221 | 16.447  |
| 2003          | 35074  | 15888.389 | 14330.491 | 1557.898 | 4.442  | 9.805  | 433.587 | 196.413 | 177.154 | 19.259  |
| 2004          | 33512  | 15091.573 | 13400.101 | 1691.471 | 5.047  | 11.208 | 410.143 | 184.701 | 164.000 | 20.701  |
| 2005          | 35392  | 15803.656 | 13782.476 | 2021.179 | 5.711  | 12.789 | 428.364 | 191.278 | 166.815 | 24.463  |
| 2006          | 33981  | 15100.563 | 12947.974 | 2152.589 | 6.335  | 14.255 | 407.699 | 181.174 | 155.348 | 25.826  |
| 2007          | 34000  | 14974.384 | 12592.438 | 2381.945 | 7.006  | 15.907 | 403.863 | 177.871 | 149.577 | 28.294  |
| 2008          | 37425  | 16406.197 | 13548.395 | 2857.802 | 7.636  | 17.419 | 439.732 | 192.768 | 159.189 | 33.578  |
| 2009          | 36826  | 16083.194 | 12979.184 | 3104.010 | 8.429  | 19.300 | 427.825 | 186.846 | 150.785 | 36.061  |
| 2010          | 36788  | 15927.400 | 12600.821 | 3326.579 | 9.043  | 20.886 | 422.489 | 182.917 | 144.713 | 38.204  |
| 2011          | 37636  | 16221.836 | 12526.793 | 3695.043 | 9.818  | 22.778 | 428.164 | 184.547 | 142.510 | 42.036  |
| 2012          | 38265  | 16358.849 | 12326.940 | 4031.909 | 10.537 | 24.647 | 430.867 | 184.202 | 138.803 | 45.400  |
| 2013          | 40112  | 16994.822 | 12466.785 | 4528.037 | 11.288 | 26.644 | 446.821 | 189.311 | 138.872 | 50.439  |
| 2014          | 40084  | 16855.093 | 12024.312 | 4830.781 | 12.052 | 28.661 | 441.613 | 185.696 | 132.474 | 53.222  |
| 2015          | 42200  | 17572.483 | 12257.131 | 5315.352 | 12.596 | 30.248 | 519.788 | 216.445 | 150.974 | 65.471  |
| 2016          | 42606  | 17579.955 | 11875.808 | 5704.148 | 13.388 | 32.447 | 519.788 | 214.473 | 144.883 | 69.590  |
| 2017          | 44364  | 18080.688 | 11823.884 | 6256.805 | 14.103 | 34.605 | 536.117 | 218.496 | 142.886 | 75.610  |
| 2018          | 45359  | 18209.262 | 11556.987 | 6652.275 | 14.666 | 36.532 | 542.932 | 217.960 | 138.334 | 79.626  |
| 2019          | 46876  | 18648.302 | 11441.809 | 7206.493 | 15.374 | 38.644 | 555.657 | 221.054 | 135.629 | 85.425  |
| 2020          | 48331  | 19002.597 | 11319.311 | 7683.286 | 15.897 | 40.433 | 649.239 | 255.266 | 152.055 | 103.211 |
| 2021          | 48338  | 18885.717 | 10830.507 | 8055.211 | 16.664 | 42.652 | 644.660 | 251.867 | 144.440 | 107.427 |
| 2022          | 49708  | 19235.076 | 10641.714 | 8593.362 | 17.288 | 44.675 | 657.895 | 254.582 | 140.846 | 113.736 |
| 2023          | 51083  | 19521.158 | 10434.405 | 9086.753 | 17.788 | 46.548 | 670.849 | 256.363 | 137.030 | 119.332 |
| 2024          | 52397  | 19918.620 | 10233.066 | 9685.554 | 18.485 | 48.626 | 682.854 | 259.583 | 133.359 | 126.224 |
| 2025          | 53387  | 20150.545 | 9984.346  | 10166.20 | 19.042 | 50.451 | 803.004 | 303.086 | 150.175 | 152.911 |
| 2026          | 54232  | 20393.792 | 9688.180  | 10705.61 | 19.740 | 52.494 | 812.615 | 305.582 | 145.168 | 160.414 |
| 2027          | 55049  | 20615.351 | 9372.752  | 11242.60 | 20.423 | 54.535 | 821.568 | 307.668 | 139.881 | 167.787 |
| 2028          | 55809  | 20731.894 | 9012.090  | 11719.80 | 21.000 | 56.530 | 829.419 | 308.115 | 133.937 | 174.178 |
| 2029          | 56527  | 20781.967 | 8634.764  | 12147.20 | 21.489 | 58.451 | 836.392 | 307.495 | 127.762 | 179.733 |
| 2030          | 56756  | 20753.201 | 8268.900  | 12484.30 | 21.996 | 60.156 | 994.067 | 363.487 | 144.828 | 218.660 |
| 2031          | 58288  | 21048.417 | 8148.422  | 12899.99 | 22.131 | 61.287 | 1019.54 | 368.165 | 142.527 | 225.638 |
| 2032          | 58782  | 21169.329 | 7819.081  | 13350.25 | 22.711 | 63.064 | 1026.18 | 369.560 | 136.500 | 233.060 |
| 2033          | 59236  | 21109.293 | 7454.825  | 13654.47 | 23.051 | 64.685 | 1031.59 | 367.618 | 129.826 | 237.793 |
| 2034          | 59614  | 21109.429 | 7096.705  | 14012.72 | 23.506 | 66.381 | 1035.33 | 366.613 | 123.250 | 243.362 |
| 2035          | 58938  | 20794.840 | 6723.580  | 14071.26 | 23.875 | 67.667 | 1253.51 | 442.268 | 142.998 | 299.270 |
| 2036          | 56014  | 19354.577 | 5955.560  | 13359.02 | 23.849 | 69.023 | 1193.11 | 412.258 | 127.707 | 284.551 |
| 2037          | 55953  | 19064.169 | 5574.973  | 13489.20 | 24.108 | 70.757 | 1192.72 | 406.385 | 118.840 | 287.545 |
| 2038          | 55859  | 18854.812 | 5233.740  | 13621.07 | 24.385 | 72.242 | 1190.66 | 401.900 | 111.560 | 290.340 |
| 2039          | 55757  | 18437.457 | 4831.257  | 13606.20 | 24.403 | 73.797 | 1187.28 | 392.602 | 102.875 | 289.726 |

## Results for PHIM for Run 4 (Sensitivity\_Analysis\_3.RTF)

\*\*\*\*\*

### Main Results for E-Component for Run: 4, Simulation: 1, COD: Four Diseases Combined, Adjusted

| Variable Parameter          | Value                                  |
|-----------------------------|----------------------------------------|
| 1. Country                  | US (United States)                     |
| 2. Sex                      | F (Females)                            |
| 3. Year of start of process | 1990                                   |
| 4. Cause of Death           | Four Diseases Combined                 |
| 5. Effective Dose NULL      | CC:1                                   |
| 6. Effective Dose Ecig      | CC:1 Ecig:0.05 Dual:0.525              |
| Note:                       | Death rates are per million population |

#### Results for Age Groups Combined and Years combined, Population and Number deaths adjusted for Ecig scenario,

| Age Group:All |         | NULL        | Ecig        | %Drop    |        |        | NULL    | Ecig    | Drop    |         |
|---------------|---------|-------------|-------------|----------|--------|--------|---------|---------|---------|---------|
| Year          | Number  | Attrib      | Attrib      | Drop     | %Drop  | Attrib | Death   | Attrib  | Attrib  | Drop    |
|               | Deaths  | Deaths      | Deaths      | Deaths   | Deaths | Deaths | Rate    | Rates   | Rates   | Rates   |
| All Comb      | 9147801 | 2946250.006 | 1966377.735 | 979872.3 | 10.712 | 33.258 | 2499.55 | 808.881 | 537.294 | 271.588 |

#### Results for Age Groups Combined, Population and Number deaths adjusted for Ecig scenario,

| Age Group:All |        | NULL      | Ecig      | %Drop    |        |        | NULL    | Ecig    | Drop    |         |
|---------------|--------|-----------|-----------|----------|--------|--------|---------|---------|---------|---------|
| Year          | Number | Attrib    | Attrib    | Drop     | %Drop  | Attrib | Death   | Attrib  | Attrib  | Drop    |
|               | Deaths | Deaths    | Deaths    | Deaths   | Deaths | Deaths | Rate    | Rates   | Rates   | Rates   |
| 1990          | 199848 | 57524.822 | 57524.822 | 0.000    | 0.000  | 0.000  | 2926.84 | 842.471 | 842.471 | 0.000   |
| 1991          | 199162 | 59078.486 | 58910.022 | 168.464  | 0.085  | 0.285  | 2877.87 | 853.678 | 851.244 | 2.434   |
| 1992          | 198533 | 60494.150 | 60022.803 | 471.347  | 0.237  | 0.779  | 2829.84 | 862.271 | 855.551 | 6.721   |
| 1993          | 202515 | 62694.848 | 61778.042 | 916.805  | 0.453  | 1.462  | 2845.86 | 881.034 | 868.142 | 12.892  |
| 1994          | 200665 | 63202.598 | 61754.980 | 1447.617 | 0.721  | 2.290  | 2777.91 | 874.966 | 854.906 | 20.060  |
| 1995          | 201036 | 63766.862 | 61676.902 | 2089.960 | 1.040  | 3.278  | 2739.86 | 869.097 | 840.577 | 28.520  |
| 1996          | 201202 | 64591.163 | 61728.849 | 2862.313 | 1.423  | 4.431  | 2706.47 | 868.908 | 830.344 | 38.564  |
| 1997          | 198673 | 64686.912 | 61105.025 | 3581.887 | 1.803  | 5.537  | 2635.34 | 858.147 | 810.539 | 47.608  |
| 1998          | 197623 | 65295.961 | 60881.210 | 4414.751 | 2.234  | 6.761  | 2584.42 | 854.046 | 796.176 | 57.870  |
| 1999          | 211404 | 67327.521 | 61628.044 | 5699.477 | 2.696  | 8.465  | 2727.28 | 868.771 | 795.052 | 73.718  |
| 2000          | 208596 | 67596.897 | 60964.309 | 6632.588 | 3.180  | 9.812  | 2657.45 | 861.419 | 776.668 | 84.752  |
| 2001          | 203734 | 67008.811 | 59389.319 | 7619.491 | 3.740  | 11.371 | 2566.51 | 844.458 | 748.149 | 96.309  |
| 2002          | 200990 | 67067.744 | 58349.198 | 8718.546 | 4.338  | 13.000 | 2506.89 | 836.925 | 727.776 | 109.149 |
| 2003          | 196550 | 66756.217 | 57047.268 | 9708.949 | 4.940  | 14.544 | 2428.31 | 825.244 | 704.800 | 120.444 |
| 2004          | 188393 | 65058.725 | 54514.116 | 10544.61 | 5.597  | 16.208 | 2304.01 | 796.234 | 666.698 | 129.536 |
| 2005          | 186693 | 65214.724 | 53542.324 | 11672.40 | 6.252  | 17.898 | 2257.67 | 789.321 | 647.485 | 141.836 |
| 2006          | 180405 | 63771.146 | 51245.264 | 12525.88 | 6.943  | 19.642 | 2162.28 | 765.117 | 614.209 | 150.908 |
| 2007          | 176005 | 63110.718 | 49710.135 | 13400.58 | 7.614  | 21.233 | 2088.18 | 749.650 | 589.778 | 159.873 |
| 2008          | 177991 | 63718.624 | 49050.772 | 14667.85 | 8.241  | 23.020 | 2088.51 | 748.674 | 575.552 | 173.122 |
| 2009          | 173275 | 62794.698 | 47316.015 | 15478.68 | 8.933  | 24.650 | 2009.92 | 729.515 | 548.844 | 180.671 |
| 2010          | 171013 | 61917.074 | 45586.880 | 16330.19 | 9.549  | 26.374 | 1960.57 | 711.083 | 522.628 | 188.454 |
| 2011          | 170893 | 61680.114 | 44201.433 | 17478.68 | 10.228 | 28.338 | 1940.37 | 701.700 | 501.876 | 199.824 |
| 2012          | 172081 | 62023.127 | 43272.824 | 18750.30 | 10.896 | 30.231 | 1933.45 | 698.386 | 486.200 | 212.186 |
| 2013          | 173439 | 62037.765 | 42145.217 | 19892.55 | 11.469 | 32.065 | 1927.36 | 691.059 | 468.342 | 222.716 |
| 2014          | 174994 | 61921.017 | 40773.120 | 21147.90 | 12.085 | 34.153 | 1922.84 | 682.195 | 448.016 | 234.179 |
| 2015          | 178282 | 61856.204 | 39644.766 | 22211.44 | 12.459 | 35.908 | 2188.79 | 761.899 | 486.724 | 275.175 |
| 2016          | 177866 | 60464.119 | 37396.806 | 23067.31 | 12.969 | 38.150 | 2162.22 | 737.655 | 454.612 | 283.043 |
| 2017          | 180433 | 60243.839 | 36026.208 | 24217.63 | 13.422 | 40.199 | 2172.00 | 728.017 | 433.672 | 294.345 |
| 2018          | 178369 | 60713.327 | 35465.682 | 25247.64 | 14.155 | 41.585 | 2126.06 | 726.721 | 422.731 | 303.990 |
| 2019          | 180561 | 61148.172 | 34571.216 | 26576.96 | 14.719 | 43.463 | 2130.64 | 724.841 | 407.943 | 316.898 |
| 2020          | 181932 | 61149.317 | 33655.248 | 27494.07 | 15.112 | 44.962 | 2430.48 | 821.432 | 449.610 | 371.823 |
| 2021          | 179675 | 58727.786 | 30845.531 | 27882.25 | 15.518 | 47.477 | 2382.05 | 783.216 | 408.937 | 374.279 |
| 2022          | 181097 | 58848.802 | 29849.908 | 28998.89 | 16.013 | 49.277 | 2381.74 | 778.881 | 392.578 | 386.303 |
| 2023          | 182464 | 58816.149 | 28839.522 | 29976.63 | 16.429 | 50.967 | 2380.09 | 772.407 | 376.188 | 396.218 |
| 2024          | 183572 | 58955.232 | 27838.531 | 31116.70 | 16.951 | 52.780 | 2375.23 | 768.316 | 360.203 | 408.113 |
| 2025          | 182518 | 58297.744 | 26711.979 | 31585.77 | 17.306 | 54.180 | 2721.76 | 876.861 | 398.337 | 478.524 |
| 2026          | 182560 | 56469.971 | 24684.621 | 31785.35 | 17.411 | 56.287 | 2710.70 | 846.150 | 366.525 | 479.625 |
| 2027          | 181998 | 56209.427 | 23572.908 | 32636.52 | 17.932 | 58.062 | 2690.24 | 838.883 | 348.447 | 490.436 |
| 2028          | 181276 | 55733.105 | 22397.550 | 33335.56 | 18.389 | 59.813 | 2667.01 | 828.298 | 329.523 | 498.775 |
| 2029          | 180457 | 55145.838 | 21211.145 | 33934.69 | 18.805 | 61.536 | 2641.90 | 815.951 | 310.533 | 505.418 |
| 2030          | 176361 | 53615.097 | 19974.258 | 33640.84 | 19.075 | 62.745 | 3050.30 | 939.056 | 345.471 | 593.585 |
| 2031          | 177967 | 52046.561 | 18761.916 | 33284.65 | 18.703 | 63.952 | 3072.13 | 910.364 | 323.875 | 586.489 |
| 2032          | 176517 | 51582.636 | 17798.973 | 33783.66 | 19.139 | 65.494 | 3039.40 | 900.496 | 306.475 | 594.020 |
| 2033          | 175009 | 50839.758 | 16818.863 | 34020.90 | 19.439 | 66.918 | 3004.36 | 885.375 | 288.727 | 596.647 |
| 2034          | 173357 | 50215.451 | 15869.558 | 34345.89 | 19.812 | 68.397 | 2966.11 | 872.104 | 271.526 | 600.578 |
| 2035          | 166118 | 47773.075 | 14735.441 | 33037.63 | 19.888 | 69.155 | 3471.68 | 1016.05 | 307.954 | 708.091 |
| 2036          | 159755 | 43298.709 | 12697.745 | 30600.96 | 19.155 | 70.674 | 3341.47 | 922.274 | 265.589 | 656.685 |
| 2037          | 157185 | 42241.563 | 11750.986 | 30490.58 | 19.398 | 72.181 | 3288.24 | 900.450 | 245.825 | 654.625 |
| 2038          | 154625 | 41356.353 | 10999.585 | 30356.77 | 19.632 | 73.403 | 3232.56 | 881.531 | 229.955 | 651.576 |
| 2039          | 152135 | 40161.050 | 10139.898 | 30021.15 | 19.733 | 74.752 | 3175.38 | 855.178 | 211.641 | 643.537 |

## Results for PHIM for Run 4 (Sensitivity\_Analysis\_3.RTF)

\*\*\*\*\*

### Main Results for E-Component for Run: 4, Simulation: 1, COD: LUNG CANCER, Adjusted

| Variable Parameter          | Value                                  |
|-----------------------------|----------------------------------------|
| 1. Country                  | US (United States)                     |
| 2. Sex                      | F (Females)                            |
| 3. Year of start of process | 1990                                   |
| 4. Cause of Death           | LUNG CANCER                            |
| 5. Effective Dose NULL      | CC:1                                   |
| 6. Effective Dose Ecig      | CC:1 Ecig:0.05 Dual:0.525              |
| Note:                       | Death rates are per million population |

#### Results for Age Groups Combined and Years combined, Population and Number deaths adjusted for Ecig scenario,

| Age Group:All | NULL    | Ecig        | %Drop       |          |        |        | NULL    | Ecig    | Drop    |         |
|---------------|---------|-------------|-------------|----------|--------|--------|---------|---------|---------|---------|
| Year          | Number  | Attrib      | Attrib      | Drop     | %Drop  | Attrib | Death   | Attrib  | Attrib  | Drop    |
|               | Deaths  | Deaths      | Deaths      | Deaths   | Deaths | Deaths | Rate    | Rates   | Rates   | Rates   |
| All Comb      | 2343792 | 1580465.217 | 1154770.950 | 425694.3 | 18.163 | 26.935 | 640.418 | 433.910 | 315.530 | 118.381 |

#### Results for Age Groups Combined, Population and Number deaths adjusted for Ecig scenario,

| Age Group:All | NULL   | Ecig      | %Drop     |          |        |        | NULL    | Ecig    | Drop    |         |
|---------------|--------|-----------|-----------|----------|--------|--------|---------|---------|---------|---------|
| Year          | Number | Attrib    | Attrib    | Drop     | %Drop  | Attrib | Death   | Attrib  | Attrib  | Drop    |
|               | Deaths | Deaths    | Deaths    | Deaths   | Deaths | Deaths | Rate    | Rates   | Rates   | Rates   |
| 1990          | 42690  | 30614.201 | 30614.201 | 0.000    | 0.000  | 0.000  | 625.210 | 448.355 | 448.355 | 0.000   |
| 1991          | 43692  | 31412.010 | 31379.684 | 32.326   | 0.074  | 0.103  | 631.345 | 453.901 | 453.433 | 0.467   |
| 1992          | 45423  | 32782.407 | 32688.581 | 93.825   | 0.207  | 0.286  | 647.451 | 467.274 | 465.935 | 1.339   |
| 1993          | 46292  | 33491.183 | 33305.918 | 185.265  | 0.400  | 0.553  | 650.518 | 470.643 | 468.035 | 2.608   |
| 1994          | 47019  | 34074.347 | 33774.370 | 299.977  | 0.638  | 0.880  | 650.904 | 471.719 | 467.556 | 4.163   |
| 1995          | 47843  | 34694.454 | 34242.562 | 451.893  | 0.945  | 1.302  | 652.042 | 472.861 | 466.682 | 6.179   |
| 1996          | 48250  | 35027.269 | 34402.477 | 624.792  | 1.295  | 1.784  | 649.027 | 471.202 | 462.764 | 8.438   |
| 1997          | 49044  | 35590.763 | 34760.319 | 830.444  | 1.693  | 2.333  | 650.551 | 472.153 | 461.085 | 11.068  |
| 1998          | 49699  | 36100.785 | 35027.461 | 1073.324 | 2.160  | 2.973  | 649.940 | 472.184 | 458.073 | 14.112  |
| 1999          | 48901  | 35451.030 | 34159.094 | 1291.936 | 2.642  | 3.644  | 630.861 | 457.448 | 440.680 | 16.767  |
| 2000          | 50356  | 36447.986 | 34832.649 | 1615.337 | 3.208  | 4.432  | 641.520 | 464.474 | 443.758 | 20.716  |
| 2001          | 50422  | 36411.326 | 34468.229 | 1943.097 | 3.854  | 5.337  | 635.180 | 458.863 | 434.209 | 24.654  |
| 2002          | 51487  | 37078.545 | 34728.389 | 2350.156 | 4.565  | 6.338  | 642.189 | 462.696 | 433.159 | 29.537  |
| 2003          | 51461  | 36999.876 | 34261.682 | 2738.194 | 5.321  | 7.401  | 635.781 | 457.395 | 423.292 | 34.103  |
| 2004          | 51464  | 36861.555 | 33692.922 | 3168.633 | 6.157  | 8.596  | 629.390 | 451.138 | 412.058 | 39.079  |
| 2005          | 51498  | 36689.529 | 33065.560 | 3623.969 | 7.037  | 9.877  | 622.764 | 444.069 | 399.860 | 44.208  |
| 2006          | 51446  | 36504.774 | 32402.535 | 4102.239 | 7.974  | 11.238 | 616.613 | 437.979 | 388.366 | 49.613  |
| 2007          | 51946  | 36663.202 | 31991.062 | 4672.140 | 8.994  | 12.743 | 616.303 | 435.498 | 379.553 | 55.945  |
| 2008          | 51097  | 35898.803 | 30799.990 | 5098.814 | 9.979  | 14.203 | 599.563 | 421.800 | 361.401 | 60.399  |
| 2009          | 51332  | 35934.525 | 30225.128 | 5709.397 | 11.122 | 15.888 | 595.428 | 417.468 | 350.598 | 66.870  |
| 2010          | 51009  | 35502.829 | 29294.627 | 6208.202 | 12.171 | 17.486 | 584.791 | 407.730 | 335.847 | 71.883  |
| 2011          | 50683  | 35136.342 | 28345.674 | 6790.668 | 13.398 | 19.327 | 575.466 | 399.726 | 321.845 | 77.882  |
| 2012          | 51442  | 35450.201 | 27935.898 | 7514.303 | 14.607 | 21.197 | 577.983 | 399.173 | 313.879 | 85.293  |
| 2013          | 51287  | 35123.224 | 26974.365 | 8148.858 | 15.889 | 23.201 | 569.928 | 391.249 | 299.755 | 91.494  |
| 2014          | 51493  | 35079.370 | 26252.403 | 8826.966 | 17.142 | 25.163 | 565.803 | 386.476 | 288.462 | 98.014  |
| 2015          | 50706  | 34324.171 | 25056.936 | 9267.235 | 18.277 | 26.999 | 622.518 | 422.780 | 307.627 | 115.152 |
| 2016          | 49132  | 33054.753 | 23402.326 | 9652.426 | 19.646 | 29.201 | 597.275 | 403.264 | 284.489 | 118.775 |
| 2017          | 48626  | 32471.234 | 22263.611 | 10207.62 | 20.992 | 31.436 | 585.350 | 392.399 | 268.002 | 124.397 |
| 2018          | 50807  | 33657.595 | 22257.611 | 11399.98 | 22.438 | 33.870 | 605.589 | 402.871 | 265.298 | 137.574 |
| 2019          | 51412  | 33863.424 | 21620.088 | 12243.34 | 23.814 | 36.155 | 606.663 | 401.412 | 255.119 | 146.293 |
| 2020          | 51855  | 33910.830 | 20967.519 | 12943.31 | 24.961 | 38.169 | 692.746 | 455.532 | 280.111 | 175.421 |
| 2021          | 48452  | 31531.880 | 18740.075 | 12791.81 | 26.401 | 40.568 | 642.358 | 420.521 | 248.448 | 172.073 |
| 2022          | 48784  | 31560.212 | 18035.856 | 13524.36 | 27.723 | 42.853 | 641.592 | 417.708 | 237.203 | 180.506 |
| 2023          | 49083  | 31508.781 | 17319.545 | 14189.24 | 28.909 | 45.033 | 640.245 | 413.791 | 225.920 | 187.872 |
| 2024          | 49303  | 31517.293 | 16601.321 | 14915.97 | 30.254 | 47.326 | 637.932 | 410.740 | 214.805 | 195.935 |
| 2025          | 49031  | 31175.389 | 15817.287 | 15358.10 | 31.323 | 49.264 | 731.171 | 468.912 | 235.872 | 233.040 |
| 2026          | 45882  | 29044.598 | 14114.890 | 14929.71 | 32.540 | 51.403 | 681.266 | 435.206 | 209.582 | 225.624 |
| 2027          | 45697  | 28825.765 | 13373.905 | 15451.86 | 33.814 | 53.604 | 675.479 | 430.203 | 197.689 | 232.514 |
| 2028          | 45464  | 28513.846 | 12611.842 | 15902.00 | 34.977 | 55.769 | 668.884 | 423.769 | 185.551 | 238.218 |
| 2029          | 45194  | 28148.109 | 11847.917 | 16300.19 | 36.068 | 57.909 | 661.637 | 416.486 | 173.454 | 243.032 |
| 2030          | 44076  | 27314.475 | 11055.777 | 16258.70 | 36.888 | 59.524 | 762.338 | 478.407 | 191.219 | 287.188 |
| 2031          | 41435  | 25423.102 | 9965.439  | 15457.66 | 37.305 | 60.802 | 715.272 | 444.684 | 172.027 | 272.657 |
| 2032          | 41042  | 25085.902 | 9364.035  | 15721.87 | 38.306 | 62.672 | 706.698 | 437.933 | 161.237 | 276.697 |
| 2033          | 40629  | 24645.067 | 8774.387  | 15870.68 | 39.063 | 64.397 | 697.467 | 429.194 | 150.629 | 278.565 |
| 2034          | 40179  | 24239.126 | 8208.148  | 16030.98 | 39.899 | 66.137 | 687.462 | 420.967 | 140.440 | 280.526 |
| 2035          | 38246  | 22944.147 | 7525.549  | 15418.60 | 40.314 | 67.201 | 799.305 | 487.980 | 157.276 | 330.704 |
| 2036          | 33718  | 19950.581 | 6234.921  | 13715.66 | 40.678 | 68.748 | 705.253 | 424.953 | 130.411 | 294.542 |
| 2037          | 33150  | 19415.334 | 5735.050  | 13680.28 | 41.267 | 70.461 | 693.490 | 413.871 | 119.975 | 293.896 |
| 2038          | 32584  | 18939.317 | 5343.528  | 13595.79 | 41.726 | 71.786 | 681.184 | 403.701 | 111.711 | 291.990 |
| 2039          | 32031  | 18379.752 | 4907.604  | 13472.15 | 42.060 | 73.299 | 668.548 | 391.373 | 102.432 | 288.941 |

## Results for PHIM for Run 4 (Sensitivity\_Analysis\_3.RTF)

\*\*\*\*\*

### Main Results for E-Component for Run: 4, Simulation: 1, COD: IHD, Adjusted

| Variable Parameter          | Value                                  |
|-----------------------------|----------------------------------------|
| 1. Country                  | US (United States)                     |
| 2. Sex                      | F (Females)                            |
| 3. Year of start of process | 1990                                   |
| 4. Cause of Death           | IHD                                    |
| 5. Effective Dose NULL      | CC:1                                   |
| 6. Effective Dose Ecig      | CC:1 Ecig:0.05 Dual:0.525              |
| Note:                       | Death rates are per million population |

### Results for Age Groups Combined and Years combined, Population and Number deaths adjusted for Ecig scenario,

| Age Group:All | NULL    | Ecig       | %Drop      |          |        |        | NULL    | Ecig    | Drop   |        |
|---------------|---------|------------|------------|----------|--------|--------|---------|---------|--------|--------|
| Year          | Number  | Attrib     | Attrib     | Drop     | %Drop  | Attrib | Death   | Attrib  | Attrib | Drop   |
|               | Deaths  | Deaths     | Deaths     | Deaths   | Deaths | Deaths | Rate    | Rates   | Rates  | Rates  |
| All Comb      | 3261467 | 398833.796 | 201377.081 | 197456.7 | 6.054  | 49.509 | 891.164 | 109.498 | 55.024 | 54.474 |

### Results for Age Groups Combined, Population and Number deaths adjusted for Ecig scenario,

| Age Group:All | NULL   | Ecig      | %Drop     |          |        |        | NULL    | Ecig    | Drop    |        |
|---------------|--------|-----------|-----------|----------|--------|--------|---------|---------|---------|--------|
| Year          | Number | Attrib    | Attrib    | Drop     | %Drop  | Attrib | Death   | Attrib  | Attrib  | Drop   |
|               | Deaths | Deaths    | Deaths    | Deaths   | Deaths | Deaths | Rate    | Rates   | Rates   | Rates  |
| 1990          | 98916  | 12922.892 | 12922.892 | 0.000    | 0.000  | 0.000  | 1448.66 | 189.260 | 189.260 | 0.000  |
| 1991          | 96403  | 12856.479 | 12766.075 | 90.404   | 0.094  | 0.703  | 1393.01 | 185.775 | 184.469 | 1.306  |
| 1992          | 93721  | 12662.244 | 12411.743 | 250.501  | 0.267  | 1.978  | 1335.88 | 180.485 | 176.914 | 3.571  |
| 1993          | 93680  | 12730.613 | 12252.628 | 477.985  | 0.510  | 3.755  | 1316.45 | 178.900 | 172.181 | 6.719  |
| 1994          | 90835  | 12495.323 | 11751.135 | 744.188  | 0.819  | 5.956  | 1257.48 | 172.983 | 162.677 | 10.306 |
| 1995          | 89704  | 12365.590 | 11314.231 | 1051.360 | 1.172  | 8.502  | 1222.55 | 168.534 | 154.198 | 14.336 |
| 1996          | 88296  | 12290.551 | 10857.343 | 1433.208 | 1.623  | 11.661 | 1187.71 | 165.338 | 146.047 | 19.291 |
| 1997          | 84792  | 11719.531 | 9994.091  | 1725.440 | 2.035  | 14.723 | 1124.73 | 155.473 | 132.569 | 22.905 |
| 1998          | 82538  | 11416.794 | 9351.944  | 2064.850 | 2.502  | 18.086 | 1079.39 | 149.327 | 122.300 | 27.027 |
| 1999          | 93972  | 13028.038 | 10186.706 | 2841.333 | 3.024  | 21.809 | 1212.31 | 168.109 | 131.417 | 36.692 |
| 2000          | 90082  | 12426.299 | 9255.370  | 3170.929 | 3.520  | 25.518 | 1147.62 | 158.354 | 117.911 | 40.444 |
| 2001          | 86173  | 11939.281 | 8366.796  | 3572.485 | 4.146  | 29.922 | 1085.55 | 150.461 | 105.400 | 45.062 |
| 2002          | 83080  | 11528.794 | 7565.804  | 3962.990 | 4.770  | 34.375 | 1036.24 | 143.865 | 94.366  | 49.499 |
| 2003          | 79381  | 11048.407 | 6790.590  | 4257.817 | 5.364  | 38.538 | 980.730 | 136.581 | 83.895  | 52.686 |
| 2004          | 73952  | 10375.132 | 5918.721  | 4456.410 | 6.026  | 42.953 | 904.418 | 126.978 | 72.385  | 54.593 |
| 2005          | 71755  | 10051.029 | 5324.139  | 4726.890 | 6.588  | 47.029 | 867.728 | 121.652 | 64.385  | 57.267 |
| 2006          | 67669  | 9542.523  | 4642.805  | 4899.719 | 7.241  | 51.346 | 811.060 | 114.490 | 55.647  | 58.843 |
| 2007          | 63632  | 8936.533  | 4002.623  | 4933.910 | 7.754  | 55.211 | 754.957 | 106.151 | 47.488  | 58.663 |
| 2008          | 63319  | 8944.180  | 3679.771  | 5264.410 | 8.314  | 58.858 | 742.977 | 105.091 | 43.178  | 61.914 |
| 2009          | 59908  | 8390.033  | 3192.039  | 5197.994 | 8.677  | 61.954 | 694.904 | 97.471  | 37.026  | 60.445 |
| 2010          | 58185  | 8157.570  | 2854.954  | 5302.615 | 9.113  | 65.002 | 667.055 | 93.685  | 32.730  | 60.955 |
| 2011          | 57564  | 8035.356  | 2566.560  | 5468.796 | 9.500  | 68.059 | 653.599 | 91.414  | 29.141  | 62.272 |
| 2012          | 57629  | 7970.766  | 2314.560  | 5656.206 | 9.815  | 70.962 | 647.504 | 89.752  | 26.006  | 63.746 |
| 2013          | 57309  | 7743.216  | 2072.675  | 5670.540 | 9.895  | 73.232 | 636.848 | 86.254  | 23.033  | 63.221 |
| 2014          | 57807  | 7774.935  | 1898.293  | 5876.642 | 10.166 | 75.584 | 635.181 | 85.658  | 20.858  | 64.799 |
| 2015          | 58696  | 7722.535  | 1756.312  | 5966.223 | 10.165 | 77.257 | 720.619 | 95.120  | 21.562  | 73.558 |
| 2016          | 58989  | 7600.353  | 1579.787  | 6020.567 | 10.206 | 79.214 | 717.100 | 92.723  | 19.205  | 73.519 |
| 2017          | 59368  | 7470.266  | 1428.454  | 6041.812 | 10.177 | 80.878 | 714.653 | 90.274  | 17.195  | 73.079 |
| 2018          | 56454  | 6907.050  | 1215.262  | 5691.788 | 10.082 | 82.405 | 672.894 | 82.675  | 14.485  | 68.190 |
| 2019          | 56294  | 6732.046  | 1098.608  | 5633.439 | 10.007 | 83.681 | 664.277 | 79.801  | 12.964  | 66.837 |
| 2020          | 55755  | 6429.836  | 985.859   | 5443.977 | 9.764  | 84.667 | 744.847 | 86.373  | 13.170  | 73.203 |
| 2021          | 56774  | 6562.016  | 917.224   | 5644.792 | 9.943  | 86.022 | 752.681 | 87.513  | 12.160  | 75.353 |
| 2022          | 56340  | 6352.366  | 831.377   | 5520.988 | 9.799  | 86.912 | 740.974 | 84.075  | 10.934  | 73.141 |
| 2023          | 55884  | 6134.123  | 758.437   | 5375.686 | 9.619  | 87.636 | 728.961 | 80.557  | 9.893   | 70.664 |
| 2024          | 55348  | 5922.193  | 690.605   | 5231.587 | 9.452  | 88.339 | 716.146 | 77.179  | 8.936   | 68.243 |
| 2025          | 53903  | 5504.188  | 615.463   | 4888.725 | 9.069  | 88.818 | 803.821 | 82.789  | 9.178   | 73.611 |
| 2026          | 55948  | 5641.075  | 597.859   | 5043.217 | 9.014  | 89.402 | 830.727 | 84.526  | 8.877   | 75.649 |
| 2027          | 54897  | 5426.216  | 550.986   | 4875.229 | 8.881  | 89.846 | 811.464 | 80.982  | 8.144   | 72.838 |
| 2028          | 53815  | 5197.830  | 506.548   | 4691.282 | 8.717  | 90.255 | 791.757 | 77.249  | 7.453   | 69.797 |
| 2029          | 52726  | 4973.547  | 468.601   | 4504.946 | 8.544  | 90.578 | 771.909 | 73.590  | 6.860   | 66.729 |
| 2030          | 50251  | 4450.618  | 405.573   | 4045.045 | 8.050  | 90.887 | 869.128 | 77.952  | 7.015   | 70.937 |
| 2031          | 52844  | 4555.052  | 406.023   | 4149.029 | 7.851  | 91.086 | 912.208 | 79.674  | 7.009   | 72.665 |
| 2032          | 51557  | 4349.999  | 377.867   | 3972.132 | 7.704  | 91.313 | 887.753 | 75.939  | 6.506   | 69.433 |
| 2033          | 50282  | 4147.948  | 355.437   | 3792.511 | 7.542  | 91.431 | 863.192 | 72.237  | 6.102   | 66.135 |
| 2034          | 48998  | 3966.133  | 334.566   | 3631.567 | 7.412  | 91.564 | 838.345 | 68.881  | 5.724   | 63.156 |
| 2035          | 45443  | 3289.064  | 270.439   | 3018.625 | 6.643  | 91.778 | 949.704 | 69.952  | 5.652   | 64.300 |
| 2036          | 47352  | 3313.192  | 267.216   | 3045.976 | 6.433  | 91.935 | 990.434 | 70.572  | 5.589   | 64.983 |
| 2037          | 45854  | 3117.951  | 248.237   | 2869.714 | 6.258  | 92.038 | 959.242 | 66.464  | 5.193   | 61.271 |
| 2038          | 44397  | 2949.775  | 234.698   | 2715.077 | 6.115  | 92.044 | 928.155 | 62.876  | 4.907   | 57.969 |
| 2039          | 42997  | 2766.312  | 221.155   | 2545.157 | 5.919  | 92.005 | 897.427 | 58.905  | 4.616   | 54.289 |

## Results for PHIM for Run 4 (Sensitivity\_Analysis\_3.RTF)

\*\*\*\*\*

### Main Results for E-Component for Run: 4, Simulation: 1, COD: STROKE, Adjusted

| Variable Parameter          | Value                                  |
|-----------------------------|----------------------------------------|
| 1. Country                  | US (United States)                     |
| 2. Sex                      | F (Females)                            |
| 3. Year of start of process | 1990                                   |
| 4. Cause of Death           | STROKE                                 |
| 5. Effective Dose NULL      | CC:1                                   |
| 6. Effective Dose Ecig      | CC:1 Ecig:0.05 Dual:0.525              |
| Note:                       | Death rates are per million population |

#### Results for Age Groups Combined and Years combined, Population and Number deaths adjusted for Ecig scenario,

| Age Group:All | NULL    | Ecig       | %Drop     |          |        |        | NULL    | Ecig   | Drop   |        |
|---------------|---------|------------|-----------|----------|--------|--------|---------|--------|--------|--------|
| Year          | Number  | Attrib     | Attrib    | Drop     | %Drop  | Attrib | Death   | Attrib | Attrib | Drop   |
|               | Deaths  | Deaths     | Deaths    | Deaths   | Deaths | Deaths | Rate    | Rates  | Rates  | Rates  |
| All Comb      | 1361396 | 104899.750 | 51870.765 | 53028.99 | 3.895  | 50.552 | 371.988 | 28.800 | 14.173 | 14.627 |

#### Results for Age Groups Combined, Population and Number deaths adjusted for Ecig scenario,

| Age Group:All | NULL   | Ecig     | %Drop    |          |        |        | NULL    | Ecig   | Drop   |        |
|---------------|--------|----------|----------|----------|--------|--------|---------|--------|--------|--------|
| Year          | Number | Attrib   | Attrib   | Drop     | %Drop  | Attrib | Death   | Attrib | Attrib | Drop   |
|               | Deaths | Deaths   | Deaths   | Deaths   | Deaths | Deaths | Rate    | Rates  | Rates  | Rates  |
| 1990          | 33504  | 3293.017 | 3293.017 | 0.000    | 0.000  | 0.000  | 490.678 | 48.227 | 48.227 | 0.000  |
| 1991          | 32505  | 3207.063 | 3179.556 | 27.507   | 0.085  | 0.858  | 469.694 | 46.342 | 45.944 | 0.397  |
| 1992          | 32560  | 3218.125 | 3141.255 | 76.870   | 0.236  | 2.389  | 464.104 | 45.871 | 44.775 | 1.096  |
| 1993          | 32768  | 3226.680 | 3081.171 | 145.509  | 0.444  | 4.510  | 460.482 | 45.344 | 43.298 | 2.045  |
| 1994          | 33006  | 3277.266 | 3045.305 | 231.960  | 0.703  | 7.078  | 456.920 | 45.370 | 42.158 | 3.212  |
| 1995          | 33732  | 3309.378 | 2977.114 | 332.264  | 0.985  | 10.040 | 459.725 | 45.104 | 40.574 | 4.530  |
| 1996          | 33754  | 3312.987 | 2863.887 | 449.099  | 1.331  | 13.556 | 454.035 | 44.568 | 38.523 | 6.044  |
| 1997          | 33705  | 3267.066 | 2704.959 | 562.107  | 1.668  | 17.205 | 447.080 | 43.341 | 35.880 | 7.461  |
| 1998          | 33282  | 3178.725 | 2508.868 | 669.857  | 2.013  | 21.073 | 435.246 | 41.577 | 32.810 | 8.767  |
| 1999          | 33902  | 3120.351 | 2340.921 | 779.430  | 2.299  | 24.979 | 437.368 | 40.264 | 30.200 | 10.064 |
| 2000          | 33842  | 3142.808 | 2231.563 | 911.245  | 2.693  | 28.995 | 431.142 | 40.050 | 28.429 | 11.621 |
| 2001          | 32525  | 2961.588 | 1983.519 | 978.070  | 3.007  | 33.025 | 409.735 | 37.323 | 24.987 | 12.335 |
| 2002          | 32103  | 2940.627 | 1841.423 | 1099.204 | 3.424  | 37.380 | 400.409 | 36.695 | 22.968 | 13.728 |
| 2003          | 30597  | 2819.545 | 1649.575 | 1169.970 | 3.824  | 41.495 | 378.021 | 34.855 | 20.380 | 14.475 |
| 2004          | 29423  | 2730.466 | 1485.156 | 1245.310 | 4.232  | 45.608 | 359.837 | 33.417 | 18.163 | 15.254 |
| 2005          | 27994  | 2670.510 | 1348.891 | 1321.619 | 4.721  | 49.489 | 338.528 | 32.322 | 16.312 | 16.010 |
| 2006          | 27247  | 2623.285 | 1228.193 | 1395.092 | 5.120  | 53.181 | 326.576 | 31.474 | 14.721 | 16.753 |
| 2007          | 26354  | 2536.599 | 1096.987 | 1439.612 | 5.463  | 56.754 | 312.674 | 30.131 | 13.015 | 17.116 |
| 2008          | 26058  | 2469.443 | 988.894  | 1480.549 | 5.682  | 59.955 | 305.755 | 29.015 | 11.603 | 17.412 |
| 2009          | 25106  | 2386.945 | 882.728  | 1504.216 | 5.991  | 63.018 | 291.218 | 27.730 | 10.239 | 17.491 |
| 2010          | 24914  | 2329.274 | 795.781  | 1533.493 | 6.155  | 65.836 | 285.630 | 26.750 | 9.123  | 17.627 |
| 2011          | 24876  | 2286.581 | 717.011  | 1569.570 | 6.310  | 68.643 | 282.445 | 26.013 | 8.141  | 17.872 |
| 2012          | 24592  | 2243.311 | 645.485  | 1597.826 | 6.497  | 71.226 | 276.313 | 25.260 | 7.252  | 18.007 |
| 2013          | 24554  | 2176.503 | 575.222  | 1601.281 | 6.522  | 73.571 | 272.856 | 24.245 | 6.392  | 17.853 |
| 2014          | 25414  | 2211.619 | 538.196  | 1673.422 | 6.585  | 75.665 | 279.250 | 24.366 | 5.914  | 18.452 |
| 2015          | 26452  | 2237.016 | 506.964  | 1730.052 | 6.540  | 77.337 | 324.755 | 27.554 | 6.224  | 21.330 |
| 2016          | 26886  | 2229.057 | 467.421  | 1761.636 | 6.552  | 79.031 | 326.843 | 27.194 | 5.682  | 21.512 |
| 2017          | 27788  | 2221.649 | 432.412  | 1789.238 | 6.439  | 80.536 | 334.499 | 26.848 | 5.205  | 21.642 |
| 2018          | 25428  | 1939.420 | 352.437  | 1586.983 | 6.241  | 81.828 | 303.084 | 23.214 | 4.201  | 19.013 |
| 2019          | 25618  | 1904.400 | 320.719  | 1583.681 | 6.182  | 83.159 | 302.293 | 22.574 | 3.785  | 18.790 |
| 2020          | 25585  | 1806.054 | 285.735  | 1520.320 | 5.942  | 84.179 | 341.802 | 24.261 | 3.817  | 20.444 |
| 2021          | 25673  | 1748.172 | 257.831  | 1490.342 | 5.805  | 85.251 | 340.356 | 23.314 | 3.418  | 19.896 |
| 2022          | 25781  | 1701.148 | 235.377  | 1465.770 | 5.685  | 86.164 | 339.067 | 22.515 | 3.096  | 19.420 |
| 2023          | 25881  | 1652.087 | 215.990  | 1436.097 | 5.549  | 86.926 | 337.597 | 21.696 | 2.817  | 18.879 |
| 2024          | 25938  | 1597.127 | 196.780  | 1400.347 | 5.399  | 87.679 | 335.614 | 20.814 | 2.546  | 18.268 |
| 2025          | 25557  | 1467.622 | 172.919  | 1294.703 | 5.066  | 88.218 | 381.115 | 22.075 | 2.579  | 19.496 |
| 2026          | 25801  | 1390.505 | 156.546  | 1233.960 | 4.783  | 88.742 | 383.108 | 20.835 | 2.324  | 18.511 |
| 2027          | 25603  | 1342.095 | 144.099  | 1197.997 | 4.679  | 89.263 | 378.453 | 20.030 | 2.130  | 17.900 |
| 2028          | 25378  | 1289.536 | 132.957  | 1156.579 | 4.557  | 89.690 | 373.378 | 19.165 | 1.956  | 17.209 |
| 2029          | 25141  | 1242.216 | 123.336  | 1118.880 | 4.450  | 90.071 | 368.065 | 18.380 | 1.806  | 16.574 |
| 2030          | 24349  | 1096.803 | 104.972  | 991.831  | 4.073  | 90.429 | 421.130 | 19.210 | 1.816  | 17.395 |
| 2031          | 24377  | 1019.991 | 95.157   | 924.833  | 3.794  | 90.671 | 420.801 | 17.841 | 1.643  | 16.198 |
| 2032          | 24046  | 977.406  | 88.667   | 888.739  | 3.696  | 90.928 | 414.040 | 17.063 | 1.527  | 15.536 |
| 2033          | 23706  | 937.450  | 83.683   | 853.766  | 3.601  | 91.073 | 406.956 | 16.326 | 1.437  | 14.889 |
| 2034          | 23341  | 900.763  | 78.884   | 821.879  | 3.521  | 91.242 | 399.367 | 15.644 | 1.350  | 14.294 |
| 2035          | 22205  | 745.023  | 63.991   | 681.033  | 3.067  | 91.411 | 464.065 | 15.845 | 1.337  | 14.508 |
| 2036          | 21381  | 680.360  | 57.058   | 623.302  | 2.915  | 91.614 | 447.215 | 14.492 | 1.193  | 13.298 |
| 2037          | 20883  | 644.109  | 53.436   | 590.673  | 2.828  | 91.704 | 436.866 | 13.730 | 1.118  | 12.612 |
| 2038          | 20385  | 612.448  | 50.711   | 561.737  | 2.756  | 91.720 | 426.162 | 13.055 | 1.060  | 11.994 |
| 2039          | 19895  | 577.529  | 48.004   | 529.525  | 2.662  | 91.688 | 415.240 | 12.298 | 1.002  | 11.296 |

## Results for PHIM for Run 4 (Sensitivity\_Analysis\_3.RTF)

\*\*\*\*\*

### Main Results for E-Component for Run: 4, Simulation: 1, COD: COPD, Adjusted

| Variable Parameter          | Value                                  |
|-----------------------------|----------------------------------------|
| 1. Country                  | US (United States)                     |
| 2. Sex                      | F (Females)                            |
| 3. Year of start of process | 1990                                   |
| 4. Cause of Death           | COPD                                   |
| 5. Effective Dose NULL      | CC:1                                   |
| 6. Effective Dose Ecig      | CC:1 Ecig:0.05 Dual:0.525              |
| Note:                       | Death rates are per million population |

#### Results for Age Groups Combined and Years combined, Population and Number deaths adjusted for Ecig scenario,

| Age Group: | NULL    | Ecig       | %Drop      |          |        |        | NULL    | Ecig    | Drop    |        |
|------------|---------|------------|------------|----------|--------|--------|---------|---------|---------|--------|
| Year       | Number  | Attrib     | Attrib     | Drop     | %Drop  | Attrib | Death   | Attrib  | Attrib  | Drop   |
|            | Deaths  | Deaths     | Deaths     | Deaths   | Deaths | Deaths | Rate    | Rates   | Rates   | Rates  |
| All Comb   | 2181146 | 862051.244 | 558358.939 | 303692.3 | 13.924 | 35.229 | 595.977 | 236.673 | 152.566 | 84.107 |

#### Results for Age Groups Combined, Population and Number deaths adjusted for Ecig scenario,

| Age Group: | NULL   | Ecig      | %Drop     |          |        |        | NULL    | Ecig    | Drop    |         |
|------------|--------|-----------|-----------|----------|--------|--------|---------|---------|---------|---------|
| Year       | Number | Attrib    | Attrib    | Drop     | %Drop  | Attrib | Death   | Attrib  | Attrib  | Drop    |
|            | Deaths | Deaths    | Deaths    | Deaths   | Deaths | Deaths | Rate    | Rates   | Rates   | Rates   |
| 1990       | 24738  | 10694.712 | 10694.712 | 0.000    | 0.000  | 0.000  | 362.296 | 156.628 | 156.628 | 0.000   |
| 1991       | 26562  | 11602.933 | 11584.706 | 18.227   | 0.069  | 0.157  | 383.818 | 167.661 | 167.398 | 0.263   |
| 1992       | 26828  | 11831.375 | 11781.224 | 50.151   | 0.187  | 0.424  | 382.401 | 168.642 | 167.927 | 0.715   |
| 1993       | 29774  | 13246.371 | 13138.325 | 108.046  | 0.363  | 0.816  | 418.408 | 186.148 | 184.628 | 1.520   |
| 1994       | 29805  | 13355.662 | 13184.170 | 171.492  | 0.575  | 1.284  | 412.606 | 184.893 | 182.515 | 2.378   |
| 1995       | 29757  | 13397.439 | 13142.996 | 254.444  | 0.855  | 1.899  | 405.549 | 182.598 | 179.122 | 3.476   |
| 1996       | 30903  | 13960.356 | 13605.142 | 355.214  | 1.149  | 2.544  | 415.697 | 187.801 | 183.009 | 4.792   |
| 1997       | 31133  | 14109.552 | 13645.656 | 463.897  | 1.490  | 3.288  | 412.976 | 187.180 | 181.005 | 6.174   |
| 1998       | 32104  | 14599.657 | 13992.936 | 606.721  | 1.890  | 4.156  | 419.844 | 190.958 | 182.993 | 7.965   |
| 1999       | 34628  | 15728.102 | 14941.324 | 786.778  | 2.272  | 5.002  | 446.735 | 202.950 | 192.755 | 10.195  |
| 2000       | 34316  | 15579.803 | 14644.727 | 935.076  | 2.725  | 6.002  | 437.174 | 198.541 | 186.570 | 11.971  |
| 2001       | 34614  | 15696.614 | 14570.775 | 1125.839 | 3.253  | 7.172  | 436.050 | 197.812 | 183.553 | 14.258  |
| 2002       | 34319  | 15519.777 | 14213.582 | 1306.195 | 3.806  | 8.416  | 428.056 | 193.668 | 177.283 | 16.386  |
| 2003       | 35110  | 15888.389 | 14345.421 | 1542.968 | 4.395  | 9.711  | 433.776 | 196.413 | 177.233 | 19.180  |
| 2004       | 33555  | 15091.573 | 13417.317 | 1674.256 | 4.990  | 11.094 | 410.369 | 184.701 | 164.091 | 20.610  |
| 2005       | 35446  | 15803.656 | 13803.734 | 1999.922 | 5.642  | 12.655 | 428.649 | 191.278 | 166.928 | 24.350  |
| 2006       | 34043  | 15100.563 | 12971.731 | 2128.832 | 6.253  | 14.098 | 408.026 | 181.174 | 155.475 | 25.699  |
| 2007       | 34072  | 14974.384 | 12619.463 | 2354.921 | 6.912  | 15.726 | 404.244 | 177.871 | 149.722 | 28.149  |
| 2008       | 37517  | 16406.197 | 13582.118 | 2824.080 | 7.527  | 17.213 | 440.218 | 192.768 | 159.370 | 33.398  |
| 2009       | 36929  | 16083.194 | 13016.119 | 3067.075 | 8.305  | 19.070 | 428.365 | 186.846 | 150.981 | 35.865  |
| 2010       | 36905  | 15927.400 | 12641.517 | 3285.883 | 8.904  | 20.630 | 423.098 | 182.917 | 144.928 | 37.989  |
| 2011       | 37770  | 16221.836 | 12572.188 | 3649.647 | 9.663  | 22.498 | 428.856 | 184.547 | 142.748 | 41.798  |
| 2012       | 38418  | 16358.849 | 12376.881 | 3981.969 | 10.365 | 24.341 | 431.650 | 184.202 | 139.063 | 45.139  |
| 2013       | 40290  | 16994.822 | 12522.954 | 4471.868 | 11.099 | 26.313 | 447.726 | 189.311 | 139.162 | 50.148  |
| 2014       | 40280  | 16855.093 | 12084.227 | 4770.866 | 11.844 | 28.305 | 442.603 | 185.696 | 132.782 | 52.914  |
| 2015       | 42429  | 17572.483 | 12324.555 | 5247.928 | 12.369 | 29.864 | 520.902 | 216.445 | 151.310 | 65.135  |
| 2016       | 42858  | 17579.955 | 11947.272 | 5632.683 | 13.143 | 32.040 | 521.002 | 214.473 | 145.236 | 69.237  |
| 2017       | 44651  | 18080.688 | 11901.731 | 6178.958 | 13.838 | 34.174 | 537.494 | 218.496 | 143.269 | 75.227  |
| 2018       | 45681  | 18209.262 | 11640.372 | 6568.890 | 14.380 | 36.074 | 544.488 | 217.960 | 138.747 | 79.213  |
| 2019       | 47238  | 18648.302 | 11531.801 | 7116.501 | 15.065 | 38.162 | 557.407 | 221.054 | 136.076 | 84.978  |
| 2020       | 48737  | 19002.597 | 11416.135 | 7586.462 | 15.566 | 39.923 | 651.087 | 255.266 | 152.511 | 102.755 |
| 2021       | 48776  | 18885.717 | 10930.402 | 7955.316 | 16.310 | 42.123 | 646.655 | 251.867 | 144.911 | 106.956 |
| 2022       | 50192  | 19235.076 | 10747.298 | 8487.779 | 16.911 | 44.127 | 660.105 | 254.582 | 141.345 | 113.236 |
| 2023       | 51616  | 19521.158 | 10545.550 | 8975.608 | 17.389 | 45.979 | 673.291 | 256.363 | 137.558 | 118.805 |
| 2024       | 52983  | 19918.620 | 10349.825 | 9568.794 | 18.060 | 48.039 | 685.541 | 259.583 | 133.916 | 125.667 |
| 2025       | 54026  | 20150.545 | 10106.310 | 10044.24 | 18.591 | 49.846 | 805.655 | 303.086 | 150.708 | 152.378 |
| 2026       | 54929  | 20393.792 | 9815.327  | 10578.47 | 19.258 | 51.871 | 815.602 | 305.582 | 145.741 | 159.841 |
| 2027       | 55802  | 20615.351 | 9503.918  | 11111.43 | 19.912 | 53.899 | 824.840 | 307.668 | 140.484 | 167.185 |
| 2028       | 56618  | 20731.894 | 9146.202  | 11585.69 | 20.463 | 55.883 | 832.995 | 308.115 | 134.563 | 173.551 |
| 2029       | 57397  | 20781.967 | 8771.291  | 12010.68 | 20.926 | 57.794 | 840.289 | 307.495 | 128.412 | 179.082 |
| 2030       | 57685  | 20753.201 | 8407.935  | 12345.27 | 21.401 | 59.486 | 997.704 | 363.487 | 145.422 | 218.065 |
| 2031       | 59311  | 21048.417 | 8295.297  | 12753.12 | 21.502 | 60.589 | 1023.85 | 368.165 | 143.196 | 224.969 |
| 2032       | 59871  | 21169.329 | 7968.404  | 13200.93 | 22.049 | 62.359 | 1030.91 | 369.560 | 137.206 | 232.355 |
| 2033       | 60392  | 21109.293 | 7605.356  | 13503.94 | 22.360 | 63.972 | 1036.75 | 367.618 | 130.560 | 237.058 |
| 2034       | 60838  | 21109.429 | 7247.960  | 13861.47 | 22.784 | 65.665 | 1040.94 | 366.613 | 124.012 | 242.601 |
| 2035       | 60224  | 20794.840 | 6875.462  | 13919.38 | 23.113 | 66.937 | 1258.61 | 442.268 | 143.689 | 298.579 |
| 2036       | 57303  | 19354.577 | 6138.549  | 13216.03 | 23.063 | 68.284 | 1198.57 | 412.258 | 128.396 | 283.862 |
| 2037       | 57298  | 19064.169 | 5714.263  | 13349.91 | 23.299 | 70.026 | 1198.65 | 406.385 | 119.540 | 286.845 |
| 2038       | 57260  | 18854.812 | 5370.647  | 13484.16 | 23.549 | 71.516 | 1197.06 | 401.900 | 112.278 | 289.622 |
| 2039       | 57213  | 18437.457 | 4963.135  | 13474.32 | 23.551 | 73.081 | 1194.16 | 392.602 | 103.591 | 289.011 |

## Results for PHIM for Run 5 (Sensitivity\_Analysis\_3.RTF)

---

### Control File Details for Run: 5

| Variable Parameter                                       | Value                  |
|----------------------------------------------------------|------------------------|
| 1. Name for Reference Scenario                           | NULL                   |
| 2. Name for Test Scenario                                | Ecig                   |
| 3. Name for Product 1                                    | CC                     |
| 4. Name for Product 2                                    | Ecig                   |
| 5. Name for Product 3                                    | -                      |
| 6. Name for Product 4                                    | Dual                   |
| 7. Country                                               | US (United States)     |
| 8. Sex                                                   | M (Males)              |
| 9. Year of start of process                              | 1990                   |
| 10. Number of months of follow-up                        | 600                    |
| 11. Follow-up interval length (in months)                | 12                     |
| 12. Lower age for risk estimation                        | 10                     |
| 13. Upper age for risk estimation                        | 79                     |
| 14. The effective dose for Product 1 (F1) - Ref          | 1                      |
| 15. The effective dose for Product 2 (F2) - Ref          | -                      |
| 16. The effective dose for Product 3 (F3) - Ref          | -                      |
| 17. The effective dose for Product 4 (F4) - Ref          | -                      |
| 18. The effective dose for Product 1 (F1) - Test         | 1                      |
| 19. The effective dose for Product 2 (F2) - Test         | 0.05                   |
| 20. The effective dose for Product 3 (F3) - Test         | -                      |
| 21. The effective dose for Product 4 (F4) - Test         | FROMF2                 |
| 22. Number in population to be simulated                 | 100000                 |
| 23. Number of MC simulations                             | 1                      |
| 24. The random number seed for the first simulation      | 15975263               |
| 25. Source for the population file (POP)                 | UN4                    |
| 26. Source for the socioeconomic prevalence file (SEP)   | -                      |
| 27. Source for the current smoking prevalence file (CSP) | ISS3                   |
| 28. Source for the former smoking prevalence file (FSP)  | ISS3                   |
| 29. Source for the quit-time distribution file (QTD)     | NHIS2006               |
| 30. Source for the death file (MORT)                     | APR-20                 |
| 31. Source for the relative risk file (RR)               | PNLEST                 |
| 32. Source for the half-life file (H)                    | PNLEST                 |
| 33. Assumption Set for TTP Factor Reference              | F1                     |
| 34. Assumption Set for TTP Factor Test                   | F1                     |
| 35. Assumption Set for TTP Reference                     | ISS3                   |
| 36. Assumption Set for TTP Test                          | S3C                    |
| 37. Assumption Set for TP for socioeconomic group        | -                      |
| 38. Source for Output Choice file (OUTC)                 | BASIC                  |
| 39. Output for DTP P1                                    | N                      |
| 40. Output for DTP P2                                    | N                      |
| 41. Output for Main P Component                          | Y                      |
| 42. Output for DTP E1                                    | N                      |
| 43. Output for DTP E2                                    | N                      |
| 44. Output for DTP E3                                    | N                      |
| 45. Output for Main E Component                          | Y                      |
| 46. Output file name                                     | Sensitivity_Analysis_3 |
| 47. Run number for P-Component                           | -                      |
| 48. Results file for E-Component                         | -                      |
| 49. Components required                                  | PE                     |
| 50. Results folder for P to be used in E-Component       | -                      |
| 51. Fixed age of starting product use                    | 16                     |
| 52. Output absolute risk file?                           | N                      |

## Results for PHIM for Run 5 (Sensitivity\_Analysis\_3.RTF)

\*\*\*\*\*

TTP values for Run: 5, Scenario: NULL

| Variable Parameter | Value               |
|--------------------|---------------------|
| 1. Country         | US (United States)  |
| 2. Sex             | M (Males)           |
| 3. Assumption Set  | ISS3                |
| Note:              | Period is in Months |

| Age   | Period  | Initiation  | Cessation    | Re-initiation |
|-------|---------|-------------|--------------|---------------|
|       |         | Never<br>CC | CC<br>Former | Former<br>CC  |
| 10-14 | 1-12    | 0.003842    | 0.008742     | 0.000000      |
| 15-19 | 1-12    | 0.004720    | 0.003614     | 0.000000      |
| 20-24 | 1-12    | 0.000376    | 0.000943     | 0.000000      |
| 25-29 | 1-12    | 0.000187    | 0.001143     | 0.000000      |
| 30-34 | 1-12    | 0.000093    | 0.000871     | 0.000000      |
| 35-39 | 1-12    | 0.000000    | 0.000867     | 0.000000      |
| 40-44 | 1-12    | 0.000000    | 0.001399     | 0.000000      |
| 45-49 | 1-12    | 0.000000    | 0.002033     | 0.000000      |
| 50-54 | 1-12    | 0.000000    | 0.003209     | 0.000000      |
| 55-59 | 1-12    | 0.000000    | 0.003574     | 0.000000      |
| 60-64 | 1-12    | 0.000000    | 0.003460     | 0.000000      |
| 65-69 | 1-12    | 0.000000    | 0.004136     | 0.000000      |
| 70-74 | 1-12    | 0.000000    | 0.005592     | 0.000000      |
| 75-79 | 1-12    | 0.000000    | 0.005592     | 0.000000      |
| 10-14 | 13-72   | 0.004906    | 0.008742     | 0.000000      |
| 15-19 | 13-72   | 0.006989    | 0.004426     | 0.000000      |
| 20-24 | 13-72   | 0.000687    | 0.001527     | 0.000000      |
| 25-29 | 13-72   | 0.000962    | 0.001515     | 0.000000      |
| 30-34 | 13-72   | 0.000364    | 0.001227     | 0.000000      |
| 35-39 | 13-72   | 0.000000    | 0.001630     | 0.000000      |
| 40-44 | 13-72   | 0.000000    | 0.001852     | 0.000000      |
| 45-49 | 13-72   | 0.000000    | 0.002667     | 0.000000      |
| 50-54 | 13-72   | 0.000000    | 0.003208     | 0.000000      |
| 55-59 | 13-72   | 0.000000    | 0.003978     | 0.000000      |
| 60-64 | 13-72   | 0.000000    | 0.005771     | 0.000000      |
| 65-69 | 13-72   | 0.000000    | 0.010432     | 0.000000      |
| 70-74 | 13-72   | 0.000000    | 0.007079     | 0.000000      |
| 75-79 | 13-72   | 0.000000    | 0.007079     | 0.000000      |
| 10-14 | 73-132  | 0.004312    | 0.008742     | 0.000000      |
| 15-19 | 73-132  | 0.005330    | 0.003289     | 0.000000      |
| 20-24 | 73-132  | 0.002456    | 0.003844     | 0.000000      |
| 25-29 | 73-132  | 0.000839    | 0.002006     | 0.000000      |
| 30-34 | 73-132  | 0.000414    | 0.001329     | 0.000000      |
| 35-39 | 73-132  | 0.000000    | 0.001278     | 0.000000      |
| 40-44 | 73-132  | 0.000000    | 0.001691     | 0.000000      |
| 45-49 | 73-132  | 0.000000    | 0.002904     | 0.000000      |
| 50-54 | 73-132  | 0.000000    | 0.003319     | 0.000000      |
| 55-59 | 73-132  | 0.000000    | 0.003976     | 0.000000      |
| 60-64 | 73-132  | 0.000000    | 0.005235     | 0.000000      |
| 65-69 | 73-132  | 0.000000    | 0.005901     | 0.000000      |
| 70-74 | 73-132  | 0.000000    | 0.005615     | 0.000000      |
| 75-79 | 73-132  | 0.000000    | 0.005615     | 0.000000      |
| 10-14 | 133-192 | 0.003468    | 0.008742     | 0.000000      |
| 15-19 | 133-192 | 0.004675    | 0.003732     | 0.000000      |
| 20-24 | 133-192 | 0.000062    | 0.002260     | 0.000000      |
| 25-29 | 133-192 | 0.001422    | 0.002822     | 0.000000      |
| 30-34 | 133-192 | 0.000696    | 0.002610     | 0.000000      |
| 35-39 | 133-192 | 0.000000    | 0.002058     | 0.000000      |
| 40-44 | 133-192 | 0.000000    | 0.002310     | 0.000000      |
| 45-49 | 133-192 | 0.000000    | 0.002256     | 0.000000      |
| 50-54 | 133-192 | 0.000000    | 0.002663     | 0.000000      |
| 55-59 | 133-192 | 0.000000    | 0.001746     | 0.000000      |
| 60-64 | 133-192 | 0.000000    | 0.005809     | 0.000000      |
| 65-69 | 133-192 | 0.000000    | 0.005896     | 0.000000      |
| 70-74 | 133-192 | 0.000000    | 0.007323     | 0.000000      |
| 75-79 | 133-192 | 0.000000    | 0.007323     | 0.000000      |
| 10-14 | 193-252 | 0.002314    | 0.008742     | 0.000000      |
| 15-19 | 193-252 | 0.003987    | 0.005036     | 0.000000      |
| 20-24 | 193-252 | 0.000320    | 0.002857     | 0.000000      |
| 25-29 | 193-252 | 0.000251    | 0.002314     | 0.000000      |
| 30-34 | 193-252 | 0.000125    | 0.004343     | 0.000000      |
| 35-39 | 193-252 | 0.000000    | 0.002092     | 0.000000      |
| 40-44 | 193-252 | 0.000000    | 0.002566     | 0.000000      |
| 45-49 | 193-252 | 0.000000    | 0.002311     | 0.000000      |
| 50-54 | 193-252 | 0.000000    | 0.003209     | 0.000000      |



### Results for PHIM for Run 5 (Sensitivity\_Analysis\_3.RTF)

|       |         |          |          |          |
|-------|---------|----------|----------|----------|
| 55-59 | 193-252 | 0.000000 | 0.004057 | 0.000000 |
| 60-64 | 193-252 | 0.000000 | 0.007166 | 0.000000 |
| 65-69 | 193-252 | 0.000000 | 0.004281 | 0.000000 |
| 70-74 | 193-252 | 0.000000 | 0.004580 | 0.000000 |
| 75-79 | 193-252 | 0.000000 | 0.004580 | 0.000000 |
| 10-14 | 253+    | 0.001325 | 0.008742 | 0.000000 |
| 15-19 | 253+    | 0.002984 | 0.010602 | 0.000000 |
| 20-24 | 253+    | 0.000452 | 0.004314 | 0.000000 |
| 25-29 | 253+    | 0.000225 | 0.003645 | 0.000000 |
| 30-34 | 253+    | 0.000112 | 0.004512 | 0.000000 |
| 35-39 | 253+    | 0.000000 | 0.002147 | 0.000000 |
| 40-44 | 253+    | 0.000000 | 0.002636 | 0.000000 |
| 45-49 | 253+    | 0.000000 | 0.001051 | 0.000000 |
| 50-54 | 253+    | 0.000000 | 0.002519 | 0.000000 |
| 55-59 | 253+    | 0.000000 | 0.003693 | 0.000000 |
| 60-64 | 253+    | 0.000000 | 0.005888 | 0.000000 |
| 65-69 | 253+    | 0.000000 | 0.004823 | 0.000000 |
| 70-74 | 253+    | 0.000000 | 0.004733 | 0.000000 |
| 75-79 | 253+    | 0.000000 | 0.004733 | 0.000000 |

## Results for PHIM for Run 5 (Sensitivity\_Analysis\_3.RTF)

\*\*\*\*\*

TTP values for Run: 5, Scenario: Ecig

| Variable Parameter | Value               |
|--------------------|---------------------|
| 1. Country         | US (United States)  |
| 2. Sex             | M (Males)           |
| 3. Assumption Set  | S3C                 |
| Note:              | Period is in Months |

| Age   | Period  | Initiation  |               |               | Cessation    |                |                | Re-initiation |                |                |
|-------|---------|-------------|---------------|---------------|--------------|----------------|----------------|---------------|----------------|----------------|
|       |         | Never<br>CC | Never<br>Ecig | Never<br>Dual | CC<br>Former | Ecig<br>Former | Dual<br>Former | Former<br>CC  | Former<br>Ecig | Former<br>Dual |
| 10-14 | 1-12    | 0.001921    | 0.001921      | 0.000000      | 0.008742     | 0.010927       | 0.000000       | 0.000000      | 0.000000       | 0.000000       |
| 15-19 | 1-12    | 0.002360    | 0.002360      | 0.000000      | 0.003614     | 0.004518       | 0.000000       | 0.000000      | 0.000000       | 0.000000       |
| 20-24 | 1-12    | 0.000188    | 0.000188      | 0.000000      | 0.000943     | 0.001179       | 0.000000       | 0.000000      | 0.000000       | 0.000000       |
| 25-29 | 1-12    | 0.000093    | 0.000093      | 0.000000      | 0.001143     | 0.001428       | 0.000000       | 0.000000      | 0.000000       | 0.000000       |
| 30-34 | 1-12    | 0.000047    | 0.000047      | 0.000000      | 0.000871     | 0.001089       | 0.000000       | 0.000000      | 0.000000       | 0.000000       |
| 35-39 | 1-12    | 0.000000    | 0.000000      | 0.000000      | 0.000867     | 0.001084       | 0.000000       | 0.000000      | 0.000000       | 0.000000       |
| 40-44 | 1-12    | 0.000000    | 0.000000      | 0.000000      | 0.001399     | 0.001748       | 0.000000       | 0.000000      | 0.000000       | 0.000000       |
| 45-49 | 1-12    | 0.000000    | 0.000000      | 0.000000      | 0.002033     | 0.002541       | 0.000000       | 0.000000      | 0.000000       | 0.000000       |
| 50-54 | 1-12    | 0.000000    | 0.000000      | 0.000000      | 0.003209     | 0.004011       | 0.000000       | 0.000000      | 0.000000       | 0.000000       |
| 55-59 | 1-12    | 0.000000    | 0.000000      | 0.000000      | 0.003574     | 0.004468       | 0.000000       | 0.000000      | 0.000000       | 0.000000       |
| 60-64 | 1-12    | 0.000000    | 0.000000      | 0.000000      | 0.003460     | 0.004324       | 0.000000       | 0.000000      | 0.000000       | 0.000000       |
| 65-69 | 1-12    | 0.000000    | 0.000000      | 0.000000      | 0.004136     | 0.005170       | 0.000000       | 0.000000      | 0.000000       | 0.000000       |
| 70-74 | 1-12    | 0.000000    | 0.000000      | 0.000000      | 0.005592     | 0.006990       | 0.000000       | 0.000000      | 0.000000       | 0.000000       |
| 75-79 | 1-12    | 0.000000    | 0.000000      | 0.000000      | 0.005592     | 0.006990       | 0.000000       | 0.000000      | 0.000000       | 0.000000       |
| 10-14 | 13-72   | 0.001962    | 0.002944      | 0.000000      | 0.008742     | 0.010927       | 0.000000       | 0.000000      | 0.000000       | 0.000000       |
| 15-19 | 13-72   | 0.002796    | 0.004193      | 0.000000      | 0.004426     | 0.005533       | 0.000000       | 0.000000      | 0.000000       | 0.000000       |
| 20-24 | 13-72   | 0.000275    | 0.000412      | 0.000000      | 0.001527     | 0.001909       | 0.000000       | 0.000000      | 0.000000       | 0.000000       |
| 25-29 | 13-72   | 0.000385    | 0.000578      | 0.000000      | 0.001515     | 0.001894       | 0.000000       | 0.000000      | 0.000000       | 0.000000       |
| 30-34 | 13-72   | 0.000146    | 0.000218      | 0.000000      | 0.001227     | 0.001533       | 0.000000       | 0.000000      | 0.000000       | 0.000000       |
| 35-39 | 13-72   | 0.000000    | 0.000000      | 0.000000      | 0.001630     | 0.002037       | 0.000000       | 0.000000      | 0.000000       | 0.000000       |
| 40-44 | 13-72   | 0.000000    | 0.000000      | 0.000000      | 0.001852     | 0.002315       | 0.000000       | 0.000000      | 0.000000       | 0.000000       |
| 45-49 | 13-72   | 0.000000    | 0.000000      | 0.000000      | 0.002667     | 0.003333       | 0.000000       | 0.000000      | 0.000000       | 0.000000       |
| 50-54 | 13-72   | 0.000000    | 0.000000      | 0.000000      | 0.003208     | 0.004010       | 0.000000       | 0.000000      | 0.000000       | 0.000000       |
| 55-59 | 13-72   | 0.000000    | 0.000000      | 0.000000      | 0.003978     | 0.004972       | 0.000000       | 0.000000      | 0.000000       | 0.000000       |
| 60-64 | 13-72   | 0.000000    | 0.000000      | 0.000000      | 0.005771     | 0.007214       | 0.000000       | 0.000000      | 0.000000       | 0.000000       |
| 65-69 | 13-72   | 0.000000    | 0.000000      | 0.000000      | 0.010432     | 0.013040       | 0.000000       | 0.000000      | 0.000000       | 0.000000       |
| 70-74 | 13-72   | 0.000000    | 0.000000      | 0.000000      | 0.007079     | 0.008849       | 0.000000       | 0.000000      | 0.000000       | 0.000000       |
| 75-79 | 13-72   | 0.000000    | 0.000000      | 0.000000      | 0.007079     | 0.008849       | 0.000000       | 0.000000      | 0.000000       | 0.000000       |
| 10-14 | 73-132  | 0.000862    | 0.003449      | 0.000000      | 0.008742     | 0.010927       | 0.000000       | 0.000000      | 0.000000       | 0.000000       |
| 15-19 | 73-132  | 0.001066    | 0.004264      | 0.000000      | 0.003289     | 0.004112       | 0.000000       | 0.000000      | 0.000000       | 0.000000       |
| 20-24 | 73-132  | 0.000491    | 0.001965      | 0.000000      | 0.003844     | 0.004805       | 0.000000       | 0.000000      | 0.000000       | 0.000000       |
| 25-29 | 73-132  | 0.000168    | 0.000671      | 0.000000      | 0.002006     | 0.002507       | 0.000000       | 0.000000      | 0.000000       | 0.000000       |
| 30-34 | 73-132  | 0.000083    | 0.000332      | 0.000000      | 0.001329     | 0.001661       | 0.000000       | 0.000000      | 0.000000       | 0.000000       |
| 35-39 | 73-132  | 0.000000    | 0.000000      | 0.000000      | 0.001278     | 0.001597       | 0.000000       | 0.000000      | 0.000000       | 0.000000       |
| 40-44 | 73-132  | 0.000000    | 0.000000      | 0.000000      | 0.001691     | 0.002114       | 0.000000       | 0.000000      | 0.000000       | 0.000000       |
| 45-49 | 73-132  | 0.000000    | 0.000000      | 0.000000      | 0.002904     | 0.003630       | 0.000000       | 0.000000      | 0.000000       | 0.000000       |
| 50-54 | 73-132  | 0.000000    | 0.000000      | 0.000000      | 0.003319     | 0.004149       | 0.000000       | 0.000000      | 0.000000       | 0.000000       |
| 55-59 | 73-132  | 0.000000    | 0.000000      | 0.000000      | 0.003976     | 0.004970       | 0.000000       | 0.000000      | 0.000000       | 0.000000       |
| 60-64 | 73-132  | 0.000000    | 0.000000      | 0.000000      | 0.005235     | 0.006543       | 0.000000       | 0.000000      | 0.000000       | 0.000000       |
| 65-69 | 73-132  | 0.000000    | 0.000000      | 0.000000      | 0.005901     | 0.007377       | 0.000000       | 0.000000      | 0.000000       | 0.000000       |
| 70-74 | 73-132  | 0.000000    | 0.000000      | 0.000000      | 0.005615     | 0.007019       | 0.000000       | 0.000000      | 0.000000       | 0.000000       |
| 75-79 | 73-132  | 0.000000    | 0.000000      | 0.000000      | 0.005615     | 0.007019       | 0.000000       | 0.000000      | 0.000000       | 0.000000       |
| 10-14 | 133-192 | 0.000173    | 0.003294      | 0.000000      | 0.008742     | 0.010927       | 0.000000       | 0.000000      | 0.000000       | 0.000000       |
| 15-19 | 133-192 | 0.000234    | 0.004442      | 0.000000      | 0.003732     | 0.004665       | 0.000000       | 0.000000      | 0.000000       | 0.000000       |
| 20-24 | 133-192 | 0.000003    | 0.000059      | 0.000000      | 0.002260     | 0.002825       | 0.000000       | 0.000000      | 0.000000       | 0.000000       |
| 25-29 | 133-192 | 0.000071    | 0.001351      | 0.000000      | 0.002822     | 0.003527       | 0.000000       | 0.000000      | 0.000000       | 0.000000       |
| 30-34 | 133-192 | 0.000035    | 0.000661      | 0.000000      | 0.002610     | 0.003262       | 0.000000       | 0.000000      | 0.000000       | 0.000000       |
| 35-39 | 133-192 | 0.000000    | 0.000000      | 0.000000      | 0.002058     | 0.002573       | 0.000000       | 0.000000      | 0.000000       | 0.000000       |
| 40-44 | 133-192 | 0.000000    | 0.000000      | 0.000000      | 0.002310     | 0.002888       | 0.000000       | 0.000000      | 0.000000       | 0.000000       |
| 45-49 | 133-192 | 0.000000    | 0.000000      | 0.000000      | 0.002256     | 0.002820       | 0.000000       | 0.000000      | 0.000000       | 0.000000       |
| 50-54 | 133-192 | 0.000000    | 0.000000      | 0.000000      | 0.002663     | 0.003329       | 0.000000       | 0.000000      | 0.000000       | 0.000000       |
| 55-59 | 133-192 | 0.000000    | 0.000000      | 0.000000      | 0.001747     | 0.002183       | 0.000000       | 0.000000      | 0.000000       | 0.000000       |
| 60-64 | 133-192 | 0.000000    | 0.000000      | 0.000000      | 0.005809     | 0.007261       | 0.000000       | 0.000000      | 0.000000       | 0.000000       |
| 65-69 | 133-192 | 0.000000    | 0.000000      | 0.000000      | 0.005896     | 0.007370       | 0.000000       | 0.000000      | 0.000000       | 0.000000       |
| 70-74 | 133-192 | 0.000000    | 0.000000      | 0.000000      | 0.007323     | 0.009153       | 0.000000       | 0.000000      | 0.000000       | 0.000000       |
| 75-79 | 133-192 | 0.000000    | 0.000000      | 0.000000      | 0.007323     | 0.009153       | 0.000000       | 0.000000      | 0.000000       | 0.000000       |
| 10-14 | 193-252 | 0.000116    | 0.002198      | 0.000000      | 0.008742     | 0.010927       | 0.000000       | 0.000000      | 0.000000       | 0.000000       |
| 15-19 | 193-252 | 0.000199    | 0.003788      | 0.000000      | 0.005036     | 0.006296       | 0.000000       | 0.000000      | 0.000000       | 0.000000       |
| 20-24 | 193-252 | 0.000016    | 0.000304      | 0.000000      | 0.002857     | 0.003571       | 0.000000       | 0.000000      | 0.000000       | 0.000000       |
| 25-29 | 193-252 | 0.000013    | 0.000239      | 0.000000      | 0.002314     | 0.002893       | 0.000000       | 0.000000      | 0.000000       | 0.000000       |
| 30-34 | 193-252 | 0.000006    | 0.000119      | 0.000000      | 0.004343     | 0.005428       | 0.000000       | 0.000000      | 0.000000       | 0.000000       |
| 35-39 | 193-252 | 0.000000    | 0.000000      | 0.000000      | 0.002092     | 0.002615       | 0.000000       | 0.000000      | 0.000000       | 0.000000       |
| 40-44 | 193-252 | 0.000000    | 0.000000      | 0.000000      | 0.002566     | 0.003207       | 0.000000       | 0.000000      | 0.000000       | 0.000000       |
| 45-49 | 193-252 | 0.000000    | 0.000000      | 0.000000      | 0.002311     | 0.002889       | 0.000000       | 0.000000      | 0.000000       | 0.000000       |
| 50-54 | 193-252 | 0.000000    | 0.000000      | 0.000000      | 0.003209     | 0.004011       | 0.000000       | 0.000000      | 0.000000       | 0.000000       |

### Results for PHIM for Run 5 (Sensitivity\_Analysis\_3.RTF)

|       |         |          |          |          |          |          |          |          |          |          |
|-------|---------|----------|----------|----------|----------|----------|----------|----------|----------|----------|
| 55-59 | 193-252 | 0.000000 | 0.000000 | 0.000000 | 0.004057 | 0.005071 | 0.000000 | 0.000000 | 0.000000 | 0.000000 |
| 60-64 | 193-252 | 0.000000 | 0.000000 | 0.000000 | 0.007166 | 0.008957 | 0.000000 | 0.000000 | 0.000000 | 0.000000 |
| 65-69 | 193-252 | 0.000000 | 0.000000 | 0.000000 | 0.004281 | 0.005351 | 0.000000 | 0.000000 | 0.000000 | 0.000000 |
| 70-74 | 193-252 | 0.000000 | 0.000000 | 0.000000 | 0.004580 | 0.005725 | 0.000000 | 0.000000 | 0.000000 | 0.000000 |
| 75-79 | 193-252 | 0.000000 | 0.000000 | 0.000000 | 0.004580 | 0.005725 | 0.000000 | 0.000000 | 0.000000 | 0.000000 |
| 10-14 | 253+    | 0.000066 | 0.001259 | 0.000000 | 0.008742 | 0.010927 | 0.000000 | 0.000000 | 0.000000 | 0.000000 |
| 15-19 | 253+    | 0.000149 | 0.002835 | 0.000000 | 0.010602 | 0.013252 | 0.000000 | 0.000000 | 0.000000 | 0.000000 |
| 20-24 | 253+    | 0.000023 | 0.000430 | 0.000000 | 0.004314 | 0.005392 | 0.000000 | 0.000000 | 0.000000 | 0.000000 |
| 25-29 | 253+    | 0.000011 | 0.000213 | 0.000000 | 0.003645 | 0.004557 | 0.000000 | 0.000000 | 0.000000 | 0.000000 |
| 30-34 | 253+    | 0.000006 | 0.000106 | 0.000000 | 0.004512 | 0.005640 | 0.000000 | 0.000000 | 0.000000 | 0.000000 |
| 35-39 | 253+    | 0.000000 | 0.000000 | 0.000000 | 0.002147 | 0.002683 | 0.000000 | 0.000000 | 0.000000 | 0.000000 |
| 40-44 | 253+    | 0.000000 | 0.000000 | 0.000000 | 0.002636 | 0.003294 | 0.000000 | 0.000000 | 0.000000 | 0.000000 |
| 45-49 | 253+    | 0.000000 | 0.000000 | 0.000000 | 0.001051 | 0.001314 | 0.000000 | 0.000000 | 0.000000 | 0.000000 |
| 50-54 | 253+    | 0.000000 | 0.000000 | 0.000000 | 0.002519 | 0.003148 | 0.000000 | 0.000000 | 0.000000 | 0.000000 |
| 55-59 | 253+    | 0.000000 | 0.000000 | 0.000000 | 0.003693 | 0.004617 | 0.000000 | 0.000000 | 0.000000 | 0.000000 |
| 60-64 | 253+    | 0.000000 | 0.000000 | 0.000000 | 0.005888 | 0.007360 | 0.000000 | 0.000000 | 0.000000 | 0.000000 |
| 65-69 | 253+    | 0.000000 | 0.000000 | 0.000000 | 0.004823 | 0.006029 | 0.000000 | 0.000000 | 0.000000 | 0.000000 |
| 70-74 | 253+    | 0.000000 | 0.000000 | 0.000000 | 0.004733 | 0.005916 | 0.000000 | 0.000000 | 0.000000 | 0.000000 |
| 75-79 | 253+    | 0.000000 | 0.000000 | 0.000000 | 0.004733 | 0.005916 | 0.000000 | 0.000000 | 0.000000 | 0.000000 |



**Results for PHIM for Run 5 (Sensitivity\_Analysis\_3.RTF)**

|       |      |          |          |          |          |          |          |
|-------|------|----------|----------|----------|----------|----------|----------|
| 25-29 | 253+ | 0.015212 | 0.000000 | 0.000000 | 0.000000 | 0.000000 | 0.000000 |
| 30-34 | 253+ | 0.015460 | 0.000000 | 0.000000 | 0.000000 | 0.000000 | 0.000000 |
| 35-39 | 253+ | 0.014711 | 0.000000 | 0.000000 | 0.000000 | 0.000000 | 0.000000 |
| 40-44 | 253+ | 0.014241 | 0.000000 | 0.000000 | 0.000000 | 0.000000 | 0.000000 |
| 45-49 | 253+ | 0.013014 | 0.000000 | 0.000000 | 0.000000 | 0.000000 | 0.000000 |
| 50-54 | 253+ | 0.011768 | 0.000000 | 0.000000 | 0.000000 | 0.000000 | 0.000000 |
| 55-59 | 253+ | 0.011032 | 0.000000 | 0.000000 | 0.000000 | 0.000000 | 0.000000 |
| 60-64 | 253+ | 0.009525 | 0.000000 | 0.000000 | 0.000000 | 0.000000 | 0.000000 |
| 65-69 | 253+ | 0.006897 | 0.000000 | 0.000000 | 0.000000 | 0.000000 | 0.000000 |
| 70-74 | 253+ | 0.005435 | 0.000000 | 0.000000 | 0.000000 | 0.000000 | 0.000000 |
| 75-79 | 253+ | 0.005435 | 0.000000 | 0.000000 | 0.000000 | 0.000000 | 0.000000 |

## Results for PHIM for Run 5 (Sensitivity\_Analysis\_3.RTF)

\*\*\*\*\*

### Main Output for the Tobacco History for Run: 5, Simulation: 1, Scenario: NULL

| Variable Parameter          | Value              |
|-----------------------------|--------------------|
| 1. Country                  | US (United States) |
| 2. Sex                      | M (Males)          |
| 3. Year of start of process | 1990               |

Year of Follow-up: 2040, Age Group: All Ages  
 Period    Age Group    Smoking Group            N            %

|    |          |           |       |       |
|----|----------|-----------|-------|-------|
| 50 | All Ages | Never Any | 19445 | 50.68 |
| 50 | All Ages | CC        | 3024  | 7.88  |
| 50 | All Ages | Former    | 15896 | 41.43 |

Year of Follow-up: 2040, Age Group: 18-19  
 Period    Age Group    Smoking Group            N            %

|    |       |           |   |   |
|----|-------|-----------|---|---|
| 50 | 18-19 | Never Any | 0 | . |
| 50 | 18-19 | CC        | 0 | . |
| 50 | 18-19 | Former    | 0 | . |

Year of Follow-up: 2040, Age Group: 20-24  
 Period    Age Group    Smoking Group            N            %

|    |       |           |   |   |
|----|-------|-----------|---|---|
| 50 | 20-24 | Never Any | 0 | . |
| 50 | 20-24 | CC        | 0 | . |
| 50 | 20-24 | Former    | 0 | . |

Year of Follow-up: 2040, Age Group: 25-29  
 Period    Age Group    Smoking Group            N            %

|    |       |           |   |   |
|----|-------|-----------|---|---|
| 50 | 25-29 | Never Any | 0 | . |
| 50 | 25-29 | CC        | 0 | . |
| 50 | 25-29 | Former    | 0 | . |

Year of Follow-up: 2040, Age Group: 30-34  
 Period    Age Group    Smoking Group            N            %

|    |       |           |   |   |
|----|-------|-----------|---|---|
| 50 | 30-34 | Never Any | 0 | . |
| 50 | 30-34 | CC        | 0 | . |
| 50 | 30-34 | Former    | 0 | . |

Year of Follow-up: 2040, Age Group: 35-39  
 Period    Age Group    Smoking Group            N            %

|    |       |           |   |   |
|----|-------|-----------|---|---|
| 50 | 35-39 | Never Any | 0 | . |
| 50 | 35-39 | CC        | 0 | . |
| 50 | 35-39 | Former    | 0 | . |

Year of Follow-up: 2040, Age Group: 40-44  
 Period    Age Group    Smoking Group            N            %

|    |       |           |   |   |
|----|-------|-----------|---|---|
| 50 | 40-44 | Never Any | 0 | . |
| 50 | 40-44 | CC        | 0 | . |
| 50 | 40-44 | Former    | 0 | . |

Year of Follow-up: 2040, Age Group: 45-49  
 Period    Age Group    Smoking Group            N            %

|    |       |           |   |   |
|----|-------|-----------|---|---|
| 50 | 45-49 | Never Any | 0 | . |
| 50 | 45-49 | CC        | 0 | . |
| 50 | 45-49 | Former    | 0 | . |

Year of Follow-up: 2040, Age Group: 50-54  
 Period    Age Group    Smoking Group            N            %

|    |       |           |   |   |
|----|-------|-----------|---|---|
| 50 | 50-54 | Never Any | 0 | . |
| 50 | 50-54 | CC        | 0 | . |
| 50 | 50-54 | Former    | 0 | . |

Year of Follow-up: 2040, Age Group: 55-59  
 Period    Age Group    Smoking Group            N            %

|    |       |           |   |   |
|----|-------|-----------|---|---|
| 50 | 55-59 | Never Any | 0 | . |
| 50 | 55-59 | CC        | 0 | . |
| 50 | 55-59 | Former    | 0 | . |

Year of Follow-up: 2040, Age Group: 60-64  
 Period    Age Group    Smoking Group            N            %

### Results for PHIM for Run 5 (Sensitivity\_Analysis\_3.RTF)

|                                           |           |               |      |       |
|-------------------------------------------|-----------|---------------|------|-------|
| 50                                        | 60-64     | Never Any     | 4363 | 49.33 |
| 50                                        | 60-64     | CC            | 934  | 10.56 |
| 50                                        | 60-64     | Former        | 3548 | 40.11 |
| Year of Follow-up: 2040, Age Group: 65-69 |           |               |      |       |
| Period                                    | Age Group | Smoking Group | N    | %     |
| 50                                        | 65-69     | Never Any     | 4948 | 54.73 |
| 50                                        | 65-69     | CC            | 734  | 8.12  |
| 50                                        | 65-69     | Former        | 3358 | 37.15 |
| Year of Follow-up: 2040, Age Group: 70-74 |           |               |      |       |
| Period                                    | Age Group | Smoking Group | N    | %     |
| 50                                        | 70-74     | Never Any     | 5145 | 52.41 |
| 50                                        | 70-74     | CC            | 688  | 7.01  |
| 50                                        | 70-74     | Former        | 3983 | 40.58 |
| Year of Follow-up: 2040, Age Group: 75-79 |           |               |      |       |
| Period                                    | Age Group | Smoking Group | N    | %     |
| 50                                        | 75-79     | Never Any     | 4989 | 46.78 |
| 50                                        | 75-79     | CC            | 668  | 6.26  |
| 50                                        | 75-79     | Former        | 5007 | 46.95 |

## Results for PHIM for Run 5 (Sensitivity\_Analysis\_3.RTF)

\*\*\*\*\*

### Main Output for the Tobacco History for Run: 5, Simulation: 1, Scenario: Ecig

| Variable Parameter                           |           | Value              |       |       |               |             |               |                |              |
|----------------------------------------------|-----------|--------------------|-------|-------|---------------|-------------|---------------|----------------|--------------|
| 1. Country                                   |           | US (United States) |       |       |               |             |               |                |              |
| 2. Sex                                       |           | M (Males)          |       |       |               |             |               |                |              |
| 3. Year of start of process                  |           | 1990               |       |       |               |             |               |                |              |
| Year of Follow-up: 1990, Age Group: All Ages |           |                    |       |       |               |             |               |                |              |
| Period                                       | Age Group | Smoking Group      | N     | %     | Ever Quit (N) | Ever Quit % | Mean Yrs Quit | Short Term (n) | Short Term % |
| 0                                            | All Ages  | Never Any          | 34075 | 39.78 |               |             |               |                |              |
| 0                                            | All Ages  | CC                 | 27323 | 31.90 | 0             | 0.00        |               |                |              |
| 0                                            | All Ages  | Ecig               | 0     | 0.00  |               |             |               |                |              |
| 0                                            | All Ages  | Dual               | 0     | 0.00  |               |             |               |                |              |
| 0                                            | All Ages  | Former             | 24266 | 28.33 |               |             | 13.08         | 3623           | 14.93        |
| Year of Follow-up: 1990, Age Group: 18-19    |           |                    |       |       |               |             |               |                |              |
| Period                                       | Age Group | Smoking Group      | N     | %     | Ever Quit (N) | Ever Quit % | Mean Yrs Quit | Short Term (n) | Short Term % |
| 0                                            | 18-19     | Never Any          | 2783  | 78.42 |               |             |               |                |              |
| 0                                            | 18-19     | CC                 | 634   | 17.86 | 0             | 0.00        |               |                |              |
| 0                                            | 18-19     | Ecig               | 0     | 0.00  |               |             |               |                |              |
| 0                                            | 18-19     | Dual               | 0     | 0.00  |               |             |               |                |              |
| 0                                            | 18-19     | Former             | 132   | 3.72  |               |             | 0.11          | 132            | 100.00       |
| Year of Follow-up: 1990, Age Group: 20-24    |           |                    |       |       |               |             |               |                |              |
| Period                                       | Age Group | Smoking Group      | N     | %     | Ever Quit (N) | Ever Quit % | Mean Yrs Quit | Short Term (n) | Short Term % |
| 0                                            | 20-24     | Never Any          | 5722  | 58.29 |               |             |               |                |              |
| 0                                            | 20-24     | CC                 | 3199  | 32.59 | 0             | 0.00        |               |                |              |
| 0                                            | 20-24     | Ecig               | 0     | 0.00  |               |             |               |                |              |
| 0                                            | 20-24     | Dual               | 0     | 0.00  |               |             |               |                |              |
| 0                                            | 20-24     | Former             | 895   | 9.12  |               |             | 1.46          | 506            | 56.54        |
| Year of Follow-up: 1990, Age Group: 25-29    |           |                    |       |       |               |             |               |                |              |
| Period                                       | Age Group | Smoking Group      | N     | %     | Ever Quit (N) | Ever Quit % | Mean Yrs Quit | Short Term (n) | Short Term % |
| 0                                            | 25-29     | Never Any          | 5232  | 49.06 |               |             |               |                |              |
| 0                                            | 25-29     | CC                 | 3914  | 36.70 | 0             | 0.00        |               |                |              |
| 0                                            | 25-29     | Ecig               | 0     | 0.00  |               |             |               |                |              |
| 0                                            | 25-29     | Dual               | 0     | 0.00  |               |             |               |                |              |
| 0                                            | 25-29     | Former             | 1518  | 14.23 |               |             | 2.87          | 643            | 42.36        |
| Year of Follow-up: 1990, Age Group: 30-34    |           |                    |       |       |               |             |               |                |              |
| Period                                       | Age Group | Smoking Group      | N     | %     | Ever Quit (N) | Ever Quit % | Mean Yrs Quit | Short Term (n) | Short Term % |
| 0                                            | 30-34     | Never Any          | 4765  | 43.65 |               |             |               |                |              |
| 0                                            | 30-34     | CC                 | 4023  | 36.85 | 0             | 0.00        |               |                |              |
| 0                                            | 30-34     | Ecig               | 0     | 0.00  |               |             |               |                |              |
| 0                                            | 30-34     | Dual               | 0     | 0.00  |               |             |               |                |              |
| 0                                            | 30-34     | Former             | 2128  | 19.49 |               |             | 4.06          | 592            | 27.82        |
| Year of Follow-up: 1990, Age Group: 35-39    |           |                    |       |       |               |             |               |                |              |
| Period                                       | Age Group | Smoking Group      | N     | %     | Ever Quit (N) | Ever Quit % | Mean Yrs Quit | Short Term (n) | Short Term % |
| 0                                            | 35-39     | Never Any          | 3941  | 39.85 |               |             |               |                |              |
| 0                                            | 35-39     | CC                 | 3474  | 35.13 | 0             | 0.00        |               |                |              |
| 0                                            | 35-39     | Ecig               | 0     | 0.00  |               |             |               |                |              |
| 0                                            | 35-39     | Dual               | 0     | 0.00  |               |             |               |                |              |
| 0                                            | 35-39     | Former             | 2474  | 25.02 |               |             | 8.31          | 425            | 17.18        |
| Year of Follow-up: 1990, Age Group: 40-44    |           |                    |       |       |               |             |               |                |              |
| Period                                       | Age Group | Smoking Group      | N     | %     | Ever Quit (N) | Ever Quit % | Mean Yrs Quit | Short Term (n) | Short Term % |
| 0                                            | 40-44     | Never Any          | 2912  | 33.65 |               |             |               |                |              |
| 0                                            | 40-44     | CC                 | 3113  | 35.97 | 0             | 0.00        |               |                |              |
| 0                                            | 40-44     | Ecig               | 0     | 0.00  |               |             |               |                |              |
| 0                                            | 40-44     | Dual               | 0     | 0.00  |               |             |               |                |              |
| 0                                            | 40-44     | Former             | 2630  | 30.39 |               |             | 10.69         | 317            | 12.05        |
| Year of Follow-up: 1990, Age Group: 45-49    |           |                    |       |       |               |             |               |                |              |
| Period                                       | Age Group | Smoking Group      | N     | %     | Ever Quit (N) | Ever Quit % | Mean Yrs Quit | Short Term (n) | Short Term % |
| 0                                            | 45-49     | Never Any          | 1919  | 29.46 |               |             |               |                |              |
| 0                                            | 45-49     | CC                 | 2318  | 35.58 | 0             | 0.00        |               |                |              |
| 0                                            | 45-49     | Ecig               | 0     | 0.00  |               |             |               |                |              |
| 0                                            | 45-49     | Dual               | 0     | 0.00  |               |             |               |                |              |
| 0                                            | 45-49     | Former             | 2278  | 34.97 |               |             | 13.26         | 221            | 9.70         |
| Year of Follow-up: 1990, Age Group: 50-54    |           |                    |       |       |               |             |               |                |              |
| Period                                       | Age Group | Smoking Group      | N     | %     | Ever Quit (N) | Ever Quit % | Mean Yrs Quit | Short Term (n) | Short Term % |
| 0                                            | 50-54     | Never Any          | 1611  | 29.41 |               |             |               |                |              |
| 0                                            | 50-54     | CC                 | 1816  | 33.16 | 0             | 0.00        |               |                |              |



**Results for PHIM for Run 5 (Sensitivity\_Analysis\_3.RTF)**

|                                              |           |               |       |       |               |             |               |                |              |
|----------------------------------------------|-----------|---------------|-------|-------|---------------|-------------|---------------|----------------|--------------|
| 0                                            | 50-54     | Ecig          | 0     | 0.00  |               |             |               |                |              |
| 0                                            | 50-54     | Dual          | 0     | 0.00  |               |             |               |                |              |
| 0                                            | 50-54     | Former        | 2050  | 37.43 |               |             | 14.55         | 261            | 12.73        |
| Year of Follow-up: 1990, Age Group: 55-59    |           |               |       |       |               |             |               |                |              |
| Period                                       | Age Group | Smoking Group | N     | %     | Ever Quit (N) | Ever Quit % | Mean Yrs Quit | Short Term (n) | Short Term % |
| 0                                            | 55-59     | Never Any     | 1337  | 26.83 |               |             |               |                |              |
| 0                                            | 55-59     | CC            | 1520  | 30.50 | 0             | 0.00        |               |                |              |
| 0                                            | 55-59     | Ecig          | 0     | 0.00  |               |             |               |                |              |
| 0                                            | 55-59     | Dual          | 0     | 0.00  |               |             |               |                |              |
| 0                                            | 55-59     | Former        | 2126  | 42.67 |               |             | 14.80         | 216            | 10.16        |
| Year of Follow-up: 1990, Age Group: 60-64    |           |               |       |       |               |             |               |                |              |
| Period                                       | Age Group | Smoking Group | N     | %     | Ever Quit (N) | Ever Quit % | Mean Yrs Quit | Short Term (n) | Short Term % |
| 0                                            | 60-64     | Never Any     | 1169  | 23.83 |               |             |               |                |              |
| 0                                            | 60-64     | CC            | 1287  | 26.24 | 0             | 0.00        |               |                |              |
| 0                                            | 60-64     | Ecig          | 0     | 0.00  |               |             |               |                |              |
| 0                                            | 60-64     | Dual          | 0     | 0.00  |               |             |               |                |              |
| 0                                            | 60-64     | Former        | 2449  | 49.93 |               |             | 18.87         | 106            | 4.33         |
| Year of Follow-up: 1990, Age Group: 65-69    |           |               |       |       |               |             |               |                |              |
| Period                                       | Age Group | Smoking Group | N     | %     | Ever Quit (N) | Ever Quit % | Mean Yrs Quit | Short Term (n) | Short Term % |
| 0                                            | 65-69     | Never Any     | 1023  | 23.32 |               |             |               |                |              |
| 0                                            | 65-69     | CC            | 979   | 22.32 | 0             | 0.00        |               |                |              |
| 0                                            | 65-69     | Ecig          | 0     | 0.00  |               |             |               |                |              |
| 0                                            | 65-69     | Dual          | 0     | 0.00  |               |             |               |                |              |
| 0                                            | 65-69     | Former        | 2385  | 54.37 |               |             | 19.91         | 113            | 4.74         |
| Year of Follow-up: 1990, Age Group: 70-74    |           |               |       |       |               |             |               |                |              |
| Period                                       | Age Group | Smoking Group | N     | %     | Ever Quit (N) | Ever Quit % | Mean Yrs Quit | Short Term (n) | Short Term % |
| 0                                            | 70-74     | Never Any     | 961   | 27.46 |               |             |               |                |              |
| 0                                            | 70-74     | CC            | 675   | 19.29 | 0             | 0.00        |               |                |              |
| 0                                            | 70-74     | Ecig          | 0     | 0.00  |               |             |               |                |              |
| 0                                            | 70-74     | Dual          | 0     | 0.00  |               |             |               |                |              |
| 0                                            | 70-74     | Former        | 1863  | 53.24 |               |             | 20.69         | 23             | 1.23         |
| Year of Follow-up: 1990, Age Group: 75-79    |           |               |       |       |               |             |               |                |              |
| Period                                       | Age Group | Smoking Group | N     | %     | Ever Quit (N) | Ever Quit % | Mean Yrs Quit | Short Term (n) | Short Term % |
| 0                                            | 75-79     | Never Any     | 700   | 29.06 |               |             |               |                |              |
| 0                                            | 75-79     | CC            | 371   | 15.40 | 0             | 0.00        |               |                |              |
| 0                                            | 75-79     | Ecig          | 0     | 0.00  |               |             |               |                |              |
| 0                                            | 75-79     | Dual          | 0     | 0.00  |               |             |               |                |              |
| 0                                            | 75-79     | Former        | 1338  | 55.54 |               |             | 22.88         | 68             | 5.08         |
| Year of Follow-up: 1995, Age Group: All Ages |           |               |       |       |               |             |               |                |              |
| Period                                       | Age Group | Smoking Group | N     | %     | Ever Quit (N) | Ever Quit % | Mean Yrs Quit | Short Term (n) | Short Term % |
| 5                                            | All Ages  | Never Any     | 38368 | 41.57 |               |             |               |                |              |
| 5                                            | All Ages  | CC            | 11508 | 12.47 | 0             | 0.00        |               |                |              |
| 5                                            | All Ages  | Ecig          | 15247 | 16.52 |               |             |               |                |              |
| 5                                            | All Ages  | Dual          | 0     | 0.00  |               |             |               |                |              |
| 5                                            | All Ages  | Former        | 27167 | 29.44 |               |             | 15.05         | 1882           | 6.93         |
| Year of Follow-up: 1995, Age Group: 18-19    |           |               |       |       |               |             |               |                |              |
| Period                                       | Age Group | Smoking Group | N     | %     | Ever Quit (N) | Ever Quit % | Mean Yrs Quit | Short Term (n) | Short Term % |
| 5                                            | 18-19     | Never Any     | 2448  | 69.07 |               |             |               |                |              |
| 5                                            | 18-19     | CC            | 320   | 9.03  | 0             | 0.00        |               |                |              |
| 5                                            | 18-19     | Ecig          | 646   | 18.23 |               |             |               |                |              |
| 5                                            | 18-19     | Dual          | 0     | 0.00  |               |             |               |                |              |
| 5                                            | 18-19     | Former        | 130   | 3.67  |               |             | 1.08          | 90             | 69.23        |
| Year of Follow-up: 1995, Age Group: 20-24    |           |               |       |       |               |             |               |                |              |
| Period                                       | Age Group | Smoking Group | N     | %     | Ever Quit (N) | Ever Quit % | Mean Yrs Quit | Short Term (n) | Short Term % |
| 5                                            | 20-24     | Never Any     | 5787  | 64.02 |               |             |               |                |              |
| 5                                            | 20-24     | CC            | 946   | 10.46 | 0             | 0.00        |               |                |              |
| 5                                            | 20-24     | Ecig          | 1787  | 19.77 |               |             |               |                |              |
| 5                                            | 20-24     | Dual          | 0     | 0.00  |               |             |               |                |              |
| 5                                            | 20-24     | Former        | 520   | 5.75  |               |             | 2.69          | 166            | 31.92        |
| Year of Follow-up: 1995, Age Group: 25-29    |           |               |       |       |               |             |               |                |              |
| Period                                       | Age Group | Smoking Group | N     | %     | Ever Quit (N) | Ever Quit % | Mean Yrs Quit | Short Term (n) | Short Term % |
| 5                                            | 25-29     | Never Any     | 5471  | 55.74 |               |             |               |                |              |
| 5                                            | 25-29     | CC            | 1255  | 12.79 | 0             | 0.00        |               |                |              |
| 5                                            | 25-29     | Ecig          | 1921  | 19.57 |               |             |               |                |              |
| 5                                            | 25-29     | Dual          | 0     | 0.00  |               |             |               |                |              |
| 5                                            | 25-29     | Former        | 1169  | 11.91 |               |             | 5.35          | 132            | 11.29        |
| Year of Follow-up: 1995, Age Group: 30-34    |           |               |       |       |               |             |               |                |              |
| Period                                       | Age Group | Smoking Group | N     | %     | Ever Quit (N) | Ever Quit % | Mean Yrs Quit | Short Term (n) | Short Term % |

**Results for PHIM for Run 5 (Sensitivity\_Analysis\_3.RTF)**

|                                              |           |               |      |       |               |             |               |                |              |
|----------------------------------------------|-----------|---------------|------|-------|---------------|-------------|---------------|----------------|--------------|
| 5                                            | 30-34     | Never Any     | 5065 | 47.50 |               |             |               |                |              |
| 5                                            | 30-34     | CC            | 1480 | 13.88 | 0             | 0.00        |               |                |              |
| 5                                            | 30-34     | Ecig          | 2301 | 21.58 |               |             |               |                |              |
| 5                                            | 30-34     | Dual          | 0    | 0.00  |               |             |               |                |              |
| 5                                            | 30-34     | Former        | 1818 | 17.05 |               |             | 6.88          | 120            | 6.60         |
| Year of Follow-up: 1995, Age Group: 35-39    |           |               |      |       |               |             |               |                |              |
| Period                                       | Age Group | Smoking Group | N    | %     | Ever Quit (N) | Ever Quit % | Mean Yrs Quit | Short Term (n) | Short Term % |
| 5                                            | 35-39     | Never Any     | 4724 | 43.28 |               |             |               |                |              |
| 5                                            | 35-39     | CC            | 1496 | 13.70 | 0             | 0.00        |               |                |              |
| 5                                            | 35-39     | Ecig          | 2255 | 20.66 |               |             |               |                |              |
| 5                                            | 35-39     | Dual          | 0    | 0.00  |               |             |               |                |              |
| 5                                            | 35-39     | Former        | 2441 | 22.36 |               |             | 8.15          | 126            | 5.16         |
| Year of Follow-up: 1995, Age Group: 40-44    |           |               |      |       |               |             |               |                |              |
| Period                                       | Age Group | Smoking Group | N    | %     | Ever Quit (N) | Ever Quit % | Mean Yrs Quit | Short Term (n) | Short Term % |
| 5                                            | 40-44     | Never Any     | 3941 | 39.85 |               |             |               |                |              |
| 5                                            | 40-44     | CC            | 1280 | 12.94 | 0             | 0.00        |               |                |              |
| 5                                            | 40-44     | Ecig          | 1871 | 18.92 |               |             |               |                |              |
| 5                                            | 40-44     | Dual          | 0    | 0.00  |               |             |               |                |              |
| 5                                            | 40-44     | Former        | 2797 | 28.28 |               |             | 11.97         | 146            | 5.22         |
| Year of Follow-up: 1995, Age Group: 45-49    |           |               |      |       |               |             |               |                |              |
| Period                                       | Age Group | Smoking Group | N    | %     | Ever Quit (N) | Ever Quit % | Mean Yrs Quit | Short Term (n) | Short Term % |
| 5                                            | 45-49     | Never Any     | 2912 | 33.65 |               |             |               |                |              |
| 5                                            | 45-49     | CC            | 1236 | 14.28 | 0             | 0.00        |               |                |              |
| 5                                            | 45-49     | Ecig          | 1527 | 17.64 |               |             |               |                |              |
| 5                                            | 45-49     | Dual          | 0    | 0.00  |               |             |               |                |              |
| 5                                            | 45-49     | Former        | 2980 | 34.43 |               |             | 14.04         | 171            | 5.74         |
| Year of Follow-up: 1995, Age Group: 50-54    |           |               |      |       |               |             |               |                |              |
| Period                                       | Age Group | Smoking Group | N    | %     | Ever Quit (N) | Ever Quit % | Mean Yrs Quit | Short Term (n) | Short Term % |
| 5                                            | 50-54     | Never Any     | 1919 | 29.46 |               |             |               |                |              |
| 5                                            | 50-54     | CC            | 940  | 14.43 | 0             | 0.00        |               |                |              |
| 5                                            | 50-54     | Ecig          | 995  | 15.27 |               |             |               |                |              |
| 5                                            | 50-54     | Dual          | 0    | 0.00  |               |             |               |                |              |
| 5                                            | 50-54     | Former        | 2661 | 40.84 |               |             | 15.87         | 187            | 7.03         |
| Year of Follow-up: 1995, Age Group: 55-59    |           |               |      |       |               |             |               |                |              |
| Period                                       | Age Group | Smoking Group | N    | %     | Ever Quit (N) | Ever Quit % | Mean Yrs Quit | Short Term (n) | Short Term % |
| 5                                            | 55-59     | Never Any     | 1611 | 29.41 |               |             |               |                |              |
| 5                                            | 55-59     | CC            | 740  | 13.51 | 0             | 0.00        |               |                |              |
| 5                                            | 55-59     | Ecig          | 733  | 13.38 |               |             |               |                |              |
| 5                                            | 55-59     | Dual          | 0    | 0.00  |               |             |               |                |              |
| 5                                            | 55-59     | Former        | 2393 | 43.69 |               |             | 17.01         | 142            | 5.93         |
| Year of Follow-up: 1995, Age Group: 60-64    |           |               |      |       |               |             |               |                |              |
| Period                                       | Age Group | Smoking Group | N    | %     | Ever Quit (N) | Ever Quit % | Mean Yrs Quit | Short Term (n) | Short Term % |
| 5                                            | 60-64     | Never Any     | 1337 | 26.83 |               |             |               |                |              |
| 5                                            | 60-64     | CC            | 597  | 11.98 | 0             | 0.00        |               |                |              |
| 5                                            | 60-64     | Ecig          | 558  | 11.20 |               |             |               |                |              |
| 5                                            | 60-64     | Dual          | 0    | 0.00  |               |             |               |                |              |
| 5                                            | 60-64     | Former        | 2491 | 49.99 |               |             | 17.18         | 151            | 6.06         |
| Year of Follow-up: 1995, Age Group: 65-69    |           |               |      |       |               |             |               |                |              |
| Period                                       | Age Group | Smoking Group | N    | %     | Ever Quit (N) | Ever Quit % | Mean Yrs Quit | Short Term (n) | Short Term % |
| 5                                            | 65-69     | Never Any     | 1169 | 23.83 |               |             |               |                |              |
| 5                                            | 65-69     | CC            | 477  | 9.72  | 0             | 0.00        |               |                |              |
| 5                                            | 65-69     | Ecig          | 343  | 6.99  |               |             |               |                |              |
| 5                                            | 65-69     | Dual          | 0    | 0.00  |               |             |               |                |              |
| 5                                            | 65-69     | Former        | 2916 | 59.45 |               |             | 20.33         | 205            | 7.03         |
| Year of Follow-up: 1995, Age Group: 70-74    |           |               |      |       |               |             |               |                |              |
| Period                                       | Age Group | Smoking Group | N    | %     | Ever Quit (N) | Ever Quit % | Mean Yrs Quit | Short Term (n) | Short Term % |
| 5                                            | 70-74     | Never Any     | 1023 | 23.32 |               |             |               |                |              |
| 5                                            | 70-74     | CC            | 438  | 9.98  | 0             | 0.00        |               |                |              |
| 5                                            | 70-74     | Ecig          | 180  | 4.10  |               |             |               |                |              |
| 5                                            | 70-74     | Dual          | 0    | 0.00  |               |             |               |                |              |
| 5                                            | 70-74     | Former        | 2746 | 62.59 |               |             | 21.88         | 145            | 5.28         |
| Year of Follow-up: 1995, Age Group: 75-79    |           |               |      |       |               |             |               |                |              |
| Period                                       | Age Group | Smoking Group | N    | %     | Ever Quit (N) | Ever Quit % | Mean Yrs Quit | Short Term (n) | Short Term % |
| 5                                            | 75-79     | Never Any     | 961  | 27.46 |               |             |               |                |              |
| 5                                            | 75-79     | CC            | 303  | 8.66  | 0             | 0.00        |               |                |              |
| 5                                            | 75-79     | Ecig          | 130  | 3.72  |               |             |               |                |              |
| 5                                            | 75-79     | Dual          | 0    | 0.00  |               |             |               |                |              |
| 5                                            | 75-79     | Former        | 2105 | 60.16 |               |             | 22.96         | 101            | 4.80         |
| Year of Follow-up: 2000, Age Group: All Ages |           |               |      |       |               |             |               |                |              |

**Results for PHIM for Run 5 (Sensitivity\_Analysis\_3.RTF)**

| Period                                    | Age Group | Smoking Group | N     | %     | Ever Quit (N) | Ever Quit % | Mean Yrs Quit | Short Term (n) | Short Term % |
|-------------------------------------------|-----------|---------------|-------|-------|---------------|-------------|---------------|----------------|--------------|
| 10                                        | All Ages  | Never Any     | 39177 | 41.64 |               |             |               |                |              |
| 10                                        | All Ages  | CC            | 4843  | 5.15  | 0             | 0.00        |               |                |              |
| 10                                        | All Ages  | Ecig          | 19865 | 21.11 |               |             |               |                |              |
| 10                                        | All Ages  | Dual          | 0     | 0.00  |               |             |               |                |              |
| 10                                        | All Ages  | Former        | 30207 | 32.10 |               |             | 16.46         | 1943           | 6.43         |
| Year of Follow-up: 2000, Age Group: 18-19 |           |               |       |       |               |             |               |                |              |
| Period                                    | Age Group | Smoking Group | N     | %     | Ever Quit (N) | Ever Quit % | Mean Yrs Quit | Short Term (n) | Short Term % |
| 10                                        | 18-19     | Never Any     | 0     | .     |               |             |               |                |              |
| 10                                        | 18-19     | CC            | 0     | .     | 0             | .           |               |                |              |
| 10                                        | 18-19     | Ecig          | 0     | .     |               |             |               |                |              |
| 10                                        | 18-19     | Dual          | 0     | .     |               |             |               |                |              |
| 10                                        | 18-19     | Former        | 0     | .     |               |             |               | 0              | .            |
| Year of Follow-up: 2000, Age Group: 20-24 |           |               |       |       |               |             |               |                |              |
| Period                                    | Age Group | Smoking Group | N     | %     | Ever Quit (N) | Ever Quit % | Mean Yrs Quit | Short Term (n) | Short Term % |
| 10                                        | 20-24     | Never Any     | 4927  | 55.70 |               |             |               |                |              |
| 10                                        | 20-24     | CC            | 462   | 5.22  | 0             | 0.00        |               |                |              |
| 10                                        | 20-24     | Ecig          | 2409  | 27.24 |               |             |               |                |              |
| 10                                        | 20-24     | Dual          | 0     | 0.00  |               |             |               |                |              |
| 10                                        | 20-24     | Former        | 1047  | 11.84 |               |             | 3.37          | 295            | 28.18        |
| Year of Follow-up: 2000, Age Group: 25-29 |           |               |       |       |               |             |               |                |              |
| Period                                    | Age Group | Smoking Group | N     | %     | Ever Quit (N) | Ever Quit % | Mean Yrs Quit | Short Term (n) | Short Term % |
| 10                                        | 25-29     | Never Any     | 5341  | 59.08 |               |             |               |                |              |
| 10                                        | 25-29     | CC            | 404   | 4.47  | 0             | 0.00        |               |                |              |
| 10                                        | 25-29     | Ecig          | 2253  | 24.92 |               |             |               |                |              |
| 10                                        | 25-29     | Dual          | 0     | 0.00  |               |             |               |                |              |
| 10                                        | 25-29     | Former        | 1042  | 11.53 |               |             | 4.77          | 223            | 21.40        |
| Year of Follow-up: 2000, Age Group: 30-34 |           |               |       |       |               |             |               |                |              |
| Period                                    | Age Group | Smoking Group | N     | %     | Ever Quit (N) | Ever Quit % | Mean Yrs Quit | Short Term (n) | Short Term % |
| 10                                        | 30-34     | Never Any     | 5276  | 53.75 |               |             |               |                |              |
| 10                                        | 30-34     | CC            | 481   | 4.90  | 0             | 0.00        |               |                |              |
| 10                                        | 30-34     | Ecig          | 2533  | 25.80 |               |             |               |                |              |
| 10                                        | 30-34     | Dual          | 0     | 0.00  |               |             |               |                |              |
| 10                                        | 30-34     | Former        | 1526  | 15.55 |               |             | 8.39          | 137            | 8.98         |
| Year of Follow-up: 2000, Age Group: 35-39 |           |               |       |       |               |             |               |                |              |
| Period                                    | Age Group | Smoking Group | N     | %     | Ever Quit (N) | Ever Quit % | Mean Yrs Quit | Short Term (n) | Short Term % |
| 10                                        | 35-39     | Never Any     | 4997  | 46.86 |               |             |               |                |              |
| 10                                        | 35-39     | CC            | 609   | 5.71  | 0             | 0.00        |               |                |              |
| 10                                        | 35-39     | Ecig          | 2918  | 27.36 |               |             |               |                |              |
| 10                                        | 35-39     | Dual          | 0     | 0.00  |               |             |               |                |              |
| 10                                        | 35-39     | Former        | 2140  | 20.07 |               |             | 10.39         | 126            | 5.89         |
| Year of Follow-up: 2000, Age Group: 40-44 |           |               |       |       |               |             |               |                |              |
| Period                                    | Age Group | Smoking Group | N     | %     | Ever Quit (N) | Ever Quit % | Mean Yrs Quit | Short Term (n) | Short Term % |
| 10                                        | 40-44     | Never Any     | 4724  | 43.28 |               |             |               |                |              |
| 10                                        | 40-44     | CC            | 567   | 5.19  | 0             | 0.00        |               |                |              |
| 10                                        | 40-44     | Ecig          | 2793  | 25.59 |               |             |               |                |              |
| 10                                        | 40-44     | Dual          | 0     | 0.00  |               |             |               |                |              |
| 10                                        | 40-44     | Former        | 2832  | 25.94 |               |             | 11.63         | 141            | 4.98         |
| Year of Follow-up: 2000, Age Group: 45-49 |           |               |       |       |               |             |               |                |              |
| Period                                    | Age Group | Smoking Group | N     | %     | Ever Quit (N) | Ever Quit % | Mean Yrs Quit | Short Term (n) | Short Term % |
| 10                                        | 45-49     | Never Any     | 3941  | 39.85 |               |             |               |                |              |
| 10                                        | 45-49     | CC            | 484   | 4.89  | 0             | 0.00        |               |                |              |
| 10                                        | 45-49     | Ecig          | 2231  | 22.56 |               |             |               |                |              |
| 10                                        | 45-49     | Dual          | 0     | 0.00  |               |             |               |                |              |
| 10                                        | 45-49     | Former        | 3233  | 32.69 |               |             | 14.94         | 191            | 5.91         |
| Year of Follow-up: 2000, Age Group: 50-54 |           |               |       |       |               |             |               |                |              |
| Period                                    | Age Group | Smoking Group | N     | %     | Ever Quit (N) | Ever Quit % | Mean Yrs Quit | Short Term (n) | Short Term % |
| 10                                        | 50-54     | Never Any     | 2912  | 33.65 |               |             |               |                |              |
| 10                                        | 50-54     | CC            | 473   | 5.47  | 0             | 0.00        |               |                |              |
| 10                                        | 50-54     | Ecig          | 1760  | 20.34 |               |             |               |                |              |
| 10                                        | 50-54     | Dual          | 0     | 0.00  |               |             |               |                |              |
| 10                                        | 50-54     | Former        | 3510  | 40.55 |               |             | 16.48         | 204            | 5.81         |
| Year of Follow-up: 2000, Age Group: 55-59 |           |               |       |       |               |             |               |                |              |
| Period                                    | Age Group | Smoking Group | N     | %     | Ever Quit (N) | Ever Quit % | Mean Yrs Quit | Short Term (n) | Short Term % |
| 10                                        | 55-59     | Never Any     | 1919  | 29.46 |               |             |               |                |              |
| 10                                        | 55-59     | CC            | 363   | 5.57  | 0             | 0.00        |               |                |              |
| 10                                        | 55-59     | Ecig          | 1130  | 17.34 |               |             |               |                |              |
| 10                                        | 55-59     | Dual          | 0     | 0.00  |               |             |               |                |              |

**Results for PHIM for Run 5 (Sensitivity\_Analysis\_3.RTF)**

| Year of Follow-up: 2000, Age Group: 60-64    | Period   | Age Group | Smoking Group | N     | %     | Ever Quit (N) | Ever Quit % | Mean Yrs Quit | Short Term (n) | Short Term % |
|----------------------------------------------|----------|-----------|---------------|-------|-------|---------------|-------------|---------------|----------------|--------------|
| 10                                           | 55-59    | Former    |               | 3103  | 47.63 |               |             | 18.19         | 161            | 5.19         |
| 10                                           | 60-64    | Never Any |               | 1611  | 29.41 |               |             |               |                |              |
| 10                                           | 60-64    | CC        |               | 306   | 5.59  | 0             | 0.00        |               |                |              |
| 10                                           | 60-64    | Ecig      |               | 781   | 14.26 |               |             |               |                |              |
| 10                                           | 60-64    | Dual      |               | 0     | 0.00  |               |             |               |                |              |
| 10                                           | 60-64    | Former    |               | 2779  | 50.74 |               |             | 19.22         | 161            | 5.79         |
| Year of Follow-up: 2000, Age Group: 65-69    | Period   | Age Group | Smoking Group | N     | %     | Ever Quit (N) | Ever Quit % | Mean Yrs Quit | Short Term (n) | Short Term % |
| 10                                           | 65-69    | Never Any |               | 1337  | 26.83 |               |             |               |                |              |
| 10                                           | 65-69    | CC        |               | 244   | 4.90  | 0             | 0.00        |               |                |              |
| 10                                           | 65-69    | Ecig      |               | 561   | 11.26 |               |             |               |                |              |
| 10                                           | 65-69    | Dual      |               | 0     | 0.00  |               |             |               |                |              |
| 10                                           | 65-69    | Former    |               | 2841  | 57.01 |               |             | 19.71         | 134            | 4.72         |
| Year of Follow-up: 2000, Age Group: 70-74    | Period   | Age Group | Smoking Group | N     | %     | Ever Quit (N) | Ever Quit % | Mean Yrs Quit | Short Term (n) | Short Term % |
| 10                                           | 70-74    | Never Any |               | 1169  | 23.83 |               |             |               |                |              |
| 10                                           | 70-74    | CC        |               | 236   | 4.81  | 0             | 0.00        |               |                |              |
| 10                                           | 70-74    | Ecig      |               | 282   | 5.75  |               |             |               |                |              |
| 10                                           | 70-74    | Dual      |               | 0     | 0.00  |               |             |               |                |              |
| 10                                           | 70-74    | Former    |               | 3218  | 65.61 |               |             | 23.17         | 102            | 3.17         |
| Year of Follow-up: 2000, Age Group: 75-79    | Period   | Age Group | Smoking Group | N     | %     | Ever Quit (N) | Ever Quit % | Mean Yrs Quit | Short Term (n) | Short Term % |
| 10                                           | 75-79    | Never Any |               | 1023  | 23.32 |               |             |               |                |              |
| 10                                           | 75-79    | CC        |               | 214   | 4.88  | 0             | 0.00        |               |                |              |
| 10                                           | 75-79    | Ecig      |               | 214   | 4.88  |               |             |               |                |              |
| 10                                           | 75-79    | Dual      |               | 0     | 0.00  |               |             |               |                |              |
| 10                                           | 75-79    | Former    |               | 2936  | 66.93 |               |             | 25.29         | 68             | 2.32         |
| Year of Follow-up: 2005, Age Group: All Ages | Period   | Age Group | Smoking Group | N     | %     | Ever Quit (N) | Ever Quit % | Mean Yrs Quit | Short Term (n) | Short Term % |
| 15                                           | All Ages | Never Any |               | 37449 | 41.75 |               |             |               |                |              |
| 15                                           | All Ages | CC        |               | 1911  | 2.13  | 0             | 0.00        |               |                |              |
| 15                                           | All Ages | Ecig      |               | 18626 | 20.76 |               |             |               |                |              |
| 15                                           | All Ages | Dual      |               | 0     | 0.00  |               |             |               |                |              |
| 15                                           | All Ages | Former    |               | 31719 | 35.36 |               |             | 17.91         | 1786           | 5.63         |
| Year of Follow-up: 2005, Age Group: 18-19    | Period   | Age Group | Smoking Group | N     | %     | Ever Quit (N) | Ever Quit % | Mean Yrs Quit | Short Term (n) | Short Term % |
| 15                                           | 18-19    | Never Any |               | 0     | .     |               |             |               |                |              |
| 15                                           | 18-19    | CC        |               | 0     | .     | 0             | .           |               |                |              |
| 15                                           | 18-19    | Ecig      |               | 0     | .     |               |             |               |                |              |
| 15                                           | 18-19    | Dual      |               | 0     | .     |               |             |               |                |              |
| 15                                           | 18-19    | Former    |               | 0     | .     |               |             | .             | 0              | .            |
| Year of Follow-up: 2005, Age Group: 20-24    | Period   | Age Group | Smoking Group | N     | %     | Ever Quit (N) | Ever Quit % | Mean Yrs Quit | Short Term (n) | Short Term % |
| 15                                           | 20-24    | Never Any |               | 0     | .     |               |             |               |                |              |
| 15                                           | 20-24    | CC        |               | 0     | .     | 0             | .           |               |                |              |
| 15                                           | 20-24    | Ecig      |               | 0     | .     |               |             |               |                |              |
| 15                                           | 20-24    | Dual      |               | 0     | .     |               |             |               |                |              |
| 15                                           | 20-24    | Former    |               | 0     | .     |               |             | .             | 0              | .            |
| Year of Follow-up: 2005, Age Group: 25-29    | Period   | Age Group | Smoking Group | N     | %     | Ever Quit (N) | Ever Quit % | Mean Yrs Quit | Short Term (n) | Short Term % |
| 15                                           | 25-29    | Never Any |               | 4634  | 52.39 |               |             |               |                |              |
| 15                                           | 25-29    | CC        |               | 179   | 2.02  | 0             | 0.00        |               |                |              |
| 15                                           | 25-29    | Ecig      |               | 2450  | 27.70 |               |             |               |                |              |
| 15                                           | 25-29    | Dual      |               | 0     | 0.00  |               |             |               |                |              |
| 15                                           | 25-29    | Former    |               | 1582  | 17.89 |               |             | 6.26          | 203            | 12.83        |
| Year of Follow-up: 2005, Age Group: 30-34    | Period   | Age Group | Smoking Group | N     | %     | Ever Quit (N) | Ever Quit % | Mean Yrs Quit | Short Term (n) | Short Term % |
| 15                                           | 30-34    | Never Any |               | 5042  | 55.77 |               |             |               |                |              |
| 15                                           | 30-34    | CC        |               | 153   | 1.69  | 0             | 0.00        |               |                |              |
| 15                                           | 30-34    | Ecig      |               | 2330  | 25.77 |               |             |               |                |              |
| 15                                           | 30-34    | Dual      |               | 0     | 0.00  |               |             |               |                |              |
| 15                                           | 30-34    | Former    |               | 1515  | 16.76 |               |             | 7.31          | 182            | 12.01        |
| Year of Follow-up: 2005, Age Group: 35-39    | Period   | Age Group | Smoking Group | N     | %     | Ever Quit (N) | Ever Quit % | Mean Yrs Quit | Short Term (n) | Short Term % |
| 15                                           | 35-39    | Never Any |               | 5163  | 52.60 |               |             |               |                |              |
| 15                                           | 35-39    | CC        |               | 188   | 1.92  | 0             | 0.00        |               |                |              |

**Results for PHIM for Run 5 (Sensitivity\_Analysis\_3.RTF)**

|                                              |           |               |       |       |               |             |               |                |              |
|----------------------------------------------|-----------|---------------|-------|-------|---------------|-------------|---------------|----------------|--------------|
| 15                                           | 35-39     | Ecig          | 2520  | 25.67 |               |             |               |                |              |
| 15                                           | 35-39     | Dual          | 0     | 0.00  |               |             |               |                |              |
| 15                                           | 35-39     | Former        | 1945  | 19.81 |               |             | 10.91         | 176            | 9.05         |
| Year of Follow-up: 2005, Age Group: 40-44    |           |               |       |       |               |             |               |                |              |
| Period                                       | Age Group | Smoking Group | N     | %     | Ever Quit (N) | Ever Quit % | Mean Yrs Quit | Short Term (n) | Short Term % |
| 15                                           | 40-44     | Never Any     | 4997  | 46.86 |               |             |               |                |              |
| 15                                           | 40-44     | CC            | 231   | 2.17  | 0             | 0.00        |               |                |              |
| 15                                           | 40-44     | Ecig          | 2812  | 26.37 |               |             |               |                |              |
| 15                                           | 40-44     | Dual          | 0     | 0.00  |               |             |               |                |              |
| 15                                           | 40-44     | Former        | 2624  | 24.61 |               |             | 12.88         | 229            | 8.73         |
| Year of Follow-up: 2005, Age Group: 45-49    |           |               |       |       |               |             |               |                |              |
| Period                                       | Age Group | Smoking Group | N     | %     | Ever Quit (N) | Ever Quit % | Mean Yrs Quit | Short Term (n) | Short Term % |
| 15                                           | 45-49     | Never Any     | 4724  | 43.28 |               |             |               |                |              |
| 15                                           | 45-49     | CC            | 216   | 1.98  | 0             | 0.00        |               |                |              |
| 15                                           | 45-49     | Ecig          | 2638  | 24.17 |               |             |               |                |              |
| 15                                           | 45-49     | Dual          | 0     | 0.00  |               |             |               |                |              |
| 15                                           | 45-49     | Former        | 3338  | 30.58 |               |             | 14.40         | 203            | 6.08         |
| Year of Follow-up: 2005, Age Group: 50-54    |           |               |       |       |               |             |               |                |              |
| Period                                       | Age Group | Smoking Group | N     | %     | Ever Quit (N) | Ever Quit % | Mean Yrs Quit | Short Term (n) | Short Term % |
| 15                                           | 50-54     | Never Any     | 3941  | 39.85 |               |             |               |                |              |
| 15                                           | 50-54     | CC            | 213   | 2.15  | 0             | 0.00        |               |                |              |
| 15                                           | 50-54     | Ecig          | 2020  | 20.43 |               |             |               |                |              |
| 15                                           | 50-54     | Dual          | 0     | 0.00  |               |             |               |                |              |
| 15                                           | 50-54     | Former        | 3715  | 37.57 |               |             | 17.63         | 184            | 4.95         |
| Year of Follow-up: 2005, Age Group: 55-59    |           |               |       |       |               |             |               |                |              |
| Period                                       | Age Group | Smoking Group | N     | %     | Ever Quit (N) | Ever Quit % | Mean Yrs Quit | Short Term (n) | Short Term % |
| 15                                           | 55-59     | Never Any     | 2912  | 33.65 |               |             |               |                |              |
| 15                                           | 55-59     | CC            | 215   | 2.48  | 0             | 0.00        |               |                |              |
| 15                                           | 55-59     | Ecig          | 1652  | 19.09 |               |             |               |                |              |
| 15                                           | 55-59     | Dual          | 0     | 0.00  |               |             |               |                |              |
| 15                                           | 55-59     | Former        | 3876  | 44.78 |               |             | 19.66         | 123            | 3.17         |
| Year of Follow-up: 2005, Age Group: 60-64    |           |               |       |       |               |             |               |                |              |
| Period                                       | Age Group | Smoking Group | N     | %     | Ever Quit (N) | Ever Quit % | Mean Yrs Quit | Short Term (n) | Short Term % |
| 15                                           | 60-64     | Never Any     | 1919  | 29.46 |               |             |               |                |              |
| 15                                           | 60-64     | CC            | 143   | 2.19  | 0             | 0.00        |               |                |              |
| 15                                           | 60-64     | Ecig          | 991   | 15.21 |               |             |               |                |              |
| 15                                           | 60-64     | Dual          | 0     | 0.00  |               |             |               |                |              |
| 15                                           | 60-64     | Former        | 3462  | 53.14 |               |             | 20.97         | 177            | 5.11         |
| Year of Follow-up: 2005, Age Group: 65-69    |           |               |       |       |               |             |               |                |              |
| Period                                       | Age Group | Smoking Group | N     | %     | Ever Quit (N) | Ever Quit % | Mean Yrs Quit | Short Term (n) | Short Term % |
| 15                                           | 65-69     | Never Any     | 1611  | 29.41 |               |             |               |                |              |
| 15                                           | 65-69     | CC            | 124   | 2.26  | 0             | 0.00        |               |                |              |
| 15                                           | 65-69     | Ecig          | 612   | 11.17 |               |             |               |                |              |
| 15                                           | 65-69     | Dual          | 0     | 0.00  |               |             |               |                |              |
| 15                                           | 65-69     | Former        | 3130  | 57.15 |               |             | 21.74         | 128            | 4.09         |
| Year of Follow-up: 2005, Age Group: 70-74    |           |               |       |       |               |             |               |                |              |
| Period                                       | Age Group | Smoking Group | N     | %     | Ever Quit (N) | Ever Quit % | Mean Yrs Quit | Short Term (n) | Short Term % |
| 15                                           | 70-74     | Never Any     | 1337  | 26.83 |               |             |               |                |              |
| 15                                           | 70-74     | CC            | 129   | 2.59  | 0             | 0.00        |               |                |              |
| 15                                           | 70-74     | Ecig          | 385   | 7.73  |               |             |               |                |              |
| 15                                           | 70-74     | Dual          | 0     | 0.00  |               |             |               |                |              |
| 15                                           | 70-74     | Former        | 3132  | 62.85 |               |             | 22.60         | 115            | 3.67         |
| Year of Follow-up: 2005, Age Group: 75-79    |           |               |       |       |               |             |               |                |              |
| Period                                       | Age Group | Smoking Group | N     | %     | Ever Quit (N) | Ever Quit % | Mean Yrs Quit | Short Term (n) | Short Term % |
| 15                                           | 75-79     | Never Any     | 1169  | 23.83 |               |             |               |                |              |
| 15                                           | 75-79     | CC            | 120   | 2.45  | 0             | 0.00        |               |                |              |
| 15                                           | 75-79     | Ecig          | 216   | 4.40  |               |             |               |                |              |
| 15                                           | 75-79     | Dual          | 0     | 0.00  |               |             |               |                |              |
| 15                                           | 75-79     | Former        | 3400  | 69.32 |               |             | 26.77         | 66             | 1.94         |
| Year of Follow-up: 2010, Age Group: All Ages |           |               |       |       |               |             |               |                |              |
| Period                                       | Age Group | Smoking Group | N     | %     | Ever Quit (N) | Ever Quit % | Mean Yrs Quit | Short Term (n) | Short Term % |
| 20                                           | All Ages  | Never Any     | 36103 | 42.57 |               |             |               |                |              |
| 20                                           | All Ages  | CC            | 738   | 0.87  | 0             | 0.00        |               |                |              |
| 20                                           | All Ages  | Ecig          | 15286 | 18.03 |               |             |               |                |              |
| 20                                           | All Ages  | Dual          | 0     | 0.00  |               |             |               |                |              |
| 20                                           | All Ages  | Former        | 32673 | 38.53 |               |             | 19.21         | 1674           | 5.12         |
| Year of Follow-up: 2010, Age Group: 18-19    |           |               |       |       |               |             |               |                |              |
| Period                                       | Age Group | Smoking Group | N     | %     | Ever Quit (N) | Ever Quit % | Mean Yrs Quit | Short Term (n) | Short Term % |

**Results for PHIM for Run 5 (Sensitivity\_Analysis\_3.RTF)**

|                                           |           |               |      |       |               |             |               |                |              |
|-------------------------------------------|-----------|---------------|------|-------|---------------|-------------|---------------|----------------|--------------|
| 20                                        | 18-19     | Never Any     | 0    | .     |               |             |               |                |              |
| 20                                        | 18-19     | CC            | 0    | .     | 0             | .           |               |                |              |
| 20                                        | 18-19     | Ecig          | 0    | .     |               |             |               |                |              |
| 20                                        | 18-19     | Dual          | 0    | .     |               |             |               |                |              |
| 20                                        | 18-19     | Former        | 0    | .     |               |             | 0             | .              |              |
| Year of Follow-up: 2010, Age Group: 20-24 |           |               |      |       |               |             |               |                |              |
| Period                                    | Age Group | Smoking Group | N    | %     | Ever Quit (N) | Ever Quit % | Mean Yrs Quit | Short Term (n) | Short Term % |
| 20                                        | 20-24     | Never Any     | 0    | .     |               |             |               |                |              |
| 20                                        | 20-24     | CC            | 0    | .     | 0             | .           |               |                |              |
| 20                                        | 20-24     | Ecig          | 0    | .     |               |             |               |                |              |
| 20                                        | 20-24     | Dual          | 0    | .     |               |             |               |                |              |
| 20                                        | 20-24     | Former        | 0    | .     |               |             |               | 0              | .            |
| Year of Follow-up: 2010, Age Group: 25-29 |           |               |      |       |               |             |               |                |              |
| Period                                    | Age Group | Smoking Group | N    | %     | Ever Quit (N) | Ever Quit % | Mean Yrs Quit | Short Term (n) | Short Term % |
| 20                                        | 25-29     | Never Any     | 0    | .     |               |             |               |                |              |
| 20                                        | 25-29     | CC            | 0    | .     | 0             | .           |               |                |              |
| 20                                        | 25-29     | Ecig          | 0    | .     |               |             |               |                |              |
| 20                                        | 25-29     | Dual          | 0    | .     |               |             |               |                |              |
| 20                                        | 25-29     | Former        | 0    | .     |               |             |               | 0              | .            |
| Year of Follow-up: 2010, Age Group: 30-34 |           |               |      |       |               |             |               |                |              |
| Period                                    | Age Group | Smoking Group | N    | %     | Ever Quit (N) | Ever Quit % | Mean Yrs Quit | Short Term (n) | Short Term % |
| 20                                        | 30-34     | Never Any     | 4508 | 50.97 |               |             |               |                |              |
| 20                                        | 30-34     | CC            | 71   | 0.80  | 0             | 0.00        |               |                |              |
| 20                                        | 30-34     | Ecig          | 2105 | 23.80 |               |             |               |                |              |
| 20                                        | 30-34     | Dual          | 0    | 0.00  |               |             |               |                |              |
| 20                                        | 30-34     | Former        | 2161 | 24.43 |               |             | 8.76          | 254            | 11.75        |
| Year of Follow-up: 2010, Age Group: 35-39 |           |               |      |       |               |             |               |                |              |
| Period                                    | Age Group | Smoking Group | N    | %     | Ever Quit (N) | Ever Quit % | Mean Yrs Quit | Short Term (n) | Short Term % |
| 20                                        | 35-39     | Never Any     | 4991 | 55.21 |               |             |               |                |              |
| 20                                        | 35-39     | CC            | 59   | 0.65  | 0             | 0.00        |               |                |              |
| 20                                        | 35-39     | Ecig          | 1953 | 21.60 |               |             |               |                |              |
| 20                                        | 35-39     | Dual          | 0    | 0.00  |               |             |               |                |              |
| 20                                        | 35-39     | Former        | 2037 | 22.53 |               |             | 9.72          | 155            | 7.61         |
| Year of Follow-up: 2010, Age Group: 40-44 |           |               |      |       |               |             |               |                |              |
| Period                                    | Age Group | Smoking Group | N    | %     | Ever Quit (N) | Ever Quit % | Mean Yrs Quit | Short Term (n) | Short Term % |
| 20                                        | 40-44     | Never Any     | 5163 | 52.60 |               |             |               |                |              |
| 20                                        | 40-44     | CC            | 68   | 0.69  | 0             | 0.00        |               |                |              |
| 20                                        | 40-44     | Ecig          | 2216 | 22.58 |               |             |               |                |              |
| 20                                        | 40-44     | Dual          | 0    | 0.00  |               |             |               |                |              |
| 20                                        | 40-44     | Former        | 2369 | 24.13 |               |             | 13.41         | 176            | 7.43         |
| Year of Follow-up: 2010, Age Group: 45-49 |           |               |      |       |               |             |               |                |              |
| Period                                    | Age Group | Smoking Group | N    | %     | Ever Quit (N) | Ever Quit % | Mean Yrs Quit | Short Term (n) | Short Term % |
| 20                                        | 45-49     | Never Any     | 4997 | 46.86 |               |             |               |                |              |
| 20                                        | 45-49     | CC            | 89   | 0.83  | 0             | 0.00        |               |                |              |
| 20                                        | 45-49     | Ecig          | 2425 | 22.74 |               |             |               |                |              |
| 20                                        | 45-49     | Dual          | 0    | 0.00  |               |             |               |                |              |
| 20                                        | 45-49     | Former        | 3153 | 29.57 |               |             | 15.24         | 188            | 5.96         |
| Year of Follow-up: 2010, Age Group: 50-54 |           |               |      |       |               |             |               |                |              |
| Period                                    | Age Group | Smoking Group | N    | %     | Ever Quit (N) | Ever Quit % | Mean Yrs Quit | Short Term (n) | Short Term % |
| 20                                        | 50-54     | Never Any     | 4724 | 43.28 |               |             |               |                |              |
| 20                                        | 50-54     | CC            | 87   | 0.80  | 0             | 0.00        |               |                |              |
| 20                                        | 50-54     | Ecig          | 2280 | 20.89 |               |             |               |                |              |
| 20                                        | 50-54     | Dual          | 0    | 0.00  |               |             |               |                |              |
| 20                                        | 50-54     | Former        | 3825 | 35.04 |               |             | 17.19         | 196            | 5.12         |
| Year of Follow-up: 2010, Age Group: 55-59 |           |               |      |       |               |             |               |                |              |
| Period                                    | Age Group | Smoking Group | N    | %     | Ever Quit (N) | Ever Quit % | Mean Yrs Quit | Short Term (n) | Short Term % |
| 20                                        | 55-59     | Never Any     | 3941 | 39.85 |               |             |               |                |              |
| 20                                        | 55-59     | CC            | 85   | 0.86  | 0             | 0.00        |               |                |              |
| 20                                        | 55-59     | Ecig          | 1623 | 16.41 |               |             |               |                |              |
| 20                                        | 55-59     | Dual          | 0    | 0.00  |               |             |               |                |              |
| 20                                        | 55-59     | Former        | 4240 | 42.88 |               |             | 20.06         | 213            | 5.02         |
| Year of Follow-up: 2010, Age Group: 60-64 |           |               |      |       |               |             |               |                |              |
| Period                                    | Age Group | Smoking Group | N    | %     | Ever Quit (N) | Ever Quit % | Mean Yrs Quit | Short Term (n) | Short Term % |
| 20                                        | 60-64     | Never Any     | 2912 | 33.65 |               |             |               |                |              |
| 20                                        | 60-64     | CC            | 87   | 1.01  | 0             | 0.00        |               |                |              |
| 20                                        | 60-64     | Ecig          | 1253 | 14.48 |               |             |               |                |              |
| 20                                        | 60-64     | Dual          | 0    | 0.00  |               |             |               |                |              |
| 20                                        | 60-64     | Former        | 4403 | 50.87 |               |             | 21.90         | 252            | 5.72         |
| Year of Follow-up: 2010, Age Group: 65-69 |           |               |      |       |               |             |               |                |              |

**Results for PHIM for Run 5 (Sensitivity\_Analysis\_3.RTF)**

| Period                                       | Age Group | Smoking Group | N     | %     | Ever Quit (N) | Ever Quit % | Mean Yrs Quit | Short Term (n) | Short Term % |
|----------------------------------------------|-----------|---------------|-------|-------|---------------|-------------|---------------|----------------|--------------|
| 20                                           | 65-69     | Never Any     | 1919  | 29.46 |               |             |               |                |              |
| 20                                           | 65-69     | CC            | 60    | 0.92  | 0             | 0.00        |               |                |              |
| 20                                           | 65-69     | Ecig          | 677   | 10.39 |               |             |               |                |              |
| 20                                           | 65-69     | Dual          | 0     | 0.00  |               |             |               |                |              |
| 20                                           | 65-69     | Former        | 3859  | 59.23 |               |             | 23.53         | 130            | 3.37         |
| Year of Follow-up: 2010, Age Group: 70-74    |           |               |       |       |               |             |               |                |              |
| Period                                       | Age Group | Smoking Group | N     | %     | Ever Quit (N) | Ever Quit % | Mean Yrs Quit | Short Term (n) | Short Term % |
| 20                                           | 70-74     | Never Any     | 1611  | 29.41 |               |             |               |                |              |
| 20                                           | 70-74     | CC            | 69    | 1.26  | 0             | 0.00        |               |                |              |
| 20                                           | 70-74     | Ecig          | 467   | 8.53  |               |             |               |                |              |
| 20                                           | 70-74     | Dual          | 0     | 0.00  |               |             |               |                |              |
| 20                                           | 70-74     | Former        | 3330  | 60.80 |               |             | 25.27         | 66             | 1.98         |
| Year of Follow-up: 2010, Age Group: 75-79    |           |               |       |       |               |             |               |                |              |
| Period                                       | Age Group | Smoking Group | N     | %     | Ever Quit (N) | Ever Quit % | Mean Yrs Quit | Short Term (n) | Short Term % |
| 20                                           | 75-79     | Never Any     | 1337  | 26.83 |               |             |               |                |              |
| 20                                           | 75-79     | CC            | 63    | 1.26  | 0             | 0.00        |               |                |              |
| 20                                           | 75-79     | Ecig          | 287   | 5.76  |               |             |               |                |              |
| 20                                           | 75-79     | Dual          | 0     | 0.00  |               |             |               |                |              |
| 20                                           | 75-79     | Former        | 3296  | 66.14 |               |             | 26.35         | 44             | 1.33         |
| Year of Follow-up: 2015, Age Group: All Ages |           |               |       |       |               |             |               |                |              |
| Period                                       | Age Group | Smoking Group | N     | %     | Ever Quit (N) | Ever Quit % | Mean Yrs Quit | Short Term (n) | Short Term % |
| 25                                           | All Ages  | Never Any     | 34747 | 43.53 |               |             |               |                |              |
| 25                                           | All Ages  | CC            | 289   | 0.36  | 0             | 0.00        |               |                |              |
| 25                                           | All Ages  | Ecig          | 12140 | 15.21 |               |             |               |                |              |
| 25                                           | All Ages  | Dual          | 0     | 0.00  |               |             |               |                |              |
| 25                                           | All Ages  | Former        | 32641 | 40.89 |               |             | 21.28         | 1181           | 3.62         |
| Year of Follow-up: 2015, Age Group: 18-19    |           |               |       |       |               |             |               |                |              |
| Period                                       | Age Group | Smoking Group | N     | %     | Ever Quit (N) | Ever Quit % | Mean Yrs Quit | Short Term (n) | Short Term % |
| 25                                           | 18-19     | Never Any     | 0     | .     |               |             |               |                |              |
| 25                                           | 18-19     | CC            | 0     | .     | 0             | .           |               |                |              |
| 25                                           | 18-19     | Ecig          | 0     | .     |               |             |               |                |              |
| 25                                           | 18-19     | Dual          | 0     | .     |               |             |               |                |              |
| 25                                           | 18-19     | Former        | 0     | .     |               |             |               | 0              | .            |
| Year of Follow-up: 2015, Age Group: 20-24    |           |               |       |       |               |             |               |                |              |
| Period                                       | Age Group | Smoking Group | N     | %     | Ever Quit (N) | Ever Quit % | Mean Yrs Quit | Short Term (n) | Short Term % |
| 25                                           | 20-24     | Never Any     | 0     | .     |               |             |               |                |              |
| 25                                           | 20-24     | CC            | 0     | .     | 0             | .           |               |                |              |
| 25                                           | 20-24     | Ecig          | 0     | .     |               |             |               |                |              |
| 25                                           | 20-24     | Dual          | 0     | .     |               |             |               |                |              |
| 25                                           | 20-24     | Former        | 0     | .     |               |             |               | 0              | .            |
| Year of Follow-up: 2015, Age Group: 25-29    |           |               |       |       |               |             |               |                |              |
| Period                                       | Age Group | Smoking Group | N     | %     | Ever Quit (N) | Ever Quit % | Mean Yrs Quit | Short Term (n) | Short Term % |
| 25                                           | 25-29     | Never Any     | 0     | .     |               |             |               |                |              |
| 25                                           | 25-29     | CC            | 0     | .     | 0             | .           |               |                |              |
| 25                                           | 25-29     | Ecig          | 0     | .     |               |             |               |                |              |
| 25                                           | 25-29     | Dual          | 0     | .     |               |             |               |                |              |
| 25                                           | 25-29     | Former        | 0     | .     |               |             |               | 0              | .            |
| Year of Follow-up: 2015, Age Group: 30-34    |           |               |       |       |               |             |               |                |              |
| Period                                       | Age Group | Smoking Group | N     | %     | Ever Quit (N) | Ever Quit % | Mean Yrs Quit | Short Term (n) | Short Term % |
| 25                                           | 30-34     | Never Any     | 0     | .     |               |             |               |                |              |
| 25                                           | 30-34     | CC            | 0     | .     | 0             | .           |               |                |              |
| 25                                           | 30-34     | Ecig          | 0     | .     |               |             |               |                |              |
| 25                                           | 30-34     | Dual          | 0     | .     |               |             |               |                |              |
| 25                                           | 30-34     | Former        | 0     | .     |               |             |               | 0              | .            |
| Year of Follow-up: 2015, Age Group: 35-39    |           |               |       |       |               |             |               |                |              |
| Period                                       | Age Group | Smoking Group | N     | %     | Ever Quit (N) | Ever Quit % | Mean Yrs Quit | Short Term (n) | Short Term % |
| 25                                           | 35-39     | Never Any     | 4489  | 50.75 |               |             |               |                |              |
| 25                                           | 35-39     | CC            | 28    | 0.32  | 0             | 0.00        |               |                |              |
| 25                                           | 35-39     | Ecig          | 1684  | 19.04 |               |             |               |                |              |
| 25                                           | 35-39     | Dual          | 0     | 0.00  |               |             |               |                |              |
| 25                                           | 35-39     | Former        | 2644  | 29.89 |               |             | 11.66         | 155            | 5.86         |
| Year of Follow-up: 2015, Age Group: 40-44    |           |               |       |       |               |             |               |                |              |
| Period                                       | Age Group | Smoking Group | N     | %     | Ever Quit (N) | Ever Quit % | Mean Yrs Quit | Short Term (n) | Short Term % |
| 25                                           | 40-44     | Never Any     | 4991  | 55.21 |               |             |               |                |              |
| 25                                           | 40-44     | CC            | 20    | 0.22  | 0             | 0.00        |               |                |              |
| 25                                           | 40-44     | Ecig          | 1663  | 18.40 |               |             |               |                |              |
| 25                                           | 40-44     | Dual          | 0     | 0.00  |               |             |               |                |              |

**Results for PHIM for Run 5 (Sensitivity\_Analysis\_3.RTF)**

|                                              |           |               |       |       |               |             |               |                |              |
|----------------------------------------------|-----------|---------------|-------|-------|---------------|-------------|---------------|----------------|--------------|
| 25                                           | 40-44     | Former        | 2366  | 26.17 |               |             | 12.96         | 122            | 5.16         |
| Year of Follow-up: 2015, Age Group: 45-49    |           |               |       |       |               |             |               |                |              |
| Period                                       | Age Group | Smoking Group | N     | %     | Ever Quit (N) | Ever Quit % | Mean Yrs Quit | Short Term (n) | Short Term % |
| 25                                           | 45-49     | Never Any     | 5163  | 52.60 |               |             |               |                |              |
| 25                                           | 45-49     | CC            | 29    | 0.30  | 0             | 0.00        |               |                |              |
| 25                                           | 45-49     | Ecig          | 1973  | 20.10 |               |             |               |                |              |
| 25                                           | 45-49     | Dual          | 0     | 0.00  |               |             |               |                |              |
| 25                                           | 45-49     | Former        | 2651  | 27.01 |               |             | 16.70         | 85             | 3.21         |
| Year of Follow-up: 2015, Age Group: 50-54    |           |               |       |       |               |             |               |                |              |
| Period                                       | Age Group | Smoking Group | N     | %     | Ever Quit (N) | Ever Quit % | Mean Yrs Quit | Short Term (n) | Short Term % |
| 25                                           | 50-54     | Never Any     | 4997  | 46.86 |               |             |               |                |              |
| 25                                           | 50-54     | CC            | 37    | 0.35  | 0             | 0.00        |               |                |              |
| 25                                           | 50-54     | Ecig          | 2155  | 20.21 |               |             |               |                |              |
| 25                                           | 50-54     | Dual          | 0     | 0.00  |               |             |               |                |              |
| 25                                           | 50-54     | Former        | 3475  | 32.59 |               |             | 18.54         | 152            | 4.37         |
| Year of Follow-up: 2015, Age Group: 55-59    |           |               |       |       |               |             |               |                |              |
| Period                                       | Age Group | Smoking Group | N     | %     | Ever Quit (N) | Ever Quit % | Mean Yrs Quit | Short Term (n) | Short Term % |
| 25                                           | 55-59     | Never Any     | 4724  | 43.28 |               |             |               |                |              |
| 25                                           | 55-59     | CC            | 33    | 0.30  | 0             | 0.00        |               |                |              |
| 25                                           | 55-59     | Ecig          | 1844  | 16.89 |               |             |               |                |              |
| 25                                           | 55-59     | Dual          | 0     | 0.00  |               |             |               |                |              |
| 25                                           | 55-59     | Former        | 4315  | 39.53 |               |             | 19.90         | 188            | 4.36         |
| Year of Follow-up: 2015, Age Group: 60-64    |           |               |       |       |               |             |               |                |              |
| Period                                       | Age Group | Smoking Group | N     | %     | Ever Quit (N) | Ever Quit % | Mean Yrs Quit | Short Term (n) | Short Term % |
| 25                                           | 60-64     | Never Any     | 3941  | 39.85 |               |             |               |                |              |
| 25                                           | 60-64     | CC            | 28    | 0.28  | 0             | 0.00        |               |                |              |
| 25                                           | 60-64     | Ecig          | 1175  | 11.88 |               |             |               |                |              |
| 25                                           | 60-64     | Dual          | 0     | 0.00  |               |             |               |                |              |
| 25                                           | 60-64     | Former        | 4745  | 47.98 |               |             | 22.59         | 223            | 4.70         |
| Year of Follow-up: 2015, Age Group: 65-69    |           |               |       |       |               |             |               |                |              |
| Period                                       | Age Group | Smoking Group | N     | %     | Ever Quit (N) | Ever Quit % | Mean Yrs Quit | Short Term (n) | Short Term % |
| 25                                           | 65-69     | Never Any     | 2912  | 33.65 |               |             |               |                |              |
| 25                                           | 65-69     | CC            | 43    | 0.50  | 0             | 0.00        |               |                |              |
| 25                                           | 65-69     | Ecig          | 821   | 9.49  |               |             |               |                |              |
| 25                                           | 65-69     | Dual          | 0     | 0.00  |               |             |               |                |              |
| 25                                           | 65-69     | Former        | 4879  | 56.37 |               |             | 24.51         | 132            | 2.71         |
| Year of Follow-up: 2015, Age Group: 70-74    |           |               |       |       |               |             |               |                |              |
| Period                                       | Age Group | Smoking Group | N     | %     | Ever Quit (N) | Ever Quit % | Mean Yrs Quit | Short Term (n) | Short Term % |
| 25                                           | 70-74     | Never Any     | 1919  | 29.46 |               |             |               |                |              |
| 25                                           | 70-74     | CC            | 35    | 0.54  | 0             | 0.00        |               |                |              |
| 25                                           | 70-74     | Ecig          | 472   | 7.24  |               |             |               |                |              |
| 25                                           | 70-74     | Dual          | 0     | 0.00  |               |             |               |                |              |
| 25                                           | 70-74     | Former        | 4089  | 62.76 |               |             | 27.05         | 74             | 1.81         |
| Year of Follow-up: 2015, Age Group: 75-79    |           |               |       |       |               |             |               |                |              |
| Period                                       | Age Group | Smoking Group | N     | %     | Ever Quit (N) | Ever Quit % | Mean Yrs Quit | Short Term (n) | Short Term % |
| 25                                           | 75-79     | Never Any     | 1611  | 29.41 |               |             |               |                |              |
| 25                                           | 75-79     | CC            | 36    | 0.66  | 0             | 0.00        |               |                |              |
| 25                                           | 75-79     | Ecig          | 353   | 6.45  |               |             |               |                |              |
| 25                                           | 75-79     | Dual          | 0     | 0.00  |               |             |               |                |              |
| 25                                           | 75-79     | Former        | 3477  | 63.48 |               |             | 29.09         | 50             | 1.44         |
| Year of Follow-up: 2020, Age Group: All Ages |           |               |       |       |               |             |               |                |              |
| Period                                       | Age Group | Smoking Group | N     | %     | Ever Quit (N) | Ever Quit % | Mean Yrs Quit | Short Term (n) | Short Term % |
| 30                                           | All Ages  | Never Any     | 33136 | 44.57 |               |             |               |                |              |
| 30                                           | All Ages  | CC            | 100   | 0.13  | 0             | 0.00        |               |                |              |
| 30                                           | All Ages  | Ecig          | 9387  | 12.63 |               |             |               |                |              |
| 30                                           | All Ages  | Dual          | 0     | 0.00  |               |             |               |                |              |
| 30                                           | All Ages  | Former        | 31717 | 42.66 |               |             | 23.48         | 959            | 3.02         |
| Year of Follow-up: 2020, Age Group: 18-19    |           |               |       |       |               |             |               |                |              |
| Period                                       | Age Group | Smoking Group | N     | %     | Ever Quit (N) | Ever Quit % | Mean Yrs Quit | Short Term (n) | Short Term % |
| 30                                           | 18-19     | Never Any     | 0     | .     |               |             |               |                |              |
| 30                                           | 18-19     | CC            | 0     | .     | 0             | .           |               |                |              |
| 30                                           | 18-19     | Ecig          | 0     | .     |               |             |               |                |              |
| 30                                           | 18-19     | Dual          | 0     | .     |               |             |               |                |              |
| 30                                           | 18-19     | Former        | 0     | .     |               |             | .             | 0              | .            |
| Year of Follow-up: 2020, Age Group: 20-24    |           |               |       |       |               |             |               |                |              |
| Period                                       | Age Group | Smoking Group | N     | %     | Ever Quit (N) | Ever Quit % | Mean Yrs Quit | Short Term (n) | Short Term % |
| 30                                           | 20-24     | Never Any     | 0     | .     |               |             |               |                |              |
| 30                                           | 20-24     | CC            | 0     | .     | 0             | .           |               |                |              |



**Results for PHIM for Run 5 (Sensitivity\_Analysis\_3.RTF)**

|                                           |           |               |      |       |               |             |               |                |              |
|-------------------------------------------|-----------|---------------|------|-------|---------------|-------------|---------------|----------------|--------------|
| 30                                        | 20-24     | Ecig          | 0    | .     |               |             |               |                |              |
| 30                                        | 20-24     | Dual          | 0    | .     |               |             |               |                |              |
| 30                                        | 20-24     | Former        | 0    | .     |               |             | 0             | .              |              |
| Year of Follow-up: 2020, Age Group: 25-29 |           |               |      |       |               |             |               |                |              |
| Period                                    | Age Group | Smoking Group | N    | %     | Ever Quit (N) | Ever Quit % | Mean Yrs Quit | Short Term (n) | Short Term % |
| 30                                        | 25-29     | Never Any     | 0    | .     |               |             |               |                |              |
| 30                                        | 25-29     | CC            | 0    | .     | 0             | .           |               |                |              |
| 30                                        | 25-29     | Ecig          | 0    | .     |               |             |               |                |              |
| 30                                        | 25-29     | Dual          | 0    | .     |               |             |               |                |              |
| 30                                        | 25-29     | Former        | 0    | .     |               |             |               | 0              | .            |
| Year of Follow-up: 2020, Age Group: 30-34 |           |               |      |       |               |             |               |                |              |
| Period                                    | Age Group | Smoking Group | N    | %     | Ever Quit (N) | Ever Quit % | Mean Yrs Quit | Short Term (n) | Short Term % |
| 30                                        | 30-34     | Never Any     | 0    | .     |               |             |               |                |              |
| 30                                        | 30-34     | CC            | 0    | .     | 0             | .           |               |                |              |
| 30                                        | 30-34     | Ecig          | 0    | .     |               |             |               |                |              |
| 30                                        | 30-34     | Dual          | 0    | .     |               |             |               |                |              |
| 30                                        | 30-34     | Former        | 0    | .     |               |             |               | 0              | .            |
| Year of Follow-up: 2020, Age Group: 35-39 |           |               |      |       |               |             |               |                |              |
| Period                                    | Age Group | Smoking Group | N    | %     | Ever Quit (N) | Ever Quit % | Mean Yrs Quit | Short Term (n) | Short Term % |
| 30                                        | 35-39     | Never Any     | 0    | .     |               |             |               |                |              |
| 30                                        | 35-39     | CC            | 0    | .     | 0             | .           |               |                |              |
| 30                                        | 35-39     | Ecig          | 0    | .     |               |             |               |                |              |
| 30                                        | 35-39     | Dual          | 0    | .     |               |             |               |                |              |
| 30                                        | 35-39     | Former        | 0    | .     |               |             |               | 0              | .            |
| Year of Follow-up: 2020, Age Group: 40-44 |           |               |      |       |               |             |               |                |              |
| Period                                    | Age Group | Smoking Group | N    | %     | Ever Quit (N) | Ever Quit % | Mean Yrs Quit | Short Term (n) | Short Term % |
| 30                                        | 40-44     | Never Any     | 4489 | 50.75 |               |             |               |                |              |
| 30                                        | 40-44     | CC            | 12   | 0.14  | 0             | 0.00        |               |                |              |
| 30                                        | 40-44     | Ecig          | 1419 | 16.04 |               |             |               |                |              |
| 30                                        | 40-44     | Dual          | 0    | 0.00  |               |             |               |                |              |
| 30                                        | 40-44     | Former        | 2925 | 33.07 |               |             | 15.24         | 114            | 3.90         |
| Year of Follow-up: 2020, Age Group: 45-49 |           |               |      |       |               |             |               |                |              |
| Period                                    | Age Group | Smoking Group | N    | %     | Ever Quit (N) | Ever Quit % | Mean Yrs Quit | Short Term (n) | Short Term % |
| 30                                        | 45-49     | Never Any     | 4991 | 55.21 |               |             |               |                |              |
| 30                                        | 45-49     | CC            | 5    | 0.06  | 0             | 0.00        |               |                |              |
| 30                                        | 45-49     | Ecig          | 1447 | 16.01 |               |             |               |                |              |
| 30                                        | 45-49     | Dual          | 0    | 0.00  |               |             |               |                |              |
| 30                                        | 45-49     | Former        | 2597 | 28.73 |               |             | 16.59         | 59             | 2.27         |
| Year of Follow-up: 2020, Age Group: 50-54 |           |               |      |       |               |             |               |                |              |
| Period                                    | Age Group | Smoking Group | N    | %     | Ever Quit (N) | Ever Quit % | Mean Yrs Quit | Short Term (n) | Short Term % |
| 30                                        | 50-54     | Never Any     | 5163 | 52.60 |               |             |               |                |              |
| 30                                        | 50-54     | CC            | 9    | 0.09  | 0             | 0.00        |               |                |              |
| 30                                        | 50-54     | Ecig          | 1773 | 18.06 |               |             |               |                |              |
| 30                                        | 50-54     | Dual          | 0    | 0.00  |               |             |               |                |              |
| 30                                        | 50-54     | Former        | 2871 | 29.25 |               |             | 20.16         | 115            | 4.01         |
| Year of Follow-up: 2020, Age Group: 55-59 |           |               |      |       |               |             |               |                |              |
| Period                                    | Age Group | Smoking Group | N    | %     | Ever Quit (N) | Ever Quit % | Mean Yrs Quit | Short Term (n) | Short Term % |
| 30                                        | 55-59     | Never Any     | 4997 | 46.86 |               |             |               |                |              |
| 30                                        | 55-59     | CC            | 18   | 0.17  | 0             | 0.00        |               |                |              |
| 30                                        | 55-59     | Ecig          | 1731 | 16.23 |               |             |               |                |              |
| 30                                        | 55-59     | Dual          | 0    | 0.00  |               |             |               |                |              |
| 30                                        | 55-59     | Former        | 3918 | 36.74 |               |             | 21.11         | 180            | 4.59         |
| Year of Follow-up: 2020, Age Group: 60-64 |           |               |      |       |               |             |               |                |              |
| Period                                    | Age Group | Smoking Group | N    | %     | Ever Quit (N) | Ever Quit % | Mean Yrs Quit | Short Term (n) | Short Term % |
| 30                                        | 60-64     | Never Any     | 4724 | 43.28 |               |             |               |                |              |
| 30                                        | 60-64     | CC            | 10   | 0.09  | 0             | 0.00        |               |                |              |
| 30                                        | 60-64     | Ecig          | 1325 | 12.14 |               |             |               |                |              |
| 30                                        | 60-64     | Dual          | 0    | 0.00  |               |             |               |                |              |
| 30                                        | 60-64     | Former        | 4857 | 44.49 |               |             | 22.34         | 214            | 4.41         |
| Year of Follow-up: 2020, Age Group: 65-69 |           |               |      |       |               |             |               |                |              |
| Period                                    | Age Group | Smoking Group | N    | %     | Ever Quit (N) | Ever Quit % | Mean Yrs Quit | Short Term (n) | Short Term % |
| 30                                        | 65-69     | Never Any     | 3941 | 39.85 |               |             |               |                |              |
| 30                                        | 65-69     | CC            | 13   | 0.13  | 0             | 0.00        |               |                |              |
| 30                                        | 65-69     | Ecig          | 781  | 7.90  |               |             |               |                |              |
| 30                                        | 65-69     | Dual          | 0    | 0.00  |               |             |               |                |              |
| 30                                        | 65-69     | Former        | 5154 | 52.12 |               |             | 25.58         | 143            | 2.77         |
| Year of Follow-up: 2020, Age Group: 70-74 |           |               |      |       |               |             |               |                |              |
| Period                                    | Age Group | Smoking Group | N    | %     | Ever Quit (N) | Ever Quit % | Mean Yrs Quit | Short Term (n) | Short Term % |

**Results for PHIM for Run 5 (Sensitivity\_Analysis\_3.RTF)**

|                                              |           |               |       |       |               |             |               |                |              |
|----------------------------------------------|-----------|---------------|-------|-------|---------------|-------------|---------------|----------------|--------------|
| 30                                           | 70-74     | Never Any     | 2912  | 33.65 |               |             |               |                |              |
| 30                                           | 70-74     | CC            | 18    | 0.21  | 0             | 0.00        |               |                |              |
| 30                                           | 70-74     | Ecig          | 576   | 6.66  |               |             |               |                |              |
| 30                                           | 70-74     | Dual          | 0     | 0.00  |               |             |               |                |              |
| 30                                           | 70-74     | Former        | 5149  | 59.49 |               |             | 28.08         | 87             | 1.69         |
| Year of Follow-up: 2020, Age Group: 75-79    |           |               |       |       |               |             |               |                |              |
| Period                                       | Age Group | Smoking Group | N     | %     | Ever Quit (N) | Ever Quit % | Mean Yrs Quit | Short Term (n) | Short Term % |
| 30                                           | 75-79     | Never Any     | 1919  | 29.46 |               |             |               |                |              |
| 30                                           | 75-79     | CC            | 15    | 0.23  | 0             | 0.00        |               |                |              |
| 30                                           | 75-79     | Ecig          | 335   | 5.14  |               |             |               |                |              |
| 30                                           | 75-79     | Dual          | 0     | 0.00  |               |             |               |                |              |
| 30                                           | 75-79     | Former        | 4246  | 65.17 |               |             | 30.95         | 47             | 1.11         |
| Year of Follow-up: 2025, Age Group: All Ages |           |               |       |       |               |             |               |                |              |
| Period                                       | Age Group | Smoking Group | N     | %     | Ever Quit (N) | Ever Quit % | Mean Yrs Quit | Short Term (n) | Short Term % |
| 35                                           | All Ages  | Never Any     | 31217 | 46.03 |               |             |               |                |              |
| 35                                           | All Ages  | CC            | 38    | 0.06  | 0             | 0.00        |               |                |              |
| 35                                           | All Ages  | Ecig          | 7009  | 10.33 |               |             |               |                |              |
| 35                                           | All Ages  | Dual          | 0     | 0.00  |               |             |               |                |              |
| 35                                           | All Ages  | Former        | 29561 | 43.58 |               |             | 25.54         | 790            | 2.67         |
| Year of Follow-up: 2025, Age Group: 18-19    |           |               |       |       |               |             |               |                |              |
| Period                                       | Age Group | Smoking Group | N     | %     | Ever Quit (N) | Ever Quit % | Mean Yrs Quit | Short Term (n) | Short Term % |
| 35                                           | 18-19     | Never Any     | 0     | .     |               |             |               |                |              |
| 35                                           | 18-19     | CC            | 0     | .     | 0             | .           |               |                |              |
| 35                                           | 18-19     | Ecig          | 0     | .     |               |             |               |                |              |
| 35                                           | 18-19     | Dual          | 0     | .     |               |             |               |                |              |
| 35                                           | 18-19     | Former        | 0     | .     |               |             | .             | 0              | .            |
| Year of Follow-up: 2025, Age Group: 20-24    |           |               |       |       |               |             |               |                |              |
| Period                                       | Age Group | Smoking Group | N     | %     | Ever Quit (N) | Ever Quit % | Mean Yrs Quit | Short Term (n) | Short Term % |
| 35                                           | 20-24     | Never Any     | 0     | .     |               |             |               |                |              |
| 35                                           | 20-24     | CC            | 0     | .     | 0             | .           |               |                |              |
| 35                                           | 20-24     | Ecig          | 0     | .     |               |             |               |                |              |
| 35                                           | 20-24     | Dual          | 0     | .     |               |             |               |                |              |
| 35                                           | 20-24     | Former        | 0     | .     |               |             | .             | 0              | .            |
| Year of Follow-up: 2025, Age Group: 25-29    |           |               |       |       |               |             |               |                |              |
| Period                                       | Age Group | Smoking Group | N     | %     | Ever Quit (N) | Ever Quit % | Mean Yrs Quit | Short Term (n) | Short Term % |
| 35                                           | 25-29     | Never Any     | 0     | .     |               |             |               |                |              |
| 35                                           | 25-29     | CC            | 0     | .     | 0             | .           |               |                |              |
| 35                                           | 25-29     | Ecig          | 0     | .     |               |             |               |                |              |
| 35                                           | 25-29     | Dual          | 0     | .     |               |             |               |                |              |
| 35                                           | 25-29     | Former        | 0     | .     |               |             | .             | 0              | .            |
| Year of Follow-up: 2025, Age Group: 30-34    |           |               |       |       |               |             |               |                |              |
| Period                                       | Age Group | Smoking Group | N     | %     | Ever Quit (N) | Ever Quit % | Mean Yrs Quit | Short Term (n) | Short Term % |
| 35                                           | 30-34     | Never Any     | 0     | .     |               |             |               |                |              |
| 35                                           | 30-34     | CC            | 0     | .     | 0             | .           |               |                |              |
| 35                                           | 30-34     | Ecig          | 0     | .     |               |             |               |                |              |
| 35                                           | 30-34     | Dual          | 0     | .     |               |             |               |                |              |
| 35                                           | 30-34     | Former        | 0     | .     |               |             | .             | 0              | .            |
| Year of Follow-up: 2025, Age Group: 35-39    |           |               |       |       |               |             |               |                |              |
| Period                                       | Age Group | Smoking Group | N     | %     | Ever Quit (N) | Ever Quit % | Mean Yrs Quit | Short Term (n) | Short Term % |
| 35                                           | 35-39     | Never Any     | 0     | .     |               |             |               |                |              |
| 35                                           | 35-39     | CC            | 0     | .     | 0             | .           |               |                |              |
| 35                                           | 35-39     | Ecig          | 0     | .     |               |             |               |                |              |
| 35                                           | 35-39     | Dual          | 0     | .     |               |             |               |                |              |
| 35                                           | 35-39     | Former        | 0     | .     |               |             | .             | 0              | .            |
| Year of Follow-up: 2025, Age Group: 40-44    |           |               |       |       |               |             |               |                |              |
| Period                                       | Age Group | Smoking Group | N     | %     | Ever Quit (N) | Ever Quit % | Mean Yrs Quit | Short Term (n) | Short Term % |
| 35                                           | 40-44     | Never Any     | 0     | .     |               |             |               |                |              |
| 35                                           | 40-44     | CC            | 0     | .     | 0             | .           |               |                |              |
| 35                                           | 40-44     | Ecig          | 0     | .     |               |             |               |                |              |
| 35                                           | 40-44     | Dual          | 0     | .     |               |             |               |                |              |
| 35                                           | 40-44     | Former        | 0     | .     |               |             | .             | 0              | .            |
| Year of Follow-up: 2025, Age Group: 45-49    |           |               |       |       |               |             |               |                |              |
| Period                                       | Age Group | Smoking Group | N     | %     | Ever Quit (N) | Ever Quit % | Mean Yrs Quit | Short Term (n) | Short Term % |
| 35                                           | 45-49     | Never Any     | 4489  | 50.75 |               |             |               |                |              |
| 35                                           | 45-49     | CC            | 7     | 0.08  | 0             | 0.00        |               |                |              |
| 35                                           | 45-49     | Ecig          | 1218  | 13.77 |               |             |               |                |              |
| 35                                           | 45-49     | Dual          | 0     | 0.00  |               |             |               |                |              |
| 35                                           | 45-49     | Former        | 3131  | 35.40 |               |             | 19.06         | 66             | 2.11         |
| Year of Follow-up: 2025, Age Group: 50-54    |           |               |       |       |               |             |               |                |              |

**Results for PHIM for Run 5 (Sensitivity\_Analysis\_3.RTF)**

| Period                                       | Age Group | Smoking Group | N     | %     | Ever Quit (N) | Ever Quit % | Mean Yrs Quit | Short Term (n) | Short Term % |
|----------------------------------------------|-----------|---------------|-------|-------|---------------|-------------|---------------|----------------|--------------|
| 35                                           | 50-54     | Never Any     | 4991  | 55.21 |               |             |               |                |              |
| 35                                           | 50-54     | CC            | 3     | 0.03  | 0             | 0.00        |               |                |              |
| 35                                           | 50-54     | Ecig          | 1304  | 14.42 |               |             |               |                |              |
| 35                                           | 50-54     | Dual          | 0     | 0.00  |               |             |               |                |              |
| 35                                           | 50-54     | Former        | 2742  | 30.33 |               |             | 20.53         | 80             | 2.92         |
| Year of Follow-up: 2025, Age Group: 55-59    |           |               |       |       |               |             |               |                |              |
| Period                                       | Age Group | Smoking Group | N     | %     | Ever Quit (N) | Ever Quit % | Mean Yrs Quit | Short Term (n) | Short Term % |
| 35                                           | 55-59     | Never Any     | 5163  | 52.60 |               |             |               |                |              |
| 35                                           | 55-59     | CC            | 0     | 0.00  | 0             | 0.00        |               |                |              |
| 35                                           | 55-59     | Ecig          | 1400  | 14.26 |               |             |               |                |              |
| 35                                           | 55-59     | Dual          | 0     | 0.00  |               |             |               |                |              |
| 35                                           | 55-59     | Former        | 3253  | 33.14 |               |             | 22.44         | 159            | 4.89         |
| Year of Follow-up: 2025, Age Group: 60-64    |           |               |       |       |               |             |               |                |              |
| Period                                       | Age Group | Smoking Group | N     | %     | Ever Quit (N) | Ever Quit % | Mean Yrs Quit | Short Term (n) | Short Term % |
| 35                                           | 60-64     | Never Any     | 4997  | 46.86 |               |             |               |                |              |
| 35                                           | 60-64     | CC            | 9     | 0.08  | 0             | 0.00        |               |                |              |
| 35                                           | 60-64     | Ecig          | 1237  | 11.60 |               |             |               |                |              |
| 35                                           | 60-64     | Dual          | 0     | 0.00  |               |             |               |                |              |
| 35                                           | 60-64     | Former        | 4421  | 41.46 |               |             | 23.36         | 192            | 4.34         |
| Year of Follow-up: 2025, Age Group: 65-69    |           |               |       |       |               |             |               |                |              |
| Period                                       | Age Group | Smoking Group | N     | %     | Ever Quit (N) | Ever Quit % | Mean Yrs Quit | Short Term (n) | Short Term % |
| 35                                           | 65-69     | Never Any     | 4724  | 43.28 |               |             |               |                |              |
| 35                                           | 65-69     | CC            | 5     | 0.05  | 0             | 0.00        |               |                |              |
| 35                                           | 65-69     | Ecig          | 874   | 8.01  |               |             |               |                |              |
| 35                                           | 65-69     | Dual          | 0     | 0.00  |               |             |               |                |              |
| 35                                           | 65-69     | Former        | 5313  | 48.67 |               |             | 25.19         | 148            | 2.79         |
| Year of Follow-up: 2025, Age Group: 70-74    |           |               |       |       |               |             |               |                |              |
| Period                                       | Age Group | Smoking Group | N     | %     | Ever Quit (N) | Ever Quit % | Mean Yrs Quit | Short Term (n) | Short Term % |
| 35                                           | 70-74     | Never Any     | 3941  | 39.85 |               |             |               |                |              |
| 35                                           | 70-74     | CC            | 5     | 0.05  | 0             | 0.00        |               |                |              |
| 35                                           | 70-74     | Ecig          | 557   | 5.63  |               |             |               |                |              |
| 35                                           | 70-74     | Dual          | 0     | 0.00  |               |             |               |                |              |
| 35                                           | 70-74     | Former        | 5386  | 54.46 |               |             | 29.36         | 82             | 1.52         |
| Year of Follow-up: 2025, Age Group: 75-79    |           |               |       |       |               |             |               |                |              |
| Period                                       | Age Group | Smoking Group | N     | %     | Ever Quit (N) | Ever Quit % | Mean Yrs Quit | Short Term (n) | Short Term % |
| 35                                           | 75-79     | Never Any     | 2912  | 33.65 |               |             |               |                |              |
| 35                                           | 75-79     | CC            | 9     | 0.10  | 0             | 0.00        |               |                |              |
| 35                                           | 75-79     | Ecig          | 419   | 4.84  |               |             |               |                |              |
| 35                                           | 75-79     | Dual          | 0     | 0.00  |               |             |               |                |              |
| 35                                           | 75-79     | Former        | 5315  | 61.41 |               |             | 32.11         | 63             | 1.19         |
| Year of Follow-up: 2030, Age Group: All Ages |           |               |       |       |               |             |               |                |              |
| Period                                       | Age Group | Smoking Group | N     | %     | Ever Quit (N) | Ever Quit % | Mean Yrs Quit | Short Term (n) | Short Term % |
| 40                                           | All Ages  | Never Any     | 28305 | 47.84 |               |             |               |                |              |
| 40                                           | All Ages  | CC            | 15    | 0.03  | 0             | 0.00        |               |                |              |
| 40                                           | All Ages  | Ecig          | 4943  | 8.35  |               |             |               |                |              |
| 40                                           | All Ages  | Dual          | 0     | 0.00  |               |             |               |                |              |
| 40                                           | All Ages  | Former        | 25907 | 43.78 |               |             | 27.36         | 626            | 2.42         |
| Year of Follow-up: 2030, Age Group: 18-19    |           |               |       |       |               |             |               |                |              |
| Period                                       | Age Group | Smoking Group | N     | %     | Ever Quit (N) | Ever Quit % | Mean Yrs Quit | Short Term (n) | Short Term % |
| 40                                           | 18-19     | Never Any     | 0     | .     |               |             |               |                |              |
| 40                                           | 18-19     | CC            | 0     | .     | 0             | .           |               |                |              |
| 40                                           | 18-19     | Ecig          | 0     | .     |               |             |               |                |              |
| 40                                           | 18-19     | Dual          | 0     | .     |               |             |               |                |              |
| 40                                           | 18-19     | Former        | 0     | .     |               |             | .             | 0              | .            |
| Year of Follow-up: 2030, Age Group: 20-24    |           |               |       |       |               |             |               |                |              |
| Period                                       | Age Group | Smoking Group | N     | %     | Ever Quit (N) | Ever Quit % | Mean Yrs Quit | Short Term (n) | Short Term % |
| 40                                           | 20-24     | Never Any     | 0     | .     |               |             |               |                |              |
| 40                                           | 20-24     | CC            | 0     | .     | 0             | .           |               |                |              |
| 40                                           | 20-24     | Ecig          | 0     | .     |               |             |               |                |              |
| 40                                           | 20-24     | Dual          | 0     | .     |               |             |               |                |              |
| 40                                           | 20-24     | Former        | 0     | .     |               |             | .             | 0              | .            |
| Year of Follow-up: 2030, Age Group: 25-29    |           |               |       |       |               |             |               |                |              |
| Period                                       | Age Group | Smoking Group | N     | %     | Ever Quit (N) | Ever Quit % | Mean Yrs Quit | Short Term (n) | Short Term % |
| 40                                           | 25-29     | Never Any     | 0     | .     |               |             |               |                |              |
| 40                                           | 25-29     | CC            | 0     | .     | 0             | .           |               |                |              |
| 40                                           | 25-29     | Ecig          | 0     | .     |               |             |               |                |              |
| 40                                           | 25-29     | Dual          | 0     | .     |               |             |               |                |              |

**Results for PHIM for Run 5 (Sensitivity\_Analysis\_3.RTF)**

| Year of Follow-up: 2030, Age Group: 30-34 | Period | Age Group | Smoking Group | N    | %     | Ever Quit (N) | Ever Quit % | Mean Yrs Quit | Short Term (n) | Short Term % |
|-------------------------------------------|--------|-----------|---------------|------|-------|---------------|-------------|---------------|----------------|--------------|
| Year of Follow-up: 2030, Age Group: 30-34 |        |           |               |      |       |               |             |               |                |              |
| 40                                        | 25-29  | Former    |               | 0    | .     |               |             |               | 0              | .            |
| Year of Follow-up: 2030, Age Group: 35-39 |        |           |               |      |       |               |             |               |                |              |
| 40                                        | 30-34  | Never Any |               | 0    | .     |               |             |               | 0              | .            |
| 40                                        | 30-34  | CC        |               | 0    | .     | 0             | .           |               |                |              |
| 40                                        | 30-34  | Ecig      |               | 0    | .     |               |             |               |                |              |
| 40                                        | 30-34  | Dual      |               | 0    | .     |               |             |               |                |              |
| 40                                        | 30-34  | Former    |               | 0    | .     |               |             |               | 0              | .            |
| Year of Follow-up: 2030, Age Group: 40-44 |        |           |               |      |       |               |             |               |                |              |
| 40                                        | 35-39  | Never Any |               | 0    | .     |               |             |               |                |              |
| 40                                        | 35-39  | CC        |               | 0    | .     | 0             | .           |               |                |              |
| 40                                        | 35-39  | Ecig      |               | 0    | .     |               |             |               |                |              |
| 40                                        | 35-39  | Dual      |               | 0    | .     |               |             |               |                |              |
| 40                                        | 35-39  | Former    |               | 0    | .     |               |             |               | 0              | .            |
| Year of Follow-up: 2030, Age Group: 45-49 |        |           |               |      |       |               |             |               |                |              |
| 40                                        | 40-44  | Never Any |               | 0    | .     |               |             |               |                |              |
| 40                                        | 40-44  | CC        |               | 0    | .     | 0             | .           |               |                |              |
| 40                                        | 40-44  | Ecig      |               | 0    | .     |               |             |               |                |              |
| 40                                        | 40-44  | Dual      |               | 0    | .     |               |             |               |                |              |
| 40                                        | 40-44  | Former    |               | 0    | .     |               |             |               | 0              | .            |
| Year of Follow-up: 2030, Age Group: 50-54 |        |           |               |      |       |               |             |               |                |              |
| 40                                        | 45-49  | Never Any |               | 0    | .     |               |             |               |                |              |
| 40                                        | 45-49  | CC        |               | 0    | .     | 0             | .           |               |                |              |
| 40                                        | 45-49  | Ecig      |               | 0    | .     |               |             |               |                |              |
| 40                                        | 45-49  | Dual      |               | 0    | .     |               |             |               |                |              |
| 40                                        | 45-49  | Former    |               | 0    | .     |               |             |               | 0              | .            |
| Year of Follow-up: 2030, Age Group: 55-59 |        |           |               |      |       |               |             |               |                |              |
| 40                                        | 50-54  | Never Any |               | 4489 | 50.75 |               |             |               |                |              |
| 40                                        | 50-54  | CC        |               | 3    | 0.03  | 0             | 0.00        |               |                |              |
| 40                                        | 50-54  | Ecig      |               | 1083 | 12.24 |               |             |               |                |              |
| 40                                        | 50-54  | Dual      |               | 0    | 0.00  |               |             |               |                |              |
| 40                                        | 50-54  | Former    |               | 3270 | 36.97 |               |             | 23.11         | 72             | 2.20         |
| Year of Follow-up: 2030, Age Group: 60-64 |        |           |               |      |       |               |             |               |                |              |
| 40                                        | 55-59  | Never Any |               | 4991 | 55.21 |               |             |               |                |              |
| 40                                        | 55-59  | CC        |               | 2    | 0.02  | 0             | 0.00        |               |                |              |
| 40                                        | 55-59  | Ecig      |               | 1050 | 11.62 |               |             |               |                |              |
| 40                                        | 55-59  | Dual      |               | 0    | 0.00  |               |             |               |                |              |
| 40                                        | 55-59  | Former    |               | 2997 | 33.15 |               |             | 23.53         | 104            | 3.47         |
| Year of Follow-up: 2030, Age Group: 65-69 |        |           |               |      |       |               |             |               |                |              |
| 40                                        | 60-64  | Never Any |               | 5163 | 52.60 |               |             |               |                |              |
| 40                                        | 60-64  | CC        |               | 0    | 0.00  | 0             | 0.00        |               |                |              |
| 40                                        | 60-64  | Ecig      |               | 980  | 9.98  |               |             |               |                |              |
| 40                                        | 60-64  | Dual      |               | 0    | 0.00  |               |             |               |                |              |
| 40                                        | 60-64  | Former    |               | 3673 | 37.42 |               |             | 24.54         | 163            | 4.44         |
| Year of Follow-up: 2030, Age Group: 70-74 |        |           |               |      |       |               |             |               |                |              |
| 40                                        | 65-69  | Never Any |               | 4997 | 46.86 |               |             |               |                |              |
| 40                                        | 65-69  | CC        |               | 4    | 0.04  | 0             | 0.00        |               |                |              |
| 40                                        | 65-69  | Ecig      |               | 823  | 7.72  |               |             |               |                |              |
| 40                                        | 65-69  | Dual      |               | 0    | 0.00  |               |             |               |                |              |
| 40                                        | 65-69  | Former    |               | 4840 | 45.39 |               |             | 26.11         | 131            | 2.71         |
| Year of Follow-up: 2030, Age Group: 75-79 |        |           |               |      |       |               |             |               |                |              |
| 40                                        | 70-74  | Never Any |               | 4724 | 43.28 |               |             |               |                |              |
| 40                                        | 70-74  | CC        |               | 3    | 0.03  | 0             | 0.00        |               |                |              |
| 40                                        | 70-74  | Ecig      |               | 615  | 5.63  |               |             |               |                |              |
| 40                                        | 70-74  | Dual      |               | 0    | 0.00  |               |             |               |                |              |
| 40                                        | 70-74  | Former    |               | 5574 | 51.06 |               |             | 28.88         | 92             | 1.65         |
| Year of Follow-up: 2030, Age Group: 75-79 |        |           |               |      |       |               |             |               |                |              |
| 40                                        | 75-79  | Never Any |               | 3941 | 39.85 |               |             |               |                |              |
| 40                                        | 75-79  | CC        |               | 3    | 0.03  | 0             | 0.00        |               |                |              |

**Results for PHIM for Run 5 (Sensitivity\_Analysis\_3.RTF)**

|                                              |           |               |       |       |               |             |               |                |              |
|----------------------------------------------|-----------|---------------|-------|-------|---------------|-------------|---------------|----------------|--------------|
| 40                                           | 75-79     | Ecig          | 392   | 3.96  |               |             |               |                |              |
| 40                                           | 75-79     | Dual          | 0     | 0.00  |               |             |               |                |              |
| 40                                           | 75-79     | Former        | 5553  | 56.15 |               |             | 33.39         | 64             | 1.15         |
| Year of Follow-up: 2035, Age Group: All Ages |           |               |       |       |               |             |               |                |              |
| Period                                       | Age Group | Smoking Group | N     | %     | Ever Quit (N) | Ever Quit % | Mean Yrs Quit | Short Term (n) | Short Term % |
| 45                                           | All Ages  | Never Any     | 24364 | 49.44 |               |             |               |                |              |
| 45                                           | All Ages  | CC            | 6     | 0.01  | 0             | 0.00        |               |                |              |
| 45                                           | All Ages  | Ecig          | 3325  | 6.75  |               |             |               |                |              |
| 45                                           | All Ages  | Dual          | 0     | 0.00  |               |             |               |                |              |
| 45                                           | All Ages  | Former        | 21586 | 43.80 |               |             | 29.09         | 482            | 2.23         |
| Year of Follow-up: 2035, Age Group: 18-19    |           |               |       |       |               |             |               |                |              |
| Period                                       | Age Group | Smoking Group | N     | %     | Ever Quit (N) | Ever Quit % | Mean Yrs Quit | Short Term (n) | Short Term % |
| 45                                           | 18-19     | Never Any     | 0     | .     |               |             |               |                |              |
| 45                                           | 18-19     | CC            | 0     | .     | 0             | .           |               |                |              |
| 45                                           | 18-19     | Ecig          | 0     | .     |               |             |               |                |              |
| 45                                           | 18-19     | Dual          | 0     | .     |               |             |               |                |              |
| 45                                           | 18-19     | Former        | 0     | .     |               |             | .             | 0              | .            |
| Year of Follow-up: 2035, Age Group: 20-24    |           |               |       |       |               |             |               |                |              |
| Period                                       | Age Group | Smoking Group | N     | %     | Ever Quit (N) | Ever Quit % | Mean Yrs Quit | Short Term (n) | Short Term % |
| 45                                           | 20-24     | Never Any     | 0     | .     |               |             |               |                |              |
| 45                                           | 20-24     | CC            | 0     | .     | 0             | .           |               |                |              |
| 45                                           | 20-24     | Ecig          | 0     | .     |               |             |               |                |              |
| 45                                           | 20-24     | Dual          | 0     | .     |               |             |               |                |              |
| 45                                           | 20-24     | Former        | 0     | .     |               |             | .             | 0              | .            |
| Year of Follow-up: 2035, Age Group: 25-29    |           |               |       |       |               |             |               |                |              |
| Period                                       | Age Group | Smoking Group | N     | %     | Ever Quit (N) | Ever Quit % | Mean Yrs Quit | Short Term (n) | Short Term % |
| 45                                           | 25-29     | Never Any     | 0     | .     |               |             |               |                |              |
| 45                                           | 25-29     | CC            | 0     | .     | 0             | .           |               |                |              |
| 45                                           | 25-29     | Ecig          | 0     | .     |               |             |               |                |              |
| 45                                           | 25-29     | Dual          | 0     | .     |               |             |               |                |              |
| 45                                           | 25-29     | Former        | 0     | .     |               |             | .             | 0              | .            |
| Year of Follow-up: 2035, Age Group: 30-34    |           |               |       |       |               |             |               |                |              |
| Period                                       | Age Group | Smoking Group | N     | %     | Ever Quit (N) | Ever Quit % | Mean Yrs Quit | Short Term (n) | Short Term % |
| 45                                           | 30-34     | Never Any     | 0     | .     |               |             |               |                |              |
| 45                                           | 30-34     | CC            | 0     | .     | 0             | .           |               |                |              |
| 45                                           | 30-34     | Ecig          | 0     | .     |               |             |               |                |              |
| 45                                           | 30-34     | Dual          | 0     | .     |               |             |               |                |              |
| 45                                           | 30-34     | Former        | 0     | .     |               |             | .             | 0              | .            |
| Year of Follow-up: 2035, Age Group: 35-39    |           |               |       |       |               |             |               |                |              |
| Period                                       | Age Group | Smoking Group | N     | %     | Ever Quit (N) | Ever Quit % | Mean Yrs Quit | Short Term (n) | Short Term % |
| 45                                           | 35-39     | Never Any     | 0     | .     |               |             |               |                |              |
| 45                                           | 35-39     | CC            | 0     | .     | 0             | .           |               |                |              |
| 45                                           | 35-39     | Ecig          | 0     | .     |               |             |               |                |              |
| 45                                           | 35-39     | Dual          | 0     | .     |               |             |               |                |              |
| 45                                           | 35-39     | Former        | 0     | .     |               |             | .             | 0              | .            |
| Year of Follow-up: 2035, Age Group: 40-44    |           |               |       |       |               |             |               |                |              |
| Period                                       | Age Group | Smoking Group | N     | %     | Ever Quit (N) | Ever Quit % | Mean Yrs Quit | Short Term (n) | Short Term % |
| 45                                           | 40-44     | Never Any     | 0     | .     |               |             |               |                |              |
| 45                                           | 40-44     | CC            | 0     | .     | 0             | .           |               |                |              |
| 45                                           | 40-44     | Ecig          | 0     | .     |               |             |               |                |              |
| 45                                           | 40-44     | Dual          | 0     | .     |               |             |               |                |              |
| 45                                           | 40-44     | Former        | 0     | .     |               |             | .             | 0              | .            |
| Year of Follow-up: 2035, Age Group: 45-49    |           |               |       |       |               |             |               |                |              |
| Period                                       | Age Group | Smoking Group | N     | %     | Ever Quit (N) | Ever Quit % | Mean Yrs Quit | Short Term (n) | Short Term % |
| 45                                           | 45-49     | Never Any     | 0     | .     |               |             |               |                |              |
| 45                                           | 45-49     | CC            | 0     | .     | 0             | .           |               |                |              |
| 45                                           | 45-49     | Ecig          | 0     | .     |               |             |               |                |              |
| 45                                           | 45-49     | Dual          | 0     | .     |               |             |               |                |              |
| 45                                           | 45-49     | Former        | 0     | .     |               |             | .             | 0              | .            |
| Year of Follow-up: 2035, Age Group: 50-54    |           |               |       |       |               |             |               |                |              |
| Period                                       | Age Group | Smoking Group | N     | %     | Ever Quit (N) | Ever Quit % | Mean Yrs Quit | Short Term (n) | Short Term % |
| 45                                           | 50-54     | Never Any     | 0     | .     |               |             |               |                |              |
| 45                                           | 50-54     | CC            | 0     | .     | 0             | .           |               |                |              |
| 45                                           | 50-54     | Ecig          | 0     | .     |               |             |               |                |              |
| 45                                           | 50-54     | Dual          | 0     | .     |               |             |               |                |              |
| 45                                           | 50-54     | Former        | 0     | .     |               |             | .             | 0              | .            |
| Year of Follow-up: 2035, Age Group: 55-59    |           |               |       |       |               |             |               |                |              |
| Period                                       | Age Group | Smoking Group | N     | %     | Ever Quit (N) | Ever Quit % | Mean Yrs Quit | Short Term (n) | Short Term % |

### Results for PHIM for Run 5 (Sensitivity\_Analysis\_3.RTF)

|                                              |           |               |       |       |               |             |               |                |              |
|----------------------------------------------|-----------|---------------|-------|-------|---------------|-------------|---------------|----------------|--------------|
| 45                                           | 55-59     | Never Any     | 4489  | 50.75 |               |             |               |                |              |
| 45                                           | 55-59     | CC            | 2     | 0.02  | 0             | 0.00        |               |                |              |
| 45                                           | 55-59     | Ecig          | 862   | 9.75  |               |             |               |                |              |
| 45                                           | 55-59     | Dual          | 0     | 0.00  |               |             |               |                |              |
| 45                                           | 55-59     | Former        | 3492  | 39.48 |               |             | 26.44         | 102            | 2.92         |
| Year of Follow-up: 2035, Age Group: 60-64    |           |               |       |       |               |             |               |                |              |
| Period                                       | Age Group | Smoking Group | N     | %     | Ever Quit (N) | Ever Quit % | Mean Yrs Quit | Short Term (n) | Short Term % |
| 45                                           | 60-64     | Never Any     | 4991  | 55.21 |               |             |               |                |              |
| 45                                           | 60-64     | CC            | 0     | 0.00  | 0             | 0.00        |               |                |              |
| 45                                           | 60-64     | Ecig          | 780   | 8.63  |               |             |               |                |              |
| 45                                           | 60-64     | Dual          | 0     | 0.00  |               |             |               |                |              |
| 45                                           | 60-64     | Former        | 3269  | 36.16 |               |             | 26.32         | 121            | 3.70         |
| Year of Follow-up: 2035, Age Group: 65-69    |           |               |       |       |               |             |               |                |              |
| Period                                       | Age Group | Smoking Group | N     | %     | Ever Quit (N) | Ever Quit % | Mean Yrs Quit | Short Term (n) | Short Term % |
| 45                                           | 65-69     | Never Any     | 5163  | 52.60 |               |             |               |                |              |
| 45                                           | 65-69     | CC            | 0     | 0.00  | 0             | 0.00        |               |                |              |
| 45                                           | 65-69     | Ecig          | 667   | 6.80  |               |             |               |                |              |
| 45                                           | 65-69     | Dual          | 0     | 0.00  |               |             |               |                |              |
| 45                                           | 65-69     | Former        | 3986  | 40.61 |               |             | 27.40         | 94             | 2.36         |
| Year of Follow-up: 2035, Age Group: 70-74    |           |               |       |       |               |             |               |                |              |
| Period                                       | Age Group | Smoking Group | N     | %     | Ever Quit (N) | Ever Quit % | Mean Yrs Quit | Short Term (n) | Short Term % |
| 45                                           | 70-74     | Never Any     | 4997  | 46.86 |               |             |               |                |              |
| 45                                           | 70-74     | CC            | 1     | 0.01  | 0             | 0.00        |               |                |              |
| 45                                           | 70-74     | Ecig          | 605   | 5.67  |               |             |               |                |              |
| 45                                           | 70-74     | Dual          | 0     | 0.00  |               |             |               |                |              |
| 45                                           | 70-74     | Former        | 5061  | 47.46 |               |             | 29.84         | 92             | 1.82         |
| Year of Follow-up: 2035, Age Group: 75-79    |           |               |       |       |               |             |               |                |              |
| Period                                       | Age Group | Smoking Group | N     | %     | Ever Quit (N) | Ever Quit % | Mean Yrs Quit | Short Term (n) | Short Term % |
| 45                                           | 75-79     | Never Any     | 4724  | 43.28 |               |             |               |                |              |
| 45                                           | 75-79     | CC            | 3     | 0.03  | 0             | 0.00        |               |                |              |
| 45                                           | 75-79     | Ecig          | 411   | 3.77  |               |             |               |                |              |
| 45                                           | 75-79     | Dual          | 0     | 0.00  |               |             |               |                |              |
| 45                                           | 75-79     | Former        | 5778  | 52.93 |               |             | 32.76         | 73             | 1.26         |
| Year of Follow-up: 2040, Age Group: All Ages |           |               |       |       |               |             |               |                |              |
| Period                                       | Age Group | Smoking Group | N     | %     | Ever Quit (N) | Ever Quit % | Mean Yrs Quit | Short Term (n) | Short Term % |
| 50                                           | All Ages  | Never Any     | 19640 | 51.19 |               |             |               |                |              |
| 50                                           | All Ages  | CC            | 1     | 0.00  | 0             | 0.00        |               |                |              |
| 50                                           | All Ages  | Ecig          | 1984  | 5.17  |               |             |               |                |              |
| 50                                           | All Ages  | Dual          | 0     | 0.00  |               |             |               |                |              |
| 50                                           | All Ages  | Former        | 16740 | 43.63 |               |             | 31.04         | 356            | 2.13         |
| Year of Follow-up: 2040, Age Group: 18-19    |           |               |       |       |               |             |               |                |              |
| Period                                       | Age Group | Smoking Group | N     | %     | Ever Quit (N) | Ever Quit % | Mean Yrs Quit | Short Term (n) | Short Term % |
| 50                                           | 18-19     | Never Any     | 0     | .     |               |             |               |                |              |
| 50                                           | 18-19     | CC            | 0     | .     | 0             | .           |               |                |              |
| 50                                           | 18-19     | Ecig          | 0     | .     |               |             |               |                |              |
| 50                                           | 18-19     | Dual          | 0     | .     |               |             |               |                |              |
| 50                                           | 18-19     | Former        | 0     | .     |               |             | .             | 0              | .            |
| Year of Follow-up: 2040, Age Group: 20-24    |           |               |       |       |               |             |               |                |              |
| Period                                       | Age Group | Smoking Group | N     | %     | Ever Quit (N) | Ever Quit % | Mean Yrs Quit | Short Term (n) | Short Term % |
| 50                                           | 20-24     | Never Any     | 0     | .     |               |             |               |                |              |
| 50                                           | 20-24     | CC            | 0     | .     | 0             | .           |               |                |              |
| 50                                           | 20-24     | Ecig          | 0     | .     |               |             |               |                |              |
| 50                                           | 20-24     | Dual          | 0     | .     |               |             |               |                |              |
| 50                                           | 20-24     | Former        | 0     | .     |               |             | .             | 0              | .            |
| Year of Follow-up: 2040, Age Group: 25-29    |           |               |       |       |               |             |               |                |              |
| Period                                       | Age Group | Smoking Group | N     | %     | Ever Quit (N) | Ever Quit % | Mean Yrs Quit | Short Term (n) | Short Term % |
| 50                                           | 25-29     | Never Any     | 0     | .     |               |             |               |                |              |
| 50                                           | 25-29     | CC            | 0     | .     | 0             | .           |               |                |              |
| 50                                           | 25-29     | Ecig          | 0     | .     |               |             |               |                |              |
| 50                                           | 25-29     | Dual          | 0     | .     |               |             |               |                |              |
| 50                                           | 25-29     | Former        | 0     | .     |               |             | .             | 0              | .            |
| Year of Follow-up: 2040, Age Group: 30-34    |           |               |       |       |               |             |               |                |              |
| Period                                       | Age Group | Smoking Group | N     | %     | Ever Quit (N) | Ever Quit % | Mean Yrs Quit | Short Term (n) | Short Term % |
| 50                                           | 30-34     | Never Any     | 0     | .     |               |             |               |                |              |
| 50                                           | 30-34     | CC            | 0     | .     | 0             | .           |               |                |              |
| 50                                           | 30-34     | Ecig          | 0     | .     |               |             |               |                |              |
| 50                                           | 30-34     | Dual          | 0     | .     |               |             |               |                |              |
| 50                                           | 30-34     | Former        | 0     | .     |               |             | .             | 0              | .            |
| Year of Follow-up: 2040, Age Group: 35-39    |           |               |       |       |               |             |               |                |              |

**Results for PHIM for Run 5 (Sensitivity\_Analysis\_3.RTF)**

| Period                                    | Age Group | Smoking Group | N    | %     | Ever Quit (N) | Ever Quit % | Mean Yrs Quit | Short Term (n) | Short Term % |
|-------------------------------------------|-----------|---------------|------|-------|---------------|-------------|---------------|----------------|--------------|
| 50                                        | 35-39     | Never Any     | 0    | .     |               |             |               |                |              |
| 50                                        | 35-39     | CC            | 0    | .     | 0             | .           |               |                |              |
| 50                                        | 35-39     | Ecig          | 0    | .     |               |             |               |                |              |
| 50                                        | 35-39     | Dual          | 0    | .     |               |             |               |                |              |
| 50                                        | 35-39     | Former        | 0    | .     |               |             | .             | 0              | .            |
| Year of Follow-up: 2040, Age Group: 40-44 |           |               |      |       |               |             |               |                |              |
| Period                                    | Age Group | Smoking Group | N    | %     | Ever Quit (N) | Ever Quit % | Mean Yrs Quit | Short Term (n) | Short Term % |
| 50                                        | 40-44     | Never Any     | 0    | .     |               |             |               |                |              |
| 50                                        | 40-44     | CC            | 0    | .     | 0             | .           |               |                |              |
| 50                                        | 40-44     | Ecig          | 0    | .     |               |             |               |                |              |
| 50                                        | 40-44     | Dual          | 0    | .     |               |             |               |                |              |
| 50                                        | 40-44     | Former        | 0    | .     |               |             | .             | 0              | .            |
| Year of Follow-up: 2040, Age Group: 45-49 |           |               |      |       |               |             |               |                |              |
| Period                                    | Age Group | Smoking Group | N    | %     | Ever Quit (N) | Ever Quit % | Mean Yrs Quit | Short Term (n) | Short Term % |
| 50                                        | 45-49     | Never Any     | 0    | .     |               |             |               |                |              |
| 50                                        | 45-49     | CC            | 0    | .     | 0             | .           |               |                |              |
| 50                                        | 45-49     | Ecig          | 0    | .     |               |             |               |                |              |
| 50                                        | 45-49     | Dual          | 0    | .     |               |             |               |                |              |
| 50                                        | 45-49     | Former        | 0    | .     |               |             | .             | 0              | .            |
| Year of Follow-up: 2040, Age Group: 50-54 |           |               |      |       |               |             |               |                |              |
| Period                                    | Age Group | Smoking Group | N    | %     | Ever Quit (N) | Ever Quit % | Mean Yrs Quit | Short Term (n) | Short Term % |
| 50                                        | 50-54     | Never Any     | 0    | .     |               |             |               |                |              |
| 50                                        | 50-54     | CC            | 0    | .     | 0             | .           |               |                |              |
| 50                                        | 50-54     | Ecig          | 0    | .     |               |             |               |                |              |
| 50                                        | 50-54     | Dual          | 0    | .     |               |             |               |                |              |
| 50                                        | 50-54     | Former        | 0    | .     |               |             | .             | 0              | .            |
| Year of Follow-up: 2040, Age Group: 55-59 |           |               |      |       |               |             |               |                |              |
| Period                                    | Age Group | Smoking Group | N    | %     | Ever Quit (N) | Ever Quit % | Mean Yrs Quit | Short Term (n) | Short Term % |
| 50                                        | 55-59     | Never Any     | 0    | .     |               |             |               |                |              |
| 50                                        | 55-59     | CC            | 0    | .     | 0             | .           |               |                |              |
| 50                                        | 55-59     | Ecig          | 0    | .     |               |             |               |                |              |
| 50                                        | 55-59     | Dual          | 0    | .     |               |             |               |                |              |
| 50                                        | 55-59     | Former        | 0    | .     |               |             | .             | 0              | .            |
| Year of Follow-up: 2040, Age Group: 60-64 |           |               |      |       |               |             |               |                |              |
| Period                                    | Age Group | Smoking Group | N    | %     | Ever Quit (N) | Ever Quit % | Mean Yrs Quit | Short Term (n) | Short Term % |
| 50                                        | 60-64     | Never Any     | 4489 | 50.75 |               |             |               |                |              |
| 50                                        | 60-64     | CC            | 0    | 0.00  | 0             | 0.00        |               |                |              |
| 50                                        | 60-64     | Ecig          | 600  | 6.78  |               |             |               |                |              |
| 50                                        | 60-64     | Dual          | 0    | 0.00  |               |             |               |                |              |
| 50                                        | 60-64     | Former        | 3756 | 42.46 |               |             | 29.38         | 107            | 2.85         |
| Year of Follow-up: 2040, Age Group: 65-69 |           |               |      |       |               |             |               |                |              |
| Period                                    | Age Group | Smoking Group | N    | %     | Ever Quit (N) | Ever Quit % | Mean Yrs Quit | Short Term (n) | Short Term % |
| 50                                        | 65-69     | Never Any     | 4991 | 55.21 |               |             |               |                |              |
| 50                                        | 65-69     | CC            | 0    | 0.00  | 0             | 0.00        |               |                |              |
| 50                                        | 65-69     | Ecig          | 504  | 5.58  |               |             |               |                |              |
| 50                                        | 65-69     | Dual          | 0    | 0.00  |               |             |               |                |              |
| 50                                        | 65-69     | Former        | 3545 | 39.21 |               |             | 29.04         | 110            | 3.10         |
| Year of Follow-up: 2040, Age Group: 70-74 |           |               |      |       |               |             |               |                |              |
| Period                                    | Age Group | Smoking Group | N    | %     | Ever Quit (N) | Ever Quit % | Mean Yrs Quit | Short Term (n) | Short Term % |
| 50                                        | 70-74     | Never Any     | 5163 | 52.60 |               |             |               |                |              |
| 50                                        | 70-74     | CC            | 0    | 0.00  | 0             | 0.00        |               |                |              |
| 50                                        | 70-74     | Ecig          | 473  | 4.82  |               |             |               |                |              |
| 50                                        | 70-74     | Dual          | 0    | 0.00  |               |             |               |                |              |
| 50                                        | 70-74     | Former        | 4180 | 42.58 |               |             | 31.00         | 65             | 1.56         |
| Year of Follow-up: 2040, Age Group: 75-79 |           |               |      |       |               |             |               |                |              |
| Period                                    | Age Group | Smoking Group | N    | %     | Ever Quit (N) | Ever Quit % | Mean Yrs Quit | Short Term (n) | Short Term % |
| 50                                        | 75-79     | Never Any     | 4997 | 46.86 |               |             |               |                |              |
| 50                                        | 75-79     | CC            | 1    | 0.01  | 0             | 0.00        |               |                |              |
| 50                                        | 75-79     | Ecig          | 407  | 3.82  |               |             |               |                |              |
| 50                                        | 75-79     | Dual          | 0    | 0.00  |               |             |               |                |              |
| 50                                        | 75-79     | Former        | 5259 | 49.32 |               |             | 33.60         | 74             | 1.41         |

## Results for PHIM for Run 5 (Sensitivity\_Analysis\_3.RTF)

\*\*\*\*\*

### Main Results for E-Component for Run: 5, Simulation: 1, COD: Four Diseases Combined

| Variable Parameter          | Value                                  |
|-----------------------------|----------------------------------------|
| 1. Country                  | US (United States)                     |
| 2. Sex                      | M (Males)                              |
| 3. Year of start of process | 1990                                   |
| 4. Cause of Death           | Four Diseases Combined                 |
| 5. Effective Dose NULL      | CC:1                                   |
| 6. Effective Dose Ecig      | CC:1 Ecig:0.05 Dual:0.525              |
| Note:                       | Death rates are per million population |

#### Results for Age Groups Combined and Years combined, Population unadjusted for deaths in Ecig scenario,

| Age Group:All |          | NULL        | Ecig        | %Drop   |        |        | NULL    | Ecig    | Drop    |         |
|---------------|----------|-------------|-------------|---------|--------|--------|---------|---------|---------|---------|
| Year          | Number   | Attrib      | Attrib      | Drop    | %Drop  | Attrib | Death   | Attrib  | Attrib  | Drop    |
|               | Deaths   | Deaths      | Deaths      | Deaths  | Deaths | Deaths | Rate    | Rates   | Rates   | Rates   |
| All Comb      | 13148871 | 4509390.583 | 2970201.899 | 1539189 | 11.706 | 34.133 | 3806.31 | 1305.37 | 859.809 | 445.562 |

#### Results for Age Groups Combined, Population unadjusted for deaths in Ecig scenario,

| Age Group:All |        | NULL       | Ecig       | %Drop    |        |        | NULL    | Ecig    | Drop    |         |
|---------------|--------|------------|------------|----------|--------|--------|---------|---------|---------|---------|
| Year          | Number | Attrib     | Attrib     | Drop     | %Drop  | Attrib | Death   | Attrib  | Attrib  | Drop    |
|               | Deaths | Deaths     | Deaths     | Deaths   | Deaths | Deaths | Rate    | Rates   | Rates   | Rates   |
| 1990          | 317161 | 125773.065 | 125773.065 | 0.000    | 0.000  | 0.000  | 5027.71 | 1993.78 | 1993.78 | 0.000   |
| 1991          | 313217 | 123999.442 | 123575.252 | 424.190  | 0.135  | 0.342  | 4883.81 | 1933.45 | 1926.84 | 6.614   |
| 1992          | 308577 | 122014.015 | 120877.008 | 1137.007 | 0.368  | 0.932  | 4729.73 | 1870.18 | 1852.75 | 17.428  |
| 1993          | 311713 | 122810.618 | 120674.084 | 2136.534 | 0.685  | 1.740  | 4692.62 | 1848.83 | 1816.66 | 32.164  |
| 1994          | 305700 | 119925.592 | 116639.479 | 3286.112 | 1.075  | 2.740  | 4516.19 | 1771.69 | 1723.15 | 48.547  |
| 1995          | 303225 | 117896.496 | 113265.073 | 4631.424 | 1.527  | 3.928  | 4393.80 | 1708.35 | 1641.24 | 67.110  |
| 1996          | 299559 | 115698.645 | 109584.218 | 6114.427 | 2.041  | 5.285  | 4273.16 | 1650.42 | 1563.20 | 87.221  |
| 1997          | 294226 | 113359.847 | 105751.687 | 7608.159 | 2.586  | 6.712  | 4128.67 | 1590.70 | 1483.94 | 106.760 |
| 1998          | 289258 | 111444.212 | 102337.316 | 9106.896 | 3.148  | 8.172  | 3992.19 | 1538.10 | 1412.41 | 125.689 |
| 1999          | 311002 | 114877.722 | 102691.446 | 12186.28 | 3.918  | 10.608 | 4224.60 | 1560.48 | 1394.94 | 165.536 |
| 2000          | 303786 | 112379.704 | 98468.995  | 13910.71 | 4.579  | 12.378 | 4066.21 | 1504.22 | 1318.02 | 186.197 |
| 2001          | 296294 | 110024.943 | 94271.204  | 15753.74 | 5.317  | 14.318 | 3914.28 | 1453.52 | 1245.40 | 208.120 |
| 2002          | 291898 | 108289.173 | 90466.044  | 17823.13 | 6.106  | 16.459 | 3813.00 | 1414.56 | 1181.74 | 232.819 |
| 2003          | 285865 | 106539.023 | 86883.783  | 19655.24 | 6.876  | 18.449 | 3695.36 | 1377.22 | 1123.14 | 254.082 |
| 2004          | 274177 | 103037.251 | 82037.867  | 20999.38 | 7.659  | 20.380 | 3506.10 | 1317.61 | 1049.08 | 268.534 |
| 2005          | 272379 | 103044.562 | 80111.023  | 22933.54 | 8.420  | 22.256 | 3442.69 | 1302.41 | 1012.55 | 289.864 |
| 2006          | 264118 | 99672.555  | 75091.303  | 24581.25 | 9.307  | 24.662 | 3307.76 | 1248.28 | 940.428 | 307.851 |
| 2007          | 258419 | 97839.152  | 71869.964  | 25969.19 | 10.049 | 26.543 | 3203.20 | 1212.75 | 890.854 | 321.897 |
| 2008          | 259461 | 98075.852  | 70348.845  | 27727.01 | 10.686 | 28.271 | 3180.09 | 1202.07 | 862.233 | 339.837 |
| 2009          | 253907 | 95617.338  | 66661.153  | 28956.18 | 11.404 | 30.283 | 3075.31 | 1158.11 | 807.397 | 350.716 |
| 2010          | 251878 | 94607.988  | 64269.714  | 30338.27 | 12.045 | 32.067 | 3013.72 | 1131.98 | 768.987 | 362.997 |
| 2011          | 251779 | 93633.119  | 61606.707  | 32026.41 | 12.720 | 34.204 | 2982.76 | 1109.25 | 729.840 | 379.409 |
| 2012          | 252643 | 92775.175  | 59094.147  | 33681.03 | 13.331 | 36.304 | 2960.61 | 1087.19 | 692.497 | 394.692 |
| 2013          | 256175 | 92345.780  | 56969.011  | 35376.77 | 13.810 | 38.309 | 2967.76 | 1069.82 | 659.980 | 409.836 |
| 2014          | 257393 | 91379.215  | 54580.516  | 36798.70 | 14.297 | 40.270 | 2947.05 | 1046.26 | 624.926 | 421.331 |
| 2015          | 259782 | 90750.242  | 52667.713  | 38082.53 | 14.659 | 41.964 | 3346.10 | 1168.90 | 678.382 | 490.519 |
| 2016          | 261453 | 88811.996  | 49406.891  | 39405.10 | 15.072 | 44.369 | 3336.15 | 1133.24 | 630.434 | 502.811 |
| 2017          | 263685 | 87325.126  | 46751.776  | 40573.35 | 15.387 | 46.462 | 3333.85 | 1104.08 | 591.097 | 512.982 |
| 2018          | 258714 | 87612.144  | 45974.181  | 41637.96 | 16.094 | 47.525 | 3240.73 | 1097.46 | 575.886 | 521.570 |
| 2019          | 261438 | 87797.760  | 44616.820  | 43180.94 | 16.517 | 49.182 | 3242.99 | 1089.08 | 553.447 | 535.635 |
| 2020          | 262288 | 87221.042  | 43145.039  | 44076.00 | 16.804 | 50.534 | 3715.29 | 1235.48 | 611.146 | 624.333 |
| 2021          | 255079 | 82001.292  | 38363.256  | 43638.04 | 17.108 | 53.216 | 3587.82 | 1153.39 | 539.598 | 613.791 |
| 2022          | 257097 | 81915.977  | 36857.104  | 45058.87 | 17.526 | 55.006 | 3588.53 | 1143.37 | 514.448 | 628.927 |
| 2023          | 259080 | 81810.810  | 35387.045  | 46423.76 | 17.919 | 56.745 | 3586.88 | 1132.64 | 489.922 | 642.722 |
| 2024          | 260719 | 81528.303  | 33932.662  | 47595.64 | 18.256 | 58.379 | 3579.65 | 1119.38 | 465.893 | 653.485 |
| 2025          | 257308 | 79599.213  | 32254.788  | 47344.42 | 18.400 | 59.479 | 4112.08 | 1272.09 | 515.469 | 756.619 |
| 2026          | 251528 | 75082.462  | 28588.928  | 46493.53 | 18.484 | 61.923 | 4003.24 | 1194.99 | 455.012 | 739.976 |
| 2027          | 250988 | 74444.425  | 27072.089  | 47372.34 | 18.874 | 63.634 | 3976.53 | 1179.46 | 428.917 | 750.544 |
| 2028          | 250285 | 73699.585  | 25482.524  | 48217.06 | 19.265 | 65.424 | 3945.35 | 1161.76 | 401.692 | 760.067 |
| 2029          | 249525 | 72819.703  | 23958.227  | 48861.48 | 19.582 | 67.099 | 3910.99 | 1141.36 | 375.515 | 765.842 |
| 2030          | 240528 | 69309.277  | 22296.647  | 47012.63 | 19.546 | 67.830 | 4504.36 | 1297.95 | 417.548 | 880.402 |
| 2031          | 235442 | 65433.368  | 19677.772  | 45755.60 | 19.434 | 69.927 | 4397.65 | 1222.18 | 367.546 | 854.635 |
| 2032          | 234017 | 64643.552  | 18430.771  | 46212.78 | 19.748 | 71.489 | 4356.12 | 1203.31 | 334.080 | 860.229 |
| 2033          | 232559 | 63793.514  | 17254.784  | 46538.73 | 20.012 | 72.952 | 4310.93 | 1182.54 | 319.851 | 862.686 |
| 2034          | 230963 | 63032.151  | 16131.530  | 46900.62 | 20.307 | 74.407 | 4260.75 | 1162.80 | 297.590 | 865.210 |
| 2035          | 215822 | 57653.301  | 14692.574  | 42960.73 | 19.906 | 74.516 | 4924.38 | 1315.47 | 335.239 | 980.231 |
| 2036          | 208183 | 52988.733  | 12221.493  | 40767.24 | 19.582 | 76.936 | 4748.94 | 1208.75 | 278.789 | 929.957 |
| 2037          | 205491 | 52026.921  | 11269.237  | 40757.68 | 19.834 | 78.340 | 4682.40 | 1185.50 | 256.785 | 928.718 |
| 2038          | 202834 | 50943.211  | 10337.077  | 40606.13 | 20.019 | 79.709 | 4612.18 | 1158.38 | 235.052 | 923.331 |
| 2039          | 200251 | 50085.991  | 9532.067   | 40553.92 | 20.252 | 80.969 | 4538.65 | 1135.19 | 216.043 | 919.148 |



## Results for PHIM for Run 5 (Sensitivity\_Analysis\_3.RTF)

\*\*\*\*\*

### Main Results for E-Component for Run: 5, Simulation: 1, COD: LUNG CANCER

| Variable Parameter          | Value                                  |
|-----------------------------|----------------------------------------|
| 1. Country                  | US (United States)                     |
| 2. Sex                      | M (Males)                              |
| 3. Year of start of process | 1990                                   |
| 4. Cause of Death           | LUNG CANCER                            |
| 5. Effective Dose NULL      | CC:1                                   |
| 6. Effective Dose Ecig      | CC:1 Ecig:0.05 Dual:0.525              |
| Note:                       | Death rates are per million population |

#### Results for Age Groups Combined and Years combined, Population unadjusted for deaths in Ecig scenario,

| Age Group:All | NULL    | Ecig        | %Drop       |          |        | NULL   | Ecig    | Drop    |         |         |
|---------------|---------|-------------|-------------|----------|--------|--------|---------|---------|---------|---------|
| Year          | Number  | Attrib      | Attrib      | Drop     | %Drop  | Attrib | Death   | Attrib  | Attrib  | Drop    |
|               | Deaths  | Deaths      | Deaths      | Deaths   | Deaths | Deaths | Rate    | Rates   | Rates   | Rates   |
| All Comb      | 3065988 | 2244988.113 | 1716180.930 | 528807.2 | 17.248 | 23.555 | 887.537 | 649.875 | 496.797 | 153.078 |

#### Results for Age Groups Combined, Population unadjusted for deaths in Ecig scenario,

| Age Group:All | NULL   | Ecig      | %Drop     |          |        | NULL   | Ecig    | Drop    |         |         |
|---------------|--------|-----------|-----------|----------|--------|--------|---------|---------|---------|---------|
| Year          | Number | Attrib    | Attrib    | Drop     | %Drop  | Attrib | Death   | Attrib  | Attrib  | Drop    |
|               | Deaths | Deaths    | Deaths    | Deaths   | Deaths | Deaths | Rate    | Rates   | Rates   | Rates   |
| 1990          | 78822  | 63385.736 | 63385.736 | 0.000    | 0.000  | 0.000  | 1249.50 | 1004.81 | 1004.81 | 0.000   |
| 1991          | 78462  | 62918.402 | 62870.284 | 48.118   | 0.061  | 0.076  | 1223.41 | 981.049 | 980.299 | 0.750   |
| 1992          | 77987  | 62366.766 | 62237.535 | 129.231  | 0.166  | 0.207  | 1195.35 | 955.930 | 953.949 | 1.981   |
| 1993          | 78542  | 62652.888 | 62398.335 | 254.552  | 0.324  | 0.406  | 1182.39 | 943.195 | 939.363 | 3.832   |
| 1994          | 77437  | 61565.227 | 61163.407 | 401.820  | 0.519  | 0.653  | 1144.00 | 909.520 | 903.584 | 5.936   |
| 1995          | 76904  | 60851.961 | 60267.044 | 584.917  | 0.761  | 0.961  | 1114.36 | 881.759 | 873.283 | 8.476   |
| 1996          | 76232  | 60122.922 | 59307.147 | 815.774  | 1.070  | 1.357  | 1087.44 | 857.643 | 846.006 | 11.637  |
| 1997          | 75473  | 59237.155 | 58173.060 | 1064.095 | 1.410  | 1.796  | 1059.06 | 831.234 | 816.303 | 14.932  |
| 1998          | 75381  | 58906.696 | 57534.368 | 1372.328 | 1.821  | 2.330  | 1040.37 | 813.001 | 794.060 | 18.940  |
| 1999          | 73159  | 56930.073 | 55254.833 | 1675.240 | 2.290  | 2.943  | 993.781 | 773.329 | 750.573 | 22.756  |
| 2000          | 73784  | 57137.121 | 55066.877 | 2070.244 | 2.806  | 3.623  | 987.608 | 764.787 | 737.077 | 27.710  |
| 2001          | 73294  | 56481.726 | 53965.873 | 2515.854 | 3.433  | 4.454  | 968.273 | 746.169 | 712.933 | 33.236  |
| 2002          | 72442  | 55588.365 | 52603.769 | 2984.596 | 4.120  | 5.369  | 946.293 | 726.138 | 687.151 | 38.987  |
| 2003          | 71942  | 54945.856 | 51441.888 | 3503.969 | 4.871  | 6.377  | 929.989 | 710.281 | 664.985 | 45.296  |
| 2004          | 71301  | 54203.126 | 50126.608 | 4076.517 | 5.717  | 7.521  | 911.778 | 693.135 | 641.006 | 52.129  |
| 2005          | 70964  | 53744.603 | 49075.342 | 4669.261 | 6.580  | 8.688  | 896.937 | 679.296 | 620.279 | 59.016  |
| 2006          | 69658  | 52535.572 | 47244.504 | 5291.068 | 7.596  | 10.071 | 872.383 | 657.945 | 591.681 | 66.264  |
| 2007          | 68565  | 51492.124 | 45585.331 | 5906.793 | 8.615  | 11.471 | 849.888 | 638.264 | 565.047 | 73.217  |
| 2008          | 68226  | 51030.736 | 44377.023 | 6653.713 | 9.752  | 13.039 | 836.215 | 625.460 | 543.909 | 81.551  |
| 2009          | 67509  | 50276.199 | 42874.955 | 7401.244 | 10.963 | 14.721 | 817.667 | 608.943 | 519.300 | 89.644  |
| 2010          | 67196  | 49840.933 | 41688.855 | 8152.078 | 12.132 | 16.356 | 804.000 | 596.347 | 498.807 | 97.540  |
| 2011          | 66506  | 49072.841 | 40093.790 | 8979.051 | 13.501 | 18.297 | 787.880 | 581.354 | 474.981 | 106.373 |
| 2012          | 66155  | 48539.512 | 38672.019 | 9867.493 | 14.916 | 20.329 | 775.240 | 568.812 | 453.180 | 115.633 |
| 2013          | 65333  | 47675.741 | 37016.992 | 10658.75 | 16.314 | 22.357 | 756.876 | 552.318 | 428.838 | 123.480 |
| 2014          | 65033  | 47194.534 | 35708.612 | 11485.92 | 17.662 | 24.337 | 744.602 | 540.359 | 408.850 | 131.509 |
| 2015          | 64145  | 46305.842 | 34099.342 | 12206.50 | 19.030 | 26.361 | 826.215 | 596.439 | 439.214 | 157.225 |
| 2016          | 61618  | 44208.867 | 31578.574 | 12630.29 | 20.498 | 28.570 | 786.248 | 564.107 | 402.944 | 161.163 |
| 2017          | 59897  | 42702.624 | 29580.294 | 13122.33 | 21.908 | 30.730 | 757.297 | 539.903 | 373.993 | 165.910 |
| 2018          | 62468  | 44321.202 | 29569.769 | 14751.43 | 23.614 | 33.283 | 782.490 | 555.181 | 370.400 | 184.781 |
| 2019          | 63045  | 44493.088 | 28651.545 | 15841.54 | 25.127 | 35.605 | 782.035 | 551.912 | 355.406 | 196.505 |
| 2020          | 63466  | 44529.551 | 27671.078 | 16858.47 | 26.563 | 37.859 | 898.991 | 630.757 | 391.959 | 238.799 |
| 2021          | 57113  | 39852.556 | 23775.717 | 16076.84 | 28.149 | 40.341 | 803.323 | 560.546 | 334.417 | 226.129 |
| 2022          | 57440  | 39853.685 | 22762.344 | 17091.34 | 29.755 | 42.885 | 801.745 | 556.274 | 317.715 | 238.559 |
| 2023          | 57738  | 39847.050 | 21755.954 | 18091.10 | 31.333 | 45.401 | 799.366 | 551.670 | 301.204 | 250.466 |
| 2024          | 57942  | 39726.010 | 20744.597 | 18981.41 | 32.759 | 47.781 | 795.539 | 545.435 | 284.822 | 260.614 |
| 2025          | 57521  | 39207.348 | 19625.046 | 19582.30 | 34.044 | 49.945 | 919.257 | 626.579 | 313.631 | 312.948 |
| 2026          | 51428  | 34803.960 | 16584.292 | 18219.67 | 35.428 | 52.349 | 818.510 | 553.929 | 263.950 | 289.978 |
| 2027          | 51172  | 34484.595 | 15583.517 | 18901.08 | 36.937 | 54.810 | 810.740 | 546.357 | 246.898 | 299.459 |
| 2028          | 50870  | 34100.638 | 14553.704 | 19546.93 | 38.425 | 57.321 | 801.884 | 537.544 | 229.417 | 308.127 |
| 2029          | 50540  | 33669.838 | 13577.877 | 20091.96 | 39.755 | 59.673 | 792.146 | 527.732 | 212.816 | 314.916 |
| 2030          | 49109  | 32557.688 | 12542.275 | 20015.41 | 40.757 | 61.477 | 919.662 | 609.705 | 234.878 | 374.827 |
| 2031          | 43585  | 28646.393 | 10431.799 | 18214.59 | 41.791 | 63.584 | 814.096 | 535.065 | 194.848 | 340.217 |
| 2032          | 43163  | 28227.160 | 9677.946  | 18549.21 | 42.975 | 65.714 | 803.454 | 525.435 | 180.150 | 345.285 |
| 2033          | 42725  | 27786.623 | 8971.432  | 18815.19 | 44.038 | 67.713 | 791.996 | 515.079 | 166.303 | 348.776 |
| 2034          | 42256  | 27348.299 | 8310.643  | 19037.66 | 45.053 | 69.612 | 779.523 | 504.514 | 153.313 | 351.202 |
| 2035          | 39748  | 25570.077 | 7496.765  | 18073.31 | 45.469 | 70.681 | 906.933 | 583.430 | 171.053 | 412.377 |
| 2036          | 34030  | 21717.319 | 5838.238  | 15879.08 | 46.662 | 73.117 | 776.269 | 495.402 | 133.178 | 362.224 |
| 2037          | 33454  | 21256.024 | 5340.657  | 15915.37 | 47.574 | 74.875 | 762.289 | 484.347 | 121.694 | 362.653 |
| 2038          | 32883  | 20747.175 | 4863.564  | 15883.61 | 48.303 | 76.558 | 747.720 | 471.764 | 110.591 | 361.173 |
| 2039          | 32325  | 20327.688 | 4459.773  | 15867.92 | 49.088 | 78.061 | 732.644 | 460.724 | 101.080 | 359.644 |

## Results for PHIM for Run 5 (Sensitivity\_Analysis\_3.RTF)

\*\*\*\*\*

### Main Results for E-Component for Run: 5, Simulation: 1, COD: IHD

| Variable Parameter          | Value                                  |
|-----------------------------|----------------------------------------|
| 1. Country                  | US (United States)                     |
| 2. Sex                      | M (Males)                              |
| 3. Year of start of process | 1990                                   |
| 4. Cause of Death           | IHD                                    |
| 5. Effective Dose NULL      | CC:1                                   |
| 6. Effective Dose Ecig      | CC:1 Ecig:0.05 Dual:0.525              |
| Note:                       | Death rates are per million population |

#### Results for Age Groups Combined and Years combined, Population unadjusted for deaths in Ecig scenario,

| Age Group:All |         | NULL        | Ecig       | %Drop    |        | Death  |         | NULL    | Ecig    | Drop    |
|---------------|---------|-------------|------------|----------|--------|--------|---------|---------|---------|---------|
| Year          | Number  | Attrib      | Attrib     | Drop     | %Drop  | Attrib | Rate    | Attrib  | Attrib  | Rates   |
|               | Deaths  | Deaths      | Deaths     | Deaths   | Deaths | Deaths |         | Rates   | Rates   | Rates   |
| All Comb      | 6360041 | 1098877.421 | 511615.279 | 587262.1 | 9.234  | 53.442 | 1841.09 | 318.101 | 148.102 | 170.000 |

#### Results for Age Groups Combined, Population unadjusted for deaths in Ecig scenario,

| Age Group:All |        | NULL      | Ecig      | %Drop    |        | Death  |         | NULL    | Ecig    | Drop    |
|---------------|--------|-----------|-----------|----------|--------|--------|---------|---------|---------|---------|
| Year          | Number | Attrib    | Attrib    | Drop     | %Drop  | Attrib | Rate    | Attrib  | Attrib  | Rates   |
|               | Deaths | Deaths    | Deaths    | Deaths   | Deaths | Deaths |         | Rates   | Rates   | Rates   |
| 1990          | 171484 | 38511.725 | 38511.725 | 0.000    | 0.000  | 0.000  | 2718.40 | 610.497 | 610.497 | 0.000   |
| 1991          | 168044 | 37309.838 | 36996.011 | 313.827  | 0.187  | 0.841  | 2620.21 | 581.750 | 576.857 | 4.893   |
| 1992          | 164548 | 36137.488 | 35292.784 | 844.704  | 0.513  | 2.337  | 2522.12 | 553.899 | 540.952 | 12.947  |
| 1993          | 164362 | 35599.588 | 34035.128 | 1564.460 | 0.952  | 4.395  | 2474.35 | 535.926 | 512.375 | 23.552  |
| 1994          | 159866 | 34336.757 | 31948.382 | 2388.375 | 1.494  | 6.956  | 2361.75 | 507.267 | 471.982 | 35.284  |
| 1995          | 158083 | 33455.759 | 30115.624 | 3340.135 | 2.113  | 9.984  | 2290.66 | 484.782 | 436.382 | 48.399  |
| 1996          | 154875 | 32193.824 | 27843.104 | 4350.720 | 2.809  | 13.514 | 2209.26 | 459.239 | 397.177 | 62.062  |
| 1997          | 149970 | 30665.509 | 25334.901 | 5330.608 | 3.554  | 17.383 | 2104.43 | 430.308 | 355.507 | 74.801  |
| 1998          | 145407 | 29188.430 | 22939.719 | 6248.712 | 4.297  | 21.408 | 2006.83 | 402.844 | 316.602 | 86.242  |
| 1999          | 165952 | 33375.386 | 24678.384 | 8697.001 | 5.241  | 26.058 | 2254.27 | 453.366 | 335.227 | 118.139 |
| 2000          | 160260 | 32024.754 | 22282.924 | 9741.830 | 6.079  | 30.420 | 2145.10 | 428.655 | 298.260 | 130.396 |
| 2001          | 154444 | 30682.393 | 19856.350 | 10826.04 | 7.010  | 35.284 | 2040.33 | 405.339 | 262.318 | 143.021 |
| 2002          | 151887 | 30218.370 | 18120.813 | 12097.56 | 7.965  | 40.034 | 1984.06 | 394.736 | 236.708 | 158.028 |
| 2003          | 146733 | 29175.202 | 16138.229 | 13036.97 | 8.885  | 44.685 | 1896.81 | 377.146 | 208.618 | 168.528 |
| 2004          | 138381 | 27488.687 | 13962.759 | 13525.93 | 9.774  | 49.205 | 1769.58 | 351.518 | 178.552 | 172.966 |
| 2005          | 135881 | 27017.439 | 12614.209 | 14403.23 | 10.600 | 53.311 | 1717.44 | 341.482 | 159.435 | 182.047 |
| 2006          | 131922 | 26231.435 | 11081.329 | 15150.11 | 11.484 | 57.756 | 1652.16 | 328.517 | 138.780 | 189.737 |
| 2007          | 126502 | 25103.049 | 9635.707  | 15467.34 | 12.227 | 61.615 | 1568.04 | 311.161 | 119.438 | 191.723 |
| 2008          | 125859 | 24621.740 | 8663.918  | 15957.82 | 12.679 | 64.812 | 1542.60 | 301.777 | 106.190 | 195.588 |
| 2009          | 122428 | 23741.177 | 7623.014  | 16118.16 | 13.165 | 67.891 | 1482.84 | 287.552 | 92.330  | 195.223 |
| 2010          | 120537 | 23189.160 | 6810.609  | 16378.55 | 13.588 | 70.630 | 1442.22 | 277.458 | 81.489  | 195.969 |
| 2011          | 120221 | 22786.927 | 6053.573  | 16733.35 | 13.919 | 73.434 | 1424.23 | 269.951 | 71.715  | 198.236 |
| 2012          | 120927 | 22485.295 | 5438.750  | 17046.54 | 14.097 | 75.812 | 1417.09 | 263.495 | 63.734  | 199.761 |
| 2013          | 122648 | 22251.884 | 4919.928  | 17331.96 | 14.131 | 77.890 | 1420.86 | 257.786 | 56.997  | 200.789 |
| 2014          | 123229 | 21894.593 | 4429.009  | 17465.58 | 14.173 | 79.771 | 1410.92 | 250.685 | 50.710  | 199.974 |
| 2015          | 123774 | 21471.109 | 4002.552  | 17468.56 | 14.113 | 81.358 | 1594.26 | 276.557 | 51.555  | 225.002 |
| 2016          | 126218 | 21411.568 | 3620.687  | 17790.88 | 14.095 | 83.090 | 1610.55 | 273.213 | 46.200  | 227.012 |
| 2017          | 128265 | 21169.399 | 3279.000  | 17890.40 | 13.948 | 84.511 | 1621.69 | 267.651 | 41.457  | 226.194 |
| 2018          | 121429 | 19830.576 | 2779.463  | 17051.11 | 14.042 | 85.984 | 1521.05 | 248.404 | 34.816  | 213.587 |
| 2019          | 121832 | 19431.014 | 2516.593  | 16914.42 | 13.883 | 87.049 | 1511.26 | 241.031 | 31.217  | 209.814 |
| 2020          | 120811 | 18532.612 | 2237.615  | 16295.00 | 13.488 | 87.926 | 1711.27 | 262.513 | 31.696  | 230.817 |
| 2021          | 119407 | 18234.128 | 1996.639  | 16237.49 | 13.598 | 89.050 | 1679.51 | 256.472 | 28.084  | 228.388 |
| 2022          | 119438 | 17812.559 | 1797.293  | 16015.27 | 13.409 | 89.910 | 1667.10 | 248.626 | 25.086  | 223.539 |
| 2023          | 119445 | 17361.668 | 1616.877  | 15744.79 | 13.182 | 90.687 | 1653.68 | 240.367 | 22.385  | 217.982 |
| 2024          | 119305 | 16929.676 | 1471.948  | 15457.73 | 12.956 | 91.306 | 1638.05 | 232.443 | 20.210  | 212.234 |
| 2025          | 115685 | 15501.666 | 1281.182  | 14220.48 | 12.292 | 91.735 | 1848.78 | 247.735 | 20.475  | 227.260 |
| 2026          | 115073 | 15523.814 | 1187.194  | 14336.62 | 12.459 | 92.352 | 1831.46 | 247.072 | 18.895  | 228.177 |
| 2027          | 113989 | 15073.070 | 1088.932  | 13984.14 | 12.268 | 92.776 | 1805.98 | 238.810 | 17.252  | 221.558 |
| 2028          | 112855 | 14636.710 | 992.448   | 13644.26 | 12.090 | 93.219 | 1778.98 | 230.725 | 15.644  | 215.081 |
| 2029          | 111718 | 14180.166 | 908.319   | 13271.85 | 11.880 | 93.594 | 1751.04 | 222.256 | 14.237  | 208.019 |
| 2030          | 104851 | 12111.772 | 758.646   | 11353.13 | 10.828 | 93.736 | 1963.54 | 226.816 | 14.207  | 212.609 |
| 2031          | 105289 | 12417.367 | 743.332   | 11674.03 | 11.088 | 94.014 | 1966.62 | 231.935 | 13.884  | 218.051 |
| 2032          | 103879 | 12054.064 | 693.072   | 11360.99 | 10.937 | 94.250 | 1933.67 | 224.381 | 12.901  | 211.479 |
| 2033          | 102485 | 11672.389 | 641.630   | 11030.76 | 10.763 | 94.503 | 1899.76 | 216.370 | 11.894  | 204.476 |
| 2034          | 101070 | 11365.762 | 598.074   | 10767.69 | 10.654 | 94.738 | 1864.51 | 209.673 | 11.033  | 198.639 |
| 2035          | 90820  | 8580.360  | 448.088   | 8132.272 | 8.954  | 94.778 | 2072.23 | 195.777 | 10.224  | 185.553 |
| 2036          | 92117  | 8948.841  | 447.586   | 8501.254 | 9.229  | 94.998 | 2101.31 | 204.135 | 10.210  | 193.925 |
| 2037          | 90327  | 8624.570  | 423.184   | 8201.386 | 9.080  | 95.093 | 2058.21 | 196.522 | 9.643   | 186.880 |
| 2038          | 88590  | 8315.017  | 394.527   | 7920.490 | 8.941  | 95.255 | 2014.42 | 189.073 | 8.971   | 180.102 |
| 2039          | 86921  | 8001.132  | 363.515   | 7637.617 | 8.787  | 95.457 | 1970.05 | 181.344 | 8.239   | 173.105 |

## Results for PHIM for Run 5 (Sensitivity\_Analysis\_3.RTF)

\*\*\*\*\*

### Main Results for E-Component for Run: 5, Simulation: 1, COD: STROKE

| Variable Parameter          | Value                                  |
|-----------------------------|----------------------------------------|
| 1. Country                  | US (United States)                     |
| 2. Sex                      | M (Males)                              |
| 3. Year of start of process | 1990                                   |
| 4. Cause of Death           | STROKE                                 |
| 5. Effective Dose NULL      | CC:1                                   |
| 6. Effective Dose Ecig      | CC:1 Ecig:0.05 Dual:0.525              |
| Note:                       | Death rates are per million population |

#### Results for Age Groups Combined and Years combined, Population unadjusted for deaths in Ecig scenario,

| Age Group:All |         | NULL       | Ecig      | %Drop    |        | NULL   | Ecig    | Drop   |        |        |
|---------------|---------|------------|-----------|----------|--------|--------|---------|--------|--------|--------|
| Year          | Number  | Attrib     | Attrib    | Drop     | %Drop  | Attrib | Death   | Attrib | Drop   |        |
|               | Deaths  | Deaths     | Deaths    | Deaths   | Deaths | Deaths | Rate    | Rates  | Rates  |        |
| All Comb      | 1489699 | 149918.462 | 69015.718 | 80902.74 | 5.431  | 53.964 | 431.236 | 43.398 | 19.979 | 23.420 |

#### Results for Age Groups Combined, Population unadjusted for deaths in Ecig scenario,

| Age Group:All |        | NULL     | Ecig     | %Drop    |        | NULL   | Ecig    | Drop   |        |        |
|---------------|--------|----------|----------|----------|--------|--------|---------|--------|--------|--------|
| Year          | Number | Attrib   | Attrib   | Drop     | %Drop  | Attrib | Death   | Attrib | Drop   |        |
|               | Deaths | Deaths   | Deaths   | Deaths   | Deaths | Deaths | Rate    | Rates  | Rates  |        |
| 1990          | 32862  | 4613.166 | 4613.166 | 0.000    | 0.000  | 0.000  | 520.936 | 73.129 | 0.000  |        |
| 1991          | 32619  | 4555.566 | 4515.509 | 40.057   | 0.123  | 0.879  | 508.609 | 71.032 | 70.408 | 0.625  |
| 1992          | 32100  | 4453.572 | 4348.478 | 105.094  | 0.327  | 2.360  | 492.014 | 68.262 | 66.652 | 1.611  |
| 1993          | 32896  | 4462.473 | 4263.823 | 198.651  | 0.604  | 4.452  | 495.226 | 67.179 | 64.189 | 2.991  |
| 1994          | 33323  | 4499.513 | 4185.843 | 313.670  | 0.941  | 6.971  | 492.290 | 66.473 | 61.839 | 4.634  |
| 1995          | 33569  | 4472.774 | 4027.879 | 444.895  | 1.325  | 9.947  | 486.422 | 64.812 | 58.365 | 6.447  |
| 1996          | 33870  | 4406.878 | 3816.819 | 590.059  | 1.742  | 13.390 | 483.150 | 62.863 | 54.446 | 8.417  |
| 1997          | 33516  | 4288.158 | 3550.760 | 737.398  | 2.200  | 17.196 | 470.307 | 60.173 | 49.825 | 10.347 |
| 1998          | 32795  | 4120.148 | 3248.088 | 872.060  | 2.659  | 21.166 | 452.620 | 56.864 | 44.828 | 12.036 |
| 1999          | 33375  | 3982.443 | 2976.152 | 1006.290 | 3.015  | 25.268 | 453.361 | 54.097 | 40.428 | 13.669 |
| 2000          | 33459  | 4021.411 | 2838.174 | 1183.237 | 3.536  | 29.423 | 447.853 | 53.827 | 37.989 | 15.838 |
| 2001          | 32275  | 3848.092 | 2545.805 | 1302.287 | 4.035  | 33.842 | 426.379 | 50.836 | 33.632 | 17.204 |
| 2002          | 31586  | 3783.081 | 2341.649 | 1441.432 | 4.564  | 38.102 | 412.601 | 49.418 | 30.588 | 18.829 |
| 2003          | 30985  | 3754.415 | 2158.778 | 1595.637 | 5.150  | 42.500 | 400.541 | 48.533 | 27.906 | 20.627 |
| 2004          | 29884  | 3666.274 | 1954.045 | 1712.230 | 5.730  | 46.702 | 382.149 | 46.883 | 24.988 | 21.896 |
| 2005          | 28708  | 3589.688 | 1766.423 | 1823.265 | 6.351  | 50.792 | 362.850 | 45.371 | 22.326 | 23.045 |
| 2006          | 28188  | 3596.985 | 1621.592 | 1975.392 | 7.008  | 54.918 | 353.021 | 45.048 | 20.308 | 24.739 |
| 2007          | 28026  | 3560.798 | 1472.441 | 2088.357 | 7.451  | 58.649 | 347.392 | 44.137 | 18.251 | 25.886 |
| 2008          | 27128  | 3417.001 | 1295.717 | 2121.284 | 7.820  | 62.080 | 332.495 | 41.881 | 15.881 | 26.000 |
| 2009          | 27068  | 3394.390 | 1179.389 | 2215.001 | 8.183  | 65.255 | 327.847 | 41.113 | 14.285 | 26.828 |
| 2010          | 26911  | 3340.137 | 1067.395 | 2272.742 | 8.445  | 68.043 | 321.990 | 39.965 | 12.771 | 27.193 |
| 2011          | 26959  | 3285.435 | 961.977  | 2323.458 | 8.618  | 70.720 | 319.377 | 38.922 | 11.396 | 27.525 |
| 2012          | 27057  | 3259.209 | 867.772  | 2391.438 | 8.839  | 73.375 | 317.068 | 38.193 | 10.169 | 28.024 |
| 2013          | 27904  | 3274.703 | 796.496  | 2478.207 | 8.881  | 75.677 | 323.265 | 37.937 | 9.227  | 28.710 |
| 2014          | 28792  | 3298.083 | 730.418  | 2567.664 | 8.918  | 77.853 | 329.657 | 37.762 | 8.363  | 29.399 |
| 2015          | 29560  | 3244.406 | 661.882  | 2582.524 | 8.737  | 79.599 | 380.745 | 41.789 | 8.525  | 33.264 |
| 2016          | 30513  | 3314.836 | 616.952  | 2697.884 | 8.842  | 81.388 | 389.347 | 42.297 | 7.872  | 34.425 |
| 2017          | 31416  | 3333.314 | 567.042  | 2766.271 | 8.805  | 82.989 | 397.202 | 42.144 | 7.169  | 34.975 |
| 2018          | 29348  | 2925.242 | 459.619  | 2465.622 | 8.401  | 84.288 | 367.626 | 36.642 | 5.757  | 30.885 |
| 2019          | 29598  | 2864.628 | 415.255  | 2449.373 | 8.275  | 85.504 | 367.149 | 35.534 | 5.151  | 30.383 |
| 2020          | 29592  | 2730.366 | 367.067  | 2363.299 | 7.986  | 86.556 | 419.174 | 38.675 | 5.199  | 33.476 |
| 2021          | 30097  | 2647.911 | 328.473  | 2319.438 | 7.707  | 87.595 | 423.328 | 37.244 | 4.620  | 32.624 |
| 2022          | 30304  | 2586.165 | 294.962  | 2291.202 | 7.561  | 88.595 | 422.974 | 36.097 | 4.117  | 31.980 |
| 2023          | 30505  | 2517.960 | 265.078  | 2252.882 | 7.385  | 89.473 | 422.337 | 34.860 | 3.670  | 31.190 |
| 2024          | 30661  | 2454.161 | 240.745  | 2213.416 | 7.219  | 90.190 | 420.968 | 33.695 | 3.305  | 30.390 |
| 2025          | 30254  | 2275.364 | 209.127  | 2066.237 | 6.830  | 90.809 | 483.488 | 36.363 | 3.342  | 33.021 |
| 2026          | 30685  | 2183.166 | 187.425  | 1995.741 | 6.504  | 91.415 | 488.380 | 34.747 | 2.983  | 31.764 |
| 2027          | 30561  | 2112.345 | 170.461  | 1941.884 | 6.354  | 91.930 | 484.196 | 33.467 | 2.701  | 30.766 |
| 2028          | 30412  | 2046.677 | 155.047  | 1891.630 | 6.220  | 92.424 | 479.392 | 32.263 | 2.444  | 29.819 |
| 2029          | 30254  | 1977.671 | 140.959  | 1836.713 | 6.071  | 92.872 | 474.195 | 30.997 | 2.209  | 28.788 |
| 2030          | 29330  | 1744.457 | 119.038  | 1625.418 | 5.542  | 93.176 | 549.260 | 32.668 | 2.229  | 30.439 |
| 2031          | 28976  | 1653.738 | 107.676  | 1546.062 | 5.336  | 93.489 | 541.223 | 30.889 | 2.011  | 28.878 |
| 2032          | 28724  | 1603.120 | 98.783   | 1504.337 | 5.237  | 93.838 | 534.690 | 29.841 | 1.839  | 28.003 |
| 2033          | 28464  | 1548.245 | 91.011   | 1457.233 | 5.120  | 94.122 | 527.627 | 28.700 | 1.687  | 27.013 |
| 2034          | 28178  | 1511.985 | 84.890   | 1427.094 | 5.065  | 94.386 | 519.826 | 27.893 | 1.566  | 26.327 |
| 2035          | 26737  | 1239.866 | 67.536   | 1172.329 | 4.385  | 94.553 | 610.065 | 28.290 | 1.541  | 26.749 |
| 2036          | 25591  | 1182.522 | 61.632   | 1120.889 | 4.380  | 94.788 | 583.762 | 26.975 | 1.406  | 25.569 |
| 2037          | 25143  | 1134.483 | 57.813   | 1076.670 | 4.282  | 94.904 | 572.916 | 25.851 | 1.317  | 24.533 |
| 2038          | 24693  | 1093.537 | 53.613   | 1039.924 | 4.211  | 95.097 | 561.491 | 24.866 | 1.219  | 23.647 |
| 2039          | 24247  | 1047.905 | 49.041   | 998.864  | 4.120  | 95.320 | 549.553 | 23.751 | 1.112  | 22.639 |

## Results for PHIM for Run 5 (Sensitivity\_Analysis\_3.RTF)

\*\*\*\*\*

### Main Results for E-Component for Run: 5, Simulation: 1, COD: COPD

| Variable Parameter          | Value                                  |
|-----------------------------|----------------------------------------|
| 1. Country                  | US (United States)                     |
| 2. Sex                      | M (Males)                              |
| 3. Year of start of process | 1990                                   |
| 4. Cause of Death           | COPD                                   |
| 5. Effective Dose NULL      | CC:1                                   |
| 6. Effective Dose Ecig      | CC:1 Ecig:0.05 Dual:0.525              |
| Note:                       | Death rates are per million population |

#### Results for Age Groups Combined and Years combined, Population unadjusted for deaths in Ecig scenario,

| Age Group:All | NULL    | Ecig        | %Drop      |          |        |        | NULL    | Ecig    | Drop    |        |
|---------------|---------|-------------|------------|----------|--------|--------|---------|---------|---------|--------|
| Year          | Number  | Attrib      | Attrib     | Drop     | %Drop  | Attrib | Death   | Attrib  | Attrib  | Drop   |
|               | Deaths  | Deaths      | Deaths     | Deaths   | Deaths | Deaths | Rate    | Rates   | Rates   | Rates  |
| All Comb      | 2233143 | 1015606.587 | 673389.972 | 342216.6 | 15.324 | 33.696 | 646.447 | 293.996 | 194.932 | 99.064 |

#### Results for Age Groups Combined, Population unadjusted for deaths in Ecig scenario,

| Age Group:All | NULL   | Ecig      | %Drop     |          |        |        | NULL    | Ecig    | Drop    |         |
|---------------|--------|-----------|-----------|----------|--------|--------|---------|---------|---------|---------|
| Year          | Number | Attrib    | Attrib    | Drop     | %Drop  | Attrib | Death   | Attrib  | Attrib  | Drop    |
|               | Deaths | Deaths    | Deaths    | Deaths   | Deaths | Deaths | Rate    | Rates   | Rates   | Rates   |
| 1990          | 33993  | 19262.437 | 19262.437 | 0.000    | 0.000  | 0.000  | 538.865 | 305.353 | 305.353 | 0.000   |
| 1991          | 34092  | 19215.636 | 19193.448 | 22.188   | 0.065  | 0.115  | 531.576 | 299.618 | 299.272 | 0.346   |
| 1992          | 33942  | 19056.189 | 18998.212 | 57.978   | 0.171  | 0.304  | 520.248 | 292.085 | 291.196 | 0.889   |
| 1993          | 35913  | 20095.670 | 19976.798 | 118.872  | 0.331  | 0.592  | 540.645 | 302.526 | 300.736 | 1.790   |
| 1994          | 35074  | 19524.095 | 19341.848 | 182.247  | 0.520  | 0.933  | 518.158 | 288.435 | 285.743 | 2.692   |
| 1995          | 34669  | 19116.002 | 18854.526 | 261.476  | 0.754  | 1.368  | 502.362 | 276.995 | 273.206 | 3.789   |
| 1996          | 34582  | 18975.021 | 18617.148 | 357.873  | 1.035  | 1.886  | 493.306 | 270.675 | 265.570 | 5.105   |
| 1997          | 35267  | 19169.025 | 18692.966 | 476.058  | 1.350  | 2.483  | 494.878 | 268.986 | 262.306 | 6.680   |
| 1998          | 35675  | 19228.937 | 18615.141 | 613.797  | 1.721  | 3.192  | 492.368 | 265.388 | 256.917 | 8.471   |
| 1999          | 38516  | 20589.820 | 19782.076 | 807.745  | 2.097  | 3.923  | 523.195 | 279.689 | 268.717 | 10.972  |
| 2000          | 36283  | 19196.417 | 18281.019 | 915.399  | 2.523  | 4.769  | 485.652 | 256.946 | 244.694 | 12.253  |
| 2001          | 36281  | 19012.731 | 17903.177 | 1109.555 | 3.058  | 5.836  | 479.301 | 251.174 | 236.515 | 14.658  |
| 2002          | 35983  | 18699.357 | 17399.813 | 1299.544 | 3.612  | 6.950  | 470.038 | 244.265 | 227.290 | 16.976  |
| 2003          | 36205  | 18663.550 | 17144.888 | 1518.662 | 4.195  | 8.137  | 468.019 | 241.262 | 221.631 | 19.632  |
| 2004          | 34611  | 17679.164 | 15994.455 | 1684.709 | 4.868  | 9.529  | 442.596 | 226.076 | 204.533 | 21.544  |
| 2005          | 36826  | 18692.832 | 16655.049 | 2037.783 | 5.534  | 10.901 | 465.456 | 236.265 | 210.509 | 25.756  |
| 2006          | 34350  | 17308.564 | 15143.877 | 2164.687 | 6.302  | 12.506 | 430.192 | 216.769 | 189.659 | 27.110  |
| 2007          | 35326  | 17683.181 | 15176.484 | 2506.697 | 7.096  | 14.176 | 437.879 | 219.189 | 188.118 | 31.071  |
| 2008          | 38248  | 19006.374 | 16012.187 | 2994.188 | 7.828  | 15.754 | 468.788 | 232.952 | 196.254 | 36.698  |
| 2009          | 36902  | 18205.573 | 14983.795 | 3221.777 | 8.731  | 17.697 | 446.956 | 220.505 | 181.483 | 39.022  |
| 2010          | 37234  | 18237.758 | 14702.856 | 3534.903 | 9.494  | 19.382 | 445.505 | 218.215 | 175.520 | 42.295  |
| 2011          | 38093  | 18487.916 | 14497.368 | 3990.549 | 10.476 | 21.585 | 451.279 | 219.022 | 171.747 | 47.275  |
| 2012          | 38504  | 18491.158 | 14115.607 | 4375.552 | 11.364 | 23.663 | 451.211 | 216.689 | 165.414 | 51.275  |
| 2013          | 40290  | 19143.452 | 14235.596 | 4907.857 | 12.181 | 25.637 | 466.755 | 221.775 | 164.918 | 56.857  |
| 2014          | 40339  | 18992.005 | 13712.476 | 5279.529 | 13.088 | 27.799 | 461.866 | 217.451 | 157.003 | 60.449  |
| 2015          | 42303  | 19728.885 | 13903.937 | 5824.948 | 13.770 | 29.525 | 544.880 | 254.116 | 179.089 | 75.028  |
| 2016          | 43104  | 19876.724 | 13590.678 | 6286.046 | 14.583 | 31.625 | 550.009 | 253.628 | 173.418 | 80.210  |
| 2017          | 44107  | 20119.790 | 13325.440 | 6794.351 | 15.404 | 33.769 | 557.659 | 254.381 | 168.478 | 85.903  |
| 2018          | 45469  | 20535.123 | 13165.329 | 7369.794 | 16.208 | 35.889 | 569.564 | 257.229 | 164.913 | 92.316  |
| 2019          | 46963  | 21009.029 | 13033.427 | 7975.602 | 16.983 | 37.963 | 582.552 | 260.605 | 161.672 | 98.933  |
| 2020          | 48419  | 21428.512 | 12869.278 | 8559.234 | 17.677 | 39.943 | 685.853 | 303.533 | 182.292 | 121.241 |
| 2021          | 48463  | 21266.697 | 12262.427 | 9004.271 | 18.580 | 42.340 | 681.652 | 299.127 | 172.477 | 126.650 |
| 2022          | 49915  | 21663.568 | 12002.505 | 9661.063 | 19.355 | 44.596 | 696.712 | 302.378 | 167.530 | 134.848 |
| 2023          | 51391  | 22084.131 | 11749.136 | 10334.99 | 20.111 | 46.798 | 711.491 | 305.748 | 162.663 | 143.085 |
| 2024          | 52811  | 22418.456 | 11475.372 | 10943.08 | 20.721 | 48.813 | 725.093 | 307.804 | 157.556 | 150.248 |
| 2025          | 53848  | 22614.834 | 11139.433 | 11475.40 | 21.311 | 50.743 | 860.553 | 361.411 | 178.021 | 183.390 |
| 2026          | 54342  | 22571.522 | 10630.017 | 11941.50 | 21.975 | 52.905 | 864.886 | 359.241 | 169.184 | 190.057 |
| 2027          | 55267  | 22774.416 | 10229.180 | 12545.24 | 22.699 | 55.085 | 875.619 | 360.827 | 162.066 | 198.761 |
| 2028          | 56149  | 22915.561 | 9781.325  | 13134.24 | 23.392 | 57.316 | 885.102 | 361.228 | 154.187 | 207.041 |
| 2029          | 57014  | 22992.027 | 9331.073  | 13660.95 | 23.961 | 59.416 | 893.616 | 360.371 | 146.253 | 214.118 |
| 2030          | 57238  | 22895.360 | 8876.688  | 14018.67 | 24.492 | 61.229 | 1071.90 | 428.760 | 166.233 | 262.527 |
| 2031          | 57592  | 22715.871 | 8394.966  | 14320.90 | 24.866 | 63.044 | 1075.71 | 424.293 | 156.803 | 267.490 |
| 2032          | 58251  | 22759.207 | 7960.970  | 14798.24 | 25.404 | 65.021 | 1084.31 | 423.652 | 148.190 | 275.462 |
| 2033          | 58885  | 22786.258 | 7550.710  | 15235.55 | 25.874 | 66.863 | 1091.54 | 422.387 | 139.967 | 282.420 |
| 2034          | 59460  | 22806.106 | 7137.923  | 15668.18 | 26.351 | 68.702 | 1096.89 | 420.721 | 131.678 | 289.042 |
| 2035          | 58516  | 22262.998 | 6680.185  | 15582.81 | 26.630 | 69.994 | 1335.15 | 507.973 | 152.421 | 355.552 |
| 2036          | 56446  | 21140.051 | 5874.036  | 15266.02 | 27.045 | 72.214 | 1287.60 | 482.234 | 133.995 | 348.239 |
| 2037          | 56568  | 21011.845 | 5447.582  | 15564.26 | 27.514 | 74.074 | 1288.98 | 478.783 | 124.130 | 354.652 |
| 2038          | 56668  | 20787.483 | 5025.373  | 15762.11 | 27.815 | 75.825 | 1288.55 | 472.681 | 114.271 | 358.410 |
| 2039          | 56758  | 20709.267 | 4659.739  | 16049.53 | 28.277 | 77.499 | 1286.40 | 469.372 | 105.612 | 363.760 |

## Results for PHIM for Run 5 (Sensitivity\_Analysis\_3.RTF)

\*\*\*\*\*

### Main Results for E-Component for Run: 5, Simulation: 1, COD: Four Diseases Combined, Adjusted

| Variable Parameter          | Value                                  |
|-----------------------------|----------------------------------------|
| 1. Country                  | US (United States)                     |
| 2. Sex                      | M (Males)                              |
| 3. Year of start of process | 1990                                   |
| 4. Cause of Death           | Four Diseases Combined                 |
| 5. Effective Dose NULL      | CC:1                                   |
| 6. Effective Dose Ecig      | CC:1 Ecig:0.05 Dual:0.525              |
| Note:                       | Death rates are per million population |

#### Results for Age Groups Combined and Years combined, Population and Number deaths adjusted for Ecig scenario,

| Age Group:All | NULL     | Ecig        | %Drop       |         |        |        | NULL    | Ecig    | Drop    |         |
|---------------|----------|-------------|-------------|---------|--------|--------|---------|---------|---------|---------|
| Year          | Number   | Attrib      | Attrib      | Drop    | %Drop  | Attrib | Death   | Attrib  | Drop    |         |
|               | Deaths   | Deaths      | Deaths      | Deaths  | Deaths | Deaths | Rate    | Rates   | Rates   |         |
| All Comb      | 13292663 | 4509390.583 | 2987933.371 | 1521457 | 11.446 | 33.740 | 3815.68 | 1305.37 | 857.691 | 447.680 |

#### Results for Age Groups Combined, Population and Number deaths adjusted for Ecig scenario,

| Age Group:All | NULL   | Ecig       | %Drop      |          |        |        | NULL    | Ecig    | Drop    |
|---------------|--------|------------|------------|----------|--------|--------|---------|---------|---------|
| Year          | Number | Attrib     | Attrib     | Drop     | %Drop  | Attrib | Death   | Attrib  | Drop    |
|               | Deaths | Deaths     | Deaths     | Deaths   | Deaths | Deaths | Rate    | Rates   | Rates   |
| 1990          | 317161 | 125773.065 | 125773.065 | 0.000    | 0.000  | 0.000  | 5027.71 | 1993.78 | 0.000   |
| 1991          | 313217 | 123999.442 | 123575.252 | 424.190  | 0.135  | 0.342  | 4883.81 | 1933.45 | 6.614   |
| 1992          | 308580 | 122014.015 | 120878.126 | 1135.889 | 0.368  | 0.931  | 4729.74 | 1870.18 | 17.423  |
| 1993          | 311723 | 122810.618 | 120678.071 | 2132.547 | 0.684  | 1.736  | 4692.65 | 1848.83 | 32.148  |
| 1994          | 305723 | 119925.592 | 116648.653 | 3276.939 | 1.072  | 2.732  | 4516.28 | 1771.69 | 48.510  |
| 1995          | 303268 | 117896.496 | 113281.714 | 4614.782 | 1.522  | 3.914  | 4393.95 | 1708.35 | 67.044  |
| 1996          | 299629 | 115698.645 | 109610.793 | 6087.852 | 2.032  | 5.262  | 4273.40 | 1650.42 | 87.117  |
| 1997          | 294330 | 113359.847 | 105790.742 | 7569.105 | 2.572  | 6.677  | 4129.04 | 1590.70 | 106.606 |
| 1998          | 289405 | 111444.212 | 102391.361 | 9052.851 | 3.128  | 8.123  | 3992.71 | 1538.10 | 125.475 |
| 1999          | 311219 | 114877.722 | 102765.728 | 12111.99 | 3.892  | 10.543 | 4225.40 | 1560.48 | 165.237 |
| 2000          | 304072 | 112379.704 | 98565.223  | 13814.48 | 4.543  | 12.293 | 4067.27 | 1504.22 | 185.807 |
| 2001          | 296654 | 110024.943 | 94390.264  | 15634.68 | 5.270  | 14.210 | 3915.61 | 1453.52 | 207.641 |
| 2002          | 292346 | 108289.173 | 90610.154  | 17679.02 | 6.047  | 16.326 | 3814.66 | 1414.56 | 232.237 |
| 2003          | 286407 | 106539.023 | 87054.346  | 19484.68 | 6.803  | 18.289 | 3697.37 | 1377.22 | 253.393 |
| 2004          | 274807 | 103037.251 | 82232.649  | 20804.60 | 7.571  | 20.191 | 3508.46 | 1317.61 | 267.747 |
| 2005          | 273123 | 103044.562 | 80336.712  | 22707.85 | 8.314  | 22.037 | 3445.49 | 1302.41 | 288.953 |
| 2006          | 264963 | 99672.555  | 75339.076  | 24333.48 | 9.184  | 24.413 | 3310.96 | 1248.28 | 306.848 |
| 2007          | 259379 | 97839.152  | 72144.550  | 25694.60 | 9.906  | 26.262 | 3206.86 | 1212.75 | 320.786 |
| 2008          | 260566 | 98075.852  | 70656.684  | 27419.17 | 10.523 | 27.957 | 3184.33 | 1202.07 | 338.590 |
| 2009          | 255139 | 95617.338  | 66993.273  | 28624.07 | 11.219 | 29.936 | 3080.06 | 1158.11 | 349.364 |
| 2010          | 253253 | 94607.988  | 64630.705  | 29977.28 | 11.837 | 31.686 | 3019.04 | 1131.98 | 361.521 |
| 2011          | 253316 | 93633.119  | 61993.877  | 31639.24 | 12.490 | 33.791 | 2988.76 | 1109.25 | 377.811 |
| 2012          | 254358 | 92775.175  | 59506.890  | 33268.28 | 13.079 | 35.859 | 2967.35 | 1087.19 | 392.978 |
| 2013          | 258100 | 92345.780  | 57409.710  | 34936.07 | 13.536 | 37.832 | 2975.40 | 1069.82 | 407.991 |
| 2014          | 259523 | 91379.215  | 55046.519  | 36332.70 | 14.000 | 39.760 | 2955.57 | 1046.26 | 419.361 |
| 2015          | 262147 | 90750.242  | 53161.072  | 37589.17 | 14.339 | 41.420 | 3354.54 | 1168.90 | 488.630 |
| 2016          | 264046 | 88811.996  | 49912.226  | 38899.77 | 14.732 | 43.800 | 3345.51 | 1133.24 | 500.849 |
| 2017          | 266529 | 87325.126  | 47271.779  | 40053.35 | 15.028 | 45.867 | 3344.27 | 1104.08 | 510.937 |
| 2018          | 261723 | 87612.144  | 46527.735  | 41084.41 | 15.698 | 46.894 | 3251.79 | 1097.46 | 519.370 |
| 2019          | 264718 | 87797.760  | 45197.079  | 42600.68 | 16.093 | 48.521 | 3255.20 | 1089.08 | 533.300 |
| 2020          | 265854 | 87221.042  | 43750.685  | 43470.36 | 16.351 | 49.839 | 3726.52 | 1235.48 | 622.218 |
| 2021          | 258785 | 82001.292  | 38941.975  | 43059.32 | 16.639 | 52.511 | 3599.61 | 1153.39 | 611.719 |
| 2022          | 261080 | 81915.977  | 37450.832  | 44465.14 | 17.031 | 54.281 | 3601.45 | 1143.37 | 626.762 |
| 2023          | 263353 | 81810.810  | 35994.523  | 45816.29 | 17.397 | 56.003 | 3601.00 | 1132.64 | 640.469 |
| 2024          | 265290 | 81528.303  | 34552.592  | 46975.71 | 17.707 | 57.619 | 3595.05 | 1119.38 | 651.143 |
| 2025          | 262162 | 79599.213  | 32883.295  | 46715.92 | 17.819 | 58.689 | 4125.25 | 1272.09 | 754.654 |
| 2026          | 256528 | 75082.462  | 29181.180  | 45901.28 | 17.893 | 61.134 | 4016.95 | 1194.99 | 738.043 |
| 2027          | 256252 | 74444.425  | 27664.839  | 46779.59 | 18.255 | 62.838 | 3991.44 | 1179.46 | 748.546 |
| 2028          | 255815 | 73699.585  | 26071.926  | 47627.66 | 18.618 | 64.624 | 3961.53 | 1161.76 | 758.012 |
| 2029          | 255325 | 72819.703  | 24542.311  | 48277.39 | 18.908 | 66.297 | 3928.49 | 1141.36 | 763.744 |
| 2030          | 246533 | 69309.277  | 22873.468  | 46435.81 | 18.836 | 66.998 | 4518.68 | 1297.95 | 878.703 |
| 2031          | 241559 | 65433.368  | 20211.332  | 45222.04 | 18.721 | 69.112 | 4412.15 | 1222.18 | 853.016 |
| 2032          | 240374 | 64643.552  | 18954.121  | 45689.43 | 19.008 | 70.679 | 4371.83 | 1203.31 | 858.579 |
| 2033          | 239155 | 63793.514  | 17767.739  | 46025.77 | 19.245 | 72.148 | 4327.89 | 1182.54 | 861.001 |
| 2034          | 237793 | 63032.151  | 16633.270  | 46398.88 | 19.512 | 73.611 | 4278.98 | 1162.80 | 863.492 |
| 2035          | 222667 | 57653.301  | 15176.312  | 42476.99 | 19.076 | 73.677 | 4939.65 | 1315.47 | 978.799 |
| 2036          | 214955 | 52988.733  | 12636.510  | 40352.22 | 18.772 | 76.152 | 4762.93 | 1208.75 | 928.749 |
| 2037          | 212411 | 52026.921  | 11666.059  | 40360.86 | 19.001 | 77.577 | 4697.27 | 1185.50 | 927.518 |
| 2038          | 209896 | 50943.211  | 10714.342  | 40228.87 | 19.166 | 78.968 | 4627.97 | 1158.38 | 922.144 |
| 2039          | 207452 | 50085.991  | 9892.035   | 40193.96 | 19.375 | 80.250 | 4555.35 | 1135.19 | 917.975 |

## Results for PHIM for Run 5 (Sensitivity\_Analysis\_3.RTF)

\*\*\*\*\*

### Main Results for E-Component for Run: 5, Simulation: 1, COD: LUNG CANCER, Adjusted

| Variable Parameter          | Value                                  |
|-----------------------------|----------------------------------------|
| 1. Country                  | US (United States)                     |
| 2. Sex                      | M (Males)                              |
| 3. Year of start of process | 1990                                   |
| 4. Cause of Death           | LUNG CANCER                            |
| 5. Effective Dose NULL      | CC:1                                   |
| 6. Effective Dose Ecig      | CC:1 Ecig:0.05 Dual:0.525              |
| Note:                       | Death rates are per million population |

#### Results for Age Groups Combined and Years combined, Population and Number deaths adjusted for Ecig scenario,

| Age Group:All |         | NULL        | Ecig        | %Drop    |        |        | NULL    | Ecig    | Drop    |         |
|---------------|---------|-------------|-------------|----------|--------|--------|---------|---------|---------|---------|
| Year          | Number  | Attrib      | Attrib      | Drop     | %Drop  | Attrib | Death   | Attrib  | Attrib  | Drop    |
|               | Deaths  | Deaths      | Deaths      | Deaths   | Deaths | Deaths | Rate    | Rates   | Rates   | Rates   |
| All Comb      | 3095951 | 2244988.113 | 1726661.817 | 518326.3 | 16.742 | 23.088 | 888.698 | 649.875 | 495.641 | 154.234 |

#### Results for Age Groups Combined, Population and Number deaths adjusted for Ecig scenario,

| Age Group:All |        | NULL      | Ecig      | %Drop    |        |        | NULL    | Ecig    | Drop    |         |
|---------------|--------|-----------|-----------|----------|--------|--------|---------|---------|---------|---------|
| Year          | Number | Attrib    | Attrib    | Drop     | %Drop  | Attrib | Death   | Attrib  | Attrib  | Drop    |
|               | Deaths | Deaths    | Deaths    | Deaths   | Deaths | Deaths | Rate    | Rates   | Rates   | Rates   |
| 1990          | 78822  | 63385.736 | 63385.736 | 0.000    | 0.000  | 0.000  | 1249.50 | 1004.81 | 1004.81 | 0.000   |
| 1991          | 78462  | 62918.402 | 62870.284 | 48.118   | 0.061  | 0.076  | 1223.41 | 981.049 | 980.299 | 0.750   |
| 1992          | 77988  | 62366.766 | 62238.117 | 128.649  | 0.165  | 0.206  | 1195.35 | 955.930 | 953.951 | 1.978   |
| 1993          | 78545  | 62652.888 | 62400.410 | 252.478  | 0.321  | 0.403  | 1182.40 | 943.195 | 939.371 | 3.824   |
| 1994          | 77443  | 61565.227 | 61168.248 | 396.979  | 0.513  | 0.645  | 1144.02 | 909.520 | 903.604 | 5.916   |
| 1995          | 76915  | 60851.961 | 60275.948 | 576.013  | 0.749  | 0.947  | 1114.40 | 881.759 | 873.319 | 8.440   |
| 1996          | 76251  | 60122.922 | 59321.610 | 801.312  | 1.051  | 1.333  | 1087.51 | 857.643 | 846.064 | 11.579  |
| 1997          | 75501  | 59237.155 | 58194.657 | 1042.498 | 1.381  | 1.760  | 1059.17 | 831.234 | 816.389 | 14.846  |
| 1998          | 75421  | 58906.696 | 57564.930 | 1341.766 | 1.779  | 2.278  | 1040.53 | 813.001 | 794.183 | 18.818  |
| 1999          | 73212  | 56930.073 | 55295.058 | 1635.015 | 2.233  | 2.872  | 993.997 | 773.329 | 750.738 | 22.591  |
| 2000          | 73856  | 57137.121 | 55120.951 | 2016.170 | 2.730  | 3.529  | 987.901 | 764.787 | 737.298 | 27.489  |
| 2001          | 73387  | 56481.726 | 54034.392 | 2447.334 | 3.335  | 4.333  | 968.648 | 746.169 | 713.212 | 32.958  |
| 2002          | 72558  | 55588.365 | 52688.099 | 2900.266 | 3.997  | 5.217  | 946.764 | 726.138 | 687.497 | 38.642  |
| 2003          | 72083  | 54945.856 | 51543.401 | 3402.455 | 4.720  | 6.192  | 930.563 | 710.281 | 665.400 | 44.881  |
| 2004          | 71471  | 54203.126 | 50246.288 | 3956.838 | 5.536  | 7.300  | 912.466 | 693.135 | 641.495 | 51.640  |
| 2005          | 71164  | 53744.603 | 49214.438 | 4530.165 | 6.366  | 8.429  | 897.750 | 679.296 | 620.848 | 58.447  |
| 2006          | 69888  | 52535.572 | 47401.390 | 5134.182 | 7.346  | 9.773  | 873.320 | 657.945 | 592.324 | 65.621  |
| 2007          | 68828  | 51492.124 | 45760.648 | 5731.476 | 8.327  | 11.131 | 850.960 | 638.264 | 565.766 | 72.497  |
| 2008          | 68526  | 51030.736 | 44572.488 | 6458.248 | 9.425  | 12.656 | 837.436 | 625.460 | 544.711 | 80.749  |
| 2009          | 67846  | 50276.199 | 43089.805 | 7186.393 | 10.592 | 14.294 | 819.044 | 608.943 | 520.185 | 88.759  |
| 2010          | 67574  | 49840.933 | 41924.367 | 7916.566 | 11.715 | 15.884 | 805.550 | 596.347 | 499.781 | 96.566  |
| 2011          | 66924  | 49072.841 | 40347.238 | 8725.603 | 13.038 | 17.781 | 789.610 | 581.354 | 476.039 | 105.315 |
| 2012          | 66616  | 48539.512 | 38943.514 | 9595.998 | 14.405 | 19.769 | 777.152 | 568.812 | 454.317 | 114.495 |
| 2013          | 65837  | 47675.741 | 37304.621 | 10371.12 | 15.753 | 21.753 | 758.975 | 552.318 | 430.052 | 122.267 |
| 2014          | 65586  | 47194.534 | 36014.926 | 11179.61 | 17.046 | 23.688 | 746.925 | 540.359 | 410.155 | 130.204 |
| 2015          | 64743  | 46305.842 | 34419.899 | 11885.94 | 18.359 | 25.668 | 728.477 | 526.439 | 400.452 | 155.987 |
| 2016          | 62244  | 44208.867 | 31902.738 | 12306.13 | 19.771 | 27.836 | 708.644 | 514.107 | 404.212 | 159.895 |
| 2017          | 60558  | 42702.624 | 29910.379 | 12792.24 | 21.124 | 29.957 | 692.856 | 503.903 | 375.300 | 164.603 |
| 2018          | 63213  | 44321.202 | 29927.004 | 14394.20 | 22.771 | 32.477 | 675.387 | 500.181 | 371.829 | 183.351 |
| 2019          | 63855  | 44493.088 | 29025.285 | 15467.80 | 24.223 | 34.765 | 665.218 | 500.181 | 356.920 | 194.992 |
| 2020          | 64345  | 44529.551 | 28060.229 | 16469.32 | 25.595 | 36.985 | 655.938 | 500.181 | 343.325 | 202.613 |
| 2021          | 57962  | 39852.556 | 24135.360 | 15717.20 | 27.116 | 39.438 | 646.235 | 500.181 | 335.715 | 224.831 |
| 2022          | 58351  | 39853.685 | 23129.964 | 16723.72 | 28.661 | 41.963 | 637.914 | 500.181 | 328.065 | 237.209 |
| 2023          | 58712  | 39847.050 | 22130.315 | 17716.74 | 30.176 | 44.462 | 629.806 | 500.181 | 320.602 | 249.068 |
| 2024          | 58980  | 39726.010 | 21124.392 | 18601.62 | 31.539 | 46.825 | 622.265 | 500.181 | 312.665 | 259.171 |
| 2025          | 58622  | 39207.348 | 20007.808 | 19199.54 | 32.751 | 48.969 | 615.447 | 500.181 | 304.832 | 271.747 |
| 2026          | 52470  | 34803.960 | 16928.451 | 17875.51 | 34.068 | 51.361 | 608.628 | 500.181 | 296.081 | 288.848 |
| 2027          | 52266  | 34484.595 | 15925.250 | 18559.34 | 35.509 | 53.819 | 601.106 | 500.181 | 287.357 | 298.301 |
| 2028          | 52016  | 34100.638 | 14890.720 | 19209.92 | 36.931 | 56.333 | 593.509 | 500.181 | 278.544 | 306.947 |
| 2029          | 51737  | 33669.838 | 13909.139 | 19760.70 | 38.194 | 58.690 | 586.037 | 500.181 | 269.732 | 313.723 |
| 2030          | 50349  | 32557.688 | 12866.597 | 19691.09 | 39.109 | 60.481 | 578.838 | 500.181 | 260.905 | 320.874 |
| 2031          | 44733  | 28646.393 | 10714.667 | 17931.73 | 40.086 | 62.597 | 571.062 | 500.181 | 252.065 | 328.358 |
| 2032          | 44351  | 28227.160 | 9952.666  | 18274.49 | 41.204 | 64.741 | 563.638 | 500.181 | 243.235 | 335.420 |
| 2033          | 43953  | 27786.623 | 9237.932  | 18548.69 | 42.201 | 66.754 | 556.406 | 500.181 | 234.402 | 342.504 |
| 2034          | 43522  | 27348.299 | 8568.774  | 18779.53 | 43.149 | 68.668 | 549.159 | 500.181 | 225.569 | 349.633 |
| 2035          | 41019  | 25570.077 | 7743.066  | 17827.01 | 43.460 | 69.718 | 541.968 | 500.181 | 216.736 | 356.762 |
| 2036          | 35140  | 21717.319 | 6035.363  | 15681.96 | 44.627 | 72.209 | 534.726 | 500.181 | 207.903 | 363.891 |
| 2037          | 34583  | 21256.024 | 5527.521  | 15728.50 | 45.480 | 73.996 | 527.480 | 500.181 | 199.070 | 371.020 |
| 2038          | 34031  | 20747.175 | 5039.843  | 15707.33 | 46.156 | 75.708 | 520.234 | 500.181 | 190.237 | 378.149 |
| 2039          | 33490  | 20327.688 | 4626.889  | 15700.80 | 46.882 | 77.238 | 513.002 | 500.181 | 181.404 | 385.278 |

## Results for PHIM for Run 5 (Sensitivity\_Analysis\_3.RTF)

\*\*\*\*\*

### Main Results for E-Component for Run: 5, Simulation: 1, COD: IHD, Adjusted

| Variable Parameter          | Value                                  |
|-----------------------------|----------------------------------------|
| 1. Country                  | US (United States)                     |
| 2. Sex                      | M (Males)                              |
| 3. Year of start of process | 1990                                   |
| 4. Cause of Death           | IHD                                    |
| 5. Effective Dose NULL      | CC:1                                   |
| 6. Effective Dose Ecig      | CC:1 Ecig:0.05 Dual:0.525              |
| Note:                       | Death rates are per million population |

### Results for Age Groups Combined and Years combined, Population and Number deaths adjusted for Ecig scenario,

| Age Group:All |         | NULL        | Ecig       | %Drop    |        |        | NULL    | Ecig    | Drop    |         |
|---------------|---------|-------------|------------|----------|--------|--------|---------|---------|---------|---------|
| Year          | Number  | Attrib      | Attrib     | Drop     | %Drop  | Attrib | Death   | Attrib  | Drop    |         |
|               | Deaths  | Deaths      | Deaths     | Deaths   | Deaths | Deaths | Rate    | Rates   | Rates   |         |
| All Comb      | 6423555 | 1098877.421 | 512739.668 | 586137.8 | 9.125  | 53.340 | 1843.89 | 318.101 | 147.183 | 170.918 |

### Results for Age Groups Combined, Population and Number deaths adjusted for Ecig scenario,

| Age Group:All |        | NULL      | Ecig      | %Drop    |        |        | NULL    | Ecig    | Drop    |         |
|---------------|--------|-----------|-----------|----------|--------|--------|---------|---------|---------|---------|
| Year          | Number | Attrib    | Attrib    | Drop     | %Drop  | Attrib | Death   | Attrib  | Drop    |         |
|               | Deaths | Deaths    | Deaths    | Deaths   | Deaths | Deaths | Rate    | Rates   | Rates   |         |
| 1990          | 171484 | 38511.725 | 38511.725 | 0.000    | 0.000  | 0.000  | 2718.40 | 610.497 | 0.000   |         |
| 1991          | 168044 | 37309.838 | 36996.011 | 313.827  | 0.187  | 0.841  | 2620.21 | 581.750 | 576.857 | 4.893   |
| 1992          | 164549 | 36137.488 | 35293.115 | 844.373  | 0.513  | 2.337  | 2522.12 | 553.899 | 540.953 | 12.946  |
| 1993          | 164367 | 35599.588 | 34036.280 | 1563.308 | 0.951  | 4.391  | 2474.37 | 535.926 | 512.379 | 23.547  |
| 1994          | 159878 | 34336.757 | 31950.951 | 2385.807 | 1.492  | 6.948  | 2361.79 | 507.267 | 471.993 | 35.273  |
| 1995          | 158105 | 33455.759 | 30120.169 | 3335.590 | 2.110  | 9.970  | 2290.74 | 484.782 | 436.401 | 48.380  |
| 1996          | 154911 | 32193.824 | 27850.054 | 4343.770 | 2.804  | 13.493 | 2209.39 | 459.239 | 397.206 | 62.033  |
| 1997          | 150023 | 30665.509 | 25344.552 | 5320.957 | 3.547  | 17.352 | 2104.61 | 430.308 | 355.548 | 74.760  |
| 1998          | 145480 | 29188.430 | 22952.216 | 6236.214 | 4.287  | 21.365 | 2007.09 | 402.844 | 316.656 | 86.188  |
| 1999          | 166067 | 33375.386 | 24696.747 | 8678.639 | 5.226  | 26.003 | 2254.69 | 453.366 | 335.306 | 118.060 |
| 2000          | 160410 | 32024.754 | 22305.360 | 9719.394 | 6.059  | 30.350 | 2145.65 | 428.655 | 298.357 | 130.299 |
| 2001          | 154631 | 30682.393 | 19882.196 | 10800.20 | 6.984  | 35.200 | 2041.01 | 405.339 | 262.429 | 142.910 |
| 2002          | 152119 | 30218.370 | 18150.479 | 12067.89 | 7.933  | 39.936 | 1984.91 | 394.736 | 236.835 | 157.901 |
| 2003          | 147010 | 29175.202 | 16170.717 | 13004.49 | 8.846  | 44.574 | 1897.82 | 377.146 | 208.756 | 168.390 |
| 2004          | 138696 | 27488.687 | 13996.656 | 13492.03 | 9.728  | 49.082 | 1770.74 | 351.518 | 178.695 | 172.822 |
| 2005          | 136249 | 27017.439 | 12650.411 | 14367.03 | 10.545 | 53.177 | 1718.80 | 341.482 | 159.587 | 181.895 |
| 2006          | 132340 | 26231.435 | 11118.361 | 15113.07 | 11.420 | 57.614 | 1653.71 | 328.517 | 138.934 | 189.583 |
| 2007          | 126967 | 25103.049 | 9672.827  | 15430.22 | 12.153 | 61.468 | 1569.77 | 311.161 | 119.591 | 191.570 |
| 2008          | 126390 | 24621.740 | 8702.052  | 15919.69 | 12.596 | 64.657 | 1544.58 | 301.777 | 106.346 | 195.431 |
| 2009          | 123015 | 23741.177 | 7661.045  | 16080.13 | 13.072 | 67.731 | 1485.05 | 287.552 | 92.485  | 195.067 |
| 2010          | 121186 | 23189.160 | 6848.669  | 16340.49 | 13.484 | 70.466 | 1444.66 | 277.458 | 81.643  | 195.815 |
| 2011          | 120944 | 22786.927 | 6091.185  | 16695.74 | 13.805 | 73.269 | 1426.96 | 269.951 | 71.867  | 198.084 |
| 2012          | 121736 | 22485.295 | 5476.163  | 17009.13 | 13.972 | 75.646 | 1420.18 | 263.495 | 63.885  | 199.610 |
| 2013          | 123555 | 22251.884 | 4957.180  | 17294.70 | 13.998 | 77.722 | 1424.36 | 257.786 | 57.147  | 200.639 |
| 2014          | 124232 | 21894.593 | 4465.773  | 17428.82 | 14.029 | 79.603 | 1414.82 | 250.685 | 50.858  | 199.826 |
| 2015          | 124882 | 21471.109 | 4038.918  | 17432.19 | 13.959 | 81.189 | 1598.05 | 276.557 | 51.684  | 224.873 |
| 2016          | 127450 | 21411.568 | 3656.393  | 17755.18 | 13.931 | 82.923 | 1614.81 | 273.213 | 46.327  | 226.885 |
| 2017          | 129627 | 21169.399 | 3313.967  | 17855.43 | 13.775 | 84.345 | 1626.49 | 267.651 | 41.582  | 226.069 |
| 2018          | 122809 | 19830.576 | 2811.010  | 17019.57 | 13.859 | 85.825 | 1525.84 | 248.404 | 34.926  | 213.478 |
| 2019          | 123324 | 19431.014 | 2547.193  | 16883.82 | 13.691 | 86.891 | 1516.50 | 241.031 | 31.322  | 209.708 |
| 2020          | 122418 | 18532.612 | 2267.134  | 16265.48 | 13.287 | 87.767 | 1715.96 | 262.513 | 31.779  | 230.734 |
| 2021          | 121095 | 18234.128 | 2024.319  | 16209.81 | 13.386 | 88.898 | 1684.39 | 256.472 | 28.158  | 228.314 |
| 2022          | 121237 | 17812.559 | 1823.577  | 15988.98 | 13.188 | 89.762 | 1672.40 | 248.626 | 25.155  | 223.471 |
| 2023          | 121360 | 17361.668 | 1641.804  | 15719.86 | 12.953 | 90.544 | 1659.43 | 240.367 | 22.449  | 217.917 |
| 2024          | 121336 | 16929.676 | 1495.868  | 15433.81 | 12.720 | 91.164 | 1644.27 | 232.443 | 20.271  | 212.172 |
| 2025          | 117819 | 15501.666 | 1303.828  | 14197.84 | 12.051 | 91.589 | 1853.94 | 247.735 | 20.516  | 227.218 |
| 2026          | 117292 | 15523.814 | 1208.751  | 14315.06 | 12.205 | 92.214 | 1836.66 | 247.072 | 18.928  | 228.144 |
| 2027          | 116305 | 15073.070 | 1109.543  | 13963.53 | 12.006 | 92.639 | 1811.59 | 238.810 | 17.283  | 221.528 |
| 2028          | 115267 | 14636.710 | 1012.075  | 13624.63 | 11.820 | 93.085 | 1785.02 | 230.725 | 15.673  | 215.052 |
| 2029          | 114227 | 14180.166 | 927.039   | 13253.13 | 11.602 | 93.462 | 1757.52 | 222.256 | 14.264  | 207.993 |
| 2030          | 107409 | 12111.772 | 775.957   | 11335.82 | 10.554 | 93.593 | 1968.68 | 226.816 | 14.222  | 212.594 |
| 2031          | 107944 | 12417.367 | 760.502   | 11656.86 | 10.799 | 93.875 | 1971.62 | 231.935 | 13.891  | 218.044 |
| 2032          | 106614 | 12054.064 | 709.576   | 11344.49 | 10.641 | 94.113 | 1939.05 | 224.381 | 12.905  | 211.475 |
| 2033          | 105298 | 11672.389 | 657.494   | 11014.89 | 10.461 | 94.367 | 1905.53 | 216.370 | 11.898  | 204.472 |
| 2034          | 103957 | 11365.762 | 613.487   | 10752.28 | 10.343 | 94.602 | 1870.66 | 209.673 | 11.039  | 198.633 |
| 2035          | 93639  | 8580.360  | 461.268   | 8119.092 | 8.671  | 94.624 | 2077.29 | 195.777 | 10.233  | 185.545 |
| 2036          | 95035  | 8948.841  | 460.826   | 8488.015 | 8.932  | 94.850 | 2105.76 | 204.135 | 10.211  | 193.924 |
| 2037          | 93285  | 8624.570  | 436.067   | 8188.503 | 8.778  | 94.944 | 2062.91 | 196.522 | 9.643   | 186.879 |
| 2038          | 91586  | 8315.017  | 406.890   | 7908.126 | 8.635  | 95.107 | 2019.36 | 189.073 | 8.971   | 180.101 |
| 2039          | 89953  | 8001.132  | 375.289   | 7625.843 | 8.478  | 95.310 | 1975.24 | 181.344 | 8.241   | 173.104 |

## Results for PHIM for Run 5 (Sensitivity\_Analysis\_3.RTF)

\*\*\*\*\*

### Main Results for E-Component for Run: 5, Simulation: 1, COD: STROKE, Adjusted

| Variable Parameter          | Value                                  |
|-----------------------------|----------------------------------------|
| 1. Country                  | US (United States)                     |
| 2. Sex                      | M (Males)                              |
| 3. Year of start of process | 1990                                   |
| 4. Cause of Death           | STROKE                                 |
| 5. Effective Dose NULL      | CC:1                                   |
| 6. Effective Dose Ecig      | CC:1 Ecig:0.05 Dual:0.525              |
| Note:                       | Death rates are per million population |

#### Results for Age Groups Combined and Years combined, Population and Number deaths adjusted for Ecig scenario,

| Age Group:All | NULL    | Ecig       | %Drop     |          |        |        | NULL    | Ecig   | Drop   |        |
|---------------|---------|------------|-----------|----------|--------|--------|---------|--------|--------|--------|
| Year          | Number  | Attrib     | Attrib    | Drop     | %Drop  | Attrib | Death   | Attrib | Attrib | Drop   |
|               | Deaths  | Deaths     | Deaths    | Deaths   | Deaths | Deaths | Rate    | Rates  | Rates  | Rates  |
| All Comb      | 1506951 | 149918.462 | 69182.161 | 80736.30 | 5.358  | 53.853 | 432.573 | 43.398 | 19.859 | 23.539 |

#### Results for Age Groups Combined, Population and Number deaths adjusted for Ecig scenario,

| Age Group:All | NULL   | Ecig     | %Drop    |          |        |        | NULL    | Ecig   | Drop   |        |
|---------------|--------|----------|----------|----------|--------|--------|---------|--------|--------|--------|
| Year          | Number | Attrib   | Attrib   | Drop     | %Drop  | Attrib | Death   | Attrib | Attrib | Drop   |
|               | Deaths | Deaths   | Deaths   | Deaths   | Deaths | Deaths | Rate    | Rates  | Rates  | Rates  |
| 1990          | 32862  | 4613.166 | 4613.166 | 0.000    | 0.000  | 0.000  | 520.936 | 73.129 | 73.129 | 0.000  |
| 1991          | 32619  | 4555.566 | 4515.509 | 40.057   | 0.123  | 0.879  | 508.609 | 71.032 | 70.408 | 0.625  |
| 1992          | 32100  | 4453.572 | 4348.519 | 105.054  | 0.327  | 2.359  | 492.015 | 68.262 | 66.652 | 1.611  |
| 1993          | 32897  | 4462.473 | 4263.966 | 198.507  | 0.603  | 4.448  | 495.229 | 67.179 | 64.189 | 2.990  |
| 1994          | 33325  | 4499.513 | 4186.176 | 313.337  | 0.940  | 6.964  | 492.297 | 66.473 | 61.840 | 4.633  |
| 1995          | 33574  | 4472.774 | 4028.482 | 444.292  | 1.323  | 9.933  | 486.436 | 64.812 | 58.367 | 6.444  |
| 1996          | 33878  | 4406.878 | 3817.765 | 589.113  | 1.739  | 13.368 | 483.172 | 62.863 | 54.450 | 8.413  |
| 1997          | 33527  | 4288.158 | 3552.101 | 736.057  | 2.195  | 17.165 | 470.341 | 60.173 | 49.831 | 10.342 |
| 1998          | 32811  | 4120.148 | 3249.843 | 870.306  | 2.652  | 21.123 | 452.668 | 56.864 | 44.836 | 12.028 |
| 1999          | 33397  | 3982.443 | 2978.335 | 1004.107 | 3.007  | 25.213 | 453.431 | 54.097 | 40.437 | 13.660 |
| 2000          | 33489  | 4021.411 | 2840.993 | 1180.418 | 3.525  | 29.353 | 447.950 | 53.827 | 38.001 | 15.826 |
| 2001          | 32312  | 3848.092 | 2549.060 | 1299.033 | 4.020  | 33.758 | 426.499 | 50.836 | 33.646 | 17.191 |
| 2002          | 31633  | 3783.081 | 2345.421 | 1437.661 | 4.545  | 38.002 | 412.754 | 49.418 | 30.604 | 18.813 |
| 2003          | 31041  | 3754.415 | 2163.004 | 1591.411 | 5.127  | 42.388 | 400.726 | 48.533 | 27.923 | 20.610 |
| 2004          | 29950  | 3666.274 | 1958.652 | 1707.622 | 5.702  | 46.576 | 382.371 | 46.883 | 25.006 | 21.877 |
| 2005          | 28784  | 3589.688 | 1771.334 | 1818.354 | 6.317  | 50.655 | 363.109 | 45.371 | 22.346 | 23.026 |
| 2006          | 28275  | 3596.985 | 1626.827 | 1970.157 | 6.968  | 54.772 | 353.325 | 45.048 | 20.329 | 24.719 |
| 2007          | 28127  | 3560.798 | 1477.897 | 2082.901 | 7.405  | 58.495 | 347.746 | 44.137 | 18.272 | 25.865 |
| 2008          | 27240  | 3417.001 | 1301.178 | 2115.823 | 7.767  | 61.920 | 332.891 | 41.881 | 15.901 | 25.979 |
| 2009          | 27195  | 3394.390 | 1184.998 | 2209.391 | 8.124  | 65.090 | 328.301 | 41.113 | 14.305 | 26.807 |
| 2010          | 27053  | 3340.137 | 1073.079 | 2267.059 | 8.380  | 67.873 | 322.505 | 39.965 | 12.792 | 27.173 |
| 2011          | 27119  | 3285.435 | 967.694  | 2317.741 | 8.547  | 70.546 | 319.966 | 38.922 | 11.417 | 27.504 |
| 2012          | 27236  | 3259.209 | 873.425  | 2385.784 | 8.760  | 73.201 | 317.732 | 38.193 | 10.189 | 28.004 |
| 2013          | 28109  | 3274.703 | 802.211  | 2472.492 | 8.796  | 75.503 | 324.038 | 37.937 | 9.248  | 28.689 |
| 2014          | 29024  | 3298.083 | 736.118  | 2561.965 | 8.827  | 77.680 | 330.540 | 37.762 | 8.383  | 29.379 |
| 2015          | 29824  | 3244.406 | 667.571  | 2576.835 | 8.640  | 79.424 | 381.636 | 41.789 | 8.543  | 33.247 |
| 2016          | 30809  | 3314.836 | 622.675  | 2692.161 | 8.738  | 81.216 | 390.357 | 42.297 | 7.889  | 34.408 |
| 2017          | 31748  | 3333.314 | 572.718  | 2760.596 | 8.695  | 82.818 | 398.354 | 42.144 | 7.186  | 34.958 |
| 2018          | 29687  | 2925.242 | 464.650  | 2460.592 | 8.288  | 84.116 | 368.851 | 36.642 | 5.773  | 30.869 |
| 2019          | 29967  | 2864.628 | 420.116  | 2444.512 | 8.157  | 85.334 | 368.503 | 35.534 | 5.166  | 30.368 |
| 2020          | 29993  | 2730.366 | 371.740  | 2358.627 | 7.864  | 86.385 | 420.419 | 38.675 | 5.211  | 33.465 |
| 2021          | 30536  | 2647.911 | 332.930  | 2314.981 | 7.581  | 87.427 | 424.743 | 37.244 | 4.631  | 32.613 |
| 2022          | 30775  | 2586.165 | 299.189  | 2286.975 | 7.431  | 88.431 | 424.525 | 36.097 | 4.127  | 31.970 |
| 2023          | 31011  | 2517.960 | 269.089  | 2248.871 | 7.252  | 89.313 | 424.034 | 34.860 | 3.679  | 31.181 |
| 2024          | 31201  | 2454.161 | 244.584  | 2209.576 | 7.082  | 90.034 | 422.820 | 33.695 | 3.314  | 30.381 |
| 2025          | 30827  | 2275.364 | 212.753  | 2062.611 | 6.691  | 90.650 | 485.083 | 36.363 | 3.348  | 33.015 |
| 2026          | 31303  | 2183.166 | 190.835  | 1992.332 | 6.365  | 91.259 | 490.171 | 34.747 | 2.988  | 31.758 |
| 2027          | 31211  | 2112.345 | 173.700  | 1938.644 | 6.212  | 91.777 | 486.143 | 33.467 | 2.706  | 30.761 |
| 2028          | 31093  | 2046.677 | 158.130  | 1888.547 | 6.074  | 92.274 | 481.502 | 32.263 | 2.449  | 29.814 |
| 2029          | 30968  | 1977.671 | 143.872  | 1833.799 | 5.922  | 92.725 | 476.476 | 30.997 | 2.214  | 28.784 |
| 2030          | 30070  | 1744.457 | 121.732  | 1622.725 | 5.397  | 93.022 | 551.146 | 32.668 | 2.231  | 30.437 |
| 2031          | 29743  | 1653.738 | 110.194  | 1543.543 | 5.190  | 93.337 | 543.259 | 30.889 | 2.013  | 28.876 |
| 2032          | 29520  | 1603.120 | 101.167  | 1501.953 | 5.088  | 93.689 | 536.893 | 29.841 | 1.840  | 28.001 |
| 2033          | 29287  | 1548.245 | 93.288   | 1454.956 | 4.968  | 93.975 | 529.999 | 28.700 | 1.688  | 27.012 |
| 2034          | 29029  | 1511.985 | 87.097   | 1424.888 | 4.908  | 94.240 | 522.371 | 27.893 | 1.567  | 26.325 |
| 2035          | 27597  | 1239.866 | 69.478   | 1170.388 | 4.241  | 94.396 | 612.204 | 28.290 | 1.541  | 26.749 |
| 2036          | 26444  | 1182.522 | 63.446   | 1119.076 | 4.232  | 94.635 | 585.951 | 26.975 | 1.406  | 25.569 |
| 2037          | 26012  | 1134.483 | 59.563   | 1074.920 | 4.132  | 94.750 | 575.229 | 25.851 | 1.317  | 24.534 |
| 2038          | 25576  | 1093.537 | 55.280   | 1038.257 | 4.059  | 94.945 | 563.932 | 24.866 | 1.219  | 23.647 |
| 2039          | 25144  | 1047.905 | 50.610   | 997.295  | 3.966  | 95.170 | 552.118 | 23.751 | 1.111  | 22.639 |



## Results for PHIM for Run 5 (Sensitivity\_Analysis\_3.RTF)

\*\*\*\*\*

### Main Results for E-Component for Run: 5, Simulation: 1, COD: COPD, Adjusted

| Variable Parameter          | Value                                  |
|-----------------------------|----------------------------------------|
| 1. Country                  | US (United States)                     |
| 2. Sex                      | M (Males)                              |
| 3. Year of start of process | 1990                                   |
| 4. Cause of Death           | COPD                                   |
| 5. Effective Dose NULL      | CC:1                                   |
| 6. Effective Dose Ecig      | CC:1 Ecig:0.05 Dual:0.525              |
| Note:                       | Death rates are per million population |

#### Results for Age Groups Combined and Years combined, Population and Number deaths adjusted for Ecig scenario,

| Age Group:All | NULL    | Ecig        | %Drop      |          |        |        | NULL    | Ecig    | Drop    |        |
|---------------|---------|-------------|------------|----------|--------|--------|---------|---------|---------|--------|
| Year          | Number  | Attrib      | Attrib     | Drop     | %Drop  | Attrib | Death   | Attrib  | Attrib  | Drop   |
|               | Deaths  | Deaths      | Deaths     | Deaths   | Deaths | Deaths | Rate    | Rates   | Rates   | Rates  |
| All Comb      | 2266207 | 1015606.587 | 679349.724 | 336256.9 | 14.838 | 33.109 | 650.518 | 293.996 | 195.008 | 98.988 |

#### Results for Age Groups Combined, Population and Number deaths adjusted for Ecig scenario,

| Age Group:All | NULL   | Ecig      | %Drop     |          |        |        | NULL    | Ecig    | Drop    |         |
|---------------|--------|-----------|-----------|----------|--------|--------|---------|---------|---------|---------|
| Year          | Number | Attrib    | Attrib    | Drop     | %Drop  | Attrib | Death   | Attrib  | Attrib  | Drop    |
|               | Deaths | Deaths    | Deaths    | Deaths   | Deaths | Deaths | Rate    | Rates   | Rates   | Rates   |
| 1990          | 33993  | 19262.437 | 19262.437 | 0.000    | 0.000  | 0.000  | 538.865 | 305.353 | 305.353 | 0.000   |
| 1991          | 34092  | 19215.636 | 19193.448 | 22.188   | 0.065  | 0.115  | 531.576 | 299.618 | 299.272 | 0.346   |
| 1992          | 33942  | 19056.189 | 18998.376 | 57.813   | 0.170  | 0.303  | 520.249 | 292.085 | 291.197 | 0.888   |
| 1993          | 35914  | 20095.670 | 19977.414 | 118.255  | 0.329  | 0.588  | 540.648 | 302.526 | 300.738 | 1.788   |
| 1994          | 35077  | 19524.095 | 19343.278 | 180.817  | 0.515  | 0.926  | 518.166 | 288.435 | 285.747 | 2.688   |
| 1995          | 34674  | 19116.002 | 18857.114 | 258.888  | 0.747  | 1.354  | 502.376 | 276.995 | 273.215 | 3.781   |
| 1996          | 34590  | 18975.021 | 18621.364 | 353.657  | 1.022  | 1.864  | 493.330 | 270.675 | 265.584 | 5.092   |
| 1997          | 35279  | 19169.025 | 18699.432 | 469.593  | 1.331  | 2.450  | 494.916 | 268.986 | 262.327 | 6.659   |
| 1998          | 35693  | 19228.937 | 18624.372 | 604.565  | 1.694  | 3.144  | 492.425 | 265.388 | 256.947 | 8.441   |
| 1999          | 38542  | 20589.820 | 19795.589 | 794.232  | 2.061  | 3.857  | 523.285 | 279.689 | 268.764 | 10.925  |
| 2000          | 36316  | 19196.417 | 18297.918 | 898.500  | 2.474  | 4.681  | 485.767 | 256.946 | 244.753 | 12.193  |
| 2001          | 36324  | 19012.731 | 17924.616 | 1088.115 | 2.996  | 5.723  | 479.450 | 251.174 | 236.591 | 14.583  |
| 2002          | 36037  | 18699.357 | 17426.155 | 1273.202 | 3.533  | 6.809  | 470.227 | 244.265 | 227.384 | 16.882  |
| 2003          | 36273  | 18663.550 | 17177.225 | 1486.325 | 4.098  | 7.964  | 468.264 | 241.262 | 221.750 | 19.513  |
| 2004          | 34690  | 17679.164 | 16031.053 | 1648.110 | 4.751  | 9.322  | 442.882 | 226.076 | 204.669 | 21.408  |
| 2005          | 36926  | 18692.832 | 16700.528 | 1992.304 | 5.395  | 10.658 | 465.825 | 236.265 | 210.680 | 25.585  |
| 2006          | 34460  | 17308.564 | 15192.497 | 2116.066 | 6.141  | 12.226 | 430.604 | 216.769 | 189.844 | 26.925  |
| 2007          | 35457  | 17683.181 | 15233.178 | 2450.003 | 6.910  | 13.855 | 438.379 | 219.189 | 188.337 | 30.853  |
| 2008          | 38412  | 19006.374 | 16080.965 | 2925.409 | 7.616  | 15.392 | 469.420 | 232.952 | 196.522 | 36.430  |
| 2009          | 37082  | 18205.573 | 15057.424 | 3148.149 | 8.490  | 17.292 | 447.664 | 220.505 | 181.775 | 38.730  |
| 2010          | 37440  | 18237.758 | 14784.590 | 3453.168 | 9.223  | 18.934 | 446.321 | 218.215 | 176.247 | 41.967  |
| 2011          | 38329  | 18487.916 | 14587.760 | 3900.156 | 10.175 | 21.096 | 452.228 | 219.022 | 172.114 | 46.907  |
| 2012          | 38770  | 18491.158 | 14213.787 | 4277.372 | 11.033 | 23.132 | 452.292 | 216.689 | 165.819 | 50.870  |
| 2013          | 40599  | 19143.452 | 14345.698 | 4797.754 | 11.817 | 25.062 | 468.030 | 221.775 | 165.379 | 56.396  |
| 2014          | 40680  | 18992.005 | 13829.702 | 5162.303 | 12.690 | 27.181 | 463.288 | 217.451 | 157.499 | 59.952  |
| 2015          | 42698  | 19728.885 | 14034.683 | 5694.202 | 13.336 | 28.862 | 546.379 | 254.116 | 179.594 | 74.523  |
| 2016          | 43543  | 19876.724 | 13730.420 | 6146.305 | 14.115 | 30.922 | 551.697 | 253.628 | 173.966 | 79.661  |
| 2017          | 44597  | 20119.790 | 13474.716 | 6645.075 | 14.900 | 33.028 | 559.575 | 254.381 | 169.074 | 85.307  |
| 2018          | 46015  | 20535.123 | 13325.071 | 7210.052 | 15.669 | 35.111 | 571.716 | 257.229 | 165.558 | 91.671  |
| 2019          | 47572  | 21009.029 | 13204.484 | 7804.546 | 16.406 | 37.149 | 584.986 | 260.605 | 162.374 | 98.231  |
| 2020          | 49097  | 21428.512 | 13051.582 | 8376.930 | 17.062 | 39.092 | 688.202 | 303.533 | 182.946 | 120.587 |
| 2021          | 49192  | 21266.697 | 12449.366 | 8817.331 | 17.924 | 41.461 | 684.243 | 299.127 | 173.167 | 125.960 |
| 2022          | 50717  | 21663.568 | 12198.102 | 9465.466 | 18.663 | 43.693 | 699.611 | 302.378 | 168.266 | 134.112 |
| 2023          | 52270  | 22084.131 | 11953.315 | 10130.82 | 19.382 | 45.874 | 714.727 | 305.748 | 163.445 | 142.302 |
| 2024          | 53773  | 22418.456 | 11687.748 | 10730.71 | 19.956 | 47.866 | 728.695 | 307.804 | 158.385 | 149.419 |
| 2025          | 54894  | 22614.834 | 11358.907 | 11255.93 | 20.505 | 49.772 | 863.778 | 361.411 | 178.738 | 182.674 |
| 2026          | 55463  | 22571.522 | 10853.142 | 11718.38 | 21.128 | 51.917 | 868.484 | 359.241 | 169.948 | 189.293 |
| 2027          | 56471  | 22774.416 | 10456.345 | 12318.07 | 21.813 | 54.087 | 879.601 | 360.827 | 162.871 | 197.956 |
| 2028          | 57439  | 22915.561 | 10011.000 | 12904.56 | 22.467 | 56.314 | 889.496 | 361.228 | 155.029 | 206.199 |
| 2029          | 58393  | 22992.027 | 9562.261  | 13429.77 | 22.999 | 58.411 | 898.452 | 360.371 | 147.127 | 213.244 |
| 2030          | 58706  | 22895.360 | 9109.183  | 13786.18 | 23.484 | 60.214 | 1076.01 | 428.760 | 166.962 | 261.798 |
| 2031          | 59140  | 22715.871 | 8625.969  | 14089.90 | 23.825 | 62.027 | 1080.20 | 424.293 | 157.556 | 266.737 |
| 2032          | 59890  | 22759.207 | 8190.711  | 14568.50 | 24.326 | 64.011 | 1089.25 | 423.652 | 148.969 | 274.682 |
| 2033          | 60616  | 22786.258 | 7779.025  | 15007.23 | 24.758 | 65.861 | 1096.95 | 422.387 | 140.774 | 281.614 |
| 2034          | 61285  | 22806.106 | 7363.913  | 15442.19 | 25.197 | 67.711 | 1102.80 | 420.721 | 132.510 | 288.211 |
| 2035          | 60412  | 22262.998 | 6902.500  | 15360.50 | 25.426 | 68.996 | 1340.19 | 507.973 | 153.125 | 354.848 |
| 2036          | 58336  | 21140.051 | 6076.876  | 15063.18 | 25.821 | 71.254 | 1292.60 | 482.234 | 134.650 | 347.583 |
| 2037          | 58531  | 21011.845 | 5642.908  | 15368.94 | 26.258 | 73.144 | 1294.36 | 478.783 | 124.788 | 353.995 |
| 2038          | 58703  | 20787.483 | 5212.329  | 15575.15 | 26.532 | 74.926 | 1294.33 | 472.681 | 114.926 | 357.755 |
| 2039          | 58865  | 20709.267 | 4839.248  | 15870.02 | 26.960 | 76.632 | 1292.60 | 469.372 | 106.263 | 363.109 |

## Results for PHIM for Run 6 (Sensitivity\_Analysis\_3.RTF)

---

### Control File Details for Run: 6

| Variable Parameter                                       | Value                  |
|----------------------------------------------------------|------------------------|
| 1. Name for Reference Scenario                           | NULL                   |
| 2. Name for Test Scenario                                | Ecig                   |
| 3. Name for Product 1                                    | CC                     |
| 4. Name for Product 2                                    | Ecig                   |
| 5. Name for Product 3                                    | -                      |
| 6. Name for Product 4                                    | Dual                   |
| 7. Country                                               | US (United States)     |
| 8. Sex                                                   | F (Females)            |
| 9. Year of start of process                              | 1990                   |
| 10. Number of months of follow-up                        | 600                    |
| 11. Follow-up interval length (in months)                | 12                     |
| 12. Lower age for risk estimation                        | 10                     |
| 13. Upper age for risk estimation                        | 79                     |
| 14. The effective dose for Product 1 (F1) - Ref          | 1                      |
| 15. The effective dose for Product 2 (F2) - Ref          | -                      |
| 16. The effective dose for Product 3 (F3) - Ref          | -                      |
| 17. The effective dose for Product 4 (F4) - Ref          | -                      |
| 18. The effective dose for Product 1 (F1) - Test         | 1                      |
| 19. The effective dose for Product 2 (F2) - Test         | 0.05                   |
| 20. The effective dose for Product 3 (F3) - Test         | -                      |
| 21. The effective dose for Product 4 (F4) - Test         | FROMF2                 |
| 22. Number in population to be simulated                 | 100000                 |
| 23. Number of MC simulations                             | 1                      |
| 24. The random number seed for the first simulation      | 15975263               |
| 25. Source for the population file (POP)                 | UN4                    |
| 26. Source for the socioeconomic prevalence file (SEP)   | -                      |
| 27. Source for the current smoking prevalence file (CSP) | ISS3                   |
| 28. Source for the former smoking prevalence file (FSP)  | ISS3                   |
| 29. Source for the quit-time distribution file (QTD)     | NHIS2006               |
| 30. Source for the death file (MORT)                     | APR-20                 |
| 31. Source for the relative risk file (RR)               | PNLEST                 |
| 32. Source for the half-life file (H)                    | PNLEST                 |
| 33. Assumption Set for TTP Factor Reference              | F1                     |
| 34. Assumption Set for TTP Factor Test                   | F1                     |
| 35. Assumption Set for TTP Reference                     | ISS3                   |
| 36. Assumption Set for TTP Test                          | S3C                    |
| 37. Assumption Set for TP for socioeconomic group        | -                      |
| 38. Source for Output Choice file (OUTC)                 | BASIC                  |
| 39. Output for DTP P1                                    | N                      |
| 40. Output for DTP P2                                    | N                      |
| 41. Output for Main P Component                          | Y                      |
| 42. Output for DTP E1                                    | N                      |
| 43. Output for DTP E2                                    | N                      |
| 44. Output for DTP E3                                    | N                      |
| 45. Output for Main E Component                          | Y                      |
| 46. Output file name                                     | Sensitivity_Analysis_3 |
| 47. Run number for P-Component                           | -                      |
| 48. Results file for E-Component                         | -                      |
| 49. Components required                                  | PE                     |
| 50. Results folder for P to be used in E-Component       | -                      |
| 51. Fixed age of starting product use                    | 16                     |
| 52. Output absolute risk file?                           | N                      |

## Results for PHIM for Run 6 (Sensitivity\_Analysis\_3.RTF)

\*\*\*\*\*

TTP values for Run: 6, Scenario: NULL

| Variable Parameter | Value               |
|--------------------|---------------------|
| 1. Country         | US (United States)  |
| 2. Sex             | F (Females)         |
| 3. Assumption Set  | ISS3                |
| Note:              | Period is in Months |

| Age   | Period  | Initiation  | Cessation    | Re-initiation |
|-------|---------|-------------|--------------|---------------|
|       |         | Never<br>CC | CC<br>Former | Former<br>CC  |
| 10-14 | 1-12    | 0.003758    | 0.008742     | 0.000000      |
| 15-19 | 1-12    | 0.003469    | 0.002515     | 0.000000      |
| 20-24 | 1-12    | 0.000276    | 0.000761     | 0.000000      |
| 25-29 | 1-12    | 0.000137    | 0.001375     | 0.000000      |
| 30-34 | 1-12    | 0.000069    | 0.001149     | 0.000000      |
| 35-39 | 1-12    | 0.000000    | 0.000991     | 0.000000      |
| 40-44 | 1-12    | 0.000000    | 0.000833     | 0.000000      |
| 45-49 | 1-12    | 0.000000    | 0.001723     | 0.000000      |
| 50-54 | 1-12    | 0.000000    | 0.002336     | 0.000000      |
| 55-59 | 1-12    | 0.000000    | 0.002233     | 0.000000      |
| 60-64 | 1-12    | 0.000000    | 0.004634     | 0.000000      |
| 65-69 | 1-12    | 0.000000    | 0.003505     | 0.000000      |
| 70-74 | 1-12    | 0.000000    | 0.004329     | 0.000000      |
| 75-79 | 1-12    | 0.000000    | 0.004329     | 0.000000      |
| 10-14 | 13-72   | 0.004794    | 0.008742     | 0.000000      |
| 15-19 | 13-72   | 0.004527    | 0.004082     | 0.000000      |
| 20-24 | 13-72   | 0.000105    | 0.001261     | 0.000000      |
| 25-29 | 13-72   | 0.000053    | 0.000952     | 0.000000      |
| 30-34 | 13-72   | 0.000026    | 0.000733     | 0.000000      |
| 35-39 | 13-72   | 0.000000    | 0.000753     | 0.000000      |
| 40-44 | 13-72   | 0.000000    | 0.001535     | 0.000000      |
| 45-49 | 13-72   | 0.000000    | 0.002998     | 0.000000      |
| 50-54 | 13-72   | 0.000000    | 0.003159     | 0.000000      |
| 55-59 | 13-72   | 0.000000    | 0.002965     | 0.000000      |
| 60-64 | 13-72   | 0.000000    | 0.003633     | 0.000000      |
| 65-69 | 13-72   | 0.000000    | 0.004522     | 0.000000      |
| 70-74 | 13-72   | 0.000000    | 0.005208     | 0.000000      |
| 75-79 | 13-72   | 0.000000    | 0.005208     | 0.000000      |
| 10-14 | 73-132  | 0.003969    | 0.008742     | 0.000000      |
| 15-19 | 73-132  | 0.003056    | 0.003373     | 0.000000      |
| 20-24 | 73-132  | 0.001459    | 0.003881     | 0.000000      |
| 25-29 | 73-132  | 0.000714    | 0.001953     | 0.000000      |
| 30-34 | 73-132  | 0.000111    | 0.001338     | 0.000000      |
| 35-39 | 73-132  | 0.000000    | 0.001507     | 0.000000      |
| 40-44 | 73-132  | 0.000000    | 0.002080     | 0.000000      |
| 45-49 | 73-132  | 0.000000    | 0.003809     | 0.000000      |
| 50-54 | 73-132  | 0.000000    | 0.004871     | 0.000000      |
| 55-59 | 73-132  | 0.000000    | 0.004560     | 0.000000      |
| 60-64 | 73-132  | 0.000000    | 0.007192     | 0.000000      |
| 65-69 | 73-132  | 0.000000    | 0.007033     | 0.000000      |
| 70-74 | 73-132  | 0.000000    | 0.008206     | 0.000000      |
| 75-79 | 73-132  | 0.000000    | 0.008206     | 0.000000      |
| 10-14 | 133-192 | 0.002861    | 0.008742     | 0.000000      |
| 15-19 | 133-192 | 0.002594    | 0.003996     | 0.000000      |
| 20-24 | 133-192 | 0.001247    | 0.002805     | 0.000000      |
| 25-29 | 133-192 | 0.000289    | 0.001574     | 0.000000      |
| 30-34 | 133-192 | 0.000132    | 0.001293     | 0.000000      |
| 35-39 | 133-192 | 0.000000    | 0.001219     | 0.000000      |
| 40-44 | 133-192 | 0.000000    | 0.001657     | 0.000000      |
| 45-49 | 133-192 | 0.000000    | 0.001995     | 0.000000      |
| 50-54 | 133-192 | 0.000000    | 0.002154     | 0.000000      |
| 55-59 | 133-192 | 0.000000    | 0.002072     | 0.000000      |
| 60-64 | 133-192 | 0.000000    | 0.005049     | 0.000000      |
| 65-69 | 133-192 | 0.000000    | 0.003680     | 0.000000      |
| 70-74 | 133-192 | 0.000000    | 0.006144     | 0.000000      |
| 75-79 | 133-192 | 0.000000    | 0.006144     | 0.000000      |
| 10-14 | 193-252 | 0.001859    | 0.008742     | 0.000000      |
| 15-19 | 193-252 | 0.002232    | 0.005770     | 0.000000      |
| 20-24 | 193-252 | 0.001079    | 0.003262     | 0.000000      |
| 25-29 | 193-252 | 0.000531    | 0.002002     | 0.000000      |
| 30-34 | 193-252 | 0.000263    | 0.003240     | 0.000000      |
| 35-39 | 193-252 | 0.000000    | 0.001771     | 0.000000      |
| 40-44 | 193-252 | 0.000000    | 0.002173     | 0.000000      |
| 45-49 | 193-252 | 0.000000    | 0.002075     | 0.000000      |
| 50-54 | 193-252 | 0.000000    | 0.003431     | 0.000000      |

### Results for PHIM for Run 6 (Sensitivity\_Analysis\_3.RTF)

|       |         |          |          |          |
|-------|---------|----------|----------|----------|
| 55-59 | 193-252 | 0.000000 | 0.002906 | 0.000000 |
| 60-64 | 193-252 | 0.000000 | 0.007139 | 0.000000 |
| 65-69 | 193-252 | 0.000000 | 0.004963 | 0.000000 |
| 70-74 | 193-252 | 0.000000 | 0.006269 | 0.000000 |
| 75-79 | 193-252 | 0.000000 | 0.006269 | 0.000000 |
| 10-14 | 253+    | 0.000931 | 0.008742 | 0.000000 |
| 15-19 | 253+    | 0.001798 | 0.009440 | 0.000000 |
| 20-24 | 253+    | 0.000023 | 0.002831 | 0.000000 |
| 25-29 | 253+    | 0.000073 | 0.002655 | 0.000000 |
| 30-34 | 253+    | 0.000037 | 0.004614 | 0.000000 |
| 35-39 | 253+    | 0.000000 | 0.002607 | 0.000000 |
| 40-44 | 253+    | 0.000000 | 0.003115 | 0.000000 |
| 45-49 | 253+    | 0.000000 | 0.002132 | 0.000000 |
| 50-54 | 253+    | 0.000000 | 0.003497 | 0.000000 |
| 55-59 | 253+    | 0.000000 | 0.002942 | 0.000000 |
| 60-64 | 253+    | 0.000000 | 0.005376 | 0.000000 |
| 65-69 | 253+    | 0.000000 | 0.001789 | 0.000000 |
| 70-74 | 253+    | 0.000000 | 0.004077 | 0.000000 |
| 75-79 | 253+    | 0.000000 | 0.004077 | 0.000000 |

## Results for PHIM for Run 6 (Sensitivity\_Analysis\_3.RTF)

\*\*\*\*\*

TTP values for Run: 6, Scenario: Ecig

| Variable Parameter |         | Value               |            |            |           |             |             |               |             |             |  |
|--------------------|---------|---------------------|------------|------------|-----------|-------------|-------------|---------------|-------------|-------------|--|
| 1. Country         |         | US (United States)  |            |            |           |             |             |               |             |             |  |
| 2. Sex             |         | F (Females)         |            |            |           |             |             |               |             |             |  |
| 3. Assumption Set  |         | S3C                 |            |            |           |             |             |               |             |             |  |
| Note:              |         | Period is in Months |            |            |           |             |             |               |             |             |  |
| Age                | Period  | Initiation          |            |            | Cessation |             |             | Re-initiation |             |             |  |
|                    |         | Never CC            | Never Ecig | Never Dual | CC Former | Ecig Former | Dual Former | Former CC     | Former Ecig | Former Dual |  |
| 10-14              | 1-12    | 0.001879            | 0.001879   | 0.000000   | 0.008742  | 0.010927    | 0.000000    | 0.000000      | 0.000000    | 0.000000    |  |
| 15-19              | 1-12    | 0.001735            | 0.001735   | 0.000000   | 0.002515  | 0.003144    | 0.000000    | 0.000000      | 0.000000    | 0.000000    |  |
| 20-24              | 1-12    | 0.000138            | 0.000138   | 0.000000   | 0.000761  | 0.000952    | 0.000000    | 0.000000      | 0.000000    | 0.000000    |  |
| 25-29              | 1-12    | 0.000069            | 0.000069   | 0.000000   | 0.001376  | 0.001719    | 0.000000    | 0.000000      | 0.000000    | 0.000000    |  |
| 30-34              | 1-12    | 0.000034            | 0.000034   | 0.000000   | 0.001149  | 0.001437    | 0.000000    | 0.000000      | 0.000000    | 0.000000    |  |
| 35-39              | 1-12    | 0.000000            | 0.000000   | 0.000000   | 0.000991  | 0.001239    | 0.000000    | 0.000000      | 0.000000    | 0.000000    |  |
| 40-44              | 1-12    | 0.000000            | 0.000000   | 0.000000   | 0.000833  | 0.001041    | 0.000000    | 0.000000      | 0.000000    | 0.000000    |  |
| 45-49              | 1-12    | 0.000000            | 0.000000   | 0.000000   | 0.001723  | 0.002154    | 0.000000    | 0.000000      | 0.000000    | 0.000000    |  |
| 50-54              | 1-12    | 0.000000            | 0.000000   | 0.000000   | 0.002336  | 0.002920    | 0.000000    | 0.000000      | 0.000000    | 0.000000    |  |
| 55-59              | 1-12    | 0.000000            | 0.000000   | 0.000000   | 0.002233  | 0.002791    | 0.000000    | 0.000000      | 0.000000    | 0.000000    |  |
| 60-64              | 1-12    | 0.000000            | 0.000000   | 0.000000   | 0.004635  | 0.005793    | 0.000000    | 0.000000      | 0.000000    | 0.000000    |  |
| 65-69              | 1-12    | 0.000000            | 0.000000   | 0.000000   | 0.003505  | 0.004381    | 0.000000    | 0.000000      | 0.000000    | 0.000000    |  |
| 70-74              | 1-12    | 0.000000            | 0.000000   | 0.000000   | 0.004329  | 0.005411    | 0.000000    | 0.000000      | 0.000000    | 0.000000    |  |
| 75-79              | 1-12    | 0.000000            | 0.000000   | 0.000000   | 0.004329  | 0.005411    | 0.000000    | 0.000000      | 0.000000    | 0.000000    |  |
| 10-14              | 13-72   | 0.001918            | 0.002877   | 0.000000   | 0.008742  | 0.010927    | 0.000000    | 0.000000      | 0.000000    | 0.000000    |  |
| 15-19              | 13-72   | 0.001811            | 0.002716   | 0.000000   | 0.004083  | 0.005103    | 0.000000    | 0.000000      | 0.000000    | 0.000000    |  |
| 20-24              | 13-72   | 0.000042            | 0.000063   | 0.000000   | 0.001261  | 0.001576    | 0.000000    | 0.000000      | 0.000000    | 0.000000    |  |
| 25-29              | 13-72   | 0.000021            | 0.000032   | 0.000000   | 0.000952  | 0.001190    | 0.000000    | 0.000000      | 0.000000    | 0.000000    |  |
| 30-34              | 13-72   | 0.000011            | 0.000016   | 0.000000   | 0.000733  | 0.000916    | 0.000000    | 0.000000      | 0.000000    | 0.000000    |  |
| 35-39              | 13-72   | 0.000000            | 0.000000   | 0.000000   | 0.000754  | 0.000942    | 0.000000    | 0.000000      | 0.000000    | 0.000000    |  |
| 40-44              | 13-72   | 0.000000            | 0.000000   | 0.000000   | 0.001535  | 0.001918    | 0.000000    | 0.000000      | 0.000000    | 0.000000    |  |
| 45-49              | 13-72   | 0.000000            | 0.000000   | 0.000000   | 0.002998  | 0.003747    | 0.000000    | 0.000000      | 0.000000    | 0.000000    |  |
| 50-54              | 13-72   | 0.000000            | 0.000000   | 0.000000   | 0.003160  | 0.003949    | 0.000000    | 0.000000      | 0.000000    | 0.000000    |  |
| 55-59              | 13-72   | 0.000000            | 0.000000   | 0.000000   | 0.002965  | 0.003706    | 0.000000    | 0.000000      | 0.000000    | 0.000000    |  |
| 60-64              | 13-72   | 0.000000            | 0.000000   | 0.000000   | 0.003633  | 0.004541    | 0.000000    | 0.000000      | 0.000000    | 0.000000    |  |
| 65-69              | 13-72   | 0.000000            | 0.000000   | 0.000000   | 0.004522  | 0.005652    | 0.000000    | 0.000000      | 0.000000    | 0.000000    |  |
| 70-74              | 13-72   | 0.000000            | 0.000000   | 0.000000   | 0.005208  | 0.006510    | 0.000000    | 0.000000      | 0.000000    | 0.000000    |  |
| 75-79              | 13-72   | 0.000000            | 0.000000   | 0.000000   | 0.005208  | 0.006510    | 0.000000    | 0.000000      | 0.000000    | 0.000000    |  |
| 10-14              | 73-132  | 0.000794            | 0.003175   | 0.000000   | 0.008742  | 0.010927    | 0.000000    | 0.000000      | 0.000000    | 0.000000    |  |
| 15-19              | 73-132  | 0.000611            | 0.002445   | 0.000000   | 0.003373  | 0.004216    | 0.000000    | 0.000000      | 0.000000    | 0.000000    |  |
| 20-24              | 73-132  | 0.000292            | 0.001167   | 0.000000   | 0.003881  | 0.004851    | 0.000000    | 0.000000      | 0.000000    | 0.000000    |  |
| 25-29              | 73-132  | 0.000143            | 0.000571   | 0.000000   | 0.001954  | 0.002442    | 0.000000    | 0.000000      | 0.000000    | 0.000000    |  |
| 30-34              | 73-132  | 0.000022            | 0.000089   | 0.000000   | 0.001338  | 0.001673    | 0.000000    | 0.000000      | 0.000000    | 0.000000    |  |
| 35-39              | 73-132  | 0.000000            | 0.000000   | 0.000000   | 0.001507  | 0.001884    | 0.000000    | 0.000000      | 0.000000    | 0.000000    |  |
| 40-44              | 73-132  | 0.000000            | 0.000000   | 0.000000   | 0.002080  | 0.002600    | 0.000000    | 0.000000      | 0.000000    | 0.000000    |  |
| 45-49              | 73-132  | 0.000000            | 0.000000   | 0.000000   | 0.003809  | 0.004761    | 0.000000    | 0.000000      | 0.000000    | 0.000000    |  |
| 50-54              | 73-132  | 0.000000            | 0.000000   | 0.000000   | 0.004871  | 0.006089    | 0.000000    | 0.000000      | 0.000000    | 0.000000    |  |
| 55-59              | 73-132  | 0.000000            | 0.000000   | 0.000000   | 0.004560  | 0.005699    | 0.000000    | 0.000000      | 0.000000    | 0.000000    |  |
| 60-64              | 73-132  | 0.000000            | 0.000000   | 0.000000   | 0.007192  | 0.008990    | 0.000000    | 0.000000      | 0.000000    | 0.000000    |  |
| 65-69              | 73-132  | 0.000000            | 0.000000   | 0.000000   | 0.007033  | 0.008792    | 0.000000    | 0.000000      | 0.000000    | 0.000000    |  |
| 70-74              | 73-132  | 0.000000            | 0.000000   | 0.000000   | 0.008206  | 0.010258    | 0.000000    | 0.000000      | 0.000000    | 0.000000    |  |
| 75-79              | 73-132  | 0.000000            | 0.000000   | 0.000000   | 0.008206  | 0.010258    | 0.000000    | 0.000000      | 0.000000    | 0.000000    |  |
| 10-14              | 133-192 | 0.000143            | 0.002718   | 0.000000   | 0.008742  | 0.010927    | 0.000000    | 0.000000      | 0.000000    | 0.000000    |  |
| 15-19              | 133-192 | 0.000130            | 0.002465   | 0.000000   | 0.003996  | 0.004994    | 0.000000    | 0.000000      | 0.000000    | 0.000000    |  |
| 20-24              | 133-192 | 0.000062            | 0.001185   | 0.000000   | 0.002805  | 0.003507    | 0.000000    | 0.000000      | 0.000000    | 0.000000    |  |
| 25-29              | 133-192 | 0.000015            | 0.000275   | 0.000000   | 0.001574  | 0.001968    | 0.000000    | 0.000000      | 0.000000    | 0.000000    |  |
| 30-34              | 133-192 | 0.000007            | 0.000125   | 0.000000   | 0.001293  | 0.001616    | 0.000000    | 0.000000      | 0.000000    | 0.000000    |  |
| 35-39              | 133-192 | 0.000000            | 0.000000   | 0.000000   | 0.001219  | 0.001524    | 0.000000    | 0.000000      | 0.000000    | 0.000000    |  |
| 40-44              | 133-192 | 0.000000            | 0.000000   | 0.000000   | 0.001657  | 0.002071    | 0.000000    | 0.000000      | 0.000000    | 0.000000    |  |
| 45-49              | 133-192 | 0.000000            | 0.000000   | 0.000000   | 0.001995  | 0.002493    | 0.000000    | 0.000000      | 0.000000    | 0.000000    |  |
| 50-54              | 133-192 | 0.000000            | 0.000000   | 0.000000   | 0.002154  | 0.002692    | 0.000000    | 0.000000      | 0.000000    | 0.000000    |  |
| 55-59              | 133-192 | 0.000000            | 0.000000   | 0.000000   | 0.002072  | 0.002590    | 0.000000    | 0.000000      | 0.000000    | 0.000000    |  |
| 60-64              | 133-192 | 0.000000            | 0.000000   | 0.000000   | 0.005049  | 0.006311    | 0.000000    | 0.000000      | 0.000000    | 0.000000    |  |
| 65-69              | 133-192 | 0.000000            | 0.000000   | 0.000000   | 0.003681  | 0.004601    | 0.000000    | 0.000000      | 0.000000    | 0.000000    |  |
| 70-74              | 133-192 | 0.000000            | 0.000000   | 0.000000   | 0.006144  | 0.007679    | 0.000000    | 0.000000      | 0.000000    | 0.000000    |  |
| 75-79              | 133-192 | 0.000000            | 0.000000   | 0.000000   | 0.006144  | 0.007679    | 0.000000    | 0.000000      | 0.000000    | 0.000000    |  |
| 10-14              | 193-252 | 0.000093            | 0.001766   | 0.000000   | 0.008742  | 0.010927    | 0.000000    | 0.000000      | 0.000000    | 0.000000    |  |
| 15-19              | 193-252 | 0.000112            | 0.002120   | 0.000000   | 0.005770  | 0.007212    | 0.000000    | 0.000000      | 0.000000    | 0.000000    |  |
| 20-24              | 193-252 | 0.000054            | 0.001025   | 0.000000   | 0.003262  | 0.004078    | 0.000000    | 0.000000      | 0.000000    | 0.000000    |  |
| 25-29              | 193-252 | 0.000027            | 0.000504   | 0.000000   | 0.002002  | 0.002502    | 0.000000    | 0.000000      | 0.000000    | 0.000000    |  |
| 30-34              | 193-252 | 0.000013            | 0.000250   | 0.000000   | 0.003241  | 0.004051    | 0.000000    | 0.000000      | 0.000000    | 0.000000    |  |
| 35-39              | 193-252 | 0.000000            | 0.000000   | 0.000000   | 0.001771  | 0.002213    | 0.000000    | 0.000000      | 0.000000    | 0.000000    |  |
| 40-44              | 193-252 | 0.000000            | 0.000000   | 0.000000   | 0.002173  | 0.002716    | 0.000000    | 0.000000      | 0.000000    | 0.000000    |  |
| 45-49              | 193-252 | 0.000000            | 0.000000   | 0.000000   | 0.002075  | 0.002593    | 0.000000    | 0.000000      | 0.000000    | 0.000000    |  |
| 50-54              | 193-252 | 0.000000            | 0.000000   | 0.000000   | 0.003432  | 0.004289    | 0.000000    | 0.000000      | 0.000000    | 0.000000    |  |

### Results for PHIM for Run 6 (Sensitivity\_Analysis\_3.RTF)

|       |         |          |          |          |          |          |          |          |          |          |
|-------|---------|----------|----------|----------|----------|----------|----------|----------|----------|----------|
| 55-59 | 193-252 | 0.000000 | 0.000000 | 0.000000 | 0.002906 | 0.003633 | 0.000000 | 0.000000 | 0.000000 | 0.000000 |
| 60-64 | 193-252 | 0.000000 | 0.000000 | 0.000000 | 0.007139 | 0.008923 | 0.000000 | 0.000000 | 0.000000 | 0.000000 |
| 65-69 | 193-252 | 0.000000 | 0.000000 | 0.000000 | 0.004963 | 0.006203 | 0.000000 | 0.000000 | 0.000000 | 0.000000 |
| 70-74 | 193-252 | 0.000000 | 0.000000 | 0.000000 | 0.006269 | 0.007836 | 0.000000 | 0.000000 | 0.000000 | 0.000000 |
| 75-79 | 193-252 | 0.000000 | 0.000000 | 0.000000 | 0.006269 | 0.007836 | 0.000000 | 0.000000 | 0.000000 | 0.000000 |
| 10-14 | 253+    | 0.000047 | 0.000884 | 0.000000 | 0.008742 | 0.010927 | 0.000000 | 0.000000 | 0.000000 | 0.000000 |
| 15-19 | 253+    | 0.000090 | 0.001708 | 0.000000 | 0.009440 | 0.011800 | 0.000000 | 0.000000 | 0.000000 | 0.000000 |
| 20-24 | 253+    | 0.000001 | 0.000022 | 0.000000 | 0.002831 | 0.003538 | 0.000000 | 0.000000 | 0.000000 | 0.000000 |
| 25-29 | 253+    | 0.000004 | 0.000070 | 0.000000 | 0.002656 | 0.003319 | 0.000000 | 0.000000 | 0.000000 | 0.000000 |
| 30-34 | 253+    | 0.000002 | 0.000035 | 0.000000 | 0.004614 | 0.005767 | 0.000000 | 0.000000 | 0.000000 | 0.000000 |
| 35-39 | 253+    | 0.000000 | 0.000000 | 0.000000 | 0.002608 | 0.003259 | 0.000000 | 0.000000 | 0.000000 | 0.000000 |
| 40-44 | 253+    | 0.000000 | 0.000000 | 0.000000 | 0.003115 | 0.003894 | 0.000000 | 0.000000 | 0.000000 | 0.000000 |
| 45-49 | 253+    | 0.000000 | 0.000000 | 0.000000 | 0.002132 | 0.002665 | 0.000000 | 0.000000 | 0.000000 | 0.000000 |
| 50-54 | 253+    | 0.000000 | 0.000000 | 0.000000 | 0.003497 | 0.004371 | 0.000000 | 0.000000 | 0.000000 | 0.000000 |
| 55-59 | 253+    | 0.000000 | 0.000000 | 0.000000 | 0.002942 | 0.003677 | 0.000000 | 0.000000 | 0.000000 | 0.000000 |
| 60-64 | 253+    | 0.000000 | 0.000000 | 0.000000 | 0.005376 | 0.006719 | 0.000000 | 0.000000 | 0.000000 | 0.000000 |
| 65-69 | 253+    | 0.000000 | 0.000000 | 0.000000 | 0.001789 | 0.002236 | 0.000000 | 0.000000 | 0.000000 | 0.000000 |
| 70-74 | 253+    | 0.000000 | 0.000000 | 0.000000 | 0.004077 | 0.005096 | 0.000000 | 0.000000 | 0.000000 | 0.000000 |
| 75-79 | 253+    | 0.000000 | 0.000000 | 0.000000 | 0.004077 | 0.005096 | 0.000000 | 0.000000 | 0.000000 | 0.000000 |



**Results for PHIM for Run 6 (Sensitivity\_Analysis\_3.RTF)**

|       |      |          |          |          |          |          |          |
|-------|------|----------|----------|----------|----------|----------|----------|
| 25-29 | 253+ | 0.014127 | 0.000000 | 0.000000 | 0.000000 | 0.000000 | 0.000000 |
| 30-34 | 253+ | 0.013889 | 0.000000 | 0.000000 | 0.000000 | 0.000000 | 0.000000 |
| 35-39 | 253+ | 0.012929 | 0.000000 | 0.000000 | 0.000000 | 0.000000 | 0.000000 |
| 40-44 | 253+ | 0.012785 | 0.000000 | 0.000000 | 0.000000 | 0.000000 | 0.000000 |
| 45-49 | 253+ | 0.012295 | 0.000000 | 0.000000 | 0.000000 | 0.000000 | 0.000000 |
| 50-54 | 253+ | 0.011536 | 0.000000 | 0.000000 | 0.000000 | 0.000000 | 0.000000 |
| 55-59 | 253+ | 0.008988 | 0.000000 | 0.000000 | 0.000000 | 0.000000 | 0.000000 |
| 60-64 | 253+ | 0.008098 | 0.000000 | 0.000000 | 0.000000 | 0.000000 | 0.000000 |
| 65-69 | 253+ | 0.006274 | 0.000000 | 0.000000 | 0.000000 | 0.000000 | 0.000000 |
| 70-74 | 253+ | 0.004141 | 0.000000 | 0.000000 | 0.000000 | 0.000000 | 0.000000 |
| 75-79 | 253+ | 0.004141 | 0.000000 | 0.000000 | 0.000000 | 0.000000 | 0.000000 |



## Results for PHIM for Run 6 (Sensitivity\_Analysis\_3.RTF)

\*\*\*\*\*

### Main Output for the Tobacco History for Run: 6, Simulation: 1, Scenario: NULL

| Variable Parameter          | Value              |
|-----------------------------|--------------------|
| 1. Country                  | US (United States) |
| 2. Sex                      | F (Females)        |
| 3. Year of start of process | 1990               |

Year of Follow-up: 2040, Age Group: All Ages  
 Period    Age Group    Smoking Group            N            %

|    |          |           |       |       |
|----|----------|-----------|-------|-------|
| 50 | All Ages | Never Any | 20670 | 58.80 |
| 50 | All Ages | CC        | 2462  | 7.00  |
| 50 | All Ages | Former    | 12019 | 34.19 |

Year of Follow-up: 2040, Age Group: 18-19  
 Period    Age Group    Smoking Group            N            %

|    |       |           |   |   |
|----|-------|-----------|---|---|
| 50 | 18-19 | Never Any | 0 | . |
| 50 | 18-19 | CC        | 0 | . |
| 50 | 18-19 | Former    | 0 | . |

Year of Follow-up: 2040, Age Group: 20-24  
 Period    Age Group    Smoking Group            N            %

|    |       |           |   |   |
|----|-------|-----------|---|---|
| 50 | 20-24 | Never Any | 0 | . |
| 50 | 20-24 | CC        | 0 | . |
| 50 | 20-24 | Former    | 0 | . |

Year of Follow-up: 2040, Age Group: 25-29  
 Period    Age Group    Smoking Group            N            %

|    |       |           |   |   |
|----|-------|-----------|---|---|
| 50 | 25-29 | Never Any | 0 | . |
| 50 | 25-29 | CC        | 0 | . |
| 50 | 25-29 | Former    | 0 | . |

Year of Follow-up: 2040, Age Group: 30-34  
 Period    Age Group    Smoking Group            N            %

|    |       |           |   |   |
|----|-------|-----------|---|---|
| 50 | 30-34 | Never Any | 0 | . |
| 50 | 30-34 | CC        | 0 | . |
| 50 | 30-34 | Former    | 0 | . |

Year of Follow-up: 2040, Age Group: 35-39  
 Period    Age Group    Smoking Group            N            %

|    |       |           |   |   |
|----|-------|-----------|---|---|
| 50 | 35-39 | Never Any | 0 | . |
| 50 | 35-39 | CC        | 0 | . |
| 50 | 35-39 | Former    | 0 | . |

Year of Follow-up: 2040, Age Group: 40-44  
 Period    Age Group    Smoking Group            N            %

|    |       |           |   |   |
|----|-------|-----------|---|---|
| 50 | 40-44 | Never Any | 0 | . |
| 50 | 40-44 | CC        | 0 | . |
| 50 | 40-44 | Former    | 0 | . |

Year of Follow-up: 2040, Age Group: 45-49  
 Period    Age Group    Smoking Group            N            %

|    |       |           |   |   |
|----|-------|-----------|---|---|
| 50 | 45-49 | Never Any | 0 | . |
| 50 | 45-49 | CC        | 0 | . |
| 50 | 45-49 | Former    | 0 | . |

Year of Follow-up: 2040, Age Group: 50-54  
 Period    Age Group    Smoking Group            N            %

|    |       |           |   |   |
|----|-------|-----------|---|---|
| 50 | 50-54 | Never Any | 0 | . |
| 50 | 50-54 | CC        | 0 | . |
| 50 | 50-54 | Former    | 0 | . |

Year of Follow-up: 2040, Age Group: 55-59  
 Period    Age Group    Smoking Group            N            %

|    |       |           |   |   |
|----|-------|-----------|---|---|
| 50 | 55-59 | Never Any | 0 | . |
| 50 | 55-59 | CC        | 0 | . |
| 50 | 55-59 | Former    | 0 | . |

Year of Follow-up: 2040, Age Group: 60-64  
 Period    Age Group    Smoking Group            N            %

### Results for PHIM for Run 6 (Sensitivity\_Analysis\_3.RTF)

|                                           |           |               |      |       |
|-------------------------------------------|-----------|---------------|------|-------|
| 50                                        | 60-64     | Never Any     | 4803 | 60.57 |
| 50                                        | 60-64     | CC            | 621  | 7.83  |
| 50                                        | 60-64     | Former        | 2506 | 31.60 |
| Year of Follow-up: 2040, Age Group: 65-69 |           |               |      |       |
| Period                                    | Age Group | Smoking Group | N    | %     |
| 50                                        | 65-69     | Never Any     | 5407 | 64.75 |
| 50                                        | 65-69     | CC            | 538  | 6.44  |
| 50                                        | 65-69     | Former        | 2405 | 28.80 |
| Year of Follow-up: 2040, Age Group: 70-74 |           |               |      |       |
| Period                                    | Age Group | Smoking Group | N    | %     |
| 50                                        | 70-74     | Never Any     | 5181 | 58.92 |
| 50                                        | 70-74     | CC            | 605  | 6.88  |
| 50                                        | 70-74     | Former        | 3007 | 34.20 |
| Year of Follow-up: 2040, Age Group: 75-79 |           |               |      |       |
| Period                                    | Age Group | Smoking Group | N    | %     |
| 50                                        | 75-79     | Never Any     | 5279 | 52.38 |
| 50                                        | 75-79     | CC            | 698  | 6.93  |
| 50                                        | 75-79     | Former        | 4101 | 40.69 |

## Results for PHIM for Run 6 (Sensitivity\_Analysis\_3.RTF)

\*\*\*\*\*

### Main Output for the Tobacco History for Run: 6, Simulation: 1, Scenario: Ecig

| Variable Parameter                           |           | Value              |       |       |               |             |               |                |              |
|----------------------------------------------|-----------|--------------------|-------|-------|---------------|-------------|---------------|----------------|--------------|
| 1. Country                                   |           | US (United States) |       |       |               |             |               |                |              |
| 2. Sex                                       |           | F (Females)        |       |       |               |             |               |                |              |
| 3. Year of start of process                  |           | 1990               |       |       |               |             |               |                |              |
| Year of Follow-up: 1990, Age Group: All Ages |           |                    |       |       |               |             |               |                |              |
| Period                                       | Age Group | Smoking Group      | N     | %     | Ever Quit (N) | Ever Quit % | Mean Yrs Quit | Short Term (n) | Short Term % |
| 0                                            | All Ages  | Never Any          | 47776 | 54.92 |               |             |               |                |              |
| 0                                            | All Ages  | CC                 | 22737 | 26.14 | 0             | 0.00        |               |                |              |
| 0                                            | All Ages  | Ecig               | 0     | 0.00  |               |             |               |                |              |
| 0                                            | All Ages  | Dual               | 0     | 0.00  |               |             |               |                |              |
| 0                                            | All Ages  | Former             | 16484 | 18.95 |               |             | 11.90         | 2815           | 17.08        |
| Year of Follow-up: 1990, Age Group: 18-19    |           |                    |       |       |               |             |               |                |              |
| Period                                       | Age Group | Smoking Group      | N     | %     | Ever Quit (N) | Ever Quit % | Mean Yrs Quit | Short Term (n) | Short Term % |
| 0                                            | 18-19     | Never Any          | 2570  | 78.43 |               |             |               |                |              |
| 0                                            | 18-19     | CC                 | 535   | 16.33 | 0             | 0.00        |               |                |              |
| 0                                            | 18-19     | Ecig               | 0     | 0.00  |               |             |               |                |              |
| 0                                            | 18-19     | Dual               | 0     | 0.00  |               |             |               |                |              |
| 0                                            | 18-19     | Former             | 172   | 5.25  |               |             | 0.20          | 172            | 100.00       |
| Year of Follow-up: 1990, Age Group: 20-24    |           |                    |       |       |               |             |               |                |              |
| Period                                       | Age Group | Smoking Group      | N     | %     | Ever Quit (N) | Ever Quit % | Mean Yrs Quit | Short Term (n) | Short Term % |
| 0                                            | 20-24     | Never Any          | 5354  | 60.89 |               |             |               |                |              |
| 0                                            | 20-24     | CC                 | 2560  | 29.11 | 0             | 0.00        |               |                |              |
| 0                                            | 20-24     | Ecig               | 0     | 0.00  |               |             |               |                |              |
| 0                                            | 20-24     | Dual               | 0     | 0.00  |               |             |               |                |              |
| 0                                            | 20-24     | Former             | 879   | 10.00 |               |             | 1.58          | 420            | 47.78        |
| Year of Follow-up: 1990, Age Group: 25-29    |           |                    |       |       |               |             |               |                |              |
| Period                                       | Age Group | Smoking Group      | N     | %     | Ever Quit (N) | Ever Quit % | Mean Yrs Quit | Short Term (n) | Short Term % |
| 0                                            | 25-29     | Never Any          | 5318  | 52.77 |               |             |               |                |              |
| 0                                            | 25-29     | CC                 | 3335  | 33.09 | 0             | 0.00        |               |                |              |
| 0                                            | 25-29     | Ecig               | 0     | 0.00  |               |             |               |                |              |
| 0                                            | 25-29     | Dual               | 0     | 0.00  |               |             |               |                |              |
| 0                                            | 25-29     | Former             | 1425  | 14.14 |               |             | 3.91          | 404            | 28.35        |
| Year of Follow-up: 1990, Age Group: 30-34    |           |                    |       |       |               |             |               |                |              |
| Period                                       | Age Group | Smoking Group      | N     | %     | Ever Quit (N) | Ever Quit % | Mean Yrs Quit | Short Term (n) | Short Term % |
| 0                                            | 30-34     | Never Any          | 5287  | 50.36 |               |             |               |                |              |
| 0                                            | 30-34     | CC                 | 3326  | 31.68 | 0             | 0.00        |               |                |              |
| 0                                            | 30-34     | Ecig               | 0     | 0.00  |               |             |               |                |              |
| 0                                            | 30-34     | Dual               | 0     | 0.00  |               |             |               |                |              |
| 0                                            | 30-34     | Former             | 1886  | 17.96 |               |             | 4.36          | 566            | 30.01        |
| Year of Follow-up: 1990, Age Group: 35-39    |           |                    |       |       |               |             |               |                |              |
| Period                                       | Age Group | Smoking Group      | N     | %     | Ever Quit (N) | Ever Quit % | Mean Yrs Quit | Short Term (n) | Short Term % |
| 0                                            | 35-39     | Never Any          | 5018  | 52.27 |               |             |               |                |              |
| 0                                            | 35-39     | CC                 | 2653  | 27.64 | 0             | 0.00        |               |                |              |
| 0                                            | 35-39     | Ecig               | 0     | 0.00  |               |             |               |                |              |
| 0                                            | 35-39     | Dual               | 0     | 0.00  |               |             |               |                |              |
| 0                                            | 35-39     | Former             | 1929  | 20.09 |               |             | 7.96          | 324            | 16.80        |
| Year of Follow-up: 1990, Age Group: 40-44    |           |                    |       |       |               |             |               |                |              |
| Period                                       | Age Group | Smoking Group      | N     | %     | Ever Quit (N) | Ever Quit % | Mean Yrs Quit | Short Term (n) | Short Term % |
| 0                                            | 40-44     | Never Any          | 4356  | 51.27 |               |             |               |                |              |
| 0                                            | 40-44     | CC                 | 2397  | 28.21 | 0             | 0.00        |               |                |              |
| 0                                            | 40-44     | Ecig               | 0     | 0.00  |               |             |               |                |              |
| 0                                            | 40-44     | Dual               | 0     | 0.00  |               |             |               |                |              |
| 0                                            | 40-44     | Former             | 1744  | 20.52 |               |             | 7.33          | 339            | 19.44        |
| Year of Follow-up: 1990, Age Group: 45-49    |           |                    |       |       |               |             |               |                |              |
| Period                                       | Age Group | Smoking Group      | N     | %     | Ever Quit (N) | Ever Quit % | Mean Yrs Quit | Short Term (n) | Short Term % |
| 0                                            | 45-49     | Never Any          | 3116  | 47.67 |               |             |               |                |              |
| 0                                            | 45-49     | CC                 | 1875  | 28.69 | 0             | 0.00        |               |                |              |
| 0                                            | 45-49     | Ecig               | 0     | 0.00  |               |             |               |                |              |
| 0                                            | 45-49     | Dual               | 0     | 0.00  |               |             |               |                |              |
| 0                                            | 45-49     | Former             | 1545  | 23.64 |               |             | 12.55         | 194            | 12.56        |
| Year of Follow-up: 1990, Age Group: 50-54    |           |                    |       |       |               |             |               |                |              |
| Period                                       | Age Group | Smoking Group      | N     | %     | Ever Quit (N) | Ever Quit % | Mean Yrs Quit | Short Term (n) | Short Term % |
| 0                                            | 50-54     | Never Any          | 2684  | 48.50 |               |             |               |                |              |
| 0                                            | 50-54     | CC                 | 1572  | 28.41 | 0             | 0.00        |               |                |              |

**Results for PHIM for Run 6 (Sensitivity\_Analysis\_3.RTF)**

|                                              |           |               |       |       |               |             |               |                |              |
|----------------------------------------------|-----------|---------------|-------|-------|---------------|-------------|---------------|----------------|--------------|
| 0                                            | 50-54     | Ecig          | 0     | 0.00  |               |             |               |                |              |
| 0                                            | 50-54     | Dual          | 0     | 0.00  |               |             |               |                |              |
| 0                                            | 50-54     | Former        | 1278  | 23.09 |               |             | 13.28         | 126            | 9.86         |
| Year of Follow-up: 1990, Age Group: 55-59    |           |               |       |       |               |             |               |                |              |
| Period                                       | Age Group | Smoking Group | N     | %     | Ever Quit (N) | Ever Quit % | Mean Yrs Quit | Short Term (n) | Short Term % |
| 0                                            | 55-59     | Never Any     | 2732  | 51.90 |               |             |               |                |              |
| 0                                            | 55-59     | CC            | 1295  | 24.60 | 0             | 0.00        |               |                |              |
| 0                                            | 55-59     | Ecig          | 0     | 0.00  |               |             |               |                |              |
| 0                                            | 55-59     | Dual          | 0     | 0.00  |               |             |               |                |              |
| 0                                            | 55-59     | Former        | 1237  | 23.50 |               |             | 17.26         | 90             | 7.28         |
| Year of Follow-up: 1990, Age Group: 60-64    |           |               |       |       |               |             |               |                |              |
| Period                                       | Age Group | Smoking Group | N     | %     | Ever Quit (N) | Ever Quit % | Mean Yrs Quit | Short Term (n) | Short Term % |
| 0                                            | 60-64     | Never Any     | 3078  | 55.72 |               |             |               |                |              |
| 0                                            | 60-64     | CC            | 1249  | 22.61 | 0             | 0.00        |               |                |              |
| 0                                            | 60-64     | Ecig          | 0     | 0.00  |               |             |               |                |              |
| 0                                            | 60-64     | Dual          | 0     | 0.00  |               |             |               |                |              |
| 0                                            | 60-64     | Former        | 1197  | 21.67 |               |             | 18.28         | 61             | 5.10         |
| Year of Follow-up: 1990, Age Group: 65-69    |           |               |       |       |               |             |               |                |              |
| Period                                       | Age Group | Smoking Group | N     | %     | Ever Quit (N) | Ever Quit % | Mean Yrs Quit | Short Term (n) | Short Term % |
| 0                                            | 65-69     | Never Any     | 3042  | 57.36 |               |             |               |                |              |
| 0                                            | 65-69     | CC            | 976   | 18.40 | 0             | 0.00        |               |                |              |
| 0                                            | 65-69     | Ecig          | 0     | 0.00  |               |             |               |                |              |
| 0                                            | 65-69     | Dual          | 0     | 0.00  |               |             |               |                |              |
| 0                                            | 65-69     | Former        | 1285  | 24.23 |               |             | 20.65         | 68             | 5.29         |
| Year of Follow-up: 1990, Age Group: 70-74    |           |               |       |       |               |             |               |                |              |
| Period                                       | Age Group | Smoking Group | N     | %     | Ever Quit (N) | Ever Quit % | Mean Yrs Quit | Short Term (n) | Short Term % |
| 0                                            | 70-74     | Never Any     | 2738  | 61.05 |               |             |               |                |              |
| 0                                            | 70-74     | CC            | 610   | 13.60 | 0             | 0.00        |               |                |              |
| 0                                            | 70-74     | Ecig          | 0     | 0.00  |               |             |               |                |              |
| 0                                            | 70-74     | Dual          | 0     | 0.00  |               |             |               |                |              |
| 0                                            | 70-74     | Former        | 1137  | 25.35 |               |             | 24.48         | 27             | 2.37         |
| Year of Follow-up: 1990, Age Group: 75-79    |           |               |       |       |               |             |               |                |              |
| Period                                       | Age Group | Smoking Group | N     | %     | Ever Quit (N) | Ever Quit % | Mean Yrs Quit | Short Term (n) | Short Term % |
| 0                                            | 75-79     | Never Any     | 2483  | 68.84 |               |             |               |                |              |
| 0                                            | 75-79     | CC            | 354   | 9.81  | 0             | 0.00        |               |                |              |
| 0                                            | 75-79     | Ecig          | 0     | 0.00  |               |             |               |                |              |
| 0                                            | 75-79     | Dual          | 0     | 0.00  |               |             |               |                |              |
| 0                                            | 75-79     | Former        | 770   | 21.35 |               |             | 24.48         | 24             | 3.12         |
| Year of Follow-up: 1995, Age Group: All Ages |           |               |       |       |               |             |               |                |              |
| Period                                       | Age Group | Smoking Group | N     | %     | Ever Quit (N) | Ever Quit % | Mean Yrs Quit | Short Term (n) | Short Term % |
| 5                                            | All Ages  | Never Any     | 50887 | 55.53 |               |             |               |                |              |
| 5                                            | All Ages  | CC            | 10659 | 11.63 | 0             | 0.00        |               |                |              |
| 5                                            | All Ages  | Ecig          | 11555 | 12.61 |               |             |               |                |              |
| 5                                            | All Ages  | Dual          | 0     | 0.00  |               |             |               |                |              |
| 5                                            | All Ages  | Former        | 18538 | 20.23 |               |             | 14.09         | 1217           | 6.56         |
| Year of Follow-up: 1995, Age Group: 18-19    |           |               |       |       |               |             |               |                |              |
| Period                                       | Age Group | Smoking Group | N     | %     | Ever Quit (N) | Ever Quit % | Mean Yrs Quit | Short Term (n) | Short Term % |
| 5                                            | 18-19     | Never Any     | 2434  | 76.64 |               |             |               |                |              |
| 5                                            | 18-19     | CC            | 233   | 7.34  | 0             | 0.00        |               |                |              |
| 5                                            | 18-19     | Ecig          | 418   | 13.16 |               |             |               |                |              |
| 5                                            | 18-19     | Dual          | 0     | 0.00  |               |             |               |                |              |
| 5                                            | 18-19     | Former        | 91    | 2.87  |               |             | 1.16          | 58             | 63.74        |
| Year of Follow-up: 1995, Age Group: 20-24    |           |               |       |       |               |             |               |                |              |
| Period                                       | Age Group | Smoking Group | N     | %     | Ever Quit (N) | Ever Quit % | Mean Yrs Quit | Short Term (n) | Short Term % |
| 5                                            | 20-24     | Never Any     | 5794  | 69.39 |               |             |               |                |              |
| 5                                            | 20-24     | CC            | 862   | 10.32 | 0             | 0.00        |               |                |              |
| 5                                            | 20-24     | Ecig          | 1229  | 14.72 |               |             |               |                |              |
| 5                                            | 20-24     | Dual          | 0     | 0.00  |               |             |               |                |              |
| 5                                            | 20-24     | Former        | 465   | 5.57  |               |             | 3.15          | 117            | 25.16        |
| Year of Follow-up: 1995, Age Group: 25-29    |           |               |       |       |               |             |               |                |              |
| Period                                       | Age Group | Smoking Group | N     | %     | Ever Quit (N) | Ever Quit % | Mean Yrs Quit | Short Term (n) | Short Term % |
| 5                                            | 25-29     | Never Any     | 5313  | 60.42 |               |             |               |                |              |
| 5                                            | 25-29     | CC            | 1062  | 12.08 | 0             | 0.00        |               |                |              |
| 5                                            | 25-29     | Ecig          | 1384  | 15.74 |               |             |               |                |              |
| 5                                            | 25-29     | Dual          | 0     | 0.00  |               |             |               |                |              |
| 5                                            | 25-29     | Former        | 1034  | 11.76 |               |             | 5.89          | 60             | 5.80         |
| Year of Follow-up: 1995, Age Group: 30-34    |           |               |       |       |               |             |               |                |              |
| Period                                       | Age Group | Smoking Group | N     | %     | Ever Quit (N) | Ever Quit % | Mean Yrs Quit | Short Term (n) | Short Term % |

**Results for PHIM for Run 6 (Sensitivity\_Analysis\_3.RTF)**

|                                              |           |               |      |       |               |             |               |                |              |
|----------------------------------------------|-----------|---------------|------|-------|---------------|-------------|---------------|----------------|--------------|
| 5                                            | 30-34     | Never Any     | 5304 | 52.63 |               |             |               |                |              |
| 5                                            | 30-34     | CC            | 1373 | 13.62 | 0             | 0.00        |               |                |              |
| 5                                            | 30-34     | Ecig          | 1792 | 17.78 |               |             |               |                |              |
| 5                                            | 30-34     | Dual          | 0    | 0.00  |               |             |               |                |              |
| 5                                            | 30-34     | Former        | 1609 | 15.97 |               |             | 8.12          | 70             | 4.35         |
| Year of Follow-up: 1995, Age Group: 35-39    |           |               |      |       |               |             |               |                |              |
| Period                                       | Age Group | Smoking Group | N    | %     | Ever Quit (N) | Ever Quit % | Mean Yrs Quit | Short Term (n) | Short Term % |
| 5                                            | 35-39     | Never Any     | 5278 | 50.27 |               |             |               |                |              |
| 5                                            | 35-39     | CC            | 1410 | 13.43 | 0             | 0.00        |               |                |              |
| 5                                            | 35-39     | Ecig          | 1735 | 16.53 |               |             |               |                |              |
| 5                                            | 35-39     | Dual          | 0    | 0.00  |               |             |               |                |              |
| 5                                            | 35-39     | Former        | 2076 | 19.77 |               |             | 8.71          | 69             | 3.32         |
| Year of Follow-up: 1995, Age Group: 40-44    |           |               |      |       |               |             |               |                |              |
| Period                                       | Age Group | Smoking Group | N    | %     | Ever Quit (N) | Ever Quit % | Mean Yrs Quit | Short Term (n) | Short Term % |
| 5                                            | 40-44     | Never Any     | 5018 | 52.27 |               |             |               |                |              |
| 5                                            | 40-44     | CC            | 1135 | 11.82 | 0             | 0.00        |               |                |              |
| 5                                            | 40-44     | Ecig          | 1342 | 13.98 |               |             |               |                |              |
| 5                                            | 40-44     | Dual          | 0    | 0.00  |               |             |               |                |              |
| 5                                            | 40-44     | Former        | 2105 | 21.93 |               |             | 12.01         | 92             | 4.37         |
| Year of Follow-up: 1995, Age Group: 45-49    |           |               |      |       |               |             |               |                |              |
| Period                                       | Age Group | Smoking Group | N    | %     | Ever Quit (N) | Ever Quit % | Mean Yrs Quit | Short Term (n) | Short Term % |
| 5                                            | 45-49     | Never Any     | 4356 | 51.27 |               |             |               |                |              |
| 5                                            | 45-49     | CC            | 974  | 11.46 | 0             | 0.00        |               |                |              |
| 5                                            | 45-49     | Ecig          | 1141 | 13.43 |               |             |               |                |              |
| 5                                            | 45-49     | Dual          | 0    | 0.00  |               |             |               |                |              |
| 5                                            | 45-49     | Former        | 2026 | 23.84 |               |             | 10.83         | 143            | 7.06         |
| Year of Follow-up: 1995, Age Group: 50-54    |           |               |      |       |               |             |               |                |              |
| Period                                       | Age Group | Smoking Group | N    | %     | Ever Quit (N) | Ever Quit % | Mean Yrs Quit | Short Term (n) | Short Term % |
| 5                                            | 50-54     | Never Any     | 3116 | 47.67 |               |             |               |                |              |
| 5                                            | 50-54     | CC            | 739  | 11.31 | 0             | 0.00        |               |                |              |
| 5                                            | 50-54     | Ecig          | 810  | 12.39 |               |             |               |                |              |
| 5                                            | 50-54     | Dual          | 0    | 0.00  |               |             |               |                |              |
| 5                                            | 50-54     | Former        | 1871 | 28.63 |               |             | 14.80         | 151            | 8.07         |
| Year of Follow-up: 1995, Age Group: 55-59    |           |               |      |       |               |             |               |                |              |
| Period                                       | Age Group | Smoking Group | N    | %     | Ever Quit (N) | Ever Quit % | Mean Yrs Quit | Short Term (n) | Short Term % |
| 5                                            | 55-59     | Never Any     | 2684 | 48.50 |               |             |               |                |              |
| 5                                            | 55-59     | CC            | 722  | 13.05 | 0             | 0.00        |               |                |              |
| 5                                            | 55-59     | Ecig          | 619  | 11.19 |               |             |               |                |              |
| 5                                            | 55-59     | Dual          | 0    | 0.00  |               |             |               |                |              |
| 5                                            | 55-59     | Former        | 1509 | 27.27 |               |             | 15.77         | 97             | 6.43         |
| Year of Follow-up: 1995, Age Group: 60-64    |           |               |      |       |               |             |               |                |              |
| Period                                       | Age Group | Smoking Group | N    | %     | Ever Quit (N) | Ever Quit % | Mean Yrs Quit | Short Term (n) | Short Term % |
| 5                                            | 60-64     | Never Any     | 2732 | 51.90 |               |             |               |                |              |
| 5                                            | 60-64     | CC            | 633  | 12.03 | 0             | 0.00        |               |                |              |
| 5                                            | 60-64     | Ecig          | 439  | 8.34  |               |             |               |                |              |
| 5                                            | 60-64     | Dual          | 0    | 0.00  |               |             |               |                |              |
| 5                                            | 60-64     | Former        | 1460 | 27.74 |               |             | 19.15         | 92             | 6.30         |
| Year of Follow-up: 1995, Age Group: 65-69    |           |               |      |       |               |             |               |                |              |
| Period                                       | Age Group | Smoking Group | N    | %     | Ever Quit (N) | Ever Quit % | Mean Yrs Quit | Short Term (n) | Short Term % |
| 5                                            | 65-69     | Never Any     | 3078 | 55.72 |               |             |               |                |              |
| 5                                            | 65-69     | CC            | 602  | 10.90 | 0             | 0.00        |               |                |              |
| 5                                            | 65-69     | Ecig          | 368  | 6.66  |               |             |               |                |              |
| 5                                            | 65-69     | Dual          | 0    | 0.00  |               |             |               |                |              |
| 5                                            | 65-69     | Former        | 1476 | 26.72 |               |             | 19.27         | 112            | 7.59         |
| Year of Follow-up: 1995, Age Group: 70-74    |           |               |      |       |               |             |               |                |              |
| Period                                       | Age Group | Smoking Group | N    | %     | Ever Quit (N) | Ever Quit % | Mean Yrs Quit | Short Term (n) | Short Term % |
| 5                                            | 70-74     | Never Any     | 3042 | 57.36 |               |             |               |                |              |
| 5                                            | 70-74     | CC            | 577  | 10.88 | 0             | 0.00        |               |                |              |
| 5                                            | 70-74     | Ecig          | 180  | 3.39  |               |             |               |                |              |
| 5                                            | 70-74     | Dual          | 0    | 0.00  |               |             |               |                |              |
| 5                                            | 70-74     | Former        | 1504 | 28.36 |               |             | 22.20         | 84             | 5.59         |
| Year of Follow-up: 1995, Age Group: 75-79    |           |               |      |       |               |             |               |                |              |
| Period                                       | Age Group | Smoking Group | N    | %     | Ever Quit (N) | Ever Quit % | Mean Yrs Quit | Short Term (n) | Short Term % |
| 5                                            | 75-79     | Never Any     | 2738 | 61.05 |               |             |               |                |              |
| 5                                            | 75-79     | CC            | 337  | 7.51  | 0             | 0.00        |               |                |              |
| 5                                            | 75-79     | Ecig          | 98   | 2.19  |               |             |               |                |              |
| 5                                            | 75-79     | Dual          | 0    | 0.00  |               |             |               |                |              |
| 5                                            | 75-79     | Former        | 1312 | 29.25 |               |             | 25.81         | 72             | 5.49         |
| Year of Follow-up: 2000, Age Group: All Ages |           |               |      |       |               |             |               |                |              |

**Results for PHIM for Run 6 (Sensitivity\_Analysis\_3.RTF)**

| Period                                    | Age Group | Smoking Group | N     | %     | Ever Quit (N) | Ever Quit % | Mean Yrs Quit | Short Term (n) | Short Term % |
|-------------------------------------------|-----------|---------------|-------|-------|---------------|-------------|---------------|----------------|--------------|
| 10                                        | All Ages  | Never Any     | 50423 | 54.86 |               |             |               |                |              |
| 10                                        | All Ages  | CC            | 4595  | 5.00  | 0             | 0.00        |               |                |              |
| 10                                        | All Ages  | Ecig          | 14951 | 16.27 |               |             |               |                |              |
| 10                                        | All Ages  | Dual          | 0     | 0.00  |               |             |               |                |              |
| 10                                        | All Ages  | Former        | 21939 | 23.87 |               |             | 14.72         | 1953           | 8.90         |
| Year of Follow-up: 2000, Age Group: 18-19 |           |               |       |       |               |             |               |                |              |
| Period                                    | Age Group | Smoking Group | N     | %     | Ever Quit (N) | Ever Quit % | Mean Yrs Quit | Short Term (n) | Short Term % |
| 10                                        | 18-19     | Never Any     | 0     | .     |               |             |               |                |              |
| 10                                        | 18-19     | CC            | 0     | .     | 0             | .           |               |                |              |
| 10                                        | 18-19     | Ecig          | 0     | .     |               |             |               |                |              |
| 10                                        | 18-19     | Dual          | 0     | .     |               |             |               |                |              |
| 10                                        | 18-19     | Former        | 0     | .     |               |             |               | 0              | .            |
| Year of Follow-up: 2000, Age Group: 20-24 |           |               |       |       |               |             |               |                |              |
| Period                                    | Age Group | Smoking Group | N     | %     | Ever Quit (N) | Ever Quit % | Mean Yrs Quit | Short Term (n) | Short Term % |
| 10                                        | 20-24     | Never Any     | 5128  | 64.67 |               |             |               |                |              |
| 10                                        | 20-24     | CC            | 370   | 4.67  | 0             | 0.00        |               |                |              |
| 10                                        | 20-24     | Ecig          | 1677  | 21.15 |               |             |               |                |              |
| 10                                        | 20-24     | Dual          | 0     | 0.00  |               |             |               |                |              |
| 10                                        | 20-24     | Former        | 755   | 9.52  |               |             | 3.55          | 199            | 26.36        |
| Year of Follow-up: 2000, Age Group: 25-29 |           |               |       |       |               |             |               |                |              |
| Period                                    | Age Group | Smoking Group | N     | %     | Ever Quit (N) | Ever Quit % | Mean Yrs Quit | Short Term (n) | Short Term % |
| 10                                        | 25-29     | Never Any     | 5493  | 65.78 |               |             |               |                |              |
| 10                                        | 25-29     | CC            | 400   | 4.79  | 0             | 0.00        |               |                |              |
| 10                                        | 25-29     | Ecig          | 1618  | 19.38 |               |             |               |                |              |
| 10                                        | 25-29     | Dual          | 0     | 0.00  |               |             |               |                |              |
| 10                                        | 25-29     | Former        | 839   | 10.05 |               |             | 5.38          | 147            | 17.52        |
| Year of Follow-up: 2000, Age Group: 30-34 |           |               |       |       |               |             |               |                |              |
| Period                                    | Age Group | Smoking Group | N     | %     | Ever Quit (N) | Ever Quit % | Mean Yrs Quit | Short Term (n) | Short Term % |
| 10                                        | 30-34     | Never Any     | 5214  | 59.30 |               |             |               |                |              |
| 10                                        | 30-34     | CC            | 417   | 4.74  | 0             | 0.00        |               |                |              |
| 10                                        | 30-34     | Ecig          | 1863  | 21.19 |               |             |               |                |              |
| 10                                        | 30-34     | Dual          | 0     | 0.00  |               |             |               |                |              |
| 10                                        | 30-34     | Former        | 1299  | 14.77 |               |             | 9.05          | 108            | 8.31         |
| Year of Follow-up: 2000, Age Group: 35-39 |           |               |       |       |               |             |               |                |              |
| Period                                    | Age Group | Smoking Group | N     | %     | Ever Quit (N) | Ever Quit % | Mean Yrs Quit | Short Term (n) | Short Term % |
| 10                                        | 35-39     | Never Any     | 5284  | 52.43 |               |             |               |                |              |
| 10                                        | 35-39     | CC            | 561   | 5.57  | 0             | 0.00        |               |                |              |
| 10                                        | 35-39     | Ecig          | 2358  | 23.40 |               |             |               |                |              |
| 10                                        | 35-39     | Dual          | 0     | 0.00  |               |             |               |                |              |
| 10                                        | 35-39     | Former        | 1875  | 18.60 |               |             | 11.50         | 129            | 6.88         |
| Year of Follow-up: 2000, Age Group: 40-44 |           |               |       |       |               |             |               |                |              |
| Period                                    | Age Group | Smoking Group | N     | %     | Ever Quit (N) | Ever Quit % | Mean Yrs Quit | Short Term (n) | Short Term % |
| 10                                        | 40-44     | Never Any     | 5278  | 50.27 |               |             |               |                |              |
| 10                                        | 40-44     | CC            | 584   | 5.56  | 0             | 0.00        |               |                |              |
| 10                                        | 40-44     | Ecig          | 2232  | 21.26 |               |             |               |                |              |
| 10                                        | 40-44     | Dual          | 0     | 0.00  |               |             |               |                |              |
| 10                                        | 40-44     | Former        | 2405  | 22.91 |               |             | 12.05         | 165            | 6.86         |
| Year of Follow-up: 2000, Age Group: 45-49 |           |               |       |       |               |             |               |                |              |
| Period                                    | Age Group | Smoking Group | N     | %     | Ever Quit (N) | Ever Quit % | Mean Yrs Quit | Short Term (n) | Short Term % |
| 10                                        | 45-49     | Never Any     | 5018  | 52.27 |               |             |               |                |              |
| 10                                        | 45-49     | CC            | 446   | 4.65  | 0             | 0.00        |               |                |              |
| 10                                        | 45-49     | Ecig          | 1600  | 16.67 |               |             |               |                |              |
| 10                                        | 45-49     | Dual          | 0     | 0.00  |               |             |               |                |              |
| 10                                        | 45-49     | Former        | 2536  | 26.42 |               |             | 14.41         | 206            | 8.12         |
| Year of Follow-up: 2000, Age Group: 50-54 |           |               |       |       |               |             |               |                |              |
| Period                                    | Age Group | Smoking Group | N     | %     | Ever Quit (N) | Ever Quit % | Mean Yrs Quit | Short Term (n) | Short Term % |
| 10                                        | 50-54     | Never Any     | 4356  | 51.27 |               |             |               |                |              |
| 10                                        | 50-54     | CC            | 378   | 4.45  | 0             | 0.00        |               |                |              |
| 10                                        | 50-54     | Ecig          | 1221  | 14.37 |               |             |               |                |              |
| 10                                        | 50-54     | Dual          | 0     | 0.00  |               |             |               |                |              |
| 10                                        | 50-54     | Former        | 2542  | 29.92 |               |             | 13.01         | 213            | 8.38         |
| Year of Follow-up: 2000, Age Group: 55-59 |           |               |       |       |               |             |               |                |              |
| Period                                    | Age Group | Smoking Group | N     | %     | Ever Quit (N) | Ever Quit % | Mean Yrs Quit | Short Term (n) | Short Term % |
| 10                                        | 55-59     | Never Any     | 3116  | 47.67 |               |             |               |                |              |
| 10                                        | 55-59     | CC            | 283   | 4.33  | 0             | 0.00        |               |                |              |
| 10                                        | 55-59     | Ecig          | 850   | 13.00 |               |             |               |                |              |
| 10                                        | 55-59     | Dual          | 0     | 0.00  |               |             |               |                |              |

**Results for PHIM for Run 6 (Sensitivity\_Analysis\_3.RTF)**

| Year of Follow-up: 2000, Age Group: 60-64    | Period   | Age Group | Smoking Group | N     | %     | Ever Quit (N) | Ever Quit % | Mean Yrs Quit | Short Term (n) | Short Term % |
|----------------------------------------------|----------|-----------|---------------|-------|-------|---------------|-------------|---------------|----------------|--------------|
| 10                                           | 55-59    | Former    |               | 2287  | 34.99 |               |             | 16.54         | 174            | 7.61         |
| 10                                           | 60-64    | Never Any |               | 2684  | 48.50 |               |             |               |                |              |
| 10                                           | 60-64    | CC        |               | 334   | 6.04  | 0             | 0.00        |               |                |              |
| 10                                           | 60-64    | Ecig      |               | 619   | 11.19 |               |             |               |                |              |
| 10                                           | 60-64    | Dual      |               | 0     | 0.00  |               |             |               |                |              |
| 10                                           | 60-64    | Former    |               | 1897  | 34.28 |               |             | 16.90         | 166            | 8.75         |
| Year of Follow-up: 2000, Age Group: 65-69    | Period   | Age Group | Smoking Group | N     | %     | Ever Quit (N) | Ever Quit % | Mean Yrs Quit | Short Term (n) | Short Term % |
| 10                                           | 65-69    | Never Any |               | 2732  | 51.90 |               |             |               |                |              |
| 10                                           | 65-69    | CC        |               | 280   | 5.32  | 0             | 0.00        |               |                |              |
| 10                                           | 65-69    | Ecig      |               | 401   | 7.62  |               |             |               |                |              |
| 10                                           | 65-69    | Dual      |               | 0     | 0.00  |               |             |               |                |              |
| 10                                           | 65-69    | Former    |               | 1851  | 35.16 |               |             | 19.44         | 167            | 9.02         |
| Year of Follow-up: 2000, Age Group: 70-74    | Period   | Age Group | Smoking Group | N     | %     | Ever Quit (N) | Ever Quit % | Mean Yrs Quit | Short Term (n) | Short Term % |
| 10                                           | 70-74    | Never Any |               | 3078  | 55.72 |               |             |               |                |              |
| 10                                           | 70-74    | CC        |               | 274   | 4.96  | 0             | 0.00        |               |                |              |
| 10                                           | 70-74    | Ecig      |               | 329   | 5.96  |               |             |               |                |              |
| 10                                           | 70-74    | Dual      |               | 0     | 0.00  |               |             |               |                |              |
| 10                                           | 70-74    | Former    |               | 1843  | 33.36 |               |             | 19.81         | 164            | 8.90         |
| Year of Follow-up: 2000, Age Group: 75-79    | Period   | Age Group | Smoking Group | N     | %     | Ever Quit (N) | Ever Quit % | Mean Yrs Quit | Short Term (n) | Short Term % |
| 10                                           | 75-79    | Never Any |               | 3042  | 57.36 |               |             |               |                |              |
| 10                                           | 75-79    | CC        |               | 268   | 5.05  | 0             | 0.00        |               |                |              |
| 10                                           | 75-79    | Ecig      |               | 183   | 3.45  |               |             |               |                |              |
| 10                                           | 75-79    | Dual      |               | 0     | 0.00  |               |             |               |                |              |
| 10                                           | 75-79    | Former    |               | 1810  | 34.13 |               |             | 22.94         | 115            | 6.35         |
| Year of Follow-up: 2005, Age Group: All Ages | Period   | Age Group | Smoking Group | N     | %     | Ever Quit (N) | Ever Quit % | Mean Yrs Quit | Short Term (n) | Short Term % |
| 15                                           | All Ages | Never Any |               | 47002 | 54.27 |               |             |               |                |              |
| 15                                           | All Ages | CC        |               | 1890  | 2.18  | 0             | 0.00        |               |                |              |
| 15                                           | All Ages | Ecig      |               | 14571 | 16.82 |               |             |               |                |              |
| 15                                           | All Ages | Dual      |               | 0     | 0.00  |               |             |               |                |              |
| 15                                           | All Ages | Former    |               | 23142 | 26.72 |               |             | 16.80         | 1072           | 4.63         |
| Year of Follow-up: 2005, Age Group: 18-19    | Period   | Age Group | Smoking Group | N     | %     | Ever Quit (N) | Ever Quit % | Mean Yrs Quit | Short Term (n) | Short Term % |
| 15                                           | 18-19    | Never Any |               | 0     | .     |               |             |               |                |              |
| 15                                           | 18-19    | CC        |               | 0     | .     | 0             | .           |               |                |              |
| 15                                           | 18-19    | Ecig      |               | 0     | .     |               |             |               |                |              |
| 15                                           | 18-19    | Dual      |               | 0     | .     |               |             |               |                |              |
| 15                                           | 18-19    | Former    |               | 0     | .     |               |             | .             | 0              | .            |
| Year of Follow-up: 2005, Age Group: 20-24    | Period   | Age Group | Smoking Group | N     | %     | Ever Quit (N) | Ever Quit % | Mean Yrs Quit | Short Term (n) | Short Term % |
| 15                                           | 20-24    | Never Any |               | 0     | .     |               |             |               |                |              |
| 15                                           | 20-24    | CC        |               | 0     | .     | 0             | .           |               |                |              |
| 15                                           | 20-24    | Ecig      |               | 0     | .     |               |             |               |                |              |
| 15                                           | 20-24    | Dual      |               | 0     | .     |               |             |               |                |              |
| 15                                           | 20-24    | Former    |               | 0     | .     |               |             | .             | 0              | .            |
| Year of Follow-up: 2005, Age Group: 25-29    | Period   | Age Group | Smoking Group | N     | %     | Ever Quit (N) | Ever Quit % | Mean Yrs Quit | Short Term (n) | Short Term % |
| 15                                           | 25-29    | Never Any |               | 4860  | 61.29 |               |             |               |                |              |
| 15                                           | 25-29    | CC        |               | 166   | 2.09  | 0             | 0.00        |               |                |              |
| 15                                           | 25-29    | Ecig      |               | 1796  | 22.65 |               |             |               |                |              |
| 15                                           | 25-29    | Dual      |               | 0     | 0.00  |               |             |               |                |              |
| 15                                           | 25-29    | Former    |               | 1108  | 13.97 |               |             | 6.58          | 115            | 10.38        |
| Year of Follow-up: 2005, Age Group: 30-34    | Period   | Age Group | Smoking Group | N     | %     | Ever Quit (N) | Ever Quit % | Mean Yrs Quit | Short Term (n) | Short Term % |
| 15                                           | 30-34    | Never Any |               | 5407  | 64.75 |               |             |               |                |              |
| 15                                           | 30-34    | CC        |               | 149   | 1.78  | 0             | 0.00        |               |                |              |
| 15                                           | 30-34    | Ecig      |               | 1710  | 20.48 |               |             |               |                |              |
| 15                                           | 30-34    | Dual      |               | 0     | 0.00  |               |             |               |                |              |
| 15                                           | 30-34    | Former    |               | 1084  | 12.98 |               |             | 8.48          | 99             | 9.13         |
| Year of Follow-up: 2005, Age Group: 35-39    | Period   | Age Group | Smoking Group | N     | %     | Ever Quit (N) | Ever Quit % | Mean Yrs Quit | Short Term (n) | Short Term % |
| 15                                           | 35-39    | Never Any |               | 5189  | 59.01 |               |             |               |                |              |
| 15                                           | 35-39    | CC        |               | 167   | 1.90  | 0             | 0.00        |               |                |              |

**Results for PHIM for Run 6 (Sensitivity\_Analysis\_3.RTF)**

|                                              |           |               |       |       |               |             |               |                |              |
|----------------------------------------------|-----------|---------------|-------|-------|---------------|-------------|---------------|----------------|--------------|
| 15                                           | 35-39     | Ecig          | 1918  | 21.81 |               |             |               |                |              |
| 15                                           | 35-39     | Dual          | 0     | 0.00  |               |             |               |                |              |
| 15                                           | 35-39     | Former        | 1519  | 17.28 |               |             | 12.31         | 88             | 5.79         |
| Year of Follow-up: 2005, Age Group: 40-44    |           |               |       |       |               |             |               |                |              |
| Period                                       | Age Group | Smoking Group | N     | %     | Ever Quit (N) | Ever Quit % | Mean Yrs Quit | Short Term (n) | Short Term % |
| 15                                           | 40-44     | Never Any     | 5284  | 52.43 |               |             |               |                |              |
| 15                                           | 40-44     | CC            | 238   | 2.36  | 0             | 0.00        |               |                |              |
| 15                                           | 40-44     | Ecig          | 2392  | 23.73 |               |             |               |                |              |
| 15                                           | 40-44     | Dual          | 0     | 0.00  |               |             |               |                |              |
| 15                                           | 40-44     | Former        | 2164  | 21.47 |               |             | 14.56         | 126            | 5.82         |
| Year of Follow-up: 2005, Age Group: 45-49    |           |               |       |       |               |             |               |                |              |
| Period                                       | Age Group | Smoking Group | N     | %     | Ever Quit (N) | Ever Quit % | Mean Yrs Quit | Short Term (n) | Short Term % |
| 15                                           | 45-49     | Never Any     | 5278  | 50.27 |               |             |               |                |              |
| 15                                           | 45-49     | CC            | 237   | 2.26  | 0             | 0.00        |               |                |              |
| 15                                           | 45-49     | Ecig          | 2215  | 21.10 |               |             |               |                |              |
| 15                                           | 45-49     | Dual          | 0     | 0.00  |               |             |               |                |              |
| 15                                           | 45-49     | Former        | 2769  | 26.37 |               |             | 15.08         | 144            | 5.20         |
| Year of Follow-up: 2005, Age Group: 50-54    |           |               |       |       |               |             |               |                |              |
| Period                                       | Age Group | Smoking Group | N     | %     | Ever Quit (N) | Ever Quit % | Mean Yrs Quit | Short Term (n) | Short Term % |
| 15                                           | 50-54     | Never Any     | 5018  | 52.27 |               |             |               |                |              |
| 15                                           | 50-54     | CC            | 191   | 1.99  | 0             | 0.00        |               |                |              |
| 15                                           | 50-54     | Ecig          | 1514  | 15.77 |               |             |               |                |              |
| 15                                           | 50-54     | Dual          | 0     | 0.00  |               |             |               |                |              |
| 15                                           | 50-54     | Former        | 2877  | 29.97 |               |             | 17.39         | 108            | 3.75         |
| Year of Follow-up: 2005, Age Group: 55-59    |           |               |       |       |               |             |               |                |              |
| Period                                       | Age Group | Smoking Group | N     | %     | Ever Quit (N) | Ever Quit % | Mean Yrs Quit | Short Term (n) | Short Term % |
| 15                                           | 55-59     | Never Any     | 4356  | 51.27 |               |             |               |                |              |
| 15                                           | 55-59     | CC            | 166   | 1.95  | 0             | 0.00        |               |                |              |
| 15                                           | 55-59     | Ecig          | 1153  | 13.57 |               |             |               |                |              |
| 15                                           | 55-59     | Dual          | 0     | 0.00  |               |             |               |                |              |
| 15                                           | 55-59     | Former        | 2822  | 33.21 |               |             | 16.45         | 89             | 3.15         |
| Year of Follow-up: 2005, Age Group: 60-64    |           |               |       |       |               |             |               |                |              |
| Period                                       | Age Group | Smoking Group | N     | %     | Ever Quit (N) | Ever Quit % | Mean Yrs Quit | Short Term (n) | Short Term % |
| 15                                           | 60-64     | Never Any     | 3116  | 47.67 |               |             |               |                |              |
| 15                                           | 60-64     | CC            | 131   | 2.00  | 0             | 0.00        |               |                |              |
| 15                                           | 60-64     | Ecig          | 764   | 11.69 |               |             |               |                |              |
| 15                                           | 60-64     | Dual          | 0     | 0.00  |               |             |               |                |              |
| 15                                           | 60-64     | Former        | 2525  | 38.63 |               |             | 19.70         | 100            | 3.96         |
| Year of Follow-up: 2005, Age Group: 65-69    |           |               |       |       |               |             |               |                |              |
| Period                                       | Age Group | Smoking Group | N     | %     | Ever Quit (N) | Ever Quit % | Mean Yrs Quit | Short Term (n) | Short Term % |
| 15                                           | 65-69     | Never Any     | 2684  | 48.50 |               |             |               |                |              |
| 15                                           | 65-69     | CC            | 160   | 2.89  | 0             | 0.00        |               |                |              |
| 15                                           | 65-69     | Ecig          | 529   | 9.56  |               |             |               |                |              |
| 15                                           | 65-69     | Dual          | 0     | 0.00  |               |             |               |                |              |
| 15                                           | 65-69     | Former        | 2161  | 39.05 |               |             | 19.53         | 69             | 3.19         |
| Year of Follow-up: 2005, Age Group: 70-74    |           |               |       |       |               |             |               |                |              |
| Period                                       | Age Group | Smoking Group | N     | %     | Ever Quit (N) | Ever Quit % | Mean Yrs Quit | Short Term (n) | Short Term % |
| 15                                           | 70-74     | Never Any     | 2732  | 51.90 |               |             |               |                |              |
| 15                                           | 70-74     | CC            | 139   | 2.64  | 0             | 0.00        |               |                |              |
| 15                                           | 70-74     | Ecig          | 334   | 6.34  |               |             |               |                |              |
| 15                                           | 70-74     | Dual          | 0     | 0.00  |               |             |               |                |              |
| 15                                           | 70-74     | Former        | 2059  | 39.11 |               |             | 22.20         | 73             | 3.55         |
| Year of Follow-up: 2005, Age Group: 75-79    |           |               |       |       |               |             |               |                |              |
| Period                                       | Age Group | Smoking Group | N     | %     | Ever Quit (N) | Ever Quit % | Mean Yrs Quit | Short Term (n) | Short Term % |
| 15                                           | 75-79     | Never Any     | 3078  | 55.72 |               |             |               |                |              |
| 15                                           | 75-79     | CC            | 146   | 2.64  | 0             | 0.00        |               |                |              |
| 15                                           | 75-79     | Ecig          | 246   | 4.45  |               |             |               |                |              |
| 15                                           | 75-79     | Dual          | 0     | 0.00  |               |             |               |                |              |
| 15                                           | 75-79     | Former        | 2054  | 37.18 |               |             | 22.50         | 61             | 2.97         |
| Year of Follow-up: 2010, Age Group: All Ages |           |               |       |       |               |             |               |                |              |
| Period                                       | Age Group | Smoking Group | N     | %     | Ever Quit (N) | Ever Quit % | Mean Yrs Quit | Short Term (n) | Short Term % |
| 20                                           | All Ages  | Never Any     | 43759 | 53.97 |               |             |               |                |              |
| 20                                           | All Ages  | CC            | 765   | 0.94  | 0             | 0.00        |               |                |              |
| 20                                           | All Ages  | Ecig          | 12481 | 15.39 |               |             |               |                |              |
| 20                                           | All Ages  | Dual          | 0     | 0.00  |               |             |               |                |              |
| 20                                           | All Ages  | Former        | 24076 | 29.69 |               |             | 18.84         | 1239           | 5.15         |
| Year of Follow-up: 2010, Age Group: 18-19    |           |               |       |       |               |             |               |                |              |
| Period                                       | Age Group | Smoking Group | N     | %     | Ever Quit (N) | Ever Quit % | Mean Yrs Quit | Short Term (n) | Short Term % |



**Results for PHIM for Run 6 (Sensitivity\_Analysis\_3.RTF)**

|                                           |           |               |      |       |               |             |               |                |              |
|-------------------------------------------|-----------|---------------|------|-------|---------------|-------------|---------------|----------------|--------------|
| 20                                        | 18-19     | Never Any     | 0    | .     |               |             |               |                |              |
| 20                                        | 18-19     | CC            | 0    | .     | 0             | .           |               |                |              |
| 20                                        | 18-19     | Ecig          | 0    | .     |               |             |               |                |              |
| 20                                        | 18-19     | Dual          | 0    | .     |               |             |               |                |              |
| 20                                        | 18-19     | Former        | 0    | .     |               |             | 0             | .              |              |
| Year of Follow-up: 2010, Age Group: 20-24 |           |               |      |       |               |             |               |                |              |
| Period                                    | Age Group | Smoking Group | N    | %     | Ever Quit (N) | Ever Quit % | Mean Yrs Quit | Short Term (n) | Short Term % |
| 20                                        | 20-24     | Never Any     | 0    | .     |               |             |               |                |              |
| 20                                        | 20-24     | CC            | 0    | .     | 0             | .           |               |                |              |
| 20                                        | 20-24     | Ecig          | 0    | .     |               |             |               |                |              |
| 20                                        | 20-24     | Dual          | 0    | .     |               |             |               |                |              |
| 20                                        | 20-24     | Former        | 0    | .     |               |             |               | 0              | .            |
| Year of Follow-up: 2010, Age Group: 25-29 |           |               |      |       |               |             |               |                |              |
| Period                                    | Age Group | Smoking Group | N    | %     | Ever Quit (N) | Ever Quit % | Mean Yrs Quit | Short Term (n) | Short Term % |
| 20                                        | 25-29     | Never Any     | 0    | .     |               |             |               |                |              |
| 20                                        | 25-29     | CC            | 0    | .     | 0             | .           |               |                |              |
| 20                                        | 25-29     | Ecig          | 0    | .     |               |             |               |                |              |
| 20                                        | 25-29     | Dual          | 0    | .     |               |             |               |                |              |
| 20                                        | 25-29     | Former        | 0    | .     |               |             |               | 0              | .            |
| Year of Follow-up: 2010, Age Group: 30-34 |           |               |      |       |               |             |               |                |              |
| Period                                    | Age Group | Smoking Group | N    | %     | Ever Quit (N) | Ever Quit % | Mean Yrs Quit | Short Term (n) | Short Term % |
| 20                                        | 30-34     | Never Any     | 4743 | 59.81 |               |             |               |                |              |
| 20                                        | 30-34     | CC            | 65   | 0.82  | 0             | 0.00        |               |                |              |
| 20                                        | 30-34     | Ecig          | 1683 | 21.22 |               |             |               |                |              |
| 20                                        | 30-34     | Dual          | 0    | 0.00  |               |             |               |                |              |
| 20                                        | 30-34     | Former        | 1439 | 18.15 |               |             | 9.32          | 153            | 10.63        |
| Year of Follow-up: 2010, Age Group: 35-39 |           |               |      |       |               |             |               |                |              |
| Period                                    | Age Group | Smoking Group | N    | %     | Ever Quit (N) | Ever Quit % | Mean Yrs Quit | Short Term (n) | Short Term % |
| 20                                        | 35-39     | Never Any     | 5359 | 64.18 |               |             |               |                |              |
| 20                                        | 35-39     | CC            | 58   | 0.69  | 0             | 0.00        |               |                |              |
| 20                                        | 35-39     | Ecig          | 1569 | 18.79 |               |             |               |                |              |
| 20                                        | 35-39     | Dual          | 0    | 0.00  |               |             |               |                |              |
| 20                                        | 35-39     | Former        | 1364 | 16.34 |               |             | 11.11         | 103            | 7.55         |
| Year of Follow-up: 2010, Age Group: 40-44 |           |               |      |       |               |             |               |                |              |
| Period                                    | Age Group | Smoking Group | N    | %     | Ever Quit (N) | Ever Quit % | Mean Yrs Quit | Short Term (n) | Short Term % |
| 20                                        | 40-44     | Never Any     | 5189 | 59.01 |               |             |               |                |              |
| 20                                        | 40-44     | CC            | 64   | 0.73  | 0             | 0.00        |               |                |              |
| 20                                        | 40-44     | Ecig          | 1721 | 19.57 |               |             |               |                |              |
| 20                                        | 40-44     | Dual          | 0    | 0.00  |               |             |               |                |              |
| 20                                        | 40-44     | Former        | 1819 | 20.69 |               |             | 14.76         | 133            | 7.31         |
| Year of Follow-up: 2010, Age Group: 45-49 |           |               |      |       |               |             |               |                |              |
| Period                                    | Age Group | Smoking Group | N    | %     | Ever Quit (N) | Ever Quit % | Mean Yrs Quit | Short Term (n) | Short Term % |
| 20                                        | 45-49     | Never Any     | 5284 | 52.43 |               |             |               |                |              |
| 20                                        | 45-49     | CC            | 105  | 1.04  | 0             | 0.00        |               |                |              |
| 20                                        | 45-49     | Ecig          | 2162 | 21.45 |               |             |               |                |              |
| 20                                        | 45-49     | Dual          | 0    | 0.00  |               |             |               |                |              |
| 20                                        | 45-49     | Former        | 2527 | 25.07 |               |             | 17.01         | 155            | 6.13         |
| Year of Follow-up: 2010, Age Group: 50-54 |           |               |      |       |               |             |               |                |              |
| Period                                    | Age Group | Smoking Group | N    | %     | Ever Quit (N) | Ever Quit % | Mean Yrs Quit | Short Term (n) | Short Term % |
| 20                                        | 50-54     | Never Any     | 5278 | 50.27 |               |             |               |                |              |
| 20                                        | 50-54     | CC            | 101  | 0.96  | 0             | 0.00        |               |                |              |
| 20                                        | 50-54     | Ecig          | 1952 | 18.59 |               |             |               |                |              |
| 20                                        | 50-54     | Dual          | 0    | 0.00  |               |             |               |                |              |
| 20                                        | 50-54     | Former        | 3168 | 30.17 |               |             | 17.77         | 188            | 5.93         |
| Year of Follow-up: 2010, Age Group: 55-59 |           |               |      |       |               |             |               |                |              |
| Period                                    | Age Group | Smoking Group | N    | %     | Ever Quit (N) | Ever Quit % | Mean Yrs Quit | Short Term (n) | Short Term % |
| 20                                        | 55-59     | Never Any     | 5018 | 52.27 |               |             |               |                |              |
| 20                                        | 55-59     | CC            | 91   | 0.95  | 0             | 0.00        |               |                |              |
| 20                                        | 55-59     | Ecig          | 1300 | 13.54 |               |             |               |                |              |
| 20                                        | 55-59     | Dual          | 0    | 0.00  |               |             |               |                |              |
| 20                                        | 55-59     | Former        | 3191 | 33.24 |               |             | 20.39         | 115            | 3.60         |
| Year of Follow-up: 2010, Age Group: 60-64 |           |               |      |       |               |             |               |                |              |
| Period                                    | Age Group | Smoking Group | N    | %     | Ever Quit (N) | Ever Quit % | Mean Yrs Quit | Short Term (n) | Short Term % |
| 20                                        | 60-64     | Never Any     | 4356 | 51.27 |               |             |               |                |              |
| 20                                        | 60-64     | CC            | 71   | 0.84  | 0             | 0.00        |               |                |              |
| 20                                        | 60-64     | Ecig          | 924  | 10.87 |               |             |               |                |              |
| 20                                        | 60-64     | Dual          | 0    | 0.00  |               |             |               |                |              |
| 20                                        | 60-64     | Former        | 3146 | 37.02 |               |             | 19.42         | 152            | 4.83         |
| Year of Follow-up: 2010, Age Group: 65-69 |           |               |      |       |               |             |               |                |              |

**Results for PHIM for Run 6 (Sensitivity\_Analysis\_3.RTF)**

| Period                                       | Age Group | Smoking Group | N     | %     | Ever Quit (N) | Ever Quit % | Mean Yrs Quit | Short Term (n) | Short Term % |
|----------------------------------------------|-----------|---------------|-------|-------|---------------|-------------|---------------|----------------|--------------|
| 20                                           | 65-69     | Never Any     | 3116  | 47.67 |               |             |               |                |              |
| 20                                           | 65-69     | CC            | 47    | 0.72  | 0             | 0.00        |               |                |              |
| 20                                           | 65-69     | Ecig          | 558   | 8.54  |               |             |               |                |              |
| 20                                           | 65-69     | Dual          | 0     | 0.00  |               |             |               |                |              |
| 20                                           | 65-69     | Former        | 2815  | 43.07 |               |             | 22.37         | 94             | 3.34         |
| Year of Follow-up: 2010, Age Group: 70-74    |           |               |       |       |               |             |               |                |              |
| Period                                       | Age Group | Smoking Group | N     | %     | Ever Quit (N) | Ever Quit % | Mean Yrs Quit | Short Term (n) | Short Term % |
| 20                                           | 70-74     | Never Any     | 2684  | 48.50 |               |             |               |                |              |
| 20                                           | 70-74     | CC            | 88    | 1.59  | 0             | 0.00        |               |                |              |
| 20                                           | 70-74     | Ecig          | 400   | 7.23  |               |             |               |                |              |
| 20                                           | 70-74     | Dual          | 0     | 0.00  |               |             |               |                |              |
| 20                                           | 70-74     | Former        | 2362  | 42.68 |               |             | 22.61         | 74             | 3.13         |
| Year of Follow-up: 2010, Age Group: 75-79    |           |               |       |       |               |             |               |                |              |
| Period                                       | Age Group | Smoking Group | N     | %     | Ever Quit (N) | Ever Quit % | Mean Yrs Quit | Short Term (n) | Short Term % |
| 20                                           | 75-79     | Never Any     | 2732  | 51.90 |               |             |               |                |              |
| 20                                           | 75-79     | CC            | 75    | 1.42  | 0             | 0.00        |               |                |              |
| 20                                           | 75-79     | Ecig          | 212   | 4.03  |               |             |               |                |              |
| 20                                           | 75-79     | Dual          | 0     | 0.00  |               |             |               |                |              |
| 20                                           | 75-79     | Former        | 2245  | 42.65 |               |             | 25.12         | 72             | 3.21         |
| Year of Follow-up: 2015, Age Group: All Ages |           |               |       |       |               |             |               |                |              |
| Period                                       | Age Group | Smoking Group | N     | %     | Ever Quit (N) | Ever Quit % | Mean Yrs Quit | Short Term (n) | Short Term % |
| 25                                           | All Ages  | Never Any     | 41010 | 54.09 |               |             |               |                |              |
| 25                                           | All Ages  | CC            | 340   | 0.45  | 0             | 0.00        |               |                |              |
| 25                                           | All Ages  | Ecig          | 9913  | 13.07 |               |             |               |                |              |
| 25                                           | All Ages  | Dual          | 0     | 0.00  |               |             |               |                |              |
| 25                                           | All Ages  | Former        | 24554 | 32.39 |               |             | 20.86         | 1027           | 4.18         |
| Year of Follow-up: 2015, Age Group: 18-19    |           |               |       |       |               |             |               |                |              |
| Period                                       | Age Group | Smoking Group | N     | %     | Ever Quit (N) | Ever Quit % | Mean Yrs Quit | Short Term (n) | Short Term % |
| 25                                           | 18-19     | Never Any     | 0     | .     |               |             |               |                |              |
| 25                                           | 18-19     | CC            | 0     | .     | 0             | .           |               |                |              |
| 25                                           | 18-19     | Ecig          | 0     | .     |               |             |               |                |              |
| 25                                           | 18-19     | Dual          | 0     | .     |               |             |               |                |              |
| 25                                           | 18-19     | Former        | 0     | .     |               |             | .             | 0              | .            |
| Year of Follow-up: 2015, Age Group: 20-24    |           |               |       |       |               |             |               |                |              |
| Period                                       | Age Group | Smoking Group | N     | %     | Ever Quit (N) | Ever Quit % | Mean Yrs Quit | Short Term (n) | Short Term % |
| 25                                           | 20-24     | Never Any     | 0     | .     |               |             |               |                |              |
| 25                                           | 20-24     | CC            | 0     | .     | 0             | .           |               |                |              |
| 25                                           | 20-24     | Ecig          | 0     | .     |               |             |               |                |              |
| 25                                           | 20-24     | Dual          | 0     | .     |               |             |               |                |              |
| 25                                           | 20-24     | Former        | 0     | .     |               |             | .             | 0              | .            |
| Year of Follow-up: 2015, Age Group: 25-29    |           |               |       |       |               |             |               |                |              |
| Period                                       | Age Group | Smoking Group | N     | %     | Ever Quit (N) | Ever Quit % | Mean Yrs Quit | Short Term (n) | Short Term % |
| 25                                           | 25-29     | Never Any     | 0     | .     |               |             |               |                |              |
| 25                                           | 25-29     | CC            | 0     | .     | 0             | .           |               |                |              |
| 25                                           | 25-29     | Ecig          | 0     | .     |               |             |               |                |              |
| 25                                           | 25-29     | Dual          | 0     | .     |               |             |               |                |              |
| 25                                           | 25-29     | Former        | 0     | .     |               |             | .             | 0              | .            |
| Year of Follow-up: 2015, Age Group: 30-34    |           |               |       |       |               |             |               |                |              |
| Period                                       | Age Group | Smoking Group | N     | %     | Ever Quit (N) | Ever Quit % | Mean Yrs Quit | Short Term (n) | Short Term % |
| 25                                           | 30-34     | Never Any     | 0     | .     |               |             |               |                |              |
| 25                                           | 30-34     | CC            | 0     | .     | 0             | .           |               |                |              |
| 25                                           | 30-34     | Ecig          | 0     | .     |               |             |               |                |              |
| 25                                           | 30-34     | Dual          | 0     | .     |               |             |               |                |              |
| 25                                           | 30-34     | Former        | 0     | .     |               |             | .             | 0              | .            |
| Year of Follow-up: 2015, Age Group: 35-39    |           |               |       |       |               |             |               |                |              |
| Period                                       | Age Group | Smoking Group | N     | %     | Ever Quit (N) | Ever Quit % | Mean Yrs Quit | Short Term (n) | Short Term % |
| 25                                           | 35-39     | Never Any     | 4726  | 59.60 |               |             |               |                |              |
| 25                                           | 35-39     | CC            | 20    | 0.25  | 0             | 0.00        |               |                |              |
| 25                                           | 35-39     | Ecig          | 1334  | 16.82 |               |             |               |                |              |
| 25                                           | 35-39     | Dual          | 0     | 0.00  |               |             |               |                |              |
| 25                                           | 35-39     | Former        | 1850  | 23.33 |               |             | 11.62         | 144            | 7.78         |
| Year of Follow-up: 2015, Age Group: 40-44    |           |               |       |       |               |             |               |                |              |
| Period                                       | Age Group | Smoking Group | N     | %     | Ever Quit (N) | Ever Quit % | Mean Yrs Quit | Short Term (n) | Short Term % |
| 25                                           | 40-44     | Never Any     | 5359  | 64.18 |               |             |               |                |              |
| 25                                           | 40-44     | CC            | 33    | 0.40  | 0             | 0.00        |               |                |              |
| 25                                           | 40-44     | Ecig          | 1318  | 15.78 |               |             |               |                |              |
| 25                                           | 40-44     | Dual          | 0     | 0.00  |               |             |               |                |              |

**Results for PHIM for Run 6 (Sensitivity\_Analysis\_3.RTF)**

|                                              |           |               |       |       |               |             |               |                |              |
|----------------------------------------------|-----------|---------------|-------|-------|---------------|-------------|---------------|----------------|--------------|
| 25                                           | 40-44     | Former        | 1640  | 19.64 |               |             | 13.73         | 111            | 6.77         |
| Year of Follow-up: 2015, Age Group: 45-49    |           |               |       |       |               |             |               |                |              |
| Period                                       | Age Group | Smoking Group | N     | %     | Ever Quit (N) | Ever Quit % | Mean Yrs Quit | Short Term (n) | Short Term % |
| 25                                           | 45-49     | Never Any     | 5189  | 59.01 |               |             |               |                |              |
| 25                                           | 45-49     | CC            | 32    | 0.36  | 0             | 0.00        |               |                |              |
| 25                                           | 45-49     | Ecig          | 1464  | 16.65 |               |             |               |                |              |
| 25                                           | 45-49     | Dual          | 0     | 0.00  |               |             |               |                |              |
| 25                                           | 45-49     | Former        | 2108  | 23.97 |               |             | 17.34         | 105            | 4.98         |
| Year of Follow-up: 2015, Age Group: 50-54    |           |               |       |       |               |             |               |                |              |
| Period                                       | Age Group | Smoking Group | N     | %     | Ever Quit (N) | Ever Quit % | Mean Yrs Quit | Short Term (n) | Short Term % |
| 25                                           | 50-54     | Never Any     | 5284  | 52.43 |               |             |               |                |              |
| 25                                           | 50-54     | CC            | 45    | 0.45  | 0             | 0.00        |               |                |              |
| 25                                           | 50-54     | Ecig          | 1841  | 18.27 |               |             |               |                |              |
| 25                                           | 50-54     | Dual          | 0     | 0.00  |               |             |               |                |              |
| 25                                           | 50-54     | Former        | 2908  | 28.85 |               |             | 19.37         | 175            | 6.02         |
| Year of Follow-up: 2015, Age Group: 55-59    |           |               |       |       |               |             |               |                |              |
| Period                                       | Age Group | Smoking Group | N     | %     | Ever Quit (N) | Ever Quit % | Mean Yrs Quit | Short Term (n) | Short Term % |
| 25                                           | 55-59     | Never Any     | 5278  | 50.27 |               |             |               |                |              |
| 25                                           | 55-59     | CC            | 37    | 0.35  | 0             | 0.00        |               |                |              |
| 25                                           | 55-59     | Ecig          | 1568  | 14.93 |               |             |               |                |              |
| 25                                           | 55-59     | Dual          | 0     | 0.00  |               |             |               |                |              |
| 25                                           | 55-59     | Former        | 3616  | 34.44 |               |             | 20.21         | 164            | 4.54         |
| Year of Follow-up: 2015, Age Group: 60-64    |           |               |       |       |               |             |               |                |              |
| Period                                       | Age Group | Smoking Group | N     | %     | Ever Quit (N) | Ever Quit % | Mean Yrs Quit | Short Term (n) | Short Term % |
| 25                                           | 60-64     | Never Any     | 5018  | 52.27 |               |             |               |                |              |
| 25                                           | 60-64     | CC            | 42    | 0.44  | 0             | 0.00        |               |                |              |
| 25                                           | 60-64     | Ecig          | 978   | 10.19 |               |             |               |                |              |
| 25                                           | 60-64     | Dual          | 0     | 0.00  |               |             |               |                |              |
| 25                                           | 60-64     | Former        | 3562  | 37.10 |               |             | 22.94         | 171            | 4.80         |
| Year of Follow-up: 2015, Age Group: 65-69    |           |               |       |       |               |             |               |                |              |
| Period                                       | Age Group | Smoking Group | N     | %     | Ever Quit (N) | Ever Quit % | Mean Yrs Quit | Short Term (n) | Short Term % |
| 25                                           | 65-69     | Never Any     | 4356  | 51.27 |               |             |               |                |              |
| 25                                           | 65-69     | CC            | 41    | 0.48  | 0             | 0.00        |               |                |              |
| 25                                           | 65-69     | Ecig          | 672   | 7.91  |               |             |               |                |              |
| 25                                           | 65-69     | Dual          | 0     | 0.00  |               |             |               |                |              |
| 25                                           | 65-69     | Former        | 3428  | 40.34 |               |             | 22.62         | 75             | 2.19         |
| Year of Follow-up: 2015, Age Group: 70-74    |           |               |       |       |               |             |               |                |              |
| Period                                       | Age Group | Smoking Group | N     | %     | Ever Quit (N) | Ever Quit % | Mean Yrs Quit | Short Term (n) | Short Term % |
| 25                                           | 70-74     | Never Any     | 3116  | 47.67 |               |             |               |                |              |
| 25                                           | 70-74     | CC            | 31    | 0.47  | 0             | 0.00        |               |                |              |
| 25                                           | 70-74     | Ecig          | 437   | 6.69  |               |             |               |                |              |
| 25                                           | 70-74     | Dual          | 0     | 0.00  |               |             |               |                |              |
| 25                                           | 70-74     | Former        | 2952  | 45.17 |               |             | 26.22         | 41             | 1.39         |
| Year of Follow-up: 2015, Age Group: 75-79    |           |               |       |       |               |             |               |                |              |
| Period                                       | Age Group | Smoking Group | N     | %     | Ever Quit (N) | Ever Quit % | Mean Yrs Quit | Short Term (n) | Short Term % |
| 25                                           | 75-79     | Never Any     | 2684  | 48.50 |               |             |               |                |              |
| 25                                           | 75-79     | CC            | 59    | 1.07  | 0             | 0.00        |               |                |              |
| 25                                           | 75-79     | Ecig          | 301   | 5.44  |               |             |               |                |              |
| 25                                           | 75-79     | Dual          | 0     | 0.00  |               |             |               |                |              |
| 25                                           | 75-79     | Former        | 2490  | 44.99 |               |             | 26.32         | 41             | 1.65         |
| Year of Follow-up: 2020, Age Group: All Ages |           |               |       |       |               |             |               |                |              |
| Period                                       | Age Group | Smoking Group | N     | %     | Ever Quit (N) | Ever Quit % | Mean Yrs Quit | Short Term (n) | Short Term % |
| 30                                           | All Ages  | Never Any     | 38326 | 54.53 |               |             |               |                |              |
| 30                                           | All Ages  | CC            | 115   | 0.16  | 0             | 0.00        |               |                |              |
| 30                                           | All Ages  | Ecig          | 7713  | 10.97 |               |             |               |                |              |
| 30                                           | All Ages  | Dual          | 0     | 0.00  |               |             |               |                |              |
| 30                                           | All Ages  | Former        | 24129 | 34.33 |               |             | 23.26         | 778            | 3.22         |
| Year of Follow-up: 2020, Age Group: 18-19    |           |               |       |       |               |             |               |                |              |
| Period                                       | Age Group | Smoking Group | N     | %     | Ever Quit (N) | Ever Quit % | Mean Yrs Quit | Short Term (n) | Short Term % |
| 30                                           | 18-19     | Never Any     | 0     | .     |               |             |               |                |              |
| 30                                           | 18-19     | CC            | 0     | .     | 0             | .           |               |                |              |
| 30                                           | 18-19     | Ecig          | 0     | .     |               |             |               |                |              |
| 30                                           | 18-19     | Dual          | 0     | .     |               |             |               |                |              |
| 30                                           | 18-19     | Former        | 0     | .     |               |             | .             | 0              | .            |
| Year of Follow-up: 2020, Age Group: 20-24    |           |               |       |       |               |             |               |                |              |
| Period                                       | Age Group | Smoking Group | N     | %     | Ever Quit (N) | Ever Quit % | Mean Yrs Quit | Short Term (n) | Short Term % |
| 30                                           | 20-24     | Never Any     | 0     | .     |               |             |               |                |              |
| 30                                           | 20-24     | CC            | 0     | .     | 0             | .           |               |                |              |

**Results for PHIM for Run 6 (Sensitivity\_Analysis\_3.RTF)**

| 30                                        | 20-24     | Ecig          | 0    | .     |               |             |               |                |              |
|-------------------------------------------|-----------|---------------|------|-------|---------------|-------------|---------------|----------------|--------------|
| 30                                        | 20-24     | Dual          | 0    | .     |               |             |               |                |              |
| 30                                        | 20-24     | Former        | 0    | .     |               |             | 0             | .              |              |
| Year of Follow-up: 2020, Age Group: 25-29 |           |               |      |       |               |             |               |                |              |
| Period                                    | Age Group | Smoking Group | N    | %     | Ever Quit (N) | Ever Quit % | Mean Yrs Quit | Short Term (n) | Short Term % |
| 30                                        | 25-29     | Never Any     | 0    | .     |               |             |               |                |              |
| 30                                        | 25-29     | CC            | 0    | .     | 0             | .           |               |                |              |
| 30                                        | 25-29     | Ecig          | 0    | .     |               |             |               |                |              |
| 30                                        | 25-29     | Dual          | 0    | .     |               |             |               |                |              |
| 30                                        | 25-29     | Former        | 0    | .     |               |             | 0             | .              |              |
| Year of Follow-up: 2020, Age Group: 30-34 |           |               |      |       |               |             |               |                |              |
| Period                                    | Age Group | Smoking Group | N    | %     | Ever Quit (N) | Ever Quit % | Mean Yrs Quit | Short Term (n) | Short Term % |
| 30                                        | 30-34     | Never Any     | 0    | .     |               |             |               |                |              |
| 30                                        | 30-34     | CC            | 0    | .     | 0             | .           |               |                |              |
| 30                                        | 30-34     | Ecig          | 0    | .     |               |             |               |                |              |
| 30                                        | 30-34     | Dual          | 0    | .     |               |             |               |                |              |
| 30                                        | 30-34     | Former        | 0    | .     |               |             | 0             | .              |              |
| Year of Follow-up: 2020, Age Group: 35-39 |           |               |      |       |               |             |               |                |              |
| Period                                    | Age Group | Smoking Group | N    | %     | Ever Quit (N) | Ever Quit % | Mean Yrs Quit | Short Term (n) | Short Term % |
| 30                                        | 35-39     | Never Any     | 0    | .     |               |             |               |                |              |
| 30                                        | 35-39     | CC            | 0    | .     | 0             | .           |               |                |              |
| 30                                        | 35-39     | Ecig          | 0    | .     |               |             |               |                |              |
| 30                                        | 35-39     | Dual          | 0    | .     |               |             |               |                |              |
| 30                                        | 35-39     | Former        | 0    | .     |               |             | 0             | .              |              |
| Year of Follow-up: 2020, Age Group: 40-44 |           |               |      |       |               |             |               |                |              |
| Period                                    | Age Group | Smoking Group | N    | %     | Ever Quit (N) | Ever Quit % | Mean Yrs Quit | Short Term (n) | Short Term % |
| 30                                        | 40-44     | Never Any     | 4726 | 59.60 |               |             |               |                |              |
| 30                                        | 40-44     | CC            | 6    | 0.08  | 0             | 0.00        |               |                |              |
| 30                                        | 40-44     | Ecig          | 1102 | 13.90 |               |             |               |                |              |
| 30                                        | 40-44     | Dual          | 0    | 0.00  |               |             |               |                |              |
| 30                                        | 40-44     | Former        | 2096 | 26.43 |               |             | 14.92         | 80             | 3.82         |
| Year of Follow-up: 2020, Age Group: 45-49 |           |               |      |       |               |             |               |                |              |
| Period                                    | Age Group | Smoking Group | N    | %     | Ever Quit (N) | Ever Quit % | Mean Yrs Quit | Short Term (n) | Short Term % |
| 30                                        | 45-49     | Never Any     | 5359 | 64.18 |               |             |               |                |              |
| 30                                        | 45-49     | CC            | 13   | 0.16  | 0             | 0.00        |               |                |              |
| 30                                        | 45-49     | Ecig          | 1128 | 13.51 |               |             |               |                |              |
| 30                                        | 45-49     | Dual          | 0    | 0.00  |               |             |               |                |              |
| 30                                        | 45-49     | Former        | 1850 | 22.16 |               |             | 16.87         | 65             | 3.51         |
| Year of Follow-up: 2020, Age Group: 50-54 |           |               |      |       |               |             |               |                |              |
| Period                                    | Age Group | Smoking Group | N    | %     | Ever Quit (N) | Ever Quit % | Mean Yrs Quit | Short Term (n) | Short Term % |
| 30                                        | 50-54     | Never Any     | 5189 | 59.01 |               |             |               |                |              |
| 30                                        | 50-54     | CC            | 9    | 0.10  | 0             | 0.00        |               |                |              |
| 30                                        | 50-54     | Ecig          | 1206 | 13.72 |               |             |               |                |              |
| 30                                        | 50-54     | Dual          | 0    | 0.00  |               |             |               |                |              |
| 30                                        | 50-54     | Former        | 2389 | 27.17 |               |             | 19.93         | 128            | 5.36         |
| Year of Follow-up: 2020, Age Group: 55-59 |           |               |      |       |               |             |               |                |              |
| Period                                    | Age Group | Smoking Group | N    | %     | Ever Quit (N) | Ever Quit % | Mean Yrs Quit | Short Term (n) | Short Term % |
| 30                                        | 55-59     | Never Any     | 5284 | 52.43 |               |             |               |                |              |
| 30                                        | 55-59     | CC            | 14   | 0.14  | 0             | 0.00        |               |                |              |
| 30                                        | 55-59     | Ecig          | 1450 | 14.39 |               |             |               |                |              |
| 30                                        | 55-59     | Dual          | 0    | 0.00  |               |             |               |                |              |
| 30                                        | 55-59     | Former        | 3330 | 33.04 |               |             | 21.54         | 163            | 4.89         |
| Year of Follow-up: 2020, Age Group: 60-64 |           |               |      |       |               |             |               |                |              |
| Period                                    | Age Group | Smoking Group | N    | %     | Ever Quit (N) | Ever Quit % | Mean Yrs Quit | Short Term (n) | Short Term % |
| 30                                        | 60-64     | Never Any     | 5278 | 50.27 |               |             |               |                |              |
| 30                                        | 60-64     | CC            | 15   | 0.14  | 0             | 0.00        |               |                |              |
| 30                                        | 60-64     | Ecig          | 1207 | 11.50 |               |             |               |                |              |
| 30                                        | 60-64     | Dual          | 0    | 0.00  |               |             |               |                |              |
| 30                                        | 60-64     | Former        | 3999 | 38.09 |               |             | 22.98         | 154            | 3.85         |
| Year of Follow-up: 2020, Age Group: 65-69 |           |               |      |       |               |             |               |                |              |
| Period                                    | Age Group | Smoking Group | N    | %     | Ever Quit (N) | Ever Quit % | Mean Yrs Quit | Short Term (n) | Short Term % |
| 30                                        | 65-69     | Never Any     | 5018 | 52.27 |               |             |               |                |              |
| 30                                        | 65-69     | CC            | 18   | 0.19  | 0             | 0.00        |               |                |              |
| 30                                        | 65-69     | Ecig          | 729  | 7.59  |               |             |               |                |              |
| 30                                        | 65-69     | Dual          | 0    | 0.00  |               |             |               |                |              |
| 30                                        | 65-69     | Former        | 3835 | 39.95 |               |             | 26.12         | 76             | 1.98         |
| Year of Follow-up: 2020, Age Group: 70-74 |           |               |      |       |               |             |               |                |              |
| Period                                    | Age Group | Smoking Group | N    | %     | Ever Quit (N) | Ever Quit % | Mean Yrs Quit | Short Term (n) | Short Term % |

**Results for PHIM for Run 6 (Sensitivity\_Analysis\_3.RTF)**

|                                              |           |               |       |       |               |             |               |                |              |
|----------------------------------------------|-----------|---------------|-------|-------|---------------|-------------|---------------|----------------|--------------|
| 30                                           | 70-74     | Never Any     | 4356  | 51.27 |               |             |               |                |              |
| 30                                           | 70-74     | CC            | 22    | 0.26  | 0             | 0.00        |               |                |              |
| 30                                           | 70-74     | Ecig          | 557   | 6.56  |               |             |               |                |              |
| 30                                           | 70-74     | Dual          | 0     | 0.00  |               |             |               |                |              |
| 30                                           | 70-74     | Former        | 3562  | 41.92 |               |             | 26.64         | 68             | 1.91         |
| Year of Follow-up: 2020, Age Group: 75-79    |           |               |       |       |               |             |               |                |              |
| Period                                       | Age Group | Smoking Group | N     | %     | Ever Quit (N) | Ever Quit % | Mean Yrs Quit | Short Term (n) | Short Term % |
| 30                                           | 75-79     | Never Any     | 3116  | 47.67 |               |             |               |                |              |
| 30                                           | 75-79     | CC            | 18    | 0.28  | 0             | 0.00        |               |                |              |
| 30                                           | 75-79     | Ecig          | 334   | 5.11  |               |             |               |                |              |
| 30                                           | 75-79     | Dual          | 0     | 0.00  |               |             |               |                |              |
| 30                                           | 75-79     | Former        | 3068  | 46.94 |               |             | 30.12         | 44             | 1.43         |
| Year of Follow-up: 2025, Age Group: All Ages |           |               |       |       |               |             |               |                |              |
| Period                                       | Age Group | Smoking Group | N     | %     | Ever Quit (N) | Ever Quit % | Mean Yrs Quit | Short Term (n) | Short Term % |
| 35                                           | All Ages  | Never Any     | 35210 | 55.23 |               |             |               |                |              |
| 35                                           | All Ages  | CC            | 47    | 0.07  | 0             | 0.00        |               |                |              |
| 35                                           | All Ages  | Ecig          | 5808  | 9.11  |               |             |               |                |              |
| 35                                           | All Ages  | Dual          | 0     | 0.00  |               |             |               |                |              |
| 35                                           | All Ages  | Former        | 22682 | 35.58 |               |             | 25.46         | 632            | 2.79         |
| Year of Follow-up: 2025, Age Group: 18-19    |           |               |       |       |               |             |               |                |              |
| Period                                       | Age Group | Smoking Group | N     | %     | Ever Quit (N) | Ever Quit % | Mean Yrs Quit | Short Term (n) | Short Term % |
| 35                                           | 18-19     | Never Any     | 0     | .     |               |             |               |                |              |
| 35                                           | 18-19     | CC            | 0     | .     | 0             | .           |               |                |              |
| 35                                           | 18-19     | Ecig          | 0     | .     |               |             |               |                |              |
| 35                                           | 18-19     | Dual          | 0     | .     |               |             |               |                |              |
| 35                                           | 18-19     | Former        | 0     | .     |               |             | .             | 0              | .            |
| Year of Follow-up: 2025, Age Group: 20-24    |           |               |       |       |               |             |               |                |              |
| Period                                       | Age Group | Smoking Group | N     | %     | Ever Quit (N) | Ever Quit % | Mean Yrs Quit | Short Term (n) | Short Term % |
| 35                                           | 20-24     | Never Any     | 0     | .     |               |             |               |                |              |
| 35                                           | 20-24     | CC            | 0     | .     | 0             | .           |               |                |              |
| 35                                           | 20-24     | Ecig          | 0     | .     |               |             |               |                |              |
| 35                                           | 20-24     | Dual          | 0     | .     |               |             |               |                |              |
| 35                                           | 20-24     | Former        | 0     | .     |               |             | .             | 0              | .            |
| Year of Follow-up: 2025, Age Group: 25-29    |           |               |       |       |               |             |               |                |              |
| Period                                       | Age Group | Smoking Group | N     | %     | Ever Quit (N) | Ever Quit % | Mean Yrs Quit | Short Term (n) | Short Term % |
| 35                                           | 25-29     | Never Any     | 0     | .     |               |             |               |                |              |
| 35                                           | 25-29     | CC            | 0     | .     | 0             | .           |               |                |              |
| 35                                           | 25-29     | Ecig          | 0     | .     |               |             |               |                |              |
| 35                                           | 25-29     | Dual          | 0     | .     |               |             |               |                |              |
| 35                                           | 25-29     | Former        | 0     | .     |               |             | .             | 0              | .            |
| Year of Follow-up: 2025, Age Group: 30-34    |           |               |       |       |               |             |               |                |              |
| Period                                       | Age Group | Smoking Group | N     | %     | Ever Quit (N) | Ever Quit % | Mean Yrs Quit | Short Term (n) | Short Term % |
| 35                                           | 30-34     | Never Any     | 0     | .     |               |             |               |                |              |
| 35                                           | 30-34     | CC            | 0     | .     | 0             | .           |               |                |              |
| 35                                           | 30-34     | Ecig          | 0     | .     |               |             |               |                |              |
| 35                                           | 30-34     | Dual          | 0     | .     |               |             |               |                |              |
| 35                                           | 30-34     | Former        | 0     | .     |               |             | .             | 0              | .            |
| Year of Follow-up: 2025, Age Group: 35-39    |           |               |       |       |               |             |               |                |              |
| Period                                       | Age Group | Smoking Group | N     | %     | Ever Quit (N) | Ever Quit % | Mean Yrs Quit | Short Term (n) | Short Term % |
| 35                                           | 35-39     | Never Any     | 0     | .     |               |             |               |                |              |
| 35                                           | 35-39     | CC            | 0     | .     | 0             | .           |               |                |              |
| 35                                           | 35-39     | Ecig          | 0     | .     |               |             |               |                |              |
| 35                                           | 35-39     | Dual          | 0     | .     |               |             |               |                |              |
| 35                                           | 35-39     | Former        | 0     | .     |               |             | .             | 0              | .            |
| Year of Follow-up: 2025, Age Group: 40-44    |           |               |       |       |               |             |               |                |              |
| Period                                       | Age Group | Smoking Group | N     | %     | Ever Quit (N) | Ever Quit % | Mean Yrs Quit | Short Term (n) | Short Term % |
| 35                                           | 40-44     | Never Any     | 0     | .     |               |             |               |                |              |
| 35                                           | 40-44     | CC            | 0     | .     | 0             | .           |               |                |              |
| 35                                           | 40-44     | Ecig          | 0     | .     |               |             |               |                |              |
| 35                                           | 40-44     | Dual          | 0     | .     |               |             |               |                |              |
| 35                                           | 40-44     | Former        | 0     | .     |               |             | .             | 0              | .            |
| Year of Follow-up: 2025, Age Group: 45-49    |           |               |       |       |               |             |               |                |              |
| Period                                       | Age Group | Smoking Group | N     | %     | Ever Quit (N) | Ever Quit % | Mean Yrs Quit | Short Term (n) | Short Term % |
| 35                                           | 45-49     | Never Any     | 4726  | 59.60 |               |             |               |                |              |
| 35                                           | 45-49     | CC            | 1     | 0.01  | 0             | 0.00        |               |                |              |
| 35                                           | 45-49     | Ecig          | 891   | 11.24 |               |             |               |                |              |
| 35                                           | 45-49     | Dual          | 0     | 0.00  |               |             |               |                |              |
| 35                                           | 45-49     | Former        | 2312  | 29.16 |               |             | 18.26         | 79             | 3.42         |
| Year of Follow-up: 2025, Age Group: 50-54    |           |               |       |       |               |             |               |                |              |

**Results for PHIM for Run 6 (Sensitivity\_Analysis\_3.RTF)**

| Period                                       | Age Group | Smoking Group | N     | %     | Ever Quit (N) | Ever Quit % | Mean Yrs Quit | Short Term (n) | Short Term % |
|----------------------------------------------|-----------|---------------|-------|-------|---------------|-------------|---------------|----------------|--------------|
| 35                                           | 50-54     | Never Any     | 5359  | 64.18 |               |             |               |                |              |
| 35                                           | 50-54     | CC            | 3     | 0.04  | 0             | 0.00        |               |                |              |
| 35                                           | 50-54     | Ecig          | 918   | 10.99 |               |             |               |                |              |
| 35                                           | 50-54     | Dual          | 0     | 0.00  |               |             |               |                |              |
| 35                                           | 50-54     | Former        | 2070  | 24.79 |               |             | 19.73         | 108            | 5.22         |
| Year of Follow-up: 2025, Age Group: 55-59    |           |               |       |       |               |             |               |                |              |
| Period                                       | Age Group | Smoking Group | N     | %     | Ever Quit (N) | Ever Quit % | Mean Yrs Quit | Short Term (n) | Short Term % |
| 35                                           | 55-59     | Never Any     | 5189  | 59.01 |               |             |               |                |              |
| 35                                           | 55-59     | CC            | 4     | 0.05  | 0             | 0.00        |               |                |              |
| 35                                           | 55-59     | Ecig          | 958   | 10.90 |               |             |               |                |              |
| 35                                           | 55-59     | Dual          | 0     | 0.00  |               |             |               |                |              |
| 35                                           | 55-59     | Former        | 2642  | 30.05 |               |             | 22.75         | 90             | 3.41         |
| Year of Follow-up: 2025, Age Group: 60-64    |           |               |       |       |               |             |               |                |              |
| Period                                       | Age Group | Smoking Group | N     | %     | Ever Quit (N) | Ever Quit % | Mean Yrs Quit | Short Term (n) | Short Term % |
| 35                                           | 60-64     | Never Any     | 5284  | 52.43 |               |             |               |                |              |
| 35                                           | 60-64     | CC            | 7     | 0.07  | 0             | 0.00        |               |                |              |
| 35                                           | 60-64     | Ecig          | 1097  | 10.89 |               |             |               |                |              |
| 35                                           | 60-64     | Dual          | 0     | 0.00  |               |             |               |                |              |
| 35                                           | 60-64     | Former        | 3690  | 36.61 |               |             | 24.13         | 161            | 4.36         |
| Year of Follow-up: 2025, Age Group: 65-69    |           |               |       |       |               |             |               |                |              |
| Period                                       | Age Group | Smoking Group | N     | %     | Ever Quit (N) | Ever Quit % | Mean Yrs Quit | Short Term (n) | Short Term % |
| 35                                           | 65-69     | Never Any     | 5278  | 50.27 |               |             |               |                |              |
| 35                                           | 65-69     | CC            | 7     | 0.07  | 0             | 0.00        |               |                |              |
| 35                                           | 65-69     | Ecig          | 902   | 8.59  |               |             |               |                |              |
| 35                                           | 65-69     | Dual          | 0     | 0.00  |               |             |               |                |              |
| 35                                           | 65-69     | Former        | 4312  | 41.07 |               |             | 26.13         | 82             | 1.90         |
| Year of Follow-up: 2025, Age Group: 70-74    |           |               |       |       |               |             |               |                |              |
| Period                                       | Age Group | Smoking Group | N     | %     | Ever Quit (N) | Ever Quit % | Mean Yrs Quit | Short Term (n) | Short Term % |
| 35                                           | 70-74     | Never Any     | 5018  | 52.27 |               |             |               |                |              |
| 35                                           | 70-74     | CC            | 11    | 0.11  | 0             | 0.00        |               |                |              |
| 35                                           | 70-74     | Ecig          | 608   | 6.33  |               |             |               |                |              |
| 35                                           | 70-74     | Dual          | 0     | 0.00  |               |             |               |                |              |
| 35                                           | 70-74     | Former        | 3963  | 41.28 |               |             | 30.17         | 65             | 1.64         |
| Year of Follow-up: 2025, Age Group: 75-79    |           |               |       |       |               |             |               |                |              |
| Period                                       | Age Group | Smoking Group | N     | %     | Ever Quit (N) | Ever Quit % | Mean Yrs Quit | Short Term (n) | Short Term % |
| 35                                           | 75-79     | Never Any     | 4356  | 51.27 |               |             |               |                |              |
| 35                                           | 75-79     | CC            | 14    | 0.16  | 0             | 0.00        |               |                |              |
| 35                                           | 75-79     | Ecig          | 434   | 5.11  |               |             |               |                |              |
| 35                                           | 75-79     | Dual          | 0     | 0.00  |               |             |               |                |              |
| 35                                           | 75-79     | Former        | 3693  | 43.46 |               |             | 30.60         | 47             | 1.27         |
| Year of Follow-up: 2030, Age Group: All Ages |           |               |       |       |               |             |               |                |              |
| Period                                       | Age Group | Smoking Group | N     | %     | Ever Quit (N) | Ever Quit % | Mean Yrs Quit | Short Term (n) | Short Term % |
| 40                                           | All Ages  | Never Any     | 30854 | 55.84 |               |             |               |                |              |
| 40                                           | All Ages  | CC            | 14    | 0.03  | 0             | 0.00        |               |                |              |
| 40                                           | All Ages  | Ecig          | 4092  | 7.41  |               |             |               |                |              |
| 40                                           | All Ages  | Dual          | 0     | 0.00  |               |             |               |                |              |
| 40                                           | All Ages  | Former        | 20290 | 36.72 |               |             | 27.70         | 508            | 2.50         |
| Year of Follow-up: 2030, Age Group: 18-19    |           |               |       |       |               |             |               |                |              |
| Period                                       | Age Group | Smoking Group | N     | %     | Ever Quit (N) | Ever Quit % | Mean Yrs Quit | Short Term (n) | Short Term % |
| 40                                           | 18-19     | Never Any     | 0     | .     |               |             |               |                |              |
| 40                                           | 18-19     | CC            | 0     | .     | 0             | .           |               |                |              |
| 40                                           | 18-19     | Ecig          | 0     | .     |               |             |               |                |              |
| 40                                           | 18-19     | Dual          | 0     | .     |               |             |               |                |              |
| 40                                           | 18-19     | Former        | 0     | .     |               |             | .             | 0              | .            |
| Year of Follow-up: 2030, Age Group: 20-24    |           |               |       |       |               |             |               |                |              |
| Period                                       | Age Group | Smoking Group | N     | %     | Ever Quit (N) | Ever Quit % | Mean Yrs Quit | Short Term (n) | Short Term % |
| 40                                           | 20-24     | Never Any     | 0     | .     |               |             |               |                |              |
| 40                                           | 20-24     | CC            | 0     | .     | 0             | .           |               |                |              |
| 40                                           | 20-24     | Ecig          | 0     | .     |               |             |               |                |              |
| 40                                           | 20-24     | Dual          | 0     | .     |               |             |               |                |              |
| 40                                           | 20-24     | Former        | 0     | .     |               |             | .             | 0              | .            |
| Year of Follow-up: 2030, Age Group: 25-29    |           |               |       |       |               |             |               |                |              |
| Period                                       | Age Group | Smoking Group | N     | %     | Ever Quit (N) | Ever Quit % | Mean Yrs Quit | Short Term (n) | Short Term % |
| 40                                           | 25-29     | Never Any     | 0     | .     |               |             |               |                |              |
| 40                                           | 25-29     | CC            | 0     | .     | 0             | .           |               |                |              |
| 40                                           | 25-29     | Ecig          | 0     | .     |               |             |               |                |              |
| 40                                           | 25-29     | Dual          | 0     | .     |               |             |               |                |              |

**Results for PHIM for Run 6 (Sensitivity\_Analysis\_3.RTF)**

| Year of Follow-up: 2030, Age Group: 30-34 | Period | Age Group | Smoking Group | N    | %     | Ever Quit (N) | Ever Quit % | Mean Yrs Quit | Short Term (n) | Short Term % |
|-------------------------------------------|--------|-----------|---------------|------|-------|---------------|-------------|---------------|----------------|--------------|
| Year of Follow-up: 2030, Age Group: 30-34 |        |           |               |      |       |               |             |               |                |              |
| 40                                        | 25-29  | Former    |               | 0    | .     |               |             |               | 0              | .            |
| 40                                        | 30-34  | Never Any |               | 0    | .     |               |             |               |                |              |
| 40                                        | 30-34  | CC        |               | 0    | .     | 0             | .           |               |                |              |
| 40                                        | 30-34  | Ecig      |               | 0    | .     |               |             |               |                |              |
| 40                                        | 30-34  | Dual      |               | 0    | .     |               |             |               |                |              |
| 40                                        | 30-34  | Former    |               | 0    | .     |               |             |               | 0              | .            |
| Year of Follow-up: 2030, Age Group: 35-39 |        |           |               |      |       |               |             |               |                |              |
| 40                                        | 35-39  | Never Any |               | 0    | .     |               |             |               |                |              |
| 40                                        | 35-39  | CC        |               | 0    | .     | 0             | .           |               |                |              |
| 40                                        | 35-39  | Ecig      |               | 0    | .     |               |             |               |                |              |
| 40                                        | 35-39  | Dual      |               | 0    | .     |               |             |               |                |              |
| 40                                        | 35-39  | Former    |               | 0    | .     |               |             |               | 0              | .            |
| Year of Follow-up: 2030, Age Group: 40-44 |        |           |               |      |       |               |             |               |                |              |
| 40                                        | 40-44  | Never Any |               | 0    | .     |               |             |               |                |              |
| 40                                        | 40-44  | CC        |               | 0    | .     | 0             | .           |               |                |              |
| 40                                        | 40-44  | Ecig      |               | 0    | .     |               |             |               |                |              |
| 40                                        | 40-44  | Dual      |               | 0    | .     |               |             |               |                |              |
| 40                                        | 40-44  | Former    |               | 0    | .     |               |             |               | 0              | .            |
| Year of Follow-up: 2030, Age Group: 45-49 |        |           |               |      |       |               |             |               |                |              |
| 40                                        | 45-49  | Never Any |               | 0    | .     |               |             |               |                |              |
| 40                                        | 45-49  | CC        |               | 0    | .     | 0             | .           |               |                |              |
| 40                                        | 45-49  | Ecig      |               | 0    | .     |               |             |               |                |              |
| 40                                        | 45-49  | Dual      |               | 0    | .     |               |             |               |                |              |
| 40                                        | 45-49  | Former    |               | 0    | .     |               |             |               | 0              | .            |
| Year of Follow-up: 2030, Age Group: 50-54 |        |           |               |      |       |               |             |               |                |              |
| 40                                        | 50-54  | Never Any |               | 4726 | 59.60 |               |             |               |                |              |
| 40                                        | 50-54  | CC        |               | 0    | 0.00  | 0             | 0.00        |               |                |              |
| 40                                        | 50-54  | Ecig      |               | 710  | 8.95  |               |             |               |                |              |
| 40                                        | 50-54  | Dual      |               | 0    | 0.00  |               |             |               |                |              |
| 40                                        | 50-54  | Former    |               | 2494 | 31.45 |               |             | 21.69         | 96             | 3.85         |
| Year of Follow-up: 2030, Age Group: 55-59 |        |           |               |      |       |               |             |               |                |              |
| 40                                        | 55-59  | Never Any |               | 5359 | 64.18 |               |             |               |                |              |
| 40                                        | 55-59  | CC        |               | 0    | 0.00  | 0             | 0.00        |               |                |              |
| 40                                        | 55-59  | Ecig      |               | 704  | 8.43  |               |             |               |                |              |
| 40                                        | 55-59  | Dual      |               | 0    | 0.00  |               |             |               |                |              |
| 40                                        | 55-59  | Former    |               | 2287 | 27.39 |               |             | 22.58         | 74             | 3.24         |
| Year of Follow-up: 2030, Age Group: 60-64 |        |           |               |      |       |               |             |               |                |              |
| 40                                        | 60-64  | Never Any |               | 5189 | 59.01 |               |             |               |                |              |
| 40                                        | 60-64  | CC        |               | 3    | 0.03  | 0             | 0.00        |               |                |              |
| 40                                        | 60-64  | Ecig      |               | 709  | 8.06  |               |             |               |                |              |
| 40                                        | 60-64  | Dual      |               | 0    | 0.00  |               |             |               |                |              |
| 40                                        | 60-64  | Former    |               | 2892 | 32.89 |               |             | 25.50         | 115            | 3.98         |
| Year of Follow-up: 2030, Age Group: 65-69 |        |           |               |      |       |               |             |               |                |              |
| 40                                        | 65-69  | Never Any |               | 5284 | 52.43 |               |             |               |                |              |
| 40                                        | 65-69  | CC        |               | 3    | 0.03  | 0             | 0.00        |               |                |              |
| 40                                        | 65-69  | Ecig      |               | 801  | 7.95  |               |             |               |                |              |
| 40                                        | 65-69  | Dual      |               | 0    | 0.00  |               |             |               |                |              |
| 40                                        | 65-69  | Former    |               | 3990 | 39.59 |               |             | 27.13         | 72             | 1.80         |
| Year of Follow-up: 2030, Age Group: 70-74 |        |           |               |      |       |               |             |               |                |              |
| 40                                        | 70-74  | Never Any |               | 5278 | 50.27 |               |             |               |                |              |
| 40                                        | 70-74  | CC        |               | 4    | 0.04  | 0             | 0.00        |               |                |              |
| 40                                        | 70-74  | Ecig      |               | 722  | 6.88  |               |             |               |                |              |
| 40                                        | 70-74  | Dual      |               | 0    | 0.00  |               |             |               |                |              |
| 40                                        | 70-74  | Former    |               | 4495 | 42.81 |               |             | 29.94         | 88             | 1.96         |
| Year of Follow-up: 2030, Age Group: 75-79 |        |           |               |      |       |               |             |               |                |              |
| 40                                        | 75-79  | Never Any |               | 5018 | 52.27 |               |             |               |                |              |
| 40                                        | 75-79  | CC        |               | 4    | 0.04  | 0             | 0.00        |               |                |              |

**Results for PHIM for Run 6 (Sensitivity\_Analysis\_3.RTF)**

|                                              |           |               |       |       |               |             |               |                |              |
|----------------------------------------------|-----------|---------------|-------|-------|---------------|-------------|---------------|----------------|--------------|
| 40                                           | 75-79     | Ecig          | 446   | 4.65  |               |             |               |                |              |
| 40                                           | 75-79     | Dual          | 0     | 0.00  |               |             |               |                |              |
| 40                                           | 75-79     | Former        | 4132  | 43.04 |               |             | 33.81         | 63             | 1.52         |
| Year of Follow-up: 2035, Age Group: All Ages |           |               |       |       |               |             |               |                |              |
| Period                                       | Age Group | Smoking Group | N     | %     | Ever Quit (N) | Ever Quit % | Mean Yrs Quit | Short Term (n) | Short Term % |
| 45                                           | All Ages  | Never Any     | 25836 | 56.60 |               |             |               |                |              |
| 45                                           | All Ages  | CC            | 5     | 0.01  | 0             | 0.00        |               |                |              |
| 45                                           | All Ages  | Ecig          | 2820  | 6.18  |               |             |               |                |              |
| 45                                           | All Ages  | Dual          | 0     | 0.00  |               |             |               |                |              |
| 45                                           | All Ages  | Former        | 16989 | 37.22 |               |             | 29.71         | 314            | 1.85         |
| Year of Follow-up: 2035, Age Group: 18-19    |           |               |       |       |               |             |               |                |              |
| Period                                       | Age Group | Smoking Group | N     | %     | Ever Quit (N) | Ever Quit % | Mean Yrs Quit | Short Term (n) | Short Term % |
| 45                                           | 18-19     | Never Any     | 0     | .     |               |             |               |                |              |
| 45                                           | 18-19     | CC            | 0     | .     | 0             | .           |               |                |              |
| 45                                           | 18-19     | Ecig          | 0     | .     |               |             |               |                |              |
| 45                                           | 18-19     | Dual          | 0     | .     |               |             |               |                |              |
| 45                                           | 18-19     | Former        | 0     | .     |               |             | .             | 0              | .            |
| Year of Follow-up: 2035, Age Group: 20-24    |           |               |       |       |               |             |               |                |              |
| Period                                       | Age Group | Smoking Group | N     | %     | Ever Quit (N) | Ever Quit % | Mean Yrs Quit | Short Term (n) | Short Term % |
| 45                                           | 20-24     | Never Any     | 0     | .     |               |             |               |                |              |
| 45                                           | 20-24     | CC            | 0     | .     | 0             | .           |               |                |              |
| 45                                           | 20-24     | Ecig          | 0     | .     |               |             |               |                |              |
| 45                                           | 20-24     | Dual          | 0     | .     |               |             |               |                |              |
| 45                                           | 20-24     | Former        | 0     | .     |               |             | .             | 0              | .            |
| Year of Follow-up: 2035, Age Group: 25-29    |           |               |       |       |               |             |               |                |              |
| Period                                       | Age Group | Smoking Group | N     | %     | Ever Quit (N) | Ever Quit % | Mean Yrs Quit | Short Term (n) | Short Term % |
| 45                                           | 25-29     | Never Any     | 0     | .     |               |             |               |                |              |
| 45                                           | 25-29     | CC            | 0     | .     | 0             | .           |               |                |              |
| 45                                           | 25-29     | Ecig          | 0     | .     |               |             |               |                |              |
| 45                                           | 25-29     | Dual          | 0     | .     |               |             |               |                |              |
| 45                                           | 25-29     | Former        | 0     | .     |               |             | .             | 0              | .            |
| Year of Follow-up: 2035, Age Group: 30-34    |           |               |       |       |               |             |               |                |              |
| Period                                       | Age Group | Smoking Group | N     | %     | Ever Quit (N) | Ever Quit % | Mean Yrs Quit | Short Term (n) | Short Term % |
| 45                                           | 30-34     | Never Any     | 0     | .     |               |             |               |                |              |
| 45                                           | 30-34     | CC            | 0     | .     | 0             | .           |               |                |              |
| 45                                           | 30-34     | Ecig          | 0     | .     |               |             |               |                |              |
| 45                                           | 30-34     | Dual          | 0     | .     |               |             |               |                |              |
| 45                                           | 30-34     | Former        | 0     | .     |               |             | .             | 0              | .            |
| Year of Follow-up: 2035, Age Group: 35-39    |           |               |       |       |               |             |               |                |              |
| Period                                       | Age Group | Smoking Group | N     | %     | Ever Quit (N) | Ever Quit % | Mean Yrs Quit | Short Term (n) | Short Term % |
| 45                                           | 35-39     | Never Any     | 0     | .     |               |             |               |                |              |
| 45                                           | 35-39     | CC            | 0     | .     | 0             | .           |               |                |              |
| 45                                           | 35-39     | Ecig          | 0     | .     |               |             |               |                |              |
| 45                                           | 35-39     | Dual          | 0     | .     |               |             |               |                |              |
| 45                                           | 35-39     | Former        | 0     | .     |               |             | .             | 0              | .            |
| Year of Follow-up: 2035, Age Group: 40-44    |           |               |       |       |               |             |               |                |              |
| Period                                       | Age Group | Smoking Group | N     | %     | Ever Quit (N) | Ever Quit % | Mean Yrs Quit | Short Term (n) | Short Term % |
| 45                                           | 40-44     | Never Any     | 0     | .     |               |             |               |                |              |
| 45                                           | 40-44     | CC            | 0     | .     | 0             | .           |               |                |              |
| 45                                           | 40-44     | Ecig          | 0     | .     |               |             |               |                |              |
| 45                                           | 40-44     | Dual          | 0     | .     |               |             |               |                |              |
| 45                                           | 40-44     | Former        | 0     | .     |               |             | .             | 0              | .            |
| Year of Follow-up: 2035, Age Group: 45-49    |           |               |       |       |               |             |               |                |              |
| Period                                       | Age Group | Smoking Group | N     | %     | Ever Quit (N) | Ever Quit % | Mean Yrs Quit | Short Term (n) | Short Term % |
| 45                                           | 45-49     | Never Any     | 0     | .     |               |             |               |                |              |
| 45                                           | 45-49     | CC            | 0     | .     | 0             | .           |               |                |              |
| 45                                           | 45-49     | Ecig          | 0     | .     |               |             |               |                |              |
| 45                                           | 45-49     | Dual          | 0     | .     |               |             |               |                |              |
| 45                                           | 45-49     | Former        | 0     | .     |               |             | .             | 0              | .            |
| Year of Follow-up: 2035, Age Group: 50-54    |           |               |       |       |               |             |               |                |              |
| Period                                       | Age Group | Smoking Group | N     | %     | Ever Quit (N) | Ever Quit % | Mean Yrs Quit | Short Term (n) | Short Term % |
| 45                                           | 50-54     | Never Any     | 0     | .     |               |             |               |                |              |
| 45                                           | 50-54     | CC            | 0     | .     | 0             | .           |               |                |              |
| 45                                           | 50-54     | Ecig          | 0     | .     |               |             |               |                |              |
| 45                                           | 50-54     | Dual          | 0     | .     |               |             |               |                |              |
| 45                                           | 50-54     | Former        | 0     | .     |               |             | .             | 0              | .            |
| Year of Follow-up: 2035, Age Group: 55-59    |           |               |       |       |               |             |               |                |              |
| Period                                       | Age Group | Smoking Group | N     | %     | Ever Quit (N) | Ever Quit % | Mean Yrs Quit | Short Term (n) | Short Term % |



**Results for PHIM for Run 6 (Sensitivity\_Analysis\_3.RTF)**

|                                              |           |               |       |       |               |             |               |                |              |
|----------------------------------------------|-----------|---------------|-------|-------|---------------|-------------|---------------|----------------|--------------|
| 45                                           | 55-59     | Never Any     | 4726  | 59.60 |               |             |               |                |              |
| 45                                           | 55-59     | CC            | 0     | 0.00  | 0             | 0.00        |               |                |              |
| 45                                           | 55-59     | Ecig          | 561   | 7.07  |               |             |               |                |              |
| 45                                           | 55-59     | Dual          | 0     | 0.00  |               |             |               |                |              |
| 45                                           | 55-59     | Former        | 2643  | 33.33 |               |             | 25.30         | 59             | 2.23         |
| Year of Follow-up: 2035, Age Group: 60-64    |           |               |       |       |               |             |               |                |              |
| Period                                       | Age Group | Smoking Group | N     | %     | Ever Quit (N) | Ever Quit % | Mean Yrs Quit | Short Term (n) | Short Term % |
| 45                                           | 60-64     | Never Any     | 5359  | 64.18 |               |             |               |                |              |
| 45                                           | 60-64     | CC            | 0     | 0.00  | 0             | 0.00        |               |                |              |
| 45                                           | 60-64     | Ecig          | 532   | 6.37  |               |             |               |                |              |
| 45                                           | 60-64     | Dual          | 0     | 0.00  |               |             |               |                |              |
| 45                                           | 60-64     | Former        | 2459  | 29.45 |               |             | 25.79         | 73             | 2.97         |
| Year of Follow-up: 2035, Age Group: 65-69    |           |               |       |       |               |             |               |                |              |
| Period                                       | Age Group | Smoking Group | N     | %     | Ever Quit (N) | Ever Quit % | Mean Yrs Quit | Short Term (n) | Short Term % |
| 45                                           | 65-69     | Never Any     | 5189  | 59.01 |               |             |               |                |              |
| 45                                           | 65-69     | CC            | 3     | 0.03  | 0             | 0.00        |               |                |              |
| 45                                           | 65-69     | Ecig          | 527   | 5.99  |               |             |               |                |              |
| 45                                           | 65-69     | Dual          | 0     | 0.00  |               |             |               |                |              |
| 45                                           | 65-69     | Former        | 3074  | 34.96 |               |             | 28.84         | 48             | 1.56         |
| Year of Follow-up: 2035, Age Group: 70-74    |           |               |       |       |               |             |               |                |              |
| Period                                       | Age Group | Smoking Group | N     | %     | Ever Quit (N) | Ever Quit % | Mean Yrs Quit | Short Term (n) | Short Term % |
| 45                                           | 70-74     | Never Any     | 5284  | 52.43 |               |             |               |                |              |
| 45                                           | 70-74     | CC            | 1     | 0.01  | 0             | 0.00        |               |                |              |
| 45                                           | 70-74     | Ecig          | 673   | 6.68  |               |             |               |                |              |
| 45                                           | 70-74     | Dual          | 0     | 0.00  |               |             |               |                |              |
| 45                                           | 70-74     | Former        | 4120  | 40.88 |               |             | 31.16         | 65             | 1.58         |
| Year of Follow-up: 2035, Age Group: 75-79    |           |               |       |       |               |             |               |                |              |
| Period                                       | Age Group | Smoking Group | N     | %     | Ever Quit (N) | Ever Quit % | Mean Yrs Quit | Short Term (n) | Short Term % |
| 45                                           | 75-79     | Never Any     | 5278  | 50.27 |               |             |               |                |              |
| 45                                           | 75-79     | CC            | 1     | 0.01  | 0             | 0.00        |               |                |              |
| 45                                           | 75-79     | Ecig          | 527   | 5.02  |               |             |               |                |              |
| 45                                           | 75-79     | Dual          | 0     | 0.00  |               |             |               |                |              |
| 45                                           | 75-79     | Former        | 4693  | 44.70 |               |             | 33.55         | 69             | 1.47         |
| Year of Follow-up: 2040, Age Group: All Ages |           |               |       |       |               |             |               |                |              |
| Period                                       | Age Group | Smoking Group | N     | %     | Ever Quit (N) | Ever Quit % | Mean Yrs Quit | Short Term (n) | Short Term % |
| 50                                           | All Ages  | Never Any     | 20558 | 58.48 |               |             |               |                |              |
| 50                                           | All Ages  | CC            | 4     | 0.01  | 0             | 0.00        |               |                |              |
| 50                                           | All Ages  | Ecig          | 1734  | 4.93  |               |             |               |                |              |
| 50                                           | All Ages  | Dual          | 0     | 0.00  |               |             |               |                |              |
| 50                                           | All Ages  | Former        | 12855 | 36.57 |               |             | 31.90         | 203            | 1.58         |
| Year of Follow-up: 2040, Age Group: 18-19    |           |               |       |       |               |             |               |                |              |
| Period                                       | Age Group | Smoking Group | N     | %     | Ever Quit (N) | Ever Quit % | Mean Yrs Quit | Short Term (n) | Short Term % |
| 50                                           | 18-19     | Never Any     | 0     | .     |               |             |               |                |              |
| 50                                           | 18-19     | CC            | 0     | .     | 0             | .           |               |                |              |
| 50                                           | 18-19     | Ecig          | 0     | .     |               |             |               |                |              |
| 50                                           | 18-19     | Dual          | 0     | .     |               |             |               |                |              |
| 50                                           | 18-19     | Former        | 0     | .     |               |             | .             | 0              | .            |
| Year of Follow-up: 2040, Age Group: 20-24    |           |               |       |       |               |             |               |                |              |
| Period                                       | Age Group | Smoking Group | N     | %     | Ever Quit (N) | Ever Quit % | Mean Yrs Quit | Short Term (n) | Short Term % |
| 50                                           | 20-24     | Never Any     | 0     | .     |               |             |               |                |              |
| 50                                           | 20-24     | CC            | 0     | .     | 0             | .           |               |                |              |
| 50                                           | 20-24     | Ecig          | 0     | .     |               |             |               |                |              |
| 50                                           | 20-24     | Dual          | 0     | .     |               |             |               |                |              |
| 50                                           | 20-24     | Former        | 0     | .     |               |             | .             | 0              | .            |
| Year of Follow-up: 2040, Age Group: 25-29    |           |               |       |       |               |             |               |                |              |
| Period                                       | Age Group | Smoking Group | N     | %     | Ever Quit (N) | Ever Quit % | Mean Yrs Quit | Short Term (n) | Short Term % |
| 50                                           | 25-29     | Never Any     | 0     | .     |               |             |               |                |              |
| 50                                           | 25-29     | CC            | 0     | .     | 0             | .           |               |                |              |
| 50                                           | 25-29     | Ecig          | 0     | .     |               |             |               |                |              |
| 50                                           | 25-29     | Dual          | 0     | .     |               |             |               |                |              |
| 50                                           | 25-29     | Former        | 0     | .     |               |             | .             | 0              | .            |
| Year of Follow-up: 2040, Age Group: 30-34    |           |               |       |       |               |             |               |                |              |
| Period                                       | Age Group | Smoking Group | N     | %     | Ever Quit (N) | Ever Quit % | Mean Yrs Quit | Short Term (n) | Short Term % |
| 50                                           | 30-34     | Never Any     | 0     | .     |               |             |               |                |              |
| 50                                           | 30-34     | CC            | 0     | .     | 0             | .           |               |                |              |
| 50                                           | 30-34     | Ecig          | 0     | .     |               |             |               |                |              |
| 50                                           | 30-34     | Dual          | 0     | .     |               |             |               |                |              |
| 50                                           | 30-34     | Former        | 0     | .     |               |             | .             | 0              | .            |
| Year of Follow-up: 2040, Age Group: 35-39    |           |               |       |       |               |             |               |                |              |

**Results for PHIM for Run 6 (Sensitivity\_Analysis\_3.RTF)**

| Period                                    | Age Group | Smoking Group | N    | %     | Ever Quit (N) | Ever Quit % | Mean Yrs Quit | Short Term (n) | Short Term % |
|-------------------------------------------|-----------|---------------|------|-------|---------------|-------------|---------------|----------------|--------------|
| 50                                        | 35-39     | Never Any     | 0    | .     |               |             |               |                |              |
| 50                                        | 35-39     | CC            | 0    | .     | 0             | .           |               |                |              |
| 50                                        | 35-39     | Ecig          | 0    | .     |               |             |               |                |              |
| 50                                        | 35-39     | Dual          | 0    | .     |               |             |               |                |              |
| 50                                        | 35-39     | Former        | 0    | .     |               |             | .             | 0              | .            |
| Year of Follow-up: 2040, Age Group: 40-44 |           |               |      |       |               |             |               |                |              |
| Period                                    | Age Group | Smoking Group | N    | %     | Ever Quit (N) | Ever Quit % | Mean Yrs Quit | Short Term (n) | Short Term % |
| 50                                        | 40-44     | Never Any     | 0    | .     |               |             |               |                |              |
| 50                                        | 40-44     | CC            | 0    | .     | 0             | .           |               |                |              |
| 50                                        | 40-44     | Ecig          | 0    | .     |               |             |               |                |              |
| 50                                        | 40-44     | Dual          | 0    | .     |               |             |               |                |              |
| 50                                        | 40-44     | Former        | 0    | .     |               |             | .             | 0              | .            |
| Year of Follow-up: 2040, Age Group: 45-49 |           |               |      |       |               |             |               |                |              |
| Period                                    | Age Group | Smoking Group | N    | %     | Ever Quit (N) | Ever Quit % | Mean Yrs Quit | Short Term (n) | Short Term % |
| 50                                        | 45-49     | Never Any     | 0    | .     |               |             |               |                |              |
| 50                                        | 45-49     | CC            | 0    | .     | 0             | .           |               |                |              |
| 50                                        | 45-49     | Ecig          | 0    | .     |               |             |               |                |              |
| 50                                        | 45-49     | Dual          | 0    | .     |               |             |               |                |              |
| 50                                        | 45-49     | Former        | 0    | .     |               |             | .             | 0              | .            |
| Year of Follow-up: 2040, Age Group: 50-54 |           |               |      |       |               |             |               |                |              |
| Period                                    | Age Group | Smoking Group | N    | %     | Ever Quit (N) | Ever Quit % | Mean Yrs Quit | Short Term (n) | Short Term % |
| 50                                        | 50-54     | Never Any     | 0    | .     |               |             |               |                |              |
| 50                                        | 50-54     | CC            | 0    | .     | 0             | .           |               |                |              |
| 50                                        | 50-54     | Ecig          | 0    | .     |               |             |               |                |              |
| 50                                        | 50-54     | Dual          | 0    | .     |               |             |               |                |              |
| 50                                        | 50-54     | Former        | 0    | .     |               |             | .             | 0              | .            |
| Year of Follow-up: 2040, Age Group: 55-59 |           |               |      |       |               |             |               |                |              |
| Period                                    | Age Group | Smoking Group | N    | %     | Ever Quit (N) | Ever Quit % | Mean Yrs Quit | Short Term (n) | Short Term % |
| 50                                        | 55-59     | Never Any     | 0    | .     |               |             |               |                |              |
| 50                                        | 55-59     | CC            | 0    | .     | 0             | .           |               |                |              |
| 50                                        | 55-59     | Ecig          | 0    | .     |               |             |               |                |              |
| 50                                        | 55-59     | Dual          | 0    | .     |               |             |               |                |              |
| 50                                        | 55-59     | Former        | 0    | .     |               |             | .             | 0              | .            |
| Year of Follow-up: 2040, Age Group: 60-64 |           |               |      |       |               |             |               |                |              |
| Period                                    | Age Group | Smoking Group | N    | %     | Ever Quit (N) | Ever Quit % | Mean Yrs Quit | Short Term (n) | Short Term % |
| 50                                        | 60-64     | Never Any     | 4726 | 59.60 |               |             |               |                |              |
| 50                                        | 60-64     | CC            | 0    | 0.00  | 0             | 0.00        |               |                |              |
| 50                                        | 60-64     | Ecig          | 417  | 5.26  |               |             |               |                |              |
| 50                                        | 60-64     | Dual          | 0    | 0.00  |               |             |               |                |              |
| 50                                        | 60-64     | Former        | 2787 | 35.15 |               |             | 28.83         | 61             | 2.19         |
| Year of Follow-up: 2040, Age Group: 65-69 |           |               |      |       |               |             |               |                |              |
| Period                                    | Age Group | Smoking Group | N    | %     | Ever Quit (N) | Ever Quit % | Mean Yrs Quit | Short Term (n) | Short Term % |
| 50                                        | 65-69     | Never Any     | 5359 | 64.18 |               |             |               |                |              |
| 50                                        | 65-69     | CC            | 0    | 0.00  | 0             | 0.00        |               |                |              |
| 50                                        | 65-69     | Ecig          | 405  | 4.85  |               |             |               |                |              |
| 50                                        | 65-69     | Dual          | 0    | 0.00  |               |             |               |                |              |
| 50                                        | 65-69     | Former        | 2586 | 30.97 |               |             | 29.40         | 30             | 1.16         |
| Year of Follow-up: 2040, Age Group: 70-74 |           |               |      |       |               |             |               |                |              |
| Period                                    | Age Group | Smoking Group | N    | %     | Ever Quit (N) | Ever Quit % | Mean Yrs Quit | Short Term (n) | Short Term % |
| 50                                        | 70-74     | Never Any     | 5189 | 59.01 |               |             |               |                |              |
| 50                                        | 70-74     | CC            | 3    | 0.03  | 0             | 0.00        |               |                |              |
| 50                                        | 70-74     | Ecig          | 422  | 4.80  |               |             |               |                |              |
| 50                                        | 70-74     | Dual          | 0    | 0.00  |               |             |               |                |              |
| 50                                        | 70-74     | Former        | 3179 | 36.15 |               |             | 32.78         | 51             | 1.60         |
| Year of Follow-up: 2040, Age Group: 75-79 |           |               |      |       |               |             |               |                |              |
| Period                                    | Age Group | Smoking Group | N    | %     | Ever Quit (N) | Ever Quit % | Mean Yrs Quit | Short Term (n) | Short Term % |
| 50                                        | 75-79     | Never Any     | 5284 | 52.43 |               |             |               |                |              |
| 50                                        | 75-79     | CC            | 1    | 0.01  | 0             | 0.00        |               |                |              |
| 50                                        | 75-79     | Ecig          | 490  | 4.86  |               |             |               |                |              |
| 50                                        | 75-79     | Dual          | 0    | 0.00  |               |             |               |                |              |
| 50                                        | 75-79     | Former        | 4303 | 42.70 |               |             | 34.72         | 61             | 1.42         |

## Results for PHIM for Run 6 (Sensitivity\_Analysis\_3.RTF)

\*\*\*\*\*

### Main Results for E-Component for Run: 6, Simulation: 1, COD: Four Diseases Combined

| Variable Parameter          | Value                                  |
|-----------------------------|----------------------------------------|
| 1. Country                  | US (United States)                     |
| 2. Sex                      | F (Females)                            |
| 3. Year of start of process | 1990                                   |
| 4. Cause of Death           | Four Diseases Combined                 |
| 5. Effective Dose NULL      | CC:1                                   |
| 6. Effective Dose Ecig      | CC:1 Ecig:0.05 Dual:0.525              |
| Note:                       | Death rates are per million population |

#### Results for Age Groups Combined and Years combined, Population unadjusted for deaths in Ecig scenario,

| Age Group:All |         | NULL        | Ecig        | %Drop   |        | Death  |         | NULL    | Ecig    | Drop    |
|---------------|---------|-------------|-------------|---------|--------|--------|---------|---------|---------|---------|
| Year          | Number  | Attrib      | Attrib      | Drop    | %Drop  | Attrib | Rate    | Attrib  | Attrib  | Drop    |
|               | Deaths  | Deaths      | Deaths      | Deaths  | Deaths | Deaths |         | Rates   | Rates   | Rates   |
| All Comb      | 9082078 | 2946250.006 | 1936328.340 | 1009922 | 11.120 | 34.278 | 2493.45 | 808.881 | 531.611 | 277.270 |

#### Results for Age Groups Combined, Population unadjusted for deaths in Ecig scenario,

| Age Group:All |        | NULL      | Ecig      | %Drop    |        | Death  |         | NULL    | Ecig    | Drop    |
|---------------|--------|-----------|-----------|----------|--------|--------|---------|---------|---------|---------|
| Year          | Number | Attrib    | Attrib    | Drop     | %Drop  | Attrib | Rate    | Attrib  | Attrib  | Drop    |
|               | Deaths | Deaths    | Deaths    | Deaths   | Deaths | Deaths |         | Rates   | Rates   | Rates   |
| 1990          | 199848 | 57524.822 | 57524.822 | 0.000    | 0.000  | 0.000  | 2926.84 | 842.471 | 842.471 | 0.000   |
| 1991          | 199162 | 59078.486 | 58910.022 | 168.464  | 0.085  | 0.285  | 2877.87 | 853.678 | 851.244 | 2.434   |
| 1992          | 198532 | 60494.150 | 60022.396 | 471.754  | 0.238  | 0.780  | 2829.84 | 862.271 | 855.547 | 6.724   |
| 1993          | 202512 | 62694.848 | 61776.514 | 918.334  | 0.453  | 1.465  | 2845.85 | 881.034 | 868.129 | 12.905  |
| 1994          | 200658 | 63202.598 | 61751.191 | 1451.407 | 0.723  | 2.296  | 2777.87 | 874.966 | 854.873 | 20.093  |
| 1995          | 201023 | 63766.862 | 61669.465 | 2097.397 | 1.043  | 3.289  | 2739.80 | 869.097 | 840.511 | 28.586  |
| 1996          | 201180 | 64591.163 | 61716.177 | 2874.985 | 1.429  | 4.451  | 2706.36 | 868.908 | 830.233 | 38.676  |
| 1997          | 198639 | 64686.912 | 61084.751 | 3602.161 | 1.813  | 5.569  | 2635.18 | 858.147 | 810.360 | 47.787  |
| 1998          | 197573 | 65295.961 | 60851.125 | 4444.837 | 2.250  | 6.807  | 2584.18 | 854.046 | 795.909 | 58.137  |
| 1999          | 211329 | 67327.521 | 61583.002 | 5744.519 | 2.718  | 8.532  | 2726.91 | 868.771 | 794.645 | 74.125  |
| 2000          | 208496 | 67596.897 | 60902.928 | 6693.968 | 3.211  | 9.903  | 2656.96 | 861.419 | 776.115 | 85.304  |
| 2001          | 203606 | 67008.811 | 59309.407 | 7699.403 | 3.782  | 11.490 | 2565.88 | 844.458 | 747.429 | 97.029  |
| 2002          | 200828 | 67067.744 | 58248.274 | 8819.470 | 4.392  | 13.150 | 2506.09 | 836.925 | 726.868 | 110.056 |
| 2003          | 196352 | 66756.217 | 56923.719 | 9832.497 | 5.008  | 14.729 | 2427.31 | 825.244 | 703.694 | 121.550 |
| 2004          | 188160 | 65058.725 | 54368.504 | 10690.22 | 5.681  | 16.432 | 2302.83 | 796.234 | 665.400 | 130.834 |
| 2005          | 186416 | 65214.724 | 53369.285 | 11845.44 | 6.354  | 18.164 | 2256.27 | 789.321 | 645.951 | 143.370 |
| 2006          | 180088 | 63771.146 | 51048.299 | 12722.85 | 7.065  | 19.951 | 2160.67 | 765.117 | 612.470 | 152.647 |
| 2007          | 175644 | 63110.718 | 49486.598 | 13624.12 | 7.757  | 21.588 | 2086.36 | 749.650 | 587.818 | 161.832 |
| 2008          | 177570 | 63718.624 | 48793.357 | 14925.27 | 8.405  | 23.424 | 2086.39 | 748.674 | 573.306 | 175.367 |
| 2009          | 172806 | 62794.698 | 47027.415 | 15767.28 | 9.124  | 25.109 | 2007.57 | 729.515 | 546.339 | 183.176 |
| 2010          | 170489 | 61917.074 | 45264.675 | 16652.40 | 9.767  | 26.895 | 1957.97 | 711.083 | 519.839 | 191.243 |
| 2011          | 170305 | 61680.114 | 43843.154 | 17836.96 | 10.474 | 28.918 | 1937.46 | 701.700 | 498.779 | 202.921 |
| 2012          | 171421 | 62023.127 | 42871.239 | 19151.89 | 11.172 | 30.879 | 1930.22 | 698.386 | 482.734 | 215.652 |
| 2013          | 172699 | 62037.765 | 41700.331 | 20337.43 | 11.776 | 32.782 | 1923.75 | 691.059 | 464.513 | 226.545 |
| 2014          | 174169 | 61921.017 | 40283.383 | 21637.63 | 12.423 | 34.944 | 1918.85 | 682.195 | 443.809 | 238.386 |
| 2015          | 177354 | 61856.204 | 39108.881 | 22747.32 | 12.826 | 36.775 | 2184.51 | 761.899 | 481.714 | 280.185 |
| 2016          | 176853 | 60464.119 | 36824.051 | 23640.07 | 13.367 | 39.098 | 2157.59 | 737.655 | 449.249 | 288.406 |
| 2017          | 179309 | 60243.839 | 35406.119 | 24837.72 | 13.852 | 41.229 | 2166.86 | 728.017 | 427.865 | 300.151 |
| 2018          | 177157 | 60713.327 | 34787.684 | 25925.64 | 14.634 | 42.702 | 2120.51 | 726.721 | 416.398 | 310.322 |
| 2019          | 179227 | 61148.172 | 33831.118 | 27317.05 | 15.242 | 44.674 | 2124.53 | 724.841 | 401.029 | 323.812 |
| 2020          | 180467 | 61149.317 | 32861.249 | 28288.07 | 15.675 | 46.261 | 2424.25 | 821.432 | 441.433 | 380.000 |
| 2021          | 178116 | 58727.786 | 30027.552 | 28700.23 | 16.113 | 48.870 | 2375.42 | 783.216 | 400.459 | 382.757 |
| 2022          | 179408 | 58848.802 | 28969.142 | 29879.66 | 16.655 | 50.774 | 2374.52 | 778.881 | 383.415 | 395.466 |
| 2023          | 180640 | 58816.149 | 27902.695 | 30913.45 | 17.113 | 52.559 | 2372.26 | 772.407 | 366.434 | 405.973 |
| 2024          | 181610 | 58955.232 | 26839.576 | 32115.66 | 17.684 | 54.475 | 2366.77 | 768.316 | 349.779 | 418.538 |
| 2025          | 180418 | 58297.744 | 25670.208 | 32627.54 | 18.084 | 55.967 | 2713.69 | 876.861 | 386.108 | 490.753 |
| 2026          | 180313 | 56469.971 | 23619.455 | 32850.52 | 18.219 | 58.173 | 2701.83 | 846.150 | 353.915 | 492.234 |
| 2027          | 179619 | 56209.427 | 22451.989 | 33757.44 | 18.794 | 60.057 | 2680.68 | 838.883 | 335.079 | 503.804 |
| 2028          | 178762 | 55733.105 | 21226.339 | 34506.77 | 19.303 | 61.914 | 2656.74 | 828.298 | 315.463 | 512.835 |
| 2029          | 177808 | 55145.838 | 19993.725 | 35152.11 | 19.770 | 63.744 | 2630.89 | 815.951 | 295.832 | 520.119 |
| 2030          | 173587 | 53615.097 | 18746.306 | 34868.79 | 20.087 | 65.035 | 3040.33 | 939.056 | 328.337 | 610.719 |
| 2031          | 174985 | 52046.561 | 17516.330 | 34530.23 | 19.733 | 66.345 | 3060.73 | 910.364 | 306.384 | 603.980 |
| 2032          | 173400 | 51582.636 | 16508.701 | 35073.94 | 20.227 | 67.996 | 3027.10 | 900.496 | 288.198 | 612.298 |
| 2033          | 171756 | 50839.758 | 15487.711 | 35352.05 | 20.583 | 69.536 | 2991.14 | 885.375 | 269.719 | 615.656 |
| 2034          | 169973 | 50215.451 | 14489.612 | 35725.84 | 21.019 | 71.145 | 2951.96 | 872.104 | 251.645 | 620.459 |
| 2035          | 162644 | 47773.075 | 13383.241 | 34389.83 | 21.144 | 71.986 | 3459.14 | 1016.05 | 284.637 | 731.409 |
| 2036          | 156254 | 43298.709 | 11425.725 | 31872.98 | 20.398 | 73.612 | 3328.25 | 922.274 | 243.371 | 678.903 |
| 2037          | 153593 | 42241.563 | 10451.523 | 31790.04 | 20.698 | 75.258 | 3274.10 | 900.450 | 222.792 | 677.659 |
| 2038          | 150947 | 41356.353 | 9671.199  | 31685.15 | 20.991 | 76.615 | 3217.50 | 881.531 | 206.146 | 675.385 |
| 2039          | 148373 | 40161.050 | 8798.174  | 31362.88 | 21.138 | 78.093 | 3159.42 | 855.178 | 187.346 | 667.832 |

## Results for PHIM for Run 6 (Sensitivity\_Analysis\_3.RTF)

\*\*\*\*\*

### Main Results for E-Component for Run: 6, Simulation: 1, COD: LUNG CANCER

| Variable Parameter          | Value                                  |
|-----------------------------|----------------------------------------|
| 1. Country                  | US (United States)                     |
| 2. Sex                      | F (Females)                            |
| 3. Year of start of process | 1990                                   |
| 4. Cause of Death           | LUNG CANCER                            |
| 5. Effective Dose NULL      | CC:1                                   |
| 6. Effective Dose Ecig      | CC:1 Ecig:0.05 Dual:0.525              |
| Note:                       | Death rates are per million population |

#### Results for Age Groups Combined and Years combined, Population unadjusted for deaths in Ecig scenario,

| Age Group:All | NULL    | Ecig        | %Drop       |          |        | NULL   | Ecig    | Drop    |         |         |
|---------------|---------|-------------|-------------|----------|--------|--------|---------|---------|---------|---------|
| Year          | Number  | Attrib      | Attrib      | Drop     | %Drop  | Attrib | Death   | Attrib  | Attrib  | Drop    |
|               | Deaths  | Deaths      | Deaths      | Deaths   | Deaths | Deaths | Rate    | Rates   | Rates   | Rates   |
| All Comb      | 2327764 | 1580465.217 | 1138102.006 | 442363.2 | 19.004 | 27.989 | 639.078 | 433.910 | 312.461 | 121.449 |

#### Results for Age Groups Combined, Population unadjusted for deaths in Ecig scenario,

| Age Group:All | NULL   | Ecig      | %Drop     |          |        | NULL   | Ecig    | Drop    |         |         |
|---------------|--------|-----------|-----------|----------|--------|--------|---------|---------|---------|---------|
| Year          | Number | Attrib    | Attrib    | Drop     | %Drop  | Attrib | Death   | Attrib  | Attrib  | Drop    |
|               | Deaths | Deaths    | Deaths    | Deaths   | Deaths | Deaths | Rate    | Rates   | Rates   | Rates   |
| 1990          | 42690  | 30614.201 | 30614.201 | 0.000    | 0.000  | 0.000  | 625.210 | 448.355 | 448.355 | 0.000   |
| 1991          | 43692  | 31412.010 | 31379.684 | 32.326   | 0.074  | 0.103  | 631.345 | 453.901 | 453.433 | 0.467   |
| 1992          | 45423  | 32782.407 | 32688.414 | 93.992   | 0.207  | 0.287  | 647.450 | 467.274 | 465.934 | 1.340   |
| 1993          | 46291  | 33491.183 | 33305.292 | 185.892  | 0.402  | 0.555  | 650.515 | 470.643 | 468.030 | 2.612   |
| 1994          | 47017  | 34074.347 | 33772.805 | 301.543  | 0.641  | 0.885  | 650.895 | 471.719 | 467.545 | 4.175   |
| 1995          | 47840  | 34694.454 | 34239.459 | 454.995  | 0.951  | 1.311  | 652.025 | 472.861 | 466.660 | 6.201   |
| 1996          | 48244  | 35027.269 | 34397.187 | 630.081  | 1.306  | 1.799  | 648.999 | 471.202 | 462.726 | 8.476   |
| 1997          | 49035  | 35590.763 | 34751.756 | 839.006  | 1.711  | 2.357  | 650.506 | 472.153 | 461.022 | 11.130  |
| 1998          | 49686  | 36100.785 | 35014.641 | 1086.143 | 2.186  | 3.009  | 649.874 | 472.184 | 457.978 | 14.206  |
| 1999          | 48883  | 35451.030 | 34141.259 | 1309.771 | 2.679  | 3.695  | 630.769 | 457.448 | 440.547 | 16.901  |
| 2000          | 50331  | 36447.986 | 34807.365 | 1640.621 | 3.260  | 4.501  | 641.392 | 464.474 | 443.567 | 20.907  |
| 2001          | 50389  | 36411.326 | 34434.810 | 1976.516 | 3.923  | 5.428  | 635.012 | 458.863 | 433.954 | 24.908  |
| 2002          | 51445  | 37078.545 | 34684.702 | 2393.843 | 4.653  | 6.456  | 641.972 | 462.696 | 432.823 | 29.872  |
| 2003          | 51408  | 36999.876 | 34207.007 | 2792.869 | 5.433  | 7.548  | 635.509 | 457.395 | 422.869 | 34.526  |
| 2004          | 51399  | 36861.555 | 33625.780 | 3235.775 | 6.295  | 8.778  | 629.057 | 451.138 | 411.536 | 39.602  |
| 2005          | 51421  | 36689.529 | 32984.981 | 3704.547 | 7.204  | 10.097 | 622.370 | 444.069 | 399.231 | 44.838  |
| 2006          | 51355  | 36504.774 | 32307.403 | 4197.371 | 8.173  | 11.498 | 616.150 | 437.979 | 387.620 | 50.359  |
| 2007          | 51839  | 36663.202 | 31879.125 | 4784.077 | 9.229  | 13.049 | 615.761 | 435.498 | 378.671 | 56.827  |
| 2008          | 50976  | 35898.803 | 30673.073 | 5225.731 | 10.251 | 14.557 | 598.952 | 421.800 | 360.399 | 61.401  |
| 2009          | 51193  | 35934.525 | 30077.965 | 5856.561 | 11.440 | 16.298 | 594.733 | 417.468 | 349.430 | 68.038  |
| 2010          | 50853  | 35502.829 | 29127.822 | 6375.008 | 12.536 | 17.956 | 584.018 | 407.730 | 334.517 | 73.213  |
| 2011          | 50509  | 35136.342 | 28158.906 | 6977.435 | 13.814 | 19.858 | 574.613 | 399.726 | 320.348 | 79.378  |
| 2012          | 51245  | 35450.201 | 27722.834 | 7727.367 | 15.079 | 21.798 | 577.023 | 399.173 | 312.162 | 87.011  |
| 2013          | 51069  | 35123.224 | 26737.146 | 8386.078 | 16.421 | 23.876 | 568.874 | 391.249 | 297.834 | 93.415  |
| 2014          | 51251  | 35079.370 | 25987.863 | 9091.507 | 17.739 | 25.917 | 564.641 | 386.476 | 286.313 | 100.163 |
| 2015          | 50443  | 34324.171 | 24769.660 | 9554.511 | 18.941 | 27.836 | 621.319 | 422.780 | 305.094 | 117.685 |
| 2016          | 48854  | 33054.753 | 23095.899 | 9958.854 | 20.385 | 30.128 | 596.013 | 403.264 | 281.767 | 121.497 |
| 2017          | 48325  | 32471.234 | 21931.760 | 10539.47 | 21.810 | 32.458 | 583.983 | 392.399 | 265.034 | 127.364 |
| 2018          | 50465  | 33657.595 | 21879.335 | 11778.26 | 23.339 | 34.994 | 604.052 | 402.871 | 261.889 | 140.982 |
| 2019          | 51036  | 33863.424 | 21202.684 | 12660.74 | 24.807 | 37.388 | 604.975 | 401.412 | 251.333 | 150.078 |
| 2020          | 51444  | 33910.830 | 20513.490 | 13397.34 | 26.043 | 39.508 | 691.053 | 455.532 | 275.562 | 179.969 |
| 2021          | 48037  | 31531.880 | 18281.903 | 13249.98 | 27.583 | 42.021 | 640.639 | 420.521 | 243.814 | 176.707 |
| 2022          | 48335  | 31560.212 | 17538.137 | 14022.08 | 29.010 | 44.430 | 639.727 | 417.708 | 232.122 | 185.586 |
| 2023          | 48599  | 31508.781 | 16785.239 | 14723.54 | 30.296 | 46.728 | 638.227 | 413.791 | 220.433 | 193.358 |
| 2024          | 48784  | 31517.293 | 16026.847 | 15490.45 | 31.753 | 49.149 | 635.757 | 410.740 | 208.865 | 201.875 |
| 2025          | 48477  | 31175.389 | 15212.137 | 15963.25 | 32.930 | 51.205 | 729.141 | 468.912 | 228.807 | 240.105 |
| 2026          | 45324  | 29044.598 | 13512.679 | 15531.92 | 34.269 | 53.476 | 679.138 | 435.206 | 202.475 | 232.731 |
| 2027          | 45107  | 28825.765 | 12736.009 | 16089.76 | 35.670 | 55.817 | 673.191 | 430.203 | 190.075 | 240.127 |
| 2028          | 44842  | 28513.846 | 11941.375 | 16572.47 | 36.958 | 58.121 | 666.430 | 423.769 | 177.471 | 246.298 |
| 2029          | 44539  | 28148.109 | 11146.965 | 17001.14 | 38.171 | 60.399 | 659.013 | 416.486 | 164.933 | 251.553 |
| 2030          | 43393  | 27314.475 | 10343.995 | 16970.48 | 39.109 | 62.130 | 760.018 | 478.407 | 181.173 | 297.234 |
| 2031          | 40748  | 25423.102 | 9266.800  | 16156.30 | 39.650 | 63.550 | 712.731 | 444.684 | 162.089 | 282.595 |
| 2032          | 40325  | 25085.902 | 8638.566  | 16447.34 | 40.787 | 65.564 | 703.969 | 437.933 | 150.806 | 287.127 |
| 2033          | 39882  | 24645.067 | 8023.835  | 16621.23 | 41.676 | 67.442 | 694.543 | 429.194 | 139.735 | 289.459 |
| 2034          | 39404  | 24239.126 | 7429.106  | 16810.02 | 42.660 | 69.351 | 684.347 | 420.967 | 129.023 | 291.944 |
| 2035          | 37454  | 22944.147 | 6761.579  | 16182.57 | 43.206 | 70.530 | 796.588 | 487.980 | 143.806 | 344.174 |
| 2036          | 32988  | 19950.581 | 5538.100  | 14412.48 | 43.689 | 72.241 | 702.663 | 424.953 | 117.963 | 306.990 |
| 2037          | 32403  | 19415.334 | 5021.461  | 14393.87 | 44.421 | 74.137 | 690.731 | 413.871 | 107.041 | 306.830 |
| 2038          | 31820  | 18939.317 | 4613.833  | 14325.48 | 45.021 | 75.639 | 678.257 | 403.701 | 98.346  | 305.355 |
| 2039          | 31251  | 18379.752 | 4169.132  | 14210.62 | 45.472 | 77.317 | 665.457 | 391.373 | 88.776  | 302.597 |

## Results for PHIM for Run 6 (Sensitivity\_Analysis\_3.RTF)

\*\*\*\*\*

### Main Results for E-Component for Run: 6, Simulation: 1, COD: IHD

| Variable Parameter          | Value                                  |
|-----------------------------|----------------------------------------|
| 1. Country                  | US (United States)                     |
| 2. Sex                      | F (Females)                            |
| 3. Year of start of process | 1990                                   |
| 4. Cause of Death           | IHD                                    |
| 5. Effective Dose NULL      | CC:1                                   |
| 6. Effective Dose Ecig      | CC:1 Ecig:0.05 Dual:0.525              |
| Note:                       | Death rates are per million population |

#### Results for Age Groups Combined and Years combined, Population unadjusted for deaths in Ecig scenario,

| Age Group:All |         | NULL       | Ecig       | %Drop    |        |        | NULL    | Ecig    | Drop   |        |
|---------------|---------|------------|------------|----------|--------|--------|---------|---------|--------|--------|
| Year          | Number  | Attrib     | Attrib     | Drop     | %Drop  | Attrib | Death   | Attrib  | Attrib | Drop   |
|               | Deaths  | Deaths     | Deaths     | Deaths   | Deaths | Deaths | Rate    | Rates   | Rates  | Rates  |
| All Comb      | 3242167 | 398833.796 | 198140.231 | 200693.6 | 6.190  | 50.320 | 890.124 | 109.498 | 54.399 | 55.100 |

#### Results for Age Groups Combined, Population unadjusted for deaths in Ecig scenario,

| Age Group:All |        | NULL      | Ecig      | %Drop    |        |        | NULL    | Ecig    | Drop    |        |
|---------------|--------|-----------|-----------|----------|--------|--------|---------|---------|---------|--------|
| Year          | Number | Attrib    | Attrib    | Drop     | %Drop  | Attrib | Death   | Attrib  | Attrib  | Drop   |
|               | Deaths | Deaths    | Deaths    | Deaths   | Deaths | Deaths | Rate    | Rates   | Rates   | Rates  |
| 1990          | 98916  | 12922.892 | 12922.892 | 0.000    | 0.000  | 0.000  | 1448.66 | 189.260 | 189.260 | 0.000  |
| 1991          | 96403  | 12856.479 | 12766.075 | 90.404   | 0.094  | 0.703  | 1393.01 | 185.775 | 184.469 | 1.306  |
| 1992          | 93721  | 12662.244 | 12411.616 | 250.628  | 0.267  | 1.979  | 1335.88 | 180.485 | 176.913 | 3.572  |
| 1993          | 93679  | 12730.613 | 12252.145 | 478.467  | 0.511  | 3.758  | 1316.45 | 178.900 | 172.176 | 6.724  |
| 1994          | 90832  | 12495.323 | 11749.940 | 745.382  | 0.821  | 5.965  | 1257.46 | 172.983 | 162.664 | 10.319 |
| 1995          | 89698  | 12365.590 | 11311.936 | 1053.654 | 1.175  | 8.521  | 1222.52 | 168.534 | 154.174 | 14.361 |
| 1996          | 88286  | 12290.551 | 10853.453 | 1437.099 | 1.628  | 11.693 | 1187.66 | 165.338 | 146.005 | 19.332 |
| 1997          | 84777  | 11719.531 | 9988.017  | 1731.514 | 2.042  | 14.775 | 1124.67 | 155.473 | 132.503 | 22.971 |
| 1998          | 82517  | 11416.794 | 9343.151  | 2073.643 | 2.513  | 18.163 | 1079.29 | 149.327 | 122.205 | 27.122 |
| 1999          | 93939  | 13028.038 | 10172.076 | 2855.962 | 3.040  | 21.922 | 1212.16 | 168.109 | 131.257 | 36.852 |
| 2000          | 90039  | 12426.299 | 9236.380  | 3189.919 | 3.543  | 25.671 | 1147.41 | 158.354 | 117.704 | 40.651 |
| 2001          | 86119  | 11939.281 | 8342.534  | 3596.747 | 4.176  | 30.125 | 1085.29 | 150.461 | 105.134 | 45.327 |
| 2002          | 83014  | 11528.794 | 7536.383  | 3992.411 | 4.809  | 34.630 | 1035.91 | 143.865 | 94.045  | 49.820 |
| 2003          | 79302  | 11048.407 | 6756.292  | 4292.115 | 5.412  | 38.848 | 980.336 | 136.581 | 83.522  | 53.059 |
| 2004          | 73861  | 10375.132 | 5880.239  | 4494.892 | 6.086  | 43.324 | 903.963 | 126.978 | 71.967  | 55.012 |
| 2005          | 71649  | 10051.029 | 5280.557  | 4770.472 | 6.658  | 47.463 | 867.197 | 121.652 | 63.913  | 57.739 |
| 2006          | 67551  | 9542.523  | 4595.589  | 4946.934 | 7.323  | 51.841 | 810.467 | 114.490 | 55.137  | 59.353 |
| 2007          | 63503  | 8936.533  | 3952.758  | 4983.775 | 7.848  | 55.769 | 754.310 | 106.151 | 46.952  | 59.199 |
| 2008          | 63171  | 8944.180  | 3624.201  | 5319.979 | 8.422  | 59.480 | 742.239 | 105.091 | 42.583  | 62.508 |
| 2009          | 59747  | 8390.033  | 3133.883  | 5256.150 | 8.797  | 62.648 | 694.108 | 97.471  | 36.408  | 61.063 |
| 2010          | 58008  | 8157.570  | 2792.487  | 5365.083 | 9.249  | 65.768 | 666.189 | 93.685  | 32.070  | 61.615 |
| 2011          | 57368  | 8035.356  | 2499.237  | 5536.119 | 9.650  | 68.897 | 652.644 | 91.414  | 28.432  | 62.981 |
| 2012          | 57411  | 7970.766  | 2241.771  | 5728.995 | 9.979  | 71.875 | 646.453 | 89.752  | 25.243  | 64.509 |
| 2013          | 57067  | 7743.216  | 1996.331  | 5746.885 | 10.070 | 74.218 | 635.688 | 86.254  | 22.238  | 64.016 |
| 2014          | 57538  | 7774.935  | 1815.929  | 5959.006 | 10.357 | 76.644 | 633.906 | 85.658  | 20.006  | 65.651 |
| 2015          | 58395  | 7722.535  | 1669.169  | 6053.366 | 10.366 | 78.386 | 719.266 | 95.120  | 20.560  | 74.561 |
| 2016          | 58658  | 7600.353  | 1488.425  | 6111.928 | 10.420 | 80.416 | 715.621 | 92.723  | 18.159  | 74.565 |
| 2017          | 59004  | 7470.266  | 1333.281  | 6136.986 | 10.401 | 82.152 | 713.034 | 90.274  | 16.112  | 74.162 |
| 2018          | 56077  | 6907.050  | 1121.985  | 5785.065 | 10.316 | 83.756 | 671.224 | 82.675  | 13.430  | 69.246 |
| 2019          | 55886  | 6732.046  | 1002.465  | 5729.581 | 10.252 | 85.109 | 662.462 | 79.801  | 11.883  | 67.918 |
| 2020          | 55313  | 6429.836  | 890.607   | 5539.228 | 10.014 | 86.149 | 743.037 | 86.373  | 11.964  | 74.410 |
| 2021          | 56292  | 6562.016  | 815.184   | 5746.832 | 10.209 | 87.577 | 750.730 | 87.513  | 10.872  | 76.642 |
| 2022          | 55827  | 6352.366  | 727.089   | 5625.276 | 10.076 | 88.554 | 738.885 | 84.075  | 9.623   | 74.452 |
| 2023          | 55338  | 6134.123  | 653.184   | 5480.940 | 9.904  | 89.352 | 726.728 | 80.557  | 8.578   | 71.979 |
| 2024          | 54770  | 5922.193  | 584.705   | 5337.487 | 9.745  | 90.127 | 713.771 | 77.179  | 7.620   | 69.559 |
| 2025          | 53295  | 5504.188  | 514.788   | 4989.400 | 9.362  | 90.647 | 801.612 | 82.789  | 7.743   | 75.046 |
| 2026          | 55278  | 5641.075  | 489.818   | 5151.258 | 9.319  | 91.317 | 828.283 | 84.526  | 7.339   | 77.187 |
| 2027          | 54199  | 5426.216  | 442.891   | 4983.325 | 9.195  | 91.838 | 808.875 | 80.982  | 6.610   | 74.372 |
| 2028          | 53090  | 5197.830  | 398.350   | 4799.480 | 9.040  | 92.336 | 789.020 | 77.249  | 5.920   | 71.329 |
| 2029          | 51974  | 4973.547  | 360.613   | 4612.934 | 8.875  | 92.749 | 769.023 | 73.590  | 5.336   | 68.254 |
| 2030          | 49479  | 4450.618  | 309.489   | 4141.129 | 8.370  | 93.046 | 866.605 | 77.952  | 5.421   | 72.531 |
| 2031          | 51987  | 4555.052  | 303.014   | 4252.038 | 8.179  | 93.348 | 909.317 | 79.674  | 5.300   | 74.374 |
| 2032          | 50677  | 4349.999  | 274.997   | 4075.002 | 8.041  | 93.678 | 884.689 | 75.939  | 4.801   | 71.139 |
| 2033          | 49380  | 4147.948  | 253.363   | 3894.585 | 7.887  | 93.892 | 859.955 | 72.237  | 4.412   | 67.824 |
| 2034          | 48076  | 3966.133  | 232.693   | 3733.440 | 7.766  | 94.133 | 834.943 | 68.881  | 4.041   | 64.840 |
| 2035          | 44518  | 3289.064  | 187.609   | 3101.455 | 6.967  | 94.296 | 946.825 | 69.952  | 3.990   | 65.962 |
| 2036          | 46347  | 3313.192  | 179.987   | 3133.205 | 6.760  | 94.568 | 987.211 | 70.572  | 3.834   | 66.738 |
| 2037          | 44841  | 3117.951  | 162.529   | 2955.422 | 6.591  | 94.787 | 955.859 | 66.464  | 3.465   | 63.000 |
| 2038          | 43378  | 2949.775  | 150.023   | 2799.752 | 6.454  | 94.914 | 924.621 | 62.876  | 3.198   | 59.678 |
| 2039          | 41973  | 2766.312  | 138.099   | 2628.213 | 6.262  | 95.008 | 893.753 | 58.905  | 2.941   | 55.964 |

## Results for PHIM for Run 6 (Sensitivity\_Analysis\_3.RTF)

\*\*\*\*\*

### Main Results for E-Component for Run: 6, Simulation: 1, COD: STROKE

| Variable Parameter          | Value                                  |
|-----------------------------|----------------------------------------|
| 1. Country                  | US (United States)                     |
| 2. Sex                      | F (Females)                            |
| 3. Year of start of process | 1990                                   |
| 4. Cause of Death           | STROKE                                 |
| 5. Effective Dose NULL      | CC:1                                   |
| 6. Effective Dose Ecig      | CC:1 Ecig:0.05 Dual:0.525              |
| Note:                       | Death rates are per million population |

#### Results for Age Groups Combined and Years combined, Population unadjusted for deaths in Ecig scenario,

| Age Group:All | NULL    | Ecig       | %Drop     |          |        | NULL   | Ecig    | Drop   |        |        |
|---------------|---------|------------|-----------|----------|--------|--------|---------|--------|--------|--------|
| Year          | Number  | Attrib     | Attrib    | Drop     | %Drop  | Attrib | Death   | Attrib | Attrib | Drop   |
|               | Deaths  | Deaths     | Deaths    | Deaths   | Deaths | Deaths | Rate    | Rates  | Rates  | Rates  |
| All Comb      | 1352207 | 104899.750 | 51048.721 | 53851.03 | 3.982  | 51.336 | 371.243 | 28.800 | 14.015 | 14.785 |

#### Results for Age Groups Combined, Population unadjusted for deaths in Ecig scenario,

| Age Group:All | NULL   | Ecig     | %Drop    |          |        | NULL   | Ecig    | Drop   |        |        |
|---------------|--------|----------|----------|----------|--------|--------|---------|--------|--------|--------|
| Year          | Number | Attrib   | Attrib   | Drop     | %Drop  | Attrib | Death   | Attrib | Attrib | Drop   |
|               | Deaths | Deaths   | Deaths   | Deaths   | Deaths | Deaths | Rate    | Rates  | Rates  | Rates  |
| 1990          | 33504  | 3293.017 | 3293.017 | 0.000    | 0.000  | 0.000  | 490.678 | 48.227 | 48.227 | 0.000  |
| 1991          | 32505  | 3207.063 | 3179.556 | 27.507   | 0.085  | 0.858  | 469.694 | 46.342 | 45.944 | 0.397  |
| 1992          | 32560  | 3218.125 | 3141.216 | 76.908   | 0.236  | 2.390  | 464.104 | 45.871 | 44.774 | 1.096  |
| 1993          | 32768  | 3226.680 | 3081.043 | 145.638  | 0.444  | 4.514  | 460.480 | 45.344 | 43.297 | 2.047  |
| 1994          | 33005  | 3277.266 | 3044.980 | 232.286  | 0.704  | 7.088  | 456.915 | 45.370 | 42.154 | 3.216  |
| 1995          | 33730  | 3309.378 | 2976.448 | 332.930  | 0.987  | 10.060 | 459.716 | 45.104 | 40.567 | 4.538  |
| 1996          | 33750  | 3312.987 | 2862.771 | 450.216  | 1.334  | 13.589 | 454.019 | 44.568 | 38.511 | 6.056  |
| 1997          | 33699  | 3267.066 | 2703.163 | 563.903  | 1.673  | 17.260 | 447.056 | 43.341 | 35.861 | 7.481  |
| 1998          | 33274  | 3178.725 | 2506.252 | 672.473  | 2.021  | 21.155 | 435.211 | 41.577 | 32.781 | 8.796  |
| 1999          | 33891  | 3120.351 | 2337.238 | 783.114  | 2.311  | 25.097 | 437.317 | 40.264 | 30.159 | 10.105 |
| 2000          | 33827  | 3142.808 | 2226.557 | 916.251  | 2.709  | 29.154 | 431.074 | 40.050 | 28.374 | 11.676 |
| 2001          | 32506  | 2961.588 | 1977.397 | 984.191  | 3.028  | 33.232 | 409.647 | 37.323 | 24.920 | 12.403 |
| 2002          | 32078  | 2940.627 | 1833.978 | 1106.649 | 3.450  | 37.633 | 400.295 | 36.695 | 22.886 | 13.810 |
| 2003          | 30568  | 2819.545 | 1640.989 | 1178.556 | 3.856  | 41.800 | 377.883 | 34.855 | 20.286 | 14.569 |
| 2004          | 29388  | 2730.466 | 1475.360 | 1255.106 | 4.271  | 45.967 | 359.671 | 33.417 | 18.056 | 15.361 |
| 2005          | 27954  | 2670.510 | 1337.866 | 1332.644 | 4.767  | 49.902 | 338.339 | 32.322 | 16.193 | 16.130 |
| 2006          | 27201  | 2623.285 | 1215.917 | 1407.369 | 5.174  | 53.649 | 326.354 | 31.474 | 14.588 | 16.885 |
| 2007          | 26302  | 2536.599 | 1083.659 | 1452.940 | 5.524  | 57.279 | 312.424 | 30.131 | 12.872 | 17.259 |
| 2008          | 25998  | 2469.443 | 974.481  | 1494.962 | 5.750  | 60.538 | 305.468 | 29.015 | 11.450 | 17.565 |
| 2009          | 25040  | 2386.945 | 867.313  | 1519.632 | 6.069  | 63.664 | 290.901 | 27.730 | 10.076 | 17.654 |
| 2010          | 24840  | 2329.274 | 779.147  | 1550.127 | 6.240  | 66.550 | 285.273 | 26.750 | 8.948  | 17.802 |
| 2011          | 24792  | 2286.581 | 699.101  | 1587.480 | 6.403  | 69.426 | 282.045 | 26.013 | 7.953  | 18.060 |
| 2012          | 24500  | 2243.311 | 626.601  | 1616.710 | 6.599  | 72.068 | 275.872 | 25.260 | 7.056  | 18.204 |
| 2013          | 24451  | 2176.503 | 555.338  | 1621.166 | 6.630  | 74.485 | 272.368 | 24.245 | 6.186  | 18.059 |
| 2014          | 25296  | 2211.619 | 516.463  | 1695.156 | 6.701  | 76.648 | 278.691 | 24.366 | 5.690  | 18.676 |
| 2015          | 26316  | 2237.016 | 483.460  | 1753.556 | 6.663  | 78.388 | 324.141 | 27.554 | 5.955  | 21.599 |
| 2016          | 26735  | 2229.057 | 442.319  | 1786.739 | 6.683  | 80.157 | 326.164 | 27.194 | 5.396  | 21.798 |
| 2017          | 27616  | 2221.649 | 405.740  | 1815.909 | 6.576  | 81.737 | 333.726 | 26.848 | 4.903  | 21.944 |
| 2018          | 25256  | 1939.420 | 327.698  | 1611.722 | 6.382  | 83.103 | 302.304 | 23.214 | 3.922  | 19.292 |
| 2019          | 25429  | 1904.400 | 294.880  | 1609.519 | 6.329  | 84.516 | 301.434 | 22.574 | 3.495  | 19.079 |
| 2020          | 25379  | 1806.054 | 259.976  | 1546.078 | 6.092  | 85.605 | 340.922 | 24.261 | 3.492  | 20.769 |
| 2021          | 25448  | 1748.172 | 231.463  | 1516.710 | 5.960  | 86.760 | 339.386 | 23.314 | 3.087  | 20.227 |
| 2022          | 25539  | 1701.148 | 208.140  | 1493.008 | 5.846  | 87.765 | 338.015 | 22.515 | 2.755  | 19.760 |
| 2023          | 25620  | 1652.087 | 188.230  | 1463.857 | 5.714  | 88.607 | 336.461 | 21.696 | 2.472  | 19.224 |
| 2024          | 25659  | 1597.127 | 168.778  | 1428.348 | 5.567  | 89.432 | 334.391 | 20.814 | 2.200  | 18.615 |
| 2025          | 25260  | 1467.622 | 146.136  | 1321.486 | 5.232  | 90.043 | 379.931 | 22.075 | 2.198  | 19.877 |
| 2026          | 25480  | 1390.505 | 129.849  | 1260.656 | 4.948  | 90.662 | 381.790 | 20.835 | 1.946  | 18.890 |
| 2027          | 25264  | 1342.095 | 117.297  | 1224.799 | 4.848  | 91.260 | 377.042 | 20.030 | 1.751  | 18.279 |
| 2028          | 25022  | 1289.536 | 106.013  | 1183.522 | 4.730  | 91.779 | 371.870 | 19.165 | 1.576  | 17.589 |
| 2029          | 24767  | 1242.216 | 96.206   | 1146.010 | 4.627  | 92.255 | 366.459 | 18.380 | 1.423  | 16.957 |
| 2030          | 23959  | 1096.803 | 80.477   | 1016.326 | 4.242  | 92.663 | 419.641 | 19.210 | 1.410  | 17.801 |
| 2031          | 23963  | 1019.991 | 71.247   | 948.744  | 3.959  | 93.015 | 419.142 | 17.841 | 1.246  | 16.595 |
| 2032          | 23615  | 977.406  | 64.579   | 912.828  | 3.865  | 93.393 | 412.259 | 17.063 | 1.127  | 15.936 |
| 2033          | 23259  | 937.450  | 59.543   | 877.907  | 3.775  | 93.648 | 405.051 | 16.326 | 1.037  | 15.289 |
| 2034          | 22879  | 900.763  | 54.614   | 846.149  | 3.698  | 93.937 | 397.339 | 15.644 | 0.948  | 14.695 |
| 2035          | 21733  | 745.023  | 43.407   | 701.617  | 3.228  | 94.174 | 462.224 | 15.845 | 0.923  | 14.922 |
| 2036          | 20904  | 680.360  | 37.535   | 642.825  | 3.075  | 94.483 | 445.263 | 14.492 | 0.800  | 13.692 |
| 2037          | 20397  | 644.109  | 34.232   | 609.877  | 2.990  | 94.685 | 434.791 | 13.730 | 0.730  | 13.001 |
| 2038          | 19890  | 612.448  | 31.696   | 580.753  | 2.920  | 94.825 | 423.966 | 13.055 | 0.676  | 12.379 |
| 2039          | 19392  | 577.529  | 29.358   | 548.172  | 2.827  | 94.917 | 412.930 | 12.298 | 0.625  | 11.673 |

## Results for PHIM for Run 6 (Sensitivity\_Analysis\_3.RTF)

\*\*\*\*\*

### Main Results for E-Component for Run: 6, Simulation: 1, COD: COPD

| Variable Parameter          | Value                                  |
|-----------------------------|----------------------------------------|
| 1. Country                  | US (United States)                     |
| 2. Sex                      | F (Females)                            |
| 3. Year of start of process | 1990                                   |
| 4. Cause of Death           | COPD                                   |
| 5. Effective Dose NULL      | CC:1                                   |
| 6. Effective Dose Ecig      | CC:1 Ecig:0.05 Dual:0.525              |
| Note:                       | Death rates are per million population |

#### Results for Age Groups Combined and Years combined, Population unadjusted for deaths in Ecig scenario,

| Age Group:All |         | NULL       | Ecig       | %Drop    |        | NULL   | Ecig    | Drop    |         |        |
|---------------|---------|------------|------------|----------|--------|--------|---------|---------|---------|--------|
| Year          | Number  | Attrib     | Attrib     | Drop     | %Drop  | Attrib | Death   | Attrib  | Attrib  | Drop   |
|               | Deaths  | Deaths     | Deaths     | Deaths   | Deaths | Deaths | Rate    | Rates   | Rates   | Rates  |
| All Comb      | 2159941 | 862051.244 | 549037.383 | 313013.9 | 14.492 | 36.310 | 593.003 | 236.673 | 150.736 | 85.937 |

#### Results for Age Groups Combined, Population unadjusted for deaths in Ecig scenario,

| Age Group:All |        | NULL      | Ecig      | %Drop    |        | NULL   | Ecig    | Drop    |         |         |
|---------------|--------|-----------|-----------|----------|--------|--------|---------|---------|---------|---------|
| Year          | Number | Attrib    | Attrib    | Drop     | %Drop  | Attrib | Death   | Attrib  | Attrib  | Drop    |
|               | Deaths | Deaths    | Deaths    | Deaths   | Deaths | Deaths | Rate    | Rates   | Rates   | Rates   |
| 1990          | 24738  | 10694.712 | 10694.712 | 0.000    | 0.000  | 0.000  | 362.296 | 156.628 | 156.628 | 0.000   |
| 1991          | 26562  | 11602.933 | 11584.706 | 18.227   | 0.069  | 0.157  | 383.818 | 167.661 | 167.398 | 0.263   |
| 1992          | 26828  | 11831.375 | 11781.150 | 50.225   | 0.187  | 0.425  | 382.401 | 168.642 | 167.926 | 0.716   |
| 1993          | 29774  | 13246.371 | 13138.034 | 108.337  | 0.364  | 0.818  | 418.406 | 186.148 | 184.625 | 1.522   |
| 1994          | 29804  | 13355.662 | 13183.466 | 172.196  | 0.578  | 1.289  | 412.601 | 184.893 | 182.510 | 2.384   |
| 1995          | 29755  | 13397.439 | 13141.622 | 255.818  | 0.860  | 1.909  | 405.540 | 182.598 | 179.111 | 3.487   |
| 1996          | 30900  | 13960.356 | 13602.766 | 357.590  | 1.157  | 2.561  | 415.680 | 187.801 | 182.990 | 4.810   |
| 1997          | 31128  | 14109.552 | 13641.815 | 467.738  | 1.503  | 3.315  | 412.949 | 187.180 | 180.975 | 6.205   |
| 1998          | 32096  | 14599.657 | 13987.081 | 612.576  | 1.909  | 4.196  | 419.803 | 190.958 | 182.946 | 8.012   |
| 1999          | 34616  | 15728.102 | 14932.429 | 795.673  | 2.299  | 5.059  | 446.673 | 202.950 | 192.683 | 10.267  |
| 2000          | 34299  | 15579.803 | 14632.626 | 947.177  | 2.762  | 6.080  | 437.088 | 198.541 | 186.471 | 12.070  |
| 2001          | 34592  | 15696.614 | 14554.666 | 1141.948 | 3.301  | 7.275  | 435.935 | 197.812 | 183.421 | 14.391  |
| 2002          | 34291  | 15519.777 | 14193.211 | 1326.566 | 3.869  | 8.548  | 427.910 | 193.668 | 177.114 | 16.554  |
| 2003          | 35074  | 15888.389 | 14319.431 | 1568.958 | 4.473  | 9.875  | 433.587 | 196.413 | 177.018 | 19.396  |
| 2004          | 33512  | 15091.573 | 13387.124 | 1704.449 | 5.086  | 11.294 | 410.143 | 184.701 | 163.841 | 20.860  |
| 2005          | 35392  | 15803.656 | 13765.880 | 2037.775 | 5.758  | 12.894 | 428.364 | 191.278 | 166.614 | 24.664  |
| 2006          | 33981  | 15100.563 | 12929.391 | 2171.172 | 6.389  | 14.378 | 407.699 | 181.174 | 155.125 | 26.049  |
| 2007          | 34000  | 14974.384 | 12571.055 | 2403.328 | 7.069  | 16.050 | 403.863 | 177.871 | 149.323 | 28.548  |
| 2008          | 37425  | 16406.197 | 13521.602 | 2884.595 | 7.708  | 17.582 | 439.732 | 192.768 | 158.875 | 33.893  |
| 2009          | 36826  | 16083.194 | 12948.254 | 3134.940 | 8.513  | 19.492 | 427.825 | 186.846 | 150.426 | 36.420  |
| 2010          | 36788  | 15927.400 | 12565.220 | 3362.181 | 9.139  | 21.109 | 422.489 | 182.917 | 144.304 | 38.613  |
| 2011          | 37636  | 16221.836 | 12485.910 | 3735.926 | 9.926  | 23.030 | 428.164 | 184.547 | 142.045 | 42.502  |
| 2012          | 38265  | 16358.849 | 12280.033 | 4078.817 | 10.659 | 24.933 | 430.867 | 184.202 | 138.274 | 45.928  |
| 2013          | 40112  | 16994.822 | 12411.516 | 4583.306 | 11.426 | 26.969 | 446.821 | 189.311 | 138.256 | 51.055  |
| 2014          | 40084  | 16855.093 | 11963.128 | 4891.965 | 12.204 | 29.024 | 441.613 | 185.696 | 131.800 | 53.896  |
| 2015          | 42200  | 17572.483 | 12186.592 | 5385.891 | 12.763 | 30.650 | 519.788 | 216.445 | 150.105 | 66.339  |
| 2016          | 42606  | 17579.955 | 11797.408 | 5782.548 | 13.572 | 32.893 | 519.788 | 214.473 | 143.927 | 70.546  |
| 2017          | 44364  | 18080.688 | 11735.339 | 6345.350 | 14.303 | 35.095 | 536.117 | 218.496 | 141.816 | 76.680  |
| 2018          | 45359  | 18209.262 | 11458.666 | 6750.596 | 14.883 | 37.072 | 542.932 | 217.960 | 137.157 | 80.803  |
| 2019          | 46876  | 18648.302 | 11331.088 | 7317.214 | 15.610 | 39.238 | 555.657 | 221.054 | 134.317 | 86.737  |
| 2020          | 48331  | 19002.597 | 11197.175 | 7805.422 | 16.150 | 41.076 | 649.239 | 255.266 | 150.414 | 104.852 |
| 2021          | 48338  | 18885.717 | 10699.002 | 8186.715 | 16.936 | 43.349 | 644.660 | 251.867 | 142.686 | 109.181 |
| 2022          | 49708  | 19235.076 | 10495.776 | 8739.300 | 17.581 | 45.434 | 657.895 | 254.582 | 138.915 | 115.667 |
| 2023          | 51083  | 19521.158 | 10276.043 | 9245.115 | 18.098 | 47.359 | 670.849 | 256.363 | 134.951 | 121.412 |
| 2024          | 52397  | 19918.620 | 10059.246 | 9859.374 | 18.817 | 49.498 | 682.854 | 259.583 | 131.094 | 128.489 |
| 2025          | 53387  | 20150.545 | 9797.148  | 10353.40 | 19.393 | 51.380 | 803.004 | 303.086 | 147.360 | 155.726 |
| 2026          | 54232  | 20393.792 | 9487.110  | 10906.68 | 20.111 | 53.480 | 812.615 | 305.582 | 142.155 | 163.426 |
| 2027          | 55049  | 20615.351 | 9155.793  | 11459.56 | 20.817 | 55.587 | 821.568 | 307.668 | 136.643 | 171.025 |
| 2028          | 55809  | 20731.894 | 8780.600  | 11951.29 | 21.415 | 57.647 | 829.419 | 308.115 | 130.496 | 177.619 |
| 2029          | 56527  | 20781.967 | 8389.942  | 12392.02 | 21.922 | 59.629 | 836.392 | 307.495 | 124.140 | 183.355 |
| 2030          | 56756  | 20753.201 | 8012.345  | 12740.86 | 22.449 | 61.392 | 994.067 | 363.487 | 140.334 | 223.153 |
| 2031          | 58288  | 21048.417 | 7875.269  | 13173.15 | 22.600 | 62.585 | 1019.54 | 368.165 | 137.749 | 230.416 |
| 2032          | 58782  | 21169.329 | 7530.559  | 13638.77 | 23.202 | 64.427 | 1026.18 | 369.560 | 131.464 | 238.097 |
| 2033          | 59236  | 21109.293 | 7150.970  | 13958.32 | 23.564 | 66.124 | 1031.59 | 367.618 | 124.534 | 243.084 |
| 2034          | 59614  | 21109.429 | 6773.200  | 14336.23 | 24.049 | 67.914 | 1035.33 | 366.613 | 117.632 | 248.981 |
| 2035          | 58938  | 20794.840 | 6390.647  | 14404.19 | 24.440 | 69.268 | 1253.51 | 442.268 | 135.917 | 306.351 |
| 2036          | 56014  | 19354.577 | 5670.102  | 13684.47 | 24.430 | 70.704 | 1193.11 | 412.258 | 120.775 | 291.483 |
| 2037          | 55953  | 19064.169 | 5233.301  | 13830.87 | 24.719 | 72.549 | 1192.72 | 406.385 | 111.557 | 294.828 |
| 2038          | 55859  | 18854.812 | 4875.647  | 13979.17 | 25.026 | 74.141 | 1190.66 | 401.900 | 103.927 | 297.973 |
| 2039          | 55757  | 18437.457 | 4461.586  | 13975.87 | 25.066 | 75.802 | 1187.28 | 392.602 | 95.004  | 297.598 |

## Results for PHIM for Run 6 (Sensitivity\_Analysis\_3.RTF)

\*\*\*\*\*

### Main Results for E-Component for Run: 6, Simulation: 1, COD: Four Diseases Combined, Adjusted

| Variable Parameter          | Value                                  |
|-----------------------------|----------------------------------------|
| 1. Country                  | US (United States)                     |
| 2. Sex                      | F (Females)                            |
| 3. Year of start of process | 1990                                   |
| 4. Cause of Death           | Four Diseases Combined                 |
| 5. Effective Dose NULL      | CC:1                                   |
| 6. Effective Dose Ecig      | CC:1 Ecig:0.05 Dual:0.525              |
| Note:                       | Death rates are per million population |

#### Results for Age Groups Combined and Years combined, Population and Number deaths adjusted for Ecig scenario,

| Age Group:All |         | NULL        | Ecig        | %Drop   |        |        | NULL    | Ecig    | Drop    |         |
|---------------|---------|-------------|-------------|---------|--------|--------|---------|---------|---------|---------|
| Year          | Number  | Attrib      | Attrib      | Drop    | %Drop  | Attrib | Death   | Attrib  | Attrib  | Drop    |
|               | Deaths  | Deaths      | Deaths      | Deaths  | Deaths | Deaths | Rate    | Rates   | Rates   | Rates   |
| All Comb      | 9148904 | 2946250.006 | 1945090.034 | 1001160 | 10.943 | 33.981 | 2499.67 | 808.881 | 531.438 | 277.443 |

#### Results for Age Groups Combined, Population and Number deaths adjusted for Ecig scenario,

| Age Group:All |        | NULL      | Ecig      | %Drop    |        |        | NULL    | Ecig    | Drop    |         |
|---------------|--------|-----------|-----------|----------|--------|--------|---------|---------|---------|---------|
| Year          | Number | Attrib    | Attrib    | Drop     | %Drop  | Attrib | Death   | Attrib  | Attrib  | Drop    |
|               | Deaths | Deaths    | Deaths    | Deaths   | Deaths | Deaths | Rate    | Rates   | Rates   | Rates   |
| 1990          | 199848 | 57524.822 | 57524.822 | 0.000    | 0.000  | 0.000  | 2926.84 | 842.471 | 842.471 | 0.000   |
| 1991          | 199162 | 59078.486 | 58910.022 | 168.464  | 0.085  | 0.285  | 2877.87 | 853.678 | 851.244 | 2.434   |
| 1992          | 198533 | 60494.150 | 60022.620 | 471.529  | 0.238  | 0.779  | 2829.84 | 862.271 | 855.548 | 6.723   |
| 1993          | 202515 | 62694.848 | 61777.392 | 917.456  | 0.453  | 1.463  | 2845.86 | 881.034 | 868.133 | 12.901  |
| 1994          | 200665 | 63202.598 | 61753.347 | 1449.251 | 0.722  | 2.293  | 2777.91 | 874.966 | 854.884 | 20.082  |
| 1995          | 201036 | 63766.862 | 61673.606 | 2093.256 | 1.041  | 3.283  | 2739.86 | 869.097 | 840.532 | 28.565  |
| 1996          | 201202 | 64591.163 | 61723.225 | 2867.938 | 1.425  | 4.440  | 2706.47 | 868.908 | 830.268 | 38.640  |
| 1997          | 198673 | 64686.912 | 61095.677 | 3591.235 | 1.808  | 5.552  | 2635.34 | 858.147 | 810.415 | 47.732  |
| 1998          | 197623 | 65295.961 | 60867.083 | 4428.878 | 2.241  | 6.783  | 2584.42 | 854.046 | 795.991 | 58.055  |
| 1999          | 211404 | 67327.521 | 61605.526 | 5721.995 | 2.707  | 8.499  | 2727.28 | 868.771 | 794.761 | 74.009  |
| 2000          | 208596 | 67596.897 | 60933.206 | 6663.690 | 3.195  | 9.858  | 2657.46 | 861.419 | 776.271 | 85.149  |
| 2001          | 203735 | 67008.811 | 59348.048 | 7660.763 | 3.760  | 11.432 | 2566.52 | 844.458 | 747.628 | 96.830  |
| 2002          | 200990 | 67067.744 | 58296.510 | 8771.233 | 4.364  | 13.078 | 2506.90 | 836.925 | 727.117 | 109.808 |
| 2003          | 196551 | 66756.217 | 56982.676 | 9773.541 | 4.973  | 14.641 | 2428.31 | 825.244 | 704.000 | 121.244 |
| 2004          | 188394 | 65058.725 | 54437.578 | 10621.15 | 5.638  | 16.325 | 2304.02 | 796.234 | 665.760 | 130.475 |
| 2005          | 186694 | 65214.724 | 53450.428 | 11764.30 | 6.301  | 18.039 | 2257.68 | 789.321 | 646.371 | 142.950 |
| 2006          | 180407 | 63771.146 | 51140.270 | 12630.88 | 7.001  | 19.807 | 2162.29 | 765.117 | 612.947 | 152.170 |
| 2007          | 176007 | 63110.718 | 49590.719 | 13520.00 | 7.682  | 21.423 | 2088.19 | 749.650 | 588.357 | 161.293 |
| 2008          | 177995 | 63718.624 | 48912.173 | 14806.45 | 8.318  | 23.237 | 2088.53 | 748.674 | 573.920 | 174.753 |
| 2009          | 173279 | 62794.698 | 47158.575 | 15636.12 | 9.024  | 24.900 | 2009.94 | 729.515 | 547.013 | 182.502 |
| 2010          | 171018 | 61917.074 | 45407.799 | 16509.28 | 9.654  | 26.664 | 1960.60 | 711.083 | 520.569 | 190.514 |
| 2011          | 170898 | 61680.114 | 43998.815 | 17681.30 | 10.346 | 28.666 | 1940.40 | 701.700 | 499.568 | 202.132 |
| 2012          | 172087 | 62023.127 | 43041.360 | 18981.77 | 11.030 | 30.604 | 1933.48 | 698.386 | 483.592 | 214.795 |
| 2013          | 173446 | 62037.765 | 41884.536 | 20153.23 | 11.619 | 32.485 | 1927.40 | 691.059 | 465.436 | 225.622 |
| 2014          | 175002 | 61921.017 | 40480.435 | 21440.58 | 12.252 | 34.626 | 1922.88 | 682.195 | 444.790 | 237.405 |
| 2015          | 178292 | 61856.204 | 39320.383 | 22535.82 | 12.640 | 36.433 | 2188.85 | 761.899 | 482.727 | 279.172 |
| 2016          | 177877 | 60464.119 | 37042.454 | 23421.66 | 13.167 | 38.736 | 2162.28 | 737.655 | 450.289 | 287.366 |
| 2017          | 180446 | 60243.839 | 35636.277 | 24607.56 | 13.637 | 40.847 | 2172.07 | 728.017 | 428.961 | 299.055 |
| 2018          | 178383 | 60713.327 | 35034.640 | 25678.69 | 14.395 | 42.295 | 2126.13 | 726.721 | 417.574 | 309.146 |
| 2019          | 180578 | 61148.172 | 34093.059 | 27055.11 | 14.983 | 44.245 | 2130.73 | 724.841 | 402.281 | 322.560 |
| 2020          | 181951 | 61149.317 | 33138.318 | 28011.00 | 15.395 | 45.808 | 2430.58 | 821.432 | 442.676 | 378.756 |
| 2021          | 179696 | 58727.786 | 30301.079 | 28426.71 | 15.819 | 48.404 | 2382.16 | 783.216 | 401.690 | 381.525 |
| 2022          | 181120 | 58848.802 | 29253.355 | 29595.45 | 16.340 | 50.291 | 2381.86 | 778.881 | 384.702 | 394.179 |
| 2023          | 182490 | 58816.149 | 28196.922 | 30619.23 | 16.779 | 52.059 | 2380.23 | 772.407 | 367.774 | 404.633 |
| 2024          | 183601 | 58955.232 | 27143.077 | 31812.15 | 17.327 | 53.960 | 2375.38 | 768.316 | 351.171 | 417.146 |
| 2025          | 182551 | 58297.744 | 25981.832 | 32315.91 | 17.702 | 55.433 | 2721.92 | 876.861 | 387.402 | 489.459 |
| 2026          | 182596 | 56469.971 | 23928.116 | 32541.86 | 17.822 | 57.627 | 2710.88 | 846.150 | 355.245 | 490.904 |
| 2027          | 182037 | 56209.427 | 22765.098 | 33444.33 | 18.372 | 59.500 | 2690.43 | 838.883 | 336.458 | 502.425 |
| 2028          | 181318 | 55733.105 | 21541.251 | 34191.85 | 18.857 | 61.349 | 2667.22 | 828.298 | 316.876 | 511.422 |
| 2029          | 180503 | 55145.838 | 20309.024 | 34836.81 | 19.300 | 63.172 | 2642.13 | 815.951 | 297.275 | 518.675 |
| 2030          | 176410 | 53615.097 | 19061.861 | 34553.24 | 19.587 | 64.447 | 3050.52 | 939.056 | 329.622 | 609.434 |
| 2031          | 178022 | 52046.561 | 17832.990 | 34213.57 | 19.219 | 65.736 | 3072.39 | 910.364 | 307.770 | 602.593 |
| 2032          | 176576 | 51582.636 | 16824.888 | 34757.75 | 19.684 | 67.383 | 3039.68 | 900.496 | 289.633 | 610.862 |
| 2033          | 175072 | 50839.758 | 15801.367 | 35038.39 | 20.014 | 68.919 | 3004.67 | 885.375 | 271.190 | 614.184 |
| 2034          | 173424 | 50215.451 | 14799.291 | 35416.16 | 20.422 | 70.528 | 2966.44 | 872.104 | 253.145 | 618.959 |
| 2035          | 166188 | 47773.075 | 13688.162 | 34084.91 | 20.510 | 71.348 | 3472.00 | 1016.05 | 285.972 | 730.073 |
| 2036          | 159827 | 43298.709 | 11700.229 | 31598.48 | 19.770 | 72.978 | 3341.81 | 922.274 | 244.638 | 677.636 |
| 2037          | 157261 | 42241.563 | 10714.405 | 31527.16 | 20.048 | 74.635 | 3288.61 | 900.450 | 224.057 | 676.394 |
| 2038          | 154705 | 41356.353 | 9925.788  | 31430.56 | 20.316 | 75.999 | 3232.95 | 881.531 | 207.425 | 674.106 |
| 2039          | 152218 | 40161.050 | 9039.717  | 31121.33 | 20.445 | 77.491 | 3175.80 | 855.178 | 188.599 | 666.578 |



## Results for PHIM for Run 6 (Sensitivity\_Analysis\_3.RTF)

\*\*\*\*\*

### Main Results for E-Component for Run: 6, Simulation: 1, COD: LUNG CANCER, Adjusted

| Variable Parameter          | Value                                  |
|-----------------------------|----------------------------------------|
| 1. Country                  | US (United States)                     |
| 2. Sex                      | F (Females)                            |
| 3. Year of start of process | 1990                                   |
| 4. Cause of Death           | LUNG CANCER                            |
| 5. Effective Dose NULL      | CC:1                                   |
| 6. Effective Dose Ecig      | CC:1 Ecig:0.05 Dual:0.525              |
| Note:                       | Death rates are per million population |

#### Results for Age Groups Combined and Years combined, Population and Number deaths adjusted for Ecig scenario,

| Age Group: | All     | NULL        | Ecig        |          |        |        |         |         |         |         |
|------------|---------|-------------|-------------|----------|--------|--------|---------|---------|---------|---------|
| Year       | Number  | Attrib      | Attrib      | Drop     | %Drop  | Attrib | Death   | Attrib  | Ecig    | Drop    |
|            | Deaths  | Deaths      | Deaths      | Deaths   | Deaths | Deaths | Rate    | Rates   | Rates   | Rates   |
| All Comb   | 2344051 | 1580465.217 | 1143096.254 | 437369.0 | 18.659 | 27.673 | 640.443 | 433.910 | 312.317 | 121.593 |

#### Results for Age Groups Combined, Population and Number deaths adjusted for Ecig scenario,

| Age Group: | All    | NULL      | Ecig      |          |        |        |         |         |         |         |
|------------|--------|-----------|-----------|----------|--------|--------|---------|---------|---------|---------|
| Year       | Number | Attrib    | Attrib    | Drop     | %Drop  | Attrib | Death   | Attrib  | Ecig    | Drop    |
|            | Deaths | Deaths    | Deaths    | Deaths   | Deaths | Deaths | Rate    | Rates   | Rates   | Rates   |
| 1990       | 42690  | 30614.201 | 30614.201 | 0.000    | 0.000  | 0.000  | 625.210 | 448.355 | 448.355 | 0.000   |
| 1991       | 43692  | 31412.010 | 31379.684 | 32.326   | 0.074  | 0.103  | 631.345 | 453.901 | 453.433 | 0.467   |
| 1992       | 45423  | 32782.407 | 32688.538 | 93.869   | 0.207  | 0.286  | 647.451 | 467.274 | 465.935 | 1.339   |
| 1993       | 46292  | 33491.183 | 33305.769 | 185.414  | 0.401  | 0.554  | 650.518 | 470.643 | 468.033 | 2.610   |
| 1994       | 47019  | 34074.347 | 33773.995 | 300.353  | 0.639  | 0.881  | 650.904 | 471.719 | 467.551 | 4.168   |
| 1995       | 47843  | 34694.454 | 34241.780 | 452.674  | 0.946  | 1.305  | 652.042 | 472.861 | 466.671 | 6.190   |
| 1996       | 48250  | 35027.269 | 34401.157 | 626.112  | 1.298  | 1.787  | 649.027 | 471.202 | 462.746 | 8.456   |
| 1997       | 49044  | 35590.763 | 34758.017 | 832.745  | 1.698  | 2.340  | 650.551 | 472.153 | 461.054 | 11.099  |
| 1998       | 49699  | 36100.785 | 35023.881 | 1076.904 | 2.167  | 2.983  | 649.941 | 472.184 | 458.026 | 14.159  |
| 1999       | 48901  | 35451.030 | 34153.794 | 1297.236 | 2.653  | 3.659  | 630.861 | 457.448 | 440.612 | 16.836  |
| 2000       | 50356  | 36447.986 | 34824.733 | 1623.253 | 3.224  | 4.454  | 641.521 | 464.474 | 443.657 | 20.817  |
| 2001       | 50422  | 36411.326 | 34457.279 | 1954.048 | 3.875  | 5.367  | 635.180 | 458.863 | 434.070 | 24.792  |
| 2002       | 51488  | 37078.545 | 34713.477 | 2365.068 | 4.593  | 6.379  | 642.190 | 462.696 | 432.972 | 29.723  |
| 2003       | 51461  | 36999.876 | 34242.468 | 2757.408 | 5.358  | 7.452  | 635.782 | 457.395 | 423.053 | 34.341  |
| 2004       | 51464  | 36861.555 | 33668.487 | 3193.068 | 6.204  | 8.662  | 629.392 | 451.138 | 411.758 | 39.379  |
| 2005       | 51498  | 36689.529 | 33035.039 | 3654.489 | 7.096  | 9.961  | 622.766 | 444.069 | 399.490 | 44.579  |
| 2006       | 51446  | 36504.774 | 32365.437 | 4139.337 | 8.046  | 11.339 | 616.617 | 437.979 | 387.919 | 50.060  |
| 2007       | 51947  | 36663.202 | 31945.969 | 4717.233 | 9.081  | 12.866 | 616.307 | 435.498 | 379.015 | 56.483  |
| 2008       | 51098  | 35898.803 | 30747.370 | 5151.433 | 10.081 | 14.350 | 599.569 | 421.800 | 360.780 | 61.019  |
| 2009       | 51333  | 35934.525 | 30161.443 | 5773.082 | 11.246 | 16.066 | 595.435 | 417.468 | 349.856 | 67.612  |
| 2010       | 51010  | 35502.829 | 29219.400 | 6283.430 | 12.318 | 17.698 | 584.798 | 407.730 | 334.980 | 72.750  |
| 2011       | 50684  | 35136.342 | 28258.281 | 6878.061 | 13.570 | 19.575 | 575.475 | 399.726 | 320.848 | 78.878  |
| 2012       | 51443  | 35450.201 | 27832.198 | 7618.002 | 14.809 | 21.489 | 577.993 | 399.173 | 312.709 | 86.464  |
| 2013       | 51289  | 35123.224 | 26854.494 | 8268.730 | 16.122 | 23.542 | 569.940 | 391.249 | 298.417 | 92.832  |
| 2014       | 51495  | 35079.370 | 26114.245 | 8965.125 | 17.410 | 25.557 | 565.816 | 386.476 | 286.937 | 99.538  |
| 2015       | 50708  | 34324.171 | 24902.769 | 9421.402 | 18.580 | 27.448 | 622.533 | 422.780 | 305.725 | 117.054 |
| 2016       | 49135  | 33054.753 | 23232.104 | 9822.649 | 19.991 | 29.716 | 597.291 | 403.264 | 282.410 | 120.854 |
| 2017       | 48630  | 32471.234 | 22073.529 | 10397.71 | 21.381 | 32.021 | 585.368 | 392.399 | 265.704 | 126.695 |
| 2018       | 50811  | 33657.595 | 22033.345 | 11624.25 | 22.877 | 34.537 | 605.611 | 402.871 | 262.613 | 140.258 |
| 2019       | 51416  | 33863.424 | 21365.396 | 12498.03 | 24.307 | 36.907 | 606.687 | 401.412 | 252.101 | 149.311 |
| 2020       | 51860  | 33910.830 | 20684.823 | 13226.01 | 25.503 | 39.002 | 692.773 | 455.532 | 276.317 | 179.215 |
| 2021       | 48458  | 31531.880 | 18446.948 | 13084.93 | 27.003 | 41.497 | 642.385 | 420.521 | 244.545 | 175.976 |
| 2022       | 48790  | 31560.212 | 17708.650 | 13851.56 | 28.390 | 43.889 | 641.622 | 417.708 | 232.881 | 184.827 |
| 2023       | 49090  | 31508.781 | 16960.621 | 14548.16 | 29.636 | 46.172 | 640.279 | 413.791 | 221.218 | 192.573 |
| 2024       | 49311  | 31517.293 | 16206.406 | 15310.89 | 31.050 | 48.579 | 637.969 | 410.740 | 209.675 | 201.065 |
| 2025       | 49040  | 31175.389 | 15395.103 | 15780.29 | 32.178 | 50.618 | 731.209 | 468.912 | 229.549 | 239.363 |
| 2026       | 45891  | 29044.598 | 13687.720 | 15356.88 | 33.464 | 52.873 | 681.307 | 435.206 | 203.213 | 231.993 |
| 2027       | 45707  | 28825.765 | 12912.016 | 15913.75 | 34.817 | 55.207 | 675.524 | 430.203 | 190.834 | 239.369 |
| 2028       | 45474  | 28513.846 | 12116.865 | 16396.98 | 36.058 | 57.505 | 668.933 | 423.769 | 178.241 | 245.528 |
| 2029       | 45205  | 28148.109 | 11321.024 | 16827.08 | 37.224 | 59.781 | 661.690 | 416.486 | 165.713 | 250.773 |
| 2030       | 44088  | 27314.475 | 10516.486 | 16797.99 | 38.101 | 61.498 | 762.389 | 478.407 | 181.854 | 296.553 |
| 2031       | 41448  | 25423.102 | 9432.872  | 15990.23 | 38.579 | 62.896 | 715.329 | 444.684 | 162.797 | 281.887 |
| 2032       | 41056  | 25085.902 | 8802.447  | 16283.45 | 39.662 | 64.911 | 706.760 | 437.933 | 151.530 | 286.403 |
| 2033       | 40643  | 24645.067 | 8184.668  | 16460.40 | 40.500 | 66.790 | 697.534 | 429.194 | 140.469 | 288.725 |
| 2034       | 40194  | 24239.126 | 7586.114  | 16653.01 | 41.431 | 68.703 | 687.534 | 420.967 | 129.762 | 291.205 |
| 2035       | 38262  | 22944.147 | 6914.184  | 16029.96 | 41.895 | 69.865 | 799.372 | 487.980 | 144.451 | 343.529 |
| 2036       | 33733  | 19950.581 | 5669.636  | 14280.95 | 42.335 | 71.582 | 705.320 | 424.953 | 118.546 | 306.407 |
| 2037       | 33166  | 19415.334 | 5146.118  | 14269.22 | 43.023 | 73.495 | 693.561 | 413.871 | 107.614 | 306.257 |
| 2038       | 32600  | 18939.317 | 4733.542  | 14205.78 | 43.576 | 75.007 | 681.260 | 403.701 | 98.919  | 304.781 |
| 2039       | 32048  | 18379.752 | 4281.735  | 14098.02 | 43.990 | 76.704 | 668.628 | 391.373 | 89.332  | 302.041 |

## Results for PHIM for Run 6 (Sensitivity\_Analysis\_3.RTF)

\*\*\*\*\*

### Main Results for E-Component for Run: 6, Simulation: 1, COD: IHD, Adjusted

| Variable Parameter          | Value                                  |
|-----------------------------|----------------------------------------|
| 1. Country                  | US (United States)                     |
| 2. Sex                      | F (Females)                            |
| 3. Year of start of process | 1990                                   |
| 4. Cause of Death           | IHD                                    |
| 5. Effective Dose NULL      | CC:1                                   |
| 6. Effective Dose Ecig      | CC:1 Ecig:0.05 Dual:0.525              |
| Note:                       | Death rates are per million population |

#### Results for Age Groups Combined and Years combined, Population and Number deaths adjusted for Ecig scenario,

| Age Group:All | NULL    | Ecig       | %Drop      |          |        |        | NULL    | Ecig    | Drop   |        |
|---------------|---------|------------|------------|----------|--------|--------|---------|---------|--------|--------|
| Year          | Number  | Attrib     | Attrib     | Drop     | %Drop  | Attrib | Death   | Attrib  | Attrib | Drop   |
|               | Deaths  | Deaths     | Deaths     | Deaths   | Deaths | Deaths | Rate    | Rates   | Rates  | Rates  |
| All Comb      | 3261782 | 398833.796 | 198404.518 | 200429.3 | 6.145  | 50.254 | 891.186 | 109.498 | 54.208 | 55.290 |

#### Results for Age Groups Combined, Population and Number deaths adjusted for Ecig scenario,

| Age Group:All | NULL   | Ecig      | %Drop     |          |        |        | NULL    | Ecig    | Drop    |        |
|---------------|--------|-----------|-----------|----------|--------|--------|---------|---------|---------|--------|
| Year          | Number | Attrib    | Attrib    | Drop     | %Drop  | Attrib | Death   | Attrib  | Attrib  | Drop   |
|               | Deaths | Deaths    | Deaths    | Deaths   | Deaths | Deaths | Rate    | Rates   | Rates   | Rates  |
| 1990          | 98916  | 12922.892 | 12922.892 | 0.000    | 0.000  | 0.000  | 1448.66 | 189.260 | 189.260 | 0.000  |
| 1991          | 96403  | 12856.479 | 12766.075 | 90.404   | 0.094  | 0.703  | 1393.01 | 185.775 | 184.469 | 1.306  |
| 1992          | 93721  | 12662.244 | 12411.662 | 250.582  | 0.267  | 1.979  | 1335.88 | 180.485 | 176.913 | 3.572  |
| 1993          | 93680  | 12730.613 | 12252.319 | 478.294  | 0.511  | 3.757  | 1316.45 | 178.900 | 172.177 | 6.723  |
| 1994          | 90835  | 12495.323 | 11750.350 | 744.973  | 0.820  | 5.962  | 1257.48 | 172.983 | 162.666 | 10.317 |
| 1995          | 89704  | 12365.590 | 11312.697 | 1052.893 | 1.174  | 8.515  | 1222.55 | 168.534 | 154.177 | 14.357 |
| 1996          | 88296  | 12290.551 | 10854.691 | 1435.861 | 1.626  | 11.683 | 1187.71 | 165.338 | 146.012 | 19.326 |
| 1997          | 84792  | 11719.531 | 9989.816  | 1729.715 | 2.040  | 14.759 | 1124.73 | 155.473 | 132.512 | 22.961 |
| 1998          | 82538  | 11416.794 | 9345.624  | 2071.170 | 2.509  | 18.141 | 1079.39 | 149.327 | 122.218 | 27.110 |
| 1999          | 93972  | 13028.038 | 10175.844 | 2852.194 | 3.035  | 21.893 | 1212.32 | 168.109 | 131.277 | 36.833 |
| 2000          | 90082  | 12426.299 | 9241.034  | 3185.265 | 3.536  | 25.633 | 1147.62 | 158.354 | 117.728 | 40.626 |
| 2001          | 86173  | 11939.281 | 8348.036  | 3591.245 | 4.167  | 30.079 | 1085.55 | 150.461 | 105.163 | 45.298 |
| 2002          | 83081  | 11528.794 | 7542.678  | 3986.115 | 4.798  | 34.575 | 1036.24 | 143.865 | 94.078  | 49.788 |
| 2003          | 79382  | 11048.407 | 6763.333  | 4285.074 | 5.398  | 38.785 | 980.732 | 136.581 | 83.558  | 53.023 |
| 2004          | 73952  | 10375.132 | 5887.726  | 4487.405 | 6.068  | 43.252 | 904.422 | 126.978 | 72.006  | 54.973 |
| 2005          | 71755  | 10051.029 | 5288.595  | 4762.434 | 6.637  | 47.383 | 867.732 | 121.652 | 63.954  | 57.697 |
| 2006          | 67670  | 9542.523  | 4603.840  | 4938.683 | 7.298  | 51.754 | 811.065 | 114.490 | 55.180  | 59.310 |
| 2007          | 63633  | 8936.533  | 3961.011  | 4975.522 | 7.819  | 55.676 | 754.963 | 106.151 | 46.994  | 59.157 |
| 2008          | 63321  | 8944.180  | 3632.898  | 5311.282 | 8.388  | 59.383 | 742.984 | 105.091 | 42.627  | 62.464 |
| 2009          | 59909  | 8390.033  | 3142.491  | 5247.543 | 8.759  | 62.545 | 694.912 | 97.471  | 36.451  | 61.020 |
| 2010          | 58186  | 8157.570  | 2801.148  | 5356.422 | 9.206  | 65.662 | 667.064 | 93.685  | 32.113  | 61.572 |
| 2011          | 57566  | 8035.356  | 2507.906  | 5527.450 | 9.602  | 68.789 | 653.608 | 91.414  | 28.475  | 62.939 |
| 2012          | 57631  | 7970.766  | 2250.369  | 5720.397 | 9.926  | 71.767 | 647.515 | 89.752  | 25.284  | 64.468 |
| 2013          | 57311  | 7743.216  | 2004.813  | 5738.403 | 10.013 | 74.109 | 636.861 | 86.254  | 22.278  | 63.976 |
| 2014          | 57809  | 7774.935  | 1824.415  | 5950.521 | 10.293 | 76.535 | 635.196 | 85.658  | 20.046  | 65.612 |
| 2015          | 58699  | 7722.535  | 1677.768  | 6044.767 | 10.298 | 78.274 | 720.636 | 95.120  | 20.598  | 74.523 |
| 2016          | 58993  | 7600.353  | 1496.790  | 6103.564 | 10.346 | 80.306 | 717.120 | 92.723  | 18.195  | 74.528 |
| 2017          | 59372  | 7470.266  | 1341.428  | 6128.839 | 10.323 | 82.043 | 714.675 | 90.274  | 16.147  | 74.127 |
| 2018          | 56458  | 6907.050  | 1129.403  | 5777.647 | 10.234 | 83.649 | 672.918 | 82.675  | 13.461  | 69.214 |
| 2019          | 56299  | 6732.046  | 1009.638  | 5722.409 | 10.164 | 85.003 | 664.304 | 79.801  | 11.913  | 67.887 |
| 2020          | 55761  | 6429.836  | 897.542   | 5532.294 | 9.921  | 86.041 | 744.876 | 86.373  | 11.990  | 74.384 |
| 2021          | 56780  | 6562.016  | 821.927   | 5740.089 | 10.109 | 87.474 | 752.713 | 87.513  | 10.896  | 76.617 |
| 2022          | 56348  | 6352.366  | 733.520   | 5618.845 | 9.972  | 88.453 | 741.009 | 84.075  | 9.646   | 74.429 |
| 2023          | 55892  | 6134.123  | 659.343   | 5474.780 | 9.795  | 89.251 | 728.999 | 80.557  | 8.600   | 71.957 |
| 2024          | 55356  | 5922.193  | 590.560   | 5331.633 | 9.631  | 90.028 | 716.188 | 77.179  | 7.641   | 69.539 |
| 2025          | 53913  | 5504.188  | 520.379   | 4983.808 | 9.244  | 90.546 | 803.864 | 82.789  | 7.759   | 75.030 |
| 2026          | 55958  | 5641.075  | 495.449   | 5145.626 | 9.195  | 91.217 | 830.775 | 84.526  | 7.356   | 77.171 |
| 2027          | 54908  | 5426.216  | 448.289   | 4977.927 | 9.066  | 91.738 | 811.516 | 80.982  | 6.626   | 74.357 |
| 2028          | 53828  | 5197.830  | 403.455   | 4794.375 | 8.907  | 92.238 | 791.813 | 77.249  | 5.935   | 71.315 |
| 2029          | 52739  | 4973.547  | 365.465   | 4608.082 | 8.738  | 92.652 | 771.969 | 73.590  | 5.350   | 68.240 |
| 2030          | 50264  | 4450.618  | 314.065   | 4136.553 | 8.230  | 92.943 | 869.185 | 77.952  | 5.431   | 72.521 |
| 2031          | 52859  | 4555.052  | 307.715   | 4247.337 | 8.035  | 93.245 | 912.274 | 79.674  | 5.311   | 74.363 |
| 2032          | 51574  | 4349.999  | 279.458   | 4070.541 | 7.893  | 93.576 | 887.823 | 75.939  | 4.811   | 71.129 |
| 2033          | 50300  | 4147.948  | 257.658   | 3890.290 | 7.734  | 93.788 | 863.266 | 72.237  | 4.422   | 67.814 |
| 2034          | 49016  | 3966.133  | 236.785   | 3729.348 | 7.608  | 94.030 | 838.424 | 68.881  | 4.050   | 64.831 |
| 2035          | 45461  | 3289.064  | 191.374   | 3097.691 | 6.814  | 94.182 | 949.777 | 69.952  | 3.998   | 65.954 |
| 2036          | 47373  | 3313.192  | 183.712   | 3129.480 | 6.606  | 94.455 | 990.517 | 70.572  | 3.841   | 66.731 |
| 2037          | 45875  | 3117.951  | 165.996   | 2951.955 | 6.435  | 94.676 | 959.328 | 66.464  | 3.471   | 62.993 |
| 2038          | 44419  | 2949.775  | 153.322   | 2796.453 | 6.296  | 94.802 | 928.246 | 62.876  | 3.204   | 59.672 |
| 2039          | 43019  | 2766.312  | 141.213   | 2625.099 | 6.102  | 94.895 | 897.523 | 58.905  | 2.946   | 55.959 |

## Results for PHIM for Run 6 (Sensitivity\_Analysis\_3.RTF)

\*\*\*\*\*

### Main Results for E-Component for Run: 6, Simulation: 1, COD: STROKE, Adjusted

| Variable Parameter          | Value                                  |
|-----------------------------|----------------------------------------|
| 1. Country                  | US (United States)                     |
| 2. Sex                      | F (Females)                            |
| 3. Year of start of process | 1990                                   |
| 4. Cause of Death           | STROKE                                 |
| 5. Effective Dose NULL      | CC:1                                   |
| 6. Effective Dose Ecig      | CC:1 Ecig:0.05 Dual:0.525              |
| Note:                       | Death rates are per million population |

### Results for Age Groups Combined and Years combined, Population and Number deaths adjusted for Ecig scenario,

| Age Group:All | NULL    | Ecig       | %Drop     |          |        |        | NULL    | Ecig   | Drop   |        |
|---------------|---------|------------|-----------|----------|--------|--------|---------|--------|--------|--------|
| Year          | Number  | Attrib     | Attrib    | Drop     | %Drop  | Attrib | Death   | Attrib | Attrib | Drop   |
|               | Deaths  | Deaths     | Deaths    | Deaths   | Deaths | Deaths | Rate    | Rates  | Rates  | Rates  |
| All Comb      | 1361551 | 104899.750 | 51109.369 | 53790.38 | 3.951  | 51.278 | 372.004 | 28.800 | 13.964 | 14.836 |

### Results for Age Groups Combined, Population and Number deaths adjusted for Ecig scenario,

| Age Group:All | NULL   | Ecig     | %Drop    |          |        |        | NULL    | Ecig   | Drop   |        |
|---------------|--------|----------|----------|----------|--------|--------|---------|--------|--------|--------|
| Year          | Number | Attrib   | Attrib   | Drop     | %Drop  | Attrib | Death   | Attrib | Attrib | Drop   |
|               | Deaths | Deaths   | Deaths   | Deaths   | Deaths | Deaths | Rate    | Rates  | Rates  | Rates  |
| 1990          | 33504  | 3293.017 | 3293.017 | 0.000    | 0.000  | 0.000  | 490.678 | 48.227 | 48.227 | 0.000  |
| 1991          | 32505  | 3207.063 | 3179.556 | 27.507   | 0.085  | 0.858  | 469.694 | 46.342 | 45.944 | 0.397  |
| 1992          | 32560  | 3218.125 | 3141.227 | 76.898   | 0.236  | 2.390  | 464.104 | 45.871 | 44.774 | 1.096  |
| 1993          | 32768  | 3226.680 | 3081.083 | 145.597  | 0.444  | 4.512  | 460.482 | 45.344 | 43.297 | 2.046  |
| 1994          | 33006  | 3277.266 | 3045.077 | 232.189  | 0.703  | 7.085  | 456.920 | 45.370 | 42.155 | 3.215  |
| 1995          | 33732  | 3309.378 | 2976.630 | 332.748  | 0.986  | 10.055 | 459.725 | 45.104 | 40.568 | 4.537  |
| 1996          | 33754  | 3312.987 | 2863.067 | 449.919  | 1.333  | 13.580 | 454.035 | 44.568 | 38.512 | 6.055  |
| 1997          | 33705  | 3267.066 | 2703.600 | 563.465  | 1.672  | 17.247 | 447.080 | 43.341 | 35.862 | 7.479  |
| 1998          | 33282  | 3178.725 | 2506.847 | 671.878  | 2.019  | 21.137 | 435.246 | 41.577 | 32.783 | 8.793  |
| 1999          | 33902  | 3120.351 | 2338.008 | 782.344  | 2.308  | 25.072 | 437.368 | 40.264 | 30.162 | 10.102 |
| 2000          | 33842  | 3142.808 | 2227.547 | 915.261  | 2.704  | 29.122 | 431.143 | 40.050 | 28.378 | 11.672 |
| 2001          | 32526  | 2961.588 | 1978.541 | 983.047  | 3.022  | 33.193 | 409.736 | 37.323 | 24.924 | 12.398 |
| 2002          | 32103  | 2940.627 | 1835.305 | 1105.322 | 3.443  | 37.588 | 400.409 | 36.695 | 22.891 | 13.804 |
| 2003          | 30598  | 2819.545 | 1642.452 | 1177.093 | 3.847  | 41.748 | 378.022 | 34.855 | 20.292 | 14.563 |
| 2004          | 29423  | 2730.466 | 1476.946 | 1253.520 | 4.260  | 45.909 | 359.838 | 33.417 | 18.063 | 15.355 |
| 2005          | 27994  | 2670.510 | 1339.552 | 1330.958 | 4.754  | 49.839 | 338.530 | 32.322 | 16.199 | 16.123 |
| 2006          | 27248  | 2623.285 | 1217.724 | 1405.562 | 5.158  | 53.580 | 326.578 | 31.474 | 14.595 | 16.879 |
| 2007          | 26354  | 2536.599 | 1085.515 | 1451.084 | 5.506  | 57.206 | 312.676 | 30.131 | 12.879 | 17.252 |
| 2008          | 26058  | 2469.443 | 976.396  | 1493.048 | 5.730  | 60.461 | 305.758 | 29.015 | 11.457 | 17.558 |
| 2009          | 25107  | 2386.945 | 869.251  | 1517.694 | 6.045  | 63.583 | 291.221 | 27.730 | 10.083 | 17.647 |
| 2010          | 24915  | 2329.274 | 781.114  | 1548.161 | 6.214  | 66.465 | 285.634 | 26.750 | 8.955  | 17.795 |
| 2011          | 24876  | 2286.581 | 701.073  | 1585.507 | 6.374  | 69.340 | 282.449 | 26.013 | 7.960  | 18.053 |
| 2012          | 24593  | 2243.311 | 628.549  | 1614.762 | 6.566  | 71.981 | 276.317 | 25.260 | 7.062  | 18.198 |
| 2013          | 24555  | 2176.503 | 557.248  | 1619.255 | 6.594  | 74.397 | 272.862 | 24.245 | 6.192  | 18.052 |
| 2014          | 25415  | 2211.619 | 518.425  | 1693.194 | 6.662  | 76.559 | 279.256 | 24.366 | 5.696  | 18.669 |
| 2015          | 26453  | 2237.016 | 485.495  | 1751.521 | 6.621  | 78.297 | 324.763 | 27.554 | 5.960  | 21.594 |
| 2016          | 26888  | 2229.057 | 444.359  | 1784.698 | 6.638  | 80.065 | 326.852 | 27.194 | 5.402  | 21.793 |
| 2017          | 27790  | 2221.649 | 407.802  | 1813.847 | 6.527  | 81.644 | 334.510 | 26.848 | 4.909  | 21.939 |
| 2018          | 25430  | 1939.420 | 329.525  | 1609.895 | 6.331  | 83.009 | 303.095 | 23.214 | 3.928  | 19.287 |
| 2019          | 25620  | 1904.400 | 296.662  | 1607.738 | 6.275  | 84.422 | 302.305 | 22.574 | 3.500  | 19.074 |
| 2020          | 25588  | 1806.054 | 261.705  | 1544.349 | 6.035  | 85.510 | 341.816 | 24.261 | 3.496  | 20.765 |
| 2021          | 25676  | 1748.172 | 233.135  | 1515.037 | 5.901  | 86.664 | 340.373 | 23.314 | 3.091  | 20.224 |
| 2022          | 25785  | 1701.148 | 209.755  | 1491.393 | 5.784  | 87.670 | 339.085 | 22.515 | 2.758  | 19.757 |
| 2023          | 25885  | 1652.087 | 189.791  | 1462.295 | 5.649  | 88.512 | 337.618 | 21.696 | 2.475  | 19.221 |
| 2024          | 25942  | 1597.127 | 170.267  | 1426.859 | 5.500  | 89.339 | 335.637 | 20.814 | 2.203  | 18.611 |
| 2025          | 25562  | 1467.622 | 147.558  | 1320.064 | 5.164  | 89.946 | 381.139 | 22.075 | 2.200  | 19.874 |
| 2026          | 25807  | 1390.505 | 131.208  | 1259.298 | 4.880  | 90.564 | 383.135 | 20.835 | 1.948  | 18.887 |
| 2027          | 25609  | 1342.095 | 118.598  | 1223.498 | 4.778  | 91.163 | 378.482 | 20.030 | 1.753  | 18.277 |
| 2028          | 25384  | 1289.536 | 107.252  | 1182.284 | 4.658  | 91.683 | 373.410 | 19.165 | 1.578  | 17.587 |
| 2029          | 25148  | 1242.216 | 97.388   | 1144.828 | 4.552  | 92.160 | 368.100 | 18.380 | 1.426  | 16.955 |
| 2030          | 24356  | 1096.803 | 81.582   | 1015.221 | 4.168  | 92.562 | 421.164 | 19.210 | 1.411  | 17.800 |
| 2031          | 24385  | 1019.991 | 72.279   | 947.712  | 3.887  | 92.914 | 420.840 | 17.841 | 1.247  | 16.594 |
| 2032          | 24054  | 977.406  | 65.555   | 911.851  | 3.791  | 93.293 | 414.082 | 17.063 | 1.129  | 15.934 |
| 2033          | 23715  | 937.450  | 60.485   | 876.965  | 3.698  | 93.548 | 407.002 | 16.326 | 1.038  | 15.288 |
| 2034          | 23351  | 900.763  | 55.510   | 845.253  | 3.620  | 93.837 | 399.415 | 15.644 | 0.950  | 14.694 |
| 2035          | 22215  | 745.023  | 44.224   | 700.800  | 3.155  | 94.064 | 464.113 | 15.845 | 0.924  | 14.921 |
| 2036          | 21391  | 680.360  | 38.261   | 642.099  | 3.002  | 94.376 | 447.266 | 14.492 | 0.800  | 13.692 |
| 2037          | 20894  | 644.109  | 34.912   | 609.197  | 2.916  | 94.580 | 436.920 | 13.730 | 0.730  | 13.000 |
| 2038          | 20396  | 612.448  | 32.342   | 580.106  | 2.844  | 94.719 | 426.219 | 13.055 | 0.676  | 12.379 |
| 2039          | 19906  | 577.529  | 29.970   | 547.559  | 2.751  | 94.811 | 415.301 | 12.298 | 0.625  | 11.672 |

## Results for PHIM for Run 6 (Sensitivity\_Analysis\_3.RTF)

\*\*\*\*\*

### Main Results for E-Component for Run: 6, Simulation: 1, COD: COPD, Adjusted

| Variable Parameter          | Value                                  |
|-----------------------------|----------------------------------------|
| 1. Country                  | US (United States)                     |
| 2. Sex                      | F (Females)                            |
| 3. Year of start of process | 1990                                   |
| 4. Cause of Death           | COPD                                   |
| 5. Effective Dose NULL      | CC:1                                   |
| 6. Effective Dose Ecig      | CC:1 Ecig:0.05 Dual:0.525              |
| Note:                       | Death rates are per million population |

#### Results for Age Groups Combined and Years combined, Population and Number deaths adjusted for Ecig scenario,

| Age Group:All | NULL    | Ecig       | %Drop      |          |        |        | NULL    | Ecig    | Drop    |        |
|---------------|---------|------------|------------|----------|--------|--------|---------|---------|---------|--------|
| Year          | Number  | Attrib     | Attrib     | Drop     | %Drop  | Attrib | Death   | Attrib  | Attrib  | Drop   |
|               | Deaths  | Deaths     | Deaths     | Deaths   | Deaths | Deaths | Rate    | Rates   | Rates   | Rates  |
| All Comb      | 2181520 | 862051.244 | 552479.893 | 309571.4 | 14.191 | 35.911 | 596.036 | 236.673 | 150.949 | 85.724 |

#### Results for Age Groups Combined, Population and Number deaths adjusted for Ecig scenario,

| Age Group:All | NULL   | Ecig      | %Drop     |          |        |        | NULL    | Ecig    | Drop    |         |
|---------------|--------|-----------|-----------|----------|--------|--------|---------|---------|---------|---------|
| Year          | Number | Attrib    | Attrib    | Drop     | %Drop  | Attrib | Death   | Attrib  | Attrib  | Drop    |
|               | Deaths | Deaths    | Deaths    | Deaths   | Deaths | Deaths | Rate    | Rates   | Rates   | Rates   |
| 1990          | 24738  | 10694.712 | 10694.712 | 0.000    | 0.000  | 0.000  | 362.296 | 156.628 | 156.628 | 0.000   |
| 1991          | 26562  | 11602.933 | 11584.706 | 18.227   | 0.069  | 0.157  | 383.818 | 167.661 | 167.398 | 0.263   |
| 1992          | 26828  | 11831.375 | 11781.194 | 50.181   | 0.187  | 0.424  | 382.401 | 168.642 | 167.926 | 0.716   |
| 1993          | 29774  | 13246.371 | 13138.221 | 108.151  | 0.363  | 0.816  | 418.408 | 186.148 | 184.626 | 1.522   |
| 1994          | 29805  | 13355.662 | 13183.926 | 171.736  | 0.576  | 1.286  | 412.606 | 184.893 | 182.512 | 2.382   |
| 1995          | 29757  | 13397.439 | 13142.498 | 254.941  | 0.857  | 1.903  | 405.549 | 182.598 | 179.115 | 3.482   |
| 1996          | 30903  | 13960.356 | 13604.310 | 356.046  | 1.152  | 2.550  | 415.697 | 187.801 | 182.998 | 4.803   |
| 1997          | 31133  | 14109.552 | 13644.244 | 465.308  | 1.495  | 3.298  | 412.976 | 187.180 | 180.987 | 6.193   |
| 1998          | 32104  | 14599.657 | 13990.732 | 608.926  | 1.897  | 4.171  | 419.844 | 190.958 | 182.964 | 7.994   |
| 1999          | 34628  | 15728.102 | 14937.881 | 790.222  | 2.282  | 5.024  | 446.736 | 202.950 | 192.711 | 10.239  |
| 2000          | 34316  | 15579.803 | 14639.893 | 939.910  | 2.739  | 6.033  | 437.174 | 198.541 | 186.508 | 12.033  |
| 2001          | 34614  | 15696.614 | 14564.192 | 1132.423 | 3.272  | 7.214  | 436.050 | 197.812 | 183.470 | 14.342  |
| 2002          | 34319  | 15519.777 | 14205.049 | 1314.728 | 3.831  | 8.471  | 428.057 | 193.668 | 177.176 | 16.492  |
| 2003          | 35110  | 15888.389 | 14334.424 | 1553.965 | 4.426  | 9.781  | 433.777 | 196.413 | 177.097 | 19.317  |
| 2004          | 33555  | 15091.573 | 13404.419 | 1687.154 | 5.028  | 11.179 | 410.370 | 184.701 | 163.933 | 20.768  |
| 2005          | 35446  | 15803.656 | 13787.241 | 2016.415 | 5.689  | 12.759 | 428.651 | 191.278 | 166.728 | 24.550  |
| 2006          | 34043  | 15100.563 | 12953.270 | 2147.294 | 6.308  | 14.220 | 408.028 | 181.174 | 155.253 | 25.922  |
| 2007          | 34073  | 14974.384 | 12598.223 | 2376.160 | 6.974  | 15.868 | 404.248 | 177.871 | 149.469 | 28.402  |
| 2008          | 37518  | 16406.197 | 13555.508 | 2850.689 | 7.598  | 17.376 | 440.223 | 192.768 | 159.056 | 33.711  |
| 2009          | 36930  | 16083.194 | 12985.390 | 3097.804 | 8.388  | 19.261 | 428.370 | 186.846 | 150.623 | 36.223  |
| 2010          | 36906  | 15927.400 | 12606.137 | 3321.263 | 8.999  | 20.853 | 423.104 | 182.917 | 144.521 | 38.397  |
| 2011          | 37772  | 16221.836 | 12531.555 | 3690.281 | 9.770  | 22.749 | 428.863 | 184.547 | 142.285 | 42.262  |
| 2012          | 38419  | 16358.849 | 12330.244 | 4028.606 | 10.486 | 24.626 | 431.659 | 184.202 | 138.537 | 45.666  |
| 2013          | 40292  | 16994.822 | 12467.981 | 4526.841 | 11.235 | 26.637 | 447.736 | 189.311 | 138.549 | 50.762  |
| 2014          | 40282  | 16855.093 | 12023.351 | 4831.743 | 11.995 | 28.666 | 442.615 | 185.696 | 132.110 | 53.586  |
| 2015          | 42431  | 17572.483 | 12254.350 | 5318.132 | 12.534 | 30.264 | 520.916 | 216.445 | 150.444 | 66.001  |
| 2016          | 42861  | 17579.955 | 11869.202 | 5710.754 | 13.324 | 32.484 | 521.018 | 214.473 | 144.282 | 70.191  |
| 2017          | 44654  | 18080.688 | 11813.518 | 6267.171 | 14.035 | 34.662 | 537.513 | 218.496 | 142.202 | 76.294  |
| 2018          | 45685  | 18209.262 | 11542.368 | 6666.894 | 14.593 | 36.613 | 544.511 | 217.960 | 137.572 | 80.387  |
| 2019          | 47242  | 18648.302 | 11421.363 | 7226.938 | 15.298 | 38.754 | 557.433 | 221.054 | 134.766 | 86.288  |
| 2020          | 48742  | 19002.597 | 11294.248 | 7708.349 | 15.815 | 40.565 | 651.117 | 255.266 | 150.873 | 104.393 |
| 2021          | 48782  | 18885.717 | 10799.069 | 8086.648 | 16.577 | 42.819 | 646.688 | 251.867 | 143.159 | 108.708 |
| 2022          | 50198  | 19235.076 | 10601.430 | 8633.647 | 17.199 | 44.885 | 660.142 | 254.582 | 139.416 | 115.166 |
| 2023          | 51624  | 19521.158 | 10387.167 | 9133.991 | 17.693 | 46.790 | 673.333 | 256.363 | 135.480 | 120.882 |
| 2024          | 52991  | 19918.620 | 10175.844 | 9742.776 | 18.386 | 48.913 | 685.589 | 259.583 | 131.653 | 127.931 |
| 2025          | 54036  | 20150.545 | 9918.792  | 10231.75 | 18.935 | 50.777 | 805.707 | 303.086 | 147.894 | 155.192 |
| 2026          | 54940  | 20393.792 | 9613.739  | 10780.05 | 19.621 | 52.859 | 815.661 | 305.582 | 142.729 | 162.853 |
| 2027          | 55814  | 20615.351 | 9286.196  | 11329.16 | 20.298 | 54.955 | 824.906 | 307.668 | 137.246 | 170.423 |
| 2028          | 56632  | 20731.894 | 8913.678  | 11818.22 | 20.868 | 57.005 | 833.069 | 308.115 | 131.122 | 176.993 |
| 2029          | 57412  | 20781.967 | 8525.147  | 12256.82 | 21.349 | 58.978 | 840.370 | 307.495 | 124.788 | 182.707 |
| 2030          | 57701  | 20753.201 | 8149.728  | 12603.47 | 21.843 | 60.730 | 997.786 | 363.487 | 140.927 | 222.560 |
| 2031          | 59330  | 21048.417 | 8020.124  | 13028.29 | 21.959 | 61.897 | 1023.95 | 368.165 | 138.415 | 229.750 |
| 2032          | 59892  | 21169.329 | 7677.429  | 13491.90 | 22.527 | 63.733 | 1031.02 | 369.560 | 132.164 | 237.397 |
| 2033          | 60415  | 21109.293 | 7298.557  | 13810.74 | 22.860 | 65.425 | 1036.87 | 367.618 | 125.261 | 242.357 |
| 2034          | 60863  | 21109.429 | 6920.882  | 14188.55 | 23.312 | 67.214 | 1041.07 | 366.613 | 118.383 | 248.230 |
| 2035          | 60250  | 20794.840 | 6538.381  | 14256.46 | 23.662 | 68.558 | 1258.73 | 442.268 | 136.599 | 305.669 |
| 2036          | 57330  | 19354.577 | 5808.621  | 13545.96 | 23.628 | 69.988 | 1198.71 | 412.258 | 121.452 | 290.806 |
| 2037          | 57327  | 19064.169 | 5367.379  | 13696.79 | 23.893 | 71.846 | 1198.80 | 406.385 | 112.241 | 294.144 |
| 2038          | 57290  | 18854.812 | 5006.582  | 13848.23 | 24.172 | 73.447 | 1197.23 | 401.900 | 104.625 | 297.274 |
| 2039          | 57246  | 18437.457 | 4586.799  | 13850.66 | 24.195 | 75.122 | 1194.34 | 392.602 | 95.696  | 296.905 |

## Results for PHIM for Run 7 (Sensitivity\_Analysis\_3.RTF)

---

### Control File Details for Run: 7

| Variable Parameter                                       | Value                  |
|----------------------------------------------------------|------------------------|
| 1. Name for Reference Scenario                           | NULL                   |
| 2. Name for Test Scenario                                | Ecig                   |
| 3. Name for Product 1                                    | CC                     |
| 4. Name for Product 2                                    | Ecig                   |
| 5. Name for Product 3                                    | -                      |
| 6. Name for Product 4                                    | Dual                   |
| 7. Country                                               | US (United States)     |
| 8. Sex                                                   | M (Males)              |
| 9. Year of start of process                              | 1990                   |
| 10. Number of months of follow-up                        | 600                    |
| 11. Follow-up interval length (in months)                | 12                     |
| 12. Lower age for risk estimation                        | 10                     |
| 13. Upper age for risk estimation                        | 79                     |
| 14. The effective dose for Product 1 (F1) - Ref          | 1                      |
| 15. The effective dose for Product 2 (F2) - Ref          | -                      |
| 16. The effective dose for Product 3 (F3) - Ref          | -                      |
| 17. The effective dose for Product 4 (F4) - Ref          | -                      |
| 18. The effective dose for Product 1 (F1) - Test         | 1                      |
| 19. The effective dose for Product 2 (F2) - Test         | 0.05                   |
| 20. The effective dose for Product 3 (F3) - Test         | -                      |
| 21. The effective dose for Product 4 (F4) - Test         | FROMF2                 |
| 22. Number in population to be simulated                 | 100000                 |
| 23. Number of MC simulations                             | 1                      |
| 24. The random number seed for the first simulation      | 15975263               |
| 25. Source for the population file (POP)                 | UN4                    |
| 26. Source for the socioeconomic prevalence file (SEP)   | -                      |
| 27. Source for the current smoking prevalence file (CSP) | ISS3                   |
| 28. Source for the former smoking prevalence file (FSP)  | ISS3                   |
| 29. Source for the quit-time distribution file (QTD)     | NHIS2006               |
| 30. Source for the death file (MORT)                     | APR-20                 |
| 31. Source for the relative risk file (RR)               | PNLEST                 |
| 32. Source for the half-life file (H)                    | PNLEST                 |
| 33. Assumption Set for TTP Factor Reference              | F1                     |
| 34. Assumption Set for TTP Factor Test                   | F1                     |
| 35. Assumption Set for TTP Reference                     | ISS3                   |
| 36. Assumption Set for TTP Test                          | S3D                    |
| 37. Assumption Set for TP for socioeconomic group        | -                      |
| 38. Source for Output Choice file (OUTC)                 | BASIC                  |
| 39. Output for DTP P1                                    | N                      |
| 40. Output for DTP P2                                    | N                      |
| 41. Output for Main P Component                          | Y                      |
| 42. Output for DTP E1                                    | N                      |
| 43. Output for DTP E2                                    | N                      |
| 44. Output for DTP E3                                    | N                      |
| 45. Output for Main E Component                          | Y                      |
| 46. Output file name                                     | Sensitivity_Analysis_3 |
| 47. Run number for P-Component                           | -                      |
| 48. Results file for E-Component                         | -                      |
| 49. Components required                                  | PE                     |
| 50. Results folder for P to be used in E-Component       | -                      |
| 51. Fixed age of starting product use                    | 16                     |
| 52. Output absolute risk file?                           | N                      |

## Results for PHIM for Run 7 (Sensitivity\_Analysis\_3.RTF)

\*\*\*\*\*

TTP values for Run: 7, Scenario: NULL

| Variable Parameter | Value               |
|--------------------|---------------------|
| 1. Country         | US (United States)  |
| 2. Sex             | M (Males)           |
| 3. Assumption Set  | ISS3                |
| Note:              | Period is in Months |

| Age   | Period  | Initiation  | Cessation    | Re-initiation |
|-------|---------|-------------|--------------|---------------|
|       |         | Never<br>CC | CC<br>Former | Former<br>CC  |
| 10-14 | 1-12    | 0.003842    | 0.008742     | 0.000000      |
| 15-19 | 1-12    | 0.004720    | 0.003614     | 0.000000      |
| 20-24 | 1-12    | 0.000376    | 0.000943     | 0.000000      |
| 25-29 | 1-12    | 0.000187    | 0.001143     | 0.000000      |
| 30-34 | 1-12    | 0.000093    | 0.000871     | 0.000000      |
| 35-39 | 1-12    | 0.000000    | 0.000867     | 0.000000      |
| 40-44 | 1-12    | 0.000000    | 0.001399     | 0.000000      |
| 45-49 | 1-12    | 0.000000    | 0.002033     | 0.000000      |
| 50-54 | 1-12    | 0.000000    | 0.003209     | 0.000000      |
| 55-59 | 1-12    | 0.000000    | 0.003574     | 0.000000      |
| 60-64 | 1-12    | 0.000000    | 0.003460     | 0.000000      |
| 65-69 | 1-12    | 0.000000    | 0.004136     | 0.000000      |
| 70-74 | 1-12    | 0.000000    | 0.005592     | 0.000000      |
| 75-79 | 1-12    | 0.000000    | 0.005592     | 0.000000      |
| 10-14 | 13-72   | 0.004906    | 0.008742     | 0.000000      |
| 15-19 | 13-72   | 0.006989    | 0.004426     | 0.000000      |
| 20-24 | 13-72   | 0.000687    | 0.001527     | 0.000000      |
| 25-29 | 13-72   | 0.000962    | 0.001515     | 0.000000      |
| 30-34 | 13-72   | 0.000364    | 0.001227     | 0.000000      |
| 35-39 | 13-72   | 0.000000    | 0.001630     | 0.000000      |
| 40-44 | 13-72   | 0.000000    | 0.001852     | 0.000000      |
| 45-49 | 13-72   | 0.000000    | 0.002667     | 0.000000      |
| 50-54 | 13-72   | 0.000000    | 0.003208     | 0.000000      |
| 55-59 | 13-72   | 0.000000    | 0.003978     | 0.000000      |
| 60-64 | 13-72   | 0.000000    | 0.005771     | 0.000000      |
| 65-69 | 13-72   | 0.000000    | 0.010432     | 0.000000      |
| 70-74 | 13-72   | 0.000000    | 0.007079     | 0.000000      |
| 75-79 | 13-72   | 0.000000    | 0.007079     | 0.000000      |
| 10-14 | 73-132  | 0.004312    | 0.008742     | 0.000000      |
| 15-19 | 73-132  | 0.005330    | 0.003289     | 0.000000      |
| 20-24 | 73-132  | 0.002456    | 0.003844     | 0.000000      |
| 25-29 | 73-132  | 0.000839    | 0.002006     | 0.000000      |
| 30-34 | 73-132  | 0.000414    | 0.001329     | 0.000000      |
| 35-39 | 73-132  | 0.000000    | 0.001278     | 0.000000      |
| 40-44 | 73-132  | 0.000000    | 0.001691     | 0.000000      |
| 45-49 | 73-132  | 0.000000    | 0.002904     | 0.000000      |
| 50-54 | 73-132  | 0.000000    | 0.003319     | 0.000000      |
| 55-59 | 73-132  | 0.000000    | 0.003976     | 0.000000      |
| 60-64 | 73-132  | 0.000000    | 0.005235     | 0.000000      |
| 65-69 | 73-132  | 0.000000    | 0.005901     | 0.000000      |
| 70-74 | 73-132  | 0.000000    | 0.005615     | 0.000000      |
| 75-79 | 73-132  | 0.000000    | 0.005615     | 0.000000      |
| 10-14 | 133-192 | 0.003468    | 0.008742     | 0.000000      |
| 15-19 | 133-192 | 0.004675    | 0.003732     | 0.000000      |
| 20-24 | 133-192 | 0.000062    | 0.002260     | 0.000000      |
| 25-29 | 133-192 | 0.001422    | 0.002822     | 0.000000      |
| 30-34 | 133-192 | 0.000696    | 0.002610     | 0.000000      |
| 35-39 | 133-192 | 0.000000    | 0.002058     | 0.000000      |
| 40-44 | 133-192 | 0.000000    | 0.002310     | 0.000000      |
| 45-49 | 133-192 | 0.000000    | 0.002256     | 0.000000      |
| 50-54 | 133-192 | 0.000000    | 0.002663     | 0.000000      |
| 55-59 | 133-192 | 0.000000    | 0.001746     | 0.000000      |
| 60-64 | 133-192 | 0.000000    | 0.005809     | 0.000000      |
| 65-69 | 133-192 | 0.000000    | 0.005896     | 0.000000      |
| 70-74 | 133-192 | 0.000000    | 0.007323     | 0.000000      |
| 75-79 | 133-192 | 0.000000    | 0.007323     | 0.000000      |
| 10-14 | 193-252 | 0.002314    | 0.008742     | 0.000000      |
| 15-19 | 193-252 | 0.003987    | 0.005036     | 0.000000      |
| 20-24 | 193-252 | 0.000320    | 0.002857     | 0.000000      |
| 25-29 | 193-252 | 0.000251    | 0.002314     | 0.000000      |
| 30-34 | 193-252 | 0.000125    | 0.004343     | 0.000000      |
| 35-39 | 193-252 | 0.000000    | 0.002092     | 0.000000      |
| 40-44 | 193-252 | 0.000000    | 0.002566     | 0.000000      |
| 45-49 | 193-252 | 0.000000    | 0.002311     | 0.000000      |
| 50-54 | 193-252 | 0.000000    | 0.003209     | 0.000000      |

### Results for PHIM for Run 7 (Sensitivity\_Analysis\_3.RTF)

|       |         |          |          |          |
|-------|---------|----------|----------|----------|
| 55-59 | 193-252 | 0.000000 | 0.004057 | 0.000000 |
| 60-64 | 193-252 | 0.000000 | 0.007166 | 0.000000 |
| 65-69 | 193-252 | 0.000000 | 0.004281 | 0.000000 |
| 70-74 | 193-252 | 0.000000 | 0.004580 | 0.000000 |
| 75-79 | 193-252 | 0.000000 | 0.004580 | 0.000000 |
| 10-14 | 253+    | 0.001325 | 0.008742 | 0.000000 |
| 15-19 | 253+    | 0.002984 | 0.010602 | 0.000000 |
| 20-24 | 253+    | 0.000452 | 0.004314 | 0.000000 |
| 25-29 | 253+    | 0.000225 | 0.003645 | 0.000000 |
| 30-34 | 253+    | 0.000112 | 0.004512 | 0.000000 |
| 35-39 | 253+    | 0.000000 | 0.002147 | 0.000000 |
| 40-44 | 253+    | 0.000000 | 0.002636 | 0.000000 |
| 45-49 | 253+    | 0.000000 | 0.001051 | 0.000000 |
| 50-54 | 253+    | 0.000000 | 0.002519 | 0.000000 |
| 55-59 | 253+    | 0.000000 | 0.003693 | 0.000000 |
| 60-64 | 253+    | 0.000000 | 0.005888 | 0.000000 |
| 65-69 | 253+    | 0.000000 | 0.004823 | 0.000000 |
| 70-74 | 253+    | 0.000000 | 0.004733 | 0.000000 |
| 75-79 | 253+    | 0.000000 | 0.004733 | 0.000000 |

## Results for PHIM for Run 7 (Sensitivity\_Analysis\_3.RTF)

\*\*\*\*\*

TTP values for Run: 7, Scenario: Ecig

| Variable Parameter | Value               |
|--------------------|---------------------|
| 1. Country         | US (United States)  |
| 2. Sex             | M (Males)           |
| 3. Assumption Set  | S3D                 |
| Note:              | Period is in Months |

| Age   | Period  | Initiation  |               |               | Cessation    |                |                | Re-initiation |                |                |
|-------|---------|-------------|---------------|---------------|--------------|----------------|----------------|---------------|----------------|----------------|
|       |         | Never<br>CC | Never<br>Ecig | Never<br>Dual | CC<br>Former | Ecig<br>Former | Dual<br>Former | Former<br>CC  | Former<br>Ecig | Former<br>Dual |
| 10-14 | 1-12    | 0.001921    | 0.001921      | 0.000000      | 0.008742     | 0.013112       | 0.000000       | 0.000000      | 0.000000       | 0.000000       |
| 15-19 | 1-12    | 0.002360    | 0.002360      | 0.000000      | 0.003614     | 0.005421       | 0.000000       | 0.000000      | 0.000000       | 0.000000       |
| 20-24 | 1-12    | 0.000188    | 0.000188      | 0.000000      | 0.000943     | 0.001415       | 0.000000       | 0.000000      | 0.000000       | 0.000000       |
| 25-29 | 1-12    | 0.000093    | 0.000093      | 0.000000      | 0.001143     | 0.001714       | 0.000000       | 0.000000      | 0.000000       | 0.000000       |
| 30-34 | 1-12    | 0.000047    | 0.000047      | 0.000000      | 0.000871     | 0.001306       | 0.000000       | 0.000000      | 0.000000       | 0.000000       |
| 35-39 | 1-12    | 0.000000    | 0.000000      | 0.000000      | 0.000867     | 0.001300       | 0.000000       | 0.000000      | 0.000000       | 0.000000       |
| 40-44 | 1-12    | 0.000000    | 0.000000      | 0.000000      | 0.001399     | 0.002098       | 0.000000       | 0.000000      | 0.000000       | 0.000000       |
| 45-49 | 1-12    | 0.000000    | 0.000000      | 0.000000      | 0.002033     | 0.003049       | 0.000000       | 0.000000      | 0.000000       | 0.000000       |
| 50-54 | 1-12    | 0.000000    | 0.000000      | 0.000000      | 0.003209     | 0.004813       | 0.000000       | 0.000000      | 0.000000       | 0.000000       |
| 55-59 | 1-12    | 0.000000    | 0.000000      | 0.000000      | 0.003574     | 0.005362       | 0.000000       | 0.000000      | 0.000000       | 0.000000       |
| 60-64 | 1-12    | 0.000000    | 0.000000      | 0.000000      | 0.003460     | 0.005189       | 0.000000       | 0.000000      | 0.000000       | 0.000000       |
| 65-69 | 1-12    | 0.000000    | 0.000000      | 0.000000      | 0.004136     | 0.006205       | 0.000000       | 0.000000      | 0.000000       | 0.000000       |
| 70-74 | 1-12    | 0.000000    | 0.000000      | 0.000000      | 0.005592     | 0.008388       | 0.000000       | 0.000000      | 0.000000       | 0.000000       |
| 75-79 | 1-12    | 0.000000    | 0.000000      | 0.000000      | 0.005592     | 0.008388       | 0.000000       | 0.000000      | 0.000000       | 0.000000       |
| 10-14 | 13-72   | 0.001962    | 0.002944      | 0.000000      | 0.008742     | 0.013112       | 0.000000       | 0.000000      | 0.000000       | 0.000000       |
| 15-19 | 13-72   | 0.002796    | 0.004193      | 0.000000      | 0.004426     | 0.006640       | 0.000000       | 0.000000      | 0.000000       | 0.000000       |
| 20-24 | 13-72   | 0.000275    | 0.000412      | 0.000000      | 0.001527     | 0.002291       | 0.000000       | 0.000000      | 0.000000       | 0.000000       |
| 25-29 | 13-72   | 0.000385    | 0.000578      | 0.000000      | 0.001515     | 0.002273       | 0.000000       | 0.000000      | 0.000000       | 0.000000       |
| 30-34 | 13-72   | 0.000146    | 0.000218      | 0.000000      | 0.001227     | 0.001840       | 0.000000       | 0.000000      | 0.000000       | 0.000000       |
| 35-39 | 13-72   | 0.000000    | 0.000000      | 0.000000      | 0.001630     | 0.002444       | 0.000000       | 0.000000      | 0.000000       | 0.000000       |
| 40-44 | 13-72   | 0.000000    | 0.000000      | 0.000000      | 0.001852     | 0.002778       | 0.000000       | 0.000000      | 0.000000       | 0.000000       |
| 45-49 | 13-72   | 0.000000    | 0.000000      | 0.000000      | 0.002667     | 0.004000       | 0.000000       | 0.000000      | 0.000000       | 0.000000       |
| 50-54 | 13-72   | 0.000000    | 0.000000      | 0.000000      | 0.003208     | 0.004811       | 0.000000       | 0.000000      | 0.000000       | 0.000000       |
| 55-59 | 13-72   | 0.000000    | 0.000000      | 0.000000      | 0.003978     | 0.005966       | 0.000000       | 0.000000      | 0.000000       | 0.000000       |
| 60-64 | 13-72   | 0.000000    | 0.000000      | 0.000000      | 0.005771     | 0.008657       | 0.000000       | 0.000000      | 0.000000       | 0.000000       |
| 65-69 | 13-72   | 0.000000    | 0.000000      | 0.000000      | 0.010432     | 0.015648       | 0.000000       | 0.000000      | 0.000000       | 0.000000       |
| 70-74 | 13-72   | 0.000000    | 0.000000      | 0.000000      | 0.007079     | 0.010619       | 0.000000       | 0.000000      | 0.000000       | 0.000000       |
| 75-79 | 13-72   | 0.000000    | 0.000000      | 0.000000      | 0.007079     | 0.010619       | 0.000000       | 0.000000      | 0.000000       | 0.000000       |
| 10-14 | 73-132  | 0.000862    | 0.003449      | 0.000000      | 0.008742     | 0.013112       | 0.000000       | 0.000000      | 0.000000       | 0.000000       |
| 15-19 | 73-132  | 0.001066    | 0.004264      | 0.000000      | 0.003289     | 0.004934       | 0.000000       | 0.000000      | 0.000000       | 0.000000       |
| 20-24 | 73-132  | 0.000491    | 0.001965      | 0.000000      | 0.003844     | 0.005765       | 0.000000       | 0.000000      | 0.000000       | 0.000000       |
| 25-29 | 73-132  | 0.000168    | 0.000671      | 0.000000      | 0.002006     | 0.003009       | 0.000000       | 0.000000      | 0.000000       | 0.000000       |
| 30-34 | 73-132  | 0.000083    | 0.000332      | 0.000000      | 0.001329     | 0.001993       | 0.000000       | 0.000000      | 0.000000       | 0.000000       |
| 35-39 | 73-132  | 0.000000    | 0.000000      | 0.000000      | 0.001278     | 0.001917       | 0.000000       | 0.000000      | 0.000000       | 0.000000       |
| 40-44 | 73-132  | 0.000000    | 0.000000      | 0.000000      | 0.001691     | 0.002537       | 0.000000       | 0.000000      | 0.000000       | 0.000000       |
| 45-49 | 73-132  | 0.000000    | 0.000000      | 0.000000      | 0.002904     | 0.004356       | 0.000000       | 0.000000      | 0.000000       | 0.000000       |
| 50-54 | 73-132  | 0.000000    | 0.000000      | 0.000000      | 0.003319     | 0.004979       | 0.000000       | 0.000000      | 0.000000       | 0.000000       |
| 55-59 | 73-132  | 0.000000    | 0.000000      | 0.000000      | 0.003976     | 0.005964       | 0.000000       | 0.000000      | 0.000000       | 0.000000       |
| 60-64 | 73-132  | 0.000000    | 0.000000      | 0.000000      | 0.005235     | 0.007852       | 0.000000       | 0.000000      | 0.000000       | 0.000000       |
| 65-69 | 73-132  | 0.000000    | 0.000000      | 0.000000      | 0.005901     | 0.008852       | 0.000000       | 0.000000      | 0.000000       | 0.000000       |
| 70-74 | 73-132  | 0.000000    | 0.000000      | 0.000000      | 0.005615     | 0.008423       | 0.000000       | 0.000000      | 0.000000       | 0.000000       |
| 75-79 | 73-132  | 0.000000    | 0.000000      | 0.000000      | 0.005615     | 0.008423       | 0.000000       | 0.000000      | 0.000000       | 0.000000       |
| 10-14 | 133-192 | 0.000173    | 0.003294      | 0.000000      | 0.008742     | 0.013112       | 0.000000       | 0.000000      | 0.000000       | 0.000000       |
| 15-19 | 133-192 | 0.000234    | 0.004442      | 0.000000      | 0.003732     | 0.005598       | 0.000000       | 0.000000      | 0.000000       | 0.000000       |
| 20-24 | 133-192 | 0.000003    | 0.000059      | 0.000000      | 0.002260     | 0.003390       | 0.000000       | 0.000000      | 0.000000       | 0.000000       |
| 25-29 | 133-192 | 0.000071    | 0.001351      | 0.000000      | 0.002822     | 0.004233       | 0.000000       | 0.000000      | 0.000000       | 0.000000       |
| 30-34 | 133-192 | 0.000035    | 0.000661      | 0.000000      | 0.002610     | 0.003914       | 0.000000       | 0.000000      | 0.000000       | 0.000000       |
| 35-39 | 133-192 | 0.000000    | 0.000000      | 0.000000      | 0.002058     | 0.003087       | 0.000000       | 0.000000      | 0.000000       | 0.000000       |
| 40-44 | 133-192 | 0.000000    | 0.000000      | 0.000000      | 0.002310     | 0.003465       | 0.000000       | 0.000000      | 0.000000       | 0.000000       |
| 45-49 | 133-192 | 0.000000    | 0.000000      | 0.000000      | 0.002256     | 0.003383       | 0.000000       | 0.000000      | 0.000000       | 0.000000       |
| 50-54 | 133-192 | 0.000000    | 0.000000      | 0.000000      | 0.002663     | 0.003995       | 0.000000       | 0.000000      | 0.000000       | 0.000000       |
| 55-59 | 133-192 | 0.000000    | 0.000000      | 0.000000      | 0.001747     | 0.002620       | 0.000000       | 0.000000      | 0.000000       | 0.000000       |
| 60-64 | 133-192 | 0.000000    | 0.000000      | 0.000000      | 0.005809     | 0.008714       | 0.000000       | 0.000000      | 0.000000       | 0.000000       |
| 65-69 | 133-192 | 0.000000    | 0.000000      | 0.000000      | 0.005896     | 0.008844       | 0.000000       | 0.000000      | 0.000000       | 0.000000       |
| 70-74 | 133-192 | 0.000000    | 0.000000      | 0.000000      | 0.007323     | 0.010984       | 0.000000       | 0.000000      | 0.000000       | 0.000000       |
| 75-79 | 133-192 | 0.000000    | 0.000000      | 0.000000      | 0.007323     | 0.010984       | 0.000000       | 0.000000      | 0.000000       | 0.000000       |
| 10-14 | 193-252 | 0.000116    | 0.002198      | 0.000000      | 0.008742     | 0.013112       | 0.000000       | 0.000000      | 0.000000       | 0.000000       |
| 15-19 | 193-252 | 0.000199    | 0.003788      | 0.000000      | 0.005036     | 0.007555       | 0.000000       | 0.000000      | 0.000000       | 0.000000       |
| 20-24 | 193-252 | 0.000016    | 0.000304      | 0.000000      | 0.002857     | 0.004286       | 0.000000       | 0.000000      | 0.000000       | 0.000000       |
| 25-29 | 193-252 | 0.000013    | 0.000239      | 0.000000      | 0.002314     | 0.003472       | 0.000000       | 0.000000      | 0.000000       | 0.000000       |
| 30-34 | 193-252 | 0.000006    | 0.000119      | 0.000000      | 0.004343     | 0.006514       | 0.000000       | 0.000000      | 0.000000       | 0.000000       |
| 35-39 | 193-252 | 0.000000    | 0.000000      | 0.000000      | 0.002092     | 0.003138       | 0.000000       | 0.000000      | 0.000000       | 0.000000       |
| 40-44 | 193-252 | 0.000000    | 0.000000      | 0.000000      | 0.002566     | 0.003849       | 0.000000       | 0.000000      | 0.000000       | 0.000000       |
| 45-49 | 193-252 | 0.000000    | 0.000000      | 0.000000      | 0.002311     | 0.003467       | 0.000000       | 0.000000      | 0.000000       | 0.000000       |
| 50-54 | 193-252 | 0.000000    | 0.000000      | 0.000000      | 0.003209     | 0.004813       | 0.000000       | 0.000000      | 0.000000       | 0.000000       |



### Results for PHIM for Run 7 (Sensitivity\_Analysis\_3.RTF)

|       |         |          |          |          |          |          |          |          |          |          |
|-------|---------|----------|----------|----------|----------|----------|----------|----------|----------|----------|
| 55-59 | 193-252 | 0.000000 | 0.000000 | 0.000000 | 0.004057 | 0.006086 | 0.000000 | 0.000000 | 0.000000 | 0.000000 |
| 60-64 | 193-252 | 0.000000 | 0.000000 | 0.000000 | 0.007166 | 0.010749 | 0.000000 | 0.000000 | 0.000000 | 0.000000 |
| 65-69 | 193-252 | 0.000000 | 0.000000 | 0.000000 | 0.004281 | 0.006422 | 0.000000 | 0.000000 | 0.000000 | 0.000000 |
| 70-74 | 193-252 | 0.000000 | 0.000000 | 0.000000 | 0.004580 | 0.006870 | 0.000000 | 0.000000 | 0.000000 | 0.000000 |
| 75-79 | 193-252 | 0.000000 | 0.000000 | 0.000000 | 0.004580 | 0.006870 | 0.000000 | 0.000000 | 0.000000 | 0.000000 |
| 10-14 | 253+    | 0.000066 | 0.001259 | 0.000000 | 0.008742 | 0.013112 | 0.000000 | 0.000000 | 0.000000 | 0.000000 |
| 15-19 | 253+    | 0.000149 | 0.002835 | 0.000000 | 0.010602 | 0.015902 | 0.000000 | 0.000000 | 0.000000 | 0.000000 |
| 20-24 | 253+    | 0.000023 | 0.000430 | 0.000000 | 0.004314 | 0.006471 | 0.000000 | 0.000000 | 0.000000 | 0.000000 |
| 25-29 | 253+    | 0.000011 | 0.000213 | 0.000000 | 0.003645 | 0.005468 | 0.000000 | 0.000000 | 0.000000 | 0.000000 |
| 30-34 | 253+    | 0.000006 | 0.000106 | 0.000000 | 0.004512 | 0.006768 | 0.000000 | 0.000000 | 0.000000 | 0.000000 |
| 35-39 | 253+    | 0.000000 | 0.000000 | 0.000000 | 0.002147 | 0.003220 | 0.000000 | 0.000000 | 0.000000 | 0.000000 |
| 40-44 | 253+    | 0.000000 | 0.000000 | 0.000000 | 0.002636 | 0.003953 | 0.000000 | 0.000000 | 0.000000 | 0.000000 |
| 45-49 | 253+    | 0.000000 | 0.000000 | 0.000000 | 0.001051 | 0.001576 | 0.000000 | 0.000000 | 0.000000 | 0.000000 |
| 50-54 | 253+    | 0.000000 | 0.000000 | 0.000000 | 0.002519 | 0.003778 | 0.000000 | 0.000000 | 0.000000 | 0.000000 |
| 55-59 | 253+    | 0.000000 | 0.000000 | 0.000000 | 0.003693 | 0.005540 | 0.000000 | 0.000000 | 0.000000 | 0.000000 |
| 60-64 | 253+    | 0.000000 | 0.000000 | 0.000000 | 0.005888 | 0.008832 | 0.000000 | 0.000000 | 0.000000 | 0.000000 |
| 65-69 | 253+    | 0.000000 | 0.000000 | 0.000000 | 0.004823 | 0.007235 | 0.000000 | 0.000000 | 0.000000 | 0.000000 |
| 70-74 | 253+    | 0.000000 | 0.000000 | 0.000000 | 0.004733 | 0.007099 | 0.000000 | 0.000000 | 0.000000 | 0.000000 |
| 75-79 | 253+    | 0.000000 | 0.000000 | 0.000000 | 0.004733 | 0.007099 | 0.000000 | 0.000000 | 0.000000 | 0.000000 |



**Results for PHIM for Run 7 (Sensitivity\_Analysis\_3.RTF)**

|       |      |          |          |          |          |          |          |
|-------|------|----------|----------|----------|----------|----------|----------|
| 25-29 | 253+ | 0.015212 | 0.000000 | 0.000000 | 0.000000 | 0.000000 | 0.000000 |
| 30-34 | 253+ | 0.015460 | 0.000000 | 0.000000 | 0.000000 | 0.000000 | 0.000000 |
| 35-39 | 253+ | 0.014711 | 0.000000 | 0.000000 | 0.000000 | 0.000000 | 0.000000 |
| 40-44 | 253+ | 0.014241 | 0.000000 | 0.000000 | 0.000000 | 0.000000 | 0.000000 |
| 45-49 | 253+ | 0.013014 | 0.000000 | 0.000000 | 0.000000 | 0.000000 | 0.000000 |
| 50-54 | 253+ | 0.011768 | 0.000000 | 0.000000 | 0.000000 | 0.000000 | 0.000000 |
| 55-59 | 253+ | 0.011032 | 0.000000 | 0.000000 | 0.000000 | 0.000000 | 0.000000 |
| 60-64 | 253+ | 0.009525 | 0.000000 | 0.000000 | 0.000000 | 0.000000 | 0.000000 |
| 65-69 | 253+ | 0.006897 | 0.000000 | 0.000000 | 0.000000 | 0.000000 | 0.000000 |
| 70-74 | 253+ | 0.005435 | 0.000000 | 0.000000 | 0.000000 | 0.000000 | 0.000000 |
| 75-79 | 253+ | 0.005435 | 0.000000 | 0.000000 | 0.000000 | 0.000000 | 0.000000 |

## Results for PHIM for Run 7 (Sensitivity\_Analysis\_3.RTF)

\*\*\*\*\*

### Main Output for the Tobacco History for Run: 7, Simulation: 1, Scenario: NULL

| Variable Parameter          | Value              |
|-----------------------------|--------------------|
| 1. Country                  | US (United States) |
| 2. Sex                      | M (Males)          |
| 3. Year of start of process | 1990               |

Year of Follow-up: 2040, Age Group: All Ages  
 Period    Age Group    Smoking Group            N            %

|    |          |           |       |       |
|----|----------|-----------|-------|-------|
| 50 | All Ages | Never Any | 19445 | 50.68 |
| 50 | All Ages | CC        | 3024  | 7.88  |
| 50 | All Ages | Former    | 15896 | 41.43 |

Year of Follow-up: 2040, Age Group: 18-19  
 Period    Age Group    Smoking Group            N            %

|    |       |           |   |   |
|----|-------|-----------|---|---|
| 50 | 18-19 | Never Any | 0 | . |
| 50 | 18-19 | CC        | 0 | . |
| 50 | 18-19 | Former    | 0 | . |

Year of Follow-up: 2040, Age Group: 20-24  
 Period    Age Group    Smoking Group            N            %

|    |       |           |   |   |
|----|-------|-----------|---|---|
| 50 | 20-24 | Never Any | 0 | . |
| 50 | 20-24 | CC        | 0 | . |
| 50 | 20-24 | Former    | 0 | . |

Year of Follow-up: 2040, Age Group: 25-29  
 Period    Age Group    Smoking Group            N            %

|    |       |           |   |   |
|----|-------|-----------|---|---|
| 50 | 25-29 | Never Any | 0 | . |
| 50 | 25-29 | CC        | 0 | . |
| 50 | 25-29 | Former    | 0 | . |

Year of Follow-up: 2040, Age Group: 30-34  
 Period    Age Group    Smoking Group            N            %

|    |       |           |   |   |
|----|-------|-----------|---|---|
| 50 | 30-34 | Never Any | 0 | . |
| 50 | 30-34 | CC        | 0 | . |
| 50 | 30-34 | Former    | 0 | . |

Year of Follow-up: 2040, Age Group: 35-39  
 Period    Age Group    Smoking Group            N            %

|    |       |           |   |   |
|----|-------|-----------|---|---|
| 50 | 35-39 | Never Any | 0 | . |
| 50 | 35-39 | CC        | 0 | . |
| 50 | 35-39 | Former    | 0 | . |

Year of Follow-up: 2040, Age Group: 40-44  
 Period    Age Group    Smoking Group            N            %

|    |       |           |   |   |
|----|-------|-----------|---|---|
| 50 | 40-44 | Never Any | 0 | . |
| 50 | 40-44 | CC        | 0 | . |
| 50 | 40-44 | Former    | 0 | . |

Year of Follow-up: 2040, Age Group: 45-49  
 Period    Age Group    Smoking Group            N            %

|    |       |           |   |   |
|----|-------|-----------|---|---|
| 50 | 45-49 | Never Any | 0 | . |
| 50 | 45-49 | CC        | 0 | . |
| 50 | 45-49 | Former    | 0 | . |

Year of Follow-up: 2040, Age Group: 50-54  
 Period    Age Group    Smoking Group            N            %

|    |       |           |   |   |
|----|-------|-----------|---|---|
| 50 | 50-54 | Never Any | 0 | . |
| 50 | 50-54 | CC        | 0 | . |
| 50 | 50-54 | Former    | 0 | . |

Year of Follow-up: 2040, Age Group: 55-59  
 Period    Age Group    Smoking Group            N            %

|    |       |           |   |   |
|----|-------|-----------|---|---|
| 50 | 55-59 | Never Any | 0 | . |
| 50 | 55-59 | CC        | 0 | . |
| 50 | 55-59 | Former    | 0 | . |

Year of Follow-up: 2040, Age Group: 60-64  
 Period    Age Group    Smoking Group            N            %

### Results for PHIM for Run 7 (Sensitivity\_Analysis\_3.RTF)

|                                           |           |               |      |       |
|-------------------------------------------|-----------|---------------|------|-------|
| 50                                        | 60-64     | Never Any     | 4363 | 49.33 |
| 50                                        | 60-64     | CC            | 934  | 10.56 |
| 50                                        | 60-64     | Former        | 3548 | 40.11 |
| Year of Follow-up: 2040, Age Group: 65-69 |           |               |      |       |
| Period                                    | Age Group | Smoking Group | N    | %     |
| 50                                        | 65-69     | Never Any     | 4948 | 54.73 |
| 50                                        | 65-69     | CC            | 734  | 8.12  |
| 50                                        | 65-69     | Former        | 3358 | 37.15 |
| Year of Follow-up: 2040, Age Group: 70-74 |           |               |      |       |
| Period                                    | Age Group | Smoking Group | N    | %     |
| 50                                        | 70-74     | Never Any     | 5145 | 52.41 |
| 50                                        | 70-74     | CC            | 688  | 7.01  |
| 50                                        | 70-74     | Former        | 3983 | 40.58 |
| Year of Follow-up: 2040, Age Group: 75-79 |           |               |      |       |
| Period                                    | Age Group | Smoking Group | N    | %     |
| 50                                        | 75-79     | Never Any     | 4989 | 46.78 |
| 50                                        | 75-79     | CC            | 668  | 6.26  |
| 50                                        | 75-79     | Former        | 5007 | 46.95 |

## Results for PHIM for Run 7 (Sensitivity\_Analysis\_3.RTF)

\*\*\*\*\*

### Main Output for the Tobacco History for Run: 7, Simulation: 1, Scenario: Ecig

| Variable Parameter                           |           |               | Value              |       |               |             |               |                |              |
|----------------------------------------------|-----------|---------------|--------------------|-------|---------------|-------------|---------------|----------------|--------------|
| 1. Country                                   |           |               | US (United States) |       |               |             |               |                |              |
| 2. Sex                                       |           |               | M (Males)          |       |               |             |               |                |              |
| 3. Year of start of process                  |           |               | 1990               |       |               |             |               |                |              |
| Year of Follow-up: 1990, Age Group: All Ages |           |               |                    |       |               |             |               |                |              |
| Period                                       | Age Group | Smoking Group | N                  | %     | Ever Quit (N) | Ever Quit % | Mean Yrs Quit | Short Term (n) | Short Term % |
| 0                                            | All Ages  | Never Any     | 34075              | 39.78 |               |             |               |                |              |
| 0                                            | All Ages  | CC            | 27323              | 31.90 | 0             | 0.00        |               |                |              |
| 0                                            | All Ages  | Ecig          | 0                  | 0.00  |               |             |               |                |              |
| 0                                            | All Ages  | Dual          | 0                  | 0.00  |               |             |               |                |              |
| 0                                            | All Ages  | Former        | 24266              | 28.33 |               |             | 13.08         | 3623           | 14.93        |
| Year of Follow-up: 1990, Age Group: 18-19    |           |               |                    |       |               |             |               |                |              |
| Period                                       | Age Group | Smoking Group | N                  | %     | Ever Quit (N) | Ever Quit % | Mean Yrs Quit | Short Term (n) | Short Term % |
| 0                                            | 18-19     | Never Any     | 2783               | 78.42 |               |             |               |                |              |
| 0                                            | 18-19     | CC            | 634                | 17.86 | 0             | 0.00        |               |                |              |
| 0                                            | 18-19     | Ecig          | 0                  | 0.00  |               |             |               |                |              |
| 0                                            | 18-19     | Dual          | 0                  | 0.00  |               |             |               |                |              |
| 0                                            | 18-19     | Former        | 132                | 3.72  |               |             | 0.11          | 132            | 100.00       |
| Year of Follow-up: 1990, Age Group: 20-24    |           |               |                    |       |               |             |               |                |              |
| Period                                       | Age Group | Smoking Group | N                  | %     | Ever Quit (N) | Ever Quit % | Mean Yrs Quit | Short Term (n) | Short Term % |
| 0                                            | 20-24     | Never Any     | 5722               | 58.29 |               |             |               |                |              |
| 0                                            | 20-24     | CC            | 3199               | 32.59 | 0             | 0.00        |               |                |              |
| 0                                            | 20-24     | Ecig          | 0                  | 0.00  |               |             |               |                |              |
| 0                                            | 20-24     | Dual          | 0                  | 0.00  |               |             |               |                |              |
| 0                                            | 20-24     | Former        | 895                | 9.12  |               |             | 1.46          | 506            | 56.54        |
| Year of Follow-up: 1990, Age Group: 25-29    |           |               |                    |       |               |             |               |                |              |
| Period                                       | Age Group | Smoking Group | N                  | %     | Ever Quit (N) | Ever Quit % | Mean Yrs Quit | Short Term (n) | Short Term % |
| 0                                            | 25-29     | Never Any     | 5232               | 49.06 |               |             |               |                |              |
| 0                                            | 25-29     | CC            | 3914               | 36.70 | 0             | 0.00        |               |                |              |
| 0                                            | 25-29     | Ecig          | 0                  | 0.00  |               |             |               |                |              |
| 0                                            | 25-29     | Dual          | 0                  | 0.00  |               |             |               |                |              |
| 0                                            | 25-29     | Former        | 1518               | 14.23 |               |             | 2.87          | 643            | 42.36        |
| Year of Follow-up: 1990, Age Group: 30-34    |           |               |                    |       |               |             |               |                |              |
| Period                                       | Age Group | Smoking Group | N                  | %     | Ever Quit (N) | Ever Quit % | Mean Yrs Quit | Short Term (n) | Short Term % |
| 0                                            | 30-34     | Never Any     | 4765               | 43.65 |               |             |               |                |              |
| 0                                            | 30-34     | CC            | 4023               | 36.85 | 0             | 0.00        |               |                |              |
| 0                                            | 30-34     | Ecig          | 0                  | 0.00  |               |             |               |                |              |
| 0                                            | 30-34     | Dual          | 0                  | 0.00  |               |             |               |                |              |
| 0                                            | 30-34     | Former        | 2128               | 19.49 |               |             | 4.06          | 592            | 27.82        |
| Year of Follow-up: 1990, Age Group: 35-39    |           |               |                    |       |               |             |               |                |              |
| Period                                       | Age Group | Smoking Group | N                  | %     | Ever Quit (N) | Ever Quit % | Mean Yrs Quit | Short Term (n) | Short Term % |
| 0                                            | 35-39     | Never Any     | 3941               | 39.85 |               |             |               |                |              |
| 0                                            | 35-39     | CC            | 3474               | 35.13 | 0             | 0.00        |               |                |              |
| 0                                            | 35-39     | Ecig          | 0                  | 0.00  |               |             |               |                |              |
| 0                                            | 35-39     | Dual          | 0                  | 0.00  |               |             |               |                |              |
| 0                                            | 35-39     | Former        | 2474               | 25.02 |               |             | 8.31          | 425            | 17.18        |
| Year of Follow-up: 1990, Age Group: 40-44    |           |               |                    |       |               |             |               |                |              |
| Period                                       | Age Group | Smoking Group | N                  | %     | Ever Quit (N) | Ever Quit % | Mean Yrs Quit | Short Term (n) | Short Term % |
| 0                                            | 40-44     | Never Any     | 2912               | 33.65 |               |             |               |                |              |
| 0                                            | 40-44     | CC            | 3113               | 35.97 | 0             | 0.00        |               |                |              |
| 0                                            | 40-44     | Ecig          | 0                  | 0.00  |               |             |               |                |              |
| 0                                            | 40-44     | Dual          | 0                  | 0.00  |               |             |               |                |              |
| 0                                            | 40-44     | Former        | 2630               | 30.39 |               |             | 10.69         | 317            | 12.05        |
| Year of Follow-up: 1990, Age Group: 45-49    |           |               |                    |       |               |             |               |                |              |
| Period                                       | Age Group | Smoking Group | N                  | %     | Ever Quit (N) | Ever Quit % | Mean Yrs Quit | Short Term (n) | Short Term % |
| 0                                            | 45-49     | Never Any     | 1919               | 29.46 |               |             |               |                |              |
| 0                                            | 45-49     | CC            | 2318               | 35.58 | 0             | 0.00        |               |                |              |
| 0                                            | 45-49     | Ecig          | 0                  | 0.00  |               |             |               |                |              |
| 0                                            | 45-49     | Dual          | 0                  | 0.00  |               |             |               |                |              |
| 0                                            | 45-49     | Former        | 2278               | 34.97 |               |             | 13.26         | 221            | 9.70         |
| Year of Follow-up: 1990, Age Group: 50-54    |           |               |                    |       |               |             |               |                |              |
| Period                                       | Age Group | Smoking Group | N                  | %     | Ever Quit (N) | Ever Quit % | Mean Yrs Quit | Short Term (n) | Short Term % |
| 0                                            | 50-54     | Never Any     | 1611               | 29.41 |               |             |               |                |              |
| 0                                            | 50-54     | CC            | 1816               | 33.16 | 0             | 0.00        |               |                |              |

**Results for PHIM for Run 7 (Sensitivity\_Analysis\_3.RTF)**

|                                              |           |               |       |       |               |             |               |                |              |
|----------------------------------------------|-----------|---------------|-------|-------|---------------|-------------|---------------|----------------|--------------|
| 0                                            | 50-54     | Ecig          | 0     | 0.00  |               |             |               |                |              |
| 0                                            | 50-54     | Dual          | 0     | 0.00  |               |             |               |                |              |
| 0                                            | 50-54     | Former        | 2050  | 37.43 |               |             | 14.55         | 261            | 12.73        |
| Year of Follow-up: 1990, Age Group: 55-59    |           |               |       |       |               |             |               |                |              |
| Period                                       | Age Group | Smoking Group | N     | %     | Ever Quit (N) | Ever Quit % | Mean Yrs Quit | Short Term (n) | Short Term % |
| 0                                            | 55-59     | Never Any     | 1337  | 26.83 |               |             |               |                |              |
| 0                                            | 55-59     | CC            | 1520  | 30.50 | 0             | 0.00        |               |                |              |
| 0                                            | 55-59     | Ecig          | 0     | 0.00  |               |             |               |                |              |
| 0                                            | 55-59     | Dual          | 0     | 0.00  |               |             |               |                |              |
| 0                                            | 55-59     | Former        | 2126  | 42.67 |               |             | 14.80         | 216            | 10.16        |
| Year of Follow-up: 1990, Age Group: 60-64    |           |               |       |       |               |             |               |                |              |
| Period                                       | Age Group | Smoking Group | N     | %     | Ever Quit (N) | Ever Quit % | Mean Yrs Quit | Short Term (n) | Short Term % |
| 0                                            | 60-64     | Never Any     | 1169  | 23.83 |               |             |               |                |              |
| 0                                            | 60-64     | CC            | 1287  | 26.24 | 0             | 0.00        |               |                |              |
| 0                                            | 60-64     | Ecig          | 0     | 0.00  |               |             |               |                |              |
| 0                                            | 60-64     | Dual          | 0     | 0.00  |               |             |               |                |              |
| 0                                            | 60-64     | Former        | 2449  | 49.93 |               |             | 18.87         | 106            | 4.33         |
| Year of Follow-up: 1990, Age Group: 65-69    |           |               |       |       |               |             |               |                |              |
| Period                                       | Age Group | Smoking Group | N     | %     | Ever Quit (N) | Ever Quit % | Mean Yrs Quit | Short Term (n) | Short Term % |
| 0                                            | 65-69     | Never Any     | 1023  | 23.32 |               |             |               |                |              |
| 0                                            | 65-69     | CC            | 979   | 22.32 | 0             | 0.00        |               |                |              |
| 0                                            | 65-69     | Ecig          | 0     | 0.00  |               |             |               |                |              |
| 0                                            | 65-69     | Dual          | 0     | 0.00  |               |             |               |                |              |
| 0                                            | 65-69     | Former        | 2385  | 54.37 |               |             | 19.91         | 113            | 4.74         |
| Year of Follow-up: 1990, Age Group: 70-74    |           |               |       |       |               |             |               |                |              |
| Period                                       | Age Group | Smoking Group | N     | %     | Ever Quit (N) | Ever Quit % | Mean Yrs Quit | Short Term (n) | Short Term % |
| 0                                            | 70-74     | Never Any     | 961   | 27.46 |               |             |               |                |              |
| 0                                            | 70-74     | CC            | 675   | 19.29 | 0             | 0.00        |               |                |              |
| 0                                            | 70-74     | Ecig          | 0     | 0.00  |               |             |               |                |              |
| 0                                            | 70-74     | Dual          | 0     | 0.00  |               |             |               |                |              |
| 0                                            | 70-74     | Former        | 1863  | 53.24 |               |             | 20.69         | 23             | 1.23         |
| Year of Follow-up: 1990, Age Group: 75-79    |           |               |       |       |               |             |               |                |              |
| Period                                       | Age Group | Smoking Group | N     | %     | Ever Quit (N) | Ever Quit % | Mean Yrs Quit | Short Term (n) | Short Term % |
| 0                                            | 75-79     | Never Any     | 700   | 29.06 |               |             |               |                |              |
| 0                                            | 75-79     | CC            | 371   | 15.40 | 0             | 0.00        |               |                |              |
| 0                                            | 75-79     | Ecig          | 0     | 0.00  |               |             |               |                |              |
| 0                                            | 75-79     | Dual          | 0     | 0.00  |               |             |               |                |              |
| 0                                            | 75-79     | Former        | 1338  | 55.54 |               |             | 22.88         | 68             | 5.08         |
| Year of Follow-up: 1995, Age Group: All Ages |           |               |       |       |               |             |               |                |              |
| Period                                       | Age Group | Smoking Group | N     | %     | Ever Quit (N) | Ever Quit % | Mean Yrs Quit | Short Term (n) | Short Term % |
| 5                                            | All Ages  | Never Any     | 38368 | 41.57 |               |             |               |                |              |
| 5                                            | All Ages  | CC            | 11508 | 12.47 | 0             | 0.00        |               |                |              |
| 5                                            | All Ages  | Ecig          | 15016 | 16.27 |               |             |               |                |              |
| 5                                            | All Ages  | Dual          | 0     | 0.00  |               |             |               |                |              |
| 5                                            | All Ages  | Former        | 27398 | 29.69 |               |             | 14.94         | 2025           | 7.39         |
| Year of Follow-up: 1995, Age Group: 18-19    |           |               |       |       |               |             |               |                |              |
| Period                                       | Age Group | Smoking Group | N     | %     | Ever Quit (N) | Ever Quit % | Mean Yrs Quit | Short Term (n) | Short Term % |
| 5                                            | 18-19     | Never Any     | 2448  | 69.07 |               |             |               |                |              |
| 5                                            | 18-19     | CC            | 320   | 9.03  | 0             | 0.00        |               |                |              |
| 5                                            | 18-19     | Ecig          | 632   | 17.83 |               |             |               |                |              |
| 5                                            | 18-19     | Dual          | 0     | 0.00  |               |             |               |                |              |
| 5                                            | 18-19     | Former        | 144   | 4.06  |               |             | 1.05          | 100            | 69.44        |
| Year of Follow-up: 1995, Age Group: 20-24    |           |               |       |       |               |             |               |                |              |
| Period                                       | Age Group | Smoking Group | N     | %     | Ever Quit (N) | Ever Quit % | Mean Yrs Quit | Short Term (n) | Short Term % |
| 5                                            | 20-24     | Never Any     | 5787  | 64.02 |               |             |               |                |              |
| 5                                            | 20-24     | CC            | 946   | 10.46 | 0             | 0.00        |               |                |              |
| 5                                            | 20-24     | Ecig          | 1746  | 19.31 |               |             |               |                |              |
| 5                                            | 20-24     | Dual          | 0     | 0.00  |               |             |               |                |              |
| 5                                            | 20-24     | Former        | 561   | 6.21  |               |             | 2.60          | 186            | 33.16        |
| Year of Follow-up: 1995, Age Group: 25-29    |           |               |       |       |               |             |               |                |              |
| Period                                       | Age Group | Smoking Group | N     | %     | Ever Quit (N) | Ever Quit % | Mean Yrs Quit | Short Term (n) | Short Term % |
| 5                                            | 25-29     | Never Any     | 5471  | 55.74 |               |             |               |                |              |
| 5                                            | 25-29     | CC            | 1255  | 12.79 | 0             | 0.00        |               |                |              |
| 5                                            | 25-29     | Ecig          | 1906  | 19.42 |               |             |               |                |              |
| 5                                            | 25-29     | Dual          | 0     | 0.00  |               |             |               |                |              |
| 5                                            | 25-29     | Former        | 1184  | 12.06 |               |             | 5.30          | 144            | 12.16        |
| Year of Follow-up: 1995, Age Group: 30-34    |           |               |       |       |               |             |               |                |              |
| Period                                       | Age Group | Smoking Group | N     | %     | Ever Quit (N) | Ever Quit % | Mean Yrs Quit | Short Term (n) | Short Term % |

**Results for PHIM for Run 7 (Sensitivity\_Analysis\_3.RTF)**

|                                              |           |               |      |       |               |             |               |                |              |
|----------------------------------------------|-----------|---------------|------|-------|---------------|-------------|---------------|----------------|--------------|
| 5                                            | 30-34     | Never Any     | 5065 | 47.50 |               |             |               |                |              |
| 5                                            | 30-34     | CC            | 1480 | 13.88 | 0             | 0.00        |               |                |              |
| 5                                            | 30-34     | Ecig          | 2279 | 21.37 |               |             |               |                |              |
| 5                                            | 30-34     | Dual          | 0    | 0.00  |               |             |               |                |              |
| 5                                            | 30-34     | Former        | 1840 | 17.25 |               |             | 6.81          | 138            | 7.50         |
| Year of Follow-up: 1995, Age Group: 35-39    |           |               |      |       |               |             |               |                |              |
| Period                                       | Age Group | Smoking Group | N    | %     | Ever Quit (N) | Ever Quit % | Mean Yrs Quit | Short Term (n) | Short Term % |
| 5                                            | 35-39     | Never Any     | 4724 | 43.28 |               |             |               |                |              |
| 5                                            | 35-39     | CC            | 1496 | 13.70 | 0             | 0.00        |               |                |              |
| 5                                            | 35-39     | Ecig          | 2234 | 20.47 |               |             |               |                |              |
| 5                                            | 35-39     | Dual          | 0    | 0.00  |               |             |               |                |              |
| 5                                            | 35-39     | Former        | 2462 | 22.55 |               |             | 8.09          | 137            | 5.56         |
| Year of Follow-up: 1995, Age Group: 40-44    |           |               |      |       |               |             |               |                |              |
| Period                                       | Age Group | Smoking Group | N    | %     | Ever Quit (N) | Ever Quit % | Mean Yrs Quit | Short Term (n) | Short Term % |
| 5                                            | 40-44     | Never Any     | 3941 | 39.85 |               |             |               |                |              |
| 5                                            | 40-44     | CC            | 1280 | 12.94 | 0             | 0.00        |               |                |              |
| 5                                            | 40-44     | Ecig          | 1859 | 18.80 |               |             |               |                |              |
| 5                                            | 40-44     | Dual          | 0    | 0.00  |               |             |               |                |              |
| 5                                            | 40-44     | Former        | 2809 | 28.41 |               |             | 11.92         | 155            | 5.52         |
| Year of Follow-up: 1995, Age Group: 45-49    |           |               |      |       |               |             |               |                |              |
| Period                                       | Age Group | Smoking Group | N    | %     | Ever Quit (N) | Ever Quit % | Mean Yrs Quit | Short Term (n) | Short Term % |
| 5                                            | 45-49     | Never Any     | 2912 | 33.65 |               |             |               |                |              |
| 5                                            | 45-49     | CC            | 1236 | 14.28 | 0             | 0.00        |               |                |              |
| 5                                            | 45-49     | Ecig          | 1505 | 17.39 |               |             |               |                |              |
| 5                                            | 45-49     | Dual          | 0    | 0.00  |               |             |               |                |              |
| 5                                            | 45-49     | Former        | 3002 | 34.69 |               |             | 13.95         | 185            | 6.16         |
| Year of Follow-up: 1995, Age Group: 50-54    |           |               |      |       |               |             |               |                |              |
| Period                                       | Age Group | Smoking Group | N    | %     | Ever Quit (N) | Ever Quit % | Mean Yrs Quit | Short Term (n) | Short Term % |
| 5                                            | 50-54     | Never Any     | 1919 | 29.46 |               |             |               |                |              |
| 5                                            | 50-54     | CC            | 940  | 14.43 | 0             | 0.00        |               |                |              |
| 5                                            | 50-54     | Ecig          | 979  | 15.03 |               |             |               |                |              |
| 5                                            | 50-54     | Dual          | 0    | 0.00  |               |             |               |                |              |
| 5                                            | 50-54     | Former        | 2677 | 41.09 |               |             | 15.78         | 197            | 7.36         |
| Year of Follow-up: 1995, Age Group: 55-59    |           |               |      |       |               |             |               |                |              |
| Period                                       | Age Group | Smoking Group | N    | %     | Ever Quit (N) | Ever Quit % | Mean Yrs Quit | Short Term (n) | Short Term % |
| 5                                            | 55-59     | Never Any     | 1611 | 29.41 |               |             |               |                |              |
| 5                                            | 55-59     | CC            | 740  | 13.51 | 0             | 0.00        |               |                |              |
| 5                                            | 55-59     | Ecig          | 708  | 12.93 |               |             |               |                |              |
| 5                                            | 55-59     | Dual          | 0    | 0.00  |               |             |               |                |              |
| 5                                            | 55-59     | Former        | 2418 | 44.15 |               |             | 16.85         | 158            | 6.53         |
| Year of Follow-up: 1995, Age Group: 60-64    |           |               |      |       |               |             |               |                |              |
| Period                                       | Age Group | Smoking Group | N    | %     | Ever Quit (N) | Ever Quit % | Mean Yrs Quit | Short Term (n) | Short Term % |
| 5                                            | 60-64     | Never Any     | 1337 | 26.83 |               |             |               |                |              |
| 5                                            | 60-64     | CC            | 597  | 11.98 | 0             | 0.00        |               |                |              |
| 5                                            | 60-64     | Ecig          | 537  | 10.78 |               |             |               |                |              |
| 5                                            | 60-64     | Dual          | 0    | 0.00  |               |             |               |                |              |
| 5                                            | 60-64     | Former        | 2512 | 50.41 |               |             | 17.05         | 163            | 6.49         |
| Year of Follow-up: 1995, Age Group: 65-69    |           |               |      |       |               |             |               |                |              |
| Period                                       | Age Group | Smoking Group | N    | %     | Ever Quit (N) | Ever Quit % | Mean Yrs Quit | Short Term (n) | Short Term % |
| 5                                            | 65-69     | Never Any     | 1169 | 23.83 |               |             |               |                |              |
| 5                                            | 65-69     | CC            | 477  | 9.72  | 0             | 0.00        |               |                |              |
| 5                                            | 65-69     | Ecig          | 329  | 6.71  |               |             |               |                |              |
| 5                                            | 65-69     | Dual          | 0    | 0.00  |               |             |               |                |              |
| 5                                            | 65-69     | Former        | 2930 | 59.73 |               |             | 20.24         | 214            | 7.30         |
| Year of Follow-up: 1995, Age Group: 70-74    |           |               |      |       |               |             |               |                |              |
| Period                                       | Age Group | Smoking Group | N    | %     | Ever Quit (N) | Ever Quit % | Mean Yrs Quit | Short Term (n) | Short Term % |
| 5                                            | 70-74     | Never Any     | 1023 | 23.32 |               |             |               |                |              |
| 5                                            | 70-74     | CC            | 438  | 9.98  | 0             | 0.00        |               |                |              |
| 5                                            | 70-74     | Ecig          | 174  | 3.97  |               |             |               |                |              |
| 5                                            | 70-74     | Dual          | 0    | 0.00  |               |             |               |                |              |
| 5                                            | 70-74     | Former        | 2752 | 62.73 |               |             | 21.83         | 147            | 5.34         |
| Year of Follow-up: 1995, Age Group: 75-79    |           |               |      |       |               |             |               |                |              |
| Period                                       | Age Group | Smoking Group | N    | %     | Ever Quit (N) | Ever Quit % | Mean Yrs Quit | Short Term (n) | Short Term % |
| 5                                            | 75-79     | Never Any     | 961  | 27.46 |               |             |               |                |              |
| 5                                            | 75-79     | CC            | 303  | 8.66  | 0             | 0.00        |               |                |              |
| 5                                            | 75-79     | Ecig          | 128  | 3.66  |               |             |               |                |              |
| 5                                            | 75-79     | Dual          | 0    | 0.00  |               |             |               |                |              |
| 5                                            | 75-79     | Former        | 2107 | 60.22 |               |             | 22.95         | 101            | 4.79         |
| Year of Follow-up: 2000, Age Group: All Ages |           |               |      |       |               |             |               |                |              |



**Results for PHIM for Run 7 (Sensitivity\_Analysis\_3.RTF)**

| Period                                    | Age Group | Smoking Group | N     | %     | Ever Quit (N) | Ever Quit % | Mean Yrs Quit | Short Term (n) | Short Term % |
|-------------------------------------------|-----------|---------------|-------|-------|---------------|-------------|---------------|----------------|--------------|
| 10                                        | All Ages  | Never Any     | 39177 | 41.64 |               |             |               |                |              |
| 10                                        | All Ages  | CC            | 4843  | 5.15  | 0             | 0.00        |               |                |              |
| 10                                        | All Ages  | Ecig          | 19082 | 20.28 |               |             |               |                |              |
| 10                                        | All Ages  | Dual          | 0     | 0.00  |               |             |               |                |              |
| 10                                        | All Ages  | Former        | 30990 | 32.94 |               |             | 16.13         | 2144           | 6.92         |
| Year of Follow-up: 2000, Age Group: 18-19 |           |               |       |       |               |             |               |                |              |
| Period                                    | Age Group | Smoking Group | N     | %     | Ever Quit (N) | Ever Quit % | Mean Yrs Quit | Short Term (n) | Short Term % |
| 10                                        | 18-19     | Never Any     | 0     | .     |               |             |               |                |              |
| 10                                        | 18-19     | CC            | 0     | .     | 0             | .           |               |                |              |
| 10                                        | 18-19     | Ecig          | 0     | .     |               |             |               |                |              |
| 10                                        | 18-19     | Dual          | 0     | .     |               |             |               |                |              |
| 10                                        | 18-19     | Former        | 0     | .     |               |             |               | 0              | .            |
| Year of Follow-up: 2000, Age Group: 20-24 |           |               |       |       |               |             |               |                |              |
| Period                                    | Age Group | Smoking Group | N     | %     | Ever Quit (N) | Ever Quit % | Mean Yrs Quit | Short Term (n) | Short Term % |
| 10                                        | 20-24     | Never Any     | 4927  | 55.70 |               |             |               |                |              |
| 10                                        | 20-24     | CC            | 462   | 5.22  | 0             | 0.00        |               |                |              |
| 10                                        | 20-24     | Ecig          | 2285  | 25.83 |               |             |               |                |              |
| 10                                        | 20-24     | Dual          | 0     | 0.00  |               |             |               |                |              |
| 10                                        | 20-24     | Former        | 1171  | 13.24 |               |             | 3.30          | 347            | 29.63        |
| Year of Follow-up: 2000, Age Group: 25-29 |           |               |       |       |               |             |               |                |              |
| Period                                    | Age Group | Smoking Group | N     | %     | Ever Quit (N) | Ever Quit % | Mean Yrs Quit | Short Term (n) | Short Term % |
| 10                                        | 25-29     | Never Any     | 5341  | 59.08 |               |             |               |                |              |
| 10                                        | 25-29     | CC            | 404   | 4.47  | 0             | 0.00        |               |                |              |
| 10                                        | 25-29     | Ecig          | 2149  | 23.77 |               |             |               |                |              |
| 10                                        | 25-29     | Dual          | 0     | 0.00  |               |             |               |                |              |
| 10                                        | 25-29     | Former        | 1146  | 12.68 |               |             | 4.68          | 242            | 21.12        |
| Year of Follow-up: 2000, Age Group: 30-34 |           |               |       |       |               |             |               |                |              |
| Period                                    | Age Group | Smoking Group | N     | %     | Ever Quit (N) | Ever Quit % | Mean Yrs Quit | Short Term (n) | Short Term % |
| 10                                        | 30-34     | Never Any     | 5276  | 53.75 |               |             |               |                |              |
| 10                                        | 30-34     | CC            | 481   | 4.90  | 0             | 0.00        |               |                |              |
| 10                                        | 30-34     | Ecig          | 2475  | 25.21 |               |             |               |                |              |
| 10                                        | 30-34     | Dual          | 0     | 0.00  |               |             |               |                |              |
| 10                                        | 30-34     | Former        | 1584  | 16.14 |               |             | 8.18          | 155            | 9.79         |
| Year of Follow-up: 2000, Age Group: 35-39 |           |               |       |       |               |             |               |                |              |
| Period                                    | Age Group | Smoking Group | N     | %     | Ever Quit (N) | Ever Quit % | Mean Yrs Quit | Short Term (n) | Short Term % |
| 10                                        | 35-39     | Never Any     | 4997  | 46.86 |               |             |               |                |              |
| 10                                        | 35-39     | CC            | 609   | 5.71  | 0             | 0.00        |               |                |              |
| 10                                        | 35-39     | Ecig          | 2858  | 26.80 |               |             |               |                |              |
| 10                                        | 35-39     | Dual          | 0     | 0.00  |               |             |               |                |              |
| 10                                        | 35-39     | Former        | 2200  | 20.63 |               |             | 10.20         | 141            | 6.41         |
| Year of Follow-up: 2000, Age Group: 40-44 |           |               |       |       |               |             |               |                |              |
| Period                                    | Age Group | Smoking Group | N     | %     | Ever Quit (N) | Ever Quit % | Mean Yrs Quit | Short Term (n) | Short Term % |
| 10                                        | 40-44     | Never Any     | 4724  | 43.28 |               |             |               |                |              |
| 10                                        | 40-44     | CC            | 567   | 5.19  | 0             | 0.00        |               |                |              |
| 10                                        | 40-44     | Ecig          | 2728  | 24.99 |               |             |               |                |              |
| 10                                        | 40-44     | Dual          | 0     | 0.00  |               |             |               |                |              |
| 10                                        | 40-44     | Former        | 2897  | 26.54 |               |             | 11.44         | 156            | 5.38         |
| Year of Follow-up: 2000, Age Group: 45-49 |           |               |       |       |               |             |               |                |              |
| Period                                    | Age Group | Smoking Group | N     | %     | Ever Quit (N) | Ever Quit % | Mean Yrs Quit | Short Term (n) | Short Term % |
| 10                                        | 45-49     | Never Any     | 3941  | 39.85 |               |             |               |                |              |
| 10                                        | 45-49     | CC            | 484   | 4.89  | 0             | 0.00        |               |                |              |
| 10                                        | 45-49     | Ecig          | 2153  | 21.77 |               |             |               |                |              |
| 10                                        | 45-49     | Dual          | 0     | 0.00  |               |             |               |                |              |
| 10                                        | 45-49     | Former        | 3311  | 33.48 |               |             | 14.64         | 219            | 6.61         |
| Year of Follow-up: 2000, Age Group: 50-54 |           |               |       |       |               |             |               |                |              |
| Period                                    | Age Group | Smoking Group | N     | %     | Ever Quit (N) | Ever Quit % | Mean Yrs Quit | Short Term (n) | Short Term % |
| 10                                        | 50-54     | Never Any     | 2912  | 33.65 |               |             |               |                |              |
| 10                                        | 50-54     | CC            | 473   | 5.47  | 0             | 0.00        |               |                |              |
| 10                                        | 50-54     | Ecig          | 1678  | 19.39 |               |             |               |                |              |
| 10                                        | 50-54     | Dual          | 0     | 0.00  |               |             |               |                |              |
| 10                                        | 50-54     | Former        | 3592  | 41.50 |               |             | 16.17         | 220            | 6.12         |
| Year of Follow-up: 2000, Age Group: 55-59 |           |               |       |       |               |             |               |                |              |
| Period                                    | Age Group | Smoking Group | N     | %     | Ever Quit (N) | Ever Quit % | Mean Yrs Quit | Short Term (n) | Short Term % |
| 10                                        | 55-59     | Never Any     | 1919  | 29.46 |               |             |               |                |              |
| 10                                        | 55-59     | CC            | 363   | 5.57  | 0             | 0.00        |               |                |              |
| 10                                        | 55-59     | Ecig          | 1062  | 16.30 |               |             |               |                |              |
| 10                                        | 55-59     | Dual          | 0     | 0.00  |               |             |               |                |              |

**Results for PHIM for Run 7 (Sensitivity\_Analysis\_3.RTF)**

| Year of Follow-up: 2000, Age Group: 60-64    | Period   | Age Group | Smoking Group | N     | %     | Ever Quit (N) | Ever Quit % | Mean Yrs Quit | Short Term (n) | Short Term % |
|----------------------------------------------|----------|-----------|---------------|-------|-------|---------------|-------------|---------------|----------------|--------------|
| 10                                           | 55-59    | Former    |               | 3171  | 48.67 |               |             | 17.87         | 180            | 5.68         |
| 10                                           | 60-64    | Never Any |               | 1611  | 29.41 |               |             |               |                |              |
| 10                                           | 60-64    | CC        |               | 306   | 5.59  | 0             | 0.00        |               |                |              |
| 10                                           | 60-64    | Ecig      |               | 722   | 13.18 |               |             |               |                |              |
| 10                                           | 60-64    | Dual      |               | 0     | 0.00  |               |             |               |                |              |
| 10                                           | 60-64    | Former    |               | 2838  | 51.82 |               |             | 18.90         | 172            | 6.06         |
| Year of Follow-up: 2000, Age Group: 65-69    | Period   | Age Group | Smoking Group | N     | %     | Ever Quit (N) | Ever Quit % | Mean Yrs Quit | Short Term (n) | Short Term % |
| 10                                           | 65-69    | Never Any |               | 1337  | 26.83 |               |             |               |                |              |
| 10                                           | 65-69    | CC        |               | 244   | 4.90  | 0             | 0.00        |               |                |              |
| 10                                           | 65-69    | Ecig      |               | 518   | 10.40 |               |             |               |                |              |
| 10                                           | 65-69    | Dual      |               | 0     | 0.00  |               |             |               |                |              |
| 10                                           | 65-69    | Former    |               | 2884  | 57.88 |               |             | 19.48         | 136            | 4.72         |
| Year of Follow-up: 2000, Age Group: 70-74    | Period   | Age Group | Smoking Group | N     | %     | Ever Quit (N) | Ever Quit % | Mean Yrs Quit | Short Term (n) | Short Term % |
| 10                                           | 70-74    | Never Any |               | 1169  | 23.83 |               |             |               |                |              |
| 10                                           | 70-74    | CC        |               | 236   | 4.81  | 0             | 0.00        |               |                |              |
| 10                                           | 70-74    | Ecig      |               | 253   | 5.16  |               |             |               |                |              |
| 10                                           | 70-74    | Dual      |               | 0     | 0.00  |               |             |               |                |              |
| 10                                           | 70-74    | Former    |               | 3247  | 66.20 |               |             | 23.00         | 103            | 3.17         |
| Year of Follow-up: 2000, Age Group: 75-79    | Period   | Age Group | Smoking Group | N     | %     | Ever Quit (N) | Ever Quit % | Mean Yrs Quit | Short Term (n) | Short Term % |
| 10                                           | 75-79    | Never Any |               | 1023  | 23.32 |               |             |               |                |              |
| 10                                           | 75-79    | CC        |               | 214   | 4.88  | 0             | 0.00        |               |                |              |
| 10                                           | 75-79    | Ecig      |               | 201   | 4.58  |               |             |               |                |              |
| 10                                           | 75-79    | Dual      |               | 0     | 0.00  |               |             |               |                |              |
| 10                                           | 75-79    | Former    |               | 2949  | 67.22 |               |             | 25.19         | 73             | 2.48         |
| Year of Follow-up: 2005, Age Group: All Ages | Period   | Age Group | Smoking Group | N     | %     | Ever Quit (N) | Ever Quit % | Mean Yrs Quit | Short Term (n) | Short Term % |
| 15                                           | All Ages | Never Any |               | 37449 | 41.75 |               |             |               |                |              |
| 15                                           | All Ages | CC        |               | 1911  | 2.13  | 0             | 0.00        |               |                |              |
| 15                                           | All Ages | Ecig      |               | 17361 | 19.35 |               |             |               |                |              |
| 15                                           | All Ages | Dual      |               | 0     | 0.00  |               |             |               |                |              |
| 15                                           | All Ages | Former    |               | 32984 | 36.77 |               |             | 17.45         | 1964           | 5.95         |
| Year of Follow-up: 2005, Age Group: 18-19    | Period   | Age Group | Smoking Group | N     | %     | Ever Quit (N) | Ever Quit % | Mean Yrs Quit | Short Term (n) | Short Term % |
| 15                                           | 18-19    | Never Any |               | 0     | .     |               |             |               |                |              |
| 15                                           | 18-19    | CC        |               | 0     | .     | 0             | .           |               |                |              |
| 15                                           | 18-19    | Ecig      |               | 0     | .     |               |             |               |                |              |
| 15                                           | 18-19    | Dual      |               | 0     | .     |               |             |               |                |              |
| 15                                           | 18-19    | Former    |               | 0     | .     |               |             | .             | 0              | .            |
| Year of Follow-up: 2005, Age Group: 20-24    | Period   | Age Group | Smoking Group | N     | %     | Ever Quit (N) | Ever Quit % | Mean Yrs Quit | Short Term (n) | Short Term % |
| 15                                           | 20-24    | Never Any |               | 0     | .     |               |             |               |                |              |
| 15                                           | 20-24    | CC        |               | 0     | .     | 0             | .           |               |                |              |
| 15                                           | 20-24    | Ecig      |               | 0     | .     |               |             |               |                |              |
| 15                                           | 20-24    | Dual      |               | 0     | .     |               |             |               |                |              |
| 15                                           | 20-24    | Former    |               | 0     | .     |               |             | .             | 0              | .            |
| Year of Follow-up: 2005, Age Group: 25-29    | Period   | Age Group | Smoking Group | N     | %     | Ever Quit (N) | Ever Quit % | Mean Yrs Quit | Short Term (n) | Short Term % |
| 15                                           | 25-29    | Never Any |               | 4634  | 52.39 |               |             |               |                |              |
| 15                                           | 25-29    | CC        |               | 179   | 2.02  | 0             | 0.00        |               |                |              |
| 15                                           | 25-29    | Ecig      |               | 2275  | 25.72 |               |             |               |                |              |
| 15                                           | 25-29    | Dual      |               | 0     | 0.00  |               |             |               |                |              |
| 15                                           | 25-29    | Former    |               | 1757  | 19.86 |               |             | 6.25          | 218            | 12.41        |
| Year of Follow-up: 2005, Age Group: 30-34    | Period   | Age Group | Smoking Group | N     | %     | Ever Quit (N) | Ever Quit % | Mean Yrs Quit | Short Term (n) | Short Term % |
| 15                                           | 30-34    | Never Any |               | 5042  | 55.77 |               |             |               |                |              |
| 15                                           | 30-34    | CC        |               | 153   | 1.69  | 0             | 0.00        |               |                |              |
| 15                                           | 30-34    | Ecig      |               | 2167  | 23.97 |               |             |               |                |              |
| 15                                           | 30-34    | Dual      |               | 0     | 0.00  |               |             |               |                |              |
| 15                                           | 30-34    | Former    |               | 1678  | 18.56 |               |             | 7.22          | 201            | 11.98        |
| Year of Follow-up: 2005, Age Group: 35-39    | Period   | Age Group | Smoking Group | N     | %     | Ever Quit (N) | Ever Quit % | Mean Yrs Quit | Short Term (n) | Short Term % |
| 15                                           | 35-39    | Never Any |               | 5163  | 52.60 |               |             |               |                |              |
| 15                                           | 35-39    | CC        |               | 188   | 1.92  | 0             | 0.00        |               |                |              |

**Results for PHIM for Run 7 (Sensitivity\_Analysis\_3.RTF)**

|                                              |           |               |       |       |               |             |               |                |              |
|----------------------------------------------|-----------|---------------|-------|-------|---------------|-------------|---------------|----------------|--------------|
| 15                                           | 35-39     | Ecig          | 2396  | 24.41 |               |             |               |                |              |
| 15                                           | 35-39     | Dual          | 0     | 0.00  |               |             |               |                |              |
| 15                                           | 35-39     | Former        | 2069  | 21.08 |               |             | 10.52         | 210            | 10.15        |
| Year of Follow-up: 2005, Age Group: 40-44    |           |               |       |       |               |             |               |                |              |
| Period                                       | Age Group | Smoking Group | N     | %     | Ever Quit (N) | Ever Quit % | Mean Yrs Quit | Short Term (n) | Short Term % |
| 15                                           | 40-44     | Never Any     | 4997  | 46.86 |               |             |               |                |              |
| 15                                           | 40-44     | CC            | 231   | 2.17  | 0             | 0.00        |               |                |              |
| 15                                           | 40-44     | Ecig          | 2678  | 25.11 |               |             |               |                |              |
| 15                                           | 40-44     | Dual          | 0     | 0.00  |               |             |               |                |              |
| 15                                           | 40-44     | Former        | 2758  | 25.86 |               |             | 12.49         | 254            | 9.21         |
| Year of Follow-up: 2005, Age Group: 45-49    |           |               |       |       |               |             |               |                |              |
| Period                                       | Age Group | Smoking Group | N     | %     | Ever Quit (N) | Ever Quit % | Mean Yrs Quit | Short Term (n) | Short Term % |
| 15                                           | 45-49     | Never Any     | 4724  | 43.28 |               |             |               |                |              |
| 15                                           | 45-49     | CC            | 216   | 1.98  | 0             | 0.00        |               |                |              |
| 15                                           | 45-49     | Ecig          | 2510  | 22.99 |               |             |               |                |              |
| 15                                           | 45-49     | Dual          | 0     | 0.00  |               |             |               |                |              |
| 15                                           | 45-49     | Former        | 3466  | 31.75 |               |             | 14.06         | 228            | 6.58         |
| Year of Follow-up: 2005, Age Group: 50-54    |           |               |       |       |               |             |               |                |              |
| Period                                       | Age Group | Smoking Group | N     | %     | Ever Quit (N) | Ever Quit % | Mean Yrs Quit | Short Term (n) | Short Term % |
| 15                                           | 50-54     | Never Any     | 3941  | 39.85 |               |             |               |                |              |
| 15                                           | 50-54     | CC            | 213   | 2.15  | 0             | 0.00        |               |                |              |
| 15                                           | 50-54     | Ecig          | 1890  | 19.11 |               |             |               |                |              |
| 15                                           | 50-54     | Dual          | 0     | 0.00  |               |             |               |                |              |
| 15                                           | 50-54     | Former        | 3845  | 38.88 |               |             | 17.21         | 200            | 5.20         |
| Year of Follow-up: 2005, Age Group: 55-59    |           |               |       |       |               |             |               |                |              |
| Period                                       | Age Group | Smoking Group | N     | %     | Ever Quit (N) | Ever Quit % | Mean Yrs Quit | Short Term (n) | Short Term % |
| 15                                           | 55-59     | Never Any     | 2912  | 33.65 |               |             |               |                |              |
| 15                                           | 55-59     | CC            | 215   | 2.48  | 0             | 0.00        |               |                |              |
| 15                                           | 55-59     | Ecig          | 1523  | 17.60 |               |             |               |                |              |
| 15                                           | 55-59     | Dual          | 0     | 0.00  |               |             |               |                |              |
| 15                                           | 55-59     | Former        | 4005  | 46.27 |               |             | 19.22         | 136            | 3.40         |
| Year of Follow-up: 2005, Age Group: 60-64    |           |               |       |       |               |             |               |                |              |
| Period                                       | Age Group | Smoking Group | N     | %     | Ever Quit (N) | Ever Quit % | Mean Yrs Quit | Short Term (n) | Short Term % |
| 15                                           | 60-64     | Never Any     | 1919  | 29.46 |               |             |               |                |              |
| 15                                           | 60-64     | CC            | 143   | 2.19  | 0             | 0.00        |               |                |              |
| 15                                           | 60-64     | Ecig          | 883   | 13.55 |               |             |               |                |              |
| 15                                           | 60-64     | Dual          | 0     | 0.00  |               |             |               |                |              |
| 15                                           | 60-64     | Former        | 3570  | 54.80 |               |             | 20.51         | 193            | 5.41         |
| Year of Follow-up: 2005, Age Group: 65-69    |           |               |       |       |               |             |               |                |              |
| Period                                       | Age Group | Smoking Group | N     | %     | Ever Quit (N) | Ever Quit % | Mean Yrs Quit | Short Term (n) | Short Term % |
| 15                                           | 65-69     | Never Any     | 1611  | 29.41 |               |             |               |                |              |
| 15                                           | 65-69     | CC            | 124   | 2.26  | 0             | 0.00        |               |                |              |
| 15                                           | 65-69     | Ecig          | 533   | 9.73  |               |             |               |                |              |
| 15                                           | 65-69     | Dual          | 0     | 0.00  |               |             |               |                |              |
| 15                                           | 65-69     | Former        | 3209  | 58.59 |               |             | 21.39         | 134            | 4.18         |
| Year of Follow-up: 2005, Age Group: 70-74    |           |               |       |       |               |             |               |                |              |
| Period                                       | Age Group | Smoking Group | N     | %     | Ever Quit (N) | Ever Quit % | Mean Yrs Quit | Short Term (n) | Short Term % |
| 15                                           | 70-74     | Never Any     | 1337  | 26.83 |               |             |               |                |              |
| 15                                           | 70-74     | CC            | 129   | 2.59  | 0             | 0.00        |               |                |              |
| 15                                           | 70-74     | Ecig          | 329   | 6.60  |               |             |               |                |              |
| 15                                           | 70-74     | Dual          | 0     | 0.00  |               |             |               |                |              |
| 15                                           | 70-74     | Former        | 3188  | 63.98 |               |             | 22.34         | 123            | 3.86         |
| Year of Follow-up: 2005, Age Group: 75-79    |           |               |       |       |               |             |               |                |              |
| Period                                       | Age Group | Smoking Group | N     | %     | Ever Quit (N) | Ever Quit % | Mean Yrs Quit | Short Term (n) | Short Term % |
| 15                                           | 75-79     | Never Any     | 1169  | 23.83 |               |             |               |                |              |
| 15                                           | 75-79     | CC            | 120   | 2.45  | 0             | 0.00        |               |                |              |
| 15                                           | 75-79     | Ecig          | 177   | 3.61  |               |             |               |                |              |
| 15                                           | 75-79     | Dual          | 0     | 0.00  |               |             |               |                |              |
| 15                                           | 75-79     | Former        | 3439  | 70.11 |               |             | 26.56         | 67             | 1.95         |
| Year of Follow-up: 2010, Age Group: All Ages |           |               |       |       |               |             |               |                |              |
| Period                                       | Age Group | Smoking Group | N     | %     | Ever Quit (N) | Ever Quit % | Mean Yrs Quit | Short Term (n) | Short Term % |
| 20                                           | All Ages  | Never Any     | 36103 | 42.57 |               |             |               |                |              |
| 20                                           | All Ages  | CC            | 738   | 0.87  | 0             | 0.00        |               |                |              |
| 20                                           | All Ages  | Ecig          | 13681 | 16.13 |               |             |               |                |              |
| 20                                           | All Ages  | Dual          | 0     | 0.00  |               |             |               |                |              |
| 20                                           | All Ages  | Former        | 34278 | 40.42 |               |             | 18.72         | 1805           | 5.27         |
| Year of Follow-up: 2010, Age Group: 18-19    |           |               |       |       |               |             |               |                |              |
| Period                                       | Age Group | Smoking Group | N     | %     | Ever Quit (N) | Ever Quit % | Mean Yrs Quit | Short Term (n) | Short Term % |

**Results for PHIM for Run 7 (Sensitivity\_Analysis\_3.RTF)**

|                                           |           |               |      |       |               |             |               |                |              |
|-------------------------------------------|-----------|---------------|------|-------|---------------|-------------|---------------|----------------|--------------|
| 20                                        | 18-19     | Never Any     | 0    | .     |               |             |               |                |              |
| 20                                        | 18-19     | CC            | 0    | .     | 0             | .           |               |                |              |
| 20                                        | 18-19     | Ecig          | 0    | .     |               |             |               |                |              |
| 20                                        | 18-19     | Dual          | 0    | .     |               |             |               |                |              |
| 20                                        | 18-19     | Former        | 0    | .     |               |             | 0             | .              |              |
| Year of Follow-up: 2010, Age Group: 20-24 |           |               |      |       |               |             |               |                |              |
| Period                                    | Age Group | Smoking Group | N    | %     | Ever Quit (N) | Ever Quit % | Mean Yrs Quit | Short Term (n) | Short Term % |
| 20                                        | 20-24     | Never Any     | 0    | .     |               |             |               |                |              |
| 20                                        | 20-24     | CC            | 0    | .     | 0             | .           |               |                |              |
| 20                                        | 20-24     | Ecig          | 0    | .     |               |             |               |                |              |
| 20                                        | 20-24     | Dual          | 0    | .     |               |             |               |                |              |
| 20                                        | 20-24     | Former        | 0    | .     |               |             |               | 0              | .            |
| Year of Follow-up: 2010, Age Group: 25-29 |           |               |      |       |               |             |               |                |              |
| Period                                    | Age Group | Smoking Group | N    | %     | Ever Quit (N) | Ever Quit % | Mean Yrs Quit | Short Term (n) | Short Term % |
| 20                                        | 25-29     | Never Any     | 0    | .     |               |             |               |                |              |
| 20                                        | 25-29     | CC            | 0    | .     | 0             | .           |               |                |              |
| 20                                        | 25-29     | Ecig          | 0    | .     |               |             |               |                |              |
| 20                                        | 25-29     | Dual          | 0    | .     |               |             |               |                |              |
| 20                                        | 25-29     | Former        | 0    | .     |               |             |               | 0              | .            |
| Year of Follow-up: 2010, Age Group: 30-34 |           |               |      |       |               |             |               |                |              |
| Period                                    | Age Group | Smoking Group | N    | %     | Ever Quit (N) | Ever Quit % | Mean Yrs Quit | Short Term (n) | Short Term % |
| 20                                        | 30-34     | Never Any     | 4508 | 50.97 |               |             |               |                |              |
| 20                                        | 30-34     | CC            | 71   | 0.80  | 0             | 0.00        |               |                |              |
| 20                                        | 30-34     | Ecig          | 1858 | 21.01 |               |             |               |                |              |
| 20                                        | 30-34     | Dual          | 0    | 0.00  |               |             |               |                |              |
| 20                                        | 30-34     | Former        | 2408 | 27.22 |               |             | 8.72          | 282            | 11.71        |
| Year of Follow-up: 2010, Age Group: 35-39 |           |               |      |       |               |             |               |                |              |
| Period                                    | Age Group | Smoking Group | N    | %     | Ever Quit (N) | Ever Quit % | Mean Yrs Quit | Short Term (n) | Short Term % |
| 20                                        | 35-39     | Never Any     | 4991 | 55.21 |               |             |               |                |              |
| 20                                        | 35-39     | CC            | 59   | 0.65  | 0             | 0.00        |               |                |              |
| 20                                        | 35-39     | Ecig          | 1737 | 19.21 |               |             |               |                |              |
| 20                                        | 35-39     | Dual          | 0    | 0.00  |               |             |               |                |              |
| 20                                        | 35-39     | Former        | 2253 | 24.92 |               |             | 9.67          | 173            | 7.68         |
| Year of Follow-up: 2010, Age Group: 40-44 |           |               |      |       |               |             |               |                |              |
| Period                                    | Age Group | Smoking Group | N    | %     | Ever Quit (N) | Ever Quit % | Mean Yrs Quit | Short Term (n) | Short Term % |
| 20                                        | 40-44     | Never Any     | 5163 | 52.60 |               |             |               |                |              |
| 20                                        | 40-44     | CC            | 68   | 0.69  | 0             | 0.00        |               |                |              |
| 20                                        | 40-44     | Ecig          | 2053 | 20.91 |               |             |               |                |              |
| 20                                        | 40-44     | Dual          | 0    | 0.00  |               |             |               |                |              |
| 20                                        | 40-44     | Former        | 2532 | 25.79 |               |             | 13.05         | 181            | 7.15         |
| Year of Follow-up: 2010, Age Group: 45-49 |           |               |      |       |               |             |               |                |              |
| Period                                    | Age Group | Smoking Group | N    | %     | Ever Quit (N) | Ever Quit % | Mean Yrs Quit | Short Term (n) | Short Term % |
| 20                                        | 45-49     | Never Any     | 4997 | 46.86 |               |             |               |                |              |
| 20                                        | 45-49     | CC            | 89   | 0.83  | 0             | 0.00        |               |                |              |
| 20                                        | 45-49     | Ecig          | 2245 | 21.05 |               |             |               |                |              |
| 20                                        | 45-49     | Dual          | 0    | 0.00  |               |             |               |                |              |
| 20                                        | 45-49     | Former        | 3333 | 31.25 |               |             | 14.84         | 208            | 6.24         |
| Year of Follow-up: 2010, Age Group: 50-54 |           |               |      |       |               |             |               |                |              |
| Period                                    | Age Group | Smoking Group | N    | %     | Ever Quit (N) | Ever Quit % | Mean Yrs Quit | Short Term (n) | Short Term % |
| 20                                        | 50-54     | Never Any     | 4724 | 43.28 |               |             |               |                |              |
| 20                                        | 50-54     | CC            | 87   | 0.80  | 0             | 0.00        |               |                |              |
| 20                                        | 50-54     | Ecig          | 2085 | 19.10 |               |             |               |                |              |
| 20                                        | 50-54     | Dual          | 0    | 0.00  |               |             |               |                |              |
| 20                                        | 50-54     | Former        | 4020 | 36.83 |               |             | 16.71         | 225            | 5.60         |
| Year of Follow-up: 2010, Age Group: 55-59 |           |               |      |       |               |             |               |                |              |
| Period                                    | Age Group | Smoking Group | N    | %     | Ever Quit (N) | Ever Quit % | Mean Yrs Quit | Short Term (n) | Short Term % |
| 20                                        | 55-59     | Never Any     | 3941 | 39.85 |               |             |               |                |              |
| 20                                        | 55-59     | CC            | 85   | 0.86  | 0             | 0.00        |               |                |              |
| 20                                        | 55-59     | Ecig          | 1444 | 14.60 |               |             |               |                |              |
| 20                                        | 55-59     | Dual          | 0    | 0.00  |               |             |               |                |              |
| 20                                        | 55-59     | Former        | 4419 | 44.69 |               |             | 19.58         | 232            | 5.25         |
| Year of Follow-up: 2010, Age Group: 60-64 |           |               |      |       |               |             |               |                |              |
| Period                                    | Age Group | Smoking Group | N    | %     | Ever Quit (N) | Ever Quit % | Mean Yrs Quit | Short Term (n) | Short Term % |
| 20                                        | 60-64     | Never Any     | 2912 | 33.65 |               |             |               |                |              |
| 20                                        | 60-64     | CC            | 87   | 1.01  | 0             | 0.00        |               |                |              |
| 20                                        | 60-64     | Ecig          | 1087 | 12.56 |               |             |               |                |              |
| 20                                        | 60-64     | Dual          | 0    | 0.00  |               |             |               |                |              |
| 20                                        | 60-64     | Former        | 4569 | 52.79 |               |             | 21.44         | 271            | 5.93         |
| Year of Follow-up: 2010, Age Group: 65-69 |           |               |      |       |               |             |               |                |              |

**Results for PHIM for Run 7 (Sensitivity\_Analysis\_3.RTF)**

| Period                                       | Age Group | Smoking Group | N     | %     | Ever Quit (N) | Ever Quit % | Mean Yrs Quit | Short Term (n) | Short Term % |
|----------------------------------------------|-----------|---------------|-------|-------|---------------|-------------|---------------|----------------|--------------|
| 20                                           | 65-69     | Never Any     | 1919  | 29.46 |               |             |               |                |              |
| 20                                           | 65-69     | CC            | 60    | 0.92  | 0             | 0.00        |               |                |              |
| 20                                           | 65-69     | Ecig          | 563   | 8.64  |               |             |               |                |              |
| 20                                           | 65-69     | Dual          | 0     | 0.00  |               |             |               |                |              |
| 20                                           | 65-69     | Former        | 3973  | 60.98 |               |             | 23.16         | 124            | 3.12         |
| Year of Follow-up: 2010, Age Group: 70-74    |           |               |       |       |               |             |               |                |              |
| Period                                       | Age Group | Smoking Group | N     | %     | Ever Quit (N) | Ever Quit % | Mean Yrs Quit | Short Term (n) | Short Term % |
| 20                                           | 70-74     | Never Any     | 1611  | 29.41 |               |             |               |                |              |
| 20                                           | 70-74     | CC            | 69    | 1.26  | 0             | 0.00        |               |                |              |
| 20                                           | 70-74     | Ecig          | 382   | 6.97  |               |             |               |                |              |
| 20                                           | 70-74     | Dual          | 0     | 0.00  |               |             |               |                |              |
| 20                                           | 70-74     | Former        | 3415  | 62.35 |               |             | 24.93         | 66             | 1.93         |
| Year of Follow-up: 2010, Age Group: 75-79    |           |               |       |       |               |             |               |                |              |
| Period                                       | Age Group | Smoking Group | N     | %     | Ever Quit (N) | Ever Quit % | Mean Yrs Quit | Short Term (n) | Short Term % |
| 20                                           | 75-79     | Never Any     | 1337  | 26.83 |               |             |               |                |              |
| 20                                           | 75-79     | CC            | 63    | 1.26  | 0             | 0.00        |               |                |              |
| 20                                           | 75-79     | Ecig          | 227   | 4.56  |               |             |               |                |              |
| 20                                           | 75-79     | Dual          | 0     | 0.00  |               |             |               |                |              |
| 20                                           | 75-79     | Former        | 3356  | 67.35 |               |             | 26.10         | 43             | 1.28         |
| Year of Follow-up: 2015, Age Group: All Ages |           |               |       |       |               |             |               |                |              |
| Period                                       | Age Group | Smoking Group | N     | %     | Ever Quit (N) | Ever Quit % | Mean Yrs Quit | Short Term (n) | Short Term % |
| 25                                           | All Ages  | Never Any     | 34747 | 43.53 |               |             |               |                |              |
| 25                                           | All Ages  | CC            | 289   | 0.36  | 0             | 0.00        |               |                |              |
| 25                                           | All Ages  | Ecig          | 10458 | 13.10 |               |             |               |                |              |
| 25                                           | All Ages  | Dual          | 0     | 0.00  |               |             |               |                |              |
| 25                                           | All Ages  | Former        | 34323 | 43.00 |               |             | 20.86         | 1207           | 3.52         |
| Year of Follow-up: 2015, Age Group: 18-19    |           |               |       |       |               |             |               |                |              |
| Period                                       | Age Group | Smoking Group | N     | %     | Ever Quit (N) | Ever Quit % | Mean Yrs Quit | Short Term (n) | Short Term % |
| 25                                           | 18-19     | Never Any     | 0     | .     |               |             |               |                |              |
| 25                                           | 18-19     | CC            | 0     | .     | 0             | .           |               |                |              |
| 25                                           | 18-19     | Ecig          | 0     | .     |               |             |               |                |              |
| 25                                           | 18-19     | Dual          | 0     | .     |               |             |               |                |              |
| 25                                           | 18-19     | Former        | 0     | .     |               |             | .             | 0              | .            |
| Year of Follow-up: 2015, Age Group: 20-24    |           |               |       |       |               |             |               |                |              |
| Period                                       | Age Group | Smoking Group | N     | %     | Ever Quit (N) | Ever Quit % | Mean Yrs Quit | Short Term (n) | Short Term % |
| 25                                           | 20-24     | Never Any     | 0     | .     |               |             |               |                |              |
| 25                                           | 20-24     | CC            | 0     | .     | 0             | .           |               |                |              |
| 25                                           | 20-24     | Ecig          | 0     | .     |               |             |               |                |              |
| 25                                           | 20-24     | Dual          | 0     | .     |               |             |               |                |              |
| 25                                           | 20-24     | Former        | 0     | .     |               |             | .             | 0              | .            |
| Year of Follow-up: 2015, Age Group: 25-29    |           |               |       |       |               |             |               |                |              |
| Period                                       | Age Group | Smoking Group | N     | %     | Ever Quit (N) | Ever Quit % | Mean Yrs Quit | Short Term (n) | Short Term % |
| 25                                           | 25-29     | Never Any     | 0     | .     |               |             |               |                |              |
| 25                                           | 25-29     | CC            | 0     | .     | 0             | .           |               |                |              |
| 25                                           | 25-29     | Ecig          | 0     | .     |               |             |               |                |              |
| 25                                           | 25-29     | Dual          | 0     | .     |               |             |               |                |              |
| 25                                           | 25-29     | Former        | 0     | .     |               |             | .             | 0              | .            |
| Year of Follow-up: 2015, Age Group: 30-34    |           |               |       |       |               |             |               |                |              |
| Period                                       | Age Group | Smoking Group | N     | %     | Ever Quit (N) | Ever Quit % | Mean Yrs Quit | Short Term (n) | Short Term % |
| 25                                           | 30-34     | Never Any     | 0     | .     |               |             |               |                |              |
| 25                                           | 30-34     | CC            | 0     | .     | 0             | .           |               |                |              |
| 25                                           | 30-34     | Ecig          | 0     | .     |               |             |               |                |              |
| 25                                           | 30-34     | Dual          | 0     | .     |               |             |               |                |              |
| 25                                           | 30-34     | Former        | 0     | .     |               |             | .             | 0              | .            |
| Year of Follow-up: 2015, Age Group: 35-39    |           |               |       |       |               |             |               |                |              |
| Period                                       | Age Group | Smoking Group | N     | %     | Ever Quit (N) | Ever Quit % | Mean Yrs Quit | Short Term (n) | Short Term % |
| 25                                           | 35-39     | Never Any     | 4489  | 50.75 |               |             |               |                |              |
| 25                                           | 35-39     | CC            | 28    | 0.32  | 0             | 0.00        |               |                |              |
| 25                                           | 35-39     | Ecig          | 1420  | 16.05 |               |             |               |                |              |
| 25                                           | 35-39     | Dual          | 0     | 0.00  |               |             |               |                |              |
| 25                                           | 35-39     | Former        | 2908  | 32.88 |               |             | 11.74         | 167            | 5.74         |
| Year of Follow-up: 2015, Age Group: 40-44    |           |               |       |       |               |             |               |                |              |
| Period                                       | Age Group | Smoking Group | N     | %     | Ever Quit (N) | Ever Quit % | Mean Yrs Quit | Short Term (n) | Short Term % |
| 25                                           | 40-44     | Never Any     | 4991  | 55.21 |               |             |               |                |              |
| 25                                           | 40-44     | CC            | 20    | 0.22  | 0             | 0.00        |               |                |              |
| 25                                           | 40-44     | Ecig          | 1435  | 15.87 |               |             |               |                |              |
| 25                                           | 40-44     | Dual          | 0     | 0.00  |               |             |               |                |              |

**Results for PHIM for Run 7 (Sensitivity\_Analysis\_3.RTF)**

| Year of Follow-up: 2015, Age Group: 45-49    | Period   | Age Group | Smoking Group | N     | %     | Ever Quit (N) | Ever Quit % | Mean Yrs Quit | Short Term (n) | Short Term % |
|----------------------------------------------|----------|-----------|---------------|-------|-------|---------------|-------------|---------------|----------------|--------------|
| 25                                           | 40-44    | Former    |               | 2594  | 28.69 |               |             | 13.01         | 126            | 4.86         |
| 25                                           | 45-49    | Never Any |               | 5163  | 52.60 |               |             |               |                |              |
| 25                                           | 45-49    | CC        |               | 29    | 0.30  | 0             | 0.00        |               |                |              |
| 25                                           | 45-49    | Ecig      |               | 1774  | 18.07 |               |             |               |                |              |
| 25                                           | 45-49    | Dual      |               | 0     | 0.00  |               |             |               |                |              |
| 25                                           | 45-49    | Former    |               | 2850  | 29.03 |               |             | 16.31         | 94             | 3.30         |
| Year of Follow-up: 2015, Age Group: 50-54    | Period   | Age Group | Smoking Group | N     | %     | Ever Quit (N) | Ever Quit % | Mean Yrs Quit | Short Term (n) | Short Term % |
| 25                                           | 50-54    | Never Any |               | 4997  | 46.86 |               |             |               |                |              |
| 25                                           | 50-54    | CC        |               | 37    | 0.35  | 0             | 0.00        |               |                |              |
| 25                                           | 50-54    | Ecig      |               | 1943  | 18.22 |               |             |               |                |              |
| 25                                           | 50-54    | Dual      |               | 0     | 0.00  |               |             |               |                |              |
| 25                                           | 50-54    | Former    |               | 3687  | 34.57 |               |             | 18.12         | 160            | 4.34         |
| Year of Follow-up: 2015, Age Group: 55-59    | Period   | Age Group | Smoking Group | N     | %     | Ever Quit (N) | Ever Quit % | Mean Yrs Quit | Short Term (n) | Short Term % |
| 25                                           | 55-59    | Never Any |               | 4724  | 43.28 |               |             |               |                |              |
| 25                                           | 55-59    | CC        |               | 33    | 0.30  | 0             | 0.00        |               |                |              |
| 25                                           | 55-59    | Ecig      |               | 1611  | 14.76 |               |             |               |                |              |
| 25                                           | 55-59    | Dual      |               | 0     | 0.00  |               |             |               |                |              |
| 25                                           | 55-59    | Former    |               | 4548  | 41.66 |               |             | 19.43         | 196            | 4.31         |
| Year of Follow-up: 2015, Age Group: 60-64    | Period   | Age Group | Smoking Group | N     | %     | Ever Quit (N) | Ever Quit % | Mean Yrs Quit | Short Term (n) | Short Term % |
| 25                                           | 60-64    | Never Any |               | 3941  | 39.85 |               |             |               |                |              |
| 25                                           | 60-64    | CC        |               | 28    | 0.28  | 0             | 0.00        |               |                |              |
| 25                                           | 60-64    | Ecig      |               | 986   | 9.97  |               |             |               |                |              |
| 25                                           | 60-64    | Dual      |               | 0     | 0.00  |               |             |               |                |              |
| 25                                           | 60-64    | Former    |               | 4934  | 49.89 |               |             | 22.22         | 219            | 4.44         |
| Year of Follow-up: 2015, Age Group: 65-69    | Period   | Age Group | Smoking Group | N     | %     | Ever Quit (N) | Ever Quit % | Mean Yrs Quit | Short Term (n) | Short Term % |
| 25                                           | 65-69    | Never Any |               | 2912  | 33.65 |               |             |               |                |              |
| 25                                           | 65-69    | CC        |               | 43    | 0.50  | 0             | 0.00        |               |                |              |
| 25                                           | 65-69    | Ecig      |               | 654   | 7.56  |               |             |               |                |              |
| 25                                           | 65-69    | Dual      |               | 0     | 0.00  |               |             |               |                |              |
| 25                                           | 65-69    | Former    |               | 5046  | 58.30 |               |             | 24.17         | 126            | 2.50         |
| Year of Follow-up: 2015, Age Group: 70-74    | Period   | Age Group | Smoking Group | N     | %     | Ever Quit (N) | Ever Quit % | Mean Yrs Quit | Short Term (n) | Short Term % |
| 25                                           | 70-74    | Never Any |               | 1919  | 29.46 |               |             |               |                |              |
| 25                                           | 70-74    | CC        |               | 35    | 0.54  | 0             | 0.00        |               |                |              |
| 25                                           | 70-74    | Ecig      |               | 364   | 5.59  |               |             |               |                |              |
| 25                                           | 70-74    | Dual      |               | 0     | 0.00  |               |             |               |                |              |
| 25                                           | 70-74    | Former    |               | 4197  | 64.42 |               |             | 26.78         | 70             | 1.67         |
| Year of Follow-up: 2015, Age Group: 75-79    | Period   | Age Group | Smoking Group | N     | %     | Ever Quit (N) | Ever Quit % | Mean Yrs Quit | Short Term (n) | Short Term % |
| 25                                           | 75-79    | Never Any |               | 1611  | 29.41 |               |             |               |                |              |
| 25                                           | 75-79    | CC        |               | 36    | 0.66  | 0             | 0.00        |               |                |              |
| 25                                           | 75-79    | Ecig      |               | 271   | 4.95  |               |             |               |                |              |
| 25                                           | 75-79    | Dual      |               | 0     | 0.00  |               |             |               |                |              |
| 25                                           | 75-79    | Former    |               | 3559  | 64.98 |               |             | 28.81         | 49             | 1.38         |
| Year of Follow-up: 2020, Age Group: All Ages | Period   | Age Group | Smoking Group | N     | %     | Ever Quit (N) | Ever Quit % | Mean Yrs Quit | Short Term (n) | Short Term % |
| 30                                           | All Ages | Never Any |               | 33136 | 44.57 |               |             |               |                |              |
| 30                                           | All Ages | CC        |               | 100   | 0.13  | 0             | 0.00        |               |                |              |
| 30                                           | All Ages | Ecig      |               | 7768  | 10.45 |               |             |               |                |              |
| 30                                           | All Ages | Dual      |               | 0     | 0.00  |               |             |               |                |              |
| 30                                           | All Ages | Former    |               | 33336 | 44.84 |               |             | 23.18         | 954            | 2.86         |
| Year of Follow-up: 2020, Age Group: 18-19    | Period   | Age Group | Smoking Group | N     | %     | Ever Quit (N) | Ever Quit % | Mean Yrs Quit | Short Term (n) | Short Term % |
| 30                                           | 18-19    | Never Any |               | 0     | .     |               |             |               |                |              |
| 30                                           | 18-19    | CC        |               | 0     | .     | 0             | .           |               |                |              |
| 30                                           | 18-19    | Ecig      |               | 0     | .     |               |             |               |                |              |
| 30                                           | 18-19    | Dual      |               | 0     | .     |               |             |               |                |              |
| 30                                           | 18-19    | Former    |               | 0     | .     |               |             | .             | 0              | .            |
| Year of Follow-up: 2020, Age Group: 20-24    | Period   | Age Group | Smoking Group | N     | %     | Ever Quit (N) | Ever Quit % | Mean Yrs Quit | Short Term (n) | Short Term % |
| 30                                           | 20-24    | Never Any |               | 0     | .     |               |             |               |                |              |
| 30                                           | 20-24    | CC        |               | 0     | .     | 0             | .           |               |                |              |

**Results for PHIM for Run 7 (Sensitivity\_Analysis\_3.RTF)**

|                                           |           |               |      |       |               |             |               |                |              |
|-------------------------------------------|-----------|---------------|------|-------|---------------|-------------|---------------|----------------|--------------|
| 30                                        | 20-24     | Ecig          | 0    | .     |               |             |               |                |              |
| 30                                        | 20-24     | Dual          | 0    | .     |               |             |               |                |              |
| 30                                        | 20-24     | Former        | 0    | .     |               |             | 0             | .              |              |
| Year of Follow-up: 2020, Age Group: 25-29 |           |               |      |       |               |             |               |                |              |
| Period                                    | Age Group | Smoking Group | N    | %     | Ever Quit (N) | Ever Quit % | Mean Yrs Quit | Short Term (n) | Short Term % |
| 30                                        | 25-29     | Never Any     | 0    | .     |               |             |               |                |              |
| 30                                        | 25-29     | CC            | 0    | .     | 0             | .           |               |                |              |
| 30                                        | 25-29     | Ecig          | 0    | .     |               |             |               |                |              |
| 30                                        | 25-29     | Dual          | 0    | .     |               |             |               |                |              |
| 30                                        | 25-29     | Former        | 0    | .     |               |             | 0             | .              |              |
| Year of Follow-up: 2020, Age Group: 30-34 |           |               |      |       |               |             |               |                |              |
| Period                                    | Age Group | Smoking Group | N    | %     | Ever Quit (N) | Ever Quit % | Mean Yrs Quit | Short Term (n) | Short Term % |
| 30                                        | 30-34     | Never Any     | 0    | .     |               |             |               |                |              |
| 30                                        | 30-34     | CC            | 0    | .     | 0             | .           |               |                |              |
| 30                                        | 30-34     | Ecig          | 0    | .     |               |             |               |                |              |
| 30                                        | 30-34     | Dual          | 0    | .     |               |             |               |                |              |
| 30                                        | 30-34     | Former        | 0    | .     |               |             | 0             | .              |              |
| Year of Follow-up: 2020, Age Group: 35-39 |           |               |      |       |               |             |               |                |              |
| Period                                    | Age Group | Smoking Group | N    | %     | Ever Quit (N) | Ever Quit % | Mean Yrs Quit | Short Term (n) | Short Term % |
| 30                                        | 35-39     | Never Any     | 0    | .     |               |             |               |                |              |
| 30                                        | 35-39     | CC            | 0    | .     | 0             | .           |               |                |              |
| 30                                        | 35-39     | Ecig          | 0    | .     |               |             |               |                |              |
| 30                                        | 35-39     | Dual          | 0    | .     |               |             |               |                |              |
| 30                                        | 35-39     | Former        | 0    | .     |               |             | 0             | .              |              |
| Year of Follow-up: 2020, Age Group: 40-44 |           |               |      |       |               |             |               |                |              |
| Period                                    | Age Group | Smoking Group | N    | %     | Ever Quit (N) | Ever Quit % | Mean Yrs Quit | Short Term (n) | Short Term % |
| 30                                        | 40-44     | Never Any     | 4489 | 50.75 |               |             |               |                |              |
| 30                                        | 40-44     | CC            | 12   | 0.14  | 0             | 0.00        |               |                |              |
| 30                                        | 40-44     | Ecig          | 1156 | 13.07 |               |             |               |                |              |
| 30                                        | 40-44     | Dual          | 0    | 0.00  |               |             |               |                |              |
| 30                                        | 40-44     | Former        | 3188 | 36.04 |               |             | 15.44         | 113            | 3.54         |
| Year of Follow-up: 2020, Age Group: 45-49 |           |               |      |       |               |             |               |                |              |
| Period                                    | Age Group | Smoking Group | N    | %     | Ever Quit (N) | Ever Quit % | Mean Yrs Quit | Short Term (n) | Short Term % |
| 30                                        | 45-49     | Never Any     | 4991 | 55.21 |               |             |               |                |              |
| 30                                        | 45-49     | CC            | 5    | 0.06  | 0             | 0.00        |               |                |              |
| 30                                        | 45-49     | Ecig          | 1208 | 13.36 |               |             |               |                |              |
| 30                                        | 45-49     | Dual          | 0    | 0.00  |               |             |               |                |              |
| 30                                        | 45-49     | Former        | 2836 | 31.37 |               |             | 16.69         | 60             | 2.12         |
| Year of Follow-up: 2020, Age Group: 50-54 |           |               |      |       |               |             |               |                |              |
| Period                                    | Age Group | Smoking Group | N    | %     | Ever Quit (N) | Ever Quit % | Mean Yrs Quit | Short Term (n) | Short Term % |
| 30                                        | 50-54     | Never Any     | 5163 | 52.60 |               |             |               |                |              |
| 30                                        | 50-54     | CC            | 9    | 0.09  | 0             | 0.00        |               |                |              |
| 30                                        | 50-54     | Ecig          | 1552 | 15.81 |               |             |               |                |              |
| 30                                        | 50-54     | Dual          | 0    | 0.00  |               |             |               |                |              |
| 30                                        | 50-54     | Former        | 3092 | 31.50 |               |             | 19.77         | 129            | 4.17         |
| Year of Follow-up: 2020, Age Group: 55-59 |           |               |      |       |               |             |               |                |              |
| Period                                    | Age Group | Smoking Group | N    | %     | Ever Quit (N) | Ever Quit % | Mean Yrs Quit | Short Term (n) | Short Term % |
| 30                                        | 55-59     | Never Any     | 4997 | 46.86 |               |             |               |                |              |
| 30                                        | 55-59     | CC            | 18   | 0.17  | 0             | 0.00        |               |                |              |
| 30                                        | 55-59     | Ecig          | 1495 | 14.02 |               |             |               |                |              |
| 30                                        | 55-59     | Dual          | 0    | 0.00  |               |             |               |                |              |
| 30                                        | 55-59     | Former        | 4154 | 38.95 |               |             | 20.75         | 186            | 4.48         |
| Year of Follow-up: 2020, Age Group: 60-64 |           |               |      |       |               |             |               |                |              |
| Period                                    | Age Group | Smoking Group | N    | %     | Ever Quit (N) | Ever Quit % | Mean Yrs Quit | Short Term (n) | Short Term % |
| 30                                        | 60-64     | Never Any     | 4724 | 43.28 |               |             |               |                |              |
| 30                                        | 60-64     | CC            | 10   | 0.09  | 0             | 0.00        |               |                |              |
| 30                                        | 60-64     | Ecig          | 1088 | 9.97  |               |             |               |                |              |
| 30                                        | 60-64     | Dual          | 0    | 0.00  |               |             |               |                |              |
| 30                                        | 60-64     | Former        | 5094 | 46.67 |               |             | 22.03         | 217            | 4.26         |
| Year of Follow-up: 2020, Age Group: 65-69 |           |               |      |       |               |             |               |                |              |
| Period                                    | Age Group | Smoking Group | N    | %     | Ever Quit (N) | Ever Quit % | Mean Yrs Quit | Short Term (n) | Short Term % |
| 30                                        | 65-69     | Never Any     | 3941 | 39.85 |               |             |               |                |              |
| 30                                        | 65-69     | CC            | 13   | 0.13  | 0             | 0.00        |               |                |              |
| 30                                        | 65-69     | Ecig          | 602  | 6.09  |               |             |               |                |              |
| 30                                        | 65-69     | Dual          | 0    | 0.00  |               |             |               |                |              |
| 30                                        | 65-69     | Former        | 5333 | 53.93 |               |             | 25.35         | 133            | 2.49         |
| Year of Follow-up: 2020, Age Group: 70-74 |           |               |      |       |               |             |               |                |              |
| Period                                    | Age Group | Smoking Group | N    | %     | Ever Quit (N) | Ever Quit % | Mean Yrs Quit | Short Term (n) | Short Term % |

**Results for PHIM for Run 7 (Sensitivity\_Analysis\_3.RTF)**

|                                              |           |               |       |       |               |             |               |                |              |
|----------------------------------------------|-----------|---------------|-------|-------|---------------|-------------|---------------|----------------|--------------|
| 30                                           | 70-74     | Never Any     | 2912  | 33.65 |               |             |               |                |              |
| 30                                           | 70-74     | CC            | 18    | 0.21  | 0             | 0.00        |               |                |              |
| 30                                           | 70-74     | Ecig          | 430   | 4.97  |               |             |               |                |              |
| 30                                           | 70-74     | Dual          | 0     | 0.00  |               |             |               |                |              |
| 30                                           | 70-74     | Former        | 5295  | 61.18 |               |             | 27.91         | 75             | 1.42         |
| Year of Follow-up: 2020, Age Group: 75-79    |           |               |       |       |               |             |               |                |              |
| Period                                       | Age Group | Smoking Group | N     | %     | Ever Quit (N) | Ever Quit % | Mean Yrs Quit | Short Term (n) | Short Term % |
| 30                                           | 75-79     | Never Any     | 1919  | 29.46 |               |             |               |                |              |
| 30                                           | 75-79     | CC            | 15    | 0.23  | 0             | 0.00        |               |                |              |
| 30                                           | 75-79     | Ecig          | 237   | 3.64  |               |             |               |                |              |
| 30                                           | 75-79     | Dual          | 0     | 0.00  |               |             |               |                |              |
| 30                                           | 75-79     | Former        | 4344  | 66.68 |               |             | 30.78         | 41             | 0.94         |
| Year of Follow-up: 2025, Age Group: All Ages |           |               |       |       |               |             |               |                |              |
| Period                                       | Age Group | Smoking Group | N     | %     | Ever Quit (N) | Ever Quit % | Mean Yrs Quit | Short Term (n) | Short Term % |
| 35                                           | All Ages  | Never Any     | 31217 | 46.03 |               |             |               |                |              |
| 35                                           | All Ages  | CC            | 38    | 0.06  | 0             | 0.00        |               |                |              |
| 35                                           | All Ages  | Ecig          | 5571  | 8.21  |               |             |               |                |              |
| 35                                           | All Ages  | Dual          | 0     | 0.00  |               |             |               |                |              |
| 35                                           | All Ages  | Former        | 30999 | 45.70 |               |             | 25.43         | 747            | 2.41         |
| Year of Follow-up: 2025, Age Group: 18-19    |           |               |       |       |               |             |               |                |              |
| Period                                       | Age Group | Smoking Group | N     | %     | Ever Quit (N) | Ever Quit % | Mean Yrs Quit | Short Term (n) | Short Term % |
| 35                                           | 18-19     | Never Any     | 0     | .     |               |             |               |                |              |
| 35                                           | 18-19     | CC            | 0     | .     | 0             | .           |               |                |              |
| 35                                           | 18-19     | Ecig          | 0     | .     |               |             |               |                |              |
| 35                                           | 18-19     | Dual          | 0     | .     |               |             |               |                |              |
| 35                                           | 18-19     | Former        | 0     | .     |               |             | .             | 0              | .            |
| Year of Follow-up: 2025, Age Group: 20-24    |           |               |       |       |               |             |               |                |              |
| Period                                       | Age Group | Smoking Group | N     | %     | Ever Quit (N) | Ever Quit % | Mean Yrs Quit | Short Term (n) | Short Term % |
| 35                                           | 20-24     | Never Any     | 0     | .     |               |             |               |                |              |
| 35                                           | 20-24     | CC            | 0     | .     | 0             | .           |               |                |              |
| 35                                           | 20-24     | Ecig          | 0     | .     |               |             |               |                |              |
| 35                                           | 20-24     | Dual          | 0     | .     |               |             |               |                |              |
| 35                                           | 20-24     | Former        | 0     | .     |               |             | .             | 0              | .            |
| Year of Follow-up: 2025, Age Group: 25-29    |           |               |       |       |               |             |               |                |              |
| Period                                       | Age Group | Smoking Group | N     | %     | Ever Quit (N) | Ever Quit % | Mean Yrs Quit | Short Term (n) | Short Term % |
| 35                                           | 25-29     | Never Any     | 0     | .     |               |             |               |                |              |
| 35                                           | 25-29     | CC            | 0     | .     | 0             | .           |               |                |              |
| 35                                           | 25-29     | Ecig          | 0     | .     |               |             |               |                |              |
| 35                                           | 25-29     | Dual          | 0     | .     |               |             |               |                |              |
| 35                                           | 25-29     | Former        | 0     | .     |               |             | .             | 0              | .            |
| Year of Follow-up: 2025, Age Group: 30-34    |           |               |       |       |               |             |               |                |              |
| Period                                       | Age Group | Smoking Group | N     | %     | Ever Quit (N) | Ever Quit % | Mean Yrs Quit | Short Term (n) | Short Term % |
| 35                                           | 30-34     | Never Any     | 0     | .     |               |             |               |                |              |
| 35                                           | 30-34     | CC            | 0     | .     | 0             | .           |               |                |              |
| 35                                           | 30-34     | Ecig          | 0     | .     |               |             |               |                |              |
| 35                                           | 30-34     | Dual          | 0     | .     |               |             |               |                |              |
| 35                                           | 30-34     | Former        | 0     | .     |               |             | .             | 0              | .            |
| Year of Follow-up: 2025, Age Group: 35-39    |           |               |       |       |               |             |               |                |              |
| Period                                       | Age Group | Smoking Group | N     | %     | Ever Quit (N) | Ever Quit % | Mean Yrs Quit | Short Term (n) | Short Term % |
| 35                                           | 35-39     | Never Any     | 0     | .     |               |             |               |                |              |
| 35                                           | 35-39     | CC            | 0     | .     | 0             | .           |               |                |              |
| 35                                           | 35-39     | Ecig          | 0     | .     |               |             |               |                |              |
| 35                                           | 35-39     | Dual          | 0     | .     |               |             |               |                |              |
| 35                                           | 35-39     | Former        | 0     | .     |               |             | .             | 0              | .            |
| Year of Follow-up: 2025, Age Group: 40-44    |           |               |       |       |               |             |               |                |              |
| Period                                       | Age Group | Smoking Group | N     | %     | Ever Quit (N) | Ever Quit % | Mean Yrs Quit | Short Term (n) | Short Term % |
| 35                                           | 40-44     | Never Any     | 0     | .     |               |             |               |                |              |
| 35                                           | 40-44     | CC            | 0     | .     | 0             | .           |               |                |              |
| 35                                           | 40-44     | Ecig          | 0     | .     |               |             |               |                |              |
| 35                                           | 40-44     | Dual          | 0     | .     |               |             |               |                |              |
| 35                                           | 40-44     | Former        | 0     | .     |               |             | .             | 0              | .            |
| Year of Follow-up: 2025, Age Group: 45-49    |           |               |       |       |               |             |               |                |              |
| Period                                       | Age Group | Smoking Group | N     | %     | Ever Quit (N) | Ever Quit % | Mean Yrs Quit | Short Term (n) | Short Term % |
| 35                                           | 45-49     | Never Any     | 4489  | 50.75 |               |             |               |                |              |
| 35                                           | 45-49     | CC            | 7     | 0.08  | 0             | 0.00        |               |                |              |
| 35                                           | 45-49     | Ecig          | 965   | 10.91 |               |             |               |                |              |
| 35                                           | 45-49     | Dual          | 0     | 0.00  |               |             |               |                |              |
| 35                                           | 45-49     | Former        | 3384  | 38.26 |               |             | 19.40         | 56             | 1.65         |
| Year of Follow-up: 2025, Age Group: 50-54    |           |               |       |       |               |             |               |                |              |



**Results for PHIM for Run 7 (Sensitivity\_Analysis\_3.RTF)**

| Period                                       | Age Group | Smoking Group | N     | %     | Ever Quit (N) | Ever Quit % | Mean Yrs Quit | Short Term (n) | Short Term % |
|----------------------------------------------|-----------|---------------|-------|-------|---------------|-------------|---------------|----------------|--------------|
| 35                                           | 50-54     | Never Any     | 4991  | 55.21 |               |             |               |                |              |
| 35                                           | 50-54     | CC            | 3     | 0.03  | 0             | 0.00        |               |                |              |
| 35                                           | 50-54     | Ecig          | 1069  | 11.83 |               |             |               |                |              |
| 35                                           | 50-54     | Dual          | 0     | 0.00  |               |             |               |                |              |
| 35                                           | 50-54     | Former        | 2977  | 32.93 |               |             | 20.74         | 74             | 2.49         |
| Year of Follow-up: 2025, Age Group: 55-59    |           |               |       |       |               |             |               |                |              |
| Period                                       | Age Group | Smoking Group | N     | %     | Ever Quit (N) | Ever Quit % | Mean Yrs Quit | Short Term (n) | Short Term % |
| 35                                           | 55-59     | Never Any     | 5163  | 52.60 |               |             |               |                |              |
| 35                                           | 55-59     | CC            | 0     | 0.00  | 0             | 0.00        |               |                |              |
| 35                                           | 55-59     | Ecig          | 1175  | 11.97 |               |             |               |                |              |
| 35                                           | 55-59     | Dual          | 0     | 0.00  |               |             |               |                |              |
| 35                                           | 55-59     | Former        | 3478  | 35.43 |               |             | 22.23         | 164            | 4.72         |
| Year of Follow-up: 2025, Age Group: 60-64    |           |               |       |       |               |             |               |                |              |
| Period                                       | Age Group | Smoking Group | N     | %     | Ever Quit (N) | Ever Quit % | Mean Yrs Quit | Short Term (n) | Short Term % |
| 35                                           | 60-64     | Never Any     | 4997  | 46.86 |               |             |               |                |              |
| 35                                           | 60-64     | CC            | 9     | 0.08  | 0             | 0.00        |               |                |              |
| 35                                           | 60-64     | Ecig          | 1003  | 9.41  |               |             |               |                |              |
| 35                                           | 60-64     | Dual          | 0     | 0.00  |               |             |               |                |              |
| 35                                           | 60-64     | Former        | 4655  | 43.65 |               |             | 23.20         | 190            | 4.08         |
| Year of Follow-up: 2025, Age Group: 65-69    |           |               |       |       |               |             |               |                |              |
| Period                                       | Age Group | Smoking Group | N     | %     | Ever Quit (N) | Ever Quit % | Mean Yrs Quit | Short Term (n) | Short Term % |
| 35                                           | 65-69     | Never Any     | 4724  | 43.28 |               |             |               |                |              |
| 35                                           | 65-69     | CC            | 5     | 0.05  | 0             | 0.00        |               |                |              |
| 35                                           | 65-69     | Ecig          | 666   | 6.10  |               |             |               |                |              |
| 35                                           | 65-69     | Dual          | 0     | 0.00  |               |             |               |                |              |
| 35                                           | 65-69     | Former        | 5521  | 50.58 |               |             | 25.11         | 139            | 2.52         |
| Year of Follow-up: 2025, Age Group: 70-74    |           |               |       |       |               |             |               |                |              |
| Period                                       | Age Group | Smoking Group | N     | %     | Ever Quit (N) | Ever Quit % | Mean Yrs Quit | Short Term (n) | Short Term % |
| 35                                           | 70-74     | Never Any     | 3941  | 39.85 |               |             |               |                |              |
| 35                                           | 70-74     | CC            | 5     | 0.05  | 0             | 0.00        |               |                |              |
| 35                                           | 70-74     | Ecig          | 395   | 3.99  |               |             |               |                |              |
| 35                                           | 70-74     | Dual          | 0     | 0.00  |               |             |               |                |              |
| 35                                           | 70-74     | Former        | 5548  | 56.10 |               |             | 29.26         | 75             | 1.35         |
| Year of Follow-up: 2025, Age Group: 75-79    |           |               |       |       |               |             |               |                |              |
| Period                                       | Age Group | Smoking Group | N     | %     | Ever Quit (N) | Ever Quit % | Mean Yrs Quit | Short Term (n) | Short Term % |
| 35                                           | 75-79     | Never Any     | 2912  | 33.65 |               |             |               |                |              |
| 35                                           | 75-79     | CC            | 9     | 0.10  | 0             | 0.00        |               |                |              |
| 35                                           | 75-79     | Ecig          | 298   | 3.44  |               |             |               |                |              |
| 35                                           | 75-79     | Dual          | 0     | 0.00  |               |             |               |                |              |
| 35                                           | 75-79     | Former        | 5436  | 62.81 |               |             | 32.11         | 49             | 0.90         |
| Year of Follow-up: 2030, Age Group: All Ages |           |               |       |       |               |             |               |                |              |
| Period                                       | Age Group | Smoking Group | N     | %     | Ever Quit (N) | Ever Quit % | Mean Yrs Quit | Short Term (n) | Short Term % |
| 40                                           | All Ages  | Never Any     | 28305 | 47.84 |               |             |               |                |              |
| 40                                           | All Ages  | CC            | 15    | 0.03  | 0             | 0.00        |               |                |              |
| 40                                           | All Ages  | Ecig          | 3736  | 6.31  |               |             |               |                |              |
| 40                                           | All Ages  | Dual          | 0     | 0.00  |               |             |               |                |              |
| 40                                           | All Ages  | Former        | 27114 | 45.82 |               |             | 27.47         | 581            | 2.14         |
| Year of Follow-up: 2030, Age Group: 18-19    |           |               |       |       |               |             |               |                |              |
| Period                                       | Age Group | Smoking Group | N     | %     | Ever Quit (N) | Ever Quit % | Mean Yrs Quit | Short Term (n) | Short Term % |
| 40                                           | 18-19     | Never Any     | 0     | .     |               |             |               |                |              |
| 40                                           | 18-19     | CC            | 0     | .     | 0             | .           |               |                |              |
| 40                                           | 18-19     | Ecig          | 0     | .     |               |             |               |                |              |
| 40                                           | 18-19     | Dual          | 0     | .     |               |             |               |                |              |
| 40                                           | 18-19     | Former        | 0     | .     |               |             | .             | 0              | .            |
| Year of Follow-up: 2030, Age Group: 20-24    |           |               |       |       |               |             |               |                |              |
| Period                                       | Age Group | Smoking Group | N     | %     | Ever Quit (N) | Ever Quit % | Mean Yrs Quit | Short Term (n) | Short Term % |
| 40                                           | 20-24     | Never Any     | 0     | .     |               |             |               |                |              |
| 40                                           | 20-24     | CC            | 0     | .     | 0             | .           |               |                |              |
| 40                                           | 20-24     | Ecig          | 0     | .     |               |             |               |                |              |
| 40                                           | 20-24     | Dual          | 0     | .     |               |             |               |                |              |
| 40                                           | 20-24     | Former        | 0     | .     |               |             | .             | 0              | .            |
| Year of Follow-up: 2030, Age Group: 25-29    |           |               |       |       |               |             |               |                |              |
| Period                                       | Age Group | Smoking Group | N     | %     | Ever Quit (N) | Ever Quit % | Mean Yrs Quit | Short Term (n) | Short Term % |
| 40                                           | 25-29     | Never Any     | 0     | .     |               |             |               |                |              |
| 40                                           | 25-29     | CC            | 0     | .     | 0             | .           |               |                |              |
| 40                                           | 25-29     | Ecig          | 0     | .     |               |             |               |                |              |
| 40                                           | 25-29     | Dual          | 0     | .     |               |             |               |                |              |

**Results for PHIM for Run 7 (Sensitivity\_Analysis\_3.RTF)**

| Year of Follow-up: 2030, Age Group: 30-34 | Period | Age Group | Smoking Group | N    | %     | Ever Quit (N) | Ever Quit % | Mean Yrs Quit | Short Term (n) | Short Term % |
|-------------------------------------------|--------|-----------|---------------|------|-------|---------------|-------------|---------------|----------------|--------------|
| 40                                        | 25-29  | Former    |               | 0    | .     |               |             |               | 0              | .            |
| 40                                        | 30-34  | Never Any |               | 0    | .     |               |             |               |                |              |
| 40                                        | 30-34  | CC        |               | 0    | .     | 0             | .           |               |                |              |
| 40                                        | 30-34  | Ecig      |               | 0    | .     |               |             |               |                |              |
| 40                                        | 30-34  | Dual      |               | 0    | .     |               |             |               |                |              |
| 40                                        | 30-34  | Former    |               | 0    | .     |               |             |               | 0              | .            |
| Year of Follow-up: 2030, Age Group: 35-39 | Period | Age Group | Smoking Group | N    | %     | Ever Quit (N) | Ever Quit % | Mean Yrs Quit | Short Term (n) | Short Term % |
| 40                                        | 35-39  | Never Any |               | 0    | .     |               |             |               |                |              |
| 40                                        | 35-39  | CC        |               | 0    | .     | 0             | .           |               |                |              |
| 40                                        | 35-39  | Ecig      |               | 0    | .     |               |             |               |                |              |
| 40                                        | 35-39  | Dual      |               | 0    | .     |               |             |               |                |              |
| 40                                        | 35-39  | Former    |               | 0    | .     |               |             |               | 0              | .            |
| Year of Follow-up: 2030, Age Group: 40-44 | Period | Age Group | Smoking Group | N    | %     | Ever Quit (N) | Ever Quit % | Mean Yrs Quit | Short Term (n) | Short Term % |
| 40                                        | 40-44  | Never Any |               | 0    | .     |               |             |               |                |              |
| 40                                        | 40-44  | CC        |               | 0    | .     | 0             | .           |               |                |              |
| 40                                        | 40-44  | Ecig      |               | 0    | .     |               |             |               |                |              |
| 40                                        | 40-44  | Dual      |               | 0    | .     |               |             |               |                |              |
| 40                                        | 40-44  | Former    |               | 0    | .     |               |             |               | 0              | .            |
| Year of Follow-up: 2030, Age Group: 45-49 | Period | Age Group | Smoking Group | N    | %     | Ever Quit (N) | Ever Quit % | Mean Yrs Quit | Short Term (n) | Short Term % |
| 40                                        | 45-49  | Never Any |               | 0    | .     |               |             |               |                |              |
| 40                                        | 45-49  | CC        |               | 0    | .     | 0             | .           |               |                |              |
| 40                                        | 45-49  | Ecig      |               | 0    | .     |               |             |               |                |              |
| 40                                        | 45-49  | Dual      |               | 0    | .     |               |             |               |                |              |
| 40                                        | 45-49  | Former    |               | 0    | .     |               |             |               | 0              | .            |
| Year of Follow-up: 2030, Age Group: 50-54 | Period | Age Group | Smoking Group | N    | %     | Ever Quit (N) | Ever Quit % | Mean Yrs Quit | Short Term (n) | Short Term % |
| 40                                        | 50-54  | Never Any |               | 4489 | 50.75 |               |             |               |                |              |
| 40                                        | 50-54  | CC        |               | 3    | 0.03  | 0             | 0.00        |               |                |              |
| 40                                        | 50-54  | Ecig      |               | 836  | 9.45  |               |             |               |                |              |
| 40                                        | 50-54  | Dual      |               | 0    | 0.00  |               |             |               |                |              |
| 40                                        | 50-54  | Former    |               | 3517 | 39.76 |               |             | 23.55         | 66             | 1.88         |
| Year of Follow-up: 2030, Age Group: 55-59 | Period | Age Group | Smoking Group | N    | %     | Ever Quit (N) | Ever Quit % | Mean Yrs Quit | Short Term (n) | Short Term % |
| 40                                        | 55-59  | Never Any |               | 4991 | 55.21 |               |             |               |                |              |
| 40                                        | 55-59  | CC        |               | 2    | 0.02  | 0             | 0.00        |               |                |              |
| 40                                        | 55-59  | Ecig      |               | 828  | 9.16  |               |             |               |                |              |
| 40                                        | 55-59  | Dual      |               | 0    | 0.00  |               |             |               |                |              |
| 40                                        | 55-59  | Former    |               | 3219 | 35.61 |               |             | 23.96         | 99             | 3.08         |
| Year of Follow-up: 2030, Age Group: 60-64 | Period | Age Group | Smoking Group | N    | %     | Ever Quit (N) | Ever Quit % | Mean Yrs Quit | Short Term (n) | Short Term % |
| 40                                        | 60-64  | Never Any |               | 5163 | 52.60 |               |             |               |                |              |
| 40                                        | 60-64  | CC        |               | 0    | 0.00  | 0             | 0.00        |               |                |              |
| 40                                        | 60-64  | Ecig      |               | 761  | 7.75  |               |             |               |                |              |
| 40                                        | 60-64  | Dual      |               | 0    | 0.00  |               |             |               |                |              |
| 40                                        | 60-64  | Former    |               | 3892 | 39.65 |               |             | 24.55         | 160            | 4.11         |
| Year of Follow-up: 2030, Age Group: 65-69 | Period | Age Group | Smoking Group | N    | %     | Ever Quit (N) | Ever Quit % | Mean Yrs Quit | Short Term (n) | Short Term % |
| 40                                        | 65-69  | Never Any |               | 4997 | 46.86 |               |             |               |                |              |
| 40                                        | 65-69  | CC        |               | 4    | 0.04  | 0             | 0.00        |               |                |              |
| 40                                        | 65-69  | Ecig      |               | 611  | 5.73  |               |             |               |                |              |
| 40                                        | 65-69  | Dual      |               | 0    | 0.00  |               |             |               |                |              |
| 40                                        | 65-69  | Former    |               | 5052 | 47.37 |               |             | 26.16         | 126            | 2.49         |
| Year of Follow-up: 2030, Age Group: 70-74 | Period | Age Group | Smoking Group | N    | %     | Ever Quit (N) | Ever Quit % | Mean Yrs Quit | Short Term (n) | Short Term % |
| 40                                        | 70-74  | Never Any |               | 4724 | 43.28 |               |             |               |                |              |
| 40                                        | 70-74  | CC        |               | 3    | 0.03  | 0             | 0.00        |               |                |              |
| 40                                        | 70-74  | Ecig      |               | 432  | 3.96  |               |             |               |                |              |
| 40                                        | 70-74  | Dual      |               | 0    | 0.00  |               |             |               |                |              |
| 40                                        | 70-74  | Former    |               | 5757 | 52.74 |               |             | 28.97         | 80             | 1.39         |
| Year of Follow-up: 2030, Age Group: 75-79 | Period | Age Group | Smoking Group | N    | %     | Ever Quit (N) | Ever Quit % | Mean Yrs Quit | Short Term (n) | Short Term % |
| 40                                        | 75-79  | Never Any |               | 3941 | 39.85 |               |             |               |                |              |
| 40                                        | 75-79  | CC        |               | 3    | 0.03  | 0             | 0.00        |               |                |              |

**Results for PHIM for Run 7 (Sensitivity\_Analysis\_3.RTF)**

|                                              |           |               |       |       |               |             |               |                |              |
|----------------------------------------------|-----------|---------------|-------|-------|---------------|-------------|---------------|----------------|--------------|
| 40                                           | 75-79     | Ecig          | 268   | 2.71  |               |             |               |                |              |
| 40                                           | 75-79     | Dual          | 0     | 0.00  |               |             |               |                |              |
| 40                                           | 75-79     | Former        | 5677  | 57.41 |               |             | 33.53         | 50             | 0.88         |
| Year of Follow-up: 2035, Age Group: All Ages |           |               |       |       |               |             |               |                |              |
| Period                                       | Age Group | Smoking Group | N     | %     | Ever Quit (N) | Ever Quit % | Mean Yrs Quit | Short Term (n) | Short Term % |
| 45                                           | All Ages  | Never Any     | 24364 | 49.44 |               |             |               |                |              |
| 45                                           | All Ages  | CC            | 6     | 0.01  | 0             | 0.00        |               |                |              |
| 45                                           | All Ages  | Ecig          | 2395  | 4.86  |               |             |               |                |              |
| 45                                           | All Ages  | Dual          | 0     | 0.00  |               |             |               |                |              |
| 45                                           | All Ages  | Former        | 22516 | 45.69 |               |             | 29.48         | 437            | 1.94         |
| Year of Follow-up: 2035, Age Group: 18-19    |           |               |       |       |               |             |               |                |              |
| Period                                       | Age Group | Smoking Group | N     | %     | Ever Quit (N) | Ever Quit % | Mean Yrs Quit | Short Term (n) | Short Term % |
| 45                                           | 18-19     | Never Any     | 0     | .     |               |             |               |                |              |
| 45                                           | 18-19     | CC            | 0     | .     | 0             | .           |               |                |              |
| 45                                           | 18-19     | Ecig          | 0     | .     |               |             |               |                |              |
| 45                                           | 18-19     | Dual          | 0     | .     |               |             |               |                |              |
| 45                                           | 18-19     | Former        | 0     | .     |               |             |               | 0              | .            |
| Year of Follow-up: 2035, Age Group: 20-24    |           |               |       |       |               |             |               |                |              |
| Period                                       | Age Group | Smoking Group | N     | %     | Ever Quit (N) | Ever Quit % | Mean Yrs Quit | Short Term (n) | Short Term % |
| 45                                           | 20-24     | Never Any     | 0     | .     |               |             |               |                |              |
| 45                                           | 20-24     | CC            | 0     | .     | 0             | .           |               |                |              |
| 45                                           | 20-24     | Ecig          | 0     | .     |               |             |               |                |              |
| 45                                           | 20-24     | Dual          | 0     | .     |               |             |               |                |              |
| 45                                           | 20-24     | Former        | 0     | .     |               |             |               | 0              | .            |
| Year of Follow-up: 2035, Age Group: 25-29    |           |               |       |       |               |             |               |                |              |
| Period                                       | Age Group | Smoking Group | N     | %     | Ever Quit (N) | Ever Quit % | Mean Yrs Quit | Short Term (n) | Short Term % |
| 45                                           | 25-29     | Never Any     | 0     | .     |               |             |               |                |              |
| 45                                           | 25-29     | CC            | 0     | .     | 0             | .           |               |                |              |
| 45                                           | 25-29     | Ecig          | 0     | .     |               |             |               |                |              |
| 45                                           | 25-29     | Dual          | 0     | .     |               |             |               |                |              |
| 45                                           | 25-29     | Former        | 0     | .     |               |             |               | 0              | .            |
| Year of Follow-up: 2035, Age Group: 30-34    |           |               |       |       |               |             |               |                |              |
| Period                                       | Age Group | Smoking Group | N     | %     | Ever Quit (N) | Ever Quit % | Mean Yrs Quit | Short Term (n) | Short Term % |
| 45                                           | 30-34     | Never Any     | 0     | .     |               |             |               |                |              |
| 45                                           | 30-34     | CC            | 0     | .     | 0             | .           |               |                |              |
| 45                                           | 30-34     | Ecig          | 0     | .     |               |             |               |                |              |
| 45                                           | 30-34     | Dual          | 0     | .     |               |             |               |                |              |
| 45                                           | 30-34     | Former        | 0     | .     |               |             |               | 0              | .            |
| Year of Follow-up: 2035, Age Group: 35-39    |           |               |       |       |               |             |               |                |              |
| Period                                       | Age Group | Smoking Group | N     | %     | Ever Quit (N) | Ever Quit % | Mean Yrs Quit | Short Term (n) | Short Term % |
| 45                                           | 35-39     | Never Any     | 0     | .     |               |             |               |                |              |
| 45                                           | 35-39     | CC            | 0     | .     | 0             | .           |               |                |              |
| 45                                           | 35-39     | Ecig          | 0     | .     |               |             |               |                |              |
| 45                                           | 35-39     | Dual          | 0     | .     |               |             |               |                |              |
| 45                                           | 35-39     | Former        | 0     | .     |               |             |               | 0              | .            |
| Year of Follow-up: 2035, Age Group: 40-44    |           |               |       |       |               |             |               |                |              |
| Period                                       | Age Group | Smoking Group | N     | %     | Ever Quit (N) | Ever Quit % | Mean Yrs Quit | Short Term (n) | Short Term % |
| 45                                           | 40-44     | Never Any     | 0     | .     |               |             |               |                |              |
| 45                                           | 40-44     | CC            | 0     | .     | 0             | .           |               |                |              |
| 45                                           | 40-44     | Ecig          | 0     | .     |               |             |               |                |              |
| 45                                           | 40-44     | Dual          | 0     | .     |               |             |               |                |              |
| 45                                           | 40-44     | Former        | 0     | .     |               |             |               | 0              | .            |
| Year of Follow-up: 2035, Age Group: 45-49    |           |               |       |       |               |             |               |                |              |
| Period                                       | Age Group | Smoking Group | N     | %     | Ever Quit (N) | Ever Quit % | Mean Yrs Quit | Short Term (n) | Short Term % |
| 45                                           | 45-49     | Never Any     | 0     | .     |               |             |               |                |              |
| 45                                           | 45-49     | CC            | 0     | .     | 0             | .           |               |                |              |
| 45                                           | 45-49     | Ecig          | 0     | .     |               |             |               |                |              |
| 45                                           | 45-49     | Dual          | 0     | .     |               |             |               |                |              |
| 45                                           | 45-49     | Former        | 0     | .     |               |             |               | 0              | .            |
| Year of Follow-up: 2035, Age Group: 50-54    |           |               |       |       |               |             |               |                |              |
| Period                                       | Age Group | Smoking Group | N     | %     | Ever Quit (N) | Ever Quit % | Mean Yrs Quit | Short Term (n) | Short Term % |
| 45                                           | 50-54     | Never Any     | 0     | .     |               |             |               |                |              |
| 45                                           | 50-54     | CC            | 0     | .     | 0             | .           |               |                |              |
| 45                                           | 50-54     | Ecig          | 0     | .     |               |             |               |                |              |
| 45                                           | 50-54     | Dual          | 0     | .     |               |             |               |                |              |
| 45                                           | 50-54     | Former        | 0     | .     |               |             |               | 0              | .            |
| Year of Follow-up: 2035, Age Group: 55-59    |           |               |       |       |               |             |               |                |              |
| Period                                       | Age Group | Smoking Group | N     | %     | Ever Quit (N) | Ever Quit % | Mean Yrs Quit | Short Term (n) | Short Term % |

**Results for PHIM for Run 7 (Sensitivity\_Analysis\_3.RTF)**

|                                              |           |               |       |       |               |             |               |                |              |
|----------------------------------------------|-----------|---------------|-------|-------|---------------|-------------|---------------|----------------|--------------|
| 45                                           | 55-59     | Never Any     | 4489  | 50.75 |               |             |               |                |              |
| 45                                           | 55-59     | CC            | 2     | 0.02  | 0             | 0.00        |               |                |              |
| 45                                           | 55-59     | Ecig          | 635   | 7.18  |               |             |               |                |              |
| 45                                           | 55-59     | Dual          | 0     | 0.00  |               |             |               |                |              |
| 45                                           | 55-59     | Former        | 3719  | 42.05 |               |             | 27.10         | 91             | 2.45         |
| Year of Follow-up: 2035, Age Group: 60-64    |           |               |       |       |               |             |               |                |              |
| Period                                       | Age Group | Smoking Group | N     | %     | Ever Quit (N) | Ever Quit % | Mean Yrs Quit | Short Term (n) | Short Term % |
| 45                                           | 60-64     | Never Any     | 4991  | 55.21 |               |             |               |                |              |
| 45                                           | 60-64     | CC            | 0     | 0.00  | 0             | 0.00        |               |                |              |
| 45                                           | 60-64     | Ecig          | 585   | 6.47  |               |             |               |                |              |
| 45                                           | 60-64     | Dual          | 0     | 0.00  |               |             |               |                |              |
| 45                                           | 60-64     | Former        | 3464  | 38.32 |               |             | 27.04         | 112            | 3.23         |
| Year of Follow-up: 2035, Age Group: 65-69    |           |               |       |       |               |             |               |                |              |
| Period                                       | Age Group | Smoking Group | N     | %     | Ever Quit (N) | Ever Quit % | Mean Yrs Quit | Short Term (n) | Short Term % |
| 45                                           | 65-69     | Never Any     | 5163  | 52.60 |               |             |               |                |              |
| 45                                           | 65-69     | CC            | 0     | 0.00  | 0             | 0.00        |               |                |              |
| 45                                           | 65-69     | Ecig          | 487   | 4.96  |               |             |               |                |              |
| 45                                           | 65-69     | Dual          | 0     | 0.00  |               |             |               |                |              |
| 45                                           | 65-69     | Former        | 4166  | 42.44 |               |             | 27.76         | 88             | 2.11         |
| Year of Follow-up: 2035, Age Group: 70-74    |           |               |       |       |               |             |               |                |              |
| Period                                       | Age Group | Smoking Group | N     | %     | Ever Quit (N) | Ever Quit % | Mean Yrs Quit | Short Term (n) | Short Term % |
| 45                                           | 70-74     | Never Any     | 4997  | 46.86 |               |             |               |                |              |
| 45                                           | 70-74     | CC            | 1     | 0.01  | 0             | 0.00        |               |                |              |
| 45                                           | 70-74     | Ecig          | 422   | 3.96  |               |             |               |                |              |
| 45                                           | 70-74     | Dual          | 0     | 0.00  |               |             |               |                |              |
| 45                                           | 70-74     | Former        | 5244  | 49.17 |               |             | 30.09         | 85             | 1.62         |
| Year of Follow-up: 2035, Age Group: 75-79    |           |               |       |       |               |             |               |                |              |
| Period                                       | Age Group | Smoking Group | N     | %     | Ever Quit (N) | Ever Quit % | Mean Yrs Quit | Short Term (n) | Short Term % |
| 45                                           | 75-79     | Never Any     | 4724  | 43.28 |               |             |               |                |              |
| 45                                           | 75-79     | CC            | 3     | 0.03  | 0             | 0.00        |               |                |              |
| 45                                           | 75-79     | Ecig          | 266   | 2.44  |               |             |               |                |              |
| 45                                           | 75-79     | Dual          | 0     | 0.00  |               |             |               |                |              |
| 45                                           | 75-79     | Former        | 5923  | 54.26 |               |             | 33.07         | 61             | 1.03         |
| Year of Follow-up: 2040, Age Group: All Ages |           |               |       |       |               |             |               |                |              |
| Period                                       | Age Group | Smoking Group | N     | %     | Ever Quit (N) | Ever Quit % | Mean Yrs Quit | Short Term (n) | Short Term % |
| 50                                           | All Ages  | Never Any     | 19640 | 51.19 |               |             |               |                |              |
| 50                                           | All Ages  | CC            | 1     | 0.00  | 0             | 0.00        |               |                |              |
| 50                                           | All Ages  | Ecig          | 1349  | 3.52  |               |             |               |                |              |
| 50                                           | All Ages  | Dual          | 0     | 0.00  |               |             |               |                |              |
| 50                                           | All Ages  | Former        | 17375 | 45.29 |               |             | 31.80         | 295            | 1.70         |
| Year of Follow-up: 2040, Age Group: 18-19    |           |               |       |       |               |             |               |                |              |
| Period                                       | Age Group | Smoking Group | N     | %     | Ever Quit (N) | Ever Quit % | Mean Yrs Quit | Short Term (n) | Short Term % |
| 50                                           | 18-19     | Never Any     | 0     | .     |               |             |               |                |              |
| 50                                           | 18-19     | CC            | 0     | .     | 0             | .           |               |                |              |
| 50                                           | 18-19     | Ecig          | 0     | .     |               |             |               |                |              |
| 50                                           | 18-19     | Dual          | 0     | .     |               |             |               |                |              |
| 50                                           | 18-19     | Former        | 0     | .     |               |             | .             | 0              | .            |
| Year of Follow-up: 2040, Age Group: 20-24    |           |               |       |       |               |             |               |                |              |
| Period                                       | Age Group | Smoking Group | N     | %     | Ever Quit (N) | Ever Quit % | Mean Yrs Quit | Short Term (n) | Short Term % |
| 50                                           | 20-24     | Never Any     | 0     | .     |               |             |               |                |              |
| 50                                           | 20-24     | CC            | 0     | .     | 0             | .           |               |                |              |
| 50                                           | 20-24     | Ecig          | 0     | .     |               |             |               |                |              |
| 50                                           | 20-24     | Dual          | 0     | .     |               |             |               |                |              |
| 50                                           | 20-24     | Former        | 0     | .     |               |             | .             | 0              | .            |
| Year of Follow-up: 2040, Age Group: 25-29    |           |               |       |       |               |             |               |                |              |
| Period                                       | Age Group | Smoking Group | N     | %     | Ever Quit (N) | Ever Quit % | Mean Yrs Quit | Short Term (n) | Short Term % |
| 50                                           | 25-29     | Never Any     | 0     | .     |               |             |               |                |              |
| 50                                           | 25-29     | CC            | 0     | .     | 0             | .           |               |                |              |
| 50                                           | 25-29     | Ecig          | 0     | .     |               |             |               |                |              |
| 50                                           | 25-29     | Dual          | 0     | .     |               |             |               |                |              |
| 50                                           | 25-29     | Former        | 0     | .     |               |             | .             | 0              | .            |
| Year of Follow-up: 2040, Age Group: 30-34    |           |               |       |       |               |             |               |                |              |
| Period                                       | Age Group | Smoking Group | N     | %     | Ever Quit (N) | Ever Quit % | Mean Yrs Quit | Short Term (n) | Short Term % |
| 50                                           | 30-34     | Never Any     | 0     | .     |               |             |               |                |              |
| 50                                           | 30-34     | CC            | 0     | .     | 0             | .           |               |                |              |
| 50                                           | 30-34     | Ecig          | 0     | .     |               |             |               |                |              |
| 50                                           | 30-34     | Dual          | 0     | .     |               |             |               |                |              |
| 50                                           | 30-34     | Former        | 0     | .     |               |             | .             | 0              | .            |
| Year of Follow-up: 2040, Age Group: 35-39    |           |               |       |       |               |             |               |                |              |

**Results for PHIM for Run 7 (Sensitivity\_Analysis\_3.RTF)**

| Period                                    | Age Group | Smoking Group | N    | %     | Ever Quit (N) | Ever Quit % | Mean Yrs Quit | Short Term (n) | Short Term % |
|-------------------------------------------|-----------|---------------|------|-------|---------------|-------------|---------------|----------------|--------------|
| 50                                        | 35-39     | Never Any     | 0    | .     |               |             |               |                |              |
| 50                                        | 35-39     | CC            | 0    | .     | 0             | .           |               |                |              |
| 50                                        | 35-39     | Ecig          | 0    | .     |               |             |               |                |              |
| 50                                        | 35-39     | Dual          | 0    | .     |               |             |               |                |              |
| 50                                        | 35-39     | Former        | 0    | .     |               |             | .             | 0              | .            |
| Year of Follow-up: 2040, Age Group: 40-44 |           |               |      |       |               |             |               |                |              |
| Period                                    | Age Group | Smoking Group | N    | %     | Ever Quit (N) | Ever Quit % | Mean Yrs Quit | Short Term (n) | Short Term % |
| 50                                        | 40-44     | Never Any     | 0    | .     |               |             |               |                |              |
| 50                                        | 40-44     | CC            | 0    | .     | 0             | .           |               |                |              |
| 50                                        | 40-44     | Ecig          | 0    | .     |               |             |               |                |              |
| 50                                        | 40-44     | Dual          | 0    | .     |               |             |               |                |              |
| 50                                        | 40-44     | Former        | 0    | .     |               |             | .             | 0              | .            |
| Year of Follow-up: 2040, Age Group: 45-49 |           |               |      |       |               |             |               |                |              |
| Period                                    | Age Group | Smoking Group | N    | %     | Ever Quit (N) | Ever Quit % | Mean Yrs Quit | Short Term (n) | Short Term % |
| 50                                        | 45-49     | Never Any     | 0    | .     |               |             |               |                |              |
| 50                                        | 45-49     | CC            | 0    | .     | 0             | .           |               |                |              |
| 50                                        | 45-49     | Ecig          | 0    | .     |               |             |               |                |              |
| 50                                        | 45-49     | Dual          | 0    | .     |               |             |               |                |              |
| 50                                        | 45-49     | Former        | 0    | .     |               |             | .             | 0              | .            |
| Year of Follow-up: 2040, Age Group: 50-54 |           |               |      |       |               |             |               |                |              |
| Period                                    | Age Group | Smoking Group | N    | %     | Ever Quit (N) | Ever Quit % | Mean Yrs Quit | Short Term (n) | Short Term % |
| 50                                        | 50-54     | Never Any     | 0    | .     |               |             |               |                |              |
| 50                                        | 50-54     | CC            | 0    | .     | 0             | .           |               |                |              |
| 50                                        | 50-54     | Ecig          | 0    | .     |               |             |               |                |              |
| 50                                        | 50-54     | Dual          | 0    | .     |               |             |               |                |              |
| 50                                        | 50-54     | Former        | 0    | .     |               |             | .             | 0              | .            |
| Year of Follow-up: 2040, Age Group: 55-59 |           |               |      |       |               |             |               |                |              |
| Period                                    | Age Group | Smoking Group | N    | %     | Ever Quit (N) | Ever Quit % | Mean Yrs Quit | Short Term (n) | Short Term % |
| 50                                        | 55-59     | Never Any     | 0    | .     |               |             |               |                |              |
| 50                                        | 55-59     | CC            | 0    | .     | 0             | .           |               |                |              |
| 50                                        | 55-59     | Ecig          | 0    | .     |               |             |               |                |              |
| 50                                        | 55-59     | Dual          | 0    | .     |               |             |               |                |              |
| 50                                        | 55-59     | Former        | 0    | .     |               |             | .             | 0              | .            |
| Year of Follow-up: 2040, Age Group: 60-64 |           |               |      |       |               |             |               |                |              |
| Period                                    | Age Group | Smoking Group | N    | %     | Ever Quit (N) | Ever Quit % | Mean Yrs Quit | Short Term (n) | Short Term % |
| 50                                        | 60-64     | Never Any     | 4489 | 50.75 |               |             |               |                |              |
| 50                                        | 60-64     | CC            | 0    | 0.00  | 0             | 0.00        |               |                |              |
| 50                                        | 60-64     | Ecig          | 409  | 4.62  |               |             |               |                |              |
| 50                                        | 60-64     | Dual          | 0    | 0.00  |               |             |               |                |              |
| 50                                        | 60-64     | Former        | 3947 | 44.62 |               |             | 30.36         | 95             | 2.41         |
| Year of Follow-up: 2040, Age Group: 65-69 |           |               |      |       |               |             |               |                |              |
| Period                                    | Age Group | Smoking Group | N    | %     | Ever Quit (N) | Ever Quit % | Mean Yrs Quit | Short Term (n) | Short Term % |
| 50                                        | 65-69     | Never Any     | 4991 | 55.21 |               |             |               |                |              |
| 50                                        | 65-69     | CC            | 0    | 0.00  | 0             | 0.00        |               |                |              |
| 50                                        | 65-69     | Ecig          | 361  | 3.99  |               |             |               |                |              |
| 50                                        | 65-69     | Dual          | 0    | 0.00  |               |             |               |                |              |
| 50                                        | 65-69     | Former        | 3688 | 40.80 |               |             | 30.23         | 83             | 2.25         |
| Year of Follow-up: 2040, Age Group: 70-74 |           |               |      |       |               |             |               |                |              |
| Period                                    | Age Group | Smoking Group | N    | %     | Ever Quit (N) | Ever Quit % | Mean Yrs Quit | Short Term (n) | Short Term % |
| 50                                        | 70-74     | Never Any     | 5163 | 52.60 |               |             |               |                |              |
| 50                                        | 70-74     | CC            | 0    | 0.00  | 0             | 0.00        |               |                |              |
| 50                                        | 70-74     | Ecig          | 325  | 3.31  |               |             |               |                |              |
| 50                                        | 70-74     | Dual          | 0    | 0.00  |               |             |               |                |              |
| 50                                        | 70-74     | Former        | 4328 | 44.09 |               |             | 31.62         | 57             | 1.32         |
| Year of Follow-up: 2040, Age Group: 75-79 |           |               |      |       |               |             |               |                |              |
| Period                                    | Age Group | Smoking Group | N    | %     | Ever Quit (N) | Ever Quit % | Mean Yrs Quit | Short Term (n) | Short Term % |
| 50                                        | 75-79     | Never Any     | 4997 | 46.86 |               |             |               |                |              |
| 50                                        | 75-79     | CC            | 1    | 0.01  | 0             | 0.00        |               |                |              |
| 50                                        | 75-79     | Ecig          | 254  | 2.38  |               |             |               |                |              |
| 50                                        | 75-79     | Dual          | 0    | 0.00  |               |             |               |                |              |
| 50                                        | 75-79     | Former        | 5412 | 50.75 |               |             | 34.07         | 60             | 1.11         |

## Results for PHIM for Run 7 (Sensitivity\_Analysis\_3.RTF)

\*\*\*\*\*

### Main Results for E-Component for Run: 7, Simulation: 1, COD: Four Diseases Combined

| Variable Parameter          | Value                                  |
|-----------------------------|----------------------------------------|
| 1. Country                  | US (United States)                     |
| 2. Sex                      | M (Males)                              |
| 3. Year of start of process | 1990                                   |
| 4. Cause of Death           | Four Diseases Combined                 |
| 5. Effective Dose NULL      | CC:1                                   |
| 6. Effective Dose Ecig      | CC:1 Ecig:0.05 Dual:0.525              |
| Note:                       | Death rates are per million population |

#### Results for Age Groups Combined and Years combined, Population unadjusted for deaths in Ecig scenario,

| Age Group:All | NULL     | Ecig        | %Drop       |         |        |        | NULL    | Ecig    | Drop    |         |
|---------------|----------|-------------|-------------|---------|--------|--------|---------|---------|---------|---------|
| Year          | Number   | Attrib      | Attrib      | Drop    | %Drop  | Attrib | Death   | Attrib  | Attrib  | Drop    |
|               | Deaths   | Deaths      | Deaths      | Deaths  | Deaths | Deaths | Rate    | Rates   | Rates   | Rates   |
| All Comb      | 13148871 | 4509390.583 | 2958074.347 | 1551316 | 11.798 | 34.402 | 3806.31 | 1305.37 | 856.298 | 449.072 |

#### Results for Age Groups Combined, Population unadjusted for deaths in Ecig scenario,

| Age Group:All | NULL   | Ecig       | %Drop      |          |        |        | NULL    | Ecig    | Drop    |         |
|---------------|--------|------------|------------|----------|--------|--------|---------|---------|---------|---------|
| Year          | Number | Attrib     | Attrib     | Drop     | %Drop  | Attrib | Death   | Attrib  | Attrib  | Drop    |
|               | Deaths | Deaths     | Deaths     | Deaths   | Deaths | Deaths | Rate    | Rates   | Rates   | Rates   |
| 1990          | 317161 | 125773.065 | 125773.065 | 0.000    | 0.000  | 0.000  | 5027.71 | 1993.78 | 1993.78 | 0.000   |
| 1991          | 313217 | 123999.442 | 123575.252 | 424.190  | 0.135  | 0.342  | 4883.81 | 1933.45 | 1926.84 | 6.614   |
| 1992          | 308577 | 122014.015 | 120876.718 | 1137.297 | 0.369  | 0.932  | 4729.73 | 1870.18 | 1852.74 | 17.432  |
| 1993          | 311713 | 122810.618 | 120673.066 | 2137.552 | 0.686  | 1.741  | 4692.62 | 1848.83 | 1816.65 | 32.179  |
| 1994          | 305700 | 119925.592 | 116637.165 | 3288.427 | 1.076  | 2.742  | 4516.19 | 1771.69 | 1723.11 | 48.581  |
| 1995          | 303225 | 117896.496 | 113260.927 | 4635.570 | 1.529  | 3.932  | 4393.80 | 1708.35 | 1641.18 | 67.170  |
| 1996          | 299559 | 115698.645 | 109577.319 | 6121.326 | 2.043  | 5.291  | 4273.16 | 1650.42 | 1563.10 | 87.320  |
| 1997          | 294226 | 113359.847 | 105741.135 | 7618.712 | 2.589  | 6.721  | 4128.67 | 1590.70 | 1483.79 | 106.908 |
| 1998          | 289258 | 111444.212 | 102322.190 | 9122.022 | 3.154  | 8.185  | 3992.19 | 1538.10 | 1412.20 | 125.898 |
| 1999          | 311002 | 114877.722 | 102668.232 | 12209.49 | 3.926  | 10.628 | 4224.60 | 1560.48 | 1394.63 | 165.852 |
| 2000          | 303786 | 112379.704 | 98439.092  | 13940.61 | 4.589  | 12.405 | 4066.21 | 1504.22 | 1317.62 | 186.597 |
| 2001          | 296294 | 110024.943 | 94232.988  | 15791.95 | 5.330  | 14.353 | 3914.28 | 1453.52 | 1244.89 | 208.625 |
| 2002          | 291898 | 108289.173 | 90418.059  | 17871.11 | 6.122  | 16.503 | 3813.00 | 1414.56 | 1181.11 | 233.446 |
| 2003          | 285865 | 106539.023 | 86826.112  | 19712.91 | 6.896  | 18.503 | 3695.36 | 1377.22 | 1122.39 | 254.827 |
| 2004          | 274177 | 103037.251 | 81971.736  | 21065.52 | 7.683  | 20.445 | 3506.10 | 1317.61 | 1048.23 | 269.380 |
| 2005          | 272379 | 103044.562 | 80032.176  | 23012.39 | 8.449  | 22.332 | 3442.69 | 1302.41 | 1011.55 | 290.861 |
| 2006          | 264118 | 99672.555  | 75000.685  | 24671.87 | 9.341  | 24.753 | 3307.76 | 1248.28 | 939.293 | 308.985 |
| 2007          | 258419 | 97839.152  | 71766.847  | 26072.30 | 10.089 | 26.648 | 3203.20 | 1212.75 | 889.576 | 323.176 |
| 2008          | 259461 | 98075.852  | 70231.158  | 27844.69 | 10.732 | 28.391 | 3180.09 | 1202.07 | 860.791 | 341.280 |
| 2009          | 253907 | 95617.338  | 66530.203  | 29087.14 | 11.456 | 30.420 | 3075.31 | 1158.11 | 805.811 | 352.302 |
| 2010          | 251878 | 94607.988  | 64123.647  | 30484.34 | 12.103 | 32.222 | 3013.72 | 1131.98 | 767.239 | 364.745 |
| 2011          | 251779 | 93633.119  | 61444.125  | 32188.99 | 12.785 | 34.378 | 2982.76 | 1109.25 | 727.914 | 381.335 |
| 2012          | 252643 | 92775.175  | 58912.127  | 33863.05 | 13.404 | 36.500 | 2960.61 | 1087.19 | 690.364 | 396.825 |
| 2013          | 256175 | 92345.780  | 56768.579  | 35577.20 | 13.888 | 38.526 | 2967.76 | 1069.82 | 657.658 | 412.158 |
| 2014          | 257393 | 91379.215  | 54360.920  | 37018.30 | 14.382 | 40.511 | 2947.05 | 1046.26 | 622.411 | 423.845 |
| 2015          | 259782 | 90750.242  | 52431.210  | 38319.03 | 14.750 | 42.225 | 3346.10 | 1168.90 | 675.336 | 493.565 |
| 2016          | 261453 | 88811.996  | 49152.105  | 39659.89 | 15.169 | 44.656 | 3336.15 | 1133.24 | 627.183 | 506.062 |
| 2017          | 263685 | 87325.126  | 46479.895  | 40845.23 | 15.490 | 46.774 | 3333.85 | 1104.08 | 587.660 | 516.419 |
| 2018          | 258714 | 87612.144  | 45678.845  | 41933.30 | 16.208 | 47.862 | 3240.73 | 1097.46 | 572.187 | 525.269 |
| 2019          | 261438 | 87797.760  | 44296.629  | 43501.13 | 16.639 | 49.547 | 3242.99 | 1089.08 | 549.475 | 539.607 |
| 2020          | 262288 | 87221.042  | 42807.560  | 44413.48 | 16.933 | 50.921 | 3715.29 | 1235.48 | 606.366 | 629.113 |
| 2021          | 255079 | 82001.292  | 38015.384  | 43985.91 | 17.244 | 53.641 | 3587.82 | 1153.39 | 534.705 | 618.684 |
| 2022          | 257097 | 81915.977  | 36487.056  | 45428.92 | 17.670 | 55.458 | 3588.53 | 1143.37 | 509.283 | 634.092 |
| 2023          | 259080 | 81810.810  | 34993.914  | 46816.90 | 18.070 | 57.226 | 3586.88 | 1132.64 | 484.480 | 648.165 |
| 2024          | 260719 | 81528.303  | 33513.682  | 48014.62 | 18.416 | 58.893 | 3579.65 | 1119.38 | 460.141 | 659.238 |
| 2025          | 257308 | 79599.213  | 31829.479  | 47769.73 | 18.565 | 60.013 | 4112.08 | 1272.09 | 508.672 | 763.416 |
| 2026          | 251528 | 75082.462  | 28159.760  | 46922.70 | 18.655 | 62.495 | 4003.24 | 1194.99 | 448.182 | 746.807 |
| 2027          | 250988 | 74444.425  | 26624.529  | 47819.90 | 19.053 | 64.236 | 3976.53 | 1179.46 | 421.826 | 757.635 |
| 2028          | 250285 | 73699.585  | 25013.327  | 48686.26 | 19.452 | 66.060 | 3945.35 | 1161.76 | 394.296 | 767.463 |
| 2029          | 249525 | 72819.703  | 23468.594  | 49351.11 | 19.778 | 67.772 | 3910.99 | 1141.36 | 367.840 | 773.516 |
| 2030          | 240528 | 69309.277  | 21817.871  | 47491.41 | 19.745 | 68.521 | 4504.36 | 1297.95 | 408.582 | 889.368 |
| 2031          | 235442 | 65433.368  | 19202.810  | 46230.56 | 19.636 | 70.653 | 4397.65 | 1222.18 | 358.675 | 863.506 |
| 2032          | 234017 | 64643.552  | 17943.185  | 46700.37 | 19.956 | 72.243 | 4356.12 | 1203.31 | 334.004 | 869.305 |
| 2033          | 232559 | 63793.514  | 16750.898  | 47042.62 | 20.228 | 73.742 | 4310.93 | 1182.54 | 310.510 | 872.026 |
| 2034          | 230963 | 63032.151  | 15608.676  | 47423.48 | 20.533 | 75.237 | 4260.75 | 1162.80 | 287.945 | 874.856 |
| 2035          | 215822 | 57653.301  | 14207.434  | 43445.87 | 20.130 | 75.357 | 4924.38 | 1315.47 | 324.170 | 991.301 |
| 2036          | 208183 | 52988.733  | 11756.283  | 41232.45 | 19.806 | 77.814 | 4748.94 | 1208.75 | 268.177 | 940.569 |
| 2037          | 205491 | 52026.921  | 10790.611  | 41236.31 | 20.067 | 79.260 | 4682.40 | 1185.50 | 245.878 | 939.624 |
| 2038          | 202834 | 50943.211  | 9849.918   | 41093.29 | 20.260 | 80.665 | 4612.18 | 1158.38 | 223.974 | 934.409 |
| 2039          | 200251 | 50085.991  | 9031.169   | 41054.82 | 20.502 | 81.969 | 4538.65 | 1135.19 | 204.690 | 930.501 |

## Results for PHIM for Run 7 (Sensitivity\_Analysis\_3.RTF)

\*\*\*\*\*

### Main Results for E-Component for Run: 7, Simulation: 1, COD: LUNG CANCER

| Variable Parameter          | Value                                  |
|-----------------------------|----------------------------------------|
| 1. Country                  | US (United States)                     |
| 2. Sex                      | M (Males)                              |
| 3. Year of start of process | 1990                                   |
| 4. Cause of Death           | LUNG CANCER                            |
| 5. Effective Dose NULL      | CC:1                                   |
| 6. Effective Dose Ecig      | CC:1 Ecig:0.05 Dual:0.525              |
| Note:                       | Death rates are per million population |

#### Results for Age Groups Combined and Years combined, Population unadjusted for deaths in Ecig scenario,

| Age Group:All |         | NULL        | Ecig        | %Drop    |        |        | NULL    | Ecig    | Drop    |         |
|---------------|---------|-------------|-------------|----------|--------|--------|---------|---------|---------|---------|
| Year          | Number  | Attrib      | Attrib      | Drop     | %Drop  | Attrib | Death   | Attrib  | Attrib  | Drop    |
|               | Deaths  | Deaths      | Deaths      | Deaths   | Deaths | Deaths | Rate    | Rates   | Rates   | Rates   |
| All Comb      | 3065988 | 2244988.113 | 1710511.128 | 534477.0 | 17.432 | 23.808 | 887.537 | 649.875 | 495.156 | 154.720 |

#### Results for Age Groups Combined, Population unadjusted for deaths in Ecig scenario,

| Age Group:All |        | NULL      | Ecig      | %Drop    |        |        | NULL    | Ecig    | Drop    |         |
|---------------|--------|-----------|-----------|----------|--------|--------|---------|---------|---------|---------|
| Year          | Number | Attrib    | Attrib    | Drop     | %Drop  | Attrib | Death   | Attrib  | Attrib  | Drop    |
|               | Deaths | Deaths    | Deaths    | Deaths   | Deaths | Deaths | Rate    | Rates   | Rates   | Rates   |
| 1990          | 78822  | 63385.736 | 63385.736 | 0.000    | 0.000  | 0.000  | 1249.50 | 1004.81 | 1004.81 | 0.000   |
| 1991          | 78462  | 62918.402 | 62870.284 | 48.118   | 0.061  | 0.076  | 1223.41 | 981.049 | 980.299 | 0.750   |
| 1992          | 77987  | 62366.766 | 62237.491 | 129.274  | 0.166  | 0.207  | 1195.35 | 955.930 | 953.948 | 1.981   |
| 1993          | 78542  | 62652.888 | 62398.182 | 254.706  | 0.324  | 0.407  | 1182.39 | 943.195 | 939.360 | 3.834   |
| 1994          | 77437  | 61565.227 | 61163.066 | 402.161  | 0.519  | 0.653  | 1144.00 | 909.520 | 903.579 | 5.941   |
| 1995          | 76904  | 60851.961 | 60266.429 | 585.532  | 0.761  | 0.962  | 1114.36 | 881.759 | 873.274 | 8.484   |
| 1996          | 76232  | 60122.922 | 59306.076 | 816.845  | 1.072  | 1.359  | 1087.44 | 857.643 | 845.991 | 11.652  |
| 1997          | 75473  | 59237.155 | 58171.373 | 1065.782 | 1.412  | 1.799  | 1059.06 | 831.234 | 816.279 | 14.955  |
| 1998          | 75381  | 58906.696 | 57531.847 | 1374.849 | 1.824  | 2.334  | 1040.37 | 813.001 | 794.026 | 18.975  |
| 1999          | 73159  | 56930.073 | 55251.320 | 1678.753 | 2.295  | 2.949  | 993.781 | 773.329 | 750.525 | 22.804  |
| 2000          | 73784  | 57137.121 | 55062.023 | 2075.098 | 2.812  | 3.632  | 987.608 | 764.787 | 737.012 | 27.775  |
| 2001          | 73294  | 56481.726 | 53959.261 | 2522.465 | 3.442  | 4.466  | 968.273 | 746.169 | 712.846 | 33.324  |
| 2002          | 72442  | 55588.365 | 52595.095 | 2993.270 | 4.132  | 5.385  | 946.293 | 726.138 | 687.038 | 39.100  |
| 2003          | 71942  | 54945.856 | 51430.867 | 3514.989 | 4.886  | 6.397  | 929.989 | 710.281 | 664.843 | 45.438  |
| 2004          | 71301  | 54203.126 | 50112.846 | 4090.280 | 5.737  | 7.546  | 911.778 | 693.135 | 640.830 | 52.305  |
| 2005          | 70964  | 53744.603 | 49057.869 | 4686.734 | 6.604  | 8.720  | 896.937 | 679.296 | 620.058 | 59.237  |
| 2006          | 69658  | 52535.572 | 47223.071 | 5312.500 | 7.627  | 10.112 | 872.383 | 657.945 | 591.412 | 66.533  |
| 2007          | 68565  | 51492.124 | 45559.491 | 5932.633 | 8.653  | 11.521 | 849.888 | 638.264 | 564.726 | 73.537  |
| 2008          | 68226  | 51030.736 | 44345.774 | 6684.961 | 9.798  | 13.100 | 836.215 | 625.460 | 543.526 | 81.934  |
| 2009          | 67509  | 50276.199 | 42837.814 | 7438.385 | 11.018 | 14.795 | 817.667 | 608.943 | 518.850 | 90.093  |
| 2010          | 67196  | 49840.933 | 41644.996 | 8195.937 | 12.197 | 16.444 | 804.000 | 596.347 | 498.282 | 98.064  |
| 2011          | 66506  | 49072.841 | 40042.580 | 9030.261 | 13.578 | 18.402 | 787.880 | 581.354 | 474.375 | 106.979 |
| 2012          | 66155  | 48539.512 | 38611.341 | 9928.171 | 15.007 | 20.454 | 775.240 | 568.812 | 452.468 | 116.344 |
| 2013          | 65333  | 47675.741 | 36947.660 | 10728.08 | 16.421 | 22.502 | 756.876 | 552.318 | 428.035 | 124.284 |
| 2014          | 65033  | 47194.534 | 35628.992 | 11565.54 | 17.784 | 24.506 | 744.602 | 540.359 | 407.938 | 132.421 |
| 2015          | 64145  | 46305.842 | 34010.505 | 12295.34 | 19.168 | 26.552 | 726.215 | 526.439 | 398.070 | 158.369 |
| 2016          | 61618  | 44208.867 | 31481.713 | 12727.15 | 20.655 | 28.789 | 786.248 | 564.107 | 401.708 | 162.399 |
| 2017          | 59897  | 42702.624 | 29474.628 | 13228.00 | 22.085 | 30.977 | 757.297 | 539.903 | 372.657 | 167.246 |
| 2018          | 62468  | 44321.202 | 29444.604 | 14876.60 | 23.815 | 33.565 | 782.490 | 555.181 | 368.832 | 186.349 |
| 2019          | 63045  | 44493.088 | 28510.371 | 15982.72 | 25.351 | 35.922 | 782.035 | 551.912 | 353.655 | 198.257 |
| 2020          | 63466  | 44529.551 | 27515.098 | 17014.45 | 26.809 | 38.209 | 898.991 | 630.757 | 389.749 | 241.008 |
| 2021          | 57113  | 39852.556 | 23619.013 | 16233.54 | 28.424 | 40.734 | 803.323 | 560.546 | 332.213 | 228.333 |
| 2022          | 57440  | 39853.685 | 22590.280 | 17263.41 | 30.055 | 43.317 | 801.745 | 556.274 | 315.313 | 240.961 |
| 2023          | 57738  | 39847.050 | 21567.502 | 18279.55 | 31.659 | 45.874 | 799.366 | 551.670 | 298.595 | 253.075 |
| 2024          | 57942  | 39726.010 | 20538.310 | 19187.70 | 33.115 | 48.300 | 795.539 | 545.435 | 281.990 | 263.446 |
| 2025          | 57521  | 39207.348 | 19406.068 | 19801.28 | 34.424 | 50.504 | 919.257 | 626.579 | 310.131 | 316.447 |
| 2026          | 51428  | 34803.960 | 16372.624 | 18431.34 | 35.839 | 52.958 | 818.510 | 553.929 | 260.581 | 293.347 |
| 2027          | 51172  | 34484.595 | 15358.263 | 19126.33 | 37.377 | 55.463 | 810.740 | 546.357 | 243.329 | 303.028 |
| 2028          | 50870  | 34100.638 | 14312.625 | 19788.01 | 38.899 | 58.028 | 801.884 | 537.544 | 225.616 | 311.927 |
| 2029          | 50540  | 33669.838 | 13322.047 | 20347.79 | 40.261 | 60.433 | 792.146 | 527.732 | 208.806 | 318.926 |
| 2030          | 49109  | 32557.688 | 12282.134 | 20275.55 | 41.287 | 62.276 | 919.662 | 609.705 | 230.007 | 379.699 |
| 2031          | 43585  | 28646.393 | 10186.606 | 18459.79 | 42.353 | 64.440 | 814.096 | 535.065 | 190.268 | 344.797 |
| 2032          | 43163  | 28227.160 | 9423.101  | 18804.06 | 43.565 | 66.617 | 803.454 | 525.435 | 175.406 | 350.029 |
| 2033          | 42725  | 27786.623 | 8705.212  | 19081.41 | 44.661 | 68.671 | 791.996 | 515.079 | 161.368 | 353.711 |
| 2034          | 42256  | 27348.299 | 8032.884  | 19315.41 | 45.711 | 70.627 | 779.523 | 504.514 | 148.188 | 356.326 |
| 2035          | 39748  | 25570.077 | 7229.167  | 18340.91 | 46.143 | 71.728 | 906.933 | 583.430 | 164.947 | 418.483 |
| 2036          | 34030  | 21717.319 | 5594.910  | 16122.41 | 47.377 | 74.238 | 776.269 | 495.402 | 127.628 | 367.774 |
| 2037          | 33454  | 21256.024 | 5089.558  | 16166.47 | 48.325 | 76.056 | 762.289 | 484.347 | 115.972 | 368.374 |
| 2038          | 32883  | 20747.175 | 4606.940  | 16140.24 | 49.084 | 77.795 | 747.720 | 471.764 | 104.756 | 367.008 |
| 2039          | 32325  | 20327.688 | 4195.478  | 16132.21 | 49.906 | 79.361 | 732.644 | 460.724 | 95.090  | 365.634 |

## Results for PHIM for Run 7 (Sensitivity\_Analysis\_3.RTF)

\*\*\*\*\*

### Main Results for E-Component for Run: 7, Simulation: 1, COD: IHD

| Variable Parameter          | Value                                  |
|-----------------------------|----------------------------------------|
| 1. Country                  | US (United States)                     |
| 2. Sex                      | M (Males)                              |
| 3. Year of start of process | 1990                                   |
| 4. Cause of Death           | IHD                                    |
| 5. Effective Dose NULL      | CC:1                                   |
| 6. Effective Dose Ecig      | CC:1 Ecig:0.05 Dual:0.525              |
| Note:                       | Death rates are per million population |

#### Results for Age Groups Combined and Years combined, Population unadjusted for deaths in Ecig scenario,

| Age Group:All |         | NULL        | Ecig       | %Drop    |        | Death  |         | NULL    | Ecig    | Drop    |
|---------------|---------|-------------|------------|----------|--------|--------|---------|---------|---------|---------|
| Year          | Number  | Attrib      | Attrib     | Drop     | %Drop  | Attrib | Rate    | Attrib  | Attrib  | Rates   |
|               | Deaths  | Deaths      | Deaths     | Deaths   | Deaths | Deaths |         | Rates   | Rates   | Rates   |
| All Comb      | 6360041 | 1098877.421 | 508120.861 | 590756.6 | 9.289  | 53.760 | 1841.09 | 318.101 | 147.090 | 171.011 |

#### Results for Age Groups Combined, Population unadjusted for deaths in Ecig scenario,

| Age Group:All |        | NULL      | Ecig      | %Drop    |        | Death  |         | NULL    | Ecig    | Drop    |
|---------------|--------|-----------|-----------|----------|--------|--------|---------|---------|---------|---------|
| Year          | Number | Attrib    | Attrib    | Drop     | %Drop  | Attrib | Rate    | Attrib  | Attrib  | Rates   |
|               | Deaths | Deaths    | Deaths    | Deaths   | Deaths | Deaths |         | Rates   | Rates   | Rates   |
| 1990          | 171484 | 38511.725 | 38511.725 | 0.000    | 0.000  | 0.000  | 2718.40 | 610.497 | 610.497 | 0.000   |
| 1991          | 168044 | 37309.838 | 36996.011 | 313.827  | 0.187  | 0.841  | 2620.21 | 581.750 | 576.857 | 4.893   |
| 1992          | 164548 | 36137.488 | 35292.595 | 844.893  | 0.513  | 2.338  | 2522.12 | 553.899 | 540.949 | 12.950  |
| 1993          | 164362 | 35599.588 | 34034.455 | 1565.133 | 0.952  | 4.396  | 2474.35 | 535.926 | 512.365 | 23.562  |
| 1994          | 159866 | 34336.757 | 31946.830 | 2389.927 | 1.495  | 6.960  | 2361.75 | 507.267 | 471.960 | 35.307  |
| 1995          | 158083 | 33455.759 | 30112.807 | 3342.952 | 2.115  | 9.992  | 2290.66 | 484.782 | 436.341 | 48.440  |
| 1996          | 154875 | 32193.824 | 27838.447 | 4355.378 | 2.812  | 13.529 | 2209.26 | 459.239 | 397.111 | 62.129  |
| 1997          | 149970 | 30665.509 | 25327.871 | 5337.638 | 3.559  | 17.406 | 2104.43 | 430.308 | 355.409 | 74.899  |
| 1998          | 145407 | 29188.430 | 22929.718 | 6258.712 | 4.304  | 21.442 | 2006.83 | 402.844 | 316.464 | 86.380  |
| 1999          | 165952 | 33375.386 | 24662.364 | 8713.021 | 5.250  | 26.106 | 2254.27 | 453.366 | 335.010 | 118.356 |
| 2000          | 160260 | 32024.754 | 22262.598 | 9762.156 | 6.091  | 30.483 | 2145.10 | 428.655 | 297.988 | 130.668 |
| 2001          | 154444 | 30682.393 | 19830.794 | 10851.60 | 7.026  | 35.368 | 2040.33 | 405.339 | 261.981 | 143.358 |
| 2002          | 151887 | 30218.370 | 18089.028 | 12129.34 | 7.986  | 40.139 | 1984.06 | 394.736 | 236.293 | 158.443 |
| 2003          | 146733 | 29175.202 | 16100.746 | 13074.46 | 8.910  | 44.814 | 1896.81 | 377.146 | 208.133 | 169.013 |
| 2004          | 138381 | 27488.687 | 13920.905 | 13567.78 | 9.805  | 49.358 | 1769.58 | 351.518 | 178.017 | 173.501 |
| 2005          | 135881 | 27017.439 | 12566.012 | 14451.43 | 10.635 | 53.489 | 1717.44 | 341.482 | 158.826 | 182.656 |
| 2006          | 131922 | 26231.435 | 11027.163 | 15204.27 | 11.525 | 57.962 | 1652.16 | 328.517 | 138.102 | 190.415 |
| 2007          | 126502 | 25103.049 | 9576.042  | 15527.01 | 12.274 | 61.853 | 1568.04 | 311.161 | 118.698 | 192.463 |
| 2008          | 125859 | 24621.740 | 8598.366  | 16023.37 | 12.731 | 65.078 | 1542.60 | 301.777 | 105.386 | 196.391 |
| 2009          | 122428 | 23741.177 | 7552.387  | 16188.79 | 13.223 | 68.189 | 1482.84 | 287.552 | 91.474  | 196.078 |
| 2010          | 120537 | 23189.160 | 6734.622  | 16454.54 | 13.651 | 70.958 | 1442.22 | 277.458 | 80.580  | 196.878 |
| 2011          | 120221 | 22786.927 | 5971.793  | 16815.13 | 13.987 | 73.793 | 1424.23 | 269.951 | 70.746  | 199.205 |
| 2012          | 120927 | 22485.295 | 5350.999  | 17134.30 | 14.169 | 76.202 | 1417.09 | 263.495 | 62.706  | 200.789 |
| 2013          | 122648 | 22251.884 | 4826.924  | 17424.96 | 14.207 | 78.308 | 1420.86 | 257.786 | 55.919  | 201.866 |
| 2014          | 123229 | 21894.593 | 4331.195  | 17563.40 | 14.253 | 80.218 | 1410.92 | 250.685 | 49.590  | 201.094 |
| 2015          | 123774 | 21471.109 | 3901.576  | 17569.53 | 14.195 | 81.829 | 1594.26 | 276.557 | 50.254  | 226.303 |
| 2016          | 126218 | 21411.568 | 3514.226  | 17897.34 | 14.180 | 83.587 | 1610.55 | 273.213 | 44.842  | 228.371 |
| 2017          | 128265 | 21169.399 | 3169.108  | 18000.29 | 14.034 | 85.030 | 1621.69 | 267.651 | 40.068  | 227.583 |
| 2018          | 121429 | 19830.576 | 2669.320  | 17161.26 | 14.133 | 86.539 | 1521.05 | 248.404 | 33.437  | 214.967 |
| 2019          | 121832 | 19431.014 | 2403.283  | 17027.73 | 13.976 | 87.632 | 1511.26 | 241.031 | 29.811  | 211.219 |
| 2020          | 120811 | 18532.612 | 2126.412  | 16406.20 | 13.580 | 88.526 | 1711.27 | 262.513 | 30.120  | 232.392 |
| 2021          | 119407 | 18234.128 | 1880.845  | 16353.28 | 13.695 | 89.685 | 1679.51 | 256.472 | 26.455  | 230.017 |
| 2022          | 119438 | 17812.559 | 1680.148  | 16132.41 | 13.507 | 90.568 | 1667.10 | 248.626 | 23.451  | 225.175 |
| 2023          | 119445 | 17361.668 | 1498.566  | 15863.10 | 13.281 | 91.369 | 1653.68 | 240.367 | 20.747  | 219.620 |
| 2024          | 119305 | 16929.676 | 1352.242  | 15577.43 | 13.057 | 92.013 | 1638.05 | 232.443 | 18.566  | 213.877 |
| 2025          | 115685 | 15501.666 | 1172.011  | 14329.66 | 12.387 | 92.439 | 1848.78 | 247.735 | 18.730  | 229.004 |
| 2026          | 115073 | 15523.814 | 1071.934  | 14451.88 | 12.559 | 93.095 | 1831.46 | 247.072 | 17.061  | 230.012 |
| 2027          | 113989 | 15073.070 | 974.125   | 14098.95 | 12.369 | 93.537 | 1805.98 | 238.810 | 15.434  | 223.377 |
| 2028          | 112855 | 14636.710 | 878.202   | 13758.51 | 12.191 | 94.000 | 1778.98 | 230.725 | 13.843  | 216.882 |
| 2029          | 111718 | 14180.166 | 794.132   | 13386.03 | 11.982 | 94.400 | 1751.04 | 222.256 | 12.447  | 209.809 |
| 2030          | 104851 | 12111.772 | 663.095   | 11448.68 | 10.919 | 94.525 | 1963.54 | 226.816 | 12.418  | 214.398 |
| 2031          | 105289 | 12417.367 | 640.920   | 11776.45 | 11.185 | 94.839 | 1966.62 | 231.935 | 11.971  | 219.963 |
| 2032          | 103879 | 12054.064 | 592.495   | 11461.57 | 11.034 | 95.085 | 1933.67 | 224.381 | 11.029  | 213.352 |
| 2033          | 102485 | 11672.389 | 542.633   | 11129.76 | 10.860 | 95.351 | 1899.76 | 216.370 | 10.059  | 206.312 |
| 2034          | 101070 | 11365.762 | 498.180   | 10867.58 | 10.753 | 95.617 | 1864.51 | 209.673 | 9.190   | 200.482 |
| 2035          | 90820  | 8580.360  | 376.706   | 8203.654 | 9.033  | 95.610 | 2072.23 | 195.777 | 8.595   | 187.182 |
| 2036          | 92117  | 8948.841  | 370.408   | 8578.433 | 9.313  | 95.861 | 2101.31 | 204.135 | 8.450   | 195.686 |
| 2037          | 90327  | 8624.570  | 347.068   | 8277.502 | 9.164  | 95.976 | 2058.21 | 196.522 | 7.908   | 188.614 |
| 2038          | 88590  | 8315.017  | 320.816   | 7994.201 | 9.024  | 96.142 | 2014.42 | 189.073 | 7.295   | 181.778 |
| 2039          | 86921  | 8001.132  | 290.015   | 7711.117 | 8.871  | 96.375 | 1970.05 | 181.344 | 6.573   | 174.771 |



## Results for PHIM for Run 7 (Sensitivity\_Analysis\_3.RTF)

\*\*\*\*\*

### Main Results for E-Component for Run: 7, Simulation: 1, COD: STROKE

| Variable Parameter          | Value                                  |
|-----------------------------|----------------------------------------|
| 1. Country                  | US (United States)                     |
| 2. Sex                      | M (Males)                              |
| 3. Year of start of process | 1990                                   |
| 4. Cause of Death           | STROKE                                 |
| 5. Effective Dose NULL      | CC:1                                   |
| 6. Effective Dose Ecig      | CC:1 Ecig:0.05 Dual:0.525              |
| Note:                       | Death rates are per million population |

#### Results for Age Groups Combined and Years combined, Population unadjusted for deaths in Ecig scenario,

| Age Group:All |         | NULL       | Ecig      | %Drop    |        | NULL   | Ecig    | Drop   |        |        |
|---------------|---------|------------|-----------|----------|--------|--------|---------|--------|--------|--------|
| Year          | Number  | Attrib     | Attrib    | Drop     | %Drop  | Attrib | Death   | Attrib | Attrib | Drop   |
|               | Deaths  | Deaths     | Deaths    | Deaths   | Deaths | Deaths | Rate    | Rates  | Rates  | Rates  |
| All Comb      | 1489699 | 149918.462 | 68553.803 | 81364.66 | 5.462  | 54.273 | 431.236 | 43.398 | 19.845 | 23.553 |

#### Results for Age Groups Combined, Population unadjusted for deaths in Ecig scenario,

| Age Group:All |        | NULL     | Ecig     | %Drop    |        | NULL   | Ecig    | Drop   |        |        |
|---------------|--------|----------|----------|----------|--------|--------|---------|--------|--------|--------|
| Year          | Number | Attrib   | Attrib   | Drop     | %Drop  | Attrib | Death   | Attrib | Attrib | Drop   |
|               | Deaths | Deaths   | Deaths   | Deaths   | Deaths | Deaths | Rate    | Rates  | Rates  | Rates  |
| 1990          | 32862  | 4613.166 | 4613.166 | 0.000    | 0.000  | 0.000  | 520.936 | 73.129 | 73.129 | 0.000  |
| 1991          | 32619  | 4555.566 | 4515.509 | 40.057   | 0.123  | 0.879  | 508.609 | 71.032 | 70.408 | 0.625  |
| 1992          | 32100  | 4453.572 | 4348.448 | 105.124  | 0.327  | 2.360  | 492.014 | 68.262 | 66.651 | 1.611  |
| 1993          | 32896  | 4462.473 | 4263.719 | 198.754  | 0.604  | 4.454  | 495.226 | 67.179 | 64.187 | 2.992  |
| 1994          | 33323  | 4499.513 | 4185.600 | 313.913  | 0.942  | 6.977  | 492.290 | 66.473 | 61.835 | 4.638  |
| 1995          | 33569  | 4472.774 | 4027.457 | 445.317  | 1.327  | 9.956  | 486.422 | 64.812 | 58.359 | 6.453  |
| 1996          | 33870  | 4406.878 | 3816.142 | 590.736  | 1.744  | 13.405 | 483.150 | 62.863 | 54.437 | 8.427  |
| 1997          | 33516  | 4288.158 | 3549.723 | 738.435  | 2.203  | 17.220 | 470.307 | 60.173 | 49.811 | 10.362 |
| 1998          | 32795  | 4120.148 | 3246.652 | 873.496  | 2.664  | 21.201 | 452.620 | 56.864 | 44.809 | 12.056 |
| 1999          | 33375  | 3982.443 | 2974.245 | 1008.198 | 3.021  | 25.316 | 453.361 | 54.097 | 40.402 | 13.695 |
| 2000          | 33459  | 4021.411 | 2835.653 | 1185.758 | 3.544  | 29.486 | 447.853 | 53.827 | 37.956 | 15.872 |
| 2001          | 32275  | 3848.092 | 2542.736 | 1305.356 | 4.044  | 33.922 | 426.379 | 50.836 | 33.592 | 17.245 |
| 2002          | 31586  | 3783.081 | 2337.945 | 1445.136 | 4.575  | 38.200 | 412.601 | 49.418 | 30.540 | 18.877 |
| 2003          | 30985  | 3754.415 | 2154.376 | 1600.039 | 5.164  | 42.618 | 400.541 | 48.533 | 27.849 | 20.684 |
| 2004          | 29884  | 3666.274 | 1949.085 | 1717.190 | 5.746  | 46.837 | 382.149 | 46.883 | 24.924 | 21.959 |
| 2005          | 28708  | 3589.688 | 1760.710 | 1828.978 | 6.371  | 50.951 | 362.850 | 45.371 | 22.254 | 23.117 |
| 2006          | 28188  | 3596.985 | 1615.056 | 1981.929 | 7.031  | 55.100 | 353.021 | 45.048 | 20.227 | 24.821 |
| 2007          | 28026  | 3560.798 | 1465.032 | 2095.766 | 7.478  | 58.857 | 347.392 | 44.137 | 18.160 | 25.978 |
| 2008          | 27128  | 3417.001 | 1287.724 | 2129.277 | 7.849  | 62.314 | 332.495 | 41.881 | 15.783 | 26.098 |
| 2009          | 27068  | 3394.390 | 1170.478 | 2223.912 | 8.216  | 65.517 | 327.847 | 41.113 | 14.177 | 26.936 |
| 2010          | 26911  | 3340.137 | 1057.776 | 2282.361 | 8.481  | 68.331 | 321.990 | 39.965 | 12.656 | 27.308 |
| 2011          | 26959  | 3285.435 | 951.536  | 2333.899 | 8.657  | 71.038 | 319.377 | 38.922 | 11.273 | 27.649 |
| 2012          | 27057  | 3259.209 | 856.436  | 2402.773 | 8.880  | 73.723 | 317.068 | 38.193 | 10.036 | 28.157 |
| 2013          | 27904  | 3274.703 | 784.207  | 2490.496 | 8.925  | 76.053 | 323.265 | 37.937 | 9.085  | 28.852 |
| 2014          | 28792  | 3298.083 | 717.084  | 2580.999 | 8.964  | 78.258 | 329.657 | 37.762 | 8.210  | 29.551 |
| 2015          | 29560  | 3244.406 | 647.992  | 2596.414 | 8.784  | 80.027 | 380.745 | 41.789 | 8.346  | 33.443 |
| 2016          | 30513  | 3314.836 | 601.841  | 2712.996 | 8.891  | 81.844 | 389.347 | 42.297 | 7.680  | 34.618 |
| 2017          | 31416  | 3333.314 | 551.170  | 2782.143 | 8.856  | 83.465 | 397.202 | 42.144 | 6.969  | 35.176 |
| 2018          | 29348  | 2925.242 | 444.917  | 2480.325 | 8.451  | 84.790 | 367.626 | 36.642 | 5.573  | 31.069 |
| 2019          | 29598  | 2864.628 | 400.037  | 2464.591 | 8.327  | 86.035 | 367.149 | 35.534 | 4.962  | 30.572 |
| 2020          | 29592  | 2730.366 | 351.883  | 2378.484 | 8.037  | 87.112 | 419.174 | 38.675 | 4.984  | 33.691 |
| 2021          | 30097  | 2647.911 | 313.170  | 2334.741 | 7.757  | 88.173 | 423.328 | 37.244 | 4.405  | 32.839 |
| 2022          | 30304  | 2586.165 | 279.419  | 2306.745 | 7.612  | 89.196 | 422.974 | 36.097 | 3.900  | 32.197 |
| 2023          | 30505  | 2517.960 | 249.343  | 2268.618 | 7.437  | 90.097 | 422.337 | 34.860 | 3.452  | 31.408 |
| 2024          | 30661  | 2454.161 | 224.801  | 2229.360 | 7.271  | 90.840 | 420.968 | 33.695 | 3.086  | 30.609 |
| 2025          | 30254  | 2275.364 | 194.035  | 2081.329 | 6.880  | 91.472 | 483.488 | 36.363 | 3.101  | 33.262 |
| 2026          | 30685  | 2183.166 | 172.456  | 2010.710 | 6.553  | 92.101 | 488.380 | 34.747 | 2.745  | 32.002 |
| 2027          | 30561  | 2112.345 | 155.541  | 1956.804 | 6.403  | 92.637 | 484.196 | 33.467 | 2.464  | 31.003 |
| 2028          | 30412  | 2046.677 | 140.119  | 1906.557 | 6.269  | 93.154 | 479.392 | 32.263 | 2.209  | 30.054 |
| 2029          | 30254  | 1977.671 | 126.037  | 1851.635 | 6.120  | 93.627 | 474.195 | 30.997 | 1.975  | 29.022 |
| 2030          | 29330  | 1744.457 | 105.523  | 1638.934 | 5.588  | 93.951 | 549.260 | 32.668 | 1.976  | 30.692 |
| 2031          | 28976  | 1653.738 | 94.531   | 1559.206 | 5.381  | 94.284 | 541.223 | 30.889 | 1.766  | 29.123 |
| 2032          | 28724  | 1603.120 | 85.758   | 1517.362 | 5.282  | 94.651 | 534.690 | 29.841 | 1.596  | 28.245 |
| 2033          | 28464  | 1548.245 | 78.080   | 1470.164 | 5.165  | 94.957 | 527.627 | 28.700 | 1.447  | 27.252 |
| 2034          | 28178  | 1511.985 | 71.925   | 1440.059 | 5.111  | 95.243 | 519.826 | 27.893 | 1.327  | 26.566 |
| 2035          | 26737  | 1239.866 | 56.901   | 1182.965 | 4.424  | 95.411 | 610.065 | 28.290 | 1.298  | 26.992 |
| 2036          | 25591  | 1182.522 | 51.302   | 1131.220 | 4.420  | 95.662 | 583.762 | 26.975 | 1.170  | 25.805 |
| 2037          | 25143  | 1134.483 | 47.585   | 1086.898 | 4.323  | 95.806 | 572.916 | 25.851 | 1.084  | 24.766 |
| 2038          | 24693  | 1093.537 | 43.708   | 1049.828 | 4.251  | 96.003 | 561.491 | 24.866 | 0.994  | 23.872 |
| 2039          | 24247  | 1047.905 | 39.236   | 1008.668 | 4.160  | 96.256 | 549.553 | 23.751 | 0.889  | 22.861 |

## Results for PHIM for Run 7 (Sensitivity\_Analysis\_3.RTF)

\*\*\*\*\*

### Main Results for E-Component for Run: 7, Simulation: 1, COD: COPD

| Variable Parameter          | Value                                  |
|-----------------------------|----------------------------------------|
| 1. Country                  | US (United States)                     |
| 2. Sex                      | M (Males)                              |
| 3. Year of start of process | 1990                                   |
| 4. Cause of Death           | COPD                                   |
| 5. Effective Dose NULL      | CC:1                                   |
| 6. Effective Dose Ecig      | CC:1 Ecig:0.05 Dual:0.525              |
| Note:                       | Death rates are per million population |

#### Results for Age Groups Combined and Years combined, Population unadjusted for deaths in Ecig scenario,

| Age Group:All | NULL    | Ecig        | %Drop      |          |        |        | NULL    | Ecig    | Drop    |        |
|---------------|---------|-------------|------------|----------|--------|--------|---------|---------|---------|--------|
| Year          | Number  | Attrib      | Attrib     | Drop     | %Drop  | Attrib | Death   | Attrib  | Attrib  | Drop   |
|               | Deaths  | Deaths      | Deaths     | Deaths   | Deaths | Deaths | Rate    | Rates   | Rates   | Rates  |
| All Comb      | 2233143 | 1015606.587 | 670888.554 | 344718.0 | 15.436 | 33.942 | 646.447 | 293.996 | 194.208 | 99.788 |

#### Results for Age Groups Combined, Population unadjusted for deaths in Ecig scenario,

| Age Group:All | NULL   | Ecig      | %Drop     |          |        |        | NULL    | Ecig    | Drop    |         |
|---------------|--------|-----------|-----------|----------|--------|--------|---------|---------|---------|---------|
| Year          | Number | Attrib    | Attrib    | Drop     | %Drop  | Attrib | Death   | Attrib  | Attrib  | Drop    |
|               | Deaths | Deaths    | Deaths    | Deaths   | Deaths | Deaths | Rate    | Rates   | Rates   | Rates   |
| 1990          | 33993  | 19262.437 | 19262.437 | 0.000    | 0.000  | 0.000  | 538.865 | 305.353 | 305.353 | 0.000   |
| 1991          | 34092  | 19215.636 | 19193.448 | 22.188   | 0.065  | 0.115  | 531.576 | 299.618 | 299.272 | 0.346   |
| 1992          | 33942  | 19056.189 | 18998.184 | 58.005   | 0.171  | 0.304  | 520.248 | 292.085 | 291.196 | 0.889   |
| 1993          | 35913  | 20095.670 | 19976.710 | 118.960  | 0.331  | 0.592  | 540.645 | 302.526 | 300.735 | 1.791   |
| 1994          | 35074  | 19524.095 | 19341.669 | 182.426  | 0.520  | 0.934  | 518.158 | 288.435 | 285.740 | 2.695   |
| 1995          | 34669  | 19116.002 | 18854.234 | 261.768  | 0.755  | 1.369  | 502.362 | 276.995 | 273.202 | 3.793   |
| 1996          | 34582  | 18975.021 | 18616.655 | 358.367  | 1.036  | 1.889  | 493.306 | 270.675 | 265.563 | 5.112   |
| 1997          | 35267  | 19169.025 | 18692.168 | 476.857  | 1.352  | 2.488  | 494.878 | 268.986 | 262.294 | 6.691   |
| 1998          | 35675  | 19228.937 | 18613.973 | 614.965  | 1.724  | 3.198  | 492.368 | 265.388 | 256.901 | 8.487   |
| 1999          | 38516  | 20589.820 | 19780.302 | 809.518  | 2.102  | 3.932  | 523.195 | 279.689 | 268.693 | 10.996  |
| 2000          | 36283  | 19196.417 | 18278.817 | 917.600  | 2.529  | 4.780  | 485.652 | 256.946 | 244.664 | 12.282  |
| 2001          | 36281  | 19012.731 | 17900.197 | 1112.535 | 3.066  | 5.852  | 479.301 | 251.174 | 236.476 | 14.697  |
| 2002          | 35983  | 18699.357 | 17395.991 | 1303.366 | 3.622  | 6.970  | 470.038 | 244.265 | 227.240 | 17.026  |
| 2003          | 36205  | 18663.550 | 17140.122 | 1523.427 | 4.208  | 8.163  | 468.019 | 241.262 | 221.569 | 19.693  |
| 2004          | 34611  | 17679.164 | 15988.901 | 1690.263 | 4.884  | 9.561  | 442.596 | 226.076 | 204.462 | 21.615  |
| 2005          | 36826  | 18692.832 | 16647.584 | 2045.248 | 5.554  | 10.941 | 465.456 | 236.265 | 210.414 | 25.851  |
| 2006          | 34350  | 17308.564 | 15135.396 | 2173.168 | 6.327  | 12.555 | 430.192 | 216.769 | 189.553 | 27.216  |
| 2007          | 35326  | 17683.181 | 15166.283 | 2516.898 | 7.125  | 14.233 | 437.879 | 219.189 | 187.992 | 31.198  |
| 2008          | 38248  | 19006.374 | 15999.293 | 3007.081 | 7.862  | 15.821 | 468.788 | 232.952 | 196.096 | 36.856  |
| 2009          | 36902  | 18205.573 | 14969.524 | 3236.048 | 8.769  | 17.775 | 446.956 | 220.505 | 181.310 | 39.195  |
| 2010          | 37234  | 18237.758 | 14686.253 | 3551.505 | 9.538  | 19.473 | 445.505 | 218.215 | 175.721 | 42.494  |
| 2011          | 38093  | 18487.916 | 14478.216 | 4009.700 | 10.526 | 21.688 | 451.279 | 219.022 | 171.520 | 47.502  |
| 2012          | 38504  | 18491.158 | 14093.350 | 4397.808 | 11.422 | 23.783 | 451.211 | 216.689 | 165.153 | 51.536  |
| 2013          | 40290  | 19143.452 | 14209.788 | 4933.664 | 12.245 | 25.772 | 466.755 | 221.775 | 164.619 | 57.156  |
| 2014          | 40339  | 18992.005 | 13683.650 | 5308.355 | 13.159 | 27.950 | 461.866 | 217.451 | 156.672 | 60.779  |
| 2015          | 42303  | 19728.885 | 13871.138 | 5857.747 | 13.847 | 29.691 | 544.880 | 254.116 | 178.666 | 75.450  |
| 2016          | 43104  | 19876.724 | 13554.325 | 6322.399 | 14.668 | 31.808 | 550.009 | 253.628 | 172.954 | 80.674  |
| 2017          | 44107  | 20119.790 | 13284.989 | 6834.801 | 15.496 | 33.971 | 557.659 | 254.381 | 167.966 | 86.415  |
| 2018          | 45469  | 20535.123 | 13120.004 | 7415.119 | 16.308 | 36.109 | 569.564 | 257.229 | 164.345 | 92.884  |
| 2019          | 46963  | 21009.029 | 12982.939 | 8026.090 | 17.090 | 38.203 | 582.552 | 260.605 | 161.046 | 99.559  |
| 2020          | 48419  | 21428.512 | 12814.168 | 8614.344 | 17.791 | 40.200 | 685.853 | 303.533 | 181.512 | 122.021 |
| 2021          | 48463  | 21266.697 | 12202.357 | 9064.341 | 18.704 | 42.622 | 681.652 | 299.127 | 171.632 | 127.494 |
| 2022          | 49915  | 21663.568 | 11937.210 | 9726.358 | 19.486 | 44.897 | 696.712 | 302.378 | 166.618 | 135.760 |
| 2023          | 51391  | 22084.131 | 11678.504 | 10405.63 | 20.248 | 47.118 | 711.491 | 305.748 | 161.685 | 144.063 |
| 2024          | 52811  | 22418.456 | 11398.329 | 11020.13 | 20.867 | 49.156 | 725.093 | 307.804 | 156.498 | 151.306 |
| 2025          | 53848  | 22614.834 | 11057.365 | 11557.47 | 21.463 | 51.106 | 860.553 | 361.411 | 176.709 | 184.702 |
| 2026          | 54342  | 22571.522 | 10542.747 | 12028.78 | 22.135 | 53.292 | 864.886 | 359.241 | 167.795 | 191.446 |
| 2027          | 55267  | 22774.416 | 10136.600 | 12637.82 | 22.867 | 55.491 | 875.619 | 360.827 | 160.599 | 200.227 |
| 2028          | 56149  | 22915.561 | 9682.381  | 13233.18 | 23.568 | 57.748 | 885.102 | 361.228 | 152.628 | 208.601 |
| 2029          | 57014  | 22992.027 | 9226.378  | 13765.65 | 24.144 | 59.871 | 893.616 | 360.371 | 144.612 | 215.759 |
| 2030          | 57238  | 22895.360 | 8767.120  | 14128.24 | 24.683 | 61.708 | 1071.90 | 428.760 | 164.181 | 264.578 |
| 2031          | 57592  | 22715.871 | 8280.752  | 14435.12 | 25.065 | 63.546 | 1075.71 | 424.293 | 154.670 | 269.623 |
| 2032          | 58251  | 22759.207 | 7841.831  | 14917.38 | 25.609 | 65.544 | 1084.31 | 423.652 | 145.972 | 277.680 |
| 2033          | 58885  | 22786.258 | 7424.973  | 15361.28 | 26.087 | 67.415 | 1091.54 | 422.387 | 137.636 | 284.751 |
| 2034          | 59460  | 22806.106 | 7005.687  | 15800.42 | 26.573 | 69.282 | 1096.89 | 420.721 | 129.239 | 291.482 |
| 2035          | 58516  | 22262.998 | 6544.660  | 15718.34 | 26.862 | 70.603 | 1335.15 | 507.973 | 149.329 | 358.644 |
| 2036          | 56446  | 21140.051 | 5739.663  | 15400.39 | 27.284 | 72.849 | 1287.60 | 482.234 | 130.930 | 351.304 |
| 2037          | 56568  | 21011.845 | 5306.399  | 15705.45 | 27.764 | 74.746 | 1288.98 | 478.783 | 120.913 | 357.870 |
| 2038          | 56668  | 20787.483 | 4878.454  | 15909.03 | 28.074 | 76.532 | 1288.55 | 472.681 | 110.930 | 361.751 |
| 2039          | 56758  | 20709.267 | 4506.440  | 16202.83 | 28.547 | 78.240 | 1286.40 | 469.372 | 102.138 | 367.234 |

## Results for PHIM for Run 7 (Sensitivity\_Analysis\_3.RTF)

\*\*\*\*\*

### Main Results for E-Component for Run: 7, Simulation: 1, COD: Four Diseases Combined, Adjusted

| Variable Parameter          | Value                                  |
|-----------------------------|----------------------------------------|
| 1. Country                  | US (United States)                     |
| 2. Sex                      | M (Males)                              |
| 3. Year of start of process | 1990                                   |
| 4. Cause of Death           | Four Diseases Combined                 |
| 5. Effective Dose NULL      | CC:1                                   |
| 6. Effective Dose Ecig      | CC:1 Ecig:0.05 Dual:0.525              |
| Note:                       | Death rates are per million population |

#### Results for Age Groups Combined and Years combined, Population and Number deaths adjusted for Ecig scenario,

| Age Group:All | NULL     | Ecig        | %Drop       |         |        |        | NULL    | Ecig    | Drop    |         |
|---------------|----------|-------------|-------------|---------|--------|--------|---------|---------|---------|---------|
| Year          | Number   | Attrib      | Attrib      | Drop    | %Drop  | Attrib | Death   | Attrib  | Attrib  | Drop    |
|               | Deaths   | Deaths      | Deaths      | Deaths  | Deaths | Deaths | Rate    | Rates   | Rates   | Rates   |
| All Comb      | 13293581 | 4509390.583 | 2975669.565 | 1533721 | 11.537 | 34.012 | 3815.76 | 1305.37 | 854.129 | 451.242 |

#### Results for Age Groups Combined, Population and Number deaths adjusted for Ecig scenario,

| Age Group:All | NULL   | Ecig       | %Drop      |          |        |        | NULL    | Ecig    | Drop    |         |
|---------------|--------|------------|------------|----------|--------|--------|---------|---------|---------|---------|
| Year          | Number | Attrib     | Attrib     | Drop     | %Drop  | Attrib | Death   | Attrib  | Attrib  | Drop    |
|               | Deaths | Deaths     | Deaths     | Deaths   | Deaths | Deaths | Rate    | Rates   | Rates   | Rates   |
| 1990          | 317161 | 125773.065 | 125773.065 | 0.000    | 0.000  | 0.000  | 5027.71 | 1993.78 | 1993.78 | 0.000   |
| 1991          | 313217 | 123999.442 | 123575.252 | 424.190  | 0.135  | 0.342  | 4883.81 | 1933.45 | 1926.84 | 6.614   |
| 1992          | 308580 | 122014.015 | 120877.836 | 1136.179 | 0.368  | 0.931  | 4729.74 | 1870.18 | 1852.75 | 17.427  |
| 1993          | 311723 | 122810.618 | 120677.054 | 2133.564 | 0.684  | 1.737  | 4692.65 | 1848.83 | 1816.66 | 32.164  |
| 1994          | 305723 | 119925.592 | 116646.343 | 3279.249 | 1.073  | 2.734  | 4516.28 | 1771.69 | 1723.15 | 48.544  |
| 1995          | 303268 | 117896.496 | 113277.580 | 4618.916 | 1.523  | 3.918  | 4393.95 | 1708.35 | 1641.24 | 67.104  |
| 1996          | 299629 | 115698.645 | 109603.917 | 6094.728 | 2.034  | 5.268  | 4273.40 | 1650.42 | 1563.21 | 87.215  |
| 1997          | 294330 | 113359.847 | 105780.229 | 7579.618 | 2.575  | 6.686  | 4129.04 | 1590.70 | 1483.95 | 106.754 |
| 1998          | 289405 | 111444.212 | 102376.297 | 9067.915 | 3.133  | 8.137  | 3992.72 | 1538.10 | 1412.41 | 125.683 |
| 1999          | 311219 | 114877.722 | 102742.608 | 12135.11 | 3.899  | 10.564 | 4225.40 | 1560.48 | 1394.93 | 165.551 |
| 2000          | 304072 | 112379.704 | 98535.455  | 13844.25 | 4.553  | 12.319 | 4067.27 | 1504.22 | 1318.01 | 186.207 |
| 2001          | 296655 | 110024.943 | 94352.226  | 15672.72 | 5.283  | 14.245 | 3915.61 | 1453.52 | 1245.37 | 208.145 |
| 2002          | 292347 | 108289.173 | 90562.399  | 17726.77 | 6.064  | 16.370 | 3814.67 | 1414.56 | 1181.69 | 232.862 |
| 2003          | 286408 | 106539.023 | 86996.959  | 19542.06 | 6.823  | 18.343 | 3697.38 | 1377.22 | 1123.09 | 254.136 |
| 2004          | 274808 | 103037.251 | 82166.855  | 20870.40 | 7.595  | 20.255 | 3508.47 | 1317.61 | 1049.02 | 268.591 |
| 2005          | 273124 | 103044.562 | 80258.255  | 22786.31 | 8.343  | 22.113 | 3445.50 | 1302.41 | 1012.47 | 289.947 |
| 2006          | 264966 | 99672.555  | 75248.885  | 24423.67 | 9.218  | 24.504 | 3310.97 | 1248.28 | 940.299 | 307.980 |
| 2007          | 259382 | 97839.152  | 72041.900  | 25797.25 | 9.946  | 26.367 | 3206.87 | 1212.75 | 890.691 | 322.061 |
| 2008          | 260570 | 98075.852  | 70539.511  | 27536.34 | 10.568 | 28.077 | 3184.35 | 1202.07 | 862.042 | 340.029 |
| 2009          | 255143 | 95617.338  | 66862.850  | 28754.49 | 11.270 | 30.072 | 3080.08 | 1158.11 | 807.168 | 350.946 |
| 2010          | 253258 | 94607.988  | 64485.180  | 30122.81 | 11.894 | 31.840 | 3019.06 | 1131.98 | 768.720 | 363.264 |
| 2011          | 253322 | 93633.119  | 61831.818  | 31801.30 | 12.554 | 33.964 | 2988.79 | 1109.25 | 729.516 | 379.732 |
| 2012          | 254365 | 92775.175  | 59325.336  | 33449.84 | 13.150 | 36.055 | 2967.39 | 1087.19 | 692.083 | 395.107 |
| 2013          | 258108 | 92345.780  | 57209.687  | 35136.09 | 13.613 | 38.048 | 2975.44 | 1069.82 | 659.508 | 410.308 |
| 2014          | 259532 | 91379.215  | 54827.237  | 36551.98 | 14.084 | 40.000 | 2955.61 | 1046.26 | 624.386 | 421.871 |
| 2015          | 262157 | 90750.242  | 52924.777  | 37825.47 | 14.429 | 41.681 | 3354.59 | 1168.90 | 677.231 | 491.671 |
| 2016          | 264058 | 88811.996  | 49657.444  | 39154.55 | 14.828 | 44.087 | 3345.56 | 1133.24 | 629.149 | 504.096 |
| 2017          | 266543 | 87325.126  | 46999.693  | 40325.43 | 15.129 | 46.178 | 3344.34 | 1104.08 | 589.709 | 514.370 |
| 2018          | 261738 | 87612.144  | 46232.022  | 41380.12 | 15.810 | 47.231 | 3251.86 | 1097.46 | 574.391 | 523.065 |
| 2019          | 264735 | 87797.760  | 44876.217  | 42921.54 | 16.213 | 48.887 | 3255.28 | 1089.08 | 551.814 | 537.267 |
| 2020          | 265873 | 87221.042  | 43412.199  | 43808.84 | 16.477 | 50.227 | 3726.60 | 1235.48 | 608.486 | 626.993 |
| 2021          | 258805 | 82001.292  | 38592.671  | 43408.62 | 16.773 | 52.937 | 3599.70 | 1153.39 | 536.782 | 616.607 |
| 2022          | 261103 | 81915.977  | 37078.910  | 44837.07 | 17.172 | 54.735 | 3601.54 | 1143.37 | 511.452 | 631.923 |
| 2023          | 263378 | 81810.810  | 35599.005  | 46211.81 | 17.546 | 56.486 | 3601.10 | 1132.64 | 486.736 | 645.909 |
| 2024          | 265318 | 81528.303  | 34130.605  | 47397.70 | 17.865 | 58.136 | 3595.16 | 1119.38 | 462.484 | 656.895 |
| 2025          | 262193 | 79599.213  | 32454.372  | 47144.84 | 17.981 | 59.228 | 4125.36 | 1272.09 | 510.640 | 761.448 |
| 2026          | 256560 | 75082.462  | 28747.885  | 46334.58 | 18.060 | 61.712 | 4017.07 | 1194.99 | 450.118 | 744.871 |
| 2027          | 256286 | 74444.425  | 27212.460  | 47231.97 | 18.429 | 63.446 | 3991.57 | 1179.46 | 423.825 | 755.636 |
| 2028          | 255852 | 73699.585  | 25597.044  | 48102.54 | 18.801 | 65.268 | 3961.67 | 1161.76 | 396.350 | 765.409 |
| 2029          | 255365 | 72819.703  | 24046.130  | 48773.57 | 19.100 | 66.979 | 3928.64 | 1141.36 | 369.935 | 771.421 |
| 2030          | 246575 | 69309.277  | 22387.351  | 46921.93 | 19.030 | 67.699 | 4518.82 | 1297.95 | 410.279 | 887.670 |
| 2031          | 241603 | 65433.368  | 19728.607  | 45704.76 | 18.917 | 69.849 | 4412.29 | 1222.18 | 360.295 | 861.886 |
| 2032          | 240420 | 64643.552  | 18457.903  | 46185.65 | 19.210 | 71.447 | 4371.98 | 1203.31 | 335.652 | 867.656 |
| 2033          | 239204 | 63793.514  | 17254.179  | 46539.34 | 19.456 | 72.953 | 4328.05 | 1182.54 | 312.190 | 870.346 |
| 2034          | 237845 | 63032.151  | 16099.621  | 46932.53 | 19.732 | 74.458 | 4279.16 | 1162.80 | 289.655 | 873.146 |
| 2035          | 222719 | 57653.301  | 14680.002  | 42973.30 | 19.295 | 74.537 | 4939.81 | 1315.47 | 325.596 | 989.875 |
| 2036          | 215008 | 52988.733  | 12160.069  | 40828.66 | 18.989 | 77.052 | 4763.08 | 1208.75 | 269.383 | 939.363 |
| 2037          | 212465 | 52026.921  | 11175.079  | 40851.84 | 19.228 | 78.521 | 4697.43 | 1185.50 | 247.072 | 938.431 |
| 2038          | 209953 | 50943.211  | 10213.848  | 40729.36 | 19.399 | 79.951 | 4628.14 | 1158.38 | 225.151 | 933.232 |
| 2039          | 207510 | 50085.991  | 9376.737   | 40709.25 | 19.618 | 81.279 | 4555.53 | 1135.19 | 205.850 | 929.341 |

## Results for PHIM for Run 7 (Sensitivity\_Analysis\_3.RTF)

\*\*\*\*\*

### Main Results for E-Component for Run: 7, Simulation: 1, COD: LUNG CANCER, Adjusted

| Variable Parameter          | Value                                  |
|-----------------------------|----------------------------------------|
| 1. Country                  | US (United States)                     |
| 2. Sex                      | M (Males)                              |
| 3. Year of start of process | 1990                                   |
| 4. Cause of Death           | LUNG CANCER                            |
| 5. Effective Dose NULL      | CC:1                                   |
| 6. Effective Dose Ecig      | CC:1 Ecig:0.05 Dual:0.525              |
| Note:                       | Death rates are per million population |

#### Results for Age Groups Combined and Years combined, Population and Number deaths adjusted for Ecig scenario,

| Age Group:All | NULL    | Ecig        | %Drop       |          |        |        | NULL    | Ecig    | Drop    |         |
|---------------|---------|-------------|-------------|----------|--------|--------|---------|---------|---------|---------|
| Year          | Number  | Attrib      | Attrib      | Drop     | %Drop  | Attrib | Death   | Attrib  | Attrib  | Drop    |
|               | Deaths  | Deaths      | Deaths      | Deaths   | Deaths | Deaths | Rate    | Rates   | Rates   | Rates   |
| All Comb      | 3096135 | 2244988.113 | 1720927.850 | 524060.3 | 16.926 | 23.344 | 888.707 | 649.875 | 493.971 | 155.905 |

#### Results for Age Groups Combined, Population and Number deaths adjusted for Ecig scenario,

| Age Group:All | NULL   | Ecig      | %Drop     |          |        |        | NULL    | Ecig    | Drop    |         |
|---------------|--------|-----------|-----------|----------|--------|--------|---------|---------|---------|---------|
| Year          | Number | Attrib    | Attrib    | Drop     | %Drop  | Attrib | Death   | Attrib  | Attrib  | Drop    |
|               | Deaths | Deaths    | Deaths    | Deaths   | Deaths | Deaths | Rate    | Rates   | Rates   | Rates   |
| 1990          | 78822  | 63385.736 | 63385.736 | 0.000    | 0.000  | 0.000  | 1249.50 | 1004.81 | 1004.81 | 0.000   |
| 1991          | 78462  | 62918.402 | 62870.284 | 48.118   | 0.061  | 0.076  | 1223.41 | 981.049 | 980.299 | 0.750   |
| 1992          | 77988  | 62366.766 | 62238.073 | 128.693  | 0.165  | 0.206  | 1195.35 | 955.930 | 953.951 | 1.979   |
| 1993          | 78545  | 62652.888 | 62400.257 | 252.631  | 0.322  | 0.403  | 1182.40 | 943.195 | 939.368 | 3.826   |
| 1994          | 77443  | 61565.227 | 61167.910 | 397.317  | 0.513  | 0.645  | 1144.02 | 909.520 | 903.599 | 5.921   |
| 1995          | 76915  | 60851.961 | 60275.341 | 576.620  | 0.750  | 0.948  | 1114.40 | 881.759 | 873.310 | 8.449   |
| 1996          | 76251  | 60122.922 | 59320.552 | 802.370  | 1.052  | 1.335  | 1087.51 | 857.643 | 846.049 | 11.594  |
| 1997          | 75501  | 59237.155 | 58192.994 | 1044.161 | 1.383  | 1.763  | 1059.17 | 831.234 | 816.365 | 14.869  |
| 1998          | 75421  | 58906.696 | 57562.448 | 1344.248 | 1.782  | 2.282  | 1040.53 | 813.001 | 794.148 | 18.852  |
| 1999          | 73212  | 56930.073 | 55291.603 | 1638.470 | 2.238  | 2.878  | 993.997 | 773.329 | 750.691 | 22.639  |
| 2000          | 73856  | 57137.121 | 55116.186 | 2020.935 | 2.736  | 3.537  | 987.902 | 764.787 | 737.234 | 27.554  |
| 2001          | 73387  | 56481.726 | 54027.904 | 2453.822 | 3.344  | 4.344  | 968.649 | 746.169 | 713.125 | 33.044  |
| 2002          | 72558  | 55588.365 | 52679.591 | 2908.774 | 4.009  | 5.233  | 946.766 | 726.138 | 687.384 | 38.754  |
| 2003          | 72084  | 54945.856 | 51532.595 | 3413.262 | 4.735  | 6.212  | 930.565 | 710.281 | 665.259 | 45.022  |
| 2004          | 71471  | 54203.126 | 50232.794 | 3970.332 | 5.555  | 7.325  | 912.468 | 693.135 | 641.321 | 51.814  |
| 2005          | 71165  | 53744.603 | 49197.289 | 4547.315 | 6.390  | 8.461  | 897.753 | 679.296 | 620.629 | 58.666  |
| 2006          | 69889  | 52535.572 | 47380.337 | 5155.235 | 7.376  | 9.813  | 873.324 | 657.945 | 592.058 | 65.887  |
| 2007          | 68829  | 51492.124 | 45735.245 | 5756.879 | 8.364  | 11.180 | 850.964 | 638.264 | 565.448 | 72.815  |
| 2008          | 68527  | 51030.736 | 44541.737 | 6488.999 | 9.469  | 12.716 | 837.441 | 625.460 | 544.331 | 81.129  |
| 2009          | 67847  | 50276.199 | 43053.217 | 7222.982 | 10.646 | 14.367 | 819.050 | 608.943 | 519.738 | 89.205  |
| 2010          | 67575  | 49840.933 | 41881.114 | 7959.818 | 11.779 | 15.970 | 805.557 | 596.347 | 499.260 | 97.087  |
| 2011          | 66926  | 49072.841 | 40296.672 | 8776.169 | 13.113 | 17.884 | 789.618 | 581.354 | 475.436 | 105.918 |
| 2012          | 66618  | 48539.512 | 38883.498 | 9656.014 | 14.495 | 19.893 | 777.161 | 568.812 | 453.610 | 115.202 |
| 2013          | 65839  | 47675.741 | 37235.960 | 10439.78 | 15.857 | 21.897 | 758.985 | 552.318 | 429.253 | 123.066 |
| 2014          | 65588  | 47194.534 | 35935.977 | 11258.56 | 17.165 | 23.856 | 746.937 | 540.359 | 409.247 | 131.112 |
| 2015          | 64745  | 46305.842 | 34331.708 | 11974.13 | 18.494 | 25.859 | 828.489 | 596.439 | 439.312 | 157.127 |
| 2016          | 62247  | 44208.867 | 31806.447 | 12402.42 | 19.924 | 28.054 | 788.658 | 564.107 | 402.981 | 161.126 |
| 2017          | 60562  | 42702.624 | 29805.199 | 12897.42 | 21.296 | 30.203 | 759.872 | 539.903 | 373.968 | 165.935 |
| 2018          | 63216  | 44321.202 | 29802.219 | 14518.98 | 22.967 | 32.759 | 785.405 | 555.181 | 370.266 | 184.915 |
| 2019          | 63859  | 44493.088 | 28884.338 | 15608.75 | 24.442 | 35.081 | 785.237 | 551.912 | 355.172 | 196.739 |
| 2020          | 64350  | 44529.551 | 27904.289 | 16625.26 | 25.836 | 37.335 | 901.959 | 630.757 | 391.120 | 239.638 |
| 2021          | 57967  | 39852.556 | 23978.455 | 15874.10 | 27.385 | 39.832 | 806.256 | 560.546 | 333.514 | 227.032 |
| 2022          | 58356  | 39853.685 | 22957.431 | 16896.25 | 28.954 | 42.396 | 804.937 | 556.274 | 316.666 | 239.608 |
| 2023          | 58718  | 39847.050 | 21941.070 | 17905.98 | 30.495 | 44.937 | 802.831 | 551.670 | 299.995 | 251.675 |
| 2024          | 58987  | 39726.010 | 20916.918 | 18809.09 | 31.887 | 47.347 | 799.292 | 545.435 | 283.433 | 262.003 |
| 2025          | 58629  | 39207.348 | 19787.218 | 19420.13 | 33.124 | 49.532 | 922.473 | 626.579 | 311.334 | 315.245 |
| 2026          | 52477  | 34803.960 | 16714.934 | 18089.03 | 34.470 | 51.974 | 821.655 | 553.929 | 261.713 | 292.216 |
| 2027          | 52273  | 34484.595 | 15697.694 | 18786.90 | 35.940 | 54.479 | 814.135 | 546.357 | 244.486 | 301.871 |
| 2028          | 52023  | 34100.638 | 14646.773 | 19453.87 | 37.395 | 57.048 | 805.539 | 537.544 | 226.794 | 310.750 |
| 2029          | 51745  | 33669.838 | 13649.869 | 20019.97 | 38.689 | 59.460 | 796.070 | 527.732 | 209.995 | 317.737 |
| 2030          | 50357  | 32557.688 | 12602.423 | 19955.27 | 39.627 | 61.292 | 922.868 | 609.705 | 230.957 | 378.748 |
| 2031          | 44741  | 28646.393 | 10465.385 | 18181.01 | 40.636 | 63.467 | 817.091 | 535.065 | 191.125 | 343.940 |
| 2032          | 44360  | 28227.160 | 9693.173  | 18533.99 | 41.781 | 65.660 | 806.669 | 525.435 | 176.268 | 349.167 |
| 2033          | 43962  | 27786.623 | 8966.414  | 18820.21 | 42.810 | 67.731 | 795.439 | 515.079 | 162.235 | 352.844 |
| 2034          | 43532  | 27348.299 | 8285.045  | 19063.25 | 43.792 | 69.705 | 783.193 | 504.514 | 149.059 | 355.455 |
| 2035          | 41029  | 25570.077 | 7469.083  | 18100.99 | 44.118 | 70.790 | 910.000 | 583.430 | 165.661 | 417.770 |
| 2036          | 35149  | 21717.319 | 5785.972  | 15931.35 | 45.326 | 73.358 | 778.652 | 495.402 | 128.177 | 367.225 |
| 2037          | 34592  | 21256.024 | 5269.735  | 15986.29 | 46.213 | 75.208 | 764.806 | 484.347 | 116.509 | 367.837 |
| 2038          | 34040  | 20747.175 | 4775.976  | 15971.20 | 46.919 | 76.980 | 750.375 | 471.764 | 105.280 | 366.484 |
| 2039          | 33500  | 20327.688 | 4354.770  | 15972.92 | 47.680 | 78.577 | 735.432 | 460.724 | 95.601  | 365.122 |

## Results for PHIM for Run 7 (Sensitivity\_Analysis\_3.RTF)

\*\*\*\*\*

### Main Results for E-Component for Run: 7, Simulation: 1, COD: IHD, Adjusted

| Variable Parameter          | Value                                  |
|-----------------------------|----------------------------------------|
| 1. Country                  | US (United States)                     |
| 2. Sex                      | M (Males)                              |
| 3. Year of start of process | 1990                                   |
| 4. Cause of Death           | IHD                                    |
| 5. Effective Dose NULL      | CC:1                                   |
| 6. Effective Dose Ecig      | CC:1 Ecig:0.05 Dual:0.525              |
| Note:                       | Death rates are per million population |

#### Results for Age Groups Combined and Years combined, Population and Number deaths adjusted for Ecig scenario,

| Age Group:All | NULL    | Ecig        | %Drop      |          |        |        | NULL    | Ecig    | Drop    |         |
|---------------|---------|-------------|------------|----------|--------|--------|---------|---------|---------|---------|
| Year          | Number  | Attrib      | Attrib     | Drop     | %Drop  | Attrib | Death   | Attrib  | Drop    |         |
|               | Deaths  | Deaths      | Deaths     | Deaths   | Deaths | Deaths | Rate    | Rates   | Rates   |         |
| All Comb      | 6423951 | 1098877.421 | 509201.800 | 589675.6 | 9.179  | 53.662 | 1843.91 | 318.101 | 146.160 | 171.941 |

#### Results for Age Groups Combined, Population and Number deaths adjusted for Ecig scenario,

| Age Group:All | NULL   | Ecig      | %Drop     |          |        |        | NULL    | Ecig    | Drop    |         |
|---------------|--------|-----------|-----------|----------|--------|--------|---------|---------|---------|---------|
| Year          | Number | Attrib    | Attrib    | Drop     | %Drop  | Attrib | Death   | Attrib  | Drop    |         |
|               | Deaths | Deaths    | Deaths    | Deaths   | Deaths | Deaths | Rate    | Rates   | Rates   |         |
| 1990          | 171484 | 38511.725 | 38511.725 | 0.000    | 0.000  | 0.000  | 2718.40 | 610.497 | 0.000   |         |
| 1991          | 168044 | 37309.838 | 36996.011 | 313.827  | 0.187  | 0.841  | 2620.21 | 581.750 | 576.857 | 4.893   |
| 1992          | 164549 | 36137.488 | 35292.926 | 844.562  | 0.513  | 2.337  | 2522.12 | 553.899 | 540.950 | 12.949  |
| 1993          | 164367 | 35599.588 | 34035.608 | 1563.980 | 0.952  | 4.393  | 2474.37 | 535.926 | 512.369 | 23.557  |
| 1994          | 159878 | 34336.757 | 31949.400 | 2387.357 | 1.493  | 6.953  | 2361.79 | 507.267 | 471.970 | 35.296  |
| 1995          | 158105 | 33455.759 | 30117.355 | 3338.404 | 2.112  | 9.979  | 2290.74 | 484.782 | 436.361 | 48.421  |
| 1996          | 154911 | 32193.824 | 27845.401 | 4348.423 | 2.807  | 13.507 | 2209.39 | 459.239 | 397.140 | 62.099  |
| 1997          | 150023 | 30665.509 | 25337.529 | 5327.980 | 3.551  | 17.375 | 2104.61 | 430.308 | 355.450 | 74.858  |
| 1998          | 145481 | 29188.430 | 22942.226 | 6246.205 | 4.293  | 21.400 | 2007.09 | 402.844 | 316.518 | 86.326  |
| 1999          | 166067 | 33375.386 | 24680.741 | 8694.645 | 5.236  | 26.051 | 2254.69 | 453.366 | 335.089 | 118.277 |
| 2000          | 160411 | 32024.754 | 22285.051 | 9739.703 | 6.072  | 30.413 | 2145.65 | 428.655 | 298.085 | 130.571 |
| 2001          | 154631 | 30682.393 | 19856.655 | 10825.74 | 7.001  | 35.283 | 2041.01 | 405.339 | 262.092 | 143.249 |
| 2002          | 152120 | 30218.370 | 18118.705 | 12099.66 | 7.954  | 40.041 | 1984.92 | 394.736 | 236.420 | 158.316 |
| 2003          | 147010 | 29175.202 | 16133.235 | 13041.97 | 8.871  | 44.702 | 1897.83 | 377.146 | 208.272 | 168.874 |
| 2004          | 138697 | 27488.687 | 13954.789 | 13533.90 | 9.758  | 49.234 | 1770.74 | 351.518 | 178.160 | 173.358 |
| 2005          | 136250 | 27017.439 | 12602.181 | 14415.26 | 10.580 | 53.355 | 1718.81 | 341.482 | 158.978 | 182.504 |
| 2006          | 132341 | 26231.435 | 11064.132 | 15167.30 | 11.461 | 57.821 | 1653.72 | 328.517 | 138.256 | 190.261 |
| 2007          | 126969 | 25103.049 | 9613.061  | 15489.99 | 12.200 | 61.706 | 1569.78 | 311.161 | 118.851 | 192.310 |
| 2008          | 126391 | 24621.740 | 8636.359  | 15985.38 | 12.648 | 64.924 | 1544.59 | 301.777 | 105.542 | 196.235 |
| 2009          | 123017 | 23741.177 | 7590.228  | 16150.95 | 13.129 | 68.029 | 1485.06 | 287.552 | 91.629  | 195.923 |
| 2010          | 121188 | 23189.160 | 6772.437  | 16416.72 | 13.546 | 70.795 | 1444.67 | 277.458 | 80.733  | 196.725 |
| 2011          | 120946 | 22786.927 | 6009.093  | 16777.83 | 13.872 | 73.629 | 1426.97 | 269.951 | 70.898  | 199.054 |
| 2012          | 121739 | 22485.295 | 5388.022  | 17097.27 | 14.044 | 76.038 | 1420.19 | 263.495 | 62.856  | 200.639 |
| 2013          | 123559 | 22251.884 | 4863.705  | 17388.18 | 14.073 | 78.143 | 1424.38 | 257.786 | 56.068  | 201.717 |
| 2014          | 124237 | 21894.593 | 4367.400  | 17527.19 | 14.108 | 80.053 | 1414.84 | 250.685 | 49.737  | 200.948 |
| 2015          | 124887 | 21471.109 | 3937.294  | 17533.82 | 14.040 | 81.662 | 1598.07 | 276.557 | 50.382  | 226.175 |
| 2016          | 127455 | 21411.568 | 3549.173  | 17862.40 | 14.015 | 83.424 | 1614.83 | 273.213 | 44.967  | 228.245 |
| 2017          | 129633 | 21169.399 | 3203.212  | 17966.19 | 13.859 | 84.869 | 1626.52 | 267.651 | 40.191  | 227.460 |
| 2018          | 122815 | 19830.576 | 2699.952  | 17130.62 | 13.948 | 86.385 | 1525.87 | 248.404 | 33.544  | 214.859 |
| 2019          | 123331 | 19431.014 | 2432.862  | 16998.15 | 13.782 | 87.479 | 1516.53 | 241.031 | 29.915  | 211.115 |
| 2020          | 122427 | 18532.612 | 2154.800  | 16377.81 | 13.378 | 88.373 | 1715.99 | 262.513 | 30.203  | 232.310 |
| 2021          | 121104 | 18234.128 | 1907.294  | 16326.83 | 13.482 | 89.540 | 1684.42 | 256.472 | 26.528  | 229.944 |
| 2022          | 121247 | 17812.559 | 1705.102  | 16107.46 | 13.285 | 90.428 | 1672.44 | 248.626 | 23.519  | 225.106 |
| 2023          | 121371 | 17361.668 | 1522.058  | 15839.61 | 13.051 | 91.233 | 1659.47 | 240.367 | 20.811  | 219.556 |
| 2024          | 121348 | 16929.676 | 1374.620  | 15555.06 | 12.819 | 91.880 | 1644.31 | 232.443 | 18.627  | 213.817 |
| 2025          | 117832 | 15501.666 | 1193.055  | 14308.61 | 12.143 | 92.304 | 1853.98 | 247.735 | 18.772  | 228.963 |
| 2026          | 117306 | 15523.814 | 1091.762  | 14432.05 | 12.303 | 92.967 | 1836.71 | 247.072 | 17.094  | 229.978 |
| 2027          | 116320 | 15073.070 | 992.925   | 14080.15 | 12.105 | 93.413 | 1811.64 | 238.810 | 15.464  | 223.346 |
| 2028          | 115283 | 14636.710 | 895.930   | 13740.78 | 11.919 | 93.879 | 1785.07 | 230.725 | 13.873  | 216.852 |
| 2029          | 114244 | 14180.166 | 810.876   | 13369.29 | 11.702 | 94.282 | 1757.58 | 222.256 | 12.475  | 209.781 |
| 2030          | 107426 | 12111.772 | 678.480   | 11433.29 | 10.643 | 94.398 | 1968.74 | 226.816 | 12.434  | 214.382 |
| 2031          | 107963 | 12417.367 | 656.010   | 11761.36 | 10.894 | 94.717 | 1971.67 | 231.935 | 11.980  | 219.954 |
| 2032          | 106633 | 12054.064 | 606.867   | 11447.20 | 10.735 | 94.965 | 1939.10 | 224.381 | 11.036  | 213.345 |
| 2033          | 105318 | 11672.389 | 556.304   | 11116.09 | 10.555 | 95.234 | 1905.58 | 216.370 | 10.066  | 206.305 |
| 2034          | 103978 | 11365.762 | 511.305   | 10854.46 | 10.439 | 95.501 | 1870.71 | 209.673 | 9.199   | 200.473 |
| 2035          | 93660  | 8580.360  | 387.963   | 8192.397 | 8.747  | 95.478 | 2077.34 | 195.777 | 8.605   | 187.173 |
| 2036          | 95057  | 8948.841  | 381.553   | 8567.288 | 9.013  | 95.736 | 2105.80 | 204.135 | 8.453   | 195.683 |
| 2037          | 93308  | 8624.570  | 357.806   | 8266.763 | 8.860  | 95.851 | 2062.96 | 196.522 | 7.911   | 188.612 |
| 2038          | 91609  | 8315.017  | 331.027   | 7983.990 | 8.715  | 96.019 | 2019.41 | 189.073 | 7.297   | 181.776 |
| 2039          | 89977  | 8001.132  | 299.594   | 7701.537 | 8.559  | 96.256 | 1975.29 | 181.344 | 6.577   | 174.767 |

## Results for PHIM for Run 7 (Sensitivity\_Analysis\_3.RTF)

\*\*\*\*\*

### Main Results for E-Component for Run: 7, Simulation: 1, COD: STROKE, Adjusted

| Variable Parameter          | Value                                  |
|-----------------------------|----------------------------------------|
| 1. Country                  | US (United States)                     |
| 2. Sex                      | M (Males)                              |
| 3. Year of start of process | 1990                                   |
| 4. Cause of Death           | STROKE                                 |
| 5. Effective Dose NULL      | CC:1                                   |
| 6. Effective Dose Ecig      | CC:1 Ecig:0.05 Dual:0.525              |
| Note:                       | Death rates are per million population |

#### Results for Age Groups Combined and Years combined, Population and Number deaths adjusted for Ecig scenario,

| Age Group:All | NULL    | Ecig       | %Drop     |          |        |        | NULL    | Ecig   | Drop   |        |
|---------------|---------|------------|-----------|----------|--------|--------|---------|--------|--------|--------|
| Year          | Number  | Attrib     | Attrib    | Drop     | %Drop  | Attrib | Death   | Attrib | Attrib | Drop   |
|               | Deaths  | Deaths     | Deaths    | Deaths   | Deaths | Deaths | Rate    | Rates  | Rates  | Rates  |
| All Comb      | 1507063 | 149918.462 | 68714.145 | 81204.32 | 5.388  | 54.166 | 432.584 | 43.398 | 19.724 | 23.675 |

#### Results for Age Groups Combined, Population and Number deaths adjusted for Ecig scenario,

| Age Group:All | NULL   | Ecig     | %Drop    |          |        |        | NULL    | Ecig   | Drop   |        |
|---------------|--------|----------|----------|----------|--------|--------|---------|--------|--------|--------|
| Year          | Number | Attrib   | Attrib   | Drop     | %Drop  | Attrib | Death   | Attrib | Attrib | Drop   |
|               | Deaths | Deaths   | Deaths   | Deaths   | Deaths | Deaths | Rate    | Rates  | Rates  | Rates  |
| 1990          | 32862  | 4613.166 | 4613.166 | 0.000    | 0.000  | 0.000  | 520.936 | 73.129 | 73.129 | 0.000  |
| 1991          | 32619  | 4555.566 | 4515.509 | 40.057   | 0.123  | 0.879  | 508.609 | 71.032 | 70.408 | 0.625  |
| 1992          | 32100  | 4453.572 | 4348.488 | 105.084  | 0.327  | 2.360  | 492.015 | 68.262 | 66.651 | 1.611  |
| 1993          | 32897  | 4462.473 | 4263.863 | 198.611  | 0.604  | 4.451  | 495.229 | 67.179 | 64.188 | 2.992  |
| 1994          | 33325  | 4499.513 | 4185.934 | 313.579  | 0.941  | 6.969  | 492.297 | 66.473 | 61.836 | 4.636  |
| 1995          | 33574  | 4472.774 | 4028.060 | 444.715  | 1.325  | 9.943  | 486.436 | 64.812 | 58.361 | 6.450  |
| 1996          | 33878  | 4406.878 | 3817.088 | 589.790  | 1.741  | 13.383 | 483.172 | 62.863 | 54.441 | 8.423  |
| 1997          | 33527  | 4288.158 | 3551.065 | 737.093  | 2.198  | 17.189 | 470.341 | 60.173 | 49.816 | 10.356 |
| 1998          | 32811  | 4120.148 | 3248.408 | 871.740  | 2.657  | 21.158 | 452.669 | 56.864 | 44.816 | 12.048 |
| 1999          | 33397  | 3982.443 | 2976.429 | 1006.013 | 3.012  | 25.261 | 453.431 | 54.097 | 40.411 | 13.686 |
| 2000          | 33489  | 4021.411 | 2838.474 | 1182.938 | 3.532  | 29.416 | 447.950 | 53.827 | 37.967 | 15.860 |
| 2001          | 32313  | 3848.092 | 2545.992 | 1302.100 | 4.030  | 33.838 | 426.500 | 50.836 | 33.605 | 17.231 |
| 2002          | 31633  | 3783.081 | 2341.718 | 1441.363 | 4.557  | 38.100 | 412.755 | 49.418 | 30.556 | 18.862 |
| 2003          | 31041  | 3754.415 | 2158.602 | 1595.813 | 5.141  | 42.505 | 400.727 | 48.533 | 27.866 | 20.667 |
| 2004          | 29950  | 3666.274 | 1953.691 | 1712.584 | 5.718  | 46.712 | 382.372 | 46.883 | 24.943 | 21.941 |
| 2005          | 28784  | 3589.688 | 1765.616 | 1824.072 | 6.337  | 50.814 | 363.110 | 45.371 | 22.273 | 23.098 |
| 2006          | 28275  | 3596.985 | 1620.283 | 1976.702 | 6.991  | 54.954 | 353.326 | 45.048 | 20.247 | 24.801 |
| 2007          | 28127  | 3560.798 | 1470.475 | 2090.322 | 7.432  | 58.704 | 347.748 | 44.137 | 18.180 | 25.957 |
| 2008          | 27240  | 3417.001 | 1293.168 | 2123.834 | 7.797  | 62.155 | 332.893 | 41.881 | 15.803 | 26.077 |
| 2009          | 27195  | 3394.390 | 1176.062 | 2218.328 | 8.157  | 65.353 | 328.303 | 41.113 | 14.197 | 26.915 |
| 2010          | 27054  | 3340.137 | 1063.428 | 2276.710 | 8.415  | 68.162 | 322.507 | 39.965 | 12.677 | 27.288 |
| 2011          | 27120  | 3285.435 | 957.211  | 2328.224 | 8.585  | 70.865 | 319.969 | 38.922 | 11.294 | 27.628 |
| 2012          | 27236  | 3259.209 | 862.038  | 2397.171 | 8.801  | 73.551 | 317.736 | 38.193 | 10.056 | 28.137 |
| 2013          | 28109  | 3274.703 | 789.858  | 2484.845 | 8.840  | 75.880 | 324.042 | 37.937 | 9.105  | 28.832 |
| 2014          | 29025  | 3298.083 | 722.705  | 2575.378 | 8.873  | 78.087 | 330.545 | 37.762 | 8.230  | 29.531 |
| 2015          | 29825  | 3244.406 | 653.589  | 2590.817 | 8.687  | 79.855 | 381.641 | 41.789 | 8.363  | 33.426 |
| 2016          | 30811  | 3314.836 | 607.453  | 2707.383 | 8.787  | 81.675 | 390.363 | 42.297 | 7.696  | 34.601 |
| 2017          | 31749  | 3333.314 | 556.719  | 2776.594 | 8.745  | 83.298 | 398.361 | 42.144 | 6.985  | 35.159 |
| 2018          | 29689  | 2925.242 | 449.816  | 2475.426 | 8.338  | 84.623 | 368.859 | 36.642 | 5.589  | 31.054 |
| 2019          | 29969  | 2864.628 | 404.751  | 2459.877 | 8.208  | 85.871 | 368.512 | 35.534 | 4.977  | 30.557 |
| 2020          | 29995  | 2730.366 | 356.391  | 2373.975 | 7.914  | 86.947 | 420.429 | 38.675 | 4.995  | 33.680 |
| 2021          | 30538  | 2647.911 | 317.451  | 2330.460 | 7.631  | 88.011 | 424.753 | 37.244 | 4.415  | 32.829 |
| 2022          | 30778  | 2586.165 | 283.455  | 2302.710 | 7.482  | 89.040 | 424.537 | 36.097 | 3.910  | 32.188 |
| 2023          | 31014  | 2517.960 | 253.148  | 2264.813 | 7.303  | 89.946 | 424.047 | 34.860 | 3.461  | 31.399 |
| 2024          | 31205  | 2454.161 | 228.419  | 2225.741 | 7.133  | 90.693 | 422.834 | 33.695 | 3.095  | 30.600 |
| 2025          | 30831  | 2275.364 | 197.429  | 2077.936 | 6.740  | 91.323 | 485.097 | 36.363 | 3.106  | 33.257 |
| 2026          | 31307  | 2183.166 | 175.623  | 2007.543 | 6.412  | 91.956 | 490.188 | 34.747 | 2.750  | 31.997 |
| 2027          | 31215  | 2112.345 | 158.527  | 1953.818 | 6.259  | 92.495 | 486.160 | 33.467 | 2.469  | 30.998 |
| 2028          | 31098  | 2046.677 | 142.936  | 1903.741 | 6.122  | 93.016 | 481.521 | 32.263 | 2.213  | 30.049 |
| 2029          | 30973  | 1977.671 | 128.672  | 1848.999 | 5.970  | 93.494 | 476.496 | 30.997 | 1.980  | 29.018 |
| 2030          | 30075  | 1744.457 | 107.934  | 1636.523 | 5.441  | 93.813 | 551.165 | 32.668 | 1.978  | 30.690 |
| 2031          | 29748  | 1653.738 | 96.767   | 1556.971 | 5.234  | 94.149 | 543.280 | 30.889 | 1.767  | 29.122 |
| 2032          | 29526  | 1603.120 | 87.850   | 1515.270 | 5.132  | 94.520 | 536.915 | 29.841 | 1.598  | 28.244 |
| 2033          | 29293  | 1548.245 | 80.054   | 1468.190 | 5.012  | 94.829 | 530.023 | 28.700 | 1.448  | 27.251 |
| 2034          | 29036  | 1511.985 | 73.817   | 1438.167 | 4.953  | 95.118 | 522.396 | 27.893 | 1.328  | 26.565 |
| 2035          | 27603  | 1239.866 | 58.554   | 1181.311 | 4.280  | 95.277 | 612.227 | 28.290 | 1.299  | 26.991 |
| 2036          | 26451  | 1182.522 | 52.829   | 1129.693 | 4.271  | 95.533 | 585.974 | 26.975 | 1.170  | 25.805 |
| 2037          | 26019  | 1134.483 | 49.041   | 1085.442 | 4.172  | 95.677 | 575.254 | 25.851 | 1.084  | 24.766 |
| 2038          | 25584  | 1093.537 | 45.081   | 1048.456 | 4.098  | 95.878 | 563.957 | 24.866 | 0.994  | 23.872 |
| 2039          | 25151  | 1047.905 | 40.507   | 1007.398 | 4.005  | 96.135 | 552.145 | 23.751 | 0.889  | 22.861 |

## Results for PHIM for Run 7 (Sensitivity\_Analysis\_3.RTF)

\*\*\*\*\*

### Main Results for E-Component for Run: 7, Simulation: 1, COD: COPD, Adjusted

| Variable Parameter          | Value                                  |
|-----------------------------|----------------------------------------|
| 1. Country                  | US (United States)                     |
| 2. Sex                      | M (Males)                              |
| 3. Year of start of process | 1990                                   |
| 4. Cause of Death           | COPD                                   |
| 5. Effective Dose NULL      | CC:1                                   |
| 6. Effective Dose Ecig      | CC:1 Ecig:0.05 Dual:0.525              |
| Note:                       | Death rates are per million population |

#### Results for Age Groups Combined and Years combined, Population and Number deaths adjusted for Ecig scenario,

| Age Group:All | NULL    | Ecig        | %Drop      |          | NULL   | Ecig   | Drop    |         |         |        |
|---------------|---------|-------------|------------|----------|--------|--------|---------|---------|---------|--------|
| Year          | Number  | Attrib      | Attrib     | Drop     | %Drop  | Attrib | Death   | Attrib  | Drop    |        |
|               | Deaths  | Deaths      | Deaths     | Deaths   | Deaths | Deaths | Rate    | Rates   | Rates   |        |
| All Comb      | 2266431 | 1015606.587 | 676825.769 | 338780.8 | 14.948 | 33.357 | 650.551 | 293.996 | 194.274 | 99.722 |

#### Results for Age Groups Combined, Population and Number deaths adjusted for Ecig scenario,

| Age Group:All | NULL   | Ecig      | %Drop     |          | NULL   | Ecig   | Drop    |         |         |
|---------------|--------|-----------|-----------|----------|--------|--------|---------|---------|---------|
| Year          | Number | Attrib    | Attrib    | Drop     | %Drop  | Attrib | Death   | Attrib  | Drop    |
|               | Deaths | Deaths    | Deaths    | Deaths   | Deaths | Deaths | Rate    | Rates   | Rates   |
| 1990          | 33993  | 19262.437 | 19262.437 | 0.000    | 0.000  | 0.000  | 538.865 | 305.353 | 0.000   |
| 1991          | 34092  | 19215.636 | 19193.448 | 22.188   | 0.065  | 0.115  | 531.576 | 299.618 | 0.346   |
| 1992          | 33942  | 19056.189 | 18998.349 | 57.840   | 0.170  | 0.304  | 520.249 | 292.085 | 0.889   |
| 1993          | 35914  | 20095.670 | 19977.327 | 118.343  | 0.330  | 0.589  | 540.648 | 302.526 | 1.789   |
| 1994          | 35077  | 19524.095 | 19343.099 | 180.995  | 0.516  | 0.927  | 518.166 | 288.435 | 2.690   |
| 1995          | 34674  | 19116.002 | 18856.824 | 259.178  | 0.747  | 1.356  | 502.377 | 276.995 | 3.785   |
| 1996          | 34590  | 18975.021 | 18620.875 | 354.146  | 1.024  | 1.866  | 493.331 | 270.675 | 5.099   |
| 1997          | 35279  | 19169.025 | 18698.640 | 470.384  | 1.333  | 2.454  | 494.916 | 268.986 | 6.670   |
| 1998          | 35693  | 19228.937 | 18623.216 | 605.722  | 1.697  | 3.150  | 492.425 | 265.388 | 8.457   |
| 1999          | 38542  | 20589.820 | 19793.835 | 795.985  | 2.065  | 3.866  | 523.285 | 279.689 | 10.949  |
| 2000          | 36316  | 19196.417 | 18295.744 | 900.673  | 2.480  | 4.692  | 485.768 | 256.946 | 12.223  |
| 2001          | 36324  | 19012.731 | 17921.675 | 1091.056 | 3.004  | 5.739  | 479.451 | 251.174 | 14.622  |
| 2002          | 36037  | 18699.357 | 17422.385 | 1276.973 | 3.543  | 6.829  | 470.227 | 244.265 | 16.931  |
| 2003          | 36273  | 18663.550 | 17172.527 | 1491.023 | 4.111  | 7.989  | 468.265 | 241.262 | 19.574  |
| 2004          | 34690  | 17679.164 | 16025.581 | 1653.582 | 4.767  | 9.353  | 442.883 | 226.076 | 21.478  |
| 2005          | 36926  | 18692.832 | 16693.169 | 1999.663 | 5.415  | 10.697 | 465.827 | 236.265 | 25.679  |
| 2006          | 34460  | 17308.564 | 15184.133 | 2124.431 | 6.165  | 12.274 | 430.606 | 216.769 | 27.030  |
| 2007          | 35458  | 17683.181 | 15223.118 | 2460.063 | 6.938  | 13.912 | 438.382 | 219.189 | 30.978  |
| 2008          | 38412  | 19006.374 | 16068.247 | 2938.127 | 7.649  | 15.459 | 469.423 | 232.952 | 36.587  |
| 2009          | 37083  | 18205.573 | 15043.343 | 3162.229 | 8.527  | 17.370 | 447.667 | 220.505 | 38.902  |
| 2010          | 37441  | 18237.758 | 14768.201 | 3469.558 | 9.267  | 19.024 | 446.325 | 218.215 | 42.165  |
| 2011          | 38330  | 18487.916 | 14568.843 | 3919.073 | 10.225 | 21.198 | 452.233 | 219.022 | 47.133  |
| 2012          | 38771  | 18491.158 | 14191.778 | 4299.380 | 11.089 | 23.251 | 452.298 | 216.689 | 51.130  |
| 2013          | 40600  | 19143.452 | 14320.164 | 4823.288 | 11.880 | 25.195 | 468.037 | 221.775 | 56.693  |
| 2014          | 40682  | 18992.005 | 13801.155 | 5190.850 | 12.760 | 27.332 | 463.296 | 217.451 | 60.280  |
| 2015          | 42700  | 19728.885 | 14002.185 | 5726.699 | 13.412 | 29.027 | 546.388 | 254.116 | 74.943  |
| 2016          | 43545  | 19876.724 | 13694.371 | 6182.354 | 14.198 | 31.103 | 551.708 | 253.628 | 80.123  |
| 2017          | 44599  | 20119.790 | 13434.563 | 6685.227 | 14.990 | 33.227 | 559.587 | 254.381 | 85.816  |
| 2018          | 46018  | 20535.123 | 13280.035 | 7255.088 | 15.766 | 35.330 | 571.730 | 257.229 | 92.237  |
| 2019          | 47575  | 21009.029 | 13154.265 | 7854.764 | 16.510 | 37.388 | 585.002 | 260.605 | 98.855  |
| 2020          | 49101  | 21428.512 | 12996.718 | 8431.793 | 17.172 | 39.348 | 688.220 | 303.533 | 121.365 |
| 2021          | 49196  | 21266.697 | 12389.471 | 8877.226 | 18.045 | 41.742 | 684.263 | 299.127 | 126.803 |
| 2022          | 50722  | 21663.568 | 12132.923 | 9530.645 | 18.790 | 43.994 | 699.633 | 302.378 | 135.021 |
| 2023          | 52276  | 22084.131 | 11882.729 | 10201.40 | 19.515 | 46.193 | 714.752 | 305.748 | 143.278 |
| 2024          | 53779  | 22418.456 | 11610.647 | 10807.81 | 20.097 | 48.209 | 728.723 | 307.804 | 150.475 |
| 2025          | 54900  | 22614.834 | 11276.671 | 11338.16 | 20.652 | 50.136 | 863.806 | 361.411 | 177.428 |
| 2026          | 55470  | 22571.522 | 10765.566 | 11805.96 | 21.284 | 52.305 | 868.516 | 359.241 | 190.680 |
| 2027          | 56479  | 22774.416 | 10363.315 | 12411.10 | 21.975 | 54.496 | 879.636 | 360.827 | 199.421 |
| 2028          | 57448  | 22915.561 | 9911.405  | 13004.16 | 22.636 | 56.748 | 889.535 | 361.228 | 207.758 |
| 2029          | 58403  | 22992.027 | 9456.713  | 13535.31 | 23.176 | 58.870 | 898.494 | 360.371 | 214.885 |
| 2030          | 58716  | 22895.360 | 8998.515  | 13896.84 | 23.668 | 60.697 | 1076.05 | 428.760 | 263.849 |
| 2031          | 59151  | 22715.871 | 8510.445  | 14205.43 | 24.016 | 62.535 | 1080.25 | 424.293 | 268.870 |
| 2032          | 59902  | 22759.207 | 8070.013  | 14689.19 | 24.522 | 64.542 | 1089.30 | 423.652 | 276.901 |
| 2033          | 60629  | 22786.258 | 7651.407  | 15134.85 | 24.963 | 66.421 | 1097.00 | 422.387 | 283.946 |
| 2034          | 61299  | 22806.106 | 7229.454  | 15576.65 | 25.411 | 68.300 | 1102.86 | 420.721 | 290.653 |
| 2035          | 60427  | 22262.998 | 6764.401  | 15498.60 | 25.648 | 69.616 | 1340.24 | 507.973 | 357.942 |
| 2036          | 58351  | 21140.051 | 5939.716  | 15200.34 | 26.050 | 71.903 | 1292.65 | 482.234 | 350.651 |
| 2037          | 58547  | 21011.845 | 5498.497  | 15513.35 | 26.497 | 73.831 | 1294.41 | 478.783 | 357.216 |
| 2038          | 58719  | 20787.483 | 5061.764  | 15725.72 | 26.781 | 75.650 | 1294.39 | 472.681 | 361.101 |
| 2039          | 58882  | 20709.267 | 4681.866  | 16027.40 | 27.219 | 77.392 | 1292.66 | 469.372 | 366.590 |

## Results for PHIM for Run 8 (Sensitivity\_Analysis\_3.RTF)

---

### Control File Details for Run: 8

| Variable Parameter                                       | Value                  |
|----------------------------------------------------------|------------------------|
| 1. Name for Reference Scenario                           | NULL                   |
| 2. Name for Test Scenario                                | Ecig                   |
| 3. Name for Product 1                                    | CC                     |
| 4. Name for Product 2                                    | Ecig                   |
| 5. Name for Product 3                                    | -                      |
| 6. Name for Product 4                                    | Dual                   |
| 7. Country                                               | US (United States)     |
| 8. Sex                                                   | F (Females)            |
| 9. Year of start of process                              | 1990                   |
| 10. Number of months of follow-up                        | 600                    |
| 11. Follow-up interval length (in months)                | 12                     |
| 12. Lower age for risk estimation                        | 10                     |
| 13. Upper age for risk estimation                        | 79                     |
| 14. The effective dose for Product 1 (F1) - Ref          | 1                      |
| 15. The effective dose for Product 2 (F2) - Ref          | -                      |
| 16. The effective dose for Product 3 (F3) - Ref          | -                      |
| 17. The effective dose for Product 4 (F4) - Ref          | -                      |
| 18. The effective dose for Product 1 (F1) - Test         | 1                      |
| 19. The effective dose for Product 2 (F2) - Test         | 0.05                   |
| 20. The effective dose for Product 3 (F3) - Test         | -                      |
| 21. The effective dose for Product 4 (F4) - Test         | FROMF2                 |
| 22. Number in population to be simulated                 | 100000                 |
| 23. Number of MC simulations                             | 1                      |
| 24. The random number seed for the first simulation      | 15975263               |
| 25. Source for the population file (POP)                 | UN4                    |
| 26. Source for the socioeconomic prevalence file (SEP)   | -                      |
| 27. Source for the current smoking prevalence file (CSP) | ISS3                   |
| 28. Source for the former smoking prevalence file (FSP)  | ISS3                   |
| 29. Source for the quit-time distribution file (QTD)     | NHIS2006               |
| 30. Source for the death file (MORT)                     | APR-20                 |
| 31. Source for the relative risk file (RR)               | PNLEST                 |
| 32. Source for the half-life file (H)                    | PNLEST                 |
| 33. Assumption Set for TTP Factor Reference              | F1                     |
| 34. Assumption Set for TTP Factor Test                   | F1                     |
| 35. Assumption Set for TTP Reference                     | ISS3                   |
| 36. Assumption Set for TTP Test                          | S3D                    |
| 37. Assumption Set for TP for socioeconomic group        | -                      |
| 38. Source for Output Choice file (OUTC)                 | BASIC                  |
| 39. Output for DTP P1                                    | N                      |
| 40. Output for DTP P2                                    | N                      |
| 41. Output for Main P Component                          | Y                      |
| 42. Output for DTP E1                                    | N                      |
| 43. Output for DTP E2                                    | N                      |
| 44. Output for DTP E3                                    | N                      |
| 45. Output for Main E Component                          | Y                      |
| 46. Output file name                                     | Sensitivity_Analysis_3 |
| 47. Run number for P-Component                           | -                      |
| 48. Results file for E-Component                         | -                      |
| 49. Components required                                  | PE                     |
| 50. Results folder for P to be used in E-Component       | -                      |
| 51. Fixed age of starting product use                    | 16                     |
| 52. Output absolute risk file?                           | N                      |



## Results for PHIM for Run 8 (Sensitivity\_Analysis\_3.RTF)

\*\*\*\*\*

TTP values for Run: 8, Scenario: NULL

| Variable Parameter | Value               |
|--------------------|---------------------|
| 1. Country         | US (United States)  |
| 2. Sex             | F (Females)         |
| 3. Assumption Set  | ISS3                |
| Note:              | Period is in Months |

| Age   | Period  | Initiation  | Cessation    | Re-initiation |
|-------|---------|-------------|--------------|---------------|
|       |         | Never<br>CC | CC<br>Former | Former<br>CC  |
| 10-14 | 1-12    | 0.003758    | 0.008742     | 0.000000      |
| 15-19 | 1-12    | 0.003469    | 0.002515     | 0.000000      |
| 20-24 | 1-12    | 0.000276    | 0.000761     | 0.000000      |
| 25-29 | 1-12    | 0.000137    | 0.001375     | 0.000000      |
| 30-34 | 1-12    | 0.000069    | 0.001149     | 0.000000      |
| 35-39 | 1-12    | 0.000000    | 0.000991     | 0.000000      |
| 40-44 | 1-12    | 0.000000    | 0.000833     | 0.000000      |
| 45-49 | 1-12    | 0.000000    | 0.001723     | 0.000000      |
| 50-54 | 1-12    | 0.000000    | 0.002336     | 0.000000      |
| 55-59 | 1-12    | 0.000000    | 0.002233     | 0.000000      |
| 60-64 | 1-12    | 0.000000    | 0.004634     | 0.000000      |
| 65-69 | 1-12    | 0.000000    | 0.003505     | 0.000000      |
| 70-74 | 1-12    | 0.000000    | 0.004329     | 0.000000      |
| 75-79 | 1-12    | 0.000000    | 0.004329     | 0.000000      |
| 10-14 | 13-72   | 0.004794    | 0.008742     | 0.000000      |
| 15-19 | 13-72   | 0.004527    | 0.004082     | 0.000000      |
| 20-24 | 13-72   | 0.000105    | 0.001261     | 0.000000      |
| 25-29 | 13-72   | 0.000053    | 0.000952     | 0.000000      |
| 30-34 | 13-72   | 0.000026    | 0.000733     | 0.000000      |
| 35-39 | 13-72   | 0.000000    | 0.000753     | 0.000000      |
| 40-44 | 13-72   | 0.000000    | 0.001535     | 0.000000      |
| 45-49 | 13-72   | 0.000000    | 0.002998     | 0.000000      |
| 50-54 | 13-72   | 0.000000    | 0.003159     | 0.000000      |
| 55-59 | 13-72   | 0.000000    | 0.002965     | 0.000000      |
| 60-64 | 13-72   | 0.000000    | 0.003633     | 0.000000      |
| 65-69 | 13-72   | 0.000000    | 0.004522     | 0.000000      |
| 70-74 | 13-72   | 0.000000    | 0.005208     | 0.000000      |
| 75-79 | 13-72   | 0.000000    | 0.005208     | 0.000000      |
| 10-14 | 73-132  | 0.003969    | 0.008742     | 0.000000      |
| 15-19 | 73-132  | 0.003056    | 0.003373     | 0.000000      |
| 20-24 | 73-132  | 0.001459    | 0.003881     | 0.000000      |
| 25-29 | 73-132  | 0.000714    | 0.001953     | 0.000000      |
| 30-34 | 73-132  | 0.000111    | 0.001338     | 0.000000      |
| 35-39 | 73-132  | 0.000000    | 0.001507     | 0.000000      |
| 40-44 | 73-132  | 0.000000    | 0.002080     | 0.000000      |
| 45-49 | 73-132  | 0.000000    | 0.003809     | 0.000000      |
| 50-54 | 73-132  | 0.000000    | 0.004871     | 0.000000      |
| 55-59 | 73-132  | 0.000000    | 0.004560     | 0.000000      |
| 60-64 | 73-132  | 0.000000    | 0.007192     | 0.000000      |
| 65-69 | 73-132  | 0.000000    | 0.007033     | 0.000000      |
| 70-74 | 73-132  | 0.000000    | 0.008206     | 0.000000      |
| 75-79 | 73-132  | 0.000000    | 0.008206     | 0.000000      |
| 10-14 | 133-192 | 0.002861    | 0.008742     | 0.000000      |
| 15-19 | 133-192 | 0.002594    | 0.003996     | 0.000000      |
| 20-24 | 133-192 | 0.001247    | 0.002805     | 0.000000      |
| 25-29 | 133-192 | 0.000289    | 0.001574     | 0.000000      |
| 30-34 | 133-192 | 0.000132    | 0.001293     | 0.000000      |
| 35-39 | 133-192 | 0.000000    | 0.001219     | 0.000000      |
| 40-44 | 133-192 | 0.000000    | 0.001657     | 0.000000      |
| 45-49 | 133-192 | 0.000000    | 0.001995     | 0.000000      |
| 50-54 | 133-192 | 0.000000    | 0.002154     | 0.000000      |
| 55-59 | 133-192 | 0.000000    | 0.002072     | 0.000000      |
| 60-64 | 133-192 | 0.000000    | 0.005049     | 0.000000      |
| 65-69 | 133-192 | 0.000000    | 0.003680     | 0.000000      |
| 70-74 | 133-192 | 0.000000    | 0.006144     | 0.000000      |
| 75-79 | 133-192 | 0.000000    | 0.006144     | 0.000000      |
| 10-14 | 193-252 | 0.001859    | 0.008742     | 0.000000      |
| 15-19 | 193-252 | 0.002232    | 0.005770     | 0.000000      |
| 20-24 | 193-252 | 0.001079    | 0.003262     | 0.000000      |
| 25-29 | 193-252 | 0.000531    | 0.002002     | 0.000000      |
| 30-34 | 193-252 | 0.000263    | 0.003240     | 0.000000      |
| 35-39 | 193-252 | 0.000000    | 0.001771     | 0.000000      |
| 40-44 | 193-252 | 0.000000    | 0.002173     | 0.000000      |
| 45-49 | 193-252 | 0.000000    | 0.002075     | 0.000000      |
| 50-54 | 193-252 | 0.000000    | 0.003431     | 0.000000      |

### Results for PHIM for Run 8 (Sensitivity\_Analysis\_3.RTF)

|       |         |          |          |          |
|-------|---------|----------|----------|----------|
| 55-59 | 193-252 | 0.000000 | 0.002906 | 0.000000 |
| 60-64 | 193-252 | 0.000000 | 0.007139 | 0.000000 |
| 65-69 | 193-252 | 0.000000 | 0.004963 | 0.000000 |
| 70-74 | 193-252 | 0.000000 | 0.006269 | 0.000000 |
| 75-79 | 193-252 | 0.000000 | 0.006269 | 0.000000 |
| 10-14 | 253+    | 0.000931 | 0.008742 | 0.000000 |
| 15-19 | 253+    | 0.001798 | 0.009440 | 0.000000 |
| 20-24 | 253+    | 0.000023 | 0.002831 | 0.000000 |
| 25-29 | 253+    | 0.000073 | 0.002655 | 0.000000 |
| 30-34 | 253+    | 0.000037 | 0.004614 | 0.000000 |
| 35-39 | 253+    | 0.000000 | 0.002607 | 0.000000 |
| 40-44 | 253+    | 0.000000 | 0.003115 | 0.000000 |
| 45-49 | 253+    | 0.000000 | 0.002132 | 0.000000 |
| 50-54 | 253+    | 0.000000 | 0.003497 | 0.000000 |
| 55-59 | 253+    | 0.000000 | 0.002942 | 0.000000 |
| 60-64 | 253+    | 0.000000 | 0.005376 | 0.000000 |
| 65-69 | 253+    | 0.000000 | 0.001789 | 0.000000 |
| 70-74 | 253+    | 0.000000 | 0.004077 | 0.000000 |
| 75-79 | 253+    | 0.000000 | 0.004077 | 0.000000 |

## Results for PHIM for Run 8 (Sensitivity\_Analysis\_3.RTF)

\*\*\*\*\*

TTP values for Run: 8, Scenario: Ecig

| Variable Parameter | Value               |
|--------------------|---------------------|
| 1. Country         | US (United States)  |
| 2. Sex             | F (Females)         |
| 3. Assumption Set  | S3D                 |
| Note:              | Period is in Months |

| Age   | Period  | Initiation  |               |               | Cessation    |                |                | Re-initiation |                |                |
|-------|---------|-------------|---------------|---------------|--------------|----------------|----------------|---------------|----------------|----------------|
|       |         | Never<br>CC | Never<br>Ecig | Never<br>Dual | CC<br>Former | Ecig<br>Former | Dual<br>Former | Former<br>CC  | Former<br>Ecig | Former<br>Dual |
| 10-14 | 1-12    | 0.001879    | 0.001879      | 0.000000      | 0.008742     | 0.013112       | 0.000000       | 0.000000      | 0.000000       | 0.000000       |
| 15-19 | 1-12    | 0.001735    | 0.001735      | 0.000000      | 0.002515     | 0.003773       | 0.000000       | 0.000000      | 0.000000       | 0.000000       |
| 20-24 | 1-12    | 0.000138    | 0.000138      | 0.000000      | 0.000761     | 0.001142       | 0.000000       | 0.000000      | 0.000000       | 0.000000       |
| 25-29 | 1-12    | 0.000069    | 0.000069      | 0.000000      | 0.001376     | 0.002063       | 0.000000       | 0.000000      | 0.000000       | 0.000000       |
| 30-34 | 1-12    | 0.000034    | 0.000034      | 0.000000      | 0.001149     | 0.001724       | 0.000000       | 0.000000      | 0.000000       | 0.000000       |
| 35-39 | 1-12    | 0.000000    | 0.000000      | 0.000000      | 0.000991     | 0.001487       | 0.000000       | 0.000000      | 0.000000       | 0.000000       |
| 40-44 | 1-12    | 0.000000    | 0.000000      | 0.000000      | 0.000833     | 0.001250       | 0.000000       | 0.000000      | 0.000000       | 0.000000       |
| 45-49 | 1-12    | 0.000000    | 0.000000      | 0.000000      | 0.001723     | 0.002585       | 0.000000       | 0.000000      | 0.000000       | 0.000000       |
| 50-54 | 1-12    | 0.000000    | 0.000000      | 0.000000      | 0.002336     | 0.003504       | 0.000000       | 0.000000      | 0.000000       | 0.000000       |
| 55-59 | 1-12    | 0.000000    | 0.000000      | 0.000000      | 0.002233     | 0.003349       | 0.000000       | 0.000000      | 0.000000       | 0.000000       |
| 60-64 | 1-12    | 0.000000    | 0.000000      | 0.000000      | 0.004635     | 0.006952       | 0.000000       | 0.000000      | 0.000000       | 0.000000       |
| 65-69 | 1-12    | 0.000000    | 0.000000      | 0.000000      | 0.003505     | 0.005257       | 0.000000       | 0.000000      | 0.000000       | 0.000000       |
| 70-74 | 1-12    | 0.000000    | 0.000000      | 0.000000      | 0.004329     | 0.006493       | 0.000000       | 0.000000      | 0.000000       | 0.000000       |
| 75-79 | 1-12    | 0.000000    | 0.000000      | 0.000000      | 0.004329     | 0.006493       | 0.000000       | 0.000000      | 0.000000       | 0.000000       |
| 10-14 | 13-72   | 0.001918    | 0.002877      | 0.000000      | 0.008742     | 0.013112       | 0.000000       | 0.000000      | 0.000000       | 0.000000       |
| 15-19 | 13-72   | 0.001811    | 0.002716      | 0.000000      | 0.004083     | 0.006124       | 0.000000       | 0.000000      | 0.000000       | 0.000000       |
| 20-24 | 13-72   | 0.000042    | 0.000063      | 0.000000      | 0.001261     | 0.001892       | 0.000000       | 0.000000      | 0.000000       | 0.000000       |
| 25-29 | 13-72   | 0.000021    | 0.000032      | 0.000000      | 0.000952     | 0.001428       | 0.000000       | 0.000000      | 0.000000       | 0.000000       |
| 30-34 | 13-72   | 0.000011    | 0.000016      | 0.000000      | 0.000733     | 0.001100       | 0.000000       | 0.000000      | 0.000000       | 0.000000       |
| 35-39 | 13-72   | 0.000000    | 0.000000      | 0.000000      | 0.000754     | 0.001130       | 0.000000       | 0.000000      | 0.000000       | 0.000000       |
| 40-44 | 13-72   | 0.000000    | 0.000000      | 0.000000      | 0.001535     | 0.002302       | 0.000000       | 0.000000      | 0.000000       | 0.000000       |
| 45-49 | 13-72   | 0.000000    | 0.000000      | 0.000000      | 0.002998     | 0.004496       | 0.000000       | 0.000000      | 0.000000       | 0.000000       |
| 50-54 | 13-72   | 0.000000    | 0.000000      | 0.000000      | 0.003160     | 0.004739       | 0.000000       | 0.000000      | 0.000000       | 0.000000       |
| 55-59 | 13-72   | 0.000000    | 0.000000      | 0.000000      | 0.002965     | 0.004447       | 0.000000       | 0.000000      | 0.000000       | 0.000000       |
| 60-64 | 13-72   | 0.000000    | 0.000000      | 0.000000      | 0.003633     | 0.005449       | 0.000000       | 0.000000      | 0.000000       | 0.000000       |
| 65-69 | 13-72   | 0.000000    | 0.000000      | 0.000000      | 0.004522     | 0.006783       | 0.000000       | 0.000000      | 0.000000       | 0.000000       |
| 70-74 | 13-72   | 0.000000    | 0.000000      | 0.000000      | 0.005208     | 0.007812       | 0.000000       | 0.000000      | 0.000000       | 0.000000       |
| 75-79 | 13-72   | 0.000000    | 0.000000      | 0.000000      | 0.005208     | 0.007812       | 0.000000       | 0.000000      | 0.000000       | 0.000000       |
| 10-14 | 73-132  | 0.000794    | 0.003175      | 0.000000      | 0.008742     | 0.013112       | 0.000000       | 0.000000      | 0.000000       | 0.000000       |
| 15-19 | 73-132  | 0.000611    | 0.002445      | 0.000000      | 0.003373     | 0.005059       | 0.000000       | 0.000000      | 0.000000       | 0.000000       |
| 20-24 | 73-132  | 0.000292    | 0.001167      | 0.000000      | 0.003881     | 0.005821       | 0.000000       | 0.000000      | 0.000000       | 0.000000       |
| 25-29 | 73-132  | 0.000143    | 0.000571      | 0.000000      | 0.001954     | 0.002930       | 0.000000       | 0.000000      | 0.000000       | 0.000000       |
| 30-34 | 73-132  | 0.000022    | 0.000089      | 0.000000      | 0.001338     | 0.002007       | 0.000000       | 0.000000      | 0.000000       | 0.000000       |
| 35-39 | 73-132  | 0.000000    | 0.000000      | 0.000000      | 0.001507     | 0.002260       | 0.000000       | 0.000000      | 0.000000       | 0.000000       |
| 40-44 | 73-132  | 0.000000    | 0.000000      | 0.000000      | 0.002080     | 0.003120       | 0.000000       | 0.000000      | 0.000000       | 0.000000       |
| 45-49 | 73-132  | 0.000000    | 0.000000      | 0.000000      | 0.003809     | 0.005713       | 0.000000       | 0.000000      | 0.000000       | 0.000000       |
| 50-54 | 73-132  | 0.000000    | 0.000000      | 0.000000      | 0.004871     | 0.007307       | 0.000000       | 0.000000      | 0.000000       | 0.000000       |
| 55-59 | 73-132  | 0.000000    | 0.000000      | 0.000000      | 0.004560     | 0.006839       | 0.000000       | 0.000000      | 0.000000       | 0.000000       |
| 60-64 | 73-132  | 0.000000    | 0.000000      | 0.000000      | 0.007192     | 0.010788       | 0.000000       | 0.000000      | 0.000000       | 0.000000       |
| 65-69 | 73-132  | 0.000000    | 0.000000      | 0.000000      | 0.007033     | 0.010550       | 0.000000       | 0.000000      | 0.000000       | 0.000000       |
| 70-74 | 73-132  | 0.000000    | 0.000000      | 0.000000      | 0.008206     | 0.012310       | 0.000000       | 0.000000      | 0.000000       | 0.000000       |
| 75-79 | 73-132  | 0.000000    | 0.000000      | 0.000000      | 0.008206     | 0.012310       | 0.000000       | 0.000000      | 0.000000       | 0.000000       |
| 10-14 | 133-192 | 0.000143    | 0.002718      | 0.000000      | 0.008742     | 0.013112       | 0.000000       | 0.000000      | 0.000000       | 0.000000       |
| 15-19 | 133-192 | 0.000130    | 0.002465      | 0.000000      | 0.003996     | 0.005993       | 0.000000       | 0.000000      | 0.000000       | 0.000000       |
| 20-24 | 133-192 | 0.000062    | 0.001185      | 0.000000      | 0.002805     | 0.004208       | 0.000000       | 0.000000      | 0.000000       | 0.000000       |
| 25-29 | 133-192 | 0.000015    | 0.000275      | 0.000000      | 0.001574     | 0.002361       | 0.000000       | 0.000000      | 0.000000       | 0.000000       |
| 30-34 | 133-192 | 0.000007    | 0.000125      | 0.000000      | 0.001293     | 0.001939       | 0.000000       | 0.000000      | 0.000000       | 0.000000       |
| 35-39 | 133-192 | 0.000000    | 0.000000      | 0.000000      | 0.001219     | 0.001829       | 0.000000       | 0.000000      | 0.000000       | 0.000000       |
| 40-44 | 133-192 | 0.000000    | 0.000000      | 0.000000      | 0.001657     | 0.002485       | 0.000000       | 0.000000      | 0.000000       | 0.000000       |
| 45-49 | 133-192 | 0.000000    | 0.000000      | 0.000000      | 0.001995     | 0.002992       | 0.000000       | 0.000000      | 0.000000       | 0.000000       |
| 50-54 | 133-192 | 0.000000    | 0.000000      | 0.000000      | 0.002154     | 0.003231       | 0.000000       | 0.000000      | 0.000000       | 0.000000       |
| 55-59 | 133-192 | 0.000000    | 0.000000      | 0.000000      | 0.002072     | 0.003108       | 0.000000       | 0.000000      | 0.000000       | 0.000000       |
| 60-64 | 133-192 | 0.000000    | 0.000000      | 0.000000      | 0.005049     | 0.007573       | 0.000000       | 0.000000      | 0.000000       | 0.000000       |
| 65-69 | 133-192 | 0.000000    | 0.000000      | 0.000000      | 0.003681     | 0.005521       | 0.000000       | 0.000000      | 0.000000       | 0.000000       |
| 70-74 | 133-192 | 0.000000    | 0.000000      | 0.000000      | 0.006144     | 0.009215       | 0.000000       | 0.000000      | 0.000000       | 0.000000       |
| 75-79 | 133-192 | 0.000000    | 0.000000      | 0.000000      | 0.006144     | 0.009215       | 0.000000       | 0.000000      | 0.000000       | 0.000000       |
| 10-14 | 193-252 | 0.000093    | 0.001766      | 0.000000      | 0.008742     | 0.013112       | 0.000000       | 0.000000      | 0.000000       | 0.000000       |
| 15-19 | 193-252 | 0.000112    | 0.002120      | 0.000000      | 0.005770     | 0.008655       | 0.000000       | 0.000000      | 0.000000       | 0.000000       |
| 20-24 | 193-252 | 0.000054    | 0.001025      | 0.000000      | 0.003262     | 0.004893       | 0.000000       | 0.000000      | 0.000000       | 0.000000       |
| 25-29 | 193-252 | 0.000027    | 0.000504      | 0.000000      | 0.002002     | 0.003003       | 0.000000       | 0.000000      | 0.000000       | 0.000000       |
| 30-34 | 193-252 | 0.000013    | 0.000250      | 0.000000      | 0.003241     | 0.004861       | 0.000000       | 0.000000      | 0.000000       | 0.000000       |
| 35-39 | 193-252 | 0.000000    | 0.000000      | 0.000000      | 0.001771     | 0.002656       | 0.000000       | 0.000000      | 0.000000       | 0.000000       |
| 40-44 | 193-252 | 0.000000    | 0.000000      | 0.000000      | 0.002173     | 0.003260       | 0.000000       | 0.000000      | 0.000000       | 0.000000       |
| 45-49 | 193-252 | 0.000000    | 0.000000      | 0.000000      | 0.002075     | 0.003112       | 0.000000       | 0.000000      | 0.000000       | 0.000000       |
| 50-54 | 193-252 | 0.000000    | 0.000000      | 0.000000      | 0.003432     | 0.005147       | 0.000000       | 0.000000      | 0.000000       | 0.000000       |

### Results for PHIM for Run 8 (Sensitivity\_Analysis\_3.RTF)

|       |         |          |          |          |          |          |          |          |          |          |
|-------|---------|----------|----------|----------|----------|----------|----------|----------|----------|----------|
| 55-59 | 193-252 | 0.000000 | 0.000000 | 0.000000 | 0.002906 | 0.004359 | 0.000000 | 0.000000 | 0.000000 | 0.000000 |
| 60-64 | 193-252 | 0.000000 | 0.000000 | 0.000000 | 0.007139 | 0.010708 | 0.000000 | 0.000000 | 0.000000 | 0.000000 |
| 65-69 | 193-252 | 0.000000 | 0.000000 | 0.000000 | 0.004963 | 0.007444 | 0.000000 | 0.000000 | 0.000000 | 0.000000 |
| 70-74 | 193-252 | 0.000000 | 0.000000 | 0.000000 | 0.006269 | 0.009403 | 0.000000 | 0.000000 | 0.000000 | 0.000000 |
| 75-79 | 193-252 | 0.000000 | 0.000000 | 0.000000 | 0.006269 | 0.009403 | 0.000000 | 0.000000 | 0.000000 | 0.000000 |
| 10-14 | 253+    | 0.000047 | 0.000884 | 0.000000 | 0.008742 | 0.013112 | 0.000000 | 0.000000 | 0.000000 | 0.000000 |
| 15-19 | 253+    | 0.000090 | 0.001708 | 0.000000 | 0.009440 | 0.014160 | 0.000000 | 0.000000 | 0.000000 | 0.000000 |
| 20-24 | 253+    | 0.000001 | 0.000022 | 0.000000 | 0.002831 | 0.004246 | 0.000000 | 0.000000 | 0.000000 | 0.000000 |
| 25-29 | 253+    | 0.000004 | 0.000070 | 0.000000 | 0.002656 | 0.003983 | 0.000000 | 0.000000 | 0.000000 | 0.000000 |
| 30-34 | 253+    | 0.000002 | 0.000035 | 0.000000 | 0.004614 | 0.006920 | 0.000000 | 0.000000 | 0.000000 | 0.000000 |
| 35-39 | 253+    | 0.000000 | 0.000000 | 0.000000 | 0.002608 | 0.003911 | 0.000000 | 0.000000 | 0.000000 | 0.000000 |
| 40-44 | 253+    | 0.000000 | 0.000000 | 0.000000 | 0.003115 | 0.004673 | 0.000000 | 0.000000 | 0.000000 | 0.000000 |
| 45-49 | 253+    | 0.000000 | 0.000000 | 0.000000 | 0.002132 | 0.003198 | 0.000000 | 0.000000 | 0.000000 | 0.000000 |
| 50-54 | 253+    | 0.000000 | 0.000000 | 0.000000 | 0.003497 | 0.005246 | 0.000000 | 0.000000 | 0.000000 | 0.000000 |
| 55-59 | 253+    | 0.000000 | 0.000000 | 0.000000 | 0.002942 | 0.004412 | 0.000000 | 0.000000 | 0.000000 | 0.000000 |
| 60-64 | 253+    | 0.000000 | 0.000000 | 0.000000 | 0.005376 | 0.008063 | 0.000000 | 0.000000 | 0.000000 | 0.000000 |
| 65-69 | 253+    | 0.000000 | 0.000000 | 0.000000 | 0.001789 | 0.002683 | 0.000000 | 0.000000 | 0.000000 | 0.000000 |
| 70-74 | 253+    | 0.000000 | 0.000000 | 0.000000 | 0.004077 | 0.006116 | 0.000000 | 0.000000 | 0.000000 | 0.000000 |
| 75-79 | 253+    | 0.000000 | 0.000000 | 0.000000 | 0.004077 | 0.006116 | 0.000000 | 0.000000 | 0.000000 | 0.000000 |



### Results for PHIM for Run 8 (Sensitivity\_Analysis\_3.RTF)

|       |      |          |          |          |          |          |          |
|-------|------|----------|----------|----------|----------|----------|----------|
| 25-29 | 253+ | 0.014127 | 0.000000 | 0.000000 | 0.000000 | 0.000000 | 0.000000 |
| 30-34 | 253+ | 0.013889 | 0.000000 | 0.000000 | 0.000000 | 0.000000 | 0.000000 |
| 35-39 | 253+ | 0.012929 | 0.000000 | 0.000000 | 0.000000 | 0.000000 | 0.000000 |
| 40-44 | 253+ | 0.012785 | 0.000000 | 0.000000 | 0.000000 | 0.000000 | 0.000000 |
| 45-49 | 253+ | 0.012295 | 0.000000 | 0.000000 | 0.000000 | 0.000000 | 0.000000 |
| 50-54 | 253+ | 0.011536 | 0.000000 | 0.000000 | 0.000000 | 0.000000 | 0.000000 |
| 55-59 | 253+ | 0.008988 | 0.000000 | 0.000000 | 0.000000 | 0.000000 | 0.000000 |
| 60-64 | 253+ | 0.008098 | 0.000000 | 0.000000 | 0.000000 | 0.000000 | 0.000000 |
| 65-69 | 253+ | 0.006274 | 0.000000 | 0.000000 | 0.000000 | 0.000000 | 0.000000 |
| 70-74 | 253+ | 0.004141 | 0.000000 | 0.000000 | 0.000000 | 0.000000 | 0.000000 |
| 75-79 | 253+ | 0.004141 | 0.000000 | 0.000000 | 0.000000 | 0.000000 | 0.000000 |

## Results for PHIM for Run 8 (Sensitivity\_Analysis\_3.RTF)

\*\*\*\*\*

### Main Output for the Tobacco History for Run: 8, Simulation: 1, Scenario: NULL

| Variable Parameter          | Value              |
|-----------------------------|--------------------|
| 1. Country                  | US (United States) |
| 2. Sex                      | F (Females)        |
| 3. Year of start of process | 1990               |

Year of Follow-up: 2040, Age Group: All Ages  
 Period    Age Group    Smoking Group            N            %

|    |          |           |       |       |
|----|----------|-----------|-------|-------|
| 50 | All Ages | Never Any | 20670 | 58.80 |
| 50 | All Ages | CC        | 2462  | 7.00  |
| 50 | All Ages | Former    | 12019 | 34.19 |

Year of Follow-up: 2040, Age Group: 18-19  
 Period    Age Group    Smoking Group            N            %

|    |       |           |   |   |
|----|-------|-----------|---|---|
| 50 | 18-19 | Never Any | 0 | . |
| 50 | 18-19 | CC        | 0 | . |
| 50 | 18-19 | Former    | 0 | . |

Year of Follow-up: 2040, Age Group: 20-24  
 Period    Age Group    Smoking Group            N            %

|    |       |           |   |   |
|----|-------|-----------|---|---|
| 50 | 20-24 | Never Any | 0 | . |
| 50 | 20-24 | CC        | 0 | . |
| 50 | 20-24 | Former    | 0 | . |

Year of Follow-up: 2040, Age Group: 25-29  
 Period    Age Group    Smoking Group            N            %

|    |       |           |   |   |
|----|-------|-----------|---|---|
| 50 | 25-29 | Never Any | 0 | . |
| 50 | 25-29 | CC        | 0 | . |
| 50 | 25-29 | Former    | 0 | . |

Year of Follow-up: 2040, Age Group: 30-34  
 Period    Age Group    Smoking Group            N            %

|    |       |           |   |   |
|----|-------|-----------|---|---|
| 50 | 30-34 | Never Any | 0 | . |
| 50 | 30-34 | CC        | 0 | . |
| 50 | 30-34 | Former    | 0 | . |

Year of Follow-up: 2040, Age Group: 35-39  
 Period    Age Group    Smoking Group            N            %

|    |       |           |   |   |
|----|-------|-----------|---|---|
| 50 | 35-39 | Never Any | 0 | . |
| 50 | 35-39 | CC        | 0 | . |
| 50 | 35-39 | Former    | 0 | . |

Year of Follow-up: 2040, Age Group: 40-44  
 Period    Age Group    Smoking Group            N            %

|    |       |           |   |   |
|----|-------|-----------|---|---|
| 50 | 40-44 | Never Any | 0 | . |
| 50 | 40-44 | CC        | 0 | . |
| 50 | 40-44 | Former    | 0 | . |

Year of Follow-up: 2040, Age Group: 45-49  
 Period    Age Group    Smoking Group            N            %

|    |       |           |   |   |
|----|-------|-----------|---|---|
| 50 | 45-49 | Never Any | 0 | . |
| 50 | 45-49 | CC        | 0 | . |
| 50 | 45-49 | Former    | 0 | . |

Year of Follow-up: 2040, Age Group: 50-54  
 Period    Age Group    Smoking Group            N            %

|    |       |           |   |   |
|----|-------|-----------|---|---|
| 50 | 50-54 | Never Any | 0 | . |
| 50 | 50-54 | CC        | 0 | . |
| 50 | 50-54 | Former    | 0 | . |

Year of Follow-up: 2040, Age Group: 55-59  
 Period    Age Group    Smoking Group            N            %

|    |       |           |   |   |
|----|-------|-----------|---|---|
| 50 | 55-59 | Never Any | 0 | . |
| 50 | 55-59 | CC        | 0 | . |
| 50 | 55-59 | Former    | 0 | . |

Year of Follow-up: 2040, Age Group: 60-64  
 Period    Age Group    Smoking Group            N            %

### Results for PHIM for Run 8 (Sensitivity\_Analysis\_3.RTF)

|                                           |           |               |      |       |
|-------------------------------------------|-----------|---------------|------|-------|
| 50                                        | 60-64     | Never Any     | 4803 | 60.57 |
| 50                                        | 60-64     | CC            | 621  | 7.83  |
| 50                                        | 60-64     | Former        | 2506 | 31.60 |
| Year of Follow-up: 2040, Age Group: 65-69 |           |               |      |       |
| Period                                    | Age Group | Smoking Group | N    | %     |
| 50                                        | 65-69     | Never Any     | 5407 | 64.75 |
| 50                                        | 65-69     | CC            | 538  | 6.44  |
| 50                                        | 65-69     | Former        | 2405 | 28.80 |
| Year of Follow-up: 2040, Age Group: 70-74 |           |               |      |       |
| Period                                    | Age Group | Smoking Group | N    | %     |
| 50                                        | 70-74     | Never Any     | 5181 | 58.92 |
| 50                                        | 70-74     | CC            | 605  | 6.88  |
| 50                                        | 70-74     | Former        | 3007 | 34.20 |
| Year of Follow-up: 2040, Age Group: 75-79 |           |               |      |       |
| Period                                    | Age Group | Smoking Group | N    | %     |
| 50                                        | 75-79     | Never Any     | 5279 | 52.38 |
| 50                                        | 75-79     | CC            | 698  | 6.93  |
| 50                                        | 75-79     | Former        | 4101 | 40.69 |



## Results for PHIM for Run 8 (Sensitivity\_Analysis\_3.RTF)

\*\*\*\*\*

### Main Output for the Tobacco History for Run: 8, Simulation: 1, Scenario: Ecig

| Variable Parameter                           |           |               | Value              |       |               |             |               |                |              |
|----------------------------------------------|-----------|---------------|--------------------|-------|---------------|-------------|---------------|----------------|--------------|
| 1. Country                                   |           |               | US (United States) |       |               |             |               |                |              |
| 2. Sex                                       |           |               | F (Females)        |       |               |             |               |                |              |
| 3. Year of start of process                  |           |               | 1990               |       |               |             |               |                |              |
| Year of Follow-up: 1990, Age Group: All Ages |           |               |                    |       |               |             |               |                |              |
| Period                                       | Age Group | Smoking Group | N                  | %     | Ever Quit (N) | Ever Quit % | Mean Yrs Quit | Short Term (n) | Short Term % |
| 0                                            | All Ages  | Never Any     | 47776              | 54.92 |               |             |               |                |              |
| 0                                            | All Ages  | CC            | 22737              | 26.14 | 0             | 0.00        |               |                |              |
| 0                                            | All Ages  | Ecig          | 0                  | 0.00  |               |             |               |                |              |
| 0                                            | All Ages  | Dual          | 0                  | 0.00  |               |             |               |                |              |
| 0                                            | All Ages  | Former        | 16484              | 18.95 |               |             | 11.90         | 2815           | 17.08        |
| Year of Follow-up: 1990, Age Group: 18-19    |           |               |                    |       |               |             |               |                |              |
| Period                                       | Age Group | Smoking Group | N                  | %     | Ever Quit (N) | Ever Quit % | Mean Yrs Quit | Short Term (n) | Short Term % |
| 0                                            | 18-19     | Never Any     | 2570               | 78.43 |               |             |               |                |              |
| 0                                            | 18-19     | CC            | 535                | 16.33 | 0             | 0.00        |               |                |              |
| 0                                            | 18-19     | Ecig          | 0                  | 0.00  |               |             |               |                |              |
| 0                                            | 18-19     | Dual          | 0                  | 0.00  |               |             |               |                |              |
| 0                                            | 18-19     | Former        | 172                | 5.25  |               |             | 0.20          | 172            | 100.00       |
| Year of Follow-up: 1990, Age Group: 20-24    |           |               |                    |       |               |             |               |                |              |
| Period                                       | Age Group | Smoking Group | N                  | %     | Ever Quit (N) | Ever Quit % | Mean Yrs Quit | Short Term (n) | Short Term % |
| 0                                            | 20-24     | Never Any     | 5354               | 60.89 |               |             |               |                |              |
| 0                                            | 20-24     | CC            | 2560               | 29.11 | 0             | 0.00        |               |                |              |
| 0                                            | 20-24     | Ecig          | 0                  | 0.00  |               |             |               |                |              |
| 0                                            | 20-24     | Dual          | 0                  | 0.00  |               |             |               |                |              |
| 0                                            | 20-24     | Former        | 879                | 10.00 |               |             | 1.58          | 420            | 47.78        |
| Year of Follow-up: 1990, Age Group: 25-29    |           |               |                    |       |               |             |               |                |              |
| Period                                       | Age Group | Smoking Group | N                  | %     | Ever Quit (N) | Ever Quit % | Mean Yrs Quit | Short Term (n) | Short Term % |
| 0                                            | 25-29     | Never Any     | 5318               | 52.77 |               |             |               |                |              |
| 0                                            | 25-29     | CC            | 3335               | 33.09 | 0             | 0.00        |               |                |              |
| 0                                            | 25-29     | Ecig          | 0                  | 0.00  |               |             |               |                |              |
| 0                                            | 25-29     | Dual          | 0                  | 0.00  |               |             |               |                |              |
| 0                                            | 25-29     | Former        | 1425               | 14.14 |               |             | 3.91          | 404            | 28.35        |
| Year of Follow-up: 1990, Age Group: 30-34    |           |               |                    |       |               |             |               |                |              |
| Period                                       | Age Group | Smoking Group | N                  | %     | Ever Quit (N) | Ever Quit % | Mean Yrs Quit | Short Term (n) | Short Term % |
| 0                                            | 30-34     | Never Any     | 5287               | 50.36 |               |             |               |                |              |
| 0                                            | 30-34     | CC            | 3326               | 31.68 | 0             | 0.00        |               |                |              |
| 0                                            | 30-34     | Ecig          | 0                  | 0.00  |               |             |               |                |              |
| 0                                            | 30-34     | Dual          | 0                  | 0.00  |               |             |               |                |              |
| 0                                            | 30-34     | Former        | 1886               | 17.96 |               |             | 4.36          | 566            | 30.01        |
| Year of Follow-up: 1990, Age Group: 35-39    |           |               |                    |       |               |             |               |                |              |
| Period                                       | Age Group | Smoking Group | N                  | %     | Ever Quit (N) | Ever Quit % | Mean Yrs Quit | Short Term (n) | Short Term % |
| 0                                            | 35-39     | Never Any     | 5018               | 52.27 |               |             |               |                |              |
| 0                                            | 35-39     | CC            | 2653               | 27.64 | 0             | 0.00        |               |                |              |
| 0                                            | 35-39     | Ecig          | 0                  | 0.00  |               |             |               |                |              |
| 0                                            | 35-39     | Dual          | 0                  | 0.00  |               |             |               |                |              |
| 0                                            | 35-39     | Former        | 1929               | 20.09 |               |             | 7.96          | 324            | 16.80        |
| Year of Follow-up: 1990, Age Group: 40-44    |           |               |                    |       |               |             |               |                |              |
| Period                                       | Age Group | Smoking Group | N                  | %     | Ever Quit (N) | Ever Quit % | Mean Yrs Quit | Short Term (n) | Short Term % |
| 0                                            | 40-44     | Never Any     | 4356               | 51.27 |               |             |               |                |              |
| 0                                            | 40-44     | CC            | 2397               | 28.21 | 0             | 0.00        |               |                |              |
| 0                                            | 40-44     | Ecig          | 0                  | 0.00  |               |             |               |                |              |
| 0                                            | 40-44     | Dual          | 0                  | 0.00  |               |             |               |                |              |
| 0                                            | 40-44     | Former        | 1744               | 20.52 |               |             | 7.33          | 339            | 19.44        |
| Year of Follow-up: 1990, Age Group: 45-49    |           |               |                    |       |               |             |               |                |              |
| Period                                       | Age Group | Smoking Group | N                  | %     | Ever Quit (N) | Ever Quit % | Mean Yrs Quit | Short Term (n) | Short Term % |
| 0                                            | 45-49     | Never Any     | 3116               | 47.67 |               |             |               |                |              |
| 0                                            | 45-49     | CC            | 1875               | 28.69 | 0             | 0.00        |               |                |              |
| 0                                            | 45-49     | Ecig          | 0                  | 0.00  |               |             |               |                |              |
| 0                                            | 45-49     | Dual          | 0                  | 0.00  |               |             |               |                |              |
| 0                                            | 45-49     | Former        | 1545               | 23.64 |               |             | 12.55         | 194            | 12.56        |
| Year of Follow-up: 1990, Age Group: 50-54    |           |               |                    |       |               |             |               |                |              |
| Period                                       | Age Group | Smoking Group | N                  | %     | Ever Quit (N) | Ever Quit % | Mean Yrs Quit | Short Term (n) | Short Term % |
| 0                                            | 50-54     | Never Any     | 2684               | 48.50 |               |             |               |                |              |
| 0                                            | 50-54     | CC            | 1572               | 28.41 | 0             | 0.00        |               |                |              |

**Results for PHIM for Run 8 (Sensitivity\_Analysis\_3.RTF)**

|                                              |           |               |       |       |               |             |               |                |              |
|----------------------------------------------|-----------|---------------|-------|-------|---------------|-------------|---------------|----------------|--------------|
| 0                                            | 50-54     | Ecig          | 0     | 0.00  |               |             |               |                |              |
| 0                                            | 50-54     | Dual          | 0     | 0.00  |               |             |               |                |              |
| 0                                            | 50-54     | Former        | 1278  | 23.09 |               |             | 13.28         | 126            | 9.86         |
| Year of Follow-up: 1990, Age Group: 55-59    |           |               |       |       |               |             |               |                |              |
| Period                                       | Age Group | Smoking Group | N     | %     | Ever Quit (N) | Ever Quit % | Mean Yrs Quit | Short Term (n) | Short Term % |
| 0                                            | 55-59     | Never Any     | 2732  | 51.90 |               |             |               |                |              |
| 0                                            | 55-59     | CC            | 1295  | 24.60 | 0             | 0.00        |               |                |              |
| 0                                            | 55-59     | Ecig          | 0     | 0.00  |               |             |               |                |              |
| 0                                            | 55-59     | Dual          | 0     | 0.00  |               |             |               |                |              |
| 0                                            | 55-59     | Former        | 1237  | 23.50 |               |             | 17.26         | 90             | 7.28         |
| Year of Follow-up: 1990, Age Group: 60-64    |           |               |       |       |               |             |               |                |              |
| Period                                       | Age Group | Smoking Group | N     | %     | Ever Quit (N) | Ever Quit % | Mean Yrs Quit | Short Term (n) | Short Term % |
| 0                                            | 60-64     | Never Any     | 3078  | 55.72 |               |             |               |                |              |
| 0                                            | 60-64     | CC            | 1249  | 22.61 | 0             | 0.00        |               |                |              |
| 0                                            | 60-64     | Ecig          | 0     | 0.00  |               |             |               |                |              |
| 0                                            | 60-64     | Dual          | 0     | 0.00  |               |             |               |                |              |
| 0                                            | 60-64     | Former        | 1197  | 21.67 |               |             | 18.28         | 61             | 5.10         |
| Year of Follow-up: 1990, Age Group: 65-69    |           |               |       |       |               |             |               |                |              |
| Period                                       | Age Group | Smoking Group | N     | %     | Ever Quit (N) | Ever Quit % | Mean Yrs Quit | Short Term (n) | Short Term % |
| 0                                            | 65-69     | Never Any     | 3042  | 57.36 |               |             |               |                |              |
| 0                                            | 65-69     | CC            | 976   | 18.40 | 0             | 0.00        |               |                |              |
| 0                                            | 65-69     | Ecig          | 0     | 0.00  |               |             |               |                |              |
| 0                                            | 65-69     | Dual          | 0     | 0.00  |               |             |               |                |              |
| 0                                            | 65-69     | Former        | 1285  | 24.23 |               |             | 20.65         | 68             | 5.29         |
| Year of Follow-up: 1990, Age Group: 70-74    |           |               |       |       |               |             |               |                |              |
| Period                                       | Age Group | Smoking Group | N     | %     | Ever Quit (N) | Ever Quit % | Mean Yrs Quit | Short Term (n) | Short Term % |
| 0                                            | 70-74     | Never Any     | 2738  | 61.05 |               |             |               |                |              |
| 0                                            | 70-74     | CC            | 610   | 13.60 | 0             | 0.00        |               |                |              |
| 0                                            | 70-74     | Ecig          | 0     | 0.00  |               |             |               |                |              |
| 0                                            | 70-74     | Dual          | 0     | 0.00  |               |             |               |                |              |
| 0                                            | 70-74     | Former        | 1137  | 25.35 |               |             | 24.48         | 27             | 2.37         |
| Year of Follow-up: 1990, Age Group: 75-79    |           |               |       |       |               |             |               |                |              |
| Period                                       | Age Group | Smoking Group | N     | %     | Ever Quit (N) | Ever Quit % | Mean Yrs Quit | Short Term (n) | Short Term % |
| 0                                            | 75-79     | Never Any     | 2483  | 68.84 |               |             |               |                |              |
| 0                                            | 75-79     | CC            | 354   | 9.81  | 0             | 0.00        |               |                |              |
| 0                                            | 75-79     | Ecig          | 0     | 0.00  |               |             |               |                |              |
| 0                                            | 75-79     | Dual          | 0     | 0.00  |               |             |               |                |              |
| 0                                            | 75-79     | Former        | 770   | 21.35 |               |             | 24.48         | 24             | 3.12         |
| Year of Follow-up: 1995, Age Group: All Ages |           |               |       |       |               |             |               |                |              |
| Period                                       | Age Group | Smoking Group | N     | %     | Ever Quit (N) | Ever Quit % | Mean Yrs Quit | Short Term (n) | Short Term % |
| 5                                            | All Ages  | Never Any     | 50887 | 55.53 |               |             |               |                |              |
| 5                                            | All Ages  | CC            | 10659 | 11.63 | 0             | 0.00        |               |                |              |
| 5                                            | All Ages  | Ecig          | 11413 | 12.45 |               |             |               |                |              |
| 5                                            | All Ages  | Dual          | 0     | 0.00  |               |             |               |                |              |
| 5                                            | All Ages  | Former        | 18680 | 20.38 |               |             | 13.99         | 1321           | 7.07         |
| Year of Follow-up: 1995, Age Group: 18-19    |           |               |       |       |               |             |               |                |              |
| Period                                       | Age Group | Smoking Group | N     | %     | Ever Quit (N) | Ever Quit % | Mean Yrs Quit | Short Term (n) | Short Term % |
| 5                                            | 18-19     | Never Any     | 2434  | 76.64 |               |             |               |                |              |
| 5                                            | 18-19     | CC            | 233   | 7.34  | 0             | 0.00        |               |                |              |
| 5                                            | 18-19     | Ecig          | 408   | 12.85 |               |             |               |                |              |
| 5                                            | 18-19     | Dual          | 0     | 0.00  |               |             |               |                |              |
| 5                                            | 18-19     | Former        | 101   | 3.18  |               |             | 1.09          | 68             | 67.33        |
| Year of Follow-up: 1995, Age Group: 20-24    |           |               |       |       |               |             |               |                |              |
| Period                                       | Age Group | Smoking Group | N     | %     | Ever Quit (N) | Ever Quit % | Mean Yrs Quit | Short Term (n) | Short Term % |
| 5                                            | 20-24     | Never Any     | 5794  | 69.39 |               |             |               |                |              |
| 5                                            | 20-24     | CC            | 862   | 10.32 | 0             | 0.00        |               |                |              |
| 5                                            | 20-24     | Ecig          | 1209  | 14.48 |               |             |               |                |              |
| 5                                            | 20-24     | Dual          | 0     | 0.00  |               |             |               |                |              |
| 5                                            | 20-24     | Former        | 485   | 5.81  |               |             | 3.05          | 132            | 27.22        |
| Year of Follow-up: 1995, Age Group: 25-29    |           |               |       |       |               |             |               |                |              |
| Period                                       | Age Group | Smoking Group | N     | %     | Ever Quit (N) | Ever Quit % | Mean Yrs Quit | Short Term (n) | Short Term % |
| 5                                            | 25-29     | Never Any     | 5313  | 60.42 |               |             |               |                |              |
| 5                                            | 25-29     | CC            | 1062  | 12.08 | 0             | 0.00        |               |                |              |
| 5                                            | 25-29     | Ecig          | 1374  | 15.63 |               |             |               |                |              |
| 5                                            | 25-29     | Dual          | 0     | 0.00  |               |             |               |                |              |
| 5                                            | 25-29     | Former        | 1044  | 11.87 |               |             | 5.84          | 67             | 6.42         |
| Year of Follow-up: 1995, Age Group: 30-34    |           |               |       |       |               |             |               |                |              |
| Period                                       | Age Group | Smoking Group | N     | %     | Ever Quit (N) | Ever Quit % | Mean Yrs Quit | Short Term (n) | Short Term % |

**Results for PHIM for Run 8 (Sensitivity\_Analysis\_3.RTF)**

|                                              |           |               |      |       |               |             |               |                |              |
|----------------------------------------------|-----------|---------------|------|-------|---------------|-------------|---------------|----------------|--------------|
| 5                                            | 30-34     | Never Any     | 5304 | 52.63 |               |             |               |                |              |
| 5                                            | 30-34     | CC            | 1373 | 13.62 | 0             | 0.00        |               |                |              |
| 5                                            | 30-34     | Ecig          | 1781 | 17.67 |               |             |               |                |              |
| 5                                            | 30-34     | Dual          | 0    | 0.00  |               |             |               |                |              |
| 5                                            | 30-34     | Former        | 1620 | 16.07 |               |             | 8.07          | 78             | 4.81         |
| Year of Follow-up: 1995, Age Group: 35-39    |           |               |      |       |               |             |               |                |              |
| Period                                       | Age Group | Smoking Group | N    | %     | Ever Quit (N) | Ever Quit % | Mean Yrs Quit | Short Term (n) | Short Term % |
| 5                                            | 35-39     | Never Any     | 5278 | 50.27 |               |             |               |                |              |
| 5                                            | 35-39     | CC            | 1410 | 13.43 | 0             | 0.00        |               |                |              |
| 5                                            | 35-39     | Ecig          | 1727 | 16.45 |               |             |               |                |              |
| 5                                            | 35-39     | Dual          | 0    | 0.00  |               |             |               |                |              |
| 5                                            | 35-39     | Former        | 2084 | 19.85 |               |             | 8.68          | 75             | 3.60         |
| Year of Follow-up: 1995, Age Group: 40-44    |           |               |      |       |               |             |               |                |              |
| Period                                       | Age Group | Smoking Group | N    | %     | Ever Quit (N) | Ever Quit % | Mean Yrs Quit | Short Term (n) | Short Term % |
| 5                                            | 40-44     | Never Any     | 5018 | 52.27 |               |             |               |                |              |
| 5                                            | 40-44     | CC            | 1135 | 11.82 | 0             | 0.00        |               |                |              |
| 5                                            | 40-44     | Ecig          | 1319 | 13.74 |               |             |               |                |              |
| 5                                            | 40-44     | Dual          | 0    | 0.00  |               |             |               |                |              |
| 5                                            | 40-44     | Former        | 2128 | 22.17 |               |             | 11.90         | 106            | 4.98         |
| Year of Follow-up: 1995, Age Group: 45-49    |           |               |      |       |               |             |               |                |              |
| Period                                       | Age Group | Smoking Group | N    | %     | Ever Quit (N) | Ever Quit % | Mean Yrs Quit | Short Term (n) | Short Term % |
| 5                                            | 45-49     | Never Any     | 4356 | 51.27 |               |             |               |                |              |
| 5                                            | 45-49     | CC            | 974  | 11.46 | 0             | 0.00        |               |                |              |
| 5                                            | 45-49     | Ecig          | 1120 | 13.18 |               |             |               |                |              |
| 5                                            | 45-49     | Dual          | 0    | 0.00  |               |             |               |                |              |
| 5                                            | 45-49     | Former        | 2047 | 24.09 |               |             | 10.73         | 158            | 7.72         |
| Year of Follow-up: 1995, Age Group: 50-54    |           |               |      |       |               |             |               |                |              |
| Period                                       | Age Group | Smoking Group | N    | %     | Ever Quit (N) | Ever Quit % | Mean Yrs Quit | Short Term (n) | Short Term % |
| 5                                            | 50-54     | Never Any     | 3116 | 47.67 |               |             |               |                |              |
| 5                                            | 50-54     | CC            | 739  | 11.31 | 0             | 0.00        |               |                |              |
| 5                                            | 50-54     | Ecig          | 804  | 12.30 |               |             |               |                |              |
| 5                                            | 50-54     | Dual          | 0    | 0.00  |               |             |               |                |              |
| 5                                            | 50-54     | Former        | 1877 | 28.72 |               |             | 14.76         | 154            | 8.20         |
| Year of Follow-up: 1995, Age Group: 55-59    |           |               |      |       |               |             |               |                |              |
| Period                                       | Age Group | Smoking Group | N    | %     | Ever Quit (N) | Ever Quit % | Mean Yrs Quit | Short Term (n) | Short Term % |
| 5                                            | 55-59     | Never Any     | 2684 | 48.50 |               |             |               |                |              |
| 5                                            | 55-59     | CC            | 722  | 13.05 | 0             | 0.00        |               |                |              |
| 5                                            | 55-59     | Ecig          | 610  | 11.02 |               |             |               |                |              |
| 5                                            | 55-59     | Dual          | 0    | 0.00  |               |             |               |                |              |
| 5                                            | 55-59     | Former        | 1518 | 27.43 |               |             | 15.68         | 106            | 6.98         |
| Year of Follow-up: 1995, Age Group: 60-64    |           |               |      |       |               |             |               |                |              |
| Period                                       | Age Group | Smoking Group | N    | %     | Ever Quit (N) | Ever Quit % | Mean Yrs Quit | Short Term (n) | Short Term % |
| 5                                            | 60-64     | Never Any     | 2732 | 51.90 |               |             |               |                |              |
| 5                                            | 60-64     | CC            | 633  | 12.03 | 0             | 0.00        |               |                |              |
| 5                                            | 60-64     | Ecig          | 430  | 8.17  |               |             |               |                |              |
| 5                                            | 60-64     | Dual          | 0    | 0.00  |               |             |               |                |              |
| 5                                            | 60-64     | Former        | 1469 | 27.91 |               |             | 19.04         | 98             | 6.67         |
| Year of Follow-up: 1995, Age Group: 65-69    |           |               |      |       |               |             |               |                |              |
| Period                                       | Age Group | Smoking Group | N    | %     | Ever Quit (N) | Ever Quit % | Mean Yrs Quit | Short Term (n) | Short Term % |
| 5                                            | 65-69     | Never Any     | 3078 | 55.72 |               |             |               |                |              |
| 5                                            | 65-69     | CC            | 602  | 10.90 | 0             | 0.00        |               |                |              |
| 5                                            | 65-69     | Ecig          | 360  | 6.52  |               |             |               |                |              |
| 5                                            | 65-69     | Dual          | 0    | 0.00  |               |             |               |                |              |
| 5                                            | 65-69     | Former        | 1484 | 26.86 |               |             | 19.17         | 117            | 7.88         |
| Year of Follow-up: 1995, Age Group: 70-74    |           |               |      |       |               |             |               |                |              |
| Period                                       | Age Group | Smoking Group | N    | %     | Ever Quit (N) | Ever Quit % | Mean Yrs Quit | Short Term (n) | Short Term % |
| 5                                            | 70-74     | Never Any     | 3042 | 57.36 |               |             |               |                |              |
| 5                                            | 70-74     | CC            | 577  | 10.88 | 0             | 0.00        |               |                |              |
| 5                                            | 70-74     | Ecig          | 175  | 3.30  |               |             |               |                |              |
| 5                                            | 70-74     | Dual          | 0    | 0.00  |               |             |               |                |              |
| 5                                            | 70-74     | Former        | 1509 | 28.46 |               |             | 22.13         | 89             | 5.90         |
| Year of Follow-up: 1995, Age Group: 75-79    |           |               |      |       |               |             |               |                |              |
| Period                                       | Age Group | Smoking Group | N    | %     | Ever Quit (N) | Ever Quit % | Mean Yrs Quit | Short Term (n) | Short Term % |
| 5                                            | 75-79     | Never Any     | 2738 | 61.05 |               |             |               |                |              |
| 5                                            | 75-79     | CC            | 337  | 7.51  | 0             | 0.00        |               |                |              |
| 5                                            | 75-79     | Ecig          | 96   | 2.14  |               |             |               |                |              |
| 5                                            | 75-79     | Dual          | 0    | 0.00  |               |             |               |                |              |
| 5                                            | 75-79     | Former        | 1314 | 29.30 |               |             | 25.77         | 73             | 5.56         |
| Year of Follow-up: 2000, Age Group: All Ages |           |               |      |       |               |             |               |                |              |

**Results for PHIM for Run 8 (Sensitivity\_Analysis\_3.RTF)**

| Period                                    | Age Group | Smoking Group | N     | %     | Ever Quit (N) | Ever Quit % | Mean Yrs Quit | Short Term (n) | Short Term % |
|-------------------------------------------|-----------|---------------|-------|-------|---------------|-------------|---------------|----------------|--------------|
| 10                                        | All Ages  | Never Any     | 50423 | 54.86 |               |             |               |                |              |
| 10                                        | All Ages  | CC            | 4595  | 5.00  | 0             | 0.00        |               |                |              |
| 10                                        | All Ages  | Ecig          | 14331 | 15.59 |               |             |               |                |              |
| 10                                        | All Ages  | Dual          | 0     | 0.00  |               |             |               |                |              |
| 10                                        | All Ages  | Former        | 22559 | 24.55 |               |             | 14.40         | 2154           | 9.55         |
| Year of Follow-up: 2000, Age Group: 18-19 |           |               |       |       |               |             |               |                |              |
| Period                                    | Age Group | Smoking Group | N     | %     | Ever Quit (N) | Ever Quit % | Mean Yrs Quit | Short Term (n) | Short Term % |
| 10                                        | 18-19     | Never Any     | 0     | .     |               |             |               |                |              |
| 10                                        | 18-19     | CC            | 0     | .     | 0             | .           |               |                |              |
| 10                                        | 18-19     | Ecig          | 0     | .     |               |             |               |                |              |
| 10                                        | 18-19     | Dual          | 0     | .     |               |             |               |                |              |
| 10                                        | 18-19     | Former        | 0     | .     |               |             |               | 0              | .            |
| Year of Follow-up: 2000, Age Group: 20-24 |           |               |       |       |               |             |               |                |              |
| Period                                    | Age Group | Smoking Group | N     | %     | Ever Quit (N) | Ever Quit % | Mean Yrs Quit | Short Term (n) | Short Term % |
| 10                                        | 20-24     | Never Any     | 5128  | 64.67 |               |             |               |                |              |
| 10                                        | 20-24     | CC            | 370   | 4.67  | 0             | 0.00        |               |                |              |
| 10                                        | 20-24     | Ecig          | 1584  | 19.97 |               |             |               |                |              |
| 10                                        | 20-24     | Dual          | 0     | 0.00  |               |             |               |                |              |
| 10                                        | 20-24     | Former        | 848   | 10.69 |               |             | 3.50          | 230            | 27.12        |
| Year of Follow-up: 2000, Age Group: 25-29 |           |               |       |       |               |             |               |                |              |
| Period                                    | Age Group | Smoking Group | N     | %     | Ever Quit (N) | Ever Quit % | Mean Yrs Quit | Short Term (n) | Short Term % |
| 10                                        | 25-29     | Never Any     | 5493  | 65.78 |               |             |               |                |              |
| 10                                        | 25-29     | CC            | 400   | 4.79  | 0             | 0.00        |               |                |              |
| 10                                        | 25-29     | Ecig          | 1555  | 18.62 |               |             |               |                |              |
| 10                                        | 25-29     | Dual          | 0     | 0.00  |               |             |               |                |              |
| 10                                        | 25-29     | Former        | 902   | 10.80 |               |             | 5.22          | 163            | 18.07        |
| Year of Follow-up: 2000, Age Group: 30-34 |           |               |       |       |               |             |               |                |              |
| Period                                    | Age Group | Smoking Group | N     | %     | Ever Quit (N) | Ever Quit % | Mean Yrs Quit | Short Term (n) | Short Term % |
| 10                                        | 30-34     | Never Any     | 5214  | 59.30 |               |             |               |                |              |
| 10                                        | 30-34     | CC            | 417   | 4.74  | 0             | 0.00        |               |                |              |
| 10                                        | 30-34     | Ecig          | 1818  | 20.68 |               |             |               |                |              |
| 10                                        | 30-34     | Dual          | 0     | 0.00  |               |             |               |                |              |
| 10                                        | 30-34     | Former        | 1344  | 15.28 |               |             | 8.83          | 124            | 9.23         |
| Year of Follow-up: 2000, Age Group: 35-39 |           |               |       |       |               |             |               |                |              |
| Period                                    | Age Group | Smoking Group | N     | %     | Ever Quit (N) | Ever Quit % | Mean Yrs Quit | Short Term (n) | Short Term % |
| 10                                        | 35-39     | Never Any     | 5284  | 52.43 |               |             |               |                |              |
| 10                                        | 35-39     | CC            | 561   | 5.57  | 0             | 0.00        |               |                |              |
| 10                                        | 35-39     | Ecig          | 2306  | 22.88 |               |             |               |                |              |
| 10                                        | 35-39     | Dual          | 0     | 0.00  |               |             |               |                |              |
| 10                                        | 35-39     | Former        | 1927  | 19.12 |               |             | 11.27         | 146            | 7.58         |
| Year of Follow-up: 2000, Age Group: 40-44 |           |               |       |       |               |             |               |                |              |
| Period                                    | Age Group | Smoking Group | N     | %     | Ever Quit (N) | Ever Quit % | Mean Yrs Quit | Short Term (n) | Short Term % |
| 10                                        | 40-44     | Never Any     | 5278  | 50.27 |               |             |               |                |              |
| 10                                        | 40-44     | CC            | 584   | 5.56  | 0             | 0.00        |               |                |              |
| 10                                        | 40-44     | Ecig          | 2185  | 20.81 |               |             |               |                |              |
| 10                                        | 40-44     | Dual          | 0     | 0.00  |               |             |               |                |              |
| 10                                        | 40-44     | Former        | 2452  | 23.35 |               |             | 11.87         | 177            | 7.22         |
| Year of Follow-up: 2000, Age Group: 45-49 |           |               |       |       |               |             |               |                |              |
| Period                                    | Age Group | Smoking Group | N     | %     | Ever Quit (N) | Ever Quit % | Mean Yrs Quit | Short Term (n) | Short Term % |
| 10                                        | 45-49     | Never Any     | 5018  | 52.27 |               |             |               |                |              |
| 10                                        | 45-49     | CC            | 446   | 4.65  | 0             | 0.00        |               |                |              |
| 10                                        | 45-49     | Ecig          | 1534  | 15.98 |               |             |               |                |              |
| 10                                        | 45-49     | Dual          | 0     | 0.00  |               |             |               |                |              |
| 10                                        | 45-49     | Former        | 2602  | 27.10 |               |             | 14.13         | 224            | 8.61         |
| Year of Follow-up: 2000, Age Group: 50-54 |           |               |       |       |               |             |               |                |              |
| Period                                    | Age Group | Smoking Group | N     | %     | Ever Quit (N) | Ever Quit % | Mean Yrs Quit | Short Term (n) | Short Term % |
| 10                                        | 50-54     | Never Any     | 4356  | 51.27 |               |             |               |                |              |
| 10                                        | 50-54     | CC            | 378   | 4.45  | 0             | 0.00        |               |                |              |
| 10                                        | 50-54     | Ecig          | 1148  | 13.51 |               |             |               |                |              |
| 10                                        | 50-54     | Dual          | 0     | 0.00  |               |             |               |                |              |
| 10                                        | 50-54     | Former        | 2615  | 30.78 |               |             | 12.73         | 238            | 9.10         |
| Year of Follow-up: 2000, Age Group: 55-59 |           |               |       |       |               |             |               |                |              |
| Period                                    | Age Group | Smoking Group | N     | %     | Ever Quit (N) | Ever Quit % | Mean Yrs Quit | Short Term (n) | Short Term % |
| 10                                        | 55-59     | Never Any     | 3116  | 47.67 |               |             |               |                |              |
| 10                                        | 55-59     | CC            | 283   | 4.33  | 0             | 0.00        |               |                |              |
| 10                                        | 55-59     | Ecig          | 802   | 12.27 |               |             |               |                |              |
| 10                                        | 55-59     | Dual          | 0     | 0.00  |               |             |               |                |              |

**Results for PHIM for Run 8 (Sensitivity\_Analysis\_3.RTF)**

| Year of Follow-up: 2000, Age Group: 60-64    | Period   | Age Group | Smoking Group | N     | %     | Ever Quit (N) | Ever Quit % | Mean Yrs Quit | Short Term (n) | Short Term % |
|----------------------------------------------|----------|-----------|---------------|-------|-------|---------------|-------------|---------------|----------------|--------------|
| 10                                           | 55-59    | Former    |               | 2335  | 35.73 |               |             | 16.25         | 189            | 8.09         |
| 10                                           | 60-64    | Never Any |               | 2684  | 48.50 |               |             |               |                |              |
| 10                                           | 60-64    | CC        |               | 334   | 6.04  | 0             | 0.00        |               |                |              |
| 10                                           | 60-64    | Ecig      |               | 568   | 10.26 |               |             |               |                |              |
| 10                                           | 60-64    | Dual      |               | 0     | 0.00  |               |             |               |                |              |
| 10                                           | 60-64    | Former    |               | 1948  | 35.20 |               |             | 16.51         | 190            | 9.75         |
| Year of Follow-up: 2000, Age Group: 65-69    | Period   | Age Group | Smoking Group | N     | %     | Ever Quit (N) | Ever Quit % | Mean Yrs Quit | Short Term (n) | Short Term % |
| 10                                           | 65-69    | Never Any |               | 2732  | 51.90 |               |             |               |                |              |
| 10                                           | 65-69    | CC        |               | 280   | 5.32  | 0             | 0.00        |               |                |              |
| 10                                           | 65-69    | Ecig      |               | 364   | 6.91  |               |             |               |                |              |
| 10                                           | 65-69    | Dual      |               | 0     | 0.00  |               |             |               |                |              |
| 10                                           | 65-69    | Former    |               | 1888  | 35.87 |               |             | 19.11         | 179            | 9.48         |
| Year of Follow-up: 2000, Age Group: 70-74    | Period   | Age Group | Smoking Group | N     | %     | Ever Quit (N) | Ever Quit % | Mean Yrs Quit | Short Term (n) | Short Term % |
| 10                                           | 70-74    | Never Any |               | 3078  | 55.72 |               |             |               |                |              |
| 10                                           | 70-74    | CC        |               | 274   | 4.96  | 0             | 0.00        |               |                |              |
| 10                                           | 70-74    | Ecig      |               | 301   | 5.45  |               |             |               |                |              |
| 10                                           | 70-74    | Dual      |               | 0     | 0.00  |               |             |               |                |              |
| 10                                           | 70-74    | Former    |               | 1871  | 33.87 |               |             | 19.56         | 172            | 9.19         |
| Year of Follow-up: 2000, Age Group: 75-79    | Period   | Age Group | Smoking Group | N     | %     | Ever Quit (N) | Ever Quit % | Mean Yrs Quit | Short Term (n) | Short Term % |
| 10                                           | 75-79    | Never Any |               | 3042  | 57.36 |               |             |               |                |              |
| 10                                           | 75-79    | CC        |               | 268   | 5.05  | 0             | 0.00        |               |                |              |
| 10                                           | 75-79    | Ecig      |               | 166   | 3.13  |               |             |               |                |              |
| 10                                           | 75-79    | Dual      |               | 0     | 0.00  |               |             |               |                |              |
| 10                                           | 75-79    | Former    |               | 1827  | 34.45 |               |             | 22.75         | 122            | 6.68         |
| Year of Follow-up: 2005, Age Group: All Ages | Period   | Age Group | Smoking Group | N     | %     | Ever Quit (N) | Ever Quit % | Mean Yrs Quit | Short Term (n) | Short Term % |
| 15                                           | All Ages | Never Any |               | 47002 | 54.27 |               |             |               |                |              |
| 15                                           | All Ages | CC        |               | 1890  | 2.18  | 0             | 0.00        |               |                |              |
| 15                                           | All Ages | Ecig      |               | 13626 | 15.73 |               |             |               |                |              |
| 15                                           | All Ages | Dual      |               | 0     | 0.00  |               |             |               |                |              |
| 15                                           | All Ages | Former    |               | 24087 | 27.81 |               |             | 16.37         | 1191           | 4.94         |
| Year of Follow-up: 2005, Age Group: 18-19    | Period   | Age Group | Smoking Group | N     | %     | Ever Quit (N) | Ever Quit % | Mean Yrs Quit | Short Term (n) | Short Term % |
| 15                                           | 18-19    | Never Any |               | 0     | .     |               |             |               |                |              |
| 15                                           | 18-19    | CC        |               | 0     | .     | 0             | .           |               |                |              |
| 15                                           | 18-19    | Ecig      |               | 0     | .     |               |             |               |                |              |
| 15                                           | 18-19    | Dual      |               | 0     | .     |               |             |               |                |              |
| 15                                           | 18-19    | Former    |               | 0     | .     |               |             | .             | 0              | .            |
| Year of Follow-up: 2005, Age Group: 20-24    | Period   | Age Group | Smoking Group | N     | %     | Ever Quit (N) | Ever Quit % | Mean Yrs Quit | Short Term (n) | Short Term % |
| 15                                           | 20-24    | Never Any |               | 0     | .     |               |             |               |                |              |
| 15                                           | 20-24    | CC        |               | 0     | .     | 0             | .           |               |                |              |
| 15                                           | 20-24    | Ecig      |               | 0     | .     |               |             |               |                |              |
| 15                                           | 20-24    | Dual      |               | 0     | .     |               |             |               |                |              |
| 15                                           | 20-24    | Former    |               | 0     | .     |               |             | .             | 0              | .            |
| Year of Follow-up: 2005, Age Group: 25-29    | Period   | Age Group | Smoking Group | N     | %     | Ever Quit (N) | Ever Quit % | Mean Yrs Quit | Short Term (n) | Short Term % |
| 15                                           | 25-29    | Never Any |               | 4860  | 61.29 |               |             |               |                |              |
| 15                                           | 25-29    | CC        |               | 166   | 2.09  | 0             | 0.00        |               |                |              |
| 15                                           | 25-29    | Ecig      |               | 1659  | 20.92 |               |             |               |                |              |
| 15                                           | 25-29    | Dual      |               | 0     | 0.00  |               |             |               |                |              |
| 15                                           | 25-29    | Former    |               | 1245  | 15.70 |               |             | 6.54          | 132            | 10.60        |
| Year of Follow-up: 2005, Age Group: 30-34    | Period   | Age Group | Smoking Group | N     | %     | Ever Quit (N) | Ever Quit % | Mean Yrs Quit | Short Term (n) | Short Term % |
| 15                                           | 30-34    | Never Any |               | 5407  | 64.75 |               |             |               |                |              |
| 15                                           | 30-34    | CC        |               | 149   | 1.78  | 0             | 0.00        |               |                |              |
| 15                                           | 30-34    | Ecig      |               | 1614  | 19.33 |               |             |               |                |              |
| 15                                           | 30-34    | Dual      |               | 0     | 0.00  |               |             |               |                |              |
| 15                                           | 30-34    | Former    |               | 1180  | 14.13 |               |             | 8.28          | 112            | 9.49         |
| Year of Follow-up: 2005, Age Group: 35-39    | Period   | Age Group | Smoking Group | N     | %     | Ever Quit (N) | Ever Quit % | Mean Yrs Quit | Short Term (n) | Short Term % |
| 15                                           | 35-39    | Never Any |               | 5189  | 59.01 |               |             |               |                |              |
| 15                                           | 35-39    | CC        |               | 167   | 1.90  | 0             | 0.00        |               |                |              |

**Results for PHIM for Run 8 (Sensitivity\_Analysis\_3.RTF)**

|                                              |           |               |       |       |               |             |               |                |              |
|----------------------------------------------|-----------|---------------|-------|-------|---------------|-------------|---------------|----------------|--------------|
| 15                                           | 35-39     | Ecig          | 1846  | 20.99 |               |             |               |                |              |
| 15                                           | 35-39     | Dual          | 0     | 0.00  |               |             |               |                |              |
| 15                                           | 35-39     | Former        | 1591  | 18.09 |               |             | 11.99         | 102            | 6.41         |
| Year of Follow-up: 2005, Age Group: 40-44    |           |               |       |       |               |             |               |                |              |
| Period                                       | Age Group | Smoking Group | N     | %     | Ever Quit (N) | Ever Quit % | Mean Yrs Quit | Short Term (n) | Short Term % |
| 15                                           | 40-44     | Never Any     | 5284  | 52.43 |               |             |               |                |              |
| 15                                           | 40-44     | CC            | 238   | 2.36  | 0             | 0.00        |               |                |              |
| 15                                           | 40-44     | Ecig          | 2308  | 22.90 |               |             |               |                |              |
| 15                                           | 40-44     | Dual          | 0     | 0.00  |               |             |               |                |              |
| 15                                           | 40-44     | Former        | 2248  | 22.31 |               |             | 14.22         | 143            | 6.36         |
| Year of Follow-up: 2005, Age Group: 45-49    |           |               |       |       |               |             |               |                |              |
| Period                                       | Age Group | Smoking Group | N     | %     | Ever Quit (N) | Ever Quit % | Mean Yrs Quit | Short Term (n) | Short Term % |
| 15                                           | 45-49     | Never Any     | 5278  | 50.27 |               |             |               |                |              |
| 15                                           | 45-49     | CC            | 237   | 2.26  | 0             | 0.00        |               |                |              |
| 15                                           | 45-49     | Ecig          | 2104  | 20.04 |               |             |               |                |              |
| 15                                           | 45-49     | Dual          | 0     | 0.00  |               |             |               |                |              |
| 15                                           | 45-49     | Former        | 2880  | 27.43 |               |             | 14.67         | 164            | 5.69         |
| Year of Follow-up: 2005, Age Group: 50-54    |           |               |       |       |               |             |               |                |              |
| Period                                       | Age Group | Smoking Group | N     | %     | Ever Quit (N) | Ever Quit % | Mean Yrs Quit | Short Term (n) | Short Term % |
| 15                                           | 50-54     | Never Any     | 5018  | 52.27 |               |             |               |                |              |
| 15                                           | 50-54     | CC            | 191   | 1.99  | 0             | 0.00        |               |                |              |
| 15                                           | 50-54     | Ecig          | 1416  | 14.75 |               |             |               |                |              |
| 15                                           | 50-54     | Dual          | 0     | 0.00  |               |             |               |                |              |
| 15                                           | 50-54     | Former        | 2975  | 30.99 |               |             | 17.03         | 114            | 3.83         |
| Year of Follow-up: 2005, Age Group: 55-59    |           |               |       |       |               |             |               |                |              |
| Period                                       | Age Group | Smoking Group | N     | %     | Ever Quit (N) | Ever Quit % | Mean Yrs Quit | Short Term (n) | Short Term % |
| 15                                           | 55-59     | Never Any     | 4356  | 51.27 |               |             |               |                |              |
| 15                                           | 55-59     | CC            | 166   | 1.95  | 0             | 0.00        |               |                |              |
| 15                                           | 55-59     | Ecig          | 1044  | 12.29 |               |             |               |                |              |
| 15                                           | 55-59     | Dual          | 0     | 0.00  |               |             |               |                |              |
| 15                                           | 55-59     | Former        | 2931  | 34.49 |               |             | 16.08         | 96             | 3.28         |
| Year of Follow-up: 2005, Age Group: 60-64    |           |               |       |       |               |             |               |                |              |
| Period                                       | Age Group | Smoking Group | N     | %     | Ever Quit (N) | Ever Quit % | Mean Yrs Quit | Short Term (n) | Short Term % |
| 15                                           | 60-64     | Never Any     | 3116  | 47.67 |               |             |               |                |              |
| 15                                           | 60-64     | CC            | 131   | 2.00  | 0             | 0.00        |               |                |              |
| 15                                           | 60-64     | Ecig          | 686   | 10.50 |               |             |               |                |              |
| 15                                           | 60-64     | Dual          | 0     | 0.00  |               |             |               |                |              |
| 15                                           | 60-64     | Former        | 2603  | 39.83 |               |             | 19.27         | 110            | 4.23         |
| Year of Follow-up: 2005, Age Group: 65-69    |           |               |       |       |               |             |               |                |              |
| Period                                       | Age Group | Smoking Group | N     | %     | Ever Quit (N) | Ever Quit % | Mean Yrs Quit | Short Term (n) | Short Term % |
| 15                                           | 65-69     | Never Any     | 2684  | 48.50 |               |             |               |                |              |
| 15                                           | 65-69     | CC            | 160   | 2.89  | 0             | 0.00        |               |                |              |
| 15                                           | 65-69     | Ecig          | 452   | 8.17  |               |             |               |                |              |
| 15                                           | 65-69     | Dual          | 0     | 0.00  |               |             |               |                |              |
| 15                                           | 65-69     | Former        | 2238  | 40.44 |               |             | 19.04         | 80             | 3.57         |
| Year of Follow-up: 2005, Age Group: 70-74    |           |               |       |       |               |             |               |                |              |
| Period                                       | Age Group | Smoking Group | N     | %     | Ever Quit (N) | Ever Quit % | Mean Yrs Quit | Short Term (n) | Short Term % |
| 15                                           | 70-74     | Never Any     | 2732  | 51.90 |               |             |               |                |              |
| 15                                           | 70-74     | CC            | 139   | 2.64  | 0             | 0.00        |               |                |              |
| 15                                           | 70-74     | Ecig          | 297   | 5.64  |               |             |               |                |              |
| 15                                           | 70-74     | Dual          | 0     | 0.00  |               |             |               |                |              |
| 15                                           | 70-74     | Former        | 2096  | 39.82 |               |             | 21.94         | 74             | 3.53         |
| Year of Follow-up: 2005, Age Group: 75-79    |           |               |       |       |               |             |               |                |              |
| Period                                       | Age Group | Smoking Group | N     | %     | Ever Quit (N) | Ever Quit % | Mean Yrs Quit | Short Term (n) | Short Term % |
| 15                                           | 75-79     | Never Any     | 3078  | 55.72 |               |             |               |                |              |
| 15                                           | 75-79     | CC            | 146   | 2.64  | 0             | 0.00        |               |                |              |
| 15                                           | 75-79     | Ecig          | 200   | 3.62  |               |             |               |                |              |
| 15                                           | 75-79     | Dual          | 0     | 0.00  |               |             |               |                |              |
| 15                                           | 75-79     | Former        | 2100  | 38.02 |               |             | 22.14         | 64             | 3.05         |
| Year of Follow-up: 2010, Age Group: All Ages |           |               |       |       |               |             |               |                |              |
| Period                                       | Age Group | Smoking Group | N     | %     | Ever Quit (N) | Ever Quit % | Mean Yrs Quit | Short Term (n) | Short Term % |
| 20                                           | All Ages  | Never Any     | 43759 | 53.97 |               |             |               |                |              |
| 20                                           | All Ages  | CC            | 765   | 0.94  | 0             | 0.00        |               |                |              |
| 20                                           | All Ages  | Ecig          | 11285 | 13.92 |               |             |               |                |              |
| 20                                           | All Ages  | Dual          | 0     | 0.00  |               |             |               |                |              |
| 20                                           | All Ages  | Former        | 25272 | 31.17 |               |             | 18.36         | 1351           | 5.35         |
| Year of Follow-up: 2010, Age Group: 18-19    |           |               |       |       |               |             |               |                |              |
| Period                                       | Age Group | Smoking Group | N     | %     | Ever Quit (N) | Ever Quit % | Mean Yrs Quit | Short Term (n) | Short Term % |

**Results for PHIM for Run 8 (Sensitivity\_Analysis\_3.RTF)**

|                                           |           |               |      |       |               |             |               |                |              |
|-------------------------------------------|-----------|---------------|------|-------|---------------|-------------|---------------|----------------|--------------|
| 20                                        | 18-19     | Never Any     | 0    | .     |               |             |               |                |              |
| 20                                        | 18-19     | CC            | 0    | .     | 0             | .           |               |                |              |
| 20                                        | 18-19     | Ecig          | 0    | .     |               |             |               |                |              |
| 20                                        | 18-19     | Dual          | 0    | .     |               |             |               |                |              |
| 20                                        | 18-19     | Former        | 0    | .     |               |             | 0             | .              |              |
| Year of Follow-up: 2010, Age Group: 20-24 |           |               |      |       |               |             |               |                |              |
| Period                                    | Age Group | Smoking Group | N    | %     | Ever Quit (N) | Ever Quit % | Mean Yrs Quit | Short Term (n) | Short Term % |
| 20                                        | 20-24     | Never Any     | 0    | .     |               |             |               |                |              |
| 20                                        | 20-24     | CC            | 0    | .     | 0             | .           |               |                |              |
| 20                                        | 20-24     | Ecig          | 0    | .     |               |             |               |                |              |
| 20                                        | 20-24     | Dual          | 0    | .     |               |             |               |                |              |
| 20                                        | 20-24     | Former        | 0    | .     |               |             |               | 0              | .            |
| Year of Follow-up: 2010, Age Group: 25-29 |           |               |      |       |               |             |               |                |              |
| Period                                    | Age Group | Smoking Group | N    | %     | Ever Quit (N) | Ever Quit % | Mean Yrs Quit | Short Term (n) | Short Term % |
| 20                                        | 25-29     | Never Any     | 0    | .     |               |             |               |                |              |
| 20                                        | 25-29     | CC            | 0    | .     | 0             | .           |               |                |              |
| 20                                        | 25-29     | Ecig          | 0    | .     |               |             |               |                |              |
| 20                                        | 25-29     | Dual          | 0    | .     |               |             |               |                |              |
| 20                                        | 25-29     | Former        | 0    | .     |               |             |               | 0              | .            |
| Year of Follow-up: 2010, Age Group: 30-34 |           |               |      |       |               |             |               |                |              |
| Period                                    | Age Group | Smoking Group | N    | %     | Ever Quit (N) | Ever Quit % | Mean Yrs Quit | Short Term (n) | Short Term % |
| 20                                        | 30-34     | Never Any     | 4743 | 59.81 |               |             |               |                |              |
| 20                                        | 30-34     | CC            | 65   | 0.82  | 0             | 0.00        |               |                |              |
| 20                                        | 30-34     | Ecig          | 1521 | 19.18 |               |             |               |                |              |
| 20                                        | 30-34     | Dual          | 0    | 0.00  |               |             |               |                |              |
| 20                                        | 30-34     | Former        | 1601 | 20.19 |               |             | 9.37          | 163            | 10.18        |
| Year of Follow-up: 2010, Age Group: 35-39 |           |               |      |       |               |             |               |                |              |
| Period                                    | Age Group | Smoking Group | N    | %     | Ever Quit (N) | Ever Quit % | Mean Yrs Quit | Short Term (n) | Short Term % |
| 20                                        | 35-39     | Never Any     | 5359 | 64.18 |               |             |               |                |              |
| 20                                        | 35-39     | CC            | 58   | 0.69  | 0             | 0.00        |               |                |              |
| 20                                        | 35-39     | Ecig          | 1430 | 17.13 |               |             |               |                |              |
| 20                                        | 35-39     | Dual          | 0    | 0.00  |               |             |               |                |              |
| 20                                        | 35-39     | Former        | 1503 | 18.00 |               |             | 10.84         | 122            | 8.12         |
| Year of Follow-up: 2010, Age Group: 40-44 |           |               |      |       |               |             |               |                |              |
| Period                                    | Age Group | Smoking Group | N    | %     | Ever Quit (N) | Ever Quit % | Mean Yrs Quit | Short Term (n) | Short Term % |
| 20                                        | 40-44     | Never Any     | 5189 | 59.01 |               |             |               |                |              |
| 20                                        | 40-44     | CC            | 64   | 0.73  | 0             | 0.00        |               |                |              |
| 20                                        | 40-44     | Ecig          | 1606 | 18.26 |               |             |               |                |              |
| 20                                        | 40-44     | Dual          | 0    | 0.00  |               |             |               |                |              |
| 20                                        | 40-44     | Former        | 1934 | 21.99 |               |             | 14.31         | 150            | 7.76         |
| Year of Follow-up: 2010, Age Group: 45-49 |           |               |      |       |               |             |               |                |              |
| Period                                    | Age Group | Smoking Group | N    | %     | Ever Quit (N) | Ever Quit % | Mean Yrs Quit | Short Term (n) | Short Term % |
| 20                                        | 45-49     | Never Any     | 5284 | 52.43 |               |             |               |                |              |
| 20                                        | 45-49     | CC            | 105  | 1.04  | 0             | 0.00        |               |                |              |
| 20                                        | 45-49     | Ecig          | 2031 | 20.15 |               |             |               |                |              |
| 20                                        | 45-49     | Dual          | 0    | 0.00  |               |             |               |                |              |
| 20                                        | 45-49     | Former        | 2658 | 26.37 |               |             | 16.54         | 173            | 6.51         |
| Year of Follow-up: 2010, Age Group: 50-54 |           |               |      |       |               |             |               |                |              |
| Period                                    | Age Group | Smoking Group | N    | %     | Ever Quit (N) | Ever Quit % | Mean Yrs Quit | Short Term (n) | Short Term % |
| 20                                        | 50-54     | Never Any     | 5278 | 50.27 |               |             |               |                |              |
| 20                                        | 50-54     | CC            | 101  | 0.96  | 0             | 0.00        |               |                |              |
| 20                                        | 50-54     | Ecig          | 1796 | 17.11 |               |             |               |                |              |
| 20                                        | 50-54     | Dual          | 0    | 0.00  |               |             |               |                |              |
| 20                                        | 50-54     | Former        | 3324 | 31.66 |               |             | 17.29         | 200            | 6.02         |
| Year of Follow-up: 2010, Age Group: 55-59 |           |               |      |       |               |             |               |                |              |
| Period                                    | Age Group | Smoking Group | N    | %     | Ever Quit (N) | Ever Quit % | Mean Yrs Quit | Short Term (n) | Short Term % |
| 20                                        | 55-59     | Never Any     | 5018 | 52.27 |               |             |               |                |              |
| 20                                        | 55-59     | CC            | 91   | 0.95  | 0             | 0.00        |               |                |              |
| 20                                        | 55-59     | Ecig          | 1169 | 12.18 |               |             |               |                |              |
| 20                                        | 55-59     | Dual          | 0    | 0.00  |               |             |               |                |              |
| 20                                        | 55-59     | Former        | 3322 | 34.60 |               |             | 19.95         | 123            | 3.70         |
| Year of Follow-up: 2010, Age Group: 60-64 |           |               |      |       |               |             |               |                |              |
| Period                                    | Age Group | Smoking Group | N    | %     | Ever Quit (N) | Ever Quit % | Mean Yrs Quit | Short Term (n) | Short Term % |
| 20                                        | 60-64     | Never Any     | 4356 | 51.27 |               |             |               |                |              |
| 20                                        | 60-64     | CC            | 71   | 0.84  | 0             | 0.00        |               |                |              |
| 20                                        | 60-64     | Ecig          | 789  | 9.29  |               |             |               |                |              |
| 20                                        | 60-64     | Dual          | 0    | 0.00  |               |             |               |                |              |
| 20                                        | 60-64     | Former        | 3281 | 38.61 |               |             | 19.01         | 166            | 5.06         |
| Year of Follow-up: 2010, Age Group: 65-69 |           |               |      |       |               |             |               |                |              |

**Results for PHIM for Run 8 (Sensitivity\_Analysis\_3.RTF)**

| Period                                       | Age Group | Smoking Group | N     | %     | Ever Quit (N) | Ever Quit % | Mean Yrs Quit | Short Term (n) | Short Term % |
|----------------------------------------------|-----------|---------------|-------|-------|---------------|-------------|---------------|----------------|--------------|
| 20                                           | 65-69     | Never Any     | 3116  | 47.67 |               |             |               |                |              |
| 20                                           | 65-69     | CC            | 47    | 0.72  | 0             | 0.00        |               |                |              |
| 20                                           | 65-69     | Ecig          | 459   | 7.02  |               |             |               |                |              |
| 20                                           | 65-69     | Dual          | 0     | 0.00  |               |             |               |                |              |
| 20                                           | 65-69     | Former        | 2914  | 44.58 |               |             | 21.91         | 100            | 3.43         |
| Year of Follow-up: 2010, Age Group: 70-74    |           |               |       |       |               |             |               |                |              |
| Period                                       | Age Group | Smoking Group | N     | %     | Ever Quit (N) | Ever Quit % | Mean Yrs Quit | Short Term (n) | Short Term % |
| 20                                           | 70-74     | Never Any     | 2684  | 48.50 |               |             |               |                |              |
| 20                                           | 70-74     | CC            | 88    | 1.59  | 0             | 0.00        |               |                |              |
| 20                                           | 70-74     | Ecig          | 312   | 5.64  |               |             |               |                |              |
| 20                                           | 70-74     | Dual          | 0     | 0.00  |               |             |               |                |              |
| 20                                           | 70-74     | Former        | 2450  | 44.27 |               |             | 22.13         | 83             | 3.39         |
| Year of Follow-up: 2010, Age Group: 75-79    |           |               |       |       |               |             |               |                |              |
| Period                                       | Age Group | Smoking Group | N     | %     | Ever Quit (N) | Ever Quit % | Mean Yrs Quit | Short Term (n) | Short Term % |
| 20                                           | 75-79     | Never Any     | 2732  | 51.90 |               |             |               |                |              |
| 20                                           | 75-79     | CC            | 75    | 1.42  | 0             | 0.00        |               |                |              |
| 20                                           | 75-79     | Ecig          | 172   | 3.27  |               |             |               |                |              |
| 20                                           | 75-79     | Dual          | 0     | 0.00  |               |             |               |                |              |
| 20                                           | 75-79     | Former        | 2285  | 43.41 |               |             | 24.89         | 71             | 3.11         |
| Year of Follow-up: 2015, Age Group: All Ages |           |               |       |       |               |             |               |                |              |
| Period                                       | Age Group | Smoking Group | N     | %     | Ever Quit (N) | Ever Quit % | Mean Yrs Quit | Short Term (n) | Short Term % |
| 25                                           | All Ages  | Never Any     | 41010 | 54.09 |               |             |               |                |              |
| 25                                           | All Ages  | CC            | 340   | 0.45  | 0             | 0.00        |               |                |              |
| 25                                           | All Ages  | Ecig          | 8588  | 11.33 |               |             |               |                |              |
| 25                                           | All Ages  | Dual          | 0     | 0.00  |               |             |               |                |              |
| 25                                           | All Ages  | Former        | 25879 | 34.13 |               |             | 20.41         | 1081           | 4.18         |
| Year of Follow-up: 2015, Age Group: 18-19    |           |               |       |       |               |             |               |                |              |
| Period                                       | Age Group | Smoking Group | N     | %     | Ever Quit (N) | Ever Quit % | Mean Yrs Quit | Short Term (n) | Short Term % |
| 25                                           | 18-19     | Never Any     | 0     | .     |               |             |               |                |              |
| 25                                           | 18-19     | CC            | 0     | .     | 0             | .           |               |                |              |
| 25                                           | 18-19     | Ecig          | 0     | .     |               |             |               |                |              |
| 25                                           | 18-19     | Dual          | 0     | .     |               |             |               |                |              |
| 25                                           | 18-19     | Former        | 0     | .     |               |             | .             | 0              | .            |
| Year of Follow-up: 2015, Age Group: 20-24    |           |               |       |       |               |             |               |                |              |
| Period                                       | Age Group | Smoking Group | N     | %     | Ever Quit (N) | Ever Quit % | Mean Yrs Quit | Short Term (n) | Short Term % |
| 25                                           | 20-24     | Never Any     | 0     | .     |               |             |               |                |              |
| 25                                           | 20-24     | CC            | 0     | .     | 0             | .           |               |                |              |
| 25                                           | 20-24     | Ecig          | 0     | .     |               |             |               |                |              |
| 25                                           | 20-24     | Dual          | 0     | .     |               |             |               |                |              |
| 25                                           | 20-24     | Former        | 0     | .     |               |             | .             | 0              | .            |
| Year of Follow-up: 2015, Age Group: 25-29    |           |               |       |       |               |             |               |                |              |
| Period                                       | Age Group | Smoking Group | N     | %     | Ever Quit (N) | Ever Quit % | Mean Yrs Quit | Short Term (n) | Short Term % |
| 25                                           | 25-29     | Never Any     | 0     | .     |               |             |               |                |              |
| 25                                           | 25-29     | CC            | 0     | .     | 0             | .           |               |                |              |
| 25                                           | 25-29     | Ecig          | 0     | .     |               |             |               |                |              |
| 25                                           | 25-29     | Dual          | 0     | .     |               |             |               |                |              |
| 25                                           | 25-29     | Former        | 0     | .     |               |             | .             | 0              | .            |
| Year of Follow-up: 2015, Age Group: 30-34    |           |               |       |       |               |             |               |                |              |
| Period                                       | Age Group | Smoking Group | N     | %     | Ever Quit (N) | Ever Quit % | Mean Yrs Quit | Short Term (n) | Short Term % |
| 25                                           | 30-34     | Never Any     | 0     | .     |               |             |               |                |              |
| 25                                           | 30-34     | CC            | 0     | .     | 0             | .           |               |                |              |
| 25                                           | 30-34     | Ecig          | 0     | .     |               |             |               |                |              |
| 25                                           | 30-34     | Dual          | 0     | .     |               |             |               |                |              |
| 25                                           | 30-34     | Former        | 0     | .     |               |             | .             | 0              | .            |
| Year of Follow-up: 2015, Age Group: 35-39    |           |               |       |       |               |             |               |                |              |
| Period                                       | Age Group | Smoking Group | N     | %     | Ever Quit (N) | Ever Quit % | Mean Yrs Quit | Short Term (n) | Short Term % |
| 25                                           | 35-39     | Never Any     | 4726  | 59.60 |               |             |               |                |              |
| 25                                           | 35-39     | CC            | 20    | 0.25  | 0             | 0.00        |               |                |              |
| 25                                           | 35-39     | Ecig          | 1148  | 14.48 |               |             |               |                |              |
| 25                                           | 35-39     | Dual          | 0     | 0.00  |               |             |               |                |              |
| 25                                           | 35-39     | Former        | 2036  | 25.67 |               |             | 11.76         | 150            | 7.37         |
| Year of Follow-up: 2015, Age Group: 40-44    |           |               |       |       |               |             |               |                |              |
| Period                                       | Age Group | Smoking Group | N     | %     | Ever Quit (N) | Ever Quit % | Mean Yrs Quit | Short Term (n) | Short Term % |
| 25                                           | 40-44     | Never Any     | 5359  | 64.18 |               |             |               |                |              |
| 25                                           | 40-44     | CC            | 33    | 0.40  | 0             | 0.00        |               |                |              |
| 25                                           | 40-44     | Ecig          | 1150  | 13.77 |               |             |               |                |              |
| 25                                           | 40-44     | Dual          | 0     | 0.00  |               |             |               |                |              |



**Results for PHIM for Run 8 (Sensitivity\_Analysis\_3.RTF)**

|                                              |           |               |       |       |               |             |               |                |              |
|----------------------------------------------|-----------|---------------|-------|-------|---------------|-------------|---------------|----------------|--------------|
| 25                                           | 40-44     | Former        | 1808  | 21.65 |               |             | 13.50         | 118            | 6.53         |
| Year of Follow-up: 2015, Age Group: 45-49    |           |               |       |       |               |             |               |                |              |
| Period                                       | Age Group | Smoking Group | N     | %     | Ever Quit (N) | Ever Quit % | Mean Yrs Quit | Short Term (n) | Short Term % |
| 25                                           | 45-49     | Never Any     | 5189  | 59.01 |               |             |               |                |              |
| 25                                           | 45-49     | CC            | 32    | 0.36  | 0             | 0.00        |               |                |              |
| 25                                           | 45-49     | Ecig          | 1327  | 15.09 |               |             |               |                |              |
| 25                                           | 45-49     | Dual          | 0     | 0.00  |               |             |               |                |              |
| 25                                           | 45-49     | Former        | 2245  | 25.53 |               |             | 16.92         | 116            | 5.17         |
| Year of Follow-up: 2015, Age Group: 50-54    |           |               |       |       |               |             |               |                |              |
| Period                                       | Age Group | Smoking Group | N     | %     | Ever Quit (N) | Ever Quit % | Mean Yrs Quit | Short Term (n) | Short Term % |
| 25                                           | 50-54     | Never Any     | 5284  | 52.43 |               |             |               |                |              |
| 25                                           | 50-54     | CC            | 45    | 0.45  | 0             | 0.00        |               |                |              |
| 25                                           | 50-54     | Ecig          | 1654  | 16.41 |               |             |               |                |              |
| 25                                           | 50-54     | Dual          | 0     | 0.00  |               |             |               |                |              |
| 25                                           | 50-54     | Former        | 3095  | 30.71 |               |             | 18.76         | 209            | 6.75         |
| Year of Follow-up: 2015, Age Group: 55-59    |           |               |       |       |               |             |               |                |              |
| Period                                       | Age Group | Smoking Group | N     | %     | Ever Quit (N) | Ever Quit % | Mean Yrs Quit | Short Term (n) | Short Term % |
| 25                                           | 55-59     | Never Any     | 5278  | 50.27 |               |             |               |                |              |
| 25                                           | 55-59     | CC            | 37    | 0.35  | 0             | 0.00        |               |                |              |
| 25                                           | 55-59     | Ecig          | 1369  | 13.04 |               |             |               |                |              |
| 25                                           | 55-59     | Dual          | 0     | 0.00  |               |             |               |                |              |
| 25                                           | 55-59     | Former        | 3815  | 36.34 |               |             | 19.69         | 175            | 4.59         |
| Year of Follow-up: 2015, Age Group: 60-64    |           |               |       |       |               |             |               |                |              |
| Period                                       | Age Group | Smoking Group | N     | %     | Ever Quit (N) | Ever Quit % | Mean Yrs Quit | Short Term (n) | Short Term % |
| 25                                           | 60-64     | Never Any     | 5018  | 52.27 |               |             |               |                |              |
| 25                                           | 60-64     | CC            | 42    | 0.44  | 0             | 0.00        |               |                |              |
| 25                                           | 60-64     | Ecig          | 836   | 8.71  |               |             |               |                |              |
| 25                                           | 60-64     | Dual          | 0     | 0.00  |               |             |               |                |              |
| 25                                           | 60-64     | Former        | 3704  | 38.58 |               |             | 22.57         | 167            | 4.51         |
| Year of Follow-up: 2015, Age Group: 65-69    |           |               |       |       |               |             |               |                |              |
| Period                                       | Age Group | Smoking Group | N     | %     | Ever Quit (N) | Ever Quit % | Mean Yrs Quit | Short Term (n) | Short Term % |
| 25                                           | 65-69     | Never Any     | 4356  | 51.27 |               |             |               |                |              |
| 25                                           | 65-69     | CC            | 41    | 0.48  | 0             | 0.00        |               |                |              |
| 25                                           | 65-69     | Ecig          | 534   | 6.28  |               |             |               |                |              |
| 25                                           | 65-69     | Dual          | 0     | 0.00  |               |             |               |                |              |
| 25                                           | 65-69     | Former        | 3566  | 41.97 |               |             | 22.30         | 72             | 2.02         |
| Year of Follow-up: 2015, Age Group: 70-74    |           |               |       |       |               |             |               |                |              |
| Period                                       | Age Group | Smoking Group | N     | %     | Ever Quit (N) | Ever Quit % | Mean Yrs Quit | Short Term (n) | Short Term % |
| 25                                           | 70-74     | Never Any     | 3116  | 47.67 |               |             |               |                |              |
| 25                                           | 70-74     | CC            | 31    | 0.47  | 0             | 0.00        |               |                |              |
| 25                                           | 70-74     | Ecig          | 341   | 5.22  |               |             |               |                |              |
| 25                                           | 70-74     | Dual          | 0     | 0.00  |               |             |               |                |              |
| 25                                           | 70-74     | Former        | 3048  | 46.63 |               |             | 25.84         | 37             | 1.21         |
| Year of Follow-up: 2015, Age Group: 75-79    |           |               |       |       |               |             |               |                |              |
| Period                                       | Age Group | Smoking Group | N     | %     | Ever Quit (N) | Ever Quit % | Mean Yrs Quit | Short Term (n) | Short Term % |
| 25                                           | 75-79     | Never Any     | 2684  | 48.50 |               |             |               |                |              |
| 25                                           | 75-79     | CC            | 59    | 1.07  | 0             | 0.00        |               |                |              |
| 25                                           | 75-79     | Ecig          | 229   | 4.14  |               |             |               |                |              |
| 25                                           | 75-79     | Dual          | 0     | 0.00  |               |             |               |                |              |
| 25                                           | 75-79     | Former        | 2562  | 46.30 |               |             | 26.04         | 37             | 1.44         |
| Year of Follow-up: 2020, Age Group: All Ages |           |               |       |       |               |             |               |                |              |
| Period                                       | Age Group | Smoking Group | N     | %     | Ever Quit (N) | Ever Quit % | Mean Yrs Quit | Short Term (n) | Short Term % |
| 30                                           | All Ages  | Never Any     | 38326 | 54.53 |               |             |               |                |              |
| 30                                           | All Ages  | CC            | 115   | 0.16  | 0             | 0.00        |               |                |              |
| 30                                           | All Ages  | Ecig          | 6444  | 9.17  |               |             |               |                |              |
| 30                                           | All Ages  | Dual          | 0     | 0.00  |               |             |               |                |              |
| 30                                           | All Ages  | Former        | 25398 | 36.14 |               |             | 22.93         | 781            | 3.08         |
| Year of Follow-up: 2020, Age Group: 18-19    |           |               |       |       |               |             |               |                |              |
| Period                                       | Age Group | Smoking Group | N     | %     | Ever Quit (N) | Ever Quit % | Mean Yrs Quit | Short Term (n) | Short Term % |
| 30                                           | 18-19     | Never Any     | 0     | .     |               |             |               |                |              |
| 30                                           | 18-19     | CC            | 0     | .     | 0             | .           |               |                |              |
| 30                                           | 18-19     | Ecig          | 0     | .     |               |             |               |                |              |
| 30                                           | 18-19     | Dual          | 0     | .     |               |             |               |                |              |
| 30                                           | 18-19     | Former        | 0     | .     |               |             | .             | 0              | .            |
| Year of Follow-up: 2020, Age Group: 20-24    |           |               |       |       |               |             |               |                |              |
| Period                                       | Age Group | Smoking Group | N     | %     | Ever Quit (N) | Ever Quit % | Mean Yrs Quit | Short Term (n) | Short Term % |
| 30                                           | 20-24     | Never Any     | 0     | .     |               |             |               |                |              |
| 30                                           | 20-24     | CC            | 0     | .     | 0             | .           |               |                |              |

**Results for PHIM for Run 8 (Sensitivity\_Analysis\_3.RTF)**

| 30                                        | 20-24     | Ecig          | 0    | .     |               |             |               |                |              |
|-------------------------------------------|-----------|---------------|------|-------|---------------|-------------|---------------|----------------|--------------|
| 30                                        | 20-24     | Dual          | 0    | .     |               |             |               |                |              |
| 30                                        | 20-24     | Former        | 0    | .     |               |             | 0             | .              |              |
| Year of Follow-up: 2020, Age Group: 25-29 |           |               |      |       |               |             |               |                |              |
| Period                                    | Age Group | Smoking Group | N    | %     | Ever Quit (N) | Ever Quit % | Mean Yrs Quit | Short Term (n) | Short Term % |
| 30                                        | 25-29     | Never Any     | 0    | .     |               |             |               |                |              |
| 30                                        | 25-29     | CC            | 0    | .     | 0             | .           |               |                |              |
| 30                                        | 25-29     | Ecig          | 0    | .     |               |             |               |                |              |
| 30                                        | 25-29     | Dual          | 0    | .     |               |             |               |                |              |
| 30                                        | 25-29     | Former        | 0    | .     |               |             | 0             | .              |              |
| Year of Follow-up: 2020, Age Group: 30-34 |           |               |      |       |               |             |               |                |              |
| Period                                    | Age Group | Smoking Group | N    | %     | Ever Quit (N) | Ever Quit % | Mean Yrs Quit | Short Term (n) | Short Term % |
| 30                                        | 30-34     | Never Any     | 0    | .     |               |             |               |                |              |
| 30                                        | 30-34     | CC            | 0    | .     | 0             | .           |               |                |              |
| 30                                        | 30-34     | Ecig          | 0    | .     |               |             |               |                |              |
| 30                                        | 30-34     | Dual          | 0    | .     |               |             |               |                |              |
| 30                                        | 30-34     | Former        | 0    | .     |               |             | 0             | .              |              |
| Year of Follow-up: 2020, Age Group: 35-39 |           |               |      |       |               |             |               |                |              |
| Period                                    | Age Group | Smoking Group | N    | %     | Ever Quit (N) | Ever Quit % | Mean Yrs Quit | Short Term (n) | Short Term % |
| 30                                        | 35-39     | Never Any     | 0    | .     |               |             |               |                |              |
| 30                                        | 35-39     | CC            | 0    | .     | 0             | .           |               |                |              |
| 30                                        | 35-39     | Ecig          | 0    | .     |               |             |               |                |              |
| 30                                        | 35-39     | Dual          | 0    | .     |               |             |               |                |              |
| 30                                        | 35-39     | Former        | 0    | .     |               |             | 0             | .              |              |
| Year of Follow-up: 2020, Age Group: 40-44 |           |               |      |       |               |             |               |                |              |
| Period                                    | Age Group | Smoking Group | N    | %     | Ever Quit (N) | Ever Quit % | Mean Yrs Quit | Short Term (n) | Short Term % |
| 30                                        | 40-44     | Never Any     | 4726 | 59.60 |               |             |               |                |              |
| 30                                        | 40-44     | CC            | 6    | 0.08  | 0             | 0.00        |               |                |              |
| 30                                        | 40-44     | Ecig          | 916  | 11.55 |               |             |               |                |              |
| 30                                        | 40-44     | Dual          | 0    | 0.00  |               |             |               |                |              |
| 30                                        | 40-44     | Former        | 2282 | 28.78 |               |             | 15.19         | 83             | 3.64         |
| Year of Follow-up: 2020, Age Group: 45-49 |           |               |      |       |               |             |               |                |              |
| Period                                    | Age Group | Smoking Group | N    | %     | Ever Quit (N) | Ever Quit % | Mean Yrs Quit | Short Term (n) | Short Term % |
| 30                                        | 45-49     | Never Any     | 5359 | 64.18 |               |             |               |                |              |
| 30                                        | 45-49     | CC            | 13   | 0.16  | 0             | 0.00        |               |                |              |
| 30                                        | 45-49     | Ecig          | 944  | 11.31 |               |             |               |                |              |
| 30                                        | 45-49     | Dual          | 0    | 0.00  |               |             |               |                |              |
| 30                                        | 45-49     | Former        | 2034 | 24.36 |               |             | 16.71         | 64             | 3.15         |
| Year of Follow-up: 2020, Age Group: 50-54 |           |               |      |       |               |             |               |                |              |
| Period                                    | Age Group | Smoking Group | N    | %     | Ever Quit (N) | Ever Quit % | Mean Yrs Quit | Short Term (n) | Short Term % |
| 30                                        | 50-54     | Never Any     | 5189 | 59.01 |               |             |               |                |              |
| 30                                        | 50-54     | CC            | 9    | 0.10  | 0             | 0.00        |               |                |              |
| 30                                        | 50-54     | Ecig          | 1059 | 12.04 |               |             |               |                |              |
| 30                                        | 50-54     | Dual          | 0    | 0.00  |               |             |               |                |              |
| 30                                        | 50-54     | Former        | 2536 | 28.84 |               |             | 19.63         | 131            | 5.17         |
| Year of Follow-up: 2020, Age Group: 55-59 |           |               |      |       |               |             |               |                |              |
| Period                                    | Age Group | Smoking Group | N    | %     | Ever Quit (N) | Ever Quit % | Mean Yrs Quit | Short Term (n) | Short Term % |
| 30                                        | 55-59     | Never Any     | 5284 | 52.43 |               |             |               |                |              |
| 30                                        | 55-59     | CC            | 14   | 0.14  | 0             | 0.00        |               |                |              |
| 30                                        | 55-59     | Ecig          | 1255 | 12.45 |               |             |               |                |              |
| 30                                        | 55-59     | Dual          | 0    | 0.00  |               |             |               |                |              |
| 30                                        | 55-59     | Former        | 3525 | 34.98 |               |             | 21.12         | 161            | 4.57         |
| Year of Follow-up: 2020, Age Group: 60-64 |           |               |      |       |               |             |               |                |              |
| Period                                    | Age Group | Smoking Group | N    | %     | Ever Quit (N) | Ever Quit % | Mean Yrs Quit | Short Term (n) | Short Term % |
| 30                                        | 60-64     | Never Any     | 5278 | 50.27 |               |             |               |                |              |
| 30                                        | 60-64     | CC            | 15   | 0.14  | 0             | 0.00        |               |                |              |
| 30                                        | 60-64     | Ecig          | 1001 | 9.53  |               |             |               |                |              |
| 30                                        | 60-64     | Dual          | 0    | 0.00  |               |             |               |                |              |
| 30                                        | 60-64     | Former        | 4205 | 40.05 |               |             | 22.58         | 170            | 4.04         |
| Year of Follow-up: 2020, Age Group: 65-69 |           |               |      |       |               |             |               |                |              |
| Period                                    | Age Group | Smoking Group | N    | %     | Ever Quit (N) | Ever Quit % | Mean Yrs Quit | Short Term (n) | Short Term % |
| 30                                        | 65-69     | Never Any     | 5018 | 52.27 |               |             |               |                |              |
| 30                                        | 65-69     | CC            | 18   | 0.19  | 0             | 0.00        |               |                |              |
| 30                                        | 65-69     | Ecig          | 596  | 6.21  |               |             |               |                |              |
| 30                                        | 65-69     | Dual          | 0    | 0.00  |               |             |               |                |              |
| 30                                        | 65-69     | Former        | 3968 | 41.33 |               |             | 25.90         | 68             | 1.71         |
| Year of Follow-up: 2020, Age Group: 70-74 |           |               |      |       |               |             |               |                |              |
| Period                                    | Age Group | Smoking Group | N    | %     | Ever Quit (N) | Ever Quit % | Mean Yrs Quit | Short Term (n) | Short Term % |

**Results for PHIM for Run 8 (Sensitivity\_Analysis\_3.RTF)**

|                                              |           |               |       |       |               |             |               |                |              |
|----------------------------------------------|-----------|---------------|-------|-------|---------------|-------------|---------------|----------------|--------------|
| 30                                           | 70-74     | Never Any     | 4356  | 51.27 |               |             |               |                |              |
| 30                                           | 70-74     | CC            | 22    | 0.26  | 0             | 0.00        |               |                |              |
| 30                                           | 70-74     | Ecig          | 421   | 4.95  |               |             |               |                |              |
| 30                                           | 70-74     | Dual          | 0     | 0.00  |               |             |               |                |              |
| 30                                           | 70-74     | Former        | 3698  | 43.52 |               |             | 26.38         | 69             | 1.87         |
| Year of Follow-up: 2020, Age Group: 75-79    |           |               |       |       |               |             |               |                |              |
| Period                                       | Age Group | Smoking Group | N     | %     | Ever Quit (N) | Ever Quit % | Mean Yrs Quit | Short Term (n) | Short Term % |
| 30                                           | 75-79     | Never Any     | 3116  | 47.67 |               |             |               |                |              |
| 30                                           | 75-79     | CC            | 18    | 0.28  | 0             | 0.00        |               |                |              |
| 30                                           | 75-79     | Ecig          | 252   | 3.86  |               |             |               |                |              |
| 30                                           | 75-79     | Dual          | 0     | 0.00  |               |             |               |                |              |
| 30                                           | 75-79     | Former        | 3150  | 48.19 |               |             | 29.91         | 35             | 1.11         |
| Year of Follow-up: 2025, Age Group: All Ages |           |               |       |       |               |             |               |                |              |
| Period                                       | Age Group | Smoking Group | N     | %     | Ever Quit (N) | Ever Quit % | Mean Yrs Quit | Short Term (n) | Short Term % |
| 35                                           | All Ages  | Never Any     | 35210 | 55.23 |               |             |               |                |              |
| 35                                           | All Ages  | CC            | 47    | 0.07  | 0             | 0.00        |               |                |              |
| 35                                           | All Ages  | Ecig          | 4652  | 7.30  |               |             |               |                |              |
| 35                                           | All Ages  | Dual          | 0     | 0.00  |               |             |               |                |              |
| 35                                           | All Ages  | Former        | 23838 | 37.39 |               |             | 25.28         | 601            | 2.52         |
| Year of Follow-up: 2025, Age Group: 18-19    |           |               |       |       |               |             |               |                |              |
| Period                                       | Age Group | Smoking Group | N     | %     | Ever Quit (N) | Ever Quit % | Mean Yrs Quit | Short Term (n) | Short Term % |
| 35                                           | 18-19     | Never Any     | 0     | .     |               |             |               |                |              |
| 35                                           | 18-19     | CC            | 0     | .     | 0             | .           |               |                |              |
| 35                                           | 18-19     | Ecig          | 0     | .     |               |             |               |                |              |
| 35                                           | 18-19     | Dual          | 0     | .     |               |             |               |                |              |
| 35                                           | 18-19     | Former        | 0     | .     |               |             | .             | 0              | .            |
| Year of Follow-up: 2025, Age Group: 20-24    |           |               |       |       |               |             |               |                |              |
| Period                                       | Age Group | Smoking Group | N     | %     | Ever Quit (N) | Ever Quit % | Mean Yrs Quit | Short Term (n) | Short Term % |
| 35                                           | 20-24     | Never Any     | 0     | .     |               |             |               |                |              |
| 35                                           | 20-24     | CC            | 0     | .     | 0             | .           |               |                |              |
| 35                                           | 20-24     | Ecig          | 0     | .     |               |             |               |                |              |
| 35                                           | 20-24     | Dual          | 0     | .     |               |             |               |                |              |
| 35                                           | 20-24     | Former        | 0     | .     |               |             | .             | 0              | .            |
| Year of Follow-up: 2025, Age Group: 25-29    |           |               |       |       |               |             |               |                |              |
| Period                                       | Age Group | Smoking Group | N     | %     | Ever Quit (N) | Ever Quit % | Mean Yrs Quit | Short Term (n) | Short Term % |
| 35                                           | 25-29     | Never Any     | 0     | .     |               |             |               |                |              |
| 35                                           | 25-29     | CC            | 0     | .     | 0             | .           |               |                |              |
| 35                                           | 25-29     | Ecig          | 0     | .     |               |             |               |                |              |
| 35                                           | 25-29     | Dual          | 0     | .     |               |             |               |                |              |
| 35                                           | 25-29     | Former        | 0     | .     |               |             | .             | 0              | .            |
| Year of Follow-up: 2025, Age Group: 30-34    |           |               |       |       |               |             |               |                |              |
| Period                                       | Age Group | Smoking Group | N     | %     | Ever Quit (N) | Ever Quit % | Mean Yrs Quit | Short Term (n) | Short Term % |
| 35                                           | 30-34     | Never Any     | 0     | .     |               |             |               |                |              |
| 35                                           | 30-34     | CC            | 0     | .     | 0             | .           |               |                |              |
| 35                                           | 30-34     | Ecig          | 0     | .     |               |             |               |                |              |
| 35                                           | 30-34     | Dual          | 0     | .     |               |             |               |                |              |
| 35                                           | 30-34     | Former        | 0     | .     |               |             | .             | 0              | .            |
| Year of Follow-up: 2025, Age Group: 35-39    |           |               |       |       |               |             |               |                |              |
| Period                                       | Age Group | Smoking Group | N     | %     | Ever Quit (N) | Ever Quit % | Mean Yrs Quit | Short Term (n) | Short Term % |
| 35                                           | 35-39     | Never Any     | 0     | .     |               |             |               |                |              |
| 35                                           | 35-39     | CC            | 0     | .     | 0             | .           |               |                |              |
| 35                                           | 35-39     | Ecig          | 0     | .     |               |             |               |                |              |
| 35                                           | 35-39     | Dual          | 0     | .     |               |             |               |                |              |
| 35                                           | 35-39     | Former        | 0     | .     |               |             | .             | 0              | .            |
| Year of Follow-up: 2025, Age Group: 40-44    |           |               |       |       |               |             |               |                |              |
| Period                                       | Age Group | Smoking Group | N     | %     | Ever Quit (N) | Ever Quit % | Mean Yrs Quit | Short Term (n) | Short Term % |
| 35                                           | 40-44     | Never Any     | 0     | .     |               |             |               |                |              |
| 35                                           | 40-44     | CC            | 0     | .     | 0             | .           |               |                |              |
| 35                                           | 40-44     | Ecig          | 0     | .     |               |             |               |                |              |
| 35                                           | 40-44     | Dual          | 0     | .     |               |             |               |                |              |
| 35                                           | 40-44     | Former        | 0     | .     |               |             | .             | 0              | .            |
| Year of Follow-up: 2025, Age Group: 45-49    |           |               |       |       |               |             |               |                |              |
| Period                                       | Age Group | Smoking Group | N     | %     | Ever Quit (N) | Ever Quit % | Mean Yrs Quit | Short Term (n) | Short Term % |
| 35                                           | 45-49     | Never Any     | 4726  | 59.60 |               |             |               |                |              |
| 35                                           | 45-49     | CC            | 1     | 0.01  | 0             | 0.00        |               |                |              |
| 35                                           | 45-49     | Ecig          | 716   | 9.03  |               |             |               |                |              |
| 35                                           | 45-49     | Dual          | 0     | 0.00  |               |             |               |                |              |
| 35                                           | 45-49     | Former        | 2487  | 31.36 |               |             | 18.70         | 76             | 3.06         |
| Year of Follow-up: 2025, Age Group: 50-54    |           |               |       |       |               |             |               |                |              |

**Results for PHIM for Run 8 (Sensitivity\_Analysis\_3.RTF)**

| Period                                       | Age Group | Smoking Group | N     | %     | Ever Quit (N) | Ever Quit % | Mean Yrs Quit | Short Term (n) | Short Term % |
|----------------------------------------------|-----------|---------------|-------|-------|---------------|-------------|---------------|----------------|--------------|
| 35                                           | 50-54     | Never Any     | 5359  | 64.18 |               |             |               |                |              |
| 35                                           | 50-54     | CC            | 3     | 0.04  | 0             | 0.00        |               |                |              |
| 35                                           | 50-54     | Ecig          | 743   | 8.90  |               |             |               |                |              |
| 35                                           | 50-54     | Dual          | 0     | 0.00  |               |             |               |                |              |
| 35                                           | 50-54     | Former        | 2245  | 26.89 |               |             | 19.83         | 104            | 4.63         |
| Year of Follow-up: 2025, Age Group: 55-59    |           |               |       |       |               |             |               |                |              |
| Period                                       | Age Group | Smoking Group | N     | %     | Ever Quit (N) | Ever Quit % | Mean Yrs Quit | Short Term (n) | Short Term % |
| 35                                           | 55-59     | Never Any     | 5189  | 59.01 |               |             |               |                |              |
| 35                                           | 55-59     | CC            | 4     | 0.05  | 0             | 0.00        |               |                |              |
| 35                                           | 55-59     | Ecig          | 805   | 9.16  |               |             |               |                |              |
| 35                                           | 55-59     | Dual          | 0     | 0.00  |               |             |               |                |              |
| 35                                           | 55-59     | Former        | 2795  | 31.79 |               |             | 22.54         | 92             | 3.29         |
| Year of Follow-up: 2025, Age Group: 60-64    |           |               |       |       |               |             |               |                |              |
| Period                                       | Age Group | Smoking Group | N     | %     | Ever Quit (N) | Ever Quit % | Mean Yrs Quit | Short Term (n) | Short Term % |
| 35                                           | 60-64     | Never Any     | 5284  | 52.43 |               |             |               |                |              |
| 35                                           | 60-64     | CC            | 7     | 0.07  | 0             | 0.00        |               |                |              |
| 35                                           | 60-64     | Ecig          | 888   | 8.81  |               |             |               |                |              |
| 35                                           | 60-64     | Dual          | 0     | 0.00  |               |             |               |                |              |
| 35                                           | 60-64     | Former        | 3899  | 38.69 |               |             | 23.79         | 159            | 4.08         |
| Year of Follow-up: 2025, Age Group: 65-69    |           |               |       |       |               |             |               |                |              |
| Period                                       | Age Group | Smoking Group | N     | %     | Ever Quit (N) | Ever Quit % | Mean Yrs Quit | Short Term (n) | Short Term % |
| 35                                           | 65-69     | Never Any     | 5278  | 50.27 |               |             |               |                |              |
| 35                                           | 65-69     | CC            | 7     | 0.07  | 0             | 0.00        |               |                |              |
| 35                                           | 65-69     | Ecig          | 716   | 6.82  |               |             |               |                |              |
| 35                                           | 65-69     | Dual          | 0     | 0.00  |               |             |               |                |              |
| 35                                           | 65-69     | Former        | 4498  | 42.84 |               |             | 25.96         | 61             | 1.36         |
| Year of Follow-up: 2025, Age Group: 70-74    |           |               |       |       |               |             |               |                |              |
| Period                                       | Age Group | Smoking Group | N     | %     | Ever Quit (N) | Ever Quit % | Mean Yrs Quit | Short Term (n) | Short Term % |
| 35                                           | 70-74     | Never Any     | 5018  | 52.27 |               |             |               |                |              |
| 35                                           | 70-74     | CC            | 11    | 0.11  | 0             | 0.00        |               |                |              |
| 35                                           | 70-74     | Ecig          | 476   | 4.96  |               |             |               |                |              |
| 35                                           | 70-74     | Dual          | 0     | 0.00  |               |             |               |                |              |
| 35                                           | 70-74     | Former        | 4095  | 42.66 |               |             | 29.99         | 68             | 1.66         |
| Year of Follow-up: 2025, Age Group: 75-79    |           |               |       |       |               |             |               |                |              |
| Period                                       | Age Group | Smoking Group | N     | %     | Ever Quit (N) | Ever Quit % | Mean Yrs Quit | Short Term (n) | Short Term % |
| 35                                           | 75-79     | Never Any     | 4356  | 51.27 |               |             |               |                |              |
| 35                                           | 75-79     | CC            | 14    | 0.16  | 0             | 0.00        |               |                |              |
| 35                                           | 75-79     | Ecig          | 308   | 3.62  |               |             |               |                |              |
| 35                                           | 75-79     | Dual          | 0     | 0.00  |               |             |               |                |              |
| 35                                           | 75-79     | Former        | 3819  | 44.95 |               |             | 30.45         | 41             | 1.07         |
| Year of Follow-up: 2030, Age Group: All Ages |           |               |       |       |               |             |               |                |              |
| Period                                       | Age Group | Smoking Group | N     | %     | Ever Quit (N) | Ever Quit % | Mean Yrs Quit | Short Term (n) | Short Term % |
| 40                                           | All Ages  | Never Any     | 30854 | 55.84 |               |             |               |                |              |
| 40                                           | All Ages  | CC            | 14    | 0.03  | 0             | 0.00        |               |                |              |
| 40                                           | All Ages  | Ecig          | 3146  | 5.69  |               |             |               |                |              |
| 40                                           | All Ages  | Dual          | 0     | 0.00  |               |             |               |                |              |
| 40                                           | All Ages  | Former        | 21236 | 38.44 |               |             | 27.73         | 464            | 2.18         |
| Year of Follow-up: 2030, Age Group: 18-19    |           |               |       |       |               |             |               |                |              |
| Period                                       | Age Group | Smoking Group | N     | %     | Ever Quit (N) | Ever Quit % | Mean Yrs Quit | Short Term (n) | Short Term % |
| 40                                           | 18-19     | Never Any     | 0     | .     |               |             |               |                |              |
| 40                                           | 18-19     | CC            | 0     | .     | 0             | .           |               |                |              |
| 40                                           | 18-19     | Ecig          | 0     | .     |               |             |               |                |              |
| 40                                           | 18-19     | Dual          | 0     | .     |               |             |               |                |              |
| 40                                           | 18-19     | Former        | 0     | .     |               |             | .             | 0              | .            |
| Year of Follow-up: 2030, Age Group: 20-24    |           |               |       |       |               |             |               |                |              |
| Period                                       | Age Group | Smoking Group | N     | %     | Ever Quit (N) | Ever Quit % | Mean Yrs Quit | Short Term (n) | Short Term % |
| 40                                           | 20-24     | Never Any     | 0     | .     |               |             |               |                |              |
| 40                                           | 20-24     | CC            | 0     | .     | 0             | .           |               |                |              |
| 40                                           | 20-24     | Ecig          | 0     | .     |               |             |               |                |              |
| 40                                           | 20-24     | Dual          | 0     | .     |               |             |               |                |              |
| 40                                           | 20-24     | Former        | 0     | .     |               |             | .             | 0              | .            |
| Year of Follow-up: 2030, Age Group: 25-29    |           |               |       |       |               |             |               |                |              |
| Period                                       | Age Group | Smoking Group | N     | %     | Ever Quit (N) | Ever Quit % | Mean Yrs Quit | Short Term (n) | Short Term % |
| 40                                           | 25-29     | Never Any     | 0     | .     |               |             |               |                |              |
| 40                                           | 25-29     | CC            | 0     | .     | 0             | .           |               |                |              |
| 40                                           | 25-29     | Ecig          | 0     | .     |               |             |               |                |              |
| 40                                           | 25-29     | Dual          | 0     | .     |               |             |               |                |              |

**Results for PHIM for Run 8 (Sensitivity\_Analysis\_3.RTF)**

| Year of Follow-up: 2030, Age Group: 30-34 | Period | Age Group | Smoking Group | N    | %     | Ever Quit (N) | Ever Quit % | Mean Yrs Quit | Short Term (n) | Short Term % |
|-------------------------------------------|--------|-----------|---------------|------|-------|---------------|-------------|---------------|----------------|--------------|
| Year of Follow-up: 2030, Age Group: 30-34 |        |           |               |      |       |               |             |               |                |              |
| 40                                        | 25-29  | Former    |               | 0    | .     |               |             |               | 0              | .            |
| 40                                        | 30-34  | Never Any |               | 0    | .     |               |             |               |                |              |
| 40                                        | 30-34  | CC        |               | 0    | .     | 0             | .           |               |                |              |
| 40                                        | 30-34  | Ecig      |               | 0    | .     |               |             |               |                |              |
| 40                                        | 30-34  | Dual      |               | 0    | .     |               |             |               |                |              |
| 40                                        | 30-34  | Former    |               | 0    | .     |               |             |               | 0              | .            |
| Year of Follow-up: 2030, Age Group: 35-39 |        |           |               |      |       |               |             |               |                |              |
| 40                                        | 35-39  | Never Any |               | 0    | .     |               |             |               |                |              |
| 40                                        | 35-39  | CC        |               | 0    | .     | 0             | .           |               |                |              |
| 40                                        | 35-39  | Ecig      |               | 0    | .     |               |             |               |                |              |
| 40                                        | 35-39  | Dual      |               | 0    | .     |               |             |               |                |              |
| 40                                        | 35-39  | Former    |               | 0    | .     |               |             |               | 0              | .            |
| Year of Follow-up: 2030, Age Group: 40-44 |        |           |               |      |       |               |             |               |                |              |
| 40                                        | 40-44  | Never Any |               | 0    | .     |               |             |               |                |              |
| 40                                        | 40-44  | CC        |               | 0    | .     | 0             | .           |               |                |              |
| 40                                        | 40-44  | Ecig      |               | 0    | .     |               |             |               |                |              |
| 40                                        | 40-44  | Dual      |               | 0    | .     |               |             |               |                |              |
| 40                                        | 40-44  | Former    |               | 0    | .     |               |             |               | 0              | .            |
| Year of Follow-up: 2030, Age Group: 45-49 |        |           |               |      |       |               |             |               |                |              |
| 40                                        | 45-49  | Never Any |               | 0    | .     |               |             |               |                |              |
| 40                                        | 45-49  | CC        |               | 0    | .     | 0             | .           |               |                |              |
| 40                                        | 45-49  | Ecig      |               | 0    | .     |               |             |               |                |              |
| 40                                        | 45-49  | Dual      |               | 0    | .     |               |             |               |                |              |
| 40                                        | 45-49  | Former    |               | 0    | .     |               |             |               | 0              | .            |
| Year of Follow-up: 2030, Age Group: 50-54 |        |           |               |      |       |               |             |               |                |              |
| 40                                        | 50-54  | Never Any |               | 4726 | 59.60 |               |             |               |                |              |
| 40                                        | 50-54  | CC        |               | 0    | 0.00  | 0             | 0.00        |               |                |              |
| 40                                        | 50-54  | Ecig      |               | 556  | 7.01  |               |             |               |                |              |
| 40                                        | 50-54  | Dual      |               | 0    | 0.00  |               |             |               |                |              |
| 40                                        | 50-54  | Former    |               | 2648 | 33.39 |               |             | 22.37         | 81             | 3.06         |
| Year of Follow-up: 2030, Age Group: 55-59 |        |           |               |      |       |               |             |               |                |              |
| 40                                        | 55-59  | Never Any |               | 5359 | 64.18 |               |             |               |                |              |
| 40                                        | 55-59  | CC        |               | 0    | 0.00  | 0             | 0.00        |               |                |              |
| 40                                        | 55-59  | Ecig      |               | 551  | 6.60  |               |             |               |                |              |
| 40                                        | 55-59  | Dual      |               | 0    | 0.00  |               |             |               |                |              |
| 40                                        | 55-59  | Former    |               | 2440 | 29.22 |               |             | 23.02         | 66             | 2.70         |
| Year of Follow-up: 2030, Age Group: 60-64 |        |           |               |      |       |               |             |               |                |              |
| 40                                        | 60-64  | Never Any |               | 5189 | 59.01 |               |             |               |                |              |
| 40                                        | 60-64  | CC        |               | 3    | 0.03  | 0             | 0.00        |               |                |              |
| 40                                        | 60-64  | Ecig      |               | 554  | 6.30  |               |             |               |                |              |
| 40                                        | 60-64  | Dual      |               | 0    | 0.00  |               |             |               |                |              |
| 40                                        | 60-64  | Former    |               | 3047 | 34.65 |               |             | 25.41         | 118            | 3.87         |
| Year of Follow-up: 2030, Age Group: 65-69 |        |           |               |      |       |               |             |               |                |              |
| 40                                        | 65-69  | Never Any |               | 5284 | 52.43 |               |             |               |                |              |
| 40                                        | 65-69  | CC        |               | 3    | 0.03  | 0             | 0.00        |               |                |              |
| 40                                        | 65-69  | Ecig      |               | 613  | 6.08  |               |             |               |                |              |
| 40                                        | 65-69  | Dual      |               | 0    | 0.00  |               |             |               |                |              |
| 40                                        | 65-69  | Former    |               | 4178 | 41.46 |               |             | 27.04         | 64             | 1.53         |
| Year of Follow-up: 2030, Age Group: 70-74 |        |           |               |      |       |               |             |               |                |              |
| 40                                        | 70-74  | Never Any |               | 5278 | 50.27 |               |             |               |                |              |
| 40                                        | 70-74  | CC        |               | 4    | 0.04  | 0             | 0.00        |               |                |              |
| 40                                        | 70-74  | Ecig      |               | 550  | 5.24  |               |             |               |                |              |
| 40                                        | 70-74  | Dual      |               | 0    | 0.00  |               |             |               |                |              |
| 40                                        | 70-74  | Former    |               | 4667 | 44.45 |               |             | 29.90         | 76             | 1.63         |
| Year of Follow-up: 2030, Age Group: 75-79 |        |           |               |      |       |               |             |               |                |              |
| 40                                        | 75-79  | Never Any |               | 5018 | 52.27 |               |             |               |                |              |
| 40                                        | 75-79  | CC        |               | 4    | 0.04  | 0             | 0.00        |               |                |              |

### Results for PHIM for Run 8 (Sensitivity\_Analysis\_3.RTF)

|                                              |           |               |       |       |               |             |               |                |              |
|----------------------------------------------|-----------|---------------|-------|-------|---------------|-------------|---------------|----------------|--------------|
| 40                                           | 75-79     | Ecig          | 322   | 3.35  |               |             |               |                |              |
| 40                                           | 75-79     | Dual          | 0     | 0.00  |               |             |               |                |              |
| 40                                           | 75-79     | Former        | 4256  | 44.33 |               |             | 33.74         | 59             | 1.39         |
| Year of Follow-up: 2035, Age Group: All Ages |           |               |       |       |               |             |               |                |              |
| Period                                       | Age Group | Smoking Group | N     | %     | Ever Quit (N) | Ever Quit % | Mean Yrs Quit | Short Term (n) | Short Term % |
| 45                                           | All Ages  | Never Any     | 25836 | 56.60 |               |             |               |                |              |
| 45                                           | All Ages  | CC            | 5     | 0.01  | 0             | 0.00        |               |                |              |
| 45                                           | All Ages  | Ecig          | 2043  | 4.48  |               |             |               |                |              |
| 45                                           | All Ages  | Dual          | 0     | 0.00  |               |             |               |                |              |
| 45                                           | All Ages  | Former        | 17766 | 38.92 |               |             | 29.94         | 285            | 1.60         |
| Year of Follow-up: 2035, Age Group: 18-19    |           |               |       |       |               |             |               |                |              |
| Period                                       | Age Group | Smoking Group | N     | %     | Ever Quit (N) | Ever Quit % | Mean Yrs Quit | Short Term (n) | Short Term % |
| 45                                           | 18-19     | Never Any     | 0     | .     |               |             |               |                |              |
| 45                                           | 18-19     | CC            | 0     | .     | 0             | .           |               |                |              |
| 45                                           | 18-19     | Ecig          | 0     | .     |               |             |               |                |              |
| 45                                           | 18-19     | Dual          | 0     | .     |               |             |               |                |              |
| 45                                           | 18-19     | Former        | 0     | .     |               |             | .             | 0              | .            |
| Year of Follow-up: 2035, Age Group: 20-24    |           |               |       |       |               |             |               |                |              |
| Period                                       | Age Group | Smoking Group | N     | %     | Ever Quit (N) | Ever Quit % | Mean Yrs Quit | Short Term (n) | Short Term % |
| 45                                           | 20-24     | Never Any     | 0     | .     |               |             |               |                |              |
| 45                                           | 20-24     | CC            | 0     | .     | 0             | .           |               |                |              |
| 45                                           | 20-24     | Ecig          | 0     | .     |               |             |               |                |              |
| 45                                           | 20-24     | Dual          | 0     | .     |               |             |               |                |              |
| 45                                           | 20-24     | Former        | 0     | .     |               |             | .             | 0              | .            |
| Year of Follow-up: 2035, Age Group: 25-29    |           |               |       |       |               |             |               |                |              |
| Period                                       | Age Group | Smoking Group | N     | %     | Ever Quit (N) | Ever Quit % | Mean Yrs Quit | Short Term (n) | Short Term % |
| 45                                           | 25-29     | Never Any     | 0     | .     |               |             |               |                |              |
| 45                                           | 25-29     | CC            | 0     | .     | 0             | .           |               |                |              |
| 45                                           | 25-29     | Ecig          | 0     | .     |               |             |               |                |              |
| 45                                           | 25-29     | Dual          | 0     | .     |               |             |               |                |              |
| 45                                           | 25-29     | Former        | 0     | .     |               |             | .             | 0              | .            |
| Year of Follow-up: 2035, Age Group: 30-34    |           |               |       |       |               |             |               |                |              |
| Period                                       | Age Group | Smoking Group | N     | %     | Ever Quit (N) | Ever Quit % | Mean Yrs Quit | Short Term (n) | Short Term % |
| 45                                           | 30-34     | Never Any     | 0     | .     |               |             |               |                |              |
| 45                                           | 30-34     | CC            | 0     | .     | 0             | .           |               |                |              |
| 45                                           | 30-34     | Ecig          | 0     | .     |               |             |               |                |              |
| 45                                           | 30-34     | Dual          | 0     | .     |               |             |               |                |              |
| 45                                           | 30-34     | Former        | 0     | .     |               |             | .             | 0              | .            |
| Year of Follow-up: 2035, Age Group: 35-39    |           |               |       |       |               |             |               |                |              |
| Period                                       | Age Group | Smoking Group | N     | %     | Ever Quit (N) | Ever Quit % | Mean Yrs Quit | Short Term (n) | Short Term % |
| 45                                           | 35-39     | Never Any     | 0     | .     |               |             |               |                |              |
| 45                                           | 35-39     | CC            | 0     | .     | 0             | .           |               |                |              |
| 45                                           | 35-39     | Ecig          | 0     | .     |               |             |               |                |              |
| 45                                           | 35-39     | Dual          | 0     | .     |               |             |               |                |              |
| 45                                           | 35-39     | Former        | 0     | .     |               |             | .             | 0              | .            |
| Year of Follow-up: 2035, Age Group: 40-44    |           |               |       |       |               |             |               |                |              |
| Period                                       | Age Group | Smoking Group | N     | %     | Ever Quit (N) | Ever Quit % | Mean Yrs Quit | Short Term (n) | Short Term % |
| 45                                           | 40-44     | Never Any     | 0     | .     |               |             |               |                |              |
| 45                                           | 40-44     | CC            | 0     | .     | 0             | .           |               |                |              |
| 45                                           | 40-44     | Ecig          | 0     | .     |               |             |               |                |              |
| 45                                           | 40-44     | Dual          | 0     | .     |               |             |               |                |              |
| 45                                           | 40-44     | Former        | 0     | .     |               |             | .             | 0              | .            |
| Year of Follow-up: 2035, Age Group: 45-49    |           |               |       |       |               |             |               |                |              |
| Period                                       | Age Group | Smoking Group | N     | %     | Ever Quit (N) | Ever Quit % | Mean Yrs Quit | Short Term (n) | Short Term % |
| 45                                           | 45-49     | Never Any     | 0     | .     |               |             |               |                |              |
| 45                                           | 45-49     | CC            | 0     | .     | 0             | .           |               |                |              |
| 45                                           | 45-49     | Ecig          | 0     | .     |               |             |               |                |              |
| 45                                           | 45-49     | Dual          | 0     | .     |               |             |               |                |              |
| 45                                           | 45-49     | Former        | 0     | .     |               |             | .             | 0              | .            |
| Year of Follow-up: 2035, Age Group: 50-54    |           |               |       |       |               |             |               |                |              |
| Period                                       | Age Group | Smoking Group | N     | %     | Ever Quit (N) | Ever Quit % | Mean Yrs Quit | Short Term (n) | Short Term % |
| 45                                           | 50-54     | Never Any     | 0     | .     |               |             |               |                |              |
| 45                                           | 50-54     | CC            | 0     | .     | 0             | .           |               |                |              |
| 45                                           | 50-54     | Ecig          | 0     | .     |               |             |               |                |              |
| 45                                           | 50-54     | Dual          | 0     | .     |               |             |               |                |              |
| 45                                           | 50-54     | Former        | 0     | .     |               |             | .             | 0              | .            |
| Year of Follow-up: 2035, Age Group: 55-59    |           |               |       |       |               |             |               |                |              |
| Period                                       | Age Group | Smoking Group | N     | %     | Ever Quit (N) | Ever Quit % | Mean Yrs Quit | Short Term (n) | Short Term % |

**Results for PHIM for Run 8 (Sensitivity\_Analysis\_3.RTF)**

|                                              |           |               |       |       |               |             |               |                |              |
|----------------------------------------------|-----------|---------------|-------|-------|---------------|-------------|---------------|----------------|--------------|
| 45                                           | 55-59     | Never Any     | 4726  | 59.60 |               |             |               |                |              |
| 45                                           | 55-59     | CC            | 0     | 0.00  | 0             | 0.00        |               |                |              |
| 45                                           | 55-59     | Ecig          | 411   | 5.18  |               |             |               |                |              |
| 45                                           | 55-59     | Dual          | 0     | 0.00  |               |             |               |                |              |
| 45                                           | 55-59     | Former        | 2793  | 35.22 |               |             | 26.06         | 55             | 1.97         |
| Year of Follow-up: 2035, Age Group: 60-64    |           |               |       |       |               |             |               |                |              |
| Period                                       | Age Group | Smoking Group | N     | %     | Ever Quit (N) | Ever Quit % | Mean Yrs Quit | Short Term (n) | Short Term % |
| 45                                           | 60-64     | Never Any     | 5359  | 64.18 |               |             |               |                |              |
| 45                                           | 60-64     | CC            | 0     | 0.00  | 0             | 0.00        |               |                |              |
| 45                                           | 60-64     | Ecig          | 389   | 4.66  |               |             |               |                |              |
| 45                                           | 60-64     | Dual          | 0     | 0.00  |               |             |               |                |              |
| 45                                           | 60-64     | Former        | 2602  | 31.16 |               |             | 26.40         | 64             | 2.46         |
| Year of Follow-up: 2035, Age Group: 65-69    |           |               |       |       |               |             |               |                |              |
| Period                                       | Age Group | Smoking Group | N     | %     | Ever Quit (N) | Ever Quit % | Mean Yrs Quit | Short Term (n) | Short Term % |
| 45                                           | 65-69     | Never Any     | 5189  | 59.01 |               |             |               |                |              |
| 45                                           | 65-69     | CC            | 3     | 0.03  | 0             | 0.00        |               |                |              |
| 45                                           | 65-69     | Ecig          | 380   | 4.32  |               |             |               |                |              |
| 45                                           | 65-69     | Dual          | 0     | 0.00  |               |             |               |                |              |
| 45                                           | 65-69     | Former        | 3221  | 36.63 |               |             | 28.90         | 47             | 1.46         |
| Year of Follow-up: 2035, Age Group: 70-74    |           |               |       |       |               |             |               |                |              |
| Period                                       | Age Group | Smoking Group | N     | %     | Ever Quit (N) | Ever Quit % | Mean Yrs Quit | Short Term (n) | Short Term % |
| 45                                           | 70-74     | Never Any     | 5284  | 52.43 |               |             |               |                |              |
| 45                                           | 70-74     | CC            | 1     | 0.01  | 0             | 0.00        |               |                |              |
| 45                                           | 70-74     | Ecig          | 489   | 4.85  |               |             |               |                |              |
| 45                                           | 70-74     | Dual          | 0     | 0.00  |               |             |               |                |              |
| 45                                           | 70-74     | Former        | 4304  | 42.71 |               |             | 31.15         | 58             | 1.35         |
| Year of Follow-up: 2035, Age Group: 75-79    |           |               |       |       |               |             |               |                |              |
| Period                                       | Age Group | Smoking Group | N     | %     | Ever Quit (N) | Ever Quit % | Mean Yrs Quit | Short Term (n) | Short Term % |
| 45                                           | 75-79     | Never Any     | 5278  | 50.27 |               |             |               |                |              |
| 45                                           | 75-79     | CC            | 1     | 0.01  | 0             | 0.00        |               |                |              |
| 45                                           | 75-79     | Ecig          | 374   | 3.56  |               |             |               |                |              |
| 45                                           | 75-79     | Dual          | 0     | 0.00  |               |             |               |                |              |
| 45                                           | 75-79     | Former        | 4846  | 46.16 |               |             | 33.69         | 61             | 1.26         |
| Year of Follow-up: 2040, Age Group: All Ages |           |               |       |       |               |             |               |                |              |
| Period                                       | Age Group | Smoking Group | N     | %     | Ever Quit (N) | Ever Quit % | Mean Yrs Quit | Short Term (n) | Short Term % |
| 50                                           | All Ages  | Never Any     | 20558 | 58.48 |               |             |               |                |              |
| 50                                           | All Ages  | CC            | 4     | 0.01  | 0             | 0.00        |               |                |              |
| 50                                           | All Ages  | Ecig          | 1191  | 3.39  |               |             |               |                |              |
| 50                                           | All Ages  | Dual          | 0     | 0.00  |               |             |               |                |              |
| 50                                           | All Ages  | Former        | 13398 | 38.12 |               |             | 32.41         | 177            | 1.32         |
| Year of Follow-up: 2040, Age Group: 18-19    |           |               |       |       |               |             |               |                |              |
| Period                                       | Age Group | Smoking Group | N     | %     | Ever Quit (N) | Ever Quit % | Mean Yrs Quit | Short Term (n) | Short Term % |
| 50                                           | 18-19     | Never Any     | 0     | .     |               |             |               |                |              |
| 50                                           | 18-19     | CC            | 0     | .     | 0             | .           |               |                |              |
| 50                                           | 18-19     | Ecig          | 0     | .     |               |             |               |                |              |
| 50                                           | 18-19     | Dual          | 0     | .     |               |             |               |                |              |
| 50                                           | 18-19     | Former        | 0     | .     |               |             | .             | 0              | .            |
| Year of Follow-up: 2040, Age Group: 20-24    |           |               |       |       |               |             |               |                |              |
| Period                                       | Age Group | Smoking Group | N     | %     | Ever Quit (N) | Ever Quit % | Mean Yrs Quit | Short Term (n) | Short Term % |
| 50                                           | 20-24     | Never Any     | 0     | .     |               |             |               |                |              |
| 50                                           | 20-24     | CC            | 0     | .     | 0             | .           |               |                |              |
| 50                                           | 20-24     | Ecig          | 0     | .     |               |             |               |                |              |
| 50                                           | 20-24     | Dual          | 0     | .     |               |             |               |                |              |
| 50                                           | 20-24     | Former        | 0     | .     |               |             | .             | 0              | .            |
| Year of Follow-up: 2040, Age Group: 25-29    |           |               |       |       |               |             |               |                |              |
| Period                                       | Age Group | Smoking Group | N     | %     | Ever Quit (N) | Ever Quit % | Mean Yrs Quit | Short Term (n) | Short Term % |
| 50                                           | 25-29     | Never Any     | 0     | .     |               |             |               |                |              |
| 50                                           | 25-29     | CC            | 0     | .     | 0             | .           |               |                |              |
| 50                                           | 25-29     | Ecig          | 0     | .     |               |             |               |                |              |
| 50                                           | 25-29     | Dual          | 0     | .     |               |             |               |                |              |
| 50                                           | 25-29     | Former        | 0     | .     |               |             | .             | 0              | .            |
| Year of Follow-up: 2040, Age Group: 30-34    |           |               |       |       |               |             |               |                |              |
| Period                                       | Age Group | Smoking Group | N     | %     | Ever Quit (N) | Ever Quit % | Mean Yrs Quit | Short Term (n) | Short Term % |
| 50                                           | 30-34     | Never Any     | 0     | .     |               |             |               |                |              |
| 50                                           | 30-34     | CC            | 0     | .     | 0             | .           |               |                |              |
| 50                                           | 30-34     | Ecig          | 0     | .     |               |             |               |                |              |
| 50                                           | 30-34     | Dual          | 0     | .     |               |             |               |                |              |
| 50                                           | 30-34     | Former        | 0     | .     |               |             | .             | 0              | .            |
| Year of Follow-up: 2040, Age Group: 35-39    |           |               |       |       |               |             |               |                |              |

**Results for PHIM for Run 8 (Sensitivity\_Analysis\_3.RTF)**

| Period                                    | Age Group | Smoking Group | N    | %     | Ever Quit (N) | Ever Quit % | Mean Yrs Quit | Short Term (n) | Short Term % |
|-------------------------------------------|-----------|---------------|------|-------|---------------|-------------|---------------|----------------|--------------|
| 50                                        | 35-39     | Never Any     | 0    | .     |               |             |               |                |              |
| 50                                        | 35-39     | CC            | 0    | .     | 0             | .           |               |                |              |
| 50                                        | 35-39     | Ecig          | 0    | .     |               |             |               |                |              |
| 50                                        | 35-39     | Dual          | 0    | .     |               |             |               |                |              |
| 50                                        | 35-39     | Former        | 0    | .     |               |             | .             | 0              | .            |
| Year of Follow-up: 2040, Age Group: 40-44 |           |               |      |       |               |             |               |                |              |
| Period                                    | Age Group | Smoking Group | N    | %     | Ever Quit (N) | Ever Quit % | Mean Yrs Quit | Short Term (n) | Short Term % |
| 50                                        | 40-44     | Never Any     | 0    | .     |               |             |               |                |              |
| 50                                        | 40-44     | CC            | 0    | .     | 0             | .           |               |                |              |
| 50                                        | 40-44     | Ecig          | 0    | .     |               |             |               |                |              |
| 50                                        | 40-44     | Dual          | 0    | .     |               |             |               |                |              |
| 50                                        | 40-44     | Former        | 0    | .     |               |             | .             | 0              | .            |
| Year of Follow-up: 2040, Age Group: 45-49 |           |               |      |       |               |             |               |                |              |
| Period                                    | Age Group | Smoking Group | N    | %     | Ever Quit (N) | Ever Quit % | Mean Yrs Quit | Short Term (n) | Short Term % |
| 50                                        | 45-49     | Never Any     | 0    | .     |               |             |               |                |              |
| 50                                        | 45-49     | CC            | 0    | .     | 0             | .           |               |                |              |
| 50                                        | 45-49     | Ecig          | 0    | .     |               |             |               |                |              |
| 50                                        | 45-49     | Dual          | 0    | .     |               |             |               |                |              |
| 50                                        | 45-49     | Former        | 0    | .     |               |             | .             | 0              | .            |
| Year of Follow-up: 2040, Age Group: 50-54 |           |               |      |       |               |             |               |                |              |
| Period                                    | Age Group | Smoking Group | N    | %     | Ever Quit (N) | Ever Quit % | Mean Yrs Quit | Short Term (n) | Short Term % |
| 50                                        | 50-54     | Never Any     | 0    | .     |               |             |               |                |              |
| 50                                        | 50-54     | CC            | 0    | .     | 0             | .           |               |                |              |
| 50                                        | 50-54     | Ecig          | 0    | .     |               |             |               |                |              |
| 50                                        | 50-54     | Dual          | 0    | .     |               |             |               |                |              |
| 50                                        | 50-54     | Former        | 0    | .     |               |             | .             | 0              | .            |
| Year of Follow-up: 2040, Age Group: 55-59 |           |               |      |       |               |             |               |                |              |
| Period                                    | Age Group | Smoking Group | N    | %     | Ever Quit (N) | Ever Quit % | Mean Yrs Quit | Short Term (n) | Short Term % |
| 50                                        | 55-59     | Never Any     | 0    | .     |               |             |               |                |              |
| 50                                        | 55-59     | CC            | 0    | .     | 0             | .           |               |                |              |
| 50                                        | 55-59     | Ecig          | 0    | .     |               |             |               |                |              |
| 50                                        | 55-59     | Dual          | 0    | .     |               |             |               |                |              |
| 50                                        | 55-59     | Former        | 0    | .     |               |             | .             | 0              | .            |
| Year of Follow-up: 2040, Age Group: 60-64 |           |               |      |       |               |             |               |                |              |
| Period                                    | Age Group | Smoking Group | N    | %     | Ever Quit (N) | Ever Quit % | Mean Yrs Quit | Short Term (n) | Short Term % |
| 50                                        | 60-64     | Never Any     | 4726 | 59.60 |               |             |               |                |              |
| 50                                        | 60-64     | CC            | 0    | 0.00  | 0             | 0.00        |               |                |              |
| 50                                        | 60-64     | Ecig          | 281  | 3.54  |               |             |               |                |              |
| 50                                        | 60-64     | Dual          | 0    | 0.00  |               |             |               |                |              |
| 50                                        | 60-64     | Former        | 2923 | 36.86 |               |             | 29.76         | 55             | 1.88         |
| Year of Follow-up: 2040, Age Group: 65-69 |           |               |      |       |               |             |               |                |              |
| Period                                    | Age Group | Smoking Group | N    | %     | Ever Quit (N) | Ever Quit % | Mean Yrs Quit | Short Term (n) | Short Term % |
| 50                                        | 65-69     | Never Any     | 5359 | 64.18 |               |             |               |                |              |
| 50                                        | 65-69     | CC            | 0    | 0.00  | 0             | 0.00        |               |                |              |
| 50                                        | 65-69     | Ecig          | 284  | 3.40  |               |             |               |                |              |
| 50                                        | 65-69     | Dual          | 0    | 0.00  |               |             |               |                |              |
| 50                                        | 65-69     | Former        | 2707 | 32.42 |               |             | 30.28         | 30             | 1.11         |
| Year of Follow-up: 2040, Age Group: 70-74 |           |               |      |       |               |             |               |                |              |
| Period                                    | Age Group | Smoking Group | N    | %     | Ever Quit (N) | Ever Quit % | Mean Yrs Quit | Short Term (n) | Short Term % |
| 50                                        | 70-74     | Never Any     | 5189 | 59.01 |               |             |               |                |              |
| 50                                        | 70-74     | CC            | 3    | 0.03  | 0             | 0.00        |               |                |              |
| 50                                        | 70-74     | Ecig          | 300  | 3.41  |               |             |               |                |              |
| 50                                        | 70-74     | Dual          | 0    | 0.00  |               |             |               |                |              |
| 50                                        | 70-74     | Former        | 3301 | 37.54 |               |             | 33.12         | 40             | 1.21         |
| Year of Follow-up: 2040, Age Group: 75-79 |           |               |      |       |               |             |               |                |              |
| Period                                    | Age Group | Smoking Group | N    | %     | Ever Quit (N) | Ever Quit % | Mean Yrs Quit | Short Term (n) | Short Term % |
| 50                                        | 75-79     | Never Any     | 5284 | 52.43 |               |             |               |                |              |
| 50                                        | 75-79     | CC            | 1    | 0.01  | 0             | 0.00        |               |                |              |
| 50                                        | 75-79     | Ecig          | 326  | 3.23  |               |             |               |                |              |
| 50                                        | 75-79     | Dual          | 0    | 0.00  |               |             |               |                |              |
| 50                                        | 75-79     | Former        | 4467 | 44.32 |               |             | 34.92         | 52             | 1.16         |



## Results for PHIM for Run 8 (Sensitivity\_Analysis\_3.RTF)

\*\*\*\*\*

### Main Results for E-Component for Run: 8, Simulation: 1, COD: Four Diseases Combined

| Variable Parameter          | Value                                  |
|-----------------------------|----------------------------------------|
| 1. Country                  | US (United States)                     |
| 2. Sex                      | F (Females)                            |
| 3. Year of start of process | 1990                                   |
| 4. Cause of Death           | Four Diseases Combined                 |
| 5. Effective Dose NULL      | CC:1                                   |
| 6. Effective Dose Ecig      | CC:1 Ecig:0.05 Dual:0.525              |
| Note:                       | Death rates are per million population |

#### Results for Age Groups Combined and Years combined, Population unadjusted for deaths in Ecig scenario,

| Age Group:All |         | NULL        | Ecig        | %Drop   |        |        | NULL    | Ecig    | Drop    |         |
|---------------|---------|-------------|-------------|---------|--------|--------|---------|---------|---------|---------|
| Year          | Number  | Attrib      | Attrib      | Drop    | %Drop  | Attrib | Death   | Attrib  | Attrib  | Drop    |
|               | Deaths  | Deaths      | Deaths      | Deaths  | Deaths | Deaths | Rate    | Rates   | Rates   | Rates   |
| All Comb      | 9082078 | 2946250.006 | 1928209.993 | 1018040 | 11.209 | 34.554 | 2493.45 | 808.881 | 529.382 | 279.499 |

#### Results for Age Groups Combined, Population unadjusted for deaths in Ecig scenario,

| Age Group:All |        | NULL      | Ecig      | %Drop    |        |        | NULL    | Ecig    | Drop    |         |
|---------------|--------|-----------|-----------|----------|--------|--------|---------|---------|---------|---------|
| Year          | Number | Attrib    | Attrib    | Drop     | %Drop  | Attrib | Death   | Attrib  | Attrib  | Drop    |
|               | Deaths | Deaths    | Deaths    | Deaths   | Deaths | Deaths | Rate    | Rates   | Rates   | Rates   |
| 1990          | 199848 | 57524.822 | 57524.822 | 0.000    | 0.000  | 0.000  | 2926.84 | 842.471 | 842.471 | 0.000   |
| 1991          | 199162 | 59078.486 | 58910.022 | 168.464  | 0.085  | 0.285  | 2877.87 | 853.678 | 851.244 | 2.434   |
| 1992          | 198532 | 60494.150 | 60022.334 | 471.815  | 0.238  | 0.780  | 2829.84 | 862.271 | 855.546 | 6.725   |
| 1993          | 202512 | 62694.848 | 61776.288 | 918.559  | 0.454  | 1.465  | 2845.85 | 881.034 | 868.125 | 12.908  |
| 1994          | 200658 | 63202.598 | 61750.565 | 1452.032 | 0.724  | 2.297  | 2777.87 | 874.966 | 854.864 | 20.102  |
| 1995          | 201023 | 63766.862 | 61668.192 | 2098.670 | 1.044  | 3.291  | 2739.80 | 869.097 | 840.494 | 28.603  |
| 1996          | 201180 | 64591.163 | 61714.001 | 2877.162 | 1.430  | 4.454  | 2706.36 | 868.908 | 830.203 | 38.705  |
| 1997          | 198639 | 64686.912 | 61081.204 | 3605.708 | 1.815  | 5.574  | 2635.18 | 858.147 | 810.313 | 47.834  |
| 1998          | 197573 | 65295.961 | 60845.476 | 4450.486 | 2.253  | 6.816  | 2584.18 | 854.046 | 795.835 | 58.211  |
| 1999          | 211329 | 67327.521 | 61574.048 | 5753.473 | 2.723  | 8.545  | 2726.91 | 868.771 | 794.530 | 74.241  |
| 2000          | 208496 | 67596.897 | 60890.418 | 6706.478 | 3.217  | 9.921  | 2656.96 | 861.419 | 775.956 | 85.464  |
| 2001          | 203606 | 67008.811 | 59292.439 | 7716.372 | 3.790  | 11.515 | 2565.88 | 844.458 | 747.215 | 97.243  |
| 2002          | 200828 | 67067.744 | 58226.275 | 8841.469 | 4.403  | 13.183 | 2506.09 | 836.925 | 726.594 | 110.331 |
| 2003          | 196352 | 66756.217 | 56896.345 | 9859.872 | 5.022  | 14.770 | 2427.31 | 825.244 | 703.356 | 121.888 |
| 2004          | 188160 | 65058.725 | 54335.883 | 10722.84 | 5.699  | 16.482 | 2302.83 | 796.234 | 665.001 | 131.234 |
| 2005          | 186416 | 65214.724 | 53330.290 | 11884.43 | 6.375  | 18.224 | 2256.27 | 789.321 | 645.479 | 143.842 |
| 2006          | 180088 | 63771.146 | 51003.093 | 12768.05 | 7.090  | 20.022 | 2160.67 | 765.117 | 611.928 | 153.189 |
| 2007          | 175644 | 63110.718 | 49434.738 | 13675.98 | 7.786  | 21.670 | 2086.36 | 749.650 | 587.202 | 162.448 |
| 2008          | 177570 | 63718.624 | 48732.221 | 14986.40 | 8.440  | 23.520 | 2086.39 | 748.674 | 572.588 | 176.085 |
| 2009          | 172806 | 62794.698 | 46958.140 | 15836.56 | 9.164  | 25.220 | 2007.57 | 729.515 | 545.534 | 183.981 |
| 2010          | 170489 | 61917.074 | 45187.335 | 16729.74 | 9.813  | 27.020 | 1957.97 | 711.083 | 518.951 | 192.132 |
| 2011          | 170305 | 61680.114 | 43755.042 | 17925.07 | 10.525 | 29.061 | 1937.46 | 701.700 | 497.777 | 203.923 |
| 2012          | 171421 | 62023.127 | 42771.195 | 19251.93 | 11.231 | 31.040 | 1930.22 | 698.386 | 481.608 | 216.779 |
| 2013          | 172699 | 62037.765 | 41587.884 | 20449.88 | 11.841 | 32.964 | 1923.75 | 691.059 | 463.261 | 227.798 |
| 2014          | 174169 | 61921.017 | 40156.944 | 21764.07 | 12.496 | 35.148 | 1918.85 | 682.195 | 442.416 | 239.779 |
| 2015          | 177354 | 61856.204 | 38968.826 | 22887.38 | 12.905 | 37.001 | 2184.51 | 761.899 | 479.989 | 281.910 |
| 2016          | 176853 | 60464.119 | 36672.453 | 23791.67 | 13.453 | 39.348 | 2157.59 | 737.655 | 447.400 | 290.256 |
| 2017          | 179309 | 60243.839 | 35239.817 | 25004.02 | 13.945 | 41.505 | 2166.86 | 728.017 | 425.856 | 302.161 |
| 2018          | 177157 | 60713.327 | 34606.128 | 26107.20 | 14.737 | 43.001 | 2120.51 | 726.721 | 414.225 | 312.495 |
| 2019          | 179227 | 61148.172 | 33632.251 | 27515.92 | 15.353 | 44.999 | 2124.53 | 724.841 | 398.672 | 326.170 |
| 2020          | 180467 | 61149.317 | 32649.048 | 28500.27 | 15.793 | 46.608 | 2424.25 | 821.432 | 438.582 | 382.850 |
| 2021          | 178116 | 58727.786 | 29808.445 | 28919.34 | 16.236 | 49.243 | 2375.42 | 783.216 | 397.537 | 385.679 |
| 2022          | 179408 | 58848.802 | 28733.632 | 30115.17 | 16.786 | 51.174 | 2374.52 | 778.881 | 380.298 | 398.583 |
| 2023          | 180640 | 58816.149 | 27649.644 | 31166.50 | 17.253 | 52.990 | 2372.26 | 772.407 | 363.111 | 409.296 |
| 2024          | 181610 | 58955.232 | 26568.273 | 32386.96 | 17.833 | 54.935 | 2366.77 | 768.316 | 346.243 | 422.073 |
| 2025          | 180418 | 58297.744 | 25384.642 | 32913.10 | 18.243 | 56.457 | 2713.69 | 876.861 | 381.812 | 495.049 |
| 2026          | 180313 | 56469.971 | 23325.767 | 33144.20 | 18.381 | 58.694 | 2701.83 | 846.150 | 349.515 | 496.635 |
| 2027          | 179619 | 56209.427 | 22144.005 | 34065.42 | 18.965 | 60.604 | 2680.68 | 838.883 | 330.482 | 508.401 |
| 2028          | 178762 | 55733.105 | 20904.068 | 34829.04 | 19.483 | 62.493 | 2656.74 | 828.298 | 310.674 | 517.625 |
| 2029          | 177808 | 55145.838 | 19659.176 | 35486.66 | 19.958 | 64.351 | 2630.89 | 815.951 | 290.882 | 525.069 |
| 2030          | 173587 | 53615.097 | 18408.068 | 35207.03 | 20.282 | 65.666 | 3040.33 | 939.056 | 322.413 | 616.643 |
| 2031          | 174985 | 52046.561 | 17174.118 | 34872.44 | 19.929 | 67.002 | 3060.73 | 910.364 | 300.398 | 609.965 |
| 2032          | 173400 | 51582.636 | 16150.550 | 35432.09 | 20.434 | 68.690 | 3027.10 | 900.496 | 281.946 | 618.550 |
| 2033          | 171756 | 50839.758 | 15116.064 | 35723.69 | 20.799 | 70.267 | 2991.14 | 885.375 | 263.246 | 622.128 |
| 2034          | 169973 | 50215.451 | 14102.360 | 36113.09 | 21.246 | 71.916 | 2951.96 | 872.104 | 244.919 | 627.185 |
| 2035          | 162644 | 47773.075 | 13007.170 | 34765.91 | 21.375 | 72.773 | 3459.14 | 1016.05 | 276.639 | 739.407 |
| 2036          | 156254 | 43298.709 | 11070.339 | 32228.37 | 20.626 | 74.433 | 3328.25 | 922.274 | 235.801 | 686.473 |
| 2037          | 153593 | 42241.563 | 10085.729 | 32155.83 | 20.936 | 76.124 | 3274.10 | 900.450 | 214.994 | 685.456 |
| 2038          | 150947 | 41356.353 | 9298.620  | 32057.73 | 21.238 | 77.516 | 3217.50 | 881.531 | 198.205 | 683.326 |
| 2039          | 148373 | 40161.050 | 8425.603  | 31735.45 | 21.389 | 79.020 | 3159.42 | 855.178 | 179.412 | 675.765 |

## Results for PHIM for Run 8 (Sensitivity\_Analysis\_3.RTF)

\*\*\*\*\*

### Main Results for E-Component for Run: 8, Simulation: 1, COD: LUNG CANCER

| Variable Parameter          | Value                                  |
|-----------------------------|----------------------------------------|
| 1. Country                  | US (United States)                     |
| 2. Sex                      | F (Females)                            |
| 3. Year of start of process | 1990                                   |
| 4. Cause of Death           | LUNG CANCER                            |
| 5. Effective Dose NULL      | CC:1                                   |
| 6. Effective Dose Ecig      | CC:1 Ecig:0.05 Dual:0.525              |
| Note:                       | Death rates are per million population |

#### Results for Age Groups Combined and Years combined, Population unadjusted for deaths in Ecig scenario,

| Age Group:All | NULL    | Ecig        | %Drop       |          |        | NULL   | Ecig    | Drop    |         |         |
|---------------|---------|-------------|-------------|----------|--------|--------|---------|---------|---------|---------|
| Year          | Number  | Attrib      | Attrib      | Drop     | %Drop  | Attrib | Death   | Attrib  | Attrib  | Drop    |
|               | Deaths  | Deaths      | Deaths      | Deaths   | Deaths | Deaths | Rate    | Rates   | Rates   | Rates   |
| All Comb      | 2327764 | 1580465.217 | 1133629.127 | 446836.1 | 19.196 | 28.272 | 639.078 | 433.910 | 311.233 | 122.677 |

#### Results for Age Groups Combined, Population unadjusted for deaths in Ecig scenario,

| Age Group:All | NULL   | Ecig      | %Drop     |          |        | NULL   | Ecig    | Drop    |         |         |
|---------------|--------|-----------|-----------|----------|--------|--------|---------|---------|---------|---------|
| Year          | Number | Attrib    | Attrib    | Drop     | %Drop  | Attrib | Death   | Attrib  | Attrib  | Drop    |
|               | Deaths | Deaths    | Deaths    | Deaths   | Deaths | Deaths | Rate    | Rates   | Rates   | Rates   |
| 1990          | 42690  | 30614.201 | 30614.201 | 0.000    | 0.000  | 0.000  | 625.210 | 448.355 | 448.355 | 0.000   |
| 1991          | 43692  | 31412.010 | 31379.684 | 32.326   | 0.074  | 0.103  | 631.345 | 453.901 | 453.433 | 0.467   |
| 1992          | 45423  | 32782.407 | 32688.403 | 94.003   | 0.207  | 0.287  | 647.450 | 467.274 | 465.934 | 1.340   |
| 1993          | 46291  | 33491.183 | 33305.249 | 185.935  | 0.402  | 0.555  | 650.515 | 470.643 | 468.030 | 2.613   |
| 1994          | 47017  | 34074.347 | 33772.678 | 301.670  | 0.642  | 0.885  | 650.895 | 471.719 | 467.543 | 4.176   |
| 1995          | 47840  | 34694.454 | 34239.179 | 455.275  | 0.952  | 1.312  | 652.025 | 472.861 | 466.656 | 6.205   |
| 1996          | 48244  | 35027.269 | 34396.707 | 630.562  | 1.307  | 1.800  | 648.999 | 471.202 | 462.719 | 8.483   |
| 1997          | 49035  | 35590.763 | 34750.896 | 839.867  | 1.713  | 2.360  | 650.506 | 472.153 | 461.011 | 11.142  |
| 1998          | 49686  | 36100.785 | 35013.230 | 1087.554 | 2.189  | 3.013  | 649.874 | 472.184 | 457.960 | 14.225  |
| 1999          | 48883  | 35451.030 | 34139.178 | 1311.852 | 2.684  | 3.700  | 630.769 | 457.448 | 440.520 | 16.928  |
| 2000          | 50331  | 36447.986 | 34804.259 | 1643.727 | 3.266  | 4.510  | 641.392 | 464.474 | 443.527 | 20.947  |
| 2001          | 50389  | 36411.326 | 34430.382 | 1980.944 | 3.931  | 5.440  | 635.012 | 458.863 | 433.898 | 24.964  |
| 2002          | 51445  | 37078.545 | 34678.562 | 2399.983 | 4.665  | 6.473  | 641.972 | 462.696 | 432.747 | 29.949  |
| 2003          | 51408  | 36999.876 | 34198.896 | 2800.980 | 5.449  | 7.570  | 635.509 | 457.395 | 422.769 | 34.626  |
| 2004          | 51399  | 36861.555 | 33615.410 | 3246.145 | 6.316  | 8.806  | 629.057 | 451.138 | 411.409 | 39.729  |
| 2005          | 51421  | 36689.529 | 32972.025 | 3717.504 | 7.230  | 10.132 | 622.370 | 444.069 | 399.074 | 44.994  |
| 2006          | 51355  | 36504.774 | 32291.359 | 4213.415 | 8.204  | 11.542 | 616.150 | 437.979 | 387.427 | 50.552  |
| 2007          | 51839  | 36663.202 | 31859.386 | 4803.816 | 9.267  | 13.103 | 615.761 | 435.498 | 378.436 | 57.061  |
| 2008          | 50976  | 35898.803 | 30649.709 | 5249.094 | 10.297 | 14.622 | 598.952 | 421.800 | 360.124 | 61.675  |
| 2009          | 51193  | 35934.525 | 30049.843 | 5884.682 | 11.495 | 16.376 | 594.733 | 417.468 | 349.103 | 68.365  |
| 2010          | 50853  | 35502.829 | 29095.391 | 6407.438 | 12.600 | 18.048 | 584.018 | 407.730 | 334.144 | 73.586  |
| 2011          | 50509  | 35136.342 | 28120.904 | 7015.438 | 13.889 | 19.966 | 574.613 | 399.726 | 319.916 | 79.811  |
| 2012          | 51245  | 35450.201 | 27677.903 | 7772.297 | 15.167 | 21.925 | 577.023 | 399.173 | 311.656 | 87.517  |
| 2013          | 51069  | 35123.224 | 26685.182 | 8438.042 | 16.523 | 24.024 | 568.874 | 391.249 | 297.255 | 93.994  |
| 2014          | 51251  | 35079.370 | 25927.735 | 9151.635 | 17.857 | 26.088 | 564.641 | 386.476 | 285.650 | 100.825 |
| 2015          | 50443  | 34324.171 | 24702.476 | 9621.695 | 19.074 | 28.032 | 621.319 | 422.780 | 304.267 | 118.513 |
| 2016          | 48854  | 33054.753 | 23022.417 | 10032.34 | 20.535 | 30.351 | 596.013 | 403.264 | 280.871 | 122.393 |
| 2017          | 48325  | 32471.234 | 21850.204 | 10621.03 | 21.978 | 32.709 | 583.983 | 392.399 | 264.049 | 128.350 |
| 2018          | 50465  | 33657.595 | 21784.167 | 11873.43 | 23.528 | 35.277 | 604.052 | 402.871 | 260.750 | 142.121 |
| 2019          | 51036  | 33863.424 | 21095.959 | 12767.46 | 25.017 | 37.703 | 604.975 | 401.412 | 250.068 | 151.344 |
| 2020          | 51444  | 33910.830 | 20396.564 | 13514.27 | 26.270 | 39.852 | 691.053 | 455.532 | 273.992 | 181.540 |
| 2021          | 48037  | 31531.880 | 18162.959 | 13368.92 | 27.830 | 42.398 | 640.639 | 420.521 | 242.228 | 178.293 |
| 2022          | 48335  | 31560.212 | 17407.484 | 14152.73 | 29.281 | 44.844 | 639.727 | 417.708 | 230.393 | 187.315 |
| 2023          | 48599  | 31508.781 | 16642.340 | 14866.44 | 30.590 | 47.182 | 638.227 | 413.791 | 218.557 | 195.234 |
| 2024          | 48784  | 31517.293 | 15870.922 | 15646.37 | 32.073 | 49.644 | 635.757 | 410.740 | 206.833 | 203.907 |
| 2025          | 48477  | 31175.389 | 15045.159 | 16130.23 | 33.274 | 51.740 | 729.141 | 468.912 | 226.295 | 242.616 |
| 2026          | 45324  | 29044.598 | 13344.826 | 15699.77 | 34.639 | 54.054 | 679.138 | 435.206 | 199.960 | 235.246 |
| 2027          | 45107  | 28825.765 | 12557.771 | 16267.99 | 36.065 | 56.436 | 673.191 | 430.203 | 187.415 | 242.787 |
| 2028          | 44842  | 28513.846 | 11752.448 | 16761.40 | 37.379 | 58.783 | 666.430 | 423.769 | 174.663 | 249.106 |
| 2029          | 44539  | 28148.109 | 10948.922 | 17199.19 | 38.616 | 61.102 | 659.013 | 416.486 | 162.003 | 254.483 |
| 2030          | 43393  | 27314.475 | 10141.800 | 17172.68 | 39.575 | 62.870 | 760.018 | 478.407 | 177.631 | 300.775 |
| 2031          | 40748  | 25423.102 | 9068.364  | 16354.74 | 40.137 | 64.330 | 712.731 | 444.684 | 158.618 | 286.066 |
| 2032          | 40325  | 25085.902 | 8429.578  | 16656.32 | 41.305 | 66.397 | 703.969 | 437.933 | 147.158 | 290.775 |
| 2033          | 39882  | 24645.067 | 7806.117  | 16838.95 | 42.222 | 68.326 | 694.543 | 429.194 | 135.944 | 293.250 |
| 2034          | 39404  | 24239.126 | 7201.470  | 17037.66 | 43.238 | 70.290 | 684.347 | 420.967 | 125.070 | 295.897 |
| 2035          | 37454  | 22944.147 | 6539.949  | 16404.20 | 43.798 | 71.496 | 796.588 | 487.980 | 139.093 | 348.887 |
| 2036          | 32988  | 19950.581 | 5334.590  | 14615.99 | 44.306 | 73.261 | 702.663 | 424.953 | 113.628 | 311.325 |
| 2037          | 32403  | 19415.334 | 4811.479  | 14603.85 | 45.069 | 75.218 | 690.731 | 413.871 | 102.565 | 311.306 |
| 2038          | 31820  | 18939.317 | 4399.915  | 14539.40 | 45.693 | 76.768 | 678.257 | 403.701 | 93.786  | 309.914 |
| 2039          | 31251  | 18379.752 | 3954.896  | 14424.86 | 46.158 | 78.482 | 665.457 | 391.373 | 84.214  | 307.159 |

## Results for PHIM for Run 8 (Sensitivity\_Analysis\_3.RTF)

\*\*\*\*\*

### Main Results for E-Component for Run: 8, Simulation: 1, COD: IHD

| Variable Parameter          | Value                                  |
|-----------------------------|----------------------------------------|
| 1. Country                  | US (United States)                     |
| 2. Sex                      | F (Females)                            |
| 3. Year of start of process | 1990                                   |
| 4. Cause of Death           | IHD                                    |
| 5. Effective Dose NULL      | CC:1                                   |
| 6. Effective Dose Ecig      | CC:1 Ecig:0.05 Dual:0.525              |
| Note:                       | Death rates are per million population |

#### Results for Age Groups Combined and Years combined, Population unadjusted for deaths in Ecig scenario,

| Age Group:All |         | NULL       | Ecig       | %Drop    |        |        | NULL    | Ecig    | Drop   |        |
|---------------|---------|------------|------------|----------|--------|--------|---------|---------|--------|--------|
| Year          | Number  | Attrib     | Attrib     | Drop     | %Drop  | Attrib | Death   | Attrib  | Attrib | Drop   |
|               | Deaths  | Deaths     | Deaths     | Deaths   | Deaths | Deaths | Rate    | Rates   | Rates  | Rates  |
| All Comb      | 3242167 | 398833.796 | 196994.290 | 201839.5 | 6.225  | 50.607 | 890.124 | 109.498 | 54.084 | 55.414 |

#### Results for Age Groups Combined, Population unadjusted for deaths in Ecig scenario,

| Age Group:All |        | NULL      | Ecig      | %Drop    |        |        | NULL    | Ecig    | Drop    |        |
|---------------|--------|-----------|-----------|----------|--------|--------|---------|---------|---------|--------|
| Year          | Number | Attrib    | Attrib    | Drop     | %Drop  | Attrib | Death   | Attrib  | Attrib  | Drop   |
|               | Deaths | Deaths    | Deaths    | Deaths   | Deaths | Deaths | Rate    | Rates   | Rates   | Rates  |
| 1990          | 98916  | 12922.892 | 12922.892 | 0.000    | 0.000  | 0.000  | 1448.66 | 189.260 | 189.260 | 0.000  |
| 1991          | 96403  | 12856.479 | 12766.075 | 90.404   | 0.094  | 0.703  | 1393.01 | 185.775 | 184.469 | 1.306  |
| 1992          | 93721  | 12662.244 | 12411.581 | 250.663  | 0.267  | 1.980  | 1335.88 | 180.485 | 176.912 | 3.573  |
| 1993          | 93679  | 12730.613 | 12252.021 | 478.591  | 0.511  | 3.759  | 1316.45 | 178.900 | 172.174 | 6.726  |
| 1994          | 90832  | 12495.323 | 11749.612 | 745.711  | 0.821  | 5.968  | 1257.46 | 172.983 | 162.660 | 10.323 |
| 1995          | 89698  | 12365.590 | 11311.293 | 1054.298 | 1.175  | 8.526  | 1222.52 | 168.534 | 154.165 | 14.369 |
| 1996          | 88286  | 12290.551 | 10852.346 | 1438.206 | 1.629  | 11.702 | 1187.66 | 165.338 | 145.990 | 19.347 |
| 1997          | 84777  | 11719.531 | 9986.318  | 1733.213 | 2.044  | 14.789 | 1124.67 | 155.473 | 132.480 | 22.993 |
| 1998          | 82517  | 11416.794 | 9340.491  | 2076.304 | 2.516  | 18.186 | 1079.29 | 149.327 | 122.170 | 27.157 |
| 1999          | 93939  | 13028.038 | 10167.622 | 2860.416 | 3.045  | 21.956 | 1212.16 | 168.109 | 131.199 | 36.910 |
| 2000          | 90039  | 12426.299 | 9230.378  | 3195.921 | 3.549  | 25.719 | 1147.41 | 158.354 | 117.627 | 40.727 |
| 2001          | 86119  | 11939.281 | 8334.599  | 3604.682 | 4.186  | 30.192 | 1085.29 | 150.461 | 105.034 | 45.427 |
| 2002          | 83014  | 11528.794 | 7526.505  | 4002.289 | 4.821  | 34.716 | 1035.91 | 143.865 | 93.922  | 49.944 |
| 2003          | 79302  | 11048.407 | 6744.565  | 4303.842 | 5.427  | 38.954 | 980.336 | 136.581 | 83.377  | 53.204 |
| 2004          | 73861  | 10375.132 | 5866.812  | 4508.320 | 6.104  | 43.453 | 903.963 | 126.978 | 71.802  | 55.176 |
| 2005          | 71649  | 10051.029 | 5265.265  | 4785.764 | 6.679  | 47.615 | 867.197 | 121.652 | 63.728  | 57.924 |
| 2006          | 67551  | 9542.523  | 4578.679  | 4963.844 | 7.348  | 52.018 | 810.467 | 114.490 | 54.934  | 59.555 |
| 2007          | 63503  | 8936.533  | 3934.718  | 5001.815 | 7.877  | 55.970 | 754.310 | 106.151 | 46.738  | 59.413 |
| 2008          | 63171  | 8944.180  | 3603.581  | 5340.600 | 8.454  | 59.710 | 742.239 | 105.091 | 42.341  | 62.750 |
| 2009          | 59747  | 8390.033  | 3111.966  | 5278.068 | 8.834  | 62.909 | 694.108 | 97.471  | 36.153  | 61.318 |
| 2010          | 58008  | 8157.570  | 2768.735  | 5388.835 | 9.290  | 66.059 | 666.189 | 93.685  | 31.797  | 61.888 |
| 2011          | 57368  | 8035.356  | 2473.404  | 5561.952 | 9.695  | 69.218 | 652.644 | 91.414  | 28.139  | 63.275 |
| 2012          | 57411  | 7970.766  | 2213.812  | 5756.954 | 10.028 | 72.226 | 646.453 | 89.752  | 24.928  | 64.824 |
| 2013          | 57067  | 7743.216  | 1966.952  | 5776.264 | 10.122 | 74.598 | 635.688 | 86.254  | 21.911  | 64.344 |
| 2014          | 57538  | 7774.935  | 1784.266  | 5990.669 | 10.412 | 77.051 | 633.906 | 85.658  | 19.658  | 66.000 |
| 2015          | 58395  | 7722.535  | 1635.756  | 6086.779 | 10.423 | 78.818 | 719.266 | 95.120  | 20.148  | 74.972 |
| 2016          | 58658  | 7600.353  | 1453.499  | 6146.855 | 10.479 | 80.876 | 715.621 | 92.723  | 17.733  | 74.991 |
| 2017          | 59004  | 7470.266  | 1296.811  | 6173.456 | 10.463 | 82.640 | 713.034 | 90.274  | 15.671  | 74.603 |
| 2018          | 56077  | 6907.050  | 1086.510  | 5820.540 | 10.380 | 84.270 | 671.224 | 82.675  | 13.005  | 69.670 |
| 2019          | 55886  | 6732.046  | 966.143   | 5765.903 | 10.317 | 85.649 | 662.462 | 79.801  | 11.453  | 68.348 |
| 2020          | 55313  | 6429.836  | 854.701   | 5575.135 | 10.079 | 86.707 | 743.037 | 86.373  | 11.481  | 74.892 |
| 2021          | 56292  | 6562.016  | 776.894   | 5785.122 | 10.277 | 88.161 | 750.730 | 87.513  | 10.361  | 77.153 |
| 2022          | 55827  | 6352.366  | 688.831   | 5663.535 | 10.145 | 89.156 | 738.885 | 84.075  | 9.117   | 74.958 |
| 2023          | 55338  | 6134.123  | 614.556   | 5519.568 | 9.974  | 89.981 | 726.728 | 80.557  | 8.071   | 72.486 |
| 2024          | 54770  | 5922.193  | 546.391   | 5375.801 | 9.815  | 90.774 | 713.771 | 77.179  | 7.121   | 70.058 |
| 2025          | 53295  | 5504.188  | 478.510   | 5025.678 | 9.430  | 91.306 | 801.612 | 82.789  | 7.197   | 75.592 |
| 2026          | 55278  | 5641.075  | 451.325   | 5189.750 | 9.389  | 91.999 | 828.283 | 84.526  | 6.763   | 77.764 |
| 2027          | 54199  | 5426.216  | 404.625   | 5021.591 | 9.265  | 92.543 | 808.875 | 80.982  | 6.039   | 74.943 |
| 2028          | 53090  | 5197.830  | 360.941   | 4836.889 | 9.111  | 93.056 | 789.020 | 77.249  | 5.364   | 71.885 |
| 2029          | 51974  | 4973.547  | 323.724   | 4649.823 | 8.946  | 93.491 | 769.023 | 73.590  | 4.790   | 68.800 |
| 2030          | 49479  | 4450.618  | 276.760   | 4173.858 | 8.436  | 93.782 | 866.605 | 77.952  | 4.847   | 73.104 |
| 2031          | 51987  | 4555.052  | 268.152   | 4286.900 | 8.246  | 94.113 | 909.317 | 79.674  | 4.690   | 74.984 |
| 2032          | 50677  | 4349.999  | 240.702   | 4109.297 | 8.109  | 94.467 | 884.689 | 75.939  | 4.202   | 71.737 |
| 2033          | 49380  | 4147.948  | 219.658   | 3928.290 | 7.955  | 94.704 | 859.955 | 72.237  | 3.825   | 68.411 |
| 2034          | 48076  | 3966.133  | 199.838   | 3766.295 | 7.834  | 94.961 | 834.943 | 68.881  | 3.471   | 65.410 |
| 2035          | 44518  | 3289.064  | 160.832   | 3128.232 | 7.027  | 95.110 | 946.825 | 69.952  | 3.421   | 66.532 |
| 2036          | 46347  | 3313.192  | 152.195   | 3160.997 | 6.820  | 95.406 | 987.211 | 70.572  | 3.242   | 67.330 |
| 2037          | 44841  | 3117.951  | 135.420   | 2982.531 | 6.651  | 95.657 | 955.859 | 66.464  | 2.887   | 63.578 |
| 2038          | 43378  | 2949.775  | 124.041   | 2825.734 | 6.514  | 95.795 | 924.621 | 62.876  | 2.644   | 60.232 |
| 2039          | 41973  | 2766.312  | 112.990   | 2653.322 | 6.322  | 95.916 | 893.753 | 58.905  | 2.406   | 56.499 |

## Results for PHIM for Run 8 (Sensitivity\_Analysis\_3.RTF)

\*\*\*\*\*

### Main Results for E-Component for Run: 8, Simulation: 1, COD: STROKE

| Variable Parameter          | Value                                  |
|-----------------------------|----------------------------------------|
| 1. Country                  | US (United States)                     |
| 2. Sex                      | F (Females)                            |
| 3. Year of start of process | 1990                                   |
| 4. Cause of Death           | STROKE                                 |
| 5. Effective Dose NULL      | CC:1                                   |
| 6. Effective Dose Ecig      | CC:1 Ecig:0.05 Dual:0.525              |
| Note:                       | Death rates are per million population |

#### Results for Age Groups Combined and Years combined, Population unadjusted for deaths in Ecig scenario,

| Age Group:All | NULL    | Ecig       | %Drop     |          |        |        | NULL    | Ecig   | Drop   |        |
|---------------|---------|------------|-----------|----------|--------|--------|---------|--------|--------|--------|
| Year          | Number  | Attrib     | Attrib    | Drop     | %Drop  | Attrib | Death   | Attrib | Attrib | Drop   |
|               | Deaths  | Deaths     | Deaths    | Deaths   | Deaths | Deaths | Rate    | Rates  | Rates  | Rates  |
| All Comb      | 1352207 | 104899.750 | 50757.869 | 54141.88 | 4.004  | 51.613 | 371.243 | 28.800 | 13.935 | 14.864 |

#### Results for Age Groups Combined, Population unadjusted for deaths in Ecig scenario,

| Age Group:All | NULL   | Ecig     | %Drop    |          |        |        | NULL    | Ecig   | Drop   |        |
|---------------|--------|----------|----------|----------|--------|--------|---------|--------|--------|--------|
| Year          | Number | Attrib   | Attrib   | Drop     | %Drop  | Attrib | Death   | Attrib | Attrib | Drop   |
|               | Deaths | Deaths   | Deaths   | Deaths   | Deaths | Deaths | Rate    | Rates  | Rates  | Rates  |
| 1990          | 33504  | 3293.017 | 3293.017 | 0.000    | 0.000  | 0.000  | 490.678 | 48.227 | 48.227 | 0.000  |
| 1991          | 32505  | 3207.063 | 3179.556 | 27.507   | 0.085  | 0.858  | 469.694 | 46.342 | 45.944 | 0.397  |
| 1992          | 32560  | 3218.125 | 3141.206 | 76.919   | 0.236  | 2.390  | 464.104 | 45.871 | 44.774 | 1.096  |
| 1993          | 32768  | 3226.680 | 3081.006 | 145.674  | 0.445  | 4.515  | 460.480 | 45.344 | 43.297 | 2.047  |
| 1994          | 33005  | 3277.266 | 3044.880 | 232.385  | 0.704  | 7.091  | 456.915 | 45.370 | 42.153 | 3.217  |
| 1995          | 33730  | 3309.378 | 2976.257 | 333.121  | 0.988  | 10.066 | 459.716 | 45.104 | 40.564 | 4.540  |
| 1996          | 33750  | 3312.987 | 2862.456 | 450.530  | 1.335  | 13.599 | 454.019 | 44.568 | 38.507 | 6.061  |
| 1997          | 33699  | 3267.066 | 2702.673 | 564.393  | 1.675  | 17.275 | 447.056 | 43.341 | 35.854 | 7.487  |
| 1998          | 33274  | 3178.725 | 2505.476 | 673.249  | 2.023  | 21.180 | 435.211 | 41.577 | 32.771 | 8.806  |
| 1999          | 33891  | 3120.351 | 2336.114 | 784.237  | 2.314  | 25.133 | 437.317 | 40.264 | 30.144 | 10.120 |
| 2000          | 33827  | 3142.808 | 2224.942 | 917.867  | 2.713  | 29.205 | 431.074 | 40.050 | 28.353 | 11.697 |
| 2001          | 32506  | 2961.588 | 1975.324 | 986.265  | 3.034  | 33.302 | 409.647 | 37.323 | 24.893 | 12.429 |
| 2002          | 32078  | 2940.627 | 1831.359 | 1109.268 | 3.458  | 37.722 | 400.295 | 36.695 | 22.853 | 13.842 |
| 2003          | 30568  | 2819.545 | 1637.916 | 1181.629 | 3.866  | 41.908 | 377.883 | 34.855 | 20.248 | 14.607 |
| 2004          | 29388  | 2730.466 | 1471.806 | 1258.660 | 4.283  | 46.097 | 359.671 | 33.417 | 18.013 | 15.404 |
| 2005          | 27954  | 2670.510 | 1333.918 | 1336.592 | 4.781  | 50.050 | 338.339 | 32.322 | 16.145 | 16.177 |
| 2006          | 27201  | 2623.285 | 1211.468 | 1411.817 | 5.190  | 53.819 | 326.354 | 31.474 | 14.535 | 16.939 |
| 2007          | 26302  | 2536.599 | 1078.810 | 1457.789 | 5.543  | 57.470 | 312.424 | 30.131 | 12.814 | 17.316 |
| 2008          | 25998  | 2469.443 | 969.126  | 1500.317 | 5.771  | 60.755 | 305.468 | 29.015 | 11.387 | 17.628 |
| 2009          | 25040  | 2386.945 | 861.453  | 1525.492 | 6.092  | 63.910 | 290.901 | 27.730 | 10.008 | 17.722 |
| 2010          | 24840  | 2329.274 | 772.679  | 1556.595 | 6.266  | 66.827 | 285.273 | 26.750 | 8.874  | 17.877 |
| 2011          | 24792  | 2286.581 | 692.059  | 1594.522 | 6.432  | 69.734 | 282.045 | 26.013 | 7.873  | 18.140 |
| 2012          | 24500  | 2243.311 | 619.181  | 1624.130 | 6.629  | 72.399 | 275.872 | 25.260 | 6.972  | 18.288 |
| 2013          | 24451  | 2176.503 | 547.546  | 1628.957 | 6.662  | 74.843 | 272.368 | 24.245 | 6.099  | 18.145 |
| 2014          | 25296  | 2211.619 | 508.000  | 1703.619 | 6.735  | 77.030 | 278.691 | 24.366 | 5.597  | 18.769 |
| 2015          | 26316  | 2237.016 | 474.355  | 1762.661 | 6.698  | 78.795 | 324.141 | 27.554 | 5.843  | 21.711 |
| 2016          | 26735  | 2229.057 | 432.716  | 1796.341 | 6.719  | 80.587 | 326.164 | 27.194 | 5.279  | 21.915 |
| 2017          | 27616  | 2221.649 | 395.528  | 1826.122 | 6.613  | 82.197 | 333.726 | 26.848 | 4.780  | 22.068 |
| 2018          | 25256  | 1939.420 | 318.287  | 1621.133 | 6.419  | 83.589 | 302.304 | 23.214 | 3.810  | 19.404 |
| 2019          | 25429  | 1904.400 | 285.100  | 1619.299 | 6.368  | 85.029 | 301.434 | 22.574 | 3.380  | 19.195 |
| 2020          | 25379  | 1806.054 | 250.285  | 1555.769 | 6.130  | 86.142 | 340.922 | 24.261 | 3.362  | 20.899 |
| 2021          | 25448  | 1748.172 | 221.644  | 1526.528 | 5.999  | 87.321 | 339.386 | 23.314 | 2.956  | 20.358 |
| 2022          | 25539  | 1701.148 | 198.257  | 1502.890 | 5.885  | 88.346 | 338.015 | 22.515 | 2.624  | 19.891 |
| 2023          | 25620  | 1652.087 | 178.183  | 1473.904 | 5.753  | 89.215 | 336.461 | 21.696 | 2.340  | 19.356 |
| 2024          | 25659  | 1597.127 | 158.846  | 1438.281 | 5.605  | 90.054 | 334.391 | 20.814 | 2.070  | 18.744 |
| 2025          | 25260  | 1467.622 | 136.716  | 1330.907 | 5.269  | 90.685 | 379.931 | 22.075 | 2.056  | 20.018 |
| 2026          | 25480  | 1390.505 | 120.530  | 1269.975 | 4.984  | 91.332 | 381.790 | 20.835 | 1.806  | 19.029 |
| 2027          | 25264  | 1342.095 | 107.905  | 1234.190 | 4.885  | 91.960 | 377.042 | 20.030 | 1.610  | 18.419 |
| 2028          | 25022  | 1289.536 | 96.781   | 1192.755 | 4.767  | 92.495 | 371.870 | 19.165 | 1.438  | 17.727 |
| 2029          | 24767  | 1242.216 | 86.979   | 1155.237 | 4.664  | 92.998 | 366.459 | 18.380 | 1.287  | 17.093 |
| 2030          | 23959  | 1096.803 | 72.255   | 1024.549 | 4.276  | 93.412 | 419.641 | 19.210 | 1.266  | 17.945 |
| 2031          | 23963  | 1019.991 | 63.240   | 956.751  | 3.993  | 93.800 | 419.142 | 17.841 | 1.106  | 16.735 |
| 2032          | 23615  | 977.406  | 56.692   | 920.714  | 3.899  | 94.200 | 412.259 | 17.063 | 0.990  | 16.073 |
| 2033          | 23259  | 937.450  | 51.689   | 885.760  | 3.808  | 94.486 | 405.051 | 16.326 | 0.900  | 15.426 |
| 2034          | 22879  | 900.763  | 46.966   | 853.797  | 3.732  | 94.786 | 397.339 | 15.644 | 0.816  | 14.828 |
| 2035          | 21733  | 745.023  | 36.961   | 708.062  | 3.258  | 95.039 | 462.224 | 15.845 | 0.786  | 15.059 |
| 2036          | 20904  | 680.360  | 31.515   | 648.844  | 3.104  | 95.368 | 445.263 | 14.492 | 0.671  | 13.821 |
| 2037          | 20397  | 644.109  | 28.317   | 615.793  | 3.019  | 95.604 | 434.791 | 13.730 | 0.604  | 13.127 |
| 2038          | 19890  | 612.448  | 26.054   | 586.394  | 2.948  | 95.746 | 423.966 | 13.055 | 0.555  | 12.499 |
| 2039          | 19392  | 577.529  | 23.836   | 553.693  | 2.855  | 95.873 | 412.930 | 12.298 | 0.508  | 11.790 |

## Results for PHIM for Run 8 (Sensitivity\_Analysis\_3.RTF)

\*\*\*\*\*

### Main Results for E-Component for Run: 8, Simulation: 1, COD: COPD

| Variable Parameter          | Value                                  |
|-----------------------------|----------------------------------------|
| 1. Country                  | US (United States)                     |
| 2. Sex                      | F (Females)                            |
| 3. Year of start of process | 1990                                   |
| 4. Cause of Death           | COPD                                   |
| 5. Effective Dose NULL      | CC:1                                   |
| 6. Effective Dose Ecig      | CC:1 Ecig:0.05 Dual:0.525              |
| Note:                       | Death rates are per million population |

#### Results for Age Groups Combined and Years combined, Population unadjusted for deaths in Ecig scenario,

| Age Group:All |         | NULL       | Ecig       | %Drop    |        | NULL   | Ecig    | Drop    |         |        |
|---------------|---------|------------|------------|----------|--------|--------|---------|---------|---------|--------|
| Year          | Number  | Attrib     | Attrib     | Drop     | %Drop  | Attrib | Death   | Attrib  | Attrib  | Drop   |
|               | Deaths  | Deaths     | Deaths     | Deaths   | Deaths | Deaths | Rate    | Rates   | Rates   | Rates  |
| All Comb      | 2159941 | 862051.244 | 546828.708 | 315222.5 | 14.594 | 36.567 | 593.003 | 236.673 | 150.130 | 86.543 |

#### Results for Age Groups Combined, Population unadjusted for deaths in Ecig scenario,

| Age Group:All |        | NULL      | Ecig      | %Drop    |        | NULL   | Ecig    | Drop    |         |         |
|---------------|--------|-----------|-----------|----------|--------|--------|---------|---------|---------|---------|
| Year          | Number | Attrib    | Attrib    | Drop     | %Drop  | Attrib | Death   | Attrib  | Attrib  | Drop    |
|               | Deaths | Deaths    | Deaths    | Deaths   | Deaths | Deaths | Rate    | Rates   | Rates   | Rates   |
| 1990          | 24738  | 10694.712 | 10694.712 | 0.000    | 0.000  | 0.000  | 362.296 | 156.628 | 156.628 | 0.000   |
| 1991          | 26562  | 11602.933 | 11584.706 | 18.227   | 0.069  | 0.157  | 383.818 | 167.661 | 167.398 | 0.263   |
| 1992          | 26828  | 11831.375 | 11781.145 | 50.230   | 0.187  | 0.425  | 382.401 | 168.642 | 167.926 | 0.716   |
| 1993          | 29774  | 13246.371 | 13138.012 | 108.359  | 0.364  | 0.818  | 418.406 | 186.148 | 184.625 | 1.523   |
| 1994          | 29804  | 13355.662 | 13183.396 | 172.266  | 0.578  | 1.290  | 412.601 | 184.893 | 182.509 | 2.385   |
| 1995          | 29755  | 13397.439 | 13141.463 | 255.977  | 0.860  | 1.911  | 405.540 | 182.598 | 179.109 | 3.489   |
| 1996          | 30900  | 13960.356 | 13602.492 | 357.864  | 1.158  | 2.563  | 415.680 | 187.801 | 182.987 | 4.814   |
| 1997          | 31128  | 14109.552 | 13641.317 | 468.235  | 1.504  | 3.319  | 412.949 | 187.180 | 180.968 | 6.212   |
| 1998          | 32096  | 14599.657 | 13986.278 | 613.379  | 1.911  | 4.201  | 419.803 | 190.958 | 182.935 | 8.023   |
| 1999          | 34616  | 15728.102 | 14931.134 | 796.968  | 2.302  | 5.067  | 446.673 | 202.950 | 192.666 | 10.284  |
| 2000          | 34299  | 15579.803 | 14630.840 | 948.963  | 2.767  | 6.091  | 437.088 | 198.541 | 186.448 | 12.093  |
| 2001          | 34592  | 15696.614 | 14552.133 | 1144.481 | 3.309  | 7.291  | 435.935 | 197.812 | 183.389 | 14.423  |
| 2002          | 34291  | 15519.777 | 14189.849 | 1329.929 | 3.878  | 8.569  | 427.910 | 193.668 | 177.072 | 16.596  |
| 2003          | 35074  | 15888.389 | 14314.968 | 1573.421 | 4.486  | 9.903  | 433.587 | 196.413 | 176.962 | 19.451  |
| 2004          | 33512  | 15091.573 | 13381.856 | 1709.717 | 5.102  | 11.329 | 410.143 | 184.701 | 163.777 | 20.925  |
| 2005          | 35392  | 15803.656 | 13759.082 | 2044.574 | 5.777  | 12.937 | 428.364 | 191.278 | 166.532 | 24.746  |
| 2006          | 33981  | 15100.563 | 12921.586 | 2178.977 | 6.412  | 14.430 | 407.699 | 181.174 | 155.031 | 26.143  |
| 2007          | 34000  | 14974.384 | 12561.823 | 2412.561 | 7.096  | 16.111 | 403.863 | 177.871 | 149.214 | 28.657  |
| 2008          | 37425  | 16406.197 | 13509.806 | 2896.392 | 7.739  | 17.654 | 439.732 | 192.768 | 158.736 | 34.032  |
| 2009          | 36826  | 16083.194 | 12934.878 | 3148.316 | 8.549  | 19.575 | 427.825 | 186.846 | 150.270 | 36.575  |
| 2010          | 36788  | 15927.400 | 12550.530 | 3376.870 | 9.179  | 21.202 | 422.489 | 182.917 | 144.136 | 38.781  |
| 2011          | 37636  | 16221.836 | 12468.675 | 3753.161 | 9.972  | 23.136 | 428.164 | 184.547 | 141.849 | 42.698  |
| 2012          | 38265  | 16358.849 | 12260.299 | 4098.550 | 10.711 | 25.054 | 430.867 | 184.202 | 138.052 | 46.150  |
| 2013          | 40112  | 16994.822 | 12388.204 | 4606.619 | 11.484 | 27.106 | 446.821 | 189.311 | 137.996 | 51.315  |
| 2014          | 40084  | 16855.093 | 11936.944 | 4918.150 | 12.270 | 29.179 | 441.613 | 185.696 | 131.511 | 54.184  |
| 2015          | 42200  | 17572.483 | 12156.240 | 5416.243 | 12.835 | 30.822 | 519.788 | 216.445 | 149.732 | 66.713  |
| 2016          | 42606  | 17579.955 | 11763.821 | 5816.134 | 13.651 | 33.084 | 519.788 | 214.473 | 143.517 | 70.956  |
| 2017          | 44364  | 18080.688 | 11697.274 | 6383.414 | 14.389 | 35.305 | 536.117 | 218.496 | 141.356 | 77.140  |
| 2018          | 45359  | 18209.262 | 11417.165 | 6792.097 | 14.974 | 37.300 | 542.932 | 217.960 | 136.660 | 81.299  |
| 2019          | 46876  | 18648.302 | 11285.049 | 7363.253 | 15.708 | 39.485 | 555.657 | 221.054 | 133.771 | 87.283  |
| 2020          | 48331  | 19002.597 | 11147.499 | 7855.098 | 16.253 | 41.337 | 649.239 | 255.266 | 149.747 | 105.519 |
| 2021          | 48338  | 18885.717 | 10646.947 | 8238.770 | 17.044 | 43.624 | 644.660 | 251.867 | 141.992 | 109.875 |
| 2022          | 49708  | 19235.076 | 10439.060 | 8796.016 | 17.696 | 45.729 | 657.895 | 254.582 | 138.164 | 116.418 |
| 2023          | 51083  | 19521.158 | 10214.566 | 9306.593 | 18.219 | 47.674 | 670.849 | 256.363 | 134.143 | 122.219 |
| 2024          | 52397  | 19918.620 | 9992.114  | 9926.505 | 18.945 | 49.835 | 682.854 | 259.583 | 130.219 | 129.364 |
| 2025          | 53387  | 20150.545 | 9724.258  | 10426.29 | 19.530 | 51.742 | 803.004 | 303.086 | 146.263 | 156.823 |
| 2026          | 54232  | 20393.792 | 9409.085  | 10984.71 | 20.255 | 53.863 | 812.615 | 305.582 | 140.986 | 164.596 |
| 2027          | 55049  | 20615.351 | 9073.703  | 11541.65 | 20.966 | 55.986 | 821.568 | 307.668 | 135.418 | 172.250 |
| 2028          | 55809  | 20731.894 | 8693.897  | 12038.00 | 21.570 | 58.065 | 829.419 | 308.115 | 129.208 | 178.907 |
| 2029          | 56527  | 20781.967 | 8299.552  | 12482.41 | 22.082 | 60.064 | 836.392 | 307.495 | 122.802 | 184.693 |
| 2030          | 56756  | 20753.201 | 7917.254  | 12835.95 | 22.616 | 61.850 | 994.067 | 363.487 | 138.669 | 224.819 |
| 2031          | 58288  | 21048.417 | 7774.361  | 13274.06 | 22.773 | 63.064 | 1019.54 | 368.165 | 135.984 | 232.181 |
| 2032          | 58782  | 21169.329 | 7423.578  | 13745.75 | 23.384 | 64.932 | 1026.18 | 369.560 | 129.596 | 239.964 |
| 2033          | 59236  | 21109.293 | 7038.600  | 14070.69 | 23.754 | 66.656 | 1031.59 | 367.618 | 122.577 | 245.041 |
| 2034          | 59614  | 21109.429 | 6654.085  | 14455.34 | 24.248 | 68.478 | 1035.33 | 366.613 | 115.563 | 251.049 |
| 2035          | 58938  | 20794.840 | 6269.427  | 14525.41 | 24.645 | 69.851 | 1253.51 | 442.268 | 133.339 | 308.929 |
| 2036          | 56014  | 19354.577 | 5552.039  | 13802.54 | 24.641 | 71.314 | 1193.11 | 412.258 | 118.260 | 293.998 |
| 2037          | 55953  | 19064.169 | 5110.514  | 13953.66 | 24.938 | 73.193 | 1192.72 | 406.385 | 108.939 | 297.446 |
| 2038          | 55859  | 18854.812 | 4748.610  | 14106.20 | 25.253 | 74.815 | 1190.66 | 401.900 | 101.219 | 300.681 |
| 2039          | 55757  | 18437.457 | 4333.881  | 14103.58 | 25.295 | 76.494 | 1187.28 | 392.602 | 92.284  | 300.317 |

## Results for PHIM for Run 8 (Sensitivity\_Analysis\_3.RTF)

\*\*\*\*\*

### Main Results for E-Component for Run: 8, Simulation: 1, COD: Four Diseases Combined, Adjusted

| Variable Parameter          | Value                                  |
|-----------------------------|----------------------------------------|
| 1. Country                  | US (United States)                     |
| 2. Sex                      | F (Females)                            |
| 3. Year of start of process | 1990                                   |
| 4. Cause of Death           | Four Diseases Combined                 |
| 5. Effective Dose NULL      | CC:1                                   |
| 6. Effective Dose Ecig      | CC:1 Ecig:0.05 Dual:0.525              |
| Note:                       | Death rates are per million population |

#### Results for Age Groups Combined and Years combined, Population and Number deaths adjusted for Ecig scenario,

| Age Group:All | NULL    | Ecig        | %Drop       |         |        | NULL   | Ecig    | Drop    |         |         |
|---------------|---------|-------------|-------------|---------|--------|--------|---------|---------|---------|---------|
| Year          | Number  | Attrib      | Attrib      | Drop    | %Drop  | Attrib | Death   | Attrib  | Attrib  | Drop    |
|               | Deaths  | Deaths      | Deaths      | Deaths  | Deaths | Deaths | Rate    | Rates   | Rates   | Rates   |
| All Comb      | 9149342 | 2946250.006 | 1936912.069 | 1009338 | 11.032 | 34.258 | 2499.71 | 808.881 | 529.188 | 279.693 |

#### Results for Age Groups Combined, Population and Number deaths adjusted for Ecig scenario,

| Age Group:All | NULL   | Ecig      | %Drop     |          |        | NULL   | Ecig    | Drop    |         |         |
|---------------|--------|-----------|-----------|----------|--------|--------|---------|---------|---------|---------|
| Year          | Number | Attrib    | Attrib    | Drop     | %Drop  | Attrib | Death   | Attrib  | Attrib  | Drop    |
|               | Deaths | Deaths    | Deaths    | Deaths   | Deaths | Deaths | Rate    | Rates   | Rates   | Rates   |
| 1990          | 199848 | 57524.822 | 57524.822 | 0.000    | 0.000  | 0.000  | 2926.84 | 842.471 | 842.471 | 0.000   |
| 1991          | 199162 | 59078.486 | 58910.022 | 168.464  | 0.085  | 0.285  | 2877.87 | 853.678 | 851.244 | 2.434   |
| 1992          | 198533 | 60494.150 | 60022.559 | 471.590  | 0.238  | 0.780  | 2829.84 | 862.271 | 855.547 | 6.724   |
| 1993          | 202515 | 62694.848 | 61777.166 | 917.681  | 0.453  | 1.464  | 2845.86 | 881.034 | 868.130 | 12.904  |
| 1994          | 200665 | 63202.598 | 61752.722 | 1449.876 | 0.723  | 2.294  | 2777.91 | 874.966 | 854.875 | 20.091  |
| 1995          | 201036 | 63766.862 | 61672.334 | 2094.528 | 1.042  | 3.285  | 2739.86 | 869.097 | 840.515 | 28.583  |
| 1996          | 201202 | 64591.163 | 61721.051 | 2870.111 | 1.426  | 4.444  | 2706.47 | 868.908 | 830.239 | 38.669  |
| 1997          | 198673 | 64686.912 | 61092.136 | 3594.776 | 1.809  | 5.557  | 2635.34 | 858.147 | 810.368 | 47.779  |
| 1998          | 197623 | 65295.961 | 60861.444 | 4434.517 | 2.244  | 6.791  | 2584.42 | 854.046 | 795.917 | 58.129  |
| 1999          | 211404 | 67327.521 | 61596.590 | 5730.931 | 2.711  | 8.512  | 2727.28 | 868.771 | 794.646 | 74.125  |
| 2000          | 208596 | 67596.897 | 60920.724 | 6676.172 | 3.201  | 9.876  | 2657.46 | 861.419 | 776.112 | 85.308  |
| 2001          | 203735 | 67008.811 | 59331.120 | 7677.691 | 3.768  | 11.458 | 2566.52 | 844.458 | 747.415 | 97.044  |
| 2002          | 200990 | 67067.744 | 58274.569 | 8793.174 | 4.375  | 13.111 | 2506.90 | 836.925 | 726.843 | 110.082 |
| 2003          | 196551 | 66756.217 | 56955.382 | 9800.835 | 4.986  | 14.682 | 2428.32 | 825.244 | 703.662 | 121.582 |
| 2004          | 188395 | 65058.725 | 54405.061 | 10653.66 | 5.655  | 16.375 | 2304.03 | 796.234 | 665.361 | 130.873 |
| 2005          | 186695 | 65214.724 | 53411.563 | 11803.16 | 6.322  | 18.099 | 2257.68 | 789.321 | 645.900 | 143.421 |
| 2006          | 180408 | 63771.146 | 51095.218 | 12675.93 | 7.026  | 19.877 | 2162.29 | 765.117 | 612.406 | 152.711 |
| 2007          | 176008 | 63110.718 | 49539.041 | 13571.68 | 7.711  | 21.505 | 2088.20 | 749.650 | 587.742 | 161.908 |
| 2008          | 177996 | 63718.624 | 48851.249 | 14867.38 | 8.353  | 23.333 | 2088.54 | 748.674 | 573.204 | 175.470 |
| 2009          | 173280 | 62794.698 | 47089.537 | 15705.16 | 9.063  | 25.010 | 2009.95 | 729.515 | 546.210 | 183.305 |
| 2010          | 171019 | 61917.074 | 45330.716 | 16586.36 | 9.699  | 26.788 | 1960.61 | 711.083 | 519.683 | 191.400 |
| 2011          | 170900 | 61680.114 | 43910.970 | 17769.14 | 10.397 | 28.809 | 1940.41 | 701.700 | 498.568 | 203.132 |
| 2012          | 172089 | 62023.127 | 42941.595 | 19081.53 | 11.088 | 30.765 | 1933.50 | 698.386 | 482.467 | 215.919 |
| 2013          | 173449 | 62037.765 | 41772.369 | 20265.40 | 11.684 | 32.666 | 1927.41 | 691.059 | 464.186 | 226.873 |
| 2014          | 175006 | 61921.017 | 40354.260 | 21566.76 | 12.323 | 34.829 | 1922.90 | 682.195 | 443.399 | 238.796 |
| 2015          | 178296 | 61856.204 | 39180.572 | 22675.63 | 12.718 | 36.659 | 2188.87 | 761.899 | 481.005 | 280.894 |
| 2016          | 177882 | 60464.119 | 36891.055 | 23573.06 | 13.252 | 38.987 | 2162.31 | 737.655 | 448.442 | 289.213 |
| 2017          | 180451 | 60243.839 | 35470.112 | 24773.73 | 13.729 | 41.122 | 2172.09 | 728.017 | 426.954 | 301.063 |
| 2018          | 178390 | 60713.327 | 34853.176 | 25860.15 | 14.496 | 42.594 | 2126.17 | 726.721 | 415.404 | 311.317 |
| 2019          | 180585 | 61148.172 | 33894.187 | 27253.98 | 15.092 | 44.570 | 2130.77 | 724.841 | 399.926 | 324.915 |
| 2020          | 181959 | 61149.317 | 32926.018 | 28223.30 | 15.511 | 46.155 | 2430.62 | 821.432 | 439.828 | 381.604 |
| 2021          | 179704 | 58727.786 | 30081.723 | 28646.06 | 15.941 | 48.778 | 2382.20 | 783.216 | 398.771 | 384.445 |
| 2022          | 181130 | 58848.802 | 29017.429 | 29831.37 | 16.470 | 50.692 | 2381.91 | 778.881 | 381.586 | 397.294 |
| 2023          | 182501 | 58816.149 | 27943.249 | 30872.90 | 16.917 | 52.491 | 2380.28 | 772.407 | 364.452 | 407.955 |
| 2024          | 183613 | 58955.232 | 26870.911 | 32084.32 | 17.474 | 54.421 | 2375.44 | 768.316 | 347.635 | 420.681 |
| 2025          | 182564 | 58297.744 | 25695.092 | 32602.65 | 17.858 | 55.924 | 2721.98 | 876.861 | 383.108 | 493.754 |
| 2026          | 182610 | 56469.971 | 23632.960 | 32837.01 | 17.982 | 58.150 | 2710.95 | 846.150 | 350.844 | 495.306 |
| 2027          | 182053 | 56209.427 | 22455.332 | 33754.09 | 18.541 | 60.051 | 2690.50 | 838.883 | 331.860 | 507.023 |
| 2028          | 181335 | 55733.105 | 21216.831 | 34516.27 | 19.035 | 61.931 | 2667.31 | 828.298 | 312.084 | 516.214 |
| 2029          | 180521 | 55145.838 | 19971.939 | 35173.90 | 19.485 | 63.783 | 2642.22 | 815.951 | 292.321 | 523.629 |
| 2030          | 176430 | 53615.097 | 18720.640 | 34894.46 | 19.778 | 65.083 | 3050.61 | 939.056 | 323.695 | 615.361 |
| 2031          | 178044 | 52046.561 | 17487.435 | 34559.13 | 19.410 | 66.400 | 3072.49 | 910.364 | 301.780 | 608.584 |
| 2032          | 176599 | 51582.636 | 16462.843 | 35119.79 | 19.887 | 68.085 | 3039.79 | 900.496 | 283.374 | 617.122 |
| 2033          | 175097 | 50839.758 | 15425.246 | 35414.51 | 20.226 | 69.659 | 3004.79 | 885.375 | 264.708 | 620.666 |
| 2034          | 173450 | 50215.451 | 14406.911 | 35808.54 | 20.645 | 71.310 | 2966.57 | 872.104 | 246.406 | 625.698 |
| 2035          | 166216 | 47773.075 | 13306.509 | 34466.57 | 20.736 | 72.146 | 3472.11 | 1016.05 | 277.962 | 738.083 |
| 2036          | 159856 | 43298.709 | 11339.186 | 31959.52 | 19.993 | 73.812 | 3341.93 | 922.274 | 237.057 | 685.218 |
| 2037          | 157291 | 42241.563 | 10342.288 | 31899.28 | 20.280 | 75.516 | 3288.74 | 900.450 | 216.243 | 684.207 |
| 2038          | 154735 | 41356.353 | 9546.340  | 31810.01 | 20.558 | 76.917 | 3233.10 | 881.531 | 199.465 | 682.066 |
| 2039          | 152250 | 40161.050 | 8659.865  | 31501.19 | 20.690 | 78.437 | 3175.95 | 855.178 | 180.645 | 674.532 |

## Results for PHIM for Run 8 (Sensitivity\_Analysis\_3.RTF)

\*\*\*\*\*

### Main Results for E-Component for Run: 8, Simulation: 1, COD: LUNG CANCER, Adjusted

| Variable Parameter          | Value                                  |
|-----------------------------|----------------------------------------|
| 1. Country                  | US (United States)                     |
| 2. Sex                      | F (Females)                            |
| 3. Year of start of process | 1990                                   |
| 4. Cause of Death           | LUNG CANCER                            |
| 5. Effective Dose NULL      | CC:1                                   |
| 6. Effective Dose Ecig      | CC:1 Ecig:0.05 Dual:0.525              |
| Note:                       | Death rates are per million population |

#### Results for Age Groups Combined and Years combined, Population and Number deaths adjusted for Ecig scenario,

| Age Group:All | NULL    | Ecig        | %Drop       |          |        |        | NULL    | Ecig    | Drop    |         |
|---------------|---------|-------------|-------------|----------|--------|--------|---------|---------|---------|---------|
| Year          | Number  | Attrib      | Attrib      | Drop     | %Drop  | Attrib | Death   | Attrib  | Attrib  | Drop    |
|               | Deaths  | Deaths      | Deaths      | Deaths   | Deaths | Deaths | Rate    | Rates   | Rates   | Rates   |
| All Comb      | 2344154 | 1580465.217 | 1138588.471 | 441876.7 | 18.850 | 27.959 | 640.452 | 433.910 | 311.077 | 122.834 |

#### Results for Age Groups Combined, Population and Number deaths adjusted for Ecig scenario,

| Age Group:All | NULL   | Ecig      | %Drop     |          |        |        | NULL    | Ecig    | Drop    |         |
|---------------|--------|-----------|-----------|----------|--------|--------|---------|---------|---------|---------|
| Year          | Number | Attrib    | Attrib    | Drop     | %Drop  | Attrib | Death   | Attrib  | Attrib  | Drop    |
|               | Deaths | Deaths    | Deaths    | Deaths   | Deaths | Deaths | Rate    | Rates   | Rates   | Rates   |
| 1990          | 42690  | 30614.201 | 30614.201 | 0.000    | 0.000  | 0.000  | 625.210 | 448.355 | 448.355 | 0.000   |
| 1991          | 43692  | 31412.010 | 31379.684 | 32.326   | 0.074  | 0.103  | 631.345 | 453.901 | 453.433 | 0.467   |
| 1992          | 45423  | 32782.407 | 32688.527 | 93.880   | 0.207  | 0.286  | 647.451 | 467.274 | 465.935 | 1.339   |
| 1993          | 46292  | 33491.183 | 33305.726 | 185.457  | 0.401  | 0.554  | 650.518 | 470.643 | 468.032 | 2.611   |
| 1994          | 47019  | 34074.347 | 33773.868 | 300.479  | 0.639  | 0.882  | 650.904 | 471.719 | 467.549 | 4.170   |
| 1995          | 47843  | 34694.454 | 34241.501 | 452.953  | 0.947  | 1.306  | 652.042 | 472.861 | 466.668 | 6.193   |
| 1996          | 48250  | 35027.269 | 34400.678 | 626.591  | 1.299  | 1.789  | 649.027 | 471.202 | 462.740 | 8.462   |
| 1997          | 49044  | 35590.763 | 34757.160 | 833.602  | 1.700  | 2.342  | 650.551 | 472.153 | 461.043 | 11.110  |
| 1998          | 49699  | 36100.785 | 35022.476 | 1078.309 | 2.170  | 2.987  | 649.941 | 472.184 | 458.007 | 14.177  |
| 1999          | 48901  | 35451.030 | 34151.724 | 1299.306 | 2.657  | 3.665  | 630.861 | 457.448 | 440.585 | 16.863  |
| 2000          | 50356  | 36447.986 | 34821.645 | 1626.341 | 3.230  | 4.462  | 641.521 | 464.474 | 443.617 | 20.857  |
| 2001          | 50422  | 36411.326 | 34452.878 | 1958.449 | 3.884  | 5.379  | 635.181 | 458.863 | 434.015 | 24.848  |
| 2002          | 51488  | 37078.545 | 34707.377 | 2371.168 | 4.605  | 6.395  | 642.191 | 462.696 | 432.896 | 29.800  |
| 2003          | 51461  | 36999.876 | 34234.412 | 2765.464 | 5.374  | 7.474  | 635.783 | 457.395 | 422.953 | 34.441  |
| 2004          | 51464  | 36861.555 | 33658.191 | 3203.364 | 6.224  | 8.690  | 629.393 | 451.138 | 411.632 | 39.506  |
| 2005          | 51499  | 36689.529 | 33022.177 | 3667.352 | 7.121  | 9.996  | 622.768 | 444.069 | 399.333 | 44.735  |
| 2006          | 51447  | 36504.774 | 32349.509 | 4155.265 | 8.077  | 11.383 | 616.618 | 437.979 | 387.728 | 50.251  |
| 2007          | 51947  | 36663.202 | 31926.369 | 4736.833 | 9.119  | 12.920 | 616.309 | 435.498 | 378.782 | 56.716  |
| 2008          | 51098  | 35898.803 | 30724.168 | 5174.635 | 10.127 | 14.415 | 599.571 | 421.800 | 360.507 | 61.293  |
| 2009          | 51334  | 35934.525 | 30133.508 | 5801.017 | 11.301 | 16.143 | 595.437 | 417.468 | 349.530 | 67.938  |
| 2010          | 51011  | 35502.829 | 29187.177 | 6315.652 | 12.381 | 17.789 | 584.801 | 407.730 | 334.609 | 73.121  |
| 2011          | 50685  | 35136.342 | 28220.501 | 6915.841 | 13.645 | 19.683 | 575.478 | 399.726 | 320.417 | 79.309  |
| 2012          | 51444  | 35450.201 | 27787.507 | 7662.693 | 14.895 | 21.615 | 577.997 | 399.173 | 312.205 | 86.968  |
| 2013          | 51290  | 35123.224 | 26802.777 | 8320.447 | 16.222 | 23.689 | 569.944 | 391.249 | 297.840 | 93.409  |
| 2014          | 51496  | 35079.370 | 26054.366 | 9025.004 | 17.526 | 25.727 | 565.821 | 386.476 | 286.277 | 100.199 |
| 2015          | 50709  | 34324.171 | 24835.828 | 9488.343 | 18.711 | 27.643 | 622.539 | 422.780 | 304.900 | 117.880 |
| 2016          | 49137  | 33054.753 | 23158.844 | 9895.909 | 20.140 | 29.938 | 597.298 | 403.264 | 281.515 | 121.749 |
| 2017          | 48631  | 32471.234 | 21992.164 | 10479.07 | 21.548 | 32.272 | 585.375 | 392.399 | 264.720 | 127.679 |
| 2018          | 50813  | 33657.595 | 21938.333 | 11719.26 | 23.064 | 34.819 | 605.620 | 402.871 | 261.476 | 141.396 |
| 2019          | 51418  | 33863.424 | 21258.770 | 12604.65 | 24.514 | 37.222 | 606.697 | 401.412 | 250.837 | 150.575 |
| 2020          | 51863  | 33910.830 | 20567.933 | 13342.90 | 25.727 | 39.347 | 692.784 | 455.532 | 274.748 | 180.784 |
| 2021          | 48460  | 31531.880 | 18327.948 | 13203.93 | 27.247 | 41.875 | 642.397 | 420.521 | 242.960 | 177.561 |
| 2022          | 48793  | 31560.212 | 17577.828 | 13982.38 | 28.657 | 44.304 | 641.635 | 417.708 | 231.153 | 186.556 |
| 2023          | 49092  | 31508.781 | 16817.413 | 14691.37 | 29.926 | 46.626 | 640.293 | 413.791 | 219.342 | 194.449 |
| 2024          | 49314  | 31517.293 | 16050.004 | 15467.29 | 31.365 | 49.076 | 637.985 | 410.740 | 207.643 | 203.097 |
| 2025          | 49043  | 31175.389 | 15227.439 | 15947.95 | 32.518 | 51.156 | 731.225 | 468.912 | 227.037 | 241.874 |
| 2026          | 45894  | 29044.598 | 13519.014 | 15525.58 | 33.829 | 53.454 | 681.323 | 435.206 | 200.697 | 234.509 |
| 2027          | 45711  | 28825.765 | 12732.708 | 16093.06 | 35.206 | 55.829 | 675.542 | 430.203 | 188.173 | 242.030 |
| 2028          | 45478  | 28513.846 | 11926.615 | 16587.23 | 36.473 | 58.173 | 668.952 | 423.769 | 175.432 | 248.338 |
| 2029          | 45209  | 28148.109 | 11121.393 | 17026.72 | 37.662 | 60.490 | 661.711 | 416.486 | 162.779 | 253.707 |
| 2030          | 44093  | 27314.475 | 10312.404 | 17002.07 | 38.559 | 62.246 | 762.408 | 478.407 | 178.310 | 300.097 |
| 2031          | 41453  | 25423.102 | 9232.382  | 16190.72 | 39.058 | 63.685 | 715.351 | 444.684 | 159.323 | 285.361 |
| 2032          | 41061  | 25085.902 | 8591.048  | 16494.85 | 40.171 | 65.753 | 706.783 | 437.933 | 147.877 | 290.056 |
| 2033          | 40649  | 24645.067 | 7964.174  | 16680.89 | 41.037 | 67.685 | 697.559 | 429.194 | 136.671 | 292.523 |
| 2034          | 40200  | 24239.126 | 7355.298  | 16883.83 | 41.999 | 69.655 | 687.561 | 420.967 | 125.800 | 295.167 |
| 2035          | 38268  | 22944.147 | 6689.085  | 16255.06 | 42.476 | 70.846 | 799.397 | 487.980 | 139.730 | 348.250 |
| 2036          | 33739  | 19950.581 | 5462.727  | 14487.85 | 42.941 | 72.619 | 705.344 | 424.953 | 114.204 | 310.749 |
| 2037          | 33172  | 19415.334 | 4932.344  | 14482.99 | 43.660 | 74.596 | 693.587 | 413.871 | 103.129 | 310.742 |
| 2038          | 32606  | 18939.317 | 4515.517  | 14423.80 | 44.236 | 76.158 | 681.288 | 403.701 | 94.349  | 309.352 |
| 2039          | 32054  | 18379.752 | 4063.152  | 14316.60 | 44.663 | 77.893 | 668.658 | 391.373 | 84.758  | 306.615 |

## Results for PHIM for Run 8 (Sensitivity\_Analysis\_3.RTF)

\*\*\*\*\*

### Main Results for E-Component for Run: 8, Simulation: 1, COD: IHD, Adjusted

| Variable Parameter          | Value                                  |
|-----------------------------|----------------------------------------|
| 1. Country                  | US (United States)                     |
| 2. Sex                      | F (Females)                            |
| 3. Year of start of process | 1990                                   |
| 4. Cause of Death           | IHD                                    |
| 5. Effective Dose NULL      | CC:1                                   |
| 6. Effective Dose Ecig      | CC:1 Ecig:0.05 Dual:0.525              |
| Note:                       | Death rates are per million population |

#### Results for Age Groups Combined and Years combined, Population and Number deaths adjusted for Ecig scenario,

| Age Group: | NULL    | Ecig       | %Drop      |          |        |        | NULL    | Ecig    | Drop   |        |
|------------|---------|------------|------------|----------|--------|--------|---------|---------|--------|--------|
| Year       | Number  | Attrib     | Attrib     | Drop     | %Drop  | Attrib | Death   | Attrib  | Attrib | Drop   |
|            | Deaths  | Deaths     | Deaths     | Deaths   | Deaths | Deaths | Rate    | Rates   | Rates  | Rates  |
| All Comb   | 3261907 | 398833.796 | 197249.685 | 201584.1 | 6.180  | 50.543 | 891.194 | 109.498 | 53.891 | 55.607 |

#### Results for Age Groups Combined, Population and Number deaths adjusted for Ecig scenario,

| Age Group: | NULL   | Ecig      | %Drop     |          |        |        | NULL    | Ecig    | Drop    |        |
|------------|--------|-----------|-----------|----------|--------|--------|---------|---------|---------|--------|
| Year       | Number | Attrib    | Attrib    | Drop     | %Drop  | Attrib | Death   | Attrib  | Attrib  | Drop   |
|            | Deaths | Deaths    | Deaths    | Deaths   | Deaths | Deaths | Rate    | Rates   | Rates   | Rates  |
| 1990       | 98916  | 12922.892 | 12922.892 | 0.000    | 0.000  | 0.000  | 1448.66 | 189.260 | 189.260 | 0.000  |
| 1991       | 96403  | 12856.479 | 12766.075 | 90.404   | 0.094  | 0.703  | 1393.01 | 185.775 | 184.469 | 1.306  |
| 1992       | 93721  | 12662.244 | 12411.627 | 250.617  | 0.267  | 1.979  | 1335.88 | 180.485 | 176.912 | 3.573  |
| 1993       | 93680  | 12730.613 | 12252.195 | 478.418  | 0.511  | 3.758  | 1316.45 | 178.900 | 172.175 | 6.725  |
| 1994       | 90835  | 12495.323 | 11750.022 | 745.301  | 0.820  | 5.965  | 1257.48 | 172.983 | 162.662 | 10.321 |
| 1995       | 89704  | 12365.590 | 11312.054 | 1053.536 | 1.174  | 8.520  | 1222.55 | 168.534 | 154.169 | 14.366 |
| 1996       | 88296  | 12290.551 | 10853.584 | 1436.967 | 1.627  | 11.692 | 1187.71 | 165.338 | 145.997 | 19.341 |
| 1997       | 84792  | 11719.531 | 9988.118  | 1731.414 | 2.042  | 14.774 | 1124.73 | 155.473 | 132.489 | 22.984 |
| 1998       | 82538  | 11416.794 | 9342.965  | 2073.829 | 2.513  | 18.165 | 1079.39 | 149.327 | 122.183 | 27.144 |
| 1999       | 93972  | 13028.038 | 10171.392 | 2856.647 | 3.040  | 21.927 | 1212.32 | 168.109 | 131.219 | 36.890 |
| 2000       | 90082  | 12426.299 | 9235.034  | 3191.265 | 3.543  | 25.682 | 1147.62 | 158.354 | 117.652 | 40.703 |
| 2001       | 86173  | 11939.281 | 8340.104  | 3599.178 | 4.177  | 30.146 | 1085.55 | 150.461 | 105.063 | 45.398 |
| 2002       | 83081  | 11528.794 | 7532.803  | 3995.991 | 4.810  | 34.661 | 1036.24 | 143.865 | 93.955  | 49.911 |
| 2003       | 79382  | 11048.407 | 6751.607  | 4296.799 | 5.413  | 38.891 | 980.733 | 136.581 | 83.414  | 53.167 |
| 2004       | 73953  | 10375.132 | 5874.300  | 4500.832 | 6.086  | 43.381 | 904.423 | 126.978 | 71.841  | 55.137 |
| 2005       | 71756  | 10051.029 | 5273.303  | 4777.727 | 6.658  | 47.535 | 867.733 | 121.652 | 63.769  | 57.882 |
| 2006       | 67670  | 9542.523  | 4586.926  | 4955.598 | 7.323  | 51.932 | 811.067 | 114.490 | 54.977  | 59.513 |
| 2007       | 63634  | 8936.533  | 3942.963  | 4993.570 | 7.847  | 55.878 | 754.965 | 106.151 | 46.780  | 59.371 |
| 2008       | 63321  | 8944.180  | 3612.263  | 5331.917 | 8.420  | 59.613 | 742.987 | 105.091 | 42.385  | 62.706 |
| 2009       | 59910  | 8390.033  | 3120.551  | 5269.483 | 8.796  | 62.806 | 694.915 | 97.471  | 36.196  | 61.274 |
| 2010       | 58187  | 8157.570  | 2777.364  | 5380.205 | 9.246  | 65.954 | 667.067 | 93.685  | 31.840  | 61.845 |
| 2011       | 57566  | 8035.356  | 2482.030  | 5553.326 | 9.647  | 69.111 | 653.612 | 91.414  | 28.181  | 63.233 |
| 2012       | 57632  | 7970.766  | 2222.355  | 5748.411 | 9.974  | 72.119 | 647.519 | 89.752  | 24.969  | 64.782 |
| 2013       | 57312  | 7743.216  | 1975.366  | 5767.850 | 10.064 | 74.489 | 636.866 | 86.254  | 21.951  | 64.303 |
| 2014       | 57810  | 7774.935  | 1792.667  | 5982.268 | 10.348 | 76.943 | 635.202 | 85.658  | 19.697  | 65.961 |
| 2015       | 58700  | 7722.535  | 1644.254  | 6078.281 | 10.355 | 78.708 | 720.643 | 95.120  | 20.186  | 74.935 |
| 2016       | 58994  | 7600.353  | 1461.742  | 6138.611 | 10.405 | 80.767 | 717.128 | 92.723  | 17.769  | 74.955 |
| 2017       | 59374  | 7470.266  | 1304.815  | 6165.451 | 10.384 | 82.533 | 714.685 | 90.274  | 15.706  | 74.568 |
| 2018       | 56460  | 6907.050  | 1093.774  | 5813.277 | 10.296 | 84.164 | 672.928 | 82.675  | 13.036  | 69.639 |
| 2019       | 56301  | 6732.046  | 973.139   | 5758.907 | 10.229 | 85.545 | 664.315 | 79.801  | 11.482  | 68.318 |
| 2020       | 55763  | 6429.836  | 861.439   | 5568.397 | 9.986  | 86.602 | 744.888 | 86.373  | 11.507  | 74.866 |
| 2021       | 56783  | 6562.016  | 783.409   | 5778.606 | 10.177 | 88.061 | 752.726 | 87.513  | 10.385  | 77.128 |
| 2022       | 56351  | 6352.366  | 695.016   | 5657.350 | 10.040 | 89.059 | 741.024 | 84.075  | 9.140   | 74.936 |
| 2023       | 55895  | 6134.123  | 620.446   | 5513.677 | 9.864  | 89.885 | 729.015 | 80.557  | 8.092   | 72.465 |
| 2024       | 55360  | 5922.193  | 551.961   | 5370.232 | 9.701  | 90.680 | 716.205 | 77.179  | 7.141   | 70.038 |
| 2025       | 53916  | 5504.188  | 483.795   | 5020.393 | 9.311  | 91.210 | 803.881 | 82.789  | 7.213   | 75.576 |
| 2026       | 55963  | 5641.075  | 456.610   | 5184.466 | 9.264  | 91.906 | 830.794 | 84.526  | 6.779   | 77.748 |
| 2027       | 54913  | 5426.216  | 409.655   | 5016.560 | 9.136  | 92.450 | 811.536 | 80.982  | 6.054   | 74.928 |
| 2028       | 53832  | 5197.830  | 365.664   | 4832.166 | 8.976  | 92.965 | 791.835 | 77.249  | 5.379   | 71.871 |
| 2029       | 52744  | 4973.547  | 328.175   | 4645.372 | 8.807  | 93.402 | 771.992 | 73.590  | 4.803   | 68.786 |
| 2030       | 50270  | 4450.618  | 280.928   | 4169.690 | 8.295  | 93.688 | 869.206 | 77.952  | 4.857   | 73.094 |
| 2031       | 52866  | 4555.052  | 272.398   | 4282.655 | 8.101  | 94.020 | 912.299 | 79.674  | 4.701   | 74.973 |
| 2032       | 51580  | 4349.999  | 244.692   | 4105.307 | 7.959  | 94.375 | 887.849 | 75.939  | 4.212   | 71.728 |
| 2033       | 50306  | 4147.948  | 223.464   | 3924.484 | 7.801  | 94.613 | 863.294 | 72.237  | 3.835   | 68.402 |
| 2034       | 49023  | 3966.133  | 203.431   | 3762.702 | 7.675  | 94.871 | 838.454 | 68.881  | 3.479   | 65.401 |
| 2035       | 45469  | 3289.064  | 164.120   | 3124.944 | 6.873  | 95.010 | 949.804 | 69.952  | 3.428   | 66.524 |
| 2036       | 47381  | 3313.192  | 155.409   | 3157.783 | 6.665  | 95.309 | 990.547 | 70.572  | 3.249   | 67.323 |
| 2037       | 45883  | 3117.951  | 138.368   | 2979.583 | 6.494  | 95.562 | 959.360 | 66.464  | 2.893   | 63.571 |
| 2038       | 44427  | 2949.775  | 126.827   | 2822.948 | 6.354  | 95.700 | 928.279 | 62.876  | 2.650   | 60.226 |
| 2039       | 43028  | 2766.312  | 115.595   | 2650.717 | 6.161  | 95.821 | 897.558 | 58.905  | 2.411   | 56.494 |



## Results for PHIM for Run 8 (Sensitivity\_Analysis\_3.RTF)

\*\*\*\*\*

### Main Results for E-Component for Run: 8, Simulation: 1, COD: STROKE, Adjusted

| Variable Parameter          | Value                                  |
|-----------------------------|----------------------------------------|
| 1. Country                  | US (United States)                     |
| 2. Sex                      | F (Females)                            |
| 3. Year of start of process | 1990                                   |
| 4. Cause of Death           | STROKE                                 |
| 5. Effective Dose NULL      | CC:1                                   |
| 6. Effective Dose Ecig      | CC:1 Ecig:0.05 Dual:0.525              |
| Note:                       | Death rates are per million population |

#### Results for Age Groups Combined and Years combined, Population and Number deaths adjusted for Ecig scenario,

| Age Group:All | NULL    | Ecig       | %Drop     |          |        |        | NULL    | Ecig   | Drop   |        |
|---------------|---------|------------|-----------|----------|--------|--------|---------|--------|--------|--------|
| Year          | Number  | Attrib     | Attrib    | Drop     | %Drop  | Attrib | Death   | Attrib | Attrib | Drop   |
|               | Deaths  | Deaths     | Deaths    | Deaths   | Deaths | Deaths | Rate    | Rates  | Rates  | Rates  |
| All Comb      | 1361613 | 104899.750 | 50816.330 | 54083.42 | 3.972  | 51.557 | 372.010 | 28.800 | 13.884 | 14.916 |

#### Results for Age Groups Combined, Population and Number deaths adjusted for Ecig scenario,

| Age Group:All | NULL   | Ecig     | %Drop    |          |        |        | NULL    | Ecig   | Drop   |        |
|---------------|--------|----------|----------|----------|--------|--------|---------|--------|--------|--------|
| Year          | Number | Attrib   | Attrib   | Drop     | %Drop  | Attrib | Death   | Attrib | Attrib | Drop   |
|               | Deaths | Deaths   | Deaths   | Deaths   | Deaths | Deaths | Rate    | Rates  | Rates  | Rates  |
| 1990          | 33504  | 3293.017 | 3293.017 | 0.000    | 0.000  | 0.000  | 490.678 | 48.227 | 48.227 | 0.000  |
| 1991          | 32505  | 3207.063 | 3179.556 | 27.507   | 0.085  | 0.858  | 469.694 | 46.342 | 45.944 | 0.397  |
| 1992          | 32560  | 3218.125 | 3141.216 | 76.908   | 0.236  | 2.390  | 464.104 | 45.871 | 44.774 | 1.096  |
| 1993          | 32768  | 3226.680 | 3081.047 | 145.634  | 0.444  | 4.513  | 460.482 | 45.344 | 43.297 | 2.047  |
| 1994          | 33006  | 3277.266 | 3044.977 | 232.289  | 0.704  | 7.088  | 456.920 | 45.370 | 42.153 | 3.217  |
| 1995          | 33732  | 3309.378 | 2976.440 | 332.938  | 0.987  | 10.060 | 459.725 | 45.104 | 40.565 | 4.539  |
| 1996          | 33754  | 3312.987 | 2862.753 | 450.234  | 1.334  | 13.590 | 454.035 | 44.568 | 38.508 | 6.060  |
| 1997          | 33705  | 3267.066 | 2703.111 | 563.955  | 1.673  | 17.262 | 447.080 | 43.341 | 35.856 | 7.486  |
| 1998          | 33282  | 3178.725 | 2506.071 | 672.654  | 2.021  | 21.161 | 435.246 | 41.577 | 32.773 | 8.803  |
| 1999          | 33902  | 3120.351 | 2336.885 | 783.467  | 2.311  | 25.108 | 437.368 | 40.264 | 30.148 | 10.116 |
| 2000          | 33842  | 3142.808 | 2225.931 | 916.877  | 2.709  | 29.174 | 431.143 | 40.050 | 28.358 | 11.693 |
| 2001          | 32526  | 2961.588 | 1976.468 | 985.120  | 3.029  | 33.263 | 409.736 | 37.323 | 24.898 | 12.424 |
| 2002          | 32103  | 2940.627 | 1832.686 | 1107.941 | 3.451  | 37.677 | 400.409 | 36.695 | 22.859 | 13.837 |
| 2003          | 30598  | 2819.545 | 1639.378 | 1180.167 | 3.857  | 41.857 | 378.022 | 34.855 | 20.254 | 14.601 |
| 2004          | 29423  | 2730.466 | 1473.391 | 1257.075 | 4.272  | 46.039 | 359.838 | 33.417 | 18.019 | 15.398 |
| 2005          | 27994  | 2670.510 | 1335.602 | 1334.908 | 4.769  | 49.987 | 338.530 | 32.322 | 16.151 | 16.171 |
| 2006          | 27248  | 2623.285 | 1213.273 | 1410.012 | 5.175  | 53.750 | 326.579 | 31.474 | 14.542 | 16.932 |
| 2007          | 26355  | 2536.599 | 1080.662 | 1455.937 | 5.524  | 57.397 | 312.677 | 30.131 | 12.821 | 17.309 |
| 2008          | 26058  | 2469.443 | 971.035  | 1498.409 | 5.750  | 60.678 | 305.759 | 29.015 | 11.394 | 17.621 |
| 2009          | 25107  | 2386.945 | 863.384  | 1523.561 | 6.068  | 63.829 | 291.223 | 27.730 | 10.015 | 17.716 |
| 2010          | 24915  | 2329.274 | 774.635  | 1554.639 | 6.240  | 66.744 | 285.635 | 26.750 | 8.881  | 17.870 |
| 2011          | 24877  | 2286.581 | 694.017  | 1592.564 | 6.402  | 69.648 | 282.451 | 26.013 | 7.880  | 18.133 |
| 2012          | 24594  | 2243.311 | 621.112  | 1622.199 | 6.596  | 72.313 | 276.319 | 25.260 | 6.978  | 18.281 |
| 2013          | 24555  | 2176.503 | 549.437  | 1627.067 | 6.626  | 74.756 | 272.864 | 24.245 | 6.105  | 18.139 |
| 2014          | 25416  | 2211.619 | 509.938  | 1701.681 | 6.695  | 76.943 | 279.259 | 24.366 | 5.603  | 18.763 |
| 2015          | 26454  | 2237.016 | 476.360  | 1760.656 | 6.656  | 78.706 | 324.766 | 27.554 | 5.848  | 21.706 |
| 2016          | 26889  | 2229.057 | 434.722  | 1794.335 | 6.673  | 80.497 | 326.856 | 27.194 | 5.284  | 21.910 |
| 2017          | 27790  | 2221.649 | 397.548  | 1824.101 | 6.564  | 82.106 | 334.514 | 26.848 | 4.785  | 22.062 |
| 2018          | 25431  | 1939.420 | 320.071  | 1619.349 | 6.368  | 83.497 | 303.100 | 23.214 | 3.815  | 19.399 |
| 2019          | 25621  | 1904.400 | 286.833  | 1617.567 | 6.313  | 84.938 | 302.311 | 22.574 | 3.384  | 19.190 |
| 2020          | 25589  | 1806.054 | 251.959  | 1554.095 | 6.073  | 86.049 | 341.822 | 24.261 | 3.366  | 20.895 |
| 2021          | 25677  | 1748.172 | 223.256  | 1524.917 | 5.939  | 87.229 | 340.380 | 23.314 | 2.960  | 20.355 |
| 2022          | 25786  | 1701.148 | 199.807  | 1501.341 | 5.822  | 88.255 | 339.093 | 22.515 | 2.628  | 19.888 |
| 2023          | 25886  | 1652.087 | 179.673  | 1472.413 | 5.688  | 89.124 | 337.626 | 21.696 | 2.343  | 19.353 |
| 2024          | 25944  | 1597.127 | 160.260  | 1436.866 | 5.538  | 89.966 | 335.646 | 20.814 | 2.073  | 18.741 |
| 2025          | 25564  | 1467.622 | 138.058  | 1329.564 | 5.201  | 90.593 | 381.148 | 22.075 | 2.058  | 20.016 |
| 2026          | 25809  | 1390.505 | 121.803  | 1268.702 | 4.916  | 91.240 | 383.146 | 20.835 | 1.808  | 19.027 |
| 2027          | 25611  | 1342.095 | 109.115  | 1232.981 | 4.814  | 91.870 | 378.494 | 20.030 | 1.613  | 18.417 |
| 2028          | 25387  | 1289.536 | 97.925   | 1191.611 | 4.694  | 92.406 | 373.422 | 19.165 | 1.440  | 17.725 |
| 2029          | 25150  | 1242.216 | 88.059   | 1154.157 | 4.589  | 92.911 | 368.113 | 18.380 | 1.289  | 17.091 |
| 2030          | 24358  | 1096.803 | 73.257   | 1023.546 | 4.202  | 93.321 | 421.177 | 19.210 | 1.267  | 17.944 |
| 2031          | 24388  | 1019.991 | 64.166   | 955.825  | 3.919  | 93.709 | 420.855 | 17.841 | 1.107  | 16.734 |
| 2032          | 24057  | 977.406  | 57.559   | 919.847  | 3.824  | 94.111 | 414.098 | 17.063 | 0.991  | 16.072 |
| 2033          | 23718  | 937.450  | 52.516   | 884.934  | 3.731  | 94.398 | 407.019 | 16.326 | 0.901  | 15.424 |
| 2034          | 23354  | 900.763  | 47.746   | 853.017  | 3.653  | 94.699 | 399.433 | 15.644 | 0.817  | 14.827 |
| 2035          | 22219  | 745.023  | 37.665   | 707.358  | 3.184  | 94.944 | 464.130 | 15.845 | 0.787  | 15.058 |
| 2036          | 21395  | 680.360  | 32.132   | 648.227  | 3.030  | 95.277 | 447.284 | 14.492 | 0.672  | 13.820 |
| 2037          | 20898  | 644.109  | 28.886   | 615.223  | 2.944  | 95.515 | 436.940 | 13.730 | 0.604  | 13.126 |
| 2038          | 20400  | 612.448  | 26.592   | 585.856  | 2.872  | 95.658 | 426.241 | 13.055 | 0.556  | 12.499 |
| 2039          | 19910  | 577.529  | 24.340   | 553.190  | 2.778  | 95.786 | 415.324 | 12.298 | 0.508  | 11.790 |

## Results for PHIM for Run 8 (Sensitivity\_Analysis\_3.RTF)

\*\*\*\*\*

### Main Results for E-Component for Run: 8, Simulation: 1, COD: COPD, Adjusted

| Variable Parameter          | Value                                  |
|-----------------------------|----------------------------------------|
| 1. Country                  | US (United States)                     |
| 2. Sex                      | F (Females)                            |
| 3. Year of start of process | 1990                                   |
| 4. Cause of Death           | COPD                                   |
| 5. Effective Dose NULL      | CC:1                                   |
| 6. Effective Dose Ecig      | CC:1 Ecig:0.05 Dual:0.525              |
| Note:                       | Death rates are per million population |

#### Results for Age Groups Combined and Years combined, Population and Number deaths adjusted for Ecig scenario,

| Age Group:All | NULL    | Ecig       | %Drop      |          |        |        | NULL    | Ecig    | Drop    |        |
|---------------|---------|------------|------------|----------|--------|--------|---------|---------|---------|--------|
| Year          | Number  | Attrib     | Attrib     | Drop     | %Drop  | Attrib | Death   | Attrib  | Attrib  | Drop   |
|               | Deaths  | Deaths     | Deaths     | Deaths   | Deaths | Deaths | Rate    | Rates   | Rates   | Rates  |
| All Comb      | 2181667 | 862051.244 | 550257.583 | 311793.7 | 14.292 | 36.169 | 596.059 | 236.673 | 150.337 | 86.336 |

#### Results for Age Groups Combined, Population and Number deaths adjusted for Ecig scenario,

| Age Group:All | NULL   | Ecig      | %Drop     |          |        |        | NULL    | Ecig    | Drop    |         |
|---------------|--------|-----------|-----------|----------|--------|--------|---------|---------|---------|---------|
| Year          | Number | Attrib    | Attrib    | Drop     | %Drop  | Attrib | Death   | Attrib  | Attrib  | Drop    |
|               | Deaths | Deaths    | Deaths    | Deaths   | Deaths | Deaths | Rate    | Rates   | Rates   | Rates   |
| 1990          | 24738  | 10694.712 | 10694.712 | 0.000    | 0.000  | 0.000  | 362.296 | 156.628 | 156.628 | 0.000   |
| 1991          | 26562  | 11602.933 | 11584.706 | 18.227   | 0.069  | 0.157  | 383.818 | 167.661 | 167.398 | 0.263   |
| 1992          | 26828  | 11831.375 | 11781.189 | 50.185   | 0.187  | 0.424  | 382.401 | 168.642 | 167.926 | 0.716   |
| 1993          | 29774  | 13246.371 | 13138.198 | 108.173  | 0.363  | 0.817  | 418.408 | 186.148 | 184.626 | 1.522   |
| 1994          | 29805  | 13355.662 | 13183.855 | 171.806  | 0.576  | 1.286  | 412.606 | 184.893 | 182.511 | 2.383   |
| 1995          | 29757  | 13397.439 | 13142.340 | 255.100  | 0.857  | 1.904  | 405.549 | 182.598 | 179.113 | 3.484   |
| 1996          | 30903  | 13960.356 | 13604.036 | 356.319  | 1.153  | 2.552  | 415.697 | 187.801 | 182.994 | 4.806   |
| 1997          | 31133  | 14109.552 | 13643.748 | 465.805  | 1.496  | 3.301  | 412.976 | 187.180 | 180.980 | 6.200   |
| 1998          | 32104  | 14599.657 | 13989.931 | 609.726  | 1.899  | 4.176  | 419.844 | 190.958 | 182.954 | 8.004   |
| 1999          | 34629  | 15728.102 | 14936.590 | 791.512  | 2.286  | 5.032  | 446.736 | 202.950 | 192.694 | 10.256  |
| 2000          | 34316  | 15579.803 | 14638.114 | 941.689  | 2.744  | 6.044  | 437.174 | 198.541 | 186.485 | 12.056  |
| 2001          | 34614  | 15696.614 | 14561.670 | 1134.944 | 3.279  | 7.231  | 436.050 | 197.812 | 183.438 | 14.373  |
| 2002          | 34319  | 15519.777 | 14201.703 | 1318.075 | 3.841  | 8.493  | 428.057 | 193.668 | 177.134 | 16.534  |
| 2003          | 35111  | 15888.389 | 14329.984 | 1558.405 | 4.439  | 9.808  | 433.778 | 196.413 | 177.042 | 19.372  |
| 2004          | 33555  | 15091.573 | 13399.180 | 1692.393 | 5.044  | 11.214 | 410.371 | 184.701 | 163.869 | 20.832  |
| 2005          | 35447  | 15803.656 | 13780.481 | 2023.174 | 5.708  | 12.802 | 428.652 | 191.278 | 166.646 | 24.632  |
| 2006          | 34043  | 15100.563 | 12945.511 | 2155.052 | 6.330  | 14.271 | 408.029 | 181.174 | 155.159 | 26.015  |
| 2007          | 34073  | 14974.384 | 12589.046 | 2385.338 | 7.001  | 15.929 | 404.249 | 177.871 | 149.359 | 28.512  |
| 2008          | 37518  | 16406.197 | 13543.783 | 2862.415 | 7.629  | 17.447 | 440.224 | 192.768 | 158.918 | 33.850  |
| 2009          | 36931  | 16083.194 | 12972.094 | 3111.100 | 8.424  | 19.344 | 428.373 | 186.846 | 150.468 | 36.378  |
| 2010          | 36907  | 15927.400 | 12591.539 | 3335.861 | 9.039  | 20.944 | 423.106 | 182.917 | 144.353 | 38.565  |
| 2011          | 37772  | 16221.836 | 12514.422 | 3707.414 | 9.815  | 22.854 | 428.866 | 184.547 | 142.089 | 42.457  |
| 2012          | 38420  | 16358.849 | 12310.621 | 4048.229 | 10.537 | 24.746 | 431.662 | 184.202 | 138.315 | 45.887  |
| 2013          | 40292  | 16994.822 | 12444.790 | 4550.033 | 11.293 | 26.773 | 447.740 | 189.311 | 138.290 | 51.021  |
| 2014          | 40283  | 16855.093 | 11997.289 | 4857.804 | 12.059 | 28.821 | 442.619 | 185.696 | 131.822 | 53.873  |
| 2015          | 42432  | 17572.483 | 12224.131 | 5348.352 | 12.605 | 30.436 | 520.922 | 216.445 | 150.071 | 66.374  |
| 2016          | 42862  | 17579.955 | 11835.747 | 5744.208 | 13.402 | 32.675 | 521.025 | 214.473 | 143.873 | 70.600  |
| 2017          | 44656  | 18080.688 | 11775.585 | 6305.104 | 14.119 | 34.872 | 537.521 | 218.496 | 141.743 | 76.753  |
| 2018          | 45686  | 18209.262 | 11500.997 | 6708.265 | 14.683 | 36.840 | 544.520 | 217.960 | 137.077 | 80.883  |
| 2019          | 47244  | 18648.302 | 11375.445 | 7272.857 | 15.394 | 39.000 | 557.444 | 221.054 | 134.222 | 86.833  |
| 2020          | 48744  | 19002.597 | 11244.687 | 7757.910 | 15.916 | 40.826 | 651.130 | 255.266 | 150.207 | 105.059 |
| 2021          | 48785  | 18885.717 | 10747.109 | 8138.608 | 16.683 | 43.094 | 646.701 | 251.867 | 142.466 | 109.401 |
| 2022          | 50201  | 19235.076 | 10544.779 | 8690.298 | 17.311 | 45.179 | 660.158 | 254.582 | 138.666 | 115.915 |
| 2023          | 51627  | 19521.158 | 10325.717 | 9195.441 | 17.811 | 47.105 | 673.351 | 256.363 | 134.674 | 121.689 |
| 2024          | 52995  | 19918.620 | 10108.686 | 9809.933 | 18.511 | 49.250 | 685.609 | 259.583 | 130.778 | 128.805 |
| 2025          | 54040  | 20150.545 | 9845.801  | 10304.74 | 19.069 | 51.139 | 805.728 | 303.086 | 146.799 | 156.287 |
| 2026          | 54945  | 20393.792 | 9535.533  | 10858.26 | 19.762 | 53.243 | 815.685 | 305.582 | 141.560 | 164.022 |
| 2027          | 55819  | 20615.351 | 9203.854  | 11411.50 | 20.444 | 55.354 | 824.932 | 307.668 | 136.021 | 171.648 |
| 2028          | 56638  | 20731.894 | 8826.628  | 11905.27 | 21.020 | 57.425 | 833.097 | 308.115 | 129.833 | 178.282 |
| 2029          | 57418  | 20781.967 | 8434.312  | 12347.66 | 21.505 | 59.415 | 840.402 | 307.495 | 123.450 | 184.045 |
| 2030          | 57708  | 20753.201 | 8054.050  | 12699.15 | 22.006 | 61.191 | 997.817 | 363.487 | 139.261 | 224.227 |
| 2031          | 59337  | 21048.417 | 7918.489  | 13129.93 | 22.128 | 62.380 | 1023.98 | 368.165 | 136.649 | 231.516 |
| 2032          | 59900  | 21169.329 | 7569.544  | 13599.79 | 22.704 | 64.243 | 1031.06 | 369.560 | 130.294 | 239.266 |
| 2033          | 60424  | 21109.293 | 7185.092  | 13924.20 | 23.044 | 65.962 | 1036.91 | 367.618 | 123.301 | 244.317 |
| 2034          | 60872  | 21109.429 | 6800.436  | 14308.99 | 23.507 | 67.785 | 1041.12 | 366.613 | 116.310 | 250.302 |
| 2035          | 60260  | 20794.840 | 6415.638  | 14379.20 | 23.862 | 69.148 | 1258.78 | 442.268 | 134.018 | 308.251 |
| 2036          | 57341  | 19354.577 | 5688.918  | 13665.66 | 23.832 | 70.607 | 1198.76 | 412.258 | 118.932 | 293.325 |
| 2037          | 57338  | 19064.169 | 5242.690  | 13821.48 | 24.105 | 72.500 | 1198.85 | 406.385 | 109.618 | 296.767 |
| 2038          | 57302  | 18854.812 | 4877.403  | 13977.41 | 24.393 | 74.132 | 1197.29 | 401.900 | 101.910 | 299.989 |
| 2039          | 57258  | 18437.457 | 4456.779  | 13980.68 | 24.417 | 75.828 | 1194.41 | 392.602 | 92.969  | 299.633 |

## Results for PHIM for Run 2 (ELL Summary Sensitivity\_Analysis\_3.RTF)

\*\*\*\*\*

### Estimated Loss of Life from the E Component for Run: 2, Simulation: 1

Country: US (United States)  
 Follow-up Period: 1990 to 2039

**Table 1: Estimated Loss of Life, at the end of follow-up, all age groups combined, Population unadjusted for deaths in Ecig scenario**

| Disease      | Sex    | Year | Years of life lost<br>NULL | Years of life lost<br>Ecig | Years of life<br>Saved |
|--------------|--------|------|----------------------------|----------------------------|------------------------|
| All Diseases | Males  | 2039 | 42093547.949               | 25222093.974               | 16871454.0             |
|              | Female | 2039 | 23817891.273               | 15034794.732               | 8783096.54             |
| Lung cancer  | Males  | 2039 | 18222549.860               | 13818803.512               | 4403746.35             |
|              | Female | 2039 | 12512468.845               | 9045245.311                | 3467223.53             |
| IHD          | Males  | 2039 | 15635992.616               | 6553329.785                | 9082662.83             |
|              | Female | 2039 | 4798769.065                | 2076650.696                | 2722118.37             |
| Stroke       | Males  | 2039 | 2389546.238                | 1150707.608                | 1238838.63             |
|              | Female | 2039 | 1665361.569                | 850177.008                 | 815184.561             |
| COPD         | Males  | 2039 | 5845459.234                | 3699253.069                | 2146206.16             |
|              | Female | 2039 | 4841291.793                | 3062721.717                | 1778570.08             |

## Results for PHIM for Run 2 (ELL Summary Sensitivity\_Analysis\_3.RTF)

\*\*\*\*\*

**Table 2: Estimated Loss of Life, at the end of follow-up, all age groups combined, Population and Number deaths adjusted for Ecig scenario**

| Disease      | Sex    | Year | Years of life lost<br>NULL | Years of life lost<br>Ecig | Years of life<br>Saved |
|--------------|--------|------|----------------------------|----------------------------|------------------------|
| All Diseases | Males  | 2039 | 42093547.949               | 25325320.782               | 16768227.2             |
|              | Female | 2039 | 23817891.273               | 15073095.863               | 8744795.41             |
| Lung cancer  | Males  | 2039 | 18222549.860               | 13881378.078               | 4341171.78             |
|              | Female | 2039 | 12512468.845               | 9069019.807                | 3443449.04             |
| IHD          | Males  | 2039 | 15635992.616               | 6566409.689                | 9069582.93             |
|              | Female | 2039 | 4798769.065                | 2078791.192                | 2719977.87             |
| Stroke       | Males  | 2039 | 2389546.238                | 1153109.802                | 1236436.44             |
|              | Female | 2039 | 1665361.569                | 850914.940                 | 814446.629             |
| COPD         | Males  | 2039 | 5845459.234                | 3724423.214                | 2121036.02             |
|              | Female | 2039 | 4841291.793                | 3074369.924                | 1766921.87             |

## Results for PHIM for Run 2 (ELL Summary Sensitivity\_Analysis\_3.RTF)

\*\*\*\*\*

**Table 3: Estimated Loss of Life, All age groups combined, Population unadjusted for deaths in Ecig scenario, cumulative over years**

| Disease      | Sex          | Year         | Years of life lost<br>NULL | Years of life lost<br>Ecig | Years of life<br>Saved |
|--------------|--------------|--------------|----------------------------|----------------------------|------------------------|
| All Diseases | Males        | 1990         | 1304839.645                | 1304839.645                | 0.000                  |
|              |              | 1991         | 2579865.358                | 2571191.563                | 8673.794               |
|              |              | 1992         | 3830683.831                | 3798442.201                | 32241.630              |
|              |              | 1993         | 5076567.803                | 5000988.765                | 75579.038              |
|              |              | 1994         | 6292145.526                | 6150098.595                | 142046.931             |
|              |              | 1995         | 7485537.010                | 7250426.326                | 235110.683             |
|              |              | 1996         | 8655955.028                | 8299988.150                | 355966.877             |
|              |              | 1997         | 9791729.713                | 9288344.237                | 503385.476             |
|              |              | 1998         | 10899134.186               | 10223186.682               | 675947.504             |
|              |              | 1999         | 12070409.674               | 11163922.373               | 906487.302             |
|              |              | 2000         | 13231384.595               | 12064395.542               | 1166989.05             |
|              |              | 2001         | 14371761.018               | 12914872.798               | 1456888.22             |
|              |              | 2002         | 15508906.386               | 13728007.590               | 1780898.80             |
|              |              | 2003         | 16638100.422               | 14504118.007               | 2133982.42             |
|              |              | 2004         | 17736465.088               | 15232831.900               | 2503633.19             |
|              |              | 2005         | 18834658.606               | 15935752.789               | 2898905.82             |
|              |              | 2006         | 19909100.501               | 16592968.037               | 3316132.46             |
|              |              | 2007         | 20958321.463               | 17212243.249               | 3746078.21             |
|              |              | 2008         | 22000068.148               | 17807940.686               | 4192127.46             |
|              |              | 2009         | 23018816.903               | 18371400.994               | 4647415.91             |
|              |              | 2010         | 24018480.537               | 18904280.245               | 5114200.29             |
|              |              | 2011         | 25003034.574               | 19410258.013               | 5592776.56             |
|              |              | 2012         | 25969871.429               | 19888100.484               | 6081770.95             |
|              |              | 2013         | 26920275.180               | 20339955.986               | 6580319.19             |
|              |              | 2014         | 27849005.227               | 20764176.782               | 7084828.45             |
|              |              | 2015         | 28749620.400               | 21164113.395               | 7585507.01             |
|              |              | 2016         | 29622417.562               | 21531359.086               | 8091058.48             |
|              |              | 2017         | 30462559.724               | 21868524.915               | 8594034.81             |
|              |              | 2018         | 31293299.299               | 22193502.398               | 9099796.90             |
|              |              | 2019         | 32109993.427               | 22501533.064               | 9608460.36             |
|              |              | 2020         | 32883323.977               | 22788406.018               | 10094918.0             |
|              |              | 2021         | 33610102.554               | 23038800.748               | 10571301.8             |
|              |              | 2022         | 34322010.448               | 23274680.021               | 11047330.4             |
|              |              | 2023         | 35018383.550               | 23496156.739               | 11522226.8             |
|              |              | 2024         | 35700177.955               | 23704578.347               | 11995599.6             |
|              |              | 2025         | 36315500.346               | 23892542.946               | 12422957.4             |
|              |              | 2026         | 36896159.343               | 24054477.056               | 12841682.3             |
|              |              | 2027         | 37462570.116               | 24206209.006               | 13256361.1             |
|              |              | 2028         | 38015337.780               | 24347860.477               | 13667477.3             |
|              |              | 2029         | 38554814.764               | 24480897.475               | 14073917.3             |
|              |              | 2030         | 39003805.400               | 24593878.656               | 14409926.7             |
|              |              | 2031         | 39436509.703               | 24692338.233               | 14744171.5             |
| 2032         | 39858470.458 | 24784685.233 | 15073785.2                 |                            |                        |
| 2033         | 40270147.082 | 24870672.983 | 15399474.1                 |                            |                        |
| 2034         | 40672665.743 | 24951899.658 | 15720766.1                 |                            |                        |
| 2035         | 40962732.664 | 25012705.491 | 15950027.2                 |                            |                        |
| 2036         | 41255021.653 | 25069367.256 | 16185654.4                 |                            |                        |
| 2037         | 41540573.023 | 25123094.872 | 16417478.2                 |                            |                        |
| 2038         | 41820158.066 | 25173677.877 | 16646480.2                 |                            |                        |
| 2039         | 42093547.949 | 25222093.974 | 16871454.0                 |                            |                        |
|              | Female       | 1990         | 588979.406                 | 588979.406                 | 0.000                  |
|              |              | 1991         | 1182571.252                | 1179606.280                | 2964.972               |
|              |              | 1992         | 1777346.679                | 1766098.723                | 11247.956              |
|              |              | 1993         | 2380261.899                | 2353274.648                | 26987.251              |
|              |              | 1994         | 2983130.039                | 2931355.451                | 51774.588              |
|              |              | 1995         | 3588982.584                | 3502036.763                | 86945.821              |
|              |              | 1996         | 4195430.235                | 4060723.304                | 134706.930             |
|              |              | 1997         | 4793866.694                | 4600959.220                | 192907.474             |
|              |              | 1998         | 5389747.381                | 5127002.291                | 262745.090             |
|              |              | 1999         | 6006722.467                | 5653499.504                | 353222.963             |
|              |              | 2000         | 6625758.871                | 6169227.205                | 456531.666             |
|              |              | 2001         | 7245135.411                | 6670263.571                | 574871.840             |
|              |              | 2002         | 7867492.021                | 7158751.763                | 708740.258             |
|              |              | 2003         | 8485051.793                | 7629912.496                | 855139.297             |
|              |              | 2004         | 9092994.774                | 8080330.768                | 1012664.01             |
|              |              | 2005         | 9706032.803                | 8521300.542                | 1184732.26             |
|              |              | 2006         | 10311907.548               | 8943133.199                | 1368774.35             |
|              |              | 2007         | 10909437.502               | 9347899.812                | 1561537.69             |
|              |              | 2008         | 11506462.491               | 9737571.185                | 1768891.31             |
|              |              | 2009         | 12098393.287               | 10113944.951               | 1984448.34             |
|              |              | 2010         | 12681188.981               | 10472348.150               | 2208840.83             |

**Results for PHIM for Run 2 (ELL Summary Sensitivity\_Analysis\_3.RTF)**

|             |       |      |              |              |            |
|-------------|-------|------|--------------|--------------|------------|
|             |       | 2011 | 13260062.991 | 10815816.590 | 2444246.40 |
|             |       | 2012 | 13839417.441 | 11147050.543 | 2692366.90 |
|             |       | 2013 | 14409614.758 | 11462814.144 | 2946800.61 |
|             |       | 2014 | 14976658.746 | 11763641.482 | 3213017.26 |
|             |       | 2015 | 15529977.821 | 12047894.960 | 3482082.86 |
|             |       | 2016 | 16066640.764 | 12311880.743 | 3754760.02 |
|             |       | 2017 | 16590035.078 | 12559261.778 | 4030773.30 |
|             |       | 2018 | 17098716.137 | 12793567.692 | 4305148.45 |
|             |       | 2019 | 17599868.850 | 13015450.841 | 4584418.01 |
|             |       | 2020 | 18081346.241 | 13223347.291 | 4857998.95 |
|             |       | 2021 | 18537594.460 | 13411087.072 | 5126507.39 |
|             |       | 2022 | 18985300.234 | 13587890.825 | 5397409.41 |
|             |       | 2023 | 19423958.747 | 13754256.446 | 5669702.30 |
|             |       | 2024 | 19853347.772 | 13910033.062 | 5943314.71 |
|             |       | 2025 | 20252822.245 | 14052425.632 | 6200396.61 |
|             |       | 2026 | 20619307.063 | 14176335.859 | 6442971.20 |
|             |       | 2027 | 20976063.406 | 14291747.483 | 6684315.92 |
|             |       | 2028 | 21323641.947 | 14399731.243 | 6923910.70 |
|             |       | 2029 | 21662117.106 | 14500169.443 | 7161947.66 |
|             |       | 2030 | 21960971.694 | 14588134.853 | 7372836.84 |
|             |       | 2031 | 22224951.983 | 14660668.532 | 7564283.45 |
|             |       | 2032 | 22480397.853 | 14727731.211 | 7752666.64 |
|             |       | 2033 | 22728639.455 | 14790359.395 | 7938280.06 |
|             |       | 2034 | 22970448.888 | 14848573.197 | 8121875.69 |
|             |       | 2035 | 23164154.188 | 14895193.641 | 8268960.55 |
|             |       | 2036 | 23334538.616 | 14933406.753 | 8401131.86 |
|             |       | 2037 | 23499760.723 | 14969141.140 | 8530619.58 |
|             |       | 2038 | 23660308.401 | 15002823.638 | 8657484.76 |
|             |       | 2039 | 23817891.273 | 15034794.732 | 8783096.54 |
| Lung cancer | Males | 1990 | 595621.791   | 595621.791   | 0.000      |
|             |       | 1991 | 1177744.113  | 1177096.215  | 647.898    |
|             |       | 1992 | 1750034.892  | 1747589.217  | 2445.675   |
|             |       | 1993 | 2319752.308  | 2313797.402  | 5954.906   |
|             |       | 1994 | 2872597.339  | 2861056.759  | 11540.580  |
|             |       | 1995 | 3411494.825  | 3391864.439  | 19630.386  |
|             |       | 1996 | 3945569.726  | 3914548.390  | 31021.336  |
|             |       | 1997 | 4463316.362  | 4417625.050  | 45691.312  |
|             |       | 1998 | 4975301.180  | 4910967.591  | 64333.590  |
|             |       | 1999 | 5473691.125  | 5386519.084  | 87172.041  |
|             |       | 2000 | 5977500.570  | 5861785.851  | 115714.719 |
|             |       | 2001 | 6474795.516  | 6324892.349  | 149903.166 |
|             |       | 2002 | 6968769.705  | 6778339.863  | 190429.842 |
|             |       | 2003 | 7460282.140  | 7222172.275  | 238109.865 |
|             |       | 2004 | 7947048.275  | 7654297.909  | 292750.367 |
|             |       | 2005 | 8430571.669  | 8075710.512  | 354861.157 |
|             |       | 2006 | 8903945.390  | 8479711.127  | 424234.263 |
|             |       | 2007 | 9364177.982  | 8864076.070  | 500101.912 |
|             |       | 2008 | 9822525.458  | 9237439.099  | 585086.359 |
|             |       | 2009 | 10275228.886 | 9596927.817  | 678301.070 |
|             |       | 2010 | 10720275.500 | 9941271.678  | 779003.822 |
|             |       | 2011 | 11155356.373 | 10268568.558 | 886787.815 |
|             |       | 2012 | 11582611.617 | 10579593.051 | 1003018.57 |
|             |       | 2013 | 11998803.791 | 10872798.916 | 1126004.87 |
|             |       | 2014 | 12402087.090 | 11147602.979 | 1254484.11 |
|             |       | 2015 | 12793451.706 | 11405793.049 | 1387658.66 |
|             |       | 2016 | 13160101.653 | 11638611.408 | 1521490.24 |
|             |       | 2017 | 13503583.414 | 11848502.171 | 1655081.24 |
|             |       | 2018 | 13859755.737 | 12055875.578 | 1803880.16 |
|             |       | 2019 | 14211625.176 | 12252104.126 | 1959521.05 |
|             |       | 2020 | 14553935.288 | 12435809.722 | 2118125.57 |
|             |       | 2021 | 14851747.495 | 12588356.107 | 2263391.39 |
|             |       | 2022 | 15144531.004 | 12731382.392 | 2413148.61 |
|             |       | 2023 | 15431932.496 | 12865036.394 | 2566896.10 |
|             |       | 2024 | 15713920.740 | 12990002.385 | 2723918.36 |
|             |       | 2025 | 15979112.816 | 13103543.307 | 2875569.51 |
|             |       | 2026 | 16206550.153 | 13195104.815 | 3011445.34 |
|             |       | 2027 | 16428826.050 | 13280209.908 | 3148616.14 |
|             |       | 2028 | 16645902.186 | 13359123.887 | 3286778.30 |
|             |       | 2029 | 16858126.517 | 13432703.919 | 3425422.60 |
|             |       | 2030 | 17045220.687 | 13496137.432 | 3549083.25 |
|             |       | 2031 | 17208482.610 | 13547519.087 | 3660963.52 |
|             |       | 2032 | 17367586.074 | 13595414.631 | 3772171.44 |
|             |       | 2033 | 17522716.280 | 13639839.345 | 3882876.93 |
|             |       | 2034 | 17674226.555 | 13681562.296 | 3992664.26 |
|             |       | 2035 | 17792201.734 | 13713641.877 | 4078559.86 |
|             |       | 2036 | 17903508.236 | 13742151.962 | 4161356.27 |
|             |       | 2037 | 18012162.345 | 13769148.422 | 4243013.92 |
|             |       | 2038 | 18118464.470 | 13794512.993 | 4323951.48 |

**Results for PHIM for Run 2 (ELL Summary Sensitivity\_Analysis\_3.RTF)**

|     |        |      |              |              |            |
|-----|--------|------|--------------|--------------|------------|
|     | Female | 2039 | 18222549.860 | 13818803.512 | 4403746.35 |
|     |        | 1990 | 307897.357   | 307897.357   | 0.000      |
|     |        | 1991 | 616547.418   | 616130.924   | 416.494    |
|     |        | 1992 | 931086.773   | 929437.524   | 1649.249   |
|     |        | 1993 | 1246155.671  | 1242095.604  | 4060.067   |
|     |        | 1994 | 1561212.934  | 1553219.700  | 7993.234   |
|     |        | 1995 | 1879967.742  | 1866046.679  | 13921.063  |
|     |        | 1996 | 2197488.109  | 2175360.179  | 22127.930  |
|     |        | 1997 | 2515698.453  | 2482661.671  | 33036.781  |
|     |        | 1998 | 2836249.556  | 2789258.839  | 46990.718  |
|     |        | 1999 | 3150201.390  | 3086226.136  | 63975.253  |
|     |        | 2000 | 3472722.342  | 3387690.531  | 85031.811  |
|     |        | 2001 | 3796994.889  | 3686506.042  | 110488.848 |
|     |        | 2002 | 4126619.935  | 3985526.285  | 141093.650 |
|     |        | 2003 | 4454982.533  | 4278543.395  | 176439.139 |
|     |        | 2004 | 4784343.030  | 4566998.723  | 217344.307 |
|     |        | 2005 | 5113443.121  | 4849550.704  | 263892.417 |
|     |        | 2006 | 5442543.963  | 5125610.830  | 316933.132 |
|     |        | 2007 | 5772441.497  | 5395886.186  | 376555.311 |
|     |        | 2008 | 6091911.943  | 5651076.911  | 440835.032 |
|     |        | 2009 | 6413671.330  | 5900821.737  | 512849.593 |
|     |        | 2010 | 6730763.530  | 6140392.510  | 590371.019 |
|     |        | 2011 | 7043614.101  | 6369546.655  | 674067.446 |
|     |        | 2012 | 7356270.780  | 6591264.980  | 765005.800 |
|     |        | 2013 | 7662551.964  | 6801322.893  | 861229.071 |
|     |        | 2014 | 7964551.465  | 7001334.781  | 963216.684 |
|     |        | 2015 | 8254895.403  | 7187719.692  | 1067175.71 |
|     |        | 2016 | 8530661.848  | 7357892.829  | 1172769.02 |
|     |        | 2017 | 8795826.122  | 7515462.576  | 1280363.55 |
|     |        | 2018 | 9067233.707  | 7669346.366  | 1397887.34 |
|     |        | 2019 | 9335343.270  | 7814690.329  | 1520652.94 |
|     |        | 2020 | 9596110.883  | 7950809.699  | 1645301.18 |
|     |        | 2021 | 9833186.859  | 8070042.399  | 1763144.46 |
|     |        | 2022 | 10066452.037 | 8181874.485  | 1884577.55 |
|     |        | 2023 | 10295503.609 | 8286643.451  | 2008860.16 |
|     |        | 2024 | 10520125.318 | 8384282.488  | 2135842.83 |
|     |        | 2025 | 10731915.863 | 8473255.406  | 2258660.46 |
|     |        | 2026 | 10917495.549 | 8547940.313  | 2369555.24 |
|     |        | 2027 | 11098620.885 | 8617155.029  | 2481465.86 |
|     |        | 2028 | 11275441.234 | 8681622.381  | 2593818.85 |
|     |        | 2029 | 11447962.710 | 8741302.744  | 2706659.97 |
|     |        | 2030 | 11601867.623 | 8793273.043  | 2808594.58 |
|     |        | 2031 | 11731666.516 | 8834662.701  | 2897003.82 |
|     |        | 2032 | 11857585.969 | 8872853.901  | 2984732.07 |
|     |        | 2033 | 11980128.625 | 8908451.632  | 3071676.99 |
|     |        | 2034 | 12099562.464 | 8941512.175  | 3158050.29 |
|     |        | 2035 | 12195919.946 | 8967711.678  | 3228208.27 |
|     |        | 2036 | 12278201.969 | 8988821.778  | 3289380.19 |
|     |        | 2037 | 12358146.336 | 9008638.725  | 3349507.61 |
|     |        | 2038 | 12435978.633 | 9027384.367  | 3408594.27 |
|     |        | 2039 | 12512468.845 | 9045245.311  | 3467223.53 |
| IHD | Males  | 1990 | 517209.093   | 517209.093   | 0.000      |
|     |        | 1991 | 1019219.395  | 1012116.414  | 7102.981   |
|     |        | 1992 | 1509598.614  | 1483230.118  | 26368.496  |
|     |        | 1993 | 1992735.299  | 1931328.165  | 61407.134  |
|     |        | 1994 | 2462877.575  | 2348336.025  | 114541.550 |
|     |        | 1995 | 2928249.390  | 2739806.334  | 188443.055 |
|     |        | 1996 | 3377377.730  | 3094184.818  | 283192.912 |
|     |        | 1997 | 3809062.472  | 3411702.984  | 397359.488 |
|     |        | 1998 | 4222213.867  | 3693142.012  | 529071.855 |
|     |        | 1999 | 4708317.743  | 3997684.074  | 710633.670 |
|     |        | 2000 | 5182084.396  | 4270357.966  | 911726.430 |
|     |        | 2001 | 5644097.705  | 4511549.680  | 1132548.02 |
|     |        | 2002 | 6107232.129  | 4730505.728  | 1376726.40 |
|     |        | 2003 | 6561785.704  | 4924419.254  | 1637366.45 |
|     |        | 2004 | 6996156.348  | 5092049.131  | 1904107.22 |
|     |        | 2005 | 7426261.361  | 5242585.504  | 2183675.86 |
|     |        | 2006 | 7849012.694  | 5375152.003  | 2473860.69 |
|     |        | 2007 | 8255300.530  | 5490339.323  | 2764961.21 |
|     |        | 2008 | 8650662.040  | 5592184.697  | 3058477.34 |
|     |        | 2009 | 9030818.513  | 5681617.465  | 3349201.05 |
|     |        | 2010 | 9403026.327  | 5761788.314  | 3641238.01 |
|     |        | 2011 | 9767535.506  | 5833682.382  | 3933853.12 |
|     |        | 2012 | 10123044.281 | 5898498.379  | 4224545.90 |
|     |        | 2013 | 10470104.786 | 5956986.690  | 4513118.10 |
|     |        | 2014 | 10807756.112 | 6010102.722  | 4797653.39 |
|     |        | 2015 | 11130681.425 | 6057851.321  | 5072830.10 |
|     |        | 2016 | 11448966.506 | 6102010.315  | 5346956.19 |

**Results for PHIM for Run 2 (ELL Summary Sensitivity\_Analysis\_3.RTF)**

|        |        |      |              |             |            |
|--------|--------|------|--------------|-------------|------------|
|        |        | 2017 | 11758164.882 | 6142746.039 | 5615418.84 |
|        |        | 2018 | 12054448.241 | 6179534.801 | 5874913.44 |
|        |        | 2019 | 12341606.261 | 6213814.463 | 6127791.80 |
|        |        | 2020 | 12600728.939 | 6243573.708 | 6357155.23 |
|        |        | 2021 | 12861767.105 | 6272613.175 | 6589153.93 |
|        |        | 2022 | 13114168.616 | 6300025.171 | 6814143.45 |
|        |        | 2023 | 13357894.797 | 6325816.961 | 7032077.84 |
|        |        | 2024 | 13593848.521 | 6350481.734 | 7243366.79 |
|        |        | 2025 | 13789177.359 | 6370418.391 | 7418758.97 |
|        |        | 2026 | 13993401.656 | 6391160.823 | 7602240.83 |
|        |        | 2027 | 14190519.224 | 6411184.183 | 7779335.04 |
|        |        | 2028 | 14381193.356 | 6430270.776 | 7950922.58 |
|        |        | 2029 | 14565171.927 | 6448732.113 | 8116439.81 |
|        |        | 2030 | 14697381.605 | 6461649.093 | 8235732.51 |
|        |        | 2031 | 14842203.512 | 6476000.576 | 8366202.94 |
|        |        | 2032 | 14982485.826 | 6489993.337 | 8492492.49 |
|        |        | 2033 | 15118410.647 | 6503308.269 | 8615102.38 |
|        |        | 2034 | 15250284.398 | 6516397.013 | 8733887.39 |
|        |        | 2035 | 15322911.166 | 6523206.891 | 8799704.28 |
|        |        | 2036 | 15405115.031 | 6531009.258 | 8874105.77 |
|        |        | 2037 | 15484709.137 | 6538683.673 | 8946025.46 |
|        |        | 2038 | 15561812.193 | 6546087.146 | 9015725.05 |
|        |        | 2039 | 15635992.616 | 6553329.785 | 9082662.83 |
|        | Female | 1990 | 147299.110   | 147299.110  | 0.000      |
|        |        | 1991 | 295122.462   | 293257.343  | 1865.120   |
|        |        | 1992 | 439962.920   | 432981.848  | 6981.072   |
|        |        | 1993 | 584735.615   | 568183.318  | 16552.297  |
|        |        | 1994 | 727640.783   | 696346.570  | 31294.213  |
|        |        | 1995 | 868486.937   | 816772.716  | 51714.222  |
|        |        | 1996 | 1010321.847  | 930970.898  | 79350.949  |
|        |        | 1997 | 1144230.930  | 1032595.556 | 111635.374 |
|        |        | 1998 | 1274513.622  | 1124933.593 | 149580.029 |
|        |        | 1999 | 1426725.938  | 1225283.995 | 201441.943 |
|        |        | 2000 | 1573462.680  | 1315092.691 | 258369.988 |
|        |        | 2001 | 1719132.015  | 1396222.626 | 322909.389 |
|        |        | 2002 | 1863006.732  | 1469080.383 | 393926.349 |
|        |        | 2003 | 2002943.227  | 1533441.019 | 469502.208 |
|        |        | 2004 | 2137798.705  | 1589669.891 | 548128.814 |
|        |        | 2005 | 2271071.245  | 1640326.135 | 630745.110 |
|        |        | 2006 | 2400707.731  | 1684558.259 | 716149.472 |
|        |        | 2007 | 2523634.512  | 1722614.050 | 801020.463 |
|        |        | 2008 | 2648752.232  | 1757633.915 | 891118.317 |
|        |        | 2009 | 2765973.961  | 1787694.300 | 978279.661 |
|        |        | 2010 | 2881329.235  | 1814771.549 | 1066557.69 |
|        |        | 2011 | 2994972.694  | 1839110.326 | 1155862.37 |
|        |        | 2012 | 3108958.829  | 1861427.227 | 1247531.60 |
|        |        | 2013 | 3218140.416  | 1881400.838 | 1336739.58 |
|        |        | 2014 | 3328387.914  | 1900061.974 | 1428325.94 |
|        |        | 2015 | 3435342.796  | 1917173.350 | 1518169.45 |
|        |        | 2016 | 3539189.408  | 1932782.667 | 1606406.74 |
|        |        | 2017 | 3640041.363  | 1947071.233 | 1692970.13 |
|        |        | 2018 | 3732645.362  | 1959489.715 | 1773155.65 |
|        |        | 2019 | 3821421.978  | 1970833.093 | 1850588.88 |
|        |        | 2020 | 3902115.950  | 1980734.296 | 1921381.65 |
|        |        | 2021 | 3984301.053  | 1990432.920 | 1993868.13 |
|        |        | 2022 | 4062629.299  | 1999348.328 | 2063280.97 |
|        |        | 2023 | 4137348.729  | 2007652.527 | 2129696.20 |
|        |        | 2024 | 4208611.493  | 2015379.249 | 2193232.24 |
|        |        | 2025 | 4269419.492  | 2021837.340 | 2247582.15 |
|        |        | 2026 | 4330969.998  | 2028286.350 | 2302683.65 |
|        |        | 2027 | 4389134.306  | 2034322.075 | 2354812.23 |
|        |        | 2028 | 4444222.970  | 2040037.629 | 2404185.34 |
|        |        | 2029 | 4496447.877  | 2045482.137 | 2450965.74 |
|        |        | 2030 | 4536975.698  | 2049569.295 | 2487406.40 |
|        |        | 2031 | 4578338.586  | 2053780.163 | 2524558.42 |
|        |        | 2032 | 4617397.784  | 2057796.663 | 2559601.12 |
|        |        | 2033 | 4654407.697  | 2061676.959 | 2592730.74 |
|        |        | 2034 | 4689913.454  | 2065442.895 | 2624470.56 |
|        |        | 2035 | 4712518.190  | 2067678.459 | 2644839.73 |
|        |        | 2036 | 4735845.827  | 2070021.005 | 2665824.82 |
|        |        | 2037 | 4757958.806  | 2072286.342 | 2685672.46 |
|        |        | 2038 | 4778813.806  | 2074489.549 | 2704324.26 |
|        |        | 2039 | 4798769.065  | 2076650.696 | 2722118.37 |
| Stroke | Males  | 1990 | 75005.854    | 75005.854   | 0.000      |
|        |        | 1991 | 149463.017   | 148743.133  | 719.885    |
|        |        | 1992 | 222966.278   | 220290.129  | 2676.150   |
|        |        | 1993 | 296801.879   | 290428.977  | 6372.901   |
|        |        | 1994 | 372453.706   | 360114.299  | 12339.407  |



**Results for PHIM for Run 2 (ELL Summary Sensitivity\_Analysis\_3.RTF)**

|        |      |             |             |            |
|--------|------|-------------|-------------|------------|
|        | 1995 | 448401.338  | 427542.909  | 20858.428  |
|        | 1996 | 523536.301  | 491447.197  | 32089.104  |
|        | 1997 | 596763.211  | 550747.085  | 46016.126  |
|        | 1998 | 667546.681  | 605081.084  | 62465.597  |
|        | 1999 | 734925.407  | 653909.086  | 81016.321  |
|        | 2000 | 803749.361  | 700840.109  | 102909.252 |
|        | 2001 | 870081.588  | 743061.108  | 127020.480 |
|        | 2002 | 935347.140  | 781798.109  | 153549.031 |
|        | 2003 | 1001627.349 | 818150.976  | 183476.373 |
|        | 2004 | 1066587.976 | 851185.811  | 215402.164 |
|        | 2005 | 1130548.052 | 881171.094  | 249376.958 |
|        | 2006 | 1195132.454 | 908967.473  | 286164.981 |
|        | 2007 | 1258974.043 | 934203.421  | 324770.622 |
|        | 2008 | 1320124.867 | 956304.585  | 363820.282 |
|        | 2009 | 1380776.123 | 976439.573  | 404336.551 |
|        | 2010 | 1440048.533 | 994562.922  | 445485.611 |
|        | 2011 | 1497484.847 | 1010748.480 | 486736.367 |
|        | 2012 | 1554496.526 | 1025437.704 | 529058.823 |
|        | 2013 | 1610819.598 | 1038808.050 | 572011.548 |
|        | 2014 | 1667484.890 | 1051161.654 | 616323.236 |
|        | 2015 | 1720948.287 | 1062062.875 | 658885.411 |
|        | 2016 | 1775699.228 | 1072375.189 | 703324.039 |
|        | 2017 | 1830250.175 | 1081939.241 | 748310.934 |
|        | 2018 | 1875958.950 | 1089455.503 | 786503.447 |
|        | 2019 | 1920359.232 | 1096317.550 | 824041.682 |
|        | 2020 | 1960605.297 | 1102224.213 | 858381.085 |
|        | 2021 | 1998912.887 | 1107533.106 | 891379.781 |
|        | 2022 | 2036003.696 | 1112407.783 | 923595.912 |
|        | 2023 | 2071857.536 | 1116892.421 | 954965.116 |
|        | 2024 | 2106636.468 | 1121081.717 | 985554.752 |
|        | 2025 | 2136450.873 | 1124548.275 | 1011902.60 |
|        | 2026 | 2164796.470 | 1127730.235 | 1037066.24 |
|        | 2027 | 2192079.608 | 1130723.131 | 1061356.48 |
|        | 2028 | 2218404.367 | 1133523.670 | 1084880.70 |
|        | 2029 | 2243769.140 | 1136179.495 | 1107589.65 |
|        | 2030 | 2263570.213 | 1138203.036 | 1125367.18 |
|        | 2031 | 2282521.590 | 1140123.543 | 1142398.05 |
|        | 2032 | 2300804.945 | 1141961.434 | 1158843.51 |
|        | 2033 | 2318464.018 | 1143706.770 | 1174757.25 |
|        | 2034 | 2335611.973 | 1145405.510 | 1190206.46 |
|        | 2035 | 2347097.290 | 1146523.955 | 1200573.34 |
|        | 2036 | 2358248.747 | 1147612.530 | 1210636.22 |
|        | 2037 | 2369033.655 | 1148677.286 | 1220356.37 |
|        | 2038 | 2379490.114 | 1149705.791 | 1229784.32 |
|        | 2039 | 2389546.238 | 1150707.608 | 1238838.63 |
| Female | 1990 | 56348.092   | 56348.092   | 0.000      |
|        | 1991 | 110871.862  | 110356.693  | 515.169    |
|        | 1992 | 165654.454  | 163676.913  | 1977.542   |
|        | 1993 | 220008.519  | 215285.353  | 4723.167   |
|        | 1994 | 275706.807  | 266529.415  | 9177.391   |
|        | 1995 | 331417.547  | 315931.250  | 15486.298  |
|        | 1996 | 387580.161  | 363605.583  | 23974.578  |
|        | 1997 | 442778.242  | 408268.880  | 34509.362  |
|        | 1998 | 496117.305  | 449254.584  | 46862.720  |
|        | 1999 | 548268.214  | 487142.203  | 61126.012  |
|        | 2000 | 601693.202  | 523757.529  | 77935.673  |
|        | 2001 | 652221.103  | 556224.332  | 95996.771  |
|        | 2002 | 703022.600  | 586650.039  | 116372.561 |
|        | 2003 | 752023.351  | 613940.547  | 138082.804 |
|        | 2004 | 799826.733  | 638584.522  | 161242.211 |
|        | 2005 | 847563.928  | 661373.042  | 186190.887 |
|        | 2006 | 894205.027  | 681906.417  | 212298.610 |
|        | 2007 | 939571.282  | 700272.800  | 239298.482 |
|        | 2008 | 983437.578  | 716638.339  | 266799.239 |
|        | 2009 | 1025803.786 | 731197.018  | 294606.768 |
|        | 2010 | 1066964.934 | 744183.559  | 322781.375 |
|        | 2011 | 1106954.044 | 755775.176  | 351178.869 |
|        | 2012 | 1146108.461 | 766241.505  | 379866.955 |
|        | 2013 | 1183544.689 | 775506.936  | 408037.753 |
|        | 2014 | 1221220.945 | 784105.161  | 437115.784 |
|        | 2015 | 1258289.311 | 792029.235  | 466260.076 |
|        | 2016 | 1294830.207 | 799283.379  | 495546.828 |
|        | 2017 | 1330332.626 | 805857.581  | 524475.044 |
|        | 2018 | 1360571.987 | 811118.625  | 549453.362 |
|        | 2019 | 1389848.723 | 815879.065  | 573969.658 |
|        | 2020 | 1416046.192 | 819932.128  | 596114.065 |
|        | 2021 | 1440588.850 | 823520.634  | 617068.215 |
|        | 2022 | 1464157.934 | 826784.650  | 637373.285 |

**Results for PHIM for Run 2 (ELL Summary Sensitivity\_Analysis\_3.RTF)**

|      |             |             |             |             |            |
|------|-------------|-------------|-------------|-------------|------------|
|      |             | 2023        | 1486810.237 | 829791.152  | 657019.085 |
|      |             | 2024        | 1508591.729 | 832553.337  | 676038.392 |
|      |             | 2025        | 1526875.621 | 834801.680  | 692073.941 |
|      |             | 2026        | 1543659.810 | 836796.500  | 706863.310 |
|      |             | 2027        | 1559623.774 | 838641.863  | 720981.912 |
|      |             | 2028        | 1574852.850 | 840370.976  | 734481.875 |
|      |             | 2029        | 1589437.452 | 841998.607  | 747438.845 |
|      |             | 2030        | 1600568.199 | 843208.483  | 757359.716 |
|      |             | 2031        | 1610776.297 | 844311.219  | 766465.078 |
|      |             | 2032        | 1620483.563 | 845357.247  | 775126.316 |
|      |             | 2033        | 1629745.442 | 846360.782  | 783384.660 |
|      |             | 2034        | 1638721.425 | 847329.683  | 791391.742 |
|      |             | 2035        | 1644649.404 | 847947.218  | 796702.186 |
|      |             | 2036        | 1650181.590 | 848526.691  | 801654.899 |
|      |             | 2037        | 1655476.066 | 849089.218  | 806386.848 |
|      |             | 2038        | 1660507.914 | 849637.925  | 810869.989 |
|      |             | 2039        | 1665361.569 | 850177.008  | 815184.561 |
| COPD | Males       | 1990        | 117002.906  | 117002.906  | 0.000      |
|      |             | 1991        | 233438.833  | 233235.802  | 203.031    |
|      |             | 1992        | 348084.047  | 347332.738  | 751.309    |
|      |             | 1993        | 467278.318  | 465434.221  | 1844.097   |
|      |             | 1994        | 584216.907  | 580591.513  | 3625.394   |
|      |             | 1995        | 697391.457  | 691212.643  | 6178.813   |
|      |             | 1996        | 809471.271  | 799807.745  | 9663.526   |
|      |             | 1997        | 922587.668  | 908269.119  | 14318.549  |
|      |             | 1998        | 1034072.457 | 1013995.995 | 20076.462  |
|      |             | 1999        | 1153475.399 | 1125810.128 | 27665.271  |
|      |             | 2000        | 1268050.268 | 1231411.615 | 36638.653  |
|      |             | 2001        | 1382786.209 | 1335369.660 | 47416.549  |
|      |             | 2002        | 1497557.412 | 1437363.891 | 60193.521  |
|      |             | 2003        | 1614405.229 | 1539375.502 | 75029.727  |
|      |             | 2004        | 1726672.489 | 1635299.049 | 91373.440  |
|      |             | 2005        | 1847277.524 | 1736285.679 | 110991.846 |
|      |             | 2006        | 1961009.963 | 1829137.434 | 131872.529 |
|      |             | 2007        | 2079868.908 | 1923624.435 | 156244.473 |
|      |             | 2008        | 2206755.783 | 2022012.305 | 184743.478 |
|      |             | 2009        | 2331993.380 | 2116416.139 | 215577.241 |
|      |             | 2010        | 2455130.176 | 2206657.330 | 248472.846 |
|      |             | 2011        | 2582657.849 | 2297258.592 | 285399.256 |
|      |             | 2012        | 2709719.005 | 2384571.351 | 325147.654 |
|      |             | 2013        | 2840547.005 | 2471362.330 | 369184.676 |
|      |             | 2014        | 2971677.135 | 2555309.428 | 416367.707 |
|      |             | 2015        | 3104538.983 | 2638406.150 | 466132.833 |
|      |             | 2016        | 3237650.175 | 2718362.175 | 519288.001 |
|      |             | 2017        | 3370561.253 | 2795337.464 | 575223.789 |
|      |             | 2018        | 3503136.371 | 2868636.515 | 634499.856 |
|      |             | 2019        | 3636402.758 | 2939296.925 | 697105.833 |
|      |             | 2020        | 3768054.453 | 3006798.375 | 761256.077 |
|      |             | 2021        | 3897675.067 | 3070298.360 | 827376.707 |
|      |             | 2022        | 4027307.132 | 3130864.675 | 896442.457 |
|      |             | 2023        | 4156698.720 | 3188410.963 | 968287.757 |
|      |             | 2024        | 4285772.226 | 3243012.511 | 1042759.71 |
|      |             | 2025        | 4410759.298 | 3294032.973 | 1116726.32 |
|      |             | 2026        | 4531411.064 | 3340481.183 | 1190929.88 |
|      |             | 2027        | 4651145.233 | 3384091.783 | 1267053.45 |
|      |             | 2028        | 4769837.872 | 3424942.144 | 1344895.73 |
|      |             | 2029        | 4887747.179 | 3463281.949 | 1424465.23 |
| 2030 | 4997632.895 | 3497889.094 | 1499743.80  |             |            |
| 2031 | 5103301.991 | 3528695.027 | 1574606.96  |             |            |
| 2032 | 5207593.613 | 3557315.831 | 1650277.78  |             |            |
| 2033 | 5310556.138 | 3583818.600 | 1726737.54  |             |            |
| 2034 | 5412542.816 | 3608534.839 | 1804007.98  |             |            |
| 2035 | 5500522.473 | 3629332.769 | 1871189.70  |             |            |
| 2036 | 5588149.640 | 3648593.507 | 1939556.13  |             |            |
| 2037 | 5674667.886 | 3666585.490 | 2008082.40  |             |            |
| 2038 | 5760391.289 | 3683371.947 | 2077019.34  |             |            |
| 2039 | 5845459.234 | 3699253.069 | 2146206.16  |             |            |
|      | Female      | 1990        | 77434.846   | 77434.846   | 0.000      |
|      |             | 1991        | 160029.510  | 159861.321  | 168.190    |
|      |             | 1992        | 240642.531  | 240002.439  | 640.092    |
|      |             | 1993        | 329362.093  | 327710.373  | 1651.720   |
|      |             | 1994        | 418569.515  | 415259.765  | 3309.750   |
|      |             | 1995        | 509110.357  | 503286.119  | 5824.238   |
|      |             | 1996        | 600040.117  | 590786.644  | 9253.473   |
|      |             | 1997        | 691159.071  | 677433.113  | 13725.957  |
|      |             | 1998        | 782866.899  | 763555.276  | 19311.623  |
|      |             | 1999        | 881526.925  | 854847.171  | 26679.754  |
|      |             | 2000        | 977880.647  | 942686.453  | 35194.194  |

**Results for PHIM for Run 2 (ELL Summary Sensitivity\_Analysis\_3.RTF)**

|      |             |             |            |
|------|-------------|-------------|------------|
| 2001 | 1076787.404 | 1031310.572 | 45476.832  |
| 2002 | 1174842.754 | 1117495.056 | 57347.698  |
| 2003 | 1275102.681 | 1203987.535 | 71115.146  |
| 2004 | 1371026.306 | 1285077.631 | 85948.675  |
| 2005 | 1473954.509 | 1370050.661 | 103903.848 |
| 2006 | 1574450.828 | 1451057.693 | 123393.135 |
| 2007 | 1673790.211 | 1529126.777 | 144663.435 |
| 2008 | 1782360.738 | 1612222.021 | 170138.717 |
| 2009 | 1892944.209 | 1694231.897 | 198712.313 |
| 2010 | 2002131.282 | 1773000.532 | 229130.750 |
| 2011 | 2114522.152 | 1851384.433 | 263137.719 |
| 2012 | 2228079.372 | 1928116.831 | 299962.541 |
| 2013 | 2345377.689 | 2004583.477 | 340794.212 |
| 2014 | 2462498.422 | 2078139.567 | 384358.855 |
| 2015 | 2581450.312 | 2150972.683 | 430477.629 |
| 2016 | 2701959.301 | 2221921.868 | 480037.433 |
| 2017 | 2823834.967 | 2290870.387 | 532964.580 |
| 2018 | 2938265.081 | 2353612.986 | 584652.095 |
| 2019 | 3053254.880 | 2414048.354 | 639206.526 |
| 2020 | 3167073.216 | 2471871.168 | 695202.048 |
| 2021 | 3279517.699 | 2527091.118 | 752426.581 |
| 2022 | 3392060.964 | 2579883.361 | 812177.603 |
| 2023 | 3504296.171 | 2630169.316 | 874126.855 |
| 2024 | 3616019.231 | 2677817.987 | 938201.244 |
| 2025 | 3724611.269 | 2722531.205 | 1002080.06 |
| 2026 | 3827181.707 | 2763312.697 | 1063869.01 |
| 2027 | 3928684.441 | 2801628.516 | 1127055.92 |
| 2028 | 4029124.892 | 2837700.257 | 1191424.64 |
| 2029 | 4128269.068 | 2871385.955 | 1256883.11 |
| 2030 | 4221560.174 | 2902084.032 | 1319476.14 |
| 2031 | 4304170.584 | 2927914.450 | 1376256.13 |
| 2032 | 4384930.537 | 2951723.400 | 1433207.14 |
| 2033 | 4464357.691 | 2973870.021 | 1490487.67 |
| 2034 | 4542251.545 | 2994288.443 | 1547963.10 |
| 2035 | 4611066.648 | 3011856.287 | 1599210.36 |
| 2036 | 4670309.230 | 3026037.280 | 1644271.95 |
| 2037 | 4728179.514 | 3039126.855 | 1689052.66 |
| 2038 | 4785008.048 | 3051311.797 | 1733696.25 |
| 2039 | 4841291.793 | 3062721.717 | 1778570.08 |

---

## Results for PHIM for Run 2 (ELL Summary Sensitivity\_Analysis\_3.RTF)

\*\*\*\*\*

**Table 4: Estimated Loss of Life, All age groups combined, Population and Number deaths adjusted for Ecig scenario, cumulative over years**

| Disease      | Sex          | Year         | Years of life lost<br>NULL | Years of life lost<br>Ecig | Years of life<br>Saved |
|--------------|--------------|--------------|----------------------------|----------------------------|------------------------|
| All Diseases | Males        | 1990         | 1304839.645                | 1304839.645                | 0.000                  |
|              |              | 1991         | 2579865.358                | 2571191.563                | 8673.794               |
|              |              | 1992         | 3830683.831                | 3798454.139                | 32229.692              |
|              |              | 1993         | 5076567.803                | 5001043.009                | 75524.793              |
|              |              | 1994         | 6292145.526                | 6150248.102                | 141897.424             |
|              |              | 1995         | 7485537.010                | 7250747.693                | 234789.317             |
|              |              | 1996         | 8655955.028                | 8300581.494                | 355373.533             |
|              |              | 1997         | 9791729.713                | 9289327.936                | 502401.777             |
|              |              | 1998         | 10899134.186               | 10224695.833               | 674438.352             |
|              |              | 1999         | 12070409.674               | 11166145.525               | 904264.150             |
|              |              | 2000         | 13231384.595               | 12067534.266               | 1163850.33             |
|              |              | 2001         | 14371761.018               | 12919125.659               | 1452635.36             |
|              |              | 2002         | 15508906.386               | 13733593.466               | 1775312.92             |
|              |              | 2003         | 16638100.422               | 14511259.267               | 2126841.16             |
|              |              | 2004         | 17736465.088               | 15241727.884               | 2494737.20             |
|              |              | 2005         | 18834658.606               | 15946643.426               | 2888015.18             |
|              |              | 2006         | 19909100.501               | 16606025.144               | 3303075.36             |
|              |              | 2007         | 20958321.463               | 17227649.288               | 3730672.18             |
|              |              | 2008         | 22000068.148               | 17825918.489               | 4174149.66             |
|              |              | 2009         | 23018816.903               | 18392120.962               | 4626695.94             |
|              |              | 2010         | 24018480.537               | 18927901.259               | 5090579.28             |
|              |              | 2011         | 25003034.574               | 19436935.941               | 5566098.63             |
|              |              | 2012         | 25969871.429               | 19917952.914               | 6051918.52             |
|              |              | 2013         | 26920275.180               | 20373101.629               | 6547173.55             |
|              |              | 2014         | 27849005.227               | 20800699.475               | 7048305.75             |
|              |              | 2015         | 28749620.400               | 21204122.352               | 7545498.05             |
|              |              | 2016         | 29622417.562               | 21574832.959               | 8047584.60             |
|              |              | 2017         | 30462559.724               | 21915437.897               | 8547121.83             |
|              |              | 2018         | 31293299.299               | 22243959.222               | 9049340.08             |
|              |              | 2019         | 32109993.427               | 22555580.116               | 9554413.31             |
|              |              | 2020         | 32883323.977               | 22846073.298               | 10037250.7             |
|              |              | 2021         | 33610102.554               | 23099811.083               | 10510291.5             |
|              |              | 2022         | 34322010.448               | 23339020.193               | 10982990.3             |
|              |              | 2023         | 35018383.550               | 23563799.617               | 11454583.9             |
|              |              | 2024         | 35700177.955               | 23775493.578               | 11924684.4             |
|              |              | 2025         | 36315500.346               | 23966663.625               | 12348836.7             |
|              |              | 2026         | 36896159.343               | 24131446.940               | 12764712.4             |
|              |              | 2027         | 37462570.116               | 24285963.769               | 13176606.3             |
|              |              | 2028         | 38015337.780               | 24430328.748               | 13585009.0             |
|              |              | 2029         | 38554814.764               | 24566009.841               | 13988804.9             |
|              |              | 2030         | 39003805.400               | 24681464.846               | 14322340.6             |
|              |              | 2031         | 39436509.703               | 24782097.659               | 14654412.0             |
| 2032         | 39858470.458 | 24876541.087 | 14981929.4                 |                            |                        |
| 2033         | 40270147.082 | 24964539.401 | 15305607.7                 |                            |                        |
| 2034         | 40672665.743 | 25047713.684 | 15624952.1                 |                            |                        |
| 2035         | 40962732.664 | 25110157.026 | 15852575.6                 |                            |                        |
| 2036         | 41255021.653 | 25168334.873 | 16086686.8                 |                            |                        |
| 2037         | 41540573.023 | 25223530.489 | 16317042.5                 |                            |                        |
| 2038         | 41820158.066 | 25275528.655 | 16544629.4                 |                            |                        |
| 2039         | 42093547.949 | 25325320.782 | 16768227.2                 |                            |                        |
|              | Female       | 1990         | 588979.406                 | 588979.406                 | 0.000                  |
|              |              | 1991         | 1182571.252                | 1179606.280                | 2964.972               |
|              |              | 1992         | 1777346.679                | 1766100.752                | 11245.927              |
|              |              | 1993         | 2380261.899                | 2353284.513                | 26977.386              |
|              |              | 1994         | 2983130.039                | 2931384.187                | 51745.852              |
|              |              | 1995         | 3588982.584                | 3502101.440                | 86881.144              |
|              |              | 1996         | 4195430.235                | 4060847.574                | 134582.661             |
|              |              | 1997         | 4793866.694                | 4601173.206                | 192693.488             |
|              |              | 1998         | 5389747.381                | 5127343.315                | 262404.066             |
|              |              | 1999         | 6006722.467                | 5654014.913                | 352707.554             |
|              |              | 2000         | 6625758.871                | 6169973.136                | 455785.734             |
|              |              | 2001         | 7245135.411                | 6671298.314                | 573837.097             |
|              |              | 2002         | 7867492.021                | 7160139.025                | 707352.996             |
|              |              | 2003         | 8485051.793                | 7631720.874                | 853330.919             |
|              |              | 2004         | 9092994.774                | 8082624.326                | 1010370.45             |
|              |              | 2005         | 9706032.803                | 8524154.499                | 1181878.30             |
|              |              | 2006         | 10311907.548               | 8946613.255                | 1365294.29             |
|              |              | 2007         | 10909437.502               | 9352075.938                | 1557361.56             |
|              |              | 2008         | 11506462.491               | 9742516.541                | 1763945.95             |
|              |              | 2009         | 12098393.287               | 10119731.408               | 1978661.88             |
|              |              | 2010         | 12681188.981               | 10479036.781               | 2202152.20             |

**Results for PHIM for Run 2 (ELL Summary Sensitivity\_Analysis\_3.RTF)**

|             |       |      |              |              |            |
|-------------|-------|------|--------------|--------------|------------|
|             |       | 2011 | 13260062.991 | 10823470.480 | 2436592.51 |
|             |       | 2012 | 13839417.441 | 11155738.438 | 2683679.00 |
|             |       | 2013 | 14409614.758 | 11472593.513 | 2937021.25 |
|             |       | 2014 | 14976658.746 | 11774565.609 | 3202093.14 |
|             |       | 2015 | 15529977.821 | 12060015.949 | 3469961.87 |
|             |       | 2016 | 16066640.764 | 12325220.111 | 3741420.65 |
|             |       | 2017 | 16590035.078 | 12573853.750 | 4016181.33 |
|             |       | 2018 | 17098716.137 | 12809448.661 | 4289267.48 |
|             |       | 2019 | 17599868.850 | 13032652.766 | 4567216.08 |
|             |       | 2020 | 18081346.241 | 13241898.025 | 4839448.22 |
|             |       | 2021 | 18537594.460 | 13430967.082 | 5106627.38 |
|             |       | 2022 | 18985300.234 | 13609113.838 | 5376186.40 |
|             |       | 2023 | 19423958.747 | 13776830.579 | 5647128.17 |
|             |       | 2024 | 19853347.772 | 13933955.943 | 5919391.83 |
|             |       | 2025 | 20252822.245 | 14077690.421 | 6175131.82 |
|             |       | 2026 | 20619307.063 | 14202856.710 | 6416450.35 |
|             |       | 2027 | 20976063.406 | 14319505.682 | 6656557.72 |
|             |       | 2028 | 21323641.947 | 14428710.492 | 6894931.45 |
|             |       | 2029 | 21662117.106 | 14530342.570 | 7131774.54 |
|             |       | 2030 | 21960971.694 | 14619458.926 | 7341512.77 |
|             |       | 2031 | 22224951.983 | 14692983.981 | 7531968.00 |
|             |       | 2032 | 22480397.853 | 14760996.882 | 7719400.97 |
|             |       | 2033 | 22728639.455 | 14824545.202 | 7904094.25 |
|             |       | 2034 | 22970448.888 | 14883640.427 | 8086808.46 |
|             |       | 2035 | 23164154.188 | 14931057.944 | 8233096.24 |
|             |       | 2036 | 23334538.616 | 14969924.041 | 8364614.58 |
|             |       | 2037 | 23499760.723 | 15006278.444 | 8493482.28 |
|             |       | 2038 | 23660308.401 | 15040554.414 | 8619753.99 |
|             |       | 2039 | 23817891.273 | 15073095.863 | 8744795.41 |
| Lung cancer | Males | 1990 | 595621.791   | 595621.791   | 0.000      |
|             |       | 1991 | 1177744.113  | 1177096.215  | 647.898    |
|             |       | 1992 | 1750034.892  | 1747594.998  | 2439.894   |
|             |       | 1993 | 2319752.308  | 2313823.778  | 5928.530   |
|             |       | 1994 | 2872597.339  | 2861130.059  | 11467.280  |
|             |       | 1995 | 3411494.825  | 3392023.502  | 19471.324  |
|             |       | 1996 | 3945569.726  | 3914846.917  | 30722.809  |
|             |       | 1997 | 4463316.362  | 4418128.083  | 45188.279  |
|             |       | 1998 | 4975301.180  | 4911755.535  | 63545.646  |
|             |       | 1999 | 5473691.125  | 5387677.980  | 86013.145  |
|             |       | 2000 | 5977500.570  | 5863439.390  | 114061.180 |
|             |       | 2001 | 6474795.516  | 6327167.019  | 147628.497 |
|             |       | 2002 | 6968769.705  | 6781375.835  | 187393.870 |
|             |       | 2003 | 7460282.140  | 7226117.338  | 234164.802 |
|             |       | 2004 | 7947048.275  | 7659305.867  | 287742.408 |
|             |       | 2005 | 8430571.669  | 8081937.515  | 348634.154 |
|             |       | 2006 | 8903945.390  | 8487297.478  | 416647.912 |
|             |       | 2007 | 9364177.982  | 8873150.774  | 491027.208 |
|             |       | 2008 | 9822525.458  | 9248154.585  | 574370.874 |
|             |       | 2009 | 10275228.886 | 9609423.685  | 665805.201 |
|             |       | 2010 | 10720275.500 | 9955676.124  | 764599.376 |
|             |       | 2011 | 11155356.373 | 10284987.958 | 870368.415 |
|             |       | 2012 | 11582611.617 | 10598116.982 | 984494.635 |
|             |       | 2013 | 11998803.791 | 10893499.162 | 1105304.63 |
|             |       | 2014 | 12402087.090 | 11170534.964 | 1231552.13 |
|             |       | 2015 | 12793451.706 | 11431013.363 | 1362438.34 |
|             |       | 2016 | 13160101.653 | 11666070.664 | 1494030.99 |
|             |       | 2017 | 13503583.414 | 11878146.412 | 1625437.00 |
|             |       | 2018 | 13859755.737 | 12087830.838 | 1771924.90 |
|             |       | 2019 | 14211625.176 | 12286398.578 | 1925226.60 |
|             |       | 2020 | 14553935.288 | 12472460.332 | 2081474.96 |
|             |       | 2021 | 14851747.495 | 12627091.097 | 2224656.40 |
|             |       | 2022 | 15144531.004 | 12772186.490 | 2372344.51 |
|             |       | 2023 | 15431932.496 | 12907884.429 | 2524048.07 |
|             |       | 2024 | 15713920.740 | 13034865.074 | 2679055.67 |
|             |       | 2025 | 15979112.816 | 13150374.451 | 2828738.37 |
|             |       | 2026 | 16206550.153 | 13243582.180 | 2962967.97 |
|             |       | 2027 | 16428826.050 | 13330285.410 | 3098540.64 |
|             |       | 2028 | 16645902.186 | 13410746.659 | 3235155.53 |
|             |       | 2029 | 16858126.517 | 13485825.288 | 3372301.23 |
|             |       | 2030 | 17045220.687 | 13550664.888 | 3494555.80 |
|             |       | 2031 | 17208482.610 | 13603193.723 | 3605288.89 |
|             |       | 2032 | 17367586.074 | 13652189.779 | 3715396.30 |
|             |       | 2033 | 17522716.280 | 13697665.685 | 3825050.59 |
|             |       | 2034 | 17674226.555 | 13740401.475 | 3933825.08 |
|             |       | 2035 | 17792201.734 | 13773345.484 | 4018856.25 |
|             |       | 2036 | 17903508.236 | 13802610.611 | 4100897.62 |
|             |       | 2037 | 18012162.345 | 13830337.111 | 4181825.23 |
|             |       | 2038 | 18118464.470 | 13856404.174 | 4262060.30 |

**Results for PHIM for Run 2 (ELL Summary Sensitivity\_Analysis\_3.RTF)**

|     |        |      |              |              |            |
|-----|--------|------|--------------|--------------|------------|
|     | Female | 2039 | 18222549.860 | 13881378.078 | 4341171.78 |
|     |        | 1990 | 307897.357   | 307897.357   | 0.000      |
|     |        | 1991 | 616547.418   | 616130.924   | 416.494    |
|     |        | 1992 | 931086.773   | 929438.639   | 1648.134   |
|     |        | 1993 | 1246155.671  | 1242101.014  | 4054.657   |
|     |        | 1994 | 1561212.934  | 1553235.574  | 7977.361   |
|     |        | 1995 | 1879967.742  | 1866082.832  | 13884.910  |
|     |        | 1996 | 2197488.109  | 2175430.248  | 22057.861  |
|     |        | 1997 | 2515698.453  | 2482783.871  | 32914.582  |
|     |        | 1998 | 2836249.556  | 2789456.437  | 46793.119  |
|     |        | 1999 | 3150201.390  | 3086523.456  | 63677.933  |
|     |        | 2000 | 3472722.342  | 3388124.335  | 84598.008  |
|     |        | 2001 | 3796994.889  | 3687113.620  | 109881.269 |
|     |        | 2002 | 4126619.935  | 3986351.715  | 140268.220 |
|     |        | 2003 | 4454982.533  | 4279632.979  | 175349.555 |
|     |        | 2004 | 4784343.030  | 4568401.046  | 215941.985 |
|     |        | 2005 | 5113443.121  | 4851313.910  | 262129.211 |
|     |        | 2006 | 5442543.963  | 5127785.704  | 314758.258 |
|     |        | 2007 | 5772441.497  | 5398527.715  | 373913.782 |
|     |        | 2008 | 6091911.943  | 5654223.659  | 437688.283 |
|     |        | 2009 | 6413671.330  | 5904527.747  | 509143.583 |
|     |        | 2010 | 6730763.530  | 6144703.296  | 586060.234 |
|     |        | 2011 | 7043614.101  | 6374503.517  | 669110.584 |
|     |        | 2012 | 7356270.780  | 6596916.748  | 759354.032 |
|     |        | 2013 | 7662551.964  | 6807703.345  | 854848.618 |
|     |        | 2014 | 7964551.465  | 7008480.979  | 956070.486 |
|     |        | 2015 | 8254895.403  | 7195654.108  | 1059241.29 |
|     |        | 2016 | 8530661.848  | 7366616.914  | 1164044.93 |
|     |        | 2017 | 8795826.122  | 7524989.294  | 1270836.83 |
|     |        | 2018 | 9067233.707  | 7679719.013  | 1387514.69 |
|     |        | 2019 | 9335343.270  | 7825927.311  | 1509415.96 |
|     |        | 2020 | 9596110.883  | 7962926.336  | 1633184.55 |
|     |        | 2021 | 9833186.859  | 8083001.669  | 1750185.19 |
|     |        | 2022 | 10066452.037 | 8195681.277  | 1870770.76 |
|     |        | 2023 | 10295503.609 | 8301298.830  | 1994204.78 |
|     |        | 2024 | 10520125.318 | 8399780.710  | 2120344.61 |
|     |        | 2025 | 10731915.863 | 8489587.719  | 2242328.14 |
|     |        | 2026 | 10917495.549 | 8565025.552  | 2352470.00 |
|     |        | 2027 | 11098620.885 | 8634977.449  | 2463643.44 |
|     |        | 2028 | 11275441.234 | 8700168.322  | 2575272.91 |
|     |        | 2029 | 11447962.710 | 8760552.019  | 2687410.69 |
|     |        | 2030 | 11601867.623 | 8813196.272  | 2788671.35 |
|     |        | 2031 | 11731666.516 | 8855143.971  | 2876522.54 |
|     |        | 2032 | 11857585.969 | 8893867.995  | 2963717.97 |
|     |        | 2033 | 11980128.625 | 8929979.915  | 3050148.71 |
|     |        | 2034 | 12099562.464 | 8963531.890  | 3136030.57 |
|     |        | 2035 | 12195919.946 | 8990172.825  | 3205747.12 |
|     |        | 2036 | 12278201.969 | 9011633.546  | 3266568.42 |
|     |        | 2037 | 12358146.336 | 9031784.179  | 3326362.16 |
|     |        | 2038 | 12435978.633 | 9050850.006  | 3385128.63 |
|     |        | 2039 | 12512468.845 | 9069019.807  | 3443449.04 |
| IHD | Males  | 1990 | 517209.093   | 517209.093   | 0.000      |
|     |        | 1991 | 1019219.395  | 1012116.414  | 7102.981   |
|     |        | 1992 | 1509598.614  | 1483234.507  | 26364.107  |
|     |        | 1993 | 1992735.299  | 1931347.796  | 61387.503  |
|     |        | 1994 | 2462877.575  | 2348389.085  | 114488.490 |
|     |        | 1995 | 2928249.390  | 2739918.524  | 188330.866 |
|     |        | 1996 | 3377377.730  | 3094385.942  | 282991.788 |
|     |        | 1997 | 3809062.472  | 3412025.542  | 397036.930 |
|     |        | 1998 | 4222213.867  | 3693617.399  | 528596.469 |
|     |        | 1999 | 4708317.743  | 3998382.344  | 709935.399 |
|     |        | 2000 | 5182084.396  | 4271324.683  | 910759.713 |
|     |        | 2001 | 5644097.705  | 4512820.922  | 1131276.78 |
|     |        | 2002 | 6107232.129  | 4732121.097  | 1375111.03 |
|     |        | 2003 | 6561785.704  | 4926405.719  | 1635379.98 |
|     |        | 2004 | 6996156.348  | 5094419.071  | 1901737.28 |
|     |        | 2005 | 7426261.361  | 5245360.041  | 2180901.32 |
|     |        | 2006 | 7849012.694  | 5378336.987  | 2470675.71 |
|     |        | 2007 | 8255300.530  | 5493932.028  | 2761368.50 |
|     |        | 2008 | 8650662.040  | 5596186.432  | 3054475.61 |
|     |        | 2009 | 9030818.513  | 5686021.690  | 3344796.82 |
|     |        | 2010 | 9403026.327  | 5766591.256  | 3636435.07 |
|     |        | 2011 | 9767535.506  | 5838877.482  | 3928658.02 |
|     |        | 2012 | 10123044.281 | 5904079.844  | 4218964.44 |
|     |        | 2013 | 10470104.786 | 5962946.671  | 4507158.11 |
|     |        | 2014 | 10807756.112 | 6016433.736  | 4791322.38 |
|     |        | 2015 | 11130681.425 | 6064546.887  | 5066134.54 |
|     |        | 2016 | 11448966.506 | 6109066.150  | 5339900.36 |

**Results for PHIM for Run 2 (ELL Summary Sensitivity\_Analysis\_3.RTF)**

|        |        |      |              |             |            |
|--------|--------|------|--------------|-------------|------------|
|        |        | 2017 | 11758164.882 | 6150156.100 | 5608008.78 |
|        |        | 2018 | 12054448.241 | 6187269.768 | 5867178.47 |
|        |        | 2019 | 12341606.261 | 6221866.988 | 6119739.27 |
|        |        | 2020 | 12600728.939 | 6251934.527 | 6348794.41 |
|        |        | 2021 | 12861767.105 | 6281277.466 | 6580489.64 |
|        |        | 2022 | 13114168.616 | 6308986.282 | 6805182.33 |
|        |        | 2023 | 13357894.797 | 6335069.033 | 7022825.76 |
|        |        | 2024 | 13593848.521 | 6360022.405 | 7233826.12 |
|        |        | 2025 | 13789177.359 | 6380231.963 | 7408945.40 |
|        |        | 2026 | 13993401.656 | 6401255.848 | 7592145.81 |
|        |        | 2027 | 14190519.224 | 6421559.244 | 7768959.98 |
|        |        | 2028 | 14381193.356 | 6440922.690 | 7940270.67 |
|        |        | 2029 | 14565171.927 | 6459658.570 | 8105513.36 |
|        |        | 2030 | 14697381.605 | 6472807.417 | 8224574.19 |
|        |        | 2031 | 14842203.512 | 6487415.302 | 8354788.21 |
|        |        | 2032 | 14982485.826 | 6501664.107 | 8480821.72 |
|        |        | 2033 | 15118410.647 | 6515230.157 | 8603180.49 |
|        |        | 2034 | 15250284.398 | 6528571.817 | 8721712.58 |
|        |        | 2035 | 15322911.166 | 6535543.187 | 8787367.98 |
|        |        | 2036 | 15405115.031 | 6543530.959 | 8861584.07 |
|        |        | 2037 | 15484709.137 | 6551392.334 | 8933316.80 |
|        |        | 2038 | 15561812.193 | 6558981.557 | 9002830.64 |
|        |        | 2039 | 15635992.616 | 6566409.689 | 9069582.93 |
|        | Female | 1990 | 147299.110   | 147299.110  | 0.000      |
|        |        | 1991 | 295122.462   | 293257.343  | 1865.120   |
|        |        | 1992 | 439962.920   | 432982.317  | 6980.603   |
|        |        | 1993 | 584735.615   | 568185.529  | 16550.087  |
|        |        | 1994 | 727640.783   | 696352.826  | 31287.956  |
|        |        | 1995 | 868486.937   | 816786.339  | 51700.599  |
|        |        | 1996 | 1010321.847  | 930996.315  | 79325.532  |
|        |        | 1997 | 1144230.930  | 1032637.466 | 111593.463 |
|        |        | 1998 | 1274513.622  | 1124997.209 | 149516.412 |
|        |        | 1999 | 1426725.938  | 1225380.150 | 201345.788 |
|        |        | 2000 | 1573462.680  | 1315228.215 | 258234.465 |
|        |        | 2001 | 1719132.015  | 1396403.693 | 322728.322 |
|        |        | 2002 | 1863006.732  | 1469312.461 | 393694.271 |
|        |        | 2003 | 2002943.227  | 1533728.318 | 469214.909 |
|        |        | 2004 | 2137798.705  | 1590015.167 | 547783.538 |
|        |        | 2005 | 2271071.245  | 1640733.188 | 630338.058 |
|        |        | 2006 | 2400707.731  | 1685027.650 | 715680.081 |
|        |        | 2007 | 2523634.512  | 1723145.105 | 800489.408 |
|        |        | 2008 | 2648752.232  | 1758228.962 | 890523.270 |
|        |        | 2009 | 2765973.961  | 1788351.523 | 977622.438 |
|        |        | 2010 | 2881329.235  | 1815491.154 | 1065838.08 |
|        |        | 2011 | 2994972.694  | 1839891.939 | 1155080.75 |
|        |        | 2012 | 3108958.829  | 1862270.687 | 1246688.14 |
|        |        | 2013 | 3218140.416  | 1882305.058 | 1335835.36 |
|        |        | 2014 | 3328387.914  | 1901027.518 | 1427360.40 |
|        |        | 2015 | 3435342.796  | 1918201.160 | 1517141.64 |
|        |        | 2016 | 3539189.408  | 1933872.223 | 1605317.19 |
|        |        | 2017 | 3640041.363  | 1948221.769 | 1691819.59 |
|        |        | 2018 | 3732645.362  | 1960696.530 | 1771948.83 |
|        |        | 2019 | 3821421.978  | 1972094.586 | 1849327.39 |
|        |        | 2020 | 3902115.950  | 1982048.859 | 1920067.09 |
|        |        | 2021 | 3984301.053  | 1991802.335 | 1992498.72 |
|        |        | 2022 | 4062629.299  | 2000770.896 | 2061858.40 |
|        |        | 2023 | 4137348.729  | 2009127.211 | 2128221.52 |
|        |        | 2024 | 4208611.493  | 2016904.551 | 2191706.94 |
|        |        | 2025 | 4269419.492  | 2023411.226 | 2246008.27 |
|        |        | 2026 | 4330969.998  | 2029910.339 | 2301059.66 |
|        |        | 2027 | 4389134.306  | 2035994.511 | 2353139.79 |
|        |        | 2028 | 4444222.970  | 2041757.443 | 2402465.53 |
|        |        | 2029 | 4496447.877  | 2047248.348 | 2449199.53 |
|        |        | 2030 | 4536975.698  | 2051377.386 | 2485598.31 |
|        |        | 2031 | 4578338.586  | 2055631.988 | 2522706.60 |
|        |        | 2032 | 4617397.784  | 2059690.947 | 2557706.84 |
|        |        | 2033 | 4654407.697  | 2063613.211 | 2590794.49 |
|        |        | 2034 | 4689913.454  | 2067420.637 | 2622492.82 |
|        |        | 2035 | 4712518.190  | 2069687.993 | 2642830.20 |
|        |        | 2036 | 4735845.827  | 2072064.038 | 2663781.79 |
|        |        | 2037 | 4757958.806  | 2074362.214 | 2683596.59 |
|        |        | 2038 | 4778813.806  | 2076597.801 | 2702216.01 |
|        |        | 2039 | 4798769.065  | 2078791.192 | 2719977.87 |
| Stroke | Males  | 1990 | 75005.854    | 75005.854   | 0.000      |
|        |        | 1991 | 149463.017   | 148743.133  | 719.885    |
|        |        | 1992 | 222966.278   | 220290.747  | 2675.531   |
|        |        | 1993 | 296801.879   | 290431.806  | 6370.073   |
|        |        | 1994 | 372453.706   | 360122.278  | 12331.427  |

**Results for PHIM for Run 2 (ELL Summary Sensitivity\_Analysis\_3.RTF)**

|        |      |             |             |            |
|--------|------|-------------|-------------|------------|
|        | 1995 | 448401.338  | 427560.223  | 20841.115  |
|        | 1996 | 523536.301  | 491479.227  | 32057.075  |
|        | 1997 | 596763.211  | 550799.785  | 45963.426  |
|        | 1998 | 667546.681  | 605160.605  | 62386.076  |
|        | 1999 | 734925.407  | 654021.088  | 80904.319  |
|        | 2000 | 803749.361  | 700994.126  | 102755.234 |
|        | 2001 | 870081.588  | 743263.354  | 126818.234 |
|        | 2002 | 935347.140  | 782056.070  | 153291.070 |
|        | 2003 | 1001627.349 | 818471.744  | 183155.606 |
|        | 2004 | 1066587.976 | 851575.291  | 215012.684 |
|        | 2005 | 1130548.052 | 881634.055  | 248913.997 |
|        | 2006 | 1195132.454 | 909509.290  | 285623.164 |
|        | 2007 | 1258974.043 | 934827.123  | 324146.920 |
|        | 2008 | 1320124.867 | 957009.235  | 363115.632 |
|        | 2009 | 1380776.123 | 977227.075  | 403549.049 |
|        | 2010 | 1440048.533 | 995433.595  | 444614.937 |
|        | 2011 | 1497484.847 | 1011702.011 | 485782.836 |
|        | 2012 | 1554496.526 | 1026472.739 | 528023.787 |
|        | 2013 | 1610819.598 | 1039924.644 | 570894.953 |
|        | 2014 | 1667484.890 | 1052358.992 | 615125.898 |
|        | 2015 | 1720948.287 | 1063339.784 | 657608.503 |
|        | 2016 | 1775699.228 | 1073732.133 | 701967.095 |
|        | 2017 | 1830250.175 | 1083375.601 | 746874.574 |
|        | 2018 | 1875958.950 | 1090959.935 | 784999.015 |
|        | 2019 | 1920359.232 | 1097887.593 | 822471.638 |
|        | 2020 | 1960605.297 | 1103857.217 | 856748.080 |
|        | 2021 | 1998912.887 | 1109225.391 | 889687.497 |
|        | 2022 | 2036003.696 | 1114156.878 | 921846.818 |
|        | 2023 | 2071857.536 | 1118696.203 | 953161.334 |
|        | 2024 | 2106636.468 | 1122938.660 | 983697.808 |
|        | 2025 | 2136450.873 | 1126455.264 | 1009995.61 |
|        | 2026 | 2164796.470 | 1129684.478 | 1035111.99 |
|        | 2027 | 2192079.608 | 1132723.271 | 1059356.34 |
|        | 2028 | 2218404.367 | 1135568.283 | 1082836.08 |
|        | 2029 | 2243769.140 | 1138267.320 | 1105501.82 |
|        | 2030 | 2263570.213 | 1140328.865 | 1123241.35 |
|        | 2031 | 2282521.590 | 1142286.220 | 1140235.37 |
|        | 2032 | 2300804.945 | 1144160.209 | 1156644.74 |
|        | 2033 | 2318464.018 | 1145940.810 | 1172523.21 |
|        | 2034 | 2335611.973 | 1147674.719 | 1187937.25 |
|        | 2035 | 2347097.290 | 1148820.005 | 1198277.29 |
|        | 2036 | 2358248.747 | 1149935.185 | 1208313.56 |
|        | 2037 | 2369033.655 | 1151026.614 | 1218007.04 |
|        | 2038 | 2379490.114 | 1152081.634 | 1227408.48 |
|        | 2039 | 2389546.238 | 1153109.802 | 1236436.44 |
| Female | 1990 | 56348.092   | 56348.092   | 0.000      |
|        | 1991 | 110871.862  | 110356.693  | 515.169    |
|        | 1992 | 165654.454  | 163677.064  | 1977.391   |
|        | 1993 | 220008.519  | 215286.065  | 4722.455   |
|        | 1994 | 275706.807  | 266531.449  | 9175.358   |
|        | 1995 | 331417.547  | 315935.746  | 15481.801  |
|        | 1996 | 387580.161  | 363614.068  | 23966.093  |
|        | 1997 | 442778.242  | 408283.111  | 34495.130  |
|        | 1998 | 496117.305  | 449276.471  | 46840.833  |
|        | 1999 | 548268.214  | 487173.750  | 61094.464  |
|        | 2000 | 601693.202  | 523801.555  | 77891.647  |
|        | 2001 | 652221.103  | 556282.627  | 95938.475  |
|        | 2002 | 703022.600  | 586724.909  | 116297.691 |
|        | 2003 | 752023.351  | 614033.733  | 137989.618 |
|        | 2004 | 799826.733  | 638697.553  | 161129.180 |
|        | 2005 | 847563.928  | 661507.598  | 186056.330 |
|        | 2006 | 894205.027  | 682063.916  | 212141.110 |
|        | 2007 | 939571.282  | 700453.956  | 239117.326 |
|        | 2008 | 983437.578  | 716843.611  | 266593.967 |
|        | 2009 | 1025803.786 | 731426.710  | 294377.076 |
|        | 2010 | 1066964.934 | 744437.723  | 322527.211 |
|        | 2011 | 1106954.044 | 756053.869  | 350900.176 |
|        | 2012 | 1146108.461 | 766544.671  | 379563.790 |
|        | 2013 | 1183544.689 | 775834.183  | 407710.506 |
|        | 2014 | 1221220.945 | 784456.970  | 436763.975 |
|        | 2015 | 1258289.311 | 792406.393  | 465882.918 |
|        | 2016 | 1294830.207 | 799685.797  | 495144.410 |
|        | 2017 | 1330332.626 | 806285.127  | 524047.499 |
|        | 2018 | 1360571.987 | 811568.126  | 549003.861 |
|        | 2019 | 1389848.723 | 816349.838  | 573498.884 |
|        | 2020 | 1416046.192 | 820423.431  | 595622.762 |
|        | 2021 | 1440588.850 | 824031.463  | 616557.387 |
|        | 2022 | 1464157.934 | 827314.255  | 636843.679 |



**Results for PHIM for Run 2 (ELL Summary Sensitivity\_Analysis\_3.RTF)**

|      |             |             |             |             |            |
|------|-------------|-------------|-------------|-------------|------------|
| COPD | Males       | 2023        | 1486810.237 | 830339.032  | 656471.205 |
|      |             | 2024        | 1508591.729 | 833118.818  | 675472.911 |
|      |             | 2025        | 1526875.621 | 835383.815  | 691491.806 |
|      |             | 2026        | 1543659.810 | 837394.023  | 706265.787 |
|      |             | 2027        | 1559623.774 | 839254.101  | 720369.674 |
|      |             | 2028        | 1574852.850 | 840997.485  | 733855.366 |
|      |             | 2029        | 1589437.452 | 842638.963  | 746798.490 |
|      |             | 2030        | 1600568.199 | 843861.230  | 756706.970 |
|      |             | 2031        | 1610776.297 | 844975.496  | 765800.800 |
|      |             | 2032        | 1620483.563 | 846032.684  | 774450.879 |
|      |             | 2033        | 1629745.442 | 847047.194  | 782698.248 |
|      |             | 2034        | 1638721.425 | 848026.919  | 790694.507 |
|      |             | 2035        | 1644649.404 | 848653.066  | 795996.339 |
|      |             | 2036        | 1650181.590 | 849240.695  | 800940.894 |
|      |             | 2037        | 1655476.066 | 849811.257  | 805664.809 |
|      |             | 2038        | 1660507.914 | 850367.918  | 810139.995 |
|      |             | 2039        | 1665361.569 | 850914.940  | 814446.629 |
|      |             | 1990        | 117002.906  | 117002.906  | 0.000      |
|      |             | 1991        | 233438.833  | 233235.802  | 203.031    |
|      |             | 1992        | 348084.047  | 347333.888  | 750.160    |
|      |             | 1993        | 467278.318  | 465439.630  | 1838.688   |
|      |             | 1994        | 584216.907  | 580606.679  | 3610.227   |
|      |             | 1995        | 697391.457  | 691245.445  | 6146.012   |
|      |             | 1996        | 809471.271  | 799869.409  | 9601.862   |
|      |             | 1997        | 922587.668  | 908374.526  | 14213.142  |
|      |             | 1998        | 1034072.457 | 1014162.295 | 19910.161  |
|      |             | 1999        | 1153475.399 | 1126064.112 | 27411.287  |
|      |             | 2000        | 1268050.268 | 1231776.066 | 36274.202  |
|      |             | 2001        | 1382786.209 | 1335874.364 | 46911.845  |
|      |             | 2002        | 1497557.412 | 1438040.463 | 59516.949  |
|      |             | 2003        | 1614405.229 | 1540264.466 | 74140.763  |
|      |             | 2004        | 1726672.489 | 1636427.655 | 90244.834  |
|      |             | 2005        | 1847277.524 | 1737711.816 | 109565.708 |
|      |             | 2006        | 1961009.963 | 1830881.389 | 130128.574 |
|      |             | 2007        | 2079868.908 | 1925739.363 | 154129.545 |
|      |             | 2008        | 2206755.783 | 2024568.237 | 182187.545 |
|      |             | 2009        | 2331993.380 | 2119448.513 | 212544.868 |
|      |             | 2010        | 2455130.176 | 2210200.283 | 244929.893 |
|      |             | 2011        | 2582657.849 | 2301368.491 | 281289.358 |
|      |             | 2012        | 2709719.005 | 2389283.349 | 320435.656 |
| 2013 | 2840547.005 | 2476731.151 | 363815.854  |             |            |
| 2014 | 2971677.135 | 2561371.783 | 410305.352  |             |            |
| 2015 | 3104538.983 | 2645222.317 | 459316.666  |             |            |
| 2016 | 3237650.175 | 2725964.012 | 511686.164  |             |            |
| 2017 | 3370561.253 | 2803759.784 | 566801.469  |             |            |
| 2018 | 3503136.371 | 2877898.681 | 625237.690  |             |            |
| 2019 | 3636402.758 | 2949426.956 | 686975.802  |             |            |
| 2020 | 3768054.453 | 3017821.222 | 750233.230  |             |            |
| 2021 | 3897675.067 | 3082217.129 | 815457.938  |             |            |
| 2022 | 4027307.132 | 3143690.543 | 883616.590  |             |            |
| 2023 | 4156698.720 | 3202149.953 | 954548.767  |             |            |
| 2024 | 4285772.226 | 3257667.439 | 1028104.79  |             |            |
| 2025 | 4410759.298 | 3309601.947 | 1101157.35  |             |            |
| 2026 | 4531411.064 | 3356924.435 | 1174486.63  |             |            |
| 2027 | 4651145.233 | 3401395.845 | 1249749.39  |             |            |
| 2028 | 4769837.872 | 3443091.116 | 1326746.76  |             |            |
| 2029 | 4887747.179 | 3482258.661 | 1405488.52  |             |            |
| 2030 | 4997632.895 | 3517663.677 | 1479969.22  |             |            |
| 2031 | 5103301.991 | 3549202.413 | 1554099.58  |             |            |
| 2032 | 5207593.613 | 3578526.992 | 1629066.62  |             |            |
| 2033 | 5310556.138 | 3605702.748 | 1704853.39  |             |            |
| 2034 | 5412542.816 | 3631065.673 | 1781477.14  |             |            |
| 2035 | 5500522.473 | 3652448.351 | 1848074.12  |             |            |
| 2036 | 5588149.640 | 3672258.118 | 1915891.52  |             |            |
| 2037 | 5674667.886 | 3690774.430 | 1983893.46  |             |            |
| 2038 | 5760391.289 | 3708061.290 | 2052330.00  |             |            |
| 2039 | 5845459.234 | 3724423.214 | 2121036.02  |             |            |
| 1990 | 77434.846   | 77434.846   | 0.000       |             |            |
| 1991 | 160029.510  | 159861.321  | 168.190     |             |            |
| 1992 | 240642.531  | 240002.732  | 639.799     |             |            |
| 1993 | 329362.093  | 327711.906  | 1650.187    |             |            |
| 1994 | 418569.515  | 415264.338  | 3305.177    |             |            |
| 1995 | 509110.357  | 503296.522  | 5813.835    |             |            |
| 1996 | 600040.117  | 590806.943  | 9233.175    |             |            |
| 1997 | 691159.071  | 677468.758  | 13690.313   |             |            |
| 1998 | 782866.899  | 763613.198  | 19253.701   |             |            |
| 1999 | 881526.925  | 854937.556  | 26589.369   |             |            |
| 2000 | 977880.647  | 942819.032  | 35061.615   |             |            |

**Results for PHIM for Run 2 (ELL Summary Sensitivity\_Analysis\_3.RTF)**

|      |             |             |            |
|------|-------------|-------------|------------|
| 2001 | 1076787.404 | 1031498.373 | 45289.031  |
| 2002 | 1174842.754 | 1117749.939 | 57092.814  |
| 2003 | 1275102.681 | 1204325.844 | 70776.837  |
| 2004 | 1371026.306 | 1285510.560 | 85515.746  |
| 2005 | 1473954.509 | 1370599.804 | 103354.705 |
| 2006 | 1574450.828 | 1451735.984 | 122714.844 |
| 2007 | 1673790.211 | 1529949.162 | 143841.049 |
| 2008 | 1782360.738 | 1613220.308 | 169140.429 |
| 2009 | 1892944.209 | 1695425.429 | 197518.780 |
| 2010 | 2002131.282 | 1774404.608 | 227726.674 |
| 2011 | 2114522.152 | 1853021.155 | 261500.997 |
| 2012 | 2228079.372 | 1930006.333 | 298073.039 |
| 2013 | 2345377.689 | 2006750.927 | 338626.762 |
| 2014 | 2462498.422 | 2080600.142 | 381898.280 |
| 2015 | 2581450.312 | 2153754.287 | 427696.024 |
| 2016 | 2701959.301 | 2225045.177 | 476914.124 |
| 2017 | 2823834.967 | 2294357.560 | 529477.407 |
| 2018 | 2938265.081 | 2357464.992 | 580800.089 |
| 2019 | 3053254.880 | 2418281.032 | 634973.848 |
| 2020 | 3167073.216 | 2476499.399 | 690573.817 |
| 2021 | 3279517.699 | 2532131.614 | 747386.085 |
| 2022 | 3392060.964 | 2585347.409 | 806713.555 |
| 2023 | 3504296.171 | 2636065.505 | 868230.666 |
| 2024 | 3616019.231 | 2684151.863 | 931867.368 |
| 2025 | 3724611.269 | 2729307.660 | 995303.609 |
| 2026 | 3827181.707 | 2770526.796 | 1056654.91 |
| 2027 | 3928684.441 | 2809279.621 | 1119404.82 |
| 2028 | 4029124.892 | 2845787.242 | 1183337.65 |
| 2029 | 4128269.068 | 2879903.241 | 1248365.83 |
| 2030 | 4221560.174 | 2911024.038 | 1310536.14 |
| 2031 | 4304170.584 | 2937232.525 | 1366938.06 |
| 2032 | 4384930.537 | 2961405.256 | 1423525.28 |
| 2033 | 4464357.691 | 2983904.882 | 1480452.81 |
| 2034 | 4542251.545 | 3004660.981 | 1537590.56 |
| 2035 | 4611066.648 | 3022544.061 | 1588522.59 |
| 2036 | 4670309.230 | 3036985.761 | 1633323.47 |
| 2037 | 4728179.514 | 3050320.794 | 1677858.72 |
| 2038 | 4785008.048 | 3062738.689 | 1722269.36 |
| 2039 | 4841291.793 | 3074369.924 | 1766921.87 |

---

## Results for PHIM for Run 2 (ELL Summary Sensitivity\_Analysis\_3.RTF)

\*\*\*\*\*

**Table 5: Estimated Loss of Life, at the end of follow-up, Population unadjusted for deaths in Ecig scenario**

| Disease      | Sex    | Age Group   | Years of life lost<br>NULL | Years of life lost<br>Ecig | Years of life<br>Saved |
|--------------|--------|-------------|----------------------------|----------------------------|------------------------|
| All Diseases | Males  | 30-34       | 443911.034                 | 241144.627                 | 202766.406             |
|              |        | 35-39       | 1146798.555                | 617782.544                 | 529016.011             |
|              |        | 40-44       | 2609591.408                | 1369845.522                | 1239745.89             |
|              |        | 45-49       | 4775841.753                | 2472651.346                | 2303190.41             |
|              |        | 50-54       | 7446969.205                | 3999283.567                | 3447685.64             |
|              |        | 55-59       | 8240205.925                | 4851138.484                | 3389067.44             |
|              |        | 60-64       | 8772829.118                | 5575961.014                | 3196868.10             |
|              |        | 65-69       | 6161494.678                | 4293922.792                | 1867571.89             |
|              |        | 70-74       | 2495906.274                | 1800364.077                | 695542.196             |
|              | 75-79  | 0.000       | 0.000                      | 0.000                      |                        |
|              | Female | 30-34       | 229140.561                 | 143044.030                 | 86096.531              |
|              |        | 35-39       | 570217.942                 | 349926.454                 | 220291.488             |
|              |        | 40-44       | 1267538.938                | 756233.350                 | 511305.588             |
|              |        | 45-49       | 2340070.698                | 1376166.208                | 963904.491             |
|              |        | 50-54       | 3743803.613                | 2220471.363                | 1523332.25             |
|              |        | 55-59       | 4591478.168                | 2848264.408                | 1743213.76             |
|              |        | 60-64       | 5207367.788                | 3348269.176                | 1859098.61             |
|              |        | 65-69       | 4092181.394                | 2771145.746                | 1321035.65             |
| 70-74        |        | 1776092.171 | 1221273.998                | 554818.172                 |                        |
| Lung cancer  | Males  | 30-34       | 66065.017                  | 51965.716                  | 14099.302              |
|              |        | 35-39       | 232509.414                 | 184560.615                 | 47948.800              |
|              |        | 40-44       | 688628.041                 | 535565.013                 | 153063.028             |
|              |        | 45-49       | 1528300.367                | 1153392.777                | 374907.590             |
|              |        | 50-54       | 2730187.229                | 2029537.340                | 700649.889             |
|              |        | 55-59       | 3909101.673                | 2890803.017                | 1018298.66             |
|              |        | 60-64       | 4287716.660                | 3256941.060                | 1030775.60             |
|              |        | 65-69       | 3467897.115                | 2683623.890                | 784273.225             |
|              |        | 70-74       | 1312144.343                | 1032414.083                | 279730.260             |
|              | 75-79  | 0.000       | 0.000                      | 0.000                      |                        |
|              | Female | 30-34       | 51913.113                  | 40826.969                  | 11086.144              |
|              |        | 35-39       | 189792.904                 | 149610.860                 | 40182.044              |
|              |        | 40-44       | 527596.573                 | 399423.856                 | 128172.717             |
|              |        | 45-49       | 1122524.269                | 819758.092                 | 302766.177             |
|              |        | 50-54       | 1882214.322                | 1346319.010                | 535895.312             |
|              |        | 55-59       | 2595581.943                | 1835211.604                | 760370.339             |
|              |        | 60-64       | 2846273.090                | 2047506.462                | 798766.628             |
|              |        | 65-69       | 2358758.394                | 1715950.797                | 642807.597             |
| 70-74        |        | 937814.238  | 690637.661                 | 247176.576                 |                        |
| IHD          | Males  | 30-34       | 263834.566                 | 119780.426                 | 144054.139             |
|              |        | 35-39       | 692140.150                 | 300616.180                 | 391523.970             |
|              |        | 40-44       | 1519708.432                | 603323.519                 | 916384.913             |
|              |        | 45-49       | 2568546.697                | 940176.316                 | 1628370.38             |
|              |        | 50-54       | 3632929.903                | 1383826.224                | 2249103.68             |
|              |        | 55-59       | 2807892.356                | 1128833.147                | 1679059.21             |
|              |        | 60-64       | 2599825.934                | 1217631.018                | 1382194.92             |
|              |        | 65-69       | 1113578.307                | 593736.504                 | 519841.803             |
|              |        | 70-74       | 437536.271                 | 265406.449                 | 172129.822             |
|              | 75-79  | 0.000       | 0.000                      | 0.000                      |                        |
|              | Female | 30-34       | 79649.097                  | 38306.933                  | 41342.163              |
|              |        | 35-39       | 193965.908                 | 82802.675                  | 111163.232             |
|              |        | 40-44       | 403380.974                 | 154482.143                 | 248898.831             |
|              |        | 45-49       | 671385.408                 | 239556.447                 | 431828.961             |
|              |        | 50-54       | 1011875.989                | 386944.800                 | 624931.189             |
|              |        | 55-59       | 849875.715                 | 352780.451                 | 497095.265             |
|              |        | 60-64       | 925490.876                 | 444833.627                 | 480657.249             |
|              |        | 65-69       | 455463.881                 | 249811.705                 | 205652.176             |
| 70-74        |        | 207681.216  | 127131.913                 | 80549.303                  |                        |
| Stroke       | Males  | 30-34       | 73463.650                  | 43343.029                  | 30120.621              |
|              |        | 35-39       | 151934.057                 | 87085.562                  | 64848.495              |
|              |        | 40-44       | 262845.974                 | 142824.251                 | 120021.723             |
|              |        | 45-49       | 383421.246                 | 195052.124                 | 188369.122             |
|              |        | 50-54       | 479872.634                 | 222671.830                 | 257200.803             |
|              |        | 55-59       | 437124.903                 | 188708.003                 | 248416.901             |
|              |        | 60-64       | 419457.235                 | 184945.780                 | 234511.454             |
|              |        | 65-69       | 128180.574                 | 59214.368                  | 68966.207              |
|              |        | 70-74       | 53245.965                  | 26862.661                  | 26383.304              |
|              | 75-79  | 0.000       | 0.000                      | 0.000                      |                        |
|              | Female | 30-34       | 62919.090                  | 40254.165                  | 22664.926              |

**Results for PHIM for Run 2 (ELL Summary Sensitivity\_Analysis\_3.RTF)**

|      |        |       |             |            |            |
|------|--------|-------|-------------|------------|------------|
|      |        | 35-39 | 120806.205  | 73134.330  | 47671.875  |
|      |        | 40-44 | 203391.885  | 114369.369 | 89022.516  |
|      |        | 45-49 | 278172.097  | 145458.013 | 132714.084 |
|      |        | 50-54 | 325979.181  | 159514.328 | 166464.854 |
|      |        | 55-59 | 275161.340  | 127111.925 | 148049.415 |
|      |        | 60-64 | 268920.493  | 126071.064 | 142849.429 |
|      |        | 65-69 | 87956.054   | 42879.819  | 45076.235  |
|      |        | 70-74 | 42055.224   | 21383.997  | 20671.227  |
|      |        | 75-79 | 0.000       | 0.000      | 0.000      |
| COPD | Males  | 30-34 | 40547.801   | 26055.456  | 14492.345  |
|      |        | 35-39 | 70214.933   | 45520.187  | 24694.746  |
|      |        | 40-44 | 138408.960  | 88132.738  | 50276.222  |
|      |        | 45-49 | 295573.443  | 184030.129 | 111543.314 |
|      |        | 50-54 | 603979.438  | 363248.172 | 240731.266 |
|      |        | 55-59 | 1086086.992 | 642794.317 | 443292.675 |
|      |        | 60-64 | 1465829.290 | 916443.155 | 549386.135 |
|      |        | 65-69 | 1451838.682 | 957348.030 | 494490.652 |
|      |        | 70-74 | 692979.695  | 475680.885 | 217298.810 |
|      |        | 75-79 | 0.000       | 0.000      | 0.000      |
|      | Female | 30-34 | 34659.261   | 23655.963  | 11003.298  |
|      |        | 35-39 | 65652.924   | 44378.588  | 21274.336  |
|      |        | 40-44 | 133169.505  | 87957.982  | 45211.523  |
|      |        | 45-49 | 267988.924  | 171393.656 | 96595.269  |
|      |        | 50-54 | 523734.121  | 327693.224 | 196040.896 |
|      |        | 55-59 | 870859.170  | 533160.428 | 337698.742 |
|      |        | 60-64 | 1166683.329 | 729858.023 | 436825.306 |
|      |        | 65-69 | 1190003.066 | 762503.425 | 427499.640 |
|      |        | 70-74 | 588541.493  | 382120.428 | 206421.066 |
|      |        | 75-79 | 0.000       | 0.000      | 0.000      |

---

## Results for PHIM for Run 2 (ELL Summary Sensitivity\_Analysis\_3.RTF)

\*\*\*\*\*

**Table 6: Estimated Loss of Life, at the end of follow-up, Population and Number deaths adjusted for Ecig scenario**

| Disease      | Sex    | Age Group   | Years of life lost<br>NULL | Years of life lost<br>Ecig | Years of life<br>Saved |
|--------------|--------|-------------|----------------------------|----------------------------|------------------------|
| All Diseases | Males  | 30-34       | 443911.034                 | 241160.620                 | 202750.414             |
|              |        | 35-39       | 1146798.555                | 617905.155                 | 528893.400             |
|              |        | 40-44       | 2609591.408                | 1370650.442                | 1238940.97             |
|              |        | 45-49       | 4775841.753                | 2476269.443                | 2299572.31             |
|              |        | 50-54       | 7446969.205                | 4010325.257                | 3436643.95             |
|              |        | 55-59       | 8240205.925                | 4869044.142                | 3371161.78             |
|              |        | 60-64       | 8772829.118                | 5606039.384                | 3166789.73             |
|              |        | 65-69       | 6161494.678                | 4319529.591                | 1841965.09             |
|              |        | 70-74       | 2495906.274                | 1814396.747                | 681509.527             |
|              | 75-79  | 0.000       | 0.000                      | 0.000                      |                        |
|              | Female | 30-34       | 229140.561                 | 143048.069                 | 86092.492              |
|              |        | 35-39       | 570217.942                 | 349956.887                 | 220261.055             |
|              |        | 40-44       | 1267538.938                | 756430.223                 | 511108.715             |
|              |        | 45-49       | 2340070.698                | 1377047.925                | 963022.773             |
|              |        | 50-54       | 3743803.613                | 2223280.276                | 1520523.34             |
|              |        | 55-59       | 4591478.168                | 2853721.416                | 1737756.75             |
|              |        | 60-64       | 5207367.788                | 3358718.663                | 1848649.13             |
|              |        | 65-69       | 4092181.394                | 2782382.142                | 1309799.25             |
| 70-74        |        | 1776092.171 | 1228510.262                | 547581.909                 |                        |
| 75-79        | 0.000  | 0.000       | 0.000                      |                            |                        |
| Lung cancer  | Males  | 30-34       | 66065.017                  | 51969.398                  | 14095.620              |
|              |        | 35-39       | 232509.414                 | 184601.044                 | 47908.371              |
|              |        | 40-44       | 688628.041                 | 535917.644                 | 152710.397             |
|              |        | 45-49       | 1528300.367                | 1155276.890                | 373023.477             |
|              |        | 50-54       | 2730187.229                | 2035689.325                | 694497.904             |
|              |        | 55-59       | 3909101.673                | 2902160.246                | 1006941.43             |
|              |        | 60-64       | 4287716.660                | 3275540.255                | 1012176.40             |
|              |        | 65-69       | 3467897.115                | 2699697.429                | 768199.685             |
|              |        | 70-74       | 1312144.343                | 1040525.847                | 271618.496             |
|              | 75-79  | 0.000       | 0.000                      | 0.000                      |                        |
|              | Female | 30-34       | 51913.113                  | 40828.277                  | 11084.835              |
|              |        | 35-39       | 189792.904                 | 149624.949                 | 40167.955              |
|              |        | 40-44       | 527596.573                 | 399537.200                 | 128059.373             |
|              |        | 45-49       | 1122524.269                | 820317.076                 | 302207.193             |
|              |        | 50-54       | 1882214.322                | 1348122.947                | 534091.375             |
|              |        | 55-59       | 2595581.943                | 1838861.360                | 756720.583             |
|              |        | 60-64       | 2846273.090                | 2054147.104                | 792125.986             |
|              |        | 65-69       | 2358758.394                | 1722867.565                | 635890.829             |
| 70-74        |        | 937814.238  | 694713.328                 | 243100.909                 |                        |
| 75-79        | 0.000  | 0.000       | 0.000                      |                            |                        |
| IHD          | Males  | 30-34       | 263834.566                 | 119788.145                 | 144046.421             |
|              |        | 35-39       | 692140.150                 | 300670.426                 | 391469.725             |
|              |        | 40-44       | 1519708.432                | 603627.591                 | 916080.841             |
|              |        | 45-49       | 2568546.697                | 941279.538                 | 1627267.16             |
|              |        | 50-54       | 3632929.903                | 1386711.793                | 2246218.11             |
|              |        | 55-59       | 2807892.356                | 1131445.379                | 1676446.98             |
|              |        | 60-64       | 2599825.934                | 1221313.248                | 1378512.69             |
|              |        | 65-69       | 1113578.307                | 595322.436                 | 518255.871             |
|              |        | 70-74       | 437536.271                 | 266251.135                 | 171285.136             |
|              | 75-79  | 0.000       | 0.000                      | 0.000                      |                        |
|              | Female | 30-34       | 79649.097                  | 38307.973                  | 41341.124              |
|              |        | 35-39       | 193965.908                 | 82809.223                  | 111156.685             |
|              |        | 40-44       | 403380.974                 | 154515.127                 | 248865.847             |
|              |        | 45-49       | 671385.408                 | 239671.616                 | 431713.792             |
|              |        | 50-54       | 1011875.989                | 387275.532                 | 624600.457             |
|              |        | 55-59       | 849875.715                 | 353145.741                 | 496729.975             |
|              |        | 60-64       | 925490.876                 | 445490.867                 | 480000.009             |
|              |        | 65-69       | 455463.881                 | 250185.825                 | 205278.056             |
| 70-74        |        | 207681.216  | 127389.287                 | 80291.929                  |                        |
| 75-79        | 0.000  | 0.000       | 0.000                      |                            |                        |
| Stroke       | Males  | 30-34       | 73463.650                  | 43345.543                  | 30118.106              |
|              |        | 35-39       | 151934.057                 | 87101.437                  | 64832.620              |
|              |        | 40-44       | 262845.974                 | 142899.671                 | 119946.304             |
|              |        | 45-49       | 383421.246                 | 195299.643                 | 188121.603             |
|              |        | 50-54       | 479872.634                 | 223191.592                 | 256681.042             |
|              |        | 55-59       | 437124.903                 | 189239.548                 | 247885.356             |
|              |        | 60-64       | 419457.235                 | 185657.180                 | 233800.055             |
|              |        | 65-69       | 128180.574                 | 59411.194                  | 68769.380              |
|              |        | 70-74       | 53245.965                  | 26963.995                  | 26281.970              |
|              | 75-79  | 0.000       | 0.000                      | 0.000                      |                        |
|              | Female | 30-34       | 62919.090                  | 40255.091                  | 22663.999              |

**Results for PHIM for Run 2 (ELL Summary Sensitivity\_Analysis\_3.RTF)**

|      |        |       |             |            |            |
|------|--------|-------|-------------|------------|------------|
|      |        | 35-39 | 120806.205  | 73139.472  | 47666.733  |
|      |        | 40-44 | 203391.885  | 114392.228 | 88999.657  |
|      |        | 45-49 | 278172.097  | 145526.224 | 132645.873 |
|      |        | 50-54 | 325979.181  | 159654.092 | 166325.089 |
|      |        | 55-59 | 275161.340  | 127262.097 | 147899.243 |
|      |        | 60-64 | 268920.493  | 126294.193 | 142626.300 |
|      |        | 65-69 | 87956.054   | 42956.902  | 44999.152  |
|      |        | 70-74 | 42055.224   | 21434.642  | 20620.582  |
|      |        | 75-79 | 0.000       | 0.000      | 0.000      |
| COPD | Males  | 30-34 | 40547.801   | 26057.535  | 14490.266  |
|      |        | 35-39 | 70214.933   | 45532.249  | 24682.685  |
|      |        | 40-44 | 138408.960  | 88205.537  | 50203.423  |
|      |        | 45-49 | 295573.443  | 184413.373 | 111160.070 |
|      |        | 50-54 | 603979.438  | 364732.548 | 239246.890 |
|      |        | 55-59 | 1086086.992 | 646198.969 | 439888.023 |
|      |        | 60-64 | 1465829.290 | 923528.702 | 542300.588 |
|      |        | 65-69 | 1451838.682 | 965098.533 | 486740.149 |
|      |        | 70-74 | 692979.695  | 480655.770 | 212323.925 |
|      |        | 75-79 | 0.000       | 0.000      | 0.000      |
|      | Female | 30-34 | 34659.261   | 23656.728  | 11002.533  |
|      |        | 35-39 | 65652.924   | 44383.243  | 21269.682  |
|      |        | 40-44 | 133169.505  | 87985.668  | 45183.838  |
|      |        | 45-49 | 267988.924  | 171533.010 | 96455.915  |
|      |        | 50-54 | 523734.121  | 328227.705 | 195506.416 |
|      |        | 55-59 | 870859.170  | 534452.219 | 336406.950 |
|      |        | 60-64 | 1166683.329 | 732786.498 | 433896.830 |
|      |        | 65-69 | 1190003.066 | 766371.850 | 423631.216 |
|      |        | 70-74 | 588541.493  | 384973.004 | 203568.489 |
|      |        | 75-79 | 0.000       | 0.000      | 0.000      |

---

## Results for PHIM for Run 4 (ELL Summary Sensitivity\_Analysis\_3.RTF)

\*\*\*\*\*

### Estimated Loss of Life from the E Component for Run: 4, Simulation: 1

Country: US (United States)  
 Follow-up Period: 1990 to 2039

**Table 1: Estimated Loss of Life, at the end of follow-up, all age groups combined, Population unadjusted for deaths in Ecig scenario**

| Disease      | Sex    | Year | Years of life lost<br>NULL | Years of life lost<br>Ecig | Years of life<br>Saved |
|--------------|--------|------|----------------------------|----------------------------|------------------------|
| All Diseases | Males  | 2039 | 42093547.949               | 25018590.279               | 17074957.7             |
|              | Female | 2039 | 23817891.273               | 14929364.074               | 8888527.20             |
| Lung cancer  | Males  | 2039 | 18222549.860               | 13740459.045               | 4482090.82             |
|              | Female | 2039 | 12512468.845               | 8990004.888                | 3522463.96             |
| IHD          | Males  | 2039 | 15635992.616               | 6464627.218                | 9171365.40             |
|              | Female | 2039 | 4798769.065                | 2051714.031                | 2747055.03             |
| Stroke       | Males  | 2039 | 2389546.238                | 1140034.545                | 1249511.69             |
|              | Female | 2039 | 1665361.569                | 843853.672                 | 821507.897             |
| COPD         | Males  | 2039 | 5845459.234                | 3673469.472                | 2171989.76             |
|              | Female | 2039 | 4841291.793                | 3043791.483                | 1797500.31             |

## Results for PHIM for Run 4 (ELL Summary Sensitivity\_Analysis\_3.RTF)

\*\*\*\*\*

**Table 2: Estimated Loss of Life, at the end of follow-up, all age groups combined, Population and Number deaths adjusted for Ecig scenario**

| Disease      | Sex    | Year | Years of life lost<br>NULL | Years of life lost<br>Ecig | Years of life<br>Saved |
|--------------|--------|------|----------------------------|----------------------------|------------------------|
| All Diseases | Males  | 2039 | 42093547.949               | 25119609.833               | 16973938.1             |
|              | Female | 2039 | 23817891.273               | 14967030.322               | 8850860.95             |
| Lung cancer  | Males  | 2039 | 18222549.860               | 13802136.812               | 4420413.05             |
|              | Female | 2039 | 12512468.845               | 9013429.591                | 3499039.25             |
| IHD          | Males  | 2039 | 15635992.616               | 6476811.231                | 9159181.38             |
|              | Female | 2039 | 4798769.065                | 2053717.364                | 2745051.70             |
| Stroke       | Males  | 2039 | 2389546.238                | 1142319.945                | 1247226.29             |
|              | Female | 2039 | 1665361.569                | 844557.139                 | 820804.431             |
| COPD         | Males  | 2039 | 5845459.234                | 3698341.844                | 2147117.39             |
|              | Female | 2039 | 4841291.793                | 3055326.228                | 1785965.57             |



## Results for PHIM for Run 4 (ELL Summary Sensitivity\_Analysis\_3.RTF)

\*\*\*\*\*

**Table 3: Estimated Loss of Life, All age groups combined, Population unadjusted for deaths in Ecig scenario, cumulative over years**

| Disease      | Sex          | Year         | Years of life lost<br>NULL | Years of life lost<br>Ecig | Years of life<br>Saved |
|--------------|--------------|--------------|----------------------------|----------------------------|------------------------|
| All Diseases | Males        | 1990         | 1304839.645                | 1304839.645                | 0.000                  |
|              |              | 1991         | 2579865.358                | 2571191.563                | 8673.794               |
|              |              | 1992         | 3830683.831                | 3798439.408                | 32244.423              |
|              |              | 1993         | 5076567.803                | 5000970.275                | 75597.528              |
|              |              | 1994         | 6292145.526                | 6150041.560                | 142103.966             |
|              |              | 1995         | 7485537.010                | 7250294.164                | 235242.846             |
|              |              | 1996         | 8655955.028                | 8299732.022                | 356223.005             |
|              |              | 1997         | 9791729.713                | 9287895.017                | 503834.695             |
|              |              | 1998         | 10899134.186               | 10222466.479               | 676667.707             |
|              |              | 1999         | 12070409.674               | 11162766.586               | 907643.088             |
|              |              | 2000         | 13231384.595               | 12062666.320               | 1168718.28             |
|              |              | 2001         | 14371761.018               | 12912409.559               | 1459351.46             |
|              |              | 2002         | 15508906.386               | 13724606.652               | 1784299.73             |
|              |              | 2003         | 16638100.422               | 14499578.520               | 2138521.90             |
|              |              | 2004         | 17736465.088               | 15226965.497               | 2509499.59             |
|              |              | 2005         | 18834658.606               | 15928290.862               | 2906367.74             |
|              |              | 2006         | 19909100.501               | 16583656.191               | 3325444.31             |
|              |              | 2007         | 20958321.463               | 17200840.633               | 3757480.83             |
|              |              | 2008         | 22000068.148               | 17794159.621               | 4205908.53             |
|              |              | 2009         | 23018816.903               | 18354971.559               | 4663845.34             |
|              |              | 2010         | 24018480.537               | 18884856.504               | 5133624.03             |
|              |              | 2011         | 25003034.574               | 19387516.635               | 5615517.94             |
|              |              | 2012         | 25969871.429               | 19861697.031               | 6108174.40             |
|              |              | 2013         | 26920275.180               | 20309550.867               | 6610724.31             |
|              |              | 2014         | 27849005.227               | 20729398.539               | 7119606.69             |
|              |              | 2015         | 28749620.400               | 21124743.781               | 7624876.62             |
|              |              | 2016         | 29622417.562               | 21487044.472               | 8135373.09             |
|              |              | 2017         | 30462559.724               | 21818977.501               | 8643582.22             |
|              |              | 2018         | 31293299.299               | 22138206.478               | 9155092.82             |
|              |              | 2019         | 32109993.427               | 22440048.682               | 9669944.74             |
|              |              | 2020         | 32883323.977               | 22720830.142               | 10162493.8             |
|              |              | 2021         | 33610102.554               | 22964801.302               | 10645301.3             |
|              |              | 2022         | 34322010.448               | 23193864.183               | 11128146.3             |
|              |              | 2023         | 35018383.550               | 23408145.635               | 11610237.9             |
|              |              | 2024         | 35700177.955               | 23608853.375               | 12091324.6             |
|              |              | 2025         | 36315500.346               | 23789850.290               | 12525650.1             |
|              |              | 2026         | 36896159.343               | 23944450.253               | 12951709.1             |
|              |              | 2027         | 37462570.116               | 24088517.748               | 13374052.4             |
|              |              | 2028         | 38015337.780               | 24222167.452               | 13793170.3             |
|              |              | 2029         | 38554814.764               | 24346666.384               | 14208148.4             |
|              |              | 2030         | 39003805.400               | 24452814.070               | 14550991.3             |
|              |              | 2031         | 39436509.703               | 24544050.735               | 14892459.0             |
| 2032         | 39858470.458 | 24628885.960 | 15229584.5                 |                            |                        |
| 2033         | 40270147.082 | 24707152.023 | 15562995.1                 |                            |                        |
| 2034         | 40672665.743 | 24780061.163 | 15892604.6                 |                            |                        |
| 2035         | 40962732.664 | 24835237.059 | 16127495.6                 |                            |                        |
| 2036         | 41255021.653 | 24885761.914 | 16369259.7                 |                            |                        |
| 2037         | 41540573.023 | 24933130.413 | 16607442.6                 |                            |                        |
| 2038         | 41820158.066 | 24977206.427 | 16842951.6                 |                            |                        |
| 2039         | 42093547.949 | 25018590.279 | 17074957.7                 |                            |                        |
|              | Female       | 1990         | 588979.406                 | 588979.406                 | 0.000                  |
|              |              | 1991         | 1182571.252                | 1179606.280                | 2964.972               |
|              |              | 1992         | 1777346.679                | 1766097.340                | 11249.339              |
|              |              | 1993         | 2380261.899                | 2353268.503                | 26993.396              |
|              |              | 1994         | 2983130.039                | 2931337.174                | 51792.865              |
|              |              | 1995         | 3588982.584                | 3501994.823                | 86987.760              |
|              |              | 1996         | 4195430.235                | 4060641.513                | 134788.722             |
|              |              | 1997         | 4793866.694                | 4600816.194                | 193050.501             |
|              |              | 1998         | 5389747.381                | 5126764.912                | 262982.469             |
|              |              | 1999         | 6006722.467                | 5653108.713                | 353613.754             |
|              |              | 2000         | 6625758.871                | 6168621.767                | 457137.104             |
|              |              | 2001         | 7245135.411                | 6669366.637                | 575768.774             |
|              |              | 2002         | 7867492.021                | 7157484.633                | 710007.388             |
|              |              | 2003         | 8485051.793                | 7628195.634                | 856856.158             |
|              |              | 2004         | 9092994.774                | 8078087.284                | 1014907.49             |
|              |              | 2005         | 9706032.803                | 8518428.588                | 1187604.21             |
|              |              | 2006         | 10311907.548               | 8939535.823                | 1372371.73             |
|              |              | 2007         | 10909437.502               | 9343480.745                | 1565956.76             |
|              |              | 2008         | 11506462.491               | 9732186.801                | 1774275.69             |
|              |              | 2009         | 12098393.287               | 10107476.807               | 1990916.48             |
|              |              | 2010         | 12681188.981               | 10464655.558               | 2216533.42             |

**Results for PHIM for Run 4 (ELL Summary Sensitivity\_Analysis\_3.RTF)**

|             |       |      |              |              |            |
|-------------|-------|------|--------------|--------------|------------|
|             |       | 2011 | 13260062.991 | 10806747.369 | 2453315.62 |
|             |       | 2012 | 13839417.441 | 11136413.986 | 2703003.46 |
|             |       | 2013 | 14409614.758 | 11450431.591 | 2959183.17 |
|             |       | 2014 | 14976658.746 | 11749291.616 | 3227367.13 |
|             |       | 2015 | 15529977.821 | 12031443.385 | 3498534.44 |
|             |       | 2016 | 16066640.764 | 12293163.613 | 3773477.15 |
|             |       | 2017 | 16590035.078 | 12538082.950 | 4051952.13 |
|             |       | 2018 | 17098716.137 | 12769686.344 | 4329029.79 |
|             |       | 2019 | 17599868.850 | 12988620.813 | 4611248.04 |
|             |       | 2020 | 18081346.241 | 13193492.745 | 4887853.50 |
|             |       | 2021 | 18537594.460 | 13378048.494 | 5159545.97 |
|             |       | 2022 | 18985300.234 | 13551434.897 | 5433865.34 |
|             |       | 2023 | 19423958.747 | 13714076.655 | 5709882.09 |
|             |       | 2024 | 19853347.772 | 13865858.093 | 5987489.68 |
|             |       | 2025 | 20252822.245 | 14004416.491 | 6248405.75 |
|             |       | 2026 | 20619307.063 | 14124429.106 | 6494877.96 |
|             |       | 2027 | 20976063.406 | 14235726.103 | 6740337.30 |
|             |       | 2028 | 21323641.947 | 14339294.377 | 6984347.57 |
|             |       | 2029 | 21662117.106 | 14435053.759 | 7227063.35 |
|             |       | 2030 | 21960971.694 | 14518913.997 | 7442057.70 |
|             |       | 2031 | 22224951.983 | 14587421.429 | 7637530.55 |
|             |       | 2032 | 22480397.853 | 14650295.103 | 7830102.75 |
|             |       | 2033 | 22728639.455 | 14708457.435 | 8020182.02 |
|             |       | 2034 | 22970448.888 | 14761985.355 | 8208463.53 |
|             |       | 2035 | 23164154.188 | 14804988.599 | 8359165.59 |
|             |       | 2036 | 23334538.616 | 14839667.725 | 8494870.89 |
|             |       | 2037 | 23499760.723 | 14871711.047 | 8628049.68 |
|             |       | 2038 | 23660308.401 | 14901494.655 | 8758813.75 |
|             |       | 2039 | 23817891.273 | 14929364.074 | 8888527.20 |
| Lung cancer | Males | 1990 | 595621.791   | 595621.791   | 0.000      |
|             |       | 1991 | 1177744.113  | 1177096.215  | 647.898    |
|             |       | 1992 | 1750034.892  | 1747588.959  | 2445.933   |
|             |       | 1993 | 2319752.308  | 2313795.563  | 5956.745   |
|             |       | 1994 | 2872597.339  | 2861051.057  | 11546.281  |
|             |       | 1995 | 3411494.825  | 3391851.132  | 19643.693  |
|             |       | 1996 | 3945569.726  | 3914521.979  | 31047.746  |
|             |       | 1997 | 4463316.362  | 4417577.810  | 45738.552  |
|             |       | 1998 | 4975301.180  | 4910889.283  | 64411.897  |
|             |       | 1999 | 5473691.125  | 5386396.682  | 87294.443  |
|             |       | 2000 | 5977500.570  | 5861600.777  | 115899.793 |
|             |       | 2001 | 6474795.516  | 6324621.648  | 150173.868 |
|             |       | 2002 | 6968769.705  | 6777953.473  | 190816.232 |
|             |       | 2003 | 7460282.140  | 7221634.946  | 238647.194 |
|             |       | 2004 | 7947048.275  | 7653566.470  | 293481.806 |
|             |       | 2005 | 8430571.669  | 8074730.198  | 355841.471 |
|             |       | 2006 | 8903945.390  | 8478422.555  | 425522.835 |
|             |       | 2007 | 9364177.982  | 8862412.177  | 501765.804 |
|             |       | 2008 | 9822525.458  | 9235310.819  | 587214.640 |
|             |       | 2009 | 10275228.886 | 9594233.622  | 680995.264 |
|             |       | 2010 | 10720275.500 | 9937892.441  | 782383.059 |
|             |       | 2011 | 11155356.373 | 10264391.636 | 890964.737 |
|             |       | 2012 | 11582611.617 | 10574471.680 | 1008139.94 |
|             |       | 2013 | 11998803.791 | 10866593.450 | 1132210.34 |
|             |       | 2014 | 12402087.090 | 11140156.297 | 1261930.79 |
|             |       | 2015 | 12793451.706 | 11396956.588 | 1396495.12 |
|             |       | 2016 | 13160101.653 | 11628270.545 | 1531831.11 |
|             |       | 2017 | 13503583.414 | 11836539.460 | 1667043.95 |
|             |       | 2018 | 13859755.737 | 12041944.914 | 1817810.82 |
|             |       | 2019 | 14211625.176 | 12235959.620 | 1975665.56 |
|             |       | 2020 | 14553935.288 | 12417286.673 | 2136648.62 |
|             |       | 2021 | 14851747.495 | 12567461.379 | 2284286.12 |
|             |       | 2022 | 15144531.004 | 12707880.222 | 2436650.78 |
|             |       | 2023 | 15431932.496 | 12838689.184 | 2593243.31 |
|             |       | 2024 | 15713920.740 | 12960547.177 | 2753373.56 |
|             |       | 2025 | 15979112.816 | 13071019.260 | 2908093.56 |
|             |       | 2026 | 16206550.153 | 13159578.002 | 3046972.15 |
|             |       | 2027 | 16428826.050 | 13241479.509 | 3187346.54 |
|             |       | 2028 | 16645902.186 | 13316977.873 | 3328924.31 |
|             |       | 2029 | 16858126.517 | 13386872.978 | 3471253.54 |
|             |       | 2030 | 17045220.687 | 13447065.037 | 3598155.65 |
|             |       | 2031 | 17208482.610 | 13495244.566 | 3713238.04 |
|             |       | 2032 | 17367586.074 | 13539783.442 | 3827802.63 |
|             |       | 2033 | 17522716.280 | 13580702.705 | 3942013.57 |
|             |       | 2034 | 17674226.555 | 13618659.325 | 4055567.23 |
|             |       | 2035 | 17792201.734 | 13647904.793 | 4144296.94 |
|             |       | 2036 | 17903508.236 | 13673451.466 | 4230056.77 |
|             |       | 2037 | 18012162.345 | 13697373.598 | 4314788.75 |
|             |       | 2038 | 18118464.470 | 13719584.373 | 4398880.10 |

**Results for PHIM for Run 4 (ELL Summary Sensitivity\_Analysis\_3.RTF)**

|     |        |      |              |              |            |
|-----|--------|------|--------------|--------------|------------|
|     | Female | 2039 | 18222549.860 | 13740459.045 | 4482090.82 |
|     |        | 1990 | 307897.357   | 307897.357   | 0.000      |
|     |        | 1991 | 616547.418   | 616130.924   | 416.494    |
|     |        | 1992 | 931086.773   | 929437.285   | 1649.488   |
|     |        | 1993 | 1246155.671  | 1242094.603  | 4061.068   |
|     |        | 1994 | 1561212.934  | 1553216.682  | 7996.252   |
|     |        | 1995 | 1879967.742  | 1866039.442  | 13928.300  |
|     |        | 1996 | 2197488.109  | 2175345.859  | 22142.250  |
|     |        | 1997 | 2515698.453  | 2482635.622  | 33062.831  |
|     |        | 1998 | 2836249.556  | 2789213.555  | 47036.001  |
|     |        | 1999 | 3150201.390  | 3086151.881  | 64049.509  |
|     |        | 2000 | 3472722.342  | 3387572.083  | 85150.260  |
|     |        | 2001 | 3796994.889  | 3686324.455  | 110670.435 |
|     |        | 2002 | 4126619.935  | 3985258.561  | 141361.374 |
|     |        | 2003 | 4454982.533  | 4278163.956  | 176818.577 |
|     |        | 2004 | 4784343.030  | 4566477.090  | 217865.940 |
|     |        | 2005 | 5113443.121  | 4848851.580  | 264591.540 |
|     |        | 2006 | 5442543.963  | 5124689.967  | 317853.996 |
|     |        | 2007 | 5772441.497  | 5394694.557  | 377746.940 |
|     |        | 2008 | 6091911.943  | 5649563.854  | 442348.089 |
|     |        | 2009 | 6413671.330  | 5898918.453  | 514752.878 |
|     |        | 2010 | 6730763.530  | 6138029.901  | 592733.629 |
|     |        | 2011 | 7043614.101  | 6366651.752  | 676962.349 |
|     |        | 2012 | 7356270.780  | 6587736.825  | 768533.955 |
|     |        | 2013 | 7662551.964  | 6797064.383  | 865487.580 |
|     |        | 2014 | 7964551.465  | 6996237.965  | 968313.499 |
|     |        | 2015 | 8254895.403  | 7181704.202  | 1073191.20 |
|     |        | 2016 | 8530661.848  | 7350875.718  | 1179786.13 |
|     |        | 2017 | 8795826.122  | 7507346.335  | 1288479.79 |
|     |        | 2018 | 9067233.707  | 7659906.505  | 1407327.20 |
|     |        | 2019 | 9335343.270  | 7803764.231  | 1531579.04 |
|     |        | 2020 | 9596110.883  | 7938288.809  | 1657822.07 |
|     |        | 2021 | 9833186.859  | 8055888.051  | 1777298.81 |
|     |        | 2022 | 10066452.037 | 8165924.605  | 1900527.43 |
|     |        | 2023 | 10295503.609 | 8268696.864  | 2026806.75 |
|     |        | 2024 | 10520125.318 | 8364152.997  | 2155972.32 |
|     |        | 2025 | 10731915.863 | 8450948.900  | 2280966.96 |
|     |        | 2026 | 10917495.549 | 8523494.999  | 2394000.55 |
|     |        | 2027 | 11098620.885 | 8590425.081  | 2508195.80 |
|     |        | 2028 | 11275441.234 | 8652404.863  | 2623036.37 |
|     |        | 2029 | 11447962.710 | 8709422.551  | 2738540.16 |
|     |        | 2030 | 11601867.623 | 8758992.657  | 2842874.97 |
|     |        | 2031 | 11731666.516 | 8798104.548  | 2933561.97 |
|     |        | 2032 | 11857585.969 | 8833907.715  | 3023678.25 |
|     |        | 2033 | 11980128.625 | 8866944.255  | 3113184.37 |
|     |        | 2034 | 12099562.464 | 8897301.146  | 3202261.32 |
|     |        | 2035 | 12195919.946 | 8921360.119  | 3274559.83 |
|     |        | 2036 | 12278201.969 | 8940413.429  | 3337788.54 |
|     |        | 2037 | 12358146.336 | 8958079.295  | 3400067.04 |
|     |        | 2038 | 12435978.633 | 8974543.771  | 3461434.86 |
|     |        | 2039 | 12512468.845 | 8990004.888  | 3522463.96 |
| IHD | Males  | 1990 | 517209.093   | 517209.093   | 0.000      |
|     |        | 1991 | 1019219.395  | 1012116.414  | 7102.981   |
|     |        | 1992 | 1509598.614  | 1483227.931  | 26370.683  |
|     |        | 1993 | 1992735.299  | 1931313.817  | 61421.482  |
|     |        | 1994 | 2462877.575  | 2348291.748  | 114585.827 |
|     |        | 1995 | 2928249.390  | 2739703.860  | 188545.530 |
|     |        | 1996 | 3377377.730  | 3093986.810  | 283390.920 |
|     |        | 1997 | 3809062.472  | 3411356.589  | 397705.883 |
|     |        | 1998 | 4222213.867  | 3692589.332  | 529624.535 |
|     |        | 1999 | 4708317.743  | 3996786.556  | 711531.187 |
|     |        | 2000 | 5182084.396  | 4269012.048  | 913072.348 |
|     |        | 2001 | 5644097.705  | 4509634.345  | 1134463.36 |
|     |        | 2002 | 6107232.129  | 4727869.237  | 1379362.89 |
|     |        | 2003 | 6561785.704  | 4920920.922  | 1640864.78 |
|     |        | 2004 | 6996156.348  | 5087567.234  | 1908589.11 |
|     |        | 2005 | 7426261.361  | 5236941.702  | 2189319.66 |
|     |        | 2006 | 7849012.694  | 5368182.427  | 2480830.27 |
|     |        | 2007 | 8255300.530  | 5481910.126  | 2773390.40 |
|     |        | 2008 | 8650662.040  | 5582141.687  | 3068520.35 |
|     |        | 2009 | 9030818.513  | 5669836.453  | 3360982.06 |
|     |        | 2010 | 9403026.327  | 5748090.703  | 3654935.62 |
|     |        | 2011 | 9767535.506  | 5817909.455  | 3949626.05 |
|     |        | 2012 | 10123044.281 | 5880510.813  | 4242533.47 |
|     |        | 2013 | 10470104.786 | 5936650.668  | 4533454.12 |
|     |        | 2014 | 10807756.112 | 5987281.681  | 4820474.43 |
|     |        | 2015 | 11130681.425 | 6032512.592  | 5098168.83 |
|     |        | 2016 | 11448966.506 | 6073999.254  | 5374967.25 |

**Results for PHIM for Run 4 (ELL Summary Sensitivity\_Analysis\_3.RTF)**

|        |        |      |              |             |            |
|--------|--------|------|--------------|-------------|------------|
|        |        | 2017 | 11758164.882 | 6111961.642 | 5646203.24 |
|        |        | 2018 | 12054448.241 | 6145821.860 | 5908626.38 |
|        |        | 2019 | 12341606.261 | 6177054.957 | 6164551.30 |
|        |        | 2020 | 12600728.939 | 6204043.403 | 6396685.54 |
|        |        | 2021 | 12861767.105 | 6230031.150 | 6631735.95 |
|        |        | 2022 | 13114168.616 | 6254310.765 | 6859857.85 |
|        |        | 2023 | 13357894.797 | 6276901.059 | 7080993.74 |
|        |        | 2024 | 13593848.521 | 6298195.686 | 7295652.83 |
|        |        | 2025 | 13789177.359 | 6315436.209 | 7473741.15 |
|        |        | 2026 | 13993401.656 | 6333103.379 | 7660298.28 |
|        |        | 2027 | 14190519.224 | 6349995.478 | 7840523.75 |
|        |        | 2028 | 14381193.356 | 6365906.086 | 8015287.27 |
|        |        | 2029 | 14565171.927 | 6381026.445 | 8184145.48 |
|        |        | 2030 | 14697381.605 | 6391734.843 | 8305646.76 |
|        |        | 2031 | 14842203.512 | 6403508.472 | 8438695.04 |
|        |        | 2032 | 14982485.826 | 6414868.048 | 8567617.78 |
|        |        | 2033 | 15118410.647 | 6425567.979 | 8692842.67 |
|        |        | 2034 | 15250284.398 | 6435829.661 | 8814454.74 |
|        |        | 2035 | 15322911.166 | 6441273.156 | 8881638.01 |
|        |        | 2036 | 15405115.031 | 6447437.194 | 8957677.84 |
|        |        | 2037 | 15484709.137 | 6453439.897 | 9031269.24 |
|        |        | 2038 | 15561812.193 | 6459175.309 | 9102636.88 |
|        |        | 2039 | 15635992.616 | 6464627.218 | 9171365.40 |
|        | Female | 1990 | 147299.110   | 147299.110  | 0.000      |
|        |        | 1991 | 295122.462   | 293257.343  | 1865.120   |
|        |        | 1992 | 439962.920   | 432981.028  | 6981.892   |
|        |        | 1993 | 584735.615   | 568179.562  | 16556.053  |
|        |        | 1994 | 727640.783   | 696335.472  | 31305.311  |
|        |        | 1995 | 868486.937   | 816747.788  | 51739.149  |
|        |        | 1996 | 1010321.847  | 930922.500  | 79399.347  |
|        |        | 1997 | 1144230.930  | 1032512.303 | 111718.627 |
|        |        | 1998 | 1274513.622  | 1124797.981 | 149715.641 |
|        |        | 1999 | 1426725.938  | 1225057.788 | 201668.150 |
|        |        | 2000 | 1573462.680  | 1314744.305 | 258718.374 |
|        |        | 2001 | 1719132.015  | 1395709.873 | 323422.142 |
|        |        | 2002 | 1863006.732  | 1468364.216 | 394642.516 |
|        |        | 2003 | 2002943.227  | 1532485.393 | 470457.834 |
|        |        | 2004 | 2137798.705  | 1588444.340 | 549354.365 |
|        |        | 2005 | 2271071.245  | 1638789.962 | 632281.283 |
|        |        | 2006 | 2400707.731  | 1682678.695 | 718029.036 |
|        |        | 2007 | 2523634.512  | 1720365.614 | 803268.899 |
|        |        | 2008 | 2648752.232  | 1754958.180 | 893794.053 |
|        |        | 2009 | 2765973.961  | 1784571.596 | 981402.365 |
|        |        | 2010 | 2881329.235  | 1811158.987 | 1070170.25 |
|        |        | 2011 | 2994972.694  | 1834965.758 | 1160006.94 |
|        |        | 2012 | 3108958.829  | 1856696.942 | 1252261.89 |
|        |        | 2013 | 3218140.416  | 1876050.726 | 1342089.69 |
|        |        | 2014 | 3328387.914  | 1894025.821 | 1434362.09 |
|        |        | 2015 | 3435342.796  | 1910434.875 | 1524907.92 |
|        |        | 2016 | 3539189.408  | 1925311.026 | 1613878.38 |
|        |        | 2017 | 3640041.363  | 1938827.666 | 1701213.70 |
|        |        | 2018 | 3732645.362  | 1950461.901 | 1782183.46 |
|        |        | 2019 | 3821421.978  | 1960991.358 | 1860430.62 |
|        |        | 2020 | 3902115.950  | 1970125.585 | 1931990.36 |
|        |        | 2021 | 3984301.053  | 1978979.329 | 2005321.72 |
|        |        | 2022 | 4062629.299  | 1987032.126 | 2075597.17 |
|        |        | 2023 | 4137348.729  | 1994435.736 | 2142912.99 |
|        |        | 2024 | 4208611.493  | 2001236.955 | 2207374.54 |
|        |        | 2025 | 4269419.492  | 2006910.862 | 2262508.63 |
|        |        | 2026 | 4330969.998  | 2012491.324 | 2318478.67 |
|        |        | 2027 | 4389134.306  | 2017640.914 | 2371493.39 |
|        |        | 2028 | 4444222.970  | 2022447.127 | 2421775.84 |
|        |        | 2029 | 4496447.877  | 2026959.966 | 2469487.91 |
|        |        | 2030 | 4536975.698  | 2030360.666 | 2506615.03 |
|        |        | 2031 | 4578338.586  | 2033808.057 | 2544530.53 |
|        |        | 2032 | 4617397.784  | 2037052.635 | 2580345.15 |
|        |        | 2033 | 4654407.697  | 2040135.289 | 2614272.41 |
|        |        | 2034 | 4689913.454  | 2043091.483 | 2646821.97 |
|        |        | 2035 | 4712518.190  | 2044867.165 | 2667651.02 |
|        |        | 2036 | 4735845.827  | 2046693.680 | 2689152.15 |
|        |        | 2037 | 4757958.806  | 2048431.917 | 2709526.89 |
|        |        | 2038 | 4778813.806  | 2050099.704 | 2728714.10 |
|        |        | 2039 | 4798769.065  | 2051714.031 | 2747055.03 |
|        | Males  | 1990 | 75005.854    | 75005.854   | 0.000      |
|        |        | 1991 | 149463.017   | 148743.133  | 719.885    |
|        |        | 1992 | 222966.278   | 220289.873  | 2676.405   |
|        |        | 1993 | 296801.879   | 290427.330  | 6374.549   |
|        |        | 1994 | 372453.706   | 360109.239  | 12344.467  |
| Stroke |        |      |              |             |            |

**Results for PHIM for Run 4 (ELL Summary Sensitivity\_Analysis\_3.RTF)**

|        |      |             |             |            |
|--------|------|-------------|-------------|------------|
|        | 1995 | 448401.338  | 427531.156  | 20870.182  |
|        | 1996 | 523536.301  | 491424.534  | 32111.767  |
|        | 1997 | 596763.211  | 550707.556  | 46055.655  |
|        | 1998 | 667546.681  | 605018.074  | 62528.607  |
|        | 1999 | 734925.407  | 653814.644  | 81110.763  |
|        | 2000 | 803749.361  | 700702.963  | 103046.398 |
|        | 2001 | 870081.588  | 742871.152  | 127210.437 |
|        | 2002 | 935347.140  | 781541.615  | 153805.524 |
|        | 2003 | 1001627.349 | 817812.500  | 183814.849 |
|        | 2004 | 1066587.976 | 850750.596  | 215837.380 |
|        | 2005 | 1130548.052 | 880620.260  | 249927.792 |
|        | 2006 | 1195132.454 | 908280.011  | 286852.443 |
|        | 2007 | 1258974.043 | 933360.204  | 325613.839 |
|        | 2008 | 1320124.867 | 955287.815  | 364837.052 |
|        | 2009 | 1380776.123 | 975225.655  | 405550.468 |
|        | 2010 | 1440048.533 | 993129.978  | 446918.555 |
|        | 2011 | 1497484.847 | 1009076.652 | 488408.195 |
|        | 2012 | 1554496.526 | 1023499.550 | 530996.976 |
|        | 2013 | 1610819.598 | 1036579.848 | 574239.750 |
|        | 2014 | 1667484.890 | 1048608.285 | 618876.604 |
|        | 2015 | 1720948.287 | 1059181.319 | 661766.968 |
|        | 2016 | 1775699.228 | 1069126.928 | 706572.300 |
|        | 2017 | 1830250.175 | 1078297.230 | 751952.945 |
|        | 2018 | 1875958.950 | 1085459.184 | 790499.766 |
|        | 2019 | 1920359.232 | 1091948.967 | 828410.265 |
|        | 2020 | 1960605.297 | 1097505.438 | 863099.859 |
|        | 2021 | 1998912.887 | 1102457.281 | 896455.606 |
|        | 2022 | 2036003.696 | 1106962.372 | 929041.324 |
|        | 2023 | 2071857.536 | 1111066.632 | 960790.904 |
|        | 2024 | 2106636.468 | 1114857.206 | 991779.263 |
|        | 2025 | 2136450.873 | 1117978.372 | 1018472.50 |
|        | 2026 | 2164796.470 | 1120809.729 | 1043986.74 |
|        | 2027 | 2192079.608 | 1123444.910 | 1068634.70 |
|        | 2028 | 2218404.367 | 1125880.601 | 1092523.77 |
|        | 2029 | 2243769.140 | 1128155.484 | 1115613.66 |
|        | 2030 | 2263570.213 | 1129884.993 | 1133685.22 |
|        | 2031 | 2282521.590 | 1131507.272 | 1151014.32 |
|        | 2032 | 2300804.945 | 1133040.368 | 1167764.58 |
|        | 2033 | 2318464.018 | 1134479.376 | 1183984.64 |
|        | 2034 | 2335611.973 | 1135852.688 | 1199759.29 |
|        | 2035 | 2347097.290 | 1136757.979 | 1210339.31 |
|        | 2036 | 2358248.747 | 1137627.932 | 1220620.81 |
|        | 2037 | 2369033.655 | 1138469.079 | 1230564.58 |
|        | 2038 | 2379490.114 | 1139272.082 | 1240218.03 |
|        | 2039 | 2389546.238 | 1140034.545 | 1249511.69 |
| Female | 1990 | 56348.092   | 56348.092   | 0.000      |
|        | 1991 | 110871.862  | 110356.693  | 515.169    |
|        | 1992 | 165654.454  | 163676.687  | 1977.768   |
|        | 1993 | 220008.519  | 215284.384  | 4724.136   |
|        | 1994 | 275706.807  | 266526.537  | 9180.270   |
|        | 1995 | 331417.547  | 315924.542  | 15493.005  |
|        | 1996 | 387580.161  | 363592.506  | 23987.655  |
|        | 1997 | 442778.242  | 408245.916  | 34532.326  |
|        | 1998 | 496117.305  | 449216.569  | 46900.736  |
|        | 1999 | 548268.214  | 487082.829  | 61185.386  |
|        | 2000 | 601693.202  | 523667.488  | 78025.713  |
|        | 2001 | 652221.103  | 556095.415  | 96125.688  |
|        | 2002 | 703022.600  | 586472.537  | 116550.063 |
|        | 2003 | 752023.351  | 613705.526  | 138317.825 |
|        | 2004 | 799826.733  | 638283.383  | 161543.350 |
|        | 2005 | 847563.928  | 660994.892  | 186569.037 |
|        | 2006 | 894205.027  | 681441.458  | 212763.569 |
|        | 2007 | 939571.282  | 699710.742  | 239860.540 |
|        | 2008 | 983437.578  | 715968.577  | 267469.001 |
|        | 2009 | 1025803.786 | 730409.547  | 295394.239 |
|        | 2010 | 1066964.934 | 743265.659  | 323699.275 |
|        | 2011 | 1106954.044 | 754715.104  | 352238.940 |
|        | 2012 | 1146108.461 | 765028.440  | 381080.021 |
|        | 2013 | 1183544.689 | 774128.843  | 409415.846 |
|        | 2014 | 1221220.945 | 782543.622  | 438677.323 |
|        | 2015 | 1258289.311 | 790273.398  | 468015.914 |
|        | 2016 | 1294830.207 | 797318.346  | 497511.861 |
|        | 2017 | 1330332.626 | 803668.555  | 526664.070 |
|        | 2018 | 1360571.987 | 808718.866  | 551853.121 |
|        | 2019 | 1389848.723 | 813256.806  | 576591.916 |
|        | 2020 | 1416046.192 | 817101.128  | 598945.065 |
|        | 2021 | 1440588.850 | 820476.444  | 620112.405 |
|        | 2022 | 1464157.934 | 823520.617  | 640637.317 |

**Results for PHIM for Run 4 (ELL Summary Sensitivity\_Analysis\_3.RTF)**

|      |             |             |             |             |            |
|------|-------------|-------------|-------------|-------------|------------|
|      |             | 2023        | 1486810.237 | 826295.433  | 660514.804 |
|      |             | 2024        | 1508591.729 | 828817.345  | 679774.384 |
|      |             | 2025        | 1526875.621 | 830860.644  | 696014.978 |
|      |             | 2026        | 1543659.810 | 832650.854  | 711008.956 |
|      |             | 2027        | 1559623.774 | 834286.067  | 725337.707 |
|      |             | 2028        | 1574852.850 | 835796.573  | 739056.277 |
|      |             | 2029        | 1589437.452 | 837198.552  | 752238.900 |
|      |             | 2030        | 1600568.199 | 838235.012  | 762333.188 |
|      |             | 2031        | 1610776.297 | 839165.277  | 771611.020 |
|      |             | 2032        | 1620483.563 | 840035.489  | 780448.074 |
|      |             | 2033        | 1629745.442 | 840855.792  | 788889.650 |
|      |             | 2034        | 1638721.425 | 841636.555  | 797084.870 |
|      |             | 2035        | 1644649.404 | 842133.207  | 802516.197 |
|      |             | 2036        | 1650181.590 | 842590.609  | 807590.981 |
|      |             | 2037        | 1655476.066 | 843027.106  | 812448.960 |
|      |             | 2038        | 1660507.914 | 843447.090  | 817060.824 |
|      |             | 2039        | 1665361.569 | 843853.672  | 821507.897 |
| COPD | Males       | 1990        | 117002.906  | 117002.906  | 0.000      |
|      |             | 1991        | 233438.833  | 233235.802  | 203.031    |
|      |             | 1992        | 348084.047  | 347332.645  | 751.402    |
|      |             | 1993        | 467278.318  | 465433.566  | 1844.752   |
|      |             | 1994        | 584216.907  | 580589.515  | 3627.391   |
|      |             | 1995        | 697391.457  | 691208.016  | 6183.441   |
|      |             | 1996        | 809471.271  | 799798.699  | 9672.572   |
|      |             | 1997        | 922587.668  | 908253.063  | 14334.605  |
|      |             | 1998        | 1034072.457 | 1013969.789 | 20102.667  |
|      |             | 1999        | 1153475.399 | 1125768.704 | 27706.696  |
|      |             | 2000        | 1268050.268 | 1231350.531 | 36699.737  |
|      |             | 2001        | 1382786.209 | 1335282.415 | 47503.795  |
|      |             | 2002        | 1497557.412 | 1437242.327 | 60315.084  |
|      |             | 2003        | 1614405.229 | 1539210.152 | 75195.077  |
|      |             | 2004        | 1726672.489 | 1635081.198 | 91591.291  |
|      |             | 2005        | 1847277.524 | 1735998.703 | 111278.821 |
|      |             | 2006        | 1961009.963 | 1828771.198 | 132238.765 |
|      |             | 2007        | 2079868.908 | 1923158.126 | 156710.782 |
|      |             | 2008        | 2206755.783 | 2021419.300 | 185336.483 |
|      |             | 2009        | 2331993.380 | 2115675.829 | 216317.551 |
|      | 2010        | 2455130.176 | 2205743.382 | 249386.794  |            |
|      | 2011        | 2582657.849 | 2296138.893 | 286518.955  |            |
|      | 2012        | 2709719.005 | 2383214.988 | 326504.017  |            |
|      | 2013        | 2840547.005 | 2469726.902 | 370820.103  |            |
|      | 2014        | 2971677.135 | 2553352.275 | 418324.860  |            |
|      | 2015        | 3104538.983 | 2636093.282 | 468445.701  |            |
|      | 2016        | 3237650.175 | 2715647.745 | 522002.431  |            |
|      | 2017        | 3370561.253 | 2792179.169 | 578382.083  |            |
|      | 2018        | 3503136.371 | 2864980.521 | 638155.850  |            |
|      | 2019        | 3636402.758 | 2935085.138 | 701317.620  |            |
|      | 2020        | 3768054.453 | 3001994.629 | 766059.824  |            |
|      | 2021        | 3897675.067 | 3064851.492 | 832823.575  |            |
|      | 2022        | 4027307.132 | 3124710.825 | 902596.307  |            |
|      | 2023        | 4156698.720 | 3181488.761 | 975209.959  |            |
|      | 2024        | 4285772.226 | 3235253.306 | 1050518.92  |            |
|      | 2025        | 4410759.298 | 3285416.449 | 1125342.85  |            |
|      | 2026        | 4531411.064 | 3330959.144 | 1200451.92  |            |
|      | 2027        | 4651145.233 | 3373597.852 | 1277547.38  |            |
|      | 2028        | 4769837.872 | 3413402.892 | 1356434.98  |            |
|      | 2029        | 4887747.179 | 3450611.477 | 1437135.70  |            |
| 2030 | 4997632.895 | 3484129.196 | 1513503.70  |             |            |
| 2031 | 5103301.991 | 3513790.425 | 1589511.57  |             |            |
| 2032 | 5207593.613 | 3541194.101 | 1666399.51  |             |            |
| 2033 | 5310556.138 | 3566401.963 | 1744154.17  |             |            |
| 2034 | 5412542.816 | 3589719.489 | 1822823.33  |             |            |
| 2035 | 5500522.473 | 3609301.131 | 1891221.34  |             |            |
| 2036 | 5588149.640 | 3627245.321 | 1960904.32  |             |            |
| 2037 | 5674667.886 | 3643847.839 | 2030820.05  |             |            |
| 2038 | 5760391.289 | 3659174.663 | 2101216.63  |             |            |
| 2039 | 5845459.234 | 3673469.472 | 2171989.76  |             |            |
|      | Female      | 1990        | 77434.846   | 77434.846   | 0.000      |
|      |             | 1991        | 160029.510  | 159861.321  | 168.190    |
|      |             | 1992        | 240642.531  | 240002.340  | 640.191    |
|      |             | 1993        | 329362.093  | 327709.954  | 1652.140   |
|      |             | 1994        | 418569.515  | 415258.483  | 3311.032   |
|      |             | 1995        | 509110.357  | 503283.050  | 5827.307   |
|      |             | 1996        | 600040.117  | 590780.648  | 9259.469   |
|      |             | 1997        | 691159.071  | 677422.353  | 13736.717  |
|      |             | 1998        | 782866.899  | 763536.808  | 19330.091  |
|      |             | 1999        | 881526.925  | 854816.216  | 26710.709  |
|      |             | 2000        | 977880.647  | 942637.890  | 35242.757  |

**Results for PHIM for Run 4 (ELL Summary Sensitivity\_Analysis\_3.RTF)**

|      |             |             |            |
|------|-------------|-------------|------------|
| 2001 | 1076787.404 | 1031236.895 | 45550.509  |
| 2002 | 1174842.754 | 1117389.319 | 57453.435  |
| 2003 | 1275102.681 | 1203840.759 | 71261.922  |
| 2004 | 1371026.306 | 1284882.470 | 86143.835  |
| 2005 | 1473954.509 | 1369792.154 | 104162.355 |
| 2006 | 1574450.828 | 1450725.704 | 123725.124 |
| 2007 | 1673790.211 | 1528709.833 | 145080.378 |
| 2008 | 1782360.738 | 1611696.190 | 170664.547 |
| 2009 | 1892944.209 | 1693577.211 | 199366.998 |
| 2010 | 2002131.282 | 1772201.010 | 229930.272 |
| 2011 | 2114522.152 | 1850414.755 | 264107.398 |
| 2012 | 2228079.372 | 1926951.779 | 301127.592 |
| 2013 | 2345377.689 | 2003187.638 | 342190.051 |
| 2014 | 2462498.422 | 2076484.207 | 386014.215 |
| 2015 | 2581450.312 | 2149030.910 | 432419.401 |
| 2016 | 2701959.301 | 2219658.524 | 482300.777 |
| 2017 | 2823834.967 | 2288240.394 | 535594.573 |
| 2018 | 2938265.081 | 2350599.072 | 587666.009 |
| 2019 | 3053254.880 | 2410608.418 | 642646.461 |
| 2020 | 3167073.216 | 2467977.223 | 699095.993 |
| 2021 | 3279517.699 | 2522704.670 | 756813.029 |
| 2022 | 3392060.964 | 2574957.549 | 817103.415 |
| 2023 | 3504296.171 | 2624648.622 | 879647.550 |
| 2024 | 3616019.231 | 2671650.796 | 944368.435 |
| 2025 | 3724611.269 | 2715696.085 | 1008915.18 |
| 2026 | 3827181.707 | 2755791.930 | 1071389.78 |
| 2027 | 3928684.441 | 2793374.040 | 1135310.40 |
| 2028 | 4029124.892 | 2828645.814 | 1200479.08 |
| 2029 | 4128269.068 | 2861472.690 | 1266796.38 |
| 2030 | 4221560.174 | 2891325.663 | 1330234.51 |
| 2031 | 4304170.584 | 2916343.548 | 1387827.04 |
| 2032 | 4384930.537 | 2939299.264 | 1445631.27 |
| 2033 | 4464357.691 | 2960522.098 | 1503835.59 |
| 2034 | 4542251.545 | 2979956.170 | 1562295.37 |
| 2035 | 4611066.648 | 2996628.108 | 1614438.54 |
| 2036 | 4670309.230 | 3009970.007 | 1660339.22 |
| 2037 | 4728179.514 | 3022172.729 | 1706006.79 |
| 2038 | 4785008.048 | 3033404.090 | 1751603.96 |
| 2039 | 4841291.793 | 3043791.483 | 1797500.31 |

---

## Results for PHIM for Run 4 (ELL Summary Sensitivity\_Analysis\_3.RTF)

\*\*\*\*\*

**Table 4: Estimated Loss of Life, All age groups combined, Population and Number deaths adjusted for Ecig scenario, cumulative over years**

| Disease      | Sex          | Year         | Years of life lost<br>NULL | Years of life lost<br>Ecig | Years of life<br>Saved |
|--------------|--------------|--------------|----------------------------|----------------------------|------------------------|
| All Diseases | Males        | 1990         | 1304839.645                | 1304839.645                | 0.000                  |
|              |              | 1991         | 2579865.358                | 2571191.563                | 8673.794               |
|              |              | 1992         | 3830683.831                | 3798451.346                | 32232.486              |
|              |              | 1993         | 5076567.803                | 5001024.524                | 75543.279              |
|              |              | 1994         | 6292145.526                | 6150191.103                | 141954.423             |
|              |              | 1995         | 7485537.010                | 7250615.657                | 234921.353             |
|              |              | 1996         | 8655955.028                | 8300325.684                | 355629.344             |
|              |              | 1997         | 9791729.713                | 9288879.368                | 502850.345             |
|              |              | 1998         | 10899134.186               | 10223976.805               | 675157.381             |
|              |              | 1999         | 12070409.674               | 11164991.661               | 905418.014             |
|              |              | 2000         | 13231384.595               | 12065808.005               | 1165576.59             |
|              |              | 2001         | 14371761.018               | 12916666.673               | 1455094.35             |
|              |              | 2002         | 15508906.386               | 13730198.282               | 1778708.10             |
|              |              | 2003         | 16638100.422               | 14506727.260               | 2131373.16             |
|              |              | 2004         | 17736465.088               | 15235870.799               | 2500594.29             |
|              |              | 2005         | 18834658.606               | 15939192.597               | 2895466.01             |
|              |              | 2006         | 19909100.501               | 16596725.885               | 3312374.62             |
|              |              | 2007         | 20958321.463               | 17216260.370               | 3742061.09             |
|              |              | 2008         | 22000068.148               | 17812151.691               | 4187916.46             |
|              |              | 2009         | 23018816.903               | 18375705.474               | 4643111.43             |
|              |              | 2010         | 24018480.537               | 18908489.805               | 5109990.73             |
|              |              | 2011         | 25003034.574               | 19414203.626               | 5588830.95             |
|              |              | 2012         | 25969871.429               | 19891553.227               | 6078318.20             |
|              |              | 2013         | 26920275.180               | 20342692.521               | 6577582.66             |
|              |              | 2014         | 27849005.227               | 20765906.583               | 7083098.64             |
|              |              | 2015         | 28749620.400               | 21164723.946               | 7584896.45             |
|              |              | 2016         | 29622417.562               | 21530471.270               | 8091946.29             |
|              |              | 2017         | 30462559.724               | 21865820.843               | 8596738.88             |
|              |              | 2018         | 31293299.299               | 22188567.089               | 9104732.21             |
|              |              | 2019         | 32109993.427               | 22493967.642               | 9616025.79             |
|              |              | 2020         | 32883323.977               | 22778331.585               | 10104992.4             |
|              |              | 2021         | 33610102.554               | 23025602.713               | 10584499.8             |
|              |              | 2022         | 34322010.448               | 23257944.961               | 11064065.5             |
|              |              | 2023         | 35018383.550               | 23475470.939               | 11542912.6             |
|              |              | 2024         | 35700177.955               | 23679384.029               | 12020793.9             |
|              |              | 2025         | 36315500.346               | 23863513.359               | 12451987.0             |
|              |              | 2026         | 36896159.343               | 24020881.887               | 12875277.5             |
|              |              | 2027         | 37462570.116               | 24167644.683               | 13294925.4             |
|              |              | 2028         | 38015337.780               | 24303907.973               | 13711429.8             |
|              |              | 2029         | 38554814.764               | 24430939.634               | 14123875.1             |
|              |              | 2030         | 39003805.400               | 24539454.585               | 14464350.8             |
|              |              | 2031         | 39436509.703               | 24632748.156               | 14803761.5             |
| 2032         | 39858470.458 | 24719552.997 | 15138917.5                 |                            |                        |
| 2033         | 40270147.082 | 24799692.772 | 15470454.3                 |                            |                        |
| 2034         | 40672665.743 | 24874396.678 | 15798269.1                 |                            |                        |
| 2035         | 40962732.664 | 24931088.940 | 16031643.7                 |                            |                        |
| 2036         | 41255021.653 | 24982994.145 | 16272027.5                 |                            |                        |
| 2037         | 41540573.023 | 25031685.106 | 16508887.9                 |                            |                        |
| 2038         | 41820158.066 | 25077021.138 | 16743136.9                 |                            |                        |
| 2039         | 42093547.949 | 25119609.833 | 16973938.1                 |                            |                        |
|              | Female       | 1990         | 588979.406                 | 588979.406                 | 0.000                  |
| 1991         |              | 1182571.252  | 1179606.280                | 2964.972                   |                        |
| 1992         |              | 1777346.679  | 1766099.369                | 11247.310                  |                        |
| 1993         |              | 2380261.899  | 2353278.369                | 26983.530                  |                        |
| 1994         |              | 2983130.039  | 2931365.916                | 51764.123                  |                        |
| 1995         |              | 3588982.584  | 3502059.520                | 86923.063                  |                        |
| 1996         |              | 4195430.235  | 4060765.836                | 134664.399                 |                        |
| 1997         |              | 4793866.694  | 4601030.295                | 192836.399                 |                        |
| 1998         |              | 5389747.381  | 5127106.152                | 262641.229                 |                        |
| 1999         |              | 6006722.467  | 5653624.494                | 353097.973                 |                        |
| 2000         |              | 6625758.871  | 6169368.310                | 456390.561                 |                        |
| 2001         |              | 7245135.411  | 6670402.332                | 574733.079                 |                        |
| 2002         |              | 7867492.021  | 7158873.312                | 708618.709                 |                        |
| 2003         |              | 8485051.793  | 7630006.039                | 855045.754                 |                        |
| 2004         |              | 9092994.774  | 8080383.611                | 1012611.16                 |                        |
| 2005         |              | 9706032.803  | 8521286.191                | 1184746.61                 |                        |
| 2006         |              | 10311907.548 | 8943020.514                | 1368887.03                 |                        |
| 2007         |              | 10909437.502 | 9347662.598                | 1561774.90                 |                        |
| 2008         |              | 11506462.491 | 9737139.024                | 1769323.47                 |                        |
| 2009         |              | 12098393.287 | 10113271.304               | 1985121.98                 |                        |
| 2010         |              | 12681188.981 | 10471353.335               | 2209835.65                 |                        |



**Results for PHIM for Run 4 (ELL Summary Sensitivity\_Analysis\_3.RTF)**

|             |       |      |              |              |            |
|-------------|-------|------|--------------|--------------|------------|
|             |       | 2011 | 13260062.991 | 10814411.338 | 2445651.65 |
|             |       | 2012 | 13839417.441 | 11145112.638 | 2694304.80 |
|             |       | 2013 | 14409614.758 | 11460222.014 | 2949392.74 |
|             |       | 2014 | 14976658.746 | 11760226.526 | 3216432.22 |
|             |       | 2015 | 15529977.821 | 12043574.231 | 3486403.59 |
|             |       | 2016 | 16066640.764 | 12306511.042 | 3760129.72 |
|             |       | 2017 | 16590035.078 | 12552680.113 | 4037354.96 |
|             |       | 2018 | 17098716.137 | 12785568.453 | 4313147.68 |
|             |       | 2019 | 17599868.850 | 13005818.363 | 4594050.49 |
|             |       | 2020 | 18081346.241 | 13212031.913 | 4869314.33 |
|             |       | 2021 | 18537594.460 | 13397907.953 | 5139686.51 |
|             |       | 2022 | 18985300.234 | 13572626.320 | 5412673.91 |
|             |       | 2023 | 19423958.747 | 13736605.379 | 5687353.37 |
|             |       | 2024 | 19853347.772 | 13889719.007 | 5963628.76 |
|             |       | 2025 | 20252822.245 | 14029600.285 | 6223221.96 |
|             |       | 2026 | 20619307.063 | 14150847.953 | 6468459.11 |
|             |       | 2027 | 20976063.406 | 14263358.125 | 6712705.28 |
|             |       | 2028 | 21323641.947 | 14368119.132 | 6955522.82 |
|             |       | 2029 | 21662117.106 | 14465040.041 | 7197077.06 |
|             |       | 2030 | 21960971.694 | 14550017.071 | 7410954.62 |
|             |       | 2031 | 22224951.983 | 14619480.846 | 7605471.14 |
|             |       | 2032 | 22480397.853 | 14683266.465 | 7797131.39 |
|             |       | 2033 | 22728639.455 | 14742305.389 | 7986334.07 |
|             |       | 2034 | 22970448.888 | 14796666.639 | 8173782.25 |
|             |       | 2035 | 23164154.188 | 14840421.968 | 8323732.22 |
|             |       | 2036 | 23334538.616 | 14875709.522 | 8458829.09 |
|             |       | 2037 | 23499760.723 | 14908324.597 | 8591436.13 |
|             |       | 2038 | 23660308.401 | 14938648.589 | 8721659.81 |
|             |       | 2039 | 23817891.273 | 14967030.322 | 8850860.95 |
| Lung cancer | Males | 1990 | 595621.791   | 595621.791   | 0.000      |
|             |       | 1991 | 1177744.113  | 1177096.215  | 647.898    |
|             |       | 1992 | 1750034.892  | 1747594.740  | 2440.152   |
|             |       | 1993 | 2319752.308  | 2313821.942  | 5930.366   |
|             |       | 1994 | 2872597.339  | 2861124.378  | 11472.961  |
|             |       | 1995 | 3411494.825  | 3392010.267  | 19484.559  |
|             |       | 1996 | 3945569.726  | 3914820.693  | 30749.032  |
|             |       | 1997 | 4463316.362  | 4418081.241  | 45235.122  |
|             |       | 1998 | 4975301.180  | 4911677.976  | 63623.205  |
|             |       | 1999 | 5473691.125  | 5387556.851  | 86134.274  |
|             |       | 2000 | 5977500.570  | 5863256.388  | 114244.182 |
|             |       | 2001 | 6474795.516  | 6326899.495  | 147896.021 |
|             |       | 2002 | 6968769.705  | 6780994.092  | 187775.613 |
|             |       | 2003 | 7460282.140  | 7225586.548  | 234695.592 |
|             |       | 2004 | 7947048.275  | 7658583.307  | 288464.968 |
|             |       | 2005 | 8430571.669  | 8080968.872  | 349602.796 |
|             |       | 2006 | 8903945.390  | 8486023.784  | 417921.606 |
|             |       | 2007 | 9364177.982  | 8871505.327  | 492672.655 |
|             |       | 2008 | 9822525.458  | 9246048.669  | 576476.789 |
|             |       | 2009 | 10275228.886 | 9606756.004  | 668472.882 |
|             |       | 2010 | 10720275.500 | 9952327.631  | 767947.870 |
|             |       | 2011 | 11155356.373 | 10280845.924 | 874510.450 |
|             |       | 2012 | 11582611.617 | 10593034.324 | 989577.292 |
|             |       | 2013 | 11998803.791 | 10887335.653 | 1111468.14 |
|             |       | 2014 | 12402087.090 | 11163132.673 | 1238954.42 |
|             |       | 2015 | 12793451.706 | 11422222.535 | 1371229.17 |
|             |       | 2016 | 13160101.653 | 11655775.229 | 1504326.42 |
|             |       | 2017 | 13503583.414 | 11866227.250 | 1637356.16 |
|             |       | 2018 | 13859755.737 | 12073939.332 | 1785816.40 |
|             |       | 2019 | 14211625.176 | 12270286.065 | 1941339.11 |
|             |       | 2020 | 14553935.288 | 12453958.709 | 2099976.58 |
|             |       | 2021 | 14851747.495 | 12606205.290 | 2245542.20 |
|             |       | 2022 | 15144531.004 | 12748676.701 | 2395854.30 |
|             |       | 2023 | 15431932.496 | 12881508.677 | 2550423.82 |
|             |       | 2024 | 15713920.740 | 13005355.531 | 2708565.21 |
|             |       | 2025 | 15979112.816 | 13117765.512 | 2861347.30 |
|             |       | 2026 | 16206550.153 | 13207938.477 | 2998611.68 |
|             |       | 2027 | 16428826.050 | 13291400.964 | 3137425.09 |
|             |       | 2028 | 16645902.186 | 13368403.544 | 3277498.64 |
|             |       | 2029 | 16858126.517 | 13439747.877 | 3418378.64 |
|             |       | 2030 | 17045220.687 | 13501295.198 | 3543925.49 |
|             |       | 2031 | 17208482.610 | 13550569.939 | 3657912.67 |
|             |       | 2032 | 17367586.074 | 13596151.806 | 3771434.27 |
|             |       | 2033 | 17522716.280 | 13638058.894 | 3884657.39 |
|             |       | 2034 | 17674226.555 | 13676957.403 | 3997269.15 |
|             |       | 2035 | 17792201.734 | 13707005.851 | 4085195.88 |
|             |       | 2036 | 17903508.236 | 13733242.056 | 4170266.18 |
|             |       | 2037 | 18012162.345 | 13757823.858 | 4254338.49 |
|             |       | 2038 | 18118464.470 | 13780661.946 | 4337802.52 |

**Results for PHIM for Run 4 (ELL Summary Sensitivity\_Analysis\_3.RTF)**

|     |        |      |              |              |            |
|-----|--------|------|--------------|--------------|------------|
|     | Female | 2039 | 18222549.860 | 13802136.812 | 4420413.05 |
|     |        | 1990 | 307897.357   | 307897.357   | 0.000      |
|     |        | 1991 | 616547.418   | 616130.924   | 416.494    |
|     |        | 1992 | 931086.773   | 929438.400   | 1648.373   |
|     |        | 1993 | 1246155.671  | 1242100.013  | 4055.658   |
|     |        | 1994 | 1561212.934  | 1553232.559  | 7980.375   |
|     |        | 1995 | 1879967.742  | 1866075.608  | 13892.134  |
|     |        | 1996 | 2197488.109  | 2175415.961  | 22072.149  |
|     |        | 1997 | 2515698.453  | 2482757.894  | 32940.559  |
|     |        | 1998 | 2836249.556  | 2789411.292  | 46838.264  |
|     |        | 1999 | 3150201.390  | 3086449.446  | 63751.944  |
|     |        | 2000 | 3472722.342  | 3388006.304  | 84716.039  |
|     |        | 2001 | 3796994.889  | 3686932.708  | 110062.182 |
|     |        | 2002 | 4126619.935  | 3986085.037  | 140534.898 |
|     |        | 2003 | 4454982.533  | 4279255.091  | 175727.443 |
|     |        | 2004 | 4784343.030  | 4567881.610  | 216461.420 |
|     |        | 2005 | 5113443.121  | 4850617.777  | 262825.344 |
|     |        | 2006 | 5442543.963  | 5126868.780  | 315675.183 |
|     |        | 2007 | 5772441.497  | 5397341.136  | 375100.361 |
|     |        | 2008 | 6091911.943  | 5652716.873  | 439195.070 |
|     |        | 2009 | 6413671.330  | 5902632.071  | 511039.259 |
|     |        | 2010 | 6730763.530  | 6142349.711  | 588413.819 |
|     |        | 2011 | 7043614.101  | 6371619.061  | 671995.040 |
|     |        | 2012 | 7356270.780  | 6593400.431  | 762870.348 |
|     |        | 2013 | 7662551.964  | 6803457.927  | 859094.036 |
|     |        | 2014 | 7964551.465  | 7003398.302  | 961153.163 |
|     |        | 2015 | 8254895.403  | 7189653.520  | 1065241.88 |
|     |        | 2016 | 8530661.848  | 7359615.020  | 1171046.83 |
|     |        | 2017 | 8795826.122  | 7516888.042  | 1278938.08 |
|     |        | 2018 | 9067233.707  | 7670293.102  | 1396940.60 |
|     |        | 2019 | 9335343.270  | 7815013.224  | 1520330.05 |
|     |        | 2020 | 9596110.883  | 7950414.454  | 1645696.43 |
|     |        | 2021 | 9833186.859  | 8068852.413  | 1764334.45 |
|     |        | 2022 | 10066452.037 | 8179731.211  | 1886720.83 |
|     |        | 2023 | 10295503.609 | 8283345.001  | 2012158.61 |
|     |        | 2024 | 10520125.318 | 8379635.092  | 2140490.23 |
|     |        | 2025 | 10731915.863 | 8467254.405  | 2264661.46 |
|     |        | 2026 | 10917495.549 | 8540541.940  | 2376953.61 |
|     |        | 2027 | 11098620.885 | 8608195.638  | 2490425.25 |
|     |        | 2028 | 11275441.234 | 8670882.664  | 2604558.57 |
|     |        | 2029 | 11447962.710 | 8728584.771  | 2719377.94 |
|     |        | 2030 | 11601867.623 | 8778808.407  | 2823059.22 |
|     |        | 2031 | 11731666.516 | 8818458.177  | 2913208.34 |
|     |        | 2032 | 11857585.969 | 8854771.898  | 3002814.07 |
|     |        | 2033 | 11980128.625 | 8888297.108  | 3091831.52 |
|     |        | 2034 | 12099562.464 | 8919117.064  | 3180445.40 |
|     |        | 2035 | 12195919.946 | 8943590.390  | 3252329.56 |
|     |        | 2036 | 12278201.969 | 8962968.384  | 3315233.59 |
|     |        | 2037 | 12358146.336 | 8980939.830  | 3377206.51 |
|     |        | 2038 | 12435978.633 | 8997693.483  | 3438285.15 |
|     |        | 2039 | 12512468.845 | 9013429.591  | 3499039.25 |
| IHD | Males  | 1990 | 517209.093   | 517209.093   | 0.000      |
|     |        | 1991 | 1019219.395  | 1012116.414  | 7102.981   |
|     |        | 1992 | 1509598.614  | 1483232.320  | 26366.294  |
|     |        | 1993 | 1992735.299  | 1931333.449  | 61401.850  |
|     |        | 1994 | 2462877.575  | 2348344.818  | 114532.757 |
|     |        | 1995 | 2928249.390  | 2739816.082  | 188433.308 |
|     |        | 1996 | 3377377.730  | 3094188.010  | 283189.720 |
|     |        | 1997 | 3809062.472  | 3411679.285  | 397383.187 |
|     |        | 1998 | 4222213.867  | 3693064.929  | 529148.938 |
|     |        | 1999 | 4708317.743  | 3997485.107  | 710832.636 |
|     |        | 2000 | 5182084.396  | 4269979.073  | 912105.324 |
|     |        | 2001 | 5644097.705  | 4510905.798  | 1133191.91 |
|     |        | 2002 | 6107232.129  | 4729484.498  | 1377747.63 |
|     |        | 2003 | 6561785.704  | 4922906.667  | 1638879.04 |
|     |        | 2004 | 6996156.348  | 5089935.450  | 1906220.90 |
|     |        | 2005 | 7426261.361  | 5239712.899  | 2186548.46 |
|     |        | 2006 | 7849012.694  | 5371361.755  | 2477650.94 |
|     |        | 2007 | 8255300.530  | 5485494.063  | 2769806.47 |
|     |        | 2008 | 8650662.040  | 5586130.562  | 3064531.48 |
|     |        | 2009 | 9030818.513  | 5674222.669  | 3356595.84 |
|     |        | 2010 | 9403026.327  | 5752869.158  | 3650157.17 |
|     |        | 2011 | 9767535.506  | 5823072.203  | 3944463.30 |
|     |        | 2012 | 10123044.281 | 5886050.508  | 4236993.77 |
|     |        | 2013 | 10470104.786 | 5942557.809  | 4527546.98 |
|     |        | 2014 | 10807756.112 | 5993547.044  | 4814209.07 |
|     |        | 2015 | 11130681.425 | 6039127.797  | 5091553.63 |
|     |        | 2016 | 11448966.506 | 6080957.890  | 5368008.62 |

**Results for PHIM for Run 4 (ELL Summary Sensitivity\_Analysis\_3.RTF)**

|        |        |      |              |             |            |
|--------|--------|------|--------------|-------------|------------|
|        |        | 2017 | 11758164.882 | 6119255.683 | 5638909.20 |
|        |        | 2018 | 12054448.241 | 6153420.871 | 5901027.37 |
|        |        | 2019 | 12341606.261 | 6184949.828 | 6156656.43 |
|        |        | 2020 | 12600728.939 | 6212223.318 | 6388505.62 |
|        |        | 2021 | 12861767.105 | 6238488.794 | 6623278.31 |
|        |        | 2022 | 13114168.616 | 6263037.412 | 6851131.20 |
|        |        | 2023 | 13357894.797 | 6285888.835 | 7072005.96 |
|        |        | 2024 | 13593848.521 | 6307439.815 | 7286408.71 |
|        |        | 2025 | 13789177.359 | 6324921.198 | 7464256.16 |
|        |        | 2026 | 13993401.656 | 6342833.164 | 7650568.49 |
|        |        | 2027 | 14190519.224 | 6359966.756 | 7830552.47 |
|        |        | 2028 | 14381193.356 | 6376113.478 | 8005079.88 |
|        |        | 2029 | 14565171.927 | 6391464.948 | 8173706.98 |
|        |        | 2030 | 14697381.605 | 6402369.010 | 8295012.59 |
|        |        | 2031 | 14842203.512 | 6414356.580 | 8427846.93 |
|        |        | 2032 | 14982485.826 | 6425927.596 | 8556558.23 |
|        |        | 2033 | 15118410.647 | 6436832.870 | 8681577.78 |
|        |        | 2034 | 15250284.398 | 6447297.070 | 8802987.33 |
|        |        | 2035 | 15322911.166 | 6452871.745 | 8870039.42 |
|        |        | 2036 | 15405115.031 | 6459184.355 | 8945930.68 |
|        |        | 2037 | 15484709.137 | 6465335.516 | 9019373.62 |
|        |        | 2038 | 15561812.193 | 6471216.927 | 9090595.27 |
|        |        | 2039 | 15635992.616 | 6476811.231 | 9159181.38 |
|        | Female | 1990 | 147299.110   | 147299.110  | 0.000      |
|        |        | 1991 | 295122.462   | 293257.343  | 1865.120   |
|        |        | 1992 | 439962.920   | 432981.497  | 6981.423   |
|        |        | 1993 | 584735.615   | 568181.773  | 16553.842  |
|        |        | 1994 | 727640.783   | 696341.729  | 31299.054  |
|        |        | 1995 | 868486.937   | 816761.414  | 51725.523  |
|        |        | 1996 | 1010321.847  | 930947.926  | 79373.922  |
|        |        | 1997 | 1144230.930  | 1032554.230 | 111676.700 |
|        |        | 1998 | 1274513.622  | 1124861.624 | 149651.998 |
|        |        | 1999 | 1426725.938  | 1225153.982 | 201571.956 |
|        |        | 2000 | 1573462.680  | 1314879.878 | 258582.802 |
|        |        | 2001 | 1719132.015  | 1395890.989 | 323241.026 |
|        |        | 2002 | 1863006.732  | 1468596.325 | 394410.407 |
|        |        | 2003 | 2002943.227  | 1532772.678 | 470170.549 |
|        |        | 2004 | 2137798.705  | 1588789.518 | 549009.187 |
|        |        | 2005 | 2271071.245  | 1639196.777 | 631874.468 |
|        |        | 2006 | 2400707.731  | 1683147.637 | 717560.094 |
|        |        | 2007 | 2523634.512  | 1720895.923 | 802738.589 |
|        |        | 2008 | 2648752.232  | 1755552.061 | 893200.171 |
|        |        | 2009 | 2765973.961  | 1785227.129 | 980746.832 |
|        |        | 2010 | 2881329.235  | 1811876.231 | 1069453.00 |
|        |        | 2011 | 2994972.694  | 1835744.162 | 1159228.53 |
|        |        | 2012 | 3108958.829  | 1857536.139 | 1251422.69 |
|        |        | 2013 | 3218140.416  | 1876949.425 | 1341190.99 |
|        |        | 2014 | 3328387.914  | 1894984.323 | 1433403.59 |
|        |        | 2015 | 3435342.796  | 1911453.848 | 1523888.95 |
|        |        | 2016 | 3539189.408  | 1926389.673 | 1612799.74 |
|        |        | 2017 | 3640041.363  | 1939964.908 | 1700076.45 |
|        |        | 2018 | 3732645.362  | 1951652.829 | 1780992.53 |
|        |        | 2019 | 3821421.978  | 1962234.078 | 1859187.90 |
|        |        | 2020 | 3902115.950  | 1971418.189 | 1930697.76 |
|        |        | 2021 | 3984301.053  | 1980323.082 | 2003977.97 |
|        |        | 2022 | 4062629.299  | 1988425.061 | 2074204.24 |
|        |        | 2023 | 4137348.729  | 1995876.397 | 2141472.33 |
|        |        | 2024 | 4208611.493  | 2002723.514 | 2205887.98 |
|        |        | 2025 | 4269419.492  | 2008441.187 | 2260978.30 |
|        |        | 2026 | 4330969.998  | 2014066.277 | 2316903.72 |
|        |        | 2027 | 4389134.306  | 2019258.534 | 2369875.77 |
|        |        | 2028 | 4444222.970  | 2024105.949 | 2420117.02 |
|        |        | 2029 | 4496447.877  | 2028658.645 | 2467789.23 |
|        |        | 2030 | 4536975.698  | 2032095.131 | 2504880.57 |
|        |        | 2031 | 4578338.586  | 2035579.417 | 2542759.17 |
|        |        | 2032 | 4617397.784  | 2038859.401 | 2578538.38 |
|        |        | 2033 | 4654407.697  | 2041976.493 | 2612431.20 |
|        |        | 2034 | 4689913.454  | 2044966.321 | 2644947.13 |
|        |        | 2035 | 4712518.190  | 2046767.900 | 2665750.29 |
|        |        | 2036 | 4735845.827  | 2048621.246 | 2687224.58 |
|        |        | 2037 | 4757958.806  | 2050385.365 | 2707573.44 |
|        |        | 2038 | 4778813.806  | 2052078.329 | 2726735.48 |
|        |        | 2039 | 4798769.065  | 2053717.364 | 2745051.70 |
| Stroke | Males  | 1990 | 75005.854    | 75005.854   | 0.000      |
|        |        | 1991 | 149463.017   | 148743.133  | 719.885    |
|        |        | 1992 | 222966.278   | 220290.491  | 2675.787   |
|        |        | 1993 | 296801.879   | 290430.158  | 6371.720   |
|        |        | 1994 | 372453.706   | 360117.220  | 12336.485  |

**Results for PHIM for Run 4 (ELL Summary Sensitivity\_Analysis\_3.RTF)**

|        |      |             |             |            |
|--------|------|-------------|-------------|------------|
|        | 1995 | 448401.338  | 427548.474  | 20852.863  |
|        | 1996 | 523536.301  | 491456.575  | 32079.726  |
|        | 1997 | 596763.211  | 550760.279  | 46002.932  |
|        | 1998 | 667546.681  | 605097.634  | 62449.047  |
|        | 1999 | 734925.407  | 653926.703  | 80998.704  |
|        | 2000 | 803749.361  | 700857.058  | 102892.303 |
|        | 2001 | 870081.588  | 743073.492  | 127008.096 |
|        | 2002 | 935347.140  | 781799.675  | 153547.464 |
|        | 2003 | 1001627.349 | 818133.351  | 183493.998 |
|        | 2004 | 1066587.976 | 851140.112  | 215447.863 |
|        | 2005 | 1130548.052 | 881083.157  | 249464.895 |
|        | 2006 | 1195132.454 | 908821.595  | 286310.859 |
|        | 2007 | 1258974.043 | 933983.421  | 324990.622 |
|        | 2008 | 1320124.867 | 955991.628  | 364133.239 |
|        | 2009 | 1380776.123 | 976011.830  | 404764.293 |
|        | 2010 | 1440048.533 | 993998.677  | 446049.856 |
|        | 2011 | 1497484.847 | 1010027.384 | 487457.463 |
|        | 2012 | 1554496.526 | 1024530.754 | 529965.772 |
|        | 2013 | 1610819.598 | 1037691.328 | 573128.269 |
|        | 2014 | 1667484.890 | 1049798.956 | 617685.934 |
|        | 2015 | 1720948.287 | 1060449.705 | 660498.582 |
|        | 2016 | 1775699.228 | 1070473.135 | 705226.093 |
|        | 2017 | 1830250.175 | 1079720.280 | 750529.895 |
|        | 2018 | 1875958.950 | 1086947.742 | 789011.208 |
|        | 2019 | 1920359.232 | 1093500.299 | 826858.932 |
|        | 2020 | 1960605.297 | 1099116.613 | 861488.684 |
|        | 2021 | 1998912.887 | 1104124.394 | 894788.493 |
|        | 2022 | 2036003.696 | 1108682.638 | 927321.058 |
|        | 2023 | 2071857.536 | 1112837.627 | 959019.909 |
|        | 2024 | 2106636.468 | 1116677.068 | 989959.401 |
|        | 2025 | 2136450.873 | 1119843.859 | 1016607.01 |
|        | 2026 | 2164796.470 | 1122717.810 | 1042078.66 |
|        | 2027 | 2192079.608 | 1125393.968 | 1066685.64 |
|        | 2028 | 2218404.367 | 1127868.905 | 1090535.46 |
|        | 2029 | 2243769.140 | 1130181.444 | 1113587.70 |
|        | 2030 | 2263570.213 | 1131943.855 | 1131626.36 |
|        | 2031 | 2282521.590 | 1133597.664 | 1148923.93 |
|        | 2032 | 2300804.945 | 1135161.265 | 1165643.68 |
|        | 2033 | 2318464.018 | 1136629.736 | 1181834.28 |
|        | 2034 | 2335611.973 | 1138031.927 | 1197580.05 |
|        | 2035 | 2347097.290 | 1138959.222 | 1208138.07 |
|        | 2036 | 2358248.747 | 1139850.683 | 1218398.06 |
|        | 2037 | 2369033.655 | 1140713.160 | 1228320.50 |
|        | 2038 | 2379490.114 | 1141537.106 | 1237953.01 |
|        | 2039 | 2389546.238 | 1142319.945 | 1247226.29 |
| Female | 1990 | 56348.092   | 56348.092   | 0.000      |
|        | 1991 | 110871.862  | 110356.693  | 515.169    |
|        | 1992 | 165654.454  | 163676.838  | 1977.617   |
|        | 1993 | 220008.519  | 215285.096  | 4723.424   |
|        | 1994 | 275706.807  | 266528.570  | 9178.236   |
|        | 1995 | 331417.547  | 315929.040  | 15488.507  |
|        | 1996 | 387580.161  | 363600.993  | 23979.168  |
|        | 1997 | 442778.242  | 408260.153  | 34518.089  |
|        | 1998 | 496117.305  | 449238.465  | 46878.840  |
|        | 1999 | 548268.214  | 487114.389  | 61153.825  |
|        | 2000 | 601693.202  | 523711.531  | 77981.671  |
|        | 2001 | 652221.103  | 556153.729  | 96067.373  |
|        | 2002 | 703022.600  | 586547.425  | 116475.175 |
|        | 2003 | 752023.351  | 613798.723  | 138224.628 |
|        | 2004 | 799826.733  | 638396.410  | 161430.322 |
|        | 2005 | 847563.928  | 661129.417  | 186434.511 |
|        | 2006 | 894205.027  | 681598.882  | 212606.145 |
|        | 2007 | 939571.282  | 699891.757  | 239679.525 |
|        | 2008 | 983437.578  | 716173.615  | 267263.963 |
|        | 2009 | 1025803.786 | 730638.882  | 295164.904 |
|        | 2010 | 1066964.934 | 743519.307  | 323445.627 |
|        | 2011 | 1106954.044 | 754993.076  | 351960.968 |
|        | 2012 | 1146108.461 | 765330.633  | 380777.828 |
|        | 2013 | 1183544.689 | 774454.809  | 409089.880 |
|        | 2014 | 1221220.945 | 782893.769  | 438327.177 |
|        | 2015 | 1258289.311 | 790648.422  | 467640.889 |
|        | 2016 | 1294830.207 | 797718.075  | 497112.132 |
|        | 2017 | 1330332.626 | 804092.749  | 526239.877 |
|        | 2018 | 1360571.987 | 809164.326  | 551407.662 |
|        | 2019 | 1389848.723 | 813722.753  | 576125.969 |
|        | 2020 | 1416046.192 | 817586.726  | 598459.466 |
|        | 2021 | 1440588.850 | 820980.604  | 619608.245 |
|        | 2022 | 1464157.934 | 824042.510  | 640115.425 |

**Results for PHIM for Run 4 (ELL Summary Sensitivity\_Analysis\_3.RTF)**

|      |             |             |             |             |            |
|------|-------------|-------------|-------------|-------------|------------|
|      |             | 2023        | 1486810.237 | 826834.435  | 659975.802 |
|      |             | 2024        | 1508591.729 | 829372.681  | 679219.048 |
|      |             | 2025        | 1526875.621 | 831431.331  | 695444.290 |
|      |             | 2026        | 1543659.810 | 833235.580  | 710424.230 |
|      |             | 2027        | 1559623.774 | 834884.072  | 724739.703 |
|      |             | 2028        | 1574852.850 | 836407.291  | 738445.559 |
|      |             | 2029        | 1589437.452 | 837821.453  | 751615.999 |
|      |             | 2030        | 1600568.199 | 838868.703  | 761699.496 |
|      |             | 2031        | 1610776.297 | 839808.882  | 770967.414 |
|      |             | 2032        | 1620483.563 | 840688.574  | 779794.989 |
|      |             | 2033        | 1629745.442 | 841518.041  | 788227.401 |
|      |             | 2034        | 1638721.425 | 842307.720  | 796413.706 |
|      |             | 2035        | 1644649.404 | 842811.428  | 801837.976 |
|      |             | 2036        | 1650181.590 | 843275.398  | 806906.191 |
|      |             | 2037        | 1655476.066 | 843718.254  | 811757.812 |
|      |             | 2038        | 1660507.914 | 844144.452  | 816363.462 |
|      |             | 2039        | 1665361.569 | 844557.139  | 820804.431 |
| COPD | Males       | 1990        | 117002.906  | 117002.906  | 0.000      |
|      |             | 1991        | 233438.833  | 233235.802  | 203.031    |
|      |             | 1992        | 348084.047  | 347333.794  | 750.253    |
|      |             | 1993        | 467278.318  | 465438.976  | 1839.342   |
|      |             | 1994        | 584216.907  | 580604.687  | 3612.220   |
|      |             | 1995        | 697391.457  | 691240.834  | 6150.623   |
|      |             | 1996        | 809471.271  | 799860.405  | 9610.866   |
|      |             | 1997        | 922587.668  | 908358.563  | 14229.105  |
|      |             | 1998        | 1034072.457 | 1014136.266 | 19936.191  |
|      |             | 1999        | 1153475.399 | 1126022.999 | 27452.400  |
|      |             | 2000        | 1268050.268 | 1231715.486 | 36334.782  |
|      |             | 2001        | 1382786.209 | 1335787.887 | 46998.322  |
|      |             | 2002        | 1497557.412 | 1437920.017 | 59637.395  |
|      |             | 2003        | 1614405.229 | 1540100.694 | 74304.536  |
|      |             | 2004        | 1726672.489 | 1636211.929 | 90460.560  |
|      |             | 2005        | 1847277.524 | 1737427.669 | 109849.855 |
|      |             | 2006        | 1961009.963 | 1830518.750 | 130491.213 |
|      |             | 2007        | 2079868.908 | 1925277.559 | 154591.349 |
|      |             | 2008        | 2206755.783 | 2023980.833 | 182774.950 |
|      |             | 2009        | 2331993.380 | 2118714.971 | 213278.410 |
|      |             | 2010        | 2455130.176 | 2209294.339 | 245835.838 |
|      |             | 2011        | 2582657.849 | 2300258.115 | 282399.733 |
|      |             | 2012        | 2709719.005 | 2387937.641 | 321781.364 |
|      |             | 2013        | 2840547.005 | 2475107.731 | 365439.275 |
|      |             | 2014        | 2971677.135 | 2559427.910 | 412249.225 |
|      |             | 2015        | 3104538.983 | 2642923.909 | 461615.073 |
|      |             | 2016        | 3237650.175 | 2723265.017 | 514385.159 |
|      |             | 2017        | 3370561.253 | 2800617.631 | 569943.622 |
|      |             | 2018        | 3503136.371 | 2874259.144 | 628877.227 |
|      |             | 2019        | 3636402.758 | 2945231.450 | 691171.309 |
|      |             | 2020        | 3768054.453 | 3013032.945 | 755021.508 |
|      |             | 2021        | 3897675.067 | 3076784.235 | 820890.832 |
|      |             | 2022        | 4027307.132 | 3137548.211 | 889758.922 |
|      |             | 2023        | 4156698.720 | 3195235.800 | 961462.920 |
|      |             | 2024        | 4285772.226 | 3249911.615 | 1035860.61 |
|      |             | 2025        | 4410759.298 | 3300982.790 | 1109776.51 |
|      |             | 2026        | 4531411.064 | 3347392.435 | 1184018.63 |
|      |             | 2027        | 4651145.233 | 3390882.995 | 1260262.24 |
|      |             | 2028        | 4769837.872 | 3431522.046 | 1338315.83 |
|      |             | 2029        | 4887747.179 | 3469545.364 | 1418201.81 |
| 2030 | 4997632.895 | 3503846.522 | 1493786.37  |             |            |
| 2031 | 5103301.991 | 3534223.973 | 1569078.02  |             |            |
| 2032 | 5207593.613 | 3562312.330 | 1645281.28  |             |            |
| 2033 | 5310556.138 | 3588171.272 | 1722384.87  |             |            |
| 2034 | 5412542.816 | 3612110.278 | 1800432.54  |             |            |
| 2035 | 5500522.473 | 3632252.122 | 1868270.35  |             |            |
| 2036 | 5588149.640 | 3650717.051 | 1937432.59  |             |            |
| 2037 | 5674667.886 | 3667812.573 | 2006855.31  |             |            |
| 2038 | 5760391.289 | 3683605.158 | 2076786.13  |             |            |
| 2039 | 5845459.234 | 3698341.844 | 2147117.39  |             |            |
|      | Female      | 1990        | 77434.846   | 77434.846   | 0.000      |
|      |             | 1991        | 160029.510  | 159861.321  | 168.190    |
|      |             | 1992        | 240642.531  | 240002.633  | 639.898    |
|      |             | 1993        | 329362.093  | 327711.487  | 1650.607   |
|      |             | 1994        | 418569.515  | 415263.057  | 3306.458   |
|      |             | 1995        | 509110.357  | 503293.457  | 5816.900   |
|      |             | 1996        | 600040.117  | 590800.956  | 9239.161   |
|      |             | 1997        | 691159.071  | 677458.019  | 13701.052  |
|      |             | 1998        | 782866.899  | 763594.771  | 19272.128  |
|      |             | 1999        | 881526.925  | 854906.677  | 26620.248  |
|      |             | 2000        | 977880.647  | 942770.597  | 35110.050  |

**Results for PHIM for Run 4 (ELL Summary Sensitivity\_Analysis\_3.RTF)**

|      |             |             |            |
|------|-------------|-------------|------------|
| 2001 | 1076787.404 | 1031424.906 | 45362.498  |
| 2002 | 1174842.754 | 1117644.524 | 57198.229  |
| 2003 | 1275102.681 | 1204179.548 | 70923.133  |
| 2004 | 1371026.306 | 1285316.071 | 85710.234  |
| 2005 | 1473954.509 | 1370342.220 | 103612.289 |
| 2006 | 1574450.828 | 1451405.214 | 123045.614 |
| 2007 | 1673790.211 | 1529533.783 | 144256.429 |
| 2008 | 1782360.738 | 1612696.475 | 169664.262 |
| 2009 | 1892944.209 | 1694773.222 | 198170.987 |
| 2010 | 2002131.282 | 1773608.086 | 228523.197 |
| 2011 | 2114522.152 | 1852055.039 | 262467.114 |
| 2012 | 2228079.372 | 1928845.435 | 299233.937 |
| 2013 | 2345377.689 | 2005359.853 | 340017.836 |
| 2014 | 2462498.422 | 2078950.132 | 383548.290 |
| 2015 | 2581450.312 | 2151818.441 | 429631.871 |
| 2016 | 2701959.301 | 2222788.274 | 479171.027 |
| 2017 | 2823834.967 | 2291734.414 | 532100.553 |
| 2018 | 2938265.081 | 2354458.196 | 583806.885 |
| 2019 | 3053254.880 | 2414848.308 | 638406.572 |
| 2020 | 3167073.216 | 2472612.543 | 694460.673 |
| 2021 | 3279517.699 | 2527751.854 | 751765.845 |
| 2022 | 3392060.964 | 2580427.539 | 811633.424 |
| 2023 | 3504296.171 | 2630549.546 | 873746.626 |
| 2024 | 3616019.231 | 2677987.719 | 938031.512 |
| 2025 | 3724611.269 | 2722473.362 | 1002137.91 |
| 2026 | 3827181.707 | 2763004.157 | 1064177.55 |
| 2027 | 3928684.441 | 2801019.881 | 1127664.56 |
| 2028 | 4029124.892 | 2836723.228 | 1192401.66 |
| 2029 | 4128269.068 | 2869975.172 | 1258293.90 |
| 2030 | 4221560.174 | 2900244.829 | 1321315.34 |
| 2031 | 4304170.584 | 2925634.370 | 1378536.21 |
| 2032 | 4384930.537 | 2948946.593 | 1435983.94 |
| 2033 | 4464357.691 | 2970513.746 | 1493843.94 |
| 2034 | 4542251.545 | 2990275.534 | 1551976.01 |
| 2035 | 4611066.648 | 3007252.249 | 1603814.40 |
| 2036 | 4670309.230 | 3020844.493 | 1649464.74 |
| 2037 | 4728179.514 | 3033281.147 | 1694898.37 |
| 2038 | 4785008.048 | 3044732.325 | 1740275.72 |
| 2039 | 4841291.793 | 3055326.228 | 1785965.57 |

---

## Results for PHIM for Run 4 (ELL Summary Sensitivity\_Analysis\_3.RTF)

\*\*\*\*\*

**Table 5: Estimated Loss of Life, at the end of follow-up, Population unadjusted for deaths in Ecig scenario**

| Disease      | Sex    | Age Group   | Years of life lost<br>NULL | Years of life lost<br>Ecig | Years of life<br>Saved |
|--------------|--------|-------------|----------------------------|----------------------------|------------------------|
| All Diseases | Males  | 30-34       | 443911.034                 | 239816.504                 | 204094.530             |
|              |        | 35-39       | 1146798.555                | 613682.920                 | 533115.635             |
|              |        | 40-44       | 2609591.408                | 1358666.518                | 1250924.89             |
|              |        | 45-49       | 4775841.753                | 2448555.456                | 2327286.30             |
|              |        | 50-54       | 7446969.205                | 3959651.342                | 3487317.86             |
|              |        | 55-59       | 8240205.925                | 4807956.411                | 3432249.51             |
|              |        | 60-64       | 8772829.118                | 5535017.102                | 3237812.02             |
|              |        | 65-69       | 6161494.678                | 4266638.275                | 1894856.40             |
|              |        | 70-74       | 2495906.274                | 1788605.751                | 707300.523             |
|              | 75-79  | 0.000       | 0.000                      | 0.000                      |                        |
|              | Female | 30-34       | 229140.561                 | 142557.807                 | 86582.753              |
|              |        | 35-39       | 570217.942                 | 348439.739                 | 221778.203             |
|              |        | 40-44       | 1267538.938                | 752138.817                 | 515400.121             |
|              |        | 45-49       | 2340070.698                | 1366889.580                | 973181.118             |
|              |        | 50-54       | 3743803.613                | 2203579.007                | 1540224.61             |
|              |        | 55-59       | 4591478.168                | 2825688.643                | 1765789.52             |
|              |        | 60-64       | 5207367.788                | 3324878.089                | 1882489.70             |
|              |        | 65-69       | 4092181.394                | 2752558.850                | 1339622.54             |
| 70-74        |        | 1776092.171 | 1212633.542                | 563458.629                 |                        |
| 75-79        | 0.000  | 0.000       | 0.000                      |                            |                        |
| Lung cancer  | Males  | 30-34       | 66065.017                  | 51829.887                  | 14235.130              |
|              |        | 35-39       | 232509.414                 | 183977.007                 | 48532.407              |
|              |        | 40-44       | 688628.041                 | 533363.552                 | 155264.490             |
|              |        | 45-49       | 1528300.367                | 1147409.328                | 380891.039             |
|              |        | 50-54       | 2730187.229                | 2017674.140                | 712513.089             |
|              |        | 55-59       | 3909101.673                | 2871957.553                | 1037144.12             |
|              |        | 60-64       | 4287716.660                | 3238941.662                | 1048775.00             |
|              |        | 65-69       | 3467897.115                | 2668893.292                | 799003.822             |
|              |        | 70-74       | 1312144.343                | 1026412.623                | 285731.721             |
|              | 75-79  | 0.000       | 0.000                      | 0.000                      |                        |
|              | Female | 30-34       | 51913.113                  | 40732.329                  | 11180.783              |
|              |        | 35-39       | 189792.904                 | 149210.915                 | 40581.990              |
|              |        | 40-44       | 527596.573                 | 397917.169                 | 129679.404             |
|              |        | 45-49       | 1122524.269                | 815710.077                 | 306814.192             |
|              |        | 50-54       | 1882214.322                | 1338380.027                | 543834.295             |
|              |        | 55-59       | 2595581.943                | 1822411.068                | 773170.875             |
|              |        | 60-64       | 2846273.090                | 2034852.911                | 811420.179             |
|              |        | 65-69       | 2358758.394                | 1704881.747                | 653876.647             |
| 70-74        |        | 937814.238  | 685908.646                 | 251905.592                 |                        |
| 75-79        | 0.000  | 0.000       | 0.000                      |                            |                        |
| IHD          | Males  | 30-34       | 263834.566                 | 118815.005                 | 145019.561             |
|              |        | 35-39       | 692140.150                 | 297645.792                 | 394494.358             |
|              |        | 40-44       | 1519708.432                | 595505.777                 | 924202.655             |
|              |        | 45-49       | 2568546.697                | 924445.228                 | 1644101.47             |
|              |        | 50-54       | 3632929.903                | 1360704.534                | 2272225.37             |
|              |        | 55-59       | 2807892.356                | 1112244.669                | 1695647.69             |
|              |        | 60-64       | 2599825.934                | 1203707.207                | 1396118.73             |
|              |        | 65-69       | 1113578.307                | 588263.816                 | 525314.492             |
|              |        | 70-74       | 437536.271                 | 263295.189                 | 174241.081             |
|              | 75-79  | 0.000       | 0.000                      | 0.000                      |                        |
|              | Female | 30-34       | 79649.097                  | 38067.857                  | 41581.240              |
|              |        | 35-39       | 193965.908                 | 82072.478                  | 111893.430             |
|              |        | 40-44       | 403380.974                 | 152659.080                 | 250721.894             |
|              |        | 45-49       | 671385.408                 | 235863.780                 | 435521.628             |
|              |        | 50-54       | 1011875.989                | 380959.618                 | 630916.372             |
|              |        | 55-59       | 849875.715                 | 347953.697                 | 501922.018             |
|              |        | 60-64       | 925490.876                 | 440152.897                 | 485337.980             |
|              |        | 65-69       | 455463.881                 | 247740.195                 | 207723.686             |
| 70-74        |        | 207681.216  | 126244.430                 | 81436.786                  |                        |
| 75-79        | 0.000  | 0.000       | 0.000                      |                            |                        |
| Stroke       | Males  | 30-34       | 73463.650                  | 43194.711                  | 30268.938              |
|              |        | 35-39       | 151934.057                 | 86708.410                  | 65225.646              |
|              |        | 40-44       | 262845.974                 | 142071.869                 | 120774.106             |
|              |        | 45-49       | 383421.246                 | 193725.500                 | 189695.746             |
|              |        | 50-54       | 479872.634                 | 220590.236                 | 259282.397             |
|              |        | 55-59       | 437124.903                 | 186412.254                 | 250712.649             |
|              |        | 60-64       | 419457.235                 | 182487.316                 | 236969.919             |
|              |        | 65-69       | 128180.574                 | 58394.696                  | 69785.878              |
|              |        | 70-74       | 53245.965                  | 26449.553                  | 26796.412              |
|              | 75-79  | 0.000       | 0.000                      | 0.000                      |                        |
|              | Female | 30-34       | 62919.090                  | 40155.757                  | 22763.334              |

**Results for PHIM for Run 4 (ELL Summary Sensitivity\_Analysis\_3.RTF)**

|      |        |       |             |            |            |
|------|--------|-------|-------------|------------|------------|
|      |        | 35-39 | 120806.205  | 72900.669  | 47905.537  |
|      |        | 40-44 | 203391.885  | 113905.377 | 89486.508  |
|      |        | 45-49 | 278172.097  | 144656.637 | 133515.460 |
|      |        | 50-54 | 325979.181  | 158286.049 | 167693.132 |
|      |        | 55-59 | 275161.340  | 125800.686 | 149360.653 |
|      |        | 60-64 | 268920.493  | 124660.432 | 144260.061 |
|      |        | 65-69 | 87956.054   | 42380.098  | 45575.955  |
|      |        | 70-74 | 42055.224   | 21107.966  | 20947.258  |
|      |        | 75-79 | 0.000       | 0.000      | 0.000      |
| COPD | Males  | 30-34 | 40547.801   | 25976.900  | 14570.901  |
|      |        | 35-39 | 70214.933   | 45351.710  | 24863.223  |
|      |        | 40-44 | 138408.960  | 87725.320  | 50683.640  |
|      |        | 45-49 | 295573.443  | 182975.400 | 112598.043 |
|      |        | 50-54 | 603979.438  | 360682.431 | 243297.007 |
|      |        | 55-59 | 1086086.992 | 637341.935 | 448745.057 |
|      |        | 60-64 | 1465829.290 | 909880.917 | 555948.373 |
|      |        | 65-69 | 1451838.682 | 951086.471 | 500752.211 |
|      |        | 70-74 | 692979.695  | 472448.386 | 220531.308 |
|      |        | 75-79 | 0.000       | 0.000      | 0.000      |
|      | Female | 30-34 | 34659.261   | 23601.864  | 11057.397  |
|      |        | 35-39 | 65652.924   | 44255.678  | 21397.246  |
|      |        | 40-44 | 133169.505  | 87657.190  | 45512.315  |
|      |        | 45-49 | 267988.924  | 170659.086 | 97329.838  |
|      |        | 50-54 | 523734.121  | 325953.314 | 197780.807 |
|      |        | 55-59 | 870859.170  | 529523.192 | 341335.978 |
|      |        | 60-64 | 1166683.329 | 725211.849 | 441471.479 |
|      |        | 65-69 | 1190003.066 | 757556.810 | 432446.255 |
|      |        | 70-74 | 588541.493  | 379372.500 | 209168.994 |
|      |        | 75-79 | 0.000       | 0.000      | 0.000      |

---



## Results for PHIM for Run 4 (ELL Summary Sensitivity\_Analysis\_3.RTF)

\*\*\*\*\*

**Table 6: Estimated Loss of Life, at the end of follow-up, Population and Number deaths adjusted for Ecig scenario**

| Disease      | Sex    | Age Group   | Years of life lost<br>NULL | Years of life lost<br>Ecig | Years of life<br>Saved |
|--------------|--------|-------------|----------------------------|----------------------------|------------------------|
| All Diseases | Males  | 30-34       | 443911.034                 | 239832.128                 | 204078.906             |
|              |        | 35-39       | 1146798.555                | 613802.017                 | 532996.538             |
|              |        | 40-44       | 2609591.408                | 1359445.246                | 1250146.16             |
|              |        | 45-49       | 4775841.753                | 2452049.626                | 2323792.13             |
|              |        | 50-54       | 7446969.205                | 3970318.093                | 3476651.11             |
|              |        | 55-59       | 8240205.925                | 4825336.045                | 3414869.88             |
|              |        | 60-64       | 8772829.118                | 5564465.317                | 3208363.80             |
|              |        | 65-69       | 6161494.678                | 4291889.249                | 1869605.43             |
|              |        | 70-74       | 2495906.274                | 1802472.112                | 693434.162             |
|              | 75-79  | 0.000       | 0.000                      | 0.000                      |                        |
|              | Female | 30-34       | 229140.561                 | 142561.788                 | 86578.773              |
|              |        | 35-39       | 570217.942                 | 348469.625                 | 221748.317             |
|              |        | 40-44       | 1267538.938                | 752331.684                 | 515207.254             |
|              |        | 45-49       | 2340070.698                | 1367751.556                | 972319.142             |
|              |        | 50-54       | 3743803.613                | 2206319.900                | 1537483.71             |
|              |        | 55-59       | 4591478.168                | 2831013.302                | 1760464.87             |
|              |        | 60-64       | 5207367.788                | 3335144.487                | 1872223.30             |
|              |        | 65-69       | 4092181.394                | 2763650.425                | 1328530.97             |
| 70-74        |        | 1776092.171 | 1219787.554                | 556304.616                 |                        |
| Lung cancer  | Males  | 30-34       | 66065.017                  | 51833.535                  | 14231.482              |
|              |        | 35-39       | 232509.414                 | 184016.955                 | 48492.460              |
|              |        | 40-44       | 688628.041                 | 533711.097                 | 154916.944             |
|              |        | 45-49       | 1528300.367                | 1149263.107                | 379037.260             |
|              |        | 50-54       | 2730187.229                | 2023716.029                | 706471.201             |
|              |        | 55-59       | 3909101.673                | 2883088.298                | 1026013.37             |
|              |        | 60-64       | 4287716.660                | 3257280.107                | 1030436.55             |
|              |        | 65-69       | 3467897.115                | 2684783.800                | 783113.314             |
|              |        | 70-74       | 1312144.343                | 1034443.885                | 277700.459             |
|              | 75-79  | 0.000       | 0.000                      | 0.000                      |                        |
|              | Female | 30-34       | 51913.113                  | 40733.627                  | 11179.486              |
|              |        | 35-39       | 189792.904                 | 149224.860                 | 40568.044              |
|              |        | 40-44       | 527596.573                 | 398029.036                 | 129567.537             |
|              |        | 45-49       | 1122524.269                | 816260.367                 | 306263.902             |
|              |        | 50-54       | 1882214.322                | 1340151.799                | 542062.523             |
|              |        | 55-59       | 2595581.943                | 1825985.103                | 769596.840             |
|              |        | 60-64       | 2846273.090                | 2041396.143                | 804876.947             |
|              |        | 65-69       | 2358758.394                | 1711710.662                | 647047.732             |
| 70-74        |        | 937814.238  | 689937.994                 | 247876.243                 |                        |
| IHD          | Males  | 30-34       | 263834.566                 | 118822.449                 | 145012.117             |
|              |        | 35-39       | 692140.150                 | 297697.458                 | 394442.693             |
|              |        | 40-44       | 1519708.432                | 595791.323                 | 923917.109             |
|              |        | 45-49       | 2568546.697                | 925466.558                 | 1643080.14             |
|              |        | 50-54       | 3632929.903                | 1363367.597                | 2269562.31             |
|              |        | 55-59       | 2807892.356                | 1114650.973                | 1693241.38             |
|              |        | 60-64       | 2599825.934                | 1207156.696                | 1392669.24             |
|              |        | 65-69       | 1113578.307                | 589760.714                 | 523817.593             |
|              |        | 70-74       | 437536.271                 | 264097.462                 | 173438.808             |
|              | 75-79  | 0.000       | 0.000                      | 0.000                      |                        |
|              | Female | 30-34       | 79649.097                  | 38068.867                  | 41580.230              |
|              |        | 35-39       | 193965.908                 | 82078.749                  | 111887.159             |
|              |        | 40-44       | 403380.974                 | 152690.251                 | 250690.723             |
|              |        | 45-49       | 671385.408                 | 235970.984                 | 435414.424             |
|              |        | 50-54       | 1011875.989                | 381265.655                 | 630610.334             |
|              |        | 55-59       | 849875.715                 | 348289.863                 | 501585.852             |
|              |        | 60-64       | 925490.876                 | 440769.018                 | 484721.858             |
|              |        | 65-69       | 455463.881                 | 248093.882                 | 207369.999             |
| 70-74        |        | 207681.216  | 126490.094                 | 81191.122                  |                        |
| Stroke       | Males  | 30-34       | 73463.650                  | 43197.185                  | 30266.464              |
|              |        | 35-39       | 151934.057                 | 86723.969                  | 65210.088              |
|              |        | 40-44       | 262845.974                 | 142145.603                 | 120700.372             |
|              |        | 45-49       | 383421.246                 | 193966.452                 | 189454.794             |
|              |        | 50-54       | 479872.634                 | 221091.007                 | 258781.626             |
|              |        | 55-59       | 437124.903                 | 186916.729                 | 250208.175             |
|              |        | 60-64       | 419457.235                 | 183158.622                 | 236298.612             |
|              |        | 65-69       | 128180.574                 | 58578.102                  | 69602.472              |
|              |        | 70-74       | 53245.965                  | 26542.276                  | 26703.689              |
|              | 75-79  | 0.000       | 0.000                      | 0.000                      |                        |
|              | Female | 30-34       | 62919.090                  | 40156.671                  | 22762.419              |

**Results for PHIM for Run 4 (ELL Summary Sensitivity\_Analysis\_3.RTF)**

|      |       |        |             |             |            |            |
|------|-------|--------|-------------|-------------|------------|------------|
|      |       | 35-39  | 120806.205  | 72905.725   | 47900.480  |            |
|      |       | 40-44  | 203391.885  | 113927.796  | 89464.090  |            |
|      |       | 45-49  | 278172.097  | 144723.196  | 133448.902 |            |
|      |       | 50-54  | 325979.181  | 158421.040  | 167558.141 |            |
|      |       | 55-59  | 275161.340  | 125943.473  | 149217.867 |            |
|      |       | 60-64  | 268920.493  | 124871.891  | 144048.602 |            |
|      |       | 65-69  | 87956.054   | 42452.415   | 45503.639  |            |
|      |       | 70-74  | 42055.224   | 21154.932   | 20900.291  |            |
|      |       | 75-79  | 0.000       | 0.000       | 0.000      |            |
| COPD | Males | 30-34  | 40547.801   | 25978.958   | 14568.843  |            |
|      |       | 35-39  | 70214.933   | 45363.636   | 24851.297  |            |
|      |       | 40-44  | 138408.960  | 87797.223   | 50611.737  |            |
|      |       | 45-49  | 295573.443  | 183353.509  | 112219.934 |            |
|      |       | 50-54  | 603979.438  | 362143.460  | 241835.978 |            |
|      |       | 55-59  | 1086086.992 | 640680.045  | 445406.947 |            |
|      |       | 60-64  | 1465829.290 | 916869.892  | 548959.398 |            |
|      |       | 65-69  | 1451838.682 | 958766.632  | 493072.050 |            |
|      |       | 70-74  | 692979.695  | 477388.488  | 215591.206 |            |
|      |       |        | 75-79       | 0.000       | 0.000      | 0.000      |
|      |       | Female | 30-34       | 34659.261   | 23602.623  | 11056.638  |
|      |       |        | 35-39       | 65652.924   | 44260.290  | 21392.634  |
|      |       |        | 40-44       | 133169.505  | 87684.601  | 45484.905  |
|      |       |        | 45-49       | 267988.924  | 170797.010 | 97191.914  |
|      |       |        | 50-54       | 523734.121  | 326481.406 | 197252.714 |
|      |       |        | 55-59       | 870859.170  | 530794.863 | 340064.307 |
|      |       |        | 60-64       | 1166683.329 | 728107.435 | 438575.894 |
|      |       |        | 65-69       | 1190003.066 | 761393.466 | 428609.600 |
|      |       |        | 70-74       | 588541.493  | 382204.534 | 206336.960 |
|      |       |        | 75-79       | 0.000       | 0.000      | 0.000      |

---

## Results for PHIM for Run 6 (ELL Summary Sensitivity\_Analysis\_3.RTF)

\*\*\*\*\*

### Estimated Loss of Life from the E Component for Run: 6, Simulation: 1

Country: US (United States)  
 Follow-up Period: 1990 to 2039

**Table 1: Estimated Loss of Life, at the end of follow-up, all age groups combined, Population unadjusted for deaths in Ecig scenario**

| Disease      | Sex    | Year | Years of life lost<br>NULL | Years of life lost<br>Ecig | Years of life<br>Saved |
|--------------|--------|------|----------------------------|----------------------------|------------------------|
| All Diseases | Males  | 2039 | 42093547.949               | 24701771.528               | 17391776.4             |
|              | Female | 2039 | 23817891.273               | 14764752.856               | 9053138.42             |
| Lung cancer  | Males  | 2039 | 18222549.860               | 13617455.197               | 4605094.66             |
|              | Female | 2039 | 12512468.845               | 8903315.492                | 3609153.35             |
| IHD          | Males  | 2039 | 15635992.616               | 6326655.141                | 9309337.48             |
|              | Female | 2039 | 4798769.065                | 2012865.918                | 2785903.15             |
| Stroke       | Males  | 2039 | 2389546.238                | 1123435.669                | 1266110.57             |
|              | Female | 2039 | 1665361.569                | 833939.012                 | 831422.557             |
| COPD         | Males  | 2039 | 5845459.234                | 3634225.521                | 2211233.71             |
|              | Female | 2039 | 4841291.793                | 3014632.434                | 1826659.36             |

## Results for PHIM for Run 6 (ELL Summary Sensitivity\_Analysis\_3.RTF)

\*\*\*\*\*

**Table 2: Estimated Loss of Life, at the end of follow-up, all age groups combined, Population and Number deaths adjusted for Ecig scenario**

| Disease      | Sex    | Year | Years of life lost<br>NULL | Years of life lost<br>Ecig | Years of life<br>Saved |
|--------------|--------|------|----------------------------|----------------------------|------------------------|
| All Diseases | Males  | 2039 | 42093547.949               | 24799506.893               | 17294041.1             |
|              | Female | 2039 | 23817891.273               | 14801459.004               | 9016432.27             |
| Lung cancer  | Males  | 2039 | 18222549.860               | 13677785.825               | 4544764.04             |
|              | Female | 2039 | 12512468.845               | 8926203.269                | 3586265.58             |
| IHD          | Males  | 2039 | 15635992.616               | 6337497.125                | 9298495.49             |
|              | Female | 2039 | 4798769.065                | 2014665.197                | 2784103.87             |
| Stroke       | Males  | 2039 | 2389546.238                | 1125547.886                | 1263998.35             |
|              | Female | 2039 | 1665361.569                | 834591.630                 | 830769.940             |
| COPD         | Males  | 2039 | 5845459.234                | 3658676.057                | 2186783.18             |
|              | Female | 2039 | 4841291.793                | 3025998.909                | 1815292.88             |

## Results for PHIM for Run 6 (ELL Summary Sensitivity\_Analysis\_3.RTF)

\*\*\*\*\*

**Table 3: Estimated Loss of Life, All age groups combined, Population unadjusted for deaths in Ecig scenario, cumulative over years**

| Disease      | Sex          | Year         | Years of life lost<br>NULL | Years of life lost<br>Ecig | Years of life<br>Saved |
|--------------|--------------|--------------|----------------------------|----------------------------|------------------------|
| All Diseases | Males        | 1990         | 1304839.645                | 1304839.645                | 0.000                  |
|              |              | 1991         | 2579865.358                | 2571191.563                | 8673.794               |
|              |              | 1992         | 3830683.831                | 3798430.243                | 32253.588              |
|              |              | 1993         | 5076567.803                | 5000923.083                | 75644.720              |
|              |              | 1994         | 6292145.526                | 6149907.287                | 142238.240             |
|              |              | 1995         | 7485537.010                | 7250000.691                | 235536.319             |
|              |              | 1996         | 8655955.028                | 8299175.440                | 356779.587             |
|              |              | 1997         | 9791729.713                | 9286939.139                | 504790.574             |
|              |              | 1998         | 10899134.186               | 10220952.679               | 678181.506             |
|              |              | 1999         | 12070409.674               | 11160375.044               | 910034.631             |
|              |              | 2000         | 13231384.595               | 12059136.525               | 1172248.07             |
|              |              | 2001         | 14371761.018               | 12907449.045               | 1464311.97             |
|              |              | 2002         | 15508906.386               | 13717868.663               | 1791037.72             |
|              |              | 2003         | 16638100.422               | 14490693.232               | 2147407.19             |
|              |              | 2004         | 17736465.088               | 15215586.345               | 2520878.74             |
|              |              | 2005         | 18834658.606               | 15913958.656               | 2920699.95             |
|              |              | 2006         | 19909100.501               | 16565920.650               | 3343179.85             |
|              |              | 2007         | 20958321.463               | 17179299.644               | 3779021.82             |
|              |              | 2008         | 22000068.148               | 17768326.736               | 4231741.41             |
|              |              | 2009         | 23018816.903               | 18324401.905               | 4694415.00             |
|              |              | 2010         | 24018480.537               | 18849013.608               | 5169466.93             |
|              |              | 2011         | 25003034.574               | 19345887.257               | 5657147.32             |
|              |              | 2012         | 25969871.429               | 19813776.126               | 6156095.30             |
|              |              | 2013         | 26920275.180               | 20254795.092               | 6665480.09             |
|              |              | 2014         | 27849005.227               | 20667297.970               | 7181707.26             |
|              |              | 2015         | 28749620.400               | 21054956.799               | 7694663.60             |
|              |              | 2016         | 29622417.562               | 21409098.809               | 8213318.75             |
|              |              | 2017         | 30462559.724               | 21732484.015               | 8730075.71             |
|              |              | 2018         | 31293299.299               | 22042404.738               | 9250894.56             |
|              |              | 2019         | 32109993.427               | 22334360.135               | 9775633.29             |
|              |              | 2020         | 32883323.977               | 22605374.287               | 10277949.7             |
|              |              | 2021         | 33610102.554               | 22839168.999               | 10770933.6             |
|              |              | 2022         | 34322010.448               | 23057536.133               | 11264474.3             |
|              |              | 2023         | 35018383.550               | 23260609.789               | 11757773.8             |
|              |              | 2024         | 35700177.955               | 23449537.619               | 12250640.3             |
|              |              | 2025         | 36315500.346               | 23619748.491               | 12695751.9             |
|              |              | 2026         | 36896159.343               | 23763119.854               | 13133039.5             |
|              |              | 2027         | 37462570.116               | 23895518.605               | 13567051.5             |
|              |              | 2028         | 38015337.780               | 24017136.231               | 13998201.5             |
|              |              | 2029         | 38554814.764               | 24129090.923               | 14425723.8             |
|              |              | 2030         | 39003805.400               | 24224985.346               | 14778820.1             |
|              |              | 2031         | 39436509.703               | 24305474.964               | 15131034.7             |
| 2032         | 39858470.458 | 24379280.471 | 15479190.0                 |                            |                        |
| 2033         | 40270147.082 | 24446339.077 | 15823808.0                 |                            |                        |
| 2034         | 40672665.743 | 24507581.250 | 16165084.5                 |                            |                        |
| 2035         | 40962732.664 | 24554663.378 | 16408069.3                 |                            |                        |
| 2036         | 41255021.653 | 24596447.578 | 16658574.1                 |                            |                        |
| 2037         | 41540573.023 | 24634843.256 | 16905729.8                 |                            |                        |
| 2038         | 41820158.066 | 24669819.368 | 17150338.7                 |                            |                        |
| 2039         | 42093547.949 | 24701771.528 | 17391776.4                 |                            |                        |
|              | Female       | 1990         | 588979.406                 | 588979.406                 | 0.000                  |
|              |              | 1991         | 1182571.252                | 1179606.280                | 2964.972               |
|              |              | 1992         | 1777346.679                | 1766095.451                | 11251.228              |
|              |              | 1993         | 2380261.899                | 2353258.183                | 27003.716              |
|              |              | 1994         | 2983130.039                | 2931304.293                | 51825.746              |
|              |              | 1995         | 3588982.584                | 3501918.504                | 87064.080              |
|              |              | 1996         | 4195430.235                | 4060489.456                | 134940.779             |
|              |              | 1997         | 4793866.694                | 4600541.972                | 193324.722             |
|              |              | 1998         | 5389747.381                | 5126306.403                | 263440.978             |
|              |              | 1999         | 6006722.467                | 5652348.525                | 354373.942             |
|              |              | 2000         | 6625758.871                | 6167450.342                | 458308.528             |
|              |              | 2001         | 7245135.411                | 6667646.336                | 577489.075             |
|              |              | 2002         | 7867492.021                | 7155069.475                | 712422.546             |
|              |              | 2003         | 8485051.793                | 7624938.202                | 860113.591             |
|              |              | 2004         | 9092994.774                | 8073839.552                | 1019155.22             |
|              |              | 2005         | 9706032.803                | 8513007.829                | 1193024.97             |
|              |              | 2006         | 10311907.548               | 8932769.286                | 1379138.26             |
|              |              | 2007         | 10909437.502               | 9335200.316                | 1574237.19             |
|              |              | 2008         | 11506462.491               | 9722158.753                | 1784303.74             |
|              |              | 2009         | 12098393.287               | 10095493.935               | 2002899.35             |
|              |              | 2010         | 12681188.981               | 10450480.987               | 2230707.99             |

**Results for PHIM for Run 6 (ELL Summary Sensitivity\_Analysis\_3.RTF)**

|             |       |      |              |              |            |
|-------------|-------|------|--------------|--------------|------------|
|             |       | 2011 | 13260062.991 | 10790107.369 | 2469955.62 |
|             |       | 2012 | 13839417.441 | 11116981.184 | 2722436.26 |
|             |       | 2013 | 14409614.758 | 11427944.582 | 2981670.18 |
|             |       | 2014 | 14976658.746 | 11723394.443 | 3253264.30 |
|             |       | 2015 | 15529977.821 | 12001906.825 | 3528071.00 |
|             |       | 2016 | 16066640.764 | 12259716.517 | 3806924.25 |
|             |       | 2017 | 16590035.078 | 12500428.251 | 4089606.83 |
|             |       | 2018 | 17098716.137 | 12727507.408 | 4371208.73 |
|             |       | 2019 | 17599868.850 | 12941554.078 | 4658314.77 |
|             |       | 2020 | 18081346.241 | 13141431.538 | 4939914.70 |
|             |       | 2021 | 18537594.460 | 13320804.310 | 5216790.15 |
|             |       | 2022 | 18985300.234 | 13488650.075 | 5496650.16 |
|             |       | 2023 | 19423958.747 | 13645394.455 | 5778564.29 |
|             |       | 2024 | 19853347.772 | 13790919.183 | 6062428.59 |
|             |       | 2025 | 20252822.245 | 13923425.570 | 6329396.67 |
|             |       | 2026 | 20619307.063 | 14037392.980 | 6581914.08 |
|             |       | 2027 | 20976063.406 | 14142328.568 | 6833734.84 |
|             |       | 2028 | 21323641.947 | 14239217.805 | 7084424.14 |
|             |       | 2029 | 21662117.106 | 14327987.035 | 7334130.07 |
|             |       | 2030 | 21960971.694 | 14405613.455 | 7555358.24 |
|             |       | 2031 | 22224951.983 | 14468134.710 | 7756817.27 |
|             |       | 2032 | 22480397.853 | 14524796.729 | 7955601.12 |
|             |       | 2033 | 22728639.455 | 14576544.958 | 8152094.50 |
|             |       | 2034 | 22970448.888 | 14623452.845 | 8346996.04 |
|             |       | 2035 | 23164154.188 | 14661216.707 | 8502937.48 |
|             |       | 2036 | 23334538.616 | 14690893.403 | 8643645.21 |
|             |       | 2037 | 23499760.723 | 14717792.150 | 8781968.57 |
|             |       | 2038 | 23660308.401 | 14742308.462 | 8917999.94 |
|             |       | 2039 | 23817891.273 | 14764752.856 | 9053138.42 |
| Lung cancer | Males | 1990 | 595621.791   | 595621.791   | 0.000      |
|             |       | 1991 | 1177744.113  | 1177096.215  | 647.898    |
|             |       | 1992 | 1750034.892  | 1747588.075  | 2446.817   |
|             |       | 1993 | 2319752.308  | 2313791.229  | 5961.079   |
|             |       | 1994 | 2872597.339  | 2861038.486  | 11558.853  |
|             |       | 1995 | 3411494.825  | 3391822.933  | 19671.892  |
|             |       | 1996 | 3945569.726  | 3914467.085  | 31102.641  |
|             |       | 1997 | 4463316.362  | 4417481.123  | 45835.240  |
|             |       | 1998 | 4975301.180  | 4910729.852  | 64571.329  |
|             |       | 1999 | 5473691.125  | 5386148.025  | 87543.099  |
|             |       | 2000 | 5977500.570  | 5861226.155  | 116274.415 |
|             |       | 2001 | 6474795.516  | 6324076.735  | 150718.781 |
|             |       | 2002 | 6968769.705  | 6777184.436  | 191585.269 |
|             |       | 2003 | 7460282.140  | 7220576.059  | 239706.081 |
|             |       | 2004 | 7947048.275  | 7652137.705  | 294910.570 |
|             |       | 2005 | 8430571.669  | 8072833.174  | 357738.495 |
|             |       | 2006 | 8903945.390  | 8475949.279  | 427996.111 |
|             |       | 2007 | 9364177.982  | 8859246.017  | 504931.965 |
|             |       | 2008 | 9822525.458  | 9231294.329  | 591231.130 |
|             |       | 2009 | 10275228.886 | 9589191.862  | 686037.024 |
|             |       | 2010 | 10720275.500 | 9931631.911  | 788643.589 |
|             |       | 2011 | 11155356.373 | 10256720.807 | 898635.566 |
|             |       | 2012 | 11582611.617 | 10565148.448 | 1017463.17 |
|             |       | 2013 | 11998803.791 | 10855380.173 | 1143423.62 |
|             |       | 2014 | 12402087.090 | 11126804.871 | 1275282.22 |
|             |       | 2015 | 12793451.706 | 11381228.441 | 1412223.26 |
|             |       | 2016 | 13160101.653 | 11609990.244 | 1550111.41 |
|             |       | 2017 | 13503583.414 | 11815535.998 | 1688047.42 |
|             |       | 2018 | 13859755.737 | 12017655.858 | 1842099.88 |
|             |       | 2019 | 14211625.176 | 12208015.677 | 2003609.50 |
|             |       | 2020 | 14553935.288 | 12385431.642 | 2168503.65 |
|             |       | 2021 | 14851747.495 | 12531734.970 | 2320012.53 |
|             |       | 2022 | 15144531.004 | 12667941.314 | 2476589.69 |
|             |       | 2023 | 15431932.496 | 12794177.219 | 2637755.28 |
|             |       | 2024 | 15713920.740 | 12911096.487 | 2802824.25 |
|             |       | 2025 | 15979112.816 | 13016673.915 | 2962438.90 |
|             |       | 2026 | 16206550.153 | 13100481.953 | 3106068.20 |
|             |       | 2027 | 16428826.050 | 13177344.622 | 3251481.43 |
|             |       | 2028 | 16645902.186 | 13247526.069 | 3398376.12 |
|             |       | 2029 | 16858126.517 | 13311797.734 | 3546328.78 |
|             |       | 2030 | 17045220.687 | 13366984.396 | 3678236.29 |
|             |       | 2031 | 17208482.610 | 13410275.144 | 3798207.47 |
|             |       | 2032 | 17367586.074 | 13449734.085 | 3917851.99 |
|             |       | 2033 | 17522716.280 | 13485414.778 | 4037301.50 |
|             |       | 2034 | 17674226.555 | 13517901.973 | 4156324.58 |
|             |       | 2035 | 17792201.734 | 13542969.095 | 4249232.64 |
|             |       | 2036 | 17903508.236 | 13564171.143 | 4339337.09 |
|             |       | 2037 | 18012162.345 | 13583626.780 | 4428535.56 |
|             |       | 2038 | 18118464.470 | 13601298.066 | 4517166.40 |

**Results for PHIM for Run 6 (ELL Summary Sensitivity\_Analysis\_3.RTF)**

|     |        |      |              |              |            |
|-----|--------|------|--------------|--------------|------------|
|     |        | 2039 | 18222549.860 | 13617455.197 | 4605094.66 |
|     | Female | 1990 | 307897.357   | 307897.357   | 0.000      |
|     |        | 1991 | 616547.418   | 616130.924   | 416.494    |
|     |        | 1992 | 931086.773   | 929436.971   | 1649.803   |
|     |        | 1993 | 1246155.671  | 1242092.972  | 4062.699   |
|     |        | 1994 | 1561212.934  | 1553211.413  | 8001.522   |
|     |        | 1995 | 1879967.742  | 1866026.677  | 13941.065  |
|     |        | 1996 | 2197488.109  | 2175319.873  | 22168.237  |
|     |        | 1997 | 2515698.453  | 2482586.734  | 33111.719  |
|     |        | 1998 | 2836249.556  | 2789128.364  | 47121.192  |
|     |        | 1999 | 3150201.390  | 3086011.268  | 64190.122  |
|     |        | 2000 | 3472722.342  | 3387348.313  | 85374.029  |
|     |        | 2001 | 3796994.889  | 3685984.057  | 111010.832 |
|     |        | 2002 | 4126619.935  | 3984759.365  | 141860.570 |
|     |        | 2003 | 4454982.533  | 4277458.758  | 177523.775 |
|     |        | 2004 | 4784343.030  | 4565508.358  | 218834.672 |
|     |        | 2005 | 5113443.121  | 4847554.352  | 265888.769 |
|     |        | 2006 | 5442543.963  | 5122984.922  | 319559.040 |
|     |        | 2007 | 5772441.497  | 5392491.350  | 379950.147 |
|     |        | 2008 | 6091911.943  | 5646776.842  | 445135.101 |
|     |        | 2009 | 6413671.330  | 5895424.385  | 518246.945 |
|     |        | 2010 | 6730763.530  | 6133707.576  | 597055.953 |
|     |        | 2011 | 7043614.101  | 6361366.608  | 682247.493 |
|     |        | 2012 | 7356270.780  | 6581317.100  | 774953.680 |
|     |        | 2013 | 7662551.964  | 6789356.952  | 873195.012 |
|     |        | 2014 | 7964551.465  | 6987062.033  | 977489.432 |
|     |        | 2015 | 8254895.403  | 7170928.558  | 1083966.84 |
|     |        | 2016 | 8530661.848  | 7338359.738  | 1192302.11 |
|     |        | 2017 | 8795826.122  | 7492931.238  | 1302894.88 |
|     |        | 2018 | 9067233.707  | 7643246.367  | 1423987.34 |
|     |        | 2019 | 9335343.270  | 7784599.754  | 1550743.52 |
|     |        | 2020 | 9596110.883  | 7916446.192  | 1679664.69 |
|     |        | 2021 | 9833186.859  | 8031338.940  | 1801847.92 |
|     |        | 2022 | 10066452.037 | 8138411.363  | 1928040.67 |
|     |        | 2023 | 10295503.609 | 8237956.204  | 2057547.40 |
|     |        | 2024 | 10520125.318 | 8329914.498  | 2190210.82 |
|     |        | 2025 | 10731915.863 | 8413211.553  | 2318704.31 |
|     |        | 2026 | 10917495.549 | 8482374.017  | 2435121.53 |
|     |        | 2027 | 11098620.885 | 8545685.180  | 2552935.70 |
|     |        | 2028 | 11275441.234 | 8603817.616  | 2671623.62 |
|     |        | 2029 | 11447962.710 | 8656758.088  | 2791204.62 |
|     |        | 2030 | 11601867.623 | 8702601.309  | 2899266.31 |
|     |        | 2031 | 11731666.516 | 8738244.924  | 2993421.59 |
|     |        | 2032 | 11857585.969 | 8770422.612  | 3087163.36 |
|     |        | 2033 | 11980128.625 | 8799688.564  | 3180440.06 |
|     |        | 2034 | 12099562.464 | 8826136.743  | 3273425.72 |
|     |        | 2035 | 12195919.946 | 8847043.955  | 3348875.99 |
|     |        | 2036 | 12278201.969 | 8863135.218  | 3415066.75 |
|     |        | 2037 | 12358146.336 | 8877745.771  | 3480400.57 |
|     |        | 2038 | 12435978.633 | 8891079.887  | 3544898.75 |
|     |        | 2039 | 12512468.845 | 8903315.492  | 3609153.35 |
| IHD | Males  | 1990 | 517209.093   | 517209.093   | 0.000      |
|     |        | 1991 | 1019219.395  | 1012116.414  | 7102.981   |
|     |        | 1992 | 1509598.614  | 1483220.731  | 26377.883  |
|     |        | 1993 | 1992735.299  | 1931276.300  | 61458.999  |
|     |        | 1994 | 2462877.575  | 2348185.678  | 114691.897 |
|     |        | 1995 | 2928249.390  | 2739473.211  | 188776.178 |
|     |        | 1996 | 3377377.730  | 3093551.211  | 283826.519 |
|     |        | 1997 | 3809062.472  | 3410611.863  | 398450.609 |
|     |        | 1998 | 4222213.867  | 3691417.243  | 530796.624 |
|     |        | 1999 | 4708317.743  | 3994919.519  | 713398.224 |
|     |        | 2000 | 5182084.396  | 4266257.175  | 915827.221 |
|     |        | 2001 | 5644097.705  | 4505775.074  | 1138322.63 |
|     |        | 2002 | 6107232.129  | 4722649.000  | 1384583.13 |
|     |        | 2003 | 6561785.704  | 4914082.170  | 1647703.53 |
|     |        | 2004 | 6996156.348  | 5078886.508  | 1917269.84 |
|     |        | 2005 | 7426261.361  | 5226119.659  | 2200141.70 |
|     |        | 2006 | 7849012.694  | 5354930.170  | 2494082.52 |
|     |        | 2007 | 8255300.530  | 5466012.019  | 2789288.51 |
|     |        | 2008 | 8650662.040  | 5563344.658  | 3087317.38 |
|     |        | 2009 | 9030818.513  | 5647942.536  | 3382875.98 |
|     |        | 2010 | 9403026.327  | 5722832.920  | 3680193.41 |
|     |        | 2011 | 9767535.506  | 5789049.940  | 3978485.57 |
|     |        | 2012 | 10123044.281 | 5847875.188  | 4275169.09 |
|     |        | 2013 | 10470104.786 | 5900042.217  | 4570062.57 |
|     |        | 2014 | 10807756.112 | 5946551.202  | 4861204.91 |
|     |        | 2015 | 11130681.425 | 5987616.913  | 5143064.51 |
|     |        | 2016 | 11448966.506 | 6024769.671  | 5424196.83 |

**Results for PHIM for Run 6 (ELL Summary Sensitivity\_Analysis\_3.RTF)**

|        |        |      |              |             |            |
|--------|--------|------|--------------|-------------|------------|
|        |        | 2017 | 11758164.882 | 6058283.604 | 5699881.28 |
|        |        | 2018 | 12054448.241 | 6087513.905 | 5966934.34 |
|        |        | 2019 | 12341606.261 | 6114010.068 | 6227596.19 |
|        |        | 2020 | 12600728.939 | 6136658.114 | 6464070.83 |
|        |        | 2021 | 12861767.105 | 6157936.967 | 6703830.14 |
|        |        | 2022 | 13114168.616 | 6177429.328 | 6936739.29 |
|        |        | 2023 | 13357894.797 | 6195185.972 | 7162708.82 |
|        |        | 2024 | 13593848.521 | 6211549.378 | 7382299.14 |
|        |        | 2025 | 13789177.359 | 6224764.030 | 7564413.33 |
|        |        | 2026 | 13993401.656 | 6237885.919 | 7755515.74 |
|        |        | 2027 | 14190519.224 | 6250181.913 | 7940337.31 |
|        |        | 2028 | 14381193.356 | 6261512.646 | 8119680.71 |
|        |        | 2029 | 14565171.927 | 6271963.075 | 8293208.85 |
|        |        | 2030 | 14697381.605 | 6279497.653 | 8417883.95 |
|        |        | 2031 | 14842203.512 | 6287545.218 | 8554658.29 |
|        |        | 2032 | 14982485.826 | 6295183.602 | 8687302.22 |
|        |        | 2033 | 15118410.647 | 6302231.809 | 8816178.84 |
|        |        | 2034 | 15250284.398 | 6308728.694 | 8941555.70 |
|        |        | 2035 | 15322911.166 | 6312297.732 | 9010613.43 |
|        |        | 2036 | 15405115.031 | 6316220.225 | 9088894.81 |
|        |        | 2037 | 15484709.137 | 6319968.243 | 9164740.89 |
|        |        | 2038 | 15561812.193 | 6323474.015 | 9238338.18 |
|        |        | 2039 | 15635992.616 | 6326655.141 | 9309337.48 |
|        | Female | 1990 | 147299.110   | 147299.110  | 0.000      |
|        |        | 1991 | 295122.462   | 293257.343  | 1865.120   |
|        |        | 1992 | 439962.920   | 432979.891  | 6983.029   |
|        |        | 1993 | 584735.615   | 568173.156  | 16562.459  |
|        |        | 1994 | 727640.783   | 696315.202  | 31325.581  |
|        |        | 1995 | 868486.937   | 816701.784  | 51785.153  |
|        |        | 1996 | 1010321.847  | 930831.448  | 79490.400  |
|        |        | 1997 | 1144230.930  | 1032350.537 | 111880.392 |
|        |        | 1998 | 1274513.622  | 1124531.419 | 149982.202 |
|        |        | 1999 | 1426725.938  | 1224609.652 | 202116.286 |
|        |        | 2000 | 1573462.680  | 1314058.606 | 259404.074 |
|        |        | 2001 | 1719132.015  | 1394709.145 | 324422.870 |
|        |        | 2002 | 1863006.732  | 1466975.652 | 396031.080 |
|        |        | 2003 | 2002943.227  | 1530641.905 | 472301.322 |
|        |        | 2004 | 2137798.705  | 1586085.892 | 551712.813 |
|        |        | 2005 | 2271071.245  | 1635845.201 | 635226.044 |
|        |        | 2006 | 2400707.731  | 1679089.914 | 721617.817 |
|        |        | 2007 | 2523634.512  | 1716093.679 | 807540.834 |
|        |        | 2008 | 2648752.232  | 1749912.596 | 898839.636 |
|        |        | 2009 | 2765973.961  | 1778719.742 | 987254.219 |
|        |        | 2010 | 2881329.235  | 1804433.125 | 1076896.11 |
|        |        | 2011 | 2994972.694  | 1827292.539 | 1167680.15 |
|        |        | 2012 | 3108958.829  | 1847980.700 | 1260978.13 |
|        |        | 2013 | 3218140.416  | 1866254.713 | 1351885.70 |
|        |        | 2014 | 3328387.914  | 1883048.764 | 1445339.15 |
|        |        | 2015 | 3435342.796  | 1898242.028 | 1537100.77 |
|        |        | 2016 | 3539189.408  | 1911855.718 | 1627333.69 |
|        |        | 2017 | 3640041.363  | 1924061.263 | 1715980.10 |
|        |        | 2018 | 3732645.362  | 1934401.429 | 1798243.93 |
|        |        | 2019 | 3821421.978  | 1943610.472 | 1877811.51 |
|        |        | 2020 | 3902115.950  | 1951512.318 | 1950603.63 |
|        |        | 2021 | 3984301.053  | 1959028.940 | 2025272.11 |
|        |        | 2022 | 4062629.299  | 1965725.566 | 2096903.73 |
|        |        | 2023 | 4137348.729  | 1971761.703 | 2165587.03 |
|        |        | 2024 | 4208611.493  | 1977187.050 | 2231424.44 |
|        |        | 2025 | 4269419.492  | 1981675.922 | 2287743.57 |
|        |        | 2026 | 4330969.998  | 1985972.315 | 2344997.68 |
|        |        | 2027 | 4389134.306  | 1989835.609 | 2399298.70 |
|        |        | 2028 | 4444222.970  | 1993349.614 | 2450873.36 |
|        |        | 2029 | 4496447.877  | 1996572.850 | 2499875.03 |
|        |        | 2030 | 4536975.698  | 1999004.765 | 2537970.93 |
|        |        | 2031 | 4578338.586  | 2001399.289 | 2576939.30 |
|        |        | 2032 | 4617397.784  | 2003590.184 | 2613807.60 |
|        |        | 2033 | 4654407.697  | 2005632.493 | 2648775.20 |
|        |        | 2034 | 4689913.454  | 2007549.345 | 2682364.11 |
|        |        | 2035 | 4712518.190  | 2008706.943 | 2703811.25 |
|        |        | 2036 | 4735845.827  | 2009857.357 | 2725988.47 |
|        |        | 2037 | 4757958.806  | 2010920.985 | 2747037.82 |
|        |        | 2038 | 4778813.806  | 2011919.983 | 2766893.82 |
|        |        | 2039 | 4798769.065  | 2012865.918 | 2785903.15 |
| Stroke | Males  | 1990 | 75005.854    | 75005.854   | 0.000      |
|        |        | 1991 | 149463.017   | 148743.133  | 719.885    |
|        |        | 1992 | 222966.278   | 220289.086  | 2677.192   |
|        |        | 1993 | 296801.879   | 290423.462  | 6378.416   |
|        |        | 1994 | 372453.706   | 360097.916  | 12355.789  |



**Results for PHIM for Run 6 (ELL Summary Sensitivity\_Analysis\_3.RTF)**

|        |      |             |             |            |
|--------|------|-------------|-------------|------------|
|        | 1995 | 448401.338  | 427506.107  | 20895.230  |
|        | 1996 | 523536.301  | 491376.653  | 32159.648  |
|        | 1997 | 596763.211  | 550624.885  | 46138.326  |
|        | 1998 | 667546.681  | 604887.335  | 62659.346  |
|        | 1999 | 734925.407  | 653620.413  | 81304.994  |
|        | 2000 | 803749.361  | 700423.247  | 103326.114 |
|        | 2001 | 870081.588  | 742486.830  | 127594.759 |
|        | 2002 | 935347.140  | 781030.345  | 154316.795 |
|        | 2003 | 1001627.349 | 817145.788  | 184481.561 |
|        | 2004 | 1066587.976 | 849901.603  | 216686.373 |
|        | 2005 | 1130548.052 | 879557.811  | 250990.240 |
|        | 2006 | 1195132.454 | 906968.710  | 288163.744 |
|        | 2007 | 1258974.043 | 931766.688  | 327207.355 |
|        | 2008 | 1320124.867 | 953383.097  | 366741.770 |
|        | 2009 | 1380776.123 | 972972.487  | 407803.636 |
|        | 2010 | 1440048.533 | 990493.521  | 449555.012 |
|        | 2011 | 1497484.847 | 1006027.702 | 491457.145 |
|        | 2012 | 1554496.526 | 1019998.928 | 534497.598 |
|        | 2013 | 1610819.598 | 1032590.373 | 578229.224 |
|        | 2014 | 1667484.890 | 1044081.089 | 623403.800 |
|        | 2015 | 1720948.287 | 1054111.871 | 666836.415 |
|        | 2016 | 1775699.228 | 1063457.134 | 712242.094 |
|        | 2017 | 1830250.175 | 1071988.819 | 758261.355 |
|        | 2018 | 1875958.950 | 1078581.185 | 797377.765 |
|        | 2019 | 1920359.232 | 1084481.729 | 835877.503 |
|        | 2020 | 1960605.297 | 1089483.215 | 871122.083 |
|        | 2021 | 1998912.887 | 1093876.011 | 905036.877 |
|        | 2022 | 2036003.696 | 1097809.171 | 938194.525 |
|        | 2023 | 2071857.536 | 1101330.493 | 970527.043 |
|        | 2024 | 2106636.468 | 1104525.448 | 1002111.02 |
|        | 2025 | 2136450.873 | 1107124.199 | 1029326.67 |
|        | 2026 | 2164796.470 | 1109433.178 | 1055363.29 |
|        | 2027 | 2192079.608 | 1111538.183 | 1080541.42 |
|        | 2028 | 2218404.367 | 1113441.072 | 1104963.30 |
|        | 2029 | 2243769.140 | 1115173.608 | 1128595.53 |
|        | 2030 | 2263570.213 | 1116479.318 | 1147090.89 |
|        | 2031 | 2282521.590 | 1117676.235 | 1164845.35 |
|        | 2032 | 2300804.945 | 1118781.896 | 1182023.05 |
|        | 2033 | 2318464.018 | 1119795.181 | 1198668.84 |
|        | 2034 | 2335611.973 | 1120732.475 | 1214879.50 |
|        | 2035 | 2347097.290 | 1121347.675 | 1225749.62 |
|        | 2036 | 2358248.747 | 1121923.422 | 1236325.33 |
|        | 2037 | 2369033.655 | 1122467.099 | 1246566.56 |
|        | 2038 | 2379490.114 | 1122973.728 | 1256516.39 |
|        | 2039 | 2389546.238 | 1123435.669 | 1266110.57 |
| Female | 1990 | 56348.092   | 56348.092   | 0.000      |
|        | 1991 | 110871.862  | 110356.693  | 515.169    |
|        | 1992 | 165654.454  | 163676.389  | 1978.065   |
|        | 1993 | 220008.519  | 215282.789  | 4725.731   |
|        | 1994 | 275706.807  | 266521.417  | 9185.390   |
|        | 1995 | 331417.547  | 315912.374  | 15505.173  |
|        | 1996 | 387580.161  | 363568.300  | 24011.861  |
|        | 1997 | 442778.242  | 408202.323  | 34575.919  |
|        | 1998 | 496117.305  | 449143.844  | 46973.461  |
|        | 1999 | 548268.214  | 486968.487  | 61299.728  |
|        | 2000 | 601693.202  | 523494.782  | 78198.419  |
|        | 2001 | 652221.103  | 555849.656  | 96371.446  |
|        | 2002 | 703022.600  | 586135.164  | 116887.436 |
|        | 2003 | 752023.351  | 613259.368  | 138763.983 |
|        | 2004 | 799826.733  | 637711.680  | 162115.053 |
|        | 2005 | 847563.928  | 660278.170  | 187285.758 |
|        | 2006 | 894205.027  | 680561.347  | 213643.680 |
|        | 2007 | 939571.282  | 698650.038  | 240921.244 |
|        | 2008 | 983437.578  | 714711.301  | 268726.277 |
|        | 2009 | 1025803.786 | 728939.556  | 296864.230 |
|        | 2010 | 1066964.934 | 741562.961  | 325401.973 |
|        | 2011 | 1106954.044 | 752759.435  | 354194.610 |
|        | 2012 | 1146108.461 | 762802.101  | 383306.360 |
|        | 2013 | 1183544.689 | 771617.014  | 411927.675 |
|        | 2014 | 1221220.945 | 779718.220  | 441502.725 |
|        | 2015 | 1258289.311 | 787115.986  | 471173.325 |
|        | 2016 | 1294830.207 | 793804.360  | 501025.847 |
|        | 2017 | 1330332.626 | 799779.827  | 530552.799 |
|        | 2018 | 1360571.987 | 804486.244  | 556085.743 |
|        | 2019 | 1389848.723 | 808666.327  | 581182.396 |
|        | 2020 | 1416046.192 | 812175.692  | 603870.500 |
|        | 2021 | 1440588.850 | 815213.386  | 625375.464 |
|        | 2022 | 1464157.934 | 817909.025  | 646248.909 |

**Results for PHIM for Run 6 (ELL Summary Sensitivity\_Analysis\_3.RTF)**

|      |             |             |             |             |            |
|------|-------------|-------------|-------------|-------------|------------|
|      |             | 2023        | 1486810.237 | 820326.468  | 666483.769 |
|      |             | 2024        | 1508591.729 | 822485.387  | 686106.342 |
|      |             | 2025        | 1526875.621 | 824213.346  | 702662.275 |
|      |             | 2026        | 1543659.810 | 825694.005  | 717965.805 |
|      |             | 2027        | 1559623.774 | 827016.622  | 732607.153 |
|      |             | 2028        | 1574852.850 | 828210.761  | 746642.090 |
|      |             | 2029        | 1589437.452 | 829294.893  | 760142.559 |
|      |             | 2030        | 1600568.199 | 830085.614  | 770482.586 |
|      |             | 2031        | 1610776.297 | 830776.729  | 779999.568 |
|      |             | 2032        | 1620483.563 | 831405.385  | 789078.178 |
|      |             | 2033        | 1629745.442 | 831984.394  | 797761.048 |
|      |             | 2034        | 1638721.425 | 832521.704  | 806199.721 |
|      |             | 2035        | 1644649.404 | 832857.052  | 811792.352 |
|      |             | 2036        | 1650181.590 | 833155.690  | 817025.900 |
|      |             | 2037        | 1655476.066 | 833432.463  | 822043.603 |
|      |             | 2038        | 1660507.914 | 833692.828  | 826815.085 |
|      |             | 2039        | 1665361.569 | 833939.012  | 831422.557 |
| COPD | Males       | 1990        | 117002.906  | 117002.906  | 0.000      |
|      |             | 1991        | 233438.833  | 233235.802  | 203.031    |
|      |             | 1992        | 348084.047  | 347332.352  | 751.695    |
|      |             | 1993        | 467278.318  | 465432.092  | 1846.226   |
|      |             | 1994        | 584216.907  | 580585.206  | 3631.701   |
|      |             | 1995        | 697391.457  | 691198.439  | 6193.018   |
|      |             | 1996        | 809471.271  | 799780.492  | 9690.779   |
|      |             | 1997        | 922587.668  | 908221.267  | 14366.400  |
|      |             | 1998        | 1034072.457 | 1013918.249 | 20154.208  |
|      |             | 1999        | 1153475.399 | 1125687.086 | 27788.314  |
|      |             | 2000        | 1268050.268 | 1231229.948 | 36820.320  |
|      |             | 2001        | 1382786.209 | 1335110.407 | 47675.802  |
|      |             | 2002        | 1497557.412 | 1437004.882 | 60552.529  |
|      |             | 2003        | 1614405.229 | 1538889.215 | 75516.014  |
|      |             | 2004        | 1726672.489 | 1634660.529 | 92011.960  |
|      |             | 2005        | 1847277.524 | 1735448.012 | 111829.512 |
|      |             | 2006        | 1961009.963 | 1828072.491 | 132937.472 |
|      |             | 2007        | 2079868.908 | 1922274.921 | 157593.988 |
|      |             | 2008        | 2206755.783 | 2020304.653 | 186451.130 |
|      |             | 2009        | 2331993.380 | 2114295.021 | 217698.360 |
|      |             | 2010        | 2455130.176 | 2204055.256 | 251074.921 |
|      |             | 2011        | 2582657.849 | 2294088.808 | 288569.040 |
|      |             | 2012        | 2709719.005 | 2380753.563 | 328965.442 |
|      |             | 2013        | 2840547.005 | 2466782.330 | 373764.676 |
|      |             | 2014        | 2971677.135 | 2549860.809 | 421816.327 |
|      |             | 2015        | 3104538.983 | 2631999.574 | 472539.409 |
|      |             | 2016        | 3237650.175 | 2710881.760 | 526768.415 |
|      |             | 2017        | 3370561.253 | 2786675.594 | 583885.659 |
|      |             | 2018        | 3503136.371 | 2858653.790 | 644482.581 |
|      |             | 2019        | 3636402.758 | 2927852.661 | 708550.097 |
|      |             | 2020        | 3768054.453 | 2993801.317 | 774253.136 |
|      |             | 2021        | 3897675.067 | 3055621.052 | 842054.014 |
|      |             | 2022        | 4027307.132 | 3114356.320 | 912950.812 |
|      |             | 2023        | 4156698.720 | 3169916.104 | 986782.616 |
|      |             | 2024        | 4285772.226 | 3222366.306 | 1063405.92 |
|      |             | 2025        | 4410759.298 | 3271186.348 | 1139572.95 |
|      |             | 2026        | 4531411.064 | 3315318.804 | 1216092.26 |
|      |             | 2027        | 4651145.233 | 3356453.887 | 1294691.35 |
|      |             | 2028        | 4769837.872 | 3394656.444 | 1375181.43 |
|      |             | 2029        | 4887747.179 | 3430156.506 | 1457590.67 |
| 2030 | 4997632.895 | 3462023.979 | 1535608.92  |             |            |
| 2031 | 5103301.991 | 3489978.367 | 1613323.62  |             |            |
| 2032 | 5207593.613 | 3515580.888 | 1692012.72  |             |            |
| 2033 | 5310556.138 | 3538897.308 | 1771658.83  |             |            |
| 2034 | 5412542.816 | 3560218.109 | 1852324.71  |             |            |
| 2035 | 5500522.473 | 3578048.876 | 1922473.60  |             |            |
| 2036 | 5588149.640 | 3594132.787 | 1994016.85  |             |            |
| 2037 | 5674667.886 | 3608781.134 | 2065886.75  |             |            |
| 2038 | 5760391.289 | 3622073.558 | 2138317.73  |             |            |
| 2039 | 5845459.234 | 3634225.521 | 2211233.71  |             |            |
|      | Female      | 1990        | 77434.846   | 77434.846   | 0.000      |
|      |             | 1991        | 160029.510  | 159861.321  | 168.190    |
|      |             | 1992        | 240642.531  | 240002.200  | 640.331    |
|      |             | 1993        | 329362.093  | 327709.266  | 1652.828   |
|      |             | 1994        | 418569.515  | 415256.262  | 3313.253   |
|      |             | 1995        | 509110.357  | 503277.669  | 5832.689   |
|      |             | 1996        | 600040.117  | 590769.836  | 9270.281   |
|      |             | 1997        | 691159.071  | 677402.378  | 13756.692  |
|      |             | 1998        | 782866.899  | 763502.776  | 19364.122  |
|      |             | 1999        | 881526.925  | 854759.119  | 26767.807  |
|      |             | 2000        | 977880.647  | 942548.641  | 35332.006  |

**Results for PHIM for Run 6 (ELL Summary Sensitivity\_Analysis\_3.RTF)**

|      |             |             |            |
|------|-------------|-------------|------------|
| 2001 | 1076787.404 | 1031103.477 | 45683.927  |
| 2002 | 1174842.754 | 1117199.294 | 57643.460  |
| 2003 | 1275102.681 | 1203578.171 | 71524.510  |
| 2004 | 1371026.306 | 1284533.622 | 86492.684  |
| 2005 | 1473954.509 | 1369330.105 | 104624.404 |
| 2006 | 1574450.828 | 1450133.102 | 124317.726 |
| 2007 | 1673790.211 | 1527965.250 | 145824.962 |
| 2008 | 1782360.738 | 1610758.014 | 171602.723 |
| 2009 | 1892944.209 | 1692410.251 | 200533.959 |
| 2010 | 2002131.282 | 1770777.324 | 231353.958 |
| 2011 | 2114522.152 | 1848688.787 | 265833.365 |
| 2012 | 2228079.372 | 1924881.283 | 303198.089 |
| 2013 | 2345377.689 | 2000715.903 | 344661.786 |
| 2014 | 2462498.422 | 2073565.426 | 388932.996 |
| 2015 | 2581450.312 | 2145620.253 | 435830.058 |
| 2016 | 2701959.301 | 2215696.701 | 486262.600 |
| 2017 | 2823834.967 | 2283655.923 | 540179.045 |
| 2018 | 2938265.081 | 2345373.368 | 592891.713 |
| 2019 | 3053254.880 | 2404677.525 | 648577.355 |
| 2020 | 3167073.216 | 2461297.335 | 705775.881 |
| 2021 | 3279517.699 | 2515223.044 | 764294.655 |
| 2022 | 3392060.964 | 2566604.120 | 825456.844 |
| 2023 | 3504296.171 | 2615350.080 | 888946.092 |
| 2024 | 3616019.231 | 2661332.247 | 954686.984 |
| 2025 | 3724611.269 | 2704324.749 | 1020286.52 |
| 2026 | 3827181.707 | 2743352.644 | 1083829.06 |
| 2027 | 3928684.441 | 2779791.157 | 1148893.28 |
| 2028 | 4029124.892 | 2813839.814 | 1215285.08 |
| 2029 | 4128269.068 | 2845361.203 | 1282907.86 |
| 2030 | 4221560.174 | 2873921.767 | 1347638.41 |
| 2031 | 4304170.584 | 2897713.769 | 1406456.82 |
| 2032 | 4384930.537 | 2919378.548 | 1465551.99 |
| 2033 | 4464357.691 | 2939239.507 | 1525118.18 |
| 2034 | 4542251.545 | 2957245.053 | 1585006.49 |
| 2035 | 4611066.648 | 2972608.757 | 1638457.89 |
| 2036 | 4670309.230 | 2984745.138 | 1685564.09 |
| 2037 | 4728179.514 | 2995692.931 | 1732486.58 |
| 2038 | 4785008.048 | 3005615.764 | 1779392.28 |
| 2039 | 4841291.793 | 3014632.434 | 1826659.36 |

---

## Results for PHIM for Run 6 (ELL Summary Sensitivity\_Analysis\_3.RTF)

\*\*\*\*\*

**Table 4: Estimated Loss of Life, All age groups combined, Population and Number deaths adjusted for Ecig scenario, cumulative over years**

| Disease      | Sex          | Year         | Years of life lost<br>NULL | Years of life lost<br>Ecig | Years of life<br>Saved |
|--------------|--------------|--------------|----------------------------|----------------------------|------------------------|
| All Diseases | Males        | 1990         | 1304839.645                | 1304839.645                | 0.000                  |
|              |              | 1991         | 2579865.358                | 2571191.563                | 8673.794               |
|              |              | 1992         | 3830683.831                | 3798442.181                | 32241.650              |
|              |              | 1993         | 5076567.803                | 5000977.348                | 75590.455              |
|              |              | 1994         | 6292145.526                | 6150056.919                | 142088.607             |
|              |              | 1995         | 7485537.010                | 7250322.468                | 235214.541             |
|              |              | 1996         | 8655955.028                | 8299769.784                | 356185.244             |
|              |              | 1997         | 9791729.713                | 9287924.846                | 503804.867             |
|              |              | 1998         | 10899134.186               | 10222465.396               | 676668.789             |
|              |              | 1999         | 12070409.674               | 11162603.990               | 907805.685             |
|              |              | 2000         | 13231384.595               | 12062284.119               | 1169100.48             |
|              |              | 2001         | 14371761.018               | 12911714.644               | 1460046.37             |
|              |              | 2002         | 15508906.386               | 13723471.860               | 1785434.53             |
|              |              | 2003         | 16638100.422               | 14497857.031               | 2140243.39             |
|              |              | 2004         | 17736465.088               | 15224510.380               | 2511954.71             |
|              |              | 2005         | 18834658.606               | 15924882.825               | 2909775.78             |
|              |              | 2006         | 19909100.501               | 16579015.908               | 3330084.59             |
|              |              | 2007         | 20958321.463               | 17194747.438               | 3763574.03             |
|              |              | 2008         | 22000068.148               | 17786348.454               | 4213719.69             |
|              |              | 2009         | 23018816.903               | 18345165.667               | 4673651.24             |
|              |              | 2010         | 24018480.537               | 18872674.865               | 5145805.67             |
|              |              | 2011         | 25003034.574               | 19372597.636               | 5630436.94             |
|              |              | 2012         | 25969871.429               | 19843647.942               | 6126223.49             |
|              |              | 2013         | 26920275.180               | 20287940.294               | 6632334.89             |
|              |              | 2014         | 27849005.227               | 20703792.936               | 7145212.29             |
|              |              | 2015         | 28749620.400               | 21094901.598               | 7654718.80             |
|              |              | 2016         | 29622417.562               | 21452461.245               | 8169956.32             |
|              |              | 2017         | 30462559.724               | 21779227.061               | 8683332.66             |
|              |              | 2018         | 31293299.299               | 22092622.602               | 9200676.70             |
|              |              | 2019         | 32109993.427               | 22388085.142               | 9721908.28             |
|              |              | 2020         | 32883323.977               | 22662621.588               | 10220702.4             |
|              |              | 2021         | 33610102.554               | 22899647.976               | 10710454.6             |
|              |              | 2022         | 34322010.448               | 23121215.430               | 11200795.0             |
|              |              | 2023         | 35018383.550               | 23327442.193               | 11690941.4             |
|              |              | 2024         | 35700177.955               | 23519470.982               | 12180707.0             |
|              |              | 2025         | 36315500.346               | 23692700.220               | 12622800.1             |
|              |              | 2026         | 36896159.343               | 23838715.787               | 13057443.6             |
|              |              | 2027         | 37462570.116               | 23973671.430               | 13488898.7             |
|              |              | 2028         | 38015337.780               | 24097749.688               | 13917588.1             |
|              |              | 2029         | 38554814.764               | 24212068.356               | 14342746.4             |
|              |              | 2030         | 39003805.400               | 24310167.165               | 14693638.2             |
| 2031         | 39436509.703 | 24392537.928 | 15043971.8                 |                            |                        |
| 2032         | 39858470.458 | 24468123.590 | 15390346.9                 |                            |                        |
| 2033         | 40270147.082 | 24536853.486 | 15733293.6                 |                            |                        |
| 2034         | 40672665.743 | 24599670.850 | 16072994.9                 |                            |                        |
| 2035         | 40962732.664 | 24648091.760 | 16314640.9                 |                            |                        |
| 2036         | 41255021.653 | 24691061.059 | 16563960.6                 |                            |                        |
| 2037         | 41540573.023 | 24730570.343 | 16810002.7                 |                            |                        |
| 2038         | 41820158.066 | 24766585.768 | 17053572.3                 |                            |                        |
| 2039         | 42093547.949 | 24799506.893 | 17294041.1                 |                            |                        |
|              | Female       | 1990         | 588979.406                 | 588979.406                 | 0.000                  |
|              |              | 1991         | 1182571.252                | 1179606.280                | 2964.972               |
|              |              | 1992         | 1777346.679                | 1766097.480                | 11249.199              |
|              |              | 1993         | 2380261.899                | 2353268.051                | 26993.848              |
|              |              | 1994         | 2983130.039                | 2931333.045                | 51796.994              |
|              |              | 1995         | 3588982.584                | 3501983.236                | 86999.348              |
|              |              | 1996         | 4195430.235                | 4060613.869                | 134816.366             |
|              |              | 1997         | 4793866.694                | 4600756.266                | 193110.428             |
|              |              | 1998         | 5389747.381                | 5126648.013                | 263099.368             |
|              |              | 1999         | 6006722.467                | 5652864.948                | 353857.519             |
|              |              | 2000         | 6625758.871                | 6168197.950                | 457560.920             |
|              |              | 2001         | 7245135.411                | 6668683.693                | 576451.718             |
|              |              | 2002         | 7867492.021                | 7156460.618                | 711031.403             |
|              |              | 2003         | 8485051.793                | 7626752.095                | 858299.698             |
|              |              | 2004         | 9092994.774                | 8076140.594                | 1016854.18             |
|              |              | 2005         | 9706032.803                | 8515871.591                | 1190161.21             |
|              |              | 2006         | 10311907.548               | 8936261.753                | 1375645.80             |
|              |              | 2007         | 10909437.502               | 9339391.721                | 1570045.78             |
|              |              | 2008         | 11506462.491               | 9727122.372                | 1779340.12             |
|              |              | 2009         | 12098393.287               | 10101301.693               | 1997091.59             |
|              |              | 2010         | 12681188.981               | 10457193.743               | 2223995.24             |

**Results for PHIM for Run 6 (ELL Summary Sensitivity\_Analysis\_3.RTF)**

|             |       |      |              |              |            |
|-------------|-------|------|--------------|--------------|------------|
|             |       | 2011 | 13260062.991 | 10797787.690 | 2462275.30 |
|             |       | 2012 | 13839417.441 | 11125697.066 | 2713720.38 |
|             |       | 2013 | 14409614.758 | 11437752.501 | 2971862.26 |
|             |       | 2014 | 14976658.746 | 11734346.147 | 3242312.60 |
|             |       | 2015 | 15529977.821 | 12014052.611 | 3515925.21 |
|             |       | 2016 | 16066640.764 | 12273075.507 | 3793565.26 |
|             |       | 2017 | 16590035.078 | 12515031.909 | 4075003.17 |
|             |       | 2018 | 17098716.137 | 12743389.228 | 4355326.91 |
|             |       | 2019 | 17599868.850 | 12958742.166 | 4641126.68 |
|             |       | 2020 | 18081346.241 | 13159949.463 | 4921396.78 |
|             |       | 2021 | 18537594.460 | 13340628.047 | 5196966.41 |
|             |       | 2022 | 18985300.234 | 13509787.724 | 5475512.51 |
|             |       | 2023 | 19423958.747 | 13667847.420 | 5756111.33 |
|             |       | 2024 | 19853347.772 | 13814677.972 | 6038669.80 |
|             |       | 2025 | 20252822.245 | 13948476.633 | 6304345.61 |
|             |       | 2026 | 20619307.063 | 14063645.736 | 6555661.33 |
|             |       | 2027 | 20976063.406 | 14169756.027 | 6806307.38 |
|             |       | 2028 | 21323641.947 | 14267793.906 | 7055848.04 |
|             |       | 2029 | 21662117.106 | 14357674.480 | 7304442.63 |
|             |       | 2030 | 21960971.694 | 14436364.461 | 7524607.23 |
|             |       | 2031 | 22224951.983 | 14499788.364 | 7725163.62 |
|             |       | 2032 | 22480397.853 | 14557302.891 | 7923094.96 |
|             |       | 2033 | 22728639.455 | 14609862.476 | 8118776.98 |
|             |       | 2034 | 22970448.888 | 14657532.353 | 8312916.53 |
|             |       | 2035 | 23164154.188 | 14695980.478 | 8468173.71 |
|             |       | 2036 | 23334538.616 | 14726199.862 | 8608338.75 |
|             |       | 2037 | 23499760.723 | 14753600.239 | 8746160.48 |
|             |       | 2038 | 23660308.401 | 14778582.130 | 8881726.27 |
|             |       | 2039 | 23817891.273 | 14801459.004 | 9016432.27 |
| Lung cancer | Males | 1990 | 595621.791   | 595621.791   | 0.000      |
|             |       | 1991 | 1177744.113  | 1177096.215  | 647.898    |
|             |       | 1992 | 1750034.892  | 1747593.856  | 2441.036   |
|             |       | 1993 | 2319752.308  | 2313817.616  | 5934.691   |
|             |       | 1994 | 2872597.339  | 2861111.856  | 11485.482  |
|             |       | 1995 | 3411494.825  | 3391982.228  | 19512.598  |
|             |       | 1996 | 3945569.726  | 3914766.197  | 30803.529  |
|             |       | 1997 | 4463316.362  | 4417985.376  | 45330.986  |
|             |       | 1998 | 4975301.180  | 4911520.064  | 63781.116  |
|             |       | 1999 | 5473691.125  | 5387310.753  | 86380.371  |
|             |       | 2000 | 5977500.570  | 5862885.898  | 114614.672 |
|             |       | 2001 | 6474795.516  | 6326360.906  | 148434.610 |
|             |       | 2002 | 6968769.705  | 6780234.295  | 188535.409 |
|             |       | 2003 | 7460282.140  | 7224540.622  | 235741.518 |
|             |       | 2004 | 7947048.275  | 7657172.074  | 289876.201 |
|             |       | 2005 | 8430571.669  | 8079094.829  | 351476.839 |
|             |       | 2006 | 8903945.390  | 8483579.712  | 420365.678 |
|             |       | 2007 | 9364177.982  | 8868375.284  | 495802.698 |
|             |       | 2008 | 9822525.458  | 9242075.873  | 580449.585 |
|             |       | 2009 | 10275228.886 | 9601765.990  | 673462.897 |
|             |       | 2010 | 10720275.500 | 9946127.115  | 774148.385 |
|             |       | 2011 | 11155356.373 | 10273243.214 | 882113.159 |
|             |       | 2012 | 11582611.617 | 10583786.770 | 998824.846 |
|             |       | 2013 | 11998803.791 | 10876204.505 | 1122599.29 |
|             |       | 2014 | 12402087.090 | 11149868.484 | 1252218.61 |
|             |       | 2015 | 12793451.706 | 11406584.707 | 1386867.00 |
|             |       | 2016 | 13160101.653 | 11637585.746 | 1522515.91 |
|             |       | 2017 | 13503583.414 | 11845312.250 | 1658271.16 |
|             |       | 2018 | 13859755.737 | 12049732.067 | 1810023.67 |
|             |       | 2019 | 14211625.176 | 12242412.582 | 1969212.59 |
|             |       | 2020 | 14553935.288 | 12422157.351 | 2131777.94 |
|             |       | 2021 | 14851747.495 | 12570512.423 | 2281235.07 |
|             |       | 2022 | 15144531.004 | 12708745.014 | 2435785.99 |
|             |       | 2023 | 15431932.496 | 12836970.300 | 2594962.20 |
|             |       | 2024 | 15713920.740 | 12955836.989 | 2758083.75 |
|             |       | 2025 | 15979112.816 | 13063303.268 | 2915809.55 |
|             |       | 2026 | 16206550.153 | 13148674.446 | 3057875.71 |
|             |       | 2027 | 16428826.050 | 13227038.773 | 3201787.28 |
|             |       | 2028 | 16645902.186 | 13298656.271 | 3347245.92 |
|             |       | 2029 | 16858126.517 | 13364299.670 | 3493826.85 |
|             |       | 2030 | 17045220.687 | 13420761.507 | 3624459.18 |
|             |       | 2031 | 17208482.610 | 13465066.715 | 3743415.89 |
|             |       | 2032 | 17367586.074 | 13505479.940 | 3862106.13 |
|             |       | 2033 | 17522716.280 | 13542051.853 | 3980664.43 |
|             |       | 2034 | 17674226.555 | 13575375.400 | 4098851.16 |
|             |       | 2035 | 17792201.734 | 13601152.935 | 4191048.80 |
|             |       | 2036 | 17903508.236 | 13622947.324 | 4280560.91 |
|             |       | 2037 | 18012162.345 | 13642958.461 | 4369203.88 |
|             |       | 2038 | 18118464.470 | 13661146.739 | 4457317.73 |

**Results for PHIM for Run 6 (ELL Summary Sensitivity\_Analysis\_3.RTF)**

|     |        |      |              |              |            |
|-----|--------|------|--------------|--------------|------------|
|     | Female | 2039 | 18222549.860 | 13677785.825 | 4544764.04 |
|     |        | 1990 | 307897.357   | 307897.357   | 0.000      |
|     |        | 1991 | 616547.418   | 616130.924   | 416.494    |
|     |        | 1992 | 931086.773   | 929438.086   | 1648.687   |
|     |        | 1993 | 1246155.671  | 1242098.384  | 4057.287   |
|     |        | 1994 | 1561212.934  | 1553227.295  | 7985.639   |
|     |        | 1995 | 1879967.742  | 1866062.864  | 13904.878  |
|     |        | 1996 | 2197488.109  | 2175390.029  | 22098.080  |
|     |        | 1997 | 2515698.453  | 2482709.127  | 32989.325  |
|     |        | 1998 | 2836249.556  | 2789326.342  | 46923.214  |
|     |        | 1999 | 3150201.390  | 3086309.261  | 63892.128  |
|     |        | 2000 | 3472722.342  | 3387783.271  | 84939.071  |
|     |        | 2001 | 3796994.889  | 3686593.507  | 110401.383 |
|     |        | 2002 | 4126619.935  | 3985587.691  | 141032.244 |
|     |        | 2003 | 4454982.533  | 4278552.616  | 176429.918 |
|     |        | 2004 | 4784343.030  | 4566916.715  | 217426.316 |
|     |        | 2005 | 5113443.121  | 4849325.745  | 264117.376 |
|     |        | 2006 | 5442543.963  | 5125170.556  | 317373.407 |
|     |        | 2007 | 5772441.497  | 5395146.635  | 377294.861 |
|     |        | 2008 | 6091911.943  | 5649940.627  | 441971.316 |
|     |        | 2009 | 6413671.330  | 5899151.017  | 514520.313 |
|     |        | 2010 | 6730763.530  | 6138042.759  | 592720.771 |
|     |        | 2011 | 7043614.101  | 6366351.633  | 677262.468 |
|     |        | 2012 | 7356270.780  | 6587000.690  | 769270.090 |
|     |        | 2013 | 7662551.964  | 6795772.517  | 866779.447 |
|     |        | 2014 | 7964551.465  | 6994246.061  | 970305.404 |
|     |        | 2015 | 8254895.403  | 7178902.738  | 1075992.66 |
|     |        | 2016 | 8530661.848  | 7347124.290  | 1183537.56 |
|     |        | 2017 | 8795826.122  | 7502497.679  | 1293328.44 |
|     |        | 2018 | 9067233.707  | 7653655.910  | 1413577.80 |
|     |        | 2019 | 9335343.270  | 7795868.395  | 1539474.88 |
|     |        | 2020 | 9596110.883  | 7928586.433  | 1667524.45 |
|     |        | 2021 | 9833186.859  | 8044311.458  | 1788875.40 |
|     |        | 2022 | 10066452.037 | 8152217.342  | 1914234.69 |
|     |        | 2023 | 10295503.609 | 8252592.280  | 2042911.33 |
|     |        | 2024 | 10520125.318 | 8345370.081  | 2174755.24 |
|     |        | 2025 | 10731915.863 | 8429473.034  | 2302442.83 |
|     |        | 2026 | 10917495.549 | 8499358.342  | 2418137.21 |
|     |        | 2027 | 11098620.885 | 8563370.992  | 2535249.89 |
|     |        | 2028 | 11275441.234 | 8622184.756  | 2653256.48 |
|     |        | 2029 | 11447962.710 | 8675779.571  | 2772183.14 |
|     |        | 2030 | 11601867.623 | 8722243.684  | 2879623.94 |
|     |        | 2031 | 11731666.516 | 8758393.456  | 2973273.06 |
|     |        | 2032 | 11857585.969 | 8791046.248  | 3066539.72 |
|     |        | 2033 | 11980128.625 | 8820761.665  | 3159366.96 |
|     |        | 2034 | 12099562.464 | 8847629.835  | 3251932.63 |
|     |        | 2035 | 12195919.946 | 8868909.868  | 3327010.08 |
|     |        | 2036 | 12278201.969 | 8885286.826  | 3392915.14 |
|     |        | 2037 | 12358146.336 | 8900161.276  | 3457985.06 |
|     |        | 2038 | 12435978.633 | 8913740.110  | 3522238.52 |
|     |        | 2039 | 12512468.845 | 8926203.269  | 3586265.58 |
| IHD | Males  | 1990 | 517209.093   | 517209.093   | 0.000      |
|     |        | 1991 | 1019219.395  | 1012116.414  | 7102.981   |
|     |        | 1992 | 1509598.614  | 1483225.121  | 26373.494  |
|     |        | 1993 | 1992735.299  | 1931295.936  | 61439.363  |
|     |        | 1994 | 2462877.575  | 2348238.773  | 114638.802 |
|     |        | 1995 | 2928249.390  | 2739585.510  | 188663.880 |
|     |        | 1996 | 3377377.730  | 3093752.577  | 283625.153 |
|     |        | 1997 | 3809062.472  | 3410934.852  | 398127.620 |
|     |        | 1998 | 4222213.867  | 3691893.278  | 530320.590 |
|     |        | 1999 | 4708317.743  | 3995618.650  | 712699.093 |
|     |        | 2000 | 5182084.396  | 4267224.832  | 914859.564 |
|     |        | 2001 | 5644097.705  | 4507046.995  | 1137050.71 |
|     |        | 2002 | 6107232.129  | 4724264.200  | 1382967.93 |
|     |        | 2003 | 6561785.704  | 4916066.754  | 1645718.95 |
|     |        | 2004 | 6996156.348  | 5081251.702  | 1914904.65 |
|     |        | 2005 | 7426261.361  | 5228884.908  | 2197376.45 |
|     |        | 2006 | 7849012.694  | 5358099.281  | 2490913.41 |
|     |        | 2007 | 8255300.530  | 5469580.029  | 2785720.50 |
|     |        | 2008 | 8650662.040  | 5567310.147  | 3083351.89 |
|     |        | 2009 | 9030818.513  | 5652296.120  | 3378522.39 |
|     |        | 2010 | 9403026.327  | 5727567.319  | 3675459.01 |
|     |        | 2011 | 9767535.506  | 5794154.816  | 3973380.69 |
|     |        | 2012 | 10123044.281 | 5853340.826  | 4269703.45 |
|     |        | 2013 | 10470104.786 | 5905856.322  | 4564248.46 |
|     |        | 2014 | 10807756.112 | 5952701.862  | 4855054.25 |
|     |        | 2015 | 11130681.425 | 5994092.717  | 5136588.71 |
|     |        | 2016 | 11448966.506 | 6031561.010  | 5417405.50 |

**Results for PHIM for Run 6 (ELL Summary Sensitivity\_Analysis\_3.RTF)**

|        |        |      |              |             |            |
|--------|--------|------|--------------|-------------|------------|
|        |        | 2017 | 11758164.882 | 6065379.405 | 5692785.48 |
|        |        | 2018 | 12054448.241 | 6094882.190 | 5959566.05 |
|        |        | 2019 | 12341606.261 | 6121638.851 | 6219967.41 |
|        |        | 2020 | 12600728.939 | 6144534.428 | 6456194.51 |
|        |        | 2021 | 12861767.105 | 6166050.162 | 6695716.94 |
|        |        | 2022 | 13114168.616 | 6185767.908 | 6928400.71 |
|        |        | 2023 | 13357894.797 | 6203739.165 | 7154155.63 |
|        |        | 2024 | 13593848.521 | 6220309.548 | 7373538.97 |
|        |        | 2025 | 13789177.359 | 6233715.879 | 7555461.48 |
|        |        | 2026 | 13993401.656 | 6247027.438 | 7746374.22 |
|        |        | 2027 | 14190519.224 | 6259506.924 | 7931012.30 |
|        |        | 2028 | 14381193.356 | 6271013.324 | 8110180.03 |
|        |        | 2029 | 14565171.927 | 6281631.512 | 8283540.42 |
|        |        | 2030 | 14697381.605 | 6289308.358 | 8408073.25 |
|        |        | 2031 | 14842203.512 | 6297507.341 | 8544696.17 |
|        |        | 2032 | 14982485.826 | 6305292.764 | 8677193.06 |
|        |        | 2033 | 15118410.647 | 6312480.890 | 8805929.76 |
|        |        | 2034 | 15250284.398 | 6319111.169 | 8931173.23 |
|        |        | 2035 | 15322911.166 | 6322768.782 | 9000142.38 |
|        |        | 2036 | 15405115.031 | 6326788.758 | 9078326.27 |
|        |        | 2037 | 15484709.137 | 6330632.271 | 9154076.87 |
|        |        | 2038 | 15561812.193 | 6334229.914 | 9227582.28 |
|        |        | 2039 | 15635992.616 | 6337497.125 | 9298495.49 |
|        | Female | 1990 | 147299.110   | 147299.110  | 0.000      |
|        |        | 1991 | 295122.462   | 293257.343  | 1865.120   |
|        |        | 1992 | 439962.920   | 432980.360  | 6982.560   |
|        |        | 1993 | 584735.615   | 568175.367  | 16560.248  |
|        |        | 1994 | 727640.783   | 696321.461  | 31319.322  |
|        |        | 1995 | 868486.937   | 816715.416  | 51771.521  |
|        |        | 1996 | 1010321.847  | 930856.887  | 79464.960  |
|        |        | 1997 | 1144230.930  | 1032392.490 | 111838.440 |
|        |        | 1998 | 1274513.622  | 1124595.104 | 149918.518 |
|        |        | 1999 | 1426725.938  | 1224705.904 | 202020.034 |
|        |        | 2000 | 1573462.680  | 1314194.248 | 259268.431 |
|        |        | 2001 | 1719132.015  | 1394890.321 | 324241.694 |
|        |        | 2002 | 1863006.732  | 1467207.773 | 395798.959 |
|        |        | 2003 | 2002943.227  | 1530929.097 | 472014.130 |
|        |        | 2004 | 2137798.705  | 1586430.794 | 551367.911 |
|        |        | 2005 | 2271071.245  | 1636251.452 | 634819.794 |
|        |        | 2006 | 2400707.731  | 1679557.872 | 721149.859 |
|        |        | 2007 | 2523634.512  | 1716622.440 | 807012.072 |
|        |        | 2008 | 2648752.232  | 1750504.163 | 898248.069 |
|        |        | 2009 | 2765973.961  | 1779372.004 | 986601.957 |
|        |        | 2010 | 2881329.235  | 1805145.886 | 1076183.35 |
|        |        | 2011 | 2994972.694  | 1828064.935 | 1166907.76 |
|        |        | 2012 | 3108958.829  | 1848811.990 | 1260146.84 |
|        |        | 2013 | 3218140.416  | 1867143.276 | 1350997.14 |
|        |        | 2014 | 3328387.914  | 1883994.461 | 1444393.45 |
|        |        | 2015 | 3435342.796  | 1899245.040 | 1536097.76 |
|        |        | 2016 | 3539189.408  | 1912914.770 | 1626274.64 |
|        |        | 2017 | 3640041.363  | 1925174.808 | 1714866.56 |
|        |        | 2018 | 3732645.362  | 1935564.325 | 1797081.04 |
|        |        | 2019 | 3821421.978  | 1944820.375 | 1876601.60 |
|        |        | 2020 | 3902115.950  | 1952766.942 | 1949349.01 |
|        |        | 2021 | 3984301.053  | 1960328.761 | 2023972.29 |
|        |        | 2022 | 4062629.299  | 1967068.111 | 2095561.19 |
|        |        | 2023 | 4137348.729  | 1973145.063 | 2164203.67 |
|        |        | 2024 | 4208611.493  | 1978608.948 | 2230002.55 |
|        |        | 2025 | 4269419.492  | 1983134.013 | 2286285.48 |
|        |        | 2026 | 4330969.998  | 1987466.540 | 2343503.46 |
|        |        | 2027 | 4389134.306  | 1991363.659 | 2397770.65 |
|        |        | 2028 | 4444222.970  | 1994909.595 | 2449313.37 |
|        |        | 2029 | 4496447.877  | 1998163.067 | 2498284.81 |
|        |        | 2030 | 4536975.698  | 2000621.855 | 2536353.84 |
|        |        | 2031 | 4578338.586  | 2003043.437 | 2575295.15 |
|        |        | 2032 | 4617397.784  | 2005259.605 | 2612138.18 |
|        |        | 2033 | 4654407.697  | 2007326.005 | 2647081.69 |
|        |        | 2034 | 4689913.454  | 2009265.832 | 2680647.62 |
|        |        | 2035 | 4712518.190  | 2010441.063 | 2702077.13 |
|        |        | 2036 | 4735845.827  | 2011609.188 | 2724236.64 |
|        |        | 2037 | 4757958.806  | 2012689.426 | 2745269.38 |
|        |        | 2038 | 4778813.806  | 2013704.165 | 2765109.64 |
|        |        | 2039 | 4798769.065  | 2014665.197 | 2784103.87 |
| Stroke | Males  | 1990 | 75005.854    | 75005.854   | 0.000      |
|        |        | 1991 | 149463.017   | 148743.133  | 719.885    |
|        |        | 1992 | 222966.278   | 220289.704  | 2676.574   |
|        |        | 1993 | 296801.879   | 290426.292  | 6375.587   |
|        |        | 1994 | 372453.706   | 360105.901  | 12347.804  |

**Results for PHIM for Run 6 (ELL Summary Sensitivity\_Analysis\_3.RTF)**

|        |      |             |             |            |
|--------|------|-------------|-------------|------------|
|        | 1995 | 448401.338  | 427523.438  | 20877.900  |
|        | 1996 | 523536.301  | 491408.722  | 32127.579  |
|        | 1997 | 596763.211  | 550677.661  | 46085.550  |
|        | 1998 | 667546.681  | 604966.980  | 62579.701  |
|        | 1999 | 734925.407  | 653732.596  | 81192.811  |
|        | 2000 | 803749.361  | 700577.508  | 103171.852 |
|        | 2001 | 870081.588  | 742689.373  | 127392.216 |
|        | 2002 | 935347.140  | 781288.627  | 154058.513 |
|        | 2003 | 1001627.349 | 817466.844  | 184160.505 |
|        | 2004 | 1066587.976 | 850291.244  | 216296.732 |
|        | 2005 | 1130548.052 | 880020.663  | 250527.389 |
|        | 2006 | 1195132.454 | 907509.955  | 287622.499 |
|        | 2007 | 1258974.043 | 932389.116  | 326584.928 |
|        | 2008 | 1320124.867 | 954085.497  | 366039.370 |
|        | 2009 | 1380776.123 | 973756.400  | 407019.723 |
|        | 2010 | 1440048.533 | 991358.840  | 448689.693 |
|        | 2011 | 1497484.847 | 1006973.647 | 490511.200 |
|        | 2012 | 1554496.526 | 1021023.616 | 533472.911 |
|        | 2013 | 1610819.598 | 1033693.188 | 577126.410 |
|        | 2014 | 1667484.890 | 1045260.516 | 622224.373 |
|        | 2015 | 1720948.287 | 1055365.952 | 665582.335 |
|        | 2016 | 1775699.228 | 1064785.379 | 710913.849 |
|        | 2017 | 1830250.175 | 1073389.677 | 756860.498 |
|        | 2018 | 1875958.950 | 1080043.354 | 795915.596 |
|        | 2019 | 1920359.232 | 1086002.024 | 834357.207 |
|        | 2020 | 1960605.297 | 1091058.317 | 869546.980 |
|        | 2021 | 1998912.887 | 1095501.718 | 903411.169 |
|        | 2022 | 2036003.696 | 1099482.280 | 936521.415 |
|        | 2023 | 2071857.536 | 1103048.137 | 968809.400 |
|        | 2024 | 2106636.468 | 1106285.342 | 1000351.13 |
|        | 2025 | 2136450.873 | 1108922.909 | 1027527.96 |
|        | 2026 | 2164796.470 | 1111267.457 | 1053529.01 |
|        | 2027 | 2192079.608 | 1113406.016 | 1078673.59 |
|        | 2028 | 2218404.367 | 1115340.367 | 1103064.00 |
|        | 2029 | 2243769.140 | 1117102.380 | 1126666.76 |
|        | 2030 | 2263570.213 | 1118433.490 | 1145136.72 |
|        | 2031 | 2282521.590 | 1119654.241 | 1162867.35 |
|        | 2032 | 2300804.945 | 1120782.431 | 1180022.51 |
|        | 2033 | 2318464.018 | 1121816.971 | 1196647.05 |
|        | 2034 | 2335611.973 | 1122774.517 | 1212837.46 |
|        | 2035 | 2347097.290 | 1123405.005 | 1223692.29 |
|        | 2036 | 2358248.747 | 1123995.326 | 1234253.42 |
|        | 2037 | 2369033.655 | 1124553.112 | 1244480.54 |
|        | 2038 | 2379490.114 | 1125073.259 | 1254416.85 |
|        | 2039 | 2389546.238 | 1125547.886 | 1263998.35 |
| Female | 1990 | 56348.092   | 56348.092   | 0.000      |
|        | 1991 | 110871.862  | 110356.693  | 515.169    |
|        | 1992 | 165654.454  | 163676.540  | 1977.914   |
|        | 1993 | 220008.519  | 215283.501  | 4725.018   |
|        | 1994 | 275706.807  | 266523.451  | 9183.356   |
|        | 1995 | 331417.547  | 315916.874  | 15500.673  |
|        | 1996 | 387580.161  | 363576.792  | 24003.369  |
|        | 1997 | 442778.242  | 408216.569  | 34561.673  |
|        | 1998 | 496117.305  | 449165.754  | 46951.551  |
|        | 1999 | 548268.214  | 487000.068  | 61268.146  |
|        | 2000 | 601693.202  | 523538.852  | 78154.349  |
|        | 2001 | 652221.103  | 555908.002  | 96313.100  |
|        | 2002 | 703022.600  | 586210.082  | 116812.518 |
|        | 2003 | 752023.351  | 613352.580  | 138670.771 |
|        | 2004 | 799826.733  | 637824.692  | 162002.041 |
|        | 2005 | 847563.928  | 660412.628  | 187151.300 |
|        | 2006 | 894205.027  | 680718.619  | 213486.407 |
|        | 2007 | 939571.282  | 698830.780  | 240740.502 |
|        | 2008 | 983437.578  | 714915.902  | 268521.676 |
|        | 2009 | 1025803.786 | 729168.236  | 296635.550 |
|        | 2010 | 1066964.934 | 741815.674  | 325149.260 |
|        | 2011 | 1106954.044 | 753036.114  | 353917.930 |
|        | 2012 | 1146108.461 | 763102.559  | 383005.902 |
|        | 2013 | 1183544.689 | 771940.715  | 411603.974 |
|        | 2014 | 1221220.945 | 780065.451  | 441155.494 |
|        | 2015 | 1258289.311 | 787487.295  | 470802.017 |
|        | 2016 | 1294830.207 | 794199.425  | 500630.782 |
|        | 2017 | 1330332.626 | 800198.256  | 530134.370 |
|        | 2018 | 1360571.987 | 804924.823  | 555647.164 |
|        | 2019 | 1389848.723 | 809124.129  | 580724.593 |
|        | 2020 | 1416046.192 | 812651.753  | 603394.440 |
|        | 2021 | 1440588.850 | 815706.490  | 624882.360 |
|        | 2022 | 1464157.934 | 818418.182  | 645739.753 |



**Results for PHIM for Run 6 (ELL Summary Sensitivity\_Analysis\_3.RTF)**

|      |             |             |             |             |            |
|------|-------------|-------------|-------------|-------------|------------|
|      |             | 2023        | 1486810.237 | 820850.902  | 665959.335 |
|      |             | 2024        | 1508591.729 | 823024.183  | 685567.546 |
|      |             | 2025        | 1526875.621 | 824765.433  | 702110.188 |
|      |             | 2026        | 1543659.810 | 826258.018  | 717401.792 |
|      |             | 2027        | 1559623.774 | 827591.695  | 732032.079 |
|      |             | 2028        | 1574852.850 | 828796.204  | 746056.646 |
|      |             | 2029        | 1589437.452 | 829890.067  | 759547.385 |
|      |             | 2030        | 1600568.199 | 830689.260  | 769878.939 |
|      |             | 2031        | 1610776.297 | 831387.983  | 779388.313 |
|      |             | 2032        | 1620483.563 | 832023.720  | 788459.844 |
|      |             | 2033        | 1629745.442 | 832609.413  | 797136.029 |
|      |             | 2034        | 1638721.425 | 833153.053  | 805568.373 |
|      |             | 2035        | 1644649.404 | 833493.307  | 811156.097 |
|      |             | 2036        | 1650181.590 | 833796.371  | 816385.219 |
|      |             | 2037        | 1655476.066 | 834077.309  | 821398.757 |
|      |             | 2038        | 1660507.914 | 834341.640  | 826166.274 |
|      |             | 2039        | 1665361.569 | 834591.630  | 830769.940 |
| COPD | Males       | 1990        | 117002.906  | 117002.906  | 0.000      |
|      |             | 1991        | 233438.833  | 233235.802  | 203.031    |
|      |             | 1992        | 348084.047  | 347333.501  | 750.546    |
|      |             | 1993        | 467278.318  | 465437.503  | 1840.814   |
|      |             | 1994        | 584216.907  | 580600.388  | 3616.518   |
|      |             | 1995        | 697391.457  | 691231.292  | 6160.164   |
|      |             | 1996        | 809471.271  | 799842.288  | 9628.983   |
|      |             | 1997        | 922587.668  | 908326.956  | 14260.712  |
|      |             | 1998        | 1034072.457 | 1014085.074 | 19987.383  |
|      |             | 1999        | 1153475.399 | 1125941.991 | 27533.408  |
|      |             | 2000        | 1268050.268 | 1231595.880 | 36454.388  |
|      |             | 2001        | 1382786.209 | 1335617.371 | 47168.839  |
|      |             | 2002        | 1497557.412 | 1437684.738 | 59872.674  |
|      |             | 2003        | 1614405.229 | 1539782.810 | 74622.419  |
|      |             | 2004        | 1726672.489 | 1635795.360 | 90877.129  |
|      |             | 2005        | 1847277.524 | 1736882.425 | 110395.099 |
|      |             | 2006        | 1961009.963 | 1829826.960 | 131183.004 |
|      |             | 2007        | 2079868.908 | 1924403.009 | 155465.899 |
|      |             | 2008        | 2206755.783 | 2022876.936 | 183878.846 |
|      |             | 2009        | 2331993.380 | 2117347.157 | 214646.223 |
|      | 2010        | 2455130.176 | 2207621.591 | 247508.586  |            |
|      | 2011        | 2582657.849 | 2298225.959 | 284431.890  |            |
|      | 2012        | 2709719.005 | 2385496.730 | 324222.275  |            |
|      | 2013        | 2840547.005 | 2472186.280 | 368360.725  |            |
|      | 2014        | 2971677.135 | 2555962.074 | 415715.062  |            |
|      | 2015        | 3104538.983 | 2638858.222 | 465680.761  |            |
|      | 2016        | 3237650.175 | 2718529.111 | 519121.064  |            |
|      | 2017        | 3370561.253 | 2795145.729 | 575415.524  |            |
|      | 2018        | 3503136.371 | 2867964.992 | 635171.380  |            |
|      | 2019        | 3636402.758 | 2938031.685 | 698371.073  |            |
|      | 2020        | 3768054.453 | 3004871.492 | 763182.961  |            |
|      | 2021        | 3897675.067 | 3067583.672 | 830091.394  |            |
|      | 2022        | 4027307.132 | 3127220.227 | 900086.905  |            |
|      | 2023        | 4156698.720 | 3183684.592 | 973014.128  |            |
|      | 2024        | 4285772.226 | 3237039.102 | 1048733.12  |            |
|      | 2025        | 4410759.298 | 3286758.164 | 1124001.13  |            |
|      | 2026        | 4531411.064 | 3331746.445 | 1199664.62  |            |
|      | 2027        | 4651145.233 | 3373719.717 | 1277425.52  |            |
|      | 2028        | 4769837.872 | 3412739.726 | 1357098.15  |            |
|      | 2029        | 4887747.179 | 3449034.795 | 1438712.38  |            |
| 2030 | 4997632.895 | 3481663.810 | 1515969.08  |             |            |
| 2031 | 5103301.991 | 3510309.631 | 1592992.36  |             |            |
| 2032 | 5207593.613 | 3536568.455 | 1671025.16  |             |            |
| 2033 | 5310556.138 | 3560503.772 | 1750052.37  |             |            |
| 2034 | 5412542.816 | 3582409.765 | 1830133.05  |             |            |
| 2035 | 5500522.473 | 3600765.038 | 1899757.43  |             |            |
| 2036 | 5588149.640 | 3617329.650 | 1970819.99  |             |            |
| 2037 | 5674667.886 | 3632426.498 | 2042241.39  |             |            |
| 2038 | 5760391.289 | 3646135.856 | 2114255.43  |             |            |
| 2039 | 5845459.234 | 3658676.057 | 2186783.18  |             |            |
|      | Female      | 1990        | 77434.846   | 77434.846   | 0.000      |
|      |             | 1991        | 160029.510  | 159861.321  | 168.190    |
|      |             | 1992        | 240642.531  | 240002.494  | 640.038    |
|      |             | 1993        | 329362.093  | 327710.799  | 1651.294   |
|      |             | 1994        | 418569.515  | 415260.838  | 3308.677   |
|      |             | 1995        | 509110.357  | 503288.082  | 5822.275   |
|      |             | 1996        | 600040.117  | 590790.161  | 9249.957   |
|      |             | 1997        | 691159.071  | 677438.081  | 13720.990  |
|      |             | 1998        | 782866.899  | 763560.813  | 19306.086  |
|      |             | 1999        | 881526.925  | 854849.714  | 26677.211  |
|      |             | 2000        | 977880.647  | 942681.578  | 35199.069  |

**Results for PHIM for Run 6 (ELL Summary Sensitivity\_Analysis\_3.RTF)**

|      |             |             |            |
|------|-------------|-------------|------------|
| 2001 | 1076787.404 | 1031291.863 | 45495.541  |
| 2002 | 1174842.754 | 1117455.072 | 57387.682  |
| 2003 | 1275102.681 | 1203917.803 | 71184.878  |
| 2004 | 1371026.306 | 1284968.394 | 86057.912  |
| 2005 | 1473954.509 | 1369881.767 | 104072.742 |
| 2006 | 1574450.828 | 1450814.707 | 123636.121 |
| 2007 | 1673790.211 | 1528791.866 | 144998.345 |
| 2008 | 1782360.738 | 1611761.680 | 170599.057 |
| 2009 | 1892944.209 | 1693610.436 | 199333.774 |
| 2010 | 2002131.282 | 1772189.424 | 229941.858 |
| 2011 | 2114522.152 | 1850335.008 | 264187.144 |
| 2012 | 2228079.372 | 1926781.827 | 301297.545 |
| 2013 | 2345377.689 | 2002895.993 | 342481.696 |
| 2014 | 2462498.422 | 2076040.173 | 386458.249 |
| 2015 | 2581450.312 | 2148417.538 | 433032.774 |
| 2016 | 2701959.301 | 2218837.022 | 483122.279 |
| 2017 | 2823834.967 | 2287161.166 | 536673.801 |
| 2018 | 2938265.081 | 2349244.171 | 589020.910 |
| 2019 | 3053254.880 | 2408929.266 | 644325.613 |
| 2020 | 3167073.216 | 2465944.335 | 701128.881 |
| 2021 | 3279517.699 | 2520281.338 | 759236.361 |
| 2022 | 3392060.964 | 2572084.089 | 819976.875 |
| 2023 | 3504296.171 | 2621259.174 | 883036.997 |
| 2024 | 3616019.231 | 2667674.760 | 948344.471 |
| 2025 | 3724611.269 | 2711104.152 | 1013507.12 |
| 2026 | 3827181.707 | 2750562.835 | 1076618.87 |
| 2027 | 3928684.441 | 2787429.681 | 1141254.76 |
| 2028 | 4029124.892 | 2821903.351 | 1207221.54 |
| 2029 | 4128269.068 | 2853841.774 | 1274427.29 |
| 2030 | 4221560.174 | 2882809.662 | 1338750.51 |
| 2031 | 4304170.584 | 2906963.487 | 1397207.10 |
| 2032 | 4384930.537 | 2928973.319 | 1455957.22 |
| 2033 | 4464357.691 | 2949165.393 | 1515192.30 |
| 2034 | 4542251.545 | 2967483.635 | 1574767.91 |
| 2035 | 4611066.648 | 2983136.239 | 1627930.41 |
| 2036 | 4670309.230 | 2995507.477 | 1674801.75 |
| 2037 | 4728179.514 | 3006672.229 | 1721507.29 |
| 2038 | 4785008.048 | 3016796.216 | 1768211.83 |
| 2039 | 4841291.793 | 3025998.909 | 1815292.88 |

---

## Results for PHIM for Run 6 (ELL Summary Sensitivity\_Analysis\_3.RTF)

\*\*\*\*\*

**Table 5: Estimated Loss of Life, at the end of follow-up, Population unadjusted for deaths in Ecig scenario**

| Disease      | Sex    | Age Group   | Years of life lost<br>NULL | Years of life lost<br>Ecig | Years of life<br>Saved |
|--------------|--------|-------------|----------------------------|----------------------------|------------------------|
| All Diseases | Males  | 30-34       | 443911.034                 | 237645.047                 | 206265.987             |
|              |        | 35-39       | 1146798.555                | 607183.896                 | 539614.659             |
|              |        | 40-44       | 2609591.408                | 1340963.673                | 1268627.73             |
|              |        | 45-49       | 4775841.753                | 2410944.078                | 2364897.67             |
|              |        | 50-54       | 7446969.205                | 3897681.478                | 3549287.73             |
|              |        | 55-59       | 8240205.925                | 4741132.307                | 3499073.62             |
|              |        | 60-64       | 8772829.118                | 5470840.242                | 3301988.88             |
|              |        | 65-69       | 6161494.678                | 4224449.199                | 1937045.48             |
|              |        | 70-74       | 2495906.274                | 1770931.607                | 724974.667             |
|              | 75-79  | 0.000       | 0.000                      | 0.000                      |                        |
|              | Female | 30-34       | 229140.561                 | 141723.201                 | 87417.360              |
|              |        | 35-39       | 570217.942                 | 345968.260                 | 224249.682             |
|              |        | 40-44       | 1267538.938                | 745477.464                 | 522061.474             |
|              |        | 45-49       | 2340070.698                | 1352098.255                | 987972.443             |
|              |        | 50-54       | 3743803.613                | 2177044.859                | 1566758.75             |
|              |        | 55-59       | 4591478.168                | 2790971.403                | 1800506.76             |
|              |        | 60-64       | 5207367.788                | 3288019.082                | 1919348.71             |
| 65-69        |        | 4092181.394 | 2723839.158                | 1368342.24                 |                        |
| Lung cancer  | Males  | 30-34       | 66065.017                  | 51601.830                  | 14463.187              |
|              |        | 35-39       | 232509.414                 | 183033.221                 | 49476.193              |
|              |        | 40-44       | 688628.041                 | 529826.268                 | 158801.773             |
|              |        | 45-49       | 1528300.367                | 1137926.121                | 390374.246             |
|              |        | 50-54       | 2730187.229                | 1998935.835                | 731251.394             |
|              |        | 55-59       | 3909101.673                | 2842457.746                | 1066643.93             |
|              |        | 60-64       | 4287716.660                | 3210443.670                | 1077272.99             |
|              |        | 65-69       | 3467897.115                | 2645917.096                | 821980.019             |
|              |        | 70-74       | 1312144.343                | 1017313.410                | 294830.934             |
|              | 75-79  | 0.000       | 0.000                      | 0.000                      |                        |
|              | Female | 30-34       | 51913.113                  | 40567.955                  | 11345.158              |
|              |        | 35-39       | 189792.904                 | 148539.147                 | 41253.757              |
|              |        | 40-44       | 527596.573                 | 395444.517                 | 132152.056             |
|              |        | 45-49       | 1122524.269                | 809217.348                 | 313306.921             |
|              |        | 50-54       | 1882214.322                | 1325845.526                | 556368.796             |
|              |        | 55-59       | 2595581.943                | 1802603.581                | 792978.362             |
|              |        | 60-64       | 2846273.090                | 2014728.719                | 831544.370             |
| 65-69        |        | 2358758.394 | 1687647.373                | 671111.021                 |                        |
| IHD          | Males  | 30-34       | 263834.566                 | 117246.624                 | 146587.942             |
|              |        | 35-39       | 692140.150                 | 292966.375                 | 399173.775             |
|              |        | 40-44       | 1519708.432                | 583184.577                 | 936523.855             |
|              |        | 45-49       | 2568546.697                | 900043.068                 | 1668503.63             |
|              |        | 50-54       | 3632929.903                | 1324682.713                | 2308247.19             |
|              |        | 55-59       | 2807892.356                | 1086722.408                | 1721169.95             |
|              |        | 60-64       | 2599825.934                | 1181887.579                | 1417938.35             |
|              |        | 65-69       | 1113578.307                | 579812.441                 | 533765.867             |
|              |        | 70-74       | 437536.271                 | 260109.357                 | 177426.913             |
|              | 75-79  | 0.000       | 0.000                      | 0.000                      |                        |
|              | Female | 30-34       | 79649.097                  | 37660.585                  | 41988.512              |
|              |        | 35-39       | 193965.908                 | 80871.377                  | 113094.531             |
|              |        | 40-44       | 403380.974                 | 149727.259                 | 253653.715             |
|              |        | 45-49       | 671385.408                 | 230039.892                 | 441345.516             |
|              |        | 50-54       | 1011875.989                | 371628.983                 | 640247.006             |
|              |        | 55-59       | 849875.715                 | 340589.032                 | 509286.683             |
|              |        | 60-64       | 925490.876                 | 432840.310                 | 492650.567             |
| 65-69        |        | 455463.881  | 244588.790                 | 210875.091                 |                        |
| Stroke       | Males  | 30-34       | 73463.650                  | 42949.914                  | 30513.736              |
|              |        | 35-39       | 151934.057                 | 86103.800                  | 65830.257              |
|              |        | 40-44       | 262845.974                 | 140873.180                 | 121972.794             |
|              |        | 45-49       | 383421.246                 | 191639.315                 | 191781.931             |
|              |        | 50-54       | 479872.634                 | 217325.324                 | 262547.310             |
|              |        | 55-59       | 437124.903                 | 182862.690                 | 254262.213             |
|              |        | 60-64       | 419457.235                 | 178664.598                 | 240792.637             |
|              |        | 65-69       | 128180.574                 | 57160.684                  | 71019.890              |
|              |        | 70-74       | 53245.965                  | 25856.164                  | 27389.801              |
|              | 75-79  | 0.000       | 0.000                      | 0.000                      |                        |
|              | Female | 30-34       | 62919.090                  | 39985.990                  | 22933.100              |

**Results for PHIM for Run 6 (ELL Summary Sensitivity\_Analysis\_3.RTF)**

|      |        |       |             |            |            |
|------|--------|-------|-------------|------------|------------|
|      |        | 35-39 | 120806.205  | 72509.323  | 48296.883  |
|      |        | 40-44 | 203391.885  | 113142.981 | 90248.904  |
|      |        | 45-49 | 278172.097  | 143361.328 | 134810.770 |
|      |        | 50-54 | 325979.181  | 156339.858 | 169639.323 |
|      |        | 55-59 | 275161.340  | 123777.738 | 151383.601 |
|      |        | 60-64 | 268920.493  | 122472.658 | 146447.835 |
|      |        | 65-69 | 87956.054   | 41637.814  | 46318.240  |
|      |        | 70-74 | 42055.224   | 20711.323  | 21343.901  |
|      |        | 75-79 | 0.000       | 0.000      | 0.000      |
| COPD | Males  | 30-34 | 40547.801   | 25846.679  | 14701.122  |
|      |        | 35-39 | 70214.933   | 45080.500  | 25134.434  |
|      |        | 40-44 | 138408.960  | 87079.648  | 51329.312  |
|      |        | 45-49 | 295573.443  | 181335.574 | 114237.869 |
|      |        | 50-54 | 603979.438  | 356737.606 | 247241.832 |
|      |        | 55-59 | 1086086.992 | 629089.463 | 456997.529 |
|      |        | 60-64 | 1465829.290 | 899844.395 | 565984.895 |
|      |        | 65-69 | 1451838.682 | 941558.979 | 510279.703 |
|      |        | 70-74 | 692979.695  | 467652.676 | 225327.018 |
|      |        | 75-79 | 0.000       | 0.000      | 0.000      |
|      | Female | 30-34 | 34659.261   | 23508.671  | 11150.590  |
|      |        | 35-39 | 65652.924   | 44048.413  | 21604.511  |
|      |        | 40-44 | 133169.505  | 87162.706  | 46006.799  |
|      |        | 45-49 | 267988.924  | 169479.688 | 98509.236  |
|      |        | 50-54 | 523734.121  | 323230.492 | 200503.628 |
|      |        | 55-59 | 870859.170  | 524001.052 | 346858.117 |
|      |        | 60-64 | 1166683.329 | 717977.395 | 448705.933 |
|      |        | 65-69 | 1190003.066 | 749965.182 | 440037.884 |
|      |        | 70-74 | 588541.493  | 375258.834 | 213282.660 |
|      |        | 75-79 | 0.000       | 0.000      | 0.000      |

---

## Results for PHIM for Run 6 (ELL Summary Sensitivity\_Analysis\_3.RTF)

\*\*\*\*\*

**Table 6: Estimated Loss of Life, at the end of follow-up, Population and Number deaths adjusted for Ecig scenario**

| Disease      | Sex    | Age Group   | Years of life lost<br>NULL | Years of life lost<br>Ecig | Years of life<br>Saved |
|--------------|--------|-------------|----------------------------|----------------------------|------------------------|
| All Diseases | Males  | 30-34       | 443911.034                 | 237660.081                 | 206250.953             |
|              |        | 35-39       | 1146798.555                | 607297.521                 | 539501.034             |
|              |        | 40-44       | 2609591.408                | 1341701.728                | 1267889.68             |
|              |        | 45-49       | 4775841.753                | 2414250.246                | 2361591.51             |
|              |        | 50-54       | 7446969.205                | 3907781.563                | 3539187.64             |
|              |        | 55-59       | 8240205.925                | 4757726.206                | 3482479.72             |
|              |        | 60-64       | 8772829.118                | 5499351.007                | 3273478.11             |
|              |        | 65-69       | 6161494.678                | 4249180.053                | 1912314.63             |
|              |        | 70-74       | 2495906.274                | 1784558.489                | 711347.785             |
|              | 75-79  | 0.000       | 0.000                      | 0.000                      |                        |
|              | Female | 30-34       | 229140.561                 | 141727.085                 | 87413.476              |
|              |        | 35-39       | 570217.942                 | 345997.267                 | 224220.674             |
|              |        | 40-44       | 1267538.938                | 745664.038                 | 521874.899             |
|              |        | 45-49       | 2340070.698                | 1352930.309                | 987140.389             |
|              |        | 50-54       | 3743803.613                | 2179684.877                | 1564118.74             |
|              |        | 55-59       | 4591478.168                | 2796103.911                | 1795374.26             |
|              |        | 60-64       | 5207367.788                | 3298008.153                | 1909359.64             |
|              |        | 65-69       | 4092181.394                | 2734706.843                | 1357474.55             |
| 70-74        |        | 1776092.171 | 1206636.521                | 569455.650                 |                        |
| 75-79        | 0.000  | 0.000       | 0.000                      |                            |                        |
| Lung cancer  | Males  | 30-34       | 66065.017                  | 51605.421                  | 14459.596              |
|              |        | 35-39       | 232509.414                 | 183072.400                 | 49437.015              |
|              |        | 40-44       | 688628.041                 | 530165.751                 | 158462.290             |
|              |        | 45-49       | 1528300.367                | 1139732.917                | 388567.450             |
|              |        | 50-54       | 2730187.229                | 2004809.090                | 725378.140             |
|              |        | 55-59       | 3909101.673                | 2853244.756                | 1055856.92             |
|              |        | 60-64       | 4287716.660                | 3228391.355                | 1059325.30             |
|              |        | 65-69       | 3467897.115                | 2661537.124                | 806359.991             |
|              |        | 70-74       | 1312144.343                | 1025227.011                | 286917.333             |
|              | 75-79  | 0.000       | 0.000                      | 0.000                      |                        |
|              | Female | 30-34       | 51913.113                  | 40569.234                  | 11343.879              |
|              |        | 35-39       | 189792.904                 | 148552.860                 | 41240.045              |
|              |        | 40-44       | 527596.573                 | 395554.031                 | 132042.542             |
|              |        | 45-49       | 1122524.269                | 809754.312                 | 312769.956             |
|              |        | 50-54       | 1882214.322                | 1327569.127                | 554645.195             |
|              |        | 55-59       | 2595581.943                | 1806066.342                | 789515.601             |
|              |        | 60-64       | 2846273.090                | 2021122.085                | 825151.004             |
|              |        | 65-69       | 2358758.394                | 1694338.348                | 664420.046             |
| 70-74        |        | 937814.238  | 682676.929                 | 255137.308                 |                        |
| 75-79        | 0.000  | 0.000       | 0.000                      |                            |                        |
| IHD          | Males  | 30-34       | 263834.566                 | 117253.633                 | 146580.932             |
|              |        | 35-39       | 692140.150                 | 293014.051                 | 399126.099             |
|              |        | 40-44       | 1519708.432                | 583441.524                 | 936266.908             |
|              |        | 45-49       | 2568546.697                | 900941.079                 | 1667605.62             |
|              |        | 50-54       | 3632929.903                | 1327010.759                | 2305919.14             |
|              |        | 55-59       | 2807892.356                | 1088823.696                | 1719068.66             |
|              |        | 60-64       | 2599825.934                | 1184987.230                | 1414838.70             |
|              |        | 65-69       | 1113578.307                | 581176.432                 | 532401.876             |
|              |        | 70-74       | 437536.271                 | 260848.721                 | 176687.549             |
|              | 75-79  | 0.000       | 0.000                      | 0.000                      |                        |
|              | Female | 30-34       | 79649.097                  | 37661.545                  | 41987.551              |
|              |        | 35-39       | 193965.908                 | 80877.209                  | 113088.698             |
|              |        | 40-44       | 403380.974                 | 149755.622                 | 253625.352             |
|              |        | 45-49       | 671385.408                 | 230135.182                 | 441250.226             |
|              |        | 50-54       | 1011875.989                | 371898.653                 | 639977.337             |
|              |        | 55-59       | 849875.715                 | 340883.324                 | 508992.391             |
|              |        | 60-64       | 925490.876                 | 433394.480                 | 492096.396             |
|              |        | 65-69       | 455463.881                 | 244911.556                 | 210552.325             |
| 70-74        |        | 207681.216  | 125147.626                 | 82533.591                  |                        |
| 75-79        | 0.000  | 0.000       | 0.000                      |                            |                        |
| Stroke       | Males  | 30-34       | 73463.650                  | 42952.322                  | 30511.327              |
|              |        | 35-39       | 151934.057                 | 86118.858                  | 65815.198              |
|              |        | 40-44       | 262845.974                 | 140944.289                 | 121901.685             |
|              |        | 45-49       | 383421.246                 | 191870.284                 | 191550.962             |
|              |        | 50-54       | 479872.634                 | 217797.475                 | 262075.159             |
|              |        | 55-59       | 437124.903                 | 183326.968                 | 253797.936             |
|              |        | 60-64       | 419457.235                 | 179276.256                 | 240180.979             |
|              |        | 65-69       | 128180.574                 | 57324.627                  | 70855.947              |
|              |        | 70-74       | 53245.965                  | 25936.807                  | 27309.158              |
|              | 75-79  | 0.000       | 0.000                      | 0.000                      |                        |
|              | Female | 30-34       | 62919.090                  | 39986.885                  | 22932.205              |

**Results for PHIM for Run 6 (ELL Summary Sensitivity\_Analysis\_3.RTF)**

|      |        |       |             |            |            |
|------|--------|-------|-------------|------------|------------|
|      |        | 35-39 | 120806.205  | 72514.242  | 48291.964  |
|      |        | 40-44 | 203391.885  | 113164.703 | 90227.183  |
|      |        | 45-49 | 278172.097  | 143425.355 | 134746.742 |
|      |        | 50-54 | 325979.181  | 156467.754 | 169511.427 |
|      |        | 55-59 | 275161.340  | 123909.855 | 151251.485 |
|      |        | 60-64 | 268920.493  | 122666.736 | 146253.757 |
|      |        | 65-69 | 87956.054   | 41703.120  | 46252.934  |
|      |        | 70-74 | 42055.224   | 20752.979  | 21302.245  |
|      |        | 75-79 | 0.000       | 0.000      | 0.000      |
| COPD | Males  | 30-34 | 40547.801   | 25848.704  | 14699.097  |
|      |        | 35-39 | 70214.933   | 45092.212  | 25122.722  |
|      |        | 40-44 | 138408.960  | 87150.163  | 51258.797  |
|      |        | 45-49 | 295573.443  | 181705.965 | 113867.478 |
|      |        | 50-54 | 603979.438  | 358164.240 | 245815.199 |
|      |        | 55-59 | 1086086.992 | 632330.787 | 453756.205 |
|      |        | 60-64 | 1465829.290 | 906696.166 | 559133.124 |
|      |        | 65-69 | 1451838.682 | 949141.870 | 502696.812 |
|      |        | 70-74 | 692979.695  | 472545.950 | 220433.745 |
|      |        | 75-79 | 0.000       | 0.000      | 0.000      |
|      | Female | 30-34 | 34659.261   | 23509.420  | 11149.841  |
|      |        | 35-39 | 65652.924   | 44052.957  | 21599.968  |
|      |        | 40-44 | 133169.505  | 87189.683  | 45979.822  |
|      |        | 45-49 | 267988.924  | 169615.459 | 98373.465  |
|      |        | 50-54 | 523734.121  | 323749.343 | 199984.777 |
|      |        | 55-59 | 870859.170  | 525244.390 | 345614.779 |
|      |        | 60-64 | 1166683.329 | 720824.851 | 445858.477 |
|      |        | 65-69 | 1190003.066 | 753753.819 | 436249.247 |
|      |        | 70-74 | 588541.493  | 378058.987 | 210482.507 |
|      |        | 75-79 | 0.000       | 0.000      | 0.000      |

---

## Results for PHIM for Run 8 (ELL Summary Sensitivity\_Analysis\_3.RTF)

\*\*\*\*\*

### Estimated Loss of Life from the E Component for Run: 8, Simulation: 1

Country: US (United States)

Follow-up Period: 1990 to 2039

**Table 1: Estimated Loss of Life, at the end of follow-up, all age groups combined, Population unadjusted for deaths in Ecig scenario**

| Disease      | Sex    | Year | Years of life lost<br>NULL | Years of life lost<br>Ecig | Years of life<br>Saved |
|--------------|--------|------|----------------------------|----------------------------|------------------------|
| All Diseases | Males  | 2039 | 42093547.949               | 24577017.788               | 17516530.2             |
|              | Female | 2039 | 23817891.273               | 14700080.837               | 9117810.44             |
| Lung cancer  | Males  | 2039 | 18222549.860               | 13568841.082               | 4653708.78             |
|              | Female | 2039 | 12512468.845               | 8869151.505                | 3643317.34             |
| IHD          | Males  | 2039 | 15635992.616               | 6272150.818                | 9363841.80             |
|              | Female | 2039 | 4798769.065                | 1997577.633                | 2801191.43             |
| Stroke       | Males  | 2039 | 2389546.238                | 1116905.583                | 1272640.66             |
|              | Female | 2039 | 1665361.569                | 830032.985                 | 835328.584             |
| COPD         | Males  | 2039 | 5845459.234                | 3619120.306                | 2226338.93             |
|              | Female | 2039 | 4841291.793                | 3003318.714                | 1837973.08             |

## Results for PHIM for Run 8 (ELL Summary Sensitivity\_Analysis\_3.RTF)

\*\*\*\*\*

**Table 2: Estimated Loss of Life, at the end of follow-up, all age groups combined, Population and Number deaths adjusted for Ecig scenario**

| Disease      | Sex    | Year | Years of life lost<br>NULL | Years of life lost<br>Ecig | Years of life<br>Saved |
|--------------|--------|------|----------------------------|----------------------------|------------------------|
| All Diseases | Males  | 2039 | 42093547.949               | 24673484.460               | 17420063.5             |
|              | Female | 2039 | 23817891.273               | 14736425.514               | 9081465.76             |
| Lung cancer  | Males  | 2039 | 18222549.860               | 13628643.625               | 4593906.23             |
|              | Female | 2039 | 12512468.845               | 8891834.834                | 3620634.01             |
| IHD          | Males  | 2039 | 15635992.616               | 6282478.278                | 9353514.34             |
|              | Female | 2039 | 4798769.065                | 1999300.144                | 2799468.92             |
| Stroke       | Males  | 2039 | 2389546.238                | 1118952.354                | 1270593.88             |
|              | Female | 2039 | 1665361.569                | 830666.633                 | 834694.936             |
| COPD         | Males  | 2039 | 5845459.234                | 3643410.203                | 2202049.03             |
|              | Female | 2039 | 4841291.793                | 3014623.903                | 1826667.89             |



## Results for PHIM for Run 8 (ELL Summary Sensitivity\_Analysis\_3.RTF)

\*\*\*\*\*

**Table 3: Estimated Loss of Life, All age groups combined, Population unadjusted for deaths in Ecig scenario, cumulative over years**

| Disease      | Sex          | Year         | Years of life lost<br>NULL | Years of life lost<br>Ecig | Years of life<br>Saved |
|--------------|--------------|--------------|----------------------------|----------------------------|------------------------|
| All Diseases | Males        | 1990         | 1304839.645                | 1304839.645                | 0.000                  |
|              |              | 1991         | 2579865.358                | 2571191.563                | 8673.794               |
|              |              | 1992         | 3830683.831                | 3798425.955                | 32257.876              |
|              |              | 1993         | 5076567.803                | 5000903.213                | 75664.590              |
|              |              | 1994         | 6292145.526                | 6149850.895                | 142294.631             |
|              |              | 1995         | 7485537.010                | 7249876.525                | 235660.485             |
|              |              | 1996         | 8655955.028                | 8298937.330                | 357017.698             |
|              |              | 1997         | 9791729.713                | 9286529.739                | 505199.974             |
|              |              | 1998         | 10899134.186               | 10220296.659               | 678837.527             |
|              |              | 1999         | 12070409.674               | 11159335.857               | 911073.818             |
|              |              | 2000         | 13231384.595               | 12057605.201               | 1173779.39             |
|              |              | 2001         | 14371761.018               | 12905295.109               | 1466465.91             |
|              |              | 2002         | 15508906.386               | 13714929.954               | 1793976.43             |
|              |              | 2003         | 16638100.422               | 14486809.334               | 2151291.09             |
|              |              | 2004         | 17736465.088               | 15210614.559               | 2525850.53             |
|              |              | 2005         | 18834658.606               | 15907721.981               | 2926936.63             |
|              |              | 2006         | 19909100.501               | 16558236.920               | 3350863.58             |
|              |              | 2007         | 20958321.463               | 17169989.421               | 3788332.04             |
|              |              | 2008         | 22000068.148               | 17757195.551               | 4242872.60             |
|              |              | 2009         | 23018816.903               | 18311263.415               | 4707553.49             |
|              |              | 2010         | 24018480.537               | 18833664.799               | 5184815.74             |
|              |              | 2011         | 25003034.574               | 19328117.941               | 5674916.63             |
|              |              | 2012         | 25969871.429               | 19793370.464               | 6176500.97             |
|              |              | 2013         | 26920275.180               | 20231547.022               | 6688728.16             |
|              |              | 2014         | 27849005.227               | 20640993.490               | 7208011.74             |
|              |              | 2015         | 28749620.400               | 21025482.404               | 7724138.00             |
|              |              | 2016         | 29622417.562               | 21376268.525               | 8246149.04             |
|              |              | 2017         | 30462559.724               | 21696173.194               | 8766386.53             |
|              |              | 2018         | 31293299.299               | 22002311.920               | 9290987.38             |
|              |              | 2019         | 32109993.427               | 22290252.472               | 9819740.96             |
|              |              | 2020         | 32883323.977               | 22557294.518               | 10326029.5             |
|              |              | 2021         | 33610102.554               | 22786993.468               | 10823109.1             |
|              |              | 2022         | 34322010.448               | 23001087.557               | 11320922.9             |
|              |              | 2023         | 35018383.550               | 23199697.312               | 11818686.2             |
|              |              | 2024         | 35700177.955               | 23383961.180               | 12316216.8             |
|              |              | 2025         | 36315500.346               | 23549905.214               | 12765595.1             |
|              |              | 2026         | 36896159.343               | 23688899.032               | 13207260.3             |
|              |              | 2027         | 37462570.116               | 23816796.410               | 13645773.7             |
|              |              | 2028         | 38015337.780               | 23933800.132               | 14081537.6             |
|              |              | 2029         | 38554814.764               | 24040980.186               | 14513834.6             |
|              |              | 2030         | 39003805.400               | 24132930.950               | 14870874.4             |
|              |              | 2031         | 39436509.703               | 24209334.473               | 15227175.2             |
| 2032         | 39858470.458 | 24279008.404 | 15579462.1                 |                            |                        |
| 2033         | 40270147.082 | 24341902.773 | 15928244.3                 |                            |                        |
| 2034         | 40672665.743 | 24398849.904 | 16273815.8                 |                            |                        |
| 2035         | 40962732.664 | 24442896.673 | 16519836.0                 |                            |                        |
| 2036         | 41255021.653 | 24481446.760 | 16773574.9                 |                            |                        |
| 2037         | 41540573.023 | 24516604.081 | 17023968.9                 |                            |                        |
| 2038         | 41820158.066 | 24548367.249 | 17271790.8                 |                            |                        |
| 2039         | 42093547.949 | 24577017.788 | 17516530.2                 |                            |                        |
|              | Female       | 1990         | 588979.406                 | 588979.406                 | 0.000                  |
| 1991         |              | 1182571.252  | 1179606.280                | 2964.972                   |                        |
| 1992         |              | 1777346.679  | 1766094.241                | 11252.438                  |                        |
| 1993         |              | 2380261.899  | 2353252.931                | 27008.968                  |                        |
| 1994         |              | 2983130.039  | 2931288.593                | 51841.446                  |                        |
| 1995         |              | 3588982.584  | 3501882.708                | 87099.876                  |                        |
| 1996         |              | 4195430.235  | 4060418.734                | 135011.500                 |                        |
| 1997         |              | 4793866.694  | 4600418.132                | 193448.562                 |                        |
| 1998         |              | 5389747.381  | 5126099.248                | 263648.133                 |                        |
| 1999         |              | 6006722.467  | 5652011.315                | 354711.152                 |                        |
| 2000         |              | 6625758.871  | 6166934.348                | 458824.523                 |                        |
| 2001         |              | 7245135.411  | 6666892.024                | 578243.387                 |                        |
| 2002         |              | 7867492.021  | 7154015.369                | 713476.651                 |                        |
| 2003         |              | 8485051.793  | 7623518.716                | 861533.077                 |                        |
| 2004         |              | 9092994.774  | 8071984.349                | 1021010.42                 |                        |
| 2005         |              | 9706032.803  | 8510637.010                | 1195395.79                 |                        |
| 2006         |              | 10311907.548 | 8929804.521                | 1382103.03                 |                        |
| 2007         |              | 10909437.502 | 9331574.155                | 1577863.35                 |                        |
| 2008         |              | 11506462.491 | 9717763.751                | 1788698.74                 |                        |
| 2009         |              | 12098393.287 | 10090231.107               | 2008162.18                 |                        |
| 2010         |              | 12681188.981 | 10444243.564               | 2236945.42                 |                        |

**Results for PHIM for Run 8 (ELL Summary Sensitivity\_Analysis\_3.RTF)**

|             |       |      |              |              |            |
|-------------|-------|------|--------------|--------------|------------|
|             |       | 2011 | 13260062.991 | 10782783.562 | 2477279.43 |
|             |       | 2012 | 13839417.441 | 11108436.308 | 2730981.13 |
|             |       | 2013 | 14409614.758 | 11418064.778 | 2991549.98 |
|             |       | 2014 | 14976658.746 | 11712037.108 | 3264621.64 |
|             |       | 2015 | 15529977.821 | 11988977.145 | 3541000.68 |
|             |       | 2016 | 16066640.764 | 12245110.819 | 3821529.95 |
|             |       | 2017 | 16590035.078 | 12484036.733 | 4105998.34 |
|             |       | 2018 | 17098716.137 | 12709209.634 | 4389506.50 |
|             |       | 2019 | 17599868.850 | 12921219.950 | 4678648.90 |
|             |       | 2020 | 18081346.241 | 13119017.858 | 4962328.38 |
|             |       | 2021 | 18537594.460 | 13296248.449 | 5241346.01 |
|             |       | 2022 | 18985300.234 | 13461829.586 | 5523470.65 |
|             |       | 2023 | 19423958.747 | 13616173.720 | 5807785.03 |
|             |       | 2024 | 19853347.772 | 13759184.425 | 6094163.35 |
|             |       | 2025 | 20252822.245 | 13889276.257 | 6363545.99 |
|             |       | 2026 | 20619307.063 | 14000863.568 | 6618443.50 |
|             |       | 2027 | 20976063.406 | 14103314.843 | 6872748.56 |
|             |       | 2028 | 21323641.947 | 14197643.589 | 7125998.36 |
|             |       | 2029 | 21662117.106 | 14283779.814 | 7378337.29 |
|             |       | 2030 | 21960971.694 | 14359070.444 | 7601901.25 |
|             |       | 2031 | 22224951.983 | 14419371.701 | 7805580.28 |
|             |       | 2032 | 22480397.853 | 14473758.556 | 8006639.30 |
|             |       | 2033 | 22728639.455 | 14523197.244 | 8205442.21 |
|             |       | 2034 | 22970448.888 | 14567763.552 | 8402685.34 |
|             |       | 2035 | 23164154.188 | 14603663.907 | 8560490.28 |
|             |       | 2036 | 23334538.616 | 14631587.478 | 8702951.14 |
|             |       | 2037 | 23499760.723 | 14656712.712 | 8843048.01 |
|             |       | 2038 | 23660308.401 | 14679443.996 | 8980864.40 |
|             |       | 2039 | 23817891.273 | 14700080.837 | 9117810.44 |
| Lung cancer | Males | 1990 | 595621.791   | 595621.791   | 0.000      |
|             |       | 1991 | 1177744.113  | 1177096.215  | 647.898    |
|             |       | 1992 | 1750034.892  | 1747587.721  | 2447.171   |
|             |       | 1993 | 2319752.308  | 2313789.405  | 5962.902   |
|             |       | 1994 | 2872597.339  | 2861033.131  | 11564.207  |
|             |       | 1995 | 3411494.825  | 3391810.699  | 19684.126  |
|             |       | 1996 | 3945569.726  | 3914442.807  | 31126.919  |
|             |       | 1997 | 4463316.362  | 4417438.251  | 45878.111  |
|             |       | 1998 | 4975301.180  | 4910658.898  | 64642.283  |
|             |       | 1999 | 5473691.125  | 5386038.109  | 87653.016  |
|             |       | 2000 | 5977500.570  | 5861061.506  | 116439.064 |
|             |       | 2001 | 6474795.516  | 6323838.715  | 150956.801 |
|             |       | 2002 | 6968769.705  | 6776848.222  | 191921.483 |
|             |       | 2003 | 7460282.140  | 7220112.508  | 240169.632 |
|             |       | 2004 | 7947048.275  | 7651513.857  | 295534.419 |
|             |       | 2005 | 8430571.669  | 8072009.409  | 358562.260 |
|             |       | 2006 | 8903945.390  | 8474881.296  | 429064.094 |
|             |       | 2007 | 9364177.982  | 8857882.095  | 506295.887 |
|             |       | 2008 | 9822525.458  | 9229568.859  | 592956.599 |
|             |       | 2009 | 10275228.886 | 9587030.872  | 688198.014 |
|             |       | 2010 | 10720275.500 | 9928960.661  | 791314.839 |
|             |       | 2011 | 11155356.373 | 10253458.124 | 901898.249 |
|             |       | 2012 | 11582611.617 | 10561193.292 | 1021418.32 |
|             |       | 2013 | 11998803.791 | 10850638.083 | 1148165.71 |
|             |       | 2014 | 12402087.090 | 11121171.061 | 1280916.03 |
|             |       | 2015 | 12793451.706 | 11374614.207 | 1418837.50 |
|             |       | 2016 | 13160101.653 | 11602325.118 | 1557776.54 |
|             |       | 2017 | 13503583.414 | 11806758.424 | 1696824.99 |
|             |       | 2018 | 13859755.737 | 12007539.299 | 1852216.44 |
|             |       | 2019 | 14211625.176 | 12196405.781 | 2015219.40 |
|             |       | 2020 | 14553935.288 | 12372223.870 | 2181711.42 |
|             |       | 2021 | 14851747.495 | 12516962.303 | 2334785.19 |
|             |       | 2022 | 15144531.004 | 12651473.988 | 2493057.02 |
|             |       | 2023 | 15431932.496 | 12775872.671 | 2656059.82 |
|             |       | 2024 | 15713920.740 | 12890811.457 | 2823109.28 |
|             |       | 2025 | 15979112.816 | 12994423.782 | 2984689.03 |
|             |       | 2026 | 16206550.153 | 13076347.862 | 3130202.29 |
|             |       | 2027 | 16428826.050 | 13151225.266 | 3277600.78 |
|             |       | 2028 | 16645902.186 | 13219318.923 | 3426583.26 |
|             |       | 2029 | 16858126.517 | 13281388.458 | 3576738.06 |
|             |       | 2030 | 17045220.687 | 13334608.035 | 3710612.65 |
|             |       | 2031 | 17208482.610 | 13375985.233 | 3832497.38 |
|             |       | 2032 | 17367586.074 | 13413476.586 | 3954109.49 |
|             |       | 2033 | 17522716.280 | 13447144.950 | 4075571.33 |
|             |       | 2034 | 17674226.555 | 13477548.530 | 4196678.03 |
|             |       | 2035 | 17792201.734 | 13501011.118 | 4291190.62 |
|             |       | 2036 | 17903508.236 | 13520563.765 | 4382944.47 |
|             |       | 2037 | 18012162.345 | 13538364.384 | 4473797.96 |
|             |       | 2038 | 18118464.470 | 13554384.624 | 4564079.85 |

**Results for PHIM for Run 8 (ELL Summary Sensitivity\_Analysis\_3.RTF)**

|     |        |      |              |              |            |
|-----|--------|------|--------------|--------------|------------|
|     | Female | 2039 | 18222549.860 | 13568841.082 | 4653708.78 |
|     |        | 1990 | 307897.357   | 307897.357   | 0.000      |
|     |        | 1991 | 616547.418   | 616130.924   | 416.494    |
|     |        | 1992 | 931086.773   | 929436.791   | 1649.982   |
|     |        | 1993 | 1246155.671  | 1242092.186  | 4063.485   |
|     |        | 1994 | 1561212.934  | 1553209.008  | 8003.926   |
|     |        | 1995 | 1879967.742  | 1866020.966  | 13946.776  |
|     |        | 1996 | 2197488.109  | 2175308.435  | 22179.674  |
|     |        | 1997 | 2515698.453  | 2482565.700  | 33132.752  |
|     |        | 1998 | 2836249.556  | 2789091.247  | 47158.309  |
|     |        | 1999 | 3150201.390  | 3085950.855  | 64250.535  |
|     |        | 2000 | 3472722.342  | 3387252.622  | 85469.721  |
|     |        | 2001 | 3796994.889  | 3685838.363  | 111156.526 |
|     |        | 2002 | 4126619.935  | 3984546.119  | 142073.817 |
|     |        | 2003 | 4454982.533  | 4277156.553  | 177825.980 |
|     |        | 2004 | 4784343.030  | 4565090.685  | 219252.345 |
|     |        | 2005 | 5113443.121  | 4846992.462  | 266450.658 |
|     |        | 2006 | 5442543.963  | 5122242.845  | 320301.118 |
|     |        | 2007 | 5772441.497  | 5391531.604  | 380909.892 |
|     |        | 2008 | 6091911.943  | 5645560.810  | 446351.133 |
|     |        | 2009 | 6413671.330  | 5893894.501  | 519776.829 |
|     |        | 2010 | 6730763.530  | 6131808.999  | 598954.531 |
|     |        | 2011 | 7043614.101  | 6359042.484  | 684571.617 |
|     |        | 2012 | 7356270.780  | 6578494.583  | 777776.197 |
|     |        | 2013 | 7662551.964  | 6785967.809  | 876584.155 |
|     |        | 2014 | 7964551.465  | 6983029.466  | 981521.999 |
|     |        | 2015 | 8254895.403  | 7166195.162  | 1088700.24 |
|     |        | 2016 | 8530661.848  | 7332871.663  | 1197790.18 |
|     |        | 2017 | 8795826.122  | 7486628.785  | 1309197.34 |
|     |        | 2018 | 9067233.707  | 7635984.849  | 1431248.86 |
|     |        | 2019 | 9335343.270  | 7776279.913  | 1559063.36 |
|     |        | 2020 | 9596110.883  | 7906998.733  | 1689112.15 |
|     |        | 2021 | 9833186.859  | 8020759.338  | 1812427.52 |
|     |        | 2022 | 10066452.037 | 8126601.165  | 1939850.87 |
|     |        | 2023 | 10295503.609 | 8224812.657  | 2070690.95 |
|     |        | 2024 | 10520125.318 | 8315343.162  | 2204782.16 |
|     |        | 2025 | 10731915.863 | 8397224.240  | 2334691.62 |
|     |        | 2026 | 10917495.549 | 8465030.611  | 2452464.94 |
|     |        | 2027 | 11098620.885 | 8526904.017  | 2571716.87 |
|     |        | 2028 | 11275441.234 | 8583529.987  | 2691911.25 |
|     |        | 2029 | 11447962.710 | 8634902.487  | 2813060.22 |
|     |        | 2030 | 11601867.623 | 8679324.910  | 2922542.71 |
|     |        | 2031 | 11731666.516 | 8713659.069  | 3018007.45 |
|     |        | 2032 | 11857585.969 | 8744482.791  | 3113103.18 |
|     |        | 2033 | 11980128.625 | 8772365.768  | 3207762.86 |
|     |        | 2034 | 12099562.464 | 8797402.551  | 3302159.91 |
|     |        | 2035 | 12195919.946 | 8817171.815  | 3378748.13 |
|     |        | 2036 | 12278201.969 | 8832209.390  | 3445992.58 |
|     |        | 2037 | 12358146.336 | 8845750.709  | 3512395.63 |
|     |        | 2038 | 12435978.633 | 8858007.355  | 3577971.28 |
|     |        | 2039 | 12512468.845 | 8869151.505  | 3643317.34 |
| IHD | Males  | 1990 | 517209.093   | 517209.093   | 0.000      |
|     |        | 1991 | 1019219.395  | 1012116.414  | 7102.981   |
|     |        | 1992 | 1509598.614  | 1483217.267  | 26381.348  |
|     |        | 1993 | 1992735.299  | 1931260.577  | 61474.722  |
|     |        | 1994 | 2462877.575  | 2348141.482  | 114736.093 |
|     |        | 1995 | 2928249.390  | 2739376.571  | 188872.819 |
|     |        | 1996 | 3377377.730  | 3093366.660  | 284011.070 |
|     |        | 1997 | 3809062.472  | 3410295.933  | 398766.539 |
|     |        | 1998 | 4222213.867  | 3690913.135  | 531300.732 |
|     |        | 1999 | 4708317.743  | 3994112.283  | 714205.461 |
|     |        | 2000 | 5182084.396  | 4265066.567  | 917017.829 |
|     |        | 2001 | 5644097.705  | 4504102.445  | 1139995.26 |
|     |        | 2002 | 6107232.129  | 4720374.114  | 1386858.02 |
|     |        | 2003 | 6561785.704  | 4911094.114  | 1650691.59 |
|     |        | 2004 | 6996156.348  | 5075092.978  | 1921063.37 |
|     |        | 2005 | 7426261.361  | 5221408.488  | 2204852.87 |
|     |        | 2006 | 7849012.694  | 5349185.426  | 2499827.27 |
|     |        | 2007 | 8255300.530  | 5459136.423  | 2796164.11 |
|     |        | 2008 | 8650662.040  | 5555240.496  | 3095421.54 |
|     |        | 2009 | 9030818.513  | 5638527.135  | 3392291.38 |
|     |        | 2010 | 9403026.327  | 5712005.813  | 3691020.51 |
|     |        | 2011 | 9767535.506  | 5776717.198  | 3990818.31 |
|     |        | 2012 | 10123044.281 | 5833958.593  | 4289085.69 |
|     |        | 2013 | 10470104.786 | 5884471.742  | 4585633.04 |
|     |        | 2014 | 10807756.112 | 5929262.519  | 4878493.59 |
|     |        | 2015 | 11130681.425 | 5968604.605  | 5162076.82 |
|     |        | 2016 | 11448966.506 | 6003968.905  | 5444997.60 |

**Results for PHIM for Run 8 (ELL Summary Sensitivity\_Analysis\_3.RTF)**

|        |        |      |              |             |            |
|--------|--------|------|--------------|-------------|------------|
|        |        | 2017 | 11758164.882 | 6035666.530 | 5722498.35 |
|        |        | 2018 | 12054448.241 | 6063009.257 | 5991438.98 |
|        |        | 2019 | 12341606.261 | 6087580.050 | 6254026.21 |
|        |        | 2020 | 12600728.939 | 6108457.827 | 6492271.11 |
|        |        | 2021 | 12861767.105 | 6127835.447 | 6733931.66 |
|        |        | 2022 | 13114168.616 | 6145414.324 | 6968754.29 |
|        |        | 2023 | 13357894.797 | 6161248.719 | 7196646.08 |
|        |        | 2024 | 13593848.521 | 6175673.969 | 7418174.55 |
|        |        | 2025 | 13789177.359 | 6187313.896 | 7601863.46 |
|        |        | 2026 | 13993401.656 | 6198686.561 | 7794715.09 |
|        |        | 2027 | 14190519.224 | 6209245.489 | 7981273.74 |
|        |        | 2028 | 14381193.356 | 6218864.582 | 8162328.77 |
|        |        | 2029 | 14565171.927 | 6227597.850 | 8337574.08 |
|        |        | 2030 | 14697381.605 | 6233946.887 | 8463434.72 |
|        |        | 2031 | 14842203.512 | 6240633.399 | 8601570.11 |
|        |        | 2032 | 14982485.826 | 6246950.086 | 8735535.74 |
|        |        | 2033 | 15118410.647 | 6252714.921 | 8865695.73 |
|        |        | 2034 | 15250284.398 | 6257904.686 | 8992379.71 |
|        |        | 2035 | 15322911.166 | 6260805.258 | 9062105.91 |
|        |        | 2036 | 15405115.031 | 6263943.963 | 9141171.07 |
|        |        | 2037 | 15484709.137 | 6266929.142 | 9217779.99 |
|        |        | 2038 | 15561812.193 | 6269706.816 | 9292105.38 |
|        |        | 2039 | 15635992.616 | 6272150.818 | 9363841.80 |
|        | Female | 1990 | 147299.110   | 147299.110  | 0.000      |
|        |        | 1991 | 295122.462   | 293257.343  | 1865.120   |
|        |        | 1992 | 439962.920   | 432979.125  | 6983.795   |
|        |        | 1993 | 584735.615   | 568169.824  | 16565.792  |
|        |        | 1994 | 727640.783   | 696305.366  | 31335.416  |
|        |        | 1995 | 868486.937   | 816679.636  | 51807.302  |
|        |        | 1996 | 1010321.847  | 930787.705  | 79534.143  |
|        |        | 1997 | 1144230.930  | 1032275.175 | 111955.754 |
|        |        | 1998 | 1274513.622  | 1124407.353 | 150106.269 |
|        |        | 1999 | 1426725.938  | 1224405.744 | 202320.193 |
|        |        | 2000 | 1573462.680  | 1313749.482 | 259713.198 |
|        |        | 2001 | 1719132.015  | 1394261.956 | 324870.059 |
|        |        | 2002 | 1863006.732  | 1466359.583 | 396647.149 |
|        |        | 2003 | 2002943.227  | 1529827.464 | 473115.763 |
|        |        | 2004 | 2137798.705  | 1585043.277 | 552755.428 |
|        |        | 2005 | 2271071.245  | 1634542.846 | 636528.399 |
|        |        | 2006 | 2400707.731  | 1677501.762 | 723205.969 |
|        |        | 2007 | 2523634.512  | 1714204.906 | 809429.607 |
|        |        | 2008 | 2648752.232  | 1747679.765 | 901072.467 |
|        |        | 2009 | 2765973.961  | 1776125.873 | 989848.088 |
|        |        | 2010 | 2881329.235  | 1801448.517 | 1079880.72 |
|        |        | 2011 | 2994972.694  | 1823889.651 | 1171083.04 |
|        |        | 2012 | 3108958.829  | 1844122.068 | 1264836.76 |
|        |        | 2013 | 3218140.416  | 1861924.999 | 1356215.42 |
|        |        | 2014 | 3328387.914  | 1878212.782 | 1450175.13 |
|        |        | 2015 | 3435342.796  | 1892888.555 | 1542454.24 |
|        |        | 2016 | 3539189.408  | 1905967.014 | 1633222.39 |
|        |        | 2017 | 3640041.363  | 1917620.463 | 1722420.90 |
|        |        | 2018 | 3732645.362  | 1927424.378 | 1805220.98 |
|        |        | 2019 | 3821421.978  | 1936095.536 | 1885326.44 |
|        |        | 2020 | 3902115.950  | 1943493.878 | 1958622.07 |
|        |        | 2021 | 3984301.053  | 1950468.291 | 2033832.76 |
|        |        | 2022 | 4062629.299  | 1956626.734 | 2106002.56 |
|        |        | 2023 | 4137348.729  | 1962122.849 | 2175225.88 |
|        |        | 2024 | 4208611.493  | 1967015.119 | 2241596.37 |
|        |        | 2025 | 4269419.492  | 1971047.964 | 2298371.53 |
|        |        | 2026 | 4330969.998  | 1974861.862 | 2356108.14 |
|        |        | 2027 | 4389134.306  | 1978247.840 | 2410886.47 |
|        |        | 2028 | 4444222.970  | 1981300.909 | 2462922.06 |
|        |        | 2029 | 4496447.877  | 1984074.108 | 2512373.77 |
|        |        | 2030 | 4536975.698  | 1986166.161 | 2550809.54 |
|        |        | 2031 | 4578338.586  | 1988196.113 | 2590142.47 |
|        |        | 2032 | 4617397.784  | 1990030.207 | 2627367.58 |
|        |        | 2033 | 4654407.697  | 1991727.073 | 2662680.62 |
|        |        | 2034 | 4689913.454  | 1993307.874 | 2696605.58 |
|        |        | 2035 | 4712518.190  | 1994259.632 | 2718258.56 |
|        |        | 2036 | 4735845.827  | 1995190.982 | 2740654.84 |
|        |        | 2037 | 4757958.806  | 1996041.118 | 2761917.69 |
|        |        | 2038 | 4778813.806  | 1996833.966 | 2781979.84 |
|        |        | 2039 | 4798769.065  | 1997577.633 | 2801191.43 |
| Stroke | Males  | 1990 | 75005.854    | 75005.854   | 0.000      |
|        |        | 1991 | 149463.017   | 148743.133  | 719.885    |
|        |        | 1992 | 222966.278   | 220288.740  | 2677.538   |
|        |        | 1993 | 296801.879   | 290421.781  | 6380.098   |
|        |        | 1994 | 372453.706   | 360092.941  | 12360.765  |

**Results for PHIM for Run 8 (ELL Summary Sensitivity\_Analysis\_3.RTF)**

|        |      |             |             |            |
|--------|------|-------------|-------------|------------|
|        | 1995 | 448401.338  | 427494.978  | 20906.360  |
|        | 1996 | 523536.301  | 491355.497  | 32180.804  |
|        | 1997 | 596763.211  | 550588.566  | 46174.645  |
|        | 1998 | 667546.681  | 604829.606  | 62717.075  |
|        | 1999 | 734925.407  | 653534.824  | 81390.583  |
|        | 2000 | 803749.361  | 700300.703  | 103448.658 |
|        | 2001 | 870081.588  | 742319.300  | 127762.289 |
|        | 2002 | 935347.140  | 780807.195  | 154539.945 |
|        | 2003 | 1001627.349 | 816854.425  | 184772.924 |
|        | 2004 | 1066587.976 | 849531.018  | 217056.958 |
|        | 2005 | 1130548.052 | 879095.447  | 251452.605 |
|        | 2006 | 1195132.454 | 906399.318  | 288733.135 |
|        | 2007 | 1258974.043 | 931075.829  | 327898.214 |
|        | 2008 | 1320124.867 | 952559.407  | 367565.459 |
|        | 2009 | 1380776.123 | 972000.183  | 408775.940 |
|        | 2010 | 1440048.533 | 989360.259  | 450688.274 |
|        | 2011 | 1497484.847 | 1004720.891 | 492763.956 |
|        | 2012 | 1554496.526 | 1018502.384 | 535994.142 |
|        | 2013 | 1610819.598 | 1030890.539 | 579929.059 |
|        | 2014 | 1667484.890 | 1042158.153 | 625326.736 |
|        | 2015 | 1720948.287 | 1051965.704 | 668982.583 |
|        | 2016 | 1775699.228 | 1061066.285 | 714632.943 |
|        | 2017 | 1830250.175 | 1069340.573 | 760909.601 |
|        | 2018 | 1875958.950 | 1075704.210 | 800254.740 |
|        | 2019 | 1920359.232 | 1081368.680 | 838990.551 |
|        | 2020 | 1960605.297 | 1086146.535 | 874458.762 |
|        | 2021 | 1998912.887 | 1090316.668 | 908596.220 |
|        | 2022 | 2036003.696 | 1094023.359 | 941980.337 |
|        | 2023 | 2071857.536 | 1097315.121 | 974542.415 |
|        | 2024 | 2106636.468 | 1100276.484 | 1006359.98 |
|        | 2025 | 2136450.873 | 1102671.969 | 1033778.90 |
|        | 2026 | 2164796.470 | 1104779.853 | 1060016.62 |
|        | 2027 | 2192079.608 | 1106683.504 | 1085396.10 |
|        | 2028 | 2218404.367 | 1108385.952 | 1110018.41 |
|        | 2029 | 2243769.140 | 1109917.032 | 1133852.11 |
|        | 2030 | 2263570.213 | 1111063.982 | 1152506.23 |
|        | 2031 | 2282521.590 | 1112103.627 | 1170417.96 |
|        | 2032 | 2300804.945 | 1113054.541 | 1187750.40 |
|        | 2033 | 2318464.018 | 1113915.735 | 1204548.28 |
|        | 2034 | 2335611.973 | 1114699.778 | 1220912.19 |
|        | 2035 | 2347097.290 | 1115212.487 | 1231884.80 |
|        | 2036 | 2358248.747 | 1115686.041 | 1242562.71 |
|        | 2037 | 2369033.655 | 1116129.693 | 1252903.96 |
|        | 2038 | 2379490.114 | 1116540.298 | 1262949.82 |
|        | 2039 | 2389546.238 | 1116905.583 | 1272640.66 |
| Female | 1990 | 56348.092   | 56348.092   | 0.000      |
|        | 1991 | 110871.862  | 110356.693  | 515.169    |
|        | 1992 | 165654.454  | 163676.191  | 1978.263   |
|        | 1993 | 220008.519  | 215281.965  | 4726.554   |
|        | 1994 | 275706.807  | 266518.928  | 9187.879   |
|        | 1995 | 331417.547  | 315906.754  | 15510.794  |
|        | 1996 | 387580.161  | 363557.338  | 24022.823  |
|        | 1997 | 442778.242  | 408183.215  | 34595.026  |
|        | 1998 | 496117.305  | 449112.259  | 47005.046  |
|        | 1999 | 548268.214  | 486919.301  | 61348.914  |
|        | 2000 | 601693.202  | 523420.450  | 78272.752  |
|        | 2001 | 652221.103  | 555743.703  | 96477.399  |
|        | 2002 | 703022.600  | 585989.691  | 117032.909 |
|        | 2003 | 752023.351  | 613066.993  | 138956.358 |
|        | 2004 | 799826.733  | 637464.369  | 162362.364 |
|        | 2005 | 847563.928  | 659967.474  | 187596.454 |
|        | 2006 | 894205.027  | 680179.338  | 214025.689 |
|        | 2007 | 939571.282  | 698189.876  | 241381.406 |
|        | 2008 | 983437.578  | 714165.555  | 269272.023 |
|        | 2009 | 1025803.786 | 728300.310  | 297503.476 |
|        | 2010 | 1066964.934 | 740820.705  | 326144.229 |
|        | 2011 | 1106954.044 | 751906.072  | 355047.973 |
|        | 2012 | 1146108.461 | 761831.036  | 384277.424 |
|        | 2013 | 1183544.689 | 770522.129  | 413022.560 |
|        | 2014 | 1221220.945 | 778488.895  | 442732.050 |
|        | 2015 | 1258289.311 | 785745.215  | 472544.096 |
|        | 2016 | 1294830.207 | 792282.866  | 502547.341 |
|        | 2017 | 1330332.626 | 798100.926  | 532231.700 |
|        | 2018 | 1360571.987 | 802664.612  | 557907.376 |
|        | 2019 | 1389848.723 | 806697.782  | 583150.940 |
|        | 2020 | 1416046.192 | 810070.204  | 605975.989 |
|        | 2021 | 1440588.850 | 812971.292  | 627617.558 |
|        | 2022 | 1464157.934 | 815528.513  | 648629.421 |

**Results for PHIM for Run 8 (ELL Summary Sensitivity\_Analysis\_3.RTF)**

|      |             |             |             |             |            |
|------|-------------|-------------|-------------|-------------|------------|
| COPD | Males       | 2023        | 1486810.237 | 817805.071  | 669005.166 |
|      |             | 2024        | 1508591.729 | 819823.508  | 688768.222 |
|      |             | 2025        | 1526875.621 | 821430.789  | 705444.832 |
|      |             | 2026        | 1543659.810 | 822795.035  | 720864.774 |
|      |             | 2027        | 1559623.774 | 824001.113  | 735622.662 |
|      |             | 2028        | 1574852.850 | 825081.183  | 749771.667 |
|      |             | 2029        | 1589437.452 | 826052.352  | 763385.100 |
|      |             | 2030        | 1600568.199 | 826756.484  | 773811.716 |
|      |             | 2031        | 1610776.297 | 827364.059  | 783412.237 |
|      |             | 2032        | 1620483.563 | 827910.534  | 792573.029 |
|      |             | 2033        | 1629745.442 | 828408.345  | 801337.097 |
|      |             | 2034        | 1638721.425 | 828866.197  | 809855.228 |
|      |             | 2035        | 1644649.404 | 829148.435  | 815500.969 |
|      |             | 2036        | 1650181.590 | 829396.252  | 820785.338 |
|      |             | 2037        | 1655476.066 | 829623.136  | 825852.930 |
|      |             | 2038        | 1660507.914 | 829834.965  | 830672.949 |
|      |             | 2039        | 1665361.569 | 830032.985  | 835328.584 |
|      |             | 1990        | 117002.906  | 117002.906  | 0.000      |
|      |             | 1991        | 233438.833  | 233235.802  | 203.031    |
|      |             | 1992        | 348084.047  | 347332.228  | 751.819    |
|      |             | 1993        | 467278.318  | 465431.450  | 1846.867   |
|      |             | 1994        | 584216.907  | 580583.341  | 3633.565   |
|      |             | 1995        | 697391.457  | 691194.277  | 6197.180   |
|      |             | 1996        | 809471.271  | 799772.366  | 9698.905   |
|      |             | 1997        | 922587.668  | 908206.988  | 14380.680  |
|      |             | 1998        | 1034072.457 | 1013895.020 | 20177.436  |
|      |             | 1999        | 1153475.399 | 1125650.641 | 27824.758  |
|      |             | 2000        | 1268050.268 | 1231176.424 | 36873.844  |
|      |             | 2001        | 1382786.209 | 1335034.650 | 47751.559  |
|      |             | 2002        | 1497557.412 | 1436900.423 | 60656.989  |
|      |             | 2003        | 1614405.229 | 1538748.287 | 75656.942  |
|      |             | 2004        | 1726672.489 | 1634476.707 | 92195.782  |
|      |             | 2005        | 1847277.524 | 1735208.637 | 112068.888 |
|      |             | 2006        | 1961009.963 | 1827770.880 | 133239.083 |
|      |             | 2007        | 2079868.908 | 1921895.074 | 157973.834 |
|      |             | 2008        | 2206755.783 | 2019826.789 | 186928.994 |
|      |             | 2009        | 2331993.380 | 2113705.225 | 218288.156 |
|      |             | 2010        | 2455130.176 | 2203338.066 | 251792.111 |
|      |             | 2011        | 2582657.849 | 2293221.728 | 289436.120 |
|      |             | 2012        | 2709719.005 | 2379716.195 | 330002.810 |
| 2013 | 2840547.005 | 2465546.659 | 375000.347  |             |            |
| 2014 | 2971677.135 | 2548401.757 | 423275.379  |             |            |
| 2015 | 3104538.983 | 2630297.888 | 474241.095  |             |            |
| 2016 | 3237650.175 | 2708908.217 | 528741.958  |             |            |
| 2017 | 3370561.253 | 2784407.666 | 586153.586  |             |            |
| 2018 | 3503136.371 | 2856059.153 | 647077.218  |             |            |
| 2019 | 3636402.758 | 2924897.960 | 711504.798  |             |            |
| 2020 | 3768054.453 | 2990466.287 | 777588.166  |             |            |
| 2021 | 3897675.067 | 3051879.050 | 845796.016  |             |            |
| 2022 | 4027307.132 | 3110175.886 | 917131.246  |             |            |
| 2023 | 4156698.720 | 3165260.800 | 991437.920  |             |            |
| 2024 | 4285772.226 | 3217199.270 | 1068572.96  |             |            |
| 2025 | 4410759.298 | 3265495.567 | 1145263.73  |             |            |
| 2026 | 4531411.064 | 3309084.756 | 1222326.31  |             |            |
| 2027 | 4651145.233 | 3349642.151 | 1301503.08  |             |            |
| 2028 | 4769837.872 | 3387230.675 | 1382607.20  |             |            |
| 2029 | 4887747.179 | 3422076.846 | 1465670.33  |             |            |
| 2030 | 4997632.895 | 3453312.046 | 1544320.85  |             |            |
| 2031 | 5103301.991 | 3480612.213 | 1622689.78  |             |            |
| 2032 | 5207593.613 | 3505527.192 | 1702066.42  |             |            |
| 2033 | 5310556.138 | 3528127.166 | 1782428.97  |             |            |
| 2034 | 5412542.816 | 3548696.910 | 1863845.91  |             |            |
| 2035 | 5500522.473 | 3565867.811 | 1934654.66  |             |            |
| 2036 | 5588149.640 | 3581252.992 | 2006896.65  |             |            |
| 2037 | 5674667.886 | 3595180.862 | 2079487.02  |             |            |
| 2038 | 5760391.289 | 3607735.511 | 2152655.78  |             |            |
| 2039 | 5845459.234 | 3619120.306 | 2226338.93  |             |            |
| 1990 | 77434.846   | 77434.846   | 0.000       |             |            |
| 1991 | 160029.510  | 159861.321  | 168.190     |             |            |
| 1992 | 240642.531  | 240002.134  | 640.397     |             |            |
| 1993 | 329362.093  | 327708.956  | 1653.137    |             |            |
| 1994 | 418569.515  | 415255.290  | 3314.225    |             |            |
| 1995 | 509110.357  | 503275.352  | 5835.005    |             |            |
| 1996 | 600040.117  | 590765.257  | 9274.860    |             |            |
| 1997 | 691159.071  | 677394.042  | 13765.029   |             |            |
| 1998 | 782866.899  | 763488.389  | 19378.509   |             |            |
| 1999 | 881526.925  | 854735.415  | 26791.511   |             |            |
| 2000 | 977880.647  | 942511.794  | 35368.853   |             |            |

**Results for PHIM for Run 8 (ELL Summary Sensitivity\_Analysis\_3.RTF)**

|      |             |             |            |
|------|-------------|-------------|------------|
| 2001 | 1076787.404 | 1031048.001 | 45739.403  |
| 2002 | 1174842.754 | 1117119.977 | 57722.776  |
| 2003 | 1275102.681 | 1203467.705 | 71634.976  |
| 2004 | 1371026.306 | 1284386.018 | 86640.288  |
| 2005 | 1473954.509 | 1369134.227 | 104820.282 |
| 2006 | 1574450.828 | 1449880.576 | 124570.252 |
| 2007 | 1673790.211 | 1527647.769 | 146142.442 |
| 2008 | 1782360.738 | 1610357.622 | 172003.116 |
| 2009 | 1892944.209 | 1691910.423 | 201033.786 |
| 2010 | 2002131.282 | 1770165.343 | 231965.939 |
| 2011 | 2114522.152 | 1847945.355 | 266576.797 |
| 2012 | 2228079.372 | 1923988.620 | 304090.752 |
| 2013 | 2345377.689 | 1999649.842 | 345727.847 |
| 2014 | 2462498.422 | 2072305.965 | 390192.457 |
| 2015 | 2581450.312 | 2144148.213 | 437302.099 |
| 2016 | 2701959.301 | 2213989.275 | 487970.026 |
| 2017 | 2823834.967 | 2281686.559 | 542148.408 |
| 2018 | 2938265.081 | 2343135.796 | 595129.284 |
| 2019 | 3053254.880 | 2402146.718 | 651108.161 |
| 2020 | 3167073.216 | 2458455.043 | 708618.173 |
| 2021 | 3279517.699 | 2512049.528 | 767468.171 |
| 2022 | 3392060.964 | 2563073.174 | 828987.790 |
| 2023 | 3504296.171 | 2611433.143 | 892863.028 |
| 2024 | 3616019.231 | 2657002.637 | 959016.594 |
| 2025 | 3724611.269 | 2699573.263 | 1025038.01 |
| 2026 | 3827181.707 | 2738176.060 | 1089005.65 |
| 2027 | 3928684.441 | 2774161.874 | 1154522.57 |
| 2028 | 4029124.892 | 2807731.510 | 1221393.38 |
| 2029 | 4128269.068 | 2838750.867 | 1289518.20 |
| 2030 | 4221560.174 | 2866822.889 | 1354737.29 |
| 2031 | 4304170.584 | 2890152.459 | 1414018.12 |
| 2032 | 4384930.537 | 2911335.023 | 1473595.51 |
| 2033 | 4464357.691 | 2930696.058 | 1533661.63 |
| 2034 | 4542251.545 | 2948186.931 | 1594064.61 |
| 2035 | 4611066.648 | 2963084.025 | 1647982.62 |
| 2036 | 4670309.230 | 2974790.854 | 1695518.38 |
| 2037 | 4728179.514 | 2985297.749 | 1742881.77 |
| 2038 | 4785008.048 | 2994767.711 | 1790240.34 |
| 2039 | 4841291.793 | 3003318.714 | 1837973.08 |

---

## Results for PHIM for Run 8 (ELL Summary Sensitivity\_Analysis\_3.RTF)

\*\*\*\*\*

**Table 4: Estimated Loss of Life, All age groups combined, Population and Number deaths adjusted for Ecig scenario, cumulative over years**

| Disease      | Sex          | Year         | Years of life lost<br>NULL | Years of life lost<br>Ecig | Years of life<br>Saved |
|--------------|--------------|--------------|----------------------------|----------------------------|------------------------|
| All Diseases | Males        | 1990         | 1304839.645                | 1304839.645                | 0.000                  |
|              |              | 1991         | 2579865.358                | 2571191.563                | 8673.794               |
|              |              | 1992         | 3830683.831                | 3798437.893                | 32245.938              |
|              |              | 1993         | 5076567.803                | 5000957.484                | 75610.319              |
|              |              | 1994         | 6292145.526                | 6150000.565                | 142144.962             |
|              |              | 1995         | 7485537.010                | 7250198.424                | 235338.586             |
|              |              | 1996         | 8655955.028                | 8299531.970                | 356423.057             |
|              |              | 1997         | 9791729.713                | 9287516.048                | 504213.665             |
|              |              | 1998         | 10899134.186               | 10221810.446               | 677323.740             |
|              |              | 1999         | 12070409.674               | 11161566.551               | 908843.124             |
|              |              | 2000         | 13231384.595               | 12060755.475               | 1170629.12             |
|              |              | 2001         | 14371761.018               | 12909564.556               | 1462196.46             |
|              |              | 2002         | 15508906.386               | 13720538.356               | 1788368.03             |
|              |              | 2003         | 16638100.422               | 14493979.871               | 2144120.55             |
|              |              | 2004         | 17736465.088               | 15219546.989               | 2516918.10             |
|              |              | 2005         | 18834658.606               | 15918656.240               | 2916002.37             |
|              |              | 2006         | 19909100.501               | 16571343.767               | 3337756.73             |
|              |              | 2007         | 20958321.463               | 17185449.959               | 3772871.50             |
|              |              | 2008         | 22000068.148               | 17775230.799               | 4224837.35             |
|              |              | 2009         | 23018816.903               | 18332040.862               | 4686776.04             |
|              |              | 2010         | 24018480.537               | 18857339.097               | 5161141.44             |
|              |              | 2011         | 25003034.574               | 19354839.527               | 5648195.05             |
|              |              | 2012         | 25969871.429               | 19823250.208               | 6146621.22             |
|              |              | 2013         | 26920275.180               | 20264695.194               | 6655579.99             |
|              |              | 2014         | 27849005.227               | 20677484.469               | 7171520.76             |
|              |              | 2015         | 28749620.400               | 21065414.175               | 7684206.23             |
|              |              | 2016         | 29622417.562               | 21419606.160               | 8202811.40             |
|              |              | 2017         | 30462559.724               | 21742877.110               | 8719682.61             |
|              |              | 2018         | 31293299.299               | 22052473.617               | 9240825.68             |
|              |              | 2019         | 32109993.427               | 22343900.631               | 9766092.80             |
|              |              | 2020         | 32883323.977               | 22614440.260               | 10268883.7             |
|              |              | 2021         | 33610102.554               | 22847343.249               | 10762759.3             |
|              |              | 2022         | 34322010.448               | 23064605.763               | 11257404.7             |
|              |              | 2023         | 35018383.550               | 23266331.770               | 11752051.8             |
|              |              | 2024         | 35700177.955               | 23453654.426               | 12246523.5             |
|              |              | 2025         | 36315500.346               | 23622571.014               | 12692929.3             |
|              |              | 2026         | 36896159.343               | 23764159.776               | 13131999.6             |
|              |              | 2027         | 37462570.116               | 23894559.465               | 13568010.7             |
|              |              | 2028         | 38015337.780               | 24013963.935               | 14001373.8             |
|              |              | 2029         | 38554814.764               | 24123442.341               | 14431372.4             |
|              |              | 2030         | 39003805.400               | 24217533.540               | 14786271.9             |
|              |              | 2031         | 39436509.703               | 24295749.901               | 15140759.8             |
| 2032         | 39858470.458 | 24367131.055 | 15491339.4                 |                            |                        |
| 2033         | 40270147.082 | 24431619.206 | 15838527.9                 |                            |                        |
| 2034         | 40672665.743 | 24490058.037 | 16182607.7                 |                            |                        |
| 2035         | 40962732.664 | 24535375.129 | 16427357.5                 |                            |                        |
| 2036         | 41255021.653 | 24575035.704 | 16679985.9                 |                            |                        |
| 2037         | 41540573.023 | 24611228.499 | 16929344.5                 |                            |                        |
| 2038         | 41820158.066 | 24643950.218 | 17176207.8                 |                            |                        |
| 2039         | 42093547.949 | 24673484.460 | 17420063.5                 |                            |                        |
|              | Female       | 1990         | 588979.406                 | 588979.406                 | 0.000                  |
|              |              | 1991         | 1182571.252                | 1179606.280                | 2964.972               |
|              |              | 1992         | 1777346.679                | 1766096.270                | 11250.409              |
|              |              | 1993         | 2380261.899                | 2353262.800                | 26999.099              |
|              |              | 1994         | 2983130.039                | 2931317.349                | 51812.690              |
|              |              | 1995         | 3588982.584                | 3501947.455                | 87035.129              |
|              |              | 1996         | 4195430.235                | 4060543.187                | 134887.048             |
|              |              | 1997         | 4793866.694                | 4600632.508                | 193234.186             |
|              |              | 1998         | 5389747.381                | 5126441.010                | 263306.371             |
|              |              | 1999         | 6006722.467                | 5652528.003                | 354194.464             |
|              |              | 2000         | 6625758.871                | 6167682.388                | 458076.482             |
|              |              | 2001         | 7245135.411                | 6667930.049                | 577205.362             |
|              | 2002         | 7867492.021  | 7155407.502                | 712084.519                 |                        |
|              | 2003         | 8485051.793  | 7625334.014                | 859717.779                 |                        |
|              | 2004         | 9092994.774  | 8074287.296                | 1018707.48                 |                        |
|              | 2005         | 9706032.803  | 8513503.272                | 1192529.53                 |                        |
|              | 2006         | 10311907.548 | 8933300.146                | 1378607.40                 |                        |
|              | 2007         | 10909437.502 | 9335769.451                | 1573668.05                 |                        |
|              | 2008         | 11506462.491 | 9722732.007                | 1783730.48                 |                        |
|              | 2009         | 12098393.287 | 10096044.224               | 2002349.06                 |                        |
|              | 2010         | 12681188.981 | 10450962.314               | 2230226.67                 |                        |



**Results for PHIM for Run 8 (ELL Summary Sensitivity\_Analysis\_3.RTF)**

|             |       |      |              |              |            |
|-------------|-------|------|--------------|--------------|------------|
|             |       | 2011 | 13260062.991 | 10790470.365 | 2469592.63 |
|             |       | 2012 | 13839417.441 | 11117158.966 | 2722258.47 |
|             |       | 2013 | 14409614.758 | 11427879.502 | 2981735.26 |
|             |       | 2014 | 14976658.746 | 11722995.234 | 3253663.51 |
|             |       | 2015 | 15529977.821 | 12001128.457 | 3528849.36 |
|             |       | 2016 | 16066640.764 | 12258473.831 | 3808166.93 |
|             |       | 2017 | 16590035.078 | 12498642.224 | 4091392.85 |
|             |       | 2018 | 17098716.137 | 12725090.370 | 4373625.77 |
|             |       | 2019 | 17599868.850 | 12938403.040 | 4661465.81 |
|             |       | 2020 | 18081346.241 | 13137525.736 | 4943820.50 |
|             |       | 2021 | 18537594.460 | 13316055.987 | 5221538.47 |
|             |       | 2022 | 18985300.234 | 13482943.523 | 5502356.71 |
|             |       | 2023 | 19423958.747 | 13638593.768 | 5785364.98 |
|             |       | 2024 | 19853347.772 | 13782899.480 | 6070448.29 |
|             |       | 2025 | 20252822.245 | 13914271.216 | 6338551.03 |
|             |       | 2026 | 20619307.063 | 14027046.881 | 6592260.18 |
|             |       | 2027 | 20976063.406 | 14130657.442 | 6845405.96 |
|             |       | 2028 | 21323641.947 | 14226117.505 | 7097524.44 |
|             |       | 2029 | 21662117.106 | 14313345.720 | 7348771.39 |
|             |       | 2030 | 21960971.694 | 14389679.726 | 7571291.97 |
|             |       | 2031 | 22224951.983 | 14450863.216 | 7774088.77 |
|             |       | 2032 | 22480397.853 | 14506080.209 | 7974317.64 |
|             |       | 2033 | 22728639.455 | 14556306.028 | 8172333.43 |
|             |       | 2034 | 22970448.888 | 14601608.451 | 8368840.44 |
|             |       | 2035 | 23164154.188 | 14638168.562 | 8525985.63 |
|             |       | 2036 | 23334538.616 | 14666611.133 | 8667927.48 |
|             |       | 2037 | 23499760.723 | 14692212.990 | 8807547.73 |
|             |       | 2038 | 23660308.401 | 14715383.670 | 8944924.73 |
|             |       | 2039 | 23817891.273 | 14736425.514 | 9081465.76 |
| Lung cancer | Males | 1990 | 595621.791   | 595621.791   | 0.000      |
|             |       | 1991 | 1177744.113  | 1177096.215  | 647.898    |
|             |       | 1992 | 1750034.892  | 1747593.502  | 2441.390   |
|             |       | 1993 | 2319752.308  | 2313815.796  | 5936.511   |
|             |       | 1994 | 2872597.339  | 2861106.522  | 11490.817  |
|             |       | 1995 | 3411494.825  | 3391970.062  | 19524.763  |
|             |       | 1996 | 3945569.726  | 3914742.091  | 30827.635  |
|             |       | 1997 | 4463316.362  | 4417942.869  | 45373.493  |
|             |       | 1998 | 4975301.180  | 4911449.790  | 63851.390  |
|             |       | 1999 | 5473691.125  | 5387201.990  | 86489.135  |
|             |       | 2000 | 5977500.570  | 5862723.112  | 114777.458 |
|             |       | 2001 | 6474795.516  | 6326125.732  | 148669.784 |
|             |       | 2002 | 6968769.705  | 6779902.223  | 188867.482 |
|             |       | 2003 | 7460282.140  | 7224082.856  | 236199.284 |
|             |       | 2004 | 7947048.275  | 7656556.037  | 290492.238 |
|             |       | 2005 | 8430571.669  | 8078281.275  | 352290.394 |
|             |       | 2006 | 8903945.390  | 8482524.672  | 421420.718 |
|             |       | 2007 | 9364177.982  | 8867027.296  | 497150.686 |
|             |       | 2008 | 9822525.458  | 9240369.596  | 582155.862 |
|             |       | 2009 | 10275228.886 | 9599627.638  | 675601.248 |
|             |       | 2010 | 10720275.500 | 9943482.058  | 776793.443 |
|             |       | 2011 | 11155356.373 | 10270010.161 | 885346.212 |
|             |       | 2012 | 11582611.617 | 10579864.415 | 1002747.20 |
|             |       | 2013 | 11998803.791 | 10871497.942 | 1127305.85 |
|             |       | 2014 | 12402087.090 | 11144272.318 | 1257814.77 |
|             |       | 2015 | 12793451.706 | 11400009.468 | 1393442.24 |
|             |       | 2016 | 13160101.653 | 11629959.871 | 1530141.78 |
|             |       | 2017 | 13503583.414 | 11836573.072 | 1667010.34 |
|             |       | 2018 | 13859755.737 | 12039651.266 | 1820104.47 |
|             |       | 2019 | 14211625.176 | 12230833.805 | 1980791.37 |
|             |       | 2020 | 14553935.288 | 12408973.706 | 2144961.58 |
|             |       | 2021 | 14851747.495 | 12555755.718 | 2295991.78 |
|             |       | 2022 | 15144531.004 | 12692282.957 | 2452248.05 |
|             |       | 2023 | 15431932.496 | 12818657.319 | 2613275.18 |
|             |       | 2024 | 15713920.740 | 12935526.563 | 2778394.18 |
|             |       | 2025 | 15979112.816 | 13041007.661 | 2938105.16 |
|             |       | 2026 | 16206550.153 | 13124474.320 | 3082075.83 |
|             |       | 2027 | 16428826.050 | 13200829.537 | 3227996.51 |
|             |       | 2028 | 16645902.186 | 13270331.945 | 3375570.24 |
|             |       | 2029 | 16858126.517 | 13333742.241 | 3524384.28 |
|             |       | 2030 | 17045220.687 | 13388204.810 | 3657015.88 |
|             |       | 2031 | 17208482.610 | 13430564.159 | 3777918.45 |
|             |       | 2032 | 17367586.074 | 13468974.506 | 3898611.57 |
|             |       | 2033 | 17522716.280 | 13503495.886 | 4019220.39 |
|             |       | 2034 | 17674226.555 | 13534694.325 | 4139532.23 |
|             |       | 2035 | 17792201.734 | 13558830.743 | 4233370.99 |
|             |       | 2036 | 17903508.236 | 13578937.579 | 4324570.66 |
|             |       | 2037 | 18012162.345 | 13597253.638 | 4414908.71 |
|             |       | 2038 | 18118464.470 | 13613749.253 | 4504715.22 |

**Results for PHIM for Run 8 (ELL Summary Sensitivity\_Analysis\_3.RTF)**

|     |        |      |              |              |            |
|-----|--------|------|--------------|--------------|------------|
|     | Female | 2039 | 18222549.860 | 13628643.625 | 4593906.23 |
|     |        | 1990 | 307897.357   | 307897.357   | 0.000      |
|     |        | 1991 | 616547.418   | 616130.924   | 416.494    |
|     |        | 1992 | 931086.773   | 929437.906   | 1648.867   |
|     |        | 1993 | 1246155.671  | 1242097.598  | 4058.073   |
|     |        | 1994 | 1561212.934  | 1553224.894  | 7988.041   |
|     |        | 1995 | 1879967.742  | 1866057.162  | 13910.580  |
|     |        | 1996 | 2197488.109  | 2175378.616  | 22109.494  |
|     |        | 1997 | 2515698.453  | 2482688.145  | 33010.308  |
|     |        | 1998 | 2836249.556  | 2789289.325  | 46960.231  |
|     |        | 1999 | 3150201.390  | 3086249.026  | 63952.364  |
|     |        | 2000 | 3472722.342  | 3387687.881  | 85034.461  |
|     |        | 2001 | 3796994.889  | 3686448.299  | 110546.590 |
|     |        | 2002 | 4126619.935  | 3985375.197  | 141244.738 |
|     |        | 2003 | 4454982.533  | 4278251.522  | 176731.012 |
|     |        | 2004 | 4784343.030  | 4566500.614  | 217842.416 |
|     |        | 2005 | 5113443.121  | 4848765.996  | 264677.125 |
|     |        | 2006 | 5442543.963  | 5124431.293  | 318112.669 |
|     |        | 2007 | 5772441.497  | 5394190.497  | 378251.000 |
|     |        | 2008 | 6091911.943  | 5648729.064  | 443182.878 |
|     |        | 2009 | 6413671.330  | 5897626.531  | 516044.799 |
|     |        | 2010 | 6730763.530  | 6136150.548  | 594612.982 |
|     |        | 2011 | 7043614.101  | 6364034.836  | 679579.265 |
|     |        | 2012 | 7356270.780  | 6584186.434  | 772084.346 |
|     |        | 2013 | 7662551.964  | 6792392.463  | 870159.500 |
|     |        | 2014 | 7964551.465  | 6990223.246  | 974328.218 |
|     |        | 2015 | 8254895.403  | 7174179.521  | 1080715.88 |
|     |        | 2016 | 8530661.848  | 7341646.507  | 1189015.34 |
|     |        | 2017 | 8795826.122  | 7496205.265  | 1299620.86 |
|     |        | 2018 | 9067233.707  | 7646403.617  | 1420830.09 |
|     |        | 2019 | 9335343.270  | 7787556.325  | 1547786.95 |
|     |        | 2020 | 9596110.883  | 7919144.524  | 1676966.36 |
|     |        | 2021 | 9833186.859  | 8033734.609  | 1799452.25 |
|     |        | 2022 | 10066452.037 | 8140406.155  | 1926045.88 |
|     |        | 2023 | 10295503.609 | 8239442.861  | 2056060.75 |
|     |        | 2024 | 10520125.318 | 8330786.827  | 2189338.49 |
|     |        | 2025 | 10731915.863 | 8413466.600  | 2318449.26 |
|     |        | 2026 | 10917495.549 | 8481988.219  | 2435507.33 |
|     |        | 2027 | 11098620.885 | 8544554.074  | 2554066.81 |
|     |        | 2028 | 11275441.234 | 8601850.964  | 2673590.27 |
|     |        | 2029 | 11447962.710 | 8653865.978  | 2794096.73 |
|     |        | 2030 | 11601867.623 | 8698896.691  | 2902970.93 |
|     |        | 2031 | 11731666.516 | 8733724.724  | 2997941.79 |
|     |        | 2032 | 11857585.969 | 8765009.935  | 3092576.03 |
|     |        | 2033 | 11980128.625 | 8793327.547  | 3186801.08 |
|     |        | 2034 | 12099562.464 | 8818768.365  | 3280794.10 |
|     |        | 2035 | 12195919.946 | 8838895.176  | 3357024.77 |
|     |        | 2036 | 12278201.969 | 8854204.143  | 3423997.83 |
|     |        | 2037 | 12358146.336 | 8867994.234  | 3490152.10 |
|     |        | 2038 | 12435978.633 | 8880479.744  | 3555498.89 |
|     |        | 2039 | 12512468.845 | 8891834.834  | 3620634.01 |
| IHD | Males  | 1990 | 517209.093   | 517209.093   | 0.000      |
|     |        | 1991 | 1019219.395  | 1012116.414  | 7102.981   |
|     |        | 1992 | 1509598.614  | 1483221.656  | 26376.958  |
|     |        | 1993 | 1992735.299  | 1931280.215  | 61455.084  |
|     |        | 1994 | 2462877.575  | 2348194.587  | 114682.988 |
|     |        | 1995 | 2928249.390  | 2739488.902  | 188760.488 |
|     |        | 1996 | 3377377.730  | 3093568.100  | 283809.629 |
|     |        | 1997 | 3809062.472  | 3410619.055  | 398443.417 |
|     |        | 1998 | 4222213.867  | 3691389.368  | 530824.499 |
|     |        | 1999 | 4708317.743  | 3994811.682  | 713506.061 |
|     |        | 2000 | 5182084.396  | 4266034.531  | 916049.865 |
|     |        | 2001 | 5644097.705  | 4505374.611  | 1138723.09 |
|     |        | 2002 | 6107232.129  | 4721989.313  | 1385242.82 |
|     |        | 2003 | 6561785.704  | 4913078.203  | 1648707.50 |
|     |        | 2004 | 6996156.348  | 5077456.873  | 1918699.48 |
|     |        | 2005 | 7426261.361  | 5224171.212  | 2202090.15 |
|     |        | 2006 | 7849012.694  | 5352350.254  | 2496662.44 |
|     |        | 2007 | 8255300.530  | 5462697.752  | 2792602.78 |
|     |        | 2008 | 8650662.040  | 5559196.192  | 3091465.85 |
|     |        | 2009 | 9030818.513  | 5642867.033  | 3387951.48 |
|     |        | 2010 | 9403026.327  | 5716721.762  | 3686304.56 |
|     |        | 2011 | 9767535.506  | 5781797.862  | 3985737.64 |
|     |        | 2012 | 10123044.281 | 5839393.208  | 4283651.07 |
|     |        | 2013 | 10470104.786 | 5890246.919  | 4579857.87 |
|     |        | 2014 | 10807756.112 | 5935365.183  | 4872390.93 |
|     |        | 2015 | 11130681.425 | 5975022.220  | 5155659.21 |
|     |        | 2016 | 11448966.506 | 6010690.607  | 5438275.90 |

**Results for PHIM for Run 8 (ELL Summary Sensitivity\_Analysis\_3.RTF)**

|        |        |      |              |             |            |
|--------|--------|------|--------------|-------------|------------|
|        |        | 2017 | 11758164.882 | 6042680.165 | 5715484.72 |
|        |        | 2018 | 12054448.241 | 6070282.183 | 5984166.06 |
|        |        | 2019 | 12341606.261 | 6095099.148 | 6246507.11 |
|        |        | 2020 | 12600728.939 | 6116209.040 | 6484519.90 |
|        |        | 2021 | 12861767.105 | 6135806.886 | 6725960.22 |
|        |        | 2022 | 13114168.616 | 6153593.466 | 6960575.15 |
|        |        | 2023 | 13357894.797 | 6169623.707 | 7188271.09 |
|        |        | 2024 | 13593848.521 | 6184236.067 | 7409612.45 |
|        |        | 2025 | 13789177.359 | 6196048.152 | 7593129.21 |
|        |        | 2026 | 13993401.656 | 6207588.797 | 7785812.86 |
|        |        | 2027 | 14190519.224 | 6218308.633 | 7972210.59 |
|        |        | 2028 | 14381193.356 | 6228080.210 | 8153113.15 |
|        |        | 2029 | 14565171.927 | 6236957.331 | 8328214.60 |
|        |        | 2030 | 14697381.605 | 6243428.302 | 8453953.30 |
|        |        | 2031 | 14842203.512 | 6250242.838 | 8591960.67 |
|        |        | 2032 | 14982485.826 | 6256683.003 | 8725802.82 |
|        |        | 2033 | 15118410.647 | 6262564.023 | 8855846.62 |
|        |        | 2034 | 15250284.398 | 6267862.412 | 8982421.99 |
|        |        | 2035 | 15322911.166 | 6270835.975 | 9052075.19 |
|        |        | 2036 | 15405115.031 | 6274053.738 | 9131061.29 |
|        |        | 2037 | 15484709.137 | 6277115.852 | 9207593.28 |
|        |        | 2038 | 15561812.193 | 6279967.064 | 9281845.13 |
|        |        | 2039 | 15635992.616 | 6282478.278 | 9353514.34 |
|        | Female | 1990 | 147299.110   | 147299.110  | 0.000      |
|        |        | 1991 | 295122.462   | 293257.343  | 1865.120   |
|        |        | 1992 | 439962.920   | 432979.594  | 6983.326   |
|        |        | 1993 | 584735.615   | 568172.035  | 16563.580  |
|        |        | 1994 | 727640.783   | 696311.626  | 31329.156  |
|        |        | 1995 | 868486.937   | 816693.270  | 51793.667  |
|        |        | 1996 | 1010321.847  | 930813.150  | 79508.697  |
|        |        | 1997 | 1144230.930  | 1032317.139 | 111913.791 |
|        |        | 1998 | 1274513.622  | 1124471.054 | 150042.568 |
|        |        | 1999 | 1426725.938  | 1224502.020 | 202223.918 |
|        |        | 2000 | 1573462.680  | 1313885.150 | 259577.530 |
|        |        | 2001 | 1719132.015  | 1394443.150 | 324688.865 |
|        |        | 2002 | 1863006.732  | 1466591.698 | 396415.034 |
|        |        | 2003 | 2002943.227  | 1530114.603 | 472828.625 |
|        |        | 2004 | 2137798.705  | 1585388.041 | 552410.664 |
|        |        | 2005 | 2271071.245  | 1634948.828 | 636122.417 |
|        |        | 2006 | 2400707.731  | 1677969.263 | 722738.468 |
|        |        | 2007 | 2523634.512  | 1714732.960 | 808901.552 |
|        |        | 2008 | 2648752.232  | 1748270.279 | 900481.954 |
|        |        | 2009 | 2765973.961  | 1776776.640 | 989197.321 |
|        |        | 2010 | 2881329.235  | 1802159.224 | 1079170.01 |
|        |        | 2011 | 2994972.694  | 1824659.301 | 1170313.39 |
|        |        | 2012 | 3108958.829  | 1844949.769 | 1264009.06 |
|        |        | 2013 | 3218140.416  | 1862808.988 | 1355331.43 |
|        |        | 2014 | 3328387.914  | 1879152.742 | 1449235.17 |
|        |        | 2015 | 3435342.796  | 1893884.463 | 1541458.33 |
|        |        | 2016 | 3539189.408  | 1907017.399 | 1632172.01 |
|        |        | 2017 | 3640041.363  | 1918723.580 | 1721317.78 |
|        |        | 2018 | 3732645.362  | 1928575.005 | 1804070.36 |
|        |        | 2019 | 3821421.978  | 1937291.158 | 1884130.82 |
|        |        | 2020 | 3902115.950  | 1944732.051 | 1957383.90 |
|        |        | 2021 | 3984301.053  | 1951749.170 | 2032551.88 |
|        |        | 2022 | 4062629.299  | 1957947.698 | 2104681.60 |
|        |        | 2023 | 4137348.729  | 1963481.789 | 2173866.94 |
|        |        | 2024 | 4208611.493  | 1968409.642 | 2240201.85 |
|        |        | 2025 | 4269419.492  | 1972475.688 | 2296943.80 |
|        |        | 2026 | 4330969.998  | 1976322.428 | 2354647.57 |
|        |        | 2027 | 4389134.306  | 1979738.814 | 2409395.49 |
|        |        | 2028 | 4444222.970  | 1982820.355 | 2461402.62 |
|        |        | 2029 | 4496447.877  | 1985620.265 | 2510827.61 |
|        |        | 2030 | 4536975.698  | 1987735.957 | 2549239.74 |
|        |        | 2031 | 4578338.586  | 1989789.403 | 2588549.18 |
|        |        | 2032 | 4617397.784  | 1991645.178 | 2625752.61 |
|        |        | 2033 | 4654407.697  | 1993362.504 | 2661045.19 |
|        |        | 2034 | 4689913.454  | 1994962.662 | 2694950.79 |
|        |        | 2035 | 4712518.190  | 1995929.207 | 2716588.98 |
|        |        | 2036 | 4735845.827  | 1996875.187 | 2738970.64 |
|        |        | 2037 | 4757958.806  | 1997738.866 | 2760219.94 |
|        |        | 2038 | 4778813.806  | 1998544.418 | 2780269.39 |
|        |        | 2039 | 4798769.065  | 1999300.144 | 2799468.92 |
| Stroke | Males  | 1990 | 75005.854    | 75005.854   | 0.000      |
|        |        | 1991 | 149463.017   | 148743.133  | 719.885    |
|        |        | 1992 | 222966.278   | 220289.358  | 2676.920   |
|        |        | 1993 | 296801.879   | 290424.610  | 6377.269   |
|        |        | 1994 | 372453.706   | 360100.927  | 12352.779  |

**Results for PHIM for Run 8 (ELL Summary Sensitivity\_Analysis\_3.RTF)**

|        |      |             |             |            |
|--------|------|-------------|-------------|------------|
|        | 1995 | 448401.338  | 427512.314  | 20889.024  |
|        | 1996 | 523536.301  | 491387.578  | 32148.723  |
|        | 1997 | 596763.211  | 550641.365  | 46121.846  |
|        | 1998 | 667546.681  | 604909.288  | 62637.393  |
|        | 1999 | 734925.407  | 653647.061  | 81278.346  |
|        | 2000 | 803749.361  | 700455.039  | 103294.321 |
|        | 2001 | 870081.588  | 742521.935  | 127559.653 |
|        | 2002 | 935347.140  | 781065.579  | 154281.561 |
|        | 2003 | 1001627.349 | 817175.574  | 184451.776 |
|        | 2004 | 1066587.976 | 849920.720  | 216667.256 |
|        | 2005 | 1130548.052 | 879558.290  | 250989.762 |
|        | 2006 | 1195132.454 | 906940.434  | 288192.020 |
|        | 2007 | 1258974.043 | 931697.937  | 327276.106 |
|        | 2008 | 1320124.867 | 953261.227  | 366863.640 |
|        | 2009 | 1380776.123 | 972783.158  | 407992.966 |
|        | 2010 | 1440048.533 | 990224.180  | 449824.353 |
|        | 2011 | 1497484.847 | 1005664.846 | 491820.001 |
|        | 2012 | 1554496.526 | 1019524.355 | 534972.171 |
|        | 2013 | 1610819.598 | 1031989.748 | 578829.850 |
|        | 2014 | 1667484.890 | 1043332.909 | 624151.981 |
|        | 2015 | 1720948.287 | 1053213.872 | 667734.415 |
|        | 2016 | 1775699.228 | 1062387.154 | 713312.074 |
|        | 2017 | 1830250.175 | 1070732.386 | 759517.788 |
|        | 2018 | 1875958.950 | 1077155.676 | 798803.273 |
|        | 2019 | 1920359.232 | 1082876.440 | 837482.792 |
|        | 2020 | 1960605.297 | 1087707.082 | 872898.216 |
|        | 2021 | 1998912.887 | 1091925.712 | 906987.176 |
|        | 2022 | 2036003.696 | 1095677.529 | 940326.167 |
|        | 2023 | 2071857.536 | 1099011.386 | 972846.150 |
|        | 2024 | 2106636.468 | 1102012.388 | 1004624.08 |
|        | 2025 | 2136450.873 | 1104444.036 | 1032006.84 |
|        | 2026 | 2164796.470 | 1106584.770 | 1058211.70 |
|        | 2027 | 2192079.608 | 1108519.121 | 1083560.49 |
|        | 2028 | 2218404.367 | 1110250.073 | 1108154.29 |
|        | 2029 | 2243769.140 | 1111807.560 | 1131961.58 |
|        | 2030 | 2263570.213 | 1112977.067 | 1150593.15 |
|        | 2031 | 2282521.590 | 1114037.656 | 1168483.93 |
|        | 2032 | 2300804.945 | 1115008.153 | 1185796.79 |
|        | 2033 | 2318464.018 | 1115887.597 | 1202576.42 |
|        | 2034 | 2335611.973 | 1116688.783 | 1218923.19 |
|        | 2035 | 2347097.290 | 1117214.359 | 1229882.93 |
|        | 2036 | 2358248.747 | 1117700.020 | 1240548.73 |
|        | 2037 | 2369033.655 | 1118155.282 | 1250878.37 |
|        | 2038 | 2379490.114 | 1118576.924 | 1260913.19 |
|        | 2039 | 2389546.238 | 1118952.354 | 1270593.88 |
| Female | 1990 | 56348.092   | 56348.092   | 0.000      |
|        | 1991 | 110871.862  | 110356.693  | 515.169    |
|        | 1992 | 165654.454  | 163676.342  | 1978.112   |
|        | 1993 | 220008.519  | 215282.677  | 4725.842   |
|        | 1994 | 275706.807  | 266520.962  | 9185.844   |
|        | 1995 | 331417.547  | 315911.254  | 15506.293  |
|        | 1996 | 387580.161  | 363565.832  | 24014.329  |
|        | 1997 | 442778.242  | 408197.465  | 34580.777  |
|        | 1998 | 496117.305  | 449134.176  | 46983.129  |
|        | 1999 | 548268.214  | 486950.892  | 61317.322  |
|        | 2000 | 601693.202  | 523464.532  | 78228.669  |
|        | 2001 | 652221.103  | 555802.063  | 96419.040  |
|        | 2002 | 703022.600  | 586064.620  | 116957.980 |
|        | 2003 | 752023.351  | 613160.211  | 138863.140 |
|        | 2004 | 799826.733  | 637577.373  | 162249.360 |
|        | 2005 | 847563.928  | 660101.900  | 187462.028 |
|        | 2006 | 894205.027  | 680336.541  | 213868.485 |
|        | 2007 | 939571.282  | 698370.497  | 241200.785 |
|        | 2008 | 983437.578  | 714369.963  | 269067.615 |
|        | 2009 | 1025803.786 | 728528.699  | 297275.087 |
|        | 2010 | 1066964.934 | 741072.999  | 325891.935 |
|        | 2011 | 1106954.044 | 752182.169  | 354771.875 |
|        | 2012 | 1146108.461 | 762130.716  | 383977.744 |
|        | 2013 | 1183544.689 | 770844.817  | 412699.872 |
|        | 2014 | 1221220.945 | 778834.832  | 442386.113 |
|        | 2015 | 1258289.311 | 786114.883  | 472174.428 |
|        | 2016 | 1294830.207 | 792675.885  | 502154.323 |
|        | 2017 | 1330332.626 | 798516.839  | 531815.787 |
|        | 2018 | 1360571.987 | 803100.202  | 557471.785 |
|        | 2019 | 1389848.723 | 807152.065  | 582696.658 |
|        | 2020 | 1416046.192 | 810542.162  | 605504.031 |
|        | 2021 | 1440588.850 | 813459.667  | 627129.183 |
|        | 2022 | 1464157.934 | 816032.261  | 648125.673 |

**Results for PHIM for Run 8 (ELL Summary Sensitivity\_Analysis\_3.RTF)**

|      |             |             |             |             |            |
|------|-------------|-------------|-------------|-------------|------------|
|      |             | 2023        | 1486810.237 | 818323.354  | 668486.883 |
|      |             | 2024        | 1508591.729 | 820355.373  | 688236.356 |
|      |             | 2025        | 1526875.621 | 821975.149  | 704900.472 |
|      |             | 2026        | 1543659.810 | 823350.514  | 720309.296 |
|      |             | 2027        | 1559623.774 | 824566.802  | 735056.972 |
|      |             | 2028        | 1574852.850 | 825656.377  | 749196.473 |
|      |             | 2029        | 1589437.452 | 826636.380  | 762801.072 |
|      |             | 2030        | 1600568.199 | 827348.151  | 773220.048 |
|      |             | 2031        | 1610776.297 | 827962.501  | 782813.795 |
|      |             | 2032        | 1620483.563 | 828515.212  | 791968.351 |
|      |             | 2033        | 1629745.442 | 829018.837  | 800726.605 |
|      |             | 2034        | 1638721.425 | 829482.146  | 809239.279 |
|      |             | 2035        | 1644649.404 | 829768.565  | 814880.840 |
|      |             | 2036        | 1650181.590 | 830020.098  | 820161.492 |
|      |             | 2037        | 1655476.066 | 830250.435  | 825225.631 |
|      |             | 2038        | 1660507.914 | 830465.522  | 830042.391 |
|      |             | 2039        | 1665361.569 | 830666.633  | 834694.936 |
| COPD | Males       | 1990        | 117002.906  | 117002.906  | 0.000      |
|      |             | 1991        | 233438.833  | 233235.802  | 203.031    |
|      |             | 1992        | 348084.047  | 347333.377  | 750.670    |
|      |             | 1993        | 467278.318  | 465436.863  | 1841.455   |
|      |             | 1994        | 584216.907  | 580598.529  | 3618.378   |
|      |             | 1995        | 697391.457  | 691227.146  | 6164.311   |
|      |             | 1996        | 809471.271  | 799834.201  | 9637.070   |
|      |             | 1997        | 922587.668  | 908312.759  | 14274.909  |
|      |             | 1998        | 1034072.457 | 1014061.999 | 20010.457  |
|      |             | 1999        | 1153475.399 | 1125905.817 | 27569.582  |
|      |             | 2000        | 1268050.268 | 1231542.792 | 36507.476  |
|      |             | 2001        | 1382786.209 | 1335542.278 | 47243.932  |
|      |             | 2002        | 1497557.412 | 1437581.241 | 59976.170  |
|      |             | 2003        | 1614405.229 | 1539643.238 | 74761.991  |
|      |             | 2004        | 1726672.489 | 1635613.359 | 91059.130  |
|      |             | 2005        | 1847277.524 | 1736645.463 | 110632.061 |
|      |             | 2006        | 1961009.963 | 1829528.407 | 131481.556 |
|      |             | 2007        | 2079868.908 | 1924026.974 | 155841.934 |
|      |             | 2008        | 2206755.783 | 2022403.784 | 184351.999 |
|      |             | 2009        | 2331993.380 | 2116763.033 | 215230.348 |
|      | 2010        | 2455130.176 | 2206911.097 | 248219.079  |            |
|      | 2011        | 2582657.849 | 2297366.659 | 285291.190  |            |
|      | 2012        | 2709719.005 | 2384468.230 | 325250.774  |            |
|      | 2013        | 2840547.005 | 2470960.585 | 369586.420  |            |
|      | 2014        | 2971677.135 | 2554514.059 | 417163.076  |            |
|      | 2015        | 3104538.983 | 2637168.616 | 467370.367  |            |
|      | 2016        | 3237650.175 | 2716568.528 | 521081.648  |            |
|      | 2017        | 3370561.253 | 2792891.487 | 577669.766  |            |
|      | 2018        | 3503136.371 | 2865384.491 | 637751.880  |            |
|      | 2019        | 3636402.758 | 2935091.239 | 701311.519  |            |
|      | 2020        | 3768054.453 | 3001550.432 | 766504.021  |            |
|      | 2021        | 3897675.067 | 3063854.934 | 833820.133  |            |
|      | 2022        | 4027307.132 | 3123051.810 | 904255.322  |            |
|      | 2023        | 4156698.720 | 3179039.358 | 977659.363  |            |
|      | 2024        | 4285772.226 | 3231879.407 | 1053892.82  |            |
|      | 2025        | 4410759.298 | 3281071.165 | 1129688.13  |            |
|      | 2026        | 4531411.064 | 3325511.889 | 1205899.18  |            |
|      | 2027        | 4651145.233 | 3366902.173 | 1284243.06  |            |
|      | 2028        | 4769837.872 | 3405301.708 | 1364536.16  |            |
|      | 2029        | 4887747.179 | 3440935.208 | 1446811.97  |            |
| 2030 | 4997632.895 | 3472923.360 | 1524709.54  |             |            |
| 2031 | 5103301.991 | 3500905.249 | 1602396.74  |             |            |
| 2032 | 5207593.613 | 3526465.393 | 1681128.22  |             |            |
| 2033 | 5310556.138 | 3549671.699 | 1760884.44  |             |            |
| 2034 | 5412542.816 | 3570812.518 | 1841730.30  |             |            |
| 2035 | 5500522.473 | 3588494.051 | 1912028.42  |             |            |
| 2036 | 5588149.640 | 3604344.368 | 1983805.27  |             |            |
| 2037 | 5674667.886 | 3618703.728 | 2055964.16  |             |            |
| 2038 | 5760391.289 | 3631656.977 | 2128734.31  |             |            |
| 2039 | 5845459.234 | 3643410.203 | 2202049.03  |             |            |
|      | Female      | 1990        | 77434.846   | 77434.846   | 0.000      |
|      |             | 1991        | 160029.510  | 159861.321  | 168.190    |
|      |             | 1992        | 240642.531  | 240002.427  | 640.104    |
|      |             | 1993        | 329362.093  | 327710.489  | 1651.604   |
|      |             | 1994        | 418569.515  | 415259.867  | 3309.648   |
|      |             | 1995        | 509110.357  | 503285.768  | 5824.589   |
|      |             | 1996        | 600040.117  | 590785.589  | 9254.528   |
|      |             | 1997        | 691159.071  | 677429.759  | 13729.311  |
|      |             | 1998        | 782866.899  | 763546.455  | 19320.444  |
|      |             | 1999        | 881526.925  | 854826.065  | 26700.860  |
|      |             | 2000        | 977880.647  | 942644.825  | 35235.822  |

**Results for PHIM for Run 8 (ELL Summary Sensitivity\_Analysis\_3.RTF)**

|      |             |             |            |
|------|-------------|-------------|------------|
| 2001 | 1076787.404 | 1031236.538 | 45550.866  |
| 2002 | 1174842.754 | 1117375.987 | 57466.767  |
| 2003 | 1275102.681 | 1203807.679 | 71295.002  |
| 2004 | 1371026.306 | 1284821.269 | 86205.037  |
| 2005 | 1473954.509 | 1369686.548 | 104267.961 |
| 2006 | 1574450.828 | 1450563.048 | 123887.780 |
| 2007 | 1673790.211 | 1528475.496 | 145314.715 |
| 2008 | 1782360.738 | 1611362.701 | 170998.037 |
| 2009 | 1892944.209 | 1693112.354 | 199831.856 |
| 2010 | 2002131.282 | 1771579.543 | 230551.739 |
| 2011 | 2114522.152 | 1849594.058 | 264928.094 |
| 2012 | 2228079.372 | 1925892.047 | 302187.325 |
| 2013 | 2345377.689 | 2001833.233 | 343544.456 |
| 2014 | 2462498.422 | 2074784.413 | 387714.009 |
| 2015 | 2581450.312 | 2146949.590 | 434500.722 |
| 2016 | 2701959.301 | 2217134.041 | 484825.260 |
| 2017 | 2823834.967 | 2285196.541 | 538638.426 |
| 2018 | 2938265.081 | 2347011.547 | 591253.534 |
| 2019 | 3053254.880 | 2406403.492 | 646851.388 |
| 2020 | 3167073.216 | 2463107.000 | 703966.216 |
| 2021 | 3279517.699 | 2517112.541 | 762405.158 |
| 2022 | 3392060.964 | 2568557.409 | 823503.555 |
| 2023 | 3504296.171 | 2617345.765 | 886950.407 |
| 2024 | 3616019.231 | 2663347.637 | 952671.594 |
| 2025 | 3724611.269 | 2706353.779 | 1018257.49 |
| 2026 | 3827181.707 | 2745385.719 | 1081795.99 |
| 2027 | 3928684.441 | 2781797.752 | 1146886.69 |
| 2028 | 4029124.892 | 2815789.810 | 1213335.08 |
| 2029 | 4128269.068 | 2847223.096 | 1281045.97 |
| 2030 | 4221560.174 | 2875698.927 | 1345861.25 |
| 2031 | 4304170.584 | 2899386.588 | 1404784.00 |
| 2032 | 4384930.537 | 2920909.885 | 1464020.65 |
| 2033 | 4464357.691 | 2940597.140 | 1523760.55 |
| 2034 | 4542251.545 | 2958395.278 | 1583856.27 |
| 2035 | 4611066.648 | 2973575.614 | 1637491.03 |
| 2036 | 4670309.230 | 2985511.706 | 1684797.52 |
| 2037 | 4728179.514 | 2996229.455 | 1731950.06 |
| 2038 | 4785008.048 | 3005893.985 | 1779114.06 |
| 2039 | 4841291.793 | 3014623.903 | 1826667.89 |

---

## Results for PHIM for Run 8 (ELL Summary Sensitivity\_Analysis\_3.RTF)

\*\*\*\*\*

**Table 5: Estimated Loss of Life, at the end of follow-up, Population unadjusted for deaths in Ecig scenario**

| Disease      | Sex    | Age Group   | Years of life lost<br>NULL | Years of life lost<br>Ecig | Years of life<br>Saved |
|--------------|--------|-------------|----------------------------|----------------------------|------------------------|
| All Diseases | Males  | 30-34       | 443911.034                 | 236715.404                 | 207195.630             |
|              |        | 35-39       | 1146798.555                | 604413.052                 | 542385.503             |
|              |        | 40-44       | 2609591.408                | 1333607.509                | 1275983.90             |
|              |        | 45-49       | 4775841.753                | 2395682.985                | 2380158.77             |
|              |        | 50-54       | 7446969.205                | 3872776.155                | 3574193.05             |
|              |        | 55-59       | 8240205.925                | 4714849.687                | 3525356.24             |
|              |        | 60-64       | 8772829.118                | 5445528.091                | 3327301.03             |
|              |        | 65-69       | 6161494.678                | 4208681.846                | 1952812.83             |
|              |        | 70-74       | 2495906.274                | 1764763.059                | 731143.215             |
|              | 75-79  | 0.000       | 0.000                      | 0.000                      |                        |
|              | Female | 30-34       | 229140.561                 | 141379.974                 | 87760.587              |
|              |        | 35-39       | 570217.942                 | 344980.188                 | 225237.754             |
|              |        | 40-44       | 1267538.938                | 742764.436                 | 524774.501             |
|              |        | 45-49       | 2340070.698                | 1346122.146                | 993948.552             |
|              |        | 50-54       | 3743803.613                | 2166489.118                | 1577314.50             |
|              |        | 55-59       | 4591478.168                | 2777581.021                | 1813897.15             |
|              |        | 60-64       | 5207367.788                | 3273495.959                | 1933871.83             |
| 65-69        |        | 4092181.394 | 2712607.368                | 1379574.03                 |                        |
| Lung cancer  | Males  | 70-74       | 1776092.171                | 1194660.627                | 581431.544             |
|              |        | 75-79       | 0.000                      | 0.000                      | 0.000                  |
|              |        | 30-34       | 66065.017                  | 51504.913                  | 14560.104              |
|              |        | 35-39       | 232509.414                 | 182629.696                 | 49879.718              |
|              |        | 40-44       | 688628.041                 | 528339.251                 | 160288.791             |
|              |        | 45-49       | 1528300.367                | 1133989.336                | 394311.031             |
|              |        | 50-54       | 2730187.229                | 1991259.925                | 738927.304             |
|              |        | 55-59       | 3909101.673                | 2830678.360                | 1078423.31             |
|              |        | 60-64       | 4287716.660                | 3199043.581                | 1088673.08             |
|              | 65-69  | 3467897.115 | 2637279.046                | 830618.069                 |                        |
|              | 70-74  | 1312144.343 | 1014116.974                | 298027.370                 |                        |
|              | 75-79  | 0.000       | 0.000                      | 0.000                      |                        |
|              | Female | 30-34       | 51913.113                  | 40499.187                  | 11413.926              |
|              |        | 35-39       | 189792.904                 | 148267.300                 | 41525.604              |
|              |        | 40-44       | 527596.573                 | 394444.433                 | 133152.140             |
|              |        | 45-49       | 1122524.269                | 806600.752                 | 315923.516             |
|              |        | 50-54       | 1882214.322                | 1320853.665                | 561360.657             |
| 55-59        |        | 2595581.943 | 1794913.952                | 800667.991                 |                        |
| 60-64        |        | 2846273.090 | 2006719.870                | 839553.219                 |                        |
| 65-69        |        | 2358758.394 | 1680876.051                | 677882.342                 |                        |
| IHD          | Males  | 70-74       | 937814.238                 | 675976.293                 | 261837.944             |
|              |        | 75-79       | 0.000                      | 0.000                      | 0.000                  |
|              |        | 30-34       | 263834.566                 | 116571.899                 | 147262.666             |
|              |        | 35-39       | 692140.150                 | 290969.821                 | 401170.330             |
|              |        | 40-44       | 1519708.432                | 578091.784                 | 941616.648             |
|              |        | 45-49       | 2568546.697                | 890248.427                 | 1678298.27             |
|              |        | 50-54       | 3632929.903                | 1310356.364                | 2322573.54             |
|              |        | 55-59       | 2807892.356                | 1076831.403                | 1731060.95             |
|              |        | 60-64       | 2599825.934                | 1173402.312                | 1426423.62             |
|              | 65-69  | 1113578.307 | 576682.368                 | 536895.939                 |                        |
|              | 70-74  | 437536.271  | 258996.440                 | 178539.831                 |                        |
|              | 75-79  | 0.000       | 0.000                      | 0.000                      |                        |
|              | Female | 30-34       | 79649.097                  | 37495.058                  | 42154.039              |
|              |        | 35-39       | 193965.908                 | 80396.037                  | 113569.871             |
|              |        | 40-44       | 403380.974                 | 148527.194                 | 254853.780             |
|              |        | 45-49       | 671385.408                 | 227685.749                 | 443699.659             |
|              |        | 50-54       | 1011875.989                | 367920.799                 | 643955.190             |
| 55-59        |        | 849875.715  | 337778.971                 | 512096.744                 |                        |
| 60-64        |        | 925490.876  | 429996.753                 | 495494.124                 |                        |
| 65-69        |        | 455463.881  | 243363.340                 | 212100.541                 |                        |
| Stroke       | Males  | 70-74       | 207681.216                 | 124413.732                 | 83267.484              |
|              |        | 75-79       | 0.000                      | 0.000                      | 0.000                  |
|              |        | 30-34       | 73463.650                  | 42846.146                  | 30617.503              |
|              |        | 35-39       | 151934.057                 | 85846.909                  | 66087.148              |
|              |        | 40-44       | 262845.974                 | 140365.277                 | 122480.698             |
|              |        | 45-49       | 383421.246                 | 190781.517                 | 192639.729             |
|              |        | 50-54       | 479872.634                 | 216010.361                 | 263862.273             |
|              |        | 55-59       | 437124.903                 | 181475.844                 | 255649.059             |
|              |        | 60-64       | 419457.235                 | 177200.654                 | 242256.581             |
|              | 65-69  | 128180.574  | 56717.981                  | 71462.593                  |                        |
|              | 70-74  | 53245.965   | 25660.893                  | 27585.072                  |                        |
|              | 75-79  | 0.000       | 0.000                      | 0.000                      |                        |
|              | Female | 30-34       | 62919.090                  | 39915.930                  | 23003.160              |

**Results for PHIM for Run 8 (ELL Summary Sensitivity\_Analysis\_3.RTF)**

|      |        |       |             |            |            |
|------|--------|-------|-------------|------------|------------|
|      |        | 35-39 | 120806.205  | 72352.305  | 48453.900  |
|      |        | 40-44 | 203391.885  | 112830.176 | 90561.709  |
|      |        | 45-49 | 278172.097  | 142829.955 | 135342.142 |
|      |        | 50-54 | 325979.181  | 155560.669 | 170418.512 |
|      |        | 55-59 | 275161.340  | 123000.485 | 152160.855 |
|      |        | 60-64 | 268920.493  | 121625.446 | 147295.047 |
|      |        | 65-69 | 87956.054   | 41353.449  | 46602.605  |
|      |        | 70-74 | 42055.224   | 20564.569  | 21490.655  |
|      |        | 75-79 | 0.000       | 0.000      | 0.000      |
| COPD | Males  | 30-34 | 40547.801   | 25792.445  | 14755.356  |
|      |        | 35-39 | 70214.933   | 44966.626  | 25248.307  |
|      |        | 40-44 | 138408.960  | 86811.198  | 51597.762  |
|      |        | 45-49 | 295573.443  | 180663.705 | 114909.738 |
|      |        | 50-54 | 603979.438  | 355149.506 | 248829.932 |
|      |        | 55-59 | 1086086.992 | 625864.080 | 460222.912 |
|      |        | 60-64 | 1465829.290 | 895881.544 | 569947.746 |
|      |        | 65-69 | 1451838.682 | 938002.450 | 513836.232 |
|      |        | 70-74 | 692979.695  | 465988.752 | 226990.943 |
|      |        | 75-79 | 0.000       | 0.000      | 0.000      |
|      | Female | 30-34 | 34659.261   | 23469.800  | 11189.461  |
|      |        | 35-39 | 65652.924   | 43964.545  | 21688.379  |
|      |        | 40-44 | 133169.505  | 86962.632  | 46206.873  |
|      |        | 45-49 | 267988.924  | 169005.689 | 98983.235  |
|      |        | 50-54 | 523734.121  | 322153.985 | 201580.136 |
|      |        | 55-59 | 870859.170  | 521887.612 | 348971.557 |
|      |        | 60-64 | 1166683.329 | 715153.890 | 451529.439 |
|      |        | 65-69 | 1190003.066 | 747014.528 | 442988.538 |
|      |        | 70-74 | 588541.493  | 373706.032 | 214835.461 |
|      |        | 75-79 | 0.000       | 0.000      | 0.000      |

---



## Results for PHIM for Run 8 (ELL Summary Sensitivity\_Analysis\_3.RTF)

\*\*\*\*\*

**Table 6: Estimated Loss of Life, at the end of follow-up, Population and Number deaths adjusted for Ecig scenario**

| Disease      | Sex    | Age Group   | Years of life lost<br>NULL | Years of life lost<br>Ecig | Years of life<br>Saved |
|--------------|--------|-------------|----------------------------|----------------------------|------------------------|
| All Diseases | Males  | 30-34       | 443911.034                 | 236730.193                 | 207180.841             |
|              |        | 35-39       | 1146798.555                | 604524.385                 | 542274.170             |
|              |        | 40-44       | 2609591.408                | 1334328.937                | 1275262.47             |
|              |        | 45-49       | 4775841.753                | 2398913.371                | 2376928.38             |
|              |        | 50-54       | 7446969.205                | 3882650.261                | 3564318.94             |
|              |        | 55-59       | 8240205.925                | 4731139.501                | 3509066.42             |
|              |        | 60-64       | 8772829.118                | 5473669.920                | 3299159.20             |
|              |        | 65-69       | 6161494.678                | 4233220.007                | 1928274.67             |
|              |        | 70-74       | 2495906.274                | 1778307.885                | 717598.389             |
|              | 75-79  | 0.000       | 0.000                      | 0.000                      |                        |
|              | Female | 30-34       | 229140.561                 | 141383.818                 | 87756.743              |
|              |        | 35-39       | 570217.942                 | 345008.854                 | 225209.088             |
|              |        | 40-44       | 1267538.938                | 742948.553                 | 524590.385             |
|              |        | 45-49       | 2340070.698                | 1346942.765                | 993127.933             |
|              |        | 50-54       | 3743803.613                | 2169091.045                | 1574712.57             |
|              |        | 55-59       | 4591478.168                | 2782642.648                | 1808835.52             |
|              |        | 60-64       | 5207367.788                | 3283378.554                | 1923989.23             |
|              |        | 65-69       | 4092181.394                | 2723390.029                | 1368791.37             |
| 70-74        |        | 1776092.171 | 1201639.248                | 574452.923                 |                        |
| Lung cancer  | Males  | 30-34       | 66065.017                  | 51508.481                  | 14556.536              |
|              |        | 35-39       | 232509.414                 | 182668.553                 | 49840.861              |
|              |        | 40-44       | 688628.041                 | 528675.387                 | 159952.655             |
|              |        | 45-49       | 1528300.367                | 1135776.614                | 392523.753             |
|              |        | 50-54       | 2730187.229                | 1997064.110                | 733123.119             |
|              |        | 55-59       | 3909101.673                | 2841329.337                | 1067772.34             |
|              |        | 60-64       | 4287716.660                | 3216833.678                | 1070882.98             |
|              |        | 65-69       | 3467897.115                | 2652797.744                | 815099.370             |
|              |        | 70-74       | 1312144.343                | 1021989.721                | 290154.622             |
|              | 75-79  | 0.000       | 0.000                      | 0.000                      |                        |
|              | Female | 30-34       | 51913.113                  | 40500.458                  | 11412.655              |
|              |        | 35-39       | 189792.904                 | 148280.921                 | 41511.984              |
|              |        | 40-44       | 527596.573                 | 394553.033                 | 133043.541             |
|              |        | 45-49       | 1122524.269                | 807132.622                 | 315391.646             |
|              |        | 50-54       | 1882214.322                | 1322559.002                | 559655.320             |
|              |        | 55-59       | 2595581.943                | 1798335.246                | 797246.697             |
|              |        | 60-64       | 2846273.090                | 2013054.776                | 833218.314             |
|              |        | 65-69       | 2358758.394                | 1687514.034                | 671244.360             |
| 70-74        |        | 937814.238  | 679904.743                 | 257909.495                 |                        |
| IHD          | Males  | 30-34       | 263834.566                 | 116578.727                 | 147255.839             |
|              |        | 35-39       | 692140.150                 | 291015.821                 | 401124.329             |
|              |        | 40-44       | 1519708.432                | 578337.113                 | 941371.319             |
|              |        | 45-49       | 2568546.697                | 891097.405                 | 1677449.29             |
|              |        | 50-54       | 3632929.903                | 1312552.661                | 2320377.24             |
|              |        | 55-59       | 2807892.356                | 1078817.178                | 1729075.18             |
|              |        | 60-64       | 2599825.934                | 1176367.454                | 1423458.48             |
|              |        | 65-69       | 1113578.307                | 577997.838                 | 535580.469             |
|              |        | 70-74       | 437536.271                 | 259714.079                 | 177822.191             |
|              | 75-79  | 0.000       | 0.000                      | 0.000                      |                        |
|              | Female | 30-34       | 79649.097                  | 37495.998                  | 42153.099              |
|              |        | 35-39       | 193965.908                 | 80401.701                  | 113564.207             |
|              |        | 40-44       | 403380.974                 | 148554.453                 | 254826.521             |
|              |        | 45-49       | 671385.408                 | 227776.477                 | 443608.931             |
|              |        | 50-54       | 1011875.989                | 368176.731                 | 643699.258             |
|              |        | 55-59       | 849875.715                 | 338057.979                 | 511817.736             |
|              |        | 60-64       | 925490.876                 | 430527.391                 | 494963.486             |
|              |        | 65-69       | 455463.881                 | 243674.363                 | 211789.518             |
| 70-74        |        | 207681.216  | 124635.051                 | 83046.165                  |                        |
| Stroke       | Males  | 30-34       | 73463.650                  | 42848.528                  | 30615.122              |
|              |        | 35-39       | 151934.057                 | 85861.760                  | 66072.297              |
|              |        | 40-44       | 262845.974                 | 140435.290                 | 122410.685             |
|              |        | 45-49       | 383421.246                 | 191008.399                 | 192412.847             |
|              |        | 50-54       | 479872.634                 | 216471.077                 | 263401.557             |
|              |        | 55-59       | 437124.903                 | 181924.757                 | 255200.147             |
|              |        | 60-64       | 419457.235                 | 177789.823                 | 241667.412             |
|              |        | 65-69       | 128180.574                 | 56875.090                  | 71305.484              |
|              |        | 70-74       | 53245.965                  | 25737.632                  | 27508.333              |
|              | 75-79  | 0.000       | 0.000                      | 0.000                      |                        |
|              | Female | 30-34       | 62919.090                  | 39916.817                  | 23002.273              |

**Results for PHIM for Run 8 (ELL Summary Sensitivity\_Analysis\_3.RTF)**

|      |       |        |             |             |            |            |
|------|-------|--------|-------------|-------------|------------|------------|
|      |       | 35-39  | 120806.205  | 72357.171   | 48449.035  |            |
|      |       | 40-44  | 203391.885  | 112851.626  | 90540.260  |            |
|      |       | 45-49  | 278172.097  | 142893.006  | 135279.091 |            |
|      |       | 50-54  | 325979.181  | 155685.865  | 170293.316 |            |
|      |       | 55-59  | 275161.340  | 123128.678  | 152032.662 |            |
|      |       | 60-64  | 268920.493  | 121812.987  | 147107.506 |            |
|      |       | 65-69  | 87956.054   | 41416.159   | 46539.895  |            |
|      |       | 70-74  | 42055.224   | 20604.325   | 21450.899  |            |
|      |       | 75-79  | 0.000       | 0.000       | 0.000      |            |
| COPD | Males | 30-34  | 40547.801   | 25794.457   | 14753.344  |            |
|      |       | 35-39  | 70214.933   | 44978.251   | 25236.682  |            |
|      |       | 40-44  | 138408.960  | 86881.148   | 51527.812  |            |
|      |       | 45-49  | 295573.443  | 181030.953  | 114542.490 |            |
|      |       | 50-54  | 603979.438  | 356562.412  | 247417.026 |            |
|      |       | 55-59  | 1086086.992 | 629068.229  | 457018.763 |            |
|      |       | 60-64  | 1465829.290 | 902678.965  | 563150.325 |            |
|      |       | 65-69  | 1451838.682 | 945549.335  | 506289.347 |            |
|      |       | 70-74  | 692979.695  | 470866.453  | 222113.242 |            |
|      |       |        | 75-79       | 0.000       | 0.000      | 0.000      |
|      |       | Female | 30-34       | 34659.261   | 23470.544  | 11188.717  |
|      |       |        | 35-39       | 65652.924   | 43969.062  | 21683.862  |
|      |       |        | 40-44       | 133169.505  | 86989.442  | 46180.063  |
|      |       |        | 45-49       | 267988.924  | 169140.659 | 98848.265  |
|      |       |        | 50-54       | 523734.121  | 322669.448 | 201064.673 |
|      |       |        | 55-59       | 870859.170  | 523120.744 | 347738.425 |
|      |       |        | 60-64       | 1166683.329 | 717983.400 | 448699.929 |
|      |       |        | 65-69       | 1190003.066 | 750785.474 | 439217.592 |
|      |       |        | 70-74       | 588541.493  | 376495.129 | 212046.364 |
|      |       |        | 75-79       | 0.000       | 0.000      | 0.000      |

---

## Results for PHIM for Run 1 (Sensitivity\_Analysis\_4.RTF)

System Date and Time: 20210220T110853  
User: JohnS  
SAS Version: 9.4  
Project: Population Health Impact Model 7.3

The System is running in Test Mode

Maximum Upper Age for P Component = 79  
Upper Age for ELL Calculations = 75  
Report in E-component: Social Classes A and B combined  
Description: Sensitivity Analysis 4 for VeneBio, Change Ecig Initialisation rate  
Assumption Files:  
Options Control File: C:\VeneBio\OG\_Test\US\_Control\_V\_S4.CSV  
TTP Test File: C:\VeneBio\OG\_Test\TTP\_Test\_MAS4.csv  
TTP Reference File: C:\VeneBio\OG\_Test\TTP\_Reference\_V.csv  
TTP Factor Test File: C:\VeneBio\OG\_Test\TTP\_FACTOR\_Test.csv  
TTP Factor Reference File: C:\VeneBio\OG\_Test\TTP\_FACTOR\_Test.csv  
TP Socioeconomic Groups: Not Used  
Output Choices:C:\VeneBio\OG\_Test\OUTC\_PA.csv

Main Results will be sent to the folder C:\VeneBio\Main\_Results\  
Plots will be sent to the folder C:\VeneBio\Plot\_Results\Plots\_20210220T110853  
Saved P, E and/or A Component results will be sent to the folder C:\VeneBio\SAVED\Saved\_20210220T110853\

### Table of Contents

|                                                                                                               |      |
|---------------------------------------------------------------------------------------------------------------|------|
| <a href="#">Control File Details for Run: 1</a>                                                               | 1486 |
| <a href="#">TTP values for Run: 1, Scenario: NULL</a>                                                         | 1487 |
| <a href="#">TTP values for Run: 1, Scenario: Ecig</a>                                                         | 1489 |
| <a href="#">Main Output for the Tobacco History for Run: 1, Simulation: 1, Scenario: NULL</a>                 | 1493 |
| <a href="#">Main Output for the Tobacco History for Run: 1, Simulation: 1, Scenario: Ecig</a>                 | 1495 |
| <a href="#">Main Results for E-Component for Run: 1, Simulation: 1, COD: Four Diseases Combined</a>           | 1511 |
| <a href="#">Main Results for E-Component for Run: 1, Simulation: 1, COD: LUNG CANCER</a>                      | 1512 |
| <a href="#">Main Results for E-Component for Run: 1, Simulation: 1, COD: IHD</a>                              | 1513 |
| <a href="#">Main Results for E-Component for Run: 1, Simulation: 1, COD: STROKE</a>                           | 1514 |
| <a href="#">Main Results for E-Component for Run: 1, Simulation: 1, COD: COPD</a>                             | 1515 |
| <a href="#">Main Results for E-Component for Run: 1, Simulation: 1, COD: Four Diseases Combined, Adjusted</a> | 1516 |
| <a href="#">Main Results for E-Component for Run: 1, Simulation: 1, COD: LUNG CANCER, Adjusted</a>            | 1517 |
| <a href="#">Main Results for E-Component for Run: 1, Simulation: 1, COD: IHD, Adjusted</a>                    | 1518 |
| <a href="#">Main Results for E-Component for Run: 1, Simulation: 1, COD: STROKE, Adjusted</a>                 | 1519 |
| <a href="#">Main Results for E-Component for Run: 1, Simulation: 1, COD: COPD, Adjusted</a>                   | 1520 |
| <a href="#">Control File Details for Run: 2</a>                                                               | 1521 |
| <a href="#">TTP values for Run: 2, Scenario: NULL</a>                                                         | 1522 |
| <a href="#">TTP values for Run: 2, Scenario: Ecig</a>                                                         | 1524 |
| <a href="#">Main Output for the Tobacco History for Run: 2, Simulation: 1, Scenario: NULL</a>                 | 1528 |
| <a href="#">Main Output for the Tobacco History for Run: 2, Simulation: 1, Scenario: Ecig</a>                 | 1530 |
| <a href="#">Main Results for E-Component for Run: 2, Simulation: 1, COD: Four Diseases Combined</a>           | 1546 |
| <a href="#">Main Results for E-Component for Run: 2, Simulation: 1, COD: LUNG CANCER</a>                      | 1547 |
| <a href="#">Main Results for E-Component for Run: 2, Simulation: 1, COD: IHD</a>                              | 1548 |
| <a href="#">Main Results for E-Component for Run: 2, Simulation: 1, COD: STROKE</a>                           | 1549 |
| <a href="#">Main Results for E-Component for Run: 2, Simulation: 1, COD: COPD</a>                             | 1550 |
| <a href="#">Main Results for E-Component for Run: 2, Simulation: 1, COD: Four Diseases Combined, Adjusted</a> | 1551 |
| <a href="#">Main Results for E-Component for Run: 2, Simulation: 1, COD: LUNG CANCER, Adjusted</a>            | 1552 |
| <a href="#">Main Results for E-Component for Run: 2, Simulation: 1, COD: IHD, Adjusted</a>                    | 1553 |
| <a href="#">Main Results for E-Component for Run: 2, Simulation: 1, COD: STROKE, Adjusted</a>                 | 1554 |
| <a href="#">Main Results for E-Component for Run: 2, Simulation: 1, COD: COPD, Adjusted</a>                   | 1555 |
| <a href="#">Control File Details for Run: 3</a>                                                               | 1556 |
| <a href="#">TTP values for Run: 3, Scenario: NULL</a>                                                         | 1557 |
| <a href="#">TTP values for Run: 3, Scenario: Ecig</a>                                                         | 1559 |
| <a href="#">Main Output for the Tobacco History for Run: 3, Simulation: 1, Scenario: NULL</a>                 | 1563 |
| <a href="#">Main Output for the Tobacco History for Run: 3, Simulation: 1, Scenario: Ecig</a>                 | 1565 |
| <a href="#">Main Results for E-Component for Run: 3, Simulation: 1, COD: Four Diseases Combined</a>           | 1581 |
| <a href="#">Main Results for E-Component for Run: 3, Simulation: 1, COD: LUNG CANCER</a>                      | 1582 |
| <a href="#">Main Results for E-Component for Run: 3, Simulation: 1, COD: IHD</a>                              | 1583 |
| <a href="#">Main Results for E-Component for Run: 3, Simulation: 1, COD: STROKE</a>                           | 1584 |
| <a href="#">Main Results for E-Component for Run: 3, Simulation: 1, COD: COPD</a>                             | 1585 |
| <a href="#">Main Results for E-Component for Run: 3, Simulation: 1, COD: Four Diseases Combined, Adjusted</a> | 1586 |
| <a href="#">Main Results for E-Component for Run: 3, Simulation: 1, COD: LUNG CANCER, Adjusted</a>            | 1587 |
| <a href="#">Main Results for E-Component for Run: 3, Simulation: 1, COD: IHD, Adjusted</a>                    | 1588 |
| <a href="#">Main Results for E-Component for Run: 3, Simulation: 1, COD: STROKE, Adjusted</a>                 | 1589 |
| <a href="#">Main Results for E-Component for Run: 3, Simulation: 1, COD: COPD, Adjusted</a>                   | 1590 |
| <a href="#">Control File Details for Run: 4</a>                                                               | 1591 |
| <a href="#">TTP values for Run: 4, Scenario: NULL</a>                                                         | 1592 |

## Results for PHIM for Run 1 (Sensitivity\_Analysis\_4.RTF)

|                                                                                                               |      |
|---------------------------------------------------------------------------------------------------------------|------|
| <a href="#">TTP values for Run: 4, Scenario: Ecig</a>                                                         | 1594 |
| <a href="#">Main Output for the Tobacco History for Run: 4, Simulation: 1, Scenario: NULL</a>                 | 1598 |
| <a href="#">Main Output for the Tobacco History for Run: 4, Simulation: 1, Scenario: Ecig</a>                 | 1600 |
| <a href="#">Main Results for E-Component for Run: 4, Simulation: 1, COD: Four Diseases Combined</a>           | 1616 |
| <a href="#">Main Results for E-Component for Run: 4, Simulation: 1, COD: LUNG CANCER</a>                      | 1617 |
| <a href="#">Main Results for E-Component for Run: 4, Simulation: 1, COD: IHD</a>                              | 1618 |
| <a href="#">Main Results for E-Component for Run: 4, Simulation: 1, COD: STROKE</a>                           | 1619 |
| <a href="#">Main Results for E-Component for Run: 4, Simulation: 1, COD: COPD</a>                             | 1620 |
| <a href="#">Main Results for E-Component for Run: 4, Simulation: 1, COD: Four Diseases Combined, Adjusted</a> | 1621 |
| <a href="#">Main Results for E-Component for Run: 4, Simulation: 1, COD: LUNG CANCER, Adjusted</a>            | 1622 |
| <a href="#">Main Results for E-Component for Run: 4, Simulation: 1, COD: IHD, Adjusted</a>                    | 1623 |
| <a href="#">Main Results for E-Component for Run: 4, Simulation: 1, COD: STROKE, Adjusted</a>                 | 1624 |
| <a href="#">Main Results for E-Component for Run: 4, Simulation: 1, COD: COPD, Adjusted</a>                   | 1625 |
| <a href="#">Control File Details for Run: 5</a>                                                               | 1626 |
| <a href="#">TTP values for Run: 5, Scenario: NULL</a>                                                         | 1627 |
| <a href="#">TTP values for Run: 5, Scenario: Ecig</a>                                                         | 1629 |
| <a href="#">Main Output for the Tobacco History for Run: 5, Simulation: 1, Scenario: NULL</a>                 | 1633 |
| <a href="#">Main Output for the Tobacco History for Run: 5, Simulation: 1, Scenario: Ecig</a>                 | 1635 |
| <a href="#">Main Results for E-Component for Run: 5, Simulation: 1, COD: Four Diseases Combined</a>           | 1651 |
| <a href="#">Main Results for E-Component for Run: 5, Simulation: 1, COD: LUNG CANCER</a>                      | 1652 |
| <a href="#">Main Results for E-Component for Run: 5, Simulation: 1, COD: IHD</a>                              | 1653 |
| <a href="#">Main Results for E-Component for Run: 5, Simulation: 1, COD: STROKE</a>                           | 1654 |
| <a href="#">Main Results for E-Component for Run: 5, Simulation: 1, COD: COPD</a>                             | 1655 |
| <a href="#">Main Results for E-Component for Run: 5, Simulation: 1, COD: Four Diseases Combined, Adjusted</a> | 1656 |
| <a href="#">Main Results for E-Component for Run: 5, Simulation: 1, COD: LUNG CANCER, Adjusted</a>            | 1657 |
| <a href="#">Main Results for E-Component for Run: 5, Simulation: 1, COD: IHD, Adjusted</a>                    | 1658 |
| <a href="#">Main Results for E-Component for Run: 5, Simulation: 1, COD: STROKE, Adjusted</a>                 | 1659 |
| <a href="#">Main Results for E-Component for Run: 5, Simulation: 1, COD: COPD, Adjusted</a>                   | 1660 |
| <a href="#">Control File Details for Run: 6</a>                                                               | 1661 |
| <a href="#">TTP values for Run: 6, Scenario: NULL</a>                                                         | 1662 |
| <a href="#">TTP values for Run: 6, Scenario: Ecig</a>                                                         | 1664 |
| <a href="#">Main Output for the Tobacco History for Run: 6, Simulation: 1, Scenario: NULL</a>                 | 1668 |
| <a href="#">Main Output for the Tobacco History for Run: 6, Simulation: 1, Scenario: Ecig</a>                 | 1670 |
| <a href="#">Main Results for E-Component for Run: 6, Simulation: 1, COD: Four Diseases Combined</a>           | 1686 |
| <a href="#">Main Results for E-Component for Run: 6, Simulation: 1, COD: LUNG CANCER</a>                      | 1687 |
| <a href="#">Main Results for E-Component for Run: 6, Simulation: 1, COD: IHD</a>                              | 1688 |
| <a href="#">Main Results for E-Component for Run: 6, Simulation: 1, COD: STROKE</a>                           | 1689 |
| <a href="#">Main Results for E-Component for Run: 6, Simulation: 1, COD: COPD</a>                             | 1690 |
| <a href="#">Main Results for E-Component for Run: 6, Simulation: 1, COD: Four Diseases Combined, Adjusted</a> | 1691 |
| <a href="#">Main Results for E-Component for Run: 6, Simulation: 1, COD: LUNG CANCER, Adjusted</a>            | 1692 |
| <a href="#">Main Results for E-Component for Run: 6, Simulation: 1, COD: IHD, Adjusted</a>                    | 1693 |
| <a href="#">Main Results for E-Component for Run: 6, Simulation: 1, COD: STROKE, Adjusted</a>                 | 1694 |
| <a href="#">Main Results for E-Component for Run: 6, Simulation: 1, COD: COPD, Adjusted</a>                   | 1695 |
| <a href="#">Control File Details for Run: 7</a>                                                               | 1696 |
| <a href="#">TTP values for Run: 7, Scenario: NULL</a>                                                         | 1697 |
| <a href="#">TTP values for Run: 7, Scenario: Ecig</a>                                                         | 1699 |
| <a href="#">Main Output for the Tobacco History for Run: 7, Simulation: 1, Scenario: NULL</a>                 | 1703 |
| <a href="#">Main Output for the Tobacco History for Run: 7, Simulation: 1, Scenario: Ecig</a>                 | 1705 |
| <a href="#">Main Results for E-Component for Run: 7, Simulation: 1, COD: Four Diseases Combined</a>           | 1721 |
| <a href="#">Main Results for E-Component for Run: 7, Simulation: 1, COD: LUNG CANCER</a>                      | 1722 |
| <a href="#">Main Results for E-Component for Run: 7, Simulation: 1, COD: IHD</a>                              | 1723 |
| <a href="#">Main Results for E-Component for Run: 7, Simulation: 1, COD: STROKE</a>                           | 1724 |
| <a href="#">Main Results for E-Component for Run: 7, Simulation: 1, COD: COPD</a>                             | 1725 |
| <a href="#">Main Results for E-Component for Run: 7, Simulation: 1, COD: Four Diseases Combined, Adjusted</a> | 1726 |
| <a href="#">Main Results for E-Component for Run: 7, Simulation: 1, COD: LUNG CANCER, Adjusted</a>            | 1727 |
| <a href="#">Main Results for E-Component for Run: 7, Simulation: 1, COD: IHD, Adjusted</a>                    | 1728 |
| <a href="#">Main Results for E-Component for Run: 7, Simulation: 1, COD: STROKE, Adjusted</a>                 | 1729 |
| <a href="#">Main Results for E-Component for Run: 7, Simulation: 1, COD: COPD, Adjusted</a>                   | 1730 |
| <a href="#">Control File Details for Run: 8</a>                                                               | 1731 |
| <a href="#">TTP values for Run: 8, Scenario: NULL</a>                                                         | 1732 |
| <a href="#">TTP values for Run: 8, Scenario: Ecig</a>                                                         | 1734 |
| <a href="#">Main Output for the Tobacco History for Run: 8, Simulation: 1, Scenario: NULL</a>                 | 1738 |
| <a href="#">Main Output for the Tobacco History for Run: 8, Simulation: 1, Scenario: Ecig</a>                 | 1740 |
| <a href="#">Main Results for E-Component for Run: 8, Simulation: 1, COD: Four Diseases Combined</a>           | 1756 |
| <a href="#">Main Results for E-Component for Run: 8, Simulation: 1, COD: LUNG CANCER</a>                      | 1757 |
| <a href="#">Main Results for E-Component for Run: 8, Simulation: 1, COD: IHD</a>                              | 1758 |
| <a href="#">Main Results for E-Component for Run: 8, Simulation: 1, COD: STROKE</a>                           | 1759 |
| <a href="#">Main Results for E-Component for Run: 8, Simulation: 1, COD: COPD</a>                             | 1760 |
| <a href="#">Main Results for E-Component for Run: 8, Simulation: 1, COD: Four Diseases Combined, Adjusted</a> | 1761 |
| <a href="#">Main Results for E-Component for Run: 8, Simulation: 1, COD: LUNG CANCER, Adjusted</a>            | 1762 |
| <a href="#">Main Results for E-Component for Run: 8, Simulation: 1, COD: IHD, Adjusted</a>                    | 1763 |
| <a href="#">Main Results for E-Component for Run: 8, Simulation: 1, COD: STROKE, Adjusted</a>                 | 1764 |
| <a href="#">Main Results for E-Component for Run: 8, Simulation: 1, COD: COPD, Adjusted</a>                   | 1765 |

## Results for PHIM for Run 1 (Sensitivity\_Analysis\_4.RTF)

|                                                                                                                                                            |      |
|------------------------------------------------------------------------------------------------------------------------------------------------------------|------|
| <a href="#">Estimated Loss of Life from the E Component for Run: 2, Simulation: 1</a>                                                                      | 1766 |
| <a href="#">Table 1: Estimated Loss of Life, at the end of follow-up, all age groups combined, Population unadjusted for deaths in Ecig scenario</a>       | 1766 |
| <a href="#">Table 2: Estimated Loss of Life, at the end of follow-up, all age groups combined, Population and Number deaths adjusted for Ecig scenario</a> | 1767 |
| <a href="#">Table 3: Estimated Loss of Life, All age groups combined, Population unadjusted for deaths in Ecig scenario, cumulative over years</a>         | 1768 |
| <a href="#">Table 4: Estimated Loss of Life, All age groups combined, Population and Number deaths adjusted for Ecig scenario, cumulative over years</a>   | 1775 |
| <a href="#">Table 5: Estimated Loss of Life, at the end of follow-up, Population unadjusted for deaths in Ecig scenario</a>                                | 1782 |
| <a href="#">Table 6: Estimated Loss of Life, at the end of follow-up, Population and Number deaths adjusted for Ecig scenario</a>                          | 1784 |
| <a href="#">Estimated Loss of Life from the E Component for Run: 4, Simulation: 1</a>                                                                      | 1786 |
| <a href="#">Table 1: Estimated Loss of Life, at the end of follow-up, all age groups combined, Population unadjusted for deaths in Ecig scenario</a>       | 1786 |
| <a href="#">Table 2: Estimated Loss of Life, at the end of follow-up, all age groups combined, Population and Number deaths adjusted for Ecig scenario</a> | 1787 |
| <a href="#">Table 3: Estimated Loss of Life, All age groups combined, Population unadjusted for deaths in Ecig scenario, cumulative over years</a>         | 1788 |
| <a href="#">Table 4: Estimated Loss of Life, All age groups combined, Population and Number deaths adjusted for Ecig scenario, cumulative over years</a>   | 1795 |
| <a href="#">Table 5: Estimated Loss of Life, at the end of follow-up, Population unadjusted for deaths in Ecig scenario</a>                                | 1802 |
| <a href="#">Table 6: Estimated Loss of Life, at the end of follow-up, Population and Number deaths adjusted for Ecig scenario</a>                          | 1804 |
| <a href="#">Estimated Loss of Life from the E Component for Run: 6, Simulation: 1</a>                                                                      | 1806 |
| <a href="#">Table 1: Estimated Loss of Life, at the end of follow-up, all age groups combined, Population unadjusted for deaths in Ecig scenario</a>       | 1806 |
| <a href="#">Table 2: Estimated Loss of Life, at the end of follow-up, all age groups combined, Population and Number deaths adjusted for Ecig scenario</a> | 1807 |
| <a href="#">Table 3: Estimated Loss of Life, All age groups combined, Population unadjusted for deaths in Ecig scenario, cumulative over years</a>         | 1808 |
| <a href="#">Table 4: Estimated Loss of Life, All age groups combined, Population and Number deaths adjusted for Ecig scenario, cumulative over years</a>   | 1815 |
| <a href="#">Table 5: Estimated Loss of Life, at the end of follow-up, Population unadjusted for deaths in Ecig scenario</a>                                | 1822 |
| <a href="#">Table 6: Estimated Loss of Life, at the end of follow-up, Population and Number deaths adjusted for Ecig scenario</a>                          | 1824 |
| <a href="#">Estimated Loss of Life from the E Component for Run: 8, Simulation: 1</a>                                                                      | 1826 |
| <a href="#">Table 1: Estimated Loss of Life, at the end of follow-up, all age groups combined, Population unadjusted for deaths in Ecig scenario</a>       | 1826 |
| <a href="#">Table 2: Estimated Loss of Life, at the end of follow-up, all age groups combined, Population and Number deaths adjusted for Ecig scenario</a> | 1827 |
| <a href="#">Table 3: Estimated Loss of Life, All age groups combined, Population unadjusted for deaths in Ecig scenario, cumulative over years</a>         | 1828 |
| <a href="#">Table 4: Estimated Loss of Life, All age groups combined, Population and Number deaths adjusted for Ecig scenario, cumulative over years</a>   | 1835 |
| <a href="#">Table 5: Estimated Loss of Life, at the end of follow-up, Population unadjusted for deaths in Ecig scenario</a>                                | 1842 |
| <a href="#">Table 6: Estimated Loss of Life, at the end of follow-up, Population and Number deaths adjusted for Ecig scenario</a>                          | 1844 |

## Results for PHIM for Run 1 (Sensitivity\_Analysis\_4.RTF)

---

### Control File Details for Run: 1

| Variable Parameter                                       | Value                  |
|----------------------------------------------------------|------------------------|
| 1. Name for Reference Scenario                           | NULL                   |
| 2. Name for Test Scenario                                | Ecig                   |
| 3. Name for Product 1                                    | CC                     |
| 4. Name for Product 2                                    | Ecig                   |
| 5. Name for Product 3                                    | -                      |
| 6. Name for Product 4                                    | Dual                   |
| 7. Country                                               | US (United States)     |
| 8. Sex                                                   | M (Males)              |
| 9. Year of start of process                              | 1990                   |
| 10. Number of months of follow-up                        | 600                    |
| 11. Follow-up interval length (in months)                | 12                     |
| 12. Lower age for risk estimation                        | 10                     |
| 13. Upper age for risk estimation                        | 79                     |
| 14. The effective dose for Product 1 (F1) - Ref          | 1                      |
| 15. The effective dose for Product 2 (F2) - Ref          | -                      |
| 16. The effective dose for Product 3 (F3) - Ref          | -                      |
| 17. The effective dose for Product 4 (F4) - Ref          | -                      |
| 18. The effective dose for Product 1 (F1) - Test         | 1                      |
| 19. The effective dose for Product 2 (F2) - Test         | 0.05                   |
| 20. The effective dose for Product 3 (F3) - Test         | -                      |
| 21. The effective dose for Product 4 (F4) - Test         | FROMF2                 |
| 22. Number in population to be simulated                 | 100000                 |
| 23. Number of MC simulations                             | 1                      |
| 24. The random number seed for the first simulation      | 15975263               |
| 25. Source for the population file (POP)                 | UN4                    |
| 26. Source for the socioeconomic prevalence file (SEP)   | -                      |
| 27. Source for the current smoking prevalence file (CSP) | ISS3                   |
| 28. Source for the former smoking prevalence file (FSP)  | ISS3                   |
| 29. Source for the quit-time distribution file (QTD)     | NHIS2006               |
| 30. Source for the death file (MORT)                     | APR-20                 |
| 31. Source for the relative risk file (RR)               | PNLEST                 |
| 32. Source for the half-life file (H)                    | PNLEST                 |
| 33. Assumption Set for TTP Factor Reference              | F1                     |
| 34. Assumption Set for TTP Factor Test                   | F1                     |
| 35. Assumption Set for TTP Reference                     | ISS3                   |
| 36. Assumption Set for TTP Test                          | S4A                    |
| 37. Assumption Set for TP for socioeconomic group        | -                      |
| 38. Source for Output Choice file (OUTC)                 | BASIC                  |
| 39. Output for DTP P1                                    | N                      |
| 40. Output for DTP P2                                    | N                      |
| 41. Output for Main P Component                          | Y                      |
| 42. Output for DTP E1                                    | N                      |
| 43. Output for DTP E2                                    | N                      |
| 44. Output for DTP E3                                    | N                      |
| 45. Output for Main E Component                          | Y                      |
| 46. Output file name                                     | Sensitivity_Analysis_4 |
| 47. Run number for P-Component                           | -                      |
| 48. Results file for E-Component                         | -                      |
| 49. Components required                                  | PE                     |
| 50. Results folder for P to be used in E-Component       | -                      |
| 51. Fixed age of starting product use                    | 16                     |
| 52. Output absolute risk file?                           | N                      |

## Results for PHIM for Run 1 (Sensitivity\_Analysis\_4.RTF)

\*\*\*\*\*

TTP values for Run: 1, Scenario: NULL

| Variable Parameter | Value               |
|--------------------|---------------------|
| 1. Country         | US (United States)  |
| 2. Sex             | M (Males)           |
| 3. Assumption Set  | ISS3                |
| Note:              | Period is in Months |

| Age   | Period  | Initiation  | Cessation    | Re-initiation |
|-------|---------|-------------|--------------|---------------|
|       |         | Never<br>CC | CC<br>Former | Former<br>CC  |
| 10-14 | 1-12    | 0.003842    | 0.008742     | 0.000000      |
| 15-19 | 1-12    | 0.004720    | 0.003614     | 0.000000      |
| 20-24 | 1-12    | 0.000376    | 0.000943     | 0.000000      |
| 25-29 | 1-12    | 0.000187    | 0.001143     | 0.000000      |
| 30-34 | 1-12    | 0.000093    | 0.000871     | 0.000000      |
| 35-39 | 1-12    | 0.000000    | 0.000867     | 0.000000      |
| 40-44 | 1-12    | 0.000000    | 0.001399     | 0.000000      |
| 45-49 | 1-12    | 0.000000    | 0.002033     | 0.000000      |
| 50-54 | 1-12    | 0.000000    | 0.003209     | 0.000000      |
| 55-59 | 1-12    | 0.000000    | 0.003574     | 0.000000      |
| 60-64 | 1-12    | 0.000000    | 0.003460     | 0.000000      |
| 65-69 | 1-12    | 0.000000    | 0.004136     | 0.000000      |
| 70-74 | 1-12    | 0.000000    | 0.005592     | 0.000000      |
| 75-79 | 1-12    | 0.000000    | 0.005592     | 0.000000      |
| 10-14 | 13-72   | 0.004906    | 0.008742     | 0.000000      |
| 15-19 | 13-72   | 0.006989    | 0.004426     | 0.000000      |
| 20-24 | 13-72   | 0.000687    | 0.001527     | 0.000000      |
| 25-29 | 13-72   | 0.000962    | 0.001515     | 0.000000      |
| 30-34 | 13-72   | 0.000364    | 0.001227     | 0.000000      |
| 35-39 | 13-72   | 0.000000    | 0.001630     | 0.000000      |
| 40-44 | 13-72   | 0.000000    | 0.001852     | 0.000000      |
| 45-49 | 13-72   | 0.000000    | 0.002667     | 0.000000      |
| 50-54 | 13-72   | 0.000000    | 0.003208     | 0.000000      |
| 55-59 | 13-72   | 0.000000    | 0.003978     | 0.000000      |
| 60-64 | 13-72   | 0.000000    | 0.005771     | 0.000000      |
| 65-69 | 13-72   | 0.000000    | 0.010432     | 0.000000      |
| 70-74 | 13-72   | 0.000000    | 0.007079     | 0.000000      |
| 75-79 | 13-72   | 0.000000    | 0.007079     | 0.000000      |
| 10-14 | 73-132  | 0.004312    | 0.008742     | 0.000000      |
| 15-19 | 73-132  | 0.005330    | 0.003289     | 0.000000      |
| 20-24 | 73-132  | 0.002456    | 0.003844     | 0.000000      |
| 25-29 | 73-132  | 0.000839    | 0.002006     | 0.000000      |
| 30-34 | 73-132  | 0.000414    | 0.001329     | 0.000000      |
| 35-39 | 73-132  | 0.000000    | 0.001278     | 0.000000      |
| 40-44 | 73-132  | 0.000000    | 0.001691     | 0.000000      |
| 45-49 | 73-132  | 0.000000    | 0.002904     | 0.000000      |
| 50-54 | 73-132  | 0.000000    | 0.003319     | 0.000000      |
| 55-59 | 73-132  | 0.000000    | 0.003976     | 0.000000      |
| 60-64 | 73-132  | 0.000000    | 0.005235     | 0.000000      |
| 65-69 | 73-132  | 0.000000    | 0.005901     | 0.000000      |
| 70-74 | 73-132  | 0.000000    | 0.005615     | 0.000000      |
| 75-79 | 73-132  | 0.000000    | 0.005615     | 0.000000      |
| 10-14 | 133-192 | 0.003468    | 0.008742     | 0.000000      |
| 15-19 | 133-192 | 0.004675    | 0.003732     | 0.000000      |
| 20-24 | 133-192 | 0.000062    | 0.002260     | 0.000000      |
| 25-29 | 133-192 | 0.001422    | 0.002822     | 0.000000      |
| 30-34 | 133-192 | 0.000696    | 0.002610     | 0.000000      |
| 35-39 | 133-192 | 0.000000    | 0.002058     | 0.000000      |
| 40-44 | 133-192 | 0.000000    | 0.002310     | 0.000000      |
| 45-49 | 133-192 | 0.000000    | 0.002256     | 0.000000      |
| 50-54 | 133-192 | 0.000000    | 0.002663     | 0.000000      |
| 55-59 | 133-192 | 0.000000    | 0.001746     | 0.000000      |
| 60-64 | 133-192 | 0.000000    | 0.005809     | 0.000000      |
| 65-69 | 133-192 | 0.000000    | 0.005896     | 0.000000      |
| 70-74 | 133-192 | 0.000000    | 0.007323     | 0.000000      |
| 75-79 | 133-192 | 0.000000    | 0.007323     | 0.000000      |
| 10-14 | 193-252 | 0.002314    | 0.008742     | 0.000000      |
| 15-19 | 193-252 | 0.003987    | 0.005036     | 0.000000      |
| 20-24 | 193-252 | 0.000320    | 0.002857     | 0.000000      |
| 25-29 | 193-252 | 0.000251    | 0.002314     | 0.000000      |
| 30-34 | 193-252 | 0.000125    | 0.004343     | 0.000000      |
| 35-39 | 193-252 | 0.000000    | 0.002092     | 0.000000      |
| 40-44 | 193-252 | 0.000000    | 0.002566     | 0.000000      |
| 45-49 | 193-252 | 0.000000    | 0.002311     | 0.000000      |
| 50-54 | 193-252 | 0.000000    | 0.003209     | 0.000000      |

### Results for PHIM for Run 1 (Sensitivity\_Analysis\_4.RTF)

|       |         |          |          |          |
|-------|---------|----------|----------|----------|
| 55-59 | 193-252 | 0.000000 | 0.004057 | 0.000000 |
| 60-64 | 193-252 | 0.000000 | 0.007166 | 0.000000 |
| 65-69 | 193-252 | 0.000000 | 0.004281 | 0.000000 |
| 70-74 | 193-252 | 0.000000 | 0.004580 | 0.000000 |
| 75-79 | 193-252 | 0.000000 | 0.004580 | 0.000000 |
| 10-14 | 253+    | 0.001325 | 0.008742 | 0.000000 |
| 15-19 | 253+    | 0.002984 | 0.010602 | 0.000000 |
| 20-24 | 253+    | 0.000452 | 0.004314 | 0.000000 |
| 25-29 | 253+    | 0.000225 | 0.003645 | 0.000000 |
| 30-34 | 253+    | 0.000112 | 0.004512 | 0.000000 |
| 35-39 | 253+    | 0.000000 | 0.002147 | 0.000000 |
| 40-44 | 253+    | 0.000000 | 0.002636 | 0.000000 |
| 45-49 | 253+    | 0.000000 | 0.001051 | 0.000000 |
| 50-54 | 253+    | 0.000000 | 0.002519 | 0.000000 |
| 55-59 | 253+    | 0.000000 | 0.003693 | 0.000000 |
| 60-64 | 253+    | 0.000000 | 0.005888 | 0.000000 |
| 65-69 | 253+    | 0.000000 | 0.004823 | 0.000000 |
| 70-74 | 253+    | 0.000000 | 0.004733 | 0.000000 |
| 75-79 | 253+    | 0.000000 | 0.004733 | 0.000000 |



## Results for PHIM for Run 1 (Sensitivity\_Analysis\_4.RTF)

\*\*\*\*\*

TTP values for Run: 1, Scenario: Ecig

| Variable Parameter | Value               |
|--------------------|---------------------|
| 1. Country         | US (United States)  |
| 2. Sex             | M (Males)           |
| 3. Assumption Set  | S4A                 |
| Note:              | Period is in Months |

| Age   | Period  | Initiation  |               | Cessation     |              |                | Re-initiation  |              |                |                |
|-------|---------|-------------|---------------|---------------|--------------|----------------|----------------|--------------|----------------|----------------|
|       |         | Never<br>CC | Never<br>Ecig | Never<br>Dual | CC<br>Former | Ecig<br>Former | Dual<br>Former | Former<br>CC | Former<br>Ecig | Former<br>Dual |
| 10-14 | 1-12    | 0.001921    | 0.000961      | 0.000000      | 0.008742     | 0.008742       | 0.000000       | 0.000000     | 0.000000       | 0.000000       |
| 15-19 | 1-12    | 0.002360    | 0.001180      | 0.000000      | 0.003614     | 0.003614       | 0.000000       | 0.000000     | 0.000000       | 0.000000       |
| 20-24 | 1-12    | 0.000188    | 0.000094      | 0.000000      | 0.000943     | 0.000943       | 0.000000       | 0.000000     | 0.000000       | 0.000000       |
| 25-29 | 1-12    | 0.000093    | 0.000047      | 0.000000      | 0.001143     | 0.001143       | 0.000000       | 0.000000     | 0.000000       | 0.000000       |
| 30-34 | 1-12    | 0.000047    | 0.000023      | 0.000000      | 0.000871     | 0.000871       | 0.000000       | 0.000000     | 0.000000       | 0.000000       |
| 35-39 | 1-12    | 0.000000    | 0.000000      | 0.000000      | 0.000867     | 0.000867       | 0.000000       | 0.000000     | 0.000000       | 0.000000       |
| 40-44 | 1-12    | 0.000000    | 0.000000      | 0.000000      | 0.001399     | 0.001399       | 0.000000       | 0.000000     | 0.000000       | 0.000000       |
| 45-49 | 1-12    | 0.000000    | 0.000000      | 0.000000      | 0.002033     | 0.002033       | 0.000000       | 0.000000     | 0.000000       | 0.000000       |
| 50-54 | 1-12    | 0.000000    | 0.000000      | 0.000000      | 0.003209     | 0.003209       | 0.000000       | 0.000000     | 0.000000       | 0.000000       |
| 55-59 | 1-12    | 0.000000    | 0.000000      | 0.000000      | 0.003574     | 0.003574       | 0.000000       | 0.000000     | 0.000000       | 0.000000       |
| 60-64 | 1-12    | 0.000000    | 0.000000      | 0.000000      | 0.003460     | 0.003460       | 0.000000       | 0.000000     | 0.000000       | 0.000000       |
| 65-69 | 1-12    | 0.000000    | 0.000000      | 0.000000      | 0.004136     | 0.004136       | 0.000000       | 0.000000     | 0.000000       | 0.000000       |
| 70-74 | 1-12    | 0.000000    | 0.000000      | 0.000000      | 0.005592     | 0.005592       | 0.000000       | 0.000000     | 0.000000       | 0.000000       |
| 75-79 | 1-12    | 0.000000    | 0.000000      | 0.000000      | 0.005592     | 0.005592       | 0.000000       | 0.000000     | 0.000000       | 0.000000       |
| 10-14 | 13-72   | 0.001962    | 0.001472      | 0.000000      | 0.008742     | 0.008742       | 0.000000       | 0.000000     | 0.000000       | 0.000000       |
| 15-19 | 13-72   | 0.002796    | 0.002097      | 0.000000      | 0.004426     | 0.004426       | 0.000000       | 0.000000     | 0.000000       | 0.000000       |
| 20-24 | 13-72   | 0.000275    | 0.000206      | 0.000000      | 0.001527     | 0.001527       | 0.000000       | 0.000000     | 0.000000       | 0.000000       |
| 25-29 | 13-72   | 0.000385    | 0.000289      | 0.000000      | 0.001515     | 0.001515       | 0.000000       | 0.000000     | 0.000000       | 0.000000       |
| 30-34 | 13-72   | 0.000146    | 0.000109      | 0.000000      | 0.001227     | 0.001227       | 0.000000       | 0.000000     | 0.000000       | 0.000000       |
| 35-39 | 13-72   | 0.000000    | 0.000000      | 0.000000      | 0.001630     | 0.001630       | 0.000000       | 0.000000     | 0.000000       | 0.000000       |
| 40-44 | 13-72   | 0.000000    | 0.000000      | 0.000000      | 0.001852     | 0.001852       | 0.000000       | 0.000000     | 0.000000       | 0.000000       |
| 45-49 | 13-72   | 0.000000    | 0.000000      | 0.000000      | 0.002667     | 0.002667       | 0.000000       | 0.000000     | 0.000000       | 0.000000       |
| 50-54 | 13-72   | 0.000000    | 0.000000      | 0.000000      | 0.003208     | 0.003208       | 0.000000       | 0.000000     | 0.000000       | 0.000000       |
| 55-59 | 13-72   | 0.000000    | 0.000000      | 0.000000      | 0.003978     | 0.003978       | 0.000000       | 0.000000     | 0.000000       | 0.000000       |
| 60-64 | 13-72   | 0.000000    | 0.000000      | 0.000000      | 0.005771     | 0.005771       | 0.000000       | 0.000000     | 0.000000       | 0.000000       |
| 65-69 | 13-72   | 0.000000    | 0.000000      | 0.000000      | 0.010432     | 0.010432       | 0.000000       | 0.000000     | 0.000000       | 0.000000       |
| 70-74 | 13-72   | 0.000000    | 0.000000      | 0.000000      | 0.007079     | 0.007079       | 0.000000       | 0.000000     | 0.000000       | 0.000000       |
| 75-79 | 13-72   | 0.000000    | 0.000000      | 0.000000      | 0.007079     | 0.007079       | 0.000000       | 0.000000     | 0.000000       | 0.000000       |
| 10-14 | 73-132  | 0.000862    | 0.001725      | 0.000000      | 0.008742     | 0.008742       | 0.000000       | 0.000000     | 0.000000       | 0.000000       |
| 15-19 | 73-132  | 0.001066    | 0.002132      | 0.000000      | 0.003289     | 0.003289       | 0.000000       | 0.000000     | 0.000000       | 0.000000       |
| 20-24 | 73-132  | 0.000491    | 0.000982      | 0.000000      | 0.003844     | 0.003844       | 0.000000       | 0.000000     | 0.000000       | 0.000000       |
| 25-29 | 73-132  | 0.000168    | 0.000336      | 0.000000      | 0.002006     | 0.002006       | 0.000000       | 0.000000     | 0.000000       | 0.000000       |
| 30-34 | 73-132  | 0.000083    | 0.000166      | 0.000000      | 0.001329     | 0.001329       | 0.000000       | 0.000000     | 0.000000       | 0.000000       |
| 35-39 | 73-132  | 0.000000    | 0.000000      | 0.000000      | 0.001278     | 0.001278       | 0.000000       | 0.000000     | 0.000000       | 0.000000       |
| 40-44 | 73-132  | 0.000000    | 0.000000      | 0.000000      | 0.001691     | 0.001691       | 0.000000       | 0.000000     | 0.000000       | 0.000000       |
| 45-49 | 73-132  | 0.000000    | 0.000000      | 0.000000      | 0.002904     | 0.002904       | 0.000000       | 0.000000     | 0.000000       | 0.000000       |
| 50-54 | 73-132  | 0.000000    | 0.000000      | 0.000000      | 0.003319     | 0.003319       | 0.000000       | 0.000000     | 0.000000       | 0.000000       |
| 55-59 | 73-132  | 0.000000    | 0.000000      | 0.000000      | 0.003976     | 0.003976       | 0.000000       | 0.000000     | 0.000000       | 0.000000       |
| 60-64 | 73-132  | 0.000000    | 0.000000      | 0.000000      | 0.005235     | 0.005235       | 0.000000       | 0.000000     | 0.000000       | 0.000000       |
| 65-69 | 73-132  | 0.000000    | 0.000000      | 0.000000      | 0.005901     | 0.005901       | 0.000000       | 0.000000     | 0.000000       | 0.000000       |
| 70-74 | 73-132  | 0.000000    | 0.000000      | 0.000000      | 0.005615     | 0.005615       | 0.000000       | 0.000000     | 0.000000       | 0.000000       |
| 75-79 | 73-132  | 0.000000    | 0.000000      | 0.000000      | 0.005615     | 0.005615       | 0.000000       | 0.000000     | 0.000000       | 0.000000       |
| 10-14 | 133-192 | 0.000173    | 0.001647      | 0.000000      | 0.008742     | 0.008742       | 0.000000       | 0.000000     | 0.000000       | 0.000000       |
| 15-19 | 133-192 | 0.000234    | 0.002221      | 0.000000      | 0.003732     | 0.003732       | 0.000000       | 0.000000     | 0.000000       | 0.000000       |
| 20-24 | 133-192 | 0.000003    | 0.000030      | 0.000000      | 0.002260     | 0.002260       | 0.000000       | 0.000000     | 0.000000       | 0.000000       |
| 25-29 | 133-192 | 0.000071    | 0.000676      | 0.000000      | 0.002822     | 0.002822       | 0.000000       | 0.000000     | 0.000000       | 0.000000       |
| 30-34 | 133-192 | 0.000035    | 0.000331      | 0.000000      | 0.002610     | 0.002610       | 0.000000       | 0.000000     | 0.000000       | 0.000000       |
| 35-39 | 133-192 | 0.000000    | 0.000000      | 0.000000      | 0.002058     | 0.002058       | 0.000000       | 0.000000     | 0.000000       | 0.000000       |
| 40-44 | 133-192 | 0.000000    | 0.000000      | 0.000000      | 0.002310     | 0.002310       | 0.000000       | 0.000000     | 0.000000       | 0.000000       |
| 45-49 | 133-192 | 0.000000    | 0.000000      | 0.000000      | 0.002256     | 0.002256       | 0.000000       | 0.000000     | 0.000000       | 0.000000       |
| 50-54 | 133-192 | 0.000000    | 0.000000      | 0.000000      | 0.002663     | 0.002663       | 0.000000       | 0.000000     | 0.000000       | 0.000000       |
| 55-59 | 133-192 | 0.000000    | 0.000000      | 0.000000      | 0.001747     | 0.001747       | 0.000000       | 0.000000     | 0.000000       | 0.000000       |
| 60-64 | 133-192 | 0.000000    | 0.000000      | 0.000000      | 0.005809     | 0.005809       | 0.000000       | 0.000000     | 0.000000       | 0.000000       |
| 65-69 | 133-192 | 0.000000    | 0.000000      | 0.000000      | 0.005896     | 0.005896       | 0.000000       | 0.000000     | 0.000000       | 0.000000       |
| 70-74 | 133-192 | 0.000000    | 0.000000      | 0.000000      | 0.007323     | 0.007323       | 0.000000       | 0.000000     | 0.000000       | 0.000000       |
| 75-79 | 133-192 | 0.000000    | 0.000000      | 0.000000      | 0.007323     | 0.007323       | 0.000000       | 0.000000     | 0.000000       | 0.000000       |
| 10-14 | 193-252 | 0.000116    | 0.001099      | 0.000000      | 0.008742     | 0.008742       | 0.000000       | 0.000000     | 0.000000       | 0.000000       |
| 15-19 | 193-252 | 0.000199    | 0.001894      | 0.000000      | 0.005036     | 0.005036       | 0.000000       | 0.000000     | 0.000000       | 0.000000       |
| 20-24 | 193-252 | 0.000016    | 0.000152      | 0.000000      | 0.002857     | 0.002857       | 0.000000       | 0.000000     | 0.000000       | 0.000000       |
| 25-29 | 193-252 | 0.000013    | 0.000119      | 0.000000      | 0.002314     | 0.002314       | 0.000000       | 0.000000     | 0.000000       | 0.000000       |
| 30-34 | 193-252 | 0.000006    | 0.000059      | 0.000000      | 0.004343     | 0.004343       | 0.000000       | 0.000000     | 0.000000       | 0.000000       |
| 35-39 | 193-252 | 0.000000    | 0.000000      | 0.000000      | 0.002092     | 0.002092       | 0.000000       | 0.000000     | 0.000000       | 0.000000       |
| 40-44 | 193-252 | 0.000000    | 0.000000      | 0.000000      | 0.002566     | 0.002566       | 0.000000       | 0.000000     | 0.000000       | 0.000000       |
| 45-49 | 193-252 | 0.000000    | 0.000000      | 0.000000      | 0.002311     | 0.002311       | 0.000000       | 0.000000     | 0.000000       | 0.000000       |
| 50-54 | 193-252 | 0.000000    | 0.000000      | 0.000000      | 0.003209     | 0.003209       | 0.000000       | 0.000000     | 0.000000       | 0.000000       |

### Results for PHIM for Run 1 (Sensitivity\_Analysis\_4.RTF)

|       |         |          |          |          |          |          |          |          |          |          |
|-------|---------|----------|----------|----------|----------|----------|----------|----------|----------|----------|
| 55-59 | 193-252 | 0.000000 | 0.000000 | 0.000000 | 0.004057 | 0.004057 | 0.000000 | 0.000000 | 0.000000 | 0.000000 |
| 60-64 | 193-252 | 0.000000 | 0.000000 | 0.000000 | 0.007166 | 0.007166 | 0.000000 | 0.000000 | 0.000000 | 0.000000 |
| 65-69 | 193-252 | 0.000000 | 0.000000 | 0.000000 | 0.004281 | 0.004281 | 0.000000 | 0.000000 | 0.000000 | 0.000000 |
| 70-74 | 193-252 | 0.000000 | 0.000000 | 0.000000 | 0.004580 | 0.004580 | 0.000000 | 0.000000 | 0.000000 | 0.000000 |
| 75-79 | 193-252 | 0.000000 | 0.000000 | 0.000000 | 0.004580 | 0.004580 | 0.000000 | 0.000000 | 0.000000 | 0.000000 |
| 10-14 | 253+    | 0.000066 | 0.000629 | 0.000000 | 0.008742 | 0.008742 | 0.000000 | 0.000000 | 0.000000 | 0.000000 |
| 15-19 | 253+    | 0.000149 | 0.001418 | 0.000000 | 0.010602 | 0.010602 | 0.000000 | 0.000000 | 0.000000 | 0.000000 |
| 20-24 | 253+    | 0.000023 | 0.000215 | 0.000000 | 0.004314 | 0.004314 | 0.000000 | 0.000000 | 0.000000 | 0.000000 |
| 25-29 | 253+    | 0.000011 | 0.000107 | 0.000000 | 0.003645 | 0.003645 | 0.000000 | 0.000000 | 0.000000 | 0.000000 |
| 30-34 | 253+    | 0.000006 | 0.000053 | 0.000000 | 0.004512 | 0.004512 | 0.000000 | 0.000000 | 0.000000 | 0.000000 |
| 35-39 | 253+    | 0.000000 | 0.000000 | 0.000000 | 0.002147 | 0.002147 | 0.000000 | 0.000000 | 0.000000 | 0.000000 |
| 40-44 | 253+    | 0.000000 | 0.000000 | 0.000000 | 0.002636 | 0.002636 | 0.000000 | 0.000000 | 0.000000 | 0.000000 |
| 45-49 | 253+    | 0.000000 | 0.000000 | 0.000000 | 0.001051 | 0.001051 | 0.000000 | 0.000000 | 0.000000 | 0.000000 |
| 50-54 | 253+    | 0.000000 | 0.000000 | 0.000000 | 0.002519 | 0.002519 | 0.000000 | 0.000000 | 0.000000 | 0.000000 |
| 55-59 | 253+    | 0.000000 | 0.000000 | 0.000000 | 0.003693 | 0.003693 | 0.000000 | 0.000000 | 0.000000 | 0.000000 |
| 60-64 | 253+    | 0.000000 | 0.000000 | 0.000000 | 0.005888 | 0.005888 | 0.000000 | 0.000000 | 0.000000 | 0.000000 |
| 65-69 | 253+    | 0.000000 | 0.000000 | 0.000000 | 0.004823 | 0.004823 | 0.000000 | 0.000000 | 0.000000 | 0.000000 |
| 70-74 | 253+    | 0.000000 | 0.000000 | 0.000000 | 0.004733 | 0.004733 | 0.000000 | 0.000000 | 0.000000 | 0.000000 |
| 75-79 | 253+    | 0.000000 | 0.000000 | 0.000000 | 0.004733 | 0.004733 | 0.000000 | 0.000000 | 0.000000 | 0.000000 |



**Results for PHIM for Run 1 (Sensitivity\_Analysis\_4.RTF)**

|       |      |          |          |          |          |          |          |
|-------|------|----------|----------|----------|----------|----------|----------|
| 25-29 | 253+ | 0.015212 | 0.000000 | 0.000000 | 0.000000 | 0.000000 | 0.000000 |
| 30-34 | 253+ | 0.015460 | 0.000000 | 0.000000 | 0.000000 | 0.000000 | 0.000000 |
| 35-39 | 253+ | 0.014711 | 0.000000 | 0.000000 | 0.000000 | 0.000000 | 0.000000 |
| 40-44 | 253+ | 0.014241 | 0.000000 | 0.000000 | 0.000000 | 0.000000 | 0.000000 |
| 45-49 | 253+ | 0.013014 | 0.000000 | 0.000000 | 0.000000 | 0.000000 | 0.000000 |
| 50-54 | 253+ | 0.011768 | 0.000000 | 0.000000 | 0.000000 | 0.000000 | 0.000000 |
| 55-59 | 253+ | 0.011032 | 0.000000 | 0.000000 | 0.000000 | 0.000000 | 0.000000 |
| 60-64 | 253+ | 0.009525 | 0.000000 | 0.000000 | 0.000000 | 0.000000 | 0.000000 |
| 65-69 | 253+ | 0.006897 | 0.000000 | 0.000000 | 0.000000 | 0.000000 | 0.000000 |
| 70-74 | 253+ | 0.005435 | 0.000000 | 0.000000 | 0.000000 | 0.000000 | 0.000000 |
| 75-79 | 253+ | 0.005435 | 0.000000 | 0.000000 | 0.000000 | 0.000000 | 0.000000 |

## Results for PHIM for Run 1 (Sensitivity\_Analysis\_4.RTF)

\*\*\*\*\*

### Main Output for the Tobacco History for Run: 1, Simulation: 1, Scenario: NULL

| Variable Parameter          | Value              |
|-----------------------------|--------------------|
| 1. Country                  | US (United States) |
| 2. Sex                      | M (Males)          |
| 3. Year of start of process | 1990               |

Year of Follow-up: 2040, Age Group: All Ages  
 Period    Age Group    Smoking Group            N            %

|    |          |           |       |       |
|----|----------|-----------|-------|-------|
| 50 | All Ages | Never Any | 19445 | 50.68 |
| 50 | All Ages | CC        | 3024  | 7.88  |
| 50 | All Ages | Former    | 15896 | 41.43 |

Year of Follow-up: 2040, Age Group: 18-19  
 Period    Age Group    Smoking Group            N            %

|    |       |           |   |   |
|----|-------|-----------|---|---|
| 50 | 18-19 | Never Any | 0 | . |
| 50 | 18-19 | CC        | 0 | . |
| 50 | 18-19 | Former    | 0 | . |

Year of Follow-up: 2040, Age Group: 20-24  
 Period    Age Group    Smoking Group            N            %

|    |       |           |   |   |
|----|-------|-----------|---|---|
| 50 | 20-24 | Never Any | 0 | . |
| 50 | 20-24 | CC        | 0 | . |
| 50 | 20-24 | Former    | 0 | . |

Year of Follow-up: 2040, Age Group: 25-29  
 Period    Age Group    Smoking Group            N            %

|    |       |           |   |   |
|----|-------|-----------|---|---|
| 50 | 25-29 | Never Any | 0 | . |
| 50 | 25-29 | CC        | 0 | . |
| 50 | 25-29 | Former    | 0 | . |

Year of Follow-up: 2040, Age Group: 30-34  
 Period    Age Group    Smoking Group            N            %

|    |       |           |   |   |
|----|-------|-----------|---|---|
| 50 | 30-34 | Never Any | 0 | . |
| 50 | 30-34 | CC        | 0 | . |
| 50 | 30-34 | Former    | 0 | . |

Year of Follow-up: 2040, Age Group: 35-39  
 Period    Age Group    Smoking Group            N            %

|    |       |           |   |   |
|----|-------|-----------|---|---|
| 50 | 35-39 | Never Any | 0 | . |
| 50 | 35-39 | CC        | 0 | . |
| 50 | 35-39 | Former    | 0 | . |

Year of Follow-up: 2040, Age Group: 40-44  
 Period    Age Group    Smoking Group            N            %

|    |       |           |   |   |
|----|-------|-----------|---|---|
| 50 | 40-44 | Never Any | 0 | . |
| 50 | 40-44 | CC        | 0 | . |
| 50 | 40-44 | Former    | 0 | . |

Year of Follow-up: 2040, Age Group: 45-49  
 Period    Age Group    Smoking Group            N            %

|    |       |           |   |   |
|----|-------|-----------|---|---|
| 50 | 45-49 | Never Any | 0 | . |
| 50 | 45-49 | CC        | 0 | . |
| 50 | 45-49 | Former    | 0 | . |

Year of Follow-up: 2040, Age Group: 50-54  
 Period    Age Group    Smoking Group            N            %

|    |       |           |   |   |
|----|-------|-----------|---|---|
| 50 | 50-54 | Never Any | 0 | . |
| 50 | 50-54 | CC        | 0 | . |
| 50 | 50-54 | Former    | 0 | . |

Year of Follow-up: 2040, Age Group: 55-59  
 Period    Age Group    Smoking Group            N            %

|    |       |           |   |   |
|----|-------|-----------|---|---|
| 50 | 55-59 | Never Any | 0 | . |
| 50 | 55-59 | CC        | 0 | . |
| 50 | 55-59 | Former    | 0 | . |

Year of Follow-up: 2040, Age Group: 60-64  
 Period    Age Group    Smoking Group            N            %

### Results for PHIM for Run 1 (Sensitivity\_Analysis\_4.RTF)

|                                           |           |               |      |       |
|-------------------------------------------|-----------|---------------|------|-------|
| 50                                        | 60-64     | Never Any     | 4363 | 49.33 |
| 50                                        | 60-64     | CC            | 934  | 10.56 |
| 50                                        | 60-64     | Former        | 3548 | 40.11 |
| Year of Follow-up: 2040, Age Group: 65-69 |           |               |      |       |
| Period                                    | Age Group | Smoking Group | N    | %     |
| 50                                        | 65-69     | Never Any     | 4948 | 54.73 |
| 50                                        | 65-69     | CC            | 734  | 8.12  |
| 50                                        | 65-69     | Former        | 3358 | 37.15 |
| Year of Follow-up: 2040, Age Group: 70-74 |           |               |      |       |
| Period                                    | Age Group | Smoking Group | N    | %     |
| 50                                        | 70-74     | Never Any     | 5145 | 52.41 |
| 50                                        | 70-74     | CC            | 688  | 7.01  |
| 50                                        | 70-74     | Former        | 3983 | 40.58 |
| Year of Follow-up: 2040, Age Group: 75-79 |           |               |      |       |
| Period                                    | Age Group | Smoking Group | N    | %     |
| 50                                        | 75-79     | Never Any     | 4989 | 46.78 |
| 50                                        | 75-79     | CC            | 668  | 6.26  |
| 50                                        | 75-79     | Former        | 5007 | 46.95 |

## Results for PHIM for Run 1 (Sensitivity\_Analysis\_4.RTF)

\*\*\*\*\*

### Main Output for the Tobacco History for Run: 1, Simulation: 1, Scenario: Ecig

| Variable Parameter                           |           | Value              |       |       |               |             |               |                |              |
|----------------------------------------------|-----------|--------------------|-------|-------|---------------|-------------|---------------|----------------|--------------|
| 1. Country                                   |           | US (United States) |       |       |               |             |               |                |              |
| 2. Sex                                       |           | M (Males)          |       |       |               |             |               |                |              |
| 3. Year of start of process                  |           | 1990               |       |       |               |             |               |                |              |
| Year of Follow-up: 1990, Age Group: All Ages |           |                    |       |       |               |             |               |                |              |
| Period                                       | Age Group | Smoking Group      | N     | %     | Ever Quit (N) | Ever Quit % | Mean Yrs Quit | Short Term (n) | Short Term % |
| 0                                            | All Ages  | Never Any          | 34075 | 39.78 |               |             |               |                |              |
| 0                                            | All Ages  | CC                 | 27323 | 31.90 | 0             | 0.00        |               |                |              |
| 0                                            | All Ages  | Ecig               | 0     | 0.00  |               |             |               |                |              |
| 0                                            | All Ages  | Dual               | 0     | 0.00  |               |             |               |                |              |
| 0                                            | All Ages  | Former             | 24266 | 28.33 |               |             | 13.08         | 3623           | 14.93        |
| Year of Follow-up: 1990, Age Group: 18-19    |           |                    |       |       |               |             |               |                |              |
| Period                                       | Age Group | Smoking Group      | N     | %     | Ever Quit (N) | Ever Quit % | Mean Yrs Quit | Short Term (n) | Short Term % |
| 0                                            | 18-19     | Never Any          | 2783  | 78.42 |               |             |               |                |              |
| 0                                            | 18-19     | CC                 | 634   | 17.86 | 0             | 0.00        |               |                |              |
| 0                                            | 18-19     | Ecig               | 0     | 0.00  |               |             |               |                |              |
| 0                                            | 18-19     | Dual               | 0     | 0.00  |               |             |               |                |              |
| 0                                            | 18-19     | Former             | 132   | 3.72  |               |             | 0.11          | 132            | 100.00       |
| Year of Follow-up: 1990, Age Group: 20-24    |           |                    |       |       |               |             |               |                |              |
| Period                                       | Age Group | Smoking Group      | N     | %     | Ever Quit (N) | Ever Quit % | Mean Yrs Quit | Short Term (n) | Short Term % |
| 0                                            | 20-24     | Never Any          | 5722  | 58.29 |               |             |               |                |              |
| 0                                            | 20-24     | CC                 | 3199  | 32.59 | 0             | 0.00        |               |                |              |
| 0                                            | 20-24     | Ecig               | 0     | 0.00  |               |             |               |                |              |
| 0                                            | 20-24     | Dual               | 0     | 0.00  |               |             |               |                |              |
| 0                                            | 20-24     | Former             | 895   | 9.12  |               |             | 1.46          | 506            | 56.54        |
| Year of Follow-up: 1990, Age Group: 25-29    |           |                    |       |       |               |             |               |                |              |
| Period                                       | Age Group | Smoking Group      | N     | %     | Ever Quit (N) | Ever Quit % | Mean Yrs Quit | Short Term (n) | Short Term % |
| 0                                            | 25-29     | Never Any          | 5232  | 49.06 |               |             |               |                |              |
| 0                                            | 25-29     | CC                 | 3914  | 36.70 | 0             | 0.00        |               |                |              |
| 0                                            | 25-29     | Ecig               | 0     | 0.00  |               |             |               |                |              |
| 0                                            | 25-29     | Dual               | 0     | 0.00  |               |             |               |                |              |
| 0                                            | 25-29     | Former             | 1518  | 14.23 |               |             | 2.87          | 643            | 42.36        |
| Year of Follow-up: 1990, Age Group: 30-34    |           |                    |       |       |               |             |               |                |              |
| Period                                       | Age Group | Smoking Group      | N     | %     | Ever Quit (N) | Ever Quit % | Mean Yrs Quit | Short Term (n) | Short Term % |
| 0                                            | 30-34     | Never Any          | 4765  | 43.65 |               |             |               |                |              |
| 0                                            | 30-34     | CC                 | 4023  | 36.85 | 0             | 0.00        |               |                |              |
| 0                                            | 30-34     | Ecig               | 0     | 0.00  |               |             |               |                |              |
| 0                                            | 30-34     | Dual               | 0     | 0.00  |               |             |               |                |              |
| 0                                            | 30-34     | Former             | 2128  | 19.49 |               |             | 4.06          | 592            | 27.82        |
| Year of Follow-up: 1990, Age Group: 35-39    |           |                    |       |       |               |             |               |                |              |
| Period                                       | Age Group | Smoking Group      | N     | %     | Ever Quit (N) | Ever Quit % | Mean Yrs Quit | Short Term (n) | Short Term % |
| 0                                            | 35-39     | Never Any          | 3941  | 39.85 |               |             |               |                |              |
| 0                                            | 35-39     | CC                 | 3474  | 35.13 | 0             | 0.00        |               |                |              |
| 0                                            | 35-39     | Ecig               | 0     | 0.00  |               |             |               |                |              |
| 0                                            | 35-39     | Dual               | 0     | 0.00  |               |             |               |                |              |
| 0                                            | 35-39     | Former             | 2474  | 25.02 |               |             | 8.31          | 425            | 17.18        |
| Year of Follow-up: 1990, Age Group: 40-44    |           |                    |       |       |               |             |               |                |              |
| Period                                       | Age Group | Smoking Group      | N     | %     | Ever Quit (N) | Ever Quit % | Mean Yrs Quit | Short Term (n) | Short Term % |
| 0                                            | 40-44     | Never Any          | 2912  | 33.65 |               |             |               |                |              |
| 0                                            | 40-44     | CC                 | 3113  | 35.97 | 0             | 0.00        |               |                |              |
| 0                                            | 40-44     | Ecig               | 0     | 0.00  |               |             |               |                |              |
| 0                                            | 40-44     | Dual               | 0     | 0.00  |               |             |               |                |              |
| 0                                            | 40-44     | Former             | 2630  | 30.39 |               |             | 10.69         | 317            | 12.05        |
| Year of Follow-up: 1990, Age Group: 45-49    |           |                    |       |       |               |             |               |                |              |
| Period                                       | Age Group | Smoking Group      | N     | %     | Ever Quit (N) | Ever Quit % | Mean Yrs Quit | Short Term (n) | Short Term % |
| 0                                            | 45-49     | Never Any          | 1919  | 29.46 |               |             |               |                |              |
| 0                                            | 45-49     | CC                 | 2318  | 35.58 | 0             | 0.00        |               |                |              |
| 0                                            | 45-49     | Ecig               | 0     | 0.00  |               |             |               |                |              |
| 0                                            | 45-49     | Dual               | 0     | 0.00  |               |             |               |                |              |
| 0                                            | 45-49     | Former             | 2278  | 34.97 |               |             | 13.26         | 221            | 9.70         |
| Year of Follow-up: 1990, Age Group: 50-54    |           |                    |       |       |               |             |               |                |              |
| Period                                       | Age Group | Smoking Group      | N     | %     | Ever Quit (N) | Ever Quit % | Mean Yrs Quit | Short Term (n) | Short Term % |
| 0                                            | 50-54     | Never Any          | 1611  | 29.41 |               |             |               |                |              |
| 0                                            | 50-54     | CC                 | 1816  | 33.16 | 0             | 0.00        |               |                |              |

**Results for PHIM for Run 1 (Sensitivity\_Analysis\_4.RTF)**

|                                              |           |               |       |       |               |             |               |                |              |
|----------------------------------------------|-----------|---------------|-------|-------|---------------|-------------|---------------|----------------|--------------|
| 0                                            | 50-54     | Ecig          | 0     | 0.00  |               |             |               |                |              |
| 0                                            | 50-54     | Dual          | 0     | 0.00  |               |             |               |                |              |
| 0                                            | 50-54     | Former        | 2050  | 37.43 |               |             | 14.55         | 261            | 12.73        |
| Year of Follow-up: 1990, Age Group: 55-59    |           |               |       |       |               |             |               |                |              |
| Period                                       | Age Group | Smoking Group | N     | %     | Ever Quit (N) | Ever Quit % | Mean Yrs Quit | Short Term (n) | Short Term % |
| 0                                            | 55-59     | Never Any     | 1337  | 26.83 |               |             |               |                |              |
| 0                                            | 55-59     | CC            | 1520  | 30.50 | 0             | 0.00        |               |                |              |
| 0                                            | 55-59     | Ecig          | 0     | 0.00  |               |             |               |                |              |
| 0                                            | 55-59     | Dual          | 0     | 0.00  |               |             |               |                |              |
| 0                                            | 55-59     | Former        | 2126  | 42.67 |               |             | 14.80         | 216            | 10.16        |
| Year of Follow-up: 1990, Age Group: 60-64    |           |               |       |       |               |             |               |                |              |
| Period                                       | Age Group | Smoking Group | N     | %     | Ever Quit (N) | Ever Quit % | Mean Yrs Quit | Short Term (n) | Short Term % |
| 0                                            | 60-64     | Never Any     | 1169  | 23.83 |               |             |               |                |              |
| 0                                            | 60-64     | CC            | 1287  | 26.24 | 0             | 0.00        |               |                |              |
| 0                                            | 60-64     | Ecig          | 0     | 0.00  |               |             |               |                |              |
| 0                                            | 60-64     | Dual          | 0     | 0.00  |               |             |               |                |              |
| 0                                            | 60-64     | Former        | 2449  | 49.93 |               |             | 18.87         | 106            | 4.33         |
| Year of Follow-up: 1990, Age Group: 65-69    |           |               |       |       |               |             |               |                |              |
| Period                                       | Age Group | Smoking Group | N     | %     | Ever Quit (N) | Ever Quit % | Mean Yrs Quit | Short Term (n) | Short Term % |
| 0                                            | 65-69     | Never Any     | 1023  | 23.32 |               |             |               |                |              |
| 0                                            | 65-69     | CC            | 979   | 22.32 | 0             | 0.00        |               |                |              |
| 0                                            | 65-69     | Ecig          | 0     | 0.00  |               |             |               |                |              |
| 0                                            | 65-69     | Dual          | 0     | 0.00  |               |             |               |                |              |
| 0                                            | 65-69     | Former        | 2385  | 54.37 |               |             | 19.91         | 113            | 4.74         |
| Year of Follow-up: 1990, Age Group: 70-74    |           |               |       |       |               |             |               |                |              |
| Period                                       | Age Group | Smoking Group | N     | %     | Ever Quit (N) | Ever Quit % | Mean Yrs Quit | Short Term (n) | Short Term % |
| 0                                            | 70-74     | Never Any     | 961   | 27.46 |               |             |               |                |              |
| 0                                            | 70-74     | CC            | 675   | 19.29 | 0             | 0.00        |               |                |              |
| 0                                            | 70-74     | Ecig          | 0     | 0.00  |               |             |               |                |              |
| 0                                            | 70-74     | Dual          | 0     | 0.00  |               |             |               |                |              |
| 0                                            | 70-74     | Former        | 1863  | 53.24 |               |             | 20.69         | 23             | 1.23         |
| Year of Follow-up: 1990, Age Group: 75-79    |           |               |       |       |               |             |               |                |              |
| Period                                       | Age Group | Smoking Group | N     | %     | Ever Quit (N) | Ever Quit % | Mean Yrs Quit | Short Term (n) | Short Term % |
| 0                                            | 75-79     | Never Any     | 700   | 29.06 |               |             |               |                |              |
| 0                                            | 75-79     | CC            | 371   | 15.40 | 0             | 0.00        |               |                |              |
| 0                                            | 75-79     | Ecig          | 0     | 0.00  |               |             |               |                |              |
| 0                                            | 75-79     | Dual          | 0     | 0.00  |               |             |               |                |              |
| 0                                            | 75-79     | Former        | 1338  | 55.54 |               |             | 22.88         | 68             | 5.08         |
| Year of Follow-up: 1995, Age Group: All Ages |           |               |       |       |               |             |               |                |              |
| Period                                       | Age Group | Smoking Group | N     | %     | Ever Quit (N) | Ever Quit % | Mean Yrs Quit | Short Term (n) | Short Term % |
| 5                                            | All Ages  | Never Any     | 39167 | 42.44 |               |             |               |                |              |
| 5                                            | All Ages  | CC            | 11544 | 12.51 | 0             | 0.00        |               |                |              |
| 5                                            | All Ages  | Ecig          | 14747 | 15.98 |               |             |               |                |              |
| 5                                            | All Ages  | Dual          | 0     | 0.00  |               |             |               |                |              |
| 5                                            | All Ages  | Former        | 26832 | 29.07 |               |             | 15.23         | 1664           | 6.20         |
| Year of Follow-up: 1995, Age Group: 18-19    |           |               |       |       |               |             |               |                |              |
| Period                                       | Age Group | Smoking Group | N     | %     | Ever Quit (N) | Ever Quit % | Mean Yrs Quit | Short Term (n) | Short Term % |
| 5                                            | 18-19     | Never Any     | 2730  | 77.03 |               |             |               |                |              |
| 5                                            | 18-19     | CC            | 337   | 9.51  | 0             | 0.00        |               |                |              |
| 5                                            | 18-19     | Ecig          | 387   | 10.92 |               |             |               |                |              |
| 5                                            | 18-19     | Dual          | 0     | 0.00  |               |             |               |                |              |
| 5                                            | 18-19     | Former        | 90    | 2.54  |               |             | 1.08          | 63             | 70.00        |
| Year of Follow-up: 1995, Age Group: 20-24    |           |               |       |       |               |             |               |                |              |
| Period                                       | Age Group | Smoking Group | N     | %     | Ever Quit (N) | Ever Quit % | Mean Yrs Quit | Short Term (n) | Short Term % |
| 5                                            | 20-24     | Never Any     | 6178  | 68.34 |               |             |               |                |              |
| 5                                            | 20-24     | CC            | 964   | 10.66 | 0             | 0.00        |               |                |              |
| 5                                            | 20-24     | Ecig          | 1451  | 16.05 |               |             |               |                |              |
| 5                                            | 20-24     | Dual          | 0     | 0.00  |               |             |               |                |              |
| 5                                            | 20-24     | Former        | 447   | 4.94  |               |             | 2.92          | 122            | 27.29        |
| Year of Follow-up: 1995, Age Group: 25-29    |           |               |       |       |               |             |               |                |              |
| Period                                       | Age Group | Smoking Group | N     | %     | Ever Quit (N) | Ever Quit % | Mean Yrs Quit | Short Term (n) | Short Term % |
| 5                                            | 25-29     | Never Any     | 5535  | 56.39 |               |             |               |                |              |
| 5                                            | 25-29     | CC            | 1255  | 12.79 | 0             | 0.00        |               |                |              |
| 5                                            | 25-29     | Ecig          | 1880  | 19.15 |               |             |               |                |              |
| 5                                            | 25-29     | Dual          | 0     | 0.00  |               |             |               |                |              |
| 5                                            | 25-29     | Former        | 1146  | 11.67 |               |             | 5.44          | 113            | 9.86         |
| Year of Follow-up: 1995, Age Group: 30-34    |           |               |       |       |               |             |               |                |              |
| Period                                       | Age Group | Smoking Group | N     | %     | Ever Quit (N) | Ever Quit % | Mean Yrs Quit | Short Term (n) | Short Term % |



**Results for PHIM for Run 1 (Sensitivity\_Analysis\_4.RTF)**

|                                              |           |               |      |       |               |             |               |                |              |
|----------------------------------------------|-----------|---------------|------|-------|---------------|-------------|---------------|----------------|--------------|
| 5                                            | 30-34     | Never Any     | 5119 | 48.00 |               |             |               |                |              |
| 5                                            | 30-34     | CC            | 1481 | 13.89 | 0             | 0.00        |               |                |              |
| 5                                            | 30-34     | Ecig          | 2265 | 21.24 |               |             |               |                |              |
| 5                                            | 30-34     | Dual          | 0    | 0.00  |               |             |               |                |              |
| 5                                            | 30-34     | Former        | 1799 | 16.87 |               |             | 6.95          | 105            | 5.84         |
| Year of Follow-up: 1995, Age Group: 35-39    |           |               |      |       |               |             |               |                |              |
| Period                                       | Age Group | Smoking Group | N    | %     | Ever Quit (N) | Ever Quit % | Mean Yrs Quit | Short Term (n) | Short Term % |
| 5                                            | 35-39     | Never Any     | 4732 | 43.35 |               |             |               |                |              |
| 5                                            | 35-39     | CC            | 1496 | 13.70 | 0             | 0.00        |               |                |              |
| 5                                            | 35-39     | Ecig          | 2268 | 20.78 |               |             |               |                |              |
| 5                                            | 35-39     | Dual          | 0    | 0.00  |               |             |               |                |              |
| 5                                            | 35-39     | Former        | 2420 | 22.17 |               |             | 8.21          | 113            | 4.67         |
| Year of Follow-up: 1995, Age Group: 40-44    |           |               |      |       |               |             |               |                |              |
| Period                                       | Age Group | Smoking Group | N    | %     | Ever Quit (N) | Ever Quit % | Mean Yrs Quit | Short Term (n) | Short Term % |
| 5                                            | 40-44     | Never Any     | 3941 | 39.85 |               |             |               |                |              |
| 5                                            | 40-44     | CC            | 1280 | 12.94 | 0             | 0.00        |               |                |              |
| 5                                            | 40-44     | Ecig          | 1894 | 19.15 |               |             |               |                |              |
| 5                                            | 40-44     | Dual          | 0    | 0.00  |               |             |               |                |              |
| 5                                            | 40-44     | Former        | 2774 | 28.05 |               |             | 12.06         | 130            | 4.69         |
| Year of Follow-up: 1995, Age Group: 45-49    |           |               |      |       |               |             |               |                |              |
| Period                                       | Age Group | Smoking Group | N    | %     | Ever Quit (N) | Ever Quit % | Mean Yrs Quit | Short Term (n) | Short Term % |
| 5                                            | 45-49     | Never Any     | 2912 | 33.65 |               |             |               |                |              |
| 5                                            | 45-49     | CC            | 1236 | 14.28 | 0             | 0.00        |               |                |              |
| 5                                            | 45-49     | Ecig          | 1562 | 18.05 |               |             |               |                |              |
| 5                                            | 45-49     | Dual          | 0    | 0.00  |               |             |               |                |              |
| 5                                            | 45-49     | Former        | 2945 | 34.03 |               |             | 14.20         | 148            | 5.03         |
| Year of Follow-up: 1995, Age Group: 50-54    |           |               |      |       |               |             |               |                |              |
| Period                                       | Age Group | Smoking Group | N    | %     | Ever Quit (N) | Ever Quit % | Mean Yrs Quit | Short Term (n) | Short Term % |
| 5                                            | 50-54     | Never Any     | 1919 | 29.46 |               |             |               |                |              |
| 5                                            | 50-54     | CC            | 940  | 14.43 | 0             | 0.00        |               |                |              |
| 5                                            | 50-54     | Ecig          | 1015 | 15.58 |               |             |               |                |              |
| 5                                            | 50-54     | Dual          | 0    | 0.00  |               |             |               |                |              |
| 5                                            | 50-54     | Former        | 2641 | 40.54 |               |             | 15.98         | 175            | 6.63         |
| Year of Follow-up: 1995, Age Group: 55-59    |           |               |      |       |               |             |               |                |              |
| Period                                       | Age Group | Smoking Group | N    | %     | Ever Quit (N) | Ever Quit % | Mean Yrs Quit | Short Term (n) | Short Term % |
| 5                                            | 55-59     | Never Any     | 1611 | 29.41 |               |             |               |                |              |
| 5                                            | 55-59     | CC            | 740  | 13.51 | 0             | 0.00        |               |                |              |
| 5                                            | 55-59     | Ecig          | 762  | 13.91 |               |             |               |                |              |
| 5                                            | 55-59     | Dual          | 0    | 0.00  |               |             |               |                |              |
| 5                                            | 55-59     | Former        | 2364 | 43.16 |               |             | 17.21         | 122            | 5.16         |
| Year of Follow-up: 1995, Age Group: 60-64    |           |               |      |       |               |             |               |                |              |
| Period                                       | Age Group | Smoking Group | N    | %     | Ever Quit (N) | Ever Quit % | Mean Yrs Quit | Short Term (n) | Short Term % |
| 5                                            | 60-64     | Never Any     | 1337 | 26.83 |               |             |               |                |              |
| 5                                            | 60-64     | CC            | 597  | 11.98 | 0             | 0.00        |               |                |              |
| 5                                            | 60-64     | Ecig          | 572  | 11.48 |               |             |               |                |              |
| 5                                            | 60-64     | Dual          | 0    | 0.00  |               |             |               |                |              |
| 5                                            | 60-64     | Former        | 2477 | 49.71 |               |             | 17.27         | 143            | 5.77         |
| Year of Follow-up: 1995, Age Group: 65-69    |           |               |      |       |               |             |               |                |              |
| Period                                       | Age Group | Smoking Group | N    | %     | Ever Quit (N) | Ever Quit % | Mean Yrs Quit | Short Term (n) | Short Term % |
| 5                                            | 65-69     | Never Any     | 1169 | 23.83 |               |             |               |                |              |
| 5                                            | 65-69     | CC            | 477  | 9.72  | 0             | 0.00        |               |                |              |
| 5                                            | 65-69     | Ecig          | 360  | 7.34  |               |             |               |                |              |
| 5                                            | 65-69     | Dual          | 0    | 0.00  |               |             |               |                |              |
| 5                                            | 65-69     | Former        | 2899 | 59.10 |               |             | 20.44         | 196            | 6.76         |
| Year of Follow-up: 1995, Age Group: 70-74    |           |               |      |       |               |             |               |                |              |
| Period                                       | Age Group | Smoking Group | N    | %     | Ever Quit (N) | Ever Quit % | Mean Yrs Quit | Short Term (n) | Short Term % |
| 5                                            | 70-74     | Never Any     | 1023 | 23.32 |               |             |               |                |              |
| 5                                            | 70-74     | CC            | 438  | 9.98  | 0             | 0.00        |               |                |              |
| 5                                            | 70-74     | Ecig          | 196  | 4.47  |               |             |               |                |              |
| 5                                            | 70-74     | Dual          | 0    | 0.00  |               |             |               |                |              |
| 5                                            | 70-74     | Former        | 2730 | 62.23 |               |             | 22.00         | 137            | 5.02         |
| Year of Follow-up: 1995, Age Group: 75-79    |           |               |      |       |               |             |               |                |              |
| Period                                       | Age Group | Smoking Group | N    | %     | Ever Quit (N) | Ever Quit % | Mean Yrs Quit | Short Term (n) | Short Term % |
| 5                                            | 75-79     | Never Any     | 961  | 27.46 |               |             |               |                |              |
| 5                                            | 75-79     | CC            | 303  | 8.66  | 0             | 0.00        |               |                |              |
| 5                                            | 75-79     | Ecig          | 135  | 3.86  |               |             |               |                |              |
| 5                                            | 75-79     | Dual          | 0    | 0.00  |               |             |               |                |              |
| 5                                            | 75-79     | Former        | 2100 | 60.02 |               |             | 23.02         | 97             | 4.62         |
| Year of Follow-up: 2000, Age Group: All Ages |           |               |      |       |               |             |               |                |              |

**Results for PHIM for Run 1 (Sensitivity\_Analysis\_4.RTF)**

| Period                                    | Age Group | Smoking Group | N     | %     | Ever Quit (N) | Ever Quit % | Mean Yrs Quit | Short Term (n) | Short Term % |
|-------------------------------------------|-----------|---------------|-------|-------|---------------|-------------|---------------|----------------|--------------|
| 10                                        | All Ages  | Never Any     | 40978 | 43.55 |               |             |               |                |              |
| 10                                        | All Ages  | CC            | 4905  | 5.21  | 0             | 0.00        |               |                |              |
| 10                                        | All Ages  | Ecig          | 19217 | 20.42 |               |             |               |                |              |
| 10                                        | All Ages  | Dual          | 0     | 0.00  |               |             |               |                |              |
| 10                                        | All Ages  | Former        | 28992 | 30.81 |               |             | 17.01         | 1625           | 5.60         |
| Year of Follow-up: 2000, Age Group: 18-19 |           |               |       |       |               |             |               |                |              |
| Period                                    | Age Group | Smoking Group | N     | %     | Ever Quit (N) | Ever Quit % | Mean Yrs Quit | Short Term (n) | Short Term % |
| 10                                        | 18-19     | Never Any     | 0     | .     |               |             |               |                |              |
| 10                                        | 18-19     | CC            | 0     | .     | 0             | .           |               |                |              |
| 10                                        | 18-19     | Ecig          | 0     | .     |               |             |               |                |              |
| 10                                        | 18-19     | Dual          | 0     | .     |               |             |               |                |              |
| 10                                        | 18-19     | Former        | 0     | .     |               |             |               | 0              | .            |
| Year of Follow-up: 2000, Age Group: 20-24 |           |               |       |       |               |             |               |                |              |
| Period                                    | Age Group | Smoking Group | N     | %     | Ever Quit (N) | Ever Quit % | Mean Yrs Quit | Short Term (n) | Short Term % |
| 10                                        | 20-24     | Never Any     | 5978  | 67.59 |               |             |               |                |              |
| 10                                        | 20-24     | CC            | 507   | 5.73  | 0             | 0.00        |               |                |              |
| 10                                        | 20-24     | Ecig          | 1689  | 19.10 |               |             |               |                |              |
| 10                                        | 20-24     | Dual          | 0     | 0.00  |               |             |               |                |              |
| 10                                        | 20-24     | Former        | 671   | 7.59  |               |             | 3.45          | 191            | 28.46        |
| Year of Follow-up: 2000, Age Group: 25-29 |           |               |       |       |               |             |               |                |              |
| Period                                    | Age Group | Smoking Group | N     | %     | Ever Quit (N) | Ever Quit % | Mean Yrs Quit | Short Term (n) | Short Term % |
| 10                                        | 25-29     | Never Any     | 5871  | 64.94 |               |             |               |                |              |
| 10                                        | 25-29     | CC            | 420   | 4.65  | 0             | 0.00        |               |                |              |
| 10                                        | 25-29     | Ecig          | 1911  | 21.14 |               |             |               |                |              |
| 10                                        | 25-29     | Dual          | 0     | 0.00  |               |             |               |                |              |
| 10                                        | 25-29     | Former        | 838   | 9.27  |               |             | 5.08          | 168            | 20.05        |
| Year of Follow-up: 2000, Age Group: 30-34 |           |               |       |       |               |             |               |                |              |
| Period                                    | Age Group | Smoking Group | N     | %     | Ever Quit (N) | Ever Quit % | Mean Yrs Quit | Short Term (n) | Short Term % |
| 10                                        | 30-34     | Never Any     | 5416  | 55.18 |               |             |               |                |              |
| 10                                        | 30-34     | CC            | 482   | 4.91  | 0             | 0.00        |               |                |              |
| 10                                        | 30-34     | Ecig          | 2476  | 25.22 |               |             |               |                |              |
| 10                                        | 30-34     | Dual          | 0     | 0.00  |               |             |               |                |              |
| 10                                        | 30-34     | Former        | 1442  | 14.69 |               |             | 8.70          | 115            | 7.98         |
| Year of Follow-up: 2000, Age Group: 35-39 |           |               |       |       |               |             |               |                |              |
| Period                                    | Age Group | Smoking Group | N     | %     | Ever Quit (N) | Ever Quit % | Mean Yrs Quit | Short Term (n) | Short Term % |
| 10                                        | 35-39     | Never Any     | 5069  | 47.53 |               |             |               |                |              |
| 10                                        | 35-39     | CC            | 609   | 5.71  | 0             | 0.00        |               |                |              |
| 10                                        | 35-39     | Ecig          | 2914  | 27.33 |               |             |               |                |              |
| 10                                        | 35-39     | Dual          | 0     | 0.00  |               |             |               |                |              |
| 10                                        | 35-39     | Former        | 2072  | 19.43 |               |             | 10.63         | 107            | 5.16         |
| Year of Follow-up: 2000, Age Group: 40-44 |           |               |       |       |               |             |               |                |              |
| Period                                    | Age Group | Smoking Group | N     | %     | Ever Quit (N) | Ever Quit % | Mean Yrs Quit | Short Term (n) | Short Term % |
| 10                                        | 40-44     | Never Any     | 4732  | 43.35 |               |             |               |                |              |
| 10                                        | 40-44     | CC            | 567   | 5.19  | 0             | 0.00        |               |                |              |
| 10                                        | 40-44     | Ecig          | 2851  | 26.12 |               |             |               |                |              |
| 10                                        | 40-44     | Dual          | 0     | 0.00  |               |             |               |                |              |
| 10                                        | 40-44     | Former        | 2766  | 25.34 |               |             | 11.82         | 124            | 4.48         |
| Year of Follow-up: 2000, Age Group: 45-49 |           |               |       |       |               |             |               |                |              |
| Period                                    | Age Group | Smoking Group | N     | %     | Ever Quit (N) | Ever Quit % | Mean Yrs Quit | Short Term (n) | Short Term % |
| 10                                        | 45-49     | Never Any     | 3941  | 39.85 |               |             |               |                |              |
| 10                                        | 45-49     | CC            | 484   | 4.89  | 0             | 0.00        |               |                |              |
| 10                                        | 45-49     | Ecig          | 2312  | 23.38 |               |             |               |                |              |
| 10                                        | 45-49     | Dual          | 0     | 0.00  |               |             |               |                |              |
| 10                                        | 45-49     | Former        | 3152  | 31.87 |               |             | 15.25         | 163            | 5.17         |
| Year of Follow-up: 2000, Age Group: 50-54 |           |               |       |       |               |             |               |                |              |
| Period                                    | Age Group | Smoking Group | N     | %     | Ever Quit (N) | Ever Quit % | Mean Yrs Quit | Short Term (n) | Short Term % |
| 10                                        | 50-54     | Never Any     | 2912  | 33.65 |               |             |               |                |              |
| 10                                        | 50-54     | CC            | 473   | 5.47  | 0             | 0.00        |               |                |              |
| 10                                        | 50-54     | Ecig          | 1859  | 21.48 |               |             |               |                |              |
| 10                                        | 50-54     | Dual          | 0     | 0.00  |               |             |               |                |              |
| 10                                        | 50-54     | Former        | 3411  | 39.41 |               |             | 16.85         | 186            | 5.45         |
| Year of Follow-up: 2000, Age Group: 55-59 |           |               |       |       |               |             |               |                |              |
| Period                                    | Age Group | Smoking Group | N     | %     | Ever Quit (N) | Ever Quit % | Mean Yrs Quit | Short Term (n) | Short Term % |
| 10                                        | 55-59     | Never Any     | 1919  | 29.46 |               |             |               |                |              |
| 10                                        | 55-59     | CC            | 363   | 5.57  | 0             | 0.00        |               |                |              |
| 10                                        | 55-59     | Ecig          | 1194  | 18.33 |               |             |               |                |              |
| 10                                        | 55-59     | Dual          | 0     | 0.00  |               |             |               |                |              |

**Results for PHIM for Run 1 (Sensitivity\_Analysis\_4.RTF)**

| Year of Follow-up: 2000, Age Group: 60-64    | Period   | Age Group | Smoking Group | N     | %     | Ever Quit (N) | Ever Quit % | Mean Yrs Quit | Short Term (n) | Short Term % |
|----------------------------------------------|----------|-----------|---------------|-------|-------|---------------|-------------|---------------|----------------|--------------|
| 10                                           | 55-59    | Former    |               | 3039  | 46.65 |               |             | 18.50         | 146            | 4.80         |
| 10                                           | 60-64    | Never Any |               | 1611  | 29.41 |               |             |               |                |              |
| 10                                           | 60-64    | CC        |               | 306   | 5.59  | 0             | 0.00        |               |                |              |
| 10                                           | 60-64    | Ecig      |               | 852   | 15.56 |               |             |               |                |              |
| 10                                           | 60-64    | Dual      |               | 0     | 0.00  |               |             |               |                |              |
| 10                                           | 60-64    | Former    |               | 2708  | 49.44 |               |             | 19.63         | 144            | 5.32         |
| Year of Follow-up: 2000, Age Group: 65-69    | Period   | Age Group | Smoking Group | N     | %     | Ever Quit (N) | Ever Quit % | Mean Yrs Quit | Short Term (n) | Short Term % |
| 10                                           | 65-69    | Never Any |               | 1337  | 26.83 |               |             |               |                |              |
| 10                                           | 65-69    | CC        |               | 244   | 4.90  | 0             | 0.00        |               |                |              |
| 10                                           | 65-69    | Ecig      |               | 603   | 12.10 |               |             |               |                |              |
| 10                                           | 65-69    | Dual      |               | 0     | 0.00  |               |             |               |                |              |
| 10                                           | 65-69    | Former    |               | 2799  | 56.17 |               |             | 19.95         | 120            | 4.29         |
| Year of Follow-up: 2000, Age Group: 70-74    | Period   | Age Group | Smoking Group | N     | %     | Ever Quit (N) | Ever Quit % | Mean Yrs Quit | Short Term (n) | Short Term % |
| 10                                           | 70-74    | Never Any |               | 1169  | 23.83 |               |             |               |                |              |
| 10                                           | 70-74    | CC        |               | 236   | 4.81  | 0             | 0.00        |               |                |              |
| 10                                           | 70-74    | Ecig      |               | 327   | 6.67  |               |             |               |                |              |
| 10                                           | 70-74    | Dual      |               | 0     | 0.00  |               |             |               |                |              |
| 10                                           | 70-74    | Former    |               | 3173  | 64.69 |               |             | 23.44         | 94             | 2.96         |
| Year of Follow-up: 2000, Age Group: 75-79    | Period   | Age Group | Smoking Group | N     | %     | Ever Quit (N) | Ever Quit % | Mean Yrs Quit | Short Term (n) | Short Term % |
| 10                                           | 75-79    | Never Any |               | 1023  | 23.32 |               |             |               |                |              |
| 10                                           | 75-79    | CC        |               | 214   | 4.88  | 0             | 0.00        |               |                |              |
| 10                                           | 75-79    | Ecig      |               | 229   | 5.22  |               |             |               |                |              |
| 10                                           | 75-79    | Dual      |               | 0     | 0.00  |               |             |               |                |              |
| 10                                           | 75-79    | Former    |               | 2921  | 66.58 |               |             | 25.38         | 67             | 2.29         |
| Year of Follow-up: 2005, Age Group: All Ages | Period   | Age Group | Smoking Group | N     | %     | Ever Quit (N) | Ever Quit % | Mean Yrs Quit | Short Term (n) | Short Term % |
| 15                                           | All Ages | Never Any |               | 39512 | 44.05 |               |             |               |                |              |
| 15                                           | All Ages | CC        |               | 1938  | 2.16  | 0             | 0.00        |               |                |              |
| 15                                           | All Ages | Ecig      |               | 18501 | 20.62 |               |             |               |                |              |
| 15                                           | All Ages | Dual      |               | 0     | 0.00  |               |             |               |                |              |
| 15                                           | All Ages | Former    |               | 29754 | 33.17 |               |             | 18.71         | 1484           | 4.99         |
| Year of Follow-up: 2005, Age Group: 18-19    | Period   | Age Group | Smoking Group | N     | %     | Ever Quit (N) | Ever Quit % | Mean Yrs Quit | Short Term (n) | Short Term % |
| 15                                           | 18-19    | Never Any |               | 0     | .     |               |             |               |                |              |
| 15                                           | 18-19    | CC        |               | 0     | .     | 0             | .           |               |                |              |
| 15                                           | 18-19    | Ecig      |               | 0     | .     |               |             |               |                |              |
| 15                                           | 18-19    | Dual      |               | 0     | .     |               |             |               |                |              |
| 15                                           | 18-19    | Former    |               | 0     | .     |               |             | .             | 0              | .            |
| Year of Follow-up: 2005, Age Group: 20-24    | Period   | Age Group | Smoking Group | N     | %     | Ever Quit (N) | Ever Quit % | Mean Yrs Quit | Short Term (n) | Short Term % |
| 15                                           | 20-24    | Never Any |               | 0     | .     |               |             |               |                |              |
| 15                                           | 20-24    | CC        |               | 0     | .     | 0             | .           |               |                |              |
| 15                                           | 20-24    | Ecig      |               | 0     | .     |               |             |               |                |              |
| 15                                           | 20-24    | Dual      |               | 0     | .     |               |             |               |                |              |
| 15                                           | 20-24    | Former    |               | 0     | .     |               |             | .             | 0              | .            |
| Year of Follow-up: 2005, Age Group: 25-29    | Period   | Age Group | Smoking Group | N     | %     | Ever Quit (N) | Ever Quit % | Mean Yrs Quit | Short Term (n) | Short Term % |
| 15                                           | 25-29    | Never Any |               | 5780  | 65.35 |               |             |               |                |              |
| 15                                           | 25-29    | CC        |               | 197   | 2.23  | 0             | 0.00        |               |                |              |
| 15                                           | 25-29    | Ecig      |               | 1868  | 21.12 |               |             |               |                |              |
| 15                                           | 25-29    | Dual      |               | 0     | 0.00  |               |             |               |                |              |
| 15                                           | 25-29    | Former    |               | 1000  | 11.31 |               |             | 6.40          | 121            | 12.10        |
| Year of Follow-up: 2005, Age Group: 30-34    | Period   | Age Group | Smoking Group | N     | %     | Ever Quit (N) | Ever Quit % | Mean Yrs Quit | Short Term (n) | Short Term % |
| 15                                           | 30-34    | Never Any |               | 5690  | 62.94 |               |             |               |                |              |
| 15                                           | 30-34    | CC        |               | 162   | 1.79  | 0             | 0.00        |               |                |              |
| 15                                           | 30-34    | Ecig      |               | 1999  | 22.11 |               |             |               |                |              |
| 15                                           | 30-34    | Dual      |               | 0     | 0.00  |               |             |               |                |              |
| 15                                           | 30-34    | Former    |               | 1189  | 13.15 |               |             | 7.64          | 143            | 12.03        |
| Year of Follow-up: 2005, Age Group: 35-39    | Period   | Age Group | Smoking Group | N     | %     | Ever Quit (N) | Ever Quit % | Mean Yrs Quit | Short Term (n) | Short Term % |
| 15                                           | 35-39    | Never Any |               | 5352  | 54.52 |               |             |               |                |              |
| 15                                           | 35-39    | CC        |               | 188   | 1.92  | 0             | 0.00        |               |                |              |

**Results for PHIM for Run 1 (Sensitivity\_Analysis\_4.RTF)**

|                                              |           |               |       |       |               |             |               |                |              |
|----------------------------------------------|-----------|---------------|-------|-------|---------------|-------------|---------------|----------------|--------------|
| 15                                           | 35-39     | Ecig          | 2491  | 25.38 |               |             |               |                |              |
| 15                                           | 35-39     | Dual          | 0     | 0.00  |               |             |               |                |              |
| 15                                           | 35-39     | Former        | 1785  | 18.18 |               |             | 11.44         | 141            | 7.90         |
| Year of Follow-up: 2005, Age Group: 40-44    |           |               |       |       |               |             |               |                |              |
| Period                                       | Age Group | Smoking Group | N     | %     | Ever Quit (N) | Ever Quit % | Mean Yrs Quit | Short Term (n) | Short Term % |
| 15                                           | 40-44     | Never Any     | 5069  | 47.53 |               |             |               |                |              |
| 15                                           | 40-44     | CC            | 231   | 2.17  | 0             | 0.00        |               |                |              |
| 15                                           | 40-44     | Ecig          | 2886  | 27.06 |               |             |               |                |              |
| 15                                           | 40-44     | Dual          | 0     | 0.00  |               |             |               |                |              |
| 15                                           | 40-44     | Former        | 2478  | 23.24 |               |             | 13.36         | 197            | 7.95         |
| Year of Follow-up: 2005, Age Group: 45-49    |           |               |       |       |               |             |               |                |              |
| Period                                       | Age Group | Smoking Group | N     | %     | Ever Quit (N) | Ever Quit % | Mean Yrs Quit | Short Term (n) | Short Term % |
| 15                                           | 45-49     | Never Any     | 4732  | 43.35 |               |             |               |                |              |
| 15                                           | 45-49     | CC            | 216   | 1.98  | 0             | 0.00        |               |                |              |
| 15                                           | 45-49     | Ecig          | 2789  | 25.55 |               |             |               |                |              |
| 15                                           | 45-49     | Dual          | 0     | 0.00  |               |             |               |                |              |
| 15                                           | 45-49     | Former        | 3179  | 29.12 |               |             | 14.89         | 159            | 5.00         |
| Year of Follow-up: 2005, Age Group: 50-54    |           |               |       |       |               |             |               |                |              |
| Period                                       | Age Group | Smoking Group | N     | %     | Ever Quit (N) | Ever Quit % | Mean Yrs Quit | Short Term (n) | Short Term % |
| 15                                           | 50-54     | Never Any     | 3941  | 39.85 |               |             |               |                |              |
| 15                                           | 50-54     | CC            | 213   | 2.15  | 0             | 0.00        |               |                |              |
| 15                                           | 50-54     | Ecig          | 2180  | 22.04 |               |             |               |                |              |
| 15                                           | 50-54     | Dual          | 0     | 0.00  |               |             |               |                |              |
| 15                                           | 50-54     | Former        | 3555  | 35.95 |               |             | 18.19         | 154            | 4.33         |
| Year of Follow-up: 2005, Age Group: 55-59    |           |               |       |       |               |             |               |                |              |
| Period                                       | Age Group | Smoking Group | N     | %     | Ever Quit (N) | Ever Quit % | Mean Yrs Quit | Short Term (n) | Short Term % |
| 15                                           | 55-59     | Never Any     | 2912  | 33.65 |               |             |               |                |              |
| 15                                           | 55-59     | CC            | 215   | 2.48  | 0             | 0.00        |               |                |              |
| 15                                           | 55-59     | Ecig          | 1781  | 20.58 |               |             |               |                |              |
| 15                                           | 55-59     | Dual          | 0     | 0.00  |               |             |               |                |              |
| 15                                           | 55-59     | Former        | 3747  | 43.29 |               |             | 20.09         | 117            | 3.12         |
| Year of Follow-up: 2005, Age Group: 60-64    |           |               |       |       |               |             |               |                |              |
| Period                                       | Age Group | Smoking Group | N     | %     | Ever Quit (N) | Ever Quit % | Mean Yrs Quit | Short Term (n) | Short Term % |
| 15                                           | 60-64     | Never Any     | 1919  | 29.46 |               |             |               |                |              |
| 15                                           | 60-64     | CC            | 143   | 2.19  | 0             | 0.00        |               |                |              |
| 15                                           | 60-64     | Ecig          | 1100  | 16.88 |               |             |               |                |              |
| 15                                           | 60-64     | Dual          | 0     | 0.00  |               |             |               |                |              |
| 15                                           | 60-64     | Former        | 3353  | 51.47 |               |             | 21.47         | 156            | 4.65         |
| Year of Follow-up: 2005, Age Group: 65-69    |           |               |       |       |               |             |               |                |              |
| Period                                       | Age Group | Smoking Group | N     | %     | Ever Quit (N) | Ever Quit % | Mean Yrs Quit | Short Term (n) | Short Term % |
| 15                                           | 65-69     | Never Any     | 1611  | 29.41 |               |             |               |                |              |
| 15                                           | 65-69     | CC            | 124   | 2.26  | 0             | 0.00        |               |                |              |
| 15                                           | 65-69     | Ecig          | 705   | 12.87 |               |             |               |                |              |
| 15                                           | 65-69     | Dual          | 0     | 0.00  |               |             |               |                |              |
| 15                                           | 65-69     | Former        | 3037  | 55.45 |               |             | 22.19         | 118            | 3.89         |
| Year of Follow-up: 2005, Age Group: 70-74    |           |               |       |       |               |             |               |                |              |
| Period                                       | Age Group | Smoking Group | N     | %     | Ever Quit (N) | Ever Quit % | Mean Yrs Quit | Short Term (n) | Short Term % |
| 15                                           | 70-74     | Never Any     | 1337  | 26.83 |               |             |               |                |              |
| 15                                           | 70-74     | CC            | 129   | 2.59  | 0             | 0.00        |               |                |              |
| 15                                           | 70-74     | Ecig          | 441   | 8.85  |               |             |               |                |              |
| 15                                           | 70-74     | Dual          | 0     | 0.00  |               |             |               |                |              |
| 15                                           | 70-74     | Former        | 3076  | 61.73 |               |             | 22.89         | 112            | 3.64         |
| Year of Follow-up: 2005, Age Group: 75-79    |           |               |       |       |               |             |               |                |              |
| Period                                       | Age Group | Smoking Group | N     | %     | Ever Quit (N) | Ever Quit % | Mean Yrs Quit | Short Term (n) | Short Term % |
| 15                                           | 75-79     | Never Any     | 1169  | 23.83 |               |             |               |                |              |
| 15                                           | 75-79     | CC            | 120   | 2.45  | 0             | 0.00        |               |                |              |
| 15                                           | 75-79     | Ecig          | 261   | 5.32  |               |             |               |                |              |
| 15                                           | 75-79     | Dual          | 0     | 0.00  |               |             |               |                |              |
| 15                                           | 75-79     | Former        | 3355  | 68.40 |               |             | 27.01         | 66             | 1.97         |
| Year of Follow-up: 2010, Age Group: All Ages |           |               |       |       |               |             |               |                |              |
| Period                                       | Age Group | Smoking Group | N     | %     | Ever Quit (N) | Ever Quit % | Mean Yrs Quit | Short Term (n) | Short Term % |
| 20                                           | All Ages  | Never Any     | 38218 | 45.07 |               |             |               |                |              |
| 20                                           | All Ages  | CC            | 749   | 0.88  | 0             | 0.00        |               |                |              |
| 20                                           | All Ages  | Ecig          | 15794 | 18.63 |               |             |               |                |              |
| 20                                           | All Ages  | Dual          | 0     | 0.00  |               |             |               |                |              |
| 20                                           | All Ages  | Former        | 30039 | 35.42 |               |             | 20.15         | 1412           | 4.70         |
| Year of Follow-up: 2010, Age Group: 18-19    |           |               |       |       |               |             |               |                |              |
| Period                                       | Age Group | Smoking Group | N     | %     | Ever Quit (N) | Ever Quit % | Mean Yrs Quit | Short Term (n) | Short Term % |

**Results for PHIM for Run 1 (Sensitivity\_Analysis\_4.RTF)**

|                                           |           |               |      |       |               |             |               |                |              |
|-------------------------------------------|-----------|---------------|------|-------|---------------|-------------|---------------|----------------|--------------|
| 20                                        | 18-19     | Never Any     | 0    | .     |               |             |               |                |              |
| 20                                        | 18-19     | CC            | 0    | .     | 0             | .           |               |                |              |
| 20                                        | 18-19     | Ecig          | 0    | .     |               |             |               |                |              |
| 20                                        | 18-19     | Dual          | 0    | .     |               |             |               |                |              |
| 20                                        | 18-19     | Former        | 0    | .     |               |             | 0             | .              |              |
| Year of Follow-up: 2010, Age Group: 20-24 |           |               |      |       |               |             |               |                |              |
| Period                                    | Age Group | Smoking Group | N    | %     | Ever Quit (N) | Ever Quit % | Mean Yrs Quit | Short Term (n) | Short Term % |
| 20                                        | 20-24     | Never Any     | 0    | .     |               |             |               |                |              |
| 20                                        | 20-24     | CC            | 0    | .     | 0             | .           |               |                |              |
| 20                                        | 20-24     | Ecig          | 0    | .     |               |             |               |                |              |
| 20                                        | 20-24     | Dual          | 0    | .     |               |             |               |                |              |
| 20                                        | 20-24     | Former        | 0    | .     |               |             |               | 0              | .            |
| Year of Follow-up: 2010, Age Group: 25-29 |           |               |      |       |               |             |               |                |              |
| Period                                    | Age Group | Smoking Group | N    | %     | Ever Quit (N) | Ever Quit % | Mean Yrs Quit | Short Term (n) | Short Term % |
| 20                                        | 25-29     | Never Any     | 0    | .     |               |             |               |                |              |
| 20                                        | 25-29     | CC            | 0    | .     | 0             | .           |               |                |              |
| 20                                        | 25-29     | Ecig          | 0    | .     |               |             |               |                |              |
| 20                                        | 25-29     | Dual          | 0    | .     |               |             |               |                |              |
| 20                                        | 25-29     | Former        | 0    | .     |               |             |               | 0              | .            |
| Year of Follow-up: 2010, Age Group: 30-34 |           |               |      |       |               |             |               |                |              |
| Period                                    | Age Group | Smoking Group | N    | %     | Ever Quit (N) | Ever Quit % | Mean Yrs Quit | Short Term (n) | Short Term % |
| 20                                        | 30-34     | Never Any     | 5693 | 64.36 |               |             |               |                |              |
| 20                                        | 30-34     | CC            | 79   | 0.89  | 0             | 0.00        |               |                |              |
| 20                                        | 30-34     | Ecig          | 1697 | 19.19 |               |             |               |                |              |
| 20                                        | 30-34     | Dual          | 0    | 0.00  |               |             |               |                |              |
| 20                                        | 30-34     | Former        | 1376 | 15.56 |               |             | 8.80          | 170            | 12.35        |
| Year of Follow-up: 2010, Age Group: 35-39 |           |               |      |       |               |             |               |                |              |
| Period                                    | Age Group | Smoking Group | N    | %     | Ever Quit (N) | Ever Quit % | Mean Yrs Quit | Short Term (n) | Short Term % |
| 20                                        | 35-39     | Never Any     | 5652 | 62.52 |               |             |               |                |              |
| 20                                        | 35-39     | CC            | 62   | 0.69  | 0             | 0.00        |               |                |              |
| 20                                        | 35-39     | Ecig          | 1747 | 19.33 |               |             |               |                |              |
| 20                                        | 35-39     | Dual          | 0    | 0.00  |               |             |               |                |              |
| 20                                        | 35-39     | Former        | 1579 | 17.47 |               |             | 10.07         | 114            | 7.22         |
| Year of Follow-up: 2010, Age Group: 40-44 |           |               |      |       |               |             |               |                |              |
| Period                                    | Age Group | Smoking Group | N    | %     | Ever Quit (N) | Ever Quit % | Mean Yrs Quit | Short Term (n) | Short Term % |
| 20                                        | 40-44     | Never Any     | 5352 | 54.52 |               |             |               |                |              |
| 20                                        | 40-44     | CC            | 68   | 0.69  | 0             | 0.00        |               |                |              |
| 20                                        | 40-44     | Ecig          | 2277 | 23.20 |               |             |               |                |              |
| 20                                        | 40-44     | Dual          | 0    | 0.00  |               |             |               |                |              |
| 20                                        | 40-44     | Former        | 2119 | 21.59 |               |             | 14.16         | 130            | 6.13         |
| Year of Follow-up: 2010, Age Group: 45-49 |           |               |      |       |               |             |               |                |              |
| Period                                    | Age Group | Smoking Group | N    | %     | Ever Quit (N) | Ever Quit % | Mean Yrs Quit | Short Term (n) | Short Term % |
| 20                                        | 45-49     | Never Any     | 5069 | 47.53 |               |             |               |                |              |
| 20                                        | 45-49     | CC            | 89   | 0.83  | 0             | 0.00        |               |                |              |
| 20                                        | 45-49     | Ecig          | 2566 | 24.06 |               |             |               |                |              |
| 20                                        | 45-49     | Dual          | 0    | 0.00  |               |             |               |                |              |
| 20                                        | 45-49     | Former        | 2940 | 27.57 |               |             | 15.81         | 165            | 5.61         |
| Year of Follow-up: 2010, Age Group: 50-54 |           |               |      |       |               |             |               |                |              |
| Period                                    | Age Group | Smoking Group | N    | %     | Ever Quit (N) | Ever Quit % | Mean Yrs Quit | Short Term (n) | Short Term % |
| 20                                        | 50-54     | Never Any     | 4732 | 43.35 |               |             |               |                |              |
| 20                                        | 50-54     | CC            | 87   | 0.80  | 0             | 0.00        |               |                |              |
| 20                                        | 50-54     | Ecig          | 2486 | 22.77 |               |             |               |                |              |
| 20                                        | 50-54     | Dual          | 0    | 0.00  |               |             |               |                |              |
| 20                                        | 50-54     | Former        | 3611 | 33.08 |               |             | 17.75         | 174            | 4.82         |
| Year of Follow-up: 2010, Age Group: 55-59 |           |               |      |       |               |             |               |                |              |
| Period                                    | Age Group | Smoking Group | N    | %     | Ever Quit (N) | Ever Quit % | Mean Yrs Quit | Short Term (n) | Short Term % |
| 20                                        | 55-59     | Never Any     | 3941 | 39.85 |               |             |               |                |              |
| 20                                        | 55-59     | CC            | 85   | 0.86  | 0             | 0.00        |               |                |              |
| 20                                        | 55-59     | Ecig          | 1859 | 18.80 |               |             |               |                |              |
| 20                                        | 55-59     | Dual          | 0    | 0.00  |               |             |               |                |              |
| 20                                        | 55-59     | Former        | 4004 | 40.49 |               |             | 20.81         | 181            | 4.52         |
| Year of Follow-up: 2010, Age Group: 60-64 |           |               |      |       |               |             |               |                |              |
| Period                                    | Age Group | Smoking Group | N    | %     | Ever Quit (N) | Ever Quit % | Mean Yrs Quit | Short Term (n) | Short Term % |
| 20                                        | 60-64     | Never Any     | 2912 | 33.65 |               |             |               |                |              |
| 20                                        | 60-64     | CC            | 87   | 1.01  | 0             | 0.00        |               |                |              |
| 20                                        | 60-64     | Ecig          | 1428 | 16.50 |               |             |               |                |              |
| 20                                        | 60-64     | Dual          | 0    | 0.00  |               |             |               |                |              |
| 20                                        | 60-64     | Former        | 4228 | 48.85 |               |             | 22.41         | 241            | 5.70         |
| Year of Follow-up: 2010, Age Group: 65-69 |           |               |      |       |               |             |               |                |              |

**Results for PHIM for Run 1 (Sensitivity\_Analysis\_4.RTF)**

| Period                                       | Age Group | Smoking Group | N     | %     | Ever Quit (N) | Ever Quit % | Mean Yrs Quit | Short Term (n) | Short Term % |
|----------------------------------------------|-----------|---------------|-------|-------|---------------|-------------|---------------|----------------|--------------|
| 20                                           | 65-69     | Never Any     | 1919  | 29.46 |               |             |               |                |              |
| 20                                           | 65-69     | CC            | 60    | 0.92  | 0             | 0.00        |               |                |              |
| 20                                           | 65-69     | Ecig          | 809   | 12.42 |               |             |               |                |              |
| 20                                           | 65-69     | Dual          | 0     | 0.00  |               |             |               |                |              |
| 20                                           | 65-69     | Former        | 3727  | 57.21 |               |             | 24.03         | 133            | 3.57         |
| Year of Follow-up: 2010, Age Group: 70-74    |           |               |       |       |               |             |               |                |              |
| Period                                       | Age Group | Smoking Group | N     | %     | Ever Quit (N) | Ever Quit % | Mean Yrs Quit | Short Term (n) | Short Term % |
| 20                                           | 70-74     | Never Any     | 1611  | 29.41 |               |             |               |                |              |
| 20                                           | 70-74     | CC            | 69    | 1.26  | 0             | 0.00        |               |                |              |
| 20                                           | 70-74     | Ecig          | 574   | 10.48 |               |             |               |                |              |
| 20                                           | 70-74     | Dual          | 0     | 0.00  |               |             |               |                |              |
| 20                                           | 70-74     | Former        | 3223  | 58.85 |               |             | 25.75         | 61             | 1.89         |
| Year of Follow-up: 2010, Age Group: 75-79    |           |               |       |       |               |             |               |                |              |
| Period                                       | Age Group | Smoking Group | N     | %     | Ever Quit (N) | Ever Quit % | Mean Yrs Quit | Short Term (n) | Short Term % |
| 20                                           | 75-79     | Never Any     | 1337  | 26.83 |               |             |               |                |              |
| 20                                           | 75-79     | CC            | 63    | 1.26  | 0             | 0.00        |               |                |              |
| 20                                           | 75-79     | Ecig          | 351   | 7.04  |               |             |               |                |              |
| 20                                           | 75-79     | Dual          | 0     | 0.00  |               |             |               |                |              |
| 20                                           | 75-79     | Former        | 3232  | 64.86 |               |             | 26.66         | 43             | 1.33         |
| Year of Follow-up: 2015, Age Group: All Ages |           |               |       |       |               |             |               |                |              |
| Period                                       | Age Group | Smoking Group | N     | %     | Ever Quit (N) | Ever Quit % | Mean Yrs Quit | Short Term (n) | Short Term % |
| 25                                           | All Ages  | Never Any     | 36870 | 46.19 |               |             |               |                |              |
| 25                                           | All Ages  | CC            | 293   | 0.37  | 0             | 0.00        |               |                |              |
| 25                                           | All Ages  | Ecig          | 12993 | 16.28 |               |             |               |                |              |
| 25                                           | All Ages  | Dual          | 0     | 0.00  |               |             |               |                |              |
| 25                                           | All Ages  | Former        | 29661 | 37.16 |               |             | 22.23         | 1028           | 3.47         |
| Year of Follow-up: 2015, Age Group: 18-19    |           |               |       |       |               |             |               |                |              |
| Period                                       | Age Group | Smoking Group | N     | %     | Ever Quit (N) | Ever Quit % | Mean Yrs Quit | Short Term (n) | Short Term % |
| 25                                           | 18-19     | Never Any     | 0     | .     |               |             |               |                |              |
| 25                                           | 18-19     | CC            | 0     | .     | 0             | .           |               |                |              |
| 25                                           | 18-19     | Ecig          | 0     | .     |               |             |               |                |              |
| 25                                           | 18-19     | Dual          | 0     | .     |               |             |               |                |              |
| 25                                           | 18-19     | Former        | 0     | .     |               |             | .             | 0              | .            |
| Year of Follow-up: 2015, Age Group: 20-24    |           |               |       |       |               |             |               |                |              |
| Period                                       | Age Group | Smoking Group | N     | %     | Ever Quit (N) | Ever Quit % | Mean Yrs Quit | Short Term (n) | Short Term % |
| 25                                           | 20-24     | Never Any     | 0     | .     |               |             |               |                |              |
| 25                                           | 20-24     | CC            | 0     | .     | 0             | .           |               |                |              |
| 25                                           | 20-24     | Ecig          | 0     | .     |               |             |               |                |              |
| 25                                           | 20-24     | Dual          | 0     | .     |               |             |               |                |              |
| 25                                           | 20-24     | Former        | 0     | .     |               |             | .             | 0              | .            |
| Year of Follow-up: 2015, Age Group: 25-29    |           |               |       |       |               |             |               |                |              |
| Period                                       | Age Group | Smoking Group | N     | %     | Ever Quit (N) | Ever Quit % | Mean Yrs Quit | Short Term (n) | Short Term % |
| 25                                           | 25-29     | Never Any     | 0     | .     |               |             |               |                |              |
| 25                                           | 25-29     | CC            | 0     | .     | 0             | .           |               |                |              |
| 25                                           | 25-29     | Ecig          | 0     | .     |               |             |               |                |              |
| 25                                           | 25-29     | Dual          | 0     | .     |               |             |               |                |              |
| 25                                           | 25-29     | Former        | 0     | .     |               |             | .             | 0              | .            |
| Year of Follow-up: 2015, Age Group: 30-34    |           |               |       |       |               |             |               |                |              |
| Period                                       | Age Group | Smoking Group | N     | %     | Ever Quit (N) | Ever Quit % | Mean Yrs Quit | Short Term (n) | Short Term % |
| 25                                           | 30-34     | Never Any     | 0     | .     |               |             |               |                |              |
| 25                                           | 30-34     | CC            | 0     | .     | 0             | .           |               |                |              |
| 25                                           | 30-34     | Ecig          | 0     | .     |               |             |               |                |              |
| 25                                           | 30-34     | Dual          | 0     | .     |               |             |               |                |              |
| 25                                           | 30-34     | Former        | 0     | .     |               |             | .             | 0              | .            |
| Year of Follow-up: 2015, Age Group: 35-39    |           |               |       |       |               |             |               |                |              |
| Period                                       | Age Group | Smoking Group | N     | %     | Ever Quit (N) | Ever Quit % | Mean Yrs Quit | Short Term (n) | Short Term % |
| 25                                           | 35-39     | Never Any     | 5682  | 64.24 |               |             |               |                |              |
| 25                                           | 35-39     | CC            | 32    | 0.36  | 0             | 0.00        |               |                |              |
| 25                                           | 35-39     | Ecig          | 1420  | 16.05 |               |             |               |                |              |
| 25                                           | 35-39     | Dual          | 0     | 0.00  |               |             |               |                |              |
| 25                                           | 35-39     | Former        | 1711  | 19.34 |               |             | 11.55         | 105            | 6.14         |
| Year of Follow-up: 2015, Age Group: 40-44    |           |               |       |       |               |             |               |                |              |
| Period                                       | Age Group | Smoking Group | N     | %     | Ever Quit (N) | Ever Quit % | Mean Yrs Quit | Short Term (n) | Short Term % |
| 25                                           | 40-44     | Never Any     | 5652  | 62.52 |               |             |               |                |              |
| 25                                           | 40-44     | CC            | 20    | 0.22  | 0             | 0.00        |               |                |              |
| 25                                           | 40-44     | Ecig          | 1536  | 16.99 |               |             |               |                |              |
| 25                                           | 40-44     | Dual          | 0     | 0.00  |               |             |               |                |              |

**Results for PHIM for Run 1 (Sensitivity\_Analysis\_4.RTF)**

|                                              |           |               |       |       |               |             |               |                |              |
|----------------------------------------------|-----------|---------------|-------|-------|---------------|-------------|---------------|----------------|--------------|
| 25                                           | 40-44     | Former        | 1832  | 20.27 |               |             | 13.27         | 94             | 5.13         |
| Year of Follow-up: 2015, Age Group: 45-49    |           |               |       |       |               |             |               |                |              |
| Period                                       | Age Group | Smoking Group | N     | %     | Ever Quit (N) | Ever Quit % | Mean Yrs Quit | Short Term (n) | Short Term % |
| 25                                           | 45-49     | Never Any     | 5352  | 54.52 |               |             |               |                |              |
| 25                                           | 45-49     | CC            | 29    | 0.30  | 0             | 0.00        |               |                |              |
| 25                                           | 45-49     | Ecig          | 2066  | 21.05 |               |             |               |                |              |
| 25                                           | 45-49     | Dual          | 0     | 0.00  |               |             |               |                |              |
| 25                                           | 45-49     | Former        | 2369  | 24.13 |               |             | 17.39         | 77             | 3.25         |
| Year of Follow-up: 2015, Age Group: 50-54    |           |               |       |       |               |             |               |                |              |
| Period                                       | Age Group | Smoking Group | N     | %     | Ever Quit (N) | Ever Quit % | Mean Yrs Quit | Short Term (n) | Short Term % |
| 25                                           | 50-54     | Never Any     | 5069  | 47.53 |               |             |               |                |              |
| 25                                           | 50-54     | CC            | 37    | 0.35  | 0             | 0.00        |               |                |              |
| 25                                           | 50-54     | Ecig          | 2336  | 21.91 |               |             |               |                |              |
| 25                                           | 50-54     | Dual          | 0     | 0.00  |               |             |               |                |              |
| 25                                           | 50-54     | Former        | 3222  | 30.21 |               |             | 19.15         | 129            | 4.00         |
| Year of Follow-up: 2015, Age Group: 55-59    |           |               |       |       |               |             |               |                |              |
| Period                                       | Age Group | Smoking Group | N     | %     | Ever Quit (N) | Ever Quit % | Mean Yrs Quit | Short Term (n) | Short Term % |
| 25                                           | 55-59     | Never Any     | 4732  | 43.35 |               |             |               |                |              |
| 25                                           | 55-59     | CC            | 33    | 0.30  | 0             | 0.00        |               |                |              |
| 25                                           | 55-59     | Ecig          | 2100  | 19.24 |               |             |               |                |              |
| 25                                           | 55-59     | Dual          | 0     | 0.00  |               |             |               |                |              |
| 25                                           | 55-59     | Former        | 4051  | 37.11 |               |             | 20.51         | 162            | 4.00         |
| Year of Follow-up: 2015, Age Group: 60-64    |           |               |       |       |               |             |               |                |              |
| Period                                       | Age Group | Smoking Group | N     | %     | Ever Quit (N) | Ever Quit % | Mean Yrs Quit | Short Term (n) | Short Term % |
| 25                                           | 60-64     | Never Any     | 3941  | 39.85 |               |             |               |                |              |
| 25                                           | 60-64     | CC            | 28    | 0.28  | 0             | 0.00        |               |                |              |
| 25                                           | 60-64     | Ecig          | 1443  | 14.59 |               |             |               |                |              |
| 25                                           | 60-64     | Dual          | 0     | 0.00  |               |             |               |                |              |
| 25                                           | 60-64     | Former        | 4477  | 45.27 |               |             | 23.28         | 205            | 4.58         |
| Year of Follow-up: 2015, Age Group: 65-69    |           |               |       |       |               |             |               |                |              |
| Period                                       | Age Group | Smoking Group | N     | %     | Ever Quit (N) | Ever Quit % | Mean Yrs Quit | Short Term (n) | Short Term % |
| 25                                           | 65-69     | Never Any     | 2912  | 33.65 |               |             |               |                |              |
| 25                                           | 65-69     | CC            | 43    | 0.50  | 0             | 0.00        |               |                |              |
| 25                                           | 65-69     | Ecig          | 1019  | 11.77 |               |             |               |                |              |
| 25                                           | 65-69     | Dual          | 0     | 0.00  |               |             |               |                |              |
| 25                                           | 65-69     | Former        | 4681  | 54.08 |               |             | 24.99         | 134            | 2.86         |
| Year of Follow-up: 2015, Age Group: 70-74    |           |               |       |       |               |             |               |                |              |
| Period                                       | Age Group | Smoking Group | N     | %     | Ever Quit (N) | Ever Quit % | Mean Yrs Quit | Short Term (n) | Short Term % |
| 25                                           | 70-74     | Never Any     | 1919  | 29.46 |               |             |               |                |              |
| 25                                           | 70-74     | CC            | 35    | 0.54  | 0             | 0.00        |               |                |              |
| 25                                           | 70-74     | Ecig          | 616   | 9.46  |               |             |               |                |              |
| 25                                           | 70-74     | Dual          | 0     | 0.00  |               |             |               |                |              |
| 25                                           | 70-74     | Former        | 3945  | 60.55 |               |             | 27.55         | 70             | 1.77         |
| Year of Follow-up: 2015, Age Group: 75-79    |           |               |       |       |               |             |               |                |              |
| Period                                       | Age Group | Smoking Group | N     | %     | Ever Quit (N) | Ever Quit % | Mean Yrs Quit | Short Term (n) | Short Term % |
| 25                                           | 75-79     | Never Any     | 1611  | 29.41 |               |             |               |                |              |
| 25                                           | 75-79     | CC            | 36    | 0.66  | 0             | 0.00        |               |                |              |
| 25                                           | 75-79     | Ecig          | 457   | 8.34  |               |             |               |                |              |
| 25                                           | 75-79     | Dual          | 0     | 0.00  |               |             |               |                |              |
| 25                                           | 75-79     | Former        | 3373  | 61.58 |               |             | 29.48         | 52             | 1.54         |
| Year of Follow-up: 2020, Age Group: All Ages |           |               |       |       |               |             |               |                |              |
| Period                                       | Age Group | Smoking Group | N     | %     | Ever Quit (N) | Ever Quit % | Mean Yrs Quit | Short Term (n) | Short Term % |
| 30                                           | All Ages  | Never Any     | 35259 | 47.43 |               |             |               |                |              |
| 30                                           | All Ages  | CC            | 102   | 0.14  | 0             | 0.00        |               |                |              |
| 30                                           | All Ages  | Ecig          | 10388 | 13.97 |               |             |               |                |              |
| 30                                           | All Ages  | Dual          | 0     | 0.00  |               |             |               |                |              |
| 30                                           | All Ages  | Former        | 28591 | 38.46 |               |             | 24.35         | 855            | 2.99         |
| Year of Follow-up: 2020, Age Group: 18-19    |           |               |       |       |               |             |               |                |              |
| Period                                       | Age Group | Smoking Group | N     | %     | Ever Quit (N) | Ever Quit % | Mean Yrs Quit | Short Term (n) | Short Term % |
| 30                                           | 18-19     | Never Any     | 0     | .     |               |             |               |                |              |
| 30                                           | 18-19     | CC            | 0     | .     | 0             | .           |               |                |              |
| 30                                           | 18-19     | Ecig          | 0     | .     |               |             |               |                |              |
| 30                                           | 18-19     | Dual          | 0     | .     |               |             |               |                |              |
| 30                                           | 18-19     | Former        | 0     | .     |               |             | .             | 0              | .            |
| Year of Follow-up: 2020, Age Group: 20-24    |           |               |       |       |               |             |               |                |              |
| Period                                       | Age Group | Smoking Group | N     | %     | Ever Quit (N) | Ever Quit % | Mean Yrs Quit | Short Term (n) | Short Term % |
| 30                                           | 20-24     | Never Any     | 0     | .     |               |             |               |                |              |
| 30                                           | 20-24     | CC            | 0     | .     | 0             | .           |               |                |              |

### Results for PHIM for Run 1 (Sensitivity\_Analysis\_4.RTF)

| 30                                        | 20-24     | Ecig          | 0    | .     |               |             |               |                |              |
|-------------------------------------------|-----------|---------------|------|-------|---------------|-------------|---------------|----------------|--------------|
| 30                                        | 20-24     | Dual          | 0    | .     |               |             |               |                |              |
| 30                                        | 20-24     | Former        | 0    | .     |               |             | 0             | .              |              |
| Year of Follow-up: 2020, Age Group: 25-29 |           |               |      |       |               |             |               |                |              |
| Period                                    | Age Group | Smoking Group | N    | %     | Ever Quit (N) | Ever Quit % | Mean Yrs Quit | Short Term (n) | Short Term % |
| 30                                        | 25-29     | Never Any     | 0    | .     |               |             |               |                |              |
| 30                                        | 25-29     | CC            | 0    | .     | 0             | .           |               |                |              |
| 30                                        | 25-29     | Ecig          | 0    | .     |               |             |               |                |              |
| 30                                        | 25-29     | Dual          | 0    | .     |               |             |               |                |              |
| 30                                        | 25-29     | Former        | 0    | .     |               |             |               | 0              | .            |
| Year of Follow-up: 2020, Age Group: 30-34 |           |               |      |       |               |             |               |                |              |
| Period                                    | Age Group | Smoking Group | N    | %     | Ever Quit (N) | Ever Quit % | Mean Yrs Quit | Short Term (n) | Short Term % |
| 30                                        | 30-34     | Never Any     | 0    | .     |               |             |               |                |              |
| 30                                        | 30-34     | CC            | 0    | .     | 0             | .           |               |                |              |
| 30                                        | 30-34     | Ecig          | 0    | .     |               |             |               |                |              |
| 30                                        | 30-34     | Dual          | 0    | .     |               |             |               |                |              |
| 30                                        | 30-34     | Former        | 0    | .     |               |             |               | 0              | .            |
| Year of Follow-up: 2020, Age Group: 35-39 |           |               |      |       |               |             |               |                |              |
| Period                                    | Age Group | Smoking Group | N    | %     | Ever Quit (N) | Ever Quit % | Mean Yrs Quit | Short Term (n) | Short Term % |
| 30                                        | 35-39     | Never Any     | 0    | .     |               |             |               |                |              |
| 30                                        | 35-39     | CC            | 0    | .     | 0             | .           |               |                |              |
| 30                                        | 35-39     | Ecig          | 0    | .     |               |             |               |                |              |
| 30                                        | 35-39     | Dual          | 0    | .     |               |             |               |                |              |
| 30                                        | 35-39     | Former        | 0    | .     |               |             |               | 0              | .            |
| Year of Follow-up: 2020, Age Group: 40-44 |           |               |      |       |               |             |               |                |              |
| Period                                    | Age Group | Smoking Group | N    | %     | Ever Quit (N) | Ever Quit % | Mean Yrs Quit | Short Term (n) | Short Term % |
| 30                                        | 40-44     | Never Any     | 5682 | 64.24 |               |             |               |                |              |
| 30                                        | 40-44     | CC            | 14   | 0.16  | 0             | 0.00        |               |                |              |
| 30                                        | 40-44     | Ecig          | 1259 | 14.23 |               |             |               |                |              |
| 30                                        | 40-44     | Dual          | 0    | 0.00  |               |             |               |                |              |
| 30                                        | 40-44     | Former        | 1890 | 21.37 |               |             | 15.18         | 63             | 3.33         |
| Year of Follow-up: 2020, Age Group: 45-49 |           |               |      |       |               |             |               |                |              |
| Period                                    | Age Group | Smoking Group | N    | %     | Ever Quit (N) | Ever Quit % | Mean Yrs Quit | Short Term (n) | Short Term % |
| 30                                        | 45-49     | Never Any     | 5652 | 62.52 |               |             |               |                |              |
| 30                                        | 45-49     | CC            | 5    | 0.06  | 0             | 0.00        |               |                |              |
| 30                                        | 45-49     | Ecig          | 1377 | 15.23 |               |             |               |                |              |
| 30                                        | 45-49     | Dual          | 0    | 0.00  |               |             |               |                |              |
| 30                                        | 45-49     | Former        | 2006 | 22.19 |               |             | 16.90         | 47             | 2.34         |
| Year of Follow-up: 2020, Age Group: 50-54 |           |               |      |       |               |             |               |                |              |
| Period                                    | Age Group | Smoking Group | N    | %     | Ever Quit (N) | Ever Quit % | Mean Yrs Quit | Short Term (n) | Short Term % |
| 30                                        | 50-54     | Never Any     | 5352 | 54.52 |               |             |               |                |              |
| 30                                        | 50-54     | CC            | 9    | 0.09  | 0             | 0.00        |               |                |              |
| 30                                        | 50-54     | Ecig          | 1897 | 19.33 |               |             |               |                |              |
| 30                                        | 50-54     | Dual          | 0    | 0.00  |               |             |               |                |              |
| 30                                        | 50-54     | Former        | 2558 | 26.06 |               |             | 20.85         | 96             | 3.75         |
| Year of Follow-up: 2020, Age Group: 55-59 |           |               |      |       |               |             |               |                |              |
| Period                                    | Age Group | Smoking Group | N    | %     | Ever Quit (N) | Ever Quit % | Mean Yrs Quit | Short Term (n) | Short Term % |
| 30                                        | 55-59     | Never Any     | 5069 | 47.53 |               |             |               |                |              |
| 30                                        | 55-59     | CC            | 18   | 0.17  | 0             | 0.00        |               |                |              |
| 30                                        | 55-59     | Ecig          | 1955 | 18.33 |               |             |               |                |              |
| 30                                        | 55-59     | Dual          | 0    | 0.00  |               |             |               |                |              |
| 30                                        | 55-59     | Former        | 3622 | 33.96 |               |             | 21.71         | 157            | 4.33         |
| Year of Follow-up: 2020, Age Group: 60-64 |           |               |      |       |               |             |               |                |              |
| Period                                    | Age Group | Smoking Group | N    | %     | Ever Quit (N) | Ever Quit % | Mean Yrs Quit | Short Term (n) | Short Term % |
| 30                                        | 60-64     | Never Any     | 4732 | 43.35 |               |             |               |                |              |
| 30                                        | 60-64     | CC            | 10   | 0.09  | 0             | 0.00        |               |                |              |
| 30                                        | 60-64     | Ecig          | 1612 | 14.77 |               |             |               |                |              |
| 30                                        | 60-64     | Dual          | 0    | 0.00  |               |             |               |                |              |
| 30                                        | 60-64     | Former        | 4562 | 41.79 |               |             | 22.88         | 203            | 4.45         |
| Year of Follow-up: 2020, Age Group: 65-69 |           |               |      |       |               |             |               |                |              |
| Period                                    | Age Group | Smoking Group | N    | %     | Ever Quit (N) | Ever Quit % | Mean Yrs Quit | Short Term (n) | Short Term % |
| 30                                        | 65-69     | Never Any     | 3941 | 39.85 |               |             |               |                |              |
| 30                                        | 65-69     | CC            | 13   | 0.13  | 0             | 0.00        |               |                |              |
| 30                                        | 65-69     | Ecig          | 1039 | 10.51 |               |             |               |                |              |
| 30                                        | 65-69     | Dual          | 0    | 0.00  |               |             |               |                |              |
| 30                                        | 65-69     | Former        | 4896 | 49.51 |               |             | 26.05         | 145            | 2.96         |
| Year of Follow-up: 2020, Age Group: 70-74 |           |               |      |       |               |             |               |                |              |
| Period                                    | Age Group | Smoking Group | N    | %     | Ever Quit (N) | Ever Quit % | Mean Yrs Quit | Short Term (n) | Short Term % |



**Results for PHIM for Run 1 (Sensitivity\_Analysis\_4.RTF)**

|                                              |           |               |       |       |               |             |               |                |              |
|----------------------------------------------|-----------|---------------|-------|-------|---------------|-------------|---------------|----------------|--------------|
| 30                                           | 70-74     | Never Any     | 2912  | 33.65 |               |             |               |                |              |
| 30                                           | 70-74     | CC            | 18    | 0.21  | 0             | 0.00        |               |                |              |
| 30                                           | 70-74     | Ecig          | 770   | 8.90  |               |             |               |                |              |
| 30                                           | 70-74     | Dual          | 0     | 0.00  |               |             |               |                |              |
| 30                                           | 70-74     | Former        | 4955  | 57.25 |               |             | 28.45         | 93             | 1.88         |
| Year of Follow-up: 2020, Age Group: 75-79    |           |               |       |       |               |             |               |                |              |
| Period                                       | Age Group | Smoking Group | N     | %     | Ever Quit (N) | Ever Quit % | Mean Yrs Quit | Short Term (n) | Short Term % |
| 30                                           | 75-79     | Never Any     | 1919  | 29.46 |               |             |               |                |              |
| 30                                           | 75-79     | CC            | 15    | 0.23  | 0             | 0.00        |               |                |              |
| 30                                           | 75-79     | Ecig          | 479   | 7.35  |               |             |               |                |              |
| 30                                           | 75-79     | Dual          | 0     | 0.00  |               |             |               |                |              |
| 30                                           | 75-79     | Former        | 4102  | 62.96 |               |             | 31.39         | 51             | 1.24         |
| Year of Follow-up: 2025, Age Group: All Ages |           |               |       |       |               |             |               |                |              |
| Period                                       | Age Group | Smoking Group | N     | %     | Ever Quit (N) | Ever Quit % | Mean Yrs Quit | Short Term (n) | Short Term % |
| 35                                           | All Ages  | Never Any     | 33340 | 49.16 |               |             |               |                |              |
| 35                                           | All Ages  | CC            | 40    | 0.06  | 0             | 0.00        |               |                |              |
| 35                                           | All Ages  | Ecig          | 8025  | 11.83 |               |             |               |                |              |
| 35                                           | All Ages  | Dual          | 0     | 0.00  |               |             |               |                |              |
| 35                                           | All Ages  | Former        | 26420 | 38.95 |               |             | 26.26         | 739            | 2.80         |
| Year of Follow-up: 2025, Age Group: 18-19    |           |               |       |       |               |             |               |                |              |
| Period                                       | Age Group | Smoking Group | N     | %     | Ever Quit (N) | Ever Quit % | Mean Yrs Quit | Short Term (n) | Short Term % |
| 35                                           | 18-19     | Never Any     | 0     | .     |               |             |               |                |              |
| 35                                           | 18-19     | CC            | 0     | .     | 0             | .           |               |                |              |
| 35                                           | 18-19     | Ecig          | 0     | .     |               |             |               |                |              |
| 35                                           | 18-19     | Dual          | 0     | .     |               |             |               |                |              |
| 35                                           | 18-19     | Former        | 0     | .     |               |             | .             | 0              | .            |
| Year of Follow-up: 2025, Age Group: 20-24    |           |               |       |       |               |             |               |                |              |
| Period                                       | Age Group | Smoking Group | N     | %     | Ever Quit (N) | Ever Quit % | Mean Yrs Quit | Short Term (n) | Short Term % |
| 35                                           | 20-24     | Never Any     | 0     | .     |               |             |               |                |              |
| 35                                           | 20-24     | CC            | 0     | .     | 0             | .           |               |                |              |
| 35                                           | 20-24     | Ecig          | 0     | .     |               |             |               |                |              |
| 35                                           | 20-24     | Dual          | 0     | .     |               |             |               |                |              |
| 35                                           | 20-24     | Former        | 0     | .     |               |             | .             | 0              | .            |
| Year of Follow-up: 2025, Age Group: 25-29    |           |               |       |       |               |             |               |                |              |
| Period                                       | Age Group | Smoking Group | N     | %     | Ever Quit (N) | Ever Quit % | Mean Yrs Quit | Short Term (n) | Short Term % |
| 35                                           | 25-29     | Never Any     | 0     | .     |               |             |               |                |              |
| 35                                           | 25-29     | CC            | 0     | .     | 0             | .           |               |                |              |
| 35                                           | 25-29     | Ecig          | 0     | .     |               |             |               |                |              |
| 35                                           | 25-29     | Dual          | 0     | .     |               |             |               |                |              |
| 35                                           | 25-29     | Former        | 0     | .     |               |             | .             | 0              | .            |
| Year of Follow-up: 2025, Age Group: 30-34    |           |               |       |       |               |             |               |                |              |
| Period                                       | Age Group | Smoking Group | N     | %     | Ever Quit (N) | Ever Quit % | Mean Yrs Quit | Short Term (n) | Short Term % |
| 35                                           | 30-34     | Never Any     | 0     | .     |               |             |               |                |              |
| 35                                           | 30-34     | CC            | 0     | .     | 0             | .           |               |                |              |
| 35                                           | 30-34     | Ecig          | 0     | .     |               |             |               |                |              |
| 35                                           | 30-34     | Dual          | 0     | .     |               |             |               |                |              |
| 35                                           | 30-34     | Former        | 0     | .     |               |             | .             | 0              | .            |
| Year of Follow-up: 2025, Age Group: 35-39    |           |               |       |       |               |             |               |                |              |
| Period                                       | Age Group | Smoking Group | N     | %     | Ever Quit (N) | Ever Quit % | Mean Yrs Quit | Short Term (n) | Short Term % |
| 35                                           | 35-39     | Never Any     | 0     | .     |               |             |               |                |              |
| 35                                           | 35-39     | CC            | 0     | .     | 0             | .           |               |                |              |
| 35                                           | 35-39     | Ecig          | 0     | .     |               |             |               |                |              |
| 35                                           | 35-39     | Dual          | 0     | .     |               |             |               |                |              |
| 35                                           | 35-39     | Former        | 0     | .     |               |             | .             | 0              | .            |
| Year of Follow-up: 2025, Age Group: 40-44    |           |               |       |       |               |             |               |                |              |
| Period                                       | Age Group | Smoking Group | N     | %     | Ever Quit (N) | Ever Quit % | Mean Yrs Quit | Short Term (n) | Short Term % |
| 35                                           | 40-44     | Never Any     | 0     | .     |               |             |               |                |              |
| 35                                           | 40-44     | CC            | 0     | .     | 0             | .           |               |                |              |
| 35                                           | 40-44     | Ecig          | 0     | .     |               |             |               |                |              |
| 35                                           | 40-44     | Dual          | 0     | .     |               |             |               |                |              |
| 35                                           | 40-44     | Former        | 0     | .     |               |             | .             | 0              | .            |
| Year of Follow-up: 2025, Age Group: 45-49    |           |               |       |       |               |             |               |                |              |
| Period                                       | Age Group | Smoking Group | N     | %     | Ever Quit (N) | Ever Quit % | Mean Yrs Quit | Short Term (n) | Short Term % |
| 35                                           | 45-49     | Never Any     | 5682  | 64.24 |               |             |               |                |              |
| 35                                           | 45-49     | CC            | 9     | 0.10  | 0             | 0.00        |               |                |              |
| 35                                           | 45-49     | Ecig          | 1121  | 12.67 |               |             |               |                |              |
| 35                                           | 45-49     | Dual          | 0     | 0.00  |               |             |               |                |              |
| 35                                           | 45-49     | Former        | 2033  | 22.98 |               |             | 18.93         | 44             | 2.16         |
| Year of Follow-up: 2025, Age Group: 50-54    |           |               |       |       |               |             |               |                |              |

**Results for PHIM for Run 1 (Sensitivity\_Analysis\_4.RTF)**

| Period                                       | Age Group | Smoking Group | N     | %     | Ever Quit (N) | Ever Quit % | Mean Yrs Quit | Short Term (n) | Short Term % |
|----------------------------------------------|-----------|---------------|-------|-------|---------------|-------------|---------------|----------------|--------------|
| 35                                           | 50-54     | Never Any     | 5652  | 62.52 |               |             |               |                |              |
| 35                                           | 50-54     | CC            | 3     | 0.03  | 0             | 0.00        |               |                |              |
| 35                                           | 50-54     | Ecig          | 1269  | 14.04 |               |             |               |                |              |
| 35                                           | 50-54     | Dual          | 0     | 0.00  |               |             |               |                |              |
| 35                                           | 50-54     | Former        | 2116  | 23.41 |               |             | 20.84         | 61             | 2.88         |
| Year of Follow-up: 2025, Age Group: 55-59    |           |               |       |       |               |             |               |                |              |
| Period                                       | Age Group | Smoking Group | N     | %     | Ever Quit (N) | Ever Quit % | Mean Yrs Quit | Short Term (n) | Short Term % |
| 35                                           | 55-59     | Never Any     | 5352  | 54.52 |               |             |               |                |              |
| 35                                           | 55-59     | CC            | 0     | 0.00  | 0             | 0.00        |               |                |              |
| 35                                           | 55-59     | Ecig          | 1568  | 15.97 |               |             |               |                |              |
| 35                                           | 55-59     | Dual          | 0     | 0.00  |               |             |               |                |              |
| 35                                           | 55-59     | Former        | 2896  | 29.50 |               |             | 23.06         | 144            | 4.97         |
| Year of Follow-up: 2025, Age Group: 60-64    |           |               |       |       |               |             |               |                |              |
| Period                                       | Age Group | Smoking Group | N     | %     | Ever Quit (N) | Ever Quit % | Mean Yrs Quit | Short Term (n) | Short Term % |
| 35                                           | 60-64     | Never Any     | 5069  | 47.53 |               |             |               |                |              |
| 35                                           | 60-64     | CC            | 9     | 0.08  | 0             | 0.00        |               |                |              |
| 35                                           | 60-64     | Ecig          | 1496  | 14.03 |               |             |               |                |              |
| 35                                           | 60-64     | Dual          | 0     | 0.00  |               |             |               |                |              |
| 35                                           | 60-64     | Former        | 4090  | 38.35 |               |             | 23.88         | 181            | 4.43         |
| Year of Follow-up: 2025, Age Group: 65-69    |           |               |       |       |               |             |               |                |              |
| Period                                       | Age Group | Smoking Group | N     | %     | Ever Quit (N) | Ever Quit % | Mean Yrs Quit | Short Term (n) | Short Term % |
| 35                                           | 65-69     | Never Any     | 4732  | 43.35 |               |             |               |                |              |
| 35                                           | 65-69     | CC            | 5     | 0.05  | 0             | 0.00        |               |                |              |
| 35                                           | 65-69     | Ecig          | 1167  | 10.69 |               |             |               |                |              |
| 35                                           | 65-69     | Dual          | 0     | 0.00  |               |             |               |                |              |
| 35                                           | 65-69     | Former        | 5012  | 45.91 |               |             | 25.57         | 158            | 3.15         |
| Year of Follow-up: 2025, Age Group: 70-74    |           |               |       |       |               |             |               |                |              |
| Period                                       | Age Group | Smoking Group | N     | %     | Ever Quit (N) | Ever Quit % | Mean Yrs Quit | Short Term (n) | Short Term % |
| 35                                           | 70-74     | Never Any     | 3941  | 39.85 |               |             |               |                |              |
| 35                                           | 70-74     | CC            | 5     | 0.05  | 0             | 0.00        |               |                |              |
| 35                                           | 70-74     | Ecig          | 811   | 8.20  |               |             |               |                |              |
| 35                                           | 70-74     | Dual          | 0     | 0.00  |               |             |               |                |              |
| 35                                           | 70-74     | Former        | 5132  | 51.90 |               |             | 29.73         | 79             | 1.54         |
| Year of Follow-up: 2025, Age Group: 75-79    |           |               |       |       |               |             |               |                |              |
| Period                                       | Age Group | Smoking Group | N     | %     | Ever Quit (N) | Ever Quit % | Mean Yrs Quit | Short Term (n) | Short Term % |
| 35                                           | 75-79     | Never Any     | 2912  | 33.65 |               |             |               |                |              |
| 35                                           | 75-79     | CC            | 9     | 0.10  | 0             | 0.00        |               |                |              |
| 35                                           | 75-79     | Ecig          | 593   | 6.85  |               |             |               |                |              |
| 35                                           | 75-79     | Dual          | 0     | 0.00  |               |             |               |                |              |
| 35                                           | 75-79     | Former        | 5141  | 59.40 |               |             | 32.31         | 72             | 1.40         |
| Year of Follow-up: 2030, Age Group: All Ages |           |               |       |       |               |             |               |                |              |
| Period                                       | Age Group | Smoking Group | N     | %     | Ever Quit (N) | Ever Quit % | Mean Yrs Quit | Short Term (n) | Short Term % |
| 40                                           | All Ages  | Never Any     | 30428 | 51.42 |               |             |               |                |              |
| 40                                           | All Ages  | CC            | 16    | 0.03  | 0             | 0.00        |               |                |              |
| 40                                           | All Ages  | Ecig          | 5814  | 9.83  |               |             |               |                |              |
| 40                                           | All Ages  | Dual          | 0     | 0.00  |               |             |               |                |              |
| 40                                           | All Ages  | Former        | 22912 | 38.72 |               |             | 27.82         | 645            | 2.82         |
| Year of Follow-up: 2030, Age Group: 18-19    |           |               |       |       |               |             |               |                |              |
| Period                                       | Age Group | Smoking Group | N     | %     | Ever Quit (N) | Ever Quit % | Mean Yrs Quit | Short Term (n) | Short Term % |
| 40                                           | 18-19     | Never Any     | 0     | .     |               |             |               |                |              |
| 40                                           | 18-19     | CC            | 0     | .     | 0             | .           |               |                |              |
| 40                                           | 18-19     | Ecig          | 0     | .     |               |             |               |                |              |
| 40                                           | 18-19     | Dual          | 0     | .     |               |             |               |                |              |
| 40                                           | 18-19     | Former        | 0     | .     |               |             | .             | 0              | .            |
| Year of Follow-up: 2030, Age Group: 20-24    |           |               |       |       |               |             |               |                |              |
| Period                                       | Age Group | Smoking Group | N     | %     | Ever Quit (N) | Ever Quit % | Mean Yrs Quit | Short Term (n) | Short Term % |
| 40                                           | 20-24     | Never Any     | 0     | .     |               |             |               |                |              |
| 40                                           | 20-24     | CC            | 0     | .     | 0             | .           |               |                |              |
| 40                                           | 20-24     | Ecig          | 0     | .     |               |             |               |                |              |
| 40                                           | 20-24     | Dual          | 0     | .     |               |             |               |                |              |
| 40                                           | 20-24     | Former        | 0     | .     |               |             | .             | 0              | .            |
| Year of Follow-up: 2030, Age Group: 25-29    |           |               |       |       |               |             |               |                |              |
| Period                                       | Age Group | Smoking Group | N     | %     | Ever Quit (N) | Ever Quit % | Mean Yrs Quit | Short Term (n) | Short Term % |
| 40                                           | 25-29     | Never Any     | 0     | .     |               |             |               |                |              |
| 40                                           | 25-29     | CC            | 0     | .     | 0             | .           |               |                |              |
| 40                                           | 25-29     | Ecig          | 0     | .     |               |             |               |                |              |
| 40                                           | 25-29     | Dual          | 0     | .     |               |             |               |                |              |

**Results for PHIM for Run 1 (Sensitivity\_Analysis\_4.RTF)**

| Year of Follow-up: 2030, Age Group: 30-34 | Period | Age Group | Smoking Group | N    | %     | Ever Quit (N) | Ever Quit % | Mean Yrs Quit | Short Term (n) | Short Term % |
|-------------------------------------------|--------|-----------|---------------|------|-------|---------------|-------------|---------------|----------------|--------------|
| Year of Follow-up: 2030, Age Group: 30-34 |        |           |               |      |       |               |             |               |                |              |
| 40                                        | 25-29  | Former    |               | 0    | .     |               |             |               | 0              | .            |
| Year of Follow-up: 2030, Age Group: 35-39 |        |           |               |      |       |               |             |               |                |              |
| 40                                        | 30-34  | Never Any |               | 0    | .     |               |             |               | 0              | .            |
| 40                                        | 30-34  | CC        |               | 0    | .     | 0             | .           |               |                |              |
| 40                                        | 30-34  | Ecig      |               | 0    | .     |               |             |               |                |              |
| 40                                        | 30-34  | Dual      |               | 0    | .     |               |             |               |                |              |
| 40                                        | 30-34  | Former    |               | 0    | .     |               |             |               | 0              | .            |
| Year of Follow-up: 2030, Age Group: 40-44 |        |           |               |      |       |               |             |               |                |              |
| 40                                        | 35-39  | Never Any |               | 0    | .     |               |             |               |                |              |
| 40                                        | 35-39  | CC        |               | 0    | .     | 0             | .           |               |                |              |
| 40                                        | 35-39  | Ecig      |               | 0    | .     |               |             |               |                |              |
| 40                                        | 35-39  | Dual      |               | 0    | .     |               |             |               |                |              |
| 40                                        | 35-39  | Former    |               | 0    | .     |               |             |               | 0              | .            |
| Year of Follow-up: 2030, Age Group: 45-49 |        |           |               |      |       |               |             |               |                |              |
| 40                                        | 40-44  | Never Any |               | 0    | .     |               |             |               |                |              |
| 40                                        | 40-44  | CC        |               | 0    | .     | 0             | .           |               |                |              |
| 40                                        | 40-44  | Ecig      |               | 0    | .     |               |             |               |                |              |
| 40                                        | 40-44  | Dual      |               | 0    | .     |               |             |               |                |              |
| 40                                        | 40-44  | Former    |               | 0    | .     |               |             |               | 0              | .            |
| Year of Follow-up: 2030, Age Group: 50-54 |        |           |               |      |       |               |             |               |                |              |
| 40                                        | 45-49  | Never Any |               | 0    | .     |               |             |               |                |              |
| 40                                        | 45-49  | CC        |               | 0    | .     | 0             | .           |               |                |              |
| 40                                        | 45-49  | Ecig      |               | 0    | .     |               |             |               |                |              |
| 40                                        | 45-49  | Dual      |               | 0    | .     |               |             |               |                |              |
| 40                                        | 45-49  | Former    |               | 0    | .     |               |             |               | 0              | .            |
| Year of Follow-up: 2030, Age Group: 55-59 |        |           |               |      |       |               |             |               |                |              |
| 40                                        | 50-54  | Never Any |               | 5682 | 64.24 |               |             |               |                |              |
| 40                                        | 50-54  | CC        |               | 4    | 0.05  | 0             | 0.00        |               |                |              |
| 40                                        | 50-54  | Ecig      |               | 1010 | 11.42 |               |             |               |                |              |
| 40                                        | 50-54  | Dual      |               | 0    | 0.00  |               |             |               |                |              |
| 40                                        | 50-54  | Former    |               | 2149 | 24.30 |               |             | 22.72         | 66             | 3.07         |
| Year of Follow-up: 2030, Age Group: 60-64 |        |           |               |      |       |               |             |               |                |              |
| 40                                        | 55-59  | Never Any |               | 5652 | 62.52 |               |             |               |                |              |
| 40                                        | 55-59  | CC        |               | 2    | 0.02  | 0             | 0.00        |               |                |              |
| 40                                        | 55-59  | Ecig      |               | 1049 | 11.60 |               |             |               |                |              |
| 40                                        | 55-59  | Dual      |               | 0    | 0.00  |               |             |               |                |              |
| 40                                        | 55-59  | Former    |               | 2337 | 25.85 |               |             | 23.58         | 99             | 4.24         |
| Year of Follow-up: 2030, Age Group: 65-69 |        |           |               |      |       |               |             |               |                |              |
| 40                                        | 60-64  | Never Any |               | 5352 | 54.52 |               |             |               |                |              |
| 40                                        | 60-64  | CC        |               | 0    | 0.00  | 0             | 0.00        |               |                |              |
| 40                                        | 60-64  | Ecig      |               | 1164 | 11.86 |               |             |               |                |              |
| 40                                        | 60-64  | Dual      |               | 0    | 0.00  |               |             |               |                |              |
| 40                                        | 60-64  | Former    |               | 3300 | 33.62 |               |             | 24.87         | 169            | 5.12         |
| Year of Follow-up: 2030, Age Group: 70-74 |        |           |               |      |       |               |             |               |                |              |
| 40                                        | 65-69  | Never Any |               | 5069 | 47.53 |               |             |               |                |              |
| 40                                        | 65-69  | CC        |               | 4    | 0.04  | 0             | 0.00        |               |                |              |
| 40                                        | 65-69  | Ecig      |               | 1098 | 10.30 |               |             |               |                |              |
| 40                                        | 65-69  | Dual      |               | 0    | 0.00  |               |             |               |                |              |
| 40                                        | 65-69  | Former    |               | 4493 | 42.13 |               |             | 26.49         | 133            | 2.96         |
| Year of Follow-up: 2030, Age Group: 75-79 |        |           |               |      |       |               |             |               |                |              |
| 40                                        | 70-74  | Never Any |               | 4732 | 43.35 |               |             |               |                |              |
| 40                                        | 70-74  | CC        |               | 3    | 0.03  | 0             | 0.00        |               |                |              |
| 40                                        | 70-74  | Ecig      |               | 878  | 8.04  |               |             |               |                |              |
| 40                                        | 70-74  | Dual      |               | 0    | 0.00  |               |             |               |                |              |
| 40                                        | 70-74  | Former    |               | 5303 | 48.58 |               |             | 29.02         | 95             | 1.79         |
| Year of Follow-up: 2030, Age Group: 75-79 |        |           |               |      |       |               |             |               |                |              |
| 40                                        | 75-79  | Never Any |               | 3941 | 39.85 |               |             |               |                |              |
| 40                                        | 75-79  | CC        |               | 3    | 0.03  | 0             | 0.00        |               |                |              |

### Results for PHIM for Run 1 (Sensitivity\_Analysis\_4.RTF)

|                                              |           |               |       |       |               |             |               |                |              |
|----------------------------------------------|-----------|---------------|-------|-------|---------------|-------------|---------------|----------------|--------------|
| 40                                           | 75-79     | Ecig          | 615   | 6.22  |               |             |               |                |              |
| 40                                           | 75-79     | Dual          | 0     | 0.00  |               |             |               |                |              |
| 40                                           | 75-79     | Former        | 5330  | 53.90 |               |             | 33.51         | 83             | 1.56         |
| Year of Follow-up: 2035, Age Group: All Ages |           |               |       |       |               |             |               |                |              |
| Period                                       | Age Group | Smoking Group | N     | %     | Ever Quit (N) | Ever Quit % | Mean Yrs Quit | Short Term (n) | Short Term % |
| 45                                           | All Ages  | Never Any     | 26487 | 53.75 |               |             |               |                |              |
| 45                                           | All Ages  | CC            | 6     | 0.01  | 0             | 0.00        |               |                |              |
| 45                                           | All Ages  | Ecig          | 3993  | 8.10  |               |             |               |                |              |
| 45                                           | All Ages  | Dual          | 0     | 0.00  |               |             |               |                |              |
| 45                                           | All Ages  | Former        | 18795 | 38.14 |               |             | 29.23         | 479            | 2.55         |
| Year of Follow-up: 2035, Age Group: 18-19    |           |               |       |       |               |             |               |                |              |
| Period                                       | Age Group | Smoking Group | N     | %     | Ever Quit (N) | Ever Quit % | Mean Yrs Quit | Short Term (n) | Short Term % |
| 45                                           | 18-19     | Never Any     | 0     | .     |               |             |               |                |              |
| 45                                           | 18-19     | CC            | 0     | .     | 0             | .           |               |                |              |
| 45                                           | 18-19     | Ecig          | 0     | .     |               |             |               |                |              |
| 45                                           | 18-19     | Dual          | 0     | .     |               |             |               |                |              |
| 45                                           | 18-19     | Former        | 0     | .     |               |             | .             | 0              | .            |
| Year of Follow-up: 2035, Age Group: 20-24    |           |               |       |       |               |             |               |                |              |
| Period                                       | Age Group | Smoking Group | N     | %     | Ever Quit (N) | Ever Quit % | Mean Yrs Quit | Short Term (n) | Short Term % |
| 45                                           | 20-24     | Never Any     | 0     | .     |               |             |               |                |              |
| 45                                           | 20-24     | CC            | 0     | .     | 0             | .           |               |                |              |
| 45                                           | 20-24     | Ecig          | 0     | .     |               |             |               |                |              |
| 45                                           | 20-24     | Dual          | 0     | .     |               |             |               |                |              |
| 45                                           | 20-24     | Former        | 0     | .     |               |             | .             | 0              | .            |
| Year of Follow-up: 2035, Age Group: 25-29    |           |               |       |       |               |             |               |                |              |
| Period                                       | Age Group | Smoking Group | N     | %     | Ever Quit (N) | Ever Quit % | Mean Yrs Quit | Short Term (n) | Short Term % |
| 45                                           | 25-29     | Never Any     | 0     | .     |               |             |               |                |              |
| 45                                           | 25-29     | CC            | 0     | .     | 0             | .           |               |                |              |
| 45                                           | 25-29     | Ecig          | 0     | .     |               |             |               |                |              |
| 45                                           | 25-29     | Dual          | 0     | .     |               |             |               |                |              |
| 45                                           | 25-29     | Former        | 0     | .     |               |             | .             | 0              | .            |
| Year of Follow-up: 2035, Age Group: 30-34    |           |               |       |       |               |             |               |                |              |
| Period                                       | Age Group | Smoking Group | N     | %     | Ever Quit (N) | Ever Quit % | Mean Yrs Quit | Short Term (n) | Short Term % |
| 45                                           | 30-34     | Never Any     | 0     | .     |               |             |               |                |              |
| 45                                           | 30-34     | CC            | 0     | .     | 0             | .           |               |                |              |
| 45                                           | 30-34     | Ecig          | 0     | .     |               |             |               |                |              |
| 45                                           | 30-34     | Dual          | 0     | .     |               |             |               |                |              |
| 45                                           | 30-34     | Former        | 0     | .     |               |             | .             | 0              | .            |
| Year of Follow-up: 2035, Age Group: 35-39    |           |               |       |       |               |             |               |                |              |
| Period                                       | Age Group | Smoking Group | N     | %     | Ever Quit (N) | Ever Quit % | Mean Yrs Quit | Short Term (n) | Short Term % |
| 45                                           | 35-39     | Never Any     | 0     | .     |               |             |               |                |              |
| 45                                           | 35-39     | CC            | 0     | .     | 0             | .           |               |                |              |
| 45                                           | 35-39     | Ecig          | 0     | .     |               |             |               |                |              |
| 45                                           | 35-39     | Dual          | 0     | .     |               |             |               |                |              |
| 45                                           | 35-39     | Former        | 0     | .     |               |             | .             | 0              | .            |
| Year of Follow-up: 2035, Age Group: 40-44    |           |               |       |       |               |             |               |                |              |
| Period                                       | Age Group | Smoking Group | N     | %     | Ever Quit (N) | Ever Quit % | Mean Yrs Quit | Short Term (n) | Short Term % |
| 45                                           | 40-44     | Never Any     | 0     | .     |               |             |               |                |              |
| 45                                           | 40-44     | CC            | 0     | .     | 0             | .           |               |                |              |
| 45                                           | 40-44     | Ecig          | 0     | .     |               |             |               |                |              |
| 45                                           | 40-44     | Dual          | 0     | .     |               |             |               |                |              |
| 45                                           | 40-44     | Former        | 0     | .     |               |             | .             | 0              | .            |
| Year of Follow-up: 2035, Age Group: 45-49    |           |               |       |       |               |             |               |                |              |
| Period                                       | Age Group | Smoking Group | N     | %     | Ever Quit (N) | Ever Quit % | Mean Yrs Quit | Short Term (n) | Short Term % |
| 45                                           | 45-49     | Never Any     | 0     | .     |               |             |               |                |              |
| 45                                           | 45-49     | CC            | 0     | .     | 0             | .           |               |                |              |
| 45                                           | 45-49     | Ecig          | 0     | .     |               |             |               |                |              |
| 45                                           | 45-49     | Dual          | 0     | .     |               |             |               |                |              |
| 45                                           | 45-49     | Former        | 0     | .     |               |             | .             | 0              | .            |
| Year of Follow-up: 2035, Age Group: 50-54    |           |               |       |       |               |             |               |                |              |
| Period                                       | Age Group | Smoking Group | N     | %     | Ever Quit (N) | Ever Quit % | Mean Yrs Quit | Short Term (n) | Short Term % |
| 45                                           | 50-54     | Never Any     | 0     | .     |               |             |               |                |              |
| 45                                           | 50-54     | CC            | 0     | .     | 0             | .           |               |                |              |
| 45                                           | 50-54     | Ecig          | 0     | .     |               |             |               |                |              |
| 45                                           | 50-54     | Dual          | 0     | .     |               |             |               |                |              |
| 45                                           | 50-54     | Former        | 0     | .     |               |             | .             | 0              | .            |
| Year of Follow-up: 2035, Age Group: 55-59    |           |               |       |       |               |             |               |                |              |
| Period                                       | Age Group | Smoking Group | N     | %     | Ever Quit (N) | Ever Quit % | Mean Yrs Quit | Short Term (n) | Short Term % |

### Results for PHIM for Run 1 (Sensitivity\_Analysis\_4.RTF)

|                                              |           |               |       |       |               |             |               |                |              |
|----------------------------------------------|-----------|---------------|-------|-------|---------------|-------------|---------------|----------------|--------------|
| 45                                           | 55-59     | Never Any     | 5682  | 64.24 |               |             |               |                |              |
| 45                                           | 55-59     | CC            | 2     | 0.02  | 0             | 0.00        |               |                |              |
| 45                                           | 55-59     | Ecig          | 854   | 9.66  |               |             |               |                |              |
| 45                                           | 55-59     | Dual          | 0     | 0.00  |               |             |               |                |              |
| 45                                           | 55-59     | Former        | 2307  | 26.08 |               |             | 25.95         | 74             | 3.21         |
| Year of Follow-up: 2035, Age Group: 60-64    |           |               |       |       |               |             |               |                |              |
| Period                                       | Age Group | Smoking Group | N     | %     | Ever Quit (N) | Ever Quit % | Mean Yrs Quit | Short Term (n) | Short Term % |
| 45                                           | 60-64     | Never Any     | 5652  | 62.52 |               |             |               |                |              |
| 45                                           | 60-64     | CC            | 0     | 0.00  | 0             | 0.00        |               |                |              |
| 45                                           | 60-64     | Ecig          | 821   | 9.08  |               |             |               |                |              |
| 45                                           | 60-64     | Dual          | 0     | 0.00  |               |             |               |                |              |
| 45                                           | 60-64     | Former        | 2567  | 28.40 |               |             | 26.19         | 106            | 4.13         |
| Year of Follow-up: 2035, Age Group: 65-69    |           |               |       |       |               |             |               |                |              |
| Period                                       | Age Group | Smoking Group | N     | %     | Ever Quit (N) | Ever Quit % | Mean Yrs Quit | Short Term (n) | Short Term % |
| 45                                           | 65-69     | Never Any     | 5352  | 54.52 |               |             |               |                |              |
| 45                                           | 65-69     | CC            | 0     | 0.00  | 0             | 0.00        |               |                |              |
| 45                                           | 65-69     | Ecig          | 850   | 8.66  |               |             |               |                |              |
| 45                                           | 65-69     | Dual          | 0     | 0.00  |               |             |               |                |              |
| 45                                           | 65-69     | Former        | 3614  | 36.82 |               |             | 27.47         | 101            | 2.79         |
| Year of Follow-up: 2035, Age Group: 70-74    |           |               |       |       |               |             |               |                |              |
| Period                                       | Age Group | Smoking Group | N     | %     | Ever Quit (N) | Ever Quit % | Mean Yrs Quit | Short Term (n) | Short Term % |
| 45                                           | 70-74     | Never Any     | 5069  | 47.53 |               |             |               |                |              |
| 45                                           | 70-74     | CC            | 1     | 0.01  | 0             | 0.00        |               |                |              |
| 45                                           | 70-74     | Ecig          | 835   | 7.83  |               |             |               |                |              |
| 45                                           | 70-74     | Dual          | 0     | 0.00  |               |             |               |                |              |
| 45                                           | 70-74     | Former        | 4759  | 44.63 |               |             | 29.85         | 99             | 2.08         |
| Year of Follow-up: 2035, Age Group: 75-79    |           |               |       |       |               |             |               |                |              |
| Period                                       | Age Group | Smoking Group | N     | %     | Ever Quit (N) | Ever Quit % | Mean Yrs Quit | Short Term (n) | Short Term % |
| 45                                           | 75-79     | Never Any     | 4732  | 43.35 |               |             |               |                |              |
| 45                                           | 75-79     | CC            | 3     | 0.03  | 0             | 0.00        |               |                |              |
| 45                                           | 75-79     | Ecig          | 633   | 5.80  |               |             |               |                |              |
| 45                                           | 75-79     | Dual          | 0     | 0.00  |               |             |               |                |              |
| 45                                           | 75-79     | Former        | 5548  | 50.82 |               |             | 32.60         | 99             | 1.78         |
| Year of Follow-up: 2040, Age Group: All Ages |           |               |       |       |               |             |               |                |              |
| Period                                       | Age Group | Smoking Group | N     | %     | Ever Quit (N) | Ever Quit % | Mean Yrs Quit | Short Term (n) | Short Term % |
| 50                                           | All Ages  | Never Any     | 21755 | 56.71 |               |             |               |                |              |
| 50                                           | All Ages  | CC            | 1     | 0.00  | 0             | 0.00        |               |                |              |
| 50                                           | All Ages  | Ecig          | 2468  | 6.43  |               |             |               |                |              |
| 50                                           | All Ages  | Dual          | 0     | 0.00  |               |             |               |                |              |
| 50                                           | All Ages  | Former        | 14141 | 36.86 |               |             | 30.87         | 342            | 2.42         |
| Year of Follow-up: 2040, Age Group: 18-19    |           |               |       |       |               |             |               |                |              |
| Period                                       | Age Group | Smoking Group | N     | %     | Ever Quit (N) | Ever Quit % | Mean Yrs Quit | Short Term (n) | Short Term % |
| 50                                           | 18-19     | Never Any     | 0     | .     |               |             |               |                |              |
| 50                                           | 18-19     | CC            | 0     | .     | 0             | .           |               |                |              |
| 50                                           | 18-19     | Ecig          | 0     | .     |               |             |               |                |              |
| 50                                           | 18-19     | Dual          | 0     | .     |               |             |               |                |              |
| 50                                           | 18-19     | Former        | 0     | .     |               |             | .             | 0              | .            |
| Year of Follow-up: 2040, Age Group: 20-24    |           |               |       |       |               |             |               |                |              |
| Period                                       | Age Group | Smoking Group | N     | %     | Ever Quit (N) | Ever Quit % | Mean Yrs Quit | Short Term (n) | Short Term % |
| 50                                           | 20-24     | Never Any     | 0     | .     |               |             |               |                |              |
| 50                                           | 20-24     | CC            | 0     | .     | 0             | .           |               |                |              |
| 50                                           | 20-24     | Ecig          | 0     | .     |               |             |               |                |              |
| 50                                           | 20-24     | Dual          | 0     | .     |               |             |               |                |              |
| 50                                           | 20-24     | Former        | 0     | .     |               |             | .             | 0              | .            |
| Year of Follow-up: 2040, Age Group: 25-29    |           |               |       |       |               |             |               |                |              |
| Period                                       | Age Group | Smoking Group | N     | %     | Ever Quit (N) | Ever Quit % | Mean Yrs Quit | Short Term (n) | Short Term % |
| 50                                           | 25-29     | Never Any     | 0     | .     |               |             |               |                |              |
| 50                                           | 25-29     | CC            | 0     | .     | 0             | .           |               |                |              |
| 50                                           | 25-29     | Ecig          | 0     | .     |               |             |               |                |              |
| 50                                           | 25-29     | Dual          | 0     | .     |               |             |               |                |              |
| 50                                           | 25-29     | Former        | 0     | .     |               |             | .             | 0              | .            |
| Year of Follow-up: 2040, Age Group: 30-34    |           |               |       |       |               |             |               |                |              |
| Period                                       | Age Group | Smoking Group | N     | %     | Ever Quit (N) | Ever Quit % | Mean Yrs Quit | Short Term (n) | Short Term % |
| 50                                           | 30-34     | Never Any     | 0     | .     |               |             |               |                |              |
| 50                                           | 30-34     | CC            | 0     | .     | 0             | .           |               |                |              |
| 50                                           | 30-34     | Ecig          | 0     | .     |               |             |               |                |              |
| 50                                           | 30-34     | Dual          | 0     | .     |               |             |               |                |              |
| 50                                           | 30-34     | Former        | 0     | .     |               |             | .             | 0              | .            |
| Year of Follow-up: 2040, Age Group: 35-39    |           |               |       |       |               |             |               |                |              |

**Results for PHIM for Run 1 (Sensitivity\_Analysis\_4.RTF)**

| Period                                    | Age Group | Smoking Group | N    | %     | Ever Quit (N) | Ever Quit % | Mean Yrs Quit | Short Term (n) | Short Term % |
|-------------------------------------------|-----------|---------------|------|-------|---------------|-------------|---------------|----------------|--------------|
| 50                                        | 35-39     | Never Any     | 0    | .     |               |             |               |                |              |
| 50                                        | 35-39     | CC            | 0    | .     | 0             | .           |               |                |              |
| 50                                        | 35-39     | Ecig          | 0    | .     |               |             |               |                |              |
| 50                                        | 35-39     | Dual          | 0    | .     |               |             |               |                |              |
| 50                                        | 35-39     | Former        | 0    | .     |               |             | .             | 0              | .            |
| Year of Follow-up: 2040, Age Group: 40-44 |           |               |      |       |               |             |               |                |              |
| Period                                    | Age Group | Smoking Group | N    | %     | Ever Quit (N) | Ever Quit % | Mean Yrs Quit | Short Term (n) | Short Term % |
| 50                                        | 40-44     | Never Any     | 0    | .     |               |             |               |                |              |
| 50                                        | 40-44     | CC            | 0    | .     | 0             | .           |               |                |              |
| 50                                        | 40-44     | Ecig          | 0    | .     |               |             |               |                |              |
| 50                                        | 40-44     | Dual          | 0    | .     |               |             |               |                |              |
| 50                                        | 40-44     | Former        | 0    | .     |               |             | .             | 0              | .            |
| Year of Follow-up: 2040, Age Group: 45-49 |           |               |      |       |               |             |               |                |              |
| Period                                    | Age Group | Smoking Group | N    | %     | Ever Quit (N) | Ever Quit % | Mean Yrs Quit | Short Term (n) | Short Term % |
| 50                                        | 45-49     | Never Any     | 0    | .     |               |             |               |                |              |
| 50                                        | 45-49     | CC            | 0    | .     | 0             | .           |               |                |              |
| 50                                        | 45-49     | Ecig          | 0    | .     |               |             |               |                |              |
| 50                                        | 45-49     | Dual          | 0    | .     |               |             |               |                |              |
| 50                                        | 45-49     | Former        | 0    | .     |               |             | .             | 0              | .            |
| Year of Follow-up: 2040, Age Group: 50-54 |           |               |      |       |               |             |               |                |              |
| Period                                    | Age Group | Smoking Group | N    | %     | Ever Quit (N) | Ever Quit % | Mean Yrs Quit | Short Term (n) | Short Term % |
| 50                                        | 50-54     | Never Any     | 0    | .     |               |             |               |                |              |
| 50                                        | 50-54     | CC            | 0    | .     | 0             | .           |               |                |              |
| 50                                        | 50-54     | Ecig          | 0    | .     |               |             |               |                |              |
| 50                                        | 50-54     | Dual          | 0    | .     |               |             |               |                |              |
| 50                                        | 50-54     | Former        | 0    | .     |               |             | .             | 0              | .            |
| Year of Follow-up: 2040, Age Group: 55-59 |           |               |      |       |               |             |               |                |              |
| Period                                    | Age Group | Smoking Group | N    | %     | Ever Quit (N) | Ever Quit % | Mean Yrs Quit | Short Term (n) | Short Term % |
| 50                                        | 55-59     | Never Any     | 0    | .     |               |             |               |                |              |
| 50                                        | 55-59     | CC            | 0    | .     | 0             | .           |               |                |              |
| 50                                        | 55-59     | Ecig          | 0    | .     |               |             |               |                |              |
| 50                                        | 55-59     | Dual          | 0    | .     |               |             |               |                |              |
| 50                                        | 55-59     | Former        | 0    | .     |               |             | .             | 0              | .            |
| Year of Follow-up: 2040, Age Group: 60-64 |           |               |      |       |               |             |               |                |              |
| Period                                    | Age Group | Smoking Group | N    | %     | Ever Quit (N) | Ever Quit % | Mean Yrs Quit | Short Term (n) | Short Term % |
| 50                                        | 60-64     | Never Any     | 5682 | 64.24 |               |             |               |                |              |
| 50                                        | 60-64     | CC            | 0    | 0.00  | 0             | 0.00        |               |                |              |
| 50                                        | 60-64     | Ecig          | 630  | 7.12  |               |             |               |                |              |
| 50                                        | 60-64     | Dual          | 0    | 0.00  |               |             |               |                |              |
| 50                                        | 60-64     | Former        | 2533 | 28.64 |               |             | 28.35         | 100            | 3.95         |
| Year of Follow-up: 2040, Age Group: 65-69 |           |               |      |       |               |             |               |                |              |
| Period                                    | Age Group | Smoking Group | N    | %     | Ever Quit (N) | Ever Quit % | Mean Yrs Quit | Short Term (n) | Short Term % |
| 50                                        | 65-69     | Never Any     | 5652 | 62.52 |               |             |               |                |              |
| 50                                        | 65-69     | CC            | 0    | 0.00  | 0             | 0.00        |               |                |              |
| 50                                        | 65-69     | Ecig          | 579  | 6.40  |               |             |               |                |              |
| 50                                        | 65-69     | Dual          | 0    | 0.00  |               |             |               |                |              |
| 50                                        | 65-69     | Former        | 2809 | 31.07 |               |             | 28.69         | 91             | 3.24         |
| Year of Follow-up: 2040, Age Group: 70-74 |           |               |      |       |               |             |               |                |              |
| Period                                    | Age Group | Smoking Group | N    | %     | Ever Quit (N) | Ever Quit % | Mean Yrs Quit | Short Term (n) | Short Term % |
| 50                                        | 70-74     | Never Any     | 5352 | 54.52 |               |             |               |                |              |
| 50                                        | 70-74     | CC            | 0    | 0.00  | 0             | 0.00        |               |                |              |
| 50                                        | 70-74     | Ecig          | 636  | 6.48  |               |             |               |                |              |
| 50                                        | 70-74     | Dual          | 0    | 0.00  |               |             |               |                |              |
| 50                                        | 70-74     | Former        | 3828 | 39.00 |               |             | 30.77         | 73             | 1.91         |
| Year of Follow-up: 2040, Age Group: 75-79 |           |               |      |       |               |             |               |                |              |
| Period                                    | Age Group | Smoking Group | N    | %     | Ever Quit (N) | Ever Quit % | Mean Yrs Quit | Short Term (n) | Short Term % |
| 50                                        | 75-79     | Never Any     | 5069 | 47.53 |               |             |               |                |              |
| 50                                        | 75-79     | CC            | 1    | 0.01  | 0             | 0.00        |               |                |              |
| 50                                        | 75-79     | Ecig          | 623  | 5.84  |               |             |               |                |              |
| 50                                        | 75-79     | Dual          | 0    | 0.00  |               |             |               |                |              |
| 50                                        | 75-79     | Former        | 4971 | 46.61 |               |             | 33.46         | 78             | 1.57         |

## Results for PHIM for Run 1 (Sensitivity\_Analysis\_4.RTF)

\*\*\*\*\*

### Main Results for E-Component for Run: 1, Simulation: 1, COD: Four Diseases Combined

| Variable Parameter          | Value                                  |
|-----------------------------|----------------------------------------|
| 1. Country                  | US (United States)                     |
| 2. Sex                      | M (Males)                              |
| 3. Year of start of process | 1990                                   |
| 4. Cause of Death           | Four Diseases Combined                 |
| 5. Effective Dose NULL      | CC:1                                   |
| 6. Effective Dose Ecig      | CC:1 Ecig:0.05 Dual:0.525              |
| Note:                       | Death rates are per million population |

#### Results for Age Groups Combined and Years combined, Population unadjusted for deaths in Ecig scenario,

| Age Group:All | NULL     | Ecig        | %Drop       |         |        | NULL   | Ecig    | Drop    |         |         |
|---------------|----------|-------------|-------------|---------|--------|--------|---------|---------|---------|---------|
| Year          | Number   | Attrib      | Attrib      | Drop    | %Drop  | Attrib | Death   | Attrib  | Drop    |         |
|               | Deaths   | Deaths      | Deaths      | Deaths  | Deaths | Deaths | Rate    | Rates   | Rates   |         |
| All Comb      | 13148871 | 4509390.583 | 2979576.335 | 1529814 | 11.635 | 33.925 | 3806.31 | 1305.37 | 862.523 | 442.848 |

#### Results for Age Groups Combined, Population unadjusted for deaths in Ecig scenario,

| Age Group:All | NULL   | Ecig       | %Drop      |          |        | NULL   | Ecig    | Drop    |         |         |
|---------------|--------|------------|------------|----------|--------|--------|---------|---------|---------|---------|
| Year          | Number | Attrib     | Attrib     | Drop     | %Drop  | Attrib | Death   | Attrib  | Drop    |         |
|               | Deaths | Deaths     | Deaths     | Deaths   | Deaths | Deaths | Rate    | Rates   | Rates   |         |
| 1990          | 317161 | 125773.065 | 125773.065 | 0.000    | 0.000  | 0.000  | 5027.71 | 1993.78 | 0.000   |         |
| 1991          | 313217 | 123999.442 | 123575.251 | 424.191  | 0.135  | 0.342  | 4883.81 | 1933.45 | 1926.84 | 6.614   |
| 1992          | 308577 | 122014.015 | 120877.247 | 1136.768 | 0.368  | 0.932  | 4729.73 | 1870.18 | 1852.75 | 17.424  |
| 1993          | 311713 | 122810.618 | 120675.225 | 2135.392 | 0.685  | 1.739  | 4692.62 | 1848.83 | 1816.68 | 32.147  |
| 1994          | 305700 | 119925.592 | 116642.101 | 3283.491 | 1.074  | 2.738  | 4516.19 | 1771.69 | 1723.19 | 48.508  |
| 1995          | 303225 | 117896.496 | 113270.052 | 4626.444 | 1.526  | 3.924  | 4393.80 | 1708.35 | 1641.31 | 67.038  |
| 1996          | 299559 | 115698.645 | 109592.515 | 6106.130 | 2.038  | 5.278  | 4273.16 | 1650.42 | 1563.32 | 87.103  |
| 1997          | 294226 | 113359.847 | 105763.768 | 7596.079 | 2.582  | 6.701  | 4128.67 | 1590.70 | 1484.11 | 106.591 |
| 1998          | 289258 | 111444.212 | 102353.885 | 9090.327 | 3.143  | 8.157  | 3992.19 | 1538.10 | 1412.64 | 125.460 |
| 1999          | 311002 | 114877.722 | 102716.432 | 12161.29 | 3.910  | 10.586 | 4224.60 | 1560.48 | 1395.28 | 165.197 |
| 2000          | 303786 | 112379.704 | 98501.613  | 13878.09 | 4.568  | 12.349 | 4066.21 | 1504.22 | 1318.46 | 185.760 |
| 2001          | 296294 | 110024.943 | 94310.411  | 15714.53 | 5.304  | 14.283 | 3914.28 | 1453.52 | 1245.92 | 207.602 |
| 2002          | 291898 | 108289.173 | 90514.053  | 17775.12 | 6.089  | 16.414 | 3813.00 | 1414.56 | 1182.36 | 232.192 |
| 2003          | 285865 | 106539.023 | 86941.236  | 19597.79 | 6.856  | 18.395 | 3695.36 | 1377.22 | 1123.88 | 253.339 |
| 2004          | 274177 | 103037.251 | 82104.004  | 20933.25 | 7.635  | 20.316 | 3506.10 | 1317.61 | 1049.92 | 267.689 |
| 2005          | 272379 | 103044.562 | 80189.432  | 22855.13 | 8.391  | 22.180 | 3442.69 | 1302.41 | 1013.54 | 288.873 |
| 2006          | 264118 | 99672.555  | 75178.908  | 24493.65 | 9.274  | 24.574 | 3307.76 | 1248.28 | 941.525 | 306.753 |
| 2007          | 258419 | 97839.152  | 71967.940  | 25871.21 | 10.011 | 26.443 | 3203.20 | 1212.75 | 892.069 | 320.683 |
| 2008          | 259461 | 98075.852  | 70460.827  | 27615.02 | 10.643 | 28.157 | 3180.09 | 1202.07 | 863.606 | 338.465 |
| 2009          | 253907 | 95617.338  | 66785.288  | 28832.05 | 11.355 | 30.154 | 3075.31 | 1158.11 | 808.901 | 349.213 |
| 2010          | 251878 | 94607.988  | 64408.006  | 30199.98 | 11.990 | 31.921 | 3013.72 | 1131.98 | 770.642 | 361.343 |
| 2011          | 251779 | 93633.119  | 61760.176  | 31872.94 | 12.659 | 34.040 | 2982.76 | 1109.25 | 731.658 | 377.591 |
| 2012          | 252643 | 92775.175  | 59262.369  | 33512.81 | 13.265 | 36.123 | 2960.61 | 1087.19 | 694.468 | 392.721 |
| 2013          | 256175 | 92345.780  | 57153.199  | 35192.58 | 13.738 | 38.110 | 2967.76 | 1069.82 | 662.114 | 407.702 |
| 2014          | 257393 | 91379.215  | 54778.879  | 36600.34 | 14.220 | 40.053 | 2947.05 | 1046.26 | 627.197 | 419.060 |
| 2015          | 259782 | 90750.242  | 52887.133  | 37863.11 | 14.575 | 41.722 | 3346.10 | 1168.90 | 681.209 | 487.693 |
| 2016          | 261453 | 88811.996  | 49641.311  | 39170.68 | 14.982 | 44.105 | 3336.15 | 1133.24 | 633.425 | 499.820 |
| 2017          | 263685 | 87325.126  | 47000.521  | 40324.61 | 15.293 | 46.178 | 3333.85 | 1104.08 | 594.242 | 509.837 |
| 2018          | 258714 | 87612.144  | 46232.588  | 41379.56 | 15.994 | 47.230 | 3240.73 | 1097.46 | 579.123 | 518.333 |
| 2019          | 261438 | 87797.760  | 44891.611  | 42906.15 | 16.412 | 48.869 | 3242.99 | 1089.08 | 556.855 | 532.227 |
| 2020          | 262288 | 87221.042  | 43442.797  | 43778.24 | 16.691 | 50.192 | 3715.29 | 1235.48 | 615.364 | 620.115 |
| 2021          | 255079 | 82001.292  | 38655.745  | 43345.55 | 16.993 | 52.860 | 3587.82 | 1153.39 | 543.712 | 609.677 |
| 2022          | 257097 | 81915.977  | 37166.953  | 44749.02 | 17.406 | 54.628 | 3588.53 | 1143.37 | 518.773 | 624.602 |
| 2023          | 259080 | 81810.810  | 35714.247  | 46096.56 | 17.792 | 56.345 | 3586.88 | 1132.64 | 494.452 | 638.192 |
| 2024          | 260719 | 81528.303  | 34268.756  | 47259.55 | 18.127 | 57.967 | 3579.65 | 1119.38 | 470.508 | 648.870 |
| 2025          | 257308 | 79599.213  | 32616.385  | 46982.83 | 18.259 | 59.024 | 4112.08 | 1272.09 | 521.248 | 750.840 |
| 2026          | 251528 | 75082.462  | 28937.297  | 46145.16 | 18.346 | 61.459 | 4003.24 | 1194.99 | 460.557 | 734.432 |
| 2027          | 250988 | 74444.425  | 27431.536  | 47012.89 | 18.731 | 63.152 | 3976.53 | 1179.46 | 434.612 | 744.849 |
| 2028          | 250285 | 73699.585  | 25855.351  | 47844.23 | 19.116 | 64.918 | 3945.35 | 1161.76 | 407.569 | 754.190 |
| 2029          | 249525 | 72819.703  | 24328.994  | 48490.71 | 19.433 | 66.590 | 3910.99 | 1141.36 | 381.326 | 760.030 |
| 2030          | 240528 | 69309.277  | 22685.447  | 46623.83 | 19.384 | 67.269 | 4504.36 | 1297.95 | 424.829 | 873.121 |
| 2031          | 235442 | 65433.368  | 20032.220  | 45401.15 | 19.283 | 69.385 | 4397.65 | 1222.18 | 374.167 | 848.014 |
| 2032          | 234017 | 64643.552  | 18782.893  | 45860.66 | 19.597 | 70.944 | 4356.12 | 1203.31 | 349.634 | 853.674 |
| 2033          | 232559 | 63793.514  | 17601.020  | 46192.49 | 19.863 | 72.409 | 4310.93 | 1182.54 | 326.269 | 856.267 |
| 2034          | 230963 | 63032.151  | 16459.835  | 46572.32 | 20.164 | 73.887 | 4260.75 | 1162.80 | 303.647 | 859.154 |
| 2035          | 215822 | 57653.301  | 15028.576  | 42624.72 | 19.750 | 73.933 | 4924.38 | 1315.47 | 342.906 | 972.565 |
| 2036          | 208183 | 52988.733  | 12497.071  | 40491.66 | 19.450 | 76.416 | 4748.94 | 1208.75 | 285.075 | 923.670 |
| 2037          | 205491 | 52026.921  | 11530.213  | 40496.71 | 19.707 | 77.838 | 4682.40 | 1185.50 | 262.731 | 922.772 |
| 2038          | 202834 | 50943.211  | 10580.870  | 40362.34 | 19.899 | 79.230 | 4612.18 | 1158.38 | 240.595 | 917.788 |
| 2039          | 200251 | 50085.991  | 9751.082   | 40334.91 | 20.142 | 80.531 | 4538.65 | 1135.19 | 221.007 | 914.184 |

## Results for PHIM for Run 1 (Sensitivity\_Analysis\_4.RTF)

\*\*\*\*\*

### Main Results for E-Component for Run: 1, Simulation: 1, COD: LUNG CANCER

| Variable Parameter          | Value                                  |
|-----------------------------|----------------------------------------|
| 1. Country                  | US (United States)                     |
| 2. Sex                      | M (Males)                              |
| 3. Year of start of process | 1990                                   |
| 4. Cause of Death           | LUNG CANCER                            |
| 5. Effective Dose NULL      | CC:1                                   |
| 6. Effective Dose Ecig      | CC:1 Ecig:0.05 Dual:0.525              |
| Note:                       | Death rates are per million population |

#### Results for Age Groups Combined and Years combined, Population unadjusted for deaths in Ecig scenario,

| Age Group:All |         | NULL        | Ecig        | %Drop    |        |        | NULL    | Ecig    | Drop    |         |
|---------------|---------|-------------|-------------|----------|--------|--------|---------|---------|---------|---------|
| Year          | Number  | Attrib      | Attrib      | Drop     | %Drop  | Attrib | Death   | Attrib  | Attrib  | Drop    |
|               | Deaths  | Deaths      | Deaths      | Deaths   | Deaths | Deaths | Rate    | Rates   | Rates   | Rates   |
| All Comb      | 3065988 | 2244988.113 | 1720736.513 | 524251.6 | 17.099 | 23.352 | 887.537 | 649.875 | 498.116 | 151.759 |

#### Results for Age Groups Combined, Population unadjusted for deaths in Ecig scenario,

| Age Group:All |        | NULL      | Ecig      | %Drop    |        |        | NULL    | Ecig    | Drop    |         |
|---------------|--------|-----------|-----------|----------|--------|--------|---------|---------|---------|---------|
| Year          | Number | Attrib    | Attrib    | Drop     | %Drop  | Attrib | Death   | Attrib  | Attrib  | Drop    |
|               | Deaths | Deaths    | Deaths    | Deaths   | Deaths | Deaths | Rate    | Rates   | Rates   | Rates   |
| 1990          | 78822  | 63385.736 | 63385.736 | 0.000    | 0.000  | 0.000  | 1249.50 | 1004.81 | 1004.81 | 0.000   |
| 1991          | 78462  | 62918.402 | 62870.284 | 48.118   | 0.061  | 0.076  | 1223.41 | 981.049 | 980.299 | 0.750   |
| 1992          | 77987  | 62366.766 | 62237.572 | 129.194  | 0.166  | 0.207  | 1195.35 | 955.930 | 953.949 | 1.980   |
| 1993          | 78542  | 62652.888 | 62398.512 | 254.375  | 0.324  | 0.406  | 1182.39 | 943.195 | 939.365 | 3.829   |
| 1994          | 77437  | 61565.227 | 61163.817 | 401.410  | 0.518  | 0.652  | 1144.00 | 909.520 | 903.590 | 5.930   |
| 1995          | 76904  | 60851.961 | 60267.826 | 584.135  | 0.760  | 0.960  | 1114.36 | 881.759 | 873.294 | 8.464   |
| 1996          | 76232  | 60122.922 | 59308.502 | 814.419  | 1.068  | 1.355  | 1087.44 | 857.643 | 846.025 | 11.618  |
| 1997          | 75473  | 59237.155 | 58175.058 | 1062.096 | 1.407  | 1.793  | 1059.06 | 831.234 | 816.331 | 14.904  |
| 1998          | 75381  | 58906.696 | 57537.254 | 1369.442 | 1.817  | 2.325  | 1040.37 | 813.001 | 794.100 | 18.900  |
| 1999          | 73159  | 56930.073 | 55258.757 | 1671.315 | 2.284  | 2.936  | 993.781 | 773.329 | 750.626 | 22.703  |
| 2000          | 73784  | 57137.121 | 55072.367 | 2064.754 | 2.798  | 3.614  | 987.608 | 764.787 | 737.150 | 27.637  |
| 2001          | 73294  | 56481.726 | 53973.016 | 2508.710 | 3.423  | 4.442  | 968.273 | 746.169 | 713.027 | 33.142  |
| 2002          | 72442  | 55588.365 | 52612.965 | 2975.401 | 4.107  | 5.353  | 946.293 | 726.138 | 687.271 | 38.867  |
| 2003          | 71942  | 54945.856 | 51453.697 | 3492.159 | 4.854  | 6.356  | 929.989 | 710.281 | 665.138 | 45.143  |
| 2004          | 71301  | 54203.126 | 50141.535 | 4061.590 | 5.696  | 7.493  | 911.778 | 693.135 | 641.196 | 51.939  |
| 2005          | 70964  | 53744.603 | 49093.804 | 4650.799 | 6.554  | 8.654  | 896.937 | 679.296 | 620.513 | 58.783  |
| 2006          | 69658  | 52535.572 | 47266.378 | 5269.194 | 7.564  | 10.030 | 872.383 | 657.945 | 591.955 | 65.990  |
| 2007          | 68565  | 51492.124 | 45611.397 | 5880.727 | 8.577  | 11.421 | 849.888 | 638.264 | 565.370 | 72.894  |
| 2008          | 68226  | 51030.736 | 44408.650 | 6622.086 | 9.706  | 12.977 | 836.215 | 625.460 | 544.296 | 81.164  |
| 2009          | 67509  | 50276.199 | 42912.518 | 7363.681 | 10.908 | 14.646 | 817.667 | 608.943 | 519.755 | 89.189  |
| 2010          | 67196  | 49840.933 | 41733.414 | 8107.519 | 12.065 | 16.267 | 804.000 | 596.347 | 499.340 | 97.006  |
| 2011          | 66506  | 49072.841 | 40146.231 | 8926.610 | 13.422 | 18.191 | 787.880 | 581.354 | 475.603 | 105.751 |
| 2012          | 66155  | 48539.512 | 38733.169 | 9806.343 | 14.823 | 20.203 | 775.240 | 568.812 | 453.896 | 114.916 |
| 2013          | 65333  | 47675.741 | 37086.546 | 10589.20 | 16.208 | 22.211 | 756.876 | 552.318 | 429.644 | 122.675 |
| 2014          | 65033  | 47194.534 | 35787.650 | 11406.88 | 17.540 | 24.170 | 744.602 | 540.359 | 409.755 | 130.604 |
| 2015          | 64145  | 46305.842 | 34189.039 | 12116.80 | 18.890 | 26.167 | 826.215 | 596.439 | 440.369 | 156.070 |
| 2016          | 61618  | 44208.867 | 31676.294 | 12532.57 | 20.339 | 28.349 | 786.248 | 564.107 | 404.191 | 159.916 |
| 2017          | 59897  | 42702.624 | 29686.069 | 13016.55 | 21.732 | 30.482 | 757.297 | 539.903 | 375.330 | 164.572 |
| 2018          | 62468  | 44321.202 | 29690.973 | 14630.23 | 23.420 | 33.010 | 782.490 | 555.181 | 371.918 | 183.263 |
| 2019          | 63045  | 44493.088 | 28785.690 | 15707.40 | 24.915 | 35.303 | 782.035 | 551.912 | 357.070 | 194.841 |
| 2020          | 63466  | 44529.551 | 27820.444 | 16709.11 | 26.328 | 37.524 | 898.991 | 630.757 | 394.074 | 236.683 |
| 2021          | 57113  | 39852.556 | 23921.704 | 15930.85 | 27.894 | 39.974 | 803.323 | 560.546 | 336.471 | 224.075 |
| 2022          | 57440  | 39853.685 | 22921.959 | 16931.73 | 29.477 | 42.485 | 801.745 | 556.274 | 319.942 | 236.331 |
| 2023          | 57738  | 39847.050 | 21929.207 | 17917.84 | 31.033 | 44.967 | 799.366 | 551.670 | 303.603 | 248.067 |
| 2024          | 57942  | 39726.010 | 20927.947 | 18798.06 | 32.443 | 47.319 | 795.539 | 545.435 | 287.339 | 258.096 |
| 2025          | 57521  | 39207.348 | 19824.572 | 19382.78 | 33.697 | 49.437 | 919.257 | 626.579 | 316.820 | 309.759 |
| 2026          | 51428  | 34803.960 | 16771.776 | 18032.18 | 35.063 | 51.811 | 818.510 | 553.929 | 266.934 | 286.995 |
| 2027          | 51172  | 34484.595 | 15779.536 | 18705.06 | 36.553 | 54.242 | 810.740 | 546.357 | 250.003 | 296.354 |
| 2028          | 50870  | 34100.638 | 14759.827 | 19340.81 | 38.020 | 56.717 | 801.884 | 537.544 | 232.666 | 304.878 |
| 2029          | 50540  | 33669.838 | 13786.635 | 19883.20 | 39.342 | 59.053 | 792.146 | 527.732 | 216.088 | 311.644 |
| 2030          | 49109  | 32557.688 | 12762.913 | 19794.78 | 40.308 | 60.799 | 919.662 | 609.705 | 239.010 | 370.695 |
| 2031          | 43585  | 28646.393 | 10624.278 | 18022.12 | 41.349 | 62.912 | 814.096 | 535.065 | 198.443 | 336.622 |
| 2032          | 43163  | 28227.160 | 9870.062  | 18357.10 | 42.530 | 65.033 | 803.454 | 525.435 | 183.726 | 341.709 |
| 2033          | 42725  | 27786.623 | 9162.736  | 18623.89 | 43.590 | 67.025 | 791.996 | 515.079 | 169.849 | 345.230 |
| 2034          | 42256  | 27348.299 | 8494.961  | 18853.34 | 44.617 | 68.938 | 779.523 | 504.514 | 156.713 | 347.801 |
| 2035          | 39748  | 25570.077 | 7685.465  | 17884.61 | 44.995 | 69.944 | 906.933 | 583.430 | 175.359 | 408.072 |
| 2036          | 34030  | 21717.319 | 5982.692  | 15734.63 | 46.238 | 72.452 | 776.269 | 495.402 | 136.473 | 358.928 |
| 2037          | 33454  | 21256.024 | 5478.274  | 15777.75 | 47.163 | 74.227 | 762.289 | 484.347 | 124.830 | 359.517 |
| 2038          | 32883  | 20747.175 | 4992.466  | 15754.71 | 47.911 | 75.937 | 747.720 | 471.764 | 113.522 | 358.242 |
| 2039          | 32325  | 20327.688 | 4574.341  | 15753.35 | 48.734 | 77.497 | 732.644 | 460.724 | 103.677 | 357.047 |



## Results for PHIM for Run 1 (Sensitivity\_Analysis\_4.RTF)

\*\*\*\*\*

### Main Results for E-Component for Run: 1, Simulation: 1, COD: IHD

| Variable Parameter          | Value                                  |
|-----------------------------|----------------------------------------|
| 1. Country                  | US (United States)                     |
| 2. Sex                      | M (Males)                              |
| 3. Year of start of process | 1990                                   |
| 4. Cause of Death           | IHD                                    |
| 5. Effective Dose NULL      | CC:1                                   |
| 6. Effective Dose Ecig      | CC:1 Ecig:0.05 Dual:0.525              |
| Note:                       | Death rates are per million population |

#### Results for Age Groups Combined and Years combined, Population unadjusted for deaths in Ecig scenario,

| Age Group:All |         | NULL        | Ecig       | %Drop    |        |        | NULL    | Ecig    | Drop    |         |
|---------------|---------|-------------|------------|----------|--------|--------|---------|---------|---------|---------|
| Year          | Number  | Attrib      | Attrib     | Drop     | %Drop  | Attrib | Death   | Attrib  | Drop    |         |
|               | Deaths  | Deaths      | Deaths     | Deaths   | Deaths | Deaths | Rate    | Rates   | Rates   |         |
| All Comb      | 6360041 | 1098877.421 | 513843.353 | 585034.1 | 9.199  | 53.239 | 1841.09 | 318.101 | 148.747 | 169.355 |

#### Results for Age Groups Combined, Population unadjusted for deaths in Ecig scenario,

| Age Group:All |        | NULL      | Ecig      | %Drop    |        |        | NULL    | Ecig    | Drop    |         |
|---------------|--------|-----------|-----------|----------|--------|--------|---------|---------|---------|---------|
| Year          | Number | Attrib    | Attrib    | Drop     | %Drop  | Attrib | Death   | Attrib  | Drop    |         |
|               | Deaths | Deaths    | Deaths    | Deaths   | Deaths | Deaths | Rate    | Rates   | Rates   |         |
| 1990          | 171484 | 38511.725 | 38511.725 | 0.000    | 0.000  | 0.000  | 2718.40 | 610.497 | 0.000   |         |
| 1991          | 168044 | 37309.838 | 36996.010 | 313.828  | 0.187  | 0.841  | 2620.21 | 581.750 | 576.857 | 4.893   |
| 1992          | 164548 | 36137.488 | 35292.947 | 844.541  | 0.513  | 2.337  | 2522.12 | 553.899 | 540.954 | 12.945  |
| 1993          | 164362 | 35599.588 | 34035.880 | 1563.707 | 0.951  | 4.392  | 2474.35 | 535.926 | 512.386 | 23.541  |
| 1994          | 159866 | 34336.757 | 31950.112 | 2386.645 | 1.493  | 6.951  | 2361.75 | 507.267 | 472.008 | 35.259  |
| 1995          | 158083 | 33455.759 | 30118.921 | 3336.838 | 2.111  | 9.974  | 2290.66 | 484.782 | 436.430 | 48.352  |
| 1996          | 154875 | 32193.824 | 27848.527 | 4345.298 | 2.806  | 13.497 | 2209.26 | 459.239 | 397.254 | 61.985  |
| 1997          | 149970 | 30665.509 | 25342.770 | 5322.739 | 3.549  | 17.357 | 2104.43 | 430.308 | 355.618 | 74.690  |
| 1998          | 145407 | 29188.430 | 22950.414 | 6238.016 | 4.290  | 21.372 | 2006.83 | 402.844 | 316.750 | 86.094  |
| 1999          | 165952 | 33375.386 | 24695.338 | 8680.048 | 5.230  | 26.007 | 2254.27 | 453.366 | 335.458 | 117.908 |
| 2000          | 160260 | 32024.754 | 22304.681 | 9720.073 | 6.065  | 30.352 | 2145.10 | 428.655 | 298.551 | 130.104 |
| 2001          | 154444 | 30682.393 | 19881.950 | 10800.44 | 6.993  | 35.201 | 2040.33 | 405.339 | 262.657 | 142.683 |
| 2002          | 151887 | 30218.370 | 18151.736 | 12066.63 | 7.944  | 39.931 | 1984.06 | 394.736 | 237.112 | 157.624 |
| 2003          | 146733 | 29175.202 | 16174.213 | 13000.99 | 8.860  | 44.562 | 1896.81 | 377.146 | 209.083 | 168.063 |
| 2004          | 138381 | 27488.687 | 14002.771 | 13485.92 | 9.745  | 49.060 | 1769.58 | 351.518 | 179.064 | 172.454 |
| 2005          | 135881 | 27017.439 | 12660.569 | 14356.87 | 10.566 | 53.139 | 1717.44 | 341.482 | 160.021 | 181.461 |
| 2006          | 131922 | 26231.435 | 11132.325 | 15099.11 | 11.445 | 57.561 | 1652.16 | 328.517 | 139.419 | 189.098 |
| 2007          | 126502 | 25103.049 | 9690.517  | 15412.53 | 12.184 | 61.397 | 1568.04 | 311.161 | 120.117 | 191.044 |
| 2008          | 125859 | 24621.740 | 8723.838  | 15897.90 | 12.632 | 64.569 | 1542.60 | 301.777 | 106.924 | 194.853 |
| 2009          | 122428 | 23741.177 | 7686.735  | 16054.44 | 13.113 | 67.623 | 1482.84 | 287.552 | 93.101  | 194.451 |
| 2010          | 120537 | 23189.160 | 6878.347  | 16310.81 | 13.532 | 70.338 | 1442.22 | 277.458 | 82.299  | 195.159 |
| 2011          | 120221 | 22786.927 | 6124.917  | 16662.01 | 13.859 | 73.121 | 1424.23 | 269.951 | 72.560  | 197.391 |
| 2012          | 120927 | 22485.295 | 5512.518  | 16972.78 | 14.036 | 75.484 | 1417.09 | 263.495 | 64.599  | 198.896 |
| 2013          | 122648 | 22251.884 | 4996.786  | 17255.10 | 14.069 | 77.544 | 1420.86 | 257.786 | 57.887  | 199.898 |
| 2014          | 123229 | 21894.593 | 4507.036  | 17387.56 | 14.110 | 79.415 | 1410.92 | 250.685 | 51.604  | 199.081 |
| 2015          | 123774 | 21471.109 | 4084.735  | 17386.37 | 14.047 | 80.976 | 1594.26 | 276.557 | 52.613  | 223.944 |
| 2016          | 126218 | 21411.568 | 3705.198  | 17706.37 | 14.028 | 82.695 | 1610.55 | 273.213 | 47.278  | 225.934 |
| 2017          | 128265 | 21169.399 | 3365.012  | 17804.39 | 13.881 | 84.104 | 1621.69 | 267.651 | 42.545  | 225.106 |
| 2018          | 121429 | 19830.576 | 2856.076  | 16974.50 | 13.979 | 85.598 | 1521.05 | 248.404 | 35.776  | 212.628 |
| 2019          | 121832 | 19431.014 | 2591.622  | 16839.39 | 13.822 | 86.662 | 1511.26 | 241.031 | 32.148  | 208.883 |
| 2020          | 120811 | 18532.612 | 2314.676  | 16217.94 | 13.424 | 87.510 | 1711.27 | 262.513 | 32.787  | 229.726 |
| 2021          | 119407 | 18234.128 | 2068.247  | 16165.88 | 13.539 | 88.657 | 1679.51 | 256.472 | 29.091  | 227.381 |
| 2022          | 119438 | 17812.559 | 1866.846  | 15945.71 | 13.351 | 89.519 | 1667.10 | 248.626 | 26.057  | 222.569 |
| 2023          | 119445 | 17361.668 | 1684.630  | 15677.04 | 13.125 | 90.297 | 1653.68 | 240.367 | 23.323  | 217.044 |
| 2024          | 119305 | 16929.676 | 1534.608  | 15395.07 | 12.904 | 90.935 | 1638.05 | 232.443 | 21.070  | 211.373 |
| 2025          | 115685 | 15501.666 | 1346.442  | 14155.22 | 12.236 | 91.314 | 1848.78 | 247.735 | 21.518  | 226.217 |
| 2026          | 115073 | 15523.814 | 1246.788  | 14277.03 | 12.407 | 91.969 | 1831.46 | 247.072 | 19.843  | 227.229 |
| 2027          | 113989 | 15073.070 | 1147.046  | 13926.02 | 12.217 | 92.390 | 1805.98 | 238.810 | 18.173  | 220.637 |
| 2028          | 112855 | 14636.710 | 1048.908  | 13587.80 | 12.040 | 92.834 | 1778.98 | 230.725 | 16.534  | 214.191 |
| 2029          | 111718 | 14180.166 | 958.393   | 13221.77 | 11.835 | 93.241 | 1751.04 | 222.256 | 15.022  | 207.235 |
| 2030          | 104851 | 12111.772 | 809.966   | 11301.81 | 10.779 | 93.313 | 1963.54 | 226.816 | 15.168  | 211.648 |
| 2031          | 105289 | 12417.367 | 788.561   | 11628.81 | 11.045 | 93.650 | 1966.62 | 231.935 | 14.729  | 217.206 |
| 2032          | 103879 | 12054.064 | 737.173   | 11316.89 | 10.894 | 93.884 | 1933.67 | 224.381 | 13.722  | 210.658 |
| 2033          | 102485 | 11672.389 | 680.874   | 10991.52 | 10.725 | 94.167 | 1899.76 | 216.370 | 12.621  | 203.749 |
| 2034          | 101070 | 11365.762 | 628.672   | 10737.09 | 10.623 | 94.469 | 1864.51 | 209.673 | 11.598  | 198.075 |
| 2035          | 90820  | 8580.360  | 481.093   | 8099.267 | 8.918  | 94.393 | 2072.23 | 195.777 | 10.977  | 184.800 |
| 2036          | 92117  | 8948.841  | 475.466   | 8473.375 | 9.199  | 94.687 | 2101.31 | 204.135 | 10.846  | 193.289 |
| 2037          | 90327  | 8624.570  | 449.252   | 8175.318 | 9.051  | 94.791 | 2058.21 | 196.522 | 10.237  | 186.286 |
| 2038          | 88590  | 8315.017  | 417.396   | 7897.621 | 8.915  | 94.980 | 2014.42 | 189.073 | 9.491   | 179.582 |
| 2039          | 86921  | 8001.132  | 384.090   | 7617.041 | 8.763  | 95.200 | 1970.05 | 181.344 | 8.705   | 172.639 |

## Results for PHIM for Run 1 (Sensitivity\_Analysis\_4.RTF)

\*\*\*\*\*

### Main Results for E-Component for Run: 1, Simulation: 1, COD: STROKE

| Variable Parameter          | Value                                  |
|-----------------------------|----------------------------------------|
| 1. Country                  | US (United States)                     |
| 2. Sex                      | M (Males)                              |
| 3. Year of start of process | 1990                                   |
| 4. Cause of Death           | STROKE                                 |
| 5. Effective Dose NULL      | CC:1                                   |
| 6. Effective Dose Ecig      | CC:1 Ecig:0.05 Dual:0.525              |
| Note:                       | Death rates are per million population |

#### Results for Age Groups Combined and Years combined, Population unadjusted for deaths in Ecig scenario,

| Age Group:All |         | NULL       | Ecig      | %Drop    |        | NULL   | Ecig    | Drop   |        |        |
|---------------|---------|------------|-----------|----------|--------|--------|---------|--------|--------|--------|
| Year          | Number  | Attrib     | Attrib    | Drop     | %Drop  | Attrib | Death   | Attrib | Drop   |        |
|               | Deaths  | Deaths     | Deaths    | Deaths   | Deaths | Deaths | Rate    | Rates  | Rates  |        |
| All Comb      | 1489699 | 149918.462 | 69337.421 | 80581.04 | 5.409  | 53.750 | 431.236 | 43.398 | 20.072 | 23.326 |

#### Results for Age Groups Combined, Population unadjusted for deaths in Ecig scenario,

| Age Group:All |        | NULL     | Ecig     | %Drop    |        | NULL   | Ecig    | Drop   |        |        |
|---------------|--------|----------|----------|----------|--------|--------|---------|--------|--------|--------|
| Year          | Number | Attrib   | Attrib   | Drop     | %Drop  | Attrib | Death   | Attrib | Drop   |        |
|               | Deaths | Deaths   | Deaths   | Deaths   | Deaths | Deaths | Rate    | Rates  | Rates  |        |
| 1990          | 32862  | 4613.166 | 4613.166 | 0.000    | 0.000  | 0.000  | 520.936 | 73.129 | 0.000  |        |
| 1991          | 32619  | 4555.566 | 4515.509 | 40.057   | 0.123  | 0.879  | 508.609 | 71.032 | 70.408 | 0.625  |
| 1992          | 32100  | 4453.572 | 4348.503 | 105.070  | 0.327  | 2.359  | 492.014 | 68.262 | 66.652 | 1.610  |
| 1993          | 32896  | 4462.473 | 4263.941 | 198.532  | 0.604  | 4.449  | 495.226 | 67.179 | 64.191 | 2.989  |
| 1994          | 33323  | 4499.513 | 4186.115 | 313.399  | 0.940  | 6.965  | 492.290 | 66.473 | 61.843 | 4.630  |
| 1995          | 33569  | 4472.774 | 4028.387 | 444.387  | 1.324  | 9.935  | 486.422 | 64.812 | 58.372 | 6.439  |
| 1996          | 33870  | 4406.878 | 3817.641 | 589.237  | 1.740  | 13.371 | 483.150 | 62.863 | 54.458 | 8.405  |
| 1997          | 33516  | 4288.158 | 3551.947 | 736.211  | 2.197  | 17.168 | 470.307 | 60.173 | 49.842 | 10.331 |
| 1998          | 32795  | 4120.148 | 3249.666 | 870.482  | 2.654  | 21.127 | 452.620 | 56.864 | 44.850 | 12.014 |
| 1999          | 33375  | 3982.443 | 2978.207 | 1004.235 | 3.009  | 25.217 | 453.361 | 54.097 | 40.456 | 13.641 |
| 2000          | 33459  | 4021.411 | 2840.907 | 1180.504 | 3.528  | 29.355 | 447.853 | 53.827 | 38.026 | 15.801 |
| 2001          | 32275  | 3848.092 | 2548.924 | 1299.168 | 4.025  | 33.761 | 426.379 | 50.836 | 33.673 | 17.163 |
| 2002          | 31586  | 3783.081 | 2345.317 | 1437.764 | 4.552  | 38.005 | 412.601 | 49.418 | 30.636 | 18.781 |
| 2003          | 30985  | 3754.415 | 2163.050 | 1591.365 | 5.136  | 42.387 | 400.541 | 48.533 | 27.962 | 20.571 |
| 2004          | 29884  | 3666.274 | 1958.897 | 1707.378 | 5.713  | 46.570 | 382.149 | 46.883 | 25.050 | 21.833 |
| 2005          | 28708  | 3589.688 | 1771.871 | 1817.817 | 6.332  | 50.640 | 362.850 | 45.371 | 22.395 | 22.976 |
| 2006          | 28188  | 3596.985 | 1627.696 | 1969.288 | 6.986  | 54.748 | 353.021 | 45.048 | 20.385 | 24.663 |
| 2007          | 28026  | 3560.798 | 1479.229 | 2081.568 | 7.427  | 58.458 | 347.392 | 44.137 | 18.336 | 25.802 |
| 2008          | 27128  | 3417.001 | 1302.910 | 2114.092 | 7.793  | 61.870 | 332.495 | 41.881 | 15.969 | 25.911 |
| 2009          | 27068  | 3394.390 | 1187.321 | 2207.069 | 8.154  | 65.021 | 327.847 | 41.113 | 14.381 | 26.732 |
| 2010          | 26911  | 3340.137 | 1076.081 | 2264.057 | 8.413  | 67.783 | 321.990 | 39.965 | 12.875 | 27.089 |
| 2011          | 26959  | 3285.435 | 971.300  | 2314.135 | 8.584  | 70.436 | 319.377 | 38.922 | 11.507 | 27.415 |
| 2012          | 27057  | 3259.209 | 877.451  | 2381.758 | 8.803  | 73.078 | 317.068 | 38.193 | 10.282 | 27.911 |
| 2013          | 27904  | 3274.703 | 806.903  | 2467.800 | 8.844  | 75.360 | 323.265 | 37.937 | 9.348  | 28.589 |
| 2014          | 28792  | 3298.083 | 741.160  | 2556.923 | 8.881  | 77.528 | 329.657 | 37.762 | 8.486  | 29.276 |
| 2015          | 29560  | 3244.406 | 673.592  | 2570.814 | 8.697  | 79.238 | 380.745 | 41.789 | 8.676  | 33.113 |
| 2016          | 30513  | 3314.836 | 629.074  | 2685.762 | 8.802  | 81.022 | 389.347 | 42.297 | 8.027  | 34.270 |
| 2017          | 31416  | 3333.314 | 579.604  | 2753.709 | 8.765  | 82.612 | 397.202 | 42.144 | 7.328  | 34.816 |
| 2018          | 29348  | 2925.242 | 471.376  | 2453.866 | 8.361  | 83.886 | 367.626 | 36.642 | 5.905  | 30.738 |
| 2019          | 29598  | 2864.628 | 426.785  | 2437.843 | 8.236  | 85.102 | 367.149 | 35.534 | 5.294  | 30.240 |
| 2020          | 29592  | 2730.366 | 378.836  | 2351.531 | 7.946  | 86.125 | 419.174 | 38.675 | 5.366  | 33.309 |
| 2021          | 30097  | 2647.911 | 340.086  | 2307.824 | 7.668  | 87.156 | 423.328 | 37.244 | 4.783  | 32.461 |
| 2022          | 30304  | 2586.165 | 306.225  | 2279.940 | 7.524  | 88.159 | 422.974 | 36.097 | 4.274  | 31.823 |
| 2023          | 30505  | 2517.960 | 276.075  | 2241.885 | 7.349  | 89.036 | 422.337 | 34.860 | 3.822  | 31.038 |
| 2024          | 30661  | 2454.161 | 250.960  | 2203.201 | 7.186  | 89.774 | 420.968 | 33.695 | 3.446  | 30.250 |
| 2025          | 30254  | 2275.364 | 219.633  | 2055.732 | 6.795  | 90.347 | 483.488 | 36.363 | 3.510  | 32.853 |
| 2026          | 30685  | 2183.166 | 197.328  | 1985.838 | 6.472  | 90.961 | 488.380 | 34.747 | 3.141  | 31.606 |
| 2027          | 30561  | 2112.345 | 179.911  | 1932.434 | 6.323  | 91.483 | 484.196 | 33.467 | 2.850  | 30.617 |
| 2028          | 30412  | 2046.677 | 164.054  | 1882.623 | 6.190  | 91.984 | 479.392 | 32.263 | 2.586  | 29.677 |
| 2029          | 30254  | 1977.671 | 149.232  | 1828.440 | 6.044  | 92.454 | 474.195 | 30.997 | 2.339  | 28.658 |
| 2030          | 29330  | 1744.457 | 127.168  | 1617.289 | 5.514  | 92.710 | 549.260 | 32.668 | 2.381  | 30.287 |
| 2031          | 28976  | 1653.738 | 114.906  | 1538.832 | 5.311  | 93.052 | 541.223 | 30.889 | 2.146  | 28.743 |
| 2032          | 28724  | 1603.120 | 105.397  | 1497.723 | 5.214  | 93.425 | 534.690 | 29.841 | 1.962  | 27.879 |
| 2033          | 28464  | 1548.245 | 96.834   | 1451.411 | 5.099  | 93.746 | 527.627 | 28.700 | 1.795  | 26.905 |
| 2034          | 28178  | 1511.985 | 89.611   | 1422.374 | 5.048  | 94.073 | 519.826 | 27.893 | 1.653  | 26.240 |
| 2035          | 26737  | 1239.866 | 72.323   | 1167.542 | 4.367  | 94.167 | 610.065 | 28.290 | 1.650  | 26.640 |
| 2036          | 25591  | 1182.522 | 65.720   | 1116.802 | 4.364  | 94.442 | 583.762 | 26.975 | 1.499  | 25.476 |
| 2037          | 25143  | 1134.483 | 61.545   | 1072.938 | 4.267  | 94.575 | 572.916 | 25.851 | 1.402  | 24.448 |
| 2038          | 24693  | 1093.537 | 56.946   | 1036.591 | 4.198  | 94.792 | 561.491 | 24.866 | 1.295  | 23.571 |
| 2039          | 24247  | 1047.905 | 52.103   | 995.802  | 4.107  | 95.028 | 549.553 | 23.751 | 1.181  | 22.570 |

## Results for PHIM for Run 1 (Sensitivity\_Analysis\_4.RTF)

\*\*\*\*\*

### Main Results for E-Component for Run: 1, Simulation: 1, COD: COPD

| Variable Parameter          | Value                                  |
|-----------------------------|----------------------------------------|
| 1. Country                  | US (United States)                     |
| 2. Sex                      | M (Males)                              |
| 3. Year of start of process | 1990                                   |
| 4. Cause of Death           | COPD                                   |
| 5. Effective Dose NULL      | CC:1                                   |
| 6. Effective Dose Ecig      | CC:1 Ecig:0.05 Dual:0.525              |
| Note:                       | Death rates are per million population |

#### Results for Age Groups Combined and Years combined, Population unadjusted for deaths in Ecig scenario,

| Age Group:All | NULL    | Ecig        | %Drop      |          |        | NULL   | Ecig    | Drop    |         |        |
|---------------|---------|-------------|------------|----------|--------|--------|---------|---------|---------|--------|
| Year          | Number  | Attrib      | Attrib     | Drop     | %Drop  | Attrib | Death   | Attrib  | Attrib  | Drop   |
|               | Deaths  | Deaths      | Deaths     | Deaths   | Deaths | Deaths | Rate    | Rates   | Rates   | Rates  |
| All Comb      | 2233143 | 1015606.587 | 675659.047 | 339947.5 | 15.223 | 33.472 | 646.447 | 293.996 | 195.589 | 98.407 |

#### Results for Age Groups Combined, Population unadjusted for deaths in Ecig scenario,

| Age Group:All | NULL   | Ecig      | %Drop     |          |        | NULL   | Ecig    | Drop    |         |         |
|---------------|--------|-----------|-----------|----------|--------|--------|---------|---------|---------|---------|
| Year          | Number | Attrib    | Attrib    | Drop     | %Drop  | Attrib | Death   | Attrib  | Attrib  | Drop    |
|               | Deaths | Deaths    | Deaths    | Deaths   | Deaths | Deaths | Rate    | Rates   | Rates   | Rates   |
| 1990          | 33993  | 19262.437 | 19262.437 | 0.000    | 0.000  | 0.000  | 538.865 | 305.353 | 305.353 | 0.000   |
| 1991          | 34092  | 19215.636 | 19193.448 | 22.188   | 0.065  | 0.115  | 531.576 | 299.618 | 299.272 | 0.346   |
| 1992          | 33942  | 19056.189 | 18998.226 | 57.963   | 0.171  | 0.304  | 520.248 | 292.085 | 291.196 | 0.888   |
| 1993          | 35913  | 20095.670 | 19976.892 | 118.777  | 0.331  | 0.591  | 540.645 | 302.526 | 300.738 | 1.788   |
| 1994          | 35074  | 19524.095 | 19342.057 | 182.037  | 0.519  | 0.932  | 518.158 | 288.435 | 285.746 | 2.689   |
| 1995          | 34669  | 19116.002 | 18854.918 | 261.084  | 0.753  | 1.366  | 502.362 | 276.995 | 273.212 | 3.783   |
| 1996          | 34582  | 18975.021 | 18617.844 | 357.177  | 1.033  | 1.882  | 493.306 | 270.675 | 265.580 | 5.095   |
| 1997          | 35267  | 19169.025 | 18693.993 | 475.032  | 1.347  | 2.478  | 494.878 | 268.986 | 262.320 | 6.666   |
| 1998          | 35675  | 19228.937 | 18616.550 | 612.388  | 1.717  | 3.185  | 492.368 | 265.388 | 256.936 | 8.452   |
| 1999          | 38516  | 20589.820 | 19784.130 | 805.690  | 2.092  | 3.913  | 523.195 | 279.689 | 268.745 | 10.944  |
| 2000          | 36283  | 19196.417 | 18283.657 | 912.760  | 2.516  | 4.755  | 485.652 | 256.946 | 244.729 | 12.217  |
| 2001          | 36281  | 19012.731 | 17906.521 | 1106.210 | 3.049  | 5.818  | 479.301 | 251.174 | 236.560 | 14.614  |
| 2002          | 35983  | 18699.357 | 17404.035 | 1295.322 | 3.600  | 6.927  | 470.038 | 244.265 | 227.345 | 16.920  |
| 2003          | 36205  | 18663.550 | 17150.276 | 1513.274 | 4.180  | 8.108  | 468.019 | 241.262 | 221.700 | 19.562  |
| 2004          | 34611  | 17679.164 | 16000.801 | 1678.363 | 4.849  | 9.493  | 442.596 | 226.076 | 204.614 | 21.462  |
| 2005          | 36826  | 18692.832 | 16663.188 | 2029.644 | 5.511  | 10.858 | 465.456 | 236.265 | 210.611 | 25.653  |
| 2006          | 34350  | 17308.564 | 15152.509 | 2156.054 | 6.277  | 12.457 | 430.192 | 216.769 | 189.767 | 27.002  |
| 2007          | 35326  | 17683.181 | 15186.796 | 2496.385 | 7.067  | 14.117 | 437.879 | 219.189 | 188.246 | 30.944  |
| 2008          | 38248  | 19006.374 | 16025.430 | 2980.945 | 7.794  | 15.684 | 468.788 | 232.952 | 196.416 | 36.536  |
| 2009          | 36902  | 18205.573 | 14998.714 | 3206.858 | 8.690  | 17.615 | 446.956 | 220.505 | 181.664 | 38.841  |
| 2010          | 37234  | 18237.758 | 14720.164 | 3517.595 | 9.447  | 19.287 | 445.505 | 218.215 | 176.127 | 42.088  |
| 2011          | 38093  | 18487.916 | 14517.728 | 3970.188 | 10.422 | 21.475 | 451.279 | 219.022 | 171.988 | 47.034  |
| 2012          | 38504  | 18491.158 | 14139.231 | 4351.927 | 11.303 | 23.535 | 451.211 | 216.689 | 165.691 | 50.998  |
| 2013          | 40290  | 19143.452 | 14262.964 | 4880.488 | 12.113 | 25.494 | 466.755 | 221.775 | 165.235 | 56.540  |
| 2014          | 40339  | 18992.005 | 13743.034 | 5248.971 | 13.012 | 27.638 | 461.866 | 217.451 | 157.352 | 60.099  |
| 2015          | 42303  | 19728.885 | 13939.766 | 5789.118 | 13.685 | 29.343 | 544.880 | 254.116 | 179.550 | 74.566  |
| 2016          | 43104  | 19876.724 | 13630.744 | 6245.980 | 14.490 | 31.424 | 550.009 | 253.628 | 173.929 | 79.699  |
| 2017          | 44107  | 20119.790 | 13369.835 | 6749.955 | 15.304 | 33.549 | 557.659 | 254.381 | 169.039 | 85.342  |
| 2018          | 45469  | 20535.123 | 13214.164 | 7320.959 | 16.101 | 35.651 | 569.564 | 257.229 | 165.525 | 91.705  |
| 2019          | 46963  | 21009.029 | 13087.515 | 7921.514 | 16.868 | 37.705 | 582.552 | 260.605 | 162.343 | 98.262  |
| 2020          | 48419  | 21428.512 | 12928.843 | 8499.669 | 17.554 | 39.665 | 685.853 | 303.533 | 183.136 | 120.397 |
| 2021          | 48463  | 21266.697 | 12325.708 | 8940.989 | 18.449 | 42.042 | 681.652 | 299.127 | 173.367 | 125.759 |
| 2022          | 49915  | 21663.568 | 12071.924 | 9591.644 | 19.216 | 44.275 | 696.712 | 302.378 | 168.499 | 133.879 |
| 2023          | 51391  | 22084.131 | 11824.335 | 10259.80 | 19.964 | 46.458 | 711.491 | 305.748 | 163.704 | 142.044 |
| 2024          | 52811  | 22418.456 | 11555.242 | 10863.21 | 20.570 | 48.457 | 725.093 | 307.804 | 158.653 | 149.151 |
| 2025          | 53848  | 22614.834 | 11225.738 | 11389.10 | 21.150 | 50.361 | 860.553 | 361.411 | 179.400 | 182.011 |
| 2026          | 54342  | 22571.522 | 10721.406 | 11850.12 | 21.807 | 52.500 | 864.886 | 359.241 | 170.638 | 188.603 |
| 2027          | 55267  | 22774.416 | 10325.043 | 12449.37 | 22.526 | 54.664 | 875.619 | 360.827 | 163.585 | 197.242 |
| 2028          | 56149  | 22915.561 | 9882.563  | 13033.00 | 23.211 | 56.874 | 885.102 | 361.228 | 155.783 | 205.445 |
| 2029          | 57014  | 22992.027 | 9434.734  | 13557.29 | 23.779 | 58.965 | 893.616 | 360.371 | 147.878 | 212.493 |
| 2030          | 57238  | 22895.360 | 8985.400  | 13909.96 | 24.302 | 60.754 | 1071.90 | 428.760 | 168.269 | 260.491 |
| 2031          | 57592  | 22715.871 | 8504.476  | 14211.39 | 24.676 | 62.562 | 1075.71 | 424.293 | 158.849 | 265.444 |
| 2032          | 58251  | 22759.207 | 8070.260  | 14688.95 | 25.217 | 64.541 | 1084.31 | 423.652 | 150.224 | 273.428 |
| 2033          | 58885  | 22786.258 | 7660.577  | 15125.68 | 25.687 | 66.381 | 1091.54 | 422.387 | 142.004 | 280.384 |
| 2034          | 59460  | 22806.106 | 7246.590  | 15559.52 | 26.168 | 68.225 | 1096.89 | 420.721 | 133.683 | 287.038 |
| 2035          | 58516  | 22262.998 | 6789.695  | 15473.30 | 26.443 | 69.502 | 1335.15 | 507.973 | 154.920 | 353.053 |
| 2036          | 56446  | 21140.051 | 5973.193  | 15166.86 | 26.870 | 71.745 | 1287.60 | 482.234 | 136.257 | 345.977 |
| 2037          | 56568  | 21011.845 | 5541.143  | 15470.70 | 27.349 | 73.628 | 1288.98 | 478.783 | 126.262 | 352.521 |
| 2038          | 56668  | 20787.483 | 5114.062  | 15673.42 | 27.658 | 75.398 | 1288.55 | 472.681 | 116.287 | 356.393 |
| 2039          | 56758  | 20709.267 | 4740.548  | 15968.72 | 28.135 | 77.109 | 1286.40 | 469.372 | 107.444 | 361.928 |

## Results for PHIM for Run 1 (Sensitivity\_Analysis\_4.RTF)

\*\*\*\*\*

### Main Results for E-Component for Run: 1, Simulation: 1, COD: Four Diseases Combined, Adjusted

| Variable Parameter          | Value                                  |
|-----------------------------|----------------------------------------|
| 1. Country                  | US (United States)                     |
| 2. Sex                      | M (Males)                              |
| 3. Year of start of process | 1990                                   |
| 4. Cause of Death           | Four Diseases Combined                 |
| 5. Effective Dose NULL      | CC:1                                   |
| 6. Effective Dose Ecig      | CC:1 Ecig:0.05 Dual:0.525              |
| Note:                       | Death rates are per million population |

#### Results for Age Groups Combined and Years combined, Population and Number deaths adjusted for Ecig scenario,

| Age Group:All | NULL     | Ecig        | %Drop       | NULL    | Ecig   | Drop   |         |         |         |         |
|---------------|----------|-------------|-------------|---------|--------|--------|---------|---------|---------|---------|
| Year          | Number   | Attrib      | Attrib      | Drop    | %Drop  | Attrib | Death   | Attrib  | Attrib  | Drop    |
|               | Deaths   | Deaths      | Deaths      | Deaths  | Deaths | Deaths | Rate    | Rates   | Rates   | Rates   |
| All Comb      | 13291617 | 4509390.583 | 2997386.267 | 1512004 | 11.376 | 33.530 | 3815.57 | 1305.37 | 860.447 | 444.924 |

#### Results for Age Groups Combined, Population and Number deaths adjusted for Ecig scenario,

| Age Group:All | NULL   | Ecig       | %Drop      | NULL     | Ecig   | Drop   |         |         |         |         |
|---------------|--------|------------|------------|----------|--------|--------|---------|---------|---------|---------|
| Year          | Number | Attrib     | Attrib     | Drop     | %Drop  | Attrib | Death   | Attrib  | Attrib  | Drop    |
|               | Deaths | Deaths     | Deaths     | Deaths   | Deaths | Deaths | Rate    | Rates   | Rates   | Rates   |
| 1990          | 317161 | 125773.065 | 125773.065 | 0.000    | 0.000  | 0.000  | 5027.71 | 1993.78 | 1993.78 | 0.000   |
| 1991          | 313217 | 123999.442 | 123575.251 | 424.191  | 0.135  | 0.342  | 4883.81 | 1933.45 | 1926.84 | 6.614   |
| 1992          | 308580 | 122014.015 | 120878.365 | 1135.650 | 0.368  | 0.931  | 4729.74 | 1870.18 | 1852.76 | 17.419  |
| 1993          | 311723 | 122810.618 | 120679.212 | 2131.406 | 0.684  | 1.736  | 4692.65 | 1848.83 | 1816.70 | 32.131  |
| 1994          | 305723 | 119925.592 | 116651.270 | 3274.322 | 1.071  | 2.730  | 4516.28 | 1771.69 | 1723.22 | 48.471  |
| 1995          | 303268 | 117896.496 | 113286.680 | 4609.816 | 1.520  | 3.910  | 4393.95 | 1708.35 | 1641.37 | 66.972  |
| 1996          | 299629 | 115698.645 | 109619.062 | 6079.583 | 2.029  | 5.255  | 4273.40 | 1650.42 | 1563.42 | 86.999  |
| 1997          | 294330 | 113359.847 | 105802.772 | 7557.075 | 2.568  | 6.666  | 4129.04 | 1590.70 | 1484.26 | 106.437 |
| 1998          | 289405 | 111444.212 | 102407.848 | 9036.364 | 3.122  | 8.108  | 3992.71 | 1538.10 | 1412.85 | 125.247 |
| 1999          | 311218 | 114877.722 | 102790.594 | 12087.13 | 3.884  | 10.522 | 4225.39 | 1560.48 | 1395.58 | 164.898 |
| 2000          | 304071 | 112379.704 | 98597.674  | 13782.03 | 4.532  | 12.264 | 4067.26 | 1504.22 | 1318.84 | 185.372 |
| 2001          | 296654 | 110024.943 | 94429.246  | 15595.70 | 5.257  | 14.175 | 3915.60 | 1453.52 | 1246.39 | 207.125 |
| 2002          | 292345 | 108289.173 | 90657.881  | 17631.29 | 6.031  | 16.282 | 3814.65 | 1414.56 | 1182.94 | 231.612 |
| 2003          | 286406 | 106539.023 | 87111.456  | 19427.57 | 6.783  | 18.235 | 3697.37 | 1377.22 | 1124.57 | 252.652 |
| 2004          | 274805 | 103037.251 | 82298.385  | 20738.87 | 7.547  | 20.128 | 3508.45 | 1317.61 | 1050.71 | 266.904 |
| 2005          | 273120 | 103044.562 | 80414.649  | 22629.91 | 8.286  | 21.961 | 3445.47 | 1302.41 | 1014.45 | 287.965 |
| 2006          | 264961 | 99672.555  | 75426.169  | 24246.39 | 9.151  | 24.326 | 3310.95 | 1248.28 | 942.524 | 305.754 |
| 2007          | 259376 | 97839.152  | 72241.972  | 25597.18 | 9.869  | 26.163 | 3206.84 | 1212.75 | 893.177 | 319.575 |
| 2008          | 260563 | 98075.852  | 70768.066  | 27307.79 | 10.480 | 27.844 | 3184.31 | 1202.07 | 864.849 | 337.222 |
| 2009          | 255134 | 95617.338  | 67116.792  | 28500.55 | 11.171 | 29.807 | 3080.04 | 1158.11 | 810.249 | 347.865 |
| 2010          | 253248 | 94607.988  | 64768.363  | 29839.63 | 11.783 | 31.540 | 3019.01 | 1131.98 | 772.113 | 359.871 |
| 2011          | 253310 | 93633.119  | 62146.728  | 31486.39 | 12.430 | 33.627 | 2988.73 | 1109.25 | 733.251 | 375.998 |
| 2012          | 254350 | 92775.175  | 59674.520  | 33100.65 | 13.014 | 35.678 | 2967.31 | 1087.19 | 696.177 | 391.012 |
| 2013          | 258091 | 92345.780  | 57593.343  | 34752.44 | 13.465 | 37.633 | 2975.35 | 1069.82 | 663.954 | 405.862 |
| 2014          | 259513 | 91379.215  | 55244.396  | 36134.82 | 13.924 | 39.544 | 2955.51 | 1046.26 | 629.161 | 417.095 |
| 2015          | 262135 | 90750.242  | 53380.124  | 37370.12 | 14.256 | 41.179 | 3354.48 | 1168.90 | 683.092 | 485.809 |
| 2016          | 264033 | 88811.996  | 50146.459  | 38665.54 | 14.644 | 43.536 | 3345.43 | 1133.24 | 635.381 | 497.863 |
| 2017          | 266514 | 87325.126  | 47520.533  | 39804.59 | 14.935 | 45.582 | 3344.19 | 1104.08 | 596.282 | 507.797 |
| 2018          | 261707 | 87612.144  | 46786.232  | 40825.91 | 15.600 | 46.598 | 3251.70 | 1097.46 | 581.318 | 516.138 |
| 2019          | 264699 | 87797.760  | 45472.182  | 42325.58 | 15.990 | 48.208 | 3255.10 | 1089.08 | 559.187 | 529.895 |
| 2020          | 265832 | 87221.042  | 44049.017  | 43172.02 | 16.240 | 49.497 | 3726.41 | 1235.48 | 617.474 | 618.005 |
| 2021          | 258762 | 82001.292  | 39235.378  | 42765.91 | 16.527 | 52.153 | 3599.49 | 1153.39 | 545.782 | 607.608 |
| 2022          | 261054 | 81915.977  | 37761.967  | 44154.01 | 16.914 | 53.902 | 3601.31 | 1143.37 | 520.936 | 622.439 |
| 2023          | 263325 | 81810.810  | 36323.450  | 45487.36 | 17.274 | 55.601 | 3600.84 | 1132.64 | 496.706 | 635.939 |
| 2024          | 265259 | 81528.303  | 34890.798  | 46637.50 | 17.582 | 57.204 | 3594.87 | 1119.38 | 472.851 | 646.527 |
| 2025          | 262128 | 79599.213  | 33247.627  | 46351.59 | 17.683 | 58.231 | 4125.07 | 1272.09 | 523.213 | 748.874 |
| 2026          | 256492 | 75082.462  | 29532.661  | 45549.80 | 17.759 | 60.666 | 4016.76 | 1194.99 | 462.493 | 732.496 |
| 2027          | 256213 | 74444.425  | 28027.930  | 46416.49 | 18.116 | 62.351 | 3991.23 | 1179.46 | 436.614 | 742.847 |
| 2028          | 255772 | 73699.585  | 26449.089  | 47250.50 | 18.474 | 64.112 | 3961.29 | 1161.76 | 409.632 | 752.128 |
| 2029          | 255280 | 72819.703  | 24917.977  | 47901.73 | 18.764 | 65.781 | 3928.23 | 1141.36 | 383.436 | 757.920 |
| 2030          | 246484 | 69309.277  | 23267.898  | 46041.38 | 18.679 | 66.429 | 4518.43 | 1297.95 | 426.536 | 871.413 |
| 2031          | 241509 | 65433.368  | 20571.358  | 44862.01 | 18.576 | 68.561 | 4411.89 | 1222.18 | 375.798 | 846.384 |
| 2032          | 240321 | 64643.552  | 19312.172  | 45331.38 | 18.863 | 70.125 | 4371.54 | 1203.31 | 351.297 | 852.012 |
| 2033          | 239099 | 63793.514  | 18120.255  | 45673.26 | 19.102 | 71.595 | 4327.58 | 1182.54 | 327.968 | 854.568 |
| 2034          | 237734 | 63032.151  | 16967.973  | 46064.18 | 19.376 | 73.080 | 4278.65 | 1162.80 | 305.383 | 857.417 |
| 2035          | 222605 | 57653.301  | 15519.346  | 42133.95 | 18.928 | 73.082 | 4939.33 | 1315.47 | 344.355 | 971.116 |
| 2036          | 214895 | 52988.733  | 12918.185  | 40070.55 | 18.647 | 75.621 | 4762.64 | 1208.75 | 286.301 | 922.444 |
| 2037          | 212348 | 52026.921  | 11933.040  | 40093.88 | 18.881 | 77.064 | 4696.96 | 1185.50 | 263.948 | 921.555 |
| 2038          | 209832 | 50943.211  | 10964.112  | 39979.10 | 19.053 | 78.478 | 4627.64 | 1158.38 | 241.802 | 916.581 |
| 2039          | 207387 | 50085.991  | 10116.747  | 39969.24 | 19.273 | 79.801 | 4555.00 | 1135.19 | 222.202 | 912.989 |

## Results for PHIM for Run 1 (Sensitivity\_Analysis\_4.RTF)

\*\*\*\*\*

### Main Results for E-Component for Run: 1, Simulation: 1, COD: LUNG CANCER, Adjusted

| Variable Parameter          | Value                                  |
|-----------------------------|----------------------------------------|
| 1. Country                  | US (United States)                     |
| 2. Sex                      | M (Males)                              |
| 3. Year of start of process | 1990                                   |
| 4. Cause of Death           | LUNG CANCER                            |
| 5. Effective Dose NULL      | CC:1                                   |
| 6. Effective Dose Ecig      | CC:1 Ecig:0.05 Dual:0.525              |
| Note:                       | Death rates are per million population |

#### Results for Age Groups Combined and Years combined, Population and Number deaths adjusted for Ecig scenario,

| Age Group:All | NULL    | Ecig        | %Drop       |          |        |        | NULL    | Ecig    | Drop    |         |
|---------------|---------|-------------|-------------|----------|--------|--------|---------|---------|---------|---------|
| Year          | Number  | Attrib      | Attrib      | Drop     | %Drop  | Attrib | Death   | Attrib  | Drop    |         |
|               | Deaths  | Deaths      | Deaths      | Deaths   | Deaths | Deaths | Rate    | Rates   | Rates   |         |
| All Comb      | 3095740 | 2244988.113 | 1731252.794 | 513735.3 | 16.595 | 22.884 | 888.681 | 649.875 | 496.983 | 152.892 |

#### Results for Age Groups Combined, Population and Number deaths adjusted for Ecig scenario,

| Age Group:All | NULL   | Ecig      | %Drop     |          |        |        | NULL    | Ecig    | Drop    |         |
|---------------|--------|-----------|-----------|----------|--------|--------|---------|---------|---------|---------|
| Year          | Number | Attrib    | Attrib    | Drop     | %Drop  | Attrib | Death   | Attrib  | Drop    |         |
|               | Deaths | Deaths    | Deaths    | Deaths   | Deaths | Deaths | Rate    | Rates   | Rates   |         |
| 1990          | 78822  | 63385.736 | 63385.736 | 0.000    | 0.000  | 0.000  | 1249.50 | 1004.81 | 0.000   |         |
| 1991          | 78462  | 62918.402 | 62870.284 | 48.118   | 0.061  | 0.076  | 1223.41 | 981.049 | 980.299 | 0.750   |
| 1992          | 77988  | 62366.766 | 62238.153 | 128.613  | 0.165  | 0.206  | 1195.35 | 955.930 | 953.952 | 1.978   |
| 1993          | 78545  | 62652.888 | 62400.586 | 252.301  | 0.321  | 0.403  | 1182.40 | 943.195 | 939.373 | 3.821   |
| 1994          | 77443  | 61565.227 | 61168.655 | 396.571  | 0.512  | 0.644  | 1144.02 | 909.520 | 903.610 | 5.910   |
| 1995          | 76915  | 60851.961 | 60276.723 | 575.238  | 0.748  | 0.945  | 1114.40 | 881.759 | 873.330 | 8.429   |
| 1996          | 76251  | 60122.922 | 59322.949 | 799.973  | 1.049  | 1.331  | 1087.51 | 857.643 | 846.083 | 11.560  |
| 1997          | 75501  | 59237.155 | 58196.625 | 1040.530 | 1.378  | 1.757  | 1059.17 | 831.234 | 816.417 | 14.818  |
| 1998          | 75421  | 58906.696 | 57567.766 | 1338.930 | 1.775  | 2.273  | 1040.53 | 813.001 | 794.222 | 18.778  |
| 1999          | 73212  | 56930.073 | 55298.909 | 1631.164 | 2.228  | 2.865  | 993.996 | 773.329 | 750.791 | 22.539  |
| 2000          | 73856  | 57137.121 | 55126.332 | 2010.788 | 2.723  | 3.519  | 987.900 | 764.787 | 737.371 | 27.417  |
| 2001          | 73387  | 56481.726 | 54041.385 | 2440.341 | 3.325  | 4.321  | 968.647 | 746.169 | 713.305 | 32.864  |
| 2002          | 72557  | 55588.365 | 52697.098 | 2891.267 | 3.985  | 5.201  | 946.763 | 726.138 | 687.615 | 38.523  |
| 2003          | 72083  | 54945.856 | 51554.961 | 3390.896 | 4.704  | 6.171  | 930.560 | 710.281 | 665.551 | 44.730  |
| 2004          | 71470  | 54203.126 | 50260.905 | 3942.220 | 5.516  | 7.273  | 912.463 | 693.135 | 641.684 | 51.451  |
| 2005          | 71164  | 53744.603 | 49232.523 | 4512.080 | 6.340  | 8.395  | 897.746 | 679.296 | 621.079 | 58.216  |
| 2006          | 69888  | 52535.572 | 47422.825 | 5112.747 | 7.316  | 9.732  | 873.316 | 657.945 | 592.595 | 65.350  |
| 2007          | 68827  | 51492.124 | 45786.215 | 5705.909 | 8.290  | 11.081 | 850.955 | 638.264 | 566.086 | 72.177  |
| 2008          | 68524  | 51030.736 | 44603.555 | 6427.181 | 9.379  | 12.595 | 837.430 | 625.460 | 545.095 | 80.365  |
| 2009          | 67845  | 50276.199 | 43126.751 | 7149.448 | 10.538 | 14.220 | 819.036 | 608.943 | 520.636 | 88.308  |
| 2010          | 67572  | 49840.933 | 41968.251 | 7872.681 | 11.651 | 15.796 | 805.541 | 596.347 | 500.310 | 96.037  |
| 2011          | 66923  | 49072.841 | 40398.966 | 8673.875 | 12.961 | 17.676 | 789.600 | 581.354 | 476.656 | 104.698 |
| 2012          | 66614  | 48539.512 | 39003.919 | 9535.593 | 14.315 | 19.645 | 777.140 | 568.812 | 455.029 | 113.783 |
| 2013          | 65835  | 47675.741 | 37373.410 | 10302.33 | 15.649 | 21.609 | 758.962 | 552.318 | 430.852 | 121.466 |
| 2014          | 65583  | 47194.534 | 36093.187 | 11101.35 | 16.927 | 23.523 | 746.910 | 540.359 | 411.054 | 129.305 |
| 2015          | 64740  | 46305.842 | 34508.849 | 11796.99 | 18.222 | 25.476 | 828.460 | 596.439 | 441.601 | 154.838 |
| 2016          | 62241  | 44208.867 | 31999.781 | 12209.09 | 19.616 | 27.617 | 788.625 | 564.107 | 405.454 | 158.653 |
| 2017          | 60555  | 42702.624 | 30015.553 | 12687.07 | 20.951 | 29.710 | 759.836 | 539.903 | 376.632 | 163.271 |
| 2018          | 63208  | 44321.202 | 30047.679 | 14273.52 | 22.582 | 32.205 | 785.363 | 555.181 | 373.342 | 181.839 |
| 2019          | 63850  | 44493.088 | 29159.021 | 15334.07 | 24.016 | 34.464 | 785.190 | 551.912 | 358.578 | 193.333 |
| 2020          | 64340  | 44529.551 | 28209.345 | 16320.21 | 25.366 | 36.650 | 901.909 | 630.757 | 395.435 | 235.322 |
| 2021          | 57957  | 39852.556 | 24281.330 | 15571.23 | 26.867 | 39.072 | 806.205 | 560.546 | 337.764 | 222.782 |
| 2022          | 58345  | 39853.685 | 23289.812 | 16563.87 | 28.390 | 41.562 | 804.881 | 556.274 | 321.289 | 234.985 |
| 2023          | 58705  | 39847.050 | 22304.098 | 17542.95 | 29.883 | 44.026 | 802.769 | 551.670 | 304.998 | 246.672 |
| 2024          | 58973  | 39726.010 | 21308.561 | 18417.45 | 31.230 | 46.361 | 799.224 | 545.435 | 288.780 | 256.655 |
| 2025          | 58614  | 39207.348 | 20208.566 | 18998.78 | 32.413 | 48.457 | 922.405 | 626.579 | 318.019 | 308.560 |
| 2026          | 52463  | 34803.960 | 17117.406 | 17686.55 | 33.713 | 50.818 | 821.586 | 553.929 | 268.065 | 285.864 |
| 2027          | 52258  | 34484.595 | 16123.112 | 18361.48 | 35.136 | 53.245 | 814.060 | 546.357 | 251.163 | 295.194 |
| 2028          | 52007  | 34100.638 | 15099.153 | 19001.49 | 36.537 | 55.722 | 805.458 | 537.544 | 233.849 | 303.695 |
| 2029          | 51728  | 33669.838 | 14120.608 | 19549.23 | 37.793 | 58.062 | 795.981 | 527.732 | 217.287 | 310.445 |
| 2030          | 50339  | 32557.688 | 13090.450 | 19467.24 | 38.673 | 59.793 | 922.785 | 609.705 | 239.968 | 369.737 |
| 2031          | 44724  | 28646.393 | 10910.244 | 17736.15 | 39.657 | 61.914 | 817.010 | 535.065 | 199.308 | 335.756 |
| 2032          | 44341  | 28227.160 | 10148.143 | 18079.02 | 40.773 | 64.048 | 806.582 | 525.435 | 184.599 | 340.836 |
| 2033          | 43943  | 27786.623 | 9432.879  | 18353.74 | 41.767 | 66.052 | 795.345 | 515.079 | 170.731 | 344.348 |
| 2034          | 43511  | 27348.299 | 8756.895  | 18591.40 | 42.728 | 67.980 | 783.093 | 504.514 | 157.603 | 346.911 |
| 2035          | 41008  | 25570.077 | 7935.969  | 17634.11 | 43.002 | 68.964 | 909.907 | 583.430 | 176.089 | 407.341 |
| 2036          | 35130  | 21717.319 | 6183.247  | 15534.07 | 44.219 | 71.528 | 778.577 | 495.402 | 137.037 | 358.365 |
| 2037          | 34573  | 21256.024 | 5668.554  | 15587.47 | 45.085 | 73.332 | 764.727 | 484.347 | 125.383 | 358.964 |
| 2038          | 34021  | 20747.175 | 5172.163  | 15575.01 | 45.781 | 75.071 | 750.291 | 471.764 | 114.067 | 357.697 |
| 2039          | 33480  | 20327.688 | 4744.706  | 15582.98 | 46.544 | 76.659 | 735.345 | 460.724 | 104.212 | 356.512 |

## Results for PHIM for Run 1 (Sensitivity\_Analysis\_4.RTF)

\*\*\*\*\*

### Main Results for E-Component for Run: 1, Simulation: 1, COD: IHD, Adjusted

| Variable Parameter          | Value                                  |
|-----------------------------|----------------------------------------|
| 1. Country                  | US (United States)                     |
| 2. Sex                      | M (Males)                              |
| 3. Year of start of process | 1990                                   |
| 4. Cause of Death           | IHD                                    |
| 5. Effective Dose NULL      | CC:1                                   |
| 6. Effective Dose Ecig      | CC:1 Ecig:0.05 Dual:0.525              |
| Note:                       | Death rates are per million population |

#### Results for Age Groups Combined and Years combined, Population and Number deaths adjusted for Ecig scenario,

| Age Group:All | NULL    | Ecig        | %Drop      |          |        |        | NULL    | Ecig    | Drop    |         |
|---------------|---------|-------------|------------|----------|--------|--------|---------|---------|---------|---------|
| Year          | Number  | Attrib      | Attrib     | Drop     | %Drop  | Attrib | Death   | Attrib  | Attrib  | Drop    |
|               | Deaths  | Deaths      | Deaths     | Deaths   | Deaths | Deaths | Rate    | Rates   | Rates   | Rates   |
| All Comb      | 6423112 | 1098877.421 | 514995.712 | 583881.7 | 9.090  | 53.134 | 1843.86 | 318.101 | 147.838 | 170.264 |

#### Results for Age Groups Combined, Population and Number deaths adjusted for Ecig scenario,

| Age Group:All | NULL   | Ecig      | %Drop     |          |        |        | NULL    | Ecig    | Drop    |         |
|---------------|--------|-----------|-----------|----------|--------|--------|---------|---------|---------|---------|
| Year          | Number | Attrib    | Attrib    | Drop     | %Drop  | Attrib | Death   | Attrib  | Attrib  | Drop    |
|               | Deaths | Deaths    | Deaths    | Deaths   | Deaths | Deaths | Rate    | Rates   | Rates   | Rates   |
| 1990          | 171484 | 38511.725 | 38511.725 | 0.000    | 0.000  | 0.000  | 2718.40 | 610.497 | 610.497 | 0.000   |
| 1991          | 168044 | 37309.838 | 36996.010 | 313.828  | 0.187  | 0.841  | 2620.21 | 581.750 | 576.857 | 4.893   |
| 1992          | 164549 | 36137.488 | 35293.278 | 844.210  | 0.513  | 2.336  | 2522.12 | 553.899 | 540.956 | 12.943  |
| 1993          | 164367 | 35599.588 | 34037.032 | 1562.555 | 0.951  | 4.389  | 2474.37 | 535.926 | 512.391 | 23.536  |
| 1994          | 159878 | 34336.757 | 31952.680 | 2384.077 | 1.491  | 6.943  | 2361.79 | 507.267 | 472.019 | 35.248  |
| 1995          | 158105 | 33455.759 | 30123.463 | 3332.296 | 2.108  | 9.960  | 2290.74 | 484.782 | 436.449 | 48.332  |
| 1996          | 154911 | 32193.824 | 27855.471 | 4338.354 | 2.801  | 13.476 | 2209.39 | 459.239 | 397.284 | 61.956  |
| 1997          | 150023 | 30665.509 | 25352.411 | 5313.098 | 3.542  | 17.326 | 2104.61 | 430.308 | 355.659 | 74.649  |
| 1998          | 145480 | 29188.430 | 22962.898 | 6225.532 | 4.279  | 21.329 | 2007.09 | 402.844 | 316.803 | 86.041  |
| 1999          | 166067 | 33375.386 | 24713.681 | 8661.705 | 5.216  | 25.952 | 2254.68 | 453.366 | 335.537 | 117.830 |
| 2000          | 160410 | 32024.754 | 22327.096 | 9697.658 | 6.046  | 30.282 | 2145.65 | 428.655 | 298.648 | 130.008 |
| 2001          | 154631 | 30682.393 | 19907.773 | 10774.62 | 6.968  | 35.117 | 2041.01 | 405.339 | 262.767 | 142.572 |
| 2002          | 152119 | 30218.370 | 18181.383 | 12036.99 | 7.913  | 39.833 | 1984.91 | 394.736 | 237.239 | 157.497 |
| 2003          | 147009 | 29175.202 | 16206.691 | 12968.51 | 8.822  | 44.450 | 1897.82 | 377.146 | 209.221 | 167.925 |
| 2004          | 138696 | 27488.687 | 14036.673 | 13452.01 | 9.699  | 48.937 | 1770.73 | 351.518 | 179.207 | 172.311 |
| 2005          | 136248 | 27017.439 | 12696.799 | 14320.64 | 10.511 | 53.005 | 1718.80 | 341.482 | 160.173 | 181.309 |
| 2006          | 132339 | 26231.435 | 11169.416 | 15062.02 | 11.381 | 57.420 | 1653.71 | 328.517 | 139.573 | 188.944 |
| 2007          | 126966 | 25103.049 | 9727.734  | 15375.32 | 12.110 | 61.249 | 1569.76 | 311.161 | 120.271 | 190.891 |
| 2008          | 126388 | 24621.740 | 8762.114  | 15859.63 | 12.548 | 64.413 | 1544.57 | 301.777 | 107.081 | 194.697 |
| 2009          | 123013 | 23741.177 | 7724.958  | 16016.22 | 13.020 | 67.462 | 1485.04 | 287.552 | 93.257  | 194.295 |
| 2010          | 121184 | 23189.160 | 6916.654  | 16272.51 | 13.428 | 70.173 | 1444.65 | 277.458 | 82.454  | 195.004 |
| 2011          | 120941 | 22786.927 | 6162.841  | 16624.09 | 13.746 | 72.954 | 1426.94 | 269.951 | 72.714  | 197.238 |
| 2012          | 121732 | 22485.295 | 5550.308  | 16934.99 | 13.912 | 75.316 | 1420.16 | 263.495 | 64.751  | 198.744 |
| 2013          | 123551 | 22251.884 | 5034.490  | 17217.39 | 13.935 | 77.375 | 1424.34 | 257.786 | 58.039  | 199.747 |
| 2014          | 124228 | 21894.593 | 4544.327  | 17350.27 | 13.966 | 79.245 | 1414.79 | 250.685 | 51.754  | 198.931 |
| 2015          | 124877 | 21471.109 | 4121.722  | 17349.39 | 13.893 | 80.803 | 1598.02 | 276.557 | 52.745  | 223.812 |
| 2016          | 127444 | 21411.568 | 3741.624  | 17669.94 | 13.865 | 82.525 | 1614.78 | 273.213 | 47.408  | 225.804 |
| 2017          | 129619 | 21169.399 | 3400.799  | 17768.60 | 13.708 | 83.935 | 1626.45 | 267.651 | 42.673  | 224.979 |
| 2018          | 122801 | 19830.576 | 2888.450  | 16942.13 | 13.796 | 85.434 | 1525.80 | 248.404 | 35.889  | 212.515 |
| 2019          | 123315 | 19431.014 | 2623.125  | 16807.89 | 13.630 | 86.500 | 1516.45 | 241.031 | 32.257  | 208.773 |
| 2020          | 122409 | 18532.612 | 2345.169  | 16187.44 | 13.224 | 87.346 | 1715.91 | 262.513 | 32.874  | 229.639 |
| 2021          | 121085 | 18234.128 | 2096.939  | 16137.19 | 13.327 | 88.500 | 1684.34 | 256.472 | 29.169  | 227.303 |
| 2022          | 121226 | 17812.559 | 1894.187  | 15918.37 | 13.131 | 89.366 | 1672.34 | 248.626 | 26.131  | 222.495 |
| 2023          | 121347 | 17361.668 | 1710.670  | 15651.00 | 12.898 | 90.147 | 1659.37 | 240.367 | 23.393  | 216.974 |
| 2024          | 121322 | 16929.676 | 1559.663  | 15370.01 | 12.669 | 90.787 | 1644.20 | 232.443 | 21.137  | 211.306 |
| 2025          | 117804 | 15501.666 | 1370.299  | 14131.37 | 11.996 | 91.160 | 1853.87 | 247.735 | 21.564  | 226.170 |
| 2026          | 117276 | 15523.814 | 1269.546  | 14254.27 | 12.154 | 91.822 | 1836.59 | 247.072 | 19.882  | 227.191 |
| 2027          | 116288 | 15073.070 | 1168.881  | 13904.19 | 11.957 | 92.245 | 1811.51 | 238.810 | 18.209  | 220.602 |
| 2028          | 115249 | 14636.710 | 1069.795  | 13566.91 | 11.772 | 92.691 | 1784.93 | 230.725 | 16.569  | 214.156 |
| 2029          | 114208 | 14180.166 | 978.378   | 13201.79 | 11.559 | 93.100 | 1757.43 | 222.256 | 15.055  | 207.201 |
| 2030          | 107388 | 12111.772 | 828.571   | 11283.20 | 10.507 | 93.159 | 1968.60 | 226.816 | 15.189  | 211.627 |
| 2031          | 107923 | 12417.367 | 806.956   | 11610.41 | 10.758 | 93.501 | 1971.53 | 231.935 | 14.741  | 217.193 |
| 2032          | 106592 | 12054.064 | 754.888   | 11299.18 | 10.600 | 93.737 | 1938.95 | 224.381 | 13.732  | 210.649 |
| 2033          | 105275 | 11672.389 | 697.880   | 10974.51 | 10.425 | 94.021 | 1905.42 | 216.370 | 12.631  | 203.739 |
| 2034          | 103933 | 11365.762 | 645.086   | 10720.68 | 10.315 | 94.324 | 1870.54 | 209.673 | 11.610  | 198.063 |
| 2035          | 93614  | 8580.360  | 495.324   | 8085.036 | 8.637  | 94.227 | 2077.18 | 195.777 | 10.991  | 184.787 |
| 2036          | 95009  | 8948.841  | 489.637   | 8459.203 | 8.904  | 94.528 | 2105.66 | 204.135 | 10.852  | 193.284 |
| 2037          | 93259  | 8624.570  | 463.010   | 8161.559 | 8.751  | 94.631 | 2062.80 | 196.522 | 10.241  | 186.281 |
| 2038          | 91560  | 8315.017  | 430.573   | 7884.444 | 8.611  | 94.822 | 2019.25 | 189.073 | 9.496   | 179.577 |
| 2039          | 89926  | 8001.132  | 396.631   | 7604.501 | 8.456  | 95.043 | 1975.12 | 181.344 | 8.712   | 172.633 |

## Results for PHIM for Run 1 (Sensitivity\_Analysis\_4.RTF)

\*\*\*\*\*

### Main Results for E-Component for Run: 1, Simulation: 1, COD: STROKE, Adjusted

| Variable Parameter          | Value                                  |
|-----------------------------|----------------------------------------|
| 1. Country                  | US (United States)                     |
| 2. Sex                      | M (Males)                              |
| 3. Year of start of process | 1990                                   |
| 4. Cause of Death           | STROKE                                 |
| 5. Effective Dose NULL      | CC:1                                   |
| 6. Effective Dose Ecig      | CC:1 Ecig:0.05 Dual:0.525              |
| Note:                       | Death rates are per million population |

#### Results for Age Groups Combined and Years combined, Population and Number deaths adjusted for Ecig scenario,

| Age Group:All | NULL    | Ecig       | %Drop     |          |        |        | NULL    | Ecig   | Drop   |        |
|---------------|---------|------------|-----------|----------|--------|--------|---------|--------|--------|--------|
| Year          | Number  | Attrib     | Attrib    | Drop     | %Drop  | Attrib | Death   | Attrib | Attrib | Drop   |
|               | Deaths  | Deaths     | Deaths    | Deaths   | Deaths | Deaths | Rate    | Rates  | Rates  | Rates  |
| All Comb      | 1506821 | 149918.462 | 69508.241 | 80410.22 | 5.336  | 53.636 | 432.557 | 43.398 | 19.953 | 23.445 |

#### Results for Age Groups Combined, Population and Number deaths adjusted for Ecig scenario,

| Age Group:All | NULL   | Ecig     | %Drop    |          |        |        | NULL    | Ecig   | Drop   |        |
|---------------|--------|----------|----------|----------|--------|--------|---------|--------|--------|--------|
| Year          | Number | Attrib   | Attrib   | Drop     | %Drop  | Attrib | Death   | Attrib | Attrib | Drop   |
|               | Deaths | Deaths   | Deaths   | Deaths   | Deaths | Deaths | Rate    | Rates  | Rates  | Rates  |
| 1990          | 32862  | 4613.166 | 4613.166 | 0.000    | 0.000  | 0.000  | 520.936 | 73.129 | 73.129 | 0.000  |
| 1991          | 32619  | 4555.566 | 4515.509 | 40.057   | 0.123  | 0.879  | 508.609 | 71.032 | 70.408 | 0.625  |
| 1992          | 32100  | 4453.572 | 4348.543 | 105.029  | 0.327  | 2.358  | 492.015 | 68.262 | 66.652 | 1.610  |
| 1993          | 32897  | 4462.473 | 4264.085 | 198.388  | 0.603  | 4.446  | 495.229 | 67.179 | 64.191 | 2.988  |
| 1994          | 33325  | 4499.513 | 4186.448 | 313.065  | 0.939  | 6.958  | 492.297 | 66.473 | 61.844 | 4.629  |
| 1995          | 33574  | 4472.774 | 4028.989 | 443.785  | 1.322  | 9.922  | 486.436 | 64.812 | 58.375 | 6.437  |
| 1996          | 33877  | 4406.878 | 3818.587 | 588.291  | 1.737  | 13.349 | 483.172 | 62.863 | 54.462 | 8.401  |
| 1997          | 33527  | 4288.158 | 3553.287 | 734.871  | 2.192  | 17.137 | 470.341 | 60.173 | 49.848 | 10.325 |
| 1998          | 32811  | 4120.148 | 3251.419 | 868.729  | 2.648  | 21.085 | 452.668 | 56.864 | 44.858 | 12.007 |
| 1999          | 33397  | 3982.443 | 2980.388 | 1002.054 | 3.000  | 25.162 | 453.430 | 54.097 | 40.465 | 13.632 |
| 2000          | 33489  | 4021.411 | 2843.724 | 1177.687 | 3.517  | 29.285 | 447.949 | 53.827 | 38.038 | 15.789 |
| 2001          | 32312  | 3848.092 | 2552.176 | 1295.916 | 4.011  | 33.677 | 426.499 | 50.836 | 33.687 | 17.150 |
| 2002          | 31632  | 3783.081 | 2349.087 | 1433.994 | 4.533  | 37.905 | 412.754 | 49.418 | 30.652 | 18.766 |
| 2003          | 31041  | 3754.415 | 2167.275 | 1587.140 | 5.113  | 42.274 | 400.725 | 48.533 | 27.979 | 20.554 |
| 2004          | 29950  | 3666.274 | 1963.505 | 1702.769 | 5.685  | 46.444 | 382.370 | 46.883 | 25.068 | 21.815 |
| 2005          | 28783  | 3589.688 | 1776.786 | 1812.902 | 6.298  | 50.503 | 363.108 | 45.371 | 22.415 | 22.957 |
| 2006          | 28275  | 3596.985 | 1632.939 | 1964.046 | 6.946  | 54.603 | 353.323 | 45.048 | 20.405 | 24.643 |
| 2007          | 28126  | 3560.798 | 1484.698 | 2076.099 | 7.381  | 58.304 | 347.744 | 44.137 | 18.356 | 25.781 |
| 2008          | 27239  | 3417.001 | 1308.389 | 2108.612 | 7.741  | 61.709 | 332.889 | 41.881 | 15.990 | 25.891 |
| 2009          | 27195  | 3394.390 | 1192.955 | 2201.434 | 8.095  | 64.855 | 328.298 | 41.113 | 14.402 | 26.711 |
| 2010          | 27053  | 3340.137 | 1081.798 | 2258.340 | 8.348  | 67.612 | 322.502 | 39.965 | 12.896 | 27.068 |
| 2011          | 27118  | 3285.435 | 977.059  | 2308.376 | 8.512  | 70.261 | 319.962 | 38.922 | 11.528 | 27.394 |
| 2012          | 27235  | 3259.209 | 883.157  | 2376.052 | 8.724  | 72.903 | 317.728 | 38.193 | 10.303 | 27.890 |
| 2013          | 28108  | 3274.703 | 812.683  | 2462.020 | 8.759  | 75.183 | 324.033 | 37.937 | 9.369  | 28.568 |
| 2014          | 29023  | 3298.083 | 746.937  | 2551.146 | 8.790  | 77.352 | 330.534 | 37.762 | 8.507  | 29.255 |
| 2015          | 29822  | 3244.406 | 679.375  | 2565.031 | 8.601  | 79.060 | 381.629 | 41.789 | 8.694  | 33.096 |
| 2016          | 30808  | 3314.836 | 634.907  | 2679.929 | 8.699  | 80.847 | 390.349 | 42.297 | 8.045  | 34.253 |
| 2017          | 31746  | 3333.314 | 585.407  | 2747.907 | 8.656  | 82.438 | 398.344 | 42.144 | 7.346  | 34.799 |
| 2018          | 29685  | 2925.242 | 476.536  | 2448.706 | 8.249  | 83.710 | 368.840 | 36.642 | 5.921  | 30.722 |
| 2019          | 29965  | 2864.628 | 431.788  | 2432.840 | 8.119  | 84.927 | 368.491 | 35.534 | 5.310  | 30.224 |
| 2020          | 29991  | 2730.366 | 383.661  | 2346.705 | 7.825  | 85.948 | 420.406 | 38.675 | 5.378  | 33.297 |
| 2021          | 30533  | 2647.911 | 344.709  | 2303.202 | 7.543  | 86.982 | 424.727 | 37.244 | 4.795  | 32.449 |
| 2022          | 30772  | 2586.165 | 310.625  | 2275.540 | 7.395  | 87.989 | 424.508 | 36.097 | 4.285  | 31.812 |
| 2023          | 31008  | 2517.960 | 280.268  | 2237.692 | 7.217  | 88.869 | 424.015 | 34.860 | 3.833  | 31.028 |
| 2024          | 31197  | 2454.161 | 254.984  | 2199.176 | 7.049  | 89.610 | 422.798 | 33.695 | 3.456  | 30.240 |
| 2025          | 30823  | 2275.364 | 223.456  | 2051.908 | 6.657  | 90.179 | 485.061 | 36.363 | 3.516  | 32.846 |
| 2026          | 31298  | 2183.166 | 200.937  | 1982.229 | 6.333  | 90.796 | 490.146 | 34.747 | 3.147  | 31.600 |
| 2027          | 31206  | 2112.345 | 183.352  | 1928.992 | 6.182  | 91.320 | 486.115 | 33.467 | 2.856  | 30.611 |
| 2028          | 31088  | 2046.677 | 167.342  | 1879.335 | 6.045  | 91.824 | 481.471 | 32.263 | 2.592  | 29.671 |
| 2029          | 30962  | 1977.671 | 152.352  | 1825.319 | 5.895  | 92.296 | 476.442 | 30.997 | 2.344  | 28.653 |
| 2030          | 30064  | 1744.457 | 130.068  | 1614.388 | 5.370  | 92.544 | 551.112 | 32.668 | 2.384  | 30.284 |
| 2031          | 29736  | 1653.738 | 117.620  | 1536.117 | 5.166  | 92.888 | 543.222 | 30.889 | 2.149  | 28.740 |
| 2032          | 29513  | 1603.120 | 107.968  | 1495.153 | 5.066  | 93.265 | 536.852 | 29.841 | 1.964  | 27.877 |
| 2033          | 29280  | 1548.245 | 99.284   | 1448.961 | 4.949  | 93.587 | 529.955 | 28.700 | 1.797  | 26.903 |
| 2034          | 29022  | 1511.985 | 91.970   | 1420.015 | 4.893  | 93.917 | 522.323 | 27.893 | 1.655  | 26.237 |
| 2035          | 27589  | 1239.866 | 74.421   | 1165.445 | 4.224  | 93.998 | 612.159 | 28.290 | 1.651  | 26.639 |
| 2036          | 26437  | 1182.522 | 67.673   | 1114.849 | 4.217  | 94.277 | 585.904 | 26.975 | 1.500  | 25.475 |
| 2037          | 26004  | 1134.483 | 63.425   | 1071.059 | 4.119  | 94.409 | 575.180 | 25.851 | 1.403  | 24.448 |
| 2038          | 25568  | 1093.537 | 58.735   | 1034.801 | 4.047  | 94.629 | 563.879 | 24.866 | 1.295  | 23.570 |
| 2039          | 25135  | 1047.905 | 53.788   | 994.117  | 3.955  | 94.867 | 552.063 | 23.751 | 1.181  | 22.569 |

## Results for PHIM for Run 1 (Sensitivity\_Analysis\_4.RTF)

\*\*\*\*\*

### Main Results for E-Component for Run: 1, Simulation: 1, COD: COPD, Adjusted

| Variable Parameter          | Value                                  |
|-----------------------------|----------------------------------------|
| 1. Country                  | US (United States)                     |
| 2. Sex                      | M (Males)                              |
| 3. Year of start of process | 1990                                   |
| 4. Cause of Death           | COPD                                   |
| 5. Effective Dose NULL      | CC:1                                   |
| 6. Effective Dose Ecig      | CC:1 Ecig:0.05 Dual:0.525              |
| Note:                       | Death rates are per million population |

### Results for Age Groups Combined and Years combined, Population and Number deaths adjusted for Ecig scenario,

| Age Group:All | NULL    | Ecig        | %Drop      |          |        |        | NULL    | Ecig    | Drop    |        |
|---------------|---------|-------------|------------|----------|--------|--------|---------|---------|---------|--------|
| Year          | Number  | Attrib      | Attrib     | Drop     | %Drop  | Attrib | Death   | Attrib  | Attrib  | Drop   |
|               | Deaths  | Deaths      | Deaths     | Deaths   | Deaths | Deaths | Rate    | Rates   | Rates   | Rates  |
| All Comb      | 2265945 | 1015606.587 | 681629.520 | 333977.1 | 14.739 | 32.884 | 650.475 | 293.996 | 195.672 | 98.324 |

### Results for Age Groups Combined, Population and Number deaths adjusted for Ecig scenario,

| Age Group:All | NULL   | Ecig      | %Drop     |          |        |        | NULL    | Ecig    | Drop    |         |
|---------------|--------|-----------|-----------|----------|--------|--------|---------|---------|---------|---------|
| Year          | Number | Attrib    | Attrib    | Drop     | %Drop  | Attrib | Death   | Attrib  | Attrib  | Drop    |
|               | Deaths | Deaths    | Deaths    | Deaths   | Deaths | Deaths | Rate    | Rates   | Rates   | Rates   |
| 1990          | 33993  | 19262.437 | 19262.437 | 0.000    | 0.000  | 0.000  | 538.865 | 305.353 | 305.353 | 0.000   |
| 1991          | 34092  | 19215.636 | 19193.448 | 22.188   | 0.065  | 0.115  | 531.576 | 299.618 | 299.272 | 0.346   |
| 1992          | 33942  | 19056.189 | 18998.391 | 57.798   | 0.170  | 0.303  | 520.249 | 292.085 | 291.197 | 0.888   |
| 1993          | 35914  | 20095.670 | 19977.508 | 118.161  | 0.329  | 0.588  | 540.648 | 302.526 | 300.740 | 1.786   |
| 1994          | 35077  | 19524.095 | 19343.487 | 180.608  | 0.515  | 0.925  | 518.166 | 288.435 | 285.750 | 2.685   |
| 1995          | 34674  | 19116.002 | 18857.505 | 258.498  | 0.746  | 1.352  | 502.376 | 276.995 | 273.220 | 3.775   |
| 1996          | 34590  | 18975.021 | 18622.056 | 352.965  | 1.020  | 1.860  | 493.330 | 270.675 | 265.594 | 5.082   |
| 1997          | 35279  | 19169.025 | 18700.448 | 468.576  | 1.328  | 2.444  | 494.916 | 268.986 | 262.341 | 6.645   |
| 1998          | 35693  | 19228.937 | 18625.764 | 603.173  | 1.690  | 3.137  | 492.425 | 265.388 | 256.967 | 8.421   |
| 1999          | 38542  | 20589.820 | 19797.617 | 792.203  | 2.055  | 3.848  | 523.284 | 279.689 | 268.791 | 10.898  |
| 2000          | 36316  | 19196.417 | 18300.521 | 895.897  | 2.467  | 4.667  | 485.767 | 256.946 | 244.788 | 12.158  |
| 2001          | 36324  | 19012.731 | 17927.911 | 1084.820 | 2.987  | 5.706  | 479.449 | 251.174 | 236.635 | 14.539  |
| 2002          | 36037  | 18699.357 | 17430.313 | 1269.044 | 3.522  | 6.787  | 470.226 | 244.265 | 227.439 | 16.827  |
| 2003          | 36273  | 18663.550 | 17182.529 | 1481.020 | 4.083  | 7.935  | 468.262 | 241.262 | 221.819 | 19.444  |
| 2004          | 34689  | 17679.164 | 16037.302 | 1641.862 | 4.733  | 9.287  | 442.880 | 226.076 | 204.749 | 21.327  |
| 2005          | 36925  | 18692.832 | 16708.541 | 1984.291 | 5.374  | 10.615 | 465.823 | 236.265 | 210.782 | 25.483  |
| 2006          | 34459  | 17308.564 | 15200.989 | 2107.575 | 6.116  | 12.176 | 430.601 | 216.769 | 189.951 | 26.818  |
| 2007          | 35457  | 17683.181 | 15243.325 | 2439.856 | 6.881  | 13.798 | 438.376 | 219.189 | 188.464 | 30.726  |
| 2008          | 38411  | 19006.374 | 16094.007 | 2912.367 | 7.582  | 15.323 | 469.416 | 232.952 | 196.683 | 36.269  |
| 2009          | 37082  | 18205.573 | 15072.128 | 3133.444 | 8.450  | 17.211 | 447.660 | 220.505 | 181.954 | 38.551  |
| 2010          | 37439  | 18237.758 | 14801.660 | 3436.099 | 9.178  | 18.841 | 446.316 | 218.215 | 176.453 | 41.762  |
| 2011          | 38328  | 18487.916 | 14607.861 | 3880.055 | 10.123 | 20.987 | 452.222 | 219.022 | 172.354 | 46.668  |
| 2012          | 38769  | 18491.158 | 14237.135 | 4254.023 | 10.973 | 23.006 | 452.285 | 216.689 | 166.094 | 50.596  |
| 2013          | 40598  | 19143.452 | 14372.760 | 4770.692 | 11.751 | 24.921 | 468.021 | 221.775 | 165.694 | 56.081  |
| 2014          | 40679  | 18992.005 | 13859.946 | 5132.059 | 12.616 | 27.022 | 463.278 | 217.451 | 157.847 | 59.604  |
| 2015          | 42696  | 19728.885 | 14070.177 | 5658.707 | 13.254 | 28.682 | 546.367 | 254.116 | 180.053 | 74.064  |
| 2016          | 43541  | 19876.724 | 13770.148 | 6106.576 | 14.025 | 30.722 | 551.683 | 253.628 | 174.475 | 79.153  |
| 2017          | 44594  | 20119.790 | 13518.773 | 6601.017 | 14.803 | 32.809 | 559.559 | 254.381 | 169.632 | 84.749  |
| 2018          | 46012  | 20535.123 | 13373.568 | 7161.555 | 15.565 | 34.875 | 571.697 | 257.229 | 166.166 | 91.063  |
| 2019          | 47568  | 21009.029 | 13258.247 | 7750.782 | 16.294 | 36.893 | 584.964 | 260.605 | 163.041 | 97.564  |
| 2020          | 49093  | 21428.512 | 13110.842 | 8317.670 | 16.943 | 38.816 | 688.177 | 303.533 | 183.786 | 119.747 |
| 2021          | 49187  | 21266.697 | 12512.399 | 8754.298 | 17.798 | 41.164 | 684.215 | 299.127 | 174.053 | 125.074 |
| 2022          | 50712  | 21663.568 | 12267.342 | 9396.226 | 18.529 | 43.373 | 699.579 | 302.378 | 169.231 | 133.147 |
| 2023          | 52264  | 22084.131 | 12028.413 | 10055.72 | 19.240 | 45.534 | 714.690 | 305.748 | 164.483 | 141.265 |
| 2024          | 53766  | 22418.456 | 11767.590 | 10650.87 | 19.810 | 47.509 | 728.653 | 307.804 | 159.478 | 148.326 |
| 2025          | 54886  | 22614.834 | 11445.306 | 11169.53 | 20.350 | 49.390 | 863.734 | 361.411 | 180.113 | 181.298 |
| 2026          | 55454  | 22571.522 | 10944.771 | 11626.75 | 20.966 | 51.511 | 868.434 | 359.241 | 171.399 | 187.842 |
| 2027          | 56461  | 22774.416 | 10552.586 | 12221.83 | 21.646 | 53.665 | 879.544 | 360.827 | 164.386 | 196.440 |
| 2028          | 57429  | 22915.561 | 10112.799 | 12802.76 | 22.293 | 55.869 | 889.432 | 361.228 | 156.623 | 204.606 |
| 2029          | 58382  | 22992.027 | 9666.638  | 13325.39 | 22.824 | 57.957 | 898.380 | 360.371 | 148.750 | 211.621 |
| 2030          | 58693  | 22895.360 | 9218.809  | 13676.55 | 23.302 | 59.735 | 1075.94 | 428.760 | 168.995 | 259.765 |
| 2031          | 59126  | 22715.871 | 8736.538  | 13979.33 | 23.643 | 61.540 | 1080.12 | 424.293 | 159.599 | 264.694 |
| 2032          | 59875  | 22759.207 | 8301.174  | 14458.03 | 24.147 | 63.526 | 1089.16 | 423.652 | 151.002 | 272.650 |
| 2033          | 60601  | 22786.258 | 7890.212  | 14896.05 | 24.581 | 65.373 | 1096.85 | 422.387 | 142.809 | 279.578 |
| 2034          | 61269  | 22806.106 | 7474.021  | 15332.09 | 25.024 | 67.228 | 1102.69 | 420.721 | 134.514 | 286.207 |
| 2035          | 60395  | 22262.998 | 7013.633  | 15249.37 | 25.249 | 68.496 | 1340.08 | 507.973 | 155.624 | 352.349 |
| 2036          | 58319  | 21140.051 | 6177.628  | 14962.42 | 25.656 | 70.778 | 1292.49 | 482.234 | 136.913 | 345.321 |
| 2037          | 58513  | 21011.845 | 5738.051  | 15273.79 | 26.103 | 72.691 | 1294.24 | 478.783 | 126.920 | 351.862 |
| 2038          | 58684  | 20787.483 | 5302.641  | 15484.84 | 26.387 | 74.491 | 1294.21 | 472.681 | 116.944 | 355.736 |
| 2039          | 58845  | 20709.267 | 4921.623  | 15787.64 | 26.829 | 76.235 | 1292.47 | 469.372 | 108.098 | 361.275 |



## Results for PHIM for Run 2 (Sensitivity\_Analysis\_4.RTF)

---

### Control File Details for Run: 2

| Variable Parameter                                       | Value                  |
|----------------------------------------------------------|------------------------|
| 1. Name for Reference Scenario                           | NULL                   |
| 2. Name for Test Scenario                                | Ecig                   |
| 3. Name for Product 1                                    | CC                     |
| 4. Name for Product 2                                    | Ecig                   |
| 5. Name for Product 3                                    | -                      |
| 6. Name for Product 4                                    | Dual                   |
| 7. Country                                               | US (United States)     |
| 8. Sex                                                   | F (Females)            |
| 9. Year of start of process                              | 1990                   |
| 10. Number of months of follow-up                        | 600                    |
| 11. Follow-up interval length (in months)                | 12                     |
| 12. Lower age for risk estimation                        | 10                     |
| 13. Upper age for risk estimation                        | 79                     |
| 14. The effective dose for Product 1 (F1) - Ref          | 1                      |
| 15. The effective dose for Product 2 (F2) - Ref          | -                      |
| 16. The effective dose for Product 3 (F3) - Ref          | -                      |
| 17. The effective dose for Product 4 (F4) - Ref          | -                      |
| 18. The effective dose for Product 1 (F1) - Test         | 1                      |
| 19. The effective dose for Product 2 (F2) - Test         | 0.05                   |
| 20. The effective dose for Product 3 (F3) - Test         | -                      |
| 21. The effective dose for Product 4 (F4) - Test         | FROMF2                 |
| 22. Number in population to be simulated                 | 100000                 |
| 23. Number of MC simulations                             | 1                      |
| 24. The random number seed for the first simulation      | 15975263               |
| 25. Source for the population file (POP)                 | UN4                    |
| 26. Source for the socioeconomic prevalence file (SEP)   | -                      |
| 27. Source for the current smoking prevalence file (CSP) | ISS3                   |
| 28. Source for the former smoking prevalence file (FSP)  | ISS3                   |
| 29. Source for the quit-time distribution file (QTD)     | NHIS2006               |
| 30. Source for the death file (MORT)                     | APR-20                 |
| 31. Source for the relative risk file (RR)               | PNLEST                 |
| 32. Source for the half-life file (H)                    | PNLEST                 |
| 33. Assumption Set for TTP Factor Reference              | F1                     |
| 34. Assumption Set for TTP Factor Test                   | F1                     |
| 35. Assumption Set for TTP Reference                     | ISS3                   |
| 36. Assumption Set for TTP Test                          | S4A                    |
| 37. Assumption Set for TP for socioeconomic group        | -                      |
| 38. Source for Output Choice file (OUTC)                 | BASIC                  |
| 39. Output for DTP P1                                    | N                      |
| 40. Output for DTP P2                                    | N                      |
| 41. Output for Main P Component                          | Y                      |
| 42. Output for DTP E1                                    | N                      |
| 43. Output for DTP E2                                    | N                      |
| 44. Output for DTP E3                                    | N                      |
| 45. Output for Main E Component                          | Y                      |
| 46. Output file name                                     | Sensitivity_Analysis_4 |
| 47. Run number for P-Component                           | -                      |
| 48. Results file for E-Component                         | -                      |
| 49. Components required                                  | PE                     |
| 50. Results folder for P to be used in E-Component       | -                      |
| 51. Fixed age of starting product use                    | 16                     |
| 52. Output absolute risk file?                           | N                      |

## Results for PHIM for Run 2 (Sensitivity\_Analysis\_4.RTF)

\*\*\*\*\*

TTP values for Run: 2, Scenario: NULL

| Variable Parameter | Value               |
|--------------------|---------------------|
| 1. Country         | US (United States)  |
| 2. Sex             | F (Females)         |
| 3. Assumption Set  | ISS3                |
| Note:              | Period is in Months |

| Age   | Period  | Initiation  | Cessation    | Re-initiation |
|-------|---------|-------------|--------------|---------------|
|       |         | Never<br>CC | CC<br>Former | Former<br>CC  |
| 10-14 | 1-12    | 0.003758    | 0.008742     | 0.000000      |
| 15-19 | 1-12    | 0.003469    | 0.002515     | 0.000000      |
| 20-24 | 1-12    | 0.000276    | 0.000761     | 0.000000      |
| 25-29 | 1-12    | 0.000137    | 0.001375     | 0.000000      |
| 30-34 | 1-12    | 0.000069    | 0.001149     | 0.000000      |
| 35-39 | 1-12    | 0.000000    | 0.000991     | 0.000000      |
| 40-44 | 1-12    | 0.000000    | 0.000833     | 0.000000      |
| 45-49 | 1-12    | 0.000000    | 0.001723     | 0.000000      |
| 50-54 | 1-12    | 0.000000    | 0.002336     | 0.000000      |
| 55-59 | 1-12    | 0.000000    | 0.002233     | 0.000000      |
| 60-64 | 1-12    | 0.000000    | 0.004634     | 0.000000      |
| 65-69 | 1-12    | 0.000000    | 0.003505     | 0.000000      |
| 70-74 | 1-12    | 0.000000    | 0.004329     | 0.000000      |
| 75-79 | 1-12    | 0.000000    | 0.004329     | 0.000000      |
| 10-14 | 13-72   | 0.004794    | 0.008742     | 0.000000      |
| 15-19 | 13-72   | 0.004527    | 0.004082     | 0.000000      |
| 20-24 | 13-72   | 0.000105    | 0.001261     | 0.000000      |
| 25-29 | 13-72   | 0.000053    | 0.000952     | 0.000000      |
| 30-34 | 13-72   | 0.000026    | 0.000733     | 0.000000      |
| 35-39 | 13-72   | 0.000000    | 0.000753     | 0.000000      |
| 40-44 | 13-72   | 0.000000    | 0.001535     | 0.000000      |
| 45-49 | 13-72   | 0.000000    | 0.002998     | 0.000000      |
| 50-54 | 13-72   | 0.000000    | 0.003159     | 0.000000      |
| 55-59 | 13-72   | 0.000000    | 0.002965     | 0.000000      |
| 60-64 | 13-72   | 0.000000    | 0.003633     | 0.000000      |
| 65-69 | 13-72   | 0.000000    | 0.004522     | 0.000000      |
| 70-74 | 13-72   | 0.000000    | 0.005208     | 0.000000      |
| 75-79 | 13-72   | 0.000000    | 0.005208     | 0.000000      |
| 10-14 | 73-132  | 0.003969    | 0.008742     | 0.000000      |
| 15-19 | 73-132  | 0.003056    | 0.003373     | 0.000000      |
| 20-24 | 73-132  | 0.001459    | 0.003881     | 0.000000      |
| 25-29 | 73-132  | 0.000714    | 0.001953     | 0.000000      |
| 30-34 | 73-132  | 0.000111    | 0.001338     | 0.000000      |
| 35-39 | 73-132  | 0.000000    | 0.001507     | 0.000000      |
| 40-44 | 73-132  | 0.000000    | 0.002080     | 0.000000      |
| 45-49 | 73-132  | 0.000000    | 0.003809     | 0.000000      |
| 50-54 | 73-132  | 0.000000    | 0.004871     | 0.000000      |
| 55-59 | 73-132  | 0.000000    | 0.004560     | 0.000000      |
| 60-64 | 73-132  | 0.000000    | 0.007192     | 0.000000      |
| 65-69 | 73-132  | 0.000000    | 0.007033     | 0.000000      |
| 70-74 | 73-132  | 0.000000    | 0.008206     | 0.000000      |
| 75-79 | 73-132  | 0.000000    | 0.008206     | 0.000000      |
| 10-14 | 133-192 | 0.002861    | 0.008742     | 0.000000      |
| 15-19 | 133-192 | 0.002594    | 0.003996     | 0.000000      |
| 20-24 | 133-192 | 0.001247    | 0.002805     | 0.000000      |
| 25-29 | 133-192 | 0.000289    | 0.001574     | 0.000000      |
| 30-34 | 133-192 | 0.000132    | 0.001293     | 0.000000      |
| 35-39 | 133-192 | 0.000000    | 0.001219     | 0.000000      |
| 40-44 | 133-192 | 0.000000    | 0.001657     | 0.000000      |
| 45-49 | 133-192 | 0.000000    | 0.001995     | 0.000000      |
| 50-54 | 133-192 | 0.000000    | 0.002154     | 0.000000      |
| 55-59 | 133-192 | 0.000000    | 0.002072     | 0.000000      |
| 60-64 | 133-192 | 0.000000    | 0.005049     | 0.000000      |
| 65-69 | 133-192 | 0.000000    | 0.003680     | 0.000000      |
| 70-74 | 133-192 | 0.000000    | 0.006144     | 0.000000      |
| 75-79 | 133-192 | 0.000000    | 0.006144     | 0.000000      |
| 10-14 | 193-252 | 0.001859    | 0.008742     | 0.000000      |
| 15-19 | 193-252 | 0.002232    | 0.005770     | 0.000000      |
| 20-24 | 193-252 | 0.001079    | 0.003262     | 0.000000      |
| 25-29 | 193-252 | 0.000531    | 0.002002     | 0.000000      |
| 30-34 | 193-252 | 0.000263    | 0.003240     | 0.000000      |
| 35-39 | 193-252 | 0.000000    | 0.001771     | 0.000000      |
| 40-44 | 193-252 | 0.000000    | 0.002173     | 0.000000      |
| 45-49 | 193-252 | 0.000000    | 0.002075     | 0.000000      |
| 50-54 | 193-252 | 0.000000    | 0.003431     | 0.000000      |

### Results for PHIM for Run 2 (Sensitivity\_Analysis\_4.RTF)

|       |         |          |          |          |
|-------|---------|----------|----------|----------|
| 55-59 | 193-252 | 0.000000 | 0.002906 | 0.000000 |
| 60-64 | 193-252 | 0.000000 | 0.007139 | 0.000000 |
| 65-69 | 193-252 | 0.000000 | 0.004963 | 0.000000 |
| 70-74 | 193-252 | 0.000000 | 0.006269 | 0.000000 |
| 75-79 | 193-252 | 0.000000 | 0.006269 | 0.000000 |
| 10-14 | 253+    | 0.000931 | 0.008742 | 0.000000 |
| 15-19 | 253+    | 0.001798 | 0.009440 | 0.000000 |
| 20-24 | 253+    | 0.000023 | 0.002831 | 0.000000 |
| 25-29 | 253+    | 0.000073 | 0.002655 | 0.000000 |
| 30-34 | 253+    | 0.000037 | 0.004614 | 0.000000 |
| 35-39 | 253+    | 0.000000 | 0.002607 | 0.000000 |
| 40-44 | 253+    | 0.000000 | 0.003115 | 0.000000 |
| 45-49 | 253+    | 0.000000 | 0.002132 | 0.000000 |
| 50-54 | 253+    | 0.000000 | 0.003497 | 0.000000 |
| 55-59 | 253+    | 0.000000 | 0.002942 | 0.000000 |
| 60-64 | 253+    | 0.000000 | 0.005376 | 0.000000 |
| 65-69 | 253+    | 0.000000 | 0.001789 | 0.000000 |
| 70-74 | 253+    | 0.000000 | 0.004077 | 0.000000 |
| 75-79 | 253+    | 0.000000 | 0.004077 | 0.000000 |

## Results for PHIM for Run 2 (Sensitivity\_Analysis\_4.RTF)

\*\*\*\*\*

TTP values for Run: 2, Scenario: Ecig

Variable Parameter

Value

- 1. Country
  - 2. Sex
  - 3. Assumption Set
- Note:

US (United States)  
 F (Females)  
 S4A  
 Period is in Months

| Age   | Period  | Initiation  |               |               | Cessation    |                |                | Re-initiation |                |                |
|-------|---------|-------------|---------------|---------------|--------------|----------------|----------------|---------------|----------------|----------------|
|       |         | Never<br>CC | Never<br>Ecig | Never<br>Dual | CC<br>Former | Ecig<br>Former | Dual<br>Former | Former<br>CC  | Former<br>Ecig | Former<br>Dual |
| 10-14 | 1-12    | 0.001879    | 0.000940      | 0.000000      | 0.008742     | 0.008742       | 0.000000       | 0.000000      | 0.000000       | 0.000000       |
| 15-19 | 1-12    | 0.001735    | 0.000867      | 0.000000      | 0.002515     | 0.002515       | 0.000000       | 0.000000      | 0.000000       | 0.000000       |
| 20-24 | 1-12    | 0.000138    | 0.000069      | 0.000000      | 0.000761     | 0.000761       | 0.000000       | 0.000000      | 0.000000       | 0.000000       |
| 25-29 | 1-12    | 0.000069    | 0.000034      | 0.000000      | 0.001376     | 0.001376       | 0.000000       | 0.000000      | 0.000000       | 0.000000       |
| 30-34 | 1-12    | 0.000034    | 0.000017      | 0.000000      | 0.001149     | 0.001149       | 0.000000       | 0.000000      | 0.000000       | 0.000000       |
| 35-39 | 1-12    | 0.000000    | 0.000000      | 0.000000      | 0.000991     | 0.000991       | 0.000000       | 0.000000      | 0.000000       | 0.000000       |
| 40-44 | 1-12    | 0.000000    | 0.000000      | 0.000000      | 0.000833     | 0.000833       | 0.000000       | 0.000000      | 0.000000       | 0.000000       |
| 45-49 | 1-12    | 0.000000    | 0.000000      | 0.000000      | 0.001723     | 0.001723       | 0.000000       | 0.000000      | 0.000000       | 0.000000       |
| 50-54 | 1-12    | 0.000000    | 0.000000      | 0.000000      | 0.002336     | 0.002336       | 0.000000       | 0.000000      | 0.000000       | 0.000000       |
| 55-59 | 1-12    | 0.000000    | 0.000000      | 0.000000      | 0.002233     | 0.002233       | 0.000000       | 0.000000      | 0.000000       | 0.000000       |
| 60-64 | 1-12    | 0.000000    | 0.000000      | 0.000000      | 0.004635     | 0.004635       | 0.000000       | 0.000000      | 0.000000       | 0.000000       |
| 65-69 | 1-12    | 0.000000    | 0.000000      | 0.000000      | 0.003505     | 0.003505       | 0.000000       | 0.000000      | 0.000000       | 0.000000       |
| 70-74 | 1-12    | 0.000000    | 0.000000      | 0.000000      | 0.004329     | 0.004329       | 0.000000       | 0.000000      | 0.000000       | 0.000000       |
| 75-79 | 1-12    | 0.000000    | 0.000000      | 0.000000      | 0.004329     | 0.004329       | 0.000000       | 0.000000      | 0.000000       | 0.000000       |
| 10-14 | 13-72   | 0.001918    | 0.001438      | 0.000000      | 0.008742     | 0.008742       | 0.000000       | 0.000000      | 0.000000       | 0.000000       |
| 15-19 | 13-72   | 0.001811    | 0.001358      | 0.000000      | 0.004083     | 0.004083       | 0.000000       | 0.000000      | 0.000000       | 0.000000       |
| 20-24 | 13-72   | 0.000042    | 0.000032      | 0.000000      | 0.001261     | 0.001261       | 0.000000       | 0.000000      | 0.000000       | 0.000000       |
| 25-29 | 13-72   | 0.000021    | 0.000016      | 0.000000      | 0.000952     | 0.000952       | 0.000000       | 0.000000      | 0.000000       | 0.000000       |
| 30-34 | 13-72   | 0.000011    | 0.000008      | 0.000000      | 0.000733     | 0.000733       | 0.000000       | 0.000000      | 0.000000       | 0.000000       |
| 35-39 | 13-72   | 0.000000    | 0.000000      | 0.000000      | 0.000754     | 0.000754       | 0.000000       | 0.000000      | 0.000000       | 0.000000       |
| 40-44 | 13-72   | 0.000000    | 0.000000      | 0.000000      | 0.001535     | 0.001535       | 0.000000       | 0.000000      | 0.000000       | 0.000000       |
| 45-49 | 13-72   | 0.000000    | 0.000000      | 0.000000      | 0.002998     | 0.002998       | 0.000000       | 0.000000      | 0.000000       | 0.000000       |
| 50-54 | 13-72   | 0.000000    | 0.000000      | 0.000000      | 0.003160     | 0.003160       | 0.000000       | 0.000000      | 0.000000       | 0.000000       |
| 55-59 | 13-72   | 0.000000    | 0.000000      | 0.000000      | 0.002965     | 0.002965       | 0.000000       | 0.000000      | 0.000000       | 0.000000       |
| 60-64 | 13-72   | 0.000000    | 0.000000      | 0.000000      | 0.003633     | 0.003633       | 0.000000       | 0.000000      | 0.000000       | 0.000000       |
| 65-69 | 13-72   | 0.000000    | 0.000000      | 0.000000      | 0.004522     | 0.004522       | 0.000000       | 0.000000      | 0.000000       | 0.000000       |
| 70-74 | 13-72   | 0.000000    | 0.000000      | 0.000000      | 0.005208     | 0.005208       | 0.000000       | 0.000000      | 0.000000       | 0.000000       |
| 75-79 | 13-72   | 0.000000    | 0.000000      | 0.000000      | 0.005208     | 0.005208       | 0.000000       | 0.000000      | 0.000000       | 0.000000       |
| 10-14 | 73-132  | 0.000794    | 0.001588      | 0.000000      | 0.008742     | 0.008742       | 0.000000       | 0.000000      | 0.000000       | 0.000000       |
| 15-19 | 73-132  | 0.000611    | 0.001223      | 0.000000      | 0.003373     | 0.003373       | 0.000000       | 0.000000      | 0.000000       | 0.000000       |
| 20-24 | 73-132  | 0.000292    | 0.000584      | 0.000000      | 0.003881     | 0.003881       | 0.000000       | 0.000000      | 0.000000       | 0.000000       |
| 25-29 | 73-132  | 0.000143    | 0.000286      | 0.000000      | 0.001954     | 0.001954       | 0.000000       | 0.000000      | 0.000000       | 0.000000       |
| 30-34 | 73-132  | 0.000022    | 0.000045      | 0.000000      | 0.001338     | 0.001338       | 0.000000       | 0.000000      | 0.000000       | 0.000000       |
| 35-39 | 73-132  | 0.000000    | 0.000000      | 0.000000      | 0.001507     | 0.001507       | 0.000000       | 0.000000      | 0.000000       | 0.000000       |
| 40-44 | 73-132  | 0.000000    | 0.000000      | 0.000000      | 0.002080     | 0.002080       | 0.000000       | 0.000000      | 0.000000       | 0.000000       |
| 45-49 | 73-132  | 0.000000    | 0.000000      | 0.000000      | 0.003809     | 0.003809       | 0.000000       | 0.000000      | 0.000000       | 0.000000       |
| 50-54 | 73-132  | 0.000000    | 0.000000      | 0.000000      | 0.004871     | 0.004871       | 0.000000       | 0.000000      | 0.000000       | 0.000000       |
| 55-59 | 73-132  | 0.000000    | 0.000000      | 0.000000      | 0.004560     | 0.004560       | 0.000000       | 0.000000      | 0.000000       | 0.000000       |
| 60-64 | 73-132  | 0.000000    | 0.000000      | 0.000000      | 0.007192     | 0.007192       | 0.000000       | 0.000000      | 0.000000       | 0.000000       |
| 65-69 | 73-132  | 0.000000    | 0.000000      | 0.000000      | 0.007033     | 0.007033       | 0.000000       | 0.000000      | 0.000000       | 0.000000       |
| 70-74 | 73-132  | 0.000000    | 0.000000      | 0.000000      | 0.008206     | 0.008206       | 0.000000       | 0.000000      | 0.000000       | 0.000000       |
| 75-79 | 73-132  | 0.000000    | 0.000000      | 0.000000      | 0.008206     | 0.008206       | 0.000000       | 0.000000      | 0.000000       | 0.000000       |
| 10-14 | 133-192 | 0.000143    | 0.001359      | 0.000000      | 0.008742     | 0.008742       | 0.000000       | 0.000000      | 0.000000       | 0.000000       |
| 15-19 | 133-192 | 0.000130    | 0.001232      | 0.000000      | 0.003996     | 0.003996       | 0.000000       | 0.000000      | 0.000000       | 0.000000       |
| 20-24 | 133-192 | 0.000062    | 0.000593      | 0.000000      | 0.002805     | 0.002805       | 0.000000       | 0.000000      | 0.000000       | 0.000000       |
| 25-29 | 133-192 | 0.000015    | 0.000137      | 0.000000      | 0.001574     | 0.001574       | 0.000000       | 0.000000      | 0.000000       | 0.000000       |
| 30-34 | 133-192 | 0.000007    | 0.000063      | 0.000000      | 0.001293     | 0.001293       | 0.000000       | 0.000000      | 0.000000       | 0.000000       |
| 35-39 | 133-192 | 0.000000    | 0.000000      | 0.000000      | 0.001219     | 0.001219       | 0.000000       | 0.000000      | 0.000000       | 0.000000       |
| 40-44 | 133-192 | 0.000000    | 0.000000      | 0.000000      | 0.001657     | 0.001657       | 0.000000       | 0.000000      | 0.000000       | 0.000000       |
| 45-49 | 133-192 | 0.000000    | 0.000000      | 0.000000      | 0.001995     | 0.001995       | 0.000000       | 0.000000      | 0.000000       | 0.000000       |
| 50-54 | 133-192 | 0.000000    | 0.000000      | 0.000000      | 0.002154     | 0.002154       | 0.000000       | 0.000000      | 0.000000       | 0.000000       |
| 55-59 | 133-192 | 0.000000    | 0.000000      | 0.000000      | 0.002072     | 0.002072       | 0.000000       | 0.000000      | 0.000000       | 0.000000       |
| 60-64 | 133-192 | 0.000000    | 0.000000      | 0.000000      | 0.005049     | 0.005049       | 0.000000       | 0.000000      | 0.000000       | 0.000000       |
| 65-69 | 133-192 | 0.000000    | 0.000000      | 0.000000      | 0.003681     | 0.003681       | 0.000000       | 0.000000      | 0.000000       | 0.000000       |
| 70-74 | 133-192 | 0.000000    | 0.000000      | 0.000000      | 0.006144     | 0.006144       | 0.000000       | 0.000000      | 0.000000       | 0.000000       |
| 75-79 | 133-192 | 0.000000    | 0.000000      | 0.000000      | 0.006144     | 0.006144       | 0.000000       | 0.000000      | 0.000000       | 0.000000       |
| 10-14 | 193-252 | 0.000093    | 0.000883      | 0.000000      | 0.008742     | 0.008742       | 0.000000       | 0.000000      | 0.000000       | 0.000000       |
| 15-19 | 193-252 | 0.000112    | 0.001060      | 0.000000      | 0.005770     | 0.005770       | 0.000000       | 0.000000      | 0.000000       | 0.000000       |
| 20-24 | 193-252 | 0.000054    | 0.000513      | 0.000000      | 0.003262     | 0.003262       | 0.000000       | 0.000000      | 0.000000       | 0.000000       |
| 25-29 | 193-252 | 0.000027    | 0.000252      | 0.000000      | 0.002002     | 0.002002       | 0.000000       | 0.000000      | 0.000000       | 0.000000       |
| 30-34 | 193-252 | 0.000013    | 0.000125      | 0.000000      | 0.003241     | 0.003241       | 0.000000       | 0.000000      | 0.000000       | 0.000000       |
| 35-39 | 193-252 | 0.000000    | 0.000000      | 0.000000      | 0.001771     | 0.001771       | 0.000000       | 0.000000      | 0.000000       | 0.000000       |
| 40-44 | 193-252 | 0.000000    | 0.000000      | 0.000000      | 0.002173     | 0.002173       | 0.000000       | 0.000000      | 0.000000       | 0.000000       |
| 45-49 | 193-252 | 0.000000    | 0.000000      | 0.000000      | 0.002075     | 0.002075       | 0.000000       | 0.000000      | 0.000000       | 0.000000       |
| 50-54 | 193-252 | 0.000000    | 0.000000      | 0.000000      | 0.003432     | 0.003432       | 0.000000       | 0.000000      | 0.000000       | 0.000000       |

### Results for PHIM for Run 2 (Sensitivity\_Analysis\_4.RTF)

|       |         |          |          |          |          |          |          |          |          |          |
|-------|---------|----------|----------|----------|----------|----------|----------|----------|----------|----------|
| 55-59 | 193-252 | 0.000000 | 0.000000 | 0.000000 | 0.002906 | 0.002906 | 0.000000 | 0.000000 | 0.000000 | 0.000000 |
| 60-64 | 193-252 | 0.000000 | 0.000000 | 0.000000 | 0.007139 | 0.007139 | 0.000000 | 0.000000 | 0.000000 | 0.000000 |
| 65-69 | 193-252 | 0.000000 | 0.000000 | 0.000000 | 0.004963 | 0.004963 | 0.000000 | 0.000000 | 0.000000 | 0.000000 |
| 70-74 | 193-252 | 0.000000 | 0.000000 | 0.000000 | 0.006269 | 0.006269 | 0.000000 | 0.000000 | 0.000000 | 0.000000 |
| 75-79 | 193-252 | 0.000000 | 0.000000 | 0.000000 | 0.006269 | 0.006269 | 0.000000 | 0.000000 | 0.000000 | 0.000000 |
| 10-14 | 253+    | 0.000047 | 0.000442 | 0.000000 | 0.008742 | 0.008742 | 0.000000 | 0.000000 | 0.000000 | 0.000000 |
| 15-19 | 253+    | 0.000090 | 0.000854 | 0.000000 | 0.009440 | 0.009440 | 0.000000 | 0.000000 | 0.000000 | 0.000000 |
| 20-24 | 253+    | 0.000001 | 0.000011 | 0.000000 | 0.002831 | 0.002831 | 0.000000 | 0.000000 | 0.000000 | 0.000000 |
| 25-29 | 253+    | 0.000004 | 0.000035 | 0.000000 | 0.002656 | 0.002656 | 0.000000 | 0.000000 | 0.000000 | 0.000000 |
| 30-34 | 253+    | 0.000002 | 0.000017 | 0.000000 | 0.004614 | 0.004614 | 0.000000 | 0.000000 | 0.000000 | 0.000000 |
| 35-39 | 253+    | 0.000000 | 0.000000 | 0.000000 | 0.002608 | 0.002608 | 0.000000 | 0.000000 | 0.000000 | 0.000000 |
| 40-44 | 253+    | 0.000000 | 0.000000 | 0.000000 | 0.003115 | 0.003115 | 0.000000 | 0.000000 | 0.000000 | 0.000000 |
| 45-49 | 253+    | 0.000000 | 0.000000 | 0.000000 | 0.002132 | 0.002132 | 0.000000 | 0.000000 | 0.000000 | 0.000000 |
| 50-54 | 253+    | 0.000000 | 0.000000 | 0.000000 | 0.003497 | 0.003497 | 0.000000 | 0.000000 | 0.000000 | 0.000000 |
| 55-59 | 253+    | 0.000000 | 0.000000 | 0.000000 | 0.002942 | 0.002942 | 0.000000 | 0.000000 | 0.000000 | 0.000000 |
| 60-64 | 253+    | 0.000000 | 0.000000 | 0.000000 | 0.005376 | 0.005376 | 0.000000 | 0.000000 | 0.000000 | 0.000000 |
| 65-69 | 253+    | 0.000000 | 0.000000 | 0.000000 | 0.001789 | 0.001789 | 0.000000 | 0.000000 | 0.000000 | 0.000000 |
| 70-74 | 253+    | 0.000000 | 0.000000 | 0.000000 | 0.004077 | 0.004077 | 0.000000 | 0.000000 | 0.000000 | 0.000000 |
| 75-79 | 253+    | 0.000000 | 0.000000 | 0.000000 | 0.004077 | 0.004077 | 0.000000 | 0.000000 | 0.000000 | 0.000000 |



**Results for PHIM for Run 2 (Sensitivity\_Analysis\_4.RTF)**

|       |      |          |          |          |          |          |          |
|-------|------|----------|----------|----------|----------|----------|----------|
| 25-29 | 253+ | 0.014127 | 0.000000 | 0.000000 | 0.000000 | 0.000000 | 0.000000 |
| 30-34 | 253+ | 0.013889 | 0.000000 | 0.000000 | 0.000000 | 0.000000 | 0.000000 |
| 35-39 | 253+ | 0.012929 | 0.000000 | 0.000000 | 0.000000 | 0.000000 | 0.000000 |
| 40-44 | 253+ | 0.012785 | 0.000000 | 0.000000 | 0.000000 | 0.000000 | 0.000000 |
| 45-49 | 253+ | 0.012295 | 0.000000 | 0.000000 | 0.000000 | 0.000000 | 0.000000 |
| 50-54 | 253+ | 0.011536 | 0.000000 | 0.000000 | 0.000000 | 0.000000 | 0.000000 |
| 55-59 | 253+ | 0.008988 | 0.000000 | 0.000000 | 0.000000 | 0.000000 | 0.000000 |
| 60-64 | 253+ | 0.008098 | 0.000000 | 0.000000 | 0.000000 | 0.000000 | 0.000000 |
| 65-69 | 253+ | 0.006274 | 0.000000 | 0.000000 | 0.000000 | 0.000000 | 0.000000 |
| 70-74 | 253+ | 0.004141 | 0.000000 | 0.000000 | 0.000000 | 0.000000 | 0.000000 |
| 75-79 | 253+ | 0.004141 | 0.000000 | 0.000000 | 0.000000 | 0.000000 | 0.000000 |

## Results for PHIM for Run 2 (Sensitivity\_Analysis\_4.RTF)

\*\*\*\*\*

### Main Output for the Tobacco History for Run: 2, Simulation: 1, Scenario: NULL

| Variable Parameter          | Value              |
|-----------------------------|--------------------|
| 1. Country                  | US (United States) |
| 2. Sex                      | F (Females)        |
| 3. Year of start of process | 1990               |

Year of Follow-up: 2040, Age Group: All Ages  
 Period    Age Group    Smoking Group            N            %

|    |          |           |       |       |
|----|----------|-----------|-------|-------|
| 50 | All Ages | Never Any | 20670 | 58.80 |
| 50 | All Ages | CC        | 2462  | 7.00  |
| 50 | All Ages | Former    | 12019 | 34.19 |

Year of Follow-up: 2040, Age Group: 18-19  
 Period    Age Group    Smoking Group            N            %

|    |       |           |   |   |
|----|-------|-----------|---|---|
| 50 | 18-19 | Never Any | 0 | . |
| 50 | 18-19 | CC        | 0 | . |
| 50 | 18-19 | Former    | 0 | . |

Year of Follow-up: 2040, Age Group: 20-24  
 Period    Age Group    Smoking Group            N            %

|    |       |           |   |   |
|----|-------|-----------|---|---|
| 50 | 20-24 | Never Any | 0 | . |
| 50 | 20-24 | CC        | 0 | . |
| 50 | 20-24 | Former    | 0 | . |

Year of Follow-up: 2040, Age Group: 25-29  
 Period    Age Group    Smoking Group            N            %

|    |       |           |   |   |
|----|-------|-----------|---|---|
| 50 | 25-29 | Never Any | 0 | . |
| 50 | 25-29 | CC        | 0 | . |
| 50 | 25-29 | Former    | 0 | . |

Year of Follow-up: 2040, Age Group: 30-34  
 Period    Age Group    Smoking Group            N            %

|    |       |           |   |   |
|----|-------|-----------|---|---|
| 50 | 30-34 | Never Any | 0 | . |
| 50 | 30-34 | CC        | 0 | . |
| 50 | 30-34 | Former    | 0 | . |

Year of Follow-up: 2040, Age Group: 35-39  
 Period    Age Group    Smoking Group            N            %

|    |       |           |   |   |
|----|-------|-----------|---|---|
| 50 | 35-39 | Never Any | 0 | . |
| 50 | 35-39 | CC        | 0 | . |
| 50 | 35-39 | Former    | 0 | . |

Year of Follow-up: 2040, Age Group: 40-44  
 Period    Age Group    Smoking Group            N            %

|    |       |           |   |   |
|----|-------|-----------|---|---|
| 50 | 40-44 | Never Any | 0 | . |
| 50 | 40-44 | CC        | 0 | . |
| 50 | 40-44 | Former    | 0 | . |

Year of Follow-up: 2040, Age Group: 45-49  
 Period    Age Group    Smoking Group            N            %

|    |       |           |   |   |
|----|-------|-----------|---|---|
| 50 | 45-49 | Never Any | 0 | . |
| 50 | 45-49 | CC        | 0 | . |
| 50 | 45-49 | Former    | 0 | . |

Year of Follow-up: 2040, Age Group: 50-54  
 Period    Age Group    Smoking Group            N            %

|    |       |           |   |   |
|----|-------|-----------|---|---|
| 50 | 50-54 | Never Any | 0 | . |
| 50 | 50-54 | CC        | 0 | . |
| 50 | 50-54 | Former    | 0 | . |

Year of Follow-up: 2040, Age Group: 55-59  
 Period    Age Group    Smoking Group            N            %

|    |       |           |   |   |
|----|-------|-----------|---|---|
| 50 | 55-59 | Never Any | 0 | . |
| 50 | 55-59 | CC        | 0 | . |
| 50 | 55-59 | Former    | 0 | . |

Year of Follow-up: 2040, Age Group: 60-64  
 Period    Age Group    Smoking Group            N            %



### Results for PHIM for Run 2 (Sensitivity\_Analysis\_4.RTF)

|                                           |           |               |      |       |
|-------------------------------------------|-----------|---------------|------|-------|
| 50                                        | 60-64     | Never Any     | 4803 | 60.57 |
| 50                                        | 60-64     | CC            | 621  | 7.83  |
| 50                                        | 60-64     | Former        | 2506 | 31.60 |
| Year of Follow-up: 2040, Age Group: 65-69 |           |               |      |       |
| Period                                    | Age Group | Smoking Group | N    | %     |
| 50                                        | 65-69     | Never Any     | 5407 | 64.75 |
| 50                                        | 65-69     | CC            | 538  | 6.44  |
| 50                                        | 65-69     | Former        | 2405 | 28.80 |
| Year of Follow-up: 2040, Age Group: 70-74 |           |               |      |       |
| Period                                    | Age Group | Smoking Group | N    | %     |
| 50                                        | 70-74     | Never Any     | 5181 | 58.92 |
| 50                                        | 70-74     | CC            | 605  | 6.88  |
| 50                                        | 70-74     | Former        | 3007 | 34.20 |
| Year of Follow-up: 2040, Age Group: 75-79 |           |               |      |       |
| Period                                    | Age Group | Smoking Group | N    | %     |
| 50                                        | 75-79     | Never Any     | 5279 | 52.38 |
| 50                                        | 75-79     | CC            | 698  | 6.93  |
| 50                                        | 75-79     | Former        | 4101 | 40.69 |

## Results for PHIM for Run 2 (Sensitivity\_Analysis\_4.RTF)

\*\*\*\*\*

### Main Output for the Tobacco History for Run: 2, Simulation: 1, Scenario: Ecig

| Variable Parameter                           |           |               | Value              |       |               |             |               |                |              |
|----------------------------------------------|-----------|---------------|--------------------|-------|---------------|-------------|---------------|----------------|--------------|
| 1. Country                                   |           |               | US (United States) |       |               |             |               |                |              |
| 2. Sex                                       |           |               | F (Females)        |       |               |             |               |                |              |
| 3. Year of start of process                  |           |               | 1990               |       |               |             |               |                |              |
| Year of Follow-up: 1990, Age Group: All Ages |           |               |                    |       |               |             |               |                |              |
| Period                                       | Age Group | Smoking Group | N                  | %     | Ever Quit (N) | Ever Quit % | Mean Yrs Quit | Short Term (n) | Short Term % |
| 0                                            | All Ages  | Never Any     | 47776              | 54.92 |               |             |               |                |              |
| 0                                            | All Ages  | CC            | 22737              | 26.14 | 0             | 0.00        |               |                |              |
| 0                                            | All Ages  | Ecig          | 0                  | 0.00  |               |             |               |                |              |
| 0                                            | All Ages  | Dual          | 0                  | 0.00  |               |             |               |                |              |
| 0                                            | All Ages  | Former        | 16484              | 18.95 |               |             | 11.90         | 2815           | 17.08        |
| Year of Follow-up: 1990, Age Group: 18-19    |           |               |                    |       |               |             |               |                |              |
| Period                                       | Age Group | Smoking Group | N                  | %     | Ever Quit (N) | Ever Quit % | Mean Yrs Quit | Short Term (n) | Short Term % |
| 0                                            | 18-19     | Never Any     | 2570               | 78.43 |               |             |               |                |              |
| 0                                            | 18-19     | CC            | 535                | 16.33 | 0             | 0.00        |               |                |              |
| 0                                            | 18-19     | Ecig          | 0                  | 0.00  |               |             |               |                |              |
| 0                                            | 18-19     | Dual          | 0                  | 0.00  |               |             |               |                |              |
| 0                                            | 18-19     | Former        | 172                | 5.25  |               |             | 0.20          | 172            | 100.00       |
| Year of Follow-up: 1990, Age Group: 20-24    |           |               |                    |       |               |             |               |                |              |
| Period                                       | Age Group | Smoking Group | N                  | %     | Ever Quit (N) | Ever Quit % | Mean Yrs Quit | Short Term (n) | Short Term % |
| 0                                            | 20-24     | Never Any     | 5354               | 60.89 |               |             |               |                |              |
| 0                                            | 20-24     | CC            | 2560               | 29.11 | 0             | 0.00        |               |                |              |
| 0                                            | 20-24     | Ecig          | 0                  | 0.00  |               |             |               |                |              |
| 0                                            | 20-24     | Dual          | 0                  | 0.00  |               |             |               |                |              |
| 0                                            | 20-24     | Former        | 879                | 10.00 |               |             | 1.58          | 420            | 47.78        |
| Year of Follow-up: 1990, Age Group: 25-29    |           |               |                    |       |               |             |               |                |              |
| Period                                       | Age Group | Smoking Group | N                  | %     | Ever Quit (N) | Ever Quit % | Mean Yrs Quit | Short Term (n) | Short Term % |
| 0                                            | 25-29     | Never Any     | 5318               | 52.77 |               |             |               |                |              |
| 0                                            | 25-29     | CC            | 3335               | 33.09 | 0             | 0.00        |               |                |              |
| 0                                            | 25-29     | Ecig          | 0                  | 0.00  |               |             |               |                |              |
| 0                                            | 25-29     | Dual          | 0                  | 0.00  |               |             |               |                |              |
| 0                                            | 25-29     | Former        | 1425               | 14.14 |               |             | 3.91          | 404            | 28.35        |
| Year of Follow-up: 1990, Age Group: 30-34    |           |               |                    |       |               |             |               |                |              |
| Period                                       | Age Group | Smoking Group | N                  | %     | Ever Quit (N) | Ever Quit % | Mean Yrs Quit | Short Term (n) | Short Term % |
| 0                                            | 30-34     | Never Any     | 5287               | 50.36 |               |             |               |                |              |
| 0                                            | 30-34     | CC            | 3326               | 31.68 | 0             | 0.00        |               |                |              |
| 0                                            | 30-34     | Ecig          | 0                  | 0.00  |               |             |               |                |              |
| 0                                            | 30-34     | Dual          | 0                  | 0.00  |               |             |               |                |              |
| 0                                            | 30-34     | Former        | 1886               | 17.96 |               |             | 4.36          | 566            | 30.01        |
| Year of Follow-up: 1990, Age Group: 35-39    |           |               |                    |       |               |             |               |                |              |
| Period                                       | Age Group | Smoking Group | N                  | %     | Ever Quit (N) | Ever Quit % | Mean Yrs Quit | Short Term (n) | Short Term % |
| 0                                            | 35-39     | Never Any     | 5018               | 52.27 |               |             |               |                |              |
| 0                                            | 35-39     | CC            | 2653               | 27.64 | 0             | 0.00        |               |                |              |
| 0                                            | 35-39     | Ecig          | 0                  | 0.00  |               |             |               |                |              |
| 0                                            | 35-39     | Dual          | 0                  | 0.00  |               |             |               |                |              |
| 0                                            | 35-39     | Former        | 1929               | 20.09 |               |             | 7.96          | 324            | 16.80        |
| Year of Follow-up: 1990, Age Group: 40-44    |           |               |                    |       |               |             |               |                |              |
| Period                                       | Age Group | Smoking Group | N                  | %     | Ever Quit (N) | Ever Quit % | Mean Yrs Quit | Short Term (n) | Short Term % |
| 0                                            | 40-44     | Never Any     | 4356               | 51.27 |               |             |               |                |              |
| 0                                            | 40-44     | CC            | 2397               | 28.21 | 0             | 0.00        |               |                |              |
| 0                                            | 40-44     | Ecig          | 0                  | 0.00  |               |             |               |                |              |
| 0                                            | 40-44     | Dual          | 0                  | 0.00  |               |             |               |                |              |
| 0                                            | 40-44     | Former        | 1744               | 20.52 |               |             | 7.33          | 339            | 19.44        |
| Year of Follow-up: 1990, Age Group: 45-49    |           |               |                    |       |               |             |               |                |              |
| Period                                       | Age Group | Smoking Group | N                  | %     | Ever Quit (N) | Ever Quit % | Mean Yrs Quit | Short Term (n) | Short Term % |
| 0                                            | 45-49     | Never Any     | 3116               | 47.67 |               |             |               |                |              |
| 0                                            | 45-49     | CC            | 1875               | 28.69 | 0             | 0.00        |               |                |              |
| 0                                            | 45-49     | Ecig          | 0                  | 0.00  |               |             |               |                |              |
| 0                                            | 45-49     | Dual          | 0                  | 0.00  |               |             |               |                |              |
| 0                                            | 45-49     | Former        | 1545               | 23.64 |               |             | 12.55         | 194            | 12.56        |
| Year of Follow-up: 1990, Age Group: 50-54    |           |               |                    |       |               |             |               |                |              |
| Period                                       | Age Group | Smoking Group | N                  | %     | Ever Quit (N) | Ever Quit % | Mean Yrs Quit | Short Term (n) | Short Term % |
| 0                                            | 50-54     | Never Any     | 2684               | 48.50 |               |             |               |                |              |
| 0                                            | 50-54     | CC            | 1572               | 28.41 | 0             | 0.00        |               |                |              |

**Results for PHIM for Run 2 (Sensitivity\_Analysis\_4.RTF)**

|                                              |           |               |       |       |               |             |               |                |              |
|----------------------------------------------|-----------|---------------|-------|-------|---------------|-------------|---------------|----------------|--------------|
| 0                                            | 50-54     | Ecig          | 0     | 0.00  |               |             |               |                |              |
| 0                                            | 50-54     | Dual          | 0     | 0.00  |               |             |               |                |              |
| 0                                            | 50-54     | Former        | 1278  | 23.09 |               |             | 13.28         | 126            | 9.86         |
| Year of Follow-up: 1990, Age Group: 55-59    |           |               |       |       |               |             |               |                |              |
| Period                                       | Age Group | Smoking Group | N     | %     | Ever Quit (N) | Ever Quit % | Mean Yrs Quit | Short Term (n) | Short Term % |
| 0                                            | 55-59     | Never Any     | 2732  | 51.90 |               |             |               |                |              |
| 0                                            | 55-59     | CC            | 1295  | 24.60 | 0             | 0.00        |               |                |              |
| 0                                            | 55-59     | Ecig          | 0     | 0.00  |               |             |               |                |              |
| 0                                            | 55-59     | Dual          | 0     | 0.00  |               |             |               |                |              |
| 0                                            | 55-59     | Former        | 1237  | 23.50 |               |             | 17.26         | 90             | 7.28         |
| Year of Follow-up: 1990, Age Group: 60-64    |           |               |       |       |               |             |               |                |              |
| Period                                       | Age Group | Smoking Group | N     | %     | Ever Quit (N) | Ever Quit % | Mean Yrs Quit | Short Term (n) | Short Term % |
| 0                                            | 60-64     | Never Any     | 3078  | 55.72 |               |             |               |                |              |
| 0                                            | 60-64     | CC            | 1249  | 22.61 | 0             | 0.00        |               |                |              |
| 0                                            | 60-64     | Ecig          | 0     | 0.00  |               |             |               |                |              |
| 0                                            | 60-64     | Dual          | 0     | 0.00  |               |             |               |                |              |
| 0                                            | 60-64     | Former        | 1197  | 21.67 |               |             | 18.28         | 61             | 5.10         |
| Year of Follow-up: 1990, Age Group: 65-69    |           |               |       |       |               |             |               |                |              |
| Period                                       | Age Group | Smoking Group | N     | %     | Ever Quit (N) | Ever Quit % | Mean Yrs Quit | Short Term (n) | Short Term % |
| 0                                            | 65-69     | Never Any     | 3042  | 57.36 |               |             |               |                |              |
| 0                                            | 65-69     | CC            | 976   | 18.40 | 0             | 0.00        |               |                |              |
| 0                                            | 65-69     | Ecig          | 0     | 0.00  |               |             |               |                |              |
| 0                                            | 65-69     | Dual          | 0     | 0.00  |               |             |               |                |              |
| 0                                            | 65-69     | Former        | 1285  | 24.23 |               |             | 20.65         | 68             | 5.29         |
| Year of Follow-up: 1990, Age Group: 70-74    |           |               |       |       |               |             |               |                |              |
| Period                                       | Age Group | Smoking Group | N     | %     | Ever Quit (N) | Ever Quit % | Mean Yrs Quit | Short Term (n) | Short Term % |
| 0                                            | 70-74     | Never Any     | 2738  | 61.05 |               |             |               |                |              |
| 0                                            | 70-74     | CC            | 610   | 13.60 | 0             | 0.00        |               |                |              |
| 0                                            | 70-74     | Ecig          | 0     | 0.00  |               |             |               |                |              |
| 0                                            | 70-74     | Dual          | 0     | 0.00  |               |             |               |                |              |
| 0                                            | 70-74     | Former        | 1137  | 25.35 |               |             | 24.48         | 27             | 2.37         |
| Year of Follow-up: 1990, Age Group: 75-79    |           |               |       |       |               |             |               |                |              |
| Period                                       | Age Group | Smoking Group | N     | %     | Ever Quit (N) | Ever Quit % | Mean Yrs Quit | Short Term (n) | Short Term % |
| 0                                            | 75-79     | Never Any     | 2483  | 68.84 |               |             |               |                |              |
| 0                                            | 75-79     | CC            | 354   | 9.81  | 0             | 0.00        |               |                |              |
| 0                                            | 75-79     | Ecig          | 0     | 0.00  |               |             |               |                |              |
| 0                                            | 75-79     | Dual          | 0     | 0.00  |               |             |               |                |              |
| 0                                            | 75-79     | Former        | 770   | 21.35 |               |             | 24.48         | 24             | 3.12         |
| Year of Follow-up: 1995, Age Group: All Ages |           |               |       |       |               |             |               |                |              |
| Period                                       | Age Group | Smoking Group | N     | %     | Ever Quit (N) | Ever Quit % | Mean Yrs Quit | Short Term (n) | Short Term % |
| 5                                            | All Ages  | Never Any     | 51349 | 56.03 |               |             |               |                |              |
| 5                                            | All Ages  | CC            | 10674 | 11.65 | 0             | 0.00        |               |                |              |
| 5                                            | All Ages  | Ecig          | 11260 | 12.29 |               |             |               |                |              |
| 5                                            | All Ages  | Dual          | 0     | 0.00  |               |             |               |                |              |
| 5                                            | All Ages  | Former        | 18356 | 20.03 |               |             | 14.22         | 1104           | 6.01         |
| Year of Follow-up: 1995, Age Group: 18-19    |           |               |       |       |               |             |               |                |              |
| Period                                       | Age Group | Smoking Group | N     | %     | Ever Quit (N) | Ever Quit % | Mean Yrs Quit | Short Term (n) | Short Term % |
| 5                                            | 18-19     | Never Any     | 2616  | 82.37 |               |             |               |                |              |
| 5                                            | 18-19     | CC            | 240   | 7.56  | 0             | 0.00        |               |                |              |
| 5                                            | 18-19     | Ecig          | 257   | 8.09  |               |             |               |                |              |
| 5                                            | 18-19     | Dual          | 0     | 0.00  |               |             |               |                |              |
| 5                                            | 18-19     | Former        | 63    | 1.98  |               |             | 1.16          | 40             | 63.49        |
| Year of Follow-up: 1995, Age Group: 20-24    |           |               |       |       |               |             |               |                |              |
| Period                                       | Age Group | Smoking Group | N     | %     | Ever Quit (N) | Ever Quit % | Mean Yrs Quit | Short Term (n) | Short Term % |
| 5                                            | 20-24     | Never Any     | 6054  | 72.50 |               |             |               |                |              |
| 5                                            | 20-24     | CC            | 870   | 10.42 | 0             | 0.00        |               |                |              |
| 5                                            | 20-24     | Ecig          | 1002  | 12.00 |               |             |               |                |              |
| 5                                            | 20-24     | Dual          | 0     | 0.00  |               |             |               |                |              |
| 5                                            | 20-24     | Former        | 424   | 5.08  |               |             | 3.32          | 94             | 22.17        |
| Year of Follow-up: 1995, Age Group: 25-29    |           |               |       |       |               |             |               |                |              |
| Period                                       | Age Group | Smoking Group | N     | %     | Ever Quit (N) | Ever Quit % | Mean Yrs Quit | Short Term (n) | Short Term % |
| 5                                            | 25-29     | Never Any     | 5324  | 60.55 |               |             |               |                |              |
| 5                                            | 25-29     | CC            | 1062  | 12.08 | 0             | 0.00        |               |                |              |
| 5                                            | 25-29     | Ecig          | 1384  | 15.74 |               |             |               |                |              |
| 5                                            | 25-29     | Dual          | 0     | 0.00  |               |             |               |                |              |
| 5                                            | 25-29     | Former        | 1023  | 11.63 |               |             | 5.94          | 54             | 5.28         |
| Year of Follow-up: 1995, Age Group: 30-34    |           |               |       |       |               |             |               |                |              |
| Period                                       | Age Group | Smoking Group | N     | %     | Ever Quit (N) | Ever Quit % | Mean Yrs Quit | Short Term (n) | Short Term % |

**Results for PHIM for Run 2 (Sensitivity\_Analysis\_4.RTF)**

|                                              |           |               |      |       |               |             |               |                |              |
|----------------------------------------------|-----------|---------------|------|-------|---------------|-------------|---------------|----------------|--------------|
| 5                                            | 30-34     | Never Any     | 5309 | 52.68 |               |             |               |                |              |
| 5                                            | 30-34     | CC            | 1373 | 13.62 | 0             | 0.00        |               |                |              |
| 5                                            | 30-34     | Ecig          | 1798 | 17.84 |               |             |               |                |              |
| 5                                            | 30-34     | Dual          | 0    | 0.00  |               |             |               |                |              |
| 5                                            | 30-34     | Former        | 1598 | 15.86 |               |             | 8.17          | 66             | 4.13         |
| Year of Follow-up: 1995, Age Group: 35-39    |           |               |      |       |               |             |               |                |              |
| Period                                       | Age Group | Smoking Group | N    | %     | Ever Quit (N) | Ever Quit % | Mean Yrs Quit | Short Term (n) | Short Term % |
| 5                                            | 35-39     | Never Any     | 5282 | 50.31 |               |             |               |                |              |
| 5                                            | 35-39     | CC            | 1410 | 13.43 | 0             | 0.00        |               |                |              |
| 5                                            | 35-39     | Ecig          | 1742 | 16.59 |               |             |               |                |              |
| 5                                            | 35-39     | Dual          | 0    | 0.00  |               |             |               |                |              |
| 5                                            | 35-39     | Former        | 2065 | 19.67 |               |             | 8.75          | 62             | 3.00         |
| Year of Follow-up: 1995, Age Group: 40-44    |           |               |      |       |               |             |               |                |              |
| Period                                       | Age Group | Smoking Group | N    | %     | Ever Quit (N) | Ever Quit % | Mean Yrs Quit | Short Term (n) | Short Term % |
| 5                                            | 40-44     | Never Any     | 5018 | 52.27 |               |             |               |                |              |
| 5                                            | 40-44     | CC            | 1135 | 11.82 | 0             | 0.00        |               |                |              |
| 5                                            | 40-44     | Ecig          | 1356 | 14.13 |               |             |               |                |              |
| 5                                            | 40-44     | Dual          | 0    | 0.00  |               |             |               |                |              |
| 5                                            | 40-44     | Former        | 2091 | 21.78 |               |             | 12.09         | 81             | 3.87         |
| Year of Follow-up: 1995, Age Group: 45-49    |           |               |      |       |               |             |               |                |              |
| Period                                       | Age Group | Smoking Group | N    | %     | Ever Quit (N) | Ever Quit % | Mean Yrs Quit | Short Term (n) | Short Term % |
| 5                                            | 45-49     | Never Any     | 4356 | 51.27 |               |             |               |                |              |
| 5                                            | 45-49     | CC            | 974  | 11.46 | 0             | 0.00        |               |                |              |
| 5                                            | 45-49     | Ecig          | 1161 | 13.66 |               |             |               |                |              |
| 5                                            | 45-49     | Dual          | 0    | 0.00  |               |             |               |                |              |
| 5                                            | 45-49     | Former        | 2006 | 23.61 |               |             | 10.93         | 133            | 6.63         |
| Year of Follow-up: 1995, Age Group: 50-54    |           |               |      |       |               |             |               |                |              |
| Period                                       | Age Group | Smoking Group | N    | %     | Ever Quit (N) | Ever Quit % | Mean Yrs Quit | Short Term (n) | Short Term % |
| 5                                            | 50-54     | Never Any     | 3116 | 47.67 |               |             |               |                |              |
| 5                                            | 50-54     | CC            | 739  | 11.31 | 0             | 0.00        |               |                |              |
| 5                                            | 50-54     | Ecig          | 826  | 12.64 |               |             |               |                |              |
| 5                                            | 50-54     | Dual          | 0    | 0.00  |               |             |               |                |              |
| 5                                            | 50-54     | Former        | 1855 | 28.38 |               |             | 14.92         | 140            | 7.55         |
| Year of Follow-up: 1995, Age Group: 55-59    |           |               |      |       |               |             |               |                |              |
| Period                                       | Age Group | Smoking Group | N    | %     | Ever Quit (N) | Ever Quit % | Mean Yrs Quit | Short Term (n) | Short Term % |
| 5                                            | 55-59     | Never Any     | 2684 | 48.50 |               |             |               |                |              |
| 5                                            | 55-59     | CC            | 722  | 13.05 | 0             | 0.00        |               |                |              |
| 5                                            | 55-59     | Ecig          | 627  | 11.33 |               |             |               |                |              |
| 5                                            | 55-59     | Dual          | 0    | 0.00  |               |             |               |                |              |
| 5                                            | 55-59     | Former        | 1501 | 27.12 |               |             | 15.84         | 93             | 6.20         |
| Year of Follow-up: 1995, Age Group: 60-64    |           |               |      |       |               |             |               |                |              |
| Period                                       | Age Group | Smoking Group | N    | %     | Ever Quit (N) | Ever Quit % | Mean Yrs Quit | Short Term (n) | Short Term % |
| 5                                            | 60-64     | Never Any     | 2732 | 51.90 |               |             |               |                |              |
| 5                                            | 60-64     | CC            | 633  | 12.03 | 0             | 0.00        |               |                |              |
| 5                                            | 60-64     | Ecig          | 444  | 8.43  |               |             |               |                |              |
| 5                                            | 60-64     | Dual          | 0    | 0.00  |               |             |               |                |              |
| 5                                            | 60-64     | Former        | 1455 | 27.64 |               |             | 19.22         | 87             | 5.98         |
| Year of Follow-up: 1995, Age Group: 65-69    |           |               |      |       |               |             |               |                |              |
| Period                                       | Age Group | Smoking Group | N    | %     | Ever Quit (N) | Ever Quit % | Mean Yrs Quit | Short Term (n) | Short Term % |
| 5                                            | 65-69     | Never Any     | 3078 | 55.72 |               |             |               |                |              |
| 5                                            | 65-69     | CC            | 602  | 10.90 | 0             | 0.00        |               |                |              |
| 5                                            | 65-69     | Ecig          | 374  | 6.77  |               |             |               |                |              |
| 5                                            | 65-69     | Dual          | 0    | 0.00  |               |             |               |                |              |
| 5                                            | 65-69     | Former        | 1470 | 26.61 |               |             | 19.34         | 107            | 7.28         |
| Year of Follow-up: 1995, Age Group: 70-74    |           |               |      |       |               |             |               |                |              |
| Period                                       | Age Group | Smoking Group | N    | %     | Ever Quit (N) | Ever Quit % | Mean Yrs Quit | Short Term (n) | Short Term % |
| 5                                            | 70-74     | Never Any     | 3042 | 57.36 |               |             |               |                |              |
| 5                                            | 70-74     | CC            | 577  | 10.88 | 0             | 0.00        |               |                |              |
| 5                                            | 70-74     | Ecig          | 188  | 3.55  |               |             |               |                |              |
| 5                                            | 70-74     | Dual          | 0    | 0.00  |               |             |               |                |              |
| 5                                            | 70-74     | Former        | 1496 | 28.21 |               |             | 22.32         | 77             | 5.15         |
| Year of Follow-up: 1995, Age Group: 75-79    |           |               |      |       |               |             |               |                |              |
| Period                                       | Age Group | Smoking Group | N    | %     | Ever Quit (N) | Ever Quit % | Mean Yrs Quit | Short Term (n) | Short Term % |
| 5                                            | 75-79     | Never Any     | 2738 | 61.05 |               |             |               |                |              |
| 5                                            | 75-79     | CC            | 337  | 7.51  | 0             | 0.00        |               |                |              |
| 5                                            | 75-79     | Ecig          | 101  | 2.25  |               |             |               |                |              |
| 5                                            | 75-79     | Dual          | 0    | 0.00  |               |             |               |                |              |
| 5                                            | 75-79     | Former        | 1309 | 29.19 |               |             | 25.87         | 70             | 5.35         |
| Year of Follow-up: 2000, Age Group: All Ages |           |               |      |       |               |             |               |                |              |

**Results for PHIM for Run 2 (Sensitivity\_Analysis\_4.RTF)**

| Period                                    | Age Group | Smoking Group | N     | %     | Ever Quit (N) | Ever Quit % | Mean Yrs Quit | Short Term (n) | Short Term % |
|-------------------------------------------|-----------|---------------|-------|-------|---------------|-------------|---------------|----------------|--------------|
| 10                                        | All Ages  | Never Any     | 51614 | 56.16 |               |             |               |                |              |
| 10                                        | All Ages  | CC            | 4619  | 5.03  | 0             | 0.00        |               |                |              |
| 10                                        | All Ages  | Ecig          | 14660 | 15.95 |               |             |               |                |              |
| 10                                        | All Ages  | Dual          | 0     | 0.00  |               |             |               |                |              |
| 10                                        | All Ages  | Former        | 21015 | 22.87 |               |             | 15.24         | 1645           | 7.83         |
| Year of Follow-up: 2000, Age Group: 18-19 |           |               |       |       |               |             |               |                |              |
| Period                                    | Age Group | Smoking Group | N     | %     | Ever Quit (N) | Ever Quit % | Mean Yrs Quit | Short Term (n) | Short Term % |
| 10                                        | 18-19     | Never Any     | 0     | .     |               |             |               |                |              |
| 10                                        | 18-19     | CC            | 0     | .     | 0             | .           |               |                |              |
| 10                                        | 18-19     | Ecig          | 0     | .     |               |             |               |                |              |
| 10                                        | 18-19     | Dual          | 0     | .     |               |             |               |                |              |
| 10                                        | 18-19     | Former        | 0     | .     |               |             |               | 0              | .            |
| Year of Follow-up: 2000, Age Group: 20-24 |           |               |       |       |               |             |               |                |              |
| Period                                    | Age Group | Smoking Group | N     | %     | Ever Quit (N) | Ever Quit % | Mean Yrs Quit | Short Term (n) | Short Term % |
| 10                                        | 20-24     | Never Any     | 5878  | 74.12 |               |             |               |                |              |
| 10                                        | 20-24     | CC            | 391   | 4.93  | 0             | 0.00        |               |                |              |
| 10                                        | 20-24     | Ecig          | 1165  | 14.69 |               |             |               |                |              |
| 10                                        | 20-24     | Dual          | 0     | 0.00  |               |             |               |                |              |
| 10                                        | 20-24     | Former        | 496   | 6.25  |               |             | 3.64          | 122            | 24.60        |
| Year of Follow-up: 2000, Age Group: 25-29 |           |               |       |       |               |             |               |                |              |
| Period                                    | Age Group | Smoking Group | N     | %     | Ever Quit (N) | Ever Quit % | Mean Yrs Quit | Short Term (n) | Short Term % |
| 10                                        | 25-29     | Never Any     | 5869  | 70.29 |               |             |               |                |              |
| 10                                        | 25-29     | CC            | 403   | 4.83  | 0             | 0.00        |               |                |              |
| 10                                        | 25-29     | Ecig          | 1381  | 16.54 |               |             |               |                |              |
| 10                                        | 25-29     | Dual          | 0     | 0.00  |               |             |               |                |              |
| 10                                        | 25-29     | Former        | 697   | 8.35  |               |             | 5.83          | 105            | 15.06        |
| Year of Follow-up: 2000, Age Group: 30-34 |           |               |       |       |               |             |               |                |              |
| Period                                    | Age Group | Smoking Group | N     | %     | Ever Quit (N) | Ever Quit % | Mean Yrs Quit | Short Term (n) | Short Term % |
| 10                                        | 30-34     | Never Any     | 5261  | 59.83 |               |             |               |                |              |
| 10                                        | 30-34     | CC            | 417   | 4.74  | 0             | 0.00        |               |                |              |
| 10                                        | 30-34     | Ecig          | 1864  | 21.20 |               |             |               |                |              |
| 10                                        | 30-34     | Dual          | 0     | 0.00  |               |             |               |                |              |
| 10                                        | 30-34     | Former        | 1251  | 14.23 |               |             | 9.30          | 88             | 7.03         |
| Year of Follow-up: 2000, Age Group: 35-39 |           |               |       |       |               |             |               |                |              |
| Period                                    | Age Group | Smoking Group | N     | %     | Ever Quit (N) | Ever Quit % | Mean Yrs Quit | Short Term (n) | Short Term % |
| 10                                        | 35-39     | Never Any     | 5298  | 52.57 |               |             |               |                |              |
| 10                                        | 35-39     | CC            | 561   | 5.57  | 0             | 0.00        |               |                |              |
| 10                                        | 35-39     | Ecig          | 2401  | 23.82 |               |             |               |                |              |
| 10                                        | 35-39     | Dual          | 0     | 0.00  |               |             |               |                |              |
| 10                                        | 35-39     | Former        | 1818  | 18.04 |               |             | 11.78         | 104            | 5.72         |
| Year of Follow-up: 2000, Age Group: 40-44 |           |               |       |       |               |             |               |                |              |
| Period                                    | Age Group | Smoking Group | N     | %     | Ever Quit (N) | Ever Quit % | Mean Yrs Quit | Short Term (n) | Short Term % |
| 10                                        | 40-44     | Never Any     | 5282  | 50.31 |               |             |               |                |              |
| 10                                        | 40-44     | CC            | 584   | 5.56  | 0             | 0.00        |               |                |              |
| 10                                        | 40-44     | Ecig          | 2288  | 21.79 |               |             |               |                |              |
| 10                                        | 40-44     | Dual          | 0     | 0.00  |               |             |               |                |              |
| 10                                        | 40-44     | Former        | 2345  | 22.34 |               |             | 12.30         | 143            | 6.10         |
| Year of Follow-up: 2000, Age Group: 45-49 |           |               |       |       |               |             |               |                |              |
| Period                                    | Age Group | Smoking Group | N     | %     | Ever Quit (N) | Ever Quit % | Mean Yrs Quit | Short Term (n) | Short Term % |
| 10                                        | 45-49     | Never Any     | 5018  | 52.27 |               |             |               |                |              |
| 10                                        | 45-49     | CC            | 446   | 4.65  | 0             | 0.00        |               |                |              |
| 10                                        | 45-49     | Ecig          | 1673  | 17.43 |               |             |               |                |              |
| 10                                        | 45-49     | Dual          | 0     | 0.00  |               |             |               |                |              |
| 10                                        | 45-49     | Former        | 2463  | 25.66 |               |             | 14.76         | 181            | 7.35         |
| Year of Follow-up: 2000, Age Group: 50-54 |           |               |       |       |               |             |               |                |              |
| Period                                    | Age Group | Smoking Group | N     | %     | Ever Quit (N) | Ever Quit % | Mean Yrs Quit | Short Term (n) | Short Term % |
| 10                                        | 50-54     | Never Any     | 4356  | 51.27 |               |             |               |                |              |
| 10                                        | 50-54     | CC            | 378   | 4.45  | 0             | 0.00        |               |                |              |
| 10                                        | 50-54     | Ecig          | 1299  | 15.29 |               |             |               |                |              |
| 10                                        | 50-54     | Dual          | 0     | 0.00  |               |             |               |                |              |
| 10                                        | 50-54     | Former        | 2464  | 29.00 |               |             | 13.32         | 188            | 7.63         |
| Year of Follow-up: 2000, Age Group: 55-59 |           |               |       |       |               |             |               |                |              |
| Period                                    | Age Group | Smoking Group | N     | %     | Ever Quit (N) | Ever Quit % | Mean Yrs Quit | Short Term (n) | Short Term % |
| 10                                        | 55-59     | Never Any     | 3116  | 47.67 |               |             |               |                |              |
| 10                                        | 55-59     | CC            | 283   | 4.33  | 0             | 0.00        |               |                |              |
| 10                                        | 55-59     | Ecig          | 912   | 13.95 |               |             |               |                |              |
| 10                                        | 55-59     | Dual          | 0     | 0.00  |               |             |               |                |              |

**Results for PHIM for Run 2 (Sensitivity\_Analysis\_4.RTF)**

| Year of Follow-up: 2000, Age Group: 60-64    | Period   | Age Group | Smoking Group | N     | %     | Ever Quit (N) | Ever Quit % | Mean Yrs Quit | Short Term (n) | Short Term % |
|----------------------------------------------|----------|-----------|---------------|-------|-------|---------------|-------------|---------------|----------------|--------------|
| 10                                           | 55-59    | Former    |               | 2225  | 34.04 |               |             | 16.92         | 157            | 7.06         |
| 10                                           | 60-64    | Never Any |               | 2684  | 48.50 |               |             |               |                |              |
| 10                                           | 60-64    | CC        |               | 334   | 6.04  | 0             | 0.00        |               |                |              |
| 10                                           | 60-64    | Ecig      |               | 663   | 11.98 |               |             |               |                |              |
| 10                                           | 60-64    | Dual      |               | 0     | 0.00  |               |             |               |                |              |
| 10                                           | 60-64    | Former    |               | 1853  | 33.48 |               |             | 17.23         | 149            | 8.04         |
| Year of Follow-up: 2000, Age Group: 65-69    | Period   | Age Group | Smoking Group | N     | %     | Ever Quit (N) | Ever Quit % | Mean Yrs Quit | Short Term (n) | Short Term % |
| 10                                           | 65-69    | Never Any |               | 2732  | 51.90 |               |             |               |                |              |
| 10                                           | 65-69    | CC        |               | 280   | 5.32  | 0             | 0.00        |               |                |              |
| 10                                           | 65-69    | Ecig      |               | 443   | 8.42  |               |             |               |                |              |
| 10                                           | 65-69    | Dual      |               | 0     | 0.00  |               |             |               |                |              |
| 10                                           | 65-69    | Former    |               | 1809  | 34.37 |               |             | 19.85         | 146            | 8.07         |
| Year of Follow-up: 2000, Age Group: 70-74    | Period   | Age Group | Smoking Group | N     | %     | Ever Quit (N) | Ever Quit % | Mean Yrs Quit | Short Term (n) | Short Term % |
| 10                                           | 70-74    | Never Any |               | 3078  | 55.72 |               |             |               |                |              |
| 10                                           | 70-74    | CC        |               | 274   | 4.96  | 0             | 0.00        |               |                |              |
| 10                                           | 70-74    | Ecig      |               | 368   | 6.66  |               |             |               |                |              |
| 10                                           | 70-74    | Dual      |               | 0     | 0.00  |               |             |               |                |              |
| 10                                           | 70-74    | Former    |               | 1804  | 32.66 |               |             | 20.18         | 154            | 8.54         |
| Year of Follow-up: 2000, Age Group: 75-79    | Period   | Age Group | Smoking Group | N     | %     | Ever Quit (N) | Ever Quit % | Mean Yrs Quit | Short Term (n) | Short Term % |
| 10                                           | 75-79    | Never Any |               | 3042  | 57.36 |               |             |               |                |              |
| 10                                           | 75-79    | CC        |               | 268   | 5.05  | 0             | 0.00        |               |                |              |
| 10                                           | 75-79    | Ecig      |               | 203   | 3.83  |               |             |               |                |              |
| 10                                           | 75-79    | Dual      |               | 0     | 0.00  |               |             |               |                |              |
| 10                                           | 75-79    | Former    |               | 1790  | 33.75 |               |             | 23.17         | 108            | 6.03         |
| Year of Follow-up: 2005, Age Group: All Ages | Period   | Age Group | Smoking Group | N     | %     | Ever Quit (N) | Ever Quit % | Mean Yrs Quit | Short Term (n) | Short Term % |
| 15                                           | All Ages | Never Any |               | 48334 | 55.81 |               |             |               |                |              |
| 15                                           | All Ages | CC        |               | 1904  | 2.20  | 0             | 0.00        |               |                |              |
| 15                                           | All Ages | Ecig      |               | 14630 | 16.89 |               |             |               |                |              |
| 15                                           | All Ages | Dual      |               | 0     | 0.00  |               |             |               |                |              |
| 15                                           | All Ages | Former    |               | 21737 | 25.10 |               |             | 17.50         | 892            | 4.10         |
| Year of Follow-up: 2005, Age Group: 18-19    | Period   | Age Group | Smoking Group | N     | %     | Ever Quit (N) | Ever Quit % | Mean Yrs Quit | Short Term (n) | Short Term % |
| 15                                           | 18-19    | Never Any |               | 0     | .     |               |             |               |                |              |
| 15                                           | 18-19    | CC        |               | 0     | .     | 0             | .           |               |                |              |
| 15                                           | 18-19    | Ecig      |               | 0     | .     |               |             |               |                |              |
| 15                                           | 18-19    | Dual      |               | 0     | .     |               |             |               |                |              |
| 15                                           | 18-19    | Former    |               | 0     | .     |               |             | .             | 0              | .            |
| Year of Follow-up: 2005, Age Group: 20-24    | Period   | Age Group | Smoking Group | N     | %     | Ever Quit (N) | Ever Quit % | Mean Yrs Quit | Short Term (n) | Short Term % |
| 15                                           | 20-24    | Never Any |               | 0     | .     |               |             |               |                |              |
| 15                                           | 20-24    | CC        |               | 0     | .     | 0             | .           |               |                |              |
| 15                                           | 20-24    | Ecig      |               | 0     | .     |               |             |               |                |              |
| 15                                           | 20-24    | Dual      |               | 0     | .     |               |             |               |                |              |
| 15                                           | 20-24    | Former    |               | 0     | .     |               |             | .             | 0              | .            |
| Year of Follow-up: 2005, Age Group: 25-29    | Period   | Age Group | Smoking Group | N     | %     | Ever Quit (N) | Ever Quit % | Mean Yrs Quit | Short Term (n) | Short Term % |
| 15                                           | 25-29    | Never Any |               | 5707  | 71.97 |               |             |               |                |              |
| 15                                           | 25-29    | CC        |               | 178   | 2.24  | 0             | 0.00        |               |                |              |
| 15                                           | 25-29    | Ecig      |               | 1325  | 16.71 |               |             |               |                |              |
| 15                                           | 25-29    | Dual      |               | 0     | 0.00  |               |             |               |                |              |
| 15                                           | 25-29    | Former    |               | 720   | 9.08  |               |             | 6.72          | 66             | 9.17         |
| Year of Follow-up: 2005, Age Group: 30-34    | Period   | Age Group | Smoking Group | N     | %     | Ever Quit (N) | Ever Quit % | Mean Yrs Quit | Short Term (n) | Short Term % |
| 15                                           | 30-34    | Never Any |               | 5816  | 69.65 |               |             |               |                |              |
| 15                                           | 30-34    | CC        |               | 151   | 1.81  | 0             | 0.00        |               |                |              |
| 15                                           | 30-34    | Ecig      |               | 1511  | 18.10 |               |             |               |                |              |
| 15                                           | 30-34    | Dual      |               | 0     | 0.00  |               |             |               |                |              |
| 15                                           | 30-34    | Former    |               | 872   | 10.44 |               |             | 9.05          | 66             | 7.57         |
| Year of Follow-up: 2005, Age Group: 35-39    | Period   | Age Group | Smoking Group | N     | %     | Ever Quit (N) | Ever Quit % | Mean Yrs Quit | Short Term (n) | Short Term % |
| 15                                           | 35-39    | Never Any |               | 5247  | 59.67 |               |             |               |                |              |
| 15                                           | 35-39    | CC        |               | 167   | 1.90  | 0             | 0.00        |               |                |              |

**Results for PHIM for Run 2 (Sensitivity\_Analysis\_4.RTF)**

|                                              |           |               |       |       |               |             |               |                |              |
|----------------------------------------------|-----------|---------------|-------|-------|---------------|-------------|---------------|----------------|--------------|
| 15                                           | 35-39     | Ecig          | 1953  | 22.21 |               |             |               |                |              |
| 15                                           | 35-39     | Dual          | 0     | 0.00  |               |             |               |                |              |
| 15                                           | 35-39     | Former        | 1426  | 16.22 |               |             | 12.81         | 64             | 4.49         |
| Year of Follow-up: 2005, Age Group: 40-44    |           |               |       |       |               |             |               |                |              |
| Period                                       | Age Group | Smoking Group | N     | %     | Ever Quit (N) | Ever Quit % | Mean Yrs Quit | Short Term (n) | Short Term % |
| 15                                           | 40-44     | Never Any     | 5298  | 52.57 |               |             |               |                |              |
| 15                                           | 40-44     | CC            | 238   | 2.36  | 0             | 0.00        |               |                |              |
| 15                                           | 40-44     | Ecig          | 2490  | 24.71 |               |             |               |                |              |
| 15                                           | 40-44     | Dual          | 0     | 0.00  |               |             |               |                |              |
| 15                                           | 40-44     | Former        | 2052  | 20.36 |               |             | 15.10         | 101            | 4.92         |
| Year of Follow-up: 2005, Age Group: 45-49    |           |               |       |       |               |             |               |                |              |
| Period                                       | Age Group | Smoking Group | N     | %     | Ever Quit (N) | Ever Quit % | Mean Yrs Quit | Short Term (n) | Short Term % |
| 15                                           | 45-49     | Never Any     | 5282  | 50.31 |               |             |               |                |              |
| 15                                           | 45-49     | CC            | 237   | 2.26  | 0             | 0.00        |               |                |              |
| 15                                           | 45-49     | Ecig          | 2317  | 22.07 |               |             |               |                |              |
| 15                                           | 45-49     | Dual          | 0     | 0.00  |               |             |               |                |              |
| 15                                           | 45-49     | Former        | 2663  | 25.36 |               |             | 15.47         | 132            | 4.96         |
| Year of Follow-up: 2005, Age Group: 50-54    |           |               |       |       |               |             |               |                |              |
| Period                                       | Age Group | Smoking Group | N     | %     | Ever Quit (N) | Ever Quit % | Mean Yrs Quit | Short Term (n) | Short Term % |
| 15                                           | 50-54     | Never Any     | 5018  | 52.27 |               |             |               |                |              |
| 15                                           | 50-54     | CC            | 191   | 1.99  | 0             | 0.00        |               |                |              |
| 15                                           | 50-54     | Ecig          | 1622  | 16.90 |               |             |               |                |              |
| 15                                           | 50-54     | Dual          | 0     | 0.00  |               |             |               |                |              |
| 15                                           | 50-54     | Former        | 2769  | 28.84 |               |             | 17.84         | 99             | 3.58         |
| Year of Follow-up: 2005, Age Group: 55-59    |           |               |       |       |               |             |               |                |              |
| Period                                       | Age Group | Smoking Group | N     | %     | Ever Quit (N) | Ever Quit % | Mean Yrs Quit | Short Term (n) | Short Term % |
| 15                                           | 55-59     | Never Any     | 4356  | 51.27 |               |             |               |                |              |
| 15                                           | 55-59     | CC            | 166   | 1.95  | 0             | 0.00        |               |                |              |
| 15                                           | 55-59     | Ecig          | 1281  | 15.08 |               |             |               |                |              |
| 15                                           | 55-59     | Dual          | 0     | 0.00  |               |             |               |                |              |
| 15                                           | 55-59     | Former        | 2694  | 31.71 |               |             | 16.95         | 78             | 2.90         |
| Year of Follow-up: 2005, Age Group: 60-64    |           |               |       |       |               |             |               |                |              |
| Period                                       | Age Group | Smoking Group | N     | %     | Ever Quit (N) | Ever Quit % | Mean Yrs Quit | Short Term (n) | Short Term % |
| 15                                           | 60-64     | Never Any     | 3116  | 47.67 |               |             |               |                |              |
| 15                                           | 60-64     | CC            | 131   | 2.00  | 0             | 0.00        |               |                |              |
| 15                                           | 60-64     | Ecig          | 852   | 13.04 |               |             |               |                |              |
| 15                                           | 60-64     | Dual          | 0     | 0.00  |               |             |               |                |              |
| 15                                           | 60-64     | Former        | 2437  | 37.29 |               |             | 20.18         | 93             | 3.82         |
| Year of Follow-up: 2005, Age Group: 65-69    |           |               |       |       |               |             |               |                |              |
| Period                                       | Age Group | Smoking Group | N     | %     | Ever Quit (N) | Ever Quit % | Mean Yrs Quit | Short Term (n) | Short Term % |
| 15                                           | 65-69     | Never Any     | 2684  | 48.50 |               |             |               |                |              |
| 15                                           | 65-69     | CC            | 160   | 2.89  | 0             | 0.00        |               |                |              |
| 15                                           | 65-69     | Ecig          | 591   | 10.68 |               |             |               |                |              |
| 15                                           | 65-69     | Dual          | 0     | 0.00  |               |             |               |                |              |
| 15                                           | 65-69     | Former        | 2099  | 37.93 |               |             | 19.92         | 68             | 3.24         |
| Year of Follow-up: 2005, Age Group: 70-74    |           |               |       |       |               |             |               |                |              |
| Period                                       | Age Group | Smoking Group | N     | %     | Ever Quit (N) | Ever Quit % | Mean Yrs Quit | Short Term (n) | Short Term % |
| 15                                           | 70-74     | Never Any     | 2732  | 51.90 |               |             |               |                |              |
| 15                                           | 70-74     | CC            | 139   | 2.64  | 0             | 0.00        |               |                |              |
| 15                                           | 70-74     | Ecig          | 391   | 7.43  |               |             |               |                |              |
| 15                                           | 70-74     | Dual          | 0     | 0.00  |               |             |               |                |              |
| 15                                           | 70-74     | Former        | 2002  | 38.03 |               |             | 22.67         | 69             | 3.45         |
| Year of Follow-up: 2005, Age Group: 75-79    |           |               |       |       |               |             |               |                |              |
| Period                                       | Age Group | Smoking Group | N     | %     | Ever Quit (N) | Ever Quit % | Mean Yrs Quit | Short Term (n) | Short Term % |
| 15                                           | 75-79     | Never Any     | 3078  | 55.72 |               |             |               |                |              |
| 15                                           | 75-79     | CC            | 146   | 2.64  | 0             | 0.00        |               |                |              |
| 15                                           | 75-79     | Ecig          | 297   | 5.38  |               |             |               |                |              |
| 15                                           | 75-79     | Dual          | 0     | 0.00  |               |             |               |                |              |
| 15                                           | 75-79     | Former        | 2003  | 36.26 |               |             | 22.91         | 56             | 2.80         |
| Year of Follow-up: 2010, Age Group: All Ages |           |               |       |       |               |             |               |                |              |
| Period                                       | Age Group | Smoking Group | N     | %     | Ever Quit (N) | Ever Quit % | Mean Yrs Quit | Short Term (n) | Short Term % |
| 20                                           | All Ages  | Never Any     | 45150 | 55.69 |               |             |               |                |              |
| 20                                           | All Ages  | CC            | 769   | 0.95  | 0             | 0.00        |               |                |              |
| 20                                           | All Ages  | Ecig          | 12868 | 15.87 |               |             |               |                |              |
| 20                                           | All Ages  | Dual          | 0     | 0.00  |               |             |               |                |              |
| 20                                           | All Ages  | Former        | 22294 | 27.50 |               |             | 19.65         | 1065           | 4.78         |
| Year of Follow-up: 2010, Age Group: 18-19    |           |               |       |       |               |             |               |                |              |
| Period                                       | Age Group | Smoking Group | N     | %     | Ever Quit (N) | Ever Quit % | Mean Yrs Quit | Short Term (n) | Short Term % |

**Results for PHIM for Run 2 (Sensitivity\_Analysis\_4.RTF)**

|                                           |           |               |      |       |               |             |               |                |              |
|-------------------------------------------|-----------|---------------|------|-------|---------------|-------------|---------------|----------------|--------------|
| 20                                        | 18-19     | Never Any     | 0    | .     |               |             |               |                |              |
| 20                                        | 18-19     | CC            | 0    | .     | 0             | .           |               |                |              |
| 20                                        | 18-19     | Ecig          | 0    | .     |               |             |               |                |              |
| 20                                        | 18-19     | Dual          | 0    | .     |               |             |               |                |              |
| 20                                        | 18-19     | Former        | 0    | .     |               |             | 0             | .              |              |
| Year of Follow-up: 2010, Age Group: 20-24 |           |               |      |       |               |             |               |                |              |
| Period                                    | Age Group | Smoking Group | N    | %     | Ever Quit (N) | Ever Quit % | Mean Yrs Quit | Short Term (n) | Short Term % |
| 20                                        | 20-24     | Never Any     | 0    | .     |               |             |               |                |              |
| 20                                        | 20-24     | CC            | 0    | .     | 0             | .           |               |                |              |
| 20                                        | 20-24     | Ecig          | 0    | .     |               |             |               |                |              |
| 20                                        | 20-24     | Dual          | 0    | .     |               |             |               |                |              |
| 20                                        | 20-24     | Former        | 0    | .     |               |             |               | 0              | .            |
| Year of Follow-up: 2010, Age Group: 25-29 |           |               |      |       |               |             |               |                |              |
| Period                                    | Age Group | Smoking Group | N    | %     | Ever Quit (N) | Ever Quit % | Mean Yrs Quit | Short Term (n) | Short Term % |
| 20                                        | 25-29     | Never Any     | 0    | .     |               |             |               |                |              |
| 20                                        | 25-29     | CC            | 0    | .     | 0             | .           |               |                |              |
| 20                                        | 25-29     | Ecig          | 0    | .     |               |             |               |                |              |
| 20                                        | 25-29     | Dual          | 0    | .     |               |             |               |                |              |
| 20                                        | 25-29     | Former        | 0    | .     |               |             |               | 0              | .            |
| Year of Follow-up: 2010, Age Group: 30-34 |           |               |      |       |               |             |               |                |              |
| Period                                    | Age Group | Smoking Group | N    | %     | Ever Quit (N) | Ever Quit % | Mean Yrs Quit | Short Term (n) | Short Term % |
| 20                                        | 30-34     | Never Any     | 5635 | 71.06 |               |             |               |                |              |
| 20                                        | 30-34     | CC            | 68   | 0.86  | 0             | 0.00        |               |                |              |
| 20                                        | 30-34     | Ecig          | 1299 | 16.38 |               |             |               |                |              |
| 20                                        | 30-34     | Dual          | 0    | 0.00  |               |             |               |                |              |
| 20                                        | 30-34     | Former        | 928  | 11.70 |               |             | 9.48          | 99             | 10.67        |
| Year of Follow-up: 2010, Age Group: 35-39 |           |               |      |       |               |             |               |                |              |
| Period                                    | Age Group | Smoking Group | N    | %     | Ever Quit (N) | Ever Quit % | Mean Yrs Quit | Short Term (n) | Short Term % |
| 20                                        | 35-39     | Never Any     | 5782 | 69.25 |               |             |               |                |              |
| 20                                        | 35-39     | CC            | 59   | 0.71  | 0             | 0.00        |               |                |              |
| 20                                        | 35-39     | Ecig          | 1434 | 17.17 |               |             |               |                |              |
| 20                                        | 35-39     | Dual          | 0    | 0.00  |               |             |               |                |              |
| 20                                        | 35-39     | Former        | 1075 | 12.87 |               |             | 11.75         | 82             | 7.63         |
| Year of Follow-up: 2010, Age Group: 40-44 |           |               |      |       |               |             |               |                |              |
| Period                                    | Age Group | Smoking Group | N    | %     | Ever Quit (N) | Ever Quit % | Mean Yrs Quit | Short Term (n) | Short Term % |
| 20                                        | 40-44     | Never Any     | 5247 | 59.67 |               |             |               |                |              |
| 20                                        | 40-44     | CC            | 64   | 0.73  | 0             | 0.00        |               |                |              |
| 20                                        | 40-44     | Ecig          | 1806 | 20.54 |               |             |               |                |              |
| 20                                        | 40-44     | Dual          | 0    | 0.00  |               |             |               |                |              |
| 20                                        | 40-44     | Former        | 1676 | 19.06 |               |             | 15.43         | 109            | 6.50         |
| Year of Follow-up: 2010, Age Group: 45-49 |           |               |      |       |               |             |               |                |              |
| Period                                    | Age Group | Smoking Group | N    | %     | Ever Quit (N) | Ever Quit % | Mean Yrs Quit | Short Term (n) | Short Term % |
| 20                                        | 45-49     | Never Any     | 5298 | 52.57 |               |             |               |                |              |
| 20                                        | 45-49     | CC            | 105  | 1.04  | 0             | 0.00        |               |                |              |
| 20                                        | 45-49     | Ecig          | 2319 | 23.01 |               |             |               |                |              |
| 20                                        | 45-49     | Dual          | 0    | 0.00  |               |             |               |                |              |
| 20                                        | 45-49     | Former        | 2356 | 23.38 |               |             | 17.74         | 129            | 5.48         |
| Year of Follow-up: 2010, Age Group: 50-54 |           |               |      |       |               |             |               |                |              |
| Period                                    | Age Group | Smoking Group | N    | %     | Ever Quit (N) | Ever Quit % | Mean Yrs Quit | Short Term (n) | Short Term % |
| 20                                        | 50-54     | Never Any     | 5282 | 50.31 |               |             |               |                |              |
| 20                                        | 50-54     | CC            | 101  | 0.96  | 0             | 0.00        |               |                |              |
| 20                                        | 50-54     | Ecig          | 2100 | 20.00 |               |             |               |                |              |
| 20                                        | 50-54     | Dual          | 0    | 0.00  |               |             |               |                |              |
| 20                                        | 50-54     | Former        | 3016 | 28.73 |               |             | 18.29         | 163            | 5.40         |
| Year of Follow-up: 2010, Age Group: 55-59 |           |               |      |       |               |             |               |                |              |
| Period                                    | Age Group | Smoking Group | N    | %     | Ever Quit (N) | Ever Quit % | Mean Yrs Quit | Short Term (n) | Short Term % |
| 20                                        | 55-59     | Never Any     | 5018 | 52.27 |               |             |               |                |              |
| 20                                        | 55-59     | CC            | 91   | 0.95  | 0             | 0.00        |               |                |              |
| 20                                        | 55-59     | Ecig          | 1433 | 14.93 |               |             |               |                |              |
| 20                                        | 55-59     | Dual          | 0    | 0.00  |               |             |               |                |              |
| 20                                        | 55-59     | Former        | 3058 | 31.85 |               |             | 20.88         | 103            | 3.37         |
| Year of Follow-up: 2010, Age Group: 60-64 |           |               |      |       |               |             |               |                |              |
| Period                                    | Age Group | Smoking Group | N    | %     | Ever Quit (N) | Ever Quit % | Mean Yrs Quit | Short Term (n) | Short Term % |
| 20                                        | 60-64     | Never Any     | 4356 | 51.27 |               |             |               |                |              |
| 20                                        | 60-64     | CC            | 71   | 0.84  | 0             | 0.00        |               |                |              |
| 20                                        | 60-64     | Ecig          | 1079 | 12.70 |               |             |               |                |              |
| 20                                        | 60-64     | Dual          | 0    | 0.00  |               |             |               |                |              |
| 20                                        | 60-64     | Former        | 2991 | 35.20 |               |             | 19.94         | 144            | 4.81         |
| Year of Follow-up: 2010, Age Group: 65-69 |           |               |      |       |               |             |               |                |              |



**Results for PHIM for Run 2 (Sensitivity\_Analysis\_4.RTF)**

| Period                                       | Age Group | Smoking Group | N     | %     | Ever Quit (N) | Ever Quit % | Mean Yrs Quit | Short Term (n) | Short Term % |
|----------------------------------------------|-----------|---------------|-------|-------|---------------|-------------|---------------|----------------|--------------|
| 20                                           | 65-69     | Never Any     | 3116  | 47.67 |               |             |               |                |              |
| 20                                           | 65-69     | CC            | 47    | 0.72  | 0             | 0.00        |               |                |              |
| 20                                           | 65-69     | Ecig          | 645   | 9.87  |               |             |               |                |              |
| 20                                           | 65-69     | Dual          | 0     | 0.00  |               |             |               |                |              |
| 20                                           | 65-69     | Former        | 2728  | 41.74 |               |             | 22.72         | 95             | 3.48         |
| Year of Follow-up: 2010, Age Group: 70-74    |           |               |       |       |               |             |               |                |              |
| Period                                       | Age Group | Smoking Group | N     | %     | Ever Quit (N) | Ever Quit % | Mean Yrs Quit | Short Term (n) | Short Term % |
| 20                                           | 70-74     | Never Any     | 2684  | 48.50 |               |             |               |                |              |
| 20                                           | 70-74     | CC            | 88    | 1.59  | 0             | 0.00        |               |                |              |
| 20                                           | 70-74     | Ecig          | 477   | 8.62  |               |             |               |                |              |
| 20                                           | 70-74     | Dual          | 0     | 0.00  |               |             |               |                |              |
| 20                                           | 70-74     | Former        | 2285  | 41.29 |               |             | 23.05         | 69             | 3.02         |
| Year of Follow-up: 2010, Age Group: 75-79    |           |               |       |       |               |             |               |                |              |
| Period                                       | Age Group | Smoking Group | N     | %     | Ever Quit (N) | Ever Quit % | Mean Yrs Quit | Short Term (n) | Short Term % |
| 20                                           | 75-79     | Never Any     | 2732  | 51.90 |               |             |               |                |              |
| 20                                           | 75-79     | CC            | 75    | 1.42  | 0             | 0.00        |               |                |              |
| 20                                           | 75-79     | Ecig          | 276   | 5.24  |               |             |               |                |              |
| 20                                           | 75-79     | Dual          | 0     | 0.00  |               |             |               |                |              |
| 20                                           | 75-79     | Former        | 2181  | 41.43 |               |             | 25.56         | 72             | 3.30         |
| Year of Follow-up: 2015, Age Group: All Ages |           |               |       |       |               |             |               |                |              |
| Period                                       | Age Group | Smoking Group | N     | %     | Ever Quit (N) | Ever Quit % | Mean Yrs Quit | Short Term (n) | Short Term % |
| 25                                           | All Ages  | Never Any     | 42407 | 55.93 |               |             |               |                |              |
| 25                                           | All Ages  | CC            | 340   | 0.45  | 0             | 0.00        |               |                |              |
| 25                                           | All Ages  | Ecig          | 10689 | 14.10 |               |             |               |                |              |
| 25                                           | All Ages  | Dual          | 0     | 0.00  |               |             |               |                |              |
| 25                                           | All Ages  | Former        | 22381 | 29.52 |               |             | 21.79         | 854            | 3.82         |
| Year of Follow-up: 2015, Age Group: 18-19    |           |               |       |       |               |             |               |                |              |
| Period                                       | Age Group | Smoking Group | N     | %     | Ever Quit (N) | Ever Quit % | Mean Yrs Quit | Short Term (n) | Short Term % |
| 25                                           | 18-19     | Never Any     | 0     | .     |               |             |               |                |              |
| 25                                           | 18-19     | CC            | 0     | .     | 0             | .           |               |                |              |
| 25                                           | 18-19     | Ecig          | 0     | .     |               |             |               |                |              |
| 25                                           | 18-19     | Dual          | 0     | .     |               |             |               |                |              |
| 25                                           | 18-19     | Former        | 0     | .     |               |             | .             | 0              | .            |
| Year of Follow-up: 2015, Age Group: 20-24    |           |               |       |       |               |             |               |                |              |
| Period                                       | Age Group | Smoking Group | N     | %     | Ever Quit (N) | Ever Quit % | Mean Yrs Quit | Short Term (n) | Short Term % |
| 25                                           | 20-24     | Never Any     | 0     | .     |               |             |               |                |              |
| 25                                           | 20-24     | CC            | 0     | .     | 0             | .           |               |                |              |
| 25                                           | 20-24     | Ecig          | 0     | .     |               |             |               |                |              |
| 25                                           | 20-24     | Dual          | 0     | .     |               |             |               |                |              |
| 25                                           | 20-24     | Former        | 0     | .     |               |             | .             | 0              | .            |
| Year of Follow-up: 2015, Age Group: 25-29    |           |               |       |       |               |             |               |                |              |
| Period                                       | Age Group | Smoking Group | N     | %     | Ever Quit (N) | Ever Quit % | Mean Yrs Quit | Short Term (n) | Short Term % |
| 25                                           | 25-29     | Never Any     | 0     | .     |               |             |               |                |              |
| 25                                           | 25-29     | CC            | 0     | .     | 0             | .           |               |                |              |
| 25                                           | 25-29     | Ecig          | 0     | .     |               |             |               |                |              |
| 25                                           | 25-29     | Dual          | 0     | .     |               |             |               |                |              |
| 25                                           | 25-29     | Former        | 0     | .     |               |             | .             | 0              | .            |
| Year of Follow-up: 2015, Age Group: 30-34    |           |               |       |       |               |             |               |                |              |
| Period                                       | Age Group | Smoking Group | N     | %     | Ever Quit (N) | Ever Quit % | Mean Yrs Quit | Short Term (n) | Short Term % |
| 25                                           | 30-34     | Never Any     | 0     | .     |               |             |               |                |              |
| 25                                           | 30-34     | CC            | 0     | .     | 0             | .           |               |                |              |
| 25                                           | 30-34     | Ecig          | 0     | .     |               |             |               |                |              |
| 25                                           | 30-34     | Dual          | 0     | .     |               |             |               |                |              |
| 25                                           | 30-34     | Former        | 0     | .     |               |             | .             | 0              | .            |
| Year of Follow-up: 2015, Age Group: 35-39    |           |               |       |       |               |             |               |                |              |
| Period                                       | Age Group | Smoking Group | N     | %     | Ever Quit (N) | Ever Quit % | Mean Yrs Quit | Short Term (n) | Short Term % |
| 25                                           | 35-39     | Never Any     | 5624  | 70.92 |               |             |               |                |              |
| 25                                           | 35-39     | CC            | 20    | 0.25  | 0             | 0.00        |               |                |              |
| 25                                           | 35-39     | Ecig          | 1103  | 13.91 |               |             |               |                |              |
| 25                                           | 35-39     | Dual          | 0     | 0.00  |               |             |               |                |              |
| 25                                           | 35-39     | Former        | 1183  | 14.92 |               |             | 11.82         | 89             | 7.52         |
| Year of Follow-up: 2015, Age Group: 40-44    |           |               |       |       |               |             |               |                |              |
| Period                                       | Age Group | Smoking Group | N     | %     | Ever Quit (N) | Ever Quit % | Mean Yrs Quit | Short Term (n) | Short Term % |
| 25                                           | 40-44     | Never Any     | 5782  | 69.25 |               |             |               |                |              |
| 25                                           | 40-44     | CC            | 33    | 0.40  | 0             | 0.00        |               |                |              |
| 25                                           | 40-44     | Ecig          | 1261  | 15.10 |               |             |               |                |              |
| 25                                           | 40-44     | Dual          | 0     | 0.00  |               |             |               |                |              |

**Results for PHIM for Run 2 (Sensitivity\_Analysis\_4.RTF)**

|                                              |           |               |       |       |               |             |               |                |              |
|----------------------------------------------|-----------|---------------|-------|-------|---------------|-------------|---------------|----------------|--------------|
| 25                                           | 40-44     | Former        | 1274  | 15.26 |               |             | 14.43         | 88             | 6.91         |
| Year of Follow-up: 2015, Age Group: 45-49    |           |               |       |       |               |             |               |                |              |
| Period                                       | Age Group | Smoking Group | N     | %     | Ever Quit (N) | Ever Quit % | Mean Yrs Quit | Short Term (n) | Short Term % |
| 25                                           | 45-49     | Never Any     | 5247  | 59.67 |               |             |               |                |              |
| 25                                           | 45-49     | CC            | 32    | 0.36  | 0             | 0.00        |               |                |              |
| 25                                           | 45-49     | Ecig          | 1591  | 18.09 |               |             |               |                |              |
| 25                                           | 45-49     | Dual          | 0     | 0.00  |               |             |               |                |              |
| 25                                           | 45-49     | Former        | 1923  | 21.87 |               |             | 18.07         | 92             | 4.78         |
| Year of Follow-up: 2015, Age Group: 50-54    |           |               |       |       |               |             |               |                |              |
| Period                                       | Age Group | Smoking Group | N     | %     | Ever Quit (N) | Ever Quit % | Mean Yrs Quit | Short Term (n) | Short Term % |
| 25                                           | 50-54     | Never Any     | 5298  | 52.57 |               |             |               |                |              |
| 25                                           | 50-54     | CC            | 45    | 0.45  | 0             | 0.00        |               |                |              |
| 25                                           | 50-54     | Ecig          | 2052  | 20.36 |               |             |               |                |              |
| 25                                           | 50-54     | Dual          | 0     | 0.00  |               |             |               |                |              |
| 25                                           | 50-54     | Former        | 2683  | 26.62 |               |             | 20.19         | 149            | 5.55         |
| Year of Follow-up: 2015, Age Group: 55-59    |           |               |       |       |               |             |               |                |              |
| Period                                       | Age Group | Smoking Group | N     | %     | Ever Quit (N) | Ever Quit % | Mean Yrs Quit | Short Term (n) | Short Term % |
| 25                                           | 55-59     | Never Any     | 5282  | 50.31 |               |             |               |                |              |
| 25                                           | 55-59     | CC            | 37    | 0.35  | 0             | 0.00        |               |                |              |
| 25                                           | 55-59     | Ecig          | 1772  | 16.88 |               |             |               |                |              |
| 25                                           | 55-59     | Dual          | 0     | 0.00  |               |             |               |                |              |
| 25                                           | 55-59     | Former        | 3408  | 32.46 |               |             | 20.85         | 140            | 4.11         |
| Year of Follow-up: 2015, Age Group: 60-64    |           |               |       |       |               |             |               |                |              |
| Period                                       | Age Group | Smoking Group | N     | %     | Ever Quit (N) | Ever Quit % | Mean Yrs Quit | Short Term (n) | Short Term % |
| 25                                           | 60-64     | Never Any     | 5018  | 52.27 |               |             |               |                |              |
| 25                                           | 60-64     | CC            | 42    | 0.44  | 0             | 0.00        |               |                |              |
| 25                                           | 60-64     | Ecig          | 1154  | 12.02 |               |             |               |                |              |
| 25                                           | 60-64     | Dual          | 0     | 0.00  |               |             |               |                |              |
| 25                                           | 60-64     | Former        | 3386  | 35.27 |               |             | 23.56         | 144            | 4.25         |
| Year of Follow-up: 2015, Age Group: 65-69    |           |               |       |       |               |             |               |                |              |
| Period                                       | Age Group | Smoking Group | N     | %     | Ever Quit (N) | Ever Quit % | Mean Yrs Quit | Short Term (n) | Short Term % |
| 25                                           | 65-69     | Never Any     | 4356  | 51.27 |               |             |               |                |              |
| 25                                           | 65-69     | CC            | 41    | 0.48  | 0             | 0.00        |               |                |              |
| 25                                           | 65-69     | Ecig          | 844   | 9.93  |               |             |               |                |              |
| 25                                           | 65-69     | Dual          | 0     | 0.00  |               |             |               |                |              |
| 25                                           | 65-69     | Former        | 3256  | 38.32 |               |             | 23.12         | 70             | 2.15         |
| Year of Follow-up: 2015, Age Group: 70-74    |           |               |       |       |               |             |               |                |              |
| Period                                       | Age Group | Smoking Group | N     | %     | Ever Quit (N) | Ever Quit % | Mean Yrs Quit | Short Term (n) | Short Term % |
| 25                                           | 70-74     | Never Any     | 3116  | 47.67 |               |             |               |                |              |
| 25                                           | 70-74     | CC            | 31    | 0.47  | 0             | 0.00        |               |                |              |
| 25                                           | 70-74     | Ecig          | 527   | 8.06  |               |             |               |                |              |
| 25                                           | 70-74     | Dual          | 0     | 0.00  |               |             |               |                |              |
| 25                                           | 70-74     | Former        | 2862  | 43.79 |               |             | 26.54         | 42             | 1.47         |
| Year of Follow-up: 2015, Age Group: 75-79    |           |               |       |       |               |             |               |                |              |
| Period                                       | Age Group | Smoking Group | N     | %     | Ever Quit (N) | Ever Quit % | Mean Yrs Quit | Short Term (n) | Short Term % |
| 25                                           | 75-79     | Never Any     | 2684  | 48.50 |               |             |               |                |              |
| 25                                           | 75-79     | CC            | 59    | 1.07  | 0             | 0.00        |               |                |              |
| 25                                           | 75-79     | Ecig          | 385   | 6.96  |               |             |               |                |              |
| 25                                           | 75-79     | Dual          | 0     | 0.00  |               |             |               |                |              |
| 25                                           | 75-79     | Former        | 2406  | 43.48 |               |             | 26.76         | 40             | 1.66         |
| Year of Follow-up: 2020, Age Group: All Ages |           |               |       |       |               |             |               |                |              |
| Period                                       | Age Group | Smoking Group | N     | %     | Ever Quit (N) | Ever Quit % | Mean Yrs Quit | Short Term (n) | Short Term % |
| 30                                           | All Ages  | Never Any     | 39723 | 56.52 |               |             |               |                |              |
| 30                                           | All Ages  | CC            | 115   | 0.16  | 0             | 0.00        |               |                |              |
| 30                                           | All Ages  | Ecig          | 8624  | 12.27 |               |             |               |                |              |
| 30                                           | All Ages  | Dual          | 0     | 0.00  |               |             |               |                |              |
| 30                                           | All Ages  | Former        | 21821 | 31.05 |               |             | 24.15         | 718            | 3.29         |
| Year of Follow-up: 2020, Age Group: 18-19    |           |               |       |       |               |             |               |                |              |
| Period                                       | Age Group | Smoking Group | N     | %     | Ever Quit (N) | Ever Quit % | Mean Yrs Quit | Short Term (n) | Short Term % |
| 30                                           | 18-19     | Never Any     | 0     | .     |               |             |               |                |              |
| 30                                           | 18-19     | CC            | 0     | .     | 0             | .           |               |                |              |
| 30                                           | 18-19     | Ecig          | 0     | .     |               |             |               |                |              |
| 30                                           | 18-19     | Dual          | 0     | .     |               |             |               |                |              |
| 30                                           | 18-19     | Former        | 0     | .     |               |             | .             | 0              | .            |
| Year of Follow-up: 2020, Age Group: 20-24    |           |               |       |       |               |             |               |                |              |
| Period                                       | Age Group | Smoking Group | N     | %     | Ever Quit (N) | Ever Quit % | Mean Yrs Quit | Short Term (n) | Short Term % |
| 30                                           | 20-24     | Never Any     | 0     | .     |               |             |               |                |              |
| 30                                           | 20-24     | CC            | 0     | .     | 0             | .           |               |                |              |

**Results for PHIM for Run 2 (Sensitivity\_Analysis\_4.RTF)**

|                                           |           |               |      |       |               |             |               |                |              |
|-------------------------------------------|-----------|---------------|------|-------|---------------|-------------|---------------|----------------|--------------|
| 30                                        | 20-24     | Ecig          | 0    | .     |               |             |               |                |              |
| 30                                        | 20-24     | Dual          | 0    | .     |               |             |               |                |              |
| 30                                        | 20-24     | Former        | 0    | .     |               |             | 0             | .              |              |
| Year of Follow-up: 2020, Age Group: 25-29 |           |               |      |       |               |             |               |                |              |
| Period                                    | Age Group | Smoking Group | N    | %     | Ever Quit (N) | Ever Quit % | Mean Yrs Quit | Short Term (n) | Short Term % |
| 30                                        | 25-29     | Never Any     | 0    | .     |               |             |               |                |              |
| 30                                        | 25-29     | CC            | 0    | .     | 0             | .           |               |                |              |
| 30                                        | 25-29     | Ecig          | 0    | .     |               |             |               |                |              |
| 30                                        | 25-29     | Dual          | 0    | .     |               |             |               |                |              |
| 30                                        | 25-29     | Former        | 0    | .     |               |             | 0             | .              |              |
| Year of Follow-up: 2020, Age Group: 30-34 |           |               |      |       |               |             |               |                |              |
| Period                                    | Age Group | Smoking Group | N    | %     | Ever Quit (N) | Ever Quit % | Mean Yrs Quit | Short Term (n) | Short Term % |
| 30                                        | 30-34     | Never Any     | 0    | .     |               |             |               |                |              |
| 30                                        | 30-34     | CC            | 0    | .     | 0             | .           |               |                |              |
| 30                                        | 30-34     | Ecig          | 0    | .     |               |             |               |                |              |
| 30                                        | 30-34     | Dual          | 0    | .     |               |             |               |                |              |
| 30                                        | 30-34     | Former        | 0    | .     |               |             | 0             | .              |              |
| Year of Follow-up: 2020, Age Group: 35-39 |           |               |      |       |               |             |               |                |              |
| Period                                    | Age Group | Smoking Group | N    | %     | Ever Quit (N) | Ever Quit % | Mean Yrs Quit | Short Term (n) | Short Term % |
| 30                                        | 35-39     | Never Any     | 0    | .     |               |             |               |                |              |
| 30                                        | 35-39     | CC            | 0    | .     | 0             | .           |               |                |              |
| 30                                        | 35-39     | Ecig          | 0    | .     |               |             |               |                |              |
| 30                                        | 35-39     | Dual          | 0    | .     |               |             |               |                |              |
| 30                                        | 35-39     | Former        | 0    | .     |               |             | 0             | .              |              |
| Year of Follow-up: 2020, Age Group: 40-44 |           |               |      |       |               |             |               |                |              |
| Period                                    | Age Group | Smoking Group | N    | %     | Ever Quit (N) | Ever Quit % | Mean Yrs Quit | Short Term (n) | Short Term % |
| 30                                        | 40-44     | Never Any     | 5624 | 70.92 |               |             |               |                |              |
| 30                                        | 40-44     | CC            | 6    | 0.08  | 0             | 0.00        |               |                |              |
| 30                                        | 40-44     | Ecig          | 946  | 11.93 |               |             |               |                |              |
| 30                                        | 40-44     | Dual          | 0    | 0.00  |               |             |               |                |              |
| 30                                        | 40-44     | Former        | 1354 | 17.07 |               |             | 14.96         | 57             | 4.21         |
| Year of Follow-up: 2020, Age Group: 45-49 |           |               |      |       |               |             |               |                |              |
| Period                                    | Age Group | Smoking Group | N    | %     | Ever Quit (N) | Ever Quit % | Mean Yrs Quit | Short Term (n) | Short Term % |
| 30                                        | 45-49     | Never Any     | 5782 | 69.25 |               |             |               |                |              |
| 30                                        | 45-49     | CC            | 13   | 0.16  | 0             | 0.00        |               |                |              |
| 30                                        | 45-49     | Ecig          | 1108 | 13.27 |               |             |               |                |              |
| 30                                        | 45-49     | Dual          | 0    | 0.00  |               |             |               |                |              |
| 30                                        | 45-49     | Former        | 1447 | 17.33 |               |             | 17.37         | 59             | 4.08         |
| Year of Follow-up: 2020, Age Group: 50-54 |           |               |      |       |               |             |               |                |              |
| Period                                    | Age Group | Smoking Group | N    | %     | Ever Quit (N) | Ever Quit % | Mean Yrs Quit | Short Term (n) | Short Term % |
| 30                                        | 50-54     | Never Any     | 5247 | 59.67 |               |             |               |                |              |
| 30                                        | 50-54     | CC            | 9    | 0.10  | 0             | 0.00        |               |                |              |
| 30                                        | 50-54     | Ecig          | 1363 | 15.50 |               |             |               |                |              |
| 30                                        | 50-54     | Dual          | 0    | 0.00  |               |             |               |                |              |
| 30                                        | 50-54     | Former        | 2174 | 24.72 |               |             | 20.62         | 120            | 5.52         |
| Year of Follow-up: 2020, Age Group: 55-59 |           |               |      |       |               |             |               |                |              |
| Period                                    | Age Group | Smoking Group | N    | %     | Ever Quit (N) | Ever Quit % | Mean Yrs Quit | Short Term (n) | Short Term % |
| 30                                        | 55-59     | Never Any     | 5298 | 52.57 |               |             |               |                |              |
| 30                                        | 55-59     | CC            | 14   | 0.14  | 0             | 0.00        |               |                |              |
| 30                                        | 55-59     | Ecig          | 1701 | 16.88 |               |             |               |                |              |
| 30                                        | 55-59     | Dual          | 0    | 0.00  |               |             |               |                |              |
| 30                                        | 55-59     | Former        | 3065 | 30.41 |               |             | 22.32         | 140            | 4.57         |
| Year of Follow-up: 2020, Age Group: 60-64 |           |               |      |       |               |             |               |                |              |
| Period                                    | Age Group | Smoking Group | N    | %     | Ever Quit (N) | Ever Quit % | Mean Yrs Quit | Short Term (n) | Short Term % |
| 30                                        | 60-64     | Never Any     | 5282 | 50.31 |               |             |               |                |              |
| 30                                        | 60-64     | CC            | 15   | 0.14  | 0             | 0.00        |               |                |              |
| 30                                        | 60-64     | Ecig          | 1427 | 13.59 |               |             |               |                |              |
| 30                                        | 60-64     | Dual          | 0    | 0.00  |               |             |               |                |              |
| 30                                        | 60-64     | Former        | 3775 | 35.96 |               |             | 23.52         | 153            | 4.05         |
| Year of Follow-up: 2020, Age Group: 65-69 |           |               |      |       |               |             |               |                |              |
| Period                                    | Age Group | Smoking Group | N    | %     | Ever Quit (N) | Ever Quit % | Mean Yrs Quit | Short Term (n) | Short Term % |
| 30                                        | 65-69     | Never Any     | 5018 | 52.27 |               |             |               |                |              |
| 30                                        | 65-69     | CC            | 18   | 0.19  | 0             | 0.00        |               |                |              |
| 30                                        | 65-69     | Ecig          | 917  | 9.55  |               |             |               |                |              |
| 30                                        | 65-69     | Dual          | 0    | 0.00  |               |             |               |                |              |
| 30                                        | 65-69     | Former        | 3647 | 37.99 |               |             | 26.68         | 75             | 2.06         |
| Year of Follow-up: 2020, Age Group: 70-74 |           |               |      |       |               |             |               |                |              |
| Period                                    | Age Group | Smoking Group | N    | %     | Ever Quit (N) | Ever Quit % | Mean Yrs Quit | Short Term (n) | Short Term % |

## Results for PHIM for Run 2 (Sensitivity\_Analysis\_4.RTF)

|                                              |           |               |       |       |               |             |               |                |              |
|----------------------------------------------|-----------|---------------|-------|-------|---------------|-------------|---------------|----------------|--------------|
| 30                                           | 70-74     | Never Any     | 4356  | 51.27 |               |             |               |                |              |
| 30                                           | 70-74     | CC            | 22    | 0.26  | 0             | 0.00        |               |                |              |
| 30                                           | 70-74     | Ecig          | 727   | 8.56  |               |             |               |                |              |
| 30                                           | 70-74     | Dual          | 0     | 0.00  |               |             |               |                |              |
| 30                                           | 70-74     | Former        | 3392  | 39.92 |               |             | 27.06         | 66             | 1.95         |
| Year of Follow-up: 2020, Age Group: 75-79    |           |               |       |       |               |             |               |                |              |
| Period                                       | Age Group | Smoking Group | N     | %     | Ever Quit (N) | Ever Quit % | Mean Yrs Quit | Short Term (n) | Short Term % |
| 30                                           | 75-79     | Never Any     | 3116  | 47.67 |               |             |               |                |              |
| 30                                           | 75-79     | CC            | 18    | 0.28  | 0             | 0.00        |               |                |              |
| 30                                           | 75-79     | Ecig          | 435   | 6.66  |               |             |               |                |              |
| 30                                           | 75-79     | Dual          | 0     | 0.00  |               |             |               |                |              |
| 30                                           | 75-79     | Former        | 2967  | 45.39 |               |             | 30.49         | 48             | 1.62         |
| Year of Follow-up: 2025, Age Group: All Ages |           |               |       |       |               |             |               |                |              |
| Period                                       | Age Group | Smoking Group | N     | %     | Ever Quit (N) | Ever Quit % | Mean Yrs Quit | Short Term (n) | Short Term % |
| 35                                           | All Ages  | Never Any     | 36607 | 57.43 |               |             |               |                |              |
| 35                                           | All Ages  | CC            | 47    | 0.07  | 0             | 0.00        |               |                |              |
| 35                                           | All Ages  | Ecig          | 6760  | 10.60 |               |             |               |                |              |
| 35                                           | All Ages  | Dual          | 0     | 0.00  |               |             |               |                |              |
| 35                                           | All Ages  | Former        | 20333 | 31.90 |               |             | 26.25         | 568            | 2.79         |
| Year of Follow-up: 2025, Age Group: 18-19    |           |               |       |       |               |             |               |                |              |
| Period                                       | Age Group | Smoking Group | N     | %     | Ever Quit (N) | Ever Quit % | Mean Yrs Quit | Short Term (n) | Short Term % |
| 35                                           | 18-19     | Never Any     | 0     | .     |               |             |               |                |              |
| 35                                           | 18-19     | CC            | 0     | .     | 0             | .           |               |                |              |
| 35                                           | 18-19     | Ecig          | 0     | .     |               |             |               |                |              |
| 35                                           | 18-19     | Dual          | 0     | .     |               |             |               |                |              |
| 35                                           | 18-19     | Former        | 0     | .     |               |             | .             | 0              | .            |
| Year of Follow-up: 2025, Age Group: 20-24    |           |               |       |       |               |             |               |                |              |
| Period                                       | Age Group | Smoking Group | N     | %     | Ever Quit (N) | Ever Quit % | Mean Yrs Quit | Short Term (n) | Short Term % |
| 35                                           | 20-24     | Never Any     | 0     | .     |               |             |               |                |              |
| 35                                           | 20-24     | CC            | 0     | .     | 0             | .           |               |                |              |
| 35                                           | 20-24     | Ecig          | 0     | .     |               |             |               |                |              |
| 35                                           | 20-24     | Dual          | 0     | .     |               |             |               |                |              |
| 35                                           | 20-24     | Former        | 0     | .     |               |             | .             | 0              | .            |
| Year of Follow-up: 2025, Age Group: 25-29    |           |               |       |       |               |             |               |                |              |
| Period                                       | Age Group | Smoking Group | N     | %     | Ever Quit (N) | Ever Quit % | Mean Yrs Quit | Short Term (n) | Short Term % |
| 35                                           | 25-29     | Never Any     | 0     | .     |               |             |               |                |              |
| 35                                           | 25-29     | CC            | 0     | .     | 0             | .           |               |                |              |
| 35                                           | 25-29     | Ecig          | 0     | .     |               |             |               |                |              |
| 35                                           | 25-29     | Dual          | 0     | .     |               |             |               |                |              |
| 35                                           | 25-29     | Former        | 0     | .     |               |             | .             | 0              | .            |
| Year of Follow-up: 2025, Age Group: 30-34    |           |               |       |       |               |             |               |                |              |
| Period                                       | Age Group | Smoking Group | N     | %     | Ever Quit (N) | Ever Quit % | Mean Yrs Quit | Short Term (n) | Short Term % |
| 35                                           | 30-34     | Never Any     | 0     | .     |               |             |               |                |              |
| 35                                           | 30-34     | CC            | 0     | .     | 0             | .           |               |                |              |
| 35                                           | 30-34     | Ecig          | 0     | .     |               |             |               |                |              |
| 35                                           | 30-34     | Dual          | 0     | .     |               |             |               |                |              |
| 35                                           | 30-34     | Former        | 0     | .     |               |             | .             | 0              | .            |
| Year of Follow-up: 2025, Age Group: 35-39    |           |               |       |       |               |             |               |                |              |
| Period                                       | Age Group | Smoking Group | N     | %     | Ever Quit (N) | Ever Quit % | Mean Yrs Quit | Short Term (n) | Short Term % |
| 35                                           | 35-39     | Never Any     | 0     | .     |               |             |               |                |              |
| 35                                           | 35-39     | CC            | 0     | .     | 0             | .           |               |                |              |
| 35                                           | 35-39     | Ecig          | 0     | .     |               |             |               |                |              |
| 35                                           | 35-39     | Dual          | 0     | .     |               |             |               |                |              |
| 35                                           | 35-39     | Former        | 0     | .     |               |             | .             | 0              | .            |
| Year of Follow-up: 2025, Age Group: 40-44    |           |               |       |       |               |             |               |                |              |
| Period                                       | Age Group | Smoking Group | N     | %     | Ever Quit (N) | Ever Quit % | Mean Yrs Quit | Short Term (n) | Short Term % |
| 35                                           | 40-44     | Never Any     | 0     | .     |               |             |               |                |              |
| 35                                           | 40-44     | CC            | 0     | .     | 0             | .           |               |                |              |
| 35                                           | 40-44     | Ecig          | 0     | .     |               |             |               |                |              |
| 35                                           | 40-44     | Dual          | 0     | .     |               |             |               |                |              |
| 35                                           | 40-44     | Former        | 0     | .     |               |             | .             | 0              | .            |
| Year of Follow-up: 2025, Age Group: 45-49    |           |               |       |       |               |             |               |                |              |
| Period                                       | Age Group | Smoking Group | N     | %     | Ever Quit (N) | Ever Quit % | Mean Yrs Quit | Short Term (n) | Short Term % |
| 35                                           | 45-49     | Never Any     | 5624  | 70.92 |               |             |               |                |              |
| 35                                           | 45-49     | CC            | 1     | 0.01  | 0             | 0.00        |               |                |              |
| 35                                           | 45-49     | Ecig          | 808   | 10.19 |               |             |               |                |              |
| 35                                           | 45-49     | Dual          | 0     | 0.00  |               |             |               |                |              |
| 35                                           | 45-49     | Former        | 1497  | 18.88 |               |             | 18.26         | 53             | 3.54         |
| Year of Follow-up: 2025, Age Group: 50-54    |           |               |       |       |               |             |               |                |              |

**Results for PHIM for Run 2 (Sensitivity\_Analysis\_4.RTF)**

| Period                                       | Age Group | Smoking Group | N     | %     | Ever Quit (N) | Ever Quit % | Mean Yrs Quit | Short Term (n) | Short Term % |
|----------------------------------------------|-----------|---------------|-------|-------|---------------|-------------|---------------|----------------|--------------|
| 35                                           | 50-54     | Never Any     | 5782  | 69.25 |               |             |               |                |              |
| 35                                           | 50-54     | CC            | 3     | 0.04  | 0             | 0.00        |               |                |              |
| 35                                           | 50-54     | Ecig          | 938   | 11.23 |               |             |               |                |              |
| 35                                           | 50-54     | Dual          | 0     | 0.00  |               |             |               |                |              |
| 35                                           | 50-54     | Former        | 1627  | 19.49 |               |             | 20.10         | 81             | 4.98         |
| Year of Follow-up: 2025, Age Group: 55-59    |           |               |       |       |               |             |               |                |              |
| Period                                       | Age Group | Smoking Group | N     | %     | Ever Quit (N) | Ever Quit % | Mean Yrs Quit | Short Term (n) | Short Term % |
| 35                                           | 55-59     | Never Any     | 5247  | 59.67 |               |             |               |                |              |
| 35                                           | 55-59     | CC            | 4     | 0.05  | 0             | 0.00        |               |                |              |
| 35                                           | 55-59     | Ecig          | 1127  | 12.82 |               |             |               |                |              |
| 35                                           | 55-59     | Dual          | 0     | 0.00  |               |             |               |                |              |
| 35                                           | 55-59     | Former        | 2415  | 27.47 |               |             | 23.26         | 94             | 3.89         |
| Year of Follow-up: 2025, Age Group: 60-64    |           |               |       |       |               |             |               |                |              |
| Period                                       | Age Group | Smoking Group | N     | %     | Ever Quit (N) | Ever Quit % | Mean Yrs Quit | Short Term (n) | Short Term % |
| 35                                           | 60-64     | Never Any     | 5298  | 52.57 |               |             |               |                |              |
| 35                                           | 60-64     | CC            | 7     | 0.07  | 0             | 0.00        |               |                |              |
| 35                                           | 60-64     | Ecig          | 1372  | 13.61 |               |             |               |                |              |
| 35                                           | 60-64     | Dual          | 0     | 0.00  |               |             |               |                |              |
| 35                                           | 60-64     | Former        | 3401  | 33.75 |               |             | 24.81         | 139            | 4.09         |
| Year of Follow-up: 2025, Age Group: 65-69    |           |               |       |       |               |             |               |                |              |
| Period                                       | Age Group | Smoking Group | N     | %     | Ever Quit (N) | Ever Quit % | Mean Yrs Quit | Short Term (n) | Short Term % |
| 35                                           | 65-69     | Never Any     | 5282  | 50.31 |               |             |               |                |              |
| 35                                           | 65-69     | CC            | 7     | 0.07  | 0             | 0.00        |               |                |              |
| 35                                           | 65-69     | Ecig          | 1138  | 10.84 |               |             |               |                |              |
| 35                                           | 65-69     | Dual          | 0     | 0.00  |               |             |               |                |              |
| 35                                           | 65-69     | Former        | 4072  | 38.78 |               |             | 26.62         | 83             | 2.04         |
| Year of Follow-up: 2025, Age Group: 70-74    |           |               |       |       |               |             |               |                |              |
| Period                                       | Age Group | Smoking Group | N     | %     | Ever Quit (N) | Ever Quit % | Mean Yrs Quit | Short Term (n) | Short Term % |
| 35                                           | 70-74     | Never Any     | 5018  | 52.27 |               |             |               |                |              |
| 35                                           | 70-74     | CC            | 11    | 0.11  | 0             | 0.00        |               |                |              |
| 35                                           | 70-74     | Ecig          | 789   | 8.22  |               |             |               |                |              |
| 35                                           | 70-74     | Dual          | 0     | 0.00  |               |             |               |                |              |
| 35                                           | 70-74     | Former        | 3782  | 39.40 |               |             | 30.61         | 65             | 1.72         |
| Year of Follow-up: 2025, Age Group: 75-79    |           |               |       |       |               |             |               |                |              |
| Period                                       | Age Group | Smoking Group | N     | %     | Ever Quit (N) | Ever Quit % | Mean Yrs Quit | Short Term (n) | Short Term % |
| 35                                           | 75-79     | Never Any     | 4356  | 51.27 |               |             |               |                |              |
| 35                                           | 75-79     | CC            | 14    | 0.16  | 0             | 0.00        |               |                |              |
| 35                                           | 75-79     | Ecig          | 588   | 6.92  |               |             |               |                |              |
| 35                                           | 75-79     | Dual          | 0     | 0.00  |               |             |               |                |              |
| 35                                           | 75-79     | Former        | 3539  | 41.65 |               |             | 30.81         | 53             | 1.50         |
| Year of Follow-up: 2030, Age Group: All Ages |           |               |       |       |               |             |               |                |              |
| Period                                       | Age Group | Smoking Group | N     | %     | Ever Quit (N) | Ever Quit % | Mean Yrs Quit | Short Term (n) | Short Term % |
| 40                                           | All Ages  | Never Any     | 32251 | 58.37 |               |             |               |                |              |
| 40                                           | All Ages  | CC            | 14    | 0.03  | 0             | 0.00        |               |                |              |
| 40                                           | All Ages  | Ecig          | 4962  | 8.98  |               |             |               |                |              |
| 40                                           | All Ages  | Dual          | 0     | 0.00  |               |             |               |                |              |
| 40                                           | All Ages  | Former        | 18023 | 32.62 |               |             | 28.36         | 483            | 2.68         |
| Year of Follow-up: 2030, Age Group: 18-19    |           |               |       |       |               |             |               |                |              |
| Period                                       | Age Group | Smoking Group | N     | %     | Ever Quit (N) | Ever Quit % | Mean Yrs Quit | Short Term (n) | Short Term % |
| 40                                           | 18-19     | Never Any     | 0     | .     |               |             |               |                |              |
| 40                                           | 18-19     | CC            | 0     | .     | 0             | .           |               |                |              |
| 40                                           | 18-19     | Ecig          | 0     | .     |               |             |               |                |              |
| 40                                           | 18-19     | Dual          | 0     | .     |               |             |               |                |              |
| 40                                           | 18-19     | Former        | 0     | .     |               |             | .             | 0              | .            |
| Year of Follow-up: 2030, Age Group: 20-24    |           |               |       |       |               |             |               |                |              |
| Period                                       | Age Group | Smoking Group | N     | %     | Ever Quit (N) | Ever Quit % | Mean Yrs Quit | Short Term (n) | Short Term % |
| 40                                           | 20-24     | Never Any     | 0     | .     |               |             |               |                |              |
| 40                                           | 20-24     | CC            | 0     | .     | 0             | .           |               |                |              |
| 40                                           | 20-24     | Ecig          | 0     | .     |               |             |               |                |              |
| 40                                           | 20-24     | Dual          | 0     | .     |               |             |               |                |              |
| 40                                           | 20-24     | Former        | 0     | .     |               |             | .             | 0              | .            |
| Year of Follow-up: 2030, Age Group: 25-29    |           |               |       |       |               |             |               |                |              |
| Period                                       | Age Group | Smoking Group | N     | %     | Ever Quit (N) | Ever Quit % | Mean Yrs Quit | Short Term (n) | Short Term % |
| 40                                           | 25-29     | Never Any     | 0     | .     |               |             |               |                |              |
| 40                                           | 25-29     | CC            | 0     | .     | 0             | .           |               |                |              |
| 40                                           | 25-29     | Ecig          | 0     | .     |               |             |               |                |              |
| 40                                           | 25-29     | Dual          | 0     | .     |               |             |               |                |              |

**Results for PHIM for Run 2 (Sensitivity\_Analysis\_4.RTF)**

| Year of Follow-up: 2030, Age Group: 30-34 | Period | Age Group | Smoking Group | N    | %     | Ever Quit (N) | Ever Quit % | Mean Yrs Quit | Short Term (n) | Short Term % |
|-------------------------------------------|--------|-----------|---------------|------|-------|---------------|-------------|---------------|----------------|--------------|
| Year of Follow-up: 2030, Age Group: 30-34 |        |           |               |      |       |               |             |               |                |              |
| 40                                        | 25-29  | Former    |               | 0    | .     |               |             |               | 0              | .            |
| 40                                        | 30-34  | Never Any |               | 0    | .     |               |             |               |                |              |
| 40                                        | 30-34  | CC        |               | 0    | .     | 0             | .           |               |                |              |
| 40                                        | 30-34  | Ecig      |               | 0    | .     |               |             |               |                |              |
| 40                                        | 30-34  | Dual      |               | 0    | .     |               |             |               |                |              |
| 40                                        | 30-34  | Former    |               | 0    | .     |               |             |               | 0              | .            |
| Year of Follow-up: 2030, Age Group: 35-39 |        |           |               |      |       |               |             |               |                |              |
| 40                                        | 35-39  | Never Any |               | 0    | .     |               |             |               |                |              |
| 40                                        | 35-39  | CC        |               | 0    | .     | 0             | .           |               |                |              |
| 40                                        | 35-39  | Ecig      |               | 0    | .     |               |             |               |                |              |
| 40                                        | 35-39  | Dual      |               | 0    | .     |               |             |               |                |              |
| 40                                        | 35-39  | Former    |               | 0    | .     |               |             |               | 0              | .            |
| Year of Follow-up: 2030, Age Group: 40-44 |        |           |               |      |       |               |             |               |                |              |
| 40                                        | 40-44  | Never Any |               | 0    | .     |               |             |               |                |              |
| 40                                        | 40-44  | CC        |               | 0    | .     | 0             | .           |               |                |              |
| 40                                        | 40-44  | Ecig      |               | 0    | .     |               |             |               |                |              |
| 40                                        | 40-44  | Dual      |               | 0    | .     |               |             |               |                |              |
| 40                                        | 40-44  | Former    |               | 0    | .     |               |             |               | 0              | .            |
| Year of Follow-up: 2030, Age Group: 45-49 |        |           |               |      |       |               |             |               |                |              |
| 40                                        | 45-49  | Never Any |               | 0    | .     |               |             |               |                |              |
| 40                                        | 45-49  | CC        |               | 0    | .     | 0             | .           |               |                |              |
| 40                                        | 45-49  | Ecig      |               | 0    | .     |               |             |               |                |              |
| 40                                        | 45-49  | Dual      |               | 0    | .     |               |             |               |                |              |
| 40                                        | 45-49  | Former    |               | 0    | .     |               |             |               | 0              | .            |
| Year of Follow-up: 2030, Age Group: 50-54 |        |           |               |      |       |               |             |               |                |              |
| 40                                        | 50-54  | Never Any |               | 5624 | 70.92 |               |             |               |                |              |
| 40                                        | 50-54  | CC        |               | 0    | 0.00  | 0             | 0.00        |               |                |              |
| 40                                        | 50-54  | Ecig      |               | 690  | 8.70  |               |             |               |                |              |
| 40                                        | 50-54  | Dual      |               | 0    | 0.00  |               |             |               |                |              |
| 40                                        | 50-54  | Former    |               | 1616 | 20.38 |               |             | 21.68         | 59             | 3.65         |
| Year of Follow-up: 2030, Age Group: 55-59 |        |           |               |      |       |               |             |               |                |              |
| 40                                        | 55-59  | Never Any |               | 5782 | 69.25 |               |             |               |                |              |
| 40                                        | 55-59  | CC        |               | 0    | 0.00  | 0             | 0.00        |               |                |              |
| 40                                        | 55-59  | Ecig      |               | 760  | 9.10  |               |             |               |                |              |
| 40                                        | 55-59  | Dual      |               | 0    | 0.00  |               |             |               |                |              |
| 40                                        | 55-59  | Former    |               | 1808 | 21.65 |               |             | 22.79         | 67             | 3.71         |
| Year of Follow-up: 2030, Age Group: 60-64 |        |           |               |      |       |               |             |               |                |              |
| 40                                        | 60-64  | Never Any |               | 5247 | 59.67 |               |             |               |                |              |
| 40                                        | 60-64  | CC        |               | 3    | 0.03  | 0             | 0.00        |               |                |              |
| 40                                        | 60-64  | Ecig      |               | 867  | 9.86  |               |             |               |                |              |
| 40                                        | 60-64  | Dual      |               | 0    | 0.00  |               |             |               |                |              |
| 40                                        | 60-64  | Former    |               | 2676 | 30.43 |               |             | 25.67         | 123            | 4.60         |
| Year of Follow-up: 2030, Age Group: 65-69 |        |           |               |      |       |               |             |               |                |              |
| 40                                        | 65-69  | Never Any |               | 5298 | 52.57 |               |             |               |                |              |
| 40                                        | 65-69  | CC        |               | 3    | 0.03  | 0             | 0.00        |               |                |              |
| 40                                        | 65-69  | Ecig      |               | 1076 | 10.68 |               |             |               |                |              |
| 40                                        | 65-69  | Dual      |               | 0    | 0.00  |               |             |               |                |              |
| 40                                        | 65-69  | Former    |               | 3701 | 36.72 |               |             | 27.59         | 73             | 1.97         |
| Year of Follow-up: 2030, Age Group: 70-74 |        |           |               |      |       |               |             |               |                |              |
| 40                                        | 70-74  | Never Any |               | 5282 | 50.31 |               |             |               |                |              |
| 40                                        | 70-74  | CC        |               | 4    | 0.04  | 0             | 0.00        |               |                |              |
| 40                                        | 70-74  | Ecig      |               | 957  | 9.12  |               |             |               |                |              |
| 40                                        | 70-74  | Dual      |               | 0    | 0.00  |               |             |               |                |              |
| 40                                        | 70-74  | Former    |               | 4256 | 40.54 |               |             | 30.33         | 85             | 2.00         |
| Year of Follow-up: 2030, Age Group: 75-79 |        |           |               |      |       |               |             |               |                |              |
| 40                                        | 75-79  | Never Any |               | 5018 | 52.27 |               |             |               |                |              |
| 40                                        | 75-79  | CC        |               | 4    | 0.04  | 0             | 0.00        |               |                |              |

**Results for PHIM for Run 2 (Sensitivity\_Analysis\_4.RTF)**

|                                              |           |               |       |       |               |             |               |                |              |
|----------------------------------------------|-----------|---------------|-------|-------|---------------|-------------|---------------|----------------|--------------|
| 40                                           | 75-79     | Ecig          | 612   | 6.38  |               |             |               |                |              |
| 40                                           | 75-79     | Dual          | 0     | 0.00  |               |             |               |                |              |
| 40                                           | 75-79     | Former        | 3966  | 41.31 |               |             | 34.05         | 76             | 1.92         |
| Year of Follow-up: 2035, Age Group: All Ages |           |               |       |       |               |             |               |                |              |
| Period                                       | Age Group | Smoking Group | N     | %     | Ever Quit (N) | Ever Quit % | Mean Yrs Quit | Short Term (n) | Short Term % |
| 45                                           | All Ages  | Never Any     | 27233 | 59.66 |               |             |               |                |              |
| 45                                           | All Ages  | CC            | 5     | 0.01  | 0             | 0.00        |               |                |              |
| 45                                           | All Ages  | Ecig          | 3529  | 7.73  |               |             |               |                |              |
| 45                                           | All Ages  | Dual          | 0     | 0.00  |               |             |               |                |              |
| 45                                           | All Ages  | Former        | 14883 | 32.60 |               |             | 30.11         | 326            | 2.19         |
| Year of Follow-up: 2035, Age Group: 18-19    |           |               |       |       |               |             |               |                |              |
| Period                                       | Age Group | Smoking Group | N     | %     | Ever Quit (N) | Ever Quit % | Mean Yrs Quit | Short Term (n) | Short Term % |
| 45                                           | 18-19     | Never Any     | 0     | .     |               |             |               |                |              |
| 45                                           | 18-19     | CC            | 0     | .     | 0             | .           |               |                |              |
| 45                                           | 18-19     | Ecig          | 0     | .     |               |             |               |                |              |
| 45                                           | 18-19     | Dual          | 0     | .     |               |             |               |                |              |
| 45                                           | 18-19     | Former        | 0     | .     |               |             | .             | 0              | .            |
| Year of Follow-up: 2035, Age Group: 20-24    |           |               |       |       |               |             |               |                |              |
| Period                                       | Age Group | Smoking Group | N     | %     | Ever Quit (N) | Ever Quit % | Mean Yrs Quit | Short Term (n) | Short Term % |
| 45                                           | 20-24     | Never Any     | 0     | .     |               |             |               |                |              |
| 45                                           | 20-24     | CC            | 0     | .     | 0             | .           |               |                |              |
| 45                                           | 20-24     | Ecig          | 0     | .     |               |             |               |                |              |
| 45                                           | 20-24     | Dual          | 0     | .     |               |             |               |                |              |
| 45                                           | 20-24     | Former        | 0     | .     |               |             | .             | 0              | .            |
| Year of Follow-up: 2035, Age Group: 25-29    |           |               |       |       |               |             |               |                |              |
| Period                                       | Age Group | Smoking Group | N     | %     | Ever Quit (N) | Ever Quit % | Mean Yrs Quit | Short Term (n) | Short Term % |
| 45                                           | 25-29     | Never Any     | 0     | .     |               |             |               |                |              |
| 45                                           | 25-29     | CC            | 0     | .     | 0             | .           |               |                |              |
| 45                                           | 25-29     | Ecig          | 0     | .     |               |             |               |                |              |
| 45                                           | 25-29     | Dual          | 0     | .     |               |             |               |                |              |
| 45                                           | 25-29     | Former        | 0     | .     |               |             | .             | 0              | .            |
| Year of Follow-up: 2035, Age Group: 30-34    |           |               |       |       |               |             |               |                |              |
| Period                                       | Age Group | Smoking Group | N     | %     | Ever Quit (N) | Ever Quit % | Mean Yrs Quit | Short Term (n) | Short Term % |
| 45                                           | 30-34     | Never Any     | 0     | .     |               |             |               |                |              |
| 45                                           | 30-34     | CC            | 0     | .     | 0             | .           |               |                |              |
| 45                                           | 30-34     | Ecig          | 0     | .     |               |             |               |                |              |
| 45                                           | 30-34     | Dual          | 0     | .     |               |             |               |                |              |
| 45                                           | 30-34     | Former        | 0     | .     |               |             | .             | 0              | .            |
| Year of Follow-up: 2035, Age Group: 35-39    |           |               |       |       |               |             |               |                |              |
| Period                                       | Age Group | Smoking Group | N     | %     | Ever Quit (N) | Ever Quit % | Mean Yrs Quit | Short Term (n) | Short Term % |
| 45                                           | 35-39     | Never Any     | 0     | .     |               |             |               |                |              |
| 45                                           | 35-39     | CC            | 0     | .     | 0             | .           |               |                |              |
| 45                                           | 35-39     | Ecig          | 0     | .     |               |             |               |                |              |
| 45                                           | 35-39     | Dual          | 0     | .     |               |             |               |                |              |
| 45                                           | 35-39     | Former        | 0     | .     |               |             | .             | 0              | .            |
| Year of Follow-up: 2035, Age Group: 40-44    |           |               |       |       |               |             |               |                |              |
| Period                                       | Age Group | Smoking Group | N     | %     | Ever Quit (N) | Ever Quit % | Mean Yrs Quit | Short Term (n) | Short Term % |
| 45                                           | 40-44     | Never Any     | 0     | .     |               |             |               |                |              |
| 45                                           | 40-44     | CC            | 0     | .     | 0             | .           |               |                |              |
| 45                                           | 40-44     | Ecig          | 0     | .     |               |             |               |                |              |
| 45                                           | 40-44     | Dual          | 0     | .     |               |             |               |                |              |
| 45                                           | 40-44     | Former        | 0     | .     |               |             | .             | 0              | .            |
| Year of Follow-up: 2035, Age Group: 45-49    |           |               |       |       |               |             |               |                |              |
| Period                                       | Age Group | Smoking Group | N     | %     | Ever Quit (N) | Ever Quit % | Mean Yrs Quit | Short Term (n) | Short Term % |
| 45                                           | 45-49     | Never Any     | 0     | .     |               |             |               |                |              |
| 45                                           | 45-49     | CC            | 0     | .     | 0             | .           |               |                |              |
| 45                                           | 45-49     | Ecig          | 0     | .     |               |             |               |                |              |
| 45                                           | 45-49     | Dual          | 0     | .     |               |             |               |                |              |
| 45                                           | 45-49     | Former        | 0     | .     |               |             | .             | 0              | .            |
| Year of Follow-up: 2035, Age Group: 50-54    |           |               |       |       |               |             |               |                |              |
| Period                                       | Age Group | Smoking Group | N     | %     | Ever Quit (N) | Ever Quit % | Mean Yrs Quit | Short Term (n) | Short Term % |
| 45                                           | 50-54     | Never Any     | 0     | .     |               |             |               |                |              |
| 45                                           | 50-54     | CC            | 0     | .     | 0             | .           |               |                |              |
| 45                                           | 50-54     | Ecig          | 0     | .     |               |             |               |                |              |
| 45                                           | 50-54     | Dual          | 0     | .     |               |             |               |                |              |
| 45                                           | 50-54     | Former        | 0     | .     |               |             | .             | 0              | .            |
| Year of Follow-up: 2035, Age Group: 55-59    |           |               |       |       |               |             |               |                |              |
| Period                                       | Age Group | Smoking Group | N     | %     | Ever Quit (N) | Ever Quit % | Mean Yrs Quit | Short Term (n) | Short Term % |

**Results for PHIM for Run 2 (Sensitivity\_Analysis\_4.RTF)**

|                                              |           |               |       |       |               |             |               |                |              |
|----------------------------------------------|-----------|---------------|-------|-------|---------------|-------------|---------------|----------------|--------------|
| 45                                           | 55-59     | Never Any     | 5624  | 70.92 |               |             |               |                |              |
| 45                                           | 55-59     | CC            | 0     | 0.00  | 0             | 0.00        |               |                |              |
| 45                                           | 55-59     | Ecig          | 566   | 7.14  |               |             |               |                |              |
| 45                                           | 55-59     | Dual          | 0     | 0.00  |               |             |               |                |              |
| 45                                           | 55-59     | Former        | 1740  | 21.94 |               |             | 24.92         | 47             | 2.70         |
| Year of Follow-up: 2035, Age Group: 60-64    |           |               |       |       |               |             |               |                |              |
| Period                                       | Age Group | Smoking Group | N     | %     | Ever Quit (N) | Ever Quit % | Mean Yrs Quit | Short Term (n) | Short Term % |
| 45                                           | 60-64     | Never Any     | 5782  | 69.25 |               |             |               |                |              |
| 45                                           | 60-64     | CC            | 0     | 0.00  | 0             | 0.00        |               |                |              |
| 45                                           | 60-64     | Ecig          | 608   | 7.28  |               |             |               |                |              |
| 45                                           | 60-64     | Dual          | 0     | 0.00  |               |             |               |                |              |
| 45                                           | 60-64     | Former        | 1960  | 23.47 |               |             | 25.78         | 69             | 3.52         |
| Year of Follow-up: 2035, Age Group: 65-69    |           |               |       |       |               |             |               |                |              |
| Period                                       | Age Group | Smoking Group | N     | %     | Ever Quit (N) | Ever Quit % | Mean Yrs Quit | Short Term (n) | Short Term % |
| 45                                           | 65-69     | Never Any     | 5247  | 59.67 |               |             |               |                |              |
| 45                                           | 65-69     | CC            | 3     | 0.03  | 0             | 0.00        |               |                |              |
| 45                                           | 65-69     | Ecig          | 678   | 7.71  |               |             |               |                |              |
| 45                                           | 65-69     | Dual          | 0     | 0.00  |               |             |               |                |              |
| 45                                           | 65-69     | Former        | 2865  | 32.58 |               |             | 28.81         | 55             | 1.92         |
| Year of Follow-up: 2035, Age Group: 70-74    |           |               |       |       |               |             |               |                |              |
| Period                                       | Age Group | Smoking Group | N     | %     | Ever Quit (N) | Ever Quit % | Mean Yrs Quit | Short Term (n) | Short Term % |
| 45                                           | 70-74     | Never Any     | 5298  | 52.57 |               |             |               |                |              |
| 45                                           | 70-74     | CC            | 1     | 0.01  | 0             | 0.00        |               |                |              |
| 45                                           | 70-74     | Ecig          | 930   | 9.23  |               |             |               |                |              |
| 45                                           | 70-74     | Dual          | 0     | 0.00  |               |             |               |                |              |
| 45                                           | 70-74     | Former        | 3849  | 38.19 |               |             | 31.40         | 76             | 1.97         |
| Year of Follow-up: 2035, Age Group: 75-79    |           |               |       |       |               |             |               |                |              |
| Period                                       | Age Group | Smoking Group | N     | %     | Ever Quit (N) | Ever Quit % | Mean Yrs Quit | Short Term (n) | Short Term % |
| 45                                           | 75-79     | Never Any     | 5282  | 50.31 |               |             |               |                |              |
| 45                                           | 75-79     | CC            | 1     | 0.01  | 0             | 0.00        |               |                |              |
| 45                                           | 75-79     | Ecig          | 747   | 7.11  |               |             |               |                |              |
| 45                                           | 75-79     | Dual          | 0     | 0.00  |               |             |               |                |              |
| 45                                           | 75-79     | Former        | 4469  | 42.57 |               |             | 33.74         | 79             | 1.77         |
| Year of Follow-up: 2040, Age Group: All Ages |           |               |       |       |               |             |               |                |              |
| Period                                       | Age Group | Smoking Group | N     | %     | Ever Quit (N) | Ever Quit % | Mean Yrs Quit | Short Term (n) | Short Term % |
| 50                                           | All Ages  | Never Any     | 21951 | 62.45 |               |             |               |                |              |
| 50                                           | All Ages  | CC            | 4     | 0.01  | 0             | 0.00        |               |                |              |
| 50                                           | All Ages  | Ecig          | 2221  | 6.32  |               |             |               |                |              |
| 50                                           | All Ages  | Dual          | 0     | 0.00  |               |             |               |                |              |
| 50                                           | All Ages  | Former        | 10975 | 31.22 |               |             | 31.94         | 199            | 1.81         |
| Year of Follow-up: 2040, Age Group: 18-19    |           |               |       |       |               |             |               |                |              |
| Period                                       | Age Group | Smoking Group | N     | %     | Ever Quit (N) | Ever Quit % | Mean Yrs Quit | Short Term (n) | Short Term % |
| 50                                           | 18-19     | Never Any     | 0     | .     |               |             |               |                |              |
| 50                                           | 18-19     | CC            | 0     | .     | 0             | .           |               |                |              |
| 50                                           | 18-19     | Ecig          | 0     | .     |               |             |               |                |              |
| 50                                           | 18-19     | Dual          | 0     | .     |               |             |               |                |              |
| 50                                           | 18-19     | Former        | 0     | .     |               |             | .             | 0              | .            |
| Year of Follow-up: 2040, Age Group: 20-24    |           |               |       |       |               |             |               |                |              |
| Period                                       | Age Group | Smoking Group | N     | %     | Ever Quit (N) | Ever Quit % | Mean Yrs Quit | Short Term (n) | Short Term % |
| 50                                           | 20-24     | Never Any     | 0     | .     |               |             |               |                |              |
| 50                                           | 20-24     | CC            | 0     | .     | 0             | .           |               |                |              |
| 50                                           | 20-24     | Ecig          | 0     | .     |               |             |               |                |              |
| 50                                           | 20-24     | Dual          | 0     | .     |               |             |               |                |              |
| 50                                           | 20-24     | Former        | 0     | .     |               |             | .             | 0              | .            |
| Year of Follow-up: 2040, Age Group: 25-29    |           |               |       |       |               |             |               |                |              |
| Period                                       | Age Group | Smoking Group | N     | %     | Ever Quit (N) | Ever Quit % | Mean Yrs Quit | Short Term (n) | Short Term % |
| 50                                           | 25-29     | Never Any     | 0     | .     |               |             |               |                |              |
| 50                                           | 25-29     | CC            | 0     | .     | 0             | .           |               |                |              |
| 50                                           | 25-29     | Ecig          | 0     | .     |               |             |               |                |              |
| 50                                           | 25-29     | Dual          | 0     | .     |               |             |               |                |              |
| 50                                           | 25-29     | Former        | 0     | .     |               |             | .             | 0              | .            |
| Year of Follow-up: 2040, Age Group: 30-34    |           |               |       |       |               |             |               |                |              |
| Period                                       | Age Group | Smoking Group | N     | %     | Ever Quit (N) | Ever Quit % | Mean Yrs Quit | Short Term (n) | Short Term % |
| 50                                           | 30-34     | Never Any     | 0     | .     |               |             |               |                |              |
| 50                                           | 30-34     | CC            | 0     | .     | 0             | .           |               |                |              |
| 50                                           | 30-34     | Ecig          | 0     | .     |               |             |               |                |              |
| 50                                           | 30-34     | Dual          | 0     | .     |               |             |               |                |              |
| 50                                           | 30-34     | Former        | 0     | .     |               |             | .             | 0              | .            |
| Year of Follow-up: 2040, Age Group: 35-39    |           |               |       |       |               |             |               |                |              |



**Results for PHIM for Run 2 (Sensitivity\_Analysis\_4.RTF)**

| Period                                    | Age Group | Smoking Group | N    | %     | Ever Quit (N) | Ever Quit % | Mean Yrs Quit | Short Term (n) | Short Term % |
|-------------------------------------------|-----------|---------------|------|-------|---------------|-------------|---------------|----------------|--------------|
| 50                                        | 35-39     | Never Any     | 0    | .     |               |             |               |                |              |
| 50                                        | 35-39     | CC            | 0    | .     | 0             | .           |               |                |              |
| 50                                        | 35-39     | Ecig          | 0    | .     |               |             |               |                |              |
| 50                                        | 35-39     | Dual          | 0    | .     |               |             |               |                |              |
| 50                                        | 35-39     | Former        | 0    | .     |               |             | .             | 0              | .            |
| Year of Follow-up: 2040, Age Group: 40-44 |           |               |      |       |               |             |               |                |              |
| Period                                    | Age Group | Smoking Group | N    | %     | Ever Quit (N) | Ever Quit % | Mean Yrs Quit | Short Term (n) | Short Term % |
| 50                                        | 40-44     | Never Any     | 0    | .     |               |             |               |                |              |
| 50                                        | 40-44     | CC            | 0    | .     | 0             | .           |               |                |              |
| 50                                        | 40-44     | Ecig          | 0    | .     |               |             |               |                |              |
| 50                                        | 40-44     | Dual          | 0    | .     |               |             |               |                |              |
| 50                                        | 40-44     | Former        | 0    | .     |               |             | .             | 0              | .            |
| Year of Follow-up: 2040, Age Group: 45-49 |           |               |      |       |               |             |               |                |              |
| Period                                    | Age Group | Smoking Group | N    | %     | Ever Quit (N) | Ever Quit % | Mean Yrs Quit | Short Term (n) | Short Term % |
| 50                                        | 45-49     | Never Any     | 0    | .     |               |             |               |                |              |
| 50                                        | 45-49     | CC            | 0    | .     | 0             | .           |               |                |              |
| 50                                        | 45-49     | Ecig          | 0    | .     |               |             |               |                |              |
| 50                                        | 45-49     | Dual          | 0    | .     |               |             |               |                |              |
| 50                                        | 45-49     | Former        | 0    | .     |               |             | .             | 0              | .            |
| Year of Follow-up: 2040, Age Group: 50-54 |           |               |      |       |               |             |               |                |              |
| Period                                    | Age Group | Smoking Group | N    | %     | Ever Quit (N) | Ever Quit % | Mean Yrs Quit | Short Term (n) | Short Term % |
| 50                                        | 50-54     | Never Any     | 0    | .     |               |             |               |                |              |
| 50                                        | 50-54     | CC            | 0    | .     | 0             | .           |               |                |              |
| 50                                        | 50-54     | Ecig          | 0    | .     |               |             |               |                |              |
| 50                                        | 50-54     | Dual          | 0    | .     |               |             |               |                |              |
| 50                                        | 50-54     | Former        | 0    | .     |               |             | .             | 0              | .            |
| Year of Follow-up: 2040, Age Group: 55-59 |           |               |      |       |               |             |               |                |              |
| Period                                    | Age Group | Smoking Group | N    | %     | Ever Quit (N) | Ever Quit % | Mean Yrs Quit | Short Term (n) | Short Term % |
| 50                                        | 55-59     | Never Any     | 0    | .     |               |             |               |                |              |
| 50                                        | 55-59     | CC            | 0    | .     | 0             | .           |               |                |              |
| 50                                        | 55-59     | Ecig          | 0    | .     |               |             |               |                |              |
| 50                                        | 55-59     | Dual          | 0    | .     |               |             |               |                |              |
| 50                                        | 55-59     | Former        | 0    | .     |               |             | .             | 0              | .            |
| Year of Follow-up: 2040, Age Group: 60-64 |           |               |      |       |               |             |               |                |              |
| Period                                    | Age Group | Smoking Group | N    | %     | Ever Quit (N) | Ever Quit % | Mean Yrs Quit | Short Term (n) | Short Term % |
| 50                                        | 60-64     | Never Any     | 5624 | 70.92 |               |             |               |                |              |
| 50                                        | 60-64     | CC            | 0    | 0.00  | 0             | 0.00        |               |                |              |
| 50                                        | 60-64     | Ecig          | 442  | 5.57  |               |             |               |                |              |
| 50                                        | 60-64     | Dual          | 0    | 0.00  |               |             |               |                |              |
| 50                                        | 60-64     | Former        | 1864 | 23.51 |               |             | 28.06         | 47             | 2.52         |
| Year of Follow-up: 2040, Age Group: 65-69 |           |               |      |       |               |             |               |                |              |
| Period                                    | Age Group | Smoking Group | N    | %     | Ever Quit (N) | Ever Quit % | Mean Yrs Quit | Short Term (n) | Short Term % |
| 50                                        | 65-69     | Never Any     | 5782 | 69.25 |               |             |               |                |              |
| 50                                        | 65-69     | CC            | 0    | 0.00  | 0             | 0.00        |               |                |              |
| 50                                        | 65-69     | Ecig          | 490  | 5.87  |               |             |               |                |              |
| 50                                        | 65-69     | Dual          | 0    | 0.00  |               |             |               |                |              |
| 50                                        | 65-69     | Former        | 2078 | 24.89 |               |             | 29.18         | 26             | 1.25         |
| Year of Follow-up: 2040, Age Group: 70-74 |           |               |      |       |               |             |               |                |              |
| Period                                    | Age Group | Smoking Group | N    | %     | Ever Quit (N) | Ever Quit % | Mean Yrs Quit | Short Term (n) | Short Term % |
| 50                                        | 70-74     | Never Any     | 5247 | 59.67 |               |             |               |                |              |
| 50                                        | 70-74     | CC            | 3    | 0.03  | 0             | 0.00        |               |                |              |
| 50                                        | 70-74     | Ecig          | 569  | 6.47  |               |             |               |                |              |
| 50                                        | 70-74     | Dual          | 0    | 0.00  |               |             |               |                |              |
| 50                                        | 70-74     | Former        | 2974 | 33.82 |               |             | 32.62         | 56             | 1.88         |
| Year of Follow-up: 2040, Age Group: 75-79 |           |               |      |       |               |             |               |                |              |
| Period                                    | Age Group | Smoking Group | N    | %     | Ever Quit (N) | Ever Quit % | Mean Yrs Quit | Short Term (n) | Short Term % |
| 50                                        | 75-79     | Never Any     | 5298 | 52.57 |               |             |               |                |              |
| 50                                        | 75-79     | CC            | 1    | 0.01  | 0             | 0.00        |               |                |              |
| 50                                        | 75-79     | Ecig          | 720  | 7.14  |               |             |               |                |              |
| 50                                        | 75-79     | Dual          | 0    | 0.00  |               |             |               |                |              |
| 50                                        | 75-79     | Former        | 4059 | 40.28 |               |             | 34.63         | 70             | 1.72         |

## Results for PHIM for Run 2 (Sensitivity\_Analysis\_4.RTF)

\*\*\*\*\*

### Main Results for E-Component for Run: 2, Simulation: 1, COD: Four Diseases Combined

| Variable Parameter          | Value                                  |
|-----------------------------|----------------------------------------|
| 1. Country                  | US (United States)                     |
| 2. Sex                      | F (Females)                            |
| 3. Year of start of process | 1990                                   |
| 4. Cause of Death           | Four Diseases Combined                 |
| 5. Effective Dose NULL      | CC:1                                   |
| 6. Effective Dose Ecig      | CC:1 Ecig:0.05 Dual:0.525              |
| Note:                       | Death rates are per million population |

#### Results for Age Groups Combined and Years combined, Population unadjusted for deaths in Ecig scenario,

| Age Group:All |         | NULL        | Ecig        | %Drop   |        | NULL   | Ecig    | Drop    |         |         |
|---------------|---------|-------------|-------------|---------|--------|--------|---------|---------|---------|---------|
| Year          | Number  | Attrib      | Attrib      | Drop    | %Drop  | Attrib | Death   | Attrib  | Attrib  | Drop    |
|               | Deaths  | Deaths      | Deaths      | Deaths  | Deaths | Deaths | Rate    | Rates   | Rates   | Rates   |
| All Comb      | 9082078 | 2946250.006 | 1943731.786 | 1002518 | 11.038 | 34.027 | 2493.45 | 808.881 | 533.644 | 275.237 |

#### Results for Age Groups Combined, Population unadjusted for deaths in Ecig scenario,

| Age Group:All |        | NULL      | Ecig      | %Drop    |        | NULL   | Ecig    | Drop    |         |         |
|---------------|--------|-----------|-----------|----------|--------|--------|---------|---------|---------|---------|
| Year          | Number | Attrib    | Attrib    | Drop     | %Drop  | Attrib | Death   | Attrib  | Attrib  | Drop    |
|               | Deaths | Deaths    | Deaths    | Deaths   | Deaths | Deaths | Rate    | Rates   | Rates   | Rates   |
| 1990          | 199848 | 57524.822 | 57524.822 | 0.000    | 0.000  | 0.000  | 2926.84 | 842.471 | 842.471 | 0.000   |
| 1991          | 199162 | 59078.486 | 58910.020 | 168.466  | 0.085  | 0.285  | 2877.87 | 853.678 | 851.244 | 2.434   |
| 1992          | 198532 | 60494.150 | 60022.448 | 471.701  | 0.238  | 0.780  | 2829.84 | 862.271 | 855.548 | 6.724   |
| 1993          | 202512 | 62694.848 | 61776.725 | 918.122  | 0.453  | 1.464  | 2845.85 | 881.034 | 868.132 | 12.902  |
| 1994          | 200658 | 63202.598 | 61751.766 | 1450.832 | 0.723  | 2.296  | 2777.87 | 874.966 | 854.881 | 20.085  |
| 1995          | 201023 | 63766.862 | 61670.694 | 2096.168 | 1.043  | 3.287  | 2739.80 | 869.097 | 840.528 | 28.569  |
| 1996          | 201180 | 64591.163 | 61718.431 | 2872.732 | 1.428  | 4.448  | 2706.36 | 868.908 | 830.263 | 38.645  |
| 1997          | 198639 | 64686.912 | 61088.568 | 3598.344 | 1.811  | 5.563  | 2635.18 | 858.147 | 810.411 | 47.736  |
| 1998          | 197573 | 65295.961 | 60857.205 | 4438.756 | 2.247  | 6.798  | 2584.18 | 854.046 | 795.989 | 58.057  |
| 1999          | 211329 | 67327.521 | 61592.993 | 5734.528 | 2.714  | 8.517  | 2726.91 | 868.771 | 794.774 | 73.996  |
| 2000          | 208496 | 67596.897 | 60916.988 | 6679.909 | 3.204  | 9.882  | 2656.96 | 861.419 | 776.294 | 85.125  |
| 2001          | 203606 | 67008.811 | 59328.209 | 7680.602 | 3.772  | 11.462 | 2565.88 | 844.458 | 747.666 | 96.792  |
| 2002          | 200828 | 67067.744 | 58272.078 | 8795.666 | 4.380  | 13.115 | 2506.09 | 836.925 | 727.165 | 109.759 |
| 2003          | 196352 | 66756.217 | 56952.864 | 9803.352 | 4.993  | 14.685 | 2427.31 | 825.244 | 704.055 | 121.190 |
| 2004          | 188160 | 65058.725 | 54403.266 | 10655.46 | 5.663  | 16.378 | 2302.83 | 796.234 | 665.825 | 130.409 |
| 2005          | 186416 | 65214.724 | 53410.906 | 11803.82 | 6.332  | 18.100 | 2256.27 | 789.321 | 646.454 | 142.866 |
| 2006          | 180088 | 63771.146 | 51095.916 | 12675.23 | 7.038  | 19.876 | 2160.67 | 765.117 | 613.041 | 152.076 |
| 2007          | 175644 | 63110.718 | 49540.632 | 13570.09 | 7.726  | 21.502 | 2086.36 | 749.650 | 588.460 | 161.190 |
| 2008          | 177570 | 63718.624 | 48854.286 | 14864.34 | 8.371  | 23.328 | 2086.39 | 748.674 | 574.022 | 174.651 |
| 2009          | 172806 | 62794.698 | 47095.525 | 15699.17 | 9.085  | 25.001 | 2007.57 | 729.515 | 547.130 | 182.385 |
| 2010          | 170489 | 61917.074 | 45341.226 | 16575.85 | 9.723  | 26.771 | 1957.97 | 711.083 | 520.718 | 190.364 |
| 2011          | 170305 | 61680.114 | 43928.656 | 17751.46 | 10.423 | 28.780 | 1937.46 | 701.700 | 499.752 | 201.948 |
| 2012          | 171421 | 62023.127 | 42966.666 | 19056.46 | 11.117 | 30.725 | 1930.22 | 698.386 | 483.809 | 214.578 |
| 2013          | 172699 | 62037.765 | 41806.597 | 20231.17 | 11.715 | 32.611 | 1923.75 | 691.059 | 465.697 | 225.362 |
| 2014          | 174169 | 61921.017 | 40400.556 | 21520.46 | 12.356 | 34.755 | 1918.85 | 682.195 | 445.100 | 237.095 |
| 2015          | 177354 | 61856.204 | 39240.796 | 22615.41 | 12.752 | 36.561 | 2184.51 | 761.899 | 483.339 | 278.560 |
| 2016          | 176853 | 60464.119 | 36967.512 | 23496.61 | 13.286 | 38.860 | 2157.59 | 737.655 | 450.999 | 286.656 |
| 2017          | 179309 | 60243.839 | 35561.611 | 24682.23 | 13.765 | 40.971 | 2166.86 | 728.017 | 429.744 | 298.272 |
| 2018          | 177157 | 60713.327 | 34955.895 | 25757.43 | 14.539 | 42.425 | 2120.51 | 726.721 | 418.412 | 308.309 |
| 2019          | 179227 | 61148.172 | 34015.176 | 27133.00 | 15.139 | 44.373 | 2124.53 | 724.841 | 403.211 | 321.630 |
| 2020          | 180467 | 61149.317 | 33065.956 | 28083.36 | 15.562 | 45.926 | 2424.25 | 821.432 | 444.182 | 377.250 |
| 2021          | 178116 | 58727.786 | 30240.113 | 28487.67 | 15.994 | 48.508 | 2375.42 | 783.216 | 403.293 | 379.922 |
| 2022          | 179408 | 58848.802 | 29196.893 | 29651.91 | 16.528 | 50.387 | 2374.52 | 778.881 | 386.429 | 392.451 |
| 2023          | 180640 | 58816.149 | 28142.260 | 30673.89 | 16.981 | 52.152 | 2372.26 | 772.407 | 369.580 | 402.827 |
| 2024          | 181610 | 58955.232 | 27096.516 | 31858.72 | 17.542 | 54.039 | 2366.77 | 768.316 | 353.127 | 415.189 |
| 2025          | 180418 | 58297.744 | 25947.347 | 32350.40 | 17.931 | 55.492 | 2713.69 | 876.861 | 390.276 | 486.585 |
| 2026          | 180313 | 56469.971 | 23899.636 | 32570.33 | 18.063 | 57.677 | 2701.83 | 846.150 | 358.114 | 488.036 |
| 2027          | 179619 | 56209.427 | 22741.884 | 33467.54 | 18.633 | 59.541 | 2680.68 | 838.883 | 339.405 | 499.478 |
| 2028          | 178762 | 55733.105 | 21528.661 | 34204.44 | 19.134 | 61.372 | 2656.74 | 828.298 | 319.956 | 508.342 |
| 2029          | 177808 | 55145.838 | 20299.249 | 34846.59 | 19.598 | 63.190 | 2630.89 | 815.951 | 300.352 | 515.598 |
| 2030          | 173587 | 53615.097 | 19068.184 | 34546.91 | 19.902 | 64.435 | 3040.33 | 939.056 | 333.975 | 605.081 |
| 2031          | 174985 | 52046.561 | 17832.705 | 34213.86 | 19.552 | 65.737 | 3060.73 | 910.364 | 311.918 | 598.446 |
| 2032          | 173400 | 51582.636 | 16828.771 | 34753.87 | 20.043 | 67.375 | 3027.10 | 900.496 | 293.786 | 606.710 |
| 2033          | 171756 | 50839.758 | 15810.225 | 35029.53 | 20.395 | 68.902 | 2991.14 | 885.375 | 275.335 | 610.039 |
| 2034          | 169973 | 50215.451 | 14820.086 | 35395.37 | 20.824 | 70.487 | 2951.96 | 872.104 | 257.384 | 614.720 |
| 2035          | 162644 | 47773.075 | 13728.392 | 34044.68 | 20.932 | 71.263 | 3459.14 | 1016.05 | 291.978 | 724.068 |
| 2036          | 156254 | 43298.709 | 11730.985 | 31567.72 | 20.203 | 72.907 | 3328.25 | 922.274 | 249.873 | 672.401 |
| 2037          | 153593 | 42241.563 | 10751.056 | 31490.51 | 20.503 | 74.549 | 3274.10 | 900.450 | 229.177 | 671.274 |
| 2038          | 150947 | 41356.353 | 9959.468  | 31396.88 | 20.800 | 75.918 | 3217.50 | 881.531 | 212.291 | 669.240 |
| 2039          | 148373 | 40161.050 | 9074.367  | 31086.68 | 20.952 | 77.405 | 3159.42 | 855.178 | 193.227 | 661.951 |

## Results for PHIM for Run 2 (Sensitivity\_Analysis\_4.RTF)

\*\*\*\*\*

### Main Results for E-Component for Run: 2, Simulation: 1, COD: LUNG CANCER

| Variable Parameter          | Value                                  |
|-----------------------------|----------------------------------------|
| 1. Country                  | US (United States)                     |
| 2. Sex                      | F (Females)                            |
| 3. Year of start of process | 1990                                   |
| 4. Cause of Death           | LUNG CANCER                            |
| 5. Effective Dose NULL      | CC:1                                   |
| 6. Effective Dose Ecig      | CC:1 Ecig:0.05 Dual:0.525              |
| Note:                       | Death rates are per million population |

#### Results for Age Groups Combined and Years combined, Population unadjusted for deaths in Ecig scenario,

| Age Group:All | NULL    | Ecig        | %Drop       |          |        | NULL   | Ecig    | Drop    |         |         |
|---------------|---------|-------------|-------------|----------|--------|--------|---------|---------|---------|---------|
| Year          | Number  | Attrib      | Attrib      | Drop     | %Drop  | Attrib | Death   | Attrib  | Attrib  | Drop    |
|               | Deaths  | Deaths      | Deaths      | Deaths   | Deaths | Deaths | Rate    | Rates   | Rates   | Rates   |
| All Comb      | 2327764 | 1580465.217 | 1142130.293 | 438334.9 | 18.831 | 27.735 | 639.078 | 433.910 | 313.567 | 120.343 |

#### Results for Age Groups Combined, Population unadjusted for deaths in Ecig scenario,

| Age Group:All | NULL   | Ecig      | %Drop     |          |        | NULL   | Ecig    | Drop    |         |         |
|---------------|--------|-----------|-----------|----------|--------|--------|---------|---------|---------|---------|
| Year          | Number | Attrib    | Attrib    | Drop     | %Drop  | Attrib | Death   | Attrib  | Attrib  | Drop    |
|               | Deaths | Deaths    | Deaths    | Deaths   | Deaths | Deaths | Rate    | Rates   | Rates   | Rates   |
| 1990          | 42690  | 30614.201 | 30614.201 | 0.000    | 0.000  | 0.000  | 625.210 | 448.355 | 448.355 | 0.000   |
| 1991          | 43692  | 31412.010 | 31379.684 | 32.326   | 0.074  | 0.103  | 631.345 | 453.901 | 453.433 | 0.467   |
| 1992          | 45423  | 32782.407 | 32688.426 | 93.981   | 0.207  | 0.287  | 647.450 | 467.274 | 465.934 | 1.340   |
| 1993          | 46291  | 33491.183 | 33305.335 | 185.848  | 0.401  | 0.555  | 650.515 | 470.643 | 468.031 | 2.612   |
| 1994          | 47017  | 34074.347 | 33772.922 | 301.425  | 0.641  | 0.885  | 650.895 | 471.719 | 467.546 | 4.173   |
| 1995          | 47840  | 34694.454 | 34239.730 | 454.724  | 0.951  | 1.311  | 652.025 | 472.861 | 466.663 | 6.198   |
| 1996          | 48244  | 35027.269 | 34397.685 | 629.584  | 1.305  | 1.797  | 648.999 | 471.202 | 462.732 | 8.469   |
| 1997          | 49035  | 35590.763 | 34752.661 | 838.101  | 1.709  | 2.355  | 650.506 | 472.153 | 461.034 | 11.118  |
| 1998          | 49686  | 36100.785 | 35016.150 | 1084.635 | 2.183  | 3.004  | 649.874 | 472.184 | 457.998 | 14.187  |
| 1999          | 48883  | 35451.030 | 34143.590 | 1307.439 | 2.675  | 3.688  | 630.769 | 457.448 | 440.577 | 16.871  |
| 2000          | 50331  | 36447.986 | 34810.911 | 1637.075 | 3.253  | 4.492  | 641.392 | 464.474 | 443.612 | 20.862  |
| 2001          | 50389  | 36411.326 | 34439.786 | 1971.541 | 3.913  | 5.415  | 635.012 | 458.863 | 434.017 | 24.846  |
| 2002          | 51445  | 37078.545 | 34691.445 | 2387.100 | 4.640  | 6.438  | 641.972 | 462.696 | 432.908 | 29.788  |
| 2003          | 51408  | 36999.876 | 34215.730 | 2784.146 | 5.416  | 7.525  | 635.509 | 457.395 | 422.977 | 34.418  |
| 2004          | 51399  | 36861.555 | 33637.041 | 3224.514 | 6.273  | 8.748  | 629.057 | 451.138 | 411.674 | 39.464  |
| 2005          | 51421  | 36689.529 | 32999.084 | 3690.444 | 7.177  | 10.059 | 622.370 | 444.069 | 399.402 | 44.667  |
| 2006          | 51355  | 36504.774 | 32324.520 | 4180.254 | 8.140  | 11.451 | 616.150 | 437.979 | 387.825 | 50.154  |
| 2007          | 51839  | 36663.202 | 31900.036 | 4763.166 | 9.188  | 12.992 | 615.761 | 435.498 | 378.919 | 56.578  |
| 2008          | 50976  | 35898.803 | 30696.857 | 5201.946 | 10.205 | 14.491 | 598.952 | 421.800 | 360.678 | 61.121  |
| 2009          | 51193  | 35934.525 | 30106.260 | 5828.266 | 11.385 | 16.219 | 594.733 | 417.468 | 349.758 | 67.710  |
| 2010          | 50853  | 35502.829 | 29160.838 | 6341.991 | 12.471 | 17.863 | 584.018 | 407.730 | 334.896 | 72.834  |
| 2011          | 50509  | 35136.342 | 28197.124 | 6939.218 | 13.739 | 19.749 | 574.613 | 399.726 | 320.783 | 78.944  |
| 2012          | 51245  | 35450.201 | 27767.189 | 7683.012 | 14.993 | 21.673 | 577.023 | 399.173 | 312.661 | 86.511  |
| 2013          | 51069  | 35123.224 | 26787.820 | 8335.404 | 16.322 | 23.732 | 568.874 | 391.249 | 298.398 | 92.851  |
| 2014          | 51251  | 35079.370 | 26045.614 | 9033.756 | 17.626 | 25.752 | 564.641 | 386.476 | 286.949 | 99.527  |
| 2015          | 50443  | 34324.171 | 24834.525 | 9489.646 | 18.813 | 27.647 | 621.319 | 422.780 | 305.893 | 116.886 |
| 2016          | 48854  | 33054.753 | 23167.410 | 9887.343 | 20.239 | 29.912 | 596.013 | 403.264 | 282.640 | 120.624 |
| 2017          | 48325  | 32471.234 | 22010.675 | 10460.56 | 21.646 | 32.215 | 583.983 | 392.399 | 265.988 | 126.411 |
| 2018          | 50465  | 33657.595 | 21969.254 | 11688.34 | 23.161 | 34.727 | 604.052 | 402.871 | 262.965 | 139.906 |
| 2019          | 51036  | 33863.424 | 21303.344 | 12560.08 | 24.610 | 37.090 | 604.975 | 401.412 | 252.527 | 148.885 |
| 2020          | 51444  | 33910.830 | 20627.170 | 13283.66 | 25.822 | 39.172 | 691.053 | 455.532 | 277.089 | 178.442 |
| 2021          | 48037  | 31531.880 | 18398.344 | 13133.54 | 27.340 | 41.652 | 640.639 | 420.521 | 245.367 | 175.154 |
| 2022          | 48335  | 31560.212 | 17665.219 | 13894.99 | 28.747 | 44.027 | 639.727 | 417.708 | 233.804 | 183.904 |
| 2023          | 48599  | 31508.781 | 16921.358 | 14587.42 | 30.016 | 46.296 | 638.227 | 413.791 | 222.221 | 191.570 |
| 2024          | 48784  | 31517.293 | 16175.218 | 15342.08 | 31.449 | 48.678 | 635.757 | 410.740 | 210.799 | 199.941 |
| 2025          | 48477  | 31175.389 | 15373.956 | 15801.43 | 32.596 | 50.686 | 729.141 | 468.912 | 231.241 | 237.671 |
| 2026          | 45324  | 29044.598 | 13672.111 | 15372.49 | 33.917 | 52.927 | 679.138 | 435.206 | 204.864 | 230.342 |
| 2027          | 45107  | 28825.765 | 12902.766 | 15923.00 | 35.300 | 55.239 | 673.191 | 430.203 | 192.564 | 237.639 |
| 2028          | 44842  | 28513.846 | 12116.822 | 16397.02 | 36.567 | 57.505 | 666.430 | 423.769 | 180.079 | 243.690 |
| 2029          | 44539  | 28148.109 | 11326.270 | 16821.84 | 37.769 | 59.762 | 659.013 | 416.486 | 167.586 | 248.900 |
| 2030          | 43393  | 27314.475 | 10534.466 | 16780.01 | 38.670 | 61.433 | 760.018 | 478.407 | 184.509 | 293.898 |
| 2031          | 40748  | 25423.102 | 9446.924  | 15976.18 | 39.208 | 62.841 | 712.731 | 444.684 | 165.239 | 279.445 |
| 2032          | 40325  | 25085.902 | 8821.544  | 16264.36 | 40.333 | 64.835 | 703.969 | 437.933 | 154.001 | 283.932 |
| 2033          | 39882  | 24645.067 | 8208.705  | 16436.36 | 41.213 | 66.692 | 694.543 | 429.194 | 142.955 | 286.239 |
| 2034          | 39404  | 24239.126 | 7618.398  | 16620.73 | 42.180 | 68.570 | 684.347 | 420.967 | 132.311 | 288.656 |
| 2035          | 37454  | 22944.147 | 6960.371  | 15983.78 | 42.675 | 69.664 | 796.588 | 487.980 | 148.034 | 339.946 |
| 2036          | 32988  | 19950.581 | 5705.751  | 14244.83 | 43.181 | 71.401 | 702.663 | 424.953 | 121.534 | 303.419 |
| 2037          | 32403  | 19415.334 | 5186.419  | 14228.91 | 43.912 | 73.287 | 690.731 | 413.871 | 110.557 | 303.313 |
| 2038          | 31820  | 18939.317 | 4772.223  | 14167.09 | 44.523 | 74.803 | 678.257 | 403.701 | 101.722 | 301.979 |
| 2039          | 31251  | 18379.752 | 4320.412  | 14059.34 | 44.988 | 76.494 | 665.457 | 391.373 | 91.998  | 299.375 |

## Results for PHIM for Run 2 (Sensitivity\_Analysis\_4.RTF)

\*\*\*\*\*

### Main Results for E-Component for Run: 2, Simulation: 1, COD: IHD

| Variable Parameter          | Value                                  |
|-----------------------------|----------------------------------------|
| 1. Country                  | US (United States)                     |
| 2. Sex                      | F (Females)                            |
| 3. Year of start of process | 1990                                   |
| 4. Cause of Death           | IHD                                    |
| 5. Effective Dose NULL      | CC:1                                   |
| 6. Effective Dose Ecig      | CC:1 Ecig:0.05 Dual:0.525              |
| Note:                       | Death rates are per million population |

#### Results for Age Groups Combined and Years combined, Population unadjusted for deaths in Ecig scenario,

| Age Group:All |         | NULL       | Ecig       | %Drop    |        |        | NULL    | Ecig    | Drop   |        |
|---------------|---------|------------|------------|----------|--------|--------|---------|---------|--------|--------|
| Year          | Number  | Attrib     | Attrib     | Drop     | %Drop  | Attrib | Death   | Attrib  | Attrib | Drop   |
|               | Deaths  | Deaths     | Deaths     | Deaths   | Deaths | Deaths | Rate    | Rates   | Rates  | Rates  |
| All Comb      | 3242167 | 398833.796 | 199065.020 | 199768.8 | 6.162  | 50.088 | 890.124 | 109.498 | 54.653 | 54.846 |

#### Results for Age Groups Combined, Population unadjusted for deaths in Ecig scenario,

| Age Group:All |        | NULL      | Ecig      | %Drop    |        |        | NULL    | Ecig    | Drop    |        |
|---------------|--------|-----------|-----------|----------|--------|--------|---------|---------|---------|--------|
| Year          | Number | Attrib    | Attrib    | Drop     | %Drop  | Attrib | Death   | Attrib  | Attrib  | Drop   |
|               | Deaths | Deaths    | Deaths    | Deaths   | Deaths | Deaths | Rate    | Rates   | Rates   | Rates  |
| 1990          | 98916  | 12922.892 | 12922.892 | 0.000    | 0.000  | 0.000  | 1448.66 | 189.260 | 189.260 | 0.000  |
| 1991          | 96403  | 12856.479 | 12766.074 | 90.405   | 0.094  | 0.703  | 1393.01 | 185.775 | 184.469 | 1.306  |
| 1992          | 93721  | 12662.244 | 12411.642 | 250.602  | 0.267  | 1.979  | 1335.88 | 180.485 | 176.913 | 3.572  |
| 1993          | 93679  | 12730.613 | 12252.260 | 478.352  | 0.511  | 3.757  | 1316.45 | 178.900 | 172.178 | 6.722  |
| 1994          | 90832  | 12495.323 | 11750.248 | 745.075  | 0.820  | 5.963  | 1257.46 | 172.983 | 162.668 | 10.315 |
| 1995          | 89698  | 12365.590 | 11312.546 | 1053.044 | 1.174  | 8.516  | 1222.52 | 168.534 | 154.182 | 14.352 |
| 1996          | 88286  | 12290.551 | 10854.577 | 1435.975 | 1.627  | 11.684 | 1187.66 | 165.338 | 146.020 | 19.317 |
| 1997          | 84777  | 11719.531 | 9989.849  | 1729.682 | 2.040  | 14.759 | 1124.67 | 155.473 | 132.527 | 22.946 |
| 1998          | 82517  | 11416.794 | 9345.968  | 2070.827 | 2.510  | 18.138 | 1079.29 | 149.327 | 122.242 | 27.086 |
| 1999          | 93939  | 13028.038 | 10176.996 | 2851.042 | 3.035  | 21.884 | 1212.16 | 168.109 | 131.320 | 36.789 |
| 2000          | 90039  | 12426.299 | 9242.982  | 3183.317 | 3.535  | 25.618 | 1147.41 | 158.354 | 117.788 | 40.567 |
| 2001          | 86119  | 11939.281 | 8351.185  | 3588.096 | 4.166  | 30.053 | 1085.29 | 150.461 | 105.243 | 45.218 |
| 2002          | 83014  | 11528.794 | 7546.962  | 3981.832 | 4.797  | 34.538 | 1035.91 | 143.865 | 94.177  | 49.688 |
| 2003          | 79302  | 11048.407 | 6768.681  | 4279.726 | 5.397  | 38.736 | 980.336 | 136.581 | 83.675  | 52.906 |
| 2004          | 73861  | 10375.132 | 5894.263  | 4480.869 | 6.067  | 43.189 | 903.963 | 126.978 | 72.138  | 54.840 |
| 2005          | 71649  | 10051.029 | 5296.496  | 4754.534 | 6.636  | 47.304 | 867.197 | 121.652 | 64.106  | 57.546 |
| 2006          | 67551  | 9542.523  | 4613.030  | 4929.494 | 7.297  | 51.658 | 810.467 | 114.490 | 55.346  | 59.143 |
| 2007          | 63503  | 8936.533  | 3971.115  | 4965.419 | 7.819  | 55.563 | 754.310 | 106.151 | 47.170  | 58.981 |
| 2008          | 63171  | 8944.180  | 3644.160  | 5300.020 | 8.390  | 59.257 | 742.239 | 105.091 | 42.818  | 62.274 |
| 2009          | 59747  | 8390.033  | 3154.550  | 5235.483 | 8.763  | 62.401 | 694.108 | 97.471  | 36.648  | 60.823 |
| 2010          | 58008  | 8157.570  | 2814.675  | 5342.894 | 9.211  | 65.496 | 666.189 | 93.685  | 32.325  | 61.360 |
| 2011          | 57368  | 8035.356  | 2522.845  | 5512.511 | 9.609  | 68.603 | 652.644 | 91.414  | 28.701  | 62.713 |
| 2012          | 57411  | 7970.766  | 2266.645  | 5704.121 | 9.936  | 71.563 | 646.453 | 89.752  | 25.523  | 64.229 |
| 2013          | 57067  | 7743.216  | 2022.172  | 5721.044 | 10.025 | 73.885 | 635.688 | 86.254  | 22.526  | 63.729 |
| 2014          | 57538  | 7774.935  | 1843.098  | 5931.837 | 10.309 | 76.294 | 633.906 | 85.658  | 20.306  | 65.352 |
| 2015          | 58395  | 7722.535  | 1698.780  | 6023.755 | 10.316 | 78.002 | 719.266 | 95.120  | 20.924  | 74.196 |
| 2016          | 58658  | 7600.353  | 1519.234  | 6081.120 | 10.367 | 80.011 | 715.621 | 92.723  | 18.534  | 74.189 |
| 2017          | 59004  | 7470.266  | 1364.640  | 6105.626 | 10.348 | 81.732 | 713.034 | 90.274  | 16.491  | 73.783 |
| 2018          | 56077  | 6907.050  | 1151.641  | 5755.409 | 10.263 | 83.327 | 671.224 | 82.675  | 13.785  | 68.891 |
| 2019          | 55886  | 6732.046  | 1032.243  | 5699.803 | 10.199 | 84.667 | 662.462 | 79.801  | 12.236  | 67.565 |
| 2020          | 55313  | 6429.836  | 921.538   | 5508.298 | 9.958  | 85.668 | 743.037 | 86.373  | 12.379  | 73.994 |
| 2021          | 56292  | 6562.016  | 846.984   | 5715.032 | 10.152 | 87.093 | 750.730 | 87.513  | 11.296  | 76.218 |
| 2022          | 55827  | 6352.366  | 758.181   | 5594.185 | 10.021 | 88.065 | 738.885 | 84.075  | 10.035  | 74.041 |
| 2023          | 55338  | 6134.123  | 683.210   | 5450.913 | 9.850  | 88.862 | 726.728 | 80.557  | 8.972   | 71.584 |
| 2024          | 54770  | 5922.193  | 613.421   | 5308.772 | 9.693  | 89.642 | 713.771 | 77.179  | 7.994   | 69.185 |
| 2025          | 53295  | 5504.188  | 544.108   | 4960.080 | 9.307  | 90.115 | 801.612 | 82.789  | 8.184   | 74.605 |
| 2026          | 55278  | 5641.075  | 519.436   | 5121.640 | 9.265  | 90.792 | 828.283 | 84.526  | 7.783   | 76.743 |
| 2027          | 54199  | 5426.216  | 471.128   | 4955.087 | 9.142  | 91.318 | 808.875 | 80.982  | 7.031   | 73.951 |
| 2028          | 53090  | 5197.830  | 425.273   | 4772.557 | 8.990  | 91.818 | 789.020 | 77.249  | 6.320   | 70.929 |
| 2029          | 51974  | 4973.547  | 385.564   | 4587.982 | 8.827  | 92.248 | 769.023 | 73.590  | 5.705   | 67.885 |
| 2030          | 49479  | 4450.618  | 334.847   | 4115.771 | 8.318  | 92.476 | 866.605 | 77.952  | 5.865   | 72.087 |
| 2031          | 51987  | 4555.052  | 327.971   | 4227.081 | 8.131  | 92.800 | 909.317 | 79.674  | 5.737   | 73.937 |
| 2032          | 50677  | 4349.999  | 298.624   | 4051.375 | 7.994  | 93.135 | 884.689 | 75.939  | 5.213   | 70.726 |
| 2033          | 49380  | 4147.948  | 275.069   | 3872.879 | 7.843  | 93.369 | 859.955 | 72.237  | 4.790   | 67.446 |
| 2034          | 48076  | 3966.133  | 252.695   | 3713.438 | 7.724  | 93.629 | 834.943 | 68.881  | 4.389   | 64.492 |
| 2035          | 44518  | 3289.064  | 208.132   | 3080.933 | 6.921  | 93.672 | 946.825 | 69.952  | 4.427   | 65.526 |
| 2036          | 46347  | 3313.192  | 199.369   | 3113.823 | 6.718  | 93.983 | 987.211 | 70.572  | 4.247   | 66.325 |
| 2037          | 44841  | 3117.951  | 180.163   | 2937.789 | 6.552  | 94.222 | 955.859 | 66.464  | 3.840   | 62.624 |
| 2038          | 43378  | 2949.775  | 165.572   | 2784.203 | 6.418  | 94.387 | 924.621 | 62.876  | 3.529   | 59.347 |
| 2039          | 41973  | 2766.312  | 151.288   | 2615.024 | 6.230  | 94.531 | 893.753 | 58.905  | 3.221   | 55.684 |

## Results for PHIM for Run 2 (Sensitivity\_Analysis\_4.RTF)

\*\*\*\*\*

### Main Results for E-Component for Run: 2, Simulation: 1, COD: STROKE

| Variable Parameter          | Value                                  |
|-----------------------------|----------------------------------------|
| 1. Country                  | US (United States)                     |
| 2. Sex                      | F (Females)                            |
| 3. Year of start of process | 1990                                   |
| 4. Cause of Death           | STROKE                                 |
| 5. Effective Dose NULL      | CC:1                                   |
| 6. Effective Dose Ecig      | CC:1 Ecig:0.05 Dual:0.525              |
| Note:                       | Death rates are per million population |

#### Results for Age Groups Combined and Years combined, Population unadjusted for deaths in Ecig scenario,

| Age Group:All | NULL    | Ecig       | %Drop     |          |        |        | NULL    | Ecig   | Drop   |        |
|---------------|---------|------------|-----------|----------|--------|--------|---------|--------|--------|--------|
| Year          | Number  | Attrib     | Attrib    | Drop     | %Drop  | Attrib | Death   | Attrib | Attrib | Drop   |
|               | Deaths  | Deaths     | Deaths    | Deaths   | Deaths | Deaths | Rate    | Rates  | Rates  | Rates  |
| All Comb      | 1352207 | 104899.750 | 51276.740 | 53623.01 | 3.966  | 51.118 | 371.243 | 28.800 | 14.078 | 14.722 |

#### Results for Age Groups Combined, Population unadjusted for deaths in Ecig scenario,

| Age Group:All | NULL   | Ecig     | %Drop    |          |        |        | NULL    | Ecig   | Drop   |        |
|---------------|--------|----------|----------|----------|--------|--------|---------|--------|--------|--------|
| Year          | Number | Attrib   | Attrib   | Drop     | %Drop  | Attrib | Death   | Attrib | Attrib | Drop   |
|               | Deaths | Deaths   | Deaths   | Deaths   | Deaths | Deaths | Rate    | Rates  | Rates  | Rates  |
| 1990          | 33504  | 3293.017 | 3293.017 | 0.000    | 0.000  | 0.000  | 490.678 | 48.227 | 48.227 | 0.000  |
| 1991          | 32505  | 3207.063 | 3179.556 | 27.507   | 0.085  | 0.858  | 469.694 | 46.342 | 45.944 | 0.397  |
| 1992          | 32560  | 3218.125 | 3141.224 | 76.901   | 0.236  | 2.390  | 464.104 | 45.871 | 44.774 | 1.096  |
| 1993          | 32768  | 3226.680 | 3081.068 | 145.612  | 0.444  | 4.513  | 460.480 | 45.344 | 43.297 | 2.046  |
| 1994          | 33005  | 3277.266 | 3045.062 | 232.203  | 0.704  | 7.085  | 456.915 | 45.370 | 42.155 | 3.215  |
| 1995          | 33730  | 3309.378 | 2976.634 | 332.744  | 0.986  | 10.055 | 459.716 | 45.104 | 40.569 | 4.535  |
| 1996          | 33750  | 3312.987 | 2863.107 | 449.880  | 1.333  | 13.579 | 454.019 | 44.568 | 38.516 | 6.052  |
| 1997          | 33699  | 3267.066 | 2703.720 | 563.346  | 1.672  | 17.243 | 447.056 | 43.341 | 35.868 | 7.473  |
| 1998          | 33274  | 3178.725 | 2507.113 | 671.612  | 2.018  | 21.128 | 435.211 | 41.577 | 32.792 | 8.784  |
| 1999          | 33891  | 3120.351 | 2338.507 | 781.844  | 2.307  | 25.056 | 437.317 | 40.264 | 30.175 | 10.089 |
| 2000          | 33827  | 3142.808 | 2228.360 | 914.449  | 2.703  | 29.097 | 431.074 | 40.050 | 28.397 | 11.653 |
| 2001          | 32506  | 2961.588 | 1979.646 | 981.943  | 3.021  | 33.156 | 409.647 | 37.323 | 24.948 | 12.375 |
| 2002          | 32078  | 2940.627 | 1836.727 | 1103.900 | 3.441  | 37.540 | 400.295 | 36.695 | 22.920 | 13.775 |
| 2003          | 30568  | 2819.545 | 1644.159 | 1175.386 | 3.845  | 41.687 | 377.883 | 34.855 | 20.325 | 14.530 |
| 2004          | 29388  | 2730.466 | 1478.967 | 1251.499 | 4.259  | 45.835 | 359.671 | 33.417 | 18.101 | 15.317 |
| 2005          | 27954  | 2670.510 | 1341.942 | 1328.568 | 4.753  | 49.750 | 338.339 | 32.322 | 16.242 | 16.080 |
| 2006          | 27201  | 2623.285 | 1220.432 | 1402.853 | 5.157  | 53.477 | 326.354 | 31.474 | 14.643 | 16.831 |
| 2007          | 26302  | 2536.599 | 1088.476 | 1448.123 | 5.506  | 57.089 | 312.424 | 30.131 | 12.929 | 17.201 |
| 2008          | 25998  | 2469.443 | 979.556  | 1489.888 | 5.731  | 60.333 | 305.468 | 29.015 | 11.509 | 17.506 |
| 2009          | 25040  | 2386.945 | 872.668  | 1514.277 | 6.047  | 63.440 | 290.901 | 27.730 | 10.138 | 17.592 |
| 2010          | 24840  | 2329.274 | 784.760  | 1544.514 | 6.218  | 66.309 | 285.273 | 26.750 | 9.013  | 17.738 |
| 2011          | 24792  | 2286.581 | 705.014  | 1581.567 | 6.379  | 69.167 | 282.045 | 26.013 | 8.021  | 17.993 |
| 2012          | 24500  | 2243.311 | 632.683  | 1610.628 | 6.574  | 71.797 | 275.872 | 25.260 | 7.124  | 18.136 |
| 2013          | 24451  | 2176.503 | 561.593  | 1614.911 | 6.605  | 74.197 | 272.368 | 24.245 | 6.256  | 17.989 |
| 2014          | 25296  | 2211.619 | 523.096  | 1688.523 | 6.675  | 76.348 | 278.691 | 24.366 | 5.763  | 18.603 |
| 2015          | 26316  | 2237.016 | 490.847  | 1746.169 | 6.635  | 78.058 | 324.141 | 27.554 | 6.046  | 21.508 |
| 2016          | 26735  | 2229.057 | 450.070  | 1778.987 | 6.654  | 79.809 | 326.164 | 27.194 | 5.491  | 21.703 |
| 2017          | 27616  | 2221.649 | 413.790  | 1807.860 | 6.546  | 81.375 | 333.726 | 26.848 | 5.000  | 21.847 |
| 2018          | 25256  | 1939.420 | 335.085  | 1604.335 | 6.352  | 82.722 | 302.304 | 23.214 | 4.011  | 19.203 |
| 2019          | 25429  | 1904.400 | 302.478  | 1601.922 | 6.300  | 84.117 | 301.434 | 22.574 | 3.586  | 18.989 |
| 2020          | 25379  | 1806.054 | 268.084  | 1537.970 | 6.060  | 85.156 | 340.922 | 24.261 | 3.601  | 20.660 |
| 2021          | 25448  | 1748.172 | 239.493  | 1508.679 | 5.928  | 86.300 | 339.386 | 23.314 | 3.194  | 20.120 |
| 2022          | 25539  | 1701.148 | 216.040  | 1485.107 | 5.815  | 87.300 | 338.015 | 22.515 | 2.859  | 19.656 |
| 2023          | 25620  | 1652.087 | 195.906  | 1456.180 | 5.684  | 88.142 | 336.461 | 21.696 | 2.573  | 19.123 |
| 2024          | 25659  | 1597.127 | 176.067  | 1421.060 | 5.538  | 88.976 | 334.391 | 20.814 | 2.295  | 18.520 |
| 2025          | 25260  | 1467.622 | 153.787  | 1313.836 | 5.201  | 89.521 | 379.931 | 22.075 | 2.313  | 19.762 |
| 2026          | 25480  | 1390.505 | 137.073  | 1253.432 | 4.919  | 90.142 | 381.790 | 20.835 | 2.054  | 18.782 |
| 2027          | 25264  | 1342.095 | 124.177  | 1217.918 | 4.821  | 90.748 | 377.042 | 20.030 | 1.853  | 18.177 |
| 2028          | 25022  | 1289.536 | 112.517  | 1177.019 | 4.704  | 91.275 | 371.870 | 19.165 | 1.672  | 17.493 |
| 2029          | 24767  | 1242.216 | 102.241  | 1139.975 | 4.603  | 91.770 | 366.459 | 18.380 | 1.513  | 16.867 |
| 2030          | 23959  | 1096.803 | 86.831   | 1009.972 | 4.215  | 92.083 | 419.641 | 19.210 | 1.521  | 17.689 |
| 2031          | 23963  | 1019.991 | 76.995   | 942.995  | 3.935  | 92.451 | 419.142 | 17.841 | 1.347  | 16.494 |
| 2032          | 23615  | 977.406  | 69.992   | 907.414  | 3.842  | 92.839 | 412.259 | 17.063 | 1.222  | 15.841 |
| 2033          | 23259  | 937.450  | 64.543   | 872.907  | 3.753  | 93.115 | 405.051 | 16.326 | 1.124  | 15.202 |
| 2034          | 22879  | 900.763  | 59.253   | 841.510  | 3.678  | 93.422 | 397.339 | 15.644 | 1.029  | 14.615 |
| 2035          | 21733  | 745.023  | 48.187   | 696.836  | 3.206  | 93.532 | 462.224 | 15.845 | 1.025  | 14.820 |
| 2036          | 20904  | 680.360  | 41.576   | 638.783  | 3.056  | 93.889 | 445.263 | 14.492 | 0.886  | 13.606 |
| 2037          | 20397  | 644.109  | 37.855   | 606.254  | 2.972  | 94.123 | 434.791 | 13.730 | 0.807  | 12.923 |
| 2038          | 19890  | 612.448  | 34.843   | 577.605  | 2.904  | 94.311 | 423.966 | 13.055 | 0.743  | 12.312 |
| 2039          | 19392  | 577.529  | 31.923   | 545.606  | 2.814  | 94.472 | 412.930 | 12.298 | 0.680  | 11.618 |

## Results for PHIM for Run 2 (Sensitivity\_Analysis\_4.RTF)

\*\*\*\*\*

### Main Results for E-Component for Run: 2, Simulation: 1, COD: COPD

| Variable Parameter          | Value                                  |
|-----------------------------|----------------------------------------|
| 1. Country                  | US (United States)                     |
| 2. Sex                      | F (Females)                            |
| 3. Year of start of process | 1990                                   |
| 4. Cause of Death           | COPD                                   |
| 5. Effective Dose NULL      | CC:1                                   |
| 6. Effective Dose Ecig      | CC:1 Ecig:0.05 Dual:0.525              |
| Note:                       | Death rates are per million population |

#### Results for Age Groups Combined and Years combined, Population unadjusted for deaths in Ecig scenario,

| Age Group:All |         | NULL       | Ecig       | %Drop    |        | NULL   | Ecig    | Drop    |         |        |
|---------------|---------|------------|------------|----------|--------|--------|---------|---------|---------|--------|
| Year          | Number  | Attrib     | Attrib     | Drop     | %Drop  | Attrib | Death   | Attrib  | Attrib  | Drop   |
|               | Deaths  | Deaths     | Deaths     | Deaths   | Deaths | Deaths | Rate    | Rates   | Rates   | Rates  |
| All Comb      | 2159941 | 862051.244 | 551259.733 | 310791.5 | 14.389 | 36.053 | 593.003 | 236.673 | 151.346 | 85.327 |

#### Results for Age Groups Combined, Population unadjusted for deaths in Ecig scenario,

| Age Group:All |        | NULL      | Ecig      | %Drop    |        | NULL   | Ecig    | Drop    |         |         |
|---------------|--------|-----------|-----------|----------|--------|--------|---------|---------|---------|---------|
| Year          | Number | Attrib    | Attrib    | Drop     | %Drop  | Attrib | Death   | Attrib  | Attrib  | Drop    |
|               | Deaths | Deaths    | Deaths    | Deaths   | Deaths | Deaths | Rate    | Rates   | Rates   | Rates   |
| 1990          | 24738  | 10694.712 | 10694.712 | 0.000    | 0.000  | 0.000  | 362.296 | 156.628 | 156.628 | 0.000   |
| 1991          | 26562  | 11602.933 | 11584.706 | 18.227   | 0.069  | 0.157  | 383.818 | 167.661 | 167.398 | 0.263   |
| 1992          | 26828  | 11831.375 | 11781.157 | 50.218   | 0.187  | 0.424  | 382.401 | 168.642 | 167.926 | 0.716   |
| 1993          | 29774  | 13246.371 | 13138.061 | 108.310  | 0.364  | 0.818  | 418.406 | 186.148 | 184.626 | 1.522   |
| 1994          | 29804  | 13355.662 | 13183.533 | 172.128  | 0.578  | 1.289  | 412.601 | 184.893 | 182.511 | 2.383   |
| 1995          | 29755  | 13397.439 | 13141.784 | 255.656  | 0.859  | 1.908  | 405.540 | 182.598 | 179.113 | 3.484   |
| 1996          | 30900  | 13960.356 | 13603.063 | 357.293  | 1.156  | 2.559  | 415.680 | 187.801 | 182.994 | 4.806   |
| 1997          | 31128  | 14109.552 | 13642.338 | 467.214  | 1.501  | 3.311  | 412.949 | 187.180 | 180.981 | 6.198   |
| 1998          | 32096  | 14599.657 | 13987.975 | 611.682  | 1.906  | 4.190  | 419.803 | 190.958 | 182.957 | 8.001   |
| 1999          | 34616  | 15728.102 | 14933.899 | 794.203  | 2.294  | 5.050  | 446.673 | 202.950 | 192.702 | 10.248  |
| 2000          | 34299  | 15579.803 | 14634.735 | 945.068  | 2.755  | 6.066  | 437.088 | 198.541 | 186.497 | 12.043  |
| 2001          | 34592  | 15696.614 | 14557.592 | 1139.022 | 3.293  | 7.256  | 435.935 | 197.812 | 183.458 | 14.354  |
| 2002          | 34291  | 15519.777 | 14196.943 | 1322.834 | 3.858  | 8.524  | 427.910 | 193.668 | 177.161 | 16.507  |
| 2003          | 35074  | 15888.389 | 14324.294 | 1564.095 | 4.459  | 9.844  | 433.587 | 196.413 | 177.078 | 19.335  |
| 2004          | 33512  | 15091.573 | 13392.995 | 1698.577 | 5.069  | 11.255 | 410.143 | 184.701 | 163.913 | 20.788  |
| 2005          | 35392  | 15803.656 | 13773.384 | 2030.271 | 5.737  | 12.847 | 428.364 | 191.278 | 166.705 | 24.573  |
| 2006          | 33981  | 15100.563 | 12937.934 | 2162.629 | 6.364  | 14.322 | 407.699 | 181.174 | 155.227 | 25.947  |
| 2007          | 34000  | 14974.384 | 12581.006 | 2393.378 | 7.039  | 15.983 | 403.863 | 177.871 | 149.441 | 28.429  |
| 2008          | 37425  | 16406.197 | 13533.713 | 2872.484 | 7.675  | 17.509 | 439.732 | 192.768 | 159.017 | 33.751  |
| 2009          | 36826  | 16083.194 | 12962.047 | 3121.147 | 8.475  | 19.406 | 427.825 | 186.846 | 150.586 | 36.260  |
| 2010          | 36788  | 15927.400 | 12580.953 | 3346.448 | 9.097  | 21.011 | 422.489 | 182.917 | 144.485 | 38.432  |
| 2011          | 37636  | 16221.836 | 12503.674 | 3718.162 | 9.879  | 22.921 | 428.164 | 184.547 | 142.247 | 42.299  |
| 2012          | 38265  | 16358.849 | 12300.149 | 4058.700 | 10.607 | 24.810 | 430.867 | 184.202 | 138.501 | 45.701  |
| 2013          | 40112  | 16994.822 | 12435.012 | 4559.811 | 11.368 | 26.831 | 446.821 | 189.311 | 138.518 | 50.793  |
| 2014          | 40084  | 16855.093 | 11988.748 | 4866.345 | 12.140 | 28.872 | 441.613 | 185.696 | 132.082 | 53.613  |
| 2015          | 42200  | 17572.483 | 12216.645 | 5355.838 | 12.692 | 30.479 | 519.788 | 216.445 | 150.476 | 65.969  |
| 2016          | 42606  | 17579.955 | 11830.798 | 5749.157 | 13.494 | 32.703 | 519.788 | 214.473 | 144.334 | 70.139  |
| 2017          | 44364  | 18080.688 | 11772.506 | 6308.182 | 14.219 | 34.889 | 536.117 | 218.496 | 142.265 | 76.231  |
| 2018          | 45359  | 18209.262 | 11499.914 | 6709.348 | 14.792 | 36.846 | 542.932 | 217.960 | 137.651 | 80.309  |
| 2019          | 46876  | 18648.302 | 11377.112 | 7271.190 | 15.512 | 38.991 | 555.657 | 221.054 | 134.863 | 86.192  |
| 2020          | 48331  | 19002.597 | 11249.164 | 7753.433 | 16.042 | 40.802 | 649.239 | 255.266 | 151.113 | 104.154 |
| 2021          | 48338  | 18885.717 | 10755.292 | 8130.425 | 16.820 | 43.051 | 644.660 | 251.867 | 143.437 | 108.430 |
| 2022          | 49708  | 19235.076 | 10557.452 | 8677.624 | 17.457 | 45.114 | 657.895 | 254.582 | 139.731 | 114.851 |
| 2023          | 51083  | 19521.158 | 10341.786 | 9179.372 | 17.970 | 47.023 | 670.849 | 256.363 | 135.814 | 120.549 |
| 2024          | 52397  | 19918.620 | 10131.811 | 9786.809 | 18.678 | 49.134 | 682.854 | 259.583 | 132.040 | 127.544 |
| 2025          | 53387  | 20150.545 | 9875.497  | 10275.05 | 19.246 | 50.991 | 803.004 | 303.086 | 148.538 | 154.548 |
| 2026          | 54232  | 20393.792 | 9571.017  | 10822.78 | 19.956 | 53.069 | 812.615 | 305.582 | 143.413 | 162.169 |
| 2027          | 55049  | 20615.351 | 9243.812  | 11371.54 | 20.657 | 55.161 | 821.568 | 307.668 | 137.957 | 169.712 |
| 2028          | 55809  | 20731.894 | 8874.049  | 11857.84 | 21.247 | 57.196 | 829.419 | 308.115 | 131.885 | 176.230 |
| 2029          | 56527  | 20781.967 | 8485.174  | 12296.79 | 21.754 | 59.170 | 836.392 | 307.495 | 125.549 | 181.946 |
| 2030          | 56756  | 20753.201 | 8112.040  | 12641.16 | 22.273 | 60.912 | 994.067 | 363.487 | 142.080 | 221.407 |
| 2031          | 58288  | 21048.417 | 7980.815  | 13067.60 | 22.419 | 62.084 | 1019.54 | 368.165 | 139.595 | 228.570 |
| 2032          | 58782  | 21169.329 | 7638.610  | 13530.72 | 23.018 | 63.917 | 1026.18 | 369.560 | 133.350 | 236.210 |
| 2033          | 59236  | 21109.293 | 7261.908  | 13847.39 | 23.377 | 65.599 | 1031.59 | 367.618 | 126.466 | 241.152 |
| 2034          | 59614  | 21109.429 | 6889.740  | 14219.69 | 23.853 | 67.362 | 1035.33 | 366.613 | 119.656 | 246.957 |
| 2035          | 58938  | 20794.840 | 6511.702  | 14283.14 | 24.234 | 68.686 | 1253.51 | 442.268 | 138.492 | 303.776 |
| 2036          | 56014  | 19354.577 | 5784.290  | 13570.29 | 24.227 | 70.114 | 1193.11 | 412.258 | 123.207 | 289.051 |
| 2037          | 55953  | 19064.169 | 5346.619  | 13717.55 | 24.516 | 71.955 | 1192.72 | 406.385 | 113.972 | 292.413 |
| 2038          | 55859  | 18854.812 | 4986.829  | 13867.98 | 24.827 | 73.551 | 1190.66 | 401.900 | 106.297 | 295.603 |
| 2039          | 55757  | 18437.457 | 4570.744  | 13866.71 | 24.870 | 75.209 | 1187.28 | 392.602 | 97.328  | 295.274 |

## Results for PHIM for Run 2 (Sensitivity\_Analysis\_4.RTF)

\*\*\*\*\*

### Main Results for E-Component for Run: 2, Simulation: 1, COD: Four Diseases Combined, Adjusted

| Variable Parameter          | Value                                  |
|-----------------------------|----------------------------------------|
| 1. Country                  | US (United States)                     |
| 2. Sex                      | F (Females)                            |
| 3. Year of start of process | 1990                                   |
| 4. Cause of Death           | Four Diseases Combined                 |
| 5. Effective Dose NULL      | CC:1                                   |
| 6. Effective Dose Ecig      | CC:1 Ecig:0.05 Dual:0.525              |
| Note:                       | Death rates are per million population |

#### Results for Age Groups Combined and Years combined, Population and Number deaths adjusted for Ecig scenario,

| Age Group:All |         | NULL        | Ecig        | %Drop    |        | NULL   | Ecig    | Drop    |         |         |
|---------------|---------|-------------|-------------|----------|--------|--------|---------|---------|---------|---------|
| Year          | Number  | Attrib      | Attrib      | Drop     | %Drop  | Attrib | Death   | Attrib  | Attrib  | Drop    |
|               | Deaths  | Deaths      | Deaths      | Deaths   | Deaths | Deaths | Rate    | Rates   | Rates   | Rates   |
| All Comb      | 9148416 | 2946250.006 | 1952548.682 | 993701.3 | 10.862 | 33.728 | 2499.61 | 808.881 | 533.492 | 275.389 |

#### Results for Age Groups Combined, Population and Number deaths adjusted for Ecig scenario,

| Age Group:All |        | NULL      | Ecig      | %Drop    |        | NULL   | Ecig    | Drop    |         |         |
|---------------|--------|-----------|-----------|----------|--------|--------|---------|---------|---------|---------|
| Year          | Number | Attrib    | Attrib    | Drop     | %Drop  | Attrib | Death   | Attrib  | Attrib  | Drop    |
|               | Deaths | Deaths    | Deaths    | Deaths   | Deaths | Deaths | Rate    | Rates   | Rates   | Rates   |
| 1990          | 199848 | 57524.822 | 57524.822 | 0.000    | 0.000  | 0.000  | 2926.84 | 842.471 | 842.471 | 0.000   |
| 1991          | 199162 | 59078.486 | 58910.020 | 168.466  | 0.085  | 0.285  | 2877.87 | 853.678 | 851.244 | 2.434   |
| 1992          | 198533 | 60494.150 | 60022.673 | 471.476  | 0.237  | 0.779  | 2829.84 | 862.271 | 855.549 | 6.722   |
| 1993          | 202515 | 62694.848 | 61777.603 | 917.244  | 0.453  | 1.463  | 2845.86 | 881.034 | 868.136 | 12.898  |
| 1994          | 200665 | 63202.598 | 61753.922 | 1448.676 | 0.722  | 2.292  | 2777.91 | 874.966 | 854.892 | 20.074  |
| 1995          | 201036 | 63766.862 | 61674.834 | 2092.028 | 1.041  | 3.281  | 2739.86 | 869.097 | 840.549 | 28.549  |
| 1996          | 201202 | 64591.163 | 61725.476 | 2865.687 | 1.424  | 4.437  | 2706.47 | 868.908 | 830.298 | 38.610  |
| 1997          | 198673 | 64686.912 | 61099.489 | 3587.423 | 1.806  | 5.546  | 2635.34 | 858.147 | 810.466 | 47.681  |
| 1998          | 197623 | 65295.961 | 60873.153 | 4422.809 | 2.238  | 6.773  | 2584.42 | 854.046 | 796.070 | 57.976  |
| 1999          | 211404 | 67327.521 | 61615.499 | 5712.023 | 2.702  | 8.484  | 2727.28 | 868.771 | 794.890 | 73.880  |
| 2000          | 208596 | 67596.897 | 60947.235 | 6649.662 | 3.188  | 9.837  | 2657.45 | 861.419 | 776.450 | 84.970  |
| 2001          | 203735 | 67008.811 | 59366.802 | 7642.009 | 3.751  | 11.404 | 2566.52 | 844.458 | 747.865 | 96.593  |
| 2002          | 200990 | 67067.744 | 58320.246 | 8747.497 | 4.352  | 13.043 | 2506.90 | 836.925 | 727.414 | 109.511 |
| 2003          | 196550 | 66756.217 | 57011.729 | 9744.488 | 4.958  | 14.597 | 2428.31 | 825.244 | 704.360 | 120.884 |
| 2004          | 188394 | 65058.725 | 54472.224 | 10586.50 | 5.619  | 16.272 | 2304.02 | 796.234 | 666.184 | 130.050 |
| 2005          | 186694 | 65214.724 | 53491.902 | 11722.82 | 6.279  | 17.976 | 2257.67 | 789.321 | 646.874 | 142.447 |
| 2006          | 180406 | 63771.146 | 51187.710 | 12583.44 | 6.975  | 19.732 | 2162.28 | 765.117 | 613.517 | 151.600 |
| 2007          | 176006 | 63110.718 | 49644.545 | 13466.17 | 7.651  | 21.337 | 2088.19 | 749.650 | 588.997 | 160.653 |
| 2008          | 177993 | 63718.624 | 48972.856 | 14745.77 | 8.284  | 23.142 | 2088.52 | 748.674 | 574.635 | 174.039 |
| 2009          | 173277 | 62794.698 | 47226.416 | 15568.28 | 8.985  | 24.792 | 2009.93 | 729.515 | 547.802 | 181.713 |
| 2010          | 171016 | 61917.074 | 45484.057 | 16433.02 | 9.609  | 26.540 | 1960.59 | 711.083 | 521.446 | 189.637 |
| 2011          | 170896 | 61680.114 | 44084.005 | 17596.11 | 10.296 | 28.528 | 1940.38 | 701.700 | 500.538 | 201.162 |
| 2012          | 172084 | 62023.127 | 43136.461 | 18886.67 | 10.975 | 30.451 | 1933.47 | 698.386 | 484.664 | 213.723 |
| 2013          | 173443 | 62037.765 | 41990.473 | 20047.29 | 11.558 | 32.315 | 1927.38 | 691.059 | 466.617 | 224.441 |
| 2014          | 174998 | 61921.017 | 40597.282 | 21323.73 | 12.185 | 34.437 | 1922.86 | 682.195 | 446.078 | 236.117 |
| 2015          | 178288 | 61856.204 | 39451.995 | 22404.21 | 12.566 | 36.220 | 2188.82 | 761.899 | 484.349 | 277.550 |
| 2016          | 177872 | 60464.119 | 37185.673 | 23278.45 | 13.087 | 38.500 | 2162.25 | 737.655 | 452.036 | 285.619 |
| 2017          | 180440 | 60243.839 | 35791.588 | 24452.25 | 13.551 | 40.589 | 2172.03 | 728.017 | 430.838 | 297.179 |
| 2018          | 178377 | 60713.327 | 35202.723 | 25510.60 | 14.302 | 42.018 | 2126.10 | 726.721 | 419.586 | 307.135 |
| 2019          | 180571 | 61148.172 | 34277.099 | 26871.07 | 14.881 | 43.944 | 2130.69 | 724.841 | 404.461 | 320.380 |
| 2020          | 181943 | 61149.317 | 33343.145 | 27806.17 | 15.283 | 45.473 | 2430.54 | 821.432 | 445.424 | 376.008 |
| 2021          | 179686 | 58727.786 | 30513.952 | 28213.83 | 15.702 | 48.042 | 2382.11 | 783.216 | 404.525 | 378.691 |
| 2022          | 181110 | 58848.802 | 29481.608 | 29367.19 | 16.215 | 49.903 | 2381.80 | 778.881 | 387.716 | 391.164 |
| 2023          | 182478 | 58816.149 | 28437.172 | 30378.98 | 16.648 | 51.651 | 2380.16 | 772.407 | 370.921 | 401.485 |
| 2024          | 183588 | 58955.232 | 27400.979 | 31554.25 | 17.188 | 53.522 | 2375.31 | 768.316 | 354.521 | 413.795 |
| 2025          | 182536 | 58297.744 | 26260.207 | 32037.54 | 17.551 | 54.955 | 2721.84 | 876.861 | 391.573 | 485.288 |
| 2026          | 182580 | 56469.971 | 24209.827 | 32260.14 | 17.669 | 57.128 | 2710.79 | 846.150 | 359.448 | 486.702 |
| 2027          | 182020 | 56209.427 | 23056.825 | 33152.60 | 18.214 | 58.981 | 2690.33 | 838.883 | 340.790 | 498.093 |
| 2028          | 181299 | 55733.105 | 21845.827 | 33887.28 | 18.691 | 60.803 | 2667.12 | 828.298 | 321.377 | 506.921 |
| 2029          | 180482 | 55145.838 | 20617.122 | 34528.72 | 19.131 | 62.613 | 2642.01 | 815.951 | 301.806 | 514.144 |
| 2030          | 176388 | 53615.097 | 19386.738 | 34228.36 | 19.405 | 63.841 | 3050.41 | 939.056 | 335.270 | 603.786 |
| 2031          | 177997 | 52046.561 | 18152.666 | 33893.90 | 19.042 | 65.122 | 3072.26 | 910.364 | 313.317 | 597.046 |
| 2032          | 176550 | 51582.636 | 17148.662 | 34433.97 | 19.504 | 66.755 | 3039.53 | 900.496 | 295.237 | 605.259 |
| 2033          | 175044 | 50839.758 | 16128.052 | 34711.71 | 19.830 | 68.277 | 3004.51 | 885.375 | 276.826 | 608.548 |
| 2034          | 173394 | 50215.451 | 15134.608 | 35080.84 | 20.232 | 69.861 | 2966.27 | 872.104 | 258.909 | 613.195 |
| 2035          | 166157 | 47773.075 | 14038.734 | 33734.34 | 20.303 | 70.614 | 3471.84 | 1016.05 | 293.338 | 722.708 |
| 2036          | 159795 | 43298.709 | 12010.718 | 31287.99 | 19.580 | 72.261 | 3341.63 | 922.274 | 251.168 | 671.107 |
| 2037          | 157228 | 42241.563 | 11019.516 | 31222.05 | 19.858 | 73.913 | 3288.41 | 900.450 | 230.473 | 669.978 |
| 2038          | 154670 | 41356.353 | 10219.848 | 31136.50 | 20.131 | 75.288 | 3232.74 | 881.531 | 213.604 | 667.927 |
| 2039          | 152182 | 40161.050 | 9321.966  | 30839.08 | 20.265 | 76.789 | 3175.57 | 855.178 | 194.520 | 660.657 |

## Results for PHIM for Run 2 (Sensitivity\_Analysis\_4.RTF)

\*\*\*\*\*

### Main Results for E-Component for Run: 2, Simulation: 1, COD: LUNG CANCER, Adjusted

| Variable Parameter          | Value                                  |
|-----------------------------|----------------------------------------|
| 1. Country                  | US (United States)                     |
| 2. Sex                      | F (Females)                            |
| 3. Year of start of process | 1990                                   |
| 4. Cause of Death           | LUNG CANCER                            |
| 5. Effective Dose NULL      | CC:1                                   |
| 6. Effective Dose Ecig      | CC:1 Ecig:0.05 Dual:0.525              |
| Note:                       | Death rates are per million population |

#### Results for Age Groups Combined and Years combined, Population and Number deaths adjusted for Ecig scenario,

| Age Group:All | NULL    | Ecig        | %Drop       |          |        |        | NULL    | Ecig    | Drop    |         |
|---------------|---------|-------------|-------------|----------|--------|--------|---------|---------|---------|---------|
| Year          | Number  | Attrib      | Attrib      | Drop     | %Drop  | Attrib | Death   | Attrib  | Attrib  | Drop    |
|               | Deaths  | Deaths      | Deaths      | Deaths   | Deaths | Deaths | Rate    | Rates   | Rates   | Rates   |
| All Comb      | 2343936 | 1580465.217 | 1147156.294 | 433308.9 | 18.486 | 27.417 | 640.431 | 433.910 | 313.436 | 120.474 |

#### Results for Age Groups Combined, Population and Number deaths adjusted for Ecig scenario,

| Age Group:All | NULL   | Ecig      | %Drop     |           |        |        | NULL    | Ecig    | Drop    |         |
|---------------|--------|-----------|-----------|-----------|--------|--------|---------|---------|---------|---------|
| Year          | Number | Attrib    | Attrib    | Drop      | %Drop  | Attrib | Death   | Attrib  | Attrib  | Drop    |
|               | Deaths | Deaths    | Deaths    | Deaths    | Deaths | Deaths | Rate    | Rates   | Rates   | Rates   |
| 1990          | 42690  | 30614.201 | 30614.201 | 0.000     | 0.000  | 0.000  | 625.210 | 448.355 | 448.355 | 0.000   |
| 1991          | 43692  | 31412.010 | 31379.684 | 32.326    | 0.074  | 0.103  | 631.345 | 453.901 | 453.433 | 0.467   |
| 1992          | 45423  | 32782.407 | 32688.550 | 93.857    | 0.207  | 0.286  | 647.451 | 467.274 | 465.935 | 1.339   |
| 1993          | 46292  | 33491.183 | 33305.813 | 185.371   | 0.400  | 0.553  | 650.518 | 470.643 | 468.033 | 2.609   |
| 1994          | 47019  | 34074.347 | 33774.112 | 300.235   | 0.639  | 0.881  | 650.904 | 471.719 | 467.553 | 4.167   |
| 1995          | 47843  | 34694.454 | 34242.051 | 452.403   | 0.946  | 1.304  | 652.042 | 472.861 | 466.675 | 6.186   |
| 1996          | 48250  | 35027.269 | 34401.653 | 625.616   | 1.297  | 1.786  | 649.027 | 471.202 | 462.753 | 8.449   |
| 1997          | 49044  | 35590.763 | 34758.919 | 831.844   | 1.696  | 2.337  | 650.551 | 472.153 | 461.066 | 11.087  |
| 1998          | 49699  | 36100.785 | 35025.383 | 1075.402  | 2.164  | 2.979  | 649.940 | 472.184 | 458.045 | 14.139  |
| 1999          | 48901  | 35451.030 | 34156.114 | 1294.915  | 2.648  | 3.653  | 630.861 | 457.448 | 440.642 | 16.806  |
| 2000          | 50356  | 36447.986 | 34828.260 | 1619.726  | 3.217  | 4.444  | 641.520 | 464.474 | 443.702 | 20.772  |
| 2001          | 50422  | 36411.326 | 34462.223 | 1949.103  | 3.866  | 5.353  | 635.180 | 458.863 | 434.133 | 24.730  |
| 2002          | 51487  | 37078.545 | 34720.175 | 2358.370  | 4.580  | 6.360  | 642.190 | 462.696 | 433.056 | 29.640  |
| 2003          | 51461  | 36999.876 | 34251.128 | 2748.748  | 5.341  | 7.429  | 635.782 | 457.395 | 423.161 | 34.234  |
| 2004          | 51464  | 36861.555 | 33679.665 | 3181.890  | 6.183  | 8.632  | 629.391 | 451.138 | 411.896 | 39.242  |
| 2005          | 51498  | 36689.529 | 33049.037 | 3640.492  | 7.069  | 9.922  | 622.765 | 444.069 | 399.660 | 44.409  |
| 2006          | 51446  | 36504.774 | 32382.424 | 4122.350  | 8.013  | 11.293 | 616.615 | 437.979 | 388.124 | 49.855  |
| 2007          | 51946  | 36663.202 | 31966.721 | 4696.481  | 9.041  | 12.810 | 616.306 | 435.498 | 379.262 | 56.235  |
| 2008          | 51098  | 35898.803 | 30770.972 | 5127.831  | 10.035 | 14.284 | 599.566 | 421.800 | 361.059 | 60.741  |
| 2009          | 51333  | 35934.525 | 30189.530 | 5744.996  | 11.192 | 15.987 | 595.432 | 417.468 | 350.183 | 67.285  |
| 2010          | 51010  | 35502.829 | 29252.185 | 6250.644  | 12.254 | 17.606 | 584.795 | 407.730 | 335.358 | 72.372  |
| 2011          | 50684  | 35136.342 | 28296.247 | 6840.095  | 13.496 | 19.467 | 575.471 | 399.726 | 321.281 | 78.445  |
| 2012          | 51443  | 35450.201 | 27876.282 | 7573.919  | 14.723 | 21.365 | 577.988 | 399.173 | 313.206 | 85.966  |
| 2013          | 51288  | 35123.224 | 26904.889 | 8218.335  | 16.024 | 23.399 | 569.934 | 391.249 | 298.980 | 92.269  |
| 2014          | 51494  | 35079.370 | 26171.708 | 8907.662  | 17.298 | 25.393 | 565.810 | 386.476 | 287.572 | 98.904  |
| 2015          | 50707  | 34324.171 | 24967.355 | 9356.816  | 18.453 | 27.260 | 622.526 | 422.780 | 306.522 | 116.257 |
| 2016          | 49134  | 33054.753 | 23303.364 | 9751.388  | 19.846 | 29.501 | 597.284 | 403.264 | 283.280 | 119.984 |
| 2017          | 48628  | 32471.234 | 22152.229 | 10319.011 | 21.220 | 31.779 | 585.359 | 392.399 | 266.655 | 125.743 |
| 2018          | 50809  | 33657.595 | 22123.082 | 11534.51  | 22.702 | 34.270 | 605.601 | 402.871 | 263.688 | 139.184 |
| 2019          | 51414  | 33863.424 | 21465.938 | 12397.49  | 24.113 | 36.610 | 606.675 | 401.412 | 253.292 | 148.119 |
| 2020          | 51858  | 33910.830 | 20798.471 | 13112.36  | 25.285 | 38.667 | 692.761 | 455.532 | 277.843 | 177.689 |
| 2021          | 48455  | 31531.880 | 18563.473 | 12968.41  | 26.764 | 41.128 | 642.372 | 420.521 | 246.097 | 174.424 |
| 2022          | 48787  | 31560.212 | 17835.941 | 13724.27  | 28.131 | 43.486 | 641.608 | 417.708 | 234.563 | 183.146 |
| 2023          | 49087  | 31508.781 | 17097.076 | 14411.71  | 29.360 | 45.739 | 640.262 | 413.791 | 223.006 | 190.785 |
| 2024          | 49307  | 31517.293 | 16355.299 | 15161.99  | 30.750 | 48.107 | 637.951 | 410.740 | 211.609 | 199.130 |
| 2025          | 49036  | 31175.389 | 15557.632 | 15617.76  | 31.850 | 50.096 | 731.191 | 468.912 | 231.984 | 236.928 |
| 2026          | 45887  | 29044.598 | 13848.032 | 15196.57  | 33.118 | 52.321 | 681.287 | 435.206 | 205.604 | 229.602 |
| 2027          | 45702  | 28825.765 | 13079.861 | 15745.90  | 34.453 | 54.624 | 675.502 | 430.203 | 193.326 | 236.877 |
| 2028          | 45469  | 28513.846 | 12293.678 | 16220.17  | 35.673 | 56.885 | 668.908 | 423.769 | 180.854 | 242.915 |
| 2029          | 45200  | 28148.109 | 11501.926 | 16646.18  | 36.828 | 59.138 | 661.663 | 416.486 | 168.372 | 248.114 |
| 2030          | 44083  | 27314.475 | 10708.840 | 16605.64  | 37.669 | 60.794 | 762.363 | 478.407 | 185.196 | 293.210 |
| 2031          | 41442  | 25423.102 | 9615.008  | 15808.09  | 38.145 | 62.180 | 715.300 | 444.684 | 165.956 | 278.728 |
| 2032          | 41050  | 25085.902 | 8987.701  | 16098.20  | 39.216 | 64.172 | 706.728 | 437.933 | 154.735 | 283.198 |
| 2033          | 40637  | 24645.067 | 8372.107  | 16272.96  | 40.045 | 66.029 | 697.499 | 429.194 | 143.701 | 285.493 |
| 2034          | 40188  | 24239.126 | 7778.379  | 16460.75  | 40.960 | 67.910 | 687.496 | 420.967 | 133.065 | 287.901 |
| 2035          | 38255  | 22944.147 | 7116.309  | 15827.84  | 41.374 | 68.984 | 799.338 | 487.980 | 148.694 | 339.285 |
| 2036          | 33726  | 19950.581 | 5840.372  | 14110.21  | 41.837 | 70.726 | 705.285 | 424.953 | 122.134 | 302.819 |
| 2037          | 33159  | 19415.334 | 5314.374  | 14100.96  | 42.525 | 72.628 | 693.524 | 413.871 | 111.150 | 302.721 |
| 2038          | 32593  | 18939.317 | 4895.347  | 14043.97  | 43.089 | 74.152 | 681.219 | 403.701 | 102.317 | 301.384 |
| 2039          | 32040  | 18379.752 | 4436.574  | 13943.18  | 43.517 | 75.862 | 668.584 | 391.373 | 92.577  | 298.796 |



## Results for PHIM for Run 2 (Sensitivity\_Analysis\_4.RTF)

\*\*\*\*\*

### Main Results for E-Component for Run: 2, Simulation: 1, COD: IHD, Adjusted

| Variable Parameter          | Value                                  |
|-----------------------------|----------------------------------------|
| 1. Country                  | US (United States)                     |
| 2. Sex                      | F (Females)                            |
| 3. Year of start of process | 1990                                   |
| 4. Cause of Death           | IHD                                    |
| 5. Effective Dose NULL      | CC:1                                   |
| 6. Effective Dose Ecig      | CC:1 Ecig:0.05 Dual:0.525              |
| Note:                       | Death rates are per million population |

#### Results for Age Groups Combined and Years combined, Population and Number deaths adjusted for Ecig scenario,

| Age Group:All |         | NULL       | Ecig       | %Drop    |        | NULL   | Ecig    | Drop    |        |        |
|---------------|---------|------------|------------|----------|--------|--------|---------|---------|--------|--------|
| Year          | Number  | Attrib     | Attrib     | Drop     | %Drop  | Attrib | Death   | Attrib  | Attrib | Drop   |
|               | Deaths  | Deaths     | Deaths     | Deaths   | Deaths | Deaths | Rate    | Rates   | Rates  | Rates  |
| All Comb      | 3261643 | 398833.796 | 199337.379 | 199496.4 | 6.116  | 50.020 | 891.175 | 109.498 | 54.465 | 55.034 |

#### Results for Age Groups Combined, Population and Number deaths adjusted for Ecig scenario,

| Age Group:All |        | NULL      | Ecig      | %Drop    |        | NULL   | Ecig    | Drop    |         |        |
|---------------|--------|-----------|-----------|----------|--------|--------|---------|---------|---------|--------|
| Year          | Number | Attrib    | Attrib    | Drop     | %Drop  | Attrib | Death   | Attrib  | Attrib  | Drop   |
|               | Deaths | Deaths    | Deaths    | Deaths   | Deaths | Deaths | Rate    | Rates   | Rates   | Rates  |
| 1990          | 98916  | 12922.892 | 12922.892 | 0.000    | 0.000  | 0.000  | 1448.66 | 189.260 | 189.260 | 0.000  |
| 1991          | 96403  | 12856.479 | 12766.074 | 90.405   | 0.094  | 0.703  | 1393.01 | 185.775 | 184.469 | 1.306  |
| 1992          | 93721  | 12662.244 | 12411.688 | 250.556  | 0.267  | 1.979  | 1335.88 | 180.485 | 176.913 | 3.572  |
| 1993          | 93680  | 12730.613 | 12252.434 | 478.179  | 0.510  | 3.756  | 1316.45 | 178.900 | 172.179 | 6.721  |
| 1994          | 90835  | 12495.323 | 11750.658 | 744.665  | 0.820  | 5.960  | 1257.48 | 172.983 | 162.670 | 10.313 |
| 1995          | 89704  | 12365.590 | 11313.307 | 1052.283 | 1.173  | 8.510  | 1222.55 | 168.534 | 154.186 | 14.348 |
| 1996          | 88296  | 12290.551 | 10855.815 | 1434.737 | 1.625  | 11.673 | 1187.71 | 165.338 | 146.027 | 19.311 |
| 1997          | 84792  | 11719.531 | 9991.647  | 1727.884 | 2.038  | 14.744 | 1124.73 | 155.473 | 132.536 | 22.937 |
| 1998          | 82538  | 11416.794 | 9348.440  | 2068.354 | 2.506  | 18.117 | 1079.39 | 149.327 | 122.254 | 27.073 |
| 1999          | 93972  | 13028.038 | 10180.762 | 2847.276 | 3.030  | 21.855 | 1212.32 | 168.109 | 131.340 | 36.769 |
| 2000          | 90082  | 12426.299 | 9247.633  | 3178.666 | 3.529  | 25.580 | 1147.62 | 158.354 | 117.812 | 40.542 |
| 2001          | 86173  | 11939.281 | 8356.684  | 3582.598 | 4.157  | 30.007 | 1085.55 | 150.461 | 105.272 | 45.189 |
| 2002          | 83080  | 11528.794 | 7553.255  | 3975.539 | 4.785  | 34.484 | 1036.24 | 143.865 | 94.210  | 49.656 |
| 2003          | 79382  | 11048.407 | 6775.718  | 4272.688 | 5.382  | 38.672 | 980.731 | 136.581 | 83.712  | 52.869 |
| 2004          | 73952  | 10375.132 | 5901.748  | 4473.383 | 6.049  | 43.116 | 904.420 | 126.978 | 72.177  | 54.801 |
| 2005          | 71755  | 10051.029 | 5304.535  | 4746.495 | 6.615  | 47.224 | 867.730 | 121.652 | 64.147  | 57.504 |
| 2006          | 67670  | 9542.523  | 4621.285  | 4921.239 | 7.272  | 51.572 | 811.063 | 114.490 | 55.389  | 59.101 |
| 2007          | 63633  | 8936.533  | 3979.377  | 4957.156 | 7.790  | 55.471 | 754.960 | 106.151 | 47.212  | 58.939 |
| 2008          | 63320  | 8944.180  | 3652.872  | 5291.309 | 8.356  | 59.159 | 742.981 | 105.091 | 42.862  | 62.229 |
| 2009          | 59909  | 8390.033  | 3163.179  | 5226.855 | 8.725  | 62.298 | 694.908 | 97.471  | 36.691  | 60.780 |
| 2010          | 58185  | 8157.570  | 2823.366  | 5334.204 | 9.168  | 65.390 | 667.060 | 93.685  | 32.368  | 61.317 |
| 2011          | 57565  | 8035.356  | 2531.555  | 5503.801 | 9.561  | 68.495 | 653.604 | 91.414  | 28.744  | 62.670 |
| 2012          | 57630  | 7970.766  | 2275.296  | 5695.470 | 9.883  | 71.454 | 647.510 | 89.752  | 25.564  | 64.187 |
| 2013          | 57310  | 7743.216  | 2030.720  | 5712.496 | 9.968  | 73.774 | 636.854 | 86.254  | 22.566  | 63.688 |
| 2014          | 57808  | 7774.935  | 1851.666  | 5923.269 | 10.246 | 76.184 | 635.189 | 85.658  | 20.346  | 65.312 |
| 2015          | 58698  | 7722.535  | 1707.481  | 6015.054 | 10.248 | 77.890 | 720.628 | 95.120  | 20.963  | 74.158 |
| 2016          | 58991  | 7600.353  | 1527.722  | 6072.631 | 10.294 | 79.899 | 717.111 | 92.723  | 18.571  | 74.152 |
| 2017          | 59370  | 7470.266  | 1372.932  | 6097.334 | 10.270 | 81.621 | 714.665 | 90.274  | 16.527  | 73.748 |
| 2018          | 56456  | 6907.050  | 1159.215  | 5747.835 | 10.181 | 83.217 | 672.907 | 82.675  | 13.817  | 68.859 |
| 2019          | 56297  | 6732.046  | 1039.595  | 5692.452 | 10.111 | 84.558 | 664.291 | 79.801  | 12.267  | 67.534 |
| 2020          | 55758  | 6429.836  | 928.674   | 5501.162 | 9.866  | 85.557 | 744.862 | 86.373  | 12.406  | 73.967 |
| 2021          | 56777  | 6562.016  | 853.960   | 5708.055 | 10.053 | 86.986 | 752.698 | 87.513  | 11.321  | 76.192 |
| 2022          | 56344  | 6352.366  | 764.865   | 5587.501 | 9.917  | 87.959 | 740.993 | 84.075  | 10.059  | 74.017 |
| 2023          | 55888  | 6134.123  | 689.639   | 5444.484 | 9.742  | 88.757 | 728.981 | 80.557  | 8.995   | 71.561 |
| 2024          | 55353  | 5922.193  | 619.562   | 5302.631 | 9.580  | 89.538 | 716.168 | 77.179  | 8.016   | 69.163 |
| 2025          | 53908  | 5504.188  | 550.003   | 4954.185 | 9.190  | 90.008 | 803.844 | 82.789  | 8.201   | 74.588 |
| 2026          | 55953  | 5641.075  | 525.405   | 5115.670 | 9.143  | 90.686 | 830.752 | 84.526  | 7.801   | 76.725 |
| 2027          | 54903  | 5426.216  | 476.875   | 4949.341 | 9.015  | 91.212 | 811.490 | 80.982  | 7.048   | 73.934 |
| 2028          | 53822  | 5197.830  | 430.741   | 4767.089 | 8.857  | 91.713 | 791.785 | 77.249  | 6.337   | 70.913 |
| 2029          | 52733  | 4973.547  | 390.787   | 4582.759 | 8.691  | 92.143 | 771.938 | 73.590  | 5.721   | 67.869 |
| 2030          | 50258  | 4450.618  | 339.808   | 4110.810 | 8.179  | 92.365 | 869.156 | 77.952  | 5.877   | 72.075 |
| 2031          | 52853  | 4555.052  | 333.086   | 4221.967 | 7.988  | 92.688 | 912.241 | 79.674  | 5.749   | 73.925 |
| 2032          | 51567  | 4349.999  | 303.502   | 4046.497 | 7.847  | 93.023 | 887.787 | 75.939  | 5.225   | 70.714 |
| 2033          | 50292  | 4147.948  | 279.781   | 3868.167 | 7.691  | 93.255 | 863.227 | 72.237  | 4.802   | 67.434 |
| 2034          | 49008  | 3966.133  | 257.210   | 3708.923 | 7.568  | 93.515 | 838.382 | 68.881  | 4.400   | 64.481 |
| 2035          | 45453  | 3289.064  | 212.330   | 3076.734 | 6.769  | 93.544 | 949.740 | 69.952  | 4.437   | 65.516 |
| 2036          | 47364  | 3313.192  | 203.531   | 3109.661 | 6.565  | 93.857 | 990.474 | 70.572  | 4.256   | 66.316 |
| 2037          | 45866  | 3117.951  | 184.048   | 2933.903 | 6.397  | 94.097 | 959.282 | 66.464  | 3.849   | 62.615 |
| 2038          | 44409  | 2949.775  | 169.264   | 2780.511 | 6.261  | 94.262 | 928.196 | 62.876  | 3.538   | 59.338 |
| 2039          | 43009  | 2766.312  | 154.760   | 2611.552 | 6.072  | 94.406 | 897.471 | 58.905  | 3.229   | 55.676 |

## Results for PHIM for Run 2 (Sensitivity\_Analysis\_4.RTF)

\*\*\*\*\*

### Main Results for E-Component for Run: 2, Simulation: 1, COD: STROKE, Adjusted

| Variable Parameter          | Value                                  |
|-----------------------------|----------------------------------------|
| 1. Country                  | US (United States)                     |
| 2. Sex                      | F (Females)                            |
| 3. Year of start of process | 1990                                   |
| 4. Cause of Death           | STROKE                                 |
| 5. Effective Dose NULL      | CC:1                                   |
| 6. Effective Dose Ecig      | CC:1 Ecig:0.05 Dual:0.525              |
| Note:                       | Death rates are per million population |

#### Results for Age Groups Combined and Years combined, Population and Number deaths adjusted for Ecig scenario,

| Age Group:All | NULL    | Ecig       | %Drop     |          |        |        | NULL    | Ecig   | Drop   |        |
|---------------|---------|------------|-----------|----------|--------|--------|---------|--------|--------|--------|
| Year          | Number  | Attrib     | Attrib    | Drop     | %Drop  | Attrib | Death   | Attrib | Attrib | Drop   |
|               | Deaths  | Deaths     | Deaths    | Deaths   | Deaths | Deaths | Rate    | Rates  | Rates  | Rates  |
| All Comb      | 1361483 | 104899.750 | 51339.406 | 53560.34 | 3.934  | 51.059 | 371.996 | 28.800 | 14.027 | 14.772 |

#### Results for Age Groups Combined, Population and Number deaths adjusted for Ecig scenario,

| Age Group:All | NULL   | Ecig     | %Drop    |          |        |        | NULL    | Ecig   | Drop   |        |
|---------------|--------|----------|----------|----------|--------|--------|---------|--------|--------|--------|
| Year          | Number | Attrib   | Attrib   | Drop     | %Drop  | Attrib | Death   | Attrib | Attrib | Drop   |
|               | Deaths | Deaths   | Deaths   | Deaths   | Deaths | Deaths | Rate    | Rates  | Rates  | Rates  |
| 1990          | 33504  | 3293.017 | 3293.017 | 0.000    | 0.000  | 0.000  | 490.678 | 48.227 | 48.227 | 0.000  |
| 1991          | 32505  | 3207.063 | 3179.556 | 27.507   | 0.085  | 0.858  | 469.694 | 46.342 | 45.944 | 0.397  |
| 1992          | 32560  | 3218.125 | 3141.235 | 76.890   | 0.236  | 2.389  | 464.104 | 45.871 | 44.774 | 1.096  |
| 1993          | 32768  | 3226.680 | 3081.109 | 145.572  | 0.444  | 4.511  | 460.482 | 45.344 | 43.298 | 2.046  |
| 1994          | 33006  | 3277.266 | 3045.159 | 232.107  | 0.703  | 7.082  | 456.920 | 45.370 | 42.156 | 3.214  |
| 1995          | 33732  | 3309.378 | 2976.816 | 332.562  | 0.986  | 10.049 | 459.725 | 45.104 | 40.570 | 4.534  |
| 1996          | 33754  | 3312.987 | 2863.402 | 449.584  | 1.332  | 13.570 | 454.035 | 44.568 | 38.517 | 6.051  |
| 1997          | 33705  | 3267.066 | 2704.157 | 562.909  | 1.670  | 17.230 | 447.080 | 43.341 | 35.870 | 7.472  |
| 1998          | 33282  | 3178.725 | 2507.707 | 671.018  | 2.016  | 21.110 | 435.246 | 41.577 | 32.795 | 8.782  |
| 1999          | 33902  | 3120.351 | 2339.277 | 781.074  | 2.304  | 25.032 | 437.368 | 40.264 | 30.179 | 10.085 |
| 2000          | 33842  | 3142.808 | 2229.349 | 913.460  | 2.699  | 29.065 | 431.143 | 40.050 | 28.401 | 11.649 |
| 2001          | 32525  | 2961.588 | 1980.790 | 980.798  | 3.015  | 33.117 | 409.735 | 37.323 | 24.953 | 12.370 |
| 2002          | 32103  | 2940.627 | 1838.054 | 1102.573 | 3.435  | 37.494 | 400.409 | 36.695 | 22.926 | 13.770 |
| 2003          | 30598  | 2819.545 | 1645.622 | 1173.923 | 3.837  | 41.635 | 378.021 | 34.855 | 20.331 | 14.524 |
| 2004          | 29423  | 2730.466 | 1480.554 | 1249.912 | 4.248  | 45.777 | 359.838 | 33.417 | 18.107 | 15.310 |
| 2005          | 27994  | 2670.510 | 1343.630 | 1326.880 | 4.740  | 49.686 | 338.529 | 32.322 | 16.248 | 16.074 |
| 2006          | 27247  | 2623.285 | 1222.242 | 1401.043 | 5.142  | 53.408 | 326.577 | 31.474 | 14.649 | 16.824 |
| 2007          | 26354  | 2536.599 | 1090.337 | 1446.263 | 5.488  | 57.016 | 312.675 | 30.131 | 12.936 | 17.195 |
| 2008          | 26058  | 2469.443 | 981.476  | 1487.967 | 5.710  | 60.255 | 305.757 | 29.015 | 11.516 | 17.499 |
| 2009          | 25106  | 2386.945 | 874.615  | 1512.330 | 6.024  | 63.358 | 291.220 | 27.730 | 10.145 | 17.585 |
| 2010          | 24915  | 2329.274 | 786.738  | 1542.537 | 6.191  | 66.224 | 285.632 | 26.750 | 9.019  | 17.731 |
| 2011          | 24876  | 2286.581 | 707.000  | 1579.581 | 6.350  | 69.080 | 282.447 | 26.013 | 8.027  | 17.986 |
| 2012          | 24593  | 2243.311 | 634.648  | 1608.663 | 6.541  | 71.709 | 276.315 | 25.260 | 7.131  | 18.129 |
| 2013          | 24554  | 2176.503 | 563.523  | 1612.980 | 6.569  | 74.109 | 272.859 | 24.245 | 6.262  | 17.983 |
| 2014          | 25415  | 2211.619 | 525.082  | 1686.537 | 6.636  | 76.258 | 279.253 | 24.366 | 5.770  | 18.596 |
| 2015          | 26453  | 2237.016 | 492.911  | 1744.105 | 6.593  | 77.966 | 324.759 | 27.554 | 6.051  | 21.502 |
| 2016          | 26887  | 2229.057 | 452.146  | 1776.911 | 6.609  | 79.716 | 326.848 | 27.194 | 5.496  | 21.698 |
| 2017          | 27789  | 2221.649 | 415.893  | 1805.756 | 6.498  | 81.280 | 334.505 | 26.848 | 5.006  | 21.841 |
| 2018          | 25429  | 1939.420 | 336.956  | 1602.464 | 6.302  | 82.626 | 303.090 | 23.214 | 4.016  | 19.198 |
| 2019          | 25619  | 1904.400 | 304.309  | 1600.090 | 6.246  | 84.021 | 302.299 | 22.574 | 3.591  | 18.984 |
| 2020          | 25587  | 1806.054 | 269.870  | 1536.185 | 6.004  | 85.057 | 341.810 | 24.261 | 3.605  | 20.656 |
| 2021          | 25674  | 1748.172 | 241.228  | 1506.944 | 5.869  | 86.201 | 340.365 | 23.314 | 3.198  | 20.116 |
| 2022          | 25783  | 1701.148 | 217.724  | 1483.424 | 5.753  | 87.201 | 339.077 | 22.515 | 2.863  | 19.652 |
| 2023          | 25883  | 1652.087 | 197.541  | 1454.546 | 5.620  | 88.043 | 337.608 | 21.696 | 2.577  | 19.119 |
| 2024          | 25941  | 1597.127 | 177.633  | 1419.494 | 5.472  | 88.878 | 335.626 | 20.814 | 2.298  | 18.516 |
| 2025          | 25560  | 1467.622 | 155.291  | 1312.331 | 5.134  | 89.419 | 381.128 | 22.075 | 2.316  | 19.759 |
| 2026          | 25804  | 1390.505 | 138.518  | 1251.987 | 4.852  | 90.038 | 383.123 | 20.835 | 2.057  | 18.779 |
| 2027          | 25606  | 1342.095 | 125.567  | 1216.529 | 4.751  | 90.644 | 378.468 | 20.030 | 1.856  | 18.174 |
| 2028          | 25382  | 1289.536 | 113.847  | 1175.689 | 4.632  | 91.171 | 373.394 | 19.165 | 1.675  | 17.490 |
| 2029          | 25145  | 1242.216 | 103.516  | 1138.700 | 4.529  | 91.667 | 368.082 | 18.380 | 1.515  | 16.865 |
| 2030          | 24353  | 1096.803 | 88.035   | 1008.768 | 4.142  | 91.973 | 421.147 | 19.210 | 1.522  | 17.688 |
| 2031          | 24381  | 1019.991 | 78.125   | 941.866  | 3.863  | 92.341 | 420.820 | 17.841 | 1.348  | 16.493 |
| 2032          | 24051  | 977.406  | 71.068   | 906.339  | 3.768  | 92.729 | 414.061 | 17.063 | 1.224  | 15.839 |
| 2033          | 23711  | 937.450  | 65.583   | 871.866  | 3.677  | 93.004 | 406.979 | 16.326 | 1.126  | 15.200 |
| 2034          | 23346  | 900.763  | 60.249   | 840.513  | 3.600  | 93.311 | 399.390 | 15.644 | 1.031  | 14.613 |
| 2035          | 22211  | 745.023  | 49.107   | 695.916  | 3.133  | 93.409 | 464.089 | 15.845 | 1.026  | 14.819 |
| 2036          | 21387  | 680.360  | 42.395   | 637.964  | 2.983  | 93.769 | 447.240 | 14.492 | 0.887  | 13.605 |
| 2037          | 20889  | 644.109  | 38.623   | 605.486  | 2.899  | 94.004 | 436.892 | 13.730 | 0.808  | 12.922 |
| 2038          | 20391  | 612.448  | 35.570   | 576.878  | 2.829  | 94.192 | 426.189 | 13.055 | 0.743  | 12.311 |
| 2039          | 19901  | 577.529  | 32.606   | 544.923  | 2.738  | 94.354 | 415.268 | 12.298 | 0.680  | 11.617 |

## Results for PHIM for Run 2 (Sensitivity\_Analysis\_4.RTF)

\*\*\*\*\*

### Main Results for E-Component for Run: 2, Simulation: 1, COD: COPD, Adjusted

| Variable Parameter          | Value                                  |
|-----------------------------|----------------------------------------|
| 1. Country                  | US (United States)                     |
| 2. Sex                      | F (Females)                            |
| 3. Year of start of process | 1990                                   |
| 4. Cause of Death           | COPD                                   |
| 5. Effective Dose NULL      | CC:1                                   |
| 6. Effective Dose Ecig      | CC:1 Ecig:0.05 Dual:0.525              |
| Note:                       | Death rates are per million population |

#### Results for Age Groups Combined and Years combined, Population and Number deaths adjusted for Ecig scenario,

| Age Group:All | NULL    | Ecig       | %Drop      |          |        |        | NULL    | Ecig    | Drop    |        |
|---------------|---------|------------|------------|----------|--------|--------|---------|---------|---------|--------|
| Year          | Number  | Attrib     | Attrib     | Drop     | %Drop  | Attrib | Death   | Attrib  | Attrib  | Drop   |
|               | Deaths  | Deaths     | Deaths     | Deaths   | Deaths | Deaths | Rate    | Rates   | Rates   | Rates  |
| All Comb      | 2181354 | 862051.244 | 554715.602 | 307335.6 | 14.089 | 35.652 | 596.009 | 236.673 | 151.564 | 85.109 |

#### Results for Age Groups Combined, Population and Number deaths adjusted for Ecig scenario,

| Age Group:All | NULL   | Ecig      | %Drop     |          |        |        | NULL    | Ecig    | Drop    |         |
|---------------|--------|-----------|-----------|----------|--------|--------|---------|---------|---------|---------|
| Year          | Number | Attrib    | Attrib    | Drop     | %Drop  | Attrib | Death   | Attrib  | Attrib  | Drop    |
|               | Deaths | Deaths    | Deaths    | Deaths   | Deaths | Deaths | Rate    | Rates   | Rates   | Rates   |
| 1990          | 24738  | 10694.712 | 10694.712 | 0.000    | 0.000  | 0.000  | 362.296 | 156.628 | 156.628 | 0.000   |
| 1991          | 26562  | 11602.933 | 11584.706 | 18.227   | 0.069  | 0.157  | 383.818 | 167.661 | 167.398 | 0.263   |
| 1992          | 26828  | 11831.375 | 11781.201 | 50.174   | 0.187  | 0.424  | 382.401 | 168.642 | 167.926 | 0.716   |
| 1993          | 29774  | 13246.371 | 13138.248 | 108.123  | 0.363  | 0.816  | 418.408 | 186.148 | 184.627 | 1.521   |
| 1994          | 29805  | 13355.662 | 13183.993 | 171.669  | 0.576  | 1.285  | 412.606 | 184.893 | 182.513 | 2.381   |
| 1995          | 29757  | 13397.439 | 13142.660 | 254.779  | 0.856  | 1.902  | 405.549 | 182.598 | 179.118 | 3.480   |
| 1996          | 30903  | 13960.356 | 13604.606 | 355.750  | 1.151  | 2.548  | 415.697 | 187.801 | 183.002 | 4.799   |
| 1997          | 31133  | 14109.552 | 13644.766 | 464.787  | 1.493  | 3.294  | 412.976 | 187.180 | 180.994 | 6.186   |
| 1998          | 32104  | 14599.657 | 13991.623 | 608.034  | 1.894  | 4.165  | 419.844 | 190.958 | 182.976 | 7.982   |
| 1999          | 34628  | 15728.102 | 14939.346 | 788.757  | 2.278  | 5.015  | 446.736 | 202.950 | 192.730 | 10.220  |
| 2000          | 34316  | 15579.803 | 14641.993 | 937.810  | 2.733  | 6.019  | 437.174 | 198.541 | 186.535 | 12.006  |
| 2001          | 34614  | 15696.614 | 14567.105 | 1129.509 | 3.263  | 7.196  | 436.050 | 197.812 | 183.507 | 14.305  |
| 2002          | 34319  | 15519.777 | 14208.762 | 1311.015 | 3.820  | 8.447  | 428.057 | 193.668 | 177.222 | 16.446  |
| 2003          | 35110  | 15888.389 | 14339.261 | 1549.128 | 4.412  | 9.750  | 433.777 | 196.413 | 177.156 | 19.257  |
| 2004          | 33555  | 15091.573 | 13410.257 | 1681.316 | 5.011  | 11.141 | 410.370 | 184.701 | 164.005 | 20.697  |
| 2005          | 35446  | 15803.656 | 13794.700 | 2008.955 | 5.668  | 12.712 | 428.650 | 191.278 | 166.818 | 24.460  |
| 2006          | 34043  | 15100.563 | 12961.760 | 2138.803 | 6.283  | 14.164 | 408.027 | 181.174 | 155.355 | 25.819  |
| 2007          | 34073  | 14974.384 | 12608.110 | 2366.273 | 6.945  | 15.802 | 404.246 | 177.871 | 149.586 | 28.284  |
| 2008          | 37518  | 16406.197 | 13567.536 | 2838.661 | 7.566  | 17.302 | 440.221 | 192.768 | 159.198 | 33.570  |
| 2009          | 36930  | 16083.194 | 12999.092 | 3084.102 | 8.351  | 19.176 | 428.368 | 186.846 | 150.783 | 36.063  |
| 2010          | 36906  | 15927.400 | 12621.769 | 3305.632 | 8.957  | 20.754 | 423.101 | 182.917 | 144.701 | 38.217  |
| 2011          | 37771  | 16221.836 | 12549.204 | 3672.632 | 9.723  | 22.640 | 428.860 | 184.547 | 142.486 | 42.061  |
| 2012          | 38419  | 16358.849 | 12350.235 | 4008.614 | 10.434 | 24.504 | 431.655 | 184.202 | 138.762 | 45.440  |
| 2013          | 40291  | 16994.822 | 12491.340 | 4503.482 | 11.177 | 26.499 | 447.731 | 189.311 | 138.810 | 50.501  |
| 2014          | 40282  | 16855.093 | 12048.827 | 4806.266 | 11.932 | 28.515 | 442.609 | 185.696 | 132.391 | 53.305  |
| 2015          | 42430  | 17572.483 | 12284.249 | 5288.234 | 12.463 | 30.094 | 520.910 | 216.445 | 150.813 | 65.632  |
| 2016          | 42860  | 17579.955 | 11902.440 | 5677.515 | 13.247 | 32.295 | 521.011 | 214.473 | 144.688 | 69.785  |
| 2017          | 44653  | 18080.688 | 11850.533 | 6230.155 | 13.952 | 34.458 | 537.504 | 218.496 | 142.650 | 75.846  |
| 2018          | 45683  | 18209.262 | 11583.471 | 6625.791 | 14.504 | 36.387 | 544.500 | 217.960 | 138.065 | 79.895  |
| 2019          | 47240  | 18648.302 | 11467.257 | 7181.045 | 15.201 | 38.508 | 557.421 | 221.054 | 135.311 | 85.743  |
| 2020          | 48740  | 19002.597 | 11346.131 | 7656.466 | 15.709 | 40.292 | 651.103 | 255.266 | 151.571 | 103.695 |
| 2021          | 48780  | 18885.717 | 10855.291 | 8030.427 | 16.463 | 42.521 | 646.672 | 251.867 | 143.909 | 107.958 |
| 2022          | 50195  | 19235.076 | 10663.079 | 8571.998 | 17.077 | 44.564 | 660.125 | 254.582 | 140.231 | 114.350 |
| 2023          | 51620  | 19521.158 | 10452.915 | 9068.243 | 17.567 | 46.453 | 673.313 | 256.363 | 136.343 | 120.020 |
| 2024          | 52987  | 19918.620 | 10248.485 | 9670.134 | 18.250 | 48.548 | 685.566 | 259.583 | 132.598 | 126.986 |
| 2025          | 54032  | 20150.545 | 9997.281  | 10153.26 | 18.791 | 50.387 | 805.682 | 303.086 | 149.072 | 154.014 |
| 2026          | 54935  | 20393.792 | 9697.871  | 10695.92 | 19.470 | 52.447 | 815.633 | 305.582 | 143.986 | 161.596 |
| 2027          | 55808  | 20615.351 | 9374.522  | 11240.83 | 20.142 | 54.526 | 824.873 | 307.668 | 138.560 | 169.109 |
| 2028          | 56626  | 20731.894 | 9007.560  | 11724.33 | 20.705 | 56.552 | 833.032 | 308.115 | 132.512 | 175.603 |
| 2029          | 57405  | 20781.967 | 8620.892  | 12161.07 | 21.185 | 58.517 | 840.329 | 307.495 | 126.198 | 181.297 |
| 2030          | 57694  | 20753.201 | 8250.054  | 12503.15 | 21.672 | 60.247 | 997.745 | 363.487 | 142.675 | 220.813 |
| 2031          | 59321  | 21048.417 | 8126.448  | 12921.97 | 21.783 | 61.392 | 1023.90 | 368.165 | 140.263 | 227.901 |
| 2032          | 59883  | 21169.329 | 7786.391  | 13382.94 | 22.349 | 63.219 | 1030.96 | 369.560 | 134.053 | 235.507 |
| 2033          | 60405  | 21109.293 | 7410.581  | 13698.71 | 22.678 | 64.894 | 1036.81 | 367.618 | 127.197 | 240.421 |
| 2034          | 60852  | 21109.429 | 7038.769  | 14070.66 | 23.123 | 66.656 | 1041.00 | 366.613 | 120.413 | 246.200 |
| 2035          | 60238  | 20794.840 | 6660.986  | 14133.85 | 23.463 | 67.968 | 1258.67 | 442.268 | 139.180 | 303.088 |
| 2036          | 57318  | 19354.577 | 5924.418  | 13430.16 | 23.431 | 69.390 | 1198.63 | 412.258 | 123.891 | 288.367 |
| 2037          | 57314  | 19064.169 | 5482.471  | 13581.70 | 23.697 | 71.242 | 1198.72 | 406.385 | 114.666 | 291.719 |
| 2038          | 57277  | 18854.812 | 5119.667  | 13735.15 | 23.980 | 72.847 | 1197.14 | 401.900 | 107.006 | 294.894 |
| 2039          | 57232  | 18437.457 | 4698.026  | 13739.43 | 24.007 | 74.519 | 1194.25 | 392.602 | 98.033  | 294.569 |

## Results for PHIM for Run 3 (Sensitivity\_Analysis\_4.RTF)

---

### Control File Details for Run: 3

| Variable Parameter                                       | Value                  |
|----------------------------------------------------------|------------------------|
| 1. Name for Reference Scenario                           | NULL                   |
| 2. Name for Test Scenario                                | Ecig                   |
| 3. Name for Product 1                                    | CC                     |
| 4. Name for Product 2                                    | Ecig                   |
| 5. Name for Product 3                                    | -                      |
| 6. Name for Product 4                                    | Dual                   |
| 7. Country                                               | US (United States)     |
| 8. Sex                                                   | M (Males)              |
| 9. Year of start of process                              | 1990                   |
| 10. Number of months of follow-up                        | 600                    |
| 11. Follow-up interval length (in months)                | 12                     |
| 12. Lower age for risk estimation                        | 10                     |
| 13. Upper age for risk estimation                        | 79                     |
| 14. The effective dose for Product 1 (F1) - Ref          | 1                      |
| 15. The effective dose for Product 2 (F2) - Ref          | -                      |
| 16. The effective dose for Product 3 (F3) - Ref          | -                      |
| 17. The effective dose for Product 4 (F4) - Ref          | -                      |
| 18. The effective dose for Product 1 (F1) - Test         | 1                      |
| 19. The effective dose for Product 2 (F2) - Test         | 0.05                   |
| 20. The effective dose for Product 3 (F3) - Test         | -                      |
| 21. The effective dose for Product 4 (F4) - Test         | FROMF2                 |
| 22. Number in population to be simulated                 | 100000                 |
| 23. Number of MC simulations                             | 1                      |
| 24. The random number seed for the first simulation      | 15975263               |
| 25. Source for the population file (POP)                 | UN4                    |
| 26. Source for the socioeconomic prevalence file (SEP)   | -                      |
| 27. Source for the current smoking prevalence file (CSP) | ISS3                   |
| 28. Source for the former smoking prevalence file (FSP)  | ISS3                   |
| 29. Source for the quit-time distribution file (QTD)     | NHIS2006               |
| 30. Source for the death file (MORT)                     | APR-20                 |
| 31. Source for the relative risk file (RR)               | PNLEST                 |
| 32. Source for the half-life file (H)                    | PNLEST                 |
| 33. Assumption Set for TTP Factor Reference              | F1                     |
| 34. Assumption Set for TTP Factor Test                   | F1                     |
| 35. Assumption Set for TTP Reference                     | ISS3                   |
| 36. Assumption Set for TTP Test                          | S4B                    |
| 37. Assumption Set for TP for socioeconomic group        | -                      |
| 38. Source for Output Choice file (OUTC)                 | BASIC                  |
| 39. Output for DTP P1                                    | N                      |
| 40. Output for DTP P2                                    | N                      |
| 41. Output for Main P Component                          | Y                      |
| 42. Output for DTP E1                                    | N                      |
| 43. Output for DTP E2                                    | N                      |
| 44. Output for DTP E3                                    | N                      |
| 45. Output for Main E Component                          | Y                      |
| 46. Output file name                                     | Sensitivity_Analysis_4 |
| 47. Run number for P-Component                           | -                      |
| 48. Results file for E-Component                         | -                      |
| 49. Components required                                  | PE                     |
| 50. Results folder for P to be used in E-Component       | -                      |
| 51. Fixed age of starting product use                    | 16                     |
| 52. Output absolute risk file?                           | N                      |

## Results for PHIM for Run 3 (Sensitivity\_Analysis\_4.RTF)

\*\*\*\*\*

TTP values for Run: 3, Scenario: NULL

| Variable Parameter | Value               |
|--------------------|---------------------|
| 1. Country         | US (United States)  |
| 2. Sex             | M (Males)           |
| 3. Assumption Set  | ISS3                |
| Note:              | Period is in Months |

| Age   | Period  | Initiation  | Cessation    | Re-initiation |
|-------|---------|-------------|--------------|---------------|
|       |         | Never<br>CC | CC<br>Former | Former<br>CC  |
| 10-14 | 1-12    | 0.003842    | 0.008742     | 0.000000      |
| 15-19 | 1-12    | 0.004720    | 0.003614     | 0.000000      |
| 20-24 | 1-12    | 0.000376    | 0.000943     | 0.000000      |
| 25-29 | 1-12    | 0.000187    | 0.001143     | 0.000000      |
| 30-34 | 1-12    | 0.000093    | 0.000871     | 0.000000      |
| 35-39 | 1-12    | 0.000000    | 0.000867     | 0.000000      |
| 40-44 | 1-12    | 0.000000    | 0.001399     | 0.000000      |
| 45-49 | 1-12    | 0.000000    | 0.002033     | 0.000000      |
| 50-54 | 1-12    | 0.000000    | 0.003209     | 0.000000      |
| 55-59 | 1-12    | 0.000000    | 0.003574     | 0.000000      |
| 60-64 | 1-12    | 0.000000    | 0.003460     | 0.000000      |
| 65-69 | 1-12    | 0.000000    | 0.004136     | 0.000000      |
| 70-74 | 1-12    | 0.000000    | 0.005592     | 0.000000      |
| 75-79 | 1-12    | 0.000000    | 0.005592     | 0.000000      |
| 10-14 | 13-72   | 0.004906    | 0.008742     | 0.000000      |
| 15-19 | 13-72   | 0.006989    | 0.004426     | 0.000000      |
| 20-24 | 13-72   | 0.000687    | 0.001527     | 0.000000      |
| 25-29 | 13-72   | 0.000962    | 0.001515     | 0.000000      |
| 30-34 | 13-72   | 0.000364    | 0.001227     | 0.000000      |
| 35-39 | 13-72   | 0.000000    | 0.001630     | 0.000000      |
| 40-44 | 13-72   | 0.000000    | 0.001852     | 0.000000      |
| 45-49 | 13-72   | 0.000000    | 0.002667     | 0.000000      |
| 50-54 | 13-72   | 0.000000    | 0.003208     | 0.000000      |
| 55-59 | 13-72   | 0.000000    | 0.003978     | 0.000000      |
| 60-64 | 13-72   | 0.000000    | 0.005771     | 0.000000      |
| 65-69 | 13-72   | 0.000000    | 0.010432     | 0.000000      |
| 70-74 | 13-72   | 0.000000    | 0.007079     | 0.000000      |
| 75-79 | 13-72   | 0.000000    | 0.007079     | 0.000000      |
| 10-14 | 73-132  | 0.004312    | 0.008742     | 0.000000      |
| 15-19 | 73-132  | 0.005330    | 0.003289     | 0.000000      |
| 20-24 | 73-132  | 0.002456    | 0.003844     | 0.000000      |
| 25-29 | 73-132  | 0.000839    | 0.002006     | 0.000000      |
| 30-34 | 73-132  | 0.000414    | 0.001329     | 0.000000      |
| 35-39 | 73-132  | 0.000000    | 0.001278     | 0.000000      |
| 40-44 | 73-132  | 0.000000    | 0.001691     | 0.000000      |
| 45-49 | 73-132  | 0.000000    | 0.002904     | 0.000000      |
| 50-54 | 73-132  | 0.000000    | 0.003319     | 0.000000      |
| 55-59 | 73-132  | 0.000000    | 0.003976     | 0.000000      |
| 60-64 | 73-132  | 0.000000    | 0.005235     | 0.000000      |
| 65-69 | 73-132  | 0.000000    | 0.005901     | 0.000000      |
| 70-74 | 73-132  | 0.000000    | 0.005615     | 0.000000      |
| 75-79 | 73-132  | 0.000000    | 0.005615     | 0.000000      |
| 10-14 | 133-192 | 0.003468    | 0.008742     | 0.000000      |
| 15-19 | 133-192 | 0.004675    | 0.003732     | 0.000000      |
| 20-24 | 133-192 | 0.000062    | 0.002260     | 0.000000      |
| 25-29 | 133-192 | 0.001422    | 0.002822     | 0.000000      |
| 30-34 | 133-192 | 0.000696    | 0.002610     | 0.000000      |
| 35-39 | 133-192 | 0.000000    | 0.002058     | 0.000000      |
| 40-44 | 133-192 | 0.000000    | 0.002310     | 0.000000      |
| 45-49 | 133-192 | 0.000000    | 0.002256     | 0.000000      |
| 50-54 | 133-192 | 0.000000    | 0.002663     | 0.000000      |
| 55-59 | 133-192 | 0.000000    | 0.001746     | 0.000000      |
| 60-64 | 133-192 | 0.000000    | 0.005809     | 0.000000      |
| 65-69 | 133-192 | 0.000000    | 0.005896     | 0.000000      |
| 70-74 | 133-192 | 0.000000    | 0.007323     | 0.000000      |
| 75-79 | 133-192 | 0.000000    | 0.007323     | 0.000000      |
| 10-14 | 193-252 | 0.002314    | 0.008742     | 0.000000      |
| 15-19 | 193-252 | 0.003987    | 0.005036     | 0.000000      |
| 20-24 | 193-252 | 0.000320    | 0.002857     | 0.000000      |
| 25-29 | 193-252 | 0.000251    | 0.002314     | 0.000000      |
| 30-34 | 193-252 | 0.000125    | 0.004343     | 0.000000      |
| 35-39 | 193-252 | 0.000000    | 0.002092     | 0.000000      |
| 40-44 | 193-252 | 0.000000    | 0.002566     | 0.000000      |
| 45-49 | 193-252 | 0.000000    | 0.002311     | 0.000000      |
| 50-54 | 193-252 | 0.000000    | 0.003209     | 0.000000      |

### Results for PHIM for Run 3 (Sensitivity\_Analysis\_4.RTF)

|       |         |          |          |          |
|-------|---------|----------|----------|----------|
| 55-59 | 193-252 | 0.000000 | 0.004057 | 0.000000 |
| 60-64 | 193-252 | 0.000000 | 0.007166 | 0.000000 |
| 65-69 | 193-252 | 0.000000 | 0.004281 | 0.000000 |
| 70-74 | 193-252 | 0.000000 | 0.004580 | 0.000000 |
| 75-79 | 193-252 | 0.000000 | 0.004580 | 0.000000 |
| 10-14 | 253+    | 0.001325 | 0.008742 | 0.000000 |
| 15-19 | 253+    | 0.002984 | 0.010602 | 0.000000 |
| 20-24 | 253+    | 0.000452 | 0.004314 | 0.000000 |
| 25-29 | 253+    | 0.000225 | 0.003645 | 0.000000 |
| 30-34 | 253+    | 0.000112 | 0.004512 | 0.000000 |
| 35-39 | 253+    | 0.000000 | 0.002147 | 0.000000 |
| 40-44 | 253+    | 0.000000 | 0.002636 | 0.000000 |
| 45-49 | 253+    | 0.000000 | 0.001051 | 0.000000 |
| 50-54 | 253+    | 0.000000 | 0.002519 | 0.000000 |
| 55-59 | 253+    | 0.000000 | 0.003693 | 0.000000 |
| 60-64 | 253+    | 0.000000 | 0.005888 | 0.000000 |
| 65-69 | 253+    | 0.000000 | 0.004823 | 0.000000 |
| 70-74 | 253+    | 0.000000 | 0.004733 | 0.000000 |
| 75-79 | 253+    | 0.000000 | 0.004733 | 0.000000 |

## Results for PHIM for Run 3 (Sensitivity\_Analysis\_4.RTF)

\*\*\*\*\*

TTP values for Run: 3, Scenario: Ecig

Variable Parameter

Value

- 1. Country
  - 2. Sex
  - 3. Assumption Set
- Note:

US (United States)  
M (Males)  
S4B  
Period is in Months

| Age   | Period  | Initiation  |               | Cessation     |              |                | Re-initiation  |              |                |                |
|-------|---------|-------------|---------------|---------------|--------------|----------------|----------------|--------------|----------------|----------------|
|       |         | Never<br>CC | Never<br>Ecig | Never<br>Dual | CC<br>Former | Ecig<br>Former | Dual<br>Former | Former<br>CC | Former<br>Ecig | Former<br>Dual |
| 10-14 | 1-12    | 0.001921    | 0.001441      | 0.000000      | 0.008742     | 0.008742       | 0.000000       | 0.000000     | 0.000000       | 0.000000       |
| 15-19 | 1-12    | 0.002360    | 0.001770      | 0.000000      | 0.003614     | 0.003614       | 0.000000       | 0.000000     | 0.000000       | 0.000000       |
| 20-24 | 1-12    | 0.000188    | 0.000141      | 0.000000      | 0.000943     | 0.000943       | 0.000000       | 0.000000     | 0.000000       | 0.000000       |
| 25-29 | 1-12    | 0.000093    | 0.000070      | 0.000000      | 0.001143     | 0.001143       | 0.000000       | 0.000000     | 0.000000       | 0.000000       |
| 30-34 | 1-12    | 0.000047    | 0.000035      | 0.000000      | 0.000871     | 0.000871       | 0.000000       | 0.000000     | 0.000000       | 0.000000       |
| 35-39 | 1-12    | 0.000000    | 0.000000      | 0.000000      | 0.000867     | 0.000867       | 0.000000       | 0.000000     | 0.000000       | 0.000000       |
| 40-44 | 1-12    | 0.000000    | 0.000000      | 0.000000      | 0.001399     | 0.001399       | 0.000000       | 0.000000     | 0.000000       | 0.000000       |
| 45-49 | 1-12    | 0.000000    | 0.000000      | 0.000000      | 0.002033     | 0.002033       | 0.000000       | 0.000000     | 0.000000       | 0.000000       |
| 50-54 | 1-12    | 0.000000    | 0.000000      | 0.000000      | 0.003209     | 0.003209       | 0.000000       | 0.000000     | 0.000000       | 0.000000       |
| 55-59 | 1-12    | 0.000000    | 0.000000      | 0.000000      | 0.003574     | 0.003574       | 0.000000       | 0.000000     | 0.000000       | 0.000000       |
| 60-64 | 1-12    | 0.000000    | 0.000000      | 0.000000      | 0.003460     | 0.003460       | 0.000000       | 0.000000     | 0.000000       | 0.000000       |
| 65-69 | 1-12    | 0.000000    | 0.000000      | 0.000000      | 0.004136     | 0.004136       | 0.000000       | 0.000000     | 0.000000       | 0.000000       |
| 70-74 | 1-12    | 0.000000    | 0.000000      | 0.000000      | 0.005592     | 0.005592       | 0.000000       | 0.000000     | 0.000000       | 0.000000       |
| 75-79 | 1-12    | 0.000000    | 0.000000      | 0.000000      | 0.005592     | 0.005592       | 0.000000       | 0.000000     | 0.000000       | 0.000000       |
| 10-14 | 13-72   | 0.001962    | 0.002208      | 0.000000      | 0.008742     | 0.008742       | 0.000000       | 0.000000     | 0.000000       | 0.000000       |
| 15-19 | 13-72   | 0.002796    | 0.003145      | 0.000000      | 0.004426     | 0.004426       | 0.000000       | 0.000000     | 0.000000       | 0.000000       |
| 20-24 | 13-72   | 0.000275    | 0.000309      | 0.000000      | 0.001527     | 0.001527       | 0.000000       | 0.000000     | 0.000000       | 0.000000       |
| 25-29 | 13-72   | 0.000385    | 0.000433      | 0.000000      | 0.001515     | 0.001515       | 0.000000       | 0.000000     | 0.000000       | 0.000000       |
| 30-34 | 13-72   | 0.000146    | 0.000164      | 0.000000      | 0.001227     | 0.001227       | 0.000000       | 0.000000     | 0.000000       | 0.000000       |
| 35-39 | 13-72   | 0.000000    | 0.000000      | 0.000000      | 0.001630     | 0.001630       | 0.000000       | 0.000000     | 0.000000       | 0.000000       |
| 40-44 | 13-72   | 0.000000    | 0.000000      | 0.000000      | 0.001852     | 0.001852       | 0.000000       | 0.000000     | 0.000000       | 0.000000       |
| 45-49 | 13-72   | 0.000000    | 0.000000      | 0.000000      | 0.002667     | 0.002667       | 0.000000       | 0.000000     | 0.000000       | 0.000000       |
| 50-54 | 13-72   | 0.000000    | 0.000000      | 0.000000      | 0.003208     | 0.003208       | 0.000000       | 0.000000     | 0.000000       | 0.000000       |
| 55-59 | 13-72   | 0.000000    | 0.000000      | 0.000000      | 0.003978     | 0.003978       | 0.000000       | 0.000000     | 0.000000       | 0.000000       |
| 60-64 | 13-72   | 0.000000    | 0.000000      | 0.000000      | 0.005771     | 0.005771       | 0.000000       | 0.000000     | 0.000000       | 0.000000       |
| 65-69 | 13-72   | 0.000000    | 0.000000      | 0.000000      | 0.010432     | 0.010432       | 0.000000       | 0.000000     | 0.000000       | 0.000000       |
| 70-74 | 13-72   | 0.000000    | 0.000000      | 0.000000      | 0.007079     | 0.007079       | 0.000000       | 0.000000     | 0.000000       | 0.000000       |
| 75-79 | 13-72   | 0.000000    | 0.000000      | 0.000000      | 0.007079     | 0.007079       | 0.000000       | 0.000000     | 0.000000       | 0.000000       |
| 10-14 | 73-132  | 0.000862    | 0.002587      | 0.000000      | 0.008742     | 0.008742       | 0.000000       | 0.000000     | 0.000000       | 0.000000       |
| 15-19 | 73-132  | 0.001066    | 0.003198      | 0.000000      | 0.003289     | 0.003289       | 0.000000       | 0.000000     | 0.000000       | 0.000000       |
| 20-24 | 73-132  | 0.000491    | 0.001473      | 0.000000      | 0.003844     | 0.003844       | 0.000000       | 0.000000     | 0.000000       | 0.000000       |
| 25-29 | 73-132  | 0.000168    | 0.000503      | 0.000000      | 0.002006     | 0.002006       | 0.000000       | 0.000000     | 0.000000       | 0.000000       |
| 30-34 | 73-132  | 0.000083    | 0.000249      | 0.000000      | 0.001329     | 0.001329       | 0.000000       | 0.000000     | 0.000000       | 0.000000       |
| 35-39 | 73-132  | 0.000000    | 0.000000      | 0.000000      | 0.001278     | 0.001278       | 0.000000       | 0.000000     | 0.000000       | 0.000000       |
| 40-44 | 73-132  | 0.000000    | 0.000000      | 0.000000      | 0.001691     | 0.001691       | 0.000000       | 0.000000     | 0.000000       | 0.000000       |
| 45-49 | 73-132  | 0.000000    | 0.000000      | 0.000000      | 0.002904     | 0.002904       | 0.000000       | 0.000000     | 0.000000       | 0.000000       |
| 50-54 | 73-132  | 0.000000    | 0.000000      | 0.000000      | 0.003319     | 0.003319       | 0.000000       | 0.000000     | 0.000000       | 0.000000       |
| 55-59 | 73-132  | 0.000000    | 0.000000      | 0.000000      | 0.003976     | 0.003976       | 0.000000       | 0.000000     | 0.000000       | 0.000000       |
| 60-64 | 73-132  | 0.000000    | 0.000000      | 0.000000      | 0.005235     | 0.005235       | 0.000000       | 0.000000     | 0.000000       | 0.000000       |
| 65-69 | 73-132  | 0.000000    | 0.000000      | 0.000000      | 0.005901     | 0.005901       | 0.000000       | 0.000000     | 0.000000       | 0.000000       |
| 70-74 | 73-132  | 0.000000    | 0.000000      | 0.000000      | 0.005615     | 0.005615       | 0.000000       | 0.000000     | 0.000000       | 0.000000       |
| 75-79 | 73-132  | 0.000000    | 0.000000      | 0.000000      | 0.005615     | 0.005615       | 0.000000       | 0.000000     | 0.000000       | 0.000000       |
| 10-14 | 133-192 | 0.000173    | 0.002471      | 0.000000      | 0.008742     | 0.008742       | 0.000000       | 0.000000     | 0.000000       | 0.000000       |
| 15-19 | 133-192 | 0.000234    | 0.003331      | 0.000000      | 0.003732     | 0.003732       | 0.000000       | 0.000000     | 0.000000       | 0.000000       |
| 20-24 | 133-192 | 0.000003    | 0.000044      | 0.000000      | 0.002260     | 0.002260       | 0.000000       | 0.000000     | 0.000000       | 0.000000       |
| 25-29 | 133-192 | 0.000071    | 0.001013      | 0.000000      | 0.002822     | 0.002822       | 0.000000       | 0.000000     | 0.000000       | 0.000000       |
| 30-34 | 133-192 | 0.000035    | 0.000496      | 0.000000      | 0.002610     | 0.002610       | 0.000000       | 0.000000     | 0.000000       | 0.000000       |
| 35-39 | 133-192 | 0.000000    | 0.000000      | 0.000000      | 0.002058     | 0.002058       | 0.000000       | 0.000000     | 0.000000       | 0.000000       |
| 40-44 | 133-192 | 0.000000    | 0.000000      | 0.000000      | 0.002310     | 0.002310       | 0.000000       | 0.000000     | 0.000000       | 0.000000       |
| 45-49 | 133-192 | 0.000000    | 0.000000      | 0.000000      | 0.002256     | 0.002256       | 0.000000       | 0.000000     | 0.000000       | 0.000000       |
| 50-54 | 133-192 | 0.000000    | 0.000000      | 0.000000      | 0.002663     | 0.002663       | 0.000000       | 0.000000     | 0.000000       | 0.000000       |
| 55-59 | 133-192 | 0.000000    | 0.000000      | 0.000000      | 0.001747     | 0.001747       | 0.000000       | 0.000000     | 0.000000       | 0.000000       |
| 60-64 | 133-192 | 0.000000    | 0.000000      | 0.000000      | 0.005809     | 0.005809       | 0.000000       | 0.000000     | 0.000000       | 0.000000       |
| 65-69 | 133-192 | 0.000000    | 0.000000      | 0.000000      | 0.005896     | 0.005896       | 0.000000       | 0.000000     | 0.000000       | 0.000000       |
| 70-74 | 133-192 | 0.000000    | 0.000000      | 0.000000      | 0.007323     | 0.007323       | 0.000000       | 0.000000     | 0.000000       | 0.000000       |
| 75-79 | 133-192 | 0.000000    | 0.000000      | 0.000000      | 0.007323     | 0.007323       | 0.000000       | 0.000000     | 0.000000       | 0.000000       |
| 10-14 | 193-252 | 0.000116    | 0.001649      | 0.000000      | 0.008742     | 0.008742       | 0.000000       | 0.000000     | 0.000000       | 0.000000       |
| 15-19 | 193-252 | 0.000199    | 0.002841      | 0.000000      | 0.005036     | 0.005036       | 0.000000       | 0.000000     | 0.000000       | 0.000000       |
| 20-24 | 193-252 | 0.000016    | 0.000228      | 0.000000      | 0.002857     | 0.002857       | 0.000000       | 0.000000     | 0.000000       | 0.000000       |
| 25-29 | 193-252 | 0.000013    | 0.000179      | 0.000000      | 0.002314     | 0.002314       | 0.000000       | 0.000000     | 0.000000       | 0.000000       |
| 30-34 | 193-252 | 0.000006    | 0.000089      | 0.000000      | 0.004343     | 0.004343       | 0.000000       | 0.000000     | 0.000000       | 0.000000       |
| 35-39 | 193-252 | 0.000000    | 0.000000      | 0.000000      | 0.002092     | 0.002092       | 0.000000       | 0.000000     | 0.000000       | 0.000000       |
| 40-44 | 193-252 | 0.000000    | 0.000000      | 0.000000      | 0.002566     | 0.002566       | 0.000000       | 0.000000     | 0.000000       | 0.000000       |
| 45-49 | 193-252 | 0.000000    | 0.000000      | 0.000000      | 0.002311     | 0.002311       | 0.000000       | 0.000000     | 0.000000       | 0.000000       |
| 50-54 | 193-252 | 0.000000    | 0.000000      | 0.000000      | 0.003209     | 0.003209       | 0.000000       | 0.000000     | 0.000000       | 0.000000       |

### Results for PHIM for Run 3 (Sensitivity\_Analysis\_4.RTF)

|       |         |          |          |          |          |          |          |          |          |          |
|-------|---------|----------|----------|----------|----------|----------|----------|----------|----------|----------|
| 55-59 | 193-252 | 0.000000 | 0.000000 | 0.000000 | 0.004057 | 0.004057 | 0.000000 | 0.000000 | 0.000000 | 0.000000 |
| 60-64 | 193-252 | 0.000000 | 0.000000 | 0.000000 | 0.007166 | 0.007166 | 0.000000 | 0.000000 | 0.000000 | 0.000000 |
| 65-69 | 193-252 | 0.000000 | 0.000000 | 0.000000 | 0.004281 | 0.004281 | 0.000000 | 0.000000 | 0.000000 | 0.000000 |
| 70-74 | 193-252 | 0.000000 | 0.000000 | 0.000000 | 0.004580 | 0.004580 | 0.000000 | 0.000000 | 0.000000 | 0.000000 |
| 75-79 | 193-252 | 0.000000 | 0.000000 | 0.000000 | 0.004580 | 0.004580 | 0.000000 | 0.000000 | 0.000000 | 0.000000 |
| 10-14 | 253+    | 0.000066 | 0.000944 | 0.000000 | 0.008742 | 0.008742 | 0.000000 | 0.000000 | 0.000000 | 0.000000 |
| 15-19 | 253+    | 0.000149 | 0.002126 | 0.000000 | 0.010602 | 0.010602 | 0.000000 | 0.000000 | 0.000000 | 0.000000 |
| 20-24 | 253+    | 0.000023 | 0.000322 | 0.000000 | 0.004314 | 0.004314 | 0.000000 | 0.000000 | 0.000000 | 0.000000 |
| 25-29 | 253+    | 0.000011 | 0.000160 | 0.000000 | 0.003645 | 0.003645 | 0.000000 | 0.000000 | 0.000000 | 0.000000 |
| 30-34 | 253+    | 0.000006 | 0.000080 | 0.000000 | 0.004512 | 0.004512 | 0.000000 | 0.000000 | 0.000000 | 0.000000 |
| 35-39 | 253+    | 0.000000 | 0.000000 | 0.000000 | 0.002147 | 0.002147 | 0.000000 | 0.000000 | 0.000000 | 0.000000 |
| 40-44 | 253+    | 0.000000 | 0.000000 | 0.000000 | 0.002636 | 0.002636 | 0.000000 | 0.000000 | 0.000000 | 0.000000 |
| 45-49 | 253+    | 0.000000 | 0.000000 | 0.000000 | 0.001051 | 0.001051 | 0.000000 | 0.000000 | 0.000000 | 0.000000 |
| 50-54 | 253+    | 0.000000 | 0.000000 | 0.000000 | 0.002519 | 0.002519 | 0.000000 | 0.000000 | 0.000000 | 0.000000 |
| 55-59 | 253+    | 0.000000 | 0.000000 | 0.000000 | 0.003693 | 0.003693 | 0.000000 | 0.000000 | 0.000000 | 0.000000 |
| 60-64 | 253+    | 0.000000 | 0.000000 | 0.000000 | 0.005888 | 0.005888 | 0.000000 | 0.000000 | 0.000000 | 0.000000 |
| 65-69 | 253+    | 0.000000 | 0.000000 | 0.000000 | 0.004823 | 0.004823 | 0.000000 | 0.000000 | 0.000000 | 0.000000 |
| 70-74 | 253+    | 0.000000 | 0.000000 | 0.000000 | 0.004733 | 0.004733 | 0.000000 | 0.000000 | 0.000000 | 0.000000 |
| 75-79 | 253+    | 0.000000 | 0.000000 | 0.000000 | 0.004733 | 0.004733 | 0.000000 | 0.000000 | 0.000000 | 0.000000 |





### Results for PHIM for Run 3 (Sensitivity\_Analysis\_4.RTF)

|       |      |          |          |          |          |          |          |
|-------|------|----------|----------|----------|----------|----------|----------|
| 25-29 | 253+ | 0.015212 | 0.000000 | 0.000000 | 0.000000 | 0.000000 | 0.000000 |
| 30-34 | 253+ | 0.015460 | 0.000000 | 0.000000 | 0.000000 | 0.000000 | 0.000000 |
| 35-39 | 253+ | 0.014711 | 0.000000 | 0.000000 | 0.000000 | 0.000000 | 0.000000 |
| 40-44 | 253+ | 0.014241 | 0.000000 | 0.000000 | 0.000000 | 0.000000 | 0.000000 |
| 45-49 | 253+ | 0.013014 | 0.000000 | 0.000000 | 0.000000 | 0.000000 | 0.000000 |
| 50-54 | 253+ | 0.011768 | 0.000000 | 0.000000 | 0.000000 | 0.000000 | 0.000000 |
| 55-59 | 253+ | 0.011032 | 0.000000 | 0.000000 | 0.000000 | 0.000000 | 0.000000 |
| 60-64 | 253+ | 0.009525 | 0.000000 | 0.000000 | 0.000000 | 0.000000 | 0.000000 |
| 65-69 | 253+ | 0.006897 | 0.000000 | 0.000000 | 0.000000 | 0.000000 | 0.000000 |
| 70-74 | 253+ | 0.005435 | 0.000000 | 0.000000 | 0.000000 | 0.000000 | 0.000000 |
| 75-79 | 253+ | 0.005435 | 0.000000 | 0.000000 | 0.000000 | 0.000000 | 0.000000 |

## Results for PHIM for Run 3 (Sensitivity\_Analysis\_4.RTF)

\*\*\*\*\*

### Main Output for the Tobacco History for Run: 3, Simulation: 1, Scenario: NULL

| Variable Parameter          | Value              |
|-----------------------------|--------------------|
| 1. Country                  | US (United States) |
| 2. Sex                      | M (Males)          |
| 3. Year of start of process | 1990               |

Year of Follow-up: 2040, Age Group: All Ages  
 Period    Age Group    Smoking Group            N            %

|    |          |           |       |       |
|----|----------|-----------|-------|-------|
| 50 | All Ages | Never Any | 19445 | 50.68 |
| 50 | All Ages | CC        | 3024  | 7.88  |
| 50 | All Ages | Former    | 15896 | 41.43 |

Year of Follow-up: 2040, Age Group: 18-19  
 Period    Age Group    Smoking Group            N            %

|    |       |           |   |   |
|----|-------|-----------|---|---|
| 50 | 18-19 | Never Any | 0 | . |
| 50 | 18-19 | CC        | 0 | . |
| 50 | 18-19 | Former    | 0 | . |

Year of Follow-up: 2040, Age Group: 20-24  
 Period    Age Group    Smoking Group            N            %

|    |       |           |   |   |
|----|-------|-----------|---|---|
| 50 | 20-24 | Never Any | 0 | . |
| 50 | 20-24 | CC        | 0 | . |
| 50 | 20-24 | Former    | 0 | . |

Year of Follow-up: 2040, Age Group: 25-29  
 Period    Age Group    Smoking Group            N            %

|    |       |           |   |   |
|----|-------|-----------|---|---|
| 50 | 25-29 | Never Any | 0 | . |
| 50 | 25-29 | CC        | 0 | . |
| 50 | 25-29 | Former    | 0 | . |

Year of Follow-up: 2040, Age Group: 30-34  
 Period    Age Group    Smoking Group            N            %

|    |       |           |   |   |
|----|-------|-----------|---|---|
| 50 | 30-34 | Never Any | 0 | . |
| 50 | 30-34 | CC        | 0 | . |
| 50 | 30-34 | Former    | 0 | . |

Year of Follow-up: 2040, Age Group: 35-39  
 Period    Age Group    Smoking Group            N            %

|    |       |           |   |   |
|----|-------|-----------|---|---|
| 50 | 35-39 | Never Any | 0 | . |
| 50 | 35-39 | CC        | 0 | . |
| 50 | 35-39 | Former    | 0 | . |

Year of Follow-up: 2040, Age Group: 40-44  
 Period    Age Group    Smoking Group            N            %

|    |       |           |   |   |
|----|-------|-----------|---|---|
| 50 | 40-44 | Never Any | 0 | . |
| 50 | 40-44 | CC        | 0 | . |
| 50 | 40-44 | Former    | 0 | . |

Year of Follow-up: 2040, Age Group: 45-49  
 Period    Age Group    Smoking Group            N            %

|    |       |           |   |   |
|----|-------|-----------|---|---|
| 50 | 45-49 | Never Any | 0 | . |
| 50 | 45-49 | CC        | 0 | . |
| 50 | 45-49 | Former    | 0 | . |

Year of Follow-up: 2040, Age Group: 50-54  
 Period    Age Group    Smoking Group            N            %

|    |       |           |   |   |
|----|-------|-----------|---|---|
| 50 | 50-54 | Never Any | 0 | . |
| 50 | 50-54 | CC        | 0 | . |
| 50 | 50-54 | Former    | 0 | . |

Year of Follow-up: 2040, Age Group: 55-59  
 Period    Age Group    Smoking Group            N            %

|    |       |           |   |   |
|----|-------|-----------|---|---|
| 50 | 55-59 | Never Any | 0 | . |
| 50 | 55-59 | CC        | 0 | . |
| 50 | 55-59 | Former    | 0 | . |

Year of Follow-up: 2040, Age Group: 60-64  
 Period    Age Group    Smoking Group            N            %

### Results for PHIM for Run 3 (Sensitivity\_Analysis\_4.RTF)

|                                           |           |               |      |       |
|-------------------------------------------|-----------|---------------|------|-------|
| 50                                        | 60-64     | Never Any     | 4363 | 49.33 |
| 50                                        | 60-64     | CC            | 934  | 10.56 |
| 50                                        | 60-64     | Former        | 3548 | 40.11 |
| Year of Follow-up: 2040, Age Group: 65-69 |           |               |      |       |
| Period                                    | Age Group | Smoking Group | N    | %     |
| 50                                        | 65-69     | Never Any     | 4948 | 54.73 |
| 50                                        | 65-69     | CC            | 734  | 8.12  |
| 50                                        | 65-69     | Former        | 3358 | 37.15 |
| Year of Follow-up: 2040, Age Group: 70-74 |           |               |      |       |
| Period                                    | Age Group | Smoking Group | N    | %     |
| 50                                        | 70-74     | Never Any     | 5145 | 52.41 |
| 50                                        | 70-74     | CC            | 688  | 7.01  |
| 50                                        | 70-74     | Former        | 3983 | 40.58 |
| Year of Follow-up: 2040, Age Group: 75-79 |           |               |      |       |
| Period                                    | Age Group | Smoking Group | N    | %     |
| 50                                        | 75-79     | Never Any     | 4989 | 46.78 |
| 50                                        | 75-79     | CC            | 668  | 6.26  |
| 50                                        | 75-79     | Former        | 5007 | 46.95 |

## Results for PHIM for Run 3 (Sensitivity\_Analysis\_4.RTF)

\*\*\*\*\*

### Main Output for the Tobacco History for Run: 3, Simulation: 1, Scenario: Ecig

| Variable Parameter                           |           | Value              |       |       |               |             |               |                |              |
|----------------------------------------------|-----------|--------------------|-------|-------|---------------|-------------|---------------|----------------|--------------|
| 1. Country                                   |           | US (United States) |       |       |               |             |               |                |              |
| 2. Sex                                       |           | M (Males)          |       |       |               |             |               |                |              |
| 3. Year of start of process                  |           | 1990               |       |       |               |             |               |                |              |
| Year of Follow-up: 1990, Age Group: All Ages |           |                    |       |       |               |             |               |                |              |
| Period                                       | Age Group | Smoking Group      | N     | %     | Ever Quit (N) | Ever Quit % | Mean Yrs Quit | Short Term (n) | Short Term % |
| 0                                            | All Ages  | Never Any          | 34075 | 39.78 |               |             |               |                |              |
| 0                                            | All Ages  | CC                 | 27323 | 31.90 | 0             | 0.00        |               |                |              |
| 0                                            | All Ages  | Ecig               | 0     | 0.00  |               |             |               |                |              |
| 0                                            | All Ages  | Dual               | 0     | 0.00  |               |             |               |                |              |
| 0                                            | All Ages  | Former             | 24266 | 28.33 |               |             | 13.08         | 3623           | 14.93        |
| Year of Follow-up: 1990, Age Group: 18-19    |           |                    |       |       |               |             |               |                |              |
| Period                                       | Age Group | Smoking Group      | N     | %     | Ever Quit (N) | Ever Quit % | Mean Yrs Quit | Short Term (n) | Short Term % |
| 0                                            | 18-19     | Never Any          | 2783  | 78.42 |               |             |               |                |              |
| 0                                            | 18-19     | CC                 | 634   | 17.86 | 0             | 0.00        |               |                |              |
| 0                                            | 18-19     | Ecig               | 0     | 0.00  |               |             |               |                |              |
| 0                                            | 18-19     | Dual               | 0     | 0.00  |               |             |               |                |              |
| 0                                            | 18-19     | Former             | 132   | 3.72  |               |             | 0.11          | 132            | 100.00       |
| Year of Follow-up: 1990, Age Group: 20-24    |           |                    |       |       |               |             |               |                |              |
| Period                                       | Age Group | Smoking Group      | N     | %     | Ever Quit (N) | Ever Quit % | Mean Yrs Quit | Short Term (n) | Short Term % |
| 0                                            | 20-24     | Never Any          | 5722  | 58.29 |               |             |               |                |              |
| 0                                            | 20-24     | CC                 | 3199  | 32.59 | 0             | 0.00        |               |                |              |
| 0                                            | 20-24     | Ecig               | 0     | 0.00  |               |             |               |                |              |
| 0                                            | 20-24     | Dual               | 0     | 0.00  |               |             |               |                |              |
| 0                                            | 20-24     | Former             | 895   | 9.12  |               |             | 1.46          | 506            | 56.54        |
| Year of Follow-up: 1990, Age Group: 25-29    |           |                    |       |       |               |             |               |                |              |
| Period                                       | Age Group | Smoking Group      | N     | %     | Ever Quit (N) | Ever Quit % | Mean Yrs Quit | Short Term (n) | Short Term % |
| 0                                            | 25-29     | Never Any          | 5232  | 49.06 |               |             |               |                |              |
| 0                                            | 25-29     | CC                 | 3914  | 36.70 | 0             | 0.00        |               |                |              |
| 0                                            | 25-29     | Ecig               | 0     | 0.00  |               |             |               |                |              |
| 0                                            | 25-29     | Dual               | 0     | 0.00  |               |             |               |                |              |
| 0                                            | 25-29     | Former             | 1518  | 14.23 |               |             | 2.87          | 643            | 42.36        |
| Year of Follow-up: 1990, Age Group: 30-34    |           |                    |       |       |               |             |               |                |              |
| Period                                       | Age Group | Smoking Group      | N     | %     | Ever Quit (N) | Ever Quit % | Mean Yrs Quit | Short Term (n) | Short Term % |
| 0                                            | 30-34     | Never Any          | 4765  | 43.65 |               |             |               |                |              |
| 0                                            | 30-34     | CC                 | 4023  | 36.85 | 0             | 0.00        |               |                |              |
| 0                                            | 30-34     | Ecig               | 0     | 0.00  |               |             |               |                |              |
| 0                                            | 30-34     | Dual               | 0     | 0.00  |               |             |               |                |              |
| 0                                            | 30-34     | Former             | 2128  | 19.49 |               |             | 4.06          | 592            | 27.82        |
| Year of Follow-up: 1990, Age Group: 35-39    |           |                    |       |       |               |             |               |                |              |
| Period                                       | Age Group | Smoking Group      | N     | %     | Ever Quit (N) | Ever Quit % | Mean Yrs Quit | Short Term (n) | Short Term % |
| 0                                            | 35-39     | Never Any          | 3941  | 39.85 |               |             |               |                |              |
| 0                                            | 35-39     | CC                 | 3474  | 35.13 | 0             | 0.00        |               |                |              |
| 0                                            | 35-39     | Ecig               | 0     | 0.00  |               |             |               |                |              |
| 0                                            | 35-39     | Dual               | 0     | 0.00  |               |             |               |                |              |
| 0                                            | 35-39     | Former             | 2474  | 25.02 |               |             | 8.31          | 425            | 17.18        |
| Year of Follow-up: 1990, Age Group: 40-44    |           |                    |       |       |               |             |               |                |              |
| Period                                       | Age Group | Smoking Group      | N     | %     | Ever Quit (N) | Ever Quit % | Mean Yrs Quit | Short Term (n) | Short Term % |
| 0                                            | 40-44     | Never Any          | 2912  | 33.65 |               |             |               |                |              |
| 0                                            | 40-44     | CC                 | 3113  | 35.97 | 0             | 0.00        |               |                |              |
| 0                                            | 40-44     | Ecig               | 0     | 0.00  |               |             |               |                |              |
| 0                                            | 40-44     | Dual               | 0     | 0.00  |               |             |               |                |              |
| 0                                            | 40-44     | Former             | 2630  | 30.39 |               |             | 10.69         | 317            | 12.05        |
| Year of Follow-up: 1990, Age Group: 45-49    |           |                    |       |       |               |             |               |                |              |
| Period                                       | Age Group | Smoking Group      | N     | %     | Ever Quit (N) | Ever Quit % | Mean Yrs Quit | Short Term (n) | Short Term % |
| 0                                            | 45-49     | Never Any          | 1919  | 29.46 |               |             |               |                |              |
| 0                                            | 45-49     | CC                 | 2318  | 35.58 | 0             | 0.00        |               |                |              |
| 0                                            | 45-49     | Ecig               | 0     | 0.00  |               |             |               |                |              |
| 0                                            | 45-49     | Dual               | 0     | 0.00  |               |             |               |                |              |
| 0                                            | 45-49     | Former             | 2278  | 34.97 |               |             | 13.26         | 221            | 9.70         |
| Year of Follow-up: 1990, Age Group: 50-54    |           |                    |       |       |               |             |               |                |              |
| Period                                       | Age Group | Smoking Group      | N     | %     | Ever Quit (N) | Ever Quit % | Mean Yrs Quit | Short Term (n) | Short Term % |
| 0                                            | 50-54     | Never Any          | 1611  | 29.41 |               |             |               |                |              |
| 0                                            | 50-54     | CC                 | 1816  | 33.16 | 0             | 0.00        |               |                |              |

### Results for PHIM for Run 3 (Sensitivity\_Analysis\_4.RTF)

|                                              |           |               |       |       |               |             |               |                |              |
|----------------------------------------------|-----------|---------------|-------|-------|---------------|-------------|---------------|----------------|--------------|
| 0                                            | 50-54     | Ecig          | 0     | 0.00  |               |             |               |                |              |
| 0                                            | 50-54     | Dual          | 0     | 0.00  |               |             |               |                |              |
| 0                                            | 50-54     | Former        | 2050  | 37.43 |               |             | 14.55         | 261            | 12.73        |
| Year of Follow-up: 1990, Age Group: 55-59    |           |               |       |       |               |             |               |                |              |
| Period                                       | Age Group | Smoking Group | N     | %     | Ever Quit (N) | Ever Quit % | Mean Yrs Quit | Short Term (n) | Short Term % |
| 0                                            | 55-59     | Never Any     | 1337  | 26.83 |               |             |               |                |              |
| 0                                            | 55-59     | CC            | 1520  | 30.50 | 0             | 0.00        |               |                |              |
| 0                                            | 55-59     | Ecig          | 0     | 0.00  |               |             |               |                |              |
| 0                                            | 55-59     | Dual          | 0     | 0.00  |               |             |               |                |              |
| 0                                            | 55-59     | Former        | 2126  | 42.67 |               |             | 14.80         | 216            | 10.16        |
| Year of Follow-up: 1990, Age Group: 60-64    |           |               |       |       |               |             |               |                |              |
| Period                                       | Age Group | Smoking Group | N     | %     | Ever Quit (N) | Ever Quit % | Mean Yrs Quit | Short Term (n) | Short Term % |
| 0                                            | 60-64     | Never Any     | 1169  | 23.83 |               |             |               |                |              |
| 0                                            | 60-64     | CC            | 1287  | 26.24 | 0             | 0.00        |               |                |              |
| 0                                            | 60-64     | Ecig          | 0     | 0.00  |               |             |               |                |              |
| 0                                            | 60-64     | Dual          | 0     | 0.00  |               |             |               |                |              |
| 0                                            | 60-64     | Former        | 2449  | 49.93 |               |             | 18.87         | 106            | 4.33         |
| Year of Follow-up: 1990, Age Group: 65-69    |           |               |       |       |               |             |               |                |              |
| Period                                       | Age Group | Smoking Group | N     | %     | Ever Quit (N) | Ever Quit % | Mean Yrs Quit | Short Term (n) | Short Term % |
| 0                                            | 65-69     | Never Any     | 1023  | 23.32 |               |             |               |                |              |
| 0                                            | 65-69     | CC            | 979   | 22.32 | 0             | 0.00        |               |                |              |
| 0                                            | 65-69     | Ecig          | 0     | 0.00  |               |             |               |                |              |
| 0                                            | 65-69     | Dual          | 0     | 0.00  |               |             |               |                |              |
| 0                                            | 65-69     | Former        | 2385  | 54.37 |               |             | 19.91         | 113            | 4.74         |
| Year of Follow-up: 1990, Age Group: 70-74    |           |               |       |       |               |             |               |                |              |
| Period                                       | Age Group | Smoking Group | N     | %     | Ever Quit (N) | Ever Quit % | Mean Yrs Quit | Short Term (n) | Short Term % |
| 0                                            | 70-74     | Never Any     | 961   | 27.46 |               |             |               |                |              |
| 0                                            | 70-74     | CC            | 675   | 19.29 | 0             | 0.00        |               |                |              |
| 0                                            | 70-74     | Ecig          | 0     | 0.00  |               |             |               |                |              |
| 0                                            | 70-74     | Dual          | 0     | 0.00  |               |             |               |                |              |
| 0                                            | 70-74     | Former        | 1863  | 53.24 |               |             | 20.69         | 23             | 1.23         |
| Year of Follow-up: 1990, Age Group: 75-79    |           |               |       |       |               |             |               |                |              |
| Period                                       | Age Group | Smoking Group | N     | %     | Ever Quit (N) | Ever Quit % | Mean Yrs Quit | Short Term (n) | Short Term % |
| 0                                            | 75-79     | Never Any     | 700   | 29.06 |               |             |               |                |              |
| 0                                            | 75-79     | CC            | 371   | 15.40 | 0             | 0.00        |               |                |              |
| 0                                            | 75-79     | Ecig          | 0     | 0.00  |               |             |               |                |              |
| 0                                            | 75-79     | Dual          | 0     | 0.00  |               |             |               |                |              |
| 0                                            | 75-79     | Former        | 1338  | 55.54 |               |             | 22.88         | 68             | 5.08         |
| Year of Follow-up: 1995, Age Group: All Ages |           |               |       |       |               |             |               |                |              |
| Period                                       | Age Group | Smoking Group | N     | %     | Ever Quit (N) | Ever Quit % | Mean Yrs Quit | Short Term (n) | Short Term % |
| 5                                            | All Ages  | Never Any     | 38738 | 41.97 |               |             |               |                |              |
| 5                                            | All Ages  | CC            | 11526 | 12.49 | 0             | 0.00        |               |                |              |
| 5                                            | All Ages  | Ecig          | 15157 | 16.42 |               |             |               |                |              |
| 5                                            | All Ages  | Dual          | 0     | 0.00  |               |             |               |                |              |
| 5                                            | All Ages  | Former        | 26869 | 29.11 |               |             | 15.21         | 1690           | 6.29         |
| Year of Follow-up: 1995, Age Group: 18-19    |           |               |       |       |               |             |               |                |              |
| Period                                       | Age Group | Smoking Group | N     | %     | Ever Quit (N) | Ever Quit % | Mean Yrs Quit | Short Term (n) | Short Term % |
| 5                                            | 18-19     | Never Any     | 2575  | 72.66 |               |             |               |                |              |
| 5                                            | 18-19     | CC            | 327   | 9.23  | 0             | 0.00        |               |                |              |
| 5                                            | 18-19     | Ecig          | 536   | 15.12 |               |             |               |                |              |
| 5                                            | 18-19     | Dual          | 0     | 0.00  |               |             |               |                |              |
| 5                                            | 18-19     | Former        | 106   | 2.99  |               |             | 1.08          | 75             | 70.75        |
| Year of Follow-up: 1995, Age Group: 20-24    |           |               |       |       |               |             |               |                |              |
| Period                                       | Age Group | Smoking Group | N     | %     | Ever Quit (N) | Ever Quit % | Mean Yrs Quit | Short Term (n) | Short Term % |
| 5                                            | 20-24     | Never Any     | 5974  | 66.08 |               |             |               |                |              |
| 5                                            | 20-24     | CC            | 956   | 10.58 | 0             | 0.00        |               |                |              |
| 5                                            | 20-24     | Ecig          | 1644  | 18.19 |               |             |               |                |              |
| 5                                            | 20-24     | Dual          | 0     | 0.00  |               |             |               |                |              |
| 5                                            | 20-24     | Former        | 466   | 5.15  |               |             | 2.86          | 134            | 28.76        |
| Year of Follow-up: 1995, Age Group: 25-29    |           |               |       |       |               |             |               |                |              |
| Period                                       | Age Group | Smoking Group | N     | %     | Ever Quit (N) | Ever Quit % | Mean Yrs Quit | Short Term (n) | Short Term % |
| 5                                            | 25-29     | Never Any     | 5499  | 56.02 |               |             |               |                |              |
| 5                                            | 25-29     | CC            | 1255  | 12.79 | 0             | 0.00        |               |                |              |
| 5                                            | 25-29     | Ecig          | 1915  | 19.51 |               |             |               |                |              |
| 5                                            | 25-29     | Dual          | 0     | 0.00  |               |             |               |                |              |
| 5                                            | 25-29     | Former        | 1147  | 11.69 |               |             | 5.44          | 114            | 9.94         |
| Year of Follow-up: 1995, Age Group: 30-34    |           |               |       |       |               |             |               |                |              |
| Period                                       | Age Group | Smoking Group | N     | %     | Ever Quit (N) | Ever Quit % | Mean Yrs Quit | Short Term (n) | Short Term % |

**Results for PHIM for Run 3 (Sensitivity\_Analysis\_4.RTF)**

|                                              |           |               |      |       |               |             |               |                |              |
|----------------------------------------------|-----------|---------------|------|-------|---------------|-------------|---------------|----------------|--------------|
| 5                                            | 30-34     | Never Any     | 5088 | 47.71 |               |             |               |                |              |
| 5                                            | 30-34     | CC            | 1481 | 13.89 | 0             | 0.00        |               |                |              |
| 5                                            | 30-34     | Ecig          | 2296 | 21.53 |               |             |               |                |              |
| 5                                            | 30-34     | Dual          | 0    | 0.00  |               |             |               |                |              |
| 5                                            | 30-34     | Former        | 1799 | 16.87 |               |             | 6.95          | 105            | 5.84         |
| Year of Follow-up: 1995, Age Group: 35-39    |           |               |      |       |               |             |               |                |              |
| Period                                       | Age Group | Smoking Group | N    | %     | Ever Quit (N) | Ever Quit % | Mean Yrs Quit | Short Term (n) | Short Term % |
| 5                                            | 35-39     | Never Any     | 4729 | 43.32 |               |             |               |                |              |
| 5                                            | 35-39     | CC            | 1496 | 13.70 | 0             | 0.00        |               |                |              |
| 5                                            | 35-39     | Ecig          | 2270 | 20.80 |               |             |               |                |              |
| 5                                            | 35-39     | Dual          | 0    | 0.00  |               |             |               |                |              |
| 5                                            | 35-39     | Former        | 2421 | 22.18 |               |             | 8.20          | 114            | 4.71         |
| Year of Follow-up: 1995, Age Group: 40-44    |           |               |      |       |               |             |               |                |              |
| Period                                       | Age Group | Smoking Group | N    | %     | Ever Quit (N) | Ever Quit % | Mean Yrs Quit | Short Term (n) | Short Term % |
| 5                                            | 40-44     | Never Any     | 3941 | 39.85 |               |             |               |                |              |
| 5                                            | 40-44     | CC            | 1280 | 12.94 | 0             | 0.00        |               |                |              |
| 5                                            | 40-44     | Ecig          | 1894 | 19.15 |               |             |               |                |              |
| 5                                            | 40-44     | Dual          | 0    | 0.00  |               |             |               |                |              |
| 5                                            | 40-44     | Former        | 2774 | 28.05 |               |             | 12.06         | 130            | 4.69         |
| Year of Follow-up: 1995, Age Group: 45-49    |           |               |      |       |               |             |               |                |              |
| Period                                       | Age Group | Smoking Group | N    | %     | Ever Quit (N) | Ever Quit % | Mean Yrs Quit | Short Term (n) | Short Term % |
| 5                                            | 45-49     | Never Any     | 2912 | 33.65 |               |             |               |                |              |
| 5                                            | 45-49     | CC            | 1236 | 14.28 | 0             | 0.00        |               |                |              |
| 5                                            | 45-49     | Ecig          | 1562 | 18.05 |               |             |               |                |              |
| 5                                            | 45-49     | Dual          | 0    | 0.00  |               |             |               |                |              |
| 5                                            | 45-49     | Former        | 2945 | 34.03 |               |             | 14.20         | 148            | 5.03         |
| Year of Follow-up: 1995, Age Group: 50-54    |           |               |      |       |               |             |               |                |              |
| Period                                       | Age Group | Smoking Group | N    | %     | Ever Quit (N) | Ever Quit % | Mean Yrs Quit | Short Term (n) | Short Term % |
| 5                                            | 50-54     | Never Any     | 1919 | 29.46 |               |             |               |                |              |
| 5                                            | 50-54     | CC            | 940  | 14.43 | 0             | 0.00        |               |                |              |
| 5                                            | 50-54     | Ecig          | 1015 | 15.58 |               |             |               |                |              |
| 5                                            | 50-54     | Dual          | 0    | 0.00  |               |             |               |                |              |
| 5                                            | 50-54     | Former        | 2641 | 40.54 |               |             | 15.98         | 175            | 6.63         |
| Year of Follow-up: 1995, Age Group: 55-59    |           |               |      |       |               |             |               |                |              |
| Period                                       | Age Group | Smoking Group | N    | %     | Ever Quit (N) | Ever Quit % | Mean Yrs Quit | Short Term (n) | Short Term % |
| 5                                            | 55-59     | Never Any     | 1611 | 29.41 |               |             |               |                |              |
| 5                                            | 55-59     | CC            | 740  | 13.51 | 0             | 0.00        |               |                |              |
| 5                                            | 55-59     | Ecig          | 762  | 13.91 |               |             |               |                |              |
| 5                                            | 55-59     | Dual          | 0    | 0.00  |               |             |               |                |              |
| 5                                            | 55-59     | Former        | 2364 | 43.16 |               |             | 17.21         | 122            | 5.16         |
| Year of Follow-up: 1995, Age Group: 60-64    |           |               |      |       |               |             |               |                |              |
| Period                                       | Age Group | Smoking Group | N    | %     | Ever Quit (N) | Ever Quit % | Mean Yrs Quit | Short Term (n) | Short Term % |
| 5                                            | 60-64     | Never Any     | 1337 | 26.83 |               |             |               |                |              |
| 5                                            | 60-64     | CC            | 597  | 11.98 | 0             | 0.00        |               |                |              |
| 5                                            | 60-64     | Ecig          | 572  | 11.48 |               |             |               |                |              |
| 5                                            | 60-64     | Dual          | 0    | 0.00  |               |             |               |                |              |
| 5                                            | 60-64     | Former        | 2477 | 49.71 |               |             | 17.27         | 143            | 5.77         |
| Year of Follow-up: 1995, Age Group: 65-69    |           |               |      |       |               |             |               |                |              |
| Period                                       | Age Group | Smoking Group | N    | %     | Ever Quit (N) | Ever Quit % | Mean Yrs Quit | Short Term (n) | Short Term % |
| 5                                            | 65-69     | Never Any     | 1169 | 23.83 |               |             |               |                |              |
| 5                                            | 65-69     | CC            | 477  | 9.72  | 0             | 0.00        |               |                |              |
| 5                                            | 65-69     | Ecig          | 360  | 7.34  |               |             |               |                |              |
| 5                                            | 65-69     | Dual          | 0    | 0.00  |               |             |               |                |              |
| 5                                            | 65-69     | Former        | 2899 | 59.10 |               |             | 20.44         | 196            | 6.76         |
| Year of Follow-up: 1995, Age Group: 70-74    |           |               |      |       |               |             |               |                |              |
| Period                                       | Age Group | Smoking Group | N    | %     | Ever Quit (N) | Ever Quit % | Mean Yrs Quit | Short Term (n) | Short Term % |
| 5                                            | 70-74     | Never Any     | 1023 | 23.32 |               |             |               |                |              |
| 5                                            | 70-74     | CC            | 438  | 9.98  | 0             | 0.00        |               |                |              |
| 5                                            | 70-74     | Ecig          | 196  | 4.47  |               |             |               |                |              |
| 5                                            | 70-74     | Dual          | 0    | 0.00  |               |             |               |                |              |
| 5                                            | 70-74     | Former        | 2730 | 62.23 |               |             | 22.00         | 137            | 5.02         |
| Year of Follow-up: 1995, Age Group: 75-79    |           |               |      |       |               |             |               |                |              |
| Period                                       | Age Group | Smoking Group | N    | %     | Ever Quit (N) | Ever Quit % | Mean Yrs Quit | Short Term (n) | Short Term % |
| 5                                            | 75-79     | Never Any     | 961  | 27.46 |               |             |               |                |              |
| 5                                            | 75-79     | CC            | 303  | 8.66  | 0             | 0.00        |               |                |              |
| 5                                            | 75-79     | Ecig          | 135  | 3.86  |               |             |               |                |              |
| 5                                            | 75-79     | Dual          | 0    | 0.00  |               |             |               |                |              |
| 5                                            | 75-79     | Former        | 2100 | 60.02 |               |             | 23.02         | 97             | 4.62         |
| Year of Follow-up: 2000, Age Group: All Ages |           |               |      |       |               |             |               |                |              |

**Results for PHIM for Run 3 (Sensitivity\_Analysis\_4.RTF)**

| Period                                    | Age Group | Smoking Group | N     | %     | Ever Quit (N) | Ever Quit % | Mean Yrs Quit | Short Term (n) | Short Term % |
|-------------------------------------------|-----------|---------------|-------|-------|---------------|-------------|---------------|----------------|--------------|
| 10                                        | All Ages  | Never Any     | 40032 | 42.55 |               |             |               |                |              |
| 10                                        | All Ages  | CC            | 4874  | 5.18  | 0             | 0.00        |               |                |              |
| 10                                        | All Ages  | Ecig          | 20003 | 21.26 |               |             |               |                |              |
| 10                                        | All Ages  | Dual          | 0     | 0.00  |               |             |               |                |              |
| 10                                        | All Ages  | Former        | 29183 | 31.02 |               |             | 16.92         | 1672           | 5.73         |
| Year of Follow-up: 2000, Age Group: 18-19 |           |               |       |       |               |             |               |                |              |
| Period                                    | Age Group | Smoking Group | N     | %     | Ever Quit (N) | Ever Quit % | Mean Yrs Quit | Short Term (n) | Short Term % |
| 10                                        | 18-19     | Never Any     | 0     | .     |               |             |               |                |              |
| 10                                        | 18-19     | CC            | 0     | .     | 0             | .           |               |                |              |
| 10                                        | 18-19     | Ecig          | 0     | .     |               |             |               |                |              |
| 10                                        | 18-19     | Dual          | 0     | .     |               |             |               |                |              |
| 10                                        | 18-19     | Former        | 0     | .     |               |             |               | 0              | .            |
| Year of Follow-up: 2000, Age Group: 20-24 |           |               |       |       |               |             |               |                |              |
| Period                                    | Age Group | Smoking Group | N     | %     | Ever Quit (N) | Ever Quit % | Mean Yrs Quit | Short Term (n) | Short Term % |
| 10                                        | 20-24     | Never Any     | 5409  | 61.15 |               |             |               |                |              |
| 10                                        | 20-24     | CC            | 485   | 5.48  | 0             | 0.00        |               |                |              |
| 10                                        | 20-24     | Ecig          | 2153  | 24.34 |               |             |               |                |              |
| 10                                        | 20-24     | Dual          | 0     | 0.00  |               |             |               |                |              |
| 10                                        | 20-24     | Former        | 798   | 9.02  |               |             | 3.46          | 222            | 27.82        |
| Year of Follow-up: 2000, Age Group: 25-29 |           |               |       |       |               |             |               |                |              |
| Period                                    | Age Group | Smoking Group | N     | %     | Ever Quit (N) | Ever Quit % | Mean Yrs Quit | Short Term (n) | Short Term % |
| 10                                        | 25-29     | Never Any     | 5601  | 61.96 |               |             |               |                |              |
| 10                                        | 25-29     | CC            | 412   | 4.56  | 0             | 0.00        |               |                |              |
| 10                                        | 25-29     | Ecig          | 2135  | 23.62 |               |             |               |                |              |
| 10                                        | 25-29     | Dual          | 0     | 0.00  |               |             |               |                |              |
| 10                                        | 25-29     | Former        | 892   | 9.87  |               |             | 4.98          | 181            | 20.29        |
| Year of Follow-up: 2000, Age Group: 30-34 |           |               |       |       |               |             |               |                |              |
| Period                                    | Age Group | Smoking Group | N     | %     | Ever Quit (N) | Ever Quit % | Mean Yrs Quit | Short Term (n) | Short Term % |
| 10                                        | 30-34     | Never Any     | 5348  | 54.48 |               |             |               |                |              |
| 10                                        | 30-34     | CC            | 481   | 4.90  | 0             | 0.00        |               |                |              |
| 10                                        | 30-34     | Ecig          | 2540  | 25.88 |               |             |               |                |              |
| 10                                        | 30-34     | Dual          | 0     | 0.00  |               |             |               |                |              |
| 10                                        | 30-34     | Former        | 1447  | 14.74 |               |             | 8.67          | 116            | 8.02         |
| Year of Follow-up: 2000, Age Group: 35-39 |           |               |       |       |               |             |               |                |              |
| Period                                    | Age Group | Smoking Group | N     | %     | Ever Quit (N) | Ever Quit % | Mean Yrs Quit | Short Term (n) | Short Term % |
| 10                                        | 35-39     | Never Any     | 5033  | 47.20 |               |             |               |                |              |
| 10                                        | 35-39     | CC            | 609   | 5.71  | 0             | 0.00        |               |                |              |
| 10                                        | 35-39     | Ecig          | 2947  | 27.64 |               |             |               |                |              |
| 10                                        | 35-39     | Dual          | 0     | 0.00  |               |             |               |                |              |
| 10                                        | 35-39     | Former        | 2075  | 19.46 |               |             | 10.62         | 109            | 5.25         |
| Year of Follow-up: 2000, Age Group: 40-44 |           |               |       |       |               |             |               |                |              |
| Period                                    | Age Group | Smoking Group | N     | %     | Ever Quit (N) | Ever Quit % | Mean Yrs Quit | Short Term (n) | Short Term % |
| 10                                        | 40-44     | Never Any     | 4729  | 43.32 |               |             |               |                |              |
| 10                                        | 40-44     | CC            | 567   | 5.19  | 0             | 0.00        |               |                |              |
| 10                                        | 40-44     | Ecig          | 2852  | 26.13 |               |             |               |                |              |
| 10                                        | 40-44     | Dual          | 0     | 0.00  |               |             |               |                |              |
| 10                                        | 40-44     | Former        | 2768  | 25.36 |               |             | 11.82         | 124            | 4.48         |
| Year of Follow-up: 2000, Age Group: 45-49 |           |               |       |       |               |             |               |                |              |
| Period                                    | Age Group | Smoking Group | N     | %     | Ever Quit (N) | Ever Quit % | Mean Yrs Quit | Short Term (n) | Short Term % |
| 10                                        | 45-49     | Never Any     | 3941  | 39.85 |               |             |               |                |              |
| 10                                        | 45-49     | CC            | 484   | 4.89  | 0             | 0.00        |               |                |              |
| 10                                        | 45-49     | Ecig          | 2312  | 23.38 |               |             |               |                |              |
| 10                                        | 45-49     | Dual          | 0     | 0.00  |               |             |               |                |              |
| 10                                        | 45-49     | Former        | 3152  | 31.87 |               |             | 15.25         | 163            | 5.17         |
| Year of Follow-up: 2000, Age Group: 50-54 |           |               |       |       |               |             |               |                |              |
| Period                                    | Age Group | Smoking Group | N     | %     | Ever Quit (N) | Ever Quit % | Mean Yrs Quit | Short Term (n) | Short Term % |
| 10                                        | 50-54     | Never Any     | 2912  | 33.65 |               |             |               |                |              |
| 10                                        | 50-54     | CC            | 473   | 5.47  | 0             | 0.00        |               |                |              |
| 10                                        | 50-54     | Ecig          | 1859  | 21.48 |               |             |               |                |              |
| 10                                        | 50-54     | Dual          | 0     | 0.00  |               |             |               |                |              |
| 10                                        | 50-54     | Former        | 3411  | 39.41 |               |             | 16.85         | 186            | 5.45         |
| Year of Follow-up: 2000, Age Group: 55-59 |           |               |       |       |               |             |               |                |              |
| Period                                    | Age Group | Smoking Group | N     | %     | Ever Quit (N) | Ever Quit % | Mean Yrs Quit | Short Term (n) | Short Term % |
| 10                                        | 55-59     | Never Any     | 1919  | 29.46 |               |             |               |                |              |
| 10                                        | 55-59     | CC            | 363   | 5.57  | 0             | 0.00        |               |                |              |
| 10                                        | 55-59     | Ecig          | 1194  | 18.33 |               |             |               |                |              |
| 10                                        | 55-59     | Dual          | 0     | 0.00  |               |             |               |                |              |



**Results for PHIM for Run 3 (Sensitivity\_Analysis\_4.RTF)**

|                                              |           |               |       |       |               |             |               |                |              |
|----------------------------------------------|-----------|---------------|-------|-------|---------------|-------------|---------------|----------------|--------------|
| 10                                           | 55-59     | Former        | 3039  | 46.65 |               |             | 18.50         | 146            | 4.80         |
| Year of Follow-up: 2000, Age Group: 60-64    |           |               |       |       |               |             |               |                |              |
| Period                                       | Age Group | Smoking Group | N     | %     | Ever Quit (N) | Ever Quit % | Mean Yrs Quit | Short Term (n) | Short Term % |
| 10                                           | 60-64     | Never Any     | 1611  | 29.41 |               |             |               |                |              |
| 10                                           | 60-64     | CC            | 306   | 5.59  | 0             | 0.00        |               |                |              |
| 10                                           | 60-64     | Ecig          | 852   | 15.56 |               |             |               |                |              |
| 10                                           | 60-64     | Dual          | 0     | 0.00  |               |             |               |                |              |
| 10                                           | 60-64     | Former        | 2708  | 49.44 |               |             | 19.63         | 144            | 5.32         |
| Year of Follow-up: 2000, Age Group: 65-69    |           |               |       |       |               |             |               |                |              |
| Period                                       | Age Group | Smoking Group | N     | %     | Ever Quit (N) | Ever Quit % | Mean Yrs Quit | Short Term (n) | Short Term % |
| 10                                           | 65-69     | Never Any     | 1337  | 26.83 |               |             |               |                |              |
| 10                                           | 65-69     | CC            | 244   | 4.90  | 0             | 0.00        |               |                |              |
| 10                                           | 65-69     | Ecig          | 603   | 12.10 |               |             |               |                |              |
| 10                                           | 65-69     | Dual          | 0     | 0.00  |               |             |               |                |              |
| 10                                           | 65-69     | Former        | 2799  | 56.17 |               |             | 19.95         | 120            | 4.29         |
| Year of Follow-up: 2000, Age Group: 70-74    |           |               |       |       |               |             |               |                |              |
| Period                                       | Age Group | Smoking Group | N     | %     | Ever Quit (N) | Ever Quit % | Mean Yrs Quit | Short Term (n) | Short Term % |
| 10                                           | 70-74     | Never Any     | 1169  | 23.83 |               |             |               |                |              |
| 10                                           | 70-74     | CC            | 236   | 4.81  | 0             | 0.00        |               |                |              |
| 10                                           | 70-74     | Ecig          | 327   | 6.67  |               |             |               |                |              |
| 10                                           | 70-74     | Dual          | 0     | 0.00  |               |             |               |                |              |
| 10                                           | 70-74     | Former        | 3173  | 64.69 |               |             | 23.44         | 94             | 2.96         |
| Year of Follow-up: 2000, Age Group: 75-79    |           |               |       |       |               |             |               |                |              |
| Period                                       | Age Group | Smoking Group | N     | %     | Ever Quit (N) | Ever Quit % | Mean Yrs Quit | Short Term (n) | Short Term % |
| 10                                           | 75-79     | Never Any     | 1023  | 23.32 |               |             |               |                |              |
| 10                                           | 75-79     | CC            | 214   | 4.88  | 0             | 0.00        |               |                |              |
| 10                                           | 75-79     | Ecig          | 229   | 5.22  |               |             |               |                |              |
| 10                                           | 75-79     | Dual          | 0     | 0.00  |               |             |               |                |              |
| 10                                           | 75-79     | Former        | 2921  | 66.58 |               |             | 25.38         | 67             | 2.29         |
| Year of Follow-up: 2005, Age Group: All Ages |           |               |       |       |               |             |               |                |              |
| Period                                       | Age Group | Smoking Group | N     | %     | Ever Quit (N) | Ever Quit % | Mean Yrs Quit | Short Term (n) | Short Term % |
| 15                                           | All Ages  | Never Any     | 38428 | 42.84 |               |             |               |                |              |
| 15                                           | All Ages  | CC            | 1922  | 2.14  | 0             | 0.00        |               |                |              |
| 15                                           | All Ages  | Ecig          | 19289 | 21.50 |               |             |               |                |              |
| 15                                           | All Ages  | Dual          | 0     | 0.00  |               |             |               |                |              |
| 15                                           | All Ages  | Former        | 30066 | 33.52 |               |             | 18.58         | 1531           | 5.09         |
| Year of Follow-up: 2005, Age Group: 18-19    |           |               |       |       |               |             |               |                |              |
| Period                                       | Age Group | Smoking Group | N     | %     | Ever Quit (N) | Ever Quit % | Mean Yrs Quit | Short Term (n) | Short Term % |
| 15                                           | 18-19     | Never Any     | 0     | .     |               |             |               |                |              |
| 15                                           | 18-19     | CC            | 0     | .     | 0             | .           |               |                |              |
| 15                                           | 18-19     | Ecig          | 0     | .     |               |             |               |                |              |
| 15                                           | 18-19     | Dual          | 0     | .     |               |             |               |                |              |
| 15                                           | 18-19     | Former        | 0     | .     |               |             | .             | 0              | .            |
| Year of Follow-up: 2005, Age Group: 20-24    |           |               |       |       |               |             |               |                |              |
| Period                                       | Age Group | Smoking Group | N     | %     | Ever Quit (N) | Ever Quit % | Mean Yrs Quit | Short Term (n) | Short Term % |
| 15                                           | 20-24     | Never Any     | 0     | .     |               |             |               |                |              |
| 15                                           | 20-24     | CC            | 0     | .     | 0             | .           |               |                |              |
| 15                                           | 20-24     | Ecig          | 0     | .     |               |             |               |                |              |
| 15                                           | 20-24     | Dual          | 0     | .     |               |             |               |                |              |
| 15                                           | 20-24     | Former        | 0     | .     |               |             | .             | 0              | .            |
| Year of Follow-up: 2005, Age Group: 25-29    |           |               |       |       |               |             |               |                |              |
| Period                                       | Age Group | Smoking Group | N     | %     | Ever Quit (N) | Ever Quit % | Mean Yrs Quit | Short Term (n) | Short Term % |
| 15                                           | 25-29     | Never Any     | 5156  | 58.29 |               |             |               |                |              |
| 15                                           | 25-29     | CC            | 186   | 2.10  | 0             | 0.00        |               |                |              |
| 15                                           | 25-29     | Ecig          | 2308  | 26.09 |               |             |               |                |              |
| 15                                           | 25-29     | Dual          | 0     | 0.00  |               |             |               |                |              |
| 15                                           | 25-29     | Former        | 1195  | 13.51 |               |             | 6.37          | 148            | 12.38        |
| Year of Follow-up: 2005, Age Group: 30-34    |           |               |       |       |               |             |               |                |              |
| Period                                       | Age Group | Smoking Group | N     | %     | Ever Quit (N) | Ever Quit % | Mean Yrs Quit | Short Term (n) | Short Term % |
| 15                                           | 30-34     | Never Any     | 5361  | 59.30 |               |             |               |                |              |
| 15                                           | 30-34     | CC            | 157   | 1.74  | 0             | 0.00        |               |                |              |
| 15                                           | 30-34     | Ecig          | 2239  | 24.77 |               |             |               |                |              |
| 15                                           | 30-34     | Dual          | 0     | 0.00  |               |             |               |                |              |
| 15                                           | 30-34     | Former        | 1283  | 14.19 |               |             | 7.50          | 158            | 12.31        |
| Year of Follow-up: 2005, Age Group: 35-39    |           |               |       |       |               |             |               |                |              |
| Period                                       | Age Group | Smoking Group | N     | %     | Ever Quit (N) | Ever Quit % | Mean Yrs Quit | Short Term (n) | Short Term % |
| 15                                           | 35-39     | Never Any     | 5260  | 53.59 |               |             |               |                |              |
| 15                                           | 35-39     | CC            | 188   | 1.92  | 0             | 0.00        |               |                |              |

**Results for PHIM for Run 3 (Sensitivity\_Analysis\_4.RTF)**

|                                              |           |               |       |       |               |             |               |                |              |
|----------------------------------------------|-----------|---------------|-------|-------|---------------|-------------|---------------|----------------|--------------|
| 15                                           | 35-39     | Ecig          | 2568  | 26.16 |               |             |               |                |              |
| 15                                           | 35-39     | Dual          | 0     | 0.00  |               |             |               |                |              |
| 15                                           | 35-39     | Former        | 1800  | 18.34 |               |             | 11.37         | 144            | 8.00         |
| Year of Follow-up: 2005, Age Group: 40-44    |           |               |       |       |               |             |               |                |              |
| Period                                       | Age Group | Smoking Group | N     | %     | Ever Quit (N) | Ever Quit % | Mean Yrs Quit | Short Term (n) | Short Term % |
| 15                                           | 40-44     | Never Any     | 5033  | 47.20 |               |             |               |                |              |
| 15                                           | 40-44     | CC            | 231   | 2.17  | 0             | 0.00        |               |                |              |
| 15                                           | 40-44     | Ecig          | 2916  | 27.34 |               |             |               |                |              |
| 15                                           | 40-44     | Dual          | 0     | 0.00  |               |             |               |                |              |
| 15                                           | 40-44     | Former        | 2484  | 23.29 |               |             | 13.33         | 199            | 8.01         |
| Year of Follow-up: 2005, Age Group: 45-49    |           |               |       |       |               |             |               |                |              |
| Period                                       | Age Group | Smoking Group | N     | %     | Ever Quit (N) | Ever Quit % | Mean Yrs Quit | Short Term (n) | Short Term % |
| 15                                           | 45-49     | Never Any     | 4729  | 43.32 |               |             |               |                |              |
| 15                                           | 45-49     | CC            | 216   | 1.98  | 0             | 0.00        |               |                |              |
| 15                                           | 45-49     | Ecig          | 2790  | 25.56 |               |             |               |                |              |
| 15                                           | 45-49     | Dual          | 0     | 0.00  |               |             |               |                |              |
| 15                                           | 45-49     | Former        | 3181  | 29.14 |               |             | 14.89         | 159            | 5.00         |
| Year of Follow-up: 2005, Age Group: 50-54    |           |               |       |       |               |             |               |                |              |
| Period                                       | Age Group | Smoking Group | N     | %     | Ever Quit (N) | Ever Quit % | Mean Yrs Quit | Short Term (n) | Short Term % |
| 15                                           | 50-54     | Never Any     | 3941  | 39.85 |               |             |               |                |              |
| 15                                           | 50-54     | CC            | 213   | 2.15  | 0             | 0.00        |               |                |              |
| 15                                           | 50-54     | Ecig          | 2180  | 22.04 |               |             |               |                |              |
| 15                                           | 50-54     | Dual          | 0     | 0.00  |               |             |               |                |              |
| 15                                           | 50-54     | Former        | 3555  | 35.95 |               |             | 18.19         | 154            | 4.33         |
| Year of Follow-up: 2005, Age Group: 55-59    |           |               |       |       |               |             |               |                |              |
| Period                                       | Age Group | Smoking Group | N     | %     | Ever Quit (N) | Ever Quit % | Mean Yrs Quit | Short Term (n) | Short Term % |
| 15                                           | 55-59     | Never Any     | 2912  | 33.65 |               |             |               |                |              |
| 15                                           | 55-59     | CC            | 215   | 2.48  | 0             | 0.00        |               |                |              |
| 15                                           | 55-59     | Ecig          | 1781  | 20.58 |               |             |               |                |              |
| 15                                           | 55-59     | Dual          | 0     | 0.00  |               |             |               |                |              |
| 15                                           | 55-59     | Former        | 3747  | 43.29 |               |             | 20.09         | 117            | 3.12         |
| Year of Follow-up: 2005, Age Group: 60-64    |           |               |       |       |               |             |               |                |              |
| Period                                       | Age Group | Smoking Group | N     | %     | Ever Quit (N) | Ever Quit % | Mean Yrs Quit | Short Term (n) | Short Term % |
| 15                                           | 60-64     | Never Any     | 1919  | 29.46 |               |             |               |                |              |
| 15                                           | 60-64     | CC            | 143   | 2.19  | 0             | 0.00        |               |                |              |
| 15                                           | 60-64     | Ecig          | 1100  | 16.88 |               |             |               |                |              |
| 15                                           | 60-64     | Dual          | 0     | 0.00  |               |             |               |                |              |
| 15                                           | 60-64     | Former        | 3353  | 51.47 |               |             | 21.47         | 156            | 4.65         |
| Year of Follow-up: 2005, Age Group: 65-69    |           |               |       |       |               |             |               |                |              |
| Period                                       | Age Group | Smoking Group | N     | %     | Ever Quit (N) | Ever Quit % | Mean Yrs Quit | Short Term (n) | Short Term % |
| 15                                           | 65-69     | Never Any     | 1611  | 29.41 |               |             |               |                |              |
| 15                                           | 65-69     | CC            | 124   | 2.26  | 0             | 0.00        |               |                |              |
| 15                                           | 65-69     | Ecig          | 705   | 12.87 |               |             |               |                |              |
| 15                                           | 65-69     | Dual          | 0     | 0.00  |               |             |               |                |              |
| 15                                           | 65-69     | Former        | 3037  | 55.45 |               |             | 22.19         | 118            | 3.89         |
| Year of Follow-up: 2005, Age Group: 70-74    |           |               |       |       |               |             |               |                |              |
| Period                                       | Age Group | Smoking Group | N     | %     | Ever Quit (N) | Ever Quit % | Mean Yrs Quit | Short Term (n) | Short Term % |
| 15                                           | 70-74     | Never Any     | 1337  | 26.83 |               |             |               |                |              |
| 15                                           | 70-74     | CC            | 129   | 2.59  | 0             | 0.00        |               |                |              |
| 15                                           | 70-74     | Ecig          | 441   | 8.85  |               |             |               |                |              |
| 15                                           | 70-74     | Dual          | 0     | 0.00  |               |             |               |                |              |
| 15                                           | 70-74     | Former        | 3076  | 61.73 |               |             | 22.89         | 112            | 3.64         |
| Year of Follow-up: 2005, Age Group: 75-79    |           |               |       |       |               |             |               |                |              |
| Period                                       | Age Group | Smoking Group | N     | %     | Ever Quit (N) | Ever Quit % | Mean Yrs Quit | Short Term (n) | Short Term % |
| 15                                           | 75-79     | Never Any     | 1169  | 23.83 |               |             |               |                |              |
| 15                                           | 75-79     | CC            | 120   | 2.45  | 0             | 0.00        |               |                |              |
| 15                                           | 75-79     | Ecig          | 261   | 5.32  |               |             |               |                |              |
| 15                                           | 75-79     | Dual          | 0     | 0.00  |               |             |               |                |              |
| 15                                           | 75-79     | Former        | 3355  | 68.40 |               |             | 27.01         | 66             | 1.97         |
| Year of Follow-up: 2010, Age Group: All Ages |           |               |       |       |               |             |               |                |              |
| Period                                       | Age Group | Smoking Group | N     | %     | Ever Quit (N) | Ever Quit % | Mean Yrs Quit | Short Term (n) | Short Term % |
| 20                                           | All Ages  | Never Any     | 37109 | 43.76 |               |             |               |                |              |
| 20                                           | All Ages  | CC            | 744   | 0.88  | 0             | 0.00        |               |                |              |
| 20                                           | All Ages  | Ecig          | 16459 | 19.41 |               |             |               |                |              |
| 20                                           | All Ages  | Dual          | 0     | 0.00  |               |             |               |                |              |
| 20                                           | All Ages  | Former        | 30488 | 35.95 |               |             | 19.98         | 1468           | 4.82         |
| Year of Follow-up: 2010, Age Group: 18-19    |           |               |       |       |               |             |               |                |              |
| Period                                       | Age Group | Smoking Group | N     | %     | Ever Quit (N) | Ever Quit % | Mean Yrs Quit | Short Term (n) | Short Term % |

**Results for PHIM for Run 3 (Sensitivity\_Analysis\_4.RTF)**

|                                           |           |               |      |       |               |             |               |                |              |
|-------------------------------------------|-----------|---------------|------|-------|---------------|-------------|---------------|----------------|--------------|
| 20                                        | 18-19     | Never Any     | 0    | .     |               |             |               |                |              |
| 20                                        | 18-19     | CC            | 0    | .     | 0             | .           |               |                |              |
| 20                                        | 18-19     | Ecig          | 0    | .     |               |             |               |                |              |
| 20                                        | 18-19     | Dual          | 0    | .     |               |             |               |                |              |
| 20                                        | 18-19     | Former        | 0    | .     |               |             | 0             | .              |              |
| Year of Follow-up: 2010, Age Group: 20-24 |           |               |      |       |               |             |               |                |              |
| Period                                    | Age Group | Smoking Group | N    | %     | Ever Quit (N) | Ever Quit % | Mean Yrs Quit | Short Term (n) | Short Term % |
| 20                                        | 20-24     | Never Any     | 0    | .     |               |             |               |                |              |
| 20                                        | 20-24     | CC            | 0    | .     | 0             | .           |               |                |              |
| 20                                        | 20-24     | Ecig          | 0    | .     |               |             |               |                |              |
| 20                                        | 20-24     | Dual          | 0    | .     |               |             |               |                |              |
| 20                                        | 20-24     | Former        | 0    | .     |               |             |               | 0              | .            |
| Year of Follow-up: 2010, Age Group: 25-29 |           |               |      |       |               |             |               |                |              |
| Period                                    | Age Group | Smoking Group | N    | %     | Ever Quit (N) | Ever Quit % | Mean Yrs Quit | Short Term (n) | Short Term % |
| 20                                        | 25-29     | Never Any     | 0    | .     |               |             |               |                |              |
| 20                                        | 25-29     | CC            | 0    | .     | 0             | .           |               |                |              |
| 20                                        | 25-29     | Ecig          | 0    | .     |               |             |               |                |              |
| 20                                        | 25-29     | Dual          | 0    | .     |               |             |               |                |              |
| 20                                        | 25-29     | Former        | 0    | .     |               |             |               | 0              | .            |
| Year of Follow-up: 2010, Age Group: 30-34 |           |               |      |       |               |             |               |                |              |
| Period                                    | Age Group | Smoking Group | N    | %     | Ever Quit (N) | Ever Quit % | Mean Yrs Quit | Short Term (n) | Short Term % |
| 20                                        | 30-34     | Never Any     | 5051 | 57.11 |               |             |               |                |              |
| 20                                        | 30-34     | CC            | 76   | 0.86  | 0             | 0.00        |               |                |              |
| 20                                        | 30-34     | Ecig          | 2067 | 23.37 |               |             |               |                |              |
| 20                                        | 30-34     | Dual          | 0    | 0.00  |               |             |               |                |              |
| 20                                        | 30-34     | Former        | 1651 | 18.67 |               |             | 8.76          | 201            | 12.17        |
| Year of Follow-up: 2010, Age Group: 35-39 |           |               |      |       |               |             |               |                |              |
| Period                                    | Age Group | Smoking Group | N    | %     | Ever Quit (N) | Ever Quit % | Mean Yrs Quit | Short Term (n) | Short Term % |
| 20                                        | 35-39     | Never Any     | 5316 | 58.81 |               |             |               |                |              |
| 20                                        | 35-39     | CC            | 60   | 0.66  | 0             | 0.00        |               |                |              |
| 20                                        | 35-39     | Ecig          | 1947 | 21.54 |               |             |               |                |              |
| 20                                        | 35-39     | Dual          | 0    | 0.00  |               |             |               |                |              |
| 20                                        | 35-39     | Former        | 1717 | 18.99 |               |             | 9.89          | 134            | 7.80         |
| Year of Follow-up: 2010, Age Group: 40-44 |           |               |      |       |               |             |               |                |              |
| Period                                    | Age Group | Smoking Group | N    | %     | Ever Quit (N) | Ever Quit % | Mean Yrs Quit | Short Term (n) | Short Term % |
| 20                                        | 40-44     | Never Any     | 5260 | 53.59 |               |             |               |                |              |
| 20                                        | 40-44     | CC            | 68   | 0.69  | 0             | 0.00        |               |                |              |
| 20                                        | 40-44     | Ecig          | 2344 | 23.88 |               |             |               |                |              |
| 20                                        | 40-44     | Dual          | 0    | 0.00  |               |             |               |                |              |
| 20                                        | 40-44     | Former        | 2144 | 21.84 |               |             | 14.07         | 133            | 6.20         |
| Year of Follow-up: 2010, Age Group: 45-49 |           |               |      |       |               |             |               |                |              |
| Period                                    | Age Group | Smoking Group | N    | %     | Ever Quit (N) | Ever Quit % | Mean Yrs Quit | Short Term (n) | Short Term % |
| 20                                        | 45-49     | Never Any     | 5033 | 47.20 |               |             |               |                |              |
| 20                                        | 45-49     | CC            | 89   | 0.83  | 0             | 0.00        |               |                |              |
| 20                                        | 45-49     | Ecig          | 2593 | 24.32 |               |             |               |                |              |
| 20                                        | 45-49     | Dual          | 0    | 0.00  |               |             |               |                |              |
| 20                                        | 45-49     | Former        | 2949 | 27.65 |               |             | 15.78         | 167            | 5.66         |
| Year of Follow-up: 2010, Age Group: 50-54 |           |               |      |       |               |             |               |                |              |
| Period                                    | Age Group | Smoking Group | N    | %     | Ever Quit (N) | Ever Quit % | Mean Yrs Quit | Short Term (n) | Short Term % |
| 20                                        | 50-54     | Never Any     | 4729 | 43.32 |               |             |               |                |              |
| 20                                        | 50-54     | CC            | 87   | 0.80  | 0             | 0.00        |               |                |              |
| 20                                        | 50-54     | Ecig          | 2487 | 22.78 |               |             |               |                |              |
| 20                                        | 50-54     | Dual          | 0    | 0.00  |               |             |               |                |              |
| 20                                        | 50-54     | Former        | 3613 | 33.10 |               |             | 17.75         | 174            | 4.82         |
| Year of Follow-up: 2010, Age Group: 55-59 |           |               |      |       |               |             |               |                |              |
| Period                                    | Age Group | Smoking Group | N    | %     | Ever Quit (N) | Ever Quit % | Mean Yrs Quit | Short Term (n) | Short Term % |
| 20                                        | 55-59     | Never Any     | 3941 | 39.85 |               |             |               |                |              |
| 20                                        | 55-59     | CC            | 85   | 0.86  | 0             | 0.00        |               |                |              |
| 20                                        | 55-59     | Ecig          | 1859 | 18.80 |               |             |               |                |              |
| 20                                        | 55-59     | Dual          | 0    | 0.00  |               |             |               |                |              |
| 20                                        | 55-59     | Former        | 4004 | 40.49 |               |             | 20.81         | 181            | 4.52         |
| Year of Follow-up: 2010, Age Group: 60-64 |           |               |      |       |               |             |               |                |              |
| Period                                    | Age Group | Smoking Group | N    | %     | Ever Quit (N) | Ever Quit % | Mean Yrs Quit | Short Term (n) | Short Term % |
| 20                                        | 60-64     | Never Any     | 2912 | 33.65 |               |             |               |                |              |
| 20                                        | 60-64     | CC            | 87   | 1.01  | 0             | 0.00        |               |                |              |
| 20                                        | 60-64     | Ecig          | 1428 | 16.50 |               |             |               |                |              |
| 20                                        | 60-64     | Dual          | 0    | 0.00  |               |             |               |                |              |
| 20                                        | 60-64     | Former        | 4228 | 48.85 |               |             | 22.41         | 241            | 5.70         |
| Year of Follow-up: 2010, Age Group: 65-69 |           |               |      |       |               |             |               |                |              |

**Results for PHIM for Run 3 (Sensitivity\_Analysis\_4.RTF)**

| Period                                       | Age Group | Smoking Group | N     | %     | Ever Quit (N) | Ever Quit % | Mean Yrs Quit | Short Term (n) | Short Term % |
|----------------------------------------------|-----------|---------------|-------|-------|---------------|-------------|---------------|----------------|--------------|
| 20                                           | 65-69     | Never Any     | 1919  | 29.46 |               |             |               |                |              |
| 20                                           | 65-69     | CC            | 60    | 0.92  | 0             | 0.00        |               |                |              |
| 20                                           | 65-69     | Ecig          | 809   | 12.42 |               |             |               |                |              |
| 20                                           | 65-69     | Dual          | 0     | 0.00  |               |             |               |                |              |
| 20                                           | 65-69     | Former        | 3727  | 57.21 |               |             | 24.03         | 133            | 3.57         |
| Year of Follow-up: 2010, Age Group: 70-74    |           |               |       |       |               |             |               |                |              |
| Period                                       | Age Group | Smoking Group | N     | %     | Ever Quit (N) | Ever Quit % | Mean Yrs Quit | Short Term (n) | Short Term % |
| 20                                           | 70-74     | Never Any     | 1611  | 29.41 |               |             |               |                |              |
| 20                                           | 70-74     | CC            | 69    | 1.26  | 0             | 0.00        |               |                |              |
| 20                                           | 70-74     | Ecig          | 574   | 10.48 |               |             |               |                |              |
| 20                                           | 70-74     | Dual          | 0     | 0.00  |               |             |               |                |              |
| 20                                           | 70-74     | Former        | 3223  | 58.85 |               |             | 25.75         | 61             | 1.89         |
| Year of Follow-up: 2010, Age Group: 75-79    |           |               |       |       |               |             |               |                |              |
| Period                                       | Age Group | Smoking Group | N     | %     | Ever Quit (N) | Ever Quit % | Mean Yrs Quit | Short Term (n) | Short Term % |
| 20                                           | 75-79     | Never Any     | 1337  | 26.83 |               |             |               |                |              |
| 20                                           | 75-79     | CC            | 63    | 1.26  | 0             | 0.00        |               |                |              |
| 20                                           | 75-79     | Ecig          | 351   | 7.04  |               |             |               |                |              |
| 20                                           | 75-79     | Dual          | 0     | 0.00  |               |             |               |                |              |
| 20                                           | 75-79     | Former        | 3232  | 64.86 |               |             | 26.66         | 43             | 1.33         |
| Year of Follow-up: 2015, Age Group: All Ages |           |               |       |       |               |             |               |                |              |
| Period                                       | Age Group | Smoking Group | N     | %     | Ever Quit (N) | Ever Quit % | Mean Yrs Quit | Short Term (n) | Short Term % |
| 25                                           | All Ages  | Never Any     | 35755 | 44.80 |               |             |               |                |              |
| 25                                           | All Ages  | CC            | 291   | 0.36  | 0             | 0.00        |               |                |              |
| 25                                           | All Ages  | Ecig          | 13570 | 17.00 |               |             |               |                |              |
| 25                                           | All Ages  | Dual          | 0     | 0.00  |               |             |               |                |              |
| 25                                           | All Ages  | Former        | 30201 | 37.84 |               |             | 22.04         | 1058           | 3.50         |
| Year of Follow-up: 2015, Age Group: 18-19    |           |               |       |       |               |             |               |                |              |
| Period                                       | Age Group | Smoking Group | N     | %     | Ever Quit (N) | Ever Quit % | Mean Yrs Quit | Short Term (n) | Short Term % |
| 25                                           | 18-19     | Never Any     | 0     | .     |               |             |               |                |              |
| 25                                           | 18-19     | CC            | 0     | .     | 0             | .           |               |                |              |
| 25                                           | 18-19     | Ecig          | 0     | .     |               |             |               |                |              |
| 25                                           | 18-19     | Dual          | 0     | .     |               |             |               |                |              |
| 25                                           | 18-19     | Former        | 0     | .     |               |             | .             | 0              | .            |
| Year of Follow-up: 2015, Age Group: 20-24    |           |               |       |       |               |             |               |                |              |
| Period                                       | Age Group | Smoking Group | N     | %     | Ever Quit (N) | Ever Quit % | Mean Yrs Quit | Short Term (n) | Short Term % |
| 25                                           | 20-24     | Never Any     | 0     | .     |               |             |               |                |              |
| 25                                           | 20-24     | CC            | 0     | .     | 0             | .           |               |                |              |
| 25                                           | 20-24     | Ecig          | 0     | .     |               |             |               |                |              |
| 25                                           | 20-24     | Dual          | 0     | .     |               |             |               |                |              |
| 25                                           | 20-24     | Former        | 0     | .     |               |             | .             | 0              | .            |
| Year of Follow-up: 2015, Age Group: 25-29    |           |               |       |       |               |             |               |                |              |
| Period                                       | Age Group | Smoking Group | N     | %     | Ever Quit (N) | Ever Quit % | Mean Yrs Quit | Short Term (n) | Short Term % |
| 25                                           | 25-29     | Never Any     | 0     | .     |               |             |               |                |              |
| 25                                           | 25-29     | CC            | 0     | .     | 0             | .           |               |                |              |
| 25                                           | 25-29     | Ecig          | 0     | .     |               |             |               |                |              |
| 25                                           | 25-29     | Dual          | 0     | .     |               |             |               |                |              |
| 25                                           | 25-29     | Former        | 0     | .     |               |             | .             | 0              | .            |
| Year of Follow-up: 2015, Age Group: 30-34    |           |               |       |       |               |             |               |                |              |
| Period                                       | Age Group | Smoking Group | N     | %     | Ever Quit (N) | Ever Quit % | Mean Yrs Quit | Short Term (n) | Short Term % |
| 25                                           | 30-34     | Never Any     | 0     | .     |               |             |               |                |              |
| 25                                           | 30-34     | CC            | 0     | .     | 0             | .           |               |                |              |
| 25                                           | 30-34     | Ecig          | 0     | .     |               |             |               |                |              |
| 25                                           | 30-34     | Dual          | 0     | .     |               |             |               |                |              |
| 25                                           | 30-34     | Former        | 0     | .     |               |             | .             | 0              | .            |
| Year of Follow-up: 2015, Age Group: 35-39    |           |               |       |       |               |             |               |                |              |
| Period                                       | Age Group | Smoking Group | N     | %     | Ever Quit (N) | Ever Quit % | Mean Yrs Quit | Short Term (n) | Short Term % |
| 25                                           | 35-39     | Never Any     | 5034  | 56.91 |               |             |               |                |              |
| 25                                           | 35-39     | CC            | 30    | 0.34  | 0             | 0.00        |               |                |              |
| 25                                           | 35-39     | Ecig          | 1734  | 19.60 |               |             |               |                |              |
| 25                                           | 35-39     | Dual          | 0     | 0.00  |               |             |               |                |              |
| 25                                           | 35-39     | Former        | 2047  | 23.14 |               |             | 11.54         | 122            | 5.96         |
| Year of Follow-up: 2015, Age Group: 40-44    |           |               |       |       |               |             |               |                |              |
| Period                                       | Age Group | Smoking Group | N     | %     | Ever Quit (N) | Ever Quit % | Mean Yrs Quit | Short Term (n) | Short Term % |
| 25                                           | 40-44     | Never Any     | 5316  | 58.81 |               |             |               |                |              |
| 25                                           | 40-44     | CC            | 20    | 0.22  | 0             | 0.00        |               |                |              |
| 25                                           | 40-44     | Ecig          | 1714  | 18.96 |               |             |               |                |              |
| 25                                           | 40-44     | Dual          | 0     | 0.00  |               |             |               |                |              |

**Results for PHIM for Run 3 (Sensitivity\_Analysis\_4.RTF)**

|                                              |           |               |       |       |               |             |               |                |              |
|----------------------------------------------|-----------|---------------|-------|-------|---------------|-------------|---------------|----------------|--------------|
| 25                                           | 40-44     | Former        | 1990  | 22.01 |               |             | 13.13         | 103            | 5.18         |
| Year of Follow-up: 2015, Age Group: 45-49    |           |               |       |       |               |             |               |                |              |
| Period                                       | Age Group | Smoking Group | N     | %     | Ever Quit (N) | Ever Quit % | Mean Yrs Quit | Short Term (n) | Short Term % |
| 25                                           | 45-49     | Never Any     | 5260  | 53.59 |               |             |               |                |              |
| 25                                           | 45-49     | CC            | 29    | 0.30  | 0             | 0.00        |               |                |              |
| 25                                           | 45-49     | Ecig          | 2124  | 21.64 |               |             |               |                |              |
| 25                                           | 45-49     | Dual          | 0     | 0.00  |               |             |               |                |              |
| 25                                           | 45-49     | Former        | 2403  | 24.48 |               |             | 17.27         | 80             | 3.33         |
| Year of Follow-up: 2015, Age Group: 50-54    |           |               |       |       |               |             |               |                |              |
| Period                                       | Age Group | Smoking Group | N     | %     | Ever Quit (N) | Ever Quit % | Mean Yrs Quit | Short Term (n) | Short Term % |
| 25                                           | 50-54     | Never Any     | 5033  | 47.20 |               |             |               |                |              |
| 25                                           | 50-54     | CC            | 37    | 0.35  | 0             | 0.00        |               |                |              |
| 25                                           | 50-54     | Ecig          | 2362  | 22.15 |               |             |               |                |              |
| 25                                           | 50-54     | Dual          | 0     | 0.00  |               |             |               |                |              |
| 25                                           | 50-54     | Former        | 3232  | 30.31 |               |             | 19.13         | 130            | 4.02         |
| Year of Follow-up: 2015, Age Group: 55-59    |           |               |       |       |               |             |               |                |              |
| Period                                       | Age Group | Smoking Group | N     | %     | Ever Quit (N) | Ever Quit % | Mean Yrs Quit | Short Term (n) | Short Term % |
| 25                                           | 55-59     | Never Any     | 4729  | 43.32 |               |             |               |                |              |
| 25                                           | 55-59     | CC            | 33    | 0.30  | 0             | 0.00        |               |                |              |
| 25                                           | 55-59     | Ecig          | 2101  | 19.25 |               |             |               |                |              |
| 25                                           | 55-59     | Dual          | 0     | 0.00  |               |             |               |                |              |
| 25                                           | 55-59     | Former        | 4053  | 37.13 |               |             | 20.51         | 162            | 4.00         |
| Year of Follow-up: 2015, Age Group: 60-64    |           |               |       |       |               |             |               |                |              |
| Period                                       | Age Group | Smoking Group | N     | %     | Ever Quit (N) | Ever Quit % | Mean Yrs Quit | Short Term (n) | Short Term % |
| 25                                           | 60-64     | Never Any     | 3941  | 39.85 |               |             |               |                |              |
| 25                                           | 60-64     | CC            | 28    | 0.28  | 0             | 0.00        |               |                |              |
| 25                                           | 60-64     | Ecig          | 1443  | 14.59 |               |             |               |                |              |
| 25                                           | 60-64     | Dual          | 0     | 0.00  |               |             |               |                |              |
| 25                                           | 60-64     | Former        | 4477  | 45.27 |               |             | 23.28         | 205            | 4.58         |
| Year of Follow-up: 2015, Age Group: 65-69    |           |               |       |       |               |             |               |                |              |
| Period                                       | Age Group | Smoking Group | N     | %     | Ever Quit (N) | Ever Quit % | Mean Yrs Quit | Short Term (n) | Short Term % |
| 25                                           | 65-69     | Never Any     | 2912  | 33.65 |               |             |               |                |              |
| 25                                           | 65-69     | CC            | 43    | 0.50  | 0             | 0.00        |               |                |              |
| 25                                           | 65-69     | Ecig          | 1019  | 11.77 |               |             |               |                |              |
| 25                                           | 65-69     | Dual          | 0     | 0.00  |               |             |               |                |              |
| 25                                           | 65-69     | Former        | 4681  | 54.08 |               |             | 24.99         | 134            | 2.86         |
| Year of Follow-up: 2015, Age Group: 70-74    |           |               |       |       |               |             |               |                |              |
| Period                                       | Age Group | Smoking Group | N     | %     | Ever Quit (N) | Ever Quit % | Mean Yrs Quit | Short Term (n) | Short Term % |
| 25                                           | 70-74     | Never Any     | 1919  | 29.46 |               |             |               |                |              |
| 25                                           | 70-74     | CC            | 35    | 0.54  | 0             | 0.00        |               |                |              |
| 25                                           | 70-74     | Ecig          | 616   | 9.46  |               |             |               |                |              |
| 25                                           | 70-74     | Dual          | 0     | 0.00  |               |             |               |                |              |
| 25                                           | 70-74     | Former        | 3945  | 60.55 |               |             | 27.55         | 70             | 1.77         |
| Year of Follow-up: 2015, Age Group: 75-79    |           |               |       |       |               |             |               |                |              |
| Period                                       | Age Group | Smoking Group | N     | %     | Ever Quit (N) | Ever Quit % | Mean Yrs Quit | Short Term (n) | Short Term % |
| 25                                           | 75-79     | Never Any     | 1611  | 29.41 |               |             |               |                |              |
| 25                                           | 75-79     | CC            | 36    | 0.66  | 0             | 0.00        |               |                |              |
| 25                                           | 75-79     | Ecig          | 457   | 8.34  |               |             |               |                |              |
| 25                                           | 75-79     | Dual          | 0     | 0.00  |               |             |               |                |              |
| 25                                           | 75-79     | Former        | 3373  | 61.58 |               |             | 29.48         | 52             | 1.54         |
| Year of Follow-up: 2020, Age Group: All Ages |           |               |       |       |               |             |               |                |              |
| Period                                       | Age Group | Smoking Group | N     | %     | Ever Quit (N) | Ever Quit % | Mean Yrs Quit | Short Term (n) | Short Term % |
| 30                                           | All Ages  | Never Any     | 34144 | 45.93 |               |             |               |                |              |
| 30                                           | All Ages  | CC            | 102   | 0.14  | 0             | 0.00        |               |                |              |
| 30                                           | All Ages  | Ecig          | 10875 | 14.63 |               |             |               |                |              |
| 30                                           | All Ages  | Dual          | 0     | 0.00  |               |             |               |                |              |
| 30                                           | All Ages  | Former        | 29219 | 39.30 |               |             | 24.14         | 894            | 3.06         |
| Year of Follow-up: 2020, Age Group: 18-19    |           |               |       |       |               |             |               |                |              |
| Period                                       | Age Group | Smoking Group | N     | %     | Ever Quit (N) | Ever Quit % | Mean Yrs Quit | Short Term (n) | Short Term % |
| 30                                           | 18-19     | Never Any     | 0     | .     |               |             |               |                |              |
| 30                                           | 18-19     | CC            | 0     | .     | 0             | .           |               |                |              |
| 30                                           | 18-19     | Ecig          | 0     | .     |               |             |               |                |              |
| 30                                           | 18-19     | Dual          | 0     | .     |               |             |               |                |              |
| 30                                           | 18-19     | Former        | 0     | .     |               |             | .             | 0              | .            |
| Year of Follow-up: 2020, Age Group: 20-24    |           |               |       |       |               |             |               |                |              |
| Period                                       | Age Group | Smoking Group | N     | %     | Ever Quit (N) | Ever Quit % | Mean Yrs Quit | Short Term (n) | Short Term % |
| 30                                           | 20-24     | Never Any     | 0     | .     |               |             |               |                |              |
| 30                                           | 20-24     | CC            | 0     | .     | 0             | .           |               |                |              |

**Results for PHIM for Run 3 (Sensitivity\_Analysis\_4.RTF)**

|                                           |           |               |      |       |               |             |               |                |              |
|-------------------------------------------|-----------|---------------|------|-------|---------------|-------------|---------------|----------------|--------------|
| 30                                        | 20-24     | Ecig          | 0    | .     |               |             |               |                |              |
| 30                                        | 20-24     | Dual          | 0    | .     |               |             |               |                |              |
| 30                                        | 20-24     | Former        | 0    | .     |               |             | 0             | .              |              |
| Year of Follow-up: 2020, Age Group: 25-29 |           |               |      |       |               |             |               |                |              |
| Period                                    | Age Group | Smoking Group | N    | %     | Ever Quit (N) | Ever Quit % | Mean Yrs Quit | Short Term (n) | Short Term % |
| 30                                        | 25-29     | Never Any     | 0    | .     |               |             |               |                |              |
| 30                                        | 25-29     | CC            | 0    | .     | 0             | .           |               |                |              |
| 30                                        | 25-29     | Ecig          | 0    | .     |               |             |               |                |              |
| 30                                        | 25-29     | Dual          | 0    | .     |               |             |               |                |              |
| 30                                        | 25-29     | Former        | 0    | .     |               |             |               | 0              | .            |
| Year of Follow-up: 2020, Age Group: 30-34 |           |               |      |       |               |             |               |                |              |
| Period                                    | Age Group | Smoking Group | N    | %     | Ever Quit (N) | Ever Quit % | Mean Yrs Quit | Short Term (n) | Short Term % |
| 30                                        | 30-34     | Never Any     | 0    | .     |               |             |               |                |              |
| 30                                        | 30-34     | CC            | 0    | .     | 0             | .           |               |                |              |
| 30                                        | 30-34     | Ecig          | 0    | .     |               |             |               |                |              |
| 30                                        | 30-34     | Dual          | 0    | .     |               |             |               |                |              |
| 30                                        | 30-34     | Former        | 0    | .     |               |             |               | 0              | .            |
| Year of Follow-up: 2020, Age Group: 35-39 |           |               |      |       |               |             |               |                |              |
| Period                                    | Age Group | Smoking Group | N    | %     | Ever Quit (N) | Ever Quit % | Mean Yrs Quit | Short Term (n) | Short Term % |
| 30                                        | 35-39     | Never Any     | 0    | .     |               |             |               |                |              |
| 30                                        | 35-39     | CC            | 0    | .     | 0             | .           |               |                |              |
| 30                                        | 35-39     | Ecig          | 0    | .     |               |             |               |                |              |
| 30                                        | 35-39     | Dual          | 0    | .     |               |             |               |                |              |
| 30                                        | 35-39     | Former        | 0    | .     |               |             |               | 0              | .            |
| Year of Follow-up: 2020, Age Group: 40-44 |           |               |      |       |               |             |               |                |              |
| Period                                    | Age Group | Smoking Group | N    | %     | Ever Quit (N) | Ever Quit % | Mean Yrs Quit | Short Term (n) | Short Term % |
| 30                                        | 40-44     | Never Any     | 5034 | 56.91 |               |             |               |                |              |
| 30                                        | 40-44     | CC            | 14   | 0.16  | 0             | 0.00        |               |                |              |
| 30                                        | 40-44     | Ecig          | 1519 | 17.17 |               |             |               |                |              |
| 30                                        | 40-44     | Dual          | 0    | 0.00  |               |             |               |                |              |
| 30                                        | 40-44     | Former        | 2278 | 25.75 |               |             | 15.07         | 89             | 3.91         |
| Year of Follow-up: 2020, Age Group: 45-49 |           |               |      |       |               |             |               |                |              |
| Period                                    | Age Group | Smoking Group | N    | %     | Ever Quit (N) | Ever Quit % | Mean Yrs Quit | Short Term (n) | Short Term % |
| 30                                        | 45-49     | Never Any     | 5316 | 58.81 |               |             |               |                |              |
| 30                                        | 45-49     | CC            | 5    | 0.06  | 0             | 0.00        |               |                |              |
| 30                                        | 45-49     | Ecig          | 1527 | 16.89 |               |             |               |                |              |
| 30                                        | 45-49     | Dual          | 0    | 0.00  |               |             |               |                |              |
| 30                                        | 45-49     | Former        | 2192 | 24.25 |               |             | 16.69         | 57             | 2.60         |
| Year of Follow-up: 2020, Age Group: 50-54 |           |               |      |       |               |             |               |                |              |
| Period                                    | Age Group | Smoking Group | N    | %     | Ever Quit (N) | Ever Quit % | Mean Yrs Quit | Short Term (n) | Short Term % |
| 30                                        | 50-54     | Never Any     | 5260 | 53.59 |               |             |               |                |              |
| 30                                        | 50-54     | CC            | 9    | 0.09  | 0             | 0.00        |               |                |              |
| 30                                        | 50-54     | Ecig          | 1950 | 19.87 |               |             |               |                |              |
| 30                                        | 50-54     | Dual          | 0    | 0.00  |               |             |               |                |              |
| 30                                        | 50-54     | Former        | 2597 | 26.46 |               |             | 20.72         | 99             | 3.81         |
| Year of Follow-up: 2020, Age Group: 55-59 |           |               |      |       |               |             |               |                |              |
| Period                                    | Age Group | Smoking Group | N    | %     | Ever Quit (N) | Ever Quit % | Mean Yrs Quit | Short Term (n) | Short Term % |
| 30                                        | 55-59     | Never Any     | 5033 | 47.20 |               |             |               |                |              |
| 30                                        | 55-59     | CC            | 18   | 0.17  | 0             | 0.00        |               |                |              |
| 30                                        | 55-59     | Ecig          | 1978 | 18.55 |               |             |               |                |              |
| 30                                        | 55-59     | Dual          | 0    | 0.00  |               |             |               |                |              |
| 30                                        | 55-59     | Former        | 3635 | 34.09 |               |             | 21.68         | 157            | 4.32         |
| Year of Follow-up: 2020, Age Group: 60-64 |           |               |      |       |               |             |               |                |              |
| Period                                    | Age Group | Smoking Group | N    | %     | Ever Quit (N) | Ever Quit % | Mean Yrs Quit | Short Term (n) | Short Term % |
| 30                                        | 60-64     | Never Any     | 4729 | 43.32 |               |             |               |                |              |
| 30                                        | 60-64     | CC            | 10   | 0.09  | 0             | 0.00        |               |                |              |
| 30                                        | 60-64     | Ecig          | 1613 | 14.78 |               |             |               |                |              |
| 30                                        | 60-64     | Dual          | 0    | 0.00  |               |             |               |                |              |
| 30                                        | 60-64     | Former        | 4564 | 41.81 |               |             | 22.88         | 203            | 4.45         |
| Year of Follow-up: 2020, Age Group: 65-69 |           |               |      |       |               |             |               |                |              |
| Period                                    | Age Group | Smoking Group | N    | %     | Ever Quit (N) | Ever Quit % | Mean Yrs Quit | Short Term (n) | Short Term % |
| 30                                        | 65-69     | Never Any     | 3941 | 39.85 |               |             |               |                |              |
| 30                                        | 65-69     | CC            | 13   | 0.13  | 0             | 0.00        |               |                |              |
| 30                                        | 65-69     | Ecig          | 1039 | 10.51 |               |             |               |                |              |
| 30                                        | 65-69     | Dual          | 0    | 0.00  |               |             |               |                |              |
| 30                                        | 65-69     | Former        | 4896 | 49.51 |               |             | 26.05         | 145            | 2.96         |
| Year of Follow-up: 2020, Age Group: 70-74 |           |               |      |       |               |             |               |                |              |
| Period                                    | Age Group | Smoking Group | N    | %     | Ever Quit (N) | Ever Quit % | Mean Yrs Quit | Short Term (n) | Short Term % |

### Results for PHIM for Run 3 (Sensitivity\_Analysis\_4.RTF)

|                                              |           |               |       |       |               |             |               |                |              |
|----------------------------------------------|-----------|---------------|-------|-------|---------------|-------------|---------------|----------------|--------------|
| 30                                           | 70-74     | Never Any     | 2912  | 33.65 |               |             |               |                |              |
| 30                                           | 70-74     | CC            | 18    | 0.21  | 0             | 0.00        |               |                |              |
| 30                                           | 70-74     | Ecig          | 770   | 8.90  |               |             |               |                |              |
| 30                                           | 70-74     | Dual          | 0     | 0.00  |               |             |               |                |              |
| 30                                           | 70-74     | Former        | 4955  | 57.25 |               |             | 28.45         | 93             | 1.88         |
| Year of Follow-up: 2020, Age Group: 75-79    |           |               |       |       |               |             |               |                |              |
| Period                                       | Age Group | Smoking Group | N     | %     | Ever Quit (N) | Ever Quit % | Mean Yrs Quit | Short Term (n) | Short Term % |
| 30                                           | 75-79     | Never Any     | 1919  | 29.46 |               |             |               |                |              |
| 30                                           | 75-79     | CC            | 15    | 0.23  | 0             | 0.00        |               |                |              |
| 30                                           | 75-79     | Ecig          | 479   | 7.35  |               |             |               |                |              |
| 30                                           | 75-79     | Dual          | 0     | 0.00  |               |             |               |                |              |
| 30                                           | 75-79     | Former        | 4102  | 62.96 |               |             | 31.39         | 51             | 1.24         |
| Year of Follow-up: 2025, Age Group: All Ages |           |               |       |       |               |             |               |                |              |
| Period                                       | Age Group | Smoking Group | N     | %     | Ever Quit (N) | Ever Quit % | Mean Yrs Quit | Short Term (n) | Short Term % |
| 35                                           | All Ages  | Never Any     | 32225 | 47.51 |               |             |               |                |              |
| 35                                           | All Ages  | CC            | 40    | 0.06  | 0             | 0.00        |               |                |              |
| 35                                           | All Ages  | Ecig          | 8443  | 12.45 |               |             |               |                |              |
| 35                                           | All Ages  | Dual          | 0     | 0.00  |               |             |               |                |              |
| 35                                           | All Ages  | Former        | 27117 | 39.98 |               |             | 26.04         | 766            | 2.82         |
| Year of Follow-up: 2025, Age Group: 18-19    |           |               |       |       |               |             |               |                |              |
| Period                                       | Age Group | Smoking Group | N     | %     | Ever Quit (N) | Ever Quit % | Mean Yrs Quit | Short Term (n) | Short Term % |
| 35                                           | 18-19     | Never Any     | 0     | .     |               |             |               |                |              |
| 35                                           | 18-19     | CC            | 0     | .     | 0             | .           |               |                |              |
| 35                                           | 18-19     | Ecig          | 0     | .     |               |             |               |                |              |
| 35                                           | 18-19     | Dual          | 0     | .     |               |             |               |                |              |
| 35                                           | 18-19     | Former        | 0     | .     |               |             | .             | 0              | .            |
| Year of Follow-up: 2025, Age Group: 20-24    |           |               |       |       |               |             |               |                |              |
| Period                                       | Age Group | Smoking Group | N     | %     | Ever Quit (N) | Ever Quit % | Mean Yrs Quit | Short Term (n) | Short Term % |
| 35                                           | 20-24     | Never Any     | 0     | .     |               |             |               |                |              |
| 35                                           | 20-24     | CC            | 0     | .     | 0             | .           |               |                |              |
| 35                                           | 20-24     | Ecig          | 0     | .     |               |             |               |                |              |
| 35                                           | 20-24     | Dual          | 0     | .     |               |             |               |                |              |
| 35                                           | 20-24     | Former        | 0     | .     |               |             | .             | 0              | .            |
| Year of Follow-up: 2025, Age Group: 25-29    |           |               |       |       |               |             |               |                |              |
| Period                                       | Age Group | Smoking Group | N     | %     | Ever Quit (N) | Ever Quit % | Mean Yrs Quit | Short Term (n) | Short Term % |
| 35                                           | 25-29     | Never Any     | 0     | .     |               |             |               |                |              |
| 35                                           | 25-29     | CC            | 0     | .     | 0             | .           |               |                |              |
| 35                                           | 25-29     | Ecig          | 0     | .     |               |             |               |                |              |
| 35                                           | 25-29     | Dual          | 0     | .     |               |             |               |                |              |
| 35                                           | 25-29     | Former        | 0     | .     |               |             | .             | 0              | .            |
| Year of Follow-up: 2025, Age Group: 30-34    |           |               |       |       |               |             |               |                |              |
| Period                                       | Age Group | Smoking Group | N     | %     | Ever Quit (N) | Ever Quit % | Mean Yrs Quit | Short Term (n) | Short Term % |
| 35                                           | 30-34     | Never Any     | 0     | .     |               |             |               |                |              |
| 35                                           | 30-34     | CC            | 0     | .     | 0             | .           |               |                |              |
| 35                                           | 30-34     | Ecig          | 0     | .     |               |             |               |                |              |
| 35                                           | 30-34     | Dual          | 0     | .     |               |             |               |                |              |
| 35                                           | 30-34     | Former        | 0     | .     |               |             | .             | 0              | .            |
| Year of Follow-up: 2025, Age Group: 35-39    |           |               |       |       |               |             |               |                |              |
| Period                                       | Age Group | Smoking Group | N     | %     | Ever Quit (N) | Ever Quit % | Mean Yrs Quit | Short Term (n) | Short Term % |
| 35                                           | 35-39     | Never Any     | 0     | .     |               |             |               |                |              |
| 35                                           | 35-39     | CC            | 0     | .     | 0             | .           |               |                |              |
| 35                                           | 35-39     | Ecig          | 0     | .     |               |             |               |                |              |
| 35                                           | 35-39     | Dual          | 0     | .     |               |             |               |                |              |
| 35                                           | 35-39     | Former        | 0     | .     |               |             | .             | 0              | .            |
| Year of Follow-up: 2025, Age Group: 40-44    |           |               |       |       |               |             |               |                |              |
| Period                                       | Age Group | Smoking Group | N     | %     | Ever Quit (N) | Ever Quit % | Mean Yrs Quit | Short Term (n) | Short Term % |
| 35                                           | 40-44     | Never Any     | 0     | .     |               |             |               |                |              |
| 35                                           | 40-44     | CC            | 0     | .     | 0             | .           |               |                |              |
| 35                                           | 40-44     | Ecig          | 0     | .     |               |             |               |                |              |
| 35                                           | 40-44     | Dual          | 0     | .     |               |             |               |                |              |
| 35                                           | 40-44     | Former        | 0     | .     |               |             | .             | 0              | .            |
| Year of Follow-up: 2025, Age Group: 45-49    |           |               |       |       |               |             |               |                |              |
| Period                                       | Age Group | Smoking Group | N     | %     | Ever Quit (N) | Ever Quit % | Mean Yrs Quit | Short Term (n) | Short Term % |
| 35                                           | 45-49     | Never Any     | 5034  | 56.91 |               |             |               |                |              |
| 35                                           | 45-49     | CC            | 9     | 0.10  | 0             | 0.00        |               |                |              |
| 35                                           | 45-49     | Ecig          | 1344  | 15.20 |               |             |               |                |              |
| 35                                           | 45-49     | Dual          | 0     | 0.00  |               |             |               |                |              |
| 35                                           | 45-49     | Former        | 2458  | 27.79 |               |             | 18.77         | 55             | 2.24         |
| Year of Follow-up: 2025, Age Group: 50-54    |           |               |       |       |               |             |               |                |              |

**Results for PHIM for Run 3 (Sensitivity\_Analysis\_4.RTF)**

| Period                                       | Age Group | Smoking Group | N     | %     | Ever Quit (N) | Ever Quit % | Mean Yrs Quit | Short Term (n) | Short Term % |
|----------------------------------------------|-----------|---------------|-------|-------|---------------|-------------|---------------|----------------|--------------|
| 35                                           | 50-54     | Never Any     | 5316  | 58.81 |               |             |               |                |              |
| 35                                           | 50-54     | CC            | 3     | 0.03  | 0             | 0.00        |               |                |              |
| 35                                           | 50-54     | Ecig          | 1408  | 15.58 |               |             |               |                |              |
| 35                                           | 50-54     | Dual          | 0     | 0.00  |               |             |               |                |              |
| 35                                           | 50-54     | Former        | 2313  | 25.59 |               |             | 20.63         | 67             | 2.90         |
| Year of Follow-up: 2025, Age Group: 55-59    |           |               |       |       |               |             |               |                |              |
| Period                                       | Age Group | Smoking Group | N     | %     | Ever Quit (N) | Ever Quit % | Mean Yrs Quit | Short Term (n) | Short Term % |
| 35                                           | 55-59     | Never Any     | 5260  | 53.59 |               |             |               |                |              |
| 35                                           | 55-59     | CC            | 0     | 0.00  | 0             | 0.00        |               |                |              |
| 35                                           | 55-59     | Ecig          | 1604  | 16.34 |               |             |               |                |              |
| 35                                           | 55-59     | Dual          | 0     | 0.00  |               |             |               |                |              |
| 35                                           | 55-59     | Former        | 2952  | 30.07 |               |             | 22.87         | 152            | 5.15         |
| Year of Follow-up: 2025, Age Group: 60-64    |           |               |       |       |               |             |               |                |              |
| Period                                       | Age Group | Smoking Group | N     | %     | Ever Quit (N) | Ever Quit % | Mean Yrs Quit | Short Term (n) | Short Term % |
| 35                                           | 60-64     | Never Any     | 5033  | 47.20 |               |             |               |                |              |
| 35                                           | 60-64     | CC            | 9     | 0.08  | 0             | 0.00        |               |                |              |
| 35                                           | 60-64     | Ecig          | 1515  | 14.21 |               |             |               |                |              |
| 35                                           | 60-64     | Dual          | 0     | 0.00  |               |             |               |                |              |
| 35                                           | 60-64     | Former        | 4107  | 38.51 |               |             | 23.84         | 183            | 4.46         |
| Year of Follow-up: 2025, Age Group: 65-69    |           |               |       |       |               |             |               |                |              |
| Period                                       | Age Group | Smoking Group | N     | %     | Ever Quit (N) | Ever Quit % | Mean Yrs Quit | Short Term (n) | Short Term % |
| 35                                           | 65-69     | Never Any     | 4729  | 43.32 |               |             |               |                |              |
| 35                                           | 65-69     | CC            | 5     | 0.05  | 0             | 0.00        |               |                |              |
| 35                                           | 65-69     | Ecig          | 1168  | 10.70 |               |             |               |                |              |
| 35                                           | 65-69     | Dual          | 0     | 0.00  |               |             |               |                |              |
| 35                                           | 65-69     | Former        | 5014  | 45.93 |               |             | 25.57         | 158            | 3.15         |
| Year of Follow-up: 2025, Age Group: 70-74    |           |               |       |       |               |             |               |                |              |
| Period                                       | Age Group | Smoking Group | N     | %     | Ever Quit (N) | Ever Quit % | Mean Yrs Quit | Short Term (n) | Short Term % |
| 35                                           | 70-74     | Never Any     | 3941  | 39.85 |               |             |               |                |              |
| 35                                           | 70-74     | CC            | 5     | 0.05  | 0             | 0.00        |               |                |              |
| 35                                           | 70-74     | Ecig          | 811   | 8.20  |               |             |               |                |              |
| 35                                           | 70-74     | Dual          | 0     | 0.00  |               |             |               |                |              |
| 35                                           | 70-74     | Former        | 5132  | 51.90 |               |             | 29.73         | 79             | 1.54         |
| Year of Follow-up: 2025, Age Group: 75-79    |           |               |       |       |               |             |               |                |              |
| Period                                       | Age Group | Smoking Group | N     | %     | Ever Quit (N) | Ever Quit % | Mean Yrs Quit | Short Term (n) | Short Term % |
| 35                                           | 75-79     | Never Any     | 2912  | 33.65 |               |             |               |                |              |
| 35                                           | 75-79     | CC            | 9     | 0.10  | 0             | 0.00        |               |                |              |
| 35                                           | 75-79     | Ecig          | 593   | 6.85  |               |             |               |                |              |
| 35                                           | 75-79     | Dual          | 0     | 0.00  |               |             |               |                |              |
| 35                                           | 75-79     | Former        | 5141  | 59.40 |               |             | 32.31         | 72             | 1.40         |
| Year of Follow-up: 2030, Age Group: All Ages |           |               |       |       |               |             |               |                |              |
| Period                                       | Age Group | Smoking Group | N     | %     | Ever Quit (N) | Ever Quit % | Mean Yrs Quit | Short Term (n) | Short Term % |
| 40                                           | All Ages  | Never Any     | 29313 | 49.54 |               |             |               |                |              |
| 40                                           | All Ages  | CC            | 16    | 0.03  | 0             | 0.00        |               |                |              |
| 40                                           | All Ages  | Ecig          | 6176  | 10.44 |               |             |               |                |              |
| 40                                           | All Ages  | Dual          | 0     | 0.00  |               |             |               |                |              |
| 40                                           | All Ages  | Former        | 23665 | 39.99 |               |             | 27.61         | 669            | 2.83         |
| Year of Follow-up: 2030, Age Group: 18-19    |           |               |       |       |               |             |               |                |              |
| Period                                       | Age Group | Smoking Group | N     | %     | Ever Quit (N) | Ever Quit % | Mean Yrs Quit | Short Term (n) | Short Term % |
| 40                                           | 18-19     | Never Any     | 0     | .     |               |             |               |                |              |
| 40                                           | 18-19     | CC            | 0     | .     | 0             | .           |               |                |              |
| 40                                           | 18-19     | Ecig          | 0     | .     |               |             |               |                |              |
| 40                                           | 18-19     | Dual          | 0     | .     |               |             |               |                |              |
| 40                                           | 18-19     | Former        | 0     | .     |               |             | .             | 0              | .            |
| Year of Follow-up: 2030, Age Group: 20-24    |           |               |       |       |               |             |               |                |              |
| Period                                       | Age Group | Smoking Group | N     | %     | Ever Quit (N) | Ever Quit % | Mean Yrs Quit | Short Term (n) | Short Term % |
| 40                                           | 20-24     | Never Any     | 0     | .     |               |             |               |                |              |
| 40                                           | 20-24     | CC            | 0     | .     | 0             | .           |               |                |              |
| 40                                           | 20-24     | Ecig          | 0     | .     |               |             |               |                |              |
| 40                                           | 20-24     | Dual          | 0     | .     |               |             |               |                |              |
| 40                                           | 20-24     | Former        | 0     | .     |               |             | .             | 0              | .            |
| Year of Follow-up: 2030, Age Group: 25-29    |           |               |       |       |               |             |               |                |              |
| Period                                       | Age Group | Smoking Group | N     | %     | Ever Quit (N) | Ever Quit % | Mean Yrs Quit | Short Term (n) | Short Term % |
| 40                                           | 25-29     | Never Any     | 0     | .     |               |             |               |                |              |
| 40                                           | 25-29     | CC            | 0     | .     | 0             | .           |               |                |              |
| 40                                           | 25-29     | Ecig          | 0     | .     |               |             |               |                |              |
| 40                                           | 25-29     | Dual          | 0     | .     |               |             |               |                |              |



### Results for PHIM for Run 3 (Sensitivity\_Analysis\_4.RTF)

| Year of Follow-up: 2030, Age Group: 30-34 | Period | Age Group | Smoking Group | N    | %     | Ever Quit (N) | Ever Quit % | Mean Yrs Quit | Short Term (n) | Short Term % |
|-------------------------------------------|--------|-----------|---------------|------|-------|---------------|-------------|---------------|----------------|--------------|
| Year of Follow-up: 2030, Age Group: 30-34 |        |           |               |      |       |               |             |               |                |              |
| 40                                        | 25-29  | Former    |               | 0    | .     |               |             |               | 0              | .            |
| Year of Follow-up: 2030, Age Group: 35-39 |        |           |               |      |       |               |             |               |                |              |
| 40                                        | 30-34  | Never Any |               | 0    | .     |               |             |               | 0              | .            |
| 40                                        | 30-34  | CC        |               | 0    | .     | 0             | .           |               |                |              |
| 40                                        | 30-34  | Ecig      |               | 0    | .     |               |             |               |                |              |
| 40                                        | 30-34  | Dual      |               | 0    | .     |               |             |               |                |              |
| 40                                        | 30-34  | Former    |               | 0    | .     |               |             |               | 0              | .            |
| Year of Follow-up: 2030, Age Group: 40-44 |        |           |               |      |       |               |             |               |                |              |
| 40                                        | 35-39  | Never Any |               | 0    | .     |               |             |               |                |              |
| 40                                        | 35-39  | CC        |               | 0    | .     | 0             | .           |               |                |              |
| 40                                        | 35-39  | Ecig      |               | 0    | .     |               |             |               |                |              |
| 40                                        | 35-39  | Dual      |               | 0    | .     |               |             |               |                |              |
| 40                                        | 35-39  | Former    |               | 0    | .     |               |             |               | 0              | .            |
| Year of Follow-up: 2030, Age Group: 45-49 |        |           |               |      |       |               |             |               |                |              |
| 40                                        | 40-44  | Never Any |               | 0    | .     |               |             |               |                |              |
| 40                                        | 40-44  | CC        |               | 0    | .     | 0             | .           |               |                |              |
| 40                                        | 40-44  | Ecig      |               | 0    | .     |               |             |               |                |              |
| 40                                        | 40-44  | Dual      |               | 0    | .     |               |             |               |                |              |
| 40                                        | 40-44  | Former    |               | 0    | .     |               |             |               | 0              | .            |
| Year of Follow-up: 2030, Age Group: 50-54 |        |           |               |      |       |               |             |               |                |              |
| 40                                        | 45-49  | Never Any |               | 0    | .     |               |             |               |                |              |
| 40                                        | 45-49  | CC        |               | 0    | .     | 0             | .           |               |                |              |
| 40                                        | 45-49  | Ecig      |               | 0    | .     |               |             |               |                |              |
| 40                                        | 45-49  | Dual      |               | 0    | .     |               |             |               |                |              |
| 40                                        | 45-49  | Former    |               | 0    | .     |               |             |               | 0              | .            |
| Year of Follow-up: 2030, Age Group: 55-59 |        |           |               |      |       |               |             |               |                |              |
| 40                                        | 50-54  | Never Any |               | 5034 | 56.91 |               |             |               |                |              |
| 40                                        | 50-54  | CC        |               | 4    | 0.05  | 0             | 0.00        |               |                |              |
| 40                                        | 50-54  | Ecig      |               | 1208 | 13.66 |               |             |               |                |              |
| 40                                        | 50-54  | Dual      |               | 0    | 0.00  |               |             |               |                |              |
| 40                                        | 50-54  | Former    |               | 2599 | 29.38 |               |             | 22.56         | 77             | 2.96         |
| Year of Follow-up: 2030, Age Group: 60-64 |        |           |               |      |       |               |             |               |                |              |
| 40                                        | 55-59  | Never Any |               | 5316 | 58.81 |               |             |               |                |              |
| 40                                        | 55-59  | CC        |               | 2    | 0.02  | 0             | 0.00        |               |                |              |
| 40                                        | 55-59  | Ecig      |               | 1174 | 12.99 |               |             |               |                |              |
| 40                                        | 55-59  | Dual      |               | 0    | 0.00  |               |             |               |                |              |
| 40                                        | 55-59  | Former    |               | 2548 | 28.19 |               |             | 23.45         | 101            | 3.96         |
| Year of Follow-up: 2030, Age Group: 65-69 |        |           |               |      |       |               |             |               |                |              |
| 40                                        | 60-64  | Never Any |               | 5260 | 53.59 |               |             |               |                |              |
| 40                                        | 60-64  | CC        |               | 0    | 0.00  | 0             | 0.00        |               |                |              |
| 40                                        | 60-64  | Ecig      |               | 1189 | 12.11 |               |             |               |                |              |
| 40                                        | 60-64  | Dual      |               | 0    | 0.00  |               |             |               |                |              |
| 40                                        | 60-64  | Former    |               | 3367 | 34.30 |               |             | 24.67         | 178            | 5.29         |
| Year of Follow-up: 2030, Age Group: 70-74 |        |           |               |      |       |               |             |               |                |              |
| 40                                        | 65-69  | Never Any |               | 5033 | 47.20 |               |             |               |                |              |
| 40                                        | 65-69  | CC        |               | 4    | 0.04  | 0             | 0.00        |               |                |              |
| 40                                        | 65-69  | Ecig      |               | 1111 | 10.42 |               |             |               |                |              |
| 40                                        | 65-69  | Dual      |               | 0    | 0.00  |               |             |               |                |              |
| 40                                        | 65-69  | Former    |               | 4516 | 42.35 |               |             | 26.43         | 135            | 2.99         |
| Year of Follow-up: 2030, Age Group: 75-79 |        |           |               |      |       |               |             |               |                |              |
| 40                                        | 70-74  | Never Any |               | 4729 | 43.32 |               |             |               |                |              |
| 40                                        | 70-74  | CC        |               | 3    | 0.03  | 0             | 0.00        |               |                |              |
| 40                                        | 70-74  | Ecig      |               | 879  | 8.05  |               |             |               |                |              |
| 40                                        | 70-74  | Dual      |               | 0    | 0.00  |               |             |               |                |              |
| 40                                        | 70-74  | Former    |               | 5305 | 48.60 |               |             | 29.02         | 95             | 1.79         |
| Year of Follow-up: 2030, Age Group: 75-79 |        |           |               |      |       |               |             |               |                |              |
| 40                                        | 75-79  | Never Any |               | 3941 | 39.85 |               |             |               |                |              |
| 40                                        | 75-79  | CC        |               | 3    | 0.03  | 0             | 0.00        |               |                |              |

**Results for PHIM for Run 3 (Sensitivity\_Analysis\_4.RTF)**

|                                              |           |               |       |       |               |             |               |                |              |
|----------------------------------------------|-----------|---------------|-------|-------|---------------|-------------|---------------|----------------|--------------|
| 40                                           | 75-79     | Ecig          | 615   | 6.22  |               |             |               |                |              |
| 40                                           | 75-79     | Dual          | 0     | 0.00  |               |             |               |                |              |
| 40                                           | 75-79     | Former        | 5330  | 53.90 |               |             | 33.51         | 83             | 1.56         |
| Year of Follow-up: 2035, Age Group: All Ages |           |               |       |       |               |             |               |                |              |
| Period                                       | Age Group | Smoking Group | N     | %     | Ever Quit (N) | Ever Quit % | Mean Yrs Quit | Short Term (n) | Short Term % |
| 45                                           | All Ages  | Never Any     | 25372 | 51.48 |               |             |               |                |              |
| 45                                           | All Ages  | CC            | 6     | 0.01  | 0             | 0.00        |               |                |              |
| 45                                           | All Ages  | Ecig          | 4288  | 8.70  |               |             |               |                |              |
| 45                                           | All Ages  | Dual          | 0     | 0.00  |               |             |               |                |              |
| 45                                           | All Ages  | Former        | 19615 | 39.80 |               |             | 29.01         | 505            | 2.57         |
| Year of Follow-up: 2035, Age Group: 18-19    |           |               |       |       |               |             |               |                |              |
| Period                                       | Age Group | Smoking Group | N     | %     | Ever Quit (N) | Ever Quit % | Mean Yrs Quit | Short Term (n) | Short Term % |
| 45                                           | 18-19     | Never Any     | 0     | .     |               |             |               |                |              |
| 45                                           | 18-19     | CC            | 0     | .     | 0             | .           |               |                |              |
| 45                                           | 18-19     | Ecig          | 0     | .     |               |             |               |                |              |
| 45                                           | 18-19     | Dual          | 0     | .     |               |             |               |                |              |
| 45                                           | 18-19     | Former        | 0     | .     |               |             | .             | 0              | .            |
| Year of Follow-up: 2035, Age Group: 20-24    |           |               |       |       |               |             |               |                |              |
| Period                                       | Age Group | Smoking Group | N     | %     | Ever Quit (N) | Ever Quit % | Mean Yrs Quit | Short Term (n) | Short Term % |
| 45                                           | 20-24     | Never Any     | 0     | .     |               |             |               |                |              |
| 45                                           | 20-24     | CC            | 0     | .     | 0             | .           |               |                |              |
| 45                                           | 20-24     | Ecig          | 0     | .     |               |             |               |                |              |
| 45                                           | 20-24     | Dual          | 0     | .     |               |             |               |                |              |
| 45                                           | 20-24     | Former        | 0     | .     |               |             | .             | 0              | .            |
| Year of Follow-up: 2035, Age Group: 25-29    |           |               |       |       |               |             |               |                |              |
| Period                                       | Age Group | Smoking Group | N     | %     | Ever Quit (N) | Ever Quit % | Mean Yrs Quit | Short Term (n) | Short Term % |
| 45                                           | 25-29     | Never Any     | 0     | .     |               |             |               |                |              |
| 45                                           | 25-29     | CC            | 0     | .     | 0             | .           |               |                |              |
| 45                                           | 25-29     | Ecig          | 0     | .     |               |             |               |                |              |
| 45                                           | 25-29     | Dual          | 0     | .     |               |             |               |                |              |
| 45                                           | 25-29     | Former        | 0     | .     |               |             | .             | 0              | .            |
| Year of Follow-up: 2035, Age Group: 30-34    |           |               |       |       |               |             |               |                |              |
| Period                                       | Age Group | Smoking Group | N     | %     | Ever Quit (N) | Ever Quit % | Mean Yrs Quit | Short Term (n) | Short Term % |
| 45                                           | 30-34     | Never Any     | 0     | .     |               |             |               |                |              |
| 45                                           | 30-34     | CC            | 0     | .     | 0             | .           |               |                |              |
| 45                                           | 30-34     | Ecig          | 0     | .     |               |             |               |                |              |
| 45                                           | 30-34     | Dual          | 0     | .     |               |             |               |                |              |
| 45                                           | 30-34     | Former        | 0     | .     |               |             | .             | 0              | .            |
| Year of Follow-up: 2035, Age Group: 35-39    |           |               |       |       |               |             |               |                |              |
| Period                                       | Age Group | Smoking Group | N     | %     | Ever Quit (N) | Ever Quit % | Mean Yrs Quit | Short Term (n) | Short Term % |
| 45                                           | 35-39     | Never Any     | 0     | .     |               |             |               |                |              |
| 45                                           | 35-39     | CC            | 0     | .     | 0             | .           |               |                |              |
| 45                                           | 35-39     | Ecig          | 0     | .     |               |             |               |                |              |
| 45                                           | 35-39     | Dual          | 0     | .     |               |             |               |                |              |
| 45                                           | 35-39     | Former        | 0     | .     |               |             | .             | 0              | .            |
| Year of Follow-up: 2035, Age Group: 40-44    |           |               |       |       |               |             |               |                |              |
| Period                                       | Age Group | Smoking Group | N     | %     | Ever Quit (N) | Ever Quit % | Mean Yrs Quit | Short Term (n) | Short Term % |
| 45                                           | 40-44     | Never Any     | 0     | .     |               |             |               |                |              |
| 45                                           | 40-44     | CC            | 0     | .     | 0             | .           |               |                |              |
| 45                                           | 40-44     | Ecig          | 0     | .     |               |             |               |                |              |
| 45                                           | 40-44     | Dual          | 0     | .     |               |             |               |                |              |
| 45                                           | 40-44     | Former        | 0     | .     |               |             | .             | 0              | .            |
| Year of Follow-up: 2035, Age Group: 45-49    |           |               |       |       |               |             |               |                |              |
| Period                                       | Age Group | Smoking Group | N     | %     | Ever Quit (N) | Ever Quit % | Mean Yrs Quit | Short Term (n) | Short Term % |
| 45                                           | 45-49     | Never Any     | 0     | .     |               |             |               |                |              |
| 45                                           | 45-49     | CC            | 0     | .     | 0             | .           |               |                |              |
| 45                                           | 45-49     | Ecig          | 0     | .     |               |             |               |                |              |
| 45                                           | 45-49     | Dual          | 0     | .     |               |             |               |                |              |
| 45                                           | 45-49     | Former        | 0     | .     |               |             | .             | 0              | .            |
| Year of Follow-up: 2035, Age Group: 50-54    |           |               |       |       |               |             |               |                |              |
| Period                                       | Age Group | Smoking Group | N     | %     | Ever Quit (N) | Ever Quit % | Mean Yrs Quit | Short Term (n) | Short Term % |
| 45                                           | 50-54     | Never Any     | 0     | .     |               |             |               |                |              |
| 45                                           | 50-54     | CC            | 0     | .     | 0             | .           |               |                |              |
| 45                                           | 50-54     | Ecig          | 0     | .     |               |             |               |                |              |
| 45                                           | 50-54     | Dual          | 0     | .     |               |             |               |                |              |
| 45                                           | 50-54     | Former        | 0     | .     |               |             | .             | 0              | .            |
| Year of Follow-up: 2035, Age Group: 55-59    |           |               |       |       |               |             |               |                |              |
| Period                                       | Age Group | Smoking Group | N     | %     | Ever Quit (N) | Ever Quit % | Mean Yrs Quit | Short Term (n) | Short Term % |

### Results for PHIM for Run 3 (Sensitivity\_Analysis\_4.RTF)

|                                              |           |               |       |       |               |             |               |                |              |
|----------------------------------------------|-----------|---------------|-------|-------|---------------|-------------|---------------|----------------|--------------|
| 45                                           | 55-59     | Never Any     | 5034  | 56.91 |               |             |               |                |              |
| 45                                           | 55-59     | CC            | 2     | 0.02  | 0             | 0.00        |               |                |              |
| 45                                           | 55-59     | Ecig          | 1015  | 11.48 |               |             |               |                |              |
| 45                                           | 55-59     | Dual          | 0     | 0.00  |               |             |               |                |              |
| 45                                           | 55-59     | Former        | 2794  | 31.59 |               |             | 25.77         | 91             | 3.26         |
| Year of Follow-up: 2035, Age Group: 60-64    |           |               |       |       |               |             |               |                |              |
| Period                                       | Age Group | Smoking Group | N     | %     | Ever Quit (N) | Ever Quit % | Mean Yrs Quit | Short Term (n) | Short Term % |
| 45                                           | 60-64     | Never Any     | 5316  | 58.81 |               |             |               |                |              |
| 45                                           | 60-64     | CC            | 0     | 0.00  | 0             | 0.00        |               |                |              |
| 45                                           | 60-64     | Ecig          | 925   | 10.23 |               |             |               |                |              |
| 45                                           | 60-64     | Dual          | 0     | 0.00  |               |             |               |                |              |
| 45                                           | 60-64     | Former        | 2799  | 30.96 |               |             | 26.07         | 113            | 4.04         |
| Year of Follow-up: 2035, Age Group: 65-69    |           |               |       |       |               |             |               |                |              |
| Period                                       | Age Group | Smoking Group | N     | %     | Ever Quit (N) | Ever Quit % | Mean Yrs Quit | Short Term (n) | Short Term % |
| 45                                           | 65-69     | Never Any     | 5260  | 53.59 |               |             |               |                |              |
| 45                                           | 65-69     | CC            | 0     | 0.00  | 0             | 0.00        |               |                |              |
| 45                                           | 65-69     | Ecig          | 868   | 8.84  |               |             |               |                |              |
| 45                                           | 65-69     | Dual          | 0     | 0.00  |               |             |               |                |              |
| 45                                           | 65-69     | Former        | 3688  | 37.57 |               |             | 27.28         | 102            | 2.77         |
| Year of Follow-up: 2035, Age Group: 70-74    |           |               |       |       |               |             |               |                |              |
| Period                                       | Age Group | Smoking Group | N     | %     | Ever Quit (N) | Ever Quit % | Mean Yrs Quit | Short Term (n) | Short Term % |
| 45                                           | 70-74     | Never Any     | 5033  | 47.20 |               |             |               |                |              |
| 45                                           | 70-74     | CC            | 1     | 0.01  | 0             | 0.00        |               |                |              |
| 45                                           | 70-74     | Ecig          | 846   | 7.93  |               |             |               |                |              |
| 45                                           | 70-74     | Dual          | 0     | 0.00  |               |             |               |                |              |
| 45                                           | 70-74     | Former        | 4784  | 44.86 |               |             | 29.79         | 100            | 2.09         |
| Year of Follow-up: 2035, Age Group: 75-79    |           |               |       |       |               |             |               |                |              |
| Period                                       | Age Group | Smoking Group | N     | %     | Ever Quit (N) | Ever Quit % | Mean Yrs Quit | Short Term (n) | Short Term % |
| 45                                           | 75-79     | Never Any     | 4729  | 43.32 |               |             |               |                |              |
| 45                                           | 75-79     | CC            | 3     | 0.03  | 0             | 0.00        |               |                |              |
| 45                                           | 75-79     | Ecig          | 634   | 5.81  |               |             |               |                |              |
| 45                                           | 75-79     | Dual          | 0     | 0.00  |               |             |               |                |              |
| 45                                           | 75-79     | Former        | 5550  | 50.84 |               |             | 32.61         | 99             | 1.78         |
| Year of Follow-up: 2040, Age Group: All Ages |           |               |       |       |               |             |               |                |              |
| Period                                       | Age Group | Smoking Group | N     | %     | Ever Quit (N) | Ever Quit % | Mean Yrs Quit | Short Term (n) | Short Term % |
| 50                                           | All Ages  | Never Any     | 20643 | 53.81 |               |             |               |                |              |
| 50                                           | All Ages  | CC            | 1     | 0.00  | 0             | 0.00        |               |                |              |
| 50                                           | All Ages  | Ecig          | 2675  | 6.97  |               |             |               |                |              |
| 50                                           | All Ages  | Dual          | 0     | 0.00  |               |             |               |                |              |
| 50                                           | All Ages  | Former        | 15046 | 39.22 |               |             | 30.60         | 376            | 2.50         |
| Year of Follow-up: 2040, Age Group: 18-19    |           |               |       |       |               |             |               |                |              |
| Period                                       | Age Group | Smoking Group | N     | %     | Ever Quit (N) | Ever Quit % | Mean Yrs Quit | Short Term (n) | Short Term % |
| 50                                           | 18-19     | Never Any     | 0     | .     |               |             |               |                |              |
| 50                                           | 18-19     | CC            | 0     | .     | 0             | .           |               |                |              |
| 50                                           | 18-19     | Ecig          | 0     | .     |               |             |               |                |              |
| 50                                           | 18-19     | Dual          | 0     | .     |               |             |               |                |              |
| 50                                           | 18-19     | Former        | 0     | .     |               |             | .             | 0              | .            |
| Year of Follow-up: 2040, Age Group: 20-24    |           |               |       |       |               |             |               |                |              |
| Period                                       | Age Group | Smoking Group | N     | %     | Ever Quit (N) | Ever Quit % | Mean Yrs Quit | Short Term (n) | Short Term % |
| 50                                           | 20-24     | Never Any     | 0     | .     |               |             |               |                |              |
| 50                                           | 20-24     | CC            | 0     | .     | 0             | .           |               |                |              |
| 50                                           | 20-24     | Ecig          | 0     | .     |               |             |               |                |              |
| 50                                           | 20-24     | Dual          | 0     | .     |               |             |               |                |              |
| 50                                           | 20-24     | Former        | 0     | .     |               |             | .             | 0              | .            |
| Year of Follow-up: 2040, Age Group: 25-29    |           |               |       |       |               |             |               |                |              |
| Period                                       | Age Group | Smoking Group | N     | %     | Ever Quit (N) | Ever Quit % | Mean Yrs Quit | Short Term (n) | Short Term % |
| 50                                           | 25-29     | Never Any     | 0     | .     |               |             |               |                |              |
| 50                                           | 25-29     | CC            | 0     | .     | 0             | .           |               |                |              |
| 50                                           | 25-29     | Ecig          | 0     | .     |               |             |               |                |              |
| 50                                           | 25-29     | Dual          | 0     | .     |               |             |               |                |              |
| 50                                           | 25-29     | Former        | 0     | .     |               |             | .             | 0              | .            |
| Year of Follow-up: 2040, Age Group: 30-34    |           |               |       |       |               |             |               |                |              |
| Period                                       | Age Group | Smoking Group | N     | %     | Ever Quit (N) | Ever Quit % | Mean Yrs Quit | Short Term (n) | Short Term % |
| 50                                           | 30-34     | Never Any     | 0     | .     |               |             |               |                |              |
| 50                                           | 30-34     | CC            | 0     | .     | 0             | .           |               |                |              |
| 50                                           | 30-34     | Ecig          | 0     | .     |               |             |               |                |              |
| 50                                           | 30-34     | Dual          | 0     | .     |               |             |               |                |              |
| 50                                           | 30-34     | Former        | 0     | .     |               |             | .             | 0              | .            |
| Year of Follow-up: 2040, Age Group: 35-39    |           |               |       |       |               |             |               |                |              |

### Results for PHIM for Run 3 (Sensitivity\_Analysis\_4.RTF)

| Period                                    | Age Group | Smoking Group | N    | %     | Ever Quit (N) | Ever Quit % | Mean Yrs Quit | Short Term (n) | Short Term % |
|-------------------------------------------|-----------|---------------|------|-------|---------------|-------------|---------------|----------------|--------------|
| 50                                        | 35-39     | Never Any     | 0    | .     |               |             |               |                |              |
| 50                                        | 35-39     | CC            | 0    | .     | 0             | .           |               |                |              |
| 50                                        | 35-39     | Ecig          | 0    | .     |               |             |               |                |              |
| 50                                        | 35-39     | Dual          | 0    | .     |               |             |               |                |              |
| 50                                        | 35-39     | Former        | 0    | .     |               |             | .             | 0              | .            |
| Year of Follow-up: 2040, Age Group: 40-44 |           |               |      |       |               |             |               |                |              |
| Period                                    | Age Group | Smoking Group | N    | %     | Ever Quit (N) | Ever Quit % | Mean Yrs Quit | Short Term (n) | Short Term % |
| 50                                        | 40-44     | Never Any     | 0    | .     |               |             |               |                |              |
| 50                                        | 40-44     | CC            | 0    | .     | 0             | .           |               |                |              |
| 50                                        | 40-44     | Ecig          | 0    | .     |               |             |               |                |              |
| 50                                        | 40-44     | Dual          | 0    | .     |               |             |               |                |              |
| 50                                        | 40-44     | Former        | 0    | .     |               |             | .             | 0              | .            |
| Year of Follow-up: 2040, Age Group: 45-49 |           |               |      |       |               |             |               |                |              |
| Period                                    | Age Group | Smoking Group | N    | %     | Ever Quit (N) | Ever Quit % | Mean Yrs Quit | Short Term (n) | Short Term % |
| 50                                        | 45-49     | Never Any     | 0    | .     |               |             |               |                |              |
| 50                                        | 45-49     | CC            | 0    | .     | 0             | .           |               |                |              |
| 50                                        | 45-49     | Ecig          | 0    | .     |               |             |               |                |              |
| 50                                        | 45-49     | Dual          | 0    | .     |               |             |               |                |              |
| 50                                        | 45-49     | Former        | 0    | .     |               |             | .             | 0              | .            |
| Year of Follow-up: 2040, Age Group: 50-54 |           |               |      |       |               |             |               |                |              |
| Period                                    | Age Group | Smoking Group | N    | %     | Ever Quit (N) | Ever Quit % | Mean Yrs Quit | Short Term (n) | Short Term % |
| 50                                        | 50-54     | Never Any     | 0    | .     |               |             |               |                |              |
| 50                                        | 50-54     | CC            | 0    | .     | 0             | .           |               |                |              |
| 50                                        | 50-54     | Ecig          | 0    | .     |               |             |               |                |              |
| 50                                        | 50-54     | Dual          | 0    | .     |               |             |               |                |              |
| 50                                        | 50-54     | Former        | 0    | .     |               |             | .             | 0              | .            |
| Year of Follow-up: 2040, Age Group: 55-59 |           |               |      |       |               |             |               |                |              |
| Period                                    | Age Group | Smoking Group | N    | %     | Ever Quit (N) | Ever Quit % | Mean Yrs Quit | Short Term (n) | Short Term % |
| 50                                        | 55-59     | Never Any     | 0    | .     |               |             |               |                |              |
| 50                                        | 55-59     | CC            | 0    | .     | 0             | .           |               |                |              |
| 50                                        | 55-59     | Ecig          | 0    | .     |               |             |               |                |              |
| 50                                        | 55-59     | Dual          | 0    | .     |               |             |               |                |              |
| 50                                        | 55-59     | Former        | 0    | .     |               |             | .             | 0              | .            |
| Year of Follow-up: 2040, Age Group: 60-64 |           |               |      |       |               |             |               |                |              |
| Period                                    | Age Group | Smoking Group | N    | %     | Ever Quit (N) | Ever Quit % | Mean Yrs Quit | Short Term (n) | Short Term % |
| 50                                        | 60-64     | Never Any     | 5034 | 56.91 |               |             |               |                |              |
| 50                                        | 60-64     | CC            | 0    | 0.00  | 0             | 0.00        |               |                |              |
| 50                                        | 60-64     | Ecig          | 754  | 8.52  |               |             |               |                |              |
| 50                                        | 60-64     | Dual          | 0    | 0.00  |               |             |               |                |              |
| 50                                        | 60-64     | Former        | 3057 | 34.56 |               |             | 28.29         | 116            | 3.79         |
| Year of Follow-up: 2040, Age Group: 65-69 |           |               |      |       |               |             |               |                |              |
| Period                                    | Age Group | Smoking Group | N    | %     | Ever Quit (N) | Ever Quit % | Mean Yrs Quit | Short Term (n) | Short Term % |
| 50                                        | 65-69     | Never Any     | 5316 | 58.81 |               |             |               |                |              |
| 50                                        | 65-69     | CC            | 0    | 0.00  | 0             | 0.00        |               |                |              |
| 50                                        | 65-69     | Ecig          | 646  | 7.15  |               |             |               |                |              |
| 50                                        | 65-69     | Dual          | 0    | 0.00  |               |             |               |                |              |
| 50                                        | 65-69     | Former        | 3078 | 34.05 |               |             | 28.45         | 106            | 3.44         |
| Year of Follow-up: 2040, Age Group: 70-74 |           |               |      |       |               |             |               |                |              |
| Period                                    | Age Group | Smoking Group | N    | %     | Ever Quit (N) | Ever Quit % | Mean Yrs Quit | Short Term (n) | Short Term % |
| 50                                        | 70-74     | Never Any     | 5260 | 53.59 |               |             |               |                |              |
| 50                                        | 70-74     | CC            | 0    | 0.00  | 0             | 0.00        |               |                |              |
| 50                                        | 70-74     | Ecig          | 645  | 6.57  |               |             |               |                |              |
| 50                                        | 70-74     | Dual          | 0    | 0.00  |               |             |               |                |              |
| 50                                        | 70-74     | Former        | 3911 | 39.84 |               |             | 30.57         | 75             | 1.92         |
| Year of Follow-up: 2040, Age Group: 75-79 |           |               |      |       |               |             |               |                |              |
| Period                                    | Age Group | Smoking Group | N    | %     | Ever Quit (N) | Ever Quit % | Mean Yrs Quit | Short Term (n) | Short Term % |
| 50                                        | 75-79     | Never Any     | 5033 | 47.20 |               |             |               |                |              |
| 50                                        | 75-79     | CC            | 1    | 0.01  | 0             | 0.00        |               |                |              |
| 50                                        | 75-79     | Ecig          | 630  | 5.91  |               |             |               |                |              |
| 50                                        | 75-79     | Dual          | 0    | 0.00  |               |             |               |                |              |
| 50                                        | 75-79     | Former        | 5000 | 46.89 |               |             | 33.38         | 79             | 1.58         |

## Results for PHIM for Run 3 (Sensitivity\_Analysis\_4.RTF)

\*\*\*\*\*

### Main Results for E-Component for Run: 3, Simulation: 1, COD: Four Diseases Combined

| Variable Parameter          | Value                                  |
|-----------------------------|----------------------------------------|
| 1. Country                  | US (United States)                     |
| 2. Sex                      | M (Males)                              |
| 3. Year of start of process | 1990                                   |
| 4. Cause of Death           | Four Diseases Combined                 |
| 5. Effective Dose NULL      | CC:1                                   |
| 6. Effective Dose Ecig      | CC:1 Ecig:0.05 Dual:0.525              |
| Note:                       | Death rates are per million population |

#### Results for Age Groups Combined and Years combined, Population unadjusted for deaths in Ecig scenario,

| Age Group:All | NULL     | Ecig        | %Drop       |         |        |        | NULL    | Ecig    | Drop    |         |
|---------------|----------|-------------|-------------|---------|--------|--------|---------|---------|---------|---------|
| Year          | Number   | Attrib      | Attrib      | Drop    | %Drop  | Attrib | Death   | Attrib  | Attrib  | Drop    |
|               | Deaths   | Deaths      | Deaths      | Deaths  | Deaths | Deaths | Rate    | Rates   | Rates   | Rates   |
| All Comb      | 13148871 | 4509390.583 | 2982237.046 | 1527154 | 11.614 | 33.866 | 3806.31 | 1305.37 | 863.293 | 442.078 |

#### Results for Age Groups Combined, Population unadjusted for deaths in Ecig scenario,

| Age Group:All | NULL   | Ecig       | %Drop      |          |        |        | NULL    | Ecig    | Drop    |         |
|---------------|--------|------------|------------|----------|--------|--------|---------|---------|---------|---------|
| Year          | Number | Attrib     | Attrib     | Drop     | %Drop  | Attrib | Death   | Attrib  | Attrib  | Drop    |
|               | Deaths | Deaths     | Deaths     | Deaths   | Deaths | Deaths | Rate    | Rates   | Rates   | Rates   |
| 1990          | 317161 | 125773.065 | 125773.065 | 0.000    | 0.000  | 0.000  | 5027.71 | 1993.78 | 1993.78 | 0.000   |
| 1991          | 313217 | 123999.442 | 123575.252 | 424.190  | 0.135  | 0.342  | 4883.81 | 1933.45 | 1926.84 | 6.614   |
| 1992          | 308577 | 122014.015 | 120877.254 | 1136.761 | 0.368  | 0.932  | 4729.73 | 1870.18 | 1852.75 | 17.424  |
| 1993          | 311713 | 122810.618 | 120675.247 | 2135.371 | 0.685  | 1.739  | 4692.62 | 1848.83 | 1816.68 | 32.146  |
| 1994          | 305700 | 119925.592 | 116642.152 | 3283.440 | 1.074  | 2.738  | 4516.19 | 1771.69 | 1723.19 | 48.507  |
| 1995          | 303225 | 117896.496 | 113270.146 | 4626.350 | 1.526  | 3.924  | 4393.80 | 1708.35 | 1641.31 | 67.037  |
| 1996          | 299559 | 115698.645 | 109592.702 | 6105.943 | 2.038  | 5.277  | 4273.16 | 1650.42 | 1563.32 | 87.100  |
| 1997          | 294226 | 113359.847 | 105764.050 | 7595.797 | 2.582  | 6.701  | 4128.67 | 1590.70 | 1484.11 | 106.587 |
| 1998          | 289258 | 111444.212 | 102354.274 | 9089.938 | 3.143  | 8.156  | 3992.19 | 1538.10 | 1412.64 | 125.455 |
| 1999          | 311002 | 114877.722 | 102717.074 | 12160.65 | 3.910  | 10.586 | 4224.60 | 1560.48 | 1395.29 | 165.188 |
| 2000          | 303786 | 112379.704 | 98502.351  | 13877.35 | 4.568  | 12.349 | 4066.21 | 1504.22 | 1318.47 | 185.750 |
| 2001          | 296294 | 110024.943 | 94311.708  | 15713.23 | 5.303  | 14.282 | 3914.28 | 1453.52 | 1245.93 | 207.585 |
| 2002          | 291898 | 108289.173 | 90515.802  | 17773.37 | 6.089  | 16.413 | 3813.00 | 1414.56 | 1182.39 | 232.169 |
| 2003          | 285865 | 106539.023 | 86943.746  | 19595.28 | 6.855  | 18.393 | 3695.36 | 1377.22 | 1123.92 | 253.307 |
| 2004          | 274177 | 103037.251 | 82107.149  | 20930.10 | 7.634  | 20.313 | 3506.10 | 1317.61 | 1049.96 | 267.648 |
| 2005          | 272379 | 103044.562 | 80193.119  | 22851.44 | 8.390  | 22.176 | 3442.69 | 1302.41 | 1013.59 | 288.827 |
| 2006          | 264118 | 99672.555  | 75184.103  | 24488.45 | 9.272  | 24.569 | 3307.76 | 1248.28 | 941.590 | 306.688 |
| 2007          | 258419 | 97839.152  | 71974.626  | 25864.53 | 10.009 | 26.436 | 3203.20 | 1212.75 | 892.152 | 320.600 |
| 2008          | 259461 | 98075.852  | 70469.037  | 27606.81 | 10.640 | 28.148 | 3180.09 | 1202.07 | 863.707 | 338.364 |
| 2009          | 253907 | 95617.338  | 66795.219  | 28822.12 | 11.351 | 30.143 | 3075.31 | 1158.11 | 809.021 | 349.092 |
| 2010          | 251878 | 94607.988  | 64419.511  | 30188.48 | 11.985 | 31.909 | 3013.72 | 1131.98 | 770.779 | 361.205 |
| 2011          | 251779 | 93633.119  | 61774.536  | 31858.58 | 12.653 | 34.025 | 2982.76 | 1109.25 | 731.828 | 377.421 |
| 2012          | 252643 | 92775.175  | 59279.911  | 33495.26 | 13.258 | 36.104 | 2960.61 | 1087.19 | 694.674 | 392.516 |
| 2013          | 256175 | 92345.780  | 57173.532  | 35172.25 | 13.730 | 38.088 | 2967.76 | 1069.82 | 662.349 | 407.467 |
| 2014          | 257393 | 91379.215  | 54802.985  | 36576.23 | 14.210 | 40.027 | 2947.05 | 1046.26 | 627.473 | 418.784 |
| 2015          | 259782 | 90750.242  | 52911.745  | 37838.50 | 14.565 | 41.695 | 3346.10 | 1168.90 | 681.526 | 487.376 |
| 2016          | 261453 | 88811.996  | 49670.598  | 39141.40 | 14.971 | 44.072 | 3336.15 | 1133.24 | 633.799 | 499.446 |
| 2017          | 263685 | 87325.126  | 47033.853  | 40291.27 | 15.280 | 46.139 | 3333.85 | 1104.08 | 594.664 | 509.415 |
| 2018          | 258714 | 87612.144  | 46275.681  | 41336.46 | 15.978 | 47.181 | 3240.73 | 1097.46 | 579.663 | 517.793 |
| 2019          | 261438 | 87797.760  | 44941.576  | 42856.18 | 16.392 | 48.812 | 3242.99 | 1089.08 | 557.475 | 531.607 |
| 2020          | 262288 | 87221.042  | 43489.803  | 43731.24 | 16.673 | 50.138 | 3715.29 | 1235.48 | 616.030 | 619.449 |
| 2021          | 255079 | 82001.292  | 38713.758  | 43287.53 | 16.970 | 52.789 | 3587.82 | 1153.39 | 544.528 | 608.861 |
| 2022          | 257097 | 81915.977  | 37232.708  | 44683.27 | 17.380 | 54.548 | 3588.53 | 1143.37 | 519.690 | 623.685 |
| 2023          | 259080 | 81810.810  | 35788.053  | 46022.76 | 17.764 | 56.255 | 3586.88 | 1132.64 | 495.474 | 637.171 |
| 2024          | 260719 | 81528.303  | 34353.720  | 47174.58 | 18.094 | 57.863 | 3579.65 | 1119.38 | 471.674 | 647.704 |
| 2025          | 257308 | 79599.213  | 32691.036  | 46908.18 | 18.230 | 58.930 | 4112.08 | 1272.09 | 522.441 | 749.647 |
| 2026          | 251528 | 75082.462  | 29027.276  | 46055.19 | 18.310 | 61.339 | 4003.24 | 1194.99 | 461.989 | 733.000 |
| 2027          | 250988 | 74444.425  | 27531.205  | 46913.22 | 18.691 | 63.018 | 3976.53 | 1179.46 | 436.191 | 743.270 |
| 2028          | 250285 | 73699.585  | 25966.018  | 47733.57 | 19.072 | 64.768 | 3945.35 | 1161.76 | 409.314 | 752.446 |
| 2029          | 249525 | 72819.703  | 24454.517  | 48365.19 | 19.383 | 66.418 | 3910.99 | 1141.36 | 383.294 | 758.063 |
| 2030          | 240528 | 69309.277  | 22788.531  | 46520.75 | 19.341 | 67.121 | 4504.36 | 1297.95 | 426.759 | 871.190 |
| 2031          | 235442 | 65433.368  | 20156.174  | 45277.19 | 19.231 | 69.196 | 4397.65 | 1222.18 | 376.482 | 845.699 |
| 2032          | 234017 | 64643.552  | 18917.953  | 45725.60 | 19.539 | 70.735 | 4356.12 | 1203.31 | 352.149 | 851.160 |
| 2033          | 232559 | 63793.514  | 17749.829  | 46043.69 | 19.799 | 72.176 | 4310.93 | 1182.54 | 329.027 | 853.509 |
| 2034          | 230963 | 63032.151  | 16629.991  | 46402.16 | 20.091 | 73.617 | 4260.75 | 1162.80 | 306.786 | 856.015 |
| 2035          | 215822 | 57653.301  | 15158.101  | 42495.20 | 19.690 | 73.708 | 4924.38 | 1315.47 | 345.861 | 969.609 |
| 2036          | 208183 | 52988.733  | 12650.434  | 40338.30 | 19.376 | 76.126 | 4748.94 | 1208.75 | 288.574 | 920.172 |
| 2037          | 205491 | 52026.921  | 11697.424  | 40329.50 | 19.626 | 77.517 | 4682.40 | 1185.50 | 266.541 | 918.961 |
| 2038          | 202834 | 50943.211  | 10762.867  | 40180.34 | 19.809 | 78.873 | 4612.18 | 1158.38 | 244.734 | 913.649 |
| 2039          | 200251 | 50085.991  | 9955.640   | 40130.35 | 20.040 | 80.123 | 4538.65 | 1135.19 | 225.643 | 909.548 |

## Results for PHIM for Run 3 (Sensitivity\_Analysis\_4.RTF)

\*\*\*\*\*

### Main Results for E-Component for Run: 3, Simulation: 1, COD: LUNG CANCER

| Variable Parameter          | Value                                  |
|-----------------------------|----------------------------------------|
| 1. Country                  | US (United States)                     |
| 2. Sex                      | M (Males)                              |
| 3. Year of start of process | 1990                                   |
| 4. Cause of Death           | LUNG CANCER                            |
| 5. Effective Dose NULL      | CC:1                                   |
| 6. Effective Dose Ecig      | CC:1 Ecig:0.05 Dual:0.525              |
| Note:                       | Death rates are per million population |

#### Results for Age Groups Combined and Years combined, Population unadjusted for deaths in Ecig scenario,

| Age Group:All |         | NULL        | Ecig        | %Drop    |        |        | NULL    | Ecig    | Drop    |         |
|---------------|---------|-------------|-------------|----------|--------|--------|---------|---------|---------|---------|
| Year          | Number  | Attrib      | Attrib      | Drop     | %Drop  | Attrib | Death   | Attrib  | Attrib  | Drop    |
|               | Deaths  | Deaths      | Deaths      | Deaths   | Deaths | Deaths | Rate    | Rates   | Rates   | Rates   |
| All Comb      | 3065988 | 2244988.113 | 1721897.045 | 523091.1 | 17.061 | 23.300 | 887.537 | 649.875 | 498.452 | 151.424 |

#### Results for Age Groups Combined, Population unadjusted for deaths in Ecig scenario,

| Age Group:All |        | NULL      | Ecig      | %Drop    |        |        | NULL    | Ecig    | Drop    |         |
|---------------|--------|-----------|-----------|----------|--------|--------|---------|---------|---------|---------|
| Year          | Number | Attrib    | Attrib    | Drop     | %Drop  | Attrib | Death   | Attrib  | Attrib  | Drop    |
|               | Deaths | Deaths    | Deaths    | Deaths   | Deaths | Deaths | Rate    | Rates   | Rates   | Rates   |
| 1990          | 78822  | 63385.736 | 63385.736 | 0.000    | 0.000  | 0.000  | 1249.50 | 1004.81 | 1004.81 | 0.000   |
| 1991          | 78462  | 62918.402 | 62870.284 | 48.118   | 0.061  | 0.076  | 1223.41 | 981.049 | 980.299 | 0.750   |
| 1992          | 77987  | 62366.766 | 62237.572 | 129.194  | 0.166  | 0.207  | 1195.35 | 955.930 | 953.949 | 1.980   |
| 1993          | 78542  | 62652.888 | 62398.513 | 254.375  | 0.324  | 0.406  | 1182.39 | 943.195 | 939.365 | 3.829   |
| 1994          | 77437  | 61565.227 | 61163.819 | 401.408  | 0.518  | 0.652  | 1144.00 | 909.520 | 903.590 | 5.930   |
| 1995          | 76904  | 60851.961 | 60267.830 | 584.131  | 0.760  | 0.960  | 1114.36 | 881.759 | 873.295 | 8.464   |
| 1996          | 76232  | 60122.922 | 59308.511 | 814.411  | 1.068  | 1.355  | 1087.44 | 857.643 | 846.025 | 11.617  |
| 1997          | 75473  | 59237.155 | 58175.071 | 1062.084 | 1.407  | 1.793  | 1059.06 | 831.234 | 816.331 | 14.903  |
| 1998          | 75381  | 58906.696 | 57537.274 | 1369.422 | 1.817  | 2.325  | 1040.37 | 813.001 | 794.100 | 18.900  |
| 1999          | 73159  | 56930.073 | 55258.788 | 1671.285 | 2.284  | 2.936  | 993.781 | 773.329 | 750.627 | 22.702  |
| 2000          | 73784  | 57137.121 | 55072.415 | 2064.706 | 2.798  | 3.614  | 987.608 | 764.787 | 737.151 | 27.636  |
| 2001          | 73294  | 56481.726 | 53973.102 | 2508.624 | 3.423  | 4.441  | 968.273 | 746.169 | 713.028 | 33.141  |
| 2002          | 72442  | 55588.365 | 52613.101 | 2975.264 | 4.107  | 5.352  | 946.293 | 726.138 | 687.273 | 38.865  |
| 2003          | 71942  | 54945.856 | 51453.906 | 3491.950 | 4.854  | 6.355  | 929.989 | 710.281 | 665.141 | 45.140  |
| 2004          | 71301  | 54203.126 | 50141.817 | 4061.309 | 5.696  | 7.493  | 911.778 | 693.135 | 641.200 | 51.935  |
| 2005          | 70964  | 53744.603 | 49094.189 | 4650.414 | 6.553  | 8.653  | 896.937 | 679.296 | 620.518 | 58.778  |
| 2006          | 69658  | 52535.572 | 47266.952 | 5268.619 | 7.564  | 10.029 | 872.383 | 657.945 | 591.962 | 65.983  |
| 2007          | 68565  | 51492.124 | 45612.189 | 5879.935 | 8.576  | 11.419 | 849.888 | 638.264 | 565.380 | 72.884  |
| 2008          | 68226  | 51030.736 | 44409.732 | 6621.004 | 9.705  | 12.975 | 836.215 | 625.460 | 544.310 | 81.151  |
| 2009          | 67509  | 50276.199 | 42913.996 | 7362.203 | 10.906 | 14.644 | 817.667 | 608.943 | 519.773 | 89.171  |
| 2010          | 67196  | 49840.933 | 41735.236 | 8105.697 | 12.063 | 16.263 | 804.000 | 596.347 | 499.362 | 96.985  |
| 2011          | 66506  | 49072.841 | 40148.570 | 8924.271 | 13.419 | 18.186 | 787.880 | 581.354 | 475.630 | 105.724 |
| 2012          | 66155  | 48539.512 | 38736.410 | 9803.102 | 14.818 | 20.196 | 775.240 | 568.812 | 453.934 | 114.878 |
| 2013          | 65333  | 47675.741 | 37090.552 | 10585.19 | 16.202 | 22.202 | 756.876 | 552.318 | 429.690 | 122.628 |
| 2014          | 65033  | 47194.534 | 35792.800 | 11401.73 | 17.532 | 24.159 | 744.602 | 540.359 | 409.814 | 130.545 |
| 2015          | 64145  | 46305.842 | 34194.714 | 12111.13 | 18.881 | 26.155 | 726.215 | 526.439 | 404.442 | 155.996 |
| 2016          | 61618  | 44208.867 | 31683.311 | 12525.56 | 20.328 | 28.333 | 786.248 | 564.107 | 404.280 | 159.827 |
| 2017          | 59897  | 42702.624 | 29694.471 | 13008.15 | 21.718 | 30.462 | 757.297 | 539.903 | 375.437 | 164.466 |
| 2018          | 62468  | 44321.202 | 29703.085 | 14618.12 | 23.401 | 32.982 | 782.490 | 555.181 | 372.070 | 183.111 |
| 2019          | 63045  | 44493.088 | 28800.592 | 15692.50 | 24.891 | 35.270 | 782.035 | 551.912 | 357.255 | 194.657 |
| 2020          | 63466  | 44529.551 | 27836.422 | 16693.13 | 26.302 | 37.488 | 898.991 | 630.757 | 394.301 | 236.457 |
| 2021          | 57113  | 39852.556 | 23940.594 | 15911.96 | 27.860 | 39.927 | 803.323 | 560.546 | 336.736 | 223.810 |
| 2022          | 57440  | 39853.685 | 22944.617 | 16909.07 | 29.438 | 42.428 | 801.745 | 556.274 | 320.259 | 236.015 |
| 2023          | 57738  | 39847.050 | 21955.946 | 17891.10 | 30.987 | 44.899 | 799.366 | 551.670 | 303.973 | 247.697 |
| 2024          | 57942  | 39726.010 | 20959.757 | 18766.25 | 32.388 | 47.239 | 795.539 | 545.435 | 287.776 | 257.659 |
| 2025          | 57521  | 39207.348 | 19855.609 | 19351.74 | 33.643 | 49.357 | 919.257 | 626.579 | 317.316 | 309.263 |
| 2026          | 51428  | 34803.960 | 16807.960 | 17996.00 | 34.993 | 51.707 | 818.510 | 553.929 | 267.510 | 286.419 |
| 2027          | 51172  | 34484.595 | 15821.186 | 18663.41 | 36.472 | 54.121 | 810.740 | 546.357 | 250.663 | 295.694 |
| 2028          | 50870  | 34100.638 | 14807.514 | 19293.12 | 37.926 | 56.577 | 801.884 | 537.544 | 233.417 | 304.126 |
| 2029          | 50540  | 33669.838 | 13842.096 | 19827.74 | 39.232 | 58.889 | 792.146 | 527.732 | 216.957 | 310.775 |
| 2030          | 49109  | 32557.688 | 12812.653 | 19745.04 | 40.206 | 60.646 | 919.662 | 609.705 | 239.942 | 369.764 |
| 2031          | 43585  | 28646.393 | 10682.036 | 17964.36 | 41.217 | 62.711 | 814.096 | 535.065 | 199.522 | 335.543 |
| 2032          | 43163  | 28227.160 | 9934.624  | 18292.54 | 42.380 | 64.805 | 803.454 | 525.435 | 184.928 | 340.507 |
| 2033          | 42725  | 27786.623 | 9234.991  | 18551.63 | 43.421 | 66.765 | 791.996 | 515.079 | 171.188 | 343.890 |
| 2034          | 42256  | 27348.299 | 8577.789  | 18770.51 | 44.421 | 68.635 | 779.523 | 504.514 | 158.241 | 346.273 |
| 2035          | 39748  | 25570.077 | 7753.858  | 17816.22 | 44.823 | 69.676 | 906.933 | 583.430 | 176.919 | 406.511 |
| 2036          | 34030  | 21717.319 | 6061.981  | 15655.34 | 46.005 | 72.087 | 776.269 | 495.402 | 138.282 | 357.120 |
| 2037          | 33454  | 21256.024 | 5564.747  | 15691.28 | 46.904 | 73.820 | 762.289 | 484.347 | 126.800 | 357.547 |
| 2038          | 32883  | 20747.175 | 5086.991  | 15660.18 | 47.624 | 75.481 | 747.720 | 471.764 | 115.672 | 356.092 |
| 2039          | 32325  | 20327.688 | 4681.135  | 15646.55 | 48.404 | 76.972 | 732.644 | 460.724 | 106.097 | 354.627 |

## Results for PHIM for Run 3 (Sensitivity\_Analysis\_4.RTF)

\*\*\*\*\*

### Main Results for E-Component for Run: 3, Simulation: 1, COD: IHD

| Variable Parameter          | Value                                  |
|-----------------------------|----------------------------------------|
| 1. Country                  | US (United States)                     |
| 2. Sex                      | M (Males)                              |
| 3. Year of start of process | 1990                                   |
| 4. Cause of Death           | IHD                                    |
| 5. Effective Dose NULL      | CC:1                                   |
| 6. Effective Dose Ecig      | CC:1 Ecig:0.05 Dual:0.525              |
| Note:                       | Death rates are per million population |

#### Results for Age Groups Combined and Years combined, Population unadjusted for deaths in Ecig scenario,

| Age Group:All |         | NULL        | Ecig       | %Drop    |        | Death  |         | NULL    | Ecig    | Drop    |
|---------------|---------|-------------|------------|----------|--------|--------|---------|---------|---------|---------|
| Year          | Number  | Attrib      | Attrib     | Drop     | %Drop  | Attrib | Rate    | Attrib  | Attrib  | Rates   |
|               | Deaths  | Deaths      | Deaths     | Deaths   | Deaths | Deaths |         | Rates   | Rates   | Rates   |
| All Comb      | 6360041 | 1098877.421 | 514821.163 | 584056.3 | 9.183  | 53.150 | 1841.09 | 318.101 | 149.030 | 169.072 |

#### Results for Age Groups Combined, Population unadjusted for deaths in Ecig scenario,

| Age Group:All |        | NULL      | Ecig      | %Drop    |        | Death  |         | NULL    | Ecig    | Drop    |
|---------------|--------|-----------|-----------|----------|--------|--------|---------|---------|---------|---------|
| Year          | Number | Attrib    | Attrib    | Drop     | %Drop  | Attrib | Rate    | Attrib  | Attrib  | Rates   |
|               | Deaths | Deaths    | Deaths    | Deaths   | Deaths | Deaths |         | Rates   | Rates   | Rates   |
| 1990          | 171484 | 38511.725 | 38511.725 | 0.000    | 0.000  | 0.000  | 2718.40 | 610.497 | 610.497 | 0.000   |
| 1991          | 168044 | 37309.838 | 36996.011 | 313.827  | 0.187  | 0.841  | 2620.21 | 581.750 | 576.857 | 4.893   |
| 1992          | 164548 | 36137.488 | 35292.953 | 844.535  | 0.513  | 2.337  | 2522.12 | 553.899 | 540.954 | 12.945  |
| 1993          | 164362 | 35599.588 | 34035.898 | 1563.689 | 0.951  | 4.392  | 2474.35 | 535.926 | 512.386 | 23.540  |
| 1994          | 159866 | 34336.757 | 31950.155 | 2386.603 | 1.493  | 6.951  | 2361.75 | 507.267 | 472.009 | 35.258  |
| 1995          | 158083 | 33455.759 | 30118.998 | 3336.761 | 2.111  | 9.974  | 2290.66 | 484.782 | 436.431 | 48.350  |
| 1996          | 154875 | 32193.824 | 27848.683 | 4345.141 | 2.806  | 13.497 | 2209.26 | 459.239 | 397.257 | 61.983  |
| 1997          | 149970 | 30665.509 | 25343.003 | 5322.507 | 3.549  | 17.357 | 2104.43 | 430.308 | 355.621 | 74.687  |
| 1998          | 145407 | 29188.430 | 22950.732 | 6237.699 | 4.290  | 21.370 | 2006.83 | 402.844 | 316.754 | 86.090  |
| 1999          | 165952 | 33375.386 | 24695.876 | 8679.509 | 5.230  | 26.006 | 2254.27 | 453.366 | 335.465 | 117.901 |
| 2000          | 160260 | 32024.754 | 22305.281 | 9719.474 | 6.065  | 30.350 | 2145.10 | 428.655 | 298.559 | 130.096 |
| 2001          | 154444 | 30682.393 | 19883.005 | 10799.39 | 6.992  | 35.197 | 2040.33 | 405.339 | 262.671 | 142.669 |
| 2002          | 151887 | 30218.370 | 18153.152 | 12065.22 | 7.944  | 39.927 | 1984.06 | 394.736 | 237.130 | 157.605 |
| 2003          | 146733 | 29175.202 | 16176.213 | 12998.99 | 8.859  | 44.555 | 1896.81 | 377.146 | 209.109 | 168.037 |
| 2004          | 138381 | 27488.687 | 14005.279 | 13483.41 | 9.744  | 49.051 | 1769.58 | 351.518 | 179.096 | 172.422 |
| 2005          | 135881 | 27017.439 | 12663.438 | 14354.00 | 10.564 | 53.129 | 1717.44 | 341.482 | 160.057 | 181.425 |
| 2006          | 131922 | 26231.435 | 11136.364 | 15095.07 | 11.442 | 57.546 | 1652.16 | 328.517 | 139.470 | 189.048 |
| 2007          | 126502 | 25103.049 | 9695.614  | 15407.44 | 12.180 | 61.377 | 1568.04 | 311.161 | 120.181 | 190.981 |
| 2008          | 125859 | 24621.740 | 8729.944  | 15891.80 | 12.627 | 64.544 | 1542.60 | 301.777 | 106.999 | 194.778 |
| 2009          | 122428 | 23741.177 | 7693.955  | 16047.22 | 13.107 | 67.592 | 1482.84 | 287.552 | 93.189  | 194.363 |
| 2010          | 120537 | 23189.160 | 6886.602  | 16302.56 | 13.525 | 70.302 | 1442.22 | 277.458 | 82.398  | 195.060 |
| 2011          | 120221 | 22786.927 | 6135.192  | 16651.74 | 13.851 | 73.076 | 1424.23 | 269.951 | 72.682  | 197.269 |
| 2012          | 120927 | 22485.295 | 5524.622  | 16960.67 | 14.026 | 75.430 | 1417.09 | 263.495 | 64.740  | 198.754 |
| 2013          | 122648 | 22251.884 | 5010.480  | 17241.40 | 14.058 | 77.483 | 1420.86 | 257.786 | 58.046  | 199.740 |
| 2014          | 123229 | 21894.593 | 4522.691  | 17371.90 | 14.097 | 79.343 | 1410.92 | 250.685 | 51.783  | 198.902 |
| 2015          | 123774 | 21471.109 | 4100.446  | 17370.66 | 14.034 | 80.902 | 1594.26 | 276.557 | 52.815  | 223.741 |
| 2016          | 126218 | 21411.568 | 3723.288  | 17688.28 | 14.014 | 82.611 | 1610.55 | 273.213 | 47.509  | 225.703 |
| 2017          | 128265 | 21169.399 | 3385.114  | 17784.28 | 13.865 | 84.009 | 1621.69 | 267.651 | 42.799  | 224.852 |
| 2018          | 121429 | 19830.576 | 2881.889  | 16948.69 | 13.958 | 85.467 | 1521.05 | 248.404 | 36.099  | 212.304 |
| 2019          | 121832 | 19431.014 | 2620.599  | 16810.42 | 13.798 | 86.513 | 1511.26 | 241.031 | 32.507  | 208.524 |
| 2020          | 120811 | 18532.612 | 2339.781  | 16192.83 | 13.403 | 87.375 | 1711.27 | 262.513 | 33.143  | 229.370 |
| 2021          | 119407 | 18234.128 | 2100.200  | 16133.93 | 13.512 | 88.482 | 1679.51 | 256.472 | 29.540  | 226.932 |
| 2022          | 119438 | 17812.559 | 1901.498  | 15911.06 | 13.322 | 89.325 | 1667.10 | 248.626 | 26.541  | 222.085 |
| 2023          | 119445 | 17361.668 | 1721.905  | 15639.76 | 13.094 | 90.082 | 1653.68 | 240.367 | 23.839  | 216.528 |
| 2024          | 119305 | 16929.676 | 1576.253  | 15353.42 | 12.869 | 90.689 | 1638.05 | 232.443 | 21.642  | 210.801 |
| 2025          | 115685 | 15501.666 | 1379.007  | 14122.66 | 12.208 | 91.104 | 1848.78 | 247.735 | 22.038  | 225.696 |
| 2026          | 115073 | 15523.814 | 1287.359  | 14236.45 | 12.372 | 91.707 | 1831.46 | 247.072 | 20.489  | 226.583 |
| 2027          | 113989 | 15073.070 | 1189.677  | 13883.39 | 12.180 | 92.107 | 1805.98 | 238.810 | 18.849  | 219.962 |
| 2028          | 112855 | 14636.710 | 1094.142  | 13542.57 | 12.000 | 92.525 | 1778.98 | 230.725 | 17.247  | 213.478 |
| 2029          | 111718 | 14180.166 | 1007.800  | 13172.37 | 11.791 | 92.893 | 1751.04 | 222.256 | 15.796  | 206.460 |
| 2030          | 104851 | 12111.772 | 843.808   | 11267.96 | 10.747 | 93.033 | 1963.54 | 226.816 | 15.802  | 211.014 |
| 2031          | 105289 | 12417.367 | 831.382   | 11585.98 | 11.004 | 93.305 | 1966.62 | 231.935 | 15.529  | 216.406 |
| 2032          | 103879 | 12054.064 | 780.657   | 11273.41 | 10.852 | 93.524 | 1933.67 | 224.381 | 14.532  | 209.849 |
| 2033          | 102485 | 11672.389 | 726.619   | 10945.77 | 10.680 | 93.775 | 1899.76 | 216.370 | 13.469  | 202.901 |
| 2034          | 101070 | 11365.762 | 680.162   | 10685.60 | 10.573 | 94.016 | 1864.51 | 209.673 | 12.547  | 197.125 |
| 2035          | 90820  | 8580.360  | 509.087   | 8071.273 | 8.887  | 94.067 | 2072.23 | 195.777 | 11.616  | 184.162 |
| 2036          | 92117  | 8948.841  | 510.297   | 8438.543 | 9.161  | 94.298 | 2101.31 | 204.135 | 11.641  | 192.495 |
| 2037          | 90327  | 8624.570  | 485.143   | 8139.427 | 9.011  | 94.375 | 2058.21 | 196.522 | 11.055  | 185.468 |
| 2038          | 88590  | 8315.017  | 454.753   | 7860.264 | 8.873  | 94.531 | 2014.42 | 189.073 | 10.340  | 178.732 |
| 2039          | 86921  | 8001.132  | 424.433   | 7576.698 | 8.717  | 94.695 | 1970.05 | 181.344 | 9.620   | 171.725 |

## Results for PHIM for Run 3 (Sensitivity\_Analysis\_4.RTF)

\*\*\*\*\*

### Main Results for E-Component for Run: 3, Simulation: 1, COD: STROKE

| Variable Parameter          | Value                                  |
|-----------------------------|----------------------------------------|
| 1. Country                  | US (United States)                     |
| 2. Sex                      | M (Males)                              |
| 3. Year of start of process | 1990                                   |
| 4. Cause of Death           | STROKE                                 |
| 5. Effective Dose NULL      | CC:1                                   |
| 6. Effective Dose Ecig      | CC:1 Ecig:0.05 Dual:0.525              |
| Note:                       | Death rates are per million population |

#### Results for Age Groups Combined and Years combined, Population unadjusted for deaths in Ecig scenario,

| Age Group:All |         | NULL       | Ecig      | %Drop    |        | NULL   | Ecig    | Drop   |        |        |
|---------------|---------|------------|-----------|----------|--------|--------|---------|--------|--------|--------|
| Year          | Number  | Attrib     | Attrib    | Drop     | %Drop  | Attrib | Death   | Attrib | Drop   |        |
|               | Deaths  | Deaths     | Deaths    | Deaths   | Deaths | Deaths | Rate    | Rates  | Rates  |        |
| All Comb      | 1489699 | 149918.462 | 69454.590 | 80463.87 | 5.401  | 53.672 | 431.236 | 43.398 | 20.106 | 23.293 |

#### Results for Age Groups Combined, Population unadjusted for deaths in Ecig scenario,

| Age Group:All |        | NULL     | Ecig     | %Drop    |        | NULL   | Ecig    | Drop   |        |        |
|---------------|--------|----------|----------|----------|--------|--------|---------|--------|--------|--------|
| Year          | Number | Attrib   | Attrib   | Drop     | %Drop  | Attrib | Death   | Attrib | Drop   |        |
|               | Deaths | Deaths   | Deaths   | Deaths   | Deaths | Deaths | Rate    | Rates  | Rates  |        |
| 1990          | 32862  | 4613.166 | 4613.166 | 0.000    | 0.000  | 0.000  | 520.936 | 73.129 | 0.000  |        |
| 1991          | 32619  | 4555.566 | 4515.509 | 40.057   | 0.123  | 0.879  | 508.609 | 71.032 | 70.408 | 0.625  |
| 1992          | 32100  | 4453.572 | 4348.503 | 105.069  | 0.327  | 2.359  | 492.014 | 68.262 | 66.652 | 1.610  |
| 1993          | 32896  | 4462.473 | 4263.943 | 198.530  | 0.604  | 4.449  | 495.226 | 67.179 | 64.191 | 2.989  |
| 1994          | 33323  | 4499.513 | 4186.120 | 313.393  | 0.940  | 6.965  | 492.290 | 66.473 | 61.843 | 4.630  |
| 1995          | 33569  | 4472.774 | 4028.398 | 444.377  | 1.324  | 9.935  | 486.422 | 64.812 | 58.372 | 6.439  |
| 1996          | 33870  | 4406.878 | 3817.660 | 589.218  | 1.740  | 13.370 | 483.150 | 62.863 | 54.458 | 8.405  |
| 1997          | 33516  | 4288.158 | 3551.975 | 736.183  | 2.197  | 17.168 | 470.307 | 60.173 | 49.842 | 10.330 |
| 1998          | 32795  | 4120.148 | 3249.708 | 870.440  | 2.654  | 21.126 | 452.620 | 56.864 | 44.851 | 12.013 |
| 1999          | 33375  | 3982.443 | 2978.264 | 1004.178 | 3.009  | 25.215 | 453.361 | 54.097 | 40.456 | 13.641 |
| 2000          | 33459  | 4021.411 | 2840.977 | 1180.434 | 3.528  | 29.354 | 447.853 | 53.827 | 38.027 | 15.800 |
| 2001          | 32275  | 3848.092 | 2549.042 | 1299.050 | 4.025  | 33.758 | 426.379 | 50.836 | 33.675 | 17.162 |
| 2002          | 31586  | 3783.081 | 2345.461 | 1437.620 | 4.551  | 38.001 | 412.601 | 49.418 | 30.638 | 18.779 |
| 2003          | 30985  | 3754.415 | 2163.278 | 1591.137 | 5.135  | 42.380 | 400.541 | 48.533 | 27.965 | 20.569 |
| 2004          | 29884  | 3666.274 | 1959.163 | 1707.112 | 5.712  | 46.563 | 382.149 | 46.883 | 25.053 | 21.830 |
| 2005          | 28708  | 3589.688 | 1772.195 | 1817.493 | 6.331  | 50.631 | 362.850 | 45.371 | 22.399 | 22.972 |
| 2006          | 28188  | 3596.985 | 1628.141 | 1968.843 | 6.985  | 54.736 | 353.021 | 45.048 | 20.391 | 24.657 |
| 2007          | 28026  | 3560.798 | 1479.816 | 2080.981 | 7.425  | 58.441 | 347.392 | 44.137 | 18.343 | 25.795 |
| 2008          | 27128  | 3417.001 | 1303.661 | 2113.341 | 7.790  | 61.848 | 332.495 | 41.881 | 15.978 | 25.902 |
| 2009          | 27068  | 3394.390 | 1188.233 | 2206.157 | 8.150  | 64.994 | 327.847 | 41.113 | 14.392 | 26.721 |
| 2010          | 26911  | 3340.137 | 1077.096 | 2263.042 | 8.409  | 67.753 | 321.990 | 39.965 | 12.887 | 27.077 |
| 2011          | 26959  | 3285.435 | 972.511  | 2312.923 | 8.579  | 70.399 | 319.377 | 38.922 | 11.521 | 27.401 |
| 2012          | 27057  | 3259.209 | 878.978  | 2380.231 | 8.797  | 73.031 | 317.068 | 38.193 | 10.300 | 27.893 |
| 2013          | 27904  | 3274.703 | 808.644  | 2466.059 | 8.838  | 75.306 | 323.265 | 37.937 | 9.368  | 28.569 |
| 2014          | 28792  | 3298.083 | 743.337  | 2554.746 | 8.873  | 77.462 | 329.657 | 37.762 | 8.511  | 29.251 |
| 2015          | 29560  | 3244.406 | 675.711  | 2568.695 | 8.690  | 79.173 | 380.745 | 41.789 | 8.703  | 33.086 |
| 2016          | 30513  | 3314.836 | 631.762  | 2683.075 | 8.793  | 80.941 | 389.347 | 42.297 | 8.061  | 34.236 |
| 2017          | 31416  | 3333.314 | 582.690  | 2750.624 | 8.755  | 82.519 | 397.202 | 42.144 | 7.367  | 34.777 |
| 2018          | 29348  | 2925.242 | 474.221  | 2451.021 | 8.351  | 83.789 | 367.626 | 36.642 | 5.940  | 30.702 |
| 2019          | 29598  | 2864.628 | 430.014  | 2434.614 | 8.226  | 84.989 | 367.149 | 35.534 | 5.334  | 30.200 |
| 2020          | 29592  | 2730.366 | 381.760  | 2348.606 | 7.937  | 86.018 | 419.174 | 38.675 | 5.408  | 33.268 |
| 2021          | 30097  | 2647.911 | 343.420  | 2304.490 | 7.657  | 87.031 | 423.328 | 37.244 | 4.830  | 32.414 |
| 2022          | 30304  | 2586.165 | 309.948  | 2276.216 | 7.511  | 88.015 | 422.974 | 36.097 | 4.326  | 31.771 |
| 2023          | 30505  | 2517.960 | 280.177  | 2237.783 | 7.336  | 88.873 | 422.337 | 34.860 | 3.879  | 30.981 |
| 2024          | 30661  | 2454.161 | 255.579  | 2198.581 | 7.171  | 89.586 | 420.968 | 33.695 | 3.509  | 30.186 |
| 2025          | 30254  | 2275.364 | 223.553  | 2051.812 | 6.782  | 90.175 | 483.488 | 36.363 | 3.573  | 32.790 |
| 2026          | 30685  | 2183.166 | 201.626  | 1981.540 | 6.458  | 90.764 | 488.380 | 34.747 | 3.209  | 31.538 |
| 2027          | 30561  | 2112.345 | 184.557  | 1927.788 | 6.308  | 91.263 | 484.196 | 33.467 | 2.924  | 30.543 |
| 2028          | 30412  | 2046.677 | 169.117  | 1877.560 | 6.174  | 91.737 | 479.392 | 32.263 | 2.666  | 29.597 |
| 2029          | 30254  | 1977.671 | 154.808  | 1822.864 | 6.025  | 92.172 | 474.195 | 30.997 | 2.426  | 28.571 |
| 2030          | 29330  | 1744.457 | 131.489  | 1612.968 | 5.499  | 92.462 | 549.260 | 32.668 | 2.462  | 30.206 |
| 2031          | 28976  | 1653.738 | 119.636  | 1534.101 | 5.294  | 92.766 | 541.223 | 30.889 | 2.235  | 28.654 |
| 2032          | 28724  | 1603.120 | 110.420  | 1492.701 | 5.197  | 93.112 | 534.690 | 29.841 | 2.055  | 27.786 |
| 2033          | 28464  | 1548.245 | 102.192  | 1446.052 | 5.080  | 93.399 | 527.627 | 28.700 | 1.894  | 26.805 |
| 2034          | 28178  | 1511.985 | 95.610   | 1416.374 | 5.026  | 93.676 | 519.826 | 27.893 | 1.764  | 26.129 |
| 2035          | 26737  | 1239.866 | 76.636   | 1163.230 | 4.351  | 93.819 | 610.065 | 28.290 | 1.749  | 26.541 |
| 2036          | 25591  | 1182.522 | 70.269   | 1112.253 | 4.346  | 94.058 | 583.762 | 26.975 | 1.603  | 25.372 |
| 2037          | 25143  | 1134.483 | 66.321   | 1068.162 | 4.248  | 94.154 | 572.916 | 25.851 | 1.511  | 24.339 |
| 2038          | 24693  | 1093.537 | 61.908   | 1031.628 | 4.178  | 94.339 | 561.491 | 24.866 | 1.408  | 23.458 |
| 2039          | 24247  | 1047.905 | 57.384   | 990.521  | 4.085  | 94.524 | 549.553 | 23.751 | 1.301  | 22.450 |



## Results for PHIM for Run 3 (Sensitivity\_Analysis\_4.RTF)

\*\*\*\*\*

### Main Results for E-Component for Run: 3, Simulation: 1, COD: COPD

| Variable Parameter          | Value                                  |
|-----------------------------|----------------------------------------|
| 1. Country                  | US (United States)                     |
| 2. Sex                      | M (Males)                              |
| 3. Year of start of process | 1990                                   |
| 4. Cause of Death           | COPD                                   |
| 5. Effective Dose NULL      | CC:1                                   |
| 6. Effective Dose Ecig      | CC:1 Ecig:0.05 Dual:0.525              |
| Note:                       | Death rates are per million population |

#### Results for Age Groups Combined and Years combined, Population unadjusted for deaths in Ecig scenario,

| Age Group:All |         | NULL        | Ecig       | %Drop    |        | NULL   | Ecig    | Drop    |         |        |
|---------------|---------|-------------|------------|----------|--------|--------|---------|---------|---------|--------|
| Year          | Number  | Attrib      | Attrib     | Drop     | %Drop  | Attrib | Death   | Attrib  | Drop    |        |
|               | Deaths  | Deaths      | Deaths     | Deaths   | Deaths | Deaths | Rate    | Rates   | Rates   |        |
| All Comb      | 2233143 | 1015606.587 | 676064.248 | 339542.3 | 15.205 | 33.432 | 646.447 | 293.996 | 195.706 | 98.290 |

#### Results for Age Groups Combined, Population unadjusted for deaths in Ecig scenario,

| Age Group:All |        | NULL      | Ecig      | %Drop    |        | NULL   | Ecig    | Drop    |         |
|---------------|--------|-----------|-----------|----------|--------|--------|---------|---------|---------|
| Year          | Number | Attrib    | Attrib    | Drop     | %Drop  | Attrib | Death   | Attrib  | Drop    |
|               | Deaths | Deaths    | Deaths    | Deaths   | Deaths | Deaths | Rate    | Rates   | Rates   |
| 1990          | 33993  | 19262.437 | 19262.437 | 0.000    | 0.000  | 0.000  | 538.865 | 305.353 | 0.000   |
| 1991          | 34092  | 19215.636 | 19193.448 | 22.188   | 0.065  | 0.115  | 531.576 | 299.618 | 0.346   |
| 1992          | 33942  | 19056.189 | 18998.226 | 57.963   | 0.171  | 0.304  | 520.248 | 292.085 | 0.888   |
| 1993          | 35913  | 20095.670 | 19976.892 | 118.777  | 0.331  | 0.591  | 540.645 | 302.526 | 1.788   |
| 1994          | 35074  | 19524.095 | 19342.059 | 182.036  | 0.519  | 0.932  | 518.158 | 288.435 | 2.689   |
| 1995          | 34669  | 19116.002 | 18854.921 | 261.081  | 0.753  | 1.366  | 502.362 | 276.995 | 3.783   |
| 1996          | 34582  | 18975.021 | 18617.848 | 357.173  | 1.033  | 1.882  | 493.306 | 270.675 | 5.095   |
| 1997          | 35267  | 19169.025 | 18694.000 | 475.024  | 1.347  | 2.478  | 494.878 | 268.986 | 6.666   |
| 1998          | 35675  | 19228.937 | 18616.560 | 612.377  | 1.717  | 3.185  | 492.368 | 265.388 | 8.452   |
| 1999          | 38516  | 20589.820 | 19784.145 | 805.675  | 2.092  | 3.913  | 523.195 | 279.689 | 10.944  |
| 2000          | 36283  | 19196.417 | 18283.678 | 912.740  | 2.516  | 4.755  | 485.652 | 256.946 | 12.217  |
| 2001          | 36281  | 19012.731 | 17906.558 | 1106.173 | 3.049  | 5.818  | 479.301 | 251.174 | 14.613  |
| 2002          | 35983  | 18699.357 | 17404.088 | 1295.269 | 3.600  | 6.927  | 470.038 | 244.265 | 16.920  |
| 2003          | 36205  | 18663.550 | 17150.349 | 1513.201 | 4.180  | 8.108  | 468.019 | 241.262 | 19.561  |
| 2004          | 34611  | 17679.164 | 16000.890 | 1678.274 | 4.849  | 9.493  | 442.596 | 226.076 | 21.461  |
| 2005          | 36826  | 18692.832 | 16663.297 | 2029.535 | 5.511  | 10.857 | 465.456 | 236.265 | 25.652  |
| 2006          | 34350  | 17308.564 | 15152.645 | 2155.918 | 6.276  | 12.456 | 430.192 | 216.769 | 27.000  |
| 2007          | 35326  | 17683.181 | 15187.007 | 2496.174 | 7.066  | 14.116 | 437.879 | 219.189 | 30.941  |
| 2008          | 38248  | 19006.374 | 16025.701 | 2980.673 | 7.793  | 15.682 | 468.788 | 232.952 | 36.533  |
| 2009          | 36902  | 18205.573 | 14999.036 | 3206.536 | 8.689  | 17.613 | 446.956 | 220.505 | 38.837  |
| 2010          | 37234  | 18237.758 | 14720.578 | 3517.181 | 9.446  | 19.285 | 445.505 | 218.215 | 42.083  |
| 2011          | 38093  | 18487.916 | 14518.263 | 3969.653 | 10.421 | 21.472 | 451.279 | 219.022 | 47.028  |
| 2012          | 38504  | 18491.158 | 14139.901 | 4351.258 | 11.301 | 23.532 | 451.211 | 216.689 | 50.990  |
| 2013          | 40290  | 19143.452 | 14263.856 | 4879.596 | 12.111 | 25.490 | 466.755 | 221.775 | 56.530  |
| 2014          | 40339  | 18992.005 | 13744.156 | 5247.849 | 13.009 | 27.632 | 461.866 | 217.451 | 60.086  |
| 2015          | 42303  | 19728.885 | 13940.875 | 5788.010 | 13.682 | 29.338 | 544.880 | 254.116 | 74.552  |
| 2016          | 43104  | 19876.724 | 13632.238 | 6244.487 | 14.487 | 31.416 | 550.009 | 253.628 | 79.680  |
| 2017          | 44107  | 20119.790 | 13371.578 | 6748.212 | 15.300 | 33.540 | 557.659 | 254.381 | 85.320  |
| 2018          | 45469  | 20535.123 | 13216.487 | 7318.636 | 16.096 | 35.640 | 569.564 | 257.229 | 91.675  |
| 2019          | 46963  | 21009.029 | 13090.371 | 7918.658 | 16.861 | 37.692 | 582.552 | 260.605 | 98.226  |
| 2020          | 48419  | 21428.512 | 12931.840 | 8496.671 | 17.548 | 39.651 | 685.853 | 303.533 | 120.355 |
| 2021          | 48463  | 21266.697 | 12329.544 | 8937.154 | 18.441 | 42.024 | 681.652 | 299.127 | 125.706 |
| 2022          | 49915  | 21663.568 | 12076.645 | 9586.923 | 19.206 | 44.254 | 696.712 | 302.378 | 133.813 |
| 2023          | 51391  | 22084.131 | 11830.024 | 10254.11 | 19.953 | 46.432 | 711.491 | 305.748 | 141.965 |
| 2024          | 52811  | 22418.456 | 11562.130 | 10856.33 | 20.557 | 48.426 | 725.093 | 307.804 | 149.057 |
| 2025          | 53848  | 22614.834 | 11232.867 | 11381.97 | 21.137 | 50.330 | 860.553 | 361.411 | 181.897 |
| 2026          | 54342  | 22571.522 | 10730.330 | 11841.19 | 21.790 | 52.461 | 864.886 | 359.241 | 188.461 |
| 2027          | 55267  | 22774.416 | 10335.786 | 12438.63 | 22.507 | 54.617 | 875.619 | 360.827 | 197.072 |
| 2028          | 56149  | 22915.561 | 9895.246  | 13020.31 | 23.189 | 56.819 | 885.102 | 361.228 | 205.245 |
| 2029          | 57014  | 22992.027 | 9449.814  | 13542.21 | 23.753 | 58.900 | 893.616 | 360.371 | 212.257 |
| 2030          | 57238  | 22895.360 | 9000.581  | 13894.78 | 24.275 | 60.688 | 1071.90 | 428.760 | 260.206 |
| 2031          | 57592  | 22715.871 | 8523.120  | 14192.75 | 24.644 | 62.479 | 1075.71 | 424.293 | 265.096 |
| 2032          | 58251  | 22759.207 | 8092.252  | 14666.96 | 25.179 | 64.444 | 1084.31 | 423.652 | 273.018 |
| 2033          | 58885  | 22786.258 | 7686.027  | 15100.23 | 25.644 | 66.269 | 1091.54 | 422.387 | 279.912 |
| 2034          | 59460  | 22806.106 | 7276.430  | 15529.68 | 26.118 | 68.094 | 1096.89 | 420.721 | 286.487 |
| 2035          | 58516  | 22262.998 | 6818.521  | 15444.48 | 26.394 | 69.373 | 1335.15 | 507.973 | 352.395 |
| 2036          | 56446  | 21140.051 | 6007.886  | 15132.17 | 26.808 | 71.581 | 1287.60 | 482.234 | 345.185 |
| 2037          | 56568  | 21011.845 | 5581.213  | 15430.63 | 27.278 | 73.438 | 1288.98 | 478.783 | 351.608 |
| 2038          | 56668  | 20787.483 | 5159.215  | 15628.27 | 27.579 | 75.181 | 1288.55 | 472.681 | 355.367 |
| 2039          | 56758  | 20709.267 | 4792.687  | 15916.58 | 28.043 | 76.857 | 1286.40 | 469.372 | 360.747 |

## Results for PHIM for Run 3 (Sensitivity\_Analysis\_4.RTF)

\*\*\*\*\*

### Main Results for E-Component for Run: 3, Simulation: 1, COD: Four Diseases Combined, Adjusted

| Variable Parameter          | Value                                  |
|-----------------------------|----------------------------------------|
| 1. Country                  | US (United States)                     |
| 2. Sex                      | M (Males)                              |
| 3. Year of start of process | 1990                                   |
| 4. Cause of Death           | Four Diseases Combined                 |
| 5. Effective Dose NULL      | CC:1                                   |
| 6. Effective Dose Ecig      | CC:1 Ecig:0.05 Dual:0.525              |
| Note:                       | Death rates are per million population |

#### Results for Age Groups Combined and Years combined, Population and Number deaths adjusted for Ecig scenario,

| Age Group:All | NULL     | Ecig        | %Drop       |         |        |        | NULL    | Ecig    | Drop    |         |
|---------------|----------|-------------|-------------|---------|--------|--------|---------|---------|---------|---------|
| Year          | Number   | Attrib      | Attrib      | Drop    | %Drop  | Attrib | Death   | Attrib  | Attrib  | Drop    |
|               | Deaths   | Deaths      | Deaths      | Deaths  | Deaths | Deaths | Rate    | Rates   | Rates   | Rates   |
| All Comb      | 13291591 | 4509390.583 | 3000091.714 | 1509299 | 11.355 | 33.470 | 3815.58 | 1305.37 | 861.227 | 444.144 |

#### Results for Age Groups Combined, Population and Number deaths adjusted for Ecig scenario,

| Age Group:All | NULL   | Ecig       | %Drop      |          |        |        | NULL    | Ecig    | Drop    |         |
|---------------|--------|------------|------------|----------|--------|--------|---------|---------|---------|---------|
| Year          | Number | Attrib     | Attrib     | Drop     | %Drop  | Attrib | Death   | Attrib  | Attrib  | Drop    |
|               | Deaths | Deaths     | Deaths     | Deaths   | Deaths | Deaths | Rate    | Rates   | Rates   | Rates   |
| 1990          | 317161 | 125773.065 | 125773.065 | 0.000    | 0.000  | 0.000  | 5027.71 | 1993.78 | 1993.78 | 0.000   |
| 1991          | 313217 | 123999.442 | 123575.252 | 424.190  | 0.135  | 0.342  | 4883.81 | 1933.45 | 1926.84 | 6.614   |
| 1992          | 308580 | 122014.015 | 120878.372 | 1135.643 | 0.368  | 0.931  | 4729.74 | 1870.18 | 1852.76 | 17.419  |
| 1993          | 311723 | 122810.618 | 120679.233 | 2131.385 | 0.684  | 1.736  | 4692.65 | 1848.83 | 1816.70 | 32.131  |
| 1994          | 305723 | 119925.592 | 116651.321 | 3274.271 | 1.071  | 2.730  | 4516.28 | 1771.69 | 1723.22 | 48.470  |
| 1995          | 303268 | 117896.496 | 113286.774 | 4609.722 | 1.520  | 3.910  | 4393.95 | 1708.35 | 1641.38 | 66.971  |
| 1996          | 299629 | 115698.645 | 109619.250 | 6079.395 | 2.029  | 5.255  | 4273.40 | 1650.42 | 1563.42 | 86.996  |
| 1997          | 294330 | 113359.847 | 105803.053 | 7556.793 | 2.567  | 6.666  | 4129.04 | 1590.70 | 1484.27 | 106.433 |
| 1998          | 289405 | 111444.212 | 102408.238 | 9035.974 | 3.122  | 8.108  | 3992.71 | 1538.10 | 1412.86 | 125.242 |
| 1999          | 311218 | 114877.722 | 102791.236 | 12086.49 | 3.884  | 10.521 | 4225.39 | 1560.48 | 1395.59 | 164.889 |
| 2000          | 304071 | 112379.704 | 98598.412  | 13781.29 | 4.532  | 12.263 | 4067.26 | 1504.22 | 1318.85 | 185.362 |
| 2001          | 296654 | 110024.943 | 94430.543  | 15594.40 | 5.257  | 14.174 | 3915.60 | 1453.52 | 1246.41 | 207.108 |
| 2002          | 292345 | 108289.173 | 90659.630  | 17629.54 | 6.030  | 16.280 | 3814.65 | 1414.56 | 1182.97 | 231.589 |
| 2003          | 286406 | 106539.023 | 87113.967  | 19425.06 | 6.782  | 18.233 | 3697.37 | 1377.22 | 1124.60 | 252.620 |
| 2004          | 274805 | 103037.251 | 82301.532  | 20735.72 | 7.546  | 20.124 | 3508.45 | 1317.61 | 1050.75 | 266.864 |
| 2005          | 273120 | 103044.562 | 80418.338  | 22626.22 | 8.284  | 21.958 | 3445.47 | 1302.41 | 1014.50 | 287.918 |
| 2006          | 264961 | 99672.555  | 75431.368  | 24241.19 | 9.149  | 24.321 | 3310.95 | 1248.28 | 942.590 | 305.689 |
| 2007          | 259376 | 97839.152  | 72248.665  | 25590.49 | 9.866  | 26.156 | 3206.84 | 1212.75 | 893.259 | 319.492 |
| 2008          | 260563 | 98075.852  | 70776.285  | 27299.57 | 10.477 | 27.835 | 3184.31 | 1202.07 | 864.949 | 337.121 |
| 2009          | 255134 | 95617.338  | 67126.737  | 28490.60 | 11.167 | 29.796 | 3080.04 | 1158.11 | 810.369 | 347.744 |
| 2010          | 253248 | 94607.988  | 64779.885  | 29828.10 | 11.778 | 31.528 | 3019.01 | 1131.98 | 772.251 | 359.733 |
| 2011          | 253310 | 93633.119  | 62161.115  | 31472.00 | 12.424 | 33.612 | 2988.73 | 1109.25 | 733.421 | 375.828 |
| 2012          | 254350 | 92775.175  | 59692.100  | 33083.07 | 13.007 | 35.659 | 2967.32 | 1087.19 | 696.383 | 390.807 |
| 2013          | 258091 | 92345.780  | 57613.727  | 34732.05 | 13.457 | 37.611 | 2975.36 | 1069.82 | 664.189 | 405.627 |
| 2014          | 259513 | 91379.215  | 55268.571  | 36110.64 | 13.915 | 39.517 | 2955.52 | 1046.26 | 629.437 | 416.819 |
| 2015          | 262135 | 90750.242  | 53404.822  | 37345.42 | 14.247 | 41.152 | 3354.48 | 1168.90 | 683.409 | 485.492 |
| 2016          | 264033 | 88811.996  | 50175.865  | 38636.13 | 14.633 | 43.503 | 3345.44 | 1133.24 | 635.755 | 497.490 |
| 2017          | 266514 | 87325.126  | 47554.016  | 39771.11 | 14.923 | 45.544 | 3344.19 | 1104.08 | 596.703 | 507.376 |
| 2018          | 261706 | 87612.144  | 46829.528  | 40782.62 | 15.583 | 46.549 | 3251.71 | 1097.46 | 581.858 | 515.599 |
| 2019          | 264699 | 87797.760  | 45522.403  | 42275.36 | 15.971 | 48.151 | 3255.10 | 1089.08 | 559.806 | 529.276 |
| 2020          | 265832 | 87221.042  | 44096.321  | 43124.72 | 16.223 | 49.443 | 3726.41 | 1235.48 | 618.139 | 617.340 |
| 2021          | 258761 | 82001.292  | 39293.787  | 42707.50 | 16.505 | 52.082 | 3599.50 | 1153.39 | 546.596 | 606.793 |
| 2022          | 261054 | 81915.977  | 37828.223  | 44087.75 | 16.888 | 53.821 | 3601.32 | 1143.37 | 521.852 | 621.523 |
| 2023          | 263324 | 81810.810  | 36397.862  | 45412.95 | 17.246 | 55.510 | 3600.85 | 1132.64 | 497.726 | 634.919 |
| 2024          | 265258 | 81528.303  | 34976.511  | 46551.79 | 17.550 | 57.099 | 3594.89 | 1119.38 | 474.016 | 645.362 |
| 2025          | 262128 | 79599.213  | 33323.106  | 46276.11 | 17.654 | 58.136 | 4125.09 | 1272.09 | 524.404 | 747.684 |
| 2026          | 256491 | 75082.462  | 29623.674  | 45458.79 | 17.723 | 60.545 | 4016.78 | 1194.99 | 463.921 | 731.067 |
| 2027          | 256212 | 74444.425  | 28128.841  | 46315.58 | 18.077 | 62.215 | 3991.25 | 1179.46 | 438.189 | 741.271 |
| 2028          | 255772 | 73699.585  | 26561.223  | 47138.36 | 18.430 | 63.960 | 3961.32 | 1161.76 | 411.373 | 750.387 |
| 2029          | 255279 | 72819.703  | 25045.235  | 47774.47 | 18.715 | 65.607 | 3928.26 | 1141.36 | 385.399 | 755.958 |
| 2030          | 246483 | 69309.277  | 23372.705  | 45936.57 | 18.637 | 66.278 | 4518.46 | 1297.95 | 428.462 | 869.487 |
| 2031          | 241508 | 65433.368  | 20697.468  | 44735.90 | 18.524 | 68.369 | 4411.92 | 1222.18 | 378.106 | 844.075 |
| 2032          | 240319 | 64643.552  | 19449.737  | 45193.81 | 18.806 | 69.912 | 4371.58 | 1203.31 | 353.804 | 849.504 |
| 2033          | 239097 | 63793.514  | 18271.963  | 45521.55 | 19.039 | 71.358 | 4327.62 | 1182.54 | 330.720 | 851.817 |
| 2034          | 237732 | 63032.151  | 17141.602  | 45890.55 | 19.303 | 72.805 | 4278.70 | 1162.80 | 308.514 | 854.287 |
| 2035          | 222604 | 57653.301  | 15652.005  | 42001.30 | 18.868 | 72.852 | 4939.37 | 1315.47 | 347.304 | 968.167 |
| 2036          | 214892 | 52988.733  | 13075.353  | 39913.38 | 18.574 | 75.324 | 4762.67 | 1208.75 | 289.790 | 918.956 |
| 2037          | 212346 | 52026.921  | 12104.651  | 39922.27 | 18.801 | 76.734 | 4697.00 | 1185.50 | 267.750 | 917.753 |
| 2038          | 209829 | 50943.211  | 11151.086  | 39792.13 | 18.964 | 78.111 | 4627.68 | 1158.38 | 245.932 | 912.451 |
| 2039          | 207383 | 50085.991  | 10327.057  | 39758.93 | 19.172 | 79.381 | 4555.05 | 1135.19 | 226.828 | 908.363 |

## Results for PHIM for Run 3 (Sensitivity\_Analysis\_4.RTF)

\*\*\*\*\*

### Main Results for E-Component for Run: 3, Simulation: 1, COD: LUNG CANCER, Adjusted

| Variable Parameter          | Value                                  |
|-----------------------------|----------------------------------------|
| 1. Country                  | US (United States)                     |
| 2. Sex                      | M (Males)                              |
| 3. Year of start of process | 1990                                   |
| 4. Cause of Death           | LUNG CANCER                            |
| 5. Effective Dose NULL      | CC:1                                   |
| 6. Effective Dose Ecig      | CC:1 Ecig:0.05 Dual:0.525              |
| Note:                       | Death rates are per million population |

#### Results for Age Groups Combined and Years combined, Population and Number deaths adjusted for Ecig scenario,

| Age Group:All | NULL    | Ecig        | %Drop       |          |        |        | NULL    | Ecig    | Drop    |         |
|---------------|---------|-------------|-------------|----------|--------|--------|---------|---------|---------|---------|
| Year          | Number  | Attrib      | Attrib      | Drop     | %Drop  | Attrib | Death   | Attrib  | Attrib  | Drop    |
|               | Deaths  | Deaths      | Deaths      | Deaths   | Deaths | Deaths | Rate    | Rates   | Rates   | Rates   |
| All Comb      | 3095735 | 2244988.113 | 1732435.184 | 512552.9 | 16.557 | 22.831 | 888.683 | 649.875 | 497.325 | 152.551 |

#### Results for Age Groups Combined, Population and Number deaths adjusted for Ecig scenario,

| Age Group:All | NULL   | Ecig      | %Drop     |          |        |        | NULL    | Ecig    | Drop    |         |
|---------------|--------|-----------|-----------|----------|--------|--------|---------|---------|---------|---------|
| Year          | Number | Attrib    | Attrib    | Drop     | %Drop  | Attrib | Death   | Attrib  | Attrib  | Drop    |
|               | Deaths | Deaths    | Deaths    | Deaths   | Deaths | Deaths | Rate    | Rates   | Rates   | Rates   |
| 1990          | 78822  | 63385.736 | 63385.736 | 0.000    | 0.000  | 0.000  | 1249.50 | 1004.81 | 1004.81 | 0.000   |
| 1991          | 78462  | 62918.402 | 62870.284 | 48.118   | 0.061  | 0.076  | 1223.41 | 981.049 | 980.299 | 0.750   |
| 1992          | 77988  | 62366.766 | 62238.153 | 128.612  | 0.165  | 0.206  | 1195.35 | 955.930 | 953.952 | 1.978   |
| 1993          | 78545  | 62652.888 | 62400.587 | 252.301  | 0.321  | 0.403  | 1182.40 | 943.195 | 939.373 | 3.821   |
| 1994          | 77443  | 61565.227 | 61168.657 | 396.570  | 0.512  | 0.644  | 1144.02 | 909.520 | 903.610 | 5.910   |
| 1995          | 76915  | 60851.961 | 60276.727 | 575.234  | 0.748  | 0.945  | 1114.40 | 881.759 | 873.330 | 8.428   |
| 1996          | 76251  | 60122.922 | 59322.957 | 799.964  | 1.049  | 1.331  | 1087.51 | 857.643 | 846.083 | 11.560  |
| 1997          | 75501  | 59237.155 | 58196.638 | 1040.517 | 1.378  | 1.757  | 1059.17 | 831.234 | 816.417 | 14.818  |
| 1998          | 75421  | 58906.696 | 57567.786 | 1338.910 | 1.775  | 2.273  | 1040.53 | 813.001 | 794.223 | 18.778  |
| 1999          | 73212  | 56930.073 | 55298.939 | 1631.134 | 2.228  | 2.865  | 993.996 | 773.329 | 750.791 | 22.538  |
| 2000          | 73856  | 57137.121 | 55126.381 | 2010.740 | 2.723  | 3.519  | 987.900 | 764.787 | 737.371 | 27.416  |
| 2001          | 73387  | 56481.726 | 54041.471 | 2440.255 | 3.325  | 4.320  | 968.647 | 746.169 | 713.306 | 32.863  |
| 2002          | 72557  | 55588.365 | 52697.234 | 2891.131 | 3.985  | 5.201  | 946.763 | 726.138 | 687.617 | 38.521  |
| 2003          | 72083  | 54945.856 | 51555.170 | 3390.687 | 4.704  | 6.171  | 930.560 | 710.281 | 665.554 | 44.727  |
| 2004          | 71470  | 54203.126 | 50261.187 | 3941.939 | 5.516  | 7.273  | 912.463 | 693.135 | 641.688 | 51.447  |
| 2005          | 71164  | 53744.603 | 49232.909 | 4511.695 | 6.340  | 8.395  | 897.747 | 679.296 | 621.084 | 58.211  |
| 2006          | 69888  | 52535.572 | 47423.399 | 5112.172 | 7.315  | 9.731  | 873.316 | 657.945 | 592.602 | 65.343  |
| 2007          | 68827  | 51492.124 | 45787.007 | 5705.117 | 8.289  | 11.080 | 850.955 | 638.264 | 566.096 | 72.168  |
| 2008          | 68524  | 51030.736 | 44604.638 | 6426.098 | 9.378  | 12.593 | 837.430 | 625.460 | 545.109 | 80.352  |
| 2009          | 67845  | 50276.199 | 43128.231 | 7147.968 | 10.536 | 14.217 | 819.037 | 608.943 | 520.654 | 88.290  |
| 2010          | 67572  | 49840.933 | 41970.076 | 7870.857 | 11.648 | 15.792 | 805.541 | 596.347 | 500.332 | 96.015  |
| 2011          | 66923  | 49072.841 | 40401.310 | 8671.531 | 12.958 | 17.671 | 789.600 | 581.354 | 476.684 | 104.671 |
| 2012          | 66614  | 48539.512 | 39007.168 | 9532.344 | 14.310 | 19.638 | 777.141 | 568.812 | 455.067 | 113.745 |
| 2013          | 65835  | 47675.741 | 37377.427 | 10298.31 | 15.643 | 21.601 | 758.962 | 552.318 | 430.899 | 121.419 |
| 2014          | 65583  | 47194.534 | 36098.354 | 11096.18 | 16.919 | 23.512 | 746.910 | 540.359 | 411.113 | 129.246 |
| 2015          | 64740  | 46305.842 | 34514.546 | 11791.30 | 18.213 | 25.464 | 828.461 | 596.439 | 441.675 | 154.764 |
| 2016          | 62241  | 44208.867 | 32006.830 | 12202.04 | 19.605 | 27.601 | 788.626 | 564.107 | 405.544 | 158.563 |
| 2017          | 60555  | 42702.624 | 30023.998 | 12678.63 | 20.937 | 29.691 | 759.837 | 539.903 | 376.738 | 163.164 |
| 2018          | 63208  | 44321.202 | 30059.854 | 14261.35 | 22.562 | 32.177 | 785.365 | 555.181 | 373.494 | 181.687 |
| 2019          | 63850  | 44493.088 | 29174.010 | 15319.08 | 23.992 | 34.430 | 785.192 | 551.912 | 358.764 | 193.148 |
| 2020          | 64340  | 44529.551 | 28225.433 | 16304.12 | 25.341 | 36.614 | 901.911 | 630.757 | 395.662 | 235.095 |
| 2021          | 57957  | 39852.556 | 24300.359 | 15552.20 | 26.834 | 39.024 | 806.208 | 560.546 | 338.030 | 222.516 |
| 2022          | 58345  | 39853.685 | 23312.657 | 16541.03 | 28.351 | 41.504 | 804.883 | 556.274 | 321.605 | 234.668 |
| 2023          | 58705  | 39847.050 | 22331.076 | 17515.97 | 29.837 | 43.958 | 802.773 | 551.670 | 305.368 | 246.301 |
| 2024          | 58973  | 39726.010 | 21340.678 | 18385.33 | 31.176 | 46.280 | 799.228 | 545.435 | 289.218 | 256.218 |
| 2025          | 58614  | 39207.348 | 20239.965 | 18967.38 | 32.360 | 48.377 | 922.409 | 626.579 | 318.515 | 308.064 |
| 2026          | 52463  | 34803.960 | 17154.024 | 17649.94 | 33.643 | 50.712 | 821.590 | 553.929 | 268.641 | 285.288 |
| 2027          | 52258  | 34484.595 | 16165.304 | 18319.29 | 35.056 | 53.123 | 814.065 | 546.357 | 251.822 | 294.535 |
| 2028          | 52007  | 34100.638 | 15147.503 | 18953.14 | 36.444 | 55.580 | 805.464 | 537.544 | 234.600 | 302.943 |
| 2029          | 51727  | 33669.838 | 14176.878 | 19492.96 | 37.684 | 57.894 | 795.988 | 527.732 | 218.155 | 309.577 |
| 2030          | 50338  | 32557.688 | 13141.046 | 19416.64 | 38.572 | 59.638 | 922.791 | 609.705 | 240.898 | 368.807 |
| 2031          | 44723  | 28646.393 | 10969.031 | 17677.36 | 39.526 | 61.709 | 817.016 | 535.065 | 200.385 | 334.680 |
| 2032          | 44341  | 28227.160 | 10213.930 | 18013.23 | 40.625 | 63.815 | 806.589 | 525.435 | 185.799 | 339.636 |
| 2033          | 43943  | 27786.623 | 9506.575  | 18280.05 | 41.600 | 65.787 | 795.353 | 515.079 | 172.068 | 343.011 |
| 2034          | 43511  | 27348.299 | 8841.459  | 18506.84 | 42.534 | 67.671 | 783.102 | 504.514 | 159.128 | 345.386 |
| 2035          | 41007  | 25570.077 | 8006.028  | 17564.05 | 42.832 | 68.690 | 909.915 | 583.430 | 177.646 | 405.784 |
| 2036          | 35130  | 21717.319 | 6264.499  | 15452.82 | 43.988 | 71.154 | 778.583 | 495.402 | 138.841 | 356.561 |
| 2037          | 34573  | 21256.024 | 5757.300  | 15498.72 | 44.829 | 72.915 | 764.734 | 484.347 | 127.349 | 356.998 |
| 2038          | 34020  | 20747.175 | 5269.270  | 15477.90 | 45.496 | 74.602 | 750.299 | 471.764 | 116.211 | 355.553 |
| 2039          | 33479  | 20327.688 | 4854.503  | 15473.18 | 46.217 | 76.119 | 735.353 | 460.724 | 106.627 | 354.097 |

## Results for PHIM for Run 3 (Sensitivity\_Analysis\_4.RTF)

\*\*\*\*\*

### Main Results for E-Component for Run: 3, Simulation: 1, COD: IHD, Adjusted

| Variable Parameter          | Value                                  |
|-----------------------------|----------------------------------------|
| 1. Country                  | US (United States)                     |
| 2. Sex                      | M (Males)                              |
| 3. Year of start of process | 1990                                   |
| 4. Cause of Death           | IHD                                    |
| 5. Effective Dose NULL      | CC:1                                   |
| 6. Effective Dose Ecig      | CC:1 Ecig:0.05 Dual:0.525              |
| Note:                       | Death rates are per million population |

#### Results for Age Groups Combined and Years combined, Population and Number deaths adjusted for Ecig scenario,

| Age Group:All | NULL    | Ecig        | %Drop      |          |        |        | NULL    | Ecig    | Drop    |         |
|---------------|---------|-------------|------------|----------|--------|--------|---------|---------|---------|---------|
| Year          | Number  | Attrib      | Attrib     | Drop     | %Drop  | Attrib | Death   | Attrib  | Attrib  | Drop    |
|               | Deaths  | Deaths      | Deaths     | Deaths   | Deaths | Deaths | Rate    | Rates   | Rates   | Rates   |
| All Comb      | 6423097 | 1098877.421 | 515985.947 | 582891.5 | 9.075  | 53.044 | 1843.86 | 318.101 | 148.123 | 169.979 |

#### Results for Age Groups Combined, Population and Number deaths adjusted for Ecig scenario,

| Age Group:All | NULL   | Ecig      | %Drop     |          |        |        | NULL    | Ecig    | Drop    |         |
|---------------|--------|-----------|-----------|----------|--------|--------|---------|---------|---------|---------|
| Year          | Number | Attrib    | Attrib    | Drop     | %Drop  | Attrib | Death   | Attrib  | Attrib  | Drop    |
|               | Deaths | Deaths    | Deaths    | Deaths   | Deaths | Deaths | Rate    | Rates   | Rates   | Rates   |
| 1990          | 171484 | 38511.725 | 38511.725 | 0.000    | 0.000  | 0.000  | 2718.40 | 610.497 | 610.497 | 0.000   |
| 1991          | 168044 | 37309.838 | 36996.011 | 313.827  | 0.187  | 0.841  | 2620.21 | 581.750 | 576.857 | 4.893   |
| 1992          | 164549 | 36137.488 | 35293.284 | 844.204  | 0.513  | 2.336  | 2522.12 | 553.899 | 540.956 | 12.943  |
| 1993          | 164367 | 35599.588 | 34037.050 | 1562.537 | 0.951  | 4.389  | 2474.37 | 535.926 | 512.391 | 23.535  |
| 1994          | 159878 | 34336.757 | 31952.722 | 2384.035 | 1.491  | 6.943  | 2361.79 | 507.267 | 472.020 | 35.247  |
| 1995          | 158105 | 33455.759 | 30123.540 | 3332.219 | 2.108  | 9.960  | 2290.74 | 484.782 | 436.450 | 48.331  |
| 1996          | 154911 | 32193.824 | 27855.627 | 4338.197 | 2.800  | 13.475 | 2209.39 | 459.239 | 397.286 | 61.953  |
| 1997          | 150023 | 30665.509 | 25352.644 | 5312.866 | 3.541  | 17.325 | 2104.61 | 430.308 | 355.662 | 74.646  |
| 1998          | 145480 | 29188.430 | 22963.216 | 6225.215 | 4.279  | 21.328 | 2007.09 | 402.844 | 316.808 | 86.036  |
| 1999          | 166067 | 33375.386 | 24714.219 | 8661.166 | 5.215  | 25.951 | 2254.68 | 453.366 | 335.544 | 117.822 |
| 2000          | 160410 | 32024.754 | 22327.695 | 9697.059 | 6.045  | 30.280 | 2145.65 | 428.655 | 298.656 | 130.000 |
| 2001          | 154631 | 30682.393 | 19908.829 | 10773.56 | 6.967  | 35.113 | 2041.01 | 405.339 | 262.781 | 142.558 |
| 2002          | 152119 | 30218.370 | 18182.799 | 12035.57 | 7.912  | 39.829 | 1984.91 | 394.736 | 237.257 | 157.478 |
| 2003          | 147009 | 29175.202 | 16208.692 | 12966.51 | 8.820  | 44.444 | 1897.82 | 377.146 | 209.247 | 167.899 |
| 2004          | 138696 | 27488.687 | 14039.182 | 13449.50 | 9.697  | 48.927 | 1770.73 | 351.518 | 179.239 | 172.279 |
| 2005          | 136248 | 27017.439 | 12699.670 | 14317.77 | 10.509 | 52.995 | 1718.80 | 341.482 | 160.209 | 181.273 |
| 2006          | 132339 | 26231.435 | 11173.459 | 15057.98 | 11.378 | 57.404 | 1653.71 | 328.517 | 139.623 | 188.894 |
| 2007          | 126966 | 25103.049 | 9732.836  | 15370.21 | 12.106 | 61.228 | 1569.76 | 311.161 | 120.334 | 190.828 |
| 2008          | 126388 | 24621.740 | 8768.228  | 15853.51 | 12.544 | 64.388 | 1544.57 | 301.777 | 107.156 | 194.622 |
| 2009          | 123013 | 23741.177 | 7732.187  | 16008.99 | 13.014 | 67.431 | 1485.04 | 287.552 | 93.345  | 194.208 |
| 2010          | 121184 | 23189.160 | 6924.921  | 16264.24 | 13.421 | 70.137 | 1444.65 | 277.458 | 82.553  | 194.905 |
| 2011          | 120941 | 22786.927 | 6173.135  | 16613.79 | 13.727 | 72.909 | 1426.95 | 269.951 | 72.835  | 197.116 |
| 2012          | 121732 | 22485.295 | 5562.439  | 16922.86 | 13.902 | 75.262 | 1420.16 | 263.495 | 64.893  | 198.602 |
| 2013          | 123551 | 22251.884 | 5048.217  | 17203.67 | 13.924 | 77.313 | 1424.34 | 257.786 | 58.197  | 199.588 |
| 2014          | 124228 | 21894.593 | 4560.026  | 17334.57 | 13.954 | 79.173 | 1414.79 | 250.685 | 51.933  | 198.752 |
| 2015          | 124877 | 21471.109 | 4137.486  | 17333.62 | 13.881 | 80.730 | 1598.02 | 276.557 | 52.946  | 223.611 |
| 2016          | 127444 | 21411.568 | 3759.785  | 17651.78 | 13.851 | 82.440 | 1614.78 | 273.213 | 47.638  | 225.574 |
| 2017          | 129619 | 21169.399 | 3420.989  | 17748.41 | 13.693 | 83.840 | 1626.45 | 267.651 | 42.926  | 224.725 |
| 2018          | 122801 | 19830.576 | 2914.378  | 16916.20 | 13.775 | 85.304 | 1525.80 | 248.404 | 36.211  | 212.193 |
| 2019          | 123315 | 19431.014 | 2652.241  | 16778.77 | 13.606 | 86.350 | 1516.46 | 241.031 | 32.616  | 208.415 |
| 2020          | 122409 | 18532.612 | 2370.424  | 16162.19 | 13.203 | 87.209 | 1715.92 | 262.513 | 33.228  | 229.285 |
| 2021          | 121084 | 18234.128 | 2129.098  | 16105.03 | 13.301 | 88.324 | 1684.34 | 256.472 | 29.617  | 226.855 |
| 2022          | 121226 | 17812.559 | 1929.084  | 15883.47 | 13.102 | 89.170 | 1672.35 | 248.626 | 26.612  | 222.014 |
| 2023          | 121347 | 17361.668 | 1748.226  | 15613.44 | 12.867 | 89.931 | 1659.37 | 240.367 | 23.906  | 216.461 |
| 2024          | 121322 | 16929.676 | 1601.640  | 15328.04 | 12.634 | 90.539 | 1644.20 | 232.443 | 21.706  | 210.737 |
| 2025          | 117804 | 15501.666 | 1403.202  | 14098.46 | 11.968 | 90.948 | 1853.88 | 247.735 | 22.082  | 225.652 |
| 2026          | 117276 | 15523.814 | 1310.553  | 14213.26 | 12.120 | 91.558 | 1836.60 | 247.072 | 20.524  | 226.548 |
| 2027          | 116288 | 15073.070 | 1212.004  | 13861.07 | 11.920 | 91.959 | 1811.52 | 238.810 | 18.881  | 219.930 |
| 2028          | 115249 | 14636.710 | 1115.579  | 13521.13 | 11.732 | 92.378 | 1784.94 | 230.725 | 17.278  | 213.447 |
| 2029          | 114208 | 14180.166 | 1028.402  | 13151.76 | 11.516 | 92.748 | 1757.44 | 222.256 | 15.825  | 206.431 |
| 2030          | 107388 | 12111.772 | 862.943   | 11248.83 | 10.475 | 92.875 | 1968.61 | 226.816 | 15.819  | 210.997 |
| 2031          | 107922 | 12417.367 | 850.473   | 11566.89 | 10.718 | 93.151 | 1971.55 | 231.935 | 15.537  | 216.398 |
| 2032          | 106591 | 12054.064 | 799.119   | 11254.95 | 10.559 | 93.371 | 1938.96 | 224.381 | 14.537  | 209.844 |
| 2033          | 105274 | 11672.389 | 744.445   | 10927.94 | 10.381 | 93.622 | 1905.44 | 216.370 | 13.474  | 202.896 |
| 2034          | 103932 | 11365.762 | 697.531   | 10668.23 | 10.265 | 93.863 | 1870.56 | 209.673 | 12.554  | 197.118 |
| 2035          | 93613  | 8580.360  | 523.965   | 8056.395 | 8.606  | 93.893 | 2077.20 | 195.777 | 11.626  | 184.151 |
| 2036          | 95008  | 8948.841  | 525.294   | 8423.546 | 8.866  | 94.130 | 2105.67 | 204.135 | 11.642  | 192.493 |
| 2037          | 93258  | 8624.570  | 499.799   | 8124.771 | 8.712  | 94.205 | 2062.82 | 196.522 | 11.055  | 185.467 |
| 2038          | 91558  | 8315.017  | 468.896   | 7846.121 | 8.570  | 94.361 | 2019.27 | 189.073 | 10.341  | 178.732 |
| 2039          | 89924  | 8001.132  | 438.035   | 7563.096 | 8.411  | 94.525 | 1975.14 | 181.344 | 9.621   | 171.723 |

## Results for PHIM for Run 3 (Sensitivity\_Analysis\_4.RTF)

\*\*\*\*\*

### Main Results for E-Component for Run: 3, Simulation: 1, COD: STROKE, Adjusted

| Variable Parameter          | Value                                  |
|-----------------------------|----------------------------------------|
| 1. Country                  | US (United States)                     |
| 2. Sex                      | M (Males)                              |
| 3. Year of start of process | 1990                                   |
| 4. Cause of Death           | STROKE                                 |
| 5. Effective Dose NULL      | CC:1                                   |
| 6. Effective Dose Ecig      | CC:1 Ecig:0.05 Dual:0.525              |
| Note:                       | Death rates are per million population |

#### Results for Age Groups Combined and Years combined, Population and Number deaths adjusted for Ecig scenario,

| Age Group:All | NULL    | Ecig       | %Drop     |          |        |        | NULL    | Ecig   | Drop   |        |
|---------------|---------|------------|-----------|----------|--------|--------|---------|--------|--------|--------|
| Year          | Number  | Attrib     | Attrib    | Drop     | %Drop  | Attrib | Death   | Attrib | Attrib | Drop   |
|               | Deaths  | Deaths     | Deaths    | Deaths   | Deaths | Deaths | Rate    | Rates  | Rates  | Rates  |
| All Comb      | 1506818 | 149918.462 | 69626.988 | 80291.47 | 5.329  | 53.557 | 432.558 | 43.398 | 19.988 | 23.411 |

#### Results for Age Groups Combined, Population and Number deaths adjusted for Ecig scenario,

| Age Group:All | NULL   | Ecig     | %Drop    |          |        |        | NULL    | Ecig   | Drop   |        |
|---------------|--------|----------|----------|----------|--------|--------|---------|--------|--------|--------|
| Year          | Number | Attrib   | Attrib   | Drop     | %Drop  | Attrib | Death   | Attrib | Attrib | Drop   |
|               | Deaths | Deaths   | Deaths   | Deaths   | Deaths | Deaths | Rate    | Rates  | Rates  | Rates  |
| 1990          | 32862  | 4613.166 | 4613.166 | 0.000    | 0.000  | 0.000  | 520.936 | 73.129 | 73.129 | 0.000  |
| 1991          | 32619  | 4555.566 | 4515.509 | 40.057   | 0.123  | 0.879  | 508.609 | 71.032 | 70.408 | 0.625  |
| 1992          | 32100  | 4453.572 | 4348.544 | 105.028  | 0.327  | 2.358  | 492.015 | 68.262 | 66.652 | 1.610  |
| 1993          | 32897  | 4462.473 | 4264.087 | 198.386  | 0.603  | 4.446  | 495.229 | 67.179 | 64.191 | 2.988  |
| 1994          | 33325  | 4499.513 | 4186.454 | 313.060  | 0.939  | 6.958  | 492.297 | 66.473 | 61.844 | 4.628  |
| 1995          | 33574  | 4472.774 | 4029.000 | 443.774  | 1.322  | 9.922  | 486.436 | 64.812 | 58.375 | 6.437  |
| 1996          | 33877  | 4406.878 | 3818.606 | 588.273  | 1.736  | 13.349 | 483.172 | 62.863 | 54.462 | 8.401  |
| 1997          | 33527  | 4288.158 | 3553.316 | 734.842  | 2.192  | 17.137 | 470.341 | 60.173 | 49.848 | 10.325 |
| 1998          | 32811  | 4120.148 | 3251.461 | 868.687  | 2.648  | 21.084 | 452.668 | 56.864 | 44.858 | 12.006 |
| 1999          | 33397  | 3982.443 | 2980.445 | 1001.997 | 3.000  | 25.160 | 453.430 | 54.097 | 40.465 | 13.632 |
| 2000          | 33489  | 4021.411 | 2843.794 | 1177.617 | 3.516  | 29.284 | 447.949 | 53.827 | 38.039 | 15.788 |
| 2001          | 32312  | 3848.092 | 2552.295 | 1295.798 | 4.010  | 33.674 | 426.499 | 50.836 | 33.688 | 17.148 |
| 2002          | 31632  | 3783.081 | 2349.231 | 1433.850 | 4.533  | 37.902 | 412.754 | 49.418 | 30.654 | 18.764 |
| 2003          | 31041  | 3754.415 | 2167.503 | 1586.912 | 5.112  | 42.268 | 400.725 | 48.533 | 27.981 | 20.552 |
| 2004          | 29950  | 3666.274 | 1963.772 | 1702.503 | 5.685  | 46.437 | 382.370 | 46.883 | 25.072 | 21.812 |
| 2005          | 28783  | 3589.688 | 1777.110 | 1812.578 | 6.297  | 50.494 | 363.108 | 45.371 | 22.419 | 22.953 |
| 2006          | 28275  | 3596.985 | 1633.384 | 1963.600 | 6.945  | 54.590 | 353.323 | 45.048 | 20.411 | 24.637 |
| 2007          | 28126  | 3560.798 | 1485.286 | 2075.512 | 7.379  | 58.288 | 347.744 | 44.137 | 18.364 | 25.774 |
| 2008          | 27239  | 3417.001 | 1309.141 | 2107.861 | 7.738  | 61.687 | 332.889 | 41.881 | 15.999 | 25.882 |
| 2009          | 27195  | 3394.390 | 1193.868 | 2200.521 | 8.092  | 64.828 | 328.299 | 41.113 | 14.413 | 26.700 |
| 2010          | 27053  | 3340.137 | 1082.814 | 2257.323 | 8.344  | 67.582 | 322.502 | 39.965 | 12.908 | 27.056 |
| 2011          | 27118  | 3285.435 | 978.273  | 2307.162 | 8.508  | 70.224 | 319.963 | 38.922 | 11.542 | 27.379 |
| 2012          | 27235  | 3259.209 | 884.687  | 2374.522 | 8.719  | 72.856 | 317.728 | 38.193 | 10.321 | 27.872 |
| 2013          | 28108  | 3274.703 | 814.428  | 2460.275 | 8.753  | 75.130 | 324.033 | 37.937 | 9.389  | 28.548 |
| 2014          | 29023  | 3298.083 | 749.120  | 2548.963 | 8.783  | 77.286 | 330.534 | 37.762 | 8.532  | 29.230 |
| 2015          | 29822  | 3244.406 | 681.501  | 2562.905 | 8.594  | 78.995 | 381.629 | 41.789 | 8.721  | 33.068 |
| 2016          | 30808  | 3314.836 | 637.604  | 2677.232 | 8.690  | 80.765 | 390.349 | 42.297 | 8.079  | 34.219 |
| 2017          | 31746  | 3333.314 | 588.504  | 2744.809 | 8.646  | 82.345 | 398.345 | 42.144 | 7.384  | 34.760 |
| 2018          | 29685  | 2925.242 | 479.393  | 2445.848 | 8.239  | 83.612 | 368.841 | 36.642 | 5.956  | 30.686 |
| 2019          | 29965  | 2864.628 | 435.033  | 2429.595 | 8.108  | 84.814 | 368.492 | 35.534 | 5.350  | 30.184 |
| 2020          | 29991  | 2730.366 | 386.603  | 2343.763 | 7.815  | 85.841 | 420.407 | 38.675 | 5.419  | 33.256 |
| 2021          | 30533  | 2647.911 | 348.066  | 2299.845 | 7.532  | 86.855 | 424.728 | 37.244 | 4.842  | 32.402 |
| 2022          | 30772  | 2586.165 | 314.377  | 2271.788 | 7.383  | 87.844 | 424.509 | 36.097 | 4.337  | 31.760 |
| 2023          | 31008  | 2517.960 | 284.404  | 2233.557 | 7.203  | 88.705 | 424.016 | 34.860 | 3.889  | 30.971 |
| 2024          | 31197  | 2454.161 | 259.644  | 2194.516 | 7.034  | 89.420 | 422.800 | 33.695 | 3.519  | 30.177 |
| 2025          | 30823  | 2275.364 | 227.419  | 2047.946 | 6.644  | 90.005 | 485.063 | 36.363 | 3.579  | 32.784 |
| 2026          | 31298  | 2183.166 | 205.286  | 1977.880 | 6.319  | 90.597 | 490.149 | 34.747 | 3.215  | 31.532 |
| 2027          | 31206  | 2112.345 | 188.056  | 1924.289 | 6.167  | 91.097 | 486.118 | 33.467 | 2.930  | 30.537 |
| 2028          | 31088  | 2046.677 | 172.470  | 1874.206 | 6.029  | 91.573 | 481.475 | 32.263 | 2.671  | 29.592 |
| 2029          | 30962  | 1977.671 | 158.003  | 1819.668 | 5.877  | 92.011 | 476.446 | 30.997 | 2.431  | 28.566 |
| 2030          | 30064  | 1744.457 | 134.459  | 1609.998 | 5.355  | 92.292 | 551.116 | 32.668 | 2.465  | 30.203 |
| 2031          | 29736  | 1653.738 | 122.432  | 1531.305 | 5.150  | 92.597 | 543.227 | 30.889 | 2.237  | 28.652 |
| 2032          | 29513  | 1603.120 | 113.081  | 1490.039 | 5.049  | 92.946 | 536.857 | 29.841 | 2.057  | 27.784 |
| 2033          | 29280  | 1548.245 | 104.744  | 1443.501 | 4.930  | 93.235 | 529.961 | 28.700 | 1.896  | 26.804 |
| 2034          | 29022  | 1511.985 | 98.088   | 1413.897 | 4.872  | 93.513 | 522.330 | 27.893 | 1.765  | 26.127 |
| 2035          | 27589  | 1239.866 | 78.834   | 1161.031 | 4.208  | 93.642 | 612.164 | 28.290 | 1.749  | 26.541 |
| 2036          | 26436  | 1182.522 | 72.332   | 1110.190 | 4.199  | 93.883 | 585.910 | 26.975 | 1.603  | 25.372 |
| 2037          | 26003  | 1134.483 | 68.323   | 1066.161 | 4.100  | 93.978 | 575.186 | 25.851 | 1.511  | 24.339 |
| 2038          | 25568  | 1093.537 | 63.828   | 1029.708 | 4.027  | 94.163 | 563.887 | 24.866 | 1.408  | 23.458 |
| 2039          | 25135  | 1047.905 | 59.210   | 988.694  | 3.934  | 94.350 | 552.071 | 23.751 | 1.301  | 22.450 |

## Results for PHIM for Run 3 (Sensitivity\_Analysis\_4.RTF)

\*\*\*\*\*

### Main Results for E-Component for Run: 3, Simulation: 1, COD: COPD, Adjusted

| Variable Parameter          | Value                                  |
|-----------------------------|----------------------------------------|
| 1. Country                  | US (United States)                     |
| 2. Sex                      | M (Males)                              |
| 3. Year of start of process | 1990                                   |
| 4. Cause of Death           | COPD                                   |
| 5. Effective Dose NULL      | CC:1                                   |
| 6. Effective Dose Ecig      | CC:1 Ecig:0.05 Dual:0.525              |
| Note:                       | Death rates are per million population |

### Results for Age Groups Combined and Years combined, Population and Number deaths adjusted for Ecig scenario,

| Age Group:All | NULL    | Ecig        | %Drop      |          |        |        | NULL    | Ecig    | Drop    |        |
|---------------|---------|-------------|------------|----------|--------|--------|---------|---------|---------|--------|
| Year          | Number  | Attrib      | Attrib     | Drop     | %Drop  | Attrib | Death   | Attrib  | Attrib  | Drop   |
|               | Deaths  | Deaths      | Deaths     | Deaths   | Deaths | Deaths | Rate    | Rates   | Rates   | Rates  |
| All Comb      | 2265940 | 1015606.587 | 682043.595 | 333563.0 | 14.721 | 32.844 | 650.477 | 293.996 | 195.792 | 98.204 |

### Results for Age Groups Combined, Population and Number deaths adjusted for Ecig scenario,

| Age Group:All | NULL   | Ecig      | %Drop     |          |        |        | NULL    | Ecig    | Drop    |         |
|---------------|--------|-----------|-----------|----------|--------|--------|---------|---------|---------|---------|
| Year          | Number | Attrib    | Attrib    | Drop     | %Drop  | Attrib | Death   | Attrib  | Attrib  | Drop    |
|               | Deaths | Deaths    | Deaths    | Deaths   | Deaths | Deaths | Rate    | Rates   | Rates   | Rates   |
| 1990          | 33993  | 19262.437 | 19262.437 | 0.000    | 0.000  | 0.000  | 538.865 | 305.353 | 305.353 | 0.000   |
| 1991          | 34092  | 19215.636 | 19193.448 | 22.188   | 0.065  | 0.115  | 531.576 | 299.618 | 299.272 | 0.346   |
| 1992          | 33942  | 19056.189 | 18998.391 | 57.798   | 0.170  | 0.303  | 520.249 | 292.085 | 291.197 | 0.888   |
| 1993          | 35914  | 20095.670 | 19977.509 | 118.161  | 0.329  | 0.588  | 540.648 | 302.526 | 300.740 | 1.786   |
| 1994          | 35077  | 19524.095 | 19343.488 | 180.607  | 0.515  | 0.925  | 518.166 | 288.435 | 285.750 | 2.684   |
| 1995          | 34674  | 19116.002 | 18857.507 | 258.495  | 0.746  | 1.352  | 502.376 | 276.995 | 273.220 | 3.775   |
| 1996          | 34590  | 18975.021 | 18622.060 | 352.962  | 1.020  | 1.860  | 493.330 | 270.675 | 265.594 | 5.082   |
| 1997          | 35279  | 19169.025 | 18700.456 | 468.569  | 1.328  | 2.444  | 494.916 | 268.986 | 262.341 | 6.645   |
| 1998          | 35693  | 19228.937 | 18625.775 | 603.162  | 1.690  | 3.137  | 492.425 | 265.388 | 256.967 | 8.421   |
| 1999          | 38542  | 20589.820 | 19797.632 | 792.188  | 2.055  | 3.847  | 523.284 | 279.689 | 268.792 | 10.897  |
| 2000          | 36316  | 19196.417 | 18300.541 | 895.876  | 2.467  | 4.667  | 485.767 | 256.946 | 244.788 | 12.158  |
| 2001          | 36324  | 19012.731 | 17927.949 | 1084.782 | 2.986  | 5.706  | 479.449 | 251.174 | 236.635 | 14.538  |
| 2002          | 36037  | 18699.357 | 17430.366 | 1268.992 | 3.521  | 6.786  | 470.226 | 244.265 | 227.439 | 16.826  |
| 2003          | 36273  | 18663.550 | 17182.603 | 1480.947 | 4.083  | 7.935  | 468.262 | 241.262 | 221.820 | 19.443  |
| 2004          | 34689  | 17679.164 | 16037.391 | 1641.773 | 4.733  | 9.286  | 442.880 | 226.076 | 204.750 | 21.326  |
| 2005          | 36925  | 18692.832 | 16708.650 | 1984.182 | 5.373  | 10.615 | 465.823 | 236.265 | 210.783 | 25.481  |
| 2006          | 34459  | 17308.564 | 15201.125 | 2107.439 | 6.116  | 12.176 | 430.601 | 216.769 | 189.953 | 26.816  |
| 2007          | 35457  | 17683.181 | 15243.536 | 2439.646 | 6.881  | 13.796 | 438.377 | 219.189 | 188.466 | 30.723  |
| 2008          | 38411  | 19006.374 | 16094.279 | 2912.095 | 7.581  | 15.322 | 469.416 | 232.952 | 196.686 | 36.266  |
| 2009          | 37082  | 18205.573 | 15072.450 | 3133.122 | 8.449  | 17.210 | 447.660 | 220.505 | 181.958 | 38.547  |
| 2010          | 37439  | 18237.758 | 14802.074 | 3435.684 | 9.177  | 18.838 | 446.316 | 218.215 | 176.458 | 41.757  |
| 2011          | 38328  | 18487.916 | 14608.397 | 3879.519 | 10.122 | 20.984 | 452.222 | 219.022 | 172.360 | 46.662  |
| 2012          | 38769  | 18491.158 | 14237.806 | 4253.352 | 10.971 | 23.002 | 452.285 | 216.689 | 166.102 | 50.588  |
| 2013          | 40598  | 19143.452 | 14373.655 | 4769.798 | 11.749 | 24.916 | 468.022 | 221.775 | 165.704 | 56.071  |
| 2014          | 40679  | 18992.005 | 13861.072 | 5130.933 | 12.613 | 27.016 | 463.279 | 217.451 | 157.860 | 59.591  |
| 2015          | 42696  | 19728.885 | 14071.289 | 5657.595 | 13.251 | 28.677 | 546.367 | 254.116 | 180.067 | 74.049  |
| 2016          | 43541  | 19876.724 | 13771.647 | 6105.077 | 14.022 | 30.715 | 551.684 | 253.628 | 174.494 | 79.134  |
| 2017          | 44594  | 20119.790 | 13520.525 | 6599.265 | 14.799 | 32.800 | 559.560 | 254.381 | 169.654 | 84.727  |
| 2018          | 46012  | 20535.123 | 13375.903 | 7159.220 | 15.560 | 34.863 | 571.698 | 257.229 | 166.196 | 91.033  |
| 2019          | 47568  | 21009.029 | 13261.119 | 7747.910 | 16.288 | 36.879 | 584.965 | 260.605 | 163.077 | 97.528  |
| 2020          | 49093  | 21428.512 | 13113.860 | 8314.652 | 16.937 | 38.802 | 688.179 | 303.533 | 183.829 | 119.704 |
| 2021          | 49187  | 21266.697 | 12516.264 | 8750.433 | 17.790 | 41.146 | 684.218 | 299.127 | 174.107 | 125.019 |
| 2022          | 50712  | 21663.568 | 12272.104 | 9391.464 | 18.519 | 43.351 | 699.582 | 302.378 | 169.298 | 133.080 |
| 2023          | 52264  | 22084.131 | 12034.156 | 10049.98 | 19.229 | 45.508 | 714.693 | 305.748 | 164.562 | 141.186 |
| 2024          | 53766  | 22418.456 | 11774.548 | 10643.91 | 19.797 | 47.478 | 728.657 | 307.804 | 159.573 | 148.230 |
| 2025          | 54886  | 22614.834 | 11452.520 | 11162.31 | 20.337 | 49.358 | 863.738 | 361.411 | 180.228 | 181.184 |
| 2026          | 55454  | 22571.522 | 10953.810 | 11617.71 | 20.950 | 51.471 | 868.439 | 359.241 | 171.542 | 187.699 |
| 2027          | 56461  | 22774.416 | 10563.477 | 12210.94 | 21.627 | 53.617 | 879.550 | 360.827 | 164.557 | 196.269 |
| 2028          | 57429  | 22915.561 | 10125.670 | 12789.89 | 22.271 | 55.813 | 889.440 | 361.228 | 156.824 | 204.405 |
| 2029          | 58382  | 22992.027 | 9681.953  | 13310.07 | 22.798 | 57.890 | 898.389 | 360.371 | 148.987 | 211.384 |
| 2030          | 58693  | 22895.360 | 9234.256  | 13661.10 | 23.275 | 59.668 | 1075.95 | 428.760 | 169.280 | 259.480 |
| 2031          | 59126  | 22715.871 | 8755.532  | 13960.34 | 23.611 | 61.456 | 1080.13 | 424.293 | 159.948 | 264.345 |
| 2032          | 59875  | 22759.207 | 8323.607  | 14435.60 | 24.110 | 63.428 | 1089.17 | 423.652 | 151.412 | 272.239 |
| 2033          | 60601  | 22786.258 | 7916.199  | 14870.06 | 24.538 | 65.259 | 1096.86 | 422.387 | 143.282 | 279.105 |
| 2034          | 61268  | 22806.106 | 7504.525  | 15301.58 | 24.975 | 67.094 | 1102.71 | 420.721 | 135.066 | 285.655 |
| 2035          | 60394  | 22262.998 | 7043.178  | 15219.82 | 25.201 | 68.364 | 1340.10 | 507.973 | 156.282 | 351.691 |
| 2036          | 58318  | 21140.051 | 6213.228  | 14926.82 | 25.596 | 70.609 | 1292.51 | 482.234 | 137.704 | 344.529 |
| 2037          | 58512  | 21011.845 | 5779.230  | 15232.62 | 26.033 | 72.495 | 1294.26 | 478.783 | 127.834 | 350.949 |
| 2038          | 58683  | 20787.483 | 5349.091  | 15438.39 | 26.308 | 74.268 | 1294.23 | 472.681 | 117.972 | 354.709 |
| 2039          | 58844  | 20709.267 | 4975.309  | 15733.96 | 26.738 | 75.975 | 1292.49 | 469.372 | 109.280 | 360.092 |

## Results for PHIM for Run 4 (Sensitivity\_Analysis\_4.RTF)

---

### Control File Details for Run: 4

| Variable Parameter                                       | Value                  |
|----------------------------------------------------------|------------------------|
| 1. Name for Reference Scenario                           | NULL                   |
| 2. Name for Test Scenario                                | Ecig                   |
| 3. Name for Product 1                                    | CC                     |
| 4. Name for Product 2                                    | Ecig                   |
| 5. Name for Product 3                                    | -                      |
| 6. Name for Product 4                                    | Dual                   |
| 7. Country                                               | US (United States)     |
| 8. Sex                                                   | F (Females)            |
| 9. Year of start of process                              | 1990                   |
| 10. Number of months of follow-up                        | 600                    |
| 11. Follow-up interval length (in months)                | 12                     |
| 12. Lower age for risk estimation                        | 10                     |
| 13. Upper age for risk estimation                        | 79                     |
| 14. The effective dose for Product 1 (F1) - Ref          | 1                      |
| 15. The effective dose for Product 2 (F2) - Ref          | -                      |
| 16. The effective dose for Product 3 (F3) - Ref          | -                      |
| 17. The effective dose for Product 4 (F4) - Ref          | -                      |
| 18. The effective dose for Product 1 (F1) - Test         | 1                      |
| 19. The effective dose for Product 2 (F2) - Test         | 0.05                   |
| 20. The effective dose for Product 3 (F3) - Test         | -                      |
| 21. The effective dose for Product 4 (F4) - Test         | FROMF2                 |
| 22. Number in population to be simulated                 | 100000                 |
| 23. Number of MC simulations                             | 1                      |
| 24. The random number seed for the first simulation      | 15975263               |
| 25. Source for the population file (POP)                 | UN4                    |
| 26. Source for the socioeconomic prevalence file (SEP)   | -                      |
| 27. Source for the current smoking prevalence file (CSP) | ISS3                   |
| 28. Source for the former smoking prevalence file (FSP)  | ISS3                   |
| 29. Source for the quit-time distribution file (QTD)     | NHIS2006               |
| 30. Source for the death file (MORT)                     | APR-20                 |
| 31. Source for the relative risk file (RR)               | PNLEST                 |
| 32. Source for the half-life file (H)                    | PNLEST                 |
| 33. Assumption Set for TTP Factor Reference              | F1                     |
| 34. Assumption Set for TTP Factor Test                   | F1                     |
| 35. Assumption Set for TTP Reference                     | ISS3                   |
| 36. Assumption Set for TTP Test                          | S4B                    |
| 37. Assumption Set for TP for socioeconomic group        | -                      |
| 38. Source for Output Choice file (OUTC)                 | BASIC                  |
| 39. Output for DTP P1                                    | N                      |
| 40. Output for DTP P2                                    | N                      |
| 41. Output for Main P Component                          | Y                      |
| 42. Output for DTP E1                                    | N                      |
| 43. Output for DTP E2                                    | N                      |
| 44. Output for DTP E3                                    | N                      |
| 45. Output for Main E Component                          | Y                      |
| 46. Output file name                                     | Sensitivity_Analysis_4 |
| 47. Run number for P-Component                           | -                      |
| 48. Results file for E-Component                         | -                      |
| 49. Components required                                  | PE                     |
| 50. Results folder for P to be used in E-Component       | -                      |
| 51. Fixed age of starting product use                    | 16                     |
| 52. Output absolute risk file?                           | N                      |

## Results for PHIM for Run 4 (Sensitivity\_Analysis\_4.RTF)

\*\*\*\*\*

TTP values for Run: 4, Scenario: NULL

| Variable Parameter | Value               |
|--------------------|---------------------|
| 1. Country         | US (United States)  |
| 2. Sex             | F (Females)         |
| 3. Assumption Set  | ISS3                |
| Note:              | Period is in Months |

| Age   | Period  | Initiation  | Cessation    | Re-initiation |
|-------|---------|-------------|--------------|---------------|
|       |         | Never<br>CC | CC<br>Former | Former<br>CC  |
| 10-14 | 1-12    | 0.003758    | 0.008742     | 0.000000      |
| 15-19 | 1-12    | 0.003469    | 0.002515     | 0.000000      |
| 20-24 | 1-12    | 0.000276    | 0.000761     | 0.000000      |
| 25-29 | 1-12    | 0.000137    | 0.001375     | 0.000000      |
| 30-34 | 1-12    | 0.000069    | 0.001149     | 0.000000      |
| 35-39 | 1-12    | 0.000000    | 0.000991     | 0.000000      |
| 40-44 | 1-12    | 0.000000    | 0.000833     | 0.000000      |
| 45-49 | 1-12    | 0.000000    | 0.001723     | 0.000000      |
| 50-54 | 1-12    | 0.000000    | 0.002336     | 0.000000      |
| 55-59 | 1-12    | 0.000000    | 0.002233     | 0.000000      |
| 60-64 | 1-12    | 0.000000    | 0.004634     | 0.000000      |
| 65-69 | 1-12    | 0.000000    | 0.003505     | 0.000000      |
| 70-74 | 1-12    | 0.000000    | 0.004329     | 0.000000      |
| 75-79 | 1-12    | 0.000000    | 0.004329     | 0.000000      |
| 10-14 | 13-72   | 0.004794    | 0.008742     | 0.000000      |
| 15-19 | 13-72   | 0.004527    | 0.004082     | 0.000000      |
| 20-24 | 13-72   | 0.000105    | 0.001261     | 0.000000      |
| 25-29 | 13-72   | 0.000053    | 0.000952     | 0.000000      |
| 30-34 | 13-72   | 0.000026    | 0.000733     | 0.000000      |
| 35-39 | 13-72   | 0.000000    | 0.000753     | 0.000000      |
| 40-44 | 13-72   | 0.000000    | 0.001535     | 0.000000      |
| 45-49 | 13-72   | 0.000000    | 0.002998     | 0.000000      |
| 50-54 | 13-72   | 0.000000    | 0.003159     | 0.000000      |
| 55-59 | 13-72   | 0.000000    | 0.002965     | 0.000000      |
| 60-64 | 13-72   | 0.000000    | 0.003633     | 0.000000      |
| 65-69 | 13-72   | 0.000000    | 0.004522     | 0.000000      |
| 70-74 | 13-72   | 0.000000    | 0.005208     | 0.000000      |
| 75-79 | 13-72   | 0.000000    | 0.005208     | 0.000000      |
| 10-14 | 73-132  | 0.003969    | 0.008742     | 0.000000      |
| 15-19 | 73-132  | 0.003056    | 0.003373     | 0.000000      |
| 20-24 | 73-132  | 0.001459    | 0.003881     | 0.000000      |
| 25-29 | 73-132  | 0.000714    | 0.001953     | 0.000000      |
| 30-34 | 73-132  | 0.000111    | 0.001338     | 0.000000      |
| 35-39 | 73-132  | 0.000000    | 0.001507     | 0.000000      |
| 40-44 | 73-132  | 0.000000    | 0.002080     | 0.000000      |
| 45-49 | 73-132  | 0.000000    | 0.003809     | 0.000000      |
| 50-54 | 73-132  | 0.000000    | 0.004871     | 0.000000      |
| 55-59 | 73-132  | 0.000000    | 0.004560     | 0.000000      |
| 60-64 | 73-132  | 0.000000    | 0.007192     | 0.000000      |
| 65-69 | 73-132  | 0.000000    | 0.007033     | 0.000000      |
| 70-74 | 73-132  | 0.000000    | 0.008206     | 0.000000      |
| 75-79 | 73-132  | 0.000000    | 0.008206     | 0.000000      |
| 10-14 | 133-192 | 0.002861    | 0.008742     | 0.000000      |
| 15-19 | 133-192 | 0.002594    | 0.003996     | 0.000000      |
| 20-24 | 133-192 | 0.001247    | 0.002805     | 0.000000      |
| 25-29 | 133-192 | 0.000289    | 0.001574     | 0.000000      |
| 30-34 | 133-192 | 0.000132    | 0.001293     | 0.000000      |
| 35-39 | 133-192 | 0.000000    | 0.001219     | 0.000000      |
| 40-44 | 133-192 | 0.000000    | 0.001657     | 0.000000      |
| 45-49 | 133-192 | 0.000000    | 0.001995     | 0.000000      |
| 50-54 | 133-192 | 0.000000    | 0.002154     | 0.000000      |
| 55-59 | 133-192 | 0.000000    | 0.002072     | 0.000000      |
| 60-64 | 133-192 | 0.000000    | 0.005049     | 0.000000      |
| 65-69 | 133-192 | 0.000000    | 0.003680     | 0.000000      |
| 70-74 | 133-192 | 0.000000    | 0.006144     | 0.000000      |
| 75-79 | 133-192 | 0.000000    | 0.006144     | 0.000000      |
| 10-14 | 193-252 | 0.001859    | 0.008742     | 0.000000      |
| 15-19 | 193-252 | 0.002232    | 0.005770     | 0.000000      |
| 20-24 | 193-252 | 0.001079    | 0.003262     | 0.000000      |
| 25-29 | 193-252 | 0.000531    | 0.002002     | 0.000000      |
| 30-34 | 193-252 | 0.000263    | 0.003240     | 0.000000      |
| 35-39 | 193-252 | 0.000000    | 0.001771     | 0.000000      |
| 40-44 | 193-252 | 0.000000    | 0.002173     | 0.000000      |
| 45-49 | 193-252 | 0.000000    | 0.002075     | 0.000000      |
| 50-54 | 193-252 | 0.000000    | 0.003431     | 0.000000      |



### Results for PHIM for Run 4 (Sensitivity\_Analysis\_4.RTF)

|       |         |          |          |          |
|-------|---------|----------|----------|----------|
| 55-59 | 193-252 | 0.000000 | 0.002906 | 0.000000 |
| 60-64 | 193-252 | 0.000000 | 0.007139 | 0.000000 |
| 65-69 | 193-252 | 0.000000 | 0.004963 | 0.000000 |
| 70-74 | 193-252 | 0.000000 | 0.006269 | 0.000000 |
| 75-79 | 193-252 | 0.000000 | 0.006269 | 0.000000 |
| 10-14 | 253+    | 0.000931 | 0.008742 | 0.000000 |
| 15-19 | 253+    | 0.001798 | 0.009440 | 0.000000 |
| 20-24 | 253+    | 0.000023 | 0.002831 | 0.000000 |
| 25-29 | 253+    | 0.000073 | 0.002655 | 0.000000 |
| 30-34 | 253+    | 0.000037 | 0.004614 | 0.000000 |
| 35-39 | 253+    | 0.000000 | 0.002607 | 0.000000 |
| 40-44 | 253+    | 0.000000 | 0.003115 | 0.000000 |
| 45-49 | 253+    | 0.000000 | 0.002132 | 0.000000 |
| 50-54 | 253+    | 0.000000 | 0.003497 | 0.000000 |
| 55-59 | 253+    | 0.000000 | 0.002942 | 0.000000 |
| 60-64 | 253+    | 0.000000 | 0.005376 | 0.000000 |
| 65-69 | 253+    | 0.000000 | 0.001789 | 0.000000 |
| 70-74 | 253+    | 0.000000 | 0.004077 | 0.000000 |
| 75-79 | 253+    | 0.000000 | 0.004077 | 0.000000 |

## Results for PHIM for Run 4 (Sensitivity\_Analysis\_4.RTF)

\*\*\*\*\*

TTP values for Run: 4, Scenario: Ecig

Variable Parameter

Value

- 1. Country
  - 2. Sex
  - 3. Assumption Set
- Note:

US (United States)  
 F (Females)  
 S4B  
 Period is in Months

| Age   | Period  | Initiation  |               |               | Cessation    |                |                | Re-initiation |                |                |
|-------|---------|-------------|---------------|---------------|--------------|----------------|----------------|---------------|----------------|----------------|
|       |         | Never<br>CC | Never<br>Ecig | Never<br>Dual | CC<br>Former | Ecig<br>Former | Dual<br>Former | Former<br>CC  | Former<br>Ecig | Former<br>Dual |
| 10-14 | 1-12    | 0.001879    | 0.001409      | 0.000000      | 0.008742     | 0.008742       | 0.000000       | 0.000000      | 0.000000       | 0.000000       |
| 15-19 | 1-12    | 0.001735    | 0.001301      | 0.000000      | 0.002515     | 0.002515       | 0.000000       | 0.000000      | 0.000000       | 0.000000       |
| 20-24 | 1-12    | 0.000138    | 0.000103      | 0.000000      | 0.000761     | 0.000761       | 0.000000       | 0.000000      | 0.000000       | 0.000000       |
| 25-29 | 1-12    | 0.000069    | 0.000052      | 0.000000      | 0.001376     | 0.001376       | 0.000000       | 0.000000      | 0.000000       | 0.000000       |
| 30-34 | 1-12    | 0.000034    | 0.000026      | 0.000000      | 0.001149     | 0.001149       | 0.000000       | 0.000000      | 0.000000       | 0.000000       |
| 35-39 | 1-12    | 0.000000    | 0.000000      | 0.000000      | 0.000991     | 0.000991       | 0.000000       | 0.000000      | 0.000000       | 0.000000       |
| 40-44 | 1-12    | 0.000000    | 0.000000      | 0.000000      | 0.000833     | 0.000833       | 0.000000       | 0.000000      | 0.000000       | 0.000000       |
| 45-49 | 1-12    | 0.000000    | 0.000000      | 0.000000      | 0.001723     | 0.001723       | 0.000000       | 0.000000      | 0.000000       | 0.000000       |
| 50-54 | 1-12    | 0.000000    | 0.000000      | 0.000000      | 0.002336     | 0.002336       | 0.000000       | 0.000000      | 0.000000       | 0.000000       |
| 55-59 | 1-12    | 0.000000    | 0.000000      | 0.000000      | 0.002233     | 0.002233       | 0.000000       | 0.000000      | 0.000000       | 0.000000       |
| 60-64 | 1-12    | 0.000000    | 0.000000      | 0.000000      | 0.004635     | 0.004635       | 0.000000       | 0.000000      | 0.000000       | 0.000000       |
| 65-69 | 1-12    | 0.000000    | 0.000000      | 0.000000      | 0.003505     | 0.003505       | 0.000000       | 0.000000      | 0.000000       | 0.000000       |
| 70-74 | 1-12    | 0.000000    | 0.000000      | 0.000000      | 0.004329     | 0.004329       | 0.000000       | 0.000000      | 0.000000       | 0.000000       |
| 75-79 | 1-12    | 0.000000    | 0.000000      | 0.000000      | 0.004329     | 0.004329       | 0.000000       | 0.000000      | 0.000000       | 0.000000       |
| 10-14 | 13-72   | 0.001918    | 0.002157      | 0.000000      | 0.008742     | 0.008742       | 0.000000       | 0.000000      | 0.000000       | 0.000000       |
| 15-19 | 13-72   | 0.001811    | 0.002037      | 0.000000      | 0.004083     | 0.004083       | 0.000000       | 0.000000      | 0.000000       | 0.000000       |
| 20-24 | 13-72   | 0.000042    | 0.000048      | 0.000000      | 0.001261     | 0.001261       | 0.000000       | 0.000000      | 0.000000       | 0.000000       |
| 25-29 | 13-72   | 0.000021    | 0.000024      | 0.000000      | 0.000952     | 0.000952       | 0.000000       | 0.000000      | 0.000000       | 0.000000       |
| 30-34 | 13-72   | 0.000011    | 0.000012      | 0.000000      | 0.000733     | 0.000733       | 0.000000       | 0.000000      | 0.000000       | 0.000000       |
| 35-39 | 13-72   | 0.000000    | 0.000000      | 0.000000      | 0.000754     | 0.000754       | 0.000000       | 0.000000      | 0.000000       | 0.000000       |
| 40-44 | 13-72   | 0.000000    | 0.000000      | 0.000000      | 0.001535     | 0.001535       | 0.000000       | 0.000000      | 0.000000       | 0.000000       |
| 45-49 | 13-72   | 0.000000    | 0.000000      | 0.000000      | 0.002998     | 0.002998       | 0.000000       | 0.000000      | 0.000000       | 0.000000       |
| 50-54 | 13-72   | 0.000000    | 0.000000      | 0.000000      | 0.003160     | 0.003160       | 0.000000       | 0.000000      | 0.000000       | 0.000000       |
| 55-59 | 13-72   | 0.000000    | 0.000000      | 0.000000      | 0.002965     | 0.002965       | 0.000000       | 0.000000      | 0.000000       | 0.000000       |
| 60-64 | 13-72   | 0.000000    | 0.000000      | 0.000000      | 0.003633     | 0.003633       | 0.000000       | 0.000000      | 0.000000       | 0.000000       |
| 65-69 | 13-72   | 0.000000    | 0.000000      | 0.000000      | 0.004522     | 0.004522       | 0.000000       | 0.000000      | 0.000000       | 0.000000       |
| 70-74 | 13-72   | 0.000000    | 0.000000      | 0.000000      | 0.005208     | 0.005208       | 0.000000       | 0.000000      | 0.000000       | 0.000000       |
| 75-79 | 13-72   | 0.000000    | 0.000000      | 0.000000      | 0.005208     | 0.005208       | 0.000000       | 0.000000      | 0.000000       | 0.000000       |
| 10-14 | 73-132  | 0.000794    | 0.002381      | 0.000000      | 0.008742     | 0.008742       | 0.000000       | 0.000000      | 0.000000       | 0.000000       |
| 15-19 | 73-132  | 0.000611    | 0.001834      | 0.000000      | 0.003373     | 0.003373       | 0.000000       | 0.000000      | 0.000000       | 0.000000       |
| 20-24 | 73-132  | 0.000292    | 0.000876      | 0.000000      | 0.003881     | 0.003881       | 0.000000       | 0.000000      | 0.000000       | 0.000000       |
| 25-29 | 73-132  | 0.000143    | 0.000428      | 0.000000      | 0.001954     | 0.001954       | 0.000000       | 0.000000      | 0.000000       | 0.000000       |
| 30-34 | 73-132  | 0.000022    | 0.000067      | 0.000000      | 0.001338     | 0.001338       | 0.000000       | 0.000000      | 0.000000       | 0.000000       |
| 35-39 | 73-132  | 0.000000    | 0.000000      | 0.000000      | 0.001507     | 0.001507       | 0.000000       | 0.000000      | 0.000000       | 0.000000       |
| 40-44 | 73-132  | 0.000000    | 0.000000      | 0.000000      | 0.002080     | 0.002080       | 0.000000       | 0.000000      | 0.000000       | 0.000000       |
| 45-49 | 73-132  | 0.000000    | 0.000000      | 0.000000      | 0.003809     | 0.003809       | 0.000000       | 0.000000      | 0.000000       | 0.000000       |
| 50-54 | 73-132  | 0.000000    | 0.000000      | 0.000000      | 0.004871     | 0.004871       | 0.000000       | 0.000000      | 0.000000       | 0.000000       |
| 55-59 | 73-132  | 0.000000    | 0.000000      | 0.000000      | 0.004560     | 0.004560       | 0.000000       | 0.000000      | 0.000000       | 0.000000       |
| 60-64 | 73-132  | 0.000000    | 0.000000      | 0.000000      | 0.007192     | 0.007192       | 0.000000       | 0.000000      | 0.000000       | 0.000000       |
| 65-69 | 73-132  | 0.000000    | 0.000000      | 0.000000      | 0.007033     | 0.007033       | 0.000000       | 0.000000      | 0.000000       | 0.000000       |
| 70-74 | 73-132  | 0.000000    | 0.000000      | 0.000000      | 0.008206     | 0.008206       | 0.000000       | 0.000000      | 0.000000       | 0.000000       |
| 75-79 | 73-132  | 0.000000    | 0.000000      | 0.000000      | 0.008206     | 0.008206       | 0.000000       | 0.000000      | 0.000000       | 0.000000       |
| 10-14 | 133-192 | 0.000143    | 0.002039      | 0.000000      | 0.008742     | 0.008742       | 0.000000       | 0.000000      | 0.000000       | 0.000000       |
| 15-19 | 133-192 | 0.000130    | 0.001848      | 0.000000      | 0.003996     | 0.003996       | 0.000000       | 0.000000      | 0.000000       | 0.000000       |
| 20-24 | 133-192 | 0.000062    | 0.000889      | 0.000000      | 0.002805     | 0.002805       | 0.000000       | 0.000000      | 0.000000       | 0.000000       |
| 25-29 | 133-192 | 0.000015    | 0.000206      | 0.000000      | 0.001574     | 0.001574       | 0.000000       | 0.000000      | 0.000000       | 0.000000       |
| 30-34 | 133-192 | 0.000007    | 0.000094      | 0.000000      | 0.001293     | 0.001293       | 0.000000       | 0.000000      | 0.000000       | 0.000000       |
| 35-39 | 133-192 | 0.000000    | 0.000000      | 0.000000      | 0.001219     | 0.001219       | 0.000000       | 0.000000      | 0.000000       | 0.000000       |
| 40-44 | 133-192 | 0.000000    | 0.000000      | 0.000000      | 0.001657     | 0.001657       | 0.000000       | 0.000000      | 0.000000       | 0.000000       |
| 45-49 | 133-192 | 0.000000    | 0.000000      | 0.000000      | 0.001995     | 0.001995       | 0.000000       | 0.000000      | 0.000000       | 0.000000       |
| 50-54 | 133-192 | 0.000000    | 0.000000      | 0.000000      | 0.002154     | 0.002154       | 0.000000       | 0.000000      | 0.000000       | 0.000000       |
| 55-59 | 133-192 | 0.000000    | 0.000000      | 0.000000      | 0.002072     | 0.002072       | 0.000000       | 0.000000      | 0.000000       | 0.000000       |
| 60-64 | 133-192 | 0.000000    | 0.000000      | 0.000000      | 0.005049     | 0.005049       | 0.000000       | 0.000000      | 0.000000       | 0.000000       |
| 65-69 | 133-192 | 0.000000    | 0.000000      | 0.000000      | 0.003681     | 0.003681       | 0.000000       | 0.000000      | 0.000000       | 0.000000       |
| 70-74 | 133-192 | 0.000000    | 0.000000      | 0.000000      | 0.006144     | 0.006144       | 0.000000       | 0.000000      | 0.000000       | 0.000000       |
| 75-79 | 133-192 | 0.000000    | 0.000000      | 0.000000      | 0.006144     | 0.006144       | 0.000000       | 0.000000      | 0.000000       | 0.000000       |
| 10-14 | 193-252 | 0.000093    | 0.001324      | 0.000000      | 0.008742     | 0.008742       | 0.000000       | 0.000000      | 0.000000       | 0.000000       |
| 15-19 | 193-252 | 0.000112    | 0.001590      | 0.000000      | 0.005770     | 0.005770       | 0.000000       | 0.000000      | 0.000000       | 0.000000       |
| 20-24 | 193-252 | 0.000054    | 0.000769      | 0.000000      | 0.003262     | 0.003262       | 0.000000       | 0.000000      | 0.000000       | 0.000000       |
| 25-29 | 193-252 | 0.000027    | 0.000378      | 0.000000      | 0.002002     | 0.002002       | 0.000000       | 0.000000      | 0.000000       | 0.000000       |
| 30-34 | 193-252 | 0.000013    | 0.000188      | 0.000000      | 0.003241     | 0.003241       | 0.000000       | 0.000000      | 0.000000       | 0.000000       |
| 35-39 | 193-252 | 0.000000    | 0.000000      | 0.000000      | 0.001771     | 0.001771       | 0.000000       | 0.000000      | 0.000000       | 0.000000       |
| 40-44 | 193-252 | 0.000000    | 0.000000      | 0.000000      | 0.002173     | 0.002173       | 0.000000       | 0.000000      | 0.000000       | 0.000000       |
| 45-49 | 193-252 | 0.000000    | 0.000000      | 0.000000      | 0.002075     | 0.002075       | 0.000000       | 0.000000      | 0.000000       | 0.000000       |
| 50-54 | 193-252 | 0.000000    | 0.000000      | 0.000000      | 0.003432     | 0.003432       | 0.000000       | 0.000000      | 0.000000       | 0.000000       |

### Results for PHIM for Run 4 (Sensitivity\_Analysis\_4.RTF)

|       |         |          |          |          |          |          |          |          |          |          |
|-------|---------|----------|----------|----------|----------|----------|----------|----------|----------|----------|
| 55-59 | 193-252 | 0.000000 | 0.000000 | 0.000000 | 0.002906 | 0.002906 | 0.000000 | 0.000000 | 0.000000 | 0.000000 |
| 60-64 | 193-252 | 0.000000 | 0.000000 | 0.000000 | 0.007139 | 0.007139 | 0.000000 | 0.000000 | 0.000000 | 0.000000 |
| 65-69 | 193-252 | 0.000000 | 0.000000 | 0.000000 | 0.004963 | 0.004963 | 0.000000 | 0.000000 | 0.000000 | 0.000000 |
| 70-74 | 193-252 | 0.000000 | 0.000000 | 0.000000 | 0.006269 | 0.006269 | 0.000000 | 0.000000 | 0.000000 | 0.000000 |
| 75-79 | 193-252 | 0.000000 | 0.000000 | 0.000000 | 0.006269 | 0.006269 | 0.000000 | 0.000000 | 0.000000 | 0.000000 |
| 10-14 | 253+    | 0.000047 | 0.000663 | 0.000000 | 0.008742 | 0.008742 | 0.000000 | 0.000000 | 0.000000 | 0.000000 |
| 15-19 | 253+    | 0.000090 | 0.001281 | 0.000000 | 0.009440 | 0.009440 | 0.000000 | 0.000000 | 0.000000 | 0.000000 |
| 20-24 | 253+    | 0.000001 | 0.000016 | 0.000000 | 0.002831 | 0.002831 | 0.000000 | 0.000000 | 0.000000 | 0.000000 |
| 25-29 | 253+    | 0.000004 | 0.000052 | 0.000000 | 0.002656 | 0.002656 | 0.000000 | 0.000000 | 0.000000 | 0.000000 |
| 30-34 | 253+    | 0.000002 | 0.000026 | 0.000000 | 0.004614 | 0.004614 | 0.000000 | 0.000000 | 0.000000 | 0.000000 |
| 35-39 | 253+    | 0.000000 | 0.000000 | 0.000000 | 0.002608 | 0.002608 | 0.000000 | 0.000000 | 0.000000 | 0.000000 |
| 40-44 | 253+    | 0.000000 | 0.000000 | 0.000000 | 0.003115 | 0.003115 | 0.000000 | 0.000000 | 0.000000 | 0.000000 |
| 45-49 | 253+    | 0.000000 | 0.000000 | 0.000000 | 0.002132 | 0.002132 | 0.000000 | 0.000000 | 0.000000 | 0.000000 |
| 50-54 | 253+    | 0.000000 | 0.000000 | 0.000000 | 0.003497 | 0.003497 | 0.000000 | 0.000000 | 0.000000 | 0.000000 |
| 55-59 | 253+    | 0.000000 | 0.000000 | 0.000000 | 0.002942 | 0.002942 | 0.000000 | 0.000000 | 0.000000 | 0.000000 |
| 60-64 | 253+    | 0.000000 | 0.000000 | 0.000000 | 0.005376 | 0.005376 | 0.000000 | 0.000000 | 0.000000 | 0.000000 |
| 65-69 | 253+    | 0.000000 | 0.000000 | 0.000000 | 0.001789 | 0.001789 | 0.000000 | 0.000000 | 0.000000 | 0.000000 |
| 70-74 | 253+    | 0.000000 | 0.000000 | 0.000000 | 0.004077 | 0.004077 | 0.000000 | 0.000000 | 0.000000 | 0.000000 |
| 75-79 | 253+    | 0.000000 | 0.000000 | 0.000000 | 0.004077 | 0.004077 | 0.000000 | 0.000000 | 0.000000 | 0.000000 |



### Results for PHIM for Run 4 (Sensitivity\_Analysis\_4.RTF)

|       |      |          |          |          |          |          |          |
|-------|------|----------|----------|----------|----------|----------|----------|
| 25-29 | 253+ | 0.014127 | 0.000000 | 0.000000 | 0.000000 | 0.000000 | 0.000000 |
| 30-34 | 253+ | 0.013889 | 0.000000 | 0.000000 | 0.000000 | 0.000000 | 0.000000 |
| 35-39 | 253+ | 0.012929 | 0.000000 | 0.000000 | 0.000000 | 0.000000 | 0.000000 |
| 40-44 | 253+ | 0.012785 | 0.000000 | 0.000000 | 0.000000 | 0.000000 | 0.000000 |
| 45-49 | 253+ | 0.012295 | 0.000000 | 0.000000 | 0.000000 | 0.000000 | 0.000000 |
| 50-54 | 253+ | 0.011536 | 0.000000 | 0.000000 | 0.000000 | 0.000000 | 0.000000 |
| 55-59 | 253+ | 0.008988 | 0.000000 | 0.000000 | 0.000000 | 0.000000 | 0.000000 |
| 60-64 | 253+ | 0.008098 | 0.000000 | 0.000000 | 0.000000 | 0.000000 | 0.000000 |
| 65-69 | 253+ | 0.006274 | 0.000000 | 0.000000 | 0.000000 | 0.000000 | 0.000000 |
| 70-74 | 253+ | 0.004141 | 0.000000 | 0.000000 | 0.000000 | 0.000000 | 0.000000 |
| 75-79 | 253+ | 0.004141 | 0.000000 | 0.000000 | 0.000000 | 0.000000 | 0.000000 |

## Results for PHIM for Run 4 (Sensitivity\_Analysis\_4.RTF)

\*\*\*\*\*

### Main Output for the Tobacco History for Run: 4, Simulation: 1, Scenario: NULL

| Variable Parameter          | Value              |
|-----------------------------|--------------------|
| 1. Country                  | US (United States) |
| 2. Sex                      | F (Females)        |
| 3. Year of start of process | 1990               |

Year of Follow-up: 2040, Age Group: All Ages  
 Period    Age Group    Smoking Group            N            %

|    |          |           |       |       |
|----|----------|-----------|-------|-------|
| 50 | All Ages | Never Any | 20670 | 58.80 |
| 50 | All Ages | CC        | 2462  | 7.00  |
| 50 | All Ages | Former    | 12019 | 34.19 |

Year of Follow-up: 2040, Age Group: 18-19  
 Period    Age Group    Smoking Group            N            %

|    |       |           |   |   |
|----|-------|-----------|---|---|
| 50 | 18-19 | Never Any | 0 | . |
| 50 | 18-19 | CC        | 0 | . |
| 50 | 18-19 | Former    | 0 | . |

Year of Follow-up: 2040, Age Group: 20-24  
 Period    Age Group    Smoking Group            N            %

|    |       |           |   |   |
|----|-------|-----------|---|---|
| 50 | 20-24 | Never Any | 0 | . |
| 50 | 20-24 | CC        | 0 | . |
| 50 | 20-24 | Former    | 0 | . |

Year of Follow-up: 2040, Age Group: 25-29  
 Period    Age Group    Smoking Group            N            %

|    |       |           |   |   |
|----|-------|-----------|---|---|
| 50 | 25-29 | Never Any | 0 | . |
| 50 | 25-29 | CC        | 0 | . |
| 50 | 25-29 | Former    | 0 | . |

Year of Follow-up: 2040, Age Group: 30-34  
 Period    Age Group    Smoking Group            N            %

|    |       |           |   |   |
|----|-------|-----------|---|---|
| 50 | 30-34 | Never Any | 0 | . |
| 50 | 30-34 | CC        | 0 | . |
| 50 | 30-34 | Former    | 0 | . |

Year of Follow-up: 2040, Age Group: 35-39  
 Period    Age Group    Smoking Group            N            %

|    |       |           |   |   |
|----|-------|-----------|---|---|
| 50 | 35-39 | Never Any | 0 | . |
| 50 | 35-39 | CC        | 0 | . |
| 50 | 35-39 | Former    | 0 | . |

Year of Follow-up: 2040, Age Group: 40-44  
 Period    Age Group    Smoking Group            N            %

|    |       |           |   |   |
|----|-------|-----------|---|---|
| 50 | 40-44 | Never Any | 0 | . |
| 50 | 40-44 | CC        | 0 | . |
| 50 | 40-44 | Former    | 0 | . |

Year of Follow-up: 2040, Age Group: 45-49  
 Period    Age Group    Smoking Group            N            %

|    |       |           |   |   |
|----|-------|-----------|---|---|
| 50 | 45-49 | Never Any | 0 | . |
| 50 | 45-49 | CC        | 0 | . |
| 50 | 45-49 | Former    | 0 | . |

Year of Follow-up: 2040, Age Group: 50-54  
 Period    Age Group    Smoking Group            N            %

|    |       |           |   |   |
|----|-------|-----------|---|---|
| 50 | 50-54 | Never Any | 0 | . |
| 50 | 50-54 | CC        | 0 | . |
| 50 | 50-54 | Former    | 0 | . |

Year of Follow-up: 2040, Age Group: 55-59  
 Period    Age Group    Smoking Group            N            %

|    |       |           |   |   |
|----|-------|-----------|---|---|
| 50 | 55-59 | Never Any | 0 | . |
| 50 | 55-59 | CC        | 0 | . |
| 50 | 55-59 | Former    | 0 | . |

Year of Follow-up: 2040, Age Group: 60-64  
 Period    Age Group    Smoking Group            N            %

### Results for PHIM for Run 4 (Sensitivity\_Analysis\_4.RTF)

|                                           |           |               |      |       |
|-------------------------------------------|-----------|---------------|------|-------|
| 50                                        | 60-64     | Never Any     | 4803 | 60.57 |
| 50                                        | 60-64     | CC            | 621  | 7.83  |
| 50                                        | 60-64     | Former        | 2506 | 31.60 |
| Year of Follow-up: 2040, Age Group: 65-69 |           |               |      |       |
| Period                                    | Age Group | Smoking Group | N    | %     |
| 50                                        | 65-69     | Never Any     | 5407 | 64.75 |
| 50                                        | 65-69     | CC            | 538  | 6.44  |
| 50                                        | 65-69     | Former        | 2405 | 28.80 |
| Year of Follow-up: 2040, Age Group: 70-74 |           |               |      |       |
| Period                                    | Age Group | Smoking Group | N    | %     |
| 50                                        | 70-74     | Never Any     | 5181 | 58.92 |
| 50                                        | 70-74     | CC            | 605  | 6.88  |
| 50                                        | 70-74     | Former        | 3007 | 34.20 |
| Year of Follow-up: 2040, Age Group: 75-79 |           |               |      |       |
| Period                                    | Age Group | Smoking Group | N    | %     |
| 50                                        | 75-79     | Never Any     | 5279 | 52.38 |
| 50                                        | 75-79     | CC            | 698  | 6.93  |
| 50                                        | 75-79     | Former        | 4101 | 40.69 |

## Results for PHIM for Run 4 (Sensitivity\_Analysis\_4.RTF)

\*\*\*\*\*

### Main Output for the Tobacco History for Run: 4, Simulation: 1, Scenario: Ecig

| Variable Parameter                           |           |               | Value              |       |               |             |               |                |              |
|----------------------------------------------|-----------|---------------|--------------------|-------|---------------|-------------|---------------|----------------|--------------|
| 1. Country                                   |           |               | US (United States) |       |               |             |               |                |              |
| 2. Sex                                       |           |               | F (Females)        |       |               |             |               |                |              |
| 3. Year of start of process                  |           |               | 1990               |       |               |             |               |                |              |
| Year of Follow-up: 1990, Age Group: All Ages |           |               |                    |       |               |             |               |                |              |
| Period                                       | Age Group | Smoking Group | N                  | %     | Ever Quit (N) | Ever Quit % | Mean Yrs Quit | Short Term (n) | Short Term % |
| 0                                            | All Ages  | Never Any     | 47776              | 54.92 |               |             |               |                |              |
| 0                                            | All Ages  | CC            | 22737              | 26.14 | 0             | 0.00        |               |                |              |
| 0                                            | All Ages  | Ecig          | 0                  | 0.00  |               |             |               |                |              |
| 0                                            | All Ages  | Dual          | 0                  | 0.00  |               |             |               |                |              |
| 0                                            | All Ages  | Former        | 16484              | 18.95 |               |             | 11.90         | 2815           | 17.08        |
| Year of Follow-up: 1990, Age Group: 18-19    |           |               |                    |       |               |             |               |                |              |
| Period                                       | Age Group | Smoking Group | N                  | %     | Ever Quit (N) | Ever Quit % | Mean Yrs Quit | Short Term (n) | Short Term % |
| 0                                            | 18-19     | Never Any     | 2570               | 78.43 |               |             |               |                |              |
| 0                                            | 18-19     | CC            | 535                | 16.33 | 0             | 0.00        |               |                |              |
| 0                                            | 18-19     | Ecig          | 0                  | 0.00  |               |             |               |                |              |
| 0                                            | 18-19     | Dual          | 0                  | 0.00  |               |             |               |                |              |
| 0                                            | 18-19     | Former        | 172                | 5.25  |               |             | 0.20          | 172            | 100.00       |
| Year of Follow-up: 1990, Age Group: 20-24    |           |               |                    |       |               |             |               |                |              |
| Period                                       | Age Group | Smoking Group | N                  | %     | Ever Quit (N) | Ever Quit % | Mean Yrs Quit | Short Term (n) | Short Term % |
| 0                                            | 20-24     | Never Any     | 5354               | 60.89 |               |             |               |                |              |
| 0                                            | 20-24     | CC            | 2560               | 29.11 | 0             | 0.00        |               |                |              |
| 0                                            | 20-24     | Ecig          | 0                  | 0.00  |               |             |               |                |              |
| 0                                            | 20-24     | Dual          | 0                  | 0.00  |               |             |               |                |              |
| 0                                            | 20-24     | Former        | 879                | 10.00 |               |             | 1.58          | 420            | 47.78        |
| Year of Follow-up: 1990, Age Group: 25-29    |           |               |                    |       |               |             |               |                |              |
| Period                                       | Age Group | Smoking Group | N                  | %     | Ever Quit (N) | Ever Quit % | Mean Yrs Quit | Short Term (n) | Short Term % |
| 0                                            | 25-29     | Never Any     | 5318               | 52.77 |               |             |               |                |              |
| 0                                            | 25-29     | CC            | 3335               | 33.09 | 0             | 0.00        |               |                |              |
| 0                                            | 25-29     | Ecig          | 0                  | 0.00  |               |             |               |                |              |
| 0                                            | 25-29     | Dual          | 0                  | 0.00  |               |             |               |                |              |
| 0                                            | 25-29     | Former        | 1425               | 14.14 |               |             | 3.91          | 404            | 28.35        |
| Year of Follow-up: 1990, Age Group: 30-34    |           |               |                    |       |               |             |               |                |              |
| Period                                       | Age Group | Smoking Group | N                  | %     | Ever Quit (N) | Ever Quit % | Mean Yrs Quit | Short Term (n) | Short Term % |
| 0                                            | 30-34     | Never Any     | 5287               | 50.36 |               |             |               |                |              |
| 0                                            | 30-34     | CC            | 3326               | 31.68 | 0             | 0.00        |               |                |              |
| 0                                            | 30-34     | Ecig          | 0                  | 0.00  |               |             |               |                |              |
| 0                                            | 30-34     | Dual          | 0                  | 0.00  |               |             |               |                |              |
| 0                                            | 30-34     | Former        | 1886               | 17.96 |               |             | 4.36          | 566            | 30.01        |
| Year of Follow-up: 1990, Age Group: 35-39    |           |               |                    |       |               |             |               |                |              |
| Period                                       | Age Group | Smoking Group | N                  | %     | Ever Quit (N) | Ever Quit % | Mean Yrs Quit | Short Term (n) | Short Term % |
| 0                                            | 35-39     | Never Any     | 5018               | 52.27 |               |             |               |                |              |
| 0                                            | 35-39     | CC            | 2653               | 27.64 | 0             | 0.00        |               |                |              |
| 0                                            | 35-39     | Ecig          | 0                  | 0.00  |               |             |               |                |              |
| 0                                            | 35-39     | Dual          | 0                  | 0.00  |               |             |               |                |              |
| 0                                            | 35-39     | Former        | 1929               | 20.09 |               |             | 7.96          | 324            | 16.80        |
| Year of Follow-up: 1990, Age Group: 40-44    |           |               |                    |       |               |             |               |                |              |
| Period                                       | Age Group | Smoking Group | N                  | %     | Ever Quit (N) | Ever Quit % | Mean Yrs Quit | Short Term (n) | Short Term % |
| 0                                            | 40-44     | Never Any     | 4356               | 51.27 |               |             |               |                |              |
| 0                                            | 40-44     | CC            | 2397               | 28.21 | 0             | 0.00        |               |                |              |
| 0                                            | 40-44     | Ecig          | 0                  | 0.00  |               |             |               |                |              |
| 0                                            | 40-44     | Dual          | 0                  | 0.00  |               |             |               |                |              |
| 0                                            | 40-44     | Former        | 1744               | 20.52 |               |             | 7.33          | 339            | 19.44        |
| Year of Follow-up: 1990, Age Group: 45-49    |           |               |                    |       |               |             |               |                |              |
| Period                                       | Age Group | Smoking Group | N                  | %     | Ever Quit (N) | Ever Quit % | Mean Yrs Quit | Short Term (n) | Short Term % |
| 0                                            | 45-49     | Never Any     | 3116               | 47.67 |               |             |               |                |              |
| 0                                            | 45-49     | CC            | 1875               | 28.69 | 0             | 0.00        |               |                |              |
| 0                                            | 45-49     | Ecig          | 0                  | 0.00  |               |             |               |                |              |
| 0                                            | 45-49     | Dual          | 0                  | 0.00  |               |             |               |                |              |
| 0                                            | 45-49     | Former        | 1545               | 23.64 |               |             | 12.55         | 194            | 12.56        |
| Year of Follow-up: 1990, Age Group: 50-54    |           |               |                    |       |               |             |               |                |              |
| Period                                       | Age Group | Smoking Group | N                  | %     | Ever Quit (N) | Ever Quit % | Mean Yrs Quit | Short Term (n) | Short Term % |
| 0                                            | 50-54     | Never Any     | 2684               | 48.50 |               |             |               |                |              |
| 0                                            | 50-54     | CC            | 1572               | 28.41 | 0             | 0.00        |               |                |              |



**Results for PHIM for Run 4 (Sensitivity\_Analysis\_4.RTF)**

|                                              |           |               |       |       |               |             |               |                |              |
|----------------------------------------------|-----------|---------------|-------|-------|---------------|-------------|---------------|----------------|--------------|
| 0                                            | 50-54     | Ecig          | 0     | 0.00  |               |             |               |                |              |
| 0                                            | 50-54     | Dual          | 0     | 0.00  |               |             |               |                |              |
| 0                                            | 50-54     | Former        | 1278  | 23.09 |               |             | 13.28         | 126            | 9.86         |
| Year of Follow-up: 1990, Age Group: 55-59    |           |               |       |       |               |             |               |                |              |
| Period                                       | Age Group | Smoking Group | N     | %     | Ever Quit (N) | Ever Quit % | Mean Yrs Quit | Short Term (n) | Short Term % |
| 0                                            | 55-59     | Never Any     | 2732  | 51.90 |               |             |               |                |              |
| 0                                            | 55-59     | CC            | 1295  | 24.60 | 0             | 0.00        |               |                |              |
| 0                                            | 55-59     | Ecig          | 0     | 0.00  |               |             |               |                |              |
| 0                                            | 55-59     | Dual          | 0     | 0.00  |               |             |               |                |              |
| 0                                            | 55-59     | Former        | 1237  | 23.50 |               |             | 17.26         | 90             | 7.28         |
| Year of Follow-up: 1990, Age Group: 60-64    |           |               |       |       |               |             |               |                |              |
| Period                                       | Age Group | Smoking Group | N     | %     | Ever Quit (N) | Ever Quit % | Mean Yrs Quit | Short Term (n) | Short Term % |
| 0                                            | 60-64     | Never Any     | 3078  | 55.72 |               |             |               |                |              |
| 0                                            | 60-64     | CC            | 1249  | 22.61 | 0             | 0.00        |               |                |              |
| 0                                            | 60-64     | Ecig          | 0     | 0.00  |               |             |               |                |              |
| 0                                            | 60-64     | Dual          | 0     | 0.00  |               |             |               |                |              |
| 0                                            | 60-64     | Former        | 1197  | 21.67 |               |             | 18.28         | 61             | 5.10         |
| Year of Follow-up: 1990, Age Group: 65-69    |           |               |       |       |               |             |               |                |              |
| Period                                       | Age Group | Smoking Group | N     | %     | Ever Quit (N) | Ever Quit % | Mean Yrs Quit | Short Term (n) | Short Term % |
| 0                                            | 65-69     | Never Any     | 3042  | 57.36 |               |             |               |                |              |
| 0                                            | 65-69     | CC            | 976   | 18.40 | 0             | 0.00        |               |                |              |
| 0                                            | 65-69     | Ecig          | 0     | 0.00  |               |             |               |                |              |
| 0                                            | 65-69     | Dual          | 0     | 0.00  |               |             |               |                |              |
| 0                                            | 65-69     | Former        | 1285  | 24.23 |               |             | 20.65         | 68             | 5.29         |
| Year of Follow-up: 1990, Age Group: 70-74    |           |               |       |       |               |             |               |                |              |
| Period                                       | Age Group | Smoking Group | N     | %     | Ever Quit (N) | Ever Quit % | Mean Yrs Quit | Short Term (n) | Short Term % |
| 0                                            | 70-74     | Never Any     | 2738  | 61.05 |               |             |               |                |              |
| 0                                            | 70-74     | CC            | 610   | 13.60 | 0             | 0.00        |               |                |              |
| 0                                            | 70-74     | Ecig          | 0     | 0.00  |               |             |               |                |              |
| 0                                            | 70-74     | Dual          | 0     | 0.00  |               |             |               |                |              |
| 0                                            | 70-74     | Former        | 1137  | 25.35 |               |             | 24.48         | 27             | 2.37         |
| Year of Follow-up: 1990, Age Group: 75-79    |           |               |       |       |               |             |               |                |              |
| Period                                       | Age Group | Smoking Group | N     | %     | Ever Quit (N) | Ever Quit % | Mean Yrs Quit | Short Term (n) | Short Term % |
| 0                                            | 75-79     | Never Any     | 2483  | 68.84 |               |             |               |                |              |
| 0                                            | 75-79     | CC            | 354   | 9.81  | 0             | 0.00        |               |                |              |
| 0                                            | 75-79     | Ecig          | 0     | 0.00  |               |             |               |                |              |
| 0                                            | 75-79     | Dual          | 0     | 0.00  |               |             |               |                |              |
| 0                                            | 75-79     | Former        | 770   | 21.35 |               |             | 24.48         | 24             | 3.12         |
| Year of Follow-up: 1995, Age Group: All Ages |           |               |       |       |               |             |               |                |              |
| Period                                       | Age Group | Smoking Group | N     | %     | Ever Quit (N) | Ever Quit % | Mean Yrs Quit | Short Term (n) | Short Term % |
| 5                                            | All Ages  | Never Any     | 51124 | 55.79 |               |             |               |                |              |
| 5                                            | All Ages  | CC            | 10663 | 11.64 | 0             | 0.00        |               |                |              |
| 5                                            | All Ages  | Ecig          | 11477 | 12.52 |               |             |               |                |              |
| 5                                            | All Ages  | Dual          | 0     | 0.00  |               |             |               |                |              |
| 5                                            | All Ages  | Former        | 18375 | 20.05 |               |             | 14.20         | 1115           | 6.07         |
| Year of Follow-up: 1995, Age Group: 18-19    |           |               |       |       |               |             |               |                |              |
| Period                                       | Age Group | Smoking Group | N     | %     | Ever Quit (N) | Ever Quit % | Mean Yrs Quit | Short Term (n) | Short Term % |
| 5                                            | 18-19     | Never Any     | 2530  | 79.66 |               |             |               |                |              |
| 5                                            | 18-19     | CC            | 235   | 7.40  | 0             | 0.00        |               |                |              |
| 5                                            | 18-19     | Ecig          | 339   | 10.67 |               |             |               |                |              |
| 5                                            | 18-19     | Dual          | 0     | 0.00  |               |             |               |                |              |
| 5                                            | 18-19     | Former        | 72    | 2.27  |               |             | 1.18          | 45             | 62.50        |
| Year of Follow-up: 1995, Age Group: 20-24    |           |               |       |       |               |             |               |                |              |
| Period                                       | Age Group | Smoking Group | N     | %     | Ever Quit (N) | Ever Quit % | Mean Yrs Quit | Short Term (n) | Short Term % |
| 5                                            | 20-24     | Never Any     | 5926  | 70.97 |               |             |               |                |              |
| 5                                            | 20-24     | CC            | 864   | 10.35 | 0             | 0.00        |               |                |              |
| 5                                            | 20-24     | Ecig          | 1127  | 13.50 |               |             |               |                |              |
| 5                                            | 20-24     | Dual          | 0     | 0.00  |               |             |               |                |              |
| 5                                            | 20-24     | Former        | 433   | 5.19  |               |             | 3.28          | 99             | 22.86        |
| Year of Follow-up: 1995, Age Group: 25-29    |           |               |       |       |               |             |               |                |              |
| Period                                       | Age Group | Smoking Group | N     | %     | Ever Quit (N) | Ever Quit % | Mean Yrs Quit | Short Term (n) | Short Term % |
| 5                                            | 25-29     | Never Any     | 5316  | 60.46 |               |             |               |                |              |
| 5                                            | 25-29     | CC            | 1062  | 12.08 | 0             | 0.00        |               |                |              |
| 5                                            | 25-29     | Ecig          | 1392  | 15.83 |               |             |               |                |              |
| 5                                            | 25-29     | Dual          | 0     | 0.00  |               |             |               |                |              |
| 5                                            | 25-29     | Former        | 1023  | 11.63 |               |             | 5.94          | 54             | 5.28         |
| Year of Follow-up: 1995, Age Group: 30-34    |           |               |       |       |               |             |               |                |              |
| Period                                       | Age Group | Smoking Group | N     | %     | Ever Quit (N) | Ever Quit % | Mean Yrs Quit | Short Term (n) | Short Term % |

**Results for PHIM for Run 4 (Sensitivity\_Analysis\_4.RTF)**

|                                              |           |               |      |       |               |             |               |                |              |
|----------------------------------------------|-----------|---------------|------|-------|---------------|-------------|---------------|----------------|--------------|
| 5                                            | 30-34     | Never Any     | 5307 | 52.66 |               |             |               |                |              |
| 5                                            | 30-34     | CC            | 1373 | 13.62 | 0             | 0.00        |               |                |              |
| 5                                            | 30-34     | Ecig          | 1799 | 17.85 |               |             |               |                |              |
| 5                                            | 30-34     | Dual          | 0    | 0.00  |               |             |               |                |              |
| 5                                            | 30-34     | Former        | 1599 | 15.87 |               |             | 8.16          | 67             | 4.19         |
| Year of Follow-up: 1995, Age Group: 35-39    |           |               |      |       |               |             |               |                |              |
| Period                                       | Age Group | Smoking Group | N    | %     | Ever Quit (N) | Ever Quit % | Mean Yrs Quit | Short Term (n) | Short Term % |
| 5                                            | 35-39     | Never Any     | 5281 | 50.30 |               |             |               |                |              |
| 5                                            | 35-39     | CC            | 1410 | 13.43 | 0             | 0.00        |               |                |              |
| 5                                            | 35-39     | Ecig          | 1743 | 16.60 |               |             |               |                |              |
| 5                                            | 35-39     | Dual          | 0    | 0.00  |               |             |               |                |              |
| 5                                            | 35-39     | Former        | 2065 | 19.67 |               |             | 8.75          | 62             | 3.00         |
| Year of Follow-up: 1995, Age Group: 40-44    |           |               |      |       |               |             |               |                |              |
| Period                                       | Age Group | Smoking Group | N    | %     | Ever Quit (N) | Ever Quit % | Mean Yrs Quit | Short Term (n) | Short Term % |
| 5                                            | 40-44     | Never Any     | 5018 | 52.27 |               |             |               |                |              |
| 5                                            | 40-44     | CC            | 1135 | 11.82 | 0             | 0.00        |               |                |              |
| 5                                            | 40-44     | Ecig          | 1356 | 14.13 |               |             |               |                |              |
| 5                                            | 40-44     | Dual          | 0    | 0.00  |               |             |               |                |              |
| 5                                            | 40-44     | Former        | 2091 | 21.78 |               |             | 12.09         | 81             | 3.87         |
| Year of Follow-up: 1995, Age Group: 45-49    |           |               |      |       |               |             |               |                |              |
| Period                                       | Age Group | Smoking Group | N    | %     | Ever Quit (N) | Ever Quit % | Mean Yrs Quit | Short Term (n) | Short Term % |
| 5                                            | 45-49     | Never Any     | 4356 | 51.27 |               |             |               |                |              |
| 5                                            | 45-49     | CC            | 974  | 11.46 | 0             | 0.00        |               |                |              |
| 5                                            | 45-49     | Ecig          | 1161 | 13.66 |               |             |               |                |              |
| 5                                            | 45-49     | Dual          | 0    | 0.00  |               |             |               |                |              |
| 5                                            | 45-49     | Former        | 2006 | 23.61 |               |             | 10.93         | 133            | 6.63         |
| Year of Follow-up: 1995, Age Group: 50-54    |           |               |      |       |               |             |               |                |              |
| Period                                       | Age Group | Smoking Group | N    | %     | Ever Quit (N) | Ever Quit % | Mean Yrs Quit | Short Term (n) | Short Term % |
| 5                                            | 50-54     | Never Any     | 3116 | 47.67 |               |             |               |                |              |
| 5                                            | 50-54     | CC            | 739  | 11.31 | 0             | 0.00        |               |                |              |
| 5                                            | 50-54     | Ecig          | 826  | 12.64 |               |             |               |                |              |
| 5                                            | 50-54     | Dual          | 0    | 0.00  |               |             |               |                |              |
| 5                                            | 50-54     | Former        | 1855 | 28.38 |               |             | 14.92         | 140            | 7.55         |
| Year of Follow-up: 1995, Age Group: 55-59    |           |               |      |       |               |             |               |                |              |
| Period                                       | Age Group | Smoking Group | N    | %     | Ever Quit (N) | Ever Quit % | Mean Yrs Quit | Short Term (n) | Short Term % |
| 5                                            | 55-59     | Never Any     | 2684 | 48.50 |               |             |               |                |              |
| 5                                            | 55-59     | CC            | 722  | 13.05 | 0             | 0.00        |               |                |              |
| 5                                            | 55-59     | Ecig          | 627  | 11.33 |               |             |               |                |              |
| 5                                            | 55-59     | Dual          | 0    | 0.00  |               |             |               |                |              |
| 5                                            | 55-59     | Former        | 1501 | 27.12 |               |             | 15.84         | 93             | 6.20         |
| Year of Follow-up: 1995, Age Group: 60-64    |           |               |      |       |               |             |               |                |              |
| Period                                       | Age Group | Smoking Group | N    | %     | Ever Quit (N) | Ever Quit % | Mean Yrs Quit | Short Term (n) | Short Term % |
| 5                                            | 60-64     | Never Any     | 2732 | 51.90 |               |             |               |                |              |
| 5                                            | 60-64     | CC            | 633  | 12.03 | 0             | 0.00        |               |                |              |
| 5                                            | 60-64     | Ecig          | 444  | 8.43  |               |             |               |                |              |
| 5                                            | 60-64     | Dual          | 0    | 0.00  |               |             |               |                |              |
| 5                                            | 60-64     | Former        | 1455 | 27.64 |               |             | 19.22         | 87             | 5.98         |
| Year of Follow-up: 1995, Age Group: 65-69    |           |               |      |       |               |             |               |                |              |
| Period                                       | Age Group | Smoking Group | N    | %     | Ever Quit (N) | Ever Quit % | Mean Yrs Quit | Short Term (n) | Short Term % |
| 5                                            | 65-69     | Never Any     | 3078 | 55.72 |               |             |               |                |              |
| 5                                            | 65-69     | CC            | 602  | 10.90 | 0             | 0.00        |               |                |              |
| 5                                            | 65-69     | Ecig          | 374  | 6.77  |               |             |               |                |              |
| 5                                            | 65-69     | Dual          | 0    | 0.00  |               |             |               |                |              |
| 5                                            | 65-69     | Former        | 1470 | 26.61 |               |             | 19.34         | 107            | 7.28         |
| Year of Follow-up: 1995, Age Group: 70-74    |           |               |      |       |               |             |               |                |              |
| Period                                       | Age Group | Smoking Group | N    | %     | Ever Quit (N) | Ever Quit % | Mean Yrs Quit | Short Term (n) | Short Term % |
| 5                                            | 70-74     | Never Any     | 3042 | 57.36 |               |             |               |                |              |
| 5                                            | 70-74     | CC            | 577  | 10.88 | 0             | 0.00        |               |                |              |
| 5                                            | 70-74     | Ecig          | 188  | 3.55  |               |             |               |                |              |
| 5                                            | 70-74     | Dual          | 0    | 0.00  |               |             |               |                |              |
| 5                                            | 70-74     | Former        | 1496 | 28.21 |               |             | 22.32         | 77             | 5.15         |
| Year of Follow-up: 1995, Age Group: 75-79    |           |               |      |       |               |             |               |                |              |
| Period                                       | Age Group | Smoking Group | N    | %     | Ever Quit (N) | Ever Quit % | Mean Yrs Quit | Short Term (n) | Short Term % |
| 5                                            | 75-79     | Never Any     | 2738 | 61.05 |               |             |               |                |              |
| 5                                            | 75-79     | CC            | 337  | 7.51  | 0             | 0.00        |               |                |              |
| 5                                            | 75-79     | Ecig          | 101  | 2.25  |               |             |               |                |              |
| 5                                            | 75-79     | Dual          | 0    | 0.00  |               |             |               |                |              |
| 5                                            | 75-79     | Former        | 1309 | 29.19 |               |             | 25.87         | 70             | 5.35         |
| Year of Follow-up: 2000, Age Group: All Ages |           |               |      |       |               |             |               |                |              |

**Results for PHIM for Run 4 (Sensitivity\_Analysis\_4.RTF)**

| Period                                    | Age Group | Smoking Group | N     | %     | Ever Quit (N) | Ever Quit % | Mean Yrs Quit | Short Term (n) | Short Term % |
|-------------------------------------------|-----------|---------------|-------|-------|---------------|-------------|---------------|----------------|--------------|
| 10                                        | All Ages  | Never Any     | 51012 | 55.50 |               |             |               |                |              |
| 10                                        | All Ages  | CC            | 4609  | 5.01  | 0             | 0.00        |               |                |              |
| 10                                        | All Ages  | Ecig          | 15157 | 16.49 |               |             |               |                |              |
| 10                                        | All Ages  | Dual          | 0     | 0.00  |               |             |               |                |              |
| 10                                        | All Ages  | Former        | 21130 | 22.99 |               |             | 15.17         | 1684           | 7.97         |
| Year of Follow-up: 2000, Age Group: 18-19 |           |               |       |       |               |             |               |                |              |
| Period                                    | Age Group | Smoking Group | N     | %     | Ever Quit (N) | Ever Quit % | Mean Yrs Quit | Short Term (n) | Short Term % |
| 10                                        | 18-19     | Never Any     | 0     | .     |               |             |               |                |              |
| 10                                        | 18-19     | CC            | 0     | .     | 0             | .           |               |                |              |
| 10                                        | 18-19     | Ecig          | 0     | .     |               |             |               |                |              |
| 10                                        | 18-19     | Dual          | 0     | .     |               |             |               |                |              |
| 10                                        | 18-19     | Former        | 0     | .     |               |             |               | 0              | .            |
| Year of Follow-up: 2000, Age Group: 20-24 |           |               |       |       |               |             |               |                |              |
| Period                                    | Age Group | Smoking Group | N     | %     | Ever Quit (N) | Ever Quit % | Mean Yrs Quit | Short Term (n) | Short Term % |
| 10                                        | 20-24     | Never Any     | 5495  | 69.29 |               |             |               |                |              |
| 10                                        | 20-24     | CC            | 384   | 4.84  | 0             | 0.00        |               |                |              |
| 10                                        | 20-24     | Ecig          | 1481  | 18.68 |               |             |               |                |              |
| 10                                        | 20-24     | Dual          | 0     | 0.00  |               |             |               |                |              |
| 10                                        | 20-24     | Former        | 570   | 7.19  |               |             | 3.56          | 147            | 25.79        |
| Year of Follow-up: 2000, Age Group: 25-29 |           |               |       |       |               |             |               |                |              |
| Period                                    | Age Group | Smoking Group | N     | %     | Ever Quit (N) | Ever Quit % | Mean Yrs Quit | Short Term (n) | Short Term % |
| 10                                        | 25-29     | Never Any     | 5683  | 68.06 |               |             |               |                |              |
| 10                                        | 25-29     | CC            | 400   | 4.79  | 0             | 0.00        |               |                |              |
| 10                                        | 25-29     | Ecig          | 1532  | 18.35 |               |             |               |                |              |
| 10                                        | 25-29     | Dual          | 0     | 0.00  |               |             |               |                |              |
| 10                                        | 25-29     | Former        | 735   | 8.80  |               |             | 5.67          | 117            | 15.92        |
| Year of Follow-up: 2000, Age Group: 30-34 |           |               |       |       |               |             |               |                |              |
| Period                                    | Age Group | Smoking Group | N     | %     | Ever Quit (N) | Ever Quit % | Mean Yrs Quit | Short Term (n) | Short Term % |
| 10                                        | 30-34     | Never Any     | 5236  | 59.55 |               |             |               |                |              |
| 10                                        | 30-34     | CC            | 417   | 4.74  | 0             | 0.00        |               |                |              |
| 10                                        | 30-34     | Ecig          | 1887  | 21.46 |               |             |               |                |              |
| 10                                        | 30-34     | Dual          | 0     | 0.00  |               |             |               |                |              |
| 10                                        | 30-34     | Former        | 1253  | 14.25 |               |             | 9.28          | 90             | 7.18         |
| Year of Follow-up: 2000, Age Group: 35-39 |           |               |       |       |               |             |               |                |              |
| Period                                    | Age Group | Smoking Group | N     | %     | Ever Quit (N) | Ever Quit % | Mean Yrs Quit | Short Term (n) | Short Term % |
| 10                                        | 35-39     | Never Any     | 5291  | 52.50 |               |             |               |                |              |
| 10                                        | 35-39     | CC            | 561   | 5.57  | 0             | 0.00        |               |                |              |
| 10                                        | 35-39     | Ecig          | 2407  | 23.88 |               |             |               |                |              |
| 10                                        | 35-39     | Dual          | 0     | 0.00  |               |             |               |                |              |
| 10                                        | 35-39     | Former        | 1819  | 18.05 |               |             | 11.78         | 104            | 5.72         |
| Year of Follow-up: 2000, Age Group: 40-44 |           |               |       |       |               |             |               |                |              |
| Period                                    | Age Group | Smoking Group | N     | %     | Ever Quit (N) | Ever Quit % | Mean Yrs Quit | Short Term (n) | Short Term % |
| 10                                        | 40-44     | Never Any     | 5281  | 50.30 |               |             |               |                |              |
| 10                                        | 40-44     | CC            | 584   | 5.56  | 0             | 0.00        |               |                |              |
| 10                                        | 40-44     | Ecig          | 2289  | 21.80 |               |             |               |                |              |
| 10                                        | 40-44     | Dual          | 0     | 0.00  |               |             |               |                |              |
| 10                                        | 40-44     | Former        | 2345  | 22.34 |               |             | 12.30         | 143            | 6.10         |
| Year of Follow-up: 2000, Age Group: 45-49 |           |               |       |       |               |             |               |                |              |
| Period                                    | Age Group | Smoking Group | N     | %     | Ever Quit (N) | Ever Quit % | Mean Yrs Quit | Short Term (n) | Short Term % |
| 10                                        | 45-49     | Never Any     | 5018  | 52.27 |               |             |               |                |              |
| 10                                        | 45-49     | CC            | 446   | 4.65  | 0             | 0.00        |               |                |              |
| 10                                        | 45-49     | Ecig          | 1673  | 17.43 |               |             |               |                |              |
| 10                                        | 45-49     | Dual          | 0     | 0.00  |               |             |               |                |              |
| 10                                        | 45-49     | Former        | 2463  | 25.66 |               |             | 14.76         | 181            | 7.35         |
| Year of Follow-up: 2000, Age Group: 50-54 |           |               |       |       |               |             |               |                |              |
| Period                                    | Age Group | Smoking Group | N     | %     | Ever Quit (N) | Ever Quit % | Mean Yrs Quit | Short Term (n) | Short Term % |
| 10                                        | 50-54     | Never Any     | 4356  | 51.27 |               |             |               |                |              |
| 10                                        | 50-54     | CC            | 378   | 4.45  | 0             | 0.00        |               |                |              |
| 10                                        | 50-54     | Ecig          | 1299  | 15.29 |               |             |               |                |              |
| 10                                        | 50-54     | Dual          | 0     | 0.00  |               |             |               |                |              |
| 10                                        | 50-54     | Former        | 2464  | 29.00 |               |             | 13.32         | 188            | 7.63         |
| Year of Follow-up: 2000, Age Group: 55-59 |           |               |       |       |               |             |               |                |              |
| Period                                    | Age Group | Smoking Group | N     | %     | Ever Quit (N) | Ever Quit % | Mean Yrs Quit | Short Term (n) | Short Term % |
| 10                                        | 55-59     | Never Any     | 3116  | 47.67 |               |             |               |                |              |
| 10                                        | 55-59     | CC            | 283   | 4.33  | 0             | 0.00        |               |                |              |
| 10                                        | 55-59     | Ecig          | 912   | 13.95 |               |             |               |                |              |
| 10                                        | 55-59     | Dual          | 0     | 0.00  |               |             |               |                |              |

**Results for PHIM for Run 4 (Sensitivity\_Analysis\_4.RTF)**

| Year of Follow-up: 2000, Age Group: 60-64    | Period   | Age Group | Smoking Group | N     | %     | Ever Quit (N) | Ever Quit % | Mean Yrs Quit | Short Term (n) | Short Term % |
|----------------------------------------------|----------|-----------|---------------|-------|-------|---------------|-------------|---------------|----------------|--------------|
| 10                                           | 55-59    | Former    |               | 2225  | 34.04 |               |             | 16.92         | 157            | 7.06         |
| 10                                           | 60-64    | Never Any |               | 2684  | 48.50 |               |             |               |                |              |
| 10                                           | 60-64    | CC        |               | 334   | 6.04  | 0             | 0.00        |               |                |              |
| 10                                           | 60-64    | Ecig      |               | 663   | 11.98 |               |             |               |                |              |
| 10                                           | 60-64    | Dual      |               | 0     | 0.00  |               |             |               |                |              |
| 10                                           | 60-64    | Former    |               | 1853  | 33.48 |               |             | 17.23         | 149            | 8.04         |
| Year of Follow-up: 2000, Age Group: 65-69    | Period   | Age Group | Smoking Group | N     | %     | Ever Quit (N) | Ever Quit % | Mean Yrs Quit | Short Term (n) | Short Term % |
| 10                                           | 65-69    | Never Any |               | 2732  | 51.90 |               |             |               |                |              |
| 10                                           | 65-69    | CC        |               | 280   | 5.32  | 0             | 0.00        |               |                |              |
| 10                                           | 65-69    | Ecig      |               | 443   | 8.42  |               |             |               |                |              |
| 10                                           | 65-69    | Dual      |               | 0     | 0.00  |               |             |               |                |              |
| 10                                           | 65-69    | Former    |               | 1809  | 34.37 |               |             | 19.85         | 146            | 8.07         |
| Year of Follow-up: 2000, Age Group: 70-74    | Period   | Age Group | Smoking Group | N     | %     | Ever Quit (N) | Ever Quit % | Mean Yrs Quit | Short Term (n) | Short Term % |
| 10                                           | 70-74    | Never Any |               | 3078  | 55.72 |               |             |               |                |              |
| 10                                           | 70-74    | CC        |               | 274   | 4.96  | 0             | 0.00        |               |                |              |
| 10                                           | 70-74    | Ecig      |               | 368   | 6.66  |               |             |               |                |              |
| 10                                           | 70-74    | Dual      |               | 0     | 0.00  |               |             |               |                |              |
| 10                                           | 70-74    | Former    |               | 1804  | 32.66 |               |             | 20.18         | 154            | 8.54         |
| Year of Follow-up: 2000, Age Group: 75-79    | Period   | Age Group | Smoking Group | N     | %     | Ever Quit (N) | Ever Quit % | Mean Yrs Quit | Short Term (n) | Short Term % |
| 10                                           | 75-79    | Never Any |               | 3042  | 57.36 |               |             |               |                |              |
| 10                                           | 75-79    | CC        |               | 268   | 5.05  | 0             | 0.00        |               |                |              |
| 10                                           | 75-79    | Ecig      |               | 203   | 3.83  |               |             |               |                |              |
| 10                                           | 75-79    | Dual      |               | 0     | 0.00  |               |             |               |                |              |
| 10                                           | 75-79    | Former    |               | 1790  | 33.75 |               |             | 23.17         | 108            | 6.03         |
| Year of Follow-up: 2005, Age Group: All Ages | Period   | Age Group | Smoking Group | N     | %     | Ever Quit (N) | Ever Quit % | Mean Yrs Quit | Short Term (n) | Short Term % |
| 15                                           | All Ages | Never Any |               | 47650 | 55.02 |               |             |               |                |              |
| 15                                           | All Ages | CC        |               | 1899  | 2.19  | 0             | 0.00        |               |                |              |
| 15                                           | All Ages | Ecig      |               | 15134 | 17.47 |               |             |               |                |              |
| 15                                           | All Ages | Dual      |               | 0     | 0.00  |               |             |               |                |              |
| 15                                           | All Ages | Former    |               | 21922 | 25.31 |               |             | 17.41         | 921            | 4.20         |
| Year of Follow-up: 2005, Age Group: 18-19    | Period   | Age Group | Smoking Group | N     | %     | Ever Quit (N) | Ever Quit % | Mean Yrs Quit | Short Term (n) | Short Term % |
| 15                                           | 18-19    | Never Any |               | 0     | .     |               |             |               |                |              |
| 15                                           | 18-19    | CC        |               | 0     | .     | 0             | .           |               |                |              |
| 15                                           | 18-19    | Ecig      |               | 0     | .     |               |             |               |                |              |
| 15                                           | 18-19    | Dual      |               | 0     | .     |               |             |               |                |              |
| 15                                           | 18-19    | Former    |               | 0     | .     |               |             | .             | 0              | .            |
| Year of Follow-up: 2005, Age Group: 20-24    | Period   | Age Group | Smoking Group | N     | %     | Ever Quit (N) | Ever Quit % | Mean Yrs Quit | Short Term (n) | Short Term % |
| 15                                           | 20-24    | Never Any |               | 0     | .     |               |             |               |                |              |
| 15                                           | 20-24    | CC        |               | 0     | .     | 0             | .           |               |                |              |
| 15                                           | 20-24    | Ecig      |               | 0     | .     |               |             |               |                |              |
| 15                                           | 20-24    | Dual      |               | 0     | .     |               |             |               |                |              |
| 15                                           | 20-24    | Former    |               | 0     | .     |               |             | .             | 0              | .            |
| Year of Follow-up: 2005, Age Group: 25-29    | Period   | Age Group | Smoking Group | N     | %     | Ever Quit (N) | Ever Quit % | Mean Yrs Quit | Short Term (n) | Short Term % |
| 15                                           | 25-29    | Never Any |               | 5262  | 66.36 |               |             |               |                |              |
| 15                                           | 25-29    | CC        |               | 175   | 2.21  | 0             | 0.00        |               |                |              |
| 15                                           | 25-29    | Ecig      |               | 1655  | 20.87 |               |             |               |                |              |
| 15                                           | 25-29    | Dual      |               | 0     | 0.00  |               |             |               |                |              |
| 15                                           | 25-29    | Former    |               | 838   | 10.57 |               |             | 6.59          | 87             | 10.38        |
| Year of Follow-up: 2005, Age Group: 30-34    | Period   | Age Group | Smoking Group | N     | %     | Ever Quit (N) | Ever Quit % | Mean Yrs Quit | Short Term (n) | Short Term % |
| 15                                           | 30-34    | Never Any |               | 5614  | 67.23 |               |             |               |                |              |
| 15                                           | 30-34    | CC        |               | 149   | 1.78  | 0             | 0.00        |               |                |              |
| 15                                           | 30-34    | Ecig      |               | 1658  | 19.86 |               |             |               |                |              |
| 15                                           | 30-34    | Dual      |               | 0     | 0.00  |               |             |               |                |              |
| 15                                           | 30-34    | Former    |               | 929   | 11.13 |               |             | 8.86          | 72             | 7.75         |
| Year of Follow-up: 2005, Age Group: 35-39    | Period   | Age Group | Smoking Group | N     | %     | Ever Quit (N) | Ever Quit % | Mean Yrs Quit | Short Term (n) | Short Term % |
| 15                                           | 35-39    | Never Any |               | 5218  | 59.34 |               |             |               |                |              |
| 15                                           | 35-39    | CC        |               | 167   | 1.90  | 0             | 0.00        |               |                |              |

**Results for PHIM for Run 4 (Sensitivity\_Analysis\_4.RTF)**

|                                              |           |               |       |       |               |             |               |                |              |
|----------------------------------------------|-----------|---------------|-------|-------|---------------|-------------|---------------|----------------|--------------|
| 15                                           | 35-39     | Ecig          | 1976  | 22.47 |               |             |               |                |              |
| 15                                           | 35-39     | Dual          | 0     | 0.00  |               |             |               |                |              |
| 15                                           | 35-39     | Former        | 1432  | 16.29 |               |             | 12.77         | 65             | 4.54         |
| Year of Follow-up: 2005, Age Group: 40-44    |           |               |       |       |               |             |               |                |              |
| Period                                       | Age Group | Smoking Group | N     | %     | Ever Quit (N) | Ever Quit % | Mean Yrs Quit | Short Term (n) | Short Term % |
| 15                                           | 40-44     | Never Any     | 5291  | 52.50 |               |             |               |                |              |
| 15                                           | 40-44     | CC            | 238   | 2.36  | 0             | 0.00        |               |                |              |
| 15                                           | 40-44     | Ecig          | 2494  | 24.75 |               |             |               |                |              |
| 15                                           | 40-44     | Dual          | 0     | 0.00  |               |             |               |                |              |
| 15                                           | 40-44     | Former        | 2055  | 20.39 |               |             | 15.08         | 101            | 4.91         |
| Year of Follow-up: 2005, Age Group: 45-49    |           |               |       |       |               |             |               |                |              |
| Period                                       | Age Group | Smoking Group | N     | %     | Ever Quit (N) | Ever Quit % | Mean Yrs Quit | Short Term (n) | Short Term % |
| 15                                           | 45-49     | Never Any     | 5281  | 50.30 |               |             |               |                |              |
| 15                                           | 45-49     | CC            | 237   | 2.26  | 0             | 0.00        |               |                |              |
| 15                                           | 45-49     | Ecig          | 2317  | 22.07 |               |             |               |                |              |
| 15                                           | 45-49     | Dual          | 0     | 0.00  |               |             |               |                |              |
| 15                                           | 45-49     | Former        | 2664  | 25.37 |               |             | 15.46         | 133            | 4.99         |
| Year of Follow-up: 2005, Age Group: 50-54    |           |               |       |       |               |             |               |                |              |
| Period                                       | Age Group | Smoking Group | N     | %     | Ever Quit (N) | Ever Quit % | Mean Yrs Quit | Short Term (n) | Short Term % |
| 15                                           | 50-54     | Never Any     | 5018  | 52.27 |               |             |               |                |              |
| 15                                           | 50-54     | CC            | 191   | 1.99  | 0             | 0.00        |               |                |              |
| 15                                           | 50-54     | Ecig          | 1622  | 16.90 |               |             |               |                |              |
| 15                                           | 50-54     | Dual          | 0     | 0.00  |               |             |               |                |              |
| 15                                           | 50-54     | Former        | 2769  | 28.84 |               |             | 17.84         | 99             | 3.58         |
| Year of Follow-up: 2005, Age Group: 55-59    |           |               |       |       |               |             |               |                |              |
| Period                                       | Age Group | Smoking Group | N     | %     | Ever Quit (N) | Ever Quit % | Mean Yrs Quit | Short Term (n) | Short Term % |
| 15                                           | 55-59     | Never Any     | 4356  | 51.27 |               |             |               |                |              |
| 15                                           | 55-59     | CC            | 166   | 1.95  | 0             | 0.00        |               |                |              |
| 15                                           | 55-59     | Ecig          | 1281  | 15.08 |               |             |               |                |              |
| 15                                           | 55-59     | Dual          | 0     | 0.00  |               |             |               |                |              |
| 15                                           | 55-59     | Former        | 2694  | 31.71 |               |             | 16.95         | 78             | 2.90         |
| Year of Follow-up: 2005, Age Group: 60-64    |           |               |       |       |               |             |               |                |              |
| Period                                       | Age Group | Smoking Group | N     | %     | Ever Quit (N) | Ever Quit % | Mean Yrs Quit | Short Term (n) | Short Term % |
| 15                                           | 60-64     | Never Any     | 3116  | 47.67 |               |             |               |                |              |
| 15                                           | 60-64     | CC            | 131   | 2.00  | 0             | 0.00        |               |                |              |
| 15                                           | 60-64     | Ecig          | 852   | 13.04 |               |             |               |                |              |
| 15                                           | 60-64     | Dual          | 0     | 0.00  |               |             |               |                |              |
| 15                                           | 60-64     | Former        | 2437  | 37.29 |               |             | 20.18         | 93             | 3.82         |
| Year of Follow-up: 2005, Age Group: 65-69    |           |               |       |       |               |             |               |                |              |
| Period                                       | Age Group | Smoking Group | N     | %     | Ever Quit (N) | Ever Quit % | Mean Yrs Quit | Short Term (n) | Short Term % |
| 15                                           | 65-69     | Never Any     | 2684  | 48.50 |               |             |               |                |              |
| 15                                           | 65-69     | CC            | 160   | 2.89  | 0             | 0.00        |               |                |              |
| 15                                           | 65-69     | Ecig          | 591   | 10.68 |               |             |               |                |              |
| 15                                           | 65-69     | Dual          | 0     | 0.00  |               |             |               |                |              |
| 15                                           | 65-69     | Former        | 2099  | 37.93 |               |             | 19.92         | 68             | 3.24         |
| Year of Follow-up: 2005, Age Group: 70-74    |           |               |       |       |               |             |               |                |              |
| Period                                       | Age Group | Smoking Group | N     | %     | Ever Quit (N) | Ever Quit % | Mean Yrs Quit | Short Term (n) | Short Term % |
| 15                                           | 70-74     | Never Any     | 2732  | 51.90 |               |             |               |                |              |
| 15                                           | 70-74     | CC            | 139   | 2.64  | 0             | 0.00        |               |                |              |
| 15                                           | 70-74     | Ecig          | 391   | 7.43  |               |             |               |                |              |
| 15                                           | 70-74     | Dual          | 0     | 0.00  |               |             |               |                |              |
| 15                                           | 70-74     | Former        | 2002  | 38.03 |               |             | 22.67         | 69             | 3.45         |
| Year of Follow-up: 2005, Age Group: 75-79    |           |               |       |       |               |             |               |                |              |
| Period                                       | Age Group | Smoking Group | N     | %     | Ever Quit (N) | Ever Quit % | Mean Yrs Quit | Short Term (n) | Short Term % |
| 15                                           | 75-79     | Never Any     | 3078  | 55.72 |               |             |               |                |              |
| 15                                           | 75-79     | CC            | 146   | 2.64  | 0             | 0.00        |               |                |              |
| 15                                           | 75-79     | Ecig          | 297   | 5.38  |               |             |               |                |              |
| 15                                           | 75-79     | Dual          | 0     | 0.00  |               |             |               |                |              |
| 15                                           | 75-79     | Former        | 2003  | 36.26 |               |             | 22.91         | 56             | 2.80         |
| Year of Follow-up: 2010, Age Group: All Ages |           |               |       |       |               |             |               |                |              |
| Period                                       | Age Group | Smoking Group | N     | %     | Ever Quit (N) | Ever Quit % | Mean Yrs Quit | Short Term (n) | Short Term % |
| 20                                           | All Ages  | Never Any     | 44434 | 54.80 |               |             |               |                |              |
| 20                                           | All Ages  | CC            | 766   | 0.94  | 0             | 0.00        |               |                |              |
| 20                                           | All Ages  | Ecig          | 13348 | 16.46 |               |             |               |                |              |
| 20                                           | All Ages  | Dual          | 0     | 0.00  |               |             |               |                |              |
| 20                                           | All Ages  | Former        | 22533 | 27.79 |               |             | 19.54         | 1086           | 4.82         |
| Year of Follow-up: 2010, Age Group: 18-19    |           |               |       |       |               |             |               |                |              |
| Period                                       | Age Group | Smoking Group | N     | %     | Ever Quit (N) | Ever Quit % | Mean Yrs Quit | Short Term (n) | Short Term % |

**Results for PHIM for Run 4 (Sensitivity\_Analysis\_4.RTF)**

|                                           |           |               |      |       |               |             |               |                |              |
|-------------------------------------------|-----------|---------------|------|-------|---------------|-------------|---------------|----------------|--------------|
| 20                                        | 18-19     | Never Any     | 0    | .     |               |             |               |                |              |
| 20                                        | 18-19     | CC            | 0    | .     | 0             | .           |               |                |              |
| 20                                        | 18-19     | Ecig          | 0    | .     |               |             |               |                |              |
| 20                                        | 18-19     | Dual          | 0    | .     |               |             |               |                |              |
| 20                                        | 18-19     | Former        | 0    | .     |               |             | 0             | .              |              |
| Year of Follow-up: 2010, Age Group: 20-24 |           |               |      |       |               |             |               |                |              |
| Period                                    | Age Group | Smoking Group | N    | %     | Ever Quit (N) | Ever Quit % | Mean Yrs Quit | Short Term (n) | Short Term % |
| 20                                        | 20-24     | Never Any     | 0    | .     |               |             |               |                |              |
| 20                                        | 20-24     | CC            | 0    | .     | 0             | .           |               |                |              |
| 20                                        | 20-24     | Ecig          | 0    | .     |               |             |               |                |              |
| 20                                        | 20-24     | Dual          | 0    | .     |               |             |               |                |              |
| 20                                        | 20-24     | Former        | 0    | .     |               |             |               | 0              | .            |
| Year of Follow-up: 2010, Age Group: 25-29 |           |               |      |       |               |             |               |                |              |
| Period                                    | Age Group | Smoking Group | N    | %     | Ever Quit (N) | Ever Quit % | Mean Yrs Quit | Short Term (n) | Short Term % |
| 20                                        | 25-29     | Never Any     | 0    | .     |               |             |               |                |              |
| 20                                        | 25-29     | CC            | 0    | .     | 0             | .           |               |                |              |
| 20                                        | 25-29     | Ecig          | 0    | .     |               |             |               |                |              |
| 20                                        | 25-29     | Dual          | 0    | .     |               |             |               |                |              |
| 20                                        | 25-29     | Former        | 0    | .     |               |             |               | 0              | .            |
| Year of Follow-up: 2010, Age Group: 30-34 |           |               |      |       |               |             |               |                |              |
| Period                                    | Age Group | Smoking Group | N    | %     | Ever Quit (N) | Ever Quit % | Mean Yrs Quit | Short Term (n) | Short Term % |
| 20                                        | 30-34     | Never Any     | 5164 | 65.12 |               |             |               |                |              |
| 20                                        | 30-34     | CC            | 66   | 0.83  | 0             | 0.00        |               |                |              |
| 20                                        | 30-34     | Ecig          | 1623 | 20.47 |               |             |               |                |              |
| 20                                        | 30-34     | Dual          | 0    | 0.00  |               |             |               |                |              |
| 20                                        | 30-34     | Former        | 1077 | 13.58 |               |             | 9.41          | 111            | 10.31        |
| Year of Follow-up: 2010, Age Group: 35-39 |           |               |      |       |               |             |               |                |              |
| Period                                    | Age Group | Smoking Group | N    | %     | Ever Quit (N) | Ever Quit % | Mean Yrs Quit | Short Term (n) | Short Term % |
| 20                                        | 35-39     | Never Any     | 5574 | 66.75 |               |             |               |                |              |
| 20                                        | 35-39     | CC            | 58   | 0.69  | 0             | 0.00        |               |                |              |
| 20                                        | 35-39     | Ecig          | 1566 | 18.75 |               |             |               |                |              |
| 20                                        | 35-39     | Dual          | 0    | 0.00  |               |             |               |                |              |
| 20                                        | 35-39     | Former        | 1152 | 13.80 |               |             | 11.54         | 88             | 7.64         |
| Year of Follow-up: 2010, Age Group: 40-44 |           |               |      |       |               |             |               |                |              |
| Period                                    | Age Group | Smoking Group | N    | %     | Ever Quit (N) | Ever Quit % | Mean Yrs Quit | Short Term (n) | Short Term % |
| 20                                        | 40-44     | Never Any     | 5218 | 59.34 |               |             |               |                |              |
| 20                                        | 40-44     | CC            | 64   | 0.73  | 0             | 0.00        |               |                |              |
| 20                                        | 40-44     | Ecig          | 1827 | 20.78 |               |             |               |                |              |
| 20                                        | 40-44     | Dual          | 0    | 0.00  |               |             |               |                |              |
| 20                                        | 40-44     | Former        | 1684 | 19.15 |               |             | 15.39         | 111            | 6.59         |
| Year of Follow-up: 2010, Age Group: 45-49 |           |               |      |       |               |             |               |                |              |
| Period                                    | Age Group | Smoking Group | N    | %     | Ever Quit (N) | Ever Quit % | Mean Yrs Quit | Short Term (n) | Short Term % |
| 20                                        | 45-49     | Never Any     | 5291 | 52.50 |               |             |               |                |              |
| 20                                        | 45-49     | CC            | 105  | 1.04  | 0             | 0.00        |               |                |              |
| 20                                        | 45-49     | Ecig          | 2322 | 23.04 |               |             |               |                |              |
| 20                                        | 45-49     | Dual          | 0    | 0.00  |               |             |               |                |              |
| 20                                        | 45-49     | Former        | 2360 | 23.42 |               |             | 17.72         | 130            | 5.51         |
| Year of Follow-up: 2010, Age Group: 50-54 |           |               |      |       |               |             |               |                |              |
| Period                                    | Age Group | Smoking Group | N    | %     | Ever Quit (N) | Ever Quit % | Mean Yrs Quit | Short Term (n) | Short Term % |
| 20                                        | 50-54     | Never Any     | 5281 | 50.30 |               |             |               |                |              |
| 20                                        | 50-54     | CC            | 101  | 0.96  | 0             | 0.00        |               |                |              |
| 20                                        | 50-54     | Ecig          | 2100 | 20.00 |               |             |               |                |              |
| 20                                        | 50-54     | Dual          | 0    | 0.00  |               |             |               |                |              |
| 20                                        | 50-54     | Former        | 3017 | 28.74 |               |             | 18.28         | 163            | 5.40         |
| Year of Follow-up: 2010, Age Group: 55-59 |           |               |      |       |               |             |               |                |              |
| Period                                    | Age Group | Smoking Group | N    | %     | Ever Quit (N) | Ever Quit % | Mean Yrs Quit | Short Term (n) | Short Term % |
| 20                                        | 55-59     | Never Any     | 5018 | 52.27 |               |             |               |                |              |
| 20                                        | 55-59     | CC            | 91   | 0.95  | 0             | 0.00        |               |                |              |
| 20                                        | 55-59     | Ecig          | 1433 | 14.93 |               |             |               |                |              |
| 20                                        | 55-59     | Dual          | 0    | 0.00  |               |             |               |                |              |
| 20                                        | 55-59     | Former        | 3058 | 31.85 |               |             | 20.88         | 103            | 3.37         |
| Year of Follow-up: 2010, Age Group: 60-64 |           |               |      |       |               |             |               |                |              |
| Period                                    | Age Group | Smoking Group | N    | %     | Ever Quit (N) | Ever Quit % | Mean Yrs Quit | Short Term (n) | Short Term % |
| 20                                        | 60-64     | Never Any     | 4356 | 51.27 |               |             |               |                |              |
| 20                                        | 60-64     | CC            | 71   | 0.84  | 0             | 0.00        |               |                |              |
| 20                                        | 60-64     | Ecig          | 1079 | 12.70 |               |             |               |                |              |
| 20                                        | 60-64     | Dual          | 0    | 0.00  |               |             |               |                |              |
| 20                                        | 60-64     | Former        | 2991 | 35.20 |               |             | 19.94         | 144            | 4.81         |
| Year of Follow-up: 2010, Age Group: 65-69 |           |               |      |       |               |             |               |                |              |

**Results for PHIM for Run 4 (Sensitivity\_Analysis\_4.RTF)**

| Period                                       | Age Group | Smoking Group | N     | %     | Ever Quit (N) | Ever Quit % | Mean Yrs Quit | Short Term (n) | Short Term % |
|----------------------------------------------|-----------|---------------|-------|-------|---------------|-------------|---------------|----------------|--------------|
| 20                                           | 65-69     | Never Any     | 3116  | 47.67 |               |             |               |                |              |
| 20                                           | 65-69     | CC            | 47    | 0.72  | 0             | 0.00        |               |                |              |
| 20                                           | 65-69     | Ecig          | 645   | 9.87  |               |             |               |                |              |
| 20                                           | 65-69     | Dual          | 0     | 0.00  |               |             |               |                |              |
| 20                                           | 65-69     | Former        | 2728  | 41.74 |               |             | 22.72         | 95             | 3.48         |
| Year of Follow-up: 2010, Age Group: 70-74    |           |               |       |       |               |             |               |                |              |
| Period                                       | Age Group | Smoking Group | N     | %     | Ever Quit (N) | Ever Quit % | Mean Yrs Quit | Short Term (n) | Short Term % |
| 20                                           | 70-74     | Never Any     | 2684  | 48.50 |               |             |               |                |              |
| 20                                           | 70-74     | CC            | 88    | 1.59  | 0             | 0.00        |               |                |              |
| 20                                           | 70-74     | Ecig          | 477   | 8.62  |               |             |               |                |              |
| 20                                           | 70-74     | Dual          | 0     | 0.00  |               |             |               |                |              |
| 20                                           | 70-74     | Former        | 2285  | 41.29 |               |             | 23.05         | 69             | 3.02         |
| Year of Follow-up: 2010, Age Group: 75-79    |           |               |       |       |               |             |               |                |              |
| Period                                       | Age Group | Smoking Group | N     | %     | Ever Quit (N) | Ever Quit % | Mean Yrs Quit | Short Term (n) | Short Term % |
| 20                                           | 75-79     | Never Any     | 2732  | 51.90 |               |             |               |                |              |
| 20                                           | 75-79     | CC            | 75    | 1.42  | 0             | 0.00        |               |                |              |
| 20                                           | 75-79     | Ecig          | 276   | 5.24  |               |             |               |                |              |
| 20                                           | 75-79     | Dual          | 0     | 0.00  |               |             |               |                |              |
| 20                                           | 75-79     | Former        | 2181  | 41.43 |               |             | 25.56         | 72             | 3.30         |
| Year of Follow-up: 2015, Age Group: All Ages |           |               |       |       |               |             |               |                |              |
| Period                                       | Age Group | Smoking Group | N     | %     | Ever Quit (N) | Ever Quit % | Mean Yrs Quit | Short Term (n) | Short Term % |
| 25                                           | All Ages  | Never Any     | 41686 | 54.98 |               |             |               |                |              |
| 25                                           | All Ages  | CC            | 340   | 0.45  | 0             | 0.00        |               |                |              |
| 25                                           | All Ages  | Ecig          | 11075 | 14.61 |               |             |               |                |              |
| 25                                           | All Ages  | Dual          | 0     | 0.00  |               |             |               |                |              |
| 25                                           | All Ages  | Former        | 22716 | 29.96 |               |             | 21.62         | 886            | 3.90         |
| Year of Follow-up: 2015, Age Group: 18-19    |           |               |       |       |               |             |               |                |              |
| Period                                       | Age Group | Smoking Group | N     | %     | Ever Quit (N) | Ever Quit % | Mean Yrs Quit | Short Term (n) | Short Term % |
| 25                                           | 18-19     | Never Any     | 0     | .     |               |             |               |                |              |
| 25                                           | 18-19     | CC            | 0     | .     | 0             | .           |               |                |              |
| 25                                           | 18-19     | Ecig          | 0     | .     |               |             |               |                |              |
| 25                                           | 18-19     | Dual          | 0     | .     |               |             |               |                |              |
| 25                                           | 18-19     | Former        | 0     | .     |               |             | .             | 0              | .            |
| Year of Follow-up: 2015, Age Group: 20-24    |           |               |       |       |               |             |               |                |              |
| Period                                       | Age Group | Smoking Group | N     | %     | Ever Quit (N) | Ever Quit % | Mean Yrs Quit | Short Term (n) | Short Term % |
| 25                                           | 20-24     | Never Any     | 0     | .     |               |             |               |                |              |
| 25                                           | 20-24     | CC            | 0     | .     | 0             | .           |               |                |              |
| 25                                           | 20-24     | Ecig          | 0     | .     |               |             |               |                |              |
| 25                                           | 20-24     | Dual          | 0     | .     |               |             |               |                |              |
| 25                                           | 20-24     | Former        | 0     | .     |               |             | .             | 0              | .            |
| Year of Follow-up: 2015, Age Group: 25-29    |           |               |       |       |               |             |               |                |              |
| Period                                       | Age Group | Smoking Group | N     | %     | Ever Quit (N) | Ever Quit % | Mean Yrs Quit | Short Term (n) | Short Term % |
| 25                                           | 25-29     | Never Any     | 0     | .     |               |             |               |                |              |
| 25                                           | 25-29     | CC            | 0     | .     | 0             | .           |               |                |              |
| 25                                           | 25-29     | Ecig          | 0     | .     |               |             |               |                |              |
| 25                                           | 25-29     | Dual          | 0     | .     |               |             |               |                |              |
| 25                                           | 25-29     | Former        | 0     | .     |               |             | .             | 0              | .            |
| Year of Follow-up: 2015, Age Group: 30-34    |           |               |       |       |               |             |               |                |              |
| Period                                       | Age Group | Smoking Group | N     | %     | Ever Quit (N) | Ever Quit % | Mean Yrs Quit | Short Term (n) | Short Term % |
| 25                                           | 30-34     | Never Any     | 0     | .     |               |             |               |                |              |
| 25                                           | 30-34     | CC            | 0     | .     | 0             | .           |               |                |              |
| 25                                           | 30-34     | Ecig          | 0     | .     |               |             |               |                |              |
| 25                                           | 30-34     | Dual          | 0     | .     |               |             |               |                |              |
| 25                                           | 30-34     | Former        | 0     | .     |               |             | .             | 0              | .            |
| Year of Follow-up: 2015, Age Group: 35-39    |           |               |       |       |               |             |               |                |              |
| Period                                       | Age Group | Smoking Group | N     | %     | Ever Quit (N) | Ever Quit % | Mean Yrs Quit | Short Term (n) | Short Term % |
| 25                                           | 35-39     | Never Any     | 5148  | 64.92 |               |             |               |                |              |
| 25                                           | 35-39     | CC            | 20    | 0.25  | 0             | 0.00        |               |                |              |
| 25                                           | 35-39     | Ecig          | 1357  | 17.11 |               |             |               |                |              |
| 25                                           | 35-39     | Dual          | 0     | 0.00  |               |             |               |                |              |
| 25                                           | 35-39     | Former        | 1405  | 17.72 |               |             | 11.55         | 110            | 7.83         |
| Year of Follow-up: 2015, Age Group: 40-44    |           |               |       |       |               |             |               |                |              |
| Period                                       | Age Group | Smoking Group | N     | %     | Ever Quit (N) | Ever Quit % | Mean Yrs Quit | Short Term (n) | Short Term % |
| 25                                           | 40-44     | Never Any     | 5574  | 66.75 |               |             |               |                |              |
| 25                                           | 40-44     | CC            | 33    | 0.40  | 0             | 0.00        |               |                |              |
| 25                                           | 40-44     | Ecig          | 1372  | 16.43 |               |             |               |                |              |
| 25                                           | 40-44     | Dual          | 0     | 0.00  |               |             |               |                |              |

**Results for PHIM for Run 4 (Sensitivity\_Analysis\_4.RTF)**

|                                              |           |               |       |       |               |             |               |                |              |
|----------------------------------------------|-----------|---------------|-------|-------|---------------|-------------|---------------|----------------|--------------|
| 25                                           | 40-44     | Former        | 1371  | 16.42 |               |             | 14.20         | 98             | 7.15         |
| Year of Follow-up: 2015, Age Group: 45-49    |           |               |       |       |               |             |               |                |              |
| Period                                       | Age Group | Smoking Group | N     | %     | Ever Quit (N) | Ever Quit % | Mean Yrs Quit | Short Term (n) | Short Term % |
| 25                                           | 45-49     | Never Any     | 5218  | 59.34 |               |             |               |                |              |
| 25                                           | 45-49     | CC            | 32    | 0.36  | 0             | 0.00        |               |                |              |
| 25                                           | 45-49     | Ecig          | 1609  | 18.30 |               |             |               |                |              |
| 25                                           | 45-49     | Dual          | 0     | 0.00  |               |             |               |                |              |
| 25                                           | 45-49     | Former        | 1934  | 21.99 |               |             | 18.01         | 93             | 4.81         |
| Year of Follow-up: 2015, Age Group: 50-54    |           |               |       |       |               |             |               |                |              |
| Period                                       | Age Group | Smoking Group | N     | %     | Ever Quit (N) | Ever Quit % | Mean Yrs Quit | Short Term (n) | Short Term % |
| 25                                           | 50-54     | Never Any     | 5291  | 52.50 |               |             |               |                |              |
| 25                                           | 50-54     | CC            | 45    | 0.45  | 0             | 0.00        |               |                |              |
| 25                                           | 50-54     | Ecig          | 2055  | 20.39 |               |             |               |                |              |
| 25                                           | 50-54     | Dual          | 0     | 0.00  |               |             |               |                |              |
| 25                                           | 50-54     | Former        | 2687  | 26.66 |               |             | 20.18         | 149            | 5.55         |
| Year of Follow-up: 2015, Age Group: 55-59    |           |               |       |       |               |             |               |                |              |
| Period                                       | Age Group | Smoking Group | N     | %     | Ever Quit (N) | Ever Quit % | Mean Yrs Quit | Short Term (n) | Short Term % |
| 25                                           | 55-59     | Never Any     | 5281  | 50.30 |               |             |               |                |              |
| 25                                           | 55-59     | CC            | 37    | 0.35  | 0             | 0.00        |               |                |              |
| 25                                           | 55-59     | Ecig          | 1772  | 16.88 |               |             |               |                |              |
| 25                                           | 55-59     | Dual          | 0     | 0.00  |               |             |               |                |              |
| 25                                           | 55-59     | Former        | 3409  | 32.47 |               |             | 20.84         | 140            | 4.11         |
| Year of Follow-up: 2015, Age Group: 60-64    |           |               |       |       |               |             |               |                |              |
| Period                                       | Age Group | Smoking Group | N     | %     | Ever Quit (N) | Ever Quit % | Mean Yrs Quit | Short Term (n) | Short Term % |
| 25                                           | 60-64     | Never Any     | 5018  | 52.27 |               |             |               |                |              |
| 25                                           | 60-64     | CC            | 42    | 0.44  | 0             | 0.00        |               |                |              |
| 25                                           | 60-64     | Ecig          | 1154  | 12.02 |               |             |               |                |              |
| 25                                           | 60-64     | Dual          | 0     | 0.00  |               |             |               |                |              |
| 25                                           | 60-64     | Former        | 3386  | 35.27 |               |             | 23.56         | 144            | 4.25         |
| Year of Follow-up: 2015, Age Group: 65-69    |           |               |       |       |               |             |               |                |              |
| Period                                       | Age Group | Smoking Group | N     | %     | Ever Quit (N) | Ever Quit % | Mean Yrs Quit | Short Term (n) | Short Term % |
| 25                                           | 65-69     | Never Any     | 4356  | 51.27 |               |             |               |                |              |
| 25                                           | 65-69     | CC            | 41    | 0.48  | 0             | 0.00        |               |                |              |
| 25                                           | 65-69     | Ecig          | 844   | 9.93  |               |             |               |                |              |
| 25                                           | 65-69     | Dual          | 0     | 0.00  |               |             |               |                |              |
| 25                                           | 65-69     | Former        | 3256  | 38.32 |               |             | 23.12         | 70             | 2.15         |
| Year of Follow-up: 2015, Age Group: 70-74    |           |               |       |       |               |             |               |                |              |
| Period                                       | Age Group | Smoking Group | N     | %     | Ever Quit (N) | Ever Quit % | Mean Yrs Quit | Short Term (n) | Short Term % |
| 25                                           | 70-74     | Never Any     | 3116  | 47.67 |               |             |               |                |              |
| 25                                           | 70-74     | CC            | 31    | 0.47  | 0             | 0.00        |               |                |              |
| 25                                           | 70-74     | Ecig          | 527   | 8.06  |               |             |               |                |              |
| 25                                           | 70-74     | Dual          | 0     | 0.00  |               |             |               |                |              |
| 25                                           | 70-74     | Former        | 2862  | 43.79 |               |             | 26.54         | 42             | 1.47         |
| Year of Follow-up: 2015, Age Group: 75-79    |           |               |       |       |               |             |               |                |              |
| Period                                       | Age Group | Smoking Group | N     | %     | Ever Quit (N) | Ever Quit % | Mean Yrs Quit | Short Term (n) | Short Term % |
| 25                                           | 75-79     | Never Any     | 2684  | 48.50 |               |             |               |                |              |
| 25                                           | 75-79     | CC            | 59    | 1.07  | 0             | 0.00        |               |                |              |
| 25                                           | 75-79     | Ecig          | 385   | 6.96  |               |             |               |                |              |
| 25                                           | 75-79     | Dual          | 0     | 0.00  |               |             |               |                |              |
| 25                                           | 75-79     | Former        | 2406  | 43.48 |               |             | 26.76         | 40             | 1.66         |
| Year of Follow-up: 2020, Age Group: All Ages |           |               |       |       |               |             |               |                |              |
| Period                                       | Age Group | Smoking Group | N     | %     | Ever Quit (N) | Ever Quit % | Mean Yrs Quit | Short Term (n) | Short Term % |
| 30                                           | All Ages  | Never Any     | 39002 | 55.49 |               |             |               |                |              |
| 30                                           | All Ages  | CC            | 115   | 0.16  | 0             | 0.00        |               |                |              |
| 30                                           | All Ages  | Ecig          | 8961  | 12.75 |               |             |               |                |              |
| 30                                           | All Ages  | Dual          | 0     | 0.00  |               |             |               |                |              |
| 30                                           | All Ages  | Former        | 22205 | 31.59 |               |             | 23.97         | 735            | 3.31         |
| Year of Follow-up: 2020, Age Group: 18-19    |           |               |       |       |               |             |               |                |              |
| Period                                       | Age Group | Smoking Group | N     | %     | Ever Quit (N) | Ever Quit % | Mean Yrs Quit | Short Term (n) | Short Term % |
| 30                                           | 18-19     | Never Any     | 0     | .     |               |             |               |                |              |
| 30                                           | 18-19     | CC            | 0     | .     | 0             | .           |               |                |              |
| 30                                           | 18-19     | Ecig          | 0     | .     |               |             |               |                |              |
| 30                                           | 18-19     | Dual          | 0     | .     |               |             |               |                |              |
| 30                                           | 18-19     | Former        | 0     | .     |               |             | .             | 0              | .            |
| Year of Follow-up: 2020, Age Group: 20-24    |           |               |       |       |               |             |               |                |              |
| Period                                       | Age Group | Smoking Group | N     | %     | Ever Quit (N) | Ever Quit % | Mean Yrs Quit | Short Term (n) | Short Term % |
| 30                                           | 20-24     | Never Any     | 0     | .     |               |             |               |                |              |
| 30                                           | 20-24     | CC            | 0     | .     | 0             | .           |               |                |              |



**Results for PHIM for Run 4 (Sensitivity\_Analysis\_4.RTF)**

|                                           |           |               |      |       |               |             |               |                |              |
|-------------------------------------------|-----------|---------------|------|-------|---------------|-------------|---------------|----------------|--------------|
| 30                                        | 20-24     | Ecig          | 0    | .     |               |             |               |                |              |
| 30                                        | 20-24     | Dual          | 0    | .     |               |             |               |                |              |
| 30                                        | 20-24     | Former        | 0    | .     |               |             | 0             | .              |              |
| Year of Follow-up: 2020, Age Group: 25-29 |           |               |      |       |               |             |               |                |              |
| Period                                    | Age Group | Smoking Group | N    | %     | Ever Quit (N) | Ever Quit % | Mean Yrs Quit | Short Term (n) | Short Term % |
| 30                                        | 25-29     | Never Any     | 0    | .     |               |             |               |                |              |
| 30                                        | 25-29     | CC            | 0    | .     | 0             | .           |               |                |              |
| 30                                        | 25-29     | Ecig          | 0    | .     |               |             |               |                |              |
| 30                                        | 25-29     | Dual          | 0    | .     |               |             |               |                |              |
| 30                                        | 25-29     | Former        | 0    | .     |               |             | 0             | .              |              |
| Year of Follow-up: 2020, Age Group: 30-34 |           |               |      |       |               |             |               |                |              |
| Period                                    | Age Group | Smoking Group | N    | %     | Ever Quit (N) | Ever Quit % | Mean Yrs Quit | Short Term (n) | Short Term % |
| 30                                        | 30-34     | Never Any     | 0    | .     |               |             |               |                |              |
| 30                                        | 30-34     | CC            | 0    | .     | 0             | .           |               |                |              |
| 30                                        | 30-34     | Ecig          | 0    | .     |               |             |               |                |              |
| 30                                        | 30-34     | Dual          | 0    | .     |               |             |               |                |              |
| 30                                        | 30-34     | Former        | 0    | .     |               |             | 0             | .              |              |
| Year of Follow-up: 2020, Age Group: 35-39 |           |               |      |       |               |             |               |                |              |
| Period                                    | Age Group | Smoking Group | N    | %     | Ever Quit (N) | Ever Quit % | Mean Yrs Quit | Short Term (n) | Short Term % |
| 30                                        | 35-39     | Never Any     | 0    | .     |               |             |               |                |              |
| 30                                        | 35-39     | CC            | 0    | .     | 0             | .           |               |                |              |
| 30                                        | 35-39     | Ecig          | 0    | .     |               |             |               |                |              |
| 30                                        | 35-39     | Dual          | 0    | .     |               |             |               |                |              |
| 30                                        | 35-39     | Former        | 0    | .     |               |             | 0             | .              |              |
| Year of Follow-up: 2020, Age Group: 40-44 |           |               |      |       |               |             |               |                |              |
| Period                                    | Age Group | Smoking Group | N    | %     | Ever Quit (N) | Ever Quit % | Mean Yrs Quit | Short Term (n) | Short Term % |
| 30                                        | 40-44     | Never Any     | 5148 | 64.92 |               |             |               |                |              |
| 30                                        | 40-44     | CC            | 6    | 0.08  | 0             | 0.00        |               |                |              |
| 30                                        | 40-44     | Ecig          | 1166 | 14.70 |               |             |               |                |              |
| 30                                        | 40-44     | Dual          | 0    | 0.00  |               |             |               |                |              |
| 30                                        | 40-44     | Former        | 1610 | 20.30 |               |             | 14.71         | 68             | 4.22         |
| Year of Follow-up: 2020, Age Group: 45-49 |           |               |      |       |               |             |               |                |              |
| Period                                    | Age Group | Smoking Group | N    | %     | Ever Quit (N) | Ever Quit % | Mean Yrs Quit | Short Term (n) | Short Term % |
| 30                                        | 45-49     | Never Any     | 5574 | 66.75 |               |             |               |                |              |
| 30                                        | 45-49     | CC            | 13   | 0.16  | 0             | 0.00        |               |                |              |
| 30                                        | 45-49     | Ecig          | 1205 | 14.43 |               |             |               |                |              |
| 30                                        | 45-49     | Dual          | 0    | 0.00  |               |             |               |                |              |
| 30                                        | 45-49     | Former        | 1558 | 18.66 |               |             | 17.16         | 65             | 4.17         |
| Year of Follow-up: 2020, Age Group: 50-54 |           |               |      |       |               |             |               |                |              |
| Period                                    | Age Group | Smoking Group | N    | %     | Ever Quit (N) | Ever Quit % | Mean Yrs Quit | Short Term (n) | Short Term % |
| 30                                        | 50-54     | Never Any     | 5218 | 59.34 |               |             |               |                |              |
| 30                                        | 50-54     | CC            | 9    | 0.10  | 0             | 0.00        |               |                |              |
| 30                                        | 50-54     | Ecig          | 1380 | 15.69 |               |             |               |                |              |
| 30                                        | 50-54     | Dual          | 0    | 0.00  |               |             |               |                |              |
| 30                                        | 50-54     | Former        | 2186 | 24.86 |               |             | 20.57         | 120            | 5.49         |
| Year of Follow-up: 2020, Age Group: 55-59 |           |               |      |       |               |             |               |                |              |
| Period                                    | Age Group | Smoking Group | N    | %     | Ever Quit (N) | Ever Quit % | Mean Yrs Quit | Short Term (n) | Short Term % |
| 30                                        | 55-59     | Never Any     | 5291 | 52.50 |               |             |               |                |              |
| 30                                        | 55-59     | CC            | 14   | 0.14  | 0             | 0.00        |               |                |              |
| 30                                        | 55-59     | Ecig          | 1704 | 16.91 |               |             |               |                |              |
| 30                                        | 55-59     | Dual          | 0    | 0.00  |               |             |               |                |              |
| 30                                        | 55-59     | Former        | 3069 | 30.45 |               |             | 22.31         | 140            | 4.56         |
| Year of Follow-up: 2020, Age Group: 60-64 |           |               |      |       |               |             |               |                |              |
| Period                                    | Age Group | Smoking Group | N    | %     | Ever Quit (N) | Ever Quit % | Mean Yrs Quit | Short Term (n) | Short Term % |
| 30                                        | 60-64     | Never Any     | 5281 | 50.30 |               |             |               |                |              |
| 30                                        | 60-64     | CC            | 15   | 0.14  | 0             | 0.00        |               |                |              |
| 30                                        | 60-64     | Ecig          | 1427 | 13.59 |               |             |               |                |              |
| 30                                        | 60-64     | Dual          | 0    | 0.00  |               |             |               |                |              |
| 30                                        | 60-64     | Former        | 3776 | 35.97 |               |             | 23.52         | 153            | 4.05         |
| Year of Follow-up: 2020, Age Group: 65-69 |           |               |      |       |               |             |               |                |              |
| Period                                    | Age Group | Smoking Group | N    | %     | Ever Quit (N) | Ever Quit % | Mean Yrs Quit | Short Term (n) | Short Term % |
| 30                                        | 65-69     | Never Any     | 5018 | 52.27 |               |             |               |                |              |
| 30                                        | 65-69     | CC            | 18   | 0.19  | 0             | 0.00        |               |                |              |
| 30                                        | 65-69     | Ecig          | 917  | 9.55  |               |             |               |                |              |
| 30                                        | 65-69     | Dual          | 0    | 0.00  |               |             |               |                |              |
| 30                                        | 65-69     | Former        | 3647 | 37.99 |               |             | 26.68         | 75             | 2.06         |
| Year of Follow-up: 2020, Age Group: 70-74 |           |               |      |       |               |             |               |                |              |
| Period                                    | Age Group | Smoking Group | N    | %     | Ever Quit (N) | Ever Quit % | Mean Yrs Quit | Short Term (n) | Short Term % |

**Results for PHIM for Run 4 (Sensitivity\_Analysis\_4.RTF)**

|                                              |           |               |       |       |               |             |               |                |              |
|----------------------------------------------|-----------|---------------|-------|-------|---------------|-------------|---------------|----------------|--------------|
| 30                                           | 70-74     | Never Any     | 4356  | 51.27 |               |             |               |                |              |
| 30                                           | 70-74     | CC            | 22    | 0.26  | 0             | 0.00        |               |                |              |
| 30                                           | 70-74     | Ecig          | 727   | 8.56  |               |             |               |                |              |
| 30                                           | 70-74     | Dual          | 0     | 0.00  |               |             |               |                |              |
| 30                                           | 70-74     | Former        | 3392  | 39.92 |               |             | 27.06         | 66             | 1.95         |
| Year of Follow-up: 2020, Age Group: 75-79    |           |               |       |       |               |             |               |                |              |
| Period                                       | Age Group | Smoking Group | N     | %     | Ever Quit (N) | Ever Quit % | Mean Yrs Quit | Short Term (n) | Short Term % |
| 30                                           | 75-79     | Never Any     | 3116  | 47.67 |               |             |               |                |              |
| 30                                           | 75-79     | CC            | 18    | 0.28  | 0             | 0.00        |               |                |              |
| 30                                           | 75-79     | Ecig          | 435   | 6.66  |               |             |               |                |              |
| 30                                           | 75-79     | Dual          | 0     | 0.00  |               |             |               |                |              |
| 30                                           | 75-79     | Former        | 2967  | 45.39 |               |             | 30.49         | 48             | 1.62         |
| Year of Follow-up: 2025, Age Group: All Ages |           |               |       |       |               |             |               |                |              |
| Period                                       | Age Group | Smoking Group | N     | %     | Ever Quit (N) | Ever Quit % | Mean Yrs Quit | Short Term (n) | Short Term % |
| 35                                           | All Ages  | Never Any     | 35886 | 56.29 |               |             |               |                |              |
| 35                                           | All Ages  | CC            | 47    | 0.07  | 0             | 0.00        |               |                |              |
| 35                                           | All Ages  | Ecig          | 7047  | 11.05 |               |             |               |                |              |
| 35                                           | All Ages  | Dual          | 0     | 0.00  |               |             |               |                |              |
| 35                                           | All Ages  | Former        | 20767 | 32.58 |               |             | 26.05         | 589            | 2.84         |
| Year of Follow-up: 2025, Age Group: 18-19    |           |               |       |       |               |             |               |                |              |
| Period                                       | Age Group | Smoking Group | N     | %     | Ever Quit (N) | Ever Quit % | Mean Yrs Quit | Short Term (n) | Short Term % |
| 35                                           | 18-19     | Never Any     | 0     | .     |               |             |               |                |              |
| 35                                           | 18-19     | CC            | 0     | .     | 0             | .           |               |                |              |
| 35                                           | 18-19     | Ecig          | 0     | .     |               |             |               |                |              |
| 35                                           | 18-19     | Dual          | 0     | .     |               |             |               |                |              |
| 35                                           | 18-19     | Former        | 0     | .     |               |             | .             | 0              | .            |
| Year of Follow-up: 2025, Age Group: 20-24    |           |               |       |       |               |             |               |                |              |
| Period                                       | Age Group | Smoking Group | N     | %     | Ever Quit (N) | Ever Quit % | Mean Yrs Quit | Short Term (n) | Short Term % |
| 35                                           | 20-24     | Never Any     | 0     | .     |               |             |               |                |              |
| 35                                           | 20-24     | CC            | 0     | .     | 0             | .           |               |                |              |
| 35                                           | 20-24     | Ecig          | 0     | .     |               |             |               |                |              |
| 35                                           | 20-24     | Dual          | 0     | .     |               |             |               |                |              |
| 35                                           | 20-24     | Former        | 0     | .     |               |             | .             | 0              | .            |
| Year of Follow-up: 2025, Age Group: 25-29    |           |               |       |       |               |             |               |                |              |
| Period                                       | Age Group | Smoking Group | N     | %     | Ever Quit (N) | Ever Quit % | Mean Yrs Quit | Short Term (n) | Short Term % |
| 35                                           | 25-29     | Never Any     | 0     | .     |               |             |               |                |              |
| 35                                           | 25-29     | CC            | 0     | .     | 0             | .           |               |                |              |
| 35                                           | 25-29     | Ecig          | 0     | .     |               |             |               |                |              |
| 35                                           | 25-29     | Dual          | 0     | .     |               |             |               |                |              |
| 35                                           | 25-29     | Former        | 0     | .     |               |             | .             | 0              | .            |
| Year of Follow-up: 2025, Age Group: 30-34    |           |               |       |       |               |             |               |                |              |
| Period                                       | Age Group | Smoking Group | N     | %     | Ever Quit (N) | Ever Quit % | Mean Yrs Quit | Short Term (n) | Short Term % |
| 35                                           | 30-34     | Never Any     | 0     | .     |               |             |               |                |              |
| 35                                           | 30-34     | CC            | 0     | .     | 0             | .           |               |                |              |
| 35                                           | 30-34     | Ecig          | 0     | .     |               |             |               |                |              |
| 35                                           | 30-34     | Dual          | 0     | .     |               |             |               |                |              |
| 35                                           | 30-34     | Former        | 0     | .     |               |             | .             | 0              | .            |
| Year of Follow-up: 2025, Age Group: 35-39    |           |               |       |       |               |             |               |                |              |
| Period                                       | Age Group | Smoking Group | N     | %     | Ever Quit (N) | Ever Quit % | Mean Yrs Quit | Short Term (n) | Short Term % |
| 35                                           | 35-39     | Never Any     | 0     | .     |               |             |               |                |              |
| 35                                           | 35-39     | CC            | 0     | .     | 0             | .           |               |                |              |
| 35                                           | 35-39     | Ecig          | 0     | .     |               |             |               |                |              |
| 35                                           | 35-39     | Dual          | 0     | .     |               |             |               |                |              |
| 35                                           | 35-39     | Former        | 0     | .     |               |             | .             | 0              | .            |
| Year of Follow-up: 2025, Age Group: 40-44    |           |               |       |       |               |             |               |                |              |
| Period                                       | Age Group | Smoking Group | N     | %     | Ever Quit (N) | Ever Quit % | Mean Yrs Quit | Short Term (n) | Short Term % |
| 35                                           | 40-44     | Never Any     | 0     | .     |               |             |               |                |              |
| 35                                           | 40-44     | CC            | 0     | .     | 0             | .           |               |                |              |
| 35                                           | 40-44     | Ecig          | 0     | .     |               |             |               |                |              |
| 35                                           | 40-44     | Dual          | 0     | .     |               |             |               |                |              |
| 35                                           | 40-44     | Former        | 0     | .     |               |             | .             | 0              | .            |
| Year of Follow-up: 2025, Age Group: 45-49    |           |               |       |       |               |             |               |                |              |
| Period                                       | Age Group | Smoking Group | N     | %     | Ever Quit (N) | Ever Quit % | Mean Yrs Quit | Short Term (n) | Short Term % |
| 35                                           | 45-49     | Never Any     | 5148  | 64.92 |               |             |               |                |              |
| 35                                           | 45-49     | CC            | 1     | 0.01  | 0             | 0.00        |               |                |              |
| 35                                           | 45-49     | Ecig          | 999   | 12.60 |               |             |               |                |              |
| 35                                           | 45-49     | Dual          | 0     | 0.00  |               |             |               |                |              |
| 35                                           | 45-49     | Former        | 1782  | 22.47 |               |             | 18.02         | 63             | 3.54         |
| Year of Follow-up: 2025, Age Group: 50-54    |           |               |       |       |               |             |               |                |              |

**Results for PHIM for Run 4 (Sensitivity\_Analysis\_4.RTF)**

| Period                                       | Age Group | Smoking Group | N     | %     | Ever Quit (N) | Ever Quit % | Mean Yrs Quit | Short Term (n) | Short Term % |
|----------------------------------------------|-----------|---------------|-------|-------|---------------|-------------|---------------|----------------|--------------|
| 35                                           | 50-54     | Never Any     | 5574  | 66.75 |               |             |               |                |              |
| 35                                           | 50-54     | CC            | 3     | 0.04  | 0             | 0.00        |               |                |              |
| 35                                           | 50-54     | Ecig          | 1017  | 12.18 |               |             |               |                |              |
| 35                                           | 50-54     | Dual          | 0     | 0.00  |               |             |               |                |              |
| 35                                           | 50-54     | Former        | 1756  | 21.03 |               |             | 19.87         | 91             | 5.18         |
| Year of Follow-up: 2025, Age Group: 55-59    |           |               |       |       |               |             |               |                |              |
| Period                                       | Age Group | Smoking Group | N     | %     | Ever Quit (N) | Ever Quit % | Mean Yrs Quit | Short Term (n) | Short Term % |
| 35                                           | 55-59     | Never Any     | 5218  | 59.34 |               |             |               |                |              |
| 35                                           | 55-59     | CC            | 4     | 0.05  | 0             | 0.00        |               |                |              |
| 35                                           | 55-59     | Ecig          | 1142  | 12.99 |               |             |               |                |              |
| 35                                           | 55-59     | Dual          | 0     | 0.00  |               |             |               |                |              |
| 35                                           | 55-59     | Former        | 2429  | 27.62 |               |             | 23.21         | 95             | 3.91         |
| Year of Follow-up: 2025, Age Group: 60-64    |           |               |       |       |               |             |               |                |              |
| Period                                       | Age Group | Smoking Group | N     | %     | Ever Quit (N) | Ever Quit % | Mean Yrs Quit | Short Term (n) | Short Term % |
| 35                                           | 60-64     | Never Any     | 5291  | 52.50 |               |             |               |                |              |
| 35                                           | 60-64     | CC            | 7     | 0.07  | 0             | 0.00        |               |                |              |
| 35                                           | 60-64     | Ecig          | 1374  | 13.63 |               |             |               |                |              |
| 35                                           | 60-64     | Dual          | 0     | 0.00  |               |             |               |                |              |
| 35                                           | 60-64     | Former        | 3406  | 33.80 |               |             | 24.80         | 139            | 4.08         |
| Year of Follow-up: 2025, Age Group: 65-69    |           |               |       |       |               |             |               |                |              |
| Period                                       | Age Group | Smoking Group | N     | %     | Ever Quit (N) | Ever Quit % | Mean Yrs Quit | Short Term (n) | Short Term % |
| 35                                           | 65-69     | Never Any     | 5281  | 50.30 |               |             |               |                |              |
| 35                                           | 65-69     | CC            | 7     | 0.07  | 0             | 0.00        |               |                |              |
| 35                                           | 65-69     | Ecig          | 1138  | 10.84 |               |             |               |                |              |
| 35                                           | 65-69     | Dual          | 0     | 0.00  |               |             |               |                |              |
| 35                                           | 65-69     | Former        | 4073  | 38.79 |               |             | 26.62         | 83             | 2.04         |
| Year of Follow-up: 2025, Age Group: 70-74    |           |               |       |       |               |             |               |                |              |
| Period                                       | Age Group | Smoking Group | N     | %     | Ever Quit (N) | Ever Quit % | Mean Yrs Quit | Short Term (n) | Short Term % |
| 35                                           | 70-74     | Never Any     | 5018  | 52.27 |               |             |               |                |              |
| 35                                           | 70-74     | CC            | 11    | 0.11  | 0             | 0.00        |               |                |              |
| 35                                           | 70-74     | Ecig          | 789   | 8.22  |               |             |               |                |              |
| 35                                           | 70-74     | Dual          | 0     | 0.00  |               |             |               |                |              |
| 35                                           | 70-74     | Former        | 3782  | 39.40 |               |             | 30.61         | 65             | 1.72         |
| Year of Follow-up: 2025, Age Group: 75-79    |           |               |       |       |               |             |               |                |              |
| Period                                       | Age Group | Smoking Group | N     | %     | Ever Quit (N) | Ever Quit % | Mean Yrs Quit | Short Term (n) | Short Term % |
| 35                                           | 75-79     | Never Any     | 4356  | 51.27 |               |             |               |                |              |
| 35                                           | 75-79     | CC            | 14    | 0.16  | 0             | 0.00        |               |                |              |
| 35                                           | 75-79     | Ecig          | 588   | 6.92  |               |             |               |                |              |
| 35                                           | 75-79     | Dual          | 0     | 0.00  |               |             |               |                |              |
| 35                                           | 75-79     | Former        | 3539  | 41.65 |               |             | 30.81         | 53             | 1.50         |
| Year of Follow-up: 2030, Age Group: All Ages |           |               |       |       |               |             |               |                |              |
| Period                                       | Age Group | Smoking Group | N     | %     | Ever Quit (N) | Ever Quit % | Mean Yrs Quit | Short Term (n) | Short Term % |
| 40                                           | All Ages  | Never Any     | 31530 | 57.07 |               |             |               |                |              |
| 40                                           | All Ages  | CC            | 14    | 0.03  | 0             | 0.00        |               |                |              |
| 40                                           | All Ages  | Ecig          | 5199  | 9.41  |               |             |               |                |              |
| 40                                           | All Ages  | Dual          | 0     | 0.00  |               |             |               |                |              |
| 40                                           | All Ages  | Former        | 18507 | 33.50 |               |             | 28.14         | 511            | 2.76         |
| Year of Follow-up: 2030, Age Group: 18-19    |           |               |       |       |               |             |               |                |              |
| Period                                       | Age Group | Smoking Group | N     | %     | Ever Quit (N) | Ever Quit % | Mean Yrs Quit | Short Term (n) | Short Term % |
| 40                                           | 18-19     | Never Any     | 0     | .     |               |             |               |                |              |
| 40                                           | 18-19     | CC            | 0     | .     | 0             | .           |               |                |              |
| 40                                           | 18-19     | Ecig          | 0     | .     |               |             |               |                |              |
| 40                                           | 18-19     | Dual          | 0     | .     |               |             |               |                |              |
| 40                                           | 18-19     | Former        | 0     | .     |               |             | .             | 0              | .            |
| Year of Follow-up: 2030, Age Group: 20-24    |           |               |       |       |               |             |               |                |              |
| Period                                       | Age Group | Smoking Group | N     | %     | Ever Quit (N) | Ever Quit % | Mean Yrs Quit | Short Term (n) | Short Term % |
| 40                                           | 20-24     | Never Any     | 0     | .     |               |             |               |                |              |
| 40                                           | 20-24     | CC            | 0     | .     | 0             | .           |               |                |              |
| 40                                           | 20-24     | Ecig          | 0     | .     |               |             |               |                |              |
| 40                                           | 20-24     | Dual          | 0     | .     |               |             |               |                |              |
| 40                                           | 20-24     | Former        | 0     | .     |               |             | .             | 0              | .            |
| Year of Follow-up: 2030, Age Group: 25-29    |           |               |       |       |               |             |               |                |              |
| Period                                       | Age Group | Smoking Group | N     | %     | Ever Quit (N) | Ever Quit % | Mean Yrs Quit | Short Term (n) | Short Term % |
| 40                                           | 25-29     | Never Any     | 0     | .     |               |             |               |                |              |
| 40                                           | 25-29     | CC            | 0     | .     | 0             | .           |               |                |              |
| 40                                           | 25-29     | Ecig          | 0     | .     |               |             |               |                |              |
| 40                                           | 25-29     | Dual          | 0     | .     |               |             |               |                |              |

**Results for PHIM for Run 4 (Sensitivity\_Analysis\_4.RTF)**

| Year of Follow-up: 2030, Age Group: 30-34 | Period | Age Group | Smoking Group | N    | %     | Ever Quit (N) | Ever Quit % | Mean Yrs Quit | Short Term (n) | Short Term % |
|-------------------------------------------|--------|-----------|---------------|------|-------|---------------|-------------|---------------|----------------|--------------|
| 40                                        | 25-29  | Former    |               | 0    | .     |               |             |               | 0              | .            |
| 40                                        | 30-34  | Never Any |               | 0    | .     |               |             |               |                |              |
| 40                                        | 30-34  | CC        |               | 0    | .     | 0             | .           |               |                |              |
| 40                                        | 30-34  | Ecig      |               | 0    | .     |               |             |               |                |              |
| 40                                        | 30-34  | Dual      |               | 0    | .     |               |             |               |                |              |
| 40                                        | 30-34  | Former    |               | 0    | .     |               |             |               | 0              | .            |
| Year of Follow-up: 2030, Age Group: 35-39 | Period | Age Group | Smoking Group | N    | %     | Ever Quit (N) | Ever Quit % | Mean Yrs Quit | Short Term (n) | Short Term % |
| 40                                        | 35-39  | Never Any |               | 0    | .     |               |             |               |                |              |
| 40                                        | 35-39  | CC        |               | 0    | .     | 0             | .           |               |                |              |
| 40                                        | 35-39  | Ecig      |               | 0    | .     |               |             |               |                |              |
| 40                                        | 35-39  | Dual      |               | 0    | .     |               |             |               |                |              |
| 40                                        | 35-39  | Former    |               | 0    | .     |               |             |               | 0              | .            |
| Year of Follow-up: 2030, Age Group: 40-44 | Period | Age Group | Smoking Group | N    | %     | Ever Quit (N) | Ever Quit % | Mean Yrs Quit | Short Term (n) | Short Term % |
| 40                                        | 40-44  | Never Any |               | 0    | .     |               |             |               |                |              |
| 40                                        | 40-44  | CC        |               | 0    | .     | 0             | .           |               |                |              |
| 40                                        | 40-44  | Ecig      |               | 0    | .     |               |             |               |                |              |
| 40                                        | 40-44  | Dual      |               | 0    | .     |               |             |               |                |              |
| 40                                        | 40-44  | Former    |               | 0    | .     |               |             |               | 0              | .            |
| Year of Follow-up: 2030, Age Group: 45-49 | Period | Age Group | Smoking Group | N    | %     | Ever Quit (N) | Ever Quit % | Mean Yrs Quit | Short Term (n) | Short Term % |
| 40                                        | 45-49  | Never Any |               | 0    | .     |               |             |               |                |              |
| 40                                        | 45-49  | CC        |               | 0    | .     | 0             | .           |               |                |              |
| 40                                        | 45-49  | Ecig      |               | 0    | .     |               |             |               |                |              |
| 40                                        | 45-49  | Dual      |               | 0    | .     |               |             |               |                |              |
| 40                                        | 45-49  | Former    |               | 0    | .     |               |             |               | 0              | .            |
| Year of Follow-up: 2030, Age Group: 50-54 | Period | Age Group | Smoking Group | N    | %     | Ever Quit (N) | Ever Quit % | Mean Yrs Quit | Short Term (n) | Short Term % |
| 40                                        | 50-54  | Never Any |               | 5148 | 64.92 |               |             |               |                |              |
| 40                                        | 50-54  | CC        |               | 0    | 0.00  | 0             | 0.00        |               |                |              |
| 40                                        | 50-54  | Ecig      |               | 849  | 10.71 |               |             |               |                |              |
| 40                                        | 50-54  | Dual      |               | 0    | 0.00  |               |             |               |                |              |
| 40                                        | 50-54  | Former    |               | 1933 | 24.38 |               |             | 21.35         | 79             | 4.09         |
| Year of Follow-up: 2030, Age Group: 55-59 | Period | Age Group | Smoking Group | N    | %     | Ever Quit (N) | Ever Quit % | Mean Yrs Quit | Short Term (n) | Short Term % |
| 40                                        | 55-59  | Never Any |               | 5574 | 66.75 |               |             |               |                |              |
| 40                                        | 55-59  | CC        |               | 0    | 0.00  | 0             | 0.00        |               |                |              |
| 40                                        | 55-59  | Ecig      |               | 826  | 9.89  |               |             |               |                |              |
| 40                                        | 55-59  | Dual      |               | 0    | 0.00  |               |             |               |                |              |
| 40                                        | 55-59  | Former    |               | 1950 | 23.35 |               |             | 22.60         | 71             | 3.64         |
| Year of Follow-up: 2030, Age Group: 60-64 | Period | Age Group | Smoking Group | N    | %     | Ever Quit (N) | Ever Quit % | Mean Yrs Quit | Short Term (n) | Short Term % |
| 40                                        | 60-64  | Never Any |               | 5218 | 59.34 |               |             |               |                |              |
| 40                                        | 60-64  | CC        |               | 3    | 0.03  | 0             | 0.00        |               |                |              |
| 40                                        | 60-64  | Ecig      |               | 877  | 9.97  |               |             |               |                |              |
| 40                                        | 60-64  | Dual      |               | 0    | 0.00  |               |             |               |                |              |
| 40                                        | 60-64  | Former    |               | 2695 | 30.65 |               |             | 25.60         | 127            | 4.71         |
| Year of Follow-up: 2030, Age Group: 65-69 | Period | Age Group | Smoking Group | N    | %     | Ever Quit (N) | Ever Quit % | Mean Yrs Quit | Short Term (n) | Short Term % |
| 40                                        | 65-69  | Never Any |               | 5291 | 52.50 |               |             |               |                |              |
| 40                                        | 65-69  | CC        |               | 3    | 0.03  | 0             | 0.00        |               |                |              |
| 40                                        | 65-69  | Ecig      |               | 1078 | 10.70 |               |             |               |                |              |
| 40                                        | 65-69  | Dual      |               | 0    | 0.00  |               |             |               |                |              |
| 40                                        | 65-69  | Former    |               | 3706 | 36.77 |               |             | 27.59         | 73             | 1.97         |
| Year of Follow-up: 2030, Age Group: 70-74 | Period | Age Group | Smoking Group | N    | %     | Ever Quit (N) | Ever Quit % | Mean Yrs Quit | Short Term (n) | Short Term % |
| 40                                        | 70-74  | Never Any |               | 5281 | 50.30 |               |             |               |                |              |
| 40                                        | 70-74  | CC        |               | 4    | 0.04  | 0             | 0.00        |               |                |              |
| 40                                        | 70-74  | Ecig      |               | 957  | 9.12  |               |             |               |                |              |
| 40                                        | 70-74  | Dual      |               | 0    | 0.00  |               |             |               |                |              |
| 40                                        | 70-74  | Former    |               | 4257 | 40.55 |               |             | 30.33         | 85             | 2.00         |
| Year of Follow-up: 2030, Age Group: 75-79 | Period | Age Group | Smoking Group | N    | %     | Ever Quit (N) | Ever Quit % | Mean Yrs Quit | Short Term (n) | Short Term % |
| 40                                        | 75-79  | Never Any |               | 5018 | 52.27 |               |             |               |                |              |
| 40                                        | 75-79  | CC        |               | 4    | 0.04  | 0             | 0.00        |               |                |              |

**Results for PHIM for Run 4 (Sensitivity\_Analysis\_4.RTF)**

|                                              |           |               |       |       |               |             |               |                |              |
|----------------------------------------------|-----------|---------------|-------|-------|---------------|-------------|---------------|----------------|--------------|
| 40                                           | 75-79     | Ecig          | 612   | 6.38  |               |             |               |                |              |
| 40                                           | 75-79     | Dual          | 0     | 0.00  |               |             |               |                |              |
| 40                                           | 75-79     | Former        | 3966  | 41.31 |               |             | 34.05         | 76             | 1.92         |
| Year of Follow-up: 2035, Age Group: All Ages |           |               |       |       |               |             |               |                |              |
| Period                                       | Age Group | Smoking Group | N     | %     | Ever Quit (N) | Ever Quit % | Mean Yrs Quit | Short Term (n) | Short Term % |
| 45                                           | All Ages  | Never Any     | 26512 | 58.08 |               |             |               |                |              |
| 45                                           | All Ages  | CC            | 5     | 0.01  | 0             | 0.00        |               |                |              |
| 45                                           | All Ages  | Ecig          | 3723  | 8.16  |               |             |               |                |              |
| 45                                           | All Ages  | Dual          | 0     | 0.00  |               |             |               |                |              |
| 45                                           | All Ages  | Former        | 15410 | 33.76 |               |             | 29.86         | 342            | 2.22         |
| Year of Follow-up: 2035, Age Group: 18-19    |           |               |       |       |               |             |               |                |              |
| Period                                       | Age Group | Smoking Group | N     | %     | Ever Quit (N) | Ever Quit % | Mean Yrs Quit | Short Term (n) | Short Term % |
| 45                                           | 18-19     | Never Any     | 0     | .     |               |             |               |                |              |
| 45                                           | 18-19     | CC            | 0     | .     | 0             | .           |               |                |              |
| 45                                           | 18-19     | Ecig          | 0     | .     |               |             |               |                |              |
| 45                                           | 18-19     | Dual          | 0     | .     |               |             |               |                |              |
| 45                                           | 18-19     | Former        | 0     | .     |               |             | .             | 0              | .            |
| Year of Follow-up: 2035, Age Group: 20-24    |           |               |       |       |               |             |               |                |              |
| Period                                       | Age Group | Smoking Group | N     | %     | Ever Quit (N) | Ever Quit % | Mean Yrs Quit | Short Term (n) | Short Term % |
| 45                                           | 20-24     | Never Any     | 0     | .     |               |             |               |                |              |
| 45                                           | 20-24     | CC            | 0     | .     | 0             | .           |               |                |              |
| 45                                           | 20-24     | Ecig          | 0     | .     |               |             |               |                |              |
| 45                                           | 20-24     | Dual          | 0     | .     |               |             |               |                |              |
| 45                                           | 20-24     | Former        | 0     | .     |               |             | .             | 0              | .            |
| Year of Follow-up: 2035, Age Group: 25-29    |           |               |       |       |               |             |               |                |              |
| Period                                       | Age Group | Smoking Group | N     | %     | Ever Quit (N) | Ever Quit % | Mean Yrs Quit | Short Term (n) | Short Term % |
| 45                                           | 25-29     | Never Any     | 0     | .     |               |             |               |                |              |
| 45                                           | 25-29     | CC            | 0     | .     | 0             | .           |               |                |              |
| 45                                           | 25-29     | Ecig          | 0     | .     |               |             |               |                |              |
| 45                                           | 25-29     | Dual          | 0     | .     |               |             |               |                |              |
| 45                                           | 25-29     | Former        | 0     | .     |               |             | .             | 0              | .            |
| Year of Follow-up: 2035, Age Group: 30-34    |           |               |       |       |               |             |               |                |              |
| Period                                       | Age Group | Smoking Group | N     | %     | Ever Quit (N) | Ever Quit % | Mean Yrs Quit | Short Term (n) | Short Term % |
| 45                                           | 30-34     | Never Any     | 0     | .     |               |             |               |                |              |
| 45                                           | 30-34     | CC            | 0     | .     | 0             | .           |               |                |              |
| 45                                           | 30-34     | Ecig          | 0     | .     |               |             |               |                |              |
| 45                                           | 30-34     | Dual          | 0     | .     |               |             |               |                |              |
| 45                                           | 30-34     | Former        | 0     | .     |               |             | .             | 0              | .            |
| Year of Follow-up: 2035, Age Group: 35-39    |           |               |       |       |               |             |               |                |              |
| Period                                       | Age Group | Smoking Group | N     | %     | Ever Quit (N) | Ever Quit % | Mean Yrs Quit | Short Term (n) | Short Term % |
| 45                                           | 35-39     | Never Any     | 0     | .     |               |             |               |                |              |
| 45                                           | 35-39     | CC            | 0     | .     | 0             | .           |               |                |              |
| 45                                           | 35-39     | Ecig          | 0     | .     |               |             |               |                |              |
| 45                                           | 35-39     | Dual          | 0     | .     |               |             |               |                |              |
| 45                                           | 35-39     | Former        | 0     | .     |               |             | .             | 0              | .            |
| Year of Follow-up: 2035, Age Group: 40-44    |           |               |       |       |               |             |               |                |              |
| Period                                       | Age Group | Smoking Group | N     | %     | Ever Quit (N) | Ever Quit % | Mean Yrs Quit | Short Term (n) | Short Term % |
| 45                                           | 40-44     | Never Any     | 0     | .     |               |             |               |                |              |
| 45                                           | 40-44     | CC            | 0     | .     | 0             | .           |               |                |              |
| 45                                           | 40-44     | Ecig          | 0     | .     |               |             |               |                |              |
| 45                                           | 40-44     | Dual          | 0     | .     |               |             |               |                |              |
| 45                                           | 40-44     | Former        | 0     | .     |               |             | .             | 0              | .            |
| Year of Follow-up: 2035, Age Group: 45-49    |           |               |       |       |               |             |               |                |              |
| Period                                       | Age Group | Smoking Group | N     | %     | Ever Quit (N) | Ever Quit % | Mean Yrs Quit | Short Term (n) | Short Term % |
| 45                                           | 45-49     | Never Any     | 0     | .     |               |             |               |                |              |
| 45                                           | 45-49     | CC            | 0     | .     | 0             | .           |               |                |              |
| 45                                           | 45-49     | Ecig          | 0     | .     |               |             |               |                |              |
| 45                                           | 45-49     | Dual          | 0     | .     |               |             |               |                |              |
| 45                                           | 45-49     | Former        | 0     | .     |               |             | .             | 0              | .            |
| Year of Follow-up: 2035, Age Group: 50-54    |           |               |       |       |               |             |               |                |              |
| Period                                       | Age Group | Smoking Group | N     | %     | Ever Quit (N) | Ever Quit % | Mean Yrs Quit | Short Term (n) | Short Term % |
| 45                                           | 50-54     | Never Any     | 0     | .     |               |             |               |                |              |
| 45                                           | 50-54     | CC            | 0     | .     | 0             | .           |               |                |              |
| 45                                           | 50-54     | Ecig          | 0     | .     |               |             |               |                |              |
| 45                                           | 50-54     | Dual          | 0     | .     |               |             |               |                |              |
| 45                                           | 50-54     | Former        | 0     | .     |               |             | .             | 0              | .            |
| Year of Follow-up: 2035, Age Group: 55-59    |           |               |       |       |               |             |               |                |              |
| Period                                       | Age Group | Smoking Group | N     | %     | Ever Quit (N) | Ever Quit % | Mean Yrs Quit | Short Term (n) | Short Term % |

### Results for PHIM for Run 4 (Sensitivity\_Analysis\_4.RTF)

|                                              |           |               |       |       |               |             |               |                |              |
|----------------------------------------------|-----------|---------------|-------|-------|---------------|-------------|---------------|----------------|--------------|
| 45                                           | 55-59     | Never Any     | 5148  | 64.92 |               |             |               |                |              |
| 45                                           | 55-59     | CC            | 0     | 0.00  | 0             | 0.00        |               |                |              |
| 45                                           | 55-59     | Ecig          | 697   | 8.79  |               |             |               |                |              |
| 45                                           | 55-59     | Dual          | 0     | 0.00  |               |             |               |                |              |
| 45                                           | 55-59     | Former        | 2085  | 26.29 |               |             | 24.58         | 59             | 2.83         |
| Year of Follow-up: 2035, Age Group: 60-64    |           |               |       |       |               |             |               |                |              |
| Period                                       | Age Group | Smoking Group | N     | %     | Ever Quit (N) | Ever Quit % | Mean Yrs Quit | Short Term (n) | Short Term % |
| 45                                           | 60-64     | Never Any     | 5574  | 66.75 |               |             |               |                |              |
| 45                                           | 60-64     | CC            | 0     | 0.00  | 0             | 0.00        |               |                |              |
| 45                                           | 60-64     | Ecig          | 660   | 7.90  |               |             |               |                |              |
| 45                                           | 60-64     | Dual          | 0     | 0.00  |               |             |               |                |              |
| 45                                           | 60-64     | Former        | 2116  | 25.34 |               |             | 25.58         | 73             | 3.45         |
| Year of Follow-up: 2035, Age Group: 65-69    |           |               |       |       |               |             |               |                |              |
| Period                                       | Age Group | Smoking Group | N     | %     | Ever Quit (N) | Ever Quit % | Mean Yrs Quit | Short Term (n) | Short Term % |
| 45                                           | 65-69     | Never Any     | 5218  | 59.34 |               |             |               |                |              |
| 45                                           | 65-69     | CC            | 3     | 0.03  | 0             | 0.00        |               |                |              |
| 45                                           | 65-69     | Ecig          | 687   | 7.81  |               |             |               |                |              |
| 45                                           | 65-69     | Dual          | 0     | 0.00  |               |             |               |                |              |
| 45                                           | 65-69     | Former        | 2885  | 32.81 |               |             | 28.74         | 55             | 1.91         |
| Year of Follow-up: 2035, Age Group: 70-74    |           |               |       |       |               |             |               |                |              |
| Period                                       | Age Group | Smoking Group | N     | %     | Ever Quit (N) | Ever Quit % | Mean Yrs Quit | Short Term (n) | Short Term % |
| 45                                           | 70-74     | Never Any     | 5291  | 52.50 |               |             |               |                |              |
| 45                                           | 70-74     | CC            | 1     | 0.01  | 0             | 0.00        |               |                |              |
| 45                                           | 70-74     | Ecig          | 932   | 9.25  |               |             |               |                |              |
| 45                                           | 70-74     | Dual          | 0     | 0.00  |               |             |               |                |              |
| 45                                           | 70-74     | Former        | 3854  | 38.24 |               |             | 31.40         | 76             | 1.97         |
| Year of Follow-up: 2035, Age Group: 75-79    |           |               |       |       |               |             |               |                |              |
| Period                                       | Age Group | Smoking Group | N     | %     | Ever Quit (N) | Ever Quit % | Mean Yrs Quit | Short Term (n) | Short Term % |
| 45                                           | 75-79     | Never Any     | 5281  | 50.30 |               |             |               |                |              |
| 45                                           | 75-79     | CC            | 1     | 0.01  | 0             | 0.00        |               |                |              |
| 45                                           | 75-79     | Ecig          | 747   | 7.11  |               |             |               |                |              |
| 45                                           | 75-79     | Dual          | 0     | 0.00  |               |             |               |                |              |
| 45                                           | 75-79     | Former        | 4470  | 42.58 |               |             | 33.74         | 79             | 1.77         |
| Year of Follow-up: 2040, Age Group: All Ages |           |               |       |       |               |             |               |                |              |
| Period                                       | Age Group | Smoking Group | N     | %     | Ever Quit (N) | Ever Quit % | Mean Yrs Quit | Short Term (n) | Short Term % |
| 50                                           | All Ages  | Never Any     | 21231 | 60.40 |               |             |               |                |              |
| 50                                           | All Ages  | CC            | 4     | 0.01  | 0             | 0.00        |               |                |              |
| 50                                           | All Ages  | Ecig          | 2367  | 6.73  |               |             |               |                |              |
| 50                                           | All Ages  | Dual          | 0     | 0.00  |               |             |               |                |              |
| 50                                           | All Ages  | Former        | 11549 | 32.86 |               |             | 31.63         | 220            | 1.90         |
| Year of Follow-up: 2040, Age Group: 18-19    |           |               |       |       |               |             |               |                |              |
| Period                                       | Age Group | Smoking Group | N     | %     | Ever Quit (N) | Ever Quit % | Mean Yrs Quit | Short Term (n) | Short Term % |
| 50                                           | 18-19     | Never Any     | 0     | .     |               |             |               |                |              |
| 50                                           | 18-19     | CC            | 0     | .     | 0             | .           |               |                |              |
| 50                                           | 18-19     | Ecig          | 0     | .     |               |             |               |                |              |
| 50                                           | 18-19     | Dual          | 0     | .     |               |             |               |                |              |
| 50                                           | 18-19     | Former        | 0     | .     |               |             | .             | 0              | .            |
| Year of Follow-up: 2040, Age Group: 20-24    |           |               |       |       |               |             |               |                |              |
| Period                                       | Age Group | Smoking Group | N     | %     | Ever Quit (N) | Ever Quit % | Mean Yrs Quit | Short Term (n) | Short Term % |
| 50                                           | 20-24     | Never Any     | 0     | .     |               |             |               |                |              |
| 50                                           | 20-24     | CC            | 0     | .     | 0             | .           |               |                |              |
| 50                                           | 20-24     | Ecig          | 0     | .     |               |             |               |                |              |
| 50                                           | 20-24     | Dual          | 0     | .     |               |             |               |                |              |
| 50                                           | 20-24     | Former        | 0     | .     |               |             | .             | 0              | .            |
| Year of Follow-up: 2040, Age Group: 25-29    |           |               |       |       |               |             |               |                |              |
| Period                                       | Age Group | Smoking Group | N     | %     | Ever Quit (N) | Ever Quit % | Mean Yrs Quit | Short Term (n) | Short Term % |
| 50                                           | 25-29     | Never Any     | 0     | .     |               |             |               |                |              |
| 50                                           | 25-29     | CC            | 0     | .     | 0             | .           |               |                |              |
| 50                                           | 25-29     | Ecig          | 0     | .     |               |             |               |                |              |
| 50                                           | 25-29     | Dual          | 0     | .     |               |             |               |                |              |
| 50                                           | 25-29     | Former        | 0     | .     |               |             | .             | 0              | .            |
| Year of Follow-up: 2040, Age Group: 30-34    |           |               |       |       |               |             |               |                |              |
| Period                                       | Age Group | Smoking Group | N     | %     | Ever Quit (N) | Ever Quit % | Mean Yrs Quit | Short Term (n) | Short Term % |
| 50                                           | 30-34     | Never Any     | 0     | .     |               |             |               |                |              |
| 50                                           | 30-34     | CC            | 0     | .     | 0             | .           |               |                |              |
| 50                                           | 30-34     | Ecig          | 0     | .     |               |             |               |                |              |
| 50                                           | 30-34     | Dual          | 0     | .     |               |             |               |                |              |
| 50                                           | 30-34     | Former        | 0     | .     |               |             | .             | 0              | .            |
| Year of Follow-up: 2040, Age Group: 35-39    |           |               |       |       |               |             |               |                |              |

**Results for PHIM for Run 4 (Sensitivity\_Analysis\_4.RTF)**

| Period                                    | Age Group | Smoking Group | N    | %     | Ever Quit (N) | Ever Quit % | Mean Yrs Quit | Short Term (n) | Short Term % |
|-------------------------------------------|-----------|---------------|------|-------|---------------|-------------|---------------|----------------|--------------|
| 50                                        | 35-39     | Never Any     | 0    | .     |               |             |               |                |              |
| 50                                        | 35-39     | CC            | 0    | .     | 0             | .           |               |                |              |
| 50                                        | 35-39     | Ecig          | 0    | .     |               |             |               |                |              |
| 50                                        | 35-39     | Dual          | 0    | .     |               |             |               |                |              |
| 50                                        | 35-39     | Former        | 0    | .     |               |             | .             | 0              | .            |
| Year of Follow-up: 2040, Age Group: 40-44 |           |               |      |       |               |             |               |                |              |
| Period                                    | Age Group | Smoking Group | N    | %     | Ever Quit (N) | Ever Quit % | Mean Yrs Quit | Short Term (n) | Short Term % |
| 50                                        | 40-44     | Never Any     | 0    | .     |               |             |               |                |              |
| 50                                        | 40-44     | CC            | 0    | .     | 0             | .           |               |                |              |
| 50                                        | 40-44     | Ecig          | 0    | .     |               |             |               |                |              |
| 50                                        | 40-44     | Dual          | 0    | .     |               |             |               |                |              |
| 50                                        | 40-44     | Former        | 0    | .     |               |             | .             | 0              | .            |
| Year of Follow-up: 2040, Age Group: 45-49 |           |               |      |       |               |             |               |                |              |
| Period                                    | Age Group | Smoking Group | N    | %     | Ever Quit (N) | Ever Quit % | Mean Yrs Quit | Short Term (n) | Short Term % |
| 50                                        | 45-49     | Never Any     | 0    | .     |               |             |               |                |              |
| 50                                        | 45-49     | CC            | 0    | .     | 0             | .           |               |                |              |
| 50                                        | 45-49     | Ecig          | 0    | .     |               |             |               |                |              |
| 50                                        | 45-49     | Dual          | 0    | .     |               |             |               |                |              |
| 50                                        | 45-49     | Former        | 0    | .     |               |             | .             | 0              | .            |
| Year of Follow-up: 2040, Age Group: 50-54 |           |               |      |       |               |             |               |                |              |
| Period                                    | Age Group | Smoking Group | N    | %     | Ever Quit (N) | Ever Quit % | Mean Yrs Quit | Short Term (n) | Short Term % |
| 50                                        | 50-54     | Never Any     | 0    | .     |               |             |               |                |              |
| 50                                        | 50-54     | CC            | 0    | .     | 0             | .           |               |                |              |
| 50                                        | 50-54     | Ecig          | 0    | .     |               |             |               |                |              |
| 50                                        | 50-54     | Dual          | 0    | .     |               |             |               |                |              |
| 50                                        | 50-54     | Former        | 0    | .     |               |             | .             | 0              | .            |
| Year of Follow-up: 2040, Age Group: 55-59 |           |               |      |       |               |             |               |                |              |
| Period                                    | Age Group | Smoking Group | N    | %     | Ever Quit (N) | Ever Quit % | Mean Yrs Quit | Short Term (n) | Short Term % |
| 50                                        | 55-59     | Never Any     | 0    | .     |               |             |               |                |              |
| 50                                        | 55-59     | CC            | 0    | .     | 0             | .           |               |                |              |
| 50                                        | 55-59     | Ecig          | 0    | .     |               |             |               |                |              |
| 50                                        | 55-59     | Dual          | 0    | .     |               |             |               |                |              |
| 50                                        | 55-59     | Former        | 0    | .     |               |             | .             | 0              | .            |
| Year of Follow-up: 2040, Age Group: 60-64 |           |               |      |       |               |             |               |                |              |
| Period                                    | Age Group | Smoking Group | N    | %     | Ever Quit (N) | Ever Quit % | Mean Yrs Quit | Short Term (n) | Short Term % |
| 50                                        | 60-64     | Never Any     | 5148 | 64.92 |               |             |               |                |              |
| 50                                        | 60-64     | CC            | 0    | 0.00  | 0             | 0.00        |               |                |              |
| 50                                        | 60-64     | Ecig          | 537  | 6.77  |               |             |               |                |              |
| 50                                        | 60-64     | Dual          | 0    | 0.00  |               |             |               |                |              |
| 50                                        | 60-64     | Former        | 2245 | 28.31 |               |             | 27.61         | 64             | 2.85         |
| Year of Follow-up: 2040, Age Group: 65-69 |           |               |      |       |               |             |               |                |              |
| Period                                    | Age Group | Smoking Group | N    | %     | Ever Quit (N) | Ever Quit % | Mean Yrs Quit | Short Term (n) | Short Term % |
| 50                                        | 65-69     | Never Any     | 5574 | 66.75 |               |             |               |                |              |
| 50                                        | 65-69     | CC            | 0    | 0.00  | 0             | 0.00        |               |                |              |
| 50                                        | 65-69     | Ecig          | 532  | 6.37  |               |             |               |                |              |
| 50                                        | 65-69     | Dual          | 0    | 0.00  |               |             |               |                |              |
| 50                                        | 65-69     | Former        | 2244 | 26.87 |               |             | 28.98         | 30             | 1.34         |
| Year of Follow-up: 2040, Age Group: 70-74 |           |               |      |       |               |             |               |                |              |
| Period                                    | Age Group | Smoking Group | N    | %     | Ever Quit (N) | Ever Quit % | Mean Yrs Quit | Short Term (n) | Short Term % |
| 50                                        | 70-74     | Never Any     | 5218 | 59.34 |               |             |               |                |              |
| 50                                        | 70-74     | CC            | 3    | 0.03  | 0             | 0.00        |               |                |              |
| 50                                        | 70-74     | Ecig          | 576  | 6.55  |               |             |               |                |              |
| 50                                        | 70-74     | Dual          | 0    | 0.00  |               |             |               |                |              |
| 50                                        | 70-74     | Former        | 2996 | 34.07 |               |             | 32.55         | 56             | 1.87         |
| Year of Follow-up: 2040, Age Group: 75-79 |           |               |      |       |               |             |               |                |              |
| Period                                    | Age Group | Smoking Group | N    | %     | Ever Quit (N) | Ever Quit % | Mean Yrs Quit | Short Term (n) | Short Term % |
| 50                                        | 75-79     | Never Any     | 5291 | 52.50 |               |             |               |                |              |
| 50                                        | 75-79     | CC            | 1    | 0.01  | 0             | 0.00        |               |                |              |
| 50                                        | 75-79     | Ecig          | 722  | 7.16  |               |             |               |                |              |
| 50                                        | 75-79     | Dual          | 0    | 0.00  |               |             |               |                |              |
| 50                                        | 75-79     | Former        | 4064 | 40.33 |               |             | 34.63         | 70             | 1.72         |

## Results for PHIM for Run 4 (Sensitivity\_Analysis\_4.RTF)

\*\*\*\*\*

### Main Results for E-Component for Run: 4, Simulation: 1, COD: Four Diseases Combined

| Variable Parameter          | Value                                  |
|-----------------------------|----------------------------------------|
| 1. Country                  | US (United States)                     |
| 2. Sex                      | F (Females)                            |
| 3. Year of start of process | 1990                                   |
| 4. Cause of Death           | Four Diseases Combined                 |
| 5. Effective Dose NULL      | CC:1                                   |
| 6. Effective Dose Ecig      | CC:1 Ecig:0.05 Dual:0.525              |
| Note:                       | Death rates are per million population |

#### Results for Age Groups Combined and Years combined, Population unadjusted for deaths in Ecig scenario,

| Age Group:All |         | NULL        | Ecig        | %Drop   |        |        | NULL    | Ecig    | Drop    |         |
|---------------|---------|-------------|-------------|---------|--------|--------|---------|---------|---------|---------|
| Year          | Number  | Attrib      | Attrib      | Drop    | %Drop  | Attrib | Death   | Attrib  | Attrib  | Drop    |
|               | Deaths  | Deaths      | Deaths      | Deaths  | Deaths | Deaths | Rate    | Rates   | Rates   | Rates   |
| All Comb      | 9082078 | 2946250.006 | 1944916.243 | 1001334 | 11.025 | 33.987 | 2493.45 | 808.881 | 533.969 | 274.912 |

#### Results for Age Groups Combined, Population unadjusted for deaths in Ecig scenario,

| Age Group:All |        | NULL      | Ecig      | %Drop    |        |        | NULL    | Ecig    | Drop    |         |
|---------------|--------|-----------|-----------|----------|--------|--------|---------|---------|---------|---------|
| Year          | Number | Attrib    | Attrib    | Drop     | %Drop  | Attrib | Death   | Attrib  | Attrib  | Drop    |
|               | Deaths | Deaths    | Deaths    | Deaths   | Deaths | Deaths | Rate    | Rates   | Rates   | Rates   |
| 1990          | 199848 | 57524.822 | 57524.822 | 0.000    | 0.000  | 0.000  | 2926.84 | 842.471 | 842.471 | 0.000   |
| 1991          | 199162 | 59078.486 | 58910.020 | 168.466  | 0.085  | 0.285  | 2877.87 | 853.678 | 851.244 | 2.434   |
| 1992          | 198532 | 60494.150 | 60022.451 | 471.699  | 0.238  | 0.780  | 2829.84 | 862.271 | 855.548 | 6.724   |
| 1993          | 202512 | 62694.848 | 61776.730 | 918.118  | 0.453  | 1.464  | 2845.85 | 881.034 | 868.132 | 12.902  |
| 1994          | 200658 | 63202.598 | 61751.771 | 1450.826 | 0.723  | 2.296  | 2777.87 | 874.966 | 854.881 | 20.085  |
| 1995          | 201023 | 63766.862 | 61670.700 | 2096.162 | 1.043  | 3.287  | 2739.80 | 869.097 | 840.528 | 28.569  |
| 1996          | 201180 | 64591.163 | 61718.442 | 2872.720 | 1.428  | 4.448  | 2706.36 | 868.908 | 830.263 | 38.645  |
| 1997          | 198639 | 64686.912 | 61088.595 | 3598.317 | 1.811  | 5.563  | 2635.18 | 858.147 | 810.411 | 47.736  |
| 1998          | 197573 | 65295.961 | 60857.249 | 4438.712 | 2.247  | 6.798  | 2584.18 | 854.046 | 795.989 | 58.057  |
| 1999          | 211329 | 67327.521 | 61593.072 | 5734.450 | 2.714  | 8.517  | 2726.91 | 868.771 | 794.775 | 73.995  |
| 2000          | 208496 | 67596.897 | 60917.093 | 6679.804 | 3.204  | 9.882  | 2656.96 | 861.419 | 776.295 | 85.124  |
| 2001          | 203606 | 67008.811 | 59328.394 | 7680.417 | 3.772  | 11.462 | 2565.88 | 844.458 | 747.668 | 96.790  |
| 2002          | 200828 | 67067.744 | 58272.439 | 8795.305 | 4.380  | 13.114 | 2506.09 | 836.925 | 727.170 | 109.755 |
| 2003          | 196352 | 66756.217 | 56953.391 | 9802.825 | 4.992  | 14.685 | 2427.31 | 825.244 | 704.061 | 121.183 |
| 2004          | 188160 | 65058.725 | 54403.900 | 10654.83 | 5.663  | 16.377 | 2302.83 | 796.234 | 665.833 | 130.401 |
| 2005          | 186416 | 65214.724 | 53411.680 | 11803.04 | 6.332  | 18.099 | 2256.27 | 789.321 | 646.464 | 142.857 |
| 2006          | 180088 | 63771.146 | 51096.964 | 12674.18 | 7.038  | 19.874 | 2160.67 | 765.117 | 613.054 | 152.063 |
| 2007          | 175644 | 63110.718 | 49542.139 | 13568.58 | 7.725  | 21.500 | 2086.36 | 749.650 | 588.478 | 161.172 |
| 2008          | 177570 | 63718.624 | 48856.467 | 14862.16 | 8.370  | 23.325 | 2086.39 | 748.674 | 574.048 | 174.626 |
| 2009          | 172806 | 62794.698 | 47098.412 | 15696.29 | 9.083  | 24.996 | 2007.57 | 729.515 | 547.164 | 182.351 |
| 2010          | 170489 | 61917.074 | 45344.678 | 16572.40 | 9.721  | 26.765 | 1957.97 | 711.083 | 520.758 | 190.325 |
| 2011          | 170305 | 61680.114 | 43932.926 | 17747.19 | 10.421 | 28.773 | 1937.46 | 701.700 | 499.800 | 201.900 |
| 2012          | 171421 | 62023.127 | 42972.428 | 19050.70 | 11.113 | 30.715 | 1930.22 | 698.386 | 483.874 | 214.513 |
| 2013          | 172699 | 62037.765 | 41813.661 | 20224.10 | 11.711 | 32.600 | 1923.75 | 691.059 | 465.776 | 225.283 |
| 2014          | 174169 | 61921.017 | 40408.922 | 21512.09 | 12.351 | 34.741 | 1918.85 | 682.195 | 445.192 | 237.003 |
| 2015          | 177354 | 61856.204 | 39249.056 | 22607.15 | 12.747 | 36.548 | 2184.51 | 761.899 | 483.441 | 278.458 |
| 2016          | 176853 | 60464.119 | 36977.234 | 23486.88 | 13.280 | 38.844 | 2157.59 | 737.655 | 451.118 | 286.537 |
| 2017          | 179309 | 60243.839 | 35573.635 | 24670.20 | 13.758 | 40.951 | 2166.86 | 728.017 | 429.890 | 298.127 |
| 2018          | 177157 | 60713.327 | 34971.377 | 25741.95 | 14.531 | 42.399 | 2120.51 | 726.721 | 418.597 | 308.124 |
| 2019          | 179227 | 61148.172 | 34033.300 | 27114.87 | 15.129 | 44.343 | 2124.53 | 724.841 | 403.426 | 321.416 |
| 2020          | 180467 | 61149.317 | 33083.138 | 28066.18 | 15.552 | 45.898 | 2424.25 | 821.432 | 444.413 | 377.019 |
| 2021          | 178116 | 58727.786 | 30260.470 | 28467.32 | 15.983 | 48.473 | 2375.42 | 783.216 | 403.565 | 379.651 |
| 2022          | 179408 | 58848.802 | 29221.563 | 29627.24 | 16.514 | 50.345 | 2374.52 | 778.881 | 386.756 | 392.125 |
| 2023          | 180640 | 58816.149 | 28171.768 | 30644.38 | 16.964 | 52.102 | 2372.26 | 772.407 | 369.967 | 402.439 |
| 2024          | 181610 | 58955.232 | 27130.803 | 31824.43 | 17.524 | 53.981 | 2366.77 | 768.316 | 353.574 | 414.742 |
| 2025          | 180418 | 58297.744 | 25977.620 | 32320.12 | 17.914 | 55.440 | 2713.69 | 876.861 | 390.732 | 486.130 |
| 2026          | 180313 | 56469.971 | 23934.943 | 32535.03 | 18.044 | 57.615 | 2701.83 | 846.150 | 358.643 | 487.507 |
| 2027          | 179619 | 56209.427 | 22783.431 | 33426.00 | 18.609 | 59.467 | 2680.68 | 838.883 | 340.025 | 498.858 |
| 2028          | 178762 | 55733.105 | 21577.523 | 34155.58 | 19.107 | 61.284 | 2656.74 | 828.298 | 320.682 | 507.616 |
| 2029          | 177808 | 55145.838 | 20355.185 | 34790.65 | 19.566 | 63.088 | 2630.89 | 815.951 | 301.180 | 514.771 |
| 2030          | 173587 | 53615.097 | 19114.706 | 34500.39 | 19.875 | 64.348 | 3040.33 | 939.056 | 334.790 | 604.266 |
| 2031          | 174985 | 52046.561 | 17886.442 | 34160.12 | 19.522 | 65.634 | 3060.73 | 910.364 | 312.858 | 597.506 |
| 2032          | 173400 | 51582.636 | 16891.092 | 34691.54 | 20.007 | 67.254 | 3027.10 | 900.496 | 294.874 | 605.622 |
| 2033          | 171756 | 50839.758 | 15882.362 | 34957.40 | 20.353 | 68.760 | 2991.14 | 885.375 | 276.591 | 608.783 |
| 2034          | 169973 | 50215.451 | 14901.581 | 35313.87 | 20.776 | 70.325 | 2951.96 | 872.104 | 258.799 | 613.304 |
| 2035          | 162644 | 47773.075 | 13792.613 | 33980.46 | 20.893 | 71.129 | 3459.14 | 1016.05 | 293.344 | 722.702 |
| 2036          | 156254 | 43298.709 | 11804.092 | 31494.62 | 20.156 | 72.738 | 3328.25 | 922.274 | 251.430 | 670.844 |
| 2037          | 153593 | 42241.563 | 10835.118 | 31406.45 | 20.448 | 74.350 | 3274.10 | 900.450 | 230.969 | 669.482 |
| 2038          | 150947 | 41356.353 | 10056.278 | 31300.07 | 20.736 | 75.684 | 3217.50 | 881.531 | 214.354 | 667.176 |
| 2039          | 148373 | 40161.050 | 9183.565  | 30977.48 | 20.878 | 77.133 | 3159.42 | 855.178 | 195.552 | 659.625 |



## Results for PHIM for Run 4 (Sensitivity\_Analysis\_4.RTF)

\*\*\*\*\*

### Main Results for E-Component for Run: 4, Simulation: 1, COD: LUNG CANCER

| Variable Parameter          | Value                                  |
|-----------------------------|----------------------------------------|
| 1. Country                  | US (United States)                     |
| 2. Sex                      | F (Females)                            |
| 3. Year of start of process | 1990                                   |
| 4. Cause of Death           | LUNG CANCER                            |
| 5. Effective Dose NULL      | CC:1                                   |
| 6. Effective Dose Ecig      | CC:1 Ecig:0.05 Dual:0.525              |
| Note:                       | Death rates are per million population |

#### Results for Age Groups Combined and Years combined, Population unadjusted for deaths in Ecig scenario,

| Age Group:All | NULL    | Ecig        | %Drop       |          |        | NULL   | Ecig    | Drop    |         |         |
|---------------|---------|-------------|-------------|----------|--------|--------|---------|---------|---------|---------|
| Year          | Number  | Attrib      | Attrib      | Drop     | %Drop  | Attrib | Death   | Attrib  | Attrib  | Drop    |
|               | Deaths  | Deaths      | Deaths      | Deaths   | Deaths | Deaths | Rate    | Rates   | Rates   | Rates   |
| All Comb      | 2327764 | 1580465.217 | 1142805.759 | 437659.5 | 18.802 | 27.692 | 639.078 | 433.910 | 313.753 | 120.158 |

#### Results for Age Groups Combined, Population unadjusted for deaths in Ecig scenario,

| Age Group:All | NULL   | Ecig      | %Drop     |          |        | NULL   | Ecig    | Drop    |         |         |
|---------------|--------|-----------|-----------|----------|--------|--------|---------|---------|---------|---------|
| Year          | Number | Attrib    | Attrib    | Drop     | %Drop  | Attrib | Death   | Attrib  | Attrib  | Drop    |
|               | Deaths | Deaths    | Deaths    | Deaths   | Deaths | Deaths | Rate    | Rates   | Rates   | Rates   |
| 1990          | 42690  | 30614.201 | 30614.201 | 0.000    | 0.000  | 0.000  | 625.210 | 448.355 | 448.355 | 0.000   |
| 1991          | 43692  | 31412.010 | 31379.684 | 32.326   | 0.074  | 0.103  | 631.345 | 453.901 | 453.433 | 0.467   |
| 1992          | 45423  | 32782.407 | 32688.426 | 93.980   | 0.207  | 0.287  | 647.450 | 467.274 | 465.934 | 1.340   |
| 1993          | 46291  | 33491.183 | 33305.336 | 185.848  | 0.401  | 0.555  | 650.515 | 470.643 | 468.031 | 2.612   |
| 1994          | 47017  | 34074.347 | 33772.923 | 301.425  | 0.641  | 0.885  | 650.895 | 471.719 | 467.546 | 4.173   |
| 1995          | 47840  | 34694.454 | 34239.731 | 454.723  | 0.951  | 1.311  | 652.025 | 472.861 | 466.663 | 6.198   |
| 1996          | 48244  | 35027.269 | 34397.686 | 629.583  | 1.305  | 1.797  | 648.999 | 471.202 | 462.732 | 8.469   |
| 1997          | 49035  | 35590.763 | 34752.665 | 838.098  | 1.709  | 2.355  | 650.506 | 472.153 | 461.034 | 11.118  |
| 1998          | 49686  | 36100.785 | 35016.155 | 1084.629 | 2.183  | 3.004  | 649.874 | 472.184 | 457.998 | 14.187  |
| 1999          | 48883  | 35451.030 | 34143.599 | 1307.431 | 2.675  | 3.688  | 630.769 | 457.448 | 440.577 | 16.871  |
| 2000          | 50331  | 36447.986 | 34810.925 | 1637.061 | 3.253  | 4.491  | 641.392 | 464.474 | 443.612 | 20.862  |
| 2001          | 50389  | 36411.326 | 34439.809 | 1971.518 | 3.913  | 5.415  | 635.012 | 458.863 | 434.017 | 24.845  |
| 2002          | 51445  | 37078.545 | 34691.500 | 2387.045 | 4.640  | 6.438  | 641.972 | 462.696 | 432.908 | 29.787  |
| 2003          | 51408  | 36999.876 | 34215.818 | 2784.057 | 5.416  | 7.525  | 635.509 | 457.395 | 422.978 | 34.417  |
| 2004          | 51399  | 36861.555 | 33637.152 | 3224.404 | 6.273  | 8.747  | 629.057 | 451.138 | 411.675 | 39.463  |
| 2005          | 51421  | 36689.529 | 32999.217 | 3690.311 | 7.177  | 10.058 | 622.370 | 444.069 | 399.403 | 44.665  |
| 2006          | 51355  | 36504.774 | 32324.762 | 4180.012 | 8.139  | 11.451 | 616.150 | 437.979 | 387.828 | 50.151  |
| 2007          | 51839  | 36663.202 | 31900.385 | 4762.817 | 9.188  | 12.991 | 615.761 | 435.498 | 378.923 | 56.574  |
| 2008          | 50976  | 35898.803 | 30697.385 | 5201.419 | 10.204 | 14.489 | 598.952 | 421.800 | 360.685 | 61.115  |
| 2009          | 51193  | 35934.525 | 30107.043 | 5827.482 | 11.383 | 16.217 | 594.733 | 417.468 | 349.767 | 67.701  |
| 2010          | 50853  | 35502.829 | 29161.858 | 6340.972 | 12.469 | 17.860 | 584.018 | 407.730 | 334.908 | 72.822  |
| 2011          | 50509  | 35136.342 | 28198.300 | 6938.042 | 13.736 | 19.746 | 574.613 | 399.726 | 320.796 | 78.930  |
| 2012          | 51245  | 35450.201 | 27769.011 | 7681.190 | 14.989 | 21.668 | 577.023 | 399.173 | 312.682 | 86.491  |
| 2013          | 51069  | 35123.224 | 26790.166 | 8333.058 | 16.317 | 23.725 | 568.874 | 391.249 | 298.424 | 92.825  |
| 2014          | 51251  | 35079.370 | 26048.409 | 9030.961 | 17.621 | 25.744 | 564.641 | 386.476 | 286.980 | 99.496  |
| 2015          | 50443  | 34324.171 | 24837.434 | 9486.737 | 18.807 | 27.639 | 621.319 | 422.780 | 305.929 | 116.851 |
| 2016          | 48854  | 33054.753 | 23170.950 | 9883.803 | 20.231 | 29.901 | 596.013 | 403.264 | 282.683 | 120.581 |
| 2017          | 48325  | 32471.234 | 22015.095 | 10456.14 | 21.637 | 32.201 | 583.983 | 392.399 | 266.041 | 126.357 |
| 2018          | 50465  | 33657.595 | 21976.276 | 11681.32 | 23.147 | 34.706 | 604.052 | 402.871 | 263.050 | 139.822 |
| 2019          | 51036  | 33863.424 | 21311.834 | 12551.59 | 24.594 | 37.065 | 604.975 | 401.412 | 252.627 | 148.785 |
| 2020          | 51444  | 33910.830 | 20635.853 | 13274.98 | 25.805 | 39.147 | 691.053 | 455.532 | 277.206 | 178.326 |
| 2021          | 48037  | 31531.880 | 18408.506 | 13123.37 | 27.319 | 41.619 | 640.639 | 420.521 | 245.503 | 175.018 |
| 2022          | 48335  | 31560.212 | 17677.880 | 13882.33 | 28.721 | 43.987 | 639.727 | 417.708 | 233.972 | 183.737 |
| 2023          | 48599  | 31508.781 | 16936.973 | 14571.81 | 29.984 | 46.247 | 638.227 | 413.791 | 222.426 | 191.365 |
| 2024          | 48784  | 31517.293 | 16193.691 | 15323.60 | 31.411 | 48.620 | 635.757 | 410.740 | 211.039 | 199.700 |
| 2025          | 48477  | 31175.389 | 15391.023 | 15784.37 | 32.561 | 50.631 | 729.141 | 468.912 | 231.498 | 237.414 |
| 2026          | 45324  | 29044.598 | 13691.872 | 15352.73 | 33.873 | 52.859 | 679.138 | 435.206 | 205.160 | 230.046 |
| 2027          | 45107  | 28825.765 | 12926.427 | 15899.34 | 35.248 | 55.157 | 673.191 | 430.203 | 192.917 | 237.286 |
| 2028          | 44842  | 28513.846 | 12145.087 | 16368.76 | 36.503 | 57.406 | 666.430 | 423.769 | 180.499 | 243.270 |
| 2029          | 44539  | 28148.109 | 11358.970 | 16789.14 | 37.695 | 59.646 | 659.013 | 416.486 | 168.070 | 248.416 |
| 2030          | 43393  | 27314.475 | 10562.210 | 16752.26 | 38.606 | 61.331 | 760.018 | 478.407 | 184.995 | 293.412 |
| 2031          | 40748  | 25423.102 | 9478.883  | 15944.22 | 39.129 | 62.715 | 712.731 | 444.684 | 165.798 | 278.886 |
| 2032          | 40325  | 25085.902 | 8858.830  | 16227.07 | 40.241 | 64.686 | 703.969 | 437.933 | 154.652 | 283.282 |
| 2033          | 39882  | 24645.067 | 8252.148  | 16392.92 | 41.104 | 66.516 | 694.543 | 429.194 | 143.711 | 285.483 |
| 2034          | 39404  | 24239.126 | 7667.730  | 16571.40 | 42.055 | 68.366 | 684.347 | 420.967 | 133.167 | 287.799 |
| 2035          | 37454  | 22944.147 | 6999.703  | 15944.44 | 42.570 | 69.492 | 796.588 | 487.980 | 148.871 | 339.109 |
| 2036          | 32988  | 19950.581 | 5750.842  | 14199.74 | 43.045 | 71.175 | 702.663 | 424.953 | 122.494 | 302.458 |
| 2037          | 32403  | 19415.334 | 5237.854  | 14177.48 | 43.753 | 73.022 | 690.731 | 413.871 | 111.654 | 302.217 |
| 2038          | 31820  | 18939.317 | 4831.087  | 14108.23 | 44.338 | 74.492 | 678.257 | 403.701 | 102.977 | 300.724 |
| 2039          | 31251  | 18379.752 | 4386.457  | 13993.30 | 44.777 | 76.134 | 665.457 | 391.373 | 93.404  | 297.969 |

## Results for PHIM for Run 4 (Sensitivity\_Analysis\_4.RTF)

\*\*\*\*\*

### Main Results for E-Component for Run: 4, Simulation: 1, COD: IHD

| Variable Parameter          | Value                                  |
|-----------------------------|----------------------------------------|
| 1. Country                  | US (United States)                     |
| 2. Sex                      | F (Females)                            |
| 3. Year of start of process | 1990                                   |
| 4. Cause of Death           | IHD                                    |
| 5. Effective Dose NULL      | CC:1                                   |
| 6. Effective Dose Ecig      | CC:1 Ecig:0.05 Dual:0.525              |
| Note:                       | Death rates are per million population |

#### Results for Age Groups Combined and Years combined, Population unadjusted for deaths in Ecig scenario,

| Age Group:All |         | NULL       | Ecig       | %Drop    |        | Death  |         | NULL    | Ecig   | Drop   |
|---------------|---------|------------|------------|----------|--------|--------|---------|---------|--------|--------|
| Year          | Number  | Attrib     | Attrib     | Drop     | %Drop  | Attrib | Rate    | Attrib  | Attrib | Rates  |
|               | Deaths  | Deaths     | Deaths     | Deaths   | Deaths | Deaths |         | Rates   | Rates  | Rates  |
| All Comb      | 3242167 | 398833.796 | 199292.847 | 199540.9 | 6.155  | 50.031 | 890.124 | 109.498 | 54.715 | 54.783 |

#### Results for Age Groups Combined, Population unadjusted for deaths in Ecig scenario,

| Age Group:All |        | NULL      | Ecig      | %Drop    |        | Death  |         | NULL    | Ecig    | Drop   |
|---------------|--------|-----------|-----------|----------|--------|--------|---------|---------|---------|--------|
| Year          | Number | Attrib    | Attrib    | Drop     | %Drop  | Attrib | Rate    | Attrib  | Attrib  | Rates  |
|               | Deaths | Deaths    | Deaths    | Deaths   | Deaths | Deaths |         | Rates   | Rates   | Rates  |
| 1990          | 98916  | 12922.892 | 12922.892 | 0.000    | 0.000  | 0.000  | 1448.66 | 189.260 | 189.260 | 0.000  |
| 1991          | 96403  | 12856.479 | 12766.074 | 90.405   | 0.094  | 0.703  | 1393.01 | 185.775 | 184.469 | 1.306  |
| 1992          | 93721  | 12662.244 | 12411.643 | 250.600  | 0.267  | 1.979  | 1335.88 | 180.485 | 176.913 | 3.572  |
| 1993          | 93679  | 12730.613 | 12252.263 | 478.350  | 0.511  | 3.757  | 1316.45 | 178.900 | 172.178 | 6.722  |
| 1994          | 90832  | 12495.323 | 11750.251 | 745.072  | 0.820  | 5.963  | 1257.46 | 172.983 | 162.668 | 10.315 |
| 1995          | 89698  | 12365.590 | 11312.550 | 1053.040 | 1.174  | 8.516  | 1222.52 | 168.534 | 154.182 | 14.352 |
| 1996          | 88286  | 12290.551 | 10854.583 | 1435.968 | 1.626  | 11.684 | 1187.66 | 165.338 | 146.021 | 19.317 |
| 1997          | 84777  | 11719.531 | 9989.865  | 1729.666 | 2.040  | 14.759 | 1124.67 | 155.473 | 132.527 | 22.946 |
| 1998          | 82517  | 11416.794 | 9345.994  | 2070.800 | 2.510  | 18.138 | 1079.29 | 149.327 | 122.242 | 27.085 |
| 1999          | 93939  | 13028.038 | 10177.046 | 2850.992 | 3.035  | 21.884 | 1212.16 | 168.109 | 131.321 | 36.788 |
| 2000          | 90039  | 12426.299 | 9243.046  | 3183.253 | 3.535  | 25.617 | 1147.41 | 158.354 | 117.789 | 40.566 |
| 2001          | 86119  | 11939.281 | 8351.299  | 3587.982 | 4.166  | 30.052 | 1085.29 | 150.461 | 105.245 | 45.216 |
| 2002          | 83014  | 11528.794 | 7547.164  | 3981.630 | 4.796  | 34.536 | 1035.91 | 143.865 | 94.180  | 49.686 |
| 2003          | 79302  | 11048.407 | 6768.969  | 4279.438 | 5.396  | 38.734 | 980.336 | 136.581 | 83.678  | 52.903 |
| 2004          | 73861  | 10375.132 | 5894.613  | 4480.519 | 6.066  | 43.185 | 903.963 | 126.978 | 72.142  | 54.836 |
| 2005          | 71649  | 10051.029 | 5296.908  | 4754.121 | 6.635  | 47.300 | 867.197 | 121.652 | 64.111  | 57.541 |
| 2006          | 67551  | 9542.523  | 4613.546  | 4928.977 | 7.297  | 51.653 | 810.467 | 114.490 | 55.353  | 59.137 |
| 2007          | 63503  | 8936.533  | 3971.855  | 4964.678 | 7.818  | 55.555 | 754.310 | 106.151 | 47.179  | 58.972 |
| 2008          | 63171  | 8944.180  | 3645.261  | 5298.920 | 8.388  | 59.244 | 742.239 | 105.091 | 42.831  | 62.261 |
| 2009          | 59747  | 8390.033  | 3155.886  | 5234.147 | 8.761  | 62.385 | 694.108 | 97.471  | 36.663  | 60.808 |
| 2010          | 58008  | 8157.570  | 2816.164  | 5341.405 | 9.208  | 65.478 | 666.189 | 93.685  | 32.342  | 61.343 |
| 2011          | 57368  | 8035.356  | 2524.735  | 5510.621 | 9.606  | 68.580 | 652.644 | 91.414  | 28.722  | 62.691 |
| 2012          | 57411  | 7970.766  | 2269.144  | 5701.621 | 9.931  | 71.532 | 646.453 | 89.752  | 25.551  | 64.201 |
| 2013          | 57067  | 7743.216  | 2025.040  | 5718.176 | 10.020 | 73.848 | 635.688 | 86.254  | 22.558  | 63.697 |
| 2014          | 57538  | 7774.935  | 1846.558  | 5928.377 | 10.303 | 76.250 | 633.906 | 85.658  | 20.344  | 65.314 |
| 2015          | 58395  | 7722.535  | 1702.120  | 6020.415 | 10.310 | 77.959 | 719.266 | 95.120  | 20.965  | 74.155 |
| 2016          | 58658  | 7600.353  | 1523.025  | 6077.328 | 10.361 | 79.961 | 715.621 | 92.723  | 18.581  | 74.143 |
| 2017          | 59004  | 7470.266  | 1369.193  | 6101.074 | 10.340 | 81.671 | 713.034 | 90.274  | 16.546  | 73.728 |
| 2018          | 56077  | 6907.050  | 1156.891  | 5750.159 | 10.254 | 83.251 | 671.224 | 82.675  | 13.848  | 68.825 |
| 2019          | 55886  | 6732.046  | 1038.170  | 5693.876 | 10.188 | 84.579 | 662.462 | 79.801  | 12.306  | 67.494 |
| 2020          | 55313  | 6429.836  | 926.663   | 5503.172 | 9.949  | 85.588 | 743.037 | 86.373  | 12.448  | 73.925 |
| 2021          | 56292  | 6562.016  | 853.366   | 5708.650 | 10.141 | 86.995 | 750.730 | 87.513  | 11.381  | 76.133 |
| 2022          | 55827  | 6352.366  | 765.501   | 5586.865 | 10.007 | 87.949 | 738.885 | 84.075  | 10.132  | 73.944 |
| 2023          | 55338  | 6134.123  | 691.424   | 5442.700 | 9.835  | 88.728 | 726.728 | 80.557  | 9.080   | 71.477 |
| 2024          | 54770  | 5922.193  | 622.614   | 5299.579 | 9.676  | 89.487 | 713.771 | 77.179  | 8.114   | 69.065 |
| 2025          | 53295  | 5504.188  | 551.352   | 4952.836 | 9.293  | 89.983 | 801.612 | 82.789  | 8.293   | 74.496 |
| 2026          | 55278  | 5641.075  | 528.352   | 5112.723 | 9.249  | 90.634 | 828.283 | 84.526  | 7.917   | 76.609 |
| 2027          | 54199  | 5426.216  | 480.913   | 4945.302 | 9.124  | 91.137 | 808.875 | 80.982  | 7.177   | 73.805 |
| 2028          | 53090  | 5197.830  | 436.035   | 4761.795 | 8.969  | 91.611 | 789.020 | 77.249  | 6.480   | 70.769 |
| 2029          | 51974  | 4973.547  | 397.308   | 4576.238 | 8.805  | 92.012 | 769.023 | 73.590  | 5.879   | 67.711 |
| 2030          | 49479  | 4450.618  | 343.292   | 4107.326 | 8.301  | 92.287 | 866.605 | 77.952  | 6.013   | 71.939 |
| 2031          | 51987  | 4555.052  | 338.379   | 4216.673 | 8.111  | 92.571 | 909.317 | 79.674  | 5.919   | 73.755 |
| 2032          | 50677  | 4349.999  | 309.790   | 4040.209 | 7.972  | 92.878 | 884.689 | 75.939  | 5.408   | 70.531 |
| 2033          | 49380  | 4147.948  | 287.035   | 3860.913 | 7.819  | 93.080 | 859.955 | 72.237  | 4.999   | 67.238 |
| 2034          | 48076  | 3966.133  | 265.406   | 3700.727 | 7.698  | 93.308 | 834.943 | 68.881  | 4.609   | 64.271 |
| 2035          | 44518  | 3289.064  | 215.572   | 3073.493 | 6.904  | 93.446 | 946.825 | 69.952  | 4.585   | 65.368 |
| 2036          | 46347  | 3313.192  | 208.453   | 3104.740 | 6.699  | 93.708 | 987.211 | 70.572  | 4.440   | 66.132 |
| 2037          | 44841  | 3117.951  | 189.933   | 2928.018 | 6.530  | 93.908 | 955.859 | 66.464  | 4.049   | 62.416 |
| 2038          | 43378  | 2949.775  | 176.113   | 2773.662 | 6.394  | 94.030 | 924.621 | 62.876  | 3.754   | 59.122 |
| 2039          | 41973  | 2766.312  | 162.596   | 2603.716 | 6.203  | 94.122 | 893.753 | 58.905  | 3.462   | 55.443 |

## Results for PHIM for Run 4 (Sensitivity\_Analysis\_4.RTF)

\*\*\*\*\*

### Main Results for E-Component for Run: 4, Simulation: 1, COD: STROKE

| Variable Parameter          | Value                                  |
|-----------------------------|----------------------------------------|
| 1. Country                  | US (United States)                     |
| 2. Sex                      | F (Females)                            |
| 3. Year of start of process | 1990                                   |
| 4. Cause of Death           | STROKE                                 |
| 5. Effective Dose NULL      | CC:1                                   |
| 6. Effective Dose Ecig      | CC:1 Ecig:0.05 Dual:0.525              |
| Note:                       | Death rates are per million population |

#### Results for Age Groups Combined and Years combined, Population unadjusted for deaths in Ecig scenario,

| Age Group:All | NULL    | Ecig       | %Drop     |          |        | NULL   | Ecig    | Drop   |        |        |
|---------------|---------|------------|-----------|----------|--------|--------|---------|--------|--------|--------|
| Year          | Number  | Attrib     | Attrib    | Drop     | %Drop  | Attrib | Death   | Attrib | Attrib | Drop   |
|               | Deaths  | Deaths     | Deaths    | Deaths   | Deaths | Deaths | Rate    | Rates  | Rates  | Rates  |
| All Comb      | 1352207 | 104899.750 | 51338.470 | 53561.28 | 3.961  | 51.059 | 371.243 | 28.800 | 14.095 | 14.705 |

#### Results for Age Groups Combined, Population unadjusted for deaths in Ecig scenario,

| Age Group:All | NULL   | Ecig     | %Drop    |          |        | NULL   | Ecig    | Drop   |        |        |
|---------------|--------|----------|----------|----------|--------|--------|---------|--------|--------|--------|
| Year          | Number | Attrib   | Attrib   | Drop     | %Drop  | Attrib | Death   | Attrib | Attrib | Drop   |
|               | Deaths | Deaths   | Deaths   | Deaths   | Deaths | Deaths | Rate    | Rates  | Rates  | Rates  |
| 1990          | 33504  | 3293.017 | 3293.017 | 0.000    | 0.000  | 0.000  | 490.678 | 48.227 | 48.227 | 0.000  |
| 1991          | 32505  | 3207.063 | 3179.556 | 27.507   | 0.085  | 0.858  | 469.694 | 46.342 | 45.944 | 0.397  |
| 1992          | 32560  | 3218.125 | 3141.224 | 76.900   | 0.236  | 2.390  | 464.104 | 45.871 | 44.774 | 1.096  |
| 1993          | 32768  | 3226.680 | 3081.069 | 145.611  | 0.444  | 4.513  | 460.480 | 45.344 | 43.297 | 2.046  |
| 1994          | 33005  | 3277.266 | 3045.064 | 232.202  | 0.704  | 7.085  | 456.915 | 45.370 | 42.155 | 3.215  |
| 1995          | 33730  | 3309.378 | 2976.635 | 332.743  | 0.986  | 10.055 | 459.716 | 45.104 | 40.569 | 4.535  |
| 1996          | 33750  | 3312.987 | 2863.109 | 449.878  | 1.333  | 13.579 | 454.019 | 44.568 | 38.516 | 6.052  |
| 1997          | 33699  | 3267.066 | 2703.726 | 563.340  | 1.672  | 17.243 | 447.056 | 43.341 | 35.868 | 7.473  |
| 1998          | 33274  | 3178.725 | 2507.122 | 671.603  | 2.018  | 21.128 | 435.211 | 41.577 | 32.792 | 8.784  |
| 1999          | 33891  | 3120.351 | 2338.522 | 781.830  | 2.307  | 25.056 | 437.317 | 40.264 | 30.175 | 10.088 |
| 2000          | 33827  | 3142.808 | 2228.381 | 914.427  | 2.703  | 29.096 | 431.074 | 40.050 | 28.397 | 11.653 |
| 2001          | 32506  | 2961.588 | 1979.681 | 981.908  | 3.021  | 33.155 | 409.647 | 37.323 | 24.948 | 12.374 |
| 2002          | 32078  | 2940.627 | 1836.802 | 1103.826 | 3.441  | 37.537 | 400.295 | 36.695 | 22.921 | 13.774 |
| 2003          | 30568  | 2819.545 | 1644.266 | 1175.279 | 3.845  | 41.683 | 377.883 | 34.855 | 20.327 | 14.529 |
| 2004          | 29388  | 2730.466 | 1479.097 | 1251.369 | 4.258  | 45.830 | 359.671 | 33.417 | 18.102 | 15.315 |
| 2005          | 27954  | 2670.510 | 1342.093 | 1328.417 | 4.752  | 49.744 | 338.339 | 32.322 | 16.244 | 16.078 |
| 2006          | 27201  | 2623.285 | 1220.632 | 1402.654 | 5.157  | 53.469 | 326.354 | 31.474 | 14.645 | 16.829 |
| 2007          | 26302  | 2536.599 | 1088.771 | 1447.828 | 5.505  | 57.078 | 312.424 | 30.131 | 12.933 | 17.198 |
| 2008          | 25998  | 2469.443 | 979.932  | 1489.511 | 5.729  | 60.318 | 305.468 | 29.015 | 11.514 | 17.501 |
| 2009          | 25040  | 2386.945 | 873.148  | 1513.797 | 6.046  | 63.420 | 290.901 | 27.730 | 10.144 | 17.586 |
| 2010          | 24840  | 2329.274 | 785.386  | 1543.889 | 6.215  | 66.282 | 285.273 | 26.750 | 9.020  | 17.731 |
| 2011          | 24792  | 2286.581 | 705.779  | 1580.802 | 6.376  | 69.134 | 282.045 | 26.013 | 8.029  | 17.984 |
| 2012          | 24500  | 2243.311 | 633.571  | 1609.740 | 6.570  | 71.757 | 275.872 | 25.260 | 7.134  | 18.126 |
| 2013          | 24451  | 2176.503 | 562.662  | 1613.841 | 6.600  | 74.148 | 272.368 | 24.245 | 6.268  | 17.977 |
| 2014          | 25296  | 2211.619 | 524.304  | 1687.315 | 6.670  | 76.293 | 278.691 | 24.366 | 5.776  | 18.589 |
| 2015          | 26316  | 2237.016 | 492.071  | 1744.945 | 6.631  | 78.003 | 324.141 | 27.554 | 6.061  | 21.493 |
| 2016          | 26735  | 2229.057 | 451.523  | 1777.534 | 6.649  | 79.744 | 326.164 | 27.194 | 5.509  | 21.686 |
| 2017          | 27616  | 2221.649 | 415.484  | 1806.165 | 6.540  | 81.298 | 333.726 | 26.848 | 5.021  | 21.827 |
| 2018          | 25256  | 1939.420 | 336.755  | 1602.665 | 6.346  | 82.636 | 302.304 | 23.214 | 4.031  | 19.183 |
| 2019          | 25429  | 1904.400 | 304.339  | 1600.061 | 6.292  | 84.019 | 301.434 | 22.574 | 3.608  | 18.967 |
| 2020          | 25379  | 1806.054 | 269.646  | 1536.409 | 6.054  | 85.070 | 340.922 | 24.261 | 3.622  | 20.639 |
| 2021          | 25448  | 1748.172 | 241.259  | 1506.913 | 5.922  | 86.199 | 339.386 | 23.314 | 3.218  | 20.097 |
| 2022          | 25539  | 1701.148 | 218.078  | 1483.070 | 5.807  | 87.181 | 338.015 | 22.515 | 2.886  | 19.629 |
| 2023          | 25620  | 1652.087 | 198.215  | 1453.872 | 5.675  | 88.002 | 336.461 | 21.696 | 2.603  | 19.093 |
| 2024          | 25659  | 1597.127 | 178.633  | 1418.493 | 5.528  | 88.815 | 334.391 | 20.814 | 2.328  | 18.486 |
| 2025          | 25260  | 1467.622 | 155.776  | 1311.846 | 5.193  | 89.386 | 379.931 | 22.075 | 2.343  | 19.732 |
| 2026          | 25480  | 1390.505 | 139.277  | 1251.228 | 4.911  | 89.984 | 381.790 | 20.835 | 2.087  | 18.748 |
| 2027          | 25264  | 1342.095 | 126.632  | 1215.464 | 4.811  | 90.565 | 377.042 | 20.030 | 1.890  | 18.140 |
| 2028          | 25022  | 1289.536 | 115.258  | 1174.278 | 4.693  | 91.062 | 371.870 | 19.165 | 1.713  | 17.452 |
| 2029          | 24767  | 1242.216 | 105.261  | 1136.955 | 4.591  | 91.526 | 366.459 | 18.380 | 1.557  | 16.823 |
| 2030          | 23959  | 1096.803 | 88.984   | 1007.819 | 4.206  | 91.887 | 419.641 | 19.210 | 1.559  | 17.652 |
| 2031          | 23963  | 1019.991 | 79.369   | 940.622  | 3.925  | 92.219 | 419.142 | 17.841 | 1.388  | 16.453 |
| 2032          | 23615  | 977.406  | 72.603   | 904.803  | 3.831  | 92.572 | 412.259 | 17.063 | 1.267  | 15.795 |
| 2033          | 23259  | 937.450  | 67.380   | 870.069  | 3.741  | 92.812 | 405.051 | 16.326 | 1.173  | 15.152 |
| 2034          | 22879  | 900.763  | 62.301   | 838.462  | 3.665  | 93.083 | 397.339 | 15.644 | 1.082  | 14.562 |
| 2035          | 21733  | 745.023  | 50.177   | 694.846  | 3.197  | 93.265 | 462.224 | 15.845 | 1.067  | 14.778 |
| 2036          | 20904  | 680.360  | 43.738   | 636.621  | 3.045  | 93.571 | 445.263 | 14.492 | 0.932  | 13.560 |
| 2037          | 20397  | 644.109  | 40.183   | 603.926  | 2.961  | 93.761 | 434.791 | 13.730 | 0.857  | 12.874 |
| 2038          | 19890  | 612.448  | 37.355   | 575.093  | 2.891  | 93.901 | 423.966 | 13.055 | 0.796  | 12.258 |
| 2039          | 19392  | 577.529  | 34.624   | 542.906  | 2.800  | 94.005 | 412.930 | 12.298 | 0.737  | 11.560 |

## Results for PHIM for Run 4 (Sensitivity\_Analysis\_4.RTF)

\*\*\*\*\*

### Main Results for E-Component for Run: 4, Simulation: 1, COD: COPD

| Variable Parameter          | Value                                  |
|-----------------------------|----------------------------------------|
| 1. Country                  | US (United States)                     |
| 2. Sex                      | F (Females)                            |
| 3. Year of start of process | 1990                                   |
| 4. Cause of Death           | COPD                                   |
| 5. Effective Dose NULL      | CC:1                                   |
| 6. Effective Dose Ecig      | CC:1 Ecig:0.05 Dual:0.525              |
| Note:                       | Death rates are per million population |

#### Results for Age Groups Combined and Years combined, Population unadjusted for deaths in Ecig scenario,

| Age Group:All |         | NULL       | Ecig       | %Drop    |        | Death  |         | NULL    | Ecig    | Drop   |
|---------------|---------|------------|------------|----------|--------|--------|---------|---------|---------|--------|
| Year          | Number  | Attrib     | Attrib     | Drop     | %Drop  | Attrib | Rate    | Attrib  | Attrib  | Rates  |
|               | Deaths  | Deaths     | Deaths     | Deaths   | Deaths | Deaths |         | Rates   | Rates   | Rates  |
| All Comb      | 2159941 | 862051.244 | 551479.167 | 310572.1 | 14.379 | 36.027 | 593.003 | 236.673 | 151.406 | 85.266 |

#### Results for Age Groups Combined, Population unadjusted for deaths in Ecig scenario,

| Age Group:All |        | NULL      | Ecig      | %Drop    |        | Death  |         | NULL    | Ecig    | Drop    |
|---------------|--------|-----------|-----------|----------|--------|--------|---------|---------|---------|---------|
| Year          | Number | Attrib    | Attrib    | Drop     | %Drop  | Attrib | Rate    | Attrib  | Attrib  | Rates   |
|               | Deaths | Deaths    | Deaths    | Deaths   | Deaths | Deaths |         | Rates   | Rates   | Rates   |
| 1990          | 24738  | 10694.712 | 10694.712 | 0.000    | 0.000  | 0.000  | 362.296 | 156.628 | 156.628 | 0.000   |
| 1991          | 26562  | 11602.933 | 11584.706 | 18.227   | 0.069  | 0.157  | 383.818 | 167.661 | 167.398 | 0.263   |
| 1992          | 26828  | 11831.375 | 11781.157 | 50.218   | 0.187  | 0.424  | 382.401 | 168.642 | 167.926 | 0.716   |
| 1993          | 29774  | 13246.371 | 13138.062 | 108.310  | 0.364  | 0.818  | 418.406 | 186.148 | 184.626 | 1.522   |
| 1994          | 29804  | 13355.662 | 13183.534 | 172.128  | 0.578  | 1.289  | 412.601 | 184.893 | 182.511 | 2.383   |
| 1995          | 29755  | 13397.439 | 13141.784 | 255.655  | 0.859  | 1.908  | 405.540 | 182.598 | 179.113 | 3.484   |
| 1996          | 30900  | 13960.356 | 13603.063 | 357.292  | 1.156  | 2.559  | 415.680 | 187.801 | 182.994 | 4.806   |
| 1997          | 31128  | 14109.552 | 13642.339 | 467.213  | 1.501  | 3.311  | 412.949 | 187.180 | 180.981 | 6.198   |
| 1998          | 32096  | 14599.657 | 13987.977 | 611.680  | 1.906  | 4.190  | 419.803 | 190.958 | 182.957 | 8.001   |
| 1999          | 34616  | 15728.102 | 14933.905 | 794.198  | 2.294  | 5.050  | 446.673 | 202.950 | 192.702 | 10.248  |
| 2000          | 34299  | 15579.803 | 14634.741 | 945.062  | 2.755  | 6.066  | 437.088 | 198.541 | 186.497 | 12.043  |
| 2001          | 34592  | 15696.614 | 14557.606 | 1139.009 | 3.293  | 7.256  | 435.935 | 197.812 | 183.458 | 14.354  |
| 2002          | 34291  | 15519.777 | 14196.973 | 1322.805 | 3.858  | 8.523  | 427.910 | 193.668 | 177.161 | 16.507  |
| 2003          | 35074  | 15888.389 | 14324.338 | 1564.051 | 4.459  | 9.844  | 433.587 | 196.413 | 177.078 | 19.335  |
| 2004          | 33512  | 15091.573 | 13393.039 | 1698.534 | 5.068  | 11.255 | 410.143 | 184.701 | 163.913 | 20.788  |
| 2005          | 35392  | 15803.656 | 13773.461 | 2030.194 | 5.736  | 12.846 | 428.364 | 191.278 | 166.706 | 24.572  |
| 2006          | 33981  | 15100.563 | 12938.025 | 2162.539 | 6.364  | 14.321 | 407.699 | 181.174 | 155.229 | 25.946  |
| 2007          | 34000  | 14974.384 | 12581.128 | 2393.255 | 7.039  | 15.982 | 403.863 | 177.871 | 149.443 | 28.428  |
| 2008          | 37425  | 16406.197 | 13533.890 | 2872.308 | 7.675  | 17.507 | 439.732 | 192.768 | 159.019 | 33.749  |
| 2009          | 36826  | 16083.194 | 12962.334 | 3120.860 | 8.475  | 19.404 | 427.825 | 186.846 | 150.589 | 36.256  |
| 2010          | 36788  | 15927.400 | 12581.270 | 3346.130 | 9.096  | 21.009 | 422.489 | 182.917 | 144.489 | 38.428  |
| 2011          | 37636  | 16221.836 | 12504.112 | 3717.723 | 9.878  | 22.918 | 428.164 | 184.547 | 142.252 | 42.294  |
| 2012          | 38265  | 16358.849 | 12300.702 | 4058.148 | 10.605 | 24.807 | 430.867 | 184.202 | 138.507 | 45.695  |
| 2013          | 40112  | 16994.822 | 12435.794 | 4559.028 | 11.366 | 26.826 | 446.821 | 189.311 | 138.526 | 50.784  |
| 2014          | 40084  | 16855.093 | 11989.651 | 4865.442 | 12.138 | 28.866 | 441.613 | 185.696 | 132.092 | 53.603  |
| 2015          | 42200  | 17572.483 | 12217.431 | 5355.051 | 12.690 | 30.474 | 519.788 | 216.445 | 150.485 | 65.960  |
| 2016          | 42606  | 17579.955 | 11831.736 | 5748.220 | 13.492 | 32.698 | 519.788 | 214.473 | 144.346 | 70.128  |
| 2017          | 44364  | 18080.688 | 11773.864 | 6306.825 | 14.216 | 34.882 | 536.117 | 218.496 | 142.281 | 76.215  |
| 2018          | 45359  | 18209.262 | 11501.455 | 6707.807 | 14.788 | 36.837 | 542.932 | 217.960 | 137.669 | 80.290  |
| 2019          | 46876  | 18648.302 | 11378.958 | 7269.344 | 15.508 | 38.981 | 555.657 | 221.054 | 134.884 | 86.170  |
| 2020          | 48331  | 19002.597 | 11250.976 | 7751.621 | 16.039 | 40.792 | 649.239 | 255.266 | 151.137 | 104.129 |
| 2021          | 48338  | 18885.717 | 10757.338 | 8128.379 | 16.816 | 43.040 | 644.660 | 251.867 | 143.464 | 108.403 |
| 2022          | 49708  | 19235.076 | 10560.105 | 8674.972 | 17.452 | 45.100 | 657.895 | 254.582 | 139.766 | 114.816 |
| 2023          | 51083  | 19521.158 | 10345.157 | 9176.001 | 17.963 | 47.005 | 670.849 | 256.363 | 135.858 | 120.504 |
| 2024          | 52397  | 19918.620 | 10135.865 | 9782.755 | 18.670 | 49.114 | 682.854 | 259.583 | 132.093 | 127.491 |
| 2025          | 53387  | 20150.545 | 9879.469  | 10271.08 | 19.239 | 50.972 | 803.004 | 303.086 | 148.598 | 154.488 |
| 2026          | 54232  | 20393.792 | 9575.442  | 10818.35 | 19.948 | 53.047 | 812.615 | 305.582 | 143.479 | 162.103 |
| 2027          | 55049  | 20615.351 | 9249.459  | 11365.89 | 20.647 | 55.133 | 821.568 | 307.668 | 138.041 | 169.627 |
| 2028          | 55809  | 20731.894 | 8881.144  | 11850.75 | 21.235 | 57.162 | 829.419 | 308.115 | 131.990 | 176.124 |
| 2029          | 56527  | 20781.967 | 8493.646  | 12288.32 | 21.739 | 59.130 | 836.392 | 307.495 | 125.674 | 181.821 |
| 2030          | 56756  | 20753.201 | 8120.219  | 12632.98 | 22.258 | 60.872 | 994.067 | 363.487 | 142.224 | 221.264 |
| 2031          | 58288  | 21048.417 | 7989.811  | 13058.61 | 22.404 | 62.041 | 1019.54 | 368.165 | 139.752 | 228.412 |
| 2032          | 58782  | 21169.329 | 7649.869  | 13519.46 | 22.999 | 63.863 | 1026.18 | 369.560 | 133.546 | 236.014 |
| 2033          | 59236  | 21109.293 | 7275.799  | 13833.49 | 23.353 | 65.533 | 1031.59 | 367.618 | 126.708 | 240.910 |
| 2034          | 59614  | 21109.429 | 6906.144  | 14203.28 | 23.825 | 67.284 | 1035.33 | 366.613 | 119.941 | 246.672 |
| 2035          | 58938  | 20794.840 | 6527.161  | 14267.68 | 24.208 | 68.612 | 1253.51 | 442.268 | 138.821 | 303.447 |
| 2036          | 56014  | 19354.577 | 5801.059  | 13553.52 | 24.197 | 70.027 | 1193.11 | 412.258 | 123.564 | 288.694 |
| 2037          | 55953  | 19064.169 | 5367.148  | 13697.02 | 24.480 | 71.847 | 1192.72 | 406.385 | 114.410 | 291.975 |
| 2038          | 55859  | 18854.812 | 5011.724  | 13843.09 | 24.782 | 73.419 | 1190.66 | 401.900 | 106.827 | 295.072 |
| 2039          | 55757  | 18437.457 | 4599.889  | 13837.57 | 24.818 | 75.051 | 1187.28 | 392.602 | 97.949  | 294.653 |

## Results for PHIM for Run 4 (Sensitivity\_Analysis\_4.RTF)

\*\*\*\*\*

### Main Results for E-Component for Run: 4, Simulation: 1, COD: Four Diseases Combined, Adjusted

| Variable Parameter          | Value                                  |
|-----------------------------|----------------------------------------|
| 1. Country                  | US (United States)                     |
| 2. Sex                      | F (Females)                            |
| 3. Year of start of process | 1990                                   |
| 4. Cause of Death           | Four Diseases Combined                 |
| 5. Effective Dose NULL      | CC:1                                   |
| 6. Effective Dose Ecig      | CC:1 Ecig:0.05 Dual:0.525              |
| Note:                       | Death rates are per million population |

#### Results for Age Groups Combined and Years combined, Population and Number deaths adjusted for Ecig scenario,

| Age Group:All |         | NULL        | Ecig        | %Drop    |        |        | NULL    | Ecig    | Drop    |         |
|---------------|---------|-------------|-------------|----------|--------|--------|---------|---------|---------|---------|
| Year          | Number  | Attrib      | Attrib      | Drop     | %Drop  | Attrib | Death   | Attrib  | Attrib  | Drop    |
|               | Deaths  | Deaths      | Deaths      | Deaths   | Deaths | Deaths | Rate    | Rates   | Rates   | Rates   |
| All Comb      | 9148411 | 2946250.006 | 1953743.543 | 992506.5 | 10.849 | 33.687 | 2499.61 | 808.881 | 533.820 | 275.062 |

#### Results for Age Groups Combined, Population and Number deaths adjusted for Ecig scenario,

| Age Group:All |        | NULL      | Ecig      | %Drop    |        |        | NULL    | Ecig    | Drop    |         |
|---------------|--------|-----------|-----------|----------|--------|--------|---------|---------|---------|---------|
| Year          | Number | Attrib    | Attrib    | Drop     | %Drop  | Attrib | Death   | Attrib  | Attrib  | Drop    |
|               | Deaths | Deaths    | Deaths    | Deaths   | Deaths | Deaths | Rate    | Rates   | Rates   | Rates   |
| 1990          | 199848 | 57524.822 | 57524.822 | 0.000    | 0.000  | 0.000  | 2926.84 | 842.471 | 842.471 | 0.000   |
| 1991          | 199162 | 59078.486 | 58910.020 | 168.466  | 0.085  | 0.285  | 2877.87 | 853.678 | 851.244 | 2.434   |
| 1992          | 198533 | 60494.150 | 60022.675 | 471.474  | 0.237  | 0.779  | 2829.84 | 862.271 | 855.549 | 6.722   |
| 1993          | 202515 | 62694.848 | 61777.608 | 917.240  | 0.453  | 1.463  | 2845.86 | 881.034 | 868.136 | 12.898  |
| 1994          | 200665 | 63202.598 | 61753.927 | 1448.671 | 0.722  | 2.292  | 2777.91 | 874.966 | 854.892 | 20.074  |
| 1995          | 201036 | 63766.862 | 61674.840 | 2092.022 | 1.041  | 3.281  | 2739.86 | 869.097 | 840.549 | 28.549  |
| 1996          | 201202 | 64591.163 | 61725.487 | 2865.676 | 1.424  | 4.437  | 2706.47 | 868.908 | 830.298 | 38.610  |
| 1997          | 198673 | 64686.912 | 61099.515 | 3587.397 | 1.806  | 5.546  | 2635.34 | 858.147 | 810.466 | 47.681  |
| 1998          | 197623 | 65295.961 | 60873.196 | 4422.765 | 2.238  | 6.773  | 2584.42 | 854.046 | 796.071 | 57.975  |
| 1999          | 211404 | 67327.521 | 61615.577 | 5711.944 | 2.702  | 8.484  | 2727.28 | 868.771 | 794.891 | 73.879  |
| 2000          | 208596 | 67596.897 | 60947.340 | 6649.557 | 3.188  | 9.837  | 2657.45 | 861.419 | 776.451 | 84.968  |
| 2001          | 203735 | 67008.811 | 59366.987 | 7641.823 | 3.751  | 11.404 | 2566.52 | 844.458 | 747.867 | 96.591  |
| 2002          | 200990 | 67067.744 | 58320.607 | 8747.136 | 4.352  | 13.042 | 2506.90 | 836.925 | 727.418 | 109.506 |
| 2003          | 196550 | 66756.217 | 57012.256 | 9743.961 | 4.957  | 14.596 | 2428.31 | 825.244 | 704.366 | 120.878 |
| 2004          | 188394 | 65058.725 | 54472.858 | 10585.87 | 5.619  | 16.271 | 2304.02 | 796.234 | 666.192 | 130.042 |
| 2005          | 186694 | 65214.724 | 53492.676 | 11722.05 | 6.279  | 17.975 | 2257.67 | 789.321 | 646.883 | 142.438 |
| 2006          | 180406 | 63771.146 | 51188.759 | 12582.39 | 6.974  | 19.731 | 2162.28 | 765.117 | 613.530 | 151.587 |
| 2007          | 176006 | 63110.718 | 49646.052 | 13464.67 | 7.650  | 21.335 | 2088.19 | 749.650 | 589.015 | 160.635 |
| 2008          | 177993 | 63718.624 | 48975.038 | 14743.59 | 8.283  | 23.139 | 2088.52 | 748.674 | 574.660 | 174.013 |
| 2009          | 173277 | 62794.698 | 47229.303 | 15565.39 | 8.983  | 24.788 | 2009.93 | 729.515 | 547.836 | 181.679 |
| 2010          | 171016 | 61917.074 | 45487.510 | 16429.56 | 9.607  | 26.535 | 1960.59 | 711.083 | 521.486 | 189.597 |
| 2011          | 170895 | 61680.114 | 44088.277 | 17591.84 | 10.294 | 28.521 | 1940.38 | 701.700 | 500.587 | 201.113 |
| 2012          | 172084 | 62023.127 | 43142.226 | 18880.90 | 10.972 | 30.442 | 1933.47 | 698.386 | 484.728 | 213.658 |
| 2013          | 173443 | 62037.765 | 41997.542 | 20040.22 | 11.554 | 32.303 | 1927.38 | 691.059 | 466.696 | 224.363 |
| 2014          | 174998 | 61921.017 | 40605.655 | 21315.36 | 12.180 | 34.423 | 1922.86 | 682.195 | 446.170 | 236.025 |
| 2015          | 178288 | 61856.204 | 39460.263 | 22395.94 | 12.562 | 36.206 | 2188.82 | 761.899 | 484.451 | 277.448 |
| 2016          | 177872 | 60464.119 | 37195.406 | 23268.71 | 13.082 | 38.484 | 2162.25 | 737.655 | 452.155 | 285.500 |
| 2017          | 180440 | 60243.839 | 35803.627 | 24440.21 | 13.545 | 40.569 | 2172.03 | 728.017 | 430.983 | 297.033 |
| 2018          | 178377 | 60713.327 | 35218.229 | 25495.10 | 14.293 | 41.993 | 2126.10 | 726.721 | 419.771 | 306.950 |
| 2019          | 180571 | 61148.172 | 34295.255 | 26852.92 | 14.871 | 43.915 | 2130.69 | 724.841 | 404.675 | 320.166 |
| 2020          | 181943 | 61149.317 | 33360.364 | 27788.95 | 15.273 | 45.444 | 2430.54 | 821.432 | 445.655 | 375.778 |
| 2021          | 179686 | 58727.786 | 30534.357 | 28193.43 | 15.690 | 48.007 | 2382.11 | 783.216 | 404.796 | 378.420 |
| 2022          | 181110 | 58848.802 | 29506.347 | 29342.46 | 16.201 | 49.861 | 2381.80 | 778.881 | 388.042 | 390.838 |
| 2023          | 182478 | 58816.149 | 28466.772 | 30349.38 | 16.632 | 51.600 | 2380.17 | 772.407 | 371.308 | 401.099 |
| 2024          | 183588 | 58955.232 | 27435.383 | 31519.85 | 17.169 | 53.464 | 2375.31 | 768.316 | 354.967 | 413.349 |
| 2025          | 182536 | 58297.744 | 26290.612 | 32007.13 | 17.535 | 54.903 | 2721.85 | 876.861 | 392.027 | 484.834 |
| 2026          | 182580 | 56469.971 | 24245.293 | 32224.68 | 17.650 | 57.065 | 2710.80 | 846.150 | 359.975 | 486.175 |
| 2027          | 182020 | 56209.427 | 23098.582 | 33110.85 | 18.191 | 58.906 | 2690.34 | 838.883 | 341.408 | 497.475 |
| 2028          | 181299 | 55733.105 | 21894.962 | 33838.14 | 18.664 | 60.715 | 2667.13 | 828.298 | 322.101 | 506.197 |
| 2029          | 180482 | 55145.838 | 20673.398 | 34472.44 | 19.100 | 62.511 | 2642.02 | 815.951 | 302.631 | 513.319 |
| 2030          | 176388 | 53615.097 | 19433.611 | 34181.49 | 19.379 | 63.753 | 3050.42 | 939.056 | 336.081 | 602.974 |
| 2031          | 177997 | 52046.561 | 18206.826 | 33839.74 | 19.011 | 65.018 | 3072.27 | 910.364 | 314.253 | 596.110 |
| 2032          | 176550 | 51582.636 | 17211.523 | 34371.11 | 19.468 | 66.633 | 3039.55 | 900.496 | 296.320 | 604.175 |
| 2033          | 175044 | 50839.758 | 16200.869 | 34638.89 | 19.789 | 68.133 | 3004.52 | 885.375 | 278.078 | 607.297 |
| 2034          | 173394 | 50215.451 | 15216.924 | 34998.53 | 20.184 | 69.697 | 2966.28 | 872.104 | 260.319 | 611.785 |
| 2035          | 166157 | 47773.075 | 14103.748 | 33669.33 | 20.264 | 70.478 | 3471.85 | 1016.05 | 294.698 | 721.348 |
| 2036          | 159795 | 43298.709 | 12084.748 | 31213.96 | 19.534 | 72.090 | 3341.65 | 922.274 | 252.717 | 669.557 |
| 2037          | 157228 | 42241.563 | 11104.727 | 31136.84 | 19.804 | 73.711 | 3288.43 | 900.450 | 232.257 | 668.194 |
| 2038          | 154669 | 41356.353 | 10318.083 | 31038.27 | 20.067 | 75.051 | 3232.76 | 881.531 | 215.659 | 665.872 |
| 2039          | 152182 | 40161.050 | 9432.878  | 30728.17 | 20.192 | 76.512 | 3175.59 | 855.178 | 196.837 | 658.340 |

## Results for PHIM for Run 4 (Sensitivity\_Analysis\_4.RTF)

\*\*\*\*\*

### Main Results for E-Component for Run: 4, Simulation: 1, COD: LUNG CANCER, Adjusted

| Variable Parameter          | Value                                  |
|-----------------------------|----------------------------------------|
| 1. Country                  | US (United States)                     |
| 2. Sex                      | F (Females)                            |
| 3. Year of start of process | 1990                                   |
| 4. Cause of Death           | LUNG CANCER                            |
| 5. Effective Dose NULL      | CC:1                                   |
| 6. Effective Dose Ecig      | CC:1 Ecig:0.05 Dual:0.525              |
| Note:                       | Death rates are per million population |

#### Results for Age Groups Combined and Years combined, Population and Number deaths adjusted for Ecig scenario,

| Age Group:All | NULL    | Ecig        |             |          |        |        | NULL    | Ecig    |         |         |
|---------------|---------|-------------|-------------|----------|--------|--------|---------|---------|---------|---------|
| Year          | Number  | Attrib      | Attrib      | Drop     | %Drop  | Attrib | Death   | Attrib  | Attrib  | Drop    |
|               | Deaths  | Deaths      | Deaths      | Deaths   | Deaths | Deaths | Rate    | Rates   | Rates   | Rates   |
| All Comb      | 2343935 | 1580465.217 | 1147837.958 | 432627.3 | 18.457 | 27.373 | 640.431 | 433.910 | 313.623 | 120.288 |

#### Results for Age Groups Combined, Population and Number deaths adjusted for Ecig scenario,

| Age Group:All | NULL   | Ecig      |           |          |        |        | NULL    | Ecig    |         |         |
|---------------|--------|-----------|-----------|----------|--------|--------|---------|---------|---------|---------|
| Year          | Number | Attrib    | Attrib    | Drop     | %Drop  | Attrib | Death   | Attrib  | Attrib  | Drop    |
|               | Deaths | Deaths    | Deaths    | Deaths   | Deaths | Deaths | Rate    | Rates   | Rates   | Rates   |
| 1990          | 42690  | 30614.201 | 30614.201 | 0.000    | 0.000  | 0.000  | 625.210 | 448.355 | 448.355 | 0.000   |
| 1991          | 43692  | 31412.010 | 31379.684 | 32.326   | 0.074  | 0.103  | 631.345 | 453.901 | 453.433 | 0.467   |
| 1992          | 45423  | 32782.407 | 32688.550 | 93.857   | 0.207  | 0.286  | 647.451 | 467.274 | 465.935 | 1.339   |
| 1993          | 46292  | 33491.183 | 33305.813 | 185.370  | 0.400  | 0.553  | 650.518 | 470.643 | 468.033 | 2.609   |
| 1994          | 47019  | 34074.347 | 33774.113 | 300.235  | 0.639  | 0.881  | 650.904 | 471.719 | 467.553 | 4.167   |
| 1995          | 47843  | 34694.454 | 34242.051 | 452.403  | 0.946  | 1.304  | 652.042 | 472.861 | 466.675 | 6.186   |
| 1996          | 48250  | 35027.269 | 34401.654 | 625.615  | 1.297  | 1.786  | 649.027 | 471.202 | 462.753 | 8.449   |
| 1997          | 49044  | 35590.763 | 34758.922 | 831.840  | 1.696  | 2.337  | 650.551 | 472.153 | 461.066 | 11.086  |
| 1998          | 49699  | 36100.785 | 35025.388 | 1075.397 | 2.164  | 2.979  | 649.940 | 472.184 | 458.045 | 14.139  |
| 1999          | 48901  | 35451.030 | 34156.123 | 1294.907 | 2.648  | 3.653  | 630.861 | 457.448 | 440.642 | 16.806  |
| 2000          | 50356  | 36447.986 | 34828.273 | 1619.712 | 3.217  | 4.444  | 641.520 | 464.474 | 443.702 | 20.772  |
| 2001          | 50422  | 36411.326 | 34462.246 | 1949.080 | 3.866  | 5.353  | 635.180 | 458.863 | 434.133 | 24.729  |
| 2002          | 51487  | 37078.545 | 34720.230 | 2358.315 | 4.580  | 6.360  | 642.190 | 462.696 | 433.057 | 29.639  |
| 2003          | 51461  | 36999.876 | 34251.216 | 2748.660 | 5.341  | 7.429  | 635.782 | 457.395 | 423.162 | 34.233  |
| 2004          | 51464  | 36861.555 | 33679.775 | 3181.780 | 6.183  | 8.632  | 629.391 | 451.138 | 411.897 | 39.241  |
| 2005          | 51498  | 36689.529 | 33049.170 | 3640.358 | 7.069  | 9.922  | 622.765 | 444.069 | 399.661 | 44.407  |
| 2006          | 51446  | 36504.774 | 32382.665 | 4122.109 | 8.012  | 11.292 | 616.615 | 437.979 | 388.127 | 49.852  |
| 2007          | 51946  | 36663.202 | 31967.070 | 4696.132 | 9.040  | 12.809 | 616.306 | 435.498 | 379.267 | 56.231  |
| 2008          | 51098  | 35898.803 | 30771.500 | 5127.304 | 10.034 | 14.283 | 599.566 | 421.800 | 361.065 | 60.735  |
| 2009          | 51333  | 35934.525 | 30190.313 | 5744.212 | 11.190 | 15.985 | 595.432 | 417.468 | 350.192 | 67.276  |
| 2010          | 51010  | 35502.829 | 29253.205 | 6249.624 | 12.252 | 17.603 | 584.795 | 407.730 | 335.370 | 72.360  |
| 2011          | 50684  | 35136.342 | 28297.423 | 6838.918 | 13.493 | 19.464 | 575.471 | 399.726 | 321.295 | 78.432  |
| 2012          | 51443  | 35450.201 | 27878.105 | 7572.096 | 14.719 | 21.360 | 577.989 | 399.173 | 313.227 | 85.946  |
| 2013          | 51288  | 35123.224 | 26907.236 | 8215.988 | 16.019 | 23.392 | 569.934 | 391.249 | 299.006 | 92.243  |
| 2014          | 51494  | 35079.370 | 26174.506 | 8904.864 | 17.293 | 25.385 | 565.810 | 386.476 | 287.602 | 98.873  |
| 2015          | 50707  | 34324.171 | 24970.267 | 9353.904 | 18.447 | 27.252 | 622.526 | 422.780 | 306.558 | 116.221 |
| 2016          | 49134  | 33054.753 | 23306.908 | 9747.844 | 19.839 | 29.490 | 597.284 | 403.264 | 283.324 | 119.941 |
| 2017          | 48628  | 32471.234 | 22156.655 | 10314.58 | 21.211 | 31.765 | 585.360 | 392.399 | 266.709 | 125.690 |
| 2018          | 50809  | 33657.595 | 22130.116 | 11527.48 | 22.688 | 34.249 | 605.601 | 402.871 | 263.772 | 139.100 |
| 2019          | 51414  | 33863.424 | 21474.445 | 12388.98 | 24.096 | 36.585 | 606.676 | 401.412 | 253.393 | 148.019 |
| 2020          | 51858  | 33910.830 | 20807.173 | 13103.66 | 25.268 | 38.642 | 692.761 | 455.532 | 277.959 | 177.573 |
| 2021          | 48455  | 31531.880 | 18573.659 | 12958.22 | 26.743 | 41.096 | 642.373 | 420.521 | 246.232 | 174.289 |
| 2022          | 48787  | 31560.212 | 17848.637 | 13711.58 | 28.105 | 43.446 | 641.608 | 417.708 | 234.730 | 182.978 |
| 2023          | 49087  | 31508.781 | 17112.741 | 14396.04 | 29.328 | 45.689 | 640.263 | 413.791 | 223.211 | 190.580 |
| 2024          | 49307  | 31517.293 | 16373.838 | 15143.46 | 30.712 | 48.048 | 637.952 | 410.740 | 211.850 | 198.890 |
| 2025          | 49036  | 31175.389 | 15574.776 | 15600.61 | 31.815 | 50.041 | 731.192 | 468.912 | 232.240 | 236.672 |
| 2026          | 45887  | 29044.598 | 13867.884 | 15176.71 | 33.074 | 52.253 | 681.288 | 435.206 | 205.900 | 229.307 |
| 2027          | 45702  | 28825.765 | 13103.642 | 15722.12 | 34.401 | 54.542 | 675.503 | 430.203 | 193.678 | 236.525 |
| 2028          | 45469  | 28513.846 | 12322.103 | 16191.74 | 35.610 | 56.786 | 668.910 | 423.769 | 181.273 | 242.496 |
| 2029          | 45200  | 28148.109 | 11534.828 | 16613.28 | 36.755 | 59.021 | 661.665 | 416.486 | 168.855 | 247.631 |
| 2030          | 44083  | 27314.475 | 10736.797 | 16577.68 | 37.606 | 60.692 | 762.365 | 478.407 | 185.680 | 292.726 |
| 2031          | 41442  | 25423.102 | 9647.219  | 15775.88 | 38.067 | 62.053 | 715.302 | 444.684 | 166.513 | 278.171 |
| 2032          | 41050  | 25085.902 | 9025.310  | 16060.59 | 39.125 | 64.022 | 706.731 | 437.933 | 155.383 | 282.550 |
| 2033          | 40637  | 24645.067 | 8415.960  | 16229.11 | 39.937 | 65.851 | 697.502 | 429.194 | 144.455 | 284.739 |
| 2034          | 40188  | 24239.126 | 7828.210  | 16410.92 | 40.836 | 67.704 | 687.499 | 420.967 | 133.919 | 287.048 |
| 2035          | 38255  | 22944.147 | 7156.128  | 15788.02 | 41.270 | 68.811 | 799.340 | 487.980 | 149.527 | 338.453 |
| 2036          | 33726  | 19950.581 | 5886.025  | 14064.56 | 41.702 | 70.497 | 705.288 | 424.953 | 123.089 | 301.864 |
| 2037          | 33159  | 19415.334 | 5366.500  | 14048.83 | 42.368 | 72.359 | 693.527 | 413.871 | 112.241 | 301.630 |
| 2038          | 32593  | 18939.317 | 4955.064  | 13984.25 | 42.906 | 73.837 | 681.223 | 403.701 | 103.566 | 300.135 |
| 2039          | 32040  | 18379.752 | 4503.640  | 13876.11 | 43.308 | 75.497 | 668.589 | 391.373 | 93.978  | 297.395 |

## Results for PHIM for Run 4 (Sensitivity\_Analysis\_4.RTF)

\*\*\*\*\*

### Main Results for E-Component for Run: 4, Simulation: 1, COD: IHD, Adjusted

| Variable Parameter          | Value                                  |
|-----------------------------|----------------------------------------|
| 1. Country                  | US (United States)                     |
| 2. Sex                      | F (Females)                            |
| 3. Year of start of process | 1990                                   |
| 4. Cause of Death           | IHD                                    |
| 5. Effective Dose NULL      | CC:1                                   |
| 6. Effective Dose Ecig      | CC:1 Ecig:0.05 Dual:0.525              |
| Note:                       | Death rates are per million population |

### Results for Age Groups Combined and Years combined, Population and Number deaths adjusted for Ecig scenario,

| Age Group: | All     | NULL       | Ecig       |          |        |        |         |         |        |        |
|------------|---------|------------|------------|----------|--------|--------|---------|---------|--------|--------|
| Year       | Number  | Attrib     | Attrib     | Drop     | %Drop  | Attrib | Death   | Attrib  | Ecig   | Drop   |
|            | Deaths  | Deaths     | Deaths     | Deaths   | Deaths | Deaths | Rate    | Rates   | Rates  | Rates  |
| All Comb   | 3261642 | 398833.796 | 199566.656 | 199267.1 | 6.109  | 49.962 | 891.176 | 109.498 | 54.527 | 54.971 |

### Results for Age Groups Combined, Population and Number deaths adjusted for Ecig scenario,

| Age Group: | All    | NULL      | Ecig      |          |        |        |         |         |         |        |
|------------|--------|-----------|-----------|----------|--------|--------|---------|---------|---------|--------|
| Year       | Number | Attrib    | Attrib    | Drop     | %Drop  | Attrib | Death   | Attrib  | Ecig    | Drop   |
|            | Deaths | Deaths    | Deaths    | Deaths   | Deaths | Deaths | Rate    | Rates   | Rates   | Rates  |
| 1990       | 98916  | 12922.892 | 12922.892 | 0.000    | 0.000  | 0.000  | 1448.66 | 189.260 | 189.260 | 0.000  |
| 1991       | 96403  | 12856.479 | 12766.074 | 90.405   | 0.094  | 0.703  | 1393.01 | 185.775 | 184.469 | 1.306  |
| 1992       | 93721  | 12662.244 | 12411.689 | 250.554  | 0.267  | 1.979  | 1335.88 | 180.485 | 176.913 | 3.572  |
| 1993       | 93680  | 12730.613 | 12252.437 | 478.176  | 0.510  | 3.756  | 1316.45 | 178.900 | 172.179 | 6.721  |
| 1994       | 90835  | 12495.323 | 11750.661 | 744.662  | 0.820  | 5.960  | 1257.48 | 172.983 | 162.670 | 10.313 |
| 1995       | 89704  | 12365.590 | 11313.311 | 1052.280 | 1.173  | 8.510  | 1222.55 | 168.534 | 154.186 | 14.348 |
| 1996       | 88296  | 12290.551 | 10855.821 | 1434.730 | 1.625  | 11.673 | 1187.71 | 165.338 | 146.027 | 19.311 |
| 1997       | 84792  | 11719.531 | 9991.663  | 1727.868 | 2.038  | 14.743 | 1124.73 | 155.473 | 132.536 | 22.937 |
| 1998       | 82538  | 11416.794 | 9348.467  | 2068.328 | 2.506  | 18.117 | 1079.39 | 149.327 | 122.255 | 27.072 |
| 1999       | 93972  | 13028.038 | 10180.812 | 2847.226 | 3.030  | 21.855 | 1212.32 | 168.109 | 131.341 | 36.768 |
| 2000       | 90082  | 12426.299 | 9247.697  | 3178.602 | 3.529  | 25.580 | 1147.62 | 158.354 | 117.813 | 40.541 |
| 2001       | 86173  | 11939.281 | 8356.798  | 3582.484 | 4.157  | 30.006 | 1085.55 | 150.461 | 105.274 | 45.188 |
| 2002       | 83080  | 11528.794 | 7553.457  | 3975.337 | 4.785  | 34.482 | 1036.24 | 143.865 | 94.212  | 49.653 |
| 2003       | 79382  | 11048.407 | 6776.006  | 4272.401 | 5.382  | 38.670 | 980.731 | 136.581 | 83.715  | 52.866 |
| 2004       | 73952  | 10375.132 | 5902.098  | 4473.033 | 6.049  | 43.113 | 904.420 | 126.978 | 72.181  | 54.797 |
| 2005       | 71755  | 10051.029 | 5304.947  | 4746.082 | 6.614  | 47.220 | 867.730 | 121.652 | 64.152  | 57.499 |
| 2006       | 67670  | 9542.523  | 4621.801  | 4920.722 | 7.272  | 51.566 | 811.063 | 114.490 | 55.395  | 59.095 |
| 2007       | 63633  | 8936.533  | 3980.118  | 4956.415 | 7.789  | 55.462 | 754.960 | 106.151 | 47.221  | 58.930 |
| 2008       | 63320  | 8944.180  | 3653.973  | 5290.207 | 8.355  | 59.147 | 742.981 | 105.091 | 42.875  | 62.217 |
| 2009       | 59909  | 8390.033  | 3164.515  | 5225.518 | 8.722  | 62.282 | 694.908 | 97.471  | 36.707  | 60.764 |
| 2010       | 58185  | 8157.570  | 2824.856  | 5332.714 | 9.165  | 65.371 | 667.060 | 93.685  | 32.385  | 61.300 |
| 2011       | 57565  | 8035.356  | 2533.446  | 5501.910 | 9.558  | 68.471 | 653.604 | 91.414  | 28.765  | 62.648 |
| 2012       | 57630  | 7970.766  | 2277.797  | 5692.969 | 9.878  | 71.423 | 647.510 | 89.752  | 25.592  | 64.159 |
| 2013       | 57310  | 7743.216  | 2033.590  | 5709.626 | 9.963  | 73.737 | 636.855 | 86.254  | 22.598  | 63.656 |
| 2014       | 57808  | 7774.935  | 1855.128  | 5919.807 | 10.240 | 76.140 | 635.189 | 85.658  | 20.384  | 65.274 |
| 2015       | 58698  | 7722.535  | 1710.824  | 6011.711 | 10.242 | 77.846 | 720.628 | 95.120  | 21.004  | 74.117 |
| 2016       | 58991  | 7600.353  | 1531.518  | 6068.836 | 10.288 | 79.849 | 717.111 | 92.723  | 18.617  | 74.106 |
| 2017       | 59370  | 7470.266  | 1377.490  | 6092.776 | 10.262 | 81.560 | 714.665 | 90.274  | 16.581  | 73.693 |
| 2018       | 56456  | 6907.050  | 1164.472  | 5742.578 | 10.172 | 83.141 | 672.907 | 82.675  | 13.880  | 68.796 |
| 2019       | 56297  | 6732.046  | 1045.532  | 5686.515 | 10.101 | 84.469 | 664.292 | 79.801  | 12.337  | 67.464 |
| 2020       | 55758  | 6429.836  | 933.810   | 5496.026 | 9.857  | 85.477 | 744.863 | 86.373  | 12.475  | 73.899 |
| 2021       | 56777  | 6562.016  | 860.357   | 5701.658 | 10.042 | 86.889 | 752.698 | 87.513  | 11.406  | 76.108 |
| 2022       | 56344  | 6352.366  | 772.204   | 5580.161 | 9.904  | 87.844 | 740.993 | 84.075  | 10.155  | 73.920 |
| 2023       | 55888  | 6134.123  | 697.877   | 5436.246 | 9.727  | 88.623 | 728.982 | 80.557  | 9.103   | 71.454 |
| 2024       | 55353  | 5922.193  | 628.784   | 5293.408 | 9.563  | 89.383 | 716.169 | 77.179  | 8.135   | 69.044 |
| 2025       | 53908  | 5504.188  | 557.277   | 4946.910 | 9.177  | 89.875 | 803.845 | 82.789  | 8.310   | 74.479 |
| 2026       | 55953  | 5641.075  | 534.361   | 5106.715 | 9.127  | 90.527 | 830.753 | 84.526  | 7.934   | 76.592 |
| 2027       | 54903  | 5426.216  | 486.706   | 4939.510 | 8.997  | 91.030 | 811.492 | 80.982  | 7.194   | 73.788 |
| 2028       | 53822  | 5197.830  | 441.559   | 4756.271 | 8.837  | 91.505 | 791.787 | 77.249  | 6.496   | 70.754 |
| 2029       | 52733  | 4973.547  | 402.596   | 4570.951 | 8.668  | 91.905 | 771.940 | 73.590  | 5.893   | 67.696 |
| 2030       | 50258  | 4450.618  | 348.313   | 4102.305 | 8.162  | 92.174 | 869.158 | 77.952  | 6.024   | 71.928 |
| 2031       | 52852  | 4555.052  | 343.571   | 4211.482 | 7.968  | 92.457 | 912.243 | 79.674  | 5.930   | 73.744 |
| 2032       | 51567  | 4349.999  | 314.757   | 4035.242 | 7.825  | 92.764 | 887.789 | 75.939  | 5.419   | 70.520 |
| 2033       | 50292  | 4147.948  | 291.848   | 3856.100 | 7.667  | 92.964 | 863.231 | 72.237  | 5.009   | 67.227 |
| 2034       | 49008  | 3966.133  | 270.035   | 3696.098 | 7.542  | 93.191 | 838.386 | 68.881  | 4.620   | 64.261 |
| 2035       | 45453  | 3289.064  | 219.858   | 3069.206 | 6.752  | 93.315 | 949.743 | 69.952  | 4.594   | 65.358 |
| 2036       | 47364  | 3313.192  | 212.726   | 3100.466 | 6.546  | 93.579 | 990.477 | 70.572  | 4.449   | 66.123 |
| 2037       | 45866  | 3117.951  | 193.946   | 2924.005 | 6.375  | 93.780 | 959.286 | 66.464  | 4.056   | 62.408 |
| 2038       | 44409  | 2949.775  | 179.949   | 2769.826 | 6.237  | 93.900 | 928.201 | 62.876  | 3.761   | 59.115 |
| 2039       | 43009  | 2766.312  | 166.232   | 2600.080 | 6.045  | 93.991 | 897.476 | 58.905  | 3.469   | 55.436 |

## Results for PHIM for Run 4 (Sensitivity\_Analysis\_4.RTF)

\*\*\*\*\*

### Main Results for E-Component for Run: 4, Simulation: 1, COD: STROKE, Adjusted

| Variable Parameter          | Value                                  |
|-----------------------------|----------------------------------------|
| 1. Country                  | US (United States)                     |
| 2. Sex                      | F (Females)                            |
| 3. Year of start of process | 1990                                   |
| 4. Cause of Death           | STROKE                                 |
| 5. Effective Dose NULL      | CC:1                                   |
| 6. Effective Dose Ecig      | CC:1 Ecig:0.05 Dual:0.525              |
| Note:                       | Death rates are per million population |

#### Results for Age Groups Combined and Years combined, Population and Number deaths adjusted for Ecig scenario,

| Age Group:All | NULL    | Ecig       | %Drop     |          |        |        | NULL    | Ecig   | Drop   |        |
|---------------|---------|------------|-----------|----------|--------|--------|---------|--------|--------|--------|
| Year          | Number  | Attrib     | Attrib    | Drop     | %Drop  | Attrib | Death   | Attrib | Attrib | Drop   |
|               | Deaths  | Deaths     | Deaths    | Deaths   | Deaths | Deaths | Rate    | Rates  | Rates  | Rates  |
| All Comb      | 1361482 | 104899.750 | 51401.495 | 53498.26 | 3.929  | 50.999 | 371.997 | 28.800 | 14.044 | 14.755 |

#### Results for Age Groups Combined, Population and Number deaths adjusted for Ecig scenario,

| Age Group:All | NULL   | Ecig     | %Drop    |          |        |        | NULL    | Ecig   | Drop   |        |
|---------------|--------|----------|----------|----------|--------|--------|---------|--------|--------|--------|
| Year          | Number | Attrib   | Attrib   | Drop     | %Drop  | Attrib | Death   | Attrib | Attrib | Drop   |
|               | Deaths | Deaths   | Deaths   | Deaths   | Deaths | Deaths | Rate    | Rates  | Rates  | Rates  |
| 1990          | 33504  | 3293.017 | 3293.017 | 0.000    | 0.000  | 0.000  | 490.678 | 48.227 | 48.227 | 0.000  |
| 1991          | 32505  | 3207.063 | 3179.556 | 27.507   | 0.085  | 0.858  | 469.694 | 46.342 | 45.944 | 0.397  |
| 1992          | 32560  | 3218.125 | 3141.235 | 76.889   | 0.236  | 2.389  | 464.104 | 45.871 | 44.774 | 1.096  |
| 1993          | 32768  | 3226.680 | 3081.110 | 145.571  | 0.444  | 4.511  | 460.482 | 45.344 | 43.298 | 2.046  |
| 1994          | 33006  | 3277.266 | 3045.160 | 232.105  | 0.703  | 7.082  | 456.920 | 45.370 | 42.156 | 3.214  |
| 1995          | 33732  | 3309.378 | 2976.818 | 332.561  | 0.986  | 10.049 | 459.725 | 45.104 | 40.570 | 4.534  |
| 1996          | 33754  | 3312.987 | 2863.405 | 449.582  | 1.332  | 13.570 | 454.035 | 44.568 | 38.517 | 6.051  |
| 1997          | 33705  | 3267.066 | 2704.163 | 562.903  | 1.670  | 17.230 | 447.080 | 43.341 | 35.870 | 7.472  |
| 1998          | 33282  | 3178.725 | 2507.716 | 671.009  | 2.016  | 21.109 | 435.246 | 41.577 | 32.795 | 8.782  |
| 1999          | 33902  | 3120.351 | 2339.292 | 781.060  | 2.304  | 25.031 | 437.368 | 40.264 | 30.179 | 10.085 |
| 2000          | 33842  | 3142.808 | 2229.370 | 913.438  | 2.699  | 29.064 | 431.143 | 40.050 | 28.402 | 11.649 |
| 2001          | 32525  | 2961.588 | 1980.825 | 980.764  | 3.015  | 33.116 | 409.735 | 37.323 | 24.953 | 12.369 |
| 2002          | 32103  | 2940.627 | 1838.129 | 1102.499 | 3.434  | 37.492 | 400.409 | 36.695 | 22.927 | 13.769 |
| 2003          | 30598  | 2819.545 | 1645.729 | 1173.816 | 3.836  | 41.631 | 378.021 | 34.855 | 20.332 | 14.523 |
| 2004          | 29423  | 2730.466 | 1480.684 | 1249.782 | 4.248  | 45.772 | 359.838 | 33.417 | 18.108 | 15.309 |
| 2005          | 27994  | 2670.510 | 1343.781 | 1326.729 | 4.739  | 49.681 | 338.529 | 32.322 | 16.250 | 16.072 |
| 2006          | 27247  | 2623.285 | 1222.442 | 1400.843 | 5.141  | 53.400 | 326.577 | 31.474 | 14.652 | 16.822 |
| 2007          | 26354  | 2536.599 | 1090.631 | 1445.968 | 5.487  | 57.004 | 312.675 | 30.131 | 12.940 | 17.191 |
| 2008          | 26058  | 2469.443 | 981.853  | 1487.590 | 5.709  | 60.240 | 305.757 | 29.015 | 11.521 | 17.494 |
| 2009          | 25106  | 2386.945 | 875.095  | 1511.850 | 6.022  | 63.338 | 291.220 | 27.730 | 10.151 | 17.580 |
| 2010          | 24915  | 2329.274 | 787.363  | 1541.911 | 6.189  | 66.197 | 285.632 | 26.750 | 9.027  | 17.724 |
| 2011          | 24876  | 2286.581 | 707.765  | 1578.816 | 6.347  | 69.047 | 282.447 | 26.013 | 8.036  | 17.977 |
| 2012          | 24593  | 2243.311 | 635.536  | 1607.775 | 6.538  | 71.670 | 276.315 | 25.260 | 7.141  | 18.119 |
| 2013          | 24554  | 2176.503 | 564.593  | 1611.911 | 6.565  | 74.060 | 272.859 | 24.245 | 6.274  | 17.971 |
| 2014          | 25415  | 2211.619 | 526.291  | 1685.328 | 6.631  | 76.203 | 279.253 | 24.366 | 5.783  | 18.583 |
| 2015          | 26453  | 2237.016 | 494.137  | 1742.879 | 6.589  | 77.911 | 324.759 | 27.554 | 6.066  | 21.487 |
| 2016          | 26887  | 2229.057 | 453.601  | 1775.457 | 6.603  | 79.651 | 326.848 | 27.194 | 5.514  | 21.680 |
| 2017          | 27789  | 2221.649 | 417.590  | 1804.060 | 6.492  | 81.204 | 334.505 | 26.848 | 5.027  | 21.821 |
| 2018          | 25429  | 1939.420 | 338.627  | 1600.793 | 6.295  | 82.540 | 303.090 | 23.214 | 4.036  | 19.178 |
| 2019          | 25619  | 1904.400 | 306.173  | 1598.226 | 6.238  | 83.923 | 302.300 | 22.574 | 3.613  | 18.962 |
| 2020          | 25587  | 1806.054 | 271.434  | 1534.620 | 5.998  | 84.971 | 341.810 | 24.261 | 3.626  | 20.635 |
| 2021          | 25674  | 1748.172 | 242.999  | 1505.174 | 5.863  | 86.100 | 340.366 | 23.314 | 3.221  | 20.093 |
| 2022          | 25783  | 1701.148 | 219.766  | 1481.382 | 5.746  | 87.081 | 339.077 | 22.515 | 2.890  | 19.625 |
| 2023          | 25883  | 1652.087 | 199.857  | 1452.230 | 5.611  | 87.903 | 337.608 | 21.696 | 2.607  | 19.089 |
| 2024          | 25941  | 1597.127 | 180.207  | 1416.920 | 5.462  | 88.717 | 335.626 | 20.814 | 2.332  | 18.482 |
| 2025          | 25560  | 1467.622 | 157.288  | 1310.334 | 5.127  | 89.283 | 381.128 | 22.075 | 2.345  | 19.729 |
| 2026          | 25804  | 1390.505 | 140.731  | 1249.774 | 4.843  | 89.879 | 383.123 | 20.835 | 2.089  | 18.746 |
| 2027          | 25606  | 1342.095 | 128.033  | 1214.062 | 4.741  | 90.460 | 378.469 | 20.030 | 1.892  | 18.137 |
| 2028          | 25382  | 1289.536 | 116.602  | 1172.934 | 4.621  | 90.958 | 373.395 | 19.165 | 1.715  | 17.450 |
| 2029          | 25145  | 1242.216 | 106.553  | 1135.663 | 4.517  | 91.422 | 368.084 | 18.380 | 1.560  | 16.820 |
| 2030          | 24353  | 1096.803 | 90.204   | 1006.599 | 4.133  | 91.776 | 421.148 | 19.210 | 1.560  | 17.650 |
| 2031          | 24381  | 1019.991 | 80.517   | 939.474  | 3.853  | 92.106 | 420.822 | 17.841 | 1.390  | 16.451 |
| 2032          | 24050  | 977.406  | 73.700   | 903.706  | 3.758  | 92.460 | 414.062 | 17.063 | 1.269  | 15.794 |
| 2033          | 23711  | 937.450  | 68.446   | 869.004  | 3.665  | 92.699 | 406.980 | 16.326 | 1.175  | 15.151 |
| 2034          | 23346  | 900.763  | 63.326   | 837.437  | 3.587  | 92.970 | 399.392 | 15.644 | 1.083  | 14.560 |
| 2035          | 22211  | 745.023  | 51.121   | 693.903  | 3.124  | 93.138 | 464.091 | 15.845 | 1.068  | 14.777 |
| 2036          | 21387  | 680.360  | 44.583   | 635.776  | 2.973  | 93.447 | 447.242 | 14.492 | 0.932  | 13.560 |
| 2037          | 20889  | 644.109  | 40.981   | 603.128  | 2.887  | 93.638 | 436.894 | 13.730 | 0.857  | 12.873 |
| 2038          | 20391  | 612.448  | 38.117   | 574.331  | 2.817  | 93.776 | 426.192 | 13.055 | 0.797  | 12.258 |
| 2039          | 19901  | 577.529  | 35.345   | 542.184  | 2.724  | 93.880 | 415.272 | 12.298 | 0.738  | 11.560 |



## Results for PHIM for Run 4 (Sensitivity\_Analysis\_4.RTF)

\*\*\*\*\*

### Main Results for E-Component for Run: 4, Simulation: 1, COD: COPD, Adjusted

| Variable Parameter          | Value                                  |
|-----------------------------|----------------------------------------|
| 1. Country                  | US (United States)                     |
| 2. Sex                      | F (Females)                            |
| 3. Year of start of process | 1990                                   |
| 4. Cause of Death           | COPD                                   |
| 5. Effective Dose NULL      | CC:1                                   |
| 6. Effective Dose Ecig      | CC:1 Ecig:0.05 Dual:0.525              |
| Note:                       | Death rates are per million population |

#### Results for Age Groups Combined and Years combined, Population and Number deaths adjusted for Ecig scenario,

| Age Group:All | NULL    | Ecig       | %Drop      |          |        |        | NULL    | Ecig    | Drop    |        |
|---------------|---------|------------|------------|----------|--------|--------|---------|---------|---------|--------|
| Year          | Number  | Attrib     | Attrib     | Drop     | %Drop  | Attrib | Death   | Attrib  | Attrib  | Drop   |
|               | Deaths  | Deaths     | Deaths     | Deaths   | Deaths | Deaths | Rate    | Rates   | Rates   | Rates  |
| All Comb      | 2181353 | 862051.244 | 554937.435 | 307113.8 | 14.079 | 35.626 | 596.009 | 236.673 | 151.625 | 85.048 |

#### Results for Age Groups Combined, Population and Number deaths adjusted for Ecig scenario,

| Age Group:All | NULL   | Ecig      | %Drop     |          |        |        | NULL    | Ecig    | Drop    |         |
|---------------|--------|-----------|-----------|----------|--------|--------|---------|---------|---------|---------|
| Year          | Number | Attrib    | Attrib    | Drop     | %Drop  | Attrib | Death   | Attrib  | Attrib  | Drop    |
|               | Deaths | Deaths    | Deaths    | Deaths   | Deaths | Deaths | Rate    | Rates   | Rates   | Rates   |
| 1990          | 24738  | 10694.712 | 10694.712 | 0.000    | 0.000  | 0.000  | 362.296 | 156.628 | 156.628 | 0.000   |
| 1991          | 26562  | 11602.933 | 11584.706 | 18.227   | 0.069  | 0.157  | 383.818 | 167.661 | 167.398 | 0.263   |
| 1992          | 26828  | 11831.375 | 11781.201 | 50.174   | 0.187  | 0.424  | 382.401 | 168.642 | 167.926 | 0.716   |
| 1993          | 29774  | 13246.371 | 13138.248 | 108.123  | 0.363  | 0.816  | 418.408 | 186.148 | 184.627 | 1.521   |
| 1994          | 29805  | 13355.662 | 13183.993 | 171.669  | 0.576  | 1.285  | 412.606 | 184.893 | 182.513 | 2.381   |
| 1995          | 29757  | 13397.439 | 13142.660 | 254.779  | 0.856  | 1.902  | 405.549 | 182.598 | 179.118 | 3.480   |
| 1996          | 30903  | 13960.356 | 13604.607 | 355.749  | 1.151  | 2.548  | 415.697 | 187.801 | 183.002 | 4.799   |
| 1997          | 31133  | 14109.552 | 13644.767 | 464.785  | 1.493  | 3.294  | 412.976 | 187.180 | 180.994 | 6.186   |
| 1998          | 32104  | 14599.657 | 13991.625 | 608.032  | 1.894  | 4.165  | 419.844 | 190.958 | 182.976 | 7.982   |
| 1999          | 34628  | 15728.102 | 14939.351 | 788.752  | 2.278  | 5.015  | 446.736 | 202.950 | 192.730 | 10.220  |
| 2000          | 34316  | 15579.803 | 14641.999 | 937.804  | 2.733  | 6.019  | 437.174 | 198.541 | 186.535 | 12.006  |
| 2001          | 34614  | 15696.614 | 14567.118 | 1129.496 | 3.263  | 7.196  | 436.050 | 197.812 | 183.507 | 14.305  |
| 2002          | 34319  | 15519.777 | 14208.792 | 1310.985 | 3.820  | 8.447  | 428.057 | 193.668 | 177.223 | 16.445  |
| 2003          | 35110  | 15888.389 | 14339.305 | 1549.085 | 4.412  | 9.750  | 433.777 | 196.413 | 177.157 | 19.256  |
| 2004          | 33555  | 15091.573 | 13410.300 | 1681.272 | 5.011  | 11.140 | 410.370 | 184.701 | 164.005 | 20.696  |
| 2005          | 35446  | 15803.656 | 13794.777 | 2008.878 | 5.667  | 12.711 | 428.650 | 191.278 | 166.819 | 24.459  |
| 2006          | 34043  | 15100.563 | 12961.851 | 2138.713 | 6.282  | 14.163 | 408.027 | 181.174 | 155.356 | 25.818  |
| 2007          | 34073  | 14974.384 | 12608.233 | 2366.151 | 6.944  | 15.801 | 404.246 | 177.871 | 149.588 | 28.283  |
| 2008          | 37518  | 16406.197 | 13567.713 | 2838.485 | 7.566  | 17.301 | 440.221 | 192.768 | 159.200 | 33.568  |
| 2009          | 36930  | 16083.194 | 12999.379 | 3083.815 | 8.350  | 19.174 | 428.368 | 186.846 | 150.786 | 36.060  |
| 2010          | 36906  | 15927.400 | 12622.086 | 3305.314 | 8.956  | 20.752 | 423.101 | 182.917 | 144.704 | 38.213  |
| 2011          | 37771  | 16221.836 | 12549.643 | 3672.193 | 9.722  | 22.637 | 428.860 | 184.547 | 142.491 | 42.056  |
| 2012          | 38419  | 16358.849 | 12350.788 | 4008.062 | 10.433 | 24.501 | 431.655 | 184.202 | 138.768 | 45.434  |
| 2013          | 40291  | 16994.822 | 12492.123 | 4502.699 | 11.175 | 26.495 | 447.731 | 189.311 | 138.818 | 50.493  |
| 2014          | 40282  | 16855.093 | 12049.731 | 4805.363 | 11.929 | 28.510 | 442.609 | 185.696 | 132.401 | 53.295  |
| 2015          | 42430  | 17572.483 | 12285.036 | 5287.447 | 12.462 | 30.089 | 520.910 | 216.445 | 150.822 | 65.622  |
| 2016          | 42860  | 17579.955 | 11903.379 | 5676.576 | 13.245 | 32.290 | 521.011 | 214.473 | 144.700 | 69.773  |
| 2017          | 44653  | 18080.688 | 11851.892 | 6228.796 | 13.949 | 34.450 | 537.504 | 218.496 | 142.666 | 75.830  |
| 2018          | 45683  | 18209.262 | 11585.014 | 6624.248 | 14.501 | 36.378 | 544.501 | 217.960 | 138.083 | 79.876  |
| 2019          | 47240  | 18648.302 | 11469.106 | 7179.196 | 15.197 | 38.498 | 557.421 | 221.054 | 135.333 | 85.722  |
| 2020          | 48740  | 19002.597 | 11347.947 | 7654.650 | 15.705 | 40.282 | 651.104 | 255.266 | 151.595 | 103.671 |
| 2021          | 48780  | 18885.717 | 10857.342 | 8028.376 | 16.458 | 42.510 | 646.673 | 251.867 | 143.936 | 107.931 |
| 2022          | 50195  | 19235.076 | 10665.739 | 8569.337 | 17.072 | 44.551 | 660.125 | 254.582 | 140.267 | 114.315 |
| 2023          | 51620  | 19521.158 | 10456.297 | 9064.861 | 17.561 | 46.436 | 673.314 | 256.363 | 136.387 | 119.976 |
| 2024          | 52987  | 19918.620 | 10252.555 | 9666.065 | 18.242 | 48.528 | 685.567 | 259.583 | 132.651 | 126.933 |
| 2025          | 54032  | 20150.545 | 10001.271 | 10149.27 | 18.784 | 50.367 | 805.684 | 303.086 | 149.132 | 153.954 |
| 2026          | 54935  | 20393.792 | 9702.318  | 10691.47 | 19.462 | 52.425 | 815.634 | 305.582 | 144.052 | 161.529 |
| 2027          | 55808  | 20615.351 | 9380.201  | 11235.15 | 20.132 | 54.499 | 824.875 | 307.668 | 138.644 | 169.025 |
| 2028          | 56626  | 20731.894 | 9014.699  | 11717.20 | 20.692 | 56.518 | 833.034 | 308.115 | 132.617 | 175.498 |
| 2029          | 57405  | 20781.967 | 8629.421  | 12152.55 | 21.170 | 58.476 | 840.332 | 307.495 | 126.323 | 181.171 |
| 2030          | 57694  | 20753.201 | 8258.298  | 12494.90 | 21.657 | 60.207 | 997.748 | 363.487 | 142.818 | 220.670 |
| 2031          | 59321  | 21048.417 | 8135.519  | 12912.90 | 21.768 | 61.349 | 1023.90 | 368.165 | 140.421 | 227.744 |
| 2032          | 59883  | 21169.329 | 7797.757  | 13371.57 | 22.330 | 63.165 | 1030.96 | 369.560 | 134.249 | 235.311 |
| 2033          | 60405  | 21109.293 | 7424.615  | 13684.68 | 22.655 | 64.828 | 1036.81 | 367.618 | 127.439 | 240.179 |
| 2034          | 60852  | 21109.429 | 7055.353  | 14054.08 | 23.096 | 66.577 | 1041.01 | 366.613 | 120.697 | 245.915 |
| 2035          | 60238  | 20794.840 | 6676.641  | 14118.20 | 23.437 | 67.893 | 1258.67 | 442.268 | 139.508 | 302.760 |
| 2036          | 57318  | 19354.577 | 5941.414  | 13413.16 | 23.401 | 69.302 | 1198.64 | 412.258 | 124.247 | 288.010 |
| 2037          | 57314  | 19064.169 | 5503.299  | 13560.87 | 23.661 | 71.133 | 1198.72 | 406.385 | 115.102 | 291.283 |
| 2038          | 57277  | 18854.812 | 5144.953  | 13709.86 | 23.936 | 72.713 | 1197.15 | 401.900 | 107.535 | 294.364 |
| 2039          | 57231  | 18437.457 | 4727.661  | 13709.80 | 23.955 | 74.358 | 1194.26 | 392.602 | 98.653  | 293.949 |

## Results for PHIM for Run 5 (Sensitivity\_Analysis\_4.RTF)

---

### Control File Details for Run: 5

| Variable Parameter                                       | Value                  |
|----------------------------------------------------------|------------------------|
| 1. Name for Reference Scenario                           | NULL                   |
| 2. Name for Test Scenario                                | Ecig                   |
| 3. Name for Product 1                                    | CC                     |
| 4. Name for Product 2                                    | Ecig                   |
| 5. Name for Product 3                                    | -                      |
| 6. Name for Product 4                                    | Dual                   |
| 7. Country                                               | US (United States)     |
| 8. Sex                                                   | M (Males)              |
| 9. Year of start of process                              | 1990                   |
| 10. Number of months of follow-up                        | 600                    |
| 11. Follow-up interval length (in months)                | 12                     |
| 12. Lower age for risk estimation                        | 10                     |
| 13. Upper age for risk estimation                        | 79                     |
| 14. The effective dose for Product 1 (F1) - Ref          | 1                      |
| 15. The effective dose for Product 2 (F2) - Ref          | -                      |
| 16. The effective dose for Product 3 (F3) - Ref          | -                      |
| 17. The effective dose for Product 4 (F4) - Ref          | -                      |
| 18. The effective dose for Product 1 (F1) - Test         | 1                      |
| 19. The effective dose for Product 2 (F2) - Test         | 0.05                   |
| 20. The effective dose for Product 3 (F3) - Test         | -                      |
| 21. The effective dose for Product 4 (F4) - Test         | FROMF2                 |
| 22. Number in population to be simulated                 | 100000                 |
| 23. Number of MC simulations                             | 1                      |
| 24. The random number seed for the first simulation      | 15975263               |
| 25. Source for the population file (POP)                 | UN4                    |
| 26. Source for the socioeconomic prevalence file (SEP)   | -                      |
| 27. Source for the current smoking prevalence file (CSP) | ISS3                   |
| 28. Source for the former smoking prevalence file (FSP)  | ISS3                   |
| 29. Source for the quit-time distribution file (QTD)     | NHIS2006               |
| 30. Source for the death file (MORT)                     | APR-20                 |
| 31. Source for the relative risk file (RR)               | PNLEST                 |
| 32. Source for the half-life file (H)                    | PNLEST                 |
| 33. Assumption Set for TTP Factor Reference              | F1                     |
| 34. Assumption Set for TTP Factor Test                   | F1                     |
| 35. Assumption Set for TTP Reference                     | ISS3                   |
| 36. Assumption Set for TTP Test                          | S4C                    |
| 37. Assumption Set for TP for socioeconomic group        | -                      |
| 38. Source for Output Choice file (OUTC)                 | BASIC                  |
| 39. Output for DTP P1                                    | N                      |
| 40. Output for DTP P2                                    | N                      |
| 41. Output for Main P Component                          | Y                      |
| 42. Output for DTP E1                                    | N                      |
| 43. Output for DTP E2                                    | N                      |
| 44. Output for DTP E3                                    | N                      |
| 45. Output for Main E Component                          | Y                      |
| 46. Output file name                                     | Sensitivity_Analysis_4 |
| 47. Run number for P-Component                           | -                      |
| 48. Results file for E-Component                         | -                      |
| 49. Components required                                  | PE                     |
| 50. Results folder for P to be used in E-Component       | -                      |
| 51. Fixed age of starting product use                    | 16                     |
| 52. Output absolute risk file?                           | N                      |

## Results for PHIM for Run 5 (Sensitivity\_Analysis\_4.RTF)

\*\*\*\*\*

TTP values for Run: 5, Scenario: NULL

| Variable Parameter | Value               |
|--------------------|---------------------|
| 1. Country         | US (United States)  |
| 2. Sex             | M (Males)           |
| 3. Assumption Set  | ISS3                |
| Note:              | Period is in Months |

| Age   | Period  | Initiation  | Cessation    | Re-initiation |
|-------|---------|-------------|--------------|---------------|
|       |         | Never<br>CC | CC<br>Former | Former<br>CC  |
| 10-14 | 1-12    | 0.003842    | 0.008742     | 0.000000      |
| 15-19 | 1-12    | 0.004720    | 0.003614     | 0.000000      |
| 20-24 | 1-12    | 0.000376    | 0.000943     | 0.000000      |
| 25-29 | 1-12    | 0.000187    | 0.001143     | 0.000000      |
| 30-34 | 1-12    | 0.000093    | 0.000871     | 0.000000      |
| 35-39 | 1-12    | 0.000000    | 0.000867     | 0.000000      |
| 40-44 | 1-12    | 0.000000    | 0.001399     | 0.000000      |
| 45-49 | 1-12    | 0.000000    | 0.002033     | 0.000000      |
| 50-54 | 1-12    | 0.000000    | 0.003209     | 0.000000      |
| 55-59 | 1-12    | 0.000000    | 0.003574     | 0.000000      |
| 60-64 | 1-12    | 0.000000    | 0.003460     | 0.000000      |
| 65-69 | 1-12    | 0.000000    | 0.004136     | 0.000000      |
| 70-74 | 1-12    | 0.000000    | 0.005592     | 0.000000      |
| 75-79 | 1-12    | 0.000000    | 0.005592     | 0.000000      |
| 10-14 | 13-72   | 0.004906    | 0.008742     | 0.000000      |
| 15-19 | 13-72   | 0.006989    | 0.004426     | 0.000000      |
| 20-24 | 13-72   | 0.000687    | 0.001527     | 0.000000      |
| 25-29 | 13-72   | 0.000962    | 0.001515     | 0.000000      |
| 30-34 | 13-72   | 0.000364    | 0.001227     | 0.000000      |
| 35-39 | 13-72   | 0.000000    | 0.001630     | 0.000000      |
| 40-44 | 13-72   | 0.000000    | 0.001852     | 0.000000      |
| 45-49 | 13-72   | 0.000000    | 0.002667     | 0.000000      |
| 50-54 | 13-72   | 0.000000    | 0.003208     | 0.000000      |
| 55-59 | 13-72   | 0.000000    | 0.003978     | 0.000000      |
| 60-64 | 13-72   | 0.000000    | 0.005771     | 0.000000      |
| 65-69 | 13-72   | 0.000000    | 0.010432     | 0.000000      |
| 70-74 | 13-72   | 0.000000    | 0.007079     | 0.000000      |
| 75-79 | 13-72   | 0.000000    | 0.007079     | 0.000000      |
| 10-14 | 73-132  | 0.004312    | 0.008742     | 0.000000      |
| 15-19 | 73-132  | 0.005330    | 0.003289     | 0.000000      |
| 20-24 | 73-132  | 0.002456    | 0.003844     | 0.000000      |
| 25-29 | 73-132  | 0.000839    | 0.002006     | 0.000000      |
| 30-34 | 73-132  | 0.000414    | 0.001329     | 0.000000      |
| 35-39 | 73-132  | 0.000000    | 0.001278     | 0.000000      |
| 40-44 | 73-132  | 0.000000    | 0.001691     | 0.000000      |
| 45-49 | 73-132  | 0.000000    | 0.002904     | 0.000000      |
| 50-54 | 73-132  | 0.000000    | 0.003319     | 0.000000      |
| 55-59 | 73-132  | 0.000000    | 0.003976     | 0.000000      |
| 60-64 | 73-132  | 0.000000    | 0.005235     | 0.000000      |
| 65-69 | 73-132  | 0.000000    | 0.005901     | 0.000000      |
| 70-74 | 73-132  | 0.000000    | 0.005615     | 0.000000      |
| 75-79 | 73-132  | 0.000000    | 0.005615     | 0.000000      |
| 10-14 | 133-192 | 0.003468    | 0.008742     | 0.000000      |
| 15-19 | 133-192 | 0.004675    | 0.003732     | 0.000000      |
| 20-24 | 133-192 | 0.000062    | 0.002260     | 0.000000      |
| 25-29 | 133-192 | 0.001422    | 0.002822     | 0.000000      |
| 30-34 | 133-192 | 0.000696    | 0.002610     | 0.000000      |
| 35-39 | 133-192 | 0.000000    | 0.002058     | 0.000000      |
| 40-44 | 133-192 | 0.000000    | 0.002310     | 0.000000      |
| 45-49 | 133-192 | 0.000000    | 0.002256     | 0.000000      |
| 50-54 | 133-192 | 0.000000    | 0.002663     | 0.000000      |
| 55-59 | 133-192 | 0.000000    | 0.001746     | 0.000000      |
| 60-64 | 133-192 | 0.000000    | 0.005809     | 0.000000      |
| 65-69 | 133-192 | 0.000000    | 0.005896     | 0.000000      |
| 70-74 | 133-192 | 0.000000    | 0.007323     | 0.000000      |
| 75-79 | 133-192 | 0.000000    | 0.007323     | 0.000000      |
| 10-14 | 193-252 | 0.002314    | 0.008742     | 0.000000      |
| 15-19 | 193-252 | 0.003987    | 0.005036     | 0.000000      |
| 20-24 | 193-252 | 0.000320    | 0.002857     | 0.000000      |
| 25-29 | 193-252 | 0.000251    | 0.002314     | 0.000000      |
| 30-34 | 193-252 | 0.000125    | 0.004343     | 0.000000      |
| 35-39 | 193-252 | 0.000000    | 0.002092     | 0.000000      |
| 40-44 | 193-252 | 0.000000    | 0.002566     | 0.000000      |
| 45-49 | 193-252 | 0.000000    | 0.002311     | 0.000000      |
| 50-54 | 193-252 | 0.000000    | 0.003209     | 0.000000      |

### Results for PHIM for Run 5 (Sensitivity\_Analysis\_4.RTF)

|       |         |          |          |          |
|-------|---------|----------|----------|----------|
| 55-59 | 193-252 | 0.000000 | 0.004057 | 0.000000 |
| 60-64 | 193-252 | 0.000000 | 0.007166 | 0.000000 |
| 65-69 | 193-252 | 0.000000 | 0.004281 | 0.000000 |
| 70-74 | 193-252 | 0.000000 | 0.004580 | 0.000000 |
| 75-79 | 193-252 | 0.000000 | 0.004580 | 0.000000 |
| 10-14 | 253+    | 0.001325 | 0.008742 | 0.000000 |
| 15-19 | 253+    | 0.002984 | 0.010602 | 0.000000 |
| 20-24 | 253+    | 0.000452 | 0.004314 | 0.000000 |
| 25-29 | 253+    | 0.000225 | 0.003645 | 0.000000 |
| 30-34 | 253+    | 0.000112 | 0.004512 | 0.000000 |
| 35-39 | 253+    | 0.000000 | 0.002147 | 0.000000 |
| 40-44 | 253+    | 0.000000 | 0.002636 | 0.000000 |
| 45-49 | 253+    | 0.000000 | 0.001051 | 0.000000 |
| 50-54 | 253+    | 0.000000 | 0.002519 | 0.000000 |
| 55-59 | 253+    | 0.000000 | 0.003693 | 0.000000 |
| 60-64 | 253+    | 0.000000 | 0.005888 | 0.000000 |
| 65-69 | 253+    | 0.000000 | 0.004823 | 0.000000 |
| 70-74 | 253+    | 0.000000 | 0.004733 | 0.000000 |
| 75-79 | 253+    | 0.000000 | 0.004733 | 0.000000 |

## Results for PHIM for Run 5 (Sensitivity\_Analysis\_4.RTF)

\*\*\*\*\*

TTP values for Run: 5, Scenario: Ecig

**Variable Parameter**

- 1. Country
  - 2. Sex
  - 3. Assumption Set
- Note:

**Value**

US (United States)  
M (Males)  
S4C  
Period is in Months

| Age   | Period  | Initiation |            | Cessation  |           |             | Re-initiation |           |             |             |
|-------|---------|------------|------------|------------|-----------|-------------|---------------|-----------|-------------|-------------|
|       |         | Never CC   | Never Ecig | Never Dual | CC Former | Ecig Former | Dual Former   | Former CC | Former Ecig | Former Dual |
| 10-14 | 1-12    | 0.001921   | 0.002401   | 0.000000   | 0.008742  | 0.008742    | 0.000000      | 0.000000  | 0.000000    | 0.000000    |
| 15-19 | 1-12    | 0.002360   | 0.002950   | 0.000000   | 0.003614  | 0.003614    | 0.000000      | 0.000000  | 0.000000    | 0.000000    |
| 20-24 | 1-12    | 0.000188   | 0.000235   | 0.000000   | 0.000943  | 0.000943    | 0.000000      | 0.000000  | 0.000000    | 0.000000    |
| 25-29 | 1-12    | 0.000093   | 0.000117   | 0.000000   | 0.001143  | 0.001143    | 0.000000      | 0.000000  | 0.000000    | 0.000000    |
| 30-34 | 1-12    | 0.000047   | 0.000058   | 0.000000   | 0.000871  | 0.000871    | 0.000000      | 0.000000  | 0.000000    | 0.000000    |
| 35-39 | 1-12    | 0.000000   | 0.000000   | 0.000000   | 0.000867  | 0.000867    | 0.000000      | 0.000000  | 0.000000    | 0.000000    |
| 40-44 | 1-12    | 0.000000   | 0.000000   | 0.000000   | 0.001399  | 0.001399    | 0.000000      | 0.000000  | 0.000000    | 0.000000    |
| 45-49 | 1-12    | 0.000000   | 0.000000   | 0.000000   | 0.002033  | 0.002033    | 0.000000      | 0.000000  | 0.000000    | 0.000000    |
| 50-54 | 1-12    | 0.000000   | 0.000000   | 0.000000   | 0.003209  | 0.003209    | 0.000000      | 0.000000  | 0.000000    | 0.000000    |
| 55-59 | 1-12    | 0.000000   | 0.000000   | 0.000000   | 0.003574  | 0.003574    | 0.000000      | 0.000000  | 0.000000    | 0.000000    |
| 60-64 | 1-12    | 0.000000   | 0.000000   | 0.000000   | 0.003460  | 0.003460    | 0.000000      | 0.000000  | 0.000000    | 0.000000    |
| 65-69 | 1-12    | 0.000000   | 0.000000   | 0.000000   | 0.004136  | 0.004136    | 0.000000      | 0.000000  | 0.000000    | 0.000000    |
| 70-74 | 1-12    | 0.000000   | 0.000000   | 0.000000   | 0.005592  | 0.005592    | 0.000000      | 0.000000  | 0.000000    | 0.000000    |
| 75-79 | 1-12    | 0.000000   | 0.000000   | 0.000000   | 0.005592  | 0.005592    | 0.000000      | 0.000000  | 0.000000    | 0.000000    |
| 10-14 | 13-72   | 0.001962   | 0.003680   | 0.000000   | 0.008742  | 0.008742    | 0.000000      | 0.000000  | 0.000000    | 0.000000    |
| 15-19 | 13-72   | 0.002796   | 0.005241   | 0.000000   | 0.004426  | 0.004426    | 0.000000      | 0.000000  | 0.000000    | 0.000000    |
| 20-24 | 13-72   | 0.000275   | 0.000515   | 0.000000   | 0.001527  | 0.001527    | 0.000000      | 0.000000  | 0.000000    | 0.000000    |
| 25-29 | 13-72   | 0.000385   | 0.000722   | 0.000000   | 0.001515  | 0.001515    | 0.000000      | 0.000000  | 0.000000    | 0.000000    |
| 30-34 | 13-72   | 0.000146   | 0.000273   | 0.000000   | 0.001227  | 0.001227    | 0.000000      | 0.000000  | 0.000000    | 0.000000    |
| 35-39 | 13-72   | 0.000000   | 0.000000   | 0.000000   | 0.001630  | 0.001630    | 0.000000      | 0.000000  | 0.000000    | 0.000000    |
| 40-44 | 13-72   | 0.000000   | 0.000000   | 0.000000   | 0.001852  | 0.001852    | 0.000000      | 0.000000  | 0.000000    | 0.000000    |
| 45-49 | 13-72   | 0.000000   | 0.000000   | 0.000000   | 0.002667  | 0.002667    | 0.000000      | 0.000000  | 0.000000    | 0.000000    |
| 50-54 | 13-72   | 0.000000   | 0.000000   | 0.000000   | 0.003208  | 0.003208    | 0.000000      | 0.000000  | 0.000000    | 0.000000    |
| 55-59 | 13-72   | 0.000000   | 0.000000   | 0.000000   | 0.003978  | 0.003978    | 0.000000      | 0.000000  | 0.000000    | 0.000000    |
| 60-64 | 13-72   | 0.000000   | 0.000000   | 0.000000   | 0.005771  | 0.005771    | 0.000000      | 0.000000  | 0.000000    | 0.000000    |
| 65-69 | 13-72   | 0.000000   | 0.000000   | 0.000000   | 0.010432  | 0.010432    | 0.000000      | 0.000000  | 0.000000    | 0.000000    |
| 70-74 | 13-72   | 0.000000   | 0.000000   | 0.000000   | 0.007079  | 0.007079    | 0.000000      | 0.000000  | 0.000000    | 0.000000    |
| 75-79 | 13-72   | 0.000000   | 0.000000   | 0.000000   | 0.007079  | 0.007079    | 0.000000      | 0.000000  | 0.000000    | 0.000000    |
| 10-14 | 73-132  | 0.000862   | 0.004312   | 0.000000   | 0.008742  | 0.008742    | 0.000000      | 0.000000  | 0.000000    | 0.000000    |
| 15-19 | 73-132  | 0.001066   | 0.005330   | 0.000000   | 0.003289  | 0.003289    | 0.000000      | 0.000000  | 0.000000    | 0.000000    |
| 20-24 | 73-132  | 0.000491   | 0.002456   | 0.000000   | 0.003844  | 0.003844    | 0.000000      | 0.000000  | 0.000000    | 0.000000    |
| 25-29 | 73-132  | 0.000168   | 0.000839   | 0.000000   | 0.002006  | 0.002006    | 0.000000      | 0.000000  | 0.000000    | 0.000000    |
| 30-34 | 73-132  | 0.000083   | 0.000414   | 0.000000   | 0.001329  | 0.001329    | 0.000000      | 0.000000  | 0.000000    | 0.000000    |
| 35-39 | 73-132  | 0.000000   | 0.000000   | 0.000000   | 0.001278  | 0.001278    | 0.000000      | 0.000000  | 0.000000    | 0.000000    |
| 40-44 | 73-132  | 0.000000   | 0.000000   | 0.000000   | 0.001691  | 0.001691    | 0.000000      | 0.000000  | 0.000000    | 0.000000    |
| 45-49 | 73-132  | 0.000000   | 0.000000   | 0.000000   | 0.002904  | 0.002904    | 0.000000      | 0.000000  | 0.000000    | 0.000000    |
| 50-54 | 73-132  | 0.000000   | 0.000000   | 0.000000   | 0.003319  | 0.003319    | 0.000000      | 0.000000  | 0.000000    | 0.000000    |
| 55-59 | 73-132  | 0.000000   | 0.000000   | 0.000000   | 0.003976  | 0.003976    | 0.000000      | 0.000000  | 0.000000    | 0.000000    |
| 60-64 | 73-132  | 0.000000   | 0.000000   | 0.000000   | 0.005235  | 0.005235    | 0.000000      | 0.000000  | 0.000000    | 0.000000    |
| 65-69 | 73-132  | 0.000000   | 0.000000   | 0.000000   | 0.005901  | 0.005901    | 0.000000      | 0.000000  | 0.000000    | 0.000000    |
| 70-74 | 73-132  | 0.000000   | 0.000000   | 0.000000   | 0.005615  | 0.005615    | 0.000000      | 0.000000  | 0.000000    | 0.000000    |
| 75-79 | 73-132  | 0.000000   | 0.000000   | 0.000000   | 0.005615  | 0.005615    | 0.000000      | 0.000000  | 0.000000    | 0.000000    |
| 10-14 | 133-192 | 0.000173   | 0.004118   | 0.000000   | 0.008742  | 0.008742    | 0.000000      | 0.000000  | 0.000000    | 0.000000    |
| 15-19 | 133-192 | 0.000234   | 0.005552   | 0.000000   | 0.003732  | 0.003732    | 0.000000      | 0.000000  | 0.000000    | 0.000000    |
| 20-24 | 133-192 | 0.000003   | 0.000074   | 0.000000   | 0.002260  | 0.002260    | 0.000000      | 0.000000  | 0.000000    | 0.000000    |
| 25-29 | 133-192 | 0.000071   | 0.001689   | 0.000000   | 0.002822  | 0.002822    | 0.000000      | 0.000000  | 0.000000    | 0.000000    |
| 30-34 | 133-192 | 0.000035   | 0.000827   | 0.000000   | 0.002610  | 0.002610    | 0.000000      | 0.000000  | 0.000000    | 0.000000    |
| 35-39 | 133-192 | 0.000000   | 0.000000   | 0.000000   | 0.002058  | 0.002058    | 0.000000      | 0.000000  | 0.000000    | 0.000000    |
| 40-44 | 133-192 | 0.000000   | 0.000000   | 0.000000   | 0.002310  | 0.002310    | 0.000000      | 0.000000  | 0.000000    | 0.000000    |
| 45-49 | 133-192 | 0.000000   | 0.000000   | 0.000000   | 0.002256  | 0.002256    | 0.000000      | 0.000000  | 0.000000    | 0.000000    |
| 50-54 | 133-192 | 0.000000   | 0.000000   | 0.000000   | 0.002663  | 0.002663    | 0.000000      | 0.000000  | 0.000000    | 0.000000    |
| 55-59 | 133-192 | 0.000000   | 0.000000   | 0.000000   | 0.001747  | 0.001747    | 0.000000      | 0.000000  | 0.000000    | 0.000000    |
| 60-64 | 133-192 | 0.000000   | 0.000000   | 0.000000   | 0.005809  | 0.005809    | 0.000000      | 0.000000  | 0.000000    | 0.000000    |
| 65-69 | 133-192 | 0.000000   | 0.000000   | 0.000000   | 0.005896  | 0.005896    | 0.000000      | 0.000000  | 0.000000    | 0.000000    |
| 70-74 | 133-192 | 0.000000   | 0.000000   | 0.000000   | 0.007323  | 0.007323    | 0.000000      | 0.000000  | 0.000000    | 0.000000    |
| 75-79 | 133-192 | 0.000000   | 0.000000   | 0.000000   | 0.007323  | 0.007323    | 0.000000      | 0.000000  | 0.000000    | 0.000000    |
| 10-14 | 193-252 | 0.000116   | 0.002748   | 0.000000   | 0.008742  | 0.008742    | 0.000000      | 0.000000  | 0.000000    | 0.000000    |
| 15-19 | 193-252 | 0.000199   | 0.004735   | 0.000000   | 0.005036  | 0.005036    | 0.000000      | 0.000000  | 0.000000    | 0.000000    |
| 20-24 | 193-252 | 0.000016   | 0.000380   | 0.000000   | 0.002857  | 0.002857    | 0.000000      | 0.000000  | 0.000000    | 0.000000    |
| 25-29 | 193-252 | 0.000013   | 0.000298   | 0.000000   | 0.002314  | 0.002314    | 0.000000      | 0.000000  | 0.000000    | 0.000000    |
| 30-34 | 193-252 | 0.000006   | 0.000149   | 0.000000   | 0.004343  | 0.004343    | 0.000000      | 0.000000  | 0.000000    | 0.000000    |
| 35-39 | 193-252 | 0.000000   | 0.000000   | 0.000000   | 0.002092  | 0.002092    | 0.000000      | 0.000000  | 0.000000    | 0.000000    |
| 40-44 | 193-252 | 0.000000   | 0.000000   | 0.000000   | 0.002566  | 0.002566    | 0.000000      | 0.000000  | 0.000000    | 0.000000    |
| 45-49 | 193-252 | 0.000000   | 0.000000   | 0.000000   | 0.002311  | 0.002311    | 0.000000      | 0.000000  | 0.000000    | 0.000000    |
| 50-54 | 193-252 | 0.000000   | 0.000000   | 0.000000   | 0.003209  | 0.003209    | 0.000000      | 0.000000  | 0.000000    | 0.000000    |

### Results for PHIM for Run 5 (Sensitivity\_Analysis\_4.RTF)

|       |         |          |          |          |          |          |          |          |          |          |
|-------|---------|----------|----------|----------|----------|----------|----------|----------|----------|----------|
| 55-59 | 193-252 | 0.000000 | 0.000000 | 0.000000 | 0.004057 | 0.004057 | 0.000000 | 0.000000 | 0.000000 | 0.000000 |
| 60-64 | 193-252 | 0.000000 | 0.000000 | 0.000000 | 0.007166 | 0.007166 | 0.000000 | 0.000000 | 0.000000 | 0.000000 |
| 65-69 | 193-252 | 0.000000 | 0.000000 | 0.000000 | 0.004281 | 0.004281 | 0.000000 | 0.000000 | 0.000000 | 0.000000 |
| 70-74 | 193-252 | 0.000000 | 0.000000 | 0.000000 | 0.004580 | 0.004580 | 0.000000 | 0.000000 | 0.000000 | 0.000000 |
| 75-79 | 193-252 | 0.000000 | 0.000000 | 0.000000 | 0.004580 | 0.004580 | 0.000000 | 0.000000 | 0.000000 | 0.000000 |
| 10-14 | 253+    | 0.000066 | 0.001573 | 0.000000 | 0.008742 | 0.008742 | 0.000000 | 0.000000 | 0.000000 | 0.000000 |
| 15-19 | 253+    | 0.000149 | 0.003544 | 0.000000 | 0.010602 | 0.010602 | 0.000000 | 0.000000 | 0.000000 | 0.000000 |
| 20-24 | 253+    | 0.000023 | 0.000537 | 0.000000 | 0.004314 | 0.004314 | 0.000000 | 0.000000 | 0.000000 | 0.000000 |
| 25-29 | 253+    | 0.000011 | 0.000267 | 0.000000 | 0.003645 | 0.003645 | 0.000000 | 0.000000 | 0.000000 | 0.000000 |
| 30-34 | 253+    | 0.000006 | 0.000133 | 0.000000 | 0.004512 | 0.004512 | 0.000000 | 0.000000 | 0.000000 | 0.000000 |
| 35-39 | 253+    | 0.000000 | 0.000000 | 0.000000 | 0.002147 | 0.002147 | 0.000000 | 0.000000 | 0.000000 | 0.000000 |
| 40-44 | 253+    | 0.000000 | 0.000000 | 0.000000 | 0.002636 | 0.002636 | 0.000000 | 0.000000 | 0.000000 | 0.000000 |
| 45-49 | 253+    | 0.000000 | 0.000000 | 0.000000 | 0.001051 | 0.001051 | 0.000000 | 0.000000 | 0.000000 | 0.000000 |
| 50-54 | 253+    | 0.000000 | 0.000000 | 0.000000 | 0.002519 | 0.002519 | 0.000000 | 0.000000 | 0.000000 | 0.000000 |
| 55-59 | 253+    | 0.000000 | 0.000000 | 0.000000 | 0.003693 | 0.003693 | 0.000000 | 0.000000 | 0.000000 | 0.000000 |
| 60-64 | 253+    | 0.000000 | 0.000000 | 0.000000 | 0.005888 | 0.005888 | 0.000000 | 0.000000 | 0.000000 | 0.000000 |
| 65-69 | 253+    | 0.000000 | 0.000000 | 0.000000 | 0.004823 | 0.004823 | 0.000000 | 0.000000 | 0.000000 | 0.000000 |
| 70-74 | 253+    | 0.000000 | 0.000000 | 0.000000 | 0.004733 | 0.004733 | 0.000000 | 0.000000 | 0.000000 | 0.000000 |
| 75-79 | 253+    | 0.000000 | 0.000000 | 0.000000 | 0.004733 | 0.004733 | 0.000000 | 0.000000 | 0.000000 | 0.000000 |



### Results for PHIM for Run 5 (Sensitivity\_Analysis\_4.RTF)

|       |      |          |          |          |          |          |          |
|-------|------|----------|----------|----------|----------|----------|----------|
| 25-29 | 253+ | 0.015212 | 0.000000 | 0.000000 | 0.000000 | 0.000000 | 0.000000 |
| 30-34 | 253+ | 0.015460 | 0.000000 | 0.000000 | 0.000000 | 0.000000 | 0.000000 |
| 35-39 | 253+ | 0.014711 | 0.000000 | 0.000000 | 0.000000 | 0.000000 | 0.000000 |
| 40-44 | 253+ | 0.014241 | 0.000000 | 0.000000 | 0.000000 | 0.000000 | 0.000000 |
| 45-49 | 253+ | 0.013014 | 0.000000 | 0.000000 | 0.000000 | 0.000000 | 0.000000 |
| 50-54 | 253+ | 0.011768 | 0.000000 | 0.000000 | 0.000000 | 0.000000 | 0.000000 |
| 55-59 | 253+ | 0.011032 | 0.000000 | 0.000000 | 0.000000 | 0.000000 | 0.000000 |
| 60-64 | 253+ | 0.009525 | 0.000000 | 0.000000 | 0.000000 | 0.000000 | 0.000000 |
| 65-69 | 253+ | 0.006897 | 0.000000 | 0.000000 | 0.000000 | 0.000000 | 0.000000 |
| 70-74 | 253+ | 0.005435 | 0.000000 | 0.000000 | 0.000000 | 0.000000 | 0.000000 |
| 75-79 | 253+ | 0.005435 | 0.000000 | 0.000000 | 0.000000 | 0.000000 | 0.000000 |



## Results for PHIM for Run 5 (Sensitivity\_Analysis\_4.RTF)

\*\*\*\*\*

### Main Output for the Tobacco History for Run: 5, Simulation: 1, Scenario: NULL

| Variable Parameter          | Value              |
|-----------------------------|--------------------|
| 1. Country                  | US (United States) |
| 2. Sex                      | M (Males)          |
| 3. Year of start of process | 1990               |

Year of Follow-up: 2040, Age Group: All Ages  
 Period    Age Group    Smoking Group            N            %

|    |          |           |       |       |
|----|----------|-----------|-------|-------|
| 50 | All Ages | Never Any | 19445 | 50.68 |
| 50 | All Ages | CC        | 3024  | 7.88  |
| 50 | All Ages | Former    | 15896 | 41.43 |

Year of Follow-up: 2040, Age Group: 18-19  
 Period    Age Group    Smoking Group            N            %

|    |       |           |   |   |
|----|-------|-----------|---|---|
| 50 | 18-19 | Never Any | 0 | . |
| 50 | 18-19 | CC        | 0 | . |
| 50 | 18-19 | Former    | 0 | . |

Year of Follow-up: 2040, Age Group: 20-24  
 Period    Age Group    Smoking Group            N            %

|    |       |           |   |   |
|----|-------|-----------|---|---|
| 50 | 20-24 | Never Any | 0 | . |
| 50 | 20-24 | CC        | 0 | . |
| 50 | 20-24 | Former    | 0 | . |

Year of Follow-up: 2040, Age Group: 25-29  
 Period    Age Group    Smoking Group            N            %

|    |       |           |   |   |
|----|-------|-----------|---|---|
| 50 | 25-29 | Never Any | 0 | . |
| 50 | 25-29 | CC        | 0 | . |
| 50 | 25-29 | Former    | 0 | . |

Year of Follow-up: 2040, Age Group: 30-34  
 Period    Age Group    Smoking Group            N            %

|    |       |           |   |   |
|----|-------|-----------|---|---|
| 50 | 30-34 | Never Any | 0 | . |
| 50 | 30-34 | CC        | 0 | . |
| 50 | 30-34 | Former    | 0 | . |

Year of Follow-up: 2040, Age Group: 35-39  
 Period    Age Group    Smoking Group            N            %

|    |       |           |   |   |
|----|-------|-----------|---|---|
| 50 | 35-39 | Never Any | 0 | . |
| 50 | 35-39 | CC        | 0 | . |
| 50 | 35-39 | Former    | 0 | . |

Year of Follow-up: 2040, Age Group: 40-44  
 Period    Age Group    Smoking Group            N            %

|    |       |           |   |   |
|----|-------|-----------|---|---|
| 50 | 40-44 | Never Any | 0 | . |
| 50 | 40-44 | CC        | 0 | . |
| 50 | 40-44 | Former    | 0 | . |

Year of Follow-up: 2040, Age Group: 45-49  
 Period    Age Group    Smoking Group            N            %

|    |       |           |   |   |
|----|-------|-----------|---|---|
| 50 | 45-49 | Never Any | 0 | . |
| 50 | 45-49 | CC        | 0 | . |
| 50 | 45-49 | Former    | 0 | . |

Year of Follow-up: 2040, Age Group: 50-54  
 Period    Age Group    Smoking Group            N            %

|    |       |           |   |   |
|----|-------|-----------|---|---|
| 50 | 50-54 | Never Any | 0 | . |
| 50 | 50-54 | CC        | 0 | . |
| 50 | 50-54 | Former    | 0 | . |

Year of Follow-up: 2040, Age Group: 55-59  
 Period    Age Group    Smoking Group            N            %

|    |       |           |   |   |
|----|-------|-----------|---|---|
| 50 | 55-59 | Never Any | 0 | . |
| 50 | 55-59 | CC        | 0 | . |
| 50 | 55-59 | Former    | 0 | . |

Year of Follow-up: 2040, Age Group: 60-64  
 Period    Age Group    Smoking Group            N            %

### Results for PHIM for Run 5 (Sensitivity\_Analysis\_4.RTF)

|                                           |           |               |      |       |
|-------------------------------------------|-----------|---------------|------|-------|
| 50                                        | 60-64     | Never Any     | 4363 | 49.33 |
| 50                                        | 60-64     | CC            | 934  | 10.56 |
| 50                                        | 60-64     | Former        | 3548 | 40.11 |
| Year of Follow-up: 2040, Age Group: 65-69 |           |               |      |       |
| Period                                    | Age Group | Smoking Group | N    | %     |
| 50                                        | 65-69     | Never Any     | 4948 | 54.73 |
| 50                                        | 65-69     | CC            | 734  | 8.12  |
| 50                                        | 65-69     | Former        | 3358 | 37.15 |
| Year of Follow-up: 2040, Age Group: 70-74 |           |               |      |       |
| Period                                    | Age Group | Smoking Group | N    | %     |
| 50                                        | 70-74     | Never Any     | 5145 | 52.41 |
| 50                                        | 70-74     | CC            | 688  | 7.01  |
| 50                                        | 70-74     | Former        | 3983 | 40.58 |
| Year of Follow-up: 2040, Age Group: 75-79 |           |               |      |       |
| Period                                    | Age Group | Smoking Group | N    | %     |
| 50                                        | 75-79     | Never Any     | 4989 | 46.78 |
| 50                                        | 75-79     | CC            | 668  | 6.26  |
| 50                                        | 75-79     | Former        | 5007 | 46.95 |

## Results for PHIM for Run 5 (Sensitivity\_Analysis\_4.RTF)

\*\*\*\*\*

### Main Output for the Tobacco History for Run: 5, Simulation: 1, Scenario: Ecig

| Variable Parameter                           |           | Value              |       |       |               |             |               |                |              |
|----------------------------------------------|-----------|--------------------|-------|-------|---------------|-------------|---------------|----------------|--------------|
| 1. Country                                   |           | US (United States) |       |       |               |             |               |                |              |
| 2. Sex                                       |           | M (Males)          |       |       |               |             |               |                |              |
| 3. Year of start of process                  |           | 1990               |       |       |               |             |               |                |              |
| Year of Follow-up: 1990, Age Group: All Ages |           |                    |       |       |               |             |               |                |              |
| Period                                       | Age Group | Smoking Group      | N     | %     | Ever Quit (N) | Ever Quit % | Mean Yrs Quit | Short Term (n) | Short Term % |
| 0                                            | All Ages  | Never Any          | 34075 | 39.78 |               |             |               |                |              |
| 0                                            | All Ages  | CC                 | 27323 | 31.90 | 0             | 0.00        |               |                |              |
| 0                                            | All Ages  | Ecig               | 0     | 0.00  |               |             |               |                |              |
| 0                                            | All Ages  | Dual               | 0     | 0.00  |               |             |               |                |              |
| 0                                            | All Ages  | Former             | 24266 | 28.33 |               |             | 13.08         | 3623           | 14.93        |
| Year of Follow-up: 1990, Age Group: 18-19    |           |                    |       |       |               |             |               |                |              |
| Period                                       | Age Group | Smoking Group      | N     | %     | Ever Quit (N) | Ever Quit % | Mean Yrs Quit | Short Term (n) | Short Term % |
| 0                                            | 18-19     | Never Any          | 2783  | 78.42 |               |             |               |                |              |
| 0                                            | 18-19     | CC                 | 634   | 17.86 | 0             | 0.00        |               |                |              |
| 0                                            | 18-19     | Ecig               | 0     | 0.00  |               |             |               |                |              |
| 0                                            | 18-19     | Dual               | 0     | 0.00  |               |             |               |                |              |
| 0                                            | 18-19     | Former             | 132   | 3.72  |               |             | 0.11          | 132            | 100.00       |
| Year of Follow-up: 1990, Age Group: 20-24    |           |                    |       |       |               |             |               |                |              |
| Period                                       | Age Group | Smoking Group      | N     | %     | Ever Quit (N) | Ever Quit % | Mean Yrs Quit | Short Term (n) | Short Term % |
| 0                                            | 20-24     | Never Any          | 5722  | 58.29 |               |             |               |                |              |
| 0                                            | 20-24     | CC                 | 3199  | 32.59 | 0             | 0.00        |               |                |              |
| 0                                            | 20-24     | Ecig               | 0     | 0.00  |               |             |               |                |              |
| 0                                            | 20-24     | Dual               | 0     | 0.00  |               |             |               |                |              |
| 0                                            | 20-24     | Former             | 895   | 9.12  |               |             | 1.46          | 506            | 56.54        |
| Year of Follow-up: 1990, Age Group: 25-29    |           |                    |       |       |               |             |               |                |              |
| Period                                       | Age Group | Smoking Group      | N     | %     | Ever Quit (N) | Ever Quit % | Mean Yrs Quit | Short Term (n) | Short Term % |
| 0                                            | 25-29     | Never Any          | 5232  | 49.06 |               |             |               |                |              |
| 0                                            | 25-29     | CC                 | 3914  | 36.70 | 0             | 0.00        |               |                |              |
| 0                                            | 25-29     | Ecig               | 0     | 0.00  |               |             |               |                |              |
| 0                                            | 25-29     | Dual               | 0     | 0.00  |               |             |               |                |              |
| 0                                            | 25-29     | Former             | 1518  | 14.23 |               |             | 2.87          | 643            | 42.36        |
| Year of Follow-up: 1990, Age Group: 30-34    |           |                    |       |       |               |             |               |                |              |
| Period                                       | Age Group | Smoking Group      | N     | %     | Ever Quit (N) | Ever Quit % | Mean Yrs Quit | Short Term (n) | Short Term % |
| 0                                            | 30-34     | Never Any          | 4765  | 43.65 |               |             |               |                |              |
| 0                                            | 30-34     | CC                 | 4023  | 36.85 | 0             | 0.00        |               |                |              |
| 0                                            | 30-34     | Ecig               | 0     | 0.00  |               |             |               |                |              |
| 0                                            | 30-34     | Dual               | 0     | 0.00  |               |             |               |                |              |
| 0                                            | 30-34     | Former             | 2128  | 19.49 |               |             | 4.06          | 592            | 27.82        |
| Year of Follow-up: 1990, Age Group: 35-39    |           |                    |       |       |               |             |               |                |              |
| Period                                       | Age Group | Smoking Group      | N     | %     | Ever Quit (N) | Ever Quit % | Mean Yrs Quit | Short Term (n) | Short Term % |
| 0                                            | 35-39     | Never Any          | 3941  | 39.85 |               |             |               |                |              |
| 0                                            | 35-39     | CC                 | 3474  | 35.13 | 0             | 0.00        |               |                |              |
| 0                                            | 35-39     | Ecig               | 0     | 0.00  |               |             |               |                |              |
| 0                                            | 35-39     | Dual               | 0     | 0.00  |               |             |               |                |              |
| 0                                            | 35-39     | Former             | 2474  | 25.02 |               |             | 8.31          | 425            | 17.18        |
| Year of Follow-up: 1990, Age Group: 40-44    |           |                    |       |       |               |             |               |                |              |
| Period                                       | Age Group | Smoking Group      | N     | %     | Ever Quit (N) | Ever Quit % | Mean Yrs Quit | Short Term (n) | Short Term % |
| 0                                            | 40-44     | Never Any          | 2912  | 33.65 |               |             |               |                |              |
| 0                                            | 40-44     | CC                 | 3113  | 35.97 | 0             | 0.00        |               |                |              |
| 0                                            | 40-44     | Ecig               | 0     | 0.00  |               |             |               |                |              |
| 0                                            | 40-44     | Dual               | 0     | 0.00  |               |             |               |                |              |
| 0                                            | 40-44     | Former             | 2630  | 30.39 |               |             | 10.69         | 317            | 12.05        |
| Year of Follow-up: 1990, Age Group: 45-49    |           |                    |       |       |               |             |               |                |              |
| Period                                       | Age Group | Smoking Group      | N     | %     | Ever Quit (N) | Ever Quit % | Mean Yrs Quit | Short Term (n) | Short Term % |
| 0                                            | 45-49     | Never Any          | 1919  | 29.46 |               |             |               |                |              |
| 0                                            | 45-49     | CC                 | 2318  | 35.58 | 0             | 0.00        |               |                |              |
| 0                                            | 45-49     | Ecig               | 0     | 0.00  |               |             |               |                |              |
| 0                                            | 45-49     | Dual               | 0     | 0.00  |               |             |               |                |              |
| 0                                            | 45-49     | Former             | 2278  | 34.97 |               |             | 13.26         | 221            | 9.70         |
| Year of Follow-up: 1990, Age Group: 50-54    |           |                    |       |       |               |             |               |                |              |
| Period                                       | Age Group | Smoking Group      | N     | %     | Ever Quit (N) | Ever Quit % | Mean Yrs Quit | Short Term (n) | Short Term % |
| 0                                            | 50-54     | Never Any          | 1611  | 29.41 |               |             |               |                |              |
| 0                                            | 50-54     | CC                 | 1816  | 33.16 | 0             | 0.00        |               |                |              |

**Results for PHIM for Run 5 (Sensitivity\_Analysis\_4.RTF)**

|                                              |           |               |       |       |               |             |               |                |              |
|----------------------------------------------|-----------|---------------|-------|-------|---------------|-------------|---------------|----------------|--------------|
| 0                                            | 50-54     | Ecig          | 0     | 0.00  |               |             |               |                |              |
| 0                                            | 50-54     | Dual          | 0     | 0.00  |               |             |               |                |              |
| 0                                            | 50-54     | Former        | 2050  | 37.43 |               |             | 14.55         | 261            | 12.73        |
| Year of Follow-up: 1990, Age Group: 55-59    |           |               |       |       |               |             |               |                |              |
| Period                                       | Age Group | Smoking Group | N     | %     | Ever Quit (N) | Ever Quit % | Mean Yrs Quit | Short Term (n) | Short Term % |
| 0                                            | 55-59     | Never Any     | 1337  | 26.83 |               |             |               |                |              |
| 0                                            | 55-59     | CC            | 1520  | 30.50 | 0             | 0.00        |               |                |              |
| 0                                            | 55-59     | Ecig          | 0     | 0.00  |               |             |               |                |              |
| 0                                            | 55-59     | Dual          | 0     | 0.00  |               |             |               |                |              |
| 0                                            | 55-59     | Former        | 2126  | 42.67 |               |             | 14.80         | 216            | 10.16        |
| Year of Follow-up: 1990, Age Group: 60-64    |           |               |       |       |               |             |               |                |              |
| Period                                       | Age Group | Smoking Group | N     | %     | Ever Quit (N) | Ever Quit % | Mean Yrs Quit | Short Term (n) | Short Term % |
| 0                                            | 60-64     | Never Any     | 1169  | 23.83 |               |             |               |                |              |
| 0                                            | 60-64     | CC            | 1287  | 26.24 | 0             | 0.00        |               |                |              |
| 0                                            | 60-64     | Ecig          | 0     | 0.00  |               |             |               |                |              |
| 0                                            | 60-64     | Dual          | 0     | 0.00  |               |             |               |                |              |
| 0                                            | 60-64     | Former        | 2449  | 49.93 |               |             | 18.87         | 106            | 4.33         |
| Year of Follow-up: 1990, Age Group: 65-69    |           |               |       |       |               |             |               |                |              |
| Period                                       | Age Group | Smoking Group | N     | %     | Ever Quit (N) | Ever Quit % | Mean Yrs Quit | Short Term (n) | Short Term % |
| 0                                            | 65-69     | Never Any     | 1023  | 23.32 |               |             |               |                |              |
| 0                                            | 65-69     | CC            | 979   | 22.32 | 0             | 0.00        |               |                |              |
| 0                                            | 65-69     | Ecig          | 0     | 0.00  |               |             |               |                |              |
| 0                                            | 65-69     | Dual          | 0     | 0.00  |               |             |               |                |              |
| 0                                            | 65-69     | Former        | 2385  | 54.37 |               |             | 19.91         | 113            | 4.74         |
| Year of Follow-up: 1990, Age Group: 70-74    |           |               |       |       |               |             |               |                |              |
| Period                                       | Age Group | Smoking Group | N     | %     | Ever Quit (N) | Ever Quit % | Mean Yrs Quit | Short Term (n) | Short Term % |
| 0                                            | 70-74     | Never Any     | 961   | 27.46 |               |             |               |                |              |
| 0                                            | 70-74     | CC            | 675   | 19.29 | 0             | 0.00        |               |                |              |
| 0                                            | 70-74     | Ecig          | 0     | 0.00  |               |             |               |                |              |
| 0                                            | 70-74     | Dual          | 0     | 0.00  |               |             |               |                |              |
| 0                                            | 70-74     | Former        | 1863  | 53.24 |               |             | 20.69         | 23             | 1.23         |
| Year of Follow-up: 1990, Age Group: 75-79    |           |               |       |       |               |             |               |                |              |
| Period                                       | Age Group | Smoking Group | N     | %     | Ever Quit (N) | Ever Quit % | Mean Yrs Quit | Short Term (n) | Short Term % |
| 0                                            | 75-79     | Never Any     | 700   | 29.06 |               |             |               |                |              |
| 0                                            | 75-79     | CC            | 371   | 15.40 | 0             | 0.00        |               |                |              |
| 0                                            | 75-79     | Ecig          | 0     | 0.00  |               |             |               |                |              |
| 0                                            | 75-79     | Dual          | 0     | 0.00  |               |             |               |                |              |
| 0                                            | 75-79     | Former        | 1338  | 55.54 |               |             | 22.88         | 68             | 5.08         |
| Year of Follow-up: 1995, Age Group: All Ages |           |               |       |       |               |             |               |                |              |
| Period                                       | Age Group | Smoking Group | N     | %     | Ever Quit (N) | Ever Quit % | Mean Yrs Quit | Short Term (n) | Short Term % |
| 5                                            | All Ages  | Never Any     | 38001 | 41.18 |               |             |               |                |              |
| 5                                            | All Ages  | CC            | 11489 | 12.45 | 0             | 0.00        |               |                |              |
| 5                                            | All Ages  | Ecig          | 15868 | 17.19 |               |             |               |                |              |
| 5                                            | All Ages  | Dual          | 0     | 0.00  |               |             |               |                |              |
| 5                                            | All Ages  | Former        | 26932 | 29.18 |               |             | 15.18         | 1728           | 6.42         |
| Year of Follow-up: 1995, Age Group: 18-19    |           |               |       |       |               |             |               |                |              |
| Period                                       | Age Group | Smoking Group | N     | %     | Ever Quit (N) | Ever Quit % | Mean Yrs Quit | Short Term (n) | Short Term % |
| 5                                            | 18-19     | Never Any     | 2333  | 65.83 |               |             |               |                |              |
| 5                                            | 18-19     | CC            | 308   | 8.69  | 0             | 0.00        |               |                |              |
| 5                                            | 18-19     | Ecig          | 773   | 21.81 |               |             |               |                |              |
| 5                                            | 18-19     | Dual          | 0     | 0.00  |               |             |               |                |              |
| 5                                            | 18-19     | Former        | 130   | 3.67  |               |             | 1.10          | 90             | 69.23        |
| Year of Follow-up: 1995, Age Group: 20-24    |           |               |       |       |               |             |               |                |              |
| Period                                       | Age Group | Smoking Group | N     | %     | Ever Quit (N) | Ever Quit % | Mean Yrs Quit | Short Term (n) | Short Term % |
| 5                                            | 20-24     | Never Any     | 5603  | 61.98 |               |             |               |                |              |
| 5                                            | 20-24     | CC            | 939   | 10.39 | 0             | 0.00        |               |                |              |
| 5                                            | 20-24     | Ecig          | 1999  | 22.11 |               |             |               |                |              |
| 5                                            | 20-24     | Dual          | 0     | 0.00  |               |             |               |                |              |
| 5                                            | 20-24     | Former        | 499   | 5.52  |               |             | 2.77          | 151            | 30.26        |
| Year of Follow-up: 1995, Age Group: 25-29    |           |               |       |       |               |             |               |                |              |
| Period                                       | Age Group | Smoking Group | N     | %     | Ever Quit (N) | Ever Quit % | Mean Yrs Quit | Short Term (n) | Short Term % |
| 5                                            | 25-29     | Never Any     | 5433  | 55.35 |               |             |               |                |              |
| 5                                            | 25-29     | CC            | 1255  | 12.79 | 0             | 0.00        |               |                |              |
| 5                                            | 25-29     | Ecig          | 1979  | 20.16 |               |             |               |                |              |
| 5                                            | 25-29     | Dual          | 0     | 0.00  |               |             |               |                |              |
| 5                                            | 25-29     | Former        | 1149  | 11.71 |               |             | 5.43          | 116            | 10.10        |
| Year of Follow-up: 1995, Age Group: 30-34    |           |               |       |       |               |             |               |                |              |
| Period                                       | Age Group | Smoking Group | N     | %     | Ever Quit (N) | Ever Quit % | Mean Yrs Quit | Short Term (n) | Short Term % |

**Results for PHIM for Run 5 (Sensitivity\_Analysis\_4.RTF)**

|                                              |           |               |      |       |               |             |               |                |              |
|----------------------------------------------|-----------|---------------|------|-------|---------------|-------------|---------------|----------------|--------------|
| 5                                            | 30-34     | Never Any     | 5042 | 47.28 |               |             |               |                |              |
| 5                                            | 30-34     | CC            | 1480 | 13.88 | 0             | 0.00        |               |                |              |
| 5                                            | 30-34     | Ecig          | 2340 | 21.94 |               |             |               |                |              |
| 5                                            | 30-34     | Dual          | 0    | 0.00  |               |             |               |                |              |
| 5                                            | 30-34     | Former        | 1802 | 16.90 |               |             | 6.94          | 108            | 5.99         |
| Year of Follow-up: 1995, Age Group: 35-39    |           |               |      |       |               |             |               |                |              |
| Period                                       | Age Group | Smoking Group | N    | %     | Ever Quit (N) | Ever Quit % | Mean Yrs Quit | Short Term (n) | Short Term % |
| 5                                            | 35-39     | Never Any     | 4717 | 43.21 |               |             |               |                |              |
| 5                                            | 35-39     | CC            | 1496 | 13.70 | 0             | 0.00        |               |                |              |
| 5                                            | 35-39     | Ecig          | 2281 | 20.90 |               |             |               |                |              |
| 5                                            | 35-39     | Dual          | 0    | 0.00  |               |             |               |                |              |
| 5                                            | 35-39     | Former        | 2422 | 22.19 |               |             | 8.20          | 115            | 4.75         |
| Year of Follow-up: 1995, Age Group: 40-44    |           |               |      |       |               |             |               |                |              |
| Period                                       | Age Group | Smoking Group | N    | %     | Ever Quit (N) | Ever Quit % | Mean Yrs Quit | Short Term (n) | Short Term % |
| 5                                            | 40-44     | Never Any     | 3941 | 39.85 |               |             |               |                |              |
| 5                                            | 40-44     | CC            | 1280 | 12.94 | 0             | 0.00        |               |                |              |
| 5                                            | 40-44     | Ecig          | 1894 | 19.15 |               |             |               |                |              |
| 5                                            | 40-44     | Dual          | 0    | 0.00  |               |             |               |                |              |
| 5                                            | 40-44     | Former        | 2774 | 28.05 |               |             | 12.06         | 130            | 4.69         |
| Year of Follow-up: 1995, Age Group: 45-49    |           |               |      |       |               |             |               |                |              |
| Period                                       | Age Group | Smoking Group | N    | %     | Ever Quit (N) | Ever Quit % | Mean Yrs Quit | Short Term (n) | Short Term % |
| 5                                            | 45-49     | Never Any     | 2912 | 33.65 |               |             |               |                |              |
| 5                                            | 45-49     | CC            | 1236 | 14.28 | 0             | 0.00        |               |                |              |
| 5                                            | 45-49     | Ecig          | 1562 | 18.05 |               |             |               |                |              |
| 5                                            | 45-49     | Dual          | 0    | 0.00  |               |             |               |                |              |
| 5                                            | 45-49     | Former        | 2945 | 34.03 |               |             | 14.20         | 148            | 5.03         |
| Year of Follow-up: 1995, Age Group: 50-54    |           |               |      |       |               |             |               |                |              |
| Period                                       | Age Group | Smoking Group | N    | %     | Ever Quit (N) | Ever Quit % | Mean Yrs Quit | Short Term (n) | Short Term % |
| 5                                            | 50-54     | Never Any     | 1919 | 29.46 |               |             |               |                |              |
| 5                                            | 50-54     | CC            | 940  | 14.43 | 0             | 0.00        |               |                |              |
| 5                                            | 50-54     | Ecig          | 1015 | 15.58 |               |             |               |                |              |
| 5                                            | 50-54     | Dual          | 0    | 0.00  |               |             |               |                |              |
| 5                                            | 50-54     | Former        | 2641 | 40.54 |               |             | 15.98         | 175            | 6.63         |
| Year of Follow-up: 1995, Age Group: 55-59    |           |               |      |       |               |             |               |                |              |
| Period                                       | Age Group | Smoking Group | N    | %     | Ever Quit (N) | Ever Quit % | Mean Yrs Quit | Short Term (n) | Short Term % |
| 5                                            | 55-59     | Never Any     | 1611 | 29.41 |               |             |               |                |              |
| 5                                            | 55-59     | CC            | 740  | 13.51 | 0             | 0.00        |               |                |              |
| 5                                            | 55-59     | Ecig          | 762  | 13.91 |               |             |               |                |              |
| 5                                            | 55-59     | Dual          | 0    | 0.00  |               |             |               |                |              |
| 5                                            | 55-59     | Former        | 2364 | 43.16 |               |             | 17.21         | 122            | 5.16         |
| Year of Follow-up: 1995, Age Group: 60-64    |           |               |      |       |               |             |               |                |              |
| Period                                       | Age Group | Smoking Group | N    | %     | Ever Quit (N) | Ever Quit % | Mean Yrs Quit | Short Term (n) | Short Term % |
| 5                                            | 60-64     | Never Any     | 1337 | 26.83 |               |             |               |                |              |
| 5                                            | 60-64     | CC            | 597  | 11.98 | 0             | 0.00        |               |                |              |
| 5                                            | 60-64     | Ecig          | 572  | 11.48 |               |             |               |                |              |
| 5                                            | 60-64     | Dual          | 0    | 0.00  |               |             |               |                |              |
| 5                                            | 60-64     | Former        | 2477 | 49.71 |               |             | 17.27         | 143            | 5.77         |
| Year of Follow-up: 1995, Age Group: 65-69    |           |               |      |       |               |             |               |                |              |
| Period                                       | Age Group | Smoking Group | N    | %     | Ever Quit (N) | Ever Quit % | Mean Yrs Quit | Short Term (n) | Short Term % |
| 5                                            | 65-69     | Never Any     | 1169 | 23.83 |               |             |               |                |              |
| 5                                            | 65-69     | CC            | 477  | 9.72  | 0             | 0.00        |               |                |              |
| 5                                            | 65-69     | Ecig          | 360  | 7.34  |               |             |               |                |              |
| 5                                            | 65-69     | Dual          | 0    | 0.00  |               |             |               |                |              |
| 5                                            | 65-69     | Former        | 2899 | 59.10 |               |             | 20.44         | 196            | 6.76         |
| Year of Follow-up: 1995, Age Group: 70-74    |           |               |      |       |               |             |               |                |              |
| Period                                       | Age Group | Smoking Group | N    | %     | Ever Quit (N) | Ever Quit % | Mean Yrs Quit | Short Term (n) | Short Term % |
| 5                                            | 70-74     | Never Any     | 1023 | 23.32 |               |             |               |                |              |
| 5                                            | 70-74     | CC            | 438  | 9.98  | 0             | 0.00        |               |                |              |
| 5                                            | 70-74     | Ecig          | 196  | 4.47  |               |             |               |                |              |
| 5                                            | 70-74     | Dual          | 0    | 0.00  |               |             |               |                |              |
| 5                                            | 70-74     | Former        | 2730 | 62.23 |               |             | 22.00         | 137            | 5.02         |
| Year of Follow-up: 1995, Age Group: 75-79    |           |               |      |       |               |             |               |                |              |
| Period                                       | Age Group | Smoking Group | N    | %     | Ever Quit (N) | Ever Quit % | Mean Yrs Quit | Short Term (n) | Short Term % |
| 5                                            | 75-79     | Never Any     | 961  | 27.46 |               |             |               |                |              |
| 5                                            | 75-79     | CC            | 303  | 8.66  | 0             | 0.00        |               |                |              |
| 5                                            | 75-79     | Ecig          | 135  | 3.86  |               |             |               |                |              |
| 5                                            | 75-79     | Dual          | 0    | 0.00  |               |             |               |                |              |
| 5                                            | 75-79     | Former        | 2100 | 60.02 |               |             | 23.02         | 97             | 4.62         |
| Year of Follow-up: 2000, Age Group: All Ages |           |               |      |       |               |             |               |                |              |

**Results for PHIM for Run 5 (Sensitivity\_Analysis\_4.RTF)**

| Period                                    | Age Group | Smoking Group | N     | %     | Ever Quit (N) | Ever Quit % | Mean Yrs Quit | Short Term (n) | Short Term % |
|-------------------------------------------|-----------|---------------|-------|-------|---------------|-------------|---------------|----------------|--------------|
| 10                                        | All Ages  | Never Any     | 38335 | 40.74 |               |             |               |                |              |
| 10                                        | All Ages  | CC            | 4811  | 5.11  | 0             | 0.00        |               |                |              |
| 10                                        | All Ages  | Ecig          | 21438 | 22.78 |               |             |               |                |              |
| 10                                        | All Ages  | Dual          | 0     | 0.00  |               |             |               |                |              |
| 10                                        | All Ages  | Former        | 29508 | 31.36 |               |             | 16.77         | 1763           | 5.97         |
| Year of Follow-up: 2000, Age Group: 18-19 |           |               |       |       |               |             |               |                |              |
| Period                                    | Age Group | Smoking Group | N     | %     | Ever Quit (N) | Ever Quit % | Mean Yrs Quit | Short Term (n) | Short Term % |
| 10                                        | 18-19     | Never Any     | 0     | .     |               |             |               |                |              |
| 10                                        | 18-19     | CC            | 0     | .     | 0             | .           |               |                |              |
| 10                                        | 18-19     | Ecig          | 0     | .     |               |             |               |                |              |
| 10                                        | 18-19     | Dual          | 0     | .     |               |             |               |                |              |
| 10                                        | 18-19     | Former        | 0     | .     |               |             |               | 0              | .            |
| Year of Follow-up: 2000, Age Group: 20-24 |           |               |       |       |               |             |               |                |              |
| Period                                    | Age Group | Smoking Group | N     | %     | Ever Quit (N) | Ever Quit % | Mean Yrs Quit | Short Term (n) | Short Term % |
| 10                                        | 20-24     | Never Any     | 4465  | 50.48 |               |             |               |                |              |
| 10                                        | 20-24     | CC            | 437   | 4.94  | 0             | 0.00        |               |                |              |
| 10                                        | 20-24     | Ecig          | 2930  | 33.13 |               |             |               |                |              |
| 10                                        | 20-24     | Dual          | 0     | 0.00  |               |             |               |                |              |
| 10                                        | 20-24     | Former        | 1013  | 11.45 |               |             | 3.43          | 280            | 27.64        |
| Year of Follow-up: 2000, Age Group: 25-29 |           |               |       |       |               |             |               |                |              |
| Period                                    | Age Group | Smoking Group | N     | %     | Ever Quit (N) | Ever Quit % | Mean Yrs Quit | Short Term (n) | Short Term % |
| 10                                        | 25-29     | Never Any     | 5093  | 56.34 |               |             |               |                |              |
| 10                                        | 25-29     | CC            | 397   | 4.39  | 0             | 0.00        |               |                |              |
| 10                                        | 25-29     | Ecig          | 2572  | 28.45 |               |             |               |                |              |
| 10                                        | 25-29     | Dual          | 0     | 0.00  |               |             |               |                |              |
| 10                                        | 25-29     | Former        | 978   | 10.82 |               |             | 4.87          | 202            | 20.65        |
| Year of Follow-up: 2000, Age Group: 30-34 |           |               |       |       |               |             |               |                |              |
| Period                                    | Age Group | Smoking Group | N     | %     | Ever Quit (N) | Ever Quit % | Mean Yrs Quit | Short Term (n) | Short Term % |
| 10                                        | 30-34     | Never Any     | 5186  | 52.83 |               |             |               |                |              |
| 10                                        | 30-34     | CC            | 481   | 4.90  | 0             | 0.00        |               |                |              |
| 10                                        | 30-34     | Ecig          | 2688  | 27.38 |               |             |               |                |              |
| 10                                        | 30-34     | Dual          | 0     | 0.00  |               |             |               |                |              |
| 10                                        | 30-34     | Former        | 1461  | 14.88 |               |             | 8.61          | 124            | 8.49         |
| Year of Follow-up: 2000, Age Group: 35-39 |           |               |       |       |               |             |               |                |              |
| Period                                    | Age Group | Smoking Group | N     | %     | Ever Quit (N) | Ever Quit % | Mean Yrs Quit | Short Term (n) | Short Term % |
| 10                                        | 35-39     | Never Any     | 4962  | 46.53 |               |             |               |                |              |
| 10                                        | 35-39     | CC            | 609   | 5.71  | 0             | 0.00        |               |                |              |
| 10                                        | 35-39     | Ecig          | 3011  | 28.24 |               |             |               |                |              |
| 10                                        | 35-39     | Dual          | 0     | 0.00  |               |             |               |                |              |
| 10                                        | 35-39     | Former        | 2082  | 19.52 |               |             | 10.59         | 111            | 5.33         |
| Year of Follow-up: 2000, Age Group: 40-44 |           |               |       |       |               |             |               |                |              |
| Period                                    | Age Group | Smoking Group | N     | %     | Ever Quit (N) | Ever Quit % | Mean Yrs Quit | Short Term (n) | Short Term % |
| 10                                        | 40-44     | Never Any     | 4717  | 43.21 |               |             |               |                |              |
| 10                                        | 40-44     | CC            | 567   | 5.19  | 0             | 0.00        |               |                |              |
| 10                                        | 40-44     | Ecig          | 2861  | 26.21 |               |             |               |                |              |
| 10                                        | 40-44     | Dual          | 0     | 0.00  |               |             |               |                |              |
| 10                                        | 40-44     | Former        | 2771  | 25.38 |               |             | 11.81         | 126            | 4.55         |
| Year of Follow-up: 2000, Age Group: 45-49 |           |               |       |       |               |             |               |                |              |
| Period                                    | Age Group | Smoking Group | N     | %     | Ever Quit (N) | Ever Quit % | Mean Yrs Quit | Short Term (n) | Short Term % |
| 10                                        | 45-49     | Never Any     | 3941  | 39.85 |               |             |               |                |              |
| 10                                        | 45-49     | CC            | 484   | 4.89  | 0             | 0.00        |               |                |              |
| 10                                        | 45-49     | Ecig          | 2312  | 23.38 |               |             |               |                |              |
| 10                                        | 45-49     | Dual          | 0     | 0.00  |               |             |               |                |              |
| 10                                        | 45-49     | Former        | 3152  | 31.87 |               |             | 15.25         | 163            | 5.17         |
| Year of Follow-up: 2000, Age Group: 50-54 |           |               |       |       |               |             |               |                |              |
| Period                                    | Age Group | Smoking Group | N     | %     | Ever Quit (N) | Ever Quit % | Mean Yrs Quit | Short Term (n) | Short Term % |
| 10                                        | 50-54     | Never Any     | 2912  | 33.65 |               |             |               |                |              |
| 10                                        | 50-54     | CC            | 473   | 5.47  | 0             | 0.00        |               |                |              |
| 10                                        | 50-54     | Ecig          | 1859  | 21.48 |               |             |               |                |              |
| 10                                        | 50-54     | Dual          | 0     | 0.00  |               |             |               |                |              |
| 10                                        | 50-54     | Former        | 3411  | 39.41 |               |             | 16.85         | 186            | 5.45         |
| Year of Follow-up: 2000, Age Group: 55-59 |           |               |       |       |               |             |               |                |              |
| Period                                    | Age Group | Smoking Group | N     | %     | Ever Quit (N) | Ever Quit % | Mean Yrs Quit | Short Term (n) | Short Term % |
| 10                                        | 55-59     | Never Any     | 1919  | 29.46 |               |             |               |                |              |
| 10                                        | 55-59     | CC            | 363   | 5.57  | 0             | 0.00        |               |                |              |
| 10                                        | 55-59     | Ecig          | 1194  | 18.33 |               |             |               |                |              |
| 10                                        | 55-59     | Dual          | 0     | 0.00  |               |             |               |                |              |

**Results for PHIM for Run 5 (Sensitivity\_Analysis\_4.RTF)**

| Year of Follow-up: 2000, Age Group: 60-64    | Period   | Age Group | Smoking Group | N     | %     | Ever Quit (N) | Ever Quit % | Mean Yrs Quit | Short Term (n) | Short Term % |
|----------------------------------------------|----------|-----------|---------------|-------|-------|---------------|-------------|---------------|----------------|--------------|
| 10                                           | 55-59    | Former    |               | 3039  | 46.65 |               |             | 18.50         | 146            | 4.80         |
| 10                                           | 60-64    | Never Any |               | 1611  | 29.41 |               |             |               |                |              |
| 10                                           | 60-64    | CC        |               | 306   | 5.59  | 0             | 0.00        |               |                |              |
| 10                                           | 60-64    | Ecig      |               | 852   | 15.56 |               |             |               |                |              |
| 10                                           | 60-64    | Dual      |               | 0     | 0.00  |               |             |               |                |              |
| 10                                           | 60-64    | Former    |               | 2708  | 49.44 |               |             | 19.63         | 144            | 5.32         |
| Year of Follow-up: 2000, Age Group: 65-69    | Period   | Age Group | Smoking Group | N     | %     | Ever Quit (N) | Ever Quit % | Mean Yrs Quit | Short Term (n) | Short Term % |
| 10                                           | 65-69    | Never Any |               | 1337  | 26.83 |               |             |               |                |              |
| 10                                           | 65-69    | CC        |               | 244   | 4.90  | 0             | 0.00        |               |                |              |
| 10                                           | 65-69    | Ecig      |               | 603   | 12.10 |               |             |               |                |              |
| 10                                           | 65-69    | Dual      |               | 0     | 0.00  |               |             |               |                |              |
| 10                                           | 65-69    | Former    |               | 2799  | 56.17 |               |             | 19.95         | 120            | 4.29         |
| Year of Follow-up: 2000, Age Group: 70-74    | Period   | Age Group | Smoking Group | N     | %     | Ever Quit (N) | Ever Quit % | Mean Yrs Quit | Short Term (n) | Short Term % |
| 10                                           | 70-74    | Never Any |               | 1169  | 23.83 |               |             |               |                |              |
| 10                                           | 70-74    | CC        |               | 236   | 4.81  | 0             | 0.00        |               |                |              |
| 10                                           | 70-74    | Ecig      |               | 327   | 6.67  |               |             |               |                |              |
| 10                                           | 70-74    | Dual      |               | 0     | 0.00  |               |             |               |                |              |
| 10                                           | 70-74    | Former    |               | 3173  | 64.69 |               |             | 23.44         | 94             | 2.96         |
| Year of Follow-up: 2000, Age Group: 75-79    | Period   | Age Group | Smoking Group | N     | %     | Ever Quit (N) | Ever Quit % | Mean Yrs Quit | Short Term (n) | Short Term % |
| 10                                           | 75-79    | Never Any |               | 1023  | 23.32 |               |             |               |                |              |
| 10                                           | 75-79    | CC        |               | 214   | 4.88  | 0             | 0.00        |               |                |              |
| 10                                           | 75-79    | Ecig      |               | 229   | 5.22  |               |             |               |                |              |
| 10                                           | 75-79    | Dual      |               | 0     | 0.00  |               |             |               |                |              |
| 10                                           | 75-79    | Former    |               | 2921  | 66.58 |               |             | 25.38         | 67             | 2.29         |
| Year of Follow-up: 2005, Age Group: All Ages | Period   | Age Group | Smoking Group | N     | %     | Ever Quit (N) | Ever Quit % | Mean Yrs Quit | Short Term (n) | Short Term % |
| 15                                           | All Ages | Never Any |               | 36509 | 40.70 |               |             |               |                |              |
| 15                                           | All Ages | CC        |               | 1896  | 2.11  | 0             | 0.00        |               |                |              |
| 15                                           | All Ages | Ecig      |               | 20692 | 23.07 |               |             |               |                |              |
| 15                                           | All Ages | Dual      |               | 0     | 0.00  |               |             |               |                |              |
| 15                                           | All Ages | Former    |               | 30608 | 34.12 |               |             | 18.35         | 1619           | 5.29         |
| Year of Follow-up: 2005, Age Group: 18-19    | Period   | Age Group | Smoking Group | N     | %     | Ever Quit (N) | Ever Quit % | Mean Yrs Quit | Short Term (n) | Short Term % |
| 15                                           | 18-19    | Never Any |               | 0     | .     |               |             |               |                |              |
| 15                                           | 18-19    | CC        |               | 0     | .     | 0             | .           |               |                |              |
| 15                                           | 18-19    | Ecig      |               | 0     | .     |               |             |               |                |              |
| 15                                           | 18-19    | Dual      |               | 0     | .     |               |             |               |                |              |
| 15                                           | 18-19    | Former    |               | 0     | .     |               |             | .             | 0              | .            |
| Year of Follow-up: 2005, Age Group: 20-24    | Period   | Age Group | Smoking Group | N     | %     | Ever Quit (N) | Ever Quit % | Mean Yrs Quit | Short Term (n) | Short Term % |
| 15                                           | 20-24    | Never Any |               | 0     | .     |               |             |               |                |              |
| 15                                           | 20-24    | CC        |               | 0     | .     | 0             | .           |               |                |              |
| 15                                           | 20-24    | Ecig      |               | 0     | .     |               |             |               |                |              |
| 15                                           | 20-24    | Dual      |               | 0     | .     |               |             |               |                |              |
| 15                                           | 20-24    | Former    |               | 0     | .     |               |             | .             | 0              | .            |
| Year of Follow-up: 2005, Age Group: 25-29    | Period   | Age Group | Smoking Group | N     | %     | Ever Quit (N) | Ever Quit % | Mean Yrs Quit | Short Term (n) | Short Term % |
| 15                                           | 25-29    | Never Any |               | 4140  | 46.81 |               |             |               |                |              |
| 15                                           | 25-29    | CC        |               | 169   | 1.91  | 0             | 0.00        |               |                |              |
| 15                                           | 25-29    | Ecig      |               | 3008  | 34.01 |               |             |               |                |              |
| 15                                           | 25-29    | Dual      |               | 0     | 0.00  |               |             |               |                |              |
| 15                                           | 25-29    | Former    |               | 1528  | 17.28 |               |             | 6.29          | 201            | 13.15        |
| Year of Follow-up: 2005, Age Group: 30-34    | Period   | Age Group | Smoking Group | N     | %     | Ever Quit (N) | Ever Quit % | Mean Yrs Quit | Short Term (n) | Short Term % |
| 15                                           | 30-34    | Never Any |               | 4749  | 52.53 |               |             |               |                |              |
| 15                                           | 30-34    | CC        |               | 148   | 1.64  | 0             | 0.00        |               |                |              |
| 15                                           | 30-34    | Ecig      |               | 2702  | 29.89 |               |             |               |                |              |
| 15                                           | 30-34    | Dual      |               | 0     | 0.00  |               |             |               |                |              |
| 15                                           | 30-34    | Former    |               | 1441  | 15.94 |               |             | 7.30          | 182            | 12.63        |
| Year of Follow-up: 2005, Age Group: 35-39    | Period   | Age Group | Smoking Group | N     | %     | Ever Quit (N) | Ever Quit % | Mean Yrs Quit | Short Term (n) | Short Term % |
| 15                                           | 35-39    | Never Any |               | 5052  | 51.47 |               |             |               |                |              |
| 15                                           | 35-39    | CC        |               | 188   | 1.92  | 0             | 0.00        |               |                |              |

**Results for PHIM for Run 5 (Sensitivity\_Analysis\_4.RTF)**

|                                              |           |               |       |       |               |             |               |                |              |
|----------------------------------------------|-----------|---------------|-------|-------|---------------|-------------|---------------|----------------|--------------|
| 15                                           | 35-39     | Ecig          | 2743  | 27.94 |               |             |               |                |              |
| 15                                           | 35-39     | Dual          | 0     | 0.00  |               |             |               |                |              |
| 15                                           | 35-39     | Former        | 1833  | 18.67 |               |             | 11.24         | 152            | 8.29         |
| Year of Follow-up: 2005, Age Group: 40-44    |           |               |       |       |               |             |               |                |              |
| Period                                       | Age Group | Smoking Group | N     | %     | Ever Quit (N) | Ever Quit % | Mean Yrs Quit | Short Term (n) | Short Term % |
| 15                                           | 40-44     | Never Any     | 4962  | 46.53 |               |             |               |                |              |
| 15                                           | 40-44     | CC            | 231   | 2.17  | 0             | 0.00        |               |                |              |
| 15                                           | 40-44     | Ecig          | 2975  | 27.90 |               |             |               |                |              |
| 15                                           | 40-44     | Dual          | 0     | 0.00  |               |             |               |                |              |
| 15                                           | 40-44     | Former        | 2496  | 23.41 |               |             | 13.29         | 201            | 8.05         |
| Year of Follow-up: 2005, Age Group: 45-49    |           |               |       |       |               |             |               |                |              |
| Period                                       | Age Group | Smoking Group | N     | %     | Ever Quit (N) | Ever Quit % | Mean Yrs Quit | Short Term (n) | Short Term % |
| 15                                           | 45-49     | Never Any     | 4717  | 43.21 |               |             |               |                |              |
| 15                                           | 45-49     | CC            | 216   | 1.98  | 0             | 0.00        |               |                |              |
| 15                                           | 45-49     | Ecig          | 2796  | 25.61 |               |             |               |                |              |
| 15                                           | 45-49     | Dual          | 0     | 0.00  |               |             |               |                |              |
| 15                                           | 45-49     | Former        | 3187  | 29.20 |               |             | 14.87         | 160            | 5.02         |
| Year of Follow-up: 2005, Age Group: 50-54    |           |               |       |       |               |             |               |                |              |
| Period                                       | Age Group | Smoking Group | N     | %     | Ever Quit (N) | Ever Quit % | Mean Yrs Quit | Short Term (n) | Short Term % |
| 15                                           | 50-54     | Never Any     | 3941  | 39.85 |               |             |               |                |              |
| 15                                           | 50-54     | CC            | 213   | 2.15  | 0             | 0.00        |               |                |              |
| 15                                           | 50-54     | Ecig          | 2180  | 22.04 |               |             |               |                |              |
| 15                                           | 50-54     | Dual          | 0     | 0.00  |               |             |               |                |              |
| 15                                           | 50-54     | Former        | 3555  | 35.95 |               |             | 18.19         | 154            | 4.33         |
| Year of Follow-up: 2005, Age Group: 55-59    |           |               |       |       |               |             |               |                |              |
| Period                                       | Age Group | Smoking Group | N     | %     | Ever Quit (N) | Ever Quit % | Mean Yrs Quit | Short Term (n) | Short Term % |
| 15                                           | 55-59     | Never Any     | 2912  | 33.65 |               |             |               |                |              |
| 15                                           | 55-59     | CC            | 215   | 2.48  | 0             | 0.00        |               |                |              |
| 15                                           | 55-59     | Ecig          | 1781  | 20.58 |               |             |               |                |              |
| 15                                           | 55-59     | Dual          | 0     | 0.00  |               |             |               |                |              |
| 15                                           | 55-59     | Former        | 3747  | 43.29 |               |             | 20.09         | 117            | 3.12         |
| Year of Follow-up: 2005, Age Group: 60-64    |           |               |       |       |               |             |               |                |              |
| Period                                       | Age Group | Smoking Group | N     | %     | Ever Quit (N) | Ever Quit % | Mean Yrs Quit | Short Term (n) | Short Term % |
| 15                                           | 60-64     | Never Any     | 1919  | 29.46 |               |             |               |                |              |
| 15                                           | 60-64     | CC            | 143   | 2.19  | 0             | 0.00        |               |                |              |
| 15                                           | 60-64     | Ecig          | 1100  | 16.88 |               |             |               |                |              |
| 15                                           | 60-64     | Dual          | 0     | 0.00  |               |             |               |                |              |
| 15                                           | 60-64     | Former        | 3353  | 51.47 |               |             | 21.47         | 156            | 4.65         |
| Year of Follow-up: 2005, Age Group: 65-69    |           |               |       |       |               |             |               |                |              |
| Period                                       | Age Group | Smoking Group | N     | %     | Ever Quit (N) | Ever Quit % | Mean Yrs Quit | Short Term (n) | Short Term % |
| 15                                           | 65-69     | Never Any     | 1611  | 29.41 |               |             |               |                |              |
| 15                                           | 65-69     | CC            | 124   | 2.26  | 0             | 0.00        |               |                |              |
| 15                                           | 65-69     | Ecig          | 705   | 12.87 |               |             |               |                |              |
| 15                                           | 65-69     | Dual          | 0     | 0.00  |               |             |               |                |              |
| 15                                           | 65-69     | Former        | 3037  | 55.45 |               |             | 22.19         | 118            | 3.89         |
| Year of Follow-up: 2005, Age Group: 70-74    |           |               |       |       |               |             |               |                |              |
| Period                                       | Age Group | Smoking Group | N     | %     | Ever Quit (N) | Ever Quit % | Mean Yrs Quit | Short Term (n) | Short Term % |
| 15                                           | 70-74     | Never Any     | 1337  | 26.83 |               |             |               |                |              |
| 15                                           | 70-74     | CC            | 129   | 2.59  | 0             | 0.00        |               |                |              |
| 15                                           | 70-74     | Ecig          | 441   | 8.85  |               |             |               |                |              |
| 15                                           | 70-74     | Dual          | 0     | 0.00  |               |             |               |                |              |
| 15                                           | 70-74     | Former        | 3076  | 61.73 |               |             | 22.89         | 112            | 3.64         |
| Year of Follow-up: 2005, Age Group: 75-79    |           |               |       |       |               |             |               |                |              |
| Period                                       | Age Group | Smoking Group | N     | %     | Ever Quit (N) | Ever Quit % | Mean Yrs Quit | Short Term (n) | Short Term % |
| 15                                           | 75-79     | Never Any     | 1169  | 23.83 |               |             |               |                |              |
| 15                                           | 75-79     | CC            | 120   | 2.45  | 0             | 0.00        |               |                |              |
| 15                                           | 75-79     | Ecig          | 261   | 5.32  |               |             |               |                |              |
| 15                                           | 75-79     | Dual          | 0     | 0.00  |               |             |               |                |              |
| 15                                           | 75-79     | Former        | 3355  | 68.40 |               |             | 27.01         | 66             | 1.97         |
| Year of Follow-up: 2010, Age Group: All Ages |           |               |       |       |               |             |               |                |              |
| Period                                       | Age Group | Smoking Group | N     | %     | Ever Quit (N) | Ever Quit % | Mean Yrs Quit | Short Term (n) | Short Term % |
| 20                                           | All Ages  | Never Any     | 35134 | 41.43 |               |             |               |                |              |
| 20                                           | All Ages  | CC            | 729   | 0.86  | 0             | 0.00        |               |                |              |
| 20                                           | All Ages  | Ecig          | 17694 | 20.87 |               |             |               |                |              |
| 20                                           | All Ages  | Dual          | 0     | 0.00  |               |             |               |                |              |
| 20                                           | All Ages  | Former        | 31243 | 36.84 |               |             | 19.69         | 1553           | 4.97         |
| Year of Follow-up: 2010, Age Group: 18-19    |           |               |       |       |               |             |               |                |              |
| Period                                       | Age Group | Smoking Group | N     | %     | Ever Quit (N) | Ever Quit % | Mean Yrs Quit | Short Term (n) | Short Term % |



**Results for PHIM for Run 5 (Sensitivity\_Analysis\_4.RTF)**

|                                           |           |               |      |       |               |             |               |                |              |
|-------------------------------------------|-----------|---------------|------|-------|---------------|-------------|---------------|----------------|--------------|
| 20                                        | 18-19     | Never Any     | 0    | .     |               |             |               |                |              |
| 20                                        | 18-19     | CC            | 0    | .     | 0             | .           |               |                |              |
| 20                                        | 18-19     | Ecig          | 0    | .     |               |             |               |                |              |
| 20                                        | 18-19     | Dual          | 0    | .     |               |             |               |                |              |
| 20                                        | 18-19     | Former        | 0    | .     |               |             | 0             | .              |              |
| Year of Follow-up: 2010, Age Group: 20-24 |           |               |      |       |               |             |               |                |              |
| Period                                    | Age Group | Smoking Group | N    | %     | Ever Quit (N) | Ever Quit % | Mean Yrs Quit | Short Term (n) | Short Term % |
| 20                                        | 20-24     | Never Any     | 0    | .     |               |             |               |                |              |
| 20                                        | 20-24     | CC            | 0    | .     | 0             | .           |               |                |              |
| 20                                        | 20-24     | Ecig          | 0    | .     |               |             |               |                |              |
| 20                                        | 20-24     | Dual          | 0    | .     |               |             |               |                |              |
| 20                                        | 20-24     | Former        | 0    | .     |               |             |               | 0              | .            |
| Year of Follow-up: 2010, Age Group: 25-29 |           |               |      |       |               |             |               |                |              |
| Period                                    | Age Group | Smoking Group | N    | %     | Ever Quit (N) | Ever Quit % | Mean Yrs Quit | Short Term (n) | Short Term % |
| 20                                        | 25-29     | Never Any     | 0    | .     |               |             |               |                |              |
| 20                                        | 25-29     | CC            | 0    | .     | 0             | .           |               |                |              |
| 20                                        | 25-29     | Ecig          | 0    | .     |               |             |               |                |              |
| 20                                        | 25-29     | Dual          | 0    | .     |               |             |               |                |              |
| 20                                        | 25-29     | Former        | 0    | .     |               |             |               | 0              | .            |
| Year of Follow-up: 2010, Age Group: 30-34 |           |               |      |       |               |             |               |                |              |
| Period                                    | Age Group | Smoking Group | N    | %     | Ever Quit (N) | Ever Quit % | Mean Yrs Quit | Short Term (n) | Short Term % |
| 20                                        | 30-34     | Never Any     | 4004 | 45.27 |               |             |               |                |              |
| 20                                        | 30-34     | CC            | 64   | 0.72  | 0             | 0.00        |               |                |              |
| 20                                        | 30-34     | Ecig          | 2682 | 30.32 |               |             |               |                |              |
| 20                                        | 30-34     | Dual          | 0    | 0.00  |               |             |               |                |              |
| 20                                        | 30-34     | Former        | 2095 | 23.69 |               |             | 8.73          | 253            | 12.08        |
| Year of Follow-up: 2010, Age Group: 35-39 |           |               |      |       |               |             |               |                |              |
| Period                                    | Age Group | Smoking Group | N    | %     | Ever Quit (N) | Ever Quit % | Mean Yrs Quit | Short Term (n) | Short Term % |
| 20                                        | 35-39     | Never Any     | 4679 | 51.76 |               |             |               |                |              |
| 20                                        | 35-39     | CC            | 57   | 0.63  | 0             | 0.00        |               |                |              |
| 20                                        | 35-39     | Ecig          | 2355 | 26.05 |               |             |               |                |              |
| 20                                        | 35-39     | Dual          | 0    | 0.00  |               |             |               |                |              |
| 20                                        | 35-39     | Former        | 1949 | 21.56 |               |             | 9.67          | 148            | 7.59         |
| Year of Follow-up: 2010, Age Group: 40-44 |           |               |      |       |               |             |               |                |              |
| Period                                    | Age Group | Smoking Group | N    | %     | Ever Quit (N) | Ever Quit % | Mean Yrs Quit | Short Term (n) | Short Term % |
| 20                                        | 40-44     | Never Any     | 5052 | 51.47 |               |             |               |                |              |
| 20                                        | 40-44     | CC            | 68   | 0.69  | 0             | 0.00        |               |                |              |
| 20                                        | 40-44     | Ecig          | 2499 | 25.46 |               |             |               |                |              |
| 20                                        | 40-44     | Dual          | 0    | 0.00  |               |             |               |                |              |
| 20                                        | 40-44     | Former        | 2197 | 22.38 |               |             | 13.87         | 147            | 6.69         |
| Year of Follow-up: 2010, Age Group: 45-49 |           |               |      |       |               |             |               |                |              |
| Period                                    | Age Group | Smoking Group | N    | %     | Ever Quit (N) | Ever Quit % | Mean Yrs Quit | Short Term (n) | Short Term % |
| 20                                        | 45-49     | Never Any     | 4962 | 46.53 |               |             |               |                |              |
| 20                                        | 45-49     | CC            | 89   | 0.83  | 0             | 0.00        |               |                |              |
| 20                                        | 45-49     | Ecig          | 2644 | 24.79 |               |             |               |                |              |
| 20                                        | 45-49     | Dual          | 0    | 0.00  |               |             |               |                |              |
| 20                                        | 45-49     | Former        | 2969 | 27.84 |               |             | 15.72         | 172            | 5.79         |
| Year of Follow-up: 2010, Age Group: 50-54 |           |               |      |       |               |             |               |                |              |
| Period                                    | Age Group | Smoking Group | N    | %     | Ever Quit (N) | Ever Quit % | Mean Yrs Quit | Short Term (n) | Short Term % |
| 20                                        | 50-54     | Never Any     | 4717 | 43.21 |               |             |               |                |              |
| 20                                        | 50-54     | CC            | 87   | 0.80  | 0             | 0.00        |               |                |              |
| 20                                        | 50-54     | Ecig          | 2493 | 22.84 |               |             |               |                |              |
| 20                                        | 50-54     | Dual          | 0    | 0.00  |               |             |               |                |              |
| 20                                        | 50-54     | Former        | 3619 | 33.15 |               |             | 17.74         | 174            | 4.81         |
| Year of Follow-up: 2010, Age Group: 55-59 |           |               |      |       |               |             |               |                |              |
| Period                                    | Age Group | Smoking Group | N    | %     | Ever Quit (N) | Ever Quit % | Mean Yrs Quit | Short Term (n) | Short Term % |
| 20                                        | 55-59     | Never Any     | 3941 | 39.85 |               |             |               |                |              |
| 20                                        | 55-59     | CC            | 85   | 0.86  | 0             | 0.00        |               |                |              |
| 20                                        | 55-59     | Ecig          | 1859 | 18.80 |               |             |               |                |              |
| 20                                        | 55-59     | Dual          | 0    | 0.00  |               |             |               |                |              |
| 20                                        | 55-59     | Former        | 4004 | 40.49 |               |             | 20.81         | 181            | 4.52         |
| Year of Follow-up: 2010, Age Group: 60-64 |           |               |      |       |               |             |               |                |              |
| Period                                    | Age Group | Smoking Group | N    | %     | Ever Quit (N) | Ever Quit % | Mean Yrs Quit | Short Term (n) | Short Term % |
| 20                                        | 60-64     | Never Any     | 2912 | 33.65 |               |             |               |                |              |
| 20                                        | 60-64     | CC            | 87   | 1.01  | 0             | 0.00        |               |                |              |
| 20                                        | 60-64     | Ecig          | 1428 | 16.50 |               |             |               |                |              |
| 20                                        | 60-64     | Dual          | 0    | 0.00  |               |             |               |                |              |
| 20                                        | 60-64     | Former        | 4228 | 48.85 |               |             | 22.41         | 241            | 5.70         |
| Year of Follow-up: 2010, Age Group: 65-69 |           |               |      |       |               |             |               |                |              |

**Results for PHIM for Run 5 (Sensitivity\_Analysis\_4.RTF)**

| Period                                       | Age Group | Smoking Group | N     | %     | Ever Quit (N) | Ever Quit % | Mean Yrs Quit | Short Term (n) | Short Term % |
|----------------------------------------------|-----------|---------------|-------|-------|---------------|-------------|---------------|----------------|--------------|
| 20                                           | 65-69     | Never Any     | 1919  | 29.46 |               |             |               |                |              |
| 20                                           | 65-69     | CC            | 60    | 0.92  | 0             | 0.00        |               |                |              |
| 20                                           | 65-69     | Ecig          | 809   | 12.42 |               |             |               |                |              |
| 20                                           | 65-69     | Dual          | 0     | 0.00  |               |             |               |                |              |
| 20                                           | 65-69     | Former        | 3727  | 57.21 |               |             | 24.03         | 133            | 3.57         |
| Year of Follow-up: 2010, Age Group: 70-74    |           |               |       |       |               |             |               |                |              |
| Period                                       | Age Group | Smoking Group | N     | %     | Ever Quit (N) | Ever Quit % | Mean Yrs Quit | Short Term (n) | Short Term % |
| 20                                           | 70-74     | Never Any     | 1611  | 29.41 |               |             |               |                |              |
| 20                                           | 70-74     | CC            | 69    | 1.26  | 0             | 0.00        |               |                |              |
| 20                                           | 70-74     | Ecig          | 574   | 10.48 |               |             |               |                |              |
| 20                                           | 70-74     | Dual          | 0     | 0.00  |               |             |               |                |              |
| 20                                           | 70-74     | Former        | 3223  | 58.85 |               |             | 25.75         | 61             | 1.89         |
| Year of Follow-up: 2010, Age Group: 75-79    |           |               |       |       |               |             |               |                |              |
| Period                                       | Age Group | Smoking Group | N     | %     | Ever Quit (N) | Ever Quit % | Mean Yrs Quit | Short Term (n) | Short Term % |
| 20                                           | 75-79     | Never Any     | 1337  | 26.83 |               |             |               |                |              |
| 20                                           | 75-79     | CC            | 63    | 1.26  | 0             | 0.00        |               |                |              |
| 20                                           | 75-79     | Ecig          | 351   | 7.04  |               |             |               |                |              |
| 20                                           | 75-79     | Dual          | 0     | 0.00  |               |             |               |                |              |
| 20                                           | 75-79     | Former        | 3232  | 64.86 |               |             | 26.66         | 43             | 1.33         |
| Year of Follow-up: 2015, Age Group: All Ages |           |               |       |       |               |             |               |                |              |
| Period                                       | Age Group | Smoking Group | N     | %     | Ever Quit (N) | Ever Quit % | Mean Yrs Quit | Short Term (n) | Short Term % |
| 25                                           | All Ages  | Never Any     | 33774 | 42.31 |               |             |               |                |              |
| 25                                           | All Ages  | CC            | 285   | 0.36  | 0             | 0.00        |               |                |              |
| 25                                           | All Ages  | Ecig          | 14641 | 18.34 |               |             |               |                |              |
| 25                                           | All Ages  | Dual          | 0     | 0.00  |               |             |               |                |              |
| 25                                           | All Ages  | Former        | 31117 | 38.99 |               |             | 21.72         | 1114           | 3.58         |
| Year of Follow-up: 2015, Age Group: 18-19    |           |               |       |       |               |             |               |                |              |
| Period                                       | Age Group | Smoking Group | N     | %     | Ever Quit (N) | Ever Quit % | Mean Yrs Quit | Short Term (n) | Short Term % |
| 25                                           | 18-19     | Never Any     | 0     | .     |               |             |               |                |              |
| 25                                           | 18-19     | CC            | 0     | .     | 0             | .           |               |                |              |
| 25                                           | 18-19     | Ecig          | 0     | .     |               |             |               |                |              |
| 25                                           | 18-19     | Dual          | 0     | .     |               |             |               |                |              |
| 25                                           | 18-19     | Former        | 0     | .     |               |             | .             | 0              | .            |
| Year of Follow-up: 2015, Age Group: 20-24    |           |               |       |       |               |             |               |                |              |
| Period                                       | Age Group | Smoking Group | N     | %     | Ever Quit (N) | Ever Quit % | Mean Yrs Quit | Short Term (n) | Short Term % |
| 25                                           | 20-24     | Never Any     | 0     | .     |               |             |               |                |              |
| 25                                           | 20-24     | CC            | 0     | .     | 0             | .           |               |                |              |
| 25                                           | 20-24     | Ecig          | 0     | .     |               |             |               |                |              |
| 25                                           | 20-24     | Dual          | 0     | .     |               |             |               |                |              |
| 25                                           | 20-24     | Former        | 0     | .     |               |             | .             | 0              | .            |
| Year of Follow-up: 2015, Age Group: 25-29    |           |               |       |       |               |             |               |                |              |
| Period                                       | Age Group | Smoking Group | N     | %     | Ever Quit (N) | Ever Quit % | Mean Yrs Quit | Short Term (n) | Short Term % |
| 25                                           | 25-29     | Never Any     | 0     | .     |               |             |               |                |              |
| 25                                           | 25-29     | CC            | 0     | .     | 0             | .           |               |                |              |
| 25                                           | 25-29     | Ecig          | 0     | .     |               |             |               |                |              |
| 25                                           | 25-29     | Dual          | 0     | .     |               |             |               |                |              |
| 25                                           | 25-29     | Former        | 0     | .     |               |             | .             | 0              | .            |
| Year of Follow-up: 2015, Age Group: 30-34    |           |               |       |       |               |             |               |                |              |
| Period                                       | Age Group | Smoking Group | N     | %     | Ever Quit (N) | Ever Quit % | Mean Yrs Quit | Short Term (n) | Short Term % |
| 25                                           | 30-34     | Never Any     | 0     | .     |               |             |               |                |              |
| 25                                           | 30-34     | CC            | 0     | .     | 0             | .           |               |                |              |
| 25                                           | 30-34     | Ecig          | 0     | .     |               |             |               |                |              |
| 25                                           | 30-34     | Dual          | 0     | .     |               |             |               |                |              |
| 25                                           | 30-34     | Former        | 0     | .     |               |             | .             | 0              | .            |
| Year of Follow-up: 2015, Age Group: 35-39    |           |               |       |       |               |             |               |                |              |
| Period                                       | Age Group | Smoking Group | N     | %     | Ever Quit (N) | Ever Quit % | Mean Yrs Quit | Short Term (n) | Short Term % |
| 25                                           | 35-39     | Never Any     | 3981  | 45.01 |               |             |               |                |              |
| 25                                           | 35-39     | CC            | 26    | 0.29  | 0             | 0.00        |               |                |              |
| 25                                           | 35-39     | Ecig          | 2243  | 25.36 |               |             |               |                |              |
| 25                                           | 35-39     | Dual          | 0     | 0.00  |               |             |               |                |              |
| 25                                           | 35-39     | Former        | 2595  | 29.34 |               |             | 11.53         | 155            | 5.97         |
| Year of Follow-up: 2015, Age Group: 40-44    |           |               |       |       |               |             |               |                |              |
| Period                                       | Age Group | Smoking Group | N     | %     | Ever Quit (N) | Ever Quit % | Mean Yrs Quit | Short Term (n) | Short Term % |
| 25                                           | 40-44     | Never Any     | 4679  | 51.76 |               |             |               |                |              |
| 25                                           | 40-44     | CC            | 18    | 0.20  | 0             | 0.00        |               |                |              |
| 25                                           | 40-44     | Ecig          | 2078  | 22.99 |               |             |               |                |              |
| 25                                           | 40-44     | Dual          | 0     | 0.00  |               |             |               |                |              |

**Results for PHIM for Run 5 (Sensitivity\_Analysis\_4.RTF)**

|                                              |           |               |       |       |               |             |               |                |              |
|----------------------------------------------|-----------|---------------|-------|-------|---------------|-------------|---------------|----------------|--------------|
| 25                                           | 40-44     | Former        | 2265  | 25.06 |               |             | 12.91         | 122            | 5.39         |
| Year of Follow-up: 2015, Age Group: 45-49    |           |               |       |       |               |             |               |                |              |
| Period                                       | Age Group | Smoking Group | N     | %     | Ever Quit (N) | Ever Quit % | Mean Yrs Quit | Short Term (n) | Short Term % |
| 25                                           | 45-49     | Never Any     | 5052  | 51.47 |               |             |               |                |              |
| 25                                           | 45-49     | CC            | 29    | 0.30  | 0             | 0.00        |               |                |              |
| 25                                           | 45-49     | Ecig          | 2269  | 23.12 |               |             |               |                |              |
| 25                                           | 45-49     | Dual          | 0     | 0.00  |               |             |               |                |              |
| 25                                           | 45-49     | Former        | 2466  | 25.12 |               |             | 17.07         | 83             | 3.37         |
| Year of Follow-up: 2015, Age Group: 50-54    |           |               |       |       |               |             |               |                |              |
| Period                                       | Age Group | Smoking Group | N     | %     | Ever Quit (N) | Ever Quit % | Mean Yrs Quit | Short Term (n) | Short Term % |
| 25                                           | 50-54     | Never Any     | 4962  | 46.53 |               |             |               |                |              |
| 25                                           | 50-54     | CC            | 37    | 0.35  | 0             | 0.00        |               |                |              |
| 25                                           | 50-54     | Ecig          | 2410  | 22.60 |               |             |               |                |              |
| 25                                           | 50-54     | Dual          | 0     | 0.00  |               |             |               |                |              |
| 25                                           | 50-54     | Former        | 3255  | 30.52 |               |             | 19.07         | 131            | 4.02         |
| Year of Follow-up: 2015, Age Group: 55-59    |           |               |       |       |               |             |               |                |              |
| Period                                       | Age Group | Smoking Group | N     | %     | Ever Quit (N) | Ever Quit % | Mean Yrs Quit | Short Term (n) | Short Term % |
| 25                                           | 55-59     | Never Any     | 4717  | 43.21 |               |             |               |                |              |
| 25                                           | 55-59     | CC            | 33    | 0.30  | 0             | 0.00        |               |                |              |
| 25                                           | 55-59     | Ecig          | 2106  | 19.29 |               |             |               |                |              |
| 25                                           | 55-59     | Dual          | 0     | 0.00  |               |             |               |                |              |
| 25                                           | 55-59     | Former        | 4060  | 37.19 |               |             | 20.50         | 162            | 3.99         |
| Year of Follow-up: 2015, Age Group: 60-64    |           |               |       |       |               |             |               |                |              |
| Period                                       | Age Group | Smoking Group | N     | %     | Ever Quit (N) | Ever Quit % | Mean Yrs Quit | Short Term (n) | Short Term % |
| 25                                           | 60-64     | Never Any     | 3941  | 39.85 |               |             |               |                |              |
| 25                                           | 60-64     | CC            | 28    | 0.28  | 0             | 0.00        |               |                |              |
| 25                                           | 60-64     | Ecig          | 1443  | 14.59 |               |             |               |                |              |
| 25                                           | 60-64     | Dual          | 0     | 0.00  |               |             |               |                |              |
| 25                                           | 60-64     | Former        | 4477  | 45.27 |               |             | 23.28         | 205            | 4.58         |
| Year of Follow-up: 2015, Age Group: 65-69    |           |               |       |       |               |             |               |                |              |
| Period                                       | Age Group | Smoking Group | N     | %     | Ever Quit (N) | Ever Quit % | Mean Yrs Quit | Short Term (n) | Short Term % |
| 25                                           | 65-69     | Never Any     | 2912  | 33.65 |               |             |               |                |              |
| 25                                           | 65-69     | CC            | 43    | 0.50  | 0             | 0.00        |               |                |              |
| 25                                           | 65-69     | Ecig          | 1019  | 11.77 |               |             |               |                |              |
| 25                                           | 65-69     | Dual          | 0     | 0.00  |               |             |               |                |              |
| 25                                           | 65-69     | Former        | 4681  | 54.08 |               |             | 24.99         | 134            | 2.86         |
| Year of Follow-up: 2015, Age Group: 70-74    |           |               |       |       |               |             |               |                |              |
| Period                                       | Age Group | Smoking Group | N     | %     | Ever Quit (N) | Ever Quit % | Mean Yrs Quit | Short Term (n) | Short Term % |
| 25                                           | 70-74     | Never Any     | 1919  | 29.46 |               |             |               |                |              |
| 25                                           | 70-74     | CC            | 35    | 0.54  | 0             | 0.00        |               |                |              |
| 25                                           | 70-74     | Ecig          | 616   | 9.46  |               |             |               |                |              |
| 25                                           | 70-74     | Dual          | 0     | 0.00  |               |             |               |                |              |
| 25                                           | 70-74     | Former        | 3945  | 60.55 |               |             | 27.55         | 70             | 1.77         |
| Year of Follow-up: 2015, Age Group: 75-79    |           |               |       |       |               |             |               |                |              |
| Period                                       | Age Group | Smoking Group | N     | %     | Ever Quit (N) | Ever Quit % | Mean Yrs Quit | Short Term (n) | Short Term % |
| 25                                           | 75-79     | Never Any     | 1611  | 29.41 |               |             |               |                |              |
| 25                                           | 75-79     | CC            | 36    | 0.66  | 0             | 0.00        |               |                |              |
| 25                                           | 75-79     | Ecig          | 457   | 8.34  |               |             |               |                |              |
| 25                                           | 75-79     | Dual          | 0     | 0.00  |               |             |               |                |              |
| 25                                           | 75-79     | Former        | 3373  | 61.58 |               |             | 29.48         | 52             | 1.54         |
| Year of Follow-up: 2020, Age Group: All Ages |           |               |       |       |               |             |               |                |              |
| Period                                       | Age Group | Smoking Group | N     | %     | Ever Quit (N) | Ever Quit % | Mean Yrs Quit | Short Term (n) | Short Term % |
| 30                                           | All Ages  | Never Any     | 32163 | 43.26 |               |             |               |                |              |
| 30                                           | All Ages  | CC            | 98    | 0.13  | 0             | 0.00        |               |                |              |
| 30                                           | All Ages  | Ecig          | 11834 | 15.92 |               |             |               |                |              |
| 30                                           | All Ages  | Dual          | 0     | 0.00  |               |             |               |                |              |
| 30                                           | All Ages  | Former        | 30245 | 40.68 |               |             | 23.82         | 944            | 3.12         |
| Year of Follow-up: 2020, Age Group: 18-19    |           |               |       |       |               |             |               |                |              |
| Period                                       | Age Group | Smoking Group | N     | %     | Ever Quit (N) | Ever Quit % | Mean Yrs Quit | Short Term (n) | Short Term % |
| 30                                           | 18-19     | Never Any     | 0     | .     |               |             |               |                |              |
| 30                                           | 18-19     | CC            | 0     | .     | 0             | .           |               |                |              |
| 30                                           | 18-19     | Ecig          | 0     | .     |               |             |               |                |              |
| 30                                           | 18-19     | Dual          | 0     | .     |               |             |               |                |              |
| 30                                           | 18-19     | Former        | 0     | .     |               |             | .             | 0              | .            |
| Year of Follow-up: 2020, Age Group: 20-24    |           |               |       |       |               |             |               |                |              |
| Period                                       | Age Group | Smoking Group | N     | %     | Ever Quit (N) | Ever Quit % | Mean Yrs Quit | Short Term (n) | Short Term % |
| 30                                           | 20-24     | Never Any     | 0     | .     |               |             |               |                |              |
| 30                                           | 20-24     | CC            | 0     | .     | 0             | .           |               |                |              |

**Results for PHIM for Run 5 (Sensitivity\_Analysis\_4.RTF)**

|                                           |           |               |      |       |               |             |               |                |              |
|-------------------------------------------|-----------|---------------|------|-------|---------------|-------------|---------------|----------------|--------------|
| 30                                        | 20-24     | Ecig          | 0    | .     |               |             |               |                |              |
| 30                                        | 20-24     | Dual          | 0    | .     |               |             |               |                |              |
| 30                                        | 20-24     | Former        | 0    | .     |               |             | 0             | .              |              |
| Year of Follow-up: 2020, Age Group: 25-29 |           |               |      |       |               |             |               |                |              |
| Period                                    | Age Group | Smoking Group | N    | %     | Ever Quit (N) | Ever Quit % | Mean Yrs Quit | Short Term (n) | Short Term % |
| 30                                        | 25-29     | Never Any     | 0    | .     |               |             |               |                |              |
| 30                                        | 25-29     | CC            | 0    | .     | 0             | .           |               |                |              |
| 30                                        | 25-29     | Ecig          | 0    | .     |               |             |               |                |              |
| 30                                        | 25-29     | Dual          | 0    | .     |               |             |               |                |              |
| 30                                        | 25-29     | Former        | 0    | .     |               |             | 0             | .              |              |
| Year of Follow-up: 2020, Age Group: 30-34 |           |               |      |       |               |             |               |                |              |
| Period                                    | Age Group | Smoking Group | N    | %     | Ever Quit (N) | Ever Quit % | Mean Yrs Quit | Short Term (n) | Short Term % |
| 30                                        | 30-34     | Never Any     | 0    | .     |               |             |               |                |              |
| 30                                        | 30-34     | CC            | 0    | .     | 0             | .           |               |                |              |
| 30                                        | 30-34     | Ecig          | 0    | .     |               |             |               |                |              |
| 30                                        | 30-34     | Dual          | 0    | .     |               |             |               |                |              |
| 30                                        | 30-34     | Former        | 0    | .     |               |             | 0             | .              |              |
| Year of Follow-up: 2020, Age Group: 35-39 |           |               |      |       |               |             |               |                |              |
| Period                                    | Age Group | Smoking Group | N    | %     | Ever Quit (N) | Ever Quit % | Mean Yrs Quit | Short Term (n) | Short Term % |
| 30                                        | 35-39     | Never Any     | 0    | .     |               |             |               |                |              |
| 30                                        | 35-39     | CC            | 0    | .     | 0             | .           |               |                |              |
| 30                                        | 35-39     | Ecig          | 0    | .     |               |             |               |                |              |
| 30                                        | 35-39     | Dual          | 0    | .     |               |             |               |                |              |
| 30                                        | 35-39     | Former        | 0    | .     |               |             | 0             | .              |              |
| Year of Follow-up: 2020, Age Group: 40-44 |           |               |      |       |               |             |               |                |              |
| Period                                    | Age Group | Smoking Group | N    | %     | Ever Quit (N) | Ever Quit % | Mean Yrs Quit | Short Term (n) | Short Term % |
| 30                                        | 40-44     | Never Any     | 3981 | 45.01 |               |             |               |                |              |
| 30                                        | 40-44     | CC            | 11   | 0.12  | 0             | 0.00        |               |                |              |
| 30                                        | 40-44     | Ecig          | 1967 | 22.24 |               |             |               |                |              |
| 30                                        | 40-44     | Dual          | 0    | 0.00  |               |             |               |                |              |
| 30                                        | 40-44     | Former        | 2886 | 32.63 |               |             | 15.06         | 122            | 4.23         |
| Year of Follow-up: 2020, Age Group: 45-49 |           |               |      |       |               |             |               |                |              |
| Period                                    | Age Group | Smoking Group | N    | %     | Ever Quit (N) | Ever Quit % | Mean Yrs Quit | Short Term (n) | Short Term % |
| 30                                        | 45-49     | Never Any     | 4679 | 51.76 |               |             |               |                |              |
| 30                                        | 45-49     | CC            | 4    | 0.04  | 0             | 0.00        |               |                |              |
| 30                                        | 45-49     | Ecig          | 1854 | 20.51 |               |             |               |                |              |
| 30                                        | 45-49     | Dual          | 0    | 0.00  |               |             |               |                |              |
| 30                                        | 45-49     | Former        | 2503 | 27.69 |               |             | 16.44         | 69             | 2.76         |
| Year of Follow-up: 2020, Age Group: 50-54 |           |               |      |       |               |             |               |                |              |
| Period                                    | Age Group | Smoking Group | N    | %     | Ever Quit (N) | Ever Quit % | Mean Yrs Quit | Short Term (n) | Short Term % |
| 30                                        | 50-54     | Never Any     | 5052 | 51.47 |               |             |               |                |              |
| 30                                        | 50-54     | CC            | 9    | 0.09  | 0             | 0.00        |               |                |              |
| 30                                        | 50-54     | Ecig          | 2088 | 21.27 |               |             |               |                |              |
| 30                                        | 50-54     | Dual          | 0    | 0.00  |               |             |               |                |              |
| 30                                        | 50-54     | Former        | 2667 | 27.17 |               |             | 20.53         | 102            | 3.82         |
| Year of Follow-up: 2020, Age Group: 55-59 |           |               |      |       |               |             |               |                |              |
| Period                                    | Age Group | Smoking Group | N    | %     | Ever Quit (N) | Ever Quit % | Mean Yrs Quit | Short Term (n) | Short Term % |
| 30                                        | 55-59     | Never Any     | 4962 | 46.53 |               |             |               |                |              |
| 30                                        | 55-59     | CC            | 18   | 0.17  | 0             | 0.00        |               |                |              |
| 30                                        | 55-59     | Ecig          | 2021 | 18.95 |               |             |               |                |              |
| 30                                        | 55-59     | Dual          | 0    | 0.00  |               |             |               |                |              |
| 30                                        | 55-59     | Former        | 3663 | 34.35 |               |             | 21.61         | 158            | 4.31         |
| Year of Follow-up: 2020, Age Group: 60-64 |           |               |      |       |               |             |               |                |              |
| Period                                    | Age Group | Smoking Group | N    | %     | Ever Quit (N) | Ever Quit % | Mean Yrs Quit | Short Term (n) | Short Term % |
| 30                                        | 60-64     | Never Any     | 4717 | 43.21 |               |             |               |                |              |
| 30                                        | 60-64     | CC            | 10   | 0.09  | 0             | 0.00        |               |                |              |
| 30                                        | 60-64     | Ecig          | 1616 | 14.80 |               |             |               |                |              |
| 30                                        | 60-64     | Dual          | 0    | 0.00  |               |             |               |                |              |
| 30                                        | 60-64     | Former        | 4573 | 41.89 |               |             | 22.86         | 204            | 4.46         |
| Year of Follow-up: 2020, Age Group: 65-69 |           |               |      |       |               |             |               |                |              |
| Period                                    | Age Group | Smoking Group | N    | %     | Ever Quit (N) | Ever Quit % | Mean Yrs Quit | Short Term (n) | Short Term % |
| 30                                        | 65-69     | Never Any     | 3941 | 39.85 |               |             |               |                |              |
| 30                                        | 65-69     | CC            | 13   | 0.13  | 0             | 0.00        |               |                |              |
| 30                                        | 65-69     | Ecig          | 1039 | 10.51 |               |             |               |                |              |
| 30                                        | 65-69     | Dual          | 0    | 0.00  |               |             |               |                |              |
| 30                                        | 65-69     | Former        | 4896 | 49.51 |               |             | 26.05         | 145            | 2.96         |
| Year of Follow-up: 2020, Age Group: 70-74 |           |               |      |       |               |             |               |                |              |
| Period                                    | Age Group | Smoking Group | N    | %     | Ever Quit (N) | Ever Quit % | Mean Yrs Quit | Short Term (n) | Short Term % |

**Results for PHIM for Run 5 (Sensitivity\_Analysis\_4.RTF)**

|                                              |           |               |       |       |               |             |               |                |              |
|----------------------------------------------|-----------|---------------|-------|-------|---------------|-------------|---------------|----------------|--------------|
| 30                                           | 70-74     | Never Any     | 2912  | 33.65 |               |             |               |                |              |
| 30                                           | 70-74     | CC            | 18    | 0.21  | 0             | 0.00        |               |                |              |
| 30                                           | 70-74     | Ecig          | 770   | 8.90  |               |             |               |                |              |
| 30                                           | 70-74     | Dual          | 0     | 0.00  |               |             |               |                |              |
| 30                                           | 70-74     | Former        | 4955  | 57.25 |               |             | 28.45         | 93             | 1.88         |
| Year of Follow-up: 2020, Age Group: 75-79    |           |               |       |       |               |             |               |                |              |
| Period                                       | Age Group | Smoking Group | N     | %     | Ever Quit (N) | Ever Quit % | Mean Yrs Quit | Short Term (n) | Short Term % |
| 30                                           | 75-79     | Never Any     | 1919  | 29.46 |               |             |               |                |              |
| 30                                           | 75-79     | CC            | 15    | 0.23  | 0             | 0.00        |               |                |              |
| 30                                           | 75-79     | Ecig          | 479   | 7.35  |               |             |               |                |              |
| 30                                           | 75-79     | Dual          | 0     | 0.00  |               |             |               |                |              |
| 30                                           | 75-79     | Former        | 4102  | 62.96 |               |             | 31.39         | 51             | 1.24         |
| Year of Follow-up: 2025, Age Group: All Ages |           |               |       |       |               |             |               |                |              |
| Period                                       | Age Group | Smoking Group | N     | %     | Ever Quit (N) | Ever Quit % | Mean Yrs Quit | Short Term (n) | Short Term % |
| 35                                           | All Ages  | Never Any     | 30244 | 44.59 |               |             |               |                |              |
| 35                                           | All Ages  | CC            | 36    | 0.05  | 0             | 0.00        |               |                |              |
| 35                                           | All Ages  | Ecig          | 9295  | 13.70 |               |             |               |                |              |
| 35                                           | All Ages  | Dual          | 0     | 0.00  |               |             |               |                |              |
| 35                                           | All Ages  | Former        | 28250 | 41.65 |               |             | 25.72         | 801            | 2.84         |
| Year of Follow-up: 2025, Age Group: 18-19    |           |               |       |       |               |             |               |                |              |
| Period                                       | Age Group | Smoking Group | N     | %     | Ever Quit (N) | Ever Quit % | Mean Yrs Quit | Short Term (n) | Short Term % |
| 35                                           | 18-19     | Never Any     | 0     | .     |               |             |               |                |              |
| 35                                           | 18-19     | CC            | 0     | .     | 0             | .           |               |                |              |
| 35                                           | 18-19     | Ecig          | 0     | .     |               |             |               |                |              |
| 35                                           | 18-19     | Dual          | 0     | .     |               |             |               |                |              |
| 35                                           | 18-19     | Former        | 0     | .     |               |             | .             | 0              | .            |
| Year of Follow-up: 2025, Age Group: 20-24    |           |               |       |       |               |             |               |                |              |
| Period                                       | Age Group | Smoking Group | N     | %     | Ever Quit (N) | Ever Quit % | Mean Yrs Quit | Short Term (n) | Short Term % |
| 35                                           | 20-24     | Never Any     | 0     | .     |               |             |               |                |              |
| 35                                           | 20-24     | CC            | 0     | .     | 0             | .           |               |                |              |
| 35                                           | 20-24     | Ecig          | 0     | .     |               |             |               |                |              |
| 35                                           | 20-24     | Dual          | 0     | .     |               |             |               |                |              |
| 35                                           | 20-24     | Former        | 0     | .     |               |             | .             | 0              | .            |
| Year of Follow-up: 2025, Age Group: 25-29    |           |               |       |       |               |             |               |                |              |
| Period                                       | Age Group | Smoking Group | N     | %     | Ever Quit (N) | Ever Quit % | Mean Yrs Quit | Short Term (n) | Short Term % |
| 35                                           | 25-29     | Never Any     | 0     | .     |               |             |               |                |              |
| 35                                           | 25-29     | CC            | 0     | .     | 0             | .           |               |                |              |
| 35                                           | 25-29     | Ecig          | 0     | .     |               |             |               |                |              |
| 35                                           | 25-29     | Dual          | 0     | .     |               |             |               |                |              |
| 35                                           | 25-29     | Former        | 0     | .     |               |             | .             | 0              | .            |
| Year of Follow-up: 2025, Age Group: 30-34    |           |               |       |       |               |             |               |                |              |
| Period                                       | Age Group | Smoking Group | N     | %     | Ever Quit (N) | Ever Quit % | Mean Yrs Quit | Short Term (n) | Short Term % |
| 35                                           | 30-34     | Never Any     | 0     | .     |               |             |               |                |              |
| 35                                           | 30-34     | CC            | 0     | .     | 0             | .           |               |                |              |
| 35                                           | 30-34     | Ecig          | 0     | .     |               |             |               |                |              |
| 35                                           | 30-34     | Dual          | 0     | .     |               |             |               |                |              |
| 35                                           | 30-34     | Former        | 0     | .     |               |             | .             | 0              | .            |
| Year of Follow-up: 2025, Age Group: 35-39    |           |               |       |       |               |             |               |                |              |
| Period                                       | Age Group | Smoking Group | N     | %     | Ever Quit (N) | Ever Quit % | Mean Yrs Quit | Short Term (n) | Short Term % |
| 35                                           | 35-39     | Never Any     | 0     | .     |               |             |               |                |              |
| 35                                           | 35-39     | CC            | 0     | .     | 0             | .           |               |                |              |
| 35                                           | 35-39     | Ecig          | 0     | .     |               |             |               |                |              |
| 35                                           | 35-39     | Dual          | 0     | .     |               |             |               |                |              |
| 35                                           | 35-39     | Former        | 0     | .     |               |             | .             | 0              | .            |
| Year of Follow-up: 2025, Age Group: 40-44    |           |               |       |       |               |             |               |                |              |
| Period                                       | Age Group | Smoking Group | N     | %     | Ever Quit (N) | Ever Quit % | Mean Yrs Quit | Short Term (n) | Short Term % |
| 35                                           | 40-44     | Never Any     | 0     | .     |               |             |               |                |              |
| 35                                           | 40-44     | CC            | 0     | .     | 0             | .           |               |                |              |
| 35                                           | 40-44     | Ecig          | 0     | .     |               |             |               |                |              |
| 35                                           | 40-44     | Dual          | 0     | .     |               |             |               |                |              |
| 35                                           | 40-44     | Former        | 0     | .     |               |             | .             | 0              | .            |
| Year of Follow-up: 2025, Age Group: 45-49    |           |               |       |       |               |             |               |                |              |
| Period                                       | Age Group | Smoking Group | N     | %     | Ever Quit (N) | Ever Quit % | Mean Yrs Quit | Short Term (n) | Short Term % |
| 35                                           | 45-49     | Never Any     | 3981  | 45.01 |               |             |               |                |              |
| 35                                           | 45-49     | CC            | 6     | 0.07  | 0             | 0.00        |               |                |              |
| 35                                           | 45-49     | Ecig          | 1747  | 19.75 |               |             |               |                |              |
| 35                                           | 45-49     | Dual          | 0     | 0.00  |               |             |               |                |              |
| 35                                           | 45-49     | Former        | 3111  | 35.17 |               |             | 18.78         | 66             | 2.12         |
| Year of Follow-up: 2025, Age Group: 50-54    |           |               |       |       |               |             |               |                |              |

**Results for PHIM for Run 5 (Sensitivity\_Analysis\_4.RTF)**

| Period                                       | Age Group | Smoking Group | N     | %     | Ever Quit (N) | Ever Quit % | Mean Yrs Quit | Short Term (n) | Short Term % |
|----------------------------------------------|-----------|---------------|-------|-------|---------------|-------------|---------------|----------------|--------------|
| 35                                           | 50-54     | Never Any     | 4679  | 51.76 |               |             |               |                |              |
| 35                                           | 50-54     | CC            | 2     | 0.02  | 0             | 0.00        |               |                |              |
| 35                                           | 50-54     | Ecig          | 1704  | 18.85 |               |             |               |                |              |
| 35                                           | 50-54     | Dual          | 0     | 0.00  |               |             |               |                |              |
| 35                                           | 50-54     | Former        | 2655  | 29.37 |               |             | 20.30         | 81             | 3.05         |
| Year of Follow-up: 2025, Age Group: 55-59    |           |               |       |       |               |             |               |                |              |
| Period                                       | Age Group | Smoking Group | N     | %     | Ever Quit (N) | Ever Quit % | Mean Yrs Quit | Short Term (n) | Short Term % |
| 35                                           | 55-59     | Never Any     | 5052  | 51.47 |               |             |               |                |              |
| 35                                           | 55-59     | CC            | 0     | 0.00  | 0             | 0.00        |               |                |              |
| 35                                           | 55-59     | Ecig          | 1722  | 17.54 |               |             |               |                |              |
| 35                                           | 55-59     | Dual          | 0     | 0.00  |               |             |               |                |              |
| 35                                           | 55-59     | Former        | 3042  | 30.99 |               |             | 22.63         | 158            | 5.19         |
| Year of Follow-up: 2025, Age Group: 60-64    |           |               |       |       |               |             |               |                |              |
| Period                                       | Age Group | Smoking Group | N     | %     | Ever Quit (N) | Ever Quit % | Mean Yrs Quit | Short Term (n) | Short Term % |
| 35                                           | 60-64     | Never Any     | 4962  | 46.53 |               |             |               |                |              |
| 35                                           | 60-64     | CC            | 9     | 0.08  | 0             | 0.00        |               |                |              |
| 35                                           | 60-64     | Ecig          | 1548  | 14.52 |               |             |               |                |              |
| 35                                           | 60-64     | Dual          | 0     | 0.00  |               |             |               |                |              |
| 35                                           | 60-64     | Former        | 4145  | 38.87 |               |             | 23.75         | 187            | 4.51         |
| Year of Follow-up: 2025, Age Group: 65-69    |           |               |       |       |               |             |               |                |              |
| Period                                       | Age Group | Smoking Group | N     | %     | Ever Quit (N) | Ever Quit % | Mean Yrs Quit | Short Term (n) | Short Term % |
| 35                                           | 65-69     | Never Any     | 4717  | 43.21 |               |             |               |                |              |
| 35                                           | 65-69     | CC            | 5     | 0.05  | 0             | 0.00        |               |                |              |
| 35                                           | 65-69     | Ecig          | 1170  | 10.72 |               |             |               |                |              |
| 35                                           | 65-69     | Dual          | 0     | 0.00  |               |             |               |                |              |
| 35                                           | 65-69     | Former        | 5024  | 46.02 |               |             | 25.56         | 158            | 3.14         |
| Year of Follow-up: 2025, Age Group: 70-74    |           |               |       |       |               |             |               |                |              |
| Period                                       | Age Group | Smoking Group | N     | %     | Ever Quit (N) | Ever Quit % | Mean Yrs Quit | Short Term (n) | Short Term % |
| 35                                           | 70-74     | Never Any     | 3941  | 39.85 |               |             |               |                |              |
| 35                                           | 70-74     | CC            | 5     | 0.05  | 0             | 0.00        |               |                |              |
| 35                                           | 70-74     | Ecig          | 811   | 8.20  |               |             |               |                |              |
| 35                                           | 70-74     | Dual          | 0     | 0.00  |               |             |               |                |              |
| 35                                           | 70-74     | Former        | 5132  | 51.90 |               |             | 29.73         | 79             | 1.54         |
| Year of Follow-up: 2025, Age Group: 75-79    |           |               |       |       |               |             |               |                |              |
| Period                                       | Age Group | Smoking Group | N     | %     | Ever Quit (N) | Ever Quit % | Mean Yrs Quit | Short Term (n) | Short Term % |
| 35                                           | 75-79     | Never Any     | 2912  | 33.65 |               |             |               |                |              |
| 35                                           | 75-79     | CC            | 9     | 0.10  | 0             | 0.00        |               |                |              |
| 35                                           | 75-79     | Ecig          | 593   | 6.85  |               |             |               |                |              |
| 35                                           | 75-79     | Dual          | 0     | 0.00  |               |             |               |                |              |
| 35                                           | 75-79     | Former        | 5141  | 59.40 |               |             | 32.31         | 72             | 1.40         |
| Year of Follow-up: 2030, Age Group: All Ages |           |               |       |       |               |             |               |                |              |
| Period                                       | Age Group | Smoking Group | N     | %     | Ever Quit (N) | Ever Quit % | Mean Yrs Quit | Short Term (n) | Short Term % |
| 40                                           | All Ages  | Never Any     | 27332 | 46.19 |               |             |               |                |              |
| 40                                           | All Ages  | CC            | 14    | 0.02  | 0             | 0.00        |               |                |              |
| 40                                           | All Ages  | Ecig          | 6893  | 11.65 |               |             |               |                |              |
| 40                                           | All Ages  | Dual          | 0     | 0.00  |               |             |               |                |              |
| 40                                           | All Ages  | Former        | 24931 | 42.13 |               |             | 27.27         | 722            | 2.90         |
| Year of Follow-up: 2030, Age Group: 18-19    |           |               |       |       |               |             |               |                |              |
| Period                                       | Age Group | Smoking Group | N     | %     | Ever Quit (N) | Ever Quit % | Mean Yrs Quit | Short Term (n) | Short Term % |
| 40                                           | 18-19     | Never Any     | 0     | .     |               |             |               |                |              |
| 40                                           | 18-19     | CC            | 0     | .     | 0             | .           |               |                |              |
| 40                                           | 18-19     | Ecig          | 0     | .     |               |             |               |                |              |
| 40                                           | 18-19     | Dual          | 0     | .     |               |             |               |                |              |
| 40                                           | 18-19     | Former        | 0     | .     |               |             | .             | 0              | .            |
| Year of Follow-up: 2030, Age Group: 20-24    |           |               |       |       |               |             |               |                |              |
| Period                                       | Age Group | Smoking Group | N     | %     | Ever Quit (N) | Ever Quit % | Mean Yrs Quit | Short Term (n) | Short Term % |
| 40                                           | 20-24     | Never Any     | 0     | .     |               |             |               |                |              |
| 40                                           | 20-24     | CC            | 0     | .     | 0             | .           |               |                |              |
| 40                                           | 20-24     | Ecig          | 0     | .     |               |             |               |                |              |
| 40                                           | 20-24     | Dual          | 0     | .     |               |             |               |                |              |
| 40                                           | 20-24     | Former        | 0     | .     |               |             | .             | 0              | .            |
| Year of Follow-up: 2030, Age Group: 25-29    |           |               |       |       |               |             |               |                |              |
| Period                                       | Age Group | Smoking Group | N     | %     | Ever Quit (N) | Ever Quit % | Mean Yrs Quit | Short Term (n) | Short Term % |
| 40                                           | 25-29     | Never Any     | 0     | .     |               |             |               |                |              |
| 40                                           | 25-29     | CC            | 0     | .     | 0             | .           |               |                |              |
| 40                                           | 25-29     | Ecig          | 0     | .     |               |             |               |                |              |
| 40                                           | 25-29     | Dual          | 0     | .     |               |             |               |                |              |

**Results for PHIM for Run 5 (Sensitivity\_Analysis\_4.RTF)**

| Year of Follow-up: 2030, Age Group: 30-34 | Period | Age Group | Smoking Group | N    | %     | Ever Quit (N) | Ever Quit % | Mean Yrs Quit | Short Term (n) | Short Term % |
|-------------------------------------------|--------|-----------|---------------|------|-------|---------------|-------------|---------------|----------------|--------------|
| 40                                        | 25-29  | Former    |               | 0    | .     |               |             |               | 0              | .            |
| 40                                        | 30-34  | Never Any |               | 0    | .     |               |             |               |                |              |
| 40                                        | 30-34  | CC        |               | 0    | .     | 0             | .           |               |                |              |
| 40                                        | 30-34  | Ecig      |               | 0    | .     |               |             |               |                |              |
| 40                                        | 30-34  | Dual      |               | 0    | .     |               |             |               |                |              |
| 40                                        | 30-34  | Former    |               | 0    | .     |               |             |               | 0              | .            |
| Year of Follow-up: 2030, Age Group: 35-39 | Period | Age Group | Smoking Group | N    | %     | Ever Quit (N) | Ever Quit % | Mean Yrs Quit | Short Term (n) | Short Term % |
| 40                                        | 35-39  | Never Any |               | 0    | .     |               |             |               |                |              |
| 40                                        | 35-39  | CC        |               | 0    | .     | 0             | .           |               |                |              |
| 40                                        | 35-39  | Ecig      |               | 0    | .     |               |             |               |                |              |
| 40                                        | 35-39  | Dual      |               | 0    | .     |               |             |               |                |              |
| 40                                        | 35-39  | Former    |               | 0    | .     |               |             |               | 0              | .            |
| Year of Follow-up: 2030, Age Group: 40-44 | Period | Age Group | Smoking Group | N    | %     | Ever Quit (N) | Ever Quit % | Mean Yrs Quit | Short Term (n) | Short Term % |
| 40                                        | 40-44  | Never Any |               | 0    | .     |               |             |               |                |              |
| 40                                        | 40-44  | CC        |               | 0    | .     | 0             | .           |               |                |              |
| 40                                        | 40-44  | Ecig      |               | 0    | .     |               |             |               |                |              |
| 40                                        | 40-44  | Dual      |               | 0    | .     |               |             |               |                |              |
| 40                                        | 40-44  | Former    |               | 0    | .     |               |             |               | 0              | .            |
| Year of Follow-up: 2030, Age Group: 45-49 | Period | Age Group | Smoking Group | N    | %     | Ever Quit (N) | Ever Quit % | Mean Yrs Quit | Short Term (n) | Short Term % |
| 40                                        | 45-49  | Never Any |               | 0    | .     |               |             |               |                |              |
| 40                                        | 45-49  | CC        |               | 0    | .     | 0             | .           |               |                |              |
| 40                                        | 45-49  | Ecig      |               | 0    | .     |               |             |               |                |              |
| 40                                        | 45-49  | Dual      |               | 0    | .     |               |             |               |                |              |
| 40                                        | 45-49  | Former    |               | 0    | .     |               |             |               | 0              | .            |
| Year of Follow-up: 2030, Age Group: 50-54 | Period | Age Group | Smoking Group | N    | %     | Ever Quit (N) | Ever Quit % | Mean Yrs Quit | Short Term (n) | Short Term % |
| 40                                        | 50-54  | Never Any |               | 3981 | 45.01 |               |             |               |                |              |
| 40                                        | 50-54  | CC        |               | 3    | 0.03  | 0             | 0.00        |               |                |              |
| 40                                        | 50-54  | Ecig      |               | 1580 | 17.86 |               |             |               |                |              |
| 40                                        | 50-54  | Dual      |               | 0    | 0.00  |               |             |               |                |              |
| 40                                        | 50-54  | Former    |               | 3281 | 37.09 |               |             | 22.64         | 87             | 2.65         |
| Year of Follow-up: 2030, Age Group: 55-59 | Period | Age Group | Smoking Group | N    | %     | Ever Quit (N) | Ever Quit % | Mean Yrs Quit | Short Term (n) | Short Term % |
| 40                                        | 55-59  | Never Any |               | 4679 | 51.76 |               |             |               |                |              |
| 40                                        | 55-59  | CC        |               | 1    | 0.01  | 0             | 0.00        |               |                |              |
| 40                                        | 55-59  | Ecig      |               | 1406 | 15.55 |               |             |               |                |              |
| 40                                        | 55-59  | Dual      |               | 0    | 0.00  |               |             |               |                |              |
| 40                                        | 55-59  | Former    |               | 2954 | 32.68 |               |             | 22.94         | 126            | 4.27         |
| Year of Follow-up: 2030, Age Group: 60-64 | Period | Age Group | Smoking Group | N    | %     | Ever Quit (N) | Ever Quit % | Mean Yrs Quit | Short Term (n) | Short Term % |
| 40                                        | 60-64  | Never Any |               | 5052 | 51.47 |               |             |               |                |              |
| 40                                        | 60-64  | CC        |               | 0    | 0.00  | 0             | 0.00        |               |                |              |
| 40                                        | 60-64  | Ecig      |               | 1280 | 13.04 |               |             |               |                |              |
| 40                                        | 60-64  | Dual      |               | 0    | 0.00  |               |             |               |                |              |
| 40                                        | 60-64  | Former    |               | 3484 | 35.49 |               |             | 24.36         | 194            | 5.57         |
| Year of Follow-up: 2030, Age Group: 65-69 | Period | Age Group | Smoking Group | N    | %     | Ever Quit (N) | Ever Quit % | Mean Yrs Quit | Short Term (n) | Short Term % |
| 40                                        | 65-69  | Never Any |               | 4962 | 46.53 |               |             |               |                |              |
| 40                                        | 65-69  | CC        |               | 4    | 0.04  | 0             | 0.00        |               |                |              |
| 40                                        | 65-69  | Ecig      |               | 1131 | 10.61 |               |             |               |                |              |
| 40                                        | 65-69  | Dual      |               | 0    | 0.00  |               |             |               |                |              |
| 40                                        | 65-69  | Former    |               | 4567 | 42.83 |               |             | 26.30         | 137            | 3.00         |
| Year of Follow-up: 2030, Age Group: 70-74 | Period | Age Group | Smoking Group | N    | %     | Ever Quit (N) | Ever Quit % | Mean Yrs Quit | Short Term (n) | Short Term % |
| 40                                        | 70-74  | Never Any |               | 4717 | 43.21 |               |             |               |                |              |
| 40                                        | 70-74  | CC        |               | 3    | 0.03  | 0             | 0.00        |               |                |              |
| 40                                        | 70-74  | Ecig      |               | 881  | 8.07  |               |             |               |                |              |
| 40                                        | 70-74  | Dual      |               | 0    | 0.00  |               |             |               |                |              |
| 40                                        | 70-74  | Former    |               | 5315 | 48.69 |               |             | 29.01         | 95             | 1.79         |
| Year of Follow-up: 2030, Age Group: 75-79 | Period | Age Group | Smoking Group | N    | %     | Ever Quit (N) | Ever Quit % | Mean Yrs Quit | Short Term (n) | Short Term % |
| 40                                        | 75-79  | Never Any |               | 3941 | 39.85 |               |             |               |                |              |
| 40                                        | 75-79  | CC        |               | 3    | 0.03  | 0             | 0.00        |               |                |              |

**Results for PHIM for Run 5 (Sensitivity\_Analysis\_4.RTF)**

|                                              |           |               |       |       |               |             |               |                |              |
|----------------------------------------------|-----------|---------------|-------|-------|---------------|-------------|---------------|----------------|--------------|
| 40                                           | 75-79     | Ecig          | 615   | 6.22  |               |             |               |                |              |
| 40                                           | 75-79     | Dual          | 0     | 0.00  |               |             |               |                |              |
| 40                                           | 75-79     | Former        | 5330  | 53.90 |               |             | 33.51         | 83             | 1.56         |
| Year of Follow-up: 2035, Age Group: All Ages |           |               |       |       |               |             |               |                |              |
| Period                                       | Age Group | Smoking Group | N     | %     | Ever Quit (N) | Ever Quit % | Mean Yrs Quit | Short Term (n) | Short Term % |
| 45                                           | All Ages  | Never Any     | 23391 | 47.46 |               |             |               |                |              |
| 45                                           | All Ages  | CC            | 6     | 0.01  | 0             | 0.00        |               |                |              |
| 45                                           | All Ages  | Ecig          | 4878  | 9.90  |               |             |               |                |              |
| 45                                           | All Ages  | Dual          | 0     | 0.00  |               |             |               |                |              |
| 45                                           | All Ages  | Former        | 21006 | 42.62 |               |             | 28.66         | 555            | 2.64         |
| Year of Follow-up: 2035, Age Group: 18-19    |           |               |       |       |               |             |               |                |              |
| Period                                       | Age Group | Smoking Group | N     | %     | Ever Quit (N) | Ever Quit % | Mean Yrs Quit | Short Term (n) | Short Term % |
| 45                                           | 18-19     | Never Any     | 0     | .     |               |             |               |                |              |
| 45                                           | 18-19     | CC            | 0     | .     | 0             | .           |               |                |              |
| 45                                           | 18-19     | Ecig          | 0     | .     |               |             |               |                |              |
| 45                                           | 18-19     | Dual          | 0     | .     |               |             |               |                |              |
| 45                                           | 18-19     | Former        | 0     | .     |               |             | .             | 0              | .            |
| Year of Follow-up: 2035, Age Group: 20-24    |           |               |       |       |               |             |               |                |              |
| Period                                       | Age Group | Smoking Group | N     | %     | Ever Quit (N) | Ever Quit % | Mean Yrs Quit | Short Term (n) | Short Term % |
| 45                                           | 20-24     | Never Any     | 0     | .     |               |             |               |                |              |
| 45                                           | 20-24     | CC            | 0     | .     | 0             | .           |               |                |              |
| 45                                           | 20-24     | Ecig          | 0     | .     |               |             |               |                |              |
| 45                                           | 20-24     | Dual          | 0     | .     |               |             |               |                |              |
| 45                                           | 20-24     | Former        | 0     | .     |               |             | .             | 0              | .            |
| Year of Follow-up: 2035, Age Group: 25-29    |           |               |       |       |               |             |               |                |              |
| Period                                       | Age Group | Smoking Group | N     | %     | Ever Quit (N) | Ever Quit % | Mean Yrs Quit | Short Term (n) | Short Term % |
| 45                                           | 25-29     | Never Any     | 0     | .     |               |             |               |                |              |
| 45                                           | 25-29     | CC            | 0     | .     | 0             | .           |               |                |              |
| 45                                           | 25-29     | Ecig          | 0     | .     |               |             |               |                |              |
| 45                                           | 25-29     | Dual          | 0     | .     |               |             |               |                |              |
| 45                                           | 25-29     | Former        | 0     | .     |               |             | .             | 0              | .            |
| Year of Follow-up: 2035, Age Group: 30-34    |           |               |       |       |               |             |               |                |              |
| Period                                       | Age Group | Smoking Group | N     | %     | Ever Quit (N) | Ever Quit % | Mean Yrs Quit | Short Term (n) | Short Term % |
| 45                                           | 30-34     | Never Any     | 0     | .     |               |             |               |                |              |
| 45                                           | 30-34     | CC            | 0     | .     | 0             | .           |               |                |              |
| 45                                           | 30-34     | Ecig          | 0     | .     |               |             |               |                |              |
| 45                                           | 30-34     | Dual          | 0     | .     |               |             |               |                |              |
| 45                                           | 30-34     | Former        | 0     | .     |               |             | .             | 0              | .            |
| Year of Follow-up: 2035, Age Group: 35-39    |           |               |       |       |               |             |               |                |              |
| Period                                       | Age Group | Smoking Group | N     | %     | Ever Quit (N) | Ever Quit % | Mean Yrs Quit | Short Term (n) | Short Term % |
| 45                                           | 35-39     | Never Any     | 0     | .     |               |             |               |                |              |
| 45                                           | 35-39     | CC            | 0     | .     | 0             | .           |               |                |              |
| 45                                           | 35-39     | Ecig          | 0     | .     |               |             |               |                |              |
| 45                                           | 35-39     | Dual          | 0     | .     |               |             |               |                |              |
| 45                                           | 35-39     | Former        | 0     | .     |               |             | .             | 0              | .            |
| Year of Follow-up: 2035, Age Group: 40-44    |           |               |       |       |               |             |               |                |              |
| Period                                       | Age Group | Smoking Group | N     | %     | Ever Quit (N) | Ever Quit % | Mean Yrs Quit | Short Term (n) | Short Term % |
| 45                                           | 40-44     | Never Any     | 0     | .     |               |             |               |                |              |
| 45                                           | 40-44     | CC            | 0     | .     | 0             | .           |               |                |              |
| 45                                           | 40-44     | Ecig          | 0     | .     |               |             |               |                |              |
| 45                                           | 40-44     | Dual          | 0     | .     |               |             |               |                |              |
| 45                                           | 40-44     | Former        | 0     | .     |               |             | .             | 0              | .            |
| Year of Follow-up: 2035, Age Group: 45-49    |           |               |       |       |               |             |               |                |              |
| Period                                       | Age Group | Smoking Group | N     | %     | Ever Quit (N) | Ever Quit % | Mean Yrs Quit | Short Term (n) | Short Term % |
| 45                                           | 45-49     | Never Any     | 0     | .     |               |             |               |                |              |
| 45                                           | 45-49     | CC            | 0     | .     | 0             | .           |               |                |              |
| 45                                           | 45-49     | Ecig          | 0     | .     |               |             |               |                |              |
| 45                                           | 45-49     | Dual          | 0     | .     |               |             |               |                |              |
| 45                                           | 45-49     | Former        | 0     | .     |               |             | .             | 0              | .            |
| Year of Follow-up: 2035, Age Group: 50-54    |           |               |       |       |               |             |               |                |              |
| Period                                       | Age Group | Smoking Group | N     | %     | Ever Quit (N) | Ever Quit % | Mean Yrs Quit | Short Term (n) | Short Term % |
| 45                                           | 50-54     | Never Any     | 0     | .     |               |             |               |                |              |
| 45                                           | 50-54     | CC            | 0     | .     | 0             | .           |               |                |              |
| 45                                           | 50-54     | Ecig          | 0     | .     |               |             |               |                |              |
| 45                                           | 50-54     | Dual          | 0     | .     |               |             |               |                |              |
| 45                                           | 50-54     | Former        | 0     | .     |               |             | .             | 0              | .            |
| Year of Follow-up: 2035, Age Group: 55-59    |           |               |       |       |               |             |               |                |              |
| Period                                       | Age Group | Smoking Group | N     | %     | Ever Quit (N) | Ever Quit % | Mean Yrs Quit | Short Term (n) | Short Term % |



### Results for PHIM for Run 5 (Sensitivity\_Analysis\_4.RTF)

|                                              |           |               |       |       |               |             |               |                |              |
|----------------------------------------------|-----------|---------------|-------|-------|---------------|-------------|---------------|----------------|--------------|
| 45                                           | 55-59     | Never Any     | 3981  | 45.01 |               |             |               |                |              |
| 45                                           | 55-59     | CC            | 2     | 0.02  | 0             | 0.00        |               |                |              |
| 45                                           | 55-59     | Ecig          | 1336  | 15.10 |               |             |               |                |              |
| 45                                           | 55-59     | Dual          | 0     | 0.00  |               |             |               |                |              |
| 45                                           | 55-59     | Former        | 3526  | 39.86 |               |             | 25.84         | 110            | 3.12         |
| Year of Follow-up: 2035, Age Group: 60-64    |           |               |       |       |               |             |               |                |              |
| Period                                       | Age Group | Smoking Group | N     | %     | Ever Quit (N) | Ever Quit % | Mean Yrs Quit | Short Term (n) | Short Term % |
| 45                                           | 60-64     | Never Any     | 4679  | 51.76 |               |             |               |                |              |
| 45                                           | 60-64     | CC            | 0     | 0.00  | 0             | 0.00        |               |                |              |
| 45                                           | 60-64     | Ecig          | 1111  | 12.29 |               |             |               |                |              |
| 45                                           | 60-64     | Dual          | 0     | 0.00  |               |             |               |                |              |
| 45                                           | 60-64     | Former        | 3250  | 35.95 |               |             | 25.57         | 135            | 4.15         |
| Year of Follow-up: 2035, Age Group: 65-69    |           |               |       |       |               |             |               |                |              |
| Period                                       | Age Group | Smoking Group | N     | %     | Ever Quit (N) | Ever Quit % | Mean Yrs Quit | Short Term (n) | Short Term % |
| 45                                           | 65-69     | Never Any     | 5052  | 51.47 |               |             |               |                |              |
| 45                                           | 65-69     | CC            | 0     | 0.00  | 0             | 0.00        |               |                |              |
| 45                                           | 65-69     | Ecig          | 935   | 9.53  |               |             |               |                |              |
| 45                                           | 65-69     | Dual          | 0     | 0.00  |               |             |               |                |              |
| 45                                           | 65-69     | Former        | 3829  | 39.01 |               |             | 26.92         | 107            | 2.79         |
| Year of Follow-up: 2035, Age Group: 70-74    |           |               |       |       |               |             |               |                |              |
| Period                                       | Age Group | Smoking Group | N     | %     | Ever Quit (N) | Ever Quit % | Mean Yrs Quit | Short Term (n) | Short Term % |
| 45                                           | 70-74     | Never Any     | 4962  | 46.53 |               |             |               |                |              |
| 45                                           | 70-74     | CC            | 1     | 0.01  | 0             | 0.00        |               |                |              |
| 45                                           | 70-74     | Ecig          | 860   | 8.06  |               |             |               |                |              |
| 45                                           | 70-74     | Dual          | 0     | 0.00  |               |             |               |                |              |
| 45                                           | 70-74     | Former        | 4841  | 45.40 |               |             | 29.65         | 104            | 2.15         |
| Year of Follow-up: 2035, Age Group: 75-79    |           |               |       |       |               |             |               |                |              |
| Period                                       | Age Group | Smoking Group | N     | %     | Ever Quit (N) | Ever Quit % | Mean Yrs Quit | Short Term (n) | Short Term % |
| 45                                           | 75-79     | Never Any     | 4717  | 43.21 |               |             |               |                |              |
| 45                                           | 75-79     | CC            | 3     | 0.03  | 0             | 0.00        |               |                |              |
| 45                                           | 75-79     | Ecig          | 636   | 5.83  |               |             |               |                |              |
| 45                                           | 75-79     | Dual          | 0     | 0.00  |               |             |               |                |              |
| 45                                           | 75-79     | Former        | 5560  | 50.93 |               |             | 32.60         | 99             | 1.78         |
| Year of Follow-up: 2040, Age Group: All Ages |           |               |       |       |               |             |               |                |              |
| Period                                       | Age Group | Smoking Group | N     | %     | Ever Quit (N) | Ever Quit % | Mean Yrs Quit | Short Term (n) | Short Term % |
| 50                                           | All Ages  | Never Any     | 18674 | 48.67 |               |             |               |                |              |
| 50                                           | All Ages  | CC            | 1     | 0.00  | 0             | 0.00        |               |                |              |
| 50                                           | All Ages  | Ecig          | 3090  | 8.05  |               |             |               |                |              |
| 50                                           | All Ages  | Dual          | 0     | 0.00  |               |             |               |                |              |
| 50                                           | All Ages  | Former        | 16600 | 43.27 |               |             | 30.15         | 438            | 2.64         |
| Year of Follow-up: 2040, Age Group: 18-19    |           |               |       |       |               |             |               |                |              |
| Period                                       | Age Group | Smoking Group | N     | %     | Ever Quit (N) | Ever Quit % | Mean Yrs Quit | Short Term (n) | Short Term % |
| 50                                           | 18-19     | Never Any     | 0     | .     |               |             |               |                |              |
| 50                                           | 18-19     | CC            | 0     | .     | 0             | .           |               |                |              |
| 50                                           | 18-19     | Ecig          | 0     | .     |               |             |               |                |              |
| 50                                           | 18-19     | Dual          | 0     | .     |               |             |               |                |              |
| 50                                           | 18-19     | Former        | 0     | .     |               |             | .             | 0              | .            |
| Year of Follow-up: 2040, Age Group: 20-24    |           |               |       |       |               |             |               |                |              |
| Period                                       | Age Group | Smoking Group | N     | %     | Ever Quit (N) | Ever Quit % | Mean Yrs Quit | Short Term (n) | Short Term % |
| 50                                           | 20-24     | Never Any     | 0     | .     |               |             |               |                |              |
| 50                                           | 20-24     | CC            | 0     | .     | 0             | .           |               |                |              |
| 50                                           | 20-24     | Ecig          | 0     | .     |               |             |               |                |              |
| 50                                           | 20-24     | Dual          | 0     | .     |               |             |               |                |              |
| 50                                           | 20-24     | Former        | 0     | .     |               |             | .             | 0              | .            |
| Year of Follow-up: 2040, Age Group: 25-29    |           |               |       |       |               |             |               |                |              |
| Period                                       | Age Group | Smoking Group | N     | %     | Ever Quit (N) | Ever Quit % | Mean Yrs Quit | Short Term (n) | Short Term % |
| 50                                           | 25-29     | Never Any     | 0     | .     |               |             |               |                |              |
| 50                                           | 25-29     | CC            | 0     | .     | 0             | .           |               |                |              |
| 50                                           | 25-29     | Ecig          | 0     | .     |               |             |               |                |              |
| 50                                           | 25-29     | Dual          | 0     | .     |               |             |               |                |              |
| 50                                           | 25-29     | Former        | 0     | .     |               |             | .             | 0              | .            |
| Year of Follow-up: 2040, Age Group: 30-34    |           |               |       |       |               |             |               |                |              |
| Period                                       | Age Group | Smoking Group | N     | %     | Ever Quit (N) | Ever Quit % | Mean Yrs Quit | Short Term (n) | Short Term % |
| 50                                           | 30-34     | Never Any     | 0     | .     |               |             |               |                |              |
| 50                                           | 30-34     | CC            | 0     | .     | 0             | .           |               |                |              |
| 50                                           | 30-34     | Ecig          | 0     | .     |               |             |               |                |              |
| 50                                           | 30-34     | Dual          | 0     | .     |               |             |               |                |              |
| 50                                           | 30-34     | Former        | 0     | .     |               |             | .             | 0              | .            |
| Year of Follow-up: 2040, Age Group: 35-39    |           |               |       |       |               |             |               |                |              |

### Results for PHIM for Run 5 (Sensitivity\_Analysis\_4.RTF)

| Period                                    | Age Group | Smoking Group | N    | %     | Ever Quit (N) | Ever Quit % | Mean Yrs Quit | Short Term (n) | Short Term % |
|-------------------------------------------|-----------|---------------|------|-------|---------------|-------------|---------------|----------------|--------------|
| 50                                        | 35-39     | Never Any     | 0    | .     |               |             |               |                |              |
| 50                                        | 35-39     | CC            | 0    | .     | 0             | .           |               |                |              |
| 50                                        | 35-39     | Ecig          | 0    | .     |               |             |               |                |              |
| 50                                        | 35-39     | Dual          | 0    | .     |               |             |               |                |              |
| 50                                        | 35-39     | Former        | 0    | .     |               |             | .             | 0              | .            |
| Year of Follow-up: 2040, Age Group: 40-44 |           |               |      |       |               |             |               |                |              |
| Period                                    | Age Group | Smoking Group | N    | %     | Ever Quit (N) | Ever Quit % | Mean Yrs Quit | Short Term (n) | Short Term % |
| 50                                        | 40-44     | Never Any     | 0    | .     |               |             |               |                |              |
| 50                                        | 40-44     | CC            | 0    | .     | 0             | .           |               |                |              |
| 50                                        | 40-44     | Ecig          | 0    | .     |               |             |               |                |              |
| 50                                        | 40-44     | Dual          | 0    | .     |               |             |               |                |              |
| 50                                        | 40-44     | Former        | 0    | .     |               |             | .             | 0              | .            |
| Year of Follow-up: 2040, Age Group: 45-49 |           |               |      |       |               |             |               |                |              |
| Period                                    | Age Group | Smoking Group | N    | %     | Ever Quit (N) | Ever Quit % | Mean Yrs Quit | Short Term (n) | Short Term % |
| 50                                        | 45-49     | Never Any     | 0    | .     |               |             |               |                |              |
| 50                                        | 45-49     | CC            | 0    | .     | 0             | .           |               |                |              |
| 50                                        | 45-49     | Ecig          | 0    | .     |               |             |               |                |              |
| 50                                        | 45-49     | Dual          | 0    | .     |               |             |               |                |              |
| 50                                        | 45-49     | Former        | 0    | .     |               |             | .             | 0              | .            |
| Year of Follow-up: 2040, Age Group: 50-54 |           |               |      |       |               |             |               |                |              |
| Period                                    | Age Group | Smoking Group | N    | %     | Ever Quit (N) | Ever Quit % | Mean Yrs Quit | Short Term (n) | Short Term % |
| 50                                        | 50-54     | Never Any     | 0    | .     |               |             |               |                |              |
| 50                                        | 50-54     | CC            | 0    | .     | 0             | .           |               |                |              |
| 50                                        | 50-54     | Ecig          | 0    | .     |               |             |               |                |              |
| 50                                        | 50-54     | Dual          | 0    | .     |               |             |               |                |              |
| 50                                        | 50-54     | Former        | 0    | .     |               |             | .             | 0              | .            |
| Year of Follow-up: 2040, Age Group: 55-59 |           |               |      |       |               |             |               |                |              |
| Period                                    | Age Group | Smoking Group | N    | %     | Ever Quit (N) | Ever Quit % | Mean Yrs Quit | Short Term (n) | Short Term % |
| 50                                        | 55-59     | Never Any     | 0    | .     |               |             |               |                |              |
| 50                                        | 55-59     | CC            | 0    | .     | 0             | .           |               |                |              |
| 50                                        | 55-59     | Ecig          | 0    | .     |               |             |               |                |              |
| 50                                        | 55-59     | Dual          | 0    | .     |               |             |               |                |              |
| 50                                        | 55-59     | Former        | 0    | .     |               |             | .             | 0              | .            |
| Year of Follow-up: 2040, Age Group: 60-64 |           |               |      |       |               |             |               |                |              |
| Period                                    | Age Group | Smoking Group | N    | %     | Ever Quit (N) | Ever Quit % | Mean Yrs Quit | Short Term (n) | Short Term % |
| 50                                        | 60-64     | Never Any     | 3981 | 45.01 |               |             |               |                |              |
| 50                                        | 60-64     | CC            | 0    | 0.00  | 0             | 0.00        |               |                |              |
| 50                                        | 60-64     | Ecig          | 990  | 11.19 |               |             |               |                |              |
| 50                                        | 60-64     | Dual          | 0    | 0.00  |               |             |               |                |              |
| 50                                        | 60-64     | Former        | 3874 | 43.80 |               |             | 28.26         | 144            | 3.72         |
| Year of Follow-up: 2040, Age Group: 65-69 |           |               |      |       |               |             |               |                |              |
| Period                                    | Age Group | Smoking Group | N    | %     | Ever Quit (N) | Ever Quit % | Mean Yrs Quit | Short Term (n) | Short Term % |
| 50                                        | 65-69     | Never Any     | 4679 | 51.76 |               |             |               |                |              |
| 50                                        | 65-69     | CC            | 0    | 0.00  | 0             | 0.00        |               |                |              |
| 50                                        | 65-69     | Ecig          | 768  | 8.50  |               |             |               |                |              |
| 50                                        | 65-69     | Dual          | 0    | 0.00  |               |             |               |                |              |
| 50                                        | 65-69     | Former        | 3593 | 39.75 |               |             | 27.85         | 133            | 3.70         |
| Year of Follow-up: 2040, Age Group: 70-74 |           |               |      |       |               |             |               |                |              |
| Period                                    | Age Group | Smoking Group | N    | %     | Ever Quit (N) | Ever Quit % | Mean Yrs Quit | Short Term (n) | Short Term % |
| 50                                        | 70-74     | Never Any     | 5052 | 51.47 |               |             |               |                |              |
| 50                                        | 70-74     | CC            | 0    | 0.00  | 0             | 0.00        |               |                |              |
| 50                                        | 70-74     | Ecig          | 691  | 7.04  |               |             |               |                |              |
| 50                                        | 70-74     | Dual          | 0    | 0.00  |               |             |               |                |              |
| 50                                        | 70-74     | Former        | 4073 | 41.49 |               |             | 30.14         | 81             | 1.99         |
| Year of Follow-up: 2040, Age Group: 75-79 |           |               |      |       |               |             |               |                |              |
| Period                                    | Age Group | Smoking Group | N    | %     | Ever Quit (N) | Ever Quit % | Mean Yrs Quit | Short Term (n) | Short Term % |
| 50                                        | 75-79     | Never Any     | 4962 | 46.53 |               |             |               |                |              |
| 50                                        | 75-79     | CC            | 1    | 0.01  | 0             | 0.00        |               |                |              |
| 50                                        | 75-79     | Ecig          | 641  | 6.01  |               |             |               |                |              |
| 50                                        | 75-79     | Dual          | 0    | 0.00  |               |             |               |                |              |
| 50                                        | 75-79     | Former        | 5060 | 47.45 |               |             | 33.24         | 80             | 1.58         |

## Results for PHIM for Run 5 (Sensitivity\_Analysis\_4.RTF)

\*\*\*\*\*

### Main Results for E-Component for Run: 5, Simulation: 1, COD: Four Diseases Combined

| Variable Parameter          | Value                                  |
|-----------------------------|----------------------------------------|
| 1. Country                  | US (United States)                     |
| 2. Sex                      | M (Males)                              |
| 3. Year of start of process | 1990                                   |
| 4. Cause of Death           | Four Diseases Combined                 |
| 5. Effective Dose NULL      | CC:1                                   |
| 6. Effective Dose Ecig      | CC:1 Ecig:0.05 Dual:0.525              |
| Note:                       | Death rates are per million population |

#### Results for Age Groups Combined and Years combined, Population unadjusted for deaths in Ecig scenario,

| Age Group:All | NULL     | Ecig        | %Drop       |         |        | NULL   | Ecig    | Drop    |         |         |
|---------------|----------|-------------|-------------|---------|--------|--------|---------|---------|---------|---------|
| Year          | Number   | Attrib      | Attrib      | Drop    | %Drop  | Attrib | Death   | Attrib  | Drop    |         |
|               | Deaths   | Deaths      | Deaths      | Deaths  | Deaths | Deaths | Rate    | Rates   | Rates   |         |
| All Comb      | 13148871 | 4509390.583 | 2987051.976 | 1522339 | 11.578 | 33.759 | 3806.31 | 1305.37 | 864.687 | 440.684 |

#### Results for Age Groups Combined, Population unadjusted for deaths in Ecig scenario,

| Age Group:All | NULL   | Ecig       | %Drop      |          |        | NULL   | Ecig    | Drop    |         |         |
|---------------|--------|------------|------------|----------|--------|--------|---------|---------|---------|---------|
| Year          | Number | Attrib     | Attrib     | Drop     | %Drop  | Attrib | Death   | Attrib  | Drop    |         |
|               | Deaths | Deaths     | Deaths     | Deaths   | Deaths | Deaths | Rate    | Rates   | Rates   |         |
| 1990          | 317161 | 125773.065 | 125773.065 | 0.000    | 0.000  | 0.000  | 5027.71 | 1993.78 | 0.000   |         |
| 1991          | 313217 | 123999.442 | 123575.252 | 424.190  | 0.135  | 0.342  | 4883.81 | 1933.45 | 1926.84 | 6.614   |
| 1992          | 308577 | 122014.015 | 120877.266 | 1136.749 | 0.368  | 0.932  | 4729.73 | 1870.18 | 1852.75 | 17.424  |
| 1993          | 311713 | 122810.618 | 120675.303 | 2135.315 | 0.685  | 1.739  | 4692.62 | 1848.83 | 1816.68 | 32.146  |
| 1994          | 305700 | 119925.592 | 116642.271 | 3283.320 | 1.074  | 2.738  | 4516.19 | 1771.69 | 1723.19 | 48.505  |
| 1995          | 303225 | 117896.496 | 113270.329 | 4626.167 | 1.526  | 3.924  | 4393.80 | 1708.35 | 1641.31 | 67.034  |
| 1996          | 299559 | 115698.645 | 109593.028 | 6105.618 | 2.038  | 5.277  | 4273.16 | 1650.42 | 1563.33 | 87.096  |
| 1997          | 294226 | 113359.847 | 105764.541 | 7595.306 | 2.581  | 6.700  | 4128.67 | 1590.70 | 1484.12 | 106.580 |
| 1998          | 289258 | 111444.212 | 102355.074 | 9089.138 | 3.142  | 8.156  | 3992.19 | 1538.10 | 1412.65 | 125.444 |
| 1999          | 311002 | 114877.722 | 102718.490 | 12159.23 | 3.910  | 10.584 | 4224.60 | 1560.48 | 1395.31 | 165.169 |
| 2000          | 303786 | 112379.704 | 98504.154  | 13875.55 | 4.568  | 12.347 | 4066.21 | 1504.22 | 1318.49 | 185.726 |
| 2001          | 296294 | 110024.943 | 94314.518  | 15710.43 | 5.302  | 14.279 | 3914.28 | 1453.52 | 1245.97 | 207.547 |
| 2002          | 291898 | 108289.173 | 90519.404  | 17769.77 | 6.088  | 16.410 | 3813.00 | 1414.56 | 1182.43 | 232.122 |
| 2003          | 285865 | 106539.023 | 86949.009  | 19590.01 | 6.853  | 18.388 | 3695.36 | 1377.22 | 1123.98 | 253.239 |
| 2004          | 274177 | 103037.251 | 82114.255  | 20923.00 | 7.631  | 20.306 | 3506.10 | 1317.61 | 1050.05 | 267.558 |
| 2005          | 272379 | 103044.562 | 80201.406  | 22843.16 | 8.387  | 22.168 | 3442.69 | 1302.41 | 1013.69 | 288.722 |
| 2006          | 264118 | 99672.555  | 75194.866  | 24477.69 | 9.268  | 24.558 | 3307.76 | 1248.28 | 941.725 | 306.554 |
| 2007          | 258419 | 97839.152  | 71987.951  | 25851.20 | 10.004 | 26.422 | 3203.20 | 1212.75 | 892.317 | 320.435 |
| 2008          | 259461 | 98075.852  | 70485.780  | 27590.07 | 10.634 | 28.131 | 3180.09 | 1202.07 | 863.912 | 338.159 |
| 2009          | 253907 | 95617.338  | 66815.035  | 28802.30 | 11.344 | 30.122 | 3075.31 | 1158.11 | 809.261 | 348.852 |
| 2010          | 251878 | 94607.988  | 64442.578  | 30165.41 | 11.976 | 31.885 | 3013.72 | 1131.98 | 771.055 | 360.929 |
| 2011          | 251779 | 93633.119  | 61801.417  | 31831.70 | 12.643 | 33.996 | 2982.76 | 1109.25 | 732.146 | 377.102 |
| 2012          | 252643 | 92775.175  | 59311.775  | 33463.40 | 13.245 | 36.069 | 2960.61 | 1087.19 | 695.047 | 392.142 |
| 2013          | 256175 | 92345.780  | 57211.131  | 35134.65 | 13.715 | 38.047 | 2967.76 | 1069.82 | 662.785 | 407.031 |
| 2014          | 257393 | 91379.215  | 54848.507  | 36530.71 | 14.193 | 39.977 | 2947.05 | 1046.26 | 627.994 | 418.262 |
| 2015          | 259782 | 90750.242  | 52959.080  | 37791.16 | 14.547 | 41.643 | 3346.10 | 1168.90 | 682.135 | 486.766 |
| 2016          | 261453 | 88811.996  | 49725.873  | 39086.12 | 14.950 | 44.010 | 3336.15 | 1133.24 | 634.504 | 498.741 |
| 2017          | 263685 | 87325.126  | 47096.146  | 40228.98 | 15.256 | 46.068 | 3333.85 | 1104.08 | 595.451 | 508.628 |
| 2018          | 258714 | 87612.144  | 46353.540  | 41258.60 | 15.948 | 47.092 | 3240.73 | 1097.46 | 580.638 | 516.818 |
| 2019          | 261438 | 87797.760  | 45032.087  | 42765.67 | 16.358 | 48.709 | 3242.99 | 1089.08 | 558.598 | 530.484 |
| 2020          | 262288 | 87221.042  | 43579.942  | 43641.10 | 16.639 | 50.035 | 3715.29 | 1235.48 | 617.306 | 618.173 |
| 2021          | 255079 | 82001.292  | 38819.259  | 43182.03 | 16.929 | 52.660 | 3587.82 | 1153.39 | 546.012 | 607.377 |
| 2022          | 257097 | 81915.977  | 37350.350  | 44565.63 | 17.334 | 54.404 | 3588.53 | 1143.37 | 521.332 | 622.043 |
| 2023          | 259080 | 81810.810  | 35918.720  | 45892.09 | 17.713 | 56.095 | 3586.88 | 1132.64 | 497.283 | 635.362 |
| 2024          | 260719 | 81528.303  | 34502.710  | 47025.59 | 18.037 | 57.680 | 3579.65 | 1119.38 | 473.720 | 645.658 |
| 2025          | 257308 | 79599.213  | 32832.353  | 46766.86 | 18.175 | 58.753 | 4112.08 | 1272.09 | 524.699 | 747.389 |
| 2026          | 251528 | 75082.462  | 29191.799  | 45890.66 | 18.245 | 61.120 | 4003.24 | 1194.99 | 464.607 | 730.381 |
| 2027          | 250988 | 74444.425  | 27710.636  | 46733.79 | 18.620 | 62.777 | 3976.53 | 1179.46 | 439.034 | 740.427 |
| 2028          | 250285 | 73699.585  | 26159.146  | 47540.44 | 18.995 | 64.506 | 3945.35 | 1161.76 | 412.358 | 749.401 |
| 2029          | 249525 | 72819.703  | 24672.700  | 48147.00 | 19.295 | 66.118 | 3910.99 | 1141.36 | 386.713 | 754.643 |
| 2030          | 240528 | 69309.277  | 22983.908  | 46325.37 | 19.260 | 66.839 | 4504.36 | 1297.95 | 430.418 | 867.532 |
| 2031          | 235442 | 65433.368  | 20380.725  | 45052.64 | 19.135 | 68.853 | 4397.65 | 1222.18 | 380.676 | 841.505 |
| 2032          | 234017 | 64643.552  | 19159.035  | 45484.52 | 19.436 | 70.362 | 4356.12 | 1203.31 | 356.636 | 846.672 |
| 2033          | 232559 | 63793.514  | 18008.588  | 45784.93 | 19.687 | 71.771 | 4310.93 | 1182.54 | 333.824 | 848.712 |
| 2034          | 230963 | 63032.151  | 16923.682  | 46108.47 | 19.964 | 73.151 | 4260.75 | 1162.80 | 312.204 | 850.597 |
| 2035          | 215822 | 57653.301  | 15405.421  | 42247.88 | 19.575 | 73.279 | 4924.38 | 1315.47 | 351.504 | 963.966 |
| 2036          | 208183 | 52988.733  | 12935.951  | 40052.78 | 19.239 | 75.587 | 4748.94 | 1208.75 | 295.087 | 913.659 |
| 2037          | 205491 | 52026.921  | 12004.499  | 40022.42 | 19.476 | 76.926 | 4682.40 | 1185.50 | 273.539 | 911.964 |
| 2038          | 202834 | 50943.211  | 11088.477  | 39854.73 | 19.649 | 78.234 | 4612.18 | 1158.38 | 252.138 | 906.245 |
| 2039          | 200251 | 50085.991  | 10310.944  | 39775.05 | 19.863 | 79.414 | 4538.65 | 1135.19 | 233.696 | 901.495 |

## Results for PHIM for Run 5 (Sensitivity\_Analysis\_4.RTF)

\*\*\*\*\*

### Main Results for E-Component for Run: 5, Simulation: 1, COD: LUNG CANCER

| Variable Parameter          | Value                                  |
|-----------------------------|----------------------------------------|
| 1. Country                  | US (United States)                     |
| 2. Sex                      | M (Males)                              |
| 3. Year of start of process | 1990                                   |
| 4. Cause of Death           | LUNG CANCER                            |
| 5. Effective Dose NULL      | CC:1                                   |
| 6. Effective Dose Ecig      | CC:1 Ecig:0.05 Dual:0.525              |
| Note:                       | Death rates are per million population |

#### Results for Age Groups Combined and Years combined, Population unadjusted for deaths in Ecig scenario,

| Age Group:All |         | NULL        | Ecig        | %Drop    |        | NULL   | Ecig    | Drop    |         |         |
|---------------|---------|-------------|-------------|----------|--------|--------|---------|---------|---------|---------|
| Year          | Number  | Attrib      | Attrib      | Drop     | %Drop  | Attrib | Death   | Attrib  | Attrib  | Drop    |
|               | Deaths  | Deaths      | Deaths      | Deaths   | Deaths | Deaths | Rate    | Rates   | Rates   | Rates   |
| All Comb      | 3065988 | 2244988.113 | 1723993.766 | 520994.3 | 16.993 | 23.207 | 887.537 | 649.875 | 499.059 | 150.817 |

#### Results for Age Groups Combined, Population unadjusted for deaths in Ecig scenario,

| Age Group:All |        | NULL      | Ecig      | %Drop    |        | NULL   | Ecig    | Drop    |         |         |
|---------------|--------|-----------|-----------|----------|--------|--------|---------|---------|---------|---------|
| Year          | Number | Attrib    | Attrib    | Drop     | %Drop  | Attrib | Death   | Attrib  | Attrib  | Drop    |
|               | Deaths | Deaths    | Deaths    | Deaths   | Deaths | Deaths | Rate    | Rates   | Rates   | Rates   |
| 1990          | 78822  | 63385.736 | 63385.736 | 0.000    | 0.000  | 0.000  | 1249.50 | 1004.81 | 1004.81 | 0.000   |
| 1991          | 78462  | 62918.402 | 62870.284 | 48.118   | 0.061  | 0.076  | 1223.41 | 981.049 | 980.299 | 0.750   |
| 1992          | 77987  | 62366.766 | 62237.572 | 129.193  | 0.166  | 0.207  | 1195.35 | 955.930 | 953.949 | 1.980   |
| 1993          | 78542  | 62652.888 | 62398.515 | 254.373  | 0.324  | 0.406  | 1182.39 | 943.195 | 939.365 | 3.829   |
| 1994          | 77437  | 61565.227 | 61163.823 | 401.404  | 0.518  | 0.652  | 1144.00 | 909.520 | 903.590 | 5.930   |
| 1995          | 76904  | 60851.961 | 60267.837 | 584.124  | 0.760  | 0.960  | 1114.36 | 881.759 | 873.295 | 8.464   |
| 1996          | 76232  | 60122.922 | 59308.526 | 814.395  | 1.068  | 1.355  | 1087.44 | 857.643 | 846.026 | 11.617  |
| 1997          | 75473  | 59237.155 | 58175.094 | 1062.060 | 1.407  | 1.793  | 1059.06 | 831.234 | 816.331 | 14.903  |
| 1998          | 75381  | 58906.696 | 57537.317 | 1369.379 | 1.817  | 2.325  | 1040.37 | 813.001 | 794.101 | 18.899  |
| 1999          | 73159  | 56930.073 | 55258.857 | 1671.216 | 2.284  | 2.936  | 993.781 | 773.329 | 750.628 | 22.702  |
| 2000          | 73784  | 57137.121 | 55072.525 | 2064.596 | 2.798  | 3.613  | 987.608 | 764.787 | 737.153 | 27.635  |
| 2001          | 73294  | 56481.726 | 53973.274 | 2508.453 | 3.422  | 4.441  | 968.273 | 746.169 | 713.031 | 33.139  |
| 2002          | 72442  | 55588.365 | 52613.366 | 2974.999 | 4.107  | 5.352  | 946.293 | 726.138 | 687.276 | 38.862  |
| 2003          | 71942  | 54945.856 | 51454.338 | 3491.519 | 4.853  | 6.354  | 929.989 | 710.281 | 665.146 | 45.135  |
| 2004          | 71301  | 54203.126 | 50142.468 | 4060.657 | 5.695  | 7.492  | 911.778 | 693.135 | 641.208 | 51.927  |
| 2005          | 70964  | 53744.603 | 49095.059 | 4649.544 | 6.552  | 8.651  | 896.937 | 679.296 | 620.528 | 58.767  |
| 2006          | 69658  | 52535.572 | 47268.112 | 5267.459 | 7.562  | 10.026 | 872.383 | 657.945 | 591.976 | 65.969  |
| 2007          | 68565  | 51492.124 | 45613.741 | 5878.383 | 8.573  | 11.416 | 849.888 | 638.264 | 565.399 | 72.865  |
| 2008          | 68226  | 51030.736 | 44411.967 | 6618.769 | 9.701  | 12.970 | 836.215 | 625.460 | 544.337 | 81.123  |
| 2009          | 67509  | 50276.199 | 42917.119 | 7359.080 | 10.901 | 14.637 | 817.667 | 608.943 | 519.811 | 89.133  |
| 2010          | 67196  | 49840.933 | 41739.024 | 8101.908 | 12.057 | 16.256 | 804.000 | 596.347 | 499.407 | 96.939  |
| 2011          | 66506  | 49072.841 | 40153.181 | 8919.660 | 13.412 | 18.176 | 787.880 | 581.354 | 475.685 | 105.669 |
| 2012          | 66155  | 48539.512 | 38742.553 | 9796.959 | 14.809 | 20.183 | 775.240 | 568.812 | 454.006 | 114.806 |
| 2013          | 65333  | 47675.741 | 37098.405 | 10577.34 | 16.190 | 22.186 | 756.876 | 552.318 | 429.781 | 122.537 |
| 2014          | 65033  | 47194.534 | 35803.082 | 11391.45 | 17.516 | 24.137 | 744.602 | 540.359 | 409.931 | 130.428 |
| 2015          | 64145  | 46305.842 | 34206.072 | 12099.77 | 18.863 | 26.130 | 726.215 | 526.439 | 440.589 | 155.850 |
| 2016          | 61618  | 44208.867 | 31696.807 | 12512.06 | 20.306 | 28.302 | 786.248 | 564.107 | 404.453 | 159.654 |
| 2017          | 59897  | 42702.624 | 29710.264 | 12992.36 | 21.691 | 30.425 | 757.297 | 539.903 | 375.636 | 164.266 |
| 2018          | 62468  | 44321.202 | 29725.700 | 14595.50 | 23.365 | 32.931 | 782.490 | 555.181 | 372.353 | 182.828 |
| 2019          | 63045  | 44493.088 | 28828.830 | 15664.26 | 24.846 | 35.206 | 782.035 | 551.912 | 357.605 | 194.306 |
| 2020          | 63466  | 44529.551 | 27867.589 | 16661.96 | 26.253 | 37.418 | 898.991 | 630.757 | 394.742 | 236.015 |
| 2021          | 57113  | 39852.556 | 23975.344 | 15877.21 | 27.800 | 39.840 | 803.323 | 560.546 | 337.225 | 223.321 |
| 2022          | 57440  | 39853.685 | 22985.584 | 16868.10 | 29.366 | 42.325 | 801.745 | 556.274 | 320.830 | 235.443 |
| 2023          | 57738  | 39847.050 | 22004.227 | 17842.82 | 30.903 | 44.778 | 799.366 | 551.670 | 304.642 | 247.028 |
| 2024          | 57942  | 39726.010 | 21017.645 | 18708.37 | 32.288 | 47.093 | 795.539 | 545.435 | 288.571 | 256.865 |
| 2025          | 57521  | 39207.348 | 19915.353 | 19291.99 | 33.539 | 49.205 | 919.257 | 626.579 | 318.270 | 308.308 |
| 2026          | 51428  | 34803.960 | 16873.890 | 17930.07 | 34.864 | 51.517 | 818.510 | 553.929 | 268.559 | 285.369 |
| 2027          | 51172  | 34484.595 | 15895.856 | 18588.74 | 36.326 | 53.904 | 810.740 | 546.357 | 251.846 | 294.511 |
| 2028          | 50870  | 34100.638 | 14891.759 | 19208.88 | 37.761 | 56.330 | 801.884 | 537.544 | 234.745 | 302.798 |
| 2029          | 50540  | 33669.838 | 13940.498 | 19729.34 | 39.037 | 58.596 | 792.146 | 527.732 | 218.500 | 309.232 |
| 2030          | 49109  | 32557.688 | 12907.449 | 19650.24 | 40.013 | 60.355 | 919.662 | 609.705 | 241.717 | 367.988 |
| 2031          | 43585  | 28646.393 | 10786.684 | 17859.71 | 40.976 | 62.345 | 814.096 | 535.065 | 201.476 | 333.588 |
| 2032          | 43163  | 28227.160 | 10050.052 | 18177.11 | 42.113 | 64.396 | 803.454 | 525.435 | 187.077 | 338.358 |
| 2033          | 42725  | 27786.623 | 9361.605  | 18425.02 | 43.124 | 66.309 | 791.996 | 515.079 | 173.535 | 341.543 |
| 2034          | 42256  | 27348.299 | 8722.538  | 18625.76 | 44.079 | 68.106 | 779.523 | 504.514 | 160.911 | 343.603 |
| 2035          | 39748  | 25570.077 | 7883.988  | 17686.09 | 44.495 | 69.167 | 906.933 | 583.430 | 179.888 | 403.542 |
| 2036          | 34030  | 21717.319 | 6206.834  | 15510.49 | 45.579 | 71.420 | 776.269 | 495.402 | 141.586 | 353.815 |
| 2037          | 33454  | 21256.024 | 5720.530  | 15535.49 | 46.439 | 73.087 | 762.289 | 484.347 | 130.350 | 353.997 |
| 2038          | 32883  | 20747.175 | 5252.772  | 15494.40 | 47.120 | 74.682 | 747.720 | 471.764 | 119.441 | 352.323 |
| 2039          | 32325  | 20327.688 | 4864.119  | 15463.57 | 47.838 | 76.071 | 732.644 | 460.724 | 110.244 | 350.479 |

## Results for PHIM for Run 5 (Sensitivity\_Analysis\_4.RTF)

\*\*\*\*\*

### Main Results for E-Component for Run: 5, Simulation: 1, COD: IHD

| Variable Parameter          | Value                                  |
|-----------------------------|----------------------------------------|
| 1. Country                  | US (United States)                     |
| 2. Sex                      | M (Males)                              |
| 3. Year of start of process | 1990                                   |
| 4. Cause of Death           | IHD                                    |
| 5. Effective Dose NULL      | CC:1                                   |
| 6. Effective Dose Ecig      | CC:1 Ecig:0.05 Dual:0.525              |
| Note:                       | Death rates are per million population |

#### Results for Age Groups Combined and Years combined, Population unadjusted for deaths in Ecig scenario,

| Age Group:All |         | NULL        | Ecig       | %Drop    |        |        | NULL    | Ecig    | Drop    |         |
|---------------|---------|-------------|------------|----------|--------|--------|---------|---------|---------|---------|
| Year          | Number  | Attrib      | Attrib     | Drop     | %Drop  | Attrib | Death   | Attrib  | Attrib  | Drop    |
|               | Deaths  | Deaths      | Deaths     | Deaths   | Deaths | Deaths | Rate    | Rates   | Rates   | Rates   |
| All Comb      | 6360041 | 1098877.421 | 516561.428 | 582316.0 | 9.156  | 52.992 | 1841.09 | 318.101 | 149.533 | 168.568 |

#### Results for Age Groups Combined, Population unadjusted for deaths in Ecig scenario,

| Age Group:All |        | NULL      | Ecig      | %Drop    |        |        | NULL    | Ecig    | Drop    |         |
|---------------|--------|-----------|-----------|----------|--------|--------|---------|---------|---------|---------|
| Year          | Number | Attrib    | Attrib    | Drop     | %Drop  | Attrib | Death   | Attrib  | Attrib  | Drop    |
|               | Deaths | Deaths    | Deaths    | Deaths   | Deaths | Deaths | Rate    | Rates   | Rates   | Rates   |
| 1990          | 171484 | 38511.725 | 38511.725 | 0.000    | 0.000  | 0.000  | 2718.40 | 610.497 | 610.497 | 0.000   |
| 1991          | 168044 | 37309.838 | 36996.011 | 313.827  | 0.187  | 0.841  | 2620.21 | 581.750 | 576.857 | 4.893   |
| 1992          | 164548 | 36137.488 | 35292.963 | 844.525  | 0.513  | 2.337  | 2522.12 | 553.899 | 540.955 | 12.945  |
| 1993          | 164362 | 35599.588 | 34035.946 | 1563.641 | 0.951  | 4.392  | 2474.35 | 535.926 | 512.387 | 23.540  |
| 1994          | 159866 | 34336.757 | 31950.255 | 2386.502 | 1.493  | 6.950  | 2361.75 | 507.267 | 472.010 | 35.256  |
| 1995          | 158083 | 33455.759 | 30119.149 | 3336.610 | 2.111  | 9.973  | 2290.66 | 484.782 | 436.433 | 48.348  |
| 1996          | 154875 | 32193.824 | 27848.952 | 4344.872 | 2.805  | 13.496 | 2209.26 | 459.239 | 397.260 | 61.979  |
| 1997          | 149970 | 30665.509 | 25343.405 | 5322.104 | 3.549  | 17.355 | 2104.43 | 430.308 | 355.627 | 74.681  |
| 1998          | 145407 | 29188.430 | 22951.387 | 6237.044 | 4.289  | 21.368 | 2006.83 | 402.844 | 316.763 | 86.081  |
| 1999          | 165952 | 33375.386 | 24697.075 | 8678.311 | 5.229  | 26.002 | 2254.27 | 453.366 | 335.481 | 117.885 |
| 2000          | 160260 | 32024.754 | 22306.768 | 9717.986 | 6.064  | 30.345 | 2145.10 | 428.655 | 298.579 | 130.076 |
| 2001          | 154444 | 30682.393 | 19885.325 | 10797.07 | 6.991  | 35.190 | 2040.33 | 405.339 | 262.701 | 142.638 |
| 2002          | 151887 | 30218.370 | 18156.090 | 12062.28 | 7.942  | 39.917 | 1984.06 | 394.736 | 237.169 | 157.567 |
| 2003          | 146733 | 29175.202 | 16180.437 | 12994.76 | 8.856  | 44.540 | 1896.81 | 377.146 | 209.163 | 167.982 |
| 2004          | 138381 | 27488.687 | 14010.906 | 13477.78 | 9.740  | 49.030 | 1769.58 | 351.518 | 179.168 | 172.350 |
| 2005          | 135881 | 27017.439 | 12669.888 | 14347.55 | 10.559 | 53.105 | 1717.44 | 341.482 | 160.139 | 181.343 |
| 2006          | 131922 | 26231.435 | 11144.789 | 15086.65 | 11.436 | 57.514 | 1652.16 | 328.517 | 139.575 | 188.942 |
| 2007          | 126502 | 25103.049 | 9705.811  | 15397.24 | 12.172 | 61.336 | 1568.04 | 311.161 | 120.307 | 190.854 |
| 2008          | 125859 | 24621.740 | 8742.389  | 15879.35 | 12.617 | 64.493 | 1542.60 | 301.777 | 107.151 | 194.626 |
| 2009          | 122428 | 23741.177 | 7708.160  | 16033.02 | 13.096 | 67.533 | 1482.84 | 287.552 | 93.361  | 194.191 |
| 2010          | 120537 | 23189.160 | 6902.998  | 16286.16 | 13.511 | 70.232 | 1442.22 | 277.458 | 82.594  | 194.864 |
| 2011          | 120221 | 22786.927 | 6154.165  | 16632.76 | 13.835 | 72.993 | 1424.23 | 269.951 | 72.907  | 197.044 |
| 2012          | 120927 | 22485.295 | 5546.278  | 16939.02 | 14.008 | 75.334 | 1417.09 | 263.495 | 64.994  | 198.501 |
| 2013          | 122648 | 22251.884 | 5035.343  | 17216.54 | 14.037 | 77.371 | 1420.86 | 257.786 | 58.334  | 199.452 |
| 2014          | 123229 | 21894.593 | 4551.659  | 17342.93 | 14.074 | 79.211 | 1410.92 | 250.685 | 52.115  | 198.570 |
| 2015          | 123774 | 21471.109 | 4130.222  | 17340.89 | 14.010 | 80.764 | 1594.26 | 276.557 | 53.199  | 223.358 |
| 2016          | 126218 | 21411.568 | 3757.309  | 17654.26 | 13.987 | 82.452 | 1610.55 | 273.213 | 47.943  | 225.269 |
| 2017          | 128265 | 21169.399 | 3422.759  | 17746.64 | 13.836 | 83.832 | 1621.69 | 267.651 | 43.275  | 224.376 |
| 2018          | 121429 | 19830.576 | 2927.692  | 16902.88 | 13.920 | 85.236 | 1521.05 | 248.404 | 36.673  | 211.731 |
| 2019          | 121832 | 19431.014 | 2671.534  | 16759.48 | 13.756 | 86.251 | 1511.26 | 241.031 | 33.139  | 207.892 |
| 2020          | 120811 | 18532.612 | 2387.282  | 16145.33 | 13.364 | 87.118 | 1711.27 | 262.513 | 33.816  | 228.697 |
| 2021          | 119407 | 18234.128 | 2157.656  | 16076.47 | 13.464 | 88.167 | 1679.51 | 256.472 | 30.349  | 226.124 |
| 2022          | 119438 | 17812.559 | 1962.771  | 15849.79 | 13.270 | 88.981 | 1667.10 | 248.626 | 27.396  | 221.230 |
| 2023          | 119445 | 17361.668 | 1786.418  | 15575.25 | 13.040 | 89.711 | 1653.68 | 240.367 | 24.732  | 215.634 |
| 2024          | 119305 | 16929.676 | 1646.181  | 15283.50 | 12.810 | 90.276 | 1638.05 | 232.443 | 22.602  | 209.841 |
| 2025          | 115685 | 15501.666 | 1439.154  | 14062.51 | 12.156 | 90.716 | 1848.78 | 247.735 | 22.999  | 224.735 |
| 2026          | 115073 | 15523.814 | 1361.121  | 14162.69 | 12.308 | 91.232 | 1831.46 | 247.072 | 21.663  | 225.409 |
| 2027          | 113989 | 15073.070 | 1265.929  | 13807.14 | 12.113 | 91.601 | 1805.98 | 238.810 | 20.057  | 218.754 |
| 2028          | 112855 | 14636.710 | 1170.471  | 13466.24 | 11.932 | 92.003 | 1778.98 | 230.725 | 18.451  | 212.274 |
| 2029          | 111718 | 14180.166 | 1089.455  | 13090.71 | 11.718 | 92.317 | 1751.04 | 222.256 | 17.076  | 205.180 |
| 2030          | 104851 | 12111.772 | 906.338   | 11205.43 | 10.687 | 92.517 | 1963.54 | 226.816 | 16.973  | 209.843 |
| 2031          | 105289 | 12417.367 | 907.452   | 11509.91 | 10.932 | 92.692 | 1966.62 | 231.935 | 16.950  | 214.985 |
| 2032          | 103879 | 12054.064 | 856.120   | 11197.94 | 10.780 | 92.898 | 1933.67 | 224.381 | 15.936  | 208.444 |
| 2033          | 102485 | 11672.389 | 801.780   | 10870.61 | 10.607 | 93.131 | 1899.76 | 216.370 | 14.863  | 201.508 |
| 2034          | 101070 | 11365.762 | 762.928   | 10602.83 | 10.491 | 93.287 | 1864.51 | 209.673 | 14.074  | 195.598 |
| 2035          | 90820  | 8580.360  | 561.850   | 8018.510 | 8.829  | 93.452 | 2072.23 | 195.777 | 12.820  | 182.958 |
| 2036          | 92117  | 8948.841  | 576.278   | 8372.563 | 9.089  | 93.560 | 2101.31 | 204.135 | 13.146  | 190.990 |
| 2037          | 90327  | 8624.570  | 552.085   | 8072.485 | 8.937  | 93.599 | 2058.21 | 196.522 | 12.580  | 183.942 |
| 2038          | 88590  | 8315.017  | 521.079   | 7793.938 | 8.798  | 93.733 | 2014.42 | 189.073 | 11.849  | 177.224 |
| 2039          | 86921  | 8001.132  | 491.693   | 7509.439 | 8.639  | 93.855 | 1970.05 | 181.344 | 11.144  | 170.200 |

## Results for PHIM for Run 5 (Sensitivity\_Analysis\_4.RTF)

\*\*\*\*\*

### Main Results for E-Component for Run: 5, Simulation: 1, COD: STROKE

| Variable Parameter          | Value                                  |
|-----------------------------|----------------------------------------|
| 1. Country                  | US (United States)                     |
| 2. Sex                      | M (Males)                              |
| 3. Year of start of process | 1990                                   |
| 4. Cause of Death           | STROKE                                 |
| 5. Effective Dose NULL      | CC:1                                   |
| 6. Effective Dose Ecig      | CC:1 Ecig:0.05 Dual:0.525              |
| Note:                       | Death rates are per million population |

#### Results for Age Groups Combined and Years combined, Population unadjusted for deaths in Ecig scenario,

| Age Group:All |         | NULL       | Ecig      | %Drop    |        |        | NULL    | Ecig   | Drop   |        |
|---------------|---------|------------|-----------|----------|--------|--------|---------|--------|--------|--------|
| Year          | Number  | Attrib     | Attrib    | Drop     | %Drop  | Attrib | Death   | Attrib | Drop   |        |
|               | Deaths  | Deaths     | Deaths    | Deaths   | Deaths | Deaths | Rate    | Rates  | Rates  |        |
| All Comb      | 1489699 | 149918.462 | 69667.866 | 80250.60 | 5.387  | 53.529 | 431.236 | 43.398 | 20.167 | 23.231 |

#### Results for Age Groups Combined, Population unadjusted for deaths in Ecig scenario,

| Age Group:All |        | NULL     | Ecig     | %Drop    |        |        | NULL    | Ecig   | Drop   |        |
|---------------|--------|----------|----------|----------|--------|--------|---------|--------|--------|--------|
| Year          | Number | Attrib   | Attrib   | Drop     | %Drop  | Attrib | Death   | Attrib | Drop   |        |
|               | Deaths | Deaths   | Deaths   | Deaths   | Deaths | Deaths | Rate    | Rates  | Rates  |        |
| 1990          | 32862  | 4613.166 | 4613.166 | 0.000    | 0.000  | 0.000  | 520.936 | 73.129 | 0.000  |        |
| 1991          | 32619  | 4555.566 | 4515.509 | 40.057   | 0.123  | 0.879  | 508.609 | 71.032 | 70.408 | 0.625  |
| 1992          | 32100  | 4453.572 | 4348.505 | 105.068  | 0.327  | 2.359  | 492.014 | 68.262 | 66.652 | 1.610  |
| 1993          | 32896  | 4462.473 | 4263.949 | 198.524  | 0.603  | 4.449  | 495.226 | 67.179 | 64.191 | 2.989  |
| 1994          | 33323  | 4499.513 | 4186.132 | 313.381  | 0.940  | 6.965  | 492.290 | 66.473 | 61.843 | 4.630  |
| 1995          | 33569  | 4472.774 | 4028.417 | 444.357  | 1.324  | 9.935  | 486.422 | 64.812 | 58.373 | 6.439  |
| 1996          | 33870  | 4406.878 | 3817.694 | 589.184  | 1.740  | 13.370 | 483.150 | 62.863 | 54.459 | 8.405  |
| 1997          | 33516  | 4288.158 | 3552.027 | 736.131  | 2.196  | 17.167 | 470.307 | 60.173 | 49.843 | 10.330 |
| 1998          | 32795  | 4120.148 | 3249.789 | 870.359  | 2.654  | 21.124 | 452.620 | 56.864 | 44.852 | 12.012 |
| 1999          | 33375  | 3982.443 | 2978.383 | 1004.060 | 3.008  | 25.212 | 453.361 | 54.097 | 40.458 | 13.639 |
| 2000          | 33459  | 4021.411 | 2841.136 | 1180.275 | 3.528  | 29.350 | 447.853 | 53.827 | 38.029 | 15.798 |
| 2001          | 32275  | 3848.092 | 2549.285 | 1298.807 | 4.024  | 33.752 | 426.379 | 50.836 | 33.678 | 17.158 |
| 2002          | 31586  | 3783.081 | 2345.754 | 1437.327 | 4.551  | 37.994 | 412.601 | 49.418 | 30.642 | 18.775 |
| 2003          | 30985  | 3754.415 | 2163.741 | 1590.674 | 5.134  | 42.368 | 400.541 | 48.533 | 27.971 | 20.563 |
| 2004          | 29884  | 3666.274 | 1959.773 | 1706.501 | 5.710  | 46.546 | 382.149 | 46.883 | 25.061 | 21.822 |
| 2005          | 28708  | 3589.688 | 1772.920 | 1816.768 | 6.328  | 50.611 | 362.850 | 45.371 | 22.409 | 22.963 |
| 2006          | 28188  | 3596.985 | 1629.051 | 1967.934 | 6.981  | 54.711 | 353.021 | 45.048 | 20.402 | 24.646 |
| 2007          | 28026  | 3560.798 | 1480.993 | 2079.805 | 7.421  | 58.408 | 347.392 | 44.137 | 18.357 | 25.780 |
| 2008          | 27128  | 3417.001 | 1305.175 | 2111.826 | 7.785  | 61.803 | 332.495 | 41.881 | 15.997 | 25.884 |
| 2009          | 27068  | 3394.390 | 1190.057 | 2204.332 | 8.144  | 64.940 | 327.847 | 41.113 | 14.414 | 26.699 |
| 2010          | 26911  | 3340.137 | 1079.151 | 2260.986 | 8.402  | 67.691 | 321.990 | 39.965 | 12.912 | 27.053 |
| 2011          | 26959  | 3285.435 | 974.789  | 2310.646 | 8.571  | 70.330 | 319.377 | 38.922 | 11.548 | 27.374 |
| 2012          | 27057  | 3259.209 | 881.789  | 2377.420 | 8.787  | 72.945 | 317.068 | 38.193 | 10.333 | 27.860 |
| 2013          | 27904  | 3274.703 | 811.854  | 2462.848 | 8.826  | 75.208 | 323.265 | 37.937 | 9.405  | 28.532 |
| 2014          | 28792  | 3298.083 | 747.421  | 2550.662 | 8.859  | 77.338 | 329.657 | 37.762 | 8.558  | 29.204 |
| 2015          | 29560  | 3244.406 | 679.725  | 2564.681 | 8.676  | 79.049 | 380.745 | 41.789 | 8.755  | 33.034 |
| 2016          | 30513  | 3314.836 | 636.697  | 2678.140 | 8.777  | 80.793 | 389.347 | 42.297 | 8.124  | 34.173 |
| 2017          | 31416  | 3333.314 | 588.300  | 2745.014 | 8.738  | 82.351 | 397.202 | 42.144 | 7.438  | 34.706 |
| 2018          | 29348  | 2925.242 | 479.321  | 2445.921 | 8.334  | 83.614 | 367.626 | 36.642 | 6.004  | 30.638 |
| 2019          | 29598  | 2864.628 | 435.866  | 2428.762 | 8.206  | 84.785 | 367.149 | 35.534 | 5.407  | 30.127 |
| 2020          | 29592  | 2730.366 | 387.298  | 2343.068 | 7.918  | 85.815 | 419.174 | 38.675 | 5.486  | 33.189 |
| 2021          | 30097  | 2647.911 | 349.483  | 2298.427 | 7.637  | 86.802 | 423.328 | 37.244 | 4.916  | 32.329 |
| 2022          | 30304  | 2586.165 | 316.612  | 2269.552 | 7.489  | 87.757 | 422.974 | 36.097 | 4.419  | 31.678 |
| 2023          | 30505  | 2517.960 | 287.422  | 2230.538 | 7.312  | 88.585 | 422.337 | 34.860 | 3.979  | 30.881 |
| 2024          | 30661  | 2454.161 | 263.675  | 2190.485 | 7.144  | 89.256 | 420.968 | 33.695 | 3.620  | 30.075 |
| 2025          | 30254  | 2275.364 | 230.891  | 2044.473 | 6.758  | 89.853 | 483.488 | 36.363 | 3.690  | 32.673 |
| 2026          | 30685  | 2183.166 | 209.564  | 1973.602 | 6.432  | 90.401 | 488.380 | 34.747 | 3.335  | 31.411 |
| 2027          | 30561  | 2112.345 | 193.035  | 1919.309 | 6.280  | 90.862 | 484.196 | 33.467 | 3.058  | 30.409 |
| 2028          | 30412  | 2046.677 | 177.986  | 1868.690 | 6.145  | 91.304 | 479.392 | 32.263 | 2.806  | 29.457 |
| 2029          | 30254  | 1977.671 | 164.480  | 1813.191 | 5.993  | 91.683 | 474.195 | 30.997 | 2.578  | 28.419 |
| 2030          | 29330  | 1744.457 | 139.711  | 1604.746 | 5.471  | 91.991 | 549.260 | 32.668 | 2.616  | 30.052 |
| 2031          | 28976  | 1653.738 | 128.218  | 1525.519 | 5.265  | 92.247 | 541.223 | 30.889 | 2.395  | 28.494 |
| 2032          | 28724  | 1603.120 | 119.453  | 1483.667 | 5.165  | 92.549 | 534.690 | 29.841 | 2.224  | 27.618 |
| 2033          | 28464  | 1548.245 | 111.617  | 1436.627 | 5.047  | 92.791 | 527.627 | 28.700 | 2.069  | 26.631 |
| 2034          | 28178  | 1511.985 | 105.905  | 1406.080 | 4.990  | 92.996 | 519.826 | 27.893 | 1.954  | 25.939 |
| 2035          | 26737  | 1239.866 | 84.684   | 1155.182 | 4.320  | 93.170 | 610.065 | 28.290 | 1.932  | 26.358 |
| 2036          | 25591  | 1182.522 | 78.914   | 1103.608 | 4.313  | 93.327 | 583.762 | 26.975 | 1.800  | 25.175 |
| 2037          | 25143  | 1134.483 | 75.268   | 1059.215 | 4.213  | 93.365 | 572.916 | 25.851 | 1.715  | 24.136 |
| 2038          | 24693  | 1093.537 | 70.882   | 1022.655 | 4.141  | 93.518 | 561.491 | 24.866 | 1.612  | 23.254 |
| 2039          | 24247  | 1047.905 | 66.396   | 981.509  | 4.048  | 93.664 | 549.553 | 23.751 | 1.505  | 22.246 |

## Results for PHIM for Run 5 (Sensitivity\_Analysis\_4.RTF)

\*\*\*\*\*

### Main Results for E-Component for Run: 5, Simulation: 1, COD: COPD

| Variable Parameter          | Value                                  |
|-----------------------------|----------------------------------------|
| 1. Country                  | US (United States)                     |
| 2. Sex                      | M (Males)                              |
| 3. Year of start of process | 1990                                   |
| 4. Cause of Death           | COPD                                   |
| 5. Effective Dose NULL      | CC:1                                   |
| 6. Effective Dose Ecig      | CC:1 Ecig:0.05 Dual:0.525              |
| Note:                       | Death rates are per million population |

#### Results for Age Groups Combined and Years combined, Population unadjusted for deaths in Ecig scenario,

| Age Group:All | NULL    | Ecig        | %Drop      |          |        |        | NULL    | Ecig    | Drop    |        |
|---------------|---------|-------------|------------|----------|--------|--------|---------|---------|---------|--------|
| Year          | Number  | Attrib      | Attrib     | Drop     | %Drop  | Attrib | Death   | Attrib  | Attrib  | Drop   |
|               | Deaths  | Deaths      | Deaths     | Deaths   | Deaths | Deaths | Rate    | Rates   | Rates   | Rates  |
| All Comb      | 2233143 | 1015606.587 | 676828.916 | 338777.7 | 15.170 | 33.357 | 646.447 | 293.996 | 195.927 | 98.069 |

#### Results for Age Groups Combined, Population unadjusted for deaths in Ecig scenario,

| Age Group:All | NULL   | Ecig      | %Drop     |          |        |        | NULL    | Ecig    | Drop    |         |
|---------------|--------|-----------|-----------|----------|--------|--------|---------|---------|---------|---------|
| Year          | Number | Attrib    | Attrib    | Drop     | %Drop  | Attrib | Death   | Attrib  | Attrib  | Drop    |
|               | Deaths | Deaths    | Deaths    | Deaths   | Deaths | Deaths | Rate    | Rates   | Rates   | Rates   |
| 1990          | 33993  | 19262.437 | 19262.437 | 0.000    | 0.000  | 0.000  | 538.865 | 305.353 | 305.353 | 0.000   |
| 1991          | 34092  | 19215.636 | 19193.448 | 22.188   | 0.065  | 0.115  | 531.576 | 299.618 | 299.272 | 0.346   |
| 1992          | 33942  | 19056.189 | 18998.226 | 57.963   | 0.171  | 0.304  | 520.248 | 292.085 | 291.196 | 0.888   |
| 1993          | 35913  | 20095.670 | 19976.893 | 118.776  | 0.331  | 0.591  | 540.645 | 302.526 | 300.738 | 1.788   |
| 1994          | 35074  | 19524.095 | 19342.062 | 182.033  | 0.519  | 0.932  | 518.158 | 288.435 | 285.746 | 2.689   |
| 1995          | 34669  | 19116.002 | 18854.926 | 261.076  | 0.753  | 1.366  | 502.362 | 276.995 | 273.212 | 3.783   |
| 1996          | 34582  | 18975.021 | 18617.855 | 357.166  | 1.033  | 1.882  | 493.306 | 270.675 | 265.580 | 5.095   |
| 1997          | 35267  | 19169.025 | 18694.014 | 475.010  | 1.347  | 2.478  | 494.878 | 268.986 | 262.320 | 6.665   |
| 1998          | 35675  | 19228.937 | 18616.581 | 612.357  | 1.716  | 3.185  | 492.368 | 265.388 | 256.937 | 8.451   |
| 1999          | 38516  | 20589.820 | 19784.176 | 805.645  | 2.092  | 3.913  | 523.195 | 279.689 | 268.745 | 10.944  |
| 2000          | 36283  | 19196.417 | 18283.724 | 912.693  | 2.515  | 4.754  | 485.652 | 256.946 | 244.730 | 12.217  |
| 2001          | 36281  | 19012.731 | 17906.633 | 1106.098 | 3.049  | 5.818  | 479.301 | 251.174 | 236.561 | 14.612  |
| 2002          | 35983  | 18699.357 | 17404.193 | 1295.164 | 3.599  | 6.926  | 470.038 | 244.265 | 227.347 | 16.918  |
| 2003          | 36205  | 18663.550 | 17150.493 | 1513.057 | 4.179  | 8.107  | 468.019 | 241.262 | 221.703 | 19.559  |
| 2004          | 34611  | 17679.164 | 16001.108 | 1678.056 | 4.848  | 9.492  | 442.596 | 226.076 | 204.618 | 21.459  |
| 2005          | 36826  | 18692.832 | 16663.539 | 2029.293 | 5.510  | 10.856 | 465.456 | 236.265 | 210.616 | 25.649  |
| 2006          | 34350  | 17308.564 | 15152.914 | 2155.650 | 6.276  | 12.454 | 430.192 | 216.769 | 189.772 | 26.997  |
| 2007          | 35326  | 17683.181 | 15187.406 | 2495.776 | 7.065  | 14.114 | 437.879 | 219.189 | 188.253 | 30.936  |
| 2008          | 38248  | 19006.374 | 16026.249 | 2980.125 | 7.792  | 15.680 | 468.788 | 232.952 | 196.426 | 36.526  |
| 2009          | 36902  | 18205.573 | 14999.700 | 3205.873 | 8.688  | 17.609 | 446.956 | 220.505 | 181.676 | 38.829  |
| 2010          | 37234  | 18237.758 | 14721.404 | 3516.355 | 9.444  | 19.281 | 445.505 | 218.215 | 176.142 | 42.073  |
| 2011          | 38093  | 18487.916 | 14519.282 | 3968.635 | 10.418 | 21.466 | 451.279 | 219.022 | 172.006 | 47.015  |
| 2012          | 38504  | 18491.158 | 14141.155 | 4350.003 | 11.298 | 23.525 | 451.211 | 216.689 | 165.714 | 50.976  |
| 2013          | 40290  | 19143.452 | 14265.529 | 4877.923 | 12.107 | 25.481 | 466.755 | 221.775 | 165.265 | 56.510  |
| 2014          | 40339  | 18992.005 | 13746.345 | 5245.660 | 13.004 | 27.620 | 461.866 | 217.451 | 157.390 | 60.061  |
| 2015          | 42303  | 19728.885 | 13943.061 | 5785.823 | 13.677 | 29.327 | 544.880 | 254.116 | 179.593 | 74.524  |
| 2016          | 43104  | 19876.724 | 13635.061 | 6241.663 | 14.480 | 31.402 | 550.009 | 253.628 | 173.984 | 79.644  |
| 2017          | 44107  | 20119.790 | 13374.823 | 6744.967 | 15.292 | 33.524 | 557.659 | 254.381 | 169.102 | 85.279  |
| 2018          | 45469  | 20535.123 | 13220.828 | 7314.296 | 16.086 | 35.618 | 569.564 | 257.229 | 165.608 | 91.621  |
| 2019          | 46963  | 21009.029 | 13095.858 | 7913.171 | 16.850 | 37.666 | 582.552 | 260.605 | 162.447 | 98.158  |
| 2020          | 48419  | 21428.512 | 12937.774 | 8490.738 | 17.536 | 39.624 | 685.853 | 303.533 | 183.263 | 120.271 |
| 2021          | 48463  | 21266.697 | 12336.775 | 8929.922 | 18.426 | 41.990 | 681.652 | 299.127 | 173.523 | 125.604 |
| 2022          | 49915  | 21663.568 | 12085.383 | 9578.185 | 19.189 | 44.213 | 696.712 | 302.378 | 168.687 | 133.691 |
| 2023          | 51391  | 22084.131 | 11840.653 | 10243.48 | 19.932 | 46.384 | 711.491 | 305.748 | 163.930 | 141.818 |
| 2024          | 52811  | 22418.456 | 11575.210 | 10843.25 | 20.532 | 48.367 | 725.093 | 307.804 | 158.927 | 148.877 |
| 2025          | 53848  | 22614.834 | 11246.954 | 11367.88 | 21.111 | 50.267 | 860.553 | 361.411 | 179.739 | 181.672 |
| 2026          | 54342  | 22571.522 | 10747.224 | 11824.30 | 21.759 | 52.386 | 864.886 | 359.241 | 171.049 | 188.192 |
| 2027          | 55267  | 22774.416 | 10355.816 | 12418.60 | 22.470 | 54.529 | 875.619 | 360.827 | 164.072 | 196.754 |
| 2028          | 56149  | 22915.561 | 9918.929  | 12996.63 | 23.147 | 56.715 | 885.102 | 361.228 | 156.357 | 204.872 |
| 2029          | 57014  | 22992.027 | 9478.267  | 13513.76 | 23.703 | 58.776 | 893.616 | 360.371 | 148.560 | 211.811 |
| 2030          | 57238  | 22895.360 | 9030.410  | 13864.95 | 24.223 | 60.558 | 1071.90 | 428.760 | 169.112 | 259.648 |
| 2031          | 57592  | 22715.871 | 8558.371  | 14157.50 | 24.582 | 62.324 | 1075.71 | 424.293 | 159.855 | 264.437 |
| 2032          | 58251  | 22759.207 | 8133.410  | 14625.80 | 25.108 | 64.263 | 1084.31 | 423.652 | 151.400 | 272.252 |
| 2033          | 58885  | 22786.258 | 7733.585  | 15052.67 | 25.563 | 66.060 | 1091.54 | 422.387 | 143.357 | 279.030 |
| 2034          | 59460  | 22806.106 | 7332.310  | 15473.80 | 26.024 | 67.849 | 1096.89 | 420.721 | 135.264 | 285.456 |
| 2035          | 58516  | 22262.998 | 6874.900  | 15388.10 | 26.297 | 69.120 | 1335.15 | 507.973 | 156.864 | 351.109 |
| 2036          | 56446  | 21140.051 | 6073.925  | 15066.13 | 26.691 | 71.268 | 1287.60 | 482.234 | 138.555 | 343.679 |
| 2037          | 56568  | 21011.845 | 5656.616  | 15355.23 | 27.145 | 73.079 | 1288.98 | 478.783 | 128.894 | 349.889 |
| 2038          | 56668  | 20787.483 | 5243.744  | 15543.74 | 27.430 | 74.775 | 1288.55 | 472.681 | 119.236 | 353.445 |
| 2039          | 56758  | 20709.267 | 4888.736  | 15820.53 | 27.874 | 76.393 | 1286.40 | 469.372 | 110.802 | 358.570 |

## Results for PHIM for Run 5 (Sensitivity\_Analysis\_4.RTF)

\*\*\*\*\*

### Main Results for E-Component for Run: 5, Simulation: 1, COD: Four Diseases Combined, Adjusted

| Variable Parameter          | Value                                  |
|-----------------------------|----------------------------------------|
| 1. Country                  | US (United States)                     |
| 2. Sex                      | M (Males)                              |
| 3. Year of start of process | 1990                                   |
| 4. Cause of Death           | Four Diseases Combined                 |
| 5. Effective Dose NULL      | CC:1                                   |
| 6. Effective Dose Ecig      | CC:1 Ecig:0.05 Dual:0.525              |
| Note:                       | Death rates are per million population |

#### Results for Age Groups Combined and Years combined, Population and Number deaths adjusted for Ecig scenario,

| Age Group:All | NULL     | Ecig        | %Drop       |         |        |        | NULL    | Ecig    | Drop    |         |
|---------------|----------|-------------|-------------|---------|--------|--------|---------|---------|---------|---------|
| Year          | Number   | Attrib      | Attrib      | Drop    | %Drop  | Attrib | Death   | Attrib  | Drop    |         |
|               | Deaths   | Deaths      | Deaths      | Deaths  | Deaths | Deaths | Rate    | Rates   | Rates   |         |
| All Comb      | 13291538 | 4509390.583 | 3004990.195 | 1504400 | 11.318 | 33.362 | 3815.59 | 1305.37 | 862.641 | 442.730 |

#### Results for Age Groups Combined, Population and Number deaths adjusted for Ecig scenario,

| Age Group:All | NULL   | Ecig       | %Drop      |          |        |        | NULL    | Ecig    | Drop    |
|---------------|--------|------------|------------|----------|--------|--------|---------|---------|---------|
| Year          | Number | Attrib     | Attrib     | Drop     | %Drop  | Attrib | Death   | Attrib  | Drop    |
|               | Deaths | Deaths     | Deaths     | Deaths   | Deaths | Deaths | Rate    | Rates   | Rates   |
| 1990          | 317161 | 125773.065 | 125773.065 | 0.000    | 0.000  | 0.000  | 5027.71 | 1993.78 | 0.000   |
| 1991          | 313217 | 123999.442 | 123575.252 | 424.190  | 0.135  | 0.342  | 4883.81 | 1933.45 | 6.614   |
| 1992          | 308580 | 122014.015 | 120878.384 | 1135.631 | 0.368  | 0.931  | 4729.74 | 1870.18 | 17.419  |
| 1993          | 311723 | 122810.618 | 120679.290 | 2131.328 | 0.684  | 1.735  | 4692.65 | 1848.83 | 32.130  |
| 1994          | 305723 | 119925.592 | 116651.440 | 3274.152 | 1.071  | 2.730  | 4516.28 | 1771.69 | 48.469  |
| 1995          | 303268 | 117896.496 | 113286.957 | 4609.539 | 1.520  | 3.910  | 4393.95 | 1708.35 | 66.968  |
| 1996          | 299629 | 115698.645 | 109619.575 | 6079.070 | 2.029  | 5.254  | 4273.40 | 1650.42 | 86.991  |
| 1997          | 294330 | 113359.847 | 105803.544 | 7556.302 | 2.567  | 6.666  | 4129.04 | 1590.70 | 106.426 |
| 1998          | 289405 | 111444.212 | 102409.037 | 9035.175 | 3.122  | 8.107  | 3992.71 | 1538.10 | 125.231 |
| 1999          | 311218 | 114877.722 | 102792.652 | 12085.07 | 3.883  | 10.520 | 4225.40 | 1560.48 | 164.870 |
| 2000          | 304071 | 112379.704 | 98600.215  | 13779.49 | 4.532  | 12.262 | 4067.26 | 1504.22 | 185.338 |
| 2001          | 296654 | 110024.943 | 94433.354  | 15591.59 | 5.256  | 14.171 | 3915.60 | 1453.52 | 207.070 |
| 2002          | 292345 | 108289.173 | 90663.233  | 17625.94 | 6.029  | 16.277 | 3814.65 | 1414.56 | 231.542 |
| 2003          | 286406 | 106539.023 | 87119.232  | 19419.79 | 6.781  | 18.228 | 3697.37 | 1377.22 | 252.552 |
| 2004          | 274805 | 103037.251 | 82308.642  | 20728.61 | 7.543  | 20.118 | 3508.45 | 1317.61 | 266.773 |
| 2005          | 273120 | 103044.562 | 80426.630  | 22617.93 | 8.281  | 21.950 | 3445.47 | 1302.41 | 287.813 |
| 2006          | 264961 | 99672.555  | 75442.138  | 24230.42 | 9.145  | 24.310 | 3310.95 | 1248.28 | 305.554 |
| 2007          | 259376 | 97839.152  | 72262.002  | 25577.15 | 9.861  | 26.142 | 3206.84 | 1212.75 | 319.327 |
| 2008          | 260562 | 98075.852  | 70793.048  | 27282.80 | 10.471 | 27.818 | 3184.31 | 1202.07 | 336.916 |
| 2009          | 255134 | 95617.338  | 67146.581  | 28470.76 | 11.159 | 29.776 | 3080.04 | 1158.11 | 347.504 |
| 2010          | 253248 | 94607.988  | 64802.989  | 29805.00 | 11.769 | 31.504 | 3019.01 | 1131.98 | 359.457 |
| 2011          | 253310 | 93633.119  | 62188.050  | 31445.07 | 12.414 | 33.583 | 2988.73 | 1109.25 | 375.509 |
| 2012          | 254350 | 92775.175  | 59724.038  | 33051.14 | 12.994 | 35.625 | 2967.32 | 1087.19 | 390.433 |
| 2013          | 258091 | 92345.780  | 57651.430  | 34694.35 | 13.443 | 37.570 | 2975.36 | 1069.82 | 405.191 |
| 2014          | 259513 | 91379.215  | 55314.233  | 36064.98 | 13.897 | 39.467 | 2955.52 | 1046.26 | 416.298 |
| 2015          | 262135 | 90750.242  | 53452.333  | 37297.91 | 14.229 | 41.100 | 3354.49 | 1168.90 | 484.883 |
| 2016          | 264033 | 88811.996  | 50231.377  | 38580.62 | 14.612 | 43.441 | 3345.45 | 1133.24 | 496.784 |
| 2017          | 266514 | 87325.126  | 47616.607  | 39708.52 | 14.899 | 45.472 | 3344.21 | 1104.08 | 506.588 |
| 2018          | 261706 | 87612.144  | 46907.787  | 40704.36 | 15.553 | 46.460 | 3251.72 | 1097.46 | 514.623 |
| 2019          | 264699 | 87797.760  | 45613.428  | 42184.33 | 15.937 | 48.047 | 3255.12 | 1089.08 | 528.153 |
| 2020          | 265832 | 87221.042  | 44187.076  | 43033.97 | 16.188 | 49.339 | 3726.43 | 1235.48 | 619.415 |
| 2021          | 258761 | 82001.292  | 39400.035  | 42601.26 | 16.464 | 51.952 | 3599.52 | 1153.39 | 605.311 |
| 2022          | 261053 | 81915.977  | 37946.797  | 43969.18 | 16.843 | 53.676 | 3601.35 | 1143.37 | 619.882 |
| 2023          | 263324 | 81810.810  | 36529.691  | 45281.12 | 17.196 | 55.349 | 3600.88 | 1132.64 | 633.111 |
| 2024          | 265258 | 81528.303  | 35126.935  | 46401.37 | 17.493 | 56.914 | 3594.92 | 1119.38 | 643.318 |
| 2025          | 262127 | 79599.213  | 33466.052  | 46133.16 | 17.600 | 57.957 | 4125.12 | 1272.09 | 745.428 |
| 2026          | 256490 | 75082.462  | 29790.173  | 45292.29 | 17.659 | 60.323 | 4016.82 | 1194.99 | 728.453 |
| 2027          | 256211 | 74444.425  | 28310.610  | 46133.82 | 18.006 | 61.971 | 3991.30 | 1179.46 | 738.432 |
| 2028          | 255770 | 73699.585  | 26757.072  | 46942.51 | 18.353 | 63.694 | 3961.37 | 1161.76 | 747.346 |
| 2029          | 255277 | 72819.703  | 25266.640  | 47553.06 | 18.628 | 65.302 | 3928.32 | 1141.36 | 752.542 |
| 2030          | 246481 | 69309.277  | 23571.471  | 45737.81 | 18.556 | 65.991 | 4518.52 | 1297.95 | 865.835 |
| 2031          | 241505 | 65433.368  | 20925.977  | 44507.39 | 18.429 | 68.019 | 4411.98 | 1222.18 | 839.892 |
| 2032          | 240317 | 64643.552  | 19695.372  | 44948.18 | 18.704 | 69.532 | 4371.65 | 1203.31 | 845.026 |
| 2033          | 239093 | 63793.514  | 18535.976  | 45257.54 | 18.929 | 70.944 | 4327.70 | 1182.54 | 847.027 |
| 2034          | 237728 | 63032.151  | 17441.572  | 45590.58 | 19.178 | 72.329 | 4278.78 | 1162.80 | 848.876 |
| 2035          | 222600 | 57653.301  | 15905.411  | 41747.89 | 18.755 | 72.412 | 4939.45 | 1315.47 | 962.533 |
| 2036          | 214888 | 52988.733  | 13368.097  | 39620.64 | 18.438 | 74.772 | 4762.75 | 1208.75 | 912.457 |
| 2037          | 212340 | 52026.921  | 12419.983  | 39606.94 | 18.653 | 76.128 | 4697.08 | 1185.50 | 910.766 |
| 2038          | 209823 | 50943.211  | 11485.929  | 39457.28 | 18.805 | 77.453 | 4627.78 | 1158.38 | 905.053 |
| 2039          | 207375 | 50085.991  | 10692.783  | 39393.21 | 18.996 | 78.651 | 4555.15 | 1135.19 | 900.316 |



## Results for PHIM for Run 5 (Sensitivity\_Analysis\_4.RTF)

\*\*\*\*\*

### Main Results for E-Component for Run: 5, Simulation: 1, COD: LUNG CANCER, Adjusted

| Variable Parameter          | Value                                  |
|-----------------------------|----------------------------------------|
| 1. Country                  | US (United States)                     |
| 2. Sex                      | M (Males)                              |
| 3. Year of start of process | 1990                                   |
| 4. Cause of Death           | LUNG CANCER                            |
| 5. Effective Dose NULL      | CC:1                                   |
| 6. Effective Dose Ecig      | CC:1 Ecig:0.05 Dual:0.525              |
| Note:                       | Death rates are per million population |

#### Results for Age Groups Combined and Years combined, Population and Number deaths adjusted for Ecig scenario,

| Age Group:All | NULL    | Ecig        | %Drop       |          |        |        | NULL    | Ecig    | Drop    |         |
|---------------|---------|-------------|-------------|----------|--------|--------|---------|---------|---------|---------|
| Year          | Number  | Attrib      | Attrib      | Drop     | %Drop  | Attrib | Death   | Attrib  | Attrib  | Drop    |
|               | Deaths  | Deaths      | Deaths      | Deaths   | Deaths | Deaths | Rate    | Rates   | Rates   | Rates   |
| All Comb      | 3095727 | 2244988.113 | 1734572.535 | 510415.6 | 16.488 | 22.736 | 888.688 | 649.875 | 497.943 | 151.933 |

#### Results for Age Groups Combined, Population and Number deaths adjusted for Ecig scenario,

| Age Group:All | NULL   | Ecig      | %Drop     |          |        |        | NULL    | Ecig    | Drop    |         |
|---------------|--------|-----------|-----------|----------|--------|--------|---------|---------|---------|---------|
| Year          | Number | Attrib    | Attrib    | Drop     | %Drop  | Attrib | Death   | Attrib  | Attrib  | Drop    |
|               | Deaths | Deaths    | Deaths    | Deaths   | Deaths | Deaths | Rate    | Rates   | Rates   | Rates   |
| 1990          | 78822  | 63385.736 | 63385.736 | 0.000    | 0.000  | 0.000  | 1249.50 | 1004.81 | 1004.81 | 0.000   |
| 1991          | 78462  | 62918.402 | 62870.284 | 48.118   | 0.061  | 0.076  | 1223.41 | 981.049 | 980.299 | 0.750   |
| 1992          | 77988  | 62366.766 | 62238.154 | 128.612  | 0.165  | 0.206  | 1195.35 | 955.930 | 953.952 | 1.978   |
| 1993          | 78545  | 62652.888 | 62400.589 | 252.299  | 0.321  | 0.403  | 1182.40 | 943.195 | 939.374 | 3.821   |
| 1994          | 77443  | 61565.227 | 61168.662 | 396.565  | 0.512  | 0.644  | 1144.02 | 909.520 | 903.610 | 5.910   |
| 1995          | 76915  | 60851.961 | 60276.734 | 575.227  | 0.748  | 0.945  | 1114.40 | 881.759 | 873.330 | 8.428   |
| 1996          | 76251  | 60122.922 | 59322.973 | 799.949  | 1.049  | 1.331  | 1087.51 | 857.643 | 846.083 | 11.560  |
| 1997          | 75501  | 59237.155 | 58196.661 | 1040.494 | 1.378  | 1.756  | 1059.17 | 831.234 | 816.417 | 14.817  |
| 1998          | 75421  | 58906.696 | 57567.829 | 1338.867 | 1.775  | 2.273  | 1040.53 | 813.001 | 794.223 | 18.777  |
| 1999          | 73212  | 56930.073 | 55299.008 | 1631.065 | 2.228  | 2.865  | 993.996 | 773.329 | 750.792 | 22.537  |
| 2000          | 73856  | 57137.121 | 55126.491 | 2010.630 | 2.722  | 3.519  | 987.900 | 764.787 | 737.373 | 27.414  |
| 2001          | 73387  | 56481.726 | 54041.643 | 2440.083 | 3.325  | 4.320  | 968.647 | 746.169 | 713.308 | 32.861  |
| 2002          | 72557  | 55588.365 | 52697.499 | 2890.866 | 3.984  | 5.200  | 946.763 | 726.138 | 687.621 | 38.517  |
| 2003          | 72083  | 54945.856 | 51555.601 | 3390.255 | 4.703  | 6.170  | 930.560 | 710.281 | 665.560 | 44.721  |
| 2004          | 71470  | 54203.126 | 50261.839 | 3941.287 | 5.515  | 7.271  | 912.463 | 693.135 | 641.696 | 51.439  |
| 2005          | 71164  | 53744.603 | 49233.779 | 4510.824 | 6.339  | 8.393  | 897.747 | 679.296 | 621.095 | 58.200  |
| 2006          | 69888  | 52535.572 | 47424.560 | 5111.011 | 7.313  | 9.729  | 873.316 | 657.945 | 592.617 | 65.328  |
| 2007          | 68827  | 51492.124 | 45788.561 | 5703.563 | 8.287  | 11.077 | 850.955 | 638.264 | 566.115 | 72.148  |
| 2008          | 68524  | 51030.736 | 44606.875 | 6423.860 | 9.375  | 12.588 | 837.431 | 625.460 | 545.136 | 80.324  |
| 2009          | 67845  | 50276.199 | 43131.358 | 7144.841 | 10.531 | 14.211 | 819.037 | 608.943 | 520.692 | 88.251  |
| 2010          | 67572  | 49840.933 | 41973.870 | 7867.062 | 11.642 | 15.784 | 805.542 | 596.347 | 500.377 | 95.969  |
| 2011          | 66923  | 49072.841 | 40405.931 | 8666.910 | 12.951 | 17.661 | 789.601 | 581.354 | 476.739 | 104.615 |
| 2012          | 66614  | 48539.512 | 39013.326 | 9526.186 | 14.300 | 19.626 | 777.142 | 568.812 | 455.140 | 113.672 |
| 2013          | 65835  | 47675.741 | 37385.305 | 10290.44 | 15.631 | 21.584 | 758.964 | 552.318 | 430.991 | 121.328 |
| 2014          | 65583  | 47194.534 | 36108.670 | 11085.86 | 16.903 | 23.490 | 746.912 | 540.359 | 411.232 | 129.127 |
| 2015          | 64740  | 46305.842 | 34525.949 | 11779.89 | 18.196 | 25.439 | 728.463 | 526.439 | 401.822 | 154.617 |
| 2016          | 62241  | 44208.867 | 32020.389 | 12188.48 | 19.583 | 27.570 | 708.629 | 514.107 | 405.717 | 158.390 |
| 2017          | 60555  | 42702.624 | 30039.872 | 12662.75 | 20.911 | 29.653 | 693.840 | 503.903 | 376.939 | 162.964 |
| 2018          | 63208  | 44321.202 | 30082.597 | 14238.61 | 22.526 | 32.126 | 675.368 | 505.181 | 373.778 | 181.402 |
| 2019          | 63850  | 44493.088 | 29202.426 | 15290.66 | 23.948 | 34.366 | 660.196 | 505.912 | 359.115 | 192.796 |
| 2020          | 64340  | 44529.551 | 28256.828 | 16272.72 | 25.292 | 36.544 | 648.916 | 505.757 | 396.104 | 234.653 |
| 2021          | 57957  | 39852.556 | 24335.372 | 15517.18 | 26.774 | 38.936 | 636.213 | 505.546 | 338.520 | 222.027 |
| 2022          | 58345  | 39853.685 | 23353.970 | 16499.71 | 28.280 | 41.401 | 624.889 | 505.274 | 322.178 | 234.096 |
| 2023          | 58705  | 39847.050 | 22379.816 | 17467.23 | 29.754 | 43.836 | 613.779 | 505.670 | 306.038 | 245.632 |
| 2024          | 58973  | 39726.010 | 21399.165 | 18326.85 | 31.077 | 46.133 | 603.235 | 505.435 | 290.014 | 255.422 |
| 2025          | 58614  | 39207.348 | 20300.431 | 18906.92 | 32.257 | 48.223 | 592.418 | 505.579 | 319.470 | 307.108 |
| 2026          | 52462  | 34803.960 | 17220.779 | 17583.18 | 33.516 | 50.521 | 581.599 | 505.929 | 269.690 | 284.239 |
| 2027          | 52257  | 34484.595 | 16240.989 | 18243.61 | 34.911 | 52.904 | 571.075 | 506.357 | 253.005 | 293.352 |
| 2028          | 52006  | 34100.638 | 15232.985 | 18867.65 | 36.280 | 55.329 | 560.475 | 506.544 | 235.929 | 301.615 |
| 2029          | 51727  | 33669.838 | 14276.805 | 19393.03 | 37.491 | 57.598 | 549.001 | 506.732 | 219.698 | 308.034 |
| 2030          | 50338  | 32557.688 | 13237.537 | 19320.15 | 38.381 | 59.341 | 537.803 | 506.705 | 242.672 | 367.034 |
| 2031          | 44723  | 28646.393 | 11075.569 | 17570.82 | 39.288 | 61.337 | 526.028 | 506.065 | 202.336 | 332.729 |
| 2032          | 44340  | 28227.160 | 10331.590 | 17895.57 | 40.360 | 63.398 | 514.603 | 505.435 | 187.944 | 337.491 |
| 2033          | 43942  | 27786.623 | 9635.821  | 18150.80 | 41.306 | 65.322 | 503.369 | 505.079 | 174.413 | 340.666 |
| 2034          | 43510  | 27348.299 | 8989.383  | 18358.92 | 42.195 | 67.130 | 492.119 | 504.514 | 161.797 | 342.718 |
| 2035          | 41007  | 25570.077 | 8139.393  | 17430.68 | 42.507 | 68.168 | 480.929 | 503.430 | 180.611 | 402.819 |
| 2036          | 35129  | 21717.319 | 6413.022  | 15304.30 | 43.566 | 70.470 | 469.595 | 495.402 | 142.138 | 353.264 |
| 2037          | 34572  | 21256.024 | 5917.282  | 15338.74 | 44.368 | 72.162 | 464.748 | 484.347 | 130.894 | 353.453 |
| 2038          | 34019  | 20747.175 | 5439.765  | 15307.41 | 44.996 | 73.781 | 459.315 | 471.764 | 119.978 | 351.786 |
| 2039          | 33478  | 20327.688 | 5042.861  | 15284.83 | 45.656 | 75.192 | 453.370 | 460.724 | 110.770 | 349.954 |

## Results for PHIM for Run 5 (Sensitivity\_Analysis\_4.RTF)

\*\*\*\*\*

### Main Results for E-Component for Run: 5, Simulation: 1, COD: IHD, Adjusted

| Variable Parameter          | Value                                  |
|-----------------------------|----------------------------------------|
| 1. Country                  | US (United States)                     |
| 2. Sex                      | M (Males)                              |
| 3. Year of start of process | 1990                                   |
| 4. Cause of Death           | IHD                                    |
| 5. Effective Dose NULL      | CC:1                                   |
| 6. Effective Dose Ecig      | CC:1 Ecig:0.05 Dual:0.525              |
| Note:                       | Death rates are per million population |

### Results for Age Groups Combined and Years combined, Population and Number deaths adjusted for Ecig scenario,

| Age Group:All |         | NULL        | Ecig       | %Drop    |        | NULL   | Ecig    | Drop    |         |         |
|---------------|---------|-------------|------------|----------|--------|--------|---------|---------|---------|---------|
| Year          | Number  | Attrib      | Attrib     | Drop     | %Drop  | Attrib | Death   | Attrib  | Drop    |         |
|               | Deaths  | Deaths      | Deaths     | Deaths   | Deaths | Deaths | Rate    | Rates   | Rates   |         |
| All Comb      | 6423068 | 1098877.421 | 517749.021 | 581128.4 | 9.048  | 52.884 | 1843.87 | 318.101 | 148.630 | 169.471 |

### Results for Age Groups Combined, Population and Number deaths adjusted for Ecig scenario,

| Age Group:All |        | NULL      | Ecig      | %Drop    |        | NULL   | Ecig    | Drop    |         |         |
|---------------|--------|-----------|-----------|----------|--------|--------|---------|---------|---------|---------|
| Year          | Number | Attrib    | Attrib    | Drop     | %Drop  | Attrib | Death   | Attrib  | Drop    |         |
|               | Deaths | Deaths    | Deaths    | Deaths   | Deaths | Deaths | Rate    | Rates   | Rates   |         |
| 1990          | 171484 | 38511.725 | 38511.725 | 0.000    | 0.000  | 0.000  | 2718.40 | 610.497 | 0.000   |         |
| 1991          | 168044 | 37309.838 | 36996.011 | 313.827  | 0.187  | 0.841  | 2620.21 | 581.750 | 576.857 | 4.893   |
| 1992          | 164549 | 36137.488 | 35293.294 | 844.194  | 0.513  | 2.336  | 2522.12 | 553.899 | 540.956 | 12.943  |
| 1993          | 164367 | 35599.588 | 34037.098 | 1562.489 | 0.951  | 4.389  | 2474.37 | 535.926 | 512.392 | 23.535  |
| 1994          | 159878 | 34336.757 | 31952.822 | 2383.935 | 1.491  | 6.943  | 2361.79 | 507.267 | 472.021 | 35.246  |
| 1995          | 158105 | 33455.759 | 30123.691 | 3332.068 | 2.108  | 9.960  | 2290.74 | 484.782 | 436.453 | 48.329  |
| 1996          | 154911 | 32193.824 | 27855.896 | 4337.928 | 2.800  | 13.474 | 2209.39 | 459.239 | 397.290 | 61.950  |
| 1997          | 150023 | 30665.509 | 25353.046 | 5312.463 | 3.541  | 17.324 | 2104.61 | 430.308 | 355.668 | 74.641  |
| 1998          | 145480 | 29188.430 | 22963.871 | 6224.560 | 4.279  | 21.325 | 2007.09 | 402.844 | 316.817 | 86.027  |
| 1999          | 166067 | 33375.386 | 24715.418 | 8659.968 | 5.215  | 25.947 | 2254.68 | 453.366 | 335.560 | 117.806 |
| 2000          | 160410 | 32024.754 | 22329.183 | 9695.571 | 6.044  | 30.275 | 2145.65 | 428.655 | 298.676 | 129.980 |
| 2001          | 154631 | 30682.393 | 19911.149 | 10771.24 | 6.966  | 35.106 | 2041.01 | 405.339 | 262.812 | 142.527 |
| 2002          | 152119 | 30218.370 | 18185.739 | 12032.63 | 7.910  | 39.819 | 1984.91 | 394.736 | 237.296 | 157.440 |
| 2003          | 147009 | 29175.202 | 16212.918 | 12962.28 | 8.817  | 44.429 | 1897.82 | 377.146 | 209.301 | 167.844 |
| 2004          | 138696 | 27488.687 | 14044.812 | 13443.87 | 9.693  | 48.907 | 1770.73 | 351.518 | 179.311 | 172.207 |
| 2005          | 136248 | 27017.439 | 12706.124 | 14311.32 | 10.504 | 52.971 | 1718.80 | 341.482 | 160.291 | 181.192 |
| 2006          | 132339 | 26231.435 | 11181.891 | 15049.54 | 11.372 | 57.372 | 1653.71 | 328.517 | 139.729 | 188.788 |
| 2007          | 126966 | 25103.049 | 9743.044  | 15360.01 | 12.098 | 61.188 | 1569.76 | 311.161 | 120.460 | 190.701 |
| 2008          | 126388 | 24621.740 | 8780.688  | 15841.05 | 12.534 | 64.338 | 1544.57 | 301.777 | 107.308 | 194.469 |
| 2009          | 123013 | 23741.177 | 7746.414  | 15994.76 | 13.002 | 67.371 | 1485.04 | 287.552 | 93.517  | 194.036 |
| 2010          | 121184 | 23189.160 | 6941.345  | 16247.81 | 13.408 | 70.066 | 1444.65 | 277.458 | 82.749  | 194.709 |
| 2011          | 120941 | 22786.927 | 6192.147  | 16594.78 | 13.721 | 72.826 | 1426.95 | 269.951 | 73.059  | 196.892 |
| 2012          | 121732 | 22485.295 | 5584.145  | 16901.15 | 13.884 | 75.165 | 1420.16 | 263.495 | 65.146  | 198.349 |
| 2013          | 123551 | 22251.884 | 5073.148  | 17178.74 | 13.904 | 77.201 | 1424.34 | 257.786 | 58.485  | 199.301 |
| 2014          | 124228 | 21894.593 | 4589.082  | 17305.51 | 13.930 | 79.040 | 1414.80 | 250.685 | 52.264  | 198.421 |
| 2015          | 124877 | 21471.109 | 4167.372  | 17303.74 | 13.857 | 80.591 | 1598.02 | 276.557 | 53.329  | 223.228 |
| 2016          | 127443 | 21411.568 | 3793.948  | 17617.62 | 13.824 | 82.281 | 1614.78 | 273.213 | 48.072  | 225.141 |
| 2017          | 129619 | 21169.399 | 3458.810  | 17710.59 | 13.664 | 83.661 | 1626.46 | 267.651 | 43.401  | 224.250 |
| 2018          | 122801 | 19830.576 | 2960.403  | 16870.17 | 13.738 | 85.072 | 1525.81 | 248.404 | 36.783  | 211.621 |
| 2019          | 123315 | 19431.014 | 2703.446  | 16727.57 | 13.565 | 86.087 | 1516.46 | 241.031 | 33.245  | 207.785 |
| 2020          | 122409 | 18532.612 | 2418.234  | 16114.38 | 13.164 | 86.951 | 1715.92 | 262.513 | 33.899  | 228.614 |
| 2021          | 121084 | 18234.128 | 2186.938  | 16047.19 | 13.253 | 88.006 | 1684.35 | 256.472 | 30.422  | 226.051 |
| 2022          | 121225 | 17812.559 | 1990.814  | 15821.74 | 13.052 | 88.824 | 1672.36 | 248.626 | 27.464  | 221.162 |
| 2023          | 121347 | 17361.668 | 1813.273  | 15548.40 | 12.813 | 89.556 | 1659.38 | 240.367 | 24.796  | 215.571 |
| 2024          | 121321 | 16929.676 | 1672.185  | 15257.49 | 12.576 | 90.123 | 1644.22 | 232.443 | 22.662  | 209.781 |
| 2025          | 117804 | 15501.666 | 1464.001  | 14037.67 | 11.916 | 90.556 | 1853.89 | 247.735 | 23.039  | 224.695 |
| 2026          | 117275 | 15523.814 | 1385.147  | 14138.67 | 12.056 | 91.077 | 1836.61 | 247.072 | 21.692  | 225.380 |
| 2027          | 116287 | 15073.070 | 1289.185  | 13783.89 | 11.853 | 91.447 | 1811.54 | 238.810 | 20.083  | 218.727 |
| 2028          | 115248 | 14636.710 | 1192.907  | 13443.80 | 11.665 | 91.850 | 1784.96 | 230.725 | 18.476  | 212.249 |
| 2029          | 114206 | 14180.166 | 1111.151  | 13069.01 | 11.443 | 92.164 | 1757.46 | 222.256 | 17.099  | 205.157 |
| 2030          | 107387 | 12111.772 | 926.485   | 11185.29 | 10.416 | 92.351 | 1968.63 | 226.816 | 16.984  | 209.832 |
| 2031          | 107921 | 12417.367 | 927.793   | 11489.57 | 10.646 | 92.528 | 1971.57 | 231.935 | 16.950  | 214.985 |
| 2032          | 106589 | 12054.064 | 875.904   | 11178.16 | 10.487 | 92.734 | 1938.99 | 224.381 | 15.934  | 208.447 |
| 2033          | 105272 | 11672.389 | 821.011   | 10851.38 | 10.308 | 92.966 | 1905.47 | 216.370 | 14.861  | 201.510 |
| 2034          | 103929 | 11365.762 | 781.902   | 10583.86 | 10.184 | 93.121 | 1870.59 | 209.673 | 14.073  | 195.599 |
| 2035          | 93612  | 8580.360  | 577.961   | 8002.399 | 8.549  | 93.264 | 2077.22 | 195.777 | 12.825  | 182.953 |
| 2036          | 95006  | 8948.841  | 592.862   | 8355.979 | 8.795  | 93.375 | 2105.70 | 204.135 | 13.140  | 190.995 |
| 2037          | 93255  | 8624.570  | 568.446   | 8056.124 | 8.639  | 93.409 | 2062.85 | 196.522 | 12.574  | 183.948 |
| 2038          | 91555  | 8315.017  | 536.997   | 7778.020 | 8.495  | 93.542 | 2019.30 | 189.073 | 11.844  | 177.229 |
| 2039          | 89921  | 8001.132  | 507.146   | 7493.986 | 8.334  | 93.662 | 1975.17 | 181.344 | 11.140  | 170.205 |

## Results for PHIM for Run 5 (Sensitivity\_Analysis\_4.RTF)

\*\*\*\*\*

### Main Results for E-Component for Run: 5, Simulation: 1, COD: STROKE, Adjusted

| Variable Parameter          | Value                                  |
|-----------------------------|----------------------------------------|
| 1. Country                  | US (United States)                     |
| 2. Sex                      | M (Males)                              |
| 3. Year of start of process | 1990                                   |
| 4. Cause of Death           | STROKE                                 |
| 5. Effective Dose NULL      | CC:1                                   |
| 6. Effective Dose Ecig      | CC:1 Ecig:0.05 Dual:0.525              |
| Note:                       | Death rates are per million population |

### Results for Age Groups Combined and Years combined, Population and Number deaths adjusted for Ecig scenario,

| Age Group:All | NULL    | Ecig       | %Drop     | NULL     | Ecig   | Drop   |         |        |        |        |
|---------------|---------|------------|-----------|----------|--------|--------|---------|--------|--------|--------|
| Year          | Number  | Attrib     | Attrib    | Drop     | %Drop  | Attrib | Death   | Attrib | Attrib | Drop   |
|               | Deaths  | Deaths     | Deaths    | Deaths   | Deaths | Deaths | Rate    | Rates  | Rates  | Rates  |
| All Comb      | 1506813 | 149918.462 | 69843.223 | 80075.24 | 5.314  | 53.413 | 432.560 | 43.398 | 20.050 | 23.348 |

### Results for Age Groups Combined, Population and Number deaths adjusted for Ecig scenario,

| Age Group:All | NULL   | Ecig     | %Drop    | NULL     | Ecig   | Drop   |         |        |        |        |
|---------------|--------|----------|----------|----------|--------|--------|---------|--------|--------|--------|
| Year          | Number | Attrib   | Attrib   | Drop     | %Drop  | Attrib | Death   | Attrib | Attrib | Drop   |
|               | Deaths | Deaths   | Deaths   | Deaths   | Deaths | Deaths | Rate    | Rates  | Rates  | Rates  |
| 1990          | 32862  | 4613.166 | 4613.166 | 0.000    | 0.000  | 0.000  | 520.936 | 73.129 | 73.129 | 0.000  |
| 1991          | 32619  | 4555.566 | 4515.509 | 40.057   | 0.123  | 0.879  | 508.609 | 71.032 | 70.408 | 0.625  |
| 1992          | 32100  | 4453.572 | 4348.545 | 105.027  | 0.327  | 2.358  | 492.015 | 68.262 | 66.652 | 1.610  |
| 1993          | 32897  | 4462.473 | 4264.093 | 198.380  | 0.603  | 4.446  | 495.229 | 67.179 | 64.191 | 2.988  |
| 1994          | 33325  | 4499.513 | 4186.466 | 313.048  | 0.939  | 6.957  | 492.297 | 66.473 | 61.844 | 4.628  |
| 1995          | 33574  | 4472.774 | 4029.020 | 443.755  | 1.322  | 9.921  | 486.436 | 64.812 | 58.375 | 6.436  |
| 1996          | 33877  | 4406.878 | 3818.639 | 588.239  | 1.736  | 13.348 | 483.172 | 62.863 | 54.463 | 8.401  |
| 1997          | 33527  | 4288.158 | 3553.367 | 734.791  | 2.192  | 17.135 | 470.341 | 60.173 | 49.849 | 10.324 |
| 1998          | 32811  | 4120.148 | 3251.542 | 868.606  | 2.647  | 21.082 | 452.668 | 56.864 | 44.859 | 12.005 |
| 1999          | 33397  | 3982.443 | 2980.564 | 1001.879 | 3.000  | 25.157 | 453.430 | 54.097 | 40.467 | 13.630 |
| 2000          | 33489  | 4021.411 | 2843.953 | 1177.458 | 3.516  | 29.280 | 447.949 | 53.827 | 38.041 | 15.786 |
| 2001          | 32312  | 3848.092 | 2552.538 | 1295.555 | 4.009  | 33.667 | 426.499 | 50.836 | 33.692 | 17.145 |
| 2002          | 31632  | 3783.081 | 2349.524 | 1433.557 | 4.532  | 37.894 | 412.754 | 49.418 | 30.658 | 18.760 |
| 2003          | 31041  | 3754.415 | 2167.967 | 1586.448 | 5.111  | 42.256 | 400.725 | 48.533 | 27.987 | 20.546 |
| 2004          | 29950  | 3666.274 | 1964.382 | 1701.892 | 5.682  | 46.420 | 382.370 | 46.883 | 25.079 | 21.804 |
| 2005          | 28783  | 3589.688 | 1777.835 | 1811.853 | 6.295  | 50.474 | 363.108 | 45.371 | 22.428 | 22.943 |
| 2006          | 28275  | 3596.985 | 1634.294 | 1962.690 | 6.941  | 54.565 | 353.323 | 45.048 | 20.422 | 24.626 |
| 2007          | 28126  | 3560.798 | 1486.463 | 2074.334 | 7.375  | 58.255 | 347.744 | 44.137 | 18.378 | 25.759 |
| 2008          | 27239  | 3417.001 | 1310.657 | 2106.345 | 7.733  | 61.643 | 332.889 | 41.881 | 16.017 | 25.863 |
| 2009          | 27195  | 3394.390 | 1195.695 | 2198.695 | 8.085  | 64.774 | 328.299 | 41.113 | 14.435 | 26.678 |
| 2010          | 27053  | 3340.137 | 1084.872 | 2255.265 | 8.337  | 67.520 | 322.502 | 39.965 | 12.933 | 27.032 |
| 2011          | 27118  | 3285.435 | 980.555  | 2304.880 | 8.499  | 70.154 | 319.963 | 38.922 | 11.569 | 27.352 |
| 2012          | 27235  | 3259.209 | 887.504  | 2371.706 | 8.708  | 72.769 | 317.729 | 38.193 | 10.354 | 27.839 |
| 2013          | 28108  | 3274.703 | 817.646  | 2457.057 | 8.742  | 75.031 | 324.034 | 37.937 | 9.426  | 28.511 |
| 2014          | 29023  | 3298.083 | 753.214  | 2544.868 | 8.768  | 77.162 | 330.535 | 37.762 | 8.578  | 29.184 |
| 2015          | 29822  | 3244.406 | 685.528  | 2558.878 | 8.580  | 78.870 | 381.630 | 41.789 | 8.773  | 33.017 |
| 2016          | 30808  | 3314.836 | 642.558  | 2672.279 | 8.674  | 80.616 | 390.350 | 42.297 | 8.142  | 34.156 |
| 2017          | 31746  | 3333.314 | 594.139  | 2739.175 | 8.628  | 82.176 | 398.346 | 42.144 | 7.455  | 34.689 |
| 2018          | 29685  | 2925.242 | 484.519  | 2440.723 | 8.222  | 83.437 | 368.842 | 36.642 | 6.020  | 30.622 |
| 2019          | 29965  | 2864.628 | 440.916  | 2423.712 | 8.088  | 84.608 | 368.493 | 35.534 | 5.422  | 30.112 |
| 2020          | 29991  | 2730.366 | 392.178  | 2338.188 | 7.796  | 85.636 | 420.409 | 38.675 | 5.498  | 33.178 |
| 2021          | 30533  | 2647.911 | 354.172  | 2293.738 | 7.512  | 86.624 | 424.731 | 37.244 | 4.927  | 32.317 |
| 2022          | 30772  | 2586.165 | 321.094  | 2265.071 | 7.361  | 87.584 | 424.512 | 36.097 | 4.430  | 31.668 |
| 2023          | 31008  | 2517.960 | 291.713  | 2226.248 | 7.180  | 88.415 | 424.020 | 34.860 | 3.989  | 30.871 |
| 2024          | 31197  | 2454.161 | 267.816  | 2186.344 | 7.008  | 89.087 | 422.804 | 33.695 | 3.630  | 30.066 |
| 2025          | 30823  | 2275.364 | 234.840  | 2040.524 | 6.620  | 89.679 | 485.067 | 36.363 | 3.696  | 32.667 |
| 2026          | 31298  | 2183.166 | 213.319  | 1969.847 | 6.294  | 90.229 | 490.154 | 34.747 | 3.341  | 31.406 |
| 2027          | 31205  | 2112.345 | 196.645  | 1915.699 | 6.139  | 90.691 | 486.124 | 33.467 | 3.063  | 30.404 |
| 2028          | 31087  | 2046.677 | 181.464  | 1865.213 | 6.000  | 91.134 | 481.482 | 32.263 | 2.811  | 29.452 |
| 2029          | 30962  | 1977.671 | 167.815  | 1809.856 | 5.845  | 91.515 | 476.454 | 30.997 | 2.582  | 28.415 |
| 2030          | 30063  | 1744.457 | 142.821  | 1601.636 | 5.328  | 91.813 | 551.123 | 32.668 | 2.618  | 30.050 |
| 2031          | 29736  | 1653.738 | 131.163  | 1522.574 | 5.120  | 92.069 | 543.235 | 30.889 | 2.396  | 28.493 |
| 2032          | 29512  | 1603.120 | 122.282  | 1480.839 | 5.018  | 92.372 | 536.867 | 29.841 | 2.224  | 27.617 |
| 2033          | 29280  | 1548.245 | 114.355  | 1433.890 | 4.897  | 92.614 | 529.972 | 28.700 | 2.070  | 26.630 |
| 2034          | 29021  | 1511.985 | 108.594  | 1403.391 | 4.836  | 92.818 | 522.342 | 27.893 | 1.955  | 25.938 |
| 2035          | 27588  | 1239.866 | 87.071   | 1152.794 | 4.179  | 92.977 | 612.175 | 28.290 | 1.932  | 26.358 |
| 2036          | 26436  | 1182.522 | 81.190   | 1101.332 | 4.166  | 93.134 | 585.922 | 26.975 | 1.799  | 25.175 |
| 2037          | 26003  | 1134.483 | 77.502   | 1056.981 | 4.065  | 93.169 | 575.200 | 25.851 | 1.714  | 24.136 |
| 2038          | 25567  | 1093.537 | 73.046   | 1020.491 | 3.991  | 93.320 | 563.902 | 24.866 | 1.611  | 23.255 |
| 2039          | 25134  | 1047.905 | 68.474   | 979.431  | 3.897  | 93.466 | 552.087 | 23.751 | 1.504  | 22.247 |

## Results for PHIM for Run 5 (Sensitivity\_Analysis\_4.RTF)

\*\*\*\*\*

### Main Results for E-Component for Run: 5, Simulation: 1, COD: COPD, Adjusted

| Variable Parameter          | Value                                  |
|-----------------------------|----------------------------------------|
| 1. Country                  | US (United States)                     |
| 2. Sex                      | M (Males)                              |
| 3. Year of start of process | 1990                                   |
| 4. Cause of Death           | COPD                                   |
| 5. Effective Dose NULL      | CC:1                                   |
| 6. Effective Dose Ecig      | CC:1 Ecig:0.05 Dual:0.525              |
| Note:                       | Death rates are per million population |

### Results for Age Groups Combined and Years combined, Population and Number deaths adjusted for Ecig scenario,

| Age Group:All | NULL    | Ecig        | %Drop      |          |        |        | NULL    | Ecig    | Drop    |        |
|---------------|---------|-------------|------------|----------|--------|--------|---------|---------|---------|--------|
| Year          | Number  | Attrib      | Attrib     | Drop     | %Drop  | Attrib | Death   | Attrib  | Attrib  | Drop   |
|               | Deaths  | Deaths      | Deaths     | Deaths   | Deaths | Deaths | Rate    | Rates   | Rates   | Rates  |
| All Comb      | 2265931 | 1015606.587 | 682825.415 | 332781.2 | 14.686 | 32.767 | 650.479 | 293.996 | 196.018 | 97.978 |

### Results for Age Groups Combined, Population and Number deaths adjusted for Ecig scenario,

| Age Group:All | NULL   | Ecig      | %Drop     |          |        |        | NULL    | Ecig    | Drop    |         |
|---------------|--------|-----------|-----------|----------|--------|--------|---------|---------|---------|---------|
| Year          | Number | Attrib    | Attrib    | Drop     | %Drop  | Attrib | Death   | Attrib  | Attrib  | Drop    |
|               | Deaths | Deaths    | Deaths    | Deaths   | Deaths | Deaths | Rate    | Rates   | Rates   | Rates   |
| 1990          | 33993  | 19262.437 | 19262.437 | 0.000    | 0.000  | 0.000  | 538.865 | 305.353 | 305.353 | 0.000   |
| 1991          | 34092  | 19215.636 | 19193.448 | 22.188   | 0.065  | 0.115  | 531.576 | 299.618 | 299.272 | 0.346   |
| 1992          | 33942  | 19056.189 | 18998.391 | 57.798   | 0.170  | 0.303  | 520.249 | 292.085 | 291.197 | 0.888   |
| 1993          | 35914  | 20095.670 | 19977.510 | 118.160  | 0.329  | 0.588  | 540.648 | 302.526 | 300.740 | 1.786   |
| 1994          | 35077  | 19524.095 | 19343.491 | 180.604  | 0.515  | 0.925  | 518.166 | 288.435 | 285.750 | 2.684   |
| 1995          | 34674  | 19116.002 | 18857.512 | 258.490  | 0.745  | 1.352  | 502.376 | 276.995 | 273.220 | 3.775   |
| 1996          | 34590  | 18975.021 | 18622.067 | 352.954  | 1.020  | 1.860  | 493.330 | 270.675 | 265.594 | 5.081   |
| 1997          | 35279  | 19169.025 | 18700.470 | 468.555  | 1.328  | 2.444  | 494.916 | 268.986 | 262.341 | 6.645   |
| 1998          | 35693  | 19228.937 | 18625.795 | 603.142  | 1.690  | 3.137  | 492.425 | 265.388 | 256.967 | 8.421   |
| 1999          | 38542  | 20589.820 | 19797.662 | 792.158  | 2.055  | 3.847  | 523.284 | 279.689 | 268.792 | 10.897  |
| 2000          | 36316  | 19196.417 | 18300.588 | 895.830  | 2.467  | 4.667  | 485.767 | 256.946 | 244.789 | 12.157  |
| 2001          | 36324  | 19012.731 | 17928.024 | 1084.708 | 2.986  | 5.705  | 479.449 | 251.174 | 236.636 | 14.537  |
| 2002          | 36037  | 18699.357 | 17430.471 | 1268.886 | 3.521  | 6.786  | 470.226 | 244.265 | 227.441 | 16.825  |
| 2003          | 36273  | 18663.550 | 17182.747 | 1480.803 | 4.082  | 7.934  | 468.262 | 241.262 | 221.822 | 19.441  |
| 2004          | 34689  | 17679.164 | 16037.609 | 1641.555 | 4.732  | 9.285  | 442.880 | 226.076 | 204.753 | 21.323  |
| 2005          | 36925  | 18692.832 | 16708.892 | 1983.940 | 5.373  | 10.613 | 465.823 | 236.265 | 210.787 | 25.478  |
| 2006          | 34459  | 17308.564 | 15201.393 | 2107.170 | 6.115  | 12.174 | 430.602 | 216.769 | 189.957 | 26.812  |
| 2007          | 35457  | 17683.181 | 15243.935 | 2439.247 | 6.879  | 13.794 | 438.377 | 219.189 | 188.471 | 30.718  |
| 2008          | 38411  | 19006.374 | 16094.827 | 2911.547 | 7.580  | 15.319 | 469.417 | 232.952 | 196.693 | 36.259  |
| 2009          | 37082  | 18205.573 | 15073.114 | 3132.458 | 8.447  | 17.206 | 447.660 | 220.505 | 181.966 | 38.539  |
| 2010          | 37439  | 18237.758 | 14802.901 | 3434.857 | 9.175  | 18.834 | 446.317 | 218.215 | 176.468 | 41.747  |
| 2011          | 38328  | 18487.916 | 14609.417 | 3878.499 | 10.119 | 20.979 | 452.222 | 219.022 | 172.373 | 46.649  |
| 2012          | 38769  | 18491.158 | 14239.063 | 4252.095 | 10.968 | 22.995 | 452.286 | 216.689 | 166.117 | 50.573  |
| 2013          | 40598  | 19143.452 | 14375.332 | 4768.120 | 11.745 | 24.907 | 468.023 | 221.775 | 165.724 | 56.051  |
| 2014          | 40679  | 18992.005 | 13863.267 | 5128.738 | 12.608 | 27.005 | 463.280 | 217.451 | 157.885 | 59.566  |
| 2015          | 42696  | 19728.885 | 14073.484 | 5655.401 | 13.246 | 28.666 | 546.369 | 254.116 | 180.096 | 74.021  |
| 2016          | 43541  | 19876.724 | 13774.482 | 6102.242 | 14.015 | 30.700 | 551.686 | 253.628 | 174.531 | 79.097  |
| 2017          | 44594  | 20119.790 | 13523.786 | 6596.004 | 14.791 | 32.784 | 559.562 | 254.381 | 169.696 | 84.685  |
| 2018          | 46012  | 20535.123 | 13380.267 | 7154.856 | 15.550 | 34.842 | 571.700 | 257.229 | 166.251 | 90.978  |
| 2019          | 47568  | 21009.029 | 13266.640 | 7742.389 | 16.276 | 36.853 | 584.968 | 260.605 | 163.146 | 97.459  |
| 2020          | 49093  | 21428.512 | 13119.836 | 8308.676 | 16.924 | 38.774 | 688.183 | 303.533 | 183.914 | 119.619 |
| 2021          | 49187  | 21266.697 | 12523.552 | 8743.145 | 17.775 | 41.112 | 684.222 | 299.127 | 174.210 | 124.917 |
| 2022          | 50711  | 21663.568 | 12280.918 | 9382.650 | 18.502 | 43.311 | 699.587 | 302.378 | 169.421 | 132.957 |
| 2023          | 52264  | 22084.131 | 12044.889 | 10039.24 | 19.209 | 45.459 | 714.700 | 305.748 | 164.711 | 141.037 |
| 2024          | 53766  | 22418.456 | 11787.769 | 10630.69 | 19.772 | 47.419 | 728.664 | 307.804 | 159.755 | 148.049 |
| 2025          | 54886  | 22614.834 | 11466.780 | 11148.05 | 20.311 | 49.295 | 863.746 | 361.411 | 180.454 | 180.957 |
| 2026          | 55454  | 22571.522 | 10970.927 | 11600.59 | 20.919 | 51.395 | 868.449 | 359.241 | 171.813 | 187.429 |
| 2027          | 56461  | 22774.416 | 10583.791 | 12190.62 | 21.591 | 53.528 | 879.562 | 360.827 | 164.876 | 195.950 |
| 2028          | 57428  | 22915.561 | 10149.716 | 12765.84 | 22.229 | 55.708 | 889.453 | 361.228 | 157.199 | 204.029 |
| 2029          | 58382  | 22992.027 | 9710.869  | 13281.16 | 22.749 | 57.764 | 898.405 | 360.371 | 149.435 | 210.936 |
| 2030          | 58693  | 22895.360 | 9264.627  | 13630.73 | 23.224 | 59.535 | 1075.96 | 428.760 | 169.840 | 258.920 |
| 2031          | 59126  | 22715.871 | 8791.452  | 13924.42 | 23.550 | 61.298 | 1080.15 | 424.293 | 160.608 | 263.685 |
| 2032          | 59875  | 22759.207 | 8365.596  | 14393.61 | 24.040 | 63.243 | 1089.19 | 423.652 | 152.180 | 271.471 |
| 2033          | 60600  | 22786.258 | 7964.790  | 14821.47 | 24.458 | 65.046 | 1096.89 | 422.387 | 144.166 | 278.221 |
| 2034          | 61268  | 22806.106 | 7561.693  | 15244.41 | 24.882 | 66.844 | 1102.73 | 420.721 | 136.100 | 284.621 |
| 2035          | 60394  | 22262.998 | 7100.986  | 15162.01 | 25.105 | 68.104 | 1340.12 | 507.973 | 157.569 | 350.404 |
| 2036          | 58317  | 21140.051 | 6281.023  | 14859.03 | 25.480 | 70.289 | 1292.53 | 482.234 | 139.212 | 343.022 |
| 2037          | 58511  | 21011.845 | 5856.753  | 15155.09 | 25.901 | 72.126 | 1294.29 | 478.783 | 129.555 | 349.228 |
| 2038          | 58682  | 20787.483 | 5436.121  | 15351.36 | 26.160 | 73.849 | 1294.26 | 472.681 | 119.897 | 352.783 |
| 2039          | 58843  | 20709.267 | 5074.302  | 15634.96 | 26.571 | 75.497 | 1292.52 | 469.372 | 111.461 | 357.911 |

## Results for PHIM for Run 6 (Sensitivity\_Analysis\_4.RTF)

---

### Control File Details for Run: 6

| Variable Parameter                                       | Value                  |
|----------------------------------------------------------|------------------------|
| 1. Name for Reference Scenario                           | NULL                   |
| 2. Name for Test Scenario                                | Ecig                   |
| 3. Name for Product 1                                    | CC                     |
| 4. Name for Product 2                                    | Ecig                   |
| 5. Name for Product 3                                    | -                      |
| 6. Name for Product 4                                    | Dual                   |
| 7. Country                                               | US (United States)     |
| 8. Sex                                                   | F (Females)            |
| 9. Year of start of process                              | 1990                   |
| 10. Number of months of follow-up                        | 600                    |
| 11. Follow-up interval length (in months)                | 12                     |
| 12. Lower age for risk estimation                        | 10                     |
| 13. Upper age for risk estimation                        | 79                     |
| 14. The effective dose for Product 1 (F1) - Ref          | 1                      |
| 15. The effective dose for Product 2 (F2) - Ref          | -                      |
| 16. The effective dose for Product 3 (F3) - Ref          | -                      |
| 17. The effective dose for Product 4 (F4) - Ref          | -                      |
| 18. The effective dose for Product 1 (F1) - Test         | 1                      |
| 19. The effective dose for Product 2 (F2) - Test         | 0.05                   |
| 20. The effective dose for Product 3 (F3) - Test         | -                      |
| 21. The effective dose for Product 4 (F4) - Test         | FROMF2                 |
| 22. Number in population to be simulated                 | 100000                 |
| 23. Number of MC simulations                             | 1                      |
| 24. The random number seed for the first simulation      | 15975263               |
| 25. Source for the population file (POP)                 | UN4                    |
| 26. Source for the socioeconomic prevalence file (SEP)   | -                      |
| 27. Source for the current smoking prevalence file (CSP) | ISS3                   |
| 28. Source for the former smoking prevalence file (FSP)  | ISS3                   |
| 29. Source for the quit-time distribution file (QTD)     | NHIS2006               |
| 30. Source for the death file (MORT)                     | APR-20                 |
| 31. Source for the relative risk file (RR)               | PNLEST                 |
| 32. Source for the half-life file (H)                    | PNLEST                 |
| 33. Assumption Set for TTP Factor Reference              | F1                     |
| 34. Assumption Set for TTP Factor Test                   | F1                     |
| 35. Assumption Set for TTP Reference                     | ISS3                   |
| 36. Assumption Set for TTP Test                          | S4C                    |
| 37. Assumption Set for TP for socioeconomic group        | -                      |
| 38. Source for Output Choice file (OUTC)                 | BASIC                  |
| 39. Output for DTP P1                                    | N                      |
| 40. Output for DTP P2                                    | N                      |
| 41. Output for Main P Component                          | Y                      |
| 42. Output for DTP E1                                    | N                      |
| 43. Output for DTP E2                                    | N                      |
| 44. Output for DTP E3                                    | N                      |
| 45. Output for Main E Component                          | Y                      |
| 46. Output file name                                     | Sensitivity_Analysis_4 |
| 47. Run number for P-Component                           | -                      |
| 48. Results file for E-Component                         | -                      |
| 49. Components required                                  | PE                     |
| 50. Results folder for P to be used in E-Component       | -                      |
| 51. Fixed age of starting product use                    | 16                     |
| 52. Output absolute risk file?                           | N                      |

## Results for PHIM for Run 6 (Sensitivity\_Analysis\_4.RTF)

\*\*\*\*\*

TTP values for Run: 6, Scenario: NULL

| Variable Parameter | Value               |
|--------------------|---------------------|
| 1. Country         | US (United States)  |
| 2. Sex             | F (Females)         |
| 3. Assumption Set  | ISS3                |
| Note:              | Period is in Months |

| Age   | Period  | Initiation  | Cessation    | Re-initiation |
|-------|---------|-------------|--------------|---------------|
|       |         | Never<br>CC | CC<br>Former | Former<br>CC  |
| 10-14 | 1-12    | 0.003758    | 0.008742     | 0.000000      |
| 15-19 | 1-12    | 0.003469    | 0.002515     | 0.000000      |
| 20-24 | 1-12    | 0.000276    | 0.000761     | 0.000000      |
| 25-29 | 1-12    | 0.000137    | 0.001375     | 0.000000      |
| 30-34 | 1-12    | 0.000069    | 0.001149     | 0.000000      |
| 35-39 | 1-12    | 0.000000    | 0.000991     | 0.000000      |
| 40-44 | 1-12    | 0.000000    | 0.000833     | 0.000000      |
| 45-49 | 1-12    | 0.000000    | 0.001723     | 0.000000      |
| 50-54 | 1-12    | 0.000000    | 0.002336     | 0.000000      |
| 55-59 | 1-12    | 0.000000    | 0.002233     | 0.000000      |
| 60-64 | 1-12    | 0.000000    | 0.004634     | 0.000000      |
| 65-69 | 1-12    | 0.000000    | 0.003505     | 0.000000      |
| 70-74 | 1-12    | 0.000000    | 0.004329     | 0.000000      |
| 75-79 | 1-12    | 0.000000    | 0.004329     | 0.000000      |
| 10-14 | 13-72   | 0.004794    | 0.008742     | 0.000000      |
| 15-19 | 13-72   | 0.004527    | 0.004082     | 0.000000      |
| 20-24 | 13-72   | 0.000105    | 0.001261     | 0.000000      |
| 25-29 | 13-72   | 0.000053    | 0.000952     | 0.000000      |
| 30-34 | 13-72   | 0.000026    | 0.000733     | 0.000000      |
| 35-39 | 13-72   | 0.000000    | 0.000753     | 0.000000      |
| 40-44 | 13-72   | 0.000000    | 0.001535     | 0.000000      |
| 45-49 | 13-72   | 0.000000    | 0.002998     | 0.000000      |
| 50-54 | 13-72   | 0.000000    | 0.003159     | 0.000000      |
| 55-59 | 13-72   | 0.000000    | 0.002965     | 0.000000      |
| 60-64 | 13-72   | 0.000000    | 0.003633     | 0.000000      |
| 65-69 | 13-72   | 0.000000    | 0.004522     | 0.000000      |
| 70-74 | 13-72   | 0.000000    | 0.005208     | 0.000000      |
| 75-79 | 13-72   | 0.000000    | 0.005208     | 0.000000      |
| 10-14 | 73-132  | 0.003969    | 0.008742     | 0.000000      |
| 15-19 | 73-132  | 0.003056    | 0.003373     | 0.000000      |
| 20-24 | 73-132  | 0.001459    | 0.003881     | 0.000000      |
| 25-29 | 73-132  | 0.000714    | 0.001953     | 0.000000      |
| 30-34 | 73-132  | 0.000111    | 0.001338     | 0.000000      |
| 35-39 | 73-132  | 0.000000    | 0.001507     | 0.000000      |
| 40-44 | 73-132  | 0.000000    | 0.002080     | 0.000000      |
| 45-49 | 73-132  | 0.000000    | 0.003809     | 0.000000      |
| 50-54 | 73-132  | 0.000000    | 0.004871     | 0.000000      |
| 55-59 | 73-132  | 0.000000    | 0.004560     | 0.000000      |
| 60-64 | 73-132  | 0.000000    | 0.007192     | 0.000000      |
| 65-69 | 73-132  | 0.000000    | 0.007033     | 0.000000      |
| 70-74 | 73-132  | 0.000000    | 0.008206     | 0.000000      |
| 75-79 | 73-132  | 0.000000    | 0.008206     | 0.000000      |
| 10-14 | 133-192 | 0.002861    | 0.008742     | 0.000000      |
| 15-19 | 133-192 | 0.002594    | 0.003996     | 0.000000      |
| 20-24 | 133-192 | 0.001247    | 0.002805     | 0.000000      |
| 25-29 | 133-192 | 0.000289    | 0.001574     | 0.000000      |
| 30-34 | 133-192 | 0.000132    | 0.001293     | 0.000000      |
| 35-39 | 133-192 | 0.000000    | 0.001219     | 0.000000      |
| 40-44 | 133-192 | 0.000000    | 0.001657     | 0.000000      |
| 45-49 | 133-192 | 0.000000    | 0.001995     | 0.000000      |
| 50-54 | 133-192 | 0.000000    | 0.002154     | 0.000000      |
| 55-59 | 133-192 | 0.000000    | 0.002072     | 0.000000      |
| 60-64 | 133-192 | 0.000000    | 0.005049     | 0.000000      |
| 65-69 | 133-192 | 0.000000    | 0.003680     | 0.000000      |
| 70-74 | 133-192 | 0.000000    | 0.006144     | 0.000000      |
| 75-79 | 133-192 | 0.000000    | 0.006144     | 0.000000      |
| 10-14 | 193-252 | 0.001859    | 0.008742     | 0.000000      |
| 15-19 | 193-252 | 0.002232    | 0.005770     | 0.000000      |
| 20-24 | 193-252 | 0.001079    | 0.003262     | 0.000000      |
| 25-29 | 193-252 | 0.000531    | 0.002002     | 0.000000      |
| 30-34 | 193-252 | 0.000263    | 0.003240     | 0.000000      |
| 35-39 | 193-252 | 0.000000    | 0.001771     | 0.000000      |
| 40-44 | 193-252 | 0.000000    | 0.002173     | 0.000000      |
| 45-49 | 193-252 | 0.000000    | 0.002075     | 0.000000      |
| 50-54 | 193-252 | 0.000000    | 0.003431     | 0.000000      |

### Results for PHIM for Run 6 (Sensitivity\_Analysis\_4.RTF)

|       |         |          |          |          |
|-------|---------|----------|----------|----------|
| 55-59 | 193-252 | 0.000000 | 0.002906 | 0.000000 |
| 60-64 | 193-252 | 0.000000 | 0.007139 | 0.000000 |
| 65-69 | 193-252 | 0.000000 | 0.004963 | 0.000000 |
| 70-74 | 193-252 | 0.000000 | 0.006269 | 0.000000 |
| 75-79 | 193-252 | 0.000000 | 0.006269 | 0.000000 |
| 10-14 | 253+    | 0.000931 | 0.008742 | 0.000000 |
| 15-19 | 253+    | 0.001798 | 0.009440 | 0.000000 |
| 20-24 | 253+    | 0.000023 | 0.002831 | 0.000000 |
| 25-29 | 253+    | 0.000073 | 0.002655 | 0.000000 |
| 30-34 | 253+    | 0.000037 | 0.004614 | 0.000000 |
| 35-39 | 253+    | 0.000000 | 0.002607 | 0.000000 |
| 40-44 | 253+    | 0.000000 | 0.003115 | 0.000000 |
| 45-49 | 253+    | 0.000000 | 0.002132 | 0.000000 |
| 50-54 | 253+    | 0.000000 | 0.003497 | 0.000000 |
| 55-59 | 253+    | 0.000000 | 0.002942 | 0.000000 |
| 60-64 | 253+    | 0.000000 | 0.005376 | 0.000000 |
| 65-69 | 253+    | 0.000000 | 0.001789 | 0.000000 |
| 70-74 | 253+    | 0.000000 | 0.004077 | 0.000000 |
| 75-79 | 253+    | 0.000000 | 0.004077 | 0.000000 |

## Results for PHIM for Run 6 (Sensitivity\_Analysis\_4.RTF)

\*\*\*\*\*

TTP values for Run: 6, Scenario: Ecig

Variable Parameter

Value

- 1. Country
  - 2. Sex
  - 3. Assumption Set
- Note:

US (United States)  
 F (Females)  
 S4C  
 Period is in Months

| Age   | Period  | Initiation  |               |               | Cessation    |                |                | Re-initiation |                |                |
|-------|---------|-------------|---------------|---------------|--------------|----------------|----------------|---------------|----------------|----------------|
|       |         | Never<br>CC | Never<br>Ecig | Never<br>Dual | CC<br>Former | Ecig<br>Former | Dual<br>Former | Former<br>CC  | Former<br>Ecig | Former<br>Dual |
| 10-14 | 1-12    | 0.001879    | 0.002349      | 0.000000      | 0.008742     | 0.008742       | 0.000000       | 0.000000      | 0.000000       | 0.000000       |
| 15-19 | 1-12    | 0.001735    | 0.002168      | 0.000000      | 0.002515     | 0.002515       | 0.000000       | 0.000000      | 0.000000       | 0.000000       |
| 20-24 | 1-12    | 0.000138    | 0.000172      | 0.000000      | 0.000761     | 0.000761       | 0.000000       | 0.000000      | 0.000000       | 0.000000       |
| 25-29 | 1-12    | 0.000069    | 0.000086      | 0.000000      | 0.001376     | 0.001376       | 0.000000       | 0.000000      | 0.000000       | 0.000000       |
| 30-34 | 1-12    | 0.000034    | 0.000043      | 0.000000      | 0.001149     | 0.001149       | 0.000000       | 0.000000      | 0.000000       | 0.000000       |
| 35-39 | 1-12    | 0.000000    | 0.000000      | 0.000000      | 0.000991     | 0.000991       | 0.000000       | 0.000000      | 0.000000       | 0.000000       |
| 40-44 | 1-12    | 0.000000    | 0.000000      | 0.000000      | 0.000833     | 0.000833       | 0.000000       | 0.000000      | 0.000000       | 0.000000       |
| 45-49 | 1-12    | 0.000000    | 0.000000      | 0.000000      | 0.001723     | 0.001723       | 0.000000       | 0.000000      | 0.000000       | 0.000000       |
| 50-54 | 1-12    | 0.000000    | 0.000000      | 0.000000      | 0.002336     | 0.002336       | 0.000000       | 0.000000      | 0.000000       | 0.000000       |
| 55-59 | 1-12    | 0.000000    | 0.000000      | 0.000000      | 0.002233     | 0.002233       | 0.000000       | 0.000000      | 0.000000       | 0.000000       |
| 60-64 | 1-12    | 0.000000    | 0.000000      | 0.000000      | 0.004635     | 0.004635       | 0.000000       | 0.000000      | 0.000000       | 0.000000       |
| 65-69 | 1-12    | 0.000000    | 0.000000      | 0.000000      | 0.003505     | 0.003505       | 0.000000       | 0.000000      | 0.000000       | 0.000000       |
| 70-74 | 1-12    | 0.000000    | 0.000000      | 0.000000      | 0.004329     | 0.004329       | 0.000000       | 0.000000      | 0.000000       | 0.000000       |
| 75-79 | 1-12    | 0.000000    | 0.000000      | 0.000000      | 0.004329     | 0.004329       | 0.000000       | 0.000000      | 0.000000       | 0.000000       |
| 10-14 | 13-72   | 0.001918    | 0.003596      | 0.000000      | 0.008742     | 0.008742       | 0.000000       | 0.000000      | 0.000000       | 0.000000       |
| 15-19 | 13-72   | 0.001811    | 0.003395      | 0.000000      | 0.004083     | 0.004083       | 0.000000       | 0.000000      | 0.000000       | 0.000000       |
| 20-24 | 13-72   | 0.000042    | 0.000079      | 0.000000      | 0.001261     | 0.001261       | 0.000000       | 0.000000      | 0.000000       | 0.000000       |
| 25-29 | 13-72   | 0.000021    | 0.000040      | 0.000000      | 0.000952     | 0.000952       | 0.000000       | 0.000000      | 0.000000       | 0.000000       |
| 30-34 | 13-72   | 0.000011    | 0.000020      | 0.000000      | 0.000733     | 0.000733       | 0.000000       | 0.000000      | 0.000000       | 0.000000       |
| 35-39 | 13-72   | 0.000000    | 0.000000      | 0.000000      | 0.000754     | 0.000754       | 0.000000       | 0.000000      | 0.000000       | 0.000000       |
| 40-44 | 13-72   | 0.000000    | 0.000000      | 0.000000      | 0.001535     | 0.001535       | 0.000000       | 0.000000      | 0.000000       | 0.000000       |
| 45-49 | 13-72   | 0.000000    | 0.000000      | 0.000000      | 0.002998     | 0.002998       | 0.000000       | 0.000000      | 0.000000       | 0.000000       |
| 50-54 | 13-72   | 0.000000    | 0.000000      | 0.000000      | 0.003160     | 0.003160       | 0.000000       | 0.000000      | 0.000000       | 0.000000       |
| 55-59 | 13-72   | 0.000000    | 0.000000      | 0.000000      | 0.002965     | 0.002965       | 0.000000       | 0.000000      | 0.000000       | 0.000000       |
| 60-64 | 13-72   | 0.000000    | 0.000000      | 0.000000      | 0.003633     | 0.003633       | 0.000000       | 0.000000      | 0.000000       | 0.000000       |
| 65-69 | 13-72   | 0.000000    | 0.000000      | 0.000000      | 0.004522     | 0.004522       | 0.000000       | 0.000000      | 0.000000       | 0.000000       |
| 70-74 | 13-72   | 0.000000    | 0.000000      | 0.000000      | 0.005208     | 0.005208       | 0.000000       | 0.000000      | 0.000000       | 0.000000       |
| 75-79 | 13-72   | 0.000000    | 0.000000      | 0.000000      | 0.005208     | 0.005208       | 0.000000       | 0.000000      | 0.000000       | 0.000000       |
| 10-14 | 73-132  | 0.000794    | 0.003969      | 0.000000      | 0.008742     | 0.008742       | 0.000000       | 0.000000      | 0.000000       | 0.000000       |
| 15-19 | 73-132  | 0.000611    | 0.003056      | 0.000000      | 0.003373     | 0.003373       | 0.000000       | 0.000000      | 0.000000       | 0.000000       |
| 20-24 | 73-132  | 0.000292    | 0.001460      | 0.000000      | 0.003881     | 0.003881       | 0.000000       | 0.000000      | 0.000000       | 0.000000       |
| 25-29 | 73-132  | 0.000143    | 0.000714      | 0.000000      | 0.001954     | 0.001954       | 0.000000       | 0.000000      | 0.000000       | 0.000000       |
| 30-34 | 73-132  | 0.000022    | 0.000111      | 0.000000      | 0.001338     | 0.001338       | 0.000000       | 0.000000      | 0.000000       | 0.000000       |
| 35-39 | 73-132  | 0.000000    | 0.000000      | 0.000000      | 0.001507     | 0.001507       | 0.000000       | 0.000000      | 0.000000       | 0.000000       |
| 40-44 | 73-132  | 0.000000    | 0.000000      | 0.000000      | 0.002080     | 0.002080       | 0.000000       | 0.000000      | 0.000000       | 0.000000       |
| 45-49 | 73-132  | 0.000000    | 0.000000      | 0.000000      | 0.003809     | 0.003809       | 0.000000       | 0.000000      | 0.000000       | 0.000000       |
| 50-54 | 73-132  | 0.000000    | 0.000000      | 0.000000      | 0.004871     | 0.004871       | 0.000000       | 0.000000      | 0.000000       | 0.000000       |
| 55-59 | 73-132  | 0.000000    | 0.000000      | 0.000000      | 0.004560     | 0.004560       | 0.000000       | 0.000000      | 0.000000       | 0.000000       |
| 60-64 | 73-132  | 0.000000    | 0.000000      | 0.000000      | 0.007192     | 0.007192       | 0.000000       | 0.000000      | 0.000000       | 0.000000       |
| 65-69 | 73-132  | 0.000000    | 0.000000      | 0.000000      | 0.007033     | 0.007033       | 0.000000       | 0.000000      | 0.000000       | 0.000000       |
| 70-74 | 73-132  | 0.000000    | 0.000000      | 0.000000      | 0.008206     | 0.008206       | 0.000000       | 0.000000      | 0.000000       | 0.000000       |
| 75-79 | 73-132  | 0.000000    | 0.000000      | 0.000000      | 0.008206     | 0.008206       | 0.000000       | 0.000000      | 0.000000       | 0.000000       |
| 10-14 | 133-192 | 0.000143    | 0.003398      | 0.000000      | 0.008742     | 0.008742       | 0.000000       | 0.000000      | 0.000000       | 0.000000       |
| 15-19 | 133-192 | 0.000130    | 0.003081      | 0.000000      | 0.003996     | 0.003996       | 0.000000       | 0.000000      | 0.000000       | 0.000000       |
| 20-24 | 133-192 | 0.000062    | 0.001481      | 0.000000      | 0.002805     | 0.002805       | 0.000000       | 0.000000      | 0.000000       | 0.000000       |
| 25-29 | 133-192 | 0.000015    | 0.000344      | 0.000000      | 0.001574     | 0.001574       | 0.000000       | 0.000000      | 0.000000       | 0.000000       |
| 30-34 | 133-192 | 0.000007    | 0.000156      | 0.000000      | 0.001293     | 0.001293       | 0.000000       | 0.000000      | 0.000000       | 0.000000       |
| 35-39 | 133-192 | 0.000000    | 0.000000      | 0.000000      | 0.001219     | 0.001219       | 0.000000       | 0.000000      | 0.000000       | 0.000000       |
| 40-44 | 133-192 | 0.000000    | 0.000000      | 0.000000      | 0.001657     | 0.001657       | 0.000000       | 0.000000      | 0.000000       | 0.000000       |
| 45-49 | 133-192 | 0.000000    | 0.000000      | 0.000000      | 0.001995     | 0.001995       | 0.000000       | 0.000000      | 0.000000       | 0.000000       |
| 50-54 | 133-192 | 0.000000    | 0.000000      | 0.000000      | 0.002154     | 0.002154       | 0.000000       | 0.000000      | 0.000000       | 0.000000       |
| 55-59 | 133-192 | 0.000000    | 0.000000      | 0.000000      | 0.002072     | 0.002072       | 0.000000       | 0.000000      | 0.000000       | 0.000000       |
| 60-64 | 133-192 | 0.000000    | 0.000000      | 0.000000      | 0.005049     | 0.005049       | 0.000000       | 0.000000      | 0.000000       | 0.000000       |
| 65-69 | 133-192 | 0.000000    | 0.000000      | 0.000000      | 0.003681     | 0.003681       | 0.000000       | 0.000000      | 0.000000       | 0.000000       |
| 70-74 | 133-192 | 0.000000    | 0.000000      | 0.000000      | 0.006144     | 0.006144       | 0.000000       | 0.000000      | 0.000000       | 0.000000       |
| 75-79 | 133-192 | 0.000000    | 0.000000      | 0.000000      | 0.006144     | 0.006144       | 0.000000       | 0.000000      | 0.000000       | 0.000000       |
| 10-14 | 193-252 | 0.000093    | 0.002207      | 0.000000      | 0.008742     | 0.008742       | 0.000000       | 0.000000      | 0.000000       | 0.000000       |
| 15-19 | 193-252 | 0.000112    | 0.002650      | 0.000000      | 0.005770     | 0.005770       | 0.000000       | 0.000000      | 0.000000       | 0.000000       |
| 20-24 | 193-252 | 0.000054    | 0.001281      | 0.000000      | 0.003262     | 0.003262       | 0.000000       | 0.000000      | 0.000000       | 0.000000       |
| 25-29 | 193-252 | 0.000027    | 0.000630      | 0.000000      | 0.002002     | 0.002002       | 0.000000       | 0.000000      | 0.000000       | 0.000000       |
| 30-34 | 193-252 | 0.000013    | 0.000313      | 0.000000      | 0.003241     | 0.003241       | 0.000000       | 0.000000      | 0.000000       | 0.000000       |
| 35-39 | 193-252 | 0.000000    | 0.000000      | 0.000000      | 0.001771     | 0.001771       | 0.000000       | 0.000000      | 0.000000       | 0.000000       |
| 40-44 | 193-252 | 0.000000    | 0.000000      | 0.000000      | 0.002173     | 0.002173       | 0.000000       | 0.000000      | 0.000000       | 0.000000       |
| 45-49 | 193-252 | 0.000000    | 0.000000      | 0.000000      | 0.002075     | 0.002075       | 0.000000       | 0.000000      | 0.000000       | 0.000000       |
| 50-54 | 193-252 | 0.000000    | 0.000000      | 0.000000      | 0.003432     | 0.003432       | 0.000000       | 0.000000      | 0.000000       | 0.000000       |



### Results for PHIM for Run 6 (Sensitivity\_Analysis\_4.RTF)

|       |         |          |          |          |          |          |          |          |          |          |
|-------|---------|----------|----------|----------|----------|----------|----------|----------|----------|----------|
| 55-59 | 193-252 | 0.000000 | 0.000000 | 0.000000 | 0.002906 | 0.002906 | 0.000000 | 0.000000 | 0.000000 | 0.000000 |
| 60-64 | 193-252 | 0.000000 | 0.000000 | 0.000000 | 0.007139 | 0.007139 | 0.000000 | 0.000000 | 0.000000 | 0.000000 |
| 65-69 | 193-252 | 0.000000 | 0.000000 | 0.000000 | 0.004963 | 0.004963 | 0.000000 | 0.000000 | 0.000000 | 0.000000 |
| 70-74 | 193-252 | 0.000000 | 0.000000 | 0.000000 | 0.006269 | 0.006269 | 0.000000 | 0.000000 | 0.000000 | 0.000000 |
| 75-79 | 193-252 | 0.000000 | 0.000000 | 0.000000 | 0.006269 | 0.006269 | 0.000000 | 0.000000 | 0.000000 | 0.000000 |
| 10-14 | 253+    | 0.000047 | 0.001105 | 0.000000 | 0.008742 | 0.008742 | 0.000000 | 0.000000 | 0.000000 | 0.000000 |
| 15-19 | 253+    | 0.000090 | 0.002135 | 0.000000 | 0.009440 | 0.009440 | 0.000000 | 0.000000 | 0.000000 | 0.000000 |
| 20-24 | 253+    | 0.000001 | 0.000027 | 0.000000 | 0.002831 | 0.002831 | 0.000000 | 0.000000 | 0.000000 | 0.000000 |
| 25-29 | 253+    | 0.000004 | 0.000087 | 0.000000 | 0.002656 | 0.002656 | 0.000000 | 0.000000 | 0.000000 | 0.000000 |
| 30-34 | 253+    | 0.000002 | 0.000044 | 0.000000 | 0.004614 | 0.004614 | 0.000000 | 0.000000 | 0.000000 | 0.000000 |
| 35-39 | 253+    | 0.000000 | 0.000000 | 0.000000 | 0.002608 | 0.002608 | 0.000000 | 0.000000 | 0.000000 | 0.000000 |
| 40-44 | 253+    | 0.000000 | 0.000000 | 0.000000 | 0.003115 | 0.003115 | 0.000000 | 0.000000 | 0.000000 | 0.000000 |
| 45-49 | 253+    | 0.000000 | 0.000000 | 0.000000 | 0.002132 | 0.002132 | 0.000000 | 0.000000 | 0.000000 | 0.000000 |
| 50-54 | 253+    | 0.000000 | 0.000000 | 0.000000 | 0.003497 | 0.003497 | 0.000000 | 0.000000 | 0.000000 | 0.000000 |
| 55-59 | 253+    | 0.000000 | 0.000000 | 0.000000 | 0.002942 | 0.002942 | 0.000000 | 0.000000 | 0.000000 | 0.000000 |
| 60-64 | 253+    | 0.000000 | 0.000000 | 0.000000 | 0.005376 | 0.005376 | 0.000000 | 0.000000 | 0.000000 | 0.000000 |
| 65-69 | 253+    | 0.000000 | 0.000000 | 0.000000 | 0.001789 | 0.001789 | 0.000000 | 0.000000 | 0.000000 | 0.000000 |
| 70-74 | 253+    | 0.000000 | 0.000000 | 0.000000 | 0.004077 | 0.004077 | 0.000000 | 0.000000 | 0.000000 | 0.000000 |
| 75-79 | 253+    | 0.000000 | 0.000000 | 0.000000 | 0.004077 | 0.004077 | 0.000000 | 0.000000 | 0.000000 | 0.000000 |



### Results for PHIM for Run 6 (Sensitivity\_Analysis\_4.RTF)

|       |      |          |          |          |          |          |          |
|-------|------|----------|----------|----------|----------|----------|----------|
| 25-29 | 253+ | 0.014127 | 0.000000 | 0.000000 | 0.000000 | 0.000000 | 0.000000 |
| 30-34 | 253+ | 0.013889 | 0.000000 | 0.000000 | 0.000000 | 0.000000 | 0.000000 |
| 35-39 | 253+ | 0.012929 | 0.000000 | 0.000000 | 0.000000 | 0.000000 | 0.000000 |
| 40-44 | 253+ | 0.012785 | 0.000000 | 0.000000 | 0.000000 | 0.000000 | 0.000000 |
| 45-49 | 253+ | 0.012295 | 0.000000 | 0.000000 | 0.000000 | 0.000000 | 0.000000 |
| 50-54 | 253+ | 0.011536 | 0.000000 | 0.000000 | 0.000000 | 0.000000 | 0.000000 |
| 55-59 | 253+ | 0.008988 | 0.000000 | 0.000000 | 0.000000 | 0.000000 | 0.000000 |
| 60-64 | 253+ | 0.008098 | 0.000000 | 0.000000 | 0.000000 | 0.000000 | 0.000000 |
| 65-69 | 253+ | 0.006274 | 0.000000 | 0.000000 | 0.000000 | 0.000000 | 0.000000 |
| 70-74 | 253+ | 0.004141 | 0.000000 | 0.000000 | 0.000000 | 0.000000 | 0.000000 |
| 75-79 | 253+ | 0.004141 | 0.000000 | 0.000000 | 0.000000 | 0.000000 | 0.000000 |

## Results for PHIM for Run 6 (Sensitivity\_Analysis\_4.RTF)

\*\*\*\*\*

### Main Output for the Tobacco History for Run: 6, Simulation: 1, Scenario: NULL

| Variable Parameter          | Value              |
|-----------------------------|--------------------|
| 1. Country                  | US (United States) |
| 2. Sex                      | F (Females)        |
| 3. Year of start of process | 1990               |

Year of Follow-up: 2040, Age Group: All Ages  
 Period    Age Group    Smoking Group            N            %

|    |          |           |       |       |
|----|----------|-----------|-------|-------|
| 50 | All Ages | Never Any | 20670 | 58.80 |
| 50 | All Ages | CC        | 2462  | 7.00  |
| 50 | All Ages | Former    | 12019 | 34.19 |

Year of Follow-up: 2040, Age Group: 18-19  
 Period    Age Group    Smoking Group            N            %

|    |       |           |   |   |
|----|-------|-----------|---|---|
| 50 | 18-19 | Never Any | 0 | . |
| 50 | 18-19 | CC        | 0 | . |
| 50 | 18-19 | Former    | 0 | . |

Year of Follow-up: 2040, Age Group: 20-24  
 Period    Age Group    Smoking Group            N            %

|    |       |           |   |   |
|----|-------|-----------|---|---|
| 50 | 20-24 | Never Any | 0 | . |
| 50 | 20-24 | CC        | 0 | . |
| 50 | 20-24 | Former    | 0 | . |

Year of Follow-up: 2040, Age Group: 25-29  
 Period    Age Group    Smoking Group            N            %

|    |       |           |   |   |
|----|-------|-----------|---|---|
| 50 | 25-29 | Never Any | 0 | . |
| 50 | 25-29 | CC        | 0 | . |
| 50 | 25-29 | Former    | 0 | . |

Year of Follow-up: 2040, Age Group: 30-34  
 Period    Age Group    Smoking Group            N            %

|    |       |           |   |   |
|----|-------|-----------|---|---|
| 50 | 30-34 | Never Any | 0 | . |
| 50 | 30-34 | CC        | 0 | . |
| 50 | 30-34 | Former    | 0 | . |

Year of Follow-up: 2040, Age Group: 35-39  
 Period    Age Group    Smoking Group            N            %

|    |       |           |   |   |
|----|-------|-----------|---|---|
| 50 | 35-39 | Never Any | 0 | . |
| 50 | 35-39 | CC        | 0 | . |
| 50 | 35-39 | Former    | 0 | . |

Year of Follow-up: 2040, Age Group: 40-44  
 Period    Age Group    Smoking Group            N            %

|    |       |           |   |   |
|----|-------|-----------|---|---|
| 50 | 40-44 | Never Any | 0 | . |
| 50 | 40-44 | CC        | 0 | . |
| 50 | 40-44 | Former    | 0 | . |

Year of Follow-up: 2040, Age Group: 45-49  
 Period    Age Group    Smoking Group            N            %

|    |       |           |   |   |
|----|-------|-----------|---|---|
| 50 | 45-49 | Never Any | 0 | . |
| 50 | 45-49 | CC        | 0 | . |
| 50 | 45-49 | Former    | 0 | . |

Year of Follow-up: 2040, Age Group: 50-54  
 Period    Age Group    Smoking Group            N            %

|    |       |           |   |   |
|----|-------|-----------|---|---|
| 50 | 50-54 | Never Any | 0 | . |
| 50 | 50-54 | CC        | 0 | . |
| 50 | 50-54 | Former    | 0 | . |

Year of Follow-up: 2040, Age Group: 55-59  
 Period    Age Group    Smoking Group            N            %

|    |       |           |   |   |
|----|-------|-----------|---|---|
| 50 | 55-59 | Never Any | 0 | . |
| 50 | 55-59 | CC        | 0 | . |
| 50 | 55-59 | Former    | 0 | . |

Year of Follow-up: 2040, Age Group: 60-64  
 Period    Age Group    Smoking Group            N            %

**Results for PHIM for Run 6 (Sensitivity\_Analysis\_4.RTF)**

|                                           |           |               |      |       |
|-------------------------------------------|-----------|---------------|------|-------|
| 50                                        | 60-64     | Never Any     | 4803 | 60.57 |
| 50                                        | 60-64     | CC            | 621  | 7.83  |
| 50                                        | 60-64     | Former        | 2506 | 31.60 |
| Year of Follow-up: 2040, Age Group: 65-69 |           |               |      |       |
| Period                                    | Age Group | Smoking Group | N    | %     |
|                                           |           |               |      |       |
| 50                                        | 65-69     | Never Any     | 5407 | 64.75 |
| 50                                        | 65-69     | CC            | 538  | 6.44  |
| 50                                        | 65-69     | Former        | 2405 | 28.80 |
| Year of Follow-up: 2040, Age Group: 70-74 |           |               |      |       |
| Period                                    | Age Group | Smoking Group | N    | %     |
|                                           |           |               |      |       |
| 50                                        | 70-74     | Never Any     | 5181 | 58.92 |
| 50                                        | 70-74     | CC            | 605  | 6.88  |
| 50                                        | 70-74     | Former        | 3007 | 34.20 |
| Year of Follow-up: 2040, Age Group: 75-79 |           |               |      |       |
| Period                                    | Age Group | Smoking Group | N    | %     |
|                                           |           |               |      |       |
| 50                                        | 75-79     | Never Any     | 5279 | 52.38 |
| 50                                        | 75-79     | CC            | 698  | 6.93  |
| 50                                        | 75-79     | Former        | 4101 | 40.69 |

## Results for PHIM for Run 6 (Sensitivity\_Analysis\_4.RTF)

\*\*\*\*\*

### Main Output for the Tobacco History for Run: 6, Simulation: 1, Scenario: Ecig

| Variable Parameter                           |           |               | Value              |       |               |             |               |                |              |
|----------------------------------------------|-----------|---------------|--------------------|-------|---------------|-------------|---------------|----------------|--------------|
| 1. Country                                   |           |               | US (United States) |       |               |             |               |                |              |
| 2. Sex                                       |           |               | F (Females)        |       |               |             |               |                |              |
| 3. Year of start of process                  |           |               | 1990               |       |               |             |               |                |              |
| Year of Follow-up: 1990, Age Group: All Ages |           |               |                    |       |               |             |               |                |              |
| Period                                       | Age Group | Smoking Group | N                  | %     | Ever Quit (N) | Ever Quit % | Mean Yrs Quit | Short Term (n) | Short Term % |
| 0                                            | All Ages  | Never Any     | 47776              | 54.92 |               |             |               |                |              |
| 0                                            | All Ages  | CC            | 22737              | 26.14 | 0             | 0.00        |               |                |              |
| 0                                            | All Ages  | Ecig          | 0                  | 0.00  |               |             |               |                |              |
| 0                                            | All Ages  | Dual          | 0                  | 0.00  |               |             |               |                |              |
| 0                                            | All Ages  | Former        | 16484              | 18.95 |               |             | 11.90         | 2815           | 17.08        |
| Year of Follow-up: 1990, Age Group: 18-19    |           |               |                    |       |               |             |               |                |              |
| Period                                       | Age Group | Smoking Group | N                  | %     | Ever Quit (N) | Ever Quit % | Mean Yrs Quit | Short Term (n) | Short Term % |
| 0                                            | 18-19     | Never Any     | 2570               | 78.43 |               |             |               |                |              |
| 0                                            | 18-19     | CC            | 535                | 16.33 | 0             | 0.00        |               |                |              |
| 0                                            | 18-19     | Ecig          | 0                  | 0.00  |               |             |               |                |              |
| 0                                            | 18-19     | Dual          | 0                  | 0.00  |               |             |               |                |              |
| 0                                            | 18-19     | Former        | 172                | 5.25  |               |             | 0.20          | 172            | 100.00       |
| Year of Follow-up: 1990, Age Group: 20-24    |           |               |                    |       |               |             |               |                |              |
| Period                                       | Age Group | Smoking Group | N                  | %     | Ever Quit (N) | Ever Quit % | Mean Yrs Quit | Short Term (n) | Short Term % |
| 0                                            | 20-24     | Never Any     | 5354               | 60.89 |               |             |               |                |              |
| 0                                            | 20-24     | CC            | 2560               | 29.11 | 0             | 0.00        |               |                |              |
| 0                                            | 20-24     | Ecig          | 0                  | 0.00  |               |             |               |                |              |
| 0                                            | 20-24     | Dual          | 0                  | 0.00  |               |             |               |                |              |
| 0                                            | 20-24     | Former        | 879                | 10.00 |               |             | 1.58          | 420            | 47.78        |
| Year of Follow-up: 1990, Age Group: 25-29    |           |               |                    |       |               |             |               |                |              |
| Period                                       | Age Group | Smoking Group | N                  | %     | Ever Quit (N) | Ever Quit % | Mean Yrs Quit | Short Term (n) | Short Term % |
| 0                                            | 25-29     | Never Any     | 5318               | 52.77 |               |             |               |                |              |
| 0                                            | 25-29     | CC            | 3335               | 33.09 | 0             | 0.00        |               |                |              |
| 0                                            | 25-29     | Ecig          | 0                  | 0.00  |               |             |               |                |              |
| 0                                            | 25-29     | Dual          | 0                  | 0.00  |               |             |               |                |              |
| 0                                            | 25-29     | Former        | 1425               | 14.14 |               |             | 3.91          | 404            | 28.35        |
| Year of Follow-up: 1990, Age Group: 30-34    |           |               |                    |       |               |             |               |                |              |
| Period                                       | Age Group | Smoking Group | N                  | %     | Ever Quit (N) | Ever Quit % | Mean Yrs Quit | Short Term (n) | Short Term % |
| 0                                            | 30-34     | Never Any     | 5287               | 50.36 |               |             |               |                |              |
| 0                                            | 30-34     | CC            | 3326               | 31.68 | 0             | 0.00        |               |                |              |
| 0                                            | 30-34     | Ecig          | 0                  | 0.00  |               |             |               |                |              |
| 0                                            | 30-34     | Dual          | 0                  | 0.00  |               |             |               |                |              |
| 0                                            | 30-34     | Former        | 1886               | 17.96 |               |             | 4.36          | 566            | 30.01        |
| Year of Follow-up: 1990, Age Group: 35-39    |           |               |                    |       |               |             |               |                |              |
| Period                                       | Age Group | Smoking Group | N                  | %     | Ever Quit (N) | Ever Quit % | Mean Yrs Quit | Short Term (n) | Short Term % |
| 0                                            | 35-39     | Never Any     | 5018               | 52.27 |               |             |               |                |              |
| 0                                            | 35-39     | CC            | 2653               | 27.64 | 0             | 0.00        |               |                |              |
| 0                                            | 35-39     | Ecig          | 0                  | 0.00  |               |             |               |                |              |
| 0                                            | 35-39     | Dual          | 0                  | 0.00  |               |             |               |                |              |
| 0                                            | 35-39     | Former        | 1929               | 20.09 |               |             | 7.96          | 324            | 16.80        |
| Year of Follow-up: 1990, Age Group: 40-44    |           |               |                    |       |               |             |               |                |              |
| Period                                       | Age Group | Smoking Group | N                  | %     | Ever Quit (N) | Ever Quit % | Mean Yrs Quit | Short Term (n) | Short Term % |
| 0                                            | 40-44     | Never Any     | 4356               | 51.27 |               |             |               |                |              |
| 0                                            | 40-44     | CC            | 2397               | 28.21 | 0             | 0.00        |               |                |              |
| 0                                            | 40-44     | Ecig          | 0                  | 0.00  |               |             |               |                |              |
| 0                                            | 40-44     | Dual          | 0                  | 0.00  |               |             |               |                |              |
| 0                                            | 40-44     | Former        | 1744               | 20.52 |               |             | 7.33          | 339            | 19.44        |
| Year of Follow-up: 1990, Age Group: 45-49    |           |               |                    |       |               |             |               |                |              |
| Period                                       | Age Group | Smoking Group | N                  | %     | Ever Quit (N) | Ever Quit % | Mean Yrs Quit | Short Term (n) | Short Term % |
| 0                                            | 45-49     | Never Any     | 3116               | 47.67 |               |             |               |                |              |
| 0                                            | 45-49     | CC            | 1875               | 28.69 | 0             | 0.00        |               |                |              |
| 0                                            | 45-49     | Ecig          | 0                  | 0.00  |               |             |               |                |              |
| 0                                            | 45-49     | Dual          | 0                  | 0.00  |               |             |               |                |              |
| 0                                            | 45-49     | Former        | 1545               | 23.64 |               |             | 12.55         | 194            | 12.56        |
| Year of Follow-up: 1990, Age Group: 50-54    |           |               |                    |       |               |             |               |                |              |
| Period                                       | Age Group | Smoking Group | N                  | %     | Ever Quit (N) | Ever Quit % | Mean Yrs Quit | Short Term (n) | Short Term % |
| 0                                            | 50-54     | Never Any     | 2684               | 48.50 |               |             |               |                |              |
| 0                                            | 50-54     | CC            | 1572               | 28.41 | 0             | 0.00        |               |                |              |

**Results for PHIM for Run 6 (Sensitivity\_Analysis\_4.RTF)**

|                                              |           |               |       |       |               |             |               |                |              |
|----------------------------------------------|-----------|---------------|-------|-------|---------------|-------------|---------------|----------------|--------------|
| 0                                            | 50-54     | Ecig          | 0     | 0.00  |               |             |               |                |              |
| 0                                            | 50-54     | Dual          | 0     | 0.00  |               |             |               |                |              |
| 0                                            | 50-54     | Former        | 1278  | 23.09 |               |             | 13.28         | 126            | 9.86         |
| Year of Follow-up: 1990, Age Group: 55-59    |           |               |       |       |               |             |               |                |              |
| Period                                       | Age Group | Smoking Group | N     | %     | Ever Quit (N) | Ever Quit % | Mean Yrs Quit | Short Term (n) | Short Term % |
| 0                                            | 55-59     | Never Any     | 2732  | 51.90 |               |             |               |                |              |
| 0                                            | 55-59     | CC            | 1295  | 24.60 | 0             | 0.00        |               |                |              |
| 0                                            | 55-59     | Ecig          | 0     | 0.00  |               |             |               |                |              |
| 0                                            | 55-59     | Dual          | 0     | 0.00  |               |             |               |                |              |
| 0                                            | 55-59     | Former        | 1237  | 23.50 |               |             | 17.26         | 90             | 7.28         |
| Year of Follow-up: 1990, Age Group: 60-64    |           |               |       |       |               |             |               |                |              |
| Period                                       | Age Group | Smoking Group | N     | %     | Ever Quit (N) | Ever Quit % | Mean Yrs Quit | Short Term (n) | Short Term % |
| 0                                            | 60-64     | Never Any     | 3078  | 55.72 |               |             |               |                |              |
| 0                                            | 60-64     | CC            | 1249  | 22.61 | 0             | 0.00        |               |                |              |
| 0                                            | 60-64     | Ecig          | 0     | 0.00  |               |             |               |                |              |
| 0                                            | 60-64     | Dual          | 0     | 0.00  |               |             |               |                |              |
| 0                                            | 60-64     | Former        | 1197  | 21.67 |               |             | 18.28         | 61             | 5.10         |
| Year of Follow-up: 1990, Age Group: 65-69    |           |               |       |       |               |             |               |                |              |
| Period                                       | Age Group | Smoking Group | N     | %     | Ever Quit (N) | Ever Quit % | Mean Yrs Quit | Short Term (n) | Short Term % |
| 0                                            | 65-69     | Never Any     | 3042  | 57.36 |               |             |               |                |              |
| 0                                            | 65-69     | CC            | 976   | 18.40 | 0             | 0.00        |               |                |              |
| 0                                            | 65-69     | Ecig          | 0     | 0.00  |               |             |               |                |              |
| 0                                            | 65-69     | Dual          | 0     | 0.00  |               |             |               |                |              |
| 0                                            | 65-69     | Former        | 1285  | 24.23 |               |             | 20.65         | 68             | 5.29         |
| Year of Follow-up: 1990, Age Group: 70-74    |           |               |       |       |               |             |               |                |              |
| Period                                       | Age Group | Smoking Group | N     | %     | Ever Quit (N) | Ever Quit % | Mean Yrs Quit | Short Term (n) | Short Term % |
| 0                                            | 70-74     | Never Any     | 2738  | 61.05 |               |             |               |                |              |
| 0                                            | 70-74     | CC            | 610   | 13.60 | 0             | 0.00        |               |                |              |
| 0                                            | 70-74     | Ecig          | 0     | 0.00  |               |             |               |                |              |
| 0                                            | 70-74     | Dual          | 0     | 0.00  |               |             |               |                |              |
| 0                                            | 70-74     | Former        | 1137  | 25.35 |               |             | 24.48         | 27             | 2.37         |
| Year of Follow-up: 1990, Age Group: 75-79    |           |               |       |       |               |             |               |                |              |
| Period                                       | Age Group | Smoking Group | N     | %     | Ever Quit (N) | Ever Quit % | Mean Yrs Quit | Short Term (n) | Short Term % |
| 0                                            | 75-79     | Never Any     | 2483  | 68.84 |               |             |               |                |              |
| 0                                            | 75-79     | CC            | 354   | 9.81  | 0             | 0.00        |               |                |              |
| 0                                            | 75-79     | Ecig          | 0     | 0.00  |               |             |               |                |              |
| 0                                            | 75-79     | Dual          | 0     | 0.00  |               |             |               |                |              |
| 0                                            | 75-79     | Former        | 770   | 21.35 |               |             | 24.48         | 24             | 3.12         |
| Year of Follow-up: 1995, Age Group: All Ages |           |               |       |       |               |             |               |                |              |
| Period                                       | Age Group | Smoking Group | N     | %     | Ever Quit (N) | Ever Quit % | Mean Yrs Quit | Short Term (n) | Short Term % |
| 5                                            | All Ages  | Never Any     | 50660 | 55.28 |               |             |               |                |              |
| 5                                            | All Ages  | CC            | 10652 | 11.62 | 0             | 0.00        |               |                |              |
| 5                                            | All Ages  | Ecig          | 11907 | 12.99 |               |             |               |                |              |
| 5                                            | All Ages  | Dual          | 0     | 0.00  |               |             |               |                |              |
| 5                                            | All Ages  | Former        | 18420 | 20.10 |               |             | 14.17         | 1142           | 6.20         |
| Year of Follow-up: 1995, Age Group: 18-19    |           |               |       |       |               |             |               |                |              |
| Period                                       | Age Group | Smoking Group | N     | %     | Ever Quit (N) | Ever Quit % | Mean Yrs Quit | Short Term (n) | Short Term % |
| 5                                            | 18-19     | Never Any     | 2344  | 73.80 |               |             |               |                |              |
| 5                                            | 18-19     | CC            | 229   | 7.21  | 0             | 0.00        |               |                |              |
| 5                                            | 18-19     | Ecig          | 510   | 16.06 |               |             |               |                |              |
| 5                                            | 18-19     | Dual          | 0     | 0.00  |               |             |               |                |              |
| 5                                            | 18-19     | Former        | 93    | 2.93  |               |             | 1.17          | 58             | 62.37        |
| Year of Follow-up: 1995, Age Group: 20-24    |           |               |       |       |               |             |               |                |              |
| Period                                       | Age Group | Smoking Group | N     | %     | Ever Quit (N) | Ever Quit % | Mean Yrs Quit | Short Term (n) | Short Term % |
| 5                                            | 20-24     | Never Any     | 5667  | 67.87 |               |             |               |                |              |
| 5                                            | 20-24     | CC            | 859   | 10.29 | 0             | 0.00        |               |                |              |
| 5                                            | 20-24     | Ecig          | 1367  | 16.37 |               |             |               |                |              |
| 5                                            | 20-24     | Dual          | 0     | 0.00  |               |             |               |                |              |
| 5                                            | 20-24     | Former        | 457   | 5.47  |               |             | 3.18          | 113            | 24.73        |
| Year of Follow-up: 1995, Age Group: 25-29    |           |               |       |       |               |             |               |                |              |
| Period                                       | Age Group | Smoking Group | N     | %     | Ever Quit (N) | Ever Quit % | Mean Yrs Quit | Short Term (n) | Short Term % |
| 5                                            | 25-29     | Never Any     | 5305  | 60.33 |               |             |               |                |              |
| 5                                            | 25-29     | CC            | 1062  | 12.08 | 0             | 0.00        |               |                |              |
| 5                                            | 25-29     | Ecig          | 1403  | 15.96 |               |             |               |                |              |
| 5                                            | 25-29     | Dual          | 0     | 0.00  |               |             |               |                |              |
| 5                                            | 25-29     | Former        | 1023  | 11.63 |               |             | 5.94          | 54             | 5.28         |
| Year of Follow-up: 1995, Age Group: 30-34    |           |               |       |       |               |             |               |                |              |
| Period                                       | Age Group | Smoking Group | N     | %     | Ever Quit (N) | Ever Quit % | Mean Yrs Quit | Short Term (n) | Short Term % |

**Results for PHIM for Run 6 (Sensitivity\_Analysis\_4.RTF)**

|                                              |           |               |      |       |               |             |               |                |              |
|----------------------------------------------|-----------|---------------|------|-------|---------------|-------------|---------------|----------------|--------------|
| 5                                            | 30-34     | Never Any     | 5303 | 52.62 |               |             |               |                |              |
| 5                                            | 30-34     | CC            | 1373 | 13.62 | 0             | 0.00        |               |                |              |
| 5                                            | 30-34     | Ecig          | 1803 | 17.89 |               |             |               |                |              |
| 5                                            | 30-34     | Dual          | 0    | 0.00  |               |             |               |                |              |
| 5                                            | 30-34     | Former        | 1599 | 15.87 |               |             | 8.16          | 67             | 4.19         |
| Year of Follow-up: 1995, Age Group: 35-39    |           |               |      |       |               |             |               |                |              |
| Period                                       | Age Group | Smoking Group | N    | %     | Ever Quit (N) | Ever Quit % | Mean Yrs Quit | Short Term (n) | Short Term % |
| 5                                            | 35-39     | Never Any     | 5277 | 50.26 |               |             |               |                |              |
| 5                                            | 35-39     | CC            | 1410 | 13.43 | 0             | 0.00        |               |                |              |
| 5                                            | 35-39     | Ecig          | 1747 | 16.64 |               |             |               |                |              |
| 5                                            | 35-39     | Dual          | 0    | 0.00  |               |             |               |                |              |
| 5                                            | 35-39     | Former        | 2065 | 19.67 |               |             | 8.75          | 62             | 3.00         |
| Year of Follow-up: 1995, Age Group: 40-44    |           |               |      |       |               |             |               |                |              |
| Period                                       | Age Group | Smoking Group | N    | %     | Ever Quit (N) | Ever Quit % | Mean Yrs Quit | Short Term (n) | Short Term % |
| 5                                            | 40-44     | Never Any     | 5018 | 52.27 |               |             |               |                |              |
| 5                                            | 40-44     | CC            | 1135 | 11.82 | 0             | 0.00        |               |                |              |
| 5                                            | 40-44     | Ecig          | 1356 | 14.13 |               |             |               |                |              |
| 5                                            | 40-44     | Dual          | 0    | 0.00  |               |             |               |                |              |
| 5                                            | 40-44     | Former        | 2091 | 21.78 |               |             | 12.09         | 81             | 3.87         |
| Year of Follow-up: 1995, Age Group: 45-49    |           |               |      |       |               |             |               |                |              |
| Period                                       | Age Group | Smoking Group | N    | %     | Ever Quit (N) | Ever Quit % | Mean Yrs Quit | Short Term (n) | Short Term % |
| 5                                            | 45-49     | Never Any     | 4356 | 51.27 |               |             |               |                |              |
| 5                                            | 45-49     | CC            | 974  | 11.46 | 0             | 0.00        |               |                |              |
| 5                                            | 45-49     | Ecig          | 1161 | 13.66 |               |             |               |                |              |
| 5                                            | 45-49     | Dual          | 0    | 0.00  |               |             |               |                |              |
| 5                                            | 45-49     | Former        | 2006 | 23.61 |               |             | 10.93         | 133            | 6.63         |
| Year of Follow-up: 1995, Age Group: 50-54    |           |               |      |       |               |             |               |                |              |
| Period                                       | Age Group | Smoking Group | N    | %     | Ever Quit (N) | Ever Quit % | Mean Yrs Quit | Short Term (n) | Short Term % |
| 5                                            | 50-54     | Never Any     | 3116 | 47.67 |               |             |               |                |              |
| 5                                            | 50-54     | CC            | 739  | 11.31 | 0             | 0.00        |               |                |              |
| 5                                            | 50-54     | Ecig          | 826  | 12.64 |               |             |               |                |              |
| 5                                            | 50-54     | Dual          | 0    | 0.00  |               |             |               |                |              |
| 5                                            | 50-54     | Former        | 1855 | 28.38 |               |             | 14.92         | 140            | 7.55         |
| Year of Follow-up: 1995, Age Group: 55-59    |           |               |      |       |               |             |               |                |              |
| Period                                       | Age Group | Smoking Group | N    | %     | Ever Quit (N) | Ever Quit % | Mean Yrs Quit | Short Term (n) | Short Term % |
| 5                                            | 55-59     | Never Any     | 2684 | 48.50 |               |             |               |                |              |
| 5                                            | 55-59     | CC            | 722  | 13.05 | 0             | 0.00        |               |                |              |
| 5                                            | 55-59     | Ecig          | 627  | 11.33 |               |             |               |                |              |
| 5                                            | 55-59     | Dual          | 0    | 0.00  |               |             |               |                |              |
| 5                                            | 55-59     | Former        | 1501 | 27.12 |               |             | 15.84         | 93             | 6.20         |
| Year of Follow-up: 1995, Age Group: 60-64    |           |               |      |       |               |             |               |                |              |
| Period                                       | Age Group | Smoking Group | N    | %     | Ever Quit (N) | Ever Quit % | Mean Yrs Quit | Short Term (n) | Short Term % |
| 5                                            | 60-64     | Never Any     | 2732 | 51.90 |               |             |               |                |              |
| 5                                            | 60-64     | CC            | 633  | 12.03 | 0             | 0.00        |               |                |              |
| 5                                            | 60-64     | Ecig          | 444  | 8.43  |               |             |               |                |              |
| 5                                            | 60-64     | Dual          | 0    | 0.00  |               |             |               |                |              |
| 5                                            | 60-64     | Former        | 1455 | 27.64 |               |             | 19.22         | 87             | 5.98         |
| Year of Follow-up: 1995, Age Group: 65-69    |           |               |      |       |               |             |               |                |              |
| Period                                       | Age Group | Smoking Group | N    | %     | Ever Quit (N) | Ever Quit % | Mean Yrs Quit | Short Term (n) | Short Term % |
| 5                                            | 65-69     | Never Any     | 3078 | 55.72 |               |             |               |                |              |
| 5                                            | 65-69     | CC            | 602  | 10.90 | 0             | 0.00        |               |                |              |
| 5                                            | 65-69     | Ecig          | 374  | 6.77  |               |             |               |                |              |
| 5                                            | 65-69     | Dual          | 0    | 0.00  |               |             |               |                |              |
| 5                                            | 65-69     | Former        | 1470 | 26.61 |               |             | 19.34         | 107            | 7.28         |
| Year of Follow-up: 1995, Age Group: 70-74    |           |               |      |       |               |             |               |                |              |
| Period                                       | Age Group | Smoking Group | N    | %     | Ever Quit (N) | Ever Quit % | Mean Yrs Quit | Short Term (n) | Short Term % |
| 5                                            | 70-74     | Never Any     | 3042 | 57.36 |               |             |               |                |              |
| 5                                            | 70-74     | CC            | 577  | 10.88 | 0             | 0.00        |               |                |              |
| 5                                            | 70-74     | Ecig          | 188  | 3.55  |               |             |               |                |              |
| 5                                            | 70-74     | Dual          | 0    | 0.00  |               |             |               |                |              |
| 5                                            | 70-74     | Former        | 1496 | 28.21 |               |             | 22.32         | 77             | 5.15         |
| Year of Follow-up: 1995, Age Group: 75-79    |           |               |      |       |               |             |               |                |              |
| Period                                       | Age Group | Smoking Group | N    | %     | Ever Quit (N) | Ever Quit % | Mean Yrs Quit | Short Term (n) | Short Term % |
| 5                                            | 75-79     | Never Any     | 2738 | 61.05 |               |             |               |                |              |
| 5                                            | 75-79     | CC            | 337  | 7.51  | 0             | 0.00        |               |                |              |
| 5                                            | 75-79     | Ecig          | 101  | 2.25  |               |             |               |                |              |
| 5                                            | 75-79     | Dual          | 0    | 0.00  |               |             |               |                |              |
| 5                                            | 75-79     | Former        | 1309 | 29.19 |               |             | 25.87         | 70             | 5.35         |
| Year of Follow-up: 2000, Age Group: All Ages |           |               |      |       |               |             |               |                |              |



**Results for PHIM for Run 6 (Sensitivity\_Analysis\_4.RTF)**

| Period                                    | Age Group | Smoking Group | N     | %     | Ever Quit (N) | Ever Quit % | Mean Yrs Quit | Short Term (n) | Short Term % |
|-------------------------------------------|-----------|---------------|-------|-------|---------------|-------------|---------------|----------------|--------------|
| 10                                        | All Ages  | Never Any     | 49902 | 54.30 |               |             |               |                |              |
| 10                                        | All Ages  | CC            | 4583  | 4.99  | 0             | 0.00        |               |                |              |
| 10                                        | All Ages  | Ecig          | 16058 | 17.47 |               |             |               |                |              |
| 10                                        | All Ages  | Dual          | 0     | 0.00  |               |             |               |                |              |
| 10                                        | All Ages  | Former        | 21365 | 23.25 |               |             | 15.05         | 1746           | 8.17         |
| Year of Follow-up: 2000, Age Group: 18-19 |           |               |       |       |               |             |               |                |              |
| Period                                    | Age Group | Smoking Group | N     | %     | Ever Quit (N) | Ever Quit % | Mean Yrs Quit | Short Term (n) | Short Term % |
| 10                                        | 18-19     | Never Any     | 0     | .     |               |             |               |                |              |
| 10                                        | 18-19     | CC            | 0     | .     | 0             | .           |               |                |              |
| 10                                        | 18-19     | Ecig          | 0     | .     |               |             |               |                |              |
| 10                                        | 18-19     | Dual          | 0     | .     |               |             |               |                |              |
| 10                                        | 18-19     | Former        | 0     | .     |               |             |               | 0              | .            |
| Year of Follow-up: 2000, Age Group: 20-24 |           |               |       |       |               |             |               |                |              |
| Period                                    | Age Group | Smoking Group | N     | %     | Ever Quit (N) | Ever Quit % | Mean Yrs Quit | Short Term (n) | Short Term % |
| 10                                        | 20-24     | Never Any     | 4813  | 60.69 |               |             |               |                |              |
| 10                                        | 20-24     | CC            | 361   | 4.55  | 0             | 0.00        |               |                |              |
| 10                                        | 20-24     | Ecig          | 2016  | 25.42 |               |             |               |                |              |
| 10                                        | 20-24     | Dual          | 0     | 0.00  |               |             |               |                |              |
| 10                                        | 20-24     | Former        | 740   | 9.33  |               |             | 3.56          | 191            | 25.81        |
| Year of Follow-up: 2000, Age Group: 25-29 |           |               |       |       |               |             |               |                |              |
| Period                                    | Age Group | Smoking Group | N     | %     | Ever Quit (N) | Ever Quit % | Mean Yrs Quit | Short Term (n) | Short Term % |
| 10                                        | 25-29     | Never Any     | 5319  | 63.70 |               |             |               |                |              |
| 10                                        | 25-29     | CC            | 397   | 4.75  | 0             | 0.00        |               |                |              |
| 10                                        | 25-29     | Ecig          | 1837  | 22.00 |               |             |               |                |              |
| 10                                        | 25-29     | Dual          | 0     | 0.00  |               |             |               |                |              |
| 10                                        | 25-29     | Former        | 797   | 9.54  |               |             | 5.52          | 132            | 16.56        |
| Year of Follow-up: 2000, Age Group: 30-34 |           |               |       |       |               |             |               |                |              |
| Period                                    | Age Group | Smoking Group | N     | %     | Ever Quit (N) | Ever Quit % | Mean Yrs Quit | Short Term (n) | Short Term % |
| 10                                        | 30-34     | Never Any     | 5190  | 59.02 |               |             |               |                |              |
| 10                                        | 30-34     | CC            | 417   | 4.74  | 0             | 0.00        |               |                |              |
| 10                                        | 30-34     | Ecig          | 1931  | 21.96 |               |             |               |                |              |
| 10                                        | 30-34     | Dual          | 0     | 0.00  |               |             |               |                |              |
| 10                                        | 30-34     | Former        | 1255  | 14.27 |               |             | 9.27          | 92             | 7.33         |
| Year of Follow-up: 2000, Age Group: 35-39 |           |               |       |       |               |             |               |                |              |
| Period                                    | Age Group | Smoking Group | N     | %     | Ever Quit (N) | Ever Quit % | Mean Yrs Quit | Short Term (n) | Short Term % |
| 10                                        | 35-39     | Never Any     | 5277  | 52.36 |               |             |               |                |              |
| 10                                        | 35-39     | CC            | 561   | 5.57  | 0             | 0.00        |               |                |              |
| 10                                        | 35-39     | Ecig          | 2420  | 24.01 |               |             |               |                |              |
| 10                                        | 35-39     | Dual          | 0     | 0.00  |               |             |               |                |              |
| 10                                        | 35-39     | Former        | 1820  | 18.06 |               |             | 11.77         | 105            | 5.77         |
| Year of Follow-up: 2000, Age Group: 40-44 |           |               |       |       |               |             |               |                |              |
| Period                                    | Age Group | Smoking Group | N     | %     | Ever Quit (N) | Ever Quit % | Mean Yrs Quit | Short Term (n) | Short Term % |
| 10                                        | 40-44     | Never Any     | 5277  | 50.26 |               |             |               |                |              |
| 10                                        | 40-44     | CC            | 584   | 5.56  | 0             | 0.00        |               |                |              |
| 10                                        | 40-44     | Ecig          | 2293  | 21.84 |               |             |               |                |              |
| 10                                        | 40-44     | Dual          | 0     | 0.00  |               |             |               |                |              |
| 10                                        | 40-44     | Former        | 2345  | 22.34 |               |             | 12.30         | 143            | 6.10         |
| Year of Follow-up: 2000, Age Group: 45-49 |           |               |       |       |               |             |               |                |              |
| Period                                    | Age Group | Smoking Group | N     | %     | Ever Quit (N) | Ever Quit % | Mean Yrs Quit | Short Term (n) | Short Term % |
| 10                                        | 45-49     | Never Any     | 5018  | 52.27 |               |             |               |                |              |
| 10                                        | 45-49     | CC            | 446   | 4.65  | 0             | 0.00        |               |                |              |
| 10                                        | 45-49     | Ecig          | 1673  | 17.43 |               |             |               |                |              |
| 10                                        | 45-49     | Dual          | 0     | 0.00  |               |             |               |                |              |
| 10                                        | 45-49     | Former        | 2463  | 25.66 |               |             | 14.76         | 181            | 7.35         |
| Year of Follow-up: 2000, Age Group: 50-54 |           |               |       |       |               |             |               |                |              |
| Period                                    | Age Group | Smoking Group | N     | %     | Ever Quit (N) | Ever Quit % | Mean Yrs Quit | Short Term (n) | Short Term % |
| 10                                        | 50-54     | Never Any     | 4356  | 51.27 |               |             |               |                |              |
| 10                                        | 50-54     | CC            | 378   | 4.45  | 0             | 0.00        |               |                |              |
| 10                                        | 50-54     | Ecig          | 1299  | 15.29 |               |             |               |                |              |
| 10                                        | 50-54     | Dual          | 0     | 0.00  |               |             |               |                |              |
| 10                                        | 50-54     | Former        | 2464  | 29.00 |               |             | 13.32         | 188            | 7.63         |
| Year of Follow-up: 2000, Age Group: 55-59 |           |               |       |       |               |             |               |                |              |
| Period                                    | Age Group | Smoking Group | N     | %     | Ever Quit (N) | Ever Quit % | Mean Yrs Quit | Short Term (n) | Short Term % |
| 10                                        | 55-59     | Never Any     | 3116  | 47.67 |               |             |               |                |              |
| 10                                        | 55-59     | CC            | 283   | 4.33  | 0             | 0.00        |               |                |              |
| 10                                        | 55-59     | Ecig          | 912   | 13.95 |               |             |               |                |              |
| 10                                        | 55-59     | Dual          | 0     | 0.00  |               |             |               |                |              |

**Results for PHIM for Run 6 (Sensitivity\_Analysis\_4.RTF)**

| Year of Follow-up: 2000, Age Group: 60-64    | Period   | Age Group | Smoking Group | N     | %     | Ever Quit (N) | Ever Quit % | Mean Yrs Quit | Short Term (n) | Short Term % |
|----------------------------------------------|----------|-----------|---------------|-------|-------|---------------|-------------|---------------|----------------|--------------|
| 10                                           | 55-59    | Former    |               | 2225  | 34.04 |               |             | 16.92         | 157            | 7.06         |
| 10                                           | 60-64    | Never Any |               | 2684  | 48.50 |               |             |               |                |              |
| 10                                           | 60-64    | CC        |               | 334   | 6.04  | 0             | 0.00        |               |                |              |
| 10                                           | 60-64    | Ecig      |               | 663   | 11.98 |               |             |               |                |              |
| 10                                           | 60-64    | Dual      |               | 0     | 0.00  |               |             |               |                |              |
| 10                                           | 60-64    | Former    |               | 1853  | 33.48 |               |             | 17.23         | 149            | 8.04         |
| Year of Follow-up: 2000, Age Group: 65-69    | Period   | Age Group | Smoking Group | N     | %     | Ever Quit (N) | Ever Quit % | Mean Yrs Quit | Short Term (n) | Short Term % |
| 10                                           | 65-69    | Never Any |               | 2732  | 51.90 |               |             |               |                |              |
| 10                                           | 65-69    | CC        |               | 280   | 5.32  | 0             | 0.00        |               |                |              |
| 10                                           | 65-69    | Ecig      |               | 443   | 8.42  |               |             |               |                |              |
| 10                                           | 65-69    | Dual      |               | 0     | 0.00  |               |             |               |                |              |
| 10                                           | 65-69    | Former    |               | 1809  | 34.37 |               |             | 19.85         | 146            | 8.07         |
| Year of Follow-up: 2000, Age Group: 70-74    | Period   | Age Group | Smoking Group | N     | %     | Ever Quit (N) | Ever Quit % | Mean Yrs Quit | Short Term (n) | Short Term % |
| 10                                           | 70-74    | Never Any |               | 3078  | 55.72 |               |             |               |                |              |
| 10                                           | 70-74    | CC        |               | 274   | 4.96  | 0             | 0.00        |               |                |              |
| 10                                           | 70-74    | Ecig      |               | 368   | 6.66  |               |             |               |                |              |
| 10                                           | 70-74    | Dual      |               | 0     | 0.00  |               |             |               |                |              |
| 10                                           | 70-74    | Former    |               | 1804  | 32.66 |               |             | 20.18         | 154            | 8.54         |
| Year of Follow-up: 2000, Age Group: 75-79    | Period   | Age Group | Smoking Group | N     | %     | Ever Quit (N) | Ever Quit % | Mean Yrs Quit | Short Term (n) | Short Term % |
| 10                                           | 75-79    | Never Any |               | 3042  | 57.36 |               |             |               |                |              |
| 10                                           | 75-79    | CC        |               | 268   | 5.05  | 0             | 0.00        |               |                |              |
| 10                                           | 75-79    | Ecig      |               | 203   | 3.83  |               |             |               |                |              |
| 10                                           | 75-79    | Dual      |               | 0     | 0.00  |               |             |               |                |              |
| 10                                           | 75-79    | Former    |               | 1790  | 33.75 |               |             | 23.17         | 108            | 6.03         |
| Year of Follow-up: 2005, Age Group: All Ages | Period   | Age Group | Smoking Group | N     | %     | Ever Quit (N) | Ever Quit % | Mean Yrs Quit | Short Term (n) | Short Term % |
| 15                                           | All Ages | Never Any |               | 46436 | 53.62 |               |             |               |                |              |
| 15                                           | All Ages | CC        |               | 1884  | 2.18  | 0             | 0.00        |               |                |              |
| 15                                           | All Ages | Ecig      |               | 16024 | 18.50 |               |             |               |                |              |
| 15                                           | All Ages | Dual      |               | 0     | 0.00  |               |             |               |                |              |
| 15                                           | All Ages | Former    |               | 22261 | 25.70 |               |             | 17.24         | 963            | 4.33         |
| Year of Follow-up: 2005, Age Group: 18-19    | Period   | Age Group | Smoking Group | N     | %     | Ever Quit (N) | Ever Quit % | Mean Yrs Quit | Short Term (n) | Short Term % |
| 15                                           | 18-19    | Never Any |               | 0     | .     |               |             |               |                |              |
| 15                                           | 18-19    | CC        |               | 0     | .     | 0             | .           |               |                |              |
| 15                                           | 18-19    | Ecig      |               | 0     | .     |               |             |               |                |              |
| 15                                           | 18-19    | Dual      |               | 0     | .     |               |             |               |                |              |
| 15                                           | 18-19    | Former    |               | 0     | .     |               |             | .             | 0              | .            |
| Year of Follow-up: 2005, Age Group: 20-24    | Period   | Age Group | Smoking Group | N     | %     | Ever Quit (N) | Ever Quit % | Mean Yrs Quit | Short Term (n) | Short Term % |
| 15                                           | 20-24    | Never Any |               | 0     | .     |               |             |               |                |              |
| 15                                           | 20-24    | CC        |               | 0     | .     | 0             | .           |               |                |              |
| 15                                           | 20-24    | Ecig      |               | 0     | .     |               |             |               |                |              |
| 15                                           | 20-24    | Dual      |               | 0     | .     |               |             |               |                |              |
| 15                                           | 20-24    | Former    |               | 0     | .     |               |             | .             | 0              | .            |
| Year of Follow-up: 2005, Age Group: 25-29    | Period   | Age Group | Smoking Group | N     | %     | Ever Quit (N) | Ever Quit % | Mean Yrs Quit | Short Term (n) | Short Term % |
| 15                                           | 25-29    | Never Any |               | 4518  | 56.97 |               |             |               |                |              |
| 15                                           | 25-29    | CC        |               | 162   | 2.04  | 0             | 0.00        |               |                |              |
| 15                                           | 25-29    | Ecig      |               | 2166  | 27.31 |               |             |               |                |              |
| 15                                           | 25-29    | Dual      |               | 0     | 0.00  |               |             |               |                |              |
| 15                                           | 25-29    | Former    |               | 1084  | 13.67 |               |             | 6.60          | 112            | 10.33        |
| Year of Follow-up: 2005, Age Group: 30-34    | Period   | Age Group | Smoking Group | N     | %     | Ever Quit (N) | Ever Quit % | Mean Yrs Quit | Short Term (n) | Short Term % |
| 15                                           | 30-34    | Never Any |               | 5218  | 62.49 |               |             |               |                |              |
| 15                                           | 30-34    | CC        |               | 147   | 1.76  | 0             | 0.00        |               |                |              |
| 15                                           | 30-34    | Ecig      |               | 1971  | 23.60 |               |             |               |                |              |
| 15                                           | 30-34    | Dual      |               | 0     | 0.00  |               |             |               |                |              |
| 15                                           | 30-34    | Former    |               | 1014  | 12.14 |               |             | 8.69          | 85             | 8.38         |
| Year of Follow-up: 2005, Age Group: 35-39    | Period   | Age Group | Smoking Group | N     | %     | Ever Quit (N) | Ever Quit % | Mean Yrs Quit | Short Term (n) | Short Term % |
| 15                                           | 35-39    | Never Any |               | 5162  | 58.71 |               |             |               |                |              |
| 15                                           | 35-39    | CC        |               | 167   | 1.90  | 0             | 0.00        |               |                |              |

**Results for PHIM for Run 6 (Sensitivity\_Analysis\_4.RTF)**

|                                              |           |               |       |       |               |             |               |                |              |
|----------------------------------------------|-----------|---------------|-------|-------|---------------|-------------|---------------|----------------|--------------|
| 15                                           | 35-39     | Ecig          | 2027  | 23.05 |               |             |               |                |              |
| 15                                           | 35-39     | Dual          | 0     | 0.00  |               |             |               |                |              |
| 15                                           | 35-39     | Former        | 1437  | 16.34 |               |             | 12.73         | 67             | 4.66         |
| Year of Follow-up: 2005, Age Group: 40-44    |           |               |       |       |               |             |               |                |              |
| Period                                       | Age Group | Smoking Group | N     | %     | Ever Quit (N) | Ever Quit % | Mean Yrs Quit | Short Term (n) | Short Term % |
| 15                                           | 40-44     | Never Any     | 5277  | 52.36 |               |             |               |                |              |
| 15                                           | 40-44     | CC            | 238   | 2.36  | 0             | 0.00        |               |                |              |
| 15                                           | 40-44     | Ecig          | 2507  | 24.88 |               |             |               |                |              |
| 15                                           | 40-44     | Dual          | 0     | 0.00  |               |             |               |                |              |
| 15                                           | 40-44     | Former        | 2056  | 20.40 |               |             | 15.08         | 101            | 4.91         |
| Year of Follow-up: 2005, Age Group: 45-49    |           |               |       |       |               |             |               |                |              |
| Period                                       | Age Group | Smoking Group | N     | %     | Ever Quit (N) | Ever Quit % | Mean Yrs Quit | Short Term (n) | Short Term % |
| 15                                           | 45-49     | Never Any     | 5277  | 50.26 |               |             |               |                |              |
| 15                                           | 45-49     | CC            | 237   | 2.26  | 0             | 0.00        |               |                |              |
| 15                                           | 45-49     | Ecig          | 2319  | 22.09 |               |             |               |                |              |
| 15                                           | 45-49     | Dual          | 0     | 0.00  |               |             |               |                |              |
| 15                                           | 45-49     | Former        | 2666  | 25.39 |               |             | 15.45         | 135            | 5.06         |
| Year of Follow-up: 2005, Age Group: 50-54    |           |               |       |       |               |             |               |                |              |
| Period                                       | Age Group | Smoking Group | N     | %     | Ever Quit (N) | Ever Quit % | Mean Yrs Quit | Short Term (n) | Short Term % |
| 15                                           | 50-54     | Never Any     | 5018  | 52.27 |               |             |               |                |              |
| 15                                           | 50-54     | CC            | 191   | 1.99  | 0             | 0.00        |               |                |              |
| 15                                           | 50-54     | Ecig          | 1622  | 16.90 |               |             |               |                |              |
| 15                                           | 50-54     | Dual          | 0     | 0.00  |               |             |               |                |              |
| 15                                           | 50-54     | Former        | 2769  | 28.84 |               |             | 17.84         | 99             | 3.58         |
| Year of Follow-up: 2005, Age Group: 55-59    |           |               |       |       |               |             |               |                |              |
| Period                                       | Age Group | Smoking Group | N     | %     | Ever Quit (N) | Ever Quit % | Mean Yrs Quit | Short Term (n) | Short Term % |
| 15                                           | 55-59     | Never Any     | 4356  | 51.27 |               |             |               |                |              |
| 15                                           | 55-59     | CC            | 166   | 1.95  | 0             | 0.00        |               |                |              |
| 15                                           | 55-59     | Ecig          | 1281  | 15.08 |               |             |               |                |              |
| 15                                           | 55-59     | Dual          | 0     | 0.00  |               |             |               |                |              |
| 15                                           | 55-59     | Former        | 2694  | 31.71 |               |             | 16.95         | 78             | 2.90         |
| Year of Follow-up: 2005, Age Group: 60-64    |           |               |       |       |               |             |               |                |              |
| Period                                       | Age Group | Smoking Group | N     | %     | Ever Quit (N) | Ever Quit % | Mean Yrs Quit | Short Term (n) | Short Term % |
| 15                                           | 60-64     | Never Any     | 3116  | 47.67 |               |             |               |                |              |
| 15                                           | 60-64     | CC            | 131   | 2.00  | 0             | 0.00        |               |                |              |
| 15                                           | 60-64     | Ecig          | 852   | 13.04 |               |             |               |                |              |
| 15                                           | 60-64     | Dual          | 0     | 0.00  |               |             |               |                |              |
| 15                                           | 60-64     | Former        | 2437  | 37.29 |               |             | 20.18         | 93             | 3.82         |
| Year of Follow-up: 2005, Age Group: 65-69    |           |               |       |       |               |             |               |                |              |
| Period                                       | Age Group | Smoking Group | N     | %     | Ever Quit (N) | Ever Quit % | Mean Yrs Quit | Short Term (n) | Short Term % |
| 15                                           | 65-69     | Never Any     | 2684  | 48.50 |               |             |               |                |              |
| 15                                           | 65-69     | CC            | 160   | 2.89  | 0             | 0.00        |               |                |              |
| 15                                           | 65-69     | Ecig          | 591   | 10.68 |               |             |               |                |              |
| 15                                           | 65-69     | Dual          | 0     | 0.00  |               |             |               |                |              |
| 15                                           | 65-69     | Former        | 2099  | 37.93 |               |             | 19.92         | 68             | 3.24         |
| Year of Follow-up: 2005, Age Group: 70-74    |           |               |       |       |               |             |               |                |              |
| Period                                       | Age Group | Smoking Group | N     | %     | Ever Quit (N) | Ever Quit % | Mean Yrs Quit | Short Term (n) | Short Term % |
| 15                                           | 70-74     | Never Any     | 2732  | 51.90 |               |             |               |                |              |
| 15                                           | 70-74     | CC            | 139   | 2.64  | 0             | 0.00        |               |                |              |
| 15                                           | 70-74     | Ecig          | 391   | 7.43  |               |             |               |                |              |
| 15                                           | 70-74     | Dual          | 0     | 0.00  |               |             |               |                |              |
| 15                                           | 70-74     | Former        | 2002  | 38.03 |               |             | 22.67         | 69             | 3.45         |
| Year of Follow-up: 2005, Age Group: 75-79    |           |               |       |       |               |             |               |                |              |
| Period                                       | Age Group | Smoking Group | N     | %     | Ever Quit (N) | Ever Quit % | Mean Yrs Quit | Short Term (n) | Short Term % |
| 15                                           | 75-79     | Never Any     | 3078  | 55.72 |               |             |               |                |              |
| 15                                           | 75-79     | CC            | 146   | 2.64  | 0             | 0.00        |               |                |              |
| 15                                           | 75-79     | Ecig          | 297   | 5.38  |               |             |               |                |              |
| 15                                           | 75-79     | Dual          | 0     | 0.00  |               |             |               |                |              |
| 15                                           | 75-79     | Former        | 2003  | 36.26 |               |             | 22.91         | 56             | 2.80         |
| Year of Follow-up: 2010, Age Group: All Ages |           |               |       |       |               |             |               |                |              |
| Period                                       | Age Group | Smoking Group | N     | %     | Ever Quit (N) | Ever Quit % | Mean Yrs Quit | Short Term (n) | Short Term % |
| 20                                           | All Ages  | Never Any     | 43177 | 53.25 |               |             |               |                |              |
| 20                                           | All Ages  | CC            | 765   | 0.94  | 0             | 0.00        |               |                |              |
| 20                                           | All Ages  | Ecig          | 14152 | 17.45 |               |             |               |                |              |
| 20                                           | All Ages  | Dual          | 0     | 0.00  |               |             |               |                |              |
| 20                                           | All Ages  | Former        | 22987 | 28.35 |               |             | 19.33         | 1143           | 4.97         |
| Year of Follow-up: 2010, Age Group: 18-19    |           |               |       |       |               |             |               |                |              |
| Period                                       | Age Group | Smoking Group | N     | %     | Ever Quit (N) | Ever Quit % | Mean Yrs Quit | Short Term (n) | Short Term % |

**Results for PHIM for Run 6 (Sensitivity\_Analysis\_4.RTF)**

|                                           |           |               |      |       |               |             |               |                |              |
|-------------------------------------------|-----------|---------------|------|-------|---------------|-------------|---------------|----------------|--------------|
| 20                                        | 18-19     | Never Any     | 0    | .     |               |             |               |                |              |
| 20                                        | 18-19     | CC            | 0    | .     | 0             | .           |               |                |              |
| 20                                        | 18-19     | Ecig          | 0    | .     |               |             |               |                |              |
| 20                                        | 18-19     | Dual          | 0    | .     |               |             |               |                |              |
| 20                                        | 18-19     | Former        | 0    | .     |               |             | 0             | .              |              |
| Year of Follow-up: 2010, Age Group: 20-24 |           |               |      |       |               |             |               |                |              |
| Period                                    | Age Group | Smoking Group | N    | %     | Ever Quit (N) | Ever Quit % | Mean Yrs Quit | Short Term (n) | Short Term % |
| 20                                        | 20-24     | Never Any     | 0    | .     |               |             |               |                |              |
| 20                                        | 20-24     | CC            | 0    | .     | 0             | .           |               |                |              |
| 20                                        | 20-24     | Ecig          | 0    | .     |               |             |               |                |              |
| 20                                        | 20-24     | Dual          | 0    | .     |               |             |               |                |              |
| 20                                        | 20-24     | Former        | 0    | .     |               |             |               | 0              | .            |
| Year of Follow-up: 2010, Age Group: 25-29 |           |               |      |       |               |             |               |                |              |
| Period                                    | Age Group | Smoking Group | N    | %     | Ever Quit (N) | Ever Quit % | Mean Yrs Quit | Short Term (n) | Short Term % |
| 20                                        | 25-29     | Never Any     | 0    | .     |               |             |               |                |              |
| 20                                        | 25-29     | CC            | 0    | .     | 0             | .           |               |                |              |
| 20                                        | 25-29     | Ecig          | 0    | .     |               |             |               |                |              |
| 20                                        | 25-29     | Dual          | 0    | .     |               |             |               |                |              |
| 20                                        | 25-29     | Former        | 0    | .     |               |             |               | 0              | .            |
| Year of Follow-up: 2010, Age Group: 30-34 |           |               |      |       |               |             |               |                |              |
| Period                                    | Age Group | Smoking Group | N    | %     | Ever Quit (N) | Ever Quit % | Mean Yrs Quit | Short Term (n) | Short Term % |
| 20                                        | 30-34     | Never Any     | 4387 | 55.32 |               |             |               |                |              |
| 20                                        | 30-34     | CC            | 65   | 0.82  | 0             | 0.00        |               |                |              |
| 20                                        | 30-34     | Ecig          | 2085 | 26.29 |               |             |               |                |              |
| 20                                        | 30-34     | Dual          | 0    | 0.00  |               |             |               |                |              |
| 20                                        | 30-34     | Former        | 1393 | 17.57 |               |             | 9.41          | 147            | 10.55        |
| Year of Follow-up: 2010, Age Group: 35-39 |           |               |      |       |               |             |               |                |              |
| Period                                    | Age Group | Smoking Group | N    | %     | Ever Quit (N) | Ever Quit % | Mean Yrs Quit | Short Term (n) | Short Term % |
| 20                                        | 35-39     | Never Any     | 5168 | 61.89 |               |             |               |                |              |
| 20                                        | 35-39     | CC            | 58   | 0.69  | 0             | 0.00        |               |                |              |
| 20                                        | 35-39     | Ecig          | 1851 | 22.17 |               |             |               |                |              |
| 20                                        | 35-39     | Dual          | 0    | 0.00  |               |             |               |                |              |
| 20                                        | 35-39     | Former        | 1273 | 15.25 |               |             | 11.28         | 105            | 8.25         |
| Year of Follow-up: 2010, Age Group: 40-44 |           |               |      |       |               |             |               |                |              |
| Period                                    | Age Group | Smoking Group | N    | %     | Ever Quit (N) | Ever Quit % | Mean Yrs Quit | Short Term (n) | Short Term % |
| 20                                        | 40-44     | Never Any     | 5162 | 58.71 |               |             |               |                |              |
| 20                                        | 40-44     | CC            | 64   | 0.73  | 0             | 0.00        |               |                |              |
| 20                                        | 40-44     | Ecig          | 1872 | 21.29 |               |             |               |                |              |
| 20                                        | 40-44     | Dual          | 0    | 0.00  |               |             |               |                |              |
| 20                                        | 40-44     | Former        | 1695 | 19.28 |               |             | 15.31         | 113            | 6.67         |
| Year of Follow-up: 2010, Age Group: 45-49 |           |               |      |       |               |             |               |                |              |
| Period                                    | Age Group | Smoking Group | N    | %     | Ever Quit (N) | Ever Quit % | Mean Yrs Quit | Short Term (n) | Short Term % |
| 20                                        | 45-49     | Never Any     | 5277 | 52.36 |               |             |               |                |              |
| 20                                        | 45-49     | CC            | 105  | 1.04  | 0             | 0.00        |               |                |              |
| 20                                        | 45-49     | Ecig          | 2332 | 23.14 |               |             |               |                |              |
| 20                                        | 45-49     | Dual          | 0    | 0.00  |               |             |               |                |              |
| 20                                        | 45-49     | Former        | 2364 | 23.46 |               |             | 17.70         | 132            | 5.58         |
| Year of Follow-up: 2010, Age Group: 50-54 |           |               |      |       |               |             |               |                |              |
| Period                                    | Age Group | Smoking Group | N    | %     | Ever Quit (N) | Ever Quit % | Mean Yrs Quit | Short Term (n) | Short Term % |
| 20                                        | 50-54     | Never Any     | 5277 | 50.26 |               |             |               |                |              |
| 20                                        | 50-54     | CC            | 101  | 0.96  | 0             | 0.00        |               |                |              |
| 20                                        | 50-54     | Ecig          | 2102 | 20.02 |               |             |               |                |              |
| 20                                        | 50-54     | Dual          | 0    | 0.00  |               |             |               |                |              |
| 20                                        | 50-54     | Former        | 3019 | 28.76 |               |             | 18.27         | 163            | 5.40         |
| Year of Follow-up: 2010, Age Group: 55-59 |           |               |      |       |               |             |               |                |              |
| Period                                    | Age Group | Smoking Group | N    | %     | Ever Quit (N) | Ever Quit % | Mean Yrs Quit | Short Term (n) | Short Term % |
| 20                                        | 55-59     | Never Any     | 5018 | 52.27 |               |             |               |                |              |
| 20                                        | 55-59     | CC            | 91   | 0.95  | 0             | 0.00        |               |                |              |
| 20                                        | 55-59     | Ecig          | 1433 | 14.93 |               |             |               |                |              |
| 20                                        | 55-59     | Dual          | 0    | 0.00  |               |             |               |                |              |
| 20                                        | 55-59     | Former        | 3058 | 31.85 |               |             | 20.88         | 103            | 3.37         |
| Year of Follow-up: 2010, Age Group: 60-64 |           |               |      |       |               |             |               |                |              |
| Period                                    | Age Group | Smoking Group | N    | %     | Ever Quit (N) | Ever Quit % | Mean Yrs Quit | Short Term (n) | Short Term % |
| 20                                        | 60-64     | Never Any     | 4356 | 51.27 |               |             |               |                |              |
| 20                                        | 60-64     | CC            | 71   | 0.84  | 0             | 0.00        |               |                |              |
| 20                                        | 60-64     | Ecig          | 1079 | 12.70 |               |             |               |                |              |
| 20                                        | 60-64     | Dual          | 0    | 0.00  |               |             |               |                |              |
| 20                                        | 60-64     | Former        | 2991 | 35.20 |               |             | 19.94         | 144            | 4.81         |
| Year of Follow-up: 2010, Age Group: 65-69 |           |               |      |       |               |             |               |                |              |

**Results for PHIM for Run 6 (Sensitivity\_Analysis\_4.RTF)**

| Period                                       | Age Group | Smoking Group | N     | %     | Ever Quit (N) | Ever Quit % | Mean Yrs Quit | Short Term (n) | Short Term % |
|----------------------------------------------|-----------|---------------|-------|-------|---------------|-------------|---------------|----------------|--------------|
| 20                                           | 65-69     | Never Any     | 3116  | 47.67 |               |             |               |                |              |
| 20                                           | 65-69     | CC            | 47    | 0.72  | 0             | 0.00        |               |                |              |
| 20                                           | 65-69     | Ecig          | 645   | 9.87  |               |             |               |                |              |
| 20                                           | 65-69     | Dual          | 0     | 0.00  |               |             |               |                |              |
| 20                                           | 65-69     | Former        | 2728  | 41.74 |               |             | 22.72         | 95             | 3.48         |
| Year of Follow-up: 2010, Age Group: 70-74    |           |               |       |       |               |             |               |                |              |
| Period                                       | Age Group | Smoking Group | N     | %     | Ever Quit (N) | Ever Quit % | Mean Yrs Quit | Short Term (n) | Short Term % |
| 20                                           | 70-74     | Never Any     | 2684  | 48.50 |               |             |               |                |              |
| 20                                           | 70-74     | CC            | 88    | 1.59  | 0             | 0.00        |               |                |              |
| 20                                           | 70-74     | Ecig          | 477   | 8.62  |               |             |               |                |              |
| 20                                           | 70-74     | Dual          | 0     | 0.00  |               |             |               |                |              |
| 20                                           | 70-74     | Former        | 2285  | 41.29 |               |             | 23.05         | 69             | 3.02         |
| Year of Follow-up: 2010, Age Group: 75-79    |           |               |       |       |               |             |               |                |              |
| Period                                       | Age Group | Smoking Group | N     | %     | Ever Quit (N) | Ever Quit % | Mean Yrs Quit | Short Term (n) | Short Term % |
| 20                                           | 75-79     | Never Any     | 2732  | 51.90 |               |             |               |                |              |
| 20                                           | 75-79     | CC            | 75    | 1.42  | 0             | 0.00        |               |                |              |
| 20                                           | 75-79     | Ecig          | 276   | 5.24  |               |             |               |                |              |
| 20                                           | 75-79     | Dual          | 0     | 0.00  |               |             |               |                |              |
| 20                                           | 75-79     | Former        | 2181  | 41.43 |               |             | 25.56         | 72             | 3.30         |
| Year of Follow-up: 2015, Age Group: All Ages |           |               |       |       |               |             |               |                |              |
| Period                                       | Age Group | Smoking Group | N     | %     | Ever Quit (N) | Ever Quit % | Mean Yrs Quit | Short Term (n) | Short Term % |
| 25                                           | All Ages  | Never Any     | 40424 | 53.32 |               |             |               |                |              |
| 25                                           | All Ages  | CC            | 340   | 0.45  | 0             | 0.00        |               |                |              |
| 25                                           | All Ages  | Ecig          | 11748 | 15.50 |               |             |               |                |              |
| 25                                           | All Ages  | Dual          | 0     | 0.00  |               |             |               |                |              |
| 25                                           | All Ages  | Former        | 23305 | 30.74 |               |             | 21.36         | 935            | 4.01         |
| Year of Follow-up: 2015, Age Group: 18-19    |           |               |       |       |               |             |               |                |              |
| Period                                       | Age Group | Smoking Group | N     | %     | Ever Quit (N) | Ever Quit % | Mean Yrs Quit | Short Term (n) | Short Term % |
| 25                                           | 18-19     | Never Any     | 0     | .     |               |             |               |                |              |
| 25                                           | 18-19     | CC            | 0     | .     | 0             | .           |               |                |              |
| 25                                           | 18-19     | Ecig          | 0     | .     |               |             |               |                |              |
| 25                                           | 18-19     | Dual          | 0     | .     |               |             |               |                |              |
| 25                                           | 18-19     | Former        | 0     | .     |               |             |               | 0              | .            |
| Year of Follow-up: 2015, Age Group: 20-24    |           |               |       |       |               |             |               |                |              |
| Period                                       | Age Group | Smoking Group | N     | %     | Ever Quit (N) | Ever Quit % | Mean Yrs Quit | Short Term (n) | Short Term % |
| 25                                           | 20-24     | Never Any     | 0     | .     |               |             |               |                |              |
| 25                                           | 20-24     | CC            | 0     | .     | 0             | .           |               |                |              |
| 25                                           | 20-24     | Ecig          | 0     | .     |               |             |               |                |              |
| 25                                           | 20-24     | Dual          | 0     | .     |               |             |               |                |              |
| 25                                           | 20-24     | Former        | 0     | .     |               |             |               | 0              | .            |
| Year of Follow-up: 2015, Age Group: 25-29    |           |               |       |       |               |             |               |                |              |
| Period                                       | Age Group | Smoking Group | N     | %     | Ever Quit (N) | Ever Quit % | Mean Yrs Quit | Short Term (n) | Short Term % |
| 25                                           | 25-29     | Never Any     | 0     | .     |               |             |               |                |              |
| 25                                           | 25-29     | CC            | 0     | .     | 0             | .           |               |                |              |
| 25                                           | 25-29     | Ecig          | 0     | .     |               |             |               |                |              |
| 25                                           | 25-29     | Dual          | 0     | .     |               |             |               |                |              |
| 25                                           | 25-29     | Former        | 0     | .     |               |             |               | 0              | .            |
| Year of Follow-up: 2015, Age Group: 30-34    |           |               |       |       |               |             |               |                |              |
| Period                                       | Age Group | Smoking Group | N     | %     | Ever Quit (N) | Ever Quit % | Mean Yrs Quit | Short Term (n) | Short Term % |
| 25                                           | 30-34     | Never Any     | 0     | .     |               |             |               |                |              |
| 25                                           | 30-34     | CC            | 0     | .     | 0             | .           |               |                |              |
| 25                                           | 30-34     | Ecig          | 0     | .     |               |             |               |                |              |
| 25                                           | 30-34     | Dual          | 0     | .     |               |             |               |                |              |
| 25                                           | 30-34     | Former        | 0     | .     |               |             |               | 0              | .            |
| Year of Follow-up: 2015, Age Group: 35-39    |           |               |       |       |               |             |               |                |              |
| Period                                       | Age Group | Smoking Group | N     | %     | Ever Quit (N) | Ever Quit % | Mean Yrs Quit | Short Term (n) | Short Term % |
| 25                                           | 35-39     | Never Any     | 4366  | 55.06 |               |             |               |                |              |
| 25                                           | 35-39     | CC            | 20    | 0.25  | 0             | 0.00        |               |                |              |
| 25                                           | 35-39     | Ecig          | 1729  | 21.80 |               |             |               |                |              |
| 25                                           | 35-39     | Dual          | 0     | 0.00  |               |             |               |                |              |
| 25                                           | 35-39     | Former        | 1815  | 22.89 |               |             | 11.55         | 147            | 8.10         |
| Year of Follow-up: 2015, Age Group: 40-44    |           |               |       |       |               |             |               |                |              |
| Period                                       | Age Group | Smoking Group | N     | %     | Ever Quit (N) | Ever Quit % | Mean Yrs Quit | Short Term (n) | Short Term % |
| 25                                           | 40-44     | Never Any     | 5168  | 61.89 |               |             |               |                |              |
| 25                                           | 40-44     | CC            | 33    | 0.40  | 0             | 0.00        |               |                |              |
| 25                                           | 40-44     | Ecig          | 1623  | 19.44 |               |             |               |                |              |
| 25                                           | 40-44     | Dual          | 0     | 0.00  |               |             |               |                |              |

**Results for PHIM for Run 6 (Sensitivity\_Analysis\_4.RTF)**

|                                              |           |               |       |       |               |             |               |                |              |
|----------------------------------------------|-----------|---------------|-------|-------|---------------|-------------|---------------|----------------|--------------|
| 25                                           | 40-44     | Former        | 1526  | 18.28 |               |             | 13.91         | 106            | 6.95         |
| Year of Follow-up: 2015, Age Group: 45-49    |           |               |       |       |               |             |               |                |              |
| Period                                       | Age Group | Smoking Group | N     | %     | Ever Quit (N) | Ever Quit % | Mean Yrs Quit | Short Term (n) | Short Term % |
| 25                                           | 45-49     | Never Any     | 5162  | 58.71 |               |             |               |                |              |
| 25                                           | 45-49     | CC            | 32    | 0.36  | 0             | 0.00        |               |                |              |
| 25                                           | 45-49     | Ecig          | 1649  | 18.75 |               |             |               |                |              |
| 25                                           | 45-49     | Dual          | 0     | 0.00  |               |             |               |                |              |
| 25                                           | 45-49     | Former        | 1950  | 22.18 |               |             | 17.92         | 96             | 4.92         |
| Year of Follow-up: 2015, Age Group: 50-54    |           |               |       |       |               |             |               |                |              |
| Period                                       | Age Group | Smoking Group | N     | %     | Ever Quit (N) | Ever Quit % | Mean Yrs Quit | Short Term (n) | Short Term % |
| 25                                           | 50-54     | Never Any     | 5277  | 52.36 |               |             |               |                |              |
| 25                                           | 50-54     | CC            | 45    | 0.45  | 0             | 0.00        |               |                |              |
| 25                                           | 50-54     | Ecig          | 2064  | 20.48 |               |             |               |                |              |
| 25                                           | 50-54     | Dual          | 0     | 0.00  |               |             |               |                |              |
| 25                                           | 50-54     | Former        | 2692  | 26.71 |               |             | 20.16         | 150            | 5.57         |
| Year of Follow-up: 2015, Age Group: 55-59    |           |               |       |       |               |             |               |                |              |
| Period                                       | Age Group | Smoking Group | N     | %     | Ever Quit (N) | Ever Quit % | Mean Yrs Quit | Short Term (n) | Short Term % |
| 25                                           | 55-59     | Never Any     | 5277  | 50.26 |               |             |               |                |              |
| 25                                           | 55-59     | CC            | 37    | 0.35  | 0             | 0.00        |               |                |              |
| 25                                           | 55-59     | Ecig          | 1773  | 16.89 |               |             |               |                |              |
| 25                                           | 55-59     | Dual          | 0     | 0.00  |               |             |               |                |              |
| 25                                           | 55-59     | Former        | 3412  | 32.50 |               |             | 20.83         | 140            | 4.10         |
| Year of Follow-up: 2015, Age Group: 60-64    |           |               |       |       |               |             |               |                |              |
| Period                                       | Age Group | Smoking Group | N     | %     | Ever Quit (N) | Ever Quit % | Mean Yrs Quit | Short Term (n) | Short Term % |
| 25                                           | 60-64     | Never Any     | 5018  | 52.27 |               |             |               |                |              |
| 25                                           | 60-64     | CC            | 42    | 0.44  | 0             | 0.00        |               |                |              |
| 25                                           | 60-64     | Ecig          | 1154  | 12.02 |               |             |               |                |              |
| 25                                           | 60-64     | Dual          | 0     | 0.00  |               |             |               |                |              |
| 25                                           | 60-64     | Former        | 3386  | 35.27 |               |             | 23.56         | 144            | 4.25         |
| Year of Follow-up: 2015, Age Group: 65-69    |           |               |       |       |               |             |               |                |              |
| Period                                       | Age Group | Smoking Group | N     | %     | Ever Quit (N) | Ever Quit % | Mean Yrs Quit | Short Term (n) | Short Term % |
| 25                                           | 65-69     | Never Any     | 4356  | 51.27 |               |             |               |                |              |
| 25                                           | 65-69     | CC            | 41    | 0.48  | 0             | 0.00        |               |                |              |
| 25                                           | 65-69     | Ecig          | 844   | 9.93  |               |             |               |                |              |
| 25                                           | 65-69     | Dual          | 0     | 0.00  |               |             |               |                |              |
| 25                                           | 65-69     | Former        | 3256  | 38.32 |               |             | 23.12         | 70             | 2.15         |
| Year of Follow-up: 2015, Age Group: 70-74    |           |               |       |       |               |             |               |                |              |
| Period                                       | Age Group | Smoking Group | N     | %     | Ever Quit (N) | Ever Quit % | Mean Yrs Quit | Short Term (n) | Short Term % |
| 25                                           | 70-74     | Never Any     | 3116  | 47.67 |               |             |               |                |              |
| 25                                           | 70-74     | CC            | 31    | 0.47  | 0             | 0.00        |               |                |              |
| 25                                           | 70-74     | Ecig          | 527   | 8.06  |               |             |               |                |              |
| 25                                           | 70-74     | Dual          | 0     | 0.00  |               |             |               |                |              |
| 25                                           | 70-74     | Former        | 2862  | 43.79 |               |             | 26.54         | 42             | 1.47         |
| Year of Follow-up: 2015, Age Group: 75-79    |           |               |       |       |               |             |               |                |              |
| Period                                       | Age Group | Smoking Group | N     | %     | Ever Quit (N) | Ever Quit % | Mean Yrs Quit | Short Term (n) | Short Term % |
| 25                                           | 75-79     | Never Any     | 2684  | 48.50 |               |             |               |                |              |
| 25                                           | 75-79     | CC            | 59    | 1.07  | 0             | 0.00        |               |                |              |
| 25                                           | 75-79     | Ecig          | 385   | 6.96  |               |             |               |                |              |
| 25                                           | 75-79     | Dual          | 0     | 0.00  |               |             |               |                |              |
| 25                                           | 75-79     | Former        | 2406  | 43.48 |               |             | 26.76         | 40             | 1.66         |
| Year of Follow-up: 2020, Age Group: All Ages |           |               |       |       |               |             |               |                |              |
| Period                                       | Age Group | Smoking Group | N     | %     | Ever Quit (N) | Ever Quit % | Mean Yrs Quit | Short Term (n) | Short Term % |
| 30                                           | All Ages  | Never Any     | 37740 | 53.70 |               |             |               |                |              |
| 30                                           | All Ages  | CC            | 115   | 0.16  | 0             | 0.00        |               |                |              |
| 30                                           | All Ages  | Ecig          | 9530  | 13.56 |               |             |               |                |              |
| 30                                           | All Ages  | Dual          | 0     | 0.00  |               |             |               |                |              |
| 30                                           | All Ages  | Former        | 22898 | 32.58 |               |             | 23.67         | 776            | 3.39         |
| Year of Follow-up: 2020, Age Group: 18-19    |           |               |       |       |               |             |               |                |              |
| Period                                       | Age Group | Smoking Group | N     | %     | Ever Quit (N) | Ever Quit % | Mean Yrs Quit | Short Term (n) | Short Term % |
| 30                                           | 18-19     | Never Any     | 0     | .     |               |             |               |                |              |
| 30                                           | 18-19     | CC            | 0     | .     | 0             | .           |               |                |              |
| 30                                           | 18-19     | Ecig          | 0     | .     |               |             |               |                |              |
| 30                                           | 18-19     | Dual          | 0     | .     |               |             |               |                |              |
| 30                                           | 18-19     | Former        | 0     | .     |               |             | .             | 0              | .            |
| Year of Follow-up: 2020, Age Group: 20-24    |           |               |       |       |               |             |               |                |              |
| Period                                       | Age Group | Smoking Group | N     | %     | Ever Quit (N) | Ever Quit % | Mean Yrs Quit | Short Term (n) | Short Term % |
| 30                                           | 20-24     | Never Any     | 0     | .     |               |             |               |                |              |
| 30                                           | 20-24     | CC            | 0     | .     | 0             | .           |               |                |              |

**Results for PHIM for Run 6 (Sensitivity\_Analysis\_4.RTF)**

|                                           |           |               |      |       |               |             |               |                |              |
|-------------------------------------------|-----------|---------------|------|-------|---------------|-------------|---------------|----------------|--------------|
| 30                                        | 20-24     | Ecig          | 0    | .     |               |             |               |                |              |
| 30                                        | 20-24     | Dual          | 0    | .     |               |             |               |                |              |
| 30                                        | 20-24     | Former        | 0    | .     |               |             | 0             | .              |              |
| Year of Follow-up: 2020, Age Group: 25-29 |           |               |      |       |               |             |               |                |              |
| Period                                    | Age Group | Smoking Group | N    | %     | Ever Quit (N) | Ever Quit % | Mean Yrs Quit | Short Term (n) | Short Term % |
| 30                                        | 25-29     | Never Any     | 0    | .     |               |             |               |                |              |
| 30                                        | 25-29     | CC            | 0    | .     | 0             | .           |               |                |              |
| 30                                        | 25-29     | Ecig          | 0    | .     |               |             |               |                |              |
| 30                                        | 25-29     | Dual          | 0    | .     |               |             |               |                |              |
| 30                                        | 25-29     | Former        | 0    | .     |               |             | 0             | .              |              |
| Year of Follow-up: 2020, Age Group: 30-34 |           |               |      |       |               |             |               |                |              |
| Period                                    | Age Group | Smoking Group | N    | %     | Ever Quit (N) | Ever Quit % | Mean Yrs Quit | Short Term (n) | Short Term % |
| 30                                        | 30-34     | Never Any     | 0    | .     |               |             |               |                |              |
| 30                                        | 30-34     | CC            | 0    | .     | 0             | .           |               |                |              |
| 30                                        | 30-34     | Ecig          | 0    | .     |               |             |               |                |              |
| 30                                        | 30-34     | Dual          | 0    | .     |               |             |               |                |              |
| 30                                        | 30-34     | Former        | 0    | .     |               |             | 0             | .              |              |
| Year of Follow-up: 2020, Age Group: 35-39 |           |               |      |       |               |             |               |                |              |
| Period                                    | Age Group | Smoking Group | N    | %     | Ever Quit (N) | Ever Quit % | Mean Yrs Quit | Short Term (n) | Short Term % |
| 30                                        | 35-39     | Never Any     | 0    | .     |               |             |               |                |              |
| 30                                        | 35-39     | CC            | 0    | .     | 0             | .           |               |                |              |
| 30                                        | 35-39     | Ecig          | 0    | .     |               |             |               |                |              |
| 30                                        | 35-39     | Dual          | 0    | .     |               |             |               |                |              |
| 30                                        | 35-39     | Former        | 0    | .     |               |             | 0             | .              |              |
| Year of Follow-up: 2020, Age Group: 40-44 |           |               |      |       |               |             |               |                |              |
| Period                                    | Age Group | Smoking Group | N    | %     | Ever Quit (N) | Ever Quit % | Mean Yrs Quit | Short Term (n) | Short Term % |
| 30                                        | 40-44     | Never Any     | 4366 | 55.06 |               |             |               |                |              |
| 30                                        | 40-44     | CC            | 6    | 0.08  | 0             | 0.00        |               |                |              |
| 30                                        | 40-44     | Ecig          | 1479 | 18.65 |               |             |               |                |              |
| 30                                        | 40-44     | Dual          | 0    | 0.00  |               |             |               |                |              |
| 30                                        | 40-44     | Former        | 2079 | 26.22 |               |             | 14.71         | 94             | 4.52         |
| Year of Follow-up: 2020, Age Group: 45-49 |           |               |      |       |               |             |               |                |              |
| Period                                    | Age Group | Smoking Group | N    | %     | Ever Quit (N) | Ever Quit % | Mean Yrs Quit | Short Term (n) | Short Term % |
| 30                                        | 45-49     | Never Any     | 5168 | 61.89 |               |             |               |                |              |
| 30                                        | 45-49     | CC            | 13   | 0.16  | 0             | 0.00        |               |                |              |
| 30                                        | 45-49     | Ecig          | 1415 | 16.95 |               |             |               |                |              |
| 30                                        | 45-49     | Dual          | 0    | 0.00  |               |             |               |                |              |
| 30                                        | 45-49     | Former        | 1754 | 21.01 |               |             | 16.74         | 79             | 4.50         |
| Year of Follow-up: 2020, Age Group: 50-54 |           |               |      |       |               |             |               |                |              |
| Period                                    | Age Group | Smoking Group | N    | %     | Ever Quit (N) | Ever Quit % | Mean Yrs Quit | Short Term (n) | Short Term % |
| 30                                        | 50-54     | Never Any     | 5162 | 58.71 |               |             |               |                |              |
| 30                                        | 50-54     | CC            | 9    | 0.10  | 0             | 0.00        |               |                |              |
| 30                                        | 50-54     | Ecig          | 1416 | 16.10 |               |             |               |                |              |
| 30                                        | 50-54     | Dual          | 0    | 0.00  |               |             |               |                |              |
| 30                                        | 50-54     | Former        | 2206 | 25.09 |               |             | 20.48         | 121            | 5.49         |
| Year of Follow-up: 2020, Age Group: 55-59 |           |               |      |       |               |             |               |                |              |
| Period                                    | Age Group | Smoking Group | N    | %     | Ever Quit (N) | Ever Quit % | Mean Yrs Quit | Short Term (n) | Short Term % |
| 30                                        | 55-59     | Never Any     | 5277 | 52.36 |               |             |               |                |              |
| 30                                        | 55-59     | CC            | 14   | 0.14  | 0             | 0.00        |               |                |              |
| 30                                        | 55-59     | Ecig          | 1713 | 17.00 |               |             |               |                |              |
| 30                                        | 55-59     | Dual          | 0    | 0.00  |               |             |               |                |              |
| 30                                        | 55-59     | Former        | 3074 | 30.50 |               |             | 22.29         | 140            | 4.55         |
| Year of Follow-up: 2020, Age Group: 60-64 |           |               |      |       |               |             |               |                |              |
| Period                                    | Age Group | Smoking Group | N    | %     | Ever Quit (N) | Ever Quit % | Mean Yrs Quit | Short Term (n) | Short Term % |
| 30                                        | 60-64     | Never Any     | 5277 | 50.26 |               |             |               |                |              |
| 30                                        | 60-64     | CC            | 15   | 0.14  | 0             | 0.00        |               |                |              |
| 30                                        | 60-64     | Ecig          | 1428 | 13.60 |               |             |               |                |              |
| 30                                        | 60-64     | Dual          | 0    | 0.00  |               |             |               |                |              |
| 30                                        | 60-64     | Former        | 3779 | 35.99 |               |             | 23.51         | 153            | 4.05         |
| Year of Follow-up: 2020, Age Group: 65-69 |           |               |      |       |               |             |               |                |              |
| Period                                    | Age Group | Smoking Group | N    | %     | Ever Quit (N) | Ever Quit % | Mean Yrs Quit | Short Term (n) | Short Term % |
| 30                                        | 65-69     | Never Any     | 5018 | 52.27 |               |             |               |                |              |
| 30                                        | 65-69     | CC            | 18   | 0.19  | 0             | 0.00        |               |                |              |
| 30                                        | 65-69     | Ecig          | 917  | 9.55  |               |             |               |                |              |
| 30                                        | 65-69     | Dual          | 0    | 0.00  |               |             |               |                |              |
| 30                                        | 65-69     | Former        | 3647 | 37.99 |               |             | 26.68         | 75             | 2.06         |
| Year of Follow-up: 2020, Age Group: 70-74 |           |               |      |       |               |             |               |                |              |
| Period                                    | Age Group | Smoking Group | N    | %     | Ever Quit (N) | Ever Quit % | Mean Yrs Quit | Short Term (n) | Short Term % |

### Results for PHIM for Run 6 (Sensitivity\_Analysis\_4.RTF)

|                                              |           |               |       |       |               |             |               |                |              |
|----------------------------------------------|-----------|---------------|-------|-------|---------------|-------------|---------------|----------------|--------------|
| 30                                           | 70-74     | Never Any     | 4356  | 51.27 |               |             |               |                |              |
| 30                                           | 70-74     | CC            | 22    | 0.26  | 0             | 0.00        |               |                |              |
| 30                                           | 70-74     | Ecig          | 727   | 8.56  |               |             |               |                |              |
| 30                                           | 70-74     | Dual          | 0     | 0.00  |               |             |               |                |              |
| 30                                           | 70-74     | Former        | 3392  | 39.92 |               |             | 27.06         | 66             | 1.95         |
| Year of Follow-up: 2020, Age Group: 75-79    |           |               |       |       |               |             |               |                |              |
| Period                                       | Age Group | Smoking Group | N     | %     | Ever Quit (N) | Ever Quit % | Mean Yrs Quit | Short Term (n) | Short Term % |
| 30                                           | 75-79     | Never Any     | 3116  | 47.67 |               |             |               |                |              |
| 30                                           | 75-79     | CC            | 18    | 0.28  | 0             | 0.00        |               |                |              |
| 30                                           | 75-79     | Ecig          | 435   | 6.66  |               |             |               |                |              |
| 30                                           | 75-79     | Dual          | 0     | 0.00  |               |             |               |                |              |
| 30                                           | 75-79     | Former        | 2967  | 45.39 |               |             | 30.49         | 48             | 1.62         |
| Year of Follow-up: 2025, Age Group: All Ages |           |               |       |       |               |             |               |                |              |
| Period                                       | Age Group | Smoking Group | N     | %     | Ever Quit (N) | Ever Quit % | Mean Yrs Quit | Short Term (n) | Short Term % |
| 35                                           | All Ages  | Never Any     | 34624 | 54.31 |               |             |               |                |              |
| 35                                           | All Ages  | CC            | 47    | 0.07  | 0             | 0.00        |               |                |              |
| 35                                           | All Ages  | Ecig          | 7519  | 11.80 |               |             |               |                |              |
| 35                                           | All Ages  | Dual          | 0     | 0.00  |               |             |               |                |              |
| 35                                           | All Ages  | Former        | 21557 | 33.82 |               |             | 25.73         | 626            | 2.90         |
| Year of Follow-up: 2025, Age Group: 18-19    |           |               |       |       |               |             |               |                |              |
| Period                                       | Age Group | Smoking Group | N     | %     | Ever Quit (N) | Ever Quit % | Mean Yrs Quit | Short Term (n) | Short Term % |
| 35                                           | 18-19     | Never Any     | 0     | .     |               |             |               |                |              |
| 35                                           | 18-19     | CC            | 0     | .     | 0             | .           |               |                |              |
| 35                                           | 18-19     | Ecig          | 0     | .     |               |             |               |                |              |
| 35                                           | 18-19     | Dual          | 0     | .     |               |             |               |                |              |
| 35                                           | 18-19     | Former        | 0     | .     |               |             | .             | 0              | .            |
| Year of Follow-up: 2025, Age Group: 20-24    |           |               |       |       |               |             |               |                |              |
| Period                                       | Age Group | Smoking Group | N     | %     | Ever Quit (N) | Ever Quit % | Mean Yrs Quit | Short Term (n) | Short Term % |
| 35                                           | 20-24     | Never Any     | 0     | .     |               |             |               |                |              |
| 35                                           | 20-24     | CC            | 0     | .     | 0             | .           |               |                |              |
| 35                                           | 20-24     | Ecig          | 0     | .     |               |             |               |                |              |
| 35                                           | 20-24     | Dual          | 0     | .     |               |             |               |                |              |
| 35                                           | 20-24     | Former        | 0     | .     |               |             | .             | 0              | .            |
| Year of Follow-up: 2025, Age Group: 25-29    |           |               |       |       |               |             |               |                |              |
| Period                                       | Age Group | Smoking Group | N     | %     | Ever Quit (N) | Ever Quit % | Mean Yrs Quit | Short Term (n) | Short Term % |
| 35                                           | 25-29     | Never Any     | 0     | .     |               |             |               |                |              |
| 35                                           | 25-29     | CC            | 0     | .     | 0             | .           |               |                |              |
| 35                                           | 25-29     | Ecig          | 0     | .     |               |             |               |                |              |
| 35                                           | 25-29     | Dual          | 0     | .     |               |             |               |                |              |
| 35                                           | 25-29     | Former        | 0     | .     |               |             | .             | 0              | .            |
| Year of Follow-up: 2025, Age Group: 30-34    |           |               |       |       |               |             |               |                |              |
| Period                                       | Age Group | Smoking Group | N     | %     | Ever Quit (N) | Ever Quit % | Mean Yrs Quit | Short Term (n) | Short Term % |
| 35                                           | 30-34     | Never Any     | 0     | .     |               |             |               |                |              |
| 35                                           | 30-34     | CC            | 0     | .     | 0             | .           |               |                |              |
| 35                                           | 30-34     | Ecig          | 0     | .     |               |             |               |                |              |
| 35                                           | 30-34     | Dual          | 0     | .     |               |             |               |                |              |
| 35                                           | 30-34     | Former        | 0     | .     |               |             | .             | 0              | .            |
| Year of Follow-up: 2025, Age Group: 35-39    |           |               |       |       |               |             |               |                |              |
| Period                                       | Age Group | Smoking Group | N     | %     | Ever Quit (N) | Ever Quit % | Mean Yrs Quit | Short Term (n) | Short Term % |
| 35                                           | 35-39     | Never Any     | 0     | .     |               |             |               |                |              |
| 35                                           | 35-39     | CC            | 0     | .     | 0             | .           |               |                |              |
| 35                                           | 35-39     | Ecig          | 0     | .     |               |             |               |                |              |
| 35                                           | 35-39     | Dual          | 0     | .     |               |             |               |                |              |
| 35                                           | 35-39     | Former        | 0     | .     |               |             | .             | 0              | .            |
| Year of Follow-up: 2025, Age Group: 40-44    |           |               |       |       |               |             |               |                |              |
| Period                                       | Age Group | Smoking Group | N     | %     | Ever Quit (N) | Ever Quit % | Mean Yrs Quit | Short Term (n) | Short Term % |
| 35                                           | 40-44     | Never Any     | 0     | .     |               |             |               |                |              |
| 35                                           | 40-44     | CC            | 0     | .     | 0             | .           |               |                |              |
| 35                                           | 40-44     | Ecig          | 0     | .     |               |             |               |                |              |
| 35                                           | 40-44     | Dual          | 0     | .     |               |             |               |                |              |
| 35                                           | 40-44     | Former        | 0     | .     |               |             | .             | 0              | .            |
| Year of Follow-up: 2025, Age Group: 45-49    |           |               |       |       |               |             |               |                |              |
| Period                                       | Age Group | Smoking Group | N     | %     | Ever Quit (N) | Ever Quit % | Mean Yrs Quit | Short Term (n) | Short Term % |
| 35                                           | 45-49     | Never Any     | 4366  | 55.06 |               |             |               |                |              |
| 35                                           | 45-49     | CC            | 1     | 0.01  | 0             | 0.00        |               |                |              |
| 35                                           | 45-49     | Ecig          | 1258  | 15.86 |               |             |               |                |              |
| 35                                           | 45-49     | Dual          | 0     | 0.00  |               |             |               |                |              |
| 35                                           | 45-49     | Former        | 2305  | 29.07 |               |             | 18.00         | 76             | 3.30         |
| Year of Follow-up: 2025, Age Group: 50-54    |           |               |       |       |               |             |               |                |              |



**Results for PHIM for Run 6 (Sensitivity\_Analysis\_4.RTF)**

| Period                                       | Age Group | Smoking Group | N     | %     | Ever Quit (N) | Ever Quit % | Mean Yrs Quit | Short Term (n) | Short Term % |
|----------------------------------------------|-----------|---------------|-------|-------|---------------|-------------|---------------|----------------|--------------|
| 35                                           | 50-54     | Never Any     | 5168  | 61.89 |               |             |               |                |              |
| 35                                           | 50-54     | CC            | 3     | 0.04  | 0             | 0.00        |               |                |              |
| 35                                           | 50-54     | Ecig          | 1191  | 14.26 |               |             |               |                |              |
| 35                                           | 50-54     | Dual          | 0     | 0.00  |               |             |               |                |              |
| 35                                           | 50-54     | Former        | 1988  | 23.81 |               |             | 19.39         | 111            | 5.58         |
| Year of Follow-up: 2025, Age Group: 55-59    |           |               |       |       |               |             |               |                |              |
| Period                                       | Age Group | Smoking Group | N     | %     | Ever Quit (N) | Ever Quit % | Mean Yrs Quit | Short Term (n) | Short Term % |
| 35                                           | 55-59     | Never Any     | 5162  | 58.71 |               |             |               |                |              |
| 35                                           | 55-59     | CC            | 4     | 0.05  | 0             | 0.00        |               |                |              |
| 35                                           | 55-59     | Ecig          | 1171  | 13.32 |               |             |               |                |              |
| 35                                           | 55-59     | Dual          | 0     | 0.00  |               |             |               |                |              |
| 35                                           | 55-59     | Former        | 2456  | 27.93 |               |             | 23.08         | 99             | 4.03         |
| Year of Follow-up: 2025, Age Group: 60-64    |           |               |       |       |               |             |               |                |              |
| Period                                       | Age Group | Smoking Group | N     | %     | Ever Quit (N) | Ever Quit % | Mean Yrs Quit | Short Term (n) | Short Term % |
| 35                                           | 60-64     | Never Any     | 5277  | 52.36 |               |             |               |                |              |
| 35                                           | 60-64     | CC            | 7     | 0.07  | 0             | 0.00        |               |                |              |
| 35                                           | 60-64     | Ecig          | 1383  | 13.72 |               |             |               |                |              |
| 35                                           | 60-64     | Dual          | 0     | 0.00  |               |             |               |                |              |
| 35                                           | 60-64     | Former        | 3411  | 33.85 |               |             | 24.79         | 139            | 4.08         |
| Year of Follow-up: 2025, Age Group: 65-69    |           |               |       |       |               |             |               |                |              |
| Period                                       | Age Group | Smoking Group | N     | %     | Ever Quit (N) | Ever Quit % | Mean Yrs Quit | Short Term (n) | Short Term % |
| 35                                           | 65-69     | Never Any     | 5277  | 50.26 |               |             |               |                |              |
| 35                                           | 65-69     | CC            | 7     | 0.07  | 0             | 0.00        |               |                |              |
| 35                                           | 65-69     | Ecig          | 1139  | 10.85 |               |             |               |                |              |
| 35                                           | 65-69     | Dual          | 0     | 0.00  |               |             |               |                |              |
| 35                                           | 65-69     | Former        | 4076  | 38.82 |               |             | 26.61         | 83             | 2.04         |
| Year of Follow-up: 2025, Age Group: 70-74    |           |               |       |       |               |             |               |                |              |
| Period                                       | Age Group | Smoking Group | N     | %     | Ever Quit (N) | Ever Quit % | Mean Yrs Quit | Short Term (n) | Short Term % |
| 35                                           | 70-74     | Never Any     | 5018  | 52.27 |               |             |               |                |              |
| 35                                           | 70-74     | CC            | 11    | 0.11  | 0             | 0.00        |               |                |              |
| 35                                           | 70-74     | Ecig          | 789   | 8.22  |               |             |               |                |              |
| 35                                           | 70-74     | Dual          | 0     | 0.00  |               |             |               |                |              |
| 35                                           | 70-74     | Former        | 3782  | 39.40 |               |             | 30.61         | 65             | 1.72         |
| Year of Follow-up: 2025, Age Group: 75-79    |           |               |       |       |               |             |               |                |              |
| Period                                       | Age Group | Smoking Group | N     | %     | Ever Quit (N) | Ever Quit % | Mean Yrs Quit | Short Term (n) | Short Term % |
| 35                                           | 75-79     | Never Any     | 4356  | 51.27 |               |             |               |                |              |
| 35                                           | 75-79     | CC            | 14    | 0.16  | 0             | 0.00        |               |                |              |
| 35                                           | 75-79     | Ecig          | 588   | 6.92  |               |             |               |                |              |
| 35                                           | 75-79     | Dual          | 0     | 0.00  |               |             |               |                |              |
| 35                                           | 75-79     | Former        | 3539  | 41.65 |               |             | 30.81         | 53             | 1.50         |
| Year of Follow-up: 2030, Age Group: All Ages |           |               |       |       |               |             |               |                |              |
| Period                                       | Age Group | Smoking Group | N     | %     | Ever Quit (N) | Ever Quit % | Mean Yrs Quit | Short Term (n) | Short Term % |
| 40                                           | All Ages  | Never Any     | 30268 | 54.78 |               |             |               |                |              |
| 40                                           | All Ages  | CC            | 14    | 0.03  | 0             | 0.00        |               |                |              |
| 40                                           | All Ages  | Ecig          | 5576  | 10.09 |               |             |               |                |              |
| 40                                           | All Ages  | Dual          | 0     | 0.00  |               |             |               |                |              |
| 40                                           | All Ages  | Former        | 19392 | 35.10 |               |             | 27.76         | 546            | 2.82         |
| Year of Follow-up: 2030, Age Group: 18-19    |           |               |       |       |               |             |               |                |              |
| Period                                       | Age Group | Smoking Group | N     | %     | Ever Quit (N) | Ever Quit % | Mean Yrs Quit | Short Term (n) | Short Term % |
| 40                                           | 18-19     | Never Any     | 0     | .     |               |             |               |                |              |
| 40                                           | 18-19     | CC            | 0     | .     | 0             | .           |               |                |              |
| 40                                           | 18-19     | Ecig          | 0     | .     |               |             |               |                |              |
| 40                                           | 18-19     | Dual          | 0     | .     |               |             |               |                |              |
| 40                                           | 18-19     | Former        | 0     | .     |               |             | .             | 0              | .            |
| Year of Follow-up: 2030, Age Group: 20-24    |           |               |       |       |               |             |               |                |              |
| Period                                       | Age Group | Smoking Group | N     | %     | Ever Quit (N) | Ever Quit % | Mean Yrs Quit | Short Term (n) | Short Term % |
| 40                                           | 20-24     | Never Any     | 0     | .     |               |             |               |                |              |
| 40                                           | 20-24     | CC            | 0     | .     | 0             | .           |               |                |              |
| 40                                           | 20-24     | Ecig          | 0     | .     |               |             |               |                |              |
| 40                                           | 20-24     | Dual          | 0     | .     |               |             |               |                |              |
| 40                                           | 20-24     | Former        | 0     | .     |               |             | .             | 0              | .            |
| Year of Follow-up: 2030, Age Group: 25-29    |           |               |       |       |               |             |               |                |              |
| Period                                       | Age Group | Smoking Group | N     | %     | Ever Quit (N) | Ever Quit % | Mean Yrs Quit | Short Term (n) | Short Term % |
| 40                                           | 25-29     | Never Any     | 0     | .     |               |             |               |                |              |
| 40                                           | 25-29     | CC            | 0     | .     | 0             | .           |               |                |              |
| 40                                           | 25-29     | Ecig          | 0     | .     |               |             |               |                |              |
| 40                                           | 25-29     | Dual          | 0     | .     |               |             |               |                |              |

### Results for PHIM for Run 6 (Sensitivity\_Analysis\_4.RTF)

| Year of Follow-up: 2030, Age Group: 30-34 | Period | Age Group | Smoking Group | N    | %     | Ever Quit (N) | Ever Quit % | Mean Yrs Quit | Short Term (n) | Short Term % |
|-------------------------------------------|--------|-----------|---------------|------|-------|---------------|-------------|---------------|----------------|--------------|
| Year of Follow-up: 2030, Age Group: 30-34 |        |           |               |      |       |               |             |               |                |              |
| 40                                        | 25-29  | Former    |               | 0    | .     |               |             |               | 0              | .            |
| 40                                        | 30-34  | Never Any |               | 0    | .     |               |             |               |                |              |
| 40                                        | 30-34  | CC        |               | 0    | .     | 0             | .           |               |                |              |
| 40                                        | 30-34  | Ecig      |               | 0    | .     |               |             |               |                |              |
| 40                                        | 30-34  | Dual      |               | 0    | .     |               |             |               |                |              |
| 40                                        | 30-34  | Former    |               | 0    | .     |               |             |               | 0              | .            |
| Year of Follow-up: 2030, Age Group: 35-39 |        |           |               |      |       |               |             |               |                |              |
| 40                                        | 35-39  | Never Any |               | 0    | .     |               |             |               |                |              |
| 40                                        | 35-39  | CC        |               | 0    | .     | 0             | .           |               |                |              |
| 40                                        | 35-39  | Ecig      |               | 0    | .     |               |             |               |                |              |
| 40                                        | 35-39  | Dual      |               | 0    | .     |               |             |               |                |              |
| 40                                        | 35-39  | Former    |               | 0    | .     |               |             |               | 0              | .            |
| Year of Follow-up: 2030, Age Group: 40-44 |        |           |               |      |       |               |             |               |                |              |
| 40                                        | 40-44  | Never Any |               | 0    | .     |               |             |               |                |              |
| 40                                        | 40-44  | CC        |               | 0    | .     | 0             | .           |               |                |              |
| 40                                        | 40-44  | Ecig      |               | 0    | .     |               |             |               |                |              |
| 40                                        | 40-44  | Dual      |               | 0    | .     |               |             |               |                |              |
| 40                                        | 40-44  | Former    |               | 0    | .     |               |             |               | 0              | .            |
| Year of Follow-up: 2030, Age Group: 45-49 |        |           |               |      |       |               |             |               |                |              |
| 40                                        | 45-49  | Never Any |               | 0    | .     |               |             |               |                |              |
| 40                                        | 45-49  | CC        |               | 0    | .     | 0             | .           |               |                |              |
| 40                                        | 45-49  | Ecig      |               | 0    | .     |               |             |               |                |              |
| 40                                        | 45-49  | Dual      |               | 0    | .     |               |             |               |                |              |
| 40                                        | 45-49  | Former    |               | 0    | .     |               |             |               | 0              | .            |
| Year of Follow-up: 2030, Age Group: 50-54 |        |           |               |      |       |               |             |               |                |              |
| 40                                        | 50-54  | Never Any |               | 4366 | 55.06 |               |             |               |                |              |
| 40                                        | 50-54  | CC        |               | 0    | 0.00  | 0             | 0.00        |               |                |              |
| 40                                        | 50-54  | Ecig      |               | 1062 | 13.39 |               |             |               |                |              |
| 40                                        | 50-54  | Dual      |               | 0    | 0.00  |               |             |               |                |              |
| 40                                        | 50-54  | Former    |               | 2502 | 31.55 |               |             | 21.33         | 100            | 4.00         |
| Year of Follow-up: 2030, Age Group: 55-59 |        |           |               |      |       |               |             |               |                |              |
| 40                                        | 55-59  | Never Any |               | 5168 | 61.89 |               |             |               |                |              |
| 40                                        | 55-59  | CC        |               | 0    | 0.00  | 0             | 0.00        |               |                |              |
| 40                                        | 55-59  | Ecig      |               | 958  | 11.47 |               |             |               |                |              |
| 40                                        | 55-59  | Dual      |               | 0    | 0.00  |               |             |               |                |              |
| 40                                        | 55-59  | Former    |               | 2224 | 26.63 |               |             | 22.03         | 83             | 3.73         |
| Year of Follow-up: 2030, Age Group: 60-64 |        |           |               |      |       |               |             |               |                |              |
| 40                                        | 60-64  | Never Any |               | 5162 | 58.71 |               |             |               |                |              |
| 40                                        | 60-64  | CC        |               | 3    | 0.03  | 0             | 0.00        |               |                |              |
| 40                                        | 60-64  | Ecig      |               | 903  | 10.27 |               |             |               |                |              |
| 40                                        | 60-64  | Dual      |               | 0    | 0.00  |               |             |               |                |              |
| 40                                        | 60-64  | Former    |               | 2725 | 30.99 |               |             | 25.48         | 128            | 4.70         |
| Year of Follow-up: 2030, Age Group: 65-69 |        |           |               |      |       |               |             |               |                |              |
| 40                                        | 65-69  | Never Any |               | 5277 | 52.36 |               |             |               |                |              |
| 40                                        | 65-69  | CC        |               | 3    | 0.03  | 0             | 0.00        |               |                |              |
| 40                                        | 65-69  | Ecig      |               | 1084 | 10.76 |               |             |               |                |              |
| 40                                        | 65-69  | Dual      |               | 0    | 0.00  |               |             |               |                |              |
| 40                                        | 65-69  | Former    |               | 3714 | 36.85 |               |             | 27.56         | 73             | 1.97         |
| Year of Follow-up: 2030, Age Group: 70-74 |        |           |               |      |       |               |             |               |                |              |
| 40                                        | 70-74  | Never Any |               | 5277 | 50.26 |               |             |               |                |              |
| 40                                        | 70-74  | CC        |               | 4    | 0.04  | 0             | 0.00        |               |                |              |
| 40                                        | 70-74  | Ecig      |               | 957  | 9.12  |               |             |               |                |              |
| 40                                        | 70-74  | Dual      |               | 0    | 0.00  |               |             |               |                |              |
| 40                                        | 70-74  | Former    |               | 4261 | 40.58 |               |             | 30.31         | 86             | 2.02         |
| Year of Follow-up: 2030, Age Group: 75-79 |        |           |               |      |       |               |             |               |                |              |
| 40                                        | 75-79  | Never Any |               | 5018 | 52.27 |               |             |               |                |              |
| 40                                        | 75-79  | CC        |               | 4    | 0.04  | 0             | 0.00        |               |                |              |

**Results for PHIM for Run 6 (Sensitivity\_Analysis\_4.RTF)**

|                                              |           |               |       |       |               |             |               |                |              |
|----------------------------------------------|-----------|---------------|-------|-------|---------------|-------------|---------------|----------------|--------------|
| 40                                           | 75-79     | Ecig          | 612   | 6.38  |               |             |               |                |              |
| 40                                           | 75-79     | Dual          | 0     | 0.00  |               |             |               |                |              |
| 40                                           | 75-79     | Former        | 3966  | 41.31 |               |             | 34.05         | 76             | 1.92         |
| Year of Follow-up: 2035, Age Group: All Ages |           |               |       |       |               |             |               |                |              |
| Period                                       | Age Group | Smoking Group | N     | %     | Ever Quit (N) | Ever Quit % | Mean Yrs Quit | Short Term (n) | Short Term % |
| 45                                           | All Ages  | Never Any     | 25250 | 55.31 |               |             |               |                |              |
| 45                                           | All Ages  | CC            | 5     | 0.01  | 0             | 0.00        |               |                |              |
| 45                                           | All Ages  | Ecig          | 4027  | 8.82  |               |             |               |                |              |
| 45                                           | All Ages  | Dual          | 0     | 0.00  |               |             |               |                |              |
| 45                                           | All Ages  | Former        | 16368 | 35.86 |               |             | 29.47         | 364            | 2.22         |
| Year of Follow-up: 2035, Age Group: 18-19    |           |               |       |       |               |             |               |                |              |
| Period                                       | Age Group | Smoking Group | N     | %     | Ever Quit (N) | Ever Quit % | Mean Yrs Quit | Short Term (n) | Short Term % |
| 45                                           | 18-19     | Never Any     | 0     | .     |               |             |               |                |              |
| 45                                           | 18-19     | CC            | 0     | .     | 0             | .           |               |                |              |
| 45                                           | 18-19     | Ecig          | 0     | .     |               |             |               |                |              |
| 45                                           | 18-19     | Dual          | 0     | .     |               |             |               |                |              |
| 45                                           | 18-19     | Former        | 0     | .     |               |             | .             | 0              | .            |
| Year of Follow-up: 2035, Age Group: 20-24    |           |               |       |       |               |             |               |                |              |
| Period                                       | Age Group | Smoking Group | N     | %     | Ever Quit (N) | Ever Quit % | Mean Yrs Quit | Short Term (n) | Short Term % |
| 45                                           | 20-24     | Never Any     | 0     | .     |               |             |               |                |              |
| 45                                           | 20-24     | CC            | 0     | .     | 0             | .           |               |                |              |
| 45                                           | 20-24     | Ecig          | 0     | .     |               |             |               |                |              |
| 45                                           | 20-24     | Dual          | 0     | .     |               |             |               |                |              |
| 45                                           | 20-24     | Former        | 0     | .     |               |             | .             | 0              | .            |
| Year of Follow-up: 2035, Age Group: 25-29    |           |               |       |       |               |             |               |                |              |
| Period                                       | Age Group | Smoking Group | N     | %     | Ever Quit (N) | Ever Quit % | Mean Yrs Quit | Short Term (n) | Short Term % |
| 45                                           | 25-29     | Never Any     | 0     | .     |               |             |               |                |              |
| 45                                           | 25-29     | CC            | 0     | .     | 0             | .           |               |                |              |
| 45                                           | 25-29     | Ecig          | 0     | .     |               |             |               |                |              |
| 45                                           | 25-29     | Dual          | 0     | .     |               |             |               |                |              |
| 45                                           | 25-29     | Former        | 0     | .     |               |             | .             | 0              | .            |
| Year of Follow-up: 2035, Age Group: 30-34    |           |               |       |       |               |             |               |                |              |
| Period                                       | Age Group | Smoking Group | N     | %     | Ever Quit (N) | Ever Quit % | Mean Yrs Quit | Short Term (n) | Short Term % |
| 45                                           | 30-34     | Never Any     | 0     | .     |               |             |               |                |              |
| 45                                           | 30-34     | CC            | 0     | .     | 0             | .           |               |                |              |
| 45                                           | 30-34     | Ecig          | 0     | .     |               |             |               |                |              |
| 45                                           | 30-34     | Dual          | 0     | .     |               |             |               |                |              |
| 45                                           | 30-34     | Former        | 0     | .     |               |             | .             | 0              | .            |
| Year of Follow-up: 2035, Age Group: 35-39    |           |               |       |       |               |             |               |                |              |
| Period                                       | Age Group | Smoking Group | N     | %     | Ever Quit (N) | Ever Quit % | Mean Yrs Quit | Short Term (n) | Short Term % |
| 45                                           | 35-39     | Never Any     | 0     | .     |               |             |               |                |              |
| 45                                           | 35-39     | CC            | 0     | .     | 0             | .           |               |                |              |
| 45                                           | 35-39     | Ecig          | 0     | .     |               |             |               |                |              |
| 45                                           | 35-39     | Dual          | 0     | .     |               |             |               |                |              |
| 45                                           | 35-39     | Former        | 0     | .     |               |             | .             | 0              | .            |
| Year of Follow-up: 2035, Age Group: 40-44    |           |               |       |       |               |             |               |                |              |
| Period                                       | Age Group | Smoking Group | N     | %     | Ever Quit (N) | Ever Quit % | Mean Yrs Quit | Short Term (n) | Short Term % |
| 45                                           | 40-44     | Never Any     | 0     | .     |               |             |               |                |              |
| 45                                           | 40-44     | CC            | 0     | .     | 0             | .           |               |                |              |
| 45                                           | 40-44     | Ecig          | 0     | .     |               |             |               |                |              |
| 45                                           | 40-44     | Dual          | 0     | .     |               |             |               |                |              |
| 45                                           | 40-44     | Former        | 0     | .     |               |             | .             | 0              | .            |
| Year of Follow-up: 2035, Age Group: 45-49    |           |               |       |       |               |             |               |                |              |
| Period                                       | Age Group | Smoking Group | N     | %     | Ever Quit (N) | Ever Quit % | Mean Yrs Quit | Short Term (n) | Short Term % |
| 45                                           | 45-49     | Never Any     | 0     | .     |               |             |               |                |              |
| 45                                           | 45-49     | CC            | 0     | .     | 0             | .           |               |                |              |
| 45                                           | 45-49     | Ecig          | 0     | .     |               |             |               |                |              |
| 45                                           | 45-49     | Dual          | 0     | .     |               |             |               |                |              |
| 45                                           | 45-49     | Former        | 0     | .     |               |             | .             | 0              | .            |
| Year of Follow-up: 2035, Age Group: 50-54    |           |               |       |       |               |             |               |                |              |
| Period                                       | Age Group | Smoking Group | N     | %     | Ever Quit (N) | Ever Quit % | Mean Yrs Quit | Short Term (n) | Short Term % |
| 45                                           | 50-54     | Never Any     | 0     | .     |               |             |               |                |              |
| 45                                           | 50-54     | CC            | 0     | .     | 0             | .           |               |                |              |
| 45                                           | 50-54     | Ecig          | 0     | .     |               |             |               |                |              |
| 45                                           | 50-54     | Dual          | 0     | .     |               |             |               |                |              |
| 45                                           | 50-54     | Former        | 0     | .     |               |             | .             | 0              | .            |
| Year of Follow-up: 2035, Age Group: 55-59    |           |               |       |       |               |             |               |                |              |
| Period                                       | Age Group | Smoking Group | N     | %     | Ever Quit (N) | Ever Quit % | Mean Yrs Quit | Short Term (n) | Short Term % |

**Results for PHIM for Run 6 (Sensitivity\_Analysis\_4.RTF)**

|                                              |           |               |       |       |               |             |               |                |              |
|----------------------------------------------|-----------|---------------|-------|-------|---------------|-------------|---------------|----------------|--------------|
| 45                                           | 55-59     | Never Any     | 4366  | 55.06 |               |             |               |                |              |
| 45                                           | 55-59     | CC            | 0     | 0.00  | 0             | 0.00        |               |                |              |
| 45                                           | 55-59     | Ecig          | 868   | 10.95 |               |             |               |                |              |
| 45                                           | 55-59     | Dual          | 0     | 0.00  |               |             |               |                |              |
| 45                                           | 55-59     | Former        | 2696  | 34.00 |               |             | 24.58         | 71             | 2.63         |
| Year of Follow-up: 2035, Age Group: 60-64    |           |               |       |       |               |             |               |                |              |
| Period                                       | Age Group | Smoking Group | N     | %     | Ever Quit (N) | Ever Quit % | Mean Yrs Quit | Short Term (n) | Short Term % |
| 45                                           | 60-64     | Never Any     | 5168  | 61.89 |               |             |               |                |              |
| 45                                           | 60-64     | CC            | 0     | 0.00  | 0             | 0.00        |               |                |              |
| 45                                           | 60-64     | Ecig          | 768   | 9.20  |               |             |               |                |              |
| 45                                           | 60-64     | Dual          | 0     | 0.00  |               |             |               |                |              |
| 45                                           | 60-64     | Former        | 2414  | 28.91 |               |             | 25.05         | 81             | 3.36         |
| Year of Follow-up: 2035, Age Group: 65-69    |           |               |       |       |               |             |               |                |              |
| Period                                       | Age Group | Smoking Group | N     | %     | Ever Quit (N) | Ever Quit % | Mean Yrs Quit | Short Term (n) | Short Term % |
| 45                                           | 65-69     | Never Any     | 5162  | 58.71 |               |             |               |                |              |
| 45                                           | 65-69     | CC            | 3     | 0.03  | 0             | 0.00        |               |                |              |
| 45                                           | 65-69     | Ecig          | 706   | 8.03  |               |             |               |                |              |
| 45                                           | 65-69     | Dual          | 0     | 0.00  |               |             |               |                |              |
| 45                                           | 65-69     | Former        | 2922  | 33.23 |               |             | 28.59         | 57             | 1.95         |
| Year of Follow-up: 2035, Age Group: 70-74    |           |               |       |       |               |             |               |                |              |
| Period                                       | Age Group | Smoking Group | N     | %     | Ever Quit (N) | Ever Quit % | Mean Yrs Quit | Short Term (n) | Short Term % |
| 45                                           | 70-74     | Never Any     | 5277  | 52.36 |               |             |               |                |              |
| 45                                           | 70-74     | CC            | 1     | 0.01  | 0             | 0.00        |               |                |              |
| 45                                           | 70-74     | Ecig          | 938   | 9.31  |               |             |               |                |              |
| 45                                           | 70-74     | Dual          | 0     | 0.00  |               |             |               |                |              |
| 45                                           | 70-74     | Former        | 3862  | 38.32 |               |             | 31.38         | 76             | 1.97         |
| Year of Follow-up: 2035, Age Group: 75-79    |           |               |       |       |               |             |               |                |              |
| Period                                       | Age Group | Smoking Group | N     | %     | Ever Quit (N) | Ever Quit % | Mean Yrs Quit | Short Term (n) | Short Term % |
| 45                                           | 75-79     | Never Any     | 5277  | 50.26 |               |             |               |                |              |
| 45                                           | 75-79     | CC            | 1     | 0.01  | 0             | 0.00        |               |                |              |
| 45                                           | 75-79     | Ecig          | 747   | 7.11  |               |             |               |                |              |
| 45                                           | 75-79     | Dual          | 0     | 0.00  |               |             |               |                |              |
| 45                                           | 75-79     | Former        | 4474  | 42.61 |               |             | 33.73         | 79             | 1.77         |
| Year of Follow-up: 2040, Age Group: All Ages |           |               |       |       |               |             |               |                |              |
| Period                                       | Age Group | Smoking Group | N     | %     | Ever Quit (N) | Ever Quit % | Mean Yrs Quit | Short Term (n) | Short Term % |
| 50                                           | All Ages  | Never Any     | 19973 | 56.82 |               |             |               |                |              |
| 50                                           | All Ages  | CC            | 4     | 0.01  | 0             | 0.00        |               |                |              |
| 50                                           | All Ages  | Ecig          | 2613  | 7.43  |               |             |               |                |              |
| 50                                           | All Ages  | Dual          | 0     | 0.00  |               |             |               |                |              |
| 50                                           | All Ages  | Former        | 12561 | 35.73 |               |             | 31.23         | 250            | 1.99         |
| Year of Follow-up: 2040, Age Group: 18-19    |           |               |       |       |               |             |               |                |              |
| Period                                       | Age Group | Smoking Group | N     | %     | Ever Quit (N) | Ever Quit % | Mean Yrs Quit | Short Term (n) | Short Term % |
| 50                                           | 18-19     | Never Any     | 0     | .     |               |             |               |                |              |
| 50                                           | 18-19     | CC            | 0     | .     | 0             | .           |               |                |              |
| 50                                           | 18-19     | Ecig          | 0     | .     |               |             |               |                |              |
| 50                                           | 18-19     | Dual          | 0     | .     |               |             |               |                |              |
| 50                                           | 18-19     | Former        | 0     | .     |               |             | .             | 0              | .            |
| Year of Follow-up: 2040, Age Group: 20-24    |           |               |       |       |               |             |               |                |              |
| Period                                       | Age Group | Smoking Group | N     | %     | Ever Quit (N) | Ever Quit % | Mean Yrs Quit | Short Term (n) | Short Term % |
| 50                                           | 20-24     | Never Any     | 0     | .     |               |             |               |                |              |
| 50                                           | 20-24     | CC            | 0     | .     | 0             | .           |               |                |              |
| 50                                           | 20-24     | Ecig          | 0     | .     |               |             |               |                |              |
| 50                                           | 20-24     | Dual          | 0     | .     |               |             |               |                |              |
| 50                                           | 20-24     | Former        | 0     | .     |               |             | .             | 0              | .            |
| Year of Follow-up: 2040, Age Group: 25-29    |           |               |       |       |               |             |               |                |              |
| Period                                       | Age Group | Smoking Group | N     | %     | Ever Quit (N) | Ever Quit % | Mean Yrs Quit | Short Term (n) | Short Term % |
| 50                                           | 25-29     | Never Any     | 0     | .     |               |             |               |                |              |
| 50                                           | 25-29     | CC            | 0     | .     | 0             | .           |               |                |              |
| 50                                           | 25-29     | Ecig          | 0     | .     |               |             |               |                |              |
| 50                                           | 25-29     | Dual          | 0     | .     |               |             |               |                |              |
| 50                                           | 25-29     | Former        | 0     | .     |               |             | .             | 0              | .            |
| Year of Follow-up: 2040, Age Group: 30-34    |           |               |       |       |               |             |               |                |              |
| Period                                       | Age Group | Smoking Group | N     | %     | Ever Quit (N) | Ever Quit % | Mean Yrs Quit | Short Term (n) | Short Term % |
| 50                                           | 30-34     | Never Any     | 0     | .     |               |             |               |                |              |
| 50                                           | 30-34     | CC            | 0     | .     | 0             | .           |               |                |              |
| 50                                           | 30-34     | Ecig          | 0     | .     |               |             |               |                |              |
| 50                                           | 30-34     | Dual          | 0     | .     |               |             |               |                |              |
| 50                                           | 30-34     | Former        | 0     | .     |               |             | .             | 0              | .            |
| Year of Follow-up: 2040, Age Group: 35-39    |           |               |       |       |               |             |               |                |              |

**Results for PHIM for Run 6 (Sensitivity\_Analysis\_4.RTF)**

| Period                                    | Age Group | Smoking Group | N    | %     | Ever Quit (N) | Ever Quit % | Mean Yrs Quit | Short Term (n) | Short Term % |
|-------------------------------------------|-----------|---------------|------|-------|---------------|-------------|---------------|----------------|--------------|
| 50                                        | 35-39     | Never Any     | 0    | .     |               |             |               |                |              |
| 50                                        | 35-39     | CC            | 0    | .     | 0             | .           |               |                |              |
| 50                                        | 35-39     | Ecig          | 0    | .     |               |             |               |                |              |
| 50                                        | 35-39     | Dual          | 0    | .     |               |             |               |                |              |
| 50                                        | 35-39     | Former        | 0    | .     |               |             | .             | 0              | .            |
| Year of Follow-up: 2040, Age Group: 40-44 |           |               |      |       |               |             |               |                |              |
| Period                                    | Age Group | Smoking Group | N    | %     | Ever Quit (N) | Ever Quit % | Mean Yrs Quit | Short Term (n) | Short Term % |
| 50                                        | 40-44     | Never Any     | 0    | .     |               |             |               |                |              |
| 50                                        | 40-44     | CC            | 0    | .     | 0             | .           |               |                |              |
| 50                                        | 40-44     | Ecig          | 0    | .     |               |             |               |                |              |
| 50                                        | 40-44     | Dual          | 0    | .     |               |             |               |                |              |
| 50                                        | 40-44     | Former        | 0    | .     |               |             | .             | 0              | .            |
| Year of Follow-up: 2040, Age Group: 45-49 |           |               |      |       |               |             |               |                |              |
| Period                                    | Age Group | Smoking Group | N    | %     | Ever Quit (N) | Ever Quit % | Mean Yrs Quit | Short Term (n) | Short Term % |
| 50                                        | 45-49     | Never Any     | 0    | .     |               |             |               |                |              |
| 50                                        | 45-49     | CC            | 0    | .     | 0             | .           |               |                |              |
| 50                                        | 45-49     | Ecig          | 0    | .     |               |             |               |                |              |
| 50                                        | 45-49     | Dual          | 0    | .     |               |             |               |                |              |
| 50                                        | 45-49     | Former        | 0    | .     |               |             | .             | 0              | .            |
| Year of Follow-up: 2040, Age Group: 50-54 |           |               |      |       |               |             |               |                |              |
| Period                                    | Age Group | Smoking Group | N    | %     | Ever Quit (N) | Ever Quit % | Mean Yrs Quit | Short Term (n) | Short Term % |
| 50                                        | 50-54     | Never Any     | 0    | .     |               |             |               |                |              |
| 50                                        | 50-54     | CC            | 0    | .     | 0             | .           |               |                |              |
| 50                                        | 50-54     | Ecig          | 0    | .     |               |             |               |                |              |
| 50                                        | 50-54     | Dual          | 0    | .     |               |             |               |                |              |
| 50                                        | 50-54     | Former        | 0    | .     |               |             | .             | 0              | .            |
| Year of Follow-up: 2040, Age Group: 55-59 |           |               |      |       |               |             |               |                |              |
| Period                                    | Age Group | Smoking Group | N    | %     | Ever Quit (N) | Ever Quit % | Mean Yrs Quit | Short Term (n) | Short Term % |
| 50                                        | 55-59     | Never Any     | 0    | .     |               |             |               |                |              |
| 50                                        | 55-59     | CC            | 0    | .     | 0             | .           |               |                |              |
| 50                                        | 55-59     | Ecig          | 0    | .     |               |             |               |                |              |
| 50                                        | 55-59     | Dual          | 0    | .     |               |             |               |                |              |
| 50                                        | 55-59     | Former        | 0    | .     |               |             | .             | 0              | .            |
| Year of Follow-up: 2040, Age Group: 60-64 |           |               |      |       |               |             |               |                |              |
| Period                                    | Age Group | Smoking Group | N    | %     | Ever Quit (N) | Ever Quit % | Mean Yrs Quit | Short Term (n) | Short Term % |
| 50                                        | 60-64     | Never Any     | 4366 | 55.06 |               |             |               |                |              |
| 50                                        | 60-64     | CC            | 0    | 0.00  | 0             | 0.00        |               |                |              |
| 50                                        | 60-64     | Ecig          | 673  | 8.49  |               |             |               |                |              |
| 50                                        | 60-64     | Dual          | 0    | 0.00  |               |             |               |                |              |
| 50                                        | 60-64     | Former        | 2891 | 36.46 |               |             | 27.71         | 86             | 2.97         |
| Year of Follow-up: 2040, Age Group: 65-69 |           |               |      |       |               |             |               |                |              |
| Period                                    | Age Group | Smoking Group | N    | %     | Ever Quit (N) | Ever Quit % | Mean Yrs Quit | Short Term (n) | Short Term % |
| 50                                        | 65-69     | Never Any     | 5168 | 61.89 |               |             |               |                |              |
| 50                                        | 65-69     | CC            | 0    | 0.00  | 0             | 0.00        |               |                |              |
| 50                                        | 65-69     | Ecig          | 621  | 7.44  |               |             |               |                |              |
| 50                                        | 65-69     | Dual          | 0    | 0.00  |               |             |               |                |              |
| 50                                        | 65-69     | Former        | 2561 | 30.67 |               |             | 28.47         | 37             | 1.44         |
| Year of Follow-up: 2040, Age Group: 70-74 |           |               |      |       |               |             |               |                |              |
| Period                                    | Age Group | Smoking Group | N    | %     | Ever Quit (N) | Ever Quit % | Mean Yrs Quit | Short Term (n) | Short Term % |
| 50                                        | 70-74     | Never Any     | 5162 | 58.71 |               |             |               |                |              |
| 50                                        | 70-74     | CC            | 3    | 0.03  | 0             | 0.00        |               |                |              |
| 50                                        | 70-74     | Ecig          | 593  | 6.74  |               |             |               |                |              |
| 50                                        | 70-74     | Dual          | 0    | 0.00  |               |             |               |                |              |
| 50                                        | 70-74     | Former        | 3035 | 34.52 |               |             | 32.40         | 56             | 1.85         |
| Year of Follow-up: 2040, Age Group: 75-79 |           |               |      |       |               |             |               |                |              |
| Period                                    | Age Group | Smoking Group | N    | %     | Ever Quit (N) | Ever Quit % | Mean Yrs Quit | Short Term (n) | Short Term % |
| 50                                        | 75-79     | Never Any     | 5277 | 52.36 |               |             |               |                |              |
| 50                                        | 75-79     | CC            | 1    | 0.01  | 0             | 0.00        |               |                |              |
| 50                                        | 75-79     | Ecig          | 726  | 7.20  |               |             |               |                |              |
| 50                                        | 75-79     | Dual          | 0    | 0.00  |               |             |               |                |              |
| 50                                        | 75-79     | Former        | 4074 | 40.42 |               |             | 34.60         | 71             | 1.74         |

## Results for PHIM for Run 6 (Sensitivity\_Analysis\_4.RTF)

\*\*\*\*\*

### Main Results for E-Component for Run: 6, Simulation: 1, COD: Four Diseases Combined

| Variable Parameter          | Value                                  |
|-----------------------------|----------------------------------------|
| 1. Country                  | US (United States)                     |
| 2. Sex                      | F (Females)                            |
| 3. Year of start of process | 1990                                   |
| 4. Cause of Death           | Four Diseases Combined                 |
| 5. Effective Dose NULL      | CC:1                                   |
| 6. Effective Dose Ecig      | CC:1 Ecig:0.05 Dual:0.525              |
| Note:                       | Death rates are per million population |

#### Results for Age Groups Combined and Years combined, Population unadjusted for deaths in Ecig scenario,

| Age Group:All |         | NULL        | Ecig        | %Drop    |        |        | NULL    | Ecig    | Drop    |         |
|---------------|---------|-------------|-------------|----------|--------|--------|---------|---------|---------|---------|
| Year          | Number  | Attrib      | Attrib      | Drop     | %Drop  | Attrib | Death   | Attrib  | Attrib  | Drop    |
|               | Deaths  | Deaths      | Deaths      | Deaths   | Deaths | Deaths | Rate    | Rates   | Rates   | Rates   |
| All Comb      | 9082078 | 2946250.006 | 1946931.895 | 999318.1 | 11.003 | 33.918 | 2493.45 | 808.881 | 534.522 | 274.359 |

#### Results for Age Groups Combined, Population unadjusted for deaths in Ecig scenario,

| Age Group:All |        | NULL      | Ecig      | %Drop    |        |        | NULL    | Ecig    | Drop    |         |
|---------------|--------|-----------|-----------|----------|--------|--------|---------|---------|---------|---------|
| Year          | Number | Attrib    | Attrib    | Drop     | %Drop  | Attrib | Death   | Attrib  | Attrib  | Drop    |
|               | Deaths | Deaths    | Deaths    | Deaths   | Deaths | Deaths | Rate    | Rates   | Rates   | Rates   |
| 1990          | 199848 | 57524.822 | 57524.822 | 0.000    | 0.000  | 0.000  | 2926.84 | 842.471 | 842.471 | 0.000   |
| 1991          | 199162 | 59078.486 | 58910.022 | 168.464  | 0.085  | 0.285  | 2877.87 | 853.678 | 851.244 | 2.434   |
| 1992          | 198532 | 60494.150 | 60022.455 | 471.694  | 0.238  | 0.780  | 2829.84 | 862.271 | 855.548 | 6.723   |
| 1993          | 202512 | 62694.848 | 61776.741 | 918.107  | 0.453  | 1.464  | 2845.85 | 881.034 | 868.132 | 12.902  |
| 1994          | 200658 | 63202.598 | 61751.787 | 1450.810 | 0.723  | 2.295  | 2777.87 | 874.966 | 854.881 | 20.085  |
| 1995          | 201023 | 63766.862 | 61670.721 | 2096.141 | 1.043  | 3.287  | 2739.80 | 869.097 | 840.528 | 28.569  |
| 1996          | 201180 | 64591.163 | 61718.479 | 2872.684 | 1.428  | 4.447  | 2706.36 | 868.908 | 830.263 | 38.645  |
| 1997          | 198639 | 64686.912 | 61088.652 | 3598.260 | 1.811  | 5.563  | 2635.18 | 858.147 | 810.412 | 47.735  |
| 1998          | 197573 | 65295.961 | 60857.358 | 4438.603 | 2.247  | 6.798  | 2584.18 | 854.046 | 795.991 | 58.055  |
| 1999          | 211329 | 67327.521 | 61593.232 | 5734.290 | 2.713  | 8.517  | 2726.91 | 868.771 | 794.777 | 73.993  |
| 2000          | 208496 | 67596.897 | 60917.317 | 6679.580 | 3.204  | 9.881  | 2656.96 | 861.419 | 776.298 | 85.121  |
| 2001          | 203606 | 67008.811 | 59328.811 | 7680.000 | 3.772  | 11.461 | 2565.88 | 844.458 | 747.673 | 96.785  |
| 2002          | 200828 | 67067.744 | 58273.098 | 8794.645 | 4.379  | 13.113 | 2506.09 | 836.925 | 727.178 | 109.747 |
| 2003          | 196352 | 66756.217 | 56954.451 | 9801.766 | 4.992  | 14.683 | 2427.31 | 825.244 | 704.074 | 121.170 |
| 2004          | 188160 | 65058.725 | 54405.415 | 10653.31 | 5.662  | 16.375 | 2302.83 | 796.234 | 665.852 | 130.383 |
| 2005          | 186416 | 65214.724 | 53413.678 | 11801.05 | 6.330  | 18.096 | 2256.27 | 789.321 | 646.488 | 142.833 |
| 2006          | 180088 | 63771.146 | 51099.373 | 12671.77 | 7.036  | 19.871 | 2160.67 | 765.117 | 613.083 | 152.034 |
| 2007          | 175644 | 63110.718 | 49545.210 | 13565.51 | 7.723  | 21.495 | 2086.36 | 749.650 | 588.515 | 161.136 |
| 2008          | 177570 | 63718.624 | 48860.961 | 14857.66 | 8.367  | 23.318 | 2086.39 | 748.674 | 574.101 | 174.573 |
| 2009          | 172806 | 62794.698 | 47104.247 | 15690.45 | 9.080  | 24.987 | 2007.57 | 729.515 | 547.232 | 182.283 |
| 2010          | 170489 | 61917.074 | 45351.658 | 16565.42 | 9.716  | 26.754 | 1957.97 | 711.083 | 520.838 | 190.244 |
| 2011          | 170305 | 61680.114 | 43941.367 | 17738.75 | 10.416 | 28.759 | 1937.46 | 701.700 | 499.896 | 201.804 |
| 2012          | 171421 | 62023.127 | 42983.169 | 19039.96 | 11.107 | 30.698 | 1930.22 | 698.386 | 483.994 | 214.392 |
| 2013          | 172699 | 62037.765 | 41826.717 | 20211.05 | 11.703 | 32.579 | 1923.75 | 691.059 | 465.921 | 225.137 |
| 2014          | 174169 | 61921.017 | 40425.142 | 21495.88 | 12.342 | 34.715 | 1918.85 | 682.195 | 445.371 | 236.824 |
| 2015          | 177354 | 61856.204 | 39265.758 | 22590.45 | 12.737 | 36.521 | 2184.51 | 761.899 | 483.646 | 278.252 |
| 2016          | 176853 | 60464.119 | 36996.408 | 23467.71 | 13.270 | 38.813 | 2157.59 | 737.655 | 451.352 | 286.303 |
| 2017          | 179309 | 60243.839 | 35596.031 | 24647.81 | 13.746 | 40.913 | 2166.86 | 728.017 | 430.160 | 297.856 |
| 2018          | 177157 | 60713.327 | 34999.254 | 25714.07 | 14.515 | 42.353 | 2120.51 | 726.721 | 418.931 | 307.790 |
| 2019          | 179227 | 61148.172 | 34066.183 | 27081.99 | 15.110 | 44.289 | 2124.53 | 724.841 | 403.815 | 321.026 |
| 2020          | 180467 | 61149.317 | 33116.207 | 28033.11 | 15.534 | 45.844 | 2424.25 | 821.432 | 444.857 | 376.575 |
| 2021          | 178116 | 58727.786 | 30297.990 | 28429.80 | 15.961 | 48.409 | 2375.42 | 783.216 | 404.065 | 379.150 |
| 2022          | 179408 | 58848.802 | 29264.969 | 29583.83 | 16.490 | 50.271 | 2374.52 | 778.881 | 387.330 | 391.550 |
| 2023          | 180640 | 58816.149 | 28222.704 | 30593.45 | 16.936 | 52.015 | 2372.26 | 772.407 | 370.636 | 401.770 |
| 2024          | 181610 | 58955.232 | 27189.698 | 31765.53 | 17.491 | 53.881 | 2366.77 | 768.316 | 354.341 | 413.975 |
| 2025          | 180418 | 58297.744 | 26034.011 | 32263.73 | 17.883 | 55.343 | 2713.69 | 876.861 | 391.580 | 485.281 |
| 2026          | 180313 | 56469.971 | 23997.450 | 32472.52 | 18.009 | 57.504 | 2701.83 | 846.150 | 359.579 | 486.570 |
| 2027          | 179619 | 56209.427 | 22854.435 | 33354.99 | 18.570 | 59.341 | 2680.68 | 838.883 | 341.085 | 497.798 |
| 2028          | 178762 | 55733.105 | 21658.571 | 34074.53 | 19.061 | 61.139 | 2656.74 | 828.298 | 321.887 | 506.411 |
| 2029          | 177808 | 55145.838 | 20447.039 | 34698.80 | 19.515 | 62.922 | 2630.89 | 815.951 | 302.539 | 513.412 |
| 2030          | 173587 | 53615.097 | 19198.251 | 34416.85 | 19.827 | 64.192 | 3040.33 | 939.056 | 336.253 | 602.803 |
| 2031          | 174985 | 52046.561 | 17978.089 | 34068.47 | 19.469 | 65.458 | 3060.73 | 910.364 | 314.461 | 595.903 |
| 2032          | 173400 | 51582.636 | 16994.231 | 34588.41 | 19.947 | 67.054 | 3027.10 | 900.496 | 296.674 | 603.822 |
| 2033          | 171756 | 50839.758 | 15998.929 | 34840.83 | 20.285 | 68.531 | 2991.14 | 885.375 | 278.621 | 606.753 |
| 2034          | 169973 | 50215.451 | 15033.611 | 35181.84 | 20.699 | 70.062 | 2951.96 | 872.104 | 261.092 | 611.011 |
| 2035          | 162644 | 47773.075 | 13907.214 | 33865.86 | 20.822 | 70.889 | 3459.14 | 1016.05 | 295.781 | 720.265 |
| 2036          | 156254 | 43298.709 | 11927.492 | 31371.22 | 20.077 | 72.453 | 3328.25 | 922.274 | 254.059 | 668.215 |
| 2037          | 153593 | 42241.563 | 10973.433 | 31268.13 | 20.358 | 74.022 | 3274.10 | 900.450 | 233.917 | 666.533 |
| 2038          | 150947 | 41356.353 | 10211.224 | 31145.13 | 20.633 | 75.309 | 3217.50 | 881.531 | 217.657 | 663.874 |
| 2039          | 148373 | 40161.050 | 9357.828  | 30803.22 | 20.761 | 76.699 | 3159.42 | 855.178 | 199.263 | 655.915 |

## Results for PHIM for Run 6 (Sensitivity\_Analysis\_4.RTF)

\*\*\*\*\*

### Main Results for E-Component for Run: 6, Simulation: 1, COD: LUNG CANCER

| Variable Parameter          | Value                                  |
|-----------------------------|----------------------------------------|
| 1. Country                  | US (United States)                     |
| 2. Sex                      | F (Females)                            |
| 3. Year of start of process | 1990                                   |
| 4. Cause of Death           | LUNG CANCER                            |
| 5. Effective Dose NULL      | CC:1                                   |
| 6. Effective Dose Ecig      | CC:1 Ecig:0.05 Dual:0.525              |
| Note:                       | Death rates are per million population |

#### Results for Age Groups Combined and Years combined, Population unadjusted for deaths in Ecig scenario,

| Age Group:All |         | NULL        | Ecig        | %Drop    |        |        | NULL    | Ecig    | Drop    |         |
|---------------|---------|-------------|-------------|----------|--------|--------|---------|---------|---------|---------|
| Year          | Number  | Attrib      | Attrib      | Drop     | %Drop  | Attrib | Death   | Attrib  | Drop    |         |
|               | Deaths  | Deaths      | Deaths      | Deaths   | Deaths | Deaths | Rate    | Rates   | Rates   |         |
| All Comb      | 2327764 | 1580465.217 | 1143948.704 | 436516.5 | 18.753 | 27.619 | 639.078 | 433.910 | 314.067 | 119.844 |

#### Results for Age Groups Combined, Population unadjusted for deaths in Ecig scenario,

| Age Group:All |        | NULL      | Ecig      | %Drop    |        |        | NULL    | Ecig    | Drop    |
|---------------|--------|-----------|-----------|----------|--------|--------|---------|---------|---------|
| Year          | Number | Attrib    | Attrib    | Drop     | %Drop  | Attrib | Death   | Attrib  | Drop    |
|               | Deaths | Deaths    | Deaths    | Deaths   | Deaths | Deaths | Rate    | Rates   | Rates   |
| 1990          | 42690  | 30614.201 | 30614.201 | 0.000    | 0.000  | 0.000  | 625.210 | 448.355 | 0.000   |
| 1991          | 43692  | 31412.010 | 31379.684 | 32.326   | 0.074  | 0.103  | 631.345 | 453.901 | 0.467   |
| 1992          | 45423  | 32782.407 | 32688.427 | 93.980   | 0.207  | 0.287  | 647.450 | 467.274 | 1.340   |
| 1993          | 46291  | 33491.183 | 33305.336 | 185.847  | 0.401  | 0.555  | 650.515 | 470.643 | 2.612   |
| 1994          | 47017  | 34074.347 | 33772.924 | 301.423  | 0.641  | 0.885  | 650.895 | 471.719 | 4.173   |
| 1995          | 47840  | 34694.454 | 34239.733 | 454.721  | 0.951  | 1.311  | 652.025 | 472.861 | 6.198   |
| 1996          | 48244  | 35027.269 | 34397.690 | 629.579  | 1.305  | 1.797  | 648.999 | 471.202 | 8.469   |
| 1997          | 49035  | 35590.763 | 34752.672 | 838.091  | 1.709  | 2.355  | 650.506 | 472.153 | 11.118  |
| 1998          | 49686  | 36100.785 | 35016.170 | 1084.615 | 2.183  | 3.004  | 649.874 | 472.184 | 14.186  |
| 1999          | 48883  | 35451.030 | 34143.619 | 1307.411 | 2.675  | 3.688  | 630.769 | 457.448 | 16.870  |
| 2000          | 50331  | 36447.986 | 34810.955 | 1637.031 | 3.253  | 4.491  | 641.392 | 464.474 | 20.861  |
| 2001          | 50389  | 36411.326 | 34439.867 | 1971.459 | 3.912  | 5.414  | 635.012 | 458.863 | 24.845  |
| 2002          | 51445  | 37078.545 | 34691.602 | 2386.943 | 4.640  | 6.438  | 641.972 | 462.696 | 29.786  |
| 2003          | 51408  | 36999.876 | 34215.995 | 2783.881 | 5.415  | 7.524  | 635.509 | 457.395 | 34.414  |
| 2004          | 51399  | 36861.555 | 33637.414 | 3224.141 | 6.273  | 8.747  | 629.057 | 451.138 | 39.459  |
| 2005          | 51421  | 36689.529 | 32999.559 | 3689.969 | 7.176  | 10.057 | 622.370 | 444.069 | 44.661  |
| 2006          | 51355  | 36504.774 | 32325.325 | 4179.449 | 8.138  | 11.449 | 616.150 | 437.979 | 50.144  |
| 2007          | 51839  | 36663.202 | 31901.115 | 4762.087 | 9.186  | 12.989 | 615.761 | 435.498 | 56.566  |
| 2008          | 50976  | 35898.803 | 30698.490 | 5200.313 | 10.201 | 14.486 | 598.952 | 421.800 | 61.102  |
| 2009          | 51193  | 35934.525 | 30108.692 | 5825.833 | 11.380 | 16.212 | 594.733 | 417.468 | 67.681  |
| 2010          | 50853  | 35502.829 | 29163.962 | 6338.867 | 12.465 | 17.855 | 584.018 | 407.730 | 72.798  |
| 2011          | 50509  | 35136.342 | 28200.718 | 6935.624 | 13.731 | 19.739 | 574.613 | 399.726 | 78.903  |
| 2012          | 51245  | 35450.201 | 27772.391 | 7677.810 | 14.983 | 21.658 | 577.023 | 399.173 | 86.453  |
| 2013          | 51069  | 35123.224 | 26794.620 | 8328.603 | 16.309 | 23.713 | 568.874 | 391.249 | 92.775  |
| 2014          | 51251  | 35079.370 | 26053.961 | 9025.409 | 17.610 | 25.729 | 564.641 | 386.476 | 99.435  |
| 2015          | 50443  | 34324.171 | 24843.621 | 9480.549 | 18.795 | 27.621 | 621.319 | 422.780 | 116.774 |
| 2016          | 48854  | 33054.753 | 23178.032 | 9876.721 | 20.217 | 29.880 | 596.013 | 403.264 | 120.495 |
| 2017          | 48325  | 32471.234 | 22023.478 | 10447.76 | 21.620 | 32.175 | 583.983 | 392.399 | 126.256 |
| 2018          | 50465  | 33657.595 | 21988.995 | 11668.60 | 23.122 | 34.669 | 604.052 | 402.871 | 139.670 |
| 2019          | 51036  | 33863.424 | 21327.635 | 12535.79 | 24.563 | 37.019 | 604.975 | 401.412 | 148.597 |
| 2020          | 51444  | 33910.830 | 20652.941 | 13257.89 | 25.772 | 39.096 | 691.053 | 455.532 | 178.096 |
| 2021          | 48037  | 31531.880 | 18427.373 | 13104.51 | 27.280 | 41.560 | 640.639 | 420.521 | 174.767 |
| 2022          | 48335  | 31560.212 | 17700.330 | 13859.88 | 28.675 | 43.916 | 639.727 | 417.708 | 183.439 |
| 2023          | 48599  | 31508.781 | 16964.116 | 14544.67 | 29.928 | 46.161 | 638.227 | 413.791 | 191.009 |
| 2024          | 48784  | 31517.293 | 16225.951 | 15291.34 | 31.345 | 48.517 | 635.757 | 410.740 | 199.280 |
| 2025          | 48477  | 31175.389 | 15423.223 | 15752.17 | 32.494 | 50.528 | 729.141 | 468.912 | 236.930 |
| 2026          | 45324  | 29044.598 | 13726.936 | 15317.66 | 33.796 | 52.738 | 679.138 | 435.206 | 229.521 |
| 2027          | 45107  | 28825.765 | 12966.924 | 15858.84 | 35.158 | 55.016 | 673.191 | 430.203 | 236.681 |
| 2028          | 44842  | 28513.846 | 12192.253 | 16321.59 | 36.398 | 57.241 | 666.430 | 423.769 | 242.569 |
| 2029          | 44539  | 28148.109 | 11413.390 | 16734.72 | 37.573 | 59.452 | 659.013 | 416.486 | 247.611 |
| 2030          | 43393  | 27314.475 | 10612.836 | 16701.64 | 38.489 | 61.146 | 760.018 | 478.407 | 292.525 |
| 2031          | 40748  | 25423.102 | 9533.554  | 15889.55 | 38.995 | 62.500 | 712.731 | 444.684 | 277.929 |
| 2032          | 40325  | 25085.902 | 8920.680  | 16165.22 | 40.087 | 64.439 | 703.969 | 437.933 | 282.202 |
| 2033          | 39882  | 24645.067 | 8322.403  | 16322.66 | 40.927 | 66.231 | 694.543 | 429.194 | 284.259 |
| 2034          | 39404  | 24239.126 | 7747.374  | 16491.75 | 41.852 | 68.038 | 684.347 | 420.967 | 286.416 |
| 2035          | 37454  | 22944.147 | 7069.582  | 15874.57 | 42.384 | 69.188 | 796.588 | 487.980 | 337.623 |
| 2036          | 32988  | 19950.581 | 5825.736  | 14124.84 | 42.818 | 70.799 | 702.663 | 424.953 | 300.863 |
| 2037          | 32403  | 19415.334 | 5321.426  | 14093.91 | 43.495 | 72.592 | 690.731 | 413.871 | 300.436 |
| 2038          | 31820  | 18939.317 | 4924.155  | 14015.16 | 44.045 | 74.000 | 678.257 | 403.701 | 298.740 |
| 2039          | 31251  | 18379.752 | 4490.635  | 13889.12 | 44.443 | 75.567 | 665.457 | 391.373 | 295.751 |

## Results for PHIM for Run 6 (Sensitivity\_Analysis\_4.RTF)

\*\*\*\*\*

### Main Results for E-Component for Run: 6, Simulation: 1, COD: IHD

| Variable Parameter          | Value                                  |
|-----------------------------|----------------------------------------|
| 1. Country                  | US (United States)                     |
| 2. Sex                      | F (Females)                            |
| 3. Year of start of process | 1990                                   |
| 4. Cause of Death           | IHD                                    |
| 5. Effective Dose NULL      | CC:1                                   |
| 6. Effective Dose Ecig      | CC:1 Ecig:0.05 Dual:0.525              |
| Note:                       | Death rates are per million population |

#### Results for Age Groups Combined and Years combined, Population unadjusted for deaths in Ecig scenario,

| Age Group:All |         | NULL       | Ecig       | %Drop    |        | NULL   | Ecig    | Drop    |        |        |
|---------------|---------|------------|------------|----------|--------|--------|---------|---------|--------|--------|
| Year          | Number  | Attrib     | Attrib     | Drop     | %Drop  | Attrib | Death   | Attrib  | Attrib | Drop   |
|               | Deaths  | Deaths     | Deaths     | Deaths   | Deaths | Deaths | Rate    | Rates   | Rates  | Rates  |
| All Comb      | 3242167 | 398833.796 | 199671.516 | 199162.3 | 6.143  | 49.936 | 890.124 | 109.498 | 54.819 | 54.679 |

#### Results for Age Groups Combined, Population unadjusted for deaths in Ecig scenario,

| Age Group:All |        | NULL      | Ecig      | %Drop    |        | NULL   | Ecig    | Drop    |         |        |
|---------------|--------|-----------|-----------|----------|--------|--------|---------|---------|---------|--------|
| Year          | Number | Attrib    | Attrib    | Drop     | %Drop  | Attrib | Death   | Attrib  | Attrib  | Drop   |
|               | Deaths | Deaths    | Deaths    | Deaths   | Deaths | Deaths | Rate    | Rates   | Rates   | Rates  |
| 1990          | 98916  | 12922.892 | 12922.892 | 0.000    | 0.000  | 0.000  | 1448.66 | 189.260 | 189.260 | 0.000  |
| 1991          | 96403  | 12856.479 | 12766.075 | 90.404   | 0.094  | 0.703  | 1393.01 | 185.775 | 184.469 | 1.306  |
| 1992          | 93721  | 12662.244 | 12411.646 | 250.597  | 0.267  | 1.979  | 1335.88 | 180.485 | 176.913 | 3.572  |
| 1993          | 93679  | 12730.613 | 12252.270 | 478.342  | 0.511  | 3.757  | 1316.45 | 178.900 | 172.178 | 6.722  |
| 1994          | 90832  | 12495.323 | 11750.261 | 745.062  | 0.820  | 5.963  | 1257.46 | 172.983 | 162.669 | 10.315 |
| 1995          | 89698  | 12365.590 | 11312.563 | 1053.027 | 1.174  | 8.516  | 1222.52 | 168.534 | 154.182 | 14.352 |
| 1996          | 88286  | 12290.551 | 10854.606 | 1435.946 | 1.626  | 11.683 | 1187.66 | 165.338 | 146.021 | 19.317 |
| 1997          | 84777  | 11719.531 | 9989.899  | 1729.632 | 2.040  | 14.759 | 1124.67 | 155.473 | 132.528 | 22.946 |
| 1998          | 82517  | 11416.794 | 9346.062  | 2070.732 | 2.509  | 18.138 | 1079.29 | 149.327 | 122.243 | 27.084 |
| 1999          | 93939  | 13028.038 | 10177.149 | 2850.889 | 3.035  | 21.883 | 1212.16 | 168.109 | 131.322 | 36.787 |
| 2000          | 90039  | 12426.299 | 9243.183  | 3183.116 | 3.535  | 25.616 | 1147.41 | 158.354 | 117.790 | 40.564 |
| 2001          | 86119  | 11939.281 | 8351.548  | 3587.734 | 4.166  | 30.050 | 1085.29 | 150.461 | 105.248 | 45.213 |
| 2002          | 83014  | 11528.794 | 7547.535  | 3981.259 | 4.796  | 34.533 | 1035.91 | 143.865 | 94.184  | 49.681 |
| 2003          | 79302  | 11048.407 | 6769.574  | 4278.833 | 5.396  | 38.728 | 980.336 | 136.581 | 83.686  | 52.895 |
| 2004          | 73861  | 10375.132 | 5895.450  | 4479.681 | 6.065  | 43.177 | 903.963 | 126.978 | 72.153  | 54.825 |
| 2005          | 71649  | 10051.029 | 5297.979  | 4753.051 | 6.634  | 47.289 | 867.197 | 121.652 | 64.124  | 57.528 |
| 2006          | 67551  | 9542.523  | 4614.725  | 4927.798 | 7.295  | 51.640 | 810.467 | 114.490 | 55.367  | 59.123 |
| 2007          | 63503  | 8936.533  | 3973.318  | 4963.216 | 7.816  | 55.538 | 754.310 | 106.151 | 47.196  | 58.955 |
| 2008          | 63171  | 8944.180  | 3647.478  | 5296.702 | 8.385  | 59.220 | 742.239 | 105.091 | 42.857  | 62.235 |
| 2009          | 59747  | 8390.033  | 3158.583  | 5231.450 | 8.756  | 62.353 | 694.108 | 97.471  | 36.695  | 60.776 |
| 2010          | 58008  | 8157.570  | 2819.248  | 5338.322 | 9.203  | 65.440 | 666.189 | 93.685  | 32.377  | 61.308 |
| 2011          | 57368  | 8035.356  | 2528.553  | 5506.803 | 9.599  | 68.532 | 652.644 | 91.414  | 28.766  | 62.648 |
| 2012          | 57411  | 7970.766  | 2273.944  | 5696.821 | 9.923  | 71.471 | 646.453 | 89.752  | 25.605  | 64.147 |
| 2013          | 57067  | 7743.216  | 2030.467  | 5712.749 | 10.011 | 73.777 | 635.688 | 86.254  | 22.618  | 63.636 |
| 2014          | 57538  | 7774.935  | 1853.409  | 5921.526 | 10.292 | 76.162 | 633.906 | 85.658  | 20.419  | 65.239 |
| 2015          | 58395  | 7722.535  | 1708.733  | 6013.802 | 10.298 | 77.873 | 719.266 | 95.120  | 21.047  | 74.074 |
| 2016          | 58658  | 7600.353  | 1530.545  | 6069.808 | 10.348 | 79.862 | 715.621 | 92.723  | 18.672  | 74.051 |
| 2017          | 59004  | 7470.266  | 1377.680  | 6092.586 | 10.326 | 81.558 | 713.034 | 90.274  | 16.649  | 73.626 |
| 2018          | 56077  | 6907.050  | 1166.396  | 5740.654 | 10.237 | 83.113 | 671.224 | 82.675  | 13.961  | 68.714 |
| 2019          | 55886  | 6732.046  | 1048.618  | 5683.428 | 10.170 | 84.423 | 662.462 | 79.801  | 12.430  | 67.370 |
| 2020          | 55313  | 6429.836  | 936.157   | 5493.679 | 9.932  | 85.440 | 743.037 | 86.373  | 12.576  | 73.798 |
| 2021          | 56292  | 6562.016  | 864.867   | 5697.148 | 10.121 | 86.820 | 750.730 | 87.513  | 11.534  | 75.979 |
| 2022          | 55827  | 6352.366  | 778.075   | 5574.290 | 9.985  | 87.751 | 738.885 | 84.075  | 10.298  | 73.777 |
| 2023          | 55338  | 6134.123  | 705.288   | 5428.836 | 9.810  | 88.502 | 726.728 | 80.557  | 9.262   | 71.295 |
| 2024          | 54770  | 5922.193  | 637.619   | 5284.573 | 9.649  | 89.233 | 713.771 | 77.179  | 8.310   | 68.870 |
| 2025          | 53295  | 5504.188  | 564.193   | 4939.995 | 9.269  | 89.750 | 801.612 | 82.789  | 8.486   | 74.303 |
| 2026          | 55278  | 5641.075  | 543.445   | 5097.630 | 9.222  | 90.366 | 828.283 | 84.526  | 8.143   | 76.383 |
| 2027          | 54199  | 5426.216  | 497.024   | 4929.192 | 9.095  | 90.840 | 808.875 | 80.982  | 7.418   | 73.564 |
| 2028          | 53090  | 5197.830  | 452.967   | 4744.863 | 8.937  | 91.285 | 789.020 | 77.249  | 6.732   | 70.518 |
| 2029          | 51974  | 4973.547  | 414.995   | 4558.552 | 8.771  | 91.656 | 769.023 | 73.590  | 6.140   | 67.449 |
| 2030          | 49479  | 4450.618  | 356.949   | 4093.669 | 8.274  | 91.980 | 866.605 | 77.952  | 6.252   | 71.700 |
| 2031          | 51987  | 4555.052  | 354.660   | 4200.392 | 8.080  | 92.214 | 909.317 | 79.674  | 6.203   | 73.470 |
| 2032          | 50677  | 4349.999  | 326.992   | 4023.008 | 7.938  | 92.483 | 884.689 | 75.939  | 5.708   | 70.231 |
| 2033          | 49380  | 4147.948  | 305.016   | 3842.932 | 7.782  | 92.647 | 859.955 | 72.237  | 5.312   | 66.925 |
| 2034          | 48076  | 3966.133  | 284.575   | 3681.558 | 7.658  | 92.825 | 834.943 | 68.881  | 4.942   | 63.939 |
| 2035          | 44518  | 3289.064  | 228.102   | 3060.963 | 6.876  | 93.065 | 946.825 | 69.952  | 4.851   | 65.101 |
| 2036          | 46347  | 3313.192  | 223.099   | 3090.093 | 6.667  | 93.266 | 987.211 | 70.572  | 4.752   | 65.820 |
| 2037          | 44841  | 3117.951  | 205.456   | 2912.495 | 6.495  | 93.411 | 955.859 | 66.464  | 4.380   | 62.085 |
| 2038          | 43378  | 2949.775  | 192.214   | 2757.560 | 6.357  | 93.484 | 924.621 | 62.876  | 4.097   | 58.779 |
| 2039          | 41973  | 2766.312  | 179.431   | 2586.881 | 6.163  | 93.514 | 893.753 | 58.905  | 3.821   | 55.084 |



## Results for PHIM for Run 6 (Sensitivity\_Analysis\_4.RTF)

\*\*\*\*\*

### Main Results for E-Component for Run: 6, Simulation: 1, COD: STROKE

| Variable Parameter          | Value                                  |
|-----------------------------|----------------------------------------|
| 1. Country                  | US (United States)                     |
| 2. Sex                      | F (Females)                            |
| 3. Year of start of process | 1990                                   |
| 4. Cause of Death           | STROKE                                 |
| 5. Effective Dose NULL      | CC:1                                   |
| 6. Effective Dose Ecig      | CC:1 Ecig:0.05 Dual:0.525              |
| Note:                       | Death rates are per million population |

#### Results for Age Groups Combined and Years combined, Population unadjusted for deaths in Ecig scenario,

| Age Group:All | NULL    | Ecig       | %Drop     |          |        |        | NULL    | Ecig   | Drop   |        |
|---------------|---------|------------|-----------|----------|--------|--------|---------|--------|--------|--------|
| Year          | Number  | Attrib     | Attrib    | Drop     | %Drop  | Attrib | Death   | Attrib | Attrib | Drop   |
|               | Deaths  | Deaths     | Deaths    | Deaths   | Deaths | Deaths | Rate    | Rates  | Rates  | Rates  |
| All Comb      | 1352207 | 104899.750 | 51442.140 | 53457.61 | 3.953  | 50.961 | 371.243 | 28.800 | 14.123 | 14.677 |

#### Results for Age Groups Combined, Population unadjusted for deaths in Ecig scenario,

| Age Group:All | NULL   | Ecig     | %Drop    |          |        |        | NULL    | Ecig   | Drop   |        |
|---------------|--------|----------|----------|----------|--------|--------|---------|--------|--------|--------|
| Year          | Number | Attrib   | Attrib   | Drop     | %Drop  | Attrib | Death   | Attrib | Attrib | Drop   |
|               | Deaths | Deaths   | Deaths   | Deaths   | Deaths | Deaths | Rate    | Rates  | Rates  | Rates  |
| 1990          | 33504  | 3293.017 | 3293.017 | 0.000    | 0.000  | 0.000  | 490.678 | 48.227 | 48.227 | 0.000  |
| 1991          | 32505  | 3207.063 | 3179.556 | 27.507   | 0.085  | 0.858  | 469.694 | 46.342 | 45.944 | 0.397  |
| 1992          | 32560  | 3218.125 | 3141.225 | 76.899   | 0.236  | 2.390  | 464.104 | 45.871 | 44.774 | 1.096  |
| 1993          | 32768  | 3226.680 | 3081.072 | 145.609  | 0.444  | 4.513  | 460.480 | 45.344 | 43.297 | 2.046  |
| 1994          | 33005  | 3277.266 | 3045.068 | 232.198  | 0.704  | 7.085  | 456.915 | 45.370 | 42.155 | 3.215  |
| 1995          | 33730  | 3309.378 | 2976.640 | 332.738  | 0.986  | 10.054 | 459.716 | 45.104 | 40.570 | 4.535  |
| 1996          | 33750  | 3312.987 | 2863.118 | 449.869  | 1.333  | 13.579 | 454.019 | 44.568 | 38.516 | 6.052  |
| 1997          | 33699  | 3267.066 | 2703.739 | 563.327  | 1.672  | 17.243 | 447.056 | 43.341 | 35.868 | 7.473  |
| 1998          | 33274  | 3178.725 | 2507.144 | 671.581  | 2.018  | 21.127 | 435.211 | 41.577 | 32.792 | 8.784  |
| 1999          | 33891  | 3120.351 | 2338.551 | 781.801  | 2.307  | 25.055 | 437.317 | 40.264 | 30.176 | 10.088 |
| 2000          | 33827  | 3142.808 | 2228.425 | 914.383  | 2.703  | 29.094 | 431.074 | 40.050 | 28.398 | 11.652 |
| 2001          | 32506  | 2961.588 | 1979.759 | 981.829  | 3.020  | 33.152 | 409.647 | 37.323 | 24.949 | 12.373 |
| 2002          | 32078  | 2940.627 | 1836.936 | 1103.692 | 3.441  | 37.533 | 400.295 | 36.695 | 22.923 | 13.773 |
| 2003          | 30568  | 2819.545 | 1644.466 | 1175.078 | 3.844  | 41.676 | 377.883 | 34.855 | 20.329 | 14.526 |
| 2004          | 29388  | 2730.466 | 1479.411 | 1251.055 | 4.257  | 45.818 | 359.671 | 33.417 | 18.106 | 15.311 |
| 2005          | 27954  | 2670.510 | 1342.481 | 1328.029 | 4.751  | 49.729 | 338.339 | 32.322 | 16.249 | 16.074 |
| 2006          | 27201  | 2623.285 | 1221.089 | 1402.196 | 5.155  | 53.452 | 326.354 | 31.474 | 14.650 | 16.823 |
| 2007          | 26302  | 2536.599 | 1089.383 | 1447.216 | 5.502  | 57.053 | 312.424 | 30.131 | 12.940 | 17.191 |
| 2008          | 25998  | 2469.443 | 980.717  | 1488.726 | 5.726  | 60.286 | 305.468 | 29.015 | 11.523 | 17.492 |
| 2009          | 25040  | 2386.945 | 874.088  | 1512.857 | 6.042  | 63.380 | 290.901 | 27.730 | 10.155 | 17.576 |
| 2010          | 24840  | 2329.274 | 786.555  | 1542.720 | 6.211  | 66.232 | 285.273 | 26.750 | 9.033  | 17.717 |
| 2011          | 24792  | 2286.581 | 707.183  | 1579.398 | 6.371  | 69.072 | 282.045 | 26.013 | 8.045  | 17.968 |
| 2012          | 24500  | 2243.311 | 635.149  | 1608.162 | 6.564  | 71.687 | 275.872 | 25.260 | 7.152  | 18.108 |
| 2013          | 24451  | 2176.503 | 564.509  | 1611.994 | 6.593  | 74.063 | 272.368 | 24.245 | 6.288  | 17.957 |
| 2014          | 25296  | 2211.619 | 526.515  | 1685.104 | 6.662  | 76.193 | 278.691 | 24.366 | 5.801  | 18.565 |
| 2015          | 26316  | 2237.016 | 494.380  | 1742.636 | 6.622  | 77.900 | 324.141 | 27.554 | 6.089  | 21.464 |
| 2016          | 26735  | 2229.057 | 454.230  | 1774.827 | 6.639  | 79.622 | 326.164 | 27.194 | 5.542  | 21.653 |
| 2017          | 27616  | 2221.649 | 418.517  | 1803.133 | 6.529  | 81.162 | 333.726 | 26.848 | 5.058  | 21.790 |
| 2018          | 25256  | 1939.420 | 339.669  | 1599.751 | 6.334  | 82.486 | 302.304 | 23.214 | 4.066  | 19.149 |
| 2019          | 25429  | 1904.400 | 307.595  | 1596.805 | 6.279  | 83.848 | 301.434 | 22.574 | 3.646  | 18.928 |
| 2020          | 25379  | 1806.054 | 272.544  | 1533.511 | 6.042  | 84.909 | 340.922 | 24.261 | 3.661  | 20.600 |
| 2021          | 25448  | 1748.172 | 244.425  | 1503.747 | 5.909  | 86.018 | 339.386 | 23.314 | 3.260  | 20.055 |
| 2022          | 25539  | 1701.148 | 221.590  | 1479.557 | 5.793  | 86.974 | 338.015 | 22.515 | 2.933  | 19.582 |
| 2023          | 25620  | 1652.087 | 202.103  | 1449.984 | 5.660  | 87.767 | 336.461 | 21.696 | 2.654  | 19.042 |
| 2024          | 25659  | 1597.127 | 182.878  | 1414.248 | 5.512  | 88.550 | 334.391 | 20.814 | 2.383  | 18.431 |
| 2025          | 25260  | 1467.622 | 159.331  | 1308.292 | 5.179  | 89.144 | 379.931 | 22.075 | 2.397  | 19.678 |
| 2026          | 25480  | 1390.505 | 143.088  | 1247.418 | 4.896  | 89.710 | 381.790 | 20.835 | 2.144  | 18.691 |
| 2027          | 25264  | 1342.095 | 130.753  | 1211.342 | 4.795  | 90.258 | 377.042 | 20.030 | 1.951  | 18.078 |
| 2028          | 25022  | 1289.536 | 119.670  | 1169.865 | 4.675  | 90.720 | 371.870 | 19.165 | 1.779  | 17.386 |
| 2029          | 24767  | 1242.216 | 109.908  | 1132.308 | 4.572  | 91.152 | 366.459 | 18.380 | 1.626  | 16.754 |
| 2030          | 23959  | 1096.803 | 92.587   | 1004.217 | 4.191  | 91.559 | 419.641 | 19.210 | 1.622  | 17.589 |
| 2031          | 23963  | 1019.991 | 83.198   | 936.793  | 3.909  | 91.843 | 419.142 | 17.841 | 1.455  | 16.386 |
| 2032          | 23615  | 977.406  | 76.717   | 900.689  | 3.814  | 92.151 | 412.259 | 17.063 | 1.339  | 15.724 |
| 2033          | 23259  | 937.450  | 71.747   | 865.703  | 3.722  | 92.347 | 405.051 | 16.326 | 1.249  | 15.076 |
| 2034          | 22879  | 900.763  | 67.007   | 833.756  | 3.644  | 92.561 | 397.339 | 15.644 | 1.164  | 14.480 |
| 2035          | 21733  | 745.023  | 53.525   | 691.499  | 3.182  | 92.816 | 462.224 | 15.845 | 1.138  | 14.707 |
| 2036          | 20904  | 680.360  | 47.224   | 633.136  | 3.029  | 93.059 | 445.263 | 14.492 | 1.006  | 13.486 |
| 2037          | 20397  | 644.109  | 43.884   | 600.225  | 2.943  | 93.187 | 434.791 | 13.730 | 0.935  | 12.795 |
| 2038          | 19890  | 612.448  | 41.183   | 571.265  | 2.872  | 93.276 | 423.966 | 13.055 | 0.878  | 12.177 |
| 2039          | 19392  | 577.529  | 38.595   | 538.935  | 2.779  | 93.317 | 412.930 | 12.298 | 0.822  | 11.476 |

## Results for PHIM for Run 6 (Sensitivity\_Analysis\_4.RTF)

\*\*\*\*\*

### Main Results for E-Component for Run: 6, Simulation: 1, COD: COPD

| Variable Parameter          | Value                                  |
|-----------------------------|----------------------------------------|
| 1. Country                  | US (United States)                     |
| 2. Sex                      | F (Females)                            |
| 3. Year of start of process | 1990                                   |
| 4. Cause of Death           | COPD                                   |
| 5. Effective Dose NULL      | CC:1                                   |
| 6. Effective Dose Ecig      | CC:1 Ecig:0.05 Dual:0.525              |
| Note:                       | Death rates are per million population |

#### Results for Age Groups Combined and Years combined, Population unadjusted for deaths in Ecig scenario,

| Age Group:All |         | NULL       | Ecig       | %Drop    |        | NULL   | Ecig    | Drop    |         |        |
|---------------|---------|------------|------------|----------|--------|--------|---------|---------|---------|--------|
| Year          | Number  | Attrib     | Attrib     | Drop     | %Drop  | Attrib | Death   | Attrib  | Attrib  | Drop   |
|               | Deaths  | Deaths     | Deaths     | Deaths   | Deaths | Deaths | Rate    | Rates   | Rates   | Rates  |
| All Comb      | 2159941 | 862051.244 | 551869.536 | 310181.7 | 14.361 | 35.982 | 593.003 | 236.673 | 151.514 | 85.159 |

#### Results for Age Groups Combined, Population unadjusted for deaths in Ecig scenario,

| Age Group:All |        | NULL      | Ecig      | %Drop    |        | NULL   | Ecig    | Drop    |         |         |
|---------------|--------|-----------|-----------|----------|--------|--------|---------|---------|---------|---------|
| Year          | Number | Attrib    | Attrib    | Drop     | %Drop  | Attrib | Death   | Attrib  | Attrib  | Drop    |
|               | Deaths | Deaths    | Deaths    | Deaths   | Deaths | Deaths | Rate    | Rates   | Rates   | Rates   |
| 1990          | 24738  | 10694.712 | 10694.712 | 0.000    | 0.000  | 0.000  | 362.296 | 156.628 | 156.628 | 0.000   |
| 1991          | 26562  | 11602.933 | 11584.706 | 18.227   | 0.069  | 0.157  | 383.818 | 167.661 | 167.398 | 0.263   |
| 1992          | 26828  | 11831.375 | 11781.157 | 50.218   | 0.187  | 0.424  | 382.401 | 168.642 | 167.926 | 0.716   |
| 1993          | 29774  | 13246.371 | 13138.062 | 108.309  | 0.364  | 0.818  | 418.406 | 186.148 | 184.626 | 1.522   |
| 1994          | 29804  | 13355.662 | 13183.534 | 172.127  | 0.578  | 1.289  | 412.601 | 184.893 | 182.511 | 2.383   |
| 1995          | 29755  | 13397.439 | 13141.785 | 255.654  | 0.859  | 1.908  | 405.540 | 182.598 | 179.113 | 3.484   |
| 1996          | 30900  | 13960.356 | 13603.065 | 357.290  | 1.156  | 2.559  | 415.680 | 187.801 | 182.994 | 4.806   |
| 1997          | 31128  | 14109.552 | 13642.342 | 467.210  | 1.501  | 3.311  | 412.949 | 187.180 | 180.982 | 6.198   |
| 1998          | 32096  | 14599.657 | 13987.983 | 611.674  | 1.906  | 4.190  | 419.803 | 190.958 | 182.957 | 8.000   |
| 1999          | 34616  | 15728.102 | 14933.914 | 794.189  | 2.294  | 5.049  | 446.673 | 202.950 | 192.702 | 10.248  |
| 2000          | 34299  | 15579.803 | 14634.754 | 945.050  | 2.755  | 6.066  | 437.088 | 198.541 | 186.498 | 12.043  |
| 2001          | 34592  | 15696.614 | 14557.636 | 1138.978 | 3.293  | 7.256  | 435.935 | 197.812 | 183.458 | 14.354  |
| 2002          | 34291  | 15519.777 | 14197.025 | 1322.752 | 3.857  | 8.523  | 427.910 | 193.668 | 177.162 | 16.506  |
| 2003          | 35074  | 15888.389 | 14324.415 | 1563.974 | 4.459  | 9.844  | 433.587 | 196.413 | 177.079 | 19.334  |
| 2004          | 33512  | 15091.573 | 13393.140 | 1698.433 | 5.068  | 11.254 | 410.143 | 184.701 | 163.915 | 20.787  |
| 2005          | 35392  | 15803.656 | 13773.659 | 2029.996 | 5.736  | 12.845 | 428.364 | 191.278 | 166.708 | 24.570  |
| 2006          | 33981  | 15100.563 | 12938.234 | 2162.330 | 6.363  | 14.320 | 407.699 | 181.174 | 155.231 | 25.943  |
| 2007          | 34000  | 14974.384 | 12581.395 | 2392.988 | 7.038  | 15.981 | 403.863 | 177.871 | 149.446 | 28.425  |
| 2008          | 37425  | 16406.197 | 13534.275 | 2871.922 | 7.674  | 17.505 | 439.732 | 192.768 | 159.023 | 33.744  |
| 2009          | 36826  | 16083.194 | 12962.884 | 3120.310 | 8.473  | 19.401 | 427.825 | 186.846 | 150.596 | 36.250  |
| 2010          | 36788  | 15927.400 | 12581.894 | 3345.507 | 9.094  | 21.005 | 422.489 | 182.917 | 144.496 | 38.421  |
| 2011          | 37636  | 16221.836 | 12504.913 | 3716.923 | 9.876  | 22.913 | 428.164 | 184.547 | 142.261 | 42.285  |
| 2012          | 38265  | 16358.849 | 12301.684 | 4057.165 | 10.603 | 24.801 | 430.867 | 184.202 | 138.518 | 45.684  |
| 2013          | 40112  | 16994.822 | 12437.120 | 4557.702 | 11.362 | 26.818 | 446.821 | 189.311 | 138.541 | 50.770  |
| 2014          | 40084  | 16855.093 | 11991.257 | 4863.837 | 12.134 | 28.857 | 441.613 | 185.696 | 132.110 | 53.586  |
| 2015          | 42200  | 17572.483 | 12219.024 | 5353.459 | 12.686 | 30.465 | 519.788 | 216.445 | 150.505 | 65.940  |
| 2016          | 42606  | 17579.955 | 11833.600 | 5746.355 | 13.487 | 32.687 | 519.788 | 214.473 | 144.369 | 70.105  |
| 2017          | 44364  | 18080.688 | 11776.356 | 6304.332 | 14.210 | 34.868 | 536.117 | 218.496 | 142.311 | 76.185  |
| 2018          | 45359  | 18209.262 | 11504.194 | 6705.068 | 14.782 | 36.822 | 542.932 | 217.960 | 137.702 | 80.258  |
| 2019          | 46876  | 18648.302 | 11382.334 | 7265.968 | 15.501 | 38.963 | 555.657 | 221.054 | 134.924 | 86.130  |
| 2020          | 48331  | 19002.597 | 11254.565 | 7748.032 | 16.031 | 40.774 | 649.239 | 255.266 | 151.185 | 104.081 |
| 2021          | 48338  | 18885.717 | 10761.325 | 8124.392 | 16.807 | 43.019 | 644.660 | 251.867 | 143.517 | 108.350 |
| 2022          | 49708  | 19235.076 | 10564.974 | 8670.102 | 17.442 | 45.074 | 657.895 | 254.582 | 139.830 | 114.751 |
| 2023          | 51083  | 19521.158 | 10351.198 | 9169.960 | 17.951 | 46.974 | 670.849 | 256.363 | 135.938 | 120.425 |
| 2024          | 52397  | 19918.620 | 10143.249 | 9775.370 | 18.656 | 49.077 | 682.854 | 259.583 | 132.189 | 127.395 |
| 2025          | 53387  | 20150.545 | 9887.265  | 10263.28 | 19.224 | 50.933 | 803.004 | 303.086 | 148.715 | 154.371 |
| 2026          | 54232  | 20393.792 | 9583.981  | 10809.81 | 19.933 | 53.005 | 812.615 | 305.582 | 143.607 | 161.975 |
| 2027          | 55049  | 20615.351 | 9259.734  | 11355.62 | 20.628 | 55.083 | 821.568 | 307.668 | 138.195 | 169.474 |
| 2028          | 55809  | 20731.894 | 8893.680  | 11838.21 | 21.212 | 57.101 | 829.419 | 308.115 | 132.177 | 175.938 |
| 2029          | 56527  | 20781.967 | 8508.747  | 12273.22 | 21.712 | 59.057 | 836.392 | 307.495 | 125.897 | 181.597 |
| 2030          | 56756  | 20753.201 | 8135.880  | 12617.32 | 22.231 | 60.797 | 994.067 | 363.487 | 142.498 | 220.989 |
| 2031          | 58288  | 21048.417 | 8006.677  | 13041.74 | 22.375 | 61.961 | 1019.54 | 368.165 | 140.047 | 228.117 |
| 2032          | 58782  | 21169.329 | 7669.842  | 13499.49 | 22.965 | 63.769 | 1026.18 | 369.560 | 133.895 | 235.665 |
| 2033          | 59236  | 21109.293 | 7299.763  | 13809.53 | 23.313 | 65.419 | 1031.59 | 367.618 | 127.125 | 240.493 |
| 2034          | 59614  | 21109.429 | 6934.655  | 14174.77 | 23.778 | 67.149 | 1035.33 | 366.613 | 120.436 | 246.177 |
| 2035          | 58938  | 20794.840 | 6556.006  | 14238.83 | 24.159 | 68.473 | 1253.51 | 442.268 | 139.434 | 302.834 |
| 2036          | 56014  | 19354.577 | 5831.433  | 13523.14 | 24.142 | 69.871 | 1193.11 | 412.258 | 124.211 | 288.047 |
| 2037          | 55953  | 19064.169 | 5402.667  | 13661.50 | 24.416 | 71.661 | 1192.72 | 406.385 | 115.167 | 291.218 |
| 2038          | 55859  | 18854.812 | 5053.671  | 13801.14 | 24.707 | 73.197 | 1190.66 | 401.900 | 107.721 | 294.178 |
| 2039          | 55757  | 18437.457 | 4649.168  | 13788.29 | 24.729 | 74.784 | 1187.28 | 392.602 | 98.998  | 293.604 |

## Results for PHIM for Run 6 (Sensitivity\_Analysis\_4.RTF)

\*\*\*\*\*

### Main Results for E-Component for Run: 6, Simulation: 1, COD: Four Diseases Combined, Adjusted

| Variable Parameter          | Value                                  |
|-----------------------------|----------------------------------------|
| 1. Country                  | US (United States)                     |
| 2. Sex                      | F (Females)                            |
| 3. Year of start of process | 1990                                   |
| 4. Cause of Death           | Four Diseases Combined                 |
| 5. Effective Dose NULL      | CC:1                                   |
| 6. Effective Dose Ecig      | CC:1 Ecig:0.05 Dual:0.525              |
| Note:                       | Death rates are per million population |

#### Results for Age Groups Combined and Years combined, Population and Number deaths adjusted for Ecig scenario,

| Age Group:All |         | NULL        | Ecig        | %Drop    |        |        | NULL    | Ecig    | Drop    |         |
|---------------|---------|-------------|-------------|----------|--------|--------|---------|---------|---------|---------|
| Year          | Number  | Attrib      | Attrib      | Drop     | %Drop  | Attrib | Death   | Attrib  | Attrib  | Drop    |
|               | Deaths  | Deaths      | Deaths      | Deaths   | Deaths | Deaths | Rate    | Rates   | Rates   | Rates   |
| All Comb      | 9148402 | 2946250.006 | 1955777.748 | 990472.3 | 10.827 | 33.618 | 2499.62 | 808.881 | 534.377 | 274.504 |

#### Results for Age Groups Combined, Population and Number deaths adjusted for Ecig scenario,

| Age Group:All |        | NULL      | Ecig      | %Drop    |        |        | NULL    | Ecig    | Drop    |         |
|---------------|--------|-----------|-----------|----------|--------|--------|---------|---------|---------|---------|
| Year          | Number | Attrib    | Attrib    | Drop     | %Drop  | Attrib | Death   | Attrib  | Attrib  | Drop    |
|               | Deaths | Deaths    | Deaths    | Deaths   | Deaths | Deaths | Rate    | Rates   | Rates   | Rates   |
| 1990          | 199848 | 57524.822 | 57524.822 | 0.000    | 0.000  | 0.000  | 2926.84 | 842.471 | 842.471 | 0.000   |
| 1991          | 199162 | 59078.486 | 58910.022 | 168.464  | 0.085  | 0.285  | 2877.87 | 853.678 | 851.244 | 2.434   |
| 1992          | 198533 | 60494.150 | 60022.680 | 471.470  | 0.237  | 0.779  | 2829.84 | 862.271 | 855.549 | 6.722   |
| 1993          | 202515 | 62694.848 | 61777.618 | 917.229  | 0.453  | 1.463  | 2845.86 | 881.034 | 868.136 | 12.898  |
| 1994          | 200665 | 63202.598 | 61753.943 | 1448.655 | 0.722  | 2.292  | 2777.91 | 874.966 | 854.892 | 20.074  |
| 1995          | 201036 | 63766.862 | 61674.861 | 2092.001 | 1.041  | 3.281  | 2739.86 | 869.097 | 840.549 | 28.548  |
| 1996          | 201202 | 64591.163 | 61725.524 | 2865.639 | 1.424  | 4.437  | 2706.47 | 868.908 | 830.299 | 38.609  |
| 1997          | 198673 | 64686.912 | 61099.572 | 3587.340 | 1.806  | 5.546  | 2635.34 | 858.147 | 810.467 | 47.680  |
| 1998          | 197623 | 65295.961 | 60873.306 | 4422.655 | 2.238  | 6.773  | 2584.42 | 854.046 | 796.072 | 57.974  |
| 1999          | 211404 | 67327.521 | 61615.737 | 5711.784 | 2.702  | 8.484  | 2727.28 | 868.771 | 794.893 | 73.877  |
| 2000          | 208596 | 67596.897 | 60947.564 | 6649.333 | 3.188  | 9.837  | 2657.45 | 861.419 | 776.454 | 84.965  |
| 2001          | 203735 | 67008.811 | 59367.404 | 7641.407 | 3.751  | 11.404 | 2566.52 | 844.458 | 747.872 | 96.586  |
| 2002          | 200990 | 67067.744 | 58321.267 | 8746.477 | 4.352  | 13.041 | 2506.90 | 836.925 | 727.427 | 109.498 |
| 2003          | 196550 | 66756.217 | 57013.315 | 9742.901 | 4.957  | 14.595 | 2428.31 | 825.244 | 704.379 | 120.865 |
| 2004          | 188394 | 65058.725 | 54474.373 | 10584.35 | 5.618  | 16.269 | 2304.02 | 796.234 | 666.211 | 130.024 |
| 2005          | 186694 | 65214.724 | 53494.674 | 11720.05 | 6.278  | 17.971 | 2257.67 | 789.321 | 646.907 | 142.413 |
| 2006          | 180406 | 63771.146 | 51191.168 | 12579.98 | 6.973  | 19.727 | 2162.28 | 765.117 | 613.559 | 151.558 |
| 2007          | 176006 | 63110.718 | 49649.125 | 13461.59 | 7.648  | 21.330 | 2088.19 | 749.650 | 589.052 | 160.598 |
| 2008          | 177993 | 63718.624 | 48979.533 | 14739.09 | 8.281  | 23.132 | 2088.53 | 748.674 | 574.713 | 173.961 |
| 2009          | 173277 | 62794.698 | 47235.140 | 15559.56 | 8.980  | 24.778 | 2009.93 | 729.515 | 547.903 | 181.612 |
| 2010          | 171016 | 61917.074 | 45494.494 | 16422.58 | 9.603  | 26.524 | 1960.59 | 711.083 | 521.566 | 189.517 |
| 2011          | 170895 | 61680.114 | 44096.722 | 17583.39 | 10.289 | 28.507 | 1940.38 | 701.700 | 500.683 | 201.017 |
| 2012          | 172084 | 62023.127 | 43152.973 | 18870.15 | 10.966 | 30.424 | 1933.47 | 698.386 | 484.849 | 213.537 |
| 2013          | 173443 | 62037.765 | 42010.607 | 20027.16 | 11.547 | 32.282 | 1927.38 | 691.059 | 466.842 | 224.217 |
| 2014          | 174998 | 61921.017 | 40621.889 | 21299.13 | 12.171 | 34.397 | 1922.86 | 682.195 | 446.349 | 235.846 |
| 2015          | 178288 | 61856.204 | 39476.983 | 22379.22 | 12.552 | 36.179 | 2188.82 | 761.899 | 484.656 | 277.242 |
| 2016          | 177872 | 60464.119 | 37214.605 | 23249.51 | 13.071 | 38.452 | 2162.26 | 737.655 | 452.389 | 285.266 |
| 2017          | 180440 | 60243.839 | 35826.056 | 24417.78 | 13.532 | 40.532 | 2172.04 | 728.017 | 431.254 | 296.763 |
| 2018          | 178377 | 60713.327 | 35246.153 | 25467.17 | 14.277 | 41.947 | 2126.10 | 726.721 | 420.104 | 306.616 |
| 2019          | 180571 | 61148.172 | 34328.201 | 26819.97 | 14.853 | 43.861 | 2130.69 | 724.841 | 405.065 | 319.776 |
| 2020          | 181943 | 61149.317 | 33393.514 | 27755.80 | 15.255 | 45.390 | 2430.54 | 821.432 | 446.098 | 375.334 |
| 2021          | 179686 | 58727.786 | 30571.977 | 28155.81 | 15.669 | 47.943 | 2382.11 | 783.216 | 405.295 | 377.920 |
| 2022          | 181110 | 58848.802 | 29549.882 | 29298.92 | 16.177 | 49.787 | 2381.81 | 778.881 | 388.616 | 390.265 |
| 2023          | 182478 | 58816.149 | 28517.882 | 30298.27 | 16.604 | 51.514 | 2380.17 | 772.407 | 371.976 | 400.431 |
| 2024          | 183588 | 58955.232 | 27494.508 | 31460.72 | 17.137 | 53.364 | 2375.32 | 768.316 | 355.734 | 412.582 |
| 2025          | 182536 | 58297.744 | 26347.272 | 31950.47 | 17.504 | 54.806 | 2721.86 | 876.861 | 392.873 | 483.988 |
| 2026          | 182579 | 56469.971 | 24308.117 | 32161.85 | 17.615 | 56.954 | 2710.81 | 846.150 | 360.909 | 485.240 |
| 2027          | 182020 | 56209.427 | 23169.975 | 33039.45 | 18.152 | 58.779 | 2690.35 | 838.883 | 342.465 | 496.418 |
| 2028          | 181299 | 55733.105 | 21976.501 | 33756.60 | 18.619 | 60.568 | 2667.14 | 828.298 | 323.303 | 504.996 |
| 2029          | 180482 | 55145.838 | 20765.861 | 34379.98 | 19.049 | 62.344 | 2642.04 | 815.951 | 303.987 | 511.964 |
| 2030          | 176387 | 53615.097 | 19517.830 | 34097.27 | 19.331 | 63.596 | 3050.43 | 939.056 | 337.540 | 601.516 |
| 2031          | 177997 | 52046.561 | 18299.252 | 33747.31 | 18.959 | 64.841 | 3072.28 | 910.364 | 315.851 | 594.513 |
| 2032          | 176549 | 51582.636 | 17315.604 | 34267.03 | 19.409 | 66.431 | 3039.57 | 900.496 | 298.115 | 602.381 |
| 2033          | 175043 | 50839.758 | 16318.605 | 34521.15 | 19.721 | 67.902 | 3004.55 | 885.375 | 280.102 | 605.273 |
| 2034          | 173393 | 50215.451 | 15350.402 | 34865.05 | 20.108 | 69.431 | 2966.31 | 872.104 | 262.606 | 609.498 |
| 2035          | 166156 | 47773.075 | 14219.869 | 33553.21 | 20.194 | 70.235 | 3471.87 | 1016.05 | 297.127 | 718.919 |
| 2036          | 159794 | 43298.709 | 12209.835 | 31088.87 | 19.456 | 71.801 | 3341.67 | 922.274 | 255.337 | 666.938 |
| 2037          | 157226 | 42241.563 | 11245.044 | 30996.52 | 19.715 | 73.379 | 3288.46 | 900.450 | 235.195 | 665.255 |
| 2038          | 154668 | 41356.353 | 10475.449 | 30880.90 | 19.966 | 74.670 | 3232.80 | 881.531 | 218.953 | 662.578 |
| 2039          | 152180 | 40161.050 | 9610.039  | 30551.01 | 20.076 | 76.071 | 3175.63 | 855.178 | 200.538 | 654.639 |

## Results for PHIM for Run 6 (Sensitivity\_Analysis\_4.RTF)

\*\*\*\*\*

### Main Results for E-Component for Run: 6, Simulation: 1, COD: LUNG CANCER, Adjusted

| Variable Parameter          | Value                                  |
|-----------------------------|----------------------------------------|
| 1. Country                  | US (United States)                     |
| 2. Sex                      | F (Females)                            |
| 3. Year of start of process | 1990                                   |
| 4. Cause of Death           | LUNG CANCER                            |
| 5. Effective Dose NULL      | CC:1                                   |
| 6. Effective Dose Ecig      | CC:1 Ecig:0.05 Dual:0.525              |
| Note:                       | Death rates are per million population |

#### Results for Age Groups Combined and Years combined, Population and Number deaths adjusted for Ecig scenario,

| Age Group: | NULL    | Ecig        | %Drop       |          |        |        | NULL    | Ecig    | Drop    |         |
|------------|---------|-------------|-------------|----------|--------|--------|---------|---------|---------|---------|
| Year       | Number  | Attrib      | Attrib      | Drop     | %Drop  | Attrib | Death   | Attrib  | Attrib  | Drop    |
|            | Deaths  | Deaths      | Deaths      | Deaths   | Deaths | Deaths | Rate    | Rates   | Rates   | Rates   |
| All Comb   | 2343933 | 1580465.217 | 1148991.907 | 431473.3 | 18.408 | 27.300 | 640.433 | 433.910 | 313.939 | 119.972 |

#### Results for Age Groups Combined, Population and Number deaths adjusted for Ecig scenario,

| Age Group: | NULL   | Ecig      | %Drop     |          |        |        | NULL    | Ecig    | Drop    |         |
|------------|--------|-----------|-----------|----------|--------|--------|---------|---------|---------|---------|
| Year       | Number | Attrib    | Attrib    | Drop     | %Drop  | Attrib | Death   | Attrib  | Attrib  | Drop    |
|            | Deaths | Deaths    | Deaths    | Deaths   | Deaths | Deaths | Rate    | Rates   | Rates   | Rates   |
| 1990       | 42690  | 30614.201 | 30614.201 | 0.000    | 0.000  | 0.000  | 625.210 | 448.355 | 448.355 | 0.000   |
| 1991       | 43692  | 31412.010 | 31379.684 | 32.326   | 0.074  | 0.103  | 631.345 | 453.901 | 453.433 | 0.467   |
| 1992       | 45423  | 32782.407 | 32688.550 | 93.857   | 0.207  | 0.286  | 647.451 | 467.274 | 465.935 | 1.339   |
| 1993       | 46292  | 33491.183 | 33305.814 | 185.370  | 0.400  | 0.553  | 650.518 | 470.643 | 468.033 | 2.609   |
| 1994       | 47019  | 34074.347 | 33774.114 | 300.233  | 0.639  | 0.881  | 650.904 | 471.719 | 467.553 | 4.167   |
| 1995       | 47843  | 34694.454 | 34242.053 | 452.401  | 0.946  | 1.304  | 652.042 | 472.861 | 466.675 | 6.186   |
| 1996       | 48250  | 35027.269 | 34401.658 | 625.611  | 1.297  | 1.786  | 649.027 | 471.202 | 462.753 | 8.449   |
| 1997       | 49044  | 35590.763 | 34758.929 | 831.833  | 1.696  | 2.337  | 650.551 | 472.153 | 461.066 | 11.086  |
| 1998       | 49699  | 36100.785 | 35025.402 | 1075.382 | 2.164  | 2.979  | 649.940 | 472.184 | 458.046 | 14.139  |
| 1999       | 48901  | 35451.030 | 34156.142 | 1294.887 | 2.648  | 3.653  | 630.861 | 457.448 | 440.642 | 16.806  |
| 2000       | 50356  | 36447.986 | 34828.304 | 1619.682 | 3.216  | 4.444  | 641.520 | 464.474 | 443.702 | 20.772  |
| 2001       | 50422  | 36411.326 | 34462.305 | 1949.021 | 3.865  | 5.353  | 635.180 | 458.863 | 434.134 | 24.729  |
| 2002       | 51487  | 37078.545 | 34720.332 | 2358.213 | 4.580  | 6.360  | 642.190 | 462.696 | 433.058 | 29.638  |
| 2003       | 51461  | 36999.876 | 34251.393 | 2748.483 | 5.341  | 7.428  | 635.782 | 457.395 | 423.164 | 34.231  |
| 2004       | 51464  | 36861.555 | 33680.038 | 3181.517 | 6.182  | 8.631  | 629.392 | 451.138 | 411.900 | 39.237  |
| 2005       | 51498  | 36689.529 | 33049.512 | 3640.017 | 7.068  | 9.921  | 622.765 | 444.069 | 399.665 | 44.403  |
| 2006       | 51446  | 36504.774 | 32383.228 | 4121.545 | 8.011  | 11.290 | 616.615 | 437.979 | 388.134 | 49.845  |
| 2007       | 51946  | 36663.202 | 31967.801 | 4695.401 | 9.039  | 12.807 | 616.306 | 435.498 | 379.275 | 56.222  |
| 2008       | 51098  | 35898.803 | 30772.606 | 5126.198 | 10.032 | 14.280 | 599.566 | 421.800 | 361.078 | 60.722  |
| 2009       | 51333  | 35934.525 | 30191.963 | 5742.562 | 11.187 | 15.981 | 595.432 | 417.468 | 350.211 | 67.257  |
| 2010       | 51010  | 35502.829 | 29255.310 | 6247.519 | 12.248 | 17.597 | 584.795 | 407.730 | 335.394 | 72.336  |
| 2011       | 50684  | 35136.342 | 28299.843 | 6836.498 | 13.489 | 19.457 | 575.471 | 399.726 | 321.322 | 78.404  |
| 2012       | 51443  | 35450.201 | 27881.487 | 7568.714 | 14.713 | 21.350 | 577.989 | 399.173 | 313.265 | 85.907  |
| 2013       | 51288  | 35123.224 | 26911.694 | 8211.529 | 16.011 | 23.379 | 569.935 | 391.249 | 299.055 | 92.194  |
| 2014       | 51494  | 35079.370 | 26180.062 | 8899.308 | 17.282 | 25.369 | 565.810 | 386.476 | 287.664 | 98.812  |
| 2015       | 50707  | 34324.171 | 24976.461 | 9347.709 | 18.435 | 27.234 | 622.527 | 422.780 | 306.634 | 116.145 |
| 2016       | 49134  | 33054.753 | 23314.000 | 9740.752 | 19.825 | 29.469 | 597.285 | 403.264 | 283.410 | 119.854 |
| 2017       | 48628  | 32471.234 | 22165.052 | 10306.18 | 21.194 | 31.739 | 585.360 | 392.399 | 266.810 | 125.588 |
| 2018       | 50809  | 33657.595 | 22142.857 | 11514.74 | 22.663 | 34.211 | 605.602 | 402.871 | 263.924 | 138.947 |
| 2019       | 51414  | 33863.424 | 21490.279 | 12373.15 | 24.066 | 36.538 | 606.677 | 401.412 | 253.580 | 147.832 |
| 2020       | 51858  | 33910.830 | 20824.304 | 13086.53 | 25.235 | 38.591 | 692.762 | 455.532 | 278.188 | 177.343 |
| 2021       | 48455  | 31531.880 | 18592.577 | 12939.30 | 26.704 | 41.036 | 642.374 | 420.521 | 246.483 | 174.038 |
| 2022       | 48787  | 31560.212 | 17871.155 | 13689.06 | 28.059 | 43.374 | 641.610 | 417.708 | 235.027 | 182.682 |
| 2023       | 49087  | 31508.781 | 17139.979 | 14368.80 | 29.272 | 45.603 | 640.265 | 413.791 | 223.567 | 190.224 |
| 2024       | 49307  | 31517.293 | 16406.226 | 15111.07 | 30.647 | 47.945 | 637.954 | 410.740 | 212.270 | 198.470 |
| 2025       | 49036  | 31175.389 | 15607.132 | 15568.26 | 31.749 | 49.938 | 731.194 | 468.912 | 232.723 | 236.188 |
| 2026       | 45887  | 29044.598 | 13903.126 | 15141.47 | 32.998 | 52.132 | 681.291 | 435.206 | 206.424 | 228.783 |
| 2027       | 45702  | 28825.765 | 13144.364 | 15681.40 | 34.312 | 54.401 | 675.506 | 430.203 | 194.281 | 235.922 |
| 2028       | 45469  | 28513.846 | 12369.559 | 16144.29 | 35.506 | 56.619 | 668.913 | 423.769 | 181.972 | 241.797 |
| 2029       | 45200  | 28148.109 | 11589.614 | 16558.49 | 36.634 | 58.826 | 661.669 | 416.486 | 169.658 | 246.828 |
| 2030       | 44083  | 27314.475 | 10787.836 | 16526.64 | 37.490 | 60.505 | 762.368 | 478.407 | 186.564 | 291.843 |
| 2031       | 41442  | 25423.102 | 9702.356  | 15720.75 | 37.934 | 61.836 | 715.306 | 444.684 | 167.466 | 277.218 |
| 2032       | 41050  | 25085.902 | 9087.726  | 15998.18 | 38.973 | 63.774 | 706.735 | 437.933 | 156.459 | 281.474 |
| 2033       | 40636  | 24645.067 | 8486.922  | 16158.15 | 39.763 | 65.563 | 697.507 | 429.194 | 145.674 | 283.519 |
| 2034       | 40188  | 24239.126 | 7908.729  | 16330.40 | 40.635 | 67.372 | 687.505 | 420.967 | 135.298 | 285.669 |
| 2035       | 38255  | 22944.147 | 7226.933  | 15717.21 | 41.085 | 68.502 | 799.345 | 487.980 | 151.008 | 336.972 |
| 2036       | 33726  | 19950.581 | 5961.927  | 13988.65 | 41.477 | 70.117 | 705.293 | 424.953 | 124.678 | 300.275 |
| 2037       | 33159  | 19415.334 | 5451.266  | 13964.07 | 42.113 | 71.923 | 693.533 | 413.871 | 114.016 | 299.855 |
| 2038       | 32592  | 18939.317 | 5049.568  | 13889.75 | 42.617 | 73.338 | 681.230 | 403.701 | 105.544 | 298.157 |
| 2039       | 32040  | 18379.752 | 4609.530  | 13770.22 | 42.978 | 74.921 | 668.597 | 391.373 | 96.190  | 295.183 |

## Results for PHIM for Run 6 (Sensitivity\_Analysis\_4.RTF)

\*\*\*\*\*

### Main Results for E-Component for Run: 6, Simulation: 1, COD: IHD, Adjusted

| Variable Parameter          | Value                                  |
|-----------------------------|----------------------------------------|
| 1. Country                  | US (United States)                     |
| 2. Sex                      | F (Females)                            |
| 3. Year of start of process | 1990                                   |
| 4. Cause of Death           | IHD                                    |
| 5. Effective Dose NULL      | CC:1                                   |
| 6. Effective Dose Ecig      | CC:1 Ecig:0.05 Dual:0.525              |
| Note:                       | Death rates are per million population |

#### Results for Age Groups Combined and Years combined, Population and Number deaths adjusted for Ecig scenario,

| Age Group:All | NULL    | Ecig       | %Drop      |          |        |        | NULL    | Ecig    | Drop   |        |
|---------------|---------|------------|------------|----------|--------|--------|---------|---------|--------|--------|
| Year          | Number  | Attrib     | Attrib     | Drop     | %Drop  | Attrib | Death   | Attrib  | Attrib | Drop   |
|               | Deaths  | Deaths     | Deaths     | Deaths   | Deaths | Deaths | Rate    | Rates   | Rates  | Rates  |
| All Comb      | 3261638 | 398833.796 | 199947.780 | 198886.0 | 6.098  | 49.867 | 891.177 | 109.498 | 54.632 | 54.867 |

#### Results for Age Groups Combined, Population and Number deaths adjusted for Ecig scenario,

| Age Group:All | NULL   | Ecig      | %Drop     |          |        |        | NULL    | Ecig    | Drop    |        |
|---------------|--------|-----------|-----------|----------|--------|--------|---------|---------|---------|--------|
| Year          | Number | Attrib    | Attrib    | Drop     | %Drop  | Attrib | Death   | Attrib  | Attrib  | Drop   |
|               | Deaths | Deaths    | Deaths    | Deaths   | Deaths | Deaths | Rate    | Rates   | Rates   | Rates  |
| 1990          | 98916  | 12922.892 | 12922.892 | 0.000    | 0.000  | 0.000  | 1448.66 | 189.260 | 189.260 | 0.000  |
| 1991          | 96403  | 12856.479 | 12766.075 | 90.404   | 0.094  | 0.703  | 1393.01 | 185.775 | 184.469 | 1.306  |
| 1992          | 93721  | 12662.244 | 12411.692 | 250.551  | 0.267  | 1.979  | 1335.88 | 180.485 | 176.913 | 3.572  |
| 1993          | 93680  | 12730.613 | 12252.444 | 478.168  | 0.510  | 3.756  | 1316.45 | 178.900 | 172.179 | 6.721  |
| 1994          | 90835  | 12495.323 | 11750.671 | 744.652  | 0.820  | 5.959  | 1257.48 | 172.983 | 162.671 | 10.312 |
| 1995          | 89704  | 12365.590 | 11313.324 | 1052.266 | 1.173  | 8.510  | 1222.55 | 168.534 | 154.186 | 14.348 |
| 1996          | 88296  | 12290.551 | 10855.844 | 1434.708 | 1.625  | 11.673 | 1187.71 | 165.338 | 146.027 | 19.311 |
| 1997          | 84792  | 11719.531 | 9991.697  | 1727.834 | 2.038  | 14.743 | 1124.73 | 155.473 | 132.537 | 22.936 |
| 1998          | 82538  | 11416.794 | 9348.534  | 2068.260 | 2.506  | 18.116 | 1079.39 | 149.327 | 122.256 | 27.072 |
| 1999          | 93972  | 13028.038 | 10180.914 | 2847.124 | 3.030  | 21.854 | 1212.32 | 168.109 | 131.342 | 36.767 |
| 2000          | 90082  | 12426.299 | 9247.834  | 3178.465 | 3.528  | 25.579 | 1147.62 | 158.354 | 117.815 | 40.540 |
| 2001          | 86173  | 11939.281 | 8357.046  | 3582.235 | 4.157  | 30.004 | 1085.55 | 150.461 | 105.277 | 45.184 |
| 2002          | 83080  | 11528.794 | 7553.828  | 3974.966 | 4.784  | 34.479 | 1036.24 | 143.865 | 94.217  | 49.648 |
| 2003          | 79382  | 11048.407 | 6776.611  | 4271.795 | 5.381  | 38.664 | 980.731 | 136.581 | 83.723  | 52.858 |
| 2004          | 73952  | 10375.132 | 5902.936  | 4472.196 | 6.047  | 43.105 | 904.420 | 126.978 | 72.192  | 54.786 |
| 2005          | 71755  | 10051.029 | 5306.018  | 4745.011 | 6.613  | 47.209 | 867.730 | 121.652 | 64.165  | 57.486 |
| 2006          | 67670  | 9542.523  | 4622.980  | 4919.543 | 7.270  | 51.554 | 811.063 | 114.490 | 55.409  | 59.080 |
| 2007          | 63633  | 8936.533  | 3981.580  | 4954.953 | 7.787  | 55.446 | 754.960 | 106.151 | 47.239  | 58.912 |
| 2008          | 63320  | 8944.180  | 3656.191  | 5287.989 | 8.351  | 59.122 | 742.981 | 105.091 | 42.901  | 62.190 |
| 2009          | 59909  | 8390.033  | 3167.213  | 5222.820 | 8.718  | 62.250 | 694.909 | 97.471  | 36.738  | 60.733 |
| 2010          | 58185  | 8157.570  | 2827.940  | 5329.629 | 9.160  | 65.334 | 667.060 | 93.685  | 32.421  | 61.265 |
| 2011          | 57565  | 8035.356  | 2537.266  | 5498.090 | 9.551  | 68.424 | 653.604 | 91.414  | 28.809  | 62.605 |
| 2012          | 57630  | 7970.766  | 2282.600  | 5688.166 | 9.870  | 71.363 | 647.510 | 89.752  | 25.646  | 64.105 |
| 2013          | 57310  | 7743.216  | 2039.021  | 5704.195 | 9.953  | 73.667 | 636.855 | 86.254  | 22.659  | 63.596 |
| 2014          | 57808  | 7774.935  | 1861.985  | 5912.950 | 10.229 | 76.051 | 635.189 | 85.658  | 20.459  | 65.199 |
| 2015          | 58698  | 7722.535  | 1717.444  | 6005.091 | 10.231 | 77.761 | 720.629 | 95.120  | 21.085  | 74.035 |
| 2016          | 58991  | 7600.353  | 1539.047  | 6061.306 | 10.275 | 79.750 | 717.111 | 92.723  | 18.709  | 74.014 |
| 2017          | 59370  | 7470.266  | 1385.990  | 6084.277 | 10.248 | 81.447 | 714.666 | 90.274  | 16.684  | 73.591 |
| 2018          | 56456  | 6907.050  | 1173.993  | 5733.057 | 10.155 | 83.003 | 672.908 | 82.675  | 13.993  | 68.682 |
| 2019          | 56297  | 6732.046  | 1055.999  | 5676.048 | 10.082 | 84.314 | 664.293 | 79.801  | 12.461  | 67.340 |
| 2020          | 55758  | 6429.836  | 943.326   | 5486.510 | 9.840  | 85.329 | 744.864 | 86.373  | 12.602  | 73.772 |
| 2021          | 56777  | 6562.016  | 871.888   | 5690.127 | 10.022 | 86.713 | 752.700 | 87.513  | 11.559  | 75.955 |
| 2022          | 56344  | 6352.366  | 784.815   | 5567.551 | 9.881  | 87.645 | 740.995 | 84.075  | 10.321  | 73.754 |
| 2023          | 55888  | 6134.123  | 711.786   | 5422.337 | 9.702  | 88.396 | 728.983 | 80.557  | 9.284   | 71.273 |
| 2024          | 55353  | 5922.193  | 643.844   | 5278.349 | 9.536  | 89.128 | 716.171 | 77.179  | 8.330   | 68.849 |
| 2025          | 53908  | 5504.188  | 570.176   | 4934.011 | 9.153  | 89.641 | 803.847 | 82.789  | 8.502   | 74.287 |
| 2026          | 55953  | 5641.075  | 549.527   | 5091.549 | 9.100  | 90.258 | 830.755 | 84.526  | 8.159   | 76.367 |
| 2027          | 54903  | 5426.216  | 502.899   | 4923.316 | 8.967  | 90.732 | 811.495 | 80.982  | 7.433   | 73.549 |
| 2028          | 53822  | 5197.830  | 458.585   | 4739.245 | 8.805  | 91.177 | 791.790 | 77.249  | 6.746   | 70.503 |
| 2029          | 52733  | 4973.547  | 420.387   | 4553.159 | 8.634  | 91.548 | 771.944 | 73.590  | 6.154   | 67.436 |
| 2030          | 50258  | 4450.618  | 362.071   | 4088.547 | 8.135  | 91.865 | 869.162 | 77.952  | 6.262   | 71.690 |
| 2031          | 52852  | 4555.052  | 359.979   | 4195.073 | 7.937  | 92.097 | 912.247 | 79.674  | 6.213   | 73.461 |
| 2032          | 51566  | 4349.999  | 332.102   | 4017.897 | 7.792  | 92.365 | 887.795 | 75.939  | 5.718   | 70.222 |
| 2033          | 50292  | 4147.948  | 309.992   | 3837.956 | 7.631  | 92.527 | 863.237 | 72.237  | 5.321   | 66.916 |
| 2034          | 49008  | 3966.133  | 289.391   | 3676.742 | 7.502  | 92.703 | 838.393 | 68.881  | 4.951   | 63.930 |
| 2035          | 45453  | 3289.064  | 232.546   | 3056.518 | 6.725  | 92.930 | 949.748 | 69.952  | 4.859   | 65.093 |
| 2036          | 47364  | 3313.192  | 227.564   | 3085.628 | 6.515  | 93.132 | 990.484 | 70.572  | 4.759   | 65.813 |
| 2037          | 45865  | 3117.951  | 209.682   | 2908.270 | 6.341  | 93.275 | 959.294 | 66.464  | 4.386   | 62.079 |
| 2038          | 44409  | 2949.775  | 196.286   | 2753.489 | 6.200  | 93.346 | 928.210 | 62.876  | 4.103   | 58.773 |
| 2039          | 43009  | 2766.312  | 183.322   | 2582.990 | 6.006  | 93.373 | 897.485 | 58.905  | 3.825   | 55.080 |

## Results for PHIM for Run 6 (Sensitivity\_Analysis\_4.RTF)

\*\*\*\*\*

### Main Results for E-Component for Run: 6, Simulation: 1, COD: STROKE, Adjusted

| Variable Parameter          | Value                                  |
|-----------------------------|----------------------------------------|
| 1. Country                  | US (United States)                     |
| 2. Sex                      | F (Females)                            |
| 3. Year of start of process | 1990                                   |
| 4. Cause of Death           | STROKE                                 |
| 5. Effective Dose NULL      | CC:1                                   |
| 6. Effective Dose Ecig      | CC:1 Ecig:0.05 Dual:0.525              |
| Note:                       | Death rates are per million population |

#### Results for Age Groups Combined and Years combined, Population and Number deaths adjusted for Ecig scenario,

| Age Group:All | NULL    | Ecig       | %Drop     |          |        | NULL   | Ecig    | Drop   |        |        |
|---------------|---------|------------|-----------|----------|--------|--------|---------|--------|--------|--------|
| Year          | Number  | Attrib     | Attrib    | Drop     | %Drop  | Attrib | Death   | Attrib | Attrib | Drop   |
|               | Deaths  | Deaths     | Deaths    | Deaths   | Deaths | Deaths | Rate    | Rates  | Rates  | Rates  |
| All Comb      | 1361481 | 104899.750 | 51505.776 | 53393.97 | 3.922  | 50.900 | 371.997 | 28.800 | 14.073 | 14.727 |

#### Results for Age Groups Combined, Population and Number deaths adjusted for Ecig scenario,

| Age Group:All | NULL   | Ecig     | %Drop    |          |        | NULL   | Ecig    | Drop   |        |        |
|---------------|--------|----------|----------|----------|--------|--------|---------|--------|--------|--------|
| Year          | Number | Attrib   | Attrib   | Drop     | %Drop  | Attrib | Death   | Attrib | Attrib | Drop   |
|               | Deaths | Deaths   | Deaths   | Deaths   | Deaths | Deaths | Rate    | Rates  | Rates  | Rates  |
| 1990          | 33504  | 3293.017 | 3293.017 | 0.000    | 0.000  | 0.000  | 490.678 | 48.227 | 48.227 | 0.000  |
| 1991          | 32505  | 3207.063 | 3179.556 | 27.507   | 0.085  | 0.858  | 469.694 | 46.342 | 45.944 | 0.397  |
| 1992          | 32560  | 3218.125 | 3141.236 | 76.888   | 0.236  | 2.389  | 464.104 | 45.871 | 44.774 | 1.096  |
| 1993          | 32768  | 3226.680 | 3081.112 | 145.568  | 0.444  | 4.511  | 460.482 | 45.344 | 43.298 | 2.046  |
| 1994          | 33006  | 3277.266 | 3045.164 | 232.101  | 0.703  | 7.082  | 456.920 | 45.370 | 42.156 | 3.214  |
| 1995          | 33732  | 3309.378 | 2976.823 | 332.556  | 0.986  | 10.049 | 459.725 | 45.104 | 40.570 | 4.534  |
| 1996          | 33754  | 3312.987 | 2863.414 | 449.573  | 1.332  | 13.570 | 454.035 | 44.568 | 38.517 | 6.051  |
| 1997          | 33705  | 3267.066 | 2704.176 | 562.890  | 1.670  | 17.229 | 447.080 | 43.341 | 35.870 | 7.471  |
| 1998          | 33282  | 3178.725 | 2507.738 | 670.987  | 2.016  | 21.109 | 435.246 | 41.577 | 32.795 | 8.781  |
| 1999          | 33902  | 3120.351 | 2339.321 | 781.031  | 2.304  | 25.030 | 437.368 | 40.264 | 30.179 | 10.085 |
| 2000          | 33842  | 3142.808 | 2229.414 | 913.394  | 2.699  | 29.063 | 431.143 | 40.050 | 28.402 | 11.648 |
| 2001          | 32525  | 2961.588 | 1980.904 | 980.685  | 3.015  | 33.113 | 409.735 | 37.323 | 24.954 | 12.368 |
| 2002          | 32103  | 2940.627 | 1838.263 | 1102.365 | 3.434  | 37.487 | 400.409 | 36.695 | 22.928 | 13.767 |
| 2003          | 30598  | 2819.545 | 1645.929 | 1173.616 | 3.836  | 41.624 | 378.021 | 34.855 | 20.335 | 14.521 |
| 2004          | 29423  | 2730.466 | 1480.998 | 1249.468 | 4.247  | 45.760 | 359.838 | 33.417 | 18.112 | 15.305 |
| 2005          | 27994  | 2670.510 | 1344.169 | 1326.341 | 4.738  | 49.666 | 338.529 | 32.322 | 16.255 | 16.067 |
| 2006          | 27247  | 2623.285 | 1222.899 | 1400.386 | 5.140  | 53.383 | 326.577 | 31.474 | 14.657 | 16.817 |
| 2007          | 26354  | 2536.599 | 1091.244 | 1445.356 | 5.484  | 56.980 | 312.675 | 30.131 | 12.947 | 17.184 |
| 2008          | 26058  | 2469.443 | 982.638  | 1486.806 | 5.706  | 60.208 | 305.757 | 29.015 | 11.530 | 17.485 |
| 2009          | 25106  | 2386.945 | 876.035  | 1510.910 | 6.018  | 63.299 | 291.220 | 27.730 | 10.162 | 17.569 |
| 2010          | 24915  | 2329.274 | 788.533  | 1540.742 | 6.184  | 66.147 | 285.632 | 26.750 | 9.040  | 17.710 |
| 2011          | 24876  | 2286.581 | 709.169  | 1577.412 | 6.341  | 68.986 | 282.447 | 26.013 | 8.052  | 17.961 |
| 2012          | 24593  | 2243.311 | 637.115  | 1606.196 | 6.531  | 71.599 | 276.315 | 25.260 | 7.158  | 18.102 |
| 2013          | 24554  | 2176.503 | 566.441  | 1610.062 | 6.557  | 73.975 | 272.859 | 24.245 | 6.295  | 17.950 |
| 2014          | 25415  | 2211.619 | 528.504  | 1683.115 | 6.623  | 76.103 | 279.253 | 24.366 | 5.807  | 18.559 |
| 2015          | 26453  | 2237.016 | 496.447  | 1740.569 | 6.580  | 77.808 | 324.759 | 27.554 | 6.095  | 21.459 |
| 2016          | 26887  | 2229.057 | 456.311  | 1772.746 | 6.593  | 79.529 | 326.848 | 27.194 | 5.547  | 21.647 |
| 2017          | 27789  | 2221.649 | 420.626  | 1801.023 | 6.481  | 81.067 | 334.505 | 26.848 | 5.063  | 21.784 |
| 2018          | 25429  | 1939.420 | 341.546  | 1597.874 | 6.284  | 82.389 | 303.090 | 23.214 | 4.071  | 19.143 |
| 2019          | 25619  | 1904.400 | 309.435  | 1594.965 | 6.226  | 83.752 | 302.300 | 22.574 | 3.651  | 18.923 |
| 2020          | 25587  | 1806.054 | 274.339  | 1531.716 | 5.986  | 84.810 | 341.810 | 24.261 | 3.665  | 20.596 |
| 2021          | 25674  | 1748.172 | 246.172  | 1502.000 | 5.850  | 85.918 | 340.366 | 23.314 | 3.264  | 20.051 |
| 2022          | 25783  | 1701.148 | 223.288  | 1477.860 | 5.732  | 86.874 | 339.078 | 22.515 | 2.937  | 19.579 |
| 2023          | 25883  | 1652.087 | 203.756  | 1448.331 | 5.596  | 87.667 | 337.609 | 21.696 | 2.658  | 19.038 |
| 2024          | 25941  | 1597.127 | 184.467  | 1412.659 | 5.446  | 88.450 | 335.627 | 20.814 | 2.387  | 18.427 |
| 2025          | 25560  | 1467.622 | 160.859  | 1306.763 | 5.113  | 89.039 | 381.129 | 22.075 | 2.399  | 19.676 |
| 2026          | 25804  | 1390.505 | 144.560  | 1245.945 | 4.828  | 89.604 | 383.124 | 20.835 | 2.146  | 18.689 |
| 2027          | 25606  | 1342.095 | 132.175  | 1209.920 | 4.725  | 90.152 | 378.470 | 20.030 | 1.954  | 18.076 |
| 2028          | 25382  | 1289.536 | 121.039  | 1168.497 | 4.604  | 90.614 | 373.397 | 19.165 | 1.781  | 17.384 |
| 2029          | 25145  | 1242.216 | 111.228  | 1130.988 | 4.498  | 91.046 | 368.086 | 18.380 | 1.628  | 16.752 |
| 2030          | 24352  | 1096.803 | 93.833   | 1002.970 | 4.119  | 91.445 | 421.150 | 19.210 | 1.623  | 17.588 |
| 2031          | 24381  | 1019.991 | 84.376   | 935.615  | 3.837  | 91.728 | 420.824 | 17.841 | 1.456  | 16.385 |
| 2032          | 24050  | 977.406  | 77.848   | 899.558  | 3.740  | 92.035 | 414.065 | 17.063 | 1.340  | 15.723 |
| 2033          | 23711  | 937.450  | 72.852   | 864.597  | 3.646  | 92.229 | 406.984 | 16.326 | 1.250  | 15.075 |
| 2034          | 23346  | 900.763  | 68.079   | 832.684  | 3.567  | 92.442 | 399.396 | 15.644 | 1.165  | 14.479 |
| 2035          | 22211  | 745.023  | 54.510   | 690.514  | 3.109  | 92.683 | 464.094 | 15.845 | 1.139  | 14.706 |
| 2036          | 21387  | 680.360  | 48.114   | 632.246  | 2.956  | 92.928 | 447.246 | 14.492 | 1.006  | 13.486 |
| 2037          | 20889  | 644.109  | 44.732   | 599.377  | 2.869  | 93.055 | 436.899 | 13.730 | 0.936  | 12.795 |
| 2038          | 20391  | 612.448  | 41.999   | 570.449  | 2.798  | 93.142 | 426.197 | 13.055 | 0.878  | 12.177 |
| 2039          | 19901  | 577.529  | 39.375   | 538.154  | 2.704  | 93.182 | 415.277 | 12.298 | 0.822  | 11.476 |

## Results for PHIM for Run 6 (Sensitivity\_Analysis\_4.RTF)

\*\*\*\*\*

### Main Results for E-Component for Run: 6, Simulation: 1, COD: COPD, Adjusted

| Variable Parameter          | Value                                  |
|-----------------------------|----------------------------------------|
| 1. Country                  | US (United States)                     |
| 2. Sex                      | F (Females)                            |
| 3. Year of start of process | 1990                                   |
| 4. Cause of Death           | COPD                                   |
| 5. Effective Dose NULL      | CC:1                                   |
| 6. Effective Dose Ecig      | CC:1 Ecig:0.05 Dual:0.525              |
| Note:                       | Death rates are per million population |

#### Results for Age Groups Combined and Years combined, Population and Number deaths adjusted for Ecig scenario,

| Age Group:All | NULL    | Ecig       | %Drop      |          |        |        | NULL    | Ecig    | Drop    |        |
|---------------|---------|------------|------------|----------|--------|--------|---------|---------|---------|--------|
| Year          | Number  | Attrib     | Attrib     | Drop     | %Drop  | Attrib | Death   | Attrib  | Attrib  | Drop   |
|               | Deaths  | Deaths     | Deaths     | Deaths   | Deaths | Deaths | Rate    | Rates   | Rates   | Rates  |
| All Comb      | 2181350 | 862051.244 | 555332.286 | 306719.0 | 14.061 | 35.580 | 596.010 | 236.673 | 151.733 | 84.939 |

#### Results for Age Groups Combined, Population and Number deaths adjusted for Ecig scenario,

| Age Group:All | NULL   | Ecig      | %Drop     |          |        |        | NULL    | Ecig    | Drop    |         |
|---------------|--------|-----------|-----------|----------|--------|--------|---------|---------|---------|---------|
| Year          | Number | Attrib    | Attrib    | Drop     | %Drop  | Attrib | Death   | Attrib  | Attrib  | Drop    |
|               | Deaths | Deaths    | Deaths    | Deaths   | Deaths | Deaths | Rate    | Rates   | Rates   | Rates   |
| 1990          | 24738  | 10694.712 | 10694.712 | 0.000    | 0.000  | 0.000  | 362.296 | 156.628 | 156.628 | 0.000   |
| 1991          | 26562  | 11602.933 | 11584.706 | 18.227   | 0.069  | 0.157  | 383.818 | 167.661 | 167.398 | 0.263   |
| 1992          | 26828  | 11831.375 | 11781.201 | 50.173   | 0.187  | 0.424  | 382.401 | 168.642 | 167.926 | 0.716   |
| 1993          | 29774  | 13246.371 | 13138.248 | 108.123  | 0.363  | 0.816  | 418.408 | 186.148 | 184.627 | 1.521   |
| 1994          | 29805  | 13355.662 | 13183.994 | 171.668  | 0.576  | 1.285  | 412.606 | 184.893 | 182.513 | 2.381   |
| 1995          | 29757  | 13397.439 | 13142.661 | 254.778  | 0.856  | 1.902  | 405.549 | 182.598 | 179.118 | 3.480   |
| 1996          | 30903  | 13960.356 | 13604.609 | 355.747  | 1.151  | 2.548  | 415.697 | 187.801 | 183.002 | 4.799   |
| 1997          | 31133  | 14109.552 | 13644.770 | 464.782  | 1.493  | 3.294  | 412.976 | 187.180 | 180.994 | 6.186   |
| 1998          | 32104  | 14599.657 | 13991.631 | 608.026  | 1.894  | 4.165  | 419.844 | 190.958 | 182.976 | 7.982   |
| 1999          | 34628  | 15728.102 | 14939.360 | 788.743  | 2.278  | 5.015  | 446.736 | 202.950 | 192.730 | 10.220  |
| 2000          | 34316  | 15579.803 | 14642.012 | 937.791  | 2.733  | 6.019  | 437.174 | 198.541 | 186.535 | 12.006  |
| 2001          | 34614  | 15696.614 | 14567.149 | 1129.465 | 3.263  | 7.196  | 436.050 | 197.812 | 183.508 | 14.304  |
| 2002          | 34319  | 15519.777 | 14208.845 | 1310.933 | 3.820  | 8.447  | 428.057 | 193.668 | 177.223 | 16.445  |
| 2003          | 35110  | 15888.389 | 14339.382 | 1549.007 | 4.412  | 9.749  | 433.777 | 196.413 | 177.158 | 19.255  |
| 2004          | 33555  | 15091.573 | 13410.401 | 1681.172 | 5.010  | 11.140 | 410.370 | 184.701 | 164.007 | 20.695  |
| 2005          | 35446  | 15803.656 | 13794.975 | 2008.680 | 5.667  | 12.710 | 428.650 | 191.278 | 166.822 | 24.457  |
| 2006          | 34043  | 15100.563 | 12962.060 | 2138.504 | 6.282  | 14.162 | 408.027 | 181.174 | 155.359 | 25.816  |
| 2007          | 34073  | 14974.384 | 12608.500 | 2365.883 | 6.944  | 15.800 | 404.246 | 177.871 | 149.591 | 28.280  |
| 2008          | 37518  | 16406.197 | 13568.099 | 2838.099 | 7.565  | 17.299 | 440.221 | 192.768 | 159.205 | 33.563  |
| 2009          | 36930  | 16083.194 | 12999.929 | 3083.265 | 8.349  | 19.171 | 428.368 | 186.846 | 150.793 | 36.053  |
| 2010          | 36906  | 15927.400 | 12622.710 | 3304.690 | 8.954  | 20.748 | 423.101 | 182.917 | 144.711 | 38.206  |
| 2011          | 37771  | 16221.836 | 12550.444 | 3671.392 | 9.720  | 22.632 | 428.860 | 184.547 | 142.500 | 42.046  |
| 2012          | 38419  | 16358.849 | 12351.771 | 4007.079 | 10.430 | 24.495 | 431.655 | 184.202 | 138.780 | 45.423  |
| 2013          | 40291  | 16994.822 | 12493.450 | 4501.372 | 11.172 | 26.487 | 447.732 | 189.311 | 138.833 | 50.478  |
| 2014          | 40282  | 16855.093 | 12051.338 | 4803.756 | 11.925 | 28.500 | 442.609 | 185.696 | 132.419 | 53.277  |
| 2015          | 42430  | 17572.483 | 12286.630 | 5285.852 | 12.458 | 30.080 | 520.910 | 216.445 | 150.842 | 65.603  |
| 2016          | 42860  | 17579.955 | 11905.246 | 5674.709 | 13.240 | 32.279 | 521.011 | 214.473 | 144.723 | 69.751  |
| 2017          | 44653  | 18080.688 | 11854.389 | 6226.300 | 13.944 | 34.436 | 537.505 | 218.496 | 142.696 | 75.800  |
| 2018          | 45683  | 18209.262 | 11587.757 | 6621.505 | 14.494 | 36.363 | 544.501 | 217.960 | 138.116 | 79.843  |
| 2019          | 47240  | 18648.302 | 11472.489 | 7175.813 | 15.190 | 38.480 | 557.422 | 221.054 | 135.373 | 85.681  |
| 2020          | 48740  | 19002.597 | 11351.545 | 7651.052 | 15.698 | 40.263 | 651.105 | 255.266 | 151.643 | 103.623 |
| 2021          | 48780  | 18885.717 | 10861.340 | 8024.377 | 16.450 | 42.489 | 646.674 | 251.867 | 143.990 | 107.877 |
| 2022          | 50195  | 19235.076 | 10670.624 | 8564.452 | 17.062 | 44.525 | 660.127 | 254.582 | 140.331 | 114.250 |
| 2023          | 51620  | 19521.158 | 10462.361 | 9058.797 | 17.549 | 46.405 | 673.316 | 256.363 | 136.467 | 119.896 |
| 2024          | 52987  | 19918.620 | 10259.970 | 9658.649 | 18.228 | 48.491 | 685.569 | 259.583 | 132.747 | 126.836 |
| 2025          | 54032  | 20150.545 | 10009.105 | 10141.44 | 18.769 | 50.328 | 805.686 | 303.086 | 149.249 | 153.837 |
| 2026          | 54935  | 20393.792 | 9710.905  | 10682.89 | 19.446 | 52.383 | 815.637 | 305.582 | 144.181 | 161.401 |
| 2027          | 55808  | 20615.351 | 9390.537  | 11224.81 | 20.113 | 54.449 | 824.879 | 307.668 | 138.797 | 168.871 |
| 2028          | 56626  | 20731.894 | 9027.318  | 11704.58 | 20.670 | 56.457 | 833.039 | 308.115 | 132.803 | 175.311 |
| 2029          | 57405  | 20781.967 | 8644.631  | 12137.34 | 21.143 | 58.403 | 840.337 | 307.495 | 126.547 | 180.948 |
| 2030          | 57694  | 20753.201 | 8274.090  | 12479.11 | 21.630 | 60.131 | 997.753 | 363.487 | 143.092 | 220.396 |
| 2031          | 59321  | 21048.417 | 8152.541  | 12895.88 | 21.739 | 61.268 | 1023.91 | 368.165 | 140.715 | 227.449 |
| 2032          | 59883  | 21169.329 | 7817.927  | 13351.40 | 22.296 | 63.070 | 1030.97 | 369.560 | 134.598 | 234.962 |
| 2033          | 60405  | 21109.293 | 7448.839  | 13660.45 | 22.615 | 64.713 | 1036.82 | 367.618 | 127.856 | 239.762 |
| 2034          | 60852  | 21109.429 | 7084.203  | 14025.23 | 23.048 | 66.441 | 1041.02 | 366.613 | 121.193 | 245.420 |
| 2035          | 60238  | 20794.840 | 6705.880  | 14088.96 | 23.389 | 67.752 | 1258.68 | 442.268 | 140.121 | 302.147 |
| 2036          | 57318  | 19354.577 | 5972.230  | 13382.35 | 23.348 | 69.143 | 1198.65 | 412.258 | 124.893 | 287.364 |
| 2037          | 57313  | 19064.169 | 5539.364  | 13524.80 | 23.598 | 70.944 | 1198.74 | 406.385 | 115.858 | 290.527 |
| 2038          | 57276  | 18854.812 | 5187.595  | 13667.22 | 23.862 | 72.487 | 1197.16 | 401.900 | 108.428 | 293.471 |
| 2039          | 57231  | 18437.457 | 4777.813  | 13659.64 | 23.868 | 74.086 | 1194.27 | 392.602 | 99.701  | 292.900 |

## Results for PHIM for Run 7 (Sensitivity\_Analysis\_4.RTF)

---

### Control File Details for Run: 7

| Variable Parameter                                       | Value                  |
|----------------------------------------------------------|------------------------|
| 1. Name for Reference Scenario                           | NULL                   |
| 2. Name for Test Scenario                                | Ecig                   |
| 3. Name for Product 1                                    | CC                     |
| 4. Name for Product 2                                    | Ecig                   |
| 5. Name for Product 3                                    | -                      |
| 6. Name for Product 4                                    | Dual                   |
| 7. Country                                               | US (United States)     |
| 8. Sex                                                   | M (Males)              |
| 9. Year of start of process                              | 1990                   |
| 10. Number of months of follow-up                        | 600                    |
| 11. Follow-up interval length (in months)                | 12                     |
| 12. Lower age for risk estimation                        | 10                     |
| 13. Upper age for risk estimation                        | 79                     |
| 14. The effective dose for Product 1 (F1) - Ref          | 1                      |
| 15. The effective dose for Product 2 (F2) - Ref          | -                      |
| 16. The effective dose for Product 3 (F3) - Ref          | -                      |
| 17. The effective dose for Product 4 (F4) - Ref          | -                      |
| 18. The effective dose for Product 1 (F1) - Test         | 1                      |
| 19. The effective dose for Product 2 (F2) - Test         | 0.05                   |
| 20. The effective dose for Product 3 (F3) - Test         | -                      |
| 21. The effective dose for Product 4 (F4) - Test         | FROMF2                 |
| 22. Number in population to be simulated                 | 100000                 |
| 23. Number of MC simulations                             | 1                      |
| 24. The random number seed for the first simulation      | 15975263               |
| 25. Source for the population file (POP)                 | UN4                    |
| 26. Source for the socioeconomic prevalence file (SEP)   | -                      |
| 27. Source for the current smoking prevalence file (CSP) | ISS3                   |
| 28. Source for the former smoking prevalence file (FSP)  | ISS3                   |
| 29. Source for the quit-time distribution file (QTD)     | NHIS2006               |
| 30. Source for the death file (MORT)                     | APR-20                 |
| 31. Source for the relative risk file (RR)               | PNLEST                 |
| 32. Source for the half-life file (H)                    | PNLEST                 |
| 33. Assumption Set for TTP Factor Reference              | F1                     |
| 34. Assumption Set for TTP Factor Test                   | F1                     |
| 35. Assumption Set for TTP Reference                     | ISS3                   |
| 36. Assumption Set for TTP Test                          | S4D                    |
| 37. Assumption Set for TP for socioeconomic group        | -                      |
| 38. Source for Output Choice file (OUTC)                 | BASIC                  |
| 39. Output for DTP P1                                    | N                      |
| 40. Output for DTP P2                                    | N                      |
| 41. Output for Main P Component                          | Y                      |
| 42. Output for DTP E1                                    | N                      |
| 43. Output for DTP E2                                    | N                      |
| 44. Output for DTP E3                                    | N                      |
| 45. Output for Main E Component                          | Y                      |
| 46. Output file name                                     | Sensitivity_Analysis_4 |
| 47. Run number for P-Component                           | -                      |
| 48. Results file for E-Component                         | -                      |
| 49. Components required                                  | PE                     |
| 50. Results folder for P to be used in E-Component       | -                      |
| 51. Fixed age of starting product use                    | 16                     |
| 52. Output absolute risk file?                           | N                      |



## Results for PHIM for Run 7 (Sensitivity\_Analysis\_4.RTF)

\*\*\*\*\*

TTP values for Run: 7, Scenario: NULL

| Variable Parameter | Value               |
|--------------------|---------------------|
| 1. Country         | US (United States)  |
| 2. Sex             | M (Males)           |
| 3. Assumption Set  | ISS3                |
| Note:              | Period is in Months |

| Age   | Period  | Initiation  | Cessation    | Re-initiation |
|-------|---------|-------------|--------------|---------------|
|       |         | Never<br>CC | CC<br>Former | Former<br>CC  |
| 10-14 | 1-12    | 0.003842    | 0.008742     | 0.000000      |
| 15-19 | 1-12    | 0.004720    | 0.003614     | 0.000000      |
| 20-24 | 1-12    | 0.000376    | 0.000943     | 0.000000      |
| 25-29 | 1-12    | 0.000187    | 0.001143     | 0.000000      |
| 30-34 | 1-12    | 0.000093    | 0.000871     | 0.000000      |
| 35-39 | 1-12    | 0.000000    | 0.000867     | 0.000000      |
| 40-44 | 1-12    | 0.000000    | 0.001399     | 0.000000      |
| 45-49 | 1-12    | 0.000000    | 0.002033     | 0.000000      |
| 50-54 | 1-12    | 0.000000    | 0.003209     | 0.000000      |
| 55-59 | 1-12    | 0.000000    | 0.003574     | 0.000000      |
| 60-64 | 1-12    | 0.000000    | 0.003460     | 0.000000      |
| 65-69 | 1-12    | 0.000000    | 0.004136     | 0.000000      |
| 70-74 | 1-12    | 0.000000    | 0.005592     | 0.000000      |
| 75-79 | 1-12    | 0.000000    | 0.005592     | 0.000000      |
| 10-14 | 13-72   | 0.004906    | 0.008742     | 0.000000      |
| 15-19 | 13-72   | 0.006989    | 0.004426     | 0.000000      |
| 20-24 | 13-72   | 0.000687    | 0.001527     | 0.000000      |
| 25-29 | 13-72   | 0.000962    | 0.001515     | 0.000000      |
| 30-34 | 13-72   | 0.000364    | 0.001227     | 0.000000      |
| 35-39 | 13-72   | 0.000000    | 0.001630     | 0.000000      |
| 40-44 | 13-72   | 0.000000    | 0.001852     | 0.000000      |
| 45-49 | 13-72   | 0.000000    | 0.002667     | 0.000000      |
| 50-54 | 13-72   | 0.000000    | 0.003208     | 0.000000      |
| 55-59 | 13-72   | 0.000000    | 0.003978     | 0.000000      |
| 60-64 | 13-72   | 0.000000    | 0.005771     | 0.000000      |
| 65-69 | 13-72   | 0.000000    | 0.010432     | 0.000000      |
| 70-74 | 13-72   | 0.000000    | 0.007079     | 0.000000      |
| 75-79 | 13-72   | 0.000000    | 0.007079     | 0.000000      |
| 10-14 | 73-132  | 0.004312    | 0.008742     | 0.000000      |
| 15-19 | 73-132  | 0.005330    | 0.003289     | 0.000000      |
| 20-24 | 73-132  | 0.002456    | 0.003844     | 0.000000      |
| 25-29 | 73-132  | 0.000839    | 0.002006     | 0.000000      |
| 30-34 | 73-132  | 0.000414    | 0.001329     | 0.000000      |
| 35-39 | 73-132  | 0.000000    | 0.001278     | 0.000000      |
| 40-44 | 73-132  | 0.000000    | 0.001691     | 0.000000      |
| 45-49 | 73-132  | 0.000000    | 0.002904     | 0.000000      |
| 50-54 | 73-132  | 0.000000    | 0.003319     | 0.000000      |
| 55-59 | 73-132  | 0.000000    | 0.003976     | 0.000000      |
| 60-64 | 73-132  | 0.000000    | 0.005235     | 0.000000      |
| 65-69 | 73-132  | 0.000000    | 0.005901     | 0.000000      |
| 70-74 | 73-132  | 0.000000    | 0.005615     | 0.000000      |
| 75-79 | 73-132  | 0.000000    | 0.005615     | 0.000000      |
| 10-14 | 133-192 | 0.003468    | 0.008742     | 0.000000      |
| 15-19 | 133-192 | 0.004675    | 0.003732     | 0.000000      |
| 20-24 | 133-192 | 0.000062    | 0.002260     | 0.000000      |
| 25-29 | 133-192 | 0.001422    | 0.002822     | 0.000000      |
| 30-34 | 133-192 | 0.000696    | 0.002610     | 0.000000      |
| 35-39 | 133-192 | 0.000000    | 0.002058     | 0.000000      |
| 40-44 | 133-192 | 0.000000    | 0.002310     | 0.000000      |
| 45-49 | 133-192 | 0.000000    | 0.002256     | 0.000000      |
| 50-54 | 133-192 | 0.000000    | 0.002663     | 0.000000      |
| 55-59 | 133-192 | 0.000000    | 0.001746     | 0.000000      |
| 60-64 | 133-192 | 0.000000    | 0.005809     | 0.000000      |
| 65-69 | 133-192 | 0.000000    | 0.005896     | 0.000000      |
| 70-74 | 133-192 | 0.000000    | 0.007323     | 0.000000      |
| 75-79 | 133-192 | 0.000000    | 0.007323     | 0.000000      |
| 10-14 | 193-252 | 0.002314    | 0.008742     | 0.000000      |
| 15-19 | 193-252 | 0.003987    | 0.005036     | 0.000000      |
| 20-24 | 193-252 | 0.000320    | 0.002857     | 0.000000      |
| 25-29 | 193-252 | 0.000251    | 0.002314     | 0.000000      |
| 30-34 | 193-252 | 0.000125    | 0.004343     | 0.000000      |
| 35-39 | 193-252 | 0.000000    | 0.002092     | 0.000000      |
| 40-44 | 193-252 | 0.000000    | 0.002566     | 0.000000      |
| 45-49 | 193-252 | 0.000000    | 0.002311     | 0.000000      |
| 50-54 | 193-252 | 0.000000    | 0.003209     | 0.000000      |

### Results for PHIM for Run 7 (Sensitivity\_Analysis\_4.RTF)

|       |         |          |          |          |
|-------|---------|----------|----------|----------|
| 55-59 | 193-252 | 0.000000 | 0.004057 | 0.000000 |
| 60-64 | 193-252 | 0.000000 | 0.007166 | 0.000000 |
| 65-69 | 193-252 | 0.000000 | 0.004281 | 0.000000 |
| 70-74 | 193-252 | 0.000000 | 0.004580 | 0.000000 |
| 75-79 | 193-252 | 0.000000 | 0.004580 | 0.000000 |
| 10-14 | 253+    | 0.001325 | 0.008742 | 0.000000 |
| 15-19 | 253+    | 0.002984 | 0.010602 | 0.000000 |
| 20-24 | 253+    | 0.000452 | 0.004314 | 0.000000 |
| 25-29 | 253+    | 0.000225 | 0.003645 | 0.000000 |
| 30-34 | 253+    | 0.000112 | 0.004512 | 0.000000 |
| 35-39 | 253+    | 0.000000 | 0.002147 | 0.000000 |
| 40-44 | 253+    | 0.000000 | 0.002636 | 0.000000 |
| 45-49 | 253+    | 0.000000 | 0.001051 | 0.000000 |
| 50-54 | 253+    | 0.000000 | 0.002519 | 0.000000 |
| 55-59 | 253+    | 0.000000 | 0.003693 | 0.000000 |
| 60-64 | 253+    | 0.000000 | 0.005888 | 0.000000 |
| 65-69 | 253+    | 0.000000 | 0.004823 | 0.000000 |
| 70-74 | 253+    | 0.000000 | 0.004733 | 0.000000 |
| 75-79 | 253+    | 0.000000 | 0.004733 | 0.000000 |

## Results for PHIM for Run 7 (Sensitivity\_Analysis\_4.RTF)

\*\*\*\*\*

TTP values for Run: 7, Scenario: Ecig

| Variable Parameter | Value               |
|--------------------|---------------------|
| 1. Country         | US (United States)  |
| 2. Sex             | M (Males)           |
| 3. Assumption Set  | S4D                 |
| Note:              | Period is in Months |

| Age   | Period  | Initiation  |               |               | Cessation    |                |                | Re-initiation |                |                |
|-------|---------|-------------|---------------|---------------|--------------|----------------|----------------|---------------|----------------|----------------|
|       |         | Never<br>CC | Never<br>Ecig | Never<br>Dual | CC<br>Former | Ecig<br>Former | Dual<br>Former | Former<br>CC  | Former<br>Ecig | Former<br>Dual |
| 10-14 | 1-12    | 0.001921    | 0.002882      | 0.000000      | 0.008742     | 0.008742       | 0.000000       | 0.000000      | 0.000000       | 0.000000       |
| 15-19 | 1-12    | 0.002360    | 0.003540      | 0.000000      | 0.003614     | 0.003614       | 0.000000       | 0.000000      | 0.000000       | 0.000000       |
| 20-24 | 1-12    | 0.000188    | 0.000282      | 0.000000      | 0.000943     | 0.000943       | 0.000000       | 0.000000      | 0.000000       | 0.000000       |
| 25-29 | 1-12    | 0.000093    | 0.000140      | 0.000000      | 0.001143     | 0.001143       | 0.000000       | 0.000000      | 0.000000       | 0.000000       |
| 30-34 | 1-12    | 0.000047    | 0.000070      | 0.000000      | 0.000871     | 0.000871       | 0.000000       | 0.000000      | 0.000000       | 0.000000       |
| 35-39 | 1-12    | 0.000000    | 0.000000      | 0.000000      | 0.000867     | 0.000867       | 0.000000       | 0.000000      | 0.000000       | 0.000000       |
| 40-44 | 1-12    | 0.000000    | 0.000000      | 0.000000      | 0.001399     | 0.001399       | 0.000000       | 0.000000      | 0.000000       | 0.000000       |
| 45-49 | 1-12    | 0.000000    | 0.000000      | 0.000000      | 0.002033     | 0.002033       | 0.000000       | 0.000000      | 0.000000       | 0.000000       |
| 50-54 | 1-12    | 0.000000    | 0.000000      | 0.000000      | 0.003209     | 0.003209       | 0.000000       | 0.000000      | 0.000000       | 0.000000       |
| 55-59 | 1-12    | 0.000000    | 0.000000      | 0.000000      | 0.003574     | 0.003574       | 0.000000       | 0.000000      | 0.000000       | 0.000000       |
| 60-64 | 1-12    | 0.000000    | 0.000000      | 0.000000      | 0.003460     | 0.003460       | 0.000000       | 0.000000      | 0.000000       | 0.000000       |
| 65-69 | 1-12    | 0.000000    | 0.000000      | 0.000000      | 0.004136     | 0.004136       | 0.000000       | 0.000000      | 0.000000       | 0.000000       |
| 70-74 | 1-12    | 0.000000    | 0.000000      | 0.000000      | 0.005592     | 0.005592       | 0.000000       | 0.000000      | 0.000000       | 0.000000       |
| 75-79 | 1-12    | 0.000000    | 0.000000      | 0.000000      | 0.005592     | 0.005592       | 0.000000       | 0.000000      | 0.000000       | 0.000000       |
| 10-14 | 13-72   | 0.001962    | 0.004415      | 0.000000      | 0.008742     | 0.008742       | 0.000000       | 0.000000      | 0.000000       | 0.000000       |
| 15-19 | 13-72   | 0.002796    | 0.006290      | 0.000000      | 0.004426     | 0.004426       | 0.000000       | 0.000000      | 0.000000       | 0.000000       |
| 20-24 | 13-72   | 0.000275    | 0.000618      | 0.000000      | 0.001527     | 0.001527       | 0.000000       | 0.000000      | 0.000000       | 0.000000       |
| 25-29 | 13-72   | 0.000385    | 0.000866      | 0.000000      | 0.001515     | 0.001515       | 0.000000       | 0.000000      | 0.000000       | 0.000000       |
| 30-34 | 13-72   | 0.000146    | 0.000328      | 0.000000      | 0.001227     | 0.001227       | 0.000000       | 0.000000      | 0.000000       | 0.000000       |
| 35-39 | 13-72   | 0.000000    | 0.000000      | 0.000000      | 0.001630     | 0.001630       | 0.000000       | 0.000000      | 0.000000       | 0.000000       |
| 40-44 | 13-72   | 0.000000    | 0.000000      | 0.000000      | 0.001852     | 0.001852       | 0.000000       | 0.000000      | 0.000000       | 0.000000       |
| 45-49 | 13-72   | 0.000000    | 0.000000      | 0.000000      | 0.002667     | 0.002667       | 0.000000       | 0.000000      | 0.000000       | 0.000000       |
| 50-54 | 13-72   | 0.000000    | 0.000000      | 0.000000      | 0.003208     | 0.003208       | 0.000000       | 0.000000      | 0.000000       | 0.000000       |
| 55-59 | 13-72   | 0.000000    | 0.000000      | 0.000000      | 0.003978     | 0.003978       | 0.000000       | 0.000000      | 0.000000       | 0.000000       |
| 60-64 | 13-72   | 0.000000    | 0.000000      | 0.000000      | 0.005771     | 0.005771       | 0.000000       | 0.000000      | 0.000000       | 0.000000       |
| 65-69 | 13-72   | 0.000000    | 0.000000      | 0.000000      | 0.010432     | 0.010432       | 0.000000       | 0.000000      | 0.000000       | 0.000000       |
| 70-74 | 13-72   | 0.000000    | 0.000000      | 0.000000      | 0.007079     | 0.007079       | 0.000000       | 0.000000      | 0.000000       | 0.000000       |
| 75-79 | 13-72   | 0.000000    | 0.000000      | 0.000000      | 0.007079     | 0.007079       | 0.000000       | 0.000000      | 0.000000       | 0.000000       |
| 10-14 | 73-132  | 0.000862    | 0.005174      | 0.000000      | 0.008742     | 0.008742       | 0.000000       | 0.000000      | 0.000000       | 0.000000       |
| 15-19 | 73-132  | 0.001066    | 0.006396      | 0.000000      | 0.003289     | 0.003289       | 0.000000       | 0.000000      | 0.000000       | 0.000000       |
| 20-24 | 73-132  | 0.000491    | 0.002947      | 0.000000      | 0.003844     | 0.003844       | 0.000000       | 0.000000      | 0.000000       | 0.000000       |
| 25-29 | 73-132  | 0.000168    | 0.001007      | 0.000000      | 0.002006     | 0.002006       | 0.000000       | 0.000000      | 0.000000       | 0.000000       |
| 30-34 | 73-132  | 0.000083    | 0.000497      | 0.000000      | 0.001329     | 0.001329       | 0.000000       | 0.000000      | 0.000000       | 0.000000       |
| 35-39 | 73-132  | 0.000000    | 0.000000      | 0.000000      | 0.001278     | 0.001278       | 0.000000       | 0.000000      | 0.000000       | 0.000000       |
| 40-44 | 73-132  | 0.000000    | 0.000000      | 0.000000      | 0.001691     | 0.001691       | 0.000000       | 0.000000      | 0.000000       | 0.000000       |
| 45-49 | 73-132  | 0.000000    | 0.000000      | 0.000000      | 0.002904     | 0.002904       | 0.000000       | 0.000000      | 0.000000       | 0.000000       |
| 50-54 | 73-132  | 0.000000    | 0.000000      | 0.000000      | 0.003319     | 0.003319       | 0.000000       | 0.000000      | 0.000000       | 0.000000       |
| 55-59 | 73-132  | 0.000000    | 0.000000      | 0.000000      | 0.003976     | 0.003976       | 0.000000       | 0.000000      | 0.000000       | 0.000000       |
| 60-64 | 73-132  | 0.000000    | 0.000000      | 0.000000      | 0.005235     | 0.005235       | 0.000000       | 0.000000      | 0.000000       | 0.000000       |
| 65-69 | 73-132  | 0.000000    | 0.000000      | 0.000000      | 0.005901     | 0.005901       | 0.000000       | 0.000000      | 0.000000       | 0.000000       |
| 70-74 | 73-132  | 0.000000    | 0.000000      | 0.000000      | 0.005615     | 0.005615       | 0.000000       | 0.000000      | 0.000000       | 0.000000       |
| 75-79 | 73-132  | 0.000000    | 0.000000      | 0.000000      | 0.005615     | 0.005615       | 0.000000       | 0.000000      | 0.000000       | 0.000000       |
| 10-14 | 133-192 | 0.000173    | 0.004941      | 0.000000      | 0.008742     | 0.008742       | 0.000000       | 0.000000      | 0.000000       | 0.000000       |
| 15-19 | 133-192 | 0.000234    | 0.006663      | 0.000000      | 0.003732     | 0.003732       | 0.000000       | 0.000000      | 0.000000       | 0.000000       |
| 20-24 | 133-192 | 0.000003    | 0.000089      | 0.000000      | 0.002260     | 0.002260       | 0.000000       | 0.000000      | 0.000000       | 0.000000       |
| 25-29 | 133-192 | 0.000071    | 0.002027      | 0.000000      | 0.002822     | 0.002822       | 0.000000       | 0.000000      | 0.000000       | 0.000000       |
| 30-34 | 133-192 | 0.000035    | 0.000992      | 0.000000      | 0.002610     | 0.002610       | 0.000000       | 0.000000      | 0.000000       | 0.000000       |
| 35-39 | 133-192 | 0.000000    | 0.000000      | 0.000000      | 0.002058     | 0.002058       | 0.000000       | 0.000000      | 0.000000       | 0.000000       |
| 40-44 | 133-192 | 0.000000    | 0.000000      | 0.000000      | 0.002310     | 0.002310       | 0.000000       | 0.000000      | 0.000000       | 0.000000       |
| 45-49 | 133-192 | 0.000000    | 0.000000      | 0.000000      | 0.002256     | 0.002256       | 0.000000       | 0.000000      | 0.000000       | 0.000000       |
| 50-54 | 133-192 | 0.000000    | 0.000000      | 0.000000      | 0.002663     | 0.002663       | 0.000000       | 0.000000      | 0.000000       | 0.000000       |
| 55-59 | 133-192 | 0.000000    | 0.000000      | 0.000000      | 0.001747     | 0.001747       | 0.000000       | 0.000000      | 0.000000       | 0.000000       |
| 60-64 | 133-192 | 0.000000    | 0.000000      | 0.000000      | 0.005809     | 0.005809       | 0.000000       | 0.000000      | 0.000000       | 0.000000       |
| 65-69 | 133-192 | 0.000000    | 0.000000      | 0.000000      | 0.005896     | 0.005896       | 0.000000       | 0.000000      | 0.000000       | 0.000000       |
| 70-74 | 133-192 | 0.000000    | 0.000000      | 0.000000      | 0.007323     | 0.007323       | 0.000000       | 0.000000      | 0.000000       | 0.000000       |
| 75-79 | 133-192 | 0.000000    | 0.000000      | 0.000000      | 0.007323     | 0.007323       | 0.000000       | 0.000000      | 0.000000       | 0.000000       |
| 10-14 | 193-252 | 0.000116    | 0.003298      | 0.000000      | 0.008742     | 0.008742       | 0.000000       | 0.000000      | 0.000000       | 0.000000       |
| 15-19 | 193-252 | 0.000199    | 0.005681      | 0.000000      | 0.005036     | 0.005036       | 0.000000       | 0.000000      | 0.000000       | 0.000000       |
| 20-24 | 193-252 | 0.000016    | 0.000455      | 0.000000      | 0.002857     | 0.002857       | 0.000000       | 0.000000      | 0.000000       | 0.000000       |
| 25-29 | 193-252 | 0.000013    | 0.000358      | 0.000000      | 0.002314     | 0.002314       | 0.000000       | 0.000000      | 0.000000       | 0.000000       |
| 30-34 | 193-252 | 0.000006    | 0.000178      | 0.000000      | 0.004343     | 0.004343       | 0.000000       | 0.000000      | 0.000000       | 0.000000       |
| 35-39 | 193-252 | 0.000000    | 0.000000      | 0.000000      | 0.002092     | 0.002092       | 0.000000       | 0.000000      | 0.000000       | 0.000000       |
| 40-44 | 193-252 | 0.000000    | 0.000000      | 0.000000      | 0.002566     | 0.002566       | 0.000000       | 0.000000      | 0.000000       | 0.000000       |
| 45-49 | 193-252 | 0.000000    | 0.000000      | 0.000000      | 0.002311     | 0.002311       | 0.000000       | 0.000000      | 0.000000       | 0.000000       |
| 50-54 | 193-252 | 0.000000    | 0.000000      | 0.000000      | 0.003209     | 0.003209       | 0.000000       | 0.000000      | 0.000000       | 0.000000       |

### Results for PHIM for Run 7 (Sensitivity\_Analysis\_4.RTF)

|       |         |          |          |          |          |          |          |          |          |          |
|-------|---------|----------|----------|----------|----------|----------|----------|----------|----------|----------|
| 55-59 | 193-252 | 0.000000 | 0.000000 | 0.000000 | 0.004057 | 0.004057 | 0.000000 | 0.000000 | 0.000000 | 0.000000 |
| 60-64 | 193-252 | 0.000000 | 0.000000 | 0.000000 | 0.007166 | 0.007166 | 0.000000 | 0.000000 | 0.000000 | 0.000000 |
| 65-69 | 193-252 | 0.000000 | 0.000000 | 0.000000 | 0.004281 | 0.004281 | 0.000000 | 0.000000 | 0.000000 | 0.000000 |
| 70-74 | 193-252 | 0.000000 | 0.000000 | 0.000000 | 0.004580 | 0.004580 | 0.000000 | 0.000000 | 0.000000 | 0.000000 |
| 75-79 | 193-252 | 0.000000 | 0.000000 | 0.000000 | 0.004580 | 0.004580 | 0.000000 | 0.000000 | 0.000000 | 0.000000 |
| 10-14 | 253+    | 0.000066 | 0.001888 | 0.000000 | 0.008742 | 0.008742 | 0.000000 | 0.000000 | 0.000000 | 0.000000 |
| 15-19 | 253+    | 0.000149 | 0.004252 | 0.000000 | 0.010602 | 0.010602 | 0.000000 | 0.000000 | 0.000000 | 0.000000 |
| 20-24 | 253+    | 0.000023 | 0.000644 | 0.000000 | 0.004314 | 0.004314 | 0.000000 | 0.000000 | 0.000000 | 0.000000 |
| 25-29 | 253+    | 0.000011 | 0.000320 | 0.000000 | 0.003645 | 0.003645 | 0.000000 | 0.000000 | 0.000000 | 0.000000 |
| 30-34 | 253+    | 0.000006 | 0.000159 | 0.000000 | 0.004512 | 0.004512 | 0.000000 | 0.000000 | 0.000000 | 0.000000 |
| 35-39 | 253+    | 0.000000 | 0.000000 | 0.000000 | 0.002147 | 0.002147 | 0.000000 | 0.000000 | 0.000000 | 0.000000 |
| 40-44 | 253+    | 0.000000 | 0.000000 | 0.000000 | 0.002636 | 0.002636 | 0.000000 | 0.000000 | 0.000000 | 0.000000 |
| 45-49 | 253+    | 0.000000 | 0.000000 | 0.000000 | 0.001051 | 0.001051 | 0.000000 | 0.000000 | 0.000000 | 0.000000 |
| 50-54 | 253+    | 0.000000 | 0.000000 | 0.000000 | 0.002519 | 0.002519 | 0.000000 | 0.000000 | 0.000000 | 0.000000 |
| 55-59 | 253+    | 0.000000 | 0.000000 | 0.000000 | 0.003693 | 0.003693 | 0.000000 | 0.000000 | 0.000000 | 0.000000 |
| 60-64 | 253+    | 0.000000 | 0.000000 | 0.000000 | 0.005888 | 0.005888 | 0.000000 | 0.000000 | 0.000000 | 0.000000 |
| 65-69 | 253+    | 0.000000 | 0.000000 | 0.000000 | 0.004823 | 0.004823 | 0.000000 | 0.000000 | 0.000000 | 0.000000 |
| 70-74 | 253+    | 0.000000 | 0.000000 | 0.000000 | 0.004733 | 0.004733 | 0.000000 | 0.000000 | 0.000000 | 0.000000 |
| 75-79 | 253+    | 0.000000 | 0.000000 | 0.000000 | 0.004733 | 0.004733 | 0.000000 | 0.000000 | 0.000000 | 0.000000 |



### Results for PHIM for Run 7 (Sensitivity\_Analysis\_4.RTF)

|       |      |          |          |          |          |          |          |
|-------|------|----------|----------|----------|----------|----------|----------|
| 25-29 | 253+ | 0.015212 | 0.000000 | 0.000000 | 0.000000 | 0.000000 | 0.000000 |
| 30-34 | 253+ | 0.015460 | 0.000000 | 0.000000 | 0.000000 | 0.000000 | 0.000000 |
| 35-39 | 253+ | 0.014711 | 0.000000 | 0.000000 | 0.000000 | 0.000000 | 0.000000 |
| 40-44 | 253+ | 0.014241 | 0.000000 | 0.000000 | 0.000000 | 0.000000 | 0.000000 |
| 45-49 | 253+ | 0.013014 | 0.000000 | 0.000000 | 0.000000 | 0.000000 | 0.000000 |
| 50-54 | 253+ | 0.011768 | 0.000000 | 0.000000 | 0.000000 | 0.000000 | 0.000000 |
| 55-59 | 253+ | 0.011032 | 0.000000 | 0.000000 | 0.000000 | 0.000000 | 0.000000 |
| 60-64 | 253+ | 0.009525 | 0.000000 | 0.000000 | 0.000000 | 0.000000 | 0.000000 |
| 65-69 | 253+ | 0.006897 | 0.000000 | 0.000000 | 0.000000 | 0.000000 | 0.000000 |
| 70-74 | 253+ | 0.005435 | 0.000000 | 0.000000 | 0.000000 | 0.000000 | 0.000000 |
| 75-79 | 253+ | 0.005435 | 0.000000 | 0.000000 | 0.000000 | 0.000000 | 0.000000 |

## Results for PHIM for Run 7 (Sensitivity\_Analysis\_4.RTF)

\*\*\*\*\*

### Main Output for the Tobacco History for Run: 7, Simulation: 1, Scenario: NULL

| Variable Parameter          | Value              |
|-----------------------------|--------------------|
| 1. Country                  | US (United States) |
| 2. Sex                      | M (Males)          |
| 3. Year of start of process | 1990               |

Year of Follow-up: 2040, Age Group: All Ages  
 Period    Age Group    Smoking Group            N            %

|    |          |           |       |       |
|----|----------|-----------|-------|-------|
| 50 | All Ages | Never Any | 19445 | 50.68 |
| 50 | All Ages | CC        | 3024  | 7.88  |
| 50 | All Ages | Former    | 15896 | 41.43 |

Year of Follow-up: 2040, Age Group: 18-19  
 Period    Age Group    Smoking Group            N            %

|    |       |           |   |   |
|----|-------|-----------|---|---|
| 50 | 18-19 | Never Any | 0 | . |
| 50 | 18-19 | CC        | 0 | . |
| 50 | 18-19 | Former    | 0 | . |

Year of Follow-up: 2040, Age Group: 20-24  
 Period    Age Group    Smoking Group            N            %

|    |       |           |   |   |
|----|-------|-----------|---|---|
| 50 | 20-24 | Never Any | 0 | . |
| 50 | 20-24 | CC        | 0 | . |
| 50 | 20-24 | Former    | 0 | . |

Year of Follow-up: 2040, Age Group: 25-29  
 Period    Age Group    Smoking Group            N            %

|    |       |           |   |   |
|----|-------|-----------|---|---|
| 50 | 25-29 | Never Any | 0 | . |
| 50 | 25-29 | CC        | 0 | . |
| 50 | 25-29 | Former    | 0 | . |

Year of Follow-up: 2040, Age Group: 30-34  
 Period    Age Group    Smoking Group            N            %

|    |       |           |   |   |
|----|-------|-----------|---|---|
| 50 | 30-34 | Never Any | 0 | . |
| 50 | 30-34 | CC        | 0 | . |
| 50 | 30-34 | Former    | 0 | . |

Year of Follow-up: 2040, Age Group: 35-39  
 Period    Age Group    Smoking Group            N            %

|    |       |           |   |   |
|----|-------|-----------|---|---|
| 50 | 35-39 | Never Any | 0 | . |
| 50 | 35-39 | CC        | 0 | . |
| 50 | 35-39 | Former    | 0 | . |

Year of Follow-up: 2040, Age Group: 40-44  
 Period    Age Group    Smoking Group            N            %

|    |       |           |   |   |
|----|-------|-----------|---|---|
| 50 | 40-44 | Never Any | 0 | . |
| 50 | 40-44 | CC        | 0 | . |
| 50 | 40-44 | Former    | 0 | . |

Year of Follow-up: 2040, Age Group: 45-49  
 Period    Age Group    Smoking Group            N            %

|    |       |           |   |   |
|----|-------|-----------|---|---|
| 50 | 45-49 | Never Any | 0 | . |
| 50 | 45-49 | CC        | 0 | . |
| 50 | 45-49 | Former    | 0 | . |

Year of Follow-up: 2040, Age Group: 50-54  
 Period    Age Group    Smoking Group            N            %

|    |       |           |   |   |
|----|-------|-----------|---|---|
| 50 | 50-54 | Never Any | 0 | . |
| 50 | 50-54 | CC        | 0 | . |
| 50 | 50-54 | Former    | 0 | . |

Year of Follow-up: 2040, Age Group: 55-59  
 Period    Age Group    Smoking Group            N            %

|    |       |           |   |   |
|----|-------|-----------|---|---|
| 50 | 55-59 | Never Any | 0 | . |
| 50 | 55-59 | CC        | 0 | . |
| 50 | 55-59 | Former    | 0 | . |

Year of Follow-up: 2040, Age Group: 60-64  
 Period    Age Group    Smoking Group            N            %

### Results for PHIM for Run 7 (Sensitivity\_Analysis\_4.RTF)

|                                           |           |               |      |       |
|-------------------------------------------|-----------|---------------|------|-------|
| 50                                        | 60-64     | Never Any     | 4363 | 49.33 |
| 50                                        | 60-64     | CC            | 934  | 10.56 |
| 50                                        | 60-64     | Former        | 3548 | 40.11 |
| Year of Follow-up: 2040, Age Group: 65-69 |           |               |      |       |
| Period                                    | Age Group | Smoking Group | N    | %     |
| 50                                        | 65-69     | Never Any     | 4948 | 54.73 |
| 50                                        | 65-69     | CC            | 734  | 8.12  |
| 50                                        | 65-69     | Former        | 3358 | 37.15 |
| Year of Follow-up: 2040, Age Group: 70-74 |           |               |      |       |
| Period                                    | Age Group | Smoking Group | N    | %     |
| 50                                        | 70-74     | Never Any     | 5145 | 52.41 |
| 50                                        | 70-74     | CC            | 688  | 7.01  |
| 50                                        | 70-74     | Former        | 3983 | 40.58 |
| Year of Follow-up: 2040, Age Group: 75-79 |           |               |      |       |
| Period                                    | Age Group | Smoking Group | N    | %     |
| 50                                        | 75-79     | Never Any     | 4989 | 46.78 |
| 50                                        | 75-79     | CC            | 668  | 6.26  |
| 50                                        | 75-79     | Former        | 5007 | 46.95 |



## Results for PHIM for Run 7 (Sensitivity\_Analysis\_4.RTF)

\*\*\*\*\*

### Main Output for the Tobacco History for Run: 7, Simulation: 1, Scenario: Ecig

| Variable Parameter                           |           | Value              |       |       |               |             |               |                |              |
|----------------------------------------------|-----------|--------------------|-------|-------|---------------|-------------|---------------|----------------|--------------|
| 1. Country                                   |           | US (United States) |       |       |               |             |               |                |              |
| 2. Sex                                       |           | M (Males)          |       |       |               |             |               |                |              |
| 3. Year of start of process                  |           | 1990               |       |       |               |             |               |                |              |
| Year of Follow-up: 1990, Age Group: All Ages |           |                    |       |       |               |             |               |                |              |
| Period                                       | Age Group | Smoking Group      | N     | %     | Ever Quit (N) | Ever Quit % | Mean Yrs Quit | Short Term (n) | Short Term % |
| 0                                            | All Ages  | Never Any          | 34075 | 39.78 |               |             |               |                |              |
| 0                                            | All Ages  | CC                 | 27323 | 31.90 | 0             | 0.00        |               |                |              |
| 0                                            | All Ages  | Ecig               | 0     | 0.00  |               |             |               |                |              |
| 0                                            | All Ages  | Dual               | 0     | 0.00  |               |             |               |                |              |
| 0                                            | All Ages  | Former             | 24266 | 28.33 |               |             | 13.08         | 3623           | 14.93        |
| Year of Follow-up: 1990, Age Group: 18-19    |           |                    |       |       |               |             |               |                |              |
| Period                                       | Age Group | Smoking Group      | N     | %     | Ever Quit (N) | Ever Quit % | Mean Yrs Quit | Short Term (n) | Short Term % |
| 0                                            | 18-19     | Never Any          | 2783  | 78.42 |               |             |               |                |              |
| 0                                            | 18-19     | CC                 | 634   | 17.86 | 0             | 0.00        |               |                |              |
| 0                                            | 18-19     | Ecig               | 0     | 0.00  |               |             |               |                |              |
| 0                                            | 18-19     | Dual               | 0     | 0.00  |               |             |               |                |              |
| 0                                            | 18-19     | Former             | 132   | 3.72  |               |             | 0.11          | 132            | 100.00       |
| Year of Follow-up: 1990, Age Group: 20-24    |           |                    |       |       |               |             |               |                |              |
| Period                                       | Age Group | Smoking Group      | N     | %     | Ever Quit (N) | Ever Quit % | Mean Yrs Quit | Short Term (n) | Short Term % |
| 0                                            | 20-24     | Never Any          | 5722  | 58.29 |               |             |               |                |              |
| 0                                            | 20-24     | CC                 | 3199  | 32.59 | 0             | 0.00        |               |                |              |
| 0                                            | 20-24     | Ecig               | 0     | 0.00  |               |             |               |                |              |
| 0                                            | 20-24     | Dual               | 0     | 0.00  |               |             |               |                |              |
| 0                                            | 20-24     | Former             | 895   | 9.12  |               |             | 1.46          | 506            | 56.54        |
| Year of Follow-up: 1990, Age Group: 25-29    |           |                    |       |       |               |             |               |                |              |
| Period                                       | Age Group | Smoking Group      | N     | %     | Ever Quit (N) | Ever Quit % | Mean Yrs Quit | Short Term (n) | Short Term % |
| 0                                            | 25-29     | Never Any          | 5232  | 49.06 |               |             |               |                |              |
| 0                                            | 25-29     | CC                 | 3914  | 36.70 | 0             | 0.00        |               |                |              |
| 0                                            | 25-29     | Ecig               | 0     | 0.00  |               |             |               |                |              |
| 0                                            | 25-29     | Dual               | 0     | 0.00  |               |             |               |                |              |
| 0                                            | 25-29     | Former             | 1518  | 14.23 |               |             | 2.87          | 643            | 42.36        |
| Year of Follow-up: 1990, Age Group: 30-34    |           |                    |       |       |               |             |               |                |              |
| Period                                       | Age Group | Smoking Group      | N     | %     | Ever Quit (N) | Ever Quit % | Mean Yrs Quit | Short Term (n) | Short Term % |
| 0                                            | 30-34     | Never Any          | 4765  | 43.65 |               |             |               |                |              |
| 0                                            | 30-34     | CC                 | 4023  | 36.85 | 0             | 0.00        |               |                |              |
| 0                                            | 30-34     | Ecig               | 0     | 0.00  |               |             |               |                |              |
| 0                                            | 30-34     | Dual               | 0     | 0.00  |               |             |               |                |              |
| 0                                            | 30-34     | Former             | 2128  | 19.49 |               |             | 4.06          | 592            | 27.82        |
| Year of Follow-up: 1990, Age Group: 35-39    |           |                    |       |       |               |             |               |                |              |
| Period                                       | Age Group | Smoking Group      | N     | %     | Ever Quit (N) | Ever Quit % | Mean Yrs Quit | Short Term (n) | Short Term % |
| 0                                            | 35-39     | Never Any          | 3941  | 39.85 |               |             |               |                |              |
| 0                                            | 35-39     | CC                 | 3474  | 35.13 | 0             | 0.00        |               |                |              |
| 0                                            | 35-39     | Ecig               | 0     | 0.00  |               |             |               |                |              |
| 0                                            | 35-39     | Dual               | 0     | 0.00  |               |             |               |                |              |
| 0                                            | 35-39     | Former             | 2474  | 25.02 |               |             | 8.31          | 425            | 17.18        |
| Year of Follow-up: 1990, Age Group: 40-44    |           |                    |       |       |               |             |               |                |              |
| Period                                       | Age Group | Smoking Group      | N     | %     | Ever Quit (N) | Ever Quit % | Mean Yrs Quit | Short Term (n) | Short Term % |
| 0                                            | 40-44     | Never Any          | 2912  | 33.65 |               |             |               |                |              |
| 0                                            | 40-44     | CC                 | 3113  | 35.97 | 0             | 0.00        |               |                |              |
| 0                                            | 40-44     | Ecig               | 0     | 0.00  |               |             |               |                |              |
| 0                                            | 40-44     | Dual               | 0     | 0.00  |               |             |               |                |              |
| 0                                            | 40-44     | Former             | 2630  | 30.39 |               |             | 10.69         | 317            | 12.05        |
| Year of Follow-up: 1990, Age Group: 45-49    |           |                    |       |       |               |             |               |                |              |
| Period                                       | Age Group | Smoking Group      | N     | %     | Ever Quit (N) | Ever Quit % | Mean Yrs Quit | Short Term (n) | Short Term % |
| 0                                            | 45-49     | Never Any          | 1919  | 29.46 |               |             |               |                |              |
| 0                                            | 45-49     | CC                 | 2318  | 35.58 | 0             | 0.00        |               |                |              |
| 0                                            | 45-49     | Ecig               | 0     | 0.00  |               |             |               |                |              |
| 0                                            | 45-49     | Dual               | 0     | 0.00  |               |             |               |                |              |
| 0                                            | 45-49     | Former             | 2278  | 34.97 |               |             | 13.26         | 221            | 9.70         |
| Year of Follow-up: 1990, Age Group: 50-54    |           |                    |       |       |               |             |               |                |              |
| Period                                       | Age Group | Smoking Group      | N     | %     | Ever Quit (N) | Ever Quit % | Mean Yrs Quit | Short Term (n) | Short Term % |
| 0                                            | 50-54     | Never Any          | 1611  | 29.41 |               |             |               |                |              |
| 0                                            | 50-54     | CC                 | 1816  | 33.16 | 0             | 0.00        |               |                |              |

**Results for PHIM for Run 7 (Sensitivity\_Analysis\_4.RTF)**

|                                              |           |               |       |       |               |             |               |                |              |
|----------------------------------------------|-----------|---------------|-------|-------|---------------|-------------|---------------|----------------|--------------|
| 0                                            | 50-54     | Ecig          | 0     | 0.00  |               |             |               |                |              |
| 0                                            | 50-54     | Dual          | 0     | 0.00  |               |             |               |                |              |
| 0                                            | 50-54     | Former        | 2050  | 37.43 |               |             | 14.55         | 261            | 12.73        |
| Year of Follow-up: 1990, Age Group: 55-59    |           |               |       |       |               |             |               |                |              |
| Period                                       | Age Group | Smoking Group | N     | %     | Ever Quit (N) | Ever Quit % | Mean Yrs Quit | Short Term (n) | Short Term % |
| 0                                            | 55-59     | Never Any     | 1337  | 26.83 |               |             |               |                |              |
| 0                                            | 55-59     | CC            | 1520  | 30.50 | 0             | 0.00        |               |                |              |
| 0                                            | 55-59     | Ecig          | 0     | 0.00  |               |             |               |                |              |
| 0                                            | 55-59     | Dual          | 0     | 0.00  |               |             |               |                |              |
| 0                                            | 55-59     | Former        | 2126  | 42.67 |               |             | 14.80         | 216            | 10.16        |
| Year of Follow-up: 1990, Age Group: 60-64    |           |               |       |       |               |             |               |                |              |
| Period                                       | Age Group | Smoking Group | N     | %     | Ever Quit (N) | Ever Quit % | Mean Yrs Quit | Short Term (n) | Short Term % |
| 0                                            | 60-64     | Never Any     | 1169  | 23.83 |               |             |               |                |              |
| 0                                            | 60-64     | CC            | 1287  | 26.24 | 0             | 0.00        |               |                |              |
| 0                                            | 60-64     | Ecig          | 0     | 0.00  |               |             |               |                |              |
| 0                                            | 60-64     | Dual          | 0     | 0.00  |               |             |               |                |              |
| 0                                            | 60-64     | Former        | 2449  | 49.93 |               |             | 18.87         | 106            | 4.33         |
| Year of Follow-up: 1990, Age Group: 65-69    |           |               |       |       |               |             |               |                |              |
| Period                                       | Age Group | Smoking Group | N     | %     | Ever Quit (N) | Ever Quit % | Mean Yrs Quit | Short Term (n) | Short Term % |
| 0                                            | 65-69     | Never Any     | 1023  | 23.32 |               |             |               |                |              |
| 0                                            | 65-69     | CC            | 979   | 22.32 | 0             | 0.00        |               |                |              |
| 0                                            | 65-69     | Ecig          | 0     | 0.00  |               |             |               |                |              |
| 0                                            | 65-69     | Dual          | 0     | 0.00  |               |             |               |                |              |
| 0                                            | 65-69     | Former        | 2385  | 54.37 |               |             | 19.91         | 113            | 4.74         |
| Year of Follow-up: 1990, Age Group: 70-74    |           |               |       |       |               |             |               |                |              |
| Period                                       | Age Group | Smoking Group | N     | %     | Ever Quit (N) | Ever Quit % | Mean Yrs Quit | Short Term (n) | Short Term % |
| 0                                            | 70-74     | Never Any     | 961   | 27.46 |               |             |               |                |              |
| 0                                            | 70-74     | CC            | 675   | 19.29 | 0             | 0.00        |               |                |              |
| 0                                            | 70-74     | Ecig          | 0     | 0.00  |               |             |               |                |              |
| 0                                            | 70-74     | Dual          | 0     | 0.00  |               |             |               |                |              |
| 0                                            | 70-74     | Former        | 1863  | 53.24 |               |             | 20.69         | 23             | 1.23         |
| Year of Follow-up: 1990, Age Group: 75-79    |           |               |       |       |               |             |               |                |              |
| Period                                       | Age Group | Smoking Group | N     | %     | Ever Quit (N) | Ever Quit % | Mean Yrs Quit | Short Term (n) | Short Term % |
| 0                                            | 75-79     | Never Any     | 700   | 29.06 |               |             |               |                |              |
| 0                                            | 75-79     | CC            | 371   | 15.40 | 0             | 0.00        |               |                |              |
| 0                                            | 75-79     | Ecig          | 0     | 0.00  |               |             |               |                |              |
| 0                                            | 75-79     | Dual          | 0     | 0.00  |               |             |               |                |              |
| 0                                            | 75-79     | Former        | 1338  | 55.54 |               |             | 22.88         | 68             | 5.08         |
| Year of Follow-up: 1995, Age Group: All Ages |           |               |       |       |               |             |               |                |              |
| Period                                       | Age Group | Smoking Group | N     | %     | Ever Quit (N) | Ever Quit % | Mean Yrs Quit | Short Term (n) | Short Term % |
| 5                                            | All Ages  | Never Any     | 37668 | 40.81 |               |             |               |                |              |
| 5                                            | All Ages  | CC            | 11475 | 12.43 | 0             | 0.00        |               |                |              |
| 5                                            | All Ages  | Ecig          | 16191 | 17.54 |               |             |               |                |              |
| 5                                            | All Ages  | Dual          | 0     | 0.00  |               |             |               |                |              |
| 5                                            | All Ages  | Former        | 26956 | 29.21 |               |             | 15.16         | 1745           | 6.47         |
| Year of Follow-up: 1995, Age Group: 18-19    |           |               |       |       |               |             |               |                |              |
| Period                                       | Age Group | Smoking Group | N     | %     | Ever Quit (N) | Ever Quit % | Mean Yrs Quit | Short Term (n) | Short Term % |
| 5                                            | 18-19     | Never Any     | 2215  | 62.50 |               |             |               |                |              |
| 5                                            | 18-19     | CC            | 303   | 8.55  | 0             | 0.00        |               |                |              |
| 5                                            | 18-19     | Ecig          | 890   | 25.11 |               |             |               |                |              |
| 5                                            | 18-19     | Dual          | 0     | 0.00  |               |             |               |                |              |
| 5                                            | 18-19     | Former        | 136   | 3.84  |               |             | 1.10          | 95             | 69.85        |
| Year of Follow-up: 1995, Age Group: 20-24    |           |               |       |       |               |             |               |                |              |
| Period                                       | Age Group | Smoking Group | N     | %     | Ever Quit (N) | Ever Quit % | Mean Yrs Quit | Short Term (n) | Short Term % |
| 5                                            | 20-24     | Never Any     | 5440  | 60.18 |               |             |               |                |              |
| 5                                            | 20-24     | CC            | 930   | 10.29 | 0             | 0.00        |               |                |              |
| 5                                            | 20-24     | Ecig          | 2153  | 23.82 |               |             |               |                |              |
| 5                                            | 20-24     | Dual          | 0     | 0.00  |               |             |               |                |              |
| 5                                            | 20-24     | Former        | 517   | 5.72  |               |             | 2.71          | 163            | 31.53        |
| Year of Follow-up: 1995, Age Group: 25-29    |           |               |       |       |               |             |               |                |              |
| Period                                       | Age Group | Smoking Group | N     | %     | Ever Quit (N) | Ever Quit % | Mean Yrs Quit | Short Term (n) | Short Term % |
| 5                                            | 25-29     | Never Any     | 5406  | 55.07 |               |             |               |                |              |
| 5                                            | 25-29     | CC            | 1255  | 12.79 | 0             | 0.00        |               |                |              |
| 5                                            | 25-29     | Ecig          | 2006  | 20.44 |               |             |               |                |              |
| 5                                            | 25-29     | Dual          | 0     | 0.00  |               |             |               |                |              |
| 5                                            | 25-29     | Former        | 1149  | 11.71 |               |             | 5.43          | 116            | 10.10        |
| Year of Follow-up: 1995, Age Group: 30-34    |           |               |       |       |               |             |               |                |              |
| Period                                       | Age Group | Smoking Group | N     | %     | Ever Quit (N) | Ever Quit % | Mean Yrs Quit | Short Term (n) | Short Term % |

**Results for PHIM for Run 7 (Sensitivity\_Analysis\_4.RTF)**

|                                              |           |               |      |       |               |             |               |                |              |
|----------------------------------------------|-----------|---------------|------|-------|---------------|-------------|---------------|----------------|--------------|
| 5                                            | 30-34     | Never Any     | 5022 | 47.09 |               |             |               |                |              |
| 5                                            | 30-34     | CC            | 1480 | 13.88 | 0             | 0.00        |               |                |              |
| 5                                            | 30-34     | Ecig          | 2360 | 22.13 |               |             |               |                |              |
| 5                                            | 30-34     | Dual          | 0    | 0.00  |               |             |               |                |              |
| 5                                            | 30-34     | Former        | 1802 | 16.90 |               |             | 6.94          | 108            | 5.99         |
| Year of Follow-up: 1995, Age Group: 35-39    |           |               |      |       |               |             |               |                |              |
| Period                                       | Age Group | Smoking Group | N    | %     | Ever Quit (N) | Ever Quit % | Mean Yrs Quit | Short Term (n) | Short Term % |
| 5                                            | 35-39     | Never Any     | 4712 | 43.17 |               |             |               |                |              |
| 5                                            | 35-39     | CC            | 1496 | 13.70 | 0             | 0.00        |               |                |              |
| 5                                            | 35-39     | Ecig          | 2286 | 20.94 |               |             |               |                |              |
| 5                                            | 35-39     | Dual          | 0    | 0.00  |               |             |               |                |              |
| 5                                            | 35-39     | Former        | 2422 | 22.19 |               |             | 8.20          | 115            | 4.75         |
| Year of Follow-up: 1995, Age Group: 40-44    |           |               |      |       |               |             |               |                |              |
| Period                                       | Age Group | Smoking Group | N    | %     | Ever Quit (N) | Ever Quit % | Mean Yrs Quit | Short Term (n) | Short Term % |
| 5                                            | 40-44     | Never Any     | 3941 | 39.85 |               |             |               |                |              |
| 5                                            | 40-44     | CC            | 1280 | 12.94 | 0             | 0.00        |               |                |              |
| 5                                            | 40-44     | Ecig          | 1894 | 19.15 |               |             |               |                |              |
| 5                                            | 40-44     | Dual          | 0    | 0.00  |               |             |               |                |              |
| 5                                            | 40-44     | Former        | 2774 | 28.05 |               |             | 12.06         | 130            | 4.69         |
| Year of Follow-up: 1995, Age Group: 45-49    |           |               |      |       |               |             |               |                |              |
| Period                                       | Age Group | Smoking Group | N    | %     | Ever Quit (N) | Ever Quit % | Mean Yrs Quit | Short Term (n) | Short Term % |
| 5                                            | 45-49     | Never Any     | 2912 | 33.65 |               |             |               |                |              |
| 5                                            | 45-49     | CC            | 1236 | 14.28 | 0             | 0.00        |               |                |              |
| 5                                            | 45-49     | Ecig          | 1562 | 18.05 |               |             |               |                |              |
| 5                                            | 45-49     | Dual          | 0    | 0.00  |               |             |               |                |              |
| 5                                            | 45-49     | Former        | 2945 | 34.03 |               |             | 14.20         | 148            | 5.03         |
| Year of Follow-up: 1995, Age Group: 50-54    |           |               |      |       |               |             |               |                |              |
| Period                                       | Age Group | Smoking Group | N    | %     | Ever Quit (N) | Ever Quit % | Mean Yrs Quit | Short Term (n) | Short Term % |
| 5                                            | 50-54     | Never Any     | 1919 | 29.46 |               |             |               |                |              |
| 5                                            | 50-54     | CC            | 940  | 14.43 | 0             | 0.00        |               |                |              |
| 5                                            | 50-54     | Ecig          | 1015 | 15.58 |               |             |               |                |              |
| 5                                            | 50-54     | Dual          | 0    | 0.00  |               |             |               |                |              |
| 5                                            | 50-54     | Former        | 2641 | 40.54 |               |             | 15.98         | 175            | 6.63         |
| Year of Follow-up: 1995, Age Group: 55-59    |           |               |      |       |               |             |               |                |              |
| Period                                       | Age Group | Smoking Group | N    | %     | Ever Quit (N) | Ever Quit % | Mean Yrs Quit | Short Term (n) | Short Term % |
| 5                                            | 55-59     | Never Any     | 1611 | 29.41 |               |             |               |                |              |
| 5                                            | 55-59     | CC            | 740  | 13.51 | 0             | 0.00        |               |                |              |
| 5                                            | 55-59     | Ecig          | 762  | 13.91 |               |             |               |                |              |
| 5                                            | 55-59     | Dual          | 0    | 0.00  |               |             |               |                |              |
| 5                                            | 55-59     | Former        | 2364 | 43.16 |               |             | 17.21         | 122            | 5.16         |
| Year of Follow-up: 1995, Age Group: 60-64    |           |               |      |       |               |             |               |                |              |
| Period                                       | Age Group | Smoking Group | N    | %     | Ever Quit (N) | Ever Quit % | Mean Yrs Quit | Short Term (n) | Short Term % |
| 5                                            | 60-64     | Never Any     | 1337 | 26.83 |               |             |               |                |              |
| 5                                            | 60-64     | CC            | 597  | 11.98 | 0             | 0.00        |               |                |              |
| 5                                            | 60-64     | Ecig          | 572  | 11.48 |               |             |               |                |              |
| 5                                            | 60-64     | Dual          | 0    | 0.00  |               |             |               |                |              |
| 5                                            | 60-64     | Former        | 2477 | 49.71 |               |             | 17.27         | 143            | 5.77         |
| Year of Follow-up: 1995, Age Group: 65-69    |           |               |      |       |               |             |               |                |              |
| Period                                       | Age Group | Smoking Group | N    | %     | Ever Quit (N) | Ever Quit % | Mean Yrs Quit | Short Term (n) | Short Term % |
| 5                                            | 65-69     | Never Any     | 1169 | 23.83 |               |             |               |                |              |
| 5                                            | 65-69     | CC            | 477  | 9.72  | 0             | 0.00        |               |                |              |
| 5                                            | 65-69     | Ecig          | 360  | 7.34  |               |             |               |                |              |
| 5                                            | 65-69     | Dual          | 0    | 0.00  |               |             |               |                |              |
| 5                                            | 65-69     | Former        | 2899 | 59.10 |               |             | 20.44         | 196            | 6.76         |
| Year of Follow-up: 1995, Age Group: 70-74    |           |               |      |       |               |             |               |                |              |
| Period                                       | Age Group | Smoking Group | N    | %     | Ever Quit (N) | Ever Quit % | Mean Yrs Quit | Short Term (n) | Short Term % |
| 5                                            | 70-74     | Never Any     | 1023 | 23.32 |               |             |               |                |              |
| 5                                            | 70-74     | CC            | 438  | 9.98  | 0             | 0.00        |               |                |              |
| 5                                            | 70-74     | Ecig          | 196  | 4.47  |               |             |               |                |              |
| 5                                            | 70-74     | Dual          | 0    | 0.00  |               |             |               |                |              |
| 5                                            | 70-74     | Former        | 2730 | 62.23 |               |             | 22.00         | 137            | 5.02         |
| Year of Follow-up: 1995, Age Group: 75-79    |           |               |      |       |               |             |               |                |              |
| Period                                       | Age Group | Smoking Group | N    | %     | Ever Quit (N) | Ever Quit % | Mean Yrs Quit | Short Term (n) | Short Term % |
| 5                                            | 75-79     | Never Any     | 961  | 27.46 |               |             |               |                |              |
| 5                                            | 75-79     | CC            | 303  | 8.66  | 0             | 0.00        |               |                |              |
| 5                                            | 75-79     | Ecig          | 135  | 3.86  |               |             |               |                |              |
| 5                                            | 75-79     | Dual          | 0    | 0.00  |               |             |               |                |              |
| 5                                            | 75-79     | Former        | 2100 | 60.02 |               |             | 23.02         | 97             | 4.62         |
| Year of Follow-up: 2000, Age Group: All Ages |           |               |      |       |               |             |               |                |              |

**Results for PHIM for Run 7 (Sensitivity\_Analysis\_4.RTF)**

| Period                                    | Age Group | Smoking Group | N     | %     | Ever Quit (N) | Ever Quit % | Mean Yrs Quit | Short Term (n) | Short Term % |
|-------------------------------------------|-----------|---------------|-------|-------|---------------|-------------|---------------|----------------|--------------|
| 10                                        | All Ages  | Never Any     | 37583 | 39.94 |               |             |               |                |              |
| 10                                        | All Ages  | CC            | 4786  | 5.09  | 0             | 0.00        |               |                |              |
| 10                                        | All Ages  | Ecig          | 22069 | 23.45 |               |             |               |                |              |
| 10                                        | All Ages  | Dual          | 0     | 0.00  |               |             |               |                |              |
| 10                                        | All Ages  | Former        | 29654 | 31.52 |               |             | 16.70         | 1814           | 6.12         |
| Year of Follow-up: 2000, Age Group: 18-19 |           |               |       |       |               |             |               |                |              |
| Period                                    | Age Group | Smoking Group | N     | %     | Ever Quit (N) | Ever Quit % | Mean Yrs Quit | Short Term (n) | Short Term % |
| 10                                        | 18-19     | Never Any     | 0     | .     |               |             |               |                |              |
| 10                                        | 18-19     | CC            | 0     | .     | 0             | .           |               |                |              |
| 10                                        | 18-19     | Ecig          | 0     | .     |               |             |               |                |              |
| 10                                        | 18-19     | Dual          | 0     | .     |               |             |               |                |              |
| 10                                        | 18-19     | Former        | 0     | .     |               |             |               | 0              | .            |
| Year of Follow-up: 2000, Age Group: 20-24 |           |               |       |       |               |             |               |                |              |
| Period                                    | Age Group | Smoking Group | N     | %     | Ever Quit (N) | Ever Quit % | Mean Yrs Quit | Short Term (n) | Short Term % |
| 10                                        | 20-24     | Never Any     | 4038  | 45.65 |               |             |               |                |              |
| 10                                        | 20-24     | CC            | 421   | 4.76  | 0             | 0.00        |               |                |              |
| 10                                        | 20-24     | Ecig          | 3287  | 37.16 |               |             |               |                |              |
| 10                                        | 20-24     | Dual          | 0     | 0.00  |               |             |               |                |              |
| 10                                        | 20-24     | Former        | 1099  | 12.43 |               |             | 3.41          | 309            | 28.12        |
| Year of Follow-up: 2000, Age Group: 25-29 |           |               |       |       |               |             |               |                |              |
| Period                                    | Age Group | Smoking Group | N     | %     | Ever Quit (N) | Ever Quit % | Mean Yrs Quit | Short Term (n) | Short Term % |
| 10                                        | 25-29     | Never Any     | 4870  | 53.87 |               |             |               |                |              |
| 10                                        | 25-29     | CC            | 389   | 4.30  | 0             | 0.00        |               |                |              |
| 10                                        | 25-29     | Ecig          | 2750  | 30.42 |               |             |               |                |              |
| 10                                        | 25-29     | Dual          | 0     | 0.00  |               |             |               |                |              |
| 10                                        | 25-29     | Former        | 1031  | 11.40 |               |             | 4.78          | 220            | 21.34        |
| Year of Follow-up: 2000, Age Group: 30-34 |           |               |       |       |               |             |               |                |              |
| Period                                    | Age Group | Smoking Group | N     | %     | Ever Quit (N) | Ever Quit % | Mean Yrs Quit | Short Term (n) | Short Term % |
| 10                                        | 30-34     | Never Any     | 5125  | 52.21 |               |             |               |                |              |
| 10                                        | 30-34     | CC            | 480   | 4.89  | 0             | 0.00        |               |                |              |
| 10                                        | 30-34     | Ecig          | 2744  | 27.95 |               |             |               |                |              |
| 10                                        | 30-34     | Dual          | 0     | 0.00  |               |             |               |                |              |
| 10                                        | 30-34     | Former        | 1467  | 14.94 |               |             | 8.58          | 128            | 8.73         |
| Year of Follow-up: 2000, Age Group: 35-39 |           |               |       |       |               |             |               |                |              |
| Period                                    | Age Group | Smoking Group | N     | %     | Ever Quit (N) | Ever Quit % | Mean Yrs Quit | Short Term (n) | Short Term % |
| 10                                        | 35-39     | Never Any     | 4926  | 46.19 |               |             |               |                |              |
| 10                                        | 35-39     | CC            | 609   | 5.71  | 0             | 0.00        |               |                |              |
| 10                                        | 35-39     | Ecig          | 3046  | 28.56 |               |             |               |                |              |
| 10                                        | 35-39     | Dual          | 0     | 0.00  |               |             |               |                |              |
| 10                                        | 35-39     | Former        | 2083  | 19.53 |               |             | 10.59         | 111            | 5.33         |
| Year of Follow-up: 2000, Age Group: 40-44 |           |               |       |       |               |             |               |                |              |
| Period                                    | Age Group | Smoking Group | N     | %     | Ever Quit (N) | Ever Quit % | Mean Yrs Quit | Short Term (n) | Short Term % |
| 10                                        | 40-44     | Never Any     | 4712  | 43.17 |               |             |               |                |              |
| 10                                        | 40-44     | CC            | 567   | 5.19  | 0             | 0.00        |               |                |              |
| 10                                        | 40-44     | Ecig          | 2866  | 26.26 |               |             |               |                |              |
| 10                                        | 40-44     | Dual          | 0     | 0.00  |               |             |               |                |              |
| 10                                        | 40-44     | Former        | 2771  | 25.38 |               |             | 11.81         | 126            | 4.55         |
| Year of Follow-up: 2000, Age Group: 45-49 |           |               |       |       |               |             |               |                |              |
| Period                                    | Age Group | Smoking Group | N     | %     | Ever Quit (N) | Ever Quit % | Mean Yrs Quit | Short Term (n) | Short Term % |
| 10                                        | 45-49     | Never Any     | 3941  | 39.85 |               |             |               |                |              |
| 10                                        | 45-49     | CC            | 484   | 4.89  | 0             | 0.00        |               |                |              |
| 10                                        | 45-49     | Ecig          | 2312  | 23.38 |               |             |               |                |              |
| 10                                        | 45-49     | Dual          | 0     | 0.00  |               |             |               |                |              |
| 10                                        | 45-49     | Former        | 3152  | 31.87 |               |             | 15.25         | 163            | 5.17         |
| Year of Follow-up: 2000, Age Group: 50-54 |           |               |       |       |               |             |               |                |              |
| Period                                    | Age Group | Smoking Group | N     | %     | Ever Quit (N) | Ever Quit % | Mean Yrs Quit | Short Term (n) | Short Term % |
| 10                                        | 50-54     | Never Any     | 2912  | 33.65 |               |             |               |                |              |
| 10                                        | 50-54     | CC            | 473   | 5.47  | 0             | 0.00        |               |                |              |
| 10                                        | 50-54     | Ecig          | 1859  | 21.48 |               |             |               |                |              |
| 10                                        | 50-54     | Dual          | 0     | 0.00  |               |             |               |                |              |
| 10                                        | 50-54     | Former        | 3411  | 39.41 |               |             | 16.85         | 186            | 5.45         |
| Year of Follow-up: 2000, Age Group: 55-59 |           |               |       |       |               |             |               |                |              |
| Period                                    | Age Group | Smoking Group | N     | %     | Ever Quit (N) | Ever Quit % | Mean Yrs Quit | Short Term (n) | Short Term % |
| 10                                        | 55-59     | Never Any     | 1919  | 29.46 |               |             |               |                |              |
| 10                                        | 55-59     | CC            | 363   | 5.57  | 0             | 0.00        |               |                |              |
| 10                                        | 55-59     | Ecig          | 1194  | 18.33 |               |             |               |                |              |
| 10                                        | 55-59     | Dual          | 0     | 0.00  |               |             |               |                |              |

**Results for PHIM for Run 7 (Sensitivity\_Analysis\_4.RTF)**

| Year of Follow-up: 2000, Age Group: 60-64    | Period   | Age Group | Smoking Group | N     | %     | Ever Quit (N) | Ever Quit % | Mean Yrs Quit | Short Term (n) | Short Term % |
|----------------------------------------------|----------|-----------|---------------|-------|-------|---------------|-------------|---------------|----------------|--------------|
| 10                                           | 55-59    | Former    |               | 3039  | 46.65 |               |             | 18.50         | 146            | 4.80         |
| 10                                           | 60-64    | Never Any |               | 1611  | 29.41 |               |             |               |                |              |
| 10                                           | 60-64    | CC        |               | 306   | 5.59  | 0             | 0.00        |               |                |              |
| 10                                           | 60-64    | Ecig      |               | 852   | 15.56 |               |             |               |                |              |
| 10                                           | 60-64    | Dual      |               | 0     | 0.00  |               |             |               |                |              |
| 10                                           | 60-64    | Former    |               | 2708  | 49.44 |               |             | 19.63         | 144            | 5.32         |
| Year of Follow-up: 2000, Age Group: 65-69    | Period   | Age Group | Smoking Group | N     | %     | Ever Quit (N) | Ever Quit % | Mean Yrs Quit | Short Term (n) | Short Term % |
| 10                                           | 65-69    | Never Any |               | 1337  | 26.83 |               |             |               |                |              |
| 10                                           | 65-69    | CC        |               | 244   | 4.90  | 0             | 0.00        |               |                |              |
| 10                                           | 65-69    | Ecig      |               | 603   | 12.10 |               |             |               |                |              |
| 10                                           | 65-69    | Dual      |               | 0     | 0.00  |               |             |               |                |              |
| 10                                           | 65-69    | Former    |               | 2799  | 56.17 |               |             | 19.95         | 120            | 4.29         |
| Year of Follow-up: 2000, Age Group: 70-74    | Period   | Age Group | Smoking Group | N     | %     | Ever Quit (N) | Ever Quit % | Mean Yrs Quit | Short Term (n) | Short Term % |
| 10                                           | 70-74    | Never Any |               | 1169  | 23.83 |               |             |               |                |              |
| 10                                           | 70-74    | CC        |               | 236   | 4.81  | 0             | 0.00        |               |                |              |
| 10                                           | 70-74    | Ecig      |               | 327   | 6.67  |               |             |               |                |              |
| 10                                           | 70-74    | Dual      |               | 0     | 0.00  |               |             |               |                |              |
| 10                                           | 70-74    | Former    |               | 3173  | 64.69 |               |             | 23.44         | 94             | 2.96         |
| Year of Follow-up: 2000, Age Group: 75-79    | Period   | Age Group | Smoking Group | N     | %     | Ever Quit (N) | Ever Quit % | Mean Yrs Quit | Short Term (n) | Short Term % |
| 10                                           | 75-79    | Never Any |               | 1023  | 23.32 |               |             |               |                |              |
| 10                                           | 75-79    | CC        |               | 214   | 4.88  | 0             | 0.00        |               |                |              |
| 10                                           | 75-79    | Ecig      |               | 229   | 5.22  |               |             |               |                |              |
| 10                                           | 75-79    | Dual      |               | 0     | 0.00  |               |             |               |                |              |
| 10                                           | 75-79    | Former    |               | 2921  | 66.58 |               |             | 25.38         | 67             | 2.29         |
| Year of Follow-up: 2005, Age Group: All Ages | Period   | Age Group | Smoking Group | N     | %     | Ever Quit (N) | Ever Quit % | Mean Yrs Quit | Short Term (n) | Short Term % |
| 15                                           | All Ages | Never Any |               | 35646 | 39.74 |               |             |               |                |              |
| 15                                           | All Ages | CC        |               | 1887  | 2.10  | 0             | 0.00        |               |                |              |
| 15                                           | All Ages | Ecig      |               | 21328 | 23.78 |               |             |               |                |              |
| 15                                           | All Ages | Dual      |               | 0     | 0.00  |               |             |               |                |              |
| 15                                           | All Ages | Former    |               | 30844 | 34.38 |               |             | 18.25         | 1656           | 5.37         |
| Year of Follow-up: 2005, Age Group: 18-19    | Period   | Age Group | Smoking Group | N     | %     | Ever Quit (N) | Ever Quit % | Mean Yrs Quit | Short Term (n) | Short Term % |
| 15                                           | 18-19    | Never Any |               | 0     | .     |               |             |               |                |              |
| 15                                           | 18-19    | CC        |               | 0     | .     | 0             | .           |               |                |              |
| 15                                           | 18-19    | Ecig      |               | 0     | .     |               |             |               |                |              |
| 15                                           | 18-19    | Dual      |               | 0     | .     |               |             |               |                |              |
| 15                                           | 18-19    | Former    |               | 0     | .     |               |             | .             | 0              | .            |
| Year of Follow-up: 2005, Age Group: 20-24    | Period   | Age Group | Smoking Group | N     | %     | Ever Quit (N) | Ever Quit % | Mean Yrs Quit | Short Term (n) | Short Term % |
| 15                                           | 20-24    | Never Any |               | 0     | .     |               |             |               |                |              |
| 15                                           | 20-24    | CC        |               | 0     | .     | 0             | .           |               |                |              |
| 15                                           | 20-24    | Ecig      |               | 0     | .     |               |             |               |                |              |
| 15                                           | 20-24    | Dual      |               | 0     | .     |               |             |               |                |              |
| 15                                           | 20-24    | Former    |               | 0     | .     |               |             | .             | 0              | .            |
| Year of Follow-up: 2005, Age Group: 25-29    | Period   | Age Group | Smoking Group | N     | %     | Ever Quit (N) | Ever Quit % | Mean Yrs Quit | Short Term (n) | Short Term % |
| 15                                           | 25-29    | Never Any |               | 3679  | 41.59 |               |             |               |                |              |
| 15                                           | 25-29    | CC        |               | 162   | 1.83  | 0             | 0.00        |               |                |              |
| 15                                           | 25-29    | Ecig      |               | 3338  | 37.74 |               |             |               |                |              |
| 15                                           | 25-29    | Dual      |               | 0     | 0.00  |               |             |               |                |              |
| 15                                           | 25-29    | Former    |               | 1666  | 18.84 |               |             | 6.27          | 217            | 13.03        |
| Year of Follow-up: 2005, Age Group: 30-34    | Period   | Age Group | Smoking Group | N     | %     | Ever Quit (N) | Ever Quit % | Mean Yrs Quit | Short Term (n) | Short Term % |
| 15                                           | 30-34    | Never Any |               | 4479  | 49.55 |               |             |               |                |              |
| 15                                           | 30-34    | CC        |               | 147   | 1.63  | 0             | 0.00        |               |                |              |
| 15                                           | 30-34    | Ecig      |               | 2894  | 32.01 |               |             |               |                |              |
| 15                                           | 30-34    | Dual      |               | 0     | 0.00  |               |             |               |                |              |
| 15                                           | 30-34    | Former    |               | 1520  | 16.81 |               |             | 7.23          | 199            | 13.09        |
| Year of Follow-up: 2005, Age Group: 35-39    | Period   | Age Group | Smoking Group | N     | %     | Ever Quit (N) | Ever Quit % | Mean Yrs Quit | Short Term (n) | Short Term % |
| 15                                           | 35-39    | Never Any |               | 4961  | 50.54 |               |             |               |                |              |
| 15                                           | 35-39    | CC        |               | 187   | 1.91  | 0             | 0.00        |               |                |              |

**Results for PHIM for Run 7 (Sensitivity\_Analysis\_4.RTF)**

|                                              |           |               |       |       |               |             |               |                |              |
|----------------------------------------------|-----------|---------------|-------|-------|---------------|-------------|---------------|----------------|--------------|
| 15                                           | 35-39     | Ecig          | 2820  | 28.73 |               |             |               |                |              |
| 15                                           | 35-39     | Dual          | 0     | 0.00  |               |             |               |                |              |
| 15                                           | 35-39     | Former        | 1848  | 18.83 |               |             | 11.18         | 155            | 8.39         |
| Year of Follow-up: 2005, Age Group: 40-44    |           |               |       |       |               |             |               |                |              |
| Period                                       | Age Group | Smoking Group | N     | %     | Ever Quit (N) | Ever Quit % | Mean Yrs Quit | Short Term (n) | Short Term % |
| 15                                           | 40-44     | Never Any     | 4926  | 46.19 |               |             |               |                |              |
| 15                                           | 40-44     | CC            | 231   | 2.17  | 0             | 0.00        |               |                |              |
| 15                                           | 40-44     | Ecig          | 3008  | 28.21 |               |             |               |                |              |
| 15                                           | 40-44     | Dual          | 0     | 0.00  |               |             |               |                |              |
| 15                                           | 40-44     | Former        | 2499  | 23.43 |               |             | 13.28         | 202            | 8.08         |
| Year of Follow-up: 2005, Age Group: 45-49    |           |               |       |       |               |             |               |                |              |
| Period                                       | Age Group | Smoking Group | N     | %     | Ever Quit (N) | Ever Quit % | Mean Yrs Quit | Short Term (n) | Short Term % |
| 15                                           | 45-49     | Never Any     | 4712  | 43.17 |               |             |               |                |              |
| 15                                           | 45-49     | CC            | 216   | 1.98  | 0             | 0.00        |               |                |              |
| 15                                           | 45-49     | Ecig          | 2800  | 25.65 |               |             |               |                |              |
| 15                                           | 45-49     | Dual          | 0     | 0.00  |               |             |               |                |              |
| 15                                           | 45-49     | Former        | 3188  | 29.20 |               |             | 14.87         | 160            | 5.02         |
| Year of Follow-up: 2005, Age Group: 50-54    |           |               |       |       |               |             |               |                |              |
| Period                                       | Age Group | Smoking Group | N     | %     | Ever Quit (N) | Ever Quit % | Mean Yrs Quit | Short Term (n) | Short Term % |
| 15                                           | 50-54     | Never Any     | 3941  | 39.85 |               |             |               |                |              |
| 15                                           | 50-54     | CC            | 213   | 2.15  | 0             | 0.00        |               |                |              |
| 15                                           | 50-54     | Ecig          | 2180  | 22.04 |               |             |               |                |              |
| 15                                           | 50-54     | Dual          | 0     | 0.00  |               |             |               |                |              |
| 15                                           | 50-54     | Former        | 3555  | 35.95 |               |             | 18.19         | 154            | 4.33         |
| Year of Follow-up: 2005, Age Group: 55-59    |           |               |       |       |               |             |               |                |              |
| Period                                       | Age Group | Smoking Group | N     | %     | Ever Quit (N) | Ever Quit % | Mean Yrs Quit | Short Term (n) | Short Term % |
| 15                                           | 55-59     | Never Any     | 2912  | 33.65 |               |             |               |                |              |
| 15                                           | 55-59     | CC            | 215   | 2.48  | 0             | 0.00        |               |                |              |
| 15                                           | 55-59     | Ecig          | 1781  | 20.58 |               |             |               |                |              |
| 15                                           | 55-59     | Dual          | 0     | 0.00  |               |             |               |                |              |
| 15                                           | 55-59     | Former        | 3747  | 43.29 |               |             | 20.09         | 117            | 3.12         |
| Year of Follow-up: 2005, Age Group: 60-64    |           |               |       |       |               |             |               |                |              |
| Period                                       | Age Group | Smoking Group | N     | %     | Ever Quit (N) | Ever Quit % | Mean Yrs Quit | Short Term (n) | Short Term % |
| 15                                           | 60-64     | Never Any     | 1919  | 29.46 |               |             |               |                |              |
| 15                                           | 60-64     | CC            | 143   | 2.19  | 0             | 0.00        |               |                |              |
| 15                                           | 60-64     | Ecig          | 1100  | 16.88 |               |             |               |                |              |
| 15                                           | 60-64     | Dual          | 0     | 0.00  |               |             |               |                |              |
| 15                                           | 60-64     | Former        | 3353  | 51.47 |               |             | 21.47         | 156            | 4.65         |
| Year of Follow-up: 2005, Age Group: 65-69    |           |               |       |       |               |             |               |                |              |
| Period                                       | Age Group | Smoking Group | N     | %     | Ever Quit (N) | Ever Quit % | Mean Yrs Quit | Short Term (n) | Short Term % |
| 15                                           | 65-69     | Never Any     | 1611  | 29.41 |               |             |               |                |              |
| 15                                           | 65-69     | CC            | 124   | 2.26  | 0             | 0.00        |               |                |              |
| 15                                           | 65-69     | Ecig          | 705   | 12.87 |               |             |               |                |              |
| 15                                           | 65-69     | Dual          | 0     | 0.00  |               |             |               |                |              |
| 15                                           | 65-69     | Former        | 3037  | 55.45 |               |             | 22.19         | 118            | 3.89         |
| Year of Follow-up: 2005, Age Group: 70-74    |           |               |       |       |               |             |               |                |              |
| Period                                       | Age Group | Smoking Group | N     | %     | Ever Quit (N) | Ever Quit % | Mean Yrs Quit | Short Term (n) | Short Term % |
| 15                                           | 70-74     | Never Any     | 1337  | 26.83 |               |             |               |                |              |
| 15                                           | 70-74     | CC            | 129   | 2.59  | 0             | 0.00        |               |                |              |
| 15                                           | 70-74     | Ecig          | 441   | 8.85  |               |             |               |                |              |
| 15                                           | 70-74     | Dual          | 0     | 0.00  |               |             |               |                |              |
| 15                                           | 70-74     | Former        | 3076  | 61.73 |               |             | 22.89         | 112            | 3.64         |
| Year of Follow-up: 2005, Age Group: 75-79    |           |               |       |       |               |             |               |                |              |
| Period                                       | Age Group | Smoking Group | N     | %     | Ever Quit (N) | Ever Quit % | Mean Yrs Quit | Short Term (n) | Short Term % |
| 15                                           | 75-79     | Never Any     | 1169  | 23.83 |               |             |               |                |              |
| 15                                           | 75-79     | CC            | 120   | 2.45  | 0             | 0.00        |               |                |              |
| 15                                           | 75-79     | Ecig          | 261   | 5.32  |               |             |               |                |              |
| 15                                           | 75-79     | Dual          | 0     | 0.00  |               |             |               |                |              |
| 15                                           | 75-79     | Former        | 3355  | 68.40 |               |             | 27.01         | 66             | 1.97         |
| Year of Follow-up: 2010, Age Group: All Ages |           |               |       |       |               |             |               |                |              |
| Period                                       | Age Group | Smoking Group | N     | %     | Ever Quit (N) | Ever Quit % | Mean Yrs Quit | Short Term (n) | Short Term % |
| 20                                           | All Ages  | Never Any     | 34261 | 40.40 |               |             |               |                |              |
| 20                                           | All Ages  | CC            | 725   | 0.85  | 0             | 0.00        |               |                |              |
| 20                                           | All Ages  | Ecig          | 18237 | 21.51 |               |             |               |                |              |
| 20                                           | All Ages  | Dual          | 0     | 0.00  |               |             |               |                |              |
| 20                                           | All Ages  | Former        | 31577 | 37.24 |               |             | 19.57         | 1598           | 5.06         |
| Year of Follow-up: 2010, Age Group: 18-19    |           |               |       |       |               |             |               |                |              |
| Period                                       | Age Group | Smoking Group | N     | %     | Ever Quit (N) | Ever Quit % | Mean Yrs Quit | Short Term (n) | Short Term % |

**Results for PHIM for Run 7 (Sensitivity\_Analysis\_4.RTF)**

|                                           |           |               |      |       |               |             |               |                |              |
|-------------------------------------------|-----------|---------------|------|-------|---------------|-------------|---------------|----------------|--------------|
| 20                                        | 18-19     | Never Any     | 0    | .     |               |             |               |                |              |
| 20                                        | 18-19     | CC            | 0    | .     | 0             | .           |               |                |              |
| 20                                        | 18-19     | Ecig          | 0    | .     |               |             |               |                |              |
| 20                                        | 18-19     | Dual          | 0    | .     |               |             |               |                |              |
| 20                                        | 18-19     | Former        | 0    | .     |               |             | 0             | .              |              |
| Year of Follow-up: 2010, Age Group: 20-24 |           |               |      |       |               |             |               |                |              |
| Period                                    | Age Group | Smoking Group | N    | %     | Ever Quit (N) | Ever Quit % | Mean Yrs Quit | Short Term (n) | Short Term % |
| 20                                        | 20-24     | Never Any     | 0    | .     |               |             |               |                |              |
| 20                                        | 20-24     | CC            | 0    | .     | 0             | .           |               |                |              |
| 20                                        | 20-24     | Ecig          | 0    | .     |               |             |               |                |              |
| 20                                        | 20-24     | Dual          | 0    | .     |               |             |               |                |              |
| 20                                        | 20-24     | Former        | 0    | .     |               |             |               | 0              | .            |
| Year of Follow-up: 2010, Age Group: 25-29 |           |               |      |       |               |             |               |                |              |
| Period                                    | Age Group | Smoking Group | N    | %     | Ever Quit (N) | Ever Quit % | Mean Yrs Quit | Short Term (n) | Short Term % |
| 20                                        | 25-29     | Never Any     | 0    | .     |               |             |               |                |              |
| 20                                        | 25-29     | CC            | 0    | .     | 0             | .           |               |                |              |
| 20                                        | 25-29     | Ecig          | 0    | .     |               |             |               |                |              |
| 20                                        | 25-29     | Dual          | 0    | .     |               |             |               |                |              |
| 20                                        | 25-29     | Former        | 0    | .     |               |             |               | 0              | .            |
| Year of Follow-up: 2010, Age Group: 30-34 |           |               |      |       |               |             |               |                |              |
| Period                                    | Age Group | Smoking Group | N    | %     | Ever Quit (N) | Ever Quit % | Mean Yrs Quit | Short Term (n) | Short Term % |
| 20                                        | 30-34     | Never Any     | 3537 | 39.99 |               |             |               |                |              |
| 20                                        | 30-34     | CC            | 61   | 0.69  | 0             | 0.00        |               |                |              |
| 20                                        | 30-34     | Ecig          | 2963 | 33.50 |               |             |               |                |              |
| 20                                        | 30-34     | Dual          | 0    | 0.00  |               |             |               |                |              |
| 20                                        | 30-34     | Former        | 2284 | 25.82 |               |             | 8.72          | 275            | 12.04        |
| Year of Follow-up: 2010, Age Group: 35-39 |           |               |      |       |               |             |               |                |              |
| Period                                    | Age Group | Smoking Group | N    | %     | Ever Quit (N) | Ever Quit % | Mean Yrs Quit | Short Term (n) | Short Term % |
| 20                                        | 35-39     | Never Any     | 4405 | 48.73 |               |             |               |                |              |
| 20                                        | 35-39     | CC            | 56   | 0.62  | 0             | 0.00        |               |                |              |
| 20                                        | 35-39     | Ecig          | 2517 | 27.84 |               |             |               |                |              |
| 20                                        | 35-39     | Dual          | 0    | 0.00  |               |             |               |                |              |
| 20                                        | 35-39     | Former        | 2062 | 22.81 |               |             | 9.59          | 165            | 8.00         |
| Year of Follow-up: 2010, Age Group: 40-44 |           |               |      |       |               |             |               |                |              |
| Period                                    | Age Group | Smoking Group | N    | %     | Ever Quit (N) | Ever Quit % | Mean Yrs Quit | Short Term (n) | Short Term % |
| 20                                        | 40-44     | Never Any     | 4961 | 50.54 |               |             |               |                |              |
| 20                                        | 40-44     | CC            | 68   | 0.69  | 0             | 0.00        |               |                |              |
| 20                                        | 40-44     | Ecig          | 2566 | 26.14 |               |             |               |                |              |
| 20                                        | 40-44     | Dual          | 0    | 0.00  |               |             |               |                |              |
| 20                                        | 40-44     | Former        | 2221 | 22.63 |               |             | 13.79         | 150            | 6.75         |
| Year of Follow-up: 2010, Age Group: 45-49 |           |               |      |       |               |             |               |                |              |
| Period                                    | Age Group | Smoking Group | N    | %     | Ever Quit (N) | Ever Quit % | Mean Yrs Quit | Short Term (n) | Short Term % |
| 20                                        | 45-49     | Never Any     | 4926 | 46.19 |               |             |               |                |              |
| 20                                        | 45-49     | CC            | 89   | 0.83  | 0             | 0.00        |               |                |              |
| 20                                        | 45-49     | Ecig          | 2673 | 25.07 |               |             |               |                |              |
| 20                                        | 45-49     | Dual          | 0    | 0.00  |               |             |               |                |              |
| 20                                        | 45-49     | Former        | 2976 | 27.91 |               |             | 15.69         | 175            | 5.88         |
| Year of Follow-up: 2010, Age Group: 50-54 |           |               |      |       |               |             |               |                |              |
| Period                                    | Age Group | Smoking Group | N    | %     | Ever Quit (N) | Ever Quit % | Mean Yrs Quit | Short Term (n) | Short Term % |
| 20                                        | 50-54     | Never Any     | 4712 | 43.17 |               |             |               |                |              |
| 20                                        | 50-54     | CC            | 87   | 0.80  | 0             | 0.00        |               |                |              |
| 20                                        | 50-54     | Ecig          | 2497 | 22.87 |               |             |               |                |              |
| 20                                        | 50-54     | Dual          | 0    | 0.00  |               |             |               |                |              |
| 20                                        | 50-54     | Former        | 3620 | 33.16 |               |             | 17.74         | 174            | 4.81         |
| Year of Follow-up: 2010, Age Group: 55-59 |           |               |      |       |               |             |               |                |              |
| Period                                    | Age Group | Smoking Group | N    | %     | Ever Quit (N) | Ever Quit % | Mean Yrs Quit | Short Term (n) | Short Term % |
| 20                                        | 55-59     | Never Any     | 3941 | 39.85 |               |             |               |                |              |
| 20                                        | 55-59     | CC            | 85   | 0.86  | 0             | 0.00        |               |                |              |
| 20                                        | 55-59     | Ecig          | 1859 | 18.80 |               |             |               |                |              |
| 20                                        | 55-59     | Dual          | 0    | 0.00  |               |             |               |                |              |
| 20                                        | 55-59     | Former        | 4004 | 40.49 |               |             | 20.81         | 181            | 4.52         |
| Year of Follow-up: 2010, Age Group: 60-64 |           |               |      |       |               |             |               |                |              |
| Period                                    | Age Group | Smoking Group | N    | %     | Ever Quit (N) | Ever Quit % | Mean Yrs Quit | Short Term (n) | Short Term % |
| 20                                        | 60-64     | Never Any     | 2912 | 33.65 |               |             |               |                |              |
| 20                                        | 60-64     | CC            | 87   | 1.01  | 0             | 0.00        |               |                |              |
| 20                                        | 60-64     | Ecig          | 1428 | 16.50 |               |             |               |                |              |
| 20                                        | 60-64     | Dual          | 0    | 0.00  |               |             |               |                |              |
| 20                                        | 60-64     | Former        | 4228 | 48.85 |               |             | 22.41         | 241            | 5.70         |
| Year of Follow-up: 2010, Age Group: 65-69 |           |               |      |       |               |             |               |                |              |

**Results for PHIM for Run 7 (Sensitivity\_Analysis\_4.RTF)**

| Period                                       | Age Group | Smoking Group | N     | %     | Ever Quit (N) | Ever Quit % | Mean Yrs Quit | Short Term (n) | Short Term % |
|----------------------------------------------|-----------|---------------|-------|-------|---------------|-------------|---------------|----------------|--------------|
| 20                                           | 65-69     | Never Any     | 1919  | 29.46 |               |             |               |                |              |
| 20                                           | 65-69     | CC            | 60    | 0.92  | 0             | 0.00        |               |                |              |
| 20                                           | 65-69     | Ecig          | 809   | 12.42 |               |             |               |                |              |
| 20                                           | 65-69     | Dual          | 0     | 0.00  |               |             |               |                |              |
| 20                                           | 65-69     | Former        | 3727  | 57.21 |               |             | 24.03         | 133            | 3.57         |
| Year of Follow-up: 2010, Age Group: 70-74    |           |               |       |       |               |             |               |                |              |
| Period                                       | Age Group | Smoking Group | N     | %     | Ever Quit (N) | Ever Quit % | Mean Yrs Quit | Short Term (n) | Short Term % |
| 20                                           | 70-74     | Never Any     | 1611  | 29.41 |               |             |               |                |              |
| 20                                           | 70-74     | CC            | 69    | 1.26  | 0             | 0.00        |               |                |              |
| 20                                           | 70-74     | Ecig          | 574   | 10.48 |               |             |               |                |              |
| 20                                           | 70-74     | Dual          | 0     | 0.00  |               |             |               |                |              |
| 20                                           | 70-74     | Former        | 3223  | 58.85 |               |             | 25.75         | 61             | 1.89         |
| Year of Follow-up: 2010, Age Group: 75-79    |           |               |       |       |               |             |               |                |              |
| Period                                       | Age Group | Smoking Group | N     | %     | Ever Quit (N) | Ever Quit % | Mean Yrs Quit | Short Term (n) | Short Term % |
| 20                                           | 75-79     | Never Any     | 1337  | 26.83 |               |             |               |                |              |
| 20                                           | 75-79     | CC            | 63    | 1.26  | 0             | 0.00        |               |                |              |
| 20                                           | 75-79     | Ecig          | 351   | 7.04  |               |             |               |                |              |
| 20                                           | 75-79     | Dual          | 0     | 0.00  |               |             |               |                |              |
| 20                                           | 75-79     | Former        | 3232  | 64.86 |               |             | 26.66         | 43             | 1.33         |
| Year of Follow-up: 2015, Age Group: All Ages |           |               |       |       |               |             |               |                |              |
| Period                                       | Age Group | Smoking Group | N     | %     | Ever Quit (N) | Ever Quit % | Mean Yrs Quit | Short Term (n) | Short Term % |
| 25                                           | All Ages  | Never Any     | 32900 | 41.22 |               |             |               |                |              |
| 25                                           | All Ages  | CC            | 283   | 0.35  | 0             | 0.00        |               |                |              |
| 25                                           | All Ages  | Ecig          | 15083 | 18.90 |               |             |               |                |              |
| 25                                           | All Ages  | Dual          | 0     | 0.00  |               |             |               |                |              |
| 25                                           | All Ages  | Former        | 31551 | 39.53 |               |             | 21.57         | 1149           | 3.64         |
| Year of Follow-up: 2015, Age Group: 18-19    |           |               |       |       |               |             |               |                |              |
| Period                                       | Age Group | Smoking Group | N     | %     | Ever Quit (N) | Ever Quit % | Mean Yrs Quit | Short Term (n) | Short Term % |
| 25                                           | 18-19     | Never Any     | 0     | .     |               |             |               |                |              |
| 25                                           | 18-19     | CC            | 0     | .     | 0             | .           |               |                |              |
| 25                                           | 18-19     | Ecig          | 0     | .     |               |             |               |                |              |
| 25                                           | 18-19     | Dual          | 0     | .     |               |             |               |                |              |
| 25                                           | 18-19     | Former        | 0     | .     |               |             |               | 0              | .            |
| Year of Follow-up: 2015, Age Group: 20-24    |           |               |       |       |               |             |               |                |              |
| Period                                       | Age Group | Smoking Group | N     | %     | Ever Quit (N) | Ever Quit % | Mean Yrs Quit | Short Term (n) | Short Term % |
| 25                                           | 20-24     | Never Any     | 0     | .     |               |             |               |                |              |
| 25                                           | 20-24     | CC            | 0     | .     | 0             | .           |               |                |              |
| 25                                           | 20-24     | Ecig          | 0     | .     |               |             |               |                |              |
| 25                                           | 20-24     | Dual          | 0     | .     |               |             |               |                |              |
| 25                                           | 20-24     | Former        | 0     | .     |               |             |               | 0              | .            |
| Year of Follow-up: 2015, Age Group: 25-29    |           |               |       |       |               |             |               |                |              |
| Period                                       | Age Group | Smoking Group | N     | %     | Ever Quit (N) | Ever Quit % | Mean Yrs Quit | Short Term (n) | Short Term % |
| 25                                           | 25-29     | Never Any     | 0     | .     |               |             |               |                |              |
| 25                                           | 25-29     | CC            | 0     | .     | 0             | .           |               |                |              |
| 25                                           | 25-29     | Ecig          | 0     | .     |               |             |               |                |              |
| 25                                           | 25-29     | Dual          | 0     | .     |               |             |               |                |              |
| 25                                           | 25-29     | Former        | 0     | .     |               |             |               | 0              | .            |
| Year of Follow-up: 2015, Age Group: 30-34    |           |               |       |       |               |             |               |                |              |
| Period                                       | Age Group | Smoking Group | N     | %     | Ever Quit (N) | Ever Quit % | Mean Yrs Quit | Short Term (n) | Short Term % |
| 25                                           | 30-34     | Never Any     | 0     | .     |               |             |               |                |              |
| 25                                           | 30-34     | CC            | 0     | .     | 0             | .           |               |                |              |
| 25                                           | 30-34     | Ecig          | 0     | .     |               |             |               |                |              |
| 25                                           | 30-34     | Dual          | 0     | .     |               |             |               |                |              |
| 25                                           | 30-34     | Former        | 0     | .     |               |             |               | 0              | .            |
| Year of Follow-up: 2015, Age Group: 35-39    |           |               |       |       |               |             |               |                |              |
| Period                                       | Age Group | Smoking Group | N     | %     | Ever Quit (N) | Ever Quit % | Mean Yrs Quit | Short Term (n) | Short Term % |
| 25                                           | 35-39     | Never Any     | 3513  | 39.72 |               |             |               |                |              |
| 25                                           | 35-39     | CC            | 24    | 0.27  | 0             | 0.00        |               |                |              |
| 25                                           | 35-39     | Ecig          | 2456  | 27.77 |               |             |               |                |              |
| 25                                           | 35-39     | Dual          | 0     | 0.00  |               |             |               |                |              |
| 25                                           | 35-39     | Former        | 2852  | 32.24 |               |             | 11.44         | 175            | 6.14         |
| Year of Follow-up: 2015, Age Group: 40-44    |           |               |       |       |               |             |               |                |              |
| Period                                       | Age Group | Smoking Group | N     | %     | Ever Quit (N) | Ever Quit % | Mean Yrs Quit | Short Term (n) | Short Term % |
| 25                                           | 40-44     | Never Any     | 4405  | 48.73 |               |             |               |                |              |
| 25                                           | 40-44     | CC            | 18    | 0.20  | 0             | 0.00        |               |                |              |
| 25                                           | 40-44     | Ecig          | 2216  | 24.51 |               |             |               |                |              |
| 25                                           | 40-44     | Dual          | 0     | 0.00  |               |             |               |                |              |



**Results for PHIM for Run 7 (Sensitivity\_Analysis\_4.RTF)**

|                                              |           |               |       |       |               |             |               |                |              |
|----------------------------------------------|-----------|---------------|-------|-------|---------------|-------------|---------------|----------------|--------------|
| 25                                           | 40-44     | Former        | 2401  | 26.56 |               |             | 12.81         | 136            | 5.66         |
| Year of Follow-up: 2015, Age Group: 45-49    |           |               |       |       |               |             |               |                |              |
| Period                                       | Age Group | Smoking Group | N     | %     | Ever Quit (N) | Ever Quit % | Mean Yrs Quit | Short Term (n) | Short Term % |
| 25                                           | 45-49     | Never Any     | 4961  | 50.54 |               |             |               |                |              |
| 25                                           | 45-49     | CC            | 29    | 0.30  | 0             | 0.00        |               |                |              |
| 25                                           | 45-49     | Ecig          | 2331  | 23.75 |               |             |               |                |              |
| 25                                           | 45-49     | Dual          | 0     | 0.00  |               |             |               |                |              |
| 25                                           | 45-49     | Former        | 2495  | 25.42 |               |             | 16.99         | 83             | 3.33         |
| Year of Follow-up: 2015, Age Group: 50-54    |           |               |       |       |               |             |               |                |              |
| Period                                       | Age Group | Smoking Group | N     | %     | Ever Quit (N) | Ever Quit % | Mean Yrs Quit | Short Term (n) | Short Term % |
| 25                                           | 50-54     | Never Any     | 4926  | 46.19 |               |             |               |                |              |
| 25                                           | 50-54     | CC            | 37    | 0.35  | 0             | 0.00        |               |                |              |
| 25                                           | 50-54     | Ecig          | 2435  | 22.83 |               |             |               |                |              |
| 25                                           | 50-54     | Dual          | 0     | 0.00  |               |             |               |                |              |
| 25                                           | 50-54     | Former        | 3266  | 30.63 |               |             | 19.03         | 132            | 4.04         |
| Year of Follow-up: 2015, Age Group: 55-59    |           |               |       |       |               |             |               |                |              |
| Period                                       | Age Group | Smoking Group | N     | %     | Ever Quit (N) | Ever Quit % | Mean Yrs Quit | Short Term (n) | Short Term % |
| 25                                           | 55-59     | Never Any     | 4712  | 43.17 |               |             |               |                |              |
| 25                                           | 55-59     | CC            | 33    | 0.30  | 0             | 0.00        |               |                |              |
| 25                                           | 55-59     | Ecig          | 2110  | 19.33 |               |             |               |                |              |
| 25                                           | 55-59     | Dual          | 0     | 0.00  |               |             |               |                |              |
| 25                                           | 55-59     | Former        | 4061  | 37.20 |               |             | 20.50         | 162            | 3.99         |
| Year of Follow-up: 2015, Age Group: 60-64    |           |               |       |       |               |             |               |                |              |
| Period                                       | Age Group | Smoking Group | N     | %     | Ever Quit (N) | Ever Quit % | Mean Yrs Quit | Short Term (n) | Short Term % |
| 25                                           | 60-64     | Never Any     | 3941  | 39.85 |               |             |               |                |              |
| 25                                           | 60-64     | CC            | 28    | 0.28  | 0             | 0.00        |               |                |              |
| 25                                           | 60-64     | Ecig          | 1443  | 14.59 |               |             |               |                |              |
| 25                                           | 60-64     | Dual          | 0     | 0.00  |               |             |               |                |              |
| 25                                           | 60-64     | Former        | 4477  | 45.27 |               |             | 23.28         | 205            | 4.58         |
| Year of Follow-up: 2015, Age Group: 65-69    |           |               |       |       |               |             |               |                |              |
| Period                                       | Age Group | Smoking Group | N     | %     | Ever Quit (N) | Ever Quit % | Mean Yrs Quit | Short Term (n) | Short Term % |
| 25                                           | 65-69     | Never Any     | 2912  | 33.65 |               |             |               |                |              |
| 25                                           | 65-69     | CC            | 43    | 0.50  | 0             | 0.00        |               |                |              |
| 25                                           | 65-69     | Ecig          | 1019  | 11.77 |               |             |               |                |              |
| 25                                           | 65-69     | Dual          | 0     | 0.00  |               |             |               |                |              |
| 25                                           | 65-69     | Former        | 4681  | 54.08 |               |             | 24.99         | 134            | 2.86         |
| Year of Follow-up: 2015, Age Group: 70-74    |           |               |       |       |               |             |               |                |              |
| Period                                       | Age Group | Smoking Group | N     | %     | Ever Quit (N) | Ever Quit % | Mean Yrs Quit | Short Term (n) | Short Term % |
| 25                                           | 70-74     | Never Any     | 1919  | 29.46 |               |             |               |                |              |
| 25                                           | 70-74     | CC            | 35    | 0.54  | 0             | 0.00        |               |                |              |
| 25                                           | 70-74     | Ecig          | 616   | 9.46  |               |             |               |                |              |
| 25                                           | 70-74     | Dual          | 0     | 0.00  |               |             |               |                |              |
| 25                                           | 70-74     | Former        | 3945  | 60.55 |               |             | 27.55         | 70             | 1.77         |
| Year of Follow-up: 2015, Age Group: 75-79    |           |               |       |       |               |             |               |                |              |
| Period                                       | Age Group | Smoking Group | N     | %     | Ever Quit (N) | Ever Quit % | Mean Yrs Quit | Short Term (n) | Short Term % |
| 25                                           | 75-79     | Never Any     | 1611  | 29.41 |               |             |               |                |              |
| 25                                           | 75-79     | CC            | 36    | 0.66  | 0             | 0.00        |               |                |              |
| 25                                           | 75-79     | Ecig          | 457   | 8.34  |               |             |               |                |              |
| 25                                           | 75-79     | Dual          | 0     | 0.00  |               |             |               |                |              |
| 25                                           | 75-79     | Former        | 3373  | 61.58 |               |             | 29.48         | 52             | 1.54         |
| Year of Follow-up: 2020, Age Group: All Ages |           |               |       |       |               |             |               |                |              |
| Period                                       | Age Group | Smoking Group | N     | %     | Ever Quit (N) | Ever Quit % | Mean Yrs Quit | Short Term (n) | Short Term % |
| 30                                           | All Ages  | Never Any     | 31289 | 42.09 |               |             |               |                |              |
| 30                                           | All Ages  | CC            | 96    | 0.13  | 0             | 0.00        |               |                |              |
| 30                                           | All Ages  | Ecig          | 12223 | 16.44 |               |             |               |                |              |
| 30                                           | All Ages  | Dual          | 0     | 0.00  |               |             |               |                |              |
| 30                                           | All Ages  | Former        | 30732 | 41.34 |               |             | 23.67         | 960            | 3.12         |
| Year of Follow-up: 2020, Age Group: 18-19    |           |               |       |       |               |             |               |                |              |
| Period                                       | Age Group | Smoking Group | N     | %     | Ever Quit (N) | Ever Quit % | Mean Yrs Quit | Short Term (n) | Short Term % |
| 30                                           | 18-19     | Never Any     | 0     | .     |               |             |               |                |              |
| 30                                           | 18-19     | CC            | 0     | .     | 0             | .           |               |                |              |
| 30                                           | 18-19     | Ecig          | 0     | .     |               |             |               |                |              |
| 30                                           | 18-19     | Dual          | 0     | .     |               |             |               |                |              |
| 30                                           | 18-19     | Former        | 0     | .     |               |             | .             | 0              | .            |
| Year of Follow-up: 2020, Age Group: 20-24    |           |               |       |       |               |             |               |                |              |
| Period                                       | Age Group | Smoking Group | N     | %     | Ever Quit (N) | Ever Quit % | Mean Yrs Quit | Short Term (n) | Short Term % |
| 30                                           | 20-24     | Never Any     | 0     | .     |               |             |               |                |              |
| 30                                           | 20-24     | CC            | 0     | .     | 0             | .           |               |                |              |

**Results for PHIM for Run 7 (Sensitivity\_Analysis\_4.RTF)**

|                                           |           |               |      |       |               |             |               |                |              |
|-------------------------------------------|-----------|---------------|------|-------|---------------|-------------|---------------|----------------|--------------|
| 30                                        | 20-24     | Ecig          | 0    | .     |               |             |               |                |              |
| 30                                        | 20-24     | Dual          | 0    | .     |               |             |               |                |              |
| 30                                        | 20-24     | Former        | 0    | .     |               |             | 0             | .              |              |
| Year of Follow-up: 2020, Age Group: 25-29 |           |               |      |       |               |             |               |                |              |
| Period                                    | Age Group | Smoking Group | N    | %     | Ever Quit (N) | Ever Quit % | Mean Yrs Quit | Short Term (n) | Short Term % |
| 30                                        | 25-29     | Never Any     | 0    | .     |               |             |               |                |              |
| 30                                        | 25-29     | CC            | 0    | .     | 0             | .           |               |                |              |
| 30                                        | 25-29     | Ecig          | 0    | .     |               |             |               |                |              |
| 30                                        | 25-29     | Dual          | 0    | .     |               |             |               |                |              |
| 30                                        | 25-29     | Former        | 0    | .     |               |             |               | 0              | .            |
| Year of Follow-up: 2020, Age Group: 30-34 |           |               |      |       |               |             |               |                |              |
| Period                                    | Age Group | Smoking Group | N    | %     | Ever Quit (N) | Ever Quit % | Mean Yrs Quit | Short Term (n) | Short Term % |
| 30                                        | 30-34     | Never Any     | 0    | .     |               |             |               |                |              |
| 30                                        | 30-34     | CC            | 0    | .     | 0             | .           |               |                |              |
| 30                                        | 30-34     | Ecig          | 0    | .     |               |             |               |                |              |
| 30                                        | 30-34     | Dual          | 0    | .     |               |             |               |                |              |
| 30                                        | 30-34     | Former        | 0    | .     |               |             |               | 0              | .            |
| Year of Follow-up: 2020, Age Group: 35-39 |           |               |      |       |               |             |               |                |              |
| Period                                    | Age Group | Smoking Group | N    | %     | Ever Quit (N) | Ever Quit % | Mean Yrs Quit | Short Term (n) | Short Term % |
| 30                                        | 35-39     | Never Any     | 0    | .     |               |             |               |                |              |
| 30                                        | 35-39     | CC            | 0    | .     | 0             | .           |               |                |              |
| 30                                        | 35-39     | Ecig          | 0    | .     |               |             |               |                |              |
| 30                                        | 35-39     | Dual          | 0    | .     |               |             |               |                |              |
| 30                                        | 35-39     | Former        | 0    | .     |               |             |               | 0              | .            |
| Year of Follow-up: 2020, Age Group: 40-44 |           |               |      |       |               |             |               |                |              |
| Period                                    | Age Group | Smoking Group | N    | %     | Ever Quit (N) | Ever Quit % | Mean Yrs Quit | Short Term (n) | Short Term % |
| 30                                        | 40-44     | Never Any     | 3513 | 39.72 |               |             |               |                |              |
| 30                                        | 40-44     | CC            | 9    | 0.10  | 0             | 0.00        |               |                |              |
| 30                                        | 40-44     | Ecig          | 2152 | 24.33 |               |             |               |                |              |
| 30                                        | 40-44     | Dual          | 0    | 0.00  |               |             |               |                |              |
| 30                                        | 40-44     | Former        | 3171 | 35.85 |               |             | 14.99         | 132            | 4.16         |
| Year of Follow-up: 2020, Age Group: 45-49 |           |               |      |       |               |             |               |                |              |
| Period                                    | Age Group | Smoking Group | N    | %     | Ever Quit (N) | Ever Quit % | Mean Yrs Quit | Short Term (n) | Short Term % |
| 30                                        | 45-49     | Never Any     | 4405 | 48.73 |               |             |               |                |              |
| 30                                        | 45-49     | CC            | 4    | 0.04  | 0             | 0.00        |               |                |              |
| 30                                        | 45-49     | Ecig          | 1978 | 21.88 |               |             |               |                |              |
| 30                                        | 45-49     | Dual          | 0    | 0.00  |               |             |               |                |              |
| 30                                        | 45-49     | Former        | 2653 | 29.35 |               |             | 16.36         | 70             | 2.64         |
| Year of Follow-up: 2020, Age Group: 50-54 |           |               |      |       |               |             |               |                |              |
| Period                                    | Age Group | Smoking Group | N    | %     | Ever Quit (N) | Ever Quit % | Mean Yrs Quit | Short Term (n) | Short Term % |
| 30                                        | 50-54     | Never Any     | 4961 | 50.54 |               |             |               |                |              |
| 30                                        | 50-54     | CC            | 9    | 0.09  | 0             | 0.00        |               |                |              |
| 30                                        | 50-54     | Ecig          | 2146 | 21.86 |               |             |               |                |              |
| 30                                        | 50-54     | Dual          | 0    | 0.00  |               |             |               |                |              |
| 30                                        | 50-54     | Former        | 2700 | 27.51 |               |             | 20.44         | 104            | 3.85         |
| Year of Follow-up: 2020, Age Group: 55-59 |           |               |      |       |               |             |               |                |              |
| Period                                    | Age Group | Smoking Group | N    | %     | Ever Quit (N) | Ever Quit % | Mean Yrs Quit | Short Term (n) | Short Term % |
| 30                                        | 55-59     | Never Any     | 4926 | 46.19 |               |             |               |                |              |
| 30                                        | 55-59     | CC            | 18   | 0.17  | 0             | 0.00        |               |                |              |
| 30                                        | 55-59     | Ecig          | 2040 | 19.13 |               |             |               |                |              |
| 30                                        | 55-59     | Dual          | 0    | 0.00  |               |             |               |                |              |
| 30                                        | 55-59     | Former        | 3680 | 34.51 |               |             | 21.55         | 161            | 4.38         |
| Year of Follow-up: 2020, Age Group: 60-64 |           |               |      |       |               |             |               |                |              |
| Period                                    | Age Group | Smoking Group | N    | %     | Ever Quit (N) | Ever Quit % | Mean Yrs Quit | Short Term (n) | Short Term % |
| 30                                        | 60-64     | Never Any     | 4712 | 43.17 |               |             |               |                |              |
| 30                                        | 60-64     | CC            | 10   | 0.09  | 0             | 0.00        |               |                |              |
| 30                                        | 60-64     | Ecig          | 1619 | 14.83 |               |             |               |                |              |
| 30                                        | 60-64     | Dual          | 0    | 0.00  |               |             |               |                |              |
| 30                                        | 60-64     | Former        | 4575 | 41.91 |               |             | 22.86         | 204            | 4.46         |
| Year of Follow-up: 2020, Age Group: 65-69 |           |               |      |       |               |             |               |                |              |
| Period                                    | Age Group | Smoking Group | N    | %     | Ever Quit (N) | Ever Quit % | Mean Yrs Quit | Short Term (n) | Short Term % |
| 30                                        | 65-69     | Never Any     | 3941 | 39.85 |               |             |               |                |              |
| 30                                        | 65-69     | CC            | 13   | 0.13  | 0             | 0.00        |               |                |              |
| 30                                        | 65-69     | Ecig          | 1039 | 10.51 |               |             |               |                |              |
| 30                                        | 65-69     | Dual          | 0    | 0.00  |               |             |               |                |              |
| 30                                        | 65-69     | Former        | 4896 | 49.51 |               |             | 26.05         | 145            | 2.96         |
| Year of Follow-up: 2020, Age Group: 70-74 |           |               |      |       |               |             |               |                |              |
| Period                                    | Age Group | Smoking Group | N    | %     | Ever Quit (N) | Ever Quit % | Mean Yrs Quit | Short Term (n) | Short Term % |

**Results for PHIM for Run 7 (Sensitivity\_Analysis\_4.RTF)**

|                                              |           |               |       |       |               |             |               |                |              |
|----------------------------------------------|-----------|---------------|-------|-------|---------------|-------------|---------------|----------------|--------------|
| 30                                           | 70-74     | Never Any     | 2912  | 33.65 |               |             |               |                |              |
| 30                                           | 70-74     | CC            | 18    | 0.21  | 0             | 0.00        |               |                |              |
| 30                                           | 70-74     | Ecig          | 770   | 8.90  |               |             |               |                |              |
| 30                                           | 70-74     | Dual          | 0     | 0.00  |               |             |               |                |              |
| 30                                           | 70-74     | Former        | 4955  | 57.25 |               |             | 28.45         | 93             | 1.88         |
| Year of Follow-up: 2020, Age Group: 75-79    |           |               |       |       |               |             |               |                |              |
| Period                                       | Age Group | Smoking Group | N     | %     | Ever Quit (N) | Ever Quit % | Mean Yrs Quit | Short Term (n) | Short Term % |
| 30                                           | 75-79     | Never Any     | 1919  | 29.46 |               |             |               |                |              |
| 30                                           | 75-79     | CC            | 15    | 0.23  | 0             | 0.00        |               |                |              |
| 30                                           | 75-79     | Ecig          | 479   | 7.35  |               |             |               |                |              |
| 30                                           | 75-79     | Dual          | 0     | 0.00  |               |             |               |                |              |
| 30                                           | 75-79     | Former        | 4102  | 62.96 |               |             | 31.39         | 51             | 1.24         |
| Year of Follow-up: 2025, Age Group: All Ages |           |               |       |       |               |             |               |                |              |
| Period                                       | Age Group | Smoking Group | N     | %     | Ever Quit (N) | Ever Quit % | Mean Yrs Quit | Short Term (n) | Short Term % |
| 35                                           | All Ages  | Never Any     | 29370 | 43.30 |               |             |               |                |              |
| 35                                           | All Ages  | CC            | 35    | 0.05  | 0             | 0.00        |               |                |              |
| 35                                           | All Ages  | Ecig          | 9635  | 14.21 |               |             |               |                |              |
| 35                                           | All Ages  | Dual          | 0     | 0.00  |               |             |               |                |              |
| 35                                           | All Ages  | Former        | 28785 | 42.44 |               |             | 25.57         | 813            | 2.82         |
| Year of Follow-up: 2025, Age Group: 18-19    |           |               |       |       |               |             |               |                |              |
| Period                                       | Age Group | Smoking Group | N     | %     | Ever Quit (N) | Ever Quit % | Mean Yrs Quit | Short Term (n) | Short Term % |
| 35                                           | 18-19     | Never Any     | 0     | .     |               |             |               |                |              |
| 35                                           | 18-19     | CC            | 0     | .     | 0             | .           |               |                |              |
| 35                                           | 18-19     | Ecig          | 0     | .     |               |             |               |                |              |
| 35                                           | 18-19     | Dual          | 0     | .     |               |             |               |                |              |
| 35                                           | 18-19     | Former        | 0     | .     |               |             | .             | 0              | .            |
| Year of Follow-up: 2025, Age Group: 20-24    |           |               |       |       |               |             |               |                |              |
| Period                                       | Age Group | Smoking Group | N     | %     | Ever Quit (N) | Ever Quit % | Mean Yrs Quit | Short Term (n) | Short Term % |
| 35                                           | 20-24     | Never Any     | 0     | .     |               |             |               |                |              |
| 35                                           | 20-24     | CC            | 0     | .     | 0             | .           |               |                |              |
| 35                                           | 20-24     | Ecig          | 0     | .     |               |             |               |                |              |
| 35                                           | 20-24     | Dual          | 0     | .     |               |             |               |                |              |
| 35                                           | 20-24     | Former        | 0     | .     |               |             | .             | 0              | .            |
| Year of Follow-up: 2025, Age Group: 25-29    |           |               |       |       |               |             |               |                |              |
| Period                                       | Age Group | Smoking Group | N     | %     | Ever Quit (N) | Ever Quit % | Mean Yrs Quit | Short Term (n) | Short Term % |
| 35                                           | 25-29     | Never Any     | 0     | .     |               |             |               |                |              |
| 35                                           | 25-29     | CC            | 0     | .     | 0             | .           |               |                |              |
| 35                                           | 25-29     | Ecig          | 0     | .     |               |             |               |                |              |
| 35                                           | 25-29     | Dual          | 0     | .     |               |             |               |                |              |
| 35                                           | 25-29     | Former        | 0     | .     |               |             | .             | 0              | .            |
| Year of Follow-up: 2025, Age Group: 30-34    |           |               |       |       |               |             |               |                |              |
| Period                                       | Age Group | Smoking Group | N     | %     | Ever Quit (N) | Ever Quit % | Mean Yrs Quit | Short Term (n) | Short Term % |
| 35                                           | 30-34     | Never Any     | 0     | .     |               |             |               |                |              |
| 35                                           | 30-34     | CC            | 0     | .     | 0             | .           |               |                |              |
| 35                                           | 30-34     | Ecig          | 0     | .     |               |             |               |                |              |
| 35                                           | 30-34     | Dual          | 0     | .     |               |             |               |                |              |
| 35                                           | 30-34     | Former        | 0     | .     |               |             | .             | 0              | .            |
| Year of Follow-up: 2025, Age Group: 35-39    |           |               |       |       |               |             |               |                |              |
| Period                                       | Age Group | Smoking Group | N     | %     | Ever Quit (N) | Ever Quit % | Mean Yrs Quit | Short Term (n) | Short Term % |
| 35                                           | 35-39     | Never Any     | 0     | .     |               |             |               |                |              |
| 35                                           | 35-39     | CC            | 0     | .     | 0             | .           |               |                |              |
| 35                                           | 35-39     | Ecig          | 0     | .     |               |             |               |                |              |
| 35                                           | 35-39     | Dual          | 0     | .     |               |             |               |                |              |
| 35                                           | 35-39     | Former        | 0     | .     |               |             | .             | 0              | .            |
| Year of Follow-up: 2025, Age Group: 40-44    |           |               |       |       |               |             |               |                |              |
| Period                                       | Age Group | Smoking Group | N     | %     | Ever Quit (N) | Ever Quit % | Mean Yrs Quit | Short Term (n) | Short Term % |
| 35                                           | 40-44     | Never Any     | 0     | .     |               |             |               |                |              |
| 35                                           | 40-44     | CC            | 0     | .     | 0             | .           |               |                |              |
| 35                                           | 40-44     | Ecig          | 0     | .     |               |             |               |                |              |
| 35                                           | 40-44     | Dual          | 0     | .     |               |             |               |                |              |
| 35                                           | 40-44     | Former        | 0     | .     |               |             | .             | 0              | .            |
| Year of Follow-up: 2025, Age Group: 45-49    |           |               |       |       |               |             |               |                |              |
| Period                                       | Age Group | Smoking Group | N     | %     | Ever Quit (N) | Ever Quit % | Mean Yrs Quit | Short Term (n) | Short Term % |
| 35                                           | 45-49     | Never Any     | 3513  | 39.72 |               |             |               |                |              |
| 35                                           | 45-49     | CC            | 5     | 0.06  | 0             | 0.00        |               |                |              |
| 35                                           | 45-49     | Ecig          | 1909  | 21.58 |               |             |               |                |              |
| 35                                           | 45-49     | Dual          | 0     | 0.00  |               |             |               |                |              |
| 35                                           | 45-49     | Former        | 3418  | 38.64 |               |             | 18.72         | 67             | 1.96         |
| Year of Follow-up: 2025, Age Group: 50-54    |           |               |       |       |               |             |               |                |              |

**Results for PHIM for Run 7 (Sensitivity\_Analysis\_4.RTF)**

| Period                                       | Age Group | Smoking Group | N     | %     | Ever Quit (N) | Ever Quit % | Mean Yrs Quit | Short Term (n) | Short Term % |
|----------------------------------------------|-----------|---------------|-------|-------|---------------|-------------|---------------|----------------|--------------|
| 35                                           | 50-54     | Never Any     | 4405  | 48.73 |               |             |               |                |              |
| 35                                           | 50-54     | CC            | 2     | 0.02  | 0             | 0.00        |               |                |              |
| 35                                           | 50-54     | Ecig          | 1815  | 20.08 |               |             |               |                |              |
| 35                                           | 50-54     | Dual          | 0     | 0.00  |               |             |               |                |              |
| 35                                           | 50-54     | Former        | 2818  | 31.17 |               |             | 20.20         | 89             | 3.16         |
| Year of Follow-up: 2025, Age Group: 55-59    |           |               |       |       |               |             |               |                |              |
| Period                                       | Age Group | Smoking Group | N     | %     | Ever Quit (N) | Ever Quit % | Mean Yrs Quit | Short Term (n) | Short Term % |
| 35                                           | 55-59     | Never Any     | 4961  | 50.54 |               |             |               |                |              |
| 35                                           | 55-59     | CC            | 0     | 0.00  | 0             | 0.00        |               |                |              |
| 35                                           | 55-59     | Ecig          | 1773  | 18.06 |               |             |               |                |              |
| 35                                           | 55-59     | Dual          | 0     | 0.00  |               |             |               |                |              |
| 35                                           | 55-59     | Former        | 3082  | 31.40 |               |             | 22.53         | 160            | 5.19         |
| Year of Follow-up: 2025, Age Group: 60-64    |           |               |       |       |               |             |               |                |              |
| Period                                       | Age Group | Smoking Group | N     | %     | Ever Quit (N) | Ever Quit % | Mean Yrs Quit | Short Term (n) | Short Term % |
| 35                                           | 60-64     | Never Any     | 4926  | 46.19 |               |             |               |                |              |
| 35                                           | 60-64     | CC            | 9     | 0.08  | 0             | 0.00        |               |                |              |
| 35                                           | 60-64     | Ecig          | 1562  | 14.65 |               |             |               |                |              |
| 35                                           | 60-64     | Dual          | 0     | 0.00  |               |             |               |                |              |
| 35                                           | 60-64     | Former        | 4167  | 39.08 |               |             | 23.68         | 188            | 4.51         |
| Year of Follow-up: 2025, Age Group: 65-69    |           |               |       |       |               |             |               |                |              |
| Period                                       | Age Group | Smoking Group | N     | %     | Ever Quit (N) | Ever Quit % | Mean Yrs Quit | Short Term (n) | Short Term % |
| 35                                           | 65-69     | Never Any     | 4712  | 43.17 |               |             |               |                |              |
| 35                                           | 65-69     | CC            | 5     | 0.05  | 0             | 0.00        |               |                |              |
| 35                                           | 65-69     | Ecig          | 1172  | 10.74 |               |             |               |                |              |
| 35                                           | 65-69     | Dual          | 0     | 0.00  |               |             |               |                |              |
| 35                                           | 65-69     | Former        | 5027  | 46.05 |               |             | 25.55         | 158            | 3.14         |
| Year of Follow-up: 2025, Age Group: 70-74    |           |               |       |       |               |             |               |                |              |
| Period                                       | Age Group | Smoking Group | N     | %     | Ever Quit (N) | Ever Quit % | Mean Yrs Quit | Short Term (n) | Short Term % |
| 35                                           | 70-74     | Never Any     | 3941  | 39.85 |               |             |               |                |              |
| 35                                           | 70-74     | CC            | 5     | 0.05  | 0             | 0.00        |               |                |              |
| 35                                           | 70-74     | Ecig          | 811   | 8.20  |               |             |               |                |              |
| 35                                           | 70-74     | Dual          | 0     | 0.00  |               |             |               |                |              |
| 35                                           | 70-74     | Former        | 5132  | 51.90 |               |             | 29.73         | 79             | 1.54         |
| Year of Follow-up: 2025, Age Group: 75-79    |           |               |       |       |               |             |               |                |              |
| Period                                       | Age Group | Smoking Group | N     | %     | Ever Quit (N) | Ever Quit % | Mean Yrs Quit | Short Term (n) | Short Term % |
| 35                                           | 75-79     | Never Any     | 2912  | 33.65 |               |             |               |                |              |
| 35                                           | 75-79     | CC            | 9     | 0.10  | 0             | 0.00        |               |                |              |
| 35                                           | 75-79     | Ecig          | 593   | 6.85  |               |             |               |                |              |
| 35                                           | 75-79     | Dual          | 0     | 0.00  |               |             |               |                |              |
| 35                                           | 75-79     | Former        | 5141  | 59.40 |               |             | 32.31         | 72             | 1.40         |
| Year of Follow-up: 2030, Age Group: All Ages |           |               |       |       |               |             |               |                |              |
| Period                                       | Age Group | Smoking Group | N     | %     | Ever Quit (N) | Ever Quit % | Mean Yrs Quit | Short Term (n) | Short Term % |
| 40                                           | All Ages  | Never Any     | 26458 | 44.72 |               |             |               |                |              |
| 40                                           | All Ages  | CC            | 13    | 0.02  | 0             | 0.00        |               |                |              |
| 40                                           | All Ages  | Ecig          | 7190  | 12.15 |               |             |               |                |              |
| 40                                           | All Ages  | Dual          | 0     | 0.00  |               |             |               |                |              |
| 40                                           | All Ages  | Former        | 25509 | 43.11 |               |             | 27.13         | 735            | 2.88         |
| Year of Follow-up: 2030, Age Group: 18-19    |           |               |       |       |               |             |               |                |              |
| Period                                       | Age Group | Smoking Group | N     | %     | Ever Quit (N) | Ever Quit % | Mean Yrs Quit | Short Term (n) | Short Term % |
| 40                                           | 18-19     | Never Any     | 0     | .     |               |             |               |                |              |
| 40                                           | 18-19     | CC            | 0     | .     | 0             | .           |               |                |              |
| 40                                           | 18-19     | Ecig          | 0     | .     |               |             |               |                |              |
| 40                                           | 18-19     | Dual          | 0     | .     |               |             |               |                |              |
| 40                                           | 18-19     | Former        | 0     | .     |               |             | .             | 0              | .            |
| Year of Follow-up: 2030, Age Group: 20-24    |           |               |       |       |               |             |               |                |              |
| Period                                       | Age Group | Smoking Group | N     | %     | Ever Quit (N) | Ever Quit % | Mean Yrs Quit | Short Term (n) | Short Term % |
| 40                                           | 20-24     | Never Any     | 0     | .     |               |             |               |                |              |
| 40                                           | 20-24     | CC            | 0     | .     | 0             | .           |               |                |              |
| 40                                           | 20-24     | Ecig          | 0     | .     |               |             |               |                |              |
| 40                                           | 20-24     | Dual          | 0     | .     |               |             |               |                |              |
| 40                                           | 20-24     | Former        | 0     | .     |               |             | .             | 0              | .            |
| Year of Follow-up: 2030, Age Group: 25-29    |           |               |       |       |               |             |               |                |              |
| Period                                       | Age Group | Smoking Group | N     | %     | Ever Quit (N) | Ever Quit % | Mean Yrs Quit | Short Term (n) | Short Term % |
| 40                                           | 25-29     | Never Any     | 0     | .     |               |             |               |                |              |
| 40                                           | 25-29     | CC            | 0     | .     | 0             | .           |               |                |              |
| 40                                           | 25-29     | Ecig          | 0     | .     |               |             |               |                |              |
| 40                                           | 25-29     | Dual          | 0     | .     |               |             |               |                |              |

### Results for PHIM for Run 7 (Sensitivity\_Analysis\_4.RTF)

| Year of Follow-up: 2030, Age Group: 30-34 | Period | Age Group | Smoking Group | N    | %     | Ever Quit (N) | Ever Quit % | Mean Yrs Quit | Short Term (n) | Short Term % |
|-------------------------------------------|--------|-----------|---------------|------|-------|---------------|-------------|---------------|----------------|--------------|
| Year of Follow-up: 2030, Age Group: 30-34 |        |           |               |      |       |               |             |               |                |              |
| 40                                        | 25-29  | Former    |               | 0    | .     |               |             |               | 0              | .            |
| Year of Follow-up: 2030, Age Group: 35-39 |        |           |               |      |       |               |             |               |                |              |
| 40                                        | 30-34  | Never Any |               | 0    | .     |               |             |               | 0              | .            |
| 40                                        | 30-34  | CC        |               | 0    | .     | 0             | .           |               |                |              |
| 40                                        | 30-34  | Ecig      |               | 0    | .     |               |             |               |                |              |
| 40                                        | 30-34  | Dual      |               | 0    | .     |               |             |               |                |              |
| 40                                        | 30-34  | Former    |               | 0    | .     |               |             |               | 0              | .            |
| Year of Follow-up: 2030, Age Group: 40-44 |        |           |               |      |       |               |             |               |                |              |
| 40                                        | 35-39  | Never Any |               | 0    | .     |               |             |               |                |              |
| 40                                        | 35-39  | CC        |               | 0    | .     | 0             | .           |               |                |              |
| 40                                        | 35-39  | Ecig      |               | 0    | .     |               |             |               |                |              |
| 40                                        | 35-39  | Dual      |               | 0    | .     |               |             |               |                |              |
| 40                                        | 35-39  | Former    |               | 0    | .     |               |             |               | 0              | .            |
| Year of Follow-up: 2030, Age Group: 45-49 |        |           |               |      |       |               |             |               |                |              |
| 40                                        | 40-44  | Never Any |               | 0    | .     |               |             |               |                |              |
| 40                                        | 40-44  | CC        |               | 0    | .     | 0             | .           |               |                |              |
| 40                                        | 40-44  | Ecig      |               | 0    | .     |               |             |               |                |              |
| 40                                        | 40-44  | Dual      |               | 0    | .     |               |             |               |                |              |
| 40                                        | 40-44  | Former    |               | 0    | .     |               |             |               | 0              | .            |
| Year of Follow-up: 2030, Age Group: 50-54 |        |           |               |      |       |               |             |               |                |              |
| 40                                        | 45-49  | Never Any |               | 0    | .     |               |             |               |                |              |
| 40                                        | 45-49  | CC        |               | 0    | .     | 0             | .           |               |                |              |
| 40                                        | 45-49  | Ecig      |               | 0    | .     |               |             |               |                |              |
| 40                                        | 45-49  | Dual      |               | 0    | .     |               |             |               |                |              |
| 40                                        | 45-49  | Former    |               | 0    | .     |               |             |               | 0              | .            |
| Year of Follow-up: 2030, Age Group: 55-59 |        |           |               |      |       |               |             |               |                |              |
| 40                                        | 50-54  | Never Any |               | 3513 | 39.72 |               |             |               |                |              |
| 40                                        | 50-54  | CC        |               | 2    | 0.02  | 0             | 0.00        |               |                |              |
| 40                                        | 50-54  | Ecig      |               | 1727 | 19.53 |               |             |               |                |              |
| 40                                        | 50-54  | Dual      |               | 0    | 0.00  |               |             |               |                |              |
| 40                                        | 50-54  | Former    |               | 3603 | 40.73 |               |             | 22.59         | 90             | 2.50         |
| Year of Follow-up: 2030, Age Group: 60-64 |        |           |               |      |       |               |             |               |                |              |
| 40                                        | 55-59  | Never Any |               | 4405 | 48.73 |               |             |               |                |              |
| 40                                        | 55-59  | CC        |               | 1    | 0.01  | 0             | 0.00        |               |                |              |
| 40                                        | 55-59  | Ecig      |               | 1504 | 16.64 |               |             |               |                |              |
| 40                                        | 55-59  | Dual      |               | 0    | 0.00  |               |             |               |                |              |
| 40                                        | 55-59  | Former    |               | 3130 | 34.62 |               |             | 22.88         | 133            | 4.25         |
| Year of Follow-up: 2030, Age Group: 65-69 |        |           |               |      |       |               |             |               |                |              |
| 40                                        | 60-64  | Never Any |               | 4961 | 50.54 |               |             |               |                |              |
| 40                                        | 60-64  | CC        |               | 0    | 0.00  | 0             | 0.00        |               |                |              |
| 40                                        | 60-64  | Ecig      |               | 1322 | 13.47 |               |             |               |                |              |
| 40                                        | 60-64  | Dual      |               | 0    | 0.00  |               |             |               |                |              |
| 40                                        | 60-64  | Former    |               | 3533 | 35.99 |               |             | 24.26         | 197            | 5.58         |
| Year of Follow-up: 2030, Age Group: 70-74 |        |           |               |      |       |               |             |               |                |              |
| 40                                        | 65-69  | Never Any |               | 4926 | 46.19 |               |             |               |                |              |
| 40                                        | 65-69  | CC        |               | 4    | 0.04  | 0             | 0.00        |               |                |              |
| 40                                        | 65-69  | Ecig      |               | 1140 | 10.69 |               |             |               |                |              |
| 40                                        | 65-69  | Dual      |               | 0    | 0.00  |               |             |               |                |              |
| 40                                        | 65-69  | Former    |               | 4594 | 43.08 |               |             | 26.23         | 137            | 2.98         |
| Year of Follow-up: 2030, Age Group: 75-79 |        |           |               |      |       |               |             |               |                |              |
| 40                                        | 70-74  | Never Any |               | 4712 | 43.17 |               |             |               |                |              |
| 40                                        | 70-74  | CC        |               | 3    | 0.03  | 0             | 0.00        |               |                |              |
| 40                                        | 70-74  | Ecig      |               | 882  | 8.08  |               |             |               |                |              |
| 40                                        | 70-74  | Dual      |               | 0    | 0.00  |               |             |               |                |              |
| 40                                        | 70-74  | Former    |               | 5319 | 48.73 |               |             | 28.99         | 95             | 1.79         |
| Year of Follow-up: 2030, Age Group: 75-79 |        |           |               |      |       |               |             |               |                |              |
| 40                                        | 75-79  | Never Any |               | 3941 | 39.85 |               |             |               |                |              |
| 40                                        | 75-79  | CC        |               | 3    | 0.03  | 0             | 0.00        |               |                |              |

**Results for PHIM for Run 7 (Sensitivity\_Analysis\_4.RTF)**

|                                              |           |               |       |       |               |             |               |                |              |
|----------------------------------------------|-----------|---------------|-------|-------|---------------|-------------|---------------|----------------|--------------|
| 40                                           | 75-79     | Ecig          | 615   | 6.22  |               |             |               |                |              |
| 40                                           | 75-79     | Dual          | 0     | 0.00  |               |             |               |                |              |
| 40                                           | 75-79     | Former        | 5330  | 53.90 |               |             | 33.51         | 83             | 1.56         |
| Year of Follow-up: 2035, Age Group: All Ages |           |               |       |       |               |             |               |                |              |
| Period                                       | Age Group | Smoking Group | N     | %     | Ever Quit (N) | Ever Quit % | Mean Yrs Quit | Short Term (n) | Short Term % |
| 45                                           | All Ages  | Never Any     | 22517 | 45.69 |               |             |               |                |              |
| 45                                           | All Ages  | CC            | 5     | 0.01  | 0             | 0.00        |               |                |              |
| 45                                           | All Ages  | Ecig          | 5112  | 10.37 |               |             |               |                |              |
| 45                                           | All Ages  | Dual          | 0     | 0.00  |               |             |               |                |              |
| 45                                           | All Ages  | Former        | 21647 | 43.93 |               |             | 28.52         | 585            | 2.70         |
| Year of Follow-up: 2035, Age Group: 18-19    |           |               |       |       |               |             |               |                |              |
| Period                                       | Age Group | Smoking Group | N     | %     | Ever Quit (N) | Ever Quit % | Mean Yrs Quit | Short Term (n) | Short Term % |
| 45                                           | 18-19     | Never Any     | 0     | .     |               |             |               |                |              |
| 45                                           | 18-19     | CC            | 0     | .     | 0             | .           |               |                |              |
| 45                                           | 18-19     | Ecig          | 0     | .     |               |             |               |                |              |
| 45                                           | 18-19     | Dual          | 0     | .     |               |             |               |                |              |
| 45                                           | 18-19     | Former        | 0     | .     |               |             | .             | 0              | .            |
| Year of Follow-up: 2035, Age Group: 20-24    |           |               |       |       |               |             |               |                |              |
| Period                                       | Age Group | Smoking Group | N     | %     | Ever Quit (N) | Ever Quit % | Mean Yrs Quit | Short Term (n) | Short Term % |
| 45                                           | 20-24     | Never Any     | 0     | .     |               |             |               |                |              |
| 45                                           | 20-24     | CC            | 0     | .     | 0             | .           |               |                |              |
| 45                                           | 20-24     | Ecig          | 0     | .     |               |             |               |                |              |
| 45                                           | 20-24     | Dual          | 0     | .     |               |             |               |                |              |
| 45                                           | 20-24     | Former        | 0     | .     |               |             | .             | 0              | .            |
| Year of Follow-up: 2035, Age Group: 25-29    |           |               |       |       |               |             |               |                |              |
| Period                                       | Age Group | Smoking Group | N     | %     | Ever Quit (N) | Ever Quit % | Mean Yrs Quit | Short Term (n) | Short Term % |
| 45                                           | 25-29     | Never Any     | 0     | .     |               |             |               |                |              |
| 45                                           | 25-29     | CC            | 0     | .     | 0             | .           |               |                |              |
| 45                                           | 25-29     | Ecig          | 0     | .     |               |             |               |                |              |
| 45                                           | 25-29     | Dual          | 0     | .     |               |             |               |                |              |
| 45                                           | 25-29     | Former        | 0     | .     |               |             | .             | 0              | .            |
| Year of Follow-up: 2035, Age Group: 30-34    |           |               |       |       |               |             |               |                |              |
| Period                                       | Age Group | Smoking Group | N     | %     | Ever Quit (N) | Ever Quit % | Mean Yrs Quit | Short Term (n) | Short Term % |
| 45                                           | 30-34     | Never Any     | 0     | .     |               |             |               |                |              |
| 45                                           | 30-34     | CC            | 0     | .     | 0             | .           |               |                |              |
| 45                                           | 30-34     | Ecig          | 0     | .     |               |             |               |                |              |
| 45                                           | 30-34     | Dual          | 0     | .     |               |             |               |                |              |
| 45                                           | 30-34     | Former        | 0     | .     |               |             | .             | 0              | .            |
| Year of Follow-up: 2035, Age Group: 35-39    |           |               |       |       |               |             |               |                |              |
| Period                                       | Age Group | Smoking Group | N     | %     | Ever Quit (N) | Ever Quit % | Mean Yrs Quit | Short Term (n) | Short Term % |
| 45                                           | 35-39     | Never Any     | 0     | .     |               |             |               |                |              |
| 45                                           | 35-39     | CC            | 0     | .     | 0             | .           |               |                |              |
| 45                                           | 35-39     | Ecig          | 0     | .     |               |             |               |                |              |
| 45                                           | 35-39     | Dual          | 0     | .     |               |             |               |                |              |
| 45                                           | 35-39     | Former        | 0     | .     |               |             | .             | 0              | .            |
| Year of Follow-up: 2035, Age Group: 40-44    |           |               |       |       |               |             |               |                |              |
| Period                                       | Age Group | Smoking Group | N     | %     | Ever Quit (N) | Ever Quit % | Mean Yrs Quit | Short Term (n) | Short Term % |
| 45                                           | 40-44     | Never Any     | 0     | .     |               |             |               |                |              |
| 45                                           | 40-44     | CC            | 0     | .     | 0             | .           |               |                |              |
| 45                                           | 40-44     | Ecig          | 0     | .     |               |             |               |                |              |
| 45                                           | 40-44     | Dual          | 0     | .     |               |             |               |                |              |
| 45                                           | 40-44     | Former        | 0     | .     |               |             | .             | 0              | .            |
| Year of Follow-up: 2035, Age Group: 45-49    |           |               |       |       |               |             |               |                |              |
| Period                                       | Age Group | Smoking Group | N     | %     | Ever Quit (N) | Ever Quit % | Mean Yrs Quit | Short Term (n) | Short Term % |
| 45                                           | 45-49     | Never Any     | 0     | .     |               |             |               |                |              |
| 45                                           | 45-49     | CC            | 0     | .     | 0             | .           |               |                |              |
| 45                                           | 45-49     | Ecig          | 0     | .     |               |             |               |                |              |
| 45                                           | 45-49     | Dual          | 0     | .     |               |             |               |                |              |
| 45                                           | 45-49     | Former        | 0     | .     |               |             | .             | 0              | .            |
| Year of Follow-up: 2035, Age Group: 50-54    |           |               |       |       |               |             |               |                |              |
| Period                                       | Age Group | Smoking Group | N     | %     | Ever Quit (N) | Ever Quit % | Mean Yrs Quit | Short Term (n) | Short Term % |
| 45                                           | 50-54     | Never Any     | 0     | .     |               |             |               |                |              |
| 45                                           | 50-54     | CC            | 0     | .     | 0             | .           |               |                |              |
| 45                                           | 50-54     | Ecig          | 0     | .     |               |             |               |                |              |
| 45                                           | 50-54     | Dual          | 0     | .     |               |             |               |                |              |
| 45                                           | 50-54     | Former        | 0     | .     |               |             | .             | 0              | .            |
| Year of Follow-up: 2035, Age Group: 55-59    |           |               |       |       |               |             |               |                |              |
| Period                                       | Age Group | Smoking Group | N     | %     | Ever Quit (N) | Ever Quit % | Mean Yrs Quit | Short Term (n) | Short Term % |

### Results for PHIM for Run 7 (Sensitivity\_Analysis\_4.RTF)

|                                              |           |               |       |       |               |             |               |                |              |
|----------------------------------------------|-----------|---------------|-------|-------|---------------|-------------|---------------|----------------|--------------|
| 45                                           | 55-59     | Never Any     | 3513  | 39.72 |               |             |               |                |              |
| 45                                           | 55-59     | CC            | 1     | 0.01  | 0             | 0.00        |               |                |              |
| 45                                           | 55-59     | Ecig          | 1456  | 16.46 |               |             |               |                |              |
| 45                                           | 55-59     | Dual          | 0     | 0.00  |               |             |               |                |              |
| 45                                           | 55-59     | Former        | 3875  | 43.81 |               |             | 25.78         | 123            | 3.17         |
| Year of Follow-up: 2035, Age Group: 60-64    |           |               |       |       |               |             |               |                |              |
| Period                                       | Age Group | Smoking Group | N     | %     | Ever Quit (N) | Ever Quit % | Mean Yrs Quit | Short Term (n) | Short Term % |
| 45                                           | 60-64     | Never Any     | 4405  | 48.73 |               |             |               |                |              |
| 45                                           | 60-64     | CC            | 0     | 0.00  | 0             | 0.00        |               |                |              |
| 45                                           | 60-64     | Ecig          | 1188  | 13.14 |               |             |               |                |              |
| 45                                           | 60-64     | Dual          | 0     | 0.00  |               |             |               |                |              |
| 45                                           | 60-64     | Former        | 3447  | 38.13 |               |             | 25.48         | 146            | 4.24         |
| Year of Follow-up: 2035, Age Group: 65-69    |           |               |       |       |               |             |               |                |              |
| Period                                       | Age Group | Smoking Group | N     | %     | Ever Quit (N) | Ever Quit % | Mean Yrs Quit | Short Term (n) | Short Term % |
| 45                                           | 65-69     | Never Any     | 4961  | 50.54 |               |             |               |                |              |
| 45                                           | 65-69     | CC            | 0     | 0.00  | 0             | 0.00        |               |                |              |
| 45                                           | 65-69     | Ecig          | 965   | 9.83  |               |             |               |                |              |
| 45                                           | 65-69     | Dual          | 0     | 0.00  |               |             |               |                |              |
| 45                                           | 65-69     | Former        | 3890  | 39.63 |               |             | 26.78         | 112            | 2.88         |
| Year of Follow-up: 2035, Age Group: 70-74    |           |               |       |       |               |             |               |                |              |
| Period                                       | Age Group | Smoking Group | N     | %     | Ever Quit (N) | Ever Quit % | Mean Yrs Quit | Short Term (n) | Short Term % |
| 45                                           | 70-74     | Never Any     | 4926  | 46.19 |               |             |               |                |              |
| 45                                           | 70-74     | CC            | 1     | 0.01  | 0             | 0.00        |               |                |              |
| 45                                           | 70-74     | Ecig          | 866   | 8.12  |               |             |               |                |              |
| 45                                           | 70-74     | Dual          | 0     | 0.00  |               |             |               |                |              |
| 45                                           | 70-74     | Former        | 4871  | 45.68 |               |             | 29.57         | 105            | 2.16         |
| Year of Follow-up: 2035, Age Group: 75-79    |           |               |       |       |               |             |               |                |              |
| Period                                       | Age Group | Smoking Group | N     | %     | Ever Quit (N) | Ever Quit % | Mean Yrs Quit | Short Term (n) | Short Term % |
| 45                                           | 75-79     | Never Any     | 4712  | 43.17 |               |             |               |                |              |
| 45                                           | 75-79     | CC            | 3     | 0.03  | 0             | 0.00        |               |                |              |
| 45                                           | 75-79     | Ecig          | 637   | 5.84  |               |             |               |                |              |
| 45                                           | 75-79     | Dual          | 0     | 0.00  |               |             |               |                |              |
| 45                                           | 75-79     | Former        | 5564  | 50.97 |               |             | 32.59         | 99             | 1.78         |
| Year of Follow-up: 2040, Age Group: All Ages |           |               |       |       |               |             |               |                |              |
| Period                                       | Age Group | Smoking Group | N     | %     | Ever Quit (N) | Ever Quit % | Mean Yrs Quit | Short Term (n) | Short Term % |
| 50                                           | All Ages  | Never Any     | 17805 | 46.41 |               |             |               |                |              |
| 50                                           | All Ages  | CC            | 1     | 0.00  | 0             | 0.00        |               |                |              |
| 50                                           | All Ages  | Ecig          | 3272  | 8.53  |               |             |               |                |              |
| 50                                           | All Ages  | Dual          | 0     | 0.00  |               |             |               |                |              |
| 50                                           | All Ages  | Former        | 17287 | 45.06 |               |             | 30.02         | 459            | 2.66         |
| Year of Follow-up: 2040, Age Group: 18-19    |           |               |       |       |               |             |               |                |              |
| Period                                       | Age Group | Smoking Group | N     | %     | Ever Quit (N) | Ever Quit % | Mean Yrs Quit | Short Term (n) | Short Term % |
| 50                                           | 18-19     | Never Any     | 0     | .     |               |             |               |                |              |
| 50                                           | 18-19     | CC            | 0     | .     | 0             | .           |               |                |              |
| 50                                           | 18-19     | Ecig          | 0     | .     |               |             |               |                |              |
| 50                                           | 18-19     | Dual          | 0     | .     |               |             |               |                |              |
| 50                                           | 18-19     | Former        | 0     | .     |               |             | .             | 0              | .            |
| Year of Follow-up: 2040, Age Group: 20-24    |           |               |       |       |               |             |               |                |              |
| Period                                       | Age Group | Smoking Group | N     | %     | Ever Quit (N) | Ever Quit % | Mean Yrs Quit | Short Term (n) | Short Term % |
| 50                                           | 20-24     | Never Any     | 0     | .     |               |             |               |                |              |
| 50                                           | 20-24     | CC            | 0     | .     | 0             | .           |               |                |              |
| 50                                           | 20-24     | Ecig          | 0     | .     |               |             |               |                |              |
| 50                                           | 20-24     | Dual          | 0     | .     |               |             |               |                |              |
| 50                                           | 20-24     | Former        | 0     | .     |               |             | .             | 0              | .            |
| Year of Follow-up: 2040, Age Group: 25-29    |           |               |       |       |               |             |               |                |              |
| Period                                       | Age Group | Smoking Group | N     | %     | Ever Quit (N) | Ever Quit % | Mean Yrs Quit | Short Term (n) | Short Term % |
| 50                                           | 25-29     | Never Any     | 0     | .     |               |             |               |                |              |
| 50                                           | 25-29     | CC            | 0     | .     | 0             | .           |               |                |              |
| 50                                           | 25-29     | Ecig          | 0     | .     |               |             |               |                |              |
| 50                                           | 25-29     | Dual          | 0     | .     |               |             |               |                |              |
| 50                                           | 25-29     | Former        | 0     | .     |               |             | .             | 0              | .            |
| Year of Follow-up: 2040, Age Group: 30-34    |           |               |       |       |               |             |               |                |              |
| Period                                       | Age Group | Smoking Group | N     | %     | Ever Quit (N) | Ever Quit % | Mean Yrs Quit | Short Term (n) | Short Term % |
| 50                                           | 30-34     | Never Any     | 0     | .     |               |             |               |                |              |
| 50                                           | 30-34     | CC            | 0     | .     | 0             | .           |               |                |              |
| 50                                           | 30-34     | Ecig          | 0     | .     |               |             |               |                |              |
| 50                                           | 30-34     | Dual          | 0     | .     |               |             |               |                |              |
| 50                                           | 30-34     | Former        | 0     | .     |               |             | .             | 0              | .            |
| Year of Follow-up: 2040, Age Group: 35-39    |           |               |       |       |               |             |               |                |              |

**Results for PHIM for Run 7 (Sensitivity\_Analysis\_4.RTF)**

| Period                                    | Age Group | Smoking Group | N    | %     | Ever Quit (N) | Ever Quit % | Mean Yrs Quit | Short Term (n) | Short Term % |
|-------------------------------------------|-----------|---------------|------|-------|---------------|-------------|---------------|----------------|--------------|
| 50                                        | 35-39     | Never Any     | 0    | .     |               |             |               |                |              |
| 50                                        | 35-39     | CC            | 0    | .     | 0             | .           |               |                |              |
| 50                                        | 35-39     | Ecig          | 0    | .     |               |             |               |                |              |
| 50                                        | 35-39     | Dual          | 0    | .     |               |             |               |                |              |
| 50                                        | 35-39     | Former        | 0    | .     |               |             | .             | 0              | .            |
| Year of Follow-up: 2040, Age Group: 40-44 |           |               |      |       |               |             |               |                |              |
| Period                                    | Age Group | Smoking Group | N    | %     | Ever Quit (N) | Ever Quit % | Mean Yrs Quit | Short Term (n) | Short Term % |
| 50                                        | 40-44     | Never Any     | 0    | .     |               |             |               |                |              |
| 50                                        | 40-44     | CC            | 0    | .     | 0             | .           |               |                |              |
| 50                                        | 40-44     | Ecig          | 0    | .     |               |             |               |                |              |
| 50                                        | 40-44     | Dual          | 0    | .     |               |             |               |                |              |
| 50                                        | 40-44     | Former        | 0    | .     |               |             | .             | 0              | .            |
| Year of Follow-up: 2040, Age Group: 45-49 |           |               |      |       |               |             |               |                |              |
| Period                                    | Age Group | Smoking Group | N    | %     | Ever Quit (N) | Ever Quit % | Mean Yrs Quit | Short Term (n) | Short Term % |
| 50                                        | 45-49     | Never Any     | 0    | .     |               |             |               |                |              |
| 50                                        | 45-49     | CC            | 0    | .     | 0             | .           |               |                |              |
| 50                                        | 45-49     | Ecig          | 0    | .     |               |             |               |                |              |
| 50                                        | 45-49     | Dual          | 0    | .     |               |             |               |                |              |
| 50                                        | 45-49     | Former        | 0    | .     |               |             | .             | 0              | .            |
| Year of Follow-up: 2040, Age Group: 50-54 |           |               |      |       |               |             |               |                |              |
| Period                                    | Age Group | Smoking Group | N    | %     | Ever Quit (N) | Ever Quit % | Mean Yrs Quit | Short Term (n) | Short Term % |
| 50                                        | 50-54     | Never Any     | 0    | .     |               |             |               |                |              |
| 50                                        | 50-54     | CC            | 0    | .     | 0             | .           |               |                |              |
| 50                                        | 50-54     | Ecig          | 0    | .     |               |             |               |                |              |
| 50                                        | 50-54     | Dual          | 0    | .     |               |             |               |                |              |
| 50                                        | 50-54     | Former        | 0    | .     |               |             | .             | 0              | .            |
| Year of Follow-up: 2040, Age Group: 55-59 |           |               |      |       |               |             |               |                |              |
| Period                                    | Age Group | Smoking Group | N    | %     | Ever Quit (N) | Ever Quit % | Mean Yrs Quit | Short Term (n) | Short Term % |
| 50                                        | 55-59     | Never Any     | 0    | .     |               |             |               |                |              |
| 50                                        | 55-59     | CC            | 0    | .     | 0             | .           |               |                |              |
| 50                                        | 55-59     | Ecig          | 0    | .     |               |             |               |                |              |
| 50                                        | 55-59     | Dual          | 0    | .     |               |             |               |                |              |
| 50                                        | 55-59     | Former        | 0    | .     |               |             | .             | 0              | .            |
| Year of Follow-up: 2040, Age Group: 60-64 |           |               |      |       |               |             |               |                |              |
| Period                                    | Age Group | Smoking Group | N    | %     | Ever Quit (N) | Ever Quit % | Mean Yrs Quit | Short Term (n) | Short Term % |
| 50                                        | 60-64     | Never Any     | 3513 | 39.72 |               |             |               |                |              |
| 50                                        | 60-64     | CC            | 0    | 0.00  | 0             | 0.00        |               |                |              |
| 50                                        | 60-64     | Ecig          | 1084 | 12.26 |               |             |               |                |              |
| 50                                        | 60-64     | Dual          | 0    | 0.00  |               |             |               |                |              |
| 50                                        | 60-64     | Former        | 4248 | 48.03 |               |             | 28.26         | 157            | 3.70         |
| Year of Follow-up: 2040, Age Group: 65-69 |           |               |      |       |               |             |               |                |              |
| Period                                    | Age Group | Smoking Group | N    | %     | Ever Quit (N) | Ever Quit % | Mean Yrs Quit | Short Term (n) | Short Term % |
| 50                                        | 65-69     | Never Any     | 4405 | 48.73 |               |             |               |                |              |
| 50                                        | 65-69     | CC            | 0    | 0.00  | 0             | 0.00        |               |                |              |
| 50                                        | 65-69     | Ecig          | 826  | 9.14  |               |             |               |                |              |
| 50                                        | 65-69     | Dual          | 0    | 0.00  |               |             |               |                |              |
| 50                                        | 65-69     | Former        | 3809 | 42.13 |               |             | 27.78         | 140            | 3.68         |
| Year of Follow-up: 2040, Age Group: 70-74 |           |               |      |       |               |             |               |                |              |
| Period                                    | Age Group | Smoking Group | N    | %     | Ever Quit (N) | Ever Quit % | Mean Yrs Quit | Short Term (n) | Short Term % |
| 50                                        | 70-74     | Never Any     | 4961 | 50.54 |               |             |               |                |              |
| 50                                        | 70-74     | CC            | 0    | 0.00  | 0             | 0.00        |               |                |              |
| 50                                        | 70-74     | Ecig          | 716  | 7.29  |               |             |               |                |              |
| 50                                        | 70-74     | Dual          | 0    | 0.00  |               |             |               |                |              |
| 50                                        | 70-74     | Former        | 4139 | 42.17 |               |             | 30.00         | 82             | 1.98         |
| Year of Follow-up: 2040, Age Group: 75-79 |           |               |      |       |               |             |               |                |              |
| Period                                    | Age Group | Smoking Group | N    | %     | Ever Quit (N) | Ever Quit % | Mean Yrs Quit | Short Term (n) | Short Term % |
| 50                                        | 75-79     | Never Any     | 4926 | 46.19 |               |             |               |                |              |
| 50                                        | 75-79     | CC            | 1    | 0.01  | 0             | 0.00        |               |                |              |
| 50                                        | 75-79     | Ecig          | 646  | 6.06  |               |             |               |                |              |
| 50                                        | 75-79     | Dual          | 0    | 0.00  |               |             |               |                |              |
| 50                                        | 75-79     | Former        | 5091 | 47.74 |               |             | 33.17         | 80             | 1.57         |



## Results for PHIM for Run 7 (Sensitivity\_Analysis\_4.RTF)

\*\*\*\*\*

### Main Results for E-Component for Run: 7, Simulation: 1, COD: Four Diseases Combined

| Variable Parameter          | Value                                  |
|-----------------------------|----------------------------------------|
| 1. Country                  | US (United States)                     |
| 2. Sex                      | M (Males)                              |
| 3. Year of start of process | 1990                                   |
| 4. Cause of Death           | Four Diseases Combined                 |
| 5. Effective Dose NULL      | CC:1                                   |
| 6. Effective Dose Ecig      | CC:1 Ecig:0.05 Dual:0.525              |
| Note:                       | Death rates are per million population |

#### Results for Age Groups Combined and Years combined, Population unadjusted for deaths in Ecig scenario,

| Age Group:All | NULL     | Ecig        | %Drop       |         |        |        | NULL    | Ecig    | Drop    |         |
|---------------|----------|-------------|-------------|---------|--------|--------|---------|---------|---------|---------|
| Year          | Number   | Attrib      | Attrib      | Drop    | %Drop  | Attrib | Death   | Attrib  | Attrib  | Drop    |
|               | Deaths   | Deaths      | Deaths      | Deaths  | Deaths | Deaths | Rate    | Rates   | Rates   | Rates   |
| All Comb      | 13148871 | 4509390.583 | 2989105.075 | 1520286 | 11.562 | 33.714 | 3806.31 | 1305.37 | 865.281 | 440.090 |

#### Results for Age Groups Combined, Population unadjusted for deaths in Ecig scenario,

| Age Group:All | NULL   | Ecig       | %Drop      |          |        |        | NULL    | Ecig    | Drop    |         |
|---------------|--------|------------|------------|----------|--------|--------|---------|---------|---------|---------|
| Year          | Number | Attrib     | Attrib     | Drop     | %Drop  | Attrib | Death   | Attrib  | Attrib  | Drop    |
|               | Deaths | Deaths     | Deaths     | Deaths   | Deaths | Deaths | Rate    | Rates   | Rates   | Rates   |
| 1990          | 317161 | 125773.065 | 125773.065 | 0.000    | 0.000  | 0.000  | 5027.71 | 1993.78 | 1993.78 | 0.000   |
| 1991          | 313217 | 123999.442 | 123575.252 | 424.190  | 0.135  | 0.342  | 4883.81 | 1933.45 | 1926.84 | 6.614   |
| 1992          | 308577 | 122014.015 | 120877.270 | 1136.745 | 0.368  | 0.932  | 4729.73 | 1870.18 | 1852.75 | 17.424  |
| 1993          | 311713 | 122810.618 | 120675.320 | 2135.298 | 0.685  | 1.739  | 4692.62 | 1848.83 | 1816.68 | 32.145  |
| 1994          | 305700 | 119925.592 | 116642.305 | 3283.287 | 1.074  | 2.738  | 4516.19 | 1771.69 | 1723.19 | 48.505  |
| 1995          | 303225 | 117896.496 | 113270.410 | 4626.086 | 1.526  | 3.924  | 4393.80 | 1708.35 | 1641.31 | 67.033  |
| 1996          | 299559 | 115698.645 | 109593.167 | 6105.478 | 2.038  | 5.277  | 4273.16 | 1650.42 | 1563.33 | 87.094  |
| 1997          | 294226 | 113359.847 | 105764.776 | 7595.070 | 2.581  | 6.700  | 4128.67 | 1590.70 | 1484.12 | 106.576 |
| 1998          | 289258 | 111444.212 | 102355.396 | 9088.816 | 3.142  | 8.155  | 3992.19 | 1538.10 | 1412.66 | 125.439 |
| 1999          | 311002 | 114877.722 | 102719.027 | 12158.69 | 3.910  | 10.584 | 4224.60 | 1560.48 | 1395.32 | 165.162 |
| 2000          | 303786 | 112379.704 | 98504.946  | 13874.76 | 4.567  | 12.346 | 4066.21 | 1504.22 | 1318.50 | 185.715 |
| 2001          | 296294 | 110024.943 | 94315.739  | 15709.20 | 5.302  | 14.278 | 3914.28 | 1453.52 | 1245.99 | 207.531 |
| 2002          | 291898 | 108289.173 | 90520.950  | 17768.22 | 6.087  | 16.408 | 3813.00 | 1414.56 | 1182.45 | 232.102 |
| 2003          | 285865 | 106539.023 | 86951.332  | 19587.69 | 6.852  | 18.385 | 3695.36 | 1377.22 | 1124.01 | 253.209 |
| 2004          | 274177 | 103037.251 | 82117.242  | 20920.01 | 7.630  | 20.303 | 3506.10 | 1317.61 | 1050.09 | 267.519 |
| 2005          | 272379 | 103044.562 | 80205.159  | 22839.40 | 8.385  | 22.165 | 3442.69 | 1302.41 | 1013.74 | 288.675 |
| 2006          | 264118 | 99672.555  | 75199.823  | 24472.73 | 9.266  | 24.553 | 3307.76 | 1248.28 | 941.787 | 306.492 |
| 2007          | 258419 | 97839.152  | 71993.961  | 25845.19 | 10.001 | 26.416 | 3203.20 | 1212.75 | 892.391 | 320.360 |
| 2008          | 259461 | 98075.852  | 70492.936  | 27582.92 | 10.631 | 28.124 | 3180.09 | 1202.07 | 864.000 | 338.071 |
| 2009          | 253907 | 95617.338  | 66823.897  | 28793.44 | 11.340 | 30.113 | 3075.31 | 1158.11 | 809.369 | 348.745 |
| 2010          | 251878 | 94607.988  | 64453.486  | 30154.50 | 11.972 | 31.873 | 3013.72 | 1131.98 | 771.186 | 360.799 |
| 2011          | 251779 | 93633.119  | 61814.122  | 31819.00 | 12.638 | 33.983 | 2982.76 | 1109.25 | 732.297 | 376.952 |
| 2012          | 252643 | 92775.175  | 59326.852  | 33448.32 | 13.239 | 36.053 | 2960.61 | 1087.19 | 695.224 | 391.965 |
| 2013          | 256175 | 92345.780  | 57228.854  | 35116.93 | 13.708 | 38.028 | 2967.76 | 1069.82 | 662.990 | 406.826 |
| 2014          | 257393 | 91379.215  | 54869.548  | 36509.67 | 14.184 | 39.954 | 2947.05 | 1046.26 | 628.235 | 418.021 |
| 2015          | 259782 | 90750.242  | 52980.681  | 37769.56 | 14.539 | 41.619 | 3346.10 | 1168.90 | 682.414 | 486.488 |
| 2016          | 261453 | 88811.996  | 49750.532  | 39061.46 | 14.940 | 43.982 | 3336.15 | 1133.24 | 634.819 | 498.426 |
| 2017          | 263685 | 87325.126  | 47123.279  | 40201.85 | 15.246 | 46.037 | 3333.85 | 1104.08 | 595.794 | 508.285 |
| 2018          | 258714 | 87612.144  | 46387.469  | 41224.67 | 15.934 | 47.054 | 3240.73 | 1097.46 | 581.063 | 516.393 |
| 2019          | 261438 | 87797.760  | 45071.695  | 42726.06 | 16.343 | 48.664 | 3242.99 | 1089.08 | 559.089 | 529.993 |
| 2020          | 262288 | 87221.042  | 43618.579  | 43602.46 | 16.624 | 49.991 | 3715.29 | 1235.48 | 617.854 | 617.625 |
| 2021          | 255079 | 82001.292  | 38863.624  | 43137.67 | 16.911 | 52.606 | 3587.82 | 1153.39 | 546.636 | 606.753 |
| 2022          | 257097 | 81915.977  | 37399.783  | 44516.19 | 17.315 | 54.344 | 3588.53 | 1143.37 | 522.022 | 621.353 |
| 2023          | 259080 | 81810.810  | 35973.934  | 45836.88 | 17.692 | 56.028 | 3586.88 | 1132.64 | 498.048 | 634.597 |
| 2024          | 260719 | 81528.303  | 34566.264  | 46962.04 | 18.013 | 57.602 | 3579.65 | 1119.38 | 474.593 | 644.786 |
| 2025          | 257308 | 79599.213  | 32891.988  | 46707.23 | 18.152 | 58.678 | 4112.08 | 1272.09 | 525.652 | 746.435 |
| 2026          | 251528 | 75082.462  | 29260.703  | 45821.76 | 18.217 | 61.029 | 4003.24 | 1194.99 | 465.704 | 729.285 |
| 2027          | 250988 | 74444.425  | 27786.479  | 46657.95 | 18.590 | 62.675 | 3976.53 | 1179.46 | 440.235 | 739.225 |
| 2028          | 250285 | 73699.585  | 26243.265  | 47456.32 | 18.961 | 64.392 | 3945.35 | 1161.76 | 413.684 | 748.075 |
| 2029          | 249525 | 72819.703  | 24766.996  | 48052.71 | 19.258 | 65.989 | 3910.99 | 1141.36 | 388.191 | 753.165 |
| 2030          | 240528 | 69309.277  | 23065.777  | 46243.50 | 19.226 | 66.721 | 4504.36 | 1297.95 | 431.951 | 865.998 |
| 2031          | 235442 | 65433.368  | 20474.999  | 44958.37 | 19.095 | 68.709 | 4397.65 | 1222.18 | 382.437 | 839.744 |
| 2032          | 234017 | 64643.552  | 19261.711  | 45381.84 | 19.393 | 70.203 | 4356.12 | 1203.31 | 358.547 | 844.761 |
| 2033          | 232559 | 63793.514  | 18122.423  | 45671.09 | 19.639 | 71.592 | 4310.93 | 1182.54 | 335.934 | 846.602 |
| 2034          | 230963 | 63032.151  | 17050.461  | 45981.69 | 19.909 | 72.950 | 4260.75 | 1162.80 | 314.542 | 848.258 |
| 2035          | 215822 | 57653.301  | 15507.569  | 42145.73 | 19.528 | 73.102 | 4924.38 | 1315.47 | 353.835 | 961.636 |
| 2036          | 208183 | 52988.733  | 13051.778  | 39936.96 | 19.184 | 75.369 | 4748.94 | 1208.75 | 297.729 | 911.017 |
| 2037          | 205491 | 52026.921  | 12130.675  | 39896.25 | 19.415 | 76.684 | 4682.40 | 1185.50 | 276.414 | 909.089 |
| 2038          | 202834 | 50943.211  | 11226.219  | 39716.99 | 19.581 | 77.963 | 4612.18 | 1158.38 | 255.270 | 903.113 |
| 2039          | 200251 | 50085.991  | 10463.357  | 39622.63 | 19.787 | 79.109 | 4538.65 | 1135.19 | 237.150 | 898.041 |

## Results for PHIM for Run 7 (Sensitivity\_Analysis\_4.RTF)

\*\*\*\*\*

### Main Results for E-Component for Run: 7, Simulation: 1, COD: LUNG CANCER

| Variable Parameter          | Value                                  |
|-----------------------------|----------------------------------------|
| 1. Country                  | US (United States)                     |
| 2. Sex                      | M (Males)                              |
| 3. Year of start of process | 1990                                   |
| 4. Cause of Death           | LUNG CANCER                            |
| 5. Effective Dose NULL      | CC:1                                   |
| 6. Effective Dose Ecig      | CC:1 Ecig:0.05 Dual:0.525              |
| Note:                       | Death rates are per million population |

#### Results for Age Groups Combined and Years combined, Population unadjusted for deaths in Ecig scenario,

| Age Group:All |         | NULL        | Ecig        | %Drop    |        | NULL   | Ecig    | Drop    |         |         |
|---------------|---------|-------------|-------------|----------|--------|--------|---------|---------|---------|---------|
| Year          | Number  | Attrib      | Attrib      | Drop     | %Drop  | Attrib | Death   | Attrib  | Attrib  | Drop    |
|               | Deaths  | Deaths      | Deaths      | Deaths   | Deaths | Deaths | Rate    | Rates   | Rates   | Rates   |
| All Comb      | 3065988 | 2244988.113 | 1724887.531 | 520100.6 | 16.964 | 23.167 | 887.537 | 649.875 | 499.318 | 150.558 |

#### Results for Age Groups Combined, Population unadjusted for deaths in Ecig scenario,

| Age Group:All |        | NULL      | Ecig      | %Drop    |        | NULL   | Ecig    | Drop    |         |         |
|---------------|--------|-----------|-----------|----------|--------|--------|---------|---------|---------|---------|
| Year          | Number | Attrib    | Attrib    | Drop     | %Drop  | Attrib | Death   | Attrib  | Attrib  | Drop    |
|               | Deaths | Deaths    | Deaths    | Deaths   | Deaths | Deaths | Rate    | Rates   | Rates   | Rates   |
| 1990          | 78822  | 63385.736 | 63385.736 | 0.000    | 0.000  | 0.000  | 1249.50 | 1004.81 | 1004.81 | 0.000   |
| 1991          | 78462  | 62918.402 | 62870.284 | 48.118   | 0.061  | 0.076  | 1223.41 | 981.049 | 980.299 | 0.750   |
| 1992          | 77987  | 62366.766 | 62237.573 | 129.193  | 0.166  | 0.207  | 1195.35 | 955.930 | 953.949 | 1.980   |
| 1993          | 78542  | 62652.888 | 62398.515 | 254.372  | 0.324  | 0.406  | 1182.39 | 943.195 | 939.365 | 3.829   |
| 1994          | 77437  | 61565.227 | 61163.824 | 401.403  | 0.518  | 0.652  | 1144.00 | 909.520 | 903.590 | 5.930   |
| 1995          | 76904  | 60851.961 | 60267.840 | 584.121  | 0.760  | 0.960  | 1114.36 | 881.759 | 873.295 | 8.464   |
| 1996          | 76232  | 60122.922 | 59308.532 | 814.389  | 1.068  | 1.355  | 1087.44 | 857.643 | 846.026 | 11.617  |
| 1997          | 75473  | 59237.155 | 58175.105 | 1062.050 | 1.407  | 1.793  | 1059.06 | 831.234 | 816.331 | 14.903  |
| 1998          | 75381  | 58906.696 | 57537.333 | 1369.363 | 1.817  | 2.325  | 1040.37 | 813.001 | 794.101 | 18.899  |
| 1999          | 73159  | 56930.073 | 55258.882 | 1671.191 | 2.284  | 2.936  | 993.781 | 773.329 | 750.628 | 22.701  |
| 2000          | 73784  | 57137.121 | 55072.574 | 2064.547 | 2.798  | 3.613  | 987.608 | 764.787 | 737.153 | 27.634  |
| 2001          | 73294  | 56481.726 | 53973.349 | 2508.377 | 3.422  | 4.441  | 968.273 | 746.169 | 713.032 | 33.138  |
| 2002          | 72442  | 55588.365 | 52613.482 | 2974.884 | 4.107  | 5.352  | 946.293 | 726.138 | 687.278 | 38.860  |
| 2003          | 71942  | 54945.856 | 51454.527 | 3491.330 | 4.853  | 6.354  | 929.989 | 710.281 | 665.149 | 45.132  |
| 2004          | 71301  | 54203.126 | 50142.729 | 4060.397 | 5.695  | 7.491  | 911.778 | 693.135 | 641.212 | 51.923  |
| 2005          | 70964  | 53744.603 | 49095.441 | 4649.162 | 6.551  | 8.650  | 896.937 | 679.296 | 620.533 | 58.762  |
| 2006          | 69658  | 52535.572 | 47268.640 | 5266.932 | 7.561  | 10.025 | 872.383 | 657.945 | 591.983 | 65.962  |
| 2007          | 68565  | 51492.124 | 45614.459 | 5877.665 | 8.572  | 11.415 | 849.888 | 638.264 | 565.408 | 72.856  |
| 2008          | 68226  | 51030.736 | 44412.961 | 6617.775 | 9.700  | 12.968 | 836.215 | 625.460 | 544.349 | 81.111  |
| 2009          | 67509  | 50276.199 | 42918.470 | 7357.728 | 10.899 | 14.635 | 817.667 | 608.943 | 519.827 | 89.117  |
| 2010          | 67196  | 49840.933 | 41740.810 | 8100.122 | 12.054 | 16.252 | 804.000 | 596.347 | 499.429 | 96.918  |
| 2011          | 66506  | 49072.841 | 40155.319 | 8917.522 | 13.409 | 18.172 | 787.880 | 581.354 | 475.710 | 105.644 |
| 2012          | 66155  | 48539.512 | 38745.477 | 9794.035 | 14.805 | 20.177 | 775.240 | 568.812 | 454.040 | 114.772 |
| 2013          | 65333  | 47675.741 | 37102.008 | 10573.73 | 16.184 | 22.178 | 756.876 | 552.318 | 429.823 | 122.496 |
| 2014          | 65033  | 47194.534 | 35807.742 | 11386.79 | 17.509 | 24.127 | 744.602 | 540.359 | 409.985 | 130.374 |
| 2015          | 64145  | 46305.842 | 34211.307 | 12094.54 | 18.855 | 26.119 | 826.215 | 596.439 | 440.656 | 155.783 |
| 2016          | 61618  | 44208.867 | 31702.951 | 12505.92 | 20.296 | 28.288 | 786.248 | 564.107 | 404.531 | 159.576 |
| 2017          | 59897  | 42702.624 | 29717.384 | 12985.24 | 21.679 | 30.409 | 757.297 | 539.903 | 375.726 | 164.176 |
| 2018          | 62468  | 44321.202 | 29735.881 | 14585.32 | 23.349 | 32.908 | 782.490 | 555.181 | 372.481 | 182.700 |
| 2019          | 63045  | 44493.088 | 28841.453 | 15651.64 | 24.826 | 35.178 | 782.035 | 551.912 | 357.762 | 194.150 |
| 2020          | 63466  | 44529.551 | 27881.352 | 16648.20 | 26.232 | 37.387 | 898.991 | 630.757 | 394.937 | 235.820 |
| 2021          | 57113  | 39852.556 | 23990.447 | 15862.11 | 27.773 | 39.802 | 803.323 | 560.546 | 337.438 | 223.108 |
| 2022          | 57440  | 39853.685 | 23003.306 | 16850.38 | 29.335 | 42.281 | 801.745 | 556.274 | 321.078 | 235.196 |
| 2023          | 57738  | 39847.050 | 22025.216 | 17821.83 | 30.867 | 44.726 | 799.366 | 551.670 | 304.932 | 246.738 |
| 2024          | 57942  | 39726.010 | 21042.878 | 18683.13 | 32.245 | 47.030 | 795.539 | 545.435 | 288.917 | 256.518 |
| 2025          | 57521  | 39207.348 | 19940.966 | 19266.38 | 33.494 | 49.140 | 919.257 | 626.579 | 318.680 | 307.899 |
| 2026          | 51428  | 34803.960 | 16901.850 | 17902.11 | 34.810 | 51.437 | 818.510 | 553.929 | 269.004 | 284.924 |
| 2027          | 51172  | 34484.595 | 15927.637 | 18556.96 | 36.264 | 53.812 | 810.740 | 546.357 | 252.350 | 294.007 |
| 2028          | 50870  | 34100.638 | 14928.326 | 19172.31 | 37.689 | 56.223 | 801.884 | 537.544 | 235.322 | 302.222 |
| 2029          | 50540  | 33669.838 | 13983.018 | 19686.82 | 38.953 | 58.470 | 792.146 | 527.732 | 219.166 | 308.566 |
| 2030          | 49109  | 32557.688 | 12947.512 | 19610.18 | 39.932 | 60.232 | 919.662 | 609.705 | 242.467 | 367.238 |
| 2031          | 43585  | 28646.393 | 10830.489 | 17815.90 | 40.876 | 62.192 | 814.096 | 535.065 | 202.295 | 332.770 |
| 2032          | 43163  | 28227.160 | 10098.679 | 18128.48 | 42.000 | 64.224 | 803.454 | 525.435 | 187.982 | 337.453 |
| 2033          | 42725  | 27786.623 | 9416.259  | 18370.36 | 42.996 | 66.112 | 791.996 | 515.079 | 174.549 | 340.530 |
| 2034          | 42256  | 27348.299 | 8784.690  | 18563.61 | 43.932 | 67.878 | 779.523 | 504.514 | 162.058 | 342.456 |
| 2035          | 39748  | 25570.077 | 7937.848  | 17632.23 | 44.360 | 68.956 | 906.933 | 583.430 | 181.117 | 402.313 |
| 2036          | 34030  | 21717.319 | 6265.821  | 15451.50 | 45.406 | 71.148 | 776.269 | 495.402 | 142.932 | 352.470 |
| 2037          | 33454  | 21256.024 | 5784.772  | 15471.25 | 46.247 | 72.785 | 762.289 | 484.347 | 131.814 | 352.533 |
| 2038          | 32883  | 20747.175 | 5323.274  | 15423.90 | 46.905 | 74.342 | 747.720 | 471.764 | 121.044 | 350.720 |
| 2039          | 32325  | 20327.688 | 4942.603  | 15385.08 | 47.595 | 75.685 | 732.644 | 460.724 | 112.023 | 348.700 |

## Results for PHIM for Run 7 (Sensitivity\_Analysis\_4.RTF)

\*\*\*\*\*

### Main Results for E-Component for Run: 7, Simulation: 1, COD: IHD

| Variable Parameter          | Value                                  |
|-----------------------------|----------------------------------------|
| 1. Country                  | US (United States)                     |
| 2. Sex                      | M (Males)                              |
| 3. Year of start of process | 1990                                   |
| 4. Cause of Death           | IHD                                    |
| 5. Effective Dose NULL      | CC:1                                   |
| 6. Effective Dose Ecig      | CC:1 Ecig:0.05 Dual:0.525              |
| Note:                       | Death rates are per million population |

#### Results for Age Groups Combined and Years combined, Population unadjusted for deaths in Ecig scenario,

| Age Group:All |         | NULL        | Ecig       | %Drop    |        |        | NULL    | Ecig    | Drop    |         |
|---------------|---------|-------------|------------|----------|--------|--------|---------|---------|---------|---------|
| Year          | Number  | Attrib      | Attrib     | Drop     | %Drop  | Attrib | Death   | Attrib  | Drop    |         |
|               | Deaths  | Deaths      | Deaths     | Deaths   | Deaths | Deaths | Rate    | Rates   | Rates   |         |
| All Comb      | 6360041 | 1098877.421 | 517299.400 | 581578.0 | 9.144  | 52.925 | 1841.09 | 318.101 | 149.747 | 168.354 |

#### Results for Age Groups Combined, Population unadjusted for deaths in Ecig scenario,

| Age Group:All |        | NULL      | Ecig      | %Drop    |        |        | NULL    | Ecig    | Drop    |         |
|---------------|--------|-----------|-----------|----------|--------|--------|---------|---------|---------|---------|
| Year          | Number | Attrib    | Attrib    | Drop     | %Drop  | Attrib | Death   | Attrib  | Drop    |         |
|               | Deaths | Deaths    | Deaths    | Deaths   | Deaths | Deaths | Rate    | Rates   | Rates   |         |
| 1990          | 171484 | 38511.725 | 38511.725 | 0.000    | 0.000  | 0.000  | 2718.40 | 610.497 | 0.000   |         |
| 1991          | 168044 | 37309.838 | 36996.011 | 313.827  | 0.187  | 0.841  | 2620.21 | 581.750 | 576.857 | 4.893   |
| 1992          | 164548 | 36137.488 | 35292.966 | 844.522  | 0.513  | 2.337  | 2522.12 | 553.899 | 540.955 | 12.944  |
| 1993          | 164362 | 35599.588 | 34035.960 | 1563.627 | 0.951  | 4.392  | 2474.35 | 535.926 | 512.387 | 23.539  |
| 1994          | 159866 | 34336.757 | 31950.282 | 2386.475 | 1.493  | 6.950  | 2361.75 | 507.267 | 472.011 | 35.256  |
| 1995          | 158083 | 33455.759 | 30119.216 | 3336.543 | 2.111  | 9.973  | 2290.66 | 484.782 | 436.434 | 48.347  |
| 1996          | 154875 | 32193.824 | 27849.069 | 4344.755 | 2.805  | 13.496 | 2209.26 | 459.239 | 397.262 | 61.977  |
| 1997          | 149970 | 30665.509 | 25343.601 | 5321.908 | 3.549  | 17.355 | 2104.43 | 430.308 | 355.629 | 74.679  |
| 1998          | 145407 | 29188.430 | 22951.655 | 6236.776 | 4.289  | 21.367 | 2006.83 | 402.844 | 316.767 | 86.077  |
| 1999          | 165952 | 33375.386 | 24697.533 | 8677.853 | 5.229  | 26.001 | 2254.27 | 453.366 | 335.487 | 117.879 |
| 2000          | 160260 | 32024.754 | 22307.428 | 9717.326 | 6.063  | 30.343 | 2145.10 | 428.655 | 298.588 | 130.068 |
| 2001          | 154444 | 30682.393 | 19886.341 | 10796.05 | 6.990  | 35.186 | 2040.33 | 405.339 | 262.715 | 142.625 |
| 2002          | 151887 | 30218.370 | 18157.363 | 12061.01 | 7.941  | 39.913 | 1984.06 | 394.736 | 237.185 | 157.550 |
| 2003          | 146733 | 29175.202 | 16182.314 | 12992.89 | 8.855  | 44.534 | 1896.81 | 377.146 | 209.188 | 167.958 |
| 2004          | 138381 | 27488.687 | 14013.310 | 13475.38 | 9.738  | 49.022 | 1769.58 | 351.518 | 179.198 | 172.319 |
| 2005          | 135881 | 27017.439 | 12672.852 | 14344.59 | 10.557 | 53.094 | 1717.44 | 341.482 | 160.176 | 181.306 |
| 2006          | 131922 | 26231.435 | 11148.695 | 15082.74 | 11.433 | 57.499 | 1652.16 | 328.517 | 139.624 | 188.893 |
| 2007          | 126502 | 25103.049 | 9710.403  | 15392.65 | 12.168 | 61.318 | 1568.04 | 311.161 | 120.364 | 190.797 |
| 2008          | 125859 | 24621.740 | 8747.646  | 15874.09 | 12.613 | 64.472 | 1542.60 | 301.777 | 107.216 | 194.561 |
| 2009          | 122428 | 23741.177 | 7714.587  | 16026.59 | 13.091 | 67.505 | 1482.84 | 287.552 | 93.439  | 194.113 |
| 2010          | 120537 | 23189.160 | 6910.770  | 16278.39 | 13.505 | 70.198 | 1442.22 | 277.458 | 82.687  | 194.771 |
| 2011          | 120221 | 22786.927 | 6163.162  | 16623.77 | 13.828 | 72.953 | 1424.23 | 269.951 | 73.013  | 196.938 |
| 2012          | 120927 | 22485.295 | 5556.477  | 16928.82 | 13.999 | 75.288 | 1417.09 | 263.495 | 65.114  | 198.381 |
| 2013          | 122648 | 22251.884 | 5047.127  | 17204.76 | 14.028 | 77.318 | 1420.86 | 257.786 | 58.470  | 199.315 |
| 2014          | 123229 | 21894.593 | 4564.995  | 17329.60 | 14.063 | 79.150 | 1410.92 | 250.685 | 52.267  | 198.417 |
| 2015          | 123774 | 21471.109 | 4143.718  | 17327.39 | 13.999 | 80.701 | 1594.26 | 276.557 | 53.373  | 223.184 |
| 2016          | 126218 | 21411.568 | 3772.265  | 17639.30 | 13.975 | 82.382 | 1610.55 | 273.213 | 48.134  | 225.078 |
| 2017          | 128265 | 21169.399 | 3438.738  | 17730.66 | 13.823 | 83.756 | 1621.69 | 267.651 | 43.477  | 224.174 |
| 2018          | 121429 | 19830.576 | 2947.143  | 16883.43 | 13.904 | 85.138 | 1521.05 | 248.404 | 36.917  | 211.487 |
| 2019          | 121832 | 19431.014 | 2693.333  | 16737.68 | 13.738 | 86.139 | 1511.26 | 241.031 | 33.409  | 207.622 |
| 2020          | 120811 | 18532.612 | 2407.059  | 16125.55 | 13.348 | 87.012 | 1711.27 | 262.513 | 34.096  | 228.417 |
| 2021          | 119407 | 18234.128 | 2181.079  | 16053.05 | 13.444 | 88.038 | 1679.51 | 256.472 | 30.678  | 225.794 |
| 2022          | 119438 | 17812.559 | 1987.726  | 15824.83 | 13.249 | 88.841 | 1667.10 | 248.626 | 27.744  | 220.881 |
| 2023          | 119445 | 17361.668 | 1812.772  | 15548.90 | 13.018 | 89.559 | 1653.68 | 240.367 | 25.097  | 215.270 |
| 2024          | 119305 | 16929.676 | 1675.144  | 15254.53 | 12.786 | 90.105 | 1638.05 | 232.443 | 23.000  | 209.444 |
| 2025          | 115685 | 15501.666 | 1463.872  | 14037.79 | 12.134 | 90.557 | 1848.78 | 247.735 | 23.394  | 224.340 |
| 2026          | 115073 | 15523.814 | 1391.370  | 14132.44 | 12.281 | 91.037 | 1831.46 | 247.072 | 22.145  | 224.927 |
| 2027          | 113989 | 15073.070 | 1297.724  | 13775.35 | 12.085 | 91.390 | 1805.98 | 238.810 | 20.561  | 218.250 |
| 2028          | 112855 | 14636.710 | 1203.835  | 13432.87 | 11.903 | 91.775 | 1778.98 | 230.725 | 18.977  | 211.748 |
| 2029          | 111718 | 14180.166 | 1124.542  | 13055.62 | 11.686 | 92.070 | 1751.04 | 222.256 | 17.626  | 204.630 |
| 2030          | 104851 | 12111.772 | 931.758   | 11180.01 | 10.663 | 92.307 | 1963.54 | 226.816 | 17.449  | 209.367 |
| 2031          | 105289 | 12417.367 | 939.171   | 11478.20 | 10.902 | 92.437 | 1966.62 | 231.935 | 17.542  | 214.393 |
| 2032          | 103879 | 12054.064 | 888.764   | 11165.30 | 10.748 | 92.627 | 1933.67 | 224.381 | 16.544  | 207.837 |
| 2033          | 102485 | 11672.389 | 836.282   | 10836.11 | 10.573 | 92.835 | 1899.76 | 216.370 | 15.502  | 200.868 |
| 2034          | 101070 | 11365.762 | 798.854   | 10566.91 | 10.455 | 92.971 | 1864.51 | 209.673 | 14.737  | 194.935 |
| 2035          | 90820  | 8580.360  | 582.860   | 7997.500 | 8.806  | 93.207 | 2072.23 | 195.777 | 13.299  | 182.478 |
| 2036          | 92117  | 8948.841  | 602.091   | 8346.750 | 9.061  | 93.272 | 2101.31 | 204.135 | 13.735  | 190.401 |
| 2037          | 90327  | 8624.570  | 578.970   | 8045.599 | 8.907  | 93.287 | 2058.21 | 196.522 | 13.193  | 183.330 |
| 2038          | 88590  | 8315.017  | 548.641   | 7766.376 | 8.767  | 93.402 | 2014.42 | 189.073 | 12.475  | 176.597 |
| 2039          | 86921  | 8001.132  | 520.203   | 7480.929 | 8.607  | 93.498 | 1970.05 | 181.344 | 11.790  | 169.554 |

## Results for PHIM for Run 7 (Sensitivity\_Analysis\_4.RTF)

\*\*\*\*\*

### Main Results for E-Component for Run: 7, Simulation: 1, COD: STROKE

| Variable Parameter          | Value                                  |
|-----------------------------|----------------------------------------|
| 1. Country                  | US (United States)                     |
| 2. Sex                      | M (Males)                              |
| 3. Year of start of process | 1990                                   |
| 4. Cause of Death           | STROKE                                 |
| 5. Effective Dose NULL      | CC:1                                   |
| 6. Effective Dose Ecig      | CC:1 Ecig:0.05 Dual:0.525              |
| Note:                       | Death rates are per million population |

#### Results for Age Groups Combined and Years combined, Population unadjusted for deaths in Ecig scenario,

| Age Group:All |         | NULL       | Ecig      | %Drop    |        | NULL   | Ecig    | Drop   |        |        |
|---------------|---------|------------|-----------|----------|--------|--------|---------|--------|--------|--------|
| Year          | Number  | Attrib     | Attrib    | Drop     | %Drop  | Attrib | Death   | Attrib | Drop   |        |
|               | Deaths  | Deaths     | Deaths    | Deaths   | Deaths | Deaths | Rate    | Rates  | Rates  |        |
| All Comb      | 1489699 | 149918.462 | 69758.716 | 80159.75 | 5.381  | 53.469 | 431.236 | 43.398 | 20.194 | 23.205 |

#### Results for Age Groups Combined, Population unadjusted for deaths in Ecig scenario,

| Age Group:All |        | NULL     | Ecig     | %Drop    |        | NULL   | Ecig    | Drop   |        |        |
|---------------|--------|----------|----------|----------|--------|--------|---------|--------|--------|--------|
| Year          | Number | Attrib   | Attrib   | Drop     | %Drop  | Attrib | Death   | Attrib | Drop   |        |
|               | Deaths | Deaths   | Deaths   | Deaths   | Deaths | Deaths | Rate    | Rates  | Rates  |        |
| 1990          | 32862  | 4613.166 | 4613.166 | 0.000    | 0.000  | 0.000  | 520.936 | 73.129 | 0.000  |        |
| 1991          | 32619  | 4555.566 | 4515.509 | 40.057   | 0.123  | 0.879  | 508.609 | 71.032 | 70.408 | 0.625  |
| 1992          | 32100  | 4453.572 | 4348.505 | 105.067  | 0.327  | 2.359  | 492.014 | 68.262 | 66.652 | 1.610  |
| 1993          | 32896  | 4462.473 | 4263.951 | 198.522  | 0.603  | 4.449  | 495.226 | 67.179 | 64.191 | 2.989  |
| 1994          | 33323  | 4499.513 | 4186.136 | 313.377  | 0.940  | 6.965  | 492.290 | 66.473 | 61.843 | 4.630  |
| 1995          | 33569  | 4472.774 | 4028.426 | 444.349  | 1.324  | 9.935  | 486.422 | 64.812 | 58.373 | 6.439  |
| 1996          | 33870  | 4406.878 | 3817.707 | 589.171  | 1.740  | 13.369 | 483.150 | 62.863 | 54.459 | 8.404  |
| 1997          | 33516  | 4288.158 | 3552.050 | 736.108  | 2.196  | 17.166 | 470.307 | 60.173 | 49.843 | 10.329 |
| 1998          | 32795  | 4120.148 | 3249.820 | 870.328  | 2.654  | 21.124 | 452.620 | 56.864 | 44.852 | 12.012 |
| 1999          | 33375  | 3982.443 | 2978.426 | 1004.017 | 3.008  | 25.211 | 453.361 | 54.097 | 40.458 | 13.638 |
| 2000          | 33459  | 4021.411 | 2841.202 | 1180.209 | 3.527  | 29.348 | 447.853 | 53.827 | 38.030 | 15.797 |
| 2001          | 32275  | 3848.092 | 2549.386 | 1298.706 | 4.024  | 33.749 | 426.379 | 50.836 | 33.679 | 17.157 |
| 2002          | 31586  | 3783.081 | 2345.872 | 1437.209 | 4.550  | 37.990 | 412.601 | 49.418 | 30.644 | 18.774 |
| 2003          | 30985  | 3754.415 | 2163.939 | 1590.476 | 5.133  | 42.363 | 400.541 | 48.533 | 27.973 | 20.560 |
| 2004          | 29884  | 3666.274 | 1960.014 | 1706.261 | 5.710  | 46.539 | 382.149 | 46.883 | 25.064 | 21.819 |
| 2005          | 28708  | 3589.688 | 1773.228 | 1816.460 | 6.327  | 50.602 | 362.850 | 45.371 | 22.412 | 22.959 |
| 2006          | 28188  | 3596.985 | 1629.453 | 1967.531 | 6.980  | 54.699 | 353.021 | 45.048 | 20.407 | 24.641 |
| 2007          | 28026  | 3560.798 | 1481.509 | 2079.288 | 7.419  | 58.394 | 347.392 | 44.137 | 18.364 | 25.774 |
| 2008          | 27128  | 3417.001 | 1305.832 | 2111.169 | 7.782  | 61.784 | 332.495 | 41.881 | 16.005 | 25.876 |
| 2009          | 27068  | 3394.390 | 1190.853 | 2203.537 | 8.141  | 64.917 | 327.847 | 41.113 | 14.424 | 26.689 |
| 2010          | 26911  | 3340.137 | 1080.099 | 2260.039 | 8.398  | 67.663 | 321.990 | 39.965 | 12.923 | 27.041 |
| 2011          | 26959  | 3285.435 | 975.864  | 2309.571 | 8.567  | 70.297 | 319.377 | 38.922 | 11.561 | 27.361 |
| 2012          | 27057  | 3259.209 | 883.119  | 2376.090 | 8.782  | 72.904 | 317.068 | 38.193 | 10.349 | 27.844 |
| 2013          | 27904  | 3274.703 | 813.373  | 2461.330 | 8.821  | 75.162 | 323.265 | 37.937 | 9.423  | 28.514 |
| 2014          | 28792  | 3298.083 | 749.358  | 2548.725 | 8.852  | 77.279 | 329.657 | 37.762 | 8.580  | 29.182 |
| 2015          | 29560  | 3244.406 | 681.561  | 2562.845 | 8.670  | 78.993 | 380.745 | 41.789 | 8.779  | 33.011 |
| 2016          | 30513  | 3314.836 | 638.927  | 2675.909 | 8.770  | 80.725 | 389.347 | 42.297 | 8.153  | 34.145 |
| 2017          | 31416  | 3333.314 | 590.806  | 2742.508 | 8.730  | 82.276 | 397.202 | 42.144 | 7.470  | 34.674 |
| 2018          | 29348  | 2925.242 | 481.601  | 2443.641 | 8.326  | 83.536 | 367.626 | 36.642 | 6.033  | 30.610 |
| 2019          | 29598  | 2864.628 | 438.498  | 2426.130 | 8.197  | 84.693 | 367.149 | 35.534 | 5.439  | 30.095 |
| 2020          | 29592  | 2730.366 | 389.705  | 2340.662 | 7.910  | 85.727 | 419.174 | 38.675 | 5.520  | 33.155 |
| 2021          | 30097  | 2647.911 | 352.083  | 2295.828 | 7.628  | 86.703 | 423.328 | 37.244 | 4.952  | 32.292 |
| 2022          | 30304  | 2586.165 | 319.457  | 2266.708 | 7.480  | 87.647 | 422.974 | 36.097 | 4.459  | 31.638 |
| 2023          | 30505  | 2517.960 | 290.545  | 2227.416 | 7.302  | 88.461 | 422.337 | 34.860 | 4.022  | 30.838 |
| 2024          | 30661  | 2454.161 | 267.169  | 2186.991 | 7.133  | 89.114 | 420.968 | 33.695 | 3.668  | 30.027 |
| 2025          | 30254  | 2275.364 | 233.973  | 2041.391 | 6.748  | 89.717 | 483.488 | 36.363 | 3.739  | 32.624 |
| 2026          | 30685  | 2183.166 | 212.878  | 1970.288 | 6.421  | 90.249 | 488.380 | 34.747 | 3.388  | 31.358 |
| 2027          | 30561  | 2112.345 | 196.572  | 1915.773 | 6.269  | 90.694 | 484.196 | 33.467 | 3.114  | 30.353 |
| 2028          | 30412  | 2046.677 | 181.774  | 1864.902 | 6.132  | 91.119 | 479.392 | 32.263 | 2.865  | 29.397 |
| 2029          | 30254  | 1977.671 | 168.642  | 1809.030 | 5.979  | 91.473 | 474.195 | 30.997 | 2.643  | 28.354 |
| 2030          | 29330  | 1744.457 | 143.123  | 1601.334 | 5.460  | 91.796 | 549.260 | 32.668 | 2.680  | 29.988 |
| 2031          | 28976  | 1653.738 | 131.796  | 1521.942 | 5.252  | 92.030 | 541.223 | 30.889 | 2.462  | 28.427 |
| 2032          | 28724  | 1603.120 | 123.240  | 1479.881 | 5.152  | 92.313 | 534.690 | 29.841 | 2.294  | 27.547 |
| 2033          | 28464  | 1548.245 | 115.689  | 1432.556 | 5.033  | 92.528 | 527.627 | 28.700 | 2.145  | 26.555 |
| 2034          | 28178  | 1511.985 | 110.270  | 1401.715 | 4.974  | 92.707 | 519.826 | 27.893 | 2.034  | 25.858 |
| 2035          | 26737  | 1239.866 | 87.914   | 1151.951 | 4.308  | 92.909 | 610.065 | 28.290 | 2.006  | 26.284 |
| 2036          | 25591  | 1182.522 | 82.267   | 1100.255 | 4.299  | 93.043 | 583.762 | 26.975 | 1.877  | 25.098 |
| 2037          | 25143  | 1134.483 | 78.787   | 1055.696 | 4.199  | 93.055 | 572.916 | 25.851 | 1.795  | 24.055 |
| 2038          | 24693  | 1093.537 | 74.482   | 1019.055 | 4.127  | 93.189 | 561.491 | 24.866 | 1.694  | 23.172 |
| 2039          | 24247  | 1047.905 | 70.161   | 977.744  | 4.032  | 93.305 | 549.553 | 23.751 | 1.590  | 22.160 |

## Results for PHIM for Run 7 (Sensitivity\_Analysis\_4.RTF)

\*\*\*\*\*

### Main Results for E-Component for Run: 7, Simulation: 1, COD: COPD

| Variable Parameter          | Value                                  |
|-----------------------------|----------------------------------------|
| 1. Country                  | US (United States)                     |
| 2. Sex                      | M (Males)                              |
| 3. Year of start of process | 1990                                   |
| 4. Cause of Death           | COPD                                   |
| 5. Effective Dose NULL      | CC:1                                   |
| 6. Effective Dose Ecig      | CC:1 Ecig:0.05 Dual:0.525              |
| Note:                       | Death rates are per million population |

#### Results for Age Groups Combined and Years combined, Population unadjusted for deaths in Ecig scenario,

| Age Group:All | NULL    | Ecig        | %Drop      |          |        |        | NULL    | Ecig    | Drop    |        |
|---------------|---------|-------------|------------|----------|--------|--------|---------|---------|---------|--------|
| Year          | Number  | Attrib      | Attrib     | Drop     | %Drop  | Attrib | Death   | Attrib  | Attrib  | Drop   |
|               | Deaths  | Deaths      | Deaths     | Deaths   | Deaths | Deaths | Rate    | Rates   | Rates   | Rates  |
| All Comb      | 2233143 | 1015606.587 | 677159.428 | 338447.2 | 15.156 | 33.325 | 646.447 | 293.996 | 196.023 | 97.973 |

#### Results for Age Groups Combined, Population unadjusted for deaths in Ecig scenario,

| Age Group:All | NULL   | Ecig      | %Drop     |          |        |        | NULL    | Ecig    | Drop    |         |
|---------------|--------|-----------|-----------|----------|--------|--------|---------|---------|---------|---------|
| Year          | Number | Attrib    | Attrib    | Drop     | %Drop  | Attrib | Death   | Attrib  | Attrib  | Drop    |
|               | Deaths | Deaths    | Deaths    | Deaths   | Deaths | Deaths | Rate    | Rates   | Rates   | Rates   |
| 1990          | 33993  | 19262.437 | 19262.437 | 0.000    | 0.000  | 0.000  | 538.865 | 305.353 | 305.353 | 0.000   |
| 1991          | 34092  | 19215.636 | 19193.448 | 22.188   | 0.065  | 0.115  | 531.576 | 299.618 | 299.272 | 0.346   |
| 1992          | 33942  | 19056.189 | 18998.226 | 57.963   | 0.171  | 0.304  | 520.248 | 292.085 | 291.196 | 0.888   |
| 1993          | 35913  | 20095.670 | 19976.894 | 118.776  | 0.331  | 0.591  | 540.645 | 302.526 | 300.738 | 1.788   |
| 1994          | 35074  | 19524.095 | 19342.062 | 182.032  | 0.519  | 0.932  | 518.158 | 288.435 | 285.746 | 2.689   |
| 1995          | 34669  | 19116.002 | 18854.928 | 261.074  | 0.753  | 1.366  | 502.362 | 276.995 | 273.212 | 3.783   |
| 1996          | 34582  | 18975.021 | 18617.858 | 357.163  | 1.033  | 1.882  | 493.306 | 270.675 | 265.580 | 5.095   |
| 1997          | 35267  | 19169.025 | 18694.020 | 475.004  | 1.347  | 2.478  | 494.878 | 268.986 | 262.320 | 6.665   |
| 1998          | 35675  | 19228.937 | 18616.588 | 612.349  | 1.716  | 3.185  | 492.368 | 265.388 | 256.937 | 8.451   |
| 1999          | 38516  | 20589.820 | 19784.186 | 805.634  | 2.092  | 3.913  | 523.195 | 279.689 | 268.745 | 10.944  |
| 2000          | 36283  | 19196.417 | 18283.742 | 912.676  | 2.515  | 4.754  | 485.652 | 256.946 | 244.730 | 12.216  |
| 2001          | 36281  | 19012.731 | 17906.663 | 1106.068 | 3.049  | 5.818  | 479.301 | 251.174 | 236.562 | 14.612  |
| 2002          | 35983  | 18699.357 | 17404.234 | 1295.124 | 3.599  | 6.926  | 470.038 | 244.265 | 227.348 | 16.918  |
| 2003          | 36205  | 18663.550 | 17150.553 | 1512.996 | 4.179  | 8.107  | 468.019 | 241.262 | 221.704 | 19.558  |
| 2004          | 34611  | 17679.164 | 16001.190 | 1677.974 | 4.848  | 9.491  | 442.596 | 226.076 | 204.619 | 21.457  |
| 2005          | 36826  | 18692.832 | 16663.638 | 2029.194 | 5.510  | 10.855 | 465.456 | 236.265 | 210.617 | 25.648  |
| 2006          | 34350  | 17308.564 | 15153.035 | 2155.528 | 6.275  | 12.454 | 430.192 | 216.769 | 189.774 | 26.995  |
| 2007          | 35326  | 17683.181 | 15187.589 | 2495.592 | 7.064  | 14.113 | 437.879 | 219.189 | 188.256 | 30.934  |
| 2008          | 38248  | 19006.374 | 16026.498 | 2979.877 | 7.791  | 15.678 | 468.788 | 232.952 | 196.429 | 36.523  |
| 2009          | 36902  | 18205.573 | 14999.987 | 3205.586 | 8.687  | 17.608 | 446.956 | 220.505 | 181.679 | 38.826  |
| 2010          | 37234  | 18237.758 | 14721.807 | 3515.951 | 9.443  | 19.278 | 445.505 | 218.215 | 176.146 | 42.068  |
| 2011          | 38093  | 18487.916 | 14519.778 | 3968.139 | 10.417 | 21.463 | 451.279 | 219.022 | 172.012 | 47.010  |
| 2012          | 38504  | 18491.158 | 14141.779 | 4349.380 | 11.296 | 23.521 | 451.211 | 216.689 | 165.721 | 50.968  |
| 2013          | 40290  | 19143.452 | 14266.346 | 4877.106 | 12.105 | 25.477 | 466.755 | 221.775 | 165.274 | 56.501  |
| 2014          | 40339  | 18992.005 | 13747.453 | 5244.552 | 13.001 | 27.615 | 461.866 | 217.451 | 157.403 | 60.048  |
| 2015          | 42303  | 19728.885 | 13944.095 | 5784.790 | 13.675 | 29.321 | 544.880 | 254.116 | 179.606 | 74.511  |
| 2016          | 43104  | 19876.724 | 13636.389 | 6240.335 | 14.477 | 31.395 | 550.009 | 253.628 | 174.001 | 79.627  |
| 2017          | 44107  | 20119.790 | 13376.351 | 6743.439 | 15.289 | 33.516 | 557.659 | 254.381 | 169.121 | 85.259  |
| 2018          | 45469  | 20535.123 | 13222.844 | 7312.279 | 16.082 | 35.609 | 569.564 | 257.229 | 165.633 | 91.596  |
| 2019          | 46963  | 21009.029 | 13098.411 | 7910.618 | 16.844 | 37.653 | 582.552 | 260.605 | 162.478 | 98.127  |
| 2020          | 48419  | 21428.512 | 12940.464 | 8488.048 | 17.530 | 39.611 | 685.853 | 303.533 | 183.301 | 120.233 |
| 2021          | 48463  | 21266.697 | 12340.015 | 8926.683 | 18.420 | 41.975 | 681.652 | 299.127 | 173.568 | 125.558 |
| 2022          | 49915  | 21663.568 | 12089.295 | 9574.273 | 19.181 | 44.195 | 696.712 | 302.378 | 168.741 | 133.637 |
| 2023          | 51391  | 22084.131 | 11845.401 | 10238.73 | 19.923 | 46.362 | 711.491 | 305.748 | 163.996 | 141.752 |
| 2024          | 52811  | 22418.456 | 11581.073 | 10837.38 | 20.521 | 48.341 | 725.093 | 307.804 | 159.007 | 148.797 |
| 2025          | 53848  | 22614.834 | 11253.176 | 11361.66 | 21.100 | 50.240 | 860.553 | 361.411 | 179.839 | 181.572 |
| 2026          | 54342  | 22571.522 | 10754.605 | 11816.92 | 21.746 | 52.353 | 864.886 | 359.241 | 171.167 | 188.074 |
| 2027          | 55267  | 22774.416 | 10364.546 | 12409.87 | 22.454 | 54.490 | 875.619 | 360.827 | 164.211 | 196.616 |
| 2028          | 56149  | 22915.561 | 9929.329  | 12986.23 | 23.128 | 56.670 | 885.102 | 361.228 | 156.520 | 204.708 |
| 2029          | 57014  | 22992.027 | 9490.795  | 13501.23 | 23.681 | 58.721 | 893.616 | 360.371 | 148.756 | 211.615 |
| 2030          | 57238  | 22895.360 | 9043.384  | 13851.98 | 24.201 | 60.501 | 1071.90 | 428.760 | 169.355 | 259.405 |
| 2031          | 57592  | 22715.871 | 8573.542  | 14142.33 | 24.556 | 62.257 | 1075.71 | 424.293 | 160.139 | 264.154 |
| 2032          | 58251  | 22759.207 | 8151.028  | 14608.18 | 25.078 | 64.186 | 1084.31 | 423.652 | 151.727 | 271.924 |
| 2033          | 58885  | 22786.258 | 7754.193  | 15032.06 | 25.528 | 65.970 | 1091.54 | 422.387 | 143.739 | 278.648 |
| 2034          | 59460  | 22806.106 | 7356.647  | 15449.46 | 25.983 | 67.743 | 1096.89 | 420.721 | 135.713 | 285.007 |
| 2035          | 58516  | 22262.998 | 6898.947  | 15364.05 | 26.256 | 69.012 | 1335.15 | 507.973 | 157.413 | 350.560 |
| 2036          | 56446  | 21140.051 | 6101.599  | 15038.45 | 26.642 | 71.137 | 1287.60 | 482.234 | 139.186 | 343.048 |
| 2037          | 56568  | 21011.845 | 5688.145  | 15323.70 | 27.089 | 72.929 | 1288.98 | 478.783 | 129.612 | 349.171 |
| 2038          | 56668  | 20787.483 | 5279.822  | 15507.66 | 27.366 | 74.601 | 1288.55 | 472.681 | 120.056 | 352.624 |
| 2039          | 56758  | 20709.267 | 4930.390  | 15778.88 | 27.800 | 76.192 | 1286.40 | 469.372 | 111.747 | 357.626 |

## Results for PHIM for Run 7 (Sensitivity\_Analysis\_4.RTF)

\*\*\*\*\*

### Main Results for E-Component for Run: 7, Simulation: 1, COD: Four Diseases Combined, Adjusted

| Variable Parameter          | Value                                  |
|-----------------------------|----------------------------------------|
| 1. Country                  | US (United States)                     |
| 2. Sex                      | M (Males)                              |
| 3. Year of start of process | 1990                                   |
| 4. Cause of Death           | Four Diseases Combined                 |
| 5. Effective Dose NULL      | CC:1                                   |
| 6. Effective Dose Ecig      | CC:1 Ecig:0.05 Dual:0.525              |
| Note:                       | Death rates are per million population |

#### Results for Age Groups Combined and Years combined, Population and Number deaths adjusted for Ecig scenario,

| Age Group:All | NULL     | Ecig        | %Drop       |         |        |        | NULL    | Ecig    | Drop    |         |
|---------------|----------|-------------|-------------|---------|--------|--------|---------|---------|---------|---------|
| Year          | Number   | Attrib      | Attrib      | Drop    | %Drop  | Attrib | Death   | Attrib  | Drop    |         |
|               | Deaths   | Deaths      | Deaths      | Deaths  | Deaths | Deaths | Rate    | Rates   | Rates   |         |
| All Comb      | 13291515 | 4509390.583 | 3007078.347 | 1502312 | 11.303 | 33.315 | 3815.60 | 1305.37 | 863.243 | 442.128 |

#### Results for Age Groups Combined, Population and Number deaths adjusted for Ecig scenario,

| Age Group:All | NULL   | Ecig       | %Drop      |          |        |        | NULL    | Ecig    | Drop    |
|---------------|--------|------------|------------|----------|--------|--------|---------|---------|---------|
| Year          | Number | Attrib     | Attrib     | Drop     | %Drop  | Attrib | Death   | Attrib  | Drop    |
|               | Deaths | Deaths     | Deaths     | Deaths   | Deaths | Deaths | Rate    | Rates   | Rates   |
| 1990          | 317161 | 125773.065 | 125773.065 | 0.000    | 0.000  | 0.000  | 5027.71 | 1993.78 | 0.000   |
| 1991          | 313217 | 123999.442 | 123575.252 | 424.190  | 0.135  | 0.342  | 4883.81 | 1933.45 | 6.614   |
| 1992          | 308580 | 122014.015 | 120878.388 | 1135.627 | 0.368  | 0.931  | 4729.74 | 1870.18 | 17.419  |
| 1993          | 311723 | 122810.618 | 120679.306 | 2131.312 | 0.684  | 1.735  | 4692.65 | 1848.83 | 32.130  |
| 1994          | 305723 | 119925.592 | 116651.473 | 3274.119 | 1.071  | 2.730  | 4516.28 | 1771.69 | 48.468  |
| 1995          | 303268 | 117896.496 | 113287.038 | 4609.458 | 1.520  | 3.910  | 4393.95 | 1708.35 | 66.967  |
| 1996          | 299629 | 115698.645 | 109619.714 | 6078.931 | 2.029  | 5.254  | 4273.40 | 1650.42 | 86.989  |
| 1997          | 294330 | 113359.847 | 105803.780 | 7556.067 | 2.567  | 6.666  | 4129.04 | 1590.70 | 106.423 |
| 1998          | 289405 | 111444.212 | 102409.360 | 9034.852 | 3.122  | 8.107  | 3992.71 | 1538.10 | 125.226 |
| 1999          | 311218 | 114877.722 | 102793.189 | 12084.53 | 3.883  | 10.519 | 4225.40 | 1560.48 | 164.863 |
| 2000          | 304071 | 112379.704 | 98601.007  | 13778.70 | 4.531  | 12.261 | 4067.26 | 1504.22 | 185.327 |
| 2001          | 296654 | 110024.943 | 94434.575  | 15590.37 | 5.255  | 14.170 | 3915.60 | 1453.52 | 207.054 |
| 2002          | 292345 | 108289.173 | 90664.780  | 17624.39 | 6.029  | 16.275 | 3814.65 | 1414.56 | 231.522 |
| 2003          | 286405 | 106539.023 | 87121.556  | 19417.47 | 6.780  | 18.226 | 3697.37 | 1377.22 | 252.522 |
| 2004          | 274805 | 103037.251 | 82311.630  | 20725.62 | 7.542  | 20.115 | 3508.45 | 1317.61 | 266.735 |
| 2005          | 273120 | 103044.562 | 80430.385  | 22614.18 | 8.280  | 21.946 | 3445.47 | 1302.41 | 287.766 |
| 2006          | 264961 | 99672.555  | 75447.100  | 24225.45 | 9.143  | 24.305 | 3310.95 | 1248.28 | 305.492 |
| 2007          | 259376 | 97839.152  | 72268.018  | 25571.13 | 9.859  | 26.136 | 3206.84 | 1212.75 | 319.252 |
| 2008          | 260562 | 98075.852  | 70800.212  | 27275.64 | 10.468 | 27.811 | 3184.31 | 1202.07 | 336.828 |
| 2009          | 255134 | 95617.338  | 67155.456  | 28461.88 | 11.156 | 29.766 | 3080.04 | 1158.11 | 347.397 |
| 2010          | 253248 | 94607.988  | 64813.917  | 29794.07 | 11.765 | 31.492 | 3019.01 | 1131.98 | 359.326 |
| 2011          | 253310 | 93633.119  | 62200.782  | 31432.34 | 12.409 | 33.570 | 2988.74 | 1109.25 | 373.558 |
| 2012          | 254350 | 92775.175  | 59739.151  | 33036.02 | 12.988 | 35.609 | 2967.32 | 1087.19 | 390.256 |
| 2013          | 258091 | 92345.780  | 57669.204  | 34676.58 | 13.436 | 37.551 | 2975.36 | 1069.82 | 404.985 |
| 2014          | 259513 | 91379.215  | 55335.340  | 36043.87 | 13.889 | 39.444 | 2955.53 | 1046.26 | 416.056 |
| 2015          | 262135 | 90750.242  | 53474.018  | 37276.22 | 14.220 | 41.076 | 3354.49 | 1168.90 | 484.604 |
| 2016          | 264033 | 88811.996  | 50256.145  | 38555.85 | 14.603 | 43.413 | 3345.45 | 1133.24 | 496.470 |
| 2017          | 266514 | 87325.126  | 47643.871  | 39681.26 | 14.889 | 45.441 | 3344.21 | 1104.08 | 506.245 |
| 2018          | 261706 | 87612.144  | 46941.889  | 40670.25 | 15.540 | 46.421 | 3251.72 | 1097.46 | 514.198 |
| 2019          | 264699 | 87797.760  | 45653.260  | 42144.50 | 15.922 | 48.002 | 3255.13 | 1089.08 | 527.662 |
| 2020          | 265832 | 87221.042  | 44225.985  | 42995.06 | 16.174 | 49.294 | 3726.44 | 1235.48 | 619.962 |
| 2021          | 258761 | 82001.292  | 39444.722  | 42556.57 | 16.446 | 51.897 | 3599.53 | 1153.39 | 604.688 |
| 2022          | 261053 | 81915.977  | 37996.625  | 43919.35 | 16.824 | 53.615 | 3601.36 | 1143.37 | 619.193 |
| 2023          | 263323 | 81810.810  | 36585.398  | 45225.41 | 17.175 | 55.280 | 3600.89 | 1132.64 | 632.347 |
| 2024          | 265257 | 81528.303  | 35191.093  | 46337.21 | 17.469 | 56.836 | 3594.93 | 1119.38 | 642.446 |
| 2025          | 262126 | 79599.213  | 33526.384  | 46072.83 | 17.577 | 57.881 | 4125.14 | 1272.09 | 744.476 |
| 2026          | 256489 | 75082.462  | 29859.903  | 45222.56 | 17.631 | 60.231 | 4016.83 | 1194.99 | 727.358 |
| 2027          | 256210 | 74444.425  | 28387.424  | 46057.00 | 17.976 | 61.868 | 3991.32 | 1179.46 | 737.233 |
| 2028          | 255769 | 73699.585  | 26842.337  | 46857.25 | 18.320 | 63.579 | 3961.39 | 1161.76 | 746.022 |
| 2029          | 255276 | 72819.703  | 25362.306  | 47457.40 | 18.591 | 65.171 | 3928.34 | 1141.36 | 751.066 |
| 2030          | 246480 | 69309.277  | 23654.771  | 45654.51 | 18.523 | 65.871 | 4518.54 | 1297.95 | 864.304 |
| 2031          | 241504 | 65433.368  | 21021.923  | 44411.44 | 18.389 | 67.873 | 4412.01 | 1222.18 | 838.135 |
| 2032          | 240315 | 64643.552  | 19799.977  | 44843.58 | 18.660 | 69.371 | 4371.68 | 1203.31 | 843.199 |
| 2033          | 239092 | 63793.514  | 18652.093  | 45141.42 | 18.880 | 70.762 | 4327.73 | 1182.54 | 844.921 |
| 2034          | 237727 | 63032.151  | 17571.027  | 45461.12 | 19.123 | 72.124 | 4278.82 | 1162.80 | 846.541 |
| 2035          | 222599 | 57653.301  | 16010.101  | 41643.20 | 18.708 | 72.230 | 4939.48 | 1315.47 | 960.205 |
| 2036          | 214886 | 52988.733  | 13486.850  | 39501.88 | 18.383 | 74.548 | 4762.78 | 1208.75 | 909.820 |
| 2037          | 212338 | 52026.921  | 12549.498  | 39477.42 | 18.592 | 75.879 | 4697.12 | 1185.50 | 907.896 |
| 2038          | 209820 | 50943.211  | 11627.482  | 39315.73 | 18.738 | 77.176 | 4627.82 | 1158.38 | 901.926 |
| 2039          | 207372 | 50085.991  | 10849.588  | 39236.40 | 18.921 | 78.338 | 4555.20 | 1135.19 | 896.866 |

## Results for PHIM for Run 7 (Sensitivity\_Analysis\_4.RTF)

\*\*\*\*\*

### Main Results for E-Component for Run: 7, Simulation: 1, COD: LUNG CANCER, Adjusted

| Variable Parameter          | Value                                  |
|-----------------------------|----------------------------------------|
| 1. Country                  | US (United States)                     |
| 2. Sex                      | M (Males)                              |
| 3. Year of start of process | 1990                                   |
| 4. Cause of Death           | LUNG CANCER                            |
| 5. Effective Dose NULL      | CC:1                                   |
| 6. Effective Dose Ecig      | CC:1 Ecig:0.05 Dual:0.525              |
| Note:                       | Death rates are per million population |

#### Results for Age Groups Combined and Years combined, Population and Number deaths adjusted for Ecig scenario,

| Age Group:All | NULL    | Ecig        | %Drop       | NULL     | Ecig   | Drop   |         |         |         |         |
|---------------|---------|-------------|-------------|----------|--------|--------|---------|---------|---------|---------|
| Year          | Number  | Attrib      | Attrib      | Drop     | %Drop  | Attrib | Death   | Attrib  | Attrib  | Drop    |
|               | Deaths  | Deaths      | Deaths      | Deaths   | Deaths | Deaths | Rate    | Rates   | Rates   | Rates   |
| All Comb      | 3095723 | 2244988.113 | 1735483.372 | 509504.7 | 16.458 | 22.695 | 888.690 | 649.875 | 498.206 | 151.670 |

#### Results for Age Groups Combined, Population and Number deaths adjusted for Ecig scenario,

| Age Group:All | NULL   | Ecig      | %Drop     | NULL     | Ecig   | Drop   |         |         |         |         |
|---------------|--------|-----------|-----------|----------|--------|--------|---------|---------|---------|---------|
| Year          | Number | Attrib    | Attrib    | Drop     | %Drop  | Attrib | Death   | Attrib  | Attrib  | Drop    |
|               | Deaths | Deaths    | Deaths    | Deaths   | Deaths | Deaths | Rate    | Rates   | Rates   | Rates   |
| 1990          | 78822  | 63385.736 | 63385.736 | 0.000    | 0.000  | 0.000  | 1249.50 | 1004.81 | 1004.81 | 0.000   |
| 1991          | 78462  | 62918.402 | 62870.284 | 48.118   | 0.061  | 0.076  | 1223.41 | 981.049 | 980.299 | 0.750   |
| 1992          | 77988  | 62366.766 | 62238.154 | 128.612  | 0.165  | 0.206  | 1195.35 | 955.930 | 953.952 | 1.978   |
| 1993          | 78545  | 62652.888 | 62400.589 | 252.298  | 0.321  | 0.403  | 1182.40 | 943.195 | 939.374 | 3.821   |
| 1994          | 77443  | 61565.227 | 61168.663 | 396.564  | 0.512  | 0.644  | 1144.02 | 909.520 | 903.610 | 5.910   |
| 1995          | 76915  | 60851.961 | 60276.738 | 575.224  | 0.748  | 0.945  | 1114.40 | 881.759 | 873.330 | 8.428   |
| 1996          | 76251  | 60122.922 | 59322.979 | 799.943  | 1.049  | 1.331  | 1087.51 | 857.643 | 846.083 | 11.560  |
| 1997          | 75501  | 59237.155 | 58196.671 | 1040.483 | 1.378  | 1.756  | 1059.17 | 831.234 | 816.417 | 14.817  |
| 1998          | 75421  | 58906.696 | 57567.845 | 1338.851 | 1.775  | 2.273  | 1040.53 | 813.001 | 794.224 | 18.777  |
| 1999          | 73212  | 56930.073 | 55299.033 | 1631.040 | 2.228  | 2.865  | 993.996 | 773.329 | 750.792 | 22.537  |
| 2000          | 73856  | 57137.121 | 55126.540 | 2010.581 | 2.722  | 3.519  | 987.900 | 764.787 | 737.374 | 27.414  |
| 2001          | 73387  | 56481.726 | 54041.719 | 2440.008 | 3.325  | 4.320  | 968.647 | 746.169 | 713.309 | 32.860  |
| 2002          | 72557  | 55588.365 | 52697.615 | 2890.751 | 3.984  | 5.200  | 946.763 | 726.138 | 687.622 | 38.516  |
| 2003          | 72083  | 54945.856 | 51555.790 | 3390.066 | 4.703  | 6.170  | 930.560 | 710.281 | 665.562 | 44.719  |
| 2004          | 71470  | 54203.126 | 50262.099 | 3941.026 | 5.514  | 7.271  | 912.463 | 693.135 | 641.699 | 51.436  |
| 2005          | 71164  | 53744.603 | 49234.161 | 4510.442 | 6.338  | 8.392  | 897.747 | 679.296 | 621.100 | 58.195  |
| 2006          | 69888  | 52535.572 | 47425.088 | 5110.484 | 7.312  | 9.728  | 873.316 | 657.945 | 592.624 | 65.321  |
| 2007          | 68827  | 51492.124 | 45789.279 | 5702.845 | 8.286  | 11.075 | 850.955 | 638.264 | 566.124 | 72.139  |
| 2008          | 68524  | 51030.736 | 44607.870 | 6422.865 | 9.373  | 12.586 | 837.431 | 625.460 | 545.149 | 80.312  |
| 2009          | 67845  | 50276.199 | 43132.712 | 7143.487 | 10.529 | 14.208 | 819.038 | 608.943 | 520.709 | 88.235  |
| 2010          | 67572  | 49840.933 | 41975.659 | 7865.273 | 11.640 | 15.781 | 805.542 | 596.347 | 500.399 | 95.948  |
| 2011          | 66923  | 49072.841 | 40408.074 | 8664.767 | 12.947 | 17.657 | 789.601 | 581.354 | 476.764 | 104.590 |
| 2012          | 66614  | 48539.512 | 39016.257 | 9523.255 | 14.296 | 19.620 | 777.142 | 568.812 | 455.174 | 113.638 |
| 2013          | 65835  | 47675.741 | 37388.919 | 10286.82 | 15.625 | 21.577 | 758.964 | 552.318 | 431.033 | 121.286 |
| 2014          | 65583  | 47194.534 | 36113.346 | 11081.19 | 16.896 | 23.480 | 746.913 | 540.359 | 411.286 | 129.073 |
| 2015          | 64740  | 46305.842 | 34531.206 | 11774.64 | 18.188 | 25.428 | 728.464 | 526.439 | 401.890 | 154.549 |
| 2016          | 62241  | 44208.867 | 32026.562 | 12182.30 | 19.573 | 27.556 | 708.630 | 514.107 | 405.796 | 158.311 |
| 2017          | 60555  | 42702.624 | 30047.029 | 12655.59 | 20.899 | 29.637 | 693.841 | 503.903 | 377.029 | 162.873 |
| 2018          | 63208  | 44321.202 | 30092.834 | 14228.37 | 22.510 | 32.103 | 675.370 | 500.181 | 373.906 | 181.274 |
| 2019          | 63850  | 44493.088 | 29215.127 | 15277.96 | 23.928 | 34.338 | 663.198 | 500.181 | 373.906 | 181.274 |
| 2020          | 64340  | 44529.551 | 28270.694 | 16258.86 | 25.270 | 36.513 | 651.918 | 500.181 | 373.906 | 181.274 |
| 2021          | 57957  | 39852.556 | 24350.592 | 15501.96 | 26.747 | 38.898 | 640.215 | 500.181 | 373.906 | 181.274 |
| 2022          | 58345  | 39853.685 | 23371.843 | 16481.84 | 28.249 | 41.356 | 628.892 | 500.181 | 373.906 | 181.274 |
| 2023          | 58705  | 39847.050 | 22401.006 | 17446.04 | 29.718 | 43.783 | 617.782 | 500.181 | 373.906 | 181.274 |
| 2024          | 58973  | 39726.010 | 21424.656 | 18301.35 | 31.033 | 46.069 | 607.239 | 500.181 | 373.906 | 181.274 |
| 2025          | 58614  | 39207.348 | 20326.358 | 18880.99 | 32.212 | 48.157 | 597.421 | 500.181 | 373.906 | 181.274 |
| 2026          | 52462  | 34803.960 | 17249.090 | 17554.87 | 33.462 | 50.439 | 588.603 | 500.181 | 373.906 | 181.274 |
| 2027          | 52257  | 34484.595 | 16273.197 | 18211.40 | 34.850 | 52.810 | 580.079 | 500.181 | 373.906 | 181.274 |
| 2028          | 52006  | 34100.638 | 15270.077 | 18830.56 | 36.208 | 55.221 | 571.805 | 500.181 | 373.906 | 181.274 |
| 2029          | 51727  | 33669.838 | 14319.974 | 19349.86 | 37.408 | 57.469 | 563.006 | 500.181 | 373.906 | 181.274 |
| 2030          | 50338  | 32557.688 | 13278.322 | 19279.37 | 38.300 | 59.216 | 554.809 | 500.181 | 373.906 | 181.274 |
| 2031          | 44723  | 28646.393 | 11120.173 | 17526.22 | 39.189 | 61.181 | 547.033 | 500.181 | 373.906 | 181.274 |
| 2032          | 44340  | 28227.160 | 10381.155 | 17846.00 | 40.248 | 63.223 | 539.609 | 500.181 | 373.906 | 181.274 |
| 2033          | 43942  | 27786.623 | 9691.604  | 18095.02 | 41.180 | 65.121 | 532.375 | 500.181 | 373.906 | 181.274 |
| 2034          | 43510  | 27348.299 | 9052.883  | 18295.42 | 42.049 | 66.898 | 525.127 | 500.181 | 373.906 | 181.274 |
| 2035          | 41006  | 25570.077 | 8194.606  | 17375.47 | 42.373 | 67.952 | 517.935 | 500.181 | 373.906 | 181.274 |
| 2036          | 35129  | 21717.319 | 6173.501  | 15243.82 | 43.394 | 70.192 | 510.600 | 500.181 | 373.906 | 181.274 |
| 2037          | 34571  | 21256.024 | 5983.228  | 15272.80 | 44.177 | 71.852 | 503.754 | 500.181 | 373.906 | 181.274 |
| 2038          | 34019  | 20747.175 | 5512.224  | 15234.95 | 44.784 | 73.431 | 496.321 | 500.181 | 373.906 | 181.274 |
| 2039          | 33478  | 20327.688 | 5123.612  | 15204.08 | 45.416 | 74.795 | 488.377 | 500.181 | 373.906 | 181.274 |

## Results for PHIM for Run 7 (Sensitivity\_Analysis\_4.RTF)

\*\*\*\*\*

### Main Results for E-Component for Run: 7, Simulation: 1, COD: IHD, Adjusted

| Variable Parameter          | Value                                  |
|-----------------------------|----------------------------------------|
| 1. Country                  | US (United States)                     |
| 2. Sex                      | M (Males)                              |
| 3. Year of start of process | 1990                                   |
| 4. Cause of Death           | IHD                                    |
| 5. Effective Dose NULL      | CC:1                                   |
| 6. Effective Dose Ecig      | CC:1 Ecig:0.05 Dual:0.525              |
| Note:                       | Death rates are per million population |

#### Results for Age Groups Combined and Years combined, Population and Number deaths adjusted for Ecig scenario,

| Age Group:All | NULL    | Ecig        | %Drop      |          |        |        | NULL    | Ecig    | Drop    |         |
|---------------|---------|-------------|------------|----------|--------|--------|---------|---------|---------|---------|
| Year          | Number  | Attrib      | Attrib     | Drop     | %Drop  | Attrib | Death   | Attrib  | Attrib  | Drop    |
|               | Deaths  | Deaths      | Deaths     | Deaths   | Deaths | Deaths | Rate    | Rates   | Rates   | Rates   |
| All Comb      | 6423056 | 1098877.421 | 518496.454 | 580381.0 | 9.036  | 52.816 | 1843.87 | 318.101 | 148.845 | 169.256 |

#### Results for Age Groups Combined, Population and Number deaths adjusted for Ecig scenario,

| Age Group:All | NULL   | Ecig      | %Drop     |          |        |        | NULL    | Ecig    | Drop    |         |
|---------------|--------|-----------|-----------|----------|--------|--------|---------|---------|---------|---------|
| Year          | Number | Attrib    | Attrib    | Drop     | %Drop  | Attrib | Death   | Attrib  | Attrib  | Drop    |
|               | Deaths | Deaths    | Deaths    | Deaths   | Deaths | Deaths | Rate    | Rates   | Rates   | Rates   |
| 1990          | 171484 | 38511.725 | 38511.725 | 0.000    | 0.000  | 0.000  | 2718.40 | 610.497 | 610.497 | 0.000   |
| 1991          | 168044 | 37309.838 | 36996.011 | 313.827  | 0.187  | 0.841  | 2620.21 | 581.750 | 576.857 | 4.893   |
| 1992          | 164549 | 36137.488 | 35293.297 | 844.191  | 0.513  | 2.336  | 2522.12 | 553.899 | 540.956 | 12.943  |
| 1993          | 164367 | 35599.588 | 34037.112 | 1562.475 | 0.951  | 4.389  | 2474.37 | 535.926 | 512.392 | 23.534  |
| 1994          | 159878 | 34336.757 | 31952.850 | 2383.908 | 1.491  | 6.943  | 2361.79 | 507.267 | 472.021 | 35.245  |
| 1995          | 158105 | 33455.759 | 30123.758 | 3332.000 | 2.107  | 9.959  | 2290.74 | 484.782 | 436.454 | 48.328  |
| 1996          | 154911 | 32193.824 | 27856.013 | 4337.811 | 2.800  | 13.474 | 2209.39 | 459.239 | 397.291 | 61.948  |
| 1997          | 150023 | 30665.509 | 25353.242 | 5312.267 | 3.541  | 17.323 | 2104.61 | 430.308 | 355.670 | 74.638  |
| 1998          | 145480 | 29188.430 | 22964.139 | 6224.292 | 4.278  | 21.325 | 2007.09 | 402.844 | 316.820 | 86.024  |
| 1999          | 166067 | 33375.386 | 24715.876 | 8659.509 | 5.214  | 25.946 | 2254.68 | 453.366 | 335.566 | 117.800 |
| 2000          | 160410 | 32024.754 | 22329.843 | 9694.911 | 6.044  | 30.273 | 2145.65 | 428.655 | 298.684 | 129.971 |
| 2001          | 154631 | 30682.393 | 19912.165 | 10770.23 | 6.965  | 35.102 | 2041.01 | 405.339 | 262.825 | 142.514 |
| 2002          | 152119 | 30218.370 | 18187.012 | 12031.36 | 7.909  | 39.815 | 1984.91 | 394.736 | 237.312 | 157.423 |
| 2003          | 147009 | 29175.202 | 16214.795 | 12960.41 | 8.816  | 44.423 | 1897.82 | 377.146 | 209.326 | 167.820 |
| 2004          | 138696 | 27488.687 | 14047.217 | 13441.47 | 9.691  | 48.898 | 1770.73 | 351.518 | 179.342 | 172.176 |
| 2005          | 136248 | 27017.439 | 12709.090 | 14308.35 | 10.502 | 52.960 | 1718.80 | 341.482 | 160.328 | 181.154 |
| 2006          | 132339 | 26231.435 | 11185.800 | 15045.64 | 11.369 | 57.357 | 1653.71 | 328.517 | 139.778 | 188.739 |
| 2007          | 126966 | 25103.049 | 9747.640  | 15355.41 | 12.094 | 61.169 | 1569.76 | 311.161 | 120.517 | 190.645 |
| 2008          | 126388 | 24621.740 | 8785.951  | 15835.79 | 12.530 | 64.316 | 1544.57 | 301.777 | 107.372 | 194.405 |
| 2009          | 123013 | 23741.177 | 7752.851  | 15988.33 | 12.997 | 67.344 | 1485.04 | 287.552 | 93.594  | 193.958 |
| 2010          | 121184 | 23189.160 | 6949.131  | 16240.03 | 13.401 | 70.033 | 1444.65 | 277.458 | 82.842  | 194.616 |
| 2011          | 120941 | 22786.927 | 6201.163  | 16585.76 | 13.714 | 72.786 | 1426.95 | 269.951 | 73.166  | 196.785 |
| 2012          | 121732 | 22485.295 | 5594.369  | 16890.93 | 13.875 | 75.120 | 1420.16 | 263.495 | 65.265  | 198.229 |
| 2013          | 123551 | 22251.884 | 5084.966  | 17166.92 | 13.895 | 77.148 | 1424.34 | 257.786 | 58.621  | 199.164 |
| 2014          | 124228 | 21894.593 | 4602.459  | 17292.13 | 13.920 | 78.979 | 1414.80 | 250.685 | 52.416  | 198.268 |
| 2015          | 124877 | 21471.109 | 4180.919  | 17290.19 | 13.846 | 80.528 | 1598.03 | 276.557 | 53.502  | 223.054 |
| 2016          | 127443 | 21411.568 | 3808.970  | 17602.60 | 13.812 | 82.211 | 1614.78 | 273.213 | 48.262  | 224.951 |
| 2017          | 129619 | 21169.399 | 3474.865  | 17694.53 | 13.651 | 83.585 | 1626.46 | 267.651 | 43.603  | 224.049 |
| 2018          | 122801 | 19830.576 | 2979.950  | 16850.63 | 13.722 | 84.973 | 1525.81 | 248.404 | 37.026  | 211.378 |
| 2019          | 123315 | 19431.014 | 2725.363  | 16705.65 | 13.547 | 85.974 | 1516.46 | 241.031 | 33.515  | 207.516 |
| 2020          | 122408 | 18532.612 | 2438.144  | 16094.47 | 13.148 | 86.844 | 1715.93 | 262.513 | 34.178  | 228.335 |
| 2021          | 121084 | 18234.128 | 2210.523  | 16023.61 | 13.233 | 87.877 | 1684.36 | 256.472 | 30.750  | 225.722 |
| 2022          | 121225 | 17812.559 | 2015.957  | 15796.60 | 13.031 | 88.682 | 1672.36 | 248.626 | 27.811  | 220.815 |
| 2023          | 121346 | 17361.668 | 1839.846  | 15521.82 | 12.791 | 89.403 | 1659.39 | 240.367 | 25.160  | 215.207 |
| 2024          | 121321 | 16929.676 | 1701.402  | 15228.27 | 12.552 | 89.950 | 1644.22 | 232.443 | 23.058  | 209.385 |
| 2025          | 117804 | 15501.666 | 1488.989  | 14012.68 | 11.895 | 90.395 | 1853.90 | 247.735 | 23.433  | 224.302 |
| 2026          | 117275 | 15523.814 | 1415.734  | 14108.08 | 12.030 | 90.880 | 1836.62 | 247.072 | 22.172  | 224.901 |
| 2027          | 116286 | 15073.070 | 1321.356  | 13751.71 | 11.826 | 91.234 | 1811.55 | 238.810 | 20.584  | 218.226 |
| 2028          | 115247 | 14636.710 | 1226.685  | 13410.02 | 11.636 | 91.619 | 1784.97 | 230.725 | 18.999  | 211.726 |
| 2029          | 114206 | 14180.166 | 1146.700  | 13033.47 | 11.412 | 91.913 | 1757.47 | 222.256 | 17.646  | 204.610 |
| 2030          | 107386 | 12111.772 | 952.322   | 11159.45 | 10.392 | 92.137 | 1968.64 | 226.816 | 17.458  | 209.358 |
| 2031          | 107920 | 12417.367 | 960.035   | 11457.33 | 10.616 | 92.269 | 1971.58 | 231.935 | 17.539  | 214.396 |
| 2032          | 106589 | 12054.064 | 909.112   | 11144.95 | 10.456 | 92.458 | 1939.00 | 224.381 | 16.538  | 207.843 |
| 2033          | 105271 | 11672.389 | 856.140   | 10816.25 | 10.275 | 92.665 | 1905.48 | 216.370 | 15.497  | 200.874 |
| 2034          | 103928 | 11365.762 | 818.513   | 10547.25 | 10.149 | 92.798 | 1870.60 | 209.673 | 14.732  | 194.940 |
| 2035          | 93611  | 8580.360  | 599.469   | 7980.891 | 8.526  | 93.013 | 2077.23 | 195.777 | 13.302  | 182.475 |
| 2036          | 95005  | 8948.841  | 619.292   | 8329.549 | 8.768  | 93.080 | 2105.71 | 204.135 | 13.726  | 190.409 |
| 2037          | 93254  | 8624.570  | 596.000   | 8028.569 | 8.609  | 93.090 | 2062.86 | 196.522 | 13.184  | 183.338 |
| 2038          | 91553  | 8315.017  | 565.271   | 7749.746 | 8.465  | 93.202 | 2019.31 | 189.073 | 12.468  | 176.605 |
| 2039          | 89919  | 8001.132  | 536.421   | 7464.710 | 8.302  | 93.296 | 1975.19 | 181.344 | 11.783  | 169.561 |



## Results for PHIM for Run 7 (Sensitivity\_Analysis\_4.RTF)

\*\*\*\*\*

### Main Results for E-Component for Run: 7, Simulation: 1, COD: STROKE, Adjusted

| Variable Parameter          | Value                                  |
|-----------------------------|----------------------------------------|
| 1. Country                  | US (United States)                     |
| 2. Sex                      | M (Males)                              |
| 3. Year of start of process | 1990                                   |
| 4. Cause of Death           | STROKE                                 |
| 5. Effective Dose NULL      | CC:1                                   |
| 6. Effective Dose Ecig      | CC:1 Ecig:0.05 Dual:0.525              |
| Note:                       | Death rates are per million population |

### Results for Age Groups Combined and Years combined, Population and Number deaths adjusted for Ecig scenario,

| Age Group:All | NULL    | Ecig       | %Drop     |          |        |        | NULL    | Ecig   | Drop   |        |
|---------------|---------|------------|-----------|----------|--------|--------|---------|--------|--------|--------|
| Year          | Number  | Attrib     | Attrib    | Drop     | %Drop  | Attrib | Death   | Attrib | Attrib | Drop   |
|               | Deaths  | Deaths     | Deaths    | Deaths   | Deaths | Deaths | Rate    | Rates  | Rates  | Rates  |
| All Comb      | 1506810 | 149918.462 | 69935.292 | 79983.17 | 5.308  | 53.351 | 432.561 | 43.398 | 20.076 | 23.322 |

### Results for Age Groups Combined, Population and Number deaths adjusted for Ecig scenario,

| Age Group:All | NULL   | Ecig     | %Drop    |          |        |        | NULL    | Ecig   | Drop   |        |
|---------------|--------|----------|----------|----------|--------|--------|---------|--------|--------|--------|
| Year          | Number | Attrib   | Attrib   | Drop     | %Drop  | Attrib | Death   | Attrib | Attrib | Drop   |
|               | Deaths | Deaths   | Deaths   | Deaths   | Deaths | Deaths | Rate    | Rates  | Rates  | Rates  |
| 1990          | 32862  | 4613.166 | 4613.166 | 0.000    | 0.000  | 0.000  | 520.936 | 73.129 | 73.129 | 0.000  |
| 1991          | 32619  | 4555.566 | 4515.509 | 40.057   | 0.123  | 0.879  | 508.609 | 71.032 | 70.408 | 0.625  |
| 1992          | 32100  | 4453.572 | 4348.546 | 105.027  | 0.327  | 2.358  | 492.015 | 68.262 | 66.652 | 1.610  |
| 1993          | 32897  | 4462.473 | 4264.095 | 198.379  | 0.603  | 4.445  | 495.229 | 67.179 | 64.191 | 2.988  |
| 1994          | 33325  | 4499.513 | 4186.469 | 313.044  | 0.939  | 6.957  | 492.297 | 66.473 | 61.844 | 4.628  |
| 1995          | 33574  | 4472.774 | 4029.028 | 443.746  | 1.322  | 9.921  | 486.436 | 64.812 | 58.375 | 6.436  |
| 1996          | 33877  | 4406.878 | 3818.653 | 588.225  | 1.736  | 13.348 | 483.172 | 62.863 | 54.463 | 8.400  |
| 1997          | 33527  | 4288.158 | 3553.391 | 734.767  | 2.192  | 17.135 | 470.341 | 60.173 | 49.849 | 10.324 |
| 1998          | 32811  | 4120.148 | 3251.573 | 868.575  | 2.647  | 21.081 | 452.668 | 56.864 | 44.860 | 12.005 |
| 1999          | 33397  | 3982.443 | 2980.607 | 1001.836 | 3.000  | 25.156 | 453.430 | 54.097 | 40.468 | 13.629 |
| 2000          | 33489  | 4021.411 | 2844.019 | 1177.392 | 3.516  | 29.278 | 447.949 | 53.827 | 38.042 | 15.785 |
| 2001          | 32312  | 3848.092 | 2552.638 | 1295.454 | 4.009  | 33.665 | 426.499 | 50.836 | 33.693 | 17.144 |
| 2002          | 31632  | 3783.081 | 2349.642 | 1433.439 | 4.532  | 37.891 | 412.754 | 49.418 | 30.659 | 18.758 |
| 2003          | 31041  | 3754.415 | 2168.164 | 1586.251 | 5.110  | 42.250 | 400.725 | 48.533 | 27.990 | 20.543 |
| 2004          | 29950  | 3666.274 | 1964.623 | 1701.651 | 5.682  | 46.414 | 382.370 | 46.883 | 25.082 | 21.801 |
| 2005          | 28783  | 3589.688 | 1778.143 | 1811.545 | 6.294  | 50.465 | 363.108 | 45.371 | 22.432 | 22.940 |
| 2006          | 28275  | 3596.985 | 1634.697 | 1962.287 | 6.940  | 54.554 | 353.323 | 45.048 | 20.427 | 24.621 |
| 2007          | 28126  | 3560.798 | 1486.980 | 2073.817 | 7.373  | 58.240 | 347.745 | 44.137 | 18.385 | 25.753 |
| 2008          | 27239  | 3417.001 | 1311.315 | 2105.687 | 7.730  | 61.624 | 332.890 | 41.881 | 16.025 | 25.855 |
| 2009          | 27195  | 3394.390 | 1196.491 | 2197.898 | 8.082  | 64.751 | 328.299 | 41.113 | 14.444 | 26.668 |
| 2010          | 27053  | 3340.137 | 1085.822 | 2254.316 | 8.333  | 67.492 | 322.502 | 39.965 | 12.944 | 27.020 |
| 2011          | 27118  | 3285.435 | 981.631  | 2303.803 | 8.495  | 70.122 | 319.963 | 38.922 | 11.582 | 27.340 |
| 2012          | 27235  | 3259.209 | 888.837  | 2370.373 | 8.703  | 72.728 | 317.729 | 38.193 | 10.369 | 27.824 |
| 2013          | 28108  | 3274.703 | 819.169  | 2455.534 | 8.736  | 74.985 | 324.034 | 37.937 | 9.444  | 28.493 |
| 2014          | 29023  | 3298.083 | 755.157  | 2542.926 | 8.762  | 77.103 | 330.535 | 37.762 | 8.600  | 29.161 |
| 2015          | 29822  | 3244.406 | 687.371  | 2557.035 | 8.574  | 78.814 | 381.631 | 41.789 | 8.796  | 32.993 |
| 2016          | 30808  | 3314.836 | 644.797  | 2670.040 | 8.667  | 80.548 | 390.351 | 42.297 | 8.170  | 34.127 |
| 2017          | 31746  | 3333.314 | 596.655  | 2736.658 | 8.621  | 82.100 | 398.347 | 42.144 | 7.487  | 34.657 |
| 2018          | 29685  | 2925.242 | 486.811  | 2438.431 | 8.214  | 83.358 | 368.843 | 36.642 | 6.049  | 30.594 |
| 2019          | 29965  | 2864.628 | 443.563  | 2421.065 | 8.080  | 84.516 | 368.494 | 35.534 | 5.455  | 30.079 |
| 2020          | 29991  | 2730.366 | 394.601  | 2335.765 | 7.788  | 85.548 | 420.410 | 38.675 | 5.532  | 33.144 |
| 2021          | 30533  | 2647.911 | 356.791  | 2291.120 | 7.504  | 86.526 | 424.732 | 37.244 | 4.963  | 32.281 |
| 2022          | 30772  | 2586.165 | 323.961  | 2262.204 | 7.352  | 87.473 | 424.513 | 36.097 | 4.469  | 31.628 |
| 2023          | 31007  | 2517.960 | 294.862  | 2223.098 | 7.170  | 88.290 | 424.021 | 34.860 | 4.032  | 30.828 |
| 2024          | 31197  | 2454.161 | 271.342  | 2182.818 | 6.997  | 88.944 | 422.806 | 33.695 | 3.677  | 30.018 |
| 2025          | 30823  | 2275.364 | 237.958  | 2037.407 | 6.610  | 89.542 | 485.069 | 36.363 | 3.745  | 32.618 |
| 2026          | 31298  | 2183.166 | 216.673  | 1966.493 | 6.283  | 90.075 | 490.156 | 34.747 | 3.393  | 31.353 |
| 2027          | 31205  | 2112.345 | 200.227  | 1912.118 | 6.128  | 90.521 | 486.126 | 33.467 | 3.119  | 30.348 |
| 2028          | 31087  | 2046.677 | 185.303  | 1861.374 | 5.988  | 90.946 | 481.484 | 32.263 | 2.870  | 29.393 |
| 2029          | 30962  | 1977.671 | 172.036  | 1805.636 | 5.832  | 91.301 | 476.457 | 30.997 | 2.647  | 28.350 |
| 2030          | 30063  | 1744.457 | 146.290  | 1598.167 | 5.316  | 91.614 | 551.126 | 32.668 | 2.682  | 29.986 |
| 2031          | 29736  | 1653.738 | 134.803  | 1518.934 | 5.108  | 91.849 | 543.239 | 30.889 | 2.463  | 28.426 |
| 2032          | 29512  | 1603.120 | 126.138  | 1476.983 | 5.005  | 92.132 | 536.871 | 29.841 | 2.295  | 27.547 |
| 2033          | 29279  | 1548.245 | 118.505  | 1429.739 | 4.883  | 92.346 | 529.977 | 28.700 | 2.145  | 26.555 |
| 2034          | 29021  | 1511.985 | 113.048  | 1398.937 | 4.820  | 92.523 | 522.348 | 27.893 | 2.035  | 25.858 |
| 2035          | 27588  | 1239.866 | 90.379   | 1149.487 | 4.167  | 92.711 | 612.180 | 28.290 | 2.006  | 26.284 |
| 2036          | 26436  | 1182.522 | 84.624   | 1097.898 | 4.153  | 92.844 | 585.927 | 26.975 | 1.876  | 25.099 |
| 2037          | 26003  | 1134.483 | 81.110   | 1053.373 | 4.051  | 92.851 | 575.205 | 25.851 | 1.794  | 24.056 |
| 2038          | 25567  | 1093.537 | 76.740   | 1016.797 | 3.977  | 92.982 | 563.907 | 24.866 | 1.693  | 23.173 |
| 2039          | 25134  | 1047.905 | 72.342   | 975.563  | 3.881  | 93.097 | 552.094 | 23.751 | 1.589  | 22.162 |

## Results for PHIM for Run 7 (Sensitivity\_Analysis\_4.RTF)

\*\*\*\*\*

### Main Results for E-Component for Run: 7, Simulation: 1, COD: COPD, Adjusted

| Variable Parameter          | Value                                  |
|-----------------------------|----------------------------------------|
| 1. Country                  | US (United States)                     |
| 2. Sex                      | M (Males)                              |
| 3. Year of start of process | 1990                                   |
| 4. Cause of Death           | COPD                                   |
| 5. Effective Dose NULL      | CC:1                                   |
| 6. Effective Dose Ecig      | CC:1 Ecig:0.05 Dual:0.525              |
| Note:                       | Death rates are per million population |

#### Results for Age Groups Combined and Years combined, Population and Number deaths adjusted for Ecig scenario,

| Age Group:All | NULL    | Ecig        | %Drop      |          |        |        | NULL    | Ecig    | Drop    |        |
|---------------|---------|-------------|------------|----------|--------|--------|---------|---------|---------|--------|
| Year          | Number  | Attrib      | Attrib     | Drop     | %Drop  | Attrib | Death   | Attrib  | Attrib  | Drop   |
|               | Deaths  | Deaths      | Deaths     | Deaths   | Deaths | Deaths | Rate    | Rates   | Rates   | Rates  |
| All Comb      | 2265926 | 1015606.587 | 683163.230 | 332443.4 | 14.671 | 32.733 | 650.480 | 293.996 | 196.116 | 97.880 |

#### Results for Age Groups Combined, Population and Number deaths adjusted for Ecig scenario,

| Age Group:All | NULL   | Ecig      | %Drop     |          |        |        | NULL    | Ecig    | Drop    |         |
|---------------|--------|-----------|-----------|----------|--------|--------|---------|---------|---------|---------|
| Year          | Number | Attrib    | Attrib    | Drop     | %Drop  | Attrib | Death   | Attrib  | Attrib  | Drop    |
|               | Deaths | Deaths    | Deaths    | Deaths   | Deaths | Deaths | Rate    | Rates   | Rates   | Rates   |
| 1990          | 33993  | 19262.437 | 19262.437 | 0.000    | 0.000  | 0.000  | 538.865 | 305.353 | 305.353 | 0.000   |
| 1991          | 34092  | 19215.636 | 19193.448 | 22.188   | 0.065  | 0.115  | 531.576 | 299.618 | 299.272 | 0.346   |
| 1992          | 33942  | 19056.189 | 18998.391 | 57.798   | 0.170  | 0.303  | 520.249 | 292.085 | 291.197 | 0.888   |
| 1993          | 35914  | 20095.670 | 19977.510 | 118.160  | 0.329  | 0.588  | 540.648 | 302.526 | 300.740 | 1.786   |
| 1994          | 35077  | 19524.095 | 19343.491 | 180.603  | 0.515  | 0.925  | 518.166 | 288.435 | 285.751 | 2.684   |
| 1995          | 34674  | 19116.002 | 18857.514 | 258.488  | 0.745  | 1.352  | 502.376 | 276.995 | 273.221 | 3.775   |
| 1996          | 34590  | 18975.021 | 18622.070 | 352.952  | 1.020  | 1.860  | 493.330 | 270.675 | 265.594 | 5.081   |
| 1997          | 35279  | 19169.025 | 18700.476 | 468.549  | 1.328  | 2.444  | 494.916 | 268.986 | 262.341 | 6.644   |
| 1998          | 35693  | 19228.937 | 18625.803 | 603.135  | 1.690  | 3.137  | 492.425 | 265.388 | 256.967 | 8.421   |
| 1999          | 38542  | 20589.820 | 19797.673 | 792.148  | 2.055  | 3.847  | 523.284 | 279.689 | 268.792 | 10.897  |
| 2000          | 36316  | 19196.417 | 18300.605 | 895.812  | 2.467  | 4.667  | 485.767 | 256.946 | 244.789 | 12.157  |
| 2001          | 36324  | 19012.731 | 17928.053 | 1084.678 | 2.986  | 5.705  | 479.449 | 251.174 | 236.637 | 14.537  |
| 2002          | 36037  | 18699.357 | 17430.511 | 1268.846 | 3.521  | 6.786  | 470.226 | 244.265 | 227.441 | 16.824  |
| 2003          | 36273  | 18663.550 | 17182.807 | 1480.742 | 4.082  | 7.934  | 468.262 | 241.262 | 221.822 | 19.440  |
| 2004          | 34689  | 17679.164 | 16037.691 | 1641.473 | 4.732  | 9.285  | 442.881 | 226.076 | 204.754 | 21.322  |
| 2005          | 36925  | 18692.832 | 16708.990 | 1983.842 | 5.373  | 10.613 | 465.823 | 236.265 | 210.788 | 25.477  |
| 2006          | 34459  | 17308.564 | 15201.515 | 2107.048 | 6.115  | 12.173 | 430.602 | 216.769 | 189.958 | 26.811  |
| 2007          | 35457  | 17683.181 | 15244.118 | 2439.063 | 6.879  | 13.793 | 438.377 | 219.189 | 188.474 | 30.716  |
| 2008          | 38411  | 19006.374 | 16095.076 | 2911.298 | 7.579  | 15.317 | 469.417 | 232.952 | 196.696 | 36.256  |
| 2009          | 37082  | 18205.573 | 15073.402 | 3132.170 | 8.447  | 17.204 | 447.660 | 220.505 | 181.970 | 38.535  |
| 2010          | 37439  | 18237.758 | 14803.305 | 3434.454 | 9.173  | 18.832 | 446.317 | 218.215 | 176.473 | 41.742  |
| 2011          | 38328  | 18487.916 | 14609.914 | 3878.002 | 10.118 | 20.976 | 452.223 | 219.022 | 172.379 | 46.643  |
| 2012          | 38769  | 18491.158 | 14239.688 | 4251.470 | 10.966 | 22.992 | 452.286 | 216.689 | 166.124 | 50.565  |
| 2013          | 40598  | 19143.452 | 14376.151 | 4767.302 | 11.743 | 24.903 | 468.023 | 221.775 | 165.733 | 56.042  |
| 2014          | 40679  | 18992.005 | 13864.378 | 5127.627 | 12.605 | 26.999 | 463.280 | 217.451 | 157.898 | 59.553  |
| 2015          | 42696  | 19728.885 | 14074.522 | 5654.363 | 13.243 | 28.660 | 546.369 | 254.116 | 180.109 | 74.007  |
| 2016          | 43541  | 19876.724 | 13775.816 | 6100.908 | 14.012 | 30.694 | 551.687 | 253.628 | 174.548 | 79.080  |
| 2017          | 44594  | 20119.790 | 13525.321 | 6594.469 | 14.788 | 32.776 | 559.563 | 254.381 | 169.715 | 84.665  |
| 2018          | 46012  | 20535.123 | 13382.295 | 7152.829 | 15.546 | 34.832 | 571.701 | 257.229 | 166.276 | 90.953  |
| 2019          | 47568  | 21009.029 | 13269.208 | 7739.821 | 16.271 | 36.840 | 584.970 | 260.605 | 163.178 | 97.427  |
| 2020          | 49093  | 21428.512 | 13122.546 | 8305.966 | 16.919 | 38.761 | 688.184 | 303.533 | 183.952 | 119.581 |
| 2021          | 49187  | 21266.697 | 12526.817 | 8739.880 | 17.769 | 41.097 | 684.224 | 299.127 | 174.256 | 124.871 |
| 2022          | 50711  | 21663.568 | 12284.865 | 9378.703 | 18.494 | 43.293 | 699.589 | 302.378 | 169.476 | 132.902 |
| 2023          | 52264  | 22084.131 | 12049.684 | 10034.45 | 19.199 | 45.437 | 714.703 | 305.748 | 164.777 | 140.971 |
| 2024          | 53766  | 22418.456 | 11793.693 | 10624.76 | 19.761 | 47.393 | 728.668 | 307.804 | 159.836 | 147.968 |
| 2025          | 54886  | 22614.834 | 11473.080 | 11141.75 | 20.300 | 49.267 | 863.750 | 361.411 | 180.554 | 180.857 |
| 2026          | 55454  | 22571.522 | 10978.405 | 11593.12 | 20.906 | 51.362 | 868.453 | 359.241 | 171.931 | 187.310 |
| 2027          | 56461  | 22774.416 | 10592.644 | 12181.77 | 21.576 | 53.489 | 879.567 | 360.827 | 165.015 | 195.811 |
| 2028          | 57428  | 22915.561 | 10160.273 | 12755.29 | 22.211 | 55.662 | 889.459 | 361.228 | 157.364 | 203.864 |
| 2029          | 58382  | 22992.027 | 9723.596  | 13268.43 | 22.727 | 57.709 | 898.411 | 360.371 | 149.633 | 210.738 |
| 2030          | 58693  | 22895.360 | 9277.838  | 13617.52 | 23.201 | 59.477 | 1075.97 | 428.760 | 170.084 | 258.676 |
| 2031          | 59126  | 22715.871 | 8806.913  | 13908.96 | 23.524 | 61.230 | 1080.16 | 424.293 | 160.892 | 263.401 |
| 2032          | 59874  | 22759.207 | 8383.571  | 14375.64 | 24.010 | 63.164 | 1089.20 | 423.652 | 152.509 | 271.143 |
| 2033          | 60600  | 22786.258 | 7985.844  | 14800.41 | 24.423 | 64.953 | 1096.90 | 422.387 | 144.549 | 277.838 |
| 2034          | 61267  | 22806.106 | 7586.583  | 15219.52 | 24.841 | 66.734 | 1102.75 | 420.721 | 136.550 | 284.171 |
| 2035          | 60393  | 22262.998 | 7125.646  | 15137.35 | 25.065 | 67.993 | 1340.13 | 507.973 | 158.119 | 349.854 |
| 2036          | 58317  | 21140.051 | 6309.432  | 14830.62 | 25.431 | 70.154 | 1292.55 | 482.234 | 139.844 | 342.390 |
| 2037          | 58510  | 21011.845 | 5889.159  | 15122.69 | 25.846 | 71.972 | 1294.30 | 478.783 | 130.274 | 348.509 |
| 2038          | 58681  | 20787.483 | 5473.247  | 15314.24 | 26.097 | 73.670 | 1294.28 | 472.681 | 120.719 | 351.962 |
| 2039          | 58842  | 20709.267 | 5117.213  | 15592.05 | 26.498 | 75.290 | 1292.54 | 469.372 | 112.406 | 356.966 |

## Results for PHIM for Run 8 (Sensitivity\_Analysis\_4.RTF)

---

### Control File Details for Run: 8

| Variable Parameter                                       | Value                  |
|----------------------------------------------------------|------------------------|
| 1. Name for Reference Scenario                           | NULL                   |
| 2. Name for Test Scenario                                | Ecig                   |
| 3. Name for Product 1                                    | CC                     |
| 4. Name for Product 2                                    | Ecig                   |
| 5. Name for Product 3                                    | -                      |
| 6. Name for Product 4                                    | Dual                   |
| 7. Country                                               | US (United States)     |
| 8. Sex                                                   | F (Females)            |
| 9. Year of start of process                              | 1990                   |
| 10. Number of months of follow-up                        | 600                    |
| 11. Follow-up interval length (in months)                | 12                     |
| 12. Lower age for risk estimation                        | 10                     |
| 13. Upper age for risk estimation                        | 79                     |
| 14. The effective dose for Product 1 (F1) - Ref          | 1                      |
| 15. The effective dose for Product 2 (F2) - Ref          | -                      |
| 16. The effective dose for Product 3 (F3) - Ref          | -                      |
| 17. The effective dose for Product 4 (F4) - Ref          | -                      |
| 18. The effective dose for Product 1 (F1) - Test         | 1                      |
| 19. The effective dose for Product 2 (F2) - Test         | 0.05                   |
| 20. The effective dose for Product 3 (F3) - Test         | -                      |
| 21. The effective dose for Product 4 (F4) - Test         | FROMF2                 |
| 22. Number in population to be simulated                 | 100000                 |
| 23. Number of MC simulations                             | 1                      |
| 24. The random number seed for the first simulation      | 15975263               |
| 25. Source for the population file (POP)                 | UN4                    |
| 26. Source for the socioeconomic prevalence file (SEP)   | -                      |
| 27. Source for the current smoking prevalence file (CSP) | ISS3                   |
| 28. Source for the former smoking prevalence file (FSP)  | ISS3                   |
| 29. Source for the quit-time distribution file (QTD)     | NHIS2006               |
| 30. Source for the death file (MORT)                     | APR-20                 |
| 31. Source for the relative risk file (RR)               | PNLEST                 |
| 32. Source for the half-life file (H)                    | PNLEST                 |
| 33. Assumption Set for TTP Factor Reference              | F1                     |
| 34. Assumption Set for TTP Factor Test                   | F1                     |
| 35. Assumption Set for TTP Reference                     | ISS3                   |
| 36. Assumption Set for TTP Test                          | S4D                    |
| 37. Assumption Set for TP for socioeconomic group        | -                      |
| 38. Source for Output Choice file (OUTC)                 | BASIC                  |
| 39. Output for DTP P1                                    | N                      |
| 40. Output for DTP P2                                    | N                      |
| 41. Output for Main P Component                          | Y                      |
| 42. Output for DTP E1                                    | N                      |
| 43. Output for DTP E2                                    | N                      |
| 44. Output for DTP E3                                    | N                      |
| 45. Output for Main E Component                          | Y                      |
| 46. Output file name                                     | Sensitivity_Analysis_4 |
| 47. Run number for P-Component                           | -                      |
| 48. Results file for E-Component                         | -                      |
| 49. Components required                                  | PE                     |
| 50. Results folder for P to be used in E-Component       | -                      |
| 51. Fixed age of starting product use                    | 16                     |
| 52. Output absolute risk file?                           | N                      |

## Results for PHIM for Run 8 (Sensitivity\_Analysis\_4.RTF)

\*\*\*\*\*

TTP values for Run: 8, Scenario: NULL

| Variable Parameter | Value               |
|--------------------|---------------------|
| 1. Country         | US (United States)  |
| 2. Sex             | F (Females)         |
| 3. Assumption Set  | ISS3                |
| Note:              | Period is in Months |

| Age   | Period  | Initiation  | Cessation    | Re-initiation |
|-------|---------|-------------|--------------|---------------|
|       |         | Never<br>CC | CC<br>Former | Former<br>CC  |
| 10-14 | 1-12    | 0.003758    | 0.008742     | 0.000000      |
| 15-19 | 1-12    | 0.003469    | 0.002515     | 0.000000      |
| 20-24 | 1-12    | 0.000276    | 0.000761     | 0.000000      |
| 25-29 | 1-12    | 0.000137    | 0.001375     | 0.000000      |
| 30-34 | 1-12    | 0.000069    | 0.001149     | 0.000000      |
| 35-39 | 1-12    | 0.000000    | 0.000991     | 0.000000      |
| 40-44 | 1-12    | 0.000000    | 0.000833     | 0.000000      |
| 45-49 | 1-12    | 0.000000    | 0.001723     | 0.000000      |
| 50-54 | 1-12    | 0.000000    | 0.002336     | 0.000000      |
| 55-59 | 1-12    | 0.000000    | 0.002233     | 0.000000      |
| 60-64 | 1-12    | 0.000000    | 0.004634     | 0.000000      |
| 65-69 | 1-12    | 0.000000    | 0.003505     | 0.000000      |
| 70-74 | 1-12    | 0.000000    | 0.004329     | 0.000000      |
| 75-79 | 1-12    | 0.000000    | 0.004329     | 0.000000      |
| 10-14 | 13-72   | 0.004794    | 0.008742     | 0.000000      |
| 15-19 | 13-72   | 0.004527    | 0.004082     | 0.000000      |
| 20-24 | 13-72   | 0.000105    | 0.001261     | 0.000000      |
| 25-29 | 13-72   | 0.000053    | 0.000952     | 0.000000      |
| 30-34 | 13-72   | 0.000026    | 0.000733     | 0.000000      |
| 35-39 | 13-72   | 0.000000    | 0.000753     | 0.000000      |
| 40-44 | 13-72   | 0.000000    | 0.001535     | 0.000000      |
| 45-49 | 13-72   | 0.000000    | 0.002998     | 0.000000      |
| 50-54 | 13-72   | 0.000000    | 0.003159     | 0.000000      |
| 55-59 | 13-72   | 0.000000    | 0.002965     | 0.000000      |
| 60-64 | 13-72   | 0.000000    | 0.003633     | 0.000000      |
| 65-69 | 13-72   | 0.000000    | 0.004522     | 0.000000      |
| 70-74 | 13-72   | 0.000000    | 0.005208     | 0.000000      |
| 75-79 | 13-72   | 0.000000    | 0.005208     | 0.000000      |
| 10-14 | 73-132  | 0.003969    | 0.008742     | 0.000000      |
| 15-19 | 73-132  | 0.003056    | 0.003373     | 0.000000      |
| 20-24 | 73-132  | 0.001459    | 0.003881     | 0.000000      |
| 25-29 | 73-132  | 0.000714    | 0.001953     | 0.000000      |
| 30-34 | 73-132  | 0.000111    | 0.001338     | 0.000000      |
| 35-39 | 73-132  | 0.000000    | 0.001507     | 0.000000      |
| 40-44 | 73-132  | 0.000000    | 0.002080     | 0.000000      |
| 45-49 | 73-132  | 0.000000    | 0.003809     | 0.000000      |
| 50-54 | 73-132  | 0.000000    | 0.004871     | 0.000000      |
| 55-59 | 73-132  | 0.000000    | 0.004560     | 0.000000      |
| 60-64 | 73-132  | 0.000000    | 0.007192     | 0.000000      |
| 65-69 | 73-132  | 0.000000    | 0.007033     | 0.000000      |
| 70-74 | 73-132  | 0.000000    | 0.008206     | 0.000000      |
| 75-79 | 73-132  | 0.000000    | 0.008206     | 0.000000      |
| 10-14 | 133-192 | 0.002861    | 0.008742     | 0.000000      |
| 15-19 | 133-192 | 0.002594    | 0.003996     | 0.000000      |
| 20-24 | 133-192 | 0.001247    | 0.002805     | 0.000000      |
| 25-29 | 133-192 | 0.000289    | 0.001574     | 0.000000      |
| 30-34 | 133-192 | 0.000132    | 0.001293     | 0.000000      |
| 35-39 | 133-192 | 0.000000    | 0.001219     | 0.000000      |
| 40-44 | 133-192 | 0.000000    | 0.001657     | 0.000000      |
| 45-49 | 133-192 | 0.000000    | 0.001995     | 0.000000      |
| 50-54 | 133-192 | 0.000000    | 0.002154     | 0.000000      |
| 55-59 | 133-192 | 0.000000    | 0.002072     | 0.000000      |
| 60-64 | 133-192 | 0.000000    | 0.005049     | 0.000000      |
| 65-69 | 133-192 | 0.000000    | 0.003680     | 0.000000      |
| 70-74 | 133-192 | 0.000000    | 0.006144     | 0.000000      |
| 75-79 | 133-192 | 0.000000    | 0.006144     | 0.000000      |
| 10-14 | 193-252 | 0.001859    | 0.008742     | 0.000000      |
| 15-19 | 193-252 | 0.002232    | 0.005770     | 0.000000      |
| 20-24 | 193-252 | 0.001079    | 0.003262     | 0.000000      |
| 25-29 | 193-252 | 0.000531    | 0.002002     | 0.000000      |
| 30-34 | 193-252 | 0.000263    | 0.003240     | 0.000000      |
| 35-39 | 193-252 | 0.000000    | 0.001771     | 0.000000      |
| 40-44 | 193-252 | 0.000000    | 0.002173     | 0.000000      |
| 45-49 | 193-252 | 0.000000    | 0.002075     | 0.000000      |
| 50-54 | 193-252 | 0.000000    | 0.003431     | 0.000000      |

### Results for PHIM for Run 8 (Sensitivity\_Analysis\_4.RTF)

|       |         |          |          |          |
|-------|---------|----------|----------|----------|
| 55-59 | 193-252 | 0.000000 | 0.002906 | 0.000000 |
| 60-64 | 193-252 | 0.000000 | 0.007139 | 0.000000 |
| 65-69 | 193-252 | 0.000000 | 0.004963 | 0.000000 |
| 70-74 | 193-252 | 0.000000 | 0.006269 | 0.000000 |
| 75-79 | 193-252 | 0.000000 | 0.006269 | 0.000000 |
| 10-14 | 253+    | 0.000931 | 0.008742 | 0.000000 |
| 15-19 | 253+    | 0.001798 | 0.009440 | 0.000000 |
| 20-24 | 253+    | 0.000023 | 0.002831 | 0.000000 |
| 25-29 | 253+    | 0.000073 | 0.002655 | 0.000000 |
| 30-34 | 253+    | 0.000037 | 0.004614 | 0.000000 |
| 35-39 | 253+    | 0.000000 | 0.002607 | 0.000000 |
| 40-44 | 253+    | 0.000000 | 0.003115 | 0.000000 |
| 45-49 | 253+    | 0.000000 | 0.002132 | 0.000000 |
| 50-54 | 253+    | 0.000000 | 0.003497 | 0.000000 |
| 55-59 | 253+    | 0.000000 | 0.002942 | 0.000000 |
| 60-64 | 253+    | 0.000000 | 0.005376 | 0.000000 |
| 65-69 | 253+    | 0.000000 | 0.001789 | 0.000000 |
| 70-74 | 253+    | 0.000000 | 0.004077 | 0.000000 |
| 75-79 | 253+    | 0.000000 | 0.004077 | 0.000000 |

## Results for PHIM for Run 8 (Sensitivity\_Analysis\_4.RTF)

\*\*\*\*\*

TTP values for Run: 8, Scenario: Ecig

**Variable Parameter**

**Value**

- 1. Country
  - 2. Sex
  - 3. Assumption Set
- Note:

US (United States)  
 F (Females)  
 S4D  
 Period is in Months

| Age   | Period  | Initiation  |               |               | Cessation    |                |                | Re-initiation |                |                |
|-------|---------|-------------|---------------|---------------|--------------|----------------|----------------|---------------|----------------|----------------|
|       |         | Never<br>CC | Never<br>Ecig | Never<br>Dual | CC<br>Former | Ecig<br>Former | Dual<br>Former | Former<br>CC  | Former<br>Ecig | Former<br>Dual |
| 10-14 | 1-12    | 0.001879    | 0.002819      | 0.000000      | 0.008742     | 0.008742       | 0.000000       | 0.000000      | 0.000000       | 0.000000       |
| 15-19 | 1-12    | 0.001735    | 0.002602      | 0.000000      | 0.002515     | 0.002515       | 0.000000       | 0.000000      | 0.000000       | 0.000000       |
| 20-24 | 1-12    | 0.000138    | 0.000207      | 0.000000      | 0.000761     | 0.000761       | 0.000000       | 0.000000      | 0.000000       | 0.000000       |
| 25-29 | 1-12    | 0.000069    | 0.000103      | 0.000000      | 0.001376     | 0.001376       | 0.000000       | 0.000000      | 0.000000       | 0.000000       |
| 30-34 | 1-12    | 0.000034    | 0.000051      | 0.000000      | 0.001149     | 0.001149       | 0.000000       | 0.000000      | 0.000000       | 0.000000       |
| 35-39 | 1-12    | 0.000000    | 0.000000      | 0.000000      | 0.000991     | 0.000991       | 0.000000       | 0.000000      | 0.000000       | 0.000000       |
| 40-44 | 1-12    | 0.000000    | 0.000000      | 0.000000      | 0.000833     | 0.000833       | 0.000000       | 0.000000      | 0.000000       | 0.000000       |
| 45-49 | 1-12    | 0.000000    | 0.000000      | 0.000000      | 0.001723     | 0.001723       | 0.000000       | 0.000000      | 0.000000       | 0.000000       |
| 50-54 | 1-12    | 0.000000    | 0.000000      | 0.000000      | 0.002336     | 0.002336       | 0.000000       | 0.000000      | 0.000000       | 0.000000       |
| 55-59 | 1-12    | 0.000000    | 0.000000      | 0.000000      | 0.002233     | 0.002233       | 0.000000       | 0.000000      | 0.000000       | 0.000000       |
| 60-64 | 1-12    | 0.000000    | 0.000000      | 0.000000      | 0.004635     | 0.004635       | 0.000000       | 0.000000      | 0.000000       | 0.000000       |
| 65-69 | 1-12    | 0.000000    | 0.000000      | 0.000000      | 0.003505     | 0.003505       | 0.000000       | 0.000000      | 0.000000       | 0.000000       |
| 70-74 | 1-12    | 0.000000    | 0.000000      | 0.000000      | 0.004329     | 0.004329       | 0.000000       | 0.000000      | 0.000000       | 0.000000       |
| 75-79 | 1-12    | 0.000000    | 0.000000      | 0.000000      | 0.004329     | 0.004329       | 0.000000       | 0.000000      | 0.000000       | 0.000000       |
| 10-14 | 13-72   | 0.001918    | 0.004315      | 0.000000      | 0.008742     | 0.008742       | 0.000000       | 0.000000      | 0.000000       | 0.000000       |
| 15-19 | 13-72   | 0.001811    | 0.004074      | 0.000000      | 0.004083     | 0.004083       | 0.000000       | 0.000000      | 0.000000       | 0.000000       |
| 20-24 | 13-72   | 0.000042    | 0.000095      | 0.000000      | 0.001261     | 0.001261       | 0.000000       | 0.000000      | 0.000000       | 0.000000       |
| 25-29 | 13-72   | 0.000021    | 0.000047      | 0.000000      | 0.000952     | 0.000952       | 0.000000       | 0.000000      | 0.000000       | 0.000000       |
| 30-34 | 13-72   | 0.000011    | 0.000024      | 0.000000      | 0.000733     | 0.000733       | 0.000000       | 0.000000      | 0.000000       | 0.000000       |
| 35-39 | 13-72   | 0.000000    | 0.000000      | 0.000000      | 0.000754     | 0.000754       | 0.000000       | 0.000000      | 0.000000       | 0.000000       |
| 40-44 | 13-72   | 0.000000    | 0.000000      | 0.000000      | 0.001535     | 0.001535       | 0.000000       | 0.000000      | 0.000000       | 0.000000       |
| 45-49 | 13-72   | 0.000000    | 0.000000      | 0.000000      | 0.002998     | 0.002998       | 0.000000       | 0.000000      | 0.000000       | 0.000000       |
| 50-54 | 13-72   | 0.000000    | 0.000000      | 0.000000      | 0.003160     | 0.003160       | 0.000000       | 0.000000      | 0.000000       | 0.000000       |
| 55-59 | 13-72   | 0.000000    | 0.000000      | 0.000000      | 0.002965     | 0.002965       | 0.000000       | 0.000000      | 0.000000       | 0.000000       |
| 60-64 | 13-72   | 0.000000    | 0.000000      | 0.000000      | 0.003633     | 0.003633       | 0.000000       | 0.000000      | 0.000000       | 0.000000       |
| 65-69 | 13-72   | 0.000000    | 0.000000      | 0.000000      | 0.004522     | 0.004522       | 0.000000       | 0.000000      | 0.000000       | 0.000000       |
| 70-74 | 13-72   | 0.000000    | 0.000000      | 0.000000      | 0.005208     | 0.005208       | 0.000000       | 0.000000      | 0.000000       | 0.000000       |
| 75-79 | 13-72   | 0.000000    | 0.000000      | 0.000000      | 0.005208     | 0.005208       | 0.000000       | 0.000000      | 0.000000       | 0.000000       |
| 10-14 | 73-132  | 0.000794    | 0.004763      | 0.000000      | 0.008742     | 0.008742       | 0.000000       | 0.000000      | 0.000000       | 0.000000       |
| 15-19 | 73-132  | 0.000611    | 0.003668      | 0.000000      | 0.003373     | 0.003373       | 0.000000       | 0.000000      | 0.000000       | 0.000000       |
| 20-24 | 73-132  | 0.000292    | 0.001750      | 0.000000      | 0.003881     | 0.003881       | 0.000000       | 0.000000      | 0.000000       | 0.000000       |
| 25-29 | 73-132  | 0.000143    | 0.000857      | 0.000000      | 0.001954     | 0.001954       | 0.000000       | 0.000000      | 0.000000       | 0.000000       |
| 30-34 | 73-132  | 0.000022    | 0.000134      | 0.000000      | 0.001338     | 0.001338       | 0.000000       | 0.000000      | 0.000000       | 0.000000       |
| 35-39 | 73-132  | 0.000000    | 0.000000      | 0.000000      | 0.001507     | 0.001507       | 0.000000       | 0.000000      | 0.000000       | 0.000000       |
| 40-44 | 73-132  | 0.000000    | 0.000000      | 0.000000      | 0.002080     | 0.002080       | 0.000000       | 0.000000      | 0.000000       | 0.000000       |
| 45-49 | 73-132  | 0.000000    | 0.000000      | 0.000000      | 0.003809     | 0.003809       | 0.000000       | 0.000000      | 0.000000       | 0.000000       |
| 50-54 | 73-132  | 0.000000    | 0.000000      | 0.000000      | 0.004871     | 0.004871       | 0.000000       | 0.000000      | 0.000000       | 0.000000       |
| 55-59 | 73-132  | 0.000000    | 0.000000      | 0.000000      | 0.004560     | 0.004560       | 0.000000       | 0.000000      | 0.000000       | 0.000000       |
| 60-64 | 73-132  | 0.000000    | 0.000000      | 0.000000      | 0.007192     | 0.007192       | 0.000000       | 0.000000      | 0.000000       | 0.000000       |
| 65-69 | 73-132  | 0.000000    | 0.000000      | 0.000000      | 0.007033     | 0.007033       | 0.000000       | 0.000000      | 0.000000       | 0.000000       |
| 70-74 | 73-132  | 0.000000    | 0.000000      | 0.000000      | 0.008206     | 0.008206       | 0.000000       | 0.000000      | 0.000000       | 0.000000       |
| 75-79 | 73-132  | 0.000000    | 0.000000      | 0.000000      | 0.008206     | 0.008206       | 0.000000       | 0.000000      | 0.000000       | 0.000000       |
| 10-14 | 133-192 | 0.000143    | 0.004077      | 0.000000      | 0.008742     | 0.008742       | 0.000000       | 0.000000      | 0.000000       | 0.000000       |
| 15-19 | 133-192 | 0.000130    | 0.003697      | 0.000000      | 0.003996     | 0.003996       | 0.000000       | 0.000000      | 0.000000       | 0.000000       |
| 20-24 | 133-192 | 0.000062    | 0.001778      | 0.000000      | 0.002805     | 0.002805       | 0.000000       | 0.000000      | 0.000000       | 0.000000       |
| 25-29 | 133-192 | 0.000015    | 0.000412      | 0.000000      | 0.001574     | 0.001574       | 0.000000       | 0.000000      | 0.000000       | 0.000000       |
| 30-34 | 133-192 | 0.000007    | 0.000188      | 0.000000      | 0.001293     | 0.001293       | 0.000000       | 0.000000      | 0.000000       | 0.000000       |
| 35-39 | 133-192 | 0.000000    | 0.000000      | 0.000000      | 0.001219     | 0.001219       | 0.000000       | 0.000000      | 0.000000       | 0.000000       |
| 40-44 | 133-192 | 0.000000    | 0.000000      | 0.000000      | 0.001657     | 0.001657       | 0.000000       | 0.000000      | 0.000000       | 0.000000       |
| 45-49 | 133-192 | 0.000000    | 0.000000      | 0.000000      | 0.001995     | 0.001995       | 0.000000       | 0.000000      | 0.000000       | 0.000000       |
| 50-54 | 133-192 | 0.000000    | 0.000000      | 0.000000      | 0.002154     | 0.002154       | 0.000000       | 0.000000      | 0.000000       | 0.000000       |
| 55-59 | 133-192 | 0.000000    | 0.000000      | 0.000000      | 0.002072     | 0.002072       | 0.000000       | 0.000000      | 0.000000       | 0.000000       |
| 60-64 | 133-192 | 0.000000    | 0.000000      | 0.000000      | 0.005049     | 0.005049       | 0.000000       | 0.000000      | 0.000000       | 0.000000       |
| 65-69 | 133-192 | 0.000000    | 0.000000      | 0.000000      | 0.003681     | 0.003681       | 0.000000       | 0.000000      | 0.000000       | 0.000000       |
| 70-74 | 133-192 | 0.000000    | 0.000000      | 0.000000      | 0.006144     | 0.006144       | 0.000000       | 0.000000      | 0.000000       | 0.000000       |
| 75-79 | 133-192 | 0.000000    | 0.000000      | 0.000000      | 0.006144     | 0.006144       | 0.000000       | 0.000000      | 0.000000       | 0.000000       |
| 10-14 | 193-252 | 0.000093    | 0.002649      | 0.000000      | 0.008742     | 0.008742       | 0.000000       | 0.000000      | 0.000000       | 0.000000       |
| 15-19 | 193-252 | 0.000112    | 0.003180      | 0.000000      | 0.005770     | 0.005770       | 0.000000       | 0.000000      | 0.000000       | 0.000000       |
| 20-24 | 193-252 | 0.000054    | 0.001538      | 0.000000      | 0.003262     | 0.003262       | 0.000000       | 0.000000      | 0.000000       | 0.000000       |
| 25-29 | 193-252 | 0.000027    | 0.000757      | 0.000000      | 0.002002     | 0.002002       | 0.000000       | 0.000000      | 0.000000       | 0.000000       |
| 30-34 | 193-252 | 0.000013    | 0.000375      | 0.000000      | 0.003241     | 0.003241       | 0.000000       | 0.000000      | 0.000000       | 0.000000       |
| 35-39 | 193-252 | 0.000000    | 0.000000      | 0.000000      | 0.001771     | 0.001771       | 0.000000       | 0.000000      | 0.000000       | 0.000000       |
| 40-44 | 193-252 | 0.000000    | 0.000000      | 0.000000      | 0.002173     | 0.002173       | 0.000000       | 0.000000      | 0.000000       | 0.000000       |
| 45-49 | 193-252 | 0.000000    | 0.000000      | 0.000000      | 0.002075     | 0.002075       | 0.000000       | 0.000000      | 0.000000       | 0.000000       |
| 50-54 | 193-252 | 0.000000    | 0.000000      | 0.000000      | 0.003432     | 0.003432       | 0.000000       | 0.000000      | 0.000000       | 0.000000       |

### Results for PHIM for Run 8 (Sensitivity\_Analysis\_4.RTF)

|       |         |          |          |          |          |          |          |          |          |          |
|-------|---------|----------|----------|----------|----------|----------|----------|----------|----------|----------|
| 55-59 | 193-252 | 0.000000 | 0.000000 | 0.000000 | 0.002906 | 0.002906 | 0.000000 | 0.000000 | 0.000000 | 0.000000 |
| 60-64 | 193-252 | 0.000000 | 0.000000 | 0.000000 | 0.007139 | 0.007139 | 0.000000 | 0.000000 | 0.000000 | 0.000000 |
| 65-69 | 193-252 | 0.000000 | 0.000000 | 0.000000 | 0.004963 | 0.004963 | 0.000000 | 0.000000 | 0.000000 | 0.000000 |
| 70-74 | 193-252 | 0.000000 | 0.000000 | 0.000000 | 0.006269 | 0.006269 | 0.000000 | 0.000000 | 0.000000 | 0.000000 |
| 75-79 | 193-252 | 0.000000 | 0.000000 | 0.000000 | 0.006269 | 0.006269 | 0.000000 | 0.000000 | 0.000000 | 0.000000 |
| 10-14 | 253+    | 0.000047 | 0.001326 | 0.000000 | 0.008742 | 0.008742 | 0.000000 | 0.000000 | 0.000000 | 0.000000 |
| 15-19 | 253+    | 0.000090 | 0.002562 | 0.000000 | 0.009440 | 0.009440 | 0.000000 | 0.000000 | 0.000000 | 0.000000 |
| 20-24 | 253+    | 0.000001 | 0.000033 | 0.000000 | 0.002831 | 0.002831 | 0.000000 | 0.000000 | 0.000000 | 0.000000 |
| 25-29 | 253+    | 0.000004 | 0.000105 | 0.000000 | 0.002656 | 0.002656 | 0.000000 | 0.000000 | 0.000000 | 0.000000 |
| 30-34 | 253+    | 0.000002 | 0.000052 | 0.000000 | 0.004614 | 0.004614 | 0.000000 | 0.000000 | 0.000000 | 0.000000 |
| 35-39 | 253+    | 0.000000 | 0.000000 | 0.000000 | 0.002608 | 0.002608 | 0.000000 | 0.000000 | 0.000000 | 0.000000 |
| 40-44 | 253+    | 0.000000 | 0.000000 | 0.000000 | 0.003115 | 0.003115 | 0.000000 | 0.000000 | 0.000000 | 0.000000 |
| 45-49 | 253+    | 0.000000 | 0.000000 | 0.000000 | 0.002132 | 0.002132 | 0.000000 | 0.000000 | 0.000000 | 0.000000 |
| 50-54 | 253+    | 0.000000 | 0.000000 | 0.000000 | 0.003497 | 0.003497 | 0.000000 | 0.000000 | 0.000000 | 0.000000 |
| 55-59 | 253+    | 0.000000 | 0.000000 | 0.000000 | 0.002942 | 0.002942 | 0.000000 | 0.000000 | 0.000000 | 0.000000 |
| 60-64 | 253+    | 0.000000 | 0.000000 | 0.000000 | 0.005376 | 0.005376 | 0.000000 | 0.000000 | 0.000000 | 0.000000 |
| 65-69 | 253+    | 0.000000 | 0.000000 | 0.000000 | 0.001789 | 0.001789 | 0.000000 | 0.000000 | 0.000000 | 0.000000 |
| 70-74 | 253+    | 0.000000 | 0.000000 | 0.000000 | 0.004077 | 0.004077 | 0.000000 | 0.000000 | 0.000000 | 0.000000 |
| 75-79 | 253+    | 0.000000 | 0.000000 | 0.000000 | 0.004077 | 0.004077 | 0.000000 | 0.000000 | 0.000000 | 0.000000 |





**Results for PHIM for Run 8 (Sensitivity\_Analysis\_4.RTF)**

|       |      |          |          |          |          |          |          |
|-------|------|----------|----------|----------|----------|----------|----------|
| 25-29 | 253+ | 0.014127 | 0.000000 | 0.000000 | 0.000000 | 0.000000 | 0.000000 |
| 30-34 | 253+ | 0.013889 | 0.000000 | 0.000000 | 0.000000 | 0.000000 | 0.000000 |
| 35-39 | 253+ | 0.012929 | 0.000000 | 0.000000 | 0.000000 | 0.000000 | 0.000000 |
| 40-44 | 253+ | 0.012785 | 0.000000 | 0.000000 | 0.000000 | 0.000000 | 0.000000 |
| 45-49 | 253+ | 0.012295 | 0.000000 | 0.000000 | 0.000000 | 0.000000 | 0.000000 |
| 50-54 | 253+ | 0.011536 | 0.000000 | 0.000000 | 0.000000 | 0.000000 | 0.000000 |
| 55-59 | 253+ | 0.008988 | 0.000000 | 0.000000 | 0.000000 | 0.000000 | 0.000000 |
| 60-64 | 253+ | 0.008098 | 0.000000 | 0.000000 | 0.000000 | 0.000000 | 0.000000 |
| 65-69 | 253+ | 0.006274 | 0.000000 | 0.000000 | 0.000000 | 0.000000 | 0.000000 |
| 70-74 | 253+ | 0.004141 | 0.000000 | 0.000000 | 0.000000 | 0.000000 | 0.000000 |
| 75-79 | 253+ | 0.004141 | 0.000000 | 0.000000 | 0.000000 | 0.000000 | 0.000000 |

## Results for PHIM for Run 8 (Sensitivity\_Analysis\_4.RTF)

\*\*\*\*\*

### Main Output for the Tobacco History for Run: 8, Simulation: 1, Scenario: NULL

| Variable Parameter          | Value              |
|-----------------------------|--------------------|
| 1. Country                  | US (United States) |
| 2. Sex                      | F (Females)        |
| 3. Year of start of process | 1990               |

Year of Follow-up: 2040, Age Group: All Ages  
 Period    Age Group    Smoking Group            N            %

|    |          |           |       |       |
|----|----------|-----------|-------|-------|
| 50 | All Ages | Never Any | 20670 | 58.80 |
| 50 | All Ages | CC        | 2462  | 7.00  |
| 50 | All Ages | Former    | 12019 | 34.19 |

Year of Follow-up: 2040, Age Group: 18-19  
 Period    Age Group    Smoking Group            N            %

|    |       |           |   |   |
|----|-------|-----------|---|---|
| 50 | 18-19 | Never Any | 0 | . |
| 50 | 18-19 | CC        | 0 | . |
| 50 | 18-19 | Former    | 0 | . |

Year of Follow-up: 2040, Age Group: 20-24  
 Period    Age Group    Smoking Group            N            %

|    |       |           |   |   |
|----|-------|-----------|---|---|
| 50 | 20-24 | Never Any | 0 | . |
| 50 | 20-24 | CC        | 0 | . |
| 50 | 20-24 | Former    | 0 | . |

Year of Follow-up: 2040, Age Group: 25-29  
 Period    Age Group    Smoking Group            N            %

|    |       |           |   |   |
|----|-------|-----------|---|---|
| 50 | 25-29 | Never Any | 0 | . |
| 50 | 25-29 | CC        | 0 | . |
| 50 | 25-29 | Former    | 0 | . |

Year of Follow-up: 2040, Age Group: 30-34  
 Period    Age Group    Smoking Group            N            %

|    |       |           |   |   |
|----|-------|-----------|---|---|
| 50 | 30-34 | Never Any | 0 | . |
| 50 | 30-34 | CC        | 0 | . |
| 50 | 30-34 | Former    | 0 | . |

Year of Follow-up: 2040, Age Group: 35-39  
 Period    Age Group    Smoking Group            N            %

|    |       |           |   |   |
|----|-------|-----------|---|---|
| 50 | 35-39 | Never Any | 0 | . |
| 50 | 35-39 | CC        | 0 | . |
| 50 | 35-39 | Former    | 0 | . |

Year of Follow-up: 2040, Age Group: 40-44  
 Period    Age Group    Smoking Group            N            %

|    |       |           |   |   |
|----|-------|-----------|---|---|
| 50 | 40-44 | Never Any | 0 | . |
| 50 | 40-44 | CC        | 0 | . |
| 50 | 40-44 | Former    | 0 | . |

Year of Follow-up: 2040, Age Group: 45-49  
 Period    Age Group    Smoking Group            N            %

|    |       |           |   |   |
|----|-------|-----------|---|---|
| 50 | 45-49 | Never Any | 0 | . |
| 50 | 45-49 | CC        | 0 | . |
| 50 | 45-49 | Former    | 0 | . |

Year of Follow-up: 2040, Age Group: 50-54  
 Period    Age Group    Smoking Group            N            %

|    |       |           |   |   |
|----|-------|-----------|---|---|
| 50 | 50-54 | Never Any | 0 | . |
| 50 | 50-54 | CC        | 0 | . |
| 50 | 50-54 | Former    | 0 | . |

Year of Follow-up: 2040, Age Group: 55-59  
 Period    Age Group    Smoking Group            N            %

|    |       |           |   |   |
|----|-------|-----------|---|---|
| 50 | 55-59 | Never Any | 0 | . |
| 50 | 55-59 | CC        | 0 | . |
| 50 | 55-59 | Former    | 0 | . |

Year of Follow-up: 2040, Age Group: 60-64  
 Period    Age Group    Smoking Group            N            %

### Results for PHIM for Run 8 (Sensitivity\_Analysis\_4.RTF)

|                                           |           |               |      |       |
|-------------------------------------------|-----------|---------------|------|-------|
| 50                                        | 60-64     | Never Any     | 4803 | 60.57 |
| 50                                        | 60-64     | CC            | 621  | 7.83  |
| 50                                        | 60-64     | Former        | 2506 | 31.60 |
| Year of Follow-up: 2040, Age Group: 65-69 |           |               |      |       |
| Period                                    | Age Group | Smoking Group | N    | %     |
| 50                                        | 65-69     | Never Any     | 5407 | 64.75 |
| 50                                        | 65-69     | CC            | 538  | 6.44  |
| 50                                        | 65-69     | Former        | 2405 | 28.80 |
| Year of Follow-up: 2040, Age Group: 70-74 |           |               |      |       |
| Period                                    | Age Group | Smoking Group | N    | %     |
| 50                                        | 70-74     | Never Any     | 5181 | 58.92 |
| 50                                        | 70-74     | CC            | 605  | 6.88  |
| 50                                        | 70-74     | Former        | 3007 | 34.20 |
| Year of Follow-up: 2040, Age Group: 75-79 |           |               |      |       |
| Period                                    | Age Group | Smoking Group | N    | %     |
| 50                                        | 75-79     | Never Any     | 5279 | 52.38 |
| 50                                        | 75-79     | CC            | 698  | 6.93  |
| 50                                        | 75-79     | Former        | 4101 | 40.69 |

## Results for PHIM for Run 8 (Sensitivity\_Analysis\_4.RTF)

\*\*\*\*\*

### Main Output for the Tobacco History for Run: 8, Simulation: 1, Scenario: Ecig

| Variable Parameter                           |           |               | Value              |       |               |             |               |                |              |
|----------------------------------------------|-----------|---------------|--------------------|-------|---------------|-------------|---------------|----------------|--------------|
| 1. Country                                   |           |               | US (United States) |       |               |             |               |                |              |
| 2. Sex                                       |           |               | F (Females)        |       |               |             |               |                |              |
| 3. Year of start of process                  |           |               | 1990               |       |               |             |               |                |              |
| Year of Follow-up: 1990, Age Group: All Ages |           |               |                    |       |               |             |               |                |              |
| Period                                       | Age Group | Smoking Group | N                  | %     | Ever Quit (N) | Ever Quit % | Mean Yrs Quit | Short Term (n) | Short Term % |
| 0                                            | All Ages  | Never Any     | 47776              | 54.92 |               |             |               |                |              |
| 0                                            | All Ages  | CC            | 22737              | 26.14 | 0             | 0.00        |               |                |              |
| 0                                            | All Ages  | Ecig          | 0                  | 0.00  |               |             |               |                |              |
| 0                                            | All Ages  | Dual          | 0                  | 0.00  |               |             |               |                |              |
| 0                                            | All Ages  | Former        | 16484              | 18.95 |               |             | 11.90         | 2815           | 17.08        |
| Year of Follow-up: 1990, Age Group: 18-19    |           |               |                    |       |               |             |               |                |              |
| Period                                       | Age Group | Smoking Group | N                  | %     | Ever Quit (N) | Ever Quit % | Mean Yrs Quit | Short Term (n) | Short Term % |
| 0                                            | 18-19     | Never Any     | 2570               | 78.43 |               |             |               |                |              |
| 0                                            | 18-19     | CC            | 535                | 16.33 | 0             | 0.00        |               |                |              |
| 0                                            | 18-19     | Ecig          | 0                  | 0.00  |               |             |               |                |              |
| 0                                            | 18-19     | Dual          | 0                  | 0.00  |               |             |               |                |              |
| 0                                            | 18-19     | Former        | 172                | 5.25  |               |             | 0.20          | 172            | 100.00       |
| Year of Follow-up: 1990, Age Group: 20-24    |           |               |                    |       |               |             |               |                |              |
| Period                                       | Age Group | Smoking Group | N                  | %     | Ever Quit (N) | Ever Quit % | Mean Yrs Quit | Short Term (n) | Short Term % |
| 0                                            | 20-24     | Never Any     | 5354               | 60.89 |               |             |               |                |              |
| 0                                            | 20-24     | CC            | 2560               | 29.11 | 0             | 0.00        |               |                |              |
| 0                                            | 20-24     | Ecig          | 0                  | 0.00  |               |             |               |                |              |
| 0                                            | 20-24     | Dual          | 0                  | 0.00  |               |             |               |                |              |
| 0                                            | 20-24     | Former        | 879                | 10.00 |               |             | 1.58          | 420            | 47.78        |
| Year of Follow-up: 1990, Age Group: 25-29    |           |               |                    |       |               |             |               |                |              |
| Period                                       | Age Group | Smoking Group | N                  | %     | Ever Quit (N) | Ever Quit % | Mean Yrs Quit | Short Term (n) | Short Term % |
| 0                                            | 25-29     | Never Any     | 5318               | 52.77 |               |             |               |                |              |
| 0                                            | 25-29     | CC            | 3335               | 33.09 | 0             | 0.00        |               |                |              |
| 0                                            | 25-29     | Ecig          | 0                  | 0.00  |               |             |               |                |              |
| 0                                            | 25-29     | Dual          | 0                  | 0.00  |               |             |               |                |              |
| 0                                            | 25-29     | Former        | 1425               | 14.14 |               |             | 3.91          | 404            | 28.35        |
| Year of Follow-up: 1990, Age Group: 30-34    |           |               |                    |       |               |             |               |                |              |
| Period                                       | Age Group | Smoking Group | N                  | %     | Ever Quit (N) | Ever Quit % | Mean Yrs Quit | Short Term (n) | Short Term % |
| 0                                            | 30-34     | Never Any     | 5287               | 50.36 |               |             |               |                |              |
| 0                                            | 30-34     | CC            | 3326               | 31.68 | 0             | 0.00        |               |                |              |
| 0                                            | 30-34     | Ecig          | 0                  | 0.00  |               |             |               |                |              |
| 0                                            | 30-34     | Dual          | 0                  | 0.00  |               |             |               |                |              |
| 0                                            | 30-34     | Former        | 1886               | 17.96 |               |             | 4.36          | 566            | 30.01        |
| Year of Follow-up: 1990, Age Group: 35-39    |           |               |                    |       |               |             |               |                |              |
| Period                                       | Age Group | Smoking Group | N                  | %     | Ever Quit (N) | Ever Quit % | Mean Yrs Quit | Short Term (n) | Short Term % |
| 0                                            | 35-39     | Never Any     | 5018               | 52.27 |               |             |               |                |              |
| 0                                            | 35-39     | CC            | 2653               | 27.64 | 0             | 0.00        |               |                |              |
| 0                                            | 35-39     | Ecig          | 0                  | 0.00  |               |             |               |                |              |
| 0                                            | 35-39     | Dual          | 0                  | 0.00  |               |             |               |                |              |
| 0                                            | 35-39     | Former        | 1929               | 20.09 |               |             | 7.96          | 324            | 16.80        |
| Year of Follow-up: 1990, Age Group: 40-44    |           |               |                    |       |               |             |               |                |              |
| Period                                       | Age Group | Smoking Group | N                  | %     | Ever Quit (N) | Ever Quit % | Mean Yrs Quit | Short Term (n) | Short Term % |
| 0                                            | 40-44     | Never Any     | 4356               | 51.27 |               |             |               |                |              |
| 0                                            | 40-44     | CC            | 2397               | 28.21 | 0             | 0.00        |               |                |              |
| 0                                            | 40-44     | Ecig          | 0                  | 0.00  |               |             |               |                |              |
| 0                                            | 40-44     | Dual          | 0                  | 0.00  |               |             |               |                |              |
| 0                                            | 40-44     | Former        | 1744               | 20.52 |               |             | 7.33          | 339            | 19.44        |
| Year of Follow-up: 1990, Age Group: 45-49    |           |               |                    |       |               |             |               |                |              |
| Period                                       | Age Group | Smoking Group | N                  | %     | Ever Quit (N) | Ever Quit % | Mean Yrs Quit | Short Term (n) | Short Term % |
| 0                                            | 45-49     | Never Any     | 3116               | 47.67 |               |             |               |                |              |
| 0                                            | 45-49     | CC            | 1875               | 28.69 | 0             | 0.00        |               |                |              |
| 0                                            | 45-49     | Ecig          | 0                  | 0.00  |               |             |               |                |              |
| 0                                            | 45-49     | Dual          | 0                  | 0.00  |               |             |               |                |              |
| 0                                            | 45-49     | Former        | 1545               | 23.64 |               |             | 12.55         | 194            | 12.56        |
| Year of Follow-up: 1990, Age Group: 50-54    |           |               |                    |       |               |             |               |                |              |
| Period                                       | Age Group | Smoking Group | N                  | %     | Ever Quit (N) | Ever Quit % | Mean Yrs Quit | Short Term (n) | Short Term % |
| 0                                            | 50-54     | Never Any     | 2684               | 48.50 |               |             |               |                |              |
| 0                                            | 50-54     | CC            | 1572               | 28.41 | 0             | 0.00        |               |                |              |

**Results for PHIM for Run 8 (Sensitivity\_Analysis\_4.RTF)**

|                                              |           |               |       |       |               |             |               |                |              |
|----------------------------------------------|-----------|---------------|-------|-------|---------------|-------------|---------------|----------------|--------------|
| 0                                            | 50-54     | Ecig          | 0     | 0.00  |               |             |               |                |              |
| 0                                            | 50-54     | Dual          | 0     | 0.00  |               |             |               |                |              |
| 0                                            | 50-54     | Former        | 1278  | 23.09 |               |             | 13.28         | 126            | 9.86         |
| Year of Follow-up: 1990, Age Group: 55-59    |           |               |       |       |               |             |               |                |              |
| Period                                       | Age Group | Smoking Group | N     | %     | Ever Quit (N) | Ever Quit % | Mean Yrs Quit | Short Term (n) | Short Term % |
| 0                                            | 55-59     | Never Any     | 2732  | 51.90 |               |             |               |                |              |
| 0                                            | 55-59     | CC            | 1295  | 24.60 | 0             | 0.00        |               |                |              |
| 0                                            | 55-59     | Ecig          | 0     | 0.00  |               |             |               |                |              |
| 0                                            | 55-59     | Dual          | 0     | 0.00  |               |             |               |                |              |
| 0                                            | 55-59     | Former        | 1237  | 23.50 |               |             | 17.26         | 90             | 7.28         |
| Year of Follow-up: 1990, Age Group: 60-64    |           |               |       |       |               |             |               |                |              |
| Period                                       | Age Group | Smoking Group | N     | %     | Ever Quit (N) | Ever Quit % | Mean Yrs Quit | Short Term (n) | Short Term % |
| 0                                            | 60-64     | Never Any     | 3078  | 55.72 |               |             |               |                |              |
| 0                                            | 60-64     | CC            | 1249  | 22.61 | 0             | 0.00        |               |                |              |
| 0                                            | 60-64     | Ecig          | 0     | 0.00  |               |             |               |                |              |
| 0                                            | 60-64     | Dual          | 0     | 0.00  |               |             |               |                |              |
| 0                                            | 60-64     | Former        | 1197  | 21.67 |               |             | 18.28         | 61             | 5.10         |
| Year of Follow-up: 1990, Age Group: 65-69    |           |               |       |       |               |             |               |                |              |
| Period                                       | Age Group | Smoking Group | N     | %     | Ever Quit (N) | Ever Quit % | Mean Yrs Quit | Short Term (n) | Short Term % |
| 0                                            | 65-69     | Never Any     | 3042  | 57.36 |               |             |               |                |              |
| 0                                            | 65-69     | CC            | 976   | 18.40 | 0             | 0.00        |               |                |              |
| 0                                            | 65-69     | Ecig          | 0     | 0.00  |               |             |               |                |              |
| 0                                            | 65-69     | Dual          | 0     | 0.00  |               |             |               |                |              |
| 0                                            | 65-69     | Former        | 1285  | 24.23 |               |             | 20.65         | 68             | 5.29         |
| Year of Follow-up: 1990, Age Group: 70-74    |           |               |       |       |               |             |               |                |              |
| Period                                       | Age Group | Smoking Group | N     | %     | Ever Quit (N) | Ever Quit % | Mean Yrs Quit | Short Term (n) | Short Term % |
| 0                                            | 70-74     | Never Any     | 2738  | 61.05 |               |             |               |                |              |
| 0                                            | 70-74     | CC            | 610   | 13.60 | 0             | 0.00        |               |                |              |
| 0                                            | 70-74     | Ecig          | 0     | 0.00  |               |             |               |                |              |
| 0                                            | 70-74     | Dual          | 0     | 0.00  |               |             |               |                |              |
| 0                                            | 70-74     | Former        | 1137  | 25.35 |               |             | 24.48         | 27             | 2.37         |
| Year of Follow-up: 1990, Age Group: 75-79    |           |               |       |       |               |             |               |                |              |
| Period                                       | Age Group | Smoking Group | N     | %     | Ever Quit (N) | Ever Quit % | Mean Yrs Quit | Short Term (n) | Short Term % |
| 0                                            | 75-79     | Never Any     | 2483  | 68.84 |               |             |               |                |              |
| 0                                            | 75-79     | CC            | 354   | 9.81  | 0             | 0.00        |               |                |              |
| 0                                            | 75-79     | Ecig          | 0     | 0.00  |               |             |               |                |              |
| 0                                            | 75-79     | Dual          | 0     | 0.00  |               |             |               |                |              |
| 0                                            | 75-79     | Former        | 770   | 21.35 |               |             | 24.48         | 24             | 3.12         |
| Year of Follow-up: 1995, Age Group: All Ages |           |               |       |       |               |             |               |                |              |
| Period                                       | Age Group | Smoking Group | N     | %     | Ever Quit (N) | Ever Quit % | Mean Yrs Quit | Short Term (n) | Short Term % |
| 5                                            | All Ages  | Never Any     | 50436 | 55.04 |               |             |               |                |              |
| 5                                            | All Ages  | CC            | 10645 | 11.62 | 0             | 0.00        |               |                |              |
| 5                                            | All Ages  | Ecig          | 12118 | 13.22 |               |             |               |                |              |
| 5                                            | All Ages  | Dual          | 0     | 0.00  |               |             |               |                |              |
| 5                                            | All Ages  | Former        | 18440 | 20.12 |               |             | 14.16         | 1156           | 6.27         |
| Year of Follow-up: 1995, Age Group: 18-19    |           |               |       |       |               |             |               |                |              |
| Period                                       | Age Group | Smoking Group | N     | %     | Ever Quit (N) | Ever Quit % | Mean Yrs Quit | Short Term (n) | Short Term % |
| 5                                            | 18-19     | Never Any     | 2249  | 70.81 |               |             |               |                |              |
| 5                                            | 18-19     | CC            | 225   | 7.08  | 0             | 0.00        |               |                |              |
| 5                                            | 18-19     | Ecig          | 601   | 18.92 |               |             |               |                |              |
| 5                                            | 18-19     | Dual          | 0     | 0.00  |               |             |               |                |              |
| 5                                            | 18-19     | Former        | 101   | 3.18  |               |             | 1.16          | 64             | 63.37        |
| Year of Follow-up: 1995, Age Group: 20-24    |           |               |       |       |               |             |               |                |              |
| Period                                       | Age Group | Smoking Group | N     | %     | Ever Quit (N) | Ever Quit % | Mean Yrs Quit | Short Term (n) | Short Term % |
| 5                                            | 20-24     | Never Any     | 5544  | 66.40 |               |             |               |                |              |
| 5                                            | 20-24     | CC            | 856   | 10.25 | 0             | 0.00        |               |                |              |
| 5                                            | 20-24     | Ecig          | 1481  | 17.74 |               |             |               |                |              |
| 5                                            | 20-24     | Dual          | 0     | 0.00  |               |             |               |                |              |
| 5                                            | 20-24     | Former        | 469   | 5.62  |               |             | 3.12          | 121            | 25.80        |
| Year of Follow-up: 1995, Age Group: 25-29    |           |               |       |       |               |             |               |                |              |
| Period                                       | Age Group | Smoking Group | N     | %     | Ever Quit (N) | Ever Quit % | Mean Yrs Quit | Short Term (n) | Short Term % |
| 5                                            | 25-29     | Never Any     | 5302  | 60.30 |               |             |               |                |              |
| 5                                            | 25-29     | CC            | 1062  | 12.08 | 0             | 0.00        |               |                |              |
| 5                                            | 25-29     | Ecig          | 1406  | 15.99 |               |             |               |                |              |
| 5                                            | 25-29     | Dual          | 0     | 0.00  |               |             |               |                |              |
| 5                                            | 25-29     | Former        | 1023  | 11.63 |               |             | 5.94          | 54             | 5.28         |
| Year of Follow-up: 1995, Age Group: 30-34    |           |               |       |       |               |             |               |                |              |
| Period                                       | Age Group | Smoking Group | N     | %     | Ever Quit (N) | Ever Quit % | Mean Yrs Quit | Short Term (n) | Short Term % |

**Results for PHIM for Run 8 (Sensitivity\_Analysis\_4.RTF)**

|                                              |           |               |      |       |               |             |               |                |              |
|----------------------------------------------|-----------|---------------|------|-------|---------------|-------------|---------------|----------------|--------------|
| 5                                            | 30-34     | Never Any     | 5301 | 52.60 |               |             |               |                |              |
| 5                                            | 30-34     | CC            | 1373 | 13.62 | 0             | 0.00        |               |                |              |
| 5                                            | 30-34     | Ecig          | 1805 | 17.91 |               |             |               |                |              |
| 5                                            | 30-34     | Dual          | 0    | 0.00  |               |             |               |                |              |
| 5                                            | 30-34     | Former        | 1599 | 15.87 |               |             | 8.16          | 67             | 4.19         |
| Year of Follow-up: 1995, Age Group: 35-39    |           |               |      |       |               |             |               |                |              |
| Period                                       | Age Group | Smoking Group | N    | %     | Ever Quit (N) | Ever Quit % | Mean Yrs Quit | Short Term (n) | Short Term % |
| 5                                            | 35-39     | Never Any     | 5276 | 50.25 |               |             |               |                |              |
| 5                                            | 35-39     | CC            | 1410 | 13.43 | 0             | 0.00        |               |                |              |
| 5                                            | 35-39     | Ecig          | 1748 | 16.65 |               |             |               |                |              |
| 5                                            | 35-39     | Dual          | 0    | 0.00  |               |             |               |                |              |
| 5                                            | 35-39     | Former        | 2065 | 19.67 |               |             | 8.75          | 62             | 3.00         |
| Year of Follow-up: 1995, Age Group: 40-44    |           |               |      |       |               |             |               |                |              |
| Period                                       | Age Group | Smoking Group | N    | %     | Ever Quit (N) | Ever Quit % | Mean Yrs Quit | Short Term (n) | Short Term % |
| 5                                            | 40-44     | Never Any     | 5018 | 52.27 |               |             |               |                |              |
| 5                                            | 40-44     | CC            | 1135 | 11.82 | 0             | 0.00        |               |                |              |
| 5                                            | 40-44     | Ecig          | 1356 | 14.13 |               |             |               |                |              |
| 5                                            | 40-44     | Dual          | 0    | 0.00  |               |             |               |                |              |
| 5                                            | 40-44     | Former        | 2091 | 21.78 |               |             | 12.09         | 81             | 3.87         |
| Year of Follow-up: 1995, Age Group: 45-49    |           |               |      |       |               |             |               |                |              |
| Period                                       | Age Group | Smoking Group | N    | %     | Ever Quit (N) | Ever Quit % | Mean Yrs Quit | Short Term (n) | Short Term % |
| 5                                            | 45-49     | Never Any     | 4356 | 51.27 |               |             |               |                |              |
| 5                                            | 45-49     | CC            | 974  | 11.46 | 0             | 0.00        |               |                |              |
| 5                                            | 45-49     | Ecig          | 1161 | 13.66 |               |             |               |                |              |
| 5                                            | 45-49     | Dual          | 0    | 0.00  |               |             |               |                |              |
| 5                                            | 45-49     | Former        | 2006 | 23.61 |               |             | 10.93         | 133            | 6.63         |
| Year of Follow-up: 1995, Age Group: 50-54    |           |               |      |       |               |             |               |                |              |
| Period                                       | Age Group | Smoking Group | N    | %     | Ever Quit (N) | Ever Quit % | Mean Yrs Quit | Short Term (n) | Short Term % |
| 5                                            | 50-54     | Never Any     | 3116 | 47.67 |               |             |               |                |              |
| 5                                            | 50-54     | CC            | 739  | 11.31 | 0             | 0.00        |               |                |              |
| 5                                            | 50-54     | Ecig          | 826  | 12.64 |               |             |               |                |              |
| 5                                            | 50-54     | Dual          | 0    | 0.00  |               |             |               |                |              |
| 5                                            | 50-54     | Former        | 1855 | 28.38 |               |             | 14.92         | 140            | 7.55         |
| Year of Follow-up: 1995, Age Group: 55-59    |           |               |      |       |               |             |               |                |              |
| Period                                       | Age Group | Smoking Group | N    | %     | Ever Quit (N) | Ever Quit % | Mean Yrs Quit | Short Term (n) | Short Term % |
| 5                                            | 55-59     | Never Any     | 2684 | 48.50 |               |             |               |                |              |
| 5                                            | 55-59     | CC            | 722  | 13.05 | 0             | 0.00        |               |                |              |
| 5                                            | 55-59     | Ecig          | 627  | 11.33 |               |             |               |                |              |
| 5                                            | 55-59     | Dual          | 0    | 0.00  |               |             |               |                |              |
| 5                                            | 55-59     | Former        | 1501 | 27.12 |               |             | 15.84         | 93             | 6.20         |
| Year of Follow-up: 1995, Age Group: 60-64    |           |               |      |       |               |             |               |                |              |
| Period                                       | Age Group | Smoking Group | N    | %     | Ever Quit (N) | Ever Quit % | Mean Yrs Quit | Short Term (n) | Short Term % |
| 5                                            | 60-64     | Never Any     | 2732 | 51.90 |               |             |               |                |              |
| 5                                            | 60-64     | CC            | 633  | 12.03 | 0             | 0.00        |               |                |              |
| 5                                            | 60-64     | Ecig          | 444  | 8.43  |               |             |               |                |              |
| 5                                            | 60-64     | Dual          | 0    | 0.00  |               |             |               |                |              |
| 5                                            | 60-64     | Former        | 1455 | 27.64 |               |             | 19.22         | 87             | 5.98         |
| Year of Follow-up: 1995, Age Group: 65-69    |           |               |      |       |               |             |               |                |              |
| Period                                       | Age Group | Smoking Group | N    | %     | Ever Quit (N) | Ever Quit % | Mean Yrs Quit | Short Term (n) | Short Term % |
| 5                                            | 65-69     | Never Any     | 3078 | 55.72 |               |             |               |                |              |
| 5                                            | 65-69     | CC            | 602  | 10.90 | 0             | 0.00        |               |                |              |
| 5                                            | 65-69     | Ecig          | 374  | 6.77  |               |             |               |                |              |
| 5                                            | 65-69     | Dual          | 0    | 0.00  |               |             |               |                |              |
| 5                                            | 65-69     | Former        | 1470 | 26.61 |               |             | 19.34         | 107            | 7.28         |
| Year of Follow-up: 1995, Age Group: 70-74    |           |               |      |       |               |             |               |                |              |
| Period                                       | Age Group | Smoking Group | N    | %     | Ever Quit (N) | Ever Quit % | Mean Yrs Quit | Short Term (n) | Short Term % |
| 5                                            | 70-74     | Never Any     | 3042 | 57.36 |               |             |               |                |              |
| 5                                            | 70-74     | CC            | 577  | 10.88 | 0             | 0.00        |               |                |              |
| 5                                            | 70-74     | Ecig          | 188  | 3.55  |               |             |               |                |              |
| 5                                            | 70-74     | Dual          | 0    | 0.00  |               |             |               |                |              |
| 5                                            | 70-74     | Former        | 1496 | 28.21 |               |             | 22.32         | 77             | 5.15         |
| Year of Follow-up: 1995, Age Group: 75-79    |           |               |      |       |               |             |               |                |              |
| Period                                       | Age Group | Smoking Group | N    | %     | Ever Quit (N) | Ever Quit % | Mean Yrs Quit | Short Term (n) | Short Term % |
| 5                                            | 75-79     | Never Any     | 2738 | 61.05 |               |             |               |                |              |
| 5                                            | 75-79     | CC            | 337  | 7.51  | 0             | 0.00        |               |                |              |
| 5                                            | 75-79     | Ecig          | 101  | 2.25  |               |             |               |                |              |
| 5                                            | 75-79     | Dual          | 0    | 0.00  |               |             |               |                |              |
| 5                                            | 75-79     | Former        | 1309 | 29.19 |               |             | 25.87         | 70             | 5.35         |
| Year of Follow-up: 2000, Age Group: All Ages |           |               |      |       |               |             |               |                |              |

**Results for PHIM for Run 8 (Sensitivity\_Analysis\_4.RTF)**

| Period                                    | Age Group | Smoking Group | N     | %     | Ever Quit (N) | Ever Quit % | Mean Yrs Quit | Short Term (n) | Short Term % |
|-------------------------------------------|-----------|---------------|-------|-------|---------------|-------------|---------------|----------------|--------------|
| 10                                        | All Ages  | Never Any     | 49386 | 53.73 |               |             |               |                |              |
| 10                                        | All Ages  | CC            | 4569  | 4.97  | 0             | 0.00        |               |                |              |
| 10                                        | All Ages  | Ecig          | 16471 | 17.92 |               |             |               |                |              |
| 10                                        | All Ages  | Dual          | 0     | 0.00  |               |             |               |                |              |
| 10                                        | All Ages  | Former        | 21482 | 23.37 |               |             | 14.98         | 1780           | 8.29         |
| Year of Follow-up: 2000, Age Group: 18-19 |           |               |       |       |               |             |               |                |              |
| Period                                    | Age Group | Smoking Group | N     | %     | Ever Quit (N) | Ever Quit % | Mean Yrs Quit | Short Term (n) | Short Term % |
| 10                                        | 18-19     | Never Any     | 0     | .     |               |             |               |                |              |
| 10                                        | 18-19     | CC            | 0     | .     | 0             | .           |               |                |              |
| 10                                        | 18-19     | Ecig          | 0     | .     |               |             |               |                |              |
| 10                                        | 18-19     | Dual          | 0     | .     |               |             |               |                |              |
| 10                                        | 18-19     | Former        | 0     | .     |               |             |               | 0              | .            |
| Year of Follow-up: 2000, Age Group: 20-24 |           |               |       |       |               |             |               |                |              |
| Period                                    | Age Group | Smoking Group | N     | %     | Ever Quit (N) | Ever Quit % | Mean Yrs Quit | Short Term (n) | Short Term % |
| 10                                        | 20-24     | Never Any     | 4505  | 56.81 |               |             |               |                |              |
| 10                                        | 20-24     | CC            | 353   | 4.45  | 0             | 0.00        |               |                |              |
| 10                                        | 20-24     | Ecig          | 2251  | 28.39 |               |             |               |                |              |
| 10                                        | 20-24     | Dual          | 0     | 0.00  |               |             |               |                |              |
| 10                                        | 20-24     | Former        | 821   | 10.35 |               |             | 3.57          | 216            | 26.31        |
| Year of Follow-up: 2000, Age Group: 25-29 |           |               |       |       |               |             |               |                |              |
| Period                                    | Age Group | Smoking Group | N     | %     | Ever Quit (N) | Ever Quit % | Mean Yrs Quit | Short Term (n) | Short Term % |
| 10                                        | 25-29     | Never Any     | 5140  | 61.56 |               |             |               |                |              |
| 10                                        | 25-29     | CC            | 391   | 4.68  | 0             | 0.00        |               |                |              |
| 10                                        | 25-29     | Ecig          | 1987  | 23.80 |               |             |               |                |              |
| 10                                        | 25-29     | Dual          | 0     | 0.00  |               |             |               |                |              |
| 10                                        | 25-29     | Former        | 832   | 9.96  |               |             | 5.42          | 140            | 16.83        |
| Year of Follow-up: 2000, Age Group: 30-34 |           |               |       |       |               |             |               |                |              |
| Period                                    | Age Group | Smoking Group | N     | %     | Ever Quit (N) | Ever Quit % | Mean Yrs Quit | Short Term (n) | Short Term % |
| 10                                        | 30-34     | Never Any     | 5169  | 58.79 |               |             |               |                |              |
| 10                                        | 30-34     | CC            | 417   | 4.74  | 0             | 0.00        |               |                |              |
| 10                                        | 30-34     | Ecig          | 1951  | 22.19 |               |             |               |                |              |
| 10                                        | 30-34     | Dual          | 0     | 0.00  |               |             |               |                |              |
| 10                                        | 30-34     | Former        | 1256  | 14.28 |               |             | 9.26          | 93             | 7.40         |
| Year of Follow-up: 2000, Age Group: 35-39 |           |               |       |       |               |             |               |                |              |
| Period                                    | Age Group | Smoking Group | N     | %     | Ever Quit (N) | Ever Quit % | Mean Yrs Quit | Short Term (n) | Short Term % |
| 10                                        | 35-39     | Never Any     | 5270  | 52.29 |               |             |               |                |              |
| 10                                        | 35-39     | CC            | 561   | 5.57  | 0             | 0.00        |               |                |              |
| 10                                        | 35-39     | Ecig          | 2427  | 24.08 |               |             |               |                |              |
| 10                                        | 35-39     | Dual          | 0     | 0.00  |               |             |               |                |              |
| 10                                        | 35-39     | Former        | 1820  | 18.06 |               |             | 11.77         | 105            | 5.77         |
| Year of Follow-up: 2000, Age Group: 40-44 |           |               |       |       |               |             |               |                |              |
| Period                                    | Age Group | Smoking Group | N     | %     | Ever Quit (N) | Ever Quit % | Mean Yrs Quit | Short Term (n) | Short Term % |
| 10                                        | 40-44     | Never Any     | 5276  | 50.25 |               |             |               |                |              |
| 10                                        | 40-44     | CC            | 584   | 5.56  | 0             | 0.00        |               |                |              |
| 10                                        | 40-44     | Ecig          | 2294  | 21.85 |               |             |               |                |              |
| 10                                        | 40-44     | Dual          | 0     | 0.00  |               |             |               |                |              |
| 10                                        | 40-44     | Former        | 2345  | 22.34 |               |             | 12.30         | 143            | 6.10         |
| Year of Follow-up: 2000, Age Group: 45-49 |           |               |       |       |               |             |               |                |              |
| Period                                    | Age Group | Smoking Group | N     | %     | Ever Quit (N) | Ever Quit % | Mean Yrs Quit | Short Term (n) | Short Term % |
| 10                                        | 45-49     | Never Any     | 5018  | 52.27 |               |             |               |                |              |
| 10                                        | 45-49     | CC            | 446   | 4.65  | 0             | 0.00        |               |                |              |
| 10                                        | 45-49     | Ecig          | 1673  | 17.43 |               |             |               |                |              |
| 10                                        | 45-49     | Dual          | 0     | 0.00  |               |             |               |                |              |
| 10                                        | 45-49     | Former        | 2463  | 25.66 |               |             | 14.76         | 181            | 7.35         |
| Year of Follow-up: 2000, Age Group: 50-54 |           |               |       |       |               |             |               |                |              |
| Period                                    | Age Group | Smoking Group | N     | %     | Ever Quit (N) | Ever Quit % | Mean Yrs Quit | Short Term (n) | Short Term % |
| 10                                        | 50-54     | Never Any     | 4356  | 51.27 |               |             |               |                |              |
| 10                                        | 50-54     | CC            | 378   | 4.45  | 0             | 0.00        |               |                |              |
| 10                                        | 50-54     | Ecig          | 1299  | 15.29 |               |             |               |                |              |
| 10                                        | 50-54     | Dual          | 0     | 0.00  |               |             |               |                |              |
| 10                                        | 50-54     | Former        | 2464  | 29.00 |               |             | 13.32         | 188            | 7.63         |
| Year of Follow-up: 2000, Age Group: 55-59 |           |               |       |       |               |             |               |                |              |
| Period                                    | Age Group | Smoking Group | N     | %     | Ever Quit (N) | Ever Quit % | Mean Yrs Quit | Short Term (n) | Short Term % |
| 10                                        | 55-59     | Never Any     | 3116  | 47.67 |               |             |               |                |              |
| 10                                        | 55-59     | CC            | 283   | 4.33  | 0             | 0.00        |               |                |              |
| 10                                        | 55-59     | Ecig          | 912   | 13.95 |               |             |               |                |              |
| 10                                        | 55-59     | Dual          | 0     | 0.00  |               |             |               |                |              |

**Results for PHIM for Run 8 (Sensitivity\_Analysis\_4.RTF)**

| Year of Follow-up: 2000, Age Group: 60-64    | Period   | Age Group | Smoking Group | N     | %     | Ever Quit (N) | Ever Quit % | Mean Yrs Quit | Short Term (n) | Short Term % |
|----------------------------------------------|----------|-----------|---------------|-------|-------|---------------|-------------|---------------|----------------|--------------|
| 10                                           | 55-59    | Former    |               | 2225  | 34.04 |               |             | 16.92         | 157            | 7.06         |
| 10                                           | 60-64    | Never Any |               | 2684  | 48.50 |               |             |               |                |              |
| 10                                           | 60-64    | CC        |               | 334   | 6.04  | 0             | 0.00        |               |                |              |
| 10                                           | 60-64    | Ecig      |               | 663   | 11.98 |               |             |               |                |              |
| 10                                           | 60-64    | Dual      |               | 0     | 0.00  |               |             |               |                |              |
| 10                                           | 60-64    | Former    |               | 1853  | 33.48 |               |             | 17.23         | 149            | 8.04         |
| Year of Follow-up: 2000, Age Group: 65-69    | Period   | Age Group | Smoking Group | N     | %     | Ever Quit (N) | Ever Quit % | Mean Yrs Quit | Short Term (n) | Short Term % |
| 10                                           | 65-69    | Never Any |               | 2732  | 51.90 |               |             |               |                |              |
| 10                                           | 65-69    | CC        |               | 280   | 5.32  | 0             | 0.00        |               |                |              |
| 10                                           | 65-69    | Ecig      |               | 443   | 8.42  |               |             |               |                |              |
| 10                                           | 65-69    | Dual      |               | 0     | 0.00  |               |             |               |                |              |
| 10                                           | 65-69    | Former    |               | 1809  | 34.37 |               |             | 19.85         | 146            | 8.07         |
| Year of Follow-up: 2000, Age Group: 70-74    | Period   | Age Group | Smoking Group | N     | %     | Ever Quit (N) | Ever Quit % | Mean Yrs Quit | Short Term (n) | Short Term % |
| 10                                           | 70-74    | Never Any |               | 3078  | 55.72 |               |             |               |                |              |
| 10                                           | 70-74    | CC        |               | 274   | 4.96  | 0             | 0.00        |               |                |              |
| 10                                           | 70-74    | Ecig      |               | 368   | 6.66  |               |             |               |                |              |
| 10                                           | 70-74    | Dual      |               | 0     | 0.00  |               |             |               |                |              |
| 10                                           | 70-74    | Former    |               | 1804  | 32.66 |               |             | 20.18         | 154            | 8.54         |
| Year of Follow-up: 2000, Age Group: 75-79    | Period   | Age Group | Smoking Group | N     | %     | Ever Quit (N) | Ever Quit % | Mean Yrs Quit | Short Term (n) | Short Term % |
| 10                                           | 75-79    | Never Any |               | 3042  | 57.36 |               |             |               |                |              |
| 10                                           | 75-79    | CC        |               | 268   | 5.05  | 0             | 0.00        |               |                |              |
| 10                                           | 75-79    | Ecig      |               | 203   | 3.83  |               |             |               |                |              |
| 10                                           | 75-79    | Dual      |               | 0     | 0.00  |               |             |               |                |              |
| 10                                           | 75-79    | Former    |               | 1790  | 33.75 |               |             | 23.17         | 108            | 6.03         |
| Year of Follow-up: 2005, Age Group: All Ages | Period   | Age Group | Smoking Group | N     | %     | Ever Quit (N) | Ever Quit % | Mean Yrs Quit | Short Term (n) | Short Term % |
| 15                                           | All Ages | Never Any |               | 45867 | 52.96 |               |             |               |                |              |
| 15                                           | All Ages | CC        |               | 1879  | 2.17  | 0             | 0.00        |               |                |              |
| 15                                           | All Ages | Ecig      |               | 16447 | 18.99 |               |             |               |                |              |
| 15                                           | All Ages | Dual      |               | 0     | 0.00  |               |             |               |                |              |
| 15                                           | All Ages | Former    |               | 22412 | 25.88 |               |             | 17.17         | 975            | 4.35         |
| Year of Follow-up: 2005, Age Group: 18-19    | Period   | Age Group | Smoking Group | N     | %     | Ever Quit (N) | Ever Quit % | Mean Yrs Quit | Short Term (n) | Short Term % |
| 15                                           | 18-19    | Never Any |               | 0     | .     |               |             |               |                |              |
| 15                                           | 18-19    | CC        |               | 0     | .     | 0             | .           |               |                |              |
| 15                                           | 18-19    | Ecig      |               | 0     | .     |               |             |               |                |              |
| 15                                           | 18-19    | Dual      |               | 0     | .     |               |             |               |                |              |
| 15                                           | 18-19    | Former    |               | 0     | .     |               |             | .             | 0              | .            |
| Year of Follow-up: 2005, Age Group: 20-24    | Period   | Age Group | Smoking Group | N     | %     | Ever Quit (N) | Ever Quit % | Mean Yrs Quit | Short Term (n) | Short Term % |
| 15                                           | 20-24    | Never Any |               | 0     | .     |               |             |               |                |              |
| 15                                           | 20-24    | CC        |               | 0     | .     | 0             | .           |               |                |              |
| 15                                           | 20-24    | Ecig      |               | 0     | .     |               |             |               |                |              |
| 15                                           | 20-24    | Dual      |               | 0     | .     |               |             |               |                |              |
| 15                                           | 20-24    | Former    |               | 0     | .     |               |             | .             | 0              | .            |
| Year of Follow-up: 2005, Age Group: 25-29    | Period   | Age Group | Smoking Group | N     | %     | Ever Quit (N) | Ever Quit % | Mean Yrs Quit | Short Term (n) | Short Term % |
| 15                                           | 25-29    | Never Any |               | 4174  | 52.64 |               |             |               |                |              |
| 15                                           | 25-29    | CC        |               | 161   | 2.03  | 0             | 0.00        |               |                |              |
| 15                                           | 25-29    | Ecig      |               | 2409  | 30.38 |               |             |               |                |              |
| 15                                           | 25-29    | Dual      |               | 0     | 0.00  |               |             |               |                |              |
| 15                                           | 25-29    | Former    |               | 1186  | 14.96 |               |             | 6.67          | 118            | 9.95         |
| Year of Follow-up: 2005, Age Group: 30-34    | Period   | Age Group | Smoking Group | N     | %     | Ever Quit (N) | Ever Quit % | Mean Yrs Quit | Short Term (n) | Short Term % |
| 15                                           | 30-34    | Never Any |               | 5026  | 60.19 |               |             |               |                |              |
| 15                                           | 30-34    | CC        |               | 143   | 1.71  | 0             | 0.00        |               |                |              |
| 15                                           | 30-34    | Ecig      |               | 2123  | 25.43 |               |             |               |                |              |
| 15                                           | 30-34    | Dual      |               | 0     | 0.00  |               |             |               |                |              |
| 15                                           | 30-34    | Former    |               | 1058  | 12.67 |               |             | 8.62          | 89             | 8.41         |
| Year of Follow-up: 2005, Age Group: 35-39    | Period   | Age Group | Smoking Group | N     | %     | Ever Quit (N) | Ever Quit % | Mean Yrs Quit | Short Term (n) | Short Term % |
| 15                                           | 35-39    | Never Any |               | 5137  | 58.42 |               |             |               |                |              |
| 15                                           | 35-39    | CC        |               | 167   | 1.90  | 0             | 0.00        |               |                |              |



**Results for PHIM for Run 8 (Sensitivity\_Analysis\_4.RTF)**

|                                              |           |               |       |       |               |             |               |                |              |
|----------------------------------------------|-----------|---------------|-------|-------|---------------|-------------|---------------|----------------|--------------|
| 15                                           | 35-39     | Ecig          | 2049  | 23.30 |               |             |               |                |              |
| 15                                           | 35-39     | Dual          | 0     | 0.00  |               |             |               |                |              |
| 15                                           | 35-39     | Former        | 1440  | 16.38 |               |             | 12.71         | 68             | 4.72         |
| Year of Follow-up: 2005, Age Group: 40-44    |           |               |       |       |               |             |               |                |              |
| Period                                       | Age Group | Smoking Group | N     | %     | Ever Quit (N) | Ever Quit % | Mean Yrs Quit | Short Term (n) | Short Term % |
| 15                                           | 40-44     | Never Any     | 5270  | 52.29 |               |             |               |                |              |
| 15                                           | 40-44     | CC            | 238   | 2.36  | 0             | 0.00        |               |                |              |
| 15                                           | 40-44     | Ecig          | 2512  | 24.93 |               |             |               |                |              |
| 15                                           | 40-44     | Dual          | 0     | 0.00  |               |             |               |                |              |
| 15                                           | 40-44     | Former        | 2058  | 20.42 |               |             | 15.07         | 102            | 4.96         |
| Year of Follow-up: 2005, Age Group: 45-49    |           |               |       |       |               |             |               |                |              |
| Period                                       | Age Group | Smoking Group | N     | %     | Ever Quit (N) | Ever Quit % | Mean Yrs Quit | Short Term (n) | Short Term % |
| 15                                           | 45-49     | Never Any     | 5276  | 50.25 |               |             |               |                |              |
| 15                                           | 45-49     | CC            | 237   | 2.26  | 0             | 0.00        |               |                |              |
| 15                                           | 45-49     | Ecig          | 2320  | 22.10 |               |             |               |                |              |
| 15                                           | 45-49     | Dual          | 0     | 0.00  |               |             |               |                |              |
| 15                                           | 45-49     | Former        | 2666  | 25.39 |               |             | 15.45         | 135            | 5.06         |
| Year of Follow-up: 2005, Age Group: 50-54    |           |               |       |       |               |             |               |                |              |
| Period                                       | Age Group | Smoking Group | N     | %     | Ever Quit (N) | Ever Quit % | Mean Yrs Quit | Short Term (n) | Short Term % |
| 15                                           | 50-54     | Never Any     | 5018  | 52.27 |               |             |               |                |              |
| 15                                           | 50-54     | CC            | 191   | 1.99  | 0             | 0.00        |               |                |              |
| 15                                           | 50-54     | Ecig          | 1622  | 16.90 |               |             |               |                |              |
| 15                                           | 50-54     | Dual          | 0     | 0.00  |               |             |               |                |              |
| 15                                           | 50-54     | Former        | 2769  | 28.84 |               |             | 17.84         | 99             | 3.58         |
| Year of Follow-up: 2005, Age Group: 55-59    |           |               |       |       |               |             |               |                |              |
| Period                                       | Age Group | Smoking Group | N     | %     | Ever Quit (N) | Ever Quit % | Mean Yrs Quit | Short Term (n) | Short Term % |
| 15                                           | 55-59     | Never Any     | 4356  | 51.27 |               |             |               |                |              |
| 15                                           | 55-59     | CC            | 166   | 1.95  | 0             | 0.00        |               |                |              |
| 15                                           | 55-59     | Ecig          | 1281  | 15.08 |               |             |               |                |              |
| 15                                           | 55-59     | Dual          | 0     | 0.00  |               |             |               |                |              |
| 15                                           | 55-59     | Former        | 2694  | 31.71 |               |             | 16.95         | 78             | 2.90         |
| Year of Follow-up: 2005, Age Group: 60-64    |           |               |       |       |               |             |               |                |              |
| Period                                       | Age Group | Smoking Group | N     | %     | Ever Quit (N) | Ever Quit % | Mean Yrs Quit | Short Term (n) | Short Term % |
| 15                                           | 60-64     | Never Any     | 3116  | 47.67 |               |             |               |                |              |
| 15                                           | 60-64     | CC            | 131   | 2.00  | 0             | 0.00        |               |                |              |
| 15                                           | 60-64     | Ecig          | 852   | 13.04 |               |             |               |                |              |
| 15                                           | 60-64     | Dual          | 0     | 0.00  |               |             |               |                |              |
| 15                                           | 60-64     | Former        | 2437  | 37.29 |               |             | 20.18         | 93             | 3.82         |
| Year of Follow-up: 2005, Age Group: 65-69    |           |               |       |       |               |             |               |                |              |
| Period                                       | Age Group | Smoking Group | N     | %     | Ever Quit (N) | Ever Quit % | Mean Yrs Quit | Short Term (n) | Short Term % |
| 15                                           | 65-69     | Never Any     | 2684  | 48.50 |               |             |               |                |              |
| 15                                           | 65-69     | CC            | 160   | 2.89  | 0             | 0.00        |               |                |              |
| 15                                           | 65-69     | Ecig          | 591   | 10.68 |               |             |               |                |              |
| 15                                           | 65-69     | Dual          | 0     | 0.00  |               |             |               |                |              |
| 15                                           | 65-69     | Former        | 2099  | 37.93 |               |             | 19.92         | 68             | 3.24         |
| Year of Follow-up: 2005, Age Group: 70-74    |           |               |       |       |               |             |               |                |              |
| Period                                       | Age Group | Smoking Group | N     | %     | Ever Quit (N) | Ever Quit % | Mean Yrs Quit | Short Term (n) | Short Term % |
| 15                                           | 70-74     | Never Any     | 2732  | 51.90 |               |             |               |                |              |
| 15                                           | 70-74     | CC            | 139   | 2.64  | 0             | 0.00        |               |                |              |
| 15                                           | 70-74     | Ecig          | 391   | 7.43  |               |             |               |                |              |
| 15                                           | 70-74     | Dual          | 0     | 0.00  |               |             |               |                |              |
| 15                                           | 70-74     | Former        | 2002  | 38.03 |               |             | 22.67         | 69             | 3.45         |
| Year of Follow-up: 2005, Age Group: 75-79    |           |               |       |       |               |             |               |                |              |
| Period                                       | Age Group | Smoking Group | N     | %     | Ever Quit (N) | Ever Quit % | Mean Yrs Quit | Short Term (n) | Short Term % |
| 15                                           | 75-79     | Never Any     | 3078  | 55.72 |               |             |               |                |              |
| 15                                           | 75-79     | CC            | 146   | 2.64  | 0             | 0.00        |               |                |              |
| 15                                           | 75-79     | Ecig          | 297   | 5.38  |               |             |               |                |              |
| 15                                           | 75-79     | Dual          | 0     | 0.00  |               |             |               |                |              |
| 15                                           | 75-79     | Former        | 2003  | 36.26 |               |             | 22.91         | 56             | 2.80         |
| Year of Follow-up: 2010, Age Group: All Ages |           |               |       |       |               |             |               |                |              |
| Period                                       | Age Group | Smoking Group | N     | %     | Ever Quit (N) | Ever Quit % | Mean Yrs Quit | Short Term (n) | Short Term % |
| 20                                           | All Ages  | Never Any     | 42596 | 52.54 |               |             |               |                |              |
| 20                                           | All Ages  | CC            | 762   | 0.94  | 0             | 0.00        |               |                |              |
| 20                                           | All Ages  | Ecig          | 14499 | 17.88 |               |             |               |                |              |
| 20                                           | All Ages  | Dual          | 0     | 0.00  |               |             |               |                |              |
| 20                                           | All Ages  | Former        | 23224 | 28.64 |               |             | 19.22         | 1181           | 5.09         |
| Year of Follow-up: 2010, Age Group: 18-19    |           |               |       |       |               |             |               |                |              |
| Period                                       | Age Group | Smoking Group | N     | %     | Ever Quit (N) | Ever Quit % | Mean Yrs Quit | Short Term (n) | Short Term % |

**Results for PHIM for Run 8 (Sensitivity\_Analysis\_4.RTF)**

|                                           |           |               |      |       |               |             |               |                |              |
|-------------------------------------------|-----------|---------------|------|-------|---------------|-------------|---------------|----------------|--------------|
| 20                                        | 18-19     | Never Any     | 0    | .     |               |             |               |                |              |
| 20                                        | 18-19     | CC            | 0    | .     | 0             | .           |               |                |              |
| 20                                        | 18-19     | Ecig          | 0    | .     |               |             |               |                |              |
| 20                                        | 18-19     | Dual          | 0    | .     |               |             |               |                |              |
| 20                                        | 18-19     | Former        | 0    | .     |               |             | 0             | .              |              |
| Year of Follow-up: 2010, Age Group: 20-24 |           |               |      |       |               |             |               |                |              |
| Period                                    | Age Group | Smoking Group | N    | %     | Ever Quit (N) | Ever Quit % | Mean Yrs Quit | Short Term (n) | Short Term % |
| 20                                        | 20-24     | Never Any     | 0    | .     |               |             |               |                |              |
| 20                                        | 20-24     | CC            | 0    | .     | 0             | .           |               |                |              |
| 20                                        | 20-24     | Ecig          | 0    | .     |               |             |               |                |              |
| 20                                        | 20-24     | Dual          | 0    | .     |               |             |               |                |              |
| 20                                        | 20-24     | Former        | 0    | .     |               |             |               | 0              | .            |
| Year of Follow-up: 2010, Age Group: 25-29 |           |               |      |       |               |             |               |                |              |
| Period                                    | Age Group | Smoking Group | N    | %     | Ever Quit (N) | Ever Quit % | Mean Yrs Quit | Short Term (n) | Short Term % |
| 20                                        | 25-29     | Never Any     | 0    | .     |               |             |               |                |              |
| 20                                        | 25-29     | CC            | 0    | .     | 0             | .           |               |                |              |
| 20                                        | 25-29     | Ecig          | 0    | .     |               |             |               |                |              |
| 20                                        | 25-29     | Dual          | 0    | .     |               |             |               |                |              |
| 20                                        | 25-29     | Former        | 0    | .     |               |             |               | 0              | .            |
| Year of Follow-up: 2010, Age Group: 30-34 |           |               |      |       |               |             |               |                |              |
| Period                                    | Age Group | Smoking Group | N    | %     | Ever Quit (N) | Ever Quit % | Mean Yrs Quit | Short Term (n) | Short Term % |
| 20                                        | 30-34     | Never Any     | 4039 | 50.93 |               |             |               |                |              |
| 20                                        | 30-34     | CC            | 64   | 0.81  | 0             | 0.00        |               |                |              |
| 20                                        | 30-34     | Ecig          | 2275 | 28.69 |               |             |               |                |              |
| 20                                        | 30-34     | Dual          | 0    | 0.00  |               |             |               |                |              |
| 20                                        | 30-34     | Former        | 1552 | 19.57 |               |             | 9.32          | 173            | 11.15        |
| Year of Follow-up: 2010, Age Group: 35-39 |           |               |      |       |               |             |               |                |              |
| Period                                    | Age Group | Smoking Group | N    | %     | Ever Quit (N) | Ever Quit % | Mean Yrs Quit | Short Term (n) | Short Term % |
| 20                                        | 35-39     | Never Any     | 4968 | 59.50 |               |             |               |                |              |
| 20                                        | 35-39     | CC            | 56   | 0.67  | 0             | 0.00        |               |                |              |
| 20                                        | 35-39     | Ecig          | 1984 | 23.76 |               |             |               |                |              |
| 20                                        | 35-39     | Dual          | 0    | 0.00  |               |             |               |                |              |
| 20                                        | 35-39     | Former        | 1342 | 16.07 |               |             | 11.12         | 116            | 8.64         |
| Year of Follow-up: 2010, Age Group: 40-44 |           |               |      |       |               |             |               |                |              |
| Period                                    | Age Group | Smoking Group | N    | %     | Ever Quit (N) | Ever Quit % | Mean Yrs Quit | Short Term (n) | Short Term % |
| 20                                        | 40-44     | Never Any     | 5137 | 58.42 |               |             |               |                |              |
| 20                                        | 40-44     | CC            | 64   | 0.73  | 0             | 0.00        |               |                |              |
| 20                                        | 40-44     | Ecig          | 1891 | 21.51 |               |             |               |                |              |
| 20                                        | 40-44     | Dual          | 0    | 0.00  |               |             |               |                |              |
| 20                                        | 40-44     | Former        | 1701 | 19.34 |               |             | 15.28         | 114            | 6.70         |
| Year of Follow-up: 2010, Age Group: 45-49 |           |               |      |       |               |             |               |                |              |
| Period                                    | Age Group | Smoking Group | N    | %     | Ever Quit (N) | Ever Quit % | Mean Yrs Quit | Short Term (n) | Short Term % |
| 20                                        | 45-49     | Never Any     | 5270 | 52.29 |               |             |               |                |              |
| 20                                        | 45-49     | CC            | 105  | 1.04  | 0             | 0.00        |               |                |              |
| 20                                        | 45-49     | Ecig          | 2336 | 23.18 |               |             |               |                |              |
| 20                                        | 45-49     | Dual          | 0    | 0.00  |               |             |               |                |              |
| 20                                        | 45-49     | Former        | 2367 | 23.49 |               |             | 17.68         | 132            | 5.58         |
| Year of Follow-up: 2010, Age Group: 50-54 |           |               |      |       |               |             |               |                |              |
| Period                                    | Age Group | Smoking Group | N    | %     | Ever Quit (N) | Ever Quit % | Mean Yrs Quit | Short Term (n) | Short Term % |
| 20                                        | 50-54     | Never Any     | 5276 | 50.25 |               |             |               |                |              |
| 20                                        | 50-54     | CC            | 101  | 0.96  | 0             | 0.00        |               |                |              |
| 20                                        | 50-54     | Ecig          | 2103 | 20.03 |               |             |               |                |              |
| 20                                        | 50-54     | Dual          | 0    | 0.00  |               |             |               |                |              |
| 20                                        | 50-54     | Former        | 3019 | 28.76 |               |             | 18.27         | 163            | 5.40         |
| Year of Follow-up: 2010, Age Group: 55-59 |           |               |      |       |               |             |               |                |              |
| Period                                    | Age Group | Smoking Group | N    | %     | Ever Quit (N) | Ever Quit % | Mean Yrs Quit | Short Term (n) | Short Term % |
| 20                                        | 55-59     | Never Any     | 5018 | 52.27 |               |             |               |                |              |
| 20                                        | 55-59     | CC            | 91   | 0.95  | 0             | 0.00        |               |                |              |
| 20                                        | 55-59     | Ecig          | 1433 | 14.93 |               |             |               |                |              |
| 20                                        | 55-59     | Dual          | 0    | 0.00  |               |             |               |                |              |
| 20                                        | 55-59     | Former        | 3058 | 31.85 |               |             | 20.88         | 103            | 3.37         |
| Year of Follow-up: 2010, Age Group: 60-64 |           |               |      |       |               |             |               |                |              |
| Period                                    | Age Group | Smoking Group | N    | %     | Ever Quit (N) | Ever Quit % | Mean Yrs Quit | Short Term (n) | Short Term % |
| 20                                        | 60-64     | Never Any     | 4356 | 51.27 |               |             |               |                |              |
| 20                                        | 60-64     | CC            | 71   | 0.84  | 0             | 0.00        |               |                |              |
| 20                                        | 60-64     | Ecig          | 1079 | 12.70 |               |             |               |                |              |
| 20                                        | 60-64     | Dual          | 0    | 0.00  |               |             |               |                |              |
| 20                                        | 60-64     | Former        | 2991 | 35.20 |               |             | 19.94         | 144            | 4.81         |
| Year of Follow-up: 2010, Age Group: 65-69 |           |               |      |       |               |             |               |                |              |

**Results for PHIM for Run 8 (Sensitivity\_Analysis\_4.RTF)**

| Period                                       | Age Group | Smoking Group | N     | %     | Ever Quit (N) | Ever Quit % | Mean Yrs Quit | Short Term (n) | Short Term % |
|----------------------------------------------|-----------|---------------|-------|-------|---------------|-------------|---------------|----------------|--------------|
| 20                                           | 65-69     | Never Any     | 3116  | 47.67 |               |             |               |                |              |
| 20                                           | 65-69     | CC            | 47    | 0.72  | 0             | 0.00        |               |                |              |
| 20                                           | 65-69     | Ecig          | 645   | 9.87  |               |             |               |                |              |
| 20                                           | 65-69     | Dual          | 0     | 0.00  |               |             |               |                |              |
| 20                                           | 65-69     | Former        | 2728  | 41.74 |               |             | 22.72         | 95             | 3.48         |
| Year of Follow-up: 2010, Age Group: 70-74    |           |               |       |       |               |             |               |                |              |
| Period                                       | Age Group | Smoking Group | N     | %     | Ever Quit (N) | Ever Quit % | Mean Yrs Quit | Short Term (n) | Short Term % |
| 20                                           | 70-74     | Never Any     | 2684  | 48.50 |               |             |               |                |              |
| 20                                           | 70-74     | CC            | 88    | 1.59  | 0             | 0.00        |               |                |              |
| 20                                           | 70-74     | Ecig          | 477   | 8.62  |               |             |               |                |              |
| 20                                           | 70-74     | Dual          | 0     | 0.00  |               |             |               |                |              |
| 20                                           | 70-74     | Former        | 2285  | 41.29 |               |             | 23.05         | 69             | 3.02         |
| Year of Follow-up: 2010, Age Group: 75-79    |           |               |       |       |               |             |               |                |              |
| Period                                       | Age Group | Smoking Group | N     | %     | Ever Quit (N) | Ever Quit % | Mean Yrs Quit | Short Term (n) | Short Term % |
| 20                                           | 75-79     | Never Any     | 2732  | 51.90 |               |             |               |                |              |
| 20                                           | 75-79     | CC            | 75    | 1.42  | 0             | 0.00        |               |                |              |
| 20                                           | 75-79     | Ecig          | 276   | 5.24  |               |             |               |                |              |
| 20                                           | 75-79     | Dual          | 0     | 0.00  |               |             |               |                |              |
| 20                                           | 75-79     | Former        | 2181  | 41.43 |               |             | 25.56         | 72             | 3.30         |
| Year of Follow-up: 2015, Age Group: All Ages |           |               |       |       |               |             |               |                |              |
| Period                                       | Age Group | Smoking Group | N     | %     | Ever Quit (N) | Ever Quit % | Mean Yrs Quit | Short Term (n) | Short Term % |
| 25                                           | All Ages  | Never Any     | 39842 | 52.55 |               |             |               |                |              |
| 25                                           | All Ages  | CC            | 338   | 0.45  | 0             | 0.00        |               |                |              |
| 25                                           | All Ages  | Ecig          | 12025 | 15.86 |               |             |               |                |              |
| 25                                           | All Ages  | Dual          | 0     | 0.00  |               |             |               |                |              |
| 25                                           | All Ages  | Former        | 23612 | 31.14 |               |             | 21.22         | 972            | 4.12         |
| Year of Follow-up: 2015, Age Group: 18-19    |           |               |       |       |               |             |               |                |              |
| Period                                       | Age Group | Smoking Group | N     | %     | Ever Quit (N) | Ever Quit % | Mean Yrs Quit | Short Term (n) | Short Term % |
| 25                                           | 18-19     | Never Any     | 0     | .     |               |             |               |                |              |
| 25                                           | 18-19     | CC            | 0     | .     | 0             | .           |               |                |              |
| 25                                           | 18-19     | Ecig          | 0     | .     |               |             |               |                |              |
| 25                                           | 18-19     | Dual          | 0     | .     |               |             |               |                |              |
| 25                                           | 18-19     | Former        | 0     | .     |               |             |               | 0              | .            |
| Year of Follow-up: 2015, Age Group: 20-24    |           |               |       |       |               |             |               |                |              |
| Period                                       | Age Group | Smoking Group | N     | %     | Ever Quit (N) | Ever Quit % | Mean Yrs Quit | Short Term (n) | Short Term % |
| 25                                           | 20-24     | Never Any     | 0     | .     |               |             |               |                |              |
| 25                                           | 20-24     | CC            | 0     | .     | 0             | .           |               |                |              |
| 25                                           | 20-24     | Ecig          | 0     | .     |               |             |               |                |              |
| 25                                           | 20-24     | Dual          | 0     | .     |               |             |               |                |              |
| 25                                           | 20-24     | Former        | 0     | .     |               |             |               | 0              | .            |
| Year of Follow-up: 2015, Age Group: 25-29    |           |               |       |       |               |             |               |                |              |
| Period                                       | Age Group | Smoking Group | N     | %     | Ever Quit (N) | Ever Quit % | Mean Yrs Quit | Short Term (n) | Short Term % |
| 25                                           | 25-29     | Never Any     | 0     | .     |               |             |               |                |              |
| 25                                           | 25-29     | CC            | 0     | .     | 0             | .           |               |                |              |
| 25                                           | 25-29     | Ecig          | 0     | .     |               |             |               |                |              |
| 25                                           | 25-29     | Dual          | 0     | .     |               |             |               |                |              |
| 25                                           | 25-29     | Former        | 0     | .     |               |             |               | 0              | .            |
| Year of Follow-up: 2015, Age Group: 30-34    |           |               |       |       |               |             |               |                |              |
| Period                                       | Age Group | Smoking Group | N     | %     | Ever Quit (N) | Ever Quit % | Mean Yrs Quit | Short Term (n) | Short Term % |
| 25                                           | 30-34     | Never Any     | 0     | .     |               |             |               |                |              |
| 25                                           | 30-34     | CC            | 0     | .     | 0             | .           |               |                |              |
| 25                                           | 30-34     | Ecig          | 0     | .     |               |             |               |                |              |
| 25                                           | 30-34     | Dual          | 0     | .     |               |             |               |                |              |
| 25                                           | 30-34     | Former        | 0     | .     |               |             |               | 0              | .            |
| Year of Follow-up: 2015, Age Group: 35-39    |           |               |       |       |               |             |               |                |              |
| Period                                       | Age Group | Smoking Group | N     | %     | Ever Quit (N) | Ever Quit % | Mean Yrs Quit | Short Term (n) | Short Term % |
| 25                                           | 35-39     | Never Any     | 4017  | 50.66 |               |             |               |                |              |
| 25                                           | 35-39     | CC            | 19    | 0.24  | 0             | 0.00        |               |                |              |
| 25                                           | 35-39     | Ecig          | 1877  | 23.67 |               |             |               |                |              |
| 25                                           | 35-39     | Dual          | 0     | 0.00  |               |             |               |                |              |
| 25                                           | 35-39     | Former        | 2017  | 25.44 |               |             | 11.49         | 170            | 8.43         |
| Year of Follow-up: 2015, Age Group: 40-44    |           |               |       |       |               |             |               |                |              |
| Period                                       | Age Group | Smoking Group | N     | %     | Ever Quit (N) | Ever Quit % | Mean Yrs Quit | Short Term (n) | Short Term % |
| 25                                           | 40-44     | Never Any     | 4968  | 59.50 |               |             |               |                |              |
| 25                                           | 40-44     | CC            | 32    | 0.38  | 0             | 0.00        |               |                |              |
| 25                                           | 40-44     | Ecig          | 1734  | 20.77 |               |             |               |                |              |
| 25                                           | 40-44     | Dual          | 0     | 0.00  |               |             |               |                |              |

**Results for PHIM for Run 8 (Sensitivity\_Analysis\_4.RTF)**

|                                              |           |               |       |       |               |             |               |                |              |
|----------------------------------------------|-----------|---------------|-------|-------|---------------|-------------|---------------|----------------|--------------|
| 25                                           | 40-44     | Former        | 1616  | 19.35 |               |             | 13.72         | 116            | 7.18         |
| Year of Follow-up: 2015, Age Group: 45-49    |           |               |       |       |               |             |               |                |              |
| Period                                       | Age Group | Smoking Group | N     | %     | Ever Quit (N) | Ever Quit % | Mean Yrs Quit | Short Term (n) | Short Term % |
| 25                                           | 45-49     | Never Any     | 5137  | 58.42 |               |             |               |                |              |
| 25                                           | 45-49     | CC            | 32    | 0.36  | 0             | 0.00        |               |                |              |
| 25                                           | 45-49     | Ecig          | 1663  | 18.91 |               |             |               |                |              |
| 25                                           | 45-49     | Dual          | 0     | 0.00  |               |             |               |                |              |
| 25                                           | 45-49     | Former        | 1961  | 22.30 |               |             | 17.86         | 99             | 5.05         |
| Year of Follow-up: 2015, Age Group: 50-54    |           |               |       |       |               |             |               |                |              |
| Period                                       | Age Group | Smoking Group | N     | %     | Ever Quit (N) | Ever Quit % | Mean Yrs Quit | Short Term (n) | Short Term % |
| 25                                           | 50-54     | Never Any     | 5270  | 52.29 |               |             |               |                |              |
| 25                                           | 50-54     | CC            | 45    | 0.45  | 0             | 0.00        |               |                |              |
| 25                                           | 50-54     | Ecig          | 2068  | 20.52 |               |             |               |                |              |
| 25                                           | 50-54     | Dual          | 0     | 0.00  |               |             |               |                |              |
| 25                                           | 50-54     | Former        | 2695  | 26.74 |               |             | 20.15         | 150            | 5.57         |
| Year of Follow-up: 2015, Age Group: 55-59    |           |               |       |       |               |             |               |                |              |
| Period                                       | Age Group | Smoking Group | N     | %     | Ever Quit (N) | Ever Quit % | Mean Yrs Quit | Short Term (n) | Short Term % |
| 25                                           | 55-59     | Never Any     | 5276  | 50.25 |               |             |               |                |              |
| 25                                           | 55-59     | CC            | 37    | 0.35  | 0             | 0.00        |               |                |              |
| 25                                           | 55-59     | Ecig          | 1773  | 16.89 |               |             |               |                |              |
| 25                                           | 55-59     | Dual          | 0     | 0.00  |               |             |               |                |              |
| 25                                           | 55-59     | Former        | 3413  | 32.51 |               |             | 20.83         | 141            | 4.13         |
| Year of Follow-up: 2015, Age Group: 60-64    |           |               |       |       |               |             |               |                |              |
| Period                                       | Age Group | Smoking Group | N     | %     | Ever Quit (N) | Ever Quit % | Mean Yrs Quit | Short Term (n) | Short Term % |
| 25                                           | 60-64     | Never Any     | 5018  | 52.27 |               |             |               |                |              |
| 25                                           | 60-64     | CC            | 42    | 0.44  | 0             | 0.00        |               |                |              |
| 25                                           | 60-64     | Ecig          | 1154  | 12.02 |               |             |               |                |              |
| 25                                           | 60-64     | Dual          | 0     | 0.00  |               |             |               |                |              |
| 25                                           | 60-64     | Former        | 3386  | 35.27 |               |             | 23.56         | 144            | 4.25         |
| Year of Follow-up: 2015, Age Group: 65-69    |           |               |       |       |               |             |               |                |              |
| Period                                       | Age Group | Smoking Group | N     | %     | Ever Quit (N) | Ever Quit % | Mean Yrs Quit | Short Term (n) | Short Term % |
| 25                                           | 65-69     | Never Any     | 4356  | 51.27 |               |             |               |                |              |
| 25                                           | 65-69     | CC            | 41    | 0.48  | 0             | 0.00        |               |                |              |
| 25                                           | 65-69     | Ecig          | 844   | 9.93  |               |             |               |                |              |
| 25                                           | 65-69     | Dual          | 0     | 0.00  |               |             |               |                |              |
| 25                                           | 65-69     | Former        | 3256  | 38.32 |               |             | 23.12         | 70             | 2.15         |
| Year of Follow-up: 2015, Age Group: 70-74    |           |               |       |       |               |             |               |                |              |
| Period                                       | Age Group | Smoking Group | N     | %     | Ever Quit (N) | Ever Quit % | Mean Yrs Quit | Short Term (n) | Short Term % |
| 25                                           | 70-74     | Never Any     | 3116  | 47.67 |               |             |               |                |              |
| 25                                           | 70-74     | CC            | 31    | 0.47  | 0             | 0.00        |               |                |              |
| 25                                           | 70-74     | Ecig          | 527   | 8.06  |               |             |               |                |              |
| 25                                           | 70-74     | Dual          | 0     | 0.00  |               |             |               |                |              |
| 25                                           | 70-74     | Former        | 2862  | 43.79 |               |             | 26.54         | 42             | 1.47         |
| Year of Follow-up: 2015, Age Group: 75-79    |           |               |       |       |               |             |               |                |              |
| Period                                       | Age Group | Smoking Group | N     | %     | Ever Quit (N) | Ever Quit % | Mean Yrs Quit | Short Term (n) | Short Term % |
| 25                                           | 75-79     | Never Any     | 2684  | 48.50 |               |             |               |                |              |
| 25                                           | 75-79     | CC            | 59    | 1.07  | 0             | 0.00        |               |                |              |
| 25                                           | 75-79     | Ecig          | 385   | 6.96  |               |             |               |                |              |
| 25                                           | 75-79     | Dual          | 0     | 0.00  |               |             |               |                |              |
| 25                                           | 75-79     | Former        | 2406  | 43.48 |               |             | 26.76         | 40             | 1.66         |
| Year of Follow-up: 2020, Age Group: All Ages |           |               |       |       |               |             |               |                |              |
| Period                                       | Age Group | Smoking Group | N     | %     | Ever Quit (N) | Ever Quit % | Mean Yrs Quit | Short Term (n) | Short Term % |
| 30                                           | All Ages  | Never Any     | 37158 | 52.87 |               |             |               |                |              |
| 30                                           | All Ages  | CC            | 115   | 0.16  | 0             | 0.00        |               |                |              |
| 30                                           | All Ages  | Ecig          | 9771  | 13.90 |               |             |               |                |              |
| 30                                           | All Ages  | Dual          | 0     | 0.00  |               |             |               |                |              |
| 30                                           | All Ages  | Former        | 23239 | 33.06 |               |             | 23.54         | 783            | 3.37         |
| Year of Follow-up: 2020, Age Group: 18-19    |           |               |       |       |               |             |               |                |              |
| Period                                       | Age Group | Smoking Group | N     | %     | Ever Quit (N) | Ever Quit % | Mean Yrs Quit | Short Term (n) | Short Term % |
| 30                                           | 18-19     | Never Any     | 0     | .     |               |             |               |                |              |
| 30                                           | 18-19     | CC            | 0     | .     | 0             | .           |               |                |              |
| 30                                           | 18-19     | Ecig          | 0     | .     |               |             |               |                |              |
| 30                                           | 18-19     | Dual          | 0     | .     |               |             |               |                |              |
| 30                                           | 18-19     | Former        | 0     | .     |               |             | .             | 0              | .            |
| Year of Follow-up: 2020, Age Group: 20-24    |           |               |       |       |               |             |               |                |              |
| Period                                       | Age Group | Smoking Group | N     | %     | Ever Quit (N) | Ever Quit % | Mean Yrs Quit | Short Term (n) | Short Term % |
| 30                                           | 20-24     | Never Any     | 0     | .     |               |             |               |                |              |
| 30                                           | 20-24     | CC            | 0     | .     | 0             | .           |               |                |              |

### Results for PHIM for Run 8 (Sensitivity\_Analysis\_4.RTF)

| 30                                        | 20-24     | Ecig          | 0    | .     |               |             |               |                |              |
|-------------------------------------------|-----------|---------------|------|-------|---------------|-------------|---------------|----------------|--------------|
| 30                                        | 20-24     | Dual          | 0    | .     |               |             |               |                |              |
| 30                                        | 20-24     | Former        | 0    | .     |               |             | 0             | .              |              |
| Year of Follow-up: 2020, Age Group: 25-29 |           |               |      |       |               |             |               |                |              |
| Period                                    | Age Group | Smoking Group | N    | %     | Ever Quit (N) | Ever Quit % | Mean Yrs Quit | Short Term (n) | Short Term % |
| 30                                        | 25-29     | Never Any     | 0    | .     |               |             |               |                |              |
| 30                                        | 25-29     | CC            | 0    | .     | 0             | .           |               |                |              |
| 30                                        | 25-29     | Ecig          | 0    | .     |               |             |               |                |              |
| 30                                        | 25-29     | Dual          | 0    | .     |               |             |               |                |              |
| 30                                        | 25-29     | Former        | 0    | .     |               |             |               | 0              | .            |
| Year of Follow-up: 2020, Age Group: 30-34 |           |               |      |       |               |             |               |                |              |
| Period                                    | Age Group | Smoking Group | N    | %     | Ever Quit (N) | Ever Quit % | Mean Yrs Quit | Short Term (n) | Short Term % |
| 30                                        | 30-34     | Never Any     | 0    | .     |               |             |               |                |              |
| 30                                        | 30-34     | CC            | 0    | .     | 0             | .           |               |                |              |
| 30                                        | 30-34     | Ecig          | 0    | .     |               |             |               |                |              |
| 30                                        | 30-34     | Dual          | 0    | .     |               |             |               |                |              |
| 30                                        | 30-34     | Former        | 0    | .     |               |             |               | 0              | .            |
| Year of Follow-up: 2020, Age Group: 35-39 |           |               |      |       |               |             |               |                |              |
| Period                                    | Age Group | Smoking Group | N    | %     | Ever Quit (N) | Ever Quit % | Mean Yrs Quit | Short Term (n) | Short Term % |
| 30                                        | 35-39     | Never Any     | 0    | .     |               |             |               |                |              |
| 30                                        | 35-39     | CC            | 0    | .     | 0             | .           |               |                |              |
| 30                                        | 35-39     | Ecig          | 0    | .     |               |             |               |                |              |
| 30                                        | 35-39     | Dual          | 0    | .     |               |             |               |                |              |
| 30                                        | 35-39     | Former        | 0    | .     |               |             |               | 0              | .            |
| Year of Follow-up: 2020, Age Group: 40-44 |           |               |      |       |               |             |               |                |              |
| Period                                    | Age Group | Smoking Group | N    | %     | Ever Quit (N) | Ever Quit % | Mean Yrs Quit | Short Term (n) | Short Term % |
| 30                                        | 40-44     | Never Any     | 4017 | 50.66 |               |             |               |                |              |
| 30                                        | 40-44     | CC            | 6    | 0.08  | 0             | 0.00        |               |                |              |
| 30                                        | 40-44     | Ecig          | 1608 | 20.28 |               |             |               |                |              |
| 30                                        | 40-44     | Dual          | 0    | 0.00  |               |             |               |                |              |
| 30                                        | 40-44     | Former        | 2299 | 28.99 |               |             | 14.73         | 96             | 4.18         |
| Year of Follow-up: 2020, Age Group: 45-49 |           |               |      |       |               |             |               |                |              |
| Period                                    | Age Group | Smoking Group | N    | %     | Ever Quit (N) | Ever Quit % | Mean Yrs Quit | Short Term (n) | Short Term % |
| 30                                        | 45-49     | Never Any     | 4968 | 59.50 |               |             |               |                |              |
| 30                                        | 45-49     | CC            | 13   | 0.16  | 0             | 0.00        |               |                |              |
| 30                                        | 45-49     | Ecig          | 1510 | 18.08 |               |             |               |                |              |
| 30                                        | 45-49     | Dual          | 0    | 0.00  |               |             |               |                |              |
| 30                                        | 45-49     | Former        | 1859 | 22.26 |               |             | 16.56         | 84             | 4.52         |
| Year of Follow-up: 2020, Age Group: 50-54 |           |               |      |       |               |             |               |                |              |
| Period                                    | Age Group | Smoking Group | N    | %     | Ever Quit (N) | Ever Quit % | Mean Yrs Quit | Short Term (n) | Short Term % |
| 30                                        | 50-54     | Never Any     | 5137 | 58.42 |               |             |               |                |              |
| 30                                        | 50-54     | CC            | 9    | 0.10  | 0             | 0.00        |               |                |              |
| 30                                        | 50-54     | Ecig          | 1429 | 16.25 |               |             |               |                |              |
| 30                                        | 50-54     | Dual          | 0    | 0.00  |               |             |               |                |              |
| 30                                        | 50-54     | Former        | 2218 | 25.22 |               |             | 20.42         | 121            | 5.46         |
| Year of Follow-up: 2020, Age Group: 55-59 |           |               |      |       |               |             |               |                |              |
| Period                                    | Age Group | Smoking Group | N    | %     | Ever Quit (N) | Ever Quit % | Mean Yrs Quit | Short Term (n) | Short Term % |
| 30                                        | 55-59     | Never Any     | 5270 | 52.29 |               |             |               |                |              |
| 30                                        | 55-59     | CC            | 14   | 0.14  | 0             | 0.00        |               |                |              |
| 30                                        | 55-59     | Ecig          | 1717 | 17.04 |               |             |               |                |              |
| 30                                        | 55-59     | Dual          | 0    | 0.00  |               |             |               |                |              |
| 30                                        | 55-59     | Former        | 3077 | 30.53 |               |             | 22.29         | 140            | 4.55         |
| Year of Follow-up: 2020, Age Group: 60-64 |           |               |      |       |               |             |               |                |              |
| Period                                    | Age Group | Smoking Group | N    | %     | Ever Quit (N) | Ever Quit % | Mean Yrs Quit | Short Term (n) | Short Term % |
| 30                                        | 60-64     | Never Any     | 5276 | 50.25 |               |             |               |                |              |
| 30                                        | 60-64     | CC            | 15   | 0.14  | 0             | 0.00        |               |                |              |
| 30                                        | 60-64     | Ecig          | 1428 | 13.60 |               |             |               |                |              |
| 30                                        | 60-64     | Dual          | 0    | 0.00  |               |             |               |                |              |
| 30                                        | 60-64     | Former        | 3780 | 36.00 |               |             | 23.51         | 153            | 4.05         |
| Year of Follow-up: 2020, Age Group: 65-69 |           |               |      |       |               |             |               |                |              |
| Period                                    | Age Group | Smoking Group | N    | %     | Ever Quit (N) | Ever Quit % | Mean Yrs Quit | Short Term (n) | Short Term % |
| 30                                        | 65-69     | Never Any     | 5018 | 52.27 |               |             |               |                |              |
| 30                                        | 65-69     | CC            | 18   | 0.19  | 0             | 0.00        |               |                |              |
| 30                                        | 65-69     | Ecig          | 917  | 9.55  |               |             |               |                |              |
| 30                                        | 65-69     | Dual          | 0    | 0.00  |               |             |               |                |              |
| 30                                        | 65-69     | Former        | 3647 | 37.99 |               |             | 26.68         | 75             | 2.06         |
| Year of Follow-up: 2020, Age Group: 70-74 |           |               |      |       |               |             |               |                |              |
| Period                                    | Age Group | Smoking Group | N    | %     | Ever Quit (N) | Ever Quit % | Mean Yrs Quit | Short Term (n) | Short Term % |

**Results for PHIM for Run 8 (Sensitivity\_Analysis\_4.RTF)**

|                                              |           |               |       |       |               |             |               |                |              |
|----------------------------------------------|-----------|---------------|-------|-------|---------------|-------------|---------------|----------------|--------------|
| 30                                           | 70-74     | Never Any     | 4356  | 51.27 |               |             |               |                |              |
| 30                                           | 70-74     | CC            | 22    | 0.26  | 0             | 0.00        |               |                |              |
| 30                                           | 70-74     | Ecig          | 727   | 8.56  |               |             |               |                |              |
| 30                                           | 70-74     | Dual          | 0     | 0.00  |               |             |               |                |              |
| 30                                           | 70-74     | Former        | 3392  | 39.92 |               |             | 27.06         | 66             | 1.95         |
| Year of Follow-up: 2020, Age Group: 75-79    |           |               |       |       |               |             |               |                |              |
| Period                                       | Age Group | Smoking Group | N     | %     | Ever Quit (N) | Ever Quit % | Mean Yrs Quit | Short Term (n) | Short Term % |
| 30                                           | 75-79     | Never Any     | 3116  | 47.67 |               |             |               |                |              |
| 30                                           | 75-79     | CC            | 18    | 0.28  | 0             | 0.00        |               |                |              |
| 30                                           | 75-79     | Ecig          | 435   | 6.66  |               |             |               |                |              |
| 30                                           | 75-79     | Dual          | 0     | 0.00  |               |             |               |                |              |
| 30                                           | 75-79     | Former        | 2967  | 45.39 |               |             | 30.49         | 48             | 1.62         |
| Year of Follow-up: 2025, Age Group: All Ages |           |               |       |       |               |             |               |                |              |
| Period                                       | Age Group | Smoking Group | N     | %     | Ever Quit (N) | Ever Quit % | Mean Yrs Quit | Short Term (n) | Short Term % |
| 35                                           | All Ages  | Never Any     | 34042 | 53.40 |               |             |               |                |              |
| 35                                           | All Ages  | CC            | 47    | 0.07  | 0             | 0.00        |               |                |              |
| 35                                           | All Ages  | Ecig          | 7724  | 12.12 |               |             |               |                |              |
| 35                                           | All Ages  | Dual          | 0     | 0.00  |               |             |               |                |              |
| 35                                           | All Ages  | Former        | 21934 | 34.41 |               |             | 25.59         | 641            | 2.92         |
| Year of Follow-up: 2025, Age Group: 18-19    |           |               |       |       |               |             |               |                |              |
| Period                                       | Age Group | Smoking Group | N     | %     | Ever Quit (N) | Ever Quit % | Mean Yrs Quit | Short Term (n) | Short Term % |
| 35                                           | 18-19     | Never Any     | 0     | .     |               |             |               |                |              |
| 35                                           | 18-19     | CC            | 0     | .     | 0             | .           |               |                |              |
| 35                                           | 18-19     | Ecig          | 0     | .     |               |             |               |                |              |
| 35                                           | 18-19     | Dual          | 0     | .     |               |             |               |                |              |
| 35                                           | 18-19     | Former        | 0     | .     |               |             | .             | 0              | .            |
| Year of Follow-up: 2025, Age Group: 20-24    |           |               |       |       |               |             |               |                |              |
| Period                                       | Age Group | Smoking Group | N     | %     | Ever Quit (N) | Ever Quit % | Mean Yrs Quit | Short Term (n) | Short Term % |
| 35                                           | 20-24     | Never Any     | 0     | .     |               |             |               |                |              |
| 35                                           | 20-24     | CC            | 0     | .     | 0             | .           |               |                |              |
| 35                                           | 20-24     | Ecig          | 0     | .     |               |             |               |                |              |
| 35                                           | 20-24     | Dual          | 0     | .     |               |             |               |                |              |
| 35                                           | 20-24     | Former        | 0     | .     |               |             | .             | 0              | .            |
| Year of Follow-up: 2025, Age Group: 25-29    |           |               |       |       |               |             |               |                |              |
| Period                                       | Age Group | Smoking Group | N     | %     | Ever Quit (N) | Ever Quit % | Mean Yrs Quit | Short Term (n) | Short Term % |
| 35                                           | 25-29     | Never Any     | 0     | .     |               |             |               |                |              |
| 35                                           | 25-29     | CC            | 0     | .     | 0             | .           |               |                |              |
| 35                                           | 25-29     | Ecig          | 0     | .     |               |             |               |                |              |
| 35                                           | 25-29     | Dual          | 0     | .     |               |             |               |                |              |
| 35                                           | 25-29     | Former        | 0     | .     |               |             | .             | 0              | .            |
| Year of Follow-up: 2025, Age Group: 30-34    |           |               |       |       |               |             |               |                |              |
| Period                                       | Age Group | Smoking Group | N     | %     | Ever Quit (N) | Ever Quit % | Mean Yrs Quit | Short Term (n) | Short Term % |
| 35                                           | 30-34     | Never Any     | 0     | .     |               |             |               |                |              |
| 35                                           | 30-34     | CC            | 0     | .     | 0             | .           |               |                |              |
| 35                                           | 30-34     | Ecig          | 0     | .     |               |             |               |                |              |
| 35                                           | 30-34     | Dual          | 0     | .     |               |             |               |                |              |
| 35                                           | 30-34     | Former        | 0     | .     |               |             | .             | 0              | .            |
| Year of Follow-up: 2025, Age Group: 35-39    |           |               |       |       |               |             |               |                |              |
| Period                                       | Age Group | Smoking Group | N     | %     | Ever Quit (N) | Ever Quit % | Mean Yrs Quit | Short Term (n) | Short Term % |
| 35                                           | 35-39     | Never Any     | 0     | .     |               |             |               |                |              |
| 35                                           | 35-39     | CC            | 0     | .     | 0             | .           |               |                |              |
| 35                                           | 35-39     | Ecig          | 0     | .     |               |             |               |                |              |
| 35                                           | 35-39     | Dual          | 0     | .     |               |             |               |                |              |
| 35                                           | 35-39     | Former        | 0     | .     |               |             | .             | 0              | .            |
| Year of Follow-up: 2025, Age Group: 40-44    |           |               |       |       |               |             |               |                |              |
| Period                                       | Age Group | Smoking Group | N     | %     | Ever Quit (N) | Ever Quit % | Mean Yrs Quit | Short Term (n) | Short Term % |
| 35                                           | 40-44     | Never Any     | 0     | .     |               |             |               |                |              |
| 35                                           | 40-44     | CC            | 0     | .     | 0             | .           |               |                |              |
| 35                                           | 40-44     | Ecig          | 0     | .     |               |             |               |                |              |
| 35                                           | 40-44     | Dual          | 0     | .     |               |             |               |                |              |
| 35                                           | 40-44     | Former        | 0     | .     |               |             | .             | 0              | .            |
| Year of Follow-up: 2025, Age Group: 45-49    |           |               |       |       |               |             |               |                |              |
| Period                                       | Age Group | Smoking Group | N     | %     | Ever Quit (N) | Ever Quit % | Mean Yrs Quit | Short Term (n) | Short Term % |
| 35                                           | 45-49     | Never Any     | 4017  | 50.66 |               |             |               |                |              |
| 35                                           | 45-49     | CC            | 1     | 0.01  | 0             | 0.00        |               |                |              |
| 35                                           | 45-49     | Ecig          | 1372  | 17.30 |               |             |               |                |              |
| 35                                           | 45-49     | Dual          | 0     | 0.00  |               |             |               |                |              |
| 35                                           | 45-49     | Former        | 2540  | 32.03 |               |             | 18.08         | 79             | 3.11         |
| Year of Follow-up: 2025, Age Group: 50-54    |           |               |       |       |               |             |               |                |              |

**Results for PHIM for Run 8 (Sensitivity\_Analysis\_4.RTF)**

| Period                                       | Age Group | Smoking Group | N     | %     | Ever Quit (N) | Ever Quit % | Mean Yrs Quit | Short Term (n) | Short Term % |
|----------------------------------------------|-----------|---------------|-------|-------|---------------|-------------|---------------|----------------|--------------|
| 35                                           | 50-54     | Never Any     | 4968  | 59.50 |               |             |               |                |              |
| 35                                           | 50-54     | CC            | 3     | 0.04  | 0             | 0.00        |               |                |              |
| 35                                           | 50-54     | Ecig          | 1270  | 15.21 |               |             |               |                |              |
| 35                                           | 50-54     | Dual          | 0     | 0.00  |               |             |               |                |              |
| 35                                           | 50-54     | Former        | 2109  | 25.26 |               |             | 19.22         | 121            | 5.74         |
| Year of Follow-up: 2025, Age Group: 55-59    |           |               |       |       |               |             |               |                |              |
| Period                                       | Age Group | Smoking Group | N     | %     | Ever Quit (N) | Ever Quit % | Mean Yrs Quit | Short Term (n) | Short Term % |
| 35                                           | 55-59     | Never Any     | 5137  | 58.42 |               |             |               |                |              |
| 35                                           | 55-59     | CC            | 4     | 0.05  | 0             | 0.00        |               |                |              |
| 35                                           | 55-59     | Ecig          | 1180  | 13.42 |               |             |               |                |              |
| 35                                           | 55-59     | Dual          | 0     | 0.00  |               |             |               |                |              |
| 35                                           | 55-59     | Former        | 2472  | 28.11 |               |             | 23.01         | 101            | 4.09         |
| Year of Follow-up: 2025, Age Group: 60-64    |           |               |       |       |               |             |               |                |              |
| Period                                       | Age Group | Smoking Group | N     | %     | Ever Quit (N) | Ever Quit % | Mean Yrs Quit | Short Term (n) | Short Term % |
| 35                                           | 60-64     | Never Any     | 5270  | 52.29 |               |             |               |                |              |
| 35                                           | 60-64     | CC            | 7     | 0.07  | 0             | 0.00        |               |                |              |
| 35                                           | 60-64     | Ecig          | 1386  | 13.75 |               |             |               |                |              |
| 35                                           | 60-64     | Dual          | 0     | 0.00  |               |             |               |                |              |
| 35                                           | 60-64     | Former        | 3415  | 33.89 |               |             | 24.78         | 139            | 4.07         |
| Year of Follow-up: 2025, Age Group: 65-69    |           |               |       |       |               |             |               |                |              |
| Period                                       | Age Group | Smoking Group | N     | %     | Ever Quit (N) | Ever Quit % | Mean Yrs Quit | Short Term (n) | Short Term % |
| 35                                           | 65-69     | Never Any     | 5276  | 50.25 |               |             |               |                |              |
| 35                                           | 65-69     | CC            | 7     | 0.07  | 0             | 0.00        |               |                |              |
| 35                                           | 65-69     | Ecig          | 1139  | 10.85 |               |             |               |                |              |
| 35                                           | 65-69     | Dual          | 0     | 0.00  |               |             |               |                |              |
| 35                                           | 65-69     | Former        | 4077  | 38.83 |               |             | 26.61         | 83             | 2.04         |
| Year of Follow-up: 2025, Age Group: 70-74    |           |               |       |       |               |             |               |                |              |
| Period                                       | Age Group | Smoking Group | N     | %     | Ever Quit (N) | Ever Quit % | Mean Yrs Quit | Short Term (n) | Short Term % |
| 35                                           | 70-74     | Never Any     | 5018  | 52.27 |               |             |               |                |              |
| 35                                           | 70-74     | CC            | 11    | 0.11  | 0             | 0.00        |               |                |              |
| 35                                           | 70-74     | Ecig          | 789   | 8.22  |               |             |               |                |              |
| 35                                           | 70-74     | Dual          | 0     | 0.00  |               |             |               |                |              |
| 35                                           | 70-74     | Former        | 3782  | 39.40 |               |             | 30.61         | 65             | 1.72         |
| Year of Follow-up: 2025, Age Group: 75-79    |           |               |       |       |               |             |               |                |              |
| Period                                       | Age Group | Smoking Group | N     | %     | Ever Quit (N) | Ever Quit % | Mean Yrs Quit | Short Term (n) | Short Term % |
| 35                                           | 75-79     | Never Any     | 4356  | 51.27 |               |             |               |                |              |
| 35                                           | 75-79     | CC            | 14    | 0.16  | 0             | 0.00        |               |                |              |
| 35                                           | 75-79     | Ecig          | 588   | 6.92  |               |             |               |                |              |
| 35                                           | 75-79     | Dual          | 0     | 0.00  |               |             |               |                |              |
| 35                                           | 75-79     | Former        | 3539  | 41.65 |               |             | 30.81         | 53             | 1.50         |
| Year of Follow-up: 2030, Age Group: All Ages |           |               |       |       |               |             |               |                |              |
| Period                                       | Age Group | Smoking Group | N     | %     | Ever Quit (N) | Ever Quit % | Mean Yrs Quit | Short Term (n) | Short Term % |
| 40                                           | All Ages  | Never Any     | 29686 | 53.73 |               |             |               |                |              |
| 40                                           | All Ages  | CC            | 14    | 0.03  | 0             | 0.00        |               |                |              |
| 40                                           | All Ages  | Ecig          | 5753  | 10.41 |               |             |               |                |              |
| 40                                           | All Ages  | Dual          | 0     | 0.00  |               |             |               |                |              |
| 40                                           | All Ages  | Former        | 19797 | 35.83 |               |             | 27.63         | 562            | 2.84         |
| Year of Follow-up: 2030, Age Group: 18-19    |           |               |       |       |               |             |               |                |              |
| Period                                       | Age Group | Smoking Group | N     | %     | Ever Quit (N) | Ever Quit % | Mean Yrs Quit | Short Term (n) | Short Term % |
| 40                                           | 18-19     | Never Any     | 0     | .     |               |             |               |                |              |
| 40                                           | 18-19     | CC            | 0     | .     | 0             | .           |               |                |              |
| 40                                           | 18-19     | Ecig          | 0     | .     |               |             |               |                |              |
| 40                                           | 18-19     | Dual          | 0     | .     |               |             |               |                |              |
| 40                                           | 18-19     | Former        | 0     | .     |               |             | .             | 0              | .            |
| Year of Follow-up: 2030, Age Group: 20-24    |           |               |       |       |               |             |               |                |              |
| Period                                       | Age Group | Smoking Group | N     | %     | Ever Quit (N) | Ever Quit % | Mean Yrs Quit | Short Term (n) | Short Term % |
| 40                                           | 20-24     | Never Any     | 0     | .     |               |             |               |                |              |
| 40                                           | 20-24     | CC            | 0     | .     | 0             | .           |               |                |              |
| 40                                           | 20-24     | Ecig          | 0     | .     |               |             |               |                |              |
| 40                                           | 20-24     | Dual          | 0     | .     |               |             |               |                |              |
| 40                                           | 20-24     | Former        | 0     | .     |               |             | .             | 0              | .            |
| Year of Follow-up: 2030, Age Group: 25-29    |           |               |       |       |               |             |               |                |              |
| Period                                       | Age Group | Smoking Group | N     | %     | Ever Quit (N) | Ever Quit % | Mean Yrs Quit | Short Term (n) | Short Term % |
| 40                                           | 25-29     | Never Any     | 0     | .     |               |             |               |                |              |
| 40                                           | 25-29     | CC            | 0     | .     | 0             | .           |               |                |              |
| 40                                           | 25-29     | Ecig          | 0     | .     |               |             |               |                |              |
| 40                                           | 25-29     | Dual          | 0     | .     |               |             |               |                |              |

### Results for PHIM for Run 8 (Sensitivity\_Analysis\_4.RTF)

| Year of Follow-up: 2030, Age Group: 30-34 | Period | Age Group | Smoking Group | N    | %     | Ever Quit (N) | Ever Quit % | Mean Yrs Quit | Short Term (n) | Short Term % |
|-------------------------------------------|--------|-----------|---------------|------|-------|---------------|-------------|---------------|----------------|--------------|
| Year of Follow-up: 2030, Age Group: 30-34 |        |           |               |      |       |               |             |               |                |              |
| 40                                        | 25-29  | Former    |               | 0    | .     |               |             |               | 0              | .            |
| 40                                        | 30-34  | Never Any |               | 0    | .     |               |             |               |                |              |
| 40                                        | 30-34  | CC        |               | 0    | .     | 0             | .           |               |                |              |
| 40                                        | 30-34  | Ecig      |               | 0    | .     |               |             |               |                |              |
| 40                                        | 30-34  | Dual      |               | 0    | .     |               |             |               |                |              |
| 40                                        | 30-34  | Former    |               | 0    | .     |               |             |               | 0              | .            |
| Year of Follow-up: 2030, Age Group: 35-39 |        |           |               |      |       |               |             |               |                |              |
| 40                                        | 35-39  | Never Any |               | 0    | .     |               |             |               |                |              |
| 40                                        | 35-39  | CC        |               | 0    | .     | 0             | .           |               |                |              |
| 40                                        | 35-39  | Ecig      |               | 0    | .     |               |             |               |                |              |
| 40                                        | 35-39  | Dual      |               | 0    | .     |               |             |               |                |              |
| 40                                        | 35-39  | Former    |               | 0    | .     |               |             |               | 0              | .            |
| Year of Follow-up: 2030, Age Group: 40-44 |        |           |               |      |       |               |             |               |                |              |
| 40                                        | 40-44  | Never Any |               | 0    | .     |               |             |               |                |              |
| 40                                        | 40-44  | CC        |               | 0    | .     | 0             | .           |               |                |              |
| 40                                        | 40-44  | Ecig      |               | 0    | .     |               |             |               |                |              |
| 40                                        | 40-44  | Dual      |               | 0    | .     |               |             |               |                |              |
| 40                                        | 40-44  | Former    |               | 0    | .     |               |             |               | 0              | .            |
| Year of Follow-up: 2030, Age Group: 45-49 |        |           |               |      |       |               |             |               |                |              |
| 40                                        | 45-49  | Never Any |               | 0    | .     |               |             |               |                |              |
| 40                                        | 45-49  | CC        |               | 0    | .     | 0             | .           |               |                |              |
| 40                                        | 45-49  | Ecig      |               | 0    | .     |               |             |               |                |              |
| 40                                        | 45-49  | Dual      |               | 0    | .     |               |             |               |                |              |
| 40                                        | 45-49  | Former    |               | 0    | .     |               |             |               | 0              | .            |
| Year of Follow-up: 2030, Age Group: 50-54 |        |           |               |      |       |               |             |               |                |              |
| 40                                        | 50-54  | Never Any |               | 4017 | 50.66 |               |             |               |                |              |
| 40                                        | 50-54  | CC        |               | 0    | 0.00  | 0             | 0.00        |               |                |              |
| 40                                        | 50-54  | Ecig      |               | 1165 | 14.69 |               |             |               |                |              |
| 40                                        | 50-54  | Dual      |               | 0    | 0.00  |               |             |               |                |              |
| 40                                        | 50-54  | Former    |               | 2748 | 34.65 |               |             | 21.46         | 105            | 3.82         |
| Year of Follow-up: 2030, Age Group: 55-59 |        |           |               |      |       |               |             |               |                |              |
| 40                                        | 55-59  | Never Any |               | 4968 | 59.50 |               |             |               |                |              |
| 40                                        | 55-59  | CC        |               | 0    | 0.00  | 0             | 0.00        |               |                |              |
| 40                                        | 55-59  | Ecig      |               | 1022 | 12.24 |               |             |               |                |              |
| 40                                        | 55-59  | Dual      |               | 0    | 0.00  |               |             |               |                |              |
| 40                                        | 55-59  | Former    |               | 2360 | 28.26 |               |             | 21.86         | 92             | 3.90         |
| Year of Follow-up: 2030, Age Group: 60-64 |        |           |               |      |       |               |             |               |                |              |
| 40                                        | 60-64  | Never Any |               | 5137 | 58.42 |               |             |               |                |              |
| 40                                        | 60-64  | CC        |               | 3    | 0.03  | 0             | 0.00        |               |                |              |
| 40                                        | 60-64  | Ecig      |               | 910  | 10.35 |               |             |               |                |              |
| 40                                        | 60-64  | Dual      |               | 0    | 0.00  |               |             |               |                |              |
| 40                                        | 60-64  | Former    |               | 2743 | 31.20 |               |             | 25.41         | 130            | 4.74         |
| Year of Follow-up: 2030, Age Group: 65-69 |        |           |               |      |       |               |             |               |                |              |
| 40                                        | 65-69  | Never Any |               | 5270 | 52.29 |               |             |               |                |              |
| 40                                        | 65-69  | CC        |               | 3    | 0.03  | 0             | 0.00        |               |                |              |
| 40                                        | 65-69  | Ecig      |               | 1087 | 10.79 |               |             |               |                |              |
| 40                                        | 65-69  | Dual      |               | 0    | 0.00  |               |             |               |                |              |
| 40                                        | 65-69  | Former    |               | 3718 | 36.89 |               |             | 27.56         | 73             | 1.96         |
| Year of Follow-up: 2030, Age Group: 70-74 |        |           |               |      |       |               |             |               |                |              |
| 40                                        | 70-74  | Never Any |               | 5276 | 50.25 |               |             |               |                |              |
| 40                                        | 70-74  | CC        |               | 4    | 0.04  | 0             | 0.00        |               |                |              |
| 40                                        | 70-74  | Ecig      |               | 957  | 9.12  |               |             |               |                |              |
| 40                                        | 70-74  | Dual      |               | 0    | 0.00  |               |             |               |                |              |
| 40                                        | 70-74  | Former    |               | 4262 | 40.59 |               |             | 30.31         | 86             | 2.02         |
| Year of Follow-up: 2030, Age Group: 75-79 |        |           |               |      |       |               |             |               |                |              |
| 40                                        | 75-79  | Never Any |               | 5018 | 52.27 |               |             |               |                |              |
| 40                                        | 75-79  | CC        |               | 4    | 0.04  | 0             | 0.00        |               |                |              |



**Results for PHIM for Run 8 (Sensitivity\_Analysis\_4.RTF)**

|                                              |           |               |       |       |               |             |               |                |              |
|----------------------------------------------|-----------|---------------|-------|-------|---------------|-------------|---------------|----------------|--------------|
| 40                                           | 75-79     | Ecig          | 612   | 6.38  |               |             |               |                |              |
| 40                                           | 75-79     | Dual          | 0     | 0.00  |               |             |               |                |              |
| 40                                           | 75-79     | Former        | 3966  | 41.31 |               |             | 34.05         | 76             | 1.92         |
| Year of Follow-up: 2035, Age Group: All Ages |           |               |       |       |               |             |               |                |              |
| Period                                       | Age Group | Smoking Group | N     | %     | Ever Quit (N) | Ever Quit % | Mean Yrs Quit | Short Term (n) | Short Term % |
| 45                                           | All Ages  | Never Any     | 24668 | 54.04 |               |             |               |                |              |
| 45                                           | All Ages  | CC            | 5     | 0.01  | 0             | 0.00        |               |                |              |
| 45                                           | All Ages  | Ecig          | 4174  | 9.14  |               |             |               |                |              |
| 45                                           | All Ages  | Dual          | 0     | 0.00  |               |             |               |                |              |
| 45                                           | All Ages  | Former        | 16803 | 36.81 |               |             | 29.34         | 372            | 2.21         |
| Year of Follow-up: 2035, Age Group: 18-19    |           |               |       |       |               |             |               |                |              |
| Period                                       | Age Group | Smoking Group | N     | %     | Ever Quit (N) | Ever Quit % | Mean Yrs Quit | Short Term (n) | Short Term % |
| 45                                           | 18-19     | Never Any     | 0     | .     |               |             |               |                |              |
| 45                                           | 18-19     | CC            | 0     | .     | 0             | .           |               |                |              |
| 45                                           | 18-19     | Ecig          | 0     | .     |               |             |               |                |              |
| 45                                           | 18-19     | Dual          | 0     | .     |               |             |               |                |              |
| 45                                           | 18-19     | Former        | 0     | .     |               |             | .             | 0              | .            |
| Year of Follow-up: 2035, Age Group: 20-24    |           |               |       |       |               |             |               |                |              |
| Period                                       | Age Group | Smoking Group | N     | %     | Ever Quit (N) | Ever Quit % | Mean Yrs Quit | Short Term (n) | Short Term % |
| 45                                           | 20-24     | Never Any     | 0     | .     |               |             |               |                |              |
| 45                                           | 20-24     | CC            | 0     | .     | 0             | .           |               |                |              |
| 45                                           | 20-24     | Ecig          | 0     | .     |               |             |               |                |              |
| 45                                           | 20-24     | Dual          | 0     | .     |               |             |               |                |              |
| 45                                           | 20-24     | Former        | 0     | .     |               |             | .             | 0              | .            |
| Year of Follow-up: 2035, Age Group: 25-29    |           |               |       |       |               |             |               |                |              |
| Period                                       | Age Group | Smoking Group | N     | %     | Ever Quit (N) | Ever Quit % | Mean Yrs Quit | Short Term (n) | Short Term % |
| 45                                           | 25-29     | Never Any     | 0     | .     |               |             |               |                |              |
| 45                                           | 25-29     | CC            | 0     | .     | 0             | .           |               |                |              |
| 45                                           | 25-29     | Ecig          | 0     | .     |               |             |               |                |              |
| 45                                           | 25-29     | Dual          | 0     | .     |               |             |               |                |              |
| 45                                           | 25-29     | Former        | 0     | .     |               |             | .             | 0              | .            |
| Year of Follow-up: 2035, Age Group: 30-34    |           |               |       |       |               |             |               |                |              |
| Period                                       | Age Group | Smoking Group | N     | %     | Ever Quit (N) | Ever Quit % | Mean Yrs Quit | Short Term (n) | Short Term % |
| 45                                           | 30-34     | Never Any     | 0     | .     |               |             |               |                |              |
| 45                                           | 30-34     | CC            | 0     | .     | 0             | .           |               |                |              |
| 45                                           | 30-34     | Ecig          | 0     | .     |               |             |               |                |              |
| 45                                           | 30-34     | Dual          | 0     | .     |               |             |               |                |              |
| 45                                           | 30-34     | Former        | 0     | .     |               |             | .             | 0              | .            |
| Year of Follow-up: 2035, Age Group: 35-39    |           |               |       |       |               |             |               |                |              |
| Period                                       | Age Group | Smoking Group | N     | %     | Ever Quit (N) | Ever Quit % | Mean Yrs Quit | Short Term (n) | Short Term % |
| 45                                           | 35-39     | Never Any     | 0     | .     |               |             |               |                |              |
| 45                                           | 35-39     | CC            | 0     | .     | 0             | .           |               |                |              |
| 45                                           | 35-39     | Ecig          | 0     | .     |               |             |               |                |              |
| 45                                           | 35-39     | Dual          | 0     | .     |               |             |               |                |              |
| 45                                           | 35-39     | Former        | 0     | .     |               |             | .             | 0              | .            |
| Year of Follow-up: 2035, Age Group: 40-44    |           |               |       |       |               |             |               |                |              |
| Period                                       | Age Group | Smoking Group | N     | %     | Ever Quit (N) | Ever Quit % | Mean Yrs Quit | Short Term (n) | Short Term % |
| 45                                           | 40-44     | Never Any     | 0     | .     |               |             |               |                |              |
| 45                                           | 40-44     | CC            | 0     | .     | 0             | .           |               |                |              |
| 45                                           | 40-44     | Ecig          | 0     | .     |               |             |               |                |              |
| 45                                           | 40-44     | Dual          | 0     | .     |               |             |               |                |              |
| 45                                           | 40-44     | Former        | 0     | .     |               |             | .             | 0              | .            |
| Year of Follow-up: 2035, Age Group: 45-49    |           |               |       |       |               |             |               |                |              |
| Period                                       | Age Group | Smoking Group | N     | %     | Ever Quit (N) | Ever Quit % | Mean Yrs Quit | Short Term (n) | Short Term % |
| 45                                           | 45-49     | Never Any     | 0     | .     |               |             |               |                |              |
| 45                                           | 45-49     | CC            | 0     | .     | 0             | .           |               |                |              |
| 45                                           | 45-49     | Ecig          | 0     | .     |               |             |               |                |              |
| 45                                           | 45-49     | Dual          | 0     | .     |               |             |               |                |              |
| 45                                           | 45-49     | Former        | 0     | .     |               |             | .             | 0              | .            |
| Year of Follow-up: 2035, Age Group: 50-54    |           |               |       |       |               |             |               |                |              |
| Period                                       | Age Group | Smoking Group | N     | %     | Ever Quit (N) | Ever Quit % | Mean Yrs Quit | Short Term (n) | Short Term % |
| 45                                           | 50-54     | Never Any     | 0     | .     |               |             |               |                |              |
| 45                                           | 50-54     | CC            | 0     | .     | 0             | .           |               |                |              |
| 45                                           | 50-54     | Ecig          | 0     | .     |               |             |               |                |              |
| 45                                           | 50-54     | Dual          | 0     | .     |               |             |               |                |              |
| 45                                           | 50-54     | Former        | 0     | .     |               |             | .             | 0              | .            |
| Year of Follow-up: 2035, Age Group: 55-59    |           |               |       |       |               |             |               |                |              |
| Period                                       | Age Group | Smoking Group | N     | %     | Ever Quit (N) | Ever Quit % | Mean Yrs Quit | Short Term (n) | Short Term % |

### Results for PHIM for Run 8 (Sensitivity\_Analysis\_4.RTF)

|                                              |           |               |       |       |               |             |               |                |              |
|----------------------------------------------|-----------|---------------|-------|-------|---------------|-------------|---------------|----------------|--------------|
| 45                                           | 55-59     | Never Any     | 4017  | 50.66 |               |             |               |                |              |
| 45                                           | 55-59     | CC            | 0     | 0.00  | 0             | 0.00        |               |                |              |
| 45                                           | 55-59     | Ecig          | 957   | 12.07 |               |             |               |                |              |
| 45                                           | 55-59     | Dual          | 0     | 0.00  |               |             |               |                |              |
| 45                                           | 55-59     | Former        | 2956  | 37.28 |               |             | 24.74         | 74             | 2.50         |
| Year of Follow-up: 2035, Age Group: 60-64    |           |               |       |       |               |             |               |                |              |
| Period                                       | Age Group | Smoking Group | N     | %     | Ever Quit (N) | Ever Quit % | Mean Yrs Quit | Short Term (n) | Short Term % |
| 45                                           | 60-64     | Never Any     | 4968  | 59.50 |               |             |               |                |              |
| 45                                           | 60-64     | CC            | 0     | 0.00  | 0             | 0.00        |               |                |              |
| 45                                           | 60-64     | Ecig          | 820   | 9.82  |               |             |               |                |              |
| 45                                           | 60-64     | Dual          | 0     | 0.00  |               |             |               |                |              |
| 45                                           | 60-64     | Former        | 2562  | 30.68 |               |             | 24.90         | 85             | 3.32         |
| Year of Follow-up: 2035, Age Group: 65-69    |           |               |       |       |               |             |               |                |              |
| Period                                       | Age Group | Smoking Group | N     | %     | Ever Quit (N) | Ever Quit % | Mean Yrs Quit | Short Term (n) | Short Term % |
| 45                                           | 65-69     | Never Any     | 5137  | 58.42 |               |             |               |                |              |
| 45                                           | 65-69     | CC            | 3     | 0.03  | 0             | 0.00        |               |                |              |
| 45                                           | 65-69     | Ecig          | 710   | 8.07  |               |             |               |                |              |
| 45                                           | 65-69     | Dual          | 0     | 0.00  |               |             |               |                |              |
| 45                                           | 65-69     | Former        | 2943  | 33.47 |               |             | 28.51         | 57             | 1.94         |
| Year of Follow-up: 2035, Age Group: 70-74    |           |               |       |       |               |             |               |                |              |
| Period                                       | Age Group | Smoking Group | N     | %     | Ever Quit (N) | Ever Quit % | Mean Yrs Quit | Short Term (n) | Short Term % |
| 45                                           | 70-74     | Never Any     | 5270  | 52.29 |               |             |               |                |              |
| 45                                           | 70-74     | CC            | 1     | 0.01  | 0             | 0.00        |               |                |              |
| 45                                           | 70-74     | Ecig          | 940   | 9.33  |               |             |               |                |              |
| 45                                           | 70-74     | Dual          | 0     | 0.00  |               |             |               |                |              |
| 45                                           | 70-74     | Former        | 3867  | 38.37 |               |             | 31.36         | 77             | 1.99         |
| Year of Follow-up: 2035, Age Group: 75-79    |           |               |       |       |               |             |               |                |              |
| Period                                       | Age Group | Smoking Group | N     | %     | Ever Quit (N) | Ever Quit % | Mean Yrs Quit | Short Term (n) | Short Term % |
| 45                                           | 75-79     | Never Any     | 5276  | 50.25 |               |             |               |                |              |
| 45                                           | 75-79     | CC            | 1     | 0.01  | 0             | 0.00        |               |                |              |
| 45                                           | 75-79     | Ecig          | 747   | 7.11  |               |             |               |                |              |
| 45                                           | 75-79     | Dual          | 0     | 0.00  |               |             |               |                |              |
| 45                                           | 75-79     | Former        | 4475  | 42.62 |               |             | 33.73         | 79             | 1.77         |
| Year of Follow-up: 2040, Age Group: All Ages |           |               |       |       |               |             |               |                |              |
| Period                                       | Age Group | Smoking Group | N     | %     | Ever Quit (N) | Ever Quit % | Mean Yrs Quit | Short Term (n) | Short Term % |
| 50                                           | All Ages  | Never Any     | 19392 | 55.17 |               |             |               |                |              |
| 50                                           | All Ages  | CC            | 4     | 0.01  | 0             | 0.00        |               |                |              |
| 50                                           | All Ages  | Ecig          | 2724  | 7.75  |               |             |               |                |              |
| 50                                           | All Ages  | Dual          | 0     | 0.00  |               |             |               |                |              |
| 50                                           | All Ages  | Former        | 13031 | 37.07 |               |             | 31.10         | 264            | 2.03         |
| Year of Follow-up: 2040, Age Group: 18-19    |           |               |       |       |               |             |               |                |              |
| Period                                       | Age Group | Smoking Group | N     | %     | Ever Quit (N) | Ever Quit % | Mean Yrs Quit | Short Term (n) | Short Term % |
| 50                                           | 18-19     | Never Any     | 0     | .     |               |             |               |                |              |
| 50                                           | 18-19     | CC            | 0     | .     | 0             | .           |               |                |              |
| 50                                           | 18-19     | Ecig          | 0     | .     |               |             |               |                |              |
| 50                                           | 18-19     | Dual          | 0     | .     |               |             |               |                |              |
| 50                                           | 18-19     | Former        | 0     | .     |               |             | .             | 0              | .            |
| Year of Follow-up: 2040, Age Group: 20-24    |           |               |       |       |               |             |               |                |              |
| Period                                       | Age Group | Smoking Group | N     | %     | Ever Quit (N) | Ever Quit % | Mean Yrs Quit | Short Term (n) | Short Term % |
| 50                                           | 20-24     | Never Any     | 0     | .     |               |             |               |                |              |
| 50                                           | 20-24     | CC            | 0     | .     | 0             | .           |               |                |              |
| 50                                           | 20-24     | Ecig          | 0     | .     |               |             |               |                |              |
| 50                                           | 20-24     | Dual          | 0     | .     |               |             |               |                |              |
| 50                                           | 20-24     | Former        | 0     | .     |               |             | .             | 0              | .            |
| Year of Follow-up: 2040, Age Group: 25-29    |           |               |       |       |               |             |               |                |              |
| Period                                       | Age Group | Smoking Group | N     | %     | Ever Quit (N) | Ever Quit % | Mean Yrs Quit | Short Term (n) | Short Term % |
| 50                                           | 25-29     | Never Any     | 0     | .     |               |             |               |                |              |
| 50                                           | 25-29     | CC            | 0     | .     | 0             | .           |               |                |              |
| 50                                           | 25-29     | Ecig          | 0     | .     |               |             |               |                |              |
| 50                                           | 25-29     | Dual          | 0     | .     |               |             |               |                |              |
| 50                                           | 25-29     | Former        | 0     | .     |               |             | .             | 0              | .            |
| Year of Follow-up: 2040, Age Group: 30-34    |           |               |       |       |               |             |               |                |              |
| Period                                       | Age Group | Smoking Group | N     | %     | Ever Quit (N) | Ever Quit % | Mean Yrs Quit | Short Term (n) | Short Term % |
| 50                                           | 30-34     | Never Any     | 0     | .     |               |             |               |                |              |
| 50                                           | 30-34     | CC            | 0     | .     | 0             | .           |               |                |              |
| 50                                           | 30-34     | Ecig          | 0     | .     |               |             |               |                |              |
| 50                                           | 30-34     | Dual          | 0     | .     |               |             |               |                |              |
| 50                                           | 30-34     | Former        | 0     | .     |               |             | .             | 0              | .            |
| Year of Follow-up: 2040, Age Group: 35-39    |           |               |       |       |               |             |               |                |              |

**Results for PHIM for Run 8 (Sensitivity\_Analysis\_4.RTF)**

| Period                                    | Age Group | Smoking Group | N    | %     | Ever Quit (N) | Ever Quit % | Mean Yrs Quit | Short Term (n) | Short Term % |
|-------------------------------------------|-----------|---------------|------|-------|---------------|-------------|---------------|----------------|--------------|
| 50                                        | 35-39     | Never Any     | 0    | .     |               |             |               |                |              |
| 50                                        | 35-39     | CC            | 0    | .     | 0             | .           |               |                |              |
| 50                                        | 35-39     | Ecig          | 0    | .     |               |             |               |                |              |
| 50                                        | 35-39     | Dual          | 0    | .     |               |             |               |                |              |
| 50                                        | 35-39     | Former        | 0    | .     |               |             | .             | 0              | .            |
| Year of Follow-up: 2040, Age Group: 40-44 |           |               |      |       |               |             |               |                |              |
| Period                                    | Age Group | Smoking Group | N    | %     | Ever Quit (N) | Ever Quit % | Mean Yrs Quit | Short Term (n) | Short Term % |
| 50                                        | 40-44     | Never Any     | 0    | .     |               |             |               |                |              |
| 50                                        | 40-44     | CC            | 0    | .     | 0             | .           |               |                |              |
| 50                                        | 40-44     | Ecig          | 0    | .     |               |             |               |                |              |
| 50                                        | 40-44     | Dual          | 0    | .     |               |             |               |                |              |
| 50                                        | 40-44     | Former        | 0    | .     |               |             | .             | 0              | .            |
| Year of Follow-up: 2040, Age Group: 45-49 |           |               |      |       |               |             |               |                |              |
| Period                                    | Age Group | Smoking Group | N    | %     | Ever Quit (N) | Ever Quit % | Mean Yrs Quit | Short Term (n) | Short Term % |
| 50                                        | 45-49     | Never Any     | 0    | .     |               |             |               |                |              |
| 50                                        | 45-49     | CC            | 0    | .     | 0             | .           |               |                |              |
| 50                                        | 45-49     | Ecig          | 0    | .     |               |             |               |                |              |
| 50                                        | 45-49     | Dual          | 0    | .     |               |             |               |                |              |
| 50                                        | 45-49     | Former        | 0    | .     |               |             | .             | 0              | .            |
| Year of Follow-up: 2040, Age Group: 50-54 |           |               |      |       |               |             |               |                |              |
| Period                                    | Age Group | Smoking Group | N    | %     | Ever Quit (N) | Ever Quit % | Mean Yrs Quit | Short Term (n) | Short Term % |
| 50                                        | 50-54     | Never Any     | 0    | .     |               |             |               |                |              |
| 50                                        | 50-54     | CC            | 0    | .     | 0             | .           |               |                |              |
| 50                                        | 50-54     | Ecig          | 0    | .     |               |             |               |                |              |
| 50                                        | 50-54     | Dual          | 0    | .     |               |             |               |                |              |
| 50                                        | 50-54     | Former        | 0    | .     |               |             | .             | 0              | .            |
| Year of Follow-up: 2040, Age Group: 55-59 |           |               |      |       |               |             |               |                |              |
| Period                                    | Age Group | Smoking Group | N    | %     | Ever Quit (N) | Ever Quit % | Mean Yrs Quit | Short Term (n) | Short Term % |
| 50                                        | 55-59     | Never Any     | 0    | .     |               |             |               |                |              |
| 50                                        | 55-59     | CC            | 0    | .     | 0             | .           |               |                |              |
| 50                                        | 55-59     | Ecig          | 0    | .     |               |             |               |                |              |
| 50                                        | 55-59     | Dual          | 0    | .     |               |             |               |                |              |
| 50                                        | 55-59     | Former        | 0    | .     |               |             | .             | 0              | .            |
| Year of Follow-up: 2040, Age Group: 60-64 |           |               |      |       |               |             |               |                |              |
| Period                                    | Age Group | Smoking Group | N    | %     | Ever Quit (N) | Ever Quit % | Mean Yrs Quit | Short Term (n) | Short Term % |
| 50                                        | 60-64     | Never Any     | 4017 | 50.66 |               |             |               |                |              |
| 50                                        | 60-64     | CC            | 0    | 0.00  | 0             | 0.00        |               |                |              |
| 50                                        | 60-64     | Ecig          | 742  | 9.36  |               |             |               |                |              |
| 50                                        | 60-64     | Dual          | 0    | 0.00  |               |             |               |                |              |
| 50                                        | 60-64     | Former        | 3171 | 39.99 |               |             | 27.86         | 91             | 2.87         |
| Year of Follow-up: 2040, Age Group: 65-69 |           |               |      |       |               |             |               |                |              |
| Period                                    | Age Group | Smoking Group | N    | %     | Ever Quit (N) | Ever Quit % | Mean Yrs Quit | Short Term (n) | Short Term % |
| 50                                        | 65-69     | Never Any     | 4968 | 59.50 |               |             |               |                |              |
| 50                                        | 65-69     | CC            | 0    | 0.00  | 0             | 0.00        |               |                |              |
| 50                                        | 65-69     | Ecig          | 657  | 7.87  |               |             |               |                |              |
| 50                                        | 65-69     | Dual          | 0    | 0.00  |               |             |               |                |              |
| 50                                        | 65-69     | Former        | 2725 | 32.63 |               |             | 28.26         | 46             | 1.69         |
| Year of Follow-up: 2040, Age Group: 70-74 |           |               |      |       |               |             |               |                |              |
| Period                                    | Age Group | Smoking Group | N    | %     | Ever Quit (N) | Ever Quit % | Mean Yrs Quit | Short Term (n) | Short Term % |
| 50                                        | 70-74     | Never Any     | 5137 | 58.42 |               |             |               |                |              |
| 50                                        | 70-74     | CC            | 3    | 0.03  | 0             | 0.00        |               |                |              |
| 50                                        | 70-74     | Ecig          | 598  | 6.80  |               |             |               |                |              |
| 50                                        | 70-74     | Dual          | 0    | 0.00  |               |             |               |                |              |
| 50                                        | 70-74     | Former        | 3055 | 34.74 |               |             | 32.34         | 56             | 1.83         |
| Year of Follow-up: 2040, Age Group: 75-79 |           |               |      |       |               |             |               |                |              |
| Period                                    | Age Group | Smoking Group | N    | %     | Ever Quit (N) | Ever Quit % | Mean Yrs Quit | Short Term (n) | Short Term % |
| 50                                        | 75-79     | Never Any     | 5270 | 52.29 |               |             |               |                |              |
| 50                                        | 75-79     | CC            | 1    | 0.01  | 0             | 0.00        |               |                |              |
| 50                                        | 75-79     | Ecig          | 727  | 7.21  |               |             |               |                |              |
| 50                                        | 75-79     | Dual          | 0    | 0.00  |               |             |               |                |              |
| 50                                        | 75-79     | Former        | 4080 | 40.48 |               |             | 34.58         | 71             | 1.74         |

## Results for PHIM for Run 8 (Sensitivity\_Analysis\_4.RTF)

\*\*\*\*\*

### Main Results for E-Component for Run: 8, Simulation: 1, COD: Four Diseases Combined

| Variable Parameter          | Value                                  |
|-----------------------------|----------------------------------------|
| 1. Country                  | US (United States)                     |
| 2. Sex                      | F (Females)                            |
| 3. Year of start of process | 1990                                   |
| 4. Cause of Death           | Four Diseases Combined                 |
| 5. Effective Dose NULL      | CC:1                                   |
| 6. Effective Dose Ecig      | CC:1 Ecig:0.05 Dual:0.525              |
| Note:                       | Death rates are per million population |

#### Results for Age Groups Combined and Years combined, Population unadjusted for deaths in Ecig scenario,

| Age Group:All |         | NULL        | Ecig        | %Drop    |        | NULL   | Ecig    | Drop    |         |         |
|---------------|---------|-------------|-------------|----------|--------|--------|---------|---------|---------|---------|
| Year          | Number  | Attrib      | Attrib      | Drop     | %Drop  | Attrib | Death   | Attrib  | Attrib  | Drop    |
|               | Deaths  | Deaths      | Deaths      | Deaths   | Deaths | Deaths | Rate    | Rates   | Rates   | Rates   |
| All Comb      | 9082078 | 2946250.006 | 1947774.515 | 998475.5 | 10.994 | 33.890 | 2493.45 | 808.881 | 534.754 | 274.128 |

#### Results for Age Groups Combined, Population unadjusted for deaths in Ecig scenario,

| Age Group:All |        | NULL      | Ecig      | %Drop    |        | NULL   | Ecig    | Drop    |         |         |
|---------------|--------|-----------|-----------|----------|--------|--------|---------|---------|---------|---------|
| Year          | Number | Attrib    | Attrib    | Drop     | %Drop  | Attrib | Death   | Attrib  | Attrib  | Drop    |
|               | Deaths | Deaths    | Deaths    | Deaths   | Deaths | Deaths | Rate    | Rates   | Rates   | Rates   |
| 1990          | 199848 | 57524.822 | 57524.822 | 0.000    | 0.000  | 0.000  | 2926.84 | 842.471 | 842.471 | 0.000   |
| 1991          | 199162 | 59078.486 | 58910.022 | 168.464  | 0.085  | 0.285  | 2877.87 | 853.678 | 851.244 | 2.434   |
| 1992          | 198532 | 60494.150 | 60022.457 | 471.693  | 0.238  | 0.780  | 2829.84 | 862.271 | 855.548 | 6.723   |
| 1993          | 202512 | 62694.848 | 61776.743 | 918.104  | 0.453  | 1.464  | 2845.85 | 881.034 | 868.132 | 12.902  |
| 1994          | 200658 | 63202.598 | 61751.793 | 1450.805 | 0.723  | 2.295  | 2777.87 | 874.966 | 854.881 | 20.085  |
| 1995          | 201023 | 63766.862 | 61670.728 | 2096.134 | 1.043  | 3.287  | 2739.80 | 869.097 | 840.528 | 28.569  |
| 1996          | 201180 | 64591.163 | 61718.492 | 2872.670 | 1.428  | 4.447  | 2706.36 | 868.908 | 830.264 | 38.644  |
| 1997          | 198639 | 64686.912 | 61088.674 | 3598.238 | 1.811  | 5.563  | 2635.18 | 858.147 | 810.412 | 47.735  |
| 1998          | 197573 | 65295.961 | 60857.396 | 4438.565 | 2.247  | 6.798  | 2584.18 | 854.046 | 795.991 | 58.055  |
| 1999          | 211329 | 67327.521 | 61593.299 | 5734.222 | 2.713  | 8.517  | 2726.91 | 868.771 | 794.778 | 73.992  |
| 2000          | 208496 | 67596.897 | 60917.413 | 6679.484 | 3.204  | 9.881  | 2656.96 | 861.419 | 776.300 | 85.120  |
| 2001          | 203606 | 67008.811 | 59329.010 | 7679.801 | 3.772  | 11.461 | 2565.88 | 844.458 | 747.676 | 96.782  |
| 2002          | 200828 | 67067.744 | 58273.382 | 8794.361 | 4.379  | 13.113 | 2506.09 | 836.925 | 727.182 | 109.743 |
| 2003          | 196352 | 66756.217 | 56954.943 | 9801.273 | 4.992  | 14.682 | 2427.31 | 825.244 | 704.080 | 121.164 |
| 2004          | 188160 | 65058.725 | 54405.953 | 10652.77 | 5.662  | 16.374 | 2302.83 | 796.234 | 665.858 | 130.376 |
| 2005          | 186416 | 65214.724 | 53414.306 | 11800.42 | 6.330  | 18.095 | 2256.27 | 789.321 | 646.495 | 142.825 |
| 2006          | 180088 | 63771.146 | 51100.355 | 12670.79 | 7.036  | 19.869 | 2160.67 | 765.117 | 613.095 | 152.022 |
| 2007          | 175644 | 63110.718 | 49546.550 | 13564.17 | 7.723  | 21.493 | 2086.36 | 749.650 | 588.530 | 161.120 |
| 2008          | 177570 | 63718.624 | 48862.813 | 14855.81 | 8.366  | 23.315 | 2086.39 | 748.674 | 574.123 | 174.551 |
| 2009          | 172806 | 62794.698 | 47106.448 | 15688.25 | 9.079  | 24.983 | 2007.57 | 729.515 | 547.257 | 182.258 |
| 2010          | 170489 | 61917.074 | 44354.292 | 16562.78 | 9.715  | 26.750 | 1957.97 | 711.083 | 520.869 | 190.214 |
| 2011          | 170305 | 61680.114 | 43944.734 | 17735.38 | 10.414 | 28.754 | 1937.46 | 701.700 | 499.935 | 201.765 |
| 2012          | 171421 | 62023.127 | 42987.457 | 19035.67 | 11.105 | 30.691 | 1930.22 | 698.386 | 484.043 | 214.343 |
| 2013          | 172699 | 62037.765 | 41831.967 | 20205.80 | 11.700 | 32.570 | 1923.75 | 691.059 | 465.980 | 225.079 |
| 2014          | 174169 | 61921.017 | 40431.536 | 21489.48 | 12.338 | 34.705 | 1918.85 | 682.195 | 445.441 | 236.753 |
| 2015          | 177354 | 61856.204 | 39271.815 | 22584.39 | 12.734 | 36.511 | 2184.51 | 761.899 | 483.721 | 278.178 |
| 2016          | 176853 | 60464.119 | 37003.507 | 23460.61 | 13.266 | 38.801 | 2157.59 | 737.655 | 451.438 | 286.217 |
| 2017          | 179309 | 60243.839 | 35604.500 | 24639.34 | 13.741 | 40.899 | 2166.86 | 728.017 | 430.263 | 297.754 |
| 2018          | 177157 | 60713.327 | 35010.180 | 25703.15 | 14.509 | 42.335 | 2120.51 | 726.721 | 419.062 | 307.659 |
| 2019          | 179227 | 61148.172 | 34079.291 | 27068.88 | 15.103 | 44.268 | 2124.53 | 724.841 | 403.971 | 320.870 |
| 2020          | 180467 | 61149.317 | 33128.990 | 28020.33 | 15.527 | 45.823 | 2424.25 | 821.432 | 445.029 | 376.403 |
| 2021          | 178116 | 58727.786 | 30312.952 | 28414.83 | 15.953 | 48.384 | 2375.42 | 783.216 | 404.265 | 378.951 |
| 2022          | 179408 | 58848.802 | 29282.318 | 29566.48 | 16.480 | 50.241 | 2374.52 | 778.881 | 387.560 | 391.321 |
| 2023          | 180640 | 58816.149 | 28243.435 | 30572.71 | 16.925 | 51.980 | 2372.26 | 772.407 | 370.909 | 401.498 |
| 2024          | 181610 | 58955.232 | 27214.150 | 31741.08 | 17.478 | 53.839 | 2366.77 | 768.316 | 354.660 | 413.656 |
| 2025          | 180418 | 58297.744 | 26056.631 | 32241.11 | 17.870 | 55.304 | 2713.69 | 876.861 | 391.920 | 484.941 |
| 2026          | 180313 | 56469.971 | 24023.016 | 32446.96 | 17.995 | 57.459 | 2701.83 | 846.150 | 359.962 | 486.187 |
| 2027          | 179619 | 56209.427 | 22883.404 | 33326.02 | 18.554 | 59.289 | 2680.68 | 838.883 | 341.517 | 497.366 |
| 2028          | 178762 | 55733.105 | 21692.353 | 34040.75 | 19.042 | 61.078 | 2656.74 | 828.298 | 322.389 | 505.909 |
| 2029          | 177808 | 55145.838 | 20486.359 | 34659.48 | 19.493 | 62.851 | 2630.89 | 815.951 | 303.121 | 512.830 |
| 2030          | 173587 | 53615.097 | 19232.541 | 34382.56 | 19.807 | 64.128 | 3040.33 | 939.056 | 336.853 | 602.202 |
| 2031          | 174985 | 52046.561 | 18016.413 | 34030.15 | 19.447 | 65.384 | 3060.73 | 910.364 | 315.131 | 595.233 |
| 2032          | 173400 | 51582.636 | 17036.961 | 34545.68 | 19.923 | 66.972 | 3027.10 | 900.496 | 297.420 | 603.076 |
| 2033          | 171756 | 50839.758 | 16048.833 | 34790.93 | 20.256 | 68.433 | 2991.14 | 885.375 | 279.490 | 605.884 |
| 2034          | 169973 | 50215.451 | 15091.298 | 35124.15 | 20.665 | 69.947 | 2951.96 | 872.104 | 262.094 | 610.010 |
| 2035          | 162644 | 47773.075 | 13955.101 | 33817.97 | 20.793 | 70.789 | 3459.14 | 1016.05 | 296.799 | 719.246 |
| 2036          | 156254 | 43298.709 | 11980.250 | 31318.46 | 20.043 | 72.331 | 3328.25 | 922.274 | 255.183 | 667.092 |
| 2037          | 153593 | 42241.563 | 11031.975 | 31209.59 | 20.320 | 73.884 | 3274.10 | 900.450 | 235.165 | 665.285 |
| 2038          | 150947 | 41356.353 | 10278.428 | 31077.92 | 20.589 | 75.147 | 3217.50 | 881.531 | 219.090 | 662.441 |
| 2039          | 148373 | 40161.050 | 9434.228  | 30726.82 | 20.709 | 76.509 | 3159.42 | 855.178 | 200.890 | 654.288 |

## Results for PHIM for Run 8 (Sensitivity\_Analysis\_4.RTF)

\*\*\*\*\*

### Main Results for E-Component for Run: 8, Simulation: 1, COD: LUNG CANCER

| Variable Parameter          | Value                                  |
|-----------------------------|----------------------------------------|
| 1. Country                  | US (United States)                     |
| 2. Sex                      | F (Females)                            |
| 3. Year of start of process | 1990                                   |
| 4. Cause of Death           | LUNG CANCER                            |
| 5. Effective Dose NULL      | CC:1                                   |
| 6. Effective Dose Ecig      | CC:1 Ecig:0.05 Dual:0.525              |
| Note:                       | Death rates are per million population |

#### Results for Age Groups Combined and Years combined, Population unadjusted for deaths in Ecig scenario,

| Age Group:All | NULL    | Ecig        | %Drop       |          |        | NULL   | Ecig    | Drop    |         |         |
|---------------|---------|-------------|-------------|----------|--------|--------|---------|---------|---------|---------|
| Year          | Number  | Attrib      | Attrib      | Drop     | %Drop  | Attrib | Death   | Attrib  | Drop    |         |
|               | Deaths  | Deaths      | Deaths      | Deaths   | Deaths | Deaths | Rate    | Rates   | Rates   |         |
| All Comb      | 2327764 | 1580465.217 | 1144421.951 | 436043.3 | 18.732 | 27.590 | 639.078 | 433.910 | 314.197 | 119.714 |

#### Results for Age Groups Combined, Population unadjusted for deaths in Ecig scenario,

| Age Group:All | NULL   | Ecig      | %Drop     |          |        | NULL   | Ecig    | Drop    |         |
|---------------|--------|-----------|-----------|----------|--------|--------|---------|---------|---------|
| Year          | Number | Attrib    | Attrib    | Drop     | %Drop  | Attrib | Death   | Attrib  | Drop    |
|               | Deaths | Deaths    | Deaths    | Deaths   | Deaths | Deaths | Rate    | Rates   | Rates   |
| 1990          | 42690  | 30614.201 | 30614.201 | 0.000    | 0.000  | 0.000  | 625.210 | 448.355 | 0.000   |
| 1991          | 43692  | 31412.010 | 31379.684 | 32.326   | 0.074  | 0.103  | 631.345 | 453.901 | 0.467   |
| 1992          | 45423  | 32782.407 | 32688.427 | 93.980   | 0.207  | 0.287  | 647.450 | 467.274 | 1.340   |
| 1993          | 46291  | 33491.183 | 33305.337 | 185.847  | 0.401  | 0.555  | 650.515 | 470.643 | 2.612   |
| 1994          | 47017  | 34074.347 | 33772.925 | 301.423  | 0.641  | 0.885  | 650.895 | 471.719 | 4.173   |
| 1995          | 47840  | 34694.454 | 34239.734 | 454.721  | 0.951  | 1.311  | 652.025 | 472.861 | 6.198   |
| 1996          | 48244  | 35027.269 | 34397.691 | 629.577  | 1.305  | 1.797  | 648.999 | 471.202 | 8.469   |
| 1997          | 49035  | 35590.763 | 34752.675 | 838.088  | 1.709  | 2.355  | 650.506 | 472.153 | 11.118  |
| 1998          | 49686  | 36100.785 | 35016.174 | 1084.610 | 2.183  | 3.004  | 649.874 | 472.184 | 14.186  |
| 1999          | 48883  | 35451.030 | 34143.626 | 1307.403 | 2.675  | 3.688  | 630.769 | 457.448 | 16.870  |
| 2000          | 50331  | 36447.986 | 34810.968 | 1637.018 | 3.253  | 4.491  | 641.392 | 464.474 | 20.861  |
| 2001          | 50389  | 36411.326 | 34439.893 | 1971.433 | 3.912  | 5.414  | 635.012 | 458.863 | 24.844  |
| 2002          | 51445  | 37078.545 | 34691.644 | 2386.901 | 4.640  | 6.437  | 641.972 | 462.696 | 29.786  |
| 2003          | 51408  | 36999.876 | 34216.074 | 2783.802 | 5.415  | 7.524  | 635.509 | 457.395 | 34.414  |
| 2004          | 51399  | 36861.555 | 33637.513 | 3224.042 | 6.273  | 8.746  | 629.057 | 451.138 | 39.458  |
| 2005          | 51421  | 36689.529 | 32999.674 | 3689.855 | 7.176  | 10.057 | 622.370 | 444.069 | 44.660  |
| 2006          | 51355  | 36504.774 | 32325.558 | 4179.216 | 8.138  | 11.448 | 616.150 | 437.979 | 50.142  |
| 2007          | 51839  | 36663.202 | 31901.427 | 4761.775 | 9.186  | 12.988 | 615.761 | 435.498 | 56.562  |
| 2008          | 50976  | 35898.803 | 30698.957 | 5199.846 | 10.201 | 14.485 | 598.952 | 421.800 | 61.097  |
| 2009          | 51193  | 35934.525 | 30109.321 | 5825.205 | 11.379 | 16.211 | 594.733 | 417.468 | 67.674  |
| 2010          | 50853  | 35502.829 | 29164.752 | 6338.077 | 12.464 | 17.852 | 584.018 | 407.730 | 72.789  |
| 2011          | 50509  | 35136.342 | 28201.718 | 6934.624 | 13.729 | 19.736 | 574.613 | 399.726 | 78.891  |
| 2012          | 51245  | 35450.201 | 27773.797 | 7676.404 | 14.980 | 21.654 | 577.023 | 399.173 | 86.437  |
| 2013          | 51069  | 35123.224 | 26796.443 | 8326.781 | 16.305 | 23.707 | 568.874 | 391.249 | 92.755  |
| 2014          | 51251  | 35079.370 | 26056.145 | 9023.224 | 17.606 | 25.722 | 564.641 | 386.476 | 99.410  |
| 2015          | 50443  | 34324.171 | 24845.833 | 9478.338 | 18.790 | 27.614 | 621.319 | 422.780 | 116.747 |
| 2016          | 48854  | 33054.753 | 23180.759 | 9873.994 | 20.211 | 29.872 | 596.013 | 403.264 | 120.462 |
| 2017          | 48325  | 32471.234 | 22026.719 | 10444.52 | 21.613 | 32.165 | 583.983 | 392.399 | 126.217 |
| 2018          | 50465  | 33657.595 | 21994.028 | 11663.57 | 23.112 | 34.654 | 604.052 | 402.871 | 139.609 |
| 2019          | 51036  | 33863.424 | 21333.852 | 12529.57 | 24.550 | 37.000 | 604.975 | 401.412 | 148.524 |
| 2020          | 51444  | 33910.830 | 20659.382 | 13251.45 | 25.759 | 39.077 | 691.053 | 455.532 | 178.010 |
| 2021          | 48037  | 31531.880 | 18434.748 | 13097.13 | 27.265 | 41.536 | 640.639 | 420.521 | 174.668 |
| 2022          | 48335  | 31560.212 | 17709.151 | 13851.06 | 28.656 | 43.888 | 639.727 | 417.708 | 183.323 |
| 2023          | 48599  | 31508.781 | 16975.006 | 14533.78 | 29.906 | 46.126 | 638.227 | 413.791 | 190.866 |
| 2024          | 48784  | 31517.293 | 16239.091 | 15278.20 | 31.318 | 48.476 | 635.757 | 410.740 | 199.109 |
| 2025          | 48477  | 31175.389 | 15435.831 | 15739.56 | 32.468 | 50.487 | 729.141 | 468.912 | 236.740 |
| 2026          | 45324  | 29044.598 | 13740.972 | 15303.63 | 33.765 | 52.690 | 679.138 | 435.206 | 229.311 |
| 2027          | 45107  | 28825.765 | 12983.096 | 15842.67 | 35.122 | 54.960 | 673.191 | 430.203 | 236.440 |
| 2028          | 44842  | 28513.846 | 12211.574 | 16302.27 | 36.355 | 57.173 | 666.430 | 423.769 | 242.282 |
| 2029          | 44539  | 28148.109 | 11436.286 | 16711.82 | 37.522 | 59.371 | 659.013 | 416.486 | 247.272 |
| 2030          | 43393  | 27314.475 | 10633.265 | 16681.21 | 38.442 | 61.071 | 760.018 | 478.407 | 292.167 |
| 2031          | 40748  | 25423.102 | 9556.042  | 15867.06 | 38.940 | 62.412 | 712.731 | 444.684 | 277.536 |
| 2032          | 40325  | 25085.902 | 8945.947  | 16139.95 | 40.025 | 64.339 | 703.969 | 437.933 | 281.761 |
| 2033          | 39882  | 24645.067 | 8351.981  | 16293.09 | 40.853 | 66.111 | 694.543 | 429.194 | 283.744 |
| 2034          | 39404  | 24239.126 | 7781.737  | 16457.39 | 41.765 | 67.896 | 684.347 | 420.967 | 285.819 |
| 2035          | 37454  | 22944.147 | 7098.450  | 15845.70 | 42.307 | 69.062 | 796.588 | 487.980 | 337.009 |
| 2036          | 32988  | 19950.581 | 5857.308  | 14093.27 | 42.722 | 70.641 | 702.663 | 424.953 | 300.191 |
| 2037          | 32403  | 19415.334 | 5356.234  | 14059.10 | 43.388 | 72.412 | 690.731 | 413.871 | 299.694 |
| 2038          | 31820  | 18939.317 | 4964.184  | 13975.13 | 43.919 | 73.789 | 678.257 | 403.701 | 297.887 |
| 2039          | 31251  | 18379.752 | 4536.120  | 13843.63 | 44.298 | 75.320 | 665.457 | 391.373 | 294.782 |

## Results for PHIM for Run 8 (Sensitivity\_Analysis\_4.RTF)

\*\*\*\*\*

### Main Results for E-Component for Run: 8, Simulation: 1, COD: IHD

| Variable Parameter          | Value                                  |
|-----------------------------|----------------------------------------|
| 1. Country                  | US (United States)                     |
| 2. Sex                      | F (Females)                            |
| 3. Year of start of process | 1990                                   |
| 4. Cause of Death           | IHD                                    |
| 5. Effective Dose NULL      | CC:1                                   |
| 6. Effective Dose Ecig      | CC:1 Ecig:0.05 Dual:0.525              |
| Note:                       | Death rates are per million population |

#### Results for Age Groups Combined and Years combined, Population unadjusted for deaths in Ecig scenario,

| Age Group:All |         | NULL       | Ecig       | %Drop    |        | NULL   | Ecig    | Drop    |        |        |
|---------------|---------|------------|------------|----------|--------|--------|---------|---------|--------|--------|
| Year          | Number  | Attrib     | Attrib     | Drop     | %Drop  | Attrib | Death   | Attrib  | Attrib | Drop   |
|               | Deaths  | Deaths     | Deaths     | Deaths   | Deaths | Deaths | Rate    | Rates   | Rates  | Rates  |
| All Comb      | 3242167 | 398833.796 | 199834.065 | 198999.7 | 6.138  | 49.895 | 890.124 | 109.498 | 54.864 | 54.635 |

#### Results for Age Groups Combined, Population unadjusted for deaths in Ecig scenario,

| Age Group:All |        | NULL      | Ecig      | %Drop    |        | NULL   | Ecig    | Drop    |         |        |
|---------------|--------|-----------|-----------|----------|--------|--------|---------|---------|---------|--------|
| Year          | Number | Attrib    | Attrib    | Drop     | %Drop  | Attrib | Death   | Attrib  | Attrib  | Drop   |
|               | Deaths | Deaths    | Deaths    | Deaths   | Deaths | Deaths | Rate    | Rates   | Rates   | Rates  |
| 1990          | 98916  | 12922.892 | 12922.892 | 0.000    | 0.000  | 0.000  | 1448.66 | 189.260 | 189.260 | 0.000  |
| 1991          | 96403  | 12856.479 | 12766.075 | 90.404   | 0.094  | 0.703  | 1393.01 | 185.775 | 184.469 | 1.306  |
| 1992          | 93721  | 12662.244 | 12411.647 | 250.596  | 0.267  | 1.979  | 1335.88 | 180.485 | 176.913 | 3.572  |
| 1993          | 93679  | 12730.613 | 12252.272 | 478.341  | 0.511  | 3.757  | 1316.45 | 178.900 | 172.178 | 6.722  |
| 1994          | 90832  | 12495.323 | 11750.265 | 745.058  | 0.820  | 5.963  | 1257.46 | 172.983 | 162.669 | 10.314 |
| 1995          | 89698  | 12365.590 | 11312.567 | 1053.023 | 1.174  | 8.516  | 1222.52 | 168.534 | 154.182 | 14.352 |
| 1996          | 88286  | 12290.551 | 10854.614 | 1435.937 | 1.626  | 11.683 | 1187.66 | 165.338 | 146.021 | 19.317 |
| 1997          | 84777  | 11719.531 | 9989.913  | 1729.619 | 2.040  | 14.758 | 1124.67 | 155.473 | 132.528 | 22.945 |
| 1998          | 82517  | 11416.794 | 9346.086  | 2070.708 | 2.509  | 18.137 | 1079.29 | 149.327 | 122.243 | 27.084 |
| 1999          | 93939  | 13028.038 | 10177.193 | 2850.845 | 3.035  | 21.882 | 1212.16 | 168.109 | 131.323 | 36.786 |
| 2000          | 90039  | 12426.299 | 9243.243  | 3183.056 | 3.535  | 25.615 | 1147.41 | 158.354 | 117.791 | 40.563 |
| 2001          | 86119  | 11939.281 | 8351.671  | 3587.610 | 4.166  | 30.049 | 1085.29 | 150.461 | 105.249 | 45.212 |
| 2002          | 83014  | 11528.794 | 7547.703  | 3981.091 | 4.796  | 34.532 | 1035.91 | 143.865 | 94.186  | 49.679 |
| 2003          | 79302  | 11048.407 | 6769.856  | 4278.551 | 5.395  | 38.726 | 980.336 | 136.581 | 83.689  | 52.892 |
| 2004          | 73861  | 10375.132 | 5895.745  | 4479.387 | 6.065  | 43.174 | 903.963 | 126.978 | 72.156  | 54.822 |
| 2005          | 71649  | 10051.029 | 5298.319  | 4752.710 | 6.633  | 47.286 | 867.197 | 121.652 | 64.128  | 57.524 |
| 2006          | 67551  | 9542.523  | 4615.221  | 4927.302 | 7.294  | 51.635 | 810.467 | 114.490 | 55.373  | 59.117 |
| 2007          | 63503  | 8936.533  | 3973.982  | 4962.551 | 7.815  | 55.531 | 754.310 | 106.151 | 47.204  | 58.947 |
| 2008          | 63171  | 8944.180  | 3648.389  | 5295.791 | 8.383  | 59.209 | 742.239 | 105.091 | 42.867  | 62.224 |
| 2009          | 59747  | 8390.033  | 3159.575  | 5230.458 | 8.754  | 62.341 | 694.108 | 97.471  | 36.706  | 60.765 |
| 2010          | 58008  | 8157.570  | 2820.389  | 5337.181 | 9.201  | 65.426 | 666.189 | 93.685  | 32.391  | 61.295 |
| 2011          | 57368  | 8035.356  | 2530.007  | 5505.349 | 9.597  | 68.514 | 652.644 | 91.414  | 28.782  | 62.631 |
| 2012          | 57411  | 7970.766  | 2275.764  | 5695.002 | 9.920  | 71.449 | 646.453 | 89.752  | 25.625  | 64.126 |
| 2013          | 57067  | 7743.216  | 2032.551  | 5710.665 | 10.007 | 73.751 | 635.688 | 86.254  | 22.641  | 63.613 |
| 2014          | 57538  | 7774.935  | 1856.007  | 5918.929 | 10.287 | 76.128 | 633.906 | 85.658  | 20.448  | 65.210 |
| 2015          | 58395  | 7722.535  | 1711.116  | 6011.418 | 10.294 | 77.843 | 719.266 | 95.120  | 21.076  | 74.044 |
| 2016          | 58658  | 7600.353  | 1533.162  | 6067.191 | 10.343 | 79.828 | 715.621 | 92.723  | 18.704  | 74.019 |
| 2017          | 59004  | 7470.266  | 1380.755  | 6089.511 | 10.321 | 81.517 | 713.034 | 90.274  | 16.686  | 73.589 |
| 2018          | 56077  | 6907.050  | 1170.012  | 5737.038 | 10.231 | 83.061 | 671.224 | 82.675  | 14.005  | 68.671 |
| 2019          | 55886  | 6732.046  | 1052.807  | 5679.240 | 10.162 | 84.361 | 662.462 | 79.801  | 12.480  | 67.321 |
| 2020          | 55313  | 6429.836  | 940.008   | 5489.828 | 9.925  | 85.381 | 743.037 | 86.373  | 12.627  | 73.746 |
| 2021          | 56292  | 6562.016  | 869.608   | 5692.408 | 10.112 | 86.748 | 750.730 | 87.513  | 11.597  | 75.916 |
| 2022          | 55827  | 6352.366  | 783.245   | 5569.120 | 9.976  | 87.670 | 738.885 | 84.075  | 10.366  | 73.709 |
| 2023          | 55338  | 6134.123  | 711.071   | 5423.052 | 9.800  | 88.408 | 726.728 | 80.557  | 9.338   | 71.219 |
| 2024          | 54770  | 5922.193  | 644.113   | 5278.079 | 9.637  | 89.124 | 713.771 | 77.179  | 8.394   | 68.785 |
| 2025          | 53295  | 5504.188  | 569.722   | 4934.466 | 9.259  | 89.649 | 801.612 | 82.789  | 8.569   | 74.220 |
| 2026          | 55278  | 5641.075  | 549.984   | 5091.092 | 9.210  | 90.250 | 828.283 | 84.526  | 8.241   | 76.285 |
| 2027          | 54199  | 5426.216  | 503.973   | 4922.242 | 9.082  | 90.712 | 808.875 | 80.982  | 7.521   | 73.461 |
| 2028          | 53090  | 5197.830  | 460.398   | 4737.432 | 8.923  | 91.142 | 789.020 | 77.249  | 6.842   | 70.407 |
| 2029          | 51974  | 4973.547  | 423.049   | 4550.498 | 8.755  | 91.494 | 769.023 | 73.590  | 6.260   | 67.330 |
| 2030          | 49479  | 4450.618  | 363.004   | 4087.614 | 8.261  | 91.844 | 866.605 | 77.952  | 6.358   | 71.594 |
| 2031          | 51987  | 4555.052  | 361.860   | 4193.193 | 8.066  | 92.056 | 909.317 | 79.674  | 6.329   | 73.345 |
| 2032          | 50677  | 4349.999  | 334.397   | 4015.602 | 7.924  | 92.313 | 884.689 | 75.939  | 5.838   | 70.102 |
| 2033          | 49380  | 4147.948  | 313.268   | 3834.681 | 7.766  | 92.448 | 859.955 | 72.237  | 5.456   | 66.781 |
| 2034          | 48076  | 3966.133  | 293.556   | 3672.577 | 7.639  | 92.598 | 834.943 | 68.881  | 5.098   | 63.783 |
| 2035          | 44518  | 3289.064  | 233.821   | 3055.243 | 6.863  | 92.891 | 946.825 | 69.952  | 4.973   | 64.979 |
| 2036          | 46347  | 3313.192  | 229.839   | 3083.353 | 6.653  | 93.063 | 987.211 | 70.572  | 4.896   | 65.676 |
| 2037          | 44841  | 3117.951  | 212.509   | 2905.442 | 6.479  | 93.184 | 955.859 | 66.464  | 4.530   | 61.934 |
| 2038          | 43378  | 2949.775  | 199.670   | 2750.104 | 6.340  | 93.231 | 924.621 | 62.876  | 4.256   | 58.620 |
| 2039          | 41973  | 2766.312  | 187.170   | 2579.142 | 6.145  | 93.234 | 893.753 | 58.905  | 3.986   | 54.919 |

## Results for PHIM for Run 8 (Sensitivity\_Analysis\_4.RTF)

\*\*\*\*\*

### Main Results for E-Component for Run: 8, Simulation: 1, COD: STROKE

| Variable Parameter          | Value                                  |
|-----------------------------|----------------------------------------|
| 1. Country                  | US (United States)                     |
| 2. Sex                      | F (Females)                            |
| 3. Year of start of process | 1990                                   |
| 4. Cause of Death           | STROKE                                 |
| 5. Effective Dose NULL      | CC:1                                   |
| 6. Effective Dose Ecig      | CC:1 Ecig:0.05 Dual:0.525              |
| Note:                       | Death rates are per million population |

#### Results for Age Groups Combined and Years combined, Population unadjusted for deaths in Ecig scenario,

| Age Group:All | NULL    | Ecig       | %Drop     |          |        |        | NULL    | Ecig   | Drop   |        |
|---------------|---------|------------|-----------|----------|--------|--------|---------|--------|--------|--------|
| Year          | Number  | Attrib     | Attrib    | Drop     | %Drop  | Attrib | Death   | Attrib | Attrib | Drop   |
|               | Deaths  | Deaths     | Deaths    | Deaths   | Deaths | Deaths | Rate    | Rates  | Rates  | Rates  |
| All Comb      | 1352207 | 104899.750 | 51485.715 | 53414.04 | 3.950  | 50.919 | 371.243 | 28.800 | 14.135 | 14.665 |

#### Results for Age Groups Combined, Population unadjusted for deaths in Ecig scenario,

| Age Group:All | NULL   | Ecig     | %Drop    |          |        |        | NULL    | Ecig   | Drop   |        |
|---------------|--------|----------|----------|----------|--------|--------|---------|--------|--------|--------|
| Year          | Number | Attrib   | Attrib   | Drop     | %Drop  | Attrib | Death   | Attrib | Attrib | Drop   |
|               | Deaths | Deaths   | Deaths   | Deaths   | Deaths | Deaths | Rate    | Rates  | Rates  | Rates  |
| 1990          | 33504  | 3293.017 | 3293.017 | 0.000    | 0.000  | 0.000  | 490.678 | 48.227 | 48.227 | 0.000  |
| 1991          | 32505  | 3207.063 | 3179.557 | 27.506   | 0.085  | 0.858  | 469.694 | 46.342 | 45.944 | 0.397  |
| 1992          | 32560  | 3218.125 | 3141.226 | 76.899   | 0.236  | 2.390  | 464.104 | 45.871 | 44.774 | 1.096  |
| 1993          | 32768  | 3226.680 | 3081.072 | 145.608  | 0.444  | 4.513  | 460.480 | 45.344 | 43.297 | 2.046  |
| 1994          | 33005  | 3277.266 | 3045.069 | 232.197  | 0.704  | 7.085  | 456.915 | 45.370 | 42.155 | 3.214  |
| 1995          | 33730  | 3309.378 | 2976.642 | 332.736  | 0.986  | 10.054 | 459.716 | 45.104 | 40.570 | 4.535  |
| 1996          | 33750  | 3312.987 | 2863.121 | 449.866  | 1.333  | 13.579 | 454.019 | 44.568 | 38.516 | 6.052  |
| 1997          | 33699  | 3267.066 | 2703.744 | 563.322  | 1.672  | 17.242 | 447.056 | 43.341 | 35.868 | 7.473  |
| 1998          | 33274  | 3178.725 | 2507.151 | 671.574  | 2.018  | 21.127 | 435.211 | 41.577 | 32.793 | 8.784  |
| 1999          | 33891  | 3120.351 | 2338.563 | 781.789  | 2.307  | 25.055 | 437.317 | 40.264 | 30.176 | 10.088 |
| 2000          | 33827  | 3142.808 | 2228.443 | 914.365  | 2.703  | 29.094 | 431.074 | 40.050 | 28.398 | 11.652 |
| 2001          | 32506  | 2961.588 | 1979.796 | 981.793  | 3.020  | 33.151 | 409.647 | 37.323 | 24.950 | 12.373 |
| 2002          | 32078  | 2940.627 | 1836.990 | 1103.638 | 3.440  | 37.531 | 400.295 | 36.695 | 22.923 | 13.772 |
| 2003          | 30568  | 2819.545 | 1644.562 | 1174.983 | 3.844  | 41.673 | 377.883 | 34.855 | 20.330 | 14.525 |
| 2004          | 29388  | 2730.466 | 1479.519 | 1250.947 | 4.257  | 45.814 | 359.671 | 33.417 | 18.107 | 15.310 |
| 2005          | 27954  | 2670.510 | 1342.597 | 1327.914 | 4.750  | 49.725 | 338.339 | 32.322 | 16.250 | 16.072 |
| 2006          | 27201  | 2623.285 | 1221.264 | 1402.021 | 5.154  | 53.445 | 326.354 | 31.474 | 14.653 | 16.821 |
| 2007          | 26302  | 2536.599 | 1089.637 | 1446.962 | 5.501  | 57.043 | 312.424 | 30.131 | 12.943 | 17.187 |
| 2008          | 25998  | 2469.443 | 981.038  | 1488.406 | 5.725  | 60.273 | 305.468 | 29.015 | 11.527 | 17.488 |
| 2009          | 25040  | 2386.945 | 874.448  | 1512.497 | 6.040  | 63.365 | 290.901 | 27.730 | 10.159 | 17.571 |
| 2010          | 24840  | 2329.274 | 787.017  | 1542.257 | 6.209  | 66.212 | 285.273 | 26.750 | 9.038  | 17.712 |
| 2011          | 24792  | 2286.581 | 707.753  | 1578.828 | 6.368  | 69.048 | 282.045 | 26.013 | 8.052  | 17.961 |
| 2012          | 24500  | 2243.311 | 635.794  | 1607.517 | 6.561  | 71.658 | 275.872 | 25.260 | 7.159  | 18.101 |
| 2013          | 24451  | 2176.503 | 565.278  | 1611.225 | 6.590  | 74.028 | 272.368 | 24.245 | 6.297  | 17.948 |
| 2014          | 25296  | 2211.619 | 527.426  | 1684.193 | 6.658  | 76.152 | 278.691 | 24.366 | 5.811  | 18.555 |
| 2015          | 26316  | 2237.016 | 495.244  | 1741.771 | 6.619  | 77.861 | 324.141 | 27.554 | 6.100  | 21.454 |
| 2016          | 26735  | 2229.057 | 455.246  | 1773.812 | 6.635  | 79.577 | 326.164 | 27.194 | 5.554  | 21.640 |
| 2017          | 27616  | 2221.649 | 419.671  | 1801.978 | 6.525  | 81.110 | 333.726 | 26.848 | 5.072  | 21.776 |
| 2018          | 25256  | 1939.420 | 340.815  | 1598.605 | 6.330  | 82.427 | 302.304 | 23.214 | 4.079  | 19.135 |
| 2019          | 25429  | 1904.400 | 308.909  | 1595.490 | 6.274  | 83.779 | 301.434 | 22.574 | 3.662  | 18.913 |
| 2020          | 25379  | 1806.054 | 273.663  | 1532.391 | 6.038  | 84.847 | 340.922 | 24.261 | 3.676  | 20.585 |
| 2021          | 25448  | 1748.172 | 245.679  | 1502.493 | 5.904  | 85.946 | 339.386 | 23.314 | 3.276  | 20.038 |
| 2022          | 25539  | 1701.148 | 222.987  | 1478.161 | 5.788  | 86.892 | 338.015 | 22.515 | 2.951  | 19.564 |
| 2023          | 25620  | 1652.087 | 203.687  | 1448.400 | 5.653  | 87.671 | 336.461 | 21.696 | 2.675  | 19.021 |
| 2024          | 25659  | 1597.127 | 184.662  | 1412.464 | 5.505  | 88.438 | 334.391 | 20.814 | 2.407  | 18.408 |
| 2025          | 25260  | 1467.622 | 160.778  | 1306.844 | 5.174  | 89.045 | 379.931 | 22.075 | 2.418  | 19.656 |
| 2026          | 25480  | 1390.505 | 144.638  | 1245.868 | 4.890  | 89.598 | 381.790 | 20.835 | 2.167  | 18.668 |
| 2027          | 25264  | 1342.095 | 132.434  | 1209.662 | 4.788  | 90.132 | 377.042 | 20.030 | 1.976  | 18.053 |
| 2028          | 25022  | 1289.536 | 121.523  | 1168.013 | 4.668  | 90.576 | 371.870 | 19.165 | 1.806  | 17.359 |
| 2029          | 24767  | 1242.216 | 111.957  | 1130.259 | 4.564  | 90.987 | 366.459 | 18.380 | 1.657  | 16.724 |
| 2030          | 23959  | 1096.803 | 94.126   | 1002.678 | 4.185  | 91.418 | 419.641 | 19.210 | 1.649  | 17.562 |
| 2031          | 23963  | 1019.991 | 84.863   | 935.128  | 3.902  | 91.680 | 419.142 | 17.841 | 1.484  | 16.357 |
| 2032          | 23615  | 977.406  | 78.483   | 898.923  | 3.807  | 91.970 | 412.259 | 17.063 | 1.370  | 15.693 |
| 2033          | 23259  | 937.450  | 73.722   | 863.727  | 3.714  | 92.136 | 405.051 | 16.326 | 1.284  | 15.042 |
| 2034          | 22879  | 900.763  | 69.171   | 831.592  | 3.635  | 92.321 | 397.339 | 15.644 | 1.201  | 14.442 |
| 2035          | 21733  | 745.023  | 55.032   | 689.992  | 3.175  | 92.613 | 462.224 | 15.845 | 1.170  | 14.675 |
| 2036          | 20904  | 680.360  | 48.809   | 631.550  | 3.021  | 92.826 | 445.263 | 14.492 | 1.040  | 13.452 |
| 2037          | 20397  | 644.109  | 45.553   | 598.557  | 2.935  | 92.928 | 434.791 | 13.730 | 0.971  | 12.759 |
| 2038          | 19890  | 612.448  | 42.937   | 569.511  | 2.863  | 92.989 | 423.966 | 13.055 | 0.915  | 12.139 |
| 2039          | 19392  | 577.529  | 40.404   | 537.126  | 2.770  | 93.004 | 412.930 | 12.298 | 0.860  | 11.437 |

## Results for PHIM for Run 8 (Sensitivity\_Analysis\_4.RTF)

\*\*\*\*\*

### Main Results for E-Component for Run: 8, Simulation: 1, COD: COPD

| Variable Parameter          | Value                                  |
|-----------------------------|----------------------------------------|
| 1. Country                  | US (United States)                     |
| 2. Sex                      | F (Females)                            |
| 3. Year of start of process | 1990                                   |
| 4. Cause of Death           | COPD                                   |
| 5. Effective Dose NULL      | CC:1                                   |
| 6. Effective Dose Ecig      | CC:1 Ecig:0.05 Dual:0.525              |
| Note:                       | Death rates are per million population |

#### Results for Age Groups Combined and Years combined, Population unadjusted for deaths in Ecig scenario,

| Age Group:All |         | NULL       | Ecig       | %Drop    |        | NULL   | Ecig    | Drop    |         |        |
|---------------|---------|------------|------------|----------|--------|--------|---------|---------|---------|--------|
| Year          | Number  | Attrib     | Attrib     | Drop     | %Drop  | Attrib | Death   | Attrib  | Attrib  | Drop   |
|               | Deaths  | Deaths     | Deaths     | Deaths   | Deaths | Deaths | Rate    | Rates   | Rates   | Rates  |
| All Comb      | 2159941 | 862051.244 | 552032.784 | 310018.5 | 14.353 | 35.963 | 593.003 | 236.673 | 151.558 | 85.114 |

#### Results for Age Groups Combined, Population unadjusted for deaths in Ecig scenario,

| Age Group:All |        | NULL      | Ecig      | %Drop    |        | NULL   | Ecig    | Drop    |         |         |
|---------------|--------|-----------|-----------|----------|--------|--------|---------|---------|---------|---------|
| Year          | Number | Attrib    | Attrib    | Drop     | %Drop  | Attrib | Death   | Attrib  | Attrib  | Drop    |
|               | Deaths | Deaths    | Deaths    | Deaths   | Deaths | Deaths | Rate    | Rates   | Rates   | Rates   |
| 1990          | 24738  | 10694.712 | 10694.712 | 0.000    | 0.000  | 0.000  | 362.296 | 156.628 | 156.628 | 0.000   |
| 1991          | 26562  | 11602.933 | 11584.706 | 18.227   | 0.069  | 0.157  | 383.818 | 167.661 | 167.398 | 0.263   |
| 1992          | 26828  | 11831.375 | 11781.157 | 50.218   | 0.187  | 0.424  | 382.401 | 168.642 | 167.926 | 0.716   |
| 1993          | 29774  | 13246.371 | 13138.062 | 108.309  | 0.364  | 0.818  | 418.406 | 186.148 | 184.626 | 1.522   |
| 1994          | 29804  | 13355.662 | 13183.535 | 172.127  | 0.578  | 1.289  | 412.601 | 184.893 | 182.511 | 2.383   |
| 1995          | 29755  | 13397.439 | 13141.786 | 255.654  | 0.859  | 1.908  | 405.540 | 182.598 | 179.113 | 3.484   |
| 1996          | 30900  | 13960.356 | 13603.066 | 357.290  | 1.156  | 2.559  | 415.680 | 187.801 | 182.994 | 4.806   |
| 1997          | 31128  | 14109.552 | 13642.344 | 467.209  | 1.501  | 3.311  | 412.949 | 187.180 | 180.982 | 6.198   |
| 1998          | 32096  | 14599.657 | 13987.985 | 611.673  | 1.906  | 4.190  | 419.803 | 190.958 | 182.957 | 8.000   |
| 1999          | 34616  | 15728.102 | 14933.917 | 794.185  | 2.294  | 5.049  | 446.673 | 202.950 | 192.702 | 10.248  |
| 2000          | 34299  | 15579.803 | 14634.759 | 945.045  | 2.755  | 6.066  | 437.088 | 198.541 | 186.498 | 12.043  |
| 2001          | 34592  | 15696.614 | 14557.650 | 1138.965 | 3.293  | 7.256  | 435.935 | 197.812 | 183.458 | 14.353  |
| 2002          | 34291  | 15519.777 | 14197.046 | 1322.732 | 3.857  | 8.523  | 427.910 | 193.668 | 177.162 | 16.506  |
| 2003          | 35074  | 15888.389 | 14324.452 | 1563.937 | 4.459  | 9.843  | 433.587 | 196.413 | 177.080 | 19.333  |
| 2004          | 33512  | 15091.573 | 13393.176 | 1698.397 | 5.068  | 11.254 | 410.143 | 184.701 | 163.915 | 20.786  |
| 2005          | 35392  | 15803.656 | 13773.716 | 2029.940 | 5.736  | 12.845 | 428.364 | 191.278 | 166.709 | 24.569  |
| 2006          | 33981  | 15100.563 | 12938.312 | 2162.251 | 6.363  | 14.319 | 407.699 | 181.174 | 155.232 | 25.942  |
| 2007          | 34000  | 14974.384 | 12581.504 | 2392.880 | 7.038  | 15.980 | 403.863 | 177.871 | 149.447 | 28.423  |
| 2008          | 37425  | 16406.197 | 13534.428 | 2871.769 | 7.673  | 17.504 | 439.732 | 192.768 | 159.025 | 33.742  |
| 2009          | 36826  | 16083.194 | 12963.104 | 3120.090 | 8.473  | 19.400 | 427.825 | 186.846 | 150.598 | 36.248  |
| 2010          | 36788  | 15927.400 | 12582.135 | 3345.266 | 9.093  | 21.003 | 422.489 | 182.917 | 144.499 | 38.418  |
| 2011          | 37636  | 16221.836 | 12505.257 | 3716.579 | 9.875  | 22.911 | 428.164 | 184.547 | 142.265 | 42.281  |
| 2012          | 38265  | 16358.849 | 12302.102 | 4056.748 | 10.602 | 24.798 | 430.867 | 184.202 | 138.523 | 45.679  |
| 2013          | 40112  | 16994.822 | 12437.694 | 4557.128 | 11.361 | 26.815 | 446.821 | 189.311 | 138.547 | 50.763  |
| 2014          | 40084  | 16855.093 | 11991.958 | 4863.135 | 12.132 | 28.853 | 441.613 | 185.696 | 132.118 | 53.578  |
| 2015          | 42200  | 17572.483 | 12219.622 | 5352.861 | 12.685 | 30.462 | 519.788 | 216.445 | 150.512 | 65.933  |
| 2016          | 42606  | 17579.955 | 11834.340 | 5745.615 | 13.485 | 32.683 | 519.788 | 214.473 | 144.378 | 70.096  |
| 2017          | 44364  | 18080.688 | 11777.355 | 6303.333 | 14.208 | 34.862 | 536.117 | 218.496 | 142.323 | 76.173  |
| 2018          | 45359  | 18209.262 | 11505.324 | 6703.938 | 14.780 | 36.816 | 542.932 | 217.960 | 137.715 | 80.244  |
| 2019          | 46876  | 18648.302 | 11383.723 | 7264.578 | 15.498 | 38.956 | 555.657 | 221.054 | 134.941 | 86.113  |
| 2020          | 48331  | 19002.597 | 11255.937 | 7746.660 | 16.028 | 40.766 | 649.239 | 255.266 | 151.204 | 104.063 |
| 2021          | 48338  | 18885.717 | 10762.918 | 8122.800 | 16.804 | 43.010 | 644.660 | 251.867 | 143.538 | 108.329 |
| 2022          | 49708  | 19235.076 | 10566.934 | 8668.142 | 17.438 | 45.064 | 657.895 | 254.582 | 139.856 | 114.725 |
| 2023          | 51083  | 19521.158 | 10353.672 | 9167.486 | 17.946 | 46.962 | 670.849 | 256.363 | 135.970 | 120.393 |
| 2024          | 52397  | 19918.620 | 10146.283 | 9772.337 | 18.650 | 49.061 | 682.854 | 259.583 | 132.228 | 127.355 |
| 2025          | 53387  | 20150.545 | 9890.300  | 10260.24 | 19.218 | 50.918 | 803.004 | 303.086 | 148.761 | 154.325 |
| 2026          | 54232  | 20393.792 | 9587.422  | 10806.37 | 19.926 | 52.989 | 812.615 | 305.582 | 143.659 | 161.923 |
| 2027          | 55049  | 20615.351 | 9263.901  | 11351.45 | 20.621 | 55.063 | 821.568 | 307.668 | 138.257 | 169.412 |
| 2028          | 55809  | 20731.894 | 8898.858  | 11833.04 | 21.203 | 57.076 | 829.419 | 308.115 | 132.254 | 175.861 |
| 2029          | 56527  | 20781.967 | 8515.066  | 12266.90 | 21.701 | 59.027 | 836.392 | 307.495 | 125.991 | 181.504 |
| 2030          | 56756  | 20753.201 | 8142.146  | 12611.05 | 22.220 | 60.767 | 994.067 | 363.487 | 142.608 | 220.880 |
| 2031          | 58288  | 21048.417 | 8013.649  | 13034.77 | 22.363 | 61.928 | 1019.54 | 368.165 | 140.169 | 227.995 |
| 2032          | 58782  | 21169.329 | 7678.134  | 13491.19 | 22.951 | 63.730 | 1026.18 | 369.560 | 134.040 | 235.520 |
| 2033          | 59236  | 21109.293 | 7309.861  | 13799.43 | 23.296 | 65.371 | 1031.59 | 367.618 | 127.301 | 240.317 |
| 2034          | 59614  | 21109.429 | 6946.833  | 14162.60 | 23.757 | 67.091 | 1035.33 | 366.613 | 120.647 | 245.965 |
| 2035          | 58938  | 20794.840 | 6567.797  | 14227.04 | 24.139 | 68.416 | 1253.51 | 442.268 | 139.685 | 302.583 |
| 2036          | 56014  | 19354.577 | 5844.293  | 13510.28 | 24.119 | 69.804 | 1193.11 | 412.258 | 124.485 | 287.773 |
| 2037          | 55953  | 19064.169 | 5417.680  | 13646.49 | 24.389 | 71.582 | 1192.72 | 406.385 | 115.487 | 290.898 |
| 2038          | 55859  | 18854.812 | 5071.636  | 13783.18 | 24.675 | 73.102 | 1190.66 | 401.900 | 108.104 | 293.795 |
| 2039          | 55757  | 18437.457 | 4670.535  | 13766.92 | 24.691 | 74.668 | 1187.28 | 392.602 | 99.453  | 293.149 |



## Results for PHIM for Run 8 (Sensitivity\_Analysis\_4.RTF)

\*\*\*\*\*

### Main Results for E-Component for Run: 8, Simulation: 1, COD: Four Diseases Combined, Adjusted

| Variable Parameter          | Value                                  |
|-----------------------------|----------------------------------------|
| 1. Country                  | US (United States)                     |
| 2. Sex                      | F (Females)                            |
| 3. Year of start of process | 1990                                   |
| 4. Cause of Death           | Four Diseases Combined                 |
| 5. Effective Dose NULL      | CC:1                                   |
| 6. Effective Dose Ecig      | CC:1 Ecig:0.05 Dual:0.525              |
| Note:                       | Death rates are per million population |

#### Results for Age Groups Combined and Years combined, Population and Number deaths adjusted for Ecig scenario,

| Age Group:All | NULL    | Ecig        | %Drop       |          |        | NULL   | Ecig    | Drop    |         |         |
|---------------|---------|-------------|-------------|----------|--------|--------|---------|---------|---------|---------|
| Year          | Number  | Attrib      | Attrib      | Drop     | %Drop  | Attrib | Death   | Attrib  | Attrib  | Drop    |
|               | Deaths  | Deaths      | Deaths      | Deaths   | Deaths | Deaths | Rate    | Rates   | Rates   | Rates   |
| All Comb      | 9148398 | 2946250.006 | 1956628.099 | 989621.9 | 10.817 | 33.589 | 2499.62 | 808.881 | 534.610 | 274.271 |

#### Results for Age Groups Combined, Population and Number deaths adjusted for Ecig scenario,

| Age Group:All | NULL   | Ecig      | %Drop     |          |        | NULL   | Ecig    | Drop    |         |         |
|---------------|--------|-----------|-----------|----------|--------|--------|---------|---------|---------|---------|
| Year          | Number | Attrib    | Attrib    | Drop     | %Drop  | Attrib | Death   | Attrib  | Attrib  | Drop    |
|               | Deaths | Deaths    | Deaths    | Deaths   | Deaths | Deaths | Rate    | Rates   | Rates   | Rates   |
| 1990          | 199848 | 57524.822 | 57524.822 | 0.000    | 0.000  | 0.000  | 2926.84 | 842.471 | 842.471 | 0.000   |
| 1991          | 199162 | 59078.486 | 58910.022 | 168.464  | 0.085  | 0.285  | 2877.87 | 853.678 | 851.244 | 2.434   |
| 1992          | 198533 | 60494.150 | 60022.682 | 471.468  | 0.237  | 0.779  | 2829.84 | 862.271 | 855.549 | 6.722   |
| 1993          | 202515 | 62694.848 | 61777.621 | 917.226  | 0.453  | 1.463  | 2845.86 | 881.034 | 868.136 | 12.898  |
| 1994          | 200665 | 63202.598 | 61753.949 | 1448.649 | 0.722  | 2.292  | 2777.91 | 874.966 | 854.892 | 20.074  |
| 1995          | 201036 | 63766.862 | 61674.868 | 2091.994 | 1.041  | 3.281  | 2739.86 | 869.097 | 840.549 | 28.548  |
| 1996          | 201202 | 64591.163 | 61725.537 | 2865.626 | 1.424  | 4.437  | 2706.47 | 868.908 | 830.299 | 38.609  |
| 1997          | 198673 | 64686.912 | 61099.595 | 3587.317 | 1.806  | 5.546  | 2635.34 | 858.147 | 810.467 | 47.680  |
| 1998          | 197623 | 65295.961 | 60873.344 | 4422.618 | 2.238  | 6.773  | 2584.42 | 854.046 | 796.073 | 57.973  |
| 1999          | 211404 | 67327.521 | 61615.804 | 5711.717 | 2.702  | 8.483  | 2727.28 | 868.771 | 794.894 | 73.877  |
| 2000          | 208596 | 67596.897 | 60947.660 | 6649.237 | 3.188  | 9.837  | 2657.45 | 861.419 | 776.455 | 84.964  |
| 2001          | 203735 | 67008.811 | 59367.603 | 7641.207 | 3.751  | 11.403 | 2566.52 | 844.458 | 747.875 | 96.583  |
| 2002          | 200990 | 67067.744 | 58321.551 | 8746.192 | 4.352  | 13.041 | 2506.90 | 836.925 | 727.430 | 109.495 |
| 2003          | 196550 | 66756.217 | 57013.808 | 9742.409 | 4.957  | 14.594 | 2428.31 | 825.244 | 704.385 | 120.859 |
| 2004          | 188394 | 65058.725 | 54474.911 | 10583.81 | 5.618  | 16.268 | 2304.02 | 796.234 | 666.217 | 130.017 |
| 2005          | 186694 | 65214.724 | 53495.302 | 11719.42 | 6.277  | 17.971 | 2257.67 | 789.321 | 646.915 | 142.406 |
| 2006          | 180406 | 63771.146 | 51192.151 | 12579.00 | 6.973  | 19.725 | 2162.28 | 765.117 | 613.571 | 151.547 |
| 2007          | 176006 | 63110.718 | 49650.464 | 13460.25 | 7.648  | 21.328 | 2088.19 | 749.650 | 589.068 | 160.583 |
| 2008          | 177993 | 63718.624 | 48981.385 | 14737.24 | 8.280  | 23.129 | 2088.53 | 748.674 | 574.735 | 173.939 |
| 2009          | 173277 | 62794.698 | 47237.342 | 15557.36 | 8.978  | 24.775 | 2009.93 | 729.515 | 547.929 | 181.586 |
| 2010          | 171016 | 61917.074 | 45497.128 | 16419.95 | 9.601  | 26.519 | 1960.59 | 711.083 | 521.596 | 189.487 |
| 2011          | 170895 | 61680.114 | 44100.091 | 17580.02 | 10.287 | 28.502 | 1940.38 | 701.700 | 500.721 | 200.979 |
| 2012          | 172084 | 62023.127 | 43157.263 | 18865.86 | 10.963 | 30.417 | 1933.47 | 698.386 | 484.898 | 213.489 |
| 2013          | 173443 | 62037.765 | 42015.860 | 20021.90 | 11.544 | 32.274 | 1927.38 | 691.059 | 466.900 | 224.159 |
| 2014          | 174998 | 61921.017 | 40628.289 | 21292.73 | 12.167 | 34.387 | 1922.86 | 682.195 | 446.419 | 235.776 |
| 2015          | 178288 | 61856.204 | 39483.047 | 22373.16 | 12.549 | 36.170 | 2188.83 | 761.899 | 484.731 | 277.168 |
| 2016          | 177872 | 60464.119 | 37221.713 | 23242.41 | 13.067 | 38.440 | 2162.26 | 737.655 | 452.475 | 285.180 |
| 2017          | 180440 | 60243.839 | 35834.537 | 24409.30 | 13.528 | 40.518 | 2172.04 | 728.017 | 431.356 | 296.661 |
| 2018          | 178377 | 60713.327 | 35257.097 | 25456.23 | 14.271 | 41.929 | 2126.10 | 726.721 | 420.235 | 306.486 |
| 2019          | 180571 | 61148.172 | 34341.335 | 26806.84 | 14.846 | 43.839 | 2130.69 | 724.841 | 405.220 | 319.621 |
| 2020          | 181943 | 61149.317 | 33406.327 | 27742.99 | 15.248 | 45.369 | 2430.54 | 821.432 | 446.270 | 375.163 |
| 2021          | 179686 | 58727.786 | 30586.980 | 28140.81 | 15.661 | 47.917 | 2382.12 | 783.216 | 405.494 | 377.721 |
| 2022          | 181110 | 58848.802 | 29567.283 | 29281.52 | 16.168 | 49.757 | 2381.81 | 778.881 | 388.845 | 390.036 |
| 2023          | 182478 | 58816.149 | 28538.683 | 30277.47 | 16.592 | 51.478 | 2380.18 | 772.407 | 372.248 | 400.159 |
| 2024          | 183588 | 58955.232 | 27519.052 | 31436.18 | 17.123 | 53.322 | 2375.33 | 768.316 | 356.052 | 412.264 |
| 2025          | 182536 | 58297.744 | 26369.997 | 31927.75 | 17.491 | 54.767 | 2721.86 | 876.861 | 393.213 | 483.648 |
| 2026          | 182579 | 56469.971 | 24333.810 | 32136.16 | 17.601 | 56.908 | 2710.81 | 846.150 | 361.292 | 484.858 |
| 2027          | 182019 | 56209.427 | 23199.100 | 33010.33 | 18.136 | 58.727 | 2690.35 | 838.883 | 342.896 | 495.987 |
| 2028          | 181299 | 55733.105 | 22010.482 | 33722.62 | 18.601 | 60.507 | 2667.14 | 828.298 | 323.803 | 504.495 |
| 2029          | 180482 | 55145.838 | 20805.432 | 34340.41 | 19.027 | 62.272 | 2642.04 | 815.951 | 304.567 | 511.383 |
| 2030          | 176387 | 53615.097 | 19552.390 | 34062.71 | 19.311 | 63.532 | 3050.44 | 939.056 | 338.138 | 600.917 |
| 2031          | 177997 | 52046.561 | 18337.900 | 33708.66 | 18.938 | 64.766 | 3072.29 | 910.364 | 316.519 | 593.845 |
| 2032          | 176549 | 51582.636 | 17358.723 | 34223.91 | 19.385 | 66.348 | 3039.57 | 900.496 | 298.858 | 601.637 |
| 2033          | 175043 | 50839.758 | 16369.000 | 34470.76 | 19.693 | 67.803 | 3004.56 | 885.375 | 280.968 | 604.406 |
| 2034          | 173393 | 50215.451 | 15408.705 | 34806.75 | 20.074 | 69.315 | 2966.32 | 872.104 | 263.605 | 608.499 |
| 2035          | 166156 | 47773.075 | 14268.378 | 33504.70 | 20.165 | 70.133 | 3471.88 | 1016.05 | 298.142 | 717.904 |
| 2036          | 159794 | 43298.709 | 12263.302 | 31035.41 | 19.422 | 71.677 | 3341.68 | 922.274 | 256.456 | 665.818 |
| 2037          | 157226 | 42241.563 | 11304.425 | 30937.14 | 19.677 | 73.239 | 3288.48 | 900.450 | 236.439 | 664.012 |
| 2038          | 154668 | 41356.353 | 10543.670 | 30812.68 | 19.922 | 74.505 | 3232.81 | 881.531 | 220.380 | 661.151 |
| 2039          | 152179 | 40161.050 | 9687.679  | 30473.37 | 20.025 | 75.878 | 3175.65 | 855.178 | 202.160 | 653.017 |

## Results for PHIM for Run 8 (Sensitivity\_Analysis\_4.RTF)

\*\*\*\*\*

### Main Results for E-Component for Run: 8, Simulation: 1, COD: LUNG CANCER, Adjusted

| Variable Parameter          | Value                                  |
|-----------------------------|----------------------------------------|
| 1. Country                  | US (United States)                     |
| 2. Sex                      | F (Females)                            |
| 3. Year of start of process | 1990                                   |
| 4. Cause of Death           | LUNG CANCER                            |
| 5. Effective Dose NULL      | CC:1                                   |
| 6. Effective Dose Ecig      | CC:1 Ecig:0.05 Dual:0.525              |
| Note:                       | Death rates are per million population |

#### Results for Age Groups Combined and Years combined, Population and Number deaths adjusted for Ecig scenario,

| Age Group:All | NULL    | Ecig        | %Drop       |          |        |        | NULL    | Ecig    | Drop    |         |
|---------------|---------|-------------|-------------|----------|--------|--------|---------|---------|---------|---------|
| Year          | Number  | Attrib      | Attrib      | Drop     | %Drop  | Attrib | Death   | Attrib  | Attrib  | Drop    |
|               | Deaths  | Deaths      | Deaths      | Deaths   | Deaths | Deaths | Rate    | Rates   | Rates   | Rates   |
| All Comb      | 2343932 | 1580465.217 | 1149469.690 | 430995.5 | 18.388 | 27.270 | 640.433 | 433.910 | 314.070 | 119.841 |

#### Results for Age Groups Combined, Population and Number deaths adjusted for Ecig scenario,

| Age Group:All | NULL   | Ecig      | %Drop     |          |        |        | NULL    | Ecig    | Drop    |         |
|---------------|--------|-----------|-----------|----------|--------|--------|---------|---------|---------|---------|
| Year          | Number | Attrib    | Attrib    | Drop     | %Drop  | Attrib | Death   | Attrib  | Attrib  | Drop    |
|               | Deaths | Deaths    | Deaths    | Deaths   | Deaths | Deaths | Rate    | Rates   | Rates   | Rates   |
| 1990          | 42690  | 30614.201 | 30614.201 | 0.000    | 0.000  | 0.000  | 625.210 | 448.355 | 448.355 | 0.000   |
| 1991          | 43692  | 31412.010 | 31379.684 | 32.326   | 0.074  | 0.103  | 631.345 | 453.901 | 453.433 | 0.467   |
| 1992          | 45423  | 32782.407 | 32688.550 | 93.856   | 0.207  | 0.286  | 647.451 | 467.274 | 465.935 | 1.339   |
| 1993          | 46292  | 33491.183 | 33305.814 | 185.369  | 0.400  | 0.553  | 650.518 | 470.643 | 468.033 | 2.609   |
| 1994          | 47019  | 34074.347 | 33774.115 | 300.233  | 0.639  | 0.881  | 650.904 | 471.719 | 467.553 | 4.167   |
| 1995          | 47843  | 34694.454 | 34242.054 | 452.400  | 0.946  | 1.304  | 652.042 | 472.861 | 466.675 | 6.186   |
| 1996          | 48250  | 35027.269 | 34401.659 | 625.610  | 1.297  | 1.786  | 649.027 | 471.202 | 462.753 | 8.449   |
| 1997          | 49044  | 35590.763 | 34758.932 | 831.831  | 1.696  | 2.337  | 650.551 | 472.153 | 461.066 | 11.086  |
| 1998          | 49699  | 36100.785 | 35025.407 | 1075.378 | 2.164  | 2.979  | 649.940 | 472.184 | 458.046 | 14.139  |
| 1999          | 48901  | 35451.030 | 34156.150 | 1294.880 | 2.648  | 3.653  | 630.861 | 457.448 | 440.642 | 16.805  |
| 2000          | 50356  | 36447.986 | 34828.316 | 1619.670 | 3.216  | 4.444  | 641.520 | 464.474 | 443.702 | 20.772  |
| 2001          | 50422  | 36411.326 | 34462.331 | 1948.995 | 3.865  | 5.353  | 635.180 | 458.863 | 434.134 | 24.728  |
| 2002          | 51487  | 37078.545 | 34720.374 | 2358.171 | 4.580  | 6.360  | 642.190 | 462.696 | 433.059 | 29.637  |
| 2003          | 51461  | 36999.876 | 34251.472 | 2748.404 | 5.341  | 7.428  | 635.782 | 457.395 | 423.165 | 34.230  |
| 2004          | 51464  | 36861.555 | 33680.137 | 3181.418 | 6.182  | 8.631  | 629.392 | 451.138 | 411.901 | 39.236  |
| 2005          | 51498  | 36689.529 | 33049.626 | 3639.902 | 7.068  | 9.921  | 622.765 | 444.069 | 399.667 | 44.402  |
| 2006          | 51446  | 36504.774 | 32383.461 | 4121.313 | 8.011  | 11.290 | 616.615 | 437.979 | 388.136 | 49.843  |
| 2007          | 51946  | 36663.202 | 31968.112 | 4695.090 | 9.038  | 12.806 | 616.306 | 435.498 | 379.279 | 56.219  |
| 2008          | 51098  | 35898.803 | 30773.072 | 5125.731 | 10.031 | 14.278 | 599.566 | 421.800 | 361.083 | 60.716  |
| 2009          | 51333  | 35934.525 | 30192.592 | 5741.934 | 11.186 | 15.979 | 595.432 | 417.468 | 350.219 | 67.249  |
| 2010          | 51010  | 35502.829 | 29256.100 | 6246.729 | 12.246 | 17.595 | 584.795 | 407.730 | 335.403 | 72.327  |
| 2011          | 50684  | 35136.342 | 28300.844 | 6835.498 | 13.487 | 19.454 | 575.471 | 399.726 | 321.334 | 78.393  |
| 2012          | 51443  | 35450.201 | 27882.894 | 7567.307 | 14.710 | 21.346 | 577.989 | 399.173 | 313.281 | 85.892  |
| 2013          | 51288  | 35123.224 | 26913.519 | 8209.705 | 16.007 | 23.374 | 569.935 | 391.249 | 299.076 | 92.173  |
| 2014          | 51494  | 35079.370 | 26182.249 | 8897.121 | 17.278 | 25.363 | 565.810 | 386.476 | 287.688 | 98.788  |
| 2015          | 50707  | 34324.171 | 24978.675 | 9345.496 | 18.430 | 27.227 | 622.527 | 422.780 | 306.662 | 116.118 |
| 2016          | 49134  | 33054.753 | 23316.731 | 9738.022 | 19.819 | 29.460 | 597.285 | 403.264 | 283.443 | 119.821 |
| 2017          | 48628  | 32471.234 | 22168.298 | 10302.94 | 21.187 | 31.729 | 585.360 | 392.399 | 266.849 | 125.549 |
| 2018          | 50809  | 33657.595 | 22147.899 | 11509.70 | 22.653 | 34.196 | 605.602 | 402.871 | 263.984 | 138.887 |
| 2019          | 51414  | 33863.424 | 21496.508 | 12366.92 | 24.053 | 36.520 | 606.677 | 401.412 | 253.654 | 147.758 |
| 2020          | 51858  | 33910.830 | 20830.760 | 13080.07 | 25.223 | 38.572 | 692.762 | 455.532 | 278.275 | 177.257 |
| 2021          | 48455  | 31531.880 | 18599.972 | 12931.91 | 26.688 | 41.012 | 642.375 | 420.521 | 246.582 | 173.939 |
| 2022          | 48787  | 31560.212 | 17880.004 | 13680.21 | 28.041 | 43.346 | 641.610 | 417.708 | 235.143 | 182.565 |
| 2023          | 49087  | 31508.781 | 17150.907 | 14357.87 | 29.250 | 45.568 | 640.266 | 413.791 | 223.710 | 190.081 |
| 2024          | 49307  | 31517.293 | 16419.418 | 15097.88 | 30.620 | 47.903 | 637.955 | 410.740 | 212.441 | 198.299 |
| 2025          | 49036  | 31175.389 | 15619.800 | 15555.59 | 31.723 | 49.897 | 731.194 | 468.912 | 232.913 | 235.999 |
| 2026          | 45887  | 29044.598 | 13917.232 | 15127.37 | 32.967 | 52.083 | 681.291 | 435.206 | 206.633 | 228.573 |
| 2027          | 45702  | 28825.765 | 13160.623 | 15665.14 | 34.276 | 54.344 | 675.507 | 430.203 | 194.522 | 235.681 |
| 2028          | 45469  | 28513.846 | 12388.995 | 16124.85 | 35.463 | 56.551 | 668.915 | 423.769 | 182.258 | 241.511 |
| 2029          | 45200  | 28148.109 | 11612.660 | 16535.45 | 36.583 | 58.744 | 661.670 | 416.486 | 169.996 | 246.490 |
| 2030          | 44083  | 27314.475 | 10808.429 | 16506.05 | 37.443 | 60.430 | 762.369 | 478.407 | 186.921 | 291.486 |
| 2031          | 41442  | 25423.102 | 9725.034  | 15698.07 | 37.879 | 61.747 | 715.308 | 444.684 | 167.858 | 276.826 |
| 2032          | 41050  | 25085.902 | 9113.223  | 15972.68 | 38.911 | 63.672 | 706.737 | 437.933 | 156.899 | 281.034 |
| 2033          | 40636  | 24645.067 | 8516.792  | 16128.27 | 39.689 | 65.442 | 697.509 | 429.194 | 146.188 | 283.006 |
| 2034          | 40187  | 24239.126 | 7943.461  | 16295.67 | 40.549 | 67.229 | 687.508 | 420.967 | 135.893 | 285.074 |
| 2035          | 38255  | 22944.147 | 7256.177  | 15687.97 | 41.009 | 68.375 | 799.347 | 487.980 | 151.620 | 336.360 |
| 2036          | 33726  | 19950.581 | 5993.918  | 13956.66 | 41.382 | 69.956 | 705.295 | 424.953 | 125.348 | 299.605 |
| 2037          | 33159  | 19415.334 | 5486.566  | 13928.77 | 42.006 | 71.741 | 693.535 | 413.871 | 114.755 | 299.116 |
| 2038          | 32592  | 18939.317 | 5090.196  | 13849.12 | 42.492 | 73.124 | 681.233 | 403.701 | 106.394 | 297.307 |
| 2039          | 32040  | 18379.752 | 4655.744  | 13724.01 | 42.834 | 74.669 | 668.600 | 391.373 | 97.155  | 294.218 |

## Results for PHIM for Run 8 (Sensitivity\_Analysis\_4.RTF)

\*\*\*\*\*

### Main Results for E-Component for Run: 8, Simulation: 1, COD: IHD, Adjusted

| Variable Parameter          | Value                                  |
|-----------------------------|----------------------------------------|
| 1. Country                  | US (United States)                     |
| 2. Sex                      | F (Females)                            |
| 3. Year of start of process | 1990                                   |
| 4. Cause of Death           | IHD                                    |
| 5. Effective Dose NULL      | CC:1                                   |
| 6. Effective Dose Ecig      | CC:1 Ecig:0.05 Dual:0.525              |
| Note:                       | Death rates are per million population |

#### Results for Age Groups Combined and Years combined, Population and Number deaths adjusted for Ecig scenario,

| Age Group:All | NULL    | Ecig       | %Drop      |          |        |        | NULL    | Ecig    | Drop   |        |
|---------------|---------|------------|------------|----------|--------|--------|---------|---------|--------|--------|
| Year          | Number  | Attrib     | Attrib     | Drop     | %Drop  | Attrib | Death   | Attrib  | Attrib | Drop   |
|               | Deaths  | Deaths     | Deaths     | Deaths   | Deaths | Deaths | Rate    | Rates   | Rates  | Rates  |
| All Comb      | 3261637 | 398833.796 | 200111.410 | 198722.4 | 6.093  | 49.826 | 891.178 | 109.498 | 54.676 | 54.822 |

#### Results for Age Groups Combined, Population and Number deaths adjusted for Ecig scenario,

| Age Group:All | NULL   | Ecig      | %Drop     |          |        |        | NULL    | Ecig    | Drop    |        |
|---------------|--------|-----------|-----------|----------|--------|--------|---------|---------|---------|--------|
| Year          | Number | Attrib    | Attrib    | Drop     | %Drop  | Attrib | Death   | Attrib  | Attrib  | Drop   |
|               | Deaths | Deaths    | Deaths    | Deaths   | Deaths | Deaths | Rate    | Rates   | Rates   | Rates  |
| 1990          | 98916  | 12922.892 | 12922.892 | 0.000    | 0.000  | 0.000  | 1448.66 | 189.260 | 189.260 | 0.000  |
| 1991          | 96403  | 12856.479 | 12766.075 | 90.404   | 0.094  | 0.703  | 1393.01 | 185.775 | 184.469 | 1.306  |
| 1992          | 93721  | 12662.244 | 12411.694 | 250.550  | 0.267  | 1.979  | 1335.88 | 180.485 | 176.913 | 3.572  |
| 1993          | 93680  | 12730.613 | 12252.446 | 478.167  | 0.510  | 3.756  | 1316.45 | 178.900 | 172.179 | 6.721  |
| 1994          | 90835  | 12495.323 | 11750.674 | 744.649  | 0.820  | 5.959  | 1257.48 | 172.983 | 162.671 | 10.312 |
| 1995          | 89704  | 12365.590 | 11313.328 | 1052.262 | 1.173  | 8.510  | 1222.55 | 168.534 | 154.186 | 14.348 |
| 1996          | 88296  | 12290.551 | 10855.852 | 1434.699 | 1.625  | 11.673 | 1187.71 | 165.338 | 146.027 | 19.311 |
| 1997          | 84792  | 11719.531 | 9991.711  | 1727.821 | 2.038  | 14.743 | 1124.73 | 155.473 | 132.537 | 22.936 |
| 1998          | 82538  | 11416.794 | 9348.558  | 2068.236 | 2.506  | 18.116 | 1079.39 | 149.327 | 122.256 | 27.071 |
| 1999          | 93972  | 13028.038 | 10180.958 | 2847.080 | 3.030  | 21.853 | 1212.32 | 168.109 | 131.343 | 36.767 |
| 2000          | 90082  | 12426.299 | 9247.894  | 3178.405 | 3.528  | 25.578 | 1147.62 | 158.354 | 117.815 | 40.539 |
| 2001          | 86173  | 11939.281 | 8357.170  | 3582.112 | 4.157  | 30.003 | 1085.55 | 150.461 | 105.278 | 45.183 |
| 2002          | 83080  | 11528.794 | 7553.995  | 3974.799 | 4.784  | 34.477 | 1036.24 | 143.865 | 94.219  | 49.646 |
| 2003          | 79382  | 11048.407 | 6776.893  | 4271.514 | 5.381  | 38.662 | 980.731 | 136.581 | 83.726  | 52.855 |
| 2004          | 73952  | 10375.132 | 5903.230  | 4471.901 | 6.047  | 43.102 | 904.420 | 126.978 | 72.195  | 54.783 |
| 2005          | 71755  | 10051.029 | 5306.359  | 4744.671 | 6.612  | 47.206 | 867.730 | 121.652 | 64.169  | 57.482 |
| 2006          | 67670  | 9542.523  | 4623.477  | 4919.046 | 7.269  | 51.549 | 811.063 | 114.490 | 55.415  | 59.075 |
| 2007          | 63633  | 8936.533  | 3982.245  | 4954.288 | 7.786  | 55.439 | 754.960 | 106.151 | 47.247  | 58.905 |
| 2008          | 63320  | 8944.180  | 3657.103  | 5287.078 | 8.350  | 59.112 | 742.981 | 105.091 | 42.911  | 62.180 |
| 2009          | 59909  | 8390.033  | 3168.206  | 5221.828 | 8.716  | 62.238 | 694.909 | 97.471  | 36.750  | 60.721 |
| 2010          | 58185  | 8157.570  | 2829.082  | 5328.488 | 9.158  | 65.320 | 667.060 | 93.685  | 32.434  | 61.251 |
| 2011          | 57565  | 8035.356  | 2538.720  | 5496.636 | 9.549  | 68.406 | 653.604 | 91.414  | 28.825  | 62.589 |
| 2012          | 57630  | 7970.766  | 2284.420  | 5686.345 | 9.867  | 71.340 | 647.510 | 89.752  | 25.667  | 64.085 |
| 2013          | 57310  | 7743.216  | 2041.106  | 5702.110 | 9.950  | 73.640 | 636.855 | 86.254  | 22.682  | 63.572 |
| 2014          | 57808  | 7774.935  | 1864.585  | 5910.351 | 10.224 | 76.018 | 635.190 | 85.658  | 20.488  | 65.170 |
| 2015          | 58698  | 7722.535  | 1719.830  | 6002.705 | 10.226 | 77.730 | 720.629 | 95.120  | 21.114  | 74.006 |
| 2016          | 58991  | 7600.353  | 1541.667  | 6058.686 | 10.270 | 79.716 | 717.112 | 92.723  | 18.741  | 73.983 |
| 2017          | 59370  | 7470.266  | 1389.069  | 6081.198 | 10.243 | 81.405 | 714.666 | 90.274  | 16.721  | 73.554 |
| 2018          | 56456  | 6907.050  | 1177.615  | 5729.435 | 10.148 | 82.951 | 672.908 | 82.675  | 14.036  | 68.639 |
| 2019          | 56297  | 6732.046  | 1060.195  | 5671.852 | 10.075 | 84.252 | 664.293 | 79.801  | 12.510  | 67.291 |
| 2020          | 55758  | 6429.836  | 947.186   | 5482.650 | 9.833  | 85.269 | 744.864 | 86.373  | 12.653  | 73.720 |
| 2021          | 56777  | 6562.016  | 876.641   | 5685.375 | 10.013 | 86.641 | 752.700 | 87.513  | 11.622  | 75.892 |
| 2022          | 56344  | 6352.366  | 790.000   | 5562.366 | 9.872  | 87.564 | 740.995 | 84.075  | 10.389  | 73.686 |
| 2023          | 55888  | 6134.123  | 717.588   | 5416.536 | 9.692  | 88.302 | 728.984 | 80.557  | 9.360   | 71.197 |
| 2024          | 55353  | 5922.193  | 650.361   | 5271.831 | 9.524  | 89.018 | 716.172 | 77.179  | 8.415   | 68.765 |
| 2025          | 53908  | 5504.188  | 575.730   | 4928.457 | 9.142  | 89.540 | 803.848 | 82.789  | 8.585   | 74.204 |
| 2026          | 55953  | 5641.075  | 556.096   | 5084.979 | 9.088  | 90.142 | 830.756 | 84.526  | 8.257   | 76.270 |
| 2027          | 54903  | 5426.216  | 509.884   | 4916.332 | 8.955  | 90.603 | 811.496 | 80.982  | 7.536   | 73.446 |
| 2028          | 53822  | 5197.830  | 466.056   | 4731.774 | 8.792  | 91.034 | 791.792 | 77.249  | 6.856   | 70.393 |
| 2029          | 52733  | 4973.547  | 428.488   | 4545.059 | 8.619  | 91.385 | 771.946 | 73.590  | 6.273   | 67.317 |
| 2030          | 50258  | 4450.618  | 368.170   | 4082.448 | 8.123  | 91.728 | 869.163 | 77.952  | 6.367   | 71.584 |
| 2031          | 52852  | 4555.052  | 367.235   | 4187.817 | 7.924  | 91.938 | 912.249 | 79.674  | 6.339   | 73.335 |
| 2032          | 51566  | 4349.999  | 339.570   | 4010.429 | 7.777  | 92.194 | 887.797 | 75.939  | 5.846   | 70.093 |
| 2033          | 50292  | 4147.948  | 318.317   | 3829.631 | 7.615  | 92.326 | 863.239 | 72.237  | 5.464   | 66.773 |
| 2034          | 49007  | 3966.133  | 298.458   | 3667.676 | 7.484  | 92.475 | 838.395 | 68.881  | 5.106   | 63.775 |
| 2035          | 45453  | 3289.064  | 238.337   | 3050.728 | 6.712  | 92.754 | 949.750 | 69.952  | 4.980   | 64.972 |
| 2036          | 47363  | 3313.192  | 234.391   | 3078.801 | 6.500  | 92.926 | 990.487 | 70.572  | 4.902   | 65.670 |
| 2037          | 45865  | 3117.951  | 216.831   | 2901.120 | 6.325  | 93.046 | 959.297 | 66.464  | 4.535   | 61.929 |
| 2038          | 44409  | 2949.775  | 203.847   | 2745.928 | 6.183  | 93.089 | 928.213 | 62.876  | 4.261   | 58.615 |
| 2039          | 43008  | 2766.312  | 191.176   | 2575.136 | 5.988  | 93.089 | 897.489 | 58.905  | 3.989   | 54.916 |

## Results for PHIM for Run 8 (Sensitivity\_Analysis\_4.RTF)

\*\*\*\*\*

### Main Results for E-Component for Run: 8, Simulation: 1, COD: STROKE, Adjusted

| Variable Parameter          | Value                                  |
|-----------------------------|----------------------------------------|
| 1. Country                  | US (United States)                     |
| 2. Sex                      | F (Females)                            |
| 3. Year of start of process | 1990                                   |
| 4. Cause of Death           | STROKE                                 |
| 5. Effective Dose NULL      | CC:1                                   |
| 6. Effective Dose Ecig      | CC:1 Ecig:0.05 Dual:0.525              |
| Note:                       | Death rates are per million population |

#### Results for Age Groups Combined and Years combined, Population and Number deaths adjusted for Ecig scenario,

| Age Group:All | NULL    | Ecig       | %Drop     |          |        |        | NULL    | Ecig   | Drop   |        |
|---------------|---------|------------|-----------|----------|--------|--------|---------|--------|--------|--------|
| Year          | Number  | Attrib     | Attrib    | Drop     | %Drop  | Attrib | Death   | Attrib | Attrib | Drop   |
|               | Deaths  | Deaths     | Deaths    | Deaths   | Deaths | Deaths | Rate    | Rates  | Rates  | Rates  |
| All Comb      | 1361481 | 104899.750 | 51549.614 | 53350.14 | 3.919  | 50.858 | 371.998 | 28.800 | 14.085 | 14.715 |

#### Results for Age Groups Combined, Population and Number deaths adjusted for Ecig scenario,

| Age Group:All | NULL   | Ecig     | %Drop    |          |        |        | NULL    | Ecig   | Drop   |        |
|---------------|--------|----------|----------|----------|--------|--------|---------|--------|--------|--------|
| Year          | Number | Attrib   | Attrib   | Drop     | %Drop  | Attrib | Death   | Attrib | Attrib | Drop   |
|               | Deaths | Deaths   | Deaths   | Deaths   | Deaths | Deaths | Rate    | Rates  | Rates  | Rates  |
| 1990          | 33504  | 3293.017 | 3293.017 | 0.000    | 0.000  | 0.000  | 490.678 | 48.227 | 48.227 | 0.000  |
| 1991          | 32505  | 3207.063 | 3179.557 | 27.506   | 0.085  | 0.858  | 469.694 | 46.342 | 45.944 | 0.397  |
| 1992          | 32560  | 3218.125 | 3141.237 | 76.888   | 0.236  | 2.389  | 464.104 | 45.871 | 44.774 | 1.096  |
| 1993          | 32768  | 3226.680 | 3081.112 | 145.568  | 0.444  | 4.511  | 460.482 | 45.344 | 43.298 | 2.046  |
| 1994          | 33006  | 3277.266 | 3045.166 | 232.100  | 0.703  | 7.082  | 456.920 | 45.370 | 42.156 | 3.214  |
| 1995          | 33732  | 3309.378 | 2976.824 | 332.554  | 0.986  | 10.049 | 459.725 | 45.104 | 40.570 | 4.534  |
| 1996          | 33754  | 3312.987 | 2863.417 | 449.570  | 1.332  | 13.570 | 454.035 | 44.568 | 38.517 | 6.051  |
| 1997          | 33705  | 3267.066 | 2704.181 | 562.885  | 1.670  | 17.229 | 447.080 | 43.341 | 35.870 | 7.471  |
| 1998          | 33282  | 3178.725 | 2507.746 | 670.979  | 2.016  | 21.108 | 435.246 | 41.577 | 32.795 | 8.781  |
| 1999          | 33902  | 3120.351 | 2339.332 | 781.019  | 2.304  | 25.030 | 437.368 | 40.264 | 30.179 | 10.085 |
| 2000          | 33842  | 3142.808 | 2229.433 | 913.376  | 2.699  | 29.062 | 431.143 | 40.050 | 28.402 | 11.648 |
| 2001          | 32525  | 2961.588 | 1980.940 | 980.648  | 3.015  | 33.112 | 409.735 | 37.323 | 24.955 | 12.368 |
| 2002          | 32103  | 2940.627 | 1838.317 | 1102.311 | 3.434  | 37.486 | 400.409 | 36.695 | 22.929 | 13.767 |
| 2003          | 30598  | 2819.545 | 1646.024 | 1173.520 | 3.835  | 41.621 | 378.021 | 34.855 | 20.336 | 14.519 |
| 2004          | 29423  | 2730.466 | 1481.106 | 1249.360 | 4.246  | 45.756 | 359.838 | 33.417 | 18.114 | 15.304 |
| 2005          | 27994  | 2670.510 | 1344.284 | 1326.226 | 4.738  | 49.662 | 338.529 | 32.322 | 16.256 | 16.066 |
| 2006          | 27247  | 2623.285 | 1223.075 | 1400.211 | 5.139  | 53.376 | 326.577 | 31.474 | 14.659 | 16.814 |
| 2007          | 26354  | 2536.599 | 1091.498 | 1445.101 | 5.483  | 56.970 | 312.675 | 30.131 | 12.950 | 17.181 |
| 2008          | 26058  | 2469.443 | 982.959  | 1486.485 | 5.705  | 60.195 | 305.757 | 29.015 | 11.534 | 17.481 |
| 2009          | 25106  | 2386.945 | 876.395  | 1510.550 | 6.017  | 63.284 | 291.220 | 27.730 | 10.166 | 17.565 |
| 2010          | 24915  | 2329.274 | 788.995  | 1540.279 | 6.182  | 66.127 | 285.632 | 26.750 | 9.045  | 17.705 |
| 2011          | 24876  | 2286.581 | 709.739  | 1576.842 | 6.339  | 68.961 | 282.447 | 26.013 | 8.059  | 17.955 |
| 2012          | 24593  | 2243.311 | 637.760  | 1605.551 | 6.529  | 71.571 | 276.315 | 25.260 | 7.166  | 18.094 |
| 2013          | 24554  | 2176.503 | 567.211  | 1609.293 | 6.554  | 73.939 | 272.859 | 24.245 | 6.303  | 17.942 |
| 2014          | 25415  | 2211.619 | 529.415  | 1682.204 | 6.619  | 76.062 | 279.254 | 24.366 | 5.817  | 18.549 |
| 2015          | 26453  | 2237.016 | 497.313  | 1739.703 | 6.577  | 77.769 | 324.759 | 27.554 | 6.105  | 21.448 |
| 2016          | 26887  | 2229.057 | 457.327  | 1771.730 | 6.589  | 79.483 | 326.849 | 27.194 | 5.559  | 21.635 |
| 2017          | 27789  | 2221.649 | 421.782  | 1799.867 | 6.477  | 81.015 | 334.505 | 26.848 | 5.077  | 21.770 |
| 2018          | 25429  | 1939.420 | 342.694  | 1596.726 | 6.279  | 82.330 | 303.090 | 23.214 | 4.085  | 19.130 |
| 2019          | 25619  | 1904.400 | 310.751  | 1593.648 | 6.221  | 83.682 | 302.300 | 22.574 | 3.667  | 18.908 |
| 2020          | 25587  | 1806.054 | 275.461  | 1530.593 | 5.982  | 84.748 | 341.810 | 24.261 | 3.680  | 20.581 |
| 2021          | 25674  | 1748.172 | 247.430  | 1500.743 | 5.845  | 85.846 | 340.366 | 23.314 | 3.280  | 20.034 |
| 2022          | 25783  | 1701.148 | 224.689  | 1476.459 | 5.726  | 86.792 | 339.078 | 22.515 | 2.955  | 19.560 |
| 2023          | 25883  | 1652.087 | 205.345  | 1446.742 | 5.590  | 87.571 | 337.610 | 21.696 | 2.678  | 19.018 |
| 2024          | 25940  | 1597.127 | 186.257  | 1410.870 | 5.439  | 88.338 | 335.628 | 20.814 | 2.410  | 18.404 |
| 2025          | 25560  | 1467.622 | 162.312  | 1305.310 | 5.107  | 88.940 | 381.130 | 22.075 | 2.420  | 19.654 |
| 2026          | 25804  | 1390.505 | 146.117  | 1244.388 | 4.822  | 89.492 | 383.125 | 20.835 | 2.169  | 18.666 |
| 2027          | 25606  | 1342.095 | 133.864  | 1208.231 | 4.719  | 90.026 | 378.471 | 20.030 | 1.979  | 18.051 |
| 2028          | 25382  | 1289.536 | 122.902  | 1166.634 | 4.596  | 90.469 | 373.397 | 19.165 | 1.808  | 17.357 |
| 2029          | 25145  | 1242.216 | 113.289  | 1128.927 | 4.490  | 90.880 | 368.087 | 18.380 | 1.658  | 16.722 |
| 2030          | 24352  | 1096.803 | 95.384   | 1001.420 | 4.112  | 91.303 | 421.151 | 19.210 | 1.650  | 17.561 |
| 2031          | 24381  | 1019.991 | 86.054   | 933.937  | 3.831  | 91.563 | 420.825 | 17.841 | 1.485  | 16.356 |
| 2032          | 24050  | 977.406  | 79.629   | 897.777  | 3.733  | 91.853 | 414.066 | 17.063 | 1.371  | 15.692 |
| 2033          | 23711  | 937.450  | 74.846   | 862.604  | 3.638  | 92.016 | 406.985 | 16.326 | 1.285  | 15.041 |
| 2034          | 23346  | 900.763  | 70.264   | 830.499  | 3.557  | 92.200 | 399.398 | 15.644 | 1.202  | 14.442 |
| 2035          | 22211  | 745.023  | 56.035   | 688.988  | 3.102  | 92.479 | 464.095 | 15.845 | 1.171  | 14.674 |
| 2036          | 21387  | 680.360  | 49.719   | 630.640  | 2.949  | 92.692 | 447.247 | 14.492 | 1.040  | 13.452 |
| 2037          | 20889  | 644.109  | 46.423   | 597.687  | 2.861  | 92.793 | 436.900 | 13.730 | 0.971  | 12.759 |
| 2038          | 20391  | 612.448  | 43.778   | 568.670  | 2.789  | 92.852 | 426.199 | 13.055 | 0.915  | 12.140 |
| 2039          | 19901  | 577.529  | 41.210   | 536.319  | 2.695  | 92.864 | 415.280 | 12.298 | 0.860  | 11.438 |

## Results for PHIM for Run 8 (Sensitivity\_Analysis\_4.RTF)

\*\*\*\*\*

### Main Results for E-Component for Run: 8, Simulation: 1, COD: COPD, Adjusted

| Variable Parameter          | Value                                  |
|-----------------------------|----------------------------------------|
| 1. Country                  | US (United States)                     |
| 2. Sex                      | F (Females)                            |
| 3. Year of start of process | 1990                                   |
| 4. Cause of Death           | COPD                                   |
| 5. Effective Dose NULL      | CC:1                                   |
| 6. Effective Dose Ecig      | CC:1 Ecig:0.05 Dual:0.525              |
| Note:                       | Death rates are per million population |

### Results for Age Groups Combined and Years combined, Population and Number deaths adjusted for Ecig scenario,

| Age Group:All | NULL    | Ecig       | %Drop      |          |        |        | NULL    | Ecig    | Drop    |        |
|---------------|---------|------------|------------|----------|--------|--------|---------|---------|---------|--------|
| Year          | Number  | Attrib     | Attrib     | Drop     | %Drop  | Attrib | Death   | Attrib  | Attrib  | Drop   |
|               | Deaths  | Deaths     | Deaths     | Deaths   | Deaths | Deaths | Rate    | Rates   | Rates   | Rates  |
| All Comb      | 2181349 | 862051.244 | 555497.385 | 306553.9 | 14.053 | 35.561 | 596.011 | 236.673 | 151.779 | 84.894 |

### Results for Age Groups Combined, Population and Number deaths adjusted for Ecig scenario,

| Age Group:All | NULL   | Ecig      | %Drop     |          |        |        | NULL    | Ecig    | Drop    |         |
|---------------|--------|-----------|-----------|----------|--------|--------|---------|---------|---------|---------|
| Year          | Number | Attrib    | Attrib    | Drop     | %Drop  | Attrib | Death   | Attrib  | Attrib  | Drop    |
|               | Deaths | Deaths    | Deaths    | Deaths   | Deaths | Deaths | Rate    | Rates   | Rates   | Rates   |
| 1990          | 24738  | 10694.712 | 10694.712 | 0.000    | 0.000  | 0.000  | 362.296 | 156.628 | 156.628 | 0.000   |
| 1991          | 26562  | 11602.933 | 11584.706 | 18.227   | 0.069  | 0.157  | 383.818 | 167.661 | 167.398 | 0.263   |
| 1992          | 26828  | 11831.375 | 11781.202 | 50.173   | 0.187  | 0.424  | 382.401 | 168.642 | 167.926 | 0.716   |
| 1993          | 29774  | 13246.371 | 13138.249 | 108.123  | 0.363  | 0.816  | 418.408 | 186.148 | 184.627 | 1.521   |
| 1994          | 29805  | 13355.662 | 13183.994 | 171.668  | 0.576  | 1.285  | 412.606 | 184.893 | 182.513 | 2.381   |
| 1995          | 29757  | 13397.439 | 13142.662 | 254.778  | 0.856  | 1.902  | 405.549 | 182.598 | 179.118 | 3.480   |
| 1996          | 30903  | 13960.356 | 13604.609 | 355.746  | 1.151  | 2.548  | 415.697 | 187.801 | 183.002 | 4.799   |
| 1997          | 31133  | 14109.552 | 13644.771 | 464.781  | 1.493  | 3.294  | 412.976 | 187.180 | 180.994 | 6.186   |
| 1998          | 32104  | 14599.657 | 13991.633 | 608.025  | 1.894  | 4.165  | 419.844 | 190.958 | 182.976 | 7.982   |
| 1999          | 34628  | 15728.102 | 14939.363 | 788.739  | 2.278  | 5.015  | 446.736 | 202.950 | 192.730 | 10.220  |
| 2000          | 34316  | 15579.803 | 14642.017 | 937.786  | 2.733  | 6.019  | 437.174 | 198.541 | 186.535 | 12.006  |
| 2001          | 34614  | 15696.614 | 14567.163 | 1129.452 | 3.263  | 7.196  | 436.050 | 197.812 | 183.508 | 14.304  |
| 2002          | 34319  | 15519.777 | 14208.865 | 1310.912 | 3.820  | 8.447  | 428.057 | 193.668 | 177.224 | 16.445  |
| 2003          | 35110  | 15888.389 | 14339.419 | 1548.970 | 4.412  | 9.749  | 433.777 | 196.413 | 177.158 | 19.255  |
| 2004          | 33555  | 15091.573 | 13410.438 | 1681.135 | 5.010  | 11.140 | 410.370 | 184.701 | 164.007 | 20.694  |
| 2005          | 35446  | 15803.656 | 13795.032 | 2008.624 | 5.667  | 12.710 | 428.650 | 191.278 | 166.822 | 24.456  |
| 2006          | 34043  | 15100.563 | 12962.138 | 2138.425 | 6.282  | 14.161 | 408.027 | 181.174 | 155.359 | 25.815  |
| 2007          | 34073  | 14974.384 | 12608.608 | 2365.775 | 6.943  | 15.799 | 404.246 | 177.871 | 149.592 | 28.279  |
| 2008          | 37518  | 16406.197 | 13568.252 | 2837.945 | 7.564  | 17.298 | 440.221 | 192.768 | 159.206 | 33.561  |
| 2009          | 36930  | 16083.194 | 13000.150 | 3083.044 | 8.348  | 19.169 | 428.368 | 186.846 | 150.795 | 36.051  |
| 2010          | 36906  | 15927.400 | 12622.951 | 3304.449 | 8.954  | 20.747 | 423.101 | 182.917 | 144.714 | 38.203  |
| 2011          | 37771  | 16221.836 | 12550.788 | 3671.048 | 9.719  | 22.630 | 428.860 | 184.547 | 142.504 | 42.043  |
| 2012          | 38419  | 16358.849 | 12352.189 | 4006.661 | 10.429 | 24.492 | 431.655 | 184.202 | 138.784 | 45.418  |
| 2013          | 40291  | 16994.822 | 12494.025 | 4500.797 | 11.171 | 26.483 | 447.732 | 189.311 | 138.839 | 50.471  |
| 2014          | 40282  | 16855.093 | 12052.040 | 4803.054 | 11.924 | 28.496 | 442.610 | 185.696 | 132.427 | 53.269  |
| 2015          | 42430  | 17572.483 | 12287.229 | 5285.254 | 12.456 | 30.077 | 520.910 | 216.445 | 150.850 | 65.595  |
| 2016          | 42860  | 17579.955 | 11905.987 | 5673.968 | 13.238 | 32.275 | 521.012 | 214.473 | 144.732 | 69.742  |
| 2017          | 44653  | 18080.688 | 11855.389 | 6225.300 | 13.942 | 34.431 | 537.505 | 218.496 | 142.708 | 75.788  |
| 2018          | 45683  | 18209.262 | 11588.890 | 6620.372 | 14.492 | 36.357 | 544.502 | 217.960 | 138.130 | 79.830  |
| 2019          | 47240  | 18648.302 | 11473.881 | 7174.421 | 15.187 | 38.472 | 557.422 | 221.054 | 135.389 | 85.665  |
| 2020          | 48740  | 19002.597 | 11352.920 | 7649.677 | 15.695 | 40.256 | 651.105 | 255.266 | 151.662 | 103.604 |
| 2021          | 48780  | 18885.717 | 10862.937 | 8022.780 | 16.447 | 42.481 | 646.674 | 251.867 | 144.011 | 107.856 |
| 2022          | 50195  | 19235.076 | 10672.590 | 8562.486 | 17.058 | 44.515 | 660.127 | 254.582 | 140.357 | 114.224 |
| 2023          | 51620  | 19521.158 | 10464.844 | 9056.314 | 17.544 | 46.392 | 673.317 | 256.363 | 136.499 | 119.863 |
| 2024          | 52987  | 19918.620 | 10263.016 | 9655.604 | 18.222 | 48.475 | 685.570 | 259.583 | 132.787 | 126.797 |
| 2025          | 54032  | 20150.545 | 10012.155 | 10138.39 | 18.764 | 50.313 | 805.687 | 303.086 | 149.295 | 153.791 |
| 2026          | 54935  | 20393.792 | 9714.365  | 10679.43 | 19.440 | 52.366 | 815.638 | 305.582 | 144.232 | 161.350 |
| 2027          | 55808  | 20615.351 | 9394.728  | 11220.62 | 20.106 | 54.428 | 824.881 | 307.668 | 138.860 | 168.809 |
| 2028          | 56626  | 20731.894 | 9032.529  | 11699.36 | 20.661 | 56.432 | 833.040 | 308.115 | 132.880 | 175.234 |
| 2029          | 57405  | 20781.967 | 8650.995  | 12130.97 | 21.132 | 58.373 | 840.339 | 307.495 | 126.641 | 180.854 |
| 2030          | 57694  | 20753.201 | 8280.408  | 12472.79 | 21.619 | 60.101 | 997.755 | 363.487 | 143.201 | 220.286 |
| 2031          | 59321  | 21048.417 | 8159.577  | 12888.84 | 21.727 | 61.234 | 1023.91 | 368.165 | 140.837 | 227.327 |
| 2032          | 59883  | 21169.329 | 7826.300  | 13343.03 | 22.282 | 63.030 | 1030.97 | 369.560 | 134.742 | 234.818 |
| 2033          | 60405  | 21109.293 | 7459.045  | 13650.25 | 22.598 | 64.665 | 1036.82 | 367.618 | 128.032 | 239.586 |
| 2034          | 60852  | 21109.429 | 7096.523  | 14012.91 | 23.028 | 66.382 | 1041.02 | 366.613 | 121.404 | 245.209 |
| 2035          | 60238  | 20794.840 | 6717.829  | 14077.01 | 23.369 | 67.695 | 1258.69 | 442.268 | 140.371 | 301.897 |
| 2036          | 57318  | 19354.577 | 5985.274  | 13369.30 | 23.325 | 69.076 | 1198.66 | 412.258 | 125.167 | 287.091 |
| 2037          | 57313  | 19064.169 | 5554.604  | 13509.57 | 23.571 | 70.864 | 1198.74 | 406.385 | 116.178 | 290.207 |
| 2038          | 57276  | 18854.812 | 5205.849  | 13648.96 | 23.830 | 72.390 | 1197.17 | 401.900 | 108.811 | 293.089 |
| 2039          | 57231  | 18437.457 | 4799.549  | 13637.91 | 23.830 | 73.968 | 1194.28 | 392.602 | 100.156 | 292.446 |

## Results for PHIM for Run 2 (ELL Summary Sensitivity\_Analysis\_4.RTF)

\*\*\*\*\*

### Estimated Loss of Life from the E Component for Run: 2, Simulation: 1

Country: US (United States)  
 Follow-up Period: 1990 to 2039

**Table 1: Estimated Loss of Life, at the end of follow-up, all age groups combined, Population unadjusted for deaths in Ecig scenario**

| Disease      | Sex    | Year | Years of life lost<br>NULL | Years of life lost<br>Ecig | Years of life<br>Saved |
|--------------|--------|------|----------------------------|----------------------------|------------------------|
| All Diseases | Males  | 2039 | 42093547.949               | 24750042.607               | 17343505.3             |
|              | Female | 2039 | 23817891.273               | 14797878.376               | 9020012.90             |
| Lung cancer  | Males  | 2039 | 18222549.860               | 13636145.173               | 4586404.69             |
|              | Female | 2039 | 12512468.845               | 8920007.375                | 3592461.47             |
| IHD          | Males  | 2039 | 15635992.616               | 6347207.742                | 9288784.87             |
|              | Female | 2039 | 4798769.065                | 2021012.822                | 2777756.24             |
| Stroke       | Males  | 2039 | 2389546.238                | 1126000.737                | 1263545.50             |
|              | Female | 2039 | 1665361.569                | 835705.244                 | 829656.325             |
| COPD         | Males  | 2039 | 5845459.234                | 3640688.955                | 2204770.28             |
|              | Female | 2039 | 4841291.793                | 3021152.934                | 1820138.86             |

## Results for PHIM for Run 2 (ELL Summary Sensitivity\_Analysis\_4.RTF)

\*\*\*\*\*

**Table 2: Estimated Loss of Life, at the end of follow-up, all age groups combined, Population and Number deaths adjusted for Ecig scenario**

| Disease      | Sex    | Year | Years of life lost<br>NULL | Years of life lost<br>Ecig | Years of life<br>Saved |
|--------------|--------|------|----------------------------|----------------------------|------------------------|
| All Diseases | Males  | 2039 | 42093547.949               | 24848023.106               | 17245524.8             |
|              | Female | 2039 | 23817891.273               | 14834741.578               | 8983149.69             |
| Lung cancer  | Males  | 2039 | 18222549.860               | 13696520.338               | 4526029.52             |
|              | Female | 2039 | 12512468.845               | 8942975.028                | 3569493.82             |
| IHD          | Males  | 2039 | 15635992.616               | 6358232.973                | 9277759.64             |
|              | Female | 2039 | 4798769.065                | 2022858.745                | 2775910.32             |
| Stroke       | Males  | 2039 | 2389546.238                | 1128139.172                | 1261407.07             |
|              | Female | 2039 | 1665361.569                | 836369.172                 | 828992.397             |
| COPD         | Males  | 2039 | 5845459.234                | 3665130.624                | 2180328.61             |
|              | Female | 2039 | 4841291.793                | 3032538.634                | 1808753.16             |

## Results for PHIM for Run 2 (ELL Summary Sensitivity\_Analysis\_4.RTF)

\*\*\*\*\*

**Table 3: Estimated Loss of Life, All age groups combined, Population unadjusted for deaths in Ecig scenario, cumulative over years**

| Disease      | Sex          | Year         | Years of life lost<br>NULL | Years of life lost<br>Ecig | Years of life<br>Saved |
|--------------|--------------|--------------|----------------------------|----------------------------|------------------------|
| All Diseases | Males        | 1990         | 1304839.645                | 1304839.645                | 0.000                  |
|              |              | 1991         | 2579865.358                | 2571191.527                | 8673.830               |
|              |              | 1992         | 3830683.831                | 3798433.770                | 32250.061              |
|              |              | 1993         | 5076567.803                | 5000942.912                | 75624.891              |
|              |              | 1994         | 6292145.526                | 6149965.471                | 142180.055             |
|              |              | 1995         | 7485537.010                | 7250133.244                | 235403.765             |
|              |              | 1996         | 8655955.028                | 8299428.436                | 356526.592             |
|              |              | 1997         | 9791729.713                | 9287371.184                | 504358.529             |
|              |              | 1998         | 10899134.186               | 10221631.097               | 677503.089             |
|              |              | 1999         | 12070409.674               | 11161433.419               | 908976.255             |
|              |              | 2000         | 13231384.595               | 12060685.729               | 1170698.87             |
|              |              | 2001         | 14371761.018               | 12909573.927               | 1462187.09             |
|              |              | 2002         | 15508906.386               | 13720701.000               | 1788205.39             |
|              |              | 2003         | 16638100.422               | 14494346.601               | 2143753.82             |
|              |              | 2004         | 17736465.088               | 15220157.670               | 2516307.42             |
|              |              | 2005         | 18834658.606               | 15919622.000               | 2915036.61             |
|              |              | 2006         | 19909100.501               | 16572790.633               | 3336309.87             |
|              |              | 2007         | 20958321.463               | 17187459.162               | 3770862.30             |
|              |              | 2008         | 22000068.148               | 17777899.419               | 4222168.73             |
|              |              | 2009         | 23018816.903               | 18335497.155               | 4683319.75             |
|              |              | 2010         | 24018480.537               | 18861749.822               | 5156730.71             |
|              |              | 2011         | 25003034.574               | 19360363.098               | 5642671.48             |
|              |              | 2012         | 25969871.429               | 19830036.447               | 6139834.98             |
|              |              | 2013         | 26920275.180               | 20272926.306               | 6647348.87             |
|              |              | 2014         | 27849005.227               | 20687283.673               | 7161721.55             |
|              |              | 2015         | 28749620.400               | 21076973.925               | 7672646.48             |
|              |              | 2016         | 29622417.562               | 21433151.617               | 8189265.94             |
|              |              | 2017         | 30462559.724               | 21758563.117               | 8703996.61             |
|              |              | 2018         | 31293299.299               | 22070361.791               | 9222937.51             |
|              |              | 2019         | 32109993.427               | 22364123.545               | 9745869.88             |
|              |              | 2020         | 32883323.977               | 22637135.718               | 10246188.3             |
|              |              | 2021         | 33610102.554               | 22872647.751               | 10737454.8             |
|              |              | 2022         | 34322010.448               | 23092693.418               | 11229317.0             |
|              |              | 2023         | 35018383.550               | 23297410.089               | 11720973.5             |
|              |              | 2024         | 35700177.955               | 23487786.550               | 12212391.4             |
|              |              | 2025         | 36315500.346               | 23659660.888               | 12655839.5             |
|              |              | 2026         | 36896159.343               | 23804323.463               | 13091835.9             |
|              |              | 2027         | 37462570.116               | 23937987.678               | 13524582.4             |
|              |              | 2028         | 38015337.780               | 24060810.998               | 13954526.8             |
|              |              | 2029         | 38554814.764               | 24173657.406               | 14381157.4             |
|              |              | 2030         | 39003805.400               | 24270641.356               | 14733164.0             |
| 2031         | 39436509.703 | 24351801.663 | 15084708.0                 |                            |                        |
| 2032         | 39858470.458 | 24426281.339 | 15432189.1                 |                            |                        |
| 2033         | 40270147.082 | 24493868.255 | 15776278.8                 |                            |                        |
| 2034         | 40672665.743 | 24555274.935 | 16117390.8                 |                            |                        |
| 2035         | 40962732.664 | 24602742.361 | 16359990.3                 |                            |                        |
| 2036         | 41255021.653 | 24644645.378 | 16610376.3                 |                            |                        |
| 2037         | 41540573.023 | 24683182.299 | 16857390.7                 |                            |                        |
| 2038         | 41820158.066 | 24718205.274 | 17101952.8                 |                            |                        |
| 2039         | 42093547.949 | 24750042.607 | 17343505.3                 |                            |                        |
|              | Female       | 1990         | 588979.406                 | 588979.406                 | 0.000                  |
|              |              | 1991         | 1182571.252                | 1179606.223                | 2965.030               |
|              |              | 1992         | 1777346.679                | 1766095.972                | 11250.708              |
|              |              | 1993         | 2380261.899                | 2353262.174                | 26999.725              |
|              |              | 1994         | 2983130.039                | 2931318.012                | 51812.027              |
|              |              | 1995         | 3588982.584                | 3501950.709                | 87031.875              |
|              |              | 1996         | 4195430.235                | 4060555.280                | 134874.954             |
|              |              | 1997         | 4793866.694                | 4600663.426                | 193203.268             |
|              |              | 1998         | 5389747.381                | 5126512.750                | 263234.631             |
|              |              | 1999         | 6006722.467                | 5652692.893                | 354029.574             |
|              |              | 2000         | 6625758.871                | 6167983.534                | 457775.336             |
|              |              | 2001         | 7245135.411                | 6668428.358                | 576707.053             |
|              |              | 2002         | 7867492.021                | 7156159.733                | 711332.288             |
|              |              | 2003         | 8485051.793                | 7626394.931                | 858656.862             |
|              |              | 2004         | 9092994.774                | 8075717.938                | 1017276.84             |
|              |              | 2005         | 9706032.803                | 8515378.561                | 1190654.24             |
|              |              | 2006         | 10311907.548               | 8935696.166                | 1376211.38             |
|              |              | 2007         | 10909437.502               | 9338736.641                | 1570700.86             |
|              |              | 2008         | 11506462.491               | 9726361.379                | 1780101.11             |
|              |              | 2009         | 12098393.287               | 10100407.074               | 1997986.21             |
|              |              | 2010         | 12681188.981               | 10456172.342               | 2225016.64             |



**Results for PHIM for Run 2 (ELL Summary Sensitivity\_Analysis\_4.RTF)**

|             |       |      |              |              |            |
|-------------|-------|------|--------------|--------------|------------|
|             |       | 2011 | 13260062.991 | 10796655.027 | 2463407.96 |
|             |       | 2012 | 13839417.441 | 11124442.482 | 2714974.96 |
|             |       | 2013 | 14409614.758 | 11436366.921 | 2973247.84 |
|             |       | 2014 | 14976658.746 | 11732852.295 | 3243806.45 |
|             |       | 2015 | 15529977.821 | 12012535.438 | 3517442.38 |
|             |       | 2016 | 16066640.764 | 12271569.006 | 3795071.76 |
|             |       | 2017 | 16590035.078 | 12513527.096 | 4076507.98 |
|             |       | 2018 | 17098716.137 | 12741829.502 | 4356886.63 |
|             |       | 2019 | 17599868.850 | 12957119.058 | 4642749.79 |
|             |       | 2020 | 18081346.241 | 13158387.963 | 4922958.28 |
|             |       | 2021 | 18537594.460 | 13339079.957 | 5198514.50 |
|             |       | 2022 | 18985300.234 | 13508231.953 | 5477068.28 |
|             |       | 2023 | 19423958.747 | 13666258.106 | 5757700.64 |
|             |       | 2024 | 19853347.772 | 13813024.910 | 6040322.86 |
|             |       | 2025 | 20252822.245 | 13946958.644 | 6305863.60 |
|             |       | 2026 | 20619307.063 | 14062145.231 | 6557161.83 |
|             |       | 2027 | 20976063.406 | 14168255.490 | 6807807.92 |
|             |       | 2028 | 21323641.947 | 14266233.804 | 7057408.14 |
|             |       | 2029 | 21662117.106 | 14355988.267 | 7306128.84 |
|             |       | 2030 | 21960971.694 | 14434796.239 | 7526175.45 |
|             |       | 2031 | 22224951.983 | 14498164.202 | 7726787.78 |
|             |       | 2032 | 22480397.853 | 14555590.521 | 7924807.33 |
|             |       | 2033 | 22728639.455 | 14607959.022 | 8120680.43 |
|             |       | 2034 | 22970448.888 | 14655307.034 | 8315141.85 |
|             |       | 2035 | 23164154.188 | 14693699.862 | 8470454.33 |
|             |       | 2036 | 23334538.616 | 14723710.634 | 8610827.98 |
|             |       | 2037 | 23499760.723 | 14750853.355 | 8748907.37 |
|             |       | 2038 | 23660308.401 | 14775482.856 | 8884825.55 |
|             |       | 2039 | 23817891.273 | 14797878.376 | 9020012.90 |
| Lung cancer | Males | 1990 | 595621.791   | 595621.791   | 0.000      |
|             |       | 1991 | 1177744.113  | 1177096.214  | 647.899    |
|             |       | 1992 | 1750034.892  | 1747588.511  | 2446.381   |
|             |       | 1993 | 2319752.308  | 2313793.394  | 5958.913   |
|             |       | 1994 | 2872597.339  | 2861044.702  | 11552.637  |
|             |       | 1995 | 3411494.825  | 3391836.816  | 19658.010  |
|             |       | 1996 | 3945569.726  | 3914493.862  | 31075.864  |
|             |       | 1997 | 4463316.362  | 4417527.455  | 45788.907  |
|             |       | 1998 | 4975301.180  | 4910805.533  | 64495.647  |
|             |       | 1999 | 5473691.125  | 5386264.500  | 87426.625  |
|             |       | 2000 | 5977500.570  | 5861399.089  | 116101.481 |
|             |       | 2001 | 6474795.516  | 6324323.397  | 150472.119 |
|             |       | 2002 | 6968769.705  | 6777526.235  | 191243.470 |
|             |       | 2003 | 7460282.140  | 7221038.441  | 239243.698 |
|             |       | 2004 | 7947048.275  | 7652751.153  | 294297.123 |
|             |       | 2005 | 8430571.669  | 8073635.705  | 356935.963 |
|             |       | 2006 | 8903945.390  | 8476979.716  | 426965.674 |
|             |       | 2007 | 9364177.982  | 8860543.558  | 503634.424 |
|             |       | 2008 | 9822525.458  | 9232912.943  | 589612.516 |
|             |       | 2009 | 10275228.886 | 9591185.789  | 684043.098 |
|             |       | 2010 | 10720275.500 | 9934066.395  | 786209.105 |
|             |       | 2011 | 11155356.373 | 10259662.559 | 895693.815 |
|             |       | 2012 | 11582611.617 | 10568656.402 | 1013955.21 |
|             |       | 2013 | 11998803.791 | 10859519.077 | 1139284.71 |
|             |       | 2014 | 12402087.090 | 11131615.924 | 1270471.17 |
|             |       | 2015 | 12793451.706 | 11386797.121 | 1406654.58 |
|             |       | 2016 | 13160101.653 | 11616345.975 | 1543755.68 |
|             |       | 2017 | 13503583.414 | 11822692.513 | 1680890.90 |
|             |       | 2018 | 13859755.737 | 12025677.141 | 1834078.60 |
|             |       | 2019 | 14211625.176 | 12216928.926 | 1994696.25 |
|             |       | 2020 | 14553935.288 | 12395329.991 | 2158605.30 |
|             |       | 2021 | 14851747.495 | 12542488.171 | 2309259.32 |
|             |       | 2022 | 15144531.004 | 12679564.858 | 2464966.15 |
|             |       | 2023 | 15431932.496 | 12806689.335 | 2625243.16 |
|             |       | 2024 | 15713920.740 | 12924454.213 | 2789466.53 |
|             |       | 2025 | 15979112.816 | 13030968.560 | 2948144.26 |
|             |       | 2026 | 16206550.153 | 13115474.298 | 3091075.86 |
|             |       | 2027 | 16428826.050 | 13193020.181 | 3235805.87 |
|             |       | 2028 | 16645902.186 | 13263859.192 | 3382042.99 |
|             |       | 2029 | 16858126.517 | 13328664.862 | 3529461.66 |
|             |       | 2030 | 17045220.687 | 13384476.463 | 3660744.22 |
|             |       | 2031 | 17208482.610 | 13428106.350 | 3780376.26 |
|             |       | 2032 | 17367586.074 | 13467887.752 | 3899698.32 |
|             |       | 2033 | 17522716.280 | 13503833.741 | 4018882.54 |
|             |       | 2034 | 17674226.555 | 13536424.565 | 4137801.99 |
|             |       | 2035 | 17792201.734 | 13561702.648 | 4230499.09 |
|             |       | 2036 | 17903508.236 | 13582927.760 | 4320580.48 |
|             |       | 2037 | 18012162.345 | 13602427.163 | 4409735.18 |
|             |       | 2038 | 18118464.470 | 13620095.728 | 4498368.74 |

**Results for PHIM for Run 2 (ELL Summary Sensitivity\_Analysis\_4.RTF)**

|     |        |      |              |              |            |
|-----|--------|------|--------------|--------------|------------|
|     | Female | 2039 | 18222549.860 | 13636145.173 | 4586404.69 |
|     |        | 1990 | 307897.357   | 307897.357   | 0.000      |
|     |        | 1991 | 616547.418   | 616130.920   | 416.498    |
|     |        | 1992 | 931086.773   | 929437.066   | 1649.707   |
|     |        | 1993 | 1246155.671  | 1242093.564  | 4062.107   |
|     |        | 1994 | 1561212.934  | 1553213.491  | 7999.443   |
|     |        | 1995 | 1879967.742  | 1866031.791  | 13935.951  |
|     |        | 1996 | 2197488.109  | 2175330.581  | 22157.528  |
|     |        | 1997 | 2515698.453  | 2482607.570  | 33090.883  |
|     |        | 1998 | 2836249.556  | 2789165.572  | 47083.984  |
|     |        | 1999 | 3150201.390  | 3086073.718  | 64127.671  |
|     |        | 2000 | 3472722.342  | 3387448.699  | 85273.644  |
|     |        | 2001 | 3796994.889  | 3686137.621  | 110857.269 |
|     |        | 2002 | 4126619.935  | 3984984.820  | 141635.115 |
|     |        | 2003 | 4454982.533  | 4277776.268  | 177206.266 |
|     |        | 2004 | 4784343.030  | 4565942.574  | 218400.456 |
|     |        | 2005 | 5113443.121  | 4848134.295  | 265308.826 |
|     |        | 2006 | 5442543.963  | 5123739.437  | 318804.526 |
|     |        | 2007 | 5772441.497  | 5393458.421  | 378983.075 |
|     |        | 2008 | 6091911.943  | 5647982.860  | 443929.083 |
|     |        | 2009 | 6413671.330  | 5896907.024  | 516764.306 |
|     |        | 2010 | 6730763.530  | 6135506.013  | 595257.517 |
|     |        | 2011 | 7043614.101  | 6363537.535  | 680076.566 |
|     |        | 2012 | 7356270.780  | 6583900.357  | 772370.423 |
|     |        | 2013 | 7662551.964  | 6792393.741  | 870158.222 |
|     |        | 2014 | 7964551.465  | 6990607.388  | 973944.077 |
|     |        | 2015 | 8254895.403  | 7175038.568  | 1079856.84 |
|     |        | 2016 | 8530661.848  | 7343073.360  | 1187588.49 |
|     |        | 2017 | 8795826.122  | 7498279.115  | 1297547.01 |
|     |        | 2018 | 9067233.707  | 7649252.057  | 1417981.65 |
|     |        | 2019 | 9335343.270  | 7791302.460  | 1544040.81 |
|     |        | 2020 | 9596110.883  | 7923933.240  | 1672177.64 |
|     |        | 2021 | 9833186.859  | 8039550.475  | 1793636.38 |
|     |        | 2022 | 10066452.037 | 8147361.199  | 1919090.84 |
|     |        | 2023 | 10295503.609 | 8247650.459  | 2047853.15 |
|     |        | 2024 | 10520125.318 | 8340354.046  | 2179771.27 |
|     |        | 2025 | 10731915.863 | 8424510.694  | 2307405.17 |
|     |        | 2026 | 10917495.549 | 8494369.212  | 2423126.34 |
|     |        | 2027 | 11098620.885 | 8558362.130  | 2540258.75 |
|     |        | 2028 | 11275441.234 | 8617135.374  | 2658305.86 |
|     |        | 2029 | 11447962.710 | 8670666.058  | 2777296.65 |
|     |        | 2030 | 11601867.623 | 8717229.882  | 2884637.74 |
|     |        | 2031 | 11731666.516 | 8753343.118  | 2978323.40 |
|     |        | 2032 | 11857585.969 | 8785944.837  | 3071641.13 |
|     |        | 2033 | 11980128.625 | 8815554.626  | 3164574.00 |
|     |        | 2034 | 12099562.464 | 8842239.242  | 3257323.22 |
|     |        | 2035 | 12195919.946 | 8863513.437  | 3332406.51 |
|     |        | 2036 | 12278201.969 | 8879755.506  | 3398446.46 |
|     |        | 2037 | 12358146.336 | 8894470.892  | 3463675.44 |
|     |        | 2038 | 12435978.633 | 8907836.207  | 3528142.43 |
|     |        | 2039 | 12512468.845 | 8920007.375  | 3592461.47 |
| IHD | Males  | 1990 | 517209.093   | 517209.093   | 0.000      |
|     |        | 1991 | 1019219.395  | 1012116.384  | 7103.011   |
|     |        | 1992 | 1509598.614  | 1483223.353  | 26375.261  |
|     |        | 1993 | 1992735.299  | 1931291.523  | 61443.776  |
|     |        | 1994 | 2462877.575  | 2348230.604  | 114646.971 |
|     |        | 1995 | 2928249.390  | 2739576.131  | 188673.258 |
|     |        | 1996 | 3377377.730  | 3093747.374  | 283630.356 |
|     |        | 1997 | 3809062.472  | 3410946.064  | 398116.408 |
|     |        | 1998 | 4222213.867  | 3691938.681  | 530275.186 |
|     |        | 1999 | 4708317.743  | 3995740.097  | 712577.646 |
|     |        | 2000 | 5182084.396  | 4267459.437  | 914624.959 |
|     |        | 2001 | 5644097.705  | 4507417.672  | 1136680.03 |
|     |        | 2002 | 6107232.129  | 4724828.258  | 1382403.87 |
|     |        | 2003 | 6561785.704  | 4916872.529  | 1644913.18 |
|     |        | 2004 | 6996156.348  | 5082341.634  | 1913814.71 |
|     |        | 2005 | 7426261.361  | 5230352.761  | 2195908.60 |
|     |        | 2006 | 7849012.694  | 5360001.556  | 2489011.14 |
|     |        | 2007 | 8255300.530  | 5471949.489  | 2783351.04 |
|     |        | 2008 | 8650662.040  | 5570198.557  | 3080463.48 |
|     |        | 2009 | 9030818.513  | 5655746.462  | 3375072.05 |
|     |        | 2010 | 9403026.327  | 5731620.221  | 3671406.11 |
|     |        | 2011 | 9767535.506  | 5798828.986  | 3968706.52 |
|     |        | 2012 | 10123044.281 | 5858617.884  | 4264426.40 |
|     |        | 2013 | 10470104.786 | 5911746.278  | 4558358.51 |
|     |        | 2014 | 10807756.112 | 5959156.446  | 4848599.67 |
|     |        | 2015 | 11130681.425 | 6001169.686  | 5129511.74 |
|     |        | 2016 | 11448966.506 | 6039234.398  | 5409732.11 |

**Results for PHIM for Run 2 (ELL Summary Sensitivity\_Analysis\_4.RTF)**

|        |        |      |              |             |            |
|--------|--------|------|--------------|-------------|------------|
|        |        | 2017 | 11758164.882 | 6073616.955 | 5684547.93 |
|        |        | 2018 | 12054448.241 | 6103506.857 | 5950941.38 |
|        |        | 2019 | 12341606.261 | 6130568.014 | 6211038.25 |
|        |        | 2020 | 12600728.939 | 6153846.589 | 6446882.35 |
|        |        | 2021 | 12861767.105 | 6175611.643 | 6686155.46 |
|        |        | 2022 | 13114168.616 | 6195538.296 | 6918630.32 |
|        |        | 2023 | 13357894.797 | 6213675.942 | 7144218.85 |
|        |        | 2024 | 13593848.521 | 6230292.164 | 7363556.36 |
|        |        | 2025 | 13789177.359 | 6243853.345 | 7545324.01 |
|        |        | 2026 | 13993401.656 | 6257223.265 | 7736178.39 |
|        |        | 2027 | 14190519.224 | 6269771.956 | 7920747.27 |
|        |        | 2028 | 14381193.356 | 6281336.880 | 8099856.48 |
|        |        | 2029 | 14565171.927 | 6291874.905 | 8273297.02 |
|        |        | 2030 | 14697381.605 | 6299585.655 | 8397795.95 |
|        |        | 2031 | 14842203.512 | 6307737.930 | 8534465.58 |
|        |        | 2032 | 14982485.826 | 6315526.745 | 8666959.08 |
|        |        | 2033 | 15118410.647 | 6322669.810 | 8795740.84 |
|        |        | 2034 | 15250284.398 | 6329124.232 | 8921160.17 |
|        |        | 2035 | 15322911.166 | 6332748.075 | 8990163.09 |
|        |        | 2036 | 15405115.031 | 6336695.546 | 9068419.49 |
|        |        | 2037 | 15484709.137 | 6340486.086 | 9144223.05 |
|        |        | 2038 | 15561812.193 | 6344012.983 | 9217799.21 |
|        |        | 2039 | 15635992.616 | 6347207.742 | 9288784.87 |
|        | Female | 1990 | 147299.110   | 147299.110  | 0.000      |
|        |        | 1991 | 295122.462   | 293257.305  | 1865.158   |
|        |        | 1992 | 439962.920   | 432980.229  | 6982.691   |
|        |        | 1993 | 584735.615   | 568175.829  | 16559.786  |
|        |        | 1994 | 727640.783   | 696324.097  | 31316.685  |
|        |        | 1995 | 868486.937   | 816722.014  | 51764.923  |
|        |        | 1996 | 1010321.847  | 930872.328  | 79449.520  |
|        |        | 1997 | 1144230.930  | 1032424.514 | 111806.416 |
|        |        | 1998 | 1274513.622  | 1124654.840 | 149858.782 |
|        |        | 1999 | 1426725.938  | 1224817.182 | 201908.756 |
|        |        | 2000 | 1573462.680  | 1314376.662 | 259086.018 |
|        |        | 2001 | 1719132.015  | 1395171.726 | 323960.289 |
|        |        | 2002 | 1863006.732  | 1467612.445 | 395394.287 |
|        |        | 2003 | 2002943.227  | 1531478.462 | 471464.766 |
|        |        | 2004 | 2137798.705  | 1587142.465 | 550656.240 |
|        |        | 2005 | 2271071.245  | 1637147.336 | 633923.909 |
|        |        | 2006 | 2400707.731  | 1680659.896 | 720047.835 |
|        |        | 2007 | 2523634.512  | 1717936.594 | 805697.918 |
|        |        | 2008 | 2648752.232  | 1752043.285 | 896708.947 |
|        |        | 2009 | 2765973.961  | 1781134.717 | 984839.244 |
|        |        | 2010 | 2881329.235  | 1807151.256 | 1074177.98 |
|        |        | 2011 | 2994972.694  | 1830320.922 | 1164651.77 |
|        |        | 2012 | 3108958.829  | 1851323.381 | 1257635.45 |
|        |        | 2013 | 3218140.416  | 1869908.138 | 1348232.28 |
|        |        | 2014 | 3328387.914  | 1887018.799 | 1441369.12 |
|        |        | 2015 | 3435342.796  | 1902565.516 | 1532777.28 |
|        |        | 2016 | 3539189.408  | 1916526.213 | 1622663.20 |
|        |        | 2017 | 3640041.363  | 1929063.977 | 1710977.39 |
|        |        | 2018 | 3732645.362  | 1939695.702 | 1792949.66 |
|        |        | 2019 | 3821421.978  | 1949169.436 | 1872252.54 |
|        |        | 2020 | 3902115.950  | 1957359.113 | 1944756.84 |
|        |        | 2021 | 3984301.053  | 1965145.324 | 2019155.73 |
|        |        | 2022 | 4062629.299  | 1972084.560 | 2090544.74 |
|        |        | 2023 | 4137348.729  | 1978332.622 | 2159016.11 |
|        |        | 2024 | 4208611.493  | 1983933.633 | 2224677.86 |
|        |        | 2025 | 4269419.492  | 1988628.364 | 2280791.13 |
|        |        | 2026 | 4330969.998  | 1993106.297 | 2337863.70 |
|        |        | 2027 | 4389134.306  | 1997130.967 | 2392003.34 |
|        |        | 2028 | 4444222.970  | 2000778.395 | 2443444.57 |
|        |        | 2029 | 4496447.877  | 2004099.224 | 2492348.65 |
|        |        | 2030 | 4536975.698  | 2006657.373 | 2530318.33 |
|        |        | 2031 | 4578338.586  | 2009153.031 | 2569185.55 |
|        |        | 2032 | 4617397.784  | 2011434.249 | 2605963.53 |
|        |        | 2033 | 4654407.697  | 2013539.796 | 2640867.90 |
|        |        | 2034 | 4689913.454  | 2015491.190 | 2674422.26 |
|        |        | 2035 | 4712518.190  | 2016714.683 | 2695803.51 |
|        |        | 2036 | 4735845.827  | 2017917.451 | 2717928.38 |
|        |        | 2037 | 4757958.806  | 2019025.020 | 2738933.79 |
|        |        | 2038 | 4778813.806  | 2020053.167 | 2758760.64 |
|        |        | 2039 | 4798769.065  | 2021012.822 | 2777756.24 |
| Stroke | Males  | 1990 | 75005.854    | 75005.854   | 0.000      |
|        |        | 1991 | 149463.017   | 148743.129  | 719.889    |
|        |        | 1992 | 222966.278   | 220289.412  | 2676.866   |
|        |        | 1993 | 296801.879   | 290425.146  | 6376.732   |
|        |        | 1994 | 372453.706   | 360102.827  | 12350.879  |

**Results for PHIM for Run 2 (ELL Summary Sensitivity\_Analysis\_4.RTF)**

|        |      |             |             |            |
|--------|------|-------------|-------------|------------|
|        | 1995 | 448401.338  | 427517.224  | 20884.114  |
|        | 1996 | 523536.301  | 491398.001  | 32138.300  |
|        | 1997 | 596763.211  | 550661.650  | 46101.561  |
|        | 1998 | 667546.681  | 604944.995  | 62601.686  |
|        | 1999 | 734925.407  | 653704.801  | 81220.606  |
|        | 2000 | 803749.361  | 700543.478  | 103205.882 |
|        | 2001 | 870081.588  | 742647.556  | 127434.033 |
|        | 2002 | 935347.140  | 781240.200  | 154106.940 |
|        | 2003 | 1001627.349 | 817411.496  | 184215.854 |
|        | 2004 | 1066587.976 | 850230.746  | 216357.230 |
|        | 2005 | 1130548.052 | 879960.409  | 250587.642 |
|        | 2006 | 1195132.454 | 907453.617  | 287678.837 |
|        | 2007 | 1258974.043 | 932339.042  | 326635.001 |
|        | 2008 | 1320124.867 | 954044.555  | 366080.312 |
|        | 2009 | 1380776.123 | 973731.513  | 407044.611 |
|        | 2010 | 1440048.533 | 991358.341  | 448690.192 |
|        | 2011 | 1497484.847 | 1007002.523 | 490482.323 |
|        | 2012 | 1554496.526 | 1021082.114 | 533414.413 |
|        | 2013 | 1610819.598 | 1033787.812 | 577031.785 |
|        | 2014 | 1667484.890 | 1045383.866 | 622101.024 |
|        | 2015 | 1720948.287 | 1055533.271 | 665415.016 |
|        | 2016 | 1775699.228 | 1064992.766 | 710706.463 |
|        | 2017 | 1830250.175 | 1073637.499 | 756612.676 |
|        | 2018 | 1875958.950 | 1080330.875 | 795628.075 |
|        | 2019 | 1920359.232 | 1086319.873 | 834039.358 |
|        | 2020 | 1960605.297 | 1091417.256 | 869188.041 |
|        | 2021 | 1998912.887 | 1095894.353 | 903018.534 |
|        | 2022 | 2036003.696 | 1099903.441 | 936100.255 |
|        | 2023 | 2071857.536 | 1103493.049 | 968364.488 |
|        | 2024 | 2106636.468 | 1106739.824 | 999896.645 |
|        | 2025 | 2136450.873 | 1109400.824 | 1027050.05 |
|        | 2026 | 2164796.470 | 1111760.843 | 1053035.63 |
|        | 2027 | 2192079.608 | 1113912.532 | 1078167.08 |
|        | 2028 | 2218404.367 | 1115856.322 | 1102548.04 |
|        | 2029 | 2243769.140 | 1117614.782 | 1126154.36 |
|        | 2030 | 2263570.213 | 1118953.400 | 1144616.81 |
|        | 2031 | 2282521.590 | 1120174.726 | 1162346.86 |
|        | 2032 | 2300804.945 | 1121302.980 | 1179501.96 |
|        | 2033 | 2318464.018 | 1122331.265 | 1196132.75 |
|        | 2034 | 2335611.973 | 1123270.092 | 1212341.88 |
|        | 2035 | 2347097.290 | 1123893.758 | 1223203.53 |
|        | 2036 | 2358248.747 | 1124475.017 | 1233773.73 |
|        | 2037 | 2369033.655 | 1125024.664 | 1244008.99 |
|        | 2038 | 2379490.114 | 1125535.239 | 1253954.87 |
|        | 2039 | 2389546.238 | 1126000.737 | 1263545.50 |
| Female | 1990 | 56348.092   | 56348.092   | 0.000      |
|        | 1991 | 110871.862  | 110356.680  | 515.182    |
|        | 1992 | 165654.454  | 163676.441  | 1978.014   |
|        | 1993 | 220008.519  | 215283.320  | 4725.199   |
|        | 1994 | 275706.807  | 266523.419  | 9183.387   |
|        | 1995 | 331417.547  | 315917.313  | 15500.234  |
|        | 1996 | 387580.161  | 363578.465  | 24001.696  |
|        | 1997 | 442778.242  | 408221.080  | 34557.162  |
|        | 1998 | 496117.305  | 449175.637  | 46941.668  |
|        | 1999 | 548268.214  | 487018.811  | 61249.403  |
|        | 2000 | 601693.202  | 523571.185  | 78122.017  |
|        | 2001 | 652221.103  | 555958.003  | 96263.100  |
|        | 2002 | 703022.600  | 586281.580  | 116741.020 |
|        | 2003 | 752023.351  | 613449.847  | 138573.504 |
|        | 2004 | 799826.733  | 637950.500  | 161876.233 |
|        | 2005 | 847563.928  | 660572.441  | 186991.487 |
|        | 2006 | 894205.027  | 680916.426  | 213288.601 |
|        | 2007 | 939571.282  | 699067.816  | 240503.466 |
|        | 2008 | 983437.578  | 715192.620  | 268244.958 |
|        | 2009 | 1025803.786 | 729485.750  | 296318.036 |
|        | 2010 | 1066964.934 | 742172.897  | 324792.038 |
|        | 2011 | 1106954.044 | 753433.162  | 353520.883 |
|        | 2012 | 1146108.461 | 763540.322  | 382568.139 |
|        | 2013 | 1183544.689 | 772416.600  | 411128.090 |
|        | 2014 | 1221220.945 | 780580.845  | 440640.100 |
|        | 2015 | 1258289.311 | 788053.033  | 470236.279 |
|        | 2016 | 1294830.207 | 794814.163  | 500016.044 |
|        | 2017 | 1330332.626 | 800858.931  | 529473.695 |
|        | 2018 | 1360571.987 | 805625.904  | 554946.084 |
|        | 2019 | 1389848.723 | 809861.561  | 579987.161 |
|        | 2020 | 1416046.192 | 813439.296  | 602606.897 |
|        | 2021 | 1440588.850 | 816536.503  | 624052.347 |
|        | 2022 | 1464157.934 | 819285.836  | 644872.098 |

**Results for PHIM for Run 2 (ELL Summary Sensitivity\_Analysis\_4.RTF)**

|      |             |             |             |             |            |
|------|-------------|-------------|-------------|-------------|------------|
|      |             | 2023        | 1486810.237 | 821749.977  | 665060.261 |
|      |             | 2024        | 1508591.729 | 823946.655  | 684645.074 |
|      |             | 2025        | 1526875.621 | 825726.417  | 701149.204 |
|      |             | 2026        | 1543659.810 | 827247.771  | 716412.038 |
|      |             | 2027        | 1559623.774 | 828605.724  | 731018.050 |
|      |             | 2028        | 1574852.850 | 829827.756  | 745025.095 |
|      |             | 2029        | 1589437.452 | 830929.732  | 758507.720 |
|      |             | 2030        | 1600568.199 | 831750.999  | 768817.201 |
|      |             | 2031        | 1610776.297 | 832464.062  | 778312.234 |
|      |             | 2032        | 1620483.563 | 833111.151  | 787372.412 |
|      |             | 2033        | 1629745.442 | 833702.933  | 796042.509 |
|      |             | 2034        | 1638721.425 | 834246.680  | 804474.745 |
|      |             | 2035        | 1644649.404 | 834596.833  | 810052.571 |
|      |             | 2036        | 1650181.590 | 834905.948  | 815275.642 |
|      |             | 2037        | 1655476.066 | 835191.323  | 820284.743 |
|      |             | 2038        | 1660507.914 | 835457.124  | 825050.790 |
|      |             | 2039        | 1665361.569 | 835705.244  | 829656.325 |
| COPD | Males       | 1990        | 117002.906  | 117002.906  | 0.000      |
|      |             | 1991        | 233438.833  | 233235.801  | 203.032    |
|      |             | 1992        | 348084.047  | 347332.494  | 751.553    |
|      |             | 1993        | 467278.318  | 465432.848  | 1845.470   |
|      |             | 1994        | 584216.907  | 580587.339  | 3629.568   |
|      |             | 1995        | 697391.457  | 691203.073  | 6188.384   |
|      |             | 1996        | 809471.271  | 799789.199  | 9682.072   |
|      |             | 1997        | 922587.668  | 908236.014  | 14351.653  |
|      |             | 1998        | 1034072.457 | 1013941.888 | 20130.569  |
|      |             | 1999        | 1153475.399 | 1125724.021 | 27751.378  |
|      |             | 2000        | 1268050.268 | 1231283.724 | 36766.544  |
|      |             | 2001        | 1382786.209 | 1335185.302 | 47600.907  |
|      |             | 2002        | 1497557.412 | 1437106.308 | 60451.104  |
|      |             | 2003        | 1614405.229 | 1539024.135 | 75381.094  |
|      |             | 2004        | 1726672.489 | 1634834.137 | 91838.352  |
|      |             | 2005        | 1847277.524 | 1735673.123 | 111604.401 |
|      |             | 2006        | 1961009.963 | 1828355.744 | 132654.219 |
|      |             | 2007        | 2079868.908 | 1922627.072 | 157241.836 |
|      |             | 2008        | 2206755.783 | 2020743.365 | 186012.418 |
|      |             | 2009        | 2331993.380 | 2114833.392 | 217159.989 |
|      | 2010        | 2455130.176 | 2204704.864 | 250425.312  |            |
|      | 2011        | 2582657.849 | 2294869.030 | 287788.819  |            |
|      | 2012        | 2709719.005 | 2381680.047 | 328038.958  |            |
|      | 2013        | 2840547.005 | 2467873.139 | 372673.867  |            |
|      | 2014        | 2971677.135 | 2551127.437 | 420549.698  |            |
|      | 2015        | 3104538.983 | 2633473.846 | 471065.137  |            |
|      | 2016        | 3237650.175 | 2712578.478 | 525071.697  |            |
|      | 2017        | 3370561.253 | 2788616.151 | 581945.102  |            |
|      | 2018        | 3503136.371 | 2860846.919 | 642289.452  |            |
|      | 2019        | 3636402.758 | 2930306.732 | 706096.026  |            |
|      | 2020        | 3768054.453 | 2996541.882 | 771512.571  |            |
|      | 2021        | 3897675.067 | 3058653.584 | 839021.483  |            |
|      | 2022        | 4027307.132 | 3117686.823 | 909620.309  |            |
|      | 2023        | 4156698.720 | 3173551.763 | 983146.957  |            |
|      | 2024        | 4285772.226 | 3226300.349 | 1059471.88  |            |
|      | 2025        | 4410759.298 | 3275438.158 | 1135321.14  |            |
|      | 2026        | 4531411.064 | 3319865.057 | 1211546.01  |            |
|      | 2027        | 4651145.233 | 3361283.009 | 1289862.22  |            |
|      | 2028        | 4769837.872 | 3399758.604 | 1370079.27  |            |
|      | 2029        | 4887747.179 | 3435502.858 | 1452244.32  |            |
| 2030 | 4997632.895 | 3467625.838 | 1530007.06  |             |            |
| 2031 | 5103301.991 | 3495782.657 | 1607519.33  |             |            |
| 2032 | 5207593.613 | 3521563.862 | 1686029.75  |             |            |
| 2033 | 5310556.138 | 3545033.439 | 1765522.70  |             |            |
| 2034 | 5412542.816 | 3566456.046 | 1846086.77  |             |            |
| 2035 | 5500522.473 | 3584397.881 | 1916124.59  |             |            |
| 2036 | 5588149.640 | 3600547.055 | 1987602.58  |             |            |
| 2037 | 5674667.886 | 3615244.386 | 2059423.50  |             |            |
| 2038 | 5760391.289 | 3628561.324 | 2131829.97  |             |            |
| 2039 | 5845459.234 | 3640688.955 | 2204770.28  |             |            |
|      | Female      | 1990        | 77434.846   | 77434.846   | 0.000      |
|      |             | 1991        | 160029.510  | 159861.318  | 168.192    |
|      |             | 1992        | 240642.531  | 240002.236  | 640.296    |
|      |             | 1993        | 329362.093  | 327709.461  | 1652.633   |
|      |             | 1994        | 418569.515  | 415257.004  | 3312.511   |
|      |             | 1995        | 509110.357  | 503279.590  | 5830.767   |
|      |             | 1996        | 600040.117  | 590773.906  | 9266.211   |
|      |             | 1997        | 691159.071  | 677410.263  | 13748.808  |
|      |             | 1998        | 782866.899  | 763516.701  | 19350.197  |
|      |             | 1999        | 881526.925  | 854783.181  | 26743.744  |
|      |             | 2000        | 977880.647  | 942586.989  | 35293.658  |

**Results for PHIM for Run 2 (ELL Summary Sensitivity\_Analysis\_4.RTF)**

|      |             |             |            |
|------|-------------|-------------|------------|
| 2001 | 1076787.404 | 1031161.009 | 45626.395  |
| 2002 | 1174842.754 | 1117280.888 | 57561.866  |
| 2003 | 1275102.681 | 1203690.355 | 71412.326  |
| 2004 | 1371026.306 | 1284682.399 | 86343.906  |
| 2005 | 1473954.509 | 1369524.488 | 104430.021 |
| 2006 | 1574450.828 | 1450380.408 | 124070.420 |
| 2007 | 1673790.211 | 1528273.809 | 145516.402 |
| 2008 | 1782360.738 | 1611142.615 | 171218.123 |
| 2009 | 1892944.209 | 1692879.583 | 200064.626 |
| 2010 | 2002131.282 | 1771342.177 | 230789.105 |
| 2011 | 2114522.152 | 1849363.409 | 265158.744 |
| 2012 | 2228079.372 | 1925678.422 | 302400.950 |
| 2013 | 2345377.689 | 2001648.443 | 343729.246 |
| 2014 | 2462498.422 | 2074645.263 | 387853.159 |
| 2015 | 2581450.312 | 2146878.322 | 434571.990 |
| 2016 | 2701959.301 | 2217155.270 | 484804.031 |
| 2017 | 2823834.967 | 2285325.073 | 538509.894 |
| 2018 | 2938265.081 | 2347255.840 | 591009.241 |
| 2019 | 3053254.880 | 2406785.600 | 646469.279 |
| 2020 | 3167073.216 | 2463656.315 | 703416.901 |
| 2021 | 3279517.699 | 2517847.656 | 761670.044 |
| 2022 | 3392060.964 | 2569500.358 | 822560.606 |
| 2023 | 3504296.171 | 2618525.048 | 885771.124 |
| 2024 | 3616019.231 | 2664790.576 | 951228.655 |
| 2025 | 3724611.269 | 2708093.168 | 1016518.10 |
| 2026 | 3827181.707 | 2747421.950 | 1079759.76 |
| 2027 | 3928684.441 | 2784156.669 | 1144527.77 |
| 2028 | 4029124.892 | 2818492.279 | 1210632.61 |
| 2029 | 4128269.068 | 2850293.253 | 1277975.81 |
| 2030 | 4221560.174 | 2879157.986 | 1342402.19 |
| 2031 | 4304170.584 | 2903203.992 | 1400966.59 |
| 2032 | 4384930.537 | 2925100.283 | 1459830.25 |
| 2033 | 4464357.691 | 2945161.667 | 1519196.02 |
| 2034 | 4542251.545 | 2963329.922 | 1578921.62 |
| 2035 | 4611066.648 | 2978874.910 | 1632191.74 |
| 2036 | 4670309.230 | 2991131.730 | 1679177.50 |
| 2037 | 4728179.514 | 3002166.119 | 1726013.40 |
| 2038 | 4785008.048 | 3012136.359 | 1772871.69 |
| 2039 | 4841291.793 | 3021152.934 | 1820138.86 |

---

## Results for PHIM for Run 2 (ELL Summary Sensitivity\_Analysis\_4.RTF)

\*\*\*\*\*

**Table 4: Estimated Loss of Life, All age groups combined, Population and Number deaths adjusted for Ecig scenario, cumulative over years**

| Disease      | Sex          | Year         | Years of life lost<br>NULL | Years of life lost<br>Ecig | Years of life<br>Saved |
|--------------|--------------|--------------|----------------------------|----------------------------|------------------------|
| All Diseases | Males        | 1990         | 1304839.645                | 1304839.645                | 0.000                  |
|              |              | 1991         | 2579865.358                | 2571191.527                | 8673.830               |
|              |              | 1992         | 3830683.831                | 3798445.708                | 32238.123              |
|              |              | 1993         | 5076567.803                | 5000997.169                | 75570.634              |
|              |              | 1994         | 6292145.526                | 6150115.056                | 142030.471             |
|              |              | 1995         | 7485537.010                | 7250454.871                | 235082.138             |
|              |              | 1996         | 8655955.028                | 8300022.424                | 355932.604             |
|              |              | 1997         | 9791729.713                | 9288356.188                | 503373.525             |
|              |              | 1998         | 10899134.186               | 10223142.588               | 675991.598             |
|              |              | 1999         | 12070409.674               | 11163660.393               | 906749.282             |
|              |              | 2000         | 13231384.595               | 12063830.334               | 1167554.26             |
|              |              | 2001         | 14371761.018               | 12913835.234               | 1457925.78             |
|              |              | 2002         | 15508906.386               | 13726298.340               | 1782608.05             |
|              |              | 2003         | 16638100.422               | 14501502.771               | 2136597.65             |
|              |              | 2004         | 17736465.088               | 15229072.184               | 2507392.90             |
|              |              | 2005         | 18834658.606               | 15930534.720               | 2904123.89             |
|              |              | 2006         | 19909100.501               | 16585872.714               | 3323227.79             |
|              |              | 2007         | 20958321.463               | 17202892.255               | 3755429.21             |
|              |              | 2008         | 22000068.148               | 17795905.195               | 4204162.95             |
|              |              | 2009         | 23018816.903               | 18356244.173               | 4662572.73             |
|              |              | 2010         | 24018480.537               | 18885394.182               | 5133086.35             |
|              |              | 2011         | 25003034.574               | 19387057.228               | 5615977.35             |
|              |              | 2012         | 25969871.429               | 19859893.491               | 6109977.94             |
|              |              | 2013         | 26920275.180               | 20306059.389               | 6614215.79             |
|              |              | 2014         | 27849005.227               | 20723770.304               | 7125234.92             |
|              |              | 2015         | 28749620.400               | 21116915.992               | 7632704.41             |
|              |              | 2016         | 29622417.562               | 21476518.622               | 8145898.94             |
|              |              | 2017         | 30462559.724               | 21805319.746               | 8657239.98             |
|              |              | 2018         | 31293299.299               | 22120602.671               | 9172696.63             |
|              |              | 2019         | 32109993.427               | 22417882.495               | 9692110.93             |
|              |              | 2020         | 32883323.977               | 22694429.843               | 10188894.1             |
|              |              | 2021         | 33610102.554               | 22933186.815               | 10676915.7             |
|              |              | 2022         | 34322010.448               | 23156446.688               | 11165563.8             |
|              |              | 2023         | 35018383.550               | 23364331.615               | 11654051.9             |
|              |              | 2024         | 35700177.955               | 23557824.565               | 12142353.4             |
|              |              | 2025         | 36315500.346               | 23732735.305               | 12582765.0             |
|              |              | 2026         | 36896159.343               | 23880057.830               | 13016101.5             |
|              |              | 2027         | 37462570.116               | 24016294.852               | 13446275.3             |
|              |              | 2028         | 38015337.780               | 24141595.369               | 13873742.4             |
|              |              | 2029         | 38554814.764               | 24256821.377               | 14297993.4             |
|              |              | 2030         | 39003805.400               | 24356027.533               | 14647777.9             |
| 2031         | 39436509.703 | 24439081.064 | 14997428.6                 |                            |                        |
| 2032         | 39858470.458 | 24515352.949 | 15343117.5                 |                            |                        |
| 2033         | 40270147.082 | 24584620.967 | 15685526.1                 |                            |                        |
| 2034         | 40672665.743 | 24647606.765 | 16025059.0                 |                            |                        |
| 2035         | 40962732.664 | 24696420.102 | 16266312.6                 |                            |                        |
| 2036         | 41255021.653 | 24739509.397 | 16515512.3                 |                            |                        |
| 2037         | 41540573.023 | 24779160.287 | 16761412.7                 |                            |                        |
| 2038         | 41820158.066 | 24815221.220 | 17004936.8                 |                            |                        |
| 2039         | 42093547.949 | 24848023.106 | 17245524.8                 |                            |                        |
|              | Female       | 1990         | 588979.406                 | 588979.406                 | 0.000                  |
|              |              | 1991         | 1182571.252                | 1179606.223                | 2965.030               |
|              |              | 1992         | 1777346.679                | 1766098.000                | 11248.679              |
|              |              | 1993         | 2380261.899                | 2353272.042                | 26989.857              |
|              |              | 1994         | 2983130.039                | 2931346.761                | 51783.278              |
|              |              | 1995         | 3588982.584                | 3502015.430                | 86967.154              |
|              |              | 1996         | 4195430.235                | 4060679.663                | 134750.571             |
|              |              | 1997         | 4793866.694                | 4600877.653                | 192989.041             |
|              |              | 1998         | 5389747.381                | 5126854.227                | 262893.154             |
|              |              | 1999         | 6006722.467                | 5653209.078                | 353513.389             |
|              |              | 2000         | 6625758.871                | 6168730.732                | 457028.138             |
|              |              | 2001         | 7245135.411                | 6669465.055                | 575670.356             |
|              |              | 2002         | 7867492.021                | 7157549.874                | 709942.147             |
|              |              | 2003         | 8485051.793                | 7628207.381                | 856844.412             |
|              |              | 2004         | 9092994.774                | 8078016.999                | 1014977.78             |
|              |              | 2005         | 9706032.803                | 8518239.703                | 1187793.10             |
|              |              | 2006         | 10311907.548               | 8939185.292                | 1372722.26             |
|              |              | 2007         | 10909437.502               | 9342923.912                | 1566513.59             |
|              |              | 2008         | 11506462.491               | 9731320.025                | 1775142.47             |
|              |              | 2009         | 12098393.287               | 10106208.990               | 1992184.30             |
|              |              | 2010         | 12681188.981               | 10462878.448               | 2218310.53             |

**Results for PHIM for Run 2 (ELL Summary Sensitivity\_Analysis\_4.RTF)**

|             |       |      |              |              |            |
|-------------|-------|------|--------------|--------------|------------|
|             |       | 2011 | 13260062.991 | 10804328.034 | 2455734.96 |
|             |       | 2012 | 13839417.441 | 11133150.547 | 2706266.89 |
|             |       | 2013 | 14409614.758 | 11446166.723 | 2963448.03 |
|             |       | 2014 | 14976658.746 | 11743795.929 | 3232862.82 |
|             |       | 2015 | 15529977.821 | 12024673.669 | 3505304.15 |
|             |       | 2016 | 16066640.764 | 12284921.576 | 3781719.19 |
|             |       | 2017 | 16590035.078 | 12528126.003 | 4061909.07 |
|             |       | 2018 | 17098716.137 | 12757708.720 | 4341007.42 |
|             |       | 2019 | 17599868.850 | 12974307.430 | 4625561.42 |
|             |       | 2020 | 18081346.241 | 13176909.939 | 4904436.30 |
|             |       | 2021 | 18537594.460 | 13358912.295 | 5178682.17 |
|             |       | 2022 | 18985300.234 | 13529383.521 | 5455916.71 |
|             |       | 2023 | 19423958.747 | 13688731.215 | 5735227.53 |
|             |       | 2024 | 19853347.772 | 13836811.123 | 6016536.65 |
|             |       | 2025 | 20252822.245 | 13972045.804 | 6280776.44 |
|             |       | 2026 | 20619307.063 | 14088442.886 | 6530864.18 |
|             |       | 2027 | 20976063.406 | 14195737.461 | 6780325.94 |
|             |       | 2028 | 21323641.947 | 14294874.627 | 7028767.32 |
|             |       | 2029 | 21662117.106 | 14385751.467 | 7276365.64 |
|             |       | 2030 | 21960971.694 | 14465635.695 | 7495336.00 |
|             |       | 2031 | 22224951.983 | 14529917.071 | 7695034.91 |
|             |       | 2032 | 22480397.853 | 14588206.634 | 7892191.22 |
|             |       | 2033 | 22728639.455 | 14641396.475 | 8087242.98 |
|             |       | 2034 | 22970448.888 | 14689515.537 | 8280933.35 |
|             |       | 2035 | 23164154.188 | 14728603.114 | 8435551.07 |
|             |       | 2036 | 23334538.616 | 14759163.518 | 8575375.10 |
|             |       | 2037 | 23499760.723 | 14786813.486 | 8712947.24 |
|             |       | 2038 | 23660308.401 | 14811912.312 | 8848396.09 |
|             |       | 2039 | 23817891.273 | 14834741.578 | 8983149.69 |
| Lung cancer | Males | 1990 | 595621.791   | 595621.791   | 0.000      |
|             |       | 1991 | 1177744.113  | 1177096.214  | 647.899    |
|             |       | 1992 | 1750034.892  | 1747594.292  | 2440.600   |
|             |       | 1993 | 2319752.308  | 2313819.777  | 5932.530   |
|             |       | 1994 | 2872597.339  | 2861118.045  | 11479.294  |
|             |       | 1995 | 3411494.825  | 3391996.025  | 19498.800  |
|             |       | 1996 | 3945569.726  | 3914792.765  | 30776.960  |
|             |       | 1997 | 4463316.362  | 4418031.283  | 45285.079  |
|             |       | 1998 | 4975301.180  | 4911594.971  | 63706.209  |
|             |       | 1999 | 5473691.125  | 5387425.936  | 86265.189  |
|             |       | 2000 | 5977500.570  | 5863056.766  | 114443.804 |
|             |       | 2001 | 6474795.516  | 6326604.431  | 148191.085 |
|             |       | 2002 | 6968769.705  | 6780571.545  | 188198.160 |
|             |       | 2003 | 7460282.140  | 7224996.676  | 235285.464 |
|             |       | 2004 | 7947048.275  | 7657777.020  | 289271.255 |
|             |       | 2005 | 8430571.669  | 8079886.282  | 350685.387 |
|             |       | 2006 | 8903945.390  | 8484596.137  | 419349.253 |
|             |       | 2007 | 9364177.982  | 8869655.555  | 494522.427 |
|             |       | 2008 | 9822525.458  | 9243673.639  | 578851.819 |
|             |       | 2009 | 10275228.886 | 9603735.235  | 671493.651 |
|             |       | 2010 | 10720275.500 | 9948532.946  | 771742.554 |
|             |       | 2011 | 11155356.373 | 10276152.335 | 879204.038 |
|             |       | 2012 | 11582611.617 | 10587258.225 | 995353.392 |
|             |       | 2013 | 11998803.791 | 10880303.349 | 1118500.44 |
|             |       | 2014 | 12402087.090 | 11154636.285 | 1247450.80 |
|             |       | 2015 | 12793451.706 | 11412107.663 | 1381344.04 |
|             |       | 2016 | 13160101.653 | 11643894.105 | 1516207.55 |
|             |       | 2017 | 13503583.414 | 11852420.622 | 1651162.79 |
|             |       | 2018 | 13859755.737 | 12057705.375 | 1802050.36 |
|             |       | 2019 | 14211625.176 | 12251279.098 | 1960346.08 |
|             |       | 2020 | 14553935.288 | 12432011.619 | 2121923.67 |
|             |       | 2021 | 14851747.495 | 12581224.926 | 2270522.57 |
|             |       | 2022 | 15144531.004 | 12720332.212 | 2424198.79 |
|             |       | 2023 | 15431932.496 | 12849451.701 | 2582480.80 |
|             |       | 2024 | 15713920.740 | 12969170.554 | 2744750.19 |
|             |       | 2025 | 15979112.816 | 13077582.112 | 2901530.70 |
|             |       | 2026 | 16206550.153 | 13163658.150 | 3042892.00 |
|             |       | 2027 | 16428826.050 | 13242713.335 | 3186112.72 |
|             |       | 2028 | 16645902.186 | 13314996.721 | 3330905.47 |
|             |       | 2029 | 16858126.517 | 13381182.464 | 3476944.05 |
|             |       | 2030 | 17045220.687 | 13438279.060 | 3606941.63 |
|             |       | 2031 | 17208482.610 | 13482929.305 | 3725553.31 |
|             |       | 2032 | 17367586.074 | 13523670.782 | 3843915.29 |
|             |       | 2033 | 17522716.280 | 13560513.046 | 3962203.23 |
|             |       | 2034 | 17674226.555 | 13593942.778 | 4080283.78 |
|             |       | 2035 | 17792201.734 | 13619935.503 | 4172266.23 |
|             |       | 2036 | 17903508.236 | 13641752.976 | 4261755.26 |
|             |       | 2037 | 18012162.345 | 13661807.656 | 4350354.69 |
|             |       | 2038 | 18118464.470 | 13679992.094 | 4438472.38 |



**Results for PHIM for Run 2 (ELL Summary Sensitivity\_Analysis\_4.RTF)**

|     |        |      |              |              |            |
|-----|--------|------|--------------|--------------|------------|
|     | Female | 2039 | 18222549.860 | 13696520.338 | 4526029.52 |
|     |        | 1990 | 307897.357   | 307897.357   | 0.000      |
|     |        | 1991 | 616547.418   | 616130.920   | 416.498    |
|     |        | 1992 | 931086.773   | 929438.182   | 1648.592   |
|     |        | 1993 | 1246155.671  | 1242098.975  | 4056.696   |
|     |        | 1994 | 1561212.934  | 1553229.372  | 7983.562   |
|     |        | 1995 | 1879967.742  | 1866067.971  | 13899.771  |
|     |        | 1996 | 2197488.109  | 2175400.719  | 22087.391  |
|     |        | 1997 | 2515698.453  | 2482729.919  | 32968.533  |
|     |        | 1998 | 2836249.556  | 2789363.461  | 46886.095  |
|     |        | 1999 | 3150201.390  | 3086371.548  | 63829.842  |
|     |        | 2000 | 3472722.342  | 3387883.362  | 84838.980  |
|     |        | 2001 | 3796994.889  | 3686746.578  | 110248.312 |
|     |        | 2002 | 4126619.935  | 3985812.368  | 140807.567 |
|     |        | 2003 | 4454982.533  | 4278868.961  | 176113.573 |
|     |        | 2004 | 4784343.030  | 4567349.269  | 216993.762 |
|     |        | 2005 | 5113443.121  | 4849903.414  | 263539.707 |
|     |        | 2006 | 5442543.963  | 5125922.061  | 316621.902 |
|     |        | 2007 | 5772441.497  | 5396109.844  | 376331.653 |
|     |        | 2008 | 6091911.943  | 5651141.844  | 440770.099 |
|     |        | 2009 | 6413671.330  | 5900627.822  | 513043.508 |
|     |        | 2010 | 6730763.530  | 6139834.279  | 590929.251 |
|     |        | 2011 | 7043614.101  | 6368514.567  | 675099.534 |
|     |        | 2012 | 7356270.780  | 6589574.891  | 766695.888 |
|     |        | 2013 | 7662551.964  | 6798799.262  | 863752.701 |
|     |        | 2014 | 7964551.465  | 6997780.520  | 966770.945 |
|     |        | 2015 | 8254895.403  | 7183001.207  | 1071894.20 |
|     |        | 2016 | 8530661.848  | 7351826.071  | 1178835.78 |
|     |        | 2017 | 8795826.122  | 7507833.726  | 1287992.40 |
|     |        | 2018 | 9067233.707  | 7659650.161  | 1407583.55 |
|     |        | 2019 | 9335343.270  | 7802560.557  | 1532782.71 |
|     |        | 2020 | 9596110.883  | 7936064.430  | 1660046.45 |
|     |        | 2021 | 9833186.859  | 8052515.883  | 1780670.98 |
|     |        | 2022 | 10066452.037 | 8161162.603  | 1905289.43 |
|     |        | 2023 | 10295503.609 | 8262285.187  | 2033218.42 |
|     |        | 2024 | 10520125.318 | 8355812.331  | 2164312.99 |
|     |        | 2025 | 10731915.863 | 8440779.931  | 2291135.93 |
|     |        | 2026 | 10917495.549 | 8511366.277  | 2406129.27 |
|     |        | 2027 | 11098620.885 | 8576066.337  | 2522554.55 |
|     |        | 2028 | 11275441.234 | 8635527.070  | 2639914.16 |
|     |        | 2029 | 11447962.710 | 8689718.943  | 2758243.77 |
|     |        | 2030 | 11601867.623 | 8736911.666  | 2864955.96 |
|     |        | 2031 | 11731666.516 | 8773537.438  | 2958129.08 |
|     |        | 2032 | 11857585.969 | 8806620.713  | 3050965.26 |
|     |        | 2033 | 11980128.625 | 8836686.041  | 3143442.58 |
|     |        | 2034 | 12099562.464 | 8863796.190  | 3235766.27 |
|     |        | 2035 | 12195919.946 | 8885449.736  | 3310470.21 |
|     |        | 2036 | 12278201.969 | 8901981.309  | 3376220.66 |
|     |        | 2037 | 12358146.336 | 8916963.685  | 3441182.65 |
|     |        | 2038 | 12435978.633 | 8930575.742  | 3505402.89 |
|     |        | 2039 | 12512468.845 | 8942975.028  | 3569493.82 |
| IHD | Males  | 1990 | 517209.093   | 517209.093   | 0.000      |
|     |        | 1991 | 1019219.395  | 1012116.384  | 7103.011   |
|     |        | 1992 | 1509598.614  | 1483227.743  | 26370.871  |
|     |        | 1993 | 1992735.299  | 1931311.157  | 61424.142  |
|     |        | 1994 | 2462877.575  | 2348283.686  | 114593.889 |
|     |        | 1995 | 2928249.390  | 2739688.391  | 188560.999 |
|     |        | 1996 | 3377377.730  | 3093948.655  | 283429.075 |
|     |        | 1997 | 3809062.472  | 3411268.901  | 397793.571 |
|     |        | 1998 | 4222213.867  | 3692414.487  | 529799.380 |
|     |        | 1999 | 4708317.743  | 3996438.920  | 711878.823 |
|     |        | 2000 | 5182084.396  | 4268426.748  | 913657.648 |
|     |        | 2001 | 5644097.705  | 4508689.287  | 1135408.42 |
|     |        | 2002 | 6107232.129  | 4726443.341  | 1380788.79 |
|     |        | 2003 | 6561785.704  | 4918857.427  | 1642928.28 |
|     |        | 2004 | 6996156.348  | 5084707.897  | 1911448.45 |
|     |        | 2005 | 7426261.361  | 5233120.302  | 2193141.06 |
|     |        | 2006 | 7849012.694  | 5363174.743  | 2485837.95 |
|     |        | 2007 | 8255300.530  | 5475523.952  | 2779776.58 |
|     |        | 2008 | 8650662.040  | 5574173.577  | 3076488.46 |
|     |        | 2009 | 9030818.513  | 5660113.337  | 3370705.18 |
|     |        | 2010 | 9403026.327  | 5736372.428  | 3666653.90 |
|     |        | 2011 | 9767535.506  | 5803956.982  | 3963578.52 |
|     |        | 2012 | 10123044.281 | 5864112.620  | 4258931.66 |
|     |        | 2013 | 10470104.786 | 5917596.246  | 4552508.54 |
|     |        | 2014 | 10807756.112 | 5965350.378  | 4842405.73 |
|     |        | 2015 | 11130681.425 | 6007697.079  | 5122984.35 |
|     |        | 2016 | 11448966.506 | 6046086.305  | 5402880.20 |

**Results for PHIM for Run 2 (ELL Summary Sensitivity\_Analysis\_4.RTF)**

|        |        |      |              |             |            |
|--------|--------|------|--------------|-------------|------------|
|        |        | 2017 | 11758164.882 | 6080782.887 | 5677382.00 |
|        |        | 2018 | 12054448.241 | 6110954.213 | 5943494.03 |
|        |        | 2019 | 12341606.261 | 6138285.020 | 6203321.24 |
|        |        | 2020 | 12600728.939 | 6161820.511 | 6438908.43 |
|        |        | 2021 | 12861767.105 | 6183831.229 | 6677935.88 |
|        |        | 2022 | 13114168.616 | 6203991.543 | 6910177.07 |
|        |        | 2023 | 13357894.797 | 6222351.784 | 7135543.01 |
|        |        | 2024 | 13593848.521 | 6239182.287 | 7354666.23 |
|        |        | 2025 | 13789177.359 | 6252942.634 | 7536234.73 |
|        |        | 2026 | 13993401.656 | 6266508.592 | 7726893.06 |
|        |        | 2027 | 14190519.224 | 6279246.793 | 7911272.43 |
|        |        | 2028 | 14381193.356 | 6290993.218 | 8090200.14 |
|        |        | 2029 | 14565171.927 | 6301703.861 | 8263468.07 |
|        |        | 2030 | 14697381.605 | 6309562.056 | 8387819.55 |
|        |        | 2031 | 14842203.512 | 6317869.675 | 8524333.84 |
|        |        | 2032 | 14982485.826 | 6325809.787 | 8656676.04 |
|        |        | 2033 | 15118410.647 | 6333095.933 | 8785314.71 |
|        |        | 2034 | 15250284.398 | 6339684.515 | 8910599.88 |
|        |        | 2035 | 15322911.166 | 6343398.860 | 8979512.31 |
|        |        | 2036 | 15405115.031 | 6347444.938 | 9057670.09 |
|        |        | 2037 | 15484709.137 | 6351332.091 | 9133377.05 |
|        |        | 2038 | 15561812.193 | 6354951.580 | 9206860.61 |
|        |        | 2039 | 15635992.616 | 6358232.973 | 9277759.64 |
|        | Female | 1990 | 147299.110   | 147299.110  | 0.000      |
|        |        | 1991 | 295122.462   | 293257.305  | 1865.158   |
|        |        | 1992 | 439962.920   | 432980.698  | 6982.222   |
|        |        | 1993 | 584735.615   | 568178.041  | 16557.575  |
|        |        | 1994 | 727640.783   | 696330.356  | 31310.427  |
|        |        | 1995 | 868486.937   | 816735.644  | 51751.293  |
|        |        | 1996 | 1010321.847  | 930897.763  | 79424.084  |
|        |        | 1997 | 1144230.930  | 1032466.458 | 111764.471 |
|        |        | 1998 | 1274513.622  | 1124718.512 | 149795.109 |
|        |        | 1999 | 1426725.938  | 1224913.418 | 201812.520 |
|        |        | 2000 | 1573462.680  | 1314512.287 | 258950.392 |
|        |        | 2001 | 1719132.015  | 1395352.895 | 323779.120 |
|        |        | 2002 | 1863006.732  | 1467844.587 | 395162.145 |
|        |        | 2003 | 2002943.227  | 1531765.731 | 471177.497 |
|        |        | 2004 | 2137798.705  | 1587487.534 | 550311.171 |
|        |        | 2005 | 2271071.245  | 1637553.893 | 633517.352 |
|        |        | 2006 | 2400707.731  | 1681128.361 | 719579.370 |
|        |        | 2007 | 2523634.512  | 1718466.129 | 805168.383 |
|        |        | 2008 | 2648752.232  | 1752635.978 | 896116.254 |
|        |        | 2009 | 2765973.961  | 1781788.538 | 984185.423 |
|        |        | 2010 | 2881329.235  | 1807866.121 | 1073463.11 |
|        |        | 2011 | 2994972.694  | 1831096.100 | 1163876.59 |
|        |        | 2012 | 3108958.829  | 1852158.275 | 1256800.55 |
|        |        | 2013 | 3218140.416  | 1870801.247 | 1347339.17 |
|        |        | 2014 | 3328387.914  | 1887970.147 | 1440417.77 |
|        |        | 2015 | 3435342.796  | 1903575.481 | 1531767.31 |
|        |        | 2016 | 3539189.408  | 1917593.694 | 1621595.71 |
|        |        | 2017 | 3640041.363  | 1930187.562 | 1709853.80 |
|        |        | 2018 | 3732645.362  | 1940870.277 | 1791775.09 |
|        |        | 2019 | 3821421.978  | 1950392.758 | 1871029.22 |
|        |        | 2020 | 3902115.950  | 1958629.016 | 1943486.93 |
|        |        | 2021 | 3984301.053  | 1966462.456 | 2017838.60 |
|        |        | 2022 | 4062629.299  | 1973446.470 | 2089182.83 |
|        |        | 2023 | 4137348.729  | 1979737.407 | 2157611.32 |
|        |        | 2024 | 4208611.493  | 1985379.020 | 2223232.47 |
|        |        | 2025 | 4269419.492  | 1990112.088 | 2279307.40 |
|        |        | 2026 | 4330969.998  | 1994628.347 | 2336341.65 |
|        |        | 2027 | 4389134.306  | 1998688.965 | 2390445.34 |
|        |        | 2028 | 4444222.970  | 2002370.354 | 2441852.62 |
|        |        | 2029 | 4496447.877  | 2005723.294 | 2490724.58 |
|        |        | 2030 | 4536975.698  | 2008310.256 | 2528665.44 |
|        |        | 2031 | 4578338.586  | 2010834.792 | 2567503.79 |
|        |        | 2032 | 4617397.784  | 2013142.964 | 2604254.82 |
|        |        | 2033 | 4654407.697  | 2015274.040 | 2639133.66 |
|        |        | 2034 | 4689913.454  | 2017249.587 | 2672663.87 |
|        |        | 2035 | 4712518.190  | 2018492.018 | 2694026.17 |
|        |        | 2036 | 4735845.827  | 2019713.656 | 2716132.17 |
|        |        | 2037 | 4757958.806  | 2020838.821 | 2737119.99 |
|        |        | 2038 | 4778813.806  | 2021883.478 | 2756930.33 |
|        |        | 2039 | 4798769.065  | 2022858.745 | 2775910.32 |
|        | Males  | 1990 | 75005.854    | 75005.854   | 0.000      |
|        |        | 1991 | 149463.017   | 148743.129  | 719.889    |
|        |        | 1992 | 222966.278   | 220290.030  | 2676.248   |
|        |        | 1993 | 296801.879   | 290427.975  | 6373.903   |
|        |        | 1994 | 372453.706   | 360110.810  | 12342.896  |
| Stroke |        |      |              |             |            |

**Results for PHIM for Run 2 (ELL Summary Sensitivity\_Analysis\_4.RTF)**

|        |      |             |             |            |
|--------|------|-------------|-------------|------------|
|        | 1995 | 448401.338  | 427534.549  | 20866.789  |
|        | 1996 | 523536.301  | 491430.057  | 32106.245  |
|        | 1997 | 596763.211  | 550714.400  | 46048.811  |
|        | 1998 | 667546.681  | 605024.597  | 62522.085  |
|        | 1999 | 734925.407  | 653816.920  | 81108.487  |
|        | 2000 | 803749.361  | 700697.654  | 103051.707 |
|        | 2001 | 870081.588  | 742849.991  | 127231.597 |
|        | 2002 | 935347.140  | 781498.359  | 153848.781 |
|        | 2003 | 1001627.349 | 817732.427  | 183894.922 |
|        | 2004 | 1066587.976 | 850620.285  | 215967.691 |
|        | 2005 | 1130548.052 | 880423.219  | 250124.832 |
|        | 2006 | 1195132.454 | 907994.931  | 287137.523 |
|        | 2007 | 1258974.043 | 932961.712  | 326012.331 |
|        | 2008 | 1320124.867 | 954747.437  | 365377.430 |
|        | 2009 | 1380776.123 | 974516.233  | 406259.890 |
|        | 2010 | 1440048.533 | 992224.894  | 447823.639 |
|        | 2011 | 1497484.847 | 1007950.232 | 489534.615 |
|        | 2012 | 1554496.526 | 1022109.189 | 532387.337 |
|        | 2013 | 1610819.598 | 1034893.771 | 575925.827 |
|        | 2014 | 1667484.890 | 1046567.307 | 620917.583 |
|        | 2015 | 1720948.287 | 1056792.402 | 664155.885 |
|        | 2016 | 1775699.228 | 1066327.228 | 709372.000 |
|        | 2017 | 1830250.175 | 1075045.863 | 755204.312 |
|        | 2018 | 1875958.950 | 1081801.798 | 794157.152 |
|        | 2019 | 1920359.232 | 1087850.224 | 832509.007 |
|        | 2020 | 1960605.297 | 1093003.777 | 867601.520 |
|        | 2021 | 1998912.887 | 1097532.831 | 901380.056 |
|        | 2022 | 2036003.696 | 1101590.632 | 934413.063 |
|        | 2023 | 2071857.536 | 1105226.066 | 966631.471 |
|        | 2024 | 2106636.468 | 1108516.303 | 998120.165 |
|        | 2025 | 2136450.873 | 1111217.388 | 1025233.49 |
|        | 2026 | 2164796.470 | 1113614.130 | 1051182.34 |
|        | 2027 | 2192079.608 | 1115800.457 | 1076279.15 |
|        | 2028 | 2218404.367 | 1117776.736 | 1100627.63 |
|        | 2029 | 2243769.140 | 1119565.601 | 1124203.54 |
|        | 2030 | 2263570.213 | 1120930.536 | 1142639.68 |
|        | 2031 | 2282521.590 | 1122176.458 | 1160345.13 |
|        | 2032 | 2300804.945 | 1123327.929 | 1177477.02 |
|        | 2033 | 2318464.018 | 1124377.994 | 1194086.02 |
|        | 2034 | 2335611.973 | 1125337.331 | 1210274.64 |
|        | 2035 | 2347097.290 | 1125976.592 | 1221120.70 |
|        | 2036 | 2358248.747 | 1126572.655 | 1231676.09 |
|        | 2037 | 2369033.655 | 1127136.598 | 1241897.06 |
|        | 2038 | 2379490.114 | 1127660.845 | 1251829.27 |
|        | 2039 | 2389546.238 | 1128139.172 | 1261407.07 |
| Female | 1990 | 56348.092   | 56348.092   | 0.000      |
|        | 1991 | 110871.862  | 110356.680  | 515.182    |
|        | 1992 | 165654.454  | 163676.592  | 1977.862   |
|        | 1993 | 220008.519  | 215284.032  | 4724.487   |
|        | 1994 | 275706.807  | 266525.453  | 9181.353   |
|        | 1995 | 331417.547  | 315921.812  | 15495.735  |
|        | 1996 | 387580.161  | 363586.956  | 23993.205  |
|        | 1997 | 442778.242  | 408235.322  | 34542.920  |
|        | 1998 | 496117.305  | 449197.541  | 46919.763  |
|        | 1999 | 548268.214  | 487050.385  | 61217.830  |
|        | 2000 | 601693.202  | 523615.244  | 78077.958  |
|        | 2001 | 652221.103  | 556016.337  | 96204.766  |
|        | 2002 | 703022.600  | 586356.487  | 116666.113 |
|        | 2003 | 752023.351  | 613543.056  | 138480.295 |
|        | 2004 | 799826.733  | 638063.522  | 161763.211 |
|        | 2005 | 847563.928  | 660706.933  | 186856.996 |
|        | 2006 | 894205.027  | 681073.771  | 213131.256 |
|        | 2007 | 939571.282  | 699248.685  | 240322.597 |
|        | 2008 | 983437.578  | 715397.419  | 268040.159 |
|        | 2009 | 1025803.786 | 729714.723  | 296089.063 |
|        | 2010 | 1066964.934 | 742426.022  | 324538.912 |
|        | 2011 | 1106954.044 | 753710.405  | 353243.640 |
|        | 2012 | 1146108.461 | 763841.524  | 382266.937 |
|        | 2013 | 1183544.689 | 772741.256  | 410803.434 |
|        | 2014 | 1221220.945 | 780929.285  | 440291.661 |
|        | 2015 | 1258289.311 | 788425.857  | 469863.454 |
|        | 2016 | 1294830.207 | 795211.100  | 499619.107 |
|        | 2017 | 1330332.626 | 801279.633  | 529052.993 |
|        | 2018 | 1360571.987 | 806067.155  | 554504.832 |
|        | 2019 | 1389848.723 | 810322.477  | 579526.245 |
|        | 2020 | 1416046.192 | 813918.956  | 602127.237 |
|        | 2021 | 1440588.850 | 817033.712  | 623555.137 |
|        | 2022 | 1464157.934 | 819799.623  | 644358.312 |

**Results for PHIM for Run 2 (ELL Summary Sensitivity\_Analysis\_4.RTF)**

|      |             |             |             |             |            |
|------|-------------|-------------|-------------|-------------|------------|
|      |             | 2023        | 1486810.237 | 822279.576  | 664530.661 |
|      |             | 2024        | 1508591.729 | 824491.162  | 684100.568 |
|      |             | 2025        | 1526875.621 | 826284.800  | 700590.821 |
|      |             | 2026        | 1543659.810 | 827818.628  | 715841.182 |
|      |             | 2027        | 1559623.774 | 829188.176  | 730435.598 |
|      |             | 2028        | 1574852.850 | 830421.083  | 744431.767 |
|      |             | 2029        | 1589437.452 | 831533.251  | 757904.201 |
|      |             | 2030        | 1600568.199 | 832363.486  | 768204.713 |
|      |             | 2031        | 1610776.297 | 833084.581  | 777691.716 |
|      |             | 2032        | 1620483.563 | 833739.134  | 786744.429 |
|      |             | 2033        | 1629745.442 | 834337.933  | 795407.510 |
|      |             | 2034        | 1638721.425 | 834888.286  | 803833.139 |
|      |             | 2035        | 1644649.404 | 835243.658  | 809405.746 |
|      |             | 2036        | 1650181.590 | 835557.451  | 814624.139 |
|      |             | 2037        | 1655476.066 | 835847.205  | 819628.861 |
|      |             | 2038        | 1660507.914 | 836117.137  | 824390.776 |
|      |             | 2039        | 1665361.569 | 836369.172  | 828992.397 |
| COPD | Males       | 1990        | 117002.906  | 117002.906  | 0.000      |
|      |             | 1991        | 233438.833  | 233235.801  | 203.032    |
|      |             | 1992        | 348084.047  | 347333.643  | 750.404    |
|      |             | 1993        | 467278.318  | 465438.259  | 1840.059   |
|      |             | 1994        | 584216.907  | 580602.515  | 3614.392   |
|      |             | 1995        | 697391.457  | 691235.907  | 6155.550   |
|      |             | 1996        | 809471.271  | 799850.947  | 9620.324   |
|      |             | 1997        | 922587.668  | 908341.604  | 14246.064  |
|      |             | 1998        | 1034072.457 | 1014108.533 | 19963.923  |
|      |             | 1999        | 1153475.399 | 1125978.617 | 27496.783  |
|      |             | 2000        | 1268050.268 | 1231649.166 | 36401.101  |
|      |             | 2001        | 1382786.209 | 1335691.525 | 47094.684  |
|      |             | 2002        | 1497557.412 | 1437785.096 | 59772.316  |
|      |             | 2003        | 1614405.229 | 1539916.241 | 74488.989  |
|      |             | 2004        | 1726672.489 | 1635966.983 | 90705.506  |
|      |             | 2005        | 1847277.524 | 1737104.916 | 110172.608 |
|      |             | 2006        | 1961009.963 | 1830106.903 | 130903.060 |
|      |             | 2007        | 2079868.908 | 1924751.035 | 155117.873 |
|      |             | 2008        | 2206755.783 | 2023310.543 | 183445.240 |
|      |             | 2009        | 2331993.380 | 2117879.367 | 214114.013 |
|      |             | 2010        | 2455130.176 | 2208263.914 | 246866.263 |
|      |             | 2011        | 2582657.849 | 2298997.679 | 283660.170 |
|      |             | 2012        | 2709719.005 | 2386413.458 | 323305.547 |
|      |             | 2013        | 2840547.005 | 2473266.023 | 367280.982 |
|      |             | 2014        | 2971677.135 | 2557216.334 | 414460.801 |
|      |             | 2015        | 3104538.983 | 2640318.849 | 464220.134 |
|      |             | 2016        | 3237650.175 | 2720210.984 | 517439.191 |
|      |             | 2017        | 3370561.253 | 2797070.374 | 573490.879 |
|      |             | 2018        | 3503136.371 | 2870141.285 | 632995.086 |
|      |             | 2019        | 3636402.758 | 2940468.153 | 695934.605 |
|      |             | 2020        | 3768054.453 | 3007593.936 | 760460.517 |
|      |             | 2021        | 3897675.067 | 3070597.828 | 827077.238 |
|      |             | 2022        | 4027307.132 | 3130532.300 | 896774.832 |
|      |             | 2023        | 4156698.720 | 3187302.064 | 969396.656 |
|      |             | 2024        | 4285772.226 | 3240955.420 | 1044816.81 |
|      |             | 2025        | 4410759.298 | 3290993.171 | 1119766.13 |
|      |             | 2026        | 4531411.064 | 3336276.958 | 1195134.11 |
|      |             | 2027        | 4651145.233 | 3378534.267 | 1272610.97 |
|      |             | 2028        | 4769837.872 | 3417828.694 | 1352009.18 |
|      |             | 2029        | 4887747.179 | 3454369.450 | 1433377.73 |
| 2030 | 4997632.895 | 3487255.881 | 1510377.01  |             |            |
| 2031 | 5103301.991 | 3516105.627 | 1587196.36  |             |            |
| 2032 | 5207593.613 | 3542544.451 | 1665049.16  |             |            |
| 2033 | 5310556.138 | 3566633.994 | 1743922.14  |             |            |
| 2034 | 5412542.816 | 3588642.141 | 1823900.67  |             |            |
| 2035 | 5500522.473 | 3607109.146 | 1893413.33  |             |            |
| 2036 | 5588149.640 | 3623738.828 | 1964410.81  |             |            |
| 2037 | 5674667.886 | 3638883.942 | 2035783.94  |             |            |
| 2038 | 5760391.289 | 3652616.701 | 2107774.59  |             |            |
| 2039 | 5845459.234 | 3665130.624 | 2180328.61  |             |            |
|      | Female      | 1990        | 77434.846   | 77434.846   | 0.000      |
|      |             | 1991        | 160029.510  | 159861.318  | 168.192    |
|      |             | 1992        | 240642.531  | 240002.529  | 640.002    |
|      |             | 1993        | 329362.093  | 327710.994  | 1651.100   |
|      |             | 1994        | 418569.515  | 415261.579  | 3307.936   |
|      |             | 1995        | 509110.357  | 503290.002  | 5820.355   |
|      |             | 1996        | 600040.117  | 590794.226  | 9245.891   |
|      |             | 1997        | 691159.071  | 677445.953  | 13713.117  |
|      |             | 1998        | 782866.899  | 763574.712  | 19292.187  |
|      |             | 1999        | 881526.925  | 854873.728  | 26653.197  |
|      |             | 2000        | 977880.647  | 942719.839  | 35160.809  |

**Results for PHIM for Run 2 (ELL Summary Sensitivity\_Analysis\_4.RTF)**

|      |             |             |            |
|------|-------------|-------------|------------|
| 2001 | 1076787.404 | 1031349.245 | 45438.159  |
| 2002 | 1174842.754 | 1117536.432 | 57306.322  |
| 2003 | 1275102.681 | 1204029.634 | 71073.047  |
| 2004 | 1371026.306 | 1285116.674 | 85909.631  |
| 2005 | 1473954.509 | 1370075.463 | 103879.046 |
| 2006 | 1574450.828 | 1451061.100 | 123389.729 |
| 2007 | 1673790.211 | 1529099.254 | 144690.958 |
| 2008 | 1782360.738 | 1612144.784 | 170215.954 |
| 2009 | 1892944.209 | 1694077.908 | 198866.302 |
| 2010 | 2002131.282 | 1772752.027 | 229379.255 |
| 2011 | 2114522.152 | 1851006.962 | 263515.191 |
| 2012 | 2228079.372 | 1927575.857 | 300503.515 |
| 2013 | 2345377.689 | 2003824.958 | 341552.731 |
| 2014 | 2462498.422 | 2077115.978 | 385382.444 |
| 2015 | 2581450.312 | 2149671.123 | 431779.188 |
| 2016 | 2701959.301 | 2220290.711 | 481668.590 |
| 2017 | 2823834.967 | 2288825.083 | 535009.884 |
| 2018 | 2938265.081 | 2351121.127 | 587143.954 |
| 2019 | 3053254.880 | 2411031.637 | 642223.243 |
| 2020 | 3167073.216 | 2468297.537 | 698775.679 |
| 2021 | 3279517.699 | 2522900.244 | 756617.456 |
| 2022 | 3392060.964 | 2574974.825 | 817086.139 |
| 2023 | 3504296.171 | 2624429.045 | 879867.126 |
| 2024 | 3616019.231 | 2671128.610 | 944890.621 |
| 2025 | 3724611.269 | 2714868.986 | 1009742.28 |
| 2026 | 3827181.707 | 2754629.634 | 1072552.07 |
| 2027 | 3928684.441 | 2791793.984 | 1136890.46 |
| 2028 | 4029124.892 | 2826556.119 | 1202568.77 |
| 2029 | 4128269.068 | 2858775.979 | 1269493.09 |
| 2030 | 4221560.174 | 2888050.286 | 1333509.89 |
| 2031 | 4304170.584 | 2912460.260 | 1391710.32 |
| 2032 | 4384930.537 | 2934703.823 | 1450226.71 |
| 2033 | 4464357.691 | 2955098.461 | 1509259.23 |
| 2034 | 4542251.545 | 2973581.474 | 1568670.07 |
| 2035 | 4611066.648 | 2989417.703 | 1621648.95 |
| 2036 | 4670309.230 | 3001911.103 | 1668398.13 |
| 2037 | 4728179.514 | 3013163.775 | 1715015.74 |
| 2038 | 4785008.048 | 3023335.955 | 1761672.09 |
| 2039 | 4841291.793 | 3032538.634 | 1808753.16 |

---

## Results for PHIM for Run 2 (ELL Summary Sensitivity\_Analysis\_4.RTF)

\*\*\*\*\*

**Table 5: Estimated Loss of Life, at the end of follow-up, Population unadjusted for deaths in Ecig scenario**

| Disease      | Sex    | Age Group   | Years of life lost<br>NULL | Years of life lost<br>Ecig | Years of life<br>Saved |
|--------------|--------|-------------|----------------------------|----------------------------|------------------------|
| All Diseases | Males  | 30-34       | 443911.034                 | 236769.975                 | 207141.058             |
|              |        | 35-39       | 1146798.555                | 605332.908                 | 541465.647             |
|              |        | 40-44       | 2609591.408                | 1338836.916                | 1270754.49             |
|              |        | 45-49       | 4775841.753                | 2411764.337                | 2364077.42             |
|              |        | 50-54       | 7446969.205                | 3903147.475                | 3543821.73             |
|              |        | 55-59       | 8240205.925                | 4749844.440                | 3490361.49             |
|              |        | 60-64       | 8772829.118                | 5486749.661                | 3286079.46             |
|              |        | 65-69       | 6161494.678                | 4239522.933                | 1921971.75             |
|              |        | 70-74       | 2495906.274                | 1778073.962                | 717832.311             |
|              | 75-79  | 0.000       | 0.000                      | 0.000                      |                        |
|              | Female | 30-34       | 229140.561                 | 141147.070                 | 87993.491              |
|              |        | 35-39       | 570217.942                 | 344871.035                 | 225346.907             |
|              |        | 40-44       | 1267538.938                | 744029.623                 | 523509.315             |
|              |        | 45-49       | 2340070.698                | 1351733.717                | 988336.981             |
|              |        | 50-54       | 3743803.613                | 2179374.802                | 1564428.81             |
|              |        | 55-59       | 4591478.168                | 2796366.213                | 1795111.96             |
|              |        | 60-64       | 5207367.788                | 3299364.816                | 1908002.97             |
| 65-69        |        | 4092181.394 | 2735570.532                | 1356610.86                 |                        |
| Lung cancer  | Males  | 70-74       | 1776092.171                | 1205420.568                | 570671.603             |
|              |        | 75-79       | 0.000                      | 0.000                      | 0.000                  |
|              |        | 30-34       | 66065.017                  | 51545.173                  | 14519.844              |
|              |        | 35-39       | 232509.414                 | 182760.247                 | 49749.167              |
|              |        | 40-44       | 688628.041                 | 529093.415                 | 159534.626             |
|              |        | 45-49       | 1528300.367                | 1137047.114                | 391253.253             |
|              |        | 50-54       | 2730187.229                | 1998916.066                | 731271.164             |
|              |        | 55-59       | 3909101.673                | 2844875.151                | 1064226.52             |
|              |        | 60-64       | 4287716.660                | 3216810.759                | 1070905.90             |
|              | 65-69  | 3467897.115 | 2654103.279                | 813793.835                 |                        |
|              | 70-74  | 1312144.343 | 1020993.969                | 291150.374                 |                        |
|              | 75-79  | 0.000       | 0.000                      | 0.000                      |                        |
|              | Female | 30-34       | 51913.113                  | 40449.662                  | 11463.451              |
|              |        | 35-39       | 189792.904                 | 148174.444                 | 41618.460              |
|              |        | 40-44       | 527596.573                 | 394600.716                 | 132995.857             |
|              |        | 45-49       | 1122524.269                | 808339.327                 | 314184.942             |
|              |        | 50-54       | 1882214.322                | 1326006.593                | 556207.729             |
| 55-59        |        | 2595581.943 | 1805046.970                | 790534.973                 |                        |
| 60-64        |        | 2846273.090 | 2020738.988                | 825534.101                 |                        |
| 65-69        |        | 2358758.394 | 1694712.201                | 664046.193                 |                        |
| IHD          | Males  | 70-74       | 937814.238                 | 681938.473                 | 255875.764             |
|              |        | 75-79       | 0.000                      | 0.000                      | 0.000                  |
|              |        | 30-34       | 263834.566                 | 116533.814                 | 147300.752             |
|              |        | 35-39       | 692140.150                 | 291642.249                 | 400497.901             |
|              |        | 40-44       | 1519708.432                | 582124.505                 | 937583.927             |
|              |        | 45-49       | 2568546.697                | 901937.046                 | 1666609.65             |
|              |        | 50-54       | 3632929.903                | 1329931.439                | 2302998.46             |
|              |        | 55-59       | 2807892.356                | 1091972.669                | 1715919.69             |
|              |        | 60-64       | 2599825.934                | 1188550.883                | 1411275.05             |
|              | 65-69  | 1113578.307 | 583086.154                 | 530492.153                 |                        |
|              | 70-74  | 437536.271  | 261428.983                 | 176107.287                 |                        |
|              | 75-79  | 0.000       | 0.000                      | 0.000                      |                        |
|              | Female | 30-34       | 79649.097                  | 37387.794                  | 42261.303              |
|              |        | 35-39       | 193965.908                 | 80441.612                  | 113524.295             |
|              |        | 40-44       | 403380.974                 | 149467.565                 | 253913.409             |
|              |        | 45-49       | 671385.408                 | 230736.095                 | 440649.313             |
|              |        | 50-54       | 1011875.989                | 373530.104                 | 638345.885             |
| 55-59        |        | 849875.715  | 342533.001                 | 507342.714                 |                        |
| 60-64        |        | 925490.876  | 435481.349                 | 490009.528                 |                        |
| 65-69        |        | 455463.881  | 245925.903                 | 209537.978                 |                        |
| Stroke       | Males  | 70-74       | 207681.216                 | 125509.399                 | 82171.817              |
|              |        | 75-79       | 0.000                      | 0.000                      | 0.000                  |
|              |        | 30-34       | 73463.650                  | 42869.777                  | 30593.873              |
|              |        | 35-39       | 151934.057                 | 85917.419                  | 66016.638              |
|              |        | 40-44       | 262845.974                 | 140667.194                 | 122178.780             |
|              |        | 45-49       | 383421.246                 | 191637.010                 | 191784.236             |
|              |        | 50-54       | 479872.634                 | 217707.408                 | 262165.226             |
|              |        | 55-59       | 437124.903                 | 183599.890                 | 253525.013             |
|              |        | 60-64       | 419457.235                 | 179861.038                 | 239596.196             |
|              | 65-69  | 128180.574  | 57641.042                  | 70539.532                  |                        |
|              | 70-74  | 53245.965   | 26099.959                  | 27146.006                  |                        |
|              | 75-79  | 0.000       | 0.000                      | 0.000                      |                        |
|              | Female | 30-34       | 62919.090                  | 39866.725                  | 23052.365              |

**Results for PHIM for Run 2 (ELL Summary Sensitivity\_Analysis\_4.RTF)**

|      |        |       |             |            |            |
|------|--------|-------|-------------|------------|------------|
|      |        | 35-39 | 120806.205  | 72322.588  | 48483.617  |
|      |        | 40-44 | 203391.885  | 112985.293 | 90406.592  |
|      |        | 45-49 | 278172.097  | 143394.230 | 134777.867 |
|      |        | 50-54 | 325979.181  | 156682.786 | 169296.395 |
|      |        | 55-59 | 275161.340  | 124327.087 | 150834.253 |
|      |        | 60-64 | 268920.493  | 123286.406 | 145634.087 |
|      |        | 65-69 | 87956.054   | 41953.853  | 46002.201  |
|      |        | 70-74 | 42055.224   | 20886.276  | 21168.948  |
|      |        | 75-79 | 0.000       | 0.000      | 0.000      |
| COPD | Males  | 30-34 | 40547.801   | 25821.212  | 14726.589  |
|      |        | 35-39 | 70214.933   | 45012.993  | 25201.940  |
|      |        | 40-44 | 138408.960  | 86951.802  | 51457.158  |
|      |        | 45-49 | 295573.443  | 181143.168 | 114430.275 |
|      |        | 50-54 | 603979.438  | 356592.563 | 247386.875 |
|      |        | 55-59 | 1086086.992 | 629396.730 | 456690.262 |
|      |        | 60-64 | 1465829.290 | 901526.980 | 564302.310 |
|      |        | 65-69 | 1451838.682 | 944692.457 | 507146.225 |
|      |        | 70-74 | 692979.695  | 469551.051 | 223428.644 |
|      |        | 75-79 | 0.000       | 0.000      | 0.000      |
|      | Female | 30-34 | 34659.261   | 23442.888  | 11216.373  |
|      |        | 35-39 | 65652.924   | 43932.390  | 21720.534  |
|      |        | 40-44 | 133169.505  | 86976.049  | 46193.457  |
|      |        | 45-49 | 267988.924  | 169264.065 | 98724.859  |
|      |        | 50-54 | 523734.121  | 323155.320 | 200578.801 |
|      |        | 55-59 | 870859.170  | 524459.154 | 346400.015 |
|      |        | 60-64 | 1166683.329 | 719858.073 | 446825.255 |
|      |        | 65-69 | 1190003.066 | 752978.575 | 437024.490 |
|      |        | 70-74 | 588541.493  | 377086.420 | 211455.074 |
|      |        | 75-79 | 0.000       | 0.000      | 0.000      |

---

## Results for PHIM for Run 2 (ELL Summary Sensitivity\_Analysis\_4.RTF)

\*\*\*\*\*

**Table 6: Estimated Loss of Life, at the end of follow-up, Population and Number deaths adjusted for Ecig scenario**

| Disease      | Sex    | Age Group   | Years of life lost<br>NULL | Years of life lost<br>Ecig | Years of life<br>Saved |
|--------------|--------|-------------|----------------------------|----------------------------|------------------------|
| All Diseases | Males  | 30-34       | 443911.034                 | 236784.791                 | 207126.243             |
|              |        | 35-39       | 1146798.555                | 605444.899                 | 541353.656             |
|              |        | 40-44       | 2609591.408                | 1339567.268                | 1270024.14             |
|              |        | 45-49       | 4775841.753                | 2415054.348                | 2360787.40             |
|              |        | 50-54       | 7446969.205                | 3913224.235                | 3533744.97             |
|              |        | 55-59       | 8240205.925                | 4766428.708                | 3473777.22             |
|              |        | 60-64       | 8772829.118                | 5515348.093                | 3257481.03             |
|              |        | 65-69       | 6161494.678                | 4264385.110                | 1897109.57             |
|              |        | 70-74       | 2495906.274                | 1791785.654                | 704120.619             |
|              | 75-79  | 0.000       | 0.000                      | 0.000                      |                        |
|              | Female | 30-34       | 229140.561                 | 141150.884                 | 87989.677              |
|              |        | 35-39       | 570217.942                 | 344899.566                 | 225318.376             |
|              |        | 40-44       | 1267538.938                | 744213.883                 | 523325.055             |
|              |        | 45-49       | 2340070.698                | 1352559.461                | 987511.238             |
|              |        | 50-54       | 3743803.613                | 2182004.701                | 1561798.91             |
|              |        | 55-59       | 4591478.168                | 2801493.383                | 1789984.78             |
|              |        | 60-64       | 5207367.788                | 3309400.031                | 1897967.76             |
|              |        | 65-69       | 4092181.394                | 2746516.208                | 1345665.19             |
| 70-74        |        | 1776092.171 | 1212503.461                | 563588.709                 |                        |
| Lung cancer  | Males  | 30-34       | 66065.017                  | 51548.757                  | 14516.261              |
|              |        | 35-39       | 232509.414                 | 182799.202                 | 49710.213              |
|              |        | 40-44       | 688628.041                 | 529430.563                 | 159197.479             |
|              |        | 45-49       | 1528300.367                | 1138842.871                | 389457.496             |
|              |        | 50-54       | 2730187.229                | 2004760.620                | 725426.610             |
|              |        | 55-59       | 3909101.673                | 2855632.578                | 1053469.10             |
|              |        | 60-64       | 4287716.660                | 3234768.479                | 1052948.18             |
|              |        | 65-69       | 3467897.115                | 2669788.478                | 798108.636             |
|              |        | 70-74       | 1312144.343                | 1028948.791                | 283195.553             |
|              | 75-79  | 0.000       | 0.000                      | 0.000                      |                        |
|              | Female | 30-34       | 51913.113                  | 40450.928                  | 11462.185              |
|              |        | 35-39       | 189792.904                 | 148188.002                 | 41604.902              |
|              |        | 40-44       | 527596.573                 | 394709.020                 | 132887.553             |
|              |        | 45-49       | 1122524.269                | 808871.625                 | 313652.643             |
|              |        | 50-54       | 1882214.322                | 1327720.348                | 554493.974             |
|              |        | 55-59       | 2595581.943                | 1808501.763                | 787080.181             |
|              |        | 60-64       | 2846273.090                | 2027154.091                | 819118.999             |
|              |        | 65-69       | 2358758.394                | 1701451.958                | 657306.436             |
| 70-74        |        | 937814.238  | 685927.292                 | 251886.945                 |                        |
| IHD          | Males  | 30-34       | 263834.566                 | 116540.632                 | 147293.934             |
|              |        | 35-39       | 692140.150                 | 291688.723                 | 400451.427             |
|              |        | 40-44       | 1519708.432                | 582377.151                 | 937331.281             |
|              |        | 45-49       | 2568546.697                | 902833.391                 | 1665713.31             |
|              |        | 50-54       | 3632929.903                | 1332273.251                | 2300656.65             |
|              |        | 55-59       | 2807892.356                | 1094104.253                | 1713788.10             |
|              |        | 60-64       | 2599825.934                | 1191725.974                | 1408099.96             |
|              |        | 65-69       | 1113578.307                | 584496.213                 | 529082.094             |
|              |        | 70-74       | 437536.271                 | 262193.385                 | 175342.886             |
|              | 75-79  | 0.000       | 0.000                      | 0.000                      |                        |
|              | Female | 30-34       | 79649.097                  | 37388.720                  | 42260.377              |
|              |        | 35-39       | 193965.908                 | 80447.250                  | 113518.657             |
|              |        | 40-44       | 403380.974                 | 149495.344                 | 253885.631             |
|              |        | 45-49       | 671385.408                 | 230831.231                 | 440554.176             |
|              |        | 50-54       | 1011875.989                | 373802.639                 | 638073.350             |
|              |        | 55-59       | 849875.715                 | 342833.649                 | 507042.067             |
|              |        | 60-64       | 925490.876                 | 436053.541                 | 489437.335             |
|              |        | 65-69       | 455463.881                 | 246261.114                 | 209202.767             |
| 70-74        |        | 207681.216  | 125745.257                 | 81935.960                  |                        |
| Stroke       | Males  | 30-34       | 73463.650                  | 42872.168                  | 30591.481              |
|              |        | 35-39       | 151934.057                 | 85932.318                  | 66001.738              |
|              |        | 40-44       | 262845.974                 | 140737.636                 | 122108.339             |
|              |        | 45-49       | 383421.246                 | 191866.740                 | 191554.506             |
|              |        | 50-54       | 479872.634                 | 218179.169                 | 261693.465             |
|              |        | 55-59       | 437124.903                 | 184067.768                 | 253057.135             |
|              |        | 60-64       | 419457.235                 | 180486.108                 | 238971.127             |
|              |        | 65-69       | 128180.574                 | 57811.859                  | 70368.715              |
|              |        | 70-74       | 53245.965                  | 26185.404                  | 27060.561              |
|              | 75-79  | 0.000       | 0.000                      | 0.000                      |                        |
|              | Female | 30-34       | 62919.090                  | 39867.607                  | 23051.484              |



**Results for PHIM for Run 2 (ELL Summary Sensitivity\_Analysis\_4.RTF)**

|      |        |       |             |            |            |
|------|--------|-------|-------------|------------|------------|
|      |        | 35-39 | 120806.205  | 72327.427  | 48478.779  |
|      |        | 40-44 | 203391.885  | 113006.756 | 90385.129  |
|      |        | 45-49 | 278172.097  | 143457.853 | 134714.245 |
|      |        | 50-54 | 325979.181  | 156810.782 | 169168.399 |
|      |        | 55-59 | 275161.340  | 124460.734 | 150700.606 |
|      |        | 60-64 | 268920.493  | 123485.732 | 145434.761 |
|      |        | 65-69 | 87956.054   | 42022.005  | 45934.049  |
|      |        | 70-74 | 42055.224   | 20930.276  | 21124.947  |
|      |        | 75-79 | 0.000       | 0.000      | 0.000      |
| COPD | Males  | 30-34 | 40547.801   | 25823.235  | 14724.566  |
|      |        | 35-39 | 70214.933   | 45024.655  | 25190.278  |
|      |        | 40-44 | 138408.960  | 87021.918  | 51387.042  |
|      |        | 45-49 | 295573.443  | 181511.346 | 114062.097 |
|      |        | 50-54 | 603979.438  | 358011.195 | 245968.243 |
|      |        | 55-59 | 1086086.992 | 632624.109 | 453462.883 |
|      |        | 60-64 | 1465829.290 | 908367.532 | 557461.758 |
|      |        | 65-69 | 1451838.682 | 952288.559 | 499550.123 |
|      |        | 70-74 | 692979.695  | 474458.074 | 218521.620 |
|      |        | 75-79 | 0.000       | 0.000      | 0.000      |
|      | Female | 30-34 | 34659.261   | 23443.630  | 11215.631  |
|      |        | 35-39 | 65652.924   | 43936.886  | 21716.038  |
|      |        | 40-44 | 133169.505  | 87002.764  | 46166.742  |
|      |        | 45-49 | 267988.924  | 169398.751 | 98590.173  |
|      |        | 50-54 | 523734.121  | 323670.931 | 200063.189 |
|      |        | 55-59 | 870859.170  | 525697.238 | 345161.932 |
|      |        | 60-64 | 1166683.329 | 722706.667 | 443976.662 |
|      |        | 65-69 | 1190003.066 | 756781.131 | 433221.935 |
|      |        | 70-74 | 588541.493  | 379900.636 | 208640.857 |
|      |        | 75-79 | 0.000       | 0.000      | 0.000      |

---

## Results for PHIM for Run 4 (ELL Summary Sensitivity\_Analysis\_4.RTF)

\*\*\*\*\*

### Estimated Loss of Life from the E Component for Run: 4, Simulation: 1

Country: US (United States)  
 Follow-up Period: 1990 to 2039

**Table 1: Estimated Loss of Life, at the end of follow-up, all age groups combined, Population unadjusted for deaths in Ecig scenario**

| Disease      | Sex    | Year | Years of life lost<br>NULL | Years of life lost<br>Ecig | Years of life<br>Saved |
|--------------|--------|------|----------------------------|----------------------------|------------------------|
| All Diseases | Males  | 2039 | 42093547.949               | 24800403.038               | 17293144.9             |
|              | Female | 2039 | 23817891.273               | 14820993.729               | 8996897.54             |
| Lung cancer  | Males  | 2039 | 18222549.860               | 13655777.559               | 4566772.30             |
|              | Female | 2039 | 12512468.845               | 8932671.726                | 3579797.12             |
| IHD          | Males  | 2039 | 15635992.616               | 6369581.951                | 9266410.66             |
|              | Female | 2039 | 4798769.065                | 2026315.446                | 2772453.62             |
| Stroke       | Males  | 2039 | 2389546.238                | 1128591.665                | 1260954.57             |
|              | Female | 2039 | 1665361.569                | 837212.123                 | 828149.446             |
| COPD         | Males  | 2039 | 5845459.234                | 3646451.863                | 2199007.37             |
|              | Female | 2039 | 4841291.793                | 3024794.434                | 1816497.36             |

## Results for PHIM for Run 4 (ELL Summary Sensitivity\_Analysis\_4.RTF)

\*\*\*\*\*

**Table 2: Estimated Loss of Life, at the end of follow-up, all age groups combined, Population and Number deaths adjusted for Ecig scenario**

| Disease      | Sex    | Year | Years of life lost<br>NULL | Years of life lost<br>Ecig | Years of life<br>Saved |
|--------------|--------|------|----------------------------|----------------------------|------------------------|
| All Diseases | Males  | 2039 | 42093547.949               | 24899027.616               | 17194520.3             |
|              | Female | 2039 | 23817891.273               | 14858008.980               | 8959882.29             |
| Lung cancer  | Males  | 2039 | 18222549.860               | 13716448.993               | 4506100.87             |
|              | Female | 2039 | 12512468.845               | 8955729.603                | 3556739.24             |
| IHD          | Males  | 2039 | 15635992.616               | 6380827.382                | 9255165.23             |
|              | Female | 2039 | 4798769.065                | 2028186.582                | 2770582.48             |
| Stroke       | Males  | 2039 | 2389546.238                | 1130756.488                | 1258789.75             |
|              | Female | 2039 | 1665361.569                | 837882.376                 | 827479.194             |
| COPD         | Males  | 2039 | 5845459.234                | 3670994.753                | 2174464.48             |
|              | Female | 2039 | 4841291.793                | 3036210.420                | 1805081.37             |

## Results for PHIM for Run 4 (ELL Summary Sensitivity\_Analysis\_4.RTF)

\*\*\*\*\*

**Table 3: Estimated Loss of Life, All age groups combined, Population unadjusted for deaths in Ecig scenario, cumulative over years**

| Disease      | Sex          | Year         | Years of life lost<br>NULL | Years of life lost<br>Ecig | Years of life<br>Saved |
|--------------|--------------|--------------|----------------------------|----------------------------|------------------------|
| All Diseases | Males        | 1990         | 1304839.645                | 1304839.645                | 0.000                  |
|              |              | 1991         | 2579865.358                | 2571191.563                | 8673.794               |
|              |              | 1992         | 3830683.831                | 3798434.112                | 32249.720              |
|              |              | 1993         | 5076567.803                | 5000944.136                | 75623.667              |
|              |              | 1994         | 6292145.526                | 6149968.798                | 142176.729             |
|              |              | 1995         | 7485537.010                | 7250140.460                | 235396.549             |
|              |              | 1996         | 8655955.028                | 8299443.215                | 356511.812             |
|              |              | 1997         | 9791729.713                | 9287397.212                | 504332.501             |
|              |              | 1998         | 10899134.186               | 10221672.492               | 677461.694             |
|              |              | 1999         | 12070409.674               | 11161500.001               | 908909.674             |
|              |              | 2000         | 13231384.595               | 12060780.877               | 1170603.72             |
|              |              | 2001         | 14371761.018               | 12909718.351               | 1462042.67             |
|              |              | 2002         | 15508906.386               | 13720910.119               | 1787996.27             |
|              |              | 2003         | 16638100.422               | 14494649.043               | 2143451.38             |
|              |              | 2004         | 17736465.088               | 15220576.287               | 2515888.80             |
|              |              | 2005         | 18834658.606               | 15920175.952               | 2914482.65             |
|              |              | 2006         | 19909100.501               | 16573530.985               | 3335569.52             |
|              |              | 2007         | 20958321.463               | 17188439.031               | 3769882.43             |
|              |              | 2008         | 22000068.148               | 17779169.630               | 4220898.52             |
|              |              | 2009         | 23018816.903               | 18337114.673               | 4681702.23             |
|              |              | 2010         | 24018480.537               | 18863767.714               | 5154712.82             |
|              |              | 2011         | 25003034.574               | 19362865.515               | 5640169.06             |
|              |              | 2012         | 25969871.429               | 19833120.371               | 6136751.06             |
|              |              | 2013         | 26920275.180               | 20276671.796               | 6643603.38             |
|              |              | 2014         | 27849005.227               | 20691802.809               | 7157202.42             |
|              |              | 2015         | 28749620.400               | 21082243.787               | 7667376.61             |
|              |              | 2016         | 29622417.562               | 21439288.884               | 8183128.68             |
|              |              | 2017         | 30462559.724               | 21765665.115               | 8696894.61             |
|              |              | 2018         | 31293299.299               | 22078717.518               | 9214581.78             |
|              |              | 2019         | 32109993.427               | 22373911.109               | 9736082.32             |
|              |              | 2020         | 32883323.977               | 22648170.314               | 10235153.7             |
|              |              | 2021         | 33610102.554               | 22885207.982               | 10724894.6             |
|              |              | 2022         | 34322010.448               | 23106932.010               | 11215078.4             |
|              |              | 2023         | 35018383.550               | 23313498.658               | 11704884.9             |
|              |              | 2024         | 35700177.955               | 23505974.162               | 12194203.8             |
|              |              | 2025         | 36315500.346               | 23679497.312               | 12636003.0             |
|              |              | 2026         | 36896159.343               | 23826137.582               | 13070021.8             |
|              |              | 2027         | 37462570.116               | 23961918.983               | 13500651.1             |
|              |              | 2028         | 38015337.780               | 24087042.418               | 13928295.4             |
|              |              | 2029         | 38554814.764               | 24202463.190               | 14352351.6             |
|              |              | 2030         | 39003805.400               | 24301264.874               | 14702540.5             |
|              |              | 2031         | 39436509.703               | 24384601.273               | 15051908.4             |
| 2032         | 39858470.458 | 24461347.429 | 15397123.0                 |                            |                        |
| 2033         | 40270147.082 | 24531370.500 | 15738776.6                 |                            |                        |
| 2034         | 40672665.743 | 24595523.680 | 16077142.1                 |                            |                        |
| 2035         | 40962732.664 | 24644640.780 | 16318091.9                 |                            |                        |
| 2036         | 41255021.653 | 24688492.490 | 16566529.2                 |                            |                        |
| 2037         | 41540573.023 | 24729043.567 | 16811529.5                 |                            |                        |
| 2038         | 41820158.066 | 24766202.499 | 17053955.6                 |                            |                        |
| 2039         | 42093547.949 | 24800403.038 | 17293144.9                 |                            |                        |
|              | Female       | 1990         | 588979.406                 | 588979.406                 | 0.000                  |
|              |              | 1991         | 1182571.252                | 1179606.223                | 2965.030               |
|              |              | 1992         | 1777346.679                | 1766096.065                | 11250.614              |
|              |              | 1993         | 2380261.899                | 2353262.439                | 26999.460              |
|              |              | 1994         | 2983130.039                | 2931318.480                | 51811.559              |
|              |              | 1995         | 3588982.584                | 3501951.421                | 87031.163              |
|              |              | 1996         | 4195430.235                | 4060556.430                | 134873.805             |
|              |              | 1997         | 4793866.694                | 4600665.542                | 193201.152             |
|              |              | 1998         | 5389747.381                | 5126516.537                | 263230.844             |
|              |              | 1999         | 6006722.467                | 5652699.758                | 354022.709             |
|              |              | 2000         | 6625758.871                | 6167994.559                | 457764.312             |
|              |              | 2001         | 7245135.411                | 6668446.719                | 576688.692             |
|              |              | 2002         | 7867492.021                | 7156192.187                | 711299.834             |
|              |              | 2003         | 8485051.793                | 7626448.177                | 858603.616             |
|              |              | 2004         | 9092994.774                | 8075795.934                | 1017198.84             |
|              |              | 2005         | 9706032.803                | 8515486.963                | 1190545.84             |
|              |              | 2006         | 10311907.548               | 8935845.320                | 1376062.23             |
|              |              | 2007         | 10909437.502               | 9338943.102                | 1570494.40             |
|              |              | 2008         | 11506462.491               | 9726650.332                | 1779812.16             |
|              |              | 2009         | 12098393.287               | 10100805.945               | 1997587.34             |
|              |              | 2010         | 12681188.981               | 10456702.623               | 2224486.36             |

**Results for PHIM for Run 4 (ELL Summary Sensitivity\_Analysis\_4.RTF)**

|             |       |      |              |              |            |
|-------------|-------|------|--------------|--------------|------------|
|             |       | 2011 | 13260062.991 | 10797345.195 | 2462717.80 |
|             |       | 2012 | 13839417.441 | 11125343.222 | 2714074.22 |
|             |       | 2013 | 14409614.758 | 11437518.613 | 2972096.14 |
|             |       | 2014 | 14976658.746 | 11734296.201 | 3242362.54 |
|             |       | 2015 | 15529977.821 | 12014254.281 | 3515723.54 |
|             |       | 2016 | 16066640.764 | 12273607.287 | 3793033.48 |
|             |       | 2017 | 16590035.078 | 12515948.820 | 4074086.26 |
|             |       | 2018 | 17098716.137 | 12744735.146 | 4353980.99 |
|             |       | 2019 | 17599868.850 | 12960579.805 | 4639289.05 |
|             |       | 2020 | 18081346.241 | 13162340.387 | 4919005.85 |
|             |       | 2021 | 18537594.460 | 13343612.233 | 5193982.23 |
|             |       | 2022 | 18985300.234 | 13513444.015 | 5471856.22 |
|             |       | 2023 | 19423958.747 | 13672261.058 | 5751697.69 |
|             |       | 2024 | 19853347.772 | 13819927.929 | 6033419.84 |
|             |       | 2025 | 20252822.245 | 13954585.324 | 6298236.92 |
|             |       | 2026 | 20619307.063 | 14070614.676 | 6548692.39 |
|             |       | 2027 | 20976063.406 | 14177681.614 | 6798381.79 |
|             |       | 2028 | 21323641.947 | 14276748.575 | 7046893.37 |
|             |       | 2029 | 21662117.106 | 14367718.611 | 7294398.50 |
|             |       | 2030 | 21960971.694 | 14447418.196 | 7513553.50 |
|             |       | 2031 | 22224951.983 | 14511814.952 | 7713137.03 |
|             |       | 2032 | 22480397.853 | 14570383.075 | 7910014.78 |
|             |       | 2033 | 22728639.455 | 14624021.015 | 8104618.44 |
|             |       | 2034 | 22970448.888 | 14672758.157 | 8297690.73 |
|             |       | 2035 | 23164154.188 | 14712061.641 | 8452092.55 |
|             |       | 2036 | 23334538.616 | 14743110.921 | 8591427.69 |
|             |       | 2037 | 23499760.723 | 14771387.245 | 8728373.48 |
|             |       | 2038 | 23660308.401 | 14797257.493 | 8863050.91 |
|             |       | 2039 | 23817891.273 | 14820993.729 | 8996897.54 |
| Lung cancer | Males | 1990 | 595621.791   | 595621.791   | 0.000      |
|             |       | 1991 | 1177744.113  | 1177096.215  | 647.898    |
|             |       | 1992 | 1750034.892  | 1747588.520  | 2446.372   |
|             |       | 1993 | 2319752.308  | 2313793.434  | 5958.873   |
|             |       | 1994 | 2872597.339  | 2861044.816  | 11552.522  |
|             |       | 1995 | 3411494.825  | 3391837.086  | 19657.739  |
|             |       | 1996 | 3945569.726  | 3914494.476  | 31075.250  |
|             |       | 1997 | 4463316.362  | 4417528.580  | 45787.782  |
|             |       | 1998 | 4975301.180  | 4910807.442  | 64493.739  |
|             |       | 1999 | 5473691.125  | 5386267.596  | 87423.529  |
|             |       | 2000 | 5977500.570  | 5861404.049  | 116096.521 |
|             |       | 2001 | 6474795.516  | 6324331.537  | 150463.979 |
|             |       | 2002 | 6968769.705  | 6777539.371  | 191230.334 |
|             |       | 2003 | 7460282.140  | 7221059.222  | 239222.918 |
|             |       | 2004 | 7947048.275  | 7652782.023  | 294266.252 |
|             |       | 2005 | 8430571.669  | 8073680.400  | 356891.269 |
|             |       | 2006 | 8903945.390  | 8477044.293  | 426901.097 |
|             |       | 2007 | 9364177.982  | 8860635.216  | 503542.766 |
|             |       | 2008 | 9822525.458  | 9233041.016  | 589484.443 |
|             |       | 2009 | 10275228.886 | 9591363.246  | 683865.640 |
|             |       | 2010 | 10720275.500 | 9934304.783  | 785970.718 |
|             |       | 2011 | 11155356.373 | 10259974.576 | 895381.798 |
|             |       | 2012 | 11582611.617 | 10569069.771 | 1013541.85 |
|             |       | 2013 | 11998803.791 | 10860054.244 | 1138749.55 |
|             |       | 2014 | 12402087.090 | 11132306.495 | 1269780.59 |
|             |       | 2015 | 12793451.706 | 11387653.347 | 1405798.36 |
|             |       | 2016 | 13160101.653 | 11617398.256 | 1542703.40 |
|             |       | 2017 | 13503583.414 | 11823974.135 | 1679609.28 |
|             |       | 2018 | 13859755.737 | 12027291.618 | 1832464.12 |
|             |       | 2019 | 14211625.176 | 12218944.330 | 1992680.85 |
|             |       | 2020 | 14553935.288 | 12397749.605 | 2156185.68 |
|             |       | 2021 | 14851747.495 | 12545383.740 | 2306363.75 |
|             |       | 2022 | 15144531.004 | 12683011.336 | 2461519.67 |
|             |       | 2023 | 15431932.496 | 12810770.991 | 2621161.51 |
|             |       | 2024 | 15713920.740 | 12929275.765 | 2784644.97 |
|             |       | 2025 | 15979112.816 | 13036445.128 | 2942667.69 |
|             |       | 2026 | 16206550.153 | 13121714.753 | 3084835.40 |
|             |       | 2027 | 16428826.050 | 13200105.580 | 3228720.47 |
|             |       | 2028 | 16645902.186 | 13271888.740 | 3374013.45 |
|             |       | 2029 | 16858126.517 | 13337771.662 | 3520354.85 |
|             |       | 2030 | 17045220.687 | 13394420.985 | 3650799.70 |
|             |       | 2031 | 17208482.610 | 13439029.607 | 3769453.00 |
|             |       | 2032 | 17367586.074 | 13479855.047 | 3887731.03 |
|             |       | 2033 | 17522716.280 | 13516939.349 | 4005776.93 |
|             |       | 2034 | 17674226.555 | 13550811.629 | 4123414.93 |
|             |       | 2035 | 17792201.734 | 13576946.725 | 4215255.01 |
|             |       | 2036 | 17903508.236 | 13599179.901 | 4304328.34 |
|             |       | 2037 | 18012162.345 | 13619719.361 | 4392442.98 |
|             |       | 2038 | 18118464.470 | 13638496.236 | 4479968.23 |

**Results for PHIM for Run 4 (ELL Summary Sensitivity\_Analysis\_4.RTF)**

|     |        |      |              |              |            |
|-----|--------|------|--------------|--------------|------------|
|     |        | 2039 | 18222549.860 | 13655777.559 | 4566772.30 |
|     | Female | 1990 | 307897.357   | 307897.357   | 0.000      |
|     |        | 1991 | 616547.418   | 616130.920   | 416.498    |
|     |        | 1992 | 931086.773   | 929437.073   | 1649.701   |
|     |        | 1993 | 1246155.671  | 1242093.582  | 4062.089   |
|     |        | 1994 | 1561212.934  | 1553213.526  | 7999.409   |
|     |        | 1995 | 1879967.742  | 1866031.849  | 13935.893  |
|     |        | 1996 | 2197488.109  | 2175330.680  | 22157.429  |
|     |        | 1997 | 2515698.453  | 2482607.790  | 33090.662  |
|     |        | 1998 | 2836249.556  | 2789165.994  | 47083.563  |
|     |        | 1999 | 3150201.390  | 3086074.460  | 64126.930  |
|     |        | 2000 | 3472722.342  | 3387449.984  | 85272.359  |
|     |        | 2001 | 3796994.889  | 3686139.802  | 110855.088 |
|     |        | 2002 | 4126619.935  | 3984989.074  | 141630.862 |
|     |        | 2003 | 4454982.533  | 4277783.943  | 177198.590 |
|     |        | 2004 | 4784343.030  | 4565954.454  | 218388.577 |
|     |        | 2005 | 5113443.121  | 4848151.211  | 265291.910 |
|     |        | 2006 | 5442543.963  | 5123765.558  | 318778.405 |
|     |        | 2007 | 5772441.497  | 5393497.297  | 378944.200 |
|     |        | 2008 | 6091911.943  | 5648041.074  | 443870.868 |
|     |        | 2009 | 6413671.330  | 5896994.230  | 516677.100 |
|     |        | 2010 | 6730763.530  | 6135631.261  | 595132.269 |
|     |        | 2011 | 7043614.101  | 6363705.247  | 679908.854 |
|     |        | 2012 | 7356270.780  | 6584132.888  | 772137.892 |
|     |        | 2013 | 7662551.964  | 6792706.355  | 869845.609 |
|     |        | 2014 | 7964551.465  | 6991014.354  | 973537.111 |
|     |        | 2015 | 8254895.403  | 7175539.782  | 1079355.62 |
|     |        | 2016 | 8530661.848  | 7343688.473  | 1186973.37 |
|     |        | 2017 | 8795826.122  | 7499030.547  | 1296795.58 |
|     |        | 2018 | 9067233.707  | 7650218.735  | 1417014.97 |
|     |        | 2019 | 9335343.270  | 7792523.722  | 1542819.55 |
|     |        | 2020 | 9596110.883  | 7925399.689  | 1670711.19 |
|     |        | 2021 | 9833186.859  | 8041304.605  | 1791882.25 |
|     |        | 2022 | 10066452.037 | 8149461.262  | 1916990.77 |
|     |        | 2023 | 10295503.609 | 8250164.380  | 2045339.23 |
|     |        | 2024 | 10520125.318 | 8343346.166  | 2176779.15 |
|     |        | 2025 | 10731915.863 | 8427906.759  | 2304009.10 |
|     |        | 2026 | 10917495.549 | 8498235.589  | 2419259.96 |
|     |        | 2027 | 11098620.885 | 8562770.265  | 2535850.62 |
|     |        | 2028 | 11275441.234 | 8622168.416  | 2653272.82 |
|     |        | 2029 | 11447962.710 | 8676403.368  | 2771559.34 |
|     |        | 2030 | 11601867.623 | 8723492.946  | 2878374.68 |
|     |        | 2031 | 11731666.516 | 8760217.300  | 2971449.22 |
|     |        | 2032 | 11857585.969 | 8793501.497  | 3064084.47 |
|     |        | 2033 | 11980128.625 | 8823874.400  | 3156254.22 |
|     |        | 2034 | 12099562.464 | 8851398.143  | 3248164.32 |
|     |        | 2035 | 12195919.946 | 8873230.504  | 3322689.44 |
|     |        | 2036 | 12278201.969 | 8890122.619  | 3388079.35 |
|     |        | 2037 | 12358146.336 | 8905542.570  | 3452603.77 |
|     |        | 2038 | 12435978.633 | 8919675.122  | 3516303.51 |
|     |        | 2039 | 12512468.845 | 8932671.726  | 3579797.12 |
| IHD | Males  | 1990 | 517209.093   | 517209.093   | 0.000      |
|     |        | 1991 | 1019219.395  | 1012116.414  | 7102.981   |
|     |        | 1992 | 1509598.614  | 1483223.639  | 26374.975  |
|     |        | 1993 | 1992735.299  | 1931292.549  | 61442.750  |
|     |        | 1994 | 2462877.575  | 2348233.369  | 114644.206 |
|     |        | 1995 | 2928249.390  | 2739582.088  | 188667.302 |
|     |        | 1996 | 3377377.730  | 3093759.632  | 283618.098 |
|     |        | 1997 | 3809062.472  | 3410967.588  | 398094.884 |
|     |        | 1998 | 4222213.867  | 3691972.701  | 530241.167 |
|     |        | 1999 | 4708317.743  | 3995795.242  | 712522.501 |
|     |        | 2000 | 5182084.396  | 4267537.734  | 914546.662 |
|     |        | 2001 | 5644097.705  | 4507536.039  | 1136561.67 |
|     |        | 2002 | 6107232.129  | 4724998.858  | 1382233.27 |
|     |        | 2003 | 6561785.704  | 4917117.319  | 1644668.38 |
|     |        | 2004 | 6996156.348  | 5082679.265  | 1913477.08 |
|     |        | 2005 | 7426261.361  | 5230795.711  | 2195465.65 |
|     |        | 2006 | 7849012.694  | 5360589.998  | 2488422.70 |
|     |        | 2007 | 8255300.530  | 5472721.502  | 2782579.03 |
|     |        | 2008 | 8650662.040  | 5571187.754  | 3079474.29 |
|     |        | 2009 | 9030818.513  | 5656989.908  | 3373828.60 |
|     |        | 2010 | 9403026.327  | 5733152.768  | 3669873.56 |
|     |        | 2011 | 9767535.506  | 5800712.688  | 3966822.82 |
|     |        | 2012 | 10123044.281 | 5860907.951  | 4262136.33 |
|     |        | 2013 | 10470104.786 | 5914489.312  | 4555615.47 |
|     |        | 2014 | 10807756.112 | 5962409.355  | 4845346.76 |
|     |        | 2015 | 11130681.425 | 6004908.260  | 5125773.17 |
|     |        | 2016 | 11448966.506 | 6043518.356  | 5405448.15 |

**Results for PHIM for Run 4 (ELL Summary Sensitivity\_Analysis\_4.RTF)**

|        |        |      |              |             |            |
|--------|--------|------|--------------|-------------|------------|
|        |        | 2017 | 11758164.882 | 6078495.461 | 5679669.42 |
|        |        | 2018 | 12054448.241 | 6109158.744 | 5945289.50 |
|        |        | 2019 | 12341606.261 | 6137080.093 | 6204526.17 |
|        |        | 2020 | 12600728.939 | 6161047.679 | 6439681.26 |
|        |        | 2021 | 12861767.105 | 6183682.169 | 6678084.94 |
|        |        | 2022 | 13114168.616 | 6204531.065 | 6909637.55 |
|        |        | 2023 | 13357894.797 | 6223650.781 | 7134244.02 |
|        |        | 2024 | 13593848.521 | 6241357.903 | 7352490.62 |
|        |        | 2025 | 13789177.359 | 6255679.498 | 7533497.86 |
|        |        | 2026 | 13993401.656 | 6269993.527 | 7723408.13 |
|        |        | 2027 | 14190519.224 | 6283512.167 | 7907007.06 |
|        |        | 2028 | 14381193.356 | 6296093.905 | 8085099.45 |
|        |        | 2029 | 14565171.927 | 6307741.913 | 8257430.01 |
|        |        | 2030 | 14697381.605 | 6316109.719 | 8381271.89 |
|        |        | 2031 | 14842203.512 | 6325087.938 | 8517115.57 |
|        |        | 2032 | 14982485.826 | 6333690.307 | 8648795.52 |
|        |        | 2033 | 15118410.647 | 6341679.058 | 8776731.59 |
|        |        | 2034 | 15250284.398 | 6349084.753 | 8901199.65 |
|        |        | 2035 | 15322911.166 | 6353103.208 | 8969807.96 |
|        |        | 2036 | 15405115.031 | 6357540.386 | 9047574.65 |
|        |        | 2037 | 15484709.137 | 6361818.540 | 9122890.60 |
|        |        | 2038 | 15561812.193 | 6365845.585 | 9195966.61 |
|        |        | 2039 | 15635992.616 | 6369581.951 | 9266410.66 |
|        | Female | 1990 | 147299.110   | 147299.110  | 0.000      |
|        |        | 1991 | 295122.462   | 293257.305  | 1865.158   |
|        |        | 1992 | 439962.920   | 432980.289  | 6982.631   |
|        |        | 1993 | 584735.615   | 568176.002  | 16559.613  |
|        |        | 1994 | 727640.783   | 696324.392  | 31316.391  |
|        |        | 1995 | 868486.937   | 816722.454  | 51764.483  |
|        |        | 1996 | 1010321.847  | 930873.028  | 79448.820  |
|        |        | 1997 | 1144230.930  | 1032425.786 | 111805.144 |
|        |        | 1998 | 1274513.622  | 1124657.142 | 149856.480 |
|        |        | 1999 | 1426725.938  | 1224821.456 | 201904.482 |
|        |        | 2000 | 1573462.680  | 1314383.446 | 259079.234 |
|        |        | 2001 | 1719132.015  | 1395183.016 | 323948.999 |
|        |        | 2002 | 1863006.732  | 1467631.583 | 395375.149 |
|        |        | 2003 | 2002943.227  | 1531508.892 | 471434.335 |
|        |        | 2004 | 2137798.705  | 1587186.527 | 550612.178 |
|        |        | 2005 | 2271071.245  | 1637207.647 | 633863.599 |
|        |        | 2006 | 2400707.731  | 1680740.271 | 719967.460 |
|        |        | 2007 | 2523634.512  | 1718045.374 | 805589.139 |
|        |        | 2008 | 2648752.232  | 1752194.107 | 896558.126 |
|        |        | 2009 | 2765973.961  | 1781336.783 | 984637.178 |
|        |        | 2010 | 2881329.235  | 1807410.173 | 1073919.06 |
|        |        | 2011 | 2994972.694  | 1830651.121 | 1164321.57 |
|        |        | 2012 | 3108958.829  | 1851745.772 | 1257213.06 |
|        |        | 2013 | 3218140.416  | 1870433.530 | 1347706.89 |
|        |        | 2014 | 3328387.914  | 1887666.181 | 1440721.73 |
|        |        | 2015 | 3435342.796  | 1903325.547 | 1532017.25 |
|        |        | 2016 | 3539189.408  | 1917412.356 | 1621777.05 |
|        |        | 2017 | 3640041.363  | 1930098.290 | 1709943.07 |
|        |        | 2018 | 3732645.362  | 1940897.188 | 1791748.17 |
|        |        | 2019 | 3821421.978  | 1950556.597 | 1870865.38 |
|        |        | 2020 | 3902115.950  | 1958895.678 | 1943220.27 |
|        |        | 2021 | 3984301.053  | 1966866.190 | 2017434.86 |
|        |        | 2022 | 4062629.299  | 1974011.124 | 2088618.17 |
|        |        | 2023 | 4137348.729  | 1980485.260 | 2156863.47 |
|        |        | 2024 | 4208611.493  | 1986336.001 | 2222275.49 |
|        |        | 2025 | 4269419.492  | 1991208.850 | 2278210.64 |
|        |        | 2026 | 4330969.998  | 1995904.866 | 2335065.13 |
|        |        | 2027 | 4389134.306  | 2000163.276 | 2388971.03 |
|        |        | 2028 | 4444222.970  | 2004062.209 | 2440160.76 |
|        |        | 2029 | 4496447.877  | 2007652.766 | 2488795.11 |
|        |        | 2030 | 4536975.698  | 2010382.524 | 2526593.17 |
|        |        | 2031 | 4578338.586  | 2013087.850 | 2565250.74 |
|        |        | 2032 | 4617397.784  | 2015587.188 | 2601810.60 |
|        |        | 2033 | 4654407.697  | 2017920.739 | 2636486.96 |
|        |        | 2034 | 4689913.454  | 2020109.265 | 2669804.19 |
|        |        | 2035 | 4712518.190  | 2021443.674 | 2691074.52 |
|        |        | 2036 | 4735845.827  | 2022780.884 | 2713064.94 |
|        |        | 2037 | 4757958.806  | 2024028.334 | 2733930.47 |
|        |        | 2038 | 4778813.806  | 2025202.984 | 2753610.82 |
|        |        | 2039 | 4798769.065  | 2026315.446 | 2772453.62 |
| Stroke | Males  | 1990 | 75005.854    | 75005.854   | 0.000      |
|        |        | 1991 | 149463.017   | 148743.133  | 719.885    |
|        |        | 1992 | 222966.278   | 220289.451  | 2676.827   |
|        |        | 1993 | 296801.879   | 290425.280  | 6376.598   |
|        |        | 1994 | 372453.706   | 360103.195  | 12350.511  |

**Results for PHIM for Run 4 (ELL Summary Sensitivity\_Analysis\_4.RTF)**

|        |      |             |             |            |
|--------|------|-------------|-------------|------------|
|        | 1995 | 448401.338  | 427518.020  | 20883.318  |
|        | 1996 | 523536.301  | 491399.558  | 32136.744  |
|        | 1997 | 596763.211  | 550664.366  | 46098.845  |
|        | 1998 | 667546.681  | 604949.365  | 62597.316  |
|        | 1999 | 734925.407  | 653711.436  | 81213.971  |
|        | 2000 | 803749.361  | 700552.846  | 103196.514 |
|        | 2001 | 870081.588  | 742661.477  | 127420.111 |
|        | 2002 | 935347.140  | 781259.557  | 154087.583 |
|        | 2003 | 1001627.349 | 817439.492  | 184187.857 |
|        | 2004 | 1066587.976 | 850268.604  | 216319.372 |
|        | 2005 | 1130548.052 | 880010.343  | 250537.709 |
|        | 2006 | 1195132.454 | 907519.649  | 287612.805 |
|        | 2007 | 1258974.043 | 932426.269  | 326547.774 |
|        | 2008 | 1320124.867 | 954158.840  | 365966.027 |
|        | 2009 | 1380776.123 | 973878.255  | 406897.868 |
|        | 2010 | 1440048.533 | 991540.749  | 448507.784 |
|        | 2011 | 1497484.847 | 1007226.642 | 490258.205 |
|        | 2012 | 1554496.526 | 1021358.142 | 533138.384 |
|        | 2013 | 1610819.598 | 1034121.815 | 576697.783 |
|        | 2014 | 1667484.890 | 1045790.084 | 621694.806 |
|        | 2015 | 1720948.287 | 1056005.890 | 664942.397 |
|        | 2016 | 1775699.228 | 1065548.350 | 710150.879 |
|        | 2017 | 1830250.175 | 1074286.107 | 755964.068 |
|        | 2018 | 1875958.950 | 1081063.323 | 794895.627 |
|        | 2019 | 1920359.232 | 1087146.325 | 833212.907 |
|        | 2020 | 1960605.297 | 1092322.650 | 868282.647 |
|        | 2021 | 1998912.887 | 1096887.528 | 902025.360 |
|        | 2022 | 2036003.696 | 1100992.237 | 935011.459 |
|        | 2023 | 2071857.536 | 1104685.919 | 967171.617 |
|        | 2024 | 2106636.468 | 1108048.573 | 998587.895 |
|        | 2025 | 2136450.873 | 1110798.038 | 1025652.84 |
|        | 2026 | 2164796.470 | 1113253.178 | 1051543.29 |
|        | 2027 | 2192079.608 | 1115505.485 | 1076574.12 |
|        | 2028 | 2218404.367 | 1117557.137 | 1100847.23 |
|        | 2029 | 2243769.140 | 1119433.958 | 1124335.18 |
|        | 2030 | 2263570.213 | 1120853.075 | 1142717.14 |
|        | 2031 | 2282521.590 | 1122160.259 | 1160361.33 |
|        | 2032 | 2300804.945 | 1123376.751 | 1177428.19 |
|        | 2033 | 2318464.018 | 1124497.913 | 1193966.11 |
|        | 2034 | 2335611.973 | 1125539.873 | 1210072.10 |
|        | 2035 | 2347097.290 | 1126223.904 | 1220873.39 |
|        | 2036 | 2358248.747 | 1126867.623 | 1231381.12 |
|        | 2037 | 2369033.655 | 1127480.804 | 1241552.85 |
|        | 2038 | 2379490.114 | 1128056.555 | 1251433.56 |
|        | 2039 | 2389546.238 | 1128591.665 | 1260954.57 |
| Female | 1990 | 56348.092   | 56348.092   | 0.000      |
|        | 1991 | 110871.862  | 110356.680  | 515.182    |
|        | 1992 | 165654.454  | 163676.464  | 1977.991   |
|        | 1993 | 220008.519  | 215283.382  | 4725.137   |
|        | 1994 | 275706.807  | 266523.535  | 9183.272   |
|        | 1995 | 331417.547  | 315917.489  | 15500.058  |
|        | 1996 | 387580.161  | 363578.749  | 24001.412  |
|        | 1997 | 442778.242  | 408221.584  | 34556.657  |
|        | 1998 | 496117.305  | 449176.491  | 46940.814  |
|        | 1999 | 548268.214  | 487020.244  | 61247.971  |
|        | 2000 | 601693.202  | 523573.471  | 78119.730  |
|        | 2001 | 652221.103  | 555961.681  | 96259.421  |
|        | 2002 | 703022.600  | 586288.235  | 116734.365 |
|        | 2003 | 752023.351  | 613460.797  | 138562.554 |
|        | 2004 | 799826.733  | 637966.634  | 161860.098 |
|        | 2005 | 847563.928  | 660594.578  | 186969.350 |
|        | 2006 | 894205.027  | 680946.445  | 213258.582 |
|        | 2007 | 939571.282  | 699109.262  | 240462.020 |
|        | 2008 | 983437.578  | 715248.454  | 268189.124 |
|        | 2009 | 1025803.786 | 729560.084  | 296243.702 |
|        | 2010 | 1066964.934 | 742271.555  | 324693.379 |
|        | 2011 | 1106954.044 | 753561.251  | 353392.794 |
|        | 2012 | 1146108.461 | 763701.712  | 382406.749 |
|        | 2013 | 1183544.689 | 772617.363  | 410927.326 |
|        | 2014 | 1221220.945 | 780825.290  | 440395.656 |
|        | 2015 | 1258289.311 | 788339.495  | 469949.817 |
|        | 2016 | 1294830.207 | 795149.760  | 499680.448 |
|        | 2017 | 1330332.626 | 801250.474  | 529082.151 |
|        | 2018 | 1360571.987 | 806071.353  | 554500.635 |
|        | 2019 | 1389848.723 | 810366.092  | 579482.630 |
|        | 2020 | 1416046.192 | 813989.715  | 602056.477 |
|        | 2021 | 1440588.850 | 817138.294  | 623450.555 |
|        | 2022 | 1464157.934 | 819945.375  | 644212.559 |



**Results for PHIM for Run 4 (ELL Summary Sensitivity\_Analysis\_4.RTF)**

|      |             |             |             |             |            |
|------|-------------|-------------|-------------|-------------|------------|
|      |             | 2023        | 1486810.237 | 822473.578  | 664336.660 |
|      |             | 2024        | 1508591.729 | 824740.383  | 683851.346 |
|      |             | 2025        | 1526875.621 | 826569.246  | 700306.375 |
|      |             | 2026        | 1543659.810 | 828144.609  | 715515.201 |
|      |             | 2027        | 1559623.774 | 829561.308  | 730062.466 |
|      |             | 2028        | 1574852.850 | 830847.277  | 744005.573 |
|      |             | 2029        | 1589437.452 | 832018.474  | 757418.978 |
|      |             | 2030        | 1600568.199 | 832882.979  | 767685.221 |
|      |             | 2031        | 1610776.297 | 833643.110  | 777133.187 |
|      |             | 2032        | 1620483.563 | 834340.290  | 786143.273 |
|      |             | 2033        | 1629745.442 | 834985.135  | 794760.307 |
|      |             | 2034        | 1638721.425 | 835584.756  | 803136.669 |
|      |             | 2035        | 1644649.404 | 835964.860  | 808684.544 |
|      |             | 2036        | 1650181.590 | 836306.265  | 813875.324 |
|      |             | 2037        | 1655476.066 | 836625.449  | 818850.617 |
|      |             | 2038        | 1660507.914 | 836926.792  | 823581.122 |
|      |             | 2039        | 1665361.569 | 837212.123  | 828149.446 |
| COPD | Males       | 1990        | 117002.906  | 117002.906  | 0.000      |
|      |             | 1991        | 233438.833  | 233235.802  | 203.031    |
|      |             | 1992        | 348084.047  | 347332.502  | 751.545    |
|      |             | 1993        | 467278.318  | 465432.872  | 1845.446   |
|      |             | 1994        | 584216.907  | 580587.418  | 3629.489   |
|      |             | 1995        | 697391.457  | 691203.267  | 6188.190   |
|      |             | 1996        | 809471.271  | 799789.550  | 9681.720   |
|      |             | 1997        | 922587.668  | 908236.678  | 14350.990  |
|      |             | 1998        | 1034072.457 | 1013942.984 | 20129.472  |
|      |             | 1999        | 1153475.399 | 1125725.727 | 27749.672  |
|      |             | 2000        | 1268050.268 | 1231286.247 | 36764.021  |
|      |             | 2001        | 1382786.209 | 1335189.297 | 47596.912  |
|      |             | 2002        | 1497557.412 | 1437112.332 | 60445.079  |
|      |             | 2003        | 1614405.229 | 1539033.010 | 75372.220  |
|      |             | 2004        | 1726672.489 | 1634846.396 | 91826.093  |
|      |             | 2005        | 1847277.524 | 1735689.498 | 111588.027 |
|      |             | 2006        | 1961009.963 | 1828377.044 | 132632.919 |
|      |             | 2007        | 2079868.908 | 1922656.043 | 157212.865 |
|      |             | 2008        | 2206755.783 | 2020782.020 | 185973.762 |
|      |             | 2009        | 2331993.380 | 2114883.263 | 217110.117 |
|      |             | 2010        | 2455130.176 | 2204769.415 | 250360.762 |
|      |             | 2011        | 2582657.849 | 2294951.610 | 287706.239 |
|      |             | 2012        | 2709719.005 | 2381784.507 | 327934.497 |
|      |             | 2013        | 2840547.005 | 2468006.425 | 372540.581 |
|      |             | 2014        | 2971677.135 | 2551296.874 | 420380.261 |
|      |             | 2015        | 3104538.983 | 2633676.289 | 470862.694 |
|      |             | 2016        | 3237650.175 | 2712823.923 | 524826.252 |
|      |             | 2017        | 3370561.253 | 2788909.411 | 581651.841 |
|      |             | 2018        | 3503136.371 | 2861203.833 | 641932.538 |
|      |             | 2019        | 3636402.758 | 2930740.361 | 705662.397 |
|      |             | 2020        | 3768054.453 | 2997050.380 | 771004.073 |
|      |             | 2021        | 3897675.067 | 3059254.545 | 838420.521 |
|      |             | 2022        | 4027307.132 | 3118397.372 | 908909.760 |
|      |             | 2023        | 4156698.720 | 3174390.966 | 982307.754 |
|      |             | 2024        | 4285772.226 | 3227291.920 | 1058480.31 |
|      |             | 2025        | 4410759.298 | 3276574.648 | 1134184.65 |
|      |             | 2026        | 4531411.064 | 3321176.125 | 1210234.94 |
|      |             | 2027        | 4651145.233 | 3362795.751 | 1288349.48 |
|      |             | 2028        | 4769837.872 | 3401502.636 | 1368335.24 |
|      |             | 2029        | 4887747.179 | 3437515.656 | 1450231.52 |
| 2030 | 4997632.895 | 3469881.095 | 1527751.80  |             |            |
| 2031 | 5103301.991 | 3498323.469 | 1604978.52  |             |            |
| 2032 | 5207593.613 | 3524425.325 | 1683168.29  |             |            |
| 2033 | 5310556.138 | 3548254.181 | 1762301.96  |             |            |
| 2034 | 5412542.816 | 3570087.425 | 1842455.39  |             |            |
| 2035 | 5500522.473 | 3588366.944 | 1912155.53  |             |            |
| 2036 | 5588149.640 | 3604904.580 | 1983245.06  |             |            |
| 2037 | 5674667.886 | 3620024.862 | 2054643.02  |             |            |
| 2038 | 5760391.289 | 3633804.123 | 2126587.17  |             |            |
| 2039 | 5845459.234 | 3646451.863 | 2199007.37  |             |            |
|      | Female      | 1990        | 77434.846   | 77434.846   | 0.000      |
|      |             | 1991        | 160029.510  | 159861.318  | 168.192    |
|      |             | 1992        | 240642.531  | 240002.240  | 640.292    |
|      |             | 1993        | 329362.093  | 327709.473  | 1652.621   |
|      |             | 1994        | 418569.515  | 415257.027  | 3312.488   |
|      |             | 1995        | 509110.357  | 503279.629  | 5830.728   |
|      |             | 1996        | 600040.117  | 590773.973  | 9266.144   |
|      |             | 1997        | 691159.071  | 677410.382  | 13748.689  |
|      |             | 1998        | 782866.899  | 763516.911  | 19349.988  |
|      |             | 1999        | 881526.925  | 854783.598  | 26743.327  |
|      |             | 2000        | 977880.647  | 942587.659  | 35292.989  |

**Results for PHIM for Run 4 (ELL Summary Sensitivity\_Analysis\_4.RTF)**

|      |             |             |            |
|------|-------------|-------------|------------|
| 2001 | 1076787.404 | 1031162.220 | 45625.183  |
| 2002 | 1174842.754 | 1117283.296 | 57559.458  |
| 2003 | 1275102.681 | 1203694.544 | 71408.137  |
| 2004 | 1371026.306 | 1284688.319 | 86337.986  |
| 2005 | 1473954.509 | 1369533.528 | 104420.981 |
| 2006 | 1574450.828 | 1450393.047 | 124057.781 |
| 2007 | 1673790.211 | 1528291.169 | 145499.042 |
| 2008 | 1782360.738 | 1611166.698 | 171194.040 |
| 2009 | 1892944.209 | 1692914.848 | 200029.361 |
| 2010 | 2002131.282 | 1771389.633 | 230741.649 |
| 2011 | 2114522.152 | 1849427.576 | 265094.576 |
| 2012 | 2228079.372 | 1925762.850 | 302316.522 |
| 2013 | 2345377.689 | 2001761.365 | 343616.324 |
| 2014 | 2462498.422 | 2074790.377 | 387708.045 |
| 2015 | 2581450.312 | 2147049.458 | 434400.854 |
| 2016 | 2701959.301 | 2217356.698 | 484602.603 |
| 2017 | 2823834.967 | 2285569.509 | 538265.459 |
| 2018 | 2938265.081 | 2347547.871 | 590717.210 |
| 2019 | 3053254.880 | 2407133.394 | 646121.486 |
| 2020 | 3167073.216 | 2464055.304 | 703017.911 |
| 2021 | 3279517.699 | 2518303.144 | 761214.555 |
| 2022 | 3392060.964 | 2570026.253 | 822034.711 |
| 2023 | 3504296.171 | 2619137.840 | 885158.331 |
| 2024 | 3616019.231 | 2665505.379 | 950513.852 |
| 2025 | 3724611.269 | 2708900.469 | 1015710.80 |
| 2026 | 3827181.707 | 2748329.613 | 1078852.09 |
| 2027 | 3928684.441 | 2785186.765 | 1143497.68 |
| 2028 | 4029124.892 | 2819670.673 | 1209454.22 |
| 2029 | 4128269.068 | 2851644.002 | 1276625.07 |
| 2030 | 4221560.174 | 2880659.748 | 1340900.43 |
| 2031 | 4304170.584 | 2904866.692 | 1399303.89 |
| 2032 | 4384930.537 | 2926954.100 | 1457976.44 |
| 2033 | 4464357.691 | 2947240.741 | 1517116.95 |
| 2034 | 4542251.545 | 2965665.993 | 1576585.55 |
| 2035 | 4611066.648 | 2981422.604 | 1629644.04 |
| 2036 | 4670309.230 | 2993901.154 | 1676408.08 |
| 2037 | 4728179.514 | 3005190.892 | 1722988.62 |
| 2038 | 4785008.048 | 3015452.596 | 1769555.45 |
| 2039 | 4841291.793 | 3024794.434 | 1816497.36 |

---

## Results for PHIM for Run 4 (ELL Summary Sensitivity\_Analysis\_4.RTF)

\*\*\*\*\*

**Table 4: Estimated Loss of Life, All age groups combined, Population and Number deaths adjusted for Ecig scenario, cumulative over years**

| Disease      | Sex          | Year         | Years of life lost<br>NULL | Years of life lost<br>Ecig | Years of life<br>Saved |
|--------------|--------------|--------------|----------------------------|----------------------------|------------------------|
| All Diseases | Males        | 1990         | 1304839.645                | 1304839.645                | 0.000                  |
|              |              | 1991         | 2579865.358                | 2571191.563                | 8673.794               |
|              |              | 1992         | 3830683.831                | 3798446.049                | 32237.782              |
|              |              | 1993         | 5076567.803                | 5000998.392                | 75569.411              |
|              |              | 1994         | 6292145.526                | 6150118.382                | 142027.144             |
|              |              | 1995         | 7485537.010                | 7250462.088                | 235074.922             |
|              |              | 1996         | 8655955.028                | 8300037.203                | 355917.824             |
|              |              | 1997         | 9791729.713                | 9288382.216                | 503347.497             |
|              |              | 1998         | 10899134.186               | 10223183.983               | 675950.203             |
|              |              | 1999         | 12070409.674               | 11163726.976               | 906682.698             |
|              |              | 2000         | 13231384.595               | 12063925.486               | 1167459.11             |
|              |              | 2001         | 14371761.018               | 12913979.671               | 1457781.35             |
|              |              | 2002         | 15508906.386               | 13726507.490               | 1782398.90             |
|              |              | 2003         | 16638100.422               | 14501805.275               | 2136295.15             |
|              |              | 2004         | 17736465.088               | 15229490.912               | 2506974.18             |
|              |              | 2005         | 18834658.606               | 15931088.850               | 2903569.76             |
|              |              | 2006         | 19909100.501               | 16586613.375               | 3322487.13             |
|              |              | 2007         | 20958321.463               | 17203872.633               | 3754448.83             |
|              |              | 2008         | 22000068.148               | 17797176.201               | 4202891.95             |
|              |              | 2009         | 23018816.903               | 18357862.885               | 4660954.02             |
|              |              | 2010         | 24018480.537               | 18887413.789               | 5131066.75             |
|              |              | 2011         | 25003034.574               | 19389562.157               | 5613472.42             |
|              |              | 2012         | 25969871.429               | 19862981.034               | 6106890.39             |
|              |              | 2013         | 26920275.180               | 20309809.942               | 6610465.24             |
|              |              | 2014         | 27849005.227               | 20728296.405               | 7120708.82             |
|              |              | 2015         | 28749620.400               | 21122195.130               | 7627425.27             |
|              |              | 2016         | 29622417.562               | 21482668.265               | 8139749.30             |
|              |              | 2017         | 30462559.724               | 21812437.960               | 8650121.76             |
|              |              | 2018         | 31293299.299               | 22128979.763               | 9164319.54             |
|              |              | 2019         | 32109993.427               | 22427697.846               | 9682295.58             |
|              |              | 2020         | 32883323.977               | 22705499.428               | 10177824.5             |
|              |              | 2021         | 33610102.554               | 22945791.382               | 10664311.2             |
|              |              | 2022         | 34322010.448               | 23170741.024               | 11151269.4             |
|              |              | 2023         | 35018383.550               | 23380489.415               | 11637894.1             |
|              |              | 2024         | 35700177.955               | 23576097.699               | 12124080.3             |
|              |              | 2025         | 36315500.346               | 23752674.121               | 12562826.2             |
|              |              | 2026         | 36896159.343               | 23901995.152               | 12994164.2             |
|              |              | 2027         | 37462570.116               | 24040373.442               | 13422196.7             |
|              |              | 2028         | 38015337.780               | 24168001.652               | 13847336.1             |
|              |              | 2029         | 38554814.764               | 24285833.976               | 14268980.8             |
|              |              | 2030         | 39003805.400               | 24386886.280               | 14616919.1             |
| 2031         | 39436509.703 | 24472150.969 | 14964358.7                 |                            |                        |
| 2032         | 39858470.458 | 24550727.834 | 15307742.6                 |                            |                        |
| 2033         | 40270147.082 | 24622475.228 | 15647671.9                 |                            |                        |
| 2034         | 40672665.743 | 24688258.047 | 15984407.7                 |                            |                        |
| 2035         | 40962732.664 | 24738757.706 | 16223975.0                 |                            |                        |
| 2036         | 41255021.653 | 24783839.877 | 16471181.8                 |                            |                        |
| 2037         | 41540573.023 | 24825553.189 | 16715019.8                 |                            |                        |
| 2038         | 41820158.066 | 24863802.925 | 16956355.1                 |                            |                        |
| 2039         | 42093547.949 | 24899027.616 | 17194520.3                 |                            |                        |
|              | Female       | 1990         | 588979.406                 | 588979.406                 | 0.000                  |
|              |              | 1991         | 1182571.252                | 1179606.223                | 2965.030               |
|              |              | 1992         | 1777346.679                | 1766098.094                | 11248.585              |
|              |              | 1993         | 2380261.899                | 2353272.306                | 26989.593              |
|              |              | 1994         | 2983130.039                | 2931347.229                | 51782.810              |
|              |              | 1995         | 3588982.584                | 3502016.141                | 86966.442              |
|              |              | 1996         | 4195430.235                | 4060680.813                | 134749.422             |
|              |              | 1997         | 4793866.694                | 4600879.769                | 192986.925             |
|              |              | 1998         | 5389747.381                | 5126858.014                | 262889.367             |
|              |              | 1999         | 6006722.467                | 5653215.943                | 353506.524             |
|              |              | 2000         | 6625758.871                | 6168741.757                | 457017.114             |
|              |              | 2001         | 7245135.411                | 6669483.416                | 575651.995             |
|              |              | 2002         | 7867492.021                | 7157582.329                | 709909.691             |
|              |              | 2003         | 8485051.793                | 7628260.629                | 856791.164             |
|              |              | 2004         | 9092994.774                | 8078095.000                | 1014899.77             |
|              |              | 2005         | 9706032.803                | 8518348.113                | 1187684.69             |
|              |              | 2006         | 10311907.548               | 8939334.459                | 1372573.09             |
|              | 2007         | 10909437.502 | 9343130.399                | 1566307.10                 |                        |
|              | 2008         | 11506462.491 | 9731609.023                | 1774853.47                 |                        |
|              | 2009         | 12098393.287 | 10106607.935               | 1991785.35                 |                        |
|              | 2010         | 12681188.981 | 10463408.841               | 2217780.14                 |                        |

**Results for PHIM for Run 4 (ELL Summary Sensitivity\_Analysis\_4.RTF)**

|             |       |      |              |              |            |
|-------------|-------|------|--------------|--------------|------------|
|             |       | 2011 | 13260062.991 | 10805018.372 | 2455044.62 |
|             |       | 2012 | 13839417.441 | 11134051.553 | 2705365.89 |
|             |       | 2013 | 14409614.758 | 11447318.826 | 2962295.93 |
|             |       | 2014 | 14976658.746 | 11745240.441 | 3231418.30 |
|             |       | 2015 | 15529977.821 | 12026393.356 | 3503584.47 |
|             |       | 2016 | 16066640.764 | 12286961.011 | 3779679.75 |
|             |       | 2017 | 16590035.078 | 12530549.331 | 4059485.75 |
|             |       | 2018 | 17098716.137 | 12760616.626 | 4338099.51 |
|             |       | 2019 | 17599868.850 | 12977771.296 | 4622097.55 |
|             |       | 2020 | 18081346.241 | 13180866.484 | 4900479.76 |
|             |       | 2021 | 18537594.460 | 13363449.944 | 5174144.52 |
|             |       | 2022 | 18985300.234 | 13534602.653 | 5450697.58 |
|             |       | 2023 | 19423958.747 | 13694743.466 | 5729215.28 |
|             |       | 2024 | 19853347.772 | 13843726.210 | 6009621.56 |
|             |       | 2025 | 20252822.245 | 13979687.518 | 6273134.73 |
|             |       | 2026 | 20619307.063 | 14096930.912 | 6522376.15 |
|             |       | 2027 | 20976063.406 | 14205186.598 | 6770876.81 |
|             |       | 2028 | 21323641.947 | 14305417.937 | 7018224.01 |
|             |       | 2029 | 21662117.106 | 14397517.001 | 7264600.11 |
|             |       | 2030 | 21960971.694 | 14478299.183 | 7482672.51 |
|             |       | 2031 | 22224951.983 | 14543616.846 | 7681335.14 |
|             |       | 2032 | 22480397.853 | 14603057.201 | 7877340.65 |
|             |       | 2033 | 22728639.455 | 14657527.211 | 8071112.24 |
|             |       | 2034 | 22970448.888 | 14707047.828 | 8263401.06 |
|             |       | 2035 | 23164154.188 | 14747056.446 | 8417097.74 |
|             |       | 2036 | 23334538.616 | 14778667.379 | 8555871.24 |
|             |       | 2037 | 23499760.723 | 14807464.945 | 8692295.78 |
|             |       | 2038 | 23660308.401 | 14833820.664 | 8826487.74 |
|             |       | 2039 | 23817891.273 | 14858008.980 | 8959882.29 |
| Lung cancer | Males | 1990 | 595621.791   | 595621.791   | 0.000      |
|             |       | 1991 | 1177744.113  | 1177096.215  | 647.898    |
|             |       | 1992 | 1750034.892  | 1747594.301  | 2440.591   |
|             |       | 1993 | 2319752.308  | 2313819.817  | 5932.490   |
|             |       | 1994 | 2872597.339  | 2861118.160  | 11479.179  |
|             |       | 1995 | 3411494.825  | 3391996.295  | 19498.530  |
|             |       | 1996 | 3945569.726  | 3914793.380  | 30776.346  |
|             |       | 1997 | 4463316.362  | 4418032.407  | 45283.955  |
|             |       | 1998 | 4975301.180  | 4911596.879  | 63704.302  |
|             |       | 1999 | 5473691.125  | 5387429.031  | 86262.094  |
|             |       | 2000 | 5977500.570  | 5863061.725  | 114438.846 |
|             |       | 2001 | 6474795.516  | 6326612.570  | 148182.946 |
|             |       | 2002 | 6968769.705  | 6780584.680  | 188185.025 |
|             |       | 2003 | 7460282.140  | 7225017.455  | 235264.685 |
|             |       | 2004 | 7947048.275  | 7657807.890  | 289240.386 |
|             |       | 2005 | 8430571.669  | 8079930.978  | 350640.691 |
|             |       | 2006 | 8903945.390  | 8484660.726  | 419284.664 |
|             |       | 2007 | 9364177.982  | 8869747.246  | 494430.736 |
|             |       | 2008 | 9822525.458  | 9243801.779  | 578723.680 |
|             |       | 2009 | 10275228.886 | 9603912.816  | 671316.070 |
|             |       | 2010 | 10720275.500 | 9948771.536  | 771503.965 |
|             |       | 2011 | 11155356.373 | 10276464.695 | 878891.678 |
|             |       | 2012 | 11582611.617 | 10587672.156 | 994939.461 |
|             |       | 2013 | 11998803.791 | 10880839.390 | 1117964.40 |
|             |       | 2014 | 12402087.090 | 11155328.172 | 1246758.92 |
|             |       | 2015 | 12793451.706 | 11412965.760 | 1380485.95 |
|             |       | 2016 | 13160101.653 | 11644949.049 | 1515152.60 |
|             |       | 2017 | 13503583.414 | 11853705.930 | 1649877.48 |
|             |       | 2018 | 13859755.737 | 12059325.078 | 1800430.66 |
|             |       | 2019 | 14211625.176 | 12253301.784 | 1958323.39 |
|             |       | 2020 | 14553935.288 | 12434441.031 | 2119494.26 |
|             |       | 2021 | 14851747.495 | 12584133.395 | 2267614.10 |
|             |       | 2022 | 15144531.004 | 12723795.602 | 2420735.40 |
|             |       | 2023 | 15431932.496 | 12853555.268 | 2578377.23 |
|             |       | 2024 | 15713920.740 | 12974020.298 | 2739900.44 |
|             |       | 2025 | 15979112.816 | 13083093.874 | 2896018.94 |
|             |       | 2026 | 16206550.153 | 13169942.113 | 3036608.04 |
|             |       | 2027 | 16428826.050 | 13249852.211 | 3178973.84 |
|             |       | 2028 | 16645902.186 | 13323091.524 | 3322810.66 |
|             |       | 2029 | 16858126.517 | 13390368.527 | 3467757.99 |
|             |       | 2030 | 17045220.687 | 13448316.269 | 3596904.42 |
|             |       | 2031 | 17208482.610 | 13493961.290 | 3714521.32 |
|             |       | 2032 | 17367586.074 | 13535764.856 | 3831821.22 |
|             |       | 2033 | 17522716.280 | 13573766.005 | 3948950.27 |
|             |       | 2034 | 17674226.555 | 13608501.258 | 4065725.30 |
|             |       | 2035 | 17792201.734 | 13635370.086 | 4156831.65 |
|             |       | 2036 | 17903508.236 | 13658218.356 | 4245289.88 |
|             |       | 2037 | 18012162.345 | 13679337.898 | 4332824.45 |
|             |       | 2038 | 18118464.470 | 13698657.933 | 4419806.54 |

**Results for PHIM for Run 4 (ELL Summary Sensitivity\_Analysis\_4.RTF)**

|     |        |      |              |              |            |
|-----|--------|------|--------------|--------------|------------|
|     | Female | 2039 | 18222549.860 | 13716448.993 | 4506100.87 |
|     |        | 1990 | 307897.357   | 307897.357   | 0.000      |
|     |        | 1991 | 616547.418   | 616130.920   | 416.498    |
|     |        | 1992 | 931086.773   | 929438.188   | 1648.585   |
|     |        | 1993 | 1246155.671  | 1242098.993  | 4056.678   |
|     |        | 1994 | 1561212.934  | 1553229.406  | 7983.528   |
|     |        | 1995 | 1879967.742  | 1866068.028  | 13899.714  |
|     |        | 1996 | 2197488.109  | 2175400.818  | 22087.291  |
|     |        | 1997 | 2515698.453  | 2482730.140  | 32968.312  |
|     |        | 1998 | 2836249.556  | 2789363.883  | 46885.674  |
|     |        | 1999 | 3150201.390  | 3086372.289  | 63829.101  |
|     |        | 2000 | 3472722.342  | 3387884.647  | 84837.695  |
|     |        | 2001 | 3796994.889  | 3686748.758  | 110246.131 |
|     |        | 2002 | 4126619.935  | 3985816.621  | 140803.314 |
|     |        | 2003 | 4454982.533  | 4278876.636  | 176105.897 |
|     |        | 2004 | 4784343.030  | 4567361.148  | 216981.882 |
|     |        | 2005 | 5113443.121  | 4849920.329  | 263522.791 |
|     |        | 2006 | 5442543.963  | 5125948.182  | 316595.780 |
|     |        | 2007 | 5772441.497  | 5396148.722  | 376292.774 |
|     |        | 2008 | 6091911.943  | 5651200.066  | 440711.877 |
|     |        | 2009 | 6413671.330  | 5900715.043  | 512956.287 |
|     |        | 2010 | 6730763.530  | 6139959.553  | 590803.977 |
|     |        | 2011 | 7043614.101  | 6368682.322  | 674931.779 |
|     |        | 2012 | 7356270.780  | 6589807.498  | 766463.282 |
|     |        | 2013 | 7662551.964  | 6799112.004  | 863439.960 |
|     |        | 2014 | 7964551.465  | 6998187.685  | 966363.780 |
|     |        | 2015 | 8254895.403  | 7183502.709  | 1071392.69 |
|     |        | 2016 | 8530661.848  | 7352441.589  | 1178220.26 |
|     |        | 2017 | 8795826.122  | 7508585.740  | 1287240.38 |
|     |        | 2018 | 9067233.707  | 7660617.732  | 1406615.97 |
|     |        | 2019 | 9335343.270  | 7803783.131  | 1531560.14 |
|     |        | 2020 | 9596110.883  | 7937532.707  | 1658578.18 |
|     |        | 2021 | 9833186.859  | 8054272.466  | 1778914.39 |
|     |        | 2022 | 10066452.037 | 8163265.996  | 1903186.04 |
|     |        | 2023 | 10295503.609 | 8264803.630  | 2030699.98 |
|     |        | 2024 | 10520125.318 | 8358810.487  | 2161314.83 |
|     |        | 2025 | 10731915.863 | 8444183.713  | 2287732.15 |
|     |        | 2026 | 10917495.549 | 8515242.348  | 2402253.20 |
|     |        | 2027 | 11098620.885 | 8580486.682  | 2518134.20 |
|     |        | 2028 | 11275441.234 | 8640575.519  | 2634865.71 |
|     |        | 2029 | 11447962.710 | 8695475.555  | 2752487.15 |
|     |        | 2030 | 11601867.623 | 8743197.819  | 2858669.80 |
|     |        | 2031 | 11731666.516 | 8780439.165  | 2951227.35 |
|     |        | 2032 | 11857585.969 | 8814210.296  | 3043375.67 |
|     |        | 2033 | 11980128.625 | 8845045.201  | 3135083.42 |
|     |        | 2034 | 12099562.464 | 8873002.000  | 3226560.46 |
|     |        | 2035 | 12195919.946 | 8895220.077  | 3300699.87 |
|     |        | 2036 | 12278201.969 | 8912409.111  | 3365792.86 |
|     |        | 2037 | 12358146.336 | 8928104.623  | 3430041.71 |
|     |        | 2038 | 12435978.633 | 8942493.758  | 3493484.88 |
|     |        | 2039 | 12512468.845 | 8955729.603  | 3556739.24 |
| IHD | Males  | 1990 | 517209.093   | 517209.093   | 0.000      |
|     |        | 1991 | 1019219.395  | 1012116.414  | 7102.981   |
|     |        | 1992 | 1509598.614  | 1483228.029  | 26370.586  |
|     |        | 1993 | 1992735.299  | 1931312.183  | 61423.116  |
|     |        | 1994 | 2462877.575  | 2348286.451  | 114591.124 |
|     |        | 1995 | 2928249.390  | 2739694.347  | 188555.043 |
|     |        | 1996 | 3377377.730  | 3093960.912  | 283416.818 |
|     |        | 1997 | 3809062.472  | 3411290.425  | 397772.047 |
|     |        | 1998 | 4222213.867  | 3692448.508  | 529765.360 |
|     |        | 1999 | 4708317.743  | 3996494.068  | 711823.675 |
|     |        | 2000 | 5182084.396  | 4268505.051  | 913579.346 |
|     |        | 2001 | 5644097.705  | 4508807.668  | 1135290.04 |
|     |        | 2002 | 6107232.129  | 4726613.973  | 1380618.16 |
|     |        | 2003 | 6561785.704  | 4919102.278  | 1642683.43 |
|     |        | 2004 | 6996156.348  | 5085045.631  | 1911110.72 |
|     |        | 2005 | 7426261.361  | 5233563.416  | 2192697.95 |
|     |        | 2006 | 7849012.694  | 5363763.457  | 2485249.24 |
|     |        | 2007 | 8255300.530  | 5476296.397  | 2779004.13 |
|     |        | 2008 | 8650662.040  | 5575163.428  | 3075498.61 |
|     |        | 2009 | 9030818.513  | 5661357.737  | 3369460.78 |
|     |        | 2010 | 9403026.327  | 5737906.314  | 3665120.01 |
|     |        | 2011 | 9767535.506  | 5805842.592  | 3961692.91 |
|     |        | 2012 | 10123044.281 | 5866405.356  | 4256638.93 |
|     |        | 2013 | 10470104.786 | 5920342.912  | 4549761.87 |
|     |        | 2014 | 10807756.112 | 5968608.148  | 4839147.96 |
|     |        | 2015 | 11130681.425 | 6011441.985  | 5119239.44 |
|     |        | 2016 | 11448966.506 | 6050378.494  | 5398588.01 |

**Results for PHIM for Run 4 (ELL Summary Sensitivity\_Analysis\_4.RTF)**

|        |        |      |              |             |            |
|--------|--------|------|--------------|-------------|------------|
|        |        | 2017 | 11758164.882 | 6085671.918 | 5672492.96 |
|        |        | 2018 | 12054448.241 | 6116619.616 | 5937828.62 |
|        |        | 2019 | 12341606.261 | 6144814.198 | 6196792.06 |
|        |        | 2020 | 12600728.939 | 6169042.486 | 6431686.45 |
|        |        | 2021 | 12861767.105 | 6191927.705 | 6669839.40 |
|        |        | 2022 | 13114168.616 | 6213016.168 | 6901152.45 |
|        |        | 2023 | 13357894.797 | 6232365.145 | 7125529.65 |
|        |        | 2024 | 13593848.521 | 6250294.307 | 7343554.21 |
|        |        | 2025 | 13789177.359 | 6264822.460 | 7524354.90 |
|        |        | 2026 | 13993401.656 | 6279341.986 | 7714059.67 |
|        |        | 2027 | 14190519.224 | 6293060.574 | 7897458.65 |
|        |        | 2028 | 14381193.356 | 6305835.252 | 8075358.10 |
|        |        | 2029 | 14565171.927 | 6317668.639 | 8247503.29 |
|        |        | 2030 | 14697381.605 | 6326193.704 | 8371187.90 |
|        |        | 2031 | 14842203.512 | 6335339.997 | 8506863.52 |
|        |        | 2032 | 14982485.826 | 6344106.814 | 8638379.01 |
|        |        | 2033 | 15118410.647 | 6352252.838 | 8766157.81 |
|        |        | 2034 | 15250284.398 | 6359809.138 | 8890475.26 |
|        |        | 2035 | 15322911.166 | 6363926.669 | 8958984.50 |
|        |        | 2036 | 15405115.031 | 6368473.324 | 9036641.71 |
|        |        | 2037 | 15484709.137 | 6372859.487 | 9111849.65 |
|        |        | 2038 | 15561812.193 | 6376991.164 | 9184821.03 |
|        |        | 2039 | 15635992.616 | 6380827.382 | 9255165.23 |
|        | Female | 1990 | 147299.110   | 147299.110  | 0.000      |
|        |        | 1991 | 295122.462   | 293257.305  | 1865.158   |
|        |        | 1992 | 439962.920   | 432980.759  | 6982.161   |
|        |        | 1993 | 584735.615   | 568178.213  | 16557.402  |
|        |        | 1994 | 727640.783   | 696330.651  | 31310.132  |
|        |        | 1995 | 868486.937   | 816736.084  | 51750.853  |
|        |        | 1996 | 1010321.847  | 930898.463  | 79423.385  |
|        |        | 1997 | 1144230.930  | 1032467.730 | 111763.199 |
|        |        | 1998 | 1274513.622  | 1124720.814 | 149792.808 |
|        |        | 1999 | 1426725.938  | 1224917.692 | 201808.246 |
|        |        | 2000 | 1573462.680  | 1314519.071 | 258943.608 |
|        |        | 2001 | 1719132.015  | 1395364.185 | 323767.830 |
|        |        | 2002 | 1863006.732  | 1467863.727 | 395143.005 |
|        |        | 2003 | 2002943.227  | 1531796.164 | 471147.064 |
|        |        | 2004 | 2137798.705  | 1587531.600 | 550267.105 |
|        |        | 2005 | 2271071.245  | 1637614.210 | 633457.035 |
|        |        | 2006 | 2400707.731  | 1681208.745 | 719498.986 |
|        |        | 2007 | 2523634.512  | 1718574.925 | 805059.587 |
|        |        | 2008 | 2648752.232  | 1752786.827 | 895965.406 |
|        |        | 2009 | 2765973.961  | 1781990.646 | 983983.316 |
|        |        | 2010 | 2881329.235  | 1808125.098 | 1073204.14 |
|        |        | 2011 | 2994972.694  | 1831426.386 | 1163546.31 |
|        |        | 2012 | 3108958.829  | 1852580.794 | 1256378.03 |
|        |        | 2013 | 3218140.416  | 1871326.827 | 1346813.59 |
|        |        | 2014 | 3328387.914  | 1888617.797 | 1439770.12 |
|        |        | 2015 | 3435342.796  | 1904335.876 | 1531006.92 |
|        |        | 2016 | 3539189.408  | 1918480.321 | 1620709.09 |
|        |        | 2017 | 3640041.363  | 1931222.525 | 1708818.84 |
|        |        | 2018 | 3732645.362  | 1942072.631 | 1790572.73 |
|        |        | 2019 | 3821421.978  | 1951781.059 | 1869640.92 |
|        |        | 2020 | 3902115.950  | 1960167.016 | 1941948.93 |
|        |        | 2021 | 3984301.053  | 1968185.149 | 2016115.90 |
|        |        | 2022 | 4062629.299  | 1975375.361 | 2087253.94 |
|        |        | 2023 | 4137348.729  | 1981892.979 | 2155455.75 |
|        |        | 2024 | 4208611.493  | 1987785.042 | 2220826.45 |
|        |        | 2025 | 4269419.492  | 1992696.933 | 2276722.56 |
|        |        | 2026 | 4330969.998  | 1997432.174 | 2333537.82 |
|        |        | 2027 | 4389134.306  | 2001727.578 | 2387406.73 |
|        |        | 2028 | 4444222.970  | 2005661.677 | 2438561.29 |
|        |        | 2029 | 4496447.877  | 2009285.722 | 2487162.15 |
|        |        | 2030 | 4536975.698  | 2012045.448 | 2524930.25 |
|        |        | 2031 | 4578338.586  | 2014781.114 | 2563557.47 |
|        |        | 2032 | 4617397.784  | 2017309.027 | 2600088.76 |
|        |        | 2033 | 4654407.697  | 2019669.899 | 2634737.80 |
|        |        | 2034 | 4689913.454  | 2021884.532 | 2668028.92 |
|        |        | 2035 | 4712518.190  | 2023239.113 | 2689279.08 |
|        |        | 2036 | 4735845.827  | 2024596.736 | 2711249.09 |
|        |        | 2037 | 4757958.806  | 2025863.482 | 2732095.32 |
|        |        | 2038 | 4778813.806  | 2027056.496 | 2751757.31 |
|        |        | 2039 | 4798769.065  | 2028186.582 | 2770582.48 |
| Stroke | Males  | 1990 | 75005.854    | 75005.854   | 0.000      |
|        |        | 1991 | 149463.017   | 148743.133  | 719.885    |
|        |        | 1992 | 222966.278   | 220290.069  | 2676.209   |
|        |        | 1993 | 296801.879   | 290428.109  | 6373.769   |
|        |        | 1994 | 372453.706   | 360111.178  | 12342.528  |

**Results for PHIM for Run 4 (ELL Summary Sensitivity\_Analysis\_4.RTF)**

|        |      |             |             |            |
|--------|------|-------------|-------------|------------|
|        | 1995 | 448401.338  | 427535.345  | 20865.993  |
|        | 1996 | 523536.301  | 491431.613  | 32104.688  |
|        | 1997 | 596763.211  | 550717.116  | 46046.095  |
|        | 1998 | 667546.681  | 605028.967  | 62517.714  |
|        | 1999 | 734925.407  | 653823.555  | 81101.852  |
|        | 2000 | 803749.361  | 700707.022  | 103042.339 |
|        | 2001 | 870081.588  | 742863.913  | 127217.675 |
|        | 2002 | 935347.140  | 781517.717  | 153829.423 |
|        | 2003 | 1001627.349 | 817760.427  | 183866.922 |
|        | 2004 | 1066587.976 | 850658.150  | 215929.826 |
|        | 2005 | 1130548.052 | 880473.165  | 250074.886 |
|        | 2006 | 1195132.454 | 908060.986  | 287071.468 |
|        | 2007 | 1258974.043 | 933048.977  | 325925.066 |
|        | 2008 | 1320124.867 | 954861.784  | 365263.083 |
|        | 2009 | 1380776.123 | 974663.071  | 406113.052 |
|        | 2010 | 1440048.533 | 992407.440  | 447641.093 |
|        | 2011 | 1497484.847 | 1008174.552 | 489310.295 |
|        | 2012 | 1554496.526 | 1022385.506 | 532111.021 |
|        | 2013 | 1610819.598 | 1035228.176 | 575591.422 |
|        | 2014 | 1667484.890 | 1046974.083 | 620510.807 |
|        | 2015 | 1720948.287 | 1057265.764 | 663682.522 |
|        | 2016 | 1775699.228 | 1066883.813 | 708815.415 |
|        | 2017 | 1830250.175 | 1075695.797 | 754554.377 |
|        | 2018 | 1875958.950 | 1082535.907 | 793423.043 |
|        | 2019 | 1920359.232 | 1088678.743 | 831680.489 |
|        | 2020 | 1960605.297 | 1093911.681 | 866693.616 |
|        | 2021 | 1998912.887 | 1098529.058 | 900383.829 |
|        | 2022 | 2036003.696 | 1102683.130 | 933320.566 |
|        | 2023 | 2071857.536 | 1106423.391 | 965434.145 |
|        | 2024 | 2106636.468 | 1109830.397 | 996806.071 |
|        | 2025 | 2136450.873 | 1112620.839 | 1023830.03 |
|        | 2026 | 2164796.470 | 1115113.711 | 1049682.76 |
|        | 2027 | 2192079.608 | 1117401.801 | 1074677.81 |
|        | 2028 | 2218404.367 | 1119487.230 | 1098917.14 |
|        | 2029 | 2243769.140 | 1121395.910 | 1122373.23 |
|        | 2030 | 2263570.213 | 1122842.581 | 1140727.63 |
|        | 2031 | 2282521.590 | 1124175.746 | 1158345.84 |
|        | 2032 | 2300804.945 | 1125416.952 | 1175387.99 |
|        | 2033 | 2318464.018 | 1126561.533 | 1191902.48 |
|        | 2034 | 2335611.973 | 1127625.890 | 1207986.08 |
|        | 2035 | 2347097.290 | 1128326.848 | 1218770.44 |
|        | 2036 | 2358248.747 | 1128986.788 | 1229261.96 |
|        | 2037 | 2369033.655 | 1129615.785 | 1239417.87 |
|        | 2038 | 2379490.114 | 1130206.810 | 1249283.30 |
|        | 2039 | 2389546.238 | 1130756.488 | 1258789.75 |
| Female | 1990 | 56348.092   | 56348.092   | 0.000      |
|        | 1991 | 110871.862  | 110356.680  | 515.182    |
|        | 1992 | 165654.454  | 163676.615  | 1977.840   |
|        | 1993 | 220008.519  | 215284.094  | 4724.425   |
|        | 1994 | 275706.807  | 266525.569  | 9181.238   |
|        | 1995 | 331417.547  | 315921.988  | 15495.559  |
|        | 1996 | 387580.161  | 363587.240  | 23992.921  |
|        | 1997 | 442778.242  | 408235.827  | 34542.415  |
|        | 1998 | 496117.305  | 449198.396  | 46918.909  |
|        | 1999 | 548268.214  | 487051.817  | 61216.397  |
|        | 2000 | 601693.202  | 523617.530  | 78075.671  |
|        | 2001 | 652221.103  | 556020.015  | 96201.087  |
|        | 2002 | 703022.600  | 586363.142  | 116659.458 |
|        | 2003 | 752023.351  | 613554.005  | 138469.345 |
|        | 2004 | 799826.733  | 638079.658  | 161747.075 |
|        | 2005 | 847563.928  | 660729.071  | 186834.857 |
|        | 2006 | 894205.027  | 681103.792  | 213101.234 |
|        | 2007 | 939571.282  | 699290.136  | 240281.146 |
|        | 2008 | 983437.578  | 715453.262  | 267984.316 |
|        | 2009 | 1025803.786 | 729789.069  | 296014.717 |
|        | 2010 | 1066964.934 | 742524.700  | 324440.234 |
|        | 2011 | 1106954.044 | 753838.522  | 353115.522 |
|        | 2012 | 1146108.461 | 764002.956  | 382105.505 |
|        | 2013 | 1183544.689 | 772942.081  | 410602.609 |
|        | 2014 | 1221220.945 | 781173.815  | 440047.130 |
|        | 2015 | 1258289.311 | 788712.437  | 469576.874 |
|        | 2016 | 1294830.207 | 795546.858  | 499283.350 |
|        | 2017 | 1330332.626 | 801671.395  | 528661.231 |
|        | 2018 | 1360571.987 | 806512.888  | 554059.099 |
|        | 2019 | 1389848.723 | 810827.373  | 579021.350 |
|        | 2020 | 1416046.192 | 814469.826  | 601576.366 |
|        | 2021 | 1440588.850 | 817636.060  | 622952.789 |
|        | 2022 | 1464157.934 | 820459.853  | 643698.082 |

**Results for PHIM for Run 4 (ELL Summary Sensitivity\_Analysis\_4.RTF)**

|      |             |             |             |             |            |
|------|-------------|-------------|-------------|-------------|------------|
|      |             | 2023        | 1486810.237 | 823004.034  | 663806.203 |
|      |             | 2024        | 1508591.729 | 825285.943  | 683305.786 |
|      |             | 2025        | 1526875.621 | 827128.872  | 699746.749 |
|      |             | 2026        | 1543659.810 | 828716.929  | 714942.881 |
|      |             | 2027        | 1559623.774 | 830145.482  | 729478.292 |
|      |             | 2028        | 1574852.850 | 831442.632  | 743410.219 |
|      |             | 2029        | 1589437.452 | 832624.373  | 756813.080 |
|      |             | 2030        | 1600568.199 | 833498.140  | 767070.059 |
|      |             | 2031        | 1610776.297 | 834266.636  | 776509.660 |
|      |             | 2032        | 1620483.563 | 834971.661  | 785511.902 |
|      |             | 2033        | 1629745.442 | 835623.948  | 794121.494 |
|      |             | 2034        | 1638721.425 | 836230.647  | 802490.778 |
|      |             | 2035        | 1644649.404 | 836616.301  | 808033.103 |
|      |             | 2036        | 1650181.590 | 836962.753  | 813218.836 |
|      |             | 2037        | 1655476.066 | 837286.724  | 818189.342 |
|      |             | 2038        | 1660507.914 | 837592.644  | 822915.269 |
|      |             | 2039        | 1665361.569 | 837882.376  | 827479.194 |
| COPD | Males       | 1990        | 117002.906  | 117002.906  | 0.000      |
|      |             | 1991        | 233438.833  | 233235.802  | 203.031    |
|      |             | 1992        | 348084.047  | 347333.651  | 750.396    |
|      |             | 1993        | 467278.318  | 465438.282  | 1840.036   |
|      |             | 1994        | 584216.907  | 580602.594  | 3614.313   |
|      |             | 1995        | 697391.457  | 691236.100  | 6155.356   |
|      |             | 1996        | 809471.271  | 799851.298  | 9619.972   |
|      |             | 1997        | 922587.668  | 908342.267  | 14245.400  |
|      |             | 1998        | 1034072.457 | 1014109.630 | 19962.827  |
|      |             | 1999        | 1153475.399 | 1125980.322 | 27495.077  |
|      |             | 2000        | 1268050.268 | 1231651.689 | 36398.579  |
|      |             | 2001        | 1382786.209 | 1335695.520 | 47090.689  |
|      |             | 2002        | 1497557.412 | 1437791.121 | 59766.291  |
|      |             | 2003        | 1614405.229 | 1539925.115 | 74480.115  |
|      |             | 2004        | 1726672.489 | 1635979.242 | 90693.247  |
|      |             | 2005        | 1847277.524 | 1737121.291 | 110156.233 |
|      |             | 2006        | 1961009.963 | 1830128.205 | 130881.758 |
|      |             | 2007        | 2079868.908 | 1924780.013 | 155088.896 |
|      |             | 2008        | 2206755.783 | 2023349.211 | 183406.572 |
|      |             | 2009        | 2331993.380 | 2117929.261 | 214064.120 |
|      | 2010        | 2455130.176 | 2208328.500 | 246801.676  |            |
|      | 2011        | 2582657.849 | 2299080.319 | 283577.530  |            |
|      | 2012        | 2709719.005 | 2386518.017 | 323200.988  |            |
|      | 2013        | 2840547.005 | 2473399.463 | 367147.542  |            |
|      | 2014        | 2971677.135 | 2557386.002 | 414291.133  |            |
|      | 2015        | 3104538.983 | 2640521.621 | 464017.362  |            |
|      | 2016        | 3237650.175 | 2720456.909 | 517193.266  |            |
|      | 2017        | 3370561.253 | 2797364.314 | 573196.938  |            |
|      | 2018        | 3503136.371 | 2870499.162 | 632637.209  |            |
|      | 2019        | 3636402.758 | 2940903.120 | 695499.638  |            |
|      | 2020        | 3768054.453 | 3008104.229 | 759950.223  |            |
|      | 2021        | 3897675.067 | 3071201.223 | 826473.844  |            |
|      | 2022        | 4027307.132 | 3131246.124 | 896061.009  |            |
|      | 2023        | 4156698.720 | 3188145.610 | 968553.110  |            |
|      | 2024        | 4285772.226 | 3241952.697 | 1043819.53  |            |
|      | 2025        | 4410759.298 | 3292136.948 | 1118622.35  |            |
|      | 2026        | 4531411.064 | 3337597.342 | 1193813.72  |            |
|      | 2027        | 4651145.233 | 3380058.856 | 1271086.38  |            |
|      | 2028        | 4769837.872 | 3419587.646 | 1350250.23  |            |
|      | 2029        | 4887747.179 | 3456400.901 | 1431346.28  |            |
| 2030 | 4997632.895 | 3489533.727 | 1508099.17  |             |            |
| 2031 | 5103301.991 | 3518673.936 | 1584628.06  |             |            |
| 2032 | 5207593.613 | 3545439.212 | 1662154.40  |             |            |
| 2033 | 5310556.138 | 3569894.852 | 1740661.29  |             |            |
| 2034 | 5412542.816 | 3592321.761 | 1820221.06  |             |            |
| 2035 | 5500522.473 | 3611134.103 | 1889388.37  |             |            |
| 2036 | 5588149.640 | 3628161.408 | 1959988.23  |             |            |
| 2037 | 5674667.886 | 3643740.019 | 2030927.87  |             |            |
| 2038 | 5760391.289 | 3657947.018 | 2102444.27  |             |            |
| 2039 | 5845459.234 | 3670994.753 | 2174464.48  |             |            |
|      | Female      | 1990        | 77434.846   | 77434.846   | 0.000      |
|      |             | 1991        | 160029.510  | 159861.318  | 168.192    |
|      |             | 1992        | 240642.531  | 240002.533  | 639.998    |
|      |             | 1993        | 329362.093  | 327711.006  | 1651.088   |
|      |             | 1994        | 418569.515  | 415261.603  | 3307.912   |
|      |             | 1995        | 509110.357  | 503290.040  | 5820.317   |
|      |             | 1996        | 600040.117  | 590794.292  | 9245.825   |
|      |             | 1997        | 691159.071  | 677446.072  | 13712.998  |
|      |             | 1998        | 782866.899  | 763574.922  | 19291.977  |
|      |             | 1999        | 881526.925  | 854874.145  | 26652.781  |
|      |             | 2000        | 977880.647  | 942720.508  | 35160.139  |



**Results for PHIM for Run 4 (ELL Summary Sensitivity\_Analysis\_4.RTF)**

|      |             |             |            |
|------|-------------|-------------|------------|
| 2001 | 1076787.404 | 1031350.457 | 45436.947  |
| 2002 | 1174842.754 | 1117538.840 | 57303.914  |
| 2003 | 1275102.681 | 1204033.824 | 71068.857  |
| 2004 | 1371026.306 | 1285122.594 | 85903.711  |
| 2005 | 1473954.509 | 1370084.502 | 103870.007 |
| 2006 | 1574450.828 | 1451073.739 | 123377.089 |
| 2007 | 1673790.211 | 1529116.615 | 144673.596 |
| 2008 | 1782360.738 | 1612168.869 | 170191.868 |
| 2009 | 1892944.209 | 1694113.177 | 198831.032 |
| 2010 | 2002131.282 | 1772799.491 | 229331.792 |
| 2011 | 2114522.152 | 1851071.142 | 263451.011 |
| 2012 | 2228079.372 | 1927660.305 | 300419.067 |
| 2013 | 2345377.689 | 2003937.915 | 341439.774 |
| 2014 | 2462498.422 | 2077261.144 | 385237.278 |
| 2015 | 2581450.312 | 2149842.334 | 431607.978 |
| 2016 | 2701959.301 | 2220492.243 | 481467.058 |
| 2017 | 2823834.967 | 2289069.670 | 534765.297 |
| 2018 | 2938265.081 | 2351413.375 | 586851.706 |
| 2019 | 3053254.880 | 2411379.734 | 641875.146 |
| 2020 | 3167073.216 | 2468696.934 | 698376.282 |
| 2021 | 3279517.699 | 2523356.268 | 756161.431 |
| 2022 | 3392060.964 | 2575501.444 | 816559.520 |
| 2023 | 3504296.171 | 2625042.824 | 879253.347 |
| 2024 | 3616019.231 | 2671844.737 | 944174.494 |
| 2025 | 3724611.269 | 2715677.999 | 1008933.27 |
| 2026 | 3827181.707 | 2755539.461 | 1071642.25 |
| 2027 | 3928684.441 | 2792826.857 | 1135857.58 |
| 2028 | 4029124.892 | 2827738.108 | 1201386.78 |
| 2029 | 4128269.068 | 2860131.351 | 1268137.72 |
| 2030 | 4221560.174 | 2889557.776 | 1332002.40 |
| 2031 | 4304170.584 | 2914129.931 | 1390040.65 |
| 2032 | 4384930.537 | 2936566.217 | 1448364.32 |
| 2033 | 4464357.691 | 2957188.163 | 1507169.53 |
| 2034 | 4542251.545 | 2975930.649 | 1566320.90 |
| 2035 | 4611066.648 | 2991980.955 | 1619085.69 |
| 2036 | 4670309.230 | 3004698.778 | 1665610.45 |
| 2037 | 4728179.514 | 3016210.115 | 1711969.40 |
| 2038 | 4785008.048 | 3026677.766 | 1758330.28 |
| 2039 | 4841291.793 | 3036210.420 | 1805081.37 |

---

## Results for PHIM for Run 4 (ELL Summary Sensitivity\_Analysis\_4.RTF)

\*\*\*\*\*

**Table 5: Estimated Loss of Life, at the end of follow-up, Population unadjusted for deaths in Ecig scenario**

| Disease      | Sex    | Age Group   | Years of life lost<br>NULL | Years of life lost<br>Ecig | Years of life<br>Saved |
|--------------|--------|-------------|----------------------------|----------------------------|------------------------|
| All Diseases | Males  | 30-34       | 443911.034                 | 237816.086                 | 206094.948             |
|              |        | 35-39       | 1146798.555                | 608029.616                 | 538768.939             |
|              |        | 40-44       | 2609591.408                | 1344509.831                | 1265081.58             |
|              |        | 45-49       | 4775841.753                | 2420722.794                | 2355118.96             |
|              |        | 50-54       | 7446969.205                | 3915377.207                | 3531592.00             |
|              |        | 55-59       | 8240205.925                | 4761213.708                | 3478992.22             |
|              |        | 60-64       | 8772829.118                | 5493123.621                | 3279705.50             |
|              |        | 65-69       | 6161494.678                | 4241274.160                | 1920220.52             |
|              |        | 70-74       | 2495906.274                | 1778336.015                | 717570.258             |
|              | 75-79  | 0.000       | 0.000                      | 0.000                      |                        |
|              | Female | 30-34       | 229140.561                 | 141677.959                 | 87462.602              |
|              |        | 35-39       | 570217.942                 | 346082.325                 | 224135.617             |
|              |        | 40-44       | 1267538.938                | 746509.919                 | 521029.019             |
|              |        | 45-49       | 2340070.698                | 1355736.336                | 984334.362             |
|              |        | 50-54       | 3743803.613                | 2184909.864                | 1558893.75             |
|              |        | 55-59       | 4591478.168                | 2802209.667                | 1789268.50             |
|              |        | 60-64       | 5207367.788                | 3302177.187                | 1905190.60             |
|              |        | 65-69       | 4092181.394                | 2736219.747                | 1355961.65             |
| 70-74        |        | 1776092.171 | 1205470.726                | 570621.445                 |                        |
| Lung cancer  | Males  | 30-34       | 66065.017                  | 51633.718                  | 14431.300              |
|              |        | 35-39       | 232509.414                 | 183158.293                 | 49351.121              |
|              |        | 40-44       | 688628.041                 | 530426.663                 | 158201.379             |
|              |        | 45-49       | 1528300.367                | 1139959.265                | 388341.102             |
|              |        | 50-54       | 2730187.229                | 2003605.130                | 726582.099             |
|              |        | 55-59       | 3909101.673                | 2850750.074                | 1058351.60             |
|              |        | 60-64       | 4287716.660                | 3220020.645                | 1067696.01             |
|              |        | 65-69       | 3467897.115                | 2655088.765                | 812808.350             |
|              |        | 70-74       | 1312144.343                | 1021135.005                | 291009.338             |
|              | 75-79  | 0.000       | 0.000                      | 0.000                      |                        |
|              | Female | 30-34       | 51913.113                  | 40562.988                  | 11350.125              |
|              |        | 35-39       | 189792.904                 | 148548.926                 | 41243.978              |
|              |        | 40-44       | 527596.573                 | 395704.797                 | 131891.776             |
|              |        | 45-49       | 1122524.269                | 810494.894                 | 312029.375             |
|              |        | 50-54       | 1882214.322                | 1329146.153                | 553068.169             |
|              |        | 55-59       | 2595581.943                | 1808753.291                | 786828.652             |
|              |        | 60-64       | 2846273.090                | 2022389.331                | 823883.758             |
|              |        | 65-69       | 2358758.394                | 1695104.315                | 663654.079             |
| 70-74        |        | 937814.238  | 681967.031                 | 255847.207                 |                        |
| IHD          | Males  | 30-34       | 263834.566                 | 117341.521                 | 146493.045             |
|              |        | 35-39       | 692140.150                 | 293579.265                 | 398560.885             |
|              |        | 40-44       | 1519708.432                | 585822.203                 | 933886.230             |
|              |        | 45-49       | 2568546.697                | 906951.582                 | 1661595.11             |
|              |        | 50-54       | 3632929.903                | 1335842.342                | 2297087.56             |
|              |        | 55-59       | 2807892.356                | 1095208.795                | 1712683.56             |
|              |        | 60-64       | 2599825.934                | 1190077.595                | 1409748.34             |
|              |        | 65-69       | 1113578.307                | 583300.597                 | 530277.711             |
|              |        | 70-74       | 437536.271                 | 261458.052                 | 176078.218             |
|              | 75-79  | 0.000       | 0.000                      | 0.000                      |                        |
|              | Female | 30-34       | 79649.097                  | 37631.668                  | 42017.429              |
|              |        | 35-39       | 193965.908                 | 80962.705                  | 113003.203             |
|              |        | 40-44       | 403380.974                 | 150343.206                 | 253037.768             |
|              |        | 45-49       | 671385.408                 | 231854.278                 | 439531.130             |
|              |        | 50-54       | 1011875.989                | 374883.613                 | 636992.377             |
|              |        | 55-59       | 849875.715                 | 343323.807                 | 506551.908             |
|              |        | 60-64       | 925490.876                 | 435837.118                 | 489653.759             |
|              |        | 65-69       | 455463.881                 | 245966.704                 | 209497.177             |
| 70-74        |        | 207681.216  | 125512.347                 | 82168.869                  |                        |
| Stroke       | Males  | 30-34       | 73463.650                  | 42974.690                  | 30488.960              |
|              |        | 35-39       | 151934.057                 | 86173.500                  | 65760.557              |
|              |        | 40-44       | 262845.974                 | 141075.345                 | 121770.629             |
|              |        | 45-49       | 383421.246                 | 192152.373                 | 191268.873             |
|              |        | 50-54       | 479872.634                 | 218289.252                 | 261583.382             |
|              |        | 55-59       | 437124.903                 | 184043.561                 | 253081.342             |
|              |        | 60-64       | 419457.235                 | 180110.225                 | 239347.010             |
|              |        | 65-69       | 128180.574                 | 57668.508                  | 70512.066              |
|              |        | 70-74       | 53245.965                  | 26104.211                  | 27141.754              |
|              | 75-79  | 0.000       | 0.000                      | 0.000                      |                        |
|              | Female | 30-34       | 62919.090                  | 39976.873                  | 22942.217              |

**Results for PHIM for Run 4 (ELL Summary Sensitivity\_Analysis\_4.RTF)**

|      |        |       |             |            |            |
|------|--------|-------|-------------|------------|------------|
|      |        | 35-39 | 120806.205  | 72520.784  | 48285.421  |
|      |        | 40-44 | 203391.885  | 113258.438 | 90133.447  |
|      |        | 45-49 | 278172.097  | 143704.637 | 134467.460 |
|      |        | 50-54 | 325979.181  | 156990.477 | 168988.704 |
|      |        | 55-59 | 275161.340  | 124534.159 | 150627.180 |
|      |        | 60-64 | 268920.493  | 123378.374 | 145542.119 |
|      |        | 65-69 | 87956.054   | 41961.447  | 45994.606  |
|      |        | 70-74 | 42055.224   | 20886.932  | 21168.291  |
|      |        | 75-79 | 0.000       | 0.000      | 0.000      |
| COPD | Males  | 30-34 | 40547.801   | 25866.158  | 14681.643  |
|      |        | 35-39 | 70214.933   | 45118.558  | 25096.375  |
|      |        | 40-44 | 138408.960  | 87185.620  | 51223.340  |
|      |        | 45-49 | 295573.443  | 181659.574 | 113913.869 |
|      |        | 50-54 | 603979.438  | 357640.482 | 246338.956 |
|      |        | 55-59 | 1086086.992 | 631211.277 | 454875.715 |
|      |        | 60-64 | 1465829.290 | 902915.156 | 562914.134 |
|      |        | 65-69 | 1451838.682 | 945216.291 | 506622.391 |
|      |        | 70-74 | 692979.695  | 469638.747 | 223340.948 |
|      |        | 75-79 | 0.000       | 0.000      | 0.000      |
|      | Female | 30-34 | 34659.261   | 23506.430  | 11152.831  |
|      |        | 35-39 | 65652.924   | 44049.910  | 21603.014  |
|      |        | 40-44 | 133169.505  | 87203.478  | 45966.027  |
|      |        | 45-49 | 267988.924  | 169682.527 | 98306.398  |
|      |        | 50-54 | 523734.121  | 323889.621 | 199844.499 |
|      |        | 55-59 | 870859.170  | 525598.409 | 345260.761 |
|      |        | 60-64 | 1166683.329 | 720572.364 | 446110.965 |
|      |        | 65-69 | 1190003.066 | 753187.280 | 436815.786 |
|      |        | 70-74 | 588541.493  | 377104.416 | 211437.078 |
|      |        | 75-79 | 0.000       | 0.000      | 0.000      |

---

## Results for PHIM for Run 4 (ELL Summary Sensitivity\_Analysis\_4.RTF)

\*\*\*\*\*

**Table 6: Estimated Loss of Life, at the end of follow-up, Population and Number deaths adjusted for Ecig scenario**

| Disease      | Sex    | Age Group   | Years of life lost<br>NULL | Years of life lost<br>Ecig | Years of life<br>Saved |
|--------------|--------|-------------|----------------------------|----------------------------|------------------------|
| All Diseases | Males  | 30-34       | 443911.034                 | 237831.189                 | 206079.845             |
|              |        | 35-39       | 1146798.555                | 608144.015                 | 538654.540             |
|              |        | 40-44       | 2609591.408                | 1345255.245                | 1264336.16             |
|              |        | 45-49       | 4775841.753                | 2424069.895                | 2351771.86             |
|              |        | 50-54       | 7446969.205                | 3925606.829                | 3521362.38             |
|              |        | 55-59       | 8240205.925                | 4777992.497                | 3462213.43             |
|              |        | 60-64       | 8772829.118                | 5521885.702                | 3250943.42             |
|              |        | 65-69       | 6161494.678                | 4266184.957                | 1895309.72             |
|              |        | 70-74       | 2495906.274                | 1792057.286                | 703848.988             |
|              | 75-79  | 0.000       | 0.000                      | 0.000                      |                        |
|              | Female | 30-34       | 229140.561                 | 141681.839                 | 87458.721              |
|              |        | 35-39       | 570217.942                 | 346111.348                 | 224106.594             |
|              |        | 40-44       | 1267538.938                | 746697.089                 | 520841.849             |
|              |        | 45-49       | 2340070.698                | 1356573.250                | 983497.449             |
|              |        | 50-54       | 3743803.613                | 2187571.272                | 1556232.34             |
|              |        | 55-59       | 4591478.168                | 2807388.653                | 1784089.51             |
|              |        | 60-64       | 5207367.788                | 3312253.248                | 1895114.54             |
|              |        | 65-69       | 4092181.394                | 2747177.425                | 1345003.97             |
| 70-74        |        | 1776092.171 | 1212554.857                | 563537.314                 |                        |
| Lung cancer  | Males  | 30-34       | 66065.017                  | 51637.321                  | 14427.697              |
|              |        | 35-39       | 232509.414                 | 183197.589                 | 49311.826              |
|              |        | 40-44       | 688628.041                 | 530767.349                 | 157860.693             |
|              |        | 45-49       | 1528300.367                | 1141773.635                | 386526.732             |
|              |        | 50-54       | 2730187.229                | 2009508.362                | 720678.867             |
|              |        | 55-59       | 3909101.673                | 2861608.070                | 1047493.60             |
|              |        | 60-64       | 4287716.660                | 3238060.448                | 1049656.21             |
|              |        | 65-69       | 3467897.115                | 2670801.235                | 797095.880             |
|              |        | 70-74       | 1312144.343                | 1029094.985                | 283049.358             |
|              | 75-79  | 0.000       | 0.000                      | 0.000                      |                        |
|              | Female | 30-34       | 51913.113                  | 40564.268                  | 11348.845              |
|              |        | 35-39       | 189792.904                 | 148562.635                 | 41230.269              |
|              |        | 40-44       | 527596.573                 | 395814.404                 | 131782.169             |
|              |        | 45-49       | 1122524.269                | 811033.229                 | 311491.039             |
|              |        | 50-54       | 1882214.322                | 1330877.813                | 551336.509             |
|              |        | 55-59       | 2595581.943                | 1812241.007                | 783340.936             |
|              |        | 60-64       | 2846273.090                | 2028828.369                | 817444.721             |
|              |        | 65-69       | 2358758.394                | 1701851.320                | 656907.073             |
| 70-74        |        | 937814.238  | 685956.557                 | 251857.681                 |                        |
| IHD          | Males  | 30-34       | 263834.566                 | 117348.570                 | 146485.996             |
|              |        | 35-39       | 692140.150                 | 293627.499                 | 398512.651             |
|              |        | 40-44       | 1519708.432                | 586084.744                 | 933623.689             |
|              |        | 45-49       | 2568546.697                | 907879.990                 | 1660666.71             |
|              |        | 50-54       | 3632929.903                | 1338258.262                | 2294671.64             |
|              |        | 55-59       | 2807892.356                | 1097395.933                | 1710496.42             |
|              |        | 60-64       | 2599825.934                | 1193292.153                | 1406533.78             |
|              |        | 65-69       | 1113578.307                | 584716.695                 | 528861.612             |
|              |        | 70-74       | 437536.271                 | 262223.536                 | 175312.735             |
|              | 75-79  | 0.000       | 0.000                      | 0.000                      |                        |
|              | Female | 30-34       | 79649.097                  | 37632.625                  | 42016.472              |
|              |        | 35-39       | 193965.908                 | 80968.558                  | 112997.350             |
|              |        | 40-44       | 403380.974                 | 150372.017                 | 253008.957             |
|              |        | 45-49       | 671385.408                 | 231952.544                 | 439432.864             |
|              |        | 50-54       | 1011875.989                | 375163.881                 | 636712.109             |
|              |        | 55-59       | 849875.715                 | 343631.489                 | 506244.226             |
|              |        | 60-64       | 925490.876                 | 436414.514                 | 489076.362             |
|              |        | 65-69       | 455463.881                 | 246302.678                 | 209161.204             |
| 70-74        |        | 207681.216  | 125748.279                 | 81932.938                  |                        |
| Stroke       | Males  | 30-34       | 73463.650                  | 42977.108                  | 30486.541              |
|              |        | 35-39       | 151934.057                 | 86188.622                  | 65745.435              |
|              |        | 40-44       | 262845.974                 | 141146.826                 | 121699.149             |
|              |        | 45-49       | 383421.246                 | 192385.295                 | 191035.951             |
|              |        | 50-54       | 479872.634                 | 218768.136                 | 261104.498             |
|              |        | 55-59       | 437124.903                 | 184518.908                 | 252605.995             |
|              |        | 60-64       | 419457.235                 | 180741.682                 | 238715.552             |
|              |        | 65-69       | 128180.574                 | 57840.096                  | 70340.478              |
|              |        | 70-74       | 53245.965                  | 26189.814                  | 27056.151              |
|              | 75-79  | 0.000       | 0.000                      | 0.000                      |                        |
|              | Female | 30-34       | 62919.090                  | 39977.768                  | 22941.322              |

**Results for PHIM for Run 4 (ELL Summary Sensitivity\_Analysis\_4.RTF)**

|      |        |       |             |            |            |
|------|--------|-------|-------------|------------|------------|
|      |        | 35-39 | 120806.205  | 72525.703  | 48280.502  |
|      |        | 40-44 | 203391.885  | 113280.217 | 90111.669  |
|      |        | 45-49 | 278172.097  | 143769.116 | 134402.981 |
|      |        | 50-54 | 325979.181  | 157120.212 | 168858.969 |
|      |        | 55-59 | 275161.340  | 124669.632 | 150491.708 |
|      |        | 60-64 | 268920.493  | 123579.038 | 145341.455 |
|      |        | 65-69 | 87956.054   | 42029.740  | 45926.313  |
|      |        | 70-74 | 42055.224   | 20930.949  | 21124.274  |
|      |        | 75-79 | 0.000       | 0.000      | 0.000      |
| COPD | Males  | 30-34 | 40547.801   | 25868.190  | 14679.611  |
|      |        | 35-39 | 70214.933   | 45130.306  | 25084.628  |
|      |        | 40-44 | 138408.960  | 87256.327  | 51152.633  |
|      |        | 45-49 | 295573.443  | 182030.975 | 113542.468 |
|      |        | 50-54 | 603979.438  | 359072.069 | 244907.370 |
|      |        | 55-59 | 1086086.992 | 634469.586 | 451617.406 |
|      |        | 60-64 | 1465829.290 | 909791.419 | 556037.871 |
|      |        | 65-69 | 1451838.682 | 952826.931 | 499011.751 |
|      |        | 70-74 | 692979.695  | 474548.950 | 218430.745 |
|      |        | 75-79 | 0.000       | 0.000      | 0.000      |
|      | Female | 30-34 | 34659.261   | 23507.179  | 11152.082  |
|      |        | 35-39 | 65652.924   | 44054.452  | 21598.472  |
|      |        | 40-44 | 133169.505  | 87230.452  | 45939.053  |
|      |        | 45-49 | 267988.924  | 169818.360 | 98170.564  |
|      |        | 50-54 | 523734.121  | 324409.366 | 199324.754 |
|      |        | 55-59 | 870859.170  | 526846.525 | 344012.645 |
|      |        | 60-64 | 1166683.329 | 723431.327 | 443252.002 |
|      |        | 65-69 | 1190003.066 | 756993.686 | 433009.380 |
|      |        | 70-74 | 588541.493  | 379919.072 | 208622.421 |
|      |        | 75-79 | 0.000       | 0.000      | 0.000      |

---

## Results for PHIM for Run 6 (ELL Summary Sensitivity\_Analysis\_4.RTF)

\*\*\*\*\*

### Estimated Loss of Life from the E Component for Run: 6, Simulation: 1

Country: US (United States)  
 Follow-up Period: 1990 to 2039

**Table 1: Estimated Loss of Life, at the end of follow-up, all age groups combined, Population unadjusted for deaths in Ecig scenario**

| Disease      | Sex    | Year | Years of life lost<br>NULL | Years of life lost<br>Ecig | Years of life<br>Saved |
|--------------|--------|------|----------------------------|----------------------------|------------------------|
| All Diseases | Males  | 2039 | 42093547.949               | 24887990.085               | 17205557.9             |
|              | Female | 2039 | 23817891.273               | 14858763.089               | 8959128.18             |
| Lung cancer  | Males  | 2039 | 18222549.860               | 13689702.011               | 4532847.85             |
|              | Female | 2039 | 12512468.845               | 8953159.368                | 3559309.48             |
| IHD          | Males  | 2039 | 15635992.616               | 6408282.037                | 9227710.58             |
|              | Female | 2039 | 4798769.065                | 2034999.242                | 2763769.82             |
| Stroke       | Males  | 2039 | 2389546.238                | 1133171.614                | 1256374.62             |
|              | Female | 2039 | 1665361.569                | 839702.131                 | 825659.438             |
| COPD         | Males  | 2039 | 5845459.234                | 3656834.423                | 2188624.81             |
|              | Female | 2039 | 4841291.793                | 3030902.348                | 1810389.44             |

## Results for PHIM for Run 6 (ELL Summary Sensitivity\_Analysis\_4.RTF)

\*\*\*\*\*

**Table 2: Estimated Loss of Life, at the end of follow-up, all age groups combined, Population and Number deaths adjusted for Ecig scenario**

| Disease      | Sex    | Year | Years of life lost<br>NULL | Years of life lost<br>Ecig | Years of life<br>Saved |
|--------------|--------|------|----------------------------|----------------------------|------------------------|
| All Diseases | Males  | 2039 | 42093547.949               | 24987760.955               | 17105787.0             |
|              | Female | 2039 | 23817891.273               | 14896031.911               | 8921859.36             |
| Lung cancer  | Males  | 2039 | 18222549.860               | 13750895.875               | 4471653.99             |
|              | Female | 2039 | 12512468.845               | 8976366.894                | 3536101.95             |
| IHD          | Males  | 2039 | 15635992.616               | 6419917.284                | 9216075.33             |
|              | Female | 2039 | 4798769.065                | 2036911.211                | 2761857.85             |
| Stroke       | Males  | 2039 | 2389546.238                | 1135384.269                | 1254161.97             |
|              | Female | 2039 | 1665361.569                | 840382.788                 | 824978.781             |
| COPD         | Males  | 2039 | 5845459.234                | 3681563.527                | 2163895.71             |
|              | Female | 2039 | 4841291.793                | 3042371.018                | 1798920.77             |

## Results for PHIM for Run 6 (ELL Summary Sensitivity\_Analysis\_4.RTF)

\*\*\*\*\*

**Table 3: Estimated Loss of Life, All age groups combined, Population unadjusted for deaths in Ecig scenario, cumulative over years**

| Disease      | Sex          | Year         | Years of life lost<br>NULL | Years of life lost<br>Ecig | Years of life<br>Saved |
|--------------|--------------|--------------|----------------------------|----------------------------|------------------------|
| All Diseases | Males        | 1990         | 1304839.645                | 1304839.645                | 0.000                  |
|              |              | 1991         | 2579865.358                | 2571191.563                | 8673.794               |
|              |              | 1992         | 3830683.831                | 3798434.586                | 32249.246              |
|              |              | 1993         | 5076567.803                | 5000946.906                | 75620.896              |
|              |              | 1994         | 6292145.526                | 6149976.372                | 142169.154             |
|              |              | 1995         | 7485537.010                | 7250155.381                | 235381.628             |
|              |              | 1996         | 8655955.028                | 8299471.258                | 356483.770             |
|              |              | 1997         | 9791729.713                | 9287444.820                | 504284.893             |
|              |              | 1998         | 10899134.186               | 10221750.872               | 677383.314             |
|              |              | 1999         | 12070409.674               | 11161632.657               | 908777.017             |
|              |              | 2000         | 13231384.595               | 12060982.774               | 1170401.82             |
|              |              | 2001         | 14371761.018               | 12910027.597               | 1461733.42             |
|              |              | 2002         | 15508906.386               | 13721354.619               | 1787551.77             |
|              |              | 2003         | 16638100.422               | 14495288.821               | 2142811.60             |
|              |              | 2004         | 17736465.088               | 15221478.193               | 2514986.90             |
|              |              | 2005         | 18834658.606               | 15921379.614               | 2913278.99             |
|              |              | 2006         | 19909100.501               | 16575120.681               | 3333979.82             |
|              |              | 2007         | 20958321.463               | 17190503.849               | 3767817.61             |
|              |              | 2008         | 22000068.148               | 17781818.816               | 4218249.33             |
|              |              | 2009         | 23018816.903               | 18340438.858               | 4678378.04             |
|              |              | 2010         | 24018480.537               | 18867874.062               | 5150606.47             |
|              |              | 2011         | 25003034.574               | 19367859.185               | 5635175.39             |
|              |              | 2012         | 25969871.429               | 19839149.862               | 6130721.57             |
|              |              | 2013         | 26920275.180               | 20283886.808               | 6636388.37             |
|              |              | 2014         | 27849005.227               | 20700438.587               | 7148566.64             |
|              |              | 2015         | 28749620.400               | 21092285.813               | 7657334.59             |
|              |              | 2016         | 29622417.562               | 21450934.320               | 8171483.24             |
|              |              | 2017         | 30462559.724               | 21779078.466               | 8683481.26             |
|              |              | 2018         | 31293299.299               | 22094316.707               | 9198982.59             |
|              |              | 2019         | 32109993.427               | 22392005.685               | 9717987.74             |
|              |              | 2020         | 32883323.977               | 22668583.006               | 10214741.0             |
|              |              | 2021         | 33610102.554               | 22908335.714               | 10701766.8             |
|              |              | 2022         | 34322010.448               | 23132992.841               | 11189017.6             |
|              |              | 2023         | 35018383.550               | 23342695.647               | 11675687.9             |
|              |              | 2024         | 35700177.955               | 23538670.030               | 12161507.9             |
|              |              | 2025         | 36315500.346               | 23715209.361               | 12600291.0             |
|              |              | 2026         | 36896159.343               | 23865363.134               | 13030796.2             |
|              |              | 2027         | 37462570.116               | 24004837.420               | 13457732.7             |
|              |              | 2028         | 38015337.780               | 24133763.203               | 13881574.6             |
|              |              | 2029         | 38554814.764               | 24253394.965               | 14301419.8             |
|              |              | 2030         | 39003805.400               | 24355496.529               | 14648308.9             |
| 2031         | 39436509.703 | 24442655.161 | 14993854.5                 |                            |                        |
| 2032         | 39858470.458 | 24523299.427 | 15335171.0                 |                            |                        |
| 2033         | 40270147.082 | 24597281.911 | 15672865.2                 |                            |                        |
| 2034         | 40672665.743 | 24665826.432 | 16006839.3                 |                            |                        |
| 2035         | 40962732.664 | 24717950.964 | 16244781.7                 |                            |                        |
| 2036         | 41255021.653 | 24765302.283 | 16489719.4                 |                            |                        |
| 2037         | 41540573.023 | 24809395.199 | 16731177.8                 |                            |                        |
| 2038         | 41820158.066 | 24850077.062 | 16970081.0                 |                            |                        |
| 2039         | 42093547.949 | 24887990.085 | 17205557.9                 |                            |                        |
|              | Female       | 1990         | 588979.406                 | 588979.406                 | 0.000                  |
| 1991         |              | 1182571.252  | 1179606.280                | 2964.972                   |                        |
| 1992         |              | 1777346.679  | 1766096.305                | 11250.374                  |                        |
| 1993         |              | 2380261.899  | 2353263.093                | 26998.806                  |                        |
| 1994         |              | 2983130.039  | 2931319.757                | 51810.282                  |                        |
| 1995         |              | 3588982.584  | 3501953.523                | 87029.061                  |                        |
| 1996         |              | 4195430.235  | 4060559.924                | 134870.311                 |                        |
| 1997         |              | 4793866.694  | 4600671.168                | 193195.526                 |                        |
| 1998         |              | 5389747.381  | 5126526.252                | 263221.129                 |                        |
| 1999         |              | 6006722.467  | 5652715.455                | 354007.012                 |                        |
| 2000         |              | 6625758.871  | 6168018.807                | 457740.064                 |                        |
| 2001         |              | 7245135.411  | 6668487.021                | 576648.390                 |                        |
| 2002         |              | 7867492.021  | 7156257.974                | 711234.047                 |                        |
| 2003         |              | 8485051.793  | 7626554.750                | 858497.043                 |                        |
| 2004         |              | 9092994.774  | 8075961.261                | 1017033.51                 |                        |
| 2005         |              | 9706032.803  | 8515730.159                | 1190302.64                 |                        |
| 2006         |              | 10311907.548 | 8936180.567                | 1375726.98                 |                        |
| 2007         |              | 10909437.502 | 9339394.249                | 1570043.25                 |                        |
| 2008         |              | 11506462.491 | 9727269.549                | 1779192.94                 |                        |
| 2009         |              | 12098393.287 | 10101640.361               | 1996752.93                 |                        |
| 2010         |              | 12681188.981 | 10457792.475               | 2223396.51                 |                        |



**Results for PHIM for Run 6 (ELL Summary Sensitivity\_Analysis\_4.RTF)**

|             |       |      |              |              |            |
|-------------|-------|------|--------------|--------------|------------|
|             |       | 2011 | 13260062.991 | 10798738.277 | 2461324.71 |
|             |       | 2012 | 13839417.441 | 11127117.676 | 2712299.76 |
|             |       | 2013 | 14409614.758 | 11439743.335 | 2969871.42 |
|             |       | 2014 | 14976658.746 | 11737068.874 | 3239589.87 |
|             |       | 2015 | 15529977.821 | 12017564.307 | 3512413.51 |
|             |       | 2016 | 16066640.764 | 12277519.978 | 3789120.79 |
|             |       | 2017 | 16590035.078 | 12520553.767 | 4069481.31 |
|             |       | 2018 | 17098716.137 | 12750182.261 | 4348533.88 |
|             |       | 2019 | 17599868.850 | 12966993.505 | 4632875.34 |
|             |       | 2020 | 18081346.241 | 13169666.108 | 4911680.13 |
|             |       | 2021 | 18537594.460 | 13351960.240 | 5185634.22 |
|             |       | 2022 | 18985300.234 | 13522947.927 | 5462352.31 |
|             |       | 2023 | 19423958.747 | 13683075.993 | 5740882.75 |
|             |       | 2024 | 19853347.772 | 13832206.824 | 6021140.95 |
|             |       | 2025 | 20252822.245 | 13968151.855 | 6284670.39 |
|             |       | 2026 | 20619307.063 | 14085592.972 | 6533714.09 |
|             |       | 2027 | 20976063.406 | 14194224.517 | 6781838.89 |
|             |       | 2028 | 21323641.947 | 14295009.910 | 7028632.04 |
|             |       | 2029 | 21662117.106 | 14387854.892 | 7272462.21 |
|             |       | 2030 | 21960971.694 | 14469065.345 | 7491906.35 |
|             |       | 2031 | 22224951.983 | 14535105.805 | 7689846.18 |
|             |       | 2032 | 22480397.853 | 14595468.444 | 7884929.41 |
|             |       | 2033 | 22728639.455 | 14651038.140 | 8077601.31 |
|             |       | 2034 | 22970448.888 | 14701861.824 | 8268587.06 |
|             |       | 2035 | 23164154.188 | 14742673.556 | 8421480.63 |
|             |       | 2036 | 23334538.616 | 14775340.127 | 8559198.49 |
|             |       | 2037 | 23499760.723 | 14805363.258 | 8694397.47 |
|             |       | 2038 | 23660308.401 | 14833070.569 | 8827237.83 |
|             |       | 2039 | 23817891.273 | 14858763.089 | 8959128.18 |
| Lung cancer | Males | 1990 | 595621.791   | 595621.791   | 0.000      |
|             |       | 1991 | 1177744.113  | 1177096.215  | 647.898    |
|             |       | 1992 | 1750034.892  | 1747588.533  | 2446.359   |
|             |       | 1993 | 2319752.308  | 2313793.527  | 5958.781   |
|             |       | 1994 | 2872597.339  | 2861045.078  | 11552.261  |
|             |       | 1995 | 3411494.825  | 3391837.653  | 19657.172  |
|             |       | 1996 | 3945569.726  | 3914495.663  | 31074.063  |
|             |       | 1997 | 4463316.362  | 4417530.679  | 45785.684  |
|             |       | 1998 | 4975301.180  | 4910811.171  | 64490.010  |
|             |       | 1999 | 5473691.125  | 5386273.914  | 87417.211  |
|             |       | 2000 | 5977500.570  | 5861414.513  | 116086.057 |
|             |       | 2001 | 6474795.516  | 6324348.398  | 150447.118 |
|             |       | 2002 | 6968769.705  | 6777566.036  | 191203.669 |
|             |       | 2003 | 7460282.140  | 7221101.453  | 239180.687 |
|             |       | 2004 | 7947048.275  | 7652847.479  | 294200.796 |
|             |       | 2005 | 8430571.669  | 8073776.727  | 356794.941 |
|             |       | 2006 | 8903945.390  | 8477180.737  | 426764.653 |
|             |       | 2007 | 9364177.982  | 8860824.843  | 503353.139 |
|             |       | 2008 | 9822525.458  | 9233305.023  | 589220.436 |
|             |       | 2009 | 10275228.886 | 9591729.426  | 683499.460 |
|             |       | 2010 | 10720275.500 | 9934794.551  | 785480.949 |
|             |       | 2011 | 11155356.373 | 10260607.870 | 894748.503 |
|             |       | 2012 | 11582611.617 | 10569893.412 | 1012718.20 |
|             |       | 2013 | 11998803.791 | 10861111.683 | 1137692.11 |
|             |       | 2014 | 12402087.090 | 11133666.335 | 1268420.75 |
|             |       | 2015 | 12793451.706 | 11389335.343 | 1404116.36 |
|             |       | 2016 | 13160101.653 | 11619450.943 | 1540650.71 |
|             |       | 2017 | 13503583.414 | 11826453.128 | 1677130.29 |
|             |       | 2018 | 13859755.737 | 12030372.970 | 1829382.77 |
|             |       | 2019 | 14211625.176 | 12222759.575 | 1988865.60 |
|             |       | 2020 | 14553935.288 | 12402328.584 | 2151606.70 |
|             |       | 2021 | 14851747.495 | 12550817.494 | 2300930.00 |
|             |       | 2022 | 15144531.004 | 12689420.258 | 2455110.75 |
|             |       | 2023 | 15431932.496 | 12818280.557 | 2613651.94 |
|             |       | 2024 | 15713920.740 | 12938069.728 | 2775851.01 |
|             |       | 2025 | 15979112.816 | 13046453.462 | 2932659.35 |
|             |       | 2026 | 16206550.153 | 13133073.216 | 3073476.94 |
|             |       | 2027 | 16428826.050 | 13212932.565 | 3215893.49 |
|             |       | 2028 | 16645902.186 | 13286293.759 | 3359608.43 |
|             |       | 2029 | 16858126.517 | 13353971.817 | 3504154.70 |
|             |       | 2030 | 17045220.687 | 13412146.413 | 3633074.27 |
|             |       | 2031 | 17208482.610 | 13458465.874 | 3750016.74 |
|             |       | 2032 | 17367586.074 | 13501084.220 | 3866501.85 |
|             |       | 2033 | 17522716.280 | 13540028.024 | 3982688.26 |
|             |       | 2034 | 17674226.555 | 13575968.746 | 4098257.81 |
|             |       | 2035 | 17792201.734 | 13603649.245 | 4188552.49 |
|             |       | 2036 | 17903508.236 | 13627648.060 | 4275860.18 |
|             |       | 2037 | 18012162.345 | 13649969.049 | 4362193.30 |
|             |       | 2038 | 18118464.470 | 13670521.012 | 4447943.46 |

**Results for PHIM for Run 6 (ELL Summary Sensitivity\_Analysis\_4.RTF)**

|     |        |      |              |              |            |
|-----|--------|------|--------------|--------------|------------|
|     | Female | 2039 | 18222549.860 | 13689702.011 | 4532847.85 |
|     |        | 1990 | 307897.357   | 307897.357   | 0.000      |
|     |        | 1991 | 616547.418   | 616130.924   | 416.494    |
|     |        | 1992 | 931086.773   | 929437.091   | 1649.683   |
|     |        | 1993 | 1246155.671  | 1242093.631  | 4062.040   |
|     |        | 1994 | 1561212.934  | 1553213.628  | 7999.306   |
|     |        | 1995 | 1879967.742  | 1866032.029  | 13935.713  |
|     |        | 1996 | 2197488.109  | 2175331.010  | 22157.100  |
|     |        | 1997 | 2515698.453  | 2482608.369  | 33090.083  |
|     |        | 1998 | 2836249.556  | 2789167.089  | 47082.467  |
|     |        | 1999 | 3150201.390  | 3086076.267  | 64125.123  |
|     |        | 2000 | 3472722.342  | 3387452.942  | 85269.400  |
|     |        | 2001 | 3796994.889  | 3686144.933  | 110849.956 |
|     |        | 2002 | 4126619.935  | 3984998.009  | 141621.926 |
|     |        | 2003 | 4454982.533  | 4277799.448  | 177183.085 |
|     |        | 2004 | 4784343.030  | 4565979.793  | 218363.238 |
|     |        | 2005 | 5113443.121  | 4848189.302  | 265253.818 |
|     |        | 2006 | 5442543.963  | 5123824.733  | 318719.229 |
|     |        | 2007 | 5772441.497  | 5393583.143  | 378858.353 |
|     |        | 2008 | 6091911.943  | 5648167.038  | 443744.905 |
|     |        | 2009 | 6413671.330  | 5897179.262  | 516492.068 |
|     |        | 2010 | 6730763.530  | 6135891.500  | 594872.030 |
|     |        | 2011 | 7043614.101  | 6364048.785  | 679565.316 |
|     |        | 2012 | 7356270.780  | 6584592.467  | 771678.312 |
|     |        | 2013 | 7662551.964  | 6793313.329  | 869238.635 |
|     |        | 2014 | 7964551.465  | 6991801.219  | 972750.246 |
|     |        | 2015 | 8254895.403  | 7176520.027  | 1078375.38 |
|     |        | 2016 | 8530661.848  | 7344885.640  | 1185776.21 |
|     |        | 2017 | 8795826.122  | 7500478.214  | 1295347.91 |
|     |        | 2018 | 9067233.707  | 7652042.179  | 1415191.53 |
|     |        | 2019 | 9335343.270  | 7794800.790  | 1540542.48 |
|     |        | 2020 | 9596110.883  | 7928140.853  | 1667970.03 |
|     |        | 2021 | 9833186.859  | 8044554.281  | 1788632.58 |
|     |        | 2022 | 10066452.037 | 8153301.841  | 1913150.20 |
|     |        | 2023 | 10295503.609 | 8254694.050  | 2040809.56 |
|     |        | 2024 | 10520125.318 | 8348666.489  | 2171458.83 |
|     |        | 2025 | 10731915.863 | 8433953.920  | 2297961.94 |
|     |        | 2026 | 10917495.549 | 8505070.744  | 2412424.80 |
|     |        | 2027 | 11098620.885 | 8570491.778  | 2528129.11 |
|     |        | 2028 | 11275441.234 | 8630880.893  | 2644560.34 |
|     |        | 2029 | 11447962.710 | 8686213.969  | 2761748.74 |
|     |        | 2030 | 11601867.623 | 8734208.834  | 2867658.79 |
|     |        | 2031 | 11731666.516 | 8771911.514  | 2959755.00 |
|     |        | 2032 | 11857585.969 | 8806269.488  | 3051316.48 |
|     |        | 2033 | 11980128.625 | 8837803.897  | 3142324.73 |
|     |        | 2034 | 12099562.464 | 8866583.777  | 3232978.69 |
|     |        | 2035 | 12195919.946 | 8889337.070  | 3306582.88 |
|     |        | 2036 | 12278201.969 | 8907226.531  | 3370975.44 |
|     |        | 2037 | 12358146.336 | 8923718.755  | 3434427.58 |
|     |        | 2038 | 12435978.633 | 8938972.731  | 3497005.90 |
|     |        | 2039 | 12512468.845 | 8953159.368  | 3559309.48 |
| IHD | Males  | 1990 | 517209.093   | 517209.093   | 0.000      |
|     |        | 1991 | 1019219.395  | 1012116.414  | 7102.981   |
|     |        | 1992 | 1509598.614  | 1483224.043  | 26374.571  |
|     |        | 1993 | 1992735.299  | 1931294.898  | 61440.401  |
|     |        | 1994 | 2462877.575  | 2348239.744  | 114637.830 |
|     |        | 1995 | 2928249.390  | 2739594.506  | 188654.884 |
|     |        | 1996 | 3377377.730  | 3093782.886  | 283594.844 |
|     |        | 1997 | 3809062.472  | 3411006.847  | 398055.625 |
|     |        | 1998 | 4222213.867  | 3692037.119  | 530176.748 |
|     |        | 1999 | 4708317.743  | 3995905.551  | 712412.192 |
|     |        | 2000 | 5182084.396  | 4267705.073  | 914379.323 |
|     |        | 2001 | 5644097.705  | 4507792.007  | 1136305.70 |
|     |        | 2002 | 6107232.129  | 4725365.023  | 1381867.11 |
|     |        | 2003 | 6561785.704  | 4917640.214  | 1644145.49 |
|     |        | 2004 | 6996156.348  | 5083409.955  | 1912746.39 |
|     |        | 2005 | 7426261.361  | 5231761.310  | 2194500.05 |
|     |        | 2006 | 7849012.694  | 5361858.955  | 2487153.74 |
|     |        | 2007 | 8255300.530  | 5474355.674  | 2780944.86 |
|     |        | 2008 | 8650662.040  | 5573258.637  | 3077403.40 |
|     |        | 2009 | 9030818.513  | 5659547.596  | 3371270.92 |
|     |        | 2010 | 9403026.327  | 5736269.845  | 3666756.48 |
|     |        | 2011 | 9767535.506  | 5804462.688  | 3963072.82 |
|     |        | 2012 | 10123044.281 | 5865369.002  | 4257675.28 |
|     |        | 2013 | 10470104.786 | 5919745.834  | 4550358.95 |
|     |        | 2014 | 10807756.112 | 5968583.444  | 4839172.67 |
|     |        | 2015 | 11130681.425 | 6011980.722  | 5118700.70 |
|     |        | 2016 | 11448966.506 | 6051594.754  | 5397371.75 |

**Results for PHIM for Run 6 (ELL Summary Sensitivity\_Analysis\_4.RTF)**

|        |        |      |              |             |            |
|--------|--------|------|--------------|-------------|------------|
|        |        | 2017 | 11758164.882 | 6087660.273 | 5670504.61 |
|        |        | 2018 | 12054448.241 | 6119646.877 | 5934801.36 |
|        |        | 2019 | 12341606.261 | 6149023.021 | 6192583.24 |
|        |        | 2020 | 12600728.939 | 6174256.562 | 6426472.38 |
|        |        | 2021 | 12861767.105 | 6198423.925 | 6663343.18 |
|        |        | 2022 | 13114168.616 | 6220863.146 | 6893305.47 |
|        |        | 2023 | 13357894.797 | 6241609.667 | 7116285.13 |
|        |        | 2024 | 13593848.521 | 6261059.744 | 7332788.78 |
|        |        | 2025 | 13789177.359 | 6276746.404 | 7512430.95 |
|        |        | 2026 | 13993401.656 | 6292730.376 | 7700671.28 |
|        |        | 2027 | 14190519.224 | 6307927.492 | 7882591.73 |
|        |        | 2028 | 14381193.356 | 6322139.803 | 8059053.55 |
|        |        | 2029 | 14565171.927 | 6335529.564 | 8229642.36 |
|        |        | 2030 | 14697381.605 | 6345069.214 | 8352312.39 |
|        |        | 2031 | 14842203.512 | 6355482.169 | 8486721.34 |
|        |        | 2032 | 14982485.826 | 6365451.699 | 8617034.13 |
|        |        | 2033 | 15118410.647 | 6374750.138 | 8743660.51 |
|        |        | 2034 | 15250284.398 | 6383596.149 | 8866688.25 |
|        |        | 2035 | 15322911.166 | 6388339.594 | 8934571.57 |
|        |        | 2036 | 15405115.031 | 6393683.341 | 9011431.69 |
|        |        | 2037 | 15484709.137 | 6398842.856 | 9085866.28 |
|        |        | 2038 | 15561812.193 | 6403708.586 | 9158103.61 |
|        |        | 2039 | 15635992.616 | 6408282.037 | 9227710.58 |
|        | Female | 1990 | 147299.110   | 147299.110  | 0.000      |
|        |        | 1991 | 295122.462   | 293257.343  | 1865.120   |
|        |        | 1992 | 439962.920   | 432980.445  | 6982.475   |
|        |        | 1993 | 584735.615   | 568176.437  | 16559.178  |
|        |        | 1994 | 727640.783   | 696325.214  | 31315.569  |
|        |        | 1995 | 868486.937   | 816723.786  | 51763.151  |
|        |        | 1996 | 1010321.847  | 930875.201  | 79446.646  |
|        |        | 1997 | 1144230.930  | 1032429.233 | 111801.696 |
|        |        | 1998 | 1274513.622  | 1124663.128 | 149850.494 |
|        |        | 1999 | 1426725.938  | 1224831.278 | 201894.660 |
|        |        | 2000 | 1573462.680  | 1314398.497 | 259064.182 |
|        |        | 2001 | 1719132.015  | 1395207.636 | 323924.379 |
|        |        | 2002 | 1863006.732  | 1467670.488 | 395336.244 |
|        |        | 2003 | 2002943.227  | 1531571.071 | 471372.156 |
|        |        | 2004 | 2137798.705  | 1587281.148 | 550517.557 |
|        |        | 2005 | 2271071.245  | 1637344.027 | 633727.218 |
|        |        | 2006 | 2400707.731  | 1680921.531 | 719786.200 |
|        |        | 2007 | 2523634.512  | 1718281.768 | 805352.744 |
|        |        | 2008 | 2648752.232  | 1752513.869 | 896238.363 |
|        |        | 2009 | 2765973.961  | 1781756.663 | 984217.298 |
|        |        | 2010 | 2881329.235  | 1807943.527 | 1073385.71 |
|        |        | 2011 | 2994972.694  | 1831323.225 | 1163649.47 |
|        |        | 2012 | 3108958.829  | 1852590.846 | 1256367.98 |
|        |        | 2013 | 3218140.416  | 1871469.571 | 1346670.85 |
|        |        | 2014 | 3328387.914  | 1888938.608 | 1439449.31 |
|        |        | 2015 | 3435342.796  | 1904814.665 | 1530528.13 |
|        |        | 2016 | 3539189.408  | 1919141.703 | 1620047.71 |
|        |        | 2017 | 3640041.363  | 1932095.694 | 1707945.67 |
|        |        | 2018 | 3732645.362  | 1943188.863 | 1789456.50 |
|        |        | 2019 | 3821421.978  | 1953164.708 | 1868257.27 |
|        |        | 2020 | 3902115.950  | 1961772.363 | 1940343.59 |
|        |        | 2021 | 3984301.053  | 1970063.547 | 2014237.51 |
|        |        | 2022 | 4062629.299  | 1977552.328 | 2085076.97 |
|        |        | 2023 | 4137348.729  | 1984395.557 | 2152953.17 |
|        |        | 2024 | 4208611.493  | 1990634.093 | 2217977.40 |
|        |        | 2025 | 4269419.492  | 1995811.380 | 2273608.11 |
|        |        | 2026 | 4330969.998  | 2000860.881 | 2330109.12 |
|        |        | 2027 | 4389134.306  | 2005490.557 | 2383643.75 |
|        |        | 2028 | 4444222.970  | 2009770.057 | 2434452.91 |
|        |        | 2029 | 4496447.877  | 2013749.892 | 2482697.98 |
|        |        | 2030 | 4536975.698  | 2016745.480 | 2520230.22 |
|        |        | 2031 | 4578338.586  | 2019764.149 | 2558574.44 |
|        |        | 2032 | 4617397.784  | 2022587.300 | 2594810.48 |
|        |        | 2033 | 4654407.697  | 2025248.026 | 2629159.67 |
|        |        | 2034 | 4689913.454  | 2027775.106 | 2662138.35 |
|        |        | 2035 | 4712518.190  | 2029286.030 | 2683232.16 |
|        |        | 2036 | 4735845.827  | 2030827.119 | 2705018.71 |
|        |        | 2037 | 4757958.806  | 2032285.733 | 2725673.07 |
|        |        | 2038 | 4778813.806  | 2033670.919 | 2745142.89 |
|        |        | 2039 | 4798769.065  | 2034999.242 | 2763769.82 |
|        | Males  | 1990 | 75005.854    | 75005.854   | 0.000      |
|        |        | 1991 | 149463.017   | 148743.133  | 719.885    |
|        |        | 1992 | 222966.278   | 220289.499  | 2676.780   |
|        |        | 1993 | 296801.879   | 290425.564  | 6376.314   |
|        |        | 1994 | 372453.706   | 360103.975  | 12349.730  |
| Stroke |        |      |              |             |            |

**Results for PHIM for Run 6 (ELL Summary Sensitivity\_Analysis\_4.RTF)**

|        |      |             |             |            |
|--------|------|-------------|-------------|------------|
|        | 1995 | 448401.338  | 427519.603  | 20881.735  |
|        | 1996 | 523536.301  | 491402.513  | 32133.789  |
|        | 1997 | 596763.211  | 550669.389  | 46093.822  |
|        | 1998 | 667546.681  | 604957.567  | 62589.114  |
|        | 1999 | 734925.407  | 653724.238  | 81201.169  |
|        | 2000 | 803749.361  | 700571.854  | 103177.507 |
|        | 2001 | 870081.588  | 742689.874  | 127391.714 |
|        | 2002 | 935347.140  | 781299.123  | 154048.017 |
|        | 2003 | 1001627.349 | 817496.508  | 184130.842 |
|        | 2004 | 1066587.976 | 850348.329  | 216239.647 |
|        | 2005 | 1130548.052 | 880116.964  | 250431.087 |
|        | 2006 | 1195132.454 | 907659.151  | 287473.302 |
|        | 2007 | 1258974.043 | 932608.092  | 326365.951 |
|        | 2008 | 1320124.867 | 954394.612  | 365730.255 |
|        | 2009 | 1380776.123 | 974177.514  | 406598.609 |
|        | 2010 | 1440048.533 | 991910.689  | 448137.844 |
|        | 2011 | 1497484.847 | 1007673.566 | 489811.280 |
|        | 2012 | 1554496.526 | 1021898.864 | 532597.662 |
|        | 2013 | 1610819.598 | 1034766.305 | 576053.293 |
|        | 2014 | 1667484.890 | 1046566.983 | 620917.907 |
|        | 2015 | 1720948.287 | 1056905.465 | 664042.821 |
|        | 2016 | 1775699.228 | 1066596.984 | 709102.244 |
|        | 2017 | 1830250.175 | 1075499.934 | 754750.241 |
|        | 2018 | 1875958.950 | 1082422.219 | 793536.731 |
|        | 2019 | 1920359.232 | 1088669.968 | 831689.264 |
|        | 2020 | 1960605.297 | 1093991.402 | 866613.896 |
|        | 2021 | 1998912.887 | 1098712.576 | 900200.311 |
|        | 2022 | 2036003.696 | 1102984.529 | 933019.166 |
|        | 2023 | 2071857.536 | 1106854.392 | 965003.144 |
|        | 2024 | 2106636.468 | 1110411.445 | 996225.024 |
|        | 2025 | 2136450.873 | 1113321.562 | 1023129.31 |
|        | 2026 | 2164796.470 | 1115947.070 | 1048849.40 |
|        | 2027 | 2192079.608 | 1118375.917 | 1073703.69 |
|        | 2028 | 2218404.367 | 1120606.495 | 1097797.87 |
|        | 2029 | 2243769.140 | 1122677.105 | 1121092.03 |
|        | 2030 | 2263570.213 | 1124242.991 | 1139327.22 |
|        | 2031 | 2282521.590 | 1125702.219 | 1156819.37 |
|        | 2032 | 2300804.945 | 1127072.348 | 1173732.60 |
|        | 2033 | 2318464.018 | 1128347.646 | 1190116.37 |
|        | 2034 | 2335611.973 | 1129556.357 | 1206055.62 |
|        | 2035 | 2347097.290 | 1130350.554 | 1216746.74 |
|        | 2036 | 2358248.747 | 1131110.225 | 1227138.52 |
|        | 2037 | 2369033.655 | 1131838.749 | 1237194.91 |
|        | 2038 | 2379490.114 | 1132526.049 | 1246964.06 |
|        | 2039 | 2389546.238 | 1133171.614 | 1256374.62 |
| Female | 1990 | 56348.092   | 56348.092   | 0.000      |
|        | 1991 | 110871.862  | 110356.693  | 515.169    |
|        | 1992 | 165654.454  | 163676.520  | 1977.935   |
|        | 1993 | 220008.519  | 215283.525  | 4724.994   |
|        | 1994 | 275706.807  | 266523.831  | 9182.976   |
|        | 1995 | 331417.547  | 315917.980  | 15499.567  |
|        | 1996 | 387580.161  | 363579.561  | 24000.600  |
|        | 1997 | 442778.242  | 408222.887  | 34555.355  |
|        | 1998 | 496117.305  | 449178.618  | 46938.687  |
|        | 1999 | 548268.214  | 487023.459  | 61244.756  |
|        | 2000 | 601693.202  | 523578.376  | 78114.825  |
|        | 2001 | 652221.103  | 555969.673  | 96251.430  |
|        | 2002 | 703022.600  | 586301.519  | 116721.081 |
|        | 2003 | 752023.351  | 613481.965  | 138541.386 |
|        | 2004 | 799826.733  | 638000.292  | 161826.441 |
|        | 2005 | 847563.928  | 660643.593  | 186920.335 |
|        | 2006 | 894205.027  | 681013.312  | 213191.715 |
|        | 2007 | 939571.282  | 699199.870  | 240371.412 |
|        | 2008 | 983437.578  | 715368.939  | 268068.639 |
|        | 2009 | 1025803.786 | 729715.822  | 296087.964 |
|        | 2010 | 1066964.934 | 742471.072  | 324493.862 |
|        | 2011 | 1106954.044 | 753812.822  | 353141.222 |
|        | 2012 | 1146108.461 | 764010.854  | 382097.607 |
|        | 2013 | 1183544.689 | 772992.368  | 410552.321 |
|        | 2014 | 1221220.945 | 781277.712  | 439943.233 |
|        | 2015 | 1258289.311 | 788868.677  | 469420.634 |
|        | 2016 | 1294830.207 | 795767.174  | 499063.034 |
|        | 2017 | 1330332.626 | 801965.379  | 528367.247 |
|        | 2018 | 1360571.987 | 806877.511  | 553694.477 |
|        | 2019 | 1389848.723 | 811272.094  | 578576.629 |
|        | 2020 | 1416046.192 | 814978.213  | 601067.979 |
|        | 2021 | 1440588.850 | 818215.754  | 622373.095 |
|        | 2022 | 1464157.934 | 821119.893  | 643038.042 |

**Results for PHIM for Run 6 (ELL Summary Sensitivity\_Analysis\_4.RTF)**

|      |             |             |             |             |            |
|------|-------------|-------------|-------------|-------------|------------|
|      |             | 2023        | 1486810.237 | 823752.606  | 663057.631 |
|      |             | 2024        | 1508591.729 | 826130.382  | 682461.347 |
|      |             | 2025        | 1526875.621 | 828043.803  | 698831.818 |
|      |             | 2026        | 1543659.810 | 829708.397  | 713951.413 |
|      |             | 2027        | 1559623.774 | 831220.069  | 728403.706 |
|      |             | 2028        | 1574852.850 | 832605.009  | 742247.841 |
|      |             | 2029        | 1589437.452 | 833878.183  | 755559.270 |
|      |             | 2030        | 1600568.199 | 834812.078  | 765756.121 |
|      |             | 2031        | 1610776.297 | 835644.963  | 775131.334 |
|      |             | 2032        | 1620483.563 | 836418.571  | 784064.992 |
|      |             | 2033        | 1629745.442 | 837141.714  | 792603.728 |
|      |             | 2034        | 1638721.425 | 837823.041  | 800898.384 |
|      |             | 2035        | 1644649.404 | 838250.956  | 806398.448 |
|      |             | 2036        | 1650181.590 | 838641.545  | 811540.044 |
|      |             | 2037        | 1655476.066 | 839011.925  | 816464.142 |
|      |             | 2038        | 1660507.914 | 839364.405  | 821143.509 |
|      |             | 2039        | 1665361.569 | 839702.131  | 825659.438 |
| COPD | Males       | 1990        | 117002.906  | 117002.906  | 0.000      |
|      |             | 1991        | 233438.833  | 233235.802  | 203.031    |
|      |             | 1992        | 348084.047  | 347332.511  | 751.536    |
|      |             | 1993        | 467278.318  | 465432.918  | 1845.400   |
|      |             | 1994        | 584216.907  | 580587.574  | 3629.332   |
|      |             | 1995        | 697391.457  | 691203.620  | 6187.837   |
|      |             | 1996        | 809471.271  | 799790.196  | 9681.074   |
|      |             | 1997        | 922587.668  | 908237.905  | 14349.763  |
|      |             | 1998        | 1034072.457 | 1013945.015 | 20127.442  |
|      |             | 1999        | 1153475.399 | 1125728.954 | 27746.445  |
|      |             | 2000        | 1268050.268 | 1231291.334 | 36758.934  |
|      |             | 2001        | 1382786.209 | 1335197.317 | 47588.892  |
|      |             | 2002        | 1497557.412 | 1437124.437 | 60432.974  |
|      |             | 2003        | 1614405.229 | 1539050.646 | 75354.584  |
|      |             | 2004        | 1726672.489 | 1634872.430 | 91800.059  |
|      |             | 2005        | 1847277.524 | 1735724.612 | 111552.913 |
|      |             | 2006        | 1961009.963 | 1828421.838 | 132588.125 |
|      |             | 2007        | 2079868.908 | 1922715.241 | 157153.668 |
|      |             | 2008        | 2206755.783 | 2020860.545 | 185895.238 |
|      |             | 2009        | 2331993.380 | 2114984.322 | 217009.058 |
|      |             | 2010        | 2455130.176 | 2204898.977 | 250231.200 |
|      |             | 2011        | 2582657.849 | 2295115.061 | 287542.787 |
|      |             | 2012        | 2709719.005 | 2381988.584 | 327730.421 |
|      |             | 2013        | 2840547.005 | 2468262.987 | 372284.019 |
|      |             | 2014        | 2971677.135 | 2551621.825 | 420055.310 |
|      |             | 2015        | 3104538.983 | 2634064.283 | 470474.700 |
|      |             | 2016        | 3237650.175 | 2713291.638 | 524358.537 |
|      |             | 2017        | 3370561.253 | 2789465.132 | 581096.121 |
|      |             | 2018        | 3503136.371 | 2861874.641 | 641261.730 |
|      |             | 2019        | 3636402.758 | 2931553.121 | 704849.637 |
|      |             | 2020        | 3768054.453 | 2998006.458 | 770047.994 |
|      |             | 2021        | 3897675.067 | 3060381.720 | 837293.347 |
|      |             | 2022        | 4027307.132 | 3119724.907 | 907582.225 |
|      |             | 2023        | 4156698.720 | 3175951.031 | 980747.689 |
|      |             | 2024        | 4285772.226 | 3229129.113 | 1056643.11 |
|      |             | 2025        | 4410759.298 | 3278687.933 | 1132071.37 |
|      |             | 2026        | 4531411.064 | 3323612.472 | 1207798.59 |
|      |             | 2027        | 4651145.233 | 3365601.446 | 1285543.79 |
|      |             | 2028        | 4769837.872 | 3404723.146 | 1365114.73 |
|      |             | 2029        | 4887747.179 | 3441216.478 | 1446530.70 |
| 2030 | 4997632.895 | 3474037.912 | 1523594.98  |             |            |
| 2031 | 5103301.991 | 3503004.898 | 1600297.09  |             |            |
| 2032 | 5207593.613 | 3529691.160 | 1677902.45  |             |            |
| 2033 | 5310556.138 | 3554156.104 | 1756400.03  |             |            |
| 2034 | 5412542.816 | 3576705.180 | 1835837.64  |             |            |
| 2035 | 5500522.473 | 3595611.571 | 1904910.90  |             |            |
| 2036 | 5588149.640 | 3612860.657 | 1975288.98  |             |            |
| 2037 | 5674667.886 | 3628744.545 | 2045923.34  |             |            |
| 2038 | 5760391.289 | 3643321.415 | 2117069.87  |             |            |
| 2039 | 5845459.234 | 3656834.423 | 2188624.81  |             |            |
|      | Female      | 1990        | 77434.846   | 77434.846   | 0.000      |
|      |             | 1991        | 160029.510  | 159861.321  | 168.190    |
|      |             | 1992        | 240642.531  | 240002.249  | 640.282    |
|      |             | 1993        | 329362.093  | 327709.499  | 1652.594   |
|      |             | 1994        | 418569.515  | 415257.084  | 3312.431   |
|      |             | 1995        | 509110.357  | 503279.728  | 5830.629   |
|      |             | 1996        | 600040.117  | 590774.152  | 9265.965   |
|      |             | 1997        | 691159.071  | 677410.678  | 13748.392  |
|      |             | 1998        | 782866.899  | 763517.417  | 19349.482  |
|      |             | 1999        | 881526.925  | 854784.451  | 26742.474  |
|      |             | 2000        | 977880.647  | 942588.991  | 35291.656  |

**Results for PHIM for Run 6 (ELL Summary Sensitivity\_Analysis\_4.RTF)**

|      |             |             |            |
|------|-------------|-------------|------------|
| 2001 | 1076787.404 | 1031164.779 | 45622.625  |
| 2002 | 1174842.754 | 1117287.958 | 57554.795  |
| 2003 | 1275102.681 | 1203702.265 | 71400.416  |
| 2004 | 1371026.306 | 1284700.028 | 86326.278  |
| 2005 | 1473954.509 | 1369553.237 | 104401.272 |
| 2006 | 1574450.828 | 1450420.991 | 124029.837 |
| 2007 | 1673790.211 | 1528329.467 | 145460.744 |
| 2008 | 1782360.738 | 1611219.703 | 171141.034 |
| 2009 | 1892944.209 | 1692988.615 | 199955.594 |
| 2010 | 2002131.282 | 1771486.376 | 230644.906 |
| 2011 | 2114522.152 | 1849553.445 | 264968.707 |
| 2012 | 2228079.372 | 1925923.508 | 302155.863 |
| 2013 | 2345377.689 | 2001968.067 | 343409.622 |
| 2014 | 2462498.422 | 2075051.335 | 387447.087 |
| 2015 | 2581450.312 | 2147360.938 | 434089.373 |
| 2016 | 2701959.301 | 2217725.462 | 484233.839 |
| 2017 | 2823834.967 | 2286014.480 | 537820.487 |
| 2018 | 2938265.081 | 2348073.708 | 590191.373 |
| 2019 | 3053254.880 | 2407755.914 | 645498.966 |
| 2020 | 3167073.216 | 2464774.680 | 702298.536 |
| 2021 | 3279517.699 | 2519126.658 | 760391.041 |
| 2022 | 3392060.964 | 2570973.865 | 821087.099 |
| 2023 | 3504296.171 | 2620233.779 | 884062.392 |
| 2024 | 3616019.231 | 2666775.861 | 949243.370 |
| 2025 | 3724611.269 | 2710342.752 | 1014268.52 |
| 2026 | 3827181.707 | 2749952.951 | 1077228.76 |
| 2027 | 3928684.441 | 2787022.112 | 1141662.33 |
| 2028 | 4029124.892 | 2821753.950 | 1207370.94 |
| 2029 | 4128269.068 | 2854012.849 | 1274256.22 |
| 2030 | 4221560.174 | 2883298.953 | 1338261.22 |
| 2031 | 4304170.584 | 2907785.179 | 1396385.41 |
| 2032 | 4384930.537 | 2930193.084 | 1454737.45 |
| 2033 | 4464357.691 | 2950844.504 | 1513513.19 |
| 2034 | 4542251.545 | 2969679.900 | 1572571.64 |
| 2035 | 4611066.648 | 2985799.500 | 1625267.15 |
| 2036 | 4670309.230 | 2998644.931 | 1671664.30 |
| 2037 | 4728179.514 | 3010346.845 | 1717832.67 |
| 2038 | 4785008.048 | 3021062.514 | 1763945.53 |
| 2039 | 4841291.793 | 3030902.348 | 1810389.44 |

---

## Results for PHIM for Run 6 (ELL Summary Sensitivity\_Analysis\_4.RTF)

\*\*\*\*\*

**Table 4: Estimated Loss of Life, All age groups combined, Population and Number deaths adjusted for Ecig scenario, cumulative over years**

| Disease      | Sex          | Year         | Years of life lost<br>NULL | Years of life lost<br>Ecig | Years of life<br>Saved |
|--------------|--------------|--------------|----------------------------|----------------------------|------------------------|
| All Diseases | Males        | 1990         | 1304839.645                | 1304839.645                | 0.000                  |
|              |              | 1991         | 2579865.358                | 2571191.563                | 8673.794               |
|              |              | 1992         | 3830683.831                | 3798446.524                | 32237.308              |
|              |              | 1993         | 5076567.803                | 5001001.163                | 75566.640              |
|              |              | 1994         | 6292145.526                | 6150125.957                | 142019.570             |
|              |              | 1995         | 7485537.010                | 7250477.008                | 235060.001             |
|              |              | 1996         | 8655955.028                | 8300065.245                | 355889.783             |
|              |              | 1997         | 9791729.713                | 9288429.823                | 503299.890             |
|              |              | 1998         | 10899134.186               | 10223262.363               | 675871.822             |
|              |              | 1999         | 12070409.674               | 11163859.637               | 906550.037             |
|              |              | 2000         | 13231384.595               | 12064127.395               | 1167257.20             |
|              |              | 2001         | 14371761.018               | 12914288.945               | 1457472.07             |
|              |              | 2002         | 15508906.386               | 13726952.048               | 1781954.34             |
|              |              | 2003         | 16638100.422               | 14502445.178               | 2135655.24             |
|              |              | 2004         | 17736465.088               | 15230393.057               | 2506072.03             |
|              |              | 2005         | 18834658.606               | 15932292.912               | 2902365.69             |
|              |              | 2006         | 19909100.501               | 16588203.738               | 3320896.76             |
|              |              | 2007         | 20958321.463               | 17205938.510               | 3752382.95             |
|              |              | 2008         | 22000068.148               | 17799827.053               | 4200241.10             |
|              |              | 2009         | 23018816.903               | 18361189.603               | 4657627.30             |
|              |              | 2010         | 24018480.537               | 18891523.793               | 5126956.74             |
|              |              | 2011         | 25003034.574               | 19394561.065               | 5608473.51             |
|              |              | 2012         | 25969871.429               | 19869017.862               | 6100853.57             |
|              |              | 2013         | 26920275.180               | 20317035.161               | 6603240.02             |
|              |              | 2014         | 27849005.227               | 20736946.209               | 7112059.02             |
|              |              | 2015         | 28749620.400               | 21132255.871               | 7617364.53             |
|              |              | 2016         | 29622417.562               | 21494338.524               | 8128079.04             |
|              |              | 2017         | 30462559.724               | 21825883.696               | 8636676.03             |
|              |              | 2018         | 31293299.299               | 22144621.321               | 9148677.98             |
|              |              | 2019         | 32109993.427               | 22445847.259               | 9664146.17             |
|              |              | 2020         | 32883323.977               | 22725981.442               | 10157342.5             |
|              |              | 2021         | 33610102.554               | 22969005.843               | 10641096.7             |
|              |              | 2022         | 34322010.448               | 23196909.717               | 11125100.7             |
|              |              | 2023         | 35018383.550               | 23409819.544               | 11608564.0             |
|              |              | 2024         | 35700177.955               | 23608956.760               | 12091221.2             |
|              |              | 2025         | 36315500.346               | 23788581.544               | 12526918.8             |
|              |              | 2026         | 36896159.343               | 23941454.821               | 12954704.5             |
|              |              | 2027         | 37462570.116               | 24083570.288               | 13378999.8             |
|              |              | 2028         | 38015337.780               | 24215049.924               | 13800287.9             |
|              |              | 2029         | 38554814.764               | 24337149.099               | 14217665.7             |
|              |              | 2030         | 39003805.400               | 24441554.492               | 14562250.9             |
|              |              | 2031         | 39436509.703               | 24530703.682               | 14905806.0             |
| 2032         | 39858470.458 | 24613246.324 | 15245224.1                 |                            |                        |
| 2033         | 40270147.082 | 24689026.325 | 15581120.8                 |                            |                        |
| 2034         | 40672665.743 | 24759284.610 | 15913381.1                 |                            |                        |
| 2035         | 40962732.664 | 24812859.632 | 16149873.0                 |                            |                        |
| 2036         | 41255021.653 | 24861522.097 | 16393499.6                 |                            |                        |
| 2037         | 41540573.023 | 24906863.893 | 16633709.1                 |                            |                        |
| 2038         | 41820158.066 | 24948726.878 | 16871431.2                 |                            |                        |
| 2039         | 42093547.949 | 24987760.955 | 17105787.0                 |                            |                        |
|              | Female       | 1990         | 588979.406                 | 588979.406                 | 0.000                  |
|              |              | 1991         | 1182571.252                | 1179606.280                | 2964.972               |
|              |              | 1992         | 1777346.679                | 1766098.334                | 11248.346              |
|              |              | 1993         | 2380261.899                | 2353272.960                | 26988.939              |
|              |              | 1994         | 2983130.039                | 2931348.505                | 51781.534              |
|              |              | 1995         | 3588982.584                | 3502018.243                | 86964.340              |
|              |              | 1996         | 4195430.235                | 4060684.307                | 134745.928             |
|              |              | 1997         | 4793866.694                | 4600885.395                | 192981.300             |
|              |              | 1998         | 5389747.381                | 5126867.728                | 262879.653             |
|              |              | 1999         | 6006722.467                | 5653231.639                | 353490.828             |
|              |              | 2000         | 6625758.871                | 6168766.004                | 456992.867             |
|              |              | 2001         | 7245135.411                | 6669523.718                | 575611.693             |
|              | 2002         | 7867492.021  | 7157648.117                | 709843.903                 |                        |
|              | 2003         | 8485051.793  | 7628367.207                | 856684.586                 |                        |
|              | 2004         | 9092994.774  | 8078260.337                | 1014734.44                 |                        |
|              | 2005         | 9706032.803  | 8518591.328                | 1187441.47                 |                        |
|              | 2006         | 10311907.548 | 8939669.739                | 1372237.81                 |                        |
|              | 2007         | 10909437.502 | 9343581.602                | 1565855.90                 |                        |
|              | 2008         | 11506462.491 | 9732228.338                | 1774234.15                 |                        |
|              | 2009         | 12098393.287 | 10107442.516               | 1990950.77                 |                        |
|              | 2010         | 12681188.981 | 10464498.949               | 2216690.03                 |                        |

**Results for PHIM for Run 6 (ELL Summary Sensitivity\_Analysis\_4.RTF)**

|             |       |      |              |              |            |
|-------------|-------|------|--------------|--------------|------------|
|             |       | 2011 | 13260062.991 | 10806411.841 | 2453651.15 |
|             |       | 2012 | 13839417.441 | 11135826.587 | 2703590.85 |
|             |       | 2013 | 14409614.758 | 11449544.412 | 2960070.35 |
|             |       | 2014 | 14976658.746 | 11748014.392 | 3228644.35 |
|             |       | 2015 | 15529977.821 | 12029705.186 | 3500272.64 |
|             |       | 2016 | 16066640.764 | 12290876.204 | 3775764.56 |
|             |       | 2017 | 16590035.078 | 12535157.687 | 4054877.39 |
|             |       | 2018 | 17098716.137 | 12766068.425 | 4332647.71 |
|             |       | 2019 | 17599868.850 | 12984191.365 | 4615677.49 |
|             |       | 2020 | 18081346.241 | 13188200.623 | 4893145.62 |
|             |       | 2021 | 18537594.460 | 13371808.838 | 5165785.62 |
|             |       | 2022 | 18985300.234 | 13544120.571 | 5441179.66 |
|             |       | 2023 | 19423958.747 | 13705576.453 | 5718382.29 |
|             |       | 2024 | 19853347.772 | 13856028.272 | 5997319.50 |
|             |       | 2025 | 20252822.245 | 13993282.934 | 6259539.31 |
|             |       | 2026 | 20619307.063 | 14111944.601 | 6507362.46 |
|             |       | 2027 | 20976063.406 | 14221772.664 | 6754290.74 |
|             |       | 2028 | 21323641.947 | 14323731.813 | 6999910.13 |
|             |       | 2029 | 21662117.106 | 14417716.899 | 7244400.21 |
|             |       | 2030 | 21960971.694 | 14500021.237 | 7460950.46 |
|             |       | 2031 | 22224951.983 | 14566995.325 | 7657956.66 |
|             |       | 2032 | 22480397.853 | 14628245.010 | 7852152.84 |
|             |       | 2033 | 22728639.455 | 14684664.083 | 8043975.37 |
|             |       | 2034 | 22970448.888 | 14736291.283 | 8234157.60 |
|             |       | 2035 | 23164154.188 | 14777826.363 | 8386327.82 |
|             |       | 2036 | 23334538.616 | 14811074.355 | 8523464.26 |
|             |       | 2037 | 23499760.723 | 14841641.212 | 8658119.51 |
|             |       | 2038 | 23660308.401 | 14869859.225 | 8790449.18 |
|             |       | 2039 | 23817891.273 | 14896031.911 | 8921859.36 |
| Lung cancer | Males | 1990 | 595621.791   | 595621.791   | 0.000      |
|             |       | 1991 | 1177744.113  | 1177096.215  | 647.898    |
|             |       | 1992 | 1750034.892  | 1747594.314  | 2440.578   |
|             |       | 1993 | 2319752.308  | 2313819.910  | 5932.398   |
|             |       | 1994 | 2872597.339  | 2861118.422  | 11478.917  |
|             |       | 1995 | 3411494.825  | 3391996.862  | 19497.963  |
|             |       | 1996 | 3945569.726  | 3914794.566  | 30775.160  |
|             |       | 1997 | 4463316.362  | 4418034.506  | 45281.857  |
|             |       | 1998 | 4975301.180  | 4911600.607  | 63700.574  |
|             |       | 1999 | 5473691.125  | 5387435.348  | 86255.777  |
|             |       | 2000 | 5977500.570  | 5863072.185  | 114428.385 |
|             |       | 2001 | 6474795.516  | 6326629.425  | 148166.091 |
|             |       | 2002 | 6968769.705  | 6780611.337  | 188158.368 |
|             |       | 2003 | 7460282.140  | 7225059.679  | 235222.460 |
|             |       | 2004 | 7947048.275  | 7657873.342  | 289174.933 |
|             |       | 2005 | 8430571.669  | 8080027.308  | 350544.360 |
|             |       | 2006 | 8903945.390  | 8484797.190  | 419148.200 |
|             |       | 2007 | 9364177.982  | 8869936.928  | 494241.054 |
|             |       | 2008 | 9822525.458  | 9244065.914  | 578459.545 |
|             |       | 2009 | 10275228.886 | 9604279.250  | 670949.636 |
|             |       | 2010 | 10720275.500 | 9949261.732  | 771013.768 |
|             |       | 2011 | 11155356.373 | 10277098.696 | 878257.677 |
|             |       | 2012 | 11582611.617 | 10588496.918 | 994114.698 |
|             |       | 2013 | 11998803.791 | 10881898.580 | 1116905.21 |
|             |       | 2014 | 12402087.090 | 11156690.677 | 1245396.41 |
|             |       | 2015 | 12793451.706 | 11414651.580 | 1378800.13 |
|             |       | 2016 | 13160101.653 | 11647007.127 | 1513094.53 |
|             |       | 2017 | 13503583.414 | 11856192.300 | 1647391.11 |
|             |       | 2018 | 13859755.737 | 12062416.829 | 1797338.91 |
|             |       | 2019 | 14211625.176 | 12257131.514 | 1954493.66 |
|             |       | 2020 | 14553935.288 | 12439039.610 | 2114895.68 |
|             |       | 2021 | 14851747.495 | 12589592.564 | 2262154.93 |
|             |       | 2022 | 15144531.004 | 12730237.391 | 2414293.61 |
|             |       | 2023 | 15431932.496 | 12861107.151 | 2570825.35 |
|             |       | 2024 | 15713920.740 | 12982868.411 | 2731052.33 |
|             |       | 2025 | 15979112.816 | 13093169.895 | 2885942.92 |
|             |       | 2026 | 16206550.153 | 13181383.646 | 3025166.51 |
|             |       | 2027 | 16428826.050 | 13262780.513 | 3166045.54 |
|             |       | 2028 | 16645902.186 | 13337618.986 | 3308283.20 |
|             |       | 2029 | 16858126.517 | 13406716.008 | 3451410.51 |
|             |       | 2030 | 17045220.687 | 13466214.306 | 3579006.38 |
|             |       | 2031 | 17208482.610 | 13513598.588 | 3694884.02 |
|             |       | 2032 | 17367586.074 | 13557226.808 | 3810359.27 |
|             |       | 2033 | 17522716.280 | 13597122.541 | 3925593.74 |
|             |       | 2034 | 17674226.555 | 13633966.743 | 4040259.81 |
|             |       | 2035 | 17792201.734 | 13662416.104 | 4129785.63 |
|             |       | 2036 | 17903508.236 | 13687070.610 | 4216437.63 |
|             |       | 2037 | 18012162.345 | 13710015.192 | 4302147.15 |
|             |       | 2038 | 18118464.470 | 13731155.750 | 4387308.72 |



**Results for PHIM for Run 6 (ELL Summary Sensitivity\_Analysis\_4.RTF)**

|     |        |      |              |              |            |
|-----|--------|------|--------------|--------------|------------|
|     | Female | 2039 | 18222549.860 | 13750895.875 | 4471653.99 |
|     |        | 1990 | 307897.357   | 307897.357   | 0.000      |
|     |        | 1991 | 616547.418   | 616130.924   | 416.494    |
|     |        | 1992 | 931086.773   | 929438.206   | 1648.567   |
|     |        | 1993 | 1246155.671  | 1242099.042  | 4056.629   |
|     |        | 1994 | 1561212.934  | 1553229.509  | 7983.425   |
|     |        | 1995 | 1879967.742  | 1866068.209  | 13899.533  |
|     |        | 1996 | 2197488.109  | 2175401.147  | 22086.962  |
|     |        | 1997 | 2515698.453  | 2482730.719  | 32967.734  |
|     |        | 1998 | 2836249.556  | 2789364.978  | 46884.578  |
|     |        | 1999 | 3150201.390  | 3086374.095  | 63827.294  |
|     |        | 2000 | 3472722.342  | 3387887.605  | 84834.738  |
|     |        | 2001 | 3796994.889  | 3686753.889  | 110241.000 |
|     |        | 2002 | 4126619.935  | 3985825.555  | 140794.380 |
|     |        | 2003 | 4454982.533  | 4278892.140  | 176090.394 |
|     |        | 2004 | 4784343.030  | 4567386.486  | 216956.545 |
|     |        | 2005 | 5113443.121  | 4849958.420  | 263484.701 |
|     |        | 2006 | 5442543.963  | 5126007.358  | 316536.604 |
|     |        | 2007 | 5772441.497  | 5396234.573  | 376206.923 |
|     |        | 2008 | 6091911.943  | 5651326.043  | 440585.900 |
|     |        | 2009 | 6413671.330  | 5900900.106  | 512771.224 |
|     |        | 2010 | 6730763.530  | 6140219.849  | 590543.681 |
|     |        | 2011 | 7043614.101  | 6369025.956  | 674588.145 |
|     |        | 2012 | 7356270.780  | 6590267.236  | 766003.544 |
|     |        | 2013 | 7662551.964  | 6799719.240  | 862832.724 |
|     |        | 2014 | 7964551.465  | 6998974.965  | 965576.500 |
|     |        | 2015 | 8254895.403  | 7184483.571  | 1070411.83 |
|     |        | 2016 | 8530661.848  | 7353639.640  | 1177022.21 |
|     |        | 2017 | 8795826.122  | 7510034.651  | 1285791.47 |
|     |        | 2018 | 9067233.707  | 7662443.022  | 1404790.69 |
|     |        | 2019 | 9335343.270  | 7806062.884  | 1529280.39 |
|     |        | 2020 | 9596110.883  | 7940277.632  | 1655833.25 |
|     |        | 2021 | 9833186.859  | 8057527.149  | 1775659.71 |
|     |        | 2022 | 10066452.037 | 8167113.204  | 1899338.83 |
|     |        | 2023 | 10295503.609 | 8269342.107  | 2026161.50 |
|     |        | 2024 | 10520125.318 | 8364142.447  | 2155982.87 |
|     |        | 2025 | 10731915.863 | 8450245.791  | 2281670.07 |
|     |        | 2026 | 10917495.549 | 8522096.058  | 2395399.49 |
|     |        | 2027 | 11098620.885 | 8588231.177  | 2510389.71 |
|     |        | 2028 | 11275441.234 | 8649316.442  | 2626124.79 |
|     |        | 2029 | 11447962.710 | 8705321.179  | 2742641.53 |
|     |        | 2030 | 11601867.623 | 8753955.583  | 2847912.04 |
|     |        | 2031 | 11731666.516 | 8792182.840  | 2939483.68 |
|     |        | 2032 | 11857585.969 | 8827036.631  | 3030549.34 |
|     |        | 2033 | 11980128.625 | 8859043.479  | 3121085.15 |
|     |        | 2034 | 12099562.464 | 8888268.518  | 3211293.95 |
|     |        | 2035 | 12195919.946 | 8911418.649  | 3284501.30 |
|     |        | 2036 | 12278201.969 | 8929617.039  | 3348584.93 |
|     |        | 2037 | 12358146.336 | 8946398.421  | 3411747.91 |
|     |        | 2038 | 12435978.633 | 8961924.160  | 3474054.47 |
|     |        | 2039 | 12512468.845 | 8976366.894  | 3536101.95 |
| IHD | Males  | 1990 | 517209.093   | 517209.093   | 0.000      |
|     |        | 1991 | 1019219.395  | 1012116.414  | 7102.981   |
|     |        | 1992 | 1509598.614  | 1483228.433  | 26370.182  |
|     |        | 1993 | 1992735.299  | 1931314.532  | 61420.767  |
|     |        | 1994 | 2462877.575  | 2348292.826  | 114584.749 |
|     |        | 1995 | 2928249.390  | 2739706.765  | 188542.625 |
|     |        | 1996 | 3377377.730  | 3093984.167  | 283393.563 |
|     |        | 1997 | 3809062.472  | 3411329.684  | 397732.787 |
|     |        | 1998 | 4222213.867  | 3692512.928  | 529700.939 |
|     |        | 1999 | 4708317.743  | 3996604.384  | 711713.359 |
|     |        | 2000 | 5182084.396  | 4268672.405  | 913411.991 |
|     |        | 2001 | 5644097.705  | 4509063.670  | 1135034.03 |
|     |        | 2002 | 6107232.129  | 4726980.202  | 1380251.93 |
|     |        | 2003 | 6561785.704  | 4919625.299  | 1642160.40 |
|     |        | 2004 | 6996156.348  | 5085776.549  | 1910379.80 |
|     |        | 2005 | 7426261.361  | 5234529.384  | 2191731.98 |
|     |        | 2006 | 7849012.694  | 5365033.009  | 2483979.69 |
|     |        | 2007 | 8255300.530  | 5477931.482  | 2777369.05 |
|     |        | 2008 | 8650662.040  | 5577235.697  | 3073426.34 |
|     |        | 2009 | 9030818.513  | 5663917.457  | 3366901.06 |
|     |        | 2010 | 9403026.327  | 5741026.251  | 3662000.08 |
|     |        | 2011 | 9767535.506  | 5809596.584  | 3957938.92 |
|     |        | 2012 | 10123044.281 | 5870871.844  | 4252172.44 |
|     |        | 2013 | 10470104.786 | 5925606.773  | 4544498.01 |
|     |        | 2014 | 10807756.112 | 5974792.010  | 4832964.10 |
|     |        | 2015 | 11130681.425 | 6018527.176  | 5112154.25 |
|     |        | 2016 | 11448966.506 | 6058471.372  | 5390495.13 |

**Results for PHIM for Run 6 (ELL Summary Sensitivity\_Analysis\_4.RTF)**

|        |        |      |              |             |            |
|--------|--------|------|--------------|-------------|------------|
|        |        | 2017 | 11758164.882 | 6094857.768 | 5663307.11 |
|        |        | 2018 | 12054448.241 | 6127134.551 | 5927313.69 |
|        |        | 2019 | 12341606.261 | 6156790.765 | 6184815.50 |
|        |        | 2020 | 12600728.939 | 6182292.554 | 6418436.38 |
|        |        | 2021 | 12861767.105 | 6206720.014 | 6655047.09 |
|        |        | 2022 | 13114168.616 | 6229409.694 | 6884758.92 |
|        |        | 2023 | 13357894.797 | 6250397.828 | 7107496.97 |
|        |        | 2024 | 13593848.521 | 6270083.868 | 7323764.65 |
|        |        | 2025 | 13789177.359 | 6285990.920 | 7503186.44 |
|        |        | 2026 | 13993401.656 | 6302197.964 | 7691203.69 |
|        |        | 2027 | 14190519.224 | 6317614.132 | 7872905.09 |
|        |        | 2028 | 14381193.356 | 6332039.225 | 8049154.13 |
|        |        | 2029 | 14565171.927 | 6345635.776 | 8219536.15 |
|        |        | 2030 | 14697381.605 | 6355350.621 | 8342030.98 |
|        |        | 2031 | 14842203.512 | 6365953.926 | 8476249.59 |
|        |        | 2032 | 14982485.826 | 6376110.381 | 8606375.44 |
|        |        | 2033 | 15118410.647 | 6385588.859 | 8732821.79 |
|        |        | 2034 | 15250284.398 | 6394611.203 | 8855673.20 |
|        |        | 2035 | 15322911.166 | 6399469.596 | 8923441.57 |
|        |        | 2036 | 15405115.031 | 6404943.188 | 9000171.84 |
|        |        | 2037 | 15484709.137 | 6410231.625 | 9074477.51 |
|        |        | 2038 | 15561812.193 | 6415222.796 | 9146589.40 |
|        |        | 2039 | 15635992.616 | 6419917.284 | 9216075.33 |
|        | Female | 1990 | 147299.110   | 147299.110  | 0.000      |
|        |        | 1991 | 295122.462   | 293257.343  | 1865.120   |
|        |        | 1992 | 439962.920   | 432980.915  | 6982.005   |
|        |        | 1993 | 584735.615   | 568178.649  | 16556.967  |
|        |        | 1994 | 727640.783   | 696331.472  | 31309.310  |
|        |        | 1995 | 868486.937   | 816737.416  | 51749.521  |
|        |        | 1996 | 1010321.847  | 930900.637  | 79421.211  |
|        |        | 1997 | 1144230.930  | 1032471.178 | 111759.752 |
|        |        | 1998 | 1274513.622  | 1124726.800 | 149786.821 |
|        |        | 1999 | 1426725.938  | 1224927.515 | 201798.423 |
|        |        | 2000 | 1573462.680  | 1314534.124 | 258928.556 |
|        |        | 2001 | 1719132.015  | 1395388.807 | 323743.208 |
|        |        | 2002 | 1863006.732  | 1467902.634 | 395104.098 |
|        |        | 2003 | 2002943.227  | 1531858.348 | 471084.879 |
|        |        | 2004 | 2137798.705  | 1587626.231 | 550172.474 |
|        |        | 2005 | 2271071.245  | 1637750.606 | 633320.639 |
|        |        | 2006 | 2400707.731  | 1681390.031 | 719317.700 |
|        |        | 2007 | 2523634.512  | 1718811.358 | 804823.154 |
|        |        | 2008 | 2648752.232  | 1753106.651 | 895645.581 |
|        |        | 2009 | 2765973.961  | 1782410.621 | 983563.340 |
|        |        | 2010 | 2881329.235  | 1808658.591 | 1072670.64 |
|        |        | 2011 | 2994972.694  | 1832098.693 | 1162874.00 |
|        |        | 2012 | 3108958.829  | 1853426.159 | 1255532.67 |
|        |        | 2013 | 3218140.416  | 1872363.278 | 1345777.14 |
|        |        | 2014 | 3328387.914  | 1889890.808 | 1438497.11 |
|        |        | 2015 | 3435342.796  | 1905825.786 | 1529517.01 |
|        |        | 2016 | 3539189.408  | 1920210.734 | 1618978.67 |
|        |        | 2017 | 3640041.363  | 1933221.335 | 1706820.03 |
|        |        | 2018 | 3732645.362  | 1944366.139 | 1788279.22 |
|        |        | 2019 | 3821421.978  | 1954391.521 | 1867030.46 |
|        |        | 2020 | 3902115.950  | 1963046.633 | 1939069.32 |
|        |        | 2021 | 3984301.053  | 1971386.195 | 2012914.86 |
|        |        | 2022 | 4062629.299  | 1978921.153 | 2083708.15 |
|        |        | 2023 | 4137348.729  | 1985808.951 | 2151539.78 |
|        |        | 2024 | 4208611.493  | 1992090.090 | 2216521.40 |
|        |        | 2025 | 4269419.492  | 1997307.717 | 2272111.77 |
|        |        | 2026 | 4330969.998  | 2002398.022 | 2328571.98 |
|        |        | 2027 | 4389134.306  | 2007066.456 | 2382067.85 |
|        |        | 2028 | 4444222.970  | 2011383.069 | 2432839.90 |
|        |        | 2029 | 4496447.877  | 2015398.503 | 2481049.37 |
|        |        | 2030 | 4536975.698  | 2018425.923 | 2518549.77 |
|        |        | 2031 | 4578338.586  | 2021477.223 | 2556861.36 |
|        |        | 2032 | 4617397.784  | 2024331.450 | 2593066.33 |
|        |        | 2033 | 4654407.697  | 2027022.197 | 2627385.50 |
|        |        | 2034 | 4689913.454  | 2029578.341 | 2660335.11 |
|        |        | 2035 | 4712518.190  | 2031111.507 | 2681406.68 |
|        |        | 2036 | 4735845.827  | 2032675.454 | 2703170.37 |
|        |        | 2037 | 4757958.806  | 2034156.007 | 2723802.80 |
|        |        | 2038 | 4778813.806  | 2035562.333 | 2743251.47 |
|        |        | 2039 | 4798769.065  | 2036911.211 | 2761857.85 |
| Stroke | Males  | 1990 | 75005.854    | 75005.854   | 0.000      |
|        |        | 1991 | 149463.017   | 148743.133  | 719.885    |
|        |        | 1992 | 222966.278   | 220290.117  | 2676.162   |
|        |        | 1993 | 296801.879   | 290428.393  | 6373.486   |
|        |        | 1994 | 372453.706   | 360111.958  | 12341.747  |

**Results for PHIM for Run 6 (ELL Summary Sensitivity\_Analysis\_4.RTF)**

|        |      |             |             |            |
|--------|------|-------------|-------------|------------|
|        | 1995 | 448401.338  | 427536.927  | 20864.410  |
|        | 1996 | 523536.301  | 491434.568  | 32101.734  |
|        | 1997 | 596763.211  | 550722.139  | 46041.072  |
|        | 1998 | 667546.681  | 605037.168  | 62509.513  |
|        | 1999 | 734925.407  | 653836.357  | 81089.050  |
|        | 2000 | 803749.361  | 700726.030  | 103023.331 |
|        | 2001 | 870081.588  | 742892.311  | 127189.277 |
|        | 2002 | 935347.140  | 781557.286  | 153789.854 |
|        | 2003 | 1001627.349 | 817817.450  | 183809.899 |
|        | 2004 | 1066587.976 | 850737.891  | 215850.085 |
|        | 2005 | 1130548.052 | 880579.814  | 249968.238 |
|        | 2006 | 1195132.454 | 908200.536  | 286931.918 |
|        | 2007 | 1258974.043 | 933230.880  | 325743.164 |
|        | 2008 | 1320124.867 | 955097.684  | 365027.183 |
|        | 2009 | 1380776.123 | 974962.530  | 405813.593 |
|        | 2010 | 1440048.533 | 992777.673  | 447270.860 |
|        | 2011 | 1497484.847 | 1008621.893 | 488862.954 |
|        | 2012 | 1554496.526 | 1022926.815 | 531569.712 |
|        | 2013 | 1610819.598 | 1035873.480 | 574946.117 |
|        | 2014 | 1667484.890 | 1047752.105 | 619732.785 |
|        | 2015 | 1720948.287 | 1058166.835 | 662781.452 |
|        | 2016 | 1775699.228 | 1067934.440 | 707764.788 |
|        | 2017 | 1830250.175 | 1076912.250 | 753337.924 |
|        | 2018 | 1875958.950 | 1083898.074 | 792060.876 |
|        | 2019 | 1920359.232 | 1090206.445 | 830152.786 |
|        | 2020 | 1960605.297 | 1095585.373 | 865019.924 |
|        | 2021 | 1998912.887 | 1100360.058 | 898552.829 |
|        | 2022 | 2036003.696 | 1104682.581 | 931321.115 |
|        | 2023 | 2071857.536 | 1108600.434 | 963257.103 |
|        | 2024 | 2106636.468 | 1112203.476 | 994432.992 |
|        | 2025 | 2136450.873 | 1115156.260 | 1021294.61 |
|        | 2026 | 2164796.470 | 1117821.401 | 1046975.07 |
|        | 2027 | 2192079.608 | 1120288.163 | 1071791.45 |
|        | 2028 | 2218404.367 | 1122554.827 | 1095849.54 |
|        | 2029 | 2243769.140 | 1124659.846 | 1119109.29 |
|        | 2030 | 2263570.213 | 1126255.621 | 1137314.59 |
|        | 2031 | 2282521.590 | 1127743.308 | 1154778.28 |
|        | 2032 | 2300804.945 | 1129140.809 | 1171664.14 |
|        | 2033 | 2318464.018 | 1130442.353 | 1188021.67 |
|        | 2034 | 2335611.973 | 1131676.621 | 1203935.35 |
|        | 2035 | 2347097.290 | 1132490.190 | 1214607.10 |
|        | 2036 | 2358248.747 | 1133268.747 | 1224980.00 |
|        | 2037 | 2369033.655 | 1134015.884 | 1235017.77 |
|        | 2038 | 2379490.114 | 1134721.284 | 1244768.83 |
|        | 2039 | 2389546.238 | 1135384.269 | 1254161.97 |
| Female | 1990 | 56348.092   | 56348.092   | 0.000      |
|        | 1991 | 110871.862  | 110356.693  | 515.169    |
|        | 1992 | 165654.454  | 163676.671  | 1977.784   |
|        | 1993 | 220008.519  | 215284.237  | 4724.282   |
|        | 1994 | 275706.807  | 266525.865  | 9180.942   |
|        | 1995 | 331417.547  | 315922.479  | 15495.068  |
|        | 1996 | 387580.161  | 363588.052  | 23992.109  |
|        | 1997 | 442778.242  | 408237.129  | 34541.112  |
|        | 1998 | 496117.305  | 449200.523  | 46916.782  |
|        | 1999 | 548268.214  | 487055.032  | 61213.183  |
|        | 2000 | 601693.202  | 523622.436  | 78070.766  |
|        | 2001 | 652221.103  | 556028.006  | 96193.096  |
|        | 2002 | 703022.600  | 586376.426  | 116646.174 |
|        | 2003 | 752023.351  | 613575.175  | 138448.176 |
|        | 2004 | 799826.733  | 638113.317  | 161713.415 |
|        | 2005 | 847563.928  | 660778.090  | 186785.838 |
|        | 2006 | 894205.027  | 681170.666  | 213034.361 |
|        | 2007 | 939571.282  | 699380.755  | 240190.527 |
|        | 2008 | 983437.578  | 715573.764  | 267863.814 |
|        | 2009 | 1025803.786 | 729944.835  | 295858.951 |
|        | 2010 | 1066964.934 | 742724.259  | 324240.675 |
|        | 2011 | 1106954.044 | 754090.157  | 352863.888 |
|        | 2012 | 1146108.461 | 764312.187  | 381796.273 |
|        | 2013 | 1183544.689 | 773317.211  | 410227.478 |
|        | 2014 | 1221220.945 | 781626.415  | 439594.530 |
|        | 2015 | 1258289.311 | 789241.864  | 469047.447 |
|        | 2016 | 1294830.207 | 796164.606  | 498665.601 |
|        | 2017 | 1330332.626 | 802386.746  | 527945.880 |
|        | 2018 | 1360571.987 | 807319.617  | 553252.370 |
|        | 2019 | 1389848.723 | 811734.099  | 578114.623 |
|        | 2020 | 1416046.192 | 815459.221  | 600586.971 |
|        | 2021 | 1440588.850 | 818714.619  | 621874.230 |
|        | 2022 | 1464157.934 | 821635.712  | 642522.222 |

**Results for PHIM for Run 6 (ELL Summary Sensitivity\_Analysis\_4.RTF)**

|      |             |             |             |             |            |
|------|-------------|-------------|-------------|-------------|------------|
|      |             | 2023        | 1486810.237 | 824284.699  | 662525.538 |
|      |             | 2024        | 1508591.729 | 826677.929  | 681913.800 |
|      |             | 2025        | 1526875.621 | 828605.771  | 698269.850 |
|      |             | 2026        | 1543659.810 | 830283.452  | 713376.357 |
|      |             | 2027        | 1559623.774 | 831807.425  | 727816.350 |
|      |             | 2028        | 1574852.850 | 833204.049  | 741648.801 |
|      |             | 2029        | 1589437.452 | 834488.319  | 754949.134 |
|      |             | 2030        | 1600568.199 | 835431.970  | 765136.230 |
|      |             | 2031        | 1610776.297 | 836273.761  | 774502.536 |
|      |             | 2032        | 1620483.563 | 837055.814  | 783427.750 |
|      |             | 2033        | 1629745.442 | 837787.059  | 791958.383 |
|      |             | 2034        | 1638721.425 | 838476.194  | 800245.231 |
|      |             | 2035        | 1644649.404 | 838910.214  | 805739.190 |
|      |             | 2036        | 1650181.590 | 839306.435  | 810875.154 |
|      |             | 2037        | 1655476.066 | 839682.235  | 815793.831 |
|      |             | 2038        | 1660507.914 | 840039.960  | 820467.953 |
|      |             | 2039        | 1665361.569 | 840382.788  | 824978.781 |
| COPD | Males       | 1990        | 117002.906  | 117002.906  | 0.000      |
|      |             | 1991        | 233438.833  | 233235.802  | 203.031    |
|      |             | 1992        | 348084.047  | 347333.661  | 750.387    |
|      |             | 1993        | 467278.318  | 465438.328  | 1839.990   |
|      |             | 1994        | 584216.907  | 580602.750  | 3614.156   |
|      |             | 1995        | 697391.457  | 691236.454  | 6155.003   |
|      |             | 1996        | 809471.271  | 799851.944  | 9619.326   |
|      |             | 1997        | 922587.668  | 908343.494  | 14244.174  |
|      |             | 1998        | 1034072.457 | 101411.660  | 19960.797  |
|      |             | 1999        | 1153475.399 | 1125983.548 | 27491.851  |
|      |             | 2000        | 1268050.268 | 1231656.775 | 36393.493  |
|      |             | 2001        | 1382786.209 | 1335703.539 | 47082.671  |
|      |             | 2002        | 1497557.412 | 1437803.224 | 59754.188  |
|      |             | 2003        | 1614405.229 | 1539942.749 | 74462.480  |
|      |             | 2004        | 1726672.489 | 1636005.275 | 90667.214  |
|      |             | 2005        | 1847277.524 | 1737156.406 | 110121.118 |
|      |             | 2006        | 1961009.963 | 1830173.003 | 130836.961 |
|      |             | 2007        | 2079868.908 | 1924839.220 | 155029.688 |
|      |             | 2008        | 2206755.783 | 2023427.759 | 183328.024 |
|      |             | 2009        | 2331993.380 | 2118030.365 | 213963.015 |
|      | 2010        | 2455130.176 | 2208458.136 | 246672.040  |            |
|      | 2011        | 2582657.849 | 2299243.893 | 283413.956  |            |
|      | 2012        | 2709719.005 | 2386722.285 | 322996.720  |            |
|      | 2013        | 2840547.005 | 2473656.327 | 366890.678  |            |
|      | 2014        | 2971677.135 | 2557711.416 | 413965.719  |            |
|      | 2015        | 3104538.983 | 2640910.281 | 463628.702  |            |
|      | 2016        | 3237650.175 | 2720925.584 | 516724.591  |            |
|      | 2017        | 3370561.253 | 2797921.377 | 572639.875  |            |
|      | 2018        | 3503136.371 | 2871171.866 | 631964.505  |            |
|      | 2019        | 3636402.758 | 2941718.536 | 694684.222  |            |
|      | 2020        | 3768054.453 | 3009063.906 | 758990.547  |            |
|      | 2021        | 3897675.067 | 3072333.206 | 825341.861  |            |
|      | 2022        | 4027307.132 | 3132580.050 | 894727.082  |            |
|      | 2023        | 4156698.720 | 3189714.131 | 966984.589  |            |
|      | 2024        | 4285772.226 | 3243801.004 | 1041971.22  |            |
|      | 2025        | 4410759.298 | 3294264.468 | 1116494.83  |            |
|      | 2026        | 4531411.064 | 3340051.809 | 1191359.26  |            |
|      | 2027        | 4651145.233 | 3382887.480 | 1268257.75  |            |
|      | 2028        | 4769837.872 | 3422836.887 | 1347000.98  |            |
|      | 2029        | 4887747.179 | 3460137.469 | 1427609.71  |            |
| 2030 | 4997632.895 | 3493733.944 | 1503898.95  |             |            |
| 2031 | 5103301.991 | 3523407.860 | 1579894.13  |             |            |
| 2032 | 5207593.613 | 3550768.326 | 1656825.29  |             |            |
| 2033 | 5310556.138 | 3575872.571 | 1734683.57  |             |            |
| 2034 | 5412542.816 | 3599030.042 | 1813512.77  |             |            |
| 2035 | 5500522.473 | 3618483.741 | 1882038.73  |             |            |
| 2036 | 5588149.640 | 3636239.552 | 1951910.09  |             |            |
| 2037 | 5674667.886 | 3652601.193 | 2022066.69  |             |            |
| 2038 | 5760391.289 | 3667627.048 | 2092764.24  |             |            |
| 2039 | 5845459.234 | 3681563.527 | 2163895.71  |             |            |
|      | Female      | 1990        | 77434.846   | 77434.846   | 0.000      |
|      |             | 1991        | 160029.510  | 159861.321  | 168.190    |
|      |             | 1992        | 240642.531  | 240002.542  | 639.989    |
|      |             | 1993        | 329362.093  | 327711.032  | 1651.061   |
|      |             | 1994        | 418569.515  | 415261.659  | 3307.856   |
|      |             | 1995        | 509110.357  | 503290.140  | 5820.218   |
|      |             | 1996        | 600040.117  | 590794.471  | 9245.646   |
|      |             | 1997        | 691159.071  | 677446.368  | 13712.702  |
|      |             | 1998        | 782866.899  | 763575.427  | 19291.471  |
|      |             | 1999        | 881526.925  | 854874.997  | 26651.928  |
|      |             | 2000        | 977880.647  | 942721.840  | 35158.807  |

**Results for PHIM for Run 6 (ELL Summary Sensitivity\_Analysis\_4.RTF)**

|      |             |             |            |
|------|-------------|-------------|------------|
| 2001 | 1076787.404 | 1031353.015 | 45434.388  |
| 2002 | 1174842.754 | 1117543.502 | 57299.252  |
| 2003 | 1275102.681 | 1204041.544 | 71061.137  |
| 2004 | 1371026.306 | 1285134.303 | 85892.003  |
| 2005 | 1473954.509 | 1370104.212 | 103850.297 |
| 2006 | 1574450.828 | 1451101.684 | 123349.144 |
| 2007 | 1673790.211 | 1529154.915 | 144635.296 |
| 2008 | 1782360.738 | 1612221.880 | 170138.858 |
| 2009 | 1892944.209 | 1694186.954 | 198757.256 |
| 2010 | 2002131.282 | 1772896.250 | 229235.032 |
| 2011 | 2114522.152 | 1851197.036 | 263325.116 |
| 2012 | 2228079.372 | 1927821.005 | 300258.367 |
| 2013 | 2345377.689 | 2004144.683 | 341233.006 |
| 2014 | 2462498.422 | 2077522.205 | 384976.217 |
| 2015 | 2581450.312 | 2150153.964 | 431296.347 |
| 2016 | 2701959.301 | 2220861.223 | 481098.078 |
| 2017 | 2823834.967 | 2289514.954 | 534320.013 |
| 2018 | 2938265.081 | 2351939.648 | 586325.433 |
| 2019 | 3053254.880 | 2412002.861 | 641252.018 |
| 2020 | 3167073.216 | 2469417.136 | 697656.079 |
| 2021 | 3279517.699 | 2524180.874 | 755336.825 |
| 2022 | 3392060.964 | 2576450.502 | 815610.461 |
| 2023 | 3504296.171 | 2626140.697 | 878155.475 |
| 2024 | 3616019.231 | 2673117.806 | 942901.425 |
| 2025 | 3724611.269 | 2717123.655 | 1007487.61 |
| 2026 | 3827181.707 | 2757167.069 | 1070014.64 |
| 2027 | 3928684.441 | 2794667.606 | 1134016.83 |
| 2028 | 4029124.892 | 2829828.253 | 1199296.64 |
| 2029 | 4128269.068 | 2862508.899 | 1265760.17 |
| 2030 | 4221560.174 | 2892207.762 | 1329352.41 |
| 2031 | 4304170.584 | 2917061.502 | 1387109.08 |
| 2032 | 4384930.537 | 2939821.115 | 1445109.42 |
| 2033 | 4464357.691 | 2960811.348 | 1503546.34 |
| 2034 | 4542251.545 | 2979968.230 | 1562283.31 |
| 2035 | 4611066.648 | 2996385.993 | 1614680.65 |
| 2036 | 4670309.230 | 3009475.427 | 1660833.80 |
| 2037 | 4728179.514 | 3021404.548 | 1706774.97 |
| 2038 | 4785008.048 | 3032332.771 | 1752675.28 |
| 2039 | 4841291.793 | 3042371.018 | 1798920.77 |

---

## Results for PHIM for Run 6 (ELL Summary Sensitivity\_Analysis\_4.RTF)

\*\*\*\*\*

**Table 5: Estimated Loss of Life, at the end of follow-up, Population unadjusted for deaths in Ecig scenario**

| Disease      | Sex    | Age Group   | Years of life lost<br>NULL | Years of life lost<br>Ecig | Years of life<br>Saved |
|--------------|--------|-------------|----------------------------|----------------------------|------------------------|
| All Diseases | Males  | 30-34       | 443911.034                 | 239427.501                 | 204483.533             |
|              |        | 35-39       | 1146798.555                | 612287.737                 | 534510.818             |
|              |        | 40-44       | 2609591.408                | 1353598.019                | 1255993.39             |
|              |        | 45-49       | 4775841.753                | 2435491.558                | 2340350.19             |
|              |        | 50-54       | 7446969.205                | 3936318.273                | 3510650.93             |
|              |        | 55-59       | 8240205.925                | 4781077.232                | 3459128.69             |
|              |        | 60-64       | 8772829.118                | 5505869.576                | 3266959.54             |
|              |        | 65-69       | 6161494.678                | 4245035.055                | 1916459.62             |
|              |        | 70-74       | 2495906.274                | 1778885.133                | 717021.140             |
|              | 75-79  | 0.000       | 0.000                      | 0.000                      |                        |
|              | Female | 30-34       | 229140.561                 | 142500.099                 | 86640.462              |
|              |        | 35-39       | 570217.942                 | 348027.764                 | 222190.178             |
|              |        | 40-44       | 1267538.938                | 750446.656                 | 517092.282             |
|              |        | 45-49       | 2340070.698                | 1362035.377                | 978035.321             |
|              |        | 50-54       | 3743803.613                | 2193614.697                | 1550188.92             |
|              |        | 55-59       | 4591478.168                | 2811358.838                | 1780119.33             |
|              |        | 60-64       | 5207367.788                | 3307497.183                | 1899870.60             |
|              |        | 65-69       | 4092181.394                | 2737677.053                | 1354504.34             |
| 70-74        |        | 1776092.171 | 1205605.423                | 570486.748                 |                        |
| 75-79        | 0.000  | 0.000       | 0.000                      |                            |                        |
| Lung cancer  | Males  | 30-34       | 66065.017                  | 51774.999                  | 14290.019              |
|              |        | 35-39       | 232509.414                 | 183766.821                 | 48742.594              |
|              |        | 40-44       | 688628.041                 | 532464.647                 | 156163.394             |
|              |        | 45-49       | 1528300.367                | 1144565.670                | 383734.697             |
|              |        | 50-54       | 2730187.229                | 2011339.017                | 718848.213             |
|              |        | 55-59       | 3909101.673                | 2860774.077                | 1048327.60             |
|              |        | 60-64       | 4287716.660                | 3226388.480                | 1061328.18             |
|              |        | 65-69       | 3467897.115                | 2657198.958                | 810698.157             |
|              |        | 70-74       | 1312144.343                | 1021429.343                | 290715.000             |
|              | 75-79  | 0.000       | 0.000                      | 0.000                      |                        |
|              | Female | 30-34       | 51913.113                  | 40721.303                  | 11191.810              |
|              |        | 35-39       | 189792.904                 | 149118.700                 | 40674.204              |
|              |        | 40-44       | 527596.573                 | 397390.680                 | 130205.893             |
|              |        | 45-49       | 1122524.269                | 813830.784                 | 308693.485             |
|              |        | 50-54       | 1882214.322                | 1334032.022                | 548182.300             |
|              |        | 55-59       | 2595581.943                | 1814523.817                | 781058.126             |
|              |        | 60-64       | 2846273.090                | 2025512.199                | 820760.890             |
|              |        | 65-69       | 2358758.394                | 1695986.129                | 662772.264             |
| 70-74        |        | 937814.238  | 682043.733                 | 255770.504                 |                        |
| 75-79        | 0.000  | 0.000       | 0.000                      |                            |                        |
| IHD          | Males  | 30-34       | 263834.566                 | 118564.787                 | 145269.779             |
|              |        | 35-39       | 692140.150                 | 296651.303                 | 395488.847             |
|              |        | 40-44       | 1519708.432                | 591813.618                 | 927894.814             |
|              |        | 45-49       | 2568546.697                | 915400.512                 | 1653146.19             |
|              |        | 50-54       | 3632929.903                | 1346262.575                | 2286667.33             |
|              |        | 55-59       | 2807892.356                | 1101108.868                | 1706783.49             |
|              |        | 60-64       | 2599825.934                | 1193196.134                | 1406629.80             |
|              |        | 65-69       | 1113578.307                | 583764.828                 | 529813.479             |
|              |        | 70-74       | 437536.271                 | 261519.412                 | 176016.858             |
|              | 75-79  | 0.000       | 0.000                      | 0.000                      |                        |
|              | Female | 30-34       | 79649.097                  | 38039.214                  | 41609.883              |
|              |        | 35-39       | 193965.908                 | 81837.282                  | 112128.625             |
|              |        | 40-44       | 403380.974                 | 151780.854                 | 251600.120             |
|              |        | 45-49       | 671385.408                 | 233647.471                 | 437737.937             |
|              |        | 50-54       | 1011875.989                | 377039.754                 | 634836.236             |
|              |        | 55-59       | 849875.715                 | 344575.347                 | 505300.368             |
|              |        | 60-64       | 925490.876                 | 436499.356                 | 488991.520             |
|              |        | 65-69       | 455463.881                 | 246059.135                 | 209404.746             |
| 70-74        |        | 207681.216  | 125520.828                 | 82160.388                  |                        |
| 75-79        | 0.000  | 0.000       | 0.000                      |                            |                        |
| Stroke       | Males  | 30-34       | 73463.650                  | 43145.800                  | 30317.850              |
|              |        | 35-39       | 151934.057                 | 86583.952                  | 65350.105              |
|              |        | 40-44       | 262845.974                 | 141762.161                 | 121083.814             |
|              |        | 45-49       | 383421.246                 | 193030.866                 | 190390.380             |
|              |        | 50-54       | 479872.634                 | 219325.532                 | 260547.102             |
|              |        | 55-59       | 437124.903                 | 184862.709                 | 252262.195             |
|              |        | 60-64       | 419457.235                 | 180618.855                 | 238838.380             |
|              |        | 65-69       | 128180.574                 | 57728.686                  | 70451.888              |
|              |        | 70-74       | 53245.965                  | 26113.054                  | 27132.911              |
|              | 75-79  | 0.000       | 0.000                      | 0.000                      |                        |
|              | Female | 30-34       | 62919.090                  | 40145.767                  | 22773.324              |

**Results for PHIM for Run 6 (ELL Summary Sensitivity\_Analysis\_4.RTF)**

|      |        |       |             |            |            |
|------|--------|-------|-------------|------------|------------|
|      |        | 35-39 | 120806.205  | 72842.546  | 47963.660  |
|      |        | 40-44 | 203391.885  | 113714.885 | 89677.000  |
|      |        | 45-49 | 278172.097  | 144216.899 | 133955.199 |
|      |        | 50-54 | 325979.181  | 157494.745 | 168484.436 |
|      |        | 55-59 | 275161.340  | 124868.594 | 150292.746 |
|      |        | 60-64 | 268920.493  | 123551.069 | 145369.424 |
|      |        | 65-69 | 87956.054   | 41978.772  | 45977.282  |
|      |        | 70-74 | 42055.224   | 20888.856  | 21166.368  |
|      |        | 75-79 | 0.000       | 0.000      | 0.000      |
| COPD | Males  | 30-34 | 40547.801   | 25941.916  | 14605.885  |
|      |        | 35-39 | 70214.933   | 45285.662  | 24929.271  |
|      |        | 40-44 | 138408.960  | 87557.593  | 50851.367  |
|      |        | 45-49 | 295573.443  | 182494.511 | 113078.932 |
|      |        | 50-54 | 603979.438  | 359391.149 | 244588.289 |
|      |        | 55-59 | 1086086.992 | 634331.579 | 451755.413 |
|      |        | 60-64 | 1465829.290 | 905666.106 | 560163.184 |
|      |        | 65-69 | 1451838.682 | 946342.583 | 505496.099 |
|      |        | 70-74 | 692979.695  | 469823.324 | 223156.370 |
|      |        | 75-79 | 0.000       | 0.000      | 0.000      |
|      | Female | 30-34 | 34659.261   | 23593.815  | 11065.446  |
|      |        | 35-39 | 65652.924   | 44229.236  | 21423.689  |
|      |        | 40-44 | 133169.505  | 87560.237  | 45609.268  |
|      |        | 45-49 | 267988.924  | 170340.223 | 97648.701  |
|      |        | 50-54 | 523734.121  | 325048.176 | 198685.945 |
|      |        | 55-59 | 870859.170  | 527391.081 | 343468.089 |
|      |        | 60-64 | 1166683.329 | 721934.558 | 444748.771 |
|      |        | 65-69 | 1190003.066 | 753653.016 | 436350.050 |
|      |        | 70-74 | 588541.493  | 377152.005 | 211389.488 |
|      |        | 75-79 | 0.000       | 0.000      | 0.000      |

---

## Results for PHIM for Run 6 (ELL Summary Sensitivity\_Analysis\_4.RTF)

\*\*\*\*\*

**Table 6: Estimated Loss of Life, at the end of follow-up, Population and Number deaths adjusted for Ecig scenario**

| Disease      | Sex    | Age Group   | Years of life lost<br>NULL | Years of life lost<br>Ecig | Years of life<br>Saved |
|--------------|--------|-------------|----------------------------|----------------------------|------------------------|
| All Diseases | Males  | 30-34       | 443911.034                 | 239442.992                 | 204468.041             |
|              |        | 35-39       | 1146798.555                | 612405.574                 | 534392.981             |
|              |        | 40-44       | 2609591.408                | 1354365.871                | 1255225.54             |
|              |        | 45-49       | 4775841.753                | 2438928.076                | 2336913.68             |
|              |        | 50-54       | 7446969.205                | 3946799.824                | 3500169.38             |
|              |        | 55-59       | 8240205.925                | 4798185.385                | 3442020.54             |
|              |        | 60-64       | 8772829.118                | 5534955.949                | 3237873.17             |
|              |        | 65-69       | 6161494.678                | 4270050.567                | 1891444.11             |
|              |        | 70-74       | 2495906.274                | 1792626.717                | 703279.557             |
|              | 75-79  | 0.000       | 0.000                      | 0.000                      |                        |
|              | Female | 30-34       | 229140.561                 | 142504.073                 | 86636.488              |
|              |        | 35-39       | 570217.942                 | 348057.520                 | 222160.422             |
|              |        | 40-44       | 1267538.938                | 750638.172                 | 516900.766             |
|              |        | 45-49       | 2340070.698                | 1362889.037                | 977181.661             |
|              |        | 50-54       | 3743803.613                | 2196323.715                | 1547479.90             |
|              |        | 55-59       | 4591478.168                | 2816616.166                | 1774862.00             |
|              |        | 60-64       | 5207367.788                | 3317649.037                | 1889718.75             |
|              |        | 65-69       | 4092181.394                | 2748661.357                | 1343520.04             |
| 70-74        |        | 1776092.171 | 1212692.834                | 563399.337                 |                        |
| Lung cancer  | Males  | 30-34       | 66065.017                  | 51778.628                  | 14286.389              |
|              |        | 35-39       | 232509.414                 | 183806.578                 | 48702.837              |
|              |        | 40-44       | 688628.041                 | 532810.320                 | 155817.721             |
|              |        | 45-49       | 1528300.367                | 1146407.856                | 381892.512             |
|              |        | 50-54       | 2730187.229                | 2017334.931                | 712852.299             |
|              |        | 55-59       | 3909101.673                | 2871797.867                | 1037303.81             |
|              |        | 60-64       | 4287716.660                | 3244589.489                | 1043127.17             |
|              |        | 65-69       | 3467897.115                | 2672969.994                | 794927.121             |
|              |        | 70-74       | 1312144.343                | 1029400.213                | 282744.130             |
|              | 75-79  | 0.000       | 0.000                      | 0.000                      |                        |
|              | Female | 30-34       | 51913.113                  | 40722.599                  | 11190.514              |
|              |        | 35-39       | 189792.904                 | 149132.619                 | 40660.285              |
|              |        | 40-44       | 527596.573                 | 397502.153                 | 130094.420             |
|              |        | 45-49       | 1122524.269                | 814378.018                 | 308146.251             |
|              |        | 50-54       | 1882214.322                | 1335790.448                | 546423.874             |
|              |        | 55-59       | 2595581.943                | 1818061.024                | 777520.920             |
|              |        | 60-64       | 2846273.090                | 2031995.654                | 814277.436             |
|              |        | 65-69       | 2358758.394                | 1702749.245                | 656009.149             |
| 70-74        |        | 937814.238  | 686035.134                 | 251779.103                 |                        |
| IHD          | Males  | 30-34       | 263834.566                 | 118572.145                 | 145262.420             |
|              |        | 35-39       | 692140.150                 | 296702.071                 | 395438.079             |
|              |        | 40-44       | 1519708.432                | 592091.114                 | 927617.318             |
|              |        | 45-49       | 2568546.697                | 916380.431                 | 1652166.27             |
|              |        | 50-54       | 3632929.903                | 1348804.772                | 2284125.13             |
|              |        | 55-59       | 2807892.356                | 1103394.703                | 1704497.65             |
|              |        | 60-64       | 2599825.934                | 1196490.793                | 1403335.14             |
|              |        | 65-69       | 1113578.307                | 585194.043                 | 528384.265             |
|              |        | 70-74       | 437536.271                 | 262287.211                 | 175249.060             |
|              | 75-79  | 0.000       | 0.000                      | 0.000                      |                        |
|              | Female | 30-34       | 79649.097                  | 38040.220                  | 41608.876              |
|              |        | 35-39       | 193965.908                 | 81843.475                  | 112122.433             |
|              |        | 40-44       | 403380.974                 | 151811.268                 | 251569.706             |
|              |        | 45-49       | 671385.408                 | 233750.529                 | 437634.879             |
|              |        | 50-54       | 1011875.989                | 377331.881                 | 634544.109             |
|              |        | 55-59       | 849875.715                 | 344893.804                 | 504981.911             |
|              |        | 60-64       | 925490.876                 | 437086.250                 | 488404.627             |
|              |        | 65-69       | 455463.881                 | 246396.812                 | 209067.070             |
| 70-74        |        | 207681.216  | 125756.972                 | 81924.245                  |                        |
| Stroke       | Males  | 30-34       | 73463.650                  | 43148.257                  | 30315.393              |
|              |        | 35-39       | 151934.057                 | 86599.397                  | 65334.660              |
|              |        | 40-44       | 262845.974                 | 141835.274                 | 121010.701             |
|              |        | 45-49       | 383421.246                 | 193268.959                 | 190152.287             |
|              |        | 50-54       | 479872.634                 | 219816.661                 | 260055.973             |
|              |        | 55-59       | 437124.903                 | 185351.497                 | 251773.407             |
|              |        | 60-64       | 419457.235                 | 181263.262                 | 238193.973             |
|              |        | 65-69       | 128180.574                 | 57901.973                  | 70278.601              |
|              |        | 70-74       | 53245.965                  | 26198.991                  | 27046.974              |
|              | 75-79  | 0.000       | 0.000                      | 0.000                      |                        |
|              | Female | 30-34       | 62919.090                  | 40146.680                  | 22772.410              |



**Results for PHIM for Run 6 (ELL Summary Sensitivity\_Analysis\_4.RTF)**

|      |        |       |             |            |            |
|------|--------|-------|-------------|------------|------------|
|      |        | 35-39 | 120806.205  | 72847.585  | 47958.620  |
|      |        | 40-44 | 203391.885  | 113737.161 | 89654.724  |
|      |        | 45-49 | 278172.097  | 144282.726 | 133889.371 |
|      |        | 50-54 | 325979.181  | 157627.221 | 168351.960 |
|      |        | 55-59 | 275161.340  | 125006.918 | 150154.422 |
|      |        | 60-64 | 268920.493  | 123754.194 | 145166.299 |
|      |        | 65-69 | 87956.054   | 42047.382  | 45908.672  |
|      |        | 70-74 | 42055.224   | 20932.920  | 21122.303  |
|      |        | 75-79 | 0.000       | 0.000      | 0.000      |
| COPD | Males  | 30-34 | 40547.801   | 25943.962  | 14603.839  |
|      |        | 35-39 | 70214.933   | 45297.528  | 24917.405  |
|      |        | 40-44 | 138408.960  | 87629.164  | 50779.796  |
|      |        | 45-49 | 295573.443  | 182870.830 | 112702.613 |
|      |        | 50-54 | 603979.438  | 360843.460 | 243135.978 |
|      |        | 55-59 | 1086086.992 | 637641.319 | 448445.673 |
|      |        | 60-64 | 1465829.290 | 912612.406 | 553216.884 |
|      |        | 65-69 | 1451838.682 | 953984.557 | 497854.125 |
|      |        | 70-74 | 692979.695  | 474740.302 | 218239.393 |
|      |        | 75-79 | 0.000       | 0.000      | 0.000      |
|      | Female | 30-34 | 34659.261   | 23594.573  | 11064.688  |
|      |        | 35-39 | 65652.924   | 44233.841  | 21419.084  |
|      |        | 40-44 | 133169.505  | 87587.590  | 45581.916  |
|      |        | 45-49 | 267988.924  | 170477.764 | 97511.160  |
|      |        | 50-54 | 523734.121  | 325574.165 | 198159.956 |
|      |        | 55-59 | 870859.170  | 528654.420 | 342204.750 |
|      |        | 60-64 | 1166683.329 | 724812.939 | 441870.390 |
|      |        | 65-69 | 1190003.066 | 757467.919 | 432535.147 |
|      |        | 70-74 | 588541.493  | 379967.808 | 208573.686 |
|      |        | 75-79 | 0.000       | 0.000      | 0.000      |

---

## Results for PHIM for Run 8 (ELL Summary Sensitivity\_Analysis\_4.RTF)

\*\*\*\*\*

### Estimated Loss of Life from the E Component for Run: 8, Simulation: 1

Country: US (United States)

Follow-up Period: 1990 to 2039

**Table 1: Estimated Loss of Life, at the end of follow-up, all age groups combined, Population unadjusted for deaths in Ecig scenario**

| Disease      | Sex    | Year | Years of life lost<br>NULL | Years of life lost<br>Ecig | Years of life<br>Saved |
|--------------|--------|------|----------------------------|----------------------------|------------------------|
| All Diseases | Males  | 2039 | 42093547.949               | 24925542.192               | 17168005.8             |
|              | Female | 2039 | 23817891.273               | 14874543.482               | 8943347.79             |
| Lung cancer  | Males  | 2039 | 18222549.860               | 13704216.169               | 4518333.69             |
|              | Female | 2039 | 12512468.845               | 8961655.229                | 3550813.62             |
| IHD          | Males  | 2039 | 15635992.616               | 6424822.793                | 9211169.82             |
|              | Female | 2039 | 4798769.065                | 2038669.294                | 2760099.77             |
| Stroke       | Males  | 2039 | 2389546.238                | 1135154.630                | 1254391.61             |
|              | Female | 2039 | 1665361.569                | 840738.853                 | 824622.716             |
| COPD         | Males  | 2039 | 5845459.234                | 3661348.599                | 2184110.63             |
|              | Female | 2039 | 4841291.793                | 3033480.107                | 1807811.69             |

## Results for PHIM for Run 8 (ELL Summary Sensitivity\_Analysis\_4.RTF)

\*\*\*\*\*

**Table 2: Estimated Loss of Life, at the end of follow-up, all age groups combined, Population and Number deaths adjusted for Ecig scenario**

| Disease      | Sex    | Year | Years of life lost<br>NULL | Years of life lost<br>Ecig | Years of life<br>Saved |
|--------------|--------|------|----------------------------|----------------------------|------------------------|
| All Diseases | Males  | 2039 | 42093547.949               | 25025790.553               | 17067757.4             |
|              | Female | 2039 | 23817891.273               | 14911919.194               | 8905972.08             |
| Lung cancer  | Males  | 2039 | 18222549.860               | 13765627.307               | 4456922.55             |
|              | Female | 2039 | 12512468.845               | 8984925.025                | 3527543.82             |
| IHD          | Males  | 2039 | 15635992.616               | 6436620.192                | 9199372.42             |
|              | Female | 2039 | 4798769.065                | 2040599.366                | 2758169.70             |
| Stroke       | Males  | 2039 | 2389546.238                | 1137387.067                | 1252159.17             |
|              | Female | 2039 | 1665361.569                | 841423.998                 | 823937.571             |
| COPD         | Males  | 2039 | 5845459.234                | 3686155.987                | 2159303.25             |
|              | Female | 2039 | 4841291.793                | 3044970.805                | 1796320.99             |

## Results for PHIM for Run 8 (ELL Summary Sensitivity\_Analysis\_4.RTF)

\*\*\*\*\*

**Table 3: Estimated Loss of Life, All age groups combined, Population unadjusted for deaths in Ecig scenario, cumulative over years**

| Disease      | Sex          | Year         | Years of life lost<br>NULL | Years of life lost<br>Ecig | Years of life<br>Saved |
|--------------|--------------|--------------|----------------------------|----------------------------|------------------------|
| All Diseases | Males        | 1990         | 1304839.645                | 1304839.645                | 0.000                  |
|              |              | 1991         | 2579865.358                | 2571191.563                | 8673.794               |
|              |              | 1992         | 3830683.831                | 3798434.752                | 32249.079              |
|              |              | 1993         | 5076567.803                | 5000947.787                | 75620.016              |
|              |              | 1994         | 6292145.526                | 6149978.624                | 142166.903             |
|              |              | 1995         | 7485537.010                | 7250160.912                | 235376.097             |
|              |              | 1996         | 8655955.028                | 8299482.414                | 356472.613             |
|              |              | 1997         | 9791729.713                | 9287465.334                | 504264.379             |
|              |              | 1998         | 10899134.186               | 10221783.822               | 677350.364             |
|              |              | 1999         | 12070409.674               | 11161686.084               | 908723.590             |
|              |              | 2000         | 13231384.595               | 12061065.861               | 1170318.73             |
|              |              | 2001         | 14371761.018               | 12910156.347               | 1461604.67             |
|              |              | 2002         | 15508906.386               | 13721539.583               | 1787366.80             |
|              |              | 2003         | 16638100.422               | 14495559.436               | 2142540.99             |
|              |              | 2004         | 17736465.088               | 15221858.192               | 2514606.90             |
|              |              | 2005         | 18834658.606               | 15921894.518               | 2912764.09             |
|              |              | 2006         | 19909100.501               | 16575811.663               | 3333288.84             |
|              |              | 2007         | 20958321.463               | 17191405.506               | 3766915.96             |
|              |              | 2008         | 22000068.148               | 17782968.225               | 4217099.92             |
|              |              | 2009         | 23018816.903               | 18341889.262               | 4676927.64             |
|              |              | 2010         | 24018480.537               | 18869692.317               | 5148788.22             |
|              |              | 2011         | 25003034.574               | 19370095.792               | 5632938.78             |
|              |              | 2012         | 25969871.429               | 19841875.900               | 6127995.53             |
|              |              | 2013         | 26920275.180               | 20287172.276               | 6633102.90             |
|              |              | 2014         | 27849005.227               | 20704382.904               | 7144622.32             |
|              |              | 2015         | 28749620.400               | 21096863.994               | 7652756.41             |
|              |              | 2016         | 29622417.562               | 21456219.040               | 8166198.52             |
|              |              | 2017         | 30462559.724               | 21785126.942               | 8677432.78             |
|              |              | 2018         | 31293299.299               | 22101316.663               | 9191982.64             |
|              |              | 2019         | 32109993.427               | 22400097.863               | 9709895.56             |
|              |              | 2020         | 32883323.977               | 22677651.205               | 10205672.8             |
|              |              | 2021         | 33610102.554               | 22918529.302               | 10691573.3             |
|              |              | 2022         | 34322010.448               | 23144408.436               | 11177602.0             |
|              |              | 2023         | 35018383.550               | 23355431.078               | 11662952.5             |
|              |              | 2024         | 35700177.955               | 23552900.422               | 12147277.5             |
|              |              | 2025         | 36315500.346               | 23730690.583               | 12584809.8             |
|              |              | 2026         | 36896159.343               | 23882304.321               | 13013855.0             |
|              |              | 2027         | 37462570.116               | 24023342.946               | 13439227.2             |
|              |              | 2028         | 38015337.780               | 24153951.665               | 13861386.1             |
|              |              | 2029         | 38554814.764               | 24275419.642               | 14279395.1             |
|              |              | 2030         | 39003805.400               | 24378874.673               | 14624930.7             |
|              |              | 2031         | 39436509.703               | 24467621.810               | 14968887.9             |
| 2032         | 39858470.458 | 24549935.659 | 15308534.8                 |                            |                        |
| 2033         | 40270147.082 | 24625699.024 | 15644448.1                 |                            |                        |
| 2034         | 40672665.743 | 24696166.471 | 15976499.3                 |                            |                        |
| 2035         | 40962732.664 | 24749495.183 | 16213237.5                 |                            |                        |
| 2036         | 41255021.653 | 24798242.637 | 16456779.0                 |                            |                        |
| 2037         | 41540573.023 | 24843799.294 | 16696773.7                 |                            |                        |
| 2038         | 41820158.066 | 24886003.044 | 16934155.0                 |                            |                        |
| 2039         | 42093547.949 | 24925542.192 | 17168005.8                 |                            |                        |
|              | Female       | 1990         | 588979.406                 | 588979.406                 | 0.000                  |
| 1991         |              | 1182571.252  | 1179606.299                | 2964.953                   |                        |
| 1992         |              | 1777346.679  | 1766096.393                | 11250.286                  |                        |
| 1993         |              | 2380261.899  | 2353263.279                | 26998.620                  |                        |
| 1994         |              | 2983130.039  | 2931320.159                | 51809.880                  |                        |
| 1995         |              | 3588982.584  | 3501954.206                | 87028.378                  |                        |
| 1996         |              | 4195430.235  | 4060561.125                | 134869.109                 |                        |
| 1997         |              | 4793866.694  | 4600673.189                | 193193.505                 |                        |
| 1998         |              | 5389747.381  | 5126529.691                | 263217.690                 |                        |
| 1999         |              | 6006722.467  | 5652721.470                | 354000.997                 |                        |
| 2000         |              | 6625758.871  | 6168028.544                | 457730.327                 |                        |
| 2001         |              | 7245135.411  | 6668504.477                | 576630.934                 |                        |
| 2002         |              | 7867492.021  | 7156286.319                | 711205.702                 |                        |
| 2003         |              | 8485051.793  | 7626602.328                | 858449.464                 |                        |
| 2004         |              | 9092994.774  | 8076029.301                | 1016965.47                 |                        |
| 2005         |              | 9706032.803  | 8515822.055                | 1190210.75                 |                        |
| 2006         |              | 10311907.548 | 8936308.949                | 1375598.60                 |                        |
| 2007         |              | 10909437.502 | 9339572.336                | 1569865.17                 |                        |
| 2008         |              | 11506462.491 | 9727515.953                | 1778946.54                 |                        |
| 2009         |              | 12098393.287 | 10101967.696               | 1996425.59                 |                        |
| 2010         |              | 12681188.981 | 10458217.091               | 2222971.89                 |                        |

**Results for PHIM for Run 8 (ELL Summary Sensitivity\_Analysis\_4.RTF)**

|             |       |      |              |              |            |
|-------------|-------|------|--------------|--------------|------------|
|             |       | 2011 | 13260062.991 | 10799283.034 | 2460779.96 |
|             |       | 2012 | 13839417.441 | 11127813.507 | 2711603.93 |
|             |       | 2013 | 14409614.758 | 11440619.846 | 2968994.91 |
|             |       | 2014 | 14976658.746 | 11738163.160 | 3238495.59 |
|             |       | 2015 | 15529977.821 | 12018853.358 | 3511124.46 |
|             |       | 2016 | 16066640.764 | 12279031.393 | 3787609.37 |
|             |       | 2017 | 16590035.078 | 12522325.515 | 4067709.56 |
|             |       | 2018 | 17098716.137 | 12752284.634 | 4346431.50 |
|             |       | 2019 | 17599868.850 | 12969484.683 | 4630384.17 |
|             |       | 2020 | 18081346.241 | 13172510.837 | 4908835.40 |
|             |       | 2021 | 18537594.460 | 13355211.468 | 5182382.99 |
|             |       | 2022 | 18985300.234 | 13526660.136 | 5458640.10 |
|             |       | 2023 | 19423958.747 | 13687324.551 | 5736634.20 |
|             |       | 2024 | 19853347.772 | 13837071.815 | 6016275.96 |
|             |       | 2025 | 20252822.245 | 13973537.731 | 6279284.51 |
|             |       | 2026 | 20619307.063 | 14091558.955 | 6527748.11 |
|             |       | 2027 | 20976063.406 | 14200830.658 | 6775232.75 |
|             |       | 2028 | 21323641.947 | 14302341.129 | 7021300.82 |
|             |       | 2029 | 21662117.106 | 14396005.350 | 7266111.76 |
|             |       | 2030 | 21960971.694 | 14477844.930 | 7483126.76 |
|             |       | 2031 | 22224951.983 | 14544574.809 | 7680377.17 |
|             |       | 2032 | 22480397.853 | 14605680.506 | 7874717.35 |
|             |       | 2033 | 22728639.455 | 14662091.444 | 8066548.01 |
|             |       | 2034 | 22970448.888 | 14713849.900 | 8256598.99 |
|             |       | 2035 | 23164154.188 | 14755305.931 | 8408848.26 |
|             |       | 2036 | 23334538.616 | 14788671.743 | 8545866.87 |
|             |       | 2037 | 23499760.723 | 14819439.578 | 8680321.15 |
|             |       | 2038 | 23660308.401 | 14847968.217 | 8812340.18 |
|             |       | 2039 | 23817891.273 | 14874543.482 | 8943347.79 |
| Lung cancer | Males | 1990 | 595621.791   | 595621.791   | 0.000      |
|             |       | 1991 | 1177744.113  | 1177096.215  | 647.898    |
|             |       | 1992 | 1750034.892  | 1747588.537  | 2446.355   |
|             |       | 1993 | 2319752.308  | 2313793.555  | 5958.752   |
|             |       | 1994 | 2872597.339  | 2861045.153  | 11552.186  |
|             |       | 1995 | 3411494.825  | 3391837.853  | 19656.972  |
|             |       | 1996 | 3945569.726  | 3914496.109  | 31073.617  |
|             |       | 1997 | 4463316.362  | 4417531.536  | 45784.826  |
|             |       | 1998 | 4975301.180  | 4910812.641  | 64488.539  |
|             |       | 1999 | 5473691.125  | 5386276.315  | 87414.809  |
|             |       | 2000 | 5977500.570  | 5861418.731  | 116081.839 |
|             |       | 2001 | 6474795.516  | 6324355.391  | 150440.125 |
|             |       | 2002 | 6968769.705  | 6777577.193  | 191192.512 |
|             |       | 2003 | 7460282.140  | 7221119.419  | 239162.721 |
|             |       | 2004 | 7947048.275  | 7652874.666  | 294173.609 |
|             |       | 2005 | 8430571.669  | 8073817.178  | 356754.490 |
|             |       | 2006 | 8903945.390  | 8477239.178  | 426706.212 |
|             |       | 2007 | 9364177.982  | 8860907.431  | 503270.551 |
|             |       | 2008 | 9822525.458  | 9233420.505  | 589104.953 |
|             |       | 2009 | 10275228.886 | 9591889.014  | 683339.873 |
|             |       | 2010 | 10720275.500 | 9935011.996  | 785263.504 |
|             |       | 2011 | 11155356.373 | 10260891.190 | 894465.183 |
|             |       | 2012 | 11582611.617 | 10570266.773 | 1012344.84 |
|             |       | 2013 | 11998803.791 | 10861592.150 | 1137211.64 |
|             |       | 2014 | 12402087.090 | 11134284.799 | 1267802.29 |
|             |       | 2015 | 12793451.706 | 11390100.383 | 1403351.32 |
|             |       | 2016 | 13160101.653 | 11620382.421 | 1539719.23 |
|             |       | 2017 | 13503583.414 | 11827573.817 | 1676009.60 |
|             |       | 2018 | 13859755.737 | 12031763.798 | 1827991.94 |
|             |       | 2019 | 14211625.176 | 12224479.561 | 1987145.61 |
|             |       | 2020 | 14553935.288 | 12404380.097 | 2149555.19 |
|             |       | 2021 | 14851747.495 | 12553235.394 | 2298512.10 |
|             |       | 2022 | 15144531.004 | 12692255.204 | 2452275.80 |
|             |       | 2023 | 15431932.496 | 12821591.775 | 2610340.72 |
|             |       | 2024 | 15713920.740 | 12941942.281 | 2771978.46 |
|             |       | 2025 | 15979112.816 | 13050836.323 | 2928276.49 |
|             |       | 2026 | 16206550.153 | 13138021.383 | 3068528.77 |
|             |       | 2027 | 16428826.050 | 13218502.497 | 3210323.55 |
|             |       | 2028 | 16645902.186 | 13292552.840 | 3353349.35 |
|             |       | 2029 | 16858126.517 | 13361012.508 | 3497114.01 |
|             |       | 2030 | 17045220.687 | 13419817.511 | 3625403.18 |
|             |       | 2031 | 17208482.610 | 13466843.505 | 3741639.11 |
|             |       | 2032 | 17367586.074 | 13510217.297 | 3857368.78 |
|             |       | 2033 | 17522716.280 | 13549974.527 | 3972741.75 |
|             |       | 2034 | 17674226.555 | 13586813.321 | 4087413.23 |
|             |       | 2035 | 17792201.734 | 13615113.387 | 4177088.35 |
|             |       | 2036 | 17903508.236 | 13639818.973 | 4263689.26 |
|             |       | 2037 | 18012162.345 | 13662879.338 | 4349283.01 |
|             |       | 2038 | 18118464.470 | 13684203.521 | 4434260.95 |

**Results for PHIM for Run 8 (ELL Summary Sensitivity\_Analysis\_4.RTF)**

|     |        |      |              |              |            |
|-----|--------|------|--------------|--------------|------------|
|     | Female | 2039 | 18222549.860 | 13704216.169 | 4518333.69 |
|     |        | 1990 | 307897.357   | 307897.357   | 0.000      |
|     |        | 1991 | 616547.418   | 616130.925   | 416.493    |
|     |        | 1992 | 931086.773   | 929437.098   | 1649.675   |
|     |        | 1993 | 1246155.671  | 1242093.647  | 4062.024   |
|     |        | 1994 | 1561212.934  | 1553213.662  | 7999.272   |
|     |        | 1995 | 1879967.742  | 1866032.088  | 13935.654  |
|     |        | 1996 | 2197488.109  | 2175331.118  | 22156.991  |
|     |        | 1997 | 2515698.453  | 2482608.579  | 33089.873  |
|     |        | 1998 | 2836249.556  | 2789167.469  | 47082.088  |
|     |        | 1999 | 3150201.390  | 3086076.927  | 64124.463  |
|     |        | 2000 | 3472722.342  | 3387454.069  | 85268.273  |
|     |        | 2001 | 3796994.889  | 3686147.039  | 110847.850 |
|     |        | 2002 | 4126619.935  | 3985001.660  | 141618.275 |
|     |        | 2003 | 4454982.533  | 4277806.102  | 177176.432 |
|     |        | 2004 | 4784343.030  | 4565990.097  | 218352.933 |
|     |        | 2005 | 5113443.121  | 4848203.787  | 265239.334 |
|     |        | 2006 | 5442543.963  | 5123847.687  | 318696.275 |
|     |        | 2007 | 5772441.497  | 5393617.270  | 378824.227 |
|     |        | 2008 | 6091911.943  | 5648217.881  | 443694.062 |
|     |        | 2009 | 6413671.330  | 5897252.496  | 516418.834 |
|     |        | 2010 | 6730763.530  | 6135993.234  | 594770.296 |
|     |        | 2011 | 7043614.101  | 6364184.576  | 679429.525 |
|     |        | 2012 | 7356270.780  | 6584776.153  | 771494.627 |
|     |        | 2013 | 7662551.964  | 6793556.995  | 868994.969 |
|     |        | 2014 | 7964551.465  | 6992116.016  | 972435.448 |
|     |        | 2015 | 8254895.403  | 7176903.825  | 1077991.58 |
|     |        | 2016 | 8530661.848  | 7345352.122  | 1185309.73 |
|     |        | 2017 | 8795826.122  | 7501040.504  | 1294785.62 |
|     |        | 2018 | 9067233.707  | 7652753.194  | 1414480.51 |
|     |        | 2019 | 9335343.270  | 7795691.930  | 1539651.34 |
|     |        | 2020 | 9596110.883  | 7929207.348  | 1666903.54 |
|     |        | 2021 | 9833186.859  | 8045819.004  | 1787367.85 |
|     |        | 2022 | 10066452.037 | 8154798.205  | 1911653.83 |
|     |        | 2023 | 10295503.609 | 8256468.389  | 2039035.22 |
|     |        | 2024 | 10520125.318 | 8350767.584  | 2169357.73 |
|     |        | 2025 | 10731915.863 | 8436341.800  | 2295574.06 |
|     |        | 2026 | 10917495.549 | 8507774.681  | 2409720.87 |
|     |        | 2027 | 11098620.885 | 8573549.957  | 2525070.93 |
|     |        | 2028 | 11275441.234 | 8634349.148  | 2641092.09 |
|     |        | 2029 | 11447962.710 | 8690153.313  | 2757809.40 |
|     |        | 2030 | 11601867.623 | 8738517.918  | 2863349.71 |
|     |        | 2031 | 11731666.516 | 8776624.269  | 2955042.25 |
|     |        | 2032 | 11857585.969 | 8811420.952  | 3046165.02 |
|     |        | 2033 | 11980128.625 | 8843452.436  | 3136676.19 |
|     |        | 2034 | 12099562.464 | 8872787.593  | 3226774.87 |
|     |        | 2035 | 12195919.946 | 8895929.079  | 3299990.87 |
|     |        | 2036 | 12278201.969 | 8914243.326  | 3363958.64 |
|     |        | 2037 | 12358146.336 | 8931184.312  | 3426962.02 |
|     |        | 2038 | 12435978.633 | 8946934.519  | 3489044.11 |
|     |        | 2039 | 12512468.845 | 8961655.229  | 3550813.62 |
| IHD | Males  | 1990 | 517209.093   | 517209.093   | 0.000      |
|     |        | 1991 | 1019219.395  | 1012116.414  | 7102.981   |
|     |        | 1992 | 1509598.614  | 1483224.184  | 26374.430  |
|     |        | 1993 | 1992735.299  | 1931295.634  | 61439.665  |
|     |        | 1994 | 2462877.575  | 2348241.617  | 114635.958 |
|     |        | 1995 | 2928249.390  | 2739599.105  | 188650.284 |
|     |        | 1996 | 3377377.730  | 3093792.192  | 283585.537 |
|     |        | 1997 | 3809062.472  | 3411023.925  | 398038.547 |
|     |        | 1998 | 4222213.867  | 3692064.508  | 530149.359 |
|     |        | 1999 | 4708317.743  | 3995950.405  | 712367.339 |
|     |        | 2000 | 5182084.396  | 4267774.595  | 914309.802 |
|     |        | 2001 | 5644097.705  | 4507899.459  | 1136198.25 |
|     |        | 2002 | 6107232.129  | 4725518.647  | 1381713.48 |
|     |        | 2003 | 6561785.704  | 4917862.934  | 1643922.77 |
|     |        | 2004 | 6996156.348  | 5083720.828  | 1912435.52 |
|     |        | 2005 | 7426261.361  | 5232178.942  | 2194082.42 |
|     |        | 2006 | 7849012.694  | 5362415.838  | 2486596.86 |
|     |        | 2007 | 8255300.530  | 5475074.106  | 2780226.42 |
|     |        | 2008 | 8650662.040  | 5574159.597  | 3076502.44 |
|     |        | 2009 | 9030818.513  | 5660667.891  | 3370150.62 |
|     |        | 2010 | 9403026.327  | 5737653.438  | 3665372.89 |
|     |        | 2011 | 9767535.506  | 5806145.570  | 3961389.94 |
|     |        | 2012 | 10123044.281 | 5867386.070  | 4255658.21 |
|     |        | 2013 | 10470104.786 | 5922139.293  | 4547965.49 |
|     |        | 2014 | 10807756.112 | 5971397.680  | 4836358.43 |
|     |        | 2015 | 11130681.425 | 6015196.706  | 5115484.72 |
|     |        | 2016 | 11448966.506 | 6055246.220  | 5393720.29 |

**Results for PHIM for Run 8 (ELL Summary Sensitivity\_Analysis\_4.RTF)**

|        |        |      |              |             |            |
|--------|--------|------|--------------|-------------|------------|
|        |        | 2017 | 11758164.882 | 6091770.892 | 5666393.99 |
|        |        | 2018 | 12054448.241 | 6124319.442 | 5930128.80 |
|        |        | 2019 | 12341606.261 | 6154316.473 | 6187289.79 |
|        |        | 2020 | 12600728.939 | 6180068.095 | 6420660.84 |
|        |        | 2021 | 12861767.105 | 6204852.202 | 6656914.90 |
|        |        | 2022 | 13114168.616 | 6227936.480 | 6886232.14 |
|        |        | 2023 | 13357894.797 | 6249346.721 | 7108548.08 |
|        |        | 2024 | 13593848.521 | 6269520.176 | 7324328.35 |
|        |        | 2025 | 13789177.359 | 6285760.800 | 7503416.56 |
|        |        | 2026 | 13993401.656 | 6302429.305 | 7690972.35 |
|        |        | 2027 | 14190519.224 | 6318335.380 | 7872183.84 |
|        |        | 2028 | 14381193.356 | 6333281.083 | 8047912.27 |
|        |        | 2029 | 14565171.927 | 6347426.881 | 8217745.05 |
|        |        | 2030 | 14697381.605 | 6357435.149 | 8339946.46 |
|        |        | 2031 | 14842203.512 | 6368444.738 | 8473758.77 |
|        |        | 2032 | 14982485.826 | 6379015.343 | 8603470.48 |
|        |        | 2033 | 15118410.647 | 6388937.156 | 8729473.49 |
|        |        | 2034 | 15250284.398 | 6398419.419 | 8851864.98 |
|        |        | 2035 | 15322911.166 | 6403443.869 | 8919467.30 |
|        |        | 2036 | 15405115.031 | 6409140.284 | 8995974.75 |
|        |        | 2037 | 15484709.137 | 6414659.981 | 9070049.16 |
|        |        | 2038 | 15561812.193 | 6419886.203 | 9141925.99 |
|        |        | 2039 | 15635992.616 | 6424822.793 | 9211169.82 |
|        | Female | 1990 | 147299.110   | 147299.110  | 0.000      |
|        |        | 1991 | 295122.462   | 293257.355  | 1865.107   |
|        |        | 1992 | 439962.920   | 432980.503  | 6982.417   |
|        |        | 1993 | 584735.615   | 568176.560  | 16559.055  |
|        |        | 1994 | 727640.783   | 696325.467  | 31315.316  |
|        |        | 1995 | 868486.937   | 816724.209  | 51762.729  |
|        |        | 1996 | 1010321.847  | 930875.951  | 79445.896  |
|        |        | 1997 | 1144230.930  | 1032430.480 | 111800.449 |
|        |        | 1998 | 1274513.622  | 1124665.271 | 149848.350 |
|        |        | 1999 | 1426725.938  | 1224835.113 | 201890.825 |
|        |        | 2000 | 1573462.680  | 1314404.661 | 259058.019 |
|        |        | 2001 | 1719132.015  | 1395218.572 | 323913.443 |
|        |        | 2002 | 1863006.732  | 1467687.841 | 395318.891 |
|        |        | 2003 | 2002943.227  | 1531599.362 | 471343.866 |
|        |        | 2004 | 2137798.705  | 1587320.566 | 550478.139 |
|        |        | 2005 | 2271071.245  | 1637396.399 | 633674.846 |
|        |        | 2006 | 2400707.731  | 1680992.224 | 719715.507 |
|        |        | 2007 | 2523634.512  | 1718377.125 | 805257.388 |
|        |        | 2008 | 2648752.232  | 1752643.024 | 896109.208 |
|        |        | 2009 | 2765973.961  | 1781922.448 | 984051.514 |
|        |        | 2010 | 2881329.235  | 1808151.449 | 1073177.79 |
|        |        | 2011 | 2994972.694  | 1831583.422 | 1163389.27 |
|        |        | 2012 | 3108958.829  | 1852915.953 | 1256042.88 |
|        |        | 2013 | 3218140.416  | 1871867.636 | 1346272.78 |
|        |        | 2014 | 3328387.914  | 1889426.498 | 1438961.42 |
|        |        | 2015 | 3435342.796  | 1905380.303 | 1529962.49 |
|        |        | 2016 | 3539189.408  | 1919791.150 | 1619398.26 |
|        |        | 2017 | 3640041.363  | 1932842.180 | 1707199.18 |
|        |        | 2018 | 3732645.362  | 1944047.569 | 1788597.79 |
|        |        | 2019 | 3821421.978  | 1954150.684 | 1867271.29 |
|        |        | 2020 | 3902115.950  | 1962867.209 | 1939248.74 |
|        |        | 2021 | 3984301.053  | 1971290.017 | 2013011.04 |
|        |        | 2022 | 4062629.299  | 1978919.806 | 2083709.49 |
|        |        | 2023 | 4137348.729  | 1985917.406 | 2151431.32 |
|        |        | 2024 | 4208611.493  | 1992325.164 | 2216286.33 |
|        |        | 2025 | 4269419.492  | 1997634.148 | 2271785.34 |
|        |        | 2026 | 4330969.998  | 2002837.887 | 2328132.11 |
|        |        | 2027 | 4389134.306  | 2007628.238 | 2381506.07 |
|        |        | 2028 | 4444222.970  | 2012076.897 | 2432146.07 |
|        |        | 2029 | 4496447.877  | 2016236.705 | 2480211.17 |
|        |        | 2030 | 4536975.698  | 2019351.494 | 2517624.20 |
|        |        | 2031 | 4578338.586  | 2022508.818 | 2555829.77 |
|        |        | 2032 | 4617397.784  | 2025470.375 | 2591927.41 |
|        |        | 2033 | 4654407.697  | 2028283.199 | 2626124.50 |
|        |        | 2034 | 4689913.454  | 2030971.255 | 2658942.20 |
|        |        | 2035 | 4712518.190  | 2032563.970 | 2679954.22 |
|        |        | 2036 | 4735845.827  | 2034200.209 | 2701645.62 |
|        |        | 2037 | 4757958.806  | 2035755.004 | 2722203.80 |
|        |        | 2038 | 4778813.806  | 2037240.544 | 2741573.26 |
|        |        | 2039 | 4798769.065  | 2038669.294 | 2760099.77 |
| Stroke | Males  | 1990 | 75005.854    | 75005.854   | 0.000      |
|        |        | 1991 | 149463.017   | 148743.133  | 719.885    |
|        |        | 1992 | 222966.278   | 220289.516  | 2676.762   |
|        |        | 1993 | 296801.879   | 290425.663  | 6376.216   |
|        |        | 1994 | 372453.706   | 360104.225  | 12349.480  |

**Results for PHIM for Run 8 (ELL Summary Sensitivity\_Analysis\_4.RTF)**

|        |      |             |             |            |
|--------|------|-------------|-------------|------------|
|        | 1995 | 448401.338  | 427520.194  | 20881.144  |
|        | 1996 | 523536.301  | 491403.660  | 32132.642  |
|        | 1997 | 596763.211  | 550671.467  | 46091.744  |
|        | 1998 | 667546.681  | 604960.859  | 62585.822  |
|        | 1999 | 734925.407  | 653729.197  | 81196.210  |
|        | 2000 | 803749.361  | 700579.307  | 103170.054 |
|        | 2001 | 870081.588  | 742701.141  | 127380.447 |
|        | 2002 | 935347.140  | 781314.733  | 154032.407 |
|        | 2003 | 1001627.349 | 817519.531  | 184107.818 |
|        | 2004 | 1066587.976 | 850380.246  | 216207.730 |
|        | 2005 | 1130548.052 | 880160.149  | 250387.903 |
|        | 2006 | 1195132.454 | 907716.790  | 287415.663 |
|        | 2007 | 1258974.043 | 932684.098  | 326289.945 |
|        | 2008 | 1320124.867 | 954494.082  | 365630.785 |
|        | 2009 | 1380776.123 | 974304.698  | 406471.425 |
|        | 2010 | 1440048.533 | 992070.484  | 447978.049 |
|        | 2011 | 1497484.847 | 1007869.842 | 489615.005 |
|        | 2012 | 1554496.526 | 1022139.885 | 532356.641 |
|        | 2013 | 1610819.598 | 1035057.097 | 575762.500 |
|        | 2014 | 1667484.890 | 1046921.620 | 620563.269 |
|        | 2015 | 1720948.287 | 1057315.984 | 663632.302 |
|        | 2016 | 1775699.228 | 1067074.745 | 708624.483 |
|        | 2017 | 1830250.175 | 1076051.861 | 754198.314 |
|        | 2018 | 1875958.950 | 1083039.637 | 792919.313 |
|        | 2019 | 1920359.232 | 1089362.111 | 830997.121 |
|        | 2020 | 1960605.297 | 1094745.892 | 865859.405 |
|        | 2021 | 1998912.887 | 1099533.526 | 899379.361 |
|        | 2022 | 2036003.696 | 1103876.762 | 932126.933 |
|        | 2023 | 2071857.536 | 1107822.781 | 964034.756 |
|        | 2024 | 2106636.468 | 1111464.403 | 995172.065 |
|        | 2025 | 2136450.873 | 1114441.320 | 1022009.55 |
|        | 2026 | 2164796.470 | 1117137.634 | 1047658.84 |
|        | 2027 | 2192079.608 | 1119640.952 | 1072438.66 |
|        | 2028 | 2218404.367 | 1121949.811 | 1096454.56 |
|        | 2029 | 2243769.140 | 1124104.756 | 1119664.38 |
|        | 2030 | 2263570.213 | 1125730.705 | 1137839.51 |
|        | 2031 | 2282521.590 | 1127252.929 | 1155268.66 |
|        | 2032 | 2300804.945 | 1128688.243 | 1172116.70 |
|        | 2033 | 2318464.018 | 1130031.791 | 1188432.23 |
|        | 2034 | 2335611.973 | 1131312.313 | 1204299.66 |
|        | 2035 | 2347097.290 | 1132149.751 | 1214947.54 |
|        | 2036 | 2358248.747 | 1132954.066 | 1225294.68 |
|        | 2037 | 2369033.655 | 1133728.674 | 1235304.98 |
|        | 2038 | 2379490.114 | 1134462.063 | 1245028.05 |
|        | 2039 | 2389546.238 | 1135154.630 | 1254391.61 |
| Female | 1990 | 56348.092   | 56348.092   | 0.000      |
|        | 1991 | 110871.862  | 110356.698  | 515.165    |
|        | 1992 | 165654.454  | 163676.540  | 1977.915   |
|        | 1993 | 220008.519  | 215283.566  | 4724.953   |
|        | 1994 | 275706.807  | 266523.928  | 9182.879   |
|        | 1995 | 331417.547  | 315918.145  | 15499.402  |
|        | 1996 | 387580.161  | 363579.842  | 24000.319  |
|        | 1997 | 442778.242  | 408223.348  | 34554.894  |
|        | 1998 | 496117.305  | 449179.362  | 46937.943  |
|        | 1999 | 548268.214  | 487024.662  | 61243.552  |
|        | 2000 | 601693.202  | 523580.305  | 78112.897  |
|        | 2001 | 652221.103  | 555973.026  | 96248.077  |
|        | 2002 | 703022.600  | 586306.989  | 116715.611 |
|        | 2003 | 752023.351  | 613491.233  | 138532.118 |
|        | 2004 | 799826.733  | 638013.804  | 161812.929 |
|        | 2005 | 847563.928  | 660661.576  | 186902.352 |
|        | 2006 | 894205.027  | 681037.968  | 213167.059 |
|        | 2007 | 939571.282  | 699234.258  | 240337.024 |
|        | 2008 | 983437.578  | 715415.376  | 268022.202 |
|        | 2009 | 1025803.786 | 729775.791  | 296027.995 |
|        | 2010 | 1066964.934 | 742548.646  | 324416.288 |
|        | 2011 | 1106954.044 | 753911.623  | 353042.422 |
|        | 2012 | 1146108.461 | 764133.144  | 381975.316 |
|        | 2013 | 1183544.689 | 773142.241  | 410402.449 |
|        | 2014 | 1221220.945 | 781460.043  | 439760.902 |
|        | 2015 | 1258289.311 | 789079.930  | 469209.381 |
|        | 2016 | 1294830.207 | 796011.693  | 498818.515 |
|        | 2017 | 1330332.626 | 802247.027  | 528085.598 |
|        | 2018 | 1360571.987 | 807195.285  | 553376.702 |
|        | 2019 | 1389848.723 | 811630.766  | 578217.957 |
|        | 2020 | 1416046.192 | 815368.888  | 600677.305 |
|        | 2021 | 1440588.850 | 818641.642  | 621947.207 |
|        | 2022 | 1464157.934 | 821584.327  | 642573.608 |



**Results for PHIM for Run 8 (ELL Summary Sensitivity\_Analysis\_4.RTF)**

|      |             |             |             |             |            |
|------|-------------|-------------|-------------|-------------|------------|
|      |             | 2023        | 1486810.237 | 824259.848  | 662550.389 |
|      |             | 2024        | 1508591.729 | 826684.917  | 681906.813 |
|      |             | 2025        | 1526875.621 | 828632.982  | 698242.639 |
|      |             | 2026        | 1543659.810 | 830334.346  | 713325.464 |
|      |             | 2027        | 1559623.774 | 831885.044  | 727738.731 |
|      |             | 2028        | 1574852.850 | 833312.153  | 741540.697 |
|      |             | 2029        | 1589437.452 | 834631.071  | 754806.381 |
|      |             | 2030        | 1600568.199 | 835594.960  | 764973.239 |
|      |             | 2031        | 1610776.297 | 836459.444  | 774316.853 |
|      |             | 2032        | 1620483.563 | 837265.552  | 783218.011 |
|      |             | 2033        | 1629745.442 | 838024.436  | 791721.006 |
|      |             | 2034        | 1638721.425 | 838743.855  | 799977.570 |
|      |             | 2035        | 1644649.404 | 839193.566  | 805455.838 |
|      |             | 2036        | 1650181.590 | 839606.867  | 810574.722 |
|      |             | 2037        | 1655476.066 | 840000.380  | 815475.686 |
|      |             | 2038        | 1660507.914 | 840376.989  | 820130.925 |
|      |             | 2039        | 1665361.569 | 840738.853  | 824622.716 |
| COPD | Males       | 1990        | 117002.906  | 117002.906  | 0.000      |
|      |             | 1991        | 233438.833  | 233235.802  | 203.031    |
|      |             | 1992        | 348084.047  | 347332.515  | 751.532    |
|      |             | 1993        | 467278.318  | 465432.935  | 1845.383   |
|      |             | 1994        | 584216.907  | 580587.628  | 3629.279   |
|      |             | 1995        | 697391.457  | 691203.760  | 6187.697   |
|      |             | 1996        | 809471.271  | 799790.454  | 9680.817   |
|      |             | 1997        | 922587.668  | 908238.405  | 14349.263  |
|      |             | 1998        | 1034072.457 | 1013945.813 | 20126.644  |
|      |             | 1999        | 1153475.399 | 1125730.167 | 27745.232  |
|      |             | 2000        | 1268050.268 | 1231293.229 | 36757.039  |
|      |             | 2001        | 1382786.209 | 1335200.356 | 47585.853  |
|      |             | 2002        | 1497557.412 | 1437129.010 | 60428.402  |
|      |             | 2003        | 1614405.229 | 1539057.552 | 75347.677  |
|      |             | 2004        | 1726672.489 | 1634882.452 | 91790.037  |
|      |             | 2005        | 1847277.524 | 1735738.248 | 111539.276 |
|      |             | 2006        | 1961009.963 | 1828439.857 | 132570.106 |
|      |             | 2007        | 2079868.908 | 1922739.872 | 157129.037 |
|      |             | 2008        | 2206755.783 | 2020894.041 | 185861.741 |
|      |             | 2009        | 2331993.380 | 2115027.659 | 216965.722 |
|      | 2010        | 2455130.176 | 2204956.398 | 250173.778  |            |
|      | 2011        | 2582657.849 | 2295189.190 | 287468.659  |            |
|      | 2012        | 2709719.005 | 2382083.173 | 327635.832  |            |
|      | 2013        | 2840547.005 | 2468383.735 | 372163.270  |            |
|      | 2014        | 2971677.135 | 2551778.805 | 419898.331  |            |
|      | 2015        | 3104538.983 | 2634250.920 | 470288.063  |            |
|      | 2016        | 3237650.175 | 2713515.654 | 524134.521  |            |
|      | 2017        | 3370561.253 | 2789730.373 | 580830.880  |            |
|      | 2018        | 3503136.371 | 2862193.786 | 640942.585  |            |
|      | 2019        | 3636402.758 | 2931939.718 | 704463.040  |            |
|      | 2020        | 3768054.453 | 2998457.121 | 769597.332  |            |
|      | 2021        | 3897675.067 | 3060908.180 | 836766.886  |            |
|      | 2022        | 4027307.132 | 3120339.990 | 906967.142  |            |
|      | 2023        | 4156698.720 | 3176669.801 | 980028.919  |            |
|      | 2024        | 4285772.226 | 3229973.562 | 1055798.66  |            |
|      | 2025        | 4410759.298 | 3279652.140 | 1131107.16  |            |
|      | 2026        | 4531411.064 | 3324715.999 | 1206695.07  |            |
|      | 2027        | 4651145.233 | 3366864.116 | 1284281.12  |            |
|      | 2028        | 4769837.872 | 3406167.930 | 1363669.94  |            |
|      | 2029        | 4887747.179 | 3442875.496 | 1444871.68  |            |
| 2030 | 4997632.895 | 3475891.307 | 1521741.59  |             |            |
| 2031 | 5103301.991 | 3505080.638 | 1598221.35  |             |            |
| 2032 | 5207593.613 | 3532014.775 | 1675578.84  |             |            |
| 2033 | 5310556.138 | 3556755.550 | 1753800.59  |             |            |
| 2034 | 5412542.816 | 3579621.419 | 1832921.40  |             |            |
| 2035 | 5500522.473 | 3598788.175 | 1901734.30  |             |            |
| 2036 | 5588149.640 | 3616329.314 | 1971820.33  |             |            |
| 2037 | 5674667.886 | 3632531.301 | 2042136.59  |             |            |
| 2038 | 5760391.289 | 3647451.256 | 2112940.03  |             |            |
| 2039 | 5845459.234 | 3661348.599 | 2184110.63  |             |            |
|      | Female      | 1990        | 77434.846   | 77434.846   | 0.000      |
|      |             | 1991        | 160029.510  | 159861.322  | 168.189    |
|      |             | 1992        | 240642.531  | 240002.253  | 640.279    |
|      |             | 1993        | 329362.093  | 327709.507  | 1652.587   |
|      |             | 1994        | 418569.515  | 415257.102  | 3312.413   |
|      |             | 1995        | 509110.357  | 503279.764  | 5830.594   |
|      |             | 1996        | 600040.117  | 590774.214  | 9265.903   |
|      |             | 1997        | 691159.071  | 677410.781  | 13748.289  |
|      |             | 1998        | 782866.899  | 763517.590  | 19349.309  |
|      |             | 1999        | 881526.925  | 854784.768  | 26742.158  |
|      |             | 2000        | 977880.647  | 942589.509  | 35291.138  |

**Results for PHIM for Run 8 (ELL Summary Sensitivity\_Analysis\_4.RTF)**

|      |             |             |            |
|------|-------------|-------------|------------|
| 2001 | 1076787.404 | 1031165.840 | 45621.563  |
| 2002 | 1174842.754 | 1117289.830 | 57552.924  |
| 2003 | 1275102.681 | 1203705.632 | 71397.049  |
| 2004 | 1371026.306 | 1284704.834 | 86321.471  |
| 2005 | 1473954.509 | 1369560.292 | 104394.217 |
| 2006 | 1574450.828 | 1450431.070 | 124019.758 |
| 2007 | 1673790.211 | 1528343.684 | 145446.527 |
| 2008 | 1782360.738 | 1611239.672 | 171121.065 |
| 2009 | 1892944.209 | 1693016.961 | 199927.248 |
| 2010 | 2002131.282 | 1771523.762 | 230607.520 |
| 2011 | 2114522.152 | 1849603.414 | 264918.739 |
| 2012 | 2228079.372 | 1925988.257 | 302091.115 |
| 2013 | 2345377.689 | 2002052.975 | 343324.714 |
| 2014 | 2462498.422 | 2075160.602 | 387337.820 |
| 2015 | 2581450.312 | 2147489.300 | 433961.011 |
| 2016 | 2701959.301 | 2217876.429 | 484082.872 |
| 2017 | 2823834.967 | 2286195.804 | 537639.163 |
| 2018 | 2938265.081 | 2348288.587 | 589976.494 |
| 2019 | 3053254.880 | 2408011.303 | 645243.576 |
| 2020 | 3167073.216 | 2465067.392 | 702005.824 |
| 2021 | 3279517.699 | 2519460.806 | 760056.894 |
| 2022 | 3392060.964 | 2571357.798 | 820703.166 |
| 2023 | 3504296.171 | 2620678.908 | 883617.264 |
| 2024 | 3616019.231 | 2667294.150 | 948725.081 |
| 2025 | 3724611.269 | 2710928.801 | 1013682.47 |
| 2026 | 3827181.707 | 2750612.041 | 1076569.67 |
| 2027 | 3928684.441 | 2787767.420 | 1140917.02 |
| 2028 | 4029124.892 | 2822602.931 | 1206521.96 |
| 2029 | 4128269.068 | 2854984.261 | 1273284.81 |
| 2030 | 4221560.174 | 2884380.558 | 1337179.62 |
| 2031 | 4304170.584 | 2908982.278 | 1395188.31 |
| 2032 | 4384930.537 | 2931523.626 | 1453406.91 |
| 2033 | 4464357.691 | 2952331.373 | 1512026.32 |
| 2034 | 4542251.545 | 2971347.197 | 1570904.35 |
| 2035 | 4611066.648 | 2987619.315 | 1623447.33 |
| 2036 | 4670309.230 | 3000621.340 | 1669687.89 |
| 2037 | 4728179.514 | 3012499.882 | 1715679.63 |
| 2038 | 4785008.048 | 3023416.166 | 1761591.88 |
| 2039 | 4841291.793 | 3033480.107 | 1807811.69 |

---

## Results for PHIM for Run 8 (ELL Summary Sensitivity\_Analysis\_4.RTF)

\*\*\*\*\*

**Table 4: Estimated Loss of Life, All age groups combined, Population and Number deaths adjusted for Ecig scenario, cumulative over years**

| Disease      | Sex          | Year         | Years of life lost<br>NULL | Years of life lost<br>Ecig | Years of life<br>Saved |
|--------------|--------------|--------------|----------------------------|----------------------------|------------------------|
| All Diseases | Males        | 1990         | 1304839.645                | 1304839.645                | 0.000                  |
|              |              | 1991         | 2579865.358                | 2571191.563                | 8673.794               |
|              |              | 1992         | 3830683.831                | 3798446.690                | 32237.141              |
|              |              | 1993         | 5076567.803                | 5001002.043                | 75565.760              |
|              |              | 1994         | 6292145.526                | 6150128.208                | 142017.318             |
|              |              | 1995         | 7485537.010                | 7250482.539                | 235054.471             |
|              |              | 1996         | 8655955.028                | 8300076.401                | 355878.627             |
|              |              | 1997         | 9791729.713                | 9288450.337                | 503279.376             |
|              |              | 1998         | 10899134.186               | 10223295.314               | 675838.872             |
|              |              | 1999         | 12070409.674               | 11163913.066               | 906496.608             |
|              |              | 2000         | 13231384.595               | 12064210.487               | 1167174.11             |
|              |              | 2001         | 14371761.018               | 12914417.710               | 1457343.31             |
|              |              | 2002         | 15508906.386               | 13727137.043               | 1781769.34             |
|              |              | 2003         | 16638100.422               | 14502715.854               | 2135384.57             |
|              |              | 2004         | 17736465.088               | 15230773.166               | 2505691.92             |
|              |              | 2005         | 18834658.606               | 15932808.006               | 2901850.60             |
|              |              | 2006         | 19909100.501               | 16588895.041               | 3320205.46             |
|              |              | 2007         | 20958321.463               | 17206840.682               | 3751480.78             |
|              |              | 2008         | 22000068.148               | 17800977.249               | 4199090.90             |
|              |              | 2009         | 23018816.903               | 18362641.186               | 4656175.72             |
|              |              | 2010         | 24018480.537               | 18893343.778               | 5125136.76             |
|              |              | 2011         | 25003034.574               | 19396800.161               | 5606234.41             |
|              |              | 2012         | 25969871.429               | 19871747.396               | 6098124.03             |
|              |              | 2013         | 26920275.180               | 20320325.493               | 6599949.69             |
|              |              | 2014         | 27849005.227               | 20740897.141               | 7108108.09             |
|              |              | 2015         | 28749620.400               | 21136842.841               | 7612777.56             |
|              |              | 2016         | 29622417.562               | 21499634.785               | 8122782.78             |
|              |              | 2017         | 30462559.724               | 21831946.957               | 8630612.77             |
|              |              | 2018         | 31293299.299               | 22151640.298               | 9141659.00             |
|              |              | 2019         | 32109993.427               | 22453963.815               | 9656029.61             |
|              |              | 2020         | 32883323.977               | 22735080.228               | 10148243.7             |
|              |              | 2021         | 33610102.554               | 22979237.319               | 10630865.2             |
|              |              | 2022         | 34322010.448               | 23208371.890               | 11113638.6             |
|              |              | 2023         | 35018383.550               | 23422611.973               | 11595771.6             |
|              |              | 2024         | 35700177.955               | 23623256.612               | 12076921.3             |
|              |              | 2025         | 36315500.346               | 23804145.684               | 12511354.7             |
|              |              | 2026         | 36896159.343               | 23958494.812               | 12937664.5             |
|              |              | 2027         | 37462570.116               | 24102192.731               | 13360377.4             |
|              |              | 2028         | 38015337.780               | 24235375.872               | 13779961.9             |
|              |              | 2029         | 38554814.764               | 24359334.917               | 14195479.8             |
|              |              | 2030         | 39003805.400               | 24465115.647               | 14538689.8             |
|              |              | 2031         | 39436509.703               | 24555879.176               | 14880630.5             |
| 2032         | 39858470.458 | 24640119.835 | 15218350.6                 |                            |                        |
| 2033         | 40270147.082 | 24717712.641 | 15552434.4                 |                            |                        |
| 2034         | 40672665.743 | 24789929.906 | 15882735.8                 |                            |                        |
| 2035         | 40962732.664 | 24844736.506 | 16117996.2                 |                            |                        |
| 2036         | 41255021.653 | 24894826.819 | 16360194.8                 |                            |                        |
| 2037         | 41540573.023 | 24941667.053 | 16598906.0                 |                            |                        |
| 2038         | 41820158.066 | 24985089.311 | 16835068.8                 |                            |                        |
| 2039         | 42093547.949 | 25025790.553 | 17067757.4                 |                            |                        |
|              | Female       | 1990         | 588979.406                 | 588979.406                 | 0.000                  |
|              |              | 1991         | 1182571.252                | 1179606.299                | 2964.953               |
|              |              | 1992         | 1777346.679                | 1766098.422                | 11248.257              |
|              |              | 1993         | 2380261.899                | 2353273.147                | 26988.752              |
|              |              | 1994         | 2983130.039                | 2931348.907                | 51781.132              |
|              |              | 1995         | 3588982.584                | 3502018.926                | 86963.658              |
|              |              | 1996         | 4195430.235                | 4060685.508                | 134744.727             |
|              |              | 1997         | 4793866.694                | 4600887.416                | 192979.279             |
|              |              | 1998         | 5389747.381                | 5126871.167                | 262876.214             |
|              |              | 1999         | 6006722.467                | 5653237.654                | 353484.813             |
|              |              | 2000         | 6625758.871                | 6168775.741                | 456983.130             |
|              |              | 2001         | 7245135.411                | 6669541.174                | 575594.237             |
|              |              | 2002         | 7867492.021                | 7157676.463                | 709815.558             |
|              |              | 2003         | 8485051.793                | 7628414.788                | 856637.005             |
|              |              | 2004         | 9092994.774                | 8078328.382                | 1014666.39             |
|              |              | 2005         | 9706032.803                | 8518683.231                | 1187349.57             |
|              |              | 2006         | 10311907.548               | 8939798.136                | 1372109.41             |
|              |              | 2007         | 10909437.502               | 9343759.715                | 1565677.79             |
|              |              | 2008         | 11506462.491               | 9732474.786                | 1773987.70             |
|              |              | 2009         | 12098393.287               | 10107769.920               | 1990623.37             |
|              |              | 2010         | 12681188.981               | 10464923.666               | 2216265.31             |

**Results for PHIM for Run 8 (ELL Summary Sensitivity\_Analysis\_4.RTF)**

|             |       |      |              |              |            |
|-------------|-------|------|--------------|--------------|------------|
|             |       | 2011 | 13260062.991 | 10806956.756 | 2453106.24 |
|             |       | 2012 | 13839417.441 | 11136522.654 | 2702894.79 |
|             |       | 2013 | 14409614.758 | 11450421.274 | 2959193.48 |
|             |       | 2014 | 14976658.746 | 11749109.189 | 3227549.56 |
|             |       | 2015 | 15529977.821 | 12030994.936 | 3498982.89 |
|             |       | 2016 | 16066640.764 | 12292388.571 | 3774252.19 |
|             |       | 2017 | 16590035.078 | 12536930.725 | 4053104.35 |
|             |       | 2018 | 17098716.137 | 12768172.579 | 4330543.56 |
|             |       | 2019 | 17599868.850 | 12986684.975 | 4613183.88 |
|             |       | 2020 | 18081346.241 | 13191048.564 | 4890297.68 |
|             |       | 2021 | 18537594.460 | 13375064.262 | 5162530.20 |
|             |       | 2022 | 18985300.234 | 13547838.216 | 5437462.02 |
|             |       | 2023 | 19423958.747 | 13709832.079 | 5714126.67 |
|             |       | 2024 | 19853347.772 | 13860902.401 | 5992445.37 |
|             |       | 2025 | 20252822.245 | 13998680.218 | 6254142.03 |
|             |       | 2026 | 20619307.063 | 14117924.620 | 6501382.44 |
|             |       | 2027 | 20976063.406 | 14228395.987 | 6747667.42 |
|             |       | 2028 | 21323641.947 | 14331084.061 | 6992557.89 |
|             |       | 2029 | 21662117.106 | 14425893.048 | 7236224.06 |
|             |       | 2030 | 21960971.694 | 14508831.131 | 7452140.56 |
|             |       | 2031 | 22224951.983 | 14576499.886 | 7648452.10 |
|             |       | 2032 | 22480397.853 | 14638498.714 | 7841899.14 |
|             |       | 2033 | 22728639.455 | 14695766.407 | 8032873.05 |
|             |       | 2034 | 22970448.888 | 14748337.093 | 8222111.79 |
|             |       | 2035 | 23164154.188 | 14790524.117 | 8373630.07 |
|             |       | 2036 | 23334538.616 | 14824479.806 | 8510058.81 |
|             |       | 2037 | 23499760.723 | 14855801.004 | 8643959.72 |
|             |       | 2038 | 23660308.401 | 14884851.369 | 8775457.03 |
|             |       | 2039 | 23817891.273 | 14911919.194 | 8905972.08 |
| Lung cancer | Males | 1990 | 595621.791   | 595621.791   | 0.000      |
|             |       | 1991 | 1177744.113  | 1177096.215  | 647.898    |
|             |       | 1992 | 1750034.892  | 1747594.318  | 2440.574   |
|             |       | 1993 | 2319752.308  | 2313819.938  | 5932.369   |
|             |       | 1994 | 2872597.339  | 2861118.497  | 11478.842  |
|             |       | 1995 | 3411494.825  | 3391997.062  | 19497.763  |
|             |       | 1996 | 3945569.726  | 3914795.012  | 30774.714  |
|             |       | 1997 | 4463316.362  | 4418035.363  | 45280.999  |
|             |       | 1998 | 4975301.180  | 4911602.077  | 63699.104  |
|             |       | 1999 | 5473691.125  | 5387437.748  | 86253.377  |
|             |       | 2000 | 5977500.570  | 5863076.402  | 114424.168 |
|             |       | 2001 | 6474795.516  | 6326636.416  | 148159.099 |
|             |       | 2002 | 6968769.705  | 6780622.492  | 188147.213 |
|             |       | 2003 | 7460282.140  | 7225077.643  | 235204.497 |
|             |       | 2004 | 7947048.275  | 7657900.528  | 289147.748 |
|             |       | 2005 | 8430571.669  | 8080067.761  | 350503.908 |
|             |       | 2006 | 8903945.390  | 8484855.641  | 419089.749 |
|             |       | 2007 | 9364177.982  | 8870019.544  | 494158.438 |
|             |       | 2008 | 9822525.458  | 9244181.457  | 578344.002 |
|             |       | 2009 | 10275228.886 | 9604438.951  | 670789.935 |
|             |       | 2010 | 10720275.500 | 9949479.376  | 770796.125 |
|             |       | 2011 | 11155356.373 | 10277382.346 | 877974.027 |
|             |       | 2012 | 11582611.617 | 10588870.809 | 993740.808 |
|             |       | 2013 | 11998803.791 | 10882379.868 | 1116423.92 |
|             |       | 2014 | 12402087.090 | 11157310.365 | 1244776.72 |
|             |       | 2015 | 12793451.706 | 11415418.379 | 1378033.33 |
|             |       | 2016 | 13160101.653 | 11647941.074 | 1512160.58 |
|             |       | 2017 | 13503583.414 | 11857316.336 | 1646267.08 |
|             |       | 2018 | 13859755.737 | 12063812.316 | 1795943.42 |
|             |       | 2019 | 14211625.176 | 12258857.928 | 1952767.25 |
|             |       | 2020 | 14553935.288 | 12441099.779 | 2112835.51 |
|             |       | 2021 | 14851747.495 | 12592021.619 | 2259725.88 |
|             |       | 2022 | 15144531.004 | 12733086.631 | 2411444.37 |
|             |       | 2023 | 15431932.496 | 12864436.669 | 2567495.83 |
|             |       | 2024 | 15713920.740 | 12986764.271 | 2727156.47 |
|             |       | 2025 | 15979112.816 | 13097581.795 | 2881531.02 |
|             |       | 2026 | 16206550.153 | 13186367.240 | 3020182.91 |
|             |       | 2027 | 16428826.050 | 13268393.370 | 3160432.68 |
|             |       | 2028 | 16645902.186 | 13343929.816 | 3301972.37 |
|             |       | 2029 | 16858126.517 | 13413818.978 | 3444307.54 |
|             |       | 2030 | 17045220.687 | 13473958.140 | 3571262.55 |
|             |       | 2031 | 17208482.610 | 13522060.677 | 3686421.93 |
|             |       | 2032 | 17367586.074 | 13566457.483 | 3801128.59 |
|             |       | 2033 | 17522716.280 | 13607181.571 | 3915534.71 |
|             |       | 2034 | 17674226.555 | 13644941.071 | 4029285.48 |
|             |       | 2035 | 17792201.734 | 13674024.176 | 4118177.56 |
|             |       | 2036 | 17903508.236 | 13699401.467 | 4204106.77 |
|             |       | 2037 | 18012162.345 | 13723102.910 | 4289059.43 |
|             |       | 2038 | 18118464.470 | 13745034.609 | 4373429.86 |

**Results for PHIM for Run 8 (ELL Summary Sensitivity\_Analysis\_4.RTF)**

|     |        |      |              |              |            |
|-----|--------|------|--------------|--------------|------------|
|     | Female | 2039 | 18222549.860 | 13765627.307 | 4456922.55 |
|     |        | 1990 | 307897.357   | 307897.357   | 0.000      |
|     |        | 1991 | 616547.418   | 616130.925   | 416.493    |
|     |        | 1992 | 931086.773   | 929438.213   | 1648.560   |
|     |        | 1993 | 1246155.671  | 1242099.058  | 4056.613   |
|     |        | 1994 | 1561212.934  | 1553229.543  | 7983.392   |
|     |        | 1995 | 1879967.742  | 1866068.268  | 13899.474  |
|     |        | 1996 | 2197488.109  | 2175401.256  | 22086.853  |
|     |        | 1997 | 2515698.453  | 2482730.929  | 32967.523  |
|     |        | 1998 | 2836249.556  | 2789365.357  | 46884.199  |
|     |        | 1999 | 3150201.390  | 3086374.755  | 63826.634  |
|     |        | 2000 | 3472722.342  | 3387888.732  | 84833.610  |
|     |        | 2001 | 3796994.889  | 3686755.994  | 110238.895 |
|     |        | 2002 | 4126619.935  | 3985829.205  | 140790.730 |
|     |        | 2003 | 4454982.533  | 4278898.793  | 176083.741 |
|     |        | 2004 | 4784343.030  | 4567396.790  | 216946.241 |
|     |        | 2005 | 5113443.121  | 4849972.904  | 263470.217 |
|     |        | 2006 | 5442543.963  | 5126030.313  | 316513.649 |
|     |        | 2007 | 5772441.497  | 5396268.703  | 376172.794 |
|     |        | 2008 | 6091911.943  | 5651376.892  | 440535.051 |
|     |        | 2009 | 6413671.330  | 5900973.354  | 512697.976 |
|     |        | 2010 | 6730763.530  | 6140321.605  | 590441.925 |
|     |        | 2011 | 7043614.101  | 6369161.787  | 674452.314 |
|     |        | 2012 | 7356270.780  | 6590450.987  | 765819.792 |
|     |        | 2013 | 7662551.964  | 6799963.014  | 862588.949 |
|     |        | 2014 | 7964551.465  | 6999289.930  | 965261.535 |
|     |        | 2015 | 8254895.403  | 7184867.608  | 1070027.79 |
|     |        | 2016 | 8530661.848  | 7354106.463  | 1176555.38 |
|     |        | 2017 | 8795826.122  | 7510597.419  | 1285228.70 |
|     |        | 2018 | 9067233.707  | 7663154.748  | 1404078.96 |
|     |        | 2019 | 9335343.270  | 7806955.056  | 1528388.21 |
|     |        | 2020 | 9596110.883  | 7941345.558  | 1654765.33 |
|     |        | 2021 | 9833186.859  | 8058793.787  | 1774393.07 |
|     |        | 2022 | 10066452.037 | 8168612.116  | 1897839.92 |
|     |        | 2023 | 10295503.609 | 8271119.858  | 2024383.75 |
|     |        | 2024 | 10520125.318 | 8366248.076  | 2153877.24 |
|     |        | 2025 | 10731915.863 | 8452639.474  | 2279276.39 |
|     |        | 2026 | 10917495.549 | 8524807.230  | 2392688.32 |
|     |        | 2027 | 11098620.885 | 8591298.339  | 2507322.55 |
|     |        | 2028 | 11275441.234 | 8652795.879  | 2622645.35 |
|     |        | 2029 | 11447962.710 | 8709274.425  | 2738688.28 |
|     |        | 2030 | 11601867.623 | 8758281.324  | 2843586.30 |
|     |        | 2031 | 11731666.516 | 8796915.331  | 2934751.19 |
|     |        | 2032 | 11857585.969 | 8832211.430  | 3025374.54 |
|     |        | 2033 | 11980128.625 | 8864719.728  | 3115408.90 |
|     |        | 2034 | 12099562.464 | 8894505.238  | 3205057.23 |
|     |        | 2035 | 12195919.946 | 8918048.175  | 3277871.77 |
|     |        | 2036 | 12278201.969 | 8936676.412  | 3341525.56 |
|     |        | 2037 | 12358146.336 | 8953912.282  | 3404234.05 |
|     |        | 2038 | 12435978.633 | 8969940.822  | 3466037.81 |
|     |        | 2039 | 12512468.845 | 8984925.025  | 3527543.82 |
| IHD | Males  | 1990 | 517209.093   | 517209.093   | 0.000      |
|     |        | 1991 | 1019219.395  | 1012116.414  | 7102.981   |
|     |        | 1992 | 1509598.614  | 1483228.574  | 26370.041  |
|     |        | 1993 | 1992735.299  | 1931315.268  | 61420.031  |
|     |        | 1994 | 2462877.575  | 2348294.699  | 114582.876 |
|     |        | 1995 | 2928249.390  | 2739711.365  | 188538.025 |
|     |        | 1996 | 3377377.730  | 3093993.473  | 283384.257 |
|     |        | 1997 | 3809062.472  | 3411346.763  | 397715.709 |
|     |        | 1998 | 4222213.867  | 3692540.319  | 529673.548 |
|     |        | 1999 | 4708317.743  | 3996649.241  | 711668.503 |
|     |        | 2000 | 5182084.396  | 4268741.934  | 913342.462 |
|     |        | 2001 | 5644097.705  | 4509171.138  | 1134926.57 |
|     |        | 2002 | 6107232.129  | 4727133.858  | 1380098.27 |
|     |        | 2003 | 6561785.704  | 4919848.080  | 1641937.62 |
|     |        | 2004 | 6996156.348  | 5086087.527  | 1910068.82 |
|     |        | 2005 | 7426261.361  | 5234947.192  | 2191314.17 |
|     |        | 2006 | 7849012.694  | 5365590.180  | 2483422.51 |
|     |        | 2007 | 8255300.530  | 5478650.360  | 2776650.17 |
|     |        | 2008 | 8650662.040  | 5578137.315  | 3072524.72 |
|     |        | 2009 | 9030818.513  | 5665038.710  | 3365779.80 |
|     |        | 2010 | 9403026.327  | 5742411.210  | 3660615.12 |
|     |        | 2011 | 9767535.506  | 5811281.380  | 3956254.13 |
|     |        | 2012 | 10123044.281 | 5872891.520  | 4250152.76 |
|     |        | 2013 | 10470104.786 | 5928003.761  | 4542101.02 |
|     |        | 2014 | 10807756.112 | 5977610.912  | 4830145.20 |
|     |        | 2015 | 11130681.425 | 6021749.200  | 5108932.22 |
|     |        | 2016 | 11448966.506 | 6062130.563  | 5386835.94 |

**Results for PHIM for Run 8 (ELL Summary Sensitivity\_Analysis\_4.RTF)**

|        |        |      |              |             |            |
|--------|--------|------|--------------|-------------|------------|
|        |        | 2017 | 11758164.882 | 6098978.032 | 5659186.85 |
|        |        | 2018 | 12054448.241 | 6131819.165 | 5922629.08 |
|        |        | 2019 | 12341606.261 | 6162099.179 | 6179507.08 |
|        |        | 2020 | 12600728.939 | 6188122.232 | 6412606.71 |
|        |        | 2021 | 12861767.105 | 6213170.278 | 6648596.83 |
|        |        | 2022 | 13114168.616 | 6236509.375 | 6877659.24 |
|        |        | 2023 | 13357894.797 | 6258166.152 | 7099728.65 |
|        |        | 2024 | 13593848.521 | 6278581.194 | 7315267.33 |
|        |        | 2025 | 13789177.359 | 6295047.876 | 7494129.48 |
|        |        | 2026 | 13993401.656 | 6311946.513 | 7681455.14 |
|        |        | 2027 | 14190519.224 | 6328079.369 | 7862439.85 |
|        |        | 2028 | 14381193.356 | 6343246.188 | 8037947.17 |
|        |        | 2029 | 14565171.927 | 6357607.804 | 8207564.12 |
|        |        | 2030 | 14697381.605 | 6367798.477 | 8329583.13 |
|        |        | 2031 | 14842203.512 | 6379007.654 | 8463195.86 |
|        |        | 2032 | 14982485.826 | 6389774.878 | 8592710.95 |
|        |        | 2033 | 15118410.647 | 6399887.201 | 8718523.45 |
|        |        | 2034 | 15250284.398 | 6409556.926 | 8840727.47 |
|        |        | 2035 | 15322911.166 | 6414702.554 | 8908208.61 |
|        |        | 2036 | 15405115.031 | 6420536.605 | 8984578.43 |
|        |        | 2037 | 15484709.137 | 6426193.502 | 9058515.63 |
|        |        | 2038 | 15561812.193 | 6431553.711 | 9130258.48 |
|        |        | 2039 | 15635992.616 | 6436620.192 | 9199372.42 |
|        | Female | 1990 | 147299.110   | 147299.110  | 0.000      |
|        |        | 1991 | 295122.462   | 293257.355  | 1865.107   |
|        |        | 1992 | 439962.920   | 432980.972  | 6981.948   |
|        |        | 1993 | 584735.615   | 568178.771  | 16556.844  |
|        |        | 1994 | 727640.783   | 696331.725  | 31309.058  |
|        |        | 1995 | 868486.937   | 816737.839  | 51749.099  |
|        |        | 1996 | 1010321.847  | 930901.386  | 79420.461  |
|        |        | 1997 | 1144230.930  | 1032472.425 | 111758.505 |
|        |        | 1998 | 1274513.622  | 1124728.943 | 149784.678 |
|        |        | 1999 | 1426725.938  | 1224931.350 | 201794.588 |
|        |        | 2000 | 1573462.680  | 1314540.287 | 258922.393 |
|        |        | 2001 | 1719132.015  | 1395399.743 | 323732.272 |
|        |        | 2002 | 1863006.732  | 1467919.988 | 395086.744 |
|        |        | 2003 | 2002943.227  | 1531886.641 | 471056.586 |
|        |        | 2004 | 2137798.705  | 1587665.653 | 550133.052 |
|        |        | 2005 | 2271071.245  | 1637802.985 | 633268.260 |
|        |        | 2006 | 2400707.731  | 1681460.735 | 719246.996 |
|        |        | 2007 | 2523634.512  | 1718906.732 | 804727.780 |
|        |        | 2008 | 2648752.232  | 1753235.834 | 895516.398 |
|        |        | 2009 | 2765973.961  | 1782576.446 | 983397.515 |
|        |        | 2010 | 2881329.235  | 1808866.570 | 1072462.66 |
|        |        | 2011 | 2994972.694  | 1832358.972 | 1162613.72 |
|        |        | 2012 | 3108958.829  | 1853751.383 | 1255207.45 |
|        |        | 2013 | 3218140.416  | 1872761.507 | 1345378.91 |
|        |        | 2014 | 3328387.914  | 1890378.928 | 1438008.99 |
|        |        | 2015 | 3435342.796  | 1906391.729 | 1528951.07 |
|        |        | 2016 | 3539189.408  | 1920860.580 | 1618328.83 |
|        |        | 2017 | 3640041.363  | 1933968.341 | 1706073.02 |
|        |        | 2018 | 3732645.362  | 1945225.523 | 1787419.84 |
|        |        | 2019 | 3821421.978  | 1955378.381 | 1866043.60 |
|        |        | 2020 | 3902115.950  | 1964142.599 | 1937973.35 |
|        |        | 2021 | 3984301.053  | 1972614.098 | 2011686.96 |
|        |        | 2022 | 4062629.299  | 1980290.433 | 2082338.87 |
|        |        | 2023 | 4137348.729  | 1987333.053 | 2150015.68 |
|        |        | 2024 | 4208611.493  | 1993783.961 | 2214827.53 |
|        |        | 2025 | 4269419.492  | 1999133.843 | 2270285.65 |
|        |        | 2026 | 4330969.998  | 2004379.070 | 2326590.93 |
|        |        | 2027 | 4389134.306  | 2009208.944 | 2379925.36 |
|        |        | 2028 | 4444222.970  | 2013695.563 | 2430527.41 |
|        |        | 2029 | 4496447.877  | 2017891.917 | 2478555.96 |
|        |        | 2030 | 4536975.698  | 2021039.362 | 2515936.34 |
|        |        | 2031 | 4578338.586  | 2024230.323 | 2554108.26 |
|        |        | 2032 | 4617397.784  | 2027224.027 | 2590173.76 |
|        |        | 2033 | 4654407.697  | 2030068.107 | 2624339.59 |
|        |        | 2034 | 4689913.454  | 2032786.606 | 2657126.85 |
|        |        | 2035 | 4712518.190  | 2034402.513 | 2678115.68 |
|        |        | 2036 | 4735845.827  | 2036062.756 | 2699783.07 |
|        |        | 2037 | 4757958.806  | 2037640.720 | 2720318.09 |
|        |        | 2038 | 4778813.806  | 2039148.705 | 2739665.10 |
|        |        | 2039 | 4798769.065  | 2040599.366 | 2758169.70 |
| Stroke | Males  | 1990 | 75005.854    | 75005.854   | 0.000      |
|        |        | 1991 | 149463.017   | 148743.133  | 719.885    |
|        |        | 1992 | 222966.278   | 220290.134  | 2676.144   |
|        |        | 1993 | 296801.879   | 290428.491  | 6373.387   |
|        |        | 1994 | 372453.706   | 360112.208  | 12341.497  |

**Results for PHIM for Run 8 (ELL Summary Sensitivity\_Analysis\_4.RTF)**

|        |      |             |             |            |
|--------|------|-------------|-------------|------------|
|        | 1995 | 448401.338  | 427537.518  | 20863.819  |
|        | 1996 | 523536.301  | 491435.715  | 32100.587  |
|        | 1997 | 596763.211  | 550724.216  | 46038.995  |
|        | 1998 | 667546.681  | 605040.460  | 62506.221  |
|        | 1999 | 734925.407  | 653841.315  | 81084.092  |
|        | 2000 | 803749.361  | 700733.482  | 103015.878 |
|        | 2001 | 870081.588  | 742903.578  | 127178.010 |
|        | 2002 | 935347.140  | 781572.897  | 153774.242 |
|        | 2003 | 1001627.349 | 817840.476  | 183786.873 |
|        | 2004 | 1066587.976 | 850769.814  | 215818.161 |
|        | 2005 | 1130548.052 | 880623.011  | 249925.041 |
|        | 2006 | 1195132.454 | 908258.196  | 286874.257 |
|        | 2007 | 1258974.043 | 933306.922  | 325667.121 |
|        | 2008 | 1320124.867 | 955197.212  | 364927.655 |
|        | 2009 | 1380776.123 | 975089.803  | 405686.320 |
|        | 2010 | 1440048.533 | 992937.601  | 447110.932 |
|        | 2011 | 1497484.847 | 1008818.359 | 488666.488 |
|        | 2012 | 1554496.526 | 1023168.105 | 531328.421 |
|        | 2013 | 1610819.598 | 1036164.648 | 574654.950 |
|        | 2014 | 1667484.890 | 1048107.257 | 619377.632 |
|        | 2015 | 1720948.287 | 1058578.039 | 662370.248 |
|        | 2016 | 1775699.228 | 1068413.109 | 707286.119 |
|        | 2017 | 1830250.175 | 1077465.358 | 752784.816 |
|        | 2018 | 1875958.950 | 1084516.949 | 791442.001 |
|        | 2019 | 1920359.232 | 1090900.389 | 829458.843 |
|        | 2020 | 1960605.297 | 1096342.045 | 864263.252 |
|        | 2021 | 1998912.887 | 1101183.621 | 897729.267 |
|        | 2022 | 2036003.696 | 1105577.929 | 930425.767 |
|        | 2023 | 2071857.536 | 1109572.527 | 962285.009 |
|        | 2024 | 2106636.468 | 1113260.825 | 993375.644 |
|        | 2025 | 2136450.873 | 1116281.116 | 1020169.76 |
|        | 2026 | 2164796.470 | 1119017.843 | 1045778.63 |
|        | 2027 | 2192079.608 | 1121559.942 | 1070519.67 |
|        | 2028 | 2218404.367 | 1123905.844 | 1094498.52 |
|        | 2029 | 2243769.140 | 1126096.277 | 1117672.86 |
|        | 2030 | 2263570.213 | 1127753.075 | 1135817.14 |
|        | 2031 | 2282521.590 | 1129304.785 | 1153216.81 |
|        | 2032 | 2300804.945 | 1130768.581 | 1170036.36 |
|        | 2033 | 2318464.018 | 1132139.592 | 1186324.43 |
|        | 2034 | 2335611.973 | 1133447.007 | 1202164.97 |
|        | 2035 | 2347097.290 | 1134304.788 | 1212792.50 |
|        | 2036 | 2358248.747 | 1135128.999 | 1223119.75 |
|        | 2037 | 2369033.655 | 1135923.302 | 1233110.35 |
|        | 2038 | 2379490.114 | 1136675.909 | 1242814.20 |
|        | 2039 | 2389546.238 | 1137387.067 | 1252159.17 |
| Female | 1990 | 56348.092   | 56348.092   | 0.000      |
|        | 1991 | 110871.862  | 110356.698  | 515.165    |
|        | 1992 | 165654.454  | 163676.691  | 1977.764   |
|        | 1993 | 220008.519  | 215284.278  | 4724.241   |
|        | 1994 | 275706.807  | 266525.961  | 9180.845   |
|        | 1995 | 331417.547  | 315922.644  | 15494.903  |
|        | 1996 | 387580.161  | 363588.332  | 23991.829  |
|        | 1997 | 442778.242  | 408237.590  | 34540.652  |
|        | 1998 | 496117.305  | 449201.267  | 46916.038  |
|        | 1999 | 548268.214  | 487056.236  | 61211.979  |
|        | 2000 | 601693.202  | 523624.364  | 78068.838  |
|        | 2001 | 652221.103  | 556031.360  | 96189.743  |
|        | 2002 | 703022.600  | 586381.896  | 116640.704 |
|        | 2003 | 752023.351  | 613584.443  | 138438.908 |
|        | 2004 | 799826.733  | 638126.830  | 161699.903 |
|        | 2005 | 847563.928  | 660796.075  | 186767.854 |
|        | 2006 | 894205.027  | 681195.325  | 213009.702 |
|        | 2007 | 939571.282  | 699415.147  | 240156.135 |
|        | 2008 | 983437.578  | 715620.209  | 267817.369 |
|        | 2009 | 1025803.786 | 730004.816  | 295798.970 |
|        | 2010 | 1066964.934 | 742801.850  | 324163.084 |
|        | 2011 | 1106954.044 | 754188.982  | 352765.062 |
|        | 2012 | 1146108.461 | 764434.513  | 381673.947 |
|        | 2013 | 1183544.689 | 773467.135  | 410077.554 |
|        | 2014 | 1221220.945 | 781808.817  | 439412.128 |
|        | 2015 | 1258289.311 | 789453.213  | 468836.098 |
|        | 2016 | 1294830.207 | 796409.254  | 498420.953 |
|        | 2017 | 1330332.626 | 802668.565  | 527664.060 |
|        | 2018 | 1360571.987 | 807637.609  | 552934.378 |
|        | 2019 | 1389848.723 | 812093.048  | 577755.674 |
|        | 2020 | 1416046.192 | 815850.239  | 600195.954 |
|        | 2021 | 1440588.850 | 819140.930  | 621447.920 |
|        | 2022 | 1464157.934 | 822100.665  | 642057.270 |

**Results for PHIM for Run 8 (ELL Summary Sensitivity\_Analysis\_4.RTF)**

|      |             |             |             |             |            |
|------|-------------|-------------|-------------|-------------|------------|
|      |             | 2023        | 1486810.237 | 824792.579  | 662017.658 |
|      |             | 2024        | 1508591.729 | 827233.245  | 681358.485 |
|      |             | 2025        | 1526875.621 | 829195.874  | 697679.747 |
|      |             | 2026        | 1543659.810 | 830910.484  | 712749.326 |
|      |             | 2027        | 1559623.774 | 832473.664  | 727150.110 |
|      |             | 2028        | 1574852.850 | 833912.666  | 740940.184 |
|      |             | 2029        | 1589437.452 | 835242.920  | 754194.532 |
|      |             | 2030        | 1600568.199 | 836216.774  | 764351.425 |
|      |             | 2031        | 1610776.297 | 837090.396  | 773685.900 |
|      |             | 2032        | 1620483.563 | 837905.206  | 782578.357 |
|      |             | 2033        | 1629745.442 | 838672.489  | 791072.953 |
|      |             | 2034        | 1638721.425 | 839400.050  | 799321.375 |
|      |             | 2035        | 1644649.404 | 839856.118  | 804793.286 |
|      |             | 2036        | 1650181.590 | 840275.321  | 809906.268 |
|      |             | 2037        | 1655476.066 | 840674.548  | 814801.518 |
|      |             | 2038        | 1660507.914 | 841056.712  | 819451.202 |
|      |             | 2039        | 1665361.569 | 841423.998  | 823937.571 |
| COPD | Males       | 1990        | 117002.906  | 117002.906  | 0.000      |
|      |             | 1991        | 233438.833  | 233235.802  | 203.031    |
|      |             | 1992        | 348084.047  | 347333.664  | 750.383    |
|      |             | 1993        | 467278.318  | 465438.345  | 1839.973   |
|      |             | 1994        | 584216.907  | 580602.804  | 3614.103   |
|      |             | 1995        | 697391.457  | 691236.594  | 6154.863   |
|      |             | 1996        | 809471.271  | 799852.202  | 9619.069   |
|      |             | 1997        | 922587.668  | 908343.994  | 14243.673  |
|      |             | 1998        | 1034072.457 | 1014112.458 | 19959.999  |
|      |             | 1999        | 1153475.399 | 1125984.762 | 27490.638  |
|      |             | 2000        | 1268050.268 | 1231658.669 | 36391.599  |
|      |             | 2001        | 1382786.209 | 1335706.577 | 47079.632  |
|      |             | 2002        | 1497557.412 | 1437807.796 | 59749.616  |
|      |             | 2003        | 1614405.229 | 1539949.655 | 74455.574  |
|      |             | 2004        | 1726672.489 | 1636015.297 | 90657.192  |
|      |             | 2005        | 1847277.524 | 1737170.042 | 110107.482 |
|      |             | 2006        | 1961009.963 | 1830191.024 | 130818.940 |
|      |             | 2007        | 2079868.908 | 1924863.856 | 155005.052 |
|      |             | 2008        | 2206755.783 | 2023461.266 | 183294.517 |
|      |             | 2009        | 2331993.380 | 2118073.721 | 213919.660 |
|      |             | 2010        | 2455130.176 | 2208515.590 | 246614.586 |
|      |             | 2011        | 2582657.849 | 2299318.076 | 283339.773 |
|      |             | 2012        | 2709719.005 | 2386816.962 | 322902.043 |
|      |             | 2013        | 2840547.005 | 2473777.216 | 366769.790 |
|      |             | 2014        | 2971677.135 | 2557868.607 | 413808.528 |
|      |             | 2015        | 3104538.983 | 2641097.223 | 463441.760 |
|      |             | 2016        | 3237650.175 | 2721150.040 | 516500.136 |
|      |             | 2017        | 3370561.253 | 2798187.231 | 572374.022 |
|      |             | 2018        | 3503136.371 | 2871491.867 | 631644.505 |
|      |             | 2019        | 3636402.758 | 2942106.319 | 694296.439 |
|      |             | 2020        | 3768054.453 | 3009516.172 | 758538.281 |
|      |             | 2021        | 3897675.067 | 3072861.801 | 824813.265 |
|      |             | 2022        | 4027307.132 | 3133197.955 | 894109.177 |
|      |             | 2023        | 4156698.720 | 3190436.624 | 966262.096 |
|      |             | 2024        | 4285772.226 | 3244650.322 | 1041121.90 |
|      |             | 2025        | 4410759.298 | 3295234.898 | 1115524.40 |
|      |             | 2026        | 4531411.064 | 3341163.216 | 1190247.85 |
|      |             | 2027        | 4651145.233 | 3384160.049 | 1266985.18 |
|      |             | 2028        | 4769837.872 | 3424294.024 | 1345543.85 |
|      |             | 2029        | 4887747.179 | 3461811.859 | 1425935.32 |
| 2030 | 4997632.895 | 3495605.956 | 1502026.94  |             |            |
| 2031 | 5103301.991 | 3525506.061 | 1577795.93  |             |            |
| 2032 | 5207593.613 | 3553118.894 | 1654474.72  |             |            |
| 2033 | 5310556.138 | 3578504.277 | 1732051.86  |             |            |
| 2034 | 5412542.816 | 3601984.901 | 1810557.91  |             |            |
| 2035 | 5500522.473 | 3621704.987 | 1878817.49  |             |            |
| 2036 | 5588149.640 | 3639759.748 | 1948389.89  |             |            |
| 2037 | 5674667.886 | 3656447.339 | 2018220.55  |             |            |
| 2038 | 5760391.289 | 3671825.082 | 2088566.21  |             |            |
| 2039 | 5845459.234 | 3686155.987 | 2159303.25  |             |            |
|      | Female      | 1990        | 77434.846   | 77434.846   | 0.000      |
|      |             | 1991        | 160029.510  | 159861.322  | 168.189    |
|      |             | 1992        | 240642.531  | 240002.546  | 639.985    |
|      |             | 1993        | 329362.093  | 327711.040  | 1651.053   |
|      |             | 1994        | 418569.515  | 415261.678  | 3307.837   |
|      |             | 1995        | 509110.357  | 503290.175  | 5820.182   |
|      |             | 1996        | 600040.117  | 590794.533  | 9245.584   |
|      |             | 1997        | 691159.071  | 677446.472  | 13712.599  |
|      |             | 1998        | 782866.899  | 763575.600  | 19291.298  |
|      |             | 1999        | 881526.925  | 854875.314  | 26651.612  |
|      |             | 2000        | 977880.647  | 942722.359  | 35158.289  |



**Results for PHIM for Run 8 (ELL Summary Sensitivity\_Analysis\_4.RTF)**

|      |             |             |            |
|------|-------------|-------------|------------|
| 2001 | 1076787.404 | 1031354.077 | 45433.327  |
| 2002 | 1174842.754 | 1117545.374 | 57297.380  |
| 2003 | 1275102.681 | 1204044.911 | 71057.770  |
| 2004 | 1371026.306 | 1285139.109 | 85887.196  |
| 2005 | 1473954.509 | 1370111.267 | 103843.242 |
| 2006 | 1574450.828 | 1451111.763 | 123339.065 |
| 2007 | 1673790.211 | 1529169.133 | 144621.078 |
| 2008 | 1782360.738 | 1612241.851 | 170118.887 |
| 2009 | 1892944.209 | 1694215.304 | 198728.906 |
| 2010 | 2002131.282 | 1772933.641 | 229197.641 |
| 2011 | 2114522.152 | 1851247.015 | 263275.137 |
| 2012 | 2228079.372 | 1927885.770 | 300193.601 |
| 2013 | 2345377.689 | 2004229.618 | 341148.071 |
| 2014 | 2462498.422 | 2077631.514 | 384866.908 |
| 2015 | 2581450.312 | 2150282.385 | 431167.926 |
| 2016 | 2701959.301 | 2221012.275 | 480947.026 |
| 2017 | 2823834.967 | 2289696.400 | 534138.567 |
| 2018 | 2938265.081 | 2352154.698 | 586110.382 |
| 2019 | 3053254.880 | 2412258.490 | 640996.390 |
| 2020 | 3167073.216 | 2469710.168 | 697363.048 |
| 2021 | 3279517.699 | 2524515.448 | 755002.252 |
| 2022 | 3392060.964 | 2576835.002 | 815225.962 |
| 2023 | 3504296.171 | 2626586.589 | 877709.582 |
| 2024 | 3616019.231 | 2673637.119 | 942382.112 |
| 2025 | 3724611.269 | 2717711.027 | 1006900.24 |
| 2026 | 3827181.707 | 2757827.836 | 1069353.87 |
| 2027 | 3928684.441 | 2795415.040 | 1133269.40 |
| 2028 | 4029124.892 | 2830679.953 | 1198444.94 |
| 2029 | 4128269.068 | 2863483.786 | 1264785.28 |
| 2030 | 4221560.174 | 2893293.671 | 1328266.50 |
| 2031 | 4304170.584 | 2918263.836 | 1385906.75 |
| 2032 | 4384930.537 | 2941158.050 | 1443772.49 |
| 2033 | 4464357.691 | 2962306.083 | 1502051.61 |
| 2034 | 4542251.545 | 2981645.198 | 1560606.35 |
| 2035 | 4611066.648 | 2998217.312 | 1612849.34 |
| 2036 | 4670309.230 | 3011465.317 | 1658843.91 |
| 2037 | 4728179.514 | 3023573.453 | 1704606.06 |
| 2038 | 4785008.048 | 3034705.130 | 1750302.92 |
| 2039 | 4841291.793 | 3044970.805 | 1796320.99 |

---

## Results for PHIM for Run 8 (ELL Summary Sensitivity\_Analysis\_4.RTF)

\*\*\*\*\*

**Table 5: Estimated Loss of Life, at the end of follow-up, Population unadjusted for deaths in Ecig scenario**

| Disease      | Sex    | Age Group   | Years of life lost<br>NULL | Years of life lost<br>Ecig | Years of life<br>Saved |
|--------------|--------|-------------|----------------------------|----------------------------|------------------------|
| All Diseases | Males  | 30-34       | 443911.034                 | 240279.821                 | 203631.213             |
|              |        | 35-39       | 1146798.555                | 614263.085                 | 532535.470             |
|              |        | 40-44       | 2609591.408                | 1357521.939                | 1252069.47             |
|              |        | 45-49       | 4775841.753                | 2441977.220                | 2333864.53             |
|              |        | 50-54       | 7446969.205                | 3945345.566                | 3501623.64             |
|              |        | 55-59       | 8240205.925                | 4789492.245                | 3450713.68             |
|              |        | 60-64       | 8772829.118                | 5510865.614                | 3261963.50             |
|              |        | 65-69       | 6161494.678                | 4246655.176                | 1914839.50             |
|              |        | 70-74       | 2495906.274                | 1779141.526                | 716764.748             |
|              | 75-79  | 0.000       | 0.000                      | 0.000                      |                        |
|              | Female | 30-34       | 229140.561                 | 142863.503                 | 86277.058              |
|              |        | 35-39       | 570217.942                 | 348786.602                 | 221431.340             |
|              |        | 40-44       | 1267538.938                | 751984.253                 | 515554.685             |
|              |        | 45-49       | 2340070.698                | 1364640.273                | 975430.425             |
|              |        | 50-54       | 3743803.613                | 2197311.423                | 1546492.19             |
|              |        | 55-59       | 4591478.168                | 2815298.127                | 1776180.04             |
|              |        | 60-64       | 5207367.788                | 3309765.865                | 1897601.92             |
|              |        | 65-69       | 4092181.394                | 2738243.868                | 1353937.53             |
| 70-74        |        | 1776092.171 | 1205649.569                | 570442.601                 |                        |
| Lung cancer  | Males  | 30-34       | 66065.017                  | 51857.918                  | 14207.099              |
|              |        | 35-39       | 232509.414                 | 184077.282                 | 48432.132              |
|              |        | 40-44       | 688628.041                 | 533406.382                 | 155221.659             |
|              |        | 45-49       | 1528300.367                | 1146611.232                | 381689.135             |
|              |        | 50-54       | 2730187.229                | 2014686.316                | 715500.913             |
|              |        | 55-59       | 3909101.673                | 2865019.123                | 1044082.55             |
|              |        | 60-64       | 4287716.660                | 3228881.303                | 1058835.36             |
|              |        | 65-69       | 3467897.115                | 2658109.142                | 809787.973             |
|              |        | 70-74       | 1312144.343                | 1021567.471                | 290576.873             |
|              | 75-79  | 0.000       | 0.000                      | 0.000                      |                        |
|              | Female | 30-34       | 51913.113                  | 40797.134                  | 11115.979              |
|              |        | 35-39       | 189792.904                 | 149354.123                 | 40438.782              |
|              |        | 40-44       | 527596.573                 | 398058.884                 | 129537.689             |
|              |        | 45-49       | 1122524.269                | 815181.430                 | 307342.839             |
|              |        | 50-54       | 1882214.322                | 1336064.313                | 546150.010             |
|              |        | 55-59       | 2595581.943                | 1816973.258                | 778608.686             |
|              |        | 60-64       | 2846273.090                | 2026829.140                | 819443.950             |
|              |        | 65-69       | 2358758.394                | 1696327.927                | 662430.467             |
| 70-74        |        | 937814.238  | 682069.022                 | 255745.216                 |                        |
| IHD          | Males  | 30-34       | 263834.566                 | 119192.707                 | 144641.859             |
|              |        | 35-39       | 692140.150                 | 298028.803                 | 394111.348             |
|              |        | 40-44       | 1519708.432                | 594313.814                 | 925394.618             |
|              |        | 45-49       | 2568546.697                | 919069.089                 | 1649477.61             |
|              |        | 50-54       | 3632929.903                | 1350711.340                | 2282218.56             |
|              |        | 55-59       | 2807892.356                | 1103572.067                | 1704320.29             |
|              |        | 60-64       | 2599825.934                | 1194416.522                | 1405409.41             |
|              |        | 65-69       | 1113578.307                | 583969.971                 | 529608.336             |
|              |        | 70-74       | 437536.271                 | 261548.481                 | 175987.790             |
|              | 75-79  | 0.000       | 0.000                      | 0.000                      |                        |
|              | Female | 30-34       | 79649.097                  | 38206.203                  | 41442.894              |
|              |        | 35-39       | 193965.908                 | 82155.612                  | 111810.295             |
|              |        | 40-44       | 403380.974                 | 152328.198                 | 251052.776             |
|              |        | 45-49       | 671385.408                 | 234418.388                 | 436967.020             |
|              |        | 50-54       | 1011875.989                | 377997.031                 | 633878.959             |
|              |        | 55-59       | 849875.715                 | 345142.124                 | 504733.592             |
|              |        | 60-64       | 925490.876                 | 436803.570                 | 488687.307             |
|              |        | 65-69       | 455463.881                 | 246094.767                 | 209369.114             |
| 70-74        |        | 207681.216  | 125523.402                 | 82157.815                  |                        |
| Stroke       | Males  | 30-34       | 73463.650                  | 43239.113                  | 30224.536              |
|              |        | 35-39       | 151934.057                 | 86780.812                  | 65153.245              |
|              |        | 40-44       | 262845.974                 | 142062.082                 | 120783.892             |
|              |        | 45-49       | 383421.246                 | 193411.622                 | 190009.624             |
|              |        | 50-54       | 479872.634                 | 219766.229                 | 260106.404             |
|              |        | 55-59       | 437124.903                 | 185202.932                 | 251921.971             |
|              |        | 60-64       | 419457.235                 | 180819.387                 | 238637.848             |
|              |        | 65-69       | 128180.574                 | 57755.258                  | 70425.316              |
|              |        | 70-74       | 53245.965                  | 26117.195                  | 27128.770              |
|              | 75-79  | 0.000       | 0.000                      | 0.000                      |                        |
|              | Female | 30-34       | 62919.090                  | 40222.252                  | 22696.838              |

**Results for PHIM for Run 8 (ELL Summary Sensitivity\_Analysis\_4.RTF)**

|      |       |        |             |             |            |            |
|------|-------|--------|-------------|-------------|------------|------------|
|      |       | 35-39  | 120806.205  | 72970.502   | 47835.703  |            |
|      |       | 40-44  | 203391.885  | 113890.224  | 89501.661  |            |
|      |       | 45-49  | 278172.097  | 144425.763  | 133746.334 |            |
|      |       | 50-54  | 325979.181  | 157709.878  | 168269.303 |            |
|      |       | 55-59  | 275161.340  | 125016.701  | 150144.638 |            |
|      |       | 60-64  | 268920.493  | 123628.739  | 145291.754 |            |
|      |       | 65-69  | 87956.054   | 41985.342   | 45970.712  |            |
|      |       | 70-74  | 42055.224   | 20889.451   | 21165.773  |            |
|      |       | 75-79  | 0.000       | 0.000       | 0.000      |            |
| COPD | Males | 30-34  | 40547.801   | 25990.083   | 14557.718  |            |
|      |       | 35-39  | 70214.933   | 45376.188   | 24838.745  |            |
|      |       | 40-44  | 138408.960  | 87739.660   | 50669.300  |            |
|      |       | 45-49  | 295573.443  | 182885.277  | 112688.166 |            |
|      |       | 50-54  | 603979.438  | 360181.680  | 243797.758 |            |
|      |       | 55-59  | 1086086.992 | 635698.123  | 450388.869 |            |
|      |       | 60-64  | 1465829.290 | 906748.402  | 559080.888 |            |
|      |       | 65-69  | 1451838.682 | 946820.806  | 505017.876 |            |
|      |       | 70-74  | 692979.695  | 469908.379  | 223071.316 |            |
|      |       |        | 75-79       | 0.000       | 0.000      | 0.000      |
|      |       | Female | 30-34       | 34659.261   | 23637.913  | 11021.348  |
|      |       |        | 35-39       | 65652.924   | 44306.364  | 21346.560  |
|      |       |        | 40-44       | 133169.505  | 87706.947  | 45462.559  |
|      |       |        | 45-49       | 267988.924  | 170614.693 | 97374.232  |
|      |       |        | 50-54       | 523734.121  | 325540.202 | 198193.919 |
|      |       |        | 55-59       | 870859.170  | 528166.044 | 342693.125 |
|      |       |        | 60-64       | 1166683.329 | 722504.416 | 444178.912 |
|      |       |        | 65-69       | 1190003.066 | 753835.832 | 436167.234 |
|      |       |        | 70-74       | 588541.493  | 377167.695 | 211373.798 |
|      |       |        | 75-79       | 0.000       | 0.000      | 0.000      |

---

## Results for PHIM for Run 8 (ELL Summary Sensitivity\_Analysis\_4.RTF)

\*\*\*\*\*

**Table 6: Estimated Loss of Life, at the end of follow-up, Population and Number deaths adjusted for Ecig scenario**

| Disease      | Sex    | Age Group   | Years of life lost<br>NULL | Years of life lost<br>Ecig | Years of life<br>Saved |
|--------------|--------|-------------|----------------------------|----------------------------|------------------------|
| All Diseases | Males  | 30-34       | 443911.034                 | 240295.542                 | 203615.492             |
|              |        | 35-39       | 1146798.555                | 614382.590                 | 532415.965             |
|              |        | 40-44       | 2609591.408                | 1358299.562                | 1251291.85             |
|              |        | 45-49       | 4775841.753                | 2445453.230                | 2330388.52             |
|              |        | 50-54       | 7446969.205                | 3955935.813                | 3491033.39             |
|              |        | 55-59       | 8240205.925                | 4806739.770                | 3433466.15             |
|              |        | 60-64       | 8772829.118                | 5540076.513                | 3232752.60             |
|              |        | 65-69       | 6161494.678                | 4271715.072                | 1889779.61             |
|              |        | 70-74       | 2495906.274                | 1792892.460                | 703013.813             |
|              | 75-79  | 0.000       | 0.000                      | 0.000                      |                        |
|              | Female | 30-34       | 229140.561                 | 142867.521                 | 86273.040              |
|              |        | 35-39       | 570217.942                 | 348816.650                 | 221401.292             |
|              |        | 40-44       | 1267538.938                | 752177.476                 | 515361.462             |
|              |        | 45-49       | 2340070.698                | 1365500.882                | 974569.816             |
|              |        | 50-54       | 3743803.613                | 2200040.712                | 1543762.90             |
|              |        | 55-59       | 4591478.168                | 2820589.243                | 1770888.93             |
|              |        | 60-64       | 5207367.788                | 3319950.168                | 1887417.62             |
|              |        | 65-69       | 4092181.394                | 2749238.552                | 1342942.84             |
| 70-74        |        | 1776092.171 | 1212737.991                | 563354.179                 |                        |
| Lung cancer  | Males  | 30-34       | 66065.017                  | 51861.568                  | 14203.450              |
|              |        | 35-39       | 232509.414                 | 184117.298                 | 48392.116              |
|              |        | 40-44       | 688628.041                 | 533754.431                 | 154873.611             |
|              |        | 45-49       | 1528300.367                | 1148465.918                | 379834.449             |
|              |        | 50-54       | 2730187.229                | 2020722.512                | 709464.717             |
|              |        | 55-59       | 3909101.673                | 2876113.102                | 1032988.57             |
|              |        | 60-64       | 4287716.660                | 3247144.087                | 1040572.57             |
|              |        | 65-69       | 3467897.115                | 2673905.011                | 793992.103             |
|              |        | 70-74       | 1312144.343                | 1029543.380                | 282600.963             |
|              | 75-79  | 0.000       | 0.000                      | 0.000                      |                        |
|              | Female | 30-34       | 51913.113                  | 40798.439                  | 11114.674              |
|              |        | 35-39       | 189792.904                 | 149368.132                 | 40424.773              |
|              |        | 40-44       | 527596.573                 | 398171.105                 | 129425.468             |
|              |        | 45-49       | 1122524.269                | 815732.278                 | 306791.991             |
|              |        | 50-54       | 1882214.322                | 1337833.891                | 544380.431             |
|              |        | 55-59       | 2595581.943                | 1820531.492                | 775050.451             |
|              |        | 60-64       | 2846273.090                | 2033331.385                | 812941.704             |
|              |        | 65-69       | 2358758.394                | 1703097.298                | 655661.096             |
| 70-74        |        | 937814.238  | 686061.005                 | 251753.232                 |                        |
| IHD          | Males  | 30-34       | 263834.566                 | 119200.238                 | 144634.328             |
|              |        | 35-39       | 692140.150                 | 298080.743                 | 394059.407             |
|              |        | 40-44       | 1519708.432                | 594597.534                 | 925110.898             |
|              |        | 45-49       | 2568546.697                | 920071.393                 | 1648475.30             |
|              |        | 50-54       | 3632929.903                | 1353307.285                | 2279622.62             |
|              |        | 55-59       | 2807892.356                | 1105898.872                | 1701993.48             |
|              |        | 60-64       | 2599825.934                | 1197741.854                | 1402084.08             |
|              |        | 65-69       | 1113578.307                | 585404.907                 | 528173.400             |
|              |        | 70-74       | 437536.271                 | 262317.365                 | 175218.905             |
|              | 75-79  | 0.000       | 0.000                      | 0.000                      |                        |
|              | Female | 30-34       | 79649.097                  | 38207.231                  | 41441.866              |
|              |        | 35-39       | 193965.908                 | 82161.928                  | 111803.979             |
|              |        | 40-44       | 403380.974                 | 152359.220                 | 251021.754             |
|              |        | 45-49       | 671385.408                 | 234523.510                 | 436861.898             |
|              |        | 50-54       | 1011875.989                | 378294.435                 | 633581.554             |
|              |        | 55-59       | 849875.715                 | 345465.467                 | 504410.248             |
|              |        | 60-64       | 925490.876                 | 437394.865                 | 488096.011             |
|              |        | 65-69       | 455463.881                 | 246433.103                 | 209030.778             |
| 70-74        |        | 207681.216  | 125759.605                 | 81921.611                  |                        |
| Stroke       | Males  | 30-34       | 73463.650                  | 43241.595                  | 30222.055              |
|              |        | 35-39       | 151934.057                 | 86796.422                  | 65137.635              |
|              |        | 40-44       | 262845.974                 | 142135.919                 | 120710.055             |
|              |        | 45-49       | 383421.246                 | 193651.963                 | 189769.283             |
|              |        | 50-54       | 479872.634                 | 220262.545                 | 259610.089             |
|              |        | 55-59       | 437124.903                 | 185697.260                 | 251427.644             |
|              |        | 60-64       | 419457.235                 | 181468.791                 | 237988.443             |
|              |        | 65-69       | 128180.574                 | 57929.286                  | 70251.288              |
|              |        | 70-74       | 53245.965                  | 26203.287                  | 27042.679              |
|              | 75-79  | 0.000       | 0.000                      | 0.000                      |                        |
|              | Female | 30-34       | 62919.090                  | 40223.175                  | 22695.915              |

**Results for PHIM for Run 8 (ELL Summary Sensitivity\_Analysis\_4.RTF)**

|      |       |        |             |             |            |            |
|------|-------|--------|-------------|-------------|------------|------------|
|      |       | 35-39  | 120806.205  | 72975.591   | 47830.614  |            |
|      |       | 40-44  | 203391.885  | 113912.692  | 89479.194  |            |
|      |       | 45-49  | 278172.097  | 144492.141  | 133679.956 |            |
|      |       | 50-54  | 325979.181  | 157843.525  | 168135.656 |            |
|      |       | 55-59  | 275161.340  | 125156.290  | 150005.049 |            |
|      |       | 60-64  | 268920.493  | 123832.981  | 145087.512 |            |
|      |       | 65-69  | 87956.054   | 42054.073   | 45901.981  |            |
|      |       | 70-74  | 42055.224   | 20933.529   | 21121.694  |            |
|      |       | 75-79  | 0.000       | 0.000       | 0.000      |            |
| COPD | Males | 30-34  | 40547.801   | 25992.141   | 14555.660  |            |
|      |       | 35-39  | 70214.933   | 45388.128   | 24826.806  |            |
|      |       | 40-44  | 138408.960  | 87811.678   | 50597.282  |            |
|      |       | 45-49  | 295573.443  | 183263.957  | 112309.486 |            |
|      |       | 50-54  | 603979.438  | 361643.471  | 242335.967 |            |
|      |       | 55-59  | 1086086.992 | 639030.536  | 447056.456 |            |
|      |       | 60-64  | 1465829.290 | 913721.781  | 552107.509 |            |
|      |       | 65-69  | 1451838.682 | 954475.868  | 497362.814 |            |
|      |       | 70-74  | 692979.695  | 474828.428  | 218151.266 |            |
|      |       |        | 75-79       | 0.000       | 0.000      | 0.000      |
|      |       | Female | 30-34       | 34659.261   | 23638.676  | 11020.585  |
|      |       |        | 35-39       | 65652.924   | 44310.999  | 21341.926  |
|      |       |        | 40-44       | 133169.505  | 87734.458  | 45435.047  |
|      |       |        | 45-49       | 267988.924  | 170752.954 | 97235.971  |
|      |       |        | 50-54       | 523734.121  | 326068.860 | 197665.261 |
|      |       |        | 55-59       | 870859.170  | 529435.993 | 341423.177 |
|      |       |        | 60-64       | 1166683.329 | 725390.937 | 441292.392 |
|      |       |        | 65-69       | 1190003.066 | 757654.078 | 432348.988 |
|      |       |        | 70-74       | 588541.493  | 379983.851 | 208557.642 |
|      |       |        | 75-79       | 0.000       | 0.000      | 0.000      |

---
